# Supplementary material for: Reactions of chemically activated C9H9 species II: The reaction of phenyl radicals with allene and cyclopropene, and of benzyl radicals with acetyleneElectronic supplementary information (ESI) available: Full [C9H9] reaction scheme. Additional quantum chemical calculations not reported yet in earlier publications. Full product distribution and over-all rate coefficient listings, both uncorrected and effective data, for all reaction conditions examined. For the most important products, tables are included listing the yield as function of temperature and pressure. Modified Arrhenius fits for the over-all TST rate coefficient and the TST rate coefficient of the different entrance channels are listed for different temperature intervals. See http://www.rsc.org/suppdata/cp/b3/b303908k/ or contact the authors directly, or download from the website http://arrhenius.chem.kuleuven.ac.be.
Source: Royal Society of Chemistry journal article supplement (doi:10.1039/b303908k), 2003-01-01
Supplement: phenylallene.pdf [file phenylallene.pdf]

**Reactions of chemically activated C<sub>9</sub>H<sub>9</sub> species II:  
The reaction of phenyl radicals with allene and cyclopropene,  
and of benzyl with acetylene**

- Supporting information -

Luc Vereecken, Jozef Peeters

Submitted to Phys. Chem. Chem. Phys

---

## Content

Page 2 : Modified Arrhenius expressions for the rate coefficient of the phenyl + allene reaction, and the partial rate coefficients for the three entrance channels, as derived in the TST calculations.

Page 3 : Temperature and pressure-dependent product yields (all products)

Page 992 : Tabulated effective product yields for the major products

Product species needed to obtain a product fraction of 0.995

=====

| species | maximum contribution |
|---------|----------------------|
|---------|----------------------|

-----

|                    |             |
|--------------------|-------------|
| rad11              | 1.00000     |
| Indene+H           | 0.987411    |
| rad6               | 0.942283    |
| Benzene+2-propynyl | 0.797641    |
| C2H2+PhCH2         | 0.176975    |
| PhCH2CCH+H         | 0.136563    |
| PhCHCCH2+H         | 0.0918421   |
| PhCCH+CH3          | 0.0685486   |
| rad7               | 0.0188489   |
| PAH7+H             | 0.0105397   |
| rad13              | 0.00959078  |
| Ph+MeAc            | 0.00910729  |
| PhcycC3H3_A+H      | 0.00890783  |
| PhCCCH3+H          | 0.00848258  |
| rad23              | 0.00803219  |
| rad22              | 0.00768315  |
| rad21              | 0.00632601  |
| rad9               | 0.00398931  |
| rad19syn           | 0.00388005  |
| rad45              | 0.00332725  |
| rad39              | 0.00192385  |
| rad54              | 0.00125314  |
| PAH9+H             | 0.00102956  |
| rad28              | 0.000651023 |
| Phenyl+Allene      | 0.00000     |

More information is available (population-averaged unimolecular rate coefficients, relative concentrations of intermediates,...), which is not included here due to the volume of the data. Contact the authors directly for obtaining additional supporting information.

## Modified Arrhenius expressions

Modified Arrhenius expressions for the total and partial rate coefficients of the initial reaction of phenyl + allene, as derived in the TST calculations. Redissociation fractions are at most 30%, which is well within the estimated error margins of about a factor of 3 for the expressions below.

10-300 K :

$$k_{\text{rad6}}(T) = 1.654 \times 10^{-14} \cdot T^{0.342} \cdot \exp(-17.648 \text{ kJ mol}^{-1} / kT)$$
$$k_{\text{rad11}}(T) = 8.266 \times 10^{-15} \cdot T^{0.436} \cdot \exp(-14.278 \text{ kJ mol}^{-1} / kT)$$
$$k_{\text{abstr}}(T) = 4.894 \times 10^{-11} \cdot T^{-0.817} \cdot \exp(-24.674 \text{ kJ mol}^{-1} / kT)$$
$$k_{\text{tot}}(T) = 3.030 \times 10^{-15} \cdot T^{0.654} \cdot \exp(-14.232 \text{ kJ mol}^{-1} / kT)$$

reproduces TST calculations within factor of 2

200-2000 K :

$$k_{\text{rad6}}(T) = 2.194 \times 10^{-20} \cdot T^{2.643} \cdot \exp(-15.551 \text{ kJ mol}^{-1} / kT)$$
$$k_{\text{rad11}}(T) = 2.966 \times 10^{-20} \cdot T^{2.526} \cdot \exp(-11.918 \text{ kJ mol}^{-1} / kT)$$
$$k_{\text{abstr}}(T) = 5.650 \times 10^{-22} \cdot T^{3.195} \cdot \exp(-18.184 \text{ kJ mol}^{-1} / kT)$$
$$k_{\text{tot}}(T) = 8.519 \times 10^{-22} \cdot T^{3.192} \cdot \exp(-11.664 \text{ kJ mol}^{-1} / kT)$$

reproduces TST calculations within factor of 1.005 for addition  
reproduces TST calculations within factor of 1.1 for H-abstraction

1000-4000 K :

$$k_{\text{rad6}}(T) = 5.490 \times 10^{-20} \cdot T^{2.530} \cdot \exp(-16.648 \text{ kJ mol}^{-1} / kT)$$
$$k_{\text{rad11}}(T) = 3.016 \times 10^{-20} \cdot T^{2.525} \cdot \exp(-12.009 \text{ kJ mol}^{-1} / kT)$$
$$k_{\text{abstr}}(T) = 9.542 \times 10^{-21} \cdot T^{2.858} \cdot \exp(-22.488 \text{ kJ mol}^{-1} / kT)$$
$$k_{\text{tot}}(T) = 1.404 \times 10^{-20} \cdot T^{2.851} \cdot \exp(-15.396 \text{ kJ mol}^{-1} / kT)$$

reproduces TST calculations within factor of 1.001 for addition  
reproduces TST calculations within factor of 1.01 for H-abstraction

## Temperature and pressure-dependent product yields (all products)

- Pressure range spans 1E-9 to 1E8 Pa, in steps of 1 order of magnitude.
- Temperature starts at 20K, increases in steps of 10K to 300K, then in steps of 100K to 1500K, and finally in steps of 250K up to 4000K.
- Rate constants are in units of  $\text{cm}^3 \text{ molecule}^{-1} \text{ s}^{-1}$ , product yields (PY) in fractions.
- The "effective" rate constants and product yields are corrected for redissociation to the original reactants, the columns denoted "true" are the original values prior to correction.
- Products are listed in order of importance. The columns marked "Cumul" give the cumulative sum of all product yields, to facilitate the selection of major versus minor products.

```

100000000. Pa, 20.0000000 K
=====
Rate constant      | True (fraction)      Effective (fraction)
-----
Total              | 1.56740e-51 (1.00   ) 1.56740e-51 (1.00   )
Formation of rad11| 1.56740e-51 (1.000  ) 1.56740e-51 (1.000  )
Formation of rad6  | 3.73945e-60 (2.39e-09) 3.73945e-60 (2.39e-09)
H-abstraction      | 1.53631e-76 (9.80e-26) 1.53631e-76 (9.80e-26)

species            | PYtrue      Cumul      | PYeffective  Cumul
-----
rad11              | 1.00000     1.00000   | 1.00000     1.00000
rad6               | 2.35504e-07 1.00000   | 2.35504e-07 1.00000
rad21              | 1.20143e-08 1.00000   | 1.20143e-08 1.00000
rad25              | 4.93618e-12 1.00000   | 4.93618e-12 1.00000
rad20              | 6.93617e-13 1.00000   | 6.93617e-13 1.00000
PhCHCCH2+H        | 2.83510e-13 1.00000   | 2.83510e-13 1.00000
rad22              | 2.66617e-13 1.00000   | 2.66617e-13 1.00000
rad24              | 3.15133e-14 1.00000   | 3.15133e-14 1.00000
rad9               | 1.46899e-14 1.00000   | 1.46899e-14 1.00000
Phenyl+Allene     | 1.80102e-16 1.00000   | 0.00000     1.00000
rad45              | 9.61692e-17 1.00000   | 9.61692e-17 1.00000
rad13              | 3.28128e-17 1.00000   | 3.28128e-17 1.00000
rad36              | 1.16355e-17 1.00000   | 1.16355e-17 1.00000
rad7               | 9.40319e-18 1.00000   | 9.40319e-18 1.00000
rad18              | 3.53107e-18 1.00000   | 3.53107e-18 1.00000
rad33              | 2.26646e-19 1.00000   | 2.26646e-19 1.00000
Indene+H           | 3.78122e-20 1.00000   | 3.78122e-20 1.00000
C2H2+PhCH2        | 2.95958e-20 1.00000   | 2.95958e-20 1.00000
rad23              | 6.02472e-21 1.00000   | 6.02472e-21 1.00000
PhCH2CCH+H        | 6.67652e-22 1.00000   | 6.67652e-22 1.00000
rad3               | 1.33793e-25 1.00000   | 1.33793e-25 1.00000
Benzene+2-propynyl| 9.80165e-26 1.00000   | 9.80165e-26 1.00000
rad4               | 3.03086e-26 1.00000   | 3.03086e-26 1.00000
rad28              | 3.28001e-27 1.00000   | 3.28001e-27 1.00000
rad8               | 9.51146e-28 1.00000   | 9.51146e-28 1.00000
PAH7+H            | 4.07035e-30 1.00000   | 4.07035e-30 1.00000
rad30              | 3.34053e-30 1.00000   | 3.34053e-30 1.00000
rad15              | 4.86556e-31 1.00000   | 4.86556e-31 1.00000
rad31              | 4.89327e-33 1.00000   | 4.89327e-33 1.00000
rad38              | 1.94796e-33 1.00000   | 1.94796e-33 1.00000
rad2               | 4.08956e-34 1.00000   | 4.08956e-34 1.00000
rad46              | 2.03277e-34 1.00000   | 2.03277e-34 1.00000
rad1               | 3.43069e-35 1.00000   | 3.43069e-35 1.00000
PhCCH+CH3         | 1.13123e-35 1.00000   | 1.13123e-35 1.00000
rad60syn           | 5.65141e-36 1.00000   | 5.65141e-36 1.00000
PAH9+H            | 2.87456e-36 1.00000   | 2.87456e-36 1.00000
rad35              | 1.66767e-36 1.00000   | 1.66767e-36 1.00000
rad14              | 1.46735e-36 1.00000   | 1.46735e-36 1.00000
rad60anti          | 5.90703e-37 1.00000   | 5.90703e-37 1.00000
rad26              | 3.90815e-37 1.00000   | 3.90815e-37 1.00000
Ph+MeAc           | 4.18090e-40 1.00000   | 4.18090e-40 1.00000
rad39              | 1.25655e-42 1.00000   | 1.25655e-42 1.00000
PAH3+H            | 1.14544e-42 1.00000   | 1.14544e-42 1.00000
rad59              | 5.36072e-43 1.00000   | 5.36072e-43 1.00000
rad10              | 3.88037e-43 1.00000   | 3.88037e-43 1.00000
rad50              | 1.72188e-44 1.00000   | 1.72188e-44 1.00000
rad27              | 4.01354e-46 1.00000   | 4.01354e-46 1.00000
PhCCCH3+H         | 6.43000e-47 1.00000   | 6.43000e-47 1.00000
rad70              | 4.30360e-49 1.00000   | 4.30360e-49 1.00000

```

|               |             |         |             |         |
|---------------|-------------|---------|-------------|---------|
| rad19syn      | 1.98103e-49 | 1.00000 | 1.98103e-49 | 1.00000 |
| rad12         | 1.35796e-49 | 1.00000 | 1.35796e-49 | 1.00000 |
| rad54         | 1.32038e-50 | 1.00000 | 1.32038e-50 | 1.00000 |
| rad37         | 3.17207e-51 | 1.00000 | 3.17207e-51 | 1.00000 |
| rad52         | 1.98928e-53 | 1.00000 | 1.98928e-53 | 1.00000 |
| rad34         | 1.84807e-54 | 1.00000 | 1.84807e-54 | 1.00000 |
| rad55         | 5.27929e-57 | 1.00000 | 5.27929e-57 | 1.00000 |
| rad51         | 9.60610e-58 | 1.00000 | 9.60610e-58 | 1.00000 |
| rad5          | 6.09342e-58 | 1.00000 | 6.09342e-58 | 1.00000 |
| PhcycC3H3_A+H | 1.29433e-58 | 1.00000 | 1.29433e-58 | 1.00000 |
| rad58         | 1.09254e-59 | 1.00000 | 1.09254e-59 | 1.00000 |
| PAH10+CH3     | 1.44734e-61 | 1.00000 | 1.44734e-61 | 1.00000 |
| rad47         | 2.96196e-63 | 1.00000 | 2.96196e-63 | 1.00000 |
| rad65         | 4.58249e-64 | 1.00000 | 4.58249e-64 | 1.00000 |
| rad62         | 2.27481e-64 | 1.00000 | 2.27481e-64 | 1.00000 |
| PAH1+H        | 6.49593e-68 | 1.00000 | 6.49593e-68 | 1.00000 |
| rad43         | 2.55710e-71 | 1.00000 | 2.55710e-71 | 1.00000 |
| rad42         | 1.18701e-74 | 1.00000 | 1.18701e-74 | 1.00000 |
| rad41         | 1.10534e-82 | 1.00000 | 1.10534e-82 | 1.00000 |

100000000. Pa, 30.0000000 K

| Rate constant      | True (fraction) |            | Effective (fraction) |            |
|--------------------|-----------------|------------|----------------------|------------|
| Total              | 5.03204e-39     | (1.00 )    | 5.03204e-39          | (1.00 )    |
| Formation of rad11 | 5.03203e-39     | (1.000 )   | 5.03203e-39          | (1.000 )   |
| Formation of rad6  | 9.92181e-45     | (1.97e-06) | 9.92181e-45          | (1.97e-06) |
| H-abstraction      | 3.33191e-55     | (6.62e-17) | 3.33191e-55          | (6.62e-17) |

  

| species            | PYtrue      | Cumul    | PYeffective | Cumul    |
|--------------------|-------------|----------|-------------|----------|
| rad11              | 0.999998    | 0.999998 | 0.999998    | 0.999998 |
| rad6               | 2.44237e-06 | 1.00000  | 2.44237e-06 | 1.00000  |
| rad21              | 2.43464e-08 | 1.00000  | 2.43464e-08 | 1.00000  |
| rad25              | 1.00792e-11 | 1.00000  | 1.00792e-11 | 1.00000  |
| rad20              | 2.83495e-12 | 1.00000  | 2.83495e-12 | 1.00000  |
| rad22              | 1.08975e-12 | 1.00000  | 1.08975e-12 | 1.00000  |
| PhCHCCH2+H         | 5.86080e-13 | 1.00000  | 5.86080e-13 | 1.00000  |
| rad24              | 1.28581e-13 | 1.00000  | 1.28581e-13 | 1.00000  |
| rad9               | 3.05373e-14 | 1.00000  | 3.05373e-14 | 1.00000  |
| rad13              | 4.93079e-15 | 1.00000  | 4.93079e-15 | 1.00000  |
| rad7               | 1.52809e-15 | 1.00000  | 1.52809e-15 | 1.00000  |
| rad45              | 7.50018e-16 | 1.00000  | 7.50018e-16 | 1.00000  |
| Phenyl+Allene      | 4.28138e-16 | 1.00000  | 0.00000     | 1.00000  |
| rad36              | 1.37100e-16 | 1.00000  | 1.37100e-16 | 1.00000  |
| Benzene+2-propynyl | 6.62139e-17 | 1.00000  | 6.62139e-17 | 1.00000  |
| rad33              | 4.41452e-17 | 1.00000  | 4.41452e-17 | 1.00000  |
| rad18              | 2.91322e-17 | 1.00000  | 2.91322e-17 | 1.00000  |
| Indene+H           | 3.12376e-19 | 1.00000  | 3.12376e-19 | 1.00000  |
| C2H2+PhCH2         | 2.46431e-19 | 1.00000  | 2.46431e-19 | 1.00000  |
| rad23              | 4.98290e-20 | 1.00000  | 4.98290e-20 | 1.00000  |
| PhCH2CCH+H         | 1.61759e-21 | 1.00000  | 1.61759e-21 | 1.00000  |
| rad3               | 9.09794e-23 | 1.00000  | 9.09794e-23 | 1.00000  |
| rad4               | 3.94858e-23 | 1.00000  | 3.94858e-23 | 1.00000  |
| rad28              | 3.42992e-24 | 1.00000  | 3.42992e-24 | 1.00000  |
| rad8               | 5.28841e-27 | 1.00000  | 5.28841e-27 | 1.00000  |
| rad30              | 5.64759e-29 | 1.00000  | 5.64759e-29 | 1.00000  |
| PAH7+H             | 1.99378e-29 | 1.00000  | 1.99378e-29 | 1.00000  |
| rad31              | 1.09540e-29 | 1.00000  | 1.09540e-29 | 1.00000  |
| rad15              | 8.25352e-30 | 1.00000  | 8.25352e-30 | 1.00000  |
| rad2               | 2.06288e-30 | 1.00000  | 2.06288e-30 | 1.00000  |
| rad1               | 3.09575e-31 | 1.00000  | 3.09575e-31 | 1.00000  |
| rad38              | 6.33634e-32 | 1.00000  | 6.33634e-32 | 1.00000  |
| PhCCH+CH3          | 4.36650e-32 | 1.00000  | 4.36650e-32 | 1.00000  |
| rad14              | 4.94265e-33 | 1.00000  | 4.94265e-33 | 1.00000  |
| rad46              | 3.44660e-33 | 1.00000  | 3.44660e-33 | 1.00000  |
| rad60syn           | 1.01818e-34 | 1.00000  | 1.01818e-34 | 1.00000  |
| PAH9+H             | 4.87279e-35 | 1.00000  | 4.87279e-35 | 1.00000  |
| rad35              | 2.82254e-35 | 1.00000  | 2.82254e-35 | 1.00000  |
| rad60anti          | 1.09653e-35 | 1.00000  | 1.09653e-35 | 1.00000  |
| rad26              | 3.88390e-36 | 1.00000  | 3.88390e-36 | 1.00000  |
| Ph+MeAc            | 1.62986e-36 | 1.00000  | 1.62986e-36 | 1.00000  |
| rad39              | 6.80810e-39 | 1.00000  | 6.80810e-39 | 1.00000  |
| rad10              | 5.50445e-39 | 1.00000  | 5.50445e-39 | 1.00000  |
| PAH3+H             | 2.29881e-41 | 1.00000  | 2.29881e-41 | 1.00000  |
| rad59              | 1.07424e-41 | 1.00000  | 1.07424e-41 | 1.00000  |
| rad27              | 6.52683e-42 | 1.00000  | 6.52683e-42 | 1.00000  |
| PhCCCH3+H          | 1.23935e-42 | 1.00000  | 1.23935e-42 | 1.00000  |
| rad50              | 3.43912e-43 | 1.00000  | 3.43912e-43 | 1.00000  |
| rad19syn           | 2.64184e-46 | 1.00000  | 2.64184e-46 | 1.00000  |

|               |             |         |             |         |
|---------------|-------------|---------|-------------|---------|
| rad54         | 1.30420e-47 | 1.00000 | 1.30420e-47 | 1.00000 |
| rad12         | 2.72088e-48 | 1.00000 | 2.72088e-48 | 1.00000 |
| rad70         | 2.37920e-48 | 1.00000 | 2.37920e-48 | 1.00000 |
| rad37         | 6.37816e-50 | 1.00000 | 6.37816e-50 | 1.00000 |
| rad52         | 8.16888e-52 | 1.00000 | 8.16888e-52 | 1.00000 |
| rad5          | 2.72886e-53 | 1.00000 | 2.72886e-53 | 1.00000 |
| rad34         | 1.05428e-53 | 1.00000 | 1.05428e-53 | 1.00000 |
| rad55         | 2.88619e-54 | 1.00000 | 2.88619e-54 | 1.00000 |
| PhcycC3H3_A+H | 7.11438e-56 | 1.00000 | 7.11438e-56 | 1.00000 |
| rad51         | 4.08813e-56 | 1.00000 | 4.08813e-56 | 1.00000 |
| rad58         | 2.48337e-58 | 1.00000 | 2.48337e-58 | 1.00000 |
| PAH10+CH3     | 3.16229e-60 | 1.00000 | 3.16229e-60 | 1.00000 |
| rad62         | 9.77697e-61 | 1.00000 | 9.77697e-61 | 1.00000 |
| rad47         | 6.98726e-62 | 1.00000 | 6.98726e-62 | 1.00000 |
| rad65         | 1.01072e-62 | 1.00000 | 1.01072e-62 | 1.00000 |
| PAH1+H        | 2.53493e-65 | 1.00000 | 2.53493e-65 | 1.00000 |
| rad43         | 5.62114e-67 | 1.00000 | 5.62114e-67 | 1.00000 |
| rad42         | 1.90558e-71 | 1.00000 | 1.90558e-71 | 1.00000 |
| rad41         | 8.16569e-79 | 1.00000 | 8.16569e-79 | 1.00000 |

100000000. Pa, 40.0000000 K

| Rate constant      | True (fraction)        | Effective (fraction)   |
|--------------------|------------------------|------------------------|
| Total              | 9.35697e-33 (1.00 )    | 9.35697e-33 (1.00 )    |
| Formation of rad11 | 9.35644e-33 (1.000 )   | 9.35644e-33 (1.000 )   |
| Formation of rad6  | 5.26139e-37 (5.62e-05) | 5.26139e-37 (5.62e-05) |
| H-abstraction      | 1.44763e-44 (1.55e-12) | 1.44763e-44 (1.55e-12) |

| species            | PYtrue      | Cumul    | PYeffective | Cumul    |
|--------------------|-------------|----------|-------------|----------|
| rad11              | 0.999943    | 0.999943 | 0.999943    | 0.999943 |
| rad6               | 5.69336e-05 | 1.000000 | 5.69336e-05 | 1.000000 |
| rad21              | 3.65933e-08 | 1.000000 | 3.65933e-08 | 1.000000 |
| rad25              | 1.53872e-11 | 1.000000 | 1.53872e-11 | 1.000000 |
| rad20              | 6.34237e-12 | 1.000000 | 6.34237e-12 | 1.000000 |
| rad22              | 2.43806e-12 | 1.000000 | 2.43806e-12 | 1.000000 |
| Benzene+2-propynyl | 1.54712e-12 | 1.000000 | 1.54712e-12 | 1.000000 |
| PhCCH2+H           | 9.17755e-13 | 1.000000 | 9.17755e-13 | 1.000000 |
| rad24              | 2.87738e-13 | 1.000000 | 2.87738e-13 | 1.000000 |
| rad13              | 2.03412e-13 | 1.000000 | 2.03412e-13 | 1.000000 |
| rad7               | 6.33096e-14 | 1.000000 | 6.33096e-14 | 1.000000 |
| rad9               | 4.83702e-14 | 1.000000 | 4.83702e-14 | 1.000000 |
| rad45              | 2.44085e-15 | 1.000000 | 2.44085e-15 | 1.000000 |
| rad33              | 1.84595e-15 | 1.000000 | 1.84595e-15 | 1.000000 |
| Phenyl+Allene      | 8.71713e-16 | 1.000000 | 0.000000    | 1.000000 |
| rad36              | 5.09363e-16 | 1.000000 | 5.09363e-16 | 1.000000 |
| rad18              | 9.71726e-17 | 1.000000 | 9.71726e-17 | 1.000000 |
| Indene+H           | 1.04447e-18 | 1.000000 | 1.04447e-18 | 1.000000 |
| C2H2+PhCH2         | 8.37833e-19 | 1.000000 | 8.37833e-19 | 1.000000 |
| rad23              | 1.66918e-19 | 1.000000 | 1.66918e-19 | 1.000000 |
| rad3               | 5.31425e-21 | 1.000000 | 5.31425e-21 | 1.000000 |
| PhCH2CCH+H         | 3.53909e-21 | 1.000000 | 3.53909e-21 | 1.000000 |
| rad4               | 2.95277e-21 | 1.000000 | 2.95277e-21 | 1.000000 |
| rad28              | 2.22580e-22 | 1.000000 | 2.22580e-22 | 1.000000 |
| rad8               | 1.78408e-26 | 1.000000 | 1.78408e-26 | 1.000000 |
| rad31              | 9.09713e-28 | 1.000000 | 9.09713e-28 | 1.000000 |
| rad30              | 2.89806e-28 | 1.000000 | 2.89806e-28 | 1.000000 |
| rad2               | 2.59921e-28 | 1.000000 | 2.59921e-28 | 1.000000 |
| PAH7+H             | 6.62007e-29 | 1.000000 | 6.62007e-29 | 1.000000 |
| rad1               | 5.00650e-29 | 1.000000 | 5.00650e-29 | 1.000000 |
| rad15              | 4.26488e-29 | 1.000000 | 4.26488e-29 | 1.000000 |
| PhCCH+CH3          | 4.32725e-30 | 1.000000 | 4.32725e-30 | 1.000000 |
| rad14              | 4.79947e-31 | 1.000000 | 4.79947e-31 | 1.000000 |
| rad38              | 4.63090e-31 | 1.000000 | 4.63090e-31 | 1.000000 |
| rad46              | 1.80189e-32 | 1.000000 | 1.80189e-32 | 1.000000 |
| rad60syn           | 5.94904e-34 | 1.000000 | 5.94904e-34 | 1.000000 |
| PAH9+H             | 2.51417e-34 | 1.000000 | 2.51417e-34 | 1.000000 |
| Ph+MeAc            | 1.64847e-34 | 1.000000 | 1.64847e-34 | 1.000000 |
| rad35              | 1.45161e-34 | 1.000000 | 1.45161e-34 | 1.000000 |
| rad60anti          | 6.81713e-35 | 1.000000 | 6.81713e-35 | 1.000000 |
| rad26              | 1.91723e-35 | 1.000000 | 1.91723e-35 | 1.000000 |
| rad10              | 1.11787e-36 | 1.000000 | 1.11787e-36 | 1.000000 |
| rad39              | 7.32674e-37 | 1.000000 | 7.32674e-37 | 1.000000 |
| rad27              | 1.36721e-39 | 1.000000 | 1.36721e-39 | 1.000000 |
| PhCCCH3+H          | 2.75933e-40 | 1.000000 | 2.75933e-40 | 1.000000 |
| PAH3+H             | 1.69017e-40 | 1.000000 | 1.69017e-40 | 1.000000 |
| rad59              | 7.87261e-41 | 1.000000 | 7.87261e-41 | 1.000000 |
| rad50              | 2.54679e-42 | 1.000000 | 2.54679e-42 | 1.000000 |
| rad19syn           | 2.72943e-44 | 1.000000 | 2.72943e-44 | 1.000000 |

|               |             |          |             |          |
|---------------|-------------|----------|-------------|----------|
| rad54         | 1.41434e-45 | 1.000000 | 1.41434e-45 | 1.000000 |
| rad12         | 1.99852e-47 | 1.000000 | 1.99852e-47 | 1.000000 |
| rad70         | 1.00315e-47 | 1.000000 | 1.00315e-47 | 1.000000 |
| rad37         | 4.72092e-49 | 1.000000 | 4.72092e-49 | 1.000000 |
| rad5          | 1.15508e-50 | 1.000000 | 1.15508e-50 | 1.000000 |
| rad52         | 9.96575e-51 | 1.000000 | 9.96575e-51 | 1.000000 |
| rad55         | 3.29794e-52 | 1.000000 | 3.29794e-52 | 1.000000 |
| rad34         | 4.74717e-53 | 1.000000 | 4.74717e-53 | 1.000000 |
| PhcycC3H3_A+H | 7.93567e-54 | 1.000000 | 7.93567e-54 | 1.000000 |
| rad51         | 5.43250e-55 | 1.000000 | 5.43250e-55 | 1.000000 |
| rad58         | 2.37462e-57 | 1.000000 | 2.37462e-57 | 1.000000 |
| rad62         | 2.35765e-58 | 1.000000 | 2.35765e-58 | 1.000000 |
| PAH10+CH3     | 2.79550e-59 | 1.000000 | 2.79550e-59 | 1.000000 |
| rad47         | 7.41722e-61 | 1.000000 | 7.41722e-61 | 1.000000 |
| rad65         | 9.07032e-62 | 1.000000 | 9.07032e-62 | 1.000000 |
| PAH1+H        | 4.23105e-63 | 1.000000 | 4.23105e-63 | 1.000000 |
| rad43         | 2.86466e-64 | 1.000000 | 2.86466e-64 | 1.000000 |
| rad42         | 5.06913e-69 | 1.000000 | 5.06913e-69 | 1.000000 |
| rad41         | 4.72189e-76 | 1.000000 | 4.72189e-76 | 1.000000 |

100000000. Pa, 50.0000000 K

| Rate constant      | True (fraction) |            | Effective (fraction) |            |
|--------------------|-----------------|------------|----------------------|------------|
| Total              | 5.52690e-29     | (1.00 )    | 5.52690e-29          | (1.00 )    |
| Formation of rad11 | 5.52459e-29     | (1.000 )   | 5.52459e-29          | (1.000 )   |
| Formation of rad6  | 2.30840e-32     | (0.000418) | 2.30840e-32          | (0.000418) |
| H-abstraction      | 3.35357e-38     | (6.07e-10) | 3.35357e-38          | (6.07e-10) |

  

| species            | PYtrue      | Cumul    | PYeffective | Cumul    |
|--------------------|-------------|----------|-------------|----------|
| rad11              | 0.999581    | 0.999581 | 0.999581    | 0.999581 |
| rad6               | 0.000418605 | 1.000000 | 0.000418605 | 1.000000 |
| rad21              | 4.90728e-08 | 1.000000 | 4.90728e-08 | 1.000000 |
| Benzene+2-propynyl | 6.06773e-10 | 1.000000 | 6.06773e-10 | 1.000000 |
| rad25              | 2.10820e-11 | 1.000000 | 2.10820e-11 | 1.000000 |
| rad20              | 1.12575e-11 | 1.000000 | 1.12575e-11 | 1.000000 |
| rad22              | 4.32758e-12 | 1.000000 | 4.32758e-12 | 1.000000 |
| rad13              | 2.02084e-12 | 1.000000 | 2.02084e-12 | 1.000000 |
| PhCHCCH2+H         | 1.30219e-12 | 1.000000 | 1.30219e-12 | 1.000000 |
| rad7               | 6.30263e-13 | 1.000000 | 6.30263e-13 | 1.000000 |
| rad24              | 5.11606e-13 | 1.000000 | 5.11606e-13 | 1.000000 |
| rad9               | 6.97153e-14 | 1.000000 | 6.97153e-14 | 1.000000 |
| rad33              | 1.84674e-14 | 1.000000 | 1.84674e-14 | 1.000000 |
| rad45              | 5.68542e-15 | 1.000000 | 5.68542e-15 | 1.000000 |
| Phenyl+Allene      | 1.69700e-15 | 1.000000 | 0.000000    | 1.000000 |
| rad36              | 1.23901e-15 | 1.000000 | 1.23901e-15 | 1.000000 |
| rad18              | 2.28831e-16 | 1.000000 | 2.28831e-16 | 1.000000 |
| Indene+H           | 2.46764e-18 | 1.000000 | 2.46764e-18 | 1.000000 |
| C2H2+PhCH2         | 2.02615e-18 | 1.000000 | 2.02615e-18 | 1.000000 |
| rad23              | 3.95275e-19 | 1.000000 | 3.95275e-19 | 1.000000 |
| rad3               | 6.75617e-20 | 1.000000 | 6.75617e-20 | 1.000000 |
| rad4               | 4.32137e-20 | 1.000000 | 4.32137e-20 | 1.000000 |
| PhCH2CCH+H         | 8.14238e-21 | 1.000000 | 8.14238e-21 | 1.000000 |
| rad28              | 3.04225e-21 | 1.000000 | 3.04225e-21 | 1.000000 |
| rad8               | 5.17016e-26 | 1.000000 | 5.17016e-26 | 1.000000 |
| rad31              | 1.42941e-26 | 1.000000 | 1.42941e-26 | 1.000000 |
| rad2               | 5.56923e-27 | 1.000000 | 5.56923e-27 | 1.000000 |
| rad1               | 1.22771e-27 | 1.000000 | 1.22771e-27 | 1.000000 |
| rad30              | 9.46026e-28 | 1.000000 | 9.46026e-28 | 1.000000 |
| PAH7+H             | 2.23238e-28 | 1.000000 | 2.23238e-28 | 1.000000 |
| rad15              | 1.40578e-28 | 1.000000 | 1.40578e-28 | 1.000000 |
| PhCCH+CH3          | 8.24068e-29 | 1.000000 | 8.24068e-29 | 1.000000 |
| rad14              | 8.81545e-30 | 1.000000 | 8.81545e-30 | 1.000000 |
| rad38              | 1.91971e-30 | 1.000000 | 1.91971e-30 | 1.000000 |
| rad46              | 6.06546e-32 | 1.000000 | 6.06546e-32 | 1.000000 |
| Ph+MeAc            | 3.67845e-33 | 1.000000 | 3.67845e-33 | 1.000000 |
| rad60syn           | 2.31429e-33 | 1.000000 | 2.31429e-33 | 1.000000 |
| PAH9+H             | 8.27106e-34 | 1.000000 | 8.27106e-34 | 1.000000 |
| rad35              | 4.75384e-34 | 1.000000 | 4.75384e-34 | 1.000000 |
| rad60anti          | 2.88971e-34 | 1.000000 | 2.88971e-34 | 1.000000 |
| rad26              | 7.89452e-35 | 1.000000 | 7.89452e-35 | 1.000000 |
| rad10              | 3.40666e-35 | 1.000000 | 3.40666e-35 | 1.000000 |
| rad39              | 1.52776e-35 | 1.000000 | 1.52776e-35 | 1.000000 |
| rad27              | 4.32406e-38 | 1.000000 | 4.32406e-38 | 1.000000 |
| PhCCCH3+H          | 9.35675e-39 | 1.000000 | 9.35675e-39 | 1.000000 |
| PAH3+H             | 9.21496e-40 | 1.000000 | 9.21496e-40 | 1.000000 |
| rad59              | 4.27166e-40 | 1.000000 | 4.27166e-40 | 1.000000 |
| rad50              | 1.40990e-41 | 1.000000 | 1.40990e-41 | 1.000000 |
| rad19syn           | 7.39592e-43 | 1.000000 | 7.39592e-43 | 1.000000 |

|               |             |          |             |          |
|---------------|-------------|----------|-------------|----------|
| rad54         | 4.13653e-44 | 1.000000 | 4.13653e-44 | 1.000000 |
| rad12         | 1.08981e-46 | 1.000000 | 1.08981e-46 | 1.000000 |
| rad70         | 4.39386e-47 | 1.000000 | 4.39386e-47 | 1.000000 |
| rad37         | 2.60394e-48 | 1.000000 | 2.60394e-48 | 1.000000 |
| rad5          | 7.62480e-49 | 1.000000 | 7.62480e-49 | 1.000000 |
| rad52         | 8.69363e-50 | 1.000000 | 8.69363e-50 | 1.000000 |
| rad55         | 1.05926e-50 | 1.000000 | 1.05926e-50 | 1.000000 |
| PhcycC3H3_A+H | 2.45561e-52 | 1.000000 | 2.45561e-52 | 1.000000 |
| rad34         | 2.28070e-52 | 1.000000 | 2.28070e-52 | 1.000000 |
| rad51         | 5.38595e-54 | 1.000000 | 5.38595e-54 | 1.000000 |
| rad58         | 1.88494e-56 | 1.000000 | 1.88494e-56 | 1.000000 |
| rad62         | 1.24651e-56 | 1.000000 | 1.24651e-56 | 1.000000 |
| PAH10+CH3     | 1.99049e-58 | 1.000000 | 1.99049e-58 | 1.000000 |
| rad47         | 6.93698e-60 | 1.000000 | 6.93698e-60 | 1.000000 |
| rad65         | 6.58995e-61 | 1.000000 | 6.58995e-61 | 1.000000 |
| PAH1+H        | 1.84449e-61 | 1.000000 | 1.84449e-61 | 1.000000 |
| rad43         | 2.55151e-62 | 1.000000 | 2.55151e-62 | 1.000000 |
| rad42         | 3.23656e-67 | 1.000000 | 3.23656e-67 | 1.000000 |
| rad41         | 5.34815e-74 | 1.000000 | 5.34815e-74 | 1.000000 |

100000000. Pa, 60.0000000 K

| Rate constant      | True (fraction)        | Effective (fraction)   |
|--------------------|------------------------|------------------------|
| Total              | 1.83429e-26 (1.00 )    | 1.83429e-26 (1.00 )    |
| Formation of rad11 | 1.83139e-26 (0.998 )   | 1.83139e-26 (0.998 )   |
| Formation of rad6  | 2.90471e-29 (0.00158 ) | 2.90471e-29 (0.00158 ) |
| H-abstraction      | 5.71259e-34 (3.11e-08) | 5.71259e-34 (3.11e-08) |

| species            | PYtrue      | Cumul    | PYeffective | Cumul    |
|--------------------|-------------|----------|-------------|----------|
| rad11              | 0.998415    | 0.998415 | 0.998415    | 0.998415 |
| rad6               | 0.00158474  | 1.000000 | 0.00158474  | 1.000000 |
| rad21              | 6.19381e-08 | 1.000000 | 6.19381e-08 | 1.000000 |
| Benzene+2-propynyl | 3.11432e-08 | 1.000000 | 3.11432e-08 | 1.000000 |
| rad25              | 2.72902e-11 | 1.000000 | 2.72902e-11 | 1.000000 |
| rad20              | 1.76747e-11 | 1.000000 | 1.76747e-11 | 1.000000 |
| rad13              | 9.67492e-12 | 1.000000 | 9.67492e-12 | 1.000000 |
| rad22              | 6.79453e-12 | 1.000000 | 6.79453e-12 | 1.000000 |
| rad7               | 3.02445e-12 | 1.000000 | 3.02445e-12 | 1.000000 |
| PhCHCCH2+H         | 1.75668e-12 | 1.000000 | 1.75668e-12 | 1.000000 |
| rad24              | 8.05410e-13 | 1.000000 | 8.05410e-13 | 1.000000 |
| rad9               | 9.57786e-14 | 1.000000 | 9.57786e-14 | 1.000000 |
| rad33              | 8.91197e-14 | 1.000000 | 8.91197e-14 | 1.000000 |
| rad45              | 1.10807e-14 | 1.000000 | 1.10807e-14 | 1.000000 |
| Phenyl+Allene      | 3.16390e-15 | 1.000000 | 0.000000    | 1.000000 |
| rad36              | 2.43388e-15 | 1.000000 | 2.43388e-15 | 1.000000 |
| rad18              | 4.48208e-16 | 1.000000 | 4.48208e-16 | 1.000000 |
| Indene+H           | 4.85203e-18 | 1.000000 | 4.85203e-18 | 1.000000 |
| C2H2+PhCH2         | 4.09689e-18 | 1.000000 | 4.09689e-18 | 1.000000 |
| rad23              | 7.79291e-19 | 1.000000 | 7.79291e-19 | 1.000000 |
| rad3               | 3.98758e-19 | 1.000000 | 3.98758e-19 | 1.000000 |
| rad4               | 2.77419e-19 | 1.000000 | 2.77419e-19 | 1.000000 |
| PhCH2CCH+H         | 2.05266e-20 | 1.000000 | 2.05266e-20 | 1.000000 |
| rad28              | 1.89663e-20 | 1.000000 | 1.89663e-20 | 1.000000 |
| rad8               | 1.42308e-25 | 1.000000 | 1.42308e-25 | 1.000000 |
| rad31              | 9.71881e-26 | 1.000000 | 9.71881e-26 | 1.000000 |
| rad2               | 4.89315e-26 | 1.000000 | 4.89315e-26 | 1.000000 |
| rad1               | 1.16620e-26 | 1.000000 | 1.16620e-26 | 1.000000 |
| rad30              | 2.43736e-27 | 1.000000 | 2.43736e-27 | 1.000000 |
| PAH7+H             | 8.92037e-28 | 1.000000 | 8.92037e-28 | 1.000000 |
| PhCCH+CH3          | 6.86423e-28 | 1.000000 | 6.86423e-28 | 1.000000 |
| rad15              | 3.66438e-28 | 1.000000 | 3.66438e-28 | 1.000000 |
| rad14              | 7.02392e-29 | 1.000000 | 7.02392e-29 | 1.000000 |
| rad38              | 5.91839e-30 | 1.000000 | 5.91839e-30 | 1.000000 |
| rad46              | 1.62580e-31 | 1.000000 | 1.62580e-31 | 1.000000 |
| Ph+MeAc            | 3.82425e-32 | 1.000000 | 3.82425e-32 | 1.000000 |
| rad60syn           | 7.30303e-33 | 1.000000 | 7.30303e-33 | 1.000000 |
| PAH9+H             | 2.15166e-33 | 1.000000 | 2.15166e-33 | 1.000000 |
| rad35              | 1.22993e-33 | 1.000000 | 1.22993e-33 | 1.000000 |
| rad60anti          | 1.00700e-33 | 1.000000 | 1.00700e-33 | 1.000000 |
| rad10              | 3.99468e-34 | 1.000000 | 3.99468e-34 | 1.000000 |
| rad26              | 3.11208e-34 | 1.000000 | 3.11208e-34 | 1.000000 |
| rad39              | 1.41137e-34 | 1.000000 | 1.41137e-34 | 1.000000 |
| rad27              | 5.29261e-37 | 1.000000 | 5.29261e-37 | 1.000000 |
| PhCCCH3+H          | 1.23774e-37 | 1.000000 | 1.23774e-37 | 1.000000 |
| PAH3+H             | 4.51944e-39 | 1.000000 | 4.51944e-39 | 1.000000 |
| rad59              | 2.08184e-39 | 1.000000 | 2.08184e-39 | 1.000000 |
| rad50              | 7.03886e-41 | 1.000000 | 7.03886e-41 | 1.000000 |
| rad19syn           | 1.12592e-41 | 1.000000 | 1.12592e-41 | 1.000000 |

|               |             |          |             |          |
|---------------|-------------|----------|-------------|----------|
| rad54         | 6.92723e-43 | 1.000000 | 6.92723e-43 | 1.000000 |
| rad12         | 5.35799e-46 | 1.000000 | 5.35799e-46 | 1.000000 |
| rad70         | 2.13003e-46 | 1.000000 | 2.13003e-46 | 1.000000 |
| rad5          | 2.07526e-47 | 1.000000 | 2.07526e-47 | 1.000000 |
| rad37         | 1.29970e-47 | 1.000000 | 1.29970e-47 | 1.000000 |
| rad52         | 6.86156e-49 | 1.000000 | 6.86156e-49 | 1.000000 |
| rad55         | 1.99333e-49 | 1.000000 | 1.99333e-49 | 1.000000 |
| PhcycC3H3_A+H | 4.40121e-51 | 1.000000 | 4.40121e-51 | 1.000000 |
| rad34         | 1.23536e-51 | 1.000000 | 1.23536e-51 | 1.000000 |
| rad51         | 5.00882e-53 | 1.000000 | 5.00882e-53 | 1.000000 |
| rad62         | 3.41211e-55 | 1.000000 | 3.41211e-55 | 1.000000 |
| rad58         | 1.47257e-55 | 1.000000 | 1.47257e-55 | 1.000000 |
| PAH10+CH3     | 1.36585e-57 | 1.000000 | 1.36585e-57 | 1.000000 |
| rad47         | 6.72510e-59 | 1.000000 | 6.72510e-59 | 1.000000 |
| rad65         | 4.63854e-60 | 1.000000 | 4.63854e-60 | 1.000000 |
| PAH1+H        | 4.45006e-60 | 1.000000 | 4.45006e-60 | 1.000000 |
| rad43         | 1.04661e-60 | 1.000000 | 1.04661e-60 | 1.000000 |
| rad42         | 1.13516e-65 | 1.000000 | 1.13516e-65 | 1.000000 |
| rad41         | 3.03512e-72 | 1.000000 | 3.03512e-72 | 1.000000 |

100000000. Pa, 70.0000000 K

| Rate constant      | True (fraction)        | Effective (fraction)   |
|--------------------|------------------------|------------------------|
| Total              | 1.17336e-24 (1.00 )    | 1.17336e-24 (1.00 )    |
| Formation of rad11 | 1.16857e-24 (0.996 )   | 1.16857e-24 (0.996 )   |
| Formation of rad6  | 4.79505e-27 (0.00409 ) | 4.79505e-27 (0.00409 ) |
| H-abstraction      | 5.89821e-31 (5.03e-07) | 5.89821e-31 (5.03e-07) |

| species            | PYtrue      | Cumul    | PYeffective | Cumul    |
|--------------------|-------------|----------|-------------|----------|
| rad11              | 0.995911    | 0.995911 | 0.995911    | 0.995911 |
| rad6               | 0.00408801  | 1.000000 | 0.00408801  | 1.000000 |
| Benzene+2-propynyl | 5.02676e-07 | 1.000000 | 5.02676e-07 | 1.000000 |
| rad21              | 7.52604e-08 | 1.000000 | 7.52604e-08 | 1.000000 |
| rad25              | 3.41030e-11 | 1.000000 | 3.41030e-11 | 1.000000 |
| rad13              | 3.04233e-11 | 1.000000 | 3.04233e-11 | 1.000000 |
| rad20              | 2.57154e-11 | 1.000000 | 2.57154e-11 | 1.000000 |
| rad22              | 9.88560e-12 | 1.000000 | 9.88560e-12 | 1.000000 |
| rad7               | 9.53541e-12 | 1.000000 | 9.53541e-12 | 1.000000 |
| PhCHCCH2+H         | 2.29816e-12 | 1.000000 | 2.29816e-12 | 1.000000 |
| rad24              | 1.17583e-12 | 1.000000 | 1.17583e-12 | 1.000000 |
| rad33              | 2.82767e-13 | 1.000000 | 2.82767e-13 | 1.000000 |
| rad9               | 1.27823e-13 | 1.000000 | 1.27823e-13 | 1.000000 |
| rad45              | 1.93221e-14 | 1.000000 | 1.93221e-14 | 1.000000 |
| Phenyl+Allene      | 5.66892e-15 | 1.000000 | 0.000000    | 1.000000 |
| rad36              | 4.21305e-15 | 1.000000 | 4.21305e-15 | 1.000000 |
| rad18              | 7.83477e-16 | 1.000000 | 7.83477e-16 | 1.000000 |
| Indene+H           | 8.51864e-18 | 1.000000 | 8.51864e-18 | 1.000000 |
| C2H2+PhCH2         | 7.42397e-18 | 1.000000 | 7.42397e-18 | 1.000000 |
| rad3               | 1.51378e-18 | 1.000000 | 1.51378e-18 | 1.000000 |
| rad23              | 1.37221e-18 | 1.000000 | 1.37221e-18 | 1.000000 |
| rad4               | 1.10876e-18 | 1.000000 | 1.10876e-18 | 1.000000 |
| rad28              | 7.52597e-20 | 1.000000 | 7.52597e-20 | 1.000000 |
| PhCH2CCH+H         | 5.99235e-20 | 1.000000 | 5.99235e-20 | 1.000000 |
| rad31              | 4.07824e-25 | 1.000000 | 4.07824e-25 | 1.000000 |
| rad8               | 3.95081e-25 | 1.000000 | 3.95081e-25 | 1.000000 |
| rad2               | 2.56963e-25 | 1.000000 | 2.56963e-25 | 1.000000 |
| rad1               | 6.41185e-26 | 1.000000 | 6.41185e-26 | 1.000000 |
| rad30              | 5.43890e-27 | 1.000000 | 5.43890e-27 | 1.000000 |
| PAH7+H             | 4.09622e-27 | 1.000000 | 4.09622e-27 | 1.000000 |
| PhCCH+CH3          | 3.55804e-27 | 1.000000 | 3.55804e-27 | 1.000000 |
| rad15              | 8.28665e-28 | 1.000000 | 8.28665e-28 | 1.000000 |
| rad14              | 3.46437e-28 | 1.000000 | 3.46437e-28 | 1.000000 |
| rad38              | 1.52501e-29 | 1.000000 | 1.52501e-29 | 1.000000 |
| rad46              | 3.80288e-31 | 1.000000 | 3.80288e-31 | 1.000000 |
| Ph+MeAc            | 2.55022e-31 | 1.000000 | 2.55022e-31 | 1.000000 |
| rad60syn           | 2.03480e-32 | 1.000000 | 2.03480e-32 | 1.000000 |
| PAH9+H             | 4.85733e-33 | 1.000000 | 4.85733e-33 | 1.000000 |
| rad60anti          | 3.11420e-33 | 1.000000 | 3.11420e-33 | 1.000000 |
| rad35              | 2.75934e-33 | 1.000000 | 2.75934e-33 | 1.000000 |
| rad10              | 2.69796e-33 | 1.000000 | 2.69796e-33 | 1.000000 |
| rad26              | 1.26681e-33 | 1.000000 | 1.26681e-33 | 1.000000 |
| rad39              | 8.20883e-34 | 1.000000 | 8.20883e-34 | 1.000000 |
| rad27              | 3.75009e-36 | 1.000000 | 3.75009e-36 | 1.000000 |
| PhCCCH3+H          | 9.54393e-37 | 1.000000 | 9.54393e-37 | 1.000000 |
| PAH3+H             | 2.20432e-38 | 1.000000 | 2.20432e-38 | 1.000000 |
| rad59              | 1.00703e-38 | 1.000000 | 1.00703e-38 | 1.000000 |
| rad50              | 3.47408e-40 | 1.000000 | 3.47408e-40 | 1.000000 |
| rad19syn           | 1.36640e-40 | 1.000000 | 1.36640e-40 | 1.000000 |



|               |             |         |             |         |
|---------------|-------------|---------|-------------|---------|
| rad54         | 9.39183e-42 | 1.00000 | 9.39183e-42 | 1.00000 |
| rad12         | 2.62968e-45 | 1.00000 | 2.62968e-45 | 1.00000 |
| rad70         | 1.20958e-45 | 1.00000 | 1.20958e-45 | 1.00000 |
| rad5          | 3.48661e-46 | 1.00000 | 3.48661e-46 | 1.00000 |
| rad37         | 6.50673e-47 | 1.00000 | 6.50673e-47 | 1.00000 |
| rad52         | 5.51878e-48 | 1.00000 | 5.51878e-48 | 1.00000 |
| rad55         | 3.09862e-48 | 1.00000 | 3.09862e-48 | 1.00000 |
| PhcycC3H3_A+H | 6.45302e-50 | 1.00000 | 6.45302e-50 | 1.00000 |
| rad34         | 7.93937e-51 | 1.00000 | 7.93937e-51 | 1.00000 |
| rad51         | 4.92157e-52 | 1.00000 | 4.92157e-52 | 1.00000 |
| rad62         | 7.12577e-54 | 1.00000 | 7.12577e-54 | 1.00000 |
| rad58         | 1.24930e-54 | 1.00000 | 1.24930e-54 | 1.00000 |
| PAH10+CH3     | 1.00170e-56 | 1.00000 | 1.00170e-56 | 1.00000 |
| rad47         | 7.42640e-58 | 1.00000 | 7.42640e-58 | 1.00000 |
| PAH1+H        | 8.54302e-59 | 1.00000 | 8.54302e-59 | 1.00000 |
| rad65         | 3.51638e-59 | 1.00000 | 3.51638e-59 | 1.00000 |
| rad43         | 3.02927e-59 | 1.00000 | 3.02927e-59 | 1.00000 |
| rad42         | 3.22863e-64 | 1.00000 | 3.22863e-64 | 1.00000 |
| rad41         | 1.32773e-70 | 1.00000 | 1.32773e-70 | 1.00000 |

100000000. Pa, 80.0000000 K

| Rate constant      | True (fraction)        | Effective (fraction)   |
|--------------------|------------------------|------------------------|
| Total              | 2.68112e-23 (1.00 )    | 2.68112e-23 (1.00 )    |
| Formation of rad11 | 2.65890e-23 (0.992 )   | 2.65890e-23 (0.992 )   |
| Formation of rad6  | 2.22189e-25 (0.00829 ) | 2.22189e-25 (0.00829 ) |
| H-abstraction      | 1.05871e-28 (3.95e-06) | 1.05871e-28 (3.95e-06) |

| species            | PYtrue      | Cumul    | PYeffective | Cumul    |
|--------------------|-------------|----------|-------------|----------|
| rad11              | 0.991707    | 0.991707 | 0.991707    | 0.991707 |
| rad6               | 0.00828882  | 0.999996 | 0.00828882  | 0.999996 |
| Benzene+2-propynyl | 3.94877e-06 | 1.00000  | 3.94877e-06 | 1.00000  |
| rad21              | 8.90921e-08 | 1.00000  | 8.90921e-08 | 1.00000  |
| rad13              | 7.34087e-11 | 1.00000  | 7.34087e-11 | 1.00000  |
| rad25              | 4.16171e-11 | 1.00000  | 4.16171e-11 | 1.00000  |
| rad20              | 3.55335e-11 | 1.00000  | 3.55335e-11 | 1.00000  |
| rad7               | 2.30738e-11 | 1.00000  | 2.30738e-11 | 1.00000  |
| rad22              | 1.36598e-11 | 1.00000  | 1.36598e-11 | 1.00000  |
| PhCHCCH2+H         | 2.94782e-12 | 1.00000  | 2.94782e-12 | 1.00000  |
| rad24              | 1.63137e-12 | 1.00000  | 1.63137e-12 | 1.00000  |
| rad33              | 6.89027e-13 | 1.00000  | 6.89027e-13 | 1.00000  |
| rad9               | 1.67468e-13 | 1.00000  | 1.67468e-13 | 1.00000  |
| rad45              | 3.12403e-14 | 1.00000  | 3.12403e-14 | 1.00000  |
| Phenyl+Allene      | 9.83799e-15 | 1.00000  | 0.00000     | 1.00000  |
| rad36              | 6.71793e-15 | 1.00000  | 6.71793e-15 | 1.00000  |
| rad18              | 1.26863e-15 | 1.00000  | 1.26863e-15 | 1.00000  |
| Indene+H           | 1.38613e-17 | 1.00000  | 1.38613e-17 | 1.00000  |
| C2H2+PhCH2         | 1.25114e-17 | 1.00000  | 1.25114e-17 | 1.00000  |
| rad3               | 4.34933e-18 | 1.00000  | 4.34933e-18 | 1.00000  |
| rad4               | 3.28871e-18 | 1.00000  | 3.28871e-18 | 1.00000  |
| rad23              | 2.23991e-18 | 1.00000  | 2.23991e-18 | 1.00000  |
| rad28              | 2.24624e-19 | 1.00000  | 2.24624e-19 | 1.00000  |
| PhCH2CCH+H         | 2.11849e-19 | 1.00000  | 2.11849e-19 | 1.00000  |
| rad31              | 1.26177e-24 | 1.00000  | 1.26177e-24 | 1.00000  |
| rad8               | 1.14066e-24 | 1.00000  | 1.14066e-24 | 1.00000  |
| rad2               | 9.74331e-25 | 1.00000  | 9.74331e-25 | 1.00000  |
| rad1               | 2.49623e-25 | 1.00000  | 2.49623e-25 | 1.00000  |
| PAH7+H             | 1.89768e-26 | 1.00000  | 1.89768e-26 | 1.00000  |
| PhCCH+CH3          | 1.36974e-26 | 1.00000  | 1.36974e-26 | 1.00000  |
| rad30              | 1.10503e-26 | 1.00000  | 1.10503e-26 | 1.00000  |
| rad15              | 1.70900e-27 | 1.00000  | 1.70900e-27 | 1.00000  |
| rad14              | 1.26412e-27 | 1.00000  | 1.26412e-27 | 1.00000  |
| rad38              | 3.49583e-29 | 1.00000  | 3.49583e-29 | 1.00000  |
| Ph+MeAc            | 1.28225e-30 | 1.00000  | 1.28225e-30 | 1.00000  |
| rad46              | 8.15903e-31 | 1.00000  | 8.15903e-31 | 1.00000  |
| rad60syn           | 5.24963e-32 | 1.00000  | 5.24963e-32 | 1.00000  |
| rad10              | 1.28591e-32 | 1.00000  | 1.28591e-32 | 1.00000  |
| PAH9+H             | 1.00060e-32 | 1.00000  | 1.00060e-32 | 1.00000  |
| rad60anti          | 8.91335e-33 | 1.00000  | 8.91335e-33 | 1.00000  |
| rad35              | 5.64570e-33 | 1.00000  | 5.64570e-33 | 1.00000  |
| rad26              | 5.62721e-33 | 1.00000  | 5.62721e-33 | 1.00000  |
| rad39              | 3.58191e-33 | 1.00000  | 3.58191e-33 | 1.00000  |
| rad27              | 1.88385e-35 | 1.00000  | 1.88385e-35 | 1.00000  |
| PhCCCH3+H          | 5.25027e-36 | 1.00000  | 5.25027e-36 | 1.00000  |
| PAH3+H             | 1.15024e-37 | 1.00000  | 1.15024e-37 | 1.00000  |
| rad59              | 5.19386e-38 | 1.00000  | 5.19386e-38 | 1.00000  |
| rad50              | 1.79859e-39 | 1.00000  | 1.79859e-39 | 1.00000  |
| rad19syn           | 1.67057e-39 | 1.00000  | 1.67057e-39 | 1.00000  |

|               |             |          |             |          |
|---------------|-------------|----------|-------------|----------|
| rad54         | 1.30155e-40 | 1.000000 | 1.30155e-40 | 1.000000 |
| rad12         | 1.38654e-44 | 1.000000 | 1.38654e-44 | 1.000000 |
| rad70         | 8.85754e-45 | 1.000000 | 8.85754e-45 | 1.000000 |
| rad5          | 4.38952e-45 | 1.000000 | 4.38952e-45 | 1.000000 |
| rad37         | 3.52948e-46 | 1.000000 | 3.52948e-46 | 1.000000 |
| rad55         | 5.04924e-47 | 1.000000 | 5.04924e-47 | 1.000000 |
| rad52         | 4.95835e-47 | 1.000000 | 4.95835e-47 | 1.000000 |
| PhcycC3H3_A+H | 9.86760e-49 | 1.000000 | 9.86760e-49 | 1.000000 |
| rad34         | 6.64331e-50 | 1.000000 | 6.64331e-50 | 1.000000 |
| rad51         | 5.65277e-51 | 1.000000 | 5.65277e-51 | 1.000000 |
| rad62         | 1.44764e-52 | 1.000000 | 1.44764e-52 | 1.000000 |
| rad58         | 1.28175e-53 | 1.000000 | 1.28175e-53 | 1.000000 |
| PAH10+CH3     | 8.73484e-56 | 1.000000 | 8.73484e-56 | 1.000000 |
| rad47         | 1.03427e-56 | 1.000000 | 1.03427e-56 | 1.000000 |
| PAH1+H        | 1.67404e-57 | 1.000000 | 1.67404e-57 | 1.000000 |
| rad43         | 7.92567e-58 | 1.000000 | 7.92567e-58 | 1.000000 |
| rad65         | 3.21763e-58 | 1.000000 | 3.21763e-58 | 1.000000 |
| rad42         | 9.67805e-63 | 1.000000 | 9.67805e-63 | 1.000000 |
| rad41         | 5.88662e-69 | 1.000000 | 5.88662e-69 | 1.000000 |

100000000. Pa, 90.0000000 K

| Rate constant      | True (fraction)        | Effective (fraction)   |
|--------------------|------------------------|------------------------|
| Total              | 3.08379e-22 (1.00 )    | 3.08379e-22 (1.00 )    |
| Formation of rad11 | 3.03962e-22 (0.986 )   | 3.03962e-22 (0.986 )   |
| Formation of rad6  | 4.41076e-24 (0.0143 )  | 4.41076e-24 (0.0143 )  |
| H-abstraction      | 5.92916e-27 (1.92e-05) | 5.92916e-27 (1.92e-05) |

| species            | PYtrue      | Cumul    | PYeffective | Cumul    |
|--------------------|-------------|----------|-------------|----------|
| rad11              | 0.985676    | 0.985676 | 0.985676    | 0.985676 |
| rad6               | 0.0143049   | 0.999981 | 0.0143049   | 0.999981 |
| Benzene+2-propynyl | 1.92269e-05 | 1.00000  | 1.92269e-05 | 1.00000  |
| rad21              | 1.03501e-07 | 1.00000  | 1.03501e-07 | 1.00000  |
| rad13              | 1.48237e-10 | 1.00000  | 1.48237e-10 | 1.00000  |
| rad25              | 4.99570e-11 | 1.00000  | 4.99570e-11 | 1.00000  |
| rad20              | 4.73309e-11 | 1.00000  | 4.73309e-11 | 1.00000  |
| rad7               | 4.67363e-11 | 1.00000  | 4.67363e-11 | 1.00000  |
| rad22              | 1.81950e-11 | 1.00000  | 1.81950e-11 | 1.00000  |
| PhCHCCH2+H         | 3.73417e-12 | 1.00000  | 3.73417e-12 | 1.00000  |
| rad24              | 2.18318e-12 | 1.00000  | 2.18318e-12 | 1.00000  |
| rad33              | 1.40612e-12 | 1.00000  | 1.40612e-12 | 1.00000  |
| rad9               | 2.16917e-13 | 1.00000  | 2.16917e-13 | 1.00000  |
| rad45              | 4.78626e-14 | 1.00000  | 4.78626e-14 | 1.00000  |
| Phenyl+Allene      | 1.66586e-14 | 1.00000  | 0.00000     | 1.00000  |
| rad36              | 1.01251e-14 | 1.00000  | 1.01251e-14 | 1.00000  |
| rad18              | 1.94620e-15 | 1.00000  | 1.94620e-15 | 1.00000  |
| Indene+H           | 2.13808e-17 | 1.00000  | 2.13808e-17 | 1.00000  |
| C2H2+PhCH2         | 2.00597e-17 | 1.00000  | 2.00597e-17 | 1.00000  |
| rad3               | 1.03560e-17 | 1.00000  | 1.03560e-17 | 1.00000  |
| rad4               | 7.98604e-18 | 1.00000  | 7.98604e-18 | 1.00000  |
| rad23              | 3.46674e-18 | 1.00000  | 3.46674e-18 | 1.00000  |
| PhCH2CCH+H         | 8.51899e-19 | 1.00000  | 8.51899e-19 | 1.00000  |
| rad28              | 5.53648e-19 | 1.00000  | 5.53648e-19 | 1.00000  |
| rad8               | 3.38272e-24 | 1.00000  | 3.38272e-24 | 1.00000  |
| rad31              | 3.17958e-24 | 1.00000  | 3.17958e-24 | 1.00000  |
| rad2               | 2.96613e-24 | 1.00000  | 2.96613e-24 | 1.00000  |
| rad1               | 7.70696e-25 | 1.00000  | 7.70696e-25 | 1.00000  |
| PAH7+H             | 8.25515e-26 | 1.00000  | 8.25515e-26 | 1.00000  |
| PhCCH+CH3          | 4.32643e-26 | 1.00000  | 4.32643e-26 | 1.00000  |
| rad30              | 2.10809e-26 | 1.00000  | 2.10809e-26 | 1.00000  |
| rad14              | 3.77192e-27 | 1.00000  | 3.77192e-27 | 1.00000  |
| rad15              | 3.31537e-27 | 1.00000  | 3.31537e-27 | 1.00000  |
| rad38              | 7.40647e-29 | 1.00000  | 7.40647e-29 | 1.00000  |
| Ph+MeAc            | 5.33347e-30 | 1.00000  | 5.33347e-30 | 1.00000  |
| rad46              | 1.65652e-30 | 1.00000  | 1.65652e-30 | 1.00000  |
| rad60syn           | 1.29217e-31 | 1.00000  | 1.29217e-31 | 1.00000  |
| rad10              | 4.85196e-32 | 1.00000  | 4.85196e-32 | 1.00000  |
| rad26              | 2.77252e-32 | 1.00000  | 2.77252e-32 | 1.00000  |
| rad60anti          | 2.42413e-32 | 1.00000  | 2.42413e-32 | 1.00000  |
| PAH9+H             | 1.94067e-32 | 1.00000  | 1.94067e-32 | 1.00000  |
| rad39              | 1.29430e-32 | 1.00000  | 1.29430e-32 | 1.00000  |
| rad35              | 1.08741e-32 | 1.00000  | 1.08741e-32 | 1.00000  |
| rad27              | 7.52615e-35 | 1.00000  | 7.52615e-35 | 1.00000  |
| PhCCCH3+H          | 2.31133e-35 | 1.00000  | 2.31133e-35 | 1.00000  |
| PAH3+H             | 6.69033e-37 | 1.00000  | 6.69033e-37 | 1.00000  |
| rad59              | 2.96717e-37 | 1.00000  | 2.96717e-37 | 1.00000  |
| rad19syn           | 2.54596e-38 | 1.00000  | 2.54596e-38 | 1.00000  |
| rad50              | 1.00119e-38 | 1.00000  | 1.00119e-38 | 1.00000  |

|               |             |         |             |         |
|---------------|-------------|---------|-------------|---------|
| rad54         | 2.31230e-39 | 1.00000 | 2.31230e-39 | 1.00000 |
| rad70         | 9.91075e-44 | 1.00000 | 9.91075e-44 | 1.00000 |
| rad12         | 8.14362e-44 | 1.00000 | 8.14362e-44 | 1.00000 |
| rad5          | 4.56876e-44 | 1.00000 | 4.56876e-44 | 1.00000 |
| rad37         | 2.16954e-45 | 1.00000 | 2.16954e-45 | 1.00000 |
| rad55         | 1.10989e-45 | 1.00000 | 1.10989e-45 | 1.00000 |
| rad52         | 5.36347e-46 | 1.00000 | 5.36347e-46 | 1.00000 |
| PhcycC3H3_A+H | 2.05700e-47 | 1.00000 | 2.05700e-47 | 1.00000 |
| rad34         | 8.58097e-49 | 1.00000 | 8.58097e-49 | 1.00000 |
| rad51         | 8.37911e-50 | 1.00000 | 8.37911e-50 | 1.00000 |
| rad62         | 3.49924e-51 | 1.00000 | 3.49924e-51 | 1.00000 |
| rad58         | 1.84422e-52 | 1.00000 | 1.84422e-52 | 1.00000 |
| PAH10+CH3     | 1.03523e-54 | 1.00000 | 1.03523e-54 | 1.00000 |
| rad47         | 2.06313e-55 | 1.00000 | 2.06313e-55 | 1.00000 |
| PAH1+H        | 4.35335e-56 | 1.00000 | 4.35335e-56 | 1.00000 |
| rad43         | 2.22883e-56 | 1.00000 | 2.22883e-56 | 1.00000 |
| rad65         | 4.14520e-57 | 1.00000 | 4.14520e-57 | 1.00000 |
| rad42         | 3.91085e-61 | 1.00000 | 3.91085e-61 | 1.00000 |
| rad41         | 3.33418e-67 | 1.00000 | 3.33418e-67 | 1.00000 |

100000000. Pa, 100.000000 K

| Rate constant      | True (fraction)        | Effective (fraction)   |
|--------------------|------------------------|------------------------|
| Total              | 2.19347e-21 (1.00 )    | 2.19347e-21 (1.00 )    |
| Formation of rad11 | 2.14498e-21 (0.978 )   | 2.14498e-21 (0.978 )   |
| Formation of rad6  | 4.83503e-23 (0.0220 )  | 4.83503e-23 (0.0220 )  |
| H-abstraction      | 1.47101e-25 (6.71e-05) | 1.47101e-25 (6.71e-05) |

| species            | PYtrue      | Cumul    | PYeffective | Cumul    |
|--------------------|-------------|----------|-------------|----------|
| rad11              | 0.977887    | 0.977887 | 0.977887    | 0.977887 |
| rad6               | 0.0220450   | 0.999932 | 0.0220450   | 0.999932 |
| Benzene+2-propynyl | 6.70630e-05 | 1.00000  | 6.70630e-05 | 1.00000  |
| rad21              | 1.18582e-07 | 1.00000  | 1.18582e-07 | 1.00000  |
| rad13              | 2.64005e-10 | 1.00000  | 2.64005e-10 | 1.00000  |
| rad7               | 8.35061e-11 | 1.00000  | 8.35061e-11 | 1.00000  |
| rad20              | 6.13745e-11 | 1.00000  | 6.13745e-11 | 1.00000  |
| rad25              | 5.92850e-11 | 1.00000  | 5.92850e-11 | 1.00000  |
| rad22              | 2.35931e-11 | 1.00000  | 2.35931e-11 | 1.00000  |
| PhCHCCH2+H         | 4.69559e-12 | 1.00000  | 4.69559e-12 | 1.00000  |
| rad24              | 2.84604e-12 | 1.00000  | 2.84604e-12 | 1.00000  |
| rad33              | 2.53245e-12 | 1.00000  | 2.53245e-12 | 1.00000  |
| rad9               | 2.79170e-13 | 1.00000  | 2.79170e-13 | 1.00000  |
| rad45              | 7.04973e-14 | 1.00000  | 7.04973e-14 | 1.00000  |
| Phenyl+Allene      | 2.76747e-14 | 1.00000  | 0.00000     | 1.00000  |
| rad36              | 1.46617e-14 | 1.00000  | 1.46617e-14 | 1.00000  |
| rad18              | 2.87091e-15 | 1.00000  | 2.87091e-15 | 1.00000  |
| Indene+H           | 3.17325e-17 | 1.00000  | 3.17325e-17 | 1.00000  |
| C2H2+PhCH2         | 3.10659e-17 | 1.00000  | 3.10659e-17 | 1.00000  |
| rad3               | 2.15930e-17 | 1.00000  | 2.15930e-17 | 1.00000  |
| rad4               | 1.68509e-17 | 1.00000  | 1.68509e-17 | 1.00000  |
| rad23              | 5.16377e-18 | 1.00000  | 5.16377e-18 | 1.00000  |
| PhCH2CCH+H         | 3.41399e-18 | 1.00000  | 3.41399e-18 | 1.00000  |
| rad28              | 1.19283e-18 | 1.00000  | 1.19283e-18 | 1.00000  |
| rad8               | 9.94540e-24 | 1.00000  | 9.94540e-24 | 1.00000  |
| rad2               | 7.73686e-24 | 1.00000  | 7.73686e-24 | 1.00000  |
| rad31              | 6.93415e-24 | 1.00000  | 6.93415e-24 | 1.00000  |
| rad1               | 2.02253e-24 | 1.00000  | 2.02253e-24 | 1.00000  |
| PAH7+H             | 3.32670e-25 | 1.00000  | 3.32670e-25 | 1.00000  |
| PhCCH+CH3          | 1.19220e-25 | 1.00000  | 1.19220e-25 | 1.00000  |
| rad30              | 3.85522e-26 | 1.00000  | 3.85522e-26 | 1.00000  |
| rad14              | 9.78706e-27 | 1.00000  | 9.78706e-27 | 1.00000  |
| rad15              | 6.17730e-27 | 1.00000  | 6.17730e-27 | 1.00000  |
| rad38              | 1.48761e-28 | 1.00000  | 1.48761e-28 | 1.00000  |
| Ph+MeAc            | 1.94536e-29 | 1.00000  | 1.94536e-29 | 1.00000  |
| rad46              | 3.25068e-30 | 1.00000  | 3.25068e-30 | 1.00000  |
| rad60syn           | 3.09414e-31 | 1.00000  | 3.09414e-31 | 1.00000  |
| rad10              | 1.55614e-31 | 1.00000  | 1.55614e-31 | 1.00000  |
| rad26              | 1.44831e-31 | 1.00000  | 1.44831e-31 | 1.00000  |
| rad60anti          | 6.37396e-32 | 1.00000  | 6.37396e-32 | 1.00000  |
| rad39              | 4.11729e-32 | 1.00000  | 4.11729e-32 | 1.00000  |
| PAH9+H             | 3.62010e-32 | 1.00000  | 3.62010e-32 | 1.00000  |
| rad35              | 2.01624e-32 | 1.00000  | 2.01624e-32 | 1.00000  |
| rad27              | 2.56825e-34 | 1.00000  | 2.56825e-34 | 1.00000  |
| PhCCCH3+H          | 8.74840e-35 | 1.00000  | 8.74840e-35 | 1.00000  |
| PAH3+H             | 4.26341e-36 | 1.00000  | 4.26341e-36 | 1.00000  |
| rad59              | 1.83991e-36 | 1.00000  | 1.83991e-36 | 1.00000  |
| rad19syn           | 5.27071e-37 | 1.00000  | 5.27071e-37 | 1.00000  |
| rad54              | 6.20193e-38 | 1.00000  | 6.20193e-38 | 1.00000  |

|               |             |          |             |          |
|---------------|-------------|----------|-------------|----------|
| rad50         | 5.87013e-38 | 1.000000 | 5.87013e-38 | 1.000000 |
| rad70         | 2.11038e-42 | 1.000000 | 2.11038e-42 | 1.000000 |
| rad12         | 5.19962e-43 | 1.000000 | 5.19962e-43 | 1.000000 |
| rad5          | 4.12880e-43 | 1.000000 | 4.12880e-43 | 1.000000 |
| rad55         | 4.26756e-44 | 1.000000 | 4.26756e-44 | 1.000000 |
| rad37         | 1.49006e-44 | 1.000000 | 1.49006e-44 | 1.000000 |
| rad52         | 7.16820e-45 | 1.000000 | 7.16820e-45 | 1.000000 |
| PhcycC3H3_A+H | 7.85030e-46 | 1.000000 | 7.85030e-46 | 1.000000 |
| rad34         | 2.15006e-47 | 1.000000 | 2.15006e-47 | 1.000000 |
| rad51         | 1.70753e-48 | 1.000000 | 1.70753e-48 | 1.000000 |
| rad62         | 1.14724e-49 | 1.000000 | 1.14724e-49 | 1.000000 |
| rad58         | 4.38076e-51 | 1.000000 | 4.38076e-51 | 1.000000 |
| PAH10+CH3     | 1.88785e-53 | 1.000000 | 1.88785e-53 | 1.000000 |
| rad47         | 6.60354e-54 | 1.000000 | 6.60354e-54 | 1.000000 |
| PAH1+H        | 1.99073e-54 | 1.000000 | 1.99073e-54 | 1.000000 |
| rad43         | 7.32309e-55 | 1.000000 | 7.32309e-55 | 1.000000 |
| rad65         | 8.86538e-56 | 1.000000 | 8.86538e-56 | 1.000000 |
| rad42         | 2.61757e-59 | 1.000000 | 2.61757e-59 | 1.000000 |
| rad41         | 2.85662e-65 | 1.000000 | 2.85662e-65 | 1.000000 |

100000000. Pa, 110.000000 K

| Rate constant      | True (fraction)        | Effective (fraction)   |
|--------------------|------------------------|------------------------|
| Total              | 1.09987e-20 (1.00 )    | 1.09987e-20 (1.00 )    |
| Formation of rad11 | 1.06527e-20 (0.969 )   | 1.06527e-20 (0.969 )   |
| Formation of rad6  | 3.44008e-22 (0.0313 )  | 3.44008e-22 (0.0313 )  |
| H-abstraction      | 2.02040e-24 (0.000184) | 2.02040e-24 (0.000184) |

| species            | PYtrue      | Cumul    | PYeffective | Cumul    |
|--------------------|-------------|----------|-------------|----------|
| rad11              | 0.968537    | 0.968537 | 0.968537    | 0.968537 |
| rad6               | 0.0312797   | 0.999817 | 0.0312797   | 0.999817 |
| Benzene+2-propynyl | 0.000183695 | 1.00000  | 0.000183695 | 1.00000  |
| rad21              | 1.34463e-07 | 1.00000  | 1.34463e-07 | 1.00000  |
| rad13              | 4.28914e-10 | 1.00000  | 4.28914e-10 | 1.00000  |
| rad7               | 1.36132e-10 | 1.00000  | 1.36132e-10 | 1.00000  |
| rad20              | 7.80145e-11 | 1.00000  | 7.80145e-11 | 1.00000  |
| rad25              | 6.98085e-11 | 1.00000  | 6.98085e-11 | 1.00000  |
| rad22              | 2.99889e-11 | 1.00000  | 2.99889e-11 | 1.00000  |
| PhCHCCH2+H         | 5.88329e-12 | 1.00000  | 5.88329e-12 | 1.00000  |
| rad33              | 4.16323e-12 | 1.00000  | 4.16323e-12 | 1.00000  |
| rad24              | 3.63933e-12 | 1.00000  | 3.63933e-12 | 1.00000  |
| rad9               | 3.58292e-13 | 1.00000  | 3.58292e-13 | 1.00000  |
| rad45              | 1.00847e-13 | 1.00000  | 1.00847e-13 | 1.00000  |
| Phenyl+Allene      | 4.52837e-14 | 1.00000  | 0.00000     | 1.00000  |
| rad36              | 2.06257e-14 | 1.00000  | 2.06257e-14 | 1.00000  |
| rad18              | 4.11465e-15 | 1.00000  | 4.11465e-15 | 1.00000  |
| C2H2+PhCH2         | 4.69736e-17 | 1.00000  | 4.69736e-17 | 1.00000  |
| Indene+H           | 4.57918e-17 | 1.00000  | 4.57918e-17 | 1.00000  |
| rad3               | 4.08612e-17 | 1.00000  | 4.08612e-17 | 1.00000  |
| rad4               | 3.21085e-17 | 1.00000  | 3.21085e-17 | 1.00000  |
| PhCH2CCH+H         | 1.25359e-17 | 1.00000  | 1.25359e-17 | 1.00000  |
| rad23              | 7.48027e-18 | 1.00000  | 7.48027e-18 | 1.00000  |
| rad28              | 2.33097e-18 | 1.00000  | 2.33097e-18 | 1.00000  |
| rad8               | 2.81847e-23 | 1.00000  | 2.81847e-23 | 1.00000  |
| rad2               | 1.80445e-23 | 1.00000  | 1.80445e-23 | 1.00000  |
| rad31              | 1.36140e-23 | 1.00000  | 1.36140e-23 | 1.00000  |
| rad1               | 4.72087e-24 | 1.00000  | 4.72087e-24 | 1.00000  |
| PAH7+H             | 1.24354e-24 | 1.00000  | 1.24354e-24 | 1.00000  |
| PhCCH+CH3          | 2.98495e-25 | 1.00000  | 2.98495e-25 | 1.00000  |
| rad30              | 6.85882e-26 | 1.00000  | 6.85882e-26 | 1.00000  |
| rad14              | 2.29950e-26 | 1.00000  | 2.29950e-26 | 1.00000  |
| rad15              | 1.12199e-26 | 1.00000  | 1.12199e-26 | 1.00000  |
| rad38              | 2.88383e-28 | 1.00000  | 2.88383e-28 | 1.00000  |
| Ph+MeAc            | 6.46827e-29 | 1.00000  | 6.46827e-29 | 1.00000  |
| rad46              | 6.25935e-30 | 1.00000  | 6.25935e-30 | 1.00000  |
| rad26              | 7.44030e-31 | 1.00000  | 7.44030e-31 | 1.00000  |
| rad60syn           | 7.30017e-31 | 1.00000  | 7.30017e-31 | 1.00000  |
| rad10              | 4.44760e-31 | 1.00000  | 4.44760e-31 | 1.00000  |
| rad60anti          | 1.63934e-31 | 1.00000  | 1.63934e-31 | 1.00000  |
| rad39              | 1.20079e-31 | 1.00000  | 1.20079e-31 | 1.00000  |
| PAH9+H             | 6.59537e-32 | 1.00000  | 6.59537e-32 | 1.00000  |
| rad35              | 3.66318e-32 | 1.00000  | 3.66318e-32 | 1.00000  |
| rad27              | 7.85143e-34 | 1.00000  | 7.85143e-34 | 1.00000  |
| PhCCCH3+H          | 2.98735e-34 | 1.00000  | 2.98735e-34 | 1.00000  |
| PAH3+H             | 2.78076e-35 | 1.00000  | 2.78076e-35 | 1.00000  |
| rad19syn           | 1.19562e-35 | 1.00000  | 1.19562e-35 | 1.00000  |
| rad59              | 1.15727e-35 | 1.00000  | 1.15727e-35 | 1.00000  |
| rad54              | 2.09877e-36 | 1.00000  | 2.09877e-36 | 1.00000  |

|               |             |         |             |         |
|---------------|-------------|---------|-------------|---------|
| rad50         | 3.44772e-37 | 1.00000 | 3.44772e-37 | 1.00000 |
| rad70         | 8.91678e-41 | 1.00000 | 8.91678e-41 | 1.00000 |
| rad12         | 3.38709e-42 | 1.00000 | 3.38709e-42 | 1.00000 |
| rad5          | 3.32238e-42 | 1.00000 | 3.32238e-42 | 1.00000 |
| rad55         | 2.87079e-42 | 1.00000 | 2.87079e-42 | 1.00000 |
| rad52         | 1.10539e-43 | 1.00000 | 1.10539e-43 | 1.00000 |
| rad37         | 1.07555e-43 | 1.00000 | 1.07555e-43 | 1.00000 |
| PhcycC3H3_A+H | 5.57289e-44 | 1.00000 | 5.57289e-44 | 1.00000 |
| rad34         | 1.10558e-45 | 1.00000 | 1.10558e-45 | 1.00000 |
| rad51         | 4.56635e-47 | 1.00000 | 4.56635e-47 | 1.00000 |
| rad62         | 4.70577e-48 | 1.00000 | 4.70577e-48 | 1.00000 |
| rad58         | 1.76457e-49 | 1.00000 | 1.76457e-49 | 1.00000 |
| PAH10+CH3     | 5.16356e-52 | 1.00000 | 5.16356e-52 | 1.00000 |
| rad47         | 3.33706e-52 | 1.00000 | 3.33706e-52 | 1.00000 |
| PAH1+H        | 1.65225e-52 | 1.00000 | 1.65225e-52 | 1.00000 |
| rad43         | 2.64238e-53 | 1.00000 | 2.64238e-53 | 1.00000 |
| rad65         | 3.20290e-54 | 1.00000 | 3.20290e-54 | 1.00000 |
| rad42         | 2.81870e-57 | 1.00000 | 2.81870e-57 | 1.00000 |
| rad41         | 3.55350e-63 | 1.00000 | 3.55350e-63 | 1.00000 |

100000000. Pa, 120.000000 K

| Rate constant      | True (fraction)        | Effective (fraction)   |
|--------------------|------------------------|------------------------|
| Total              | 4.24245e-20 (1.00 )    | 4.24245e-20 (1.00 )    |
| Formation of rad11 | 4.06372e-20 (0.958 )   | 4.06372e-20 (0.958 )   |
| Formation of rad6  | 1.76944e-21 (0.0417 )  | 1.76944e-21 (0.0417 )  |
| H-abstraction      | 1.78210e-23 (0.000420) | 1.78210e-23 (0.000420) |

| species            | PYtrue      | Cumul    | PYeffective | Cumul    |
|--------------------|-------------|----------|-------------|----------|
| rad11              | 0.957869    | 0.957869 | 0.957869    | 0.957869 |
| rad6               | 0.0417107   | 0.999580 | 0.0417107   | 0.999580 |
| Benzene+2-propynyl | 0.000420064 | 1.00000  | 0.000420064 | 1.00000  |
| rad21              | 1.51303e-07 | 1.00000  | 1.51303e-07 | 1.00000  |
| rad13              | 6.50320e-10 | 1.00000  | 6.50320e-10 | 1.00000  |
| rad7               | 2.07147e-10 | 1.00000  | 2.07147e-10 | 1.00000  |
| rad20              | 9.77034e-11 | 1.00000  | 9.77034e-11 | 1.00000  |
| rad25              | 8.17865e-11 | 1.00000  | 8.17865e-11 | 1.00000  |
| rad22              | 3.75559e-11 | 1.00000  | 3.75559e-11 | 1.00000  |
| PhCHCCH2+H         | 7.36541e-12 | 1.00000  | 7.36541e-12 | 1.00000  |
| rad33              | 6.39130e-12 | 1.00000  | 6.39130e-12 | 1.00000  |
| rad24              | 4.58824e-12 | 1.00000  | 4.58824e-12 | 1.00000  |
| rad9               | 4.59770e-13 | 1.00000  | 4.59770e-13 | 1.00000  |
| rad45              | 1.41162e-13 | 1.00000  | 1.41162e-13 | 1.00000  |
| Phenyl+Allene      | 7.31919e-14 | 1.00000  | 0.00000     | 1.00000  |
| rad36              | 2.84111e-14 | 1.00000  | 2.84111e-14 | 1.00000  |
| rad18              | 5.77326e-15 | 1.00000  | 5.77326e-15 | 1.00000  |
| rad3               | 7.19138e-17 | 1.00000  | 7.19138e-17 | 1.00000  |
| C2H2+PhCH2         | 6.98990e-17 | 1.00000  | 6.98990e-17 | 1.00000  |
| Indene+H           | 6.47445e-17 | 1.00000  | 6.47445e-17 | 1.00000  |
| rad4               | 5.67154e-17 | 1.00000  | 5.67154e-17 | 1.00000  |
| PhCH2CCH+H         | 4.11919e-17 | 1.00000  | 4.11919e-17 | 1.00000  |
| rad23              | 1.06195e-17 | 1.00000  | 1.06195e-17 | 1.00000  |
| rad28              | 4.23719e-18 | 1.00000  | 4.23719e-18 | 1.00000  |
| rad8               | 7.60848e-23 | 1.00000  | 7.60848e-23 | 1.00000  |
| rad2               | 3.87550e-23 | 1.00000  | 3.87550e-23 | 1.00000  |
| rad31              | 2.47210e-23 | 1.00000  | 2.47210e-23 | 1.00000  |
| rad1               | 1.01119e-23 | 1.00000  | 1.01119e-23 | 1.00000  |
| PAH7+H             | 4.31962e-24 | 1.00000  | 4.31962e-24 | 1.00000  |
| PhCCH+CH3          | 6.98507e-25 | 1.00000  | 6.98507e-25 | 1.00000  |
| rad30              | 1.20013e-25 | 1.00000  | 1.20013e-25 | 1.00000  |
| rad14              | 5.03154e-26 | 1.00000  | 5.03154e-26 | 1.00000  |
| rad15              | 2.00856e-26 | 1.00000  | 2.00856e-26 | 1.00000  |
| rad38              | 5.46726e-28 | 1.00000  | 5.46726e-28 | 1.00000  |
| Ph+MeAc            | 2.01334e-28 | 1.00000  | 2.01334e-28 | 1.00000  |
| rad46              | 1.19584e-29 | 1.00000  | 1.19584e-29 | 1.00000  |
| rad26              | 3.55998e-30 | 1.00000  | 3.55998e-30 | 1.00000  |
| rad60syn           | 1.71132e-30 | 1.00000  | 1.71132e-30 | 1.00000  |
| rad10              | 1.17095e-30 | 1.00000  | 1.17095e-30 | 1.00000  |
| rad60anti          | 4.15715e-31 | 1.00000  | 4.15715e-31 | 1.00000  |
| rad39              | 3.30191e-31 | 1.00000  | 3.30191e-31 | 1.00000  |
| PAH9+H             | 1.18727e-31 | 1.00000  | 1.18727e-31 | 1.00000  |
| rad35              | 6.62693e-32 | 1.00000  | 6.62693e-32 | 1.00000  |
| rad27              | 2.22370e-33 | 1.00000  | 2.22370e-33 | 1.00000  |
| PhCCCH3+H          | 9.51950e-34 | 1.00000  | 9.51950e-34 | 1.00000  |
| rad19syn           | 2.28705e-34 | 1.00000  | 2.28705e-34 | 1.00000  |
| PAH3+H             | 1.73409e-34 | 1.00000  | 1.73409e-34 | 1.00000  |
| rad59              | 6.91973e-35 | 1.00000  | 6.91973e-35 | 1.00000  |
| rad54              | 6.28905e-35 | 1.00000  | 6.28905e-35 | 1.00000  |

|               |             |         |             |         |
|---------------|-------------|---------|-------------|---------|
| rad50         | 1.93780e-36 | 1.00000 | 1.93780e-36 | 1.00000 |
| rad70         | 5.94364e-39 | 1.00000 | 5.94364e-39 | 1.00000 |
| rad55         | 2.44501e-40 | 1.00000 | 2.44501e-40 | 1.00000 |
| rad5          | 2.41820e-41 | 1.00000 | 2.41820e-41 | 1.00000 |
| rad12         | 2.13455e-41 | 1.00000 | 2.13455e-41 | 1.00000 |
| PhcycC3H3_A+H | 5.23998e-42 | 1.00000 | 5.23998e-42 | 1.00000 |
| rad52         | 1.72128e-42 | 1.00000 | 1.72128e-42 | 1.00000 |
| rad37         | 7.68588e-43 | 1.00000 | 7.68588e-43 | 1.00000 |
| rad34         | 9.46873e-44 | 1.00000 | 9.46873e-44 | 1.00000 |
| rad51         | 1.35464e-45 | 1.00000 | 1.35464e-45 | 1.00000 |
| rad62         | 1.87881e-46 | 1.00000 | 1.87881e-46 | 1.00000 |
| rad58         | 1.00185e-47 | 1.00000 | 1.00185e-47 | 1.00000 |
| rad47         | 2.24371e-50 | 1.00000 | 2.24371e-50 | 1.00000 |
| PAH1+H        | 1.88173e-50 | 1.00000 | 1.88173e-50 | 1.00000 |
| PAH10+CH3     | 1.67376e-50 | 1.00000 | 1.67376e-50 | 1.00000 |
| rad43         | 9.02936e-52 | 1.00000 | 9.02936e-52 | 1.00000 |
| rad65         | 1.58821e-52 | 1.00000 | 1.58821e-52 | 1.00000 |
| rad42         | 3.79836e-55 | 1.00000 | 3.79836e-55 | 1.00000 |
| rad41         | 5.10534e-61 | 1.00000 | 5.10534e-61 | 1.00000 |

100000000. Pa, 130.000000 K

| Rate constant      | True (fraction) |            | Effective (fraction) |            |
|--------------------|-----------------|------------|----------------------|------------|
| Total              | 1.33719e-19     | (1.00 )    | 1.33719e-19          | (1.00 )    |
| Formation of rad11 | 1.26517e-19     | (0.946 )   | 1.26517e-19          | (0.946 )   |
| Formation of rad6  | 7.08974e-21     | (0.0530 )  | 7.08974e-21          | (0.0530 )  |
| H-abstraction      | 1.11864e-22     | (0.000837) | 1.11864e-22          | (0.000837) |

  

| species            | PYtrue      | Cumul    | PYeffective | Cumul    |
|--------------------|-------------|----------|-------------|----------|
| rad11              | 0.946141    | 0.946141 | 0.946141    | 0.946141 |
| rad6               | 0.0530228   | 0.999164 | 0.0530228   | 0.999164 |
| Benzene+2-propynyl | 0.000836559 | 1.00000  | 0.000836559 | 1.00000  |
| rad21              | 1.69291e-07 | 1.00000  | 1.69291e-07 | 1.00000  |
| rad13              | 9.35047e-10 | 1.00000  | 9.35047e-10 | 1.00000  |
| rad7               | 2.98970e-10 | 1.00000  | 2.98970e-10 | 1.00000  |
| rad20              | 1.21021e-10 | 1.00000  | 1.21021e-10 | 1.00000  |
| rad25              | 9.55402e-11 | 1.00000  | 9.55402e-11 | 1.00000  |
| rad22              | 4.65162e-11 | 1.00000  | 4.65162e-11 | 1.00000  |
| rad33              | 9.31066e-12 | 1.00000  | 9.31066e-12 | 1.00000  |
| PhCHCCH2+H         | 9.23250e-12 | 1.00000  | 9.23250e-12 | 1.00000  |
| rad24              | 5.72522e-12 | 1.00000  | 5.72522e-12 | 1.00000  |
| rad9               | 5.91012e-13 | 1.00000  | 5.91012e-13 | 1.00000  |
| rad45              | 1.94437e-13 | 1.00000  | 1.94437e-13 | 1.00000  |
| Phenyl+Allene      | 1.17112e-13 | 1.00000  | 0.00000     | 1.00000  |
| rad36              | 3.85436e-14 | 1.00000  | 3.85436e-14 | 1.00000  |
| rad18              | 7.97562e-15 | 1.00000  | 7.97562e-15 | 1.00000  |
| PhCH2CCH+H         | 1.21724e-16 | 1.00000  | 1.21724e-16 | 1.00000  |
| rad3               | 1.19780e-16 | 1.00000  | 1.19780e-16 | 1.00000  |
| C2H2+PhCH2         | 1.02981e-16 | 1.00000  | 1.02981e-16 | 1.00000  |
| rad4               | 9.46051e-17 | 1.00000  | 9.46051e-17 | 1.00000  |
| Indene+H           | 9.02146e-17 | 1.00000  | 9.02146e-17 | 1.00000  |
| rad23              | 1.48618e-17 | 1.00000  | 1.48618e-17 | 1.00000  |
| rad28              | 7.29488e-18 | 1.00000  | 7.29488e-18 | 1.00000  |
| rad8               | 1.95501e-22 | 1.00000  | 1.95501e-22 | 1.00000  |
| rad2               | 7.82921e-23 | 1.00000  | 7.82921e-23 | 1.00000  |
| rad31              | 4.23228e-23 | 1.00000  | 4.23228e-23 | 1.00000  |
| rad1               | 2.03257e-23 | 1.00000  | 2.03257e-23 | 1.00000  |
| PAH7+H             | 1.39851e-23 | 1.00000  | 1.39851e-23 | 1.00000  |
| PhCCH+CH3          | 1.55920e-24 | 1.00000  | 1.55920e-24 | 1.00000  |
| rad30              | 2.08256e-25 | 1.00000  | 2.08256e-25 | 1.00000  |
| rad14              | 1.04631e-25 | 1.00000  | 1.04631e-25 | 1.00000  |
| rad15              | 3.57347e-26 | 1.00000  | 3.57347e-26 | 1.00000  |
| rad38              | 1.02382e-27 | 1.00000  | 1.02382e-27 | 1.00000  |
| Ph+MeAc            | 5.97528e-28 | 1.00000  | 5.97528e-28 | 1.00000  |
| rad46              | 2.28551e-29 | 1.00000  | 2.28551e-29 | 1.00000  |
| rad26              | 1.55313e-29 | 1.00000  | 1.55313e-29 | 1.00000  |
| rad60syn           | 4.00732e-30 | 1.00000  | 4.00732e-30 | 1.00000  |
| rad10              | 2.90909e-30 | 1.00000  | 2.90909e-30 | 1.00000  |
| rad60anti          | 1.04503e-30 | 1.00000  | 1.04503e-30 | 1.00000  |
| rad39              | 8.73066e-31 | 1.00000  | 8.73066e-31 | 1.00000  |
| PAH9+H             | 2.13096e-31 | 1.00000  | 2.13096e-31 | 1.00000  |
| rad35              | 1.21349e-31 | 1.00000  | 1.21349e-31 | 1.00000  |
| rad27              | 5.97880e-33 | 1.00000  | 5.97880e-33 | 1.00000  |
| rad19syn           | 3.33292e-33 | 1.00000  | 3.33292e-33 | 1.00000  |
| PhCCCH3+H          | 2.90035e-33 | 1.00000  | 2.90035e-33 | 1.00000  |
| rad54              | 1.40132e-33 | 1.00000  | 1.40132e-33 | 1.00000  |
| PAH3+H             | 9.95840e-34 | 1.00000  | 9.95840e-34 | 1.00000  |
| rad59              | 3.80142e-34 | 1.00000  | 3.80142e-34 | 1.00000  |

|               |             |         |             |         |
|---------------|-------------|---------|-------------|---------|
| rad50         | 1.01700e-35 | 1.00000 | 1.01700e-35 | 1.00000 |
| rad70         | 4.53971e-37 | 1.00000 | 4.53971e-37 | 1.00000 |
| rad55         | 1.45536e-38 | 1.00000 | 1.45536e-38 | 1.00000 |
| PhcycC3H3_A+H | 3.52083e-40 | 1.00000 | 3.52083e-40 | 1.00000 |
| rad5          | 1.61178e-40 | 1.00000 | 1.61178e-40 | 1.00000 |
| rad12         | 1.26959e-40 | 1.00000 | 1.26959e-40 | 1.00000 |
| rad52         | 2.42243e-41 | 1.00000 | 2.42243e-41 | 1.00000 |
| rad34         | 1.03856e-41 | 1.00000 | 1.03856e-41 | 1.00000 |
| rad37         | 5.25589e-42 | 1.00000 | 5.25589e-42 | 1.00000 |
| rad51         | 3.69811e-44 | 1.00000 | 3.69811e-44 | 1.00000 |
| rad62         | 6.05517e-45 | 1.00000 | 6.05517e-45 | 1.00000 |
| rad58         | 6.09687e-46 | 1.00000 | 6.09687e-46 | 1.00000 |
| PAH1+H        | 1.97742e-48 | 1.00000 | 1.97742e-48 | 1.00000 |
| rad47         | 1.61537e-48 | 1.00000 | 1.61537e-48 | 1.00000 |
| PAH10+CH3     | 4.99465e-49 | 1.00000 | 4.99465e-49 | 1.00000 |
| rad43         | 2.60681e-50 | 1.00000 | 2.60681e-50 | 1.00000 |
| rad65         | 7.80896e-51 | 1.00000 | 7.80896e-51 | 1.00000 |
| rad42         | 4.64465e-53 | 1.00000 | 4.64465e-53 | 1.00000 |
| rad41         | 6.40142e-59 | 1.00000 | 6.40142e-59 | 1.00000 |

100000000. Pa, 140.000000 K

| Rate constant      | True (fraction)        | Effective (fraction)   |
|--------------------|------------------------|------------------------|
| Total              | 3.59582e-19 (1.00 )    | 3.59582e-19 (1.00 )    |
| Formation of rad11 | 3.35703e-19 (0.934 )   | 3.35703e-19 (0.934 )   |
| Formation of rad6  | 2.33415e-20 (0.0649 )  | 2.33415e-20 (0.0649 )  |
| H-abstraction      | 5.37685e-22 (0.00150 ) | 5.37685e-22 (0.00150 ) |

| species            | PYtrue      | Cumul    | PYeffective | Cumul    |
|--------------------|-------------|----------|-------------|----------|
| rad11              | 0.933588    | 0.933588 | 0.933588    | 0.933588 |
| rad6               | 0.0649162   | 0.998504 | 0.0649162   | 0.998504 |
| Benzene+2-propynyl | 0.00149531  | 0.999999 | 0.00149531  | 0.999999 |
| rad21              | 1.88650e-07 | 1.000000 | 1.88650e-07 | 1.000000 |
| rad13              | 1.28982e-09 | 1.000000 | 1.28982e-09 | 1.000000 |
| rad7               | 4.14047e-10 | 1.000000 | 4.14047e-10 | 1.000000 |
| rad20              | 1.48703e-10 | 1.000000 | 1.48703e-10 | 1.000000 |
| rad25              | 1.11465e-10 | 1.000000 | 1.11465e-10 | 1.000000 |
| rad22              | 5.71524e-11 | 1.000000 | 5.71524e-11 | 1.000000 |
| rad33              | 1.30214e-11 | 1.000000 | 1.30214e-11 | 1.000000 |
| PhCHCCH2+H         | 1.16051e-11 | 1.000000 | 1.16051e-11 | 1.000000 |
| rad24              | 7.09182e-12 | 1.000000 | 7.09182e-12 | 1.000000 |
| rad9               | 7.62043e-13 | 1.000000 | 7.62043e-13 | 1.000000 |
| rad45              | 2.64705e-13 | 1.000000 | 2.64705e-13 | 1.000000 |
| Phenyl+Allene      | 1.85818e-13 | 1.000000 | 0.000000    | 1.000000 |
| rad36              | 5.17283e-14 | 1.000000 | 5.17283e-14 | 1.000000 |
| rad18              | 1.08966e-14 | 1.000000 | 1.08966e-14 | 1.000000 |
| PhCH2CCH+H         | 3.27884e-16 | 1.000000 | 3.27884e-16 | 1.000000 |
| rad3               | 1.91246e-16 | 1.000000 | 1.91246e-16 | 1.000000 |
| rad4               | 1.51060e-16 | 1.000000 | 1.51060e-16 | 1.000000 |
| C2H2+PhCH2         | 1.50918e-16 | 1.000000 | 1.50918e-16 | 1.000000 |
| Indene+H           | 1.24446e-16 | 1.000000 | 1.24446e-16 | 1.000000 |
| rad23              | 2.05965e-17 | 1.000000 | 2.05965e-17 | 1.000000 |
| rad28              | 1.20531e-17 | 1.000000 | 1.20531e-17 | 1.000000 |
| rad8               | 4.80176e-22 | 1.000000 | 4.80176e-22 | 1.000000 |
| rad2               | 1.51129e-22 | 1.000000 | 1.51129e-22 | 1.000000 |
| rad31              | 6.92821e-23 | 1.000000 | 6.92821e-23 | 1.000000 |
| PAH7+H             | 4.24217e-23 | 1.000000 | 4.24217e-23 | 1.000000 |
| rad1               | 3.89800e-23 | 1.000000 | 3.89800e-23 | 1.000000 |
| PhCCH+CH3          | 3.37009e-24 | 1.000000 | 3.37009e-24 | 1.000000 |
| rad30              | 3.60694e-25 | 1.000000 | 3.60694e-25 | 1.000000 |
| rad14              | 2.09915e-25 | 1.000000 | 2.09915e-25 | 1.000000 |
| rad15              | 6.35870e-26 | 1.000000 | 6.35870e-26 | 1.000000 |
| rad38              | 1.90837e-27 | 1.000000 | 1.90837e-27 | 1.000000 |
| Ph+MeAc            | 1.71220e-27 | 1.000000 | 1.71220e-27 | 1.000000 |
| rad26              | 6.17674e-29 | 1.000000 | 6.17674e-29 | 1.000000 |
| rad46              | 4.39620e-29 | 1.000000 | 4.39620e-29 | 1.000000 |
| rad60syn           | 9.40313e-30 | 1.000000 | 9.40313e-30 | 1.000000 |
| rad10              | 6.94380e-30 | 1.000000 | 6.94380e-30 | 1.000000 |
| rad60anti          | 2.61313e-30 | 1.000000 | 2.61313e-30 | 1.000000 |
| rad39              | 2.25038e-30 | 1.000000 | 2.25038e-30 | 1.000000 |
| PAH9+H             | 3.84071e-31 | 1.000000 | 3.84071e-31 | 1.000000 |
| rad35              | 2.28948e-31 | 1.000000 | 2.28948e-31 | 1.000000 |
| rad19syn           | 3.69356e-32 | 1.000000 | 3.69356e-32 | 1.000000 |
| rad54              | 2.26764e-32 | 1.000000 | 2.26764e-32 | 1.000000 |
| rad27              | 1.55375e-32 | 1.000000 | 1.55375e-32 | 1.000000 |
| PhCCCH3+H          | 8.59652e-33 | 1.000000 | 8.59652e-33 | 1.000000 |
| PAH3+H             | 5.21117e-33 | 1.000000 | 5.21117e-33 | 1.000000 |
| rad59              | 1.90280e-33 | 1.000000 | 1.90280e-33 | 1.000000 |

|               |             |          |             |          |
|---------------|-------------|----------|-------------|----------|
| rad50         | 4.95098e-35 | 1.000000 | 4.95098e-35 | 1.000000 |
| rad70         | 2.14610e-35 | 1.000000 | 2.14610e-35 | 1.000000 |
| rad55         | 5.69965e-37 | 1.000000 | 5.69965e-37 | 1.000000 |
| PhcycC3H3_A+H | 1.53865e-38 | 1.000000 | 1.53865e-38 | 1.000000 |
| rad34         | 1.10169e-39 | 1.000000 | 1.10169e-39 | 1.000000 |
| rad5          | 9.94309e-40 | 1.000000 | 9.94309e-40 | 1.000000 |
| rad12         | 7.09027e-40 | 1.000000 | 7.09027e-40 | 1.000000 |
| rad52         | 2.92056e-40 | 1.000000 | 2.92056e-40 | 1.000000 |
| rad37         | 3.39505e-41 | 1.000000 | 3.39505e-41 | 1.000000 |
| rad51         | 8.35549e-43 | 1.000000 | 8.35549e-43 | 1.000000 |
| rad62         | 1.49145e-43 | 1.000000 | 1.49145e-43 | 1.000000 |
| rad58         | 2.95138e-44 | 1.000000 | 2.95138e-44 | 1.000000 |
| PAH1+H        | 1.84388e-46 | 1.000000 | 1.84388e-46 | 1.000000 |
| rad47         | 1.00888e-46 | 1.000000 | 1.00888e-46 | 1.000000 |
| PAH10+CH3     | 1.21877e-47 | 1.000000 | 1.21877e-47 | 1.000000 |
| rad43         | 6.10628e-49 | 1.000000 | 6.10628e-49 | 1.000000 |
| rad65         | 2.89946e-49 | 1.000000 | 2.89946e-49 | 1.000000 |
| rad42         | 5.61667e-51 | 1.000000 | 5.61667e-51 | 1.000000 |
| rad41         | 7.09380e-57 | 1.000000 | 7.09380e-57 | 1.000000 |

100000000. Pa, 150.000000 K

| Rate constant      | True (fraction)        | Effective (fraction)   |
|--------------------|------------------------|------------------------|
| Total              | 8.51464e-19 (1.00 )    | 8.51464e-19 (1.00 )    |
| Formation of rad11 | 7.83711e-19 (0.920 )   | 7.83711e-19 (0.920 )   |
| Formation of rad6  | 6.56651e-20 (0.0771 )  | 6.56651e-20 (0.0771 )  |
| H-abstraction      | 2.08816e-21 (0.00245 ) | 2.08816e-21 (0.00245 ) |

| species            | PYtrue      | Cumul    | PYeffective | Cumul    |
|--------------------|-------------|----------|-------------|----------|
| rad11              | 0.920423    | 0.920423 | 0.920423    | 0.920423 |
| rad6               | 0.0771239   | 0.997547 | 0.0771239   | 0.997547 |
| Benzene+2-propynyl | 0.00245244  | 1.000000 | 0.00245244  | 1.000000 |
| rad21              | 2.09640e-07 | 1.000000 | 2.09640e-07 | 1.000000 |
| rad13              | 1.72173e-09 | 1.000000 | 1.72173e-09 | 1.000000 |
| rad7               | 5.55011e-10 | 1.000000 | 5.55011e-10 | 1.000000 |
| rad20              | 1.81686e-10 | 1.000000 | 1.81686e-10 | 1.000000 |
| rad25              | 1.30049e-10 | 1.000000 | 1.30049e-10 | 1.000000 |
| rad22              | 6.98221e-11 | 1.000000 | 6.98221e-11 | 1.000000 |
| rad33              | 1.76352e-11 | 1.000000 | 1.76352e-11 | 1.000000 |
| PhCHCCH2+H         | 1.46441e-11 | 1.000000 | 1.46441e-11 | 1.000000 |
| rad24              | 8.74119e-12 | 1.000000 | 8.74119e-12 | 1.000000 |
| rad9               | 9.86437e-13 | 1.000000 | 9.86437e-13 | 1.000000 |
| rad45              | 3.57413e-13 | 1.000000 | 3.57413e-13 | 1.000000 |
| Phenyl+Allene      | 2.92728e-13 | 1.000000 | 0.000000    | 1.000000 |
| rad36              | 6.89158e-14 | 1.000000 | 6.89158e-14 | 1.000000 |
| rad18              | 1.47748e-14 | 1.000000 | 1.47748e-14 | 1.000000 |
| PhCH2CCH+H         | 8.16685e-16 | 1.000000 | 8.16685e-16 | 1.000000 |
| rad3               | 2.95557e-16 | 1.000000 | 2.95557e-16 | 1.000000 |
| rad4               | 2.33249e-16 | 1.000000 | 2.33249e-16 | 1.000000 |
| C2H2+PhCH2         | 2.20814e-16 | 1.000000 | 2.20814e-16 | 1.000000 |
| Indene+H           | 1.70562e-16 | 1.000000 | 1.70562e-16 | 1.000000 |
| rad23              | 2.83697e-17 | 1.000000 | 2.83697e-17 | 1.000000 |
| rad28              | 1.93036e-17 | 1.000000 | 1.93036e-17 | 1.000000 |
| rad8               | 1.13366e-21 | 1.000000 | 1.13366e-21 | 1.000000 |
| rad2               | 2.82092e-22 | 1.000000 | 2.82092e-22 | 1.000000 |
| PAH7+H             | 1.21373e-22 | 1.000000 | 1.21373e-22 | 1.000000 |
| rad31              | 1.09597e-22 | 1.000000 | 1.09597e-22 | 1.000000 |
| rad1               | 7.22175e-23 | 1.000000 | 7.22175e-23 | 1.000000 |
| PhCCH+CH3          | 7.13135e-24 | 1.000000 | 7.13135e-24 | 1.000000 |
| rad30              | 6.26594e-25 | 1.000000 | 6.26594e-25 | 1.000000 |
| rad14              | 4.10906e-25 | 1.000000 | 4.10906e-25 | 1.000000 |
| rad15              | 1.13705e-25 | 1.000000 | 1.13705e-25 | 1.000000 |
| Ph+MeAc            | 4.77688e-27 | 1.000000 | 4.77688e-27 | 1.000000 |
| rad38              | 3.56133e-27 | 1.000000 | 3.56133e-27 | 1.000000 |
| rad26              | 2.25871e-28 | 1.000000 | 2.25871e-28 | 1.000000 |
| rad46              | 8.54603e-29 | 1.000000 | 8.54603e-29 | 1.000000 |
| rad60syn           | 2.21436e-29 | 1.000000 | 2.21436e-29 | 1.000000 |
| rad10              | 1.61411e-29 | 1.000000 | 1.61411e-29 | 1.000000 |
| rad60anti          | 6.51279e-30 | 1.000000 | 6.51279e-30 | 1.000000 |
| rad39              | 5.70684e-30 | 1.000000 | 5.70684e-30 | 1.000000 |
| PAH9+H             | 6.98966e-31 | 1.000000 | 6.98966e-31 | 1.000000 |
| rad35              | 4.53128e-31 | 1.000000 | 4.53128e-31 | 1.000000 |
| rad19syn           | 3.20777e-31 | 1.000000 | 3.20777e-31 | 1.000000 |
| rad54              | 2.74144e-31 | 1.000000 | 2.74144e-31 | 1.000000 |
| rad27              | 3.95472e-32 | 1.000000 | 3.95472e-32 | 1.000000 |
| PhCCCH3+H          | 2.50859e-32 | 1.000000 | 2.50859e-32 | 1.000000 |
| PAH3+H             | 2.49419e-32 | 1.000000 | 2.49419e-32 | 1.000000 |
| rad59              | 8.72158e-33 | 1.000000 | 8.72158e-33 | 1.000000 |



|               |             |          |             |          |
|---------------|-------------|----------|-------------|----------|
| rad70         | 6.20027e-34 | 1.000000 | 6.20027e-34 | 1.000000 |
| rad50         | 2.24276e-34 | 1.000000 | 2.24276e-34 | 1.000000 |
| rad55         | 1.45508e-35 | 1.000000 | 1.45508e-35 | 1.000000 |
| PhcycC3H3_A+H | 4.26091e-37 | 1.000000 | 4.26091e-37 | 1.000000 |
| rad34         | 9.80869e-38 | 1.000000 | 9.80869e-38 | 1.000000 |
| rad5          | 5.73040e-39 | 1.000000 | 5.73040e-39 | 1.000000 |
| rad12         | 3.73048e-39 | 1.000000 | 3.73048e-39 | 1.000000 |
| rad52         | 2.98087e-39 | 1.000000 | 2.98087e-39 | 1.000000 |
| rad37         | 2.06654e-40 | 1.000000 | 2.06654e-40 | 1.000000 |
| rad51         | 1.51502e-41 | 1.000000 | 1.51502e-41 | 1.000000 |
| rad62         | 2.80074e-42 | 1.000000 | 2.80074e-42 | 1.000000 |
| rad58         | 1.01380e-42 | 1.000000 | 1.01380e-42 | 1.000000 |
| PAH1+H        | 8.76080e-45 | 1.000000 | 8.76080e-45 | 1.000000 |
| rad47         | 4.85555e-45 | 1.000000 | 4.85555e-45 | 1.000000 |
| PAH10+CH3     | 2.38583e-46 | 1.000000 | 2.38583e-46 | 1.000000 |
| rad43         | 1.15457e-47 | 1.000000 | 1.15457e-47 | 1.000000 |
| rad65         | 7.87181e-48 | 1.000000 | 7.87181e-48 | 1.000000 |
| rad42         | 4.27763e-49 | 1.000000 | 4.27763e-49 | 1.000000 |
| rad41         | 5.10144e-55 | 1.000000 | 5.10144e-55 | 1.000000 |

100000000. Pa, 160.000000 K

| Rate constant      | True (fraction)        | Effective (fraction)   |
|--------------------|------------------------|------------------------|
| Total              | 1.81800e-18 (1.00 )    | 1.81800e-18 (1.00 )    |
| Formation of rad11 | 1.64862e-18 (0.907 )   | 1.64862e-18 (0.907 )   |
| Formation of rad6  | 1.62558e-19 (0.0894 )  | 1.62558e-19 (0.0894 )  |
| H-abstraction      | 6.82130e-21 (0.00375 ) | 6.82130e-21 (0.00375 ) |

| species            | PYtrue      | Cumul    | PYeffective | Cumul    |
|--------------------|-------------|----------|-------------|----------|
| rad11              | 0.906828    | 0.906828 | 0.906828    | 0.906828 |
| rad6               | 0.0894200   | 0.996248 | 0.0894200   | 0.996248 |
| Benzene+2-propynyl | 0.00375209  | 1.000000 | 0.00375209  | 1.000000 |
| rad21              | 2.32555e-07 | 1.000000 | 2.32555e-07 | 1.000000 |
| rad13              | 2.23868e-09 | 1.000000 | 2.23868e-09 | 1.000000 |
| rad7               | 7.24838e-10 | 1.000000 | 7.24838e-10 | 1.000000 |
| rad20              | 2.21148e-10 | 1.000000 | 2.21148e-10 | 1.000000 |
| rad25              | 1.51893e-10 | 1.000000 | 1.51893e-10 | 1.000000 |
| rad22              | 8.49778e-11 | 1.000000 | 8.49778e-11 | 1.000000 |
| rad33              | 2.32823e-11 | 1.000000 | 2.32823e-11 | 1.000000 |
| PhCHCCH2+H         | 1.85645e-11 | 1.000000 | 1.85645e-11 | 1.000000 |
| rad24              | 1.07412e-11 | 1.000000 | 1.07412e-11 | 1.000000 |
| rad9               | 1.28259e-12 | 1.000000 | 1.28259e-12 | 1.000000 |
| rad45              | 4.79971e-13 | 1.000000 | 4.79971e-13 | 1.000000 |
| Phenyl+Allene      | 4.58264e-13 | 1.000000 | 0.000000    | 1.000000 |
| rad36              | 9.13928e-14 | 1.000000 | 9.13928e-14 | 1.000000 |
| rad18              | 1.99380e-14 | 1.000000 | 1.99380e-14 | 1.000000 |
| PhCH2CCH+H         | 1.90491e-15 | 1.000000 | 1.90491e-15 | 1.000000 |
| rad3               | 4.45422e-16 | 1.000000 | 4.45422e-16 | 1.000000 |
| rad4               | 3.50998e-16 | 1.000000 | 3.50998e-16 | 1.000000 |
| C2H2+PhCH2         | 3.23490e-16 | 1.000000 | 3.23490e-16 | 1.000000 |
| Indene+H           | 2.32944e-16 | 1.000000 | 2.32944e-16 | 1.000000 |
| rad23              | 3.89523e-17 | 1.000000 | 3.89523e-17 | 1.000000 |
| rad28              | 3.01958e-17 | 1.000000 | 3.01958e-17 | 1.000000 |
| rad8               | 2.58676e-21 | 1.000000 | 2.58676e-21 | 1.000000 |
| rad2               | 5.13837e-22 | 1.000000 | 5.13837e-22 | 1.000000 |
| PAH7+H             | 3.29836e-22 | 1.000000 | 3.29836e-22 | 1.000000 |
| rad31              | 1.68893e-22 | 1.000000 | 1.68893e-22 | 1.000000 |
| rad1               | 1.30493e-22 | 1.000000 | 1.30493e-22 | 1.000000 |
| PhCCH+CH3          | 1.48924e-23 | 1.000000 | 1.48924e-23 | 1.000000 |
| rad30              | 1.09574e-24 | 1.000000 | 1.09574e-24 | 1.000000 |
| rad14              | 7.91489e-25 | 1.000000 | 7.91489e-25 | 1.000000 |
| rad15              | 2.05014e-25 | 1.000000 | 2.05014e-25 | 1.000000 |
| Ph+MeAc            | 1.30460e-26 | 1.000000 | 1.30460e-26 | 1.000000 |
| rad38              | 6.68252e-27 | 1.000000 | 6.68252e-27 | 1.000000 |
| rad26              | 7.67879e-28 | 1.000000 | 7.67879e-28 | 1.000000 |
| rad46              | 1.68324e-28 | 1.000000 | 1.68324e-28 | 1.000000 |
| rad60syn           | 5.23506e-29 | 1.000000 | 5.23506e-29 | 1.000000 |
| rad10              | 3.69107e-29 | 1.000000 | 3.69107e-29 | 1.000000 |
| rad60anti          | 1.61935e-29 | 1.000000 | 1.61935e-29 | 1.000000 |
| rad39              | 1.43222e-29 | 1.000000 | 1.43222e-29 | 1.000000 |
| rad54              | 2.57742e-30 | 1.000000 | 2.57742e-30 | 1.000000 |
| rad19syn           | 2.26212e-30 | 1.000000 | 2.26212e-30 | 1.000000 |
| PAH9+H             | 1.28967e-30 | 1.000000 | 1.28967e-30 | 1.000000 |
| rad35              | 9.54536e-31 | 1.000000 | 9.54536e-31 | 1.000000 |
| PAH3+H             | 1.10194e-31 | 1.000000 | 1.10194e-31 | 1.000000 |
| rad27              | 9.95169e-32 | 1.000000 | 9.95169e-32 | 1.000000 |
| PhCCCH3+H          | 7.26350e-32 | 1.000000 | 7.26350e-32 | 1.000000 |
| rad59              | 3.69661e-32 | 1.000000 | 3.69661e-32 | 1.000000 |

|               |             |         |             |         |
|---------------|-------------|---------|-------------|---------|
| rad70         | 1.23017e-32 | 1.00000 | 1.23017e-32 | 1.00000 |
| rad50         | 9.51955e-34 | 1.00000 | 9.51955e-34 | 1.00000 |
| rad55         | 2.62835e-34 | 1.00000 | 2.62835e-34 | 1.00000 |
| PhcycC3H3_A+H | 8.29117e-36 | 1.00000 | 8.29117e-36 | 1.00000 |
| rad34         | 4.35364e-36 | 1.00000 | 4.35364e-36 | 1.00000 |
| rad5          | 3.11046e-38 | 1.00000 | 3.11046e-38 | 1.00000 |
| rad52         | 2.59795e-38 | 1.00000 | 2.59795e-38 | 1.00000 |
| rad12         | 1.85942e-38 | 1.00000 | 1.85942e-38 | 1.00000 |
| rad37         | 1.18737e-39 | 1.00000 | 1.18737e-39 | 1.00000 |
| rad51         | 2.21577e-40 | 1.00000 | 2.21577e-40 | 1.00000 |
| rad62         | 4.12979e-41 | 1.00000 | 4.12979e-41 | 1.00000 |
| rad58         | 2.50761e-41 | 1.00000 | 2.50761e-41 | 1.00000 |
| PAH1+H        | 2.68324e-43 | 1.00000 | 2.68324e-43 | 1.00000 |
| rad47         | 1.68222e-43 | 1.00000 | 1.68222e-43 | 1.00000 |
| PAH10+CH3     | 3.79987e-45 | 1.00000 | 3.79987e-45 | 1.00000 |
| rad43         | 1.79361e-46 | 1.00000 | 1.79361e-46 | 1.00000 |
| rad65         | 1.60327e-46 | 1.00000 | 1.60327e-46 | 1.00000 |
| rad42         | 1.93812e-47 | 1.00000 | 1.93812e-47 | 1.00000 |
| rad41         | 2.34879e-53 | 1.00000 | 2.34879e-53 | 1.00000 |

100000000. Pa, 170.000000 K

| Rate constant      | True (fraction)        | Effective (fraction)   |
|--------------------|------------------------|------------------------|
| Total              | 3.56414e-18 (1.00 )    | 3.56414e-18 (1.00 )    |
| Formation of rad11 | 3.18264e-18 (0.893 )   | 3.18264e-18 (0.893 )   |
| Formation of rad6  | 3.62173e-19 (0.102 )   | 3.62173e-19 (0.102 )   |
| H-abstraction      | 1.93278e-20 (0.00542 ) | 1.93278e-20 (0.00542 ) |

| species            | PYtrue      | Cumul    | PYeffective | Cumul    |
|--------------------|-------------|----------|-------------|----------|
| rad11              | 0.892956    | 0.892956 | 0.892956    | 0.892956 |
| rad6               | 0.101620    | 0.994576 | 0.101620    | 0.994576 |
| Benzene+2-propynyl | 0.00542285  | 0.999999 | 0.00542285  | 0.999999 |
| rad21              | 2.57743e-07 | 0.999999 | 2.57743e-07 | 0.999999 |
| rad13              | 2.84988e-09 | 0.999999 | 2.84988e-09 | 0.999999 |
| rad7               | 9.27013e-10 | 0.999999 | 9.27013e-10 | 0.999999 |
| rad20              | 2.68583e-10 | 0.999999 | 2.68583e-10 | 0.999999 |
| rad25              | 1.77737e-10 | 0.999999 | 1.77737e-10 | 0.999999 |
| rad22              | 1.03190e-10 | 0.999999 | 1.03190e-10 | 0.999999 |
| rad33              | 3.01172e-11 | 0.999999 | 3.01172e-11 | 0.999999 |
| PhCHCCH2+H         | 2.36539e-11 | 0.999999 | 2.36539e-11 | 0.999999 |
| rad24              | 1.31785e-11 | 0.999999 | 1.31785e-11 | 0.999999 |
| rad9               | 1.67544e-12 | 0.999999 | 1.67544e-12 | 0.999999 |
| Phenyl+Allene      | 7.13332e-13 | 0.999999 | 0.000000    | 0.999999 |
| rad45              | 6.42490e-13 | 0.999999 | 6.42490e-13 | 0.999999 |
| rad36              | 1.20909e-13 | 0.999999 | 1.20909e-13 | 0.999999 |
| rad18              | 2.68384e-14 | 0.999999 | 2.68384e-14 | 0.999999 |
| PhCH2CCH+H         | 4.20470e-15 | 0.999999 | 4.20470e-15 | 0.999999 |
| rad3               | 6.58436e-16 | 0.999999 | 6.58436e-16 | 0.999999 |
| rad4               | 5.17888e-16 | 0.999999 | 5.17888e-16 | 0.999999 |
| C2H2+PhCH2         | 4.75544e-16 | 0.999999 | 4.75544e-16 | 0.999999 |
| Indene+H           | 3.17772e-16 | 0.999999 | 3.17772e-16 | 0.999999 |
| rad23              | 5.34407e-17 | 0.999999 | 5.34407e-17 | 0.999999 |
| rad28              | 4.64062e-17 | 0.999999 | 4.64062e-17 | 0.999999 |
| rad8               | 5.73136e-21 | 0.999999 | 5.73136e-21 | 0.999999 |
| rad2               | 9.19833e-22 | 0.999999 | 9.19833e-22 | 0.999999 |
| PAH7+H             | 8.56891e-22 | 0.999999 | 8.56891e-22 | 0.999999 |
| rad31              | 2.55140e-22 | 0.999999 | 2.55140e-22 | 0.999999 |
| rad1               | 2.31663e-22 | 0.999999 | 2.31663e-22 | 0.999999 |
| PhCCH+CH3          | 3.08640e-23 | 0.999999 | 3.08640e-23 | 0.999999 |
| rad30              | 1.93365e-24 | 0.999999 | 1.93365e-24 | 0.999999 |
| rad14              | 1.50966e-24 | 0.999999 | 1.50966e-24 | 0.999999 |
| rad15              | 3.73509e-25 | 0.999999 | 3.73509e-25 | 0.999999 |
| Ph+MeAc            | 3.49953e-26 | 0.999999 | 3.49953e-26 | 0.999999 |
| rad38              | 1.26453e-26 | 0.999999 | 1.26453e-26 | 0.999999 |
| rad26              | 2.45269e-27 | 0.999999 | 2.45269e-27 | 0.999999 |
| rad46              | 3.36297e-28 | 0.999999 | 3.36297e-28 | 0.999999 |
| rad60syn           | 1.24187e-28 | 0.999999 | 1.24187e-28 | 0.999999 |
| rad10              | 8.36456e-29 | 0.999999 | 8.36456e-29 | 0.999999 |
| rad60anti          | 4.01743e-29 | 0.999999 | 4.01743e-29 | 0.999999 |
| rad39              | 3.56910e-29 | 0.999999 | 3.56910e-29 | 0.999999 |
| rad54              | 1.95766e-29 | 0.999999 | 1.95766e-29 | 0.999999 |
| rad19syn           | 1.33829e-29 | 0.999999 | 1.33829e-29 | 0.999999 |
| PAH9+H             | 2.41915e-30 | 0.999999 | 2.41915e-30 | 0.999999 |
| rad35              | 2.15301e-30 | 0.999999 | 2.15301e-30 | 0.999999 |
| PAH3+H             | 4.53973e-31 | 0.999999 | 4.53973e-31 | 0.999999 |
| rad27              | 2.49165e-31 | 0.999999 | 2.49165e-31 | 0.999999 |
| PhCCCH3+H          | 2.09617e-31 | 0.999999 | 2.09617e-31 | 0.999999 |
| rad70              | 1.78441e-31 | 0.999999 | 1.78441e-31 | 0.999999 |

|               |             |          |             |          |
|---------------|-------------|----------|-------------|----------|
| rad59         | 1.46404e-31 | 0.999999 | 1.46404e-31 | 0.999999 |
| rad50         | 3.81543e-33 | 0.999999 | 3.81543e-33 | 0.999999 |
| rad55         | 3.52631e-33 | 0.999999 | 3.52631e-33 | 0.999999 |
| PhcycC3H3_A+H | 1.18951e-34 | 0.999999 | 1.18951e-34 | 0.999999 |
| rad34         | 1.06634e-34 | 0.999999 | 1.06634e-34 | 0.999999 |
| rad52         | 1.96485e-37 | 0.999999 | 1.96485e-37 | 0.999999 |
| rad5          | 1.60187e-37 | 0.999999 | 1.60187e-37 | 0.999999 |
| rad12         | 8.82567e-38 | 0.999999 | 8.82567e-38 | 0.999999 |
| rad37         | 6.45793e-39 | 0.999999 | 6.45793e-39 | 0.999999 |
| rad51         | 2.65979e-39 | 0.999999 | 2.65979e-39 | 0.999999 |
| rad62         | 4.91860e-40 | 0.999999 | 4.91860e-40 | 0.999999 |
| rad58         | 4.58725e-40 | 0.999999 | 4.58725e-40 | 0.999999 |
| PAH1+H        | 5.54419e-42 | 0.999999 | 5.54419e-42 | 0.999999 |
| rad47         | 4.08583e-42 | 0.999999 | 4.08583e-42 | 0.999999 |
| PAH10+CH3     | 5.00337e-44 | 0.999999 | 5.00337e-44 | 0.999999 |
| rad65         | 2.51603e-45 | 0.999999 | 2.51603e-45 | 0.999999 |
| rad43         | 2.32745e-45 | 0.999999 | 2.32745e-45 | 0.999999 |
| rad42         | 5.16253e-46 | 0.999999 | 5.16253e-46 | 0.999999 |
| rad41         | 6.79453e-52 | 0.999999 | 6.79453e-52 | 0.999999 |

100000000. Pa, 180.000000 K

| Rate constant      | True (fraction)        | Effective (fraction)   |
|--------------------|------------------------|------------------------|
| Total              | 6.50681e-18 (1.00 )    | 6.50681e-18 (1.00 )    |
| Formation of rad11 | 5.71915e-18 (0.879 )   | 5.71915e-18 (0.879 )   |
| Formation of rad6  | 7.39013e-19 (0.114 )   | 7.39013e-19 (0.114 )   |
| H-abstraction      | 4.86496e-20 (0.00748 ) | 4.86496e-20 (0.00748 ) |

| species            | PYtrue      | Cumul    | PYeffective | Cumul    |
|--------------------|-------------|----------|-------------|----------|
| rad11              | 0.878943    | 0.878943 | 0.878943    | 0.878943 |
| rad6               | 0.113580    | 0.992523 | 0.113580    | 0.992523 |
| Benzene+2-propynyl | 0.00747672  | 1.00000  | 0.00747672  | 1.00000  |
| rad21              | 2.85597e-07 | 1.00000  | 2.85597e-07 | 1.00000  |
| rad13              | 3.56627e-09 | 1.00000  | 3.56627e-09 | 1.00000  |
| rad7               | 1.16569e-09 | 1.00000  | 1.16569e-09 | 1.00000  |
| rad20              | 3.25875e-10 | 1.00000  | 3.25875e-10 | 1.00000  |
| rad25              | 2.08494e-10 | 1.00000  | 2.08494e-10 | 1.00000  |
| rad22              | 1.25181e-10 | 1.00000  | 1.25181e-10 | 1.00000  |
| rad33              | 3.83264e-11 | 1.00000  | 3.83264e-11 | 1.00000  |
| PhCHCCH2+H         | 3.02968e-11 | 1.00000  | 3.02968e-11 | 1.00000  |
| rad24              | 1.61638e-11 | 1.00000  | 1.61638e-11 | 1.00000  |
| rad9               | 2.19877e-12 | 1.00000  | 2.19877e-12 | 1.00000  |
| Phenyl+Allene      | 1.10443e-12 | 1.00000  | 0.00000     | 1.00000  |
| rad45              | 8.58817e-13 | 1.00000  | 8.58817e-13 | 1.00000  |
| rad36              | 1.59848e-13 | 1.00000  | 1.59848e-13 | 1.00000  |
| rad18              | 3.61021e-14 | 1.00000  | 3.61021e-14 | 1.00000  |
| PhCH2CCH+H         | 8.85810e-15 | 1.00000  | 8.85810e-15 | 1.00000  |
| rad3               | 9.59092e-16 | 1.00000  | 9.59092e-16 | 1.00000  |
| rad4               | 7.52787e-16 | 1.00000  | 7.52787e-16 | 1.00000  |
| C2H2+PhCH2         | 7.02608e-16 | 1.00000  | 7.02608e-16 | 1.00000  |
| Indene+H           | 4.33813e-16 | 1.00000  | 4.33813e-16 | 1.00000  |
| rad23              | 7.34027e-17 | 1.00000  | 7.34027e-17 | 1.00000  |
| rad28              | 7.03906e-17 | 1.00000  | 7.03906e-17 | 1.00000  |
| rad8               | 1.23784e-20 | 1.00000  | 1.23784e-20 | 1.00000  |
| PAH7+H             | 2.14010e-21 | 1.00000  | 2.14010e-21 | 1.00000  |
| rad2               | 1.62701e-21 | 1.00000  | 1.62701e-21 | 1.00000  |
| rad1               | 4.06335e-22 | 1.00000  | 4.06335e-22 | 1.00000  |
| rad31              | 3.79689e-22 | 1.00000  | 3.79689e-22 | 1.00000  |
| PhCCH+CH3          | 6.37149e-23 | 1.00000  | 6.37149e-23 | 1.00000  |
| rad30              | 3.44840e-24 | 1.00000  | 3.44840e-24 | 1.00000  |
| rad14              | 2.86426e-24 | 1.00000  | 2.86426e-24 | 1.00000  |
| rad15              | 6.88315e-25 | 1.00000  | 6.88315e-25 | 1.00000  |
| Ph+MeAc            | 9.23875e-26 | 1.00000  | 9.23875e-26 | 1.00000  |
| rad38              | 2.41740e-26 | 1.00000  | 2.41740e-26 | 1.00000  |
| rad26              | 7.42783e-27 | 1.00000  | 7.42783e-27 | 1.00000  |
| rad46              | 6.81553e-28 | 1.00000  | 6.81553e-28 | 1.00000  |
| rad60syn           | 2.95295e-28 | 1.00000  | 2.95295e-28 | 1.00000  |
| rad10              | 1.88810e-28 | 1.00000  | 1.88810e-28 | 1.00000  |
| rad54              | 1.24152e-28 | 1.00000  | 1.24152e-28 | 1.00000  |
| rad60anti          | 9.94062e-29 | 1.00000  | 9.94062e-29 | 1.00000  |
| rad39              | 8.84607e-29 | 1.00000  | 8.84607e-29 | 1.00000  |
| rad19syn           | 6.82977e-29 | 1.00000  | 6.82977e-29 | 1.00000  |
| rad35              | 5.17324e-30 | 1.00000  | 5.17324e-30 | 1.00000  |
| PAH9+H             | 4.62002e-30 | 1.00000  | 4.62002e-30 | 1.00000  |
| rad70              | 1.99273e-30 | 1.00000  | 1.99273e-30 | 1.00000  |
| PAH3+H             | 1.76029e-30 | 1.00000  | 1.76029e-30 | 1.00000  |
| rad27              | 6.23153e-31 | 1.00000  | 6.23153e-31 | 1.00000  |
| PhCCCH3+H          | 6.04205e-31 | 1.00000  | 6.04205e-31 | 1.00000  |

|               |             |         |             |         |
|---------------|-------------|---------|-------------|---------|
| rad59         | 5.46922e-31 | 1.00000 | 5.46922e-31 | 1.00000 |
| rad55         | 3.67768e-32 | 1.00000 | 3.67768e-32 | 1.00000 |
| rad50         | 1.45433e-32 | 1.00000 | 1.45433e-32 | 1.00000 |
| rad34         | 1.76926e-33 | 1.00000 | 1.76926e-33 | 1.00000 |
| PhcycC3H3_A+H | 1.31976e-33 | 1.00000 | 1.31976e-33 | 1.00000 |
| rad52         | 1.31241e-36 | 1.00000 | 1.31241e-36 | 1.00000 |
| rad5          | 7.88235e-37 | 1.00000 | 7.88235e-37 | 1.00000 |
| rad12         | 4.00557e-37 | 1.00000 | 4.00557e-37 | 1.00000 |
| rad37         | 3.33413e-38 | 1.00000 | 3.33413e-38 | 1.00000 |
| rad51         | 2.67709e-38 | 1.00000 | 2.67709e-38 | 1.00000 |
| rad58         | 6.45518e-39 | 1.00000 | 6.45518e-39 | 1.00000 |
| rad62         | 4.86189e-39 | 1.00000 | 4.86189e-39 | 1.00000 |
| PAH1+H        | 8.47068e-41 | 1.00000 | 8.47068e-41 | 1.00000 |
| rad47         | 7.24216e-41 | 1.00000 | 7.24216e-41 | 1.00000 |
| PAH10+CH3     | 5.53371e-43 | 1.00000 | 5.53371e-43 | 1.00000 |
| rad65         | 3.13949e-44 | 1.00000 | 3.13949e-44 | 1.00000 |
| rad43         | 2.56364e-44 | 1.00000 | 2.56364e-44 | 1.00000 |
| rad42         | 9.83100e-45 | 1.00000 | 9.83100e-45 | 1.00000 |
| rad41         | 1.41281e-50 | 1.00000 | 1.41281e-50 | 1.00000 |

100000000. Pa, 190.000000 K

| Rate constant      | True (fraction)        | Effective (fraction)   |
|--------------------|------------------------|------------------------|
| Total              | 1.11858e-17 (1.00 )    | 1.11858e-17 (1.00 )    |
| Formation of rad11 | 9.67466e-18 (0.865 )   | 9.67466e-18 (0.865 )   |
| Formation of rad6  | 1.40029e-18 (0.125 )   | 1.40029e-18 (0.125 )   |
| H-abstraction      | 1.10851e-19 (0.00991 ) | 1.10851e-19 (0.00991 ) |

| species            | PYtrue      | Cumul    | PYeffective | Cumul    |
|--------------------|-------------|----------|-------------|----------|
| rad11              | 0.864900    | 0.864900 | 0.864900    | 0.864900 |
| rad6               | 0.125190    | 0.990090 | 0.125190    | 0.990090 |
| Benzene+2-propynyl | 0.00990995  | 1.00000  | 0.00990995  | 1.00000  |
| rad21              | 3.16572e-07 | 1.00000  | 3.16572e-07 | 1.00000  |
| rad13              | 4.40089e-09 | 1.00000  | 4.40089e-09 | 1.00000  |
| rad7               | 1.44586e-09 | 1.00000  | 1.44586e-09 | 1.00000  |
| rad20              | 3.95405e-10 | 1.00000  | 3.95405e-10 | 1.00000  |
| rad25              | 2.45290e-10 | 1.00000  | 2.45290e-10 | 1.00000  |
| rad22              | 1.51860e-10 | 1.00000  | 1.51860e-10 | 1.00000  |
| rad33              | 4.81365e-11 | 1.00000  | 4.81365e-11 | 1.00000  |
| PhCHCCH2+H         | 3.90074e-11 | 1.00000  | 3.90074e-11 | 1.00000  |
| rad24              | 1.98379e-11 | 1.00000  | 1.98379e-11 | 1.00000  |
| rad9               | 2.89823e-12 | 1.00000  | 2.89823e-12 | 1.00000  |
| Phenyl+Allene      | 1.70107e-12 | 1.00000  | 0.00000     | 1.00000  |
| rad45              | 1.14797e-12 | 1.00000  | 1.14797e-12 | 1.00000  |
| rad36              | 2.11472e-13 | 1.00000  | 2.11472e-13 | 1.00000  |
| rad18              | 4.86001e-14 | 1.00000  | 4.86001e-14 | 1.00000  |
| PhCH2CCH+H         | 1.79330e-14 | 1.00000  | 1.79330e-14 | 1.00000  |
| rad3               | 1.38162e-15 | 1.00000  | 1.38162e-15 | 1.00000  |
| rad4               | 1.08202e-15 | 1.00000  | 1.08202e-15 | 1.00000  |
| C2H2+PhCH2         | 1.04445e-15 | 1.00000  | 1.04445e-15 | 1.00000  |
| Indene+H           | 5.93564e-16 | 1.00000  | 5.93564e-16 | 1.00000  |
| rad28              | 1.05754e-16 | 1.00000  | 1.05754e-16 | 1.00000  |
| rad23              | 1.01092e-16 | 1.00000  | 1.01092e-16 | 1.00000  |
| rad8               | 2.61404e-20 | 1.00000  | 2.61404e-20 | 1.00000  |
| PAH7+H             | 5.16231e-21 | 1.00000  | 5.16231e-21 | 1.00000  |
| rad2               | 2.85528e-21 | 1.00000  | 2.85528e-21 | 1.00000  |
| rad1               | 7.07146e-22 | 1.00000  | 7.07146e-22 | 1.00000  |
| rad31              | 5.58779e-22 | 1.00000  | 5.58779e-22 | 1.00000  |
| PhCCH+CH3          | 1.31310e-22 | 1.00000  | 1.31310e-22 | 1.00000  |
| rad30              | 6.21832e-24 | 1.00000  | 6.21832e-24 | 1.00000  |
| rad14              | 5.42241e-24 | 1.00000  | 5.42241e-24 | 1.00000  |
| rad15              | 1.28323e-24 | 1.00000  | 1.28323e-24 | 1.00000  |
| Ph+MeAc            | 2.40310e-25 | 1.00000  | 2.40310e-25 | 1.00000  |
| rad38              | 4.67254e-26 | 1.00000  | 4.67254e-26 | 1.00000  |
| rad26              | 2.14882e-26 | 1.00000  | 2.14882e-26 | 1.00000  |
| rad46              | 1.39994e-27 | 1.00000  | 1.39994e-27 | 1.00000  |
| rad60syn           | 7.02855e-28 | 1.00000  | 7.02855e-28 | 1.00000  |
| rad54              | 6.75617e-28 | 1.00000  | 6.75617e-28 | 1.00000  |
| rad10              | 4.25925e-28 | 1.00000  | 4.25925e-28 | 1.00000  |
| rad19syn           | 3.07659e-28 | 1.00000  | 3.07659e-28 | 1.00000  |
| rad60anti          | 2.45147e-28 | 1.00000  | 2.45147e-28 | 1.00000  |
| rad39              | 2.18160e-28 | 1.00000  | 2.18160e-28 | 1.00000  |
| rad70              | 1.77969e-29 | 1.00000  | 1.77969e-29 | 1.00000  |
| rad35              | 1.30612e-29 | 1.00000  | 1.30612e-29 | 1.00000  |
| PAH9+H             | 8.98625e-30 | 1.00000  | 8.98625e-30 | 1.00000  |
| PAH3+H             | 6.47470e-30 | 1.00000  | 6.47470e-30 | 1.00000  |
| rad59              | 1.94232e-30 | 1.00000  | 1.94232e-30 | 1.00000  |
| PhCCCH3+H          | 1.74023e-30 | 1.00000  | 1.74023e-30 | 1.00000  |

|               |             |         |             |         |
|---------------|-------------|---------|-------------|---------|
| rad27         | 1.55995e-30 | 1.00000 | 1.55995e-30 | 1.00000 |
| rad55         | 3.08811e-31 | 1.00000 | 3.08811e-31 | 1.00000 |
| rad50         | 5.30429e-32 | 1.00000 | 5.30429e-32 | 1.00000 |
| rad34         | 2.18883e-32 | 1.00000 | 2.18883e-32 | 1.00000 |
| PhcycC3H3_A+H | 1.17225e-32 | 1.00000 | 1.17225e-32 | 1.00000 |
| rad52         | 7.86809e-36 | 1.00000 | 7.86809e-36 | 1.00000 |
| rad5          | 3.72980e-36 | 1.00000 | 3.72980e-36 | 1.00000 |
| rad12         | 1.74336e-36 | 1.00000 | 1.74336e-36 | 1.00000 |
| rad51         | 2.30431e-37 | 1.00000 | 2.30431e-37 | 1.00000 |
| rad37         | 1.63738e-37 | 1.00000 | 1.63738e-37 | 1.00000 |
| rad58         | 7.23041e-38 | 1.00000 | 7.23041e-38 | 1.00000 |
| rad62         | 4.07035e-38 | 1.00000 | 4.07035e-38 | 1.00000 |
| PAH1+H        | 9.92258e-40 | 1.00000 | 9.92258e-40 | 1.00000 |
| rad47         | 9.88508e-40 | 1.00000 | 9.88508e-40 | 1.00000 |
| PAH10+CH3     | 5.20974e-42 | 1.00000 | 5.20974e-42 | 1.00000 |
| rad65         | 3.20119e-43 | 1.00000 | 3.20119e-43 | 1.00000 |
| rad43         | 2.42119e-43 | 1.00000 | 2.42119e-43 | 1.00000 |
| rad42         | 1.39280e-43 | 1.00000 | 1.39280e-43 | 1.00000 |
| rad41         | 2.19260e-49 | 1.00000 | 2.19260e-49 | 1.00000 |

100000000. Pa, 200.000000 K

| Rate constant      | True (fraction)       | Effective (fraction)  |
|--------------------|-----------------------|-----------------------|
| Total              | 1.82690e-17 (1.00 )   | 1.82690e-17 (1.00 )   |
| Formation of rad11 | 1.55456e-17 (0.851 )  | 1.55456e-17 (0.851 )  |
| Formation of rad6  | 2.49126e-18 (0.136 )  | 2.49126e-18 (0.136 )  |
| H-abstraction      | 2.32112e-19 (0.0127 ) | 2.32112e-19 (0.0127 ) |

| species            | PYtrue      | Cumul    | PYeffective | Cumul    |
|--------------------|-------------|----------|-------------|----------|
| rad11              | 0.850923    | 0.850923 | 0.850923    | 0.850923 |
| rad6               | 0.136371    | 0.987294 | 0.136371    | 0.987294 |
| Benzene+2-propynyl | 0.0127053   | 0.999999 | 0.0127053   | 0.999999 |
| rad21              | 3.51193e-07 | 0.999999 | 3.51193e-07 | 0.999999 |
| rad13              | 5.36948e-09 | 0.999999 | 5.36948e-09 | 0.999999 |
| rad7               | 1.77353e-09 | 0.999999 | 1.77353e-09 | 0.999999 |
| rad20              | 4.80179e-10 | 0.999999 | 4.80179e-10 | 0.999999 |
| rad25              | 2.89509e-10 | 0.999999 | 2.89509e-10 | 0.999999 |
| rad22              | 1.84375e-10 | 0.999999 | 1.84375e-10 | 0.999999 |
| rad33              | 5.98227e-11 | 0.999999 | 5.98227e-11 | 0.999999 |
| PhCHCCH2+H         | 5.04722e-11 | 0.999999 | 5.04722e-11 | 0.999999 |
| rad24              | 2.43808e-11 | 0.999999 | 2.43808e-11 | 0.999999 |
| rad9               | 3.83551e-12 | 0.999999 | 3.83551e-12 | 0.999999 |
| Phenyl+Allene      | 2.60652e-12 | 0.999999 | 0.00000     | 0.999999 |
| rad45              | 1.53611e-12 | 0.999999 | 1.53611e-12 | 0.999999 |
| rad36              | 2.80247e-13 | 0.999999 | 2.80247e-13 | 0.999999 |
| rad18              | 6.55460e-14 | 0.999999 | 6.55460e-14 | 0.999999 |
| PhCH2CCH+H         | 3.50788e-14 | 0.999999 | 3.50788e-14 | 0.999999 |
| rad3               | 1.97399e-15 | 0.999999 | 1.97399e-15 | 0.999999 |
| C2H2+PhCH2         | 1.56304e-15 | 0.999999 | 1.56304e-15 | 0.999999 |
| rad4               | 1.54244e-15 | 0.999999 | 1.54244e-15 | 0.999999 |
| Indene+H           | 8.14913e-16 | 0.999999 | 8.14913e-16 | 0.999999 |
| rad28              | 1.57798e-16 | 0.999999 | 1.57798e-16 | 0.999999 |
| rad23              | 1.39766e-16 | 0.999999 | 1.39766e-16 | 0.999999 |
| rad8               | 5.41080e-20 | 0.999999 | 5.41080e-20 | 0.999999 |
| PAH7+H             | 1.20729e-20 | 0.999999 | 1.20729e-20 | 0.999999 |
| rad2               | 4.98648e-21 | 0.999999 | 4.98648e-21 | 0.999999 |
| rad1               | 1.22488e-21 | 0.999999 | 1.22488e-21 | 0.999999 |
| rad31              | 8.15741e-22 | 0.999999 | 8.15741e-22 | 0.999999 |
| PhCCH+CH3          | 2.70461e-22 | 0.999999 | 2.70461e-22 | 0.999999 |
| rad30              | 1.13362e-23 | 0.999999 | 1.13362e-23 | 0.999999 |
| rad14              | 1.02630e-23 | 0.999999 | 1.02630e-23 | 0.999999 |
| rad15              | 2.41879e-24 | 0.999999 | 2.41879e-24 | 0.999999 |
| Ph+MeAc            | 6.16199e-25 | 0.999999 | 6.16199e-25 | 0.999999 |
| rad38              | 9.13170e-26 | 0.999999 | 9.13170e-26 | 0.999999 |
| rad26              | 5.97382e-26 | 0.999999 | 5.97382e-26 | 0.999999 |
| rad54              | 3.22544e-27 | 0.999999 | 3.22544e-27 | 0.999999 |
| rad46              | 2.91032e-27 | 0.999999 | 2.91032e-27 | 0.999999 |
| rad60syn           | 1.67206e-27 | 0.999999 | 1.67206e-27 | 0.999999 |
| rad19syn           | 1.24630e-27 | 0.999999 | 1.24630e-27 | 0.999999 |
| rad10              | 9.62023e-28 | 0.999999 | 9.62023e-28 | 0.999999 |
| rad60anti          | 6.01977e-28 | 0.999999 | 6.01977e-28 | 0.999999 |
| rad39              | 5.35177e-28 | 0.999999 | 5.35177e-28 | 0.999999 |
| rad70              | 1.30992e-28 | 0.999999 | 1.30992e-28 | 0.999999 |
| rad35              | 3.40726e-29 | 0.999999 | 3.40726e-29 | 0.999999 |
| PAH3+H             | 2.27331e-29 | 0.999999 | 2.27331e-29 | 0.999999 |
| PAH9+H             | 1.77922e-29 | 0.999999 | 1.77922e-29 | 0.999999 |
| rad59              | 6.59839e-30 | 0.999999 | 6.59839e-30 | 0.999999 |
| PhCCCH3+H          | 5.00485e-30 | 0.999999 | 5.00485e-30 | 0.999999 |

|               |             |          |             |          |
|---------------|-------------|----------|-------------|----------|
| rad27         | 3.91136e-30 | 0.999999 | 3.91136e-30 | 0.999999 |
| rad55         | 2.14764e-30 | 0.999999 | 2.14764e-30 | 0.999999 |
| rad34         | 2.11973e-31 | 0.999999 | 2.11973e-31 | 0.999999 |
| rad50         | 1.86034e-31 | 0.999999 | 1.86034e-31 | 0.999999 |
| PhcycC3H3_A+H | 8.57183e-32 | 0.999999 | 8.57183e-32 | 0.999999 |
| rad52         | 4.29143e-35 | 0.999999 | 4.29143e-35 | 0.999999 |
| rad5          | 1.70403e-35 | 0.999999 | 1.70403e-35 | 0.999999 |
| rad12         | 7.28782e-36 | 0.999999 | 7.28782e-36 | 0.999999 |
| rad51         | 1.72419e-36 | 0.999999 | 1.72419e-36 | 0.999999 |
| rad37         | 7.65436e-37 | 0.999999 | 7.65436e-37 | 0.999999 |
| rad58         | 6.61596e-37 | 0.999999 | 6.61596e-37 | 0.999999 |
| rad62         | 2.93018e-37 | 0.999999 | 2.93018e-37 | 0.999999 |
| rad47         | 1.07563e-38 | 0.999999 | 1.07563e-38 | 0.999999 |
| PAH1+H        | 9.20120e-39 | 0.999999 | 9.20120e-39 | 0.999999 |
| PAH10+CH3     | 4.21542e-41 | 0.999999 | 4.21542e-41 | 0.999999 |
| rad65         | 2.72481e-42 | 0.999999 | 2.72481e-42 | 0.999999 |
| rad43         | 1.97430e-42 | 0.999999 | 1.97430e-42 | 0.999999 |
| rad42         | 1.52444e-42 | 0.999999 | 1.52444e-42 | 0.999999 |
| rad41         | 2.63269e-48 | 0.999999 | 2.63269e-48 | 0.999999 |

100000000. Pa, 210.000000 K

| Rate constant      | True (fraction)       | Effective (fraction)  |
|--------------------|-----------------------|-----------------------|
| Total              | 2.85520e-17 (1.00 )   | 2.85520e-17 (1.00 )   |
| Formation of rad11 | 2.39009e-17 (0.837 )  | 2.39009e-17 (0.837 )  |
| Formation of rad6  | 4.19900e-18 (0.147 )  | 4.19900e-18 (0.147 )  |
| H-abstraction      | 4.52111e-19 (0.0158 ) | 4.52111e-19 (0.0158 ) |

| species            | PYtrue      | Cumul    | PYeffective | Cumul    |
|--------------------|-------------|----------|-------------|----------|
| rad11              | 0.837094    | 0.837094 | 0.837094    | 0.837094 |
| rad6               | 0.147071    | 0.984164 | 0.147071    | 0.984164 |
| Benzene+2-propynyl | 0.0158346   | 0.999999 | 0.0158346   | 0.999999 |
| rad21              | 3.90059e-07 | 0.999999 | 3.90059e-07 | 0.999999 |
| rad13              | 6.49082e-09 | 0.999999 | 6.49082e-09 | 0.999999 |
| rad7               | 2.15591e-09 | 0.999999 | 2.15591e-09 | 0.999999 |
| rad20              | 5.83989e-10 | 0.999999 | 5.83989e-10 | 0.999999 |
| rad25              | 3.42858e-10 | 0.999999 | 3.42858e-10 | 0.999999 |
| rad22              | 2.24174e-10 | 0.999999 | 2.24174e-10 | 0.999999 |
| rad33              | 7.37186e-11 | 0.999999 | 7.37186e-11 | 0.999999 |
| PhCHCCH2+H         | 6.56072e-11 | 0.999999 | 6.56072e-11 | 0.999999 |
| rad24              | 3.00216e-11 | 0.999999 | 3.00216e-11 | 0.999999 |
| rad9               | 5.09371e-12 | 0.999999 | 5.09371e-12 | 0.999999 |
| Phenyl+Allene      | 3.97312e-12 | 0.999999 | 0.00000     | 0.999999 |
| rad45              | 2.05933e-12 | 0.999999 | 2.05933e-12 | 0.999999 |
| rad36              | 3.72303e-13 | 0.999999 | 3.72303e-13 | 0.999999 |
| rad18              | 8.86360e-14 | 0.999999 | 8.86360e-14 | 0.999999 |
| PhCH2CCH+H         | 6.65919e-14 | 0.999999 | 6.65919e-14 | 0.999999 |
| rad3               | 2.80349e-15 | 0.999999 | 2.80349e-15 | 0.999999 |
| C2H2+PhCH2         | 2.35528e-15 | 0.999999 | 2.35528e-15 | 0.999999 |
| rad4               | 2.18565e-15 | 0.999999 | 2.18565e-15 | 0.999999 |
| Indene+H           | 1.12357e-15 | 0.999999 | 1.12357e-15 | 0.999999 |
| rad28              | 2.34326e-16 | 0.999999 | 2.34326e-16 | 0.999999 |
| rad23              | 1.94152e-16 | 0.999999 | 1.94152e-16 | 0.999999 |
| rad8               | 1.09985e-19 | 0.999999 | 1.09985e-19 | 0.999999 |
| PAH7+H             | 2.74583e-20 | 0.999999 | 2.74583e-20 | 0.999999 |
| rad2               | 8.68485e-21 | 0.999999 | 8.68485e-21 | 0.999999 |
| rad1               | 2.11643e-21 | 0.999999 | 2.11643e-21 | 0.999999 |
| rad31              | 1.18425e-21 | 0.999999 | 1.18425e-21 | 0.999999 |
| PhCCH+CH3          | 5.56923e-22 | 0.999999 | 5.56923e-22 | 0.999999 |
| rad30              | 2.08779e-23 | 0.999999 | 2.08779e-23 | 0.999999 |
| rad14              | 1.94417e-23 | 0.999999 | 1.94417e-23 | 0.999999 |
| rad15              | 4.60475e-24 | 0.999999 | 4.60475e-24 | 0.999999 |
| Ph+MeAc            | 1.55786e-24 | 0.999999 | 1.55786e-24 | 0.999999 |
| rad38              | 1.80343e-25 | 0.999999 | 1.80343e-25 | 0.999999 |
| rad26              | 1.60345e-25 | 0.999999 | 1.60345e-25 | 0.999999 |
| rad54              | 1.37472e-26 | 0.999999 | 1.37472e-26 | 0.999999 |
| rad46              | 6.11270e-27 | 0.999999 | 6.11270e-27 | 0.999999 |
| rad19syn           | 4.60749e-27 | 0.999999 | 4.60749e-27 | 0.999999 |
| rad60syn           | 3.96950e-27 | 0.999999 | 3.96950e-27 | 0.999999 |
| rad10              | 2.17729e-27 | 0.999999 | 2.17729e-27 | 0.999999 |
| rad60anti          | 1.47032e-27 | 0.999999 | 1.47032e-27 | 0.999999 |
| rad39              | 1.30481e-27 | 0.999999 | 1.30481e-27 | 0.999999 |
| rad70              | 8.13868e-28 | 0.999999 | 8.13868e-28 | 0.999999 |
| rad35              | 9.04422e-29 | 0.999999 | 9.04422e-29 | 0.999999 |
| PAH3+H             | 7.65503e-29 | 0.999999 | 7.65503e-29 | 0.999999 |
| PAH9+H             | 3.58148e-29 | 0.999999 | 3.58148e-29 | 0.999999 |
| rad59              | 2.15433e-29 | 0.999999 | 2.15433e-29 | 0.999999 |
| PhCCCH3+H          | 1.43498e-29 | 0.999999 | 1.43498e-29 | 0.999999 |

|               |             |          |             |          |
|---------------|-------------|----------|-------------|----------|
| rad55         | 1.26537e-29 | 0.999999 | 1.26537e-29 | 0.999999 |
| rad27         | 9.81939e-30 | 0.999999 | 9.81939e-30 | 0.999999 |
| rad34         | 1.65815e-30 | 0.999999 | 1.65815e-30 | 0.999999 |
| rad50         | 6.29799e-31 | 0.999999 | 6.29799e-31 | 0.999999 |
| PhcycC3H3_A+H | 5.27749e-31 | 0.999999 | 5.27749e-31 | 0.999999 |
| rad52         | 2.15183e-34 | 0.999999 | 2.15183e-34 | 0.999999 |
| rad5          | 7.51435e-35 | 0.999999 | 7.51435e-35 | 0.999999 |
| rad12         | 2.92595e-35 | 0.999999 | 2.92595e-35 | 0.999999 |
| rad51         | 1.13613e-35 | 0.999999 | 1.13613e-35 | 0.999999 |
| rad58         | 5.04743e-36 | 0.999999 | 5.04743e-36 | 0.999999 |
| rad37         | 3.40227e-36 | 0.999999 | 3.40227e-36 | 0.999999 |
| rad62         | 1.83479e-36 | 0.999999 | 1.83479e-36 | 0.999999 |
| rad47         | 9.57092e-38 | 0.999999 | 9.57092e-38 | 0.999999 |
| PAH1+H        | 6.94168e-38 | 0.999999 | 6.94168e-38 | 0.999999 |
| PAH10+CH3     | 2.95210e-40 | 0.999999 | 2.95210e-40 | 0.999999 |
| rad65         | 1.96829e-41 | 0.999999 | 1.96829e-41 | 0.999999 |
| rad43         | 1.39837e-41 | 0.999999 | 1.39837e-41 | 0.999999 |
| rad42         | 1.33179e-41 | 0.999999 | 1.33179e-41 | 0.999999 |
| rad41         | 2.52426e-47 | 0.999999 | 2.52426e-47 | 0.999999 |

100000000. Pa, 220.000000 K

| Rate constant      | True (fraction)       | Effective (fraction)  |
|--------------------|-----------------------|-----------------------|
| Total              | 4.29529e-17 (1.00 )   | 4.29529e-17 (1.00 )   |
| Formation of rad11 | 3.53712e-17 (0.823 )  | 3.53712e-17 (0.823 )  |
| Formation of rad6  | 6.75433e-18 (0.157 )  | 6.75433e-18 (0.157 )  |
| H-abstraction      | 8.27372e-19 (0.0193 ) | 8.27372e-19 (0.0193 ) |

| species            | PYtrue      | Cumul    | PYeffective | Cumul    |
|--------------------|-------------|----------|-------------|----------|
| rad11              | 0.823480    | 0.823480 | 0.823480    | 0.823480 |
| rad6               | 0.157256    | 0.980737 | 0.157256    | 0.980737 |
| Benzene+2-propynyl | 0.0192623   | 0.999999 | 0.0192623   | 0.999999 |
| rad21              | 4.33861e-07 | 0.999999 | 4.33861e-07 | 0.999999 |
| rad13              | 7.78733e-09 | 0.999999 | 7.78733e-09 | 0.999999 |
| rad7               | 2.60167e-09 | 0.999999 | 2.60167e-09 | 0.999999 |
| rad20              | 7.11622e-10 | 0.999999 | 7.11622e-10 | 0.999999 |
| rad25              | 4.07430e-10 | 0.999999 | 4.07430e-10 | 0.999999 |
| rad22              | 2.73083e-10 | 0.999999 | 2.73083e-10 | 0.999999 |
| rad33              | 9.02288e-11 | 0.999999 | 9.02288e-11 | 0.999999 |
| PhCHCCH2+H         | 8.56320e-11 | 0.999999 | 8.56320e-11 | 0.999999 |
| rad24              | 3.70519e-11 | 0.999999 | 3.70519e-11 | 0.999999 |
| rad9               | 6.78452e-12 | 0.999999 | 6.78452e-12 | 0.999999 |
| Phenyl+Allene      | 6.02411e-12 | 0.999999 | 0.00000     | 0.999999 |
| rad45              | 2.76734e-12 | 0.999999 | 2.76734e-12 | 0.999999 |
| rad36              | 4.96062e-13 | 0.999999 | 4.96062e-13 | 0.999999 |
| PhCH2CCH+H         | 1.23116e-13 | 0.999999 | 1.23116e-13 | 0.999999 |
| rad18              | 1.20245e-13 | 0.999999 | 1.20245e-13 | 0.999999 |
| rad3               | 3.96471e-15 | 0.999999 | 3.96471e-15 | 0.999999 |
| C2H2+PhCH2         | 3.57312e-15 | 0.999999 | 3.57312e-15 | 0.999999 |
| rad4               | 3.08412e-15 | 0.999999 | 3.08412e-15 | 0.999999 |
| Indene+H           | 1.55661e-15 | 0.999999 | 1.55661e-15 | 0.999999 |
| rad28              | 3.46815e-16 | 0.999999 | 3.46815e-16 | 0.999999 |
| rad23              | 2.71138e-16 | 0.999999 | 2.71138e-16 | 0.999999 |
| rad8               | 2.19876e-19 | 0.999999 | 2.19876e-19 | 0.999999 |
| PAH7+H             | 6.08824e-20 | 0.999999 | 6.08824e-20 | 0.999999 |
| rad2               | 1.51072e-20 | 0.999999 | 1.51072e-20 | 0.999999 |
| rad1               | 3.65345e-21 | 0.999999 | 3.65345e-21 | 0.999999 |
| rad31              | 1.71313e-21 | 0.999999 | 1.71313e-21 | 0.999999 |
| PhCCH+CH3          | 1.14614e-21 | 0.999999 | 1.14614e-21 | 0.999999 |
| rad30              | 3.88002e-23 | 0.999999 | 3.88002e-23 | 0.999999 |
| rad14              | 3.68755e-23 | 0.999999 | 3.68755e-23 | 0.999999 |
| rad15              | 8.84098e-24 | 0.999999 | 8.84098e-24 | 0.999999 |
| Ph+MeAc            | 3.88234e-24 | 0.999999 | 3.88234e-24 | 0.999999 |
| rad26              | 4.17028e-25 | 0.999999 | 4.17028e-25 | 0.999999 |
| rad38              | 3.59572e-25 | 0.999999 | 3.59572e-25 | 0.999999 |
| rad54              | 5.30217e-26 | 0.999999 | 5.30217e-26 | 0.999999 |
| rad19syn           | 1.57216e-26 | 0.999999 | 1.57216e-26 | 0.999999 |
| rad46              | 1.29468e-26 | 0.999999 | 1.29468e-26 | 0.999999 |
| rad60syn           | 9.38903e-27 | 0.999999 | 9.38903e-27 | 0.999999 |
| rad10              | 4.93710e-27 | 0.999999 | 4.93710e-27 | 0.999999 |
| rad70              | 4.35166e-27 | 0.999999 | 4.35166e-27 | 0.999999 |
| rad60anti          | 3.56794e-27 | 0.999999 | 3.56794e-27 | 0.999999 |
| rad39              | 3.15756e-27 | 0.999999 | 3.15756e-27 | 0.999999 |
| PAH3+H             | 2.47995e-28 | 0.999999 | 2.47995e-28 | 0.999999 |
| rad35              | 2.41339e-28 | 0.999999 | 2.41339e-28 | 0.999999 |
| PAH9+H             | 7.31667e-29 | 0.999999 | 7.31667e-29 | 0.999999 |
| rad59              | 6.78131e-29 | 0.999999 | 6.78131e-29 | 0.999999 |
| rad55              | 6.43316e-29 | 0.999999 | 6.43316e-29 | 0.999999 |

|               |             |          |             |          |
|---------------|-------------|----------|-------------|----------|
| PhCCCH3+H     | 4.09154e-29 | 0.999999 | 4.09154e-29 | 0.999999 |
| rad27         | 2.46511e-29 | 0.999999 | 2.46511e-29 | 0.999999 |
| rad34         | 1.07485e-29 | 0.999999 | 1.07485e-29 | 0.999999 |
| PhcycC3H3_A+H | 2.78680e-30 | 0.999999 | 2.78680e-30 | 0.999999 |
| rad50         | 2.06328e-30 | 0.999999 | 2.06328e-30 | 0.999999 |
| rad52         | 9.99342e-34 | 0.999999 | 9.99342e-34 | 0.999999 |
| rad5          | 3.18164e-34 | 0.999999 | 3.18164e-34 | 0.999999 |
| rad12         | 1.12609e-34 | 0.999999 | 1.12609e-34 | 0.999999 |
| rad51         | 6.66108e-35 | 0.999999 | 6.66108e-35 | 0.999999 |
| rad58         | 3.26747e-35 | 0.999999 | 3.26747e-35 | 0.999999 |
| rad37         | 1.43355e-35 | 0.999999 | 1.43355e-35 | 0.999999 |
| rad62         | 1.00885e-35 | 0.999999 | 1.00885e-35 | 0.999999 |
| rad47         | 7.12144e-37 | 0.999999 | 7.12144e-37 | 0.999999 |
| PAH1+H        | 4.36215e-37 | 0.999999 | 4.36215e-37 | 0.999999 |
| PAH10+CH3     | 1.80143e-39 | 0.999999 | 1.80143e-39 | 0.999999 |
| rad65         | 1.22357e-40 | 0.999999 | 1.22357e-40 | 0.999999 |
| rad42         | 9.55048e-41 | 0.999999 | 9.55048e-41 | 0.999999 |
| rad43         | 8.65932e-41 | 0.999999 | 8.65932e-41 | 0.999999 |
| rad41         | 1.98631e-46 | 0.999999 | 1.98631e-46 | 0.999999 |

100000000. Pa, 230.000000 K

| Rate constant      | True (fraction)       | Effective (fraction)  |
|--------------------|-----------------------|-----------------------|
| Total              | 6.25016e-17 (1.00 )   | 6.25016e-17 (1.00 )   |
| Formation of rad11 | 5.06355e-17 (0.810 )  | 5.06355e-17 (0.810 )  |
| Formation of rad6  | 1.04318e-17 (0.167 )  | 1.04318e-17 (0.167 )  |
| H-abstraction      | 1.43428e-18 (0.0229 ) | 1.43428e-18 (0.0229 ) |

| species            | PYtrue      | Cumul    | PYeffective | Cumul    |
|--------------------|-------------|----------|-------------|----------|
| rad11              | 0.810139    | 0.810139 | 0.810139    | 0.810139 |
| rad6               | 0.166913    | 0.977052 | 0.166913    | 0.977052 |
| Benzene+2-propynyl | 0.0229478   | 1.00000  | 0.0229478   | 1.00000  |
| rad21              | 4.83386e-07 | 1.00000  | 4.83386e-07 | 1.00000  |
| rad13              | 9.28560e-09 | 1.00000  | 9.28560e-09 | 1.00000  |
| rad7               | 3.12111e-09 | 1.00000  | 3.12111e-09 | 1.00000  |
| rad20              | 8.69123e-10 | 1.00000  | 8.69123e-10 | 1.00000  |
| rad25              | 4.85800e-10 | 1.00000  | 4.85800e-10 | 1.00000  |
| rad22              | 3.33407e-10 | 1.00000  | 3.33407e-10 | 1.00000  |
| PhCHCCH2+H         | 1.12168e-10 | 1.00000  | 1.12168e-10 | 1.00000  |
| rad33              | 1.09841e-10 | 1.00000  | 1.09841e-10 | 1.00000  |
| rad24              | 4.58429e-11 | 1.00000  | 4.58429e-11 | 1.00000  |
| Phenyl+Allene      | 9.08440e-12 | 1.00000  | 0.00000     | 1.00000  |
| rad9               | 9.05766e-12 | 1.00000  | 9.05766e-12 | 1.00000  |
| rad45              | 3.72886e-12 | 1.00000  | 3.72886e-12 | 1.00000  |
| rad36              | 6.63110e-13 | 1.00000  | 6.63110e-13 | 1.00000  |
| PhCH2CCH+H         | 2.22313e-13 | 1.00000  | 2.22313e-13 | 1.00000  |
| rad18              | 1.63704e-13 | 1.00000  | 1.63704e-13 | 1.00000  |
| rad3               | 5.59044e-15 | 1.00000  | 5.59044e-15 | 1.00000  |
| C2H2+PhCH2         | 5.45516e-15 | 1.00000  | 5.45516e-15 | 1.00000  |
| rad4               | 4.33946e-15 | 1.00000  | 4.33946e-15 | 1.00000  |
| Indene+H           | 2.16762e-15 | 1.00000  | 2.16762e-15 | 1.00000  |
| rad28              | 5.12154e-16 | 1.00000  | 5.12154e-16 | 1.00000  |
| rad23              | 3.80793e-16 | 1.00000  | 3.80793e-16 | 1.00000  |
| rad8               | 4.32787e-19 | 1.00000  | 4.32787e-19 | 1.00000  |
| PAH7+H             | 1.31856e-19 | 1.00000  | 1.31856e-19 | 1.00000  |
| rad2               | 2.62687e-20 | 1.00000  | 2.62687e-20 | 1.00000  |
| rad1               | 6.30660e-21 | 1.00000  | 6.30660e-21 | 1.00000  |
| rad31              | 2.47354e-21 | 1.00000  | 2.47354e-21 | 1.00000  |
| PhCCH+CH3          | 2.35555e-21 | 1.00000  | 2.35555e-21 | 1.00000  |
| rad30              | 7.26604e-23 | 1.00000  | 7.26604e-23 | 1.00000  |
| rad14              | 7.00199e-23 | 1.00000  | 7.00199e-23 | 1.00000  |
| rad15              | 1.70907e-23 | 1.00000  | 1.70907e-23 | 1.00000  |
| Ph+MeAc            | 9.52981e-24 | 1.00000  | 9.52981e-24 | 1.00000  |
| rad26              | 1.05365e-24 | 1.00000  | 1.05365e-24 | 1.00000  |
| rad38              | 7.22908e-25 | 1.00000  | 7.22908e-25 | 1.00000  |
| rad54              | 1.86960e-25 | 1.00000  | 1.86960e-25 | 1.00000  |
| rad19syn           | 4.99263e-26 | 1.00000  | 4.99263e-26 | 1.00000  |
| rad46              | 2.75979e-26 | 1.00000  | 2.75979e-26 | 1.00000  |
| rad60syn           | 2.20885e-26 | 1.00000  | 2.20885e-26 | 1.00000  |
| rad70              | 2.03440e-26 | 1.00000  | 2.03440e-26 | 1.00000  |
| rad10              | 1.12056e-26 | 1.00000  | 1.12056e-26 | 1.00000  |
| rad60anti          | 8.59005e-27 | 1.00000  | 8.59005e-27 | 1.00000  |
| rad39              | 7.56979e-27 | 1.00000  | 7.56979e-27 | 1.00000  |
| PAH3+H             | 7.74112e-28 | 1.00000  | 7.74112e-28 | 1.00000  |
| rad35              | 6.41568e-28 | 1.00000  | 6.41568e-28 | 1.00000  |
| rad55              | 2.86523e-28 | 1.00000  | 2.86523e-28 | 1.00000  |
| rad59              | 2.06133e-28 | 1.00000  | 2.06133e-28 | 1.00000  |
| PAH9+H             | 1.51374e-28 | 1.00000  | 1.51374e-28 | 1.00000  |



|               |             |         |             |         |
|---------------|-------------|---------|-------------|---------|
| PhCCCH3+H     | 1.15602e-28 | 1.00000 | 1.15602e-28 | 1.00000 |
| rad27         | 6.17501e-29 | 1.00000 | 6.17501e-29 | 1.00000 |
| rad34         | 5.90029e-29 | 1.00000 | 5.90029e-29 | 1.00000 |
| PhcycC3H3_A+H | 1.28187e-29 | 1.00000 | 1.28187e-29 | 1.00000 |
| rad50         | 6.54884e-30 | 1.00000 | 6.54884e-30 | 1.00000 |
| rad52         | 4.31989e-33 | 1.00000 | 4.31989e-33 | 1.00000 |
| rad5          | 1.28283e-33 | 1.00000 | 1.28283e-33 | 1.00000 |
| rad12         | 4.14013e-34 | 1.00000 | 4.14013e-34 | 1.00000 |
| rad51         | 3.50490e-34 | 1.00000 | 3.50490e-34 | 1.00000 |
| rad58         | 1.82292e-34 | 1.00000 | 1.82292e-34 | 1.00000 |
| rad37         | 5.70181e-35 | 1.00000 | 5.70181e-35 | 1.00000 |
| rad62         | 4.91330e-35 | 1.00000 | 4.91330e-35 | 1.00000 |
| rad47         | 4.52063e-36 | 1.00000 | 4.52063e-36 | 1.00000 |
| PAH1+H        | 2.33012e-36 | 1.00000 | 2.33012e-36 | 1.00000 |
| PAH10+CH3     | 9.64986e-39 | 1.00000 | 9.64986e-39 | 1.00000 |
| rad65         | 6.62821e-40 | 1.00000 | 6.62821e-40 | 1.00000 |
| rad42         | 5.75823e-40 | 1.00000 | 5.75823e-40 | 1.00000 |
| rad43         | 4.72341e-40 | 1.00000 | 4.72341e-40 | 1.00000 |
| rad41         | 1.31329e-45 | 1.00000 | 1.31329e-45 | 1.00000 |

100000000. Pa, 240.000000 K

| Rate constant      | True (fraction)       | Effective (fraction)  |
|--------------------|-----------------------|-----------------------|
| Total              | 8.83273e-17 (1.00 )   | 8.83273e-17 (1.00 )   |
| Formation of rad11 | 7.04077e-17 (0.797 )  | 7.04077e-17 (0.797 )  |
| Formation of rad6  | 1.55481e-17 (0.176 )  | 1.55481e-17 (0.176 )  |
| H-abstraction      | 2.37143e-18 (0.0268 ) | 2.37143e-18 (0.0268 ) |

| species            | PYtrue      | Cumul    | PYeffective | Cumul    |
|--------------------|-------------|----------|-------------|----------|
| rad11              | 0.797114    | 0.797114 | 0.797114    | 0.797114 |
| rad6               | 0.176036    | 0.973151 | 0.176036    | 0.973151 |
| Benzene+2-propynyl | 0.0268483   | 0.999999 | 0.0268483   | 0.999999 |
| rad21              | 5.39542e-07 | 1.000000 | 5.39542e-07 | 1.000000 |
| rad13              | 1.10171e-08 | 1.000000 | 1.10171e-08 | 1.000000 |
| rad7               | 3.72647e-09 | 1.000000 | 3.72647e-09 | 1.000000 |
| rad20              | 1.06411e-09 | 1.000000 | 1.06411e-09 | 1.000000 |
| rad25              | 5.81125e-10 | 1.000000 | 5.81125e-10 | 1.000000 |
| rad22              | 4.08046e-10 | 1.000000 | 4.08046e-10 | 1.000000 |
| PhCHCCH2+H         | 1.47361e-10 | 1.000000 | 1.47361e-10 | 1.000000 |
| rad33              | 1.33144e-10 | 1.000000 | 1.33144e-10 | 1.000000 |
| rad24              | 5.68660e-11 | 1.000000 | 5.68660e-11 | 1.000000 |
| Phenyl+Allene      | 1.36233e-11 | 1.000000 | 0.000000    | 1.000000 |
| rad9               | 1.21132e-11 | 1.000000 | 1.21132e-11 | 1.000000 |
| rad45              | 5.03872e-12 | 1.000000 | 5.03872e-12 | 1.000000 |
| rad36              | 8.89383e-13 | 1.000000 | 8.89383e-13 | 1.000000 |
| PhCH2CCH+H         | 3.92981e-13 | 1.000000 | 3.92981e-13 | 1.000000 |
| rad18              | 2.23689e-13 | 1.000000 | 2.23689e-13 | 1.000000 |
| C2H2+PhCH2         | 8.37642e-15 | 1.000000 | 8.37642e-15 | 1.000000 |
| rad3               | 7.86720e-15 | 1.000000 | 7.86720e-15 | 1.000000 |
| rad4               | 6.09428e-15 | 1.000000 | 6.09428e-15 | 1.000000 |
| Indene+H           | 3.03431e-15 | 1.000000 | 3.03431e-15 | 1.000000 |
| rad28              | 7.55146e-16 | 1.000000 | 7.55146e-16 | 1.000000 |
| rad23              | 5.37891e-16 | 1.000000 | 5.37891e-16 | 1.000000 |
| rad8               | 8.39419e-19 | 1.000000 | 8.39419e-19 | 1.000000 |
| PAH7+H             | 2.79326e-19 | 1.000000 | 2.79326e-19 | 1.000000 |
| rad2               | 4.56761e-20 | 1.000000 | 4.56761e-20 | 1.000000 |
| rad1               | 1.08909e-20 | 1.000000 | 1.08909e-20 | 1.000000 |
| PhCCH+CH3          | 4.82847e-21 | 1.000000 | 4.82847e-21 | 1.000000 |
| rad31              | 3.56983e-21 | 1.000000 | 3.56983e-21 | 1.000000 |
| rad30              | 1.36889e-22 | 1.000000 | 1.36889e-22 | 1.000000 |
| rad14              | 1.33013e-22 | 1.000000 | 1.33013e-22 | 1.000000 |
| rad15              | 3.32035e-23 | 1.000000 | 3.32035e-23 | 1.000000 |
| Ph+MeAc            | 2.30089e-23 | 1.000000 | 2.30089e-23 | 1.000000 |
| rad26              | 2.59035e-24 | 1.000000 | 2.59035e-24 | 1.000000 |
| rad38              | 1.46347e-24 | 1.000000 | 1.46347e-24 | 1.000000 |
| rad54              | 6.07363e-25 | 1.000000 | 6.07363e-25 | 1.000000 |
| rad19syn           | 1.48427e-25 | 1.000000 | 1.48427e-25 | 1.000000 |
| rad70              | 8.42674e-26 | 1.000000 | 8.42674e-26 | 1.000000 |
| rad46              | 5.90847e-26 | 1.000000 | 5.90847e-26 | 1.000000 |
| rad60syn           | 5.15841e-26 | 1.000000 | 5.15841e-26 | 1.000000 |
| rad10              | 2.54098e-26 | 1.000000 | 2.54098e-26 | 1.000000 |
| rad60anti          | 2.04827e-26 | 1.000000 | 2.04827e-26 | 1.000000 |
| rad39              | 1.79302e-26 | 1.000000 | 1.79302e-26 | 1.000000 |
| PAH3+H             | 2.32816e-27 | 1.000000 | 2.32816e-27 | 1.000000 |
| rad35              | 1.68721e-27 | 1.000000 | 1.68721e-27 | 1.000000 |
| rad55              | 1.13237e-27 | 1.000000 | 1.13237e-27 | 1.000000 |
| rad59              | 6.05151e-28 | 1.000000 | 6.05151e-28 | 1.000000 |
| PhCCCH3+H          | 3.22131e-28 | 1.000000 | 3.22131e-28 | 1.000000 |

|               |             |          |             |          |
|---------------|-------------|----------|-------------|----------|
| PAH9+H        | 3.16342e-28 | 1.000000 | 3.16342e-28 | 1.000000 |
| rad34         | 2.79425e-28 | 1.000000 | 2.79425e-28 | 1.000000 |
| rad27         | 1.53848e-28 | 1.000000 | 1.53848e-28 | 1.000000 |
| PhcycC3H3_A+H | 5.20525e-29 | 1.000000 | 5.20525e-29 | 1.000000 |
| rad50         | 2.01356e-29 | 1.000000 | 2.01356e-29 | 1.000000 |
| rad52         | 1.74380e-32 | 1.000000 | 1.74380e-32 | 1.000000 |
| rad5          | 4.88463e-33 | 1.000000 | 4.88463e-33 | 1.000000 |
| rad51         | 1.66786e-33 | 1.000000 | 1.66786e-33 | 1.000000 |
| rad12         | 1.44786e-33 | 1.000000 | 1.44786e-33 | 1.000000 |
| rad58         | 8.88754e-34 | 1.000000 | 8.88754e-34 | 1.000000 |
| rad62         | 2.13731e-34 | 1.000000 | 2.13731e-34 | 1.000000 |
| rad37         | 2.13159e-34 | 1.000000 | 2.13159e-34 | 1.000000 |
| rad47         | 2.49221e-35 | 1.000000 | 2.49221e-35 | 1.000000 |
| PAH1+H        | 1.07683e-35 | 1.000000 | 1.07683e-35 | 1.000000 |
| PAH10+CH3     | 4.57483e-38 | 1.000000 | 4.57483e-38 | 1.000000 |
| rad65         | 3.16553e-39 | 1.000000 | 3.16553e-39 | 1.000000 |
| rad42         | 2.97952e-39 | 1.000000 | 2.97952e-39 | 1.000000 |
| rad43         | 2.28841e-39 | 1.000000 | 2.28841e-39 | 1.000000 |
| rad41         | 7.44471e-45 | 1.000000 | 7.44471e-45 | 1.000000 |

100000000. Pa, 250.000000 K

| Rate constant      | True (fraction)       | Effective (fraction)  |
|--------------------|-----------------------|-----------------------|
| Total              | 1.21641e-16 (1.00 )   | 1.21641e-16 (1.00 )   |
| Formation of rad11 | 9.54219e-17 (0.784 )  | 9.54219e-17 (0.784 )  |
| Formation of rad6  | 2.24583e-17 (0.185 )  | 2.24583e-17 (0.185 )  |
| H-abstraction      | 3.76121e-18 (0.0309 ) | 3.76121e-18 (0.0309 ) |

| species            | PYtrue      | Cumul    | PYeffective | Cumul    |
|--------------------|-------------|----------|-------------|----------|
| rad11              | 0.784443    | 0.784443 | 0.784443    | 0.784443 |
| rad6               | 0.184636    | 0.969079 | 0.184636    | 0.969079 |
| Benzene+2-propynyl | 0.0309205   | 0.999999 | 0.0309205   | 0.999999 |
| rad21              | 6.03362e-07 | 1.000000 | 6.03362e-07 | 1.000000 |
| rad13              | 1.30187e-08 | 1.000000 | 1.30187e-08 | 1.000000 |
| rad7               | 4.43229e-09 | 1.000000 | 4.43229e-09 | 1.000000 |
| rad20              | 1.30620e-09 | 1.000000 | 1.30620e-09 | 1.000000 |
| rad25              | 6.97270e-10 | 1.000000 | 6.97270e-10 | 1.000000 |
| rad22              | 5.00661e-10 | 1.000000 | 5.00661e-10 | 1.000000 |
| PhCHCCH2+H         | 1.94054e-10 | 1.000000 | 1.94054e-10 | 1.000000 |
| rad33              | 1.60842e-10 | 1.000000 | 1.60842e-10 | 1.000000 |
| rad24              | 7.07193e-11 | 1.000000 | 7.07193e-11 | 1.000000 |
| Phenyl+Allene      | 2.03143e-11 | 1.000000 | 0.000000    | 1.000000 |
| rad9               | 1.62176e-11 | 1.000000 | 1.62176e-11 | 1.000000 |
| rad45              | 6.82777e-12 | 1.000000 | 6.82777e-12 | 1.000000 |
| rad36              | 1.19681e-12 | 1.000000 | 1.19681e-12 | 1.000000 |
| PhCH2CCH+H         | 6.81313e-13 | 1.000000 | 6.81313e-13 | 1.000000 |
| rad18              | 3.06766e-13 | 1.000000 | 3.06766e-13 | 1.000000 |
| C2H2+PhCH2         | 1.29263e-14 | 1.000000 | 1.29263e-14 | 1.000000 |
| rad3               | 1.10566e-14 | 1.000000 | 1.10566e-14 | 1.000000 |
| rad4               | 8.54842e-15 | 1.000000 | 8.54842e-15 | 1.000000 |
| Indene+H           | 4.26948e-15 | 1.000000 | 4.26948e-15 | 1.000000 |
| rad28              | 1.11214e-15 | 1.000000 | 1.11214e-15 | 1.000000 |
| rad23              | 7.64153e-16 | 1.000000 | 7.64153e-16 | 1.000000 |
| rad8               | 1.60511e-18 | 1.000000 | 1.60511e-18 | 1.000000 |
| PAH7+H             | 5.79312e-19 | 1.000000 | 5.79312e-19 | 1.000000 |
| rad2               | 7.94137e-20 | 1.000000 | 7.94137e-20 | 1.000000 |
| rad1               | 1.88143e-20 | 1.000000 | 1.88143e-20 | 1.000000 |
| PhCCH+CH3          | 9.85389e-21 | 1.000000 | 9.85389e-21 | 1.000000 |
| rad31              | 5.15582e-21 | 1.000000 | 5.15582e-21 | 1.000000 |
| rad30              | 2.58966e-22 | 1.000000 | 2.58966e-22 | 1.000000 |
| rad14              | 2.52493e-22 | 1.000000 | 2.52493e-22 | 1.000000 |
| rad15              | 6.46970e-23 | 1.000000 | 6.46970e-23 | 1.000000 |
| Ph+MeAc            | 5.45281e-23 | 1.000000 | 5.45281e-23 | 1.000000 |
| rad26              | 6.20067e-24 | 1.000000 | 6.20067e-24 | 1.000000 |
| rad38              | 2.97856e-24 | 1.000000 | 2.97856e-24 | 1.000000 |
| rad54              | 1.82863e-24 | 1.000000 | 1.82863e-24 | 1.000000 |
| rad19syn           | 4.14769e-25 | 1.000000 | 4.14769e-25 | 1.000000 |
| rad70              | 3.12782e-25 | 1.000000 | 3.12782e-25 | 1.000000 |
| rad46              | 1.26760e-25 | 1.000000 | 1.26760e-25 | 1.000000 |
| rad60syn           | 1.19295e-25 | 1.000000 | 1.19295e-25 | 1.000000 |
| rad10              | 5.74060e-26 | 1.000000 | 5.74060e-26 | 1.000000 |
| rad60anti          | 4.82618e-26 | 1.000000 | 4.82618e-26 | 1.000000 |
| rad39              | 4.18174e-26 | 1.000000 | 4.18174e-26 | 1.000000 |
| PAH3+H             | 6.73778e-27 | 1.000000 | 6.73778e-27 | 1.000000 |
| rad35              | 4.36362e-27 | 1.000000 | 4.36362e-27 | 1.000000 |
| rad55              | 4.01525e-27 | 1.000000 | 4.01525e-27 | 1.000000 |
| rad59              | 1.71388e-27 | 1.000000 | 1.71388e-27 | 1.000000 |
| rad34              | 1.15999e-27 | 1.000000 | 1.15999e-27 | 1.000000 |

|               |             |          |             |          |
|---------------|-------------|----------|-------------|----------|
| PhCCCH3+H     | 8.80434e-28 | 1.000000 | 8.80434e-28 | 1.000000 |
| PAH9+H        | 6.65704e-28 | 1.000000 | 6.65704e-28 | 1.000000 |
| rad27         | 3.79628e-28 | 1.000000 | 3.79628e-28 | 1.000000 |
| PhcycC3H3_A+H | 1.88782e-28 | 1.000000 | 1.88782e-28 | 1.000000 |
| rad50         | 5.99027e-29 | 1.000000 | 5.99027e-29 | 1.000000 |
| rad52         | 6.58927e-32 | 1.000000 | 6.58927e-32 | 1.000000 |
| rad5          | 1.74567e-32 | 1.000000 | 1.74567e-32 | 1.000000 |
| rad51         | 7.22954e-33 | 1.000000 | 7.22954e-33 | 1.000000 |
| rad12         | 4.79646e-33 | 1.000000 | 4.79646e-33 | 1.000000 |
| rad58         | 3.83439e-33 | 1.000000 | 3.83439e-33 | 1.000000 |
| rad62         | 8.37335e-34 | 1.000000 | 8.37335e-34 | 1.000000 |
| rad37         | 7.46521e-34 | 1.000000 | 7.46521e-34 | 1.000000 |
| rad47         | 1.21218e-34 | 1.000000 | 1.21218e-34 | 1.000000 |
| PAH1+H        | 4.37187e-35 | 1.000000 | 4.37187e-35 | 1.000000 |
| PAH10+CH3     | 1.93592e-37 | 1.000000 | 1.93592e-37 | 1.000000 |
| rad65         | 1.34745e-38 | 1.000000 | 1.34745e-38 | 1.000000 |
| rad42         | 1.34665e-38 | 1.000000 | 1.34665e-38 | 1.000000 |
| rad43         | 9.93277e-39 | 1.000000 | 9.93277e-39 | 1.000000 |
| rad41         | 3.68160e-44 | 1.000000 | 3.68160e-44 | 1.000000 |

100000000. Pa, 260.000000 K

| Rate constant      | True (fraction)       | Effective (fraction)  |
|--------------------|-----------------------|-----------------------|
| Total              | 1.63720e-16 (1.00 )   | 1.63720e-16 (1.00 )   |
| Formation of rad11 | 1.26419e-16 (0.772 )  | 1.26419e-16 (0.772 )  |
| Formation of rad6  | 3.15515e-17 (0.193 )  | 3.15515e-17 (0.193 )  |
| H-abstraction      | 5.75028e-18 (0.0351 ) | 5.75028e-18 (0.0351 ) |

| species            | PYtrue      | Cumul    | PYeffective | Cumul    |
|--------------------|-------------|----------|-------------|----------|
| rad11              | 0.772152    | 0.772152 | 0.772152    | 0.772152 |
| rad6               | 0.192726    | 0.964877 | 0.192726    | 0.964877 |
| Benzene+2-propynyl | 0.0351226   | 1.00000  | 0.0351226   | 1.00000  |
| rad21              | 6.76031e-07 | 1.00000  | 6.76031e-07 | 1.00000  |
| rad13              | 1.53339e-08 | 1.00000  | 1.53339e-08 | 1.00000  |
| rad7               | 5.25570e-09 | 1.00000  | 5.25570e-09 | 1.00000  |
| rad20              | 1.60751e-09 | 1.00000  | 1.60751e-09 | 1.00000  |
| rad25              | 8.38960e-10 | 1.00000  | 8.38960e-10 | 1.00000  |
| rad22              | 6.15856e-10 | 1.00000  | 6.15856e-10 | 1.00000  |
| PhCHCCH2+H         | 2.55991e-10 | 1.00000  | 2.55991e-10 | 1.00000  |
| rad33              | 1.93780e-10 | 1.00000  | 1.93780e-10 | 1.00000  |
| rad24              | 8.81599e-11 | 1.00000  | 8.81599e-11 | 1.00000  |
| Phenyl+Allene      | 3.01154e-11 | 1.00000  | 0.00000     | 1.00000  |
| rad9               | 2.17243e-11 | 1.00000  | 2.17243e-11 | 1.00000  |
| rad45              | 9.27644e-12 | 1.00000  | 9.27644e-12 | 1.00000  |
| rad36              | 1.61556e-12 | 1.00000  | 1.61556e-12 | 1.00000  |
| PhCH2CCH+H         | 1.16019e-12 | 1.00000  | 1.16019e-12 | 1.00000  |
| rad18              | 4.22160e-13 | 1.00000  | 4.22160e-13 | 1.00000  |
| C2H2+PhCH2         | 2.00292e-14 | 1.00000  | 2.00292e-14 | 1.00000  |
| rad3               | 1.55246e-14 | 1.00000  | 1.55246e-14 | 1.00000  |
| rad4               | 1.19813e-14 | 1.00000  | 1.19813e-14 | 1.00000  |
| Indene+H           | 6.03711e-15 | 1.00000  | 6.03711e-15 | 1.00000  |
| rad28              | 1.63626e-15 | 1.00000  | 1.63626e-15 | 1.00000  |
| rad23              | 1.09158e-15 | 1.00000  | 1.09158e-15 | 1.00000  |
| rad8               | 3.02634e-18 | 1.00000  | 3.02634e-18 | 1.00000  |
| PAH7+H             | 1.17670e-18 | 1.00000  | 1.17670e-18 | 1.00000  |
| rad2               | 1.37977e-19 | 1.00000  | 1.37977e-19 | 1.00000  |
| rad1               | 3.24965e-20 | 1.00000  | 3.24965e-20 | 1.00000  |
| PhCCH+CH3          | 1.99735e-20 | 1.00000  | 1.99735e-20 | 1.00000  |
| rad31              | 7.45965e-21 | 1.00000  | 7.45965e-21 | 1.00000  |
| rad30              | 4.90902e-22 | 1.00000  | 4.90902e-22 | 1.00000  |
| rad14              | 4.78115e-22 | 1.00000  | 4.78115e-22 | 1.00000  |
| Ph+MeAc            | 1.26501e-22 | 1.00000  | 1.26501e-22 | 1.00000  |
| rad15              | 1.26136e-22 | 1.00000  | 1.26136e-22 | 1.00000  |
| rad26              | 1.44496e-23 | 1.00000  | 1.44496e-23 | 1.00000  |
| rad38              | 6.08333e-24 | 1.00000  | 6.08333e-24 | 1.00000  |
| rad54              | 5.12691e-24 | 1.00000  | 5.12691e-24 | 1.00000  |
| rad19syn           | 1.09257e-24 | 1.00000  | 1.09257e-24 | 1.00000  |
| rad70              | 1.05066e-24 | 1.00000  | 1.05066e-24 | 1.00000  |
| rad60syn           | 2.72396e-25 | 1.00000  | 2.72396e-25 | 1.00000  |
| rad46              | 2.71830e-25 | 1.00000  | 2.71830e-25 | 1.00000  |
| rad10              | 1.28736e-25 | 1.00000  | 1.28736e-25 | 1.00000  |
| rad60anti          | 1.12046e-25 | 1.00000  | 1.12046e-25 | 1.00000  |
| rad39              | 9.56385e-26 | 1.00000  | 9.56385e-26 | 1.00000  |
| PAH3+H             | 1.87267e-26 | 1.00000  | 1.87267e-26 | 1.00000  |
| rad55              | 1.28993e-26 | 1.00000  | 1.28993e-26 | 1.00000  |
| rad35              | 1.10403e-26 | 1.00000  | 1.10403e-26 | 1.00000  |
| rad59              | 4.67373e-27 | 1.00000  | 4.67373e-27 | 1.00000  |
| rad34              | 4.27989e-27 | 1.00000  | 4.27989e-27 | 1.00000  |

|               |             |         |             |         |
|---------------|-------------|---------|-------------|---------|
| PhCCCH3+H     | 2.34678e-27 | 1.00000 | 2.34678e-27 | 1.00000 |
| PAH9+H        | 1.40537e-27 | 1.00000 | 1.40537e-27 | 1.00000 |
| rad27         | 9.23199e-28 | 1.00000 | 9.23199e-28 | 1.00000 |
| PhcycC3H3_A+H | 6.17854e-28 | 1.00000 | 6.17854e-28 | 1.00000 |
| rad50         | 1.72132e-28 | 1.00000 | 1.72132e-28 | 1.00000 |
| rad52         | 2.33587e-31 | 1.00000 | 2.33587e-31 | 1.00000 |
| rad5          | 5.83652e-32 | 1.00000 | 5.83652e-32 | 1.00000 |
| rad51         | 2.87407e-32 | 1.00000 | 2.87407e-32 | 1.00000 |
| rad12         | 1.50054e-32 | 1.00000 | 1.50054e-32 | 1.00000 |
| rad58         | 1.48053e-32 | 1.00000 | 1.48053e-32 | 1.00000 |
| rad62         | 2.97837e-33 | 1.00000 | 2.97837e-33 | 1.00000 |
| rad37         | 2.44483e-33 | 1.00000 | 2.44483e-33 | 1.00000 |
| rad47         | 5.27436e-34 | 1.00000 | 5.27436e-34 | 1.00000 |
| PAH1+H        | 1.58031e-34 | 1.00000 | 1.58031e-34 | 1.00000 |
| PAH10+CH3     | 7.37558e-37 | 1.00000 | 7.37558e-37 | 1.00000 |
| rad42         | 5.39781e-38 | 1.00000 | 5.39781e-38 | 1.00000 |
| rad65         | 5.16480e-38 | 1.00000 | 5.16480e-38 | 1.00000 |
| rad43         | 3.89588e-38 | 1.00000 | 3.89588e-38 | 1.00000 |
| rad41         | 1.61210e-43 | 1.00000 | 1.61210e-43 | 1.00000 |

100000000. Pa, 270.000000 K

| Rate constant      | True (fraction) |           | Effective (fraction) |           |
|--------------------|-----------------|-----------|----------------------|-----------|
| Total              | 2.15887e-16     | (1.00 )   | 2.15887e-16          | (1.00 )   |
| Formation of rad11 | 1.64133e-16     | (0.760 )  | 1.64133e-16          | (0.760 )  |
| Formation of rad6  | 4.32452e-17     | (0.200 )  | 4.32452e-17          | (0.200 )  |
| H-abstraction      | 8.50919e-18     | (0.0394 ) | 8.50919e-18          | (0.0394 ) |

  

| species            | PYtrue      | Cumul    | PYeffective | Cumul    |
|--------------------|-------------|----------|-------------|----------|
| rad11              | 0.760260    | 0.760260 | 0.760260    | 0.760260 |
| rad6               | 0.200324    | 0.960584 | 0.200324    | 0.960584 |
| Benzene+2-propynyl | 0.0394150   | 0.999999 | 0.0394150   | 0.999999 |
| rad21              | 7.58902e-07 | 1.000000 | 7.58902e-07 | 1.000000 |
| rad13              | 1.80133e-08 | 1.000000 | 1.80133e-08 | 1.000000 |
| rad7               | 6.21686e-09 | 1.000000 | 6.21686e-09 | 1.000000 |
| rad20              | 1.98329e-09 | 1.000000 | 1.98329e-09 | 1.000000 |
| rad25              | 1.01196e-09 | 1.000000 | 1.01196e-09 | 1.000000 |
| rad22              | 7.59425e-10 | 1.000000 | 7.59425e-10 | 1.000000 |
| PhCHCCH2+H         | 3.38080e-10 | 1.000000 | 3.38080e-10 | 1.000000 |
| rad33              | 2.32966e-10 | 1.000000 | 2.32966e-10 | 1.000000 |
| rad24              | 1.10145e-10 | 1.000000 | 1.10145e-10 | 1.000000 |
| Phenyl+Allene      | 4.43782e-11 | 1.000000 | 0.000000    | 1.000000 |
| rad9               | 2.91000e-11 | 1.000000 | 2.91000e-11 | 1.000000 |
| rad45              | 1.26330e-11 | 1.000000 | 1.26330e-11 | 1.000000 |
| rad36              | 2.18708e-12 | 1.000000 | 2.18708e-12 | 1.000000 |
| PhCH2CCH+H         | 1.94265e-12 | 1.000000 | 1.94265e-12 | 1.000000 |
| rad18              | 5.82815e-13 | 1.000000 | 5.82815e-13 | 1.000000 |
| C2H2+PhCH2         | 3.11308e-14 | 1.000000 | 3.11308e-14 | 1.000000 |
| rad3               | 2.17813e-14 | 1.000000 | 2.17813e-14 | 1.000000 |
| rad4               | 1.67824e-14 | 1.000000 | 1.67824e-14 | 1.000000 |
| Indene+H           | 8.57543e-15 | 1.000000 | 8.57543e-15 | 1.000000 |
| rad28              | 2.40463e-15 | 1.000000 | 2.40463e-15 | 1.000000 |
| rad23              | 1.56732e-15 | 1.000000 | 1.56732e-15 | 1.000000 |
| rad8               | 5.62489e-18 | 1.000000 | 5.62489e-18 | 1.000000 |
| PAH7+H             | 2.34047e-18 | 1.000000 | 2.34047e-18 | 1.000000 |
| rad2               | 2.39301e-19 | 1.000000 | 2.39301e-19 | 1.000000 |
| rad1               | 5.60601e-20 | 1.000000 | 5.60601e-20 | 1.000000 |
| PhCCH+CH3          | 4.00953e-20 | 1.000000 | 4.00953e-20 | 1.000000 |
| rad31              | 1.08214e-20 | 1.000000 | 1.08214e-20 | 1.000000 |
| rad30              | 9.30133e-22 | 1.000000 | 9.30133e-22 | 1.000000 |
| rad14              | 9.01042e-22 | 1.000000 | 9.01042e-22 | 1.000000 |
| Ph+MeAc            | 2.86445e-22 | 1.000000 | 2.86445e-22 | 1.000000 |
| rad15              | 2.45395e-22 | 1.000000 | 2.45395e-22 | 1.000000 |
| rad26              | 3.27518e-23 | 1.000000 | 3.27518e-23 | 1.000000 |
| rad54              | 1.34403e-23 | 1.000000 | 1.34403e-23 | 1.000000 |
| rad38              | 1.24408e-23 | 1.000000 | 1.24408e-23 | 1.000000 |
| rad70              | 3.22177e-24 | 1.000000 | 3.22177e-24 | 1.000000 |
| rad19syn           | 2.71898e-24 | 1.000000 | 2.71898e-24 | 1.000000 |
| rad60syn           | 6.12033e-25 | 1.000000 | 6.12033e-25 | 1.000000 |
| rad46              | 5.80973e-25 | 1.000000 | 5.80973e-25 | 1.000000 |
| rad10              | 2.85335e-25 | 1.000000 | 2.85335e-25 | 1.000000 |
| rad60anti          | 2.55461e-25 | 1.000000 | 2.55461e-25 | 1.000000 |
| rad39              | 2.13576e-25 | 1.000000 | 2.13576e-25 | 1.000000 |
| PAH3+H             | 4.98825e-26 | 1.000000 | 4.98825e-26 | 1.000000 |
| rad55              | 3.78710e-26 | 1.000000 | 3.78710e-26 | 1.000000 |
| rad35              | 2.71962e-26 | 1.000000 | 2.71962e-26 | 1.000000 |
| rad34              | 1.42040e-26 | 1.000000 | 1.42040e-26 | 1.000000 |
| rad59              | 1.22458e-26 | 1.000000 | 1.22458e-26 | 1.000000 |

|               |             |          |             |          |
|---------------|-------------|----------|-------------|----------|
| PhCCCH3+H     | 6.06878e-27 | 1.000000 | 6.06878e-27 | 1.000000 |
| PAH9+H        | 2.96327e-27 | 1.000000 | 2.96327e-27 | 1.000000 |
| rad27         | 2.20127e-27 | 1.000000 | 2.20127e-27 | 1.000000 |
| PhcycC3H3_A+H | 1.84174e-27 | 1.000000 | 1.84174e-27 | 1.000000 |
| rad50         | 4.76950e-28 | 1.000000 | 4.76950e-28 | 1.000000 |
| rad52         | 7.78666e-31 | 1.000000 | 7.78666e-31 | 1.000000 |
| rad5          | 1.82454e-31 | 1.000000 | 1.82454e-31 | 1.000000 |
| rad51         | 1.05471e-31 | 1.000000 | 1.05471e-31 | 1.000000 |
| rad58         | 5.16842e-32 | 1.000000 | 5.16842e-32 | 1.000000 |
| rad12         | 4.42536e-32 | 1.000000 | 4.42536e-32 | 1.000000 |
| rad62         | 9.69374e-33 | 1.000000 | 9.69374e-33 | 1.000000 |
| rad37         | 7.48580e-33 | 1.000000 | 7.48580e-33 | 1.000000 |
| rad47         | 2.07812e-33 | 1.000000 | 2.07812e-33 | 1.000000 |
| PAH1+H        | 5.14589e-34 | 1.000000 | 5.14589e-34 | 1.000000 |
| PAH10+CH3     | 2.55114e-36 | 1.000000 | 2.55114e-36 | 1.000000 |
| rad42         | 1.94415e-37 | 1.000000 | 1.94415e-37 | 1.000000 |
| rad65         | 1.79987e-37 | 1.000000 | 1.79987e-37 | 1.000000 |
| rad43         | 1.39225e-37 | 1.000000 | 1.39225e-37 | 1.000000 |
| rad41         | 6.33097e-43 | 1.000000 | 6.33097e-43 | 1.000000 |

100000000. Pa, 280.000000 K

| Rate constant      | True (fraction)       | Effective (fraction)  |
|--------------------|-----------------------|-----------------------|
| Total              | 2.79491e-16 (1.00 )   | 2.79491e-16 (1.00 )   |
| Formation of rad11 | 2.09281e-16 (0.749 )  | 2.09281e-16 (0.749 )  |
| Formation of rad6  | 5.79792e-17 (0.207 )  | 5.79792e-17 (0.207 )  |
| H-abstraction      | 1.22310e-17 (0.0438 ) | 1.22310e-17 (0.0438 ) |

| species            | PYtrue      | Cumul    | PYeffective | Cumul    |
|--------------------|-------------|----------|-------------|----------|
| rad11              | 0.748781    | 0.748781 | 0.748781    | 0.748781 |
| rad6               | 0.207457    | 0.956237 | 0.207457    | 0.956237 |
| Benzene+2-propynyl | 0.0437616   | 0.999999 | 0.0437616   | 0.999999 |
| rad21              | 8.53516e-07 | 1.000000 | 8.53516e-07 | 1.000000 |
| rad13              | 2.11156e-08 | 1.000000 | 2.11156e-08 | 1.000000 |
| rad7               | 7.33941e-09 | 1.000000 | 7.33941e-09 | 1.000000 |
| rad20              | 2.45271e-09 | 1.000000 | 2.45271e-09 | 1.000000 |
| rad25              | 1.22328e-09 | 1.000000 | 1.22328e-09 | 1.000000 |
| rad22              | 9.38644e-10 | 1.000000 | 9.38644e-10 | 1.000000 |
| PhCHCCH2+H         | 4.46738e-10 | 1.000000 | 4.46738e-10 | 1.000000 |
| rad33              | 2.79596e-10 | 1.000000 | 2.79596e-10 | 1.000000 |
| rad24              | 1.37876e-10 | 1.000000 | 1.37876e-10 | 1.000000 |
| Phenyl+Allene      | 6.49910e-11 | 1.000000 | 0.000000    | 1.000000 |
| rad9               | 3.89570e-11 | 1.000000 | 3.89570e-11 | 1.000000 |
| rad45              | 1.72381e-11 | 1.000000 | 1.72381e-11 | 1.000000 |
| PhCH2CCH+H         | 3.20094e-12 | 1.000000 | 3.20094e-12 | 1.000000 |
| rad36              | 2.96813e-12 | 1.000000 | 2.96813e-12 | 1.000000 |
| rad18              | 8.06854e-13 | 1.000000 | 8.06854e-13 | 1.000000 |
| C2H2+PhCH2         | 4.84781e-14 | 1.000000 | 4.84781e-14 | 1.000000 |
| rad3               | 3.05336e-14 | 1.000000 | 3.05336e-14 | 1.000000 |
| rad4               | 2.34911e-14 | 1.000000 | 2.34911e-14 | 1.000000 |
| Indene+H           | 1.22299e-14 | 1.000000 | 1.22299e-14 | 1.000000 |
| rad28              | 3.52844e-15 | 1.000000 | 3.52844e-15 | 1.000000 |
| rad23              | 2.26083e-15 | 1.000000 | 2.26083e-15 | 1.000000 |
| rad8               | 1.02996e-17 | 1.000000 | 1.02996e-17 | 1.000000 |
| PAH7+H             | 4.55574e-18 | 1.000000 | 4.55574e-18 | 1.000000 |
| rad2               | 4.13628e-19 | 1.000000 | 4.13628e-19 | 1.000000 |
| rad1               | 9.64414e-20 | 1.000000 | 9.64414e-20 | 1.000000 |
| PhCCH+CH3          | 7.94556e-20 | 1.000000 | 7.94556e-20 | 1.000000 |
| rad31              | 1.57501e-20 | 1.000000 | 1.57501e-20 | 1.000000 |
| rad30              | 1.75649e-21 | 1.000000 | 1.75649e-21 | 1.000000 |
| rad14              | 1.68532e-21 | 1.000000 | 1.68532e-21 | 1.000000 |
| Ph+MeAc            | 6.31295e-22 | 1.000000 | 6.31295e-22 | 1.000000 |
| rad15              | 4.74916e-22 | 1.000000 | 4.74916e-22 | 1.000000 |
| rad26              | 7.21151e-23 | 1.000000 | 7.21151e-23 | 1.000000 |
| rad54              | 3.30688e-23 | 1.000000 | 3.30688e-23 | 1.000000 |
| rad38              | 2.54117e-23 | 1.000000 | 2.54117e-23 | 1.000000 |
| rad70              | 9.08887e-24 | 1.000000 | 9.08887e-24 | 1.000000 |
| rad19syn           | 6.40520e-24 | 1.000000 | 6.40520e-24 | 1.000000 |
| rad60syn           | 1.34827e-24 | 1.000000 | 1.34827e-24 | 1.000000 |
| rad46              | 1.23364e-24 | 1.000000 | 1.23364e-24 | 1.000000 |
| rad10              | 6.22268e-25 | 1.000000 | 6.22268e-25 | 1.000000 |
| rad60anti          | 5.69966e-25 | 1.000000 | 5.69966e-25 | 1.000000 |
| rad39              | 4.63857e-25 | 1.000000 | 4.63857e-25 | 1.000000 |
| PAH3+H             | 1.27127e-25 | 1.000000 | 1.27127e-25 | 1.000000 |
| rad55              | 1.02405e-25 | 1.000000 | 1.02405e-25 | 1.000000 |
| rad35              | 6.49622e-26 | 1.000000 | 6.49622e-26 | 1.000000 |
| rad34              | 4.28483e-26 | 1.000000 | 4.28483e-26 | 1.000000 |
| rad59              | 3.07713e-26 | 1.000000 | 3.07713e-26 | 1.000000 |

|               |             |          |             |          |
|---------------|-------------|----------|-------------|----------|
| PhCCCH3+H     | 1.51625e-26 | 1.000000 | 1.51625e-26 | 1.000000 |
| PAH9+H        | 6.21058e-27 | 1.000000 | 6.21058e-27 | 1.000000 |
| rad27         | 5.12189e-27 | 1.000000 | 5.12189e-27 | 1.000000 |
| PhcycC3H3_A+H | 5.04170e-27 | 1.000000 | 5.04170e-27 | 1.000000 |
| rad50         | 1.27272e-27 | 1.000000 | 1.27272e-27 | 1.000000 |
| rad52         | 2.44711e-30 | 1.000000 | 2.44711e-30 | 1.000000 |
| rad5          | 5.34005e-31 | 1.000000 | 5.34005e-31 | 1.000000 |
| rad51         | 3.59458e-31 | 1.000000 | 3.59458e-31 | 1.000000 |
| rad58         | 1.64627e-31 | 1.000000 | 1.64627e-31 | 1.000000 |
| rad12         | 1.22993e-31 | 1.000000 | 1.22993e-31 | 1.000000 |
| rad62         | 2.90830e-32 | 1.000000 | 2.90830e-32 | 1.000000 |
| rad37         | 2.14551e-32 | 1.000000 | 2.14551e-32 | 1.000000 |
| rad47         | 7.49299e-33 | 1.000000 | 7.49299e-33 | 1.000000 |
| PAH1+H        | 1.52502e-33 | 1.000000 | 1.52502e-33 | 1.000000 |
| PAH10+CH3     | 8.07522e-36 | 1.000000 | 8.07522e-36 | 1.000000 |
| rad42         | 6.36396e-37 | 1.000000 | 6.36396e-37 | 1.000000 |
| rad65         | 5.75399e-37 | 1.000000 | 5.75399e-37 | 1.000000 |
| rad43         | 4.56842e-37 | 1.000000 | 4.56842e-37 | 1.000000 |
| rad41         | 2.25458e-42 | 1.000000 | 2.25458e-42 | 1.000000 |

100000000. Pa, 290.000000 K

| Rate constant      | True (fraction)       | Effective (fraction)  |
|--------------------|-----------------------|-----------------------|
| Total              | 3.55893e-16 (1.00 )   | 3.55893e-16 (1.00 )   |
| Formation of rad11 | 2.62555e-16 (0.738 )  | 2.62555e-16 (0.738 )  |
| Formation of rad6  | 7.62093e-17 (0.214 )  | 7.62093e-17 (0.214 )  |
| H-abstraction      | 1.71289e-17 (0.0481 ) | 1.71289e-17 (0.0481 ) |

| species            | PYtrue      | Cumul    | PYeffective | Cumul    |
|--------------------|-------------|----------|-------------|----------|
| rad11              | 0.737722    | 0.737722 | 0.737722    | 0.737722 |
| rad6               | 0.214148    | 0.951870 | 0.214148    | 0.951870 |
| Benzene+2-propynyl | 0.0481294   | 0.999999 | 0.0481294   | 0.999999 |
| rad21              | 9.61627e-07 | 1.00000  | 9.61627e-07 | 1.00000  |
| rad13              | 2.47089e-08 | 1.00000  | 2.47089e-08 | 1.00000  |
| rad7               | 8.65090e-09 | 1.00000  | 8.65090e-09 | 1.00000  |
| rad20              | 3.03980e-09 | 1.00000  | 3.03980e-09 | 1.00000  |
| rad25              | 1.48142e-09 | 1.00000  | 1.48142e-09 | 1.00000  |
| rad22              | 1.16262e-09 | 1.00000  | 1.16262e-09 | 1.00000  |
| PhCHCCH2+H         | 5.90285e-10 | 1.00000  | 5.90285e-10 | 1.00000  |
| rad33              | 3.35085e-10 | 1.00000  | 3.35085e-10 | 1.00000  |
| rad24              | 1.72864e-10 | 1.00000  | 1.72864e-10 | 1.00000  |
| Phenyl+Allene      | 9.45617e-11 | 1.00000  | 0.00000     | 1.00000  |
| rad9               | 5.20938e-11 | 1.00000  | 5.20938e-11 | 1.00000  |
| rad45              | 2.35571e-11 | 1.00000  | 2.35571e-11 | 1.00000  |
| PhCH2CCH+H         | 5.19236e-12 | 1.00000  | 5.19236e-12 | 1.00000  |
| rad36              | 4.03627e-12 | 1.00000  | 4.03627e-12 | 1.00000  |
| rad18              | 1.11955e-12 | 1.00000  | 1.11955e-12 | 1.00000  |
| C2H2+PhCH2         | 7.55332e-14 | 1.00000  | 7.55332e-14 | 1.00000  |
| rad3               | 4.27518e-14 | 1.00000  | 4.27518e-14 | 1.00000  |
| rad4               | 3.28490e-14 | 1.00000  | 3.28490e-14 | 1.00000  |
| Indene+H           | 1.74996e-14 | 1.00000  | 1.74996e-14 | 1.00000  |
| rad28              | 5.16614e-15 | 1.00000  | 5.16614e-15 | 1.00000  |
| rad23              | 3.27413e-15 | 1.00000  | 3.27413e-15 | 1.00000  |
| rad8               | 1.85620e-17 | 1.00000  | 1.85620e-17 | 1.00000  |
| PAH7+H             | 8.67018e-18 | 1.00000  | 8.67018e-18 | 1.00000  |
| rad2               | 7.11045e-19 | 1.00000  | 7.11045e-19 | 1.00000  |
| rad1               | 1.65115e-19 | 1.00000  | 1.65115e-19 | 1.00000  |
| PhCCH+CH3          | 1.54931e-19 | 1.00000  | 1.54931e-19 | 1.00000  |
| rad31              | 2.30098e-20 | 1.00000  | 2.30098e-20 | 1.00000  |
| rad30              | 3.29539e-21 | 1.00000  | 3.29539e-21 | 1.00000  |
| rad14              | 3.11906e-21 | 1.00000  | 3.11906e-21 | 1.00000  |
| Ph+MeAc            | 1.35092e-21 | 1.00000  | 1.35092e-21 | 1.00000  |
| rad15              | 9.11211e-22 | 1.00000  | 9.11211e-22 | 1.00000  |
| rad26              | 1.54039e-22 | 1.00000  | 1.54039e-22 | 1.00000  |
| rad54              | 7.66352e-23 | 1.00000  | 7.66352e-23 | 1.00000  |
| rad38              | 5.17000e-23 | 1.00000  | 5.17000e-23 | 1.00000  |
| rad70              | 2.37538e-23 | 1.00000  | 2.37538e-23 | 1.00000  |
| rad19syn           | 1.43116e-23 | 1.00000  | 1.43116e-23 | 1.00000  |
| rad60syn           | 2.90196e-24 | 1.00000  | 2.90196e-24 | 1.00000  |
| rad46              | 2.59417e-24 | 1.00000  | 2.59417e-24 | 1.00000  |
| rad10              | 1.32971e-24 | 1.00000  | 1.32971e-24 | 1.00000  |
| rad60anti          | 1.24027e-24 | 1.00000  | 1.24027e-24 | 1.00000  |
| rad39              | 9.76505e-25 | 1.00000  | 9.76505e-25 | 1.00000  |
| PAH3+H             | 3.09664e-25 | 1.00000  | 3.09664e-25 | 1.00000  |
| rad55              | 2.56828e-25 | 1.00000  | 2.56828e-25 | 1.00000  |
| rad35              | 1.49987e-25 | 1.00000  | 1.49987e-25 | 1.00000  |
| rad34              | 1.18574e-25 | 1.00000  | 1.18574e-25 | 1.00000  |
| rad59              | 7.40598e-26 | 1.00000  | 7.40598e-26 | 1.00000  |

|               |             |         |             |         |
|---------------|-------------|---------|-------------|---------|
| PhCCCH3+H     | 3.64934e-26 | 1.00000 | 3.64934e-26 | 1.00000 |
| PAH9+H        | 1.28759e-26 | 1.00000 | 1.28759e-26 | 1.00000 |
| PhcycC3H3_A+H | 1.27690e-26 | 1.00000 | 1.27690e-26 | 1.00000 |
| rad27         | 1.15845e-26 | 1.00000 | 1.15845e-26 | 1.00000 |
| rad50         | 3.26873e-27 | 1.00000 | 3.26873e-27 | 1.00000 |
| rad52         | 7.26999e-30 | 1.00000 | 7.26999e-30 | 1.00000 |
| rad5          | 1.46703e-30 | 1.00000 | 1.46703e-30 | 1.00000 |
| rad51         | 1.14402e-30 | 1.00000 | 1.14402e-30 | 1.00000 |
| rad58         | 4.82413e-31 | 1.00000 | 4.82413e-31 | 1.00000 |
| rad12         | 3.22426e-31 | 1.00000 | 3.22426e-31 | 1.00000 |
| rad62         | 8.09855e-32 | 1.00000 | 8.09855e-32 | 1.00000 |
| rad37         | 5.76885e-32 | 1.00000 | 5.76885e-32 | 1.00000 |
| rad47         | 2.49502e-32 | 1.00000 | 2.49502e-32 | 1.00000 |
| PAH1+H        | 4.15055e-33 | 1.00000 | 4.15055e-33 | 1.00000 |
| PAH10+CH3     | 2.35659e-35 | 1.00000 | 2.35659e-35 | 1.00000 |
| rad42         | 1.91202e-36 | 1.00000 | 1.91202e-36 | 1.00000 |
| rad65         | 1.70157e-36 | 1.00000 | 1.70157e-36 | 1.00000 |
| rad43         | 1.38620e-36 | 1.00000 | 1.38620e-36 | 1.00000 |
| rad41         | 7.35044e-42 | 1.00000 | 7.35044e-42 | 1.00000 |

100000000. Pa, 300.000000 K

| Rate constant      | True (fraction)       | Effective (fraction)  |
|--------------------|-----------------------|-----------------------|
| Total              | 6.34395e-16 (1.00 )   | 6.34395e-16 (1.00 )   |
| Formation of rad11 | 4.51153e-16 (0.711 )  | 4.51153e-16 (0.711 )  |
| Formation of rad6  | 1.51589e-16 (0.239 )  | 1.51589e-16 (0.239 )  |
| H-abstraction      | 3.16530e-17 (0.0499 ) | 3.16530e-17 (0.0499 ) |

| species            | PYtrue      | Cumul    | PYeffective | Cumul    |
|--------------------|-------------|----------|-------------|----------|
| rad11              | 0.711125    | 0.711125 | 0.711125    | 0.711125 |
| rad6               | 0.238977    | 0.950102 | 0.238977    | 0.950102 |
| Benzene+2-propynyl | 0.0498949   | 0.999997 | 0.0498949   | 0.999997 |
| rad21              | 2.16392e-06 | 0.999999 | 2.16392e-06 | 0.999999 |
| rad13              | 4.55764e-08 | 0.999999 | 4.55764e-08 | 0.999999 |
| rad7               | 1.62797e-08 | 0.999999 | 1.62797e-08 | 0.999999 |
| rad20              | 1.29709e-08 | 0.999999 | 1.29709e-08 | 0.999999 |
| rad22              | 5.43530e-09 | 0.999999 | 5.43530e-09 | 0.999999 |
| rad25              | 4.51787e-09 | 0.999999 | 4.51787e-09 | 0.999999 |
| PhCHCCH2+H         | 2.63421e-09 | 0.999999 | 2.63421e-09 | 0.999999 |
| rad24              | 7.96093e-10 | 0.999999 | 7.96093e-10 | 0.999999 |
| rad33              | 6.29560e-10 | 0.999999 | 6.29560e-10 | 0.999999 |
| Phenyl+Allene      | 4.24257e-10 | 0.999999 | 0.00000     | 0.999999 |
| rad9               | 2.56874e-10 | 0.999999 | 2.56874e-10 | 0.999999 |
| rad45              | 2.35562e-10 | 0.999999 | 2.35562e-10 | 0.999999 |
| PhCH2CCH+H         | 6.08065e-11 | 0.999999 | 6.08065e-11 | 0.999999 |
| rad36              | 2.87606e-11 | 0.999999 | 2.87606e-11 | 0.999999 |
| rad18              | 1.25436e-11 | 0.999999 | 1.25436e-11 | 0.999999 |
| C2H2+PhCH2         | 2.66050e-12 | 0.999999 | 2.66050e-12 | 0.999999 |
| Indene+H           | 2.72304e-13 | 0.999999 | 2.72304e-13 | 0.999999 |
| rad3               | 2.18434e-13 | 0.999999 | 2.18434e-13 | 0.999999 |
| rad4               | 1.66412e-13 | 0.999999 | 1.66412e-13 | 0.999999 |
| rad23              | 6.04006e-14 | 0.999999 | 6.04006e-14 | 0.999999 |
| rad28              | 3.55977e-14 | 0.999999 | 3.55977e-14 | 0.999999 |
| rad15              | 3.62722e-15 | 0.999999 | 3.62722e-15 | 0.999999 |
| rad12              | 3.54337e-15 | 0.999999 | 3.54337e-15 | 0.999999 |
| PAH7+H             | 4.48642e-16 | 0.999999 | 4.48642e-16 | 0.999999 |
| rad8               | 4.35889e-16 | 0.999999 | 4.35889e-16 | 0.999999 |
| rad2               | 1.86644e-17 | 0.999999 | 1.86644e-17 | 0.999999 |
| PhCCH+CH3          | 1.46876e-17 | 0.999999 | 1.46876e-17 | 0.999999 |
| rad1               | 4.16069e-18 | 0.999999 | 4.16069e-18 | 0.999999 |
| rad19anti          | 2.69625e-18 | 0.999999 | 2.69625e-18 | 0.999999 |
| rad30              | 6.96084e-19 | 0.999999 | 6.96084e-19 | 0.999999 |
| Ph+MeAc            | 3.53410e-19 | 0.999999 | 3.53410e-19 | 0.999999 |
| rad14              | 1.62762e-19 | 0.999999 | 1.62762e-19 | 0.999999 |
| rad31              | 1.41082e-19 | 0.999999 | 1.41082e-19 | 0.999999 |
| rad26              | 5.64996e-20 | 0.999999 | 5.64996e-20 | 0.999999 |
| rad70              | 4.97137e-20 | 0.999999 | 4.97137e-20 | 0.999999 |
| rad38              | 4.84749e-20 | 0.999999 | 4.84749e-20 | 0.999999 |
| rad54              | 1.30288e-20 | 0.999999 | 1.30288e-20 | 0.999999 |
| rad46              | 4.43480e-21 | 0.999999 | 4.43480e-21 | 0.999999 |
| rad60syn           | 2.60638e-21 | 0.999999 | 2.60638e-21 | 0.999999 |
| PAH3+H             | 1.75903e-21 | 0.999999 | 1.75903e-21 | 0.999999 |
| rad34              | 1.73103e-21 | 0.999999 | 1.73103e-21 | 0.999999 |
| rad19syn           | 1.52575e-21 | 0.999999 | 1.52575e-21 | 0.999999 |
| rad60anti          | 1.29439e-21 | 0.999999 | 1.29439e-21 | 0.999999 |
| rad10              | 4.97620e-22 | 0.999999 | 4.97620e-22 | 0.999999 |
| rad35              | 3.44814e-22 | 0.999999 | 3.44814e-22 | 0.999999 |
| rad59              | 3.02997e-22 | 0.999999 | 3.02997e-22 | 0.999999 |

|               |             |          |             |          |
|---------------|-------------|----------|-------------|----------|
| rad50         | 1.62844e-22 | 0.999999 | 1.62844e-22 | 0.999999 |
| rad55         | 1.61671e-22 | 0.999999 | 1.61671e-22 | 0.999999 |
| rad39         | 1.52529e-22 | 0.999999 | 1.52529e-22 | 0.999999 |
| PhCCCH3+H     | 1.09530e-22 | 0.999999 | 1.09530e-22 | 0.999999 |
| PAH9+H        | 5.23315e-23 | 0.999999 | 5.23315e-23 | 0.999999 |
| PhcycC3H3_A+H | 1.88187e-23 | 0.999999 | 1.88187e-23 | 0.999999 |
| rad27         | 1.08474e-23 | 0.999999 | 1.08474e-23 | 0.999999 |
| rad51         | 6.29655e-24 | 0.999999 | 6.29655e-24 | 0.999999 |
| rad52         | 5.24163e-24 | 0.999999 | 5.24163e-24 | 0.999999 |
| rad47         | 4.46978e-24 | 0.999999 | 4.46978e-24 | 0.999999 |
| rad5          | 5.93061e-25 | 0.999999 | 5.93061e-25 | 0.999999 |
| rad67         | 5.63967e-25 | 0.999999 | 5.63967e-25 | 0.999999 |
| rad58         | 2.58249e-25 | 0.999999 | 2.58249e-25 | 0.999999 |
| rad53         | 1.50227e-25 | 0.999999 | 1.50227e-25 | 0.999999 |
| rad68syn      | 1.22111e-25 | 0.999999 | 1.22111e-25 | 0.999999 |
| rad68anti     | 8.63752e-26 | 0.999999 | 8.63752e-26 | 0.999999 |
| rad62         | 4.46110e-26 | 0.999999 | 4.46110e-26 | 0.999999 |
| rad56         | 7.14175e-27 | 0.999999 | 7.14175e-27 | 0.999999 |
| rad37         | 3.65968e-27 | 0.999999 | 3.65968e-27 | 0.999999 |
| PAH8+H        | 2.66352e-27 | 0.999999 | 2.66352e-27 | 0.999999 |
| rad40syn      | 2.21675e-27 | 0.999999 | 2.21675e-27 | 0.999999 |
| PAH1+H        | 1.58124e-27 | 0.999999 | 1.58124e-27 | 0.999999 |
| rad73         | 7.04060e-28 | 0.999999 | 7.04060e-28 | 0.999999 |
| rad40anti     | 5.33272e-28 | 0.999999 | 5.33272e-28 | 0.999999 |
| rad65         | 4.38326e-28 | 0.999999 | 4.38326e-28 | 0.999999 |
| rad42         | 4.31097e-28 | 0.999999 | 4.31097e-28 | 0.999999 |
| rad71         | 3.17755e-28 | 0.999999 | 3.17755e-28 | 0.999999 |
| PAH10+CH3     | 1.45857e-28 | 0.999999 | 1.45857e-28 | 0.999999 |
| rad43         | 5.81244e-29 | 0.999999 | 5.81244e-29 | 0.999999 |
| rad64         | 1.71926e-30 | 0.999999 | 1.71926e-30 | 0.999999 |
| rad72         | 8.99427e-31 | 0.999999 | 8.99427e-31 | 0.999999 |
| rad41         | 6.03126e-31 | 0.999999 | 6.03126e-31 | 0.999999 |
| rad61         | 1.21189e-32 | 0.999999 | 1.21189e-32 | 0.999999 |

100000000. Pa, 400.000000 K

=====

| Rate constant      | True (fraction)       | Effective (fraction)  |
|--------------------|-----------------------|-----------------------|
| Total              | 5.11288e-15 (1.00 )   | 5.11288e-15 (1.00 )   |
| Formation of rad11 | 3.08094e-15 (0.603 )  | 3.08094e-15 (0.603 )  |
| Formation of rad6  | 1.54092e-15 (0.301 )  | 1.54092e-15 (0.301 )  |
| H-abstraction      | 4.91025e-16 (0.0960 ) | 4.91025e-16 (0.0960 ) |

| species            | PYtrue      | Cumul    | PYeffective | Cumul    |
|--------------------|-------------|----------|-------------|----------|
| rad11              | 0.602501    | 0.602501 | 0.602501    | 0.602501 |
| rad6               | 0.301454    | 0.903955 | 0.301454    | 0.903955 |
| Benzene+2-propynyl | 0.0960368   | 0.999992 | 0.0960368   | 0.999992 |
| rad21              | 7.17210e-06 | 0.999999 | 7.17210e-06 | 0.999999 |
| rad13              | 2.14490e-07 | 0.999999 | 2.14490e-07 | 0.999999 |
| rad20              | 1.09688e-07 | 0.999999 | 1.09688e-07 | 0.999999 |
| rad7               | 8.33058e-08 | 0.999999 | 8.33058e-08 | 0.999999 |
| rad22              | 4.63315e-08 | 0.999999 | 4.63315e-08 | 0.999999 |
| PhCHCCH2+H         | 3.11703e-08 | 1.000000 | 3.11703e-08 | 1.000000 |
| rad25              | 2.78117e-08 | 1.000000 | 2.78117e-08 | 1.000000 |
| Phenyl+Allene      | 9.48501e-09 | 1.000000 | 0.000000    | 1.000000 |
| rad24              | 6.29072e-09 | 1.000000 | 6.29072e-09 | 1.000000 |
| rad45              | 4.52628e-09 | 1.000000 | 4.52628e-09 | 1.000000 |
| rad33              | 3.69526e-09 | 1.000000 | 3.69526e-09 | 1.000000 |
| rad9               | 3.23380e-09 | 1.000000 | 3.23380e-09 | 1.000000 |
| PhCH2CCH+H         | 2.25186e-09 | 1.000000 | 2.25186e-09 | 1.000000 |
| rad36              | 4.56689e-10 | 1.000000 | 4.56689e-10 | 1.000000 |
| rad18              | 3.17323e-10 | 1.000000 | 3.17323e-10 | 1.000000 |
| C2H2+PhCH2         | 1.70390e-10 | 1.000000 | 1.70390e-10 | 1.000000 |
| Indene+H           | 1.09508e-11 | 1.000000 | 1.09508e-11 | 1.000000 |
| rad23              | 5.84481e-12 | 1.000000 | 5.84481e-12 | 1.000000 |
| rad3               | 5.54077e-12 | 1.000000 | 5.54078e-12 | 1.000000 |
| rad4               | 4.36062e-12 | 1.000000 | 4.36062e-12 | 1.000000 |
| rad28              | 1.32458e-12 | 1.000000 | 1.32458e-12 | 1.000000 |
| rad15              | 1.75498e-13 | 1.000000 | 1.75498e-13 | 1.000000 |
| rad12              | 1.06602e-13 | 1.000000 | 1.06602e-13 | 1.000000 |
| PAH7+H             | 6.06078e-14 | 1.000000 | 6.06078e-14 | 1.000000 |
| PhCCH+CH3          | 3.51295e-14 | 1.000000 | 3.51295e-14 | 1.000000 |
| rad8               | 3.01540e-14 | 1.000000 | 3.01540e-14 | 1.000000 |
| rad2               | 8.11139e-15 | 1.000000 | 8.11139e-15 | 1.000000 |
| Ph+MeAc            | 2.41562e-15 | 1.000000 | 2.41562e-15 | 1.000000 |
| rad1               | 2.01188e-15 | 1.000000 | 2.01188e-15 | 1.000000 |
| rad38              | 1.85986e-15 | 1.000000 | 1.85986e-15 | 1.000000 |
| rad46              | 4.77679e-16 | 1.000000 | 4.77679e-16 | 1.000000 |
| PAH9+H             | 3.21015e-16 | 1.000000 | 3.21015e-16 | 1.000000 |



|               |             |          |             |          |
|---------------|-------------|----------|-------------|----------|
| rad19anti     | 2.92716e-16 | 1.000000 | 2.92716e-16 | 1.000000 |
| rad50         | 2.76149e-16 | 1.000000 | 2.76149e-16 | 1.000000 |
| rad30         | 2.37555e-16 | 1.000000 | 2.37555e-16 | 1.000000 |
| rad14         | 1.92166e-16 | 1.000000 | 1.92166e-16 | 1.000000 |
| rad39         | 8.56673e-17 | 1.000000 | 8.56673e-17 | 1.000000 |
| rad51         | 6.80088e-17 | 1.000000 | 6.80088e-17 | 1.000000 |
| rad35         | 4.85605e-17 | 1.000000 | 4.85605e-17 | 1.000000 |
| rad70         | 4.22653e-17 | 1.000000 | 4.22653e-17 | 1.000000 |
| rad26         | 3.73332e-17 | 1.000000 | 3.73332e-17 | 1.000000 |
| rad52         | 2.26698e-17 | 1.000000 | 2.26698e-17 | 1.000000 |
| PhCCCH3+H     | 2.04254e-17 | 1.000000 | 2.04254e-17 | 1.000000 |
| rad54         | 1.77878e-17 | 1.000000 | 1.77878e-17 | 1.000000 |
| rad31         | 1.58320e-17 | 1.000000 | 1.58320e-17 | 1.000000 |
| rad10         | 1.52712e-17 | 1.000000 | 1.52712e-17 | 1.000000 |
| rad47         | 8.67027e-18 | 1.000000 | 8.67027e-18 | 1.000000 |
| PAH3+H        | 5.14610e-18 | 1.000000 | 5.14610e-18 | 1.000000 |
| rad19syn      | 3.80792e-18 | 1.000000 | 3.80792e-18 | 1.000000 |
| rad34         | 3.04313e-18 | 1.000000 | 3.04313e-18 | 1.000000 |
| rad60syn      | 2.30045e-18 | 1.000000 | 2.30045e-18 | 1.000000 |
| rad60anti     | 1.23671e-18 | 1.000000 | 1.23671e-18 | 1.000000 |
| rad71         | 1.11686e-18 | 1.000000 | 1.11686e-18 | 1.000000 |
| rad73         | 9.07181e-19 | 1.000000 | 9.07181e-19 | 1.000000 |
| PhcycC3H3_A+H | 8.56769e-19 | 1.000000 | 8.56769e-19 | 1.000000 |
| rad59         | 6.93392e-19 | 1.000000 | 6.93392e-19 | 1.000000 |
| rad55         | 6.50837e-19 | 1.000000 | 6.50837e-19 | 1.000000 |
| rad27         | 5.22041e-19 | 1.000000 | 5.22041e-19 | 1.000000 |
| PAH10+CH3     | 4.35223e-19 | 1.000000 | 4.35223e-19 | 1.000000 |
| PAH1+H        | 3.91764e-19 | 1.000000 | 3.91764e-19 | 1.000000 |
| rad65         | 2.89552e-19 | 1.000000 | 2.89552e-19 | 1.000000 |
| rad37         | 2.18277e-19 | 1.000000 | 2.18277e-19 | 1.000000 |
| rad5          | 1.23927e-19 | 1.000000 | 1.23927e-19 | 1.000000 |
| rad62         | 5.40626e-20 | 1.000000 | 5.40626e-20 | 1.000000 |
| rad53         | 3.47853e-20 | 1.000000 | 3.47853e-20 | 1.000000 |
| rad72         | 2.99193e-20 | 1.000000 | 2.99193e-20 | 1.000000 |
| PAH8+H        | 2.17823e-20 | 1.000000 | 2.17823e-20 | 1.000000 |
| rad56         | 1.85038e-20 | 1.000000 | 1.85038e-20 | 1.000000 |
| rad68syn      | 1.83944e-20 | 1.000000 | 1.83944e-20 | 1.000000 |
| rad58         | 1.66396e-20 | 1.000000 | 1.66396e-20 | 1.000000 |
| rad67         | 1.65922e-20 | 1.000000 | 1.65922e-20 | 1.000000 |
| rad68anti     | 1.22210e-20 | 1.000000 | 1.22210e-20 | 1.000000 |
| rad64         | 7.16306e-21 | 1.000000 | 7.16306e-21 | 1.000000 |
| rad40syn      | 3.65870e-21 | 1.000000 | 3.65870e-21 | 1.000000 |
| rad42         | 1.99411e-21 | 1.000000 | 1.99411e-21 | 1.000000 |
| rad40anti     | 1.85017e-21 | 1.000000 | 1.85017e-21 | 1.000000 |
| rad43         | 1.26671e-21 | 1.000000 | 1.26671e-21 | 1.000000 |
| rad61         | 8.07875e-22 | 1.000000 | 8.07875e-22 | 1.000000 |
| rad41         | 5.35259e-23 | 1.000000 | 5.35259e-23 | 1.000000 |

100000000. Pa, 500.000000 K

=====

| Rate constant      | True (fraction)      | Effective (fraction) |
|--------------------|----------------------|----------------------|
| Total              | 2.11551e-14 (1.00 )  | 2.11551e-14 (1.00 )  |
| Formation of rad11 | 1.10850e-14 (0.524 ) | 1.10850e-14 (0.524 ) |
| Formation of rad6  | 7.08033e-15 (0.335 ) | 7.08033e-15 (0.335 ) |
| H-abstraction      | 2.98976e-15 (0.141 ) | 2.98976e-15 (0.141 ) |

| species            | PYtrue      | Cumul    | PYeffective | Cumul    |
|--------------------|-------------|----------|-------------|----------|
| rad11              | 0.523753    | 0.523753 | 0.523753    | 0.523753 |
| rad6               | 0.334894    | 0.858647 | 0.334894    | 0.858647 |
| Benzene+2-propynyl | 0.141326    | 0.999973 | 0.141326    | 0.999973 |
| rad21              | 2.42334e-05 | 0.999997 | 2.42334e-05 | 0.999997 |
| rad20              | 9.34658e-07 | 0.999998 | 9.34658e-07 | 0.999998 |
| rad13              | 9.02123e-07 | 0.999999 | 9.02123e-07 | 0.999999 |
| rad22              | 4.07864e-07 | 0.999999 | 4.07864e-07 | 0.999999 |
| rad7               | 3.91091e-07 | 0.999999 | 3.91091e-07 | 0.999999 |
| PhCHCCH2+H         | 3.18746e-07 | 1.000000 | 3.18746e-07 | 1.000000 |
| rad25              | 1.63236e-07 | 1.000000 | 1.63236e-07 | 1.000000 |
| Phenyl+Allene      | 1.53931e-07 | 1.000000 | 0.000000    | 1.000000 |
| rad45              | 7.30337e-08 | 1.000000 | 7.30337e-08 | 1.000000 |
| PhCH2CCH+H         | 5.48854e-08 | 1.000000 | 5.48854e-08 | 1.000000 |
| rad24              | 4.17266e-08 | 1.000000 | 4.17266e-08 | 1.000000 |
| rad9               | 3.41478e-08 | 1.000000 | 3.41478e-08 | 1.000000 |
| rad33              | 1.85064e-08 | 1.000000 | 1.85064e-08 | 1.000000 |
| C2H2+PhCH2         | 1.21824e-08 | 1.000000 | 1.21824e-08 | 1.000000 |
| rad18              | 8.25589e-09 | 1.000000 | 8.25589e-09 | 1.000000 |
| rad36              | 6.79381e-09 | 1.000000 | 6.79380e-09 | 1.000000 |
| rad23              | 2.28297e-09 | 1.000000 | 2.28297e-09 | 1.000000 |
| Indene+H           | 1.02800e-09 | 1.000000 | 1.02800e-09 | 1.000000 |

|               |             |         |             |         |
|---------------|-------------|---------|-------------|---------|
| rad3          | 1.09968e-10 | 1.00000 | 1.09968e-10 | 1.00000 |
| PhCCH+CH3     | 9.63063e-11 | 1.00000 | 9.63063e-11 | 1.00000 |
| rad4          | 9.05755e-11 | 1.00000 | 9.05755e-11 | 1.00000 |
| rad28         | 7.84724e-11 | 1.00000 | 7.84724e-11 | 1.00000 |
| PAH7+H        | 2.39689e-11 | 1.00000 | 2.39689e-11 | 1.00000 |
| rad38         | 2.13134e-11 | 1.00000 | 2.13134e-11 | 1.00000 |
| PAH9+H        | 1.51891e-11 | 1.00000 | 1.51891e-11 | 1.00000 |
| Ph+MeAc       | 1.34759e-11 | 1.00000 | 1.34759e-11 | 1.00000 |
| rad15         | 1.14157e-11 | 1.00000 | 1.14157e-11 | 1.00000 |
| rad50         | 7.98941e-12 | 1.00000 | 7.98941e-12 | 1.00000 |
| rad46         | 7.43712e-12 | 1.00000 | 7.43712e-12 | 1.00000 |
| rad39         | 3.72075e-12 | 1.00000 | 3.72075e-12 | 1.00000 |
| rad2          | 3.70714e-12 | 1.00000 | 3.70714e-12 | 1.00000 |
| rad51         | 2.64285e-12 | 1.00000 | 2.64285e-12 | 1.00000 |
| rad12         | 2.48082e-12 | 1.00000 | 2.48082e-12 | 1.00000 |
| rad35         | 2.14436e-12 | 1.00000 | 2.14436e-12 | 1.00000 |
| rad8          | 1.35079e-12 | 1.00000 | 1.35079e-12 | 1.00000 |
| rad1          | 1.13490e-12 | 1.00000 | 1.13490e-12 | 1.00000 |
| rad19syn      | 7.63073e-13 | 1.00000 | 7.63073e-13 | 1.00000 |
| rad52         | 7.49241e-13 | 1.00000 | 7.49241e-13 | 1.00000 |
| rad54         | 6.85992e-13 | 1.00000 | 6.85992e-13 | 1.00000 |
| rad47         | 6.49648e-13 | 1.00000 | 6.49648e-13 | 1.00000 |
| PhCCCH3+H     | 5.79299e-13 | 1.00000 | 5.79299e-13 | 1.00000 |
| PhcycC3H3_A+H | 4.88070e-13 | 1.00000 | 4.88070e-13 | 1.00000 |
| rad70         | 4.37591e-13 | 1.00000 | 4.37592e-13 | 1.00000 |
| rad19anti     | 4.15128e-13 | 1.00000 | 4.15128e-13 | 1.00000 |
| rad26         | 4.13852e-13 | 1.00000 | 4.13852e-13 | 1.00000 |
| rad30         | 3.68393e-13 | 1.00000 | 3.68393e-13 | 1.00000 |
| PAH3+H        | 2.84104e-13 | 1.00000 | 2.84104e-13 | 1.00000 |
| rad10         | 1.96452e-13 | 1.00000 | 1.96452e-13 | 1.00000 |
| rad14         | 1.61149e-13 | 1.00000 | 1.61149e-13 | 1.00000 |
| rad34         | 9.79266e-14 | 1.00000 | 9.79266e-14 | 1.00000 |
| rad71         | 7.23224e-14 | 1.00000 | 7.23224e-14 | 1.00000 |
| PAH1+H        | 7.02243e-14 | 1.00000 | 7.02243e-14 | 1.00000 |
| rad73         | 5.44165e-14 | 1.00000 | 5.44166e-14 | 1.00000 |
| PAH10+CH3     | 5.05286e-14 | 1.00000 | 5.05286e-14 | 1.00000 |
| rad55         | 4.95299e-14 | 1.00000 | 4.95299e-14 | 1.00000 |
| rad59         | 2.82467e-14 | 1.00000 | 2.82467e-14 | 1.00000 |
| rad60syn      | 2.63032e-14 | 1.00000 | 2.63032e-14 | 1.00000 |
| rad65         | 2.32437e-14 | 1.00000 | 2.32437e-14 | 1.00000 |
| rad37         | 2.15462e-14 | 1.00000 | 2.15462e-14 | 1.00000 |
| rad60anti     | 1.61712e-14 | 1.00000 | 1.61712e-14 | 1.00000 |
| PAH8+H        | 1.33071e-14 | 1.00000 | 1.33071e-14 | 1.00000 |
| rad56         | 1.30700e-14 | 1.00000 | 1.30700e-14 | 1.00000 |
| rad53         | 1.28695e-14 | 1.00000 | 1.28695e-14 | 1.00000 |
| rad67         | 1.26733e-14 | 1.00000 | 1.26733e-14 | 1.00000 |
| rad68syn      | 5.28182e-15 | 1.00000 | 5.28182e-15 | 1.00000 |
| rad62         | 5.18928e-15 | 1.00000 | 5.18928e-15 | 1.00000 |
| rad31         | 3.58301e-15 | 1.00000 | 3.58301e-15 | 1.00000 |
| rad68anti     | 3.45141e-15 | 1.00000 | 3.45141e-15 | 1.00000 |
| rad58         | 2.60958e-15 | 1.00000 | 2.60958e-15 | 1.00000 |
| rad27         | 2.56506e-15 | 1.00000 | 2.56506e-15 | 1.00000 |
| rad72         | 2.22594e-15 | 1.00000 | 2.22594e-15 | 1.00000 |
| rad40syn      | 1.71874e-15 | 1.00000 | 1.71874e-15 | 1.00000 |
| rad5          | 1.65918e-15 | 1.00000 | 1.65918e-15 | 1.00000 |
| rad64         | 1.30960e-15 | 1.00000 | 1.30960e-15 | 1.00000 |
| rad40anti     | 9.77841e-16 | 1.00000 | 9.77841e-16 | 1.00000 |
| rad42         | 3.91311e-16 | 1.00000 | 3.91311e-16 | 1.00000 |
| rad43         | 2.61764e-16 | 1.00000 | 2.61764e-16 | 1.00000 |
| rad61         | 1.08025e-16 | 1.00000 | 1.08025e-16 | 1.00000 |
| rad41         | 1.91266e-17 | 1.00000 | 1.91266e-17 | 1.00000 |

100000000. Pa, 600.000000 K

=====

| Rate constant      | True (fraction)      | Effective (fraction) |
|--------------------|----------------------|----------------------|
| Total              | 6.08120e-14 (1.00 )  | 6.08118e-14 (1.00 )  |
| Formation of rad11 | 2.83304e-14 (0.466 ) | 2.83304e-14 (0.466 ) |
| Formation of rad6  | 2.13840e-14 (0.352 ) | 2.13840e-14 (0.352 ) |
| H-abstraction      | 1.10975e-14 (0.182 ) | 1.10975e-14 (0.182 ) |

| species            | PYtrue      | Cumul    | PYeffective | Cumul    |
|--------------------|-------------|----------|-------------|----------|
| rad11              | 0.465185    | 0.465185 | 0.465187    | 0.465187 |
| rad6               | 0.352223    | 0.817409 | 0.352225    | 0.817412 |
| Benzene+2-propynyl | 0.182488    | 0.999897 | 0.182489    | 0.999900 |
| rad21              | 7.64647e-05 | 0.999973 | 7.64649e-05 | 0.999977 |
| rad20              | 7.00415e-06 | 0.999980 | 7.00417e-06 | 0.999984 |
| rad22              | 3.53907e-06 | 0.999984 | 3.53908e-06 | 0.999987 |
| rad13              | 3.26723e-06 | 0.999987 | 3.26723e-06 | 0.999991 |

|               |             |          |             |          |
|---------------|-------------|----------|-------------|----------|
| PhCHCCH2+H    | 3.07496e-06 | 0.999990 | 3.07497e-06 | 0.999994 |
| Phenyl+Allene | 2.58903e-06 | 0.999993 | 0.00000     | 0.999994 |
| rad7          | 1.79037e-06 | 0.999995 | 1.79037e-06 | 0.999995 |
| PhCH2CCH+H    | 1.41500e-06 | 0.999996 | 1.41501e-06 | 0.999997 |
| rad45         | 9.64754e-07 | 0.999997 | 9.64753e-07 | 0.999998 |
| rad25         | 8.55444e-07 | 0.999998 | 8.55452e-07 | 0.999999 |
| C2H2+PhCH2    | 7.96278e-07 | 0.999999 | 7.96280e-07 | 0.999999 |
| rad9          | 3.38031e-07 | 0.999999 | 3.38032e-07 | 1.000000 |
| rad24         | 2.33333e-07 | 0.999999 | 2.33334e-07 | 1.000000 |
| rad18         | 1.87392e-07 | 1.000000 | 1.87392e-07 | 1.000000 |
| Indene+H      | 9.60666e-08 | 1.000000 | 9.60666e-08 | 1.000000 |
| rad23         | 9.18417e-08 | 1.000000 | 9.18425e-08 | 1.000000 |
| rad36         | 8.98012e-08 | 1.000000 | 8.98020e-08 | 1.000000 |
| rad33         | 7.35052e-08 | 1.000000 | 7.35054e-08 | 1.000000 |
| PhCCH+CH3     | 2.42972e-08 | 1.000000 | 2.42973e-08 | 1.000000 |
| rad28         | 8.91358e-09 | 1.000000 | 8.91365e-09 | 1.000000 |
| PAH7+H        | 6.24269e-09 | 1.000000 | 6.24271e-09 | 1.000000 |
| Ph+MeAc       | 4.21440e-09 | 1.000000 | 4.21441e-09 | 1.000000 |
| rad3          | 1.76064e-09 | 1.000000 | 1.76065e-09 | 1.000000 |
| rad4          | 1.44816e-09 | 1.000000 | 1.44816e-09 | 1.000000 |
| rad38         | 1.29065e-09 | 1.000000 | 1.29066e-09 | 1.000000 |
| PAH9+H        | 1.12173e-09 | 1.000000 | 1.12174e-09 | 1.000000 |
| rad15         | 1.04556e-09 | 1.000000 | 1.04556e-09 | 1.000000 |
| rad19syn      | 6.46832e-10 | 1.000000 | 6.46834e-10 | 1.000000 |
| rad39         | 5.95582e-10 | 1.000000 | 5.95583e-10 | 1.000000 |
| rad50         | 5.31108e-10 | 1.000000 | 5.31109e-10 | 1.000000 |
| PhcycC3H3_A+H | 4.76801e-10 | 1.000000 | 4.76801e-10 | 1.000000 |
| rad46         | 4.71540e-10 | 1.000000 | 4.71541e-10 | 1.000000 |
| rad54         | 4.33810e-10 | 1.000000 | 4.33812e-10 | 1.000000 |
| rad19anti     | 2.94723e-10 | 1.000000 | 2.94723e-10 | 1.000000 |
| rad2          | 2.20963e-10 | 1.000000 | 2.20963e-10 | 1.000000 |
| PhCCCH3+H     | 1.93146e-10 | 1.000000 | 1.93147e-10 | 1.000000 |
| rad51         | 1.74758e-10 | 1.000000 | 1.74759e-10 | 1.000000 |
| rad35         | 1.68394e-10 | 1.000000 | 1.68395e-10 | 1.000000 |
| rad70         | 1.59156e-10 | 1.000000 | 1.59157e-10 | 1.000000 |
| rad47         | 1.50676e-10 | 1.000000 | 1.50676e-10 | 1.000000 |
| PAH3+H        | 1.05264e-10 | 1.000000 | 1.05264e-10 | 1.000000 |
| rad30         | 9.35299e-11 | 1.000000 | 9.35298e-11 | 1.000000 |
| rad26         | 7.54773e-11 | 1.000000 | 7.54775e-11 | 1.000000 |
| rad12         | 7.49577e-11 | 1.000000 | 7.49579e-11 | 1.000000 |
| rad1          | 7.41933e-11 | 1.000000 | 7.41935e-11 | 1.000000 |
| rad52         | 4.89519e-11 | 1.000000 | 4.89520e-11 | 1.000000 |
| rad34         | 4.08558e-11 | 1.000000 | 4.08559e-11 | 1.000000 |
| rad8          | 4.06420e-11 | 1.000000 | 4.06422e-11 | 1.000000 |
| PAH1+H        | 4.06174e-11 | 1.000000 | 4.06175e-11 | 1.000000 |
| rad10         | 3.48737e-11 | 1.000000 | 3.48738e-11 | 1.000000 |
| rad55         | 3.37184e-11 | 1.000000 | 3.37186e-11 | 1.000000 |
| rad67         | 1.58327e-11 | 1.000000 | 1.58327e-11 | 1.000000 |
| rad56         | 1.24790e-11 | 1.000000 | 1.24791e-11 | 1.000000 |
| rad53         | 1.11399e-11 | 1.000000 | 1.11399e-11 | 1.000000 |
| rad14         | 1.03875e-11 | 1.000000 | 1.03875e-11 | 1.000000 |
| rad59         | 1.00879e-11 | 1.000000 | 1.00880e-11 | 1.000000 |
| PAH8+H        | 9.70991e-12 | 1.000000 | 9.70991e-12 | 1.000000 |
| PAH10+CH3     | 9.01437e-12 | 1.000000 | 9.01437e-12 | 1.000000 |
| rad60syn      | 8.46615e-12 | 1.000000 | 8.46615e-12 | 1.000000 |
| rad60anti     | 5.26597e-12 | 1.000000 | 5.26598e-12 | 1.000000 |
| rad37         | 3.95613e-12 | 1.000000 | 3.95614e-12 | 1.000000 |
| rad71         | 3.71648e-12 | 1.000000 | 3.71650e-12 | 1.000000 |
| rad62         | 3.42644e-12 | 1.000000 | 3.42644e-12 | 1.000000 |
| rad68syn      | 3.12813e-12 | 1.000000 | 3.12813e-12 | 1.000000 |
| rad73         | 2.88682e-12 | 1.000000 | 2.88683e-12 | 1.000000 |
| rad68anti     | 2.03578e-12 | 1.000000 | 2.03578e-12 | 1.000000 |
| rad65         | 1.79871e-12 | 1.000000 | 1.79871e-12 | 1.000000 |
| rad40syn      | 1.15777e-12 | 1.000000 | 1.15778e-12 | 1.000000 |
| rad58         | 1.10138e-12 | 1.000000 | 1.10139e-12 | 1.000000 |
| rad31         | 8.34254e-13 | 1.000000 | 8.34254e-13 | 1.000000 |
| rad64         | 7.57977e-13 | 1.000000 | 7.57979e-13 | 1.000000 |
| rad40anti     | 6.81294e-13 | 1.000000 | 6.81296e-13 | 1.000000 |
| rad42         | 3.09631e-13 | 1.000000 | 3.09632e-13 | 1.000000 |
| rad5          | 2.52408e-13 | 1.000000 | 2.52409e-13 | 1.000000 |
| rad27         | 1.99889e-13 | 1.000000 | 1.99890e-13 | 1.000000 |
| rad43         | 1.54898e-13 | 1.000000 | 1.54899e-13 | 1.000000 |
| rad72         | 1.10149e-13 | 1.000000 | 1.10150e-13 | 1.000000 |
| rad61         | 1.87594e-14 | 1.000000 | 1.87594e-14 | 1.000000 |
| rad41         | 1.35306e-14 | 1.000000 | 1.35305e-14 | 1.000000 |

100000000. Pa, 700.000000 K

=====

Rate constant | True (fraction) | Effective (fraction)

-----

|                    |             |          |             |          |
|--------------------|-------------|----------|-------------|----------|
| Total              | 1.39564e-13 | (1.00 )  | 1.39559e-13 | (1.00 )  |
| Formation of rad11 | 5.88273e-14 | (0.422 ) | 5.88251e-14 | (0.422 ) |
| Formation of rad6  | 5.01684e-14 | (0.359 ) | 5.01665e-14 | (0.359 ) |
| H-abstraction      | 3.05678e-14 | (0.219 ) | 3.05678e-14 | (0.219 ) |

| species            | PYtrue      | Cumul    | PYeffective | Cumul    |
|--------------------|-------------|----------|-------------|----------|
| rad11              | 0.419426    | 0.419426 | 0.419439    | 0.419439 |
| rad6               | 0.361133    | 0.780559 | 0.361144    | 0.780583 |
| Benzene+2-propynyl | 0.219024    | 0.999584 | 0.219031    | 0.999613 |
| rad21              | 0.000213958 | 0.999798 | 0.000213964 | 0.999827 |
| rad20              | 3.53618e-05 | 0.999833 | 3.53628e-05 | 0.999863 |
| Phenyl+Allene      | 2.94833e-05 | 0.999863 | 0.00000     | 0.999863 |
| rad22              | 2.70747e-05 | 0.999890 | 2.70755e-05 | 0.999890 |
| PhCHCCH2+H         | 2.64474e-05 | 0.999916 | 2.64481e-05 | 0.999916 |
| C2H2+PhCH2         | 2.14150e-05 | 0.999937 | 2.14156e-05 | 0.999938 |
| PhCH2CCH+H         | 1.84283e-05 | 0.999956 | 1.84288e-05 | 0.999956 |
| rad45              | 1.03745e-05 | 0.999966 | 1.03748e-05 | 0.999966 |
| rad13              | 9.54844e-06 | 0.999976 | 9.54868e-06 | 0.999976 |
| rad7               | 7.53892e-06 | 0.999983 | 7.53914e-06 | 0.999984 |
| rad25              | 3.99657e-06 | 0.999987 | 3.99668e-06 | 0.999988 |
| rad9               | 2.91910e-06 | 0.999990 | 2.91918e-06 | 0.999990 |
| Indene+H           | 2.65417e-06 | 0.999993 | 2.65425e-06 | 0.999993 |
| rad18              | 2.28303e-06 | 0.999995 | 2.28309e-06 | 0.999995 |
| rad24              | 1.34240e-06 | 0.999997 | 1.34243e-06 | 0.999997 |
| rad23              | 1.22683e-06 | 0.999998 | 1.22687e-06 | 0.999998 |
| rad36              | 1.09148e-06 | 0.999999 | 1.09151e-06 | 0.999999 |
| PhCCH+CH3          | 3.55647e-07 | 0.999999 | 3.55657e-07 | 0.999999 |
| rad33              | 2.24074e-07 | 0.999999 | 2.24081e-07 | 1.000000 |
| rad28              | 1.13094e-07 | 1.000000 | 1.13098e-07 | 1.000000 |
| PAH7+H             | 1.08459e-07 | 1.000000 | 1.08462e-07 | 1.000000 |
| Ph+MeAc            | 6.44638e-08 | 1.000000 | 6.44657e-08 | 1.000000 |
| rad15              | 2.15658e-08 | 1.000000 | 2.15664e-08 | 1.000000 |
| rad38              | 1.65999e-08 | 1.000000 | 1.66004e-08 | 1.000000 |
| PAH9+H             | 1.59185e-08 | 1.000000 | 1.59190e-08 | 1.000000 |
| rad3               | 1.44067e-08 | 1.000000 | 1.44072e-08 | 1.000000 |
| rad19anti          | 1.20173e-08 | 1.000000 | 1.20176e-08 | 1.000000 |
| rad19syn           | 1.18517e-08 | 1.000000 | 1.18521e-08 | 1.000000 |
| rad4               | 1.18315e-08 | 1.000000 | 1.18319e-08 | 1.000000 |
| rad39              | 1.00152e-08 | 1.000000 | 1.00155e-08 | 1.000000 |
| PhcycC3H3_A+H      | 9.03448e-09 | 1.000000 | 9.03480e-09 | 1.000000 |
| rad54              | 7.31980e-09 | 1.000000 | 7.32002e-09 | 1.000000 |
| rad50              | 7.08004e-09 | 1.000000 | 7.08025e-09 | 1.000000 |
| rad46              | 6.24615e-09 | 1.000000 | 6.24633e-09 | 1.000000 |
| rad2               | 3.22110e-09 | 1.000000 | 3.22120e-09 | 1.000000 |
| rad30              | 3.21782e-09 | 1.000000 | 3.21792e-09 | 1.000000 |
| PhCCCH3+H          | 3.10948e-09 | 1.000000 | 3.10957e-09 | 1.000000 |
| rad47              | 3.03871e-09 | 1.000000 | 3.03880e-09 | 1.000000 |
| rad12              | 2.82501e-09 | 1.000000 | 2.82509e-09 | 1.000000 |
| rad35              | 2.64219e-09 | 1.000000 | 2.64227e-09 | 1.000000 |
| PAH3+H             | 2.45975e-09 | 1.000000 | 2.45983e-09 | 1.000000 |
| rad70              | 2.40139e-09 | 1.000000 | 2.40146e-09 | 1.000000 |
| rad51              | 2.28633e-09 | 1.000000 | 2.28640e-09 | 1.000000 |
| rad26              | 1.46479e-09 | 1.000000 | 1.46483e-09 | 1.000000 |
| rad1               | 1.04063e-09 | 1.000000 | 1.04066e-09 | 1.000000 |
| rad8               | 8.42212e-10 | 1.000000 | 8.42236e-10 | 1.000000 |
| PAH1+H             | 8.11832e-10 | 1.000000 | 8.11857e-10 | 1.000000 |
| rad67              | 7.41748e-10 | 1.000000 | 7.41770e-10 | 1.000000 |
| rad52              | 6.38399e-10 | 1.000000 | 6.38418e-10 | 1.000000 |
| rad34              | 6.14929e-10 | 1.000000 | 6.14948e-10 | 1.000000 |
| rad55              | 5.77223e-10 | 1.000000 | 5.77240e-10 | 1.000000 |
| rad10              | 5.07680e-10 | 1.000000 | 5.07695e-10 | 1.000000 |
| rad59              | 2.45898e-10 | 1.000000 | 2.45905e-10 | 1.000000 |
| rad60syn           | 2.34399e-10 | 1.000000 | 2.34406e-10 | 1.000000 |
| rad56              | 2.30098e-10 | 1.000000 | 2.30105e-10 | 1.000000 |
| PAH10+CH3          | 2.09051e-10 | 1.000000 | 2.09057e-10 | 1.000000 |
| rad53              | 2.00828e-10 | 1.000000 | 2.00834e-10 | 1.000000 |
| PAH8+H             | 1.59703e-10 | 1.000000 | 1.59708e-10 | 1.000000 |
| rad60anti          | 1.43795e-10 | 1.000000 | 1.43799e-10 | 1.000000 |
| rad14              | 9.09079e-11 | 1.000000 | 9.09103e-11 | 1.000000 |
| rad37              | 9.00527e-11 | 1.000000 | 9.00559e-11 | 1.000000 |
| rad62              | 6.06394e-11 | 1.000000 | 6.06412e-11 | 1.000000 |
| rad68syn           | 4.91051e-11 | 1.000000 | 4.91065e-11 | 1.000000 |
| rad31              | 4.85805e-11 | 1.000000 | 4.85820e-11 | 1.000000 |
| rad71              | 4.34633e-11 | 1.000000 | 4.34645e-11 | 1.000000 |
| rad73              | 3.41014e-11 | 1.000000 | 3.41024e-11 | 1.000000 |
| rad68anti          | 3.19318e-11 | 1.000000 | 3.19328e-11 | 1.000000 |
| rad65              | 2.60667e-11 | 1.000000 | 2.60675e-11 | 1.000000 |
| rad58              | 2.25908e-11 | 1.000000 | 2.25915e-11 | 1.000000 |
| rad40syn           | 1.86850e-11 | 1.000000 | 1.86855e-11 | 1.000000 |

|           |             |          |             |         |
|-----------|-------------|----------|-------------|---------|
| rad64     | 1.53316e-11 | 1.000000 | 1.53320e-11 | 1.00000 |
| rad40anti | 1.10831e-11 | 1.000000 | 1.10834e-11 | 1.00000 |
| rad42     | 5.71798e-12 | 1.000000 | 5.71815e-12 | 1.00000 |
| rad5      | 4.47489e-12 | 1.000000 | 4.47502e-12 | 1.00000 |
| rad43     | 2.79097e-12 | 1.000000 | 2.79106e-12 | 1.00000 |
| rad27     | 1.95402e-12 | 1.000000 | 1.95408e-12 | 1.00000 |
| rad72     | 1.27973e-12 | 1.000000 | 1.27977e-12 | 1.00000 |
| rad61     | 4.43515e-13 | 1.000000 | 4.43528e-13 | 1.00000 |
| rad41     | 2.53803e-13 | 1.000000 | 2.53810e-13 | 1.00000 |

100000000. Pa, 800.000000 K

| Rate constant      | True (fraction)      | Effective (fraction) |
|--------------------|----------------------|----------------------|
| Total              | 2.75392e-13 (1.00 )  | 2.75313e-13 (1.00 )  |
| Formation of rad11 | 1.06471e-13 (0.387 ) | 1.06430e-13 (0.387 ) |
| Formation of rad6  | 9.97133e-14 (0.362 ) | 9.96751e-14 (0.362 ) |
| H-abstraction      | 6.92082e-14 (0.251 ) | 6.92082e-14 (0.251 ) |

| species            | PYtrue      | Cumul    | PYeffective | Cumul    |
|--------------------|-------------|----------|-------------|----------|
| rad11              | 0.379430    | 0.379430 | 0.379538    | 0.379538 |
| rad6               | 0.367219    | 0.746649 | 0.367325    | 0.746863 |
| Benzene+2-propynyl | 0.251308    | 0.997957 | 0.251380    | 0.998243 |
| rad21              | 0.000561501 | 0.998518 | 0.000561662 | 0.998805 |
| Phenyl+Allene      | 0.000286710 | 0.998805 | 0.000000    | 0.998805 |
| C2H2+PhCH2         | 0.000247849 | 0.999053 | 0.000247920 | 0.999053 |
| PhCHCCH2+H         | 0.000234595 | 0.999287 | 0.000234662 | 0.999287 |
| PhCH2CCH+H         | 0.000216797 | 0.999504 | 0.000216859 | 0.999504 |
| rad22              | 0.000134239 | 0.999639 | 0.000134278 | 0.999638 |
| rad20              | 0.000102089 | 0.999741 | 0.000102119 | 0.999740 |
| rad45              | 7.81545e-05 | 0.999819 | 7.81769e-05 | 0.999819 |
| Indene+H           | 4.50615e-05 | 0.999864 | 4.50745e-05 | 0.999864 |
| rad9               | 2.71673e-05 | 0.999891 | 2.71751e-05 | 0.999891 |
| rad7               | 2.70676e-05 | 0.999918 | 2.70754e-05 | 0.999918 |
| rad13              | 2.22032e-05 | 0.999940 | 2.22096e-05 | 0.999940 |
| rad25              | 1.61184e-05 | 0.999956 | 1.61230e-05 | 0.999956 |
| rad23              | 1.14508e-05 | 0.999968 | 1.14540e-05 | 0.999968 |
| rad18              | 9.43300e-06 | 0.999977 | 9.43568e-06 | 0.999977 |
| rad36              | 9.23197e-06 | 0.999986 | 9.23460e-06 | 0.999986 |
| rad24              | 7.31106e-06 | 0.999994 | 7.31315e-06 | 0.999994 |
| PhCCH+CH3          | 1.91619e-06 | 0.999996 | 1.91674e-06 | 0.999996 |
| PAH7+H             | 1.12119e-06 | 0.999997 | 1.12151e-06 | 0.999997 |
| rad28              | 6.74030e-07 | 0.999998 | 6.74223e-07 | 0.999997 |
| rad33              | 6.43794e-07 | 0.999998 | 6.43979e-07 | 0.999998 |
| Ph+MeAc            | 3.66315e-07 | 0.999999 | 3.66420e-07 | 0.999998 |
| rad19anti          | 1.86032e-07 | 0.999999 | 1.86086e-07 | 0.999999 |
| rad15              | 1.76181e-07 | 0.999999 | 1.76231e-07 | 0.999999 |
| PAH9+H             | 1.33656e-07 | 0.999999 | 1.33694e-07 | 0.999999 |
| rad38              | 1.23816e-07 | 0.999999 | 1.23851e-07 | 0.999999 |
| rad12              | 1.14141e-07 | 0.999999 | 1.14174e-07 | 0.999999 |
| rad3               | 7.59930e-08 | 0.999999 | 7.60141e-08 | 0.999999 |
| rad30              | 6.82375e-08 | 0.999999 | 6.82570e-08 | 0.999999 |
| rad39              | 6.72528e-08 | 0.999999 | 6.72721e-08 | 0.999999 |
| rad19syn           | 6.66809e-08 | 1.000000 | 6.67000e-08 | 0.999999 |
| rad4               | 6.46610e-08 | 1.000000 | 6.46794e-08 | 1.000000 |
| PAH3+H             | 6.38279e-08 | 1.000000 | 6.38462e-08 | 1.000000 |
| rad50              | 5.37007e-08 | 1.000000 | 5.37161e-08 | 1.000000 |
| PhcycC3H3_A+H      | 5.13552e-08 | 1.000000 | 5.13699e-08 | 1.000000 |
| rad46              | 4.68693e-08 | 1.000000 | 4.68828e-08 | 1.000000 |
| rad54              | 3.96975e-08 | 1.000000 | 3.97088e-08 | 1.000000 |
| rad70              | 3.02655e-08 | 1.000000 | 3.02742e-08 | 1.000000 |
| rad47              | 2.77948e-08 | 1.000000 | 2.78027e-08 | 1.000000 |
| rad35              | 2.74828e-08 | 1.000000 | 2.74907e-08 | 1.000000 |
| rad2               | 2.63549e-08 | 1.000000 | 2.63624e-08 | 1.000000 |
| PhCCCH3+H          | 2.25480e-08 | 1.000000 | 2.25545e-08 | 1.000000 |
| rad51              | 1.74677e-08 | 1.000000 | 1.74728e-08 | 1.000000 |
| rad26              | 1.65966e-08 | 1.000000 | 1.66014e-08 | 1.000000 |
| rad8               | 1.49072e-08 | 1.000000 | 1.49115e-08 | 1.000000 |
| rad67              | 1.26125e-08 | 1.000000 | 1.26161e-08 | 1.000000 |
| rad1               | 8.88743e-09 | 1.000000 | 8.88994e-09 | 1.000000 |
| rad34              | 6.86613e-09 | 1.000000 | 6.86810e-09 | 1.000000 |
| rad59              | 6.36246e-09 | 1.000000 | 6.36428e-09 | 1.000000 |
| rad60syn           | 5.80284e-09 | 1.000000 | 5.80451e-09 | 1.000000 |
| PAH1+H             | 5.37146e-09 | 1.000000 | 5.37300e-09 | 1.000000 |
| rad52              | 4.85733e-09 | 1.000000 | 4.85872e-09 | 1.000000 |
| rad10              | 4.16191e-09 | 1.000000 | 4.16310e-09 | 1.000000 |
| rad60anti          | 3.58217e-09 | 1.000000 | 3.58320e-09 | 1.000000 |
| rad55              | 3.14295e-09 | 1.000000 | 3.14385e-09 | 1.000000 |
| PAH10+CH3          | 2.59905e-09 | 1.000000 | 2.59979e-09 | 1.000000 |

|           |             |         |             |         |
|-----------|-------------|---------|-------------|---------|
| rad56     | 1.28873e-09 | 1.00000 | 1.28910e-09 | 1.00000 |
| PAH8+H    | 1.13619e-09 | 1.00000 | 1.13652e-09 | 1.00000 |
| rad53     | 1.11399e-09 | 1.00000 | 1.11431e-09 | 1.00000 |
| rad37     | 1.10823e-09 | 1.00000 | 1.10854e-09 | 1.00000 |
| rad58     | 5.72375e-10 | 1.00000 | 5.72539e-10 | 1.00000 |
| rad31     | 5.42643e-10 | 1.00000 | 5.42798e-10 | 1.00000 |
| rad14     | 4.49543e-10 | 1.00000 | 4.49672e-10 | 1.00000 |
| rad68syn  | 4.01843e-10 | 1.00000 | 4.01958e-10 | 1.00000 |
| rad62     | 3.48469e-10 | 1.00000 | 3.48569e-10 | 1.00000 |
| rad71     | 3.31859e-10 | 1.00000 | 3.31954e-10 | 1.00000 |
| rad68anti | 2.62139e-10 | 1.00000 | 2.62214e-10 | 1.00000 |
| rad73     | 2.58377e-10 | 1.00000 | 2.58451e-10 | 1.00000 |
| rad65     | 2.20073e-10 | 1.00000 | 2.20136e-10 | 1.00000 |
| rad40syn  | 1.39504e-10 | 1.00000 | 1.39544e-10 | 1.00000 |
| rad64     | 1.01987e-10 | 1.00000 | 1.02016e-10 | 1.00000 |
| rad40anti | 8.10182e-11 | 1.00000 | 8.10419e-11 | 1.00000 |
| rad5      | 4.62371e-11 | 1.00000 | 4.62504e-11 | 1.00000 |
| rad42     | 3.34690e-11 | 1.00000 | 3.34787e-11 | 1.00000 |
| rad43     | 2.02514e-11 | 1.00000 | 2.02572e-11 | 1.00000 |
| rad27     | 1.42403e-11 | 1.00000 | 1.42444e-11 | 1.00000 |
| rad72     | 9.92788e-12 | 1.00000 | 9.93075e-12 | 1.00000 |
| rad61     | 5.58703e-12 | 1.00000 | 5.58863e-12 | 1.00000 |
| rad41     | 1.86812e-12 | 1.00000 | 1.86866e-12 | 1.00000 |

100000000. Pa, 900.000000 K

| Rate constant      | True (fraction)      | Effective (fraction) |
|--------------------|----------------------|----------------------|
| Total              | 4.88072e-13 (1.00 )  | 4.86719e-13 (1.00 )  |
| Formation of rad11 | 1.74945e-13 (0.358 ) | 1.74272e-13 (0.358 ) |
| Formation of rad6  | 1.76509e-13 (0.362 ) | 1.75829e-13 (0.361 ) |
| H-abstraction      | 1.36618e-13 (0.280 ) | 1.36618e-13 (0.281 ) |

| species            | PYtrue      | Cumul    | PYeffective | Cumul    |
|--------------------|-------------|----------|-------------|----------|
| rad6               | 0.378300    | 0.378300 | 0.379352    | 0.379352 |
| rad11              | 0.329071    | 0.707371 | 0.329986    | 0.709337 |
| Benzene+2-propynyl | 0.279914    | 0.987285 | 0.280692    | 0.990029 |
| Phenyl+Allene      | 0.00277186  | 0.990057 | 0.000000    | 0.990029 |
| PhCH2CCH+H         | 0.00252610  | 0.992583 | 0.00253312  | 0.992562 |
| PhCHCCH2+H         | 0.00203716  | 0.994620 | 0.00204282  | 0.994605 |
| rad21              | 0.00158911  | 0.996209 | 0.00159353  | 0.996198 |
| C2H2+PhCH2         | 0.00158292  | 0.997792 | 0.00158732  | 0.997786 |
| rad45              | 0.000443686 | 0.998236 | 0.000444919 | 0.998231 |
| Indene+H           | 0.000408727 | 0.998644 | 0.000409863 | 0.998641 |
| rad22              | 0.000403554 | 0.999048 | 0.000404676 | 0.999045 |
| rad9               | 0.000259072 | 0.999307 | 0.000259793 | 0.999305 |
| rad20              | 0.000256948 | 0.999564 | 0.000257663 | 0.999563 |
| rad7               | 0.000106361 | 0.999670 | 0.000106657 | 0.999669 |
| rad23              | 7.19546e-05 | 0.999742 | 7.21545e-05 | 0.999741 |
| rad13              | 5.62411e-05 | 0.999798 | 5.63974e-05 | 0.999798 |
| rad25              | 5.45243e-05 | 0.999853 | 5.46758e-05 | 0.999853 |
| rad36              | 5.00694e-05 | 0.999903 | 5.02086e-05 | 0.999903 |
| rad24              | 3.29599e-05 | 0.999936 | 3.30515e-05 | 0.999936 |
| rad18              | 1.86749e-05 | 0.999955 | 1.87268e-05 | 0.999955 |
| PAH7+H             | 1.34302e-05 | 0.999968 | 1.34675e-05 | 0.999968 |
| PhCCH+CH3          | 1.02213e-05 | 0.999978 | 1.02497e-05 | 0.999978 |
| rad28              | 4.11187e-06 | 0.999982 | 4.12330e-06 | 0.999982 |
| rad33              | 2.67333e-06 | 0.999985 | 2.68075e-06 | 0.999985 |
| rad12              | 2.25676e-06 | 0.999987 | 2.26303e-06 | 0.999987 |
| Ph+MeAc            | 1.98662e-06 | 0.999989 | 1.99215e-06 | 0.999989 |
| rad19anti          | 1.19868e-06 | 0.999991 | 1.20201e-06 | 0.999991 |
| PAH3+H             | 1.03306e-06 | 0.999992 | 1.03593e-06 | 0.999992 |
| PAH9+H             | 1.01592e-06 | 0.999993 | 1.01875e-06 | 0.999993 |
| rad15              | 9.10376e-07 | 0.999993 | 9.12903e-07 | 0.999993 |
| rad30              | 7.06517e-07 | 0.999994 | 7.08481e-07 | 0.999994 |
| rad38              | 6.82974e-07 | 0.999995 | 6.84872e-07 | 0.999995 |
| rad70              | 6.36041e-07 | 0.999996 | 6.37808e-07 | 0.999996 |
| rad3               | 4.36735e-07 | 0.999996 | 4.37949e-07 | 0.999996 |
| rad39              | 4.35235e-07 | 0.999996 | 4.36445e-07 | 0.999996 |
| rad4               | 3.69913e-07 | 0.999997 | 3.70942e-07 | 0.999997 |
| rad19syn           | 3.43223e-07 | 0.999997 | 3.44177e-07 | 0.999997 |
| rad50              | 3.07221e-07 | 0.999997 | 3.08074e-07 | 0.999997 |
| rad8               | 2.73657e-07 | 0.999998 | 2.74418e-07 | 0.999998 |
| rad46              | 2.64865e-07 | 0.999998 | 2.65601e-07 | 0.999998 |
| PhcycC3H3_A+H      | 2.56448e-07 | 0.999998 | 2.57161e-07 | 0.999998 |
| rad35              | 2.39514e-07 | 0.999998 | 2.40181e-07 | 0.999998 |
| rad54              | 2.03258e-07 | 0.999999 | 2.03822e-07 | 0.999999 |
| rad2               | 1.62678e-07 | 0.999999 | 1.63130e-07 | 0.999999 |
| rad47              | 1.61446e-07 | 0.999999 | 1.61895e-07 | 0.999999 |

|           |             |          |             |          |
|-----------|-------------|----------|-------------|----------|
| rad34     | 1.54351e-07 | 0.999999 | 1.54781e-07 | 0.999999 |
| PhCCCH3+H | 1.31196e-07 | 0.999999 | 1.31561e-07 | 0.999999 |
| rad26     | 1.30079e-07 | 0.999999 | 1.30440e-07 | 0.999999 |
| rad51     | 9.80405e-08 | 0.999999 | 9.83129e-08 | 0.999999 |
| rad59     | 9.76012e-08 | 1.000000 | 9.78727e-08 | 1.000000 |
| rad67     | 8.45677e-08 | 1.000000 | 8.48028e-08 | 1.000000 |
| rad60syn  | 7.74496e-08 | 1.000000 | 7.76652e-08 | 1.000000 |
| rad1      | 5.76902e-08 | 1.000000 | 5.78506e-08 | 1.000000 |
| rad60anti | 4.85242e-08 | 1.000000 | 4.86591e-08 | 1.000000 |
| PAH1+H    | 3.76249e-08 | 1.000000 | 3.77294e-08 | 1.000000 |
| rad10     | 2.94769e-08 | 1.000000 | 2.95588e-08 | 1.000000 |
| PAH8+H    | 2.82688e-08 | 1.000000 | 2.83474e-08 | 1.000000 |
| PAH10+CH3 | 2.81601e-08 | 1.000000 | 2.82384e-08 | 1.000000 |
| rad52     | 2.71818e-08 | 1.000000 | 2.72574e-08 | 1.000000 |
| rad55     | 1.60206e-08 | 1.000000 | 1.60650e-08 | 1.000000 |
| rad37     | 1.16657e-08 | 1.000000 | 1.16981e-08 | 1.000000 |
| rad58     | 1.12502e-08 | 1.000000 | 1.12814e-08 | 1.000000 |
| rad68syn  | 1.00409e-08 | 1.000000 | 1.00687e-08 | 1.000000 |
| rad68anti | 6.54719e-09 | 1.000000 | 6.56539e-09 | 1.000000 |
| rad56     | 6.46569e-09 | 1.000000 | 6.48366e-09 | 1.000000 |
| rad53     | 5.60865e-09 | 1.000000 | 5.62424e-09 | 1.000000 |
| rad31     | 3.53343e-09 | 1.000000 | 3.54325e-09 | 1.000000 |
| rad40syn  | 3.49532e-09 | 1.000000 | 3.50504e-09 | 1.000000 |
| rad14     | 2.70675e-09 | 1.000000 | 2.71427e-09 | 1.000000 |
| rad40anti | 2.02386e-09 | 1.000000 | 2.02949e-09 | 1.000000 |
| rad71     | 1.95105e-09 | 1.000000 | 1.95648e-09 | 1.000000 |
| rad62     | 1.94122e-09 | 1.000000 | 1.94661e-09 | 1.000000 |
| rad65     | 1.66291e-09 | 1.000000 | 1.66753e-09 | 1.000000 |
| rad73     | 1.50819e-09 | 1.000000 | 1.51238e-09 | 1.000000 |
| rad64     | 7.18949e-10 | 1.000000 | 7.20948e-10 | 1.000000 |
| rad5      | 2.76052e-10 | 1.000000 | 2.76819e-10 | 1.000000 |
| rad42     | 1.88335e-10 | 1.000000 | 1.88859e-10 | 1.000000 |
| rad43     | 1.21710e-10 | 1.000000 | 1.22049e-10 | 1.000000 |
| rad27     | 1.18601e-10 | 1.000000 | 1.18930e-10 | 1.000000 |
| rad61     | 6.21680e-11 | 1.000000 | 6.23409e-11 | 1.000000 |
| rad72     | 5.91297e-11 | 1.000000 | 5.92941e-11 | 1.000000 |
| rad41     | 1.13136e-11 | 1.000000 | 1.13451e-11 | 1.000000 |

100000000. Pa, 1000.00000 K

| Rate constant      | True (fraction)      | Effective (fraction) |
|--------------------|----------------------|----------------------|
| Total              | 7.98668e-13 (1.00 )  | 7.88904e-13 (1.00 )  |
| Formation of rad11 | 2.67704e-13 (0.335 ) | 2.62992e-13 (0.333 ) |
| Formation of rad6  | 2.87049e-13 (0.359 ) | 2.81997e-13 (0.357 ) |
| H-abstraction      | 2.43915e-13 (0.305 ) | 2.43915e-13 (0.309 ) |

| species            | PYtrue      | Cumul    | PYeffective | Cumul    |
|--------------------|-------------|----------|-------------|----------|
| rad6               | 0.392353    | 0.392353 | 0.397208    | 0.397208 |
| Benzene+2-propynyl | 0.305402    | 0.697755 | 0.309181    | 0.706390 |
| rad11              | 0.255779    | 0.953534 | 0.258945    | 0.965335 |
| PhCH2CCH+H         | 0.0122711   | 0.965805 | 0.0124230   | 0.977758 |
| Phenyl+Allene      | 0.0122244   | 0.978030 | 0.000000    | 0.977758 |
| PhCHCCH2+H         | 0.00817070  | 0.986200 | 0.00827179  | 0.986030 |
| C2H2+PhCH2         | 0.00446454  | 0.990665 | 0.00451979  | 0.990549 |
| rad21              | 0.00338059  | 0.994046 | 0.00342243  | 0.993972 |
| Indene+H           | 0.00131122  | 0.995357 | 0.00132745  | 0.995299 |
| rad45              | 0.00119128  | 0.996548 | 0.00120603  | 0.996505 |
| rad9               | 0.00105573  | 0.997604 | 0.00106880  | 0.997574 |
| rad22              | 0.000605112 | 0.998209 | 0.000612601 | 0.998187 |
| rad20              | 0.000510044 | 0.998719 | 0.000516356 | 0.998703 |
| rad7               | 0.000332926 | 0.999052 | 0.000337046 | 0.999040 |
| rad23              | 0.000185806 | 0.999238 | 0.000188105 | 0.999228 |
| rad13              | 0.000177525 | 0.999415 | 0.000179722 | 0.999408 |
| rad36              | 0.000127380 | 0.999543 | 0.000128956 | 0.999537 |
| rad25              | 0.000122317 | 0.999665 | 0.000123831 | 0.999661 |
| rad24              | 0.000100949 | 0.999766 | 0.000102198 | 0.999763 |
| PAH7+H             | 6.64580e-05 | 0.999832 | 6.72805e-05 | 0.999830 |
| PhCCH+CH3          | 4.97934e-05 | 0.999882 | 5.04097e-05 | 0.999881 |
| rad18              | 2.28684e-05 | 0.999905 | 2.31514e-05 | 0.999904 |
| rad28              | 1.69833e-05 | 0.999922 | 1.71934e-05 | 0.999921 |
| rad33              | 1.36498e-05 | 0.999936 | 1.38188e-05 | 0.999935 |
| rad12              | 1.05136e-05 | 0.999946 | 1.06437e-05 | 0.999945 |
| Ph+MeAc            | 9.25559e-06 | 0.999955 | 9.37012e-06 | 0.999955 |
| PAH3+H             | 4.44338e-06 | 0.999960 | 4.49837e-06 | 0.999959 |
| rad70              | 4.26887e-06 | 0.999964 | 4.32171e-06 | 0.999964 |
| PAH9+H             | 3.62879e-06 | 0.999968 | 3.67370e-06 | 0.999967 |
| rad8               | 3.49006e-06 | 0.999971 | 3.53325e-06 | 0.999971 |
| rad19anti          | 3.22419e-06 | 0.999974 | 3.26408e-06 | 0.999974 |

|               |             |          |             |          |
|---------------|-------------|----------|-------------|----------|
| rad30         | 2.47308e-06 | 0.999977 | 2.50369e-06 | 0.999976 |
| rad15         | 2.37471e-06 | 0.999979 | 2.40410e-06 | 0.999979 |
| rad3          | 2.11284e-06 | 0.999981 | 2.13898e-06 | 0.999981 |
| rad19syn      | 1.90545e-06 | 0.999983 | 1.92903e-06 | 0.999983 |
| rad39         | 1.89380e-06 | 0.999985 | 1.91724e-06 | 0.999985 |
| rad38         | 1.84769e-06 | 0.999987 | 1.87056e-06 | 0.999987 |
| rad4          | 1.74622e-06 | 0.999989 | 1.76783e-06 | 0.999989 |
| PhcycC3H3_A+H | 1.43534e-06 | 0.999990 | 1.45310e-06 | 0.999990 |
| rad34         | 1.12680e-06 | 0.999991 | 1.14074e-06 | 0.999991 |
| rad54         | 1.03183e-06 | 0.999992 | 1.04459e-06 | 0.999992 |
| rad35         | 8.73103e-07 | 0.999993 | 8.83909e-07 | 0.999993 |
| rad50         | 8.52091e-07 | 0.999994 | 8.62639e-07 | 0.999994 |
| rad46         | 7.29495e-07 | 0.999995 | 7.38520e-07 | 0.999995 |
| rad2          | 6.77279e-07 | 0.999995 | 6.85661e-07 | 0.999995 |
| PhCCCH3+H     | 5.02419e-07 | 0.999996 | 5.08637e-07 | 0.999996 |
| rad47         | 4.31587e-07 | 0.999996 | 4.36929e-07 | 0.999996 |
| rad26         | 4.14424e-07 | 0.999997 | 4.19553e-07 | 0.999997 |
| rad59         | 4.09675e-07 | 0.999997 | 4.14745e-07 | 0.999997 |
| rad60syn      | 3.05661e-07 | 0.999998 | 3.09444e-07 | 0.999997 |
| PAH8+H        | 2.96878e-07 | 0.999998 | 3.00552e-07 | 0.999998 |
| rad51         | 2.67353e-07 | 0.999998 | 2.70662e-07 | 0.999998 |
| rad67         | 2.34794e-07 | 0.999998 | 2.37700e-07 | 0.999998 |
| rad1          | 2.20896e-07 | 0.999999 | 2.23630e-07 | 0.999998 |
| rad60anti     | 1.92789e-07 | 0.999999 | 1.95175e-07 | 0.999999 |
| PAH1+H        | 1.86779e-07 | 0.999999 | 1.89090e-07 | 0.999999 |
| PAH10+CH3     | 1.12971e-07 | 0.999999 | 1.14369e-07 | 0.999999 |
| rad10         | 1.00691e-07 | 0.999999 | 1.01937e-07 | 0.999999 |
| rad68syn      | 9.19710e-08 | 0.999999 | 9.31092e-08 | 0.999999 |
| rad55         | 8.15826e-08 | 0.999999 | 8.25929e-08 | 0.999999 |
| rad52         | 7.40157e-08 | 0.999999 | 7.49317e-08 | 0.999999 |
| rad68anti     | 5.98100e-08 | 0.999999 | 6.05502e-08 | 0.999999 |
| rad58         | 5.25833e-08 | 1.000000 | 5.32340e-08 | 0.999999 |
| rad37         | 4.57555e-08 | 1.000000 | 4.63218e-08 | 0.999999 |
| rad40syn      | 3.48220e-08 | 1.000000 | 3.52530e-08 | 0.999999 |
| rad56         | 3.33174e-08 | 1.000000 | 3.37298e-08 | 1.000000 |
| rad53         | 2.88132e-08 | 1.000000 | 2.91697e-08 | 1.000000 |
| rad40anti     | 2.06062e-08 | 1.000000 | 2.08612e-08 | 1.000000 |
| rad14         | 2.02219e-08 | 1.000000 | 2.04722e-08 | 1.000000 |
| rad31         | 1.74454e-08 | 1.000000 | 1.76613e-08 | 1.000000 |
| rad62         | 9.37978e-09 | 1.000000 | 9.49585e-09 | 1.000000 |
| rad65         | 6.06047e-09 | 1.000000 | 6.13548e-09 | 1.000000 |
| rad71         | 5.52792e-09 | 1.000000 | 5.59633e-09 | 1.000000 |
| rad73         | 4.25526e-09 | 1.000000 | 4.30792e-09 | 1.000000 |
| rad64         | 3.58351e-09 | 1.000000 | 3.62785e-09 | 1.000000 |
| rad27         | 9.90552e-10 | 1.000000 | 1.00281e-09 | 1.000000 |
| rad42         | 9.14390e-10 | 1.000000 | 9.25711e-10 | 1.000000 |
| rad5          | 7.43706e-10 | 1.000000 | 7.52909e-10 | 1.000000 |
| rad43         | 4.60220e-10 | 1.000000 | 4.65915e-10 | 1.000000 |
| rad61         | 2.54881e-10 | 1.000000 | 2.58036e-10 | 1.000000 |
| rad72         | 1.68784e-10 | 1.000000 | 1.70873e-10 | 1.000000 |
| rad41         | 4.27313e-11 | 1.000000 | 4.32602e-11 | 1.000000 |

100000000. Pa, 1100.00000 K

=====

| Rate constant      | True (fraction)      | Effective (fraction) |
|--------------------|----------------------|----------------------|
| Total              | 1.22919e-12 (1.00 )  | 1.19882e-12 (1.00 )  |
| Formation of rad11 | 3.87976e-13 (0.316 ) | 3.73705e-13 (0.312 ) |
| Formation of rad6  | 4.37724e-13 (0.356 ) | 4.21623e-13 (0.352 ) |
| H-abstraction      | 4.03491e-13 (0.328 ) | 4.03491e-13 (0.337 ) |

| species            | PYtrue      | Cumul    | PYeffective | Cumul    |
|--------------------|-------------|----------|-------------|----------|
| rad6               | 0.391330    | 0.391330 | 0.401245    | 0.401245 |
| Benzene+2-propynyl | 0.328257    | 0.719588 | 0.336574    | 0.737819 |
| rad11              | 0.194539    | 0.914127 | 0.199468    | 0.937287 |
| PhCH2CCH+H         | 0.0256048   | 0.939732 | 0.0262534   | 0.963540 |
| Phenyl+Allene      | 0.0247095   | 0.964441 | 0.000000    | 0.963540 |
| PhCHCCH2+H         | 0.0151284   | 0.979570 | 0.0155117   | 0.979052 |
| C2H2+PhCH2         | 0.00609951  | 0.985669 | 0.00625405  | 0.985306 |
| rad21              | 0.00510289  | 0.990772 | 0.00523218  | 0.990538 |
| rad9               | 0.00189127  | 0.992663 | 0.00193919  | 0.992478 |
| Indene+H           | 0.00180994  | 0.994473 | 0.00185580  | 0.994333 |
| rad45              | 0.00153540  | 0.996009 | 0.00157430  | 0.995908 |
| rad20              | 0.000794927 | 0.996804 | 0.000815065 | 0.996723 |
| rad7               | 0.000743787 | 0.997547 | 0.000762628 | 0.997485 |
| rad22              | 0.000578131 | 0.998126 | 0.000592778 | 0.998078 |
| rad13              | 0.000558745 | 0.998684 | 0.000572901 | 0.998651 |
| rad23              | 0.000225744 | 0.998910 | 0.000231463 | 0.998882 |
| rad25              | 0.000203245 | 0.999113 | 0.000208394 | 0.999091 |



|               |             |          |             |          |
|---------------|-------------|----------|-------------|----------|
| rad24         | 0.000160864 | 0.999274 | 0.000164940 | 0.999256 |
| rad36         | 0.000159710 | 0.999434 | 0.000163755 | 0.999420 |
| PhCCH+CH3     | 0.000158414 | 0.999592 | 0.000162428 | 0.999582 |
| PAH7+H        | 0.000136623 | 0.999729 | 0.000140084 | 0.999722 |
| rad33         | 5.51436e-05 | 0.999784 | 5.65407e-05 | 0.999779 |
| rad28         | 4.03775e-05 | 0.999824 | 4.14005e-05 | 0.999820 |
| Ph+MeAc       | 2.86782e-05 | 0.999853 | 2.94048e-05 | 0.999849 |
| rad18         | 2.73966e-05 | 0.999881 | 2.80907e-05 | 0.999878 |
| rad12         | 1.92898e-05 | 0.999900 | 1.97785e-05 | 0.999897 |
| rad8          | 1.40771e-05 | 0.999914 | 1.44338e-05 | 0.999912 |
| rad70         | 8.68342e-06 | 0.999923 | 8.90338e-06 | 0.999921 |
| rad19syn      | 7.73169e-06 | 0.999930 | 7.92754e-06 | 0.999929 |
| PAH3+H        | 7.01393e-06 | 0.999937 | 7.19161e-06 | 0.999936 |
| rad3          | 6.20702e-06 | 0.999944 | 6.36428e-06 | 0.999942 |
| PhcycC3H3_A+H | 6.13264e-06 | 0.999950 | 6.28801e-06 | 0.999948 |
| PAH9+H        | 5.64817e-06 | 0.999955 | 5.79127e-06 | 0.999954 |
| rad39         | 5.52570e-06 | 0.999961 | 5.66570e-06 | 0.999960 |
| rad4          | 5.06174e-06 | 0.999966 | 5.18998e-06 | 0.999965 |
| rad19anti     | 4.82200e-06 | 0.999971 | 4.94416e-06 | 0.999970 |
| rad15         | 3.80275e-06 | 0.999975 | 3.89909e-06 | 0.999974 |
| rad30         | 3.60365e-06 | 0.999978 | 3.69495e-06 | 0.999978 |
| rad54         | 3.23734e-06 | 0.999981 | 3.31936e-06 | 0.999981 |
| rad38         | 2.48509e-06 | 0.999984 | 2.54805e-06 | 0.999983 |
| rad34         | 2.36897e-06 | 0.999986 | 2.42900e-06 | 0.999986 |
| rad2          | 1.82060e-06 | 0.999988 | 1.86673e-06 | 0.999988 |
| rad35         | 1.35601e-06 | 0.999989 | 1.39036e-06 | 0.999989 |
| PhCCCH3+H     | 1.30397e-06 | 0.999991 | 1.33701e-06 | 0.999990 |
| rad50         | 1.15510e-06 | 0.999992 | 1.18437e-06 | 0.999992 |
| rad46         | 9.85850e-07 | 0.999993 | 1.01082e-06 | 0.999993 |
| rad26         | 7.36331e-07 | 0.999994 | 7.54986e-07 | 0.999993 |
| PAH8+H        | 7.16535e-07 | 0.999994 | 7.34691e-07 | 0.999994 |
| rad59         | 6.40461e-07 | 0.999995 | 6.56688e-07 | 0.999995 |
| PAH1+H        | 6.34755e-07 | 0.999996 | 6.50836e-07 | 0.999995 |
| rad47         | 5.55782e-07 | 0.999996 | 5.69863e-07 | 0.999996 |
| rad1          | 5.44341e-07 | 0.999997 | 5.58132e-07 | 0.999997 |
| rad60syn      | 4.66659e-07 | 0.999997 | 4.78482e-07 | 0.999997 |
| rad51         | 3.60019e-07 | 0.999998 | 3.69140e-07 | 0.999997 |
| rad67         | 3.58474e-07 | 0.999998 | 3.67556e-07 | 0.999998 |
| rad60anti     | 2.95095e-07 | 0.999998 | 3.02571e-07 | 0.999998 |
| rad55         | 2.57507e-07 | 0.999998 | 2.64030e-07 | 0.999998 |
| PAH10+CH3     | 2.40805e-07 | 0.999999 | 2.46906e-07 | 0.999999 |
| rad10         | 2.26135e-07 | 0.999999 | 2.31864e-07 | 0.999999 |
| rad68syn      | 2.10776e-07 | 0.999999 | 2.16116e-07 | 0.999999 |
| rad68anti     | 1.36931e-07 | 0.999999 | 1.40400e-07 | 0.999999 |
| rad14         | 1.24750e-07 | 0.999999 | 1.27911e-07 | 0.999999 |
| rad56         | 1.08436e-07 | 0.999999 | 1.11184e-07 | 0.999999 |
| rad52         | 9.96060e-08 | 1.000000 | 1.02130e-07 | 1.000000 |
| rad37         | 9.58725e-08 | 1.000000 | 9.83012e-08 | 1.000000 |
| rad53         | 9.29134e-08 | 1.000000 | 9.52673e-08 | 1.000000 |
| rad58         | 8.57325e-08 | 1.000000 | 8.79046e-08 | 1.000000 |
| rad40syn      | 8.23812e-08 | 1.000000 | 8.44681e-08 | 1.000000 |
| rad31         | 5.26744e-08 | 1.000000 | 5.40089e-08 | 1.000000 |
| rad40anti     | 4.91548e-08 | 1.000000 | 5.04002e-08 | 1.000000 |
| rad62         | 2.74383e-08 | 1.000000 | 2.81335e-08 | 1.000000 |
| rad64         | 1.23417e-08 | 1.000000 | 1.26544e-08 | 1.000000 |
| rad65         | 9.68881e-09 | 1.000000 | 9.93428e-09 | 1.000000 |
| rad71         | 7.63086e-09 | 1.000000 | 7.82418e-09 | 1.000000 |
| rad27         | 6.06860e-09 | 1.000000 | 6.22235e-09 | 1.000000 |
| rad73         | 5.85807e-09 | 1.000000 | 6.00649e-09 | 1.000000 |
| rad42         | 2.68148e-09 | 1.000000 | 2.74942e-09 | 1.000000 |
| rad5          | 1.15988e-09 | 1.000000 | 1.18926e-09 | 1.000000 |
| rad43         | 1.05874e-09 | 1.000000 | 1.08557e-09 | 1.000000 |
| rad61         | 5.52301e-10 | 1.000000 | 5.66294e-10 | 1.000000 |
| rad72         | 2.34104e-10 | 1.000000 | 2.40036e-10 | 1.000000 |
| rad41         | 9.77507e-11 | 1.000000 | 1.00227e-10 | 1.000000 |

100000000. Pa, 1200.00000 K

| Rate constant      | True (fraction)      | Effective (fraction) |
|--------------------|----------------------|----------------------|
| Total              | 1.80237e-12 (1.00 )  | 1.74022e-12 (1.00 )  |
| Formation of rad11 | 5.38789e-13 (0.299 ) | 5.10257e-13 (0.293 ) |
| Formation of rad6  | 6.34764e-13 (0.352 ) | 6.01150e-13 (0.345 ) |
| H-abstraction      | 6.28816e-13 (0.349 ) | 6.28816e-13 (0.361 ) |

  

| species            | PYtrue   | Cumul    | PYeffective | Cumul    |
|--------------------|----------|----------|-------------|----------|
| rad6               | 0.375658 | 0.375658 | 0.389073    | 0.389073 |
| Benzene+2-propynyl | 0.348883 | 0.724541 | 0.361342    | 0.750416 |
| rad11              | 0.163307 | 0.887848 | 0.169139    | 0.919555 |

|               |             |          |             |          |
|---------------|-------------|----------|-------------|----------|
| Phenyl+Allene | 0.0344806   | 0.922328 | 0.00000     | 0.919555 |
| PhCH2CCH+H    | 0.0339218   | 0.956250 | 0.0351332   | 0.954688 |
| PhCHCCH2+H    | 0.0187978   | 0.975048 | 0.0194692   | 0.974157 |
| C2H2+PhCH2    | 0.00617867  | 0.981227 | 0.00639935  | 0.980556 |
| rad21         | 0.00603196  | 0.987259 | 0.00624738  | 0.986804 |
| rad9          | 0.00229136  | 0.989550 | 0.00237319  | 0.989177 |
| rad7          | 0.00189295  | 0.991443 | 0.00196055  | 0.991137 |
| Indene+H      | 0.00181398  | 0.993257 | 0.00187876  | 0.993016 |
| rad13         | 0.00179102  | 0.995048 | 0.00185498  | 0.994871 |
| rad45         | 0.00148033  | 0.996528 | 0.00153319  | 0.996404 |
| rad20         | 0.000991195 | 0.997519 | 0.00102659  | 0.997431 |
| rad22         | 0.000451908 | 0.997971 | 0.000468047 | 0.997899 |
| PhCCH+CH3     | 0.000409659 | 0.998381 | 0.000424289 | 0.998323 |
| rad25         | 0.000313446 | 0.998694 | 0.000324641 | 0.998648 |
| PAH7+H        | 0.000205314 | 0.998900 | 0.000212646 | 0.998861 |
| rad23         | 0.000202732 | 0.999102 | 0.000209973 | 0.999071 |
| rad33         | 0.000178701 | 0.999281 | 0.000185082 | 0.999256 |
| rad24         | 0.000170354 | 0.999452 | 0.000176438 | 0.999432 |
| rad36         | 0.000152123 | 0.999604 | 0.000157556 | 0.999590 |
| rad28         | 8.23963e-05 | 0.999686 | 8.53387e-05 | 0.999675 |
| Ph+MeAc       | 7.34864e-05 | 0.999760 | 7.61101e-05 | 0.999751 |
| rad18         | 3.67811e-05 | 0.999796 | 3.80946e-05 | 0.999789 |
| rad8          | 2.37032e-05 | 0.999820 | 2.45497e-05 | 0.999814 |
| rad12         | 2.36324e-05 | 0.999844 | 2.44763e-05 | 0.999838 |
| rad19syn      | 2.22828e-05 | 0.999866 | 2.30785e-05 | 0.999861 |
| PhcycC3H3_A+H | 1.81323e-05 | 0.999884 | 1.87799e-05 | 0.999880 |
| rad3          | 1.49250e-05 | 0.999899 | 1.54579e-05 | 0.999896 |
| rad39         | 1.37638e-05 | 0.999913 | 1.42554e-05 | 0.999910 |
| rad4          | 1.21312e-05 | 0.999925 | 1.25644e-05 | 0.999922 |
| rad70         | 9.51132e-06 | 0.999934 | 9.85098e-06 | 0.999932 |
| rad54         | 8.28989e-06 | 0.999943 | 8.58599e-06 | 0.999941 |
| PAH3+H        | 7.40405e-06 | 0.999950 | 7.66843e-06 | 0.999949 |
| PAH9+H        | 6.42351e-06 | 0.999957 | 6.65290e-06 | 0.999955 |
| rad15         | 6.40270e-06 | 0.999963 | 6.63137e-06 | 0.999962 |
| rad19anti     | 5.59096e-06 | 0.999969 | 5.79063e-06 | 0.999968 |
| rad2          | 4.14386e-06 | 0.999973 | 4.29184e-06 | 0.999972 |
| rad30         | 3.64716e-06 | 0.999976 | 3.77740e-06 | 0.999976 |
| PhCCCH3+H     | 2.98837e-06 | 0.999979 | 3.09509e-06 | 0.999979 |
| rad34         | 2.62246e-06 | 0.999982 | 2.71612e-06 | 0.999981 |
| rad38         | 2.54578e-06 | 0.999984 | 2.63669e-06 | 0.999984 |
| PAH1+H        | 1.73267e-06 | 0.999986 | 1.79455e-06 | 0.999986 |
| rad35         | 1.49987e-06 | 0.999988 | 1.55344e-06 | 0.999987 |
| rad26         | 1.21679e-06 | 0.999989 | 1.26024e-06 | 0.999989 |
| rad50         | 1.17831e-06 | 0.999990 | 1.22039e-06 | 0.999990 |
| rad1          | 1.17654e-06 | 0.999991 | 1.21856e-06 | 0.999991 |
| rad46         | 1.00427e-06 | 0.999992 | 1.04013e-06 | 0.999992 |
| PAH8+H        | 8.32381e-07 | 0.999993 | 8.62111e-07 | 0.999993 |
| rad59         | 6.72617e-07 | 0.999994 | 6.96635e-07 | 0.999994 |
| rad55         | 6.61717e-07 | 0.999994 | 6.85350e-07 | 0.999994 |
| rad10         | 5.89372e-07 | 0.999995 | 6.10419e-07 | 0.999995 |
| rad14         | 5.77804e-07 | 0.999996 | 5.98438e-07 | 0.999996 |
| rad47         | 5.37445e-07 | 0.999996 | 5.56638e-07 | 0.999996 |
| rad60syn      | 4.84018e-07 | 0.999997 | 5.01304e-07 | 0.999997 |
| PAH10+CH3     | 4.74963e-07 | 0.999997 | 4.91925e-07 | 0.999997 |
| rad67         | 4.07207e-07 | 0.999998 | 4.21749e-07 | 0.999998 |
| rad51         | 3.66733e-07 | 0.999998 | 3.79829e-07 | 0.999998 |
| rad60anti     | 3.06487e-07 | 0.999998 | 3.17432e-07 | 0.999998 |
| rad56         | 2.83966e-07 | 0.999998 | 2.94107e-07 | 0.999999 |
| rad53         | 2.41895e-07 | 0.999999 | 2.50533e-07 | 0.999999 |
| rad68syn      | 2.40221e-07 | 0.999999 | 2.48799e-07 | 0.999999 |
| rad37         | 1.85653e-07 | 0.999999 | 1.92283e-07 | 0.999999 |
| rad68anti     | 1.56004e-07 | 0.999999 | 1.61575e-07 | 0.999999 |
| rad31         | 1.27686e-07 | 0.999999 | 1.32246e-07 | 1.000000 |
| rad52         | 1.01434e-07 | 1.000000 | 1.05056e-07 | 1.000000 |
| rad40syn      | 9.49869e-08 | 1.000000 | 9.83795e-08 | 1.000000 |
| rad58         | 9.20686e-08 | 1.000000 | 9.53561e-08 | 1.000000 |
| rad62         | 5.85814e-08 | 1.000000 | 6.06734e-08 | 1.000000 |
| rad40anti     | 5.68551e-08 | 1.000000 | 5.88856e-08 | 1.000000 |
| rad64         | 3.40860e-08 | 1.000000 | 3.53033e-08 | 1.000000 |
| rad27         | 2.47135e-08 | 1.000000 | 2.55961e-08 | 1.000000 |
| rad65         | 1.13324e-08 | 1.000000 | 1.17371e-08 | 1.000000 |
| rad71         | 7.91023e-09 | 1.000000 | 8.19270e-09 | 1.000000 |
| rad73         | 6.05990e-09 | 1.000000 | 6.27631e-09 | 1.000000 |
| rad42         | 5.72458e-09 | 1.000000 | 5.92901e-09 | 1.000000 |
| rad43         | 2.03055e-09 | 1.000000 | 2.10307e-09 | 1.000000 |
| rad5          | 1.71729e-09 | 1.000000 | 1.77862e-09 | 1.000000 |
| rad61         | 1.10771e-09 | 1.000000 | 1.14727e-09 | 1.000000 |
| rad72         | 2.43548e-10 | 1.000000 | 2.52246e-10 | 1.000000 |
| rad41         | 1.87145e-10 | 1.000000 | 1.93828e-10 | 1.000000 |

100000000. Pa, 1300.00000 K

| =====              |                 |          |                      |          |
|--------------------|-----------------|----------|----------------------|----------|
| Rate constant      | True (fraction) |          | Effective (fraction) |          |
| -----              |                 |          |                      |          |
| Total              | 2.54148e-12     | (1.00 )  | 2.42841e-12          | (1.00 )  |
| Formation of rad11 | 7.22991e-13     | (0.284 ) | 6.72130e-13          | (0.277 ) |
| Formation of rad6  | 8.84215e-13     | (0.348 ) | 8.22012e-13          | (0.338 ) |
| H-abstraction      | 9.34273e-13     | (0.368 ) | 9.34273e-13          | (0.385 ) |
| -----              |                 |          |                      |          |
| species            | PYtrue          | Cumul    | PYeffective          | Cumul    |
| -----              |                 |          |                      |          |
| Benzene+2-propynyl | 0.367610        | 0.367610 | 0.384726             | 0.384726 |
| rad6               | 0.343477        | 0.711087 | 0.359469             | 0.744194 |
| rad11              | 0.157633        | 0.868720 | 0.164973             | 0.909167 |
| Phenyl+Allene      | 0.0444879       | 0.913208 | 0.000000             | 0.909167 |
| PhCH2CCH+H         | 0.0351981       | 0.948406 | 0.0368369            | 0.946004 |
| PhCHCCH2+H         | 0.0190051       | 0.967411 | 0.0198899            | 0.965894 |
| rad21              | 0.00604458      | 0.973456 | 0.00632601           | 0.972220 |
| rad7               | 0.00579632      | 0.979252 | 0.00606619           | 0.978286 |
| C2H2+PhCH2         | 0.00566415      | 0.984916 | 0.00592787           | 0.984214 |
| rad13              | 0.00506480      | 0.989981 | 0.00530061           | 0.989515 |
| rad9               | 0.00228841      | 0.992270 | 0.00239496           | 0.991909 |
| Indene+H           | 0.00164982      | 0.993919 | 0.00172664           | 0.993636 |
| rad45              | 0.00133011      | 0.995250 | 0.00139204           | 0.995028 |
| rad20              | 0.00102724      | 0.996277 | 0.00107506           | 0.996103 |
| PhCCH+CH3          | 0.000993750     | 0.997271 | 0.00104002           | 0.997143 |
| rad33              | 0.000471562     | 0.997742 | 0.000493518          | 0.997637 |
| rad25              | 0.000384378     | 0.998126 | 0.000402274          | 0.998039 |
| PAH7+H             | 0.000343623     | 0.998470 | 0.000359622          | 0.998399 |
| rad22              | 0.000342402     | 0.998813 | 0.000358344          | 0.998757 |
| Ph+MeAc            | 0.000179181     | 0.998992 | 0.000187524          | 0.998945 |
| rad23              | 0.000165617     | 0.999157 | 0.000173328          | 0.999118 |
| rad28              | 0.000155238     | 0.999313 | 0.000162466          | 0.999280 |
| rad24              | 0.000155207     | 0.999468 | 0.000162434          | 0.999443 |
| rad36              | 0.000135961     | 0.999604 | 0.000142291          | 0.999585 |
| rad18              | 5.31468e-05     | 0.999657 | 5.56212e-05          | 0.999641 |
| rad19syn           | 4.89708e-05     | 0.999706 | 5.12508e-05          | 0.999692 |
| PhcycC3H3_A+H      | 4.03712e-05     | 0.999746 | 4.22509e-05          | 0.999734 |
| rad39              | 3.31283e-05     | 0.999779 | 3.46707e-05          | 0.999769 |
| rad3               | 3.30445e-05     | 0.999812 | 3.45830e-05          | 0.999803 |
| rad8               | 2.72506e-05     | 0.999840 | 2.85194e-05          | 0.999832 |
| rad4               | 2.69716e-05     | 0.999867 | 2.82274e-05          | 0.999860 |
| rad12              | 2.37668e-05     | 0.999890 | 2.48733e-05          | 0.999885 |
| rad54              | 2.08883e-05     | 0.999911 | 2.18609e-05          | 0.999907 |
| rad15              | 1.22899e-05     | 0.999924 | 1.28621e-05          | 0.999920 |
| rad2               | 9.03951e-06     | 0.999933 | 9.46040e-06          | 0.999929 |
| rad70              | 8.48003e-06     | 0.999941 | 8.87484e-06          | 0.999938 |
| PhCCCH3+H          | 6.72724e-06     | 0.999948 | 7.04046e-06          | 0.999945 |
| PAH9+H             | 6.71352e-06     | 0.999955 | 7.02613e-06          | 0.999952 |
| PAH3+H             | 6.44532e-06     | 0.999961 | 6.74544e-06          | 0.999959 |
| rad19anti          | 5.65250e-06     | 0.999967 | 5.91568e-06          | 0.999965 |
| PAH1+H             | 4.47336e-06     | 0.999971 | 4.68164e-06          | 0.999970 |
| rad30              | 3.11303e-06     | 0.999974 | 3.25797e-06          | 0.999973 |
| rad1               | 2.49991e-06     | 0.999977 | 2.61631e-06          | 0.999975 |
| rad38              | 2.46432e-06     | 0.999979 | 2.57906e-06          | 0.999978 |
| rad34              | 2.35146e-06     | 0.999982 | 2.46094e-06          | 0.999980 |
| rad26              | 2.31917e-06     | 0.999984 | 2.42715e-06          | 0.999983 |
| rad14              | 1.91537e-06     | 0.999986 | 2.00455e-06          | 0.999985 |
| rad10              | 1.75455e-06     | 0.999987 | 1.83624e-06          | 0.999987 |
| rad55              | 1.67525e-06     | 0.999989 | 1.75325e-06          | 0.999988 |
| rad35              | 1.46388e-06     | 0.999991 | 1.53204e-06          | 0.999990 |
| rad50              | 1.11945e-06     | 0.999992 | 1.17157e-06          | 0.999991 |
| PAH10+CH3          | 1.00307e-06     | 0.999993 | 1.04977e-06          | 0.999992 |
| rad46              | 9.53505e-07     | 0.999994 | 9.97901e-07          | 0.999993 |
| PAH8+H             | 7.67684e-07     | 0.999994 | 8.03425e-07          | 0.999994 |
| rad56              | 7.35514e-07     | 0.999995 | 7.69758e-07          | 0.999995 |
| rad53              | 6.22388e-07     | 0.999996 | 6.51366e-07          | 0.999995 |
| rad59              | 5.84006e-07     | 0.999996 | 6.11196e-07          | 0.999996 |
| rad47              | 4.84925e-07     | 0.999997 | 5.07503e-07          | 0.999997 |
| rad60syn           | 4.17756e-07     | 0.999997 | 4.37207e-07          | 0.999997 |
| rad37              | 3.84056e-07     | 0.999998 | 4.01937e-07          | 0.999997 |
| rad67              | 3.77507e-07     | 0.999998 | 3.95083e-07          | 0.999998 |
| rad51              | 3.48731e-07     | 0.999998 | 3.64968e-07          | 0.999998 |
| rad31              | 2.87495e-07     | 0.999999 | 3.00881e-07          | 0.999998 |
| rad60anti          | 2.64698e-07     | 0.999999 | 2.77022e-07          | 0.999999 |
| rad68syn           | 2.18976e-07     | 0.999999 | 2.29172e-07          | 0.999999 |
| rad68anti          | 1.42178e-07     | 0.999999 | 1.48797e-07          | 0.999999 |
| rad62              | 1.18432e-07     | 0.999999 | 1.23946e-07          | 0.999999 |
| rad52              | 9.64401e-08     | 1.000000 | 1.00930e-07          | 0.999999 |
| rad64              | 8.89311e-08     | 1.000000 | 9.30713e-08          | 0.999999 |

|           |             |          |             |          |
|-----------|-------------|----------|-------------|----------|
| rad40syn  | 8.72135e-08 | 1.000000 | 9.12741e-08 | 1.000000 |
| rad58     | 8.08612e-08 | 1.000000 | 8.46261e-08 | 1.000000 |
| rad27     | 7.33098e-08 | 1.000000 | 7.67229e-08 | 1.000000 |
| rad40anti | 5.23108e-08 | 1.000000 | 5.47463e-08 | 1.000000 |
| rad65     | 1.21666e-08 | 1.000000 | 1.27330e-08 | 1.000000 |
| rad42     | 1.16246e-08 | 1.000000 | 1.21658e-08 | 1.000000 |
| rad71     | 7.62517e-09 | 1.000000 | 7.98023e-09 | 1.000000 |
| rad73     | 5.83117e-09 | 1.000000 | 6.10267e-09 | 1.000000 |
| rad43     | 4.03295e-09 | 1.000000 | 4.22073e-09 | 1.000000 |
| rad5      | 3.19698e-09 | 1.000000 | 3.34583e-09 | 1.000000 |
| rad61     | 2.37999e-09 | 1.000000 | 2.49080e-09 | 1.000000 |
| rad41     | 3.73476e-10 | 1.000000 | 3.90865e-10 | 1.000000 |
| rad72     | 2.35489e-10 | 1.000000 | 2.46452e-10 | 1.000000 |

100000000. Pa, 1400.00000 K

| =====              |                 |          |                      |          |
|--------------------|-----------------|----------|----------------------|----------|
| Rate constant      | True (fraction) |          | Effective (fraction) |          |
| -----              |                 |          |                      |          |
| Total              | 3.47024e-12     | (1.00 )  | 3.28710e-12          | (1.00 )  |
| Formation of rad11 | 9.43269e-13     | (0.272 ) | 8.62364e-13          | (0.262 ) |
| Formation of rad6  | 1.19194e-12     | (0.343 ) | 1.08970e-12          | (0.332 ) |
| H-abstraction      | 1.33503e-12     | (0.385 ) | 1.33503e-12          | (0.406 ) |
| -----              |                 |          |                      |          |
| species            | PYtrue          | Cumul    | PYeffective          | Cumul    |
| -----              |                 |          |                      |          |
| Benzene+2-propynyl | 0.384709        | 0.384709 | 0.406143             | 0.406143 |
| rad6               | 0.305448        | 0.690157 | 0.322466             | 0.728609 |
| rad11              | 0.165928        | 0.856085 | 0.175172             | 0.903782 |
| Phenyl+Allene      | 0.0527745       | 0.908860 | 0.000000             | 0.903782 |
| PhCH2CCH+H         | 0.0319074       | 0.940767 | 0.0336851            | 0.937467 |
| PhCHCCH2+H         | 0.0170610       | 0.957828 | 0.0180116            | 0.955478 |
| rad7               | 0.0126896       | 0.970518 | 0.0133966            | 0.968875 |
| rad13              | 0.00876162      | 0.979279 | 0.00924980           | 0.978125 |
| rad21              | 0.00538721      | 0.984667 | 0.00568736           | 0.983812 |
| C2H2+PhCH2         | 0.00490769      | 0.989574 | 0.00518112           | 0.988993 |
| rad9               | 0.00203976      | 0.991614 | 0.00215341           | 0.991147 |
| PhCCH+CH3          | 0.00159902      | 0.993213 | 0.00168811           | 0.992835 |
| Indene+H           | 0.00139414      | 0.994607 | 0.00147181           | 0.994306 |
| rad45              | 0.00114608      | 0.995753 | 0.00120993           | 0.995516 |
| rad20              | 0.000930203     | 0.996684 | 0.000982032          | 0.996498 |
| rad33              | 0.000763705     | 0.997447 | 0.000806256          | 0.997305 |
| PAH7+H             | 0.000482580     | 0.997930 | 0.000509466          | 0.997814 |
| rad25              | 0.000379053     | 0.998309 | 0.000400172          | 0.998214 |
| Ph+MeAc            | 0.000291037     | 0.998600 | 0.000307252          | 0.998522 |
| rad22              | 0.000290314     | 0.998890 | 0.000306489          | 0.998828 |
| rad28              | 0.000218539     | 0.999109 | 0.000230715          | 0.999059 |
| rad23              | 0.000132380     | 0.999241 | 0.000139756          | 0.999198 |
| rad24              | 0.000131280     | 0.999372 | 0.000138594          | 0.999337 |
| rad36              | 0.000116843     | 0.999489 | 0.000123352          | 0.999460 |
| rad18              | 6.81779e-05     | 0.999557 | 7.19767e-05          | 0.999532 |
| rad19syn           | 5.91101e-05     | 0.999617 | 6.24037e-05          | 0.999595 |
| rad39              | 5.21895e-05     | 0.999669 | 5.50973e-05          | 0.999650 |
| PhcycC3H3_A+H      | 4.90784e-05     | 0.999718 | 5.18129e-05          | 0.999702 |
| rad3               | 4.85027e-05     | 0.999766 | 5.12050e-05          | 0.999753 |
| rad4               | 3.97570e-05     | 0.999806 | 4.19720e-05          | 0.999795 |
| rad54              | 3.50276e-05     | 0.999841 | 3.69791e-05          | 0.999832 |
| rad8               | 2.59226e-05     | 0.999867 | 2.73668e-05          | 0.999859 |
| rad12              | 2.12862e-05     | 0.999888 | 2.24721e-05          | 0.999882 |
| rad15              | 2.10817e-05     | 0.999909 | 2.22562e-05          | 0.999904 |
| rad2               | 1.34649e-05     | 0.999923 | 1.42151e-05          | 0.999918 |
| PhCCCH3+H          | 1.04826e-05     | 0.999933 | 1.10666e-05          | 0.999929 |
| PAH1+H             | 7.40995e-06     | 0.999941 | 7.82282e-06          | 0.999937 |
| rad70              | 7.17669e-06     | 0.999948 | 7.57655e-06          | 0.999945 |
| PAH9+H             | 6.45053e-06     | 0.999954 | 6.80994e-06          | 0.999951 |
| rad19anti          | 5.21294e-06     | 0.999960 | 5.50337e-06          | 0.999957 |
| PAH3+H             | 5.01238e-06     | 0.999965 | 5.29164e-06          | 0.999962 |
| rad26              | 3.85256e-06     | 0.999968 | 4.06720e-06          | 0.999966 |
| rad1               | 3.68319e-06     | 0.999972 | 3.88840e-06          | 0.999970 |
| rad14              | 3.51289e-06     | 0.999976 | 3.70861e-06          | 0.999974 |
| rad10              | 3.20327e-06     | 0.999979 | 3.38174e-06          | 0.999977 |
| rad55              | 2.82144e-06     | 0.999982 | 2.97864e-06          | 0.999980 |
| rad30              | 2.39152e-06     | 0.999984 | 2.52477e-06          | 0.999983 |
| rad38              | 2.27986e-06     | 0.999986 | 2.40688e-06          | 0.999985 |
| rad34              | 1.99907e-06     | 0.999988 | 2.11046e-06          | 0.999987 |
| PAH10+CH3          | 1.38463e-06     | 0.999990 | 1.46177e-06          | 0.999989 |
| rad35              | 1.30493e-06     | 0.999991 | 1.37764e-06          | 0.999990 |
| rad56              | 1.26511e-06     | 0.999992 | 1.33560e-06          | 0.999992 |
| rad53              | 1.06399e-06     | 0.999993 | 1.12327e-06          | 0.999993 |
| rad50              | 1.01690e-06     | 0.999994 | 1.07356e-06          | 0.999994 |
| rad46              | 8.65887e-07     | 0.999995 | 9.14130e-07          | 0.999995 |

|           |             |          |             |          |
|-----------|-------------|----------|-------------|----------|
| PAH8+H    | 6.67019e-07 | 0.999996 | 7.04184e-07 | 0.999995 |
| rad37     | 5.22549e-07 | 0.999996 | 5.51662e-07 | 0.999996 |
| rad59     | 4.53344e-07 | 0.999997 | 4.78602e-07 | 0.999996 |
| rad31     | 4.30549e-07 | 0.999997 | 4.54536e-07 | 0.999997 |
| rad47     | 4.19529e-07 | 0.999998 | 4.42903e-07 | 0.999997 |
| rad60syn  | 3.23029e-07 | 0.999998 | 3.41027e-07 | 0.999998 |
| rad51     | 3.17297e-07 | 0.999998 | 3.34975e-07 | 0.999998 |
| rad67     | 2.97729e-07 | 0.999999 | 3.14318e-07 | 0.999998 |
| rad60anti | 2.04759e-07 | 0.999999 | 2.16168e-07 | 0.999998 |
| rad68syn  | 1.88561e-07 | 0.999999 | 1.99067e-07 | 0.999999 |
| rad62     | 1.72397e-07 | 0.999999 | 1.82001e-07 | 0.999999 |
| rad64     | 1.48432e-07 | 0.999999 | 1.56702e-07 | 0.999999 |
| rad27     | 1.27378e-07 | 1.000000 | 1.34474e-07 | 0.999999 |
| rad68anti | 1.22410e-07 | 1.000000 | 1.29230e-07 | 0.999999 |
| rad52     | 8.77393e-08 | 1.000000 | 9.26280e-08 | 0.999999 |
| rad40syn  | 7.55276e-08 | 1.000000 | 7.97354e-08 | 0.999999 |
| rad58     | 6.32907e-08 | 1.000000 | 6.68172e-08 | 1.000000 |
| rad40anti | 4.53785e-08 | 1.000000 | 4.79067e-08 | 1.000000 |
| rad42     | 1.70495e-08 | 1.000000 | 1.79994e-08 | 1.000000 |
| rad65     | 1.19797e-08 | 1.000000 | 1.26471e-08 | 1.000000 |
| rad71     | 7.01906e-09 | 1.000000 | 7.41009e-09 | 1.000000 |
| rad5      | 6.49329e-09 | 1.000000 | 6.85507e-09 | 1.000000 |
| rad43     | 5.91869e-09 | 1.000000 | 6.24844e-09 | 1.000000 |
| rad73     | 5.35899e-09 | 1.000000 | 5.65757e-09 | 1.000000 |
| rad61     | 3.32367e-09 | 1.000000 | 3.50885e-09 | 1.000000 |
| rad41     | 5.51746e-10 | 1.000000 | 5.82487e-10 | 1.000000 |
| rad72     | 2.17363e-10 | 1.000000 | 2.29473e-10 | 1.000000 |

100000000. Pa, 1500.00000 K

| =====              |                 |          |                      |          |
|--------------------|-----------------|----------|----------------------|----------|
| Rate constant      | True (fraction) |          | Effective (fraction) |          |
| -----              |                 |          |                      |          |
| Total              | 4.61271e-12     | (1.00 )  | 4.37799e-12          | (1.00 )  |
| Formation of rad11 | 1.20217e-12     | (0.261 ) | 1.10015e-12          | (0.251 ) |
| Formation of rad6  | 1.56360e-12     | (0.339 ) | 1.43090e-12          | (0.327 ) |
| H-abstraction      | 1.84694e-12     | (0.400 ) | 1.84694e-12          | (0.422 ) |
| -----              |                 |          |                      |          |
| species            | PYtrue          | Cumul    | PYeffective          | Cumul    |
| -----              |                 |          |                      |          |
| Benzene+2-propynyl | 0.400402        | 0.400402 | 0.421869             | 0.421869 |
| rad6               | 0.292346        | 0.692749 | 0.308020             | 0.729889 |
| rad11              | 0.170262        | 0.863011 | 0.179390             | 0.909279 |
| Phenyl+Allene      | 0.0508856       | 0.913896 | 0.000000             | 0.909279 |
| PhCH2CCH+H         | 0.0280932       | 0.941989 | 0.0295994            | 0.938879 |
| rad7               | 0.0155233       | 0.957513 | 0.0163555            | 0.955234 |
| PhCHCCH2+H         | 0.0149473       | 0.972460 | 0.0157486            | 0.970983 |
| rad13              | 0.00910273      | 0.981563 | 0.00959078           | 0.980573 |
| rad21              | 0.00463312      | 0.986196 | 0.00488152           | 0.985455 |
| C2H2+PhCH2         | 0.00426632      | 0.990462 | 0.00449505           | 0.989950 |
| rad9               | 0.00177815      | 0.992240 | 0.00187348           | 0.991824 |
| PhCCH+CH3          | 0.00161828      | 0.993858 | 0.00170504           | 0.993529 |
| Indene+H           | 0.00113666      | 0.994995 | 0.00119760           | 0.994726 |
| rad45              | 0.000980120     | 0.995975 | 0.00103267           | 0.995759 |
| rad20              | 0.000807796     | 0.996783 | 0.000851101          | 0.996610 |
| rad33              | 0.000758905     | 0.997542 | 0.000799589          | 0.997410 |
| PAH7+H             | 0.000452335     | 0.997994 | 0.000476587          | 0.997886 |
| rad25              | 0.000343101     | 0.998337 | 0.000361496          | 0.998248 |
| rad22              | 0.000308554     | 0.998646 | 0.000325097          | 0.998573 |
| Ph+MeAc            | 0.000296261     | 0.998942 | 0.000312145          | 0.998885 |
| rad28              | 0.000249818     | 0.999192 | 0.000263212          | 0.999148 |
| rad23              | 0.000121365     | 0.999313 | 0.000127872          | 0.999276 |
| rad24              | 0.000109865     | 0.999423 | 0.000115756          | 0.999392 |
| rad36              | 9.97431e-05     | 0.999523 | 0.000105091          | 0.999497 |
| rad18              | 7.31419e-05     | 0.999596 | 7.70631e-05          | 0.999574 |
| rad39              | 4.82207e-05     | 0.999644 | 5.08059e-05          | 0.999625 |
| rad3               | 4.56468e-05     | 0.999690 | 4.80941e-05          | 0.999673 |
| rad19syn           | 4.46114e-05     | 0.999735 | 4.70032e-05          | 0.999720 |
| rad4               | 3.74864e-05     | 0.999772 | 3.94962e-05          | 0.999759 |
| PhcycC3H3_A+H      | 3.72623e-05     | 0.999809 | 3.92600e-05          | 0.999799 |
| rad54              | 3.63823e-05     | 0.999846 | 3.83329e-05          | 0.999837 |
| rad15              | 2.84598e-05     | 0.999874 | 2.99857e-05          | 0.999867 |
| rad8               | 2.31136e-05     | 0.999897 | 2.43528e-05          | 0.999891 |
| rad12              | 1.86107e-05     | 0.999916 | 1.96085e-05          | 0.999911 |
| rad2               | 1.29206e-05     | 0.999929 | 1.36133e-05          | 0.999924 |
| PhCCCH3+H          | 1.05476e-05     | 0.999939 | 1.11131e-05          | 0.999936 |
| PAH1+H             | 7.01775e-06     | 0.999946 | 7.39400e-06          | 0.999943 |
| rad70              | 6.18419e-06     | 0.999953 | 6.51576e-06          | 0.999949 |
| PAH9+H             | 5.55513e-06     | 0.999958 | 5.85294e-06          | 0.999955 |
| rad19anti          | 4.73872e-06     | 0.999963 | 4.99278e-06          | 0.999960 |
| rad26              | 4.55672e-06     | 0.999967 | 4.80103e-06          | 0.999965 |

|           |             |          |             |          |
|-----------|-------------|----------|-------------|----------|
| PAH3+H    | 3.95298e-06 | 0.999971 | 4.16491e-06 | 0.999969 |
| rad14     | 3.70472e-06 | 0.999975 | 3.90334e-06 | 0.999973 |
| rad1      | 3.51991e-06 | 0.999979 | 3.70863e-06 | 0.999977 |
| rad10     | 3.08378e-06 | 0.999982 | 3.24912e-06 | 0.999980 |
| rad55     | 2.93755e-06 | 0.999985 | 3.09504e-06 | 0.999983 |
| rad38     | 2.02777e-06 | 0.999987 | 2.13649e-06 | 0.999985 |
| rad30     | 1.86183e-06 | 0.999988 | 1.96166e-06 | 0.999987 |
| rad34     | 1.72799e-06 | 0.999990 | 1.82064e-06 | 0.999989 |
| rad56     | 1.33261e-06 | 0.999992 | 1.40405e-06 | 0.999991 |
| rad53     | 1.11694e-06 | 0.999993 | 1.17683e-06 | 0.999992 |
| rad35     | 1.08847e-06 | 0.999994 | 1.14682e-06 | 0.999993 |
| PAH10+CH3 | 9.77920e-07 | 0.999995 | 1.03035e-06 | 0.999994 |
| rad50     | 9.13721e-07 | 0.999996 | 9.62709e-07 | 0.999995 |
| rad46     | 7.77906e-07 | 0.999996 | 8.19616e-07 | 0.999996 |
| PAH8+H    | 5.85066e-07 | 0.999997 | 6.16432e-07 | 0.999996 |
| rad31     | 4.09997e-07 | 0.999997 | 4.31979e-07 | 0.999997 |
| rad37     | 3.66870e-07 | 0.999998 | 3.86540e-07 | 0.999997 |
| rad47     | 3.59994e-07 | 0.999998 | 3.79294e-07 | 0.999997 |
| rad59     | 3.56876e-07 | 0.999999 | 3.76009e-07 | 0.999998 |
| rad51     | 2.85424e-07 | 0.999999 | 3.00727e-07 | 0.999998 |
| rad60syn  | 2.53268e-07 | 0.999999 | 2.66847e-07 | 0.999998 |
| rad67     | 2.28146e-07 | 0.999999 | 2.40378e-07 | 0.999999 |
| rad62     | 1.66481e-07 | 0.999999 | 1.75407e-07 | 0.999999 |
| rad68syn  | 1.64416e-07 | 1.000000 | 1.73231e-07 | 0.999999 |
| rad60anti | 1.60608e-07 | 1.000000 | 1.69219e-07 | 0.999999 |
| rad64     | 1.41088e-07 | 1.000000 | 1.48653e-07 | 0.999999 |
| rad27     | 1.31557e-07 | 1.000000 | 1.38610e-07 | 0.999999 |
| rad68anti | 1.06724e-07 | 1.000000 | 1.12445e-07 | 1.000000 |
| rad52     | 7.89220e-08 | 1.000000 | 8.31531e-08 | 1.000000 |
| rad40syn  | 6.60973e-08 | 1.000000 | 6.96410e-08 | 1.000000 |
| rad58     | 5.02305e-08 | 1.000000 | 5.29235e-08 | 1.000000 |
| rad40anti | 3.97537e-08 | 1.000000 | 4.18850e-08 | 1.000000 |
| rad42     | 1.65621e-08 | 1.000000 | 1.74501e-08 | 1.000000 |
| rad5      | 1.27650e-08 | 1.000000 | 1.34493e-08 | 1.000000 |
| rad65     | 1.04979e-08 | 1.000000 | 1.10608e-08 | 1.000000 |
| rad71     | 6.38284e-09 | 1.000000 | 6.72505e-09 | 1.000000 |
| rad43     | 5.77997e-09 | 1.000000 | 6.08985e-09 | 1.000000 |
| rad73     | 4.86597e-09 | 1.000000 | 5.12685e-09 | 1.000000 |
| rad61     | 2.36006e-09 | 1.000000 | 2.48659e-09 | 1.000000 |
| rad41     | 5.41331e-10 | 1.000000 | 5.70354e-10 | 1.000000 |
| rad72     | 1.98162e-10 | 1.000000 | 2.08786e-10 | 1.000000 |

100000000. Pa, 1750.00000 K

=====

| Rate constant      | True (fraction)      | Effective (fraction) |
|--------------------|----------------------|----------------------|
| Total              | 8.61869e-12 (1.00 )  | 6.68217e-12 (1.00 )  |
| Formation of rad11 | 2.04015e-12 (0.237 ) | 1.22433e-12 (0.183 ) |
| Formation of rad6  | 2.80256e-12 (0.325 ) | 1.68186e-12 (0.252 ) |
| H-abstraction      | 3.77597e-12 (0.438 ) | 3.77597e-12 (0.565 ) |

| species            | PYtrue      | Cumul    | PYeffective | Cumul    |
|--------------------|-------------|----------|-------------|----------|
| Benzene+2-propynyl | 0.438115    | 0.438115 | 0.565082    | 0.565082 |
| Phenyl+Allene      | 0.224689    | 0.662804 | 0.000000    | 0.565082 |
| rad6               | 0.137202    | 0.800005 | 0.176964    | 0.742046 |
| PhCH2CCH+H         | 0.0985154   | 0.898521 | 0.127066    | 0.869112 |
| PhCHCCH2+H         | 0.0426268   | 0.941148 | 0.0549801   | 0.924092 |
| rad11              | 0.0174544   | 0.958602 | 0.0225128   | 0.946605 |
| C2H2+PhCH2         | 0.0153080   | 0.973910 | 0.0197443   | 0.966349 |
| PhCCH+CH3          | 0.00603633  | 0.979946 | 0.00778568  | 0.974135 |
| PhcycC3H3_A+H      | 0.00499970  | 0.984946 | 0.00644865  | 0.980583 |
| PAH7+H             | 0.00276693  | 0.987713 | 0.00356880  | 0.984152 |
| rad19syn           | 0.00210351  | 0.989816 | 0.00271312  | 0.986865 |
| rad7               | 0.00205300  | 0.991869 | 0.00264797  | 0.989513 |
| Ph+MeAc            | 0.00202107  | 0.993890 | 0.00260679  | 0.992120 |
| Indene+H           | 0.00139069  | 0.995281 | 0.00179372  | 0.993914 |
| rad54              | 0.000680876 | 0.995962 | 0.000878194 | 0.994792 |
| rad13              | 0.000642482 | 0.996605 | 0.000828679 | 0.995621 |
| PAH1+H             | 0.000331036 | 0.996936 | 0.000426973 | 0.996048 |
| rad39              | 0.000297926 | 0.997233 | 0.000384267 | 0.996432 |
| rad21              | 0.000216352 | 0.997450 | 0.000279052 | 0.996711 |
| rad56              | 0.000177838 | 0.997628 | 0.000229376 | 0.996940 |
| PAH8+H             | 0.000159857 | 0.997788 | 0.000206184 | 0.997147 |
| rad9               | 0.000146998 | 0.997935 | 0.000189599 | 0.997336 |
| rad50              | 0.000145633 | 0.998080 | 0.000187838 | 0.997524 |
| rad19anti          | 0.000132749 | 0.998213 | 0.000171220 | 0.997695 |
| PAH3+H             | 0.000128872 | 0.998342 | 0.000166220 | 0.997862 |
| rad51              | 0.000117522 | 0.998459 | 0.000151580 | 0.998013 |
| PAH9+H             | 0.000103065 | 0.998562 | 0.000132934 | 0.998146 |

|           |             |          |             |          |
|-----------|-------------|----------|-------------|----------|
| rad70     | 0.000102352 | 0.998665 | 0.000132014 | 0.998278 |
| rad53     | 0.000100495 | 0.998765 | 0.000129619 | 0.998408 |
| PhCCCH3+H | 8.61140e-05 | 0.998851 | 0.000111070 | 0.998519 |
| rad71     | 8.55909e-05 | 0.998937 | 0.000110396 | 0.998629 |
| rad55     | 8.19341e-05 | 0.999019 | 0.000105679 | 0.998735 |
| rad38     | 7.48757e-05 | 0.999094 | 9.65752e-05 | 0.998831 |
| rad33     | 6.48191e-05 | 0.999159 | 8.36038e-05 | 0.998915 |
| rad28     | 6.25817e-05 | 0.999221 | 8.07181e-05 | 0.998996 |
| rad45     | 6.04662e-05 | 0.999282 | 7.79899e-05 | 0.999074 |
| rad67     | 5.71123e-05 | 0.999339 | 7.36642e-05 | 0.999147 |
| PAH10+CH3 | 5.70887e-05 | 0.999396 | 7.36333e-05 | 0.999221 |
| rad20     | 5.51371e-05 | 0.999451 | 7.11160e-05 | 0.999292 |
| rad47     | 5.42123e-05 | 0.999505 | 6.99234e-05 | 0.999362 |
| rad22     | 4.89252e-05 | 0.999554 | 6.31039e-05 | 0.999425 |
| rad34     | 4.63691e-05 | 0.999600 | 5.98073e-05 | 0.999485 |
| rad35     | 3.93945e-05 | 0.999640 | 5.08114e-05 | 0.999536 |
| rad62     | 3.77263e-05 | 0.999678 | 4.86594e-05 | 0.999584 |
| rad46     | 3.76148e-05 | 0.999715 | 4.85159e-05 | 0.999633 |
| rad73     | 2.76898e-05 | 0.999743 | 3.57144e-05 | 0.999669 |
| rad25     | 2.47826e-05 | 0.999768 | 3.19648e-05 | 0.999701 |
| rad8      | 2.19102e-05 | 0.999790 | 2.82599e-05 | 0.999729 |
| rad52     | 1.91070e-05 | 0.999809 | 2.46443e-05 | 0.999753 |
| rad68syn  | 1.63455e-05 | 0.999825 | 2.10825e-05 | 0.999775 |
| rad23     | 1.61811e-05 | 0.999841 | 2.08705e-05 | 0.999795 |
| rad72     | 1.59579e-05 | 0.999857 | 2.05826e-05 | 0.999816 |
| rad12     | 1.20251e-05 | 0.999869 | 1.55101e-05 | 0.999832 |
| rad40syn  | 1.13995e-05 | 0.999881 | 1.47031e-05 | 0.999846 |
| rad36     | 1.10090e-05 | 0.999892 | 1.41995e-05 | 0.999860 |
| rad30     | 1.06528e-05 | 0.999902 | 1.37400e-05 | 0.999874 |
| rad15     | 1.04757e-05 | 0.999913 | 1.35117e-05 | 0.999888 |
| rad68anti | 1.03879e-05 | 0.999923 | 1.33983e-05 | 0.999901 |
| rad24     | 9.57739e-06 | 0.999933 | 1.23530e-05 | 0.999913 |
| rad42     | 9.52508e-06 | 0.999942 | 1.22855e-05 | 0.999926 |
| rad40anti | 8.89167e-06 | 0.999951 | 1.14685e-05 | 0.999937 |
| rad59     | 8.43654e-06 | 0.999960 | 1.08815e-05 | 0.999948 |
| rad64     | 7.83892e-06 | 0.999967 | 1.01107e-05 | 0.999958 |
| rad18     | 4.46736e-06 | 0.999972 | 5.76205e-06 | 0.999964 |
| rad37     | 4.35121e-06 | 0.999976 | 5.61222e-06 | 0.999970 |
| rad58     | 3.72103e-06 | 0.999980 | 4.79940e-06 | 0.999974 |
| rad60syn  | 3.52042e-06 | 0.999983 | 4.54067e-06 | 0.999979 |
| rad14     | 3.26265e-06 | 0.999987 | 4.20819e-06 | 0.999983 |
| rad60anti | 2.66298e-06 | 0.999989 | 3.43473e-06 | 0.999987 |
| rad65     | 2.38577e-06 | 0.999992 | 3.07718e-06 | 0.999990 |
| rad26     | 1.84791e-06 | 0.999994 | 2.38344e-06 | 0.999992 |
| rad3      | 1.56686e-06 | 0.999995 | 2.02095e-06 | 0.999994 |
| rad10     | 1.27572e-06 | 0.999996 | 1.64543e-06 | 0.999996 |
| rad4      | 1.01428e-06 | 0.999997 | 1.30823e-06 | 0.999997 |
| rad43     | 8.00069e-07 | 0.999998 | 1.03193e-06 | 0.999998 |
| rad61     | 6.12225e-07 | 0.999999 | 7.89649e-07 | 0.999999 |
| rad2      | 4.80838e-07 | 0.999999 | 6.20188e-07 | 0.999999 |
| rad41     | 2.27917e-07 | 1.000000 | 2.93969e-07 | 1.000000 |
| rad1      | 1.05523e-07 | 1.000000 | 1.36104e-07 | 1.000000 |
| rad27     | 8.53094e-08 | 1.000000 | 1.10032e-07 | 1.000000 |
| rad5      | 4.66760e-08 | 1.000000 | 6.02030e-08 | 1.000000 |

100000000. Pa, 2000.00000 K

| Rate constant      | True (fraction) |          | Effective (fraction) |          |
|--------------------|-----------------|----------|----------------------|----------|
| Total              | 1.44111e-11     | (1.00 )  | 1.04420e-11          | (1.00 )  |
| Formation of rad11 | 3.16882e-12     | (0.220 ) | 1.53582e-12          | (0.147 ) |
| Formation of rad6  | 4.53302e-12     | (0.315 ) | 2.19700e-12          | (0.210 ) |
| H-abstraction      | 6.70922e-12     | (0.466 ) | 6.70922e-12          | (0.643 ) |

  

| species            | PYtrue     | Cumul    | PYeffective | Cumul    |
|--------------------|------------|----------|-------------|----------|
| Benzene+2-propynyl | 0.465560   | 0.465560 | 0.642520    | 0.642520 |
| Phenyl+Allene      | 0.275415   | 0.740975 | 0.000000    | 0.642520 |
| PhCH2CCH+H         | 0.0928675  | 0.833843 | 0.128166    | 0.770686 |
| rad6               | 0.0709319  | 0.904775 | 0.0978931   | 0.868579 |
| PhCHCCH2+H         | 0.0403906  | 0.945165 | 0.0557430   | 0.924322 |
| C2H2+PhCH2         | 0.0145768  | 0.959742 | 0.0201175   | 0.944440 |
| rad11              | 0.0124616  | 0.972204 | 0.0171982   | 0.961638 |
| PhCCH+CH3          | 0.00682415 | 0.979028 | 0.00941807  | 0.971056 |
| PhcycC3H3_A+H      | 0.00560018 | 0.984628 | 0.00772879  | 0.978785 |
| PAH7+H             | 0.00287195 | 0.987500 | 0.00396356  | 0.982748 |
| Ph+MeAc            | 0.00260905 | 0.990109 | 0.00360075  | 0.986349 |
| rad19syn           | 0.00227825 | 0.992387 | 0.00314422  | 0.989493 |
| rad7               | 0.00157954 | 0.993967 | 0.00217992  | 0.991673 |
| Indene+H           | 0.00132249 | 0.995289 | 0.00182517  | 0.993498 |

|           |             |          |             |          |
|-----------|-------------|----------|-------------|----------|
| rad54     | 0.000794824 | 0.996084 | 0.00109694  | 0.994595 |
| PAH1+H    | 0.000432579 | 0.996517 | 0.000597003 | 0.995192 |
| rad13     | 0.000426288 | 0.996943 | 0.000588319 | 0.995781 |
| rad39     | 0.000286398 | 0.997229 | 0.000395259 | 0.996176 |
| rad56     | 0.000233853 | 0.997463 | 0.000322741 | 0.996499 |
| rad21     | 0.000196359 | 0.997659 | 0.000270995 | 0.996770 |
| PAH8+H    | 0.000162788 | 0.997822 | 0.000224664 | 0.996994 |
| rad50     | 0.000139609 | 0.997962 | 0.000192674 | 0.997187 |
| rad53     | 0.000128978 | 0.998091 | 0.000178003 | 0.997365 |
| rad9      | 0.000127940 | 0.998219 | 0.000176569 | 0.997542 |
| PAH3+H    | 0.000127874 | 0.998347 | 0.000176479 | 0.997718 |
| rad19anti | 0.000125996 | 0.998473 | 0.000173888 | 0.997892 |
| rad51     | 0.000112713 | 0.998585 | 0.000155555 | 0.998047 |
| PAH9+H    | 0.000103892 | 0.998689 | 0.000143382 | 0.998191 |
| rad70     | 9.99846e-05 | 0.998789 | 0.000137989 | 0.998329 |
| rad55     | 9.76796e-05 | 0.998887 | 0.000134808 | 0.998464 |
| PhCCCH3+H | 8.47349e-05 | 0.998972 | 0.000116942 | 0.998581 |
| rad71     | 8.29076e-05 | 0.999055 | 0.000114421 | 0.998695 |
| rad38     | 7.20623e-05 | 0.999127 | 9.94528e-05 | 0.998794 |
| PAH10+CH3 | 5.76591e-05 | 0.999184 | 7.95754e-05 | 0.998874 |
| rad62     | 5.49575e-05 | 0.999239 | 7.58469e-05 | 0.998950 |
| rad28     | 5.48415e-05 | 0.999294 | 7.56868e-05 | 0.999026 |
| rad67     | 5.47384e-05 | 0.999349 | 7.55441e-05 | 0.999101 |
| rad45     | 5.35044e-05 | 0.999402 | 7.38415e-05 | 0.999175 |
| rad20     | 4.89039e-05 | 0.999451 | 6.74923e-05 | 0.999242 |
| rad22     | 4.73971e-05 | 0.999499 | 6.54128e-05 | 0.999308 |
| rad47     | 4.71655e-05 | 0.999546 | 6.50932e-05 | 0.999373 |
| rad33     | 4.58837e-05 | 0.999592 | 6.33240e-05 | 0.999436 |
| rad34     | 4.55778e-05 | 0.999637 | 6.29019e-05 | 0.999499 |
| rad35     | 3.84154e-05 | 0.999676 | 5.30172e-05 | 0.999552 |
| rad46     | 3.61103e-05 | 0.999712 | 4.98360e-05 | 0.999602 |
| rad73     | 2.67641e-05 | 0.999739 | 3.69374e-05 | 0.999639 |
| rad23     | 2.47288e-05 | 0.999763 | 3.41282e-05 | 0.999673 |
| rad25     | 2.26196e-05 | 0.999786 | 3.12174e-05 | 0.999704 |
| rad8      | 1.91441e-05 | 0.999805 | 2.64207e-05 | 0.999731 |
| rad52     | 1.83347e-05 | 0.999823 | 2.53037e-05 | 0.999756 |
| rad68syn  | 1.63330e-05 | 0.999840 | 2.25411e-05 | 0.999779 |
| rad72     | 1.54999e-05 | 0.999855 | 2.13914e-05 | 0.999800 |
| rad42     | 1.41122e-05 | 0.999869 | 1.94763e-05 | 0.999819 |
| rad40syn  | 1.15732e-05 | 0.999881 | 1.59722e-05 | 0.999835 |
| rad15     | 1.08578e-05 | 0.999892 | 1.49849e-05 | 0.999850 |
| rad68anti | 1.03787e-05 | 0.999902 | 1.43236e-05 | 0.999865 |
| rad12     | 1.03071e-05 | 0.999912 | 1.42249e-05 | 0.999879 |
| rad30     | 1.02758e-05 | 0.999923 | 1.41817e-05 | 0.999893 |
| rad64     | 9.86250e-06 | 0.999933 | 1.36112e-05 | 0.999907 |
| rad36     | 9.72183e-06 | 0.999942 | 1.34172e-05 | 0.999920 |
| rad40anti | 9.06666e-06 | 0.999951 | 1.25129e-05 | 0.999933 |
| rad24     | 8.42475e-06 | 0.999960 | 1.16270e-05 | 0.999944 |
| rad59     | 8.33047e-06 | 0.999968 | 1.14968e-05 | 0.999956 |
| rad18     | 4.11505e-06 | 0.999972 | 5.67918e-06 | 0.999961 |
| rad37     | 4.05472e-06 | 0.999976 | 5.59592e-06 | 0.999967 |
| rad14     | 3.99135e-06 | 0.999980 | 5.50845e-06 | 0.999973 |
| rad58     | 3.73584e-06 | 0.999984 | 5.15583e-06 | 0.999978 |
| rad60syn  | 3.44838e-06 | 0.999987 | 4.75910e-06 | 0.999983 |
| rad60anti | 2.61194e-06 | 0.999990 | 3.60472e-06 | 0.999986 |
| rad65     | 2.50375e-06 | 0.999993 | 3.45544e-06 | 0.999990 |
| rad26     | 1.76688e-06 | 0.999994 | 2.43847e-06 | 0.999992 |
| rad10     | 1.20742e-06 | 0.999996 | 1.66637e-06 | 0.999994 |
| rad43     | 1.09000e-06 | 0.999997 | 1.50431e-06 | 0.999995 |
| rad3      | 1.07319e-06 | 0.999998 | 1.48112e-06 | 0.999997 |
| rad4      | 7.24332e-07 | 0.999998 | 9.99647e-07 | 0.999998 |
| rad61     | 6.47436e-07 | 0.999999 | 8.93525e-07 | 0.999999 |
| rad2      | 3.68233e-07 | 0.999999 | 5.08197e-07 | 0.999999 |
| rad41     | 3.16602e-07 | 1.000000 | 4.36944e-07 | 1.000000 |
| rad5      | 2.00384e-07 | 1.000000 | 2.76550e-07 | 1.000000 |
| rad27     | 9.71825e-08 | 1.000000 | 1.34122e-07 | 1.000000 |
| rad1      | 8.38018e-08 | 1.000000 | 1.15654e-07 | 1.000000 |

100000000. Pa, 2250.00000 K

=====

| Rate constant      | True (fraction)      | Effective (fraction) |             |          |
|--------------------|----------------------|----------------------|-------------|----------|
| Total              | 2.23655e-11 (1.00 )  | 1.60276e-11 (1.00 )  |             |          |
| Formation of rad11 | 4.62280e-12 (0.207 ) | 2.06352e-12 (0.129 ) |             |          |
| Formation of rad6  | 6.82518e-12 (0.305 ) | 3.04662e-12 (0.190 ) |             |          |
| H-abstraction      | 1.09175e-11 (0.488 ) | 1.09175e-11 (0.681 ) |             |          |
| species            | PYtrue               | Cumul                | PYeffective | Cumul    |
| Benzene+2-propynyl | 0.488140             | 0.488140             | 0.681167    | 0.681167 |



|               |             |          |             |          |
|---------------|-------------|----------|-------------|----------|
| Phenyl+Allene | 0.283376    | 0.771517 | 0.00000     | 0.681167 |
| PhCH2CCH+H    | 0.0872030   | 0.858720 | 0.121686    | 0.802853 |
| rad6          | 0.0514864   | 0.910206 | 0.0718456   | 0.874698 |
| PhCHCCH2+H    | 0.0384135   | 0.948619 | 0.0536035   | 0.928302 |
| C2H2+PhCH2    | 0.0135585   | 0.962178 | 0.0189199   | 0.947222 |
| rad11         | 0.00999120  | 0.972169 | 0.0139421   | 0.961164 |
| PhCCH+CH3     | 0.00689025  | 0.979059 | 0.00961490  | 0.970779 |
| PhcycC3H3_A+H | 0.00571118  | 0.984771 | 0.00796956  | 0.978748 |
| PAH7+H        | 0.00283313  | 0.987604 | 0.00395344  | 0.982702 |
| Ph+MeAc       | 0.00272479  | 0.990328 | 0.00380228  | 0.986504 |
| rad19syn      | 0.00229375  | 0.992622 | 0.00320077  | 0.989705 |
| rad7          | 0.00139264  | 0.994015 | 0.00194334  | 0.991648 |
| Indene+H      | 0.00132155  | 0.995336 | 0.00184413  | 0.993492 |
| rad54         | 0.000808129 | 0.996145 | 0.00112769  | 0.994620 |
| PAH1+H        | 0.000466233 | 0.996611 | 0.000650595 | 0.995270 |
| rad13         | 0.000357270 | 0.996968 | 0.000498547 | 0.995769 |
| rad39         | 0.000280827 | 0.997249 | 0.000391875 | 0.996161 |
| rad56         | 0.000248960 | 0.997498 | 0.000347407 | 0.996508 |
| rad21         | 0.000191335 | 0.997689 | 0.000266995 | 0.996775 |
| PAH8+H        | 0.000155944 | 0.997845 | 0.000217610 | 0.996993 |
| rad50         | 0.000140355 | 0.997985 | 0.000195855 | 0.997189 |
| rad53         | 0.000135949 | 0.998121 | 0.000189708 | 0.997378 |
| PAH3+H        | 0.000123969 | 0.998245 | 0.000172991 | 0.997551 |
| rad19anti     | 0.000120302 | 0.998366 | 0.000167874 | 0.997719 |
| rad9          | 0.000118975 | 0.998485 | 0.000166021 | 0.997885 |
| rad51         | 0.000113596 | 0.998598 | 0.000158516 | 0.998044 |
| PAH9+H        | 0.000106895 | 0.998705 | 0.000149165 | 0.998193 |
| rad55         | 0.000100068 | 0.998805 | 0.000139638 | 0.998333 |
| rad70         | 9.57864e-05 | 0.998901 | 0.000133664 | 0.998466 |
| rad71         | 8.41620e-05 | 0.998985 | 0.000117443 | 0.998584 |
| PhCCCH3+H     | 8.17640e-05 | 0.999067 | 0.000114096 | 0.998698 |
| rad38         | 7.27138e-05 | 0.999140 | 0.000101468 | 0.998799 |
| rad62         | 6.17861e-05 | 0.999201 | 8.62179e-05 | 0.998885 |
| PAH10+CH3     | 5.64699e-05 | 0.999258 | 7.88003e-05 | 0.998964 |
| rad28         | 5.41983e-05 | 0.999312 | 7.56301e-05 | 0.999040 |
| rad67         | 5.24063e-05 | 0.999364 | 7.31295e-05 | 0.999113 |
| rad45         | 5.04639e-05 | 0.999415 | 7.04191e-05 | 0.999183 |
| rad22         | 4.95664e-05 | 0.999465 | 6.91667e-05 | 0.999253 |
| rad20         | 4.65463e-05 | 0.999511 | 6.49524e-05 | 0.999318 |
| rad47         | 4.35629e-05 | 0.999555 | 6.07891e-05 | 0.999378 |
| rad34         | 4.35369e-05 | 0.999598 | 6.07527e-05 | 0.999439 |
| rad33         | 3.84643e-05 | 0.999637 | 5.36743e-05 | 0.999493 |
| rad35         | 3.75977e-05 | 0.999674 | 5.24650e-05 | 0.999545 |
| rad46         | 3.63622e-05 | 0.999711 | 5.07410e-05 | 0.999596 |
| rad23         | 3.13767e-05 | 0.999742 | 4.37841e-05 | 0.999640 |
| rad73         | 2.71173e-05 | 0.999769 | 3.78404e-05 | 0.999678 |
| rad25         | 2.22070e-05 | 0.999791 | 3.09884e-05 | 0.999709 |
| rad52         | 1.84874e-05 | 0.999810 | 2.57980e-05 | 0.999734 |
| rad8          | 1.68423e-05 | 0.999827 | 2.35023e-05 | 0.999758 |
| rad42         | 1.60247e-05 | 0.999843 | 2.23614e-05 | 0.999780 |
| rad72         | 1.57722e-05 | 0.999858 | 2.20091e-05 | 0.999802 |
| rad68syn      | 1.55584e-05 | 0.999874 | 2.17108e-05 | 0.999824 |
| rad40syn      | 1.10937e-05 | 0.999885 | 1.54805e-05 | 0.999839 |
| rad64         | 1.03949e-05 | 0.999895 | 1.45054e-05 | 0.999854 |
| rad15         | 1.03061e-05 | 0.999906 | 1.43816e-05 | 0.999868 |
| rad30         | 9.99345e-06 | 0.999916 | 1.39452e-05 | 0.999882 |
| rad68anti     | 9.88657e-06 | 0.999926 | 1.37960e-05 | 0.999896 |
| rad36         | 9.15722e-06 | 0.999935 | 1.27783e-05 | 0.999909 |
| rad12         | 9.13265e-06 | 0.999944 | 1.27440e-05 | 0.999922 |
| rad40anti     | 8.70622e-06 | 0.999953 | 1.21489e-05 | 0.999934 |
| rad59         | 8.07479e-06 | 0.999961 | 1.12678e-05 | 0.999945 |
| rad24         | 7.95957e-06 | 0.999969 | 1.11070e-05 | 0.999956 |
| rad18         | 4.06016e-06 | 0.999973 | 5.66570e-06 | 0.999962 |
| rad14         | 3.92408e-06 | 0.999977 | 5.47580e-06 | 0.999967 |
| rad37         | 3.86877e-06 | 0.999981 | 5.39861e-06 | 0.999973 |
| rad58         | 3.62532e-06 | 0.999984 | 5.05890e-06 | 0.999978 |
| rad60syn      | 3.34397e-06 | 0.999987 | 4.66628e-06 | 0.999982 |
| rad65         | 2.63592e-06 | 0.999990 | 3.67825e-06 | 0.999986 |
| rad60anti     | 2.53260e-06 | 0.999993 | 3.53408e-06 | 0.999990 |
| rad26         | 1.82903e-06 | 0.999994 | 2.55229e-06 | 0.999992 |
| rad43         | 1.20123e-06 | 0.999996 | 1.67624e-06 | 0.999994 |
| rad10         | 1.10024e-06 | 0.999997 | 1.53531e-06 | 0.999995 |
| rad3          | 9.05971e-07 | 0.999998 | 1.26422e-06 | 0.999997 |
| rad61         | 6.44391e-07 | 0.999998 | 8.99206e-07 | 0.999998 |
| rad4          | 6.17006e-07 | 0.999999 | 8.60993e-07 | 0.999998 |
| rad41         | 3.52778e-07 | 0.999999 | 4.92279e-07 | 0.999999 |
| rad5          | 3.32402e-07 | 1.000000 | 4.63845e-07 | 0.999999 |
| rad2          | 3.19099e-07 | 1.000000 | 4.45283e-07 | 1.000000 |
| rad27         | 9.39299e-08 | 1.000000 | 1.31073e-07 | 1.000000 |
| rad1          | 7.39438e-08 | 1.000000 | 1.03183e-07 | 1.000000 |

100000000. Pa, 2500.00000 K

=====

| Rate constant      | True (fraction)      | Effective (fraction) |
|--------------------|----------------------|----------------------|
| Total              | 3.28090e-11 (1.00 )  | 2.36483e-11 (1.00 )  |
| Formation of rad11 | 6.43164e-12 (0.196 ) | 2.78817e-12 (0.118 ) |
| Formation of rad6  | 9.73932e-12 (0.297 ) | 4.22207e-12 (0.179 ) |
| H-abstraction      | 1.66381e-11 (0.507 ) | 1.66381e-11 (0.704 ) |

| species            | PYtrue      | Cumul    | PYeffective | Cumul    |
|--------------------|-------------|----------|-------------|----------|
| Benzene+2-propynyl | 0.507119    | 0.507119 | 0.703563    | 0.703563 |
| Phenyl+Allene      | 0.279213    | 0.786332 | 0.00000     | 0.703563 |
| PhCH2CCH+H         | 0.0830806   | 0.869413 | 0.115264    | 0.818826 |
| rad6               | 0.0454438   | 0.914856 | 0.0630475   | 0.881874 |
| PhCHCCH2+H         | 0.0369310   | 0.951787 | 0.0512371   | 0.933111 |
| C2H2+PhCH2         | 0.0126717   | 0.964459 | 0.0175804   | 0.950691 |
| rad11              | 0.00793288  | 0.972392 | 0.0110059   | 0.961697 |
| PhCCH+CH3          | 0.00683829  | 0.979230 | 0.00948724  | 0.971185 |
| PhcycC3H3_A+H      | 0.00571935  | 0.984950 | 0.00793486  | 0.979119 |
| PAH7+H             | 0.00280154  | 0.987751 | 0.00388677  | 0.983006 |
| Ph+MeAc            | 0.00269410  | 0.990445 | 0.00373772  | 0.986744 |
| rad19syn           | 0.00229324  | 0.992738 | 0.00318157  | 0.989925 |
| rad7               | 0.00134268  | 0.994081 | 0.00186280  | 0.991788 |
| Indene+H           | 0.00133118  | 0.995412 | 0.00184684  | 0.993635 |
| rad54              | 0.000799163 | 0.996211 | 0.00110874  | 0.994744 |
| PAH1+H             | 0.000467261 | 0.996679 | 0.000648267 | 0.995392 |
| rad13              | 0.000339683 | 0.997018 | 0.000471267 | 0.995863 |
| rad39              | 0.000280527 | 0.997299 | 0.000389196 | 0.996253 |
| rad56              | 0.000246882 | 0.997546 | 0.000342518 | 0.996595 |
| rad21              | 0.000184054 | 0.997730 | 0.000255352 | 0.996850 |
| PAH8+H             | 0.000144406 | 0.997874 | 0.000200345 | 0.997051 |
| rad50              | 0.000141957 | 0.998016 | 0.000196947 | 0.997248 |
| rad53              | 0.000134669 | 0.998151 | 0.000186836 | 0.997435 |
| PAH3+H             | 0.000118377 | 0.998269 | 0.000164233 | 0.997599 |
| rad19anti          | 0.000115843 | 0.998385 | 0.000160718 | 0.997760 |
| rad51              | 0.000115249 | 0.998500 | 0.000159893 | 0.997919 |
| rad9               | 0.000114624 | 0.998615 | 0.000159026 | 0.998078 |
| PAH9+H             | 0.000109306 | 0.998724 | 0.000151648 | 0.998230 |
| rad55              | 9.89568e-05 | 0.998823 | 0.000137290 | 0.998367 |
| rad70              | 9.11323e-05 | 0.998914 | 0.000126434 | 0.998494 |
| rad71              | 8.58624e-05 | 0.999000 | 0.000119123 | 0.998613 |
| PhCCCH3+H          | 7.91927e-05 | 0.999079 | 0.000109870 | 0.998723 |
| rad38              | 7.38972e-05 | 0.999153 | 0.000102523 | 0.998825 |
| rad62              | 6.19803e-05 | 0.999215 | 8.59899e-05 | 0.998911 |
| rad28              | 5.77164e-05 | 0.999273 | 8.00739e-05 | 0.998991 |
| PAH10+CH3          | 5.53136e-05 | 0.999328 | 7.67408e-05 | 0.999068 |
| rad22              | 5.09989e-05 | 0.999379 | 7.07545e-05 | 0.999139 |
| rad67              | 5.04213e-05 | 0.999430 | 6.99530e-05 | 0.999209 |
| rad45              | 4.84193e-05 | 0.999478 | 6.71757e-05 | 0.999276 |
| rad20              | 4.48500e-05 | 0.999523 | 6.22237e-05 | 0.999338 |
| rad34              | 4.10790e-05 | 0.999564 | 5.69919e-05 | 0.999395 |
| rad47              | 4.08573e-05 | 0.999605 | 5.66841e-05 | 0.999452 |
| rad46              | 3.68453e-05 | 0.999642 | 5.11182e-05 | 0.999503 |
| rad35              | 3.68102e-05 | 0.999679 | 5.10693e-05 | 0.999554 |
| rad33              | 3.64054e-05 | 0.999715 | 5.05079e-05 | 0.999605 |
| rad23              | 3.46649e-05 | 0.999750 | 4.80931e-05 | 0.999653 |
| rad73              | 2.76188e-05 | 0.999777 | 3.83175e-05 | 0.999691 |
| rad25              | 2.17392e-05 | 0.999799 | 3.01604e-05 | 0.999721 |
| rad52              | 1.87666e-05 | 0.999818 | 2.60363e-05 | 0.999747 |
| rad72              | 1.61243e-05 | 0.999834 | 2.23704e-05 | 0.999770 |
| rad42              | 1.61164e-05 | 0.999850 | 2.23595e-05 | 0.999792 |
| rad8               | 1.49667e-05 | 0.999865 | 2.07644e-05 | 0.999813 |
| rad68syn           | 1.44597e-05 | 0.999880 | 2.00610e-05 | 0.999833 |
| rad64              | 1.03943e-05 | 0.999890 | 1.44208e-05 | 0.999847 |
| rad40syn           | 1.03039e-05 | 0.999900 | 1.42953e-05 | 0.999861 |
| rad15              | 9.82268e-06 | 0.999910 | 1.36277e-05 | 0.999875 |
| rad30              | 9.74333e-06 | 0.999920 | 1.35176e-05 | 0.999889 |
| rad68anti          | 9.18913e-06 | 0.999929 | 1.27488e-05 | 0.999901 |
| rad36              | 8.77896e-06 | 0.999938 | 1.21797e-05 | 0.999914 |
| rad12              | 8.32634e-06 | 0.999946 | 1.15517e-05 | 0.999925 |
| rad40anti          | 8.08577e-06 | 0.999954 | 1.12180e-05 | 0.999936 |
| rad59              | 7.73040e-06 | 0.999962 | 1.07250e-05 | 0.999947 |
| rad24              | 7.61709e-06 | 0.999969 | 1.05677e-05 | 0.999958 |
| rad18              | 4.08376e-06 | 0.999974 | 5.66569e-06 | 0.999963 |
| rad37              | 3.78211e-06 | 0.999977 | 5.24718e-06 | 0.999969 |
| rad14              | 3.60805e-06 | 0.999981 | 5.00570e-06 | 0.999974 |
| rad58              | 3.44364e-06 | 0.999984 | 4.77762e-06 | 0.999978 |
| rad60syn           | 3.21833e-06 | 0.999988 | 4.46503e-06 | 0.999983 |

|           |             |          |             |          |
|-----------|-------------|----------|-------------|----------|
| rad65     | 2.71462e-06 | 0.999990 | 3.76618e-06 | 0.999987 |
| rad60anti | 2.43522e-06 | 0.999993 | 3.37856e-06 | 0.999990 |
| rad26     | 1.82108e-06 | 0.999995 | 2.52652e-06 | 0.999992 |
| rad43     | 1.20250e-06 | 0.999996 | 1.66832e-06 | 0.999994 |
| rad10     | 1.02993e-06 | 0.999997 | 1.42890e-06 | 0.999996 |
| rad3      | 8.65115e-07 | 0.999998 | 1.20024e-06 | 0.999997 |
| rad61     | 6.32318e-07 | 0.999998 | 8.77259e-07 | 0.999998 |
| rad4      | 5.86002e-07 | 0.999999 | 8.13003e-07 | 0.999998 |
| rad41     | 3.54097e-07 | 0.999999 | 4.91265e-07 | 0.999999 |
| rad5      | 3.53518e-07 | 1.000000 | 4.90461e-07 | 0.999999 |
| rad2      | 3.03262e-07 | 1.000000 | 4.20736e-07 | 1.000000 |
| rad27     | 8.63479e-08 | 1.000000 | 1.19797e-07 | 1.000000 |
| rad1      | 6.98364e-08 | 1.000000 | 9.68888e-08 | 1.000000 |

100000000. Pa, 2750.00000 K

| Rate constant      | True (fraction) |          | Effective (fraction) |          |
|--------------------|-----------------|----------|----------------------|----------|
| Total              | 4.60596e-11     | (1.00 )  | 3.34512e-11          | (1.00 )  |
| Formation of rad11 | 8.62280e-12     | (0.187 ) | 3.67065e-12          | (0.110 ) |
| Formation of rad6  | 1.33313e-11     | (0.289 ) | 5.67502e-12          | (0.170 ) |
| H-abstraction      | 2.41055e-11     | (0.523 ) | 2.41055e-11          | (0.721 ) |

  

| species            | PYtrue      | Cumul    | PYeffective | Cumul    |
|--------------------|-------------|----------|-------------|----------|
| Benzene+2-propynyl | 0.523355    | 0.523355 | 0.720618    | 0.720618 |
| Phenyl+Allene      | 0.273742    | 0.797096 | 0.000000    | 0.720618 |
| PhCH2CCH+H         | 0.0803753   | 0.877472 | 0.110671    | 0.831288 |
| rad6               | 0.0412435   | 0.918715 | 0.0567892   | 0.888078 |
| PhCHCCH2+H         | 0.0357747   | 0.954490 | 0.0492590   | 0.937337 |
| C2H2+PhCH2         | 0.0120065   | 0.966496 | 0.0165320   | 0.953869 |
| PhCCH+CH3          | 0.00681179  | 0.973308 | 0.00937931  | 0.963248 |
| rad11              | 0.00611279  | 0.979421 | 0.00841684  | 0.971665 |
| PhcycC3H3_A+H      | 0.00570401  | 0.985125 | 0.00785396  | 0.979519 |
| PAH7+H             | 0.00279114  | 0.987916 | 0.00384318  | 0.983362 |
| Ph+MeAc            | 0.00264157  | 0.990558 | 0.00363722  | 0.986999 |
| rad19syn           | 0.00229418  | 0.992852 | 0.00315892  | 0.990158 |
| rad7               | 0.00134083  | 0.994193 | 0.00184622  | 0.992004 |
| Indene+H           | 0.00132537  | 0.995518 | 0.00182493  | 0.993829 |
| rad54              | 0.000789649 | 0.996308 | 0.00108729  | 0.994916 |
| PAH1+H             | 0.000458105 | 0.996766 | 0.000630775 | 0.995547 |
| rad13              | 0.000333663 | 0.997099 | 0.000459427 | 0.996007 |
| rad39              | 0.000281413 | 0.997381 | 0.000387484 | 0.996394 |
| rad56              | 0.000240109 | 0.997621 | 0.000330613 | 0.996725 |
| rad21              | 0.000170336 | 0.997791 | 0.000234539 | 0.996959 |
| rad50              | 0.000141500 | 0.997933 | 0.000194835 | 0.997154 |
| rad53              | 0.000131334 | 0.998064 | 0.000180836 | 0.997335 |
| PAH8+H             | 0.000131213 | 0.998195 | 0.000180671 | 0.997516 |
| rad51              | 0.000115223 | 0.998311 | 0.000158653 | 0.997674 |
| rad19anti          | 0.000112419 | 0.998423 | 0.000154793 | 0.997829 |
| rad9               | 0.000111736 | 0.998535 | 0.000153852 | 0.997983 |
| PAH3+H             | 0.000111638 | 0.998646 | 0.000153717 | 0.998137 |
| PAH9+H             | 0.000109539 | 0.998756 | 0.000150827 | 0.998287 |
| rad55              | 9.74630e-05 | 0.998853 | 0.000134199 | 0.998422 |
| rad70              | 8.66522e-05 | 0.998940 | 0.000119313 | 0.998541 |
| rad71              | 8.62390e-05 | 0.999026 | 0.000118744 | 0.998660 |
| PhCCCH3+H          | 7.70802e-05 | 0.999103 | 0.000106133 | 0.998766 |
| rad38              | 7.40797e-05 | 0.999177 | 0.000102002 | 0.998868 |
| rad28              | 6.10873e-05 | 0.999238 | 8.41122e-05 | 0.998952 |
| rad62              | 5.99196e-05 | 0.999298 | 8.25046e-05 | 0.999034 |
| PAH10+CH3          | 5.42489e-05 | 0.999353 | 7.46962e-05 | 0.999109 |
| rad22              | 4.96007e-05 | 0.999402 | 6.82958e-05 | 0.999177 |
| rad67              | 4.86955e-05 | 0.999451 | 6.70495e-05 | 0.999244 |
| rad45              | 4.61207e-05 | 0.999497 | 6.35044e-05 | 0.999308 |
| rad20              | 4.23829e-05 | 0.999539 | 5.83579e-05 | 0.999366 |
| rad34              | 3.86292e-05 | 0.999578 | 5.31893e-05 | 0.999420 |
| rad47              | 3.80428e-05 | 0.999616 | 5.23819e-05 | 0.999472 |
| rad46              | 3.68011e-05 | 0.999653 | 5.06721e-05 | 0.999523 |
| rad33              | 3.59474e-05 | 0.999689 | 4.94967e-05 | 0.999572 |
| rad35              | 3.58607e-05 | 0.999725 | 4.93775e-05 | 0.999621 |
| rad23              | 3.50444e-05 | 0.999760 | 4.82532e-05 | 0.999670 |
| rad73              | 2.76988e-05 | 0.999787 | 3.81390e-05 | 0.999708 |
| rad25              | 2.05660e-05 | 0.999808 | 2.83176e-05 | 0.999736 |
| rad52              | 1.87733e-05 | 0.999827 | 2.58494e-05 | 0.999762 |
| rad72              | 1.62245e-05 | 0.999843 | 2.23399e-05 | 0.999784 |
| rad42              | 1.55767e-05 | 0.999859 | 2.14478e-05 | 0.999806 |
| rad8               | 1.34302e-05 | 0.999872 | 1.84924e-05 | 0.999824 |
| rad68syn           | 1.32773e-05 | 0.999885 | 1.82818e-05 | 0.999843 |
| rad64              | 1.02467e-05 | 0.999896 | 1.41090e-05 | 0.999857 |
| rad15              | 9.51751e-06 | 0.999905 | 1.31048e-05 | 0.999870 |

|           |             |          |             |          |
|-----------|-------------|----------|-------------|----------|
| rad30     | 9.47948e-06 | 0.999915 | 1.30525e-05 | 0.999883 |
| rad40syn  | 9.41417e-06 | 0.999924 | 1.29626e-05 | 0.999896 |
| rad68anti | 8.43901e-06 | 0.999932 | 1.16198e-05 | 0.999907 |
| rad36     | 8.35807e-06 | 0.999941 | 1.15084e-05 | 0.999919 |
| rad12     | 7.75850e-06 | 0.999949 | 1.06828e-05 | 0.999930 |
| rad40anti | 7.37823e-06 | 0.999956 | 1.01593e-05 | 0.999940 |
| rad59     | 7.32347e-06 | 0.999963 | 1.00838e-05 | 0.999950 |
| rad24     | 7.17661e-06 | 0.999970 | 9.88164e-06 | 0.999960 |
| rad18     | 4.02251e-06 | 0.999974 | 5.53867e-06 | 0.999965 |
| rad37     | 3.74258e-06 | 0.999978 | 5.15323e-06 | 0.999970 |
| rad14     | 3.27601e-06 | 0.999981 | 4.51079e-06 | 0.999975 |
| rad58     | 3.21542e-06 | 0.999985 | 4.42737e-06 | 0.999979 |
| rad60syn  | 3.07470e-06 | 0.999988 | 4.23362e-06 | 0.999984 |
| rad65     | 2.71748e-06 | 0.999990 | 3.74177e-06 | 0.999987 |
| rad60anti | 2.32325e-06 | 0.999993 | 3.19893e-06 | 0.999991 |
| rad26     | 1.81300e-06 | 0.999995 | 2.49636e-06 | 0.999993 |
| rad43     | 1.16686e-06 | 0.999996 | 1.60667e-06 | 0.999995 |
| rad10     | 9.90092e-07 | 0.999997 | 1.36328e-06 | 0.999996 |
| rad3      | 8.54115e-07 | 0.999998 | 1.17605e-06 | 0.999997 |
| rad61     | 6.17375e-07 | 0.999998 | 8.50076e-07 | 0.999998 |
| rad4      | 5.74663e-07 | 0.999999 | 7.91263e-07 | 0.999999 |
| rad41     | 3.43356e-07 | 0.999999 | 4.72773e-07 | 0.999999 |
| rad5      | 3.35562e-07 | 0.999999 | 4.62042e-07 | 1.000000 |
| rad2      | 2.98269e-07 | 1.000000 | 4.10695e-07 | 1.000000 |
| rad27     | 7.88681e-08 | 1.000000 | 1.08595e-07 | 1.000000 |
| rad1      | 6.76965e-08 | 1.000000 | 9.32125e-08 | 1.000000 |

100000000. Pa, 3000.00000 K

=====

| Rate constant      | True (fraction)      | Effective (fraction) |
|--------------------|----------------------|----------------------|
| Total              | 6.24269e-11 (1.00 )  | 4.56414e-11 (1.00 )  |
| Formation of rad11 | 1.12221e-11 (0.180 ) | 4.69861e-12 (0.103 ) |
| Formation of rad6  | 1.76534e-11 (0.283 ) | 7.39138e-12 (0.162 ) |
| H-abstraction      | 3.35514e-11 (0.537 ) | 3.35514e-11 (0.735 ) |

| species            | PYtrue      | Cumul    | PYeffective | Cumul    |
|--------------------|-------------|----------|-------------|----------|
| Benzene+2-propynyl | 0.537451    | 0.537451 | 0.735109    | 0.735109 |
| Phenyl+Allene      | 0.268882    | 0.806334 | 0.000000    | 0.735109 |
| PhCH2CCH+H         | 0.0786592   | 0.884993 | 0.107588    | 0.842697 |
| rad6               | 0.0369522   | 0.921945 | 0.0505420   | 0.893239 |
| PhCHCCH2+H         | 0.0347962   | 0.956741 | 0.0475932   | 0.940832 |
| C2H2+PhCH2         | 0.0115645   | 0.968306 | 0.0158175   | 0.956649 |
| PhCCH+CH3          | 0.00680770  | 0.975113 | 0.00931136  | 0.965961 |
| PhcycC3H3_A+H      | 0.00564966  | 0.980763 | 0.00772747  | 0.973688 |
| rad11              | 0.00459116  | 0.985354 | 0.00627963  | 0.979968 |
| PAH7+H             | 0.00279032  | 0.988144 | 0.00381652  | 0.983784 |
| Ph+MeAc            | 0.00259211  | 0.990737 | 0.00354540  | 0.987330 |
| rad19syn           | 0.00228602  | 0.993023 | 0.00312674  | 0.990457 |
| rad7               | 0.00134048  | 0.994363 | 0.00183346  | 0.992290 |
| Indene+H           | 0.00129596  | 0.995659 | 0.00177258  | 0.994063 |
| rad54              | 0.000782318 | 0.996441 | 0.00107003  | 0.995133 |
| PAH1+H             | 0.000443347 | 0.996885 | 0.000606396 | 0.995739 |
| rad13              | 0.000325351 | 0.997210 | 0.000445006 | 0.996184 |
| rad39              | 0.000280990 | 0.997491 | 0.000384330 | 0.996568 |
| rad56              | 0.000231702 | 0.997723 | 0.000316915 | 0.996885 |
| rad21              | 0.000151467 | 0.997874 | 0.000207172 | 0.997092 |
| rad50              | 0.000138080 | 0.998012 | 0.000188861 | 0.997281 |
| rad53              | 0.000127390 | 0.998140 | 0.000174241 | 0.997456 |
| PAH8+H             | 0.000118493 | 0.998258 | 0.000162071 | 0.997618 |
| rad51              | 0.000112718 | 0.998371 | 0.000154173 | 0.997772 |
| rad19anti          | 0.000109960 | 0.998481 | 0.000150400 | 0.997922 |
| rad9               | 0.000108431 | 0.998589 | 0.000148309 | 0.998070 |
| PAH9+H             | 0.000107121 | 0.998696 | 0.000146517 | 0.998217 |
| PAH3+H             | 0.000104637 | 0.998801 | 0.000143120 | 0.998360 |
| rad55              | 9.61000e-05 | 0.998897 | 0.000131443 | 0.998492 |
| rad71              | 8.47028e-05 | 0.998982 | 0.000115854 | 0.998607 |
| rad70              | 8.27749e-05 | 0.999065 | 0.000113217 | 0.998721 |
| PhCCCH3+H          | 7.52849e-05 | 0.999140 | 0.000102972 | 0.998824 |
| rad38              | 7.27427e-05 | 0.999213 | 9.94954e-05 | 0.998923 |
| rad28              | 6.32841e-05 | 0.999276 | 8.65581e-05 | 0.999010 |
| rad62              | 5.67519e-05 | 0.999333 | 7.76239e-05 | 0.999087 |
| PAH10+CH3          | 5.31635e-05 | 0.999386 | 7.27152e-05 | 0.999160 |
| rad67              | 4.71730e-05 | 0.999433 | 6.45221e-05 | 0.999224 |
| rad22              | 4.55906e-05 | 0.999479 | 6.23574e-05 | 0.999287 |
| rad45              | 4.32105e-05 | 0.999522 | 5.91019e-05 | 0.999346 |
| rad20              | 3.89157e-05 | 0.999561 | 5.32277e-05 | 0.999399 |
| rad34              | 3.64916e-05 | 0.999597 | 4.99120e-05 | 0.999449 |
| rad46              | 3.59914e-05 | 0.999633 | 4.92278e-05 | 0.999498 |

|           |             |          |             |          |
|-----------|-------------|----------|-------------|----------|
| rad33     | 3.55501e-05 | 0.999669 | 4.86244e-05 | 0.999547 |
| rad47     | 3.48805e-05 | 0.999704 | 4.77084e-05 | 0.999595 |
| rad35     | 3.47060e-05 | 0.999738 | 4.74700e-05 | 0.999642 |
| rad23     | 3.38356e-05 | 0.999772 | 4.62793e-05 | 0.999688 |
| rad73     | 2.71696e-05 | 0.999799 | 3.71618e-05 | 0.999726 |
| rad25     | 1.86974e-05 | 0.999818 | 2.55737e-05 | 0.999751 |
| rad52     | 1.83767e-05 | 0.999836 | 2.51351e-05 | 0.999776 |
| rad72     | 1.59607e-05 | 0.999852 | 2.18306e-05 | 0.999798 |
| rad42     | 1.47243e-05 | 0.999867 | 2.01394e-05 | 0.999818 |
| rad68syn  | 1.21928e-05 | 0.999879 | 1.66769e-05 | 0.999835 |
| rad8      | 1.21908e-05 | 0.999892 | 1.66742e-05 | 0.999852 |
| rad64     | 1.00085e-05 | 0.999902 | 1.36893e-05 | 0.999865 |
| rad15     | 9.29186e-06 | 0.999911 | 1.27091e-05 | 0.999878 |
| rad30     | 9.19556e-06 | 0.999920 | 1.25774e-05 | 0.999891 |
| rad40syn  | 8.56945e-06 | 0.999929 | 1.17210e-05 | 0.999902 |
| rad36     | 7.82840e-06 | 0.999936 | 1.07074e-05 | 0.999913 |
| rad68anti | 7.75121e-06 | 0.999944 | 1.06019e-05 | 0.999924 |
| rad12     | 7.33746e-06 | 0.999952 | 1.00359e-05 | 0.999934 |
| rad59     | 6.90382e-06 | 0.999958 | 9.44285e-06 | 0.999943 |
| rad40anti | 6.70011e-06 | 0.999965 | 9.16422e-06 | 0.999952 |
| rad24     | 6.59960e-06 | 0.999972 | 9.02671e-06 | 0.999961 |
| rad18     | 3.81149e-06 | 0.999976 | 5.21324e-06 | 0.999966 |
| rad37     | 3.72687e-06 | 0.999979 | 5.09751e-06 | 0.999972 |
| rad58     | 2.97338e-06 | 0.999982 | 4.06690e-06 | 0.999976 |
| rad14     | 2.96450e-06 | 0.999985 | 4.05474e-06 | 0.999980 |
| rad60syn  | 2.92713e-06 | 0.999988 | 4.00364e-06 | 0.999984 |
| rad65     | 2.64561e-06 | 0.999991 | 3.61859e-06 | 0.999987 |
| rad60anti | 2.20818e-06 | 0.999993 | 3.02028e-06 | 0.999990 |
| rad26     | 1.82279e-06 | 0.999995 | 2.49315e-06 | 0.999993 |
| rad43     | 1.11281e-06 | 0.999996 | 1.52207e-06 | 0.999994 |
| rad10     | 9.67976e-07 | 0.999997 | 1.32397e-06 | 0.999996 |
| rad3      | 8.37190e-07 | 0.999998 | 1.14508e-06 | 0.999997 |
| rad61     | 5.99722e-07 | 0.999998 | 8.20285e-07 | 0.999998 |
| rad4      | 5.61122e-07 | 0.999999 | 7.67487e-07 | 0.999998 |
| rad41     | 3.26511e-07 | 0.999999 | 4.46593e-07 | 0.999999 |
| rad5      | 3.12163e-07 | 1.000000 | 4.26967e-07 | 0.999999 |
| rad2      | 2.93318e-07 | 1.000000 | 4.01190e-07 | 1.000000 |
| rad27     | 7.20211e-08 | 1.000000 | 9.85087e-08 | 1.000000 |
| rad1      | 6.57092e-08 | 1.000000 | 8.98751e-08 | 1.000000 |

100000000. Pa, 3250.00000 K

| Rate constant      | True (fraction)      | Effective (fraction)  |
|--------------------|----------------------|-----------------------|
| Total              | 8.22129e-11 (1.00 )  | 6.04259e-11 (1.00 )   |
| Formation of rad11 | 1.42538e-11 (0.173 ) | 5.86259e-12 (0.0970 ) |
| Formation of rad6  | 2.27549e-11 (0.277 ) | 9.35907e-12 (0.155 )  |
| H-abstraction      | 4.52043e-11 (0.550 ) | 4.52043e-11 (0.748 )  |

| species            | PYtrue      | Cumul    | PYeffective | Cumul    |
|--------------------|-------------|----------|-------------|----------|
| Benzene+2-propynyl | 0.549844    | 0.549844 | 0.748094    | 0.748094 |
| Phenyl+Allene      | 0.265007    | 0.814851 | 0.000000    | 0.748094 |
| PhCH2CCH+H         | 0.0774984   | 0.892349 | 0.105441    | 0.853535 |
| PhCHCCH2+H         | 0.0339067   | 0.926256 | 0.0461321   | 0.899667 |
| rad6               | 0.0323523   | 0.958608 | 0.0440171   | 0.943684 |
| C2H2+PhCH2         | 0.0113070   | 0.969915 | 0.0153838   | 0.959068 |
| PhCCH+CH3          | 0.00680586  | 0.976721 | 0.00925976  | 0.968328 |
| PhcycC3H3_A+H      | 0.00554696  | 0.982268 | 0.00754698  | 0.975875 |
| rad11              | 0.00339415  | 0.985662 | 0.00461794  | 0.980493 |
| PAH7+H             | 0.00278925  | 0.988451 | 0.00379494  | 0.984288 |
| Ph+MeAc            | 0.00255234  | 0.991004 | 0.00347260  | 0.987760 |
| rad19syn           | 0.00226246  | 0.993266 | 0.00307822  | 0.990838 |
| rad7               | 0.00131632  | 0.994583 | 0.00179093  | 0.992629 |
| Indene+H           | 0.00124509  | 0.995828 | 0.00169401  | 0.994323 |
| rad54              | 0.000777726 | 0.996605 | 0.00105814  | 0.995381 |
| PAH1+H             | 0.000425099 | 0.997030 | 0.000578371 | 0.995960 |
| rad13              | 0.000310014 | 0.997340 | 0.000421791 | 0.996382 |
| rad39              | 0.000278232 | 0.997619 | 0.000378549 | 0.996760 |
| rad56              | 0.000223344 | 0.997842 | 0.000303872 | 0.997064 |
| rad50              | 0.000132046 | 0.997974 | 0.000179656 | 0.997244 |
| rad21              | 0.000130386 | 0.998104 | 0.000177398 | 0.997421 |
| rad53              | 0.000123619 | 0.998228 | 0.000168190 | 0.997589 |
| rad19anti          | 0.000108260 | 0.998336 | 0.000147294 | 0.997737 |
| rad51              | 0.000107976 | 0.998444 | 0.000146908 | 0.997883 |
| PAH8+H             | 0.000107964 | 0.998552 | 0.000146891 | 0.998030 |
| rad9               | 0.000103664 | 0.998656 | 0.000141041 | 0.998171 |
| PAH9+H             | 0.000102475 | 0.998758 | 0.000139423 | 0.998311 |
| PAH3+H             | 9.83352e-05 | 0.998857 | 0.000133791 | 0.998445 |
| rad55              | 9.50613e-05 | 0.998952 | 0.000129336 | 0.998574 |

|           |             |          |             |          |
|-----------|-------------|----------|-------------|----------|
| rad71     | 8.14319e-05 | 0.999033 | 0.000110793 | 0.998685 |
| rad70     | 7.97460e-05 | 0.999113 | 0.000108499 | 0.998793 |
| PhCCCH3+H | 7.36973e-05 | 0.999187 | 0.000100270 | 0.998894 |
| rad38     | 7.00164e-05 | 0.999257 | 9.52613e-05 | 0.998989 |
| rad28     | 6.32051e-05 | 0.999320 | 8.59939e-05 | 0.999075 |
| rad62     | 5.30099e-05 | 0.999373 | 7.21232e-05 | 0.999147 |
| PAH10+CH3 | 5.20493e-05 | 0.999425 | 7.08158e-05 | 0.999218 |
| rad67     | 4.58187e-05 | 0.999471 | 6.23389e-05 | 0.999280 |
| rad22     | 3.99541e-05 | 0.999511 | 5.43598e-05 | 0.999334 |
| rad45     | 3.97833e-05 | 0.999551 | 5.41273e-05 | 0.999389 |
| rad34     | 3.48610e-05 | 0.999585 | 4.74304e-05 | 0.999436 |
| rad20     | 3.48050e-05 | 0.999620 | 4.73543e-05 | 0.999483 |
| rad33     | 3.45231e-05 | 0.999655 | 4.69706e-05 | 0.999530 |
| rad46     | 3.45023e-05 | 0.999689 | 4.69424e-05 | 0.999577 |
| rad35     | 3.34127e-05 | 0.999723 | 4.54600e-05 | 0.999623 |
| rad23     | 3.16952e-05 | 0.999754 | 4.31233e-05 | 0.999666 |
| rad47     | 3.14889e-05 | 0.999786 | 4.28424e-05 | 0.999709 |
| rad73     | 2.60907e-05 | 0.999812 | 3.54978e-05 | 0.999744 |
| rad52     | 1.76155e-05 | 0.999830 | 2.39668e-05 | 0.999768 |
| rad25     | 1.64259e-05 | 0.999846 | 2.23484e-05 | 0.999790 |
| rad72     | 1.53649e-05 | 0.999861 | 2.09048e-05 | 0.999811 |
| rad42     | 1.37006e-05 | 0.999875 | 1.86404e-05 | 0.999830 |
| rad68syn  | 1.13439e-05 | 0.999886 | 1.54341e-05 | 0.999845 |
| rad8      | 1.11938e-05 | 0.999898 | 1.52298e-05 | 0.999861 |
| rad64     | 9.71077e-06 | 0.999907 | 1.32121e-05 | 0.999874 |
| rad15     | 9.02356e-06 | 0.999916 | 1.22771e-05 | 0.999886 |
| rad30     | 8.90103e-06 | 0.999925 | 1.21104e-05 | 0.999898 |
| rad40syn  | 7.88237e-06 | 0.999933 | 1.07244e-05 | 0.999909 |
| rad68anti | 7.21308e-06 | 0.999940 | 9.81378e-06 | 0.999919 |
| rad36     | 7.20637e-06 | 0.999947 | 9.80466e-06 | 0.999929 |
| rad12     | 6.98242e-06 | 0.999954 | 9.49996e-06 | 0.999938 |
| rad59     | 6.52596e-06 | 0.999961 | 8.87896e-06 | 0.999947 |
| rad40anti | 6.14260e-06 | 0.999967 | 8.35733e-06 | 0.999955 |
| rad24     | 5.92977e-06 | 0.999973 | 8.06782e-06 | 0.999963 |
| rad37     | 3.72330e-06 | 0.999977 | 5.06575e-06 | 0.999968 |
| rad18     | 3.46942e-06 | 0.999980 | 4.72034e-06 | 0.999973 |
| rad60syn  | 2.79190e-06 | 0.999983 | 3.79854e-06 | 0.999977 |
| rad58     | 2.75345e-06 | 0.999986 | 3.74622e-06 | 0.999981 |
| rad14     | 2.68468e-06 | 0.999988 | 3.65266e-06 | 0.999984 |
| rad65     | 2.51524e-06 | 0.999991 | 3.42212e-06 | 0.999988 |
| rad60anti | 2.10314e-06 | 0.999993 | 2.86145e-06 | 0.999991 |
| rad26     | 1.82684e-06 | 0.999995 | 2.48552e-06 | 0.999993 |
| rad43     | 1.04891e-06 | 0.999996 | 1.42710e-06 | 0.999995 |
| rad10     | 9.51306e-07 | 0.999997 | 1.29430e-06 | 0.999996 |
| rad3      | 8.01651e-07 | 0.999998 | 1.09069e-06 | 0.999997 |
| rad61     | 5.79986e-07 | 0.999998 | 7.89106e-07 | 0.999998 |
| rad4      | 5.37311e-07 | 0.999999 | 7.31041e-07 | 0.999999 |
| rad41     | 3.06206e-07 | 0.999999 | 4.16610e-07 | 0.999999 |
| rad5      | 2.91415e-07 | 0.999999 | 3.96487e-07 | 0.999999 |
| rad2      | 2.83344e-07 | 1.000000 | 3.85507e-07 | 1.000000 |
| rad27     | 6.58650e-08 | 1.000000 | 8.96130e-08 | 1.000000 |
| rad1      | 6.30214e-08 | 1.000000 | 8.57440e-08 | 1.000000 |

100000000. Pa, 3500.00000 K

| Rate constant      | True (fraction)      | Effective (fraction)  |
|--------------------|----------------------|-----------------------|
| Total              | 1.05713e-10 (1.00 )  | 7.80083e-11 (1.00 )   |
| Formation of rad11 | 1.77412e-11 (0.168 ) | 7.15352e-12 (0.0917 ) |
| Formation of rad6  | 2.86822e-11 (0.271 ) | 1.15651e-11 (0.148 )  |
| H-abstraction      | 5.92897e-11 (0.561 ) | 5.92897e-11 (0.760 )  |

| species            | PYtrue      | Cumul    | PYeffective | Cumul    |
|--------------------|-------------|----------|-------------|----------|
| Benzene+2-propynyl | 0.560855    | 0.560855 | 0.760043    | 0.760043 |
| Phenyl+Allene      | 0.262075    | 0.822930 | 0.000000    | 0.760043 |
| PhCH2CCH+H         | 0.0765593   | 0.899489 | 0.103750    | 0.863793 |
| PhCHCCH2+H         | 0.0330607   | 0.932550 | 0.0448023   | 0.908595 |
| rad6               | 0.0276315   | 0.960182 | 0.0374450   | 0.946040 |
| C2H2+PhCH2         | 0.0111805   | 0.971362 | 0.0151513   | 0.961191 |
| PhCCH+CH3          | 0.00678611  | 0.978148 | 0.00919622  | 0.970388 |
| PhcycC3H3_A+H      | 0.00540509  | 0.983553 | 0.00732470  | 0.977712 |
| PAH7+H             | 0.00277887  | 0.986332 | 0.00376579  | 0.981478 |
| Ph+MeAc            | 0.00252369  | 0.988856 | 0.00341998  | 0.984898 |
| rad11              | 0.00249397  | 0.991350 | 0.00337972  | 0.988278 |
| rad19syn           | 0.00222372  | 0.993573 | 0.00301347  | 0.991291 |
| rad7               | 0.00125782  | 0.994831 | 0.00170454  | 0.992996 |
| Indene+H           | 0.00117865  | 0.996010 | 0.00159725  | 0.994593 |
| rad54              | 0.000775452 | 0.996785 | 0.00105086  | 0.995644 |
| PAH1+H             | 0.000406040 | 0.997191 | 0.000550247 | 0.996194 |

|           |             |          |             |          |
|-----------|-------------|----------|-------------|----------|
| rad13     | 0.000287237 | 0.997479 | 0.000389251 | 0.996584 |
| rad39     | 0.000272698 | 0.997751 | 0.000369548 | 0.996953 |
| rad56     | 0.000216536 | 0.997968 | 0.000293441 | 0.997246 |
| rad50     | 0.000124229 | 0.998092 | 0.000168349 | 0.997415 |
| rad53     | 0.000120668 | 0.998213 | 0.000163524 | 0.997578 |
| rad21     | 0.000109674 | 0.998322 | 0.000148626 | 0.997727 |
| rad19anti | 0.000106913 | 0.998429 | 0.000144884 | 0.997872 |
| rad51     | 0.000101654 | 0.998531 | 0.000137757 | 0.998010 |
| PAH8+H    | 0.000100700 | 0.998632 | 0.000136463 | 0.998146 |
| rad9      | 9.70823e-05 | 0.998729 | 0.000131561 | 0.998278 |
| PAH9+H    | 9.63656e-05 | 0.998825 | 0.000130590 | 0.998408 |
| rad55     | 9.44149e-05 | 0.998920 | 0.000127947 | 0.998536 |
| PAH3+H    | 9.33439e-05 | 0.999013 | 0.000126495 | 0.998663 |
| rad70     | 7.75698e-05 | 0.999091 | 0.000105119 | 0.998768 |
| rad71     | 7.69233e-05 | 0.999167 | 0.000104243 | 0.998872 |
| PhCCCH3+H | 7.22012e-05 | 0.999240 | 9.78438e-05 | 0.998970 |
| rad38     | 6.62855e-05 | 0.999306 | 8.98271e-05 | 0.999060 |
| rad28     | 6.64018e-05 | 0.999366 | 8.18540e-05 | 0.999142 |
| PAH10+CH3 | 5.09128e-05 | 0.999417 | 6.89945e-05 | 0.999211 |
| rad62     | 4.92980e-05 | 0.999467 | 6.68061e-05 | 0.999277 |
| rad67     | 4.45877e-05 | 0.999511 | 6.04233e-05 | 0.999338 |
| rad45     | 3.60746e-05 | 0.999547 | 4.88866e-05 | 0.999387 |
| rad34     | 3.37822e-05 | 0.999581 | 4.57801e-05 | 0.999432 |
| rad22     | 3.37772e-05 | 0.999615 | 4.57734e-05 | 0.999478 |
| rad33     | 3.26357e-05 | 0.999647 | 4.42264e-05 | 0.999522 |
| rad46     | 3.25423e-05 | 0.999680 | 4.40997e-05 | 0.999567 |
| rad35     | 3.20671e-05 | 0.999712 | 4.34559e-05 | 0.999610 |
| rad20     | 3.05237e-05 | 0.999743 | 4.13645e-05 | 0.999651 |
| rad23     | 2.90056e-05 | 0.999772 | 3.93071e-05 | 0.999691 |
| rad47     | 2.80747e-05 | 0.999800 | 3.80454e-05 | 0.999729 |
| rad73     | 2.46225e-05 | 0.999824 | 3.33672e-05 | 0.999762 |
| rad52     | 1.65962e-05 | 0.999841 | 2.24904e-05 | 0.999785 |
| rad72     | 1.45298e-05 | 0.999855 | 1.96901e-05 | 0.999804 |
| rad25     | 1.40650e-05 | 0.999869 | 1.90603e-05 | 0.999823 |
| rad42     | 1.26646e-05 | 0.999882 | 1.71625e-05 | 0.999841 |
| rad68syn  | 1.07981e-05 | 0.999893 | 1.46331e-05 | 0.999855 |
| rad8      | 1.03658e-05 | 0.999903 | 1.40472e-05 | 0.999869 |
| rad64     | 9.39964e-06 | 0.999913 | 1.27380e-05 | 0.999882 |
| rad15     | 8.62670e-06 | 0.999921 | 1.16905e-05 | 0.999894 |
| rad30     | 8.60167e-06 | 0.999930 | 1.16566e-05 | 0.999905 |
| rad40syn  | 7.41791e-06 | 0.999937 | 1.00524e-05 | 0.999915 |
| rad68anti | 6.86714e-06 | 0.999944 | 9.30600e-06 | 0.999925 |
| rad12     | 6.62675e-06 | 0.999951 | 8.98024e-06 | 0.999934 |
| rad36     | 6.53422e-06 | 0.999957 | 8.85486e-06 | 0.999942 |
| rad59     | 6.22278e-06 | 0.999964 | 8.43282e-06 | 0.999951 |
| rad40anti | 5.76036e-06 | 0.999969 | 7.80618e-06 | 0.999959 |
| rad24     | 5.22930e-06 | 0.999975 | 7.08652e-06 | 0.999966 |
| rad37     | 3.71601e-06 | 0.999978 | 5.03576e-06 | 0.999971 |
| rad18     | 3.05247e-06 | 0.999981 | 4.13657e-06 | 0.999975 |
| rad60syn  | 2.67813e-06 | 0.999984 | 3.62927e-06 | 0.999979 |
| rad58     | 2.58101e-06 | 0.999987 | 3.49766e-06 | 0.999982 |
| rad14     | 2.44832e-06 | 0.999989 | 3.31786e-06 | 0.999985 |
| rad65     | 2.34850e-06 | 0.999991 | 3.18257e-06 | 0.999989 |
| rad60anti | 2.01560e-06 | 0.999993 | 2.73145e-06 | 0.999991 |
| rad26     | 1.79491e-06 | 0.999995 | 2.43239e-06 | 0.999994 |
| rad43     | 9.85117e-07 | 0.999996 | 1.33498e-06 | 0.999995 |
| rad10     | 9.28467e-07 | 0.999997 | 1.25821e-06 | 0.999996 |
| rad3      | 7.46213e-07 | 0.999998 | 1.01123e-06 | 0.999997 |
| rad61     | 5.59498e-07 | 0.999998 | 7.58206e-07 | 0.999998 |
| rad4      | 5.01974e-07 | 0.999999 | 6.80253e-07 | 0.999999 |
| rad41     | 2.85499e-07 | 0.999999 | 3.86894e-07 | 0.999999 |
| rad5      | 2.73758e-07 | 0.999999 | 3.70985e-07 | 1.000000 |
| rad2      | 2.66951e-07 | 1.000000 | 3.61759e-07 | 1.000000 |
| rad27     | 6.05186e-08 | 1.000000 | 8.20117e-08 | 1.000000 |
| rad1      | 5.93654e-08 | 1.000000 | 8.04489e-08 | 1.000000 |

100000000. Pa, 3750.00000 K

| Rate constant      | True (fraction) |          | Effective (fraction) |           |
|--------------------|-----------------|----------|----------------------|-----------|
| Total              | 1.33217e-10     | (1.00 )  | 9.85976e-11          | (1.00 )   |
| Formation of rad11 | 2.17064e-11     | (0.163 ) | 8.56585e-12          | (0.0869 ) |
| Formation of rad6  | 3.54800e-11     | (0.266 ) | 1.40012e-11          | (0.142 )  |
| H-abstraction      | 7.60305e-11     | (0.571 ) | 7.60305e-11          | (0.771 )  |
| species            | PYtrue          | Cumul    | PYeffective          | Cumul     |
| Benzene+2-propynyl | 0.570727        | 0.570727 | 0.771119             | 0.771119  |
| Phenyl+Allene      | 0.259872        | 0.830599 | 0.000000             | 0.771119  |
| PhCH2CCH+H         | 0.0756361       | 0.906235 | 0.102194             | 0.873313  |

|               |             |          |             |          |
|---------------|-------------|----------|-------------|----------|
| PhCCCH2+H     | 0.0322410   | 0.938476 | 0.0435615   | 0.916874 |
| rad6          | 0.0230634   | 0.961540 | 0.0311614   | 0.948036 |
| C2H2+PhCH2    | 0.0111354   | 0.972675 | 0.0150452   | 0.963081 |
| PhCCH+CH3     | 0.00673465  | 0.979410 | 0.00909933  | 0.972180 |
| PhcycC3H3_A+H | 0.00524589  | 0.984655 | 0.00708783  | 0.979268 |
| PAH7+H        | 0.00275194  | 0.987407 | 0.00371821  | 0.982986 |
| Ph+MeAc       | 0.00250512  | 0.989913 | 0.00338473  | 0.986371 |
| rad19syn      | 0.00217438  | 0.992087 | 0.00293784  | 0.989309 |
| rad11         | 0.00183574  | 0.993923 | 0.00248031  | 0.991789 |
| rad7          | 0.00116639  | 0.995089 | 0.00157593  | 0.993365 |
| Indene+H      | 0.00110279  | 0.996192 | 0.00149000  | 0.994855 |
| rad54         | 0.000774172 | 0.996966 | 0.00104600  | 0.995901 |
| PAH1+H        | 0.000389265 | 0.997355 | 0.000525942 | 0.996427 |
| rad39         | 0.000264324 | 0.997620 | 0.000357134 | 0.996784 |
| rad13         | 0.000258935 | 0.997879 | 0.000349851 | 0.997134 |
| rad56         | 0.000212373 | 0.998091 | 0.000286941 | 0.997421 |
| rad53         | 0.000118954 | 0.998210 | 0.000160721 | 0.997582 |
| rad50         | 0.000115475 | 0.998325 | 0.000156020 | 0.997738 |
| rad19anti     | 0.000105452 | 0.998431 | 0.000142478 | 0.997880 |
| PAH8+H        | 9.70938e-05 | 0.998528 | 0.000131185 | 0.998012 |
| rad51         | 9.44477e-05 | 0.998622 | 0.000127610 | 0.998139 |
| rad55         | 9.40897e-05 | 0.998716 | 0.000127126 | 0.998266 |
| rad21         | 9.09092e-05 | 0.998807 | 0.000122829 | 0.998389 |
| PAH3+H        | 8.98279e-05 | 0.998897 | 0.000121368 | 0.998510 |
| PAH9+H        | 8.95296e-05 | 0.998987 | 0.000120965 | 0.998631 |
| rad9          | 8.88826e-05 | 0.999076 | 0.000120091 | 0.998752 |
| rad70         | 7.60787e-05 | 0.999152 | 0.000102792 | 0.998854 |
| rad71         | 7.17143e-05 | 0.999223 | 9.68943e-05 | 0.998951 |
| PhCCCH3+H     | 7.07034e-05 | 0.999294 | 9.55286e-05 | 0.999047 |
| rad38         | 6.19557e-05 | 0.999356 | 8.37094e-05 | 0.999130 |
| rad28         | 5.52654e-05 | 0.999411 | 7.46702e-05 | 0.999205 |
| PAH10+CH3     | 4.97493e-05 | 0.999461 | 6.72169e-05 | 0.999272 |
| rad62         | 4.63087e-05 | 0.999507 | 6.25682e-05 | 0.999335 |
| rad67         | 4.34347e-05 | 0.999551 | 5.86852e-05 | 0.999394 |
| rad34         | 3.31852e-05 | 0.999584 | 4.48372e-05 | 0.999438 |
| rad45         | 3.23121e-05 | 0.999616 | 4.36574e-05 | 0.999482 |
| rad35         | 3.07344e-05 | 0.999647 | 4.15258e-05 | 0.999524 |
| rad46         | 3.03234e-05 | 0.999677 | 4.09705e-05 | 0.999565 |
| rad33         | 2.99716e-05 | 0.999707 | 4.04951e-05 | 0.999605 |
| rad22         | 2.78586e-05 | 0.999735 | 3.76403e-05 | 0.999643 |
| rad20         | 2.64338e-05 | 0.999762 | 3.57152e-05 | 0.999678 |
| rad23         | 2.60548e-05 | 0.999788 | 3.52032e-05 | 0.999714 |
| rad47         | 2.48127e-05 | 0.999812 | 3.35248e-05 | 0.999747 |
| rad73         | 2.29371e-05 | 0.999835 | 3.09909e-05 | 0.999778 |
| rad52         | 1.54312e-05 | 0.999851 | 2.08494e-05 | 0.999799 |
| rad72         | 1.35567e-05 | 0.999864 | 1.83168e-05 | 0.999817 |
| rad25         | 1.18357e-05 | 0.999876 | 1.59914e-05 | 0.999833 |
| rad42         | 1.18048e-05 | 0.999888 | 1.59497e-05 | 0.999849 |
| rad68syn      | 1.05574e-05 | 0.999899 | 1.42643e-05 | 0.999864 |
| rad8          | 9.63511e-06 | 0.999908 | 1.30182e-05 | 0.999877 |
| rad64         | 9.12364e-06 | 0.999917 | 1.23271e-05 | 0.999889 |
| rad30         | 8.29737e-06 | 0.999926 | 1.12108e-05 | 0.999900 |
| rad15         | 8.07187e-06 | 0.999934 | 1.09061e-05 | 0.999911 |
| rad40syn      | 7.19435e-06 | 0.999941 | 9.72042e-06 | 0.999921 |
| rad68anti     | 6.71451e-06 | 0.999948 | 9.07214e-06 | 0.999930 |
| rad12         | 6.22901e-06 | 0.999954 | 8.41612e-06 | 0.999938 |
| rad59         | 6.00085e-06 | 0.999960 | 8.10789e-06 | 0.999946 |
| rad36         | 5.85279e-06 | 0.999966 | 7.90782e-06 | 0.999954 |
| rad40anti     | 5.57166e-06 | 0.999971 | 7.52797e-06 | 0.999962 |
| rad24         | 4.54875e-06 | 0.999976 | 6.14590e-06 | 0.999968 |
| rad37         | 3.68686e-06 | 0.999980 | 4.98138e-06 | 0.999973 |
| rad18         | 2.61724e-06 | 0.999982 | 3.53620e-06 | 0.999976 |
| rad60syn      | 2.58667e-06 | 0.999985 | 3.49489e-06 | 0.999980 |
| rad58         | 2.46613e-06 | 0.999987 | 3.33204e-06 | 0.999983 |
| rad14         | 2.26465e-06 | 0.999989 | 3.05981e-06 | 0.999986 |
| rad65         | 2.16615e-06 | 0.999992 | 2.92672e-06 | 0.999989 |
| rad60anti     | 1.94640e-06 | 0.999994 | 2.62981e-06 | 0.999992 |
| rad26         | 1.71088e-06 | 0.999995 | 2.31160e-06 | 0.999994 |
| rad43         | 9.33115e-07 | 0.999996 | 1.26075e-06 | 0.999995 |
| rad10         | 8.91587e-07 | 0.999997 | 1.20464e-06 | 0.999997 |
| rad3          | 6.75813e-07 | 0.999998 | 9.13101e-07 | 0.999998 |
| rad61         | 5.39922e-07 | 0.999998 | 7.29497e-07 | 0.999998 |
| rad4          | 4.57665e-07 | 0.999999 | 6.18360e-07 | 0.999999 |
| rad41         | 2.68098e-07 | 0.999999 | 3.62233e-07 | 0.999999 |
| rad5          | 2.57927e-07 | 0.999999 | 3.48491e-07 | 1.000000 |
| rad2          | 2.45156e-07 | 1.000000 | 3.31236e-07 | 1.000000 |
| rad27         | 5.61270e-08 | 1.000000 | 7.58341e-08 | 1.000000 |
| rad1          | 5.48495e-08 | 1.000000 | 7.41081e-08 | 1.000000 |

10000000. Pa, 4000.00000 K



```

=====
Rate constant      | True (fraction)      Effective (fraction)
-----
Total              | 1.65008e-10 (1.00   ) 1.22416e-10 (1.00   )
Formation of rad11| 2.61707e-11 (0.159   ) 1.01003e-11 (0.0825  )
Formation of rad6  | 4.31906e-11 (0.262   ) 1.66690e-11 (0.136   )
H-abstraction     | 9.56470e-11 (0.580   ) 9.56470e-11 (0.781   )

```

```

species           | PYtrue      Cumul      | PYeffective  Cumul
-----
Benzene+2-propynyl| 0.579650    0.579650    | 0.781325    0.781325
Phenyl+Allene     | 0.258120    0.837770    | 0.000000    0.781325
PhCH2CCH+H        | 0.0746345   0.912404    | 0.100602    0.881927
PhCHCCH2+H        | 0.0314464   0.943850    | 0.0423875   0.924315
rad6               | 0.0188835   0.962734    | 0.0254535   0.949768
C2H2+PhCH2        | 0.0111343   0.973868    | 0.0150083   0.964776
PhCCH+CH3         | 0.00664671  0.980515    | 0.00895930  0.973736
PhcycC3H3_A+H     | 0.00509334  0.985608    | 0.00686543  0.980601
PAH7+H            | 0.00270473  0.988313    | 0.00364579  0.984247
Ph+MeAc           | 0.00249432  0.990807    | 0.00336217  0.987609
rad19syn          | 0.00212037  0.992928    | 0.00285810  0.990467
rad11             | 0.00136130  0.994289    | 0.00183494  0.992302
rad7              | 0.00105128  0.995340    | 0.00141706  0.993719
Indene+H          | 0.00102266  0.996363    | 0.00137848  0.995098
rad54             | 0.000772091 0.997135    | 0.00104072  0.996138
PAH1+H           | 0.000377456 0.997512    | 0.000508784 0.996647
rad39            | 0.000253430 0.997766    | 0.000341605 0.996989
rad13            | 0.000227923 0.997994    | 0.000307225 0.997296
rad56            | 0.000211275 0.998205    | 0.000284782 0.997581
rad53            | 0.000118562 0.998324    | 0.000159812 0.997741
rad50            | 0.000106462 0.998430    | 0.000143503 0.997884
rad19anti        | 0.000103509 0.998534    | 0.000139523 0.998024
PAH8+H          | 9.70127e-05 0.998631    | 0.000130766 0.998154
rad55           | 9.39059e-05 0.998725    | 0.000126578 0.998281
PAH3+H          | 8.76338e-05 0.998812    | 0.000118124 0.998399
rad51           | 8.69318e-05 0.998899    | 0.000117178 0.998516
PAH9+H          | 8.25291e-05 0.998982    | 0.000111243 0.998628
rad9            | 7.96097e-05 0.999061    | 0.000107308 0.998735
rad70           | 7.50435e-05 0.999136    | 0.000101153 0.998836
rad21           | 7.47644e-05 0.999211    | 0.000100777 0.998937
PhCCCH3+H       | 6.91695e-05 0.999280    | 9.32355e-05 0.999030
rad71           | 6.62598e-05 0.999346    | 8.93131e-05 0.999119
rad38           | 5.73606e-05 0.999404    | 7.73182e-05 0.999197
rad28           | 4.86795e-05 0.999453    | 6.56162e-05 0.999262
PAH10+CH3       | 4.85505e-05 0.999501    | 6.54426e-05 0.999328
rad62           | 4.46484e-05 0.999546    | 6.01828e-05 0.999388
rad67           | 4.23234e-05 0.999588    | 5.70488e-05 0.999445
rad34           | 3.29448e-05 0.999621    | 4.44072e-05 0.999489
rad35           | 2.94530e-05 0.999650    | 3.97004e-05 0.999529
rad45           | 2.86681e-05 0.999679    | 3.86425e-05 0.999568
rad46           | 2.80149e-05 0.999707    | 3.77621e-05 0.999605
rad33           | 2.67929e-05 0.999734    | 3.61150e-05 0.999642
rad23           | 2.30678e-05 0.999757    | 3.10938e-05 0.999673
rad20           | 2.27405e-05 0.999780    | 3.06525e-05 0.999703
rad22           | 2.26320e-05 0.999802    | 3.05064e-05 0.999734
rad47           | 2.18154e-05 0.999824    | 2.94056e-05 0.999763
rad73           | 2.11788e-05 0.999845    | 2.85476e-05 0.999792
rad52           | 1.42134e-05 0.999860    | 1.91586e-05 0.999811
rad72           | 1.25328e-05 0.999872    | 1.68933e-05 0.999828
rad42           | 1.12954e-05 0.999883    | 1.52255e-05 0.999843
rad68syn        | 1.05807e-05 0.999894    | 1.42621e-05 0.999857
rad25           | 9.85444e-06 0.999904    | 1.32831e-05 0.999871
rad8            | 8.94918e-06 0.999913    | 1.20629e-05 0.999883
rad64           | 8.91710e-06 0.999922    | 1.20196e-05 0.999895
rad30           | 7.98636e-06 0.999930    | 1.07651e-05 0.999905
rad15           | 7.38009e-06 0.999937    | 9.94782e-06 0.999915
rad40syn        | 7.19531e-06 0.999944    | 9.69877e-06 0.999925
rad68anti       | 6.72914e-06 0.999951    | 9.07037e-06 0.999934
rad59           | 5.84913e-06 0.999957    | 7.88423e-06 0.999942
rad12           | 5.77654e-06 0.999963    | 7.78635e-06 0.999950
rad40anti       | 5.56695e-06 0.999968    | 7.50385e-06 0.999957
rad36           | 5.19309e-06 0.999973    | 6.99991e-06 0.999964
rad24           | 3.92003e-06 0.999977    | 5.28393e-06 0.999970
rad37           | 3.62255e-06 0.999981    | 4.88294e-06 0.999975
rad60syn        | 2.51334e-06 0.999983    | 3.38780e-06 0.999978
rad58           | 2.40659e-06 0.999986    | 3.24391e-06 0.999981
rad18           | 2.20428e-06 0.999988    | 2.97120e-06 0.999984
rad14           | 2.13485e-06 0.999990    | 2.87761e-06 0.999987
rad65           | 1.98410e-06 0.999992    | 2.67444e-06 0.999990
rad60anti       | 1.89230e-06 0.999994    | 2.55067e-06 0.999992

```

|       |             |          |             |          |
|-------|-------------|----------|-------------|----------|
| rad26 | 1.57765e-06 | 0.999996 | 2.12655e-06 | 0.999994 |
| rad43 | 9.03249e-07 | 0.999997 | 1.21752e-06 | 0.999996 |
| rad10 | 8.38444e-07 | 0.999997 | 1.13016e-06 | 0.999997 |
| rad3  | 5.97806e-07 | 0.999998 | 8.05797e-07 | 0.999998 |
| rad61 | 5.22748e-07 | 0.999999 | 7.04625e-07 | 0.999998 |
| rad4  | 4.08541e-07 | 0.999999 | 5.50684e-07 | 0.999999 |
| rad41 | 2.57489e-07 | 0.999999 | 3.47076e-07 | 0.999999 |
| rad5  | 2.42760e-07 | 0.999999 | 3.27223e-07 | 0.999999 |
| rad2  | 2.20157e-07 | 1.000000 | 2.96757e-07 | 1.000000 |
| rad27 | 5.27372e-08 | 1.000000 | 7.10861e-08 | 1.000000 |
| rad1  | 4.97800e-08 | 1.000000 | 6.70999e-08 | 1.000000 |

10000000.0 Pa, 20.0000000 K

| Rate constant      | True (fraction) |            | Effective (fraction) |            |
|--------------------|-----------------|------------|----------------------|------------|
| Total              | 1.56740e-51     | (1.00 )    | 1.56740e-51          | (1.00 )    |
| Formation of rad11 | 1.56740e-51     | (1.000 )   | 1.56740e-51          | (1.000 )   |
| Formation of rad6  | 3.73945e-60     | (2.39e-09) | 3.73945e-60          | (2.39e-09) |
| H-abstraction      | 1.53631e-76     | (9.80e-26) | 1.53631e-76          | (9.80e-26) |

  

| species            | PYtrue      | Cumul    | PYeffective | Cumul    |
|--------------------|-------------|----------|-------------|----------|
| rad11              | 0.999998    | 0.999998 | 0.999998    | 0.999998 |
| rad6               | 2.32234e-06 | 1.00000  | 2.32234e-06 | 1.00000  |
| rad21              | 1.20053e-07 | 1.00000  | 1.20053e-07 | 1.00000  |
| rad20              | 6.93070e-11 | 1.00000  | 6.93070e-11 | 1.00000  |
| rad25              | 4.93615e-11 | 1.00000  | 4.93615e-11 | 1.00000  |
| rad22              | 2.66492e-11 | 1.00000  | 2.66492e-11 | 1.00000  |
| rad24              | 3.05497e-12 | 1.00000  | 3.05497e-12 | 1.00000  |
| PhCHCCH2+H         | 2.83510e-12 | 1.00000  | 2.83510e-12 | 1.00000  |
| rad9               | 1.46898e-13 | 1.00000  | 1.46898e-13 | 1.00000  |
| rad45              | 8.82331e-14 | 1.00000  | 8.82331e-14 | 1.00000  |
| rad36              | 1.74915e-14 | 1.00000  | 1.74915e-14 | 1.00000  |
| rad13              | 8.74696e-15 | 1.00000  | 8.74696e-15 | 1.00000  |
| rad18              | 3.52878e-15 | 1.00000  | 3.52878e-15 | 1.00000  |
| rad7               | 2.55255e-15 | 1.00000  | 2.55255e-15 | 1.00000  |
| Phenyl+Allene      | 1.80102e-15 | 1.00000  | 0.00000     | 1.00000  |
| rad33              | 6.36772e-17 | 1.00000  | 6.36772e-17 | 1.00000  |
| Indene+H           | 3.78962e-17 | 1.00000  | 3.78962e-17 | 1.00000  |
| C2H2+PhCH2         | 2.95811e-17 | 1.00000  | 2.95811e-17 | 1.00000  |
| rad23              | 6.16472e-18 | 1.00000  | 6.16472e-18 | 1.00000  |
| PhCH2CCH+H         | 6.67648e-21 | 1.00000  | 6.67648e-21 | 1.00000  |
| rad3               | 2.63126e-22 | 1.00000  | 2.63126e-22 | 1.00000  |
| rad4               | 2.03630e-22 | 1.00000  | 2.03630e-22 | 1.00000  |
| rad28              | 9.12895e-24 | 1.00000  | 9.12895e-24 | 1.00000  |
| rad8               | 2.50468e-25 | 1.00000  | 2.50468e-25 | 1.00000  |
| Benzene+2-propynyl | 9.80165e-26 | 1.00000  | 9.80165e-26 | 1.00000  |
| rad30              | 3.33896e-26 | 1.00000  | 3.33896e-26 | 1.00000  |
| rad15              | 4.86333e-27 | 1.00000  | 4.86333e-27 | 1.00000  |
| PAH7+H             | 4.08728e-28 | 1.00000  | 4.08728e-28 | 1.00000  |
| rad38              | 1.36410e-28 | 1.00000  | 1.36410e-28 | 1.00000  |
| rad2               | 4.04663e-29 | 1.00000  | 4.04663e-29 | 1.00000  |
| rad31              | 4.00277e-29 | 1.00000  | 4.00277e-29 | 1.00000  |
| rad1               | 1.03003e-29 | 1.00000  | 1.03003e-29 | 1.00000  |
| rad46              | 1.88015e-30 | 1.00000  | 1.88015e-30 | 1.00000  |
| PhCCH+CH3          | 1.95438e-31 | 1.00000  | 1.95438e-31 | 1.00000  |
| rad60syn           | 5.64884e-32 | 1.00000  | 5.64884e-32 | 1.00000  |
| PAH9+H             | 2.88803e-32 | 1.00000  | 2.88803e-32 | 1.00000  |
| rad14              | 2.66867e-32 | 1.00000  | 2.66867e-32 | 1.00000  |
| rad35              | 1.67582e-32 | 1.00000  | 1.67582e-32 | 1.00000  |
| rad60anti          | 5.90386e-33 | 1.00000  | 5.90386e-33 | 1.00000  |
| rad26              | 3.83963e-34 | 1.00000  | 3.83963e-34 | 1.00000  |
| Ph+MeAc            | 2.49758e-36 | 1.00000  | 2.49758e-36 | 1.00000  |
| rad10              | 4.16055e-37 | 1.00000  | 4.16055e-37 | 1.00000  |
| rad39              | 1.40473e-38 | 1.00000  | 1.40473e-38 | 1.00000  |
| PAH3+H             | 1.14403e-38 | 1.00000  | 1.14403e-38 | 1.00000  |
| rad59              | 5.35424e-39 | 1.00000  | 5.35424e-39 | 1.00000  |
| rad27              | 4.01336e-40 | 1.00000  | 4.01336e-40 | 1.00000  |
| rad50              | 1.55242e-40 | 1.00000  | 1.55242e-40 | 1.00000  |
| PhCCCH3+H          | 6.48125e-41 | 1.00000  | 6.48125e-41 | 1.00000  |
| rad12              | 1.33327e-45 | 1.00000  | 1.33327e-45 | 1.00000  |
| rad19syn           | 3.35969e-46 | 1.00000  | 3.35969e-46 | 1.00000  |
| rad70              | 4.30192e-47 | 1.00000  | 4.30192e-47 | 1.00000  |
| rad37              | 3.11261e-47 | 1.00000  | 3.11261e-47 | 1.00000  |
| rad54              | 2.37065e-47 | 1.00000  | 2.37065e-47 | 1.00000  |
| rad52              | 1.24022e-48 | 1.00000  | 1.24022e-48 | 1.00000  |
| rad5               | 2.52720e-51 | 1.00000  | 2.52720e-51 | 1.00000  |
| rad34              | 1.84687e-52 | 1.00000  | 1.84687e-52 | 1.00000  |
| rad51              | 5.70439e-53 | 1.00000  | 5.70439e-53 | 1.00000  |

|               |             |         |             |         |
|---------------|-------------|---------|-------------|---------|
| rad55         | 9.82462e-54 | 1.00000 | 9.82462e-54 | 1.00000 |
| PhcycC3H3_A+H | 2.41539e-55 | 1.00000 | 2.41539e-55 | 1.00000 |
| rad58         | 1.08752e-55 | 1.00000 | 1.08752e-55 | 1.00000 |
| PAH10+CH3     | 1.39587e-57 | 1.00000 | 1.39587e-57 | 1.00000 |
| rad62         | 2.98668e-59 | 1.00000 | 2.98668e-59 | 1.00000 |
| rad47         | 2.59138e-59 | 1.00000 | 2.59138e-59 | 1.00000 |
| rad65         | 4.66101e-60 | 1.00000 | 4.66101e-60 | 1.00000 |
| PAH1+H        | 8.35612e-64 | 1.00000 | 8.35612e-64 | 1.00000 |
| rad43         | 1.91661e-64 | 1.00000 | 1.91661e-64 | 1.00000 |
| rad42         | 1.51627e-69 | 1.00000 | 1.51627e-69 | 1.00000 |
| rad41         | 7.52482e-76 | 1.00000 | 7.52482e-76 | 1.00000 |

10000000.0 Pa, 30.0000000 K

| Rate constant      | True (fraction) |            | Effective (fraction) |            |
|--------------------|-----------------|------------|----------------------|------------|
| Total              | 5.03204e-39     | (1.00 )    | 5.03204e-39          | (1.00 )    |
| Formation of rad11 | 5.03203e-39     | (1.000 )   | 5.03203e-39          | (1.000 )   |
| Formation of rad6  | 9.92181e-45     | (1.97e-06) | 9.92181e-45          | (1.97e-06) |
| H-abstraction      | 3.33191e-55     | (6.62e-17) | 3.33191e-55          | (6.62e-17) |

  

| species            | PYtrue      | Cumul    | PYeffective | Cumul    |
|--------------------|-------------|----------|-------------|----------|
| rad11              | 0.999993    | 0.999993 | 0.999993    | 0.999993 |
| rad6               | 6.66196e-06 | 1.000000 | 6.66196e-06 | 1.000000 |
| rad21              | 2.43099e-07 | 1.000000 | 2.43099e-07 | 1.000000 |
| rad20              | 2.83045e-10 | 1.000000 | 2.83045e-10 | 1.000000 |
| rad22              | 1.08872e-10 | 1.000000 | 1.08872e-10 | 1.000000 |
| rad25              | 1.00791e-10 | 1.000000 | 1.00791e-10 | 1.000000 |
| rad24              | 1.20820e-11 | 1.000000 | 1.20820e-11 | 1.000000 |
| PhCHCCH2+H         | 5.86079e-12 | 1.000000 | 5.86079e-12 | 1.000000 |
| rad45              | 7.30189e-13 | 1.000000 | 7.30189e-13 | 1.000000 |
| rad9               | 3.05372e-13 | 1.000000 | 3.05372e-13 | 1.000000 |
| rad36              | 1.23001e-13 | 1.000000 | 1.23001e-13 | 1.000000 |
| rad13              | 8.71065e-14 | 1.000000 | 8.71065e-14 | 1.000000 |
| rad18              | 2.90939e-14 | 1.000000 | 2.90939e-14 | 1.000000 |
| rad7               | 2.64005e-14 | 1.000000 | 2.64005e-14 | 1.000000 |
| Phenyl+Allene      | 4.28137e-15 | 1.000000 | 0.000000    | 1.000000 |
| rad33              | 7.21682e-16 | 1.000000 | 7.21682e-16 | 1.000000 |
| Indene+H           | 3.13776e-16 | 1.000000 | 3.13776e-16 | 1.000000 |
| C2H2+PhCH2         | 2.46183e-16 | 1.000000 | 2.46183e-16 | 1.000000 |
| Benzene+2-propynyl | 6.62139e-17 | 1.000000 | 6.62139e-17 | 1.000000 |
| rad23              | 5.27652e-17 | 1.000000 | 5.27652e-17 | 1.000000 |
| PhCH2CCH+H         | 1.61758e-20 | 1.000000 | 1.61758e-20 | 1.000000 |
| rad3               | 9.67216e-21 | 1.000000 | 9.67216e-21 | 1.000000 |
| rad4               | 7.36782e-21 | 1.000000 | 7.36782e-21 | 1.000000 |
| rad28              | 4.30048e-22 | 1.000000 | 4.30048e-22 | 1.000000 |
| rad8               | 1.91881e-24 | 1.000000 | 1.91881e-24 | 1.000000 |
| rad30              | 5.64225e-25 | 1.000000 | 5.64225e-25 | 1.000000 |
| rad15              | 8.24589e-26 | 1.000000 | 8.24589e-26 | 1.000000 |
| rad2               | 6.09925e-27 | 1.000000 | 6.09925e-27 | 1.000000 |
| rad38              | 3.45088e-27 | 1.000000 | 3.45088e-27 | 1.000000 |
| PAH7+H             | 2.00982e-27 | 1.000000 | 2.00982e-27 | 1.000000 |
| rad31              | 1.48100e-27 | 1.000000 | 1.48100e-27 | 1.000000 |
| rad1               | 1.37542e-27 | 1.000000 | 1.37542e-27 | 1.000000 |
| PhCCH+CH3          | 4.45779e-29 | 1.000000 | 4.45779e-29 | 1.000000 |
| rad46              | 3.04350e-29 | 1.000000 | 3.04350e-29 | 1.000000 |
| rad14              | 4.18257e-30 | 1.000000 | 4.18257e-30 | 1.000000 |
| rad60syn           | 1.01724e-30 | 1.000000 | 1.01724e-30 | 1.000000 |
| PAH9+H             | 4.94367e-31 | 1.000000 | 4.94367e-31 | 1.000000 |
| rad35              | 2.86517e-31 | 1.000000 | 2.86517e-31 | 1.000000 |
| rad60anti          | 1.09535e-31 | 1.000000 | 1.09535e-31 | 1.000000 |
| rad26              | 3.74931e-33 | 1.000000 | 3.74931e-33 | 1.000000 |
| Ph+MeAc            | 2.55423e-33 | 1.000000 | 2.55423e-33 | 1.000000 |
| rad10              | 2.12161e-34 | 1.000000 | 2.12161e-34 | 1.000000 |
| rad39              | 7.08312e-36 | 1.000000 | 7.08312e-36 | 1.000000 |
| rad27              | 2.74024e-37 | 1.000000 | 2.74024e-37 | 1.000000 |
| PAH3+H             | 2.29313e-37 | 1.000000 | 2.29313e-37 | 1.000000 |
| rad59              | 1.07163e-37 | 1.000000 | 1.07163e-37 | 1.000000 |
| PhCCCH3+H          | 7.21639e-38 | 1.000000 | 7.21639e-38 | 1.000000 |
| rad50              | 2.92758e-39 | 1.000000 | 2.92758e-39 | 1.000000 |
| rad19syn           | 2.99107e-44 | 1.000000 | 2.99107e-44 | 1.000000 |
| rad12              | 2.62307e-44 | 1.000000 | 2.62307e-44 | 1.000000 |
| rad54              | 1.54398e-45 | 1.000000 | 1.54398e-45 | 1.000000 |
| rad37              | 6.14179e-46 | 1.000000 | 6.14179e-46 | 1.000000 |
| rad70              | 2.37734e-46 | 1.000000 | 2.37734e-46 | 1.000000 |
| rad52              | 3.72798e-47 | 1.000000 | 3.72798e-47 | 1.000000 |
| rad5               | 7.30291e-48 | 1.000000 | 7.30291e-48 | 1.000000 |
| rad51              | 1.73698e-51 | 1.000000 | 1.73698e-51 | 1.000000 |
| rad34              | 1.05290e-51 | 1.000000 | 1.05290e-51 | 1.000000 |

|               |             |          |             |          |
|---------------|-------------|----------|-------------|----------|
| rad55         | 3.91702e-52 | 1.000000 | 3.91702e-52 | 1.000000 |
| PhcycC3H3_A+H | 9.74051e-54 | 1.000000 | 9.74051e-54 | 1.000000 |
| rad58         | 2.46044e-54 | 1.000000 | 2.46044e-54 | 1.000000 |
| PAH10+CH3     | 2.94228e-56 | 1.000000 | 2.94228e-56 | 1.000000 |
| rad62         | 7.75565e-57 | 1.000000 | 7.75565e-57 | 1.000000 |
| rad47         | 5.66609e-58 | 1.000000 | 5.66609e-58 | 1.000000 |
| rad65         | 1.06056e-58 | 1.000000 | 1.06056e-58 | 1.000000 |
| rad43         | 1.79190e-61 | 1.000000 | 1.79190e-61 | 1.000000 |
| PAH1+H        | 4.27516e-62 | 1.000000 | 4.27516e-62 | 1.000000 |
| rad42         | 1.80320e-67 | 1.000000 | 1.80320e-67 | 1.000000 |
| rad41         | 2.55947e-73 | 1.000000 | 2.55947e-73 | 1.000000 |

10000000.0 Pa, 40.0000000 K

| Rate constant      | True (fraction) |            | Effective (fraction) |            |
|--------------------|-----------------|------------|----------------------|------------|
| Total              | 9.35697e-33     | (1.00 )    | 9.35697e-33          | (1.00 )    |
| Formation of rad11 | 9.35644e-33     | (1.000 )   | 9.35644e-33          | (1.000 )   |
| Formation of rad6  | 5.26139e-37     | (5.62e-05) | 5.26139e-37          | (5.62e-05) |
| H-abstraction      | 1.44763e-44     | (1.55e-12) | 1.44763e-44          | (1.55e-12) |

  

| species            | PYtrue      | Cumul    | PYeffective | Cumul    |
|--------------------|-------------|----------|-------------|----------|
| rad11              | 0.999936    | 0.999936 | 0.999936    | 0.999936 |
| rad6               | 6.32505e-05 | 0.999999 | 6.32505e-05 | 0.999999 |
| rad21              | 3.65116e-07 | 1.000000 | 3.65116e-07 | 1.000000 |
| rad20              | 6.32736e-10 | 1.000000 | 6.32736e-10 | 1.000000 |
| rad22              | 2.43462e-10 | 1.000000 | 2.43462e-10 | 1.000000 |
| rad25              | 1.53870e-10 | 1.000000 | 1.53870e-10 | 1.000000 |
| rad24              | 2.62445e-11 | 1.000000 | 2.62445e-11 | 1.000000 |
| PhCHCCH2+H         | 9.17753e-12 | 1.000000 | 9.17753e-12 | 1.000000 |
| rad45              | 2.41481e-12 | 1.000000 | 2.41481e-12 | 1.000000 |
| rad13              | 2.11864e-12 | 1.000000 | 2.11864e-12 | 1.000000 |
| Benzene+2-propynyl | 1.54712e-12 | 1.000000 | 1.54712e-12 | 1.000000 |
| rad7               | 6.58860e-13 | 1.000000 | 6.58860e-13 | 1.000000 |
| rad9               | 4.83701e-13 | 1.000000 | 4.83701e-13 | 1.000000 |
| rad36              | 3.70420e-13 | 1.000000 | 3.70420e-13 | 1.000000 |
| rad18              | 9.69825e-14 | 1.000000 | 9.69825e-14 | 1.000000 |
| rad33              | 1.90486e-14 | 1.000000 | 1.90486e-14 | 1.000000 |
| Phenyl+Allene      | 8.71710e-15 | 1.000000 | 0.000000    | 1.000000 |
| Indene+H           | 1.05144e-15 | 1.000000 | 1.05144e-15 | 1.000000 |
| C2H2+PhCH2         | 8.36573e-16 | 1.000000 | 8.36573e-16 | 1.000000 |
| rad23              | 1.82585e-16 | 1.000000 | 1.82585e-16 | 1.000000 |
| rad3               | 4.74032e-19 | 1.000000 | 4.74032e-19 | 1.000000 |
| rad4               | 3.50746e-19 | 1.000000 | 3.50746e-19 | 1.000000 |
| PhCH2CCH+H         | 3.53904e-20 | 1.000000 | 3.53904e-20 | 1.000000 |
| rad28              | 2.25599e-20 | 1.000000 | 2.25599e-20 | 1.000000 |
| rad8               | 7.25098e-24 | 1.000000 | 7.25098e-24 | 1.000000 |
| rad30              | 2.89396e-24 | 1.000000 | 2.89396e-24 | 1.000000 |
| rad2               | 5.15973e-25 | 1.000000 | 5.15973e-25 | 1.000000 |
| rad15              | 4.25899e-25 | 1.000000 | 4.25899e-25 | 1.000000 |
| rad1               | 1.05377e-25 | 1.000000 | 1.05377e-25 | 1.000000 |
| rad31              | 5.28800e-26 | 1.000000 | 5.28800e-26 | 1.000000 |
| rad38              | 2.10059e-26 | 1.000000 | 2.10059e-26 | 1.000000 |
| PAH7+H             | 6.69249e-27 | 1.000000 | 6.69249e-27 | 1.000000 |
| PhCCH+CH3          | 4.14528e-27 | 1.000000 | 4.14528e-27 | 1.000000 |
| rad14              | 3.49088e-28 | 1.000000 | 3.49088e-28 | 1.000000 |
| rad46              | 1.54452e-28 | 1.000000 | 1.54452e-28 | 1.000000 |
| rad60syn           | 5.94087e-30 | 1.000000 | 5.94087e-30 | 1.000000 |
| PAH9+H             | 2.57937e-30 | 1.000000 | 2.57937e-30 | 1.000000 |
| rad35              | 1.49055e-30 | 1.000000 | 1.49055e-30 | 1.000000 |
| rad60anti          | 6.80633e-31 | 1.000000 | 6.80633e-31 | 1.000000 |
| Ph+MeAc            | 3.26579e-31 | 1.000000 | 3.26579e-31 | 1.000000 |
| rad10              | 3.04382e-32 | 1.000000 | 3.04382e-32 | 1.000000 |
| rad26              | 1.82058e-32 | 1.000000 | 1.82058e-32 | 1.000000 |
| rad39              | 7.33977e-34 | 1.000000 | 7.33977e-34 | 1.000000 |
| rad27              | 4.18766e-35 | 1.000000 | 4.18766e-35 | 1.000000 |
| PhCCCH3+H          | 1.26872e-35 | 1.000000 | 1.26872e-35 | 1.000000 |
| PAH3+H             | 1.68400e-36 | 1.000000 | 1.68400e-36 | 1.000000 |
| rad59              | 7.84439e-37 | 1.000000 | 7.84439e-37 | 1.000000 |
| rad50              | 2.08910e-38 | 1.000000 | 2.08910e-38 | 1.000000 |
| rad19syn           | 2.74838e-42 | 1.000000 | 2.74838e-42 | 1.000000 |
| rad12              | 1.89389e-43 | 1.000000 | 1.89389e-43 | 1.000000 |
| rad54              | 1.41089e-43 | 1.000000 | 1.41089e-43 | 1.000000 |
| rad37              | 4.46594e-45 | 1.000000 | 4.46594e-45 | 1.000000 |
| rad5               | 2.07065e-45 | 1.000000 | 2.07065e-45 | 1.000000 |
| rad70              | 1.00199e-45 | 1.000000 | 1.00199e-45 | 1.000000 |
| rad52              | 3.64105e-46 | 1.000000 | 3.64105e-46 | 1.000000 |
| rad55              | 3.29820e-50 | 1.000000 | 3.29820e-50 | 1.000000 |
| rad51              | 1.81971e-50 | 1.000000 | 1.81971e-50 | 1.000000 |

|               |             |          |             |          |
|---------------|-------------|----------|-------------|----------|
| rad34         | 4.73796e-51 | 1.000000 | 4.73796e-51 | 1.000000 |
| PhcycC3H3_A+H | 8.09488e-52 | 1.000000 | 8.09488e-52 | 1.000000 |
| rad58         | 2.34209e-53 | 1.000000 | 2.34209e-53 | 1.000000 |
| rad62         | 1.57982e-54 | 1.000000 | 1.57982e-54 | 1.000000 |
| PAH10+CH3     | 2.51329e-55 | 1.000000 | 2.51329e-55 | 1.000000 |
| rad47         | 5.67253e-57 | 1.000000 | 5.67253e-57 | 1.000000 |
| rad65         | 9.86946e-58 | 1.000000 | 9.86946e-58 | 1.000000 |
| rad43         | 6.32675e-59 | 1.000000 | 6.32675e-59 | 1.000000 |
| PAH1+H        | 4.35429e-60 | 1.000000 | 4.35429e-60 | 1.000000 |
| rad42         | 3.26666e-65 | 1.000000 | 3.26666e-65 | 1.000000 |
| rad41         | 8.10608e-71 | 1.000000 | 8.10608e-71 | 1.000000 |

10000000.0 Pa, 50.0000000 K

| Rate constant      | True (fraction)        | Effective (fraction)   |
|--------------------|------------------------|------------------------|
| Total              | 5.52690e-29 (1.00 )    | 5.52690e-29 (1.00 )    |
| Formation of rad11 | 5.52459e-29 (1.000 )   | 5.52459e-29 (1.000 )   |
| Formation of rad6  | 2.30840e-32 (0.000418) | 2.30840e-32 (0.000418) |
| H-abstraction      | 3.35357e-38 (6.07e-10) | 3.35357e-38 (6.07e-10) |

| species            | PYtrue      | Cumul    | PYeffective | Cumul    |
|--------------------|-------------|----------|-------------|----------|
| rad11              | 0.999572    | 0.999572 | 0.999572    | 0.999572 |
| rad6               | 0.000427030 | 0.999999 | 0.000427030 | 0.999999 |
| rad21              | 4.89278e-07 | 1.000000 | 4.89278e-07 | 1.000000 |
| rad20              | 1.12222e-09 | 1.000000 | 1.12222e-09 | 1.000000 |
| Benzene+2-propynyl | 6.06773e-10 | 1.000000 | 6.06773e-10 | 1.000000 |
| rad22              | 4.31947e-10 | 1.000000 | 4.31947e-10 | 1.000000 |
| rad25              | 2.10815e-10 | 1.000000 | 2.10815e-10 | 1.000000 |
| rad24              | 4.53396e-11 | 1.000000 | 4.53396e-11 | 1.000000 |
| rad13              | 2.03283e-11 | 1.000000 | 2.03283e-11 | 1.000000 |
| PhCHCCH2+H         | 1.30219e-11 | 1.000000 | 1.30219e-11 | 1.000000 |
| rad7               | 6.34926e-12 | 1.000000 | 6.34926e-12 | 1.000000 |
| rad45              | 5.61341e-12 | 1.000000 | 5.61341e-12 | 1.000000 |
| rad36              | 8.07683e-13 | 1.000000 | 8.07683e-13 | 1.000000 |
| rad9               | 6.97151e-13 | 1.000000 | 6.97151e-13 | 1.000000 |
| rad18              | 2.28238e-13 | 1.000000 | 2.28238e-13 | 1.000000 |
| rad33              | 1.84974e-13 | 1.000000 | 1.84974e-13 | 1.000000 |
| Phenyl+Allene      | 1.69699e-14 | 1.000000 | 0.000000    | 1.000000 |
| Indene+H           | 2.48944e-15 | 1.000000 | 2.48944e-15 | 1.000000 |
| C2H2+PhCH2         | 2.02210e-15 | 1.000000 | 2.02210e-15 | 1.000000 |
| rad23              | 4.45495e-16 | 1.000000 | 4.45495e-16 | 1.000000 |
| rad3               | 6.32944e-18 | 1.000000 | 6.32944e-18 | 1.000000 |
| rad4               | 4.58757e-18 | 1.000000 | 4.58757e-18 | 1.000000 |
| rad28              | 3.04739e-19 | 1.000000 | 3.04739e-19 | 1.000000 |
| PhCH2CCH+H         | 8.14223e-20 | 1.000000 | 8.14223e-20 | 1.000000 |
| rad8               | 2.12306e-23 | 1.000000 | 2.12306e-23 | 1.000000 |
| rad30              | 9.44244e-24 | 1.000000 | 9.44244e-24 | 1.000000 |
| rad2               | 9.29882e-24 | 1.000000 | 9.29882e-24 | 1.000000 |
| rad1               | 1.77195e-24 | 1.000000 | 1.77195e-24 | 1.000000 |
| rad15              | 1.40319e-24 | 1.000000 | 1.40319e-24 | 1.000000 |
| rad31              | 5.13396e-25 | 1.000000 | 5.13396e-25 | 1.000000 |
| PhCCH+CH3          | 7.93592e-26 | 1.000000 | 7.93592e-26 | 1.000000 |
| rad38              | 7.54737e-26 | 1.000000 | 7.54737e-26 | 1.000000 |
| PAH7+H             | 2.25822e-26 | 1.000000 | 2.25822e-26 | 1.000000 |
| rad14              | 6.25523e-27 | 1.000000 | 6.25523e-27 | 1.000000 |
| rad46              | 5.08909e-28 | 1.000000 | 5.08909e-28 | 1.000000 |
| rad60syn           | 2.31006e-29 | 1.000000 | 2.31006e-29 | 1.000000 |
| PAH9+H             | 8.58466e-30 | 1.000000 | 8.58466e-30 | 1.000000 |
| Ph+MeAc            | 7.87935e-30 | 1.000000 | 7.87935e-30 | 1.000000 |
| rad35              | 4.93984e-30 | 1.000000 | 4.93984e-30 | 1.000000 |
| rad60anti          | 2.88374e-30 | 1.000000 | 2.88374e-30 | 1.000000 |
| rad10              | 7.74078e-31 | 1.000000 | 7.74078e-31 | 1.000000 |
| rad26              | 7.38166e-32 | 1.000000 | 7.38166e-32 | 1.000000 |
| rad39              | 1.52727e-32 | 1.000000 | 1.52727e-32 | 1.000000 |
| rad27              | 1.10848e-33 | 1.000000 | 1.10848e-33 | 1.000000 |
| PhCCCH3+H          | 3.71161e-34 | 1.000000 | 3.71161e-34 | 1.000000 |
| PAH3+H             | 9.17093e-36 | 1.000000 | 9.17093e-36 | 1.000000 |
| rad59              | 4.25164e-36 | 1.000000 | 4.25164e-36 | 1.000000 |
| rad50              | 1.12529e-37 | 1.000000 | 1.12529e-37 | 1.000000 |
| rad19syn           | 7.40418e-41 | 1.000000 | 7.40418e-41 | 1.000000 |
| rad54              | 4.07427e-42 | 1.000000 | 4.07427e-42 | 1.000000 |
| rad12              | 1.01612e-42 | 1.000000 | 1.01612e-42 | 1.000000 |
| rad5               | 1.02931e-43 | 1.000000 | 1.02931e-43 | 1.000000 |
| rad37              | 2.42205e-44 | 1.000000 | 2.42205e-44 | 1.000000 |
| rad70              | 4.38717e-45 | 1.000000 | 4.38717e-45 | 1.000000 |
| rad52              | 2.66567e-45 | 1.000000 | 2.66567e-45 | 1.000000 |
| rad55              | 1.03464e-48 | 1.000000 | 1.03464e-48 | 1.000000 |
| rad51              | 1.49345e-49 | 1.000000 | 1.49345e-49 | 1.000000 |

|               |             |          |             |          |
|---------------|-------------|----------|-------------|----------|
| PhcycC3H3_A+H | 2.46379e-50 | 1.000000 | 2.46379e-50 | 1.000000 |
| rad34         | 2.27489e-50 | 1.000000 | 2.27489e-50 | 1.000000 |
| rad58         | 1.85085e-52 | 1.000000 | 1.85085e-52 | 1.000000 |
| rad62         | 8.33313e-53 | 1.000000 | 8.33313e-53 | 1.000000 |
| PAH10+CH3     | 1.73034e-54 | 1.000000 | 1.73034e-54 | 1.000000 |
| rad47         | 5.03935e-56 | 1.000000 | 5.03935e-56 | 1.000000 |
| rad65         | 7.49025e-57 | 1.000000 | 7.49025e-57 | 1.000000 |
| rad43         | 4.69962e-57 | 1.000000 | 4.69962e-57 | 1.000000 |
| PAH1+H        | 1.83220e-58 | 1.000000 | 1.83220e-58 | 1.000000 |
| rad42         | 2.08187e-63 | 1.000000 | 2.08187e-63 | 1.000000 |
| rad41         | 7.60012e-69 | 1.000000 | 7.60012e-69 | 1.000000 |

10000000.0 Pa, 60.0000000 K

| Rate constant      | True (fraction)        | Effective (fraction)   |
|--------------------|------------------------|------------------------|
| Total              | 1.83429e-26 (1.00 )    | 1.83429e-26 (1.00 )    |
| Formation of rad11 | 1.83139e-26 (0.998 )   | 1.83139e-26 (0.998 )   |
| Formation of rad6  | 2.90471e-29 (0.00158 ) | 2.90471e-29 (0.00158 ) |
| H-abstraction      | 5.71259e-34 (3.11e-08) | 5.71259e-34 (3.11e-08) |

| species            | PYtrue      | Cumul    | PYeffective | Cumul    |
|--------------------|-------------|----------|-------------|----------|
| rad11              | 0.998404    | 0.998404 | 0.998404    | 0.998404 |
| rad6               | 0.00159530  | 0.999999 | 0.00159530  | 0.999999 |
| rad21              | 6.17106e-07 | 1.000000 | 6.17106e-07 | 1.000000 |
| Benzene+2-propynyl | 3.11432e-08 | 1.000000 | 3.11432e-08 | 1.000000 |
| rad20              | 1.76057e-09 | 1.000000 | 1.76057e-09 | 1.000000 |
| rad22              | 6.77868e-10 | 1.000000 | 6.77868e-10 | 1.000000 |
| rad25              | 2.72895e-10 | 1.000000 | 2.72895e-10 | 1.000000 |
| rad13              | 9.67724e-11 | 1.000000 | 9.67724e-11 | 1.000000 |
| rad24              | 6.93961e-11 | 1.000000 | 6.93961e-11 | 1.000000 |
| rad7               | 3.03185e-11 | 1.000000 | 3.03185e-11 | 1.000000 |
| PhCHCCH2+H         | 1.75667e-11 | 1.000000 | 1.75667e-11 | 1.000000 |
| rad45              | 1.08296e-11 | 1.000000 | 1.08296e-11 | 1.000000 |
| rad36              | 1.48510e-12 | 1.000000 | 1.48510e-12 | 1.000000 |
| rad9               | 9.57781e-13 | 1.000000 | 9.57781e-13 | 1.000000 |
| rad33              | 8.87690e-13 | 1.000000 | 8.87690e-13 | 1.000000 |
| rad18              | 4.46757e-13 | 1.000000 | 4.46757e-13 | 1.000000 |
| Phenyl+Allene      | 3.16388e-14 | 1.000000 | 0.000000    | 1.000000 |
| Indene+H           | 4.90540e-15 | 1.000000 | 4.90540e-15 | 1.000000 |
| C2H2+PhCH2         | 4.08664e-15 | 1.000000 | 4.08664e-15 | 1.000000 |
| rad23              | 9.02899e-16 | 1.000000 | 9.02899e-16 | 1.000000 |
| rad3               | 3.88548e-17 | 1.000000 | 3.88548e-17 | 1.000000 |
| rad4               | 2.77278e-17 | 1.000000 | 2.77278e-17 | 1.000000 |
| rad28              | 1.89604e-18 | 1.000000 | 1.89604e-18 | 1.000000 |
| PhCH2CCH+H         | 2.05262e-19 | 1.000000 | 2.05262e-19 | 1.000000 |
| rad2               | 7.23391e-23 | 1.000000 | 7.23391e-23 | 1.000000 |
| rad8               | 5.47841e-23 | 1.000000 | 5.47841e-23 | 1.000000 |
| rad30              | 2.43160e-23 | 1.000000 | 2.43160e-23 | 1.000000 |
| rad1               | 1.30858e-23 | 1.000000 | 1.30858e-23 | 1.000000 |
| rad15              | 3.65590e-24 | 1.000000 | 3.65590e-24 | 1.000000 |
| rad31              | 2.41974e-24 | 1.000000 | 2.41974e-24 | 1.000000 |
| PhCCH+CH3          | 6.63527e-25 | 1.000000 | 6.63527e-25 | 1.000000 |
| rad38              | 2.06894e-25 | 1.000000 | 2.06894e-25 | 1.000000 |
| PAH7+H             | 9.00082e-26 | 1.000000 | 9.00082e-26 | 1.000000 |
| rad14              | 4.93633e-26 | 1.000000 | 4.93633e-26 | 1.000000 |
| rad46              | 1.34158e-27 | 1.000000 | 1.34158e-27 | 1.000000 |
| Ph+MeAc            | 8.24085e-29 | 1.000000 | 8.24085e-29 | 1.000000 |
| rad60syn           | 7.28627e-29 | 1.000000 | 7.28627e-29 | 1.000000 |
| PAH9+H             | 2.25976e-29 | 1.000000 | 2.25976e-29 | 1.000000 |
| rad35              | 1.29355e-29 | 1.000000 | 1.29355e-29 | 1.000000 |
| rad60anti          | 1.00444e-29 | 1.000000 | 1.00444e-29 | 1.000000 |
| rad10              | 7.94208e-30 | 1.000000 | 7.94208e-30 | 1.000000 |
| rad26              | 2.86867e-31 | 1.000000 | 2.86867e-31 | 1.000000 |
| rad39              | 1.41020e-31 | 1.000000 | 1.41020e-31 | 1.000000 |
| rad27              | 1.18479e-32 | 1.000000 | 1.18479e-32 | 1.000000 |
| PhCCCH3+H          | 4.34909e-33 | 1.000000 | 4.34909e-33 | 1.000000 |
| PAH3+H             | 4.49301e-35 | 1.000000 | 4.49301e-35 | 1.000000 |
| rad59              | 2.06991e-35 | 1.000000 | 2.06991e-35 | 1.000000 |
| rad50              | 5.50027e-37 | 1.000000 | 5.50027e-37 | 1.000000 |
| rad19syn           | 1.12620e-39 | 1.000000 | 1.12620e-39 | 1.000000 |
| rad54              | 6.78521e-41 | 1.000000 | 6.78521e-41 | 1.000000 |
| rad12              | 4.92043e-42 | 1.000000 | 4.92043e-42 | 1.000000 |
| rad5               | 2.23903e-42 | 1.000000 | 2.23903e-42 | 1.000000 |
| rad37              | 1.18980e-43 | 1.000000 | 1.18980e-43 | 1.000000 |
| rad70              | 2.12602e-44 | 1.000000 | 2.12602e-44 | 1.000000 |
| rad52              | 1.81735e-44 | 1.000000 | 1.81735e-44 | 1.000000 |
| rad55              | 1.92813e-47 | 1.000000 | 1.92813e-47 | 1.000000 |
| rad51              | 1.18295e-48 | 1.000000 | 1.18295e-48 | 1.000000 |

|               |             |          |             |          |
|---------------|-------------|----------|-------------|----------|
| PhcycC3H3_A+H | 4.40469e-49 | 1.000000 | 4.40469e-49 | 1.000000 |
| rad34         | 1.23147e-49 | 1.000000 | 1.23147e-49 | 1.000000 |
| rad62         | 2.32064e-51 | 1.000000 | 2.32064e-51 | 1.000000 |
| rad58         | 1.43954e-51 | 1.000000 | 1.43954e-51 | 1.000000 |
| PAH10+CH3     | 1.14839e-53 | 1.000000 | 1.14839e-53 | 1.000000 |
| rad47         | 4.66730e-55 | 1.000000 | 4.66730e-55 | 1.000000 |
| rad43         | 1.68742e-55 | 1.000000 | 1.68742e-55 | 1.000000 |
| rad65         | 5.56697e-56 | 1.000000 | 5.56697e-56 | 1.000000 |
| PAH1+H        | 4.38300e-57 | 1.000000 | 4.38300e-57 | 1.000000 |
| rad42         | 7.54911e-62 | 1.000000 | 7.54911e-62 | 1.000000 |
| rad41         | 3.80915e-67 | 1.000000 | 3.80915e-67 | 1.000000 |

10000000.0 Pa, 70.0000000 K

| Rate constant      | True (fraction) |            | Effective (fraction) |            |
|--------------------|-----------------|------------|----------------------|------------|
| Total              | 1.17336e-24     | (1.00 )    | 1.17336e-24          | (1.00 )    |
| Formation of rad11 | 1.16857e-24     | (0.996 )   | 1.16857e-24          | (0.996 )   |
| Formation of rad6  | 4.79505e-27     | (0.00409 ) | 4.79505e-27          | (0.00409 ) |
| H-abstraction      | 5.89821e-31     | (5.03e-07) | 5.89821e-31          | (5.03e-07) |

  

| species            | PYtrue      | Cumul    | PYeffective | Cumul    |
|--------------------|-------------|----------|-------------|----------|
| rad11              | 0.995897    | 0.995897 | 0.995897    | 0.995897 |
| rad6               | 0.00410076  | 0.999998 | 0.00410076  | 0.999998 |
| rad21              | 7.49296e-07 | 0.999999 | 7.49296e-07 | 0.999999 |
| Benzene+2-propynyl | 5.02676e-07 | 1.000000 | 5.02676e-07 | 1.000000 |
| rad20              | 2.55950e-09 | 1.000000 | 2.55950e-09 | 1.000000 |
| rad22              | 9.85795e-10 | 1.000000 | 9.85795e-10 | 1.000000 |
| rad25              | 3.41019e-10 | 1.000000 | 3.41019e-10 | 1.000000 |
| rad13              | 3.03738e-10 | 1.000000 | 3.03738e-10 | 1.000000 |
| rad24              | 9.85390e-11 | 1.000000 | 9.85390e-11 | 1.000000 |
| rad7               | 9.54619e-11 | 1.000000 | 9.54619e-11 | 1.000000 |
| PhCHCCH2+H         | 2.29814e-11 | 1.000000 | 2.29814e-11 | 1.000000 |
| rad45              | 1.86208e-11 | 1.000000 | 1.86208e-11 | 1.000000 |
| rad33              | 2.80972e-12 | 1.000000 | 2.80972e-12 | 1.000000 |
| rad36              | 2.45791e-12 | 1.000000 | 2.45791e-12 | 1.000000 |
| rad9               | 1.27822e-12 | 1.000000 | 1.27822e-12 | 1.000000 |
| rad18              | 7.80432e-13 | 1.000000 | 7.80432e-13 | 1.000000 |
| Phenyl+Allene      | 5.66889e-14 | 1.000000 | 0.000000    | 1.000000 |
| Indene+H           | 8.63101e-15 | 1.000000 | 8.63101e-15 | 1.000000 |
| C2H2+PhCH2         | 7.40159e-15 | 1.000000 | 7.40159e-15 | 1.000000 |
| rad23              | 1.63127e-15 | 1.000000 | 1.63127e-15 | 1.000000 |
| rad3               | 1.51471e-16 | 1.000000 | 1.51471e-16 | 1.000000 |
| rad4               | 1.06770e-16 | 1.000000 | 1.06770e-16 | 1.000000 |
| rad28              | 7.51819e-18 | 1.000000 | 7.51819e-18 | 1.000000 |
| PhCH2CCH+H         | 5.99221e-19 | 1.000000 | 5.99221e-19 | 1.000000 |
| rad2               | 3.46240e-22 | 1.000000 | 3.46240e-22 | 1.000000 |
| rad8               | 1.32922e-22 | 1.000000 | 1.32922e-22 | 1.000000 |
| rad1               | 6.01068e-23 | 1.000000 | 6.01068e-23 | 1.000000 |
| rad30              | 5.42335e-23 | 1.000000 | 5.42335e-23 | 1.000000 |
| rad15              | 8.26342e-24 | 1.000000 | 8.26342e-24 | 1.000000 |
| rad31              | 7.57565e-24 | 1.000000 | 7.57565e-24 | 1.000000 |
| PhCCH+CH3          | 3.44457e-24 | 1.000000 | 3.44457e-24 | 1.000000 |
| rad38              | 4.82379e-25 | 1.000000 | 4.82379e-25 | 1.000000 |
| PAH7+H             | 4.11834e-25 | 1.000000 | 4.11834e-25 | 1.000000 |
| rad14              | 2.42696e-25 | 1.000000 | 2.42696e-25 | 1.000000 |
| rad46              | 3.09520e-27 | 1.000000 | 3.09520e-27 | 1.000000 |
| Ph+MeAc            | 5.35271e-28 | 1.000000 | 5.35271e-28 | 1.000000 |
| rad60syn           | 2.02912e-28 | 1.000000 | 2.02912e-28 | 1.000000 |
| PAH9+H             | 5.16262e-29 | 1.000000 | 5.16262e-29 | 1.000000 |
| rad10              | 4.82788e-29 | 1.000000 | 4.82788e-29 | 1.000000 |
| rad60anti          | 3.10476e-29 | 1.000000 | 3.10476e-29 | 1.000000 |
| rad35              | 2.93751e-29 | 1.000000 | 2.93751e-29 | 1.000000 |
| rad26              | 1.15325e-30 | 1.000000 | 1.15325e-30 | 1.000000 |
| rad39              | 8.19954e-31 | 1.000000 | 8.19954e-31 | 1.000000 |
| rad27              | 7.52393e-32 | 1.000000 | 7.52393e-32 | 1.000000 |
| PhCCCH3+H          | 3.02045e-32 | 1.000000 | 3.02045e-32 | 1.000000 |
| PAH3+H             | 2.18924e-34 | 1.000000 | 2.18924e-34 | 1.000000 |
| rad59              | 1.00029e-34 | 1.000000 | 1.00029e-34 | 1.000000 |
| rad50              | 2.67178e-36 | 1.000000 | 2.67178e-36 | 1.000000 |
| rad19syn           | 1.36642e-38 | 1.000000 | 1.36642e-38 | 1.000000 |
| rad54              | 9.15728e-40 | 1.000000 | 9.15728e-40 | 1.000000 |
| rad5               | 3.13731e-41 | 1.000000 | 3.13731e-41 | 1.000000 |
| rad12              | 2.38238e-41 | 1.000000 | 2.38238e-41 | 1.000000 |
| rad37              | 5.87122e-43 | 1.000000 | 5.87122e-43 | 1.000000 |
| rad52              | 1.29031e-43 | 1.000000 | 1.29031e-43 | 1.000000 |
| rad70              | 1.20688e-43 | 1.000000 | 1.20688e-43 | 1.000000 |
| rad55              | 2.97282e-46 | 1.000000 | 2.97282e-46 | 1.000000 |
| rad51              | 1.01048e-47 | 1.000000 | 1.01048e-47 | 1.000000 |

|               |             |          |             |          |
|---------------|-------------|----------|-------------|----------|
| PhcycC3H3_A+H | 6.45350e-48 | 1.000000 | 6.45350e-48 | 1.000000 |
| rad34         | 7.90968e-49 | 1.000000 | 7.90968e-49 | 1.000000 |
| rad62         | 4.97121e-50 | 1.000000 | 4.97121e-50 | 1.000000 |
| rad58         | 1.21592e-50 | 1.000000 | 1.21592e-50 | 1.000000 |
| PAH10+CH3     | 8.15070e-53 | 1.000000 | 8.15070e-53 | 1.000000 |
| rad47         | 4.95960e-54 | 1.000000 | 4.95960e-54 | 1.000000 |
| rad43         | 4.39774e-54 | 1.000000 | 4.39774e-54 | 1.000000 |
| rad65         | 4.51964e-55 | 1.000000 | 4.51964e-55 | 1.000000 |
| PAH1+H        | 8.37220e-56 | 1.000000 | 8.37220e-56 | 1.000000 |
| rad42         | 2.25233e-60 | 1.000000 | 2.25233e-60 | 1.000000 |
| rad41         | 1.51943e-65 | 1.000000 | 1.51943e-65 | 1.000000 |

10000000.0 Pa, 80.0000000 K

| Rate constant      | True (fraction)        | Effective (fraction)   |
|--------------------|------------------------|------------------------|
| Total              | 2.68112e-23 (1.00 )    | 2.68112e-23 (1.00 )    |
| Formation of rad11 | 2.65890e-23 (0.992 )   | 2.65890e-23 (0.992 )   |
| Formation of rad6  | 2.22189e-25 (0.00829 ) | 2.22189e-25 (0.00829 ) |
| H-abstraction      | 1.05871e-28 (3.95e-06) | 1.05871e-28 (3.95e-06) |

| species            | PYtrue      | Cumul    | PYeffective | Cumul    |
|--------------------|-------------|----------|-------------|----------|
| rad11              | 0.991691    | 0.991691 | 0.991691    | 0.991691 |
| rad6               | 0.00830379  | 0.999995 | 0.00830379  | 0.999995 |
| Benzene+2-propynyl | 3.94877e-06 | 0.999999 | 3.94877e-06 | 0.999999 |
| rad21              | 8.86352e-07 | 1.000000 | 8.86352e-07 | 1.000000 |
| rad20              | 3.53390e-09 | 1.000000 | 3.53390e-09 | 1.000000 |
| rad22              | 1.36152e-09 | 1.000000 | 1.36152e-09 | 1.000000 |
| rad13              | 7.32147e-10 | 1.000000 | 7.32147e-10 | 1.000000 |
| rad25              | 4.16154e-10 | 1.000000 | 4.16154e-10 | 1.000000 |
| rad7               | 2.30885e-10 | 1.000000 | 2.30885e-10 | 1.000000 |
| rad24              | 1.32994e-10 | 1.000000 | 1.32994e-10 | 1.000000 |
| rad45              | 2.96283e-11 | 1.000000 | 2.96283e-11 | 1.000000 |
| PhCHCCH2+H         | 2.94780e-11 | 1.000000 | 2.94780e-11 | 1.000000 |
| rad33              | 6.83453e-12 | 1.000000 | 6.83453e-12 | 1.000000 |
| rad36              | 3.78981e-12 | 1.000000 | 3.78981e-12 | 1.000000 |
| rad9               | 1.67466e-12 | 1.000000 | 1.67466e-12 | 1.000000 |
| rad18              | 1.26286e-12 | 1.000000 | 1.26286e-12 | 1.000000 |
| Phenyl+Allene      | 9.83792e-14 | 1.000000 | 0.000000    | 1.000000 |
| Indene+H           | 1.40752e-14 | 1.000000 | 1.40752e-14 | 1.000000 |
| C2H2+PhCH2         | 1.24670e-14 | 1.000000 | 1.24670e-14 | 1.000000 |
| rad23              | 2.72778e-15 | 1.000000 | 2.72778e-15 | 1.000000 |
| rad3               | 4.42939e-16 | 1.000000 | 4.42939e-16 | 1.000000 |
| rad4               | 3.09076e-16 | 1.000000 | 3.09076e-16 | 1.000000 |
| rad28              | 2.24292e-17 | 1.000000 | 2.24292e-17 | 1.000000 |
| PhCH2CCH+H         | 2.11844e-18 | 1.000000 | 2.11844e-18 | 1.000000 |
| rad2               | 1.21991e-21 | 1.000000 | 1.21991e-21 | 1.000000 |
| rad8               | 3.17104e-22 | 1.000000 | 3.17104e-22 | 1.000000 |
| rad1               | 2.04739e-22 | 1.000000 | 2.04739e-22 | 1.000000 |
| rad30              | 1.10130e-22 | 1.000000 | 1.10130e-22 | 1.000000 |
| rad31              | 1.84317e-23 | 1.000000 | 1.84317e-23 | 1.000000 |
| rad15              | 1.70333e-23 | 1.000000 | 1.70333e-23 | 1.000000 |
| PhCCH+CH3          | 1.32597e-23 | 1.000000 | 1.32597e-23 | 1.000000 |
| PAH7+H             | 1.90290e-24 | 1.000000 | 1.90290e-24 | 1.000000 |
| rad38              | 1.01306e-24 | 1.000000 | 1.01306e-24 | 1.000000 |
| rad14              | 8.85989e-25 | 1.000000 | 8.85989e-25 | 1.000000 |
| rad46              | 6.56192e-27 | 1.000000 | 6.56192e-27 | 1.000000 |
| Ph+MeAc            | 2.58156e-27 | 1.000000 | 2.58156e-27 | 1.000000 |
| rad60syn           | 5.23219e-28 | 1.000000 | 5.23219e-28 | 1.000000 |
| rad10              | 2.11105e-28 | 1.000000 | 2.11105e-28 | 1.000000 |
| PAH9+H             | 1.07645e-28 | 1.000000 | 1.07645e-28 | 1.000000 |
| rad60anti          | 8.88170e-29 | 1.000000 | 8.88170e-29 | 1.000000 |
| rad35              | 6.08428e-29 | 1.000000 | 6.08428e-29 | 1.000000 |
| rad26              | 5.07360e-30 | 1.000000 | 5.07360e-30 | 1.000000 |
| rad39              | 3.57686e-30 | 1.000000 | 3.57686e-30 | 1.000000 |
| rad27              | 3.44846e-31 | 1.000000 | 3.44846e-31 | 1.000000 |
| PhCCCH3+H          | 1.51423e-31 | 1.000000 | 1.51423e-31 | 1.000000 |
| PAH3+H             | 1.14138e-33 | 1.000000 | 1.14138e-33 | 1.000000 |
| rad59              | 5.15476e-34 | 1.000000 | 5.15476e-34 | 1.000000 |
| rad50              | 1.36824e-35 | 1.000000 | 1.36824e-35 | 1.000000 |
| rad19syn           | 1.67042e-37 | 1.000000 | 1.67042e-37 | 1.000000 |
| rad54              | 1.26413e-38 | 1.000000 | 1.26413e-38 | 1.000000 |
| rad5               | 3.39928e-40 | 1.000000 | 3.39928e-40 | 1.000000 |
| rad12              | 1.24253e-40 | 1.000000 | 1.24253e-40 | 1.000000 |
| rad37              | 3.14721e-42 | 1.000000 | 3.14721e-42 | 1.000000 |
| rad52              | 1.04642e-42 | 1.000000 | 1.04642e-42 | 1.000000 |
| rad70              | 8.83476e-43 | 1.000000 | 8.83476e-43 | 1.000000 |
| rad55              | 4.80746e-45 | 1.000000 | 4.80746e-45 | 1.000000 |
| rad51              | 1.03005e-46 | 1.000000 | 1.03005e-46 | 1.000000 |



|               |             |          |             |          |
|---------------|-------------|----------|-------------|----------|
| PhcycC3H3_A+H | 9.86535e-47 | 1.000000 | 9.86535e-47 | 1.000000 |
| rad34         | 6.61460e-48 | 1.000000 | 6.61460e-48 | 1.000000 |
| rad62         | 1.03654e-48 | 1.000000 | 1.03654e-48 | 1.000000 |
| rad58         | 1.24220e-49 | 1.000000 | 1.24220e-49 | 1.000000 |
| PAH10+CH3     | 6.89368e-52 | 1.000000 | 6.89368e-52 | 1.000000 |
| rad43         | 1.05649e-52 | 1.000000 | 1.05649e-52 | 1.000000 |
| rad47         | 6.71554e-53 | 1.000000 | 6.71554e-53 | 1.000000 |
| rad65         | 4.49381e-54 | 1.000000 | 4.49381e-54 | 1.000000 |
| PAH1+H        | 1.63380e-54 | 1.000000 | 1.63380e-54 | 1.000000 |
| rad42         | 7.12377e-59 | 1.000000 | 7.12377e-59 | 1.000000 |
| rad41         | 6.25465e-64 | 1.000000 | 6.25465e-64 | 1.000000 |

10000000.0 Pa, 90.0000000 K

| Rate constant      | True (fraction)        | Effective (fraction)   |
|--------------------|------------------------|------------------------|
| Total              | 3.08379e-22 (1.00 )    | 3.08379e-22 (1.00 )    |
| Formation of rad11 | 3.03962e-22 (0.986 )   | 3.03962e-22 (0.986 )   |
| Formation of rad6  | 4.41076e-24 (0.0143 )  | 4.41076e-24 (0.0143 )  |
| H-abstraction      | 5.92916e-27 (1.92e-05) | 5.92916e-27 (1.92e-05) |

| species            | PYtrue      | Cumul    | PYeffective | Cumul    |
|--------------------|-------------|----------|-------------|----------|
| rad11              | 0.985657    | 0.985657 | 0.985657    | 0.985657 |
| rad6               | 0.0143222   | 0.999979 | 0.0143222   | 0.999979 |
| Benzene+2-propynyl | 1.92269e-05 | 0.999999 | 1.92269e-05 | 0.999999 |
| rad21              | 1.02893e-06 | 1.000000 | 1.02893e-06 | 1.000000 |
| rad20              | 4.70331e-09 | 1.000000 | 4.70331e-09 | 1.000000 |
| rad22              | 1.81266e-09 | 1.000000 | 1.81266e-09 | 1.000000 |
| rad13              | 1.47732e-09 | 1.000000 | 1.47732e-09 | 1.000000 |
| rad25              | 4.99545e-10 | 1.000000 | 4.99545e-10 | 1.000000 |
| rad7               | 4.67555e-10 | 1.000000 | 4.67555e-10 | 1.000000 |
| rad24              | 1.73133e-10 | 1.000000 | 1.73133e-10 | 1.000000 |
| rad45              | 4.46236e-11 | 1.000000 | 4.46236e-11 | 1.000000 |
| PhCHCCH2+H         | 3.73414e-11 | 1.000000 | 3.73414e-11 | 1.000000 |
| rad33              | 1.39254e-11 | 1.000000 | 1.39254e-11 | 1.000000 |
| rad36              | 5.55801e-12 | 1.000000 | 5.55801e-12 | 1.000000 |
| rad9               | 2.16915e-12 | 1.000000 | 2.16915e-12 | 1.000000 |
| rad18              | 1.93599e-12 | 1.000000 | 1.93599e-12 | 1.000000 |
| Phenyl+Allene      | 1.66585e-13 | 1.000000 | 0.000000    | 1.000000 |
| Indene+H           | 2.17602e-14 | 1.000000 | 2.17602e-14 | 1.000000 |
| C2H2+PhCH2         | 1.99773e-14 | 1.000000 | 1.99773e-14 | 1.000000 |
| rad23              | 4.31927e-15 | 1.000000 | 4.31927e-15 | 1.000000 |
| rad3               | 1.06703e-15 | 1.000000 | 1.06703e-15 | 1.000000 |
| rad4               | 7.38215e-16 | 1.000000 | 7.38215e-16 | 1.000000 |
| rad28              | 5.52624e-17 | 1.000000 | 5.52624e-17 | 1.000000 |
| PhCH2CCH+H         | 8.51879e-18 | 1.000000 | 8.51879e-18 | 1.000000 |
| rad2               | 3.49893e-21 | 1.000000 | 3.49893e-21 | 1.000000 |
| rad8               | 7.63700e-22 | 1.000000 | 7.63700e-22 | 1.000000 |
| rad1               | 5.70766e-22 | 1.000000 | 5.70766e-22 | 1.000000 |
| rad30              | 2.09979e-22 | 1.000000 | 2.09979e-22 | 1.000000 |
| PhCCH+CH3          | 4.18296e-23 | 1.000000 | 4.18296e-23 | 1.000000 |
| rad31              | 3.79962e-23 | 1.000000 | 3.79962e-23 | 1.000000 |
| rad15              | 3.30253e-23 | 1.000000 | 3.30253e-23 | 1.000000 |
| PAH7+H             | 8.26484e-24 | 1.000000 | 8.26484e-24 | 1.000000 |
| rad14              | 2.65091e-24 | 1.000000 | 2.65091e-24 | 1.000000 |
| rad38              | 1.98424e-24 | 1.000000 | 1.98424e-24 | 1.000000 |
| rad46              | 1.31790e-26 | 1.000000 | 1.31790e-26 | 1.000000 |
| Ph+MeAc            | 1.02203e-26 | 1.000000 | 1.02203e-26 | 1.000000 |
| rad60syn           | 1.28712e-27 | 1.000000 | 1.28712e-27 | 1.000000 |
| rad10              | 7.40765e-28 | 1.000000 | 7.40765e-28 | 1.000000 |
| rad60anti          | 2.41411e-28 | 1.000000 | 2.41411e-28 | 1.000000 |
| PAH9+H             | 2.11378e-28 | 1.000000 | 2.11378e-28 | 1.000000 |
| rad35              | 1.18647e-28 | 1.000000 | 1.18647e-28 | 1.000000 |
| rad26              | 2.48391e-29 | 1.000000 | 2.48391e-29 | 1.000000 |
| rad39              | 1.29210e-29 | 1.000000 | 1.29210e-29 | 1.000000 |
| rad27              | 1.27316e-30 | 1.000000 | 1.27316e-30 | 1.000000 |
| PhCCCH3+H          | 6.12679e-31 | 1.000000 | 6.12679e-31 | 1.000000 |
| PAH3+H             | 6.63414e-33 | 1.000000 | 6.63414e-33 | 1.000000 |
| rad59              | 2.94284e-33 | 1.000000 | 2.94284e-33 | 1.000000 |
| rad50              | 7.56687e-35 | 1.000000 | 7.56687e-35 | 1.000000 |
| rad19syn           | 2.54563e-36 | 1.000000 | 2.54563e-36 | 1.000000 |
| rad54              | 2.24107e-37 | 1.000000 | 2.24107e-37 | 1.000000 |
| rad5               | 3.10709e-39 | 1.000000 | 3.10709e-39 | 1.000000 |
| rad12              | 7.24221e-40 | 1.000000 | 7.24221e-40 | 1.000000 |
| rad37              | 1.91813e-41 | 1.000000 | 1.91813e-41 | 1.000000 |
| rad52              | 1.05241e-41 | 1.000000 | 1.05241e-41 | 1.000000 |
| rad70              | 9.88213e-42 | 1.000000 | 9.88213e-42 | 1.000000 |
| rad55              | 1.05061e-43 | 1.000000 | 1.05061e-43 | 1.000000 |
| PhcycC3H3_A+H      | 2.05620e-45 | 1.000000 | 2.05620e-45 | 1.000000 |

|           |             |          |             |          |
|-----------|-------------|----------|-------------|----------|
| rad51     | 1.39527e-45 | 1.000000 | 1.39527e-45 | 1.000000 |
| rad34     | 8.53910e-47 | 1.000000 | 8.53910e-47 | 1.000000 |
| rad62     | 2.54020e-47 | 1.000000 | 2.54020e-47 | 1.000000 |
| rad58     | 1.78061e-48 | 1.000000 | 1.78061e-48 | 1.000000 |
| PAH10+CH3 | 7.97930e-51 | 1.000000 | 7.97930e-51 | 1.000000 |
| rad43     | 2.77313e-51 | 1.000000 | 2.77313e-51 | 1.000000 |
| rad47     | 1.32073e-51 | 1.000000 | 1.32073e-51 | 1.000000 |
| rad65     | 6.30515e-53 | 1.000000 | 6.30515e-53 | 1.000000 |
| PAH1+H    | 4.23484e-53 | 1.000000 | 4.23484e-53 | 1.000000 |
| rad42     | 3.00322e-57 | 1.000000 | 3.00322e-57 | 1.000000 |
| rad41     | 3.30710e-62 | 1.000000 | 3.30710e-62 | 1.000000 |

10000000.0 Pa, 100.000000 K

| Rate constant      | True (fraction) |            | Effective (fraction) |            |
|--------------------|-----------------|------------|----------------------|------------|
| Total              | 2.19347e-21     | (1.00 )    | 2.19347e-21          | (1.00 )    |
| Formation of rad11 | 2.14498e-21     | (0.978 )   | 2.14498e-21          | (0.978 )   |
| Formation of rad6  | 4.83503e-23     | (0.0220 )  | 4.83503e-23          | (0.0220 )  |
| H-abstraction      | 1.47101e-25     | (6.71e-05) | 1.47101e-25          | (6.71e-05) |

  

| species            | PYtrue      | Cumul    | PYeffective | Cumul    |
|--------------------|-------------|----------|-------------|----------|
| rad11              | 0.977867    | 0.977867 | 0.977867    | 0.977867 |
| rad6               | 0.0220646   | 0.999932 | 0.0220646   | 0.999932 |
| Benzene+2-propynyl | 6.70630e-05 | 0.999999 | 6.70630e-05 | 0.999999 |
| rad21              | 1.17794e-06 | 1.00000  | 1.17794e-06 | 1.00000  |
| rad20              | 6.09364e-09 | 1.00000  | 6.09364e-09 | 1.00000  |
| rad13              | 2.62929e-09 | 1.00000  | 2.62929e-09 | 1.00000  |
| rad22              | 2.34926e-09 | 1.00000  | 2.34926e-09 | 1.00000  |
| rad7               | 8.35301e-10 | 1.00000  | 8.35301e-10 | 1.00000  |
| rad25              | 5.92814e-10 | 1.00000  | 5.92814e-10 | 1.00000  |
| rad24              | 2.19501e-10 | 1.00000  | 2.19501e-10 | 1.00000  |
| rad45              | 6.45672e-11 | 1.00000  | 6.45672e-11 | 1.00000  |
| PhCHCCH2+H         | 4.69554e-11 | 1.00000  | 4.69554e-11 | 1.00000  |
| rad33              | 2.50406e-11 | 1.00000  | 2.50406e-11 | 1.00000  |
| rad36              | 7.85945e-12 | 1.00000  | 7.85945e-12 | 1.00000  |
| rad18              | 2.85375e-12 | 1.00000  | 2.85375e-12 | 1.00000  |
| rad9               | 2.79167e-12 | 1.00000  | 2.79167e-12 | 1.00000  |
| Phenyl+Allene      | 2.76744e-13 | 1.00000  | 0.00000     | 1.00000  |
| Indene+H           | 3.23720e-14 | 1.00000  | 3.23720e-14 | 1.00000  |
| C2H2+PhCH2         | 3.09197e-14 | 1.00000  | 3.09197e-14 | 1.00000  |
| rad23              | 6.57515e-15 | 1.00000  | 6.57515e-15 | 1.00000  |
| rad3               | 2.24181e-15 | 1.00000  | 2.24181e-15 | 1.00000  |
| rad4               | 1.53962e-15 | 1.00000  | 1.53962e-15 | 1.00000  |
| rad28              | 1.19021e-16 | 1.00000  | 1.19021e-16 | 1.00000  |
| PhCH2CCH+H         | 3.41391e-17 | 1.00000  | 3.41391e-17 | 1.00000  |
| rad2               | 8.68821e-21 | 1.00000  | 8.68821e-21 | 1.00000  |
| rad8               | 1.86597e-21 | 1.00000  | 1.86597e-21 | 1.00000  |
| rad1               | 1.38311e-21 | 1.00000  | 1.38311e-21 | 1.00000  |
| rad30              | 3.83771e-22 | 1.00000  | 3.83771e-22 | 1.00000  |
| PhCCH+CH3          | 1.15007e-22 | 1.00000  | 1.15007e-22 | 1.00000  |
| rad31              | 6.98870e-23 | 1.00000  | 6.98870e-23 | 1.00000  |
| rad15              | 6.14965e-23 | 1.00000  | 6.14965e-23 | 1.00000  |
| PAH7+H             | 3.32759e-23 | 1.00000  | 3.32759e-23 | 1.00000  |
| rad14              | 6.90740e-24 | 1.00000  | 6.90740e-24 | 1.00000  |
| rad38              | 3.70908e-24 | 1.00000  | 3.70908e-24 | 1.00000  |
| Ph+MeAc            | 3.53354e-26 | 1.00000  | 3.53354e-26 | 1.00000  |
| rad46              | 2.55989e-26 | 1.00000  | 2.55989e-26 | 1.00000  |
| rad60syn           | 3.07997e-27 | 1.00000  | 3.07997e-27 | 1.00000  |
| rad10              | 2.23169e-27 | 1.00000  | 2.23169e-27 | 1.00000  |
| rad60anti          | 6.34342e-28 | 1.00000  | 6.34342e-28 | 1.00000  |
| PAH9+H             | 3.99357e-28 | 1.00000  | 3.99357e-28 | 1.00000  |
| rad35              | 2.22744e-28 | 1.00000  | 2.22744e-28 | 1.00000  |
| rad26              | 1.29153e-28 | 1.00000  | 1.29153e-28 | 1.00000  |
| rad39              | 4.10894e-29 | 1.00000  | 4.10894e-29 | 1.00000  |
| rad27              | 4.05297e-30 | 1.00000  | 4.05297e-30 | 1.00000  |
| PhCCCH3+H          | 2.14467e-30 | 1.00000  | 2.14467e-30 | 1.00000  |
| PAH3+H             | 4.22506e-32 | 1.00000  | 4.22506e-32 | 1.00000  |
| rad59              | 1.82376e-32 | 1.00000  | 1.82376e-32 | 1.00000  |
| rad50              | 4.41792e-34 | 1.00000  | 4.41792e-34 | 1.00000  |
| rad19syn           | 5.26999e-35 | 1.00000  | 5.26999e-35 | 1.00000  |
| rad54              | 6.01826e-36 | 1.00000  | 6.01826e-36 | 1.00000  |
| rad5               | 2.48939e-38 | 1.00000  | 2.48939e-38 | 1.00000  |
| rad12              | 4.59720e-39 | 1.00000  | 4.59720e-39 | 1.00000  |
| rad70              | 2.10380e-40 | 1.00000  | 2.10380e-40 | 1.00000  |
| rad52              | 1.35600e-40 | 1.00000  | 1.35600e-40 | 1.00000  |
| rad37              | 1.30891e-40 | 1.00000  | 1.30891e-40 | 1.00000  |
| rad55              | 4.03590e-42 | 1.00000  | 4.03590e-42 | 1.00000  |
| PhcycC3H3_A+H      | 7.84668e-44 | 1.00000  | 7.84668e-44 | 1.00000  |

|           |             |         |             |         |
|-----------|-------------|---------|-------------|---------|
| rad51     | 2.70983e-44 | 1.00000 | 2.70983e-44 | 1.00000 |
| rad34     | 2.13854e-45 | 1.00000 | 2.13854e-45 | 1.00000 |
| rad62     | 8.22712e-46 | 1.00000 | 8.22712e-46 | 1.00000 |
| rad58     | 4.21900e-47 | 1.00000 | 4.21900e-47 | 1.00000 |
| PAH10+CH3 | 1.44185e-49 | 1.00000 | 1.44185e-49 | 1.00000 |
| rad43     | 8.65548e-50 | 1.00000 | 8.65548e-50 | 1.00000 |
| rad47     | 4.22953e-50 | 1.00000 | 4.22953e-50 | 1.00000 |
| PAH1+H    | 1.93381e-51 | 1.00000 | 1.93381e-51 | 1.00000 |
| rad65     | 1.42191e-51 | 1.00000 | 1.42191e-51 | 1.00000 |
| rad42     | 2.02058e-55 | 1.00000 | 2.02058e-55 | 1.00000 |
| rad41     | 2.63393e-60 | 1.00000 | 2.63393e-60 | 1.00000 |

10000000.0 Pa, 110.000000 K

| Rate constant      | True (fraction)        | Effective (fraction)   |
|--------------------|------------------------|------------------------|
| Total              | 1.09987e-20 (1.00 )    | 1.09987e-20 (1.00 )    |
| Formation of rad11 | 1.06527e-20 (0.969 )   | 1.06527e-20 (0.969 )   |
| Formation of rad6  | 3.44008e-22 (0.0313 )  | 3.44008e-22 (0.0313 )  |
| H-abstraction      | 2.02040e-24 (0.000184) | 2.02040e-24 (0.000184) |

| species            | PYtrue      | Cumul    | PYeffective | Cumul    |
|--------------------|-------------|----------|-------------|----------|
| rad11              | 0.968513    | 0.968513 | 0.968513    | 0.968513 |
| rad6               | 0.0313016   | 0.999815 | 0.0313016   | 0.999815 |
| Benzene+2-propynyl | 0.000183695 | 0.999998 | 0.000183695 | 0.999998 |
| rad21              | 1.33461e-06 | 1.000000 | 1.33461e-06 | 1.000000 |
| rad20              | 7.73883e-09 | 1.000000 | 7.73883e-09 | 1.000000 |
| rad13              | 4.26888e-09 | 1.000000 | 4.26888e-09 | 1.000000 |
| rad22              | 2.98452e-09 | 1.000000 | 2.98452e-09 | 1.000000 |
| rad7               | 1.36161e-09 | 1.000000 | 1.36161e-09 | 1.000000 |
| rad25              | 6.98035e-10 | 1.000000 | 6.98035e-10 | 1.000000 |
| rad24              | 2.72858e-10 | 1.000000 | 2.72858e-10 | 1.000000 |
| rad45              | 9.06820e-11 | 1.000000 | 9.06820e-11 | 1.000000 |
| PhCHCCH2+H         | 5.88323e-11 | 1.000000 | 5.88323e-11 | 1.000000 |
| rad33              | 4.10992e-11 | 1.000000 | 4.10992e-11 | 1.000000 |
| rad36              | 1.08184e-11 | 1.000000 | 1.08184e-11 | 1.000000 |
| rad18              | 4.08689e-12 | 1.000000 | 4.08689e-12 | 1.000000 |
| rad9               | 3.58288e-12 | 1.000000 | 3.58288e-12 | 1.000000 |
| Phenyl+Allene      | 4.52831e-13 | 1.000000 | 0.000000    | 1.000000 |
| Indene+H           | 4.68309e-14 | 1.000000 | 4.68309e-14 | 1.000000 |
| C2H2+PhCH2         | 4.67222e-14 | 1.000000 | 4.67222e-14 | 1.000000 |
| rad23              | 9.72591e-15 | 1.000000 | 9.72591e-15 | 1.000000 |
| rad3               | 4.26284e-15 | 1.000000 | 4.26284e-15 | 1.000000 |
| rad4               | 2.90887e-15 | 1.000000 | 2.90887e-15 | 1.000000 |
| rad28              | 2.32499e-16 | 1.000000 | 2.32499e-16 | 1.000000 |
| PhCH2CCH+H         | 1.25356e-16 | 1.000000 | 1.25356e-16 | 1.000000 |
| rad2               | 1.94448e-20 | 1.000000 | 1.94448e-20 | 1.000000 |
| rad8               | 4.57964e-21 | 1.000000 | 4.57964e-21 | 1.000000 |
| rad1               | 3.03048e-21 | 1.000000 | 3.03048e-21 | 1.000000 |
| rad30              | 6.82311e-22 | 1.000000 | 6.82311e-22 | 1.000000 |
| PhCCH+CH3          | 2.87027e-22 | 1.000000 | 2.87027e-22 | 1.000000 |
| PAH7+H             | 1.24322e-22 | 1.000000 | 1.24322e-22 | 1.000000 |
| rad31              | 1.18552e-22 | 1.000000 | 1.18552e-22 | 1.000000 |
| rad15              | 1.11622e-22 | 1.000000 | 1.11622e-22 | 1.000000 |
| rad14              | 1.63133e-23 | 1.000000 | 1.63133e-23 | 1.000000 |
| rad38              | 6.72457e-24 | 1.000000 | 6.72457e-24 | 1.000000 |
| Ph+MeAc            | 1.11125e-25 | 1.000000 | 1.11125e-25 | 1.000000 |
| rad46              | 4.88002e-26 | 1.000000 | 4.88002e-26 | 1.000000 |
| rad60syn           | 7.26117e-27 | 1.000000 | 7.26117e-27 | 1.000000 |
| rad10              | 6.03665e-27 | 1.000000 | 6.03665e-27 | 1.000000 |
| rad60anti          | 1.63023e-27 | 1.000000 | 1.63023e-27 | 1.000000 |
| PAH9+H             | 7.37272e-28 | 1.000000 | 7.37272e-28 | 1.000000 |
| rad26              | 6.59949e-28 | 1.000000 | 6.59949e-28 | 1.000000 |
| rad35              | 4.09688e-28 | 1.000000 | 4.09688e-28 | 1.000000 |
| rad39              | 1.19791e-28 | 1.000000 | 1.19791e-28 | 1.000000 |
| rad27              | 1.16406e-29 | 1.000000 | 1.16406e-29 | 1.000000 |
| PhCCCH3+H          | 6.80367e-30 | 1.000000 | 6.80367e-30 | 1.000000 |
| PAH3+H             | 2.75393e-31 | 1.000000 | 2.75393e-31 | 1.000000 |
| rad59              | 1.14638e-31 | 1.000000 | 1.14638e-31 | 1.000000 |
| rad50              | 2.58332e-33 | 1.000000 | 2.58332e-33 | 1.000000 |
| rad19syn           | 1.19545e-33 | 1.000000 | 1.19545e-33 | 1.000000 |
| rad54              | 2.04188e-34 | 1.000000 | 2.04188e-34 | 1.000000 |
| rad5               | 1.78015e-37 | 1.000000 | 1.78015e-37 | 1.000000 |
| rad12              | 2.97490e-38 | 1.000000 | 2.97490e-38 | 1.000000 |
| rad70              | 8.88825e-39 | 1.000000 | 8.88825e-39 | 1.000000 |
| rad52              | 2.06954e-39 | 1.000000 | 2.06954e-39 | 1.000000 |
| rad37              | 9.38140e-40 | 1.000000 | 9.38140e-40 | 1.000000 |
| rad55              | 2.72807e-40 | 1.000000 | 2.72807e-40 | 1.000000 |
| PhcycC3H3_A+H      | 5.57034e-42 | 1.000000 | 5.57034e-42 | 1.000000 |

|           |             |          |             |          |
|-----------|-------------|----------|-------------|----------|
| rad51     | 7.20795e-43 | 1.000000 | 7.20795e-43 | 1.000000 |
| rad34     | 1.09930e-43 | 1.000000 | 1.09930e-43 | 1.000000 |
| rad62     | 3.27227e-44 | 1.000000 | 3.27227e-44 | 1.000000 |
| rad58     | 1.69793e-45 | 1.000000 | 1.69793e-45 | 1.000000 |
| PAH10+CH3 | 3.96798e-48 | 1.000000 | 3.96798e-48 | 1.000000 |
| rad43     | 3.01189e-48 | 1.000000 | 3.01189e-48 | 1.000000 |
| rad47     | 2.15793e-48 | 1.000000 | 2.15793e-48 | 1.000000 |
| PAH1+H    | 1.60611e-49 | 1.000000 | 1.60611e-49 | 1.000000 |
| rad65     | 5.10085e-50 | 1.000000 | 5.10085e-50 | 1.000000 |
| rad42     | 2.10262e-53 | 1.000000 | 2.10262e-53 | 1.000000 |
| rad41     | 3.05031e-58 | 1.000000 | 3.05031e-58 | 1.000000 |

10000000.0 Pa, 120.000000 K

| Rate constant      | True (fraction)        | Effective (fraction)   |
|--------------------|------------------------|------------------------|
| Total              | 4.24245e-20 (1.00 )    | 4.24245e-20 (1.00 )    |
| Formation of rad11 | 4.06372e-20 (0.958 )   | 4.06372e-20 (0.958 )   |
| Formation of rad6  | 1.76944e-21 (0.0417 )  | 1.76944e-21 (0.0417 )  |
| H-abstraction      | 1.78210e-23 (0.000420) | 1.78210e-23 (0.000420) |

| species            | PYtrue      | Cumul    | PYeffective | Cumul    |
|--------------------|-------------|----------|-------------|----------|
| rad11              | 0.957843    | 0.957843 | 0.957843    | 0.957843 |
| rad6               | 0.0417352   | 0.999579 | 0.0417352   | 0.999579 |
| Benzene+2-propynyl | 0.000420064 | 0.999999 | 0.000420064 | 0.999999 |
| rad21              | 1.50049e-06 | 1.00000  | 1.50049e-06 | 1.00000  |
| rad20              | 9.68274e-09 | 1.00000  | 9.68274e-09 | 1.00000  |
| rad13              | 6.46818e-09 | 1.00000  | 6.46818e-09 | 1.00000  |
| rad22              | 3.73549e-09 | 1.00000  | 3.73549e-09 | 1.00000  |
| rad7               | 2.07181e-09 | 1.00000  | 2.07181e-09 | 1.00000  |
| rad25              | 8.17796e-10 | 1.00000  | 8.17796e-10 | 1.00000  |
| rad24              | 3.34202e-10 | 1.00000  | 3.34202e-10 | 1.00000  |
| rad45              | 1.24549e-10 | 1.00000  | 1.24549e-10 | 1.00000  |
| PhCHCCH2+H         | 7.36532e-11 | 1.00000  | 7.36532e-11 | 1.00000  |
| rad33              | 6.29878e-11 | 1.00000  | 6.29878e-11 | 1.00000  |
| rad36              | 1.45959e-11 | 1.00000  | 1.45959e-11 | 1.00000  |
| rad18              | 5.72953e-12 | 1.00000  | 5.72953e-12 | 1.00000  |
| rad9               | 4.59764e-12 | 1.00000  | 4.59764e-12 | 1.00000  |
| Phenyl+Allene      | 7.31908e-13 | 1.00000  | 0.00000     | 1.00000  |
| C2H2+PhCH2         | 6.94757e-14 | 1.00000  | 6.94757e-14 | 1.00000  |
| Indene+H           | 6.63886e-14 | 1.00000  | 6.63886e-14 | 1.00000  |
| rad23              | 1.40894e-14 | 1.00000  | 1.40894e-14 | 1.00000  |
| rad3               | 7.52401e-15 | 1.00000  | 7.52401e-15 | 1.00000  |
| rad4               | 5.10520e-15 | 1.00000  | 5.10520e-15 | 1.00000  |
| rad28              | 4.22469e-16 | 1.00000  | 4.22469e-16 | 1.00000  |
| PhCH2CCH+H         | 4.11908e-16 | 1.00000  | 4.11908e-16 | 1.00000  |
| rad2               | 4.03300e-20 | 1.00000  | 4.03300e-20 | 1.00000  |
| rad8               | 1.11416e-20 | 1.00000  | 1.11416e-20 | 1.00000  |
| rad1               | 6.16920e-21 | 1.00000  | 6.16920e-21 | 1.00000  |
| rad30              | 1.19298e-21 | 1.00000  | 1.19298e-21 | 1.00000  |
| PhCCH+CH3          | 6.68887e-22 | 1.00000  | 6.68887e-22 | 1.00000  |
| PAH7+H             | 4.31715e-22 | 1.00000  | 4.31715e-22 | 1.00000  |
| rad15              | 1.99669e-22 | 1.00000  | 1.99669e-22 | 1.00000  |
| rad31              | 1.89661e-22 | 1.00000  | 1.89661e-22 | 1.00000  |
| rad14              | 3.59020e-23 | 1.00000  | 3.59020e-23 | 1.00000  |
| rad38              | 1.19655e-23 | 1.00000  | 1.19655e-23 | 1.00000  |
| Ph+MeAc            | 3.26857e-25 | 1.00000  | 3.26857e-25 | 1.00000  |
| rad46              | 9.22895e-26 | 1.00000  | 9.22895e-26 | 1.00000  |
| rad60syn           | 1.70066e-26 | 1.00000  | 1.70066e-26 | 1.00000  |
| rad10              | 1.51277e-26 | 1.00000  | 1.51277e-26 | 1.00000  |
| rad60anti          | 4.13032e-27 | 1.00000  | 4.13032e-27 | 1.00000  |
| rad26              | 3.13434e-27 | 1.00000  | 3.13434e-27 | 1.00000  |
| PAH9+H             | 1.34571e-27 | 1.00000  | 1.34571e-27 | 1.00000  |
| rad35              | 7.49723e-28 | 1.00000  | 7.49723e-28 | 1.00000  |
| rad39              | 3.29254e-28 | 1.00000  | 3.29254e-28 | 1.00000  |
| rad27              | 3.11393e-29 | 1.00000  | 3.11393e-29 | 1.00000  |
| PhCCCH3+H          | 2.02087e-29 | 1.00000  | 2.02087e-29 | 1.00000  |
| PAH3+H             | 1.71590e-30 | 1.00000  | 1.71590e-30 | 1.00000  |
| rad59              | 6.84896e-31 | 1.00000  | 6.84896e-31 | 1.00000  |
| rad19syn           | 2.28674e-32 | 1.00000  | 2.28674e-32 | 1.00000  |
| rad50              | 1.44307e-32 | 1.00000  | 1.44307e-32 | 1.00000  |
| rad54              | 6.12692e-33 | 1.00000  | 6.12692e-33 | 1.00000  |
| rad5               | 1.15086e-36 | 1.00000  | 1.15086e-36 | 1.00000  |
| rad70              | 5.92528e-37 | 1.00000  | 5.92528e-37 | 1.00000  |
| rad12              | 1.85790e-37 | 1.00000  | 1.85790e-37 | 1.00000  |
| rad52              | 3.20087e-38 | 1.00000  | 3.20087e-38 | 1.00000  |
| rad55              | 2.34217e-38 | 1.00000  | 2.34217e-38 | 1.00000  |
| rad37              | 6.64031e-39 | 1.00000  | 6.64031e-39 | 1.00000  |
| PhcycC3H3_A+H      | 5.23784e-40 | 1.00000  | 5.23784e-40 | 1.00000  |

|           |             |         |             |         |
|-----------|-------------|---------|-------------|---------|
| rad51     | 2.16990e-41 | 1.00000 | 2.16990e-41 | 1.00000 |
| rad34     | 9.41387e-42 | 1.00000 | 9.41387e-42 | 1.00000 |
| rad62     | 1.26936e-42 | 1.00000 | 1.26936e-42 | 1.00000 |
| rad58     | 9.64435e-44 | 1.00000 | 9.64435e-44 | 1.00000 |
| rad47     | 1.46804e-46 | 1.00000 | 1.46804e-46 | 1.00000 |
| PAH10+CH3 | 1.29758e-46 | 1.00000 | 1.29758e-46 | 1.00000 |
| rad43     | 9.97878e-47 | 1.00000 | 9.97878e-47 | 1.00000 |
| PAH1+H    | 1.83271e-47 | 1.00000 | 1.83271e-47 | 1.00000 |
| rad65     | 2.40120e-48 | 1.00000 | 2.40120e-48 | 1.00000 |
| rad42     | 2.69085e-51 | 1.00000 | 2.69085e-51 | 1.00000 |
| rad41     | 4.14540e-56 | 1.00000 | 4.14540e-56 | 1.00000 |

10000000.0 Pa, 130.000000 K

| Rate constant      | True (fraction)        | Effective (fraction)   |
|--------------------|------------------------|------------------------|
| Total              | 1.33719e-19 (1.00 )    | 1.33719e-19 (1.00 )    |
| Formation of rad11 | 1.26517e-19 (0.946 )   | 1.26517e-19 (0.946 )   |
| Formation of rad6  | 7.08974e-21 (0.0530 )  | 7.08974e-21 (0.0530 )  |
| H-abstraction      | 1.11864e-22 (0.000837) | 1.11864e-22 (0.000837) |

| species            | PYtrue      | Cumul    | PYeffective | Cumul    |
|--------------------|-------------|----------|-------------|----------|
| rad11              | 0.946112    | 0.946112 | 0.946112    | 0.946112 |
| rad6               | 0.0530500   | 0.999162 | 0.0530500   | 0.999162 |
| Benzene+2-propynyl | 0.000836559 | 0.999998 | 0.000836559 | 0.999998 |
| rad21              | 1.67739e-06 | 1.00000  | 1.67739e-06 | 1.00000  |
| rad20              | 1.19815e-08 | 1.00000  | 1.19815e-08 | 1.00000  |
| rad13              | 9.29372e-09 | 1.00000  | 9.29372e-09 | 1.00000  |
| rad22              | 4.62395e-09 | 1.00000  | 4.62395e-09 | 1.00000  |
| rad7               | 2.99009e-09 | 1.00000  | 2.99009e-09 | 1.00000  |
| rad25              | 9.55307e-10 | 1.00000  | 9.55307e-10 | 1.00000  |
| rad24              | 4.04797e-10 | 1.00000  | 4.04797e-10 | 1.00000  |
| rad45              | 1.68223e-10 | 1.00000  | 1.68223e-10 | 1.00000  |
| PhCHCCH2+H         | 9.23236e-11 | 1.00000  | 9.23236e-11 | 1.00000  |
| rad33              | 9.15930e-11 | 1.00000  | 9.15930e-11 | 1.00000  |
| rad36              | 1.94018e-11 | 1.00000  | 1.94018e-11 | 1.00000  |
| rad18              | 7.90810e-12 | 1.00000  | 7.90810e-12 | 1.00000  |
| rad9               | 5.91003e-12 | 1.00000  | 5.91003e-12 | 1.00000  |
| Phenyl+Allene      | 1.17110e-12 | 1.00000  | 0.00000     | 1.00000  |
| C2H2+PhCH2         | 1.02276e-13 | 1.00000  | 1.02276e-13 | 1.00000  |
| Indene+H           | 9.27671e-14 | 1.00000  | 9.27671e-14 | 1.00000  |
| rad23              | 2.01087e-14 | 1.00000  | 2.01087e-14 | 1.00000  |
| rad3               | 1.25502e-14 | 1.00000  | 1.25502e-14 | 1.00000  |
| rad4               | 8.47274e-15 | 1.00000  | 8.47274e-15 | 1.00000  |
| PhCH2CCH+H         | 1.21720e-15 | 1.00000  | 1.21720e-15 | 1.00000  |
| rad28              | 7.27030e-16 | 1.00000  | 7.27030e-16 | 1.00000  |
| rad2               | 7.90831e-20 | 1.00000  | 7.90831e-20 | 1.00000  |
| rad8               | 2.66135e-20 | 1.00000  | 2.66135e-20 | 1.00000  |
| rad1               | 1.18986e-20 | 1.00000  | 1.18986e-20 | 1.00000  |
| rad30              | 2.06838e-21 | 1.00000  | 2.06838e-21 | 1.00000  |
| PhCCH+CH3          | 1.48545e-21 | 1.00000  | 1.48545e-21 | 1.00000  |
| PAH7+H             | 1.39741e-21 | 1.00000  | 1.39741e-21 | 1.00000  |
| rad15              | 3.54927e-22 | 1.00000  | 3.54927e-22 | 1.00000  |
| rad31              | 2.90707e-22 | 1.00000  | 2.90707e-22 | 1.00000  |
| rad14              | 7.51177e-23 | 1.00000  | 7.51177e-23 | 1.00000  |
| rad38              | 2.10828e-23 | 1.00000  | 2.10828e-23 | 1.00000  |
| Ph+MeAc            | 9.16749e-25 | 1.00000  | 9.16749e-25 | 1.00000  |
| rad46              | 1.74526e-25 | 1.00000  | 1.74526e-25 | 1.00000  |
| rad60syn           | 3.97819e-26 | 1.00000  | 3.97819e-26 | 1.00000  |
| rad10              | 3.59312e-26 | 1.00000  | 3.59312e-26 | 1.00000  |
| rad26              | 1.35408e-26 | 1.00000  | 1.35408e-26 | 1.00000  |
| rad60anti          | 1.03718e-26 | 1.00000  | 1.03718e-26 | 1.00000  |
| PAH9+H             | 2.45087e-27 | 1.00000  | 2.45087e-27 | 1.00000  |
| rad35              | 1.38600e-27 | 1.00000  | 1.38600e-27 | 1.00000  |
| rad39              | 8.70136e-28 | 1.00000  | 8.70136e-28 | 1.00000  |
| rad27              | 7.94037e-29 | 1.00000  | 7.94037e-29 | 1.00000  |
| PhCCCH3+H          | 5.75331e-29 | 1.00000  | 5.75331e-29 | 1.00000  |
| PAH3+H             | 9.84312e-30 | 1.00000  | 9.84312e-30 | 1.00000  |
| rad59              | 3.75851e-30 | 1.00000  | 3.75851e-30 | 1.00000  |
| rad19syn           | 3.33244e-31 | 1.00000  | 3.33244e-31 | 1.00000  |
| rad54              | 1.36514e-31 | 1.00000  | 1.36514e-31 | 1.00000  |
| rad50              | 7.51118e-32 | 1.00000  | 7.51118e-32 | 1.00000  |
| rad70              | 4.52720e-35 | 1.00000  | 4.52720e-35 | 1.00000  |
| rad5               | 6.80925e-36 | 1.00000  | 6.80925e-36 | 1.00000  |
| rad55              | 1.39831e-36 | 1.00000  | 1.39831e-36 | 1.00000  |
| rad12              | 1.09188e-36 | 1.00000  | 1.09188e-36 | 1.00000  |
| rad52              | 4.42829e-37 | 1.00000  | 4.42829e-37 | 1.00000  |
| rad37              | 4.48418e-38 | 1.00000  | 4.48418e-38 | 1.00000  |
| PhcycC3H3_A+H      | 3.51948e-38 | 1.00000  | 3.51948e-38 | 1.00000  |

|           |             |         |             |         |
|-----------|-------------|---------|-------------|---------|
| rad34     | 1.03270e-39 | 1.00000 | 1.03270e-39 | 1.00000 |
| rad51     | 5.95438e-40 | 1.00000 | 5.95438e-40 | 1.00000 |
| rad62     | 4.01147e-41 | 1.00000 | 4.01147e-41 | 1.00000 |
| rad58     | 5.87546e-42 | 1.00000 | 5.87546e-42 | 1.00000 |
| rad47     | 1.06827e-44 | 1.00000 | 1.06827e-44 | 1.00000 |
| PAH10+CH3 | 3.87636e-45 | 1.00000 | 3.87636e-45 | 1.00000 |
| rad43     | 2.78756e-45 | 1.00000 | 2.78756e-45 | 1.00000 |
| PAH1+H    | 1.93000e-45 | 1.00000 | 1.93000e-45 | 1.00000 |
| rad65     | 1.11741e-46 | 1.00000 | 1.11741e-46 | 1.00000 |
| rad42     | 3.13919e-49 | 1.00000 | 3.13919e-49 | 1.00000 |
| rad41     | 5.01951e-54 | 1.00000 | 5.01951e-54 | 1.00000 |

10000000.0 Pa, 140.000000 K

| Rate constant      | True (fraction)        | Effective (fraction)   |
|--------------------|------------------------|------------------------|
| Total              | 3.59582e-19 (1.00 )    | 3.59582e-19 (1.00 )    |
| Formation of rad11 | 3.35703e-19 (0.934 )   | 3.35703e-19 (0.934 )   |
| Formation of rad6  | 2.33415e-20 (0.0649 )  | 2.33415e-20 (0.0649 )  |
| H-abstraction      | 5.37685e-22 (0.00150 ) | 5.37685e-22 (0.00150 ) |

| species            | PYtrue      | Cumul    | PYeffective | Cumul    |
|--------------------|-------------|----------|-------------|----------|
| rad11              | 0.933557    | 0.933557 | 0.933557    | 0.933557 |
| rad6               | 0.0649460   | 0.998503 | 0.0649460   | 0.998503 |
| Benzene+2-propynyl | 0.00149531  | 0.999998 | 0.00149531  | 0.999998 |
| rad21              | 1.86744e-06 | 1.00000  | 1.86744e-06 | 1.00000  |
| rad20              | 1.47061e-08 | 1.00000  | 1.47061e-08 | 1.00000  |
| rad13              | 1.28106e-08 | 1.00000  | 1.28106e-08 | 1.00000  |
| rad22              | 5.67757e-09 | 1.00000  | 5.67757e-09 | 1.00000  |
| rad7               | 4.14091e-09 | 1.00000  | 4.14091e-09 | 1.00000  |
| rad25              | 1.11452e-09 | 1.00000  | 1.11452e-09 | 1.00000  |
| rad24              | 4.86224e-10 | 1.00000  | 4.86224e-10 | 1.00000  |
| rad45              | 2.24401e-10 | 1.00000  | 2.24401e-10 | 1.00000  |
| rad33              | 1.27848e-10 | 1.00000  | 1.27848e-10 | 1.00000  |
| PhCHCCH2+H         | 1.16049e-10 | 1.00000  | 1.16049e-10 | 1.00000  |
| rad36              | 2.55106e-11 | 1.00000  | 2.55106e-11 | 1.00000  |
| rad18              | 1.07937e-11 | 1.00000  | 1.07937e-11 | 1.00000  |
| rad9               | 7.62029e-12 | 1.00000  | 7.62029e-12 | 1.00000  |
| Phenyl+Allene      | 1.85814e-12 | 1.00000  | 0.00000     | 1.00000  |
| C2H2+PhCH2         | 1.49755e-13 | 1.00000  | 1.49755e-13 | 1.00000  |
| Indene+H           | 1.28358e-13 | 1.00000  | 1.28358e-13 | 1.00000  |
| rad23              | 2.84073e-14 | 1.00000  | 2.84073e-14 | 1.00000  |
| rad3               | 2.00458e-14 | 1.00000  | 2.00458e-14 | 1.00000  |
| rad4               | 1.34720e-14 | 1.00000  | 1.34720e-14 | 1.00000  |
| PhCH2CCH+H         | 3.27873e-15 | 1.00000  | 3.27873e-15 | 1.00000  |
| rad28              | 1.20068e-15 | 1.00000  | 1.20068e-15 | 1.00000  |
| rad2               | 1.48803e-19 | 1.00000  | 1.48803e-19 | 1.00000  |
| rad8               | 6.21228e-20 | 1.00000  | 6.21228e-20 | 1.00000  |
| rad1               | 2.20608e-20 | 1.00000  | 2.20608e-20 | 1.00000  |
| PAH7+H             | 4.23815e-21 | 1.00000  | 4.23815e-21 | 1.00000  |
| rad30              | 3.57886e-21 | 1.00000  | 3.57886e-21 | 1.00000  |
| PhCCH+CH3          | 3.19105e-21 | 1.00000  | 3.19105e-21 | 1.00000  |
| rad15              | 6.30928e-22 | 1.00000  | 6.30928e-22 | 1.00000  |
| rad31              | 4.31856e-22 | 1.00000  | 4.31856e-22 | 1.00000  |
| rad14              | 1.51652e-22 | 1.00000  | 1.51652e-22 | 1.00000  |
| rad38              | 3.70353e-23 | 1.00000  | 3.70353e-23 | 1.00000  |
| Ph+MeAc            | 2.48488e-24 | 1.00000  | 2.48488e-24 | 1.00000  |
| rad46              | 3.31922e-25 | 1.00000  | 3.31922e-25 | 1.00000  |
| rad60syn           | 9.32325e-26 | 1.00000  | 9.32325e-26 | 1.00000  |
| rad10              | 8.22799e-26 | 1.00000  | 8.22799e-26 | 1.00000  |
| rad26              | 5.31986e-26 | 1.00000  | 5.31986e-26 | 1.00000  |
| rad60anti          | 2.59025e-26 | 1.00000  | 2.59025e-26 | 1.00000  |
| PAH9+H             | 4.48605e-27 | 1.00000  | 4.48605e-27 | 1.00000  |
| rad35              | 2.62980e-27 | 1.00000  | 2.62980e-27 | 1.00000  |
| rad39              | 2.24143e-27 | 1.00000  | 2.24143e-27 | 1.00000  |
| rad27              | 1.96343e-28 | 1.00000  | 1.96343e-28 | 1.00000  |
| PhCCCH3+H          | 1.59660e-28 | 1.00000  | 1.59660e-28 | 1.00000  |
| PAH3+H             | 5.14368e-29 | 1.00000  | 5.14368e-29 | 1.00000  |
| rad59              | 1.87878e-29 | 1.00000  | 1.87878e-29 | 1.00000  |
| rad19syn           | 3.69300e-30 | 1.00000  | 3.69300e-30 | 1.00000  |
| rad54              | 2.20679e-30 | 1.00000  | 2.20679e-30 | 1.00000  |
| rad50              | 3.61906e-31 | 1.00000  | 3.61906e-31 | 1.00000  |
| rad70              | 2.14023e-33 | 1.00000  | 2.14023e-33 | 1.00000  |
| rad55              | 5.47693e-35 | 1.00000  | 5.47693e-35 | 1.00000  |
| rad5               | 3.73092e-35 | 1.00000  | 3.73092e-35 | 1.00000  |
| rad12              | 6.00769e-36 | 1.00000  | 6.00769e-36 | 1.00000  |
| rad52              | 5.18156e-36 | 1.00000  | 5.18156e-36 | 1.00000  |
| PhcycC3H3_A+H      | 1.53805e-36 | 1.00000  | 1.53805e-36 | 1.00000  |
| rad37              | 2.85176e-37 | 1.00000  | 2.85176e-37 | 1.00000  |

|           |             |         |             |         |
|-----------|-------------|---------|-------------|---------|
| rad34     | 1.09590e-37 | 1.00000 | 1.09590e-37 | 1.00000 |
| rad51     | 1.32778e-38 | 1.00000 | 1.32778e-38 | 1.00000 |
| rad62     | 9.75351e-40 | 1.00000 | 9.75351e-40 | 1.00000 |
| rad58     | 2.84431e-40 | 1.00000 | 2.84431e-40 | 1.00000 |
| rad47     | 6.72558e-43 | 1.00000 | 6.72558e-43 | 1.00000 |
| PAH1+H    | 1.80385e-43 | 1.00000 | 1.80385e-43 | 1.00000 |
| PAH10+CH3 | 9.39120e-44 | 1.00000 | 9.39120e-44 | 1.00000 |
| rad43     | 6.29255e-44 | 1.00000 | 6.29255e-44 | 1.00000 |
| rad65     | 4.03496e-45 | 1.00000 | 4.03496e-45 | 1.00000 |
| rad42     | 3.57805e-47 | 1.00000 | 3.57805e-47 | 1.00000 |
| rad41     | 5.55398e-52 | 1.00000 | 5.55398e-52 | 1.00000 |

10000000.0 Pa, 150.000000 K

| Rate constant      | True (fraction)        | Effective (fraction)   |
|--------------------|------------------------|------------------------|
| Total              | 8.51464e-19 (1.00 )    | 8.51464e-19 (1.00 )    |
| Formation of rad11 | 7.83711e-19 (0.920 )   | 7.83711e-19 (0.920 )   |
| Formation of rad6  | 6.56651e-20 (0.0771 )  | 6.56651e-20 (0.0771 )  |
| H-abstraction      | 2.08816e-21 (0.00245 ) | 2.08816e-21 (0.00245 ) |

| species            | PYtrue      | Cumul    | PYeffective | Cumul    |
|--------------------|-------------|----------|-------------|----------|
| rad11              | 0.920389    | 0.920389 | 0.920389    | 0.920389 |
| rad6               | 0.0771567   | 0.997546 | 0.0771567   | 0.997546 |
| Benzene+2-propynyl | 0.00245244  | 0.999998 | 0.00245244  | 0.999998 |
| rad21              | 2.07311e-06 | 1.00000  | 2.07311e-06 | 1.00000  |
| rad20              | 1.79467e-08 | 1.00000  | 1.79467e-08 | 1.00000  |
| rad13              | 1.70870e-08 | 1.00000  | 1.70870e-08 | 1.00000  |
| rad22              | 6.93135e-09 | 1.00000  | 6.93135e-09 | 1.00000  |
| rad7               | 5.55057e-09 | 1.00000  | 5.55057e-09 | 1.00000  |
| rad25              | 1.30031e-09 | 1.00000  | 1.30031e-09 | 1.00000  |
| rad24              | 5.80417e-10 | 1.00000  | 5.80417e-10 | 1.00000  |
| rad45              | 2.96624e-10 | 1.00000  | 2.96624e-10 | 1.00000  |
| rad33              | 1.72783e-10 | 1.00000  | 1.72783e-10 | 1.00000  |
| PhCHCCH2+H         | 1.46438e-10 | 1.00000  | 1.46438e-10 | 1.00000  |
| rad36              | 3.32830e-11 | 1.00000  | 3.32830e-11 | 1.00000  |
| rad18              | 1.46195e-11 | 1.00000  | 1.46195e-11 | 1.00000  |
| rad9               | 9.86416e-12 | 1.00000  | 9.86416e-12 | 1.00000  |
| Phenyl+Allene      | 2.92721e-12 | 1.00000  | 0.00000     | 1.00000  |
| C2H2+PhCH2         | 2.18895e-13 | 1.00000  | 2.18895e-13 | 1.00000  |
| Indene+H           | 1.76509e-13 | 1.00000  | 1.76509e-13 | 1.00000  |
| rad23              | 3.98700e-14 | 1.00000  | 3.98700e-14 | 1.00000  |
| rad3               | 3.09650e-14 | 1.00000  | 3.09650e-14 | 1.00000  |
| rad4               | 2.07258e-14 | 1.00000  | 2.07258e-14 | 1.00000  |
| PhCH2CCH+H         | 8.16653e-15 | 1.00000  | 8.16653e-15 | 1.00000  |
| rad28              | 1.92195e-15 | 1.00000  | 1.92195e-15 | 1.00000  |
| rad2               | 2.71705e-19 | 1.00000  | 2.71705e-19 | 1.00000  |
| rad8               | 1.41535e-19 | 1.00000  | 1.41535e-19 | 1.00000  |
| rad1               | 3.97531e-20 | 1.00000  | 3.97531e-20 | 1.00000  |
| PAH7+H             | 1.21240e-20 | 1.00000  | 1.21240e-20 | 1.00000  |
| PhCCH+CH3          | 6.70463e-21 | 1.00000  | 6.70463e-21 | 1.00000  |
| rad30              | 6.21005e-21 | 1.00000  | 6.21005e-21 | 1.00000  |
| rad15              | 1.12689e-21 | 1.00000  | 1.12689e-21 | 1.00000  |
| rad31              | 6.27189e-22 | 1.00000  | 6.27189e-22 | 1.00000  |
| rad14              | 2.98719e-22 | 1.00000  | 2.98719e-22 | 1.00000  |
| rad38              | 6.51967e-23 | 1.00000  | 6.51967e-23 | 1.00000  |
| Ph+MeAc            | 6.56865e-24 | 1.00000  | 6.56865e-24 | 1.00000  |
| rad46              | 6.37352e-25 | 1.00000  | 6.37352e-25 | 1.00000  |
| rad60syn           | 2.19235e-25 | 1.00000  | 2.19235e-25 | 1.00000  |
| rad26              | 1.91744e-25 | 1.00000  | 1.91744e-25 | 1.00000  |
| rad10              | 1.84002e-25 | 1.00000  | 1.84002e-25 | 1.00000  |
| rad60anti          | 6.44620e-26 | 1.00000  | 6.44620e-26 | 1.00000  |
| PAH9+H             | 8.29899e-27 | 1.00000  | 8.29899e-27 | 1.00000  |
| rad39              | 5.67991e-27 | 1.00000  | 5.67991e-27 | 1.00000  |
| rad35              | 5.20278e-27 | 1.00000  | 5.20278e-27 | 1.00000  |
| rad27              | 4.76783e-28 | 1.00000  | 4.76783e-28 | 1.00000  |
| PhCCCH3+H          | 4.37007e-28 | 1.00000  | 4.37007e-28 | 1.00000  |
| PAH3+H             | 2.45769e-28 | 1.00000  | 2.45769e-28 | 1.00000  |
| rad59              | 8.59713e-29 | 1.00000  | 8.59713e-29 | 1.00000  |
| rad19syn           | 3.20725e-29 | 1.00000  | 3.20725e-29 | 1.00000  |
| rad54              | 2.66314e-29 | 1.00000  | 2.66314e-29 | 1.00000  |
| rad50              | 1.61945e-30 | 1.00000  | 1.61945e-30 | 1.00000  |
| rad70              | 6.18228e-32 | 1.00000  | 6.18228e-32 | 1.00000  |
| rad55              | 1.39619e-33 | 1.00000  | 1.39619e-33 | 1.00000  |
| rad5               | 1.91323e-34 | 1.00000  | 1.91323e-34 | 1.00000  |
| rad52              | 5.07759e-35 | 1.00000  | 5.07759e-35 | 1.00000  |
| PhcycC3H3_A+H      | 4.25920e-35 | 1.00000  | 4.25920e-35 | 1.00000  |
| rad12              | 3.10548e-35 | 1.00000  | 3.10548e-35 | 1.00000  |
| rad34              | 9.76398e-36 | 1.00000  | 9.76398e-36 | 1.00000  |

|           |             |         |             |         |
|-----------|-------------|---------|-------------|---------|
| rad37     | 1.70410e-36 | 1.00000 | 1.70410e-36 | 1.00000 |
| rad51     | 2.33953e-37 | 1.00000 | 2.33953e-37 | 1.00000 |
| rad62     | 1.81658e-38 | 1.00000 | 1.81658e-38 | 1.00000 |
| rad58     | 9.75520e-39 | 1.00000 | 9.75520e-39 | 1.00000 |
| rad47     | 3.24728e-41 | 1.00000 | 3.24728e-41 | 1.00000 |
| PAH1+H    | 8.56651e-42 | 1.00000 | 8.56651e-42 | 1.00000 |
| PAH10+CH3 | 1.81381e-42 | 1.00000 | 1.81381e-42 | 1.00000 |
| rad43     | 1.14319e-42 | 1.00000 | 1.14319e-42 | 1.00000 |
| rad65     | 1.08441e-43 | 1.00000 | 1.08441e-43 | 1.00000 |
| rad42     | 2.62929e-45 | 1.00000 | 2.62929e-45 | 1.00000 |
| rad41     | 4.03621e-50 | 1.00000 | 4.03621e-50 | 1.00000 |

10000000.0 Pa, 160.000000 K

| Rate constant      | True (fraction)        | Effective (fraction)   |
|--------------------|------------------------|------------------------|
| Total              | 1.81800e-18 (1.00 )    | 1.81800e-18 (1.00 )    |
| Formation of rad11 | 1.64862e-18 (0.907 )   | 1.64862e-18 (0.907 )   |
| Formation of rad6  | 1.62558e-19 (0.0894 )  | 1.62558e-19 (0.0894 )  |
| H-abstraction      | 6.82130e-21 (0.00375 ) | 6.82130e-21 (0.00375 ) |

| species            | PYtrue      | Cumul    | PYeffective | Cumul    |
|--------------------|-------------|----------|-------------|----------|
| rad11              | 0.906790    | 0.906790 | 0.906790    | 0.906790 |
| rad6               | 0.0894559   | 0.996246 | 0.0894559   | 0.996246 |
| Benzene+2-propynyl | 0.00375209  | 0.999998 | 0.00375209  | 0.999998 |
| rad21              | 2.29723e-06 | 1.00000  | 2.29723e-06 | 1.00000  |
| rad13              | 2.21987e-08 | 1.00000  | 2.21987e-08 | 1.00000  |
| rad20              | 2.18166e-08 | 1.00000  | 2.18166e-08 | 1.00000  |
| rad22              | 8.42944e-09 | 1.00000  | 8.42944e-09 | 1.00000  |
| rad7               | 7.24886e-09 | 1.00000  | 7.24886e-09 | 1.00000  |
| rad25              | 1.51867e-09 | 1.00000  | 1.51867e-09 | 1.00000  |
| rad24              | 6.89728e-10 | 1.00000  | 6.89728e-10 | 1.00000  |
| rad45              | 3.89558e-10 | 1.00000  | 3.89558e-10 | 1.00000  |
| rad33              | 2.27585e-10 | 1.00000  | 2.27585e-10 | 1.00000  |
| PhCHCCH2+H         | 1.85641e-10 | 1.00000  | 1.85641e-10 | 1.00000  |
| rad36              | 4.31927e-11 | 1.00000  | 4.31927e-11 | 1.00000  |
| rad18              | 1.97046e-11 | 1.00000  | 1.97046e-11 | 1.00000  |
| rad9               | 1.28256e-11 | 1.00000  | 1.28256e-11 | 1.00000  |
| Phenyl+Allene      | 4.58250e-12 | 1.00000  | 0.00000     | 1.00000  |
| C2H2+PhCH2         | 3.20316e-13 | 1.00000  | 3.20316e-13 | 1.00000  |
| Indene+H           | 2.41945e-13 | 1.00000  | 2.41945e-13 | 1.00000  |
| rad23              | 5.57614e-14 | 1.00000  | 5.57614e-14 | 1.00000  |
| rad3               | 4.66120e-14 | 1.00000  | 4.66120e-14 | 1.00000  |
| rad4               | 3.10845e-14 | 1.00000  | 3.10845e-14 | 1.00000  |
| PhCH2CCH+H         | 1.90482e-14 | 1.00000  | 1.90482e-14 | 1.00000  |
| rad28              | 3.00462e-15 | 1.00000  | 3.00462e-15 | 1.00000  |
| rad2               | 4.85607e-19 | 1.00000  | 4.85607e-19 | 1.00000  |
| rad8               | 3.14954e-19 | 1.00000  | 3.14954e-19 | 1.00000  |
| rad1               | 7.02128e-20 | 1.00000  | 7.02128e-20 | 1.00000  |
| PAH7+H             | 3.29423e-20 | 1.00000  | 3.29423e-20 | 1.00000  |
| PhCCH+CH3          | 1.38890e-20 | 1.00000  | 1.38890e-20 | 1.00000  |
| rad30              | 1.08452e-20 | 1.00000  | 1.08452e-20 | 1.00000  |
| rad15              | 2.02901e-21 | 1.00000  | 2.02901e-21 | 1.00000  |
| rad31              | 8.96473e-22 | 1.00000  | 8.96473e-22 | 1.00000  |
| rad14              | 5.78901e-22 | 1.00000  | 5.78901e-22 | 1.00000  |
| rad38              | 1.15446e-22 | 1.00000  | 1.15446e-22 | 1.00000  |
| Ph+MeAc            | 1.70363e-23 | 1.00000  | 1.70363e-23 | 1.00000  |
| rad46              | 1.23849e-24 | 1.00000  | 1.23849e-24 | 1.00000  |
| rad26              | 6.41084e-25 | 1.00000  | 6.41084e-25 | 1.00000  |
| rad60syn           | 5.17415e-25 | 1.00000  | 5.17415e-25 | 1.00000  |
| rad10              | 4.05735e-25 | 1.00000  | 4.05735e-25 | 1.00000  |
| rad60anti          | 1.59999e-25 | 1.00000  | 1.59999e-25 | 1.00000  |
| PAH9+H             | 1.55808e-26 | 1.00000  | 1.55808e-26 | 1.00000  |
| rad39              | 1.42418e-26 | 1.00000  | 1.42418e-26 | 1.00000  |
| rad35              | 1.08730e-26 | 1.00000  | 1.08730e-26 | 1.00000  |
| PhCCCH3+H          | 1.18896e-27 | 1.00000  | 1.18896e-27 | 1.00000  |
| rad27              | 1.14735e-27 | 1.00000  | 1.14735e-27 | 1.00000  |
| PAH3+H             | 1.08358e-27 | 1.00000  | 1.08358e-27 | 1.00000  |
| rad59              | 3.63655e-28 | 1.00000  | 3.63655e-28 | 1.00000  |
| rad54              | 2.49787e-28 | 1.00000  | 2.49787e-28 | 1.00000  |
| rad19syn           | 2.26170e-28 | 1.00000  | 2.26170e-28 | 1.00000  |
| rad50              | 6.77778e-30 | 1.00000  | 6.77778e-30 | 1.00000  |
| rad70              | 1.22629e-30 | 1.00000  | 1.22629e-30 | 1.00000  |
| rad55              | 2.51592e-32 | 1.00000  | 2.51592e-32 | 1.00000  |
| rad5               | 9.26466e-34 | 1.00000  | 9.26466e-34 | 1.00000  |
| PhcycC3H3_A+H      | 8.28761e-34 | 1.00000  | 8.28761e-34 | 1.00000  |
| rad34              | 4.33358e-34 | 1.00000  | 4.33358e-34 | 1.00000  |
| rad52              | 4.21377e-34 | 1.00000  | 4.21377e-34 | 1.00000  |
| rad12              | 1.51667e-34 | 1.00000  | 1.51667e-34 | 1.00000  |



|           |             |         |             |         |
|-----------|-------------|---------|-------------|---------|
| rad37     | 9.58594e-36 | 1.00000 | 9.58594e-36 | 1.00000 |
| rad51     | 3.28662e-36 | 1.00000 | 3.28662e-36 | 1.00000 |
| rad62     | 2.66404e-37 | 1.00000 | 2.66404e-37 | 1.00000 |
| rad58     | 2.40660e-37 | 1.00000 | 2.40660e-37 | 1.00000 |
| rad47     | 1.11895e-39 | 1.00000 | 1.11895e-39 | 1.00000 |
| PAH1+H    | 2.62077e-40 | 1.00000 | 2.62077e-40 | 1.00000 |
| PAH10+CH3 | 2.83649e-41 | 1.00000 | 2.83649e-41 | 1.00000 |
| rad43     | 1.70410e-41 | 1.00000 | 1.70410e-41 | 1.00000 |
| rad65     | 2.20841e-42 | 1.00000 | 2.20841e-42 | 1.00000 |
| rad42     | 1.17226e-43 | 1.00000 | 1.17226e-43 | 1.00000 |
| rad41     | 1.86816e-48 | 1.00000 | 1.86816e-48 | 1.00000 |

10000000.0 Pa, 170.000000 K

| Rate constant      | True (fraction)        | Effective (fraction)   |
|--------------------|------------------------|------------------------|
| Total              | 3.56414e-18 (1.00 )    | 3.56414e-18 (1.00 )    |
| Formation of rad11 | 3.18264e-18 (0.893 )   | 3.18264e-18 (0.893 )   |
| Formation of rad6  | 3.62173e-19 (0.102 )   | 3.62173e-19 (0.102 )   |
| H-abstraction      | 1.93278e-20 (0.00542 ) | 1.93278e-20 (0.00542 ) |

| species            | PYtrue      | Cumul    | PYeffective | Cumul    |
|--------------------|-------------|----------|-------------|----------|
| rad11              | 0.892915    | 0.892915 | 0.892915    | 0.892915 |
| rad6               | 0.101660    | 0.994575 | 0.101660    | 0.994575 |
| Benzene+2-propynyl | 0.00542285  | 0.999998 | 0.00542285  | 0.999998 |
| rad21              | 2.54305e-06 | 1.00000  | 2.54305e-06 | 1.00000  |
| rad13              | 2.82334e-08 | 1.00000  | 2.82334e-08 | 1.00000  |
| rad20              | 2.64586e-08 | 1.00000  | 2.64586e-08 | 1.00000  |
| rad22              | 1.02275e-08 | 1.00000  | 1.02275e-08 | 1.00000  |
| rad7               | 9.27060e-09 | 1.00000  | 9.27060e-09 | 1.00000  |
| rad25              | 1.77701e-09 | 1.00000  | 1.77701e-09 | 1.00000  |
| rad24              | 8.16994e-10 | 1.00000  | 8.16994e-10 | 1.00000  |
| rad45              | 5.09365e-10 | 1.00000  | 5.09365e-10 | 1.00000  |
| rad33              | 2.93651e-10 | 1.00000  | 2.93651e-10 | 1.00000  |
| PhCHCCH2+H         | 2.36532e-10 | 1.00000  | 2.36532e-10 | 1.00000  |
| rad36              | 5.58642e-11 | 1.00000  | 5.58642e-11 | 1.00000  |
| rad18              | 2.64884e-11 | 1.00000  | 2.64884e-11 | 1.00000  |
| rad9               | 1.67540e-11 | 1.00000  | 1.67540e-11 | 1.00000  |
| Phenyl+Allene      | 7.13308e-12 | 1.00000  | 0.00000     | 1.00000  |
| C2H2+PhCH2         | 4.70270e-13 | 1.00000  | 4.70270e-13 | 1.00000  |
| Indene+H           | 3.31376e-13 | 1.00000  | 3.31376e-13 | 1.00000  |
| rad23              | 7.79003e-14 | 1.00000  | 7.79003e-14 | 1.00000  |
| rad3               | 6.87825e-14 | 1.00000  | 6.87825e-14 | 1.00000  |
| rad4               | 4.57174e-14 | 1.00000  | 4.57174e-14 | 1.00000  |
| PhCH2CCH+H         | 4.20450e-14 | 1.00000  | 4.20450e-14 | 1.00000  |
| rad28              | 4.61451e-15 | 1.00000  | 4.61451e-15 | 1.00000  |
| rad2               | 8.55173e-19 | 1.00000  | 8.55173e-19 | 1.00000  |
| rad8               | 6.85581e-19 | 1.00000  | 6.85581e-19 | 1.00000  |
| rad1               | 1.22343e-19 | 1.00000  | 1.22343e-19 | 1.00000  |
| PAH7+H             | 8.55670e-20 | 1.00000  | 8.55670e-20 | 1.00000  |
| PhCCH+CH3          | 2.85290e-20 | 1.00000  | 2.85290e-20 | 1.00000  |
| rad30              | 1.91082e-20 | 1.00000  | 1.91082e-20 | 1.00000  |
| rad15              | 3.69057e-21 | 1.00000  | 3.69057e-21 | 1.00000  |
| rad31              | 1.26777e-21 | 1.00000  | 1.26777e-21 | 1.00000  |
| rad14              | 1.11056e-21 | 1.00000  | 1.11056e-21 | 1.00000  |
| rad38              | 2.06145e-22 | 1.00000  | 2.06145e-22 | 1.00000  |
| Ph+MeAc            | 4.35167e-23 | 1.00000  | 4.35167e-23 | 1.00000  |
| rad46              | 2.43770e-24 | 1.00000  | 2.43770e-24 | 1.00000  |
| rad26              | 2.00945e-24 | 1.00000  | 2.00945e-24 | 1.00000  |
| rad60syn           | 1.22495e-24 | 1.00000  | 1.22495e-24 | 1.00000  |
| rad10              | 8.88413e-25 | 1.00000  | 8.88413e-25 | 1.00000  |
| rad60anti          | 3.96125e-25 | 1.00000  | 3.96125e-25 | 1.00000  |
| rad39              | 3.54525e-26 | 1.00000  | 3.54525e-26 | 1.00000  |
| PAH9+H             | 2.97670e-26 | 1.00000  | 2.97670e-26 | 1.00000  |
| rad35              | 2.41570e-26 | 1.00000  | 2.41570e-26 | 1.00000  |
| PAH3+H             | 4.45315e-27 | 1.00000  | 4.45315e-27 | 1.00000  |
| PhCCCH3+H          | 3.23040e-27 | 1.00000  | 3.23040e-27 | 1.00000  |
| rad27              | 2.75312e-27 | 1.00000  | 2.75312e-27 | 1.00000  |
| rad54              | 1.89170e-27 | 1.00000  | 1.89170e-27 | 1.00000  |
| rad59              | 1.43683e-27 | 1.00000  | 1.43683e-27 | 1.00000  |
| rad19syn           | 1.33802e-27 | 1.00000  | 1.33802e-27 | 1.00000  |
| rad50              | 2.67383e-29 | 1.00000  | 2.67383e-29 | 1.00000  |
| rad70              | 1.77825e-29 | 1.00000  | 1.77825e-29 | 1.00000  |
| rad55              | 3.36518e-31 | 1.00000  | 3.36518e-31 | 1.00000  |
| PhcycC3H3_A+H      | 1.18896e-32 | 1.00000  | 1.18896e-32 | 1.00000  |
| rad34              | 1.06106e-32 | 1.00000  | 1.06106e-32 | 1.00000  |
| rad5               | 4.26722e-33 | 1.00000  | 4.26722e-33 | 1.00000  |
| rad52              | 3.01573e-33 | 1.00000  | 3.01573e-33 | 1.00000  |
| rad12              | 7.03529e-34 | 1.00000  | 7.03529e-34 | 1.00000  |

|           |             |         |             |         |
|-----------|-------------|---------|-------------|---------|
| rad37     | 5.09099e-35 | 1.00000 | 5.09099e-35 | 1.00000 |
| rad51     | 3.75774e-35 | 1.00000 | 3.75774e-35 | 1.00000 |
| rad58     | 4.38824e-36 | 1.00000 | 4.38824e-36 | 1.00000 |
| rad62     | 3.16209e-36 | 1.00000 | 3.16209e-36 | 1.00000 |
| rad47     | 2.68581e-38 | 1.00000 | 2.68581e-38 | 1.00000 |
| PAH1+H    | 5.40786e-39 | 1.00000 | 5.40786e-39 | 1.00000 |
| PAH10+CH3 | 3.65461e-40 | 1.00000 | 3.65461e-40 | 1.00000 |
| rad43     | 2.12347e-40 | 1.00000 | 2.12347e-40 | 1.00000 |
| rad65     | 3.48801e-41 | 1.00000 | 3.48801e-41 | 1.00000 |
| rad42     | 3.12159e-42 | 1.00000 | 3.12159e-42 | 1.00000 |
| rad41     | 5.33834e-47 | 1.00000 | 5.33834e-47 | 1.00000 |

10000000.0 Pa, 180.000000 K

| Rate constant      | True (fraction)        | Effective (fraction)   |
|--------------------|------------------------|------------------------|
| Total              | 6.50681e-18 (1.00 )    | 6.50681e-18 (1.00 )    |
| Formation of rad11 | 5.71915e-18 (0.879 )   | 5.71915e-18 (0.879 )   |
| Formation of rad6  | 7.39013e-19 (0.114 )   | 7.39013e-19 (0.114 )   |
| H-abstraction      | 4.86496e-20 (0.00748 ) | 4.86496e-20 (0.00748 ) |

| species            | PYtrue      | Cumul    | PYeffective | Cumul    |
|--------------------|-------------|----------|-------------|----------|
| rad11              | 0.878897    | 0.878897 | 0.878897    | 0.878897 |
| rad6               | 0.113623    | 0.992520 | 0.113623    | 0.992520 |
| Benzene+2-propynyl | 0.00747672  | 0.999997 | 0.00747672  | 0.999997 |
| rad21              | 2.81429e-06 | 1.000000 | 2.81429e-06 | 1.000000 |
| rad13              | 3.52949e-08 | 1.000000 | 3.52949e-08 | 1.000000 |
| rad20              | 3.20524e-08 | 1.000000 | 3.20524e-08 | 1.000000 |
| rad22              | 1.23956e-08 | 1.000000 | 1.23956e-08 | 1.000000 |
| rad7               | 1.16573e-08 | 1.000000 | 1.16573e-08 | 1.000000 |
| rad25              | 2.08444e-09 | 1.000000 | 2.08444e-09 | 1.000000 |
| rad24              | 9.65611e-10 | 1.000000 | 9.65611e-10 | 1.000000 |
| rad45              | 6.64185e-10 | 1.000000 | 6.64185e-10 | 1.000000 |
| rad33              | 3.72649e-10 | 1.000000 | 3.72649e-10 | 1.000000 |
| PhCHCCH2+H         | 3.02958e-10 | 1.000000 | 3.02958e-10 | 1.000000 |
| rad36              | 7.21205e-11 | 1.000000 | 7.21205e-11 | 1.000000 |
| rad18              | 3.55774e-11 | 1.000000 | 3.55774e-11 | 1.000000 |
| rad9               | 2.19870e-11 | 1.000000 | 2.19870e-11 | 1.000000 |
| Phenyl+Allene      | 1.10438e-11 | 1.000000 | 0.000000    | 1.000000 |
| C2H2+PhCH2         | 6.93784e-13 | 1.000000 | 6.93784e-13 | 1.000000 |
| Indene+H           | 4.54394e-13 | 1.000000 | 4.54394e-13 | 1.000000 |
| rad23              | 1.08917e-13 | 1.000000 | 1.08917e-13 | 1.000000 |
| rad3               | 9.99610e-14 | 1.000000 | 9.99610e-14 | 1.000000 |
| PhCH2CCH+H         | 8.85757e-14 | 1.000000 | 8.85757e-14 | 1.000000 |
| rad4               | 6.62420e-14 | 1.000000 | 6.62420e-14 | 1.000000 |
| rad28              | 6.99399e-15 | 1.000000 | 6.99399e-15 | 1.000000 |
| rad2               | 1.49143e-18 | 1.000000 | 1.49143e-18 | 1.000000 |
| rad8               | 1.46236e-18 | 1.000000 | 1.46236e-18 | 1.000000 |
| PAH7+H             | 2.13660e-19 | 1.000000 | 2.13660e-19 | 1.000000 |
| rad1               | 2.11353e-19 | 1.000000 | 2.11353e-19 | 1.000000 |
| PhCCH+CH3          | 5.83297e-20 | 1.000000 | 5.83297e-20 | 1.000000 |
| rad30              | 3.40140e-20 | 1.000000 | 3.40140e-20 | 1.000000 |
| rad15              | 6.78807e-21 | 1.000000 | 6.78807e-21 | 1.000000 |
| rad14              | 2.11834e-21 | 1.000000 | 2.11834e-21 | 1.000000 |
| rad31              | 1.78128e-21 | 1.000000 | 1.78128e-21 | 1.000000 |
| rad38              | 3.71738e-22 | 1.000000 | 3.71738e-22 | 1.000000 |
| Ph+MeAc            | 1.09726e-22 | 1.000000 | 1.09726e-22 | 1.000000 |
| rad26              | 5.95891e-24 | 1.000000 | 5.95891e-24 | 1.000000 |
| rad46              | 4.85939e-24 | 1.000000 | 4.85939e-24 | 1.000000 |
| rad60syn           | 2.90581e-24 | 1.000000 | 2.90581e-24 | 1.000000 |
| rad10              | 1.94125e-24 | 1.000000 | 1.94125e-24 | 1.000000 |
| rad60anti          | 9.77806e-25 | 1.000000 | 9.77806e-25 | 1.000000 |
| rad39              | 8.77570e-26 | 1.000000 | 8.77570e-26 | 1.000000 |
| PAH9+H             | 5.79524e-26 | 1.000000 | 5.79524e-26 | 1.000000 |
| rad35              | 5.69037e-26 | 1.000000 | 5.69037e-26 | 1.000000 |
| PAH3+H             | 1.72174e-26 | 1.000000 | 1.72174e-26 | 1.000000 |
| rad54              | 1.19553e-26 | 1.000000 | 1.19553e-26 | 1.000000 |
| PhCCCH3+H          | 8.78521e-27 | 1.000000 | 8.78521e-27 | 1.000000 |
| rad19syn           | 6.82819e-27 | 1.000000 | 6.82819e-27 | 1.000000 |
| rad27              | 6.61281e-27 | 1.000000 | 6.61281e-27 | 1.000000 |
| rad59              | 5.35245e-27 | 1.000000 | 5.35245e-27 | 1.000000 |
| rad70              | 1.98515e-28 | 1.000000 | 1.98515e-28 | 1.000000 |
| rad50              | 1.00142e-28 | 1.000000 | 1.00142e-28 | 1.000000 |
| rad55              | 3.49700e-30 | 1.000000 | 3.49700e-30 | 1.000000 |
| rad34              | 1.75991e-31 | 1.000000 | 1.75991e-31 | 1.000000 |
| PhcycC3H3_A+H      | 1.31909e-31 | 1.000000 | 1.31909e-31 | 1.000000 |
| rad52              | 1.89715e-32 | 1.000000 | 1.89715e-32 | 1.000000 |
| rad5               | 1.88010e-32 | 1.000000 | 1.88010e-32 | 1.000000 |
| rad12              | 3.11256e-33 | 1.000000 | 3.11256e-33 | 1.000000 |

|           |             |          |             |          |
|-----------|-------------|----------|-------------|----------|
| rad51     | 3.58110e-34 | 1.000000 | 3.58110e-34 | 1.000000 |
| rad37     | 2.56010e-34 | 1.000000 | 2.56010e-34 | 1.000000 |
| rad58     | 6.15331e-35 | 1.000000 | 6.15331e-35 | 1.000000 |
| rad62     | 3.11981e-35 | 1.000000 | 3.11981e-35 | 1.000000 |
| rad47     | 4.69340e-37 | 1.000000 | 4.69340e-37 | 1.000000 |
| PAH1+H    | 8.25011e-38 | 1.000000 | 8.25011e-38 | 1.000000 |
| PAH10+CH3 | 3.94694e-39 | 1.000000 | 3.94694e-39 | 1.000000 |
| rad43     | 2.25144e-39 | 1.000000 | 2.25144e-39 | 1.000000 |
| rad65     | 4.39953e-40 | 1.000000 | 4.39953e-40 | 1.000000 |
| rad42     | 5.95972e-41 | 1.000000 | 5.95972e-41 | 1.000000 |
| rad41     | 1.09625e-45 | 1.000000 | 1.09625e-45 | 1.000000 |

10000000.0 Pa, 190.000000 K

| Rate constant      | True (fraction)        | Effective (fraction)   |
|--------------------|------------------------|------------------------|
| Total              | 1.11858e-17 (1.00 )    | 1.11858e-17 (1.00 )    |
| Formation of rad11 | 9.67466e-18 (0.865 )   | 9.67466e-18 (0.865 )   |
| Formation of rad6  | 1.40029e-18 (0.125 )   | 1.40029e-18 (0.125 )   |
| H-abstraction      | 1.10851e-19 (0.00991 ) | 1.10851e-19 (0.00991 ) |

| species            | PYtrue      | Cumul    | PYeffective | Cumul    |
|--------------------|-------------|----------|-------------|----------|
| rad11              | 0.864851    | 0.864851 | 0.864851    | 0.864851 |
| rad6               | 0.125236    | 0.990087 | 0.125236    | 0.990087 |
| Benzene+2-propynyl | 0.00990995  | 0.999997 | 0.00990995  | 0.999997 |
| rad21              | 3.11520e-06 | 1.00000  | 3.11520e-06 | 1.00000  |
| rad13              | 4.35068e-08 | 1.00000  | 4.35068e-08 | 1.00000  |
| rad20              | 3.88238e-08 | 1.00000  | 3.88238e-08 | 1.00000  |
| rad22              | 1.50220e-08 | 1.00000  | 1.50220e-08 | 1.00000  |
| rad7               | 1.44589e-08 | 1.00000  | 1.44589e-08 | 1.00000  |
| rad25              | 2.45219e-09 | 1.00000  | 2.45219e-09 | 1.00000  |
| rad24              | 1.13961e-09 | 1.00000  | 1.13961e-09 | 1.00000  |
| rad45              | 8.64770e-10 | 1.00000  | 8.64770e-10 | 1.00000  |
| rad33              | 4.66580e-10 | 1.00000  | 4.66580e-10 | 1.00000  |
| PhCHCCH2+H         | 3.90058e-10 | 1.00000  | 3.90058e-10 | 1.00000  |
| rad36              | 9.30467e-11 | 1.00000  | 9.30467e-11 | 1.00000  |
| rad18              | 4.78117e-11 | 1.00000  | 4.78117e-11 | 1.00000  |
| rad9               | 2.89811e-11 | 1.00000  | 2.89811e-11 | 1.00000  |
| Phenyl+Allene      | 1.70098e-11 | 1.00000  | 0.00000     | 1.00000  |
| C2H2+PhCH2         | 1.02956e-12 | 1.00000  | 1.02956e-12 | 1.00000  |
| Indene+H           | 6.24782e-13 | 1.00000  | 6.24782e-13 | 1.00000  |
| PhCH2CCH+H         | 1.79317e-13 | 1.00000  | 1.79317e-13 | 1.00000  |
| rad23              | 1.52633e-13 | 1.00000  | 1.52633e-13 | 1.00000  |
| rad3               | 1.43601e-13 | 1.00000  | 1.43601e-13 | 1.00000  |
| rad4               | 9.49036e-14 | 1.00000  | 9.49036e-14 | 1.00000  |
| rad28              | 1.04983e-14 | 1.00000  | 1.04983e-14 | 1.00000  |
| rad8               | 3.06170e-18 | 1.00000  | 3.06170e-18 | 1.00000  |
| rad2               | 2.58574e-18 | 1.00000  | 2.58574e-18 | 1.00000  |
| PAH7+H             | 5.15265e-19 | 1.00000  | 5.15265e-19 | 1.00000  |
| rad1               | 3.63347e-19 | 1.00000  | 3.63347e-19 | 1.00000  |
| PhCCH+CH3          | 1.18989e-19 | 1.00000  | 1.18989e-19 | 1.00000  |
| rad30              | 6.12024e-20 | 1.00000  | 6.12024e-20 | 1.00000  |
| rad15              | 1.26264e-20 | 1.00000  | 1.26264e-20 | 1.00000  |
| rad14              | 4.02967e-21 | 1.00000  | 4.02967e-21 | 1.00000  |
| rad31              | 2.49507e-21 | 1.00000  | 2.49507e-21 | 1.00000  |
| rad38              | 6.77342e-22 | 1.00000  | 6.77342e-22 | 1.00000  |
| Ph+MeAc            | 2.73458e-22 | 1.00000  | 2.73458e-22 | 1.00000  |
| rad26              | 1.68434e-23 | 1.00000  | 1.68434e-23 | 1.00000  |
| rad46              | 9.80111e-24 | 1.00000  | 9.80111e-24 | 1.00000  |
| rad60syn           | 6.89728e-24 | 1.00000  | 6.89728e-24 | 1.00000  |
| rad10              | 4.24651e-24 | 1.00000  | 4.24651e-24 | 1.00000  |
| rad60anti          | 2.40460e-24 | 1.00000  | 2.40460e-24 | 1.00000  |
| rad39              | 2.16096e-25 | 1.00000  | 2.16096e-25 | 1.00000  |
| rad35              | 1.40626e-25 | 1.00000  | 1.40626e-25 | 1.00000  |
| PAH9+H             | 1.15004e-25 | 1.00000  | 1.15004e-25 | 1.00000  |
| rad54              | 6.47997e-26 | 1.00000  | 6.47997e-26 | 1.00000  |
| PAH3+H             | 6.31157e-26 | 1.00000  | 6.31157e-26 | 1.00000  |
| rad19syn           | 3.07577e-26 | 1.00000  | 3.07577e-26 | 1.00000  |
| PhCCCH3+H          | 2.39294e-26 | 1.00000  | 2.39294e-26 | 1.00000  |
| rad59              | 1.89460e-26 | 1.00000  | 1.89460e-26 | 1.00000  |
| rad27              | 1.59316e-26 | 1.00000  | 1.59316e-26 | 1.00000  |
| rad70              | 1.77221e-27 | 1.00000  | 1.77221e-27 | 1.00000  |
| rad50              | 3.58253e-28 | 1.00000  | 3.58253e-28 | 1.00000  |
| rad55              | 2.92456e-29 | 1.00000  | 2.92456e-29 | 1.00000  |
| rad34              | 2.17651e-30 | 1.00000  | 2.17651e-30 | 1.00000  |
| PhcycC3H3_A+H      | 1.17162e-30 | 1.00000  | 1.17162e-30 | 1.00000  |
| rad52              | 1.06735e-31 | 1.00000  | 1.06735e-31 | 1.00000  |
| rad5               | 7.95705e-32 | 1.00000  | 7.95705e-32 | 1.00000  |
| rad12              | 1.31738e-32 | 1.00000  | 1.31738e-32 | 1.00000  |

|           |             |         |             |         |
|-----------|-------------|---------|-------------|---------|
| rad51     | 2.90662e-33 | 1.00000 | 2.90662e-33 | 1.00000 |
| rad37     | 1.22174e-33 | 1.00000 | 1.22174e-33 | 1.00000 |
| rad58     | 6.86631e-34 | 1.00000 | 6.86631e-34 | 1.00000 |
| rad62     | 2.61079e-34 | 1.00000 | 2.61079e-34 | 1.00000 |
| rad47     | 6.30711e-36 | 1.00000 | 6.30711e-36 | 1.00000 |
| PAH1+H    | 9.64901e-37 | 1.00000 | 9.64901e-37 | 1.00000 |
| PAH10+CH3 | 3.62464e-38 | 1.00000 | 3.62464e-38 | 1.00000 |
| rad43     | 2.05450e-38 | 1.00000 | 2.05450e-38 | 1.00000 |
| rad65     | 4.54878e-39 | 1.00000 | 4.54878e-39 | 1.00000 |
| rad42     | 8.48307e-40 | 1.00000 | 8.48307e-40 | 1.00000 |
| rad41     | 1.68032e-44 | 1.00000 | 1.68032e-44 | 1.00000 |

10000000.0 Pa, 200.000000 K

| Rate constant      | True (fraction) |           | Effective (fraction) |           |
|--------------------|-----------------|-----------|----------------------|-----------|
| Total              | 1.82690e-17     | (1.00 )   | 1.82690e-17          | (1.00 )   |
| Formation of rad11 | 1.55456e-17     | (0.851 )  | 1.55456e-17          | (0.851 )  |
| Formation of rad6  | 2.49126e-18     | (0.136 )  | 2.49126e-18          | (0.136 )  |
| H-abstraction      | 2.32112e-19     | (0.0127 ) | 2.32112e-19          | (0.0127 ) |

  

| species            | PYtrue      | Cumul    | PYeffective | Cumul    |
|--------------------|-------------|----------|-------------|----------|
| rad11              | 0.850868    | 0.850868 | 0.850868    | 0.850868 |
| rad6               | 0.136422    | 0.987291 | 0.136422    | 0.987291 |
| Benzene+2-propynyl | 0.0127053   | 0.999996 | 0.0127053   | 0.999996 |
| rad21              | 3.45062e-06 | 1.000000 | 3.45062e-06 | 1.000000 |
| rad13              | 5.30171e-08 | 1.000000 | 5.30171e-08 | 1.000000 |
| rad20              | 4.70564e-08 | 1.000000 | 4.70564e-08 | 1.000000 |
| rad22              | 1.82177e-08 | 1.000000 | 1.82177e-08 | 1.000000 |
| rad7               | 1.77355e-08 | 1.000000 | 1.77355e-08 | 1.000000 |
| rad25              | 2.89407e-09 | 1.000000 | 2.89407e-09 | 1.000000 |
| rad24              | 1.34378e-09 | 1.000000 | 1.34378e-09 | 1.000000 |
| rad45              | 1.12532e-09 | 1.000000 | 1.12532e-09 | 1.000000 |
| rad33              | 5.77849e-10 | 1.000000 | 5.77849e-10 | 1.000000 |
| PhCHCCH2+H         | 5.04698e-10 | 1.000000 | 5.04698e-10 | 1.000000 |
| rad36              | 1.20074e-10 | 1.000000 | 1.20074e-10 | 1.000000 |
| rad18              | 6.43576e-11 | 1.000000 | 6.43576e-11 | 1.000000 |
| rad9               | 3.83532e-11 | 1.000000 | 3.83532e-11 | 1.000000 |
| Phenyl+Allene      | 2.60637e-11 | 1.000000 | 0.000000    | 1.000000 |
| C2H2+PhCH2         | 1.53773e-12 | 1.000000 | 1.53773e-12 | 1.000000 |
| Indene+H           | 8.62458e-13 | 1.000000 | 8.62458e-13 | 1.000000 |
| PhCH2CCH+H         | 3.50758e-13 | 1.000000 | 3.50758e-13 | 1.000000 |
| rad23              | 2.14627e-13 | 1.000000 | 2.14627e-13 | 1.000000 |
| rad3               | 2.04505e-13 | 1.000000 | 2.04505e-13 | 1.000000 |
| rad4               | 1.34828e-13 | 1.000000 | 1.34828e-13 | 1.000000 |
| rad28              | 1.56484e-14 | 1.000000 | 1.56484e-14 | 1.000000 |
| rad8               | 6.30103e-18 | 1.000000 | 6.30103e-18 | 1.000000 |
| rad2               | 4.46876e-18 | 1.000000 | 4.46876e-18 | 1.000000 |
| PAH7+H             | 1.20468e-18 | 1.000000 | 1.20468e-18 | 1.000000 |
| rad1               | 6.23296e-19 | 1.000000 | 6.23296e-19 | 1.000000 |
| PhCCH+CH3          | 2.42489e-19 | 1.000000 | 2.42489e-19 | 1.000000 |
| rad30              | 1.11291e-19 | 1.000000 | 1.11291e-19 | 1.000000 |
| rad15              | 2.37372e-20 | 1.000000 | 2.37372e-20 | 1.000000 |
| rad14              | 7.65919e-21 | 1.000000 | 7.65919e-21 | 1.000000 |
| rad31              | 3.49370e-21 | 1.000000 | 3.49370e-21 | 1.000000 |
| rad38              | 1.24685e-21 | 1.000000 | 1.24685e-21 | 1.000000 |
| Ph+MeAc            | 6.73980e-22 | 1.000000 | 6.73980e-22 | 1.000000 |
| rad26              | 4.56527e-23 | 1.000000 | 4.56527e-23 | 1.000000 |
| rad46              | 1.99712e-23 | 1.000000 | 1.99712e-23 | 1.000000 |
| rad60syn           | 1.63556e-23 | 1.000000 | 1.63556e-23 | 1.000000 |
| rad10              | 9.31667e-24 | 1.000000 | 9.31667e-24 | 1.000000 |
| rad60anti          | 5.88538e-24 | 1.000000 | 5.88538e-24 | 1.000000 |
| rad39              | 5.29159e-25 | 1.000000 | 5.29159e-25 | 1.000000 |
| rad35              | 3.59407e-25 | 1.000000 | 3.59407e-25 | 1.000000 |
| rad54              | 3.07960e-25 | 1.000000 | 3.07960e-25 | 1.000000 |
| PAH9+H             | 2.32465e-25 | 1.000000 | 2.32465e-25 | 1.000000 |
| PAH3+H             | 2.20738e-25 | 1.000000 | 2.20738e-25 | 1.000000 |
| rad19syn           | 1.24593e-25 | 1.000000 | 1.24593e-25 | 1.000000 |
| PhCCCH3+H          | 6.52489e-26 | 1.000000 | 6.52489e-26 | 1.000000 |
| rad59              | 6.41178e-26 | 1.000000 | 6.41178e-26 | 1.000000 |
| rad27              | 3.85250e-26 | 1.000000 | 3.85250e-26 | 1.000000 |
| rad70              | 1.30385e-26 | 1.000000 | 1.30385e-26 | 1.000000 |
| rad50              | 1.23037e-27 | 1.000000 | 1.23037e-27 | 1.000000 |
| rad55              | 2.02504e-28 | 1.000000 | 2.02504e-28 | 1.000000 |
| rad34              | 2.10702e-29 | 1.000000 | 2.10702e-29 | 1.000000 |
| PhcycC3H3_A+H      | 8.56685e-30 | 1.000000 | 8.56685e-30 | 1.000000 |
| rad52              | 5.44874e-31 | 1.000000 | 5.44874e-31 | 1.000000 |
| rad5               | 3.24309e-31 | 1.000000 | 3.24309e-31 | 1.000000 |
| rad12              | 5.34363e-32 | 1.000000 | 5.34363e-32 | 1.000000 |

|           |             |          |             |          |
|-----------|-------------|----------|-------------|----------|
| rad51     | 2.04553e-32 | 1.000000 | 2.04553e-32 | 1.000000 |
| rad58     | 6.25816e-33 | 1.000000 | 6.25816e-33 | 1.000000 |
| rad37     | 5.53911e-33 | 1.000000 | 5.53911e-33 | 1.000000 |
| rad62     | 1.88139e-33 | 1.000000 | 1.88139e-33 | 1.000000 |
| rad47     | 6.75037e-35 | 1.000000 | 6.75037e-35 | 1.000000 |
| PAH1+H    | 8.93314e-36 | 1.000000 | 8.93314e-36 | 1.000000 |
| PAH10+CH3 | 2.86022e-37 | 1.000000 | 2.86022e-37 | 1.000000 |
| rad43     | 1.62596e-37 | 1.000000 | 1.62596e-37 | 1.000000 |
| rad65     | 3.93556e-38 | 1.000000 | 3.93556e-38 | 1.000000 |
| rad42     | 9.34344e-39 | 1.000000 | 9.34344e-39 | 1.000000 |
| rad41     | 1.99369e-43 | 1.000000 | 1.99369e-43 | 1.000000 |

10000000.0 Pa, 210.000000 K

| Rate constant      | True (fraction)       | Effective (fraction)  |
|--------------------|-----------------------|-----------------------|
| Total              | 2.85520e-17 (1.00 )   | 2.85520e-17 (1.00 )   |
| Formation of rad11 | 2.39009e-17 (0.837 )  | 2.39009e-17 (0.837 )  |
| Formation of rad6  | 4.19900e-18 (0.147 )  | 4.19900e-18 (0.147 )  |
| H-abstraction      | 4.52111e-19 (0.0158 ) | 4.52111e-19 (0.0158 ) |

| species            | PYtrue      | Cumul    | PYeffective | Cumul    |
|--------------------|-------------|----------|-------------|----------|
| rad11              | 0.837035    | 0.837035 | 0.837035    | 0.837035 |
| rad6               | 0.147127    | 0.984161 | 0.147127    | 0.984161 |
| Benzene+2-propynyl | 0.0158346   | 0.999996 | 0.0158346   | 0.999996 |
| rad21              | 3.82612e-06 | 1.000000 | 3.82612e-06 | 1.000000 |
| rad13              | 6.40017e-08 | 1.000000 | 6.40017e-08 | 1.000000 |
| rad20              | 5.71063e-08 | 1.000000 | 5.71063e-08 | 1.000000 |
| rad22              | 2.21221e-08 | 1.000000 | 2.21221e-08 | 1.000000 |
| rad7               | 2.15591e-08 | 1.000000 | 2.15591e-08 | 1.000000 |
| rad25              | 3.42710e-09 | 1.000000 | 3.42710e-09 | 1.000000 |
| rad24              | 1.58370e-09 | 1.000000 | 1.58370e-09 | 1.000000 |
| rad45              | 1.46456e-09 | 1.000000 | 1.46456e-09 | 1.000000 |
| rad33              | 7.09331e-10 | 1.000000 | 7.09331e-10 | 1.000000 |
| PhCHCCH2+H         | 6.56036e-10 | 1.000000 | 6.56036e-10 | 1.000000 |
| rad36              | 1.55087e-10 | 1.000000 | 1.55087e-10 | 1.000000 |
| rad18              | 8.68372e-11 | 1.000000 | 8.68372e-11 | 1.000000 |
| rad9               | 5.09341e-11 | 1.000000 | 5.09341e-11 | 1.000000 |
| Phenyl+Allene      | 3.97283e-11 | 1.000000 | 0.000000    | 1.000000 |
| C2H2+PhCH2         | 2.31191e-12 | 1.000000 | 2.31191e-12 | 1.000000 |
| Indene+H           | 1.19632e-12 | 1.000000 | 1.19632e-12 | 1.000000 |
| PhCH2CCH+H         | 6.65853e-13 | 1.000000 | 6.65853e-13 | 1.000000 |
| rad23              | 3.03061e-13 | 1.000000 | 3.03061e-13 | 1.000000 |
| rad3               | 2.89376e-13 | 1.000000 | 2.89376e-13 | 1.000000 |
| rad4               | 1.90372e-13 | 1.000000 | 1.90372e-13 | 1.000000 |
| rad28              | 2.32095e-14 | 1.000000 | 2.32095e-14 | 1.000000 |
| rad8               | 1.27626e-17 | 1.000000 | 1.27626e-17 | 1.000000 |
| rad2               | 7.71330e-18 | 1.000000 | 7.71330e-18 | 1.000000 |
| PAH7+H             | 2.73893e-18 | 1.000000 | 2.73893e-18 | 1.000000 |
| rad1               | 1.06890e-18 | 1.000000 | 1.06890e-18 | 1.000000 |
| PhCCH+CH3          | 4.93910e-19 | 1.000000 | 4.93910e-19 | 1.000000 |
| rad30              | 2.04354e-19 | 1.000000 | 2.04354e-19 | 1.000000 |
| rad15              | 4.50504e-20 | 1.000000 | 4.50504e-20 | 1.000000 |
| rad14              | 1.45608e-20 | 1.000000 | 1.45608e-20 | 1.000000 |
| rad31              | 4.90142e-21 | 1.000000 | 4.90142e-21 | 1.000000 |
| rad38              | 2.31714e-21 | 1.000000 | 2.31714e-21 | 1.000000 |
| Ph+MeAc            | 1.64298e-21 | 1.000000 | 1.64298e-21 | 1.000000 |
| rad26              | 1.19212e-22 | 1.000000 | 1.19212e-22 | 1.000000 |
| rad46              | 4.10383e-23 | 1.000000 | 4.10383e-23 | 1.000000 |
| rad60syn           | 3.86841e-23 | 1.000000 | 3.86841e-23 | 1.000000 |
| rad10              | 2.05159e-23 | 1.000000 | 2.05159e-23 | 1.000000 |
| rad60anti          | 1.43207e-23 | 1.000000 | 1.43207e-23 | 1.000000 |
| rad54              | 1.30600e-24 | 1.000000 | 1.30600e-24 | 1.000000 |
| rad39              | 1.28743e-24 | 1.000000 | 1.28743e-24 | 1.000000 |
| rad35              | 9.36563e-25 | 1.000000 | 9.36563e-25 | 1.000000 |
| PAH3+H             | 7.39982e-25 | 1.000000 | 7.39982e-25 | 1.000000 |
| PAH9+H             | 4.77973e-25 | 1.000000 | 4.77973e-25 | 1.000000 |
| rad19syn           | 4.60592e-25 | 1.000000 | 4.60592e-25 | 1.000000 |
| rad59              | 2.08425e-25 | 1.000000 | 2.08425e-25 | 1.000000 |
| PhCCCH3+H          | 1.77861e-25 | 1.000000 | 1.77861e-25 | 1.000000 |
| rad27              | 9.34701e-26 | 1.000000 | 9.34701e-26 | 1.000000 |
| rad70              | 8.09717e-26 | 1.000000 | 8.09717e-26 | 1.000000 |
| rad50              | 4.07238e-27 | 1.000000 | 4.07238e-27 | 1.000000 |
| rad55              | 1.18768e-27 | 1.000000 | 1.18768e-27 | 1.000000 |
| rad34              | 1.64759e-28 | 1.000000 | 1.64759e-28 | 1.000000 |
| PhcycC3H3_A+H      | 5.27420e-29 | 1.000000 | 5.27420e-29 | 1.000000 |
| rad52              | 2.55277e-30 | 1.000000 | 2.55277e-30 | 1.000000 |
| rad5               | 1.27355e-30 | 1.000000 | 1.27355e-30 | 1.000000 |
| rad12              | 2.07803e-31 | 1.000000 | 2.07803e-31 | 1.000000 |

|           |             |         |             |         |
|-----------|-------------|---------|-------------|---------|
| rad51     | 1.26591e-31 | 1.00000 | 1.26591e-31 | 1.00000 |
| rad58     | 4.75533e-32 | 1.00000 | 4.75533e-32 | 1.00000 |
| rad37     | 2.38458e-32 | 1.00000 | 2.38458e-32 | 1.00000 |
| rad62     | 1.18097e-32 | 1.00000 | 1.18097e-32 | 1.00000 |
| rad47     | 5.90417e-34 | 1.00000 | 5.90417e-34 | 1.00000 |
| PAH1+H    | 6.72850e-35 | 1.00000 | 6.72850e-35 | 1.00000 |
| PAH10+CH3 | 1.95413e-36 | 1.00000 | 1.95413e-36 | 1.00000 |
| rad43     | 1.12283e-36 | 1.00000 | 1.12283e-36 | 1.00000 |
| rad65     | 2.89601e-37 | 1.00000 | 2.89601e-37 | 1.00000 |
| rad42     | 8.22457e-38 | 1.00000 | 8.22457e-38 | 1.00000 |
| rad41     | 1.89053e-42 | 1.00000 | 1.89053e-42 | 1.00000 |

10000000.0 Pa, 220.000000 K

| Rate constant      | True (fraction) |           | Effective (fraction) |           |
|--------------------|-----------------|-----------|----------------------|-----------|
| Total              | 4.29529e-17     | (1.00 )   | 4.29529e-17          | (1.00 )   |
| Formation of rad11 | 3.53712e-17     | (0.823 )  | 3.53712e-17          | (0.823 )  |
| Formation of rad6  | 6.75433e-18     | (0.157 )  | 6.75433e-18          | (0.157 )  |
| H-abstraction      | 8.27372e-19     | (0.0193 ) | 8.27372e-19          | (0.0193 ) |

  

| species            | PYtrue      | Cumul    | PYeffective | Cumul    |
|--------------------|-------------|----------|-------------|----------|
| rad11              | 0.823416    | 0.823416 | 0.823416    | 0.823416 |
| rad6               | 0.157317    | 0.980733 | 0.157317    | 0.980733 |
| Benzene+2-propynyl | 0.0192623   | 0.999995 | 0.0192623   | 0.999995 |
| rad21              | 4.24798e-06 | 0.999999 | 4.24798e-06 | 0.999999 |
| rad13              | 7.66691e-08 | 0.999999 | 7.66691e-08 | 0.999999 |
| rad20              | 6.94195e-08 | 0.999999 | 6.94195e-08 | 0.999999 |
| rad22              | 2.69105e-08 | 1.000000 | 2.69105e-08 | 1.000000 |
| rad7               | 2.60163e-08 | 1.000000 | 2.60163e-08 | 1.000000 |
| rad25              | 4.07217e-09 | 1.000000 | 4.07217e-09 | 1.000000 |
| rad45              | 1.90715e-09 | 1.000000 | 1.90715e-09 | 1.000000 |
| rad24              | 1.86591e-09 | 1.000000 | 1.86591e-09 | 1.000000 |
| rad33              | 8.64454e-10 | 1.000000 | 8.64454e-10 | 1.000000 |
| PhCHCCH2+H         | 8.56263e-10 | 1.000000 | 8.56263e-10 | 1.000000 |
| rad36              | 2.00572e-10 | 1.000000 | 2.00572e-10 | 1.000000 |
| rad18              | 1.17510e-10 | 1.000000 | 1.17510e-10 | 1.000000 |
| rad9               | 6.78405e-11 | 1.000000 | 6.78405e-11 | 1.000000 |
| Phenyl+Allene      | 6.02360e-11 | 1.000000 | 0.000000    | 1.000000 |
| C2H2+PhCH2         | 3.49819e-12 | 1.000000 | 3.49819e-12 | 1.000000 |
| Indene+H           | 1.66850e-12 | 1.000000 | 1.66850e-12 | 1.000000 |
| PhCH2CCH+H         | 1.23101e-12 | 1.000000 | 1.23101e-12 | 1.000000 |
| rad23              | 4.29923e-13 | 1.000000 | 4.29923e-13 | 1.000000 |
| rad3               | 4.07555e-13 | 1.000000 | 4.07555e-13 | 1.000000 |
| rad4               | 2.67614e-13 | 1.000000 | 2.67614e-13 | 1.000000 |
| rad28              | 3.43037e-14 | 1.000000 | 3.43037e-14 | 1.000000 |
| rad8               | 2.54669e-17 | 1.000000 | 2.54669e-17 | 1.000000 |
| rad2               | 1.33128e-17 | 1.000000 | 1.33128e-17 | 1.000000 |
| PAH7+H             | 6.07042e-18 | 1.000000 | 6.07042e-18 | 1.000000 |
| rad1               | 1.83474e-18 | 1.000000 | 1.83474e-18 | 1.000000 |
| PhCCH+CH3          | 1.00534e-18 | 1.000000 | 1.00534e-18 | 1.000000 |
| rad30              | 3.78470e-19 | 1.000000 | 3.78470e-19 | 1.000000 |
| rad15              | 8.61859e-20 | 1.000000 | 8.61859e-20 | 1.000000 |
| rad14              | 2.76974e-20 | 1.000000 | 2.76974e-20 | 1.000000 |
| rad31              | 6.90221e-21 | 1.000000 | 6.90221e-21 | 1.000000 |
| rad38              | 4.34272e-21 | 1.000000 | 4.34272e-21 | 1.000000 |
| Ph+MeAc            | 3.96022e-21 | 1.000000 | 3.96022e-21 | 1.000000 |
| rad26              | 3.01002e-22 | 1.000000 | 3.01002e-22 | 1.000000 |
| rad60syn           | 9.11078e-23 | 1.000000 | 9.11078e-23 | 1.000000 |
| rad46              | 8.48788e-23 | 1.000000 | 8.48788e-23 | 1.000000 |
| rad10              | 4.53385e-23 | 1.000000 | 4.53385e-23 | 1.000000 |
| rad60anti          | 3.46002e-23 | 1.000000 | 3.46002e-23 | 1.000000 |
| rad54              | 5.00976e-24 | 1.000000 | 5.00976e-24 | 1.000000 |
| rad39              | 3.10793e-24 | 1.000000 | 3.10793e-24 | 1.000000 |
| rad35              | 2.45896e-24 | 1.000000 | 2.45896e-24 | 1.000000 |
| PAH3+H             | 2.38518e-24 | 1.000000 | 2.38518e-24 | 1.000000 |
| rad19syn           | 1.57155e-24 | 1.000000 | 1.57155e-24 | 1.000000 |
| PAH9+H             | 9.97753e-25 | 1.000000 | 9.97753e-25 | 1.000000 |
| rad59              | 6.52825e-25 | 1.000000 | 6.52825e-25 | 1.000000 |
| PhCCCH3+H          | 4.83613e-25 | 1.000000 | 4.83613e-25 | 1.000000 |
| rad70              | 4.32735e-25 | 1.000000 | 4.32735e-25 | 1.000000 |
| rad27              | 2.27261e-25 | 1.000000 | 2.27261e-25 | 1.000000 |
| rad50              | 1.30265e-26 | 1.000000 | 1.30265e-26 | 1.000000 |
| rad55              | 6.00983e-27 | 1.000000 | 6.00983e-27 | 1.000000 |
| rad34              | 1.06759e-27 | 1.000000 | 1.06759e-27 | 1.000000 |
| PhcycC3H3_A+H      | 2.78495e-28 | 1.000000 | 2.78495e-28 | 1.000000 |
| rad52              | 1.10679e-29 | 1.000000 | 1.10679e-29 | 1.000000 |
| rad5               | 4.81047e-30 | 1.000000 | 4.81047e-30 | 1.000000 |
| rad12              | 7.73770e-31 | 1.000000 | 7.73770e-31 | 1.000000 |

|           |             |          |             |          |
|-----------|-------------|----------|-------------|----------|
| rad51     | 6.96679e-31 | 1.000000 | 6.96679e-31 | 1.000000 |
| rad58     | 3.06593e-31 | 1.000000 | 3.06593e-31 | 1.000000 |
| rad37     | 9.72563e-32 | 1.000000 | 9.72563e-32 | 1.000000 |
| rad62     | 6.51861e-32 | 1.000000 | 6.51861e-32 | 1.000000 |
| rad47     | 4.31628e-33 | 1.000000 | 4.31628e-33 | 1.000000 |
| PAH1+H    | 4.22131e-34 | 1.000000 | 4.22131e-34 | 1.000000 |
| PAH10+CH3 | 1.16406e-35 | 1.000000 | 1.16406e-35 | 1.000000 |
| rad43     | 6.80816e-36 | 1.000000 | 6.80816e-36 | 1.000000 |
| rad65     | 1.83790e-36 | 1.000000 | 1.83790e-36 | 1.000000 |
| rad42     | 5.94897e-37 | 1.000000 | 5.94897e-37 | 1.000000 |
| rad41     | 1.47294e-41 | 1.000000 | 1.47294e-41 | 1.000000 |

10000000.0 Pa, 230.000000 K

| Rate constant      | True (fraction) |           | Effective (fraction) |           |
|--------------------|-----------------|-----------|----------------------|-----------|
| Total              | 6.25016e-17     | (1.00 )   | 6.25016e-17          | (1.00 )   |
| Formation of rad11 | 5.06355e-17     | (0.810 )  | 5.06355e-17          | (0.810 )  |
| Formation of rad6  | 1.04318e-17     | (0.167 )  | 1.04318e-17          | (0.167 )  |
| H-abstraction      | 1.43428e-18     | (0.0229 ) | 1.43428e-18          | (0.0229 ) |

  

| species            | PYtrue      | Cumul    | PYeffective | Cumul    |
|--------------------|-------------|----------|-------------|----------|
| rad11              | 0.810068    | 0.810068 | 0.810068    | 0.810068 |
| rad6               | 0.166979    | 0.977047 | 0.166979    | 0.977047 |
| Benzene+2-propynyl | 0.0229478   | 0.999995 | 0.0229478   | 0.999995 |
| rad21              | 4.72333e-06 | 1.000000 | 4.72333e-06 | 1.000000 |
| rad13              | 9.12652e-08 | 1.000000 | 9.12652e-08 | 1.000000 |
| rad20              | 8.45551e-08 | 1.000000 | 8.45551e-08 | 1.000000 |
| rad22              | 3.28030e-08 | 1.000000 | 3.28030e-08 | 1.000000 |
| rad7               | 3.12101e-08 | 1.000000 | 3.12101e-08 | 1.000000 |
| rad25              | 4.85491e-09 | 1.000000 | 4.85491e-09 | 1.000000 |
| rad45              | 2.48552e-09 | 1.000000 | 2.48552e-09 | 1.000000 |
| rad24              | 2.19802e-09 | 1.000000 | 2.19802e-09 | 1.000000 |
| PhCHCCH2+H         | 1.12159e-09 | 1.000000 | 1.12159e-09 | 1.000000 |
| rad33              | 1.04728e-09 | 1.000000 | 1.04728e-09 | 1.000000 |
| rad36              | 2.59796e-10 | 1.000000 | 2.59796e-10 | 1.000000 |
| rad18              | 1.59525e-10 | 1.000000 | 1.59525e-10 | 1.000000 |
| Phenyl+Allene      | 9.08348e-11 | 1.000000 | 0.000000    | 1.000000 |
| rad9               | 9.05693e-11 | 1.000000 | 9.05693e-11 | 1.000000 |
| C2H2+PhCH2         | 5.32484e-12 | 1.000000 | 5.32484e-12 | 1.000000 |
| Indene+H           | 2.34061e-12 | 1.000000 | 2.34061e-12 | 1.000000 |
| PhCH2CCH+H         | 2.22282e-12 | 1.000000 | 2.22282e-12 | 1.000000 |
| rad23              | 6.12850e-13 | 1.000000 | 6.12850e-13 | 1.000000 |
| rad3               | 5.72071e-13 | 1.000000 | 5.72071e-13 | 1.000000 |
| rad4               | 3.75033e-13 | 1.000000 | 3.75033e-13 | 1.000000 |
| rad28              | 5.05762e-14 | 1.000000 | 5.05762e-14 | 1.000000 |
| rad8               | 5.01031e-17 | 1.000000 | 5.01031e-17 | 1.000000 |
| rad2               | 2.29911e-17 | 1.000000 | 2.29911e-17 | 1.000000 |
| PAH7+H             | 1.31406e-17 | 1.000000 | 1.31406e-17 | 1.000000 |
| rad1               | 3.15425e-18 | 1.000000 | 3.15425e-18 | 1.000000 |
| PhCCH+CH3          | 2.04370e-18 | 1.000000 | 2.04370e-18 | 1.000000 |
| rad30              | 7.05923e-19 | 1.000000 | 7.05923e-19 | 1.000000 |
| rad15              | 1.65920e-19 | 1.000000 | 1.65920e-19 | 1.000000 |
| rad14              | 5.27071e-20 | 1.000000 | 5.27071e-20 | 1.000000 |
| rad31              | 9.77101e-21 | 1.000000 | 9.77101e-21 | 1.000000 |
| Ph+MeAc            | 9.43137e-21 | 1.000000 | 9.43137e-21 | 1.000000 |
| rad38              | 8.19762e-21 | 1.000000 | 8.19762e-21 | 1.000000 |
| rad26              | 7.36873e-22 | 1.000000 | 7.36873e-22 | 1.000000 |
| rad60syn           | 2.13293e-22 | 1.000000 | 2.13293e-22 | 1.000000 |
| rad46              | 1.76359e-22 | 1.000000 | 1.76359e-22 | 1.000000 |
| rad10              | 1.00461e-22 | 1.000000 | 1.00461e-22 | 1.000000 |
| rad60anti          | 8.28905e-23 | 1.000000 | 8.28905e-23 | 1.000000 |
| rad54              | 1.75633e-23 | 1.000000 | 1.75633e-23 | 1.000000 |
| rad39              | 7.43018e-24 | 1.000000 | 7.43018e-24 | 1.000000 |
| PAH3+H             | 7.40380e-24 | 1.000000 | 7.40380e-24 | 1.000000 |
| rad35              | 6.44431e-24 | 1.000000 | 6.44431e-24 | 1.000000 |
| rad19syn           | 4.99045e-24 | 1.000000 | 4.99045e-24 | 1.000000 |
| PAH9+H             | 2.10968e-24 | 1.000000 | 2.10968e-24 | 1.000000 |
| rad70              | 2.02202e-24 | 1.000000 | 2.02202e-24 | 1.000000 |
| rad59              | 1.97349e-24 | 1.000000 | 1.97349e-24 | 1.000000 |
| PhCCCH3+H          | 1.30750e-24 | 1.000000 | 1.30750e-24 | 1.000000 |
| rad27              | 5.52599e-25 | 1.000000 | 5.52599e-25 | 1.000000 |
| rad50              | 4.03319e-26 | 1.000000 | 4.03319e-26 | 1.000000 |
| rad55              | 2.66395e-26 | 1.000000 | 2.66395e-26 | 1.000000 |
| rad34              | 5.85820e-27 | 1.000000 | 5.85820e-27 | 1.000000 |
| PhcycC3H3_A+H      | 1.28097e-27 | 1.000000 | 1.28097e-27 | 1.000000 |
| rad52              | 4.46627e-29 | 1.000000 | 4.46627e-29 | 1.000000 |
| rad5               | 1.74160e-29 | 1.000000 | 1.74160e-29 | 1.000000 |
| rad51              | 3.44083e-30 | 1.000000 | 3.44083e-30 | 1.000000 |

|           |             |         |             |         |
|-----------|-------------|---------|-------------|---------|
| rad12     | 2.75132e-30 | 1.00000 | 2.75132e-30 | 1.00000 |
| rad58     | 1.70355e-30 | 1.00000 | 1.70355e-30 | 1.00000 |
| rad37     | 3.74509e-31 | 1.00000 | 3.74509e-31 | 1.00000 |
| rad62     | 3.19109e-31 | 1.00000 | 3.19109e-31 | 1.00000 |
| rad47     | 2.69092e-32 | 1.00000 | 2.69092e-32 | 1.00000 |
| PAH1+H    | 2.25122e-33 | 1.00000 | 2.25122e-33 | 1.00000 |
| PAH10+CH3 | 6.09119e-35 | 1.00000 | 6.09119e-35 | 1.00000 |
| rad43     | 3.65016e-35 | 1.00000 | 3.65016e-35 | 1.00000 |
| rad65     | 1.01874e-35 | 1.00000 | 1.01874e-35 | 1.00000 |
| rad42     | 3.62109e-36 | 1.00000 | 3.62109e-36 | 1.00000 |
| rad41     | 9.65582e-41 | 1.00000 | 9.65582e-41 | 1.00000 |

10000000.0 Pa, 240.000000 K

| Rate constant      | True (fraction)       | Effective (fraction)  |
|--------------------|-----------------------|-----------------------|
| Total              | 8.83273e-17 (1.00 )   | 8.83273e-17 (1.00 )   |
| Formation of rad11 | 7.04077e-17 (0.797 )  | 7.04077e-17 (0.797 )  |
| Formation of rad6  | 1.55481e-17 (0.176 )  | 1.55481e-17 (0.176 )  |
| H-abstraction      | 2.37143e-18 (0.0268 ) | 2.37143e-18 (0.0268 ) |

| species            | PYtrue      | Cumul    | PYeffective | Cumul    |
|--------------------|-------------|----------|-------------|----------|
| rad11              | 0.797037    | 0.797037 | 0.797037    | 0.797037 |
| rad6               | 0.176109    | 0.973146 | 0.176109    | 0.973146 |
| Benzene+2-propynyl | 0.0268483   | 0.999994 | 0.0268483   | 0.999994 |
| rad21              | 5.26032e-06 | 0.999999 | 5.26032e-06 | 0.999999 |
| rad13              | 1.08078e-07 | 1.000000 | 1.08078e-07 | 1.000000 |
| rad20              | 1.03212e-07 | 1.000000 | 1.03212e-07 | 1.000000 |
| rad22              | 4.00757e-08 | 1.000000 | 4.00757e-08 | 1.000000 |
| rad7               | 3.72630e-08 | 1.000000 | 3.72630e-08 | 1.000000 |
| rad25              | 5.80674e-09 | 1.000000 | 5.80674e-09 | 1.000000 |
| rad45              | 3.24220e-09 | 1.000000 | 3.24220e-09 | 1.000000 |
| rad24              | 2.58875e-09 | 1.000000 | 2.58875e-09 | 1.000000 |
| PhCHCCH2+H         | 1.47348e-09 | 1.000000 | 1.47348e-09 | 1.000000 |
| rad33              | 1.26261e-09 | 1.000000 | 1.26261e-09 | 1.000000 |
| rad36              | 3.37061e-10 | 1.000000 | 3.37061e-10 | 1.000000 |
| rad18              | 2.17276e-10 | 1.000000 | 2.17276e-10 | 1.000000 |
| Phenyl+Allene      | 1.36218e-10 | 1.000000 | 0.000000    | 1.000000 |
| rad9               | 1.21120e-10 | 1.000000 | 1.21120e-10 | 1.000000 |
| C2H2+PhCH2         | 8.14846e-12 | 1.000000 | 8.14846e-12 | 1.000000 |
| PhCH2CCH+H         | 3.92918e-12 | 1.000000 | 3.92918e-12 | 1.000000 |
| Indene+H           | 3.30308e-12 | 1.000000 | 3.30308e-12 | 1.000000 |
| rad23              | 8.77842e-13 | 1.000000 | 8.77842e-13 | 1.000000 |
| rad3               | 8.01068e-13 | 1.000000 | 8.01068e-13 | 1.000000 |
| rad4               | 5.24453e-13 | 1.000000 | 5.24453e-13 | 1.000000 |
| rad28              | 7.44344e-14 | 1.000000 | 7.44344e-14 | 1.000000 |
| rad8               | 9.72394e-17 | 1.000000 | 9.72394e-17 | 1.000000 |
| rad2               | 3.97362e-17 | 1.000000 | 3.97362e-17 | 1.000000 |
| PAH7+H             | 2.78212e-17 | 1.000000 | 2.78212e-17 | 1.000000 |
| rad1               | 5.43230e-18 | 1.000000 | 5.43230e-18 | 1.000000 |
| PhCCH+CH3          | 4.14469e-18 | 1.000000 | 4.14469e-18 | 1.000000 |
| rad30              | 1.32383e-18 | 1.000000 | 1.32383e-18 | 1.000000 |
| rad15              | 3.20821e-19 | 1.000000 | 3.20821e-19 | 1.000000 |
| rad14              | 1.00277e-19 | 1.000000 | 1.00277e-19 | 1.000000 |
| Ph+MeAc            | 2.21617e-20 | 1.000000 | 2.21617e-20 | 1.000000 |
| rad38              | 1.55641e-20 | 1.000000 | 1.55641e-20 | 1.000000 |
| rad31              | 1.39225e-20 | 1.000000 | 1.39225e-20 | 1.000000 |
| rad26              | 1.75223e-21 | 1.000000 | 1.75223e-21 | 1.000000 |
| rad60syn           | 4.95380e-22 | 1.000000 | 4.95380e-22 | 1.000000 |
| rad46              | 3.67407e-22 | 1.000000 | 3.67407e-22 | 1.000000 |
| rad10              | 2.22808e-22 | 1.000000 | 2.22808e-22 | 1.000000 |
| rad60anti          | 1.96553e-22 | 1.000000 | 1.96553e-22 | 1.000000 |
| rad54              | 5.67163e-23 | 1.000000 | 5.67163e-23 | 1.000000 |
| PAH3+H             | 2.21331e-23 | 1.000000 | 2.21331e-23 | 1.000000 |
| rad39              | 1.75454e-23 | 1.000000 | 1.75454e-23 | 1.000000 |
| rad35              | 1.67337e-23 | 1.000000 | 1.67337e-23 | 1.000000 |
| rad19syn           | 1.48354e-23 | 1.000000 | 1.48354e-23 | 1.000000 |
| rad70              | 8.37118e-24 | 1.000000 | 8.37118e-24 | 1.000000 |
| rad59              | 5.75909e-24 | 1.000000 | 5.75909e-24 | 1.000000 |
| PAH9+H             | 4.50639e-24 | 1.000000 | 4.50639e-24 | 1.000000 |
| PhCCCH3+H          | 3.49999e-24 | 1.000000 | 3.49999e-24 | 1.000000 |
| rad27              | 1.33974e-24 | 1.000000 | 1.33974e-24 | 1.000000 |
| rad50              | 1.20916e-25 | 1.000000 | 1.20916e-25 | 1.000000 |
| rad55              | 1.04778e-25 | 1.000000 | 1.04778e-25 | 1.000000 |
| rad34              | 2.77324e-26 | 1.000000 | 2.77324e-26 | 1.000000 |
| PhcycC3H3_A+H      | 5.20142e-27 | 1.000000 | 5.20142e-27 | 1.000000 |
| rad52              | 1.68397e-28 | 1.000000 | 1.68397e-28 | 1.000000 |
| rad5               | 6.01738e-29 | 1.000000 | 6.01738e-29 | 1.000000 |
| rad51              | 1.53728e-29 | 1.000000 | 1.53728e-29 | 1.000000 |



|           |             |          |             |          |
|-----------|-------------|----------|-------------|----------|
| rad12     | 9.30880e-30 | 1.000000 | 9.30880e-30 | 1.000000 |
| rad58     | 8.27189e-30 | 1.000000 | 8.27189e-30 | 1.000000 |
| rad62     | 1.39694e-30 | 1.000000 | 1.39694e-30 | 1.000000 |
| rad37     | 1.35658e-30 | 1.000000 | 1.35658e-30 | 1.000000 |
| rad47     | 1.45632e-31 | 1.000000 | 1.45632e-31 | 1.000000 |
| PAH1+H    | 1.03868e-32 | 1.000000 | 1.03868e-32 | 1.000000 |
| PAH10+CH3 | 2.82249e-34 | 1.000000 | 2.82249e-34 | 1.000000 |
| rad43     | 1.74410e-34 | 1.000000 | 1.74410e-34 | 1.000000 |
| rad65     | 4.99043e-35 | 1.000000 | 4.99043e-35 | 1.000000 |
| rad42     | 1.89314e-35 | 1.000000 | 1.89314e-35 | 1.000000 |
| rad41     | 5.43586e-40 | 1.000000 | 5.43586e-40 | 1.000000 |

10000000.0 Pa, 250.000000 K

| Rate constant      | True (fraction) |           | Effective (fraction) |           |
|--------------------|-----------------|-----------|----------------------|-----------|
| Total              | 1.21641e-16     | (1.00 )   | 1.21641e-16          | (1.00 )   |
| Formation of rad11 | 9.54219e-17     | (0.784 )  | 9.54219e-17          | (0.784 )  |
| Formation of rad6  | 2.24583e-17     | (0.185 )  | 2.24583e-17          | (0.185 )  |
| H-abstraction      | 3.76121e-18     | (0.0309 ) | 3.76121e-18          | (0.0309 ) |

  

| species            | PYtrue      | Cumul    | PYeffective | Cumul    |
|--------------------|-------------|----------|-------------|----------|
| rad11              | 0.784357    | 0.784357 | 0.784357    | 0.784357 |
| rad6               | 0.184715    | 0.969073 | 0.184715    | 0.969073 |
| Benzene+2-propynyl | 0.0309205   | 0.999993 | 0.0309205   | 0.999993 |
| rad21              | 5.86813e-06 | 0.999999 | 5.86813e-06 | 0.999999 |
| rad13              | 1.27443e-07 | 0.999999 | 1.27443e-07 | 0.999999 |
| rad20              | 1.26266e-07 | 0.999999 | 1.26266e-07 | 0.999999 |
| rad22              | 4.90746e-08 | 0.999999 | 4.90746e-08 | 0.999999 |
| rad7               | 4.43200e-08 | 0.999999 | 4.43200e-08 | 0.999999 |
| rad25              | 6.96608e-09 | 0.999999 | 6.96608e-09 | 0.999999 |
| rad45              | 4.23283e-09 | 0.999999 | 4.23283e-09 | 0.999999 |
| rad24              | 3.04814e-09 | 0.999999 | 3.04814e-09 | 0.999999 |
| PhCHCCH2+H         | 1.94033e-09 | 0.999999 | 1.94033e-09 | 0.999999 |
| rad33              | 1.51606e-09 | 0.999999 | 1.51606e-09 | 0.999999 |
| rad36              | 4.38010e-10 | 0.999999 | 4.38010e-10 | 0.999999 |
| rad18              | 2.96880e-10 | 0.999999 | 2.96880e-10 | 0.999999 |
| Phenyl+Allene      | 2.03114e-10 | 0.999999 | 0.00000     | 0.999999 |
| rad9               | 1.62158e-10 | 0.999999 | 1.62158e-10 | 0.999999 |
| C2H2+PhCH2         | 1.25257e-11 | 0.999999 | 1.25257e-11 | 0.999999 |
| PhCH2CCH+H         | 6.81183e-12 | 0.999999 | 6.81183e-12 | 0.999999 |
| Indene+H           | 4.68897e-12 | 0.999999 | 4.68897e-12 | 0.999999 |
| rad23              | 1.26327e-12 | 0.999999 | 1.26327e-12 | 0.999999 |
| rad3               | 1.11978e-12 | 0.999999 | 1.11978e-12 | 0.999999 |
| rad4               | 7.32341e-13 | 0.999999 | 7.32341e-13 | 0.999999 |
| rad28              | 1.09392e-13 | 0.999999 | 1.09392e-13 | 0.999999 |
| rad8               | 1.86225e-16 | 0.999999 | 1.86225e-16 | 0.999999 |
| rad2               | 6.87126e-17 | 0.999999 | 6.87126e-17 | 0.999999 |
| PAH7+H             | 5.76625e-17 | 0.999999 | 5.76625e-17 | 0.999999 |
| rad1               | 9.37011e-18 | 0.999999 | 9.37011e-18 | 0.999999 |
| PhCCH+CH3          | 8.37229e-18 | 0.999999 | 8.37229e-18 | 0.999999 |
| rad30              | 2.49136e-18 | 0.999999 | 2.49136e-18 | 0.999999 |
| rad15              | 6.21764e-19 | 0.999999 | 6.21764e-19 | 0.999999 |
| rad14              | 1.90533e-19 | 0.999999 | 1.90533e-19 | 0.999999 |
| Ph+MeAc            | 5.12757e-20 | 0.999999 | 5.12757e-20 | 0.999999 |
| rad38              | 2.96766e-20 | 0.999999 | 2.96766e-20 | 0.999999 |
| rad31              | 1.99874e-20 | 0.999999 | 1.99874e-20 | 0.999999 |
| rad26              | 4.05142e-21 | 0.999999 | 4.05142e-21 | 0.999999 |
| rad60syn           | 1.13868e-21 | 0.999999 | 1.13868e-21 | 0.999999 |
| rad46              | 7.65919e-22 | 0.999999 | 7.65919e-22 | 0.999999 |
| rad10              | 4.93328e-22 | 0.999999 | 4.93328e-22 | 0.999999 |
| rad60anti          | 4.60292e-22 | 0.999999 | 4.60292e-22 | 0.999999 |
| rad54              | 1.69722e-22 | 0.999999 | 1.69722e-22 | 0.999999 |
| PAH3+H             | 6.36485e-23 | 0.999999 | 6.36485e-23 | 0.999999 |
| rad35              | 4.27852e-23 | 0.999999 | 4.27852e-23 | 0.999999 |
| rad19syn           | 4.14542e-23 | 0.999999 | 4.14542e-23 | 0.999999 |
| rad39              | 4.07842e-23 | 0.999999 | 4.07842e-23 | 0.999999 |
| rad70              | 3.10562e-23 | 0.999999 | 3.10562e-23 | 0.999999 |
| rad59              | 1.62076e-23 | 0.999999 | 1.62076e-23 | 0.999999 |
| PAH9+H             | 9.69370e-24 | 0.999999 | 9.69370e-24 | 0.999999 |
| PhCCCH3+H          | 9.22852e-24 | 0.999999 | 9.22852e-24 | 0.999999 |
| rad27              | 3.22583e-24 | 0.999999 | 3.22583e-24 | 0.999999 |
| rad55              | 3.69763e-25 | 0.999999 | 3.69763e-25 | 0.999999 |
| rad50              | 3.50809e-25 | 0.999999 | 3.50809e-25 | 0.999999 |
| rad34              | 1.15082e-25 | 0.999999 | 1.15082e-25 | 0.999999 |
| PhcycC3H3_A+H      | 1.88636e-26 | 0.999999 | 1.88636e-26 | 0.999999 |
| rad52              | 5.94909e-28 | 0.999999 | 5.94909e-28 | 0.999999 |
| rad5               | 1.97608e-28 | 0.999999 | 1.97608e-28 | 0.999999 |
| rad51              | 6.25854e-29 | 0.999999 | 6.25854e-29 | 0.999999 |

|           |             |          |             |          |
|-----------|-------------|----------|-------------|----------|
| rad58     | 3.55430e-29 | 0.999999 | 3.55430e-29 | 0.999999 |
| rad12     | 2.98619e-29 | 0.999999 | 2.98619e-29 | 0.999999 |
| rad62     | 5.51319e-30 | 0.999999 | 5.51319e-30 | 0.999999 |
| rad37     | 4.60865e-30 | 0.999999 | 4.60865e-30 | 0.999999 |
| rad47     | 6.94989e-31 | 0.999999 | 6.94989e-31 | 0.999999 |
| PAH1+H    | 4.21016e-32 | 0.999999 | 4.21016e-32 | 0.999999 |
| PAH10+CH3 | 1.16792e-33 | 0.999999 | 1.16792e-33 | 0.999999 |
| rad43     | 7.48893e-34 | 0.999999 | 7.48893e-34 | 0.999999 |
| rad65     | 2.18447e-34 | 0.999999 | 2.18447e-34 | 0.999999 |
| rad42     | 8.65164e-35 | 0.999999 | 8.65164e-35 | 0.999999 |
| rad41     | 2.67448e-39 | 0.999999 | 2.67448e-39 | 0.999999 |

10000000.0 Pa, 260.000000 K

| Rate constant      | True (fraction)       | Effective (fraction)  |
|--------------------|-----------------------|-----------------------|
| Total              | 1.63720e-16 (1.00 )   | 1.63720e-16 (1.00 )   |
| Formation of rad11 | 1.26419e-16 (0.772 )  | 1.26419e-16 (0.772 )  |
| Formation of rad6  | 3.15515e-17 (0.193 )  | 3.15515e-17 (0.193 )  |
| H-abstraction      | 5.75028e-18 (0.0351 ) | 5.75028e-18 (0.0351 ) |

| species            | PYtrue      | Cumul    | PYeffective | Cumul    |
|--------------------|-------------|----------|-------------|----------|
| rad11              | 0.772057    | 0.772057 | 0.772057    | 0.772057 |
| rad6               | 0.192812    | 0.964870 | 0.192812    | 0.964870 |
| Benzene+2-propynyl | 0.0351226   | 0.999992 | 0.0351226   | 0.999992 |
| rad21              | 6.55711e-06 | 0.999999 | 6.55711e-06 | 0.999999 |
| rad20              | 1.54805e-07 | 0.999999 | 1.54805e-07 | 0.999999 |
| rad13              | 1.49750e-07 | 0.999999 | 1.49750e-07 | 0.999999 |
| rad22              | 6.02331e-08 | 0.999999 | 6.02331e-08 | 0.999999 |
| rad7               | 5.25525e-08 | 0.999999 | 5.25525e-08 | 0.999999 |
| rad25              | 8.37989e-09 | 0.999999 | 8.37989e-09 | 0.999999 |
| rad45              | 5.52999e-09 | 0.999999 | 5.52999e-09 | 0.999999 |
| rad24              | 3.58762e-09 | 0.999999 | 3.58762e-09 | 0.999999 |
| PhCHCCH2+H         | 2.55956e-09 | 0.999999 | 2.55956e-09 | 0.999999 |
| rad33              | 1.81418e-09 | 0.999999 | 1.81418e-09 | 0.999999 |
| rad36              | 5.70048e-10 | 0.999999 | 5.70048e-10 | 0.999999 |
| rad18              | 4.06866e-10 | 0.999999 | 4.06866e-10 | 0.999999 |
| Phenyl+Allene      | 3.01103e-10 | 0.999999 | 0.00000     | 0.999999 |
| rad9               | 2.17214e-10 | 0.999999 | 2.17214e-10 | 0.999999 |
| C2H2+PhCH2         | 1.93235e-11 | 0.999999 | 1.93235e-11 | 0.999999 |
| PhCH2CCH+H         | 1.15993e-11 | 0.999999 | 1.15993e-11 | 0.999999 |
| Indene+H           | 6.69433e-12 | 0.999999 | 6.69433e-12 | 0.999999 |
| rad23              | 1.82578e-12 | 0.999999 | 1.82578e-12 | 0.999999 |
| rad3               | 1.56322e-12 | 0.999999 | 1.56322e-12 | 0.999999 |
| rad4               | 1.02158e-12 | 0.999999 | 1.02158e-12 | 0.999999 |
| rad28              | 1.60554e-13 | 0.999999 | 1.60554e-13 | 0.999999 |
| rad8               | 3.51923e-16 | 0.999999 | 3.51923e-16 | 0.999999 |
| rad2               | 1.18797e-16 | 0.999999 | 1.18797e-16 | 0.999999 |
| PAH7+H             | 1.17038e-16 | 0.999999 | 1.17038e-16 | 0.999999 |
| PhCCH+CH3          | 1.68087e-17 | 0.999999 | 1.68087e-17 | 0.999999 |
| rad1               | 1.61771e-17 | 0.999999 | 1.61771e-17 | 0.999999 |
| rad30              | 4.69504e-18 | 0.999999 | 4.69504e-18 | 0.999999 |
| rad15              | 1.20494e-18 | 0.999999 | 1.20494e-18 | 0.999999 |
| rad14              | 3.60960e-19 | 0.999999 | 3.60960e-19 | 0.999999 |
| Ph+MeAc            | 1.16506e-19 | 0.999999 | 1.16506e-19 | 0.999999 |
| rad38              | 5.67342e-20 | 0.999999 | 5.67342e-20 | 0.999999 |
| rad31              | 2.89339e-20 | 0.999999 | 2.89339e-20 | 0.999999 |
| rad26              | 9.11086e-21 | 0.999999 | 9.11086e-21 | 0.999999 |
| rad60syn           | 2.58296e-21 | 0.999999 | 2.58296e-21 | 0.999999 |
| rad46              | 1.59429e-21 | 0.999999 | 1.59429e-21 | 0.999999 |
| rad10              | 1.08669e-21 | 0.999999 | 1.08669e-21 | 0.999999 |
| rad60anti          | 1.06160e-21 | 0.999999 | 1.06160e-21 | 0.999999 |
| rad54              | 4.72939e-22 | 0.999999 | 4.72939e-22 | 0.999999 |
| PAH3+H             | 1.75752e-22 | 0.999999 | 1.75752e-22 | 0.999999 |
| rad19syn           | 1.09191e-22 | 0.999999 | 1.09191e-22 | 0.999999 |
| rad35              | 1.07125e-22 | 0.999999 | 1.07125e-22 | 0.999999 |
| rad70              | 1.04268e-22 | 0.999999 | 1.04268e-22 | 0.999999 |
| rad39              | 9.29495e-23 | 0.999999 | 9.29495e-23 | 0.999999 |
| rad59              | 4.39093e-23 | 0.999999 | 4.39093e-23 | 0.999999 |
| PhCCCH3+H          | 2.38363e-23 | 0.999999 | 2.38363e-23 | 0.999999 |
| PAH9+H             | 2.09208e-23 | 0.999999 | 2.09208e-23 | 0.999999 |
| rad27              | 7.67777e-24 | 0.999999 | 7.67777e-24 | 0.999999 |
| rad55              | 1.18225e-24 | 0.999999 | 1.18225e-24 | 0.999999 |
| rad50              | 9.83731e-25 | 0.999999 | 9.83731e-25 | 0.999999 |
| rad34              | 4.24439e-25 | 0.999999 | 4.24439e-25 | 0.999999 |
| PhcycC3H3_A+H      | 6.17361e-26 | 0.999999 | 6.17361e-26 | 0.999999 |
| rad52              | 1.97392e-27 | 0.999999 | 1.97392e-27 | 0.999999 |
| rad5               | 6.14988e-28 | 0.999999 | 6.14988e-28 | 0.999999 |
| rad51              | 2.33784e-28 | 0.999999 | 2.33784e-28 | 0.999999 |

|           |             |          |             |          |
|-----------|-------------|----------|-------------|----------|
| rad58     | 1.36680e-28 | 0.999999 | 1.36680e-28 | 0.999999 |
| rad12     | 9.05687e-29 | 0.999999 | 9.05687e-29 | 0.999999 |
| rad62     | 1.97732e-29 | 0.999999 | 1.97732e-29 | 0.999999 |
| rad37     | 1.46591e-29 | 0.999999 | 1.46591e-29 | 0.999999 |
| rad47     | 2.96506e-30 | 0.999999 | 2.96506e-30 | 0.999999 |
| PAH1+H    | 1.51940e-31 | 0.999999 | 1.51940e-31 | 0.999999 |
| PAH10+CH3 | 4.35221e-33 | 0.999999 | 4.35221e-33 | 0.999999 |
| rad43     | 2.91399e-33 | 0.999999 | 2.91399e-33 | 0.999999 |
| rad65     | 8.63356e-34 | 0.999999 | 8.63356e-34 | 0.999999 |
| rad42     | 3.50875e-34 | 0.999999 | 3.50875e-34 | 0.999999 |
| rad41     | 1.16746e-38 | 0.999999 | 1.16746e-38 | 0.999999 |

10000000.0 Pa, 270.000000 K

| Rate constant      | True (fraction) |           | Effective (fraction) |           |
|--------------------|-----------------|-----------|----------------------|-----------|
| Total              | 2.15887e-16     | (1.00 )   | 2.15887e-16          | (1.00 )   |
| Formation of rad11 | 1.64133e-16     | (0.760 )  | 1.64133e-16          | (0.760 )  |
| Formation of rad6  | 4.32452e-17     | (0.200 )  | 4.32452e-17          | (0.200 )  |
| H-abstraction      | 8.50919e-18     | (0.0394 ) | 8.50919e-18          | (0.0394 ) |

  

| species            | PYtrue      | Cumul    | PYeffective | Cumul    |
|--------------------|-------------|----------|-------------|----------|
| rad11              | 0.760156    | 0.760156 | 0.760156    | 0.760156 |
| rad6               | 0.200421    | 0.960577 | 0.200421    | 0.960577 |
| Benzene+2-propynyl | 0.0394150   | 0.999992 | 0.0394150   | 0.999992 |
| rad21              | 7.33898e-06 | 1.000000 | 7.33898e-06 | 1.000000 |
| rad20              | 1.90187e-07 | 1.000000 | 1.90187e-07 | 1.000000 |
| rad13              | 1.75447e-07 | 1.000000 | 1.75447e-07 | 1.000000 |
| rad22              | 7.40923e-08 | 1.000000 | 7.40923e-08 | 1.000000 |
| rad7               | 6.21619e-08 | 1.000000 | 6.21619e-08 | 1.000000 |
| rad25              | 1.01054e-08 | 1.000000 | 1.01054e-08 | 1.000000 |
| rad45              | 7.22806e-09 | 1.000000 | 7.22806e-09 | 1.000000 |
| rad24              | 4.22010e-09 | 1.000000 | 4.22010e-09 | 1.000000 |
| PhCHCCH2+H         | 3.38026e-09 | 1.000000 | 3.38026e-09 | 1.000000 |
| rad33              | 2.16460e-09 | 1.000000 | 2.16460e-09 | 1.000000 |
| rad36              | 7.42860e-10 | 1.000000 | 7.42860e-10 | 1.000000 |
| rad18              | 5.59080e-10 | 1.000000 | 5.59080e-10 | 1.000000 |
| Phenyl+Allene      | 4.43692e-10 | 1.000000 | 0.000000    | 1.000000 |
| rad9               | 2.90952e-10 | 1.000000 | 2.90952e-10 | 1.000000 |
| C2H2+PhCH2         | 2.98861e-11 | 1.000000 | 2.98861e-11 | 1.000000 |
| PhCH2CCH+H         | 1.94214e-11 | 1.000000 | 1.94214e-11 | 1.000000 |
| Indene+H           | 9.60815e-12 | 1.000000 | 9.60815e-12 | 1.000000 |
| rad23              | 2.64897e-12 | 1.000000 | 2.64897e-12 | 1.000000 |
| rad3               | 2.17967e-12 | 1.000000 | 2.17967e-12 | 1.000000 |
| rad4               | 1.42386e-12 | 1.000000 | 1.42386e-12 | 1.000000 |
| rad28              | 2.35300e-13 | 1.000000 | 2.35300e-13 | 1.000000 |
| rad8               | 6.56005e-16 | 1.000000 | 6.56005e-16 | 1.000000 |
| PAH7+H             | 2.32599e-16 | 1.000000 | 2.32599e-16 | 1.000000 |
| rad2               | 2.05108e-16 | 1.000000 | 2.05108e-16 | 1.000000 |
| PhCCH+CH3          | 3.34507e-17 | 1.000000 | 3.34507e-17 | 1.000000 |
| rad1               | 2.79238e-17 | 1.000000 | 2.79238e-17 | 1.000000 |
| rad30              | 8.83836e-18 | 1.000000 | 8.83836e-18 | 1.000000 |
| rad15              | 2.32875e-18 | 1.000000 | 2.32875e-18 | 1.000000 |
| rad14              | 6.80373e-19 | 1.000000 | 6.80373e-19 | 1.000000 |
| Ph+MeAc            | 2.59183e-19 | 1.000000 | 2.59183e-19 | 1.000000 |
| rad38              | 1.08546e-19 | 1.000000 | 1.08546e-19 | 1.000000 |
| rad31              | 4.22604e-20 | 1.000000 | 4.22604e-20 | 1.000000 |
| rad26              | 1.99201e-20 | 1.000000 | 1.99201e-20 | 1.000000 |
| rad60syn           | 5.76321e-21 | 1.000000 | 5.76321e-21 | 1.000000 |
| rad46              | 3.30564e-21 | 1.000000 | 3.30564e-21 | 1.000000 |
| rad60anti          | 2.40357e-21 | 1.000000 | 2.40357e-21 | 1.000000 |
| rad10              | 2.37171e-21 | 1.000000 | 2.37171e-21 | 1.000000 |
| rad54              | 1.23230e-21 | 1.000000 | 1.23230e-21 | 1.000000 |
| PAH3+H             | 4.65084e-22 | 1.000000 | 4.65084e-22 | 1.000000 |
| rad70              | 3.19566e-22 | 1.000000 | 3.19566e-22 | 1.000000 |
| rad19syn           | 2.71722e-22 | 1.000000 | 2.71722e-22 | 1.000000 |
| rad35              | 2.61366e-22 | 1.000000 | 2.61366e-22 | 1.000000 |
| rad39              | 2.06830e-22 | 1.000000 | 2.06830e-22 | 1.000000 |
| rad59              | 1.14288e-22 | 1.000000 | 1.14288e-22 | 1.000000 |
| PhCCCH3+H          | 5.99954e-23 | 1.000000 | 5.99954e-23 | 1.000000 |
| PAH9+H             | 4.51068e-23 | 1.000000 | 4.51068e-23 | 1.000000 |
| rad27              | 1.79740e-23 | 1.000000 | 1.79740e-23 | 1.000000 |
| rad55              | 3.45464e-24 | 1.000000 | 3.45464e-24 | 1.000000 |
| rad50              | 2.66262e-24 | 1.000000 | 2.66262e-24 | 1.000000 |
| rad34              | 1.40806e-24 | 1.000000 | 1.40806e-24 | 1.000000 |
| PhcycC3H3_A+H      | 1.84022e-25 | 1.000000 | 1.84022e-25 | 1.000000 |
| rad52              | 6.16606e-27 | 1.000000 | 6.16606e-27 | 1.000000 |
| rad5               | 1.81113e-27 | 1.000000 | 1.81113e-27 | 1.000000 |
| rad51              | 8.06528e-28 | 1.000000 | 8.06528e-28 | 1.000000 |

|           |             |         |             |         |
|-----------|-------------|---------|-------------|---------|
| rad58     | 4.75190e-28 | 1.00000 | 4.75190e-28 | 1.00000 |
| rad12     | 2.59268e-28 | 1.00000 | 2.59268e-28 | 1.00000 |
| rad62     | 6.49439e-29 | 1.00000 | 6.49439e-29 | 1.00000 |
| rad37     | 4.36443e-29 | 1.00000 | 4.36443e-29 | 1.00000 |
| rad47     | 1.14453e-29 | 1.00000 | 1.14453e-29 | 1.00000 |
| PAH1+H    | 4.93954e-31 | 1.00000 | 4.93954e-31 | 1.00000 |
| PAH10+CH3 | 1.47262e-32 | 1.00000 | 1.47262e-32 | 1.00000 |
| rad43     | 1.03586e-32 | 1.00000 | 1.03586e-32 | 1.00000 |
| rad65     | 3.11064e-33 | 1.00000 | 3.11064e-33 | 1.00000 |
| rad42     | 1.27942e-33 | 1.00000 | 1.27942e-33 | 1.00000 |
| rad41     | 4.58053e-38 | 1.00000 | 4.58053e-38 | 1.00000 |

10000000.0 Pa, 280.000000 K

| Rate constant      | True (fraction)       | Effective (fraction)  |
|--------------------|-----------------------|-----------------------|
| Total              | 2.79491e-16 (1.00 )   | 2.79491e-16 (1.00 )   |
| Formation of rad11 | 2.09281e-16 (0.749 )  | 2.09281e-16 (0.749 )  |
| Formation of rad6  | 5.79792e-17 (0.207 )  | 5.79792e-17 (0.207 )  |
| H-abstraction      | 1.22310e-17 (0.0438 ) | 1.22310e-17 (0.0438 ) |

| species            | PYtrue      | Cumul    | PYeffective | Cumul    |
|--------------------|-------------|----------|-------------|----------|
| rad11              | 0.748667    | 0.748667 | 0.748667    | 0.748667 |
| rad6               | 0.207563    | 0.956230 | 0.207563    | 0.956230 |
| Benzene+2-propynyl | 0.0437616   | 0.999991 | 0.0437616   | 0.999991 |
| rad21              | 8.22688e-06 | 1.000000 | 8.22688e-06 | 1.000000 |
| rad20              | 2.34097e-07 | 1.000000 | 2.34097e-07 | 1.000000 |
| rad13              | 2.05050e-07 | 1.000000 | 2.05050e-07 | 1.000000 |
| rad22              | 9.13277e-08 | 1.000000 | 9.13277e-08 | 1.000000 |
| rad7               | 7.33841e-08 | 1.000000 | 7.33841e-08 | 1.000000 |
| rad25              | 1.22118e-08 | 1.000000 | 1.22118e-08 | 1.000000 |
| rad45              | 9.44913e-09 | 1.000000 | 9.44913e-09 | 1.000000 |
| rad24              | 4.96016e-09 | 1.000000 | 4.96016e-09 | 1.000000 |
| PhCHCCH2+H         | 4.46654e-09 | 1.000000 | 4.46654e-09 | 1.000000 |
| rad33              | 2.57604e-09 | 1.000000 | 2.57604e-09 | 1.000000 |
| rad36              | 9.69090e-10 | 1.000000 | 9.69090e-10 | 1.000000 |
| rad18              | 7.69941e-10 | 1.000000 | 7.69941e-10 | 1.000000 |
| Phenyl+Allene      | 6.49756e-10 | 1.000000 | 0.000000    | 1.000000 |
| rad9               | 3.89495e-10 | 1.000000 | 3.89495e-10 | 1.000000 |
| C2H2+PhCH2         | 4.62842e-11 | 1.000000 | 4.62842e-11 | 1.000000 |
| PhCH2CCH+H         | 3.19996e-11 | 1.000000 | 3.19996e-11 | 1.000000 |
| Indene+H           | 1.38559e-11 | 1.000000 | 1.38559e-11 | 1.000000 |
| rad23              | 3.85591e-12 | 1.000000 | 3.85591e-12 | 1.000000 |
| rad3               | 3.03547e-12 | 1.000000 | 3.03547e-12 | 1.000000 |
| rad4               | 1.98281e-12 | 1.000000 | 1.98281e-12 | 1.000000 |
| rad28              | 3.44203e-13 | 1.000000 | 3.44203e-13 | 1.000000 |
| rad8               | 1.20530e-15 | 1.000000 | 1.20530e-15 | 1.000000 |
| PAH7+H             | 4.52360e-16 | 1.000000 | 4.52360e-16 | 1.000000 |
| rad2               | 3.53068e-16 | 1.000000 | 3.53068e-16 | 1.000000 |
| PhCCH+CH3          | 6.57864e-17 | 1.000000 | 6.57864e-17 | 1.000000 |
| rad1               | 4.81166e-17 | 1.000000 | 4.81166e-17 | 1.000000 |
| rad30              | 1.65736e-17 | 1.000000 | 1.65736e-17 | 1.000000 |
| rad15              | 4.47487e-18 | 1.000000 | 4.47487e-18 | 1.000000 |
| rad14              | 1.27266e-18 | 1.000000 | 1.27266e-18 | 1.000000 |
| Ph+MeAc            | 5.62837e-19 | 1.000000 | 5.62837e-19 | 1.000000 |
| rad38              | 2.07403e-19 | 1.000000 | 2.07403e-19 | 1.000000 |
| rad31              | 6.23041e-20 | 1.000000 | 6.23041e-20 | 1.000000 |
| rad26              | 4.23118e-20 | 1.000000 | 4.23118e-20 | 1.000000 |
| rad60syn           | 1.26047e-20 | 1.000000 | 1.26047e-20 | 1.000000 |
| rad46              | 6.80935e-21 | 1.000000 | 6.80935e-21 | 1.000000 |
| rad60anti          | 5.32426e-21 | 1.000000 | 5.32426e-21 | 1.000000 |
| rad10              | 5.10636e-21 | 1.000000 | 5.10636e-21 | 1.000000 |
| rad54              | 3.01379e-21 | 1.000000 | 3.01379e-21 | 1.000000 |
| PAH3+H             | 1.17757e-21 | 1.000000 | 1.17757e-21 | 1.000000 |
| rad70              | 9.01070e-22 | 1.000000 | 9.01070e-22 | 1.000000 |
| rad19syn           | 6.40073e-22 | 1.000000 | 6.40073e-22 | 1.000000 |
| rad35              | 6.18830e-22 | 1.000000 | 6.18830e-22 | 1.000000 |
| rad39              | 4.47600e-22 | 1.000000 | 4.47600e-22 | 1.000000 |
| rad59              | 2.85287e-22 | 1.000000 | 2.85287e-22 | 1.000000 |
| PhCCCH3+H          | 1.46509e-22 | 1.000000 | 1.46509e-22 | 1.000000 |
| PAH9+H             | 9.67130e-23 | 1.000000 | 9.67130e-23 | 1.000000 |
| rad27              | 4.11929e-23 | 1.000000 | 4.11929e-23 | 1.000000 |
| rad55              | 9.29765e-24 | 1.000000 | 9.29765e-24 | 1.000000 |
| rad50              | 6.94814e-24 | 1.000000 | 6.94814e-24 | 1.000000 |
| rad34              | 4.24595e-24 | 1.000000 | 4.24595e-24 | 1.000000 |
| PhcycC3H3_A+H      | 5.03743e-25 | 1.000000 | 5.03743e-25 | 1.000000 |
| rad52              | 1.81804e-26 | 1.000000 | 1.81804e-26 | 1.000000 |
| rad5               | 5.04695e-27 | 1.000000 | 5.04695e-27 | 1.000000 |
| rad51              | 2.58561e-27 | 1.000000 | 2.58561e-27 | 1.000000 |

|           |             |         |             |         |
|-----------|-------------|---------|-------------|---------|
| rad58     | 1.50736e-27 | 1.00000 | 1.50736e-27 | 1.00000 |
| rad12     | 7.00241e-28 | 1.00000 | 7.00241e-28 | 1.00000 |
| rad62     | 1.96762e-28 | 1.00000 | 1.96762e-28 | 1.00000 |
| rad37     | 1.21752e-28 | 1.00000 | 1.21752e-28 | 1.00000 |
| rad47     | 4.03885e-29 | 1.00000 | 4.03885e-29 | 1.00000 |
| PAH1+H    | 1.46150e-30 | 1.00000 | 1.46150e-30 | 1.00000 |
| PAH10+CH3 | 4.55984e-32 | 1.00000 | 4.55984e-32 | 1.00000 |
| rad43     | 3.38974e-32 | 1.00000 | 3.38974e-32 | 1.00000 |
| rad65     | 1.03080e-32 | 1.00000 | 1.03080e-32 | 1.00000 |
| rad42     | 4.24217e-33 | 1.00000 | 4.24217e-33 | 1.00000 |
| rad41     | 1.63341e-37 | 1.00000 | 1.63341e-37 | 1.00000 |

10000000.0 Pa, 290.000000 K

| Rate constant      | True (fraction)       | Effective (fraction)  |
|--------------------|-----------------------|-----------------------|
| Total              | 3.55893e-16 (1.00 )   | 3.55893e-16 (1.00 )   |
| Formation of rad11 | 2.62555e-16 (0.738 )  | 2.62555e-16 (0.738 )  |
| Formation of rad6  | 7.62093e-17 (0.214 )  | 7.62093e-17 (0.214 )  |
| H-abstraction      | 1.71289e-17 (0.0481 ) | 1.71289e-17 (0.0481 ) |

| species            | PYtrue      | Cumul    | PYeffective | Cumul    |
|--------------------|-------------|----------|-------------|----------|
| rad11              | 0.737596    | 0.737596 | 0.737596    | 0.737596 |
| rad6               | 0.214265    | 0.951861 | 0.214265    | 0.951861 |
| Benzene+2-propynyl | 0.0481294   | 0.999990 | 0.0481294   | 0.999990 |
| rad21              | 9.23554e-06 | 1.000000 | 9.23554e-06 | 1.000000 |
| rad20              | 2.88614e-07 | 1.000000 | 2.88614e-07 | 1.000000 |
| rad13              | 2.39146e-07 | 1.000000 | 2.39146e-07 | 1.000000 |
| rad22              | 1.12778e-07 | 1.000000 | 1.12778e-07 | 1.000000 |
| rad7               | 8.64946e-08 | 1.000000 | 8.64946e-08 | 1.000000 |
| rad25              | 1.47834e-08 | 1.000000 | 1.47834e-08 | 1.000000 |
| rad45              | 1.23504e-08 | 1.000000 | 1.23504e-08 | 1.000000 |
| PhCHCCH2+H         | 5.90154e-09 | 1.000000 | 5.90154e-09 | 1.000000 |
| rad24              | 5.82406e-09 | 1.000000 | 5.82406e-09 | 1.000000 |
| rad33              | 3.05848e-09 | 1.000000 | 3.05848e-09 | 1.000000 |
| rad36              | 1.26519e-09 | 1.000000 | 1.26519e-09 | 1.000000 |
| rad18              | 1.06209e-09 | 1.000000 | 1.06209e-09 | 1.000000 |
| Phenyl+Allene      | 9.45354e-10 | 1.000000 | 0.000000    | 1.000000 |
| rad9               | 5.20820e-10 | 1.000000 | 5.20820e-10 | 1.000000 |
| C2H2+PhCH2         | 7.16787e-11 | 1.000000 | 7.16787e-11 | 1.000000 |
| PhCH2CCH+H         | 5.19052e-11 | 1.000000 | 5.19052e-11 | 1.000000 |
| Indene+H           | 2.00612e-11 | 1.000000 | 2.00612e-11 | 1.000000 |
| rad23              | 5.62722e-12 | 1.000000 | 5.62722e-12 | 1.000000 |
| rad3               | 4.22074e-12 | 1.000000 | 4.22074e-12 | 1.000000 |
| rad4               | 2.75801e-12 | 1.000000 | 2.75801e-12 | 1.000000 |
| rad28              | 5.02239e-13 | 1.000000 | 5.02239e-13 | 1.000000 |
| rad8               | 2.18044e-15 | 1.000000 | 2.18044e-15 | 1.000000 |
| PAH7+H             | 8.60110e-16 | 1.000000 | 8.60110e-16 | 1.000000 |
| rad2               | 6.04699e-16 | 1.000000 | 6.04699e-16 | 1.000000 |
| PhCCH+CH3          | 1.27458e-16 | 1.000000 | 1.27458e-16 | 1.000000 |
| rad1               | 8.26051e-17 | 1.000000 | 8.26051e-17 | 1.000000 |
| rad30              | 3.08626e-17 | 1.000000 | 3.08626e-17 | 1.000000 |
| rad15              | 8.52160e-18 | 1.000000 | 8.52160e-18 | 1.000000 |
| rad14              | 2.35565e-18 | 1.000000 | 2.35565e-18 | 1.000000 |
| Ph+MeAc            | 1.18994e-18 | 1.000000 | 1.18994e-18 | 1.000000 |
| rad38              | 3.94864e-19 | 1.000000 | 3.94864e-19 | 1.000000 |
| rad31              | 9.27336e-20 | 1.000000 | 9.27336e-20 | 1.000000 |
| rad26              | 8.72268e-20 | 1.000000 | 8.72268e-20 | 1.000000 |
| rad60syn           | 2.69318e-20 | 1.000000 | 2.69318e-20 | 1.000000 |
| rad46              | 1.38970e-20 | 1.000000 | 1.38970e-20 | 1.000000 |
| rad60anti          | 1.15018e-20 | 1.000000 | 1.15018e-20 | 1.000000 |
| rad10              | 1.08008e-20 | 1.000000 | 1.08008e-20 | 1.000000 |
| rad54              | 6.94303e-21 | 1.000000 | 6.94303e-21 | 1.000000 |
| PAH3+H             | 2.85001e-21 | 1.000000 | 2.85001e-21 | 1.000000 |
| rad70              | 2.35380e-21 | 1.000000 | 2.35380e-21 | 1.000000 |
| rad19syn           | 1.43009e-21 | 1.000000 | 1.43009e-21 | 1.000000 |
| rad35              | 1.41723e-21 | 1.000000 | 1.41723e-21 | 1.000000 |
| rad39              | 9.38968e-22 | 1.000000 | 9.38968e-22 | 1.000000 |
| rad59              | 6.82150e-22 | 1.000000 | 6.82150e-22 | 1.000000 |
| PhCCCH3+H          | 3.46007e-22 | 1.000000 | 3.46007e-22 | 1.000000 |
| PAH9+H             | 2.05272e-22 | 1.000000 | 2.05272e-22 | 1.000000 |
| rad27              | 9.20540e-23 | 1.000000 | 9.20540e-23 | 1.000000 |
| rad55              | 2.32093e-23 | 1.000000 | 2.32093e-23 | 1.000000 |
| rad50              | 1.74684e-23 | 1.000000 | 1.74684e-23 | 1.000000 |
| rad34              | 1.17451e-23 | 1.000000 | 1.17451e-23 | 1.000000 |
| PhcycC3H3_A+H      | 1.27578e-24 | 1.000000 | 1.27578e-24 | 1.000000 |
| rad52              | 5.07337e-26 | 1.000000 | 5.07337e-26 | 1.000000 |
| rad5               | 1.33215e-26 | 1.000000 | 1.33215e-26 | 1.000000 |
| rad51              | 7.74665e-27 | 1.000000 | 7.74665e-27 | 1.000000 |

|           |             |         |             |         |
|-----------|-------------|---------|-------------|---------|
| rad58     | 4.39862e-27 | 1.00000 | 4.39862e-27 | 1.00000 |
| rad12     | 1.78557e-27 | 1.00000 | 1.78557e-27 | 1.00000 |
| rad62     | 5.53643e-28 | 1.00000 | 5.53643e-28 | 1.00000 |
| rad37     | 3.18876e-28 | 1.00000 | 3.18876e-28 | 1.00000 |
| rad47     | 1.31461e-28 | 1.00000 | 1.31461e-28 | 1.00000 |
| PAH1+H    | 3.97119e-30 | 1.00000 | 3.97119e-30 | 1.00000 |
| PAH10+CH3 | 1.30154e-31 | 1.00000 | 1.30154e-31 | 1.00000 |
| rad43     | 1.02836e-31 | 1.00000 | 1.02836e-31 | 1.00000 |
| rad65     | 3.16688e-32 | 1.00000 | 3.16688e-32 | 1.00000 |
| rad42     | 1.29156e-32 | 1.00000 | 1.29156e-32 | 1.00000 |
| rad41     | 5.34498e-37 | 1.00000 | 5.34498e-37 | 1.00000 |

10000000.0 Pa, 300.000000 K

| Rate constant      | True (fraction)       | Effective (fraction)  |
|--------------------|-----------------------|-----------------------|
| Total              | 6.34395e-16 (1.00 )   | 6.34395e-16 (1.00 )   |
| Formation of rad11 | 4.51153e-16 (0.711 )  | 4.51153e-16 (0.711 )  |
| Formation of rad6  | 1.51589e-16 (0.239 )  | 1.51589e-16 (0.239 )  |
| H-abstraction      | 3.16530e-17 (0.0499 ) | 3.16530e-17 (0.0499 ) |

| species            | PYtrue      | Cumul    | PYeffective | Cumul    |
|--------------------|-------------|----------|-------------|----------|
| rad11              | 0.710860    | 0.710860 | 0.710860    | 0.710860 |
| rad6               | 0.239223    | 0.950083 | 0.239223    | 0.950083 |
| Benzene+2-propynyl | 0.00498949  | 0.999978 | 0.00498949  | 0.999978 |
| rad21              | 2.00466e-05 | 0.999998 | 2.00466e-05 | 0.999998 |
| rad20              | 1.14865e-06 | 0.999999 | 1.14865e-06 | 0.999999 |
| rad22              | 5.07159e-07 | 1.000000 | 5.07159e-07 | 1.000000 |
| rad13              | 4.27227e-07 | 1.000000 | 4.27227e-07 | 1.000000 |
| rad7               | 1.62808e-07 | 1.000000 | 1.62808e-07 | 1.000000 |
| rad45              | 7.85544e-08 | 1.000000 | 7.85544e-08 | 1.000000 |
| rad25              | 4.48521e-08 | 1.000000 | 4.48521e-08 | 1.000000 |
| PhCHCCH2+H         | 2.63142e-08 | 1.000000 | 2.63142e-08 | 1.000000 |
| rad24              | 1.54300e-08 | 1.000000 | 1.54300e-08 | 1.000000 |
| rad18              | 1.07579e-08 | 1.000000 | 1.07579e-08 | 1.000000 |
| rad33              | 5.32819e-09 | 1.000000 | 5.32819e-09 | 1.000000 |
| rad36              | 4.58361e-09 | 1.000000 | 4.58361e-09 | 1.000000 |
| Phenyl+Allene      | 4.23574e-09 | 1.000000 | 0.000000    | 1.000000 |
| rad9               | 2.56580e-09 | 1.000000 | 2.56580e-09 | 1.000000 |
| C2H2+PhCH2         | 2.21180e-09 | 1.000000 | 2.21180e-09 | 1.000000 |
| PhCH2CCH+H         | 6.06688e-10 | 1.000000 | 6.06688e-10 | 1.000000 |
| Indene+H           | 3.61075e-10 | 1.000000 | 3.61075e-10 | 1.000000 |
| rad23              | 1.00770e-10 | 1.000000 | 1.00770e-10 | 1.000000 |
| rad3               | 2.07154e-11 | 1.000000 | 2.07154e-11 | 1.000000 |
| rad4               | 1.33565e-11 | 1.000000 | 1.33565e-11 | 1.000000 |
| rad28              | 3.25744e-12 | 1.000000 | 3.25744e-12 | 1.000000 |
| rad15              | 3.51825e-13 | 1.000000 | 3.51825e-13 | 1.000000 |
| PAH7+H             | 4.31887e-14 | 1.000000 | 4.31887e-14 | 1.000000 |
| rad12              | 2.18840e-14 | 1.000000 | 2.18840e-14 | 1.000000 |
| rad2               | 1.57658e-14 | 1.000000 | 1.57658e-14 | 1.000000 |
| PhCCH+CH3          | 1.15046e-14 | 1.000000 | 1.15046e-14 | 1.000000 |
| rad30              | 5.05461e-15 | 1.000000 | 5.05461e-15 | 1.000000 |
| rad1               | 2.09680e-15 | 1.000000 | 2.09680e-15 | 1.000000 |
| rad8               | 5.82999e-16 | 1.000000 | 5.82999e-16 | 1.000000 |
| Ph+MeAc            | 2.74101e-16 | 1.000000 | 2.74101e-16 | 1.000000 |
| rad19anti          | 2.68825e-16 | 1.000000 | 2.68825e-16 | 1.000000 |
| rad38              | 1.40457e-16 | 1.000000 | 1.40457e-16 | 1.000000 |
| rad14              | 1.21017e-16 | 1.000000 | 1.21017e-16 | 1.000000 |
| rad60syn           | 1.69094e-17 | 1.000000 | 1.69094e-17 | 1.000000 |
| rad26              | 1.30832e-17 | 1.000000 | 1.30832e-17 | 1.000000 |
| rad46              | 1.28414e-17 | 1.000000 | 1.28414e-17 | 1.000000 |
| PAH3+H             | 9.97572e-18 | 1.000000 | 9.97572e-18 | 1.000000 |
| rad60anti          | 8.31402e-18 | 1.000000 | 8.31402e-18 | 1.000000 |
| rad70              | 4.49793e-18 | 1.000000 | 4.49793e-18 | 1.000000 |
| rad10              | 3.65199e-18 | 1.000000 | 3.65199e-18 | 1.000000 |
| rad35              | 2.24755e-18 | 1.000000 | 2.24755e-18 | 1.000000 |
| rad59              | 1.75007e-18 | 1.000000 | 1.75007e-18 | 1.000000 |
| PAH9+H             | 1.10615e-18 | 1.000000 | 1.10615e-18 | 1.000000 |
| PhCCCH3+H          | 7.97228e-19 | 1.000000 | 7.97228e-19 | 1.000000 |
| rad54              | 7.94122e-19 | 1.000000 | 7.94122e-19 | 1.000000 |
| rad31              | 7.06347e-19 | 1.000000 | 7.06347e-19 | 1.000000 |
| rad50              | 4.43109e-19 | 1.000000 | 4.43109e-19 | 1.000000 |
| rad19syn           | 1.56312e-19 | 1.000000 | 1.56312e-19 | 1.000000 |
| rad34              | 1.51893e-19 | 1.000000 | 1.51893e-19 | 1.000000 |
| rad39              | 1.38705e-19 | 1.000000 | 1.38705e-19 | 1.000000 |
| rad27              | 6.15899e-20 | 1.000000 | 6.15899e-20 | 1.000000 |
| rad51              | 1.39737e-20 | 1.000000 | 1.39737e-20 | 1.000000 |
| rad52              | 1.20137e-20 | 1.000000 | 1.20137e-20 | 1.000000 |
| rad55              | 8.86866e-21 | 1.000000 | 8.86866e-21 | 1.000000 |

|               |             |         |             |         |
|---------------|-------------|---------|-------------|---------|
| PhcycC3H3_A+H | 1.87695e-21 | 1.00000 | 1.87695e-21 | 1.00000 |
| rad58         | 1.06220e-21 | 1.00000 | 1.06220e-21 | 1.00000 |
| rad5          | 5.84325e-22 | 1.00000 | 5.84325e-22 | 1.00000 |
| rad67         | 5.29070e-22 | 1.00000 | 5.29070e-22 | 1.00000 |
| rad47         | 4.62891e-22 | 1.00000 | 4.62891e-22 | 1.00000 |
| rad62         | 2.13249e-22 | 1.00000 | 2.13249e-22 | 1.00000 |
| rad68syn      | 8.91479e-24 | 1.00000 | 8.91479e-24 | 1.00000 |
| rad65         | 8.34296e-24 | 1.00000 | 8.34296e-24 | 1.00000 |
| rad37         | 8.03173e-24 | 1.00000 | 8.03173e-24 | 1.00000 |
| rad68anti     | 6.32152e-24 | 1.00000 | 6.32152e-24 | 1.00000 |
| rad53         | 5.59451e-24 | 1.00000 | 5.59451e-24 | 1.00000 |
| PAH1+H        | 2.99184e-24 | 1.00000 | 2.99184e-24 | 1.00000 |
| rad73         | 2.39169e-24 | 1.00000 | 2.39169e-24 | 1.00000 |
| rad42         | 1.63585e-24 | 1.00000 | 1.63585e-24 | 1.00000 |
| rad43         | 1.63127e-24 | 1.00000 | 1.63127e-24 | 1.00000 |
| PAH10+CH3     | 1.26878e-24 | 1.00000 | 1.26878e-24 | 1.00000 |
| rad71         | 1.01596e-24 | 1.00000 | 1.01596e-24 | 1.00000 |
| rad56         | 1.92460e-25 | 1.00000 | 1.92460e-25 | 1.00000 |
| PAH8+H        | 1.57601e-25 | 1.00000 | 1.57601e-25 | 1.00000 |
| rad40syn      | 1.43220e-25 | 1.00000 | 1.43220e-25 | 1.00000 |
| rad40anti     | 3.29733e-26 | 1.00000 | 3.29733e-26 | 1.00000 |
| rad41         | 1.23444e-26 | 1.00000 | 1.23444e-26 | 1.00000 |
| rad64         | 6.40272e-27 | 1.00000 | 6.40272e-27 | 1.00000 |
| rad72         | 2.34218e-27 | 1.00000 | 2.34218e-27 | 1.00000 |
| rad61         | 2.82334e-28 | 1.00000 | 2.82334e-28 | 1.00000 |

10000000.0 Pa, 400.000000 K

| =====              |                 |           |                      |           |
|--------------------|-----------------|-----------|----------------------|-----------|
| Rate constant      | True (fraction) |           | Effective (fraction) |           |
| -----              |                 |           |                      |           |
| Total              | 5.11288e-15     | (1.00 )   | 5.11288e-15          | (1.00 )   |
| Formation of rad11 | 3.08094e-15     | (0.603 )  | 3.08094e-15          | (0.603 )  |
| Formation of rad6  | 1.54092e-15     | (0.301 )  | 1.54092e-15          | (0.301 )  |
| H-abstraction      | 4.91025e-16     | (0.0960 ) | 4.91025e-16          | (0.0960 ) |
| species            | PYtrue          | Cumul     | PYeffective          | Cumul     |
| -----              |                 |           |                      |           |
| rad11              | 0.601771        | 0.601771  | 0.601771             | 0.601771  |
| rad6               | 0.302115        | 0.903886  | 0.302115             | 0.903886  |
| Benzene+2-propynyl | 0.0960368       | 0.999923  | 0.0960368            | 0.999923  |
| rad21              | 5.99856e-05     | 0.999983  | 5.99856e-05          | 0.999983  |
| rad20              | 7.99224e-06     | 0.999991  | 7.99224e-06          | 0.999991  |
| rad22              | 3.88845e-06     | 0.999995  | 3.88845e-06          | 0.999995  |
| rad13              | 1.79736e-06     | 0.999997  | 1.79736e-06          | 0.999997  |
| rad7               | 8.32311e-07     | 0.999998  | 8.32311e-07          | 0.999998  |
| rad45              | 8.29243e-07     | 0.999998  | 8.29244e-07          | 0.999998  |
| PhCHCCH2+H         | 3.10391e-07     | 0.999999  | 3.10391e-07          | 0.999999  |
| rad25              | 2.68881e-07     | 0.999999  | 2.68881e-07          | 0.999999  |
| rad18              | 2.06814e-07     | 0.999999  | 2.06814e-07          | 0.999999  |
| C2H2+PhCH2         | 1.03236e-07     | 0.999999  | 1.03236e-07          | 0.999999  |
| Phenyl+Allene      | 9.43078e-08     | 0.999999  | 0.00000              | 0.999999  |
| rad24              | 5.58809e-08     | 1.000000  | 5.58810e-08          | 0.999999  |
| rad36              | 4.72825e-08     | 1.000000  | 4.72826e-08          | 0.999999  |
| rad9               | 3.22050e-08     | 1.000000  | 3.22050e-08          | 1.000000  |
| rad33              | 2.43753e-08     | 1.000000  | 2.43753e-08          | 1.000000  |
| PhCH2CCH+H         | 2.23516e-08     | 1.000000  | 2.23516e-08          | 1.000000  |
| Indene+H           | 1.57392e-08     | 1.000000  | 1.57392e-08          | 1.000000  |
| rad23              | 8.09413e-09     | 1.000000  | 8.09413e-09          | 1.000000  |
| rad3               | 4.36556e-10     | 1.000000  | 4.36556e-10          | 1.000000  |
| rad4               | 2.93140e-10     | 1.000000  | 2.93140e-10          | 1.000000  |
| rad28              | 1.02989e-10     | 1.000000  | 1.02989e-10          | 1.000000  |
| rad15              | 1.58946e-11     | 1.000000  | 1.58946e-11          | 1.000000  |
| PhCCH+CH3          | 1.32217e-11     | 1.000000  | 1.32217e-11          | 1.000000  |
| PAH7+H             | 5.53968e-12     | 1.000000  | 5.53968e-12          | 1.000000  |
| rad2               | 4.37366e-12     | 1.000000  | 4.37366e-12          | 1.000000  |
| rad38              | 2.32212e-12     | 1.000000  | 2.32212e-12          | 1.000000  |
| PAH9+H             | 1.50060e-12     | 1.000000  | 1.50060e-12          | 1.000000  |
| rad30              | 9.80963e-13     | 1.000000  | 9.80963e-13          | 1.000000  |
| Ph+MeAc            | 7.63597e-13     | 1.000000  | 7.63597e-13          | 1.000000  |
| rad1               | 6.82843e-13     | 1.000000  | 6.82843e-13          | 1.000000  |
| rad46              | 6.00910e-13     | 1.000000  | 6.00910e-13          | 1.000000  |
| rad50              | 3.00841e-13     | 1.000000  | 3.00841e-13          | 1.000000  |
| rad12              | 2.85937e-13     | 1.000000  | 2.85937e-13          | 1.000000  |
| rad35              | 2.36185e-13     | 1.000000  | 2.36185e-13          | 1.000000  |
| rad39              | 9.65008e-14     | 1.000000  | 9.65008e-14          | 1.000000  |
| rad51              | 6.34645e-14     | 1.000000  | 6.34645e-14          | 1.000000  |
| rad14              | 6.16415e-14     | 1.000000  | 6.16415e-14          | 1.000000  |
| rad19anti          | 3.06676e-14     | 1.000000  | 3.06676e-14          | 1.000000  |
| rad10              | 2.89674e-14     | 1.000000  | 2.89674e-14          | 1.000000  |
| PhCCCH3+H          | 2.71638e-14     | 1.000000  | 2.71638e-14          | 1.000000  |

|               |             |          |             |          |
|---------------|-------------|----------|-------------|----------|
| rad52         | 2.21862e-14 | 1.000000 | 2.21862e-14 | 1.000000 |
| rad26         | 1.54850e-14 | 1.000000 | 1.54850e-14 | 1.000000 |
| PAH3+H        | 1.24328e-14 | 1.000000 | 1.24328e-14 | 1.000000 |
| rad8          | 9.00692e-15 | 1.000000 | 9.00693e-15 | 1.000000 |
| rad60syn      | 7.18351e-15 | 1.000000 | 7.18351e-15 | 1.000000 |
| rad60anti     | 3.77177e-15 | 1.000000 | 3.77177e-15 | 1.000000 |
| rad70         | 2.99247e-15 | 1.000000 | 2.99247e-15 | 1.000000 |
| rad59         | 1.71168e-15 | 1.000000 | 1.71168e-15 | 1.000000 |
| PAH10+CH3     | 1.70332e-15 | 1.000000 | 1.70332e-15 | 1.000000 |
| PAH1+H        | 1.00901e-15 | 1.000000 | 1.00901e-15 | 1.000000 |
| rad71         | 9.92642e-16 | 1.000000 | 9.92642e-16 | 1.000000 |
| rad37         | 9.58255e-16 | 1.000000 | 9.58255e-16 | 1.000000 |
| rad65         | 9.10897e-16 | 1.000000 | 9.10897e-16 | 1.000000 |
| rad73         | 8.25186e-16 | 1.000000 | 8.25186e-16 | 1.000000 |
| rad54         | 4.35067e-16 | 1.000000 | 4.35068e-16 | 1.000000 |
| rad27         | 3.20242e-16 | 1.000000 | 3.20242e-16 | 1.000000 |
| rad19syn      | 2.03861e-16 | 1.000000 | 2.03861e-16 | 1.000000 |
| rad34         | 1.97106e-16 | 1.000000 | 1.97106e-16 | 1.000000 |
| rad31         | 1.13171e-16 | 1.000000 | 1.13171e-16 | 1.000000 |
| rad67         | 9.67105e-17 | 1.000000 | 9.67105e-17 | 1.000000 |
| PhcycC3H3_A+H | 5.18988e-17 | 1.000000 | 5.18988e-17 | 1.000000 |
| rad58         | 4.47049e-17 | 1.000000 | 4.47049e-17 | 1.000000 |
| rad47         | 3.48569e-17 | 1.000000 | 3.48569e-17 | 1.000000 |
| rad5          | 3.34318e-17 | 1.000000 | 3.34318e-17 | 1.000000 |
| rad72         | 2.53189e-17 | 1.000000 | 2.53189e-17 | 1.000000 |
| rad62         | 2.50510e-17 | 1.000000 | 2.50510e-17 | 1.000000 |
| rad64         | 1.79254e-17 | 1.000000 | 1.79254e-17 | 1.000000 |
| rad55         | 1.13136e-17 | 1.000000 | 1.13136e-17 | 1.000000 |
| PAH8+H        | 9.53410e-18 | 1.000000 | 9.53410e-18 | 1.000000 |
| rad68syn      | 3.34004e-18 | 1.000000 | 3.34005e-18 | 1.000000 |
| rad61         | 2.88848e-18 | 1.000000 | 2.88848e-18 | 1.000000 |
| rad68anti     | 2.17923e-18 | 1.000000 | 2.17923e-18 | 1.000000 |
| rad43         | 2.01003e-18 | 1.000000 | 2.01003e-18 | 1.000000 |
| rad40syn      | 1.17141e-18 | 1.000000 | 1.17141e-18 | 1.000000 |
| rad42         | 8.95205e-19 | 1.000000 | 8.95205e-19 | 1.000000 |
| rad53         | 7.52674e-19 | 1.000000 | 7.52674e-19 | 1.000000 |
| rad56         | 6.92417e-19 | 1.000000 | 6.92417e-19 | 1.000000 |
| rad40anti     | 6.83831e-19 | 1.000000 | 6.83831e-19 | 1.000000 |
| rad41         | 9.57975e-20 | 1.000000 | 9.57975e-20 | 1.000000 |

10000000.0 Pa, 500.000000 K

=====

| Rate constant      | True (fraction)      | Effective (fraction) |
|--------------------|----------------------|----------------------|
| Total              | 2.11551e-14 (1.00 )  | 2.11551e-14 (1.00 )  |
| Formation of rad11 | 1.10850e-14 (0.524 ) | 1.10850e-14 (0.524 ) |
| Formation of rad6  | 7.08033e-15 (0.335 ) | 7.08032e-15 (0.335 ) |
| H-abstraction      | 2.98976e-15 (0.141 ) | 2.98976e-15 (0.141 ) |

| species            | PYtrue      | Cumul    | PYeffective | Cumul    |
|--------------------|-------------|----------|-------------|----------|
| rad11              | 0.521652    | 0.521652 | 0.521653    | 0.521653 |
| rad6               | 0.336751    | 0.858404 | 0.336752    | 0.858405 |
| Benzene+2-propynyl | 0.141326    | 0.999730 | 0.141326    | 0.999731 |
| rad21              | 0.000166891 | 0.999896 | 0.000166891 | 0.999898 |
| rad20              | 4.46761e-05 | 0.999941 | 4.46762e-05 | 0.999943 |
| rad22              | 2.73017e-05 | 0.999968 | 2.73017e-05 | 0.999970 |
| rad45              | 6.52024e-06 | 0.999975 | 6.52026e-06 | 0.999977 |
| rad13              | 5.92909e-06 | 0.999981 | 5.92910e-06 | 0.999983 |
| rad7               | 3.87890e-06 | 0.999985 | 3.87891e-06 | 0.999986 |
| C2H2+PhCH2         | 3.30073e-06 | 0.999988 | 3.30073e-06 | 0.999990 |
| PhCHCCH2+H         | 3.11949e-06 | 0.999991 | 3.11949e-06 | 0.999993 |
| rad18              | 2.83979e-06 | 0.999994 | 2.83980e-06 | 0.999996 |
| Phenyl+Allene      | 1.48205e-06 | 0.999995 | 0.00000     | 0.999996 |
| rad25              | 1.43822e-06 | 0.999997 | 1.43823e-06 | 0.999997 |
| Indene+H           | 9.16068e-07 | 0.999998 | 9.16068e-07 | 0.999998 |
| rad23              | 6.55249e-07 | 0.999998 | 6.55251e-07 | 0.999999 |
| PhCH2CCH+H         | 5.13339e-07 | 0.999999 | 5.13339e-07 | 0.999999 |
| rad36              | 4.00444e-07 | 0.999999 | 4.00444e-07 | 1.000000 |
| rad9               | 3.35165e-07 | 1.000000 | 3.35165e-07 | 1.000000 |
| rad24              | 1.92431e-07 | 1.000000 | 1.92431e-07 | 1.000000 |
| rad33              | 7.91744e-08 | 1.000000 | 7.91745e-08 | 1.000000 |
| PAH9+H             | 1.64399e-08 | 1.000000 | 1.64399e-08 | 1.000000 |
| rad38              | 9.87621e-09 | 1.000000 | 9.87621e-09 | 1.000000 |
| rad3               | 4.73920e-09 | 1.000000 | 4.73921e-09 | 1.000000 |
| PAH7+H             | 3.88890e-09 | 1.000000 | 3.88891e-09 | 1.000000 |
| rad50              | 3.63724e-09 | 1.000000 | 3.63725e-09 | 1.000000 |
| rad46              | 3.48739e-09 | 1.000000 | 3.48740e-09 | 1.000000 |
| PhCCH+CH3          | 3.40835e-09 | 1.000000 | 3.40836e-09 | 1.000000 |
| rad4               | 3.31982e-09 | 1.000000 | 3.31983e-09 | 1.000000 |



|               |             |         |             |         |
|---------------|-------------|---------|-------------|---------|
| rad28         | 2.63258e-09 | 1.00000 | 2.63258e-09 | 1.00000 |
| rad35         | 2.31177e-09 | 1.00000 | 2.31177e-09 | 1.00000 |
| rad39         | 1.63767e-09 | 1.00000 | 1.63767e-09 | 1.00000 |
| rad51         | 1.15003e-09 | 1.00000 | 1.15003e-09 | 1.00000 |
| rad15         | 6.03582e-10 | 1.00000 | 6.03583e-10 | 1.00000 |
| Ph+MeAc       | 4.20458e-10 | 1.00000 | 4.20458e-10 | 1.00000 |
| rad52         | 3.28774e-10 | 1.00000 | 3.28773e-10 | 1.00000 |
| rad2          | 2.98425e-10 | 1.00000 | 2.98425e-10 | 1.00000 |
| rad30         | 1.56070e-10 | 1.00000 | 1.56070e-10 | 1.00000 |
| PAH3+H        | 1.00834e-10 | 1.00000 | 1.00835e-10 | 1.00000 |
| rad19anti     | 7.75296e-11 | 1.00000 | 7.75298e-11 | 1.00000 |
| PAH10+CH3     | 6.75401e-11 | 1.00000 | 6.75402e-11 | 1.00000 |
| rad1          | 5.70555e-11 | 1.00000 | 5.70555e-11 | 1.00000 |
| PhCCCH3+H     | 5.45566e-11 | 1.00000 | 5.45567e-11 | 1.00000 |
| rad71         | 4.15127e-11 | 1.00000 | 4.15128e-11 | 1.00000 |
| PAH1+H        | 3.82849e-11 | 1.00000 | 3.82849e-11 | 1.00000 |
| rad26         | 3.46272e-11 | 1.00000 | 3.46273e-11 | 1.00000 |
| rad73         | 2.98758e-11 | 1.00000 | 2.98758e-11 | 1.00000 |
| rad37         | 2.70229e-11 | 1.00000 | 2.70230e-11 | 1.00000 |
| rad65         | 2.49966e-11 | 1.00000 | 2.49966e-11 | 1.00000 |
| rad10         | 2.00676e-11 | 1.00000 | 2.00677e-11 | 1.00000 |
| rad59         | 9.39115e-12 | 1.00000 | 9.39115e-12 | 1.00000 |
| rad19syn      | 9.36273e-12 | 1.00000 | 9.36272e-12 | 1.00000 |
| rad60syn      | 7.93859e-12 | 1.00000 | 7.93860e-12 | 1.00000 |
| rad70         | 6.86408e-12 | 1.00000 | 6.86409e-12 | 1.00000 |
| PhcycC3H3_A+H | 5.52925e-12 | 1.00000 | 5.52926e-12 | 1.00000 |
| rad67         | 5.10190e-12 | 1.00000 | 5.10191e-12 | 1.00000 |
| rad60anti     | 4.89791e-12 | 1.00000 | 4.89792e-12 | 1.00000 |
| rad14         | 4.64376e-12 | 1.00000 | 4.64377e-12 | 1.00000 |
| rad54         | 4.45422e-12 | 1.00000 | 4.45423e-12 | 1.00000 |
| rad12         | 4.13483e-12 | 1.00000 | 4.13483e-12 | 1.00000 |
| rad34         | 1.70945e-12 | 1.00000 | 1.70945e-12 | 1.00000 |
| rad72         | 1.37088e-12 | 1.00000 | 1.37089e-12 | 1.00000 |
| rad58         | 1.18555e-12 | 1.00000 | 1.18556e-12 | 1.00000 |
| rad47         | 8.64814e-13 | 1.00000 | 8.64814e-13 | 1.00000 |
| rad64         | 7.43927e-13 | 1.00000 | 7.43928e-13 | 1.00000 |
| PAH8+H        | 5.13814e-13 | 1.00000 | 5.13814e-13 | 1.00000 |
| rad62         | 3.20519e-13 | 1.00000 | 3.20520e-13 | 1.00000 |
| rad55         | 3.17829e-13 | 1.00000 | 3.17830e-13 | 1.00000 |
| rad61         | 1.53655e-13 | 1.00000 | 1.53655e-13 | 1.00000 |
| rad68syn      | 1.46937e-13 | 1.00000 | 1.46937e-13 | 1.00000 |
| rad8          | 1.08782e-13 | 1.00000 | 1.08783e-13 | 1.00000 |
| rad68anti     | 9.54322e-14 | 1.00000 | 9.54322e-14 | 1.00000 |
| rad56         | 8.51497e-14 | 1.00000 | 8.51499e-14 | 1.00000 |
| rad53         | 8.26726e-14 | 1.00000 | 8.26727e-14 | 1.00000 |
| rad40syn      | 5.87335e-14 | 1.00000 | 5.87337e-14 | 1.00000 |
| rad27         | 5.60731e-14 | 1.00000 | 5.60732e-14 | 1.00000 |
| rad43         | 5.27083e-14 | 1.00000 | 5.27083e-14 | 1.00000 |
| rad40anti     | 3.54244e-14 | 1.00000 | 3.54245e-14 | 1.00000 |
| rad42         | 2.97352e-14 | 1.00000 | 2.97353e-14 | 1.00000 |
| rad5          | 2.37041e-14 | 1.00000 | 2.37042e-14 | 1.00000 |
| rad31         | 2.24634e-14 | 1.00000 | 2.24634e-14 | 1.00000 |
| rad41         | 4.64646e-15 | 1.00000 | 4.64646e-15 | 1.00000 |

10000000.0 Pa, 600.000000 K

=====

| Rate constant      | True (fraction)      | Effective (fraction) |
|--------------------|----------------------|----------------------|
| Total              | 6.08120e-14 (1.00 )  | 6.08108e-14 (1.00 )  |
| Formation of rad11 | 2.83304e-14 (0.466 ) | 2.83298e-14 (0.466 ) |
| Formation of rad6  | 2.13840e-14 (0.352 ) | 2.13835e-14 (0.352 ) |
| H-abstraction      | 1.10975e-14 (0.182 ) | 1.10975e-14 (0.182 ) |

| species            | PYtrue      | Cumul    | PYeffective | Cumul    |
|--------------------|-------------|----------|-------------|----------|
| rad11              | 0.459205    | 0.459205 | 0.459214    | 0.459214 |
| rad6               | 0.357359    | 0.816564 | 0.357366    | 0.816580 |
| Benzene+2-propynyl | 0.182488    | 0.999053 | 0.182492    | 0.999071 |
| rad21              | 0.000389280 | 0.999442 | 0.000389288 | 0.999461 |
| rad20              | 0.000163227 | 0.999605 | 0.000163230 | 0.999624 |
| rad22              | 0.000152698 | 0.999758 | 0.000152701 | 0.999777 |
| C2H2+PhCH2         | 5.77270e-05 | 0.999815 | 5.77280e-05 | 0.999834 |
| rad45              | 3.44520e-05 | 0.999850 | 3.44527e-05 | 0.999869 |
| PhCHCCH2+H         | 2.63608e-05 | 0.999876 | 2.63613e-05 | 0.999895 |
| Indene+H           | 2.24422e-05 | 0.999899 | 2.24426e-05 | 0.999918 |
| rad18              | 2.10570e-05 | 0.999920 | 2.10574e-05 | 0.999939 |
| Phenyl+Allene      | 1.91754e-05 | 0.999939 | 0.00000     | 0.999939 |
| rad7               | 1.63382e-05 | 0.999955 | 1.63385e-05 | 0.999955 |
| rad13              | 1.46002e-05 | 0.999970 | 1.46005e-05 | 0.999970 |
| PhCH2CCH+H         | 8.76054e-06 | 0.999979 | 8.76075e-06 | 0.999978 |

|               |             |          |             |          |
|---------------|-------------|----------|-------------|----------|
| rad23         | 7.30358e-06 | 0.999986 | 7.30372e-06 | 0.999986 |
| rad25         | 5.90220e-06 | 0.999992 | 5.90230e-06 | 0.999991 |
| rad9          | 2.87338e-06 | 0.999995 | 2.87344e-06 | 0.999994 |
| rad36         | 2.43686e-06 | 0.999997 | 2.43691e-06 | 0.999997 |
| rad24         | 7.34439e-07 | 0.999998 | 7.34453e-07 | 0.999998 |
| PAH9+H        | 5.82629e-07 | 0.999998 | 5.82641e-07 | 0.999998 |
| rad38         | 3.24882e-07 | 0.999999 | 3.24888e-07 | 0.999998 |
| PhCCH+CH3     | 2.14964e-07 | 0.999999 | 2.14968e-07 | 0.999999 |
| rad33         | 1.88964e-07 | 0.999999 | 1.88967e-07 | 0.999999 |
| PAH7+H        | 1.78565e-07 | 0.999999 | 1.78568e-07 | 0.999999 |
| rad50         | 1.32706e-07 | 0.999999 | 1.32709e-07 | 0.999999 |
| rad46         | 1.18529e-07 | 1.000000 | 1.18531e-07 | 0.999999 |
| rad35         | 8.09139e-08 | 1.000000 | 8.09154e-08 | 0.999999 |
| rad39         | 6.59618e-08 | 1.000000 | 6.59631e-08 | 0.999999 |
| rad28         | 5.52919e-08 | 1.000000 | 5.52930e-08 | 0.999999 |
| rad51         | 4.34112e-08 | 1.000000 | 4.34121e-08 | 1.000000 |
| Ph+MeAc       | 3.63704e-08 | 1.000000 | 3.63711e-08 | 1.000000 |
| rad3          | 2.38831e-08 | 1.000000 | 2.38836e-08 | 1.000000 |
| rad4          | 1.71919e-08 | 1.000000 | 1.71923e-08 | 1.000000 |
| rad15         | 1.42582e-08 | 1.000000 | 1.42585e-08 | 1.000000 |
| rad52         | 1.21829e-08 | 1.000000 | 1.21831e-08 | 1.000000 |
| rad19anti     | 6.84122e-09 | 1.000000 | 6.84135e-09 | 1.000000 |
| rad30         | 6.49700e-09 | 1.000000 | 6.49713e-09 | 1.000000 |
| rad19syn      | 5.29015e-09 | 1.000000 | 5.29025e-09 | 1.000000 |
| PAH3+H        | 4.24461e-09 | 1.000000 | 4.24469e-09 | 1.000000 |
| PhcycC3H3_A+H | 3.82039e-09 | 1.000000 | 3.82046e-09 | 1.000000 |
| PhCCCH3+H     | 3.26828e-09 | 1.000000 | 3.26834e-09 | 1.000000 |
| PAH10+CH3     | 2.89858e-09 | 1.000000 | 2.89864e-09 | 1.000000 |
| rad2          | 2.61649e-09 | 1.000000 | 2.61654e-09 | 1.000000 |
| rad54         | 2.42886e-09 | 1.000000 | 2.42891e-09 | 1.000000 |
| PAH1+H        | 1.96469e-09 | 1.000000 | 1.96473e-09 | 1.000000 |
| rad71         | 1.51494e-09 | 1.000000 | 1.51497e-09 | 1.000000 |
| rad37         | 1.12109e-09 | 1.000000 | 1.12111e-09 | 1.000000 |
| rad73         | 1.09314e-09 | 1.000000 | 1.09316e-09 | 1.000000 |
| rad47         | 1.00580e-09 | 1.000000 | 1.00581e-09 | 1.000000 |
| rad65         | 9.84063e-10 | 1.000000 | 9.84084e-10 | 1.000000 |
| rad26         | 9.57077e-10 | 1.000000 | 9.57098e-10 | 1.000000 |
| rad70         | 5.75980e-10 | 1.000000 | 5.75991e-10 | 1.000000 |
| rad1          | 5.62276e-10 | 1.000000 | 5.62287e-10 | 1.000000 |
| rad10         | 4.17504e-10 | 1.000000 | 4.17512e-10 | 1.000000 |
| rad67         | 4.00826e-10 | 1.000000 | 4.00834e-10 | 1.000000 |
| rad59         | 3.98557e-10 | 1.000000 | 3.98566e-10 | 1.000000 |
| rad60syn      | 3.51416e-10 | 1.000000 | 3.51423e-10 | 1.000000 |
| rad60anti     | 2.15880e-10 | 1.000000 | 2.15883e-10 | 1.000000 |
| rad55         | 1.86940e-10 | 1.000000 | 1.86943e-10 | 1.000000 |
| rad34         | 1.42741e-10 | 1.000000 | 1.42743e-10 | 1.000000 |
| rad12         | 9.22734e-11 | 1.000000 | 9.22746e-11 | 1.000000 |
| rad56         | 6.65375e-11 | 1.000000 | 6.65388e-11 | 1.000000 |
| rad53         | 5.99980e-11 | 1.000000 | 5.99991e-11 | 1.000000 |
| rad72         | 5.02200e-11 | 1.000000 | 5.02210e-11 | 1.000000 |
| rad58         | 4.95787e-11 | 1.000000 | 4.95797e-11 | 1.000000 |
| rad14         | 3.91192e-11 | 1.000000 | 3.91199e-11 | 1.000000 |
| rad64         | 3.81180e-11 | 1.000000 | 3.81187e-11 | 1.000000 |
| PAH8+H        | 3.79595e-11 | 1.000000 | 3.79603e-11 | 1.000000 |
| rad62         | 3.48531e-11 | 1.000000 | 3.48538e-11 | 1.000000 |
| rad68syn      | 1.14048e-11 | 1.000000 | 1.14050e-11 | 1.000000 |
| rad68anti     | 7.41414e-12 | 1.000000 | 7.41429e-12 | 1.000000 |
| rad61         | 6.79470e-12 | 1.000000 | 6.79483e-12 | 1.000000 |
| rad40syn      | 4.41685e-12 | 1.000000 | 4.41694e-12 | 1.000000 |
| rad43         | 3.40617e-12 | 1.000000 | 3.40624e-12 | 1.000000 |
| rad42         | 3.15946e-12 | 1.000000 | 3.15952e-12 | 1.000000 |
| rad40anti     | 2.64066e-12 | 1.000000 | 2.64071e-12 | 1.000000 |
| rad31         | 1.54848e-12 | 1.000000 | 1.54851e-12 | 1.000000 |
| rad8          | 1.39740e-12 | 1.000000 | 1.39742e-12 | 1.000000 |
| rad5          | 5.09918e-13 | 1.000000 | 5.09928e-13 | 1.000000 |
| rad27         | 4.34265e-13 | 1.000000 | 4.34273e-13 | 1.000000 |
| rad41         | 2.98614e-13 | 1.000000 | 2.98619e-13 | 1.000000 |

10000000.0 Pa, 700.000000 K

=====

| Rate constant      | True (fraction) |          | Effective (fraction) |          |
|--------------------|-----------------|----------|----------------------|----------|
| Total              | 1.39564e-13     | (1.00 )  | 1.39538e-13          | (1.00 )  |
| Formation of rad11 | 5.88273e-14     | (0.422 ) | 5.88136e-14          | (0.421 ) |
| Formation of rad6  | 5.01684e-14     | (0.359 ) | 5.01567e-14          | (0.359 ) |
| H-abstraction      | 3.05678e-14     | (0.219 ) | 3.05678e-14          | (0.219 ) |
| species            | PYtrue          | Cumul    | PYeffective          | Cumul    |
| rad11              | 0.402838        | 0.402838 | 0.402912             | 0.402912 |

|                    |             |          |             |          |
|--------------------|-------------|----------|-------------|----------|
| rad6               | 0.374795    | 0.777633 | 0.374864    | 0.777776 |
| Benzene+2-propynyl | 0.219024    | 0.996657 | 0.219064    | 0.996840 |
| rad21              | 0.000758314 | 0.997416 | 0.000758453 | 0.997599 |
| rad22              | 0.000597733 | 0.998013 | 0.000597843 | 0.998197 |
| C2H2+PhCH2         | 0.000514401 | 0.998528 | 0.000514495 | 0.998711 |
| rad20              | 0.000362845 | 0.998891 | 0.000362912 | 0.999074 |
| Indene+H           | 0.000205565 | 0.999096 | 0.000205602 | 0.999280 |
| PhCHCCH2+H         | 0.000189141 | 0.999285 | 0.000189175 | 0.999469 |
| Phenyl+Allene      | 0.000182812 | 0.999468 | 0.000000    | 0.999469 |
| rad45              | 0.000158415 | 0.999627 | 0.000158444 | 0.999627 |
| PhCH2CCH+H         | 9.83155e-05 | 0.999725 | 9.83331e-05 | 0.999726 |
| rad18              | 7.17093e-05 | 0.999797 | 7.17225e-05 | 0.999797 |
| rad7               | 6.07287e-05 | 0.999857 | 6.07398e-05 | 0.999858 |
| rad23              | 4.56362e-05 | 0.999903 | 4.56445e-05 | 0.999904 |
| rad13              | 2.82163e-05 | 0.999931 | 2.82215e-05 | 0.999932 |
| rad9               | 1.83054e-05 | 0.999950 | 1.83088e-05 | 0.999950 |
| rad25              | 1.72311e-05 | 0.999967 | 1.72342e-05 | 0.999967 |
| rad36              | 1.37317e-05 | 0.999981 | 1.37342e-05 | 0.999981 |
| PAH9+H             | 3.94464e-06 | 0.999984 | 3.94536e-06 | 0.999985 |
| rad24              | 3.27525e-06 | 0.999988 | 3.27585e-06 | 0.999988 |
| PhCCH+CH3          | 2.62662e-06 | 0.999990 | 2.62709e-06 | 0.999991 |
| rad38              | 2.15899e-06 | 0.999993 | 2.15939e-06 | 0.999993 |
| PAH7+H             | 1.69918e-06 | 0.999994 | 1.69950e-06 | 0.999995 |
| rad50              | 8.98278e-07 | 0.999995 | 8.98435e-07 | 0.999996 |
| rad46              | 7.93370e-07 | 0.999996 | 7.93517e-07 | 0.999997 |
| rad35              | 5.52333e-07 | 0.999996 | 5.52434e-07 | 0.999997 |
| Ph+MeAc            | 4.98250e-07 | 0.999997 | 4.98341e-07 | 0.999998 |
| rad39              | 4.91687e-07 | 0.999997 | 4.91777e-07 | 0.999998 |
| rad28              | 4.68364e-07 | 0.999998 | 4.68450e-07 | 0.999999 |
| rad33              | 4.22310e-07 | 0.999998 | 4.22388e-07 | 0.999999 |
| rad51              | 2.95230e-07 | 0.999999 | 2.95284e-07 | 0.999999 |
| rad19anti          | 2.76763e-07 | 0.999999 | 2.76813e-07 | 1.000000 |
| rad15              | 1.18980e-07 | 0.999999 | 1.19002e-07 | 1.000000 |
| rad30              | 9.23980e-08 | 0.999999 | 9.24144e-08 | 1.000000 |
| rad19syn           | 8.79308e-08 | 0.999999 | 8.79466e-08 | 1.000000 |
| rad52              | 8.25374e-08 | 0.999999 | 8.25519e-08 | 1.000000 |
| rad3               | 7.01112e-08 | 0.999999 | 7.01241e-08 | 1.000000 |
| PhcycC3H3_A+H      | 6.71122e-08 | 0.999999 | 6.71245e-08 | 1.000000 |
| rad4               | 5.23666e-08 | 0.999999 | 5.23762e-08 | 1.000000 |
| PhCCCH3+H          | 4.39371e-08 | 1.000000 | 4.39451e-08 | 1.000000 |
| rad54              | 3.99567e-08 | 1.000000 | 3.99640e-08 | 1.000000 |
| PAH3+H             | 3.91411e-08 | 1.000000 | 3.91482e-08 | 1.000000 |
| rad47              | 2.76627e-08 | 1.000000 | 2.76678e-08 | 1.000000 |
| PAH10+CH3          | 2.37440e-08 | 1.000000 | 2.37483e-08 | 1.000000 |
| PAH1+H             | 1.85927e-08 | 1.000000 | 1.85961e-08 | 1.000000 |
| rad67              | 1.66117e-08 | 1.000000 | 1.66148e-08 | 1.000000 |
| rad2               | 1.27902e-08 | 1.000000 | 1.27925e-08 | 1.000000 |
| rad71              | 9.43489e-09 | 1.000000 | 9.43667e-09 | 1.000000 |
| rad37              | 9.20294e-09 | 1.000000 | 9.20465e-09 | 1.000000 |
| rad26              | 7.88676e-09 | 1.000000 | 7.88823e-09 | 1.000000 |
| rad70              | 7.88059e-09 | 1.000000 | 7.88198e-09 | 1.000000 |
| rad73              | 6.83248e-09 | 1.000000 | 6.83373e-09 | 1.000000 |
| rad65              | 6.81283e-09 | 1.000000 | 6.81408e-09 | 1.000000 |
| rad60syn           | 4.23336e-09 | 1.000000 | 4.23414e-09 | 1.000000 |
| rad59              | 3.91366e-09 | 1.000000 | 3.91438e-09 | 1.000000 |
| rad55              | 3.13729e-09 | 1.000000 | 3.13786e-09 | 1.000000 |
| rad1               | 2.96442e-09 | 1.000000 | 2.96496e-09 | 1.000000 |
| rad12              | 2.67135e-09 | 1.000000 | 2.67184e-09 | 1.000000 |
| rad60anti          | 2.54725e-09 | 1.000000 | 2.54772e-09 | 1.000000 |
| rad10              | 2.46261e-09 | 1.000000 | 2.46306e-09 | 1.000000 |
| rad34              | 1.79989e-09 | 1.000000 | 1.80022e-09 | 1.000000 |
| rad56              | 1.23286e-09 | 1.000000 | 1.23309e-09 | 1.000000 |
| rad53              | 1.07950e-09 | 1.000000 | 1.07969e-09 | 1.000000 |
| rad62              | 4.90558e-10 | 1.000000 | 4.90648e-10 | 1.000000 |
| PAH8+H             | 4.45226e-10 | 1.000000 | 4.45307e-10 | 1.000000 |
| rad58              | 3.90295e-10 | 1.000000 | 3.90366e-10 | 1.000000 |
| rad64              | 3.59709e-10 | 1.000000 | 3.59775e-10 | 1.000000 |
| rad72              | 3.14056e-10 | 1.000000 | 3.14113e-10 | 1.000000 |
| rad14              | 1.45537e-10 | 1.000000 | 1.45563e-10 | 1.000000 |
| rad68syn           | 1.32975e-10 | 1.000000 | 1.33000e-10 | 1.000000 |
| rad68anti          | 8.64517e-11 | 1.000000 | 8.64675e-11 | 1.000000 |
| rad61              | 5.57133e-11 | 1.000000 | 5.57235e-11 | 1.000000 |
| rad40syn           | 5.16822e-11 | 1.000000 | 5.16917e-11 | 1.000000 |
| rad43              | 4.57595e-11 | 1.000000 | 4.57678e-11 | 1.000000 |
| rad42              | 4.57433e-11 | 1.000000 | 4.57517e-11 | 1.000000 |
| rad31              | 3.79367e-11 | 1.000000 | 3.79436e-11 | 1.000000 |
| rad40anti          | 3.09730e-11 | 1.000000 | 3.09787e-11 | 1.000000 |
| rad8               | 2.52697e-11 | 1.000000 | 2.52744e-11 | 1.000000 |
| rad5               | 5.04052e-12 | 1.000000 | 5.04144e-12 | 1.000000 |
| rad41              | 4.13298e-12 | 1.000000 | 4.13373e-12 | 1.000000 |

rad27 | 1.50372e-12 1.000000 | 1.50400e-12 1.00000

10000000.0 Pa, 800.000000 K

=====

| Rate constant      | True (fraction)      | Effective (fraction) |
|--------------------|----------------------|----------------------|
| Total              | 2.75392e-13 (1.00 )  | 2.75062e-13 (1.00 )  |
| Formation of rad11 | 1.06471e-13 (0.387 ) | 1.06300e-13 (0.386 ) |
| Formation of rad6  | 9.97133e-14 (0.362 ) | 9.95537e-14 (0.362 ) |
| H-abstraction      | 6.92082e-14 (0.251 ) | 6.92082e-14 (0.252 ) |

| species            | PYtrue      | Cumul    | PYeffective | Cumul    |
|--------------------|-------------|----------|-------------|----------|
| rad6               | 0.399224    | 0.399224 | 0.399703    | 0.399703 |
| rad11              | 0.338040    | 0.737264 | 0.338445    | 0.738148 |
| Benzene+2-propynyl | 0.251308    | 0.988571 | 0.251609    | 0.989757 |
| C2H2+PhCH2         | 0.00245937  | 0.991031 | 0.00246233  | 0.992219 |
| rad21              | 0.00142480  | 0.992455 | 0.00142651  | 0.993646 |
| rad22              | 0.00141069  | 0.993866 | 0.00141238  | 0.995058 |
| Phenyl+Allene      | 0.00119800  | 0.995064 | 0.000000    | 0.995058 |
| PhCHCCH2+H         | 0.00110455  | 0.996169 | 0.00110587  | 0.996164 |
| Indene+H           | 0.00107978  | 0.997248 | 0.00108107  | 0.997245 |
| PhCH2CCH+H         | 0.000785738 | 0.998034 | 0.000786679 | 0.998032 |
| rad20              | 0.000587410 | 0.998622 | 0.000588114 | 0.998620 |
| rad45              | 0.000561687 | 0.999183 | 0.000562360 | 0.999182 |
| rad7               | 0.000194677 | 0.999378 | 0.000194911 | 0.999377 |
| rad23              | 0.000192323 | 0.999570 | 0.000192553 | 0.999570 |
| rad18              | 0.000109944 | 0.999680 | 0.000110076 | 0.999680 |
| rad9               | 8.75678e-05 | 0.999768 | 8.76732e-05 | 0.999767 |
| rad36              | 5.88607e-05 | 0.999827 | 5.89313e-05 | 0.999826 |
| rad13              | 5.26050e-05 | 0.999879 | 5.26682e-05 | 0.999879 |
| rad25              | 3.70436e-05 | 0.999916 | 3.70880e-05 | 0.999916 |
| PAH9+H             | 1.51627e-05 | 0.999931 | 1.51809e-05 | 0.999931 |
| rad24              | 1.32230e-05 | 0.999945 | 1.32389e-05 | 0.999944 |
| PhCCH+CH3          | 1.26859e-05 | 0.999957 | 1.27011e-05 | 0.999957 |
| PAH7+H             | 8.51263e-06 | 0.999966 | 8.52282e-06 | 0.999966 |
| rad38              | 8.19541e-06 | 0.999974 | 8.20528e-06 | 0.999974 |
| rad50              | 3.47354e-06 | 0.999978 | 3.47770e-06 | 0.999977 |
| rad19anti          | 3.35312e-06 | 0.999981 | 3.35715e-06 | 0.999981 |
| rad46              | 3.03104e-06 | 0.999984 | 3.03467e-06 | 0.999984 |
| rad28              | 2.83385e-06 | 0.999987 | 2.83724e-06 | 0.999987 |
| Ph+MeAc            | 2.80128e-06 | 0.999990 | 2.80465e-06 | 0.999989 |
| rad35              | 2.19133e-06 | 0.999992 | 2.19395e-06 | 0.999992 |
| rad39              | 1.93121e-06 | 0.999994 | 1.93353e-06 | 0.999993 |
| rad33              | 1.25574e-06 | 0.999995 | 1.25725e-06 | 0.999995 |
| rad51              | 1.14829e-06 | 0.999996 | 1.14967e-06 | 0.999996 |
| rad30              | 6.54215e-07 | 0.999997 | 6.55000e-07 | 0.999997 |
| rad19syn           | 3.68362e-07 | 0.999997 | 3.68804e-07 | 0.999997 |
| rad15              | 3.53752e-07 | 0.999997 | 3.54177e-07 | 0.999997 |
| PhCCCH3+H          | 3.37721e-07 | 0.999998 | 3.38126e-07 | 0.999998 |
| rad52              | 3.19687e-07 | 0.999998 | 3.20070e-07 | 0.999998 |
| PAH3+H             | 2.83105e-07 | 0.999998 | 2.83444e-07 | 0.999998 |
| PhcycC3H3_A+H      | 2.82762e-07 | 0.999999 | 2.83101e-07 | 0.999998 |
| rad67              | 2.39117e-07 | 0.999999 | 2.39404e-07 | 0.999999 |
| rad3               | 1.97087e-07 | 0.999999 | 1.97322e-07 | 0.999999 |
| rad54              | 1.67363e-07 | 0.999999 | 1.67565e-07 | 0.999999 |
| rad47              | 1.65373e-07 | 0.999999 | 1.65571e-07 | 0.999999 |
| rad4               | 1.54287e-07 | 1.000000 | 1.54472e-07 | 0.999999 |
| PAH10+CH3          | 1.23081e-07 | 1.000000 | 1.23229e-07 | 1.000000 |
| PAH1+H             | 7.62768e-08 | 1.000000 | 7.63680e-08 | 1.000000 |
| rad70              | 7.16406e-08 | 1.000000 | 7.17265e-08 | 1.000000 |
| rad2               | 6.15830e-08 | 1.000000 | 6.16569e-08 | 1.000000 |
| rad12              | 6.08222e-08 | 1.000000 | 6.08951e-08 | 1.000000 |
| rad37              | 4.72725e-08 | 1.000000 | 4.73292e-08 | 1.000000 |
| rad26              | 4.03317e-08 | 1.000000 | 4.03801e-08 | 1.000000 |
| rad71              | 3.63866e-08 | 1.000000 | 3.64302e-08 | 1.000000 |
| rad60syn           | 3.43204e-08 | 1.000000 | 3.43616e-08 | 1.000000 |
| rad59              | 2.98958e-08 | 1.000000 | 2.99317e-08 | 1.000000 |
| rad65              | 2.67824e-08 | 1.000000 | 2.68145e-08 | 1.000000 |
| rad73              | 2.62264e-08 | 1.000000 | 2.62579e-08 | 1.000000 |
| rad60anti          | 2.06334e-08 | 1.000000 | 2.06581e-08 | 1.000000 |
| rad1               | 1.62938e-08 | 1.000000 | 1.63133e-08 | 1.000000 |
| rad34              | 1.38230e-08 | 1.000000 | 1.38395e-08 | 1.000000 |
| rad55              | 1.31396e-08 | 1.000000 | 1.31554e-08 | 1.000000 |
| rad10              | 1.10245e-08 | 1.000000 | 1.10377e-08 | 1.000000 |
| rad56              | 5.25529e-09 | 1.000000 | 5.26158e-09 | 1.000000 |
| rad53              | 4.56803e-09 | 1.000000 | 4.57351e-09 | 1.000000 |
| rad62              | 2.36501e-09 | 1.000000 | 2.36785e-09 | 1.000000 |
| rad58              | 2.21219e-09 | 1.000000 | 2.21484e-09 | 1.000000 |
| PAH8+H             | 1.94608e-09 | 1.000000 | 1.94842e-09 | 1.000000 |

|           |             |         |             |         |
|-----------|-------------|---------|-------------|---------|
| rad64     | 1.46867e-09 | 1.00000 | 1.47043e-09 | 1.00000 |
| rad72     | 1.22595e-09 | 1.00000 | 1.22743e-09 | 1.00000 |
| rad8      | 7.19583e-10 | 1.00000 | 7.20446e-10 | 1.00000 |
| rad68syn  | 6.50346e-10 | 1.00000 | 6.51126e-10 | 1.00000 |
| rad14     | 5.67760e-10 | 1.00000 | 5.68441e-10 | 1.00000 |
| rad68anti | 4.24306e-10 | 1.00000 | 4.24814e-10 | 1.00000 |
| rad31     | 3.82754e-10 | 1.00000 | 3.83214e-10 | 1.00000 |
| rad43     | 3.41692e-10 | 1.00000 | 3.42102e-10 | 1.00000 |
| rad61     | 2.91496e-10 | 1.00000 | 2.91845e-10 | 1.00000 |
| rad40syn  | 2.33805e-10 | 1.00000 | 2.34085e-10 | 1.00000 |
| rad42     | 2.23035e-10 | 1.00000 | 2.23303e-10 | 1.00000 |
| rad40anti | 1.38819e-10 | 1.00000 | 1.38985e-10 | 1.00000 |
| rad41     | 3.18411e-11 | 1.00000 | 3.18792e-11 | 1.00000 |
| rad5      | 2.27773e-11 | 1.00000 | 2.28046e-11 | 1.00000 |
| rad27     | 8.02179e-12 | 1.00000 | 8.03143e-12 | 1.00000 |

10000000.0 Pa, 900.000000 K

| Rate constant      | True (fraction)      | Effective (fraction) |
|--------------------|----------------------|----------------------|
| Total              | 4.88072e-13 (1.00 )  | 4.85372e-13 (1.00 )  |
| Formation of rad11 | 1.74945e-13 (0.358 ) | 1.73601e-13 (0.358 ) |
| Formation of rad6  | 1.76509e-13 (0.362 ) | 1.75153e-13 (0.361 ) |
| H-abstraction      | 1.36618e-13 (0.280 ) | 1.36618e-13 (0.281 ) |

| species            | PYtrue      | Cumul    | PYeffective | Cumul    |
|--------------------|-------------|----------|-------------|----------|
| rad6               | 0.434566    | 0.434566 | 0.436983    | 0.436983 |
| Benzene+2-propynyl | 0.279914    | 0.714479 | 0.281471    | 0.718454 |
| rad11              | 0.251464    | 0.965944 | 0.252863    | 0.971317 |
| C2H2+PhCH2         | 0.00718408  | 0.973128 | 0.00722402  | 0.978541 |
| Phenyl+Allene      | 0.00553209  | 0.978660 | 0.000000    | 0.978541 |
| PhCHCCH2+H         | 0.00457331  | 0.983233 | 0.00459875  | 0.983140 |
| PhCH2CCH+H         | 0.00423075  | 0.987464 | 0.00425429  | 0.987394 |
| Indene+H           | 0.00349463  | 0.990958 | 0.00351407  | 0.990908 |
| rad21              | 0.00257737  | 0.993536 | 0.00259171  | 0.993500 |
| rad22              | 0.00197393  | 0.995510 | 0.00198491  | 0.995485 |
| rad45              | 0.00148192  | 0.996992 | 0.00149016  | 0.996975 |
| rad20              | 0.000860827 | 0.997852 | 0.000865619 | 0.997841 |
| rad7               | 0.000533230 | 0.998386 | 0.000536197 | 0.998377 |
| rad23              | 0.000493145 | 0.998879 | 0.000495888 | 0.998873 |
| rad9               | 0.000386352 | 0.999265 | 0.000388502 | 0.999261 |
| rad36              | 0.000156568 | 0.999422 | 0.000157440 | 0.999419 |
| rad13              | 0.000125009 | 0.999547 | 0.000125705 | 0.999544 |
| rad18              | 9.86576e-05 | 0.999645 | 9.92066e-05 | 0.999643 |
| rad25              | 6.72643e-05 | 0.999713 | 6.76385e-05 | 0.999711 |
| PhCCH+CH3          | 5.68129e-05 | 0.999769 | 5.71290e-05 | 0.999768 |
| PAH9+H             | 4.18931e-05 | 0.999811 | 4.21261e-05 | 0.999810 |
| PAH7+H             | 3.52458e-05 | 0.999847 | 3.54418e-05 | 0.999846 |
| rad24              | 3.33232e-05 | 0.999880 | 3.35086e-05 | 0.999879 |
| rad38              | 2.20899e-05 | 0.999902 | 2.22128e-05 | 0.999902 |
| rad28              | 1.65931e-05 | 0.999919 | 1.66854e-05 | 0.999918 |
| rad19anti          | 1.38833e-05 | 0.999932 | 1.39605e-05 | 0.999932 |
| Ph+MeAc            | 1.22960e-05 | 0.999945 | 1.23645e-05 | 0.999945 |
| rad50              | 9.56001e-06 | 0.999954 | 9.61320e-06 | 0.999954 |
| rad46              | 8.24888e-06 | 0.999963 | 8.29477e-06 | 0.999962 |
| rad35              | 6.24817e-06 | 0.999969 | 6.28293e-06 | 0.999969 |
| rad39              | 5.62838e-06 | 0.999974 | 5.65969e-06 | 0.999974 |
| rad33              | 5.22935e-06 | 0.999980 | 5.25845e-06 | 0.999980 |
| rad51              | 3.16045e-06 | 0.999983 | 3.17803e-06 | 0.999983 |
| rad30              | 2.61249e-06 | 0.999985 | 2.62702e-06 | 0.999985 |
| PAH3+H             | 1.71058e-06 | 0.999987 | 1.72009e-06 | 0.999987 |
| PhCCCH3+H          | 1.47376e-06 | 0.999989 | 1.48196e-06 | 0.999989 |
| rad19syn           | 1.10530e-06 | 0.999990 | 1.11146e-06 | 0.999990 |
| rad12              | 1.04349e-06 | 0.999991 | 1.04930e-06 | 0.999991 |
| rad67              | 1.03551e-06 | 0.999992 | 1.04127e-06 | 0.999992 |
| rad52              | 8.76936e-07 | 0.999993 | 8.81808e-07 | 0.999993 |
| rad15              | 8.17428e-07 | 0.999994 | 8.21969e-07 | 0.999994 |
| rad3               | 8.03379e-07 | 0.999994 | 8.07850e-07 | 0.999994 |
| PhcycC3H3_A+H      | 7.77787e-07 | 0.999995 | 7.82119e-07 | 0.999995 |
| rad4               | 6.50728e-07 | 0.999996 | 6.54348e-07 | 0.999996 |
| rad70              | 5.87506e-07 | 0.999996 | 5.90775e-07 | 0.999996 |
| rad54              | 5.11768e-07 | 0.999997 | 5.14615e-07 | 0.999997 |
| rad47              | 4.91741e-07 | 0.999997 | 4.94477e-07 | 0.999997 |
| PAH10+CH3          | 4.17376e-07 | 0.999998 | 4.19699e-07 | 0.999998 |
| rad2               | 2.61597e-07 | 0.999998 | 2.63053e-07 | 0.999998 |
| PAH1+H             | 2.18720e-07 | 0.999998 | 2.19937e-07 | 0.999998 |
| rad60syn           | 1.80181e-07 | 0.999998 | 1.81183e-07 | 0.999999 |
| rad59              | 1.76766e-07 | 0.999999 | 1.77749e-07 | 0.999999 |
| rad37              | 1.61203e-07 | 0.999999 | 1.62099e-07 | 0.999999 |

|           |             |          |             |          |
|-----------|-------------|----------|-------------|----------|
| rad26     | 1.59178e-07 | 0.999999 | 1.60063e-07 | 0.999999 |
| rad34     | 1.15729e-07 | 0.999999 | 1.16372e-07 | 0.999999 |
| rad60anti | 1.09892e-07 | 0.999999 | 1.10503e-07 | 0.999999 |
| rad71     | 1.02945e-07 | 0.999999 | 1.03518e-07 | 0.999999 |
| rad1      | 7.87573e-08 | 0.999999 | 7.91956e-08 | 0.999999 |
| rad65     | 7.49473e-08 | 0.999999 | 7.53644e-08 | 1.000000 |
| rad73     | 7.37584e-08 | 0.999999 | 7.41687e-08 | 1.000000 |
| rad10     | 4.18555e-08 | 1.000000 | 4.20883e-08 | 1.000000 |
| rad55     | 3.88263e-08 | 1.000000 | 3.90424e-08 | 1.000000 |
| rad8      | 1.78880e-08 | 1.000000 | 1.79875e-08 | 1.000000 |
| rad56     | 1.38267e-08 | 1.000000 | 1.39037e-08 | 1.000000 |
| rad58     | 1.35928e-08 | 1.000000 | 1.36684e-08 | 1.000000 |
| rad53     | 1.23361e-08 | 1.000000 | 1.24047e-08 | 1.000000 |
| PAH8+H    | 9.19615e-09 | 1.000000 | 9.24725e-09 | 1.000000 |
| rad62     | 9.18218e-09 | 1.000000 | 9.23324e-09 | 1.000000 |
| rad68syn  | 4.25058e-09 | 1.000000 | 4.27422e-09 | 1.000000 |
| rad64     | 4.13803e-09 | 1.000000 | 4.16105e-09 | 1.000000 |
| rad72     | 3.50648e-09 | 1.000000 | 3.52599e-09 | 1.000000 |
| rad14     | 3.46238e-09 | 1.000000 | 3.48164e-09 | 1.000000 |
| rad68anti | 2.78875e-09 | 1.000000 | 2.80427e-09 | 1.000000 |
| rad31     | 2.29033e-09 | 1.000000 | 2.30307e-09 | 1.000000 |
| rad43     | 1.44853e-09 | 1.000000 | 1.45658e-09 | 1.000000 |
| rad40syn  | 1.25336e-09 | 1.000000 | 1.26034e-09 | 1.000000 |
| rad61     | 9.88765e-10 | 1.000000 | 9.94265e-10 | 1.000000 |
| rad42     | 8.50624e-10 | 1.000000 | 8.55359e-10 | 1.000000 |
| rad40anti | 7.04102e-10 | 1.000000 | 7.08019e-10 | 1.000000 |
| rad41     | 1.35630e-10 | 1.000000 | 1.36385e-10 | 1.000000 |
| rad5      | 7.68030e-11 | 1.000000 | 7.72304e-11 | 1.000000 |
| rad27     | 6.41068e-11 | 1.000000 | 6.44635e-11 | 1.000000 |

10000000.0 Pa, 1000.00000 K

| Rate constant      | True (fraction) |          | Effective (fraction) |          |
|--------------------|-----------------|----------|----------------------|----------|
| Total              | 7.98668e-13     | (1.00 )  | 7.86372e-13          | (1.00 )  |
| Formation of rad11 | 2.67704e-13     | (0.335 ) | 2.61770e-13          | (0.333 ) |
| Formation of rad6  | 2.87049e-13     | (0.359 ) | 2.80687e-13          | (0.357 ) |
| H-abstraction      | 2.43915e-13     | (0.305 ) | 2.43915e-13          | (0.310 ) |

  

| species            | PYtrue      | Cumul    | PYeffective | Cumul    |
|--------------------|-------------|----------|-------------|----------|
| rad6               | 0.452315    | 0.452315 | 0.459387    | 0.459387 |
| Benzene+2-propynyl | 0.305402    | 0.757717 | 0.310177    | 0.769564 |
| rad11              | 0.171897    | 0.929614 | 0.174585    | 0.944149 |
| Phenyl+Allene      | 0.0153956   | 0.945009 | 0.000000    | 0.944149 |
| PhCH2CCH+H         | 0.0126242   | 0.957633 | 0.0128216   | 0.956971 |
| C2H2+PhCH2         | 0.0124220   | 0.970055 | 0.0126162   | 0.969587 |
| PhCHCCH2+H         | 0.0110711   | 0.981126 | 0.0112441   | 0.980831 |
| Indene+H           | 0.00623769  | 0.987364 | 0.00633523  | 0.987166 |
| rad21              | 0.00325867  | 0.990623 | 0.00330962  | 0.990476 |
| rad45              | 0.00246282  | 0.993086 | 0.00250133  | 0.992977 |
| rad22              | 0.00157511  | 0.994661 | 0.00159974  | 0.994577 |
| rad7               | 0.00108289  | 0.995744 | 0.00109982  | 0.995677 |
| rad9               | 0.00106918  | 0.996813 | 0.00108590  | 0.996763 |
| rad20              | 0.000923482 | 0.997736 | 0.000937924 | 0.997701 |
| rad23              | 0.000684008 | 0.998420 | 0.000694700 | 0.998395 |
| rad13              | 0.000363133 | 0.998783 | 0.000368812 | 0.998764 |
| rad36              | 0.000251474 | 0.999035 | 0.000255407 | 0.999020 |
| PhCCH+CH3          | 0.000245520 | 0.999280 | 0.000249358 | 0.999269 |
| PAH7+H             | 0.000116949 | 0.999397 | 0.000118777 | 0.999388 |
| rad25              | 0.000100979 | 0.999498 | 0.000102558 | 0.999490 |
| PAH9+H             | 7.47770e-05 | 0.999573 | 7.59460e-05 | 0.999566 |
| rad18              | 6.50250e-05 | 0.999638 | 6.60418e-05 | 0.999632 |
| rad28              | 6.19550e-05 | 0.999700 | 6.29237e-05 | 0.999695 |
| rad24              | 4.93964e-05 | 0.999750 | 5.01688e-05 | 0.999745 |
| Ph+MeAc            | 4.70926e-05 | 0.999797 | 4.78290e-05 | 0.999793 |
| rad38              | 3.79065e-05 | 0.999835 | 3.84993e-05 | 0.999832 |
| rad19anti          | 2.90902e-05 | 0.999864 | 2.95451e-05 | 0.999861 |
| rad33              | 2.08807e-05 | 0.999884 | 2.12072e-05 | 0.999882 |
| rad50              | 1.65976e-05 | 0.999901 | 1.68571e-05 | 0.999899 |
| rad46              | 1.42363e-05 | 0.999915 | 1.44589e-05 | 0.999914 |
| rad39              | 1.40713e-05 | 0.999929 | 1.42913e-05 | 0.999928 |
| rad35              | 1.14780e-05 | 0.999941 | 1.16575e-05 | 0.999940 |
| rad12              | 6.20142e-06 | 0.999947 | 6.29839e-06 | 0.999946 |
| PAH3+H             | 6.08009e-06 | 0.999953 | 6.17516e-06 | 0.999952 |
| rad30              | 5.79476e-06 | 0.999959 | 5.88537e-06 | 0.999958 |
| rad51              | 5.48040e-06 | 0.999964 | 5.56609e-06 | 0.999964 |
| rad19syn           | 4.78795e-06 | 0.999969 | 4.86282e-06 | 0.999969 |
| PhCCCH3+H          | 4.41679e-06 | 0.999974 | 4.48585e-06 | 0.999973 |
| PhcycC3H3_A+H      | 2.97748e-06 | 0.999977 | 3.02404e-06 | 0.999976 |

|           |             |          |             |          |
|-----------|-------------|----------|-------------|----------|
| rad3      | 2.93313e-06 | 0.999980 | 2.97899e-06 | 0.999979 |
| rad70     | 2.74943e-06 | 0.999982 | 2.79242e-06 | 0.999982 |
| rad4      | 2.38126e-06 | 0.999985 | 2.41849e-06 | 0.999984 |
| rad54     | 2.35305e-06 | 0.999987 | 2.38984e-06 | 0.999987 |
| rad67     | 2.21239e-06 | 0.999989 | 2.24699e-06 | 0.999989 |
| rad15     | 1.62949e-06 | 0.999991 | 1.65497e-06 | 0.999991 |
| rad52     | 1.51812e-06 | 0.999992 | 1.54186e-06 | 0.999992 |
| PAH10+CH3 | 9.39743e-07 | 0.999993 | 9.54439e-07 | 0.999993 |
| rad2      | 8.87835e-07 | 0.999994 | 9.01716e-07 | 0.999994 |
| rad47     | 8.34796e-07 | 0.999995 | 8.47847e-07 | 0.999995 |
| PAH1+H    | 6.18568e-07 | 0.999996 | 6.28240e-07 | 0.999995 |
| rad34     | 6.10893e-07 | 0.999996 | 6.20446e-07 | 0.999996 |
| rad59     | 5.95959e-07 | 0.999997 | 6.05277e-07 | 0.999997 |
| rad60syn  | 5.22821e-07 | 0.999997 | 5.30997e-07 | 0.999997 |
| rad26     | 4.88910e-07 | 0.999998 | 4.96554e-07 | 0.999998 |
| rad37     | 3.75603e-07 | 0.999998 | 3.81476e-07 | 0.999998 |
| rad60anti | 3.24002e-07 | 0.999999 | 3.29068e-07 | 0.999998 |
| rad1      | 2.64417e-07 | 0.999999 | 2.68551e-07 | 0.999999 |
| rad8      | 2.22612e-07 | 0.999999 | 2.26093e-07 | 0.999999 |
| rad71     | 1.82711e-07 | 0.999999 | 1.85569e-07 | 0.999999 |
| rad55     | 1.74350e-07 | 0.999999 | 1.77076e-07 | 0.999999 |
| rad65     | 1.33989e-07 | 1.000000 | 1.36084e-07 | 0.999999 |
| rad10     | 1.31168e-07 | 1.000000 | 1.33219e-07 | 0.999999 |
| rad73     | 1.30404e-07 | 1.000000 | 1.32443e-07 | 1.000000 |
| PAH8+H    | 7.31037e-08 | 1.000000 | 7.42470e-08 | 1.000000 |
| rad58     | 5.84267e-08 | 1.000000 | 5.93402e-08 | 1.000000 |
| rad56     | 5.31440e-08 | 1.000000 | 5.39750e-08 | 1.000000 |
| rad53     | 4.98737e-08 | 1.000000 | 5.06535e-08 | 1.000000 |
| rad62     | 3.59019e-08 | 1.000000 | 3.64633e-08 | 1.000000 |
| rad68syn  | 3.05803e-08 | 1.000000 | 3.10585e-08 | 1.000000 |
| rad14     | 2.35440e-08 | 1.000000 | 2.39121e-08 | 1.000000 |
| rad68anti | 2.00044e-08 | 1.000000 | 2.03172e-08 | 1.000000 |
| rad64     | 1.12075e-08 | 1.000000 | 1.13828e-08 | 1.000000 |
| rad31     | 1.01772e-08 | 1.000000 | 1.03363e-08 | 1.000000 |
| rad40syn  | 9.65609e-09 | 1.000000 | 9.80707e-09 | 1.000000 |
| rad72     | 6.26357e-09 | 1.000000 | 6.36150e-09 | 1.000000 |
| rad40anti | 5.46304e-09 | 1.000000 | 5.54846e-09 | 1.000000 |
| rad43     | 4.19927e-09 | 1.000000 | 4.26493e-09 | 1.000000 |
| rad42     | 3.21830e-09 | 1.000000 | 3.26861e-09 | 1.000000 |
| rad61     | 2.17993e-09 | 1.000000 | 2.21401e-09 | 1.000000 |
| rad27     | 5.97269e-10 | 1.000000 | 6.06608e-10 | 1.000000 |
| rad41     | 3.89269e-10 | 1.000000 | 3.95356e-10 | 1.000000 |
| rad5      | 1.90520e-10 | 1.000000 | 1.93499e-10 | 1.000000 |

10000000.0 Pa, 1100.00000 K

| Rate constant      | True (fraction)      | Effective (fraction) |
|--------------------|----------------------|----------------------|
| Total              | 1.22919e-12 (1.00 )  | 1.19082e-12 (1.00 )  |
| Formation of rad11 | 3.87976e-13 (0.316 ) | 3.69948e-13 (0.311 ) |
| Formation of rad6  | 4.37724e-13 (0.356 ) | 4.17384e-13 (0.351 ) |
| H-abstraction      | 4.03491e-13 (0.328 ) | 4.03491e-13 (0.339 ) |

| species            | PYtrue      | Cumul    | PYeffective | Cumul    |
|--------------------|-------------|----------|-------------|----------|
| rad6               | 0.432745    | 0.432745 | 0.446689    | 0.446689 |
| Benzene+2-propynyl | 0.328257    | 0.761003 | 0.338834    | 0.785522 |
| rad11              | 0.127076    | 0.888078 | 0.131169    | 0.916692 |
| Phenyl+Allene      | 0.0312144   | 0.919293 | 0.000000    | 0.916692 |
| PhCH2CCH+H         | 0.0243904   | 0.943683 | 0.0251762   | 0.941868 |
| PhCHCCH2+H         | 0.0181076   | 0.961791 | 0.0186911   | 0.960559 |
| C2H2+PhCH2         | 0.0151892   | 0.976980 | 0.0156786   | 0.976238 |
| Indene+H           | 0.00754817  | 0.984528 | 0.00779138  | 0.984029 |
| rad21              | 0.00291137  | 0.987439 | 0.00300518  | 0.987034 |
| rad45              | 0.00289499  | 0.990334 | 0.00298827  | 0.990023 |
| rad7               | 0.00196732  | 0.992302 | 0.00203071  | 0.992053 |
| rad9               | 0.00185185  | 0.994154 | 0.00191152  | 0.993965 |
| rad13              | 0.000997625 | 0.995151 | 0.00102977  | 0.994995 |
| rad22              | 0.000935328 | 0.996087 | 0.000965461 | 0.995960 |
| PhCCH+CH3          | 0.000872762 | 0.996959 | 0.000900885 | 0.996861 |
| rad20              | 0.000728888 | 0.997688 | 0.000752374 | 0.997613 |
| rad23              | 0.000658601 | 0.998347 | 0.000679824 | 0.998293 |
| PAH7+H             | 0.000341552 | 0.998688 | 0.000352557 | 0.998646 |
| rad36              | 0.000289543 | 0.998978 | 0.000298872 | 0.998944 |
| Ph+MeAc            | 0.000157197 | 0.999135 | 0.000162263 | 0.999107 |
| rad28              | 0.000139941 | 0.999275 | 0.000144450 | 0.999251 |
| rad25              | 0.000120201 | 0.999395 | 0.000124074 | 0.999375 |
| PAH9+H             | 9.62507e-05 | 0.999492 | 9.93521e-05 | 0.999475 |
| rad33              | 6.15527e-05 | 0.999553 | 6.35359e-05 | 0.999538 |
| rad24              | 5.99691e-05 | 0.999613 | 6.19014e-05 | 0.999600 |

|               |             |          |             |          |
|---------------|-------------|----------|-------------|----------|
| rad38         | 4.69993e-05 | 0.999660 | 4.85136e-05 | 0.999649 |
| rad18         | 4.65410e-05 | 0.999707 | 4.80405e-05 | 0.999697 |
| rad19anti     | 4.34622e-05 | 0.999750 | 4.48626e-05 | 0.999741 |
| rad39         | 3.98142e-05 | 0.999790 | 4.10970e-05 | 0.999783 |
| rad19syn      | 2.57865e-05 | 0.999816 | 2.66174e-05 | 0.999809 |
| rad50         | 2.06550e-05 | 0.999836 | 2.13205e-05 | 0.999831 |
| rad46         | 1.76691e-05 | 0.999854 | 1.82384e-05 | 0.999849 |
| PhcycC3H3_A+H | 1.74103e-05 | 0.999871 | 1.79713e-05 | 0.999867 |
| rad35         | 1.51870e-05 | 0.999887 | 1.56763e-05 | 0.999882 |
| rad12         | 1.41708e-05 | 0.999901 | 1.46274e-05 | 0.999897 |
| rad54         | 1.18022e-05 | 0.999913 | 1.21825e-05 | 0.999909 |
| PAH3+H        | 1.15746e-05 | 0.999924 | 1.19475e-05 | 0.999921 |
| PhCCCH3+H     | 1.15410e-05 | 0.999936 | 1.19128e-05 | 0.999933 |
| rad30         | 8.33008e-06 | 0.999944 | 8.59847e-06 | 0.999942 |
| rad3          | 7.77650e-06 | 0.999952 | 8.02709e-06 | 0.999950 |
| rad70         | 7.44909e-06 | 0.999959 | 7.68910e-06 | 0.999957 |
| rad51         | 6.81819e-06 | 0.999966 | 7.03785e-06 | 0.999964 |
| rad4          | 6.27787e-06 | 0.999972 | 6.48015e-06 | 0.999971 |
| rad67         | 3.37365e-06 | 0.999976 | 3.48234e-06 | 0.999974 |
| rad15         | 2.93869e-06 | 0.999979 | 3.03338e-06 | 0.999977 |
| PAH1+H        | 2.52520e-06 | 0.999981 | 2.60656e-06 | 0.999980 |
| rad2          | 2.45384e-06 | 0.999984 | 2.53290e-06 | 0.999983 |
| PAH10+CH3     | 1.96219e-06 | 0.999986 | 2.02541e-06 | 0.999985 |
| rad52         | 1.88732e-06 | 0.999987 | 1.94813e-06 | 0.999987 |
| rad34         | 1.83621e-06 | 0.999989 | 1.89537e-06 | 0.999988 |
| rad8          | 1.27835e-06 | 0.999991 | 1.31954e-06 | 0.999990 |
| rad26         | 1.21552e-06 | 0.999992 | 1.25468e-06 | 0.999991 |
| rad59         | 1.09879e-06 | 0.999993 | 1.13419e-06 | 0.999992 |
| rad47         | 9.85252e-07 | 0.999994 | 1.01699e-06 | 0.999993 |
| rad55         | 8.97872e-07 | 0.999995 | 9.26803e-07 | 0.999994 |
| rad60syn      | 8.84746e-07 | 0.999996 | 9.13249e-07 | 0.999995 |
| rad37         | 8.29159e-07 | 0.999996 | 8.55880e-07 | 0.999996 |
| rad1          | 6.97511e-07 | 0.999997 | 7.19984e-07 | 0.999997 |
| rad60anti     | 5.53395e-07 | 0.999998 | 5.71226e-07 | 0.999997 |
| rad10         | 4.00539e-07 | 0.999998 | 4.13444e-07 | 0.999998 |
| PAH8+H        | 3.59740e-07 | 0.999998 | 3.71331e-07 | 0.999998 |
| rad56         | 3.05130e-07 | 0.999999 | 3.14962e-07 | 0.999998 |
| rad53         | 2.78270e-07 | 0.999999 | 2.87236e-07 | 0.999999 |
| rad71         | 2.31223e-07 | 0.999999 | 2.38672e-07 | 0.999999 |
| rad65         | 1.72868e-07 | 0.999999 | 1.78438e-07 | 0.999999 |
| rad73         | 1.64598e-07 | 1.000000 | 1.69901e-07 | 0.999999 |
| rad62         | 1.38730e-07 | 1.000000 | 1.43200e-07 | 0.999999 |
| rad14         | 1.32132e-07 | 1.000000 | 1.36389e-07 | 0.999999 |
| rad68syn      | 1.24450e-07 | 1.000000 | 1.28461e-07 | 1.000000 |
| rad58         | 1.24323e-07 | 1.000000 | 1.28328e-07 | 1.000000 |
| rad68anti     | 8.11096e-08 | 1.000000 | 8.37235e-08 | 1.000000 |
| rad64         | 4.57333e-08 | 1.000000 | 4.72069e-08 | 1.000000 |
| rad40syn      | 4.40990e-08 | 1.000000 | 4.55199e-08 | 1.000000 |
| rad31         | 3.30346e-08 | 1.000000 | 3.40989e-08 | 1.000000 |
| rad40anti     | 2.56828e-08 | 1.000000 | 2.65103e-08 | 1.000000 |
| rad42         | 1.25976e-08 | 1.000000 | 1.30035e-08 | 1.000000 |
| rad43         | 1.06923e-08 | 1.000000 | 1.10368e-08 | 1.000000 |
| rad72         | 7.95827e-09 | 1.000000 | 8.21466e-09 | 1.000000 |
| rad27         | 4.84934e-09 | 1.000000 | 5.00558e-09 | 1.000000 |
| rad61         | 4.34163e-09 | 1.000000 | 4.48152e-09 | 1.000000 |
| rad41         | 9.79011e-10 | 1.000000 | 1.01055e-09 | 1.000000 |
| rad5          | 3.65638e-10 | 1.000000 | 3.77419e-10 | 1.000000 |

10000000.0 Pa, 1200.00000 K

=====

| Rate constant      | True (fraction)      | Effective (fraction) |
|--------------------|----------------------|----------------------|
| Total              | 1.80237e-12 (1.00 )  | 1.69684e-12 (1.00 )  |
| Formation of rad11 | 5.38789e-13 (0.299 ) | 4.90339e-13 (0.289 ) |
| Formation of rad6  | 6.34764e-13 (0.352 ) | 5.77684e-13 (0.340 ) |
| H-abstraction      | 6.28816e-13 (0.349 ) | 6.28816e-13 (0.371 ) |

| species            | PYtrue     | Cumul    | PYeffective | Cumul    |
|--------------------|------------|----------|-------------|----------|
| rad6               | 0.379886   | 0.379886 | 0.403512    | 0.403512 |
| Benzene+2-propynyl | 0.348883   | 0.728769 | 0.370581    | 0.774093 |
| rad11              | 0.104527   | 0.833296 | 0.111028    | 0.885122 |
| Phenyl+Allene      | 0.0585510  | 0.891847 | 0.000000    | 0.885122 |
| PhCH2CCH+H         | 0.0381466  | 0.929994 | 0.0405190   | 0.925641 |
| PhCHCCH2+H         | 0.0248307  | 0.954825 | 0.0263749   | 0.952015 |
| C2H2+PhCH2         | 0.0161958  | 0.971021 | 0.0172031   | 0.969219 |
| Indene+H           | 0.00783737 | 0.978858 | 0.00832476  | 0.977543 |
| rad7               | 0.00378850 | 0.982646 | 0.00402411  | 0.981567 |
| rad45              | 0.00294035 | 0.985587 | 0.00312321  | 0.984691 |
| rad21              | 0.00254326 | 0.988130 | 0.00270144  | 0.987392 |



|               |             |          |             |          |
|---------------|-------------|----------|-------------|----------|
| rad9          | 0.00253856  | 0.990669 | 0.00269643  | 0.990089 |
| PhCCH+CH3     | 0.00243785  | 0.993106 | 0.00258946  | 0.992678 |
| rad13         | 0.00218435  | 0.995291 | 0.00232020  | 0.994998 |
| PAH7+H        | 0.000881515 | 0.996172 | 0.000936337 | 0.995935 |
| rad20         | 0.000580176 | 0.996752 | 0.000616259 | 0.996551 |
| rad23         | 0.000564149 | 0.997317 | 0.000599234 | 0.997150 |
| rad22         | 0.000558601 | 0.997875 | 0.000593342 | 0.997743 |
| Ph+MeAc       | 0.000433561 | 0.998309 | 0.000460525 | 0.998204 |
| rad36         | 0.000291225 | 0.998600 | 0.000309337 | 0.998513 |
| rad28         | 0.000226785 | 0.998827 | 0.000240889 | 0.998754 |
| rad33         | 0.000150085 | 0.998977 | 0.000159419 | 0.998914 |
| rad25         | 0.000124888 | 0.999102 | 0.000132655 | 0.999046 |
| rad39         | 0.000109382 | 0.999211 | 0.000116185 | 0.999162 |
| PAH9+H        | 0.000106868 | 0.999318 | 0.000113515 | 0.999276 |
| rad19syn      | 0.000103738 | 0.999422 | 0.000110190 | 0.999386 |
| PhcycC3H3_A+H | 7.72694e-05 | 0.999499 | 8.20750e-05 | 0.999468 |
| rad24         | 6.43356e-05 | 0.999563 | 6.83367e-05 | 0.999536 |
| rad19anti     | 5.77275e-05 | 0.999621 | 6.13177e-05 | 0.999598 |
| rad38         | 5.08421e-05 | 0.999672 | 5.40041e-05 | 0.999652 |
| rad18         | 4.40788e-05 | 0.999716 | 4.68202e-05 | 0.999699 |
| rad54         | 4.12525e-05 | 0.999757 | 4.38181e-05 | 0.999742 |
| PhCCCH3+H     | 2.69980e-05 | 0.999784 | 2.86772e-05 | 0.999771 |
| rad50         | 2.22885e-05 | 0.999807 | 2.36747e-05 | 0.999795 |
| rad12         | 2.14914e-05 | 0.999828 | 2.28280e-05 | 0.999818 |
| rad46         | 1.90440e-05 | 0.999847 | 2.02284e-05 | 0.999838 |
| rad35         | 1.73145e-05 | 0.999864 | 1.83913e-05 | 0.999856 |
| rad3          | 1.59964e-05 | 0.999880 | 1.69913e-05 | 0.999873 |
| PAH3+H        | 1.58564e-05 | 0.999896 | 1.68426e-05 | 0.999890 |
| rad70         | 1.33580e-05 | 0.999910 | 1.41888e-05 | 0.999904 |
| rad4          | 1.28533e-05 | 0.999922 | 1.36527e-05 | 0.999918 |
| rad30         | 9.77086e-06 | 0.999932 | 1.03786e-05 | 0.999928 |
| PAH1+H        | 9.49394e-06 | 0.999942 | 1.00844e-05 | 0.999938 |
| rad51         | 7.35932e-06 | 0.999949 | 7.81701e-06 | 0.999946 |
| rad15         | 6.18831e-06 | 0.999955 | 6.57315e-06 | 0.999953 |
| rad2          | 5.49266e-06 | 0.999961 | 5.83426e-06 | 0.999959 |
| PAH10+CH3     | 4.66865e-06 | 0.999965 | 4.95900e-06 | 0.999964 |
| rad67         | 4.53795e-06 | 0.999970 | 4.82018e-06 | 0.999968 |
| rad8          | 3.60501e-06 | 0.999974 | 3.82922e-06 | 0.999972 |
| rad34         | 3.48780e-06 | 0.999977 | 3.70472e-06 | 0.999976 |
| rad55         | 3.20475e-06 | 0.999980 | 3.40406e-06 | 0.999979 |
| rad26         | 2.37321e-06 | 0.999983 | 2.52080e-06 | 0.999982 |
| rad52         | 2.03650e-06 | 0.999985 | 2.16316e-06 | 0.999984 |
| rad37         | 1.98007e-06 | 0.999987 | 2.10322e-06 | 0.999986 |
| rad1          | 1.51269e-06 | 0.999988 | 1.60677e-06 | 0.999988 |
| rad59         | 1.47920e-06 | 0.999990 | 1.57119e-06 | 0.999989 |
| rad10         | 1.28411e-06 | 0.999991 | 1.36398e-06 | 0.999991 |
| rad56         | 1.20164e-06 | 0.999992 | 1.27637e-06 | 0.999992 |
| rad60syn      | 1.13742e-06 | 0.999993 | 1.20816e-06 | 0.999993 |
| rad53         | 1.06529e-06 | 0.999994 | 1.13154e-06 | 0.999994 |
| rad47         | 1.00109e-06 | 0.999995 | 1.06335e-06 | 0.999995 |
| PAH8+H        | 8.78455e-07 | 0.999996 | 9.33089e-07 | 0.999996 |
| rad60anti     | 7.15044e-07 | 0.999997 | 7.59514e-07 | 0.999997 |
| rad14         | 5.66857e-07 | 0.999997 | 6.02111e-07 | 0.999998 |
| rad62         | 4.30473e-07 | 0.999998 | 4.57245e-07 | 0.999998 |
| rad68syn      | 2.76429e-07 | 0.999998 | 2.93621e-07 | 0.999998 |
| rad71         | 2.52899e-07 | 0.999998 | 2.68628e-07 | 0.999999 |
| rad65         | 1.92639e-07 | 0.999999 | 2.04619e-07 | 0.999999 |
| rad58         | 1.80548e-07 | 0.999999 | 1.91777e-07 | 0.999999 |
| rad68anti     | 1.79827e-07 | 0.999999 | 1.91011e-07 | 0.999999 |
| rad73         | 1.79681e-07 | 0.999999 | 1.90856e-07 | 0.999999 |
| rad64         | 1.77439e-07 | 0.999999 | 1.88475e-07 | 1.000000 |
| rad40syn      | 1.03836e-07 | 0.999999 | 1.10293e-07 | 1.000000 |
| rad31         | 8.19437e-08 | 1.000000 | 8.70399e-08 | 1.000000 |
| rad40anti     | 6.13928e-08 | 1.000000 | 6.52110e-08 | 1.000000 |
| rad42         | 4.03087e-08 | 1.000000 | 4.28156e-08 | 1.000000 |
| rad27         | 2.57780e-08 | 1.000000 | 2.73812e-08 | 1.000000 |
| rad43         | 2.48964e-08 | 1.000000 | 2.64449e-08 | 1.000000 |
| rad61         | 1.02044e-08 | 1.000000 | 1.08390e-08 | 1.000000 |
| rad72         | 8.72855e-09 | 1.000000 | 9.27141e-09 | 1.000000 |
| rad41         | 2.27473e-09 | 1.000000 | 2.41620e-09 | 1.000000 |
| rad5          | 6.87860e-10 | 1.000000 | 7.30642e-10 | 1.000000 |

10000000.0 Pa, 1300.00000 K

=====

| Rate constant      | True (fraction)      | Effective (fraction) |
|--------------------|----------------------|----------------------|
| Total              | 2.54148e-12 (1.00 )  | 2.28573e-12 (1.00 )  |
| Formation of rad11 | 7.22991e-13 (0.284 ) | 6.07942e-13 (0.266 ) |
| Formation of rad6  | 8.84215e-13 (0.348 ) | 7.43511e-13 (0.325 ) |
| H-abstraction      | 9.34273e-13 (0.368 ) | 9.34273e-13 (0.409 ) |

| species            | PYtrue      | Cumul    | PYeffective | Cumul    |
|--------------------|-------------|----------|-------------|----------|
| Benzene+2-propynyl | 0.367610    | 0.367610 | 0.408742    | 0.408742 |
| rad6               | 0.304051    | 0.671661 | 0.338071    | 0.746813 |
| Phenyl+Allene      | 0.100632    | 0.772292 | 0.00000     | 0.746813 |
| rad11              | 0.0893118   | 0.861604 | 0.0993053   | 0.846119 |
| PhCH2CCH+H         | 0.0517127   | 0.913317 | 0.0574990   | 0.903618 |
| PhCHCCH2+H         | 0.0309868   | 0.944304 | 0.0344539   | 0.938072 |
| C2H2+PhCH2         | 0.0170195   | 0.961323 | 0.0189239   | 0.956995 |
| Indene+H           | 0.00797785  | 0.969301 | 0.00887052  | 0.965866 |
| rad7               | 0.00701902  | 0.976320 | 0.00780442  | 0.973670 |
| PhCCH+CH3          | 0.00496150  | 0.981281 | 0.00551665  | 0.979187 |
| rad13              | 0.00371714  | 0.984999 | 0.00413305  | 0.983320 |
| rad9               | 0.00312254  | 0.988121 | 0.00347192  | 0.986792 |
| rad45              | 0.00293652  | 0.991058 | 0.00326509  | 0.990057 |
| rad21              | 0.00238247  | 0.993440 | 0.00264904  | 0.992706 |
| PAH7+H             | 0.00177502  | 0.995215 | 0.00197363  | 0.994680 |
| Ph+MeAc            | 0.000889001 | 0.996104 | 0.000988470 | 0.995668 |
| rad20              | 0.000521750 | 0.996626 | 0.000580129 | 0.996248 |
| rad23              | 0.000488492 | 0.997114 | 0.000543149 | 0.996792 |
| rad22              | 0.000400447 | 0.997515 | 0.000445254 | 0.997237 |
| rad36              | 0.000289540 | 0.997804 | 0.000321937 | 0.997559 |
| rad33              | 0.000279379 | 0.998084 | 0.000310638 | 0.997869 |
| rad28              | 0.000275180 | 0.998359 | 0.000305970 | 0.998175 |
| rad19syn           | 0.000258056 | 0.998617 | 0.000286930 | 0.998462 |
| rad39              | 0.000226740 | 0.998844 | 0.000252111 | 0.998714 |
| PhcycC3H3_A+H      | 0.000203406 | 0.999047 | 0.000226166 | 0.998941 |
| rad25              | 0.000138100 | 0.999185 | 0.000153552 | 0.999094 |
| PAH9+H             | 0.000116355 | 0.999302 | 0.000129374 | 0.999223 |
| rad54              | 9.83348e-05 | 0.999400 | 0.000109338 | 0.999333 |
| rad19anti          | 7.30132e-05 | 0.999473 | 8.11832e-05 | 0.999414 |
| rad24              | 6.50464e-05 | 0.999538 | 7.23244e-05 | 0.999486 |
| rad38              | 5.42837e-05 | 0.999592 | 6.03574e-05 | 0.999547 |
| PhCCCH3+H          | 4.98983e-05 | 0.999642 | 5.54814e-05 | 0.999602 |
| rad18              | 4.93428e-05 | 0.999691 | 5.48639e-05 | 0.999657 |
| rad12              | 2.76279e-05 | 0.999719 | 3.07193e-05 | 0.999688 |
| rad3               | 2.47370e-05 | 0.999744 | 2.75048e-05 | 0.999715 |
| PAH1+H             | 2.39303e-05 | 0.999768 | 2.66080e-05 | 0.999742 |
| rad50              | 2.36363e-05 | 0.999791 | 2.62810e-05 | 0.999768 |
| rad46              | 2.01810e-05 | 0.999812 | 2.24391e-05 | 0.999791 |
| rad4               | 1.98219e-05 | 0.999831 | 2.20398e-05 | 0.999813 |
| PAH3+H             | 1.94684e-05 | 0.999851 | 2.16468e-05 | 0.999834 |
| rad35              | 1.92436e-05 | 0.999870 | 2.13968e-05 | 0.999856 |
| rad70              | 1.85904e-05 | 0.999889 | 2.06705e-05 | 0.999876 |
| rad15              | 1.54707e-05 | 0.999904 | 1.72018e-05 | 0.999894 |
| rad30              | 1.08401e-05 | 0.999915 | 1.20530e-05 | 0.999906 |
| PAH10+CH3          | 9.83221e-06 | 0.999925 | 1.09324e-05 | 0.999917 |
| rad2               | 9.23941e-06 | 0.999934 | 1.02732e-05 | 0.999927 |
| rad51              | 7.80837e-06 | 0.999942 | 8.68203e-06 | 0.999935 |
| rad55              | 7.75165e-06 | 0.999950 | 8.61894e-06 | 0.999944 |
| rad8               | 6.14932e-06 | 0.999956 | 6.83736e-06 | 0.999951 |
| rad67              | 5.73063e-06 | 0.999962 | 6.37181e-06 | 0.999957 |
| rad34              | 4.99818e-06 | 0.999967 | 5.55743e-06 | 0.999963 |
| rad37              | 3.99388e-06 | 0.999971 | 4.44076e-06 | 0.999967 |
| rad10              | 3.88823e-06 | 0.999974 | 4.32329e-06 | 0.999972 |
| rad26              | 3.70631e-06 | 0.999978 | 4.12101e-06 | 0.999976 |
| rad56              | 3.11347e-06 | 0.999981 | 3.46184e-06 | 0.999979 |
| rad53              | 2.70614e-06 | 0.999984 | 3.00894e-06 | 0.999982 |
| rad1               | 2.50106e-06 | 0.999986 | 2.78091e-06 | 0.999985 |
| rad52              | 2.16037e-06 | 0.999989 | 2.40210e-06 | 0.999987 |
| rad59              | 1.79455e-06 | 0.999990 | 1.99535e-06 | 0.999989 |
| rad14              | 1.63307e-06 | 0.999992 | 1.81579e-06 | 0.999991 |
| PAH8+H             | 1.42783e-06 | 0.999993 | 1.58759e-06 | 0.999993 |
| rad60syn           | 1.33889e-06 | 0.999995 | 1.48870e-06 | 0.999994 |
| rad47              | 1.00036e-06 | 0.999996 | 1.11229e-06 | 0.999995 |
| rad62              | 9.32016e-07 | 0.999997 | 1.03630e-06 | 0.999996 |
| rad60anti          | 8.44462e-07 | 0.999998 | 9.38953e-07 | 0.999997 |
| rad64              | 4.58366e-07 | 0.999998 | 5.09653e-07 | 0.999998 |
| rad68syn           | 4.28316e-07 | 0.999998 | 4.76241e-07 | 0.999998 |
| rad68anti          | 2.78377e-07 | 0.999999 | 3.09525e-07 | 0.999999 |
| rad71              | 2.71357e-07 | 0.999999 | 3.01719e-07 | 0.999999 |
| rad58              | 2.30741e-07 | 0.999999 | 2.56559e-07 | 0.999999 |
| rad65              | 2.11046e-07 | 0.999999 | 2.34660e-07 | 0.999999 |
| rad73              | 1.92486e-07 | 1.000000 | 2.14024e-07 | 1.000000 |
| rad40syn           | 1.65746e-07 | 1.000000 | 1.84291e-07 | 1.000000 |
| rad31              | 1.48692e-07 | 1.000000 | 1.65329e-07 | 1.000000 |
| rad40anti          | 9.87806e-08 | 1.000000 | 1.09833e-07 | 1.000000 |
| rad42              | 8.92890e-08 | 1.000000 | 9.92793e-08 | 1.000000 |
| rad27              | 7.53271e-08 | 1.000000 | 8.37552e-08 | 1.000000 |

|       |             |         |             |         |
|-------|-------------|---------|-------------|---------|
| rad43 | 4.67207e-08 | 1.00000 | 5.19483e-08 | 1.00000 |
| rad61 | 2.21983e-08 | 1.00000 | 2.46821e-08 | 1.00000 |
| rad72 | 9.38638e-09 | 1.00000 | 1.04366e-08 | 1.00000 |
| rad41 | 4.29615e-09 | 1.00000 | 4.77685e-09 | 1.00000 |
| rad5  | 1.35780e-09 | 1.00000 | 1.50972e-09 | 1.00000 |

10000000.0 Pa, 1400.00000 K

| Rate constant      | True (fraction) |          | Effective (fraction) |          |
|--------------------|-----------------|----------|----------------------|----------|
| Total              | 3.47024e-12     | (1.00 )  | 2.98902e-12          | (1.00 )  |
| Formation of rad11 | 9.43269e-13     | (0.272 ) | 7.30681e-13          | (0.244 ) |
| Formation of rad6  | 1.19194e-12     | (0.343 ) | 9.23304e-13          | (0.309 ) |
| H-abstraction      | 1.33503e-12     | (0.385 ) | 1.33503e-12          | (0.447 ) |

  

| species            | PYtrue      | Cumul    | PYeffective | Cumul    |
|--------------------|-------------|----------|-------------|----------|
| Benzene+2-propynyl | 0.384709    | 0.384709 | 0.446646    | 0.446646 |
| rad6               | 0.237580    | 0.622289 | 0.275831    | 0.722476 |
| Phenyl+Allene      | 0.138671    | 0.760960 | 0.000000    | 0.722476 |
| rad11              | 0.0798334   | 0.840793 | 0.0926863   | 0.815162 |
| PhCH2CCH+H         | 0.0595810   | 0.900374 | 0.0691732   | 0.884336 |
| PhCHCCH2+H         | 0.0343401   | 0.934715 | 0.0398687   | 0.924204 |
| C2H2+PhCH2         | 0.0173353   | 0.952050 | 0.0201262   | 0.944331 |
| rad7               | 0.0115673   | 0.963617 | 0.0134297   | 0.957760 |
| Indene+H           | 0.00793104  | 0.971548 | 0.00920793  | 0.966968 |
| PhCCH+CH3          | 0.00704188  | 0.978590 | 0.00817559  | 0.975144 |
| rad13              | 0.00466553  | 0.983256 | 0.00541666  | 0.980560 |
| rad9               | 0.00340757  | 0.986663 | 0.00395619  | 0.984517 |
| rad45              | 0.00286585  | 0.989529 | 0.00332725  | 0.987844 |
| PAH7+H             | 0.00254838  | 0.992077 | 0.00295866  | 0.990803 |
| rad21              | 0.00225763  | 0.994335 | 0.00262110  | 0.993424 |
| Ph+MeAc            | 0.00127860  | 0.995614 | 0.00148445  | 0.994908 |
| rad20              | 0.000488802 | 0.996103 | 0.000567498 | 0.995476 |
| rad23              | 0.000448557 | 0.996551 | 0.000520773 | 0.995996 |
| rad19syn           | 0.000383943 | 0.996935 | 0.000445756 | 0.996442 |
| rad22              | 0.000366999 | 0.997302 | 0.000426085 | 0.996868 |
| rad33              | 0.000357548 | 0.997660 | 0.000415112 | 0.997283 |
| rad39              | 0.000323989 | 0.997984 | 0.000376151 | 0.997660 |
| PhcycC3H3_A+H      | 0.000311627 | 0.998295 | 0.000361798 | 0.998021 |
| rad36              | 0.000281938 | 0.998577 | 0.000327329 | 0.998349 |
| rad28              | 0.000268894 | 0.998846 | 0.000312185 | 0.998661 |
| rad54              | 0.000158417 | 0.999004 | 0.000183922 | 0.998845 |
| rad25              | 0.000151733 | 0.999156 | 0.000176162 | 0.999021 |
| PAH9+H             | 0.000123042 | 0.999279 | 0.000142852 | 0.999164 |
| rad19anti          | 8.33098e-05 | 0.999363 | 9.67225e-05 | 0.999260 |
| PhCCH3+H           | 6.65622e-05 | 0.999429 | 7.72787e-05 | 0.999338 |
| rad24              | 6.30593e-05 | 0.999492 | 7.32116e-05 | 0.999411 |
| rad18              | 5.82401e-05 | 0.999550 | 6.76166e-05 | 0.999479 |
| rad38              | 5.63996e-05 | 0.999607 | 6.54795e-05 | 0.999544 |
| PAH1+H             | 3.94399e-05 | 0.999646 | 4.57896e-05 | 0.999590 |
| rad15              | 3.72337e-05 | 0.999683 | 4.32282e-05 | 0.999633 |
| rad12              | 3.07031e-05 | 0.999714 | 3.56462e-05 | 0.999669 |
| rad3               | 2.74643e-05 | 0.999742 | 3.18859e-05 | 0.999701 |
| rad50              | 2.44101e-05 | 0.999766 | 2.83400e-05 | 0.999729 |
| rad4               | 2.19681e-05 | 0.999788 | 2.55049e-05 | 0.999754 |
| rad70              | 2.15904e-05 | 0.999810 | 2.50664e-05 | 0.999780 |
| PAH3+H             | 2.13692e-05 | 0.999831 | 2.48096e-05 | 0.999804 |
| rad46              | 2.08301e-05 | 0.999852 | 2.41837e-05 | 0.999829 |
| rad35              | 2.04944e-05 | 0.999872 | 2.37939e-05 | 0.999852 |
| PAH10+CH3          | 1.45730e-05 | 0.999887 | 1.69192e-05 | 0.999869 |
| rad55              | 1.26359e-05 | 0.999899 | 1.46702e-05 | 0.999884 |
| rad30              | 1.12578e-05 | 0.999911 | 1.30702e-05 | 0.999897 |
| rad2               | 1.09925e-05 | 0.999922 | 1.27623e-05 | 0.999910 |
| rad10              | 8.73129e-06 | 0.999930 | 1.01370e-05 | 0.999920 |
| rad51              | 8.06948e-06 | 0.999939 | 9.36862e-06 | 0.999929 |
| rad8               | 7.72123e-06 | 0.999946 | 8.96429e-06 | 0.999938 |
| rad67              | 6.41478e-06 | 0.999953 | 7.44754e-06 | 0.999946 |
| rad34              | 5.89078e-06 | 0.999959 | 6.83918e-06 | 0.999952 |
| rad37              | 5.65822e-06 | 0.999964 | 6.56915e-06 | 0.999959 |
| rad56              | 5.37040e-06 | 0.999970 | 6.23503e-06 | 0.999965 |
| rad26              | 5.14564e-06 | 0.999975 | 5.97407e-06 | 0.999971 |
| rad53              | 4.59200e-06 | 0.999979 | 5.33129e-06 | 0.999977 |
| rad1               | 2.94711e-06 | 0.999982 | 3.42159e-06 | 0.999980 |
| rad14              | 2.80978e-06 | 0.999985 | 3.26214e-06 | 0.999983 |
| rad52              | 2.23229e-06 | 0.999987 | 2.59169e-06 | 0.999986 |
| rad59              | 1.95632e-06 | 0.999989 | 2.27128e-06 | 0.999988 |
| PAH8+H             | 1.79637e-06 | 0.999991 | 2.08557e-06 | 0.999990 |
| rad60syn           | 1.43554e-06 | 0.999993 | 1.66665e-06 | 0.999992 |
| rad62              | 1.39838e-06 | 0.999994 | 1.62352e-06 | 0.999994 |

|           |             |          |             |          |
|-----------|-------------|----------|-------------|----------|
| rad47     | 9.76473e-07 | 0.999995 | 1.13368e-06 | 0.999995 |
| rad60anti | 9.07044e-07 | 0.999996 | 1.05307e-06 | 0.999996 |
| rad64     | 7.69969e-07 | 0.999997 | 8.93933e-07 | 0.999997 |
| rad68syn  | 5.25340e-07 | 0.999997 | 6.09918e-07 | 0.999997 |
| rad68anti | 3.41271e-07 | 0.999997 | 3.96214e-07 | 0.999998 |
| rad71     | 2.83231e-07 | 0.999998 | 3.28830e-07 | 0.999998 |
| rad58     | 2.59191e-07 | 0.999998 | 3.00920e-07 | 0.999998 |
| rad65     | 2.24957e-07 | 0.999998 | 2.61174e-07 | 0.999998 |
| rad40syn  | 2.06532e-07 | 0.999998 | 2.39782e-07 | 0.999999 |
| rad73     | 2.00625e-07 | 0.999999 | 2.32925e-07 | 0.999999 |
| rad31     | 1.89734e-07 | 0.999999 | 2.20280e-07 | 0.999999 |
| rad42     | 1.36710e-07 | 0.999999 | 1.58720e-07 | 0.999999 |
| rad40anti | 1.23623e-07 | 0.999999 | 1.43526e-07 | 0.999999 |
| rad27     | 1.23595e-07 | 0.999999 | 1.43494e-07 | 1.000000 |
| rad43     | 6.43502e-08 | 0.999999 | 7.47100e-08 | 1.000000 |
| rad61     | 3.41327e-08 | 0.999999 | 3.96280e-08 | 1.000000 |
| rad72     | 9.81617e-09 | 0.999999 | 1.13965e-08 | 1.000000 |
| rad41     | 5.98138e-09 | 0.999999 | 6.94438e-09 | 1.000000 |
| rad5      | 2.75114e-09 | 0.999999 | 3.19406e-09 | 1.000000 |

10000000.0 Pa, 1500.00000 K

| Rate constant      | True (fraction)      | Effective (fraction) |
|--------------------|----------------------|----------------------|
| Total              | 4.61271e-12 (1.00 )  | 3.90288e-12 (1.00 )  |
| Formation of rad11 | 1.20217e-12 (0.261 ) | 8.93634e-13 (0.229 ) |
| Formation of rad6  | 1.56360e-12 (0.339 ) | 1.16230e-12 (0.298 ) |
| H-abstraction      | 1.84694e-12 (0.400 ) | 1.84694e-12 (0.473 ) |

| species            | PYtrue      | Cumul    | PYeffective | Cumul    |
|--------------------|-------------|----------|-------------|----------|
| Benzene+2-propynyl | 0.400402    | 0.400402 | 0.473225    | 0.473225 |
| rad6               | 0.206242    | 0.606645 | 0.243753    | 0.716978 |
| Phenyl+Allene      | 0.153887    | 0.760531 | 0.00000     | 0.716978 |
| rad11              | 0.0744988   | 0.835030 | 0.0880483   | 0.805027 |
| PhCH2CCH+H         | 0.0609731   | 0.896003 | 0.0720628   | 0.877089 |
| PhCHCCH2+H         | 0.0345808   | 0.930584 | 0.0408703   | 0.917960 |
| C2H2+PhCH2         | 0.0168417   | 0.947426 | 0.0199048   | 0.937864 |
| rad7               | 0.0159483   | 0.963374 | 0.0188489   | 0.956713 |
| PhCCH+CH3          | 0.00765566  | 0.971030 | 0.00904804  | 0.965761 |
| Indene+H           | 0.00754726  | 0.978577 | 0.00891987  | 0.974681 |
| rad13              | 0.00456405  | 0.983141 | 0.00539412  | 0.980075 |
| rad9               | 0.00337541  | 0.986517 | 0.00398931  | 0.984065 |
| PAH7+H             | 0.00279101  | 0.989308 | 0.00329863  | 0.987363 |
| rad45              | 0.00267349  | 0.991981 | 0.00315973  | 0.990523 |
| rad21              | 0.00207968  | 0.994061 | 0.00245792  | 0.992981 |
| Ph+MeAc            | 0.00140619  | 0.995467 | 0.00166195  | 0.994643 |
| rad23              | 0.000463672 | 0.995931 | 0.000548004 | 0.995191 |
| rad20              | 0.000449851 | 0.996381 | 0.000531668 | 0.995723 |
| rad19syn           | 0.000407400 | 0.996788 | 0.000481496 | 0.996204 |
| rad22              | 0.000404895 | 0.997193 | 0.000478535 | 0.996683 |
| rad33              | 0.000350209 | 0.997543 | 0.000413904 | 0.997096 |
| rad39              | 0.000348972 | 0.997892 | 0.000412442 | 0.997509 |
| PhcycC3H3_A+H      | 0.000336162 | 0.998228 | 0.000397301 | 0.997906 |
| rad28              | 0.000269907 | 0.998498 | 0.000318996 | 0.998225 |
| rad36              | 0.000262667 | 0.998761 | 0.000310440 | 0.998536 |
| rad54              | 0.000187978 | 0.998949 | 0.000222167 | 0.998758 |
| rad25              | 0.000153191 | 0.999102 | 0.000181053 | 0.998939 |
| PAH9+H             | 0.000123183 | 0.999225 | 0.000145586 | 0.999084 |
| rad19anti          | 8.64122e-05 | 0.999312 | 0.000102128 | 0.999187 |
| PhCCCH3+H          | 6.95629e-05 | 0.999381 | 8.22148e-05 | 0.999269 |
| rad15              | 6.95126e-05 | 0.999451 | 8.21547e-05 | 0.999351 |
| rad18              | 6.58100e-05 | 0.999516 | 7.77798e-05 | 0.999429 |
| rad24              | 5.83374e-05 | 0.999575 | 6.89474e-05 | 0.999498 |
| rad38              | 5.55141e-05 | 0.999630 | 6.56108e-05 | 0.999563 |
| PAH1+H             | 4.65566e-05 | 0.999677 | 5.50242e-05 | 0.999618 |
| rad12              | 3.05768e-05 | 0.999707 | 3.61381e-05 | 0.999654 |
| rad3               | 2.44880e-05 | 0.999732 | 2.89418e-05 | 0.999683 |
| rad50              | 2.39902e-05 | 0.999756 | 2.83534e-05 | 0.999712 |
| rad70              | 2.22082e-05 | 0.999778 | 2.62473e-05 | 0.999738 |
| PAH3+H             | 2.14754e-05 | 0.999800 | 2.53813e-05 | 0.999763 |
| rad35              | 2.05125e-05 | 0.999820 | 2.42432e-05 | 0.999788 |
| rad46              | 2.04641e-05 | 0.999841 | 2.41860e-05 | 0.999812 |
| rad4               | 1.95607e-05 | 0.999860 | 2.31183e-05 | 0.999835 |
| PAH10+CH3          | 1.54547e-05 | 0.999876 | 1.82655e-05 | 0.999853 |
| rad55              | 1.51169e-05 | 0.999891 | 1.78662e-05 | 0.999871 |
| rad10              | 1.27481e-05 | 0.999903 | 1.50667e-05 | 0.999886 |
| rad30              | 1.09940e-05 | 0.999914 | 1.29936e-05 | 0.999899 |
| rad2               | 1.02938e-05 | 0.999925 | 1.21660e-05 | 0.999911 |
| rad8               | 8.05194e-06 | 0.999933 | 9.51639e-06 | 0.999921 |

|           |             |          |             |          |
|-----------|-------------|----------|-------------|----------|
| rad51     | 7.93657e-06 | 0.999941 | 9.38001e-06 | 0.999930 |
| rad26     | 7.70333e-06 | 0.999948 | 9.10435e-06 | 0.999939 |
| rad56     | 6.68545e-06 | 0.999955 | 7.90136e-06 | 0.999947 |
| rad67     | 6.48519e-06 | 0.999962 | 7.66468e-06 | 0.999955 |
| rad34     | 6.10049e-06 | 0.999968 | 7.21002e-06 | 0.999962 |
| rad37     | 5.85523e-06 | 0.999974 | 6.92013e-06 | 0.999969 |
| rad53     | 5.65054e-06 | 0.999979 | 6.67824e-06 | 0.999976 |
| rad14     | 3.29601e-06 | 0.999982 | 3.89548e-06 | 0.999980 |
| rad1      | 2.74424e-06 | 0.999985 | 3.24335e-06 | 0.999983 |
| rad52     | 2.19529e-06 | 0.999987 | 2.59455e-06 | 0.999985 |
| rad59     | 1.95890e-06 | 0.999989 | 2.31517e-06 | 0.999988 |
| PAH8+H    | 1.91946e-06 | 0.999991 | 2.26857e-06 | 0.999990 |
| rad62     | 1.59142e-06 | 0.999993 | 1.88086e-06 | 0.999992 |
| rad60syn  | 1.42505e-06 | 0.999994 | 1.68424e-06 | 0.999994 |
| rad64     | 9.20239e-07 | 0.999995 | 1.08761e-06 | 0.999995 |
| rad47     | 9.10195e-07 | 0.999996 | 1.07574e-06 | 0.999996 |
| rad60anti | 9.01261e-07 | 0.999997 | 1.06518e-06 | 0.999997 |
| rad68syn  | 5.54367e-07 | 0.999998 | 6.55192e-07 | 0.999997 |
| rad68anti | 3.60044e-07 | 0.999998 | 4.25527e-07 | 0.999998 |
| rad71     | 2.81029e-07 | 0.999998 | 3.32141e-07 | 0.999998 |
| rad58     | 2.63716e-07 | 0.999999 | 3.11679e-07 | 0.999998 |
| rad65     | 2.27505e-07 | 0.999999 | 2.68883e-07 | 0.999999 |
| rad40syn  | 2.19617e-07 | 0.999999 | 2.59560e-07 | 0.999999 |
| rad73     | 1.98816e-07 | 0.999999 | 2.34976e-07 | 0.999999 |
| rad31     | 1.88473e-07 | 0.999999 | 2.22752e-07 | 0.999999 |
| rad42     | 1.58031e-07 | 1.000000 | 1.86773e-07 | 1.000000 |
| rad27     | 1.38726e-07 | 1.000000 | 1.63957e-07 | 1.000000 |
| rad40anti | 1.31730e-07 | 1.000000 | 1.55689e-07 | 1.000000 |
| rad43     | 6.91492e-08 | 1.000000 | 8.17254e-08 | 1.000000 |
| rad61     | 3.69624e-08 | 1.000000 | 4.36849e-08 | 1.000000 |
| rad72     | 9.75659e-09 | 1.000000 | 1.15310e-08 | 1.000000 |
| rad41     | 6.49184e-09 | 1.000000 | 7.67258e-09 | 1.000000 |
| rad5      | 6.04011e-09 | 1.000000 | 7.13864e-09 | 1.000000 |

10000000.0 Pa, 1750.00000 K

| Rate constant      | True (fraction)      | Effective (fraction) |
|--------------------|----------------------|----------------------|
| Total              | 8.61869e-12 (1.00 )  | 6.42671e-12 (1.00 )  |
| Formation of rad11 | 2.04015e-12 (0.237 ) | 1.11671e-12 (0.174 ) |
| Formation of rad6  | 2.80256e-12 (0.325 ) | 1.53403e-12 (0.239 ) |
| H-abstraction      | 3.77597e-12 (0.438 ) | 3.77597e-12 (0.588 ) |

| species            | PYtrue      | Cumul    | PYeffective | Cumul    |
|--------------------|-------------|----------|-------------|----------|
| Benzene+2-propynyl | 0.438115    | 0.438115 | 0.587544    | 0.587544 |
| Phenyl+Allene      | 0.254329    | 0.692444 | 0.000000    | 0.587544 |
| rad6               | 0.108406    | 0.800850 | 0.145380    | 0.732925 |
| PhCH2CCH+H         | 0.0937472   | 0.894597 | 0.125722    | 0.858646 |
| PhCHCCH2+H         | 0.0451902   | 0.939787 | 0.0606034   | 0.919250 |
| C2H2+PhCH2         | 0.0169870   | 0.956774 | 0.0227808   | 0.942031 |
| rad11              | 0.0103553   | 0.967130 | 0.0138872   | 0.955918 |
| PhCCH+CH3          | 0.00886402  | 0.975994 | 0.0118873   | 0.967805 |
| PhcycC3H3_A+H      | 0.00510130  | 0.981095 | 0.00684124  | 0.974646 |
| PAH7+H             | 0.00392139  | 0.985016 | 0.00525885  | 0.979905 |
| Indene+H           | 0.00335161  | 0.988368 | 0.00449474  | 0.984400 |
| Ph+MeAc            | 0.00249537  | 0.990863 | 0.00334647  | 0.987746 |
| rad19syn           | 0.00244392  | 0.993307 | 0.00327748  | 0.991024 |
| rad7               | 0.00151206  | 0.994819 | 0.00202778  | 0.993052 |
| rad54              | 0.000705284 | 0.995524 | 0.000945835 | 0.993998 |
| rad39              | 0.000582608 | 0.996107 | 0.000781319 | 0.994779 |
| rad50              | 0.000319392 | 0.996426 | 0.000428327 | 0.995207 |
| rad13              | 0.000283040 | 0.996710 | 0.000379577 | 0.995587 |
| PAH1+H             | 0.000276810 | 0.996986 | 0.000371222 | 0.995958 |
| rad51              | 0.000262278 | 0.997249 | 0.000351734 | 0.996310 |
| PAH9+H             | 0.000235074 | 0.997484 | 0.000315251 | 0.996625 |
| rad71              | 0.000228846 | 0.997713 | 0.000306899 | 0.996932 |
| rad38              | 0.000187075 | 0.997900 | 0.000250882 | 0.997183 |
| rad19anti          | 0.000169617 | 0.998069 | 0.000227469 | 0.997410 |
| rad22              | 0.000154090 | 0.998223 | 0.000206646 | 0.997617 |
| PAH3+H             | 0.000132436 | 0.998356 | 0.000177607 | 0.997794 |
| rad56              | 0.000125661 | 0.998481 | 0.000168520 | 0.997963 |
| rad21              | 0.000125334 | 0.998607 | 0.000168081 | 0.998131 |
| PhCCCH3+H          | 0.000112999 | 0.998720 | 0.000151540 | 0.998283 |
| PAH8+H             | 0.000111366 | 0.998831 | 0.000149350 | 0.998432 |
| rad28              | 9.72056e-05 | 0.998928 | 0.000130360 | 0.998562 |
| rad70              | 9.13457e-05 | 0.999020 | 0.000122501 | 0.998685 |
| rad46              | 8.83570e-05 | 0.999108 | 0.000118493 | 0.998803 |
| rad55              | 7.93219e-05 | 0.999187 | 0.000106376 | 0.998910 |
| rad53              | 7.68384e-05 | 0.999264 | 0.000103046 | 0.999013 |

|           |             |          |             |          |
|-----------|-------------|----------|-------------|----------|
| PAH10+CH3 | 7.33620e-05 | 0.999338 | 9.83839e-05 | 0.999111 |
| rad73     | 7.12589e-05 | 0.999409 | 9.55631e-05 | 0.999207 |
| rad67     | 6.16725e-05 | 0.999470 | 8.27073e-05 | 0.999289 |
| rad9      | 6.15590e-05 | 0.999532 | 8.25551e-05 | 0.999372 |
| rad35     | 5.61117e-05 | 0.999588 | 7.52501e-05 | 0.999447 |
| rad72     | 4.44374e-05 | 0.999633 | 5.95937e-05 | 0.999507 |
| rad52     | 4.36071e-05 | 0.999676 | 5.84805e-05 | 0.999565 |
| rad23     | 4.10695e-05 | 0.999717 | 5.50773e-05 | 0.999620 |
| rad34     | 3.88149e-05 | 0.999756 | 5.20536e-05 | 0.999672 |
| rad45     | 2.92680e-05 | 0.999785 | 3.92505e-05 | 0.999712 |
| rad20     | 2.65861e-05 | 0.999812 | 3.56540e-05 | 0.999747 |
| rad33     | 2.24697e-05 | 0.999834 | 3.01335e-05 | 0.999777 |
| rad62     | 2.19454e-05 | 0.999856 | 2.94305e-05 | 0.999807 |
| rad30     | 1.47801e-05 | 0.999871 | 1.98212e-05 | 0.999827 |
| rad68syn  | 1.21271e-05 | 0.999883 | 1.62633e-05 | 0.999843 |
| rad25     | 1.17404e-05 | 0.999895 | 1.57448e-05 | 0.999859 |
| rad47     | 1.06467e-05 | 0.999906 | 1.42779e-05 | 0.999873 |
| rad59     | 9.00961e-06 | 0.999915 | 1.20825e-05 | 0.999885 |
| rad40syn  | 8.12773e-06 | 0.999923 | 1.08999e-05 | 0.999896 |
| rad37     | 7.71935e-06 | 0.999930 | 1.03523e-05 | 0.999906 |
| rad68anti | 7.71266e-06 | 0.999938 | 1.03433e-05 | 0.999917 |
| rad64     | 7.08942e-06 | 0.999945 | 9.50744e-06 | 0.999926 |
| rad40anti | 6.27317e-06 | 0.999952 | 8.41278e-06 | 0.999935 |
| rad36     | 5.26577e-06 | 0.999957 | 7.06178e-06 | 0.999942 |
| rad42     | 5.12896e-06 | 0.999962 | 6.87832e-06 | 0.999949 |
| rad18     | 4.92250e-06 | 0.999967 | 6.60144e-06 | 0.999955 |
| rad65     | 4.60266e-06 | 0.999971 | 6.17253e-06 | 0.999961 |
| rad15     | 4.08584e-06 | 0.999976 | 5.47939e-06 | 0.999967 |
| rad60syn  | 4.06062e-06 | 0.999980 | 5.44557e-06 | 0.999972 |
| rad58     | 3.51411e-06 | 0.999983 | 4.71268e-06 | 0.999977 |
| rad24     | 3.31111e-06 | 0.999986 | 4.44046e-06 | 0.999981 |
| rad60anti | 3.03176e-06 | 0.999989 | 4.06582e-06 | 0.999985 |
| rad8      | 2.41278e-06 | 0.999992 | 3.23572e-06 | 0.999989 |
| rad26     | 2.11925e-06 | 0.999994 | 2.84206e-06 | 0.999992 |
| rad12     | 2.07976e-06 | 0.999996 | 2.78911e-06 | 0.999994 |
| rad10     | 8.55622e-07 | 0.999997 | 1.14746e-06 | 0.999995 |
| rad3      | 6.95788e-07 | 0.999998 | 9.33103e-07 | 0.999996 |
| rad61     | 6.54197e-07 | 0.999998 | 8.77327e-07 | 0.999997 |
| rad43     | 5.99172e-07 | 0.999999 | 8.03534e-07 | 0.999998 |
| rad4      | 4.24851e-07 | 0.999999 | 5.69758e-07 | 0.999999 |
| rad14     | 4.02882e-07 | 1.000000 | 5.40292e-07 | 0.999999 |
| rad2      | 2.65650e-07 | 1.000000 | 3.56257e-07 | 1.000000 |
| rad41     | 1.52083e-07 | 1.000000 | 2.03955e-07 | 1.000000 |
| rad1      | 6.32582e-08 | 1.000000 | 8.48339e-08 | 1.000000 |
| rad27     | 1.35283e-08 | 1.000000 | 1.81425e-08 | 1.000000 |
| rad5      | 1.12046e-08 | 1.000000 | 1.50262e-08 | 1.000000 |

1000000.0 Pa, 2000.00000 K

| Rate constant      | True (fraction) |          | Effective (fraction) |          |
|--------------------|-----------------|----------|----------------------|----------|
| Total              | 1.44111e-11     | (1.00 )  | 1.00969e-11          | (1.00 )  |
| Formation of rad11 | 3.16882e-12     | (0.220 ) | 1.39383e-12          | (0.138 ) |
| Formation of rad6  | 4.53302e-12     | (0.315 ) | 1.99388e-12          | (0.197 ) |
| H-abstraction      | 6.70922e-12     | (0.466 ) | 6.70922e-12          | (0.664 ) |

  

| species            | PYtrue      | Cumul    | PYeffective | Cumul    |
|--------------------|-------------|----------|-------------|----------|
| Benzene+2-propynyl | 0.465560    | 0.465560 | 0.664481    | 0.664481 |
| Phenyl+Allene      | 0.299363    | 0.764923 | 0.000000    | 0.664481 |
| PhCH2CCH+H         | 0.0860550   | 0.850978 | 0.122824    | 0.787305 |
| rad6               | 0.0516649   | 0.902643 | 0.0737397   | 0.861045 |
| PhCHCCH2+H         | 0.0420923   | 0.944735 | 0.0600773   | 0.921122 |
| C2H2+PhCH2         | 0.0156309   | 0.960366 | 0.0223096   | 0.943432 |
| PhCCH+CH3          | 0.00899312  | 0.969359 | 0.0128356   | 0.956267 |
| PhcycC3H3_A+H      | 0.00601031  | 0.975369 | 0.00857831  | 0.964846 |
| rad11              | 0.00585233  | 0.981222 | 0.00835291  | 0.973199 |
| PAH7+H             | 0.00385124  | 0.985073 | 0.00549677  | 0.978695 |
| Indene+H           | 0.00324039  | 0.988313 | 0.00462493  | 0.983320 |
| Ph+MeAc            | 0.00293653  | 0.991250 | 0.00419124  | 0.987512 |
| rad19syn           | 0.00268695  | 0.993937 | 0.00383501  | 0.991347 |
| rad54              | 0.000864558 | 0.994801 | 0.00123396  | 0.992581 |
| rad7               | 0.000837221 | 0.995639 | 0.00119494  | 0.993775 |
| rad39              | 0.000527805 | 0.996166 | 0.000753320 | 0.994529 |
| PAH1+H             | 0.000398269 | 0.996565 | 0.000568439 | 0.995097 |
| rad50              | 0.000304703 | 0.996869 | 0.000434896 | 0.995532 |
| rad51              | 0.000251024 | 0.997120 | 0.000358281 | 0.995890 |
| PAH9+H             | 0.000246009 | 0.997366 | 0.000351121 | 0.996242 |
| rad71              | 0.000219739 | 0.997586 | 0.000313627 | 0.996555 |
| rad56              | 0.000200258 | 0.997786 | 0.000285822 | 0.996841 |

|           |             |          |             |          |
|-----------|-------------|----------|-------------|----------|
| rad38     | 0.000179422 | 0.997966 | 0.000256084 | 0.997097 |
| rad13     | 0.000159456 | 0.998125 | 0.000227587 | 0.997325 |
| rad19anti | 0.000154451 | 0.998280 | 0.000220444 | 0.997545 |
| PAH3+H    | 0.000131952 | 0.998412 | 0.000188332 | 0.997733 |
| rad53     | 0.000115763 | 0.998528 | 0.000165225 | 0.997899 |
| PAH8+H    | 0.000106702 | 0.998634 | 0.000152293 | 0.998051 |
| rad21     | 0.000104690 | 0.998739 | 0.000149421 | 0.998200 |
| PhCCCH3+H | 0.000101987 | 0.998841 | 0.000145563 | 0.998346 |
| rad55     | 0.000101643 | 0.998943 | 0.000145072 | 0.998491 |
| rad22     | 0.000101505 | 0.999044 | 0.000144874 | 0.998636 |
| rad46     | 8.44083e-05 | 0.999128 | 0.000120474 | 0.998756 |
| rad70     | 8.42908e-05 | 0.999213 | 0.000120306 | 0.998877 |
| PAH10+CH3 | 7.23728e-05 | 0.999285 | 0.000103295 | 0.998980 |
| rad73     | 6.83757e-05 | 0.999353 | 9.75910e-05 | 0.999078 |
| rad28     | 6.55870e-05 | 0.999419 | 9.36108e-05 | 0.999171 |
| rad9      | 5.87857e-05 | 0.999478 | 8.39029e-05 | 0.999255 |
| rad67     | 5.70557e-05 | 0.999535 | 8.14341e-05 | 0.999337 |
| rad35     | 5.53124e-05 | 0.999590 | 7.89459e-05 | 0.999415 |
| rad23     | 4.56692e-05 | 0.999636 | 6.51823e-05 | 0.999481 |
| rad72     | 4.26868e-05 | 0.999679 | 6.09255e-05 | 0.999542 |
| rad52     | 4.17563e-05 | 0.999720 | 5.95976e-05 | 0.999601 |
| rad62     | 4.04218e-05 | 0.999761 | 5.76928e-05 | 0.999659 |
| rad34     | 3.57880e-05 | 0.999797 | 5.10794e-05 | 0.999710 |
| rad45     | 2.64610e-05 | 0.999823 | 3.77670e-05 | 0.999748 |
| rad20     | 2.21388e-05 | 0.999845 | 3.15982e-05 | 0.999779 |
| rad30     | 1.43696e-05 | 0.999860 | 2.05093e-05 | 0.999800 |
| rad33     | 1.37066e-05 | 0.999873 | 1.95630e-05 | 0.999819 |
| rad68syn  | 1.13101e-05 | 0.999885 | 1.61426e-05 | 0.999836 |
| rad25     | 1.01500e-05 | 0.999895 | 1.44868e-05 | 0.999850 |
| rad42     | 1.00047e-05 | 0.999905 | 1.42793e-05 | 0.999864 |
| rad64     | 9.77089e-06 | 0.999914 | 1.39457e-05 | 0.999878 |
| rad47     | 9.20348e-06 | 0.999924 | 1.31359e-05 | 0.999891 |
| rad59     | 8.92060e-06 | 0.999933 | 1.27322e-05 | 0.999904 |
| rad40syn  | 7.76375e-06 | 0.999940 | 1.10810e-05 | 0.999915 |
| rad68anti | 7.19222e-06 | 0.999948 | 1.02653e-05 | 0.999925 |
| rad37     | 6.55977e-06 | 0.999954 | 9.36259e-06 | 0.999935 |
| rad40anti | 6.03334e-06 | 0.999960 | 8.61126e-06 | 0.999943 |
| rad65     | 4.94558e-06 | 0.999965 | 7.05868e-06 | 0.999950 |
| rad36     | 4.75482e-06 | 0.999970 | 6.78644e-06 | 0.999957 |
| rad15     | 4.08356e-06 | 0.999974 | 5.82837e-06 | 0.999963 |
| rad60syn  | 3.98602e-06 | 0.999978 | 5.68913e-06 | 0.999969 |
| rad18     | 3.85497e-06 | 0.999982 | 5.50207e-06 | 0.999974 |
| rad58     | 3.56127e-06 | 0.999985 | 5.08291e-06 | 0.999979 |
| rad60anti | 2.97991e-06 | 0.999988 | 4.25314e-06 | 0.999984 |
| rad24     | 2.91005e-06 | 0.999991 | 4.15342e-06 | 0.999988 |
| rad8      | 2.00453e-06 | 0.999993 | 2.86102e-06 | 0.999991 |
| rad12     | 1.79075e-06 | 0.999995 | 2.55589e-06 | 0.999993 |
| rad26     | 1.17045e-06 | 0.999996 | 1.67055e-06 | 0.999995 |
| rad43     | 9.13432e-07 | 0.999997 | 1.30372e-06 | 0.999996 |
| rad61     | 7.02794e-07 | 0.999998 | 1.00308e-06 | 0.999997 |
| rad10     | 5.17201e-07 | 0.999998 | 7.38185e-07 | 0.999998 |
| rad3      | 4.04839e-07 | 0.999999 | 5.77817e-07 | 0.999998 |
| rad14     | 3.93193e-07 | 0.999999 | 5.61196e-07 | 0.999999 |
| rad4      | 2.50768e-07 | 0.999999 | 3.57915e-07 | 0.999999 |
| rad41     | 2.49742e-07 | 1.000000 | 3.56449e-07 | 1.000000 |
| rad2      | 1.61849e-07 | 1.000000 | 2.31002e-07 | 1.000000 |
| rad1      | 3.88730e-08 | 1.000000 | 5.54824e-08 | 1.000000 |
| rad5      | 2.98530e-08 | 1.000000 | 4.26082e-08 | 1.000000 |
| rad27     | 1.17741e-08 | 1.000000 | 1.68049e-08 | 1.000000 |

10000000.0 Pa, 2250.00000 K

=====

| Rate constant      | True (fraction)      | Effective (fraction) |
|--------------------|----------------------|----------------------|
| Total              | 2.23655e-11 (1.00 )  | 1.55430e-11 (1.00 )  |
| Formation of rad11 | 4.62280e-12 (0.207 ) | 1.86783e-12 (0.120 ) |
| Formation of rad6  | 6.82518e-12 (0.305 ) | 2.75769e-12 (0.177 ) |
| H-abstraction      | 1.09175e-11 (0.488 ) | 1.09175e-11 (0.702 ) |

| species            | PYtrue     | Cumul    | PYeffective | Cumul    |
|--------------------|------------|----------|-------------|----------|
| Benzene+2-propynyl | 0.488140   | 0.488140 | 0.702405    | 0.702405 |
| Phenyl+Allene      | 0.305044   | 0.793185 | 0.000000    | 0.702405 |
| PhCH2CCH+H         | 0.0820818  | 0.875266 | 0.118111    | 0.820516 |
| PhCHCCH2+H         | 0.0403406  | 0.915607 | 0.0580477   | 0.878563 |
| rad6               | 0.0328891  | 0.948496 | 0.0473257   | 0.925889 |
| C2H2+PhCH2         | 0.0144107  | 0.962907 | 0.0207362   | 0.946625 |
| PhCCH+CH3          | 0.00890759 | 0.971814 | 0.0128175   | 0.959443 |
| PhcycC3H3_A+H      | 0.00619054 | 0.978005 | 0.00890783  | 0.968350 |
| PAH7+H             | 0.00373802 | 0.981743 | 0.00537879  | 0.973729 |

|           |             |          |             |          |
|-----------|-------------|----------|-------------|----------|
| rad11     | 0.00360732  | 0.985350 | 0.00519071  | 0.978920 |
| Indene+H  | 0.00315305  | 0.988503 | 0.00453705  | 0.983457 |
| Ph+MeAc   | 0.00300676  | 0.991510 | 0.00432653  | 0.987784 |
| rad19syn  | 0.00269645  | 0.994207 | 0.00388005  | 0.991664 |
| rad54     | 0.000870873 | 0.995077 | 0.00125314  | 0.992917 |
| rad7      | 0.000720468 | 0.995798 | 0.00103671  | 0.993953 |
| rad39     | 0.000503136 | 0.996301 | 0.000723984 | 0.994677 |
| PAH1+H    | 0.000443929 | 0.996745 | 0.000638788 | 0.995316 |
| rad50     | 0.000291828 | 0.997037 | 0.000419922 | 0.995736 |
| PAH9+H    | 0.000253665 | 0.997291 | 0.000365009 | 0.996101 |
| rad51     | 0.000241667 | 0.997532 | 0.000347746 | 0.996449 |
| rad56     | 0.000218511 | 0.997751 | 0.000314424 | 0.996763 |
| rad71     | 0.000211982 | 0.997963 | 0.000305029 | 0.997068 |
| rad38     | 0.000173221 | 0.998136 | 0.000249255 | 0.997318 |
| rad19anti | 0.000148930 | 0.998285 | 0.000214301 | 0.997532 |
| rad13     | 0.000131691 | 0.998417 | 0.000189496 | 0.997721 |
| rad53     | 0.000123895 | 0.998540 | 0.000178277 | 0.997900 |
| PAH3+H    | 0.000117887 | 0.998658 | 0.000169632 | 0.998069 |
| rad55     | 0.000103551 | 0.998762 | 0.000149004 | 0.998218 |
| PhCCCH3+H | 9.56436e-05 | 0.998857 | 0.000137625 | 0.998356 |
| PAH8+H    | 9.05408e-05 | 0.998948 | 0.000130283 | 0.998486 |
| rad21     | 8.39942e-05 | 0.999032 | 0.000120862 | 0.998607 |
| rad46     | 8.10351e-05 | 0.999113 | 0.000116605 | 0.998724 |
| rad70     | 7.62697e-05 | 0.999189 | 0.000109748 | 0.998833 |
| PAH10+CH3 | 6.91830e-05 | 0.999259 | 9.95504e-05 | 0.998933 |
| rad22     | 6.75046e-05 | 0.999326 | 9.71354e-05 | 0.999030 |
| rad73     | 6.59004e-05 | 0.999392 | 9.48266e-05 | 0.999125 |
| rad9      | 6.11995e-05 | 0.999453 | 8.80626e-05 | 0.999213 |
| rad35     | 5.39526e-05 | 0.999507 | 7.76345e-05 | 0.999291 |
| rad67     | 5.34632e-05 | 0.999561 | 7.69307e-05 | 0.999368 |
| rad28     | 5.26013e-05 | 0.999613 | 7.56898e-05 | 0.999443 |
| rad62     | 4.87224e-05 | 0.999662 | 7.01087e-05 | 0.999513 |
| rad72     | 4.12213e-05 | 0.999703 | 5.93149e-05 | 0.999573 |
| rad52     | 4.02099e-05 | 0.999743 | 5.78596e-05 | 0.999631 |
| rad23     | 3.93527e-05 | 0.999783 | 5.66261e-05 | 0.999687 |
| rad34     | 3.16187e-05 | 0.999814 | 4.54972e-05 | 0.999733 |
| rad45     | 2.45140e-05 | 0.999839 | 3.52743e-05 | 0.999768 |
| rad20     | 1.77459e-05 | 0.999857 | 2.55353e-05 | 0.999794 |
| rad30     | 1.34754e-05 | 0.999870 | 1.93903e-05 | 0.999813 |
| rad42     | 1.23566e-05 | 0.999882 | 1.77804e-05 | 0.999831 |
| rad33     | 1.16523e-05 | 0.999894 | 1.67669e-05 | 0.999847 |
| rad64     | 1.05857e-05 | 0.999905 | 1.52322e-05 | 0.999863 |
| rad68syn  | 9.58611e-06 | 0.999914 | 1.37939e-05 | 0.999876 |
| rad25     | 8.55758e-06 | 0.999923 | 1.23138e-05 | 0.999889 |
| rad47     | 8.09102e-06 | 0.999931 | 1.16425e-05 | 0.999900 |
| rad59     | 8.01168e-06 | 0.999939 | 1.15283e-05 | 0.999912 |
| rad40syn  | 6.63099e-06 | 0.999945 | 9.54159e-06 | 0.999921 |
| rad68anti | 6.09727e-06 | 0.999952 | 8.77364e-06 | 0.999930 |
| rad37     | 6.06032e-06 | 0.999958 | 8.72046e-06 | 0.999939 |
| rad65     | 5.29043e-06 | 0.999963 | 7.61257e-06 | 0.999947 |
| rad40anti | 5.16702e-06 | 0.999968 | 7.43503e-06 | 0.999954 |
| rad36     | 4.40556e-06 | 0.999972 | 6.33934e-06 | 0.999960 |
| rad15     | 4.38088e-06 | 0.999977 | 6.30384e-06 | 0.999967 |
| rad60syn  | 3.62633e-06 | 0.999981 | 5.21806e-06 | 0.999972 |
| rad58     | 3.15330e-06 | 0.999984 | 4.53740e-06 | 0.999976 |
| rad18     | 3.12265e-06 | 0.999987 | 4.49330e-06 | 0.999981 |
| rad60anti | 2.70506e-06 | 0.999989 | 3.89243e-06 | 0.999985 |
| rad24     | 2.53861e-06 | 0.999992 | 3.65292e-06 | 0.999988 |
| rad12     | 1.74937e-06 | 0.999994 | 2.51724e-06 | 0.999991 |
| rad8      | 1.73867e-06 | 0.999996 | 2.50185e-06 | 0.999993 |
| rad26     | 1.04704e-06 | 0.999997 | 1.50663e-06 | 0.999995 |
| rad43     | 1.04244e-06 | 0.999998 | 1.50001e-06 | 0.999996 |
| rad61     | 6.91088e-07 | 0.999998 | 9.94432e-07 | 0.999997 |
| rad10     | 4.56670e-07 | 0.999999 | 6.57120e-07 | 0.999998 |
| rad14     | 3.77506e-07 | 0.999999 | 5.43209e-07 | 0.999999 |
| rad3      | 3.38336e-07 | 0.999999 | 4.86845e-07 | 0.999999 |
| rad41     | 2.93924e-07 | 1.000000 | 4.22939e-07 | 1.000000 |
| rad4      | 2.09478e-07 | 1.000000 | 3.01425e-07 | 1.000000 |
| rad2      | 1.40320e-07 | 1.000000 | 2.01913e-07 | 1.000000 |
| rad5      | 4.27440e-08 | 1.000000 | 6.15061e-08 | 1.000000 |
| rad1      | 3.38897e-08 | 1.000000 | 4.87654e-08 | 1.000000 |
| rad27     | 1.09505e-08 | 1.000000 | 1.57571e-08 | 1.000000 |

10000000.0 Pa, 2500.00000 K

=====

| Rate constant      | True (fraction)      | Effective (fraction) |
|--------------------|----------------------|----------------------|
| Total              | 3.28090e-11 (1.00 )  | 2.30145e-11 (1.00 )  |
| Formation of rad11 | 6.43164e-12 (0.196 ) | 2.53609e-12 (0.110 ) |
| Formation of rad6  | 9.73932e-12 (0.297 ) | 3.84035e-12 (0.167 ) |



H-abstraction | 1.66381e-11 (0.507 ) 1.66381e-11 (0.723 )

| species            | PYtrue      | Cumul    | PYeffective | Cumul    |
|--------------------|-------------|----------|-------------|----------|
| Benzene+2-propynyl | 0.507119    | 0.507119 | 0.722938    | 0.722938 |
| Phenyl+Allene      | 0.298531    | 0.805650 | 0.00000     | 0.722938 |
| PhCH2CCH+H         | 0.0813550   | 0.887005 | 0.115978    | 0.838916 |
| PhCHCCH2+H         | 0.0393587   | 0.926364 | 0.0561089   | 0.895025 |
| rad6               | 0.0253733   | 0.951737 | 0.0361718   | 0.931197 |
| C2H2+PhCH2         | 0.0135104   | 0.965247 | 0.0192601   | 0.950457 |
| PhCCH+CH3          | 0.00893964  | 0.974187 | 0.0127442   | 0.963201 |
| PhcycC3H3_A+H      | 0.00591270  | 0.980100 | 0.00842902  | 0.971630 |
| PAH7+H             | 0.00372845  | 0.983828 | 0.00531521  | 0.976946 |
| Indene+H           | 0.00296691  | 0.986795 | 0.00422957  | 0.981175 |
| Ph+MeAc            | 0.00294618  | 0.989741 | 0.00420003  | 0.985375 |
| rad19syn           | 0.00260136  | 0.992343 | 0.00370844  | 0.989084 |
| rad11              | 0.00220499  | 0.994548 | 0.00314340  | 0.992227 |
| rad54              | 0.000841827 | 0.995389 | 0.00120009  | 0.993427 |
| rad7               | 0.000698906 | 0.996088 | 0.000996344 | 0.994423 |
| rad39              | 0.000491199 | 0.996580 | 0.000700243 | 0.995124 |
| PAH1+H             | 0.000425697 | 0.997005 | 0.000606865 | 0.995730 |
| rad50              | 0.000269118 | 0.997274 | 0.000383650 | 0.996114 |
| PAH9+H             | 0.000239650 | 0.997514 | 0.000341642 | 0.996456 |
| rad51              | 0.000223188 | 0.997737 | 0.000318172 | 0.996774 |
| rad56              | 0.000203549 | 0.997941 | 0.000290175 | 0.997064 |
| rad71              | 0.000195807 | 0.998137 | 0.000279140 | 0.997343 |
| rad38              | 0.000161690 | 0.998298 | 0.000230503 | 0.997574 |
| rad19anti          | 0.000150941 | 0.998449 | 0.000215179 | 0.997789 |
| rad13              | 0.000121746 | 0.998571 | 0.000173558 | 0.997963 |
| rad53              | 0.000116045 | 0.998687 | 0.000165431 | 0.998128 |
| PAH3+H             | 0.000100336 | 0.998787 | 0.000143037 | 0.998271 |
| rad55              | 9.92747e-05 | 0.998887 | 0.000141524 | 0.998413 |
| PhCCCH3+H          | 9.35312e-05 | 0.998980 | 0.000133336 | 0.998546 |
| rad46              | 7.51684e-05 | 0.999055 | 0.000107158 | 0.998653 |
| PAH8+H             | 7.32649e-05 | 0.999129 | 0.000104445 | 0.998757 |
| rad70              | 7.11839e-05 | 0.999200 | 0.000101478 | 0.998859 |
| PAH10+CH3          | 6.65242e-05 | 0.999266 | 9.48357e-05 | 0.998954 |
| rad21              | 6.31568e-05 | 0.999329 | 9.00353e-05 | 0.999044 |
| rad9               | 6.14229e-05 | 0.999391 | 8.75637e-05 | 0.999131 |
| rad73              | 6.08467e-05 | 0.999452 | 8.67416e-05 | 0.999218 |
| rad67              | 5.11172e-05 | 0.999503 | 7.28714e-05 | 0.999291 |
| rad35              | 5.07205e-05 | 0.999553 | 7.23059e-05 | 0.999363 |
| rad28              | 5.05445e-05 | 0.999604 | 7.20549e-05 | 0.999435 |
| rad22              | 4.66470e-05 | 0.999651 | 6.64992e-05 | 0.999502 |
| rad62              | 4.57358e-05 | 0.999696 | 6.52001e-05 | 0.999567 |
| rad72              | 3.80921e-05 | 0.999735 | 5.43035e-05 | 0.999621 |
| rad52              | 3.71786e-05 | 0.999772 | 5.30011e-05 | 0.999674 |
| rad23              | 3.51190e-05 | 0.999807 | 5.00650e-05 | 0.999724 |
| rad34              | 2.86244e-05 | 0.999835 | 4.08065e-05 | 0.999765 |
| rad45              | 2.20204e-05 | 0.999857 | 3.13919e-05 | 0.999797 |
| rad20              | 1.34886e-05 | 0.999871 | 1.92291e-05 | 0.999816 |
| rad30              | 1.24584e-05 | 0.999883 | 1.77605e-05 | 0.999834 |
| rad42              | 1.15978e-05 | 0.999895 | 1.65337e-05 | 0.999850 |
| rad33              | 1.12396e-05 | 0.999906 | 1.60230e-05 | 0.999866 |
| rad64              | 1.01809e-05 | 0.999916 | 1.45137e-05 | 0.999881 |
| rad68syn           | 8.03219e-06 | 0.999924 | 1.14505e-05 | 0.999892 |
| rad59              | 6.91877e-06 | 0.999931 | 9.86331e-06 | 0.999902 |
| rad47              | 6.89645e-06 | 0.999938 | 9.83142e-06 | 0.999912 |
| rad25              | 6.75410e-06 | 0.999945 | 9.62856e-06 | 0.999921 |
| rad37              | 6.07797e-06 | 0.999951 | 8.66466e-06 | 0.999930 |
| rad40syn           | 5.45807e-06 | 0.999957 | 7.78092e-06 | 0.999938 |
| rad68anti          | 5.11162e-06 | 0.999962 | 7.28705e-06 | 0.999945 |
| rad65              | 5.01891e-06 | 0.999967 | 7.15484e-06 | 0.999952 |
| rad15              | 4.59252e-06 | 0.999971 | 6.54699e-06 | 0.999959 |
| rad40anti          | 4.23530e-06 | 0.999976 | 6.03776e-06 | 0.999965 |
| rad36              | 3.96240e-06 | 0.999979 | 5.64871e-06 | 0.999971 |
| rad60syn           | 3.21338e-06 | 0.999983 | 4.58094e-06 | 0.999975 |
| rad58              | 2.59427e-06 | 0.999985 | 3.69833e-06 | 0.999979 |
| rad18              | 2.38753e-06 | 0.999988 | 3.40362e-06 | 0.999982 |
| rad60anti          | 2.38731e-06 | 0.999990 | 3.40329e-06 | 0.999986 |
| rad24              | 2.11527e-06 | 0.999992 | 3.01548e-06 | 0.999989 |
| rad12              | 1.78770e-06 | 0.999994 | 2.54850e-06 | 0.999991 |
| rad8               | 1.57107e-06 | 0.999996 | 2.23968e-06 | 0.999993 |
| rad26              | 1.13643e-06 | 0.999997 | 1.62007e-06 | 0.999995 |
| rad43              | 9.83476e-07 | 0.999998 | 1.40202e-06 | 0.999996 |
| rad61              | 6.52255e-07 | 0.999998 | 9.29844e-07 | 0.999997 |
| rad10              | 4.79825e-07 | 0.999999 | 6.84029e-07 | 0.999998 |
| rad14              | 3.45224e-07 | 0.999999 | 4.92145e-07 | 0.999999 |
| rad3               | 3.14533e-07 | 0.999999 | 4.48391e-07 | 0.999999 |
| rad41              | 2.76151e-07 | 1.000000 | 3.93674e-07 | 0.999999 |

|       |             |          |             |          |
|-------|-------------|----------|-------------|----------|
| rad4  | 1.93485e-07 | 1.000000 | 2.75828e-07 | 1.000000 |
| rad2  | 1.32435e-07 | 1.000000 | 1.88797e-07 | 1.000000 |
| rad5  | 4.62335e-08 | 1.000000 | 6.59096e-08 | 1.000000 |
| rad1  | 3.13949e-08 | 1.000000 | 4.47560e-08 | 1.000000 |
| rad27 | 1.03303e-08 | 1.000000 | 1.47267e-08 | 1.000000 |

10000000.0 Pa, 2750.00000 K

| Rate constant      | True (fraction) |          | Effective (fraction) |          |
|--------------------|-----------------|----------|----------------------|----------|
| Total              | 4.60596e-11     | (1.00 )  | 3.26374e-11          | (1.00 )  |
| Formation of rad11 | 8.62280e-12     | (0.187 ) | 3.35103e-12          | (0.103 ) |
| Formation of rad6  | 1.33313e-11     | (0.289 ) | 5.18087e-12          | (0.159 ) |
| H-abstraction      | 2.41055e-11     | (0.523 ) | 2.41055e-11          | (0.739 ) |

  

| species            | PYtrue      | Cumul    | PYeffective | Cumul    |
|--------------------|-------------|----------|-------------|----------|
| Benzene+2-propynyl | 0.523355    | 0.523355 | 0.738586    | 0.738586 |
| Phenyl+Allene      | 0.291410    | 0.814764 | 0.000000    | 0.738586 |
| PhCH2CCH+H         | 0.0816789   | 0.896443 | 0.115269    | 0.853855 |
| PhCHCCH2+H         | 0.0384701   | 0.934913 | 0.0542911   | 0.908146 |
| rad6               | 0.0196256   | 0.954539 | 0.0276966   | 0.935842 |
| C2H2+PhCH2         | 0.0128667   | 0.967406 | 0.0181582   | 0.954001 |
| PhCCH+CH3          | 0.00897366  | 0.976379 | 0.0126641   | 0.966665 |
| PhcycC3H3_A+H      | 0.00545516  | 0.981834 | 0.00769860  | 0.974363 |
| PAH7+H             | 0.00374994  | 0.985584 | 0.00529210  | 0.979655 |
| Ph+MeAc            | 0.00286994  | 0.988454 | 0.00405023  | 0.983706 |
| Indene+H           | 0.00270659  | 0.991161 | 0.00381968  | 0.987525 |
| rad19syn           | 0.00246452  | 0.993625 | 0.00347807  | 0.991003 |
| rad11              | 0.00134026  | 0.994966 | 0.00189145  | 0.992895 |
| rad54              | 0.000820388 | 0.995786 | 0.00115777  | 0.994053 |
| rad7               | 0.000649267 | 0.996435 | 0.000916281 | 0.994969 |
| rad39              | 0.000475979 | 0.996911 | 0.000671725 | 0.995641 |
| PAH1+H             | 0.000387352 | 0.997299 | 0.000546652 | 0.996187 |
| rad50              | 0.000239628 | 0.997538 | 0.000338176 | 0.996525 |
| PAH9+H             | 0.000214934 | 0.997753 | 0.000303327 | 0.996829 |
| rad51              | 0.000198313 | 0.997951 | 0.000279870 | 0.997109 |
| rad56              | 0.000182825 | 0.998134 | 0.000258013 | 0.997367 |
| rad71              | 0.000173496 | 0.998308 | 0.000244846 | 0.997611 |
| rad19anti          | 0.000155541 | 0.998463 | 0.000219508 | 0.997831 |
| rad38              | 0.000146281 | 0.998610 | 0.000206439 | 0.998037 |
| rad13              | 0.000108996 | 0.998719 | 0.000153821 | 0.998191 |
| rad53              | 0.000106034 | 0.998825 | 0.000149640 | 0.998341 |
| rad55              | 9.54540e-05 | 0.998920 | 0.000134710 | 0.998476 |
| PhCCCH3+H          | 9.25760e-05 | 0.999013 | 0.000130648 | 0.998606 |
| PAH3+H             | 8.74520e-05 | 0.999100 | 0.000123417 | 0.998730 |
| rad70              | 6.92718e-05 | 0.999169 | 9.77604e-05 | 0.998827 |
| rad46              | 6.75478e-05 | 0.999237 | 9.53266e-05 | 0.998923 |
| PAH10+CH3          | 6.42747e-05 | 0.999301 | 9.07074e-05 | 0.999013 |
| PAH8+H             | 6.07651e-05 | 0.999362 | 8.57552e-05 | 0.999099 |
| rad9               | 5.73252e-05 | 0.999419 | 8.09002e-05 | 0.999180 |
| rad73              | 5.39305e-05 | 0.999473 | 7.61098e-05 | 0.999256 |
| rad67              | 4.94467e-05 | 0.999523 | 6.97817e-05 | 0.999326 |
| rad35              | 4.68604e-05 | 0.999570 | 6.61319e-05 | 0.999392 |
| rad28              | 4.63452e-05 | 0.999616 | 6.54046e-05 | 0.999457 |
| rad21              | 4.55731e-05 | 0.999661 | 6.43150e-05 | 0.999522 |
| rad62              | 3.92859e-05 | 0.999701 | 5.54424e-05 | 0.999577 |
| rad72              | 3.37341e-05 | 0.999734 | 4.76072e-05 | 0.999625 |
| rad52              | 3.31102e-05 | 0.999768 | 4.67268e-05 | 0.999672 |
| rad22              | 3.12403e-05 | 0.999799 | 4.40881e-05 | 0.999716 |
| rad23              | 3.00644e-05 | 0.999829 | 4.24284e-05 | 0.999758 |
| rad34              | 2.72844e-05 | 0.999856 | 3.85050e-05 | 0.999797 |
| rad45              | 1.90394e-05 | 0.999875 | 2.68695e-05 | 0.999823 |
| rad30              | 1.16066e-05 | 0.999887 | 1.63798e-05 | 0.999840 |
| rad33              | 1.05620e-05 | 0.999897 | 1.49056e-05 | 0.999855 |
| rad20              | 9.97790e-06 | 0.999907 | 1.40814e-05 | 0.999869 |
| rad42              | 9.85407e-06 | 0.999917 | 1.39066e-05 | 0.999883 |
| rad64              | 9.40540e-06 | 0.999927 | 1.32734e-05 | 0.999896 |
| rad68syn           | 7.08428e-06 | 0.999934 | 9.99769e-06 | 0.999906 |
| rad37              | 6.26579e-06 | 0.999940 | 8.84258e-06 | 0.999915 |
| rad59              | 6.12904e-06 | 0.999946 | 8.64963e-06 | 0.999924 |
| rad47              | 5.70306e-06 | 0.999952 | 8.04843e-06 | 0.999932 |
| rad25              | 5.09129e-06 | 0.999957 | 7.18511e-06 | 0.999939 |
| rad40syn           | 4.64548e-06 | 0.999962 | 6.55594e-06 | 0.999945 |
| rad68anti          | 4.51131e-06 | 0.999966 | 6.36659e-06 | 0.999952 |
| rad15              | 4.48515e-06 | 0.999971 | 6.32968e-06 | 0.999958 |
| rad65              | 4.43038e-06 | 0.999975 | 6.25238e-06 | 0.999964 |
| rad40anti          | 3.56961e-06 | 0.999979 | 5.03761e-06 | 0.999969 |
| rad36              | 3.43173e-06 | 0.999982 | 4.84304e-06 | 0.999974 |
| rad60syn           | 2.91414e-06 | 0.999985 | 4.11257e-06 | 0.999978 |

|           |             |          |             |          |
|-----------|-------------|----------|-------------|----------|
| rad58     | 2.16352e-06 | 0.999987 | 3.05327e-06 | 0.999981 |
| rad60anti | 2.15752e-06 | 0.999989 | 3.04480e-06 | 0.999984 |
| rad12     | 1.78699e-06 | 0.999991 | 2.52190e-06 | 0.999987 |
| rad18     | 1.74038e-06 | 0.999993 | 2.45611e-06 | 0.999989 |
| rad24     | 1.70116e-06 | 0.999994 | 2.40076e-06 | 0.999992 |
| rad8      | 1.44811e-06 | 0.999996 | 2.04365e-06 | 0.999994 |
| rad26     | 1.17785e-06 | 0.999997 | 1.66225e-06 | 0.999995 |
| rad43     | 8.69802e-07 | 0.999998 | 1.22751e-06 | 0.999997 |
| rad61     | 6.03900e-07 | 0.999999 | 8.52253e-07 | 0.999997 |
| rad10     | 4.99100e-07 | 0.999999 | 7.04355e-07 | 0.999998 |
| rad14     | 3.06616e-07 | 0.999999 | 4.32712e-07 | 0.999999 |
| rad3      | 2.82590e-07 | 1.000000 | 3.98806e-07 | 0.999999 |
| rad41     | 2.39284e-07 | 1.000000 | 3.37690e-07 | 0.999999 |
| rad4      | 1.73280e-07 | 1.000000 | 2.44541e-07 | 1.000000 |
| rad2      | 1.19509e-07 | 1.000000 | 1.68657e-07 | 1.000000 |
| rad5      | 4.62379e-08 | 1.000000 | 6.52532e-08 | 1.000000 |
| rad1      | 2.77237e-08 | 1.000000 | 3.91251e-08 | 1.000000 |
| rad27     | 9.61723e-09 | 1.000000 | 1.35723e-08 | 1.000000 |

10000000.0 Pa, 3000.00000 K

| Rate constant      | True (fraction)      | Effective (fraction)  |
|--------------------|----------------------|-----------------------|
| Total              | 6.24269e-11 (1.00 )  | 4.45906e-11 (1.00 )   |
| Formation of rad11 | 1.12221e-11 (0.180 ) | 4.29024e-12 (0.0962 ) |
| Formation of rad6  | 1.76534e-11 (0.283 ) | 6.74898e-12 (0.151 )  |
| H-abstraction      | 3.35514e-11 (0.537 ) | 3.35514e-11 (0.752 )  |

| species            | PYtrue      | Cumul    | PYeffective | Cumul    |
|--------------------|-------------|----------|-------------|----------|
| Benzene+2-propynyl | 0.537451    | 0.537451 | 0.752432    | 0.752432 |
| Phenyl+Allene      | 0.285714    | 0.823166 | 0.000000    | 0.752432 |
| PhCH2CCH+H         | 0.0818045   | 0.904970 | 0.114526    | 0.866958 |
| PhCHCCH2+H         | 0.0374318   | 0.942402 | 0.0524044   | 0.919362 |
| rad6               | 0.0145800   | 0.956982 | 0.0204120   | 0.939774 |
| C2H2+PhCH2         | 0.0124071   | 0.969389 | 0.0173699   | 0.957144 |
| PhCCH+CH3          | 0.00890374  | 0.978293 | 0.0124652   | 0.969610 |
| PhcycC3H3_A+H      | 0.00499825  | 0.983291 | 0.00699756  | 0.976607 |
| PAH7+H             | 0.00374280  | 0.987034 | 0.00523992  | 0.981847 |
| Ph+MeAc            | 0.00280096  | 0.989835 | 0.00392135  | 0.985768 |
| Indene+H           | 0.00241424  | 0.992249 | 0.00337995  | 0.989148 |
| rad19syn           | 0.00232875  | 0.994578 | 0.00326025  | 0.992409 |
| rad11              | 0.000822375 | 0.995400 | 0.00115132  | 0.993560 |
| rad54              | 0.000813933 | 0.996214 | 0.00113950  | 0.994699 |
| rad7               | 0.000561775 | 0.996776 | 0.000786484 | 0.995486 |
| rad39              | 0.000452375 | 0.997228 | 0.000633323 | 0.996119 |
| PAH1+H             | 0.000349408 | 0.997578 | 0.000489170 | 0.996608 |
| rad50              | 0.000208648 | 0.997786 | 0.000292108 | 0.996900 |
| PAH9+H             | 0.000188136 | 0.997975 | 0.000263390 | 0.997164 |
| rad51              | 0.000171789 | 0.998146 | 0.000240504 | 0.997404 |
| rad56              | 0.000167203 | 0.998314 | 0.000234085 | 0.997638 |
| rad19anti          | 0.000158572 | 0.998472 | 0.000222001 | 0.997860 |
| rad71              | 0.000149261 | 0.998621 | 0.000208965 | 0.998069 |
| rad38              | 0.000129736 | 0.998751 | 0.000181630 | 0.998251 |
| rad53              | 9.90178e-05 | 0.998850 | 0.000138625 | 0.998390 |
| rad55              | 9.37299e-05 | 0.998944 | 0.000131222 | 0.998521 |
| rad13              | 9.21526e-05 | 0.999036 | 0.000129013 | 0.998650 |
| PhCCCH3+H          | 9.10781e-05 | 0.999127 | 0.000127509 | 0.998777 |
| PAH3+H             | 8.02952e-05 | 0.999207 | 0.000112413 | 0.998890 |
| rad70              | 6.94535e-05 | 0.999277 | 9.72350e-05 | 0.998987 |
| PAH10+CH3          | 6.22096e-05 | 0.999339 | 8.70934e-05 | 0.999074 |
| rad46              | 5.95078e-05 | 0.999399 | 8.33108e-05 | 0.999157 |
| PAH8+H             | 5.42343e-05 | 0.999453 | 7.59279e-05 | 0.999233 |
| rad9               | 4.97499e-05 | 0.999503 | 6.96500e-05 | 0.999303 |
| rad67              | 4.81032e-05 | 0.999551 | 6.73447e-05 | 0.999370 |
| rad73              | 4.64584e-05 | 0.999597 | 6.50415e-05 | 0.999435 |
| rad35              | 4.31557e-05 | 0.999640 | 6.04180e-05 | 0.999496 |
| rad28              | 3.87941e-05 | 0.999679 | 5.43117e-05 | 0.999550 |
| rad62              | 3.28252e-05 | 0.999712 | 4.59553e-05 | 0.999596 |
| rad21              | 3.23010e-05 | 0.999744 | 4.52213e-05 | 0.999641 |
| rad72              | 2.89683e-05 | 0.999773 | 4.05556e-05 | 0.999682 |
| rad52              | 2.87789e-05 | 0.999802 | 4.02904e-05 | 0.999722 |
| rad34              | 2.72300e-05 | 0.999829 | 3.81220e-05 | 0.999760 |
| rad23              | 2.45356e-05 | 0.999854 | 3.43498e-05 | 0.999795 |
| rad22              | 2.03940e-05 | 0.999874 | 2.85515e-05 | 0.999823 |
| rad45              | 1.59526e-05 | 0.999890 | 2.23336e-05 | 0.999846 |
| rad30              | 1.09201e-05 | 0.999901 | 1.52882e-05 | 0.999861 |
| rad33              | 9.35856e-06 | 0.999910 | 1.31020e-05 | 0.999874 |
| rad64              | 8.67390e-06 | 0.999919 | 1.21434e-05 | 0.999886 |
| rad42              | 8.07670e-06 | 0.999927 | 1.13074e-05 | 0.999897 |

|           |             |          |             |          |
|-----------|-------------|----------|-------------|----------|
| rad20     | 7.34712e-06 | 0.999934 | 1.02860e-05 | 0.999908 |
| rad68syn  | 6.75178e-06 | 0.999941 | 9.45244e-06 | 0.999917 |
| rad37     | 6.39182e-06 | 0.999948 | 8.94857e-06 | 0.999926 |
| rad59     | 5.69023e-06 | 0.999953 | 7.96629e-06 | 0.999934 |
| rad47     | 4.62817e-06 | 0.999958 | 6.47942e-06 | 0.999941 |
| rad68anti | 4.30167e-06 | 0.999962 | 6.02234e-06 | 0.999947 |
| rad40syn  | 4.25968e-06 | 0.999966 | 5.96354e-06 | 0.999953 |
| rad15     | 4.05439e-06 | 0.999971 | 5.67614e-06 | 0.999958 |
| rad65     | 3.77976e-06 | 0.999974 | 5.29167e-06 | 0.999963 |
| rad25     | 3.75055e-06 | 0.999978 | 5.25077e-06 | 0.999969 |
| rad40anti | 3.23414e-06 | 0.999981 | 4.52779e-06 | 0.999973 |
| rad36     | 2.88011e-06 | 0.999984 | 4.03214e-06 | 0.999977 |
| rad60syn  | 2.73633e-06 | 0.999987 | 3.83087e-06 | 0.999981 |
| rad60anti | 2.02292e-06 | 0.999989 | 2.83208e-06 | 0.999984 |
| rad58     | 1.91530e-06 | 0.999991 | 2.68141e-06 | 0.999987 |
| rad12     | 1.69989e-06 | 0.999993 | 2.37985e-06 | 0.999989 |
| rad24     | 1.34114e-06 | 0.999994 | 1.87760e-06 | 0.999991 |
| rad8      | 1.33980e-06 | 0.999995 | 1.87572e-06 | 0.999993 |
| rad18     | 1.23778e-06 | 0.999996 | 1.73289e-06 | 0.999995 |
| rad26     | 1.10326e-06 | 0.999998 | 1.54456e-06 | 0.999996 |
| rad43     | 7.58663e-07 | 0.999998 | 1.06213e-06 | 0.999997 |
| rad61     | 5.56807e-07 | 0.999999 | 7.79527e-07 | 0.999998 |
| rad10     | 4.82290e-07 | 0.999999 | 6.75204e-07 | 0.999999 |
| rad14     | 2.67312e-07 | 1.000000 | 3.74236e-07 | 0.999999 |
| rad3      | 2.39641e-07 | 1.000000 | 3.35497e-07 | 0.999999 |
| rad41     | 2.02438e-07 | 1.000000 | 2.83413e-07 | 1.000000 |
| rad4      | 1.47250e-07 | 1.000000 | 2.06150e-07 | 1.000000 |
| rad2      | 1.01290e-07 | 1.000000 | 1.41805e-07 | 1.000000 |
| rad5      | 4.46454e-08 | 1.000000 | 6.25035e-08 | 1.000000 |
| rad1      | 2.31414e-08 | 1.000000 | 3.23980e-08 | 1.000000 |
| rad27     | 8.72617e-09 | 1.000000 | 1.22166e-08 | 1.000000 |

10000000.0 Pa, 3250.00000 K

| =====              |                 |          |                      |           |
|--------------------|-----------------|----------|----------------------|-----------|
| Rate constant      | True (fraction) |          | Effective (fraction) |           |
| -----              |                 |          |                      |           |
| Total              | 8.22129e-11     | (1.00 )  | 5.90884e-11          | (1.00 )   |
| Formation of rad11 | 1.42538e-11     | (0.173 ) | 5.34744e-12          | (0.0905 ) |
| Formation of rad6  | 2.27549e-11     | (0.277 ) | 8.53669e-12          | (0.144 )  |
| H-abstraction      | 4.52043e-11     | (0.550 ) | 4.52043e-11          | (0.765 )  |
| species            | PYtrue          | Cumul    | PYeffective          | Cumul     |
| -----              |                 |          |                      |           |
| Benzene+2-propynyl | 0.549844        | 0.549844 | 0.765028             | 0.765028  |
| Phenyl+Allene      | 0.281276        | 0.831120 | 0.000000             | 0.765028  |
| PhCH2CCH+H         | 0.0813175       | 0.912437 | 0.113141             | 0.878169  |
| PhCHCCH2+H         | 0.0362380       | 0.948675 | 0.0504198            | 0.928589  |
| C2H2+PhCH2         | 0.0120745       | 0.960750 | 0.0168000            | 0.945389  |
| rad6               | 0.0104148       | 0.971165 | 0.0144906            | 0.959880  |
| PhCCH+CH3          | 0.00870102      | 0.979866 | 0.0121062            | 0.971986  |
| PhcycC3H3_A+H      | 0.00465344      | 0.984519 | 0.00647459           | 0.978461  |
| PAH7+H             | 0.00368096      | 0.988200 | 0.00512152           | 0.983582  |
| Ph+MeAc            | 0.00274285      | 0.990943 | 0.00381628           | 0.987398  |
| rad19syn           | 0.00222103      | 0.993164 | 0.00309024           | 0.990489  |
| Indene+H           | 0.00211928      | 0.995283 | 0.00294867           | 0.993437  |
| rad54              | 0.000818789     | 0.996102 | 0.00113923           | 0.994576  |
| rad11              | 0.000514834     | 0.996617 | 0.000716320          | 0.995293  |
| rad7               | 0.000456742     | 0.997074 | 0.000635491          | 0.995928  |
| rad39              | 0.000420903     | 0.997495 | 0.000585626          | 0.996514  |
| PAH1+H             | 0.000321339     | 0.997816 | 0.000447096          | 0.996961  |
| rad50              | 0.000179756     | 0.997996 | 0.000250104          | 0.997211  |
| PAH9+H             | 0.000163185     | 0.998159 | 0.000227048          | 0.997438  |
| rad56              | 0.000160472     | 0.998319 | 0.000223274          | 0.997661  |
| rad19anti          | 0.000157748     | 0.998477 | 0.000219484          | 0.997881  |
| rad51              | 0.000146867     | 0.998624 | 0.000204344          | 0.998085  |
| rad71              | 0.000126164     | 0.998750 | 0.000175539          | 0.998261  |
| rad38              | 0.000113850     | 0.998864 | 0.000158406          | 0.998419  |
| rad53              | 9.65373e-05     | 0.998960 | 0.000134318          | 0.998554  |
| rad55              | 9.39899e-05     | 0.999054 | 0.000130773          | 0.998684  |
| PhCCCH3+H          | 8.84975e-05     | 0.999143 | 0.000123132          | 0.998807  |
| PAH3+H             | 7.74548e-05     | 0.999220 | 0.000107767          | 0.998915  |
| rad13              | 7.41213e-05     | 0.999295 | 0.000103129          | 0.999018  |
| rad70              | 7.06605e-05     | 0.999365 | 9.83140e-05          | 0.999117  |
| PAH10+CH3          | 6.02178e-05     | 0.999425 | 8.37845e-05          | 0.999200  |
| PAH8+H             | 5.32242e-05     | 0.999479 | 7.40536e-05          | 0.999274  |
| rad46              | 5.19233e-05     | 0.999531 | 7.22438e-05          | 0.999347  |
| rad67              | 4.69198e-05     | 0.999577 | 6.52823e-05          | 0.999412  |
| rad9               | 4.05931e-05     | 0.999618 | 5.64795e-05          | 0.999468  |
| rad35              | 3.98820e-05     | 0.999658 | 5.54901e-05          | 0.999524  |
| rad73              | 3.93708e-05     | 0.999697 | 5.47788e-05          | 0.999579  |

|           |             |          |             |          |
|-----------|-------------|----------|-------------|----------|
| rad28     | 3.00312e-05 | 0.999727 | 4.17839e-05 | 0.999621 |
| rad62     | 2.79887e-05 | 0.999755 | 3.89422e-05 | 0.999659 |
| rad34     | 2.79654e-05 | 0.999783 | 3.89097e-05 | 0.999698 |
| rad52     | 2.47095e-05 | 0.999808 | 3.43797e-05 | 0.999733 |
| rad72     | 2.43941e-05 | 0.999832 | 3.39410e-05 | 0.999767 |
| rad21     | 2.28403e-05 | 0.999855 | 3.17790e-05 | 0.999798 |
| rad23     | 1.93374e-05 | 0.999875 | 2.69052e-05 | 0.999825 |
| rad22     | 1.32192e-05 | 0.999888 | 1.83927e-05 | 0.999844 |
| rad45     | 1.30444e-05 | 0.999901 | 1.81494e-05 | 0.999862 |
| rad30     | 1.03256e-05 | 0.999911 | 1.43666e-05 | 0.999876 |
| rad64     | 8.17704e-06 | 0.999919 | 1.13772e-05 | 0.999888 |
| rad33     | 7.85324e-06 | 0.999927 | 1.09267e-05 | 0.999899 |
| rad68syn  | 6.91287e-06 | 0.999934 | 9.61825e-06 | 0.999908 |
| rad42     | 6.71340e-06 | 0.999941 | 9.34075e-06 | 0.999918 |
| rad37     | 6.33653e-06 | 0.999947 | 8.81639e-06 | 0.999926 |
| rad59     | 5.50379e-06 | 0.999953 | 7.65769e-06 | 0.999934 |
| rad20     | 5.45783e-06 | 0.999958 | 7.59381e-06 | 0.999942 |
| rad68anti | 4.40498e-06 | 0.999963 | 6.12890e-06 | 0.999948 |
| rad40syn  | 4.25280e-06 | 0.999967 | 5.91716e-06 | 0.999954 |
| rad47     | 3.72756e-06 | 0.999971 | 5.18637e-06 | 0.999959 |
| rad15     | 3.42516e-06 | 0.999974 | 4.76561e-06 | 0.999964 |
| rad40anti | 3.19987e-06 | 0.999977 | 4.45216e-06 | 0.999968 |
| rad65     | 3.18530e-06 | 0.999980 | 4.43188e-06 | 0.999973 |
| rad25     | 2.74327e-06 | 0.999983 | 3.81686e-06 | 0.999976 |
| rad60syn  | 2.63921e-06 | 0.999986 | 3.67207e-06 | 0.999980 |
| rad36     | 2.35835e-06 | 0.999988 | 3.28129e-06 | 0.999983 |
| rad60anti | 1.95249e-06 | 0.999990 | 2.71661e-06 | 0.999986 |
| rad58     | 1.81856e-06 | 0.999992 | 2.53025e-06 | 0.999989 |
| rad12     | 1.53355e-06 | 0.999993 | 2.13371e-06 | 0.999991 |
| rad8      | 1.23298e-06 | 0.999995 | 1.71551e-06 | 0.999992 |
| rad24     | 1.04744e-06 | 0.999996 | 1.45737e-06 | 0.999994 |
| rad26     | 9.40182e-07 | 0.999997 | 1.30812e-06 | 0.999995 |
| rad18     | 8.73577e-07 | 0.999997 | 1.21546e-06 | 0.999996 |
| rad43     | 6.76112e-07 | 0.999998 | 9.40713e-07 | 0.999997 |
| rad61     | 5.19147e-07 | 0.999999 | 7.22318e-07 | 0.999998 |
| rad10     | 4.30224e-07 | 0.999999 | 5.98594e-07 | 0.999999 |
| rad14     | 2.32571e-07 | 0.999999 | 3.23589e-07 | 0.999999 |
| rad3      | 1.93328e-07 | 1.000000 | 2.68989e-07 | 0.999999 |
| rad41     | 1.74514e-07 | 1.000000 | 2.42811e-07 | 0.999999 |
| rad4      | 1.19683e-07 | 1.000000 | 1.66522e-07 | 1.000000 |
| rad2      | 8.14017e-08 | 1.000000 | 1.13259e-07 | 1.000000 |
| rad5      | 4.18184e-08 | 1.000000 | 5.81843e-08 | 1.000000 |
| rad1      | 1.84821e-08 | 1.000000 | 2.57151e-08 | 1.000000 |
| rad27     | 7.73490e-09 | 1.000000 | 1.07620e-08 | 1.000000 |

10000000.0 Pa, 3500.00000 K

=====

| Rate constant      | True (fraction)      | Effective (fraction)  |
|--------------------|----------------------|-----------------------|
| Total              | 1.05713e-10 (1.00 )  | 7.63724e-11 (1.00 )   |
| Formation of rad11 | 1.77412e-11 (0.168 ) | 6.52832e-12 (0.0855 ) |
| Formation of rad6  | 2.86822e-11 (0.271 ) | 1.05543e-11 (0.138 )  |
| H-abstraction      | 5.92897e-11 (0.561 ) | 5.92897e-11 (0.776 )  |

| species            | PYtrue      | Cumul    | PYeffective | Cumul    |
|--------------------|-------------|----------|-------------|----------|
| Benzene+2-propynyl | 0.560855    | 0.560855 | 0.776324    | 0.776324 |
| Phenyl+Allene      | 0.277551    | 0.838405 | 0.000000    | 0.776324 |
| PhCH2CCH+H         | 0.0802543   | 0.918660 | 0.111087    | 0.887411 |
| PhCHCCH2+H         | 0.0349729   | 0.953633 | 0.0484088   | 0.935820 |
| C2H2+PhCH2         | 0.0118323   | 0.965465 | 0.0163781   | 0.952198 |
| PhCCH+CH3          | 0.00839189  | 0.973857 | 0.0116159   | 0.963814 |
| rad6               | 0.00723602  | 0.981093 | 0.0100159   | 0.973829 |
| PhcycC3H3_A+H      | 0.00445869  | 0.985552 | 0.00617162  | 0.980001 |
| PAH7+H             | 0.00356489  | 0.989116 | 0.00493447  | 0.984936 |
| Ph+MeAc            | 0.00269528  | 0.991812 | 0.00373076  | 0.988666 |
| rad19syn           | 0.00214879  | 0.993961 | 0.00297431  | 0.991641 |
| Indene+H           | 0.00183996  | 0.995800 | 0.00254684  | 0.994187 |
| rad54              | 0.000827921 | 0.996628 | 0.00114599  | 0.995333 |
| rad39              | 0.000384839 | 0.997013 | 0.000532687 | 0.995866 |
| rad7               | 0.000354716 | 0.997368 | 0.000490991 | 0.996357 |
| rad11              | 0.000330711 | 0.997699 | 0.000457764 | 0.996815 |
| PAH1+H             | 0.000306093 | 0.998005 | 0.000423689 | 0.997239 |
| rad56              | 0.000162426 | 0.998167 | 0.000224826 | 0.997463 |
| rad50              | 0.000154653 | 0.998322 | 0.000214067 | 0.997677 |
| rad19anti          | 0.000152793 | 0.998475 | 0.000211493 | 0.997889 |
| PAH9+H             | 0.000141344 | 0.998616 | 0.000195646 | 0.998085 |
| rad51              | 0.000125178 | 0.998741 | 0.000173269 | 0.998258 |
| rad71              | 0.000105952 | 0.998847 | 0.000146657 | 0.998405 |
| rad38              | 9.94480e-05 | 0.998947 | 0.000137654 | 0.998542 |

|           |             |          |             |          |
|-----------|-------------|----------|-------------|----------|
| rad53     | 9.81648e-05 | 0.999045 | 0.000135878 | 0.998678 |
| rad55     | 9.54171e-05 | 0.999140 | 0.000132074 | 0.998810 |
| PhCCCH3+H | 8.50352e-05 | 0.999225 | 0.000117704 | 0.998928 |
| PAH3+H    | 7.72804e-05 | 0.999302 | 0.000106970 | 0.999035 |
| rad70     | 7.21555e-05 | 0.999375 | 9.98762e-05 | 0.999135 |
| PAH10+CH3 | 5.82452e-05 | 0.999433 | 8.06220e-05 | 0.999215 |
| rad13     | 5.75566e-05 | 0.999490 | 7.96687e-05 | 0.999295 |
| PAH8+H    | 5.67771e-05 | 0.999547 | 7.85897e-05 | 0.999374 |
| rad67     | 4.58156e-05 | 0.999593 | 6.34173e-05 | 0.999437 |
| rad46     | 4.51863e-05 | 0.999638 | 6.25458e-05 | 0.999500 |
| rad35     | 3.70687e-05 | 0.999675 | 5.13097e-05 | 0.999551 |
| rad73     | 3.31930e-05 | 0.999708 | 4.59453e-05 | 0.999597 |
| rad9      | 3.15880e-05 | 0.999740 | 4.37235e-05 | 0.999641 |
| rad34     | 2.90864e-05 | 0.999769 | 4.02608e-05 | 0.999681 |
| rad62     | 2.55222e-05 | 0.999795 | 3.53274e-05 | 0.999716 |
| rad28     | 2.19955e-05 | 0.999817 | 3.04459e-05 | 0.999747 |
| rad52     | 2.11577e-05 | 0.999838 | 2.92861e-05 | 0.999776 |
| rad72     | 2.03633e-05 | 0.999858 | 2.81865e-05 | 0.999804 |
| rad21     | 1.62677e-05 | 0.999874 | 2.25175e-05 | 0.999827 |
| rad23     | 1.48974e-05 | 0.999889 | 2.06207e-05 | 0.999847 |
| rad45     | 1.04690e-05 | 0.999900 | 1.44910e-05 | 0.999862 |
| rad30     | 9.76954e-06 | 0.999910 | 1.35228e-05 | 0.999875 |
| rad22     | 8.63232e-06 | 0.999918 | 1.19487e-05 | 0.999887 |
| rad64     | 7.94959e-06 | 0.999926 | 1.10037e-05 | 0.999898 |
| rad68syn  | 7.42340e-06 | 0.999934 | 1.02753e-05 | 0.999908 |
| rad33     | 6.32571e-06 | 0.999940 | 8.75591e-06 | 0.999917 |
| rad37     | 6.08726e-06 | 0.999946 | 8.42585e-06 | 0.999926 |
| rad42     | 5.97167e-06 | 0.999952 | 8.26588e-06 | 0.999934 |
| rad59     | 5.46393e-06 | 0.999957 | 7.56304e-06 | 0.999941 |
| rad68anti | 4.72951e-06 | 0.999962 | 6.54648e-06 | 0.999948 |
| rad40syn  | 4.54485e-06 | 0.999967 | 6.29093e-06 | 0.999954 |
| rad20     | 4.11864e-06 | 0.999971 | 5.70094e-06 | 0.999960 |
| rad40anti | 3.40962e-06 | 0.999974 | 4.71954e-06 | 0.999965 |
| rad47     | 3.00878e-06 | 0.999977 | 4.16469e-06 | 0.999969 |
| rad15     | 2.74425e-06 | 0.999980 | 3.79853e-06 | 0.999973 |
| rad65     | 2.68850e-06 | 0.999983 | 3.72136e-06 | 0.999976 |
| rad60syn  | 2.58413e-06 | 0.999985 | 3.57689e-06 | 0.999980 |
| rad25     | 2.01220e-06 | 0.999987 | 2.78526e-06 | 0.999983 |
| rad60anti | 1.91619e-06 | 0.999989 | 2.65235e-06 | 0.999985 |
| rad36     | 1.89467e-06 | 0.999991 | 2.62256e-06 | 0.999988 |
| rad58     | 1.82695e-06 | 0.999993 | 2.52884e-06 | 0.999991 |
| rad12     | 1.32237e-06 | 0.999994 | 1.83040e-06 | 0.999992 |
| rad8      | 1.12445e-06 | 0.999995 | 1.55645e-06 | 0.999994 |
| rad24     | 8.15559e-07 | 0.999996 | 1.12888e-06 | 0.999995 |
| rad26     | 7.45278e-07 | 0.999997 | 1.03160e-06 | 0.999996 |
| rad43     | 6.33384e-07 | 0.999998 | 8.76716e-07 | 0.999997 |
| rad18     | 6.18268e-07 | 0.999998 | 8.55793e-07 | 0.999998 |
| rad61     | 4.94500e-07 | 0.999999 | 6.84478e-07 | 0.999998 |
| rad10     | 3.59082e-07 | 0.999999 | 4.97035e-07 | 0.999999 |
| rad14     | 2.05779e-07 | 0.999999 | 2.84836e-07 | 0.999999 |
| rad41     | 1.59457e-07 | 0.999999 | 2.20717e-07 | 0.999999 |
| rad3      | 1.50600e-07 | 1.000000 | 2.08458e-07 | 1.000000 |
| rad4      | 9.44018e-08 | 1.000000 | 1.30669e-07 | 1.000000 |
| rad2      | 6.29906e-08 | 1.000000 | 8.71902e-08 | 1.000000 |
| rad5      | 3.81561e-08 | 1.000000 | 5.28150e-08 | 1.000000 |
| rad1      | 1.43378e-08 | 1.000000 | 1.98462e-08 | 1.000000 |
| rad27     | 6.77619e-09 | 1.000000 | 9.37949e-09 | 1.000000 |

10000000.0 Pa, 3750.00000 K

=====

| Rate constant      | True (fraction)      | Effective (fraction)  |
|--------------------|----------------------|-----------------------|
| Total              | 1.33217e-10 (1.00 )  | 9.66986e-11 (1.00 )   |
| Formation of rad11 | 2.17064e-11 (0.163 ) | 7.84503e-12 (0.0811 ) |
| Formation of rad6  | 3.54800e-11 (0.266 ) | 1.28230e-11 (0.133 )  |
| H-abstraction      | 7.60305e-11 (0.571 ) | 7.60305e-11 (0.786 )  |

| species            | PYtrue     | Cumul    | PYeffective | Cumul    |
|--------------------|------------|----------|-------------|----------|
| Benzene+2-propynyl | 0.570727   | 0.570727 | 0.786263    | 0.786263 |
| Phenyl+Allene      | 0.274127   | 0.844854 | 0.00000     | 0.786263 |
| PhCH2CCH+H         | 0.0788050  | 0.923659 | 0.108566    | 0.894829 |
| PhCHCCH2+H         | 0.0337254  | 0.957385 | 0.0464619   | 0.941291 |
| C2H2+PhCH2         | 0.0116573  | 0.969042 | 0.0160597   | 0.957351 |
| PhCCH+CH3          | 0.00802264 | 0.977065 | 0.0110524   | 0.968403 |
| rad6               | 0.00495351 | 0.982018 | 0.00682418  | 0.975227 |
| PhcycC3H3_A+H      | 0.00439829 | 0.986417 | 0.00605931  | 0.981287 |
| PAH7+H             | 0.00340888 | 0.989825 | 0.00469624  | 0.985983 |
| Ph+MeAc            | 0.00265696 | 0.992482 | 0.00366037  | 0.989643 |
| rad19syn           | 0.00210584 | 0.994588 | 0.00290111  | 0.992544 |

|           |             |          |             |          |
|-----------|-------------|----------|-------------|----------|
| Indene+H  | 0.00158695  | 0.996175 | 0.00218625  | 0.994731 |
| rad54     | 0.000835082 | 0.997010 | 0.00115045  | 0.995881 |
| rad39     | 0.000347879 | 0.997358 | 0.000479255 | 0.996360 |
| PAH1+H    | 0.000303029 | 0.997661 | 0.000417468 | 0.996778 |
| rad7      | 0.000267402 | 0.997929 | 0.000368386 | 0.997146 |
| rad11     | 0.000218542 | 0.998147 | 0.000301074 | 0.997447 |
| rad56     | 0.000170863 | 0.998318 | 0.000235388 | 0.997683 |
| rad19anti | 0.000144697 | 0.998463 | 0.000199342 | 0.997882 |
| rad50     | 0.000133741 | 0.998596 | 0.000184248 | 0.998066 |
| PAH9+H    | 0.000122666 | 0.998719 | 0.000168990 | 0.998235 |
| rad51     | 0.000107194 | 0.998826 | 0.000147676 | 0.998383 |
| rad53     | 0.000102594 | 0.998929 | 0.000141339 | 0.998524 |
| rad55     | 9.71178e-05 | 0.999026 | 0.000133794 | 0.998658 |
| rad71     | 8.93626e-05 | 0.999115 | 0.000123111 | 0.998781 |
| rad38     | 8.67496e-05 | 0.999202 | 0.000119510 | 0.998901 |
| PhCCCH3+H | 8.11716e-05 | 0.999283 | 0.000111826 | 0.999012 |
| PAH3+H    | 7.85127e-05 | 0.999362 | 0.000108163 | 0.999121 |
| rad70     | 7.35052e-05 | 0.999435 | 0.000101264 | 0.999222 |
| PAH8+H    | 6.38243e-05 | 0.999499 | 8.79278e-05 | 0.999310 |
| PAH10+CH3 | 5.62721e-05 | 0.999555 | 7.75234e-05 | 0.999387 |
| rad67     | 4.47392e-05 | 0.999600 | 6.16350e-05 | 0.999449 |
| rad13     | 4.37854e-05 | 0.999644 | 6.03210e-05 | 0.999509 |
| rad46     | 3.93798e-05 | 0.999683 | 5.42517e-05 | 0.999563 |
| rad35     | 3.46503e-05 | 0.999718 | 4.77359e-05 | 0.999611 |
| rad34     | 3.03128e-05 | 0.999748 | 4.17603e-05 | 0.999653 |
| rad73     | 2.81308e-05 | 0.999776 | 3.87545e-05 | 0.999692 |
| rad62     | 2.56125e-05 | 0.999802 | 3.52851e-05 | 0.999727 |
| rad9      | 2.37827e-05 | 0.999826 | 3.27643e-05 | 0.999760 |
| rad52     | 1.81914e-05 | 0.999844 | 2.50613e-05 | 0.999785 |
| rad72     | 1.70384e-05 | 0.999861 | 2.34730e-05 | 0.999808 |
| rad28     | 1.55689e-05 | 0.999877 | 2.14485e-05 | 0.999830 |
| rad21     | 1.17379e-05 | 0.999888 | 1.61708e-05 | 0.999846 |
| rad23     | 1.13226e-05 | 0.999900 | 1.55985e-05 | 0.999862 |
| rad30     | 9.23022e-06 | 0.999909 | 1.27160e-05 | 0.999874 |
| rad45     | 8.28741e-06 | 0.999917 | 1.14172e-05 | 0.999886 |
| rad68syn  | 8.15322e-06 | 0.999925 | 1.12323e-05 | 0.999897 |
| rad64     | 7.94112e-06 | 0.999933 | 1.09401e-05 | 0.999908 |
| rad42     | 5.91461e-06 | 0.999939 | 8.14826e-06 | 0.999916 |
| rad22     | 5.73114e-06 | 0.999945 | 7.89552e-06 | 0.999924 |
| rad37     | 5.69525e-06 | 0.999951 | 7.84606e-06 | 0.999932 |
| rad59     | 5.49418e-06 | 0.999956 | 7.56908e-06 | 0.999939 |
| rad68anti | 5.19257e-06 | 0.999961 | 7.15353e-06 | 0.999946 |
| rad40syn  | 5.05310e-06 | 0.999966 | 6.96140e-06 | 0.999953 |
| rad33     | 4.95965e-06 | 0.999971 | 6.83265e-06 | 0.999960 |
| rad40anti | 3.80149e-06 | 0.999975 | 5.23713e-06 | 0.999965 |
| rad20     | 3.16737e-06 | 0.999978 | 4.36352e-06 | 0.999970 |
| rad60syn  | 2.54597e-06 | 0.999981 | 3.50746e-06 | 0.999973 |
| rad47     | 2.45304e-06 | 0.999983 | 3.37943e-06 | 0.999977 |
| rad65     | 2.29326e-06 | 0.999986 | 3.15931e-06 | 0.999980 |
| rad15     | 2.11701e-06 | 0.999988 | 2.91650e-06 | 0.999983 |
| rad58     | 1.90060e-06 | 0.999990 | 2.61836e-06 | 0.999985 |
| rad60anti | 1.89411e-06 | 0.999991 | 2.60943e-06 | 0.999988 |
| rad36     | 1.50071e-06 | 0.999993 | 2.06746e-06 | 0.999990 |
| rad25     | 1.48908e-06 | 0.999994 | 2.05143e-06 | 0.999992 |
| rad12     | 1.10257e-06 | 0.999996 | 1.51895e-06 | 0.999994 |
| rad8      | 1.01555e-06 | 0.999997 | 1.39907e-06 | 0.999995 |
| rad24     | 6.35560e-07 | 0.999997 | 8.75576e-07 | 0.999996 |
| rad43     | 6.32941e-07 | 0.999998 | 8.71969e-07 | 0.999997 |
| rad26     | 5.62206e-07 | 0.999998 | 7.74524e-07 | 0.999998 |
| rad61     | 4.82155e-07 | 0.999999 | 6.64238e-07 | 0.999998 |
| rad18     | 4.41614e-07 | 0.999999 | 6.08391e-07 | 0.999999 |
| rad10     | 2.85475e-07 | 1.000000 | 3.93284e-07 | 0.999999 |
| rad14     | 1.87578e-07 | 1.000000 | 2.58416e-07 | 1.000000 |
| rad41     | 1.58301e-07 | 1.000000 | 2.18084e-07 | 1.000000 |
| rad3      | 1.14973e-07 | 1.000000 | 1.58393e-07 | 1.000000 |
| rad4      | 7.32962e-08 | 1.000000 | 1.00977e-07 | 1.000000 |
| rad2      | 4.76609e-08 | 1.000000 | 6.56601e-08 | 1.000000 |
| rad5      | 3.41523e-08 | 1.000000 | 4.70498e-08 | 1.000000 |
| rad1      | 1.09540e-08 | 1.000000 | 1.50907e-08 | 1.000000 |
| rad27     | 5.95011e-09 | 1.000000 | 8.19714e-09 | 1.000000 |

10000000.0 Pa, 4000.00000 K

| Rate constant      | True (fraction)      | Effective (fraction)  |
|--------------------|----------------------|-----------------------|
| Total              | 1.65008e-10 (1.00 )  | 1.20325e-10 (1.00 )   |
| Formation of rad11 | 2.61707e-11 (0.159 ) | 9.31117e-12 (0.0774 ) |
| Formation of rad6  | 4.31906e-11 (0.262 ) | 1.53666e-11 (0.128 )  |
| H-abstraction      | 9.56470e-11 (0.580 ) | 9.56470e-11 (0.795 )  |

| species            | PYtrue      | Cumul    | PYeffective | Cumul    |
|--------------------|-------------|----------|-------------|----------|
| Benzene+2-propynyl | 0.579650    | 0.579650 | 0.794907    | 0.794907 |
| Phenyl+Allene      | 0.270796    | 0.850445 | 0.00000     | 0.794907 |
| PhCH2CCH+H         | 0.0771578   | 0.927603 | 0.105811    | 0.900718 |
| PhCHCCH2+H         | 0.0325559   | 0.960159 | 0.0446457   | 0.945364 |
| C2H2+PhCH2         | 0.0115331   | 0.971692 | 0.0158160   | 0.961180 |
| PhCCH+CH3          | 0.00763550  | 0.979328 | 0.0104710   | 0.971651 |
| PhcycC3H3_A+H      | 0.00443268  | 0.983760 | 0.00607878  | 0.977729 |
| rad6               | 0.00337992  | 0.987140 | 0.00463508  | 0.982364 |
| PAH7+H             | 0.00323014  | 0.990370 | 0.00442968  | 0.986794 |
| Ph+MeAc            | 0.00262618  | 0.992997 | 0.00360144  | 0.990396 |
| rad19syn           | 0.00208104  | 0.995078 | 0.00285385  | 0.993249 |
| Indene+H           | 0.00136527  | 0.996443 | 0.00187228  | 0.995122 |
| rad54              | 0.000836447 | 0.997279 | 0.00114707  | 0.996269 |
| rad39              | 0.000312779 | 0.997592 | 0.000428932 | 0.996698 |
| PAH1+H             | 0.000310076 | 0.997902 | 0.000425224 | 0.997123 |
| rad7               | 0.000198328 | 0.998100 | 0.000271980 | 0.997395 |
| rad56              | 0.000183080 | 0.998284 | 0.000251069 | 0.997646 |
| rad11              | 0.000148701 | 0.998432 | 0.000203922 | 0.997850 |
| rad19anti          | 0.000134836 | 0.998567 | 0.000184908 | 0.998035 |
| rad50              | 0.000116691 | 0.998684 | 0.000160025 | 0.998195 |
| rad53              | 0.000108407 | 0.998792 | 0.000148665 | 0.998343 |
| PAH9+H             | 0.000106777 | 0.998899 | 0.000146429 | 0.998490 |
| rad55              | 9.84347e-05 | 0.998997 | 0.000134989 | 0.998625 |
| rad51              | 9.26932e-05 | 0.999090 | 0.000127115 | 0.998752 |
| PAH3+H             | 8.03264e-05 | 0.999170 | 0.000110156 | 0.998862 |
| PhCCCH3+H          | 7.73571e-05 | 0.999248 | 0.000106084 | 0.998968 |
| rad71              | 7.64348e-05 | 0.999324 | 0.000104819 | 0.999073 |
| rad38              | 7.56837e-05 | 0.999400 | 0.000103789 | 0.999177 |
| rad70              | 7.44869e-05 | 0.999474 | 0.000102148 | 0.999279 |
| PAH8+H             | 7.33520e-05 | 0.999548 | 0.000100592 | 0.999380 |
| PAH10+CH3          | 5.43025e-05 | 0.999602 | 7.44679e-05 | 0.999454 |
| rad67              | 4.36542e-05 | 0.999646 | 5.98652e-05 | 0.999514 |
| rad46              | 3.44337e-05 | 0.999680 | 4.72208e-05 | 0.999561 |
| rad13              | 3.30382e-05 | 0.999713 | 4.53073e-05 | 0.999606 |
| rad35              | 3.25430e-05 | 0.999746 | 4.46281e-05 | 0.999651 |
| rad34              | 3.14679e-05 | 0.999777 | 4.31538e-05 | 0.999694 |
| rad62              | 2.80870e-05 | 0.999805 | 3.85173e-05 | 0.999733 |
| rad73              | 2.41746e-05 | 0.999829 | 3.31521e-05 | 0.999766 |
| rad9               | 1.75530e-05 | 0.999847 | 2.40714e-05 | 0.999790 |
| rad52              | 1.57705e-05 | 0.999863 | 2.16269e-05 | 0.999812 |
| rad72              | 1.44487e-05 | 0.999877 | 1.98144e-05 | 0.999831 |
| rad28              | 1.08350e-05 | 0.999888 | 1.48587e-05 | 0.999846 |
| rad68syn           | 8.99697e-06 | 0.999897 | 1.23381e-05 | 0.999859 |
| rad30              | 8.70550e-06 | 0.999906 | 1.19383e-05 | 0.999871 |
| rad21              | 8.60924e-06 | 0.999914 | 1.18063e-05 | 0.999882 |
| rad23              | 8.55073e-06 | 0.999923 | 1.17261e-05 | 0.999894 |
| rad64              | 8.07607e-06 | 0.999931 | 1.10752e-05 | 0.999905 |
| rad42              | 6.51568e-06 | 0.999937 | 8.93535e-06 | 0.999914 |
| rad45              | 6.50089e-06 | 0.999944 | 8.91501e-06 | 0.999923 |
| rad68anti          | 5.72732e-06 | 0.999950 | 7.85420e-06 | 0.999931 |
| rad40syn           | 5.70327e-06 | 0.999955 | 7.82123e-06 | 0.999939 |
| rad59              | 5.54766e-06 | 0.999961 | 7.60783e-06 | 0.999946 |
| rad37              | 5.22857e-06 | 0.999966 | 7.17026e-06 | 0.999953 |
| rad40anti          | 4.31826e-06 | 0.999971 | 5.92186e-06 | 0.999959 |
| rad22              | 3.88878e-06 | 0.999974 | 5.33291e-06 | 0.999965 |
| rad33              | 3.83036e-06 | 0.999978 | 5.25278e-06 | 0.999970 |
| rad60syn           | 2.51127e-06 | 0.999981 | 3.44384e-06 | 0.999973 |
| rad20              | 2.48496e-06 | 0.999983 | 3.40779e-06 | 0.999977 |
| rad47              | 2.03077e-06 | 0.999985 | 2.78492e-06 | 0.999980 |
| rad58              | 2.01001e-06 | 0.999987 | 2.75645e-06 | 0.999982 |
| rad65              | 1.98693e-06 | 0.999989 | 2.72479e-06 | 0.999985 |
| rad60anti          | 1.87529e-06 | 0.999991 | 2.57168e-06 | 0.999988 |
| rad15              | 1.59412e-06 | 0.999993 | 2.18611e-06 | 0.999990 |
| rad36              | 1.17734e-06 | 0.999994 | 1.61455e-06 | 0.999991 |
| rad25              | 1.11569e-06 | 0.999995 | 1.53000e-06 | 0.999993 |
| rad8               | 9.08978e-07 | 0.999996 | 1.24653e-06 | 0.999994 |
| rad12              | 8.99247e-07 | 0.999997 | 1.23319e-06 | 0.999995 |
| rad43              | 6.71733e-07 | 0.999997 | 9.21184e-07 | 0.999996 |
| rad24              | 4.97039e-07 | 0.999998 | 6.81621e-07 | 0.999997 |
| rad61              | 4.79103e-07 | 0.999998 | 6.57020e-07 | 0.999998 |
| rad26              | 4.11489e-07 | 0.999999 | 5.64297e-07 | 0.999998 |
| rad18              | 3.19625e-07 | 0.999999 | 4.38321e-07 | 0.999999 |
| rad10              | 2.19849e-07 | 0.999999 | 3.01491e-07 | 0.999999 |
| rad14              | 1.76527e-07 | 1.000000 | 2.42082e-07 | 0.999999 |
| rad41              | 1.70338e-07 | 1.000000 | 2.33595e-07 | 1.000000 |
| rad3               | 8.71071e-08 | 1.000000 | 1.19455e-07 | 1.000000 |
| rad4               | 5.66826e-08 | 1.000000 | 7.77321e-08 | 1.000000 |
| rad2               | 3.57386e-08 | 1.000000 | 4.90105e-08 | 1.000000 |



|       |             |          |             |          |
|-------|-------------|----------|-------------|----------|
| rad5  | 3.02173e-08 | 1.000000 | 4.14387e-08 | 1.000000 |
| rad1  | 8.33555e-09 | 1.000000 | 1.14310e-08 | 1.000000 |
| rad27 | 5.29419e-09 | 1.000000 | 7.26021e-09 | 1.000000 |

1000000.00 Pa, 20.0000000 K

| =====              |                 |            |                      |            |
|--------------------|-----------------|------------|----------------------|------------|
| Rate constant      | True (fraction) |            | Effective (fraction) |            |
| -----              |                 |            |                      |            |
| Total              | 1.56740e-51     | (1.00 )    | 1.56740e-51          | (1.00 )    |
| Formation of rad11 | 1.56740e-51     | (1.000 )   | 1.56740e-51          | (1.000 )   |
| Formation of rad6  | 3.73945e-60     | (2.39e-09) | 3.73945e-60          | (2.39e-09) |
| H-abstraction      | 1.53631e-76     | (9.80e-26) | 1.53631e-76          | (9.80e-26) |
| -----              |                 |            |                      |            |
| species            | PYtrue          | Cumul      | PYeffective          | Cumul      |
| -----              |                 |            |                      |            |
| rad11              | 0.999976        | 0.999976   | 0.999976             | 0.999976   |
| rad6               | 2.31802e-05     | 0.999999   | 2.31802e-05          | 0.999999   |
| rad21              | 1.19165e-06     | 1.00000    | 1.19165e-06          | 1.00000    |
| rad20              | 6.87635e-09     | 1.00000    | 6.87635e-09          | 1.00000    |
| rad22              | 2.65243e-09     | 1.00000    | 2.65243e-09          | 1.00000    |
| rad25              | 4.93590e-10     | 1.00000    | 4.93590e-10          | 1.00000    |
| rad24              | 2.26712e-10     | 1.00000    | 2.26712e-10          | 1.00000    |
| rad45              | 7.88637e-11     | 1.00000    | 7.88637e-11          | 1.00000    |
| PhCHCCH2+H         | 2.83508e-11     | 1.00000    | 2.83508e-11          | 1.00000    |
| rad36              | 9.09331e-12     | 1.00000    | 9.09331e-12          | 1.00000    |
| rad18              | 3.50592e-12     | 1.00000    | 3.50592e-12          | 1.00000    |
| rad9               | 1.46897e-12     | 1.00000    | 1.46897e-12          | 1.00000    |
| rad13              | 1.06387e-12     | 1.00000    | 1.06387e-12          | 1.00000    |
| rad7               | 3.14330e-13     | 1.00000    | 3.14330e-13          | 1.00000    |
| Indene+H           | 3.87314e-14     | 1.00000    | 3.87314e-14          | 1.00000    |
| C2H2+PhCH2         | 2.94340e-14     | 1.00000    | 2.94340e-14          | 1.00000    |
| Phenyl+Allene      | 1.80100e-14     | 1.00000    | 0.00000              | 1.00000    |
| rad23              | 8.08441e-15     | 1.00000    | 8.08441e-15          | 1.00000    |
| rad33              | 7.94990e-15     | 1.00000    | 7.94990e-15          | 1.00000    |
| rad3               | 3.77848e-19     | 1.00000    | 3.77848e-19          | 1.00000    |
| rad4               | 2.54800e-19     | 1.00000    | 2.54800e-19          | 1.00000    |
| PhCH2CCH+H         | 6.67614e-20     | 1.00000    | 6.67614e-20          | 1.00000    |
| rad28              | 1.27588e-20     | 1.00000    | 1.27588e-20          | 1.00000    |
| rad30              | 3.32339e-22     | 1.00000    | 3.32339e-22          | 1.00000    |
| rad8               | 1.79684e-22     | 1.00000    | 1.79684e-22          | 1.00000    |
| rad15              | 4.84117e-23     | 1.00000    | 4.84117e-23          | 1.00000    |
| rad38              | 3.13183e-24     | 1.00000    | 3.13183e-24          | 1.00000    |
| rad2               | 6.84875e-25     | 1.00000    | 6.84875e-25          | 1.00000    |
| rad1               | 1.02549e-25     | 1.00000    | 1.02549e-25          | 1.00000    |
| Benzene+2-propynyl | 9.80165e-26     | 1.00000    | 9.80165e-26          | 1.00000    |
| PAH7+H             | 4.23515e-26     | 1.00000    | 4.23515e-26          | 1.00000    |
| rad46              | 1.47739e-26     | 1.00000    | 1.47739e-26          | 1.00000    |
| rad31              | 7.39826e-27     | 1.00000    | 7.39826e-27          | 1.00000    |
| PhCCH+CH3          | 2.84702e-27     | 1.00000    | 2.84702e-27          | 1.00000    |
| rad60syn           | 5.62319e-28     | 1.00000    | 5.62319e-28          | 1.00000    |
| PAH9+H             | 3.21391e-28     | 1.00000    | 3.21391e-28          | 1.00000    |
| rad14              | 2.75120e-28     | 1.00000    | 2.75120e-28          | 1.00000    |
| rad35              | 1.87000e-28     | 1.00000    | 1.87000e-28          | 1.00000    |
| rad60anti          | 5.87233e-29     | 1.00000    | 5.87233e-29          | 1.00000    |
| rad26              | 3.25594e-31     | 1.00000    | 3.25594e-31          | 1.00000    |
| rad10              | 8.88748e-32     | 1.00000    | 8.88748e-32          | 1.00000    |
| Ph+MeAc            | 7.21543e-32     | 1.00000    | 7.21543e-32          | 1.00000    |
| rad39              | 1.94031e-34     | 1.00000    | 1.94031e-34          | 1.00000    |
| PAH3+H             | 1.13007e-34     | 1.00000    | 1.13007e-34          | 1.00000    |
| rad27              | 9.50911e-35     | 1.00000    | 9.50911e-35          | 1.00000    |
| rad59              | 5.29008e-35     | 1.00000    | 5.29008e-35          | 1.00000    |
| PhCCCH3+H          | 2.38558e-35     | 1.00000    | 2.38558e-35          | 1.00000    |
| rad50              | 1.13251e-36     | 1.00000    | 1.13251e-36          | 1.00000    |
| rad12              | 1.12415e-41     | 1.00000    | 1.12415e-41          | 1.00000    |
| rad19syn           | 3.77722e-43     | 1.00000    | 3.77722e-43          | 1.00000    |
| rad37              | 2.61155e-43     | 1.00000    | 2.61155e-43          | 1.00000    |
| rad54              | 2.56550e-44     | 1.00000    | 2.56550e-44          | 1.00000    |
| rad52              | 2.07530e-44     | 1.00000    | 2.07530e-44          | 1.00000    |
| rad70              | 4.28524e-45     | 1.00000    | 4.28524e-45          | 1.00000    |
| rad5               | 1.59169e-45     | 1.00000    | 1.59169e-45          | 1.00000    |
| rad51              | 8.47811e-49     | 1.00000    | 8.47811e-49          | 1.00000    |
| rad34              | 1.83490e-50     | 1.00000    | 1.83490e-50          | 1.00000    |
| rad55              | 1.03291e-50     | 1.00000    | 1.03291e-50          | 1.00000    |
| rad58              | 1.03916e-51     | 1.00000    | 1.03916e-51          | 1.00000    |
| PhcycC3H3_A+H      | 2.66567e-52     | 1.00000    | 2.66567e-52          | 1.00000    |
| PAH10+CH3          | 1.01580e-53     | 1.00000    | 1.01580e-53          | 1.00000    |
| rad62              | 2.26370e-54     | 1.00000    | 2.26370e-54          | 1.00000    |
| rad47              | 1.54170e-55     | 1.00000    | 1.54170e-55          | 1.00000    |
| rad65              | 5.78321e-56     | 1.00000    | 5.78321e-56          | 1.00000    |
| rad43              | 2.71235e-58     | 1.00000    | 2.71235e-58          | 1.00000    |

|        |             |         |             |         |
|--------|-------------|---------|-------------|---------|
| PAH1+H | 7.28000e-60 | 1.00000 | 7.28000e-60 | 1.00000 |
| rad42  | 1.07312e-64 | 1.00000 | 1.07312e-64 | 1.00000 |
| rad41  | 8.50066e-70 | 1.00000 | 8.50066e-70 | 1.00000 |

1000000.00 Pa, 30.0000000 K

| Rate constant      | True (fraction)        | Effective (fraction)   |
|--------------------|------------------------|------------------------|
| Total              | 5.03204e-39 (1.00 )    | 5.03204e-39 (1.00 )    |
| Formation of rad11 | 5.03203e-39 (1.000 )   | 5.03203e-39 (1.000 )   |
| Formation of rad6  | 9.92181e-45 (1.97e-06) | 9.92181e-45 (1.97e-06) |
| H-abstraction      | 3.33191e-55 (6.62e-17) | 3.33191e-55 (6.62e-17) |

| species            | PYtrue      | Cumul    | PYeffective | Cumul    |
|--------------------|-------------|----------|-------------|----------|
| rad11              | 0.999949    | 0.999949 | 0.999949    | 0.999949 |
| rad6               | 4.88504e-05 | 0.999998 | 4.88504e-05 | 0.999998 |
| rad21              | 2.39497e-06 | 1.00000  | 2.39497e-06 | 1.00000  |
| rad20              | 2.78594e-08 | 1.00000  | 2.78594e-08 | 1.00000  |
| rad22              | 1.07848e-08 | 1.00000  | 1.07848e-08 | 1.00000  |
| rad25              | 1.00781e-09 | 1.00000  | 1.00781e-09 | 1.00000  |
| rad24              | 6.79937e-10 | 1.00000  | 6.79937e-10 | 1.00000  |
| rad45              | 5.47778e-10 | 1.00000  | 5.47778e-10 | 1.00000  |
| PhCHCCH2+H         | 5.86069e-11 | 1.00000  | 5.86069e-11 | 1.00000  |
| rad36              | 5.43570e-11 | 1.00000  | 5.43570e-11 | 1.00000  |
| rad18              | 2.87156e-11 | 1.00000  | 2.87156e-11 | 1.00000  |
| rad13              | 4.86443e-12 | 1.00000  | 4.86443e-12 | 1.00000  |
| rad9               | 3.05367e-12 | 1.00000  | 3.05367e-12 | 1.00000  |
| rad7               | 1.45217e-12 | 1.00000  | 1.45217e-12 | 1.00000  |
| Indene+H           | 3.27595e-13 | 1.00000  | 3.27595e-13 | 1.00000  |
| C2H2+PhCH2         | 2.43723e-13 | 1.00000  | 2.43723e-13 | 1.00000  |
| rad23              | 8.05850e-14 | 1.00000  | 8.05850e-14 | 1.00000  |
| Phenyl+Allene      | 4.28126e-14 | 1.00000  | 0.00000     | 1.00000  |
| rad33              | 3.69841e-14 | 1.00000  | 3.69841e-14 | 1.00000  |
| Benzene+2-propynyl | 6.62139e-17 | 1.00000  | 6.62139e-17 | 1.00000  |
| rad3               | 4.02128e-18 | 1.00000  | 4.02128e-18 | 1.00000  |
| rad4               | 2.58066e-18 | 1.00000  | 2.58066e-18 | 1.00000  |
| PhCH2CCH+H         | 1.61741e-19 | 1.00000  | 1.61741e-19 | 1.00000  |
| rad28              | 1.42892e-19 | 1.00000  | 1.42892e-19 | 1.00000  |
| rad30              | 5.58927e-21 | 1.00000  | 5.58927e-21 | 1.00000  |
| rad8               | 1.56899e-21 | 1.00000  | 1.56899e-21 | 1.00000  |
| rad15              | 8.17024e-22 | 1.00000  | 8.17024e-22 | 1.00000  |
| rad38              | 5.25927e-23 | 1.00000  | 5.25927e-23 | 1.00000  |
| rad2               | 1.64908e-23 | 1.00000  | 1.64908e-23 | 1.00000  |
| rad1               | 2.09751e-24 | 1.00000  | 2.09751e-24 | 1.00000  |
| rad46              | 2.25475e-25 | 1.00000  | 2.25475e-25 | 1.00000  |
| PAH7+H             | 2.13362e-25 | 1.00000  | 2.13362e-25 | 1.00000  |
| PhCCH+CH3          | 9.08311e-26 | 1.00000  | 9.08311e-26 | 1.00000  |
| rad31              | 3.17376e-26 | 1.00000  | 3.17376e-26 | 1.00000  |
| rad60syn           | 1.00796e-26 | 1.00000  | 1.00796e-26 | 1.00000  |
| rad14              | 7.39396e-27 | 1.00000  | 7.39396e-27 | 1.00000  |
| PAH9+H             | 6.03784e-27 | 1.00000  | 6.03784e-27 | 1.00000  |
| rad35              | 3.51360e-27 | 1.00000  | 3.51360e-27 | 1.00000  |
| rad60anti          | 1.08368e-27 | 1.00000  | 1.08368e-27 | 1.00000  |
| Ph+MeAc            | 5.71410e-30 | 1.00000  | 5.71410e-30 | 1.00000  |
| rad10              | 5.26367e-30 | 1.00000  | 5.26367e-30 | 1.00000  |
| rad26              | 2.75399e-30 | 1.00000  | 2.75399e-30 | 1.00000  |
| rad39              | 1.03214e-32 | 1.00000  | 1.03214e-32 | 1.00000  |
| rad27              | 6.44285e-33 | 1.00000  | 6.44285e-33 | 1.00000  |
| PAH3+H             | 2.23746e-33 | 1.00000  | 2.23746e-33 | 1.00000  |
| PhCCCH3+H          | 2.12884e-33 | 1.00000  | 2.12884e-33 | 1.00000  |
| rad59              | 1.04608e-33 | 1.00000  | 1.04608e-33 | 1.00000  |
| rad50              | 1.91785e-35 | 1.00000  | 1.91785e-35 | 1.00000  |
| rad12              | 1.90737e-40 | 1.00000  | 1.90737e-40 | 1.00000  |
| rad19syn           | 6.55479e-42 | 1.00000  | 6.55479e-42 | 1.00000  |
| rad37              | 4.42758e-42 | 1.00000  | 4.42758e-42 | 1.00000  |
| rad54              | 3.81951e-43 | 1.00000  | 3.81951e-43 | 1.00000  |
| rad52              | 3.81512e-43 | 1.00000  | 3.81512e-43 | 1.00000  |
| rad5               | 2.75180e-43 | 1.00000  | 2.75180e-43 | 1.00000  |
| rad70              | 2.35884e-44 | 1.00000  | 2.35884e-44 | 1.00000  |
| rad51              | 1.53504e-47 | 1.00000  | 1.53504e-47 | 1.00000  |
| rad55              | 1.32870e-49 | 1.00000  | 1.32870e-49 | 1.00000  |
| rad34              | 1.03923e-49 | 1.00000  | 1.03923e-49 | 1.00000  |
| rad58              | 2.24728e-50 | 1.00000  | 2.24728e-50 | 1.00000  |
| PhcycC3H3_A+H      | 3.62558e-51 | 1.00000  | 3.62558e-51 | 1.00000  |
| PAH10+CH3          | 1.66930e-52 | 1.00000  | 1.66930e-52 | 1.00000  |
| rad62              | 1.44192e-52 | 1.00000  | 1.44192e-52 | 1.00000  |
| rad47              | 2.55757e-54 | 1.00000  | 2.55757e-54 | 1.00000  |
| rad65              | 1.44203e-54 | 1.00000  | 1.44203e-54 | 1.00000  |
| rad43              | 3.98928e-56 | 1.00000  | 3.98928e-56 | 1.00000  |

|        |             |         |             |         |
|--------|-------------|---------|-------------|---------|
| PAH1+H | 1.67275e-58 | 1.00000 | 1.67275e-58 | 1.00000 |
| rad42  | 5.55763e-63 | 1.00000 | 5.55763e-63 | 1.00000 |
| rad41  | 9.32165e-68 | 1.00000 | 9.32165e-68 | 1.00000 |

1000000.00 Pa, 40.0000000 K

| Rate constant      | True (fraction)        | Effective (fraction)   |
|--------------------|------------------------|------------------------|
| Total              | 9.35697e-33 (1.00 )    | 9.35697e-33 (1.00 )    |
| Formation of rad11 | 9.35644e-33 (1.000 )   | 9.35644e-33 (1.000 )   |
| Formation of rad6  | 5.26139e-37 (5.62e-05) | 5.26139e-37 (5.62e-05) |
| H-abstraction      | 1.44763e-44 (1.55e-12) | 1.44763e-44 (1.55e-12) |

| species            | PYtrue      | Cumul    | PYeffective | Cumul    |
|--------------------|-------------|----------|-------------|----------|
| rad11              | 0.999870    | 0.999870 | 0.999870    | 0.999870 |
| rad6               | 0.000126412 | 0.999996 | 0.000126412 | 0.999996 |
| rad21              | 3.57121e-06 | 1.000000 | 3.57121e-06 | 1.000000 |
| rad20              | 6.18000e-08 | 1.000000 | 6.18000e-08 | 1.000000 |
| rad22              | 2.40072e-08 | 1.000000 | 2.40072e-08 | 1.000000 |
| rad45              | 1.56428e-09 | 1.000000 | 1.56428e-09 | 1.000000 |
| rad25              | 1.53845e-09 | 1.000000 | 1.53845e-09 | 1.000000 |
| rad24              | 1.15707e-09 | 1.000000 | 1.15707e-09 | 1.000000 |
| rad36              | 1.43718e-10 | 1.000000 | 1.43718e-10 | 1.000000 |
| rad18              | 9.51119e-11 | 1.000000 | 9.51119e-11 | 1.000000 |
| PhCHCCH2+H         | 9.17728e-11 | 1.000000 | 9.17728e-11 | 1.000000 |
| rad13              | 2.98588e-11 | 1.000000 | 2.98588e-11 | 1.000000 |
| rad7               | 9.26367e-12 | 1.000000 | 9.26367e-12 | 1.000000 |
| rad9               | 4.83688e-12 | 1.000000 | 4.83688e-12 | 1.000000 |
| Benzene+2-propynyl | 1.54712e-12 | 1.000000 | 1.54712e-12 | 1.000000 |
| Indene+H           | 1.11979e-12 | 1.000000 | 1.11979e-12 | 1.000000 |
| C2H2+PhCH2         | 8.24144e-13 | 1.000000 | 8.24144e-13 | 1.000000 |
| rad23              | 3.03083e-13 | 1.000000 | 3.03083e-13 | 1.000000 |
| rad33              | 2.50803e-13 | 1.000000 | 2.50803e-13 | 1.000000 |
| Phenyl+Allene      | 8.71679e-14 | 1.000000 | 0.000000    | 1.000000 |
| rad3               | 6.05047e-17 | 1.000000 | 6.05047e-17 | 1.000000 |
| rad4               | 3.78341e-17 | 1.000000 | 3.78341e-17 | 1.000000 |
| rad28              | 2.58468e-18 | 1.000000 | 2.58468e-18 | 1.000000 |
| PhCH2CCH+H         | 3.53852e-19 | 1.000000 | 3.53852e-19 | 1.000000 |
| rad30              | 2.85350e-20 | 1.000000 | 2.85350e-20 | 1.000000 |
| rad8               | 6.11690e-21 | 1.000000 | 6.11690e-21 | 1.000000 |
| rad15              | 4.20077e-21 | 1.000000 | 4.20077e-21 | 1.000000 |
| rad2               | 5.33356e-22 | 1.000000 | 5.33356e-22 | 1.000000 |
| rad38              | 2.55953e-22 | 1.000000 | 2.55953e-22 | 1.000000 |
| rad1               | 6.23722e-23 | 1.000000 | 6.23722e-23 | 1.000000 |
| PhCCH+CH3          | 4.37062e-24 | 1.000000 | 4.37062e-24 | 1.000000 |
| rad46              | 1.08849e-24 | 1.000000 | 1.08849e-24 | 1.000000 |
| PAH7+H             | 7.19479e-25 | 1.000000 | 7.19479e-25 | 1.000000 |
| rad31              | 3.03833e-25 | 1.000000 | 3.03833e-25 | 1.000000 |
| rad14              | 3.00151e-25 | 1.000000 | 3.00151e-25 | 1.000000 |
| rad60syn           | 5.86020e-26 | 1.000000 | 5.86020e-26 | 1.000000 |
| PAH9+H             | 3.36549e-26 | 1.000000 | 3.36549e-26 | 1.000000 |
| rad35              | 1.95385e-26 | 1.000000 | 1.95385e-26 | 1.000000 |
| rad60anti          | 6.69998e-27 | 1.000000 | 6.69998e-27 | 1.000000 |
| Ph+MeAc            | 4.97591e-28 | 1.000000 | 4.97591e-28 | 1.000000 |
| rad10              | 3.38790e-28 | 1.000000 | 3.38790e-28 | 1.000000 |
| rad26              | 1.18634e-29 | 1.000000 | 1.18634e-29 | 1.000000 |
| rad39              | 7.48741e-31 | 1.000000 | 7.48741e-31 | 1.000000 |
| rad27              | 4.83048e-31 | 1.000000 | 4.83048e-31 | 1.000000 |
| PhCCCH3+H          | 1.97289e-31 | 1.000000 | 1.97289e-31 | 1.000000 |
| PAH3+H             | 1.62416e-32 | 1.000000 | 1.62416e-32 | 1.000000 |
| rad59              | 7.57068e-33 | 1.000000 | 7.57068e-33 | 1.000000 |
| rad50              | 1.24929e-34 | 1.000000 | 1.24929e-34 | 1.000000 |
| rad12              | 1.21723e-39 | 1.000000 | 1.21723e-39 | 1.000000 |
| rad19syn           | 2.93772e-40 | 1.000000 | 2.93772e-40 | 1.000000 |
| rad5               | 4.52106e-41 | 1.000000 | 4.52106e-41 | 1.000000 |
| rad37              | 2.83688e-41 | 1.000000 | 2.83688e-41 | 1.000000 |
| rad54              | 1.38059e-41 | 1.000000 | 1.38059e-41 | 1.000000 |
| rad52              | 2.80039e-42 | 1.000000 | 2.80039e-42 | 1.000000 |
| rad70              | 9.90475e-44 | 1.000000 | 9.90475e-44 | 1.000000 |
| rad51              | 1.18474e-46 | 1.000000 | 1.18474e-46 | 1.000000 |
| rad55              | 3.30518e-48 | 1.000000 | 3.30518e-48 | 1.000000 |
| rad34              | 4.64727e-49 | 1.000000 | 4.64727e-49 | 1.000000 |
| rad58              | 2.04962e-49 | 1.000000 | 2.04962e-49 | 1.000000 |
| PhcycC3H3_A+H      | 9.67840e-50 | 1.000000 | 9.67840e-50 | 1.000000 |
| rad62              | 1.37245e-50 | 1.000000 | 1.37245e-50 | 1.000000 |
| PAH10+CH3          | 1.17121e-51 | 1.000000 | 1.17121e-51 | 1.000000 |
| rad47              | 2.07719e-53 | 1.000000 | 2.07719e-53 | 1.000000 |
| rad65              | 1.40354e-53 | 1.000000 | 1.40354e-53 | 1.000000 |
| rad43              | 6.60314e-54 | 1.000000 | 6.60314e-54 | 1.000000 |

|        |             |         |             |         |
|--------|-------------|---------|-------------|---------|
| PAH1+H | 5.03572e-57 | 1.00000 | 5.03572e-57 | 1.00000 |
| rad42  | 3.09657e-61 | 1.00000 | 3.09657e-61 | 1.00000 |
| rad41  | 8.53690e-66 | 1.00000 | 8.53690e-66 | 1.00000 |

1000000.00 Pa, 50.0000000 K

| Rate constant      | True (fraction)        | Effective (fraction)   |
|--------------------|------------------------|------------------------|
| Total              | 5.52690e-29 (1.00 )    | 5.52690e-29 (1.00 )    |
| Formation of rad11 | 5.52459e-29 (1.000 )   | 5.52459e-29 (1.000 )   |
| Formation of rad6  | 2.30840e-32 (0.000418) | 2.30840e-32 (0.000418) |
| H-abstraction      | 3.35357e-38 (6.07e-10) | 3.35357e-38 (6.07e-10) |

| species            | PYtrue      | Cumul    | PYeffective | Cumul    |
|--------------------|-------------|----------|-------------|----------|
| rad11              | 0.999484    | 0.999484 | 0.999484    | 0.999484 |
| rad6               | 0.000511272 | 0.999995 | 0.000511272 | 0.999995 |
| rad21              | 4.75192e-06 | 1.00000  | 4.75192e-06 | 1.00000  |
| rad20              | 1.08779e-07 | 1.00000  | 1.08779e-07 | 1.00000  |
| rad22              | 4.24021e-08 | 1.00000  | 4.24021e-08 | 1.00000  |
| rad45              | 3.20236e-09 | 1.00000  | 3.20236e-09 | 1.00000  |
| rad25              | 2.10769e-09 | 1.00000  | 2.10769e-09 | 1.00000  |
| rad24              | 1.60489e-09 | 1.00000  | 1.60489e-09 | 1.00000  |
| Benzene+2-propynyl | 6.06773e-10 | 1.00000  | 6.06773e-10 | 1.00000  |
| rad36              | 2.79967e-10 | 1.00000  | 2.79967e-10 | 1.00000  |
| rad18              | 2.22426e-10 | 1.00000  | 2.22426e-10 | 1.00000  |
| rad13              | 2.15471e-10 | 1.00000  | 2.15471e-10 | 1.00000  |
| PhCHCCH2+H         | 1.30214e-10 | 1.00000  | 1.30214e-10 | 1.00000  |
| rad7               | 6.82717e-11 | 1.00000  | 6.82717e-11 | 1.00000  |
| rad9               | 6.97126e-12 | 1.00000  | 6.97126e-12 | 1.00000  |
| Indene+H           | 2.70196e-12 | 1.00000  | 2.70196e-12 | 1.00000  |
| C2H2+PhCH2         | 1.98233e-12 | 1.00000  | 1.98233e-12 | 1.00000  |
| rad33              | 1.88220e-12 | 1.00000  | 1.88220e-12 | 1.00000  |
| rad23              | 7.76350e-13 | 1.00000  | 7.76350e-13 | 1.00000  |
| Phenyl+Allene      | 1.69692e-13 | 1.00000  | 0.00000     | 1.00000  |
| rad3               | 6.92715e-16 | 1.00000  | 6.92715e-16 | 1.00000  |
| rad4               | 4.25847e-16 | 1.00000  | 4.25847e-16 | 1.00000  |
| rad28              | 3.10334e-17 | 1.00000  | 3.10334e-17 | 1.00000  |
| PhCH2CCH+H         | 8.14068e-19 | 1.00000  | 8.14068e-19 | 1.00000  |
| rad30              | 9.26725e-20 | 1.00000  | 9.26725e-20 | 1.00000  |
| rad8               | 1.78915e-20 | 1.00000  | 1.78915e-20 | 1.00000  |
| rad15              | 1.37771e-20 | 1.00000  | 1.37771e-20 | 1.00000  |
| rad2               | 8.81818e-21 | 1.00000  | 8.81818e-21 | 1.00000  |
| rad1               | 9.76697e-22 | 1.00000  | 9.76697e-22 | 1.00000  |
| rad38              | 7.87277e-22 | 1.00000  | 7.87277e-22 | 1.00000  |
| PhCCH+CH3          | 7.95979e-23 | 1.00000  | 7.95979e-23 | 1.00000  |
| rad14              | 5.22165e-24 | 1.00000  | 5.22165e-24 | 1.00000  |
| rad46              | 3.41687e-24 | 1.00000  | 3.41687e-24 | 1.00000  |
| rad31              | 2.61375e-24 | 1.00000  | 2.61375e-24 | 1.00000  |
| PAH7+H             | 2.41976e-24 | 1.00000  | 2.41976e-24 | 1.00000  |
| rad60syn           | 2.26848e-25 | 1.00000  | 2.26848e-25 | 1.00000  |
| PAH9+H             | 1.17661e-25 | 1.00000  | 1.17661e-25 | 1.00000  |
| rad35              | 6.80271e-26 | 1.00000  | 6.80271e-26 | 1.00000  |
| rad60anti          | 2.82515e-26 | 1.00000  | 2.82515e-26 | 1.00000  |
| Ph+MeAc            | 1.08964e-26 | 1.00000  | 1.08964e-26 | 1.00000  |
| rad10              | 7.89594e-27 | 1.00000  | 7.89594e-27 | 1.00000  |
| rad26              | 4.34435e-29 | 1.00000  | 4.34435e-29 | 1.00000  |
| rad39              | 1.52289e-29 | 1.00000  | 1.52289e-29 | 1.00000  |
| rad27              | 1.17214e-29 | 1.00000  | 1.17214e-29 | 1.00000  |
| PhCCCH3+H          | 5.11306e-30 | 1.00000  | 5.11306e-30 | 1.00000  |
| PAH3+H             | 8.74809e-32 | 1.00000  | 8.74809e-32 | 1.00000  |
| rad59              | 4.05926e-32 | 1.00000  | 4.05926e-32 | 1.00000  |
| rad50              | 6.21414e-34 | 1.00000  | 6.21414e-34 | 1.00000  |
| rad19syn           | 7.48589e-39 | 1.00000  | 7.48589e-39 | 1.00000  |
| rad12              | 5.87738e-39 | 1.00000  | 5.87738e-39 | 1.00000  |
| rad5               | 1.88327e-39 | 1.00000  | 1.88327e-39 | 1.00000  |
| rad54              | 3.53481e-40 | 1.00000  | 3.53481e-40 | 1.00000  |
| rad37              | 1.38060e-40 | 1.00000  | 1.38060e-40 | 1.00000  |
| rad52              | 1.67186e-41 | 1.00000  | 1.67186e-41 | 1.00000  |
| rad70              | 4.32104e-43 | 1.00000  | 4.32104e-43 | 1.00000  |
| rad51              | 7.80851e-46 | 1.00000  | 7.80851e-46 | 1.00000  |
| rad55              | 8.37614e-47 | 1.00000  | 8.37614e-47 | 1.00000  |
| PhcycC3H3_A+H      | 2.54489e-48 | 1.00000  | 2.54489e-48 | 1.00000  |
| rad34              | 2.21785e-48 | 1.00000  | 2.21785e-48 | 1.00000  |
| rad58              | 1.55414e-48 | 1.00000  | 1.55414e-48 | 1.00000  |
| rad62              | 6.94849e-49 | 1.00000  | 6.94849e-49 | 1.00000  |
| PAH10+CH3          | 6.83200e-51 | 1.00000  | 6.83200e-51 | 1.00000  |
| rad43              | 4.52909e-52 | 1.00000  | 4.52909e-52 | 1.00000  |
| rad47              | 1.56298e-52 | 1.00000  | 1.56298e-52 | 1.00000  |
| rad65              | 1.10074e-52 | 1.00000  | 1.10074e-52 | 1.00000  |

|        |             |         |             |         |
|--------|-------------|---------|-------------|---------|
| PAH1+H | 1.68413e-55 | 1.00000 | 1.68413e-55 | 1.00000 |
| rad42  | 1.67100e-59 | 1.00000 | 1.67100e-59 | 1.00000 |
| rad41  | 6.60796e-64 | 1.00000 | 6.60796e-64 | 1.00000 |

1000000.00 Pa, 60.0000000 K

| =====              |                 |            |                      |            |
|--------------------|-----------------|------------|----------------------|------------|
| Rate constant      | True (fraction) |            | Effective (fraction) |            |
| -----              |                 |            |                      |            |
| Total              | 1.83429e-26     | (1.00 )    | 1.83429e-26          | (1.00 )    |
| Formation of rad11 | 1.83139e-26     | (0.998 )   | 1.83139e-26          | (0.998 )   |
| Formation of rad6  | 2.90471e-29     | (0.00158 ) | 2.90471e-29          | (0.00158 ) |
| H-abstraction      | 5.71259e-34     | (3.11e-08) | 5.71259e-34          | (3.11e-08) |
| -----              |                 |            |                      |            |
| species            | PYtrue          | Cumul      | PYeffective          | Cumul      |
| -----              |                 |            |                      |            |
| rad11              | 0.998293        | 0.998293   | 0.998293             | 0.998293   |
| rad6               | 0.00170095      | 0.999994   | 0.00170095           | 0.999994   |
| rad21              | 5.95153e-06     | 1.000000   | 5.95153e-06          | 1.000000   |
| rad20              | 1.69365e-07     | 1.000000   | 1.69365e-07          | 1.000000   |
| rad22              | 6.62460e-08     | 1.000000   | 6.62460e-08          | 1.000000   |
| Benzene+2-propynyl | 3.11432e-08     | 1.000000   | 3.11432e-08          | 1.000000   |
| rad45              | 5.52103e-09     | 1.000000   | 5.52103e-09          | 1.000000   |
| rad25              | 2.72819e-09     | 1.000000   | 2.72819e-09          | 1.000000   |
| rad24              | 2.01079e-09     | 1.000000   | 2.01079e-09          | 1.000000   |
| rad13              | 9.70426e-10     | 1.000000   | 9.70426e-10          | 1.000000   |
| rad36              | 4.65795e-10     | 1.000000   | 4.65795e-10          | 1.000000   |
| rad18              | 4.32635e-10     | 1.000000   | 4.32635e-10          | 1.000000   |
| rad7               | 3.10715e-10     | 1.000000   | 3.10715e-10          | 1.000000   |
| PhCHCCH2+H         | 1.75659e-10     | 1.000000   | 1.75659e-10          | 1.000000   |
| rad9               | 9.57738e-12     | 1.000000   | 9.57738e-12          | 1.000000   |
| rad33              | 8.54548e-12     | 1.000000   | 8.54548e-12          | 1.000000   |
| Indene+H           | 5.42247e-12     | 1.000000   | 5.42247e-12          | 1.000000   |
| C2H2+PhCH2         | 3.98653e-12     | 1.000000   | 3.98653e-12          | 1.000000   |
| rad23              | 1.61913e-12     | 1.000000   | 1.61913e-12          | 1.000000   |
| Phenyl+Allene      | 3.16372e-13     | 1.000000   | 0.000000             | 1.000000   |
| rad3               | 4.13214e-15     | 1.000000   | 4.13214e-15          | 1.000000   |
| rad4               | 2.50896e-15     | 1.000000   | 2.50896e-15          | 1.000000   |
| rad28              | 1.89104e-16     | 1.000000   | 1.89104e-16          | 1.000000   |
| PhCH2CCH+H         | 2.05216e-18     | 1.000000   | 2.05216e-18          | 1.000000   |
| rad30              | 2.37523e-19     | 1.000000   | 2.37523e-19          | 1.000000   |
| rad2               | 6.80671e-20     | 1.000000   | 6.80671e-20          | 1.000000   |
| rad8               | 4.51108e-20     | 1.000000   | 4.51108e-20          | 1.000000   |
| rad15              | 3.57289e-20     | 1.000000   | 3.57289e-20          | 1.000000   |
| rad1               | 7.25062e-21     | 1.000000   | 7.25062e-21          | 1.000000   |
| rad38              | 1.91140e-21     | 1.000000   | 1.91140e-21          | 1.000000   |
| PhCCH+CH3          | 6.59143e-22     | 1.000000   | 6.59143e-22          | 1.000000   |
| rad14              | 4.17611e-23     | 1.000000   | 4.17611e-23          | 1.000000   |
| rad31              | 1.27855e-23     | 1.000000   | 1.27855e-23          | 1.000000   |
| PAH7+H             | 9.43937e-24     | 1.000000   | 9.43937e-24          | 1.000000   |
| rad46              | 8.58686e-24     | 1.000000   | 8.58686e-24          | 1.000000   |
| rad60syn           | 7.12226e-25     | 1.000000   | 7.12226e-25          | 1.000000   |
| PAH9+H             | 3.21683e-25     | 1.000000   | 3.21683e-25          | 1.000000   |
| rad35              | 1.84991e-25     | 1.000000   | 1.84991e-25          | 1.000000   |
| Ph+MeAc            | 1.07309e-25     | 1.000000   | 1.07309e-25          | 1.000000   |
| rad60anti          | 9.79443e-26     | 1.000000   | 9.79443e-26          | 1.000000   |
| rad10              | 7.89834e-26     | 1.000000   | 7.89834e-26          | 1.000000   |
| rad26              | 1.54897e-28     | 1.000000   | 1.54897e-28          | 1.000000   |
| rad39              | 1.39880e-28     | 1.000000   | 1.39880e-28          | 1.000000   |
| rad27              | 1.21368e-28     | 1.000000   | 1.21368e-28          | 1.000000   |
| PhCCCH3+H          | 5.61115e-29     | 1.000000   | 5.61115e-29          | 1.000000   |
| PAH3+H             | 4.24146e-31     | 1.000000   | 4.24146e-31          | 1.000000   |
| rad59              | 1.95625e-31     | 1.000000   | 1.95625e-31          | 1.000000   |
| rad50              | 2.83670e-33     | 1.000000   | 2.83670e-33          | 1.000000   |
| rad19syn           | 1.12895e-37     | 1.000000   | 1.12895e-37          | 1.000000   |
| rad5               | 3.67169e-38     | 1.000000   | 3.67169e-38          | 1.000000   |
| rad12              | 2.60104e-38     | 1.000000   | 2.60104e-38          | 1.000000   |
| rad54              | 5.59425e-39     | 1.000000   | 5.59425e-39          | 1.000000   |
| rad37              | 6.17940e-40     | 1.000000   | 6.17940e-40          | 1.000000   |
| rad52              | 9.73671e-41     | 1.000000   | 9.73671e-41          | 1.000000   |
| rad70              | 2.08657e-42     | 1.000000   | 2.08657e-42          | 1.000000   |
| rad51              | 5.22138e-45     | 1.000000   | 5.22138e-45          | 1.000000   |
| rad55              | 1.43185e-45     | 1.000000   | 1.43185e-45          | 1.000000   |
| PhcycC3H3_A+H      | 4.43946e-47     | 1.000000   | 4.43946e-47          | 1.000000   |
| rad62              | 1.94925e-47     | 1.000000   | 1.94925e-47          | 1.000000   |
| rad34              | 1.19349e-47     | 1.000000   | 1.19349e-47          | 1.000000   |
| rad58              | 1.16093e-47     | 1.000000   | 1.16093e-47          | 1.000000   |
| PAH10+CH3          | 3.92304e-50     | 1.000000   | 3.92304e-50          | 1.000000   |
| rad43              | 1.58683e-50     | 1.000000   | 1.58683e-50          | 1.000000   |
| rad47              | 1.26832e-51     | 1.000000   | 1.26832e-51          | 1.000000   |
| rad65              | 8.44702e-52     | 1.000000   | 8.44702e-52          | 1.000000   |

|        |             |         |             |         |
|--------|-------------|---------|-------------|---------|
| PAH1+H | 3.77136e-54 | 1.00000 | 3.77136e-54 | 1.00000 |
| rad42  | 5.92064e-58 | 1.00000 | 5.92064e-58 | 1.00000 |
| rad41  | 3.16885e-62 | 1.00000 | 3.16885e-62 | 1.00000 |

1000000.00 Pa, 70.0000000 K

| =====              |                 |            |                      |            |
|--------------------|-----------------|------------|----------------------|------------|
| Rate constant      | True (fraction) |            | Effective (fraction) |            |
| -----              |                 |            |                      |            |
| Total              | 1.17336e-24     | (1.00 )    | 1.17336e-24          | (1.00 )    |
| Formation of rad11 | 1.16857e-24     | (0.996 )   | 1.16857e-24          | (0.996 )   |
| Formation of rad6  | 4.79505e-27     | (0.00409 ) | 4.79505e-27          | (0.00409 ) |
| H-abstraction      | 5.89821e-31     | (5.03e-07) | 5.89821e-31          | (5.03e-07) |
| -----              |                 |            |                      |            |
| species            | PYtrue          | Cumul      | PYeffective          | Cumul      |
| rad11              | 0.995763        | 0.995763   | 0.995763             | 0.995763   |
| rad6               | 0.00422821      | 0.999992   | 0.00422821           | 0.999992   |
| rad21              | 7.17592e-06     | 0.999999   | 7.17592e-06          | 0.999999   |
| Benzene+2-propynyl | 5.02676e-07     | 0.999999   | 5.02676e-07          | 0.999999   |
| rad20              | 2.44346e-07     | 1.000000   | 2.44346e-07          | 1.000000   |
| rad22              | 9.59069e-08     | 1.000000   | 9.59069e-08          | 1.000000   |
| rad45              | 8.58035e-09     | 1.000000   | 8.58035e-09          | 1.000000   |
| rad25              | 3.40901e-09     | 1.000000   | 3.40901e-09          | 1.000000   |
| rad13              | 2.98937e-09     | 1.000000   | 2.98937e-09          | 1.000000   |
| rad24              | 2.37441e-09     | 1.000000   | 2.37441e-09          | 1.000000   |
| rad7               | 9.65541e-10     | 1.000000   | 9.65541e-10          | 1.000000   |
| rad18              | 7.50935e-10     | 1.000000   | 7.50935e-10          | 1.000000   |
| rad36              | 7.04482e-10     | 1.000000   | 7.04482e-10          | 1.000000   |
| PhCHCCH2+H         | 2.29801e-10     | 1.000000   | 2.29801e-10          | 1.000000   |
| rad33              | 2.64001e-11     | 1.000000   | 2.64001e-11          | 1.000000   |
| rad9               | 1.27815e-11     | 1.000000   | 1.27815e-11          | 1.000000   |
| Indene+H           | 9.71272e-12     | 1.000000   | 9.71272e-12          | 1.000000   |
| C2H2+PhCH2         | 7.18391e-12     | 1.000000   | 7.18391e-12          | 1.000000   |
| rad23              | 2.97255e-12     | 1.000000   | 2.97255e-12          | 1.000000   |
| Phenyl+Allene      | 5.66853e-13     | 1.000000   | 0.00000              | 1.000000   |
| rad3               | 1.59364e-14     | 1.000000   | 1.59364e-14          | 1.000000   |
| rad4               | 9.58412e-15     | 1.000000   | 9.58412e-15          | 1.000000   |
| rad28              | 7.44261e-16     | 1.000000   | 7.44261e-16          | 1.000000   |
| PhCH2CCH+H         | 5.99074e-18     | 1.000000   | 5.99074e-18          | 1.000000   |
| rad30              | 5.27186e-19     | 1.000000   | 5.27186e-19          | 1.000000   |
| rad2               | 3.26537e-19     | 1.000000   | 3.26537e-19          | 1.000000   |
| rad8               | 1.04142e-19     | 1.000000   | 1.04142e-19          | 1.000000   |
| rad15              | 8.03704e-20     | 1.000000   | 8.03704e-20          | 1.000000   |
| rad1               | 3.37631e-20     | 1.000000   | 3.37631e-20          | 1.000000   |
| rad38              | 4.02551e-21     | 1.000000   | 4.02551e-21          | 1.000000   |
| PhCCH+CH3          | 3.40650e-21     | 1.000000   | 3.40650e-21          | 1.000000   |
| rad14              | 2.08302e-22     | 1.000000   | 2.08302e-22          | 1.000000   |
| rad31              | 4.26214e-23     | 1.000000   | 4.26214e-23          | 1.000000   |
| PAH7+H             | 4.20982e-23     | 1.000000   | 4.20982e-23          | 1.000000   |
| rad46              | 1.88921e-23     | 1.000000   | 1.88921e-23          | 1.000000   |
| rad60syn           | 1.97387e-24     | 1.000000   | 1.97387e-24          | 1.000000   |
| PAH9+H             | 7.57164e-25     | 1.000000   | 7.57164e-25          | 1.000000   |
| Ph+MeAc            | 6.66791e-25     | 1.000000   | 6.66791e-25          | 1.000000   |
| rad10              | 4.74017e-25     | 1.000000   | 4.74017e-25          | 1.000000   |
| rad35              | 4.32666e-25     | 1.000000   | 4.32666e-25          | 1.000000   |
| rad60anti          | 3.01310e-25     | 1.000000   | 3.01310e-25          | 1.000000   |
| rad39              | 8.10814e-28     | 1.000000   | 8.10814e-28          | 1.000000   |
| rad27              | 7.56704e-28     | 1.000000   | 7.56704e-28          | 1.000000   |
| rad26              | 5.81210e-28     | 1.000000   | 5.81210e-28          | 1.000000   |
| PhCCCH3+H          | 3.72148e-28     | 1.000000   | 3.72148e-28          | 1.000000   |
| PAH3+H             | 2.04699e-30     | 1.000000   | 2.04699e-30          | 1.000000   |
| rad59              | 9.36601e-31     | 1.000000   | 9.36601e-31          | 1.000000   |
| rad50              | 1.30239e-32     | 1.000000   | 1.30239e-32          | 1.000000   |
| rad19syn           | 1.36654e-36     | 1.000000   | 1.36654e-36          | 1.000000   |
| rad5               | 4.76780e-37     | 1.000000   | 4.76780e-37          | 1.000000   |
| rad12              | 1.17013e-37     | 1.000000   | 1.17013e-37          | 1.000000   |
| rad54              | 7.25033e-38     | 1.000000   | 7.25033e-38          | 1.000000   |
| rad37              | 2.82357e-39     | 1.000000   | 2.82357e-39          | 1.000000   |
| rad52              | 6.10937e-40     | 1.000000   | 6.10937e-40          | 1.000000   |
| rad70              | 1.18038e-41     | 1.000000   | 1.18038e-41          | 1.000000   |
| rad51              | 3.90679e-44     | 1.000000   | 3.90679e-44          | 1.000000   |
| rad55              | 2.06161e-44     | 1.000000   | 2.06161e-44          | 1.000000   |
| PhcycC3H3_A+H      | 6.45904e-46     | 1.000000   | 6.45904e-46          | 1.000000   |
| rad62              | 4.21667e-46     | 1.000000   | 4.21667e-46          | 1.000000   |
| rad58              | 9.42708e-47     | 1.000000   | 9.42708e-47          | 1.000000   |
| rad34              | 7.62122e-47     | 1.000000   | 7.62122e-47          | 1.000000   |
| rad43              | 4.07770e-49     | 1.000000   | 4.07770e-49          | 1.000000   |
| PAH10+CH3          | 2.45041e-49     | 1.000000   | 2.45041e-49          | 1.000000   |
| rad47              | 1.21845e-50     | 1.000000   | 1.21845e-50          | 1.000000   |
| rad65              | 7.10902e-51     | 1.000000   | 7.10902e-51          | 1.000000   |

|        |             |          |             |          |
|--------|-------------|----------|-------------|----------|
| PAH1+H | 6.90782e-53 | 1.000000 | 6.90782e-53 | 1.000000 |
| rad42  | 1.76321e-56 | 1.000000 | 1.76321e-56 | 1.000000 |
| rad41  | 1.24160e-60 | 1.000000 | 1.24160e-60 | 1.000000 |

1000000.00 Pa, 80.0000000 K

| =====              |                 |            |                      |            |
|--------------------|-----------------|------------|----------------------|------------|
| Rate constant      | True (fraction) |            | Effective (fraction) |            |
| -----              |                 |            |                      |            |
| Total              | 2.68112e-23     | (1.00 )    | 2.68112e-23          | (1.00 )    |
| Formation of rad11 | 2.65890e-23     | (0.992 )   | 2.65890e-23          | (0.992 )   |
| Formation of rad6  | 2.22189e-25     | (0.00829 ) | 2.22189e-25          | (0.00829 ) |
| H-abstraction      | 1.05871e-28     | (3.95e-06) | 1.05871e-28          | (3.95e-06) |
| -----              |                 |            |                      |            |
| species            | PYtrue          | Cumul      | PYeffective          | Cumul      |
| rad11              | 0.991534        | 0.991534   | 0.991534             | 0.991534   |
| rad6               | 0.00845350      | 0.999988   | 0.00845350           | 0.999988   |
| rad21              | 8.42874e-06     | 0.999996   | 8.42874e-06          | 0.999996   |
| Benzene+2-propynyl | 3.94877e-06     | 1.000000   | 3.94877e-06          | 1.000000   |
| rad20              | 3.34757e-07     | 1.000000   | 3.34757e-07          | 1.000000   |
| rad22              | 1.31859e-07     | 1.000000   | 1.31859e-07          | 1.000000   |
| rad45              | 1.24519e-08     | 1.000000   | 1.24519e-08          | 1.000000   |
| rad13              | 7.13281e-09     | 1.000000   | 7.13281e-09          | 1.000000   |
| rad25              | 4.15979e-09     | 1.000000   | 4.15979e-09          | 1.000000   |
| rad24              | 2.69992e-09     | 1.000000   | 2.69992e-09          | 1.000000   |
| rad7               | 2.32376e-09     | 1.000000   | 2.32376e-09          | 1.000000   |
| rad18              | 1.20719e-09     | 1.000000   | 1.20719e-09          | 1.000000   |
| rad36              | 1.00046e-09     | 1.000000   | 1.00046e-09          | 1.000000   |
| PhCHCCH2+H         | 2.94760e-10     | 1.000000   | 2.94760e-10          | 1.000000   |
| rad33              | 6.31176e-11     | 1.000000   | 6.31176e-11          | 1.000000   |
| rad9               | 1.67455e-11     | 1.000000   | 1.67455e-11          | 1.000000   |
| Indene+H           | 1.61205e-11     | 1.000000   | 1.61205e-11          | 1.000000   |
| C2H2+PhCH2         | 1.20374e-11     | 1.000000   | 1.20374e-11          | 1.000000   |
| rad23              | 5.00848e-12     | 1.000000   | 5.00848e-12          | 1.000000   |
| Phenyl+Allene      | 9.83719e-13     | 1.000000   | 0.000000             | 1.000000   |
| rad3               | 4.62949e-14     | 1.000000   | 4.62949e-14          | 1.000000   |
| rad4               | 2.76286e-14     | 1.000000   | 2.76286e-14          | 1.000000   |
| rad28              | 2.21041e-15     | 1.000000   | 2.21041e-15          | 1.000000   |
| PhCH2CCH+H         | 2.11792e-17     | 1.000000   | 2.11792e-17          | 1.000000   |
| rad2               | 1.15466e-18     | 1.000000   | 1.15466e-18          | 1.000000   |
| rad30              | 1.06508e-18     | 1.000000   | 1.06508e-18          | 1.000000   |
| rad8               | 2.28145e-19     | 1.000000   | 2.28145e-19          | 1.000000   |
| rad15              | 1.64831e-19     | 1.000000   | 1.64831e-19          | 1.000000   |
| rad1               | 1.16604e-19     | 1.000000   | 1.16604e-19          | 1.000000   |
| PhCCH+CH3          | 1.30676e-20     | 1.000000   | 1.30676e-20          | 1.000000   |
| rad38              | 7.73194e-21     | 1.000000   | 7.73194e-21          | 1.000000   |
| rad14              | 7.69572e-22     | 1.000000   | 7.69572e-22          | 1.000000   |
| PAH7+H             | 1.91056e-22     | 1.000000   | 1.91056e-22          | 1.000000   |
| rad31              | 1.10824e-22     | 1.000000   | 1.10824e-22          | 1.000000   |
| rad46              | 3.81929e-23     | 1.000000   | 3.81929e-23          | 1.000000   |
| rad60syn           | 5.06322e-24     | 1.000000   | 5.06322e-24          | 1.000000   |
| Ph+MeAc            | 3.10512e-24     | 1.000000   | 3.10512e-24          | 1.000000   |
| rad10              | 2.05554e-24     | 1.000000   | 2.05554e-24          | 1.000000   |
| PAH9+H             | 1.61677e-24     | 1.000000   | 1.61677e-24          | 1.000000   |
| rad35              | 9.17213e-25     | 1.000000   | 9.17213e-25          | 1.000000   |
| rad60anti          | 8.57567e-25     | 1.000000   | 8.57567e-25          | 1.000000   |
| rad39              | 3.52719e-27     | 1.000000   | 3.52719e-27          | 1.000000   |
| rad27              | 3.42397e-27     | 1.000000   | 3.42397e-27          | 1.000000   |
| rad26              | 2.43875e-27     | 1.000000   | 2.43875e-27          | 1.000000   |
| PhCCCH3+H          | 1.80044e-27     | 1.000000   | 1.80044e-27          | 1.000000   |
| PAH3+H             | 1.05842e-29     | 1.000000   | 1.05842e-29          | 1.000000   |
| rad59              | 4.78809e-30     | 1.000000   | 4.78809e-30          | 1.000000   |
| rad50              | 6.38634e-32     | 1.000000   | 6.38634e-32          | 1.000000   |
| rad19syn           | 1.66901e-35     | 1.000000   | 1.66901e-35          | 1.000000   |
| rad5               | 4.88563e-36     | 1.000000   | 4.88563e-36          | 1.000000   |
| rad54              | 9.67893e-37     | 1.000000   | 9.67893e-37          | 1.000000   |
| rad12              | 5.79026e-37     | 1.000000   | 5.79026e-37          | 1.000000   |
| rad37              | 1.43057e-38     | 1.000000   | 1.43057e-38          | 1.000000   |
| rad52              | 4.51666e-39     | 1.000000   | 4.51666e-39          | 1.000000   |
| rad70              | 8.61158e-41     | 1.000000   | 8.61158e-41          | 1.000000   |
| rad51              | 3.60654e-43     | 1.000000   | 3.60654e-43          | 1.000000   |
| rad55              | 3.13467e-43     | 1.000000   | 3.13467e-43          | 1.000000   |
| PhcycC3H3_A+H      | 9.84474e-45     | 1.000000   | 9.84474e-45          | 1.000000   |
| rad62              | 8.85871e-45     | 1.000000   | 8.85871e-45          | 1.000000   |
| rad58              | 9.27659e-46     | 1.000000   | 9.27659e-46          | 1.000000   |
| rad34              | 6.33700e-46     | 1.000000   | 6.33700e-46          | 1.000000   |
| rad43              | 9.68802e-48     | 1.000000   | 9.68802e-48          | 1.000000   |
| PAH10+CH3          | 1.85958e-48     | 1.000000   | 1.85958e-48          | 1.000000   |
| rad47              | 1.53950e-49     | 1.000000   | 1.53950e-49          | 1.000000   |
| rad65              | 7.36155e-50     | 1.000000   | 7.36155e-50          | 1.000000   |

|        |             |         |             |         |
|--------|-------------|---------|-------------|---------|
| PAH1+H | 1.30129e-51 | 1.00000 | 1.30129e-51 | 1.00000 |
| rad42  | 5.60568e-55 | 1.00000 | 5.60568e-55 | 1.00000 |
| rad41  | 5.06758e-59 | 1.00000 | 5.06758e-59 | 1.00000 |

1000000.00 Pa, 90.0000000 K

| =====              |                 |            |                      |            |
|--------------------|-----------------|------------|----------------------|------------|
| Rate constant      | True (fraction) |            | Effective (fraction) |            |
| -----              |                 |            |                      |            |
| Total              | 3.08379e-22     | (1.00 )    | 3.08379e-22          | (1.00 )    |
| Formation of rad11 | 3.03962e-22     | (0.986 )   | 3.03962e-22          | (0.986 )   |
| Formation of rad6  | 4.41076e-24     | (0.0143 )  | 4.41076e-24          | (0.0143 )  |
| H-abstraction      | 5.92916e-27     | (1.92e-05) | 5.92916e-27          | (1.92e-05) |
| -----              |                 |            |                      |            |
| species            | PYtrue          | Cumul      | PYeffective          | Cumul      |
| -----              |                 |            |                      |            |
| rad11              | 0.985476        | 0.985476   | 0.985476             | 0.985476   |
| rad6               | 0.0144947       | 0.999971   | 0.0144947            | 0.999971   |
| Benzene+2-propynyl | 1.92269e-05     | 0.999990   | 1.92269e-05          | 0.999990   |
| rad21              | 9.71455e-06     | 1.000000   | 9.71455e-06          | 1.000000   |
| rad20              | 4.41996e-07     | 1.000000   | 4.41996e-07          | 1.000000   |
| rad22              | 1.74735e-07     | 1.000000   | 1.74735e-07          | 1.000000   |
| rad45              | 1.72285e-08     | 1.000000   | 1.72285e-08          | 1.000000   |
| rad13              | 1.42841e-08     | 1.000000   | 1.42841e-08          | 1.000000   |
| rad25              | 4.99293e-09     | 1.000000   | 4.99293e-09          | 1.000000   |
| rad7               | 4.69494e-09     | 1.000000   | 4.69494e-09          | 1.000000   |
| rad24              | 2.99331e-09     | 1.000000   | 2.99331e-09          | 1.000000   |
| rad18              | 1.83814e-09     | 1.000000   | 1.83814e-09          | 1.000000   |
| rad36              | 1.35991e-09     | 1.000000   | 1.35991e-09          | 1.000000   |
| PhCHCCH2+H         | 3.73384e-10     | 1.000000   | 3.73384e-10          | 1.000000   |
| rad33              | 1.26636e-10     | 1.000000   | 1.26636e-10          | 1.000000   |
| Indene+H           | 2.53628e-11     | 1.000000   | 2.53628e-11          | 1.000000   |
| rad9               | 2.16898e-11     | 1.000000   | 2.16898e-11          | 1.000000   |
| C2H2+PhCH2         | 1.91835e-11     | 1.000000   | 1.91835e-11          | 1.000000   |
| rad23              | 7.94325e-12     | 1.000000   | 7.94325e-12          | 1.000000   |
| Phenyl+Allene      | 1.66570e-12     | 1.000000   | 0.000000             | 1.000000   |
| rad3               | 1.10929e-13     | 1.000000   | 1.10929e-13          | 1.000000   |
| rad4               | 6.57841e-14     | 1.000000   | 6.57841e-14          | 1.000000   |
| rad28              | 5.42617e-15     | 1.000000   | 5.42617e-15          | 1.000000   |
| PhCH2CCH+H         | 8.51678e-17     | 1.000000   | 8.51678e-17          | 1.000000   |
| rad2               | 3.32247e-18     | 1.000000   | 3.32247e-18          | 1.000000   |
| rad30              | 2.01972e-18     | 1.000000   | 2.01972e-18          | 1.000000   |
| rad8               | 4.85606e-19     | 1.000000   | 4.85606e-19          | 1.000000   |
| rad1               | 3.29132e-19     | 1.000000   | 3.29132e-19          | 1.000000   |
| rad15              | 3.17861e-19     | 1.000000   | 3.17861e-19          | 1.000000   |
| PhCCH+CH3          | 4.10860e-20     | 1.000000   | 4.10860e-20          | 1.000000   |
| rad38              | 1.39637e-20     | 1.000000   | 1.39637e-20          | 1.000000   |
| rad14              | 2.32453e-21     | 1.000000   | 2.32453e-21          | 1.000000   |
| PAH7+H             | 8.21229e-22     | 1.000000   | 8.21229e-22          | 1.000000   |
| rad31              | 2.43697e-22     | 1.000000   | 2.43697e-22          | 1.000000   |
| rad46              | 7.31134e-23     | 1.000000   | 7.31134e-23          | 1.000000   |
| rad60syn           | 1.23841e-23     | 1.000000   | 1.23841e-23          | 1.000000   |
| Ph+MeAc            | 1.19409e-23     | 1.000000   | 1.19409e-23          | 1.000000   |
| rad10              | 7.16775e-24     | 1.000000   | 7.16775e-24          | 1.000000   |
| PAH9+H             | 3.23591e-24     | 1.000000   | 3.23591e-24          | 1.000000   |
| rad60anti          | 2.31783e-24     | 1.000000   | 2.31783e-24          | 1.000000   |
| rad35              | 1.82129e-24     | 1.000000   | 1.82129e-24          | 1.000000   |
| rad39              | 1.27048e-26     | 1.000000   | 1.27048e-26          | 1.000000   |
| rad27              | 1.25149e-26     | 1.000000   | 1.25149e-26          | 1.000000   |
| rad26              | 1.16448e-26     | 1.000000   | 1.16448e-26          | 1.000000   |
| PhCCCH3+H          | 7.07574e-27     | 1.000000   | 7.07574e-27          | 1.000000   |
| PAH3+H             | 6.11137e-29     | 1.000000   | 6.11137e-29          | 1.000000   |
| rad59              | 2.71614e-29     | 1.000000   | 2.71614e-29          | 1.000000   |
| rad50              | 3.42193e-31     | 1.000000   | 3.42193e-31          | 1.000000   |
| rad19syn           | 2.54244e-34     | 1.000000   | 2.54244e-34          | 1.000000   |
| rad5               | 4.27256e-35     | 1.000000   | 4.27256e-35          | 1.000000   |
| rad54              | 1.68701e-35     | 1.000000   | 1.68701e-35          | 1.000000   |
| rad12              | 3.27496e-36     | 1.000000   | 3.27496e-36          | 1.000000   |
| rad37              | 8.43268e-38     | 1.000000   | 8.43268e-38          | 1.000000   |
| rad52              | 4.28410e-38     | 1.000000   | 4.28410e-38          | 1.000000   |
| rad70              | 9.60253e-40     | 1.000000   | 9.60253e-40          | 1.000000   |
| rad55              | 6.54536e-42     | 1.000000   | 6.54536e-42          | 1.000000   |
| rad51              | 4.58060e-42     | 1.000000   | 4.58060e-42          | 1.000000   |
| rad62              | 2.17687e-43     | 1.000000   | 2.17687e-43          | 1.000000   |
| PhcycC3H3_A+H      | 2.04867e-43     | 1.000000   | 2.04867e-43          | 1.000000   |
| rad58              | 1.28740e-44     | 1.000000   | 1.28740e-44          | 1.000000   |
| rad34              | 8.13618e-45     | 1.000000   | 8.13618e-45          | 1.000000   |
| rad43              | 2.51413e-46     | 1.000000   | 2.51413e-46          | 1.000000   |
| PAH10+CH3          | 1.99698e-47     | 1.000000   | 1.99698e-47          | 1.000000   |
| rad47              | 2.91129e-48     | 1.000000   | 2.91129e-48          | 1.000000   |
| rad65              | 1.07325e-48     | 1.000000   | 1.07325e-48          | 1.000000   |



|        |             |         |             |         |
|--------|-------------|---------|-------------|---------|
| PAH1+H | 3.28125e-50 | 1.00000 | 3.28125e-50 | 1.00000 |
| rad42  | 2.37922e-53 | 1.00000 | 2.37922e-53 | 1.00000 |
| rad41  | 2.66274e-57 | 1.00000 | 2.66274e-57 | 1.00000 |

1000000.00 Pa, 100.000000 K

| =====              |                 |            |                      |            |
|--------------------|-----------------|------------|----------------------|------------|
| Rate constant      | True (fraction) |            | Effective (fraction) |            |
| -----              |                 |            |                      |            |
| Total              | 2.19347e-21     | (1.00 )    | 2.19347e-21          | (1.00 )    |
| Formation of rad11 | 2.14498e-21     | (0.978 )   | 2.14498e-21          | (0.978 )   |
| Formation of rad6  | 4.83503e-23     | (0.0220 )  | 4.83503e-23          | (0.0220 )  |
| H-abstraction      | 1.47101e-25     | (6.71e-05) | 1.47101e-25          | (6.71e-05) |
| -----              |                 |            |                      |            |
| species            | PYtrue          | Cumul      | PYeffective          | Cumul      |
| -----              |                 |            |                      |            |
| rad11              | 0.977660        | 0.977660   | 0.977660             | 0.977660   |
| rad6               | 0.0222604       | 0.999921   | 0.0222604            | 0.999921   |
| Benzene+2-propynyl | 6.70630e-05     | 0.999988   | 6.70630e-05          | 0.999988   |
| rad21              | 1.10401e-05     | 0.999999   | 1.10401e-05          | 0.999999   |
| rad20              | 5.67947e-07     | 1.000000   | 5.67947e-07          | 1.000000   |
| rad22              | 2.25376e-07     | 1.000000   | 2.25376e-07          | 1.000000   |
| rad13              | 2.52533e-08     | 1.000000   | 2.52533e-08          | 1.000000   |
| rad45              | 2.30345e-08     | 1.000000   | 2.30345e-08          | 1.000000   |
| rad7               | 8.37725e-09     | 1.000000   | 8.37725e-09          | 1.000000   |
| rad25              | 5.92459e-09     | 1.000000   | 5.92459e-09          | 1.000000   |
| rad24              | 3.26118e-09     | 1.000000   | 3.26118e-09          | 1.000000   |
| rad18              | 2.69040e-09     | 1.000000   | 2.69040e-09          | 1.000000   |
| rad36              | 1.79143e-09     | 1.000000   | 1.79143e-09          | 1.000000   |
| PhCHCCH2+H         | 4.69509e-10     | 1.000000   | 4.69509e-10          | 1.000000   |
| rad33              | 2.24303e-10     | 1.000000   | 2.24303e-10          | 1.000000   |
| Indene+H           | 3.84013e-11     | 1.000000   | 3.84013e-11          | 1.000000   |
| C2H2+PhCH2         | 2.95195e-11     | 1.000000   | 2.95195e-11          | 1.000000   |
| rad9               | 2.79141e-11     | 1.000000   | 2.79141e-11          | 1.000000   |
| rad23              | 1.20572e-11     | 1.000000   | 1.20572e-11          | 1.000000   |
| Phenyl+Allene      | 2.76715e-12     | 1.000000   | 0.000000             | 1.000000   |
| rad3               | 2.31918e-13     | 1.000000   | 2.31918e-13          | 1.000000   |
| rad4               | 1.36805e-13     | 1.000000   | 1.36805e-13          | 1.000000   |
| rad28              | 1.16458e-14     | 1.000000   | 1.16458e-14          | 1.000000   |
| PhCH2CCH+H         | 3.41311e-16     | 1.000000   | 3.41311e-16          | 1.000000   |
| rad2               | 8.27001e-18     | 1.000000   | 8.27001e-18          | 1.000000   |
| rad30              | 3.66973e-18     | 1.000000   | 3.66973e-18          | 1.000000   |
| rad8               | 1.01950e-18     | 1.000000   | 1.01950e-18          | 1.000000   |
| rad1               | 8.06306e-19     | 1.000000   | 8.06306e-19          | 1.000000   |
| rad15              | 5.88418e-19     | 1.000000   | 5.88418e-19          | 1.000000   |
| PhCCH+CH3          | 1.12567e-19     | 1.000000   | 1.12567e-19          | 1.000000   |
| rad38              | 2.41965e-20     | 1.000000   | 2.41965e-20          | 1.000000   |
| rad14              | 6.10190e-21     | 1.000000   | 6.10190e-21          | 1.000000   |
| PAH7+H             | 3.28791e-21     | 1.000000   | 3.28791e-21          | 1.000000   |
| rad31              | 4.76490e-22     | 1.000000   | 4.76490e-22          | 1.000000   |
| rad46              | 1.35234e-22     | 1.000000   | 1.35234e-22          | 1.000000   |
| Ph+MeAc            | 4.02620e-23     | 1.000000   | 4.02620e-23          | 1.000000   |
| rad60syn           | 2.94432e-23     | 1.000000   | 2.94432e-23          | 1.000000   |
| rad10              | 2.14794e-23     | 1.000000   | 2.14794e-23          | 1.000000   |
| PAH9+H             | 6.20699e-24     | 1.000000   | 6.20699e-24          | 1.000000   |
| rad60anti          | 6.05156e-24     | 1.000000   | 6.05156e-24          | 1.000000   |
| rad35              | 3.46534e-24     | 1.000000   | 3.46534e-24          | 1.000000   |
| rad26              | 5.96912e-26     | 1.000000   | 5.96912e-26          | 1.000000   |
| rad39              | 4.02734e-26     | 1.000000   | 4.02734e-26          | 1.000000   |
| rad27              | 3.94988e-26     | 1.000000   | 3.94988e-26          | 1.000000   |
| PhCCCH3+H          | 2.41591e-26     | 1.000000   | 2.41591e-26          | 1.000000   |
| PAH3+H             | 3.87046e-28     | 1.000000   | 3.87046e-28          | 1.000000   |
| rad59              | 1.67421e-28     | 1.000000   | 1.67421e-28          | 1.000000   |
| rad50              | 1.94683e-30     | 1.000000   | 1.94683e-30          | 1.000000   |
| rad19syn           | 5.26280e-33     | 1.000000   | 5.26280e-33          | 1.000000   |
| rad54              | 4.59158e-34     | 1.000000   | 4.59158e-34          | 1.000000   |
| rad5               | 3.29260e-34     | 1.000000   | 3.29260e-34          | 1.000000   |
| rad12              | 2.04112e-35     | 1.000000   | 2.04112e-35          | 1.000000   |
| rad37              | 5.63989e-37     | 1.000000   | 5.63989e-37          | 1.000000   |
| rad52              | 5.39383e-37     | 1.000000   | 5.39383e-37          | 1.000000   |
| rad70              | 2.03960e-38     | 1.000000   | 2.03960e-38          | 1.000000   |
| rad55              | 2.50452e-40     | 1.000000   | 2.50452e-40          | 1.000000   |
| rad51              | 8.65328e-41     | 1.000000   | 8.65328e-41          | 1.000000   |
| PhcycC3H3_A+H      | 7.81201e-42     | 1.000000   | 7.81201e-42          | 1.000000   |
| rad62              | 7.00865e-42     | 1.000000   | 7.00865e-42          | 1.000000   |
| rad58              | 2.98719e-43     | 1.000000   | 2.98719e-43          | 1.000000   |
| rad34              | 2.02819e-43     | 1.000000   | 2.02819e-43          | 1.000000   |
| rad43              | 7.73865e-45     | 1.000000   | 7.73865e-45          | 1.000000   |
| PAH10+CH3          | 3.55402e-46     | 1.000000   | 3.55402e-46          | 1.000000   |
| rad47              | 9.15045e-47     | 1.000000   | 9.15045e-47          | 1.000000   |
| rad65              | 2.46663e-47     | 1.000000   | 2.46663e-47          | 1.000000   |

|        |             |          |             |          |
|--------|-------------|----------|-------------|----------|
| PAH1+H | 1.48233e-48 | 1.000000 | 1.48233e-48 | 1.000000 |
| rad42  | 1.60115e-51 | 1.000000 | 1.60115e-51 | 1.000000 |
| rad41  | 2.09669e-55 | 1.000000 | 2.09669e-55 | 1.000000 |

1000000.00 Pa, 110.000000 K

| Rate constant      | True (fraction)        | Effective (fraction)   |
|--------------------|------------------------|------------------------|
| Total              | 1.09987e-20 (1.00 )    | 1.09987e-20 (1.00 )    |
| Formation of rad11 | 1.06527e-20 (0.969 )   | 1.06527e-20 (0.969 )   |
| Formation of rad6  | 3.44008e-22 (0.0313 )  | 3.44008e-22 (0.0313 )  |
| H-abstraction      | 2.02040e-24 (0.000184) | 2.02040e-24 (0.000184) |

| species            | PYtrue      | Cumul    | PYeffective | Cumul    |
|--------------------|-------------|----------|-------------|----------|
| rad11              | 0.968281    | 0.968281 | 0.968281    | 0.968281 |
| rad6               | 0.0315215   | 0.999803 | 0.0315215   | 0.999803 |
| Benzene+2-propynyl | 0.000183695 | 0.999986 | 0.000183695 | 0.999986 |
| rad21              | 1.24141e-05 | 0.999999 | 1.24141e-05 | 0.999999 |
| rad20              | 7.15099e-07 | 0.999999 | 7.15099e-07 | 0.999999 |
| rad22              | 2.84893e-07 | 1.000000 | 2.84893e-07 | 1.000000 |
| rad13              | 4.07380e-08 | 1.000000 | 4.07380e-08 | 1.000000 |
| rad45              | 3.00340e-08 | 1.000000 | 3.00340e-08 | 1.000000 |
| rad7               | 1.36454e-08 | 1.000000 | 1.36454e-08 | 1.000000 |
| rad25              | 6.97539e-09 | 1.000000 | 6.97539e-09 | 1.000000 |
| rad18              | 3.82428e-09 | 1.000000 | 3.82428e-09 | 1.000000 |
| rad24              | 3.50999e-09 | 1.000000 | 3.50999e-09 | 1.000000 |
| rad36              | 2.30658e-09 | 1.000000 | 2.30658e-09 | 1.000000 |
| PhCHCCH2+H         | 5.88257e-10 | 1.000000 | 5.88257e-10 | 1.000000 |
| rad33              | 3.62521e-10 | 1.000000 | 3.62521e-10 | 1.000000 |
| Indene+H           | 5.65520e-11 | 1.000000 | 5.65520e-11 | 1.000000 |
| C2H2+PhCH2         | 4.43291e-11 | 1.000000 | 4.43291e-11 | 1.000000 |
| rad9               | 3.58249e-11 | 1.000000 | 3.58249e-11 | 1.000000 |
| rad23              | 1.77215e-11 | 1.000000 | 1.77215e-11 | 1.000000 |
| Phenyl+Allene      | 4.52776e-12 | 1.000000 | 0.000000    | 1.000000 |
| rad3               | 4.38867e-13 | 1.000000 | 4.38867e-13 | 1.000000 |
| rad4               | 2.57713e-13 | 1.000000 | 2.57713e-13 | 1.000000 |
| rad28              | 2.26686e-14 | 1.000000 | 2.26686e-14 | 1.000000 |
| PhCH2CCH+H         | 1.25326e-15 | 1.000000 | 1.25326e-15 | 1.000000 |
| rad2               | 1.85372e-17 | 1.000000 | 1.85372e-17 | 1.000000 |
| rad30              | 6.48243e-18 | 1.000000 | 6.48243e-18 | 1.000000 |
| rad8               | 2.12908e-18 | 1.000000 | 2.12908e-18 | 1.000000 |
| rad1               | 1.78338e-18 | 1.000000 | 1.78338e-18 | 1.000000 |
| rad15              | 1.06113e-18 | 1.000000 | 1.06113e-18 | 1.000000 |
| PhCCH+CH3          | 2.79859e-19 | 1.000000 | 2.79859e-19 | 1.000000 |
| rad38              | 4.08049e-20 | 1.000000 | 4.08049e-20 | 1.000000 |
| rad14              | 1.44919e-20 | 1.000000 | 1.44919e-20 | 1.000000 |
| PAH7+H             | 1.22485e-20 | 1.000000 | 1.22485e-20 | 1.000000 |
| rad31              | 8.56023e-22 | 1.000000 | 8.56023e-22 | 1.000000 |
| rad46              | 2.45143e-22 | 1.000000 | 2.45143e-22 | 1.000000 |
| Ph+MeAc            | 1.23820e-22 | 1.000000 | 1.23820e-22 | 1.000000 |
| rad60syn           | 6.89037e-23 | 1.000000 | 6.89037e-23 | 1.000000 |
| rad10              | 5.78126e-23 | 1.000000 | 5.78126e-23 | 1.000000 |
| rad60anti          | 1.54380e-23 | 1.000000 | 1.54380e-23 | 1.000000 |
| PAH9+H             | 1.15944e-23 | 1.000000 | 1.15944e-23 | 1.000000 |
| rad35              | 6.42659e-24 | 1.000000 | 6.42659e-24 | 1.000000 |
| rad26              | 2.99528e-25 | 1.000000 | 2.99528e-25 | 1.000000 |
| rad39              | 1.16985e-25 | 1.000000 | 1.16985e-25 | 1.000000 |
| rad27              | 1.12547e-25 | 1.000000 | 1.12547e-25 | 1.000000 |
| PhCCCH3+H          | 7.49633e-26 | 1.000000 | 7.49633e-26 | 1.000000 |
| PAH3+H             | 2.50758e-27 | 1.000000 | 2.50758e-27 | 1.000000 |
| rad59              | 1.04619e-27 | 1.000000 | 1.04619e-27 | 1.000000 |
| rad50              | 1.10695e-29 | 1.000000 | 1.10695e-29 | 1.000000 |
| rad19syn           | 1.19383e-31 | 1.000000 | 1.19383e-31 | 1.000000 |
| rad54              | 1.59698e-32 | 1.000000 | 1.59698e-32 | 1.000000 |
| rad5               | 2.26915e-33 | 1.000000 | 2.26915e-33 | 1.000000 |
| rad12              | 1.29192e-34 | 1.000000 | 1.29192e-34 | 1.000000 |
| rad52              | 8.21413e-36 | 1.000000 | 8.21413e-36 | 1.000000 |
| rad37              | 3.95095e-36 | 1.000000 | 3.95095e-36 | 1.000000 |
| rad70              | 8.61032e-37 | 1.000000 | 8.61032e-37 | 1.000000 |
| rad55              | 1.76879e-38 | 1.000000 | 1.76879e-38 | 1.000000 |
| rad51              | 2.31105e-39 | 1.000000 | 2.31105e-39 | 1.000000 |
| PhcycC3H3_A+H      | 5.54544e-40 | 1.000000 | 5.54544e-40 | 1.000000 |
| rad62              | 2.74843e-40 | 1.000000 | 2.74843e-40 | 1.000000 |
| rad58              | 1.19496e-41 | 1.000000 | 1.19496e-41 | 1.000000 |
| rad34              | 1.03934e-41 | 1.000000 | 1.03934e-41 | 1.000000 |
| rad43              | 2.64925e-43 | 1.000000 | 2.64925e-43 | 1.000000 |
| PAH10+CH3          | 1.02380e-44 | 1.000000 | 1.02380e-44 | 1.000000 |
| rad47              | 4.61130e-45 | 1.000000 | 4.61130e-45 | 1.000000 |
| rad65              | 8.73546e-46 | 1.000000 | 8.73546e-46 | 1.000000 |

|        |             |          |             |          |
|--------|-------------|----------|-------------|----------|
| PAH1+H | 1.24070e-46 | 1.000000 | 1.24070e-46 | 1.000000 |
| rad42  | 1.64951e-49 | 1.000000 | 1.64951e-49 | 1.000000 |
| rad41  | 2.38207e-53 | 1.000000 | 2.38207e-53 | 1.000000 |

1000000.00 Pa, 120.000000 K

| =====              |                 |            |                      |            |
|--------------------|-----------------|------------|----------------------|------------|
| Rate constant      | True (fraction) |            | Effective (fraction) |            |
| -----              |                 |            |                      |            |
| Total              | 4.24245e-20     | (1.00 )    | 4.24245e-20          | (1.00 )    |
| Formation of rad11 | 4.06372e-20     | (0.958 )   | 4.06372e-20          | (0.958 )   |
| Formation of rad6  | 1.76944e-21     | (0.0417 )  | 1.76944e-21          | (0.0417 )  |
| H-abstraction      | 1.78210e-23     | (0.000420) | 1.78210e-23          | (0.000420) |
| -----              |                 |            |                      |            |
| species            | PYtrue          | Cumul      | PYeffective          | Cumul      |
| -----              |                 |            |                      |            |
| rad11              | 0.957585        | 0.957585   | 0.957585             | 0.957585   |
| rad6               | 0.0419801       | 0.999565   | 0.0419801            | 0.999565   |
| Benzene+2-propynyl | 1.000420064     | 0.999985   | 0.000420064          | 0.999985   |
| rad21              | 1.38477e-05     | 0.999999   | 1.38477e-05          | 0.999999   |
| rad20              | 8.86650e-07     | 0.999999   | 8.86650e-07          | 0.999999   |
| rad22              | 3.54714e-07     | 1.000000   | 3.54714e-07          | 1.000000   |
| rad13              | 6.13270e-08     | 1.000000   | 6.13270e-08          | 1.000000   |
| rad45              | 3.84420e-08     | 1.000000   | 3.84420e-08          | 1.000000   |
| rad7               | 2.07525e-08     | 1.000000   | 2.07525e-08          | 1.000000   |
| rad25              | 8.17109e-09     | 1.000000   | 8.17109e-09          | 1.000000   |
| rad18              | 5.31883e-09     | 1.000000   | 5.31883e-09          | 1.000000   |
| rad24              | 3.74579e-09     | 1.000000   | 3.74579e-09          | 1.000000   |
| rad36              | 2.92058e-09     | 1.000000   | 2.92058e-09          | 1.000000   |
| PhCHCCH2+H         | 7.36437e-10     | 1.000000   | 7.36437e-10          | 1.000000   |
| rad33              | 5.46747e-10     | 1.000000   | 5.46747e-10          | 1.000000   |
| Indene+H           | 8.16405e-11     | 1.000000   | 8.16405e-11          | 1.000000   |
| C2H2+PhCH2         | 6.54718e-11     | 1.000000   | 6.54718e-11          | 1.000000   |
| rad9               | 4.59704e-11     | 1.000000   | 4.59704e-11          | 1.000000   |
| rad23              | 2.54355e-11     | 1.000000   | 2.54355e-11          | 1.000000   |
| Phenyl+Allene      | 7.31802e-12     | 1.000000   | 0.000000             | 1.000000   |
| rad3               | 7.70791e-13     | 1.000000   | 7.70791e-13          | 1.000000   |
| rad4               | 4.50876e-13     | 1.000000   | 4.50876e-13          | 1.000000   |
| rad28              | 4.10359e-14     | 1.000000   | 4.10359e-14          | 1.000000   |
| PhCH2CCH+H         | 4.11800e-15     | 1.000000   | 4.11800e-15          | 1.000000   |
| rad2               | 3.84715e-17     | 1.000000   | 3.84715e-17          | 1.000000   |
| rad30              | 1.12529e-17     | 1.000000   | 1.12529e-17          | 1.000000   |
| rad8               | 4.43890e-18     | 1.000000   | 4.43890e-18          | 1.000000   |
| rad1               | 3.65981e-18     | 1.000000   | 3.65981e-18          | 1.000000   |
| rad15              | 1.88435e-18     | 1.000000   | 1.88435e-18          | 1.000000   |
| PhCCH+CH3          | 6.49365e-19     | 1.000000   | 6.49365e-19          | 1.000000   |
| rad38              | 6.76694e-20     | 1.000000   | 6.76694e-20          | 1.000000   |
| PAH7+H             | 4.24713e-20     | 1.000000   | 4.24713e-20          | 1.000000   |
| rad14              | 3.20223e-20     | 1.000000   | 3.20223e-20          | 1.000000   |
| rad31              | 1.44516e-21     | 1.000000   | 1.44516e-21          | 1.000000   |
| rad46              | 4.40013e-22     | 1.000000   | 4.40013e-22          | 1.000000   |
| Ph+MeAc            | 3.56805e-22     | 1.000000   | 3.56805e-22          | 1.000000   |
| rad60syn           | 1.60014e-22     | 1.000000   | 1.60014e-22          | 1.000000   |
| rad10              | 1.44152e-22     | 1.000000   | 1.44152e-22          | 1.000000   |
| rad60anti          | 3.87793e-23     | 1.000000   | 3.87793e-23          | 1.000000   |
| PAH9+H             | 2.13451e-23     | 1.000000   | 2.13451e-23          | 1.000000   |
| rad35              | 1.17811e-23     | 1.000000   | 1.17811e-23          | 1.000000   |
| rad26              | 1.38277e-24     | 1.000000   | 1.38277e-24          | 1.000000   |
| rad39              | 3.20181e-25     | 1.000000   | 3.20181e-25          | 1.000000   |
| rad27              | 2.98722e-25     | 1.000000   | 2.98722e-25          | 1.000000   |
| PhCCCH3+H          | 2.18171e-25     | 1.000000   | 2.18171e-25          | 1.000000   |
| PAH3+H             | 1.55033e-26     | 1.000000   | 1.55033e-26          | 1.000000   |
| rad59              | 6.20317e-27     | 1.000000   | 6.20317e-27          | 1.000000   |
| rad50              | 5.97283e-29     | 1.000000   | 5.97283e-29          | 1.000000   |
| rad19syn           | 2.28360e-30     | 1.000000   | 2.28360e-30          | 1.000000   |
| rad54              | 4.85625e-31     | 1.000000   | 4.85625e-31          | 1.000000   |
| rad5               | 1.41490e-32     | 1.000000   | 1.41490e-32          | 1.000000   |
| rad12              | 7.80263e-34     | 1.000000   | 7.80263e-34          | 1.000000   |
| rad52              | 1.26353e-34     | 1.000000   | 1.26353e-34          | 1.000000   |
| rad70              | 5.74645e-35     | 1.000000   | 5.74645e-35          | 1.000000   |
| rad37              | 2.70269e-35     | 1.000000   | 2.70269e-35          | 1.000000   |
| rad55              | 1.63026e-36     | 1.000000   | 1.63026e-36          | 1.000000   |
| rad51              | 7.07058e-38     | 1.000000   | 7.07058e-38          | 1.000000   |
| PhcycC3H3_A+H      | 5.21675e-38     | 1.000000   | 5.21675e-38          | 1.000000   |
| rad62              | 1.04908e-38     | 1.000000   | 1.04908e-38          | 1.000000   |
| rad34              | 8.89067e-40     | 1.000000   | 8.89067e-40          | 1.000000   |
| rad58              | 6.82606e-40     | 1.000000   | 6.82606e-40          | 1.000000   |
| rad43              | 8.62586e-42     | 1.000000   | 8.62586e-42          | 1.000000   |
| PAH10+CH3          | 3.52712e-43     | 1.000000   | 3.52712e-43          | 1.000000   |
| rad47              | 3.09846e-43     | 1.000000   | 3.09846e-43          | 1.000000   |
| rad65              | 3.95547e-44     | 1.000000   | 3.95547e-44          | 1.000000   |

|        |             |          |             |          |
|--------|-------------|----------|-------------|----------|
| PAH1+H | 1.44207e-44 | 1.000000 | 1.44207e-44 | 1.000000 |
| rad42  | 2.07608e-47 | 1.000000 | 2.07608e-47 | 1.000000 |
| rad41  | 3.16295e-51 | 1.000000 | 3.16295e-51 | 1.000000 |

1000000.00 Pa, 130.000000 K

| =====              |                 |            |                      |            |
|--------------------|-----------------|------------|----------------------|------------|
| Rate constant      | True (fraction) |            | Effective (fraction) |            |
| -----              |                 |            |                      |            |
| Total              | 1.33719e-19     | (1.00 )    | 1.33719e-19          | (1.00 )    |
| Formation of rad11 | 1.26517e-19     | (0.946 )   | 1.26517e-19          | (0.946 )   |
| Formation of rad6  | 7.08974e-21     | (0.0530 )  | 7.08974e-21          | (0.0530 )  |
| H-abstraction      | 1.11864e-22     | (0.000837) | 1.11864e-22          | (0.000837) |
| -----              |                 |            |                      |            |
| species            | PYtrue          | Cumul      | PYeffective          | Cumul      |
| -----              |                 |            |                      |            |
| rad11              | 0.945825        | 0.945825   | 0.945825             | 0.945825   |
| rad6               | 0.0533210       | 0.999146   | 0.0533210            | 0.999146   |
| Benzene+2-propynyl | 1.000836559     | 0.999983   | 0.000836559          | 0.999983   |
| rad21              | 1.53536e-05     | 0.999998   | 1.53536e-05          | 0.999998   |
| rad20              | 1.08664e-06     | 0.999999   | 1.08664e-06          | 0.999999   |
| rad22              | 4.36654e-07     | 0.999999   | 4.36654e-07          | 0.999999   |
| rad13              | 8.75272e-08     | 1.000000   | 8.75272e-08          | 1.000000   |
| rad45              | 4.85359e-08     | 1.000000   | 4.85359e-08          | 1.000000   |
| rad7               | 2.99400e-08     | 1.000000   | 2.99400e-08          | 1.000000   |
| rad25              | 9.54357e-09     | 1.000000   | 9.54357e-09          | 1.000000   |
| rad18              | 7.27859e-09     | 1.000000   | 7.27859e-09          | 1.000000   |
| rad24              | 3.97412e-09     | 1.000000   | 3.97412e-09          | 1.000000   |
| rad36              | 3.65319e-09     | 1.000000   | 3.65319e-09          | 1.000000   |
| PhCHCCH2+H         | 9.23095e-10     | 1.000000   | 9.23095e-10          | 1.000000   |
| rad33              | 7.81693e-10     | 1.000000   | 7.81693e-10          | 1.000000   |
| Indene+H           | 1.16230e-10     | 1.000000   | 1.16230e-10          | 1.000000   |
| C2H2+PhCH2         | 9.56667e-11     | 1.000000   | 9.56667e-11          | 1.000000   |
| rad9               | 5.90913e-11     | 1.000000   | 5.90913e-11          | 1.000000   |
| rad23              | 3.58777e-11     | 1.000000   | 3.58777e-11          | 1.000000   |
| Phenyl+Allene      | 1.17090e-11     | 1.000000   | 0.000000             | 1.000000   |
| rad3               | 1.27905e-12     | 1.000000   | 1.27905e-12          | 1.000000   |
| rad4               | 7.45691e-13     | 1.000000   | 7.45691e-13          | 1.000000   |
| rad28              | 7.03309e-14     | 1.000000   | 7.03309e-14          | 1.000000   |
| PhCH2CCH+H         | 1.21685e-14     | 1.000000   | 1.21685e-14          | 1.000000   |
| rad2               | 7.54171e-17     | 1.000000   | 7.54171e-17          | 1.000000   |
| rad30              | 1.93520e-17     | 1.000000   | 1.93520e-17          | 1.000000   |
| rad8               | 9.24495e-18     | 1.000000   | 9.24495e-18          | 1.000000   |
| rad1               | 7.10677e-18     | 1.000000   | 7.10677e-18          | 1.000000   |
| rad15              | 3.32195e-18     | 1.000000   | 3.32195e-18          | 1.000000   |
| PhCCH+CH3          | 1.43498e-18     | 1.000000   | 1.43498e-18          | 1.000000   |
| PAH7+H             | 1.37356e-19     | 1.000000   | 1.37356e-19          | 1.000000   |
| rad38              | 1.11220e-19     | 1.000000   | 1.11220e-19          | 1.000000   |
| rad14              | 6.71717e-20     | 1.000000   | 6.71717e-20          | 1.000000   |
| rad31              | 2.32983e-21     | 1.000000   | 2.32983e-21          | 1.000000   |
| Ph+MeAc            | 9.81579e-22     | 1.000000   | 9.81579e-22          | 1.000000   |
| rad46              | 7.87942e-22     | 1.000000   | 7.87942e-22          | 1.000000   |
| rad60syn           | 3.70618e-22     | 1.000000   | 3.70618e-22          | 1.000000   |
| rad10              | 3.40567e-22     | 1.000000   | 3.40567e-22          | 1.000000   |
| rad60anti          | 9.64081e-23     | 1.000000   | 9.64081e-23          | 1.000000   |
| PAH9+H             | 3.90884e-23     | 1.000000   | 3.90884e-23          | 1.000000   |
| rad35              | 2.16202e-23     | 1.000000   | 2.16202e-23          | 1.000000   |
| rad26              | 5.74716e-24     | 1.000000   | 5.74716e-24          | 1.000000   |
| rad39              | 8.41938e-25     | 1.000000   | 8.41938e-25          | 1.000000   |
| rad27              | 7.55529e-25     | 1.000000   | 7.55529e-25          | 1.000000   |
| PhCCCH3+H          | 6.09239e-25     | 1.000000   | 6.09239e-25          | 1.000000   |
| PAH3+H             | 8.80431e-26     | 1.000000   | 8.80431e-26          | 1.000000   |
| rad59              | 3.37088e-26     | 1.000000   | 3.37088e-26          | 1.000000   |
| rad50              | 2.98009e-28     | 1.000000   | 2.98009e-28          | 1.000000   |
| rad19syn           | 3.32767e-29     | 1.000000   | 3.32767e-29          | 1.000000   |
| rad54              | 1.08319e-29     | 1.000000   | 1.08319e-29          | 1.000000   |
| rad5               | 8.07918e-32     | 1.000000   | 8.07918e-32          | 1.000000   |
| rad70              | 4.40520e-33     | 1.000000   | 4.40520e-33          | 1.000000   |
| rad12              | 4.38284e-33     | 1.000000   | 4.38284e-33          | 1.000000   |
| rad52              | 1.71235e-33     | 1.000000   | 1.71235e-33          | 1.000000   |
| rad37              | 1.74293e-34     | 1.000000   | 1.74293e-34          | 1.000000   |
| rad55              | 9.99253e-35     | 1.000000   | 9.99253e-35          | 1.000000   |
| PhcycC3H3_A+H      | 3.50612e-36     | 1.000000   | 3.50612e-36          | 1.000000   |
| rad51              | 1.94082e-36     | 1.000000   | 1.94082e-36          | 1.000000   |
| rad62              | 3.26782e-37     | 1.000000   | 3.26782e-37          | 1.000000   |
| rad34              | 9.76680e-38     | 1.000000   | 9.76680e-38          | 1.000000   |
| rad58              | 4.20646e-38     | 1.000000   | 4.20646e-38          | 1.000000   |
| rad43              | 2.36650e-40     | 1.000000   | 2.36650e-40          | 1.000000   |
| rad47              | 2.22882e-41     | 1.000000   | 2.22882e-41          | 1.000000   |
| PAH10+CH3          | 1.07300e-41     | 1.000000   | 1.07300e-41          | 1.000000   |
| rad65              | 1.75671e-42     | 1.000000   | 1.75671e-42          | 1.000000   |

|        |             |          |             |          |
|--------|-------------|----------|-------------|----------|
| PAH1+H | 1.54923e-42 | 1.000000 | 1.54923e-42 | 1.000000 |
| rad42  | 2.37904e-45 | 1.000000 | 2.37904e-45 | 1.000000 |
| rad41  | 3.74459e-49 | 1.000000 | 3.74459e-49 | 1.000000 |

1000000.00 Pa, 140.000000 K

| =====              |                 |            |                      |            |
|--------------------|-----------------|------------|----------------------|------------|
| Rate constant      | True (fraction) |            | Effective (fraction) |            |
| -----              |                 |            |                      |            |
| Total              | 3.59582e-19     | (1.00 )    | 3.59582e-19          | (1.00 )    |
| Formation of rad11 | 3.35703e-19     | (0.934 )   | 3.35703e-19          | (0.934 )   |
| Formation of rad6  | 2.33415e-20     | (0.0649 )  | 2.33415e-20          | (0.0649 )  |
| H-abstraction      | 5.37685e-22     | (0.00150 ) | 5.37685e-22          | (0.00150 ) |
| -----              |                 |            |                      |            |
| species            | PYtrue          | Cumul      | PYeffective          | Cumul      |
| rad11              | 0.933241        | 0.933241   | 0.933241             | 0.933241   |
| rad6               | 0.0652445       | 0.998486   | 0.0652445            | 0.998486   |
| Benzene+2-propynyl | 0.00149531      | 0.999981   | 0.00149531           | 0.999981   |
| rad21              | 1.69462e-05     | 0.999998   | 1.69462e-05          | 0.999998   |
| rad20              | 1.32011e-06     | 0.999999   | 1.32011e-06          | 0.999999   |
| rad22              | 5.33000e-07     | 1.00000    | 5.33000e-07          | 1.00000    |
| rad13              | 1.19799e-07     | 1.00000    | 1.19799e-07          | 1.00000    |
| rad45              | 6.06705e-08     | 1.00000    | 6.06705e-08          | 1.00000    |
| rad7               | 4.14524e-08     | 1.00000    | 4.14524e-08          | 1.00000    |
| rad25              | 1.11320e-08     | 1.00000    | 1.11320e-08          | 1.00000    |
| rad18              | 9.84251e-09     | 1.00000    | 9.84251e-09          | 1.00000    |
| rad36              | 4.52977e-09     | 1.00000    | 4.52977e-09          | 1.00000    |
| rad24              | 4.20000e-09     | 1.00000    | 4.20000e-09          | 1.00000    |
| PhCHCCH2+H         | 1.16028e-09     | 1.00000    | 1.16028e-09          | 1.00000    |
| rad33              | 1.07160e-09     | 1.00000    | 1.07160e-09          | 1.00000    |
| Indene+H           | 1.63952e-10     | 1.00000    | 1.63952e-10          | 1.00000    |
| C2H2+PhCH2         | 1.38922e-10     | 1.00000    | 1.38922e-10          | 1.00000    |
| rad9               | 7.61894e-11     | 1.00000    | 7.61894e-11          | 1.00000    |
| rad23              | 4.99786e-11     | 1.00000    | 4.99786e-11          | 1.00000    |
| Phenyl+Allene      | 1.85776e-11     | 1.00000    | 0.00000              | 1.00000    |
| rad3               | 2.03169e-12     | 1.00000    | 2.03169e-12          | 1.00000    |
| rad4               | 1.18109e-12     | 1.00000    | 1.18109e-12          | 1.00000    |
| rad28              | 1.15629e-13     | 1.00000    | 1.15629e-13          | 1.00000    |
| PhCH2CCH+H         | 3.27764e-14     | 1.00000    | 3.27764e-14          | 1.00000    |
| rad2               | 1.41729e-16     | 1.00000    | 1.41729e-16          | 1.00000    |
| rad30              | 3.31744e-17     | 1.00000    | 3.31744e-17          | 1.00000    |
| rad8               | 1.92154e-17     | 1.00000    | 1.92154e-17          | 1.00000    |
| rad1               | 1.32497e-17     | 1.00000    | 1.32497e-17          | 1.00000    |
| rad15              | 5.84931e-18     | 1.00000    | 5.84931e-18          | 1.00000    |
| PhCCH+CH3          | 3.06507e-18     | 1.00000    | 3.06507e-18          | 1.00000    |
| PAH7+H             | 4.16282e-19     | 1.00000    | 4.16282e-19          | 1.00000    |
| rad38              | 1.82250e-19     | 1.00000    | 1.82250e-19          | 1.00000    |
| rad14              | 1.35761e-19     | 1.00000    | 1.35761e-19          | 1.00000    |
| rad31              | 3.62955e-21     | 1.00000    | 3.62955e-21          | 1.00000    |
| Ph+MeAc            | 2.61137e-21     | 1.00000    | 2.61137e-21          | 1.00000    |
| rad46              | 1.41537e-21     | 1.00000    | 1.41537e-21          | 1.00000    |
| rad60syn           | 8.58606e-22     | 1.00000    | 8.58606e-22          | 1.00000    |
| rad10              | 7.75267e-22     | 1.00000    | 7.75267e-22          | 1.00000    |
| rad60anti          | 2.37962e-22     | 1.00000    | 2.37962e-22          | 1.00000    |
| PAH9+H             | 7.17133e-23     | 1.00000    | 7.17133e-23          | 1.00000    |
| rad35              | 4.02078e-23     | 1.00000    | 4.02078e-23          | 1.00000    |
| rad26              | 2.15397e-23     | 1.00000    | 2.15397e-23          | 1.00000    |
| rad39              | 2.15595e-24     | 1.00000    | 2.15595e-24          | 1.00000    |
| rad27              | 1.85166e-24     | 1.00000    | 1.85166e-24          | 1.00000    |
| PhCCCH3+H          | 1.65915e-24     | 1.00000    | 1.65915e-24          | 1.00000    |
| PAH3+H             | 4.54324e-25     | 1.00000    | 4.54324e-25          | 1.00000    |
| rad59              | 1.66443e-25     | 1.00000    | 1.66443e-25          | 1.00000    |
| rad50              | 1.36690e-27     | 1.00000    | 1.36690e-27          | 1.00000    |
| rad19syn           | 3.68735e-28     | 1.00000    | 3.68735e-28          | 1.00000    |
| rad54              | 1.73849e-28     | 1.00000    | 1.73849e-28          | 1.00000    |
| rad5               | 4.27495e-31     | 1.00000    | 4.27495e-31          | 1.00000    |
| rad70              | 2.08311e-31     | 1.00000    | 2.08311e-31          | 1.00000    |
| rad12              | 2.28274e-32     | 1.00000    | 2.28274e-32          | 1.00000    |
| rad52              | 1.93296e-32     | 1.00000    | 1.93296e-32          | 1.00000    |
| rad55              | 3.92685e-33     | 1.00000    | 3.92685e-33          | 1.00000    |
| rad37              | 1.04824e-33     | 1.00000    | 1.04824e-33          | 1.00000    |
| PhcycC3H3_A+H      | 1.53216e-34     | 1.00000    | 1.53216e-34          | 1.00000    |
| rad51              | 4.24131e-35     | 1.00000    | 4.24131e-35          | 1.00000    |
| rad34              | 1.04060e-35     | 1.00000    | 1.04060e-35          | 1.00000    |
| rad62              | 7.83918e-36     | 1.00000    | 7.83918e-36          | 1.00000    |
| rad58              | 2.04109e-36     | 1.00000    | 2.04109e-36          | 1.00000    |
| rad43              | 5.23865e-39     | 1.00000    | 5.23865e-39          | 1.00000    |
| rad47              | 1.38588e-39     | 1.00000    | 1.38588e-39          | 1.00000    |
| PAH10+CH3          | 2.56635e-40     | 1.00000    | 2.56635e-40          | 1.00000    |
| PAH1+H             | 1.47998e-40     | 1.00000    | 1.47998e-40          | 1.00000    |

|       |             |         |             |         |
|-------|-------------|---------|-------------|---------|
| rad65 | 6.10926e-41 | 1.00000 | 6.10926e-41 | 1.00000 |
| rad42 | 2.64572e-43 | 1.00000 | 2.64572e-43 | 1.00000 |
| rad41 | 4.04520e-47 | 1.00000 | 4.04520e-47 | 1.00000 |

1000000.00 Pa, 150.000000 K

| =====              |                 |            |                      |            |
|--------------------|-----------------|------------|----------------------|------------|
| Rate constant      | True (fraction) |            | Effective (fraction) |            |
| -----              |                 |            |                      |            |
| Total              | 8.51464e-19     | (1.00 )    | 8.51464e-19          | (1.00 )    |
| Formation of rad11 | 7.83711e-19     | (0.920 )   | 7.83711e-19          | (0.920 )   |
| Formation of rad6  | 6.56651e-20     | (0.0771 )  | 6.56651e-20          | (0.0771 )  |
| H-abstraction      | 2.08816e-21     | (0.00245 ) | 2.08816e-21          | (0.00245 ) |
| -----              |                 |            |                      |            |
| species            | PYtrue          | Cumul      | PYeffective          | Cumul      |
| -----              |                 |            |                      |            |
| rad11              | 0.920042        | 0.920042   | 0.920042             | 0.920042   |
| rad6               | 0.0774842       | 0.997526   | 0.0774842            | 0.997526   |
| Benzene+2-propynyl | 0.00245244      | 0.999979   | 0.00245244           | 0.999979   |
| rad21              | 1.86418e-05     | 0.999997   | 1.86418e-05          | 0.999997   |
| rad20              | 1.59328e-06     | 0.999999   | 1.59328e-06          | 0.999999   |
| rad22              | 6.46604e-07     | 1.000000   | 6.46604e-07          | 1.000000   |
| rad13              | 1.58591e-07     | 1.000000   | 1.58591e-07          | 1.000000   |
| rad45              | 7.52988e-08     | 1.000000   | 7.52988e-08          | 1.000000   |
| rad7               | 5.55524e-08     | 1.000000   | 5.55524e-08          | 1.000000   |
| rad18              | 1.31962e-08     | 1.000000   | 1.31962e-08          | 1.000000   |
| rad25              | 1.29849e-08     | 1.000000   | 1.29849e-08          | 1.000000   |
| rad36              | 5.58270e-09     | 1.000000   | 5.58270e-09          | 1.000000   |
| rad24              | 4.42798e-09     | 1.000000   | 4.42798e-09          | 1.000000   |
| PhCHCCH2+H         | 1.46407e-09     | 1.000000   | 1.46407e-09          | 1.000000   |
| rad33              | 1.42049e-09     | 1.000000   | 1.42049e-09          | 1.000000   |
| Indene+H           | 2.30007e-10     | 1.000000   | 2.30007e-10          | 1.000000   |
| C2H2+PhCH2         | 2.01188e-10     | 1.000000   | 2.01188e-10          | 1.000000   |
| rad9               | 9.86210e-11     | 1.000000   | 9.86210e-11          | 1.000000   |
| rad23              | 6.90227e-11     | 1.000000   | 6.90227e-11          | 1.000000   |
| Phenyl+Allene      | 2.92650e-11     | 1.000000   | 0.00000              | 1.000000   |
| rad3               | 3.11965e-12     | 1.000000   | 3.11965e-12          | 1.000000   |
| rad4               | 1.80910e-12     | 1.000000   | 1.80910e-12          | 1.000000   |
| rad28              | 1.84161e-13     | 1.000000   | 1.84161e-13          | 1.000000   |
| PhCH2CCH+H         | 8.16342e-14     | 1.000000   | 8.16342e-14          | 1.000000   |
| rad2               | 2.58203e-16     | 1.000000   | 2.58203e-16          | 1.000000   |
| rad30              | 5.69517e-17     | 1.000000   | 5.69517e-17          | 1.000000   |
| rad8               | 3.97938e-17     | 1.000000   | 3.97938e-17          | 1.000000   |
| rad1               | 2.39794e-17     | 1.000000   | 2.39794e-17          | 1.000000   |
| rad15              | 1.03331e-17     | 1.000000   | 1.03331e-17          | 1.000000   |
| PhCCH+CH3          | 6.39722e-18     | 1.000000   | 6.39722e-18          | 1.000000   |
| PAH7+H             | 1.18989e-18     | 1.000000   | 1.18989e-18          | 1.000000   |
| rad38              | 2.99090e-19     | 1.000000   | 2.99090e-19          | 1.000000   |
| rad14              | 2.67317e-19     | 1.000000   | 2.67317e-19          | 1.000000   |
| Ph+MeAc            | 6.77701e-21     | 1.000000   | 6.77701e-21          | 1.000000   |
| rad31              | 5.51323e-21     | 1.000000   | 5.51323e-21          | 1.000000   |
| rad46              | 2.55983e-21     | 1.000000   | 2.55983e-21          | 1.000000   |
| rad60syn           | 1.99199e-21     | 1.000000   | 1.99199e-21          | 1.000000   |
| rad10              | 1.72206e-21     | 1.000000   | 1.72206e-21          | 1.000000   |
| rad60anti          | 5.84144e-22     | 1.000000   | 5.84144e-22          | 1.000000   |
| PAH9+H             | 1.32532e-22     | 1.000000   | 1.32532e-22          | 1.000000   |
| rad35              | 7.66925e-23     | 1.000000   | 7.66925e-23          | 1.000000   |
| rad26              | 7.35703e-23     | 1.000000   | 7.35703e-23          | 1.000000   |
| rad39              | 5.42480e-24     | 1.000000   | 5.42480e-24          | 1.000000   |
| PhCCCH3+H          | 4.45657e-24     | 1.000000   | 4.45657e-24          | 1.000000   |
| rad27              | 4.45167e-24     | 1.000000   | 4.45167e-24          | 1.000000   |
| PAH3+H             | 2.13781e-24     | 1.000000   | 2.13781e-24          | 1.000000   |
| rad59              | 7.50338e-25     | 1.000000   | 7.50338e-25          | 1.000000   |
| rad50              | 5.78899e-27     | 1.000000   | 5.78899e-27          | 1.000000   |
| rad19syn           | 3.20190e-27     | 1.000000   | 3.20190e-27          | 1.000000   |
| rad54              | 2.07134e-27     | 1.000000   | 2.07134e-27          | 1.000000   |
| rad70              | 6.00751e-30     | 1.000000   | 6.00751e-30          | 1.000000   |
| rad5               | 2.11833e-30     | 1.000000   | 2.11833e-30          | 1.000000   |
| rad52              | 1.80564e-31     | 1.000000   | 1.80564e-31          | 1.000000   |
| rad12              | 1.10873e-31     | 1.000000   | 1.10873e-31          | 1.000000   |
| rad55              | 9.92341e-32     | 1.000000   | 9.92341e-32          | 1.000000   |
| rad37              | 5.88033e-33     | 1.000000   | 5.88033e-33          | 1.000000   |
| PhcycC3H3_A+H      | 4.24211e-33     | 1.000000   | 4.24211e-33          | 1.000000   |
| rad34              | 9.33595e-34     | 1.000000   | 9.33595e-34          | 1.000000   |
| rad51              | 7.20882e-34     | 1.000000   | 7.20882e-34          | 1.000000   |
| rad62              | 1.44097e-34     | 1.000000   | 1.44097e-34          | 1.000000   |
| rad58              | 6.92097e-35     | 1.000000   | 6.92097e-35          | 1.000000   |
| rad43              | 9.31643e-38     | 1.000000   | 9.31643e-38          | 1.000000   |
| rad47              | 6.51422e-38     | 1.000000   | 6.51422e-38          | 1.000000   |
| PAH1+H             | 7.00560e-39     | 1.000000   | 7.00560e-39          | 1.000000   |
| PAH10+CH3          | 4.79509e-39     | 1.000000   | 4.79509e-39          | 1.000000   |

|       |             |          |             |          |
|-------|-------------|----------|-------------|----------|
| rad65 | 1.59124e-39 | 1.000000 | 1.59124e-39 | 1.000000 |
| rad42 | 1.90144e-41 | 1.000000 | 1.90144e-41 | 1.000000 |
| rad41 | 2.88235e-45 | 1.000000 | 2.88235e-45 | 1.000000 |

1000000.00 Pa, 160.000000 K

| =====              |                 |            |                      |            |
|--------------------|-----------------|------------|----------------------|------------|
| Rate constant      | True (fraction) |            | Effective (fraction) |            |
| -----              |                 |            |                      |            |
| Total              | 1.81800e-18     | (1.00 )    | 1.81800e-18          | (1.00 )    |
| Formation of rad11 | 1.64862e-18     | (0.907 )   | 1.64862e-18          | (0.907 )   |
| Formation of rad6  | 1.62558e-19     | (0.0894 )  | 1.62558e-19          | (0.0894 )  |
| H-abstraction      | 6.82130e-21     | (0.00375 ) | 6.82130e-21          | (0.00375 ) |
| -----              |                 |            |                      |            |
| species            | PYtrue          | Cumul      | PYeffective          | Cumul      |
| -----              |                 |            |                      |            |
| rad11              | 0.906410        | 0.906410   | 0.906410             | 0.906410   |
| rad6               | 0.0898144       | 0.996225   | 0.0898144            | 0.996225   |
| Benzene+2-propynyl | 0.00375209      | 0.999977   | 0.00375209           | 0.999977   |
| rad21              | 2.04580e-05     | 0.999997   | 2.04580e-05          | 0.999997   |
| rad20              | 1.91379e-06     | 0.999999   | 1.91379e-06          | 0.999999   |
| rad22              | 7.81022e-07     | 1.000000   | 7.81022e-07          | 1.000000   |
| rad13              | 2.04375e-07     | 1.000000   | 2.04375e-07          | 1.000000   |
| rad45              | 9.29955e-08     | 1.000000   | 9.29955e-08          | 1.000000   |
| rad7               | 7.25371e-08     | 1.000000   | 7.25371e-08          | 1.000000   |
| rad18              | 1.75881e-08     | 1.000000   | 1.75881e-08          | 1.000000   |
| rad25              | 1.51613e-08     | 1.000000   | 1.51613e-08          | 1.000000   |
| rad36              | 6.85319e-09     | 1.000000   | 6.85319e-09          | 1.000000   |
| rad24              | 4.66227e-09     | 1.000000   | 4.66227e-09          | 1.000000   |
| PhCHCCH2+H         | 1.85595e-09     | 1.000000   | 1.85595e-09          | 1.000000   |
| rad33              | 1.83240e-09     | 1.000000   | 1.83240e-09          | 1.000000   |
| Indene+H           | 3.21883e-10     | 1.000000   | 3.21883e-10          | 1.000000   |
| C2H2+PhCH2         | 2.91347e-10     | 1.000000   | 2.91347e-10          | 1.000000   |
| rad9               | 1.28225e-10     | 1.000000   | 1.28225e-10          | 1.000000   |
| rad23              | 9.47943e-11     | 1.000000   | 9.47943e-11          | 1.000000   |
| Phenyl+Allene      | 4.58118e-11     | 1.000000   | 0.000000             | 1.000000   |
| rad3               | 4.66539e-12     | 1.000000   | 4.66539e-12          | 1.000000   |
| rad4               | 2.69984e-12     | 1.000000   | 2.69984e-12          | 1.000000   |
| rad28              | 2.86280e-13     | 1.000000   | 2.86280e-13          | 1.000000   |
| PhCH2CCH+H         | 1.90397e-13     | 1.000000   | 1.90397e-13          | 1.000000   |
| rad2               | 4.59921e-16     | 1.000000   | 4.59921e-16          | 1.000000   |
| rad30              | 9.82354e-17     | 1.000000   | 9.82354e-17          | 1.000000   |
| rad8               | 8.19757e-17     | 1.000000   | 8.19757e-17          | 1.000000   |
| rad1               | 4.24839e-17     | 1.000000   | 4.24839e-17          | 1.000000   |
| rad15              | 1.83690e-17     | 1.000000   | 1.83690e-17          | 1.000000   |
| PhCCH+CH3          | 1.31497e-17     | 1.000000   | 1.31497e-17          | 1.000000   |
| PAH7+H             | 3.22988e-18     | 1.000000   | 3.22988e-18          | 1.000000   |
| rad14              | 5.17041e-19     | 1.000000   | 5.17041e-19          | 1.000000   |
| rad38              | 4.93197e-19     | 1.000000   | 4.93197e-19          | 1.000000   |
| Ph+MeAc            | 1.72540e-20     | 1.000000   | 1.72540e-20          | 1.000000   |
| rad31              | 8.22237e-21     | 1.000000   | 8.22237e-21          | 1.000000   |
| rad46              | 4.67211e-21     | 1.000000   | 4.67211e-21          | 1.000000   |
| rad60syn           | 4.62817e-21     | 1.000000   | 4.62817e-21          | 1.000000   |
| rad10              | 3.76768e-21     | 1.000000   | 3.76768e-21          | 1.000000   |
| rad60anti          | 1.42697e-21     | 1.000000   | 1.42697e-21          | 1.000000   |
| PAH9+H             | 2.47693e-22     | 1.000000   | 2.47693e-22          | 1.000000   |
| rad26              | 2.31896e-22     | 1.000000   | 2.31896e-22          | 1.000000   |
| rad35              | 1.51685e-22     | 1.000000   | 1.51685e-22          | 1.000000   |
| rad39              | 1.34884e-23     | 1.000000   | 1.34884e-23          | 1.000000   |
| PhCCCH3+H          | 1.18946e-23     | 1.000000   | 1.18946e-23          | 1.000000   |
| rad27              | 1.05903e-23     | 1.000000   | 1.05903e-23          | 1.000000   |
| PAH3+H             | 9.25552e-24     | 1.000000   | 9.25552e-24          | 1.000000   |
| rad59              | 3.11802e-24     | 1.000000   | 3.11802e-24          | 1.000000   |
| rad50              | 2.28222e-26     | 1.000000   | 2.28222e-26          | 1.000000   |
| rad19syn           | 2.25755e-26     | 1.000000   | 2.25755e-26          | 1.000000   |
| rad54              | 1.90992e-26     | 1.000000   | 1.90992e-26          | 1.000000   |
| rad70              | 1.18874e-28     | 1.000000   | 1.18874e-28          | 1.000000   |
| rad5               | 9.91645e-30     | 1.000000   | 9.91645e-30          | 1.000000   |
| rad55              | 1.76127e-30     | 1.000000   | 1.76127e-30          | 1.000000   |
| rad52              | 1.41599e-30     | 1.000000   | 1.41599e-30          | 1.000000   |
| rad12              | 5.05984e-31     | 1.000000   | 5.05984e-31          | 1.000000   |
| PhcycC3H3_A+H      | 8.25219e-32     | 1.000000   | 8.25219e-32          | 1.000000   |
| rad34              | 4.14179e-32     | 1.000000   | 4.14179e-32          | 1.000000   |
| rad37              | 3.08859e-32     | 1.000000   | 3.08859e-32          | 1.000000   |
| rad51              | 9.65986e-33     | 1.000000   | 9.65986e-33          | 1.000000   |
| rad62              | 2.08374e-33     | 1.000000   | 2.08374e-33          | 1.000000   |
| rad58              | 1.67323e-33     | 1.000000   | 1.67323e-33          | 1.000000   |
| rad47              | 2.11644e-36     | 1.000000   | 2.11644e-36          | 1.000000   |
| rad43              | 1.35626e-36     | 1.000000   | 1.35626e-36          | 1.000000   |
| PAH1+H             | 2.12458e-37     | 1.000000   | 2.12458e-37          | 1.000000   |
| PAH10+CH3          | 7.15922e-38     | 1.000000   | 7.15922e-38          | 1.000000   |

|       |             |         |             |         |
|-------|-------------|---------|-------------|---------|
| rad65 | 3.14917e-38 | 1.00000 | 3.14917e-38 | 1.00000 |
| rad42 | 8.33220e-40 | 1.00000 | 8.33220e-40 | 1.00000 |
| rad41 | 1.31164e-43 | 1.00000 | 1.31164e-43 | 1.00000 |

1000000.00 Pa, 170.000000 K

| =====              |                 |            |                      |            |
|--------------------|-----------------|------------|----------------------|------------|
| Rate constant      | True (fraction) |            | Effective (fraction) |            |
| -----              |                 |            |                      |            |
| Total              | 3.56414e-18     | (1.00 )    | 3.56414e-18          | (1.00 )    |
| Formation of rad11 | 3.18264e-18     | (0.893 )   | 3.18264e-18          | (0.893 )   |
| Formation of rad6  | 3.62173e-19     | (0.102 )   | 3.62173e-19          | (0.102 )   |
| H-abstraction      | 1.93278e-20     | (0.00542 ) | 1.93278e-20          | (0.00542 ) |
| -----              |                 |            |                      |            |
| species            | PYtrue          | Cumul      | PYeffective          | Cumul      |
| rad11              | 0.892500        | 0.892500   | 0.892500             | 0.892500   |
| rad6               | 0.102052        | 0.994551   | 0.102052             | 0.994551   |
| Benzene+2-propynyl | 0.00542285      | 0.999974   | 0.00542285           | 0.999974   |
| rad21              | 2.24143e-05     | 0.999997   | 2.24143e-05          | 0.999997   |
| rad20              | 2.29097e-06     | 0.999999   | 2.29097e-06          | 0.999999   |
| rad22              | 9.40660e-07     | 1.000000   | 9.40660e-07          | 1.000000   |
| rad13              | 2.57669e-07     | 1.000000   | 2.57669e-07          | 1.000000   |
| rad45              | 1.14489e-07     | 1.000000   | 1.14489e-07          | 1.000000   |
| rad7               | 9.27542e-08     | 1.000000   | 9.27542e-08          | 1.000000   |
| rad18              | 2.33515e-08     | 1.000000   | 2.33515e-08          | 1.000000   |
| rad25              | 1.77345e-08     | 1.000000   | 1.77345e-08          | 1.000000   |
| rad36              | 8.39365e-09     | 1.000000   | 8.39365e-09          | 1.000000   |
| rad24              | 4.90679e-09     | 1.000000   | 4.90679e-09          | 1.000000   |
| PhCHCCH2+H         | 2.36465e-09     | 1.000000   | 2.36465e-09          | 1.000000   |
| rad33              | 2.31152e-09     | 1.000000   | 2.31152e-09          | 1.000000   |
| Indene+H           | 4.50455e-10     | 1.000000   | 4.50455e-10          | 1.000000   |
| C2H2+PhCH2         | 4.22718e-10     | 1.000000   | 4.22718e-10          | 1.000000   |
| rad9               | 1.67491e-10     | 1.000000   | 1.67491e-10          | 1.000000   |
| rad23              | 1.29782e-10     | 1.000000   | 1.29782e-10          | 1.000000   |
| Phenyl+Allene      | 7.13059e-11     | 1.000000   | 0.000000             | 1.000000   |
| rad3               | 6.83480e-12     | 1.000000   | 6.83480e-12          | 1.000000   |
| rad4               | 3.94837e-12     | 1.000000   | 3.94837e-12          | 1.000000   |
| rad28              | 4.36863e-13     | 1.000000   | 4.36863e-13          | 1.000000   |
| PhCH2CCH+H         | 4.20232e-13     | 1.000000   | 4.20232e-13          | 1.000000   |
| rad2               | 8.06216e-16     | 1.000000   | 8.06216e-16          | 1.000000   |
| rad30              | 1.70615e-16     | 1.000000   | 1.70615e-16          | 1.000000   |
| rad8               | 1.67734e-16     | 1.000000   | 1.67734e-16          | 1.000000   |
| rad1               | 7.41576e-17     | 1.000000   | 7.41576e-17          | 1.000000   |
| rad15              | 3.29191e-17     | 1.000000   | 3.29191e-17          | 1.000000   |
| PhCCH+CH3          | 2.67672e-17     | 1.000000   | 2.67672e-17          | 1.000000   |
| PAH7+H             | 8.37885e-18     | 1.000000   | 8.37885e-18          | 1.000000   |
| rad14              | 9.88289e-19     | 1.000000   | 9.88289e-19          | 1.000000   |
| rad38              | 8.19052e-19     | 1.000000   | 8.19052e-19          | 1.000000   |
| Ph+MeAc            | 4.32457e-20     | 1.000000   | 4.32457e-20          | 1.000000   |
| rad31              | 1.21061e-20     | 1.000000   | 1.21061e-20          | 1.000000   |
| rad60syn           | 1.07597e-20     | 1.000000   | 1.07597e-20          | 1.000000   |
| rad46              | 8.61484e-21     | 1.000000   | 8.61484e-21          | 1.000000   |
| rad10              | 8.17495e-21     | 1.000000   | 8.17495e-21          | 1.000000   |
| rad60anti          | 3.46824e-21     | 1.000000   | 3.46824e-21          | 1.000000   |
| rad26              | 6.82503e-22     | 1.000000   | 6.82503e-22          | 1.000000   |
| PAH9+H             | 4.69321e-22     | 1.000000   | 4.69321e-22          | 1.000000   |
| rad35              | 3.13587e-22     | 1.000000   | 3.13587e-22          | 1.000000   |
| PAH3+H             | 3.72358e-23     | 1.000000   | 3.72358e-23          | 1.000000   |
| rad39              | 3.32452e-23     | 1.000000   | 3.32452e-23          | 1.000000   |
| PhCCCH3+H          | 3.16806e-23     | 1.000000   | 3.16806e-23          | 1.000000   |
| rad27              | 2.50744e-23     | 1.000000   | 2.50744e-23          | 1.000000   |
| rad59              | 1.20658e-23     | 1.000000   | 1.20658e-23          | 1.000000   |
| rad54              | 1.41687e-25     | 1.000000   | 1.41687e-25          | 1.000000   |
| rad19syn           | 1.33528e-25     | 1.000000   | 1.33528e-25          | 1.000000   |
| rad50              | 8.44871e-26     | 1.000000   | 8.44871e-26          | 1.000000   |
| rad70              | 1.71875e-27     | 1.000000   | 1.71875e-27          | 1.000000   |
| rad5               | 4.41596e-29     | 1.000000   | 4.41596e-29          | 1.000000   |
| rad55              | 2.31056e-29     | 1.000000   | 2.31056e-29          | 1.000000   |
| rad52              | 9.51590e-30     | 1.000000   | 9.51590e-30          | 1.000000   |
| rad12              | 2.18434e-30     | 1.000000   | 2.18434e-30          | 1.000000   |
| PhcycC3H3_A+H      | 1.18351e-30     | 1.000000   | 1.18351e-30          | 1.000000   |
| rad34              | 1.01085e-30     | 1.000000   | 1.01085e-30          | 1.000000   |
| rad37              | 1.52572e-31     | 1.000000   | 1.52572e-31          | 1.000000   |
| rad51              | 1.04549e-31     | 1.000000   | 1.04549e-31          | 1.000000   |
| rad58              | 2.97613e-32     | 1.000000   | 2.97613e-32          | 1.000000   |
| rad62              | 2.43587e-32     | 1.000000   | 2.43587e-32          | 1.000000   |
| rad47              | 4.71225e-35     | 1.000000   | 4.71225e-35          | 1.000000   |
| rad43              | 1.64722e-35     | 1.000000   | 1.64722e-35          | 1.000000   |
| PAH1+H             | 4.33882e-36     | 1.000000   | 4.33882e-36          | 1.000000   |
| PAH10+CH3          | 8.73844e-37     | 1.000000   | 8.73844e-37          | 1.000000   |



|       |             |         |             |         |
|-------|-------------|---------|-------------|---------|
| rad65 | 4.84237e-37 | 1.00000 | 4.84237e-37 | 1.00000 |
| rad42 | 2.19705e-38 | 1.00000 | 2.19705e-38 | 1.00000 |
| rad41 | 3.69780e-42 | 1.00000 | 3.69780e-42 | 1.00000 |

1000000.00 Pa, 180.000000 K

| =====              |                 |            |                      |            |
|--------------------|-----------------|------------|----------------------|------------|
| Rate constant      | True (fraction) |            | Effective (fraction) |            |
| -----              |                 |            |                      |            |
| Total              | 6.50681e-18     | (1.00 )    | 6.50681e-18          | (1.00 )    |
| Formation of rad11 | 5.71915e-18     | (0.879 )   | 5.71915e-18          | (0.879 )   |
| Formation of rad6  | 7.39013e-19     | (0.114 )   | 7.39013e-19          | (0.114 )   |
| H-abstraction      | 4.86496e-20     | (0.00748 ) | 4.86496e-20          | (0.00748 ) |
| -----              |                 |            |                      |            |
| species            | PYtrue          | Cumul      | PYeffective          | Cumul      |
| -----              |                 |            |                      |            |
| rad11              | 0.878444        | 0.878444   | 0.878444             | 0.878444   |
| rad6               | 0.114051        | 0.992494   | 0.114051             | 0.992494   |
| Benzene+2-propynyl | 0.00747672      | 0.999971   | 0.00747672           | 0.999971   |
| rad21              | 2.45323e-05     | 0.999996   | 2.45323e-05          | 0.999996   |
| rad20              | 2.73611e-06     | 0.999998   | 2.73611e-06          | 0.999998   |
| rad22              | 1.13098e-06     | 1.000000   | 1.13098e-06          | 1.000000   |
| rad13              | 3.19062e-07     | 1.000000   | 3.19062e-07          | 1.000000   |
| rad45              | 1.40700e-07     | 1.000000   | 1.40700e-07          | 1.000000   |
| rad7               | 1.16618e-07     | 1.000000   | 1.16618e-07          | 1.000000   |
| rad18              | 3.09340e-08     | 1.000000   | 3.09340e-08          | 1.000000   |
| rad25              | 2.07942e-08     | 1.000000   | 2.07942e-08          | 1.000000   |
| rad36              | 1.02706e-08     | 1.000000   | 1.02706e-08          | 1.000000   |
| rad24              | 5.16526e-09     | 1.000000   | 5.16526e-09          | 1.000000   |
| PhCHCCH2+H         | 3.02856e-09     | 1.000000   | 3.02856e-09          | 1.000000   |
| rad33              | 2.86224e-09     | 1.000000   | 2.86224e-09          | 1.000000   |
| Indene+H           | 6.31598e-10     | 1.000000   | 6.31598e-10          | 1.000000   |
| C2H2+PhCH2         | 6.15336e-10     | 1.000000   | 6.15336e-10          | 1.000000   |
| rad9               | 2.19793e-10     | 1.000000   | 2.19793e-10          | 1.000000   |
| rad23              | 1.77472e-10     | 1.000000   | 1.77472e-10          | 1.000000   |
| Phenyl+Allene      | 1.10392e-10     | 1.000000   | 0.000000             | 1.000000   |
| rad3               | 9.85338e-12     | 1.000000   | 9.85338e-12          | 1.000000   |
| rad4               | 5.68412e-12     | 1.000000   | 5.68412e-12          | 1.000000   |
| PhCH2CCH+H         | 8.85221e-13     | 1.000000   | 8.85221e-13          | 1.000000   |
| rad28              | 6.57327e-13     | 1.000000   | 6.57327e-13          | 1.000000   |
| rad2               | 1.39766e-15     | 1.000000   | 1.39766e-15          | 1.000000   |
| rad8               | 3.40490e-16     | 1.000000   | 3.40490e-16          | 1.000000   |
| rad30              | 2.98693e-16     | 1.000000   | 2.98693e-16          | 1.000000   |
| rad1               | 1.28159e-16     | 1.000000   | 1.28159e-16          | 1.000000   |
| rad15              | 5.95145e-17     | 1.000000   | 5.95145e-17          | 1.000000   |
| PhCCH+CH3          | 5.41544e-17     | 1.000000   | 5.41544e-17          | 1.000000   |
| PAH7+H             | 2.08885e-17     | 1.000000   | 2.08885e-17          | 1.000000   |
| rad14              | 1.87478e-18     | 1.000000   | 1.87478e-18          | 1.000000   |
| rad38              | 1.37175e-18     | 1.000000   | 1.37175e-18          | 1.000000   |
| Ph+MeAc            | 1.06921e-19     | 1.000000   | 1.06921e-19          | 1.000000   |
| rad60syn           | 2.49955e-20     | 1.000000   | 2.49955e-20          | 1.000000   |
| rad31              | 1.76735e-20     | 1.000000   | 1.76735e-20          | 1.000000   |
| rad10              | 1.76733e-20     | 1.000000   | 1.76733e-20          | 1.000000   |
| rad46              | 1.60494e-20     | 1.000000   | 1.60494e-20          | 1.000000   |
| rad60anti          | 8.38106e-21     | 1.000000   | 8.38106e-21          | 1.000000   |
| rad26              | 1.89449e-21     | 1.000000   | 1.89449e-21          | 1.000000   |
| PAH9+H             | 9.02679e-22     | 1.000000   | 9.02679e-22          | 1.000000   |
| rad35              | 6.79639e-22     | 1.000000   | 6.79639e-22          | 1.000000   |
| PAH3+H             | 1.40466e-22     | 1.000000   | 1.40466e-22          | 1.000000   |
| PhCCCH3+H          | 8.43709e-23     | 1.000000   | 8.43709e-23          | 1.000000   |
| rad39              | 8.13387e-23     | 1.000000   | 8.13387e-23          | 1.000000   |
| rad27              | 5.92906e-23     | 1.000000   | 5.92906e-23          | 1.000000   |
| rad59              | 4.38789e-23     | 1.000000   | 4.38789e-23          | 1.000000   |
| rad54              | 8.74371e-25     | 1.000000   | 8.74371e-25          | 1.000000   |
| rad19syn           | 6.81244e-25     | 1.000000   | 6.81244e-25          | 1.000000   |
| rad50              | 2.96049e-25     | 1.000000   | 2.96049e-25          | 1.000000   |
| rad70              | 1.91224e-26     | 1.000000   | 1.91224e-26          | 1.000000   |
| rad55              | 2.34749e-28     | 1.000000   | 2.34749e-28          | 1.000000   |
| rad5               | 1.88061e-28     | 1.000000   | 1.88061e-28          | 1.000000   |
| rad52              | 5.59577e-29     | 1.000000   | 5.59577e-29          | 1.000000   |
| rad34              | 1.67122e-29     | 1.000000   | 1.67122e-29          | 1.000000   |
| PhcycC3H3_A+H      | 1.31256e-29     | 1.000000   | 1.31256e-29          | 1.000000   |
| rad12              | 8.96830e-30     | 1.000000   | 8.96830e-30          | 1.000000   |
| rad51              | 9.38508e-31     | 1.000000   | 9.38508e-31          | 1.000000   |
| rad37              | 7.11753e-31     | 1.000000   | 7.11753e-31          | 1.000000   |
| rad58              | 4.06213e-31     | 1.000000   | 4.06213e-31          | 1.000000   |
| rad62              | 2.36361e-31     | 1.000000   | 2.36361e-31          | 1.000000   |
| rad47              | 7.64387e-34     | 1.000000   | 7.64387e-34          | 1.000000   |
| rad43              | 1.69968e-34     | 1.000000   | 1.69968e-34          | 1.000000   |
| PAH1+H             | 6.54380e-35     | 1.000000   | 6.54380e-35          | 1.000000   |
| PAH10+CH3          | 8.91074e-36     | 1.000000   | 8.91074e-36          | 1.000000   |

|       |             |         |             |         |
|-------|-------------|---------|-------------|---------|
| rad65 | 5.95476e-36 | 1.00000 | 5.95476e-36 | 1.00000 |
| rad42 | 4.15594e-37 | 1.00000 | 4.15594e-37 | 1.00000 |
| rad41 | 7.49542e-41 | 1.00000 | 7.49542e-41 | 1.00000 |

1000000.00 Pa, 190.000000 K

| =====              |                 |            |                      |            |
|--------------------|-----------------|------------|----------------------|------------|
| Rate constant      | True (fraction) |            | Effective (fraction) |            |
| -----              |                 |            |                      |            |
| Total              | 1.11858e-17     | (1.00 )    | 1.11858e-17          | (1.00 )    |
| Formation of rad11 | 9.67466e-18     | (0.865 )   | 9.67466e-18          | (0.865 )   |
| Formation of rad6  | 1.40029e-18     | (0.125 )   | 1.40029e-18          | (0.125 )   |
| H-abstraction      | 1.10851e-19     | (0.00991 ) | 1.10851e-19          | (0.00991 ) |
| -----              |                 |            |                      |            |
| species            | PYtrue          | Cumul      | PYeffective          | Cumul      |
| rad11              | 0.864355        | 0.864355   | 0.864355             | 0.864355   |
| rad6               | 0.125704        | 0.990058   | 0.125704             | 0.990058   |
| Benzene+2-propynyl | 0.00990995      | 0.999968   | 0.00990995           | 0.999968   |
| rad21              | 2.68353e-05     | 0.999995   | 2.68353e-05          | 0.999995   |
| rad20              | 3.26287e-06     | 0.999998   | 3.26287e-06          | 0.999998   |
| rad22              | 1.35870e-06     | 1.000000   | 1.35870e-06          | 1.000000   |
| rad13              | 3.89226e-07     | 1.000000   | 3.89226e-07          | 1.000000   |
| rad45              | 1.72792e-07     | 1.000000   | 1.72792e-07          | 1.000000   |
| rad7               | 1.44626e-07     | 1.000000   | 1.44626e-07          | 1.000000   |
| rad18              | 4.09362e-08     | 1.000000   | 4.09362e-08          | 1.000000   |
| rad25              | 2.44506e-08     | 1.000000   | 2.44506e-08          | 1.000000   |
| rad36              | 1.25683e-08     | 1.000000   | 1.25683e-08          | 1.000000   |
| rad24              | 5.44128e-09     | 1.000000   | 5.44128e-09          | 1.000000   |
| PhCHCCH2+H         | 3.89902e-09     | 1.000000   | 3.89902e-09          | 1.000000   |
| rad33              | 3.48923e-09     | 1.000000   | 3.48923e-09          | 1.000000   |
| C2H2+PhCH2         | 8.99387e-10     | 1.000000   | 8.99387e-10          | 1.000000   |
| Indene+H           | 8.88597e-10     | 1.000000   | 8.88597e-10          | 1.000000   |
| rad9               | 2.89693e-10     | 1.000000   | 2.89693e-10          | 1.000000   |
| rad23              | 2.42760e-10     | 1.000000   | 2.42760e-10          | 1.000000   |
| Phenyl+Allene      | 1.70014e-10     | 1.000000   | 0.000000             | 1.000000   |
| rad3               | 1.40282e-11     | 1.000000   | 1.40282e-11          | 1.000000   |
| rad4               | 8.08358e-12     | 1.000000   | 8.08358e-12          | 1.000000   |
| PhCH2CCH+H         | 1.79189e-12     | 1.000000   | 1.79189e-12          | 1.000000   |
| rad28              | 9.78517e-13     | 1.000000   | 9.78517e-13          | 1.000000   |
| rad2               | 2.40500e-15     | 1.000000   | 2.40500e-15          | 1.000000   |
| rad8               | 6.85044e-16     | 1.000000   | 6.85044e-16          | 1.000000   |
| rad30              | 5.27216e-16     | 1.000000   | 5.27216e-16          | 1.000000   |
| rad1               | 2.20071e-16     | 1.000000   | 2.20071e-16          | 1.000000   |
| PhCCH+CH3          | 1.09135e-16     | 1.000000   | 1.09135e-16          | 1.000000   |
| rad15              | 1.08522e-16     | 1.000000   | 1.08522e-16          | 1.000000   |
| PAH7+H             | 5.02758e-17     | 1.000000   | 5.02758e-17          | 1.000000   |
| rad14              | 3.53957e-18     | 1.000000   | 3.53957e-18          | 1.000000   |
| rad38              | 2.31833e-18     | 1.000000   | 2.31833e-18          | 1.000000   |
| Ph+MeAc            | 2.61020e-19     | 1.000000   | 2.61020e-19          | 1.000000   |
| rad60syn           | 5.79242e-20     | 1.000000   | 5.79242e-20          | 1.000000   |
| rad10              | 3.81818e-20     | 1.000000   | 3.81818e-20          | 1.000000   |
| rad46              | 3.01910e-20     | 1.000000   | 3.01910e-20          | 1.000000   |
| rad31              | 2.56721e-20     | 1.000000   | 2.56721e-20          | 1.000000   |
| rad60anti          | 2.01152e-20     | 1.000000   | 2.01152e-20          | 1.000000   |
| rad26              | 5.00071e-21     | 1.000000   | 5.00071e-21          | 1.000000   |
| PAH9+H             | 1.76274e-21     | 1.000000   | 1.76274e-21          | 1.000000   |
| rad35              | 1.53923e-21     | 1.000000   | 1.53923e-21          | 1.000000   |
| PAH3+H             | 5.00629e-22     | 1.000000   | 5.00629e-22          | 1.000000   |
| PhCCCH3+H          | 2.24747e-22     | 1.000000   | 2.24747e-22          | 1.000000   |
| rad39              | 1.97584e-22     | 1.000000   | 1.97584e-22          | 1.000000   |
| rad59              | 1.51098e-22     | 1.000000   | 1.51098e-22          | 1.000000   |
| rad27              | 1.40239e-22     | 1.000000   | 1.40239e-22          | 1.000000   |
| rad54              | 4.61431e-24     | 1.000000   | 4.61431e-24          | 1.000000   |
| rad19syn           | 3.06774e-24     | 1.000000   | 3.06774e-24          | 1.000000   |
| rad50              | 9.88670e-25     | 1.000000   | 9.88670e-25          | 1.000000   |
| rad70              | 1.70065e-25     | 1.000000   | 1.70065e-25          | 1.000000   |
| rad55              | 1.91520e-27     | 1.000000   | 1.91520e-27          | 1.000000   |
| rad5               | 7.68836e-28     | 1.000000   | 7.68836e-28          | 1.000000   |
| rad52              | 2.93369e-28     | 1.000000   | 2.93369e-28          | 1.000000   |
| rad34              | 2.05996e-28     | 1.000000   | 2.05996e-28          | 1.000000   |
| PhcycC3H3_A+H      | 1.16536e-28     | 1.000000   | 1.16536e-28          | 1.000000   |
| rad12              | 3.51604e-29     | 1.000000   | 3.51604e-29          | 1.000000   |
| rad51              | 7.15516e-30     | 1.000000   | 7.15516e-30          | 1.000000   |
| rad58              | 4.40574e-30     | 1.000000   | 4.40574e-30          | 1.000000   |
| rad37              | 3.14619e-30     | 1.000000   | 3.14619e-30          | 1.000000   |
| rad62              | 1.94325e-30     | 1.000000   | 1.94325e-30          | 1.000000   |
| rad47              | 9.53794e-33     | 1.000000   | 9.53794e-33          | 1.000000   |
| rad43              | 1.50866e-33     | 1.000000   | 1.50866e-33          | 1.000000   |
| PAH1+H             | 7.56241e-34     | 1.000000   | 7.56241e-34          | 1.000000   |
| PAH10+CH3          | 7.72330e-35     | 1.000000   | 7.72330e-35          | 1.000000   |

|       |             |         |             |         |
|-------|-------------|---------|-------------|---------|
| rad65 | 6.00928e-35 | 1.00000 | 6.00928e-35 | 1.00000 |
| rad42 | 5.86338e-36 | 1.00000 | 5.86338e-36 | 1.00000 |
| rad41 | 1.13440e-39 | 1.00000 | 1.13440e-39 | 1.00000 |

1000000.00 Pa, 200.000000 K

| =====              |                 |           |                      |           |
|--------------------|-----------------|-----------|----------------------|-----------|
| Rate constant      | True (fraction) |           | Effective (fraction) |           |
| -----              |                 |           |                      |           |
| Total              | 1.82690e-17     | (1.00 )   | 1.82690e-17          | (1.00 )   |
| Formation of rad11 | 1.55456e-17     | (0.851 )  | 1.55456e-17          | (0.851 )  |
| Formation of rad6  | 2.49126e-18     | (0.136 )  | 2.49126e-18          | (0.136 )  |
| H-abstraction      | 2.32112e-19     | (0.0127 ) | 2.32112e-19          | (0.0127 ) |
| -----              |                 |           |                      |           |
| species            | PYtrue          | Cumul     | PYeffective          | Cumul     |
| rad11              | 0.850327        | 0.850327  | 0.850327             | 0.850327  |
| rad6               | 0.136932        | 0.987259  | 0.136932             | 0.987259  |
| Benzene+2-propynyl | 0.0127053       | 0.999964  | 0.0127053            | 0.999964  |
| rad21              | 2.93486e-05     | 0.999994  | 2.93486e-05          | 0.999994  |
| rad20              | 3.88764e-06     | 0.999998  | 3.88764e-06          | 0.999998  |
| rad22              | 1.63212e-06     | 0.999999  | 1.63212e-06          | 0.999999  |
| rad13              | 4.68926e-07     | 1.000000  | 4.68926e-07          | 1.000000  |
| rad45              | 2.12228e-07     | 1.000000  | 2.12228e-07          | 1.000000  |
| rad7               | 1.77377e-07     | 1.000000  | 1.77377e-07          | 1.000000  |
| rad18              | 5.41627e-08     | 1.000000  | 5.41627e-08          | 1.000000  |
| rad25              | 2.88389e-08     | 1.000000  | 2.88389e-08          | 1.000000  |
| rad36              | 1.53936e-08     | 1.000000  | 1.53936e-08          | 1.000000  |
| rad24              | 5.73837e-09     | 1.000000  | 5.73837e-09          | 1.000000  |
| PhCHCCH2+H         | 5.04459e-09     | 1.000000  | 5.04459e-09          | 1.000000  |
| rad33              | 4.19728e-09     | 1.000000  | 4.19728e-09          | 1.000000  |
| C2H2+PhCH2         | 1.32040e-09     | 1.000000  | 1.32040e-09          | 1.000000  |
| Indene+H           | 1.25574e-09     | 1.000000  | 1.25574e-09          | 1.000000  |
| rad9               | 3.83347e-10     | 1.000000  | 3.83347e-10          | 1.000000  |
| rad23              | 3.32541e-10     | 1.000000  | 3.32541e-10          | 1.000000  |
| Phenyl+Allene      | 2.60482e-10     | 1.000000  | 0.000000             | 1.000000  |
| rad3               | 1.97775e-11     | 1.000000  | 1.97775e-11          | 1.000000  |
| rad4               | 1.13877e-11     | 1.000000  | 1.13877e-11          | 1.000000  |
| PhCH2CCH+H         | 3.50465e-12     | 1.000000  | 3.50465e-12          | 1.000000  |
| rad28              | 1.44481e-12     | 1.000000  | 1.44481e-12          | 1.000000  |
| rad2               | 4.11821e-15     | 1.000000  | 4.11821e-15          | 1.000000  |
| rad8               | 1.36500e-15     | 1.000000  | 1.36500e-15          | 1.000000  |
| rad30              | 9.37734e-16     | 1.000000  | 9.37734e-16          | 1.000000  |
| rad1               | 3.76464e-16     | 1.000000  | 3.76464e-16          | 1.000000  |
| PhCCH+CH3          | 2.19311e-16     | 1.000000  | 2.19311e-16          | 1.000000  |
| rad15              | 1.99405e-16     | 1.000000  | 1.99405e-16          | 1.000000  |
| PAH7+H             | 1.17264e-16     | 1.000000  | 1.17264e-16          | 1.000000  |
| rad14              | 6.66228e-18     | 1.000000  | 6.66228e-18          | 1.000000  |
| rad38              | 3.95381e-18     | 1.000000  | 3.95381e-18          | 1.000000  |
| Ph+MeAc            | 6.29404e-19     | 1.000000  | 6.29404e-19          | 1.000000  |
| rad60syn           | 1.33659e-19     | 1.000000  | 1.33659e-19          | 1.000000  |
| rad10              | 8.25652e-20     | 1.000000  | 8.25652e-20          | 1.000000  |
| rad46              | 5.72827e-20     | 1.000000  | 5.72827e-20          | 1.000000  |
| rad60anti          | 4.78894e-20     | 1.000000  | 4.78894e-20          | 1.000000  |
| rad31              | 3.72094e-20     | 1.000000  | 3.72094e-20          | 1.000000  |
| rad26              | 1.26356e-20     | 1.000000  | 1.26356e-20          | 1.000000  |
| rad35              | 3.61239e-21     | 1.000000  | 3.61239e-21          | 1.000000  |
| PAH9+H             | 3.49260e-21     | 1.000000  | 3.49260e-21          | 1.000000  |
| PAH3+H             | 1.69598e-21     | 1.000000  | 1.69598e-21          | 1.000000  |
| PhCCCH3+H          | 5.98362e-22     | 1.000000  | 5.98362e-22          | 1.000000  |
| rad59              | 4.95633e-22     | 1.000000  | 4.95633e-22          | 1.000000  |
| rad39              | 4.76280e-22     | 1.000000  | 4.76280e-22          | 1.000000  |
| rad27              | 3.31880e-22     | 1.000000  | 3.31880e-22          | 1.000000  |
| rad54              | 2.12969e-23     | 1.000000  | 2.12969e-23          | 1.000000  |
| rad19syn           | 1.24223e-23     | 1.000000  | 1.24223e-23          | 1.000000  |
| rad50              | 3.16459e-24     | 1.000000  | 3.16459e-24          | 1.000000  |
| rad70              | 1.24601e-24     | 1.000000  | 1.24601e-24          | 1.000000  |
| rad55              | 1.29195e-26     | 1.000000  | 1.29195e-26          | 1.000000  |
| rad5               | 3.02431e-27     | 1.000000  | 3.02431e-27          | 1.000000  |
| rad34              | 1.98730e-27     | 1.000000  | 1.98730e-27          | 1.000000  |
| rad52              | 1.39303e-27     | 1.000000  | 1.39303e-27          | 1.000000  |
| PhcycC3H3_A+H      | 8.51758e-28     | 1.000000  | 8.51758e-28          | 1.000000  |
| rad12              | 1.31995e-28     | 1.000000  | 1.31995e-28          | 1.000000  |
| rad51              | 4.72520e-29     | 1.000000  | 4.72520e-29          | 1.000000  |
| rad58              | 3.89966e-29     | 1.000000  | 3.89966e-29          | 1.000000  |
| rad62              | 1.37506e-29     | 1.000000  | 1.37506e-29          | 1.000000  |
| rad37              | 1.32079e-29     | 1.000000  | 1.32079e-29          | 1.000000  |
| rad47              | 9.48020e-32     | 1.000000  | 9.48020e-32          | 1.000000  |
| rad43              | 1.16192e-32     | 1.000000  | 1.16192e-32          | 1.000000  |
| PAH1+H             | 6.91710e-33     | 1.000000  | 6.91710e-33          | 1.000000  |
| PAH10+CH3          | 5.76215e-34     | 1.000000  | 5.76215e-34          | 1.000000  |

|       |             |         |             |         |
|-------|-------------|---------|-------------|---------|
| rad65 | 5.08076e-34 | 1.00000 | 5.08076e-34 | 1.00000 |
| rad42 | 6.40247e-35 | 1.00000 | 6.40247e-35 | 1.00000 |
| rad41 | 1.32921e-38 | 1.00000 | 1.32921e-38 | 1.00000 |

1000000.00 Pa, 210.000000 K

| =====              |                 |           |                      |           |
|--------------------|-----------------|-----------|----------------------|-----------|
| Rate constant      | True (fraction) |           | Effective (fraction) |           |
| -----              |                 |           |                      |           |
| Total              | 2.85520e-17     | (1.00 )   | 2.85520e-17          | (1.00 )   |
| Formation of rad11 | 2.39009e-17     | (0.837 )  | 2.39009e-17          | (0.837 )  |
| Formation of rad6  | 4.19900e-18     | (0.147 )  | 4.19900e-18          | (0.147 )  |
| H-abstraction      | 4.52111e-19     | (0.0158 ) | 4.52111e-19          | (0.0158 ) |
| -----              |                 |           |                      |           |
| species            | PYtrue          | Cumul     | PYeffective          | Cumul     |
| -----              |                 |           |                      |           |
| rad11              | 0.836443        | 0.836443  | 0.836443             | 0.836443  |
| rad6               | 0.147683        | 0.984126  | 0.147683             | 0.984126  |
| Benzene+2-propynyl | 0.0158346       | 0.999961  | 0.0158346            | 0.999961  |
| rad21              | 3.20994e-05     | 0.999993  | 3.20994e-05          | 0.999993  |
| rad20              | 4.62997e-06     | 0.999997  | 4.62997e-06          | 0.999997  |
| rad22              | 1.96140e-06     | 0.999999  | 1.96140e-06          | 0.999999  |
| rad13              | 5.59026e-07     | 1.000000  | 5.59026e-07          | 1.000000  |
| rad45              | 2.60851e-07     | 1.000000  | 2.60851e-07          | 1.000000  |
| rad7               | 2.15590e-07     | 1.000000  | 2.15590e-07          | 1.000000  |
| rad18              | 7.16901e-08     | 1.000000  | 7.16901e-08          | 1.000000  |
| rad25              | 3.41247e-08     | 1.000000  | 3.41247e-08          | 1.000000  |
| rad36              | 1.88816e-08     | 1.000000  | 1.88816e-08          | 1.000000  |
| PhCHCCH2+H         | 6.55667e-09     | 1.000000  | 6.55667e-09          | 1.000000  |
| rad24              | 6.06001e-09     | 1.000000  | 6.06001e-09          | 1.000000  |
| rad33              | 4.99127e-09     | 1.000000  | 4.99127e-09          | 1.000000  |
| C2H2+PhCH2         | 1.94696e-09     | 1.000000  | 1.94696e-09          | 1.000000  |
| Indene+H           | 1.78364e-09     | 1.000000  | 1.78364e-09          | 1.000000  |
| rad9               | 5.09048e-10     | 1.000000  | 5.09048e-10          | 1.000000  |
| rad23              | 4.56541e-10     | 1.000000  | 4.56541e-10          | 1.000000  |
| Phenyl+Allene      | 3.97001e-10     | 1.000000  | 0.000000             | 1.000000  |
| rad3               | 2.76700e-11     | 1.000000  | 2.76700e-11          | 1.000000  |
| rad4               | 1.59247e-11     | 1.000000  | 1.59247e-11          | 1.000000  |
| PhCH2CCH+H         | 6.65195e-12     | 1.000000  | 6.65195e-12          | 1.000000  |
| rad28              | 2.11990e-12     | 1.000000  | 2.11990e-12          | 1.000000  |
| rad2               | 7.02969e-15     | 1.000000  | 7.02969e-15          | 1.000000  |
| rad8               | 2.69204e-15     | 1.000000  | 2.69204e-15          | 1.000000  |
| rad30              | 1.67895e-15     | 1.000000  | 1.67895e-15          | 1.000000  |
| rad1               | 6.42659e-16     | 1.000000  | 6.42659e-16          | 1.000000  |
| PhCCH+CH3          | 4.39601e-16     | 1.000000  | 4.39601e-16          | 1.000000  |
| rad15              | 3.68692e-16     | 1.000000  | 3.68692e-16          | 1.000000  |
| PAH7+H             | 2.65847e-16     | 1.000000  | 2.65847e-16          | 1.000000  |
| rad14              | 1.25121e-17     | 1.000000  | 1.25121e-17          | 1.000000  |
| rad38              | 6.80147e-18     | 1.000000  | 6.80147e-18          | 1.000000  |
| Ph+MeAc            | 1.49895e-18     | 1.000000  | 1.49895e-18          | 1.000000  |
| rad60syn           | 3.06529e-19     | 1.000000  | 3.06529e-19          | 1.000000  |
| rad10              | 1.78801e-19     | 1.000000  | 1.78801e-19          | 1.000000  |
| rad60anti          | 1.12944e-19     | 1.000000  | 1.12944e-19          | 1.000000  |
| rad46              | 1.09471e-19     | 1.000000  | 1.09471e-19          | 1.000000  |
| rad31              | 5.39355e-20     | 1.000000  | 5.39355e-20          | 1.000000  |
| rad26              | 3.07231e-20     | 1.000000  | 3.07231e-20          | 1.000000  |
| rad35              | 8.68803e-21     | 1.000000  | 8.68803e-21          | 1.000000  |
| PAH9+H             | 7.01238e-21     | 1.000000  | 7.01238e-21          | 1.000000  |
| PAH3+H             | 5.48643e-21     | 1.000000  | 5.48643e-21          | 1.000000  |
| PhCCCH3+H          | 1.58975e-21     | 1.000000  | 1.58975e-21          | 1.000000  |
| rad59              | 1.55576e-21     | 1.000000  | 1.55576e-21          | 1.000000  |
| rad39              | 1.13811e-21     | 1.000000  | 1.13811e-21          | 1.000000  |
| rad27              | 7.85211e-22     | 1.000000  | 7.85211e-22          | 1.000000  |
| rad54              | 8.75253e-23     | 1.000000  | 8.75253e-23          | 1.000000  |
| rad19syn           | 4.59036e-23     | 1.000000  | 4.59036e-23          | 1.000000  |
| rad50              | 9.75324e-24     | 1.000000  | 9.75324e-24          | 1.000000  |
| rad70              | 7.70358e-24     | 1.000000  | 7.70358e-24          | 1.000000  |
| rad55              | 7.37726e-26     | 1.000000  | 7.37726e-26          | 1.000000  |
| rad34              | 1.54846e-26     | 1.000000  | 1.54846e-26          | 1.000000  |
| rad5               | 1.14534e-26     | 1.000000  | 1.14534e-26          | 1.000000  |
| rad52              | 6.06736e-27     | 1.000000  | 6.06736e-27          | 1.000000  |
| PhcycC3H3_A+H      | 5.24176e-27     | 1.000000  | 5.24176e-27          | 1.000000  |
| rad12              | 4.75204e-28     | 1.000000  | 4.75204e-28          | 1.000000  |
| rad58              | 2.87698e-28     | 1.000000  | 2.87698e-28          | 1.000000  |
| rad51              | 2.74569e-28     | 1.000000  | 2.74569e-28          | 1.000000  |
| rad62              | 8.47588e-29     | 1.000000  | 8.47588e-29          | 1.000000  |
| rad37              | 5.27061e-29     | 1.000000  | 5.27061e-29          | 1.000000  |
| rad47              | 7.70849e-31     | 1.000000  | 7.70849e-31          | 1.000000  |
| rad43              | 7.81763e-32     | 1.000000  | 7.81763e-32          | 1.000000  |
| PAH1+H             | 5.14755e-32     | 1.000000  | 5.14755e-32          | 1.000000  |
| PAH10+CH3          | 3.73355e-33     | 1.000000  | 3.73355e-33          | 1.000000  |

|       |             |         |             |         |
|-------|-------------|---------|-------------|---------|
| rad65 | 3.65894e-33 | 1.00000 | 3.65894e-33 | 1.00000 |
| rad42 | 5.58773e-34 | 1.00000 | 5.58773e-34 | 1.00000 |
| rad41 | 1.24486e-37 | 1.00000 | 1.24486e-37 | 1.00000 |

1000000.00 Pa, 220.000000 K

| =====              |                 |           |                      |           |
|--------------------|-----------------|-----------|----------------------|-----------|
| Rate constant      | True (fraction) |           | Effective (fraction) |           |
| -----              |                 |           |                      |           |
| Total              | 4.29529e-17     | (1.00 )   | 4.29529e-17          | (1.00 )   |
| Formation of rad11 | 3.53712e-17     | (0.823 )  | 3.53712e-17          | (0.823 )  |
| Formation of rad6  | 6.75433e-18     | (0.157 )  | 6.75433e-18          | (0.157 )  |
| H-abstraction      | 8.27372e-19     | (0.0193 ) | 8.27372e-19          | (0.0193 ) |
| -----              |                 |           |                      |           |
| species            | PYtrue          | Cumul     | PYeffective          | Cumul     |
| -----              |                 |           |                      |           |
| rad11              | 0.822768        | 0.822768  | 0.822768             | 0.822768  |
| rad6               | 0.157924        | 0.980693  | 0.157924             | 0.980693  |
| Benzene+2-propynyl | 0.0192623       | 0.999955  | 0.0192623            | 0.999955  |
| rad21              | 3.51172e-05     | 0.999990  | 3.51172e-05          | 0.999990  |
| rad20              | 5.51306e-06     | 0.999996  | 5.51306e-06          | 0.999996  |
| rad22              | 2.35902e-06     | 0.999998  | 2.35902e-06          | 0.999998  |
| rad13              | 6.60486e-07     | 0.999999  | 6.60486e-07          | 0.999999  |
| rad45              | 3.20972e-07     | 0.999999  | 3.20972e-07          | 0.999999  |
| rad7               | 2.60126e-07     | 0.999999  | 2.60126e-07          | 0.999999  |
| rad18              | 9.49538e-08     | 0.999999  | 9.49538e-08          | 0.999999  |
| rad25              | 4.05102e-08     | 0.999999  | 4.05102e-08          | 0.999999  |
| rad36              | 2.32034e-08     | 0.999999  | 2.32034e-08          | 0.999999  |
| PhCHCCH2+H         | 8.55690e-09     | 0.999999  | 8.55690e-09          | 0.999999  |
| rad24              | 6.40968e-09     | 0.999999  | 6.40968e-09          | 0.999999  |
| rad33              | 5.87595e-09     | 0.999999  | 5.87595e-09          | 0.999999  |
| C2H2+PhCH2         | 2.88235e-09     | 0.999999  | 2.88235e-09          | 0.999999  |
| Indene+H           | 2.54719e-09     | 0.999999  | 2.54719e-09          | 0.999999  |
| rad9               | 6.77940e-10     | 0.999999  | 6.77940e-10          | 0.999999  |
| rad23              | 6.28503e-10     | 0.999999  | 6.28503e-10          | 0.999999  |
| Phenyl+Allene      | 6.01850e-10     | 0.999999  | 0.00000              | 0.999999  |
| rad3               | 3.84773e-11     | 0.999999  | 3.84773e-11          | 0.999999  |
| rad4               | 2.21415e-11     | 0.999999  | 2.21415e-11          | 0.999999  |
| PhCH2CCH+H         | 1.22958e-11     | 0.999999  | 1.22958e-11          | 0.999999  |
| rad28              | 3.09502e-12     | 0.999999  | 3.09502e-12          | 0.999999  |
| rad2               | 1.19743e-14     | 0.999999  | 1.19743e-14          | 0.999999  |
| rad8               | 5.25220e-15     | 0.999999  | 5.25220e-15          | 0.999999  |
| rad30              | 3.02154e-15     | 0.999999  | 3.02154e-15          | 0.999999  |
| rad1               | 1.09597e-15     | 0.999999  | 1.09597e-15          | 0.999999  |
| PhCCH+CH3          | 8.78694e-16     | 0.999999  | 8.78694e-16          | 0.999999  |
| rad15              | 6.84768e-16     | 0.999999  | 6.84768e-16          | 0.999999  |
| PAH7+H             | 5.87218e-16     | 0.999999  | 5.87218e-16          | 0.999999  |
| rad14              | 2.34503e-17     | 0.999999  | 2.34503e-17          | 0.999999  |
| rad38              | 1.17923e-17     | 0.999999  | 1.17923e-17          | 0.999999  |
| Ph+MeAc            | 3.52423e-18     | 0.999999  | 3.52423e-18          | 0.999999  |
| rad60syn           | 6.97398e-19     | 0.999999  | 6.97398e-19          | 0.999999  |
| rad10              | 3.87662e-19     | 0.999999  | 3.87662e-19          | 0.999999  |
| rad60anti          | 2.63503e-19     | 0.999999  | 2.63503e-19          | 0.999999  |
| rad46              | 2.10402e-19     | 0.999999  | 2.10402e-19          | 0.999999  |
| rad31              | 7.83285e-20     | 0.999999  | 7.83285e-20          | 0.999999  |
| rad26              | 7.21847e-20     | 0.999999  | 7.21847e-20          | 0.999999  |
| rad35              | 2.11715e-20     | 0.999999  | 2.11715e-20          | 0.999999  |
| PAH3+H             | 1.70037e-20     | 0.999999  | 1.70037e-20          | 0.999999  |
| PAH9+H             | 1.42433e-20     | 0.999999  | 1.42433e-20          | 0.999999  |
| rad59              | 4.68820e-21     | 0.999999  | 4.68820e-21          | 0.999999  |
| PhCCCH3+H          | 4.20569e-21     | 0.999999  | 4.20569e-21          | 0.999999  |
| rad39              | 2.69224e-21     | 0.999999  | 2.69224e-21          | 0.999999  |
| rad27              | 1.85450e-21     | 0.999999  | 1.85450e-21          | 0.999999  |
| rad54              | 3.24865e-22     | 0.999999  | 3.24865e-22          | 0.999999  |
| rad19syn           | 1.56552e-22     | 0.999999  | 1.56552e-22          | 0.999999  |
| rad70              | 4.09793e-23     | 0.999999  | 4.09793e-23          | 0.999999  |
| rad50              | 2.90450e-23     | 0.999999  | 2.90450e-23          | 0.999999  |
| rad55              | 3.63420e-25     | 0.999999  | 3.63420e-25          | 0.999999  |
| rad34              | 9.99754e-26     | 0.999999  | 9.99754e-26          | 0.999999  |
| rad5               | 4.17093e-26     | 0.999999  | 4.17093e-26          | 0.999999  |
| PhcycC3H3_A+H      | 2.76675e-26     | 0.999999  | 2.76675e-26          | 0.999999  |
| rad52              | 2.44740e-26     | 0.999999  | 2.44740e-26          | 0.999999  |
| rad58              | 1.80120e-27     | 0.999999  | 1.80120e-27          | 0.999999  |
| rad12              | 1.64077e-27     | 0.999999  | 1.64077e-27          | 0.999999  |
| rad51              | 1.42127e-27     | 0.999999  | 1.42127e-27          | 0.999999  |
| rad62              | 4.59615e-28     | 0.999999  | 4.59615e-28          | 0.999999  |
| rad37              | 1.99777e-28     | 0.999999  | 1.99777e-28          | 0.999999  |
| rad47              | 5.24733e-30     | 0.999999  | 5.24733e-30          | 0.999999  |
| rad43              | 4.62515e-31     | 0.999999  | 4.62515e-31          | 0.999999  |
| PAH1+H             | 3.19122e-31     | 0.999999  | 3.19122e-31          | 0.999999  |
| rad65              | 2.27624e-32     | 0.999999  | 2.27624e-32          | 0.999999  |

|           |             |          |             |          |
|-----------|-------------|----------|-------------|----------|
| PAH10+CH3 | 2.11678e-32 | 0.999999 | 2.11678e-32 | 0.999999 |
| rad42     | 4.00715e-33 | 0.999999 | 4.00715e-33 | 0.999999 |
| rad41     | 9.57903e-37 | 0.999999 | 9.57903e-37 | 0.999999 |

1000000.00 Pa, 230.000000 K

| =====              |                 |           |                      |           |
|--------------------|-----------------|-----------|----------------------|-----------|
| Rate constant      | True (fraction) |           | Effective (fraction) |           |
| -----              |                 |           |                      |           |
| Total              | 6.25016e-17     | (1.00 )   | 6.25016e-17          | (1.00 )   |
| Formation of rad11 | 5.06355e-17     | (0.810 )  | 5.06355e-17          | (0.810 )  |
| Formation of rad6  | 1.04318e-17     | (0.167 )  | 1.04318e-17          | (0.167 )  |
| H-abstraction      | 1.43428e-18     | (0.0229 ) | 1.43428e-18          | (0.0229 ) |
| -----              |                 |           |                      |           |
| species            | PYtrue          | Cumul     | PYeffective          | Cumul     |
| -----              |                 |           |                      |           |
| rad11              | 0.809360        | 0.809360  | 0.809360             | 0.809360  |
| rad6               | 0.167643        | 0.977002  | 0.167643             | 0.977002  |
| Benzene+2-propynyl | 0.0229478       | 0.999950  | 0.0229478            | 0.999950  |
| rad21              | 3.84331e-05     | 0.999989  | 3.84331e-05          | 0.999989  |
| rad20              | 6.56427e-06     | 0.999995  | 6.56427e-06          | 0.999995  |
| rad22              | 2.84018e-06     | 0.999998  | 2.84018e-06          | 0.999998  |
| rad13              | 7.74357e-07     | 0.999999  | 7.74357e-07          | 0.999999  |
| rad45              | 3.95483e-07     | 0.999999  | 3.95483e-07          | 0.999999  |
| rad7               | 3.12011e-07     | 0.999999  | 3.12011e-07          | 0.999999  |
| rad18              | 1.25861e-07     | 1.000000  | 1.25861e-07          | 1.000000  |
| rad25              | 4.82421e-08     | 1.000000  | 4.82421e-08          | 1.000000  |
| rad36              | 2.85746e-08     | 1.000000  | 2.85746e-08          | 1.000000  |
| PhCHCCH2+H         | 1.12069e-08     | 1.000000  | 1.12069e-08          | 1.000000  |
| rad33              | 6.85570e-09     | 1.000000  | 6.85570e-09          | 1.000000  |
| rad24              | 6.79089e-09     | 1.000000  | 6.79089e-09          | 1.000000  |
| C2H2+PhCH2         | 4.28148e-09     | 1.000000  | 4.28148e-09          | 1.000000  |
| Indene+H           | 3.65719e-09     | 1.000000  | 3.65719e-09          | 1.000000  |
| Phenyl+Allene      | 9.07431e-10     | 1.000000  | 0.000000             | 1.000000  |
| rad9               | 9.04954e-10     | 1.000000  | 9.04954e-10          | 1.000000  |
| rad23              | 8.67859e-10     | 1.000000  | 8.67859e-10          | 1.000000  |
| rad3               | 5.32431e-11     | 1.000000  | 5.32431e-11          | 1.000000  |
| rad4               | 3.06448e-11     | 1.000000  | 3.06448e-11          | 1.000000  |
| PhCH2CCH+H         | 2.21977e-11     | 1.000000  | 2.21977e-11          | 1.000000  |
| rad28              | 4.50023e-12     | 1.000000  | 4.50023e-12          | 1.000000  |
| rad2               | 2.03641e-14     | 1.000000  | 2.03641e-14          | 1.000000  |
| rad8               | 1.01324e-14     | 1.000000  | 1.01324e-14          | 1.000000  |
| rad30              | 5.45651e-15     | 1.000000  | 5.45651e-15          | 1.000000  |
| rad1               | 1.86812e-15     | 1.000000  | 1.86812e-15          | 1.000000  |
| PhCCH+CH3          | 1.75022e-15     | 1.000000  | 1.75022e-15          | 1.000000  |
| rad15              | 1.27508e-15     | 1.000000  | 1.27508e-15          | 1.000000  |
| PAH7+H             | 1.26610e-15     | 1.000000  | 1.26610e-15          | 1.000000  |
| rad14              | 4.38464e-17     | 1.000000  | 4.38464e-17          | 1.000000  |
| rad38              | 2.05868e-17     | 1.000000  | 2.05868e-17          | 1.000000  |
| Ph+MeAc            | 8.17382e-18     | 1.000000  | 8.17382e-18          | 1.000000  |
| rad60syn           | 1.57122e-18     | 1.000000  | 1.57122e-18          | 1.000000  |
| rad10              | 8.40682e-19     | 1.000000  | 8.40682e-19          | 1.000000  |
| rad60anti          | 6.07254e-19     | 1.000000  | 6.07254e-19          | 1.000000  |
| rad46              | 4.06093e-19     | 1.000000  | 4.06093e-19          | 1.000000  |
| rad26              | 1.64412e-19     | 1.000000  | 1.64412e-19          | 1.000000  |
| rad31              | 1.14135e-19     | 1.000000  | 1.14135e-19          | 1.000000  |
| rad35              | 5.17482e-20     | 1.000000  | 5.17482e-20          | 1.000000  |
| PAH3+H             | 5.05879e-20     | 1.000000  | 5.05879e-20          | 1.000000  |
| PAH9+H             | 2.92106e-20     | 1.000000  | 2.92106e-20          | 1.000000  |
| rad59              | 1.35903e-20     | 1.000000  | 1.35903e-20          | 1.000000  |
| PhCCCH3+H          | 1.10462e-20     | 1.000000  | 1.10462e-20          | 1.000000  |
| rad39              | 6.29311e-21     | 1.000000  | 6.29311e-21          | 1.000000  |
| rad27              | 4.36280e-21     | 1.000000  | 4.36280e-21          | 1.000000  |
| rad54              | 1.10105e-21     | 1.000000  | 1.10105e-21          | 1.000000  |
| rad19syn           | 4.96880e-22     | 1.000000  | 4.96880e-22          | 1.000000  |
| rad70              | 1.90573e-22     | 1.000000  | 1.90573e-22          | 1.000000  |
| rad50              | 8.37812e-23     | 1.000000  | 8.37812e-23          | 1.000000  |
| rad55              | 1.56884e-24     | 1.000000  | 1.56884e-24          | 1.000000  |
| rad34              | 5.46610e-25     | 1.000000  | 5.46610e-25          | 1.000000  |
| rad5               | 1.45656e-25     | 1.000000  | 1.45656e-25          | 1.000000  |
| PhcycC3H3_A+H      | 1.27214e-25     | 1.000000  | 1.27214e-25          | 1.000000  |
| rad52              | 9.20661e-26     | 1.000000  | 9.20661e-26          | 1.000000  |
| rad58              | 9.72196e-27     | 1.000000  | 9.72196e-27          | 1.000000  |
| rad51              | 6.61885e-27     | 1.000000  | 6.61885e-27          | 1.000000  |
| rad12              | 5.42606e-27     | 1.000000  | 5.42606e-27          | 1.000000  |
| rad62              | 2.21190e-27     | 1.000000  | 2.21190e-27          | 1.000000  |
| rad37              | 7.17765e-28     | 1.000000  | 7.17765e-28          | 1.000000  |
| rad47              | 3.05185e-29     | 1.000000  | 3.05185e-29          | 1.000000  |
| rad43              | 2.42327e-30     | 1.000000  | 2.42327e-30          | 1.000000  |
| PAH1+H             | 1.68205e-30     | 1.000000  | 1.68205e-30          | 1.000000  |
| rad65              | 1.23880e-31     | 1.000000  | 1.23880e-31          | 1.000000  |

|           |             |          |             |          |
|-----------|-------------|----------|-------------|----------|
| PAH10+CH3 | 1.05794e-31 | 1.000000 | 1.05794e-31 | 1.000000 |
| rad42     | 2.41803e-32 | 1.000000 | 2.41803e-32 | 1.000000 |
| rad41     | 6.20157e-36 | 1.000000 | 6.20157e-36 | 1.000000 |

1000000.00 Pa, 240.000000 K

| Rate constant      | True (fraction)       | Effective (fraction)  |
|--------------------|-----------------------|-----------------------|
| Total              | 8.83273e-17 (1.00 )   | 8.83273e-17 (1.00 )   |
| Formation of rad11 | 7.04077e-17 (0.797 )  | 7.04077e-17 (0.797 )  |
| Formation of rad6  | 1.55481e-17 (0.176 )  | 1.55481e-17 (0.176 )  |
| H-abstraction      | 2.37143e-18 (0.0268 ) | 2.37143e-18 (0.0268 ) |

| species            | PYtrue      | Cumul    | PYeffective | Cumul    |
|--------------------|-------------|----------|-------------|----------|
| rad11              | 0.796260    | 0.796260 | 0.796260    | 0.796260 |
| rad6               | 0.176836    | 0.973096 | 0.176836    | 0.973096 |
| Benzene+2-propynyl | 0.0268483   | 0.999945 | 0.0268483   | 0.999945 |
| rad21              | 4.20803e-05 | 0.999987 | 4.20803e-05 | 0.999987 |
| rad20              | 7.81558e-06 | 0.999994 | 7.81558e-06 | 0.999994 |
| rad22              | 3.42348e-06 | 0.999998 | 3.42348e-06 | 0.999998 |
| rad13              | 9.01766e-07 | 0.999999 | 9.01766e-07 | 0.999999 |
| rad45              | 4.88000e-07 | 0.999999 | 4.88000e-07 | 0.999999 |
| rad7               | 3.72461e-07 | 1.000000 | 3.72461e-07 | 1.000000 |
| rad18              | 1.66934e-07 | 1.000000 | 1.66934e-07 | 1.000000 |
| rad25              | 5.76203e-08 | 1.000000 | 5.76203e-08 | 1.000000 |
| rad36              | 3.52675e-08 | 1.000000 | 3.52675e-08 | 1.000000 |
| PhCHCCH2+H         | 1.47208e-08 | 1.000000 | 1.47208e-08 | 1.000000 |
| rad33              | 7.93434e-09 | 1.000000 | 7.93434e-09 | 1.000000 |
| rad24              | 7.20722e-09 | 1.000000 | 7.20722e-09 | 1.000000 |
| C2H2+PhCH2         | 6.37598e-09 | 1.000000 | 6.37598e-09 | 1.000000 |
| Indene+H           | 5.27764e-09 | 1.000000 | 5.27764e-09 | 1.000000 |
| Phenyl+Allene      | 1.36053e-09 | 1.000000 | 0.000000    | 1.000000 |
| rad9               | 1.21003e-09 | 1.000000 | 1.21003e-09 | 1.000000 |
| rad23              | 1.20211e-09 | 1.000000 | 1.20211e-09 | 1.000000 |
| rad3               | 7.33731e-11 | 1.000000 | 7.33731e-11 | 1.000000 |
| rad4               | 4.22546e-11 | 1.000000 | 4.22546e-11 | 1.000000 |
| PhCH2CCH+H         | 3.92282e-11 | 1.000000 | 3.92282e-11 | 1.000000 |
| rad28              | 6.52016e-12 | 1.000000 | 6.52016e-12 | 1.000000 |
| rad2               | 3.45785e-14 | 1.000000 | 3.45785e-14 | 1.000000 |
| rad8               | 1.93201e-14 | 1.000000 | 1.93201e-14 | 1.000000 |
| rad30              | 9.86961e-15 | 1.000000 | 9.86961e-15 | 1.000000 |
| PhCCH+CH3          | 3.47027e-15 | 1.000000 | 3.47027e-15 | 1.000000 |
| rad1               | 3.18308e-15 | 1.000000 | 3.18308e-15 | 1.000000 |
| PAH7+H             | 2.66829e-15 | 1.000000 | 2.66829e-15 | 1.000000 |
| rad15              | 2.37557e-15 | 1.000000 | 2.37557e-15 | 1.000000 |
| rad14              | 8.17290e-17 | 1.000000 | 8.17290e-17 | 1.000000 |
| rad38              | 3.61498e-17 | 1.000000 | 3.61498e-17 | 1.000000 |
| Ph+MeAc            | 1.86790e-17 | 1.000000 | 1.86790e-17 | 1.000000 |
| rad60syn           | 3.49888e-18 | 1.000000 | 3.49888e-18 | 1.000000 |
| rad10              | 1.82058e-18 | 1.000000 | 1.82058e-18 | 1.000000 |
| rad60anti          | 1.38015e-18 | 1.000000 | 1.38015e-18 | 1.000000 |
| rad46              | 7.85939e-19 | 1.000000 | 7.85939e-19 | 1.000000 |
| rad26              | 3.63885e-19 | 1.000000 | 3.63885e-19 | 1.000000 |
| rad31              | 1.67061e-19 | 1.000000 | 1.67061e-19 | 1.000000 |
| PAH3+H             | 1.44592e-19 | 1.000000 | 1.44592e-19 | 1.000000 |
| rad35              | 1.25800e-19 | 1.000000 | 1.25800e-19 | 1.000000 |
| PAH9+H             | 6.03544e-20 | 1.000000 | 6.03544e-20 | 1.000000 |
| rad59              | 3.79300e-20 | 1.000000 | 3.79300e-20 | 1.000000 |
| PhCCCH3+H          | 2.86964e-20 | 1.000000 | 2.86964e-20 | 1.000000 |
| rad39              | 1.45020e-20 | 1.000000 | 1.45020e-20 | 1.000000 |
| rad27              | 1.01956e-20 | 1.000000 | 1.01956e-20 | 1.000000 |
| rad54              | 3.43666e-21 | 1.000000 | 3.43666e-21 | 1.000000 |
| rad19syn           | 1.47633e-21 | 1.000000 | 1.47633e-21 | 1.000000 |
| rad70              | 7.85199e-22 | 1.000000 | 7.85199e-22 | 1.000000 |
| rad50              | 2.34401e-22 | 1.000000 | 2.34401e-22 | 1.000000 |
| rad55              | 6.01325e-24 | 1.000000 | 6.01325e-24 | 1.000000 |
| rad34              | 2.57823e-24 | 1.000000 | 2.57823e-24 | 1.000000 |
| PhcycC3H3_A+H      | 5.16382e-25 | 1.000000 | 5.16382e-25 | 1.000000 |
| rad5               | 4.86051e-25 | 1.000000 | 4.86051e-25 | 1.000000 |
| rad52              | 3.24550e-25 | 1.000000 | 3.24550e-25 | 1.000000 |
| rad58              | 4.58774e-26 | 1.000000 | 4.58774e-26 | 1.000000 |
| rad51              | 2.79625e-26 | 1.000000 | 2.79625e-26 | 1.000000 |
| rad12              | 1.71453e-26 | 1.000000 | 1.71453e-26 | 1.000000 |
| rad62              | 9.52608e-27 | 1.000000 | 9.52608e-27 | 1.000000 |
| rad37              | 2.43763e-27 | 1.000000 | 2.43763e-27 | 1.000000 |
| rad47              | 1.54387e-28 | 1.000000 | 1.54387e-28 | 1.000000 |
| rad43              | 1.13306e-29 | 1.000000 | 1.13306e-29 | 1.000000 |
| PAH1+H             | 7.67203e-30 | 1.000000 | 7.67203e-30 | 1.000000 |
| rad65              | 5.96698e-31 | 1.000000 | 5.96698e-31 | 1.000000 |

|           |             |          |             |          |
|-----------|-------------|----------|-------------|----------|
| PAH10+CH3 | 4.69694e-31 | 1.000000 | 4.69694e-31 | 1.000000 |
| rad42     | 1.25302e-31 | 1.000000 | 1.25302e-31 | 1.000000 |
| rad41     | 3.44756e-35 | 1.000000 | 3.44756e-35 | 1.000000 |

1000000.00 Pa, 250.000000 K

| Rate constant      | True (fraction)       | Effective (fraction)  |
|--------------------|-----------------------|-----------------------|
| Total              | 1.21641e-16 (1.00 )   | 1.21641e-16 (1.00 )   |
| Formation of rad11 | 9.54219e-17 (0.784 )  | 9.54219e-17 (0.784 )  |
| Formation of rad6  | 2.24583e-17 (0.185 )  | 2.24583e-17 (0.185 )  |
| H-abstraction      | 3.76121e-18 (0.0309 ) | 3.76121e-18 (0.0309 ) |

| species            | PYtrue      | Cumul    | PYeffective | Cumul    |
|--------------------|-------------|----------|-------------|----------|
| rad11              | 0.783506    | 0.783506 | 0.783506    | 0.783506 |
| rad6               | 0.185512    | 0.969018 | 0.185512    | 0.969018 |
| Benzene+2-propynyl | 0.0309205   | 0.999938 | 0.0309205   | 0.999938 |
| rad21              | 4.60943e-05 | 0.999984 | 4.60943e-05 | 0.999984 |
| rad20              | 9.30418e-06 | 0.999993 | 9.30418e-06 | 0.999993 |
| rad22              | 4.13144e-06 | 0.999998 | 4.13144e-06 | 0.999998 |
| rad13              | 1.04390e-06 | 0.999999 | 1.04390e-06 | 0.999999 |
| rad45              | 6.03024e-07 | 0.999999 | 6.03024e-07 | 0.999999 |
| rad7               | 4.42919e-07 | 1.000000 | 4.42919e-07 | 1.000000 |
| rad18              | 2.21494e-07 | 1.000000 | 2.21494e-07 | 1.000000 |
| rad25              | 6.90082e-08 | 1.000000 | 6.90082e-08 | 1.000000 |
| rad36              | 4.36253e-08 | 1.000000 | 4.36253e-08 | 1.000000 |
| PhCHCCH2+H         | 1.93814e-08 | 1.000000 | 1.93814e-08 | 1.000000 |
| C2H2+PhCH2         | 9.51046e-09 | 1.000000 | 9.51046e-09 | 1.000000 |
| rad33              | 9.11478e-09 | 1.000000 | 9.11478e-09 | 1.000000 |
| rad24              | 7.66235e-09 | 1.000000 | 7.66235e-09 | 1.000000 |
| Indene+H           | 7.65065e-09 | 1.000000 | 7.65065e-09 | 1.000000 |
| Phenyl+Allene      | 2.02824e-09 | 1.000000 | 0.000000    | 1.000000 |
| rad23              | 1.67016e-09 | 1.000000 | 1.67016e-09 | 1.000000 |
| rad9               | 1.61971e-09 | 1.000000 | 1.61971e-09 | 1.000000 |
| rad3               | 1.00751e-10 | 1.000000 | 1.00751e-10 | 1.000000 |
| PhCH2CCH+H         | 6.79889e-11 | 1.000000 | 6.79889e-11 | 1.000000 |
| rad4               | 5.80762e-11 | 1.000000 | 5.80762e-11 | 1.000000 |
| rad28              | 9.41537e-12 | 1.000000 | 9.41537e-12 | 1.000000 |
| rad2               | 5.86058e-14 | 1.000000 | 5.86058e-14 | 1.000000 |
| rad8               | 3.63924e-14 | 1.000000 | 3.63924e-14 | 1.000000 |
| rad30              | 1.78462e-14 | 1.000000 | 1.78462e-14 | 1.000000 |
| PhCCH+CH3          | 6.83953e-15 | 1.000000 | 6.83953e-15 | 1.000000 |
| PAH7+H             | 5.50136e-15 | 1.000000 | 5.50136e-15 | 1.000000 |
| rad1               | 5.42011e-15 | 1.000000 | 5.42011e-15 | 1.000000 |
| rad15              | 4.41908e-15 | 1.000000 | 4.41908e-15 | 1.000000 |
| rad14              | 1.51707e-16 | 1.000000 | 1.51707e-16 | 1.000000 |
| rad38              | 6.37763e-17 | 1.000000 | 6.37763e-17 | 1.000000 |
| Ph+MeAc            | 4.19866e-17 | 1.000000 | 4.19866e-17 | 1.000000 |
| rad60syn           | 7.68575e-18 | 1.000000 | 7.68575e-18 | 1.000000 |
| rad10              | 3.92828e-18 | 1.000000 | 3.92828e-18 | 1.000000 |
| rad60anti          | 3.08793e-18 | 1.000000 | 3.08793e-18 | 1.000000 |
| rad46              | 1.52301e-18 | 1.000000 | 1.52301e-18 | 1.000000 |
| rad26              | 7.83898e-19 | 1.000000 | 7.83898e-19 | 1.000000 |
| PAH3+H             | 3.96974e-19 | 1.000000 | 3.96974e-19 | 1.000000 |
| rad35              | 3.02051e-19 | 1.000000 | 3.02051e-19 | 1.000000 |
| rad31              | 2.45859e-19 | 1.000000 | 2.45859e-19 | 1.000000 |
| PAH9+H             | 1.25325e-19 | 1.000000 | 1.25325e-19 | 1.000000 |
| rad59              | 1.01912e-19 | 1.000000 | 1.01912e-19 | 1.000000 |
| PhCCCH3+H          | 7.34107e-20 | 1.000000 | 7.34107e-20 | 1.000000 |
| rad39              | 3.28514e-20 | 1.000000 | 3.28514e-20 | 1.000000 |
| rad27              | 2.35900e-20 | 1.000000 | 2.35900e-20 | 1.000000 |
| rad54              | 9.94421e-21 | 1.000000 | 9.94421e-21 | 1.000000 |
| rad19syn           | 4.12308e-21 | 1.000000 | 4.12308e-21 | 1.000000 |
| rad70              | 2.89906e-21 | 1.000000 | 2.89906e-21 | 1.000000 |
| rad50              | 6.36298e-22 | 1.000000 | 6.36298e-22 | 1.000000 |
| rad55              | 2.06958e-23 | 1.000000 | 2.06958e-23 | 1.000000 |
| rad34              | 1.06601e-23 | 1.000000 | 1.06601e-23 | 1.000000 |
| PhcycC3H3_A+H      | 1.87215e-24 | 1.000000 | 1.87215e-24 | 1.000000 |
| rad5               | 1.54455e-24 | 1.000000 | 1.54455e-24 | 1.000000 |
| rad52              | 1.07578e-24 | 1.000000 | 1.07578e-24 | 1.000000 |
| rad58              | 1.91663e-25 | 1.000000 | 1.91663e-25 | 1.000000 |
| rad51              | 1.07950e-25 | 1.000000 | 1.07950e-25 | 1.000000 |
| rad12              | 5.16171e-26 | 1.000000 | 5.16171e-26 | 1.000000 |
| rad62              | 3.70130e-26 | 1.000000 | 3.70130e-26 | 1.000000 |
| rad37              | 7.80472e-27 | 1.000000 | 7.80472e-27 | 1.000000 |
| rad47              | 6.90062e-28 | 1.000000 | 6.90062e-28 | 1.000000 |
| rad43              | 4.76636e-29 | 1.000000 | 4.76636e-29 | 1.000000 |
| PAH1+H             | 3.07483e-29 | 1.000000 | 3.07483e-29 | 1.000000 |
| rad65              | 2.57138e-30 | 1.000000 | 2.57138e-30 | 1.000000 |



|           |             |          |             |          |
|-----------|-------------|----------|-------------|----------|
| PAH10+CH3 | 1.86715e-30 | 1.000000 | 1.86715e-30 | 1.000000 |
| rad42     | 5.67454e-31 | 1.000000 | 5.67454e-31 | 1.000000 |
| rad41     | 1.67475e-34 | 1.000000 | 1.67475e-34 | 1.000000 |

1000000.00 Pa, 260.000000 K

| Rate constant      | True (fraction)       | Effective (fraction)  |
|--------------------|-----------------------|-----------------------|
| Total              | 1.63720e-16 (1.00 )   | 1.63720e-16 (1.00 )   |
| Formation of rad11 | 1.26419e-16 (0.772 )  | 1.26419e-16 (0.772 )  |
| Formation of rad6  | 3.15515e-17 (0.193 )  | 3.15515e-17 (0.193 )  |
| H-abstraction      | 5.75028e-18 (0.0351 ) | 5.75028e-18 (0.0351 ) |

| species            | PYtrue      | Cumul    | PYeffective | Cumul    |
|--------------------|-------------|----------|-------------|----------|
| rad11              | 0.771120    | 0.771120 | 0.771120    | 0.771120 |
| rad6               | 0.193688    | 0.964808 | 0.193688    | 0.964808 |
| Benzene+2-propynyl | 0.0351226   | 0.999931 | 0.0351226   | 0.999931 |
| rad21              | 5.05118e-05 | 0.999981 | 5.05118e-05 | 0.999981 |
| rad20              | 1.10729e-05 | 0.999992 | 1.10729e-05 | 0.999992 |
| rad22              | 4.99141e-06 | 0.999997 | 4.99141e-06 | 0.999997 |
| rad13              | 1.20199e-06 | 0.999998 | 1.20199e-06 | 0.999998 |
| rad45              | 7.46149e-07 | 0.999999 | 7.46149e-07 | 0.999999 |
| rad7               | 5.25083e-07 | 1.000000 | 5.25083e-07 | 1.000000 |
| rad18              | 2.93879e-07 | 1.000000 | 2.93879e-07 | 1.000000 |
| rad25              | 8.28445e-08 | 1.000000 | 8.28445e-08 | 1.000000 |
| rad36              | 5.40795e-08 | 1.000000 | 5.40795e-08 | 1.000000 |
| PhCHCCH2+H         | 2.55613e-08 | 1.000000 | 2.55613e-08 | 1.000000 |
| C2H2+PhCH2         | 1.41944e-08 | 1.000000 | 1.41944e-08 | 1.000000 |
| Indene+H           | 1.11329e-08 | 1.000000 | 1.11329e-08 | 1.000000 |
| rad33              | 1.03989e-08 | 1.000000 | 1.03989e-08 | 1.000000 |
| rad24              | 8.16006e-09 | 1.000000 | 8.16006e-09 | 1.000000 |
| Phenyl+Allene      | 3.00592e-09 | 1.000000 | 0.000000    | 1.000000 |
| rad23              | 2.32708e-09 | 1.000000 | 2.32708e-09 | 1.000000 |
| rad9               | 2.16917e-09 | 1.000000 | 2.16917e-09 | 1.000000 |
| rad3               | 1.37889e-10 | 1.000000 | 1.37889e-10 | 1.000000 |
| PhCH2CCH+H         | 1.15733e-10 | 1.000000 | 1.15733e-10 | 1.000000 |
| rad4               | 7.95896e-11 | 1.000000 | 7.95896e-11 | 1.000000 |
| rad28              | 1.35512e-11 | 1.000000 | 1.35512e-11 | 1.000000 |
| rad2               | 9.90794e-14 | 1.000000 | 9.90794e-14 | 1.000000 |
| rad8               | 6.76798e-14 | 1.000000 | 6.76798e-14 | 1.000000 |
| rad30              | 3.21940e-14 | 1.000000 | 3.21940e-14 | 1.000000 |
| PhCCH+CH3          | 1.33750e-14 | 1.000000 | 1.33750e-14 | 1.000000 |
| PAH7+H             | 1.11005e-14 | 1.000000 | 1.11005e-14 | 1.000000 |
| rad1               | 9.21782e-15 | 1.000000 | 9.21782e-15 | 1.000000 |
| rad15              | 8.19021e-15 | 1.000000 | 8.19021e-15 | 1.000000 |
| rad14              | 2.80033e-16 | 1.000000 | 2.80033e-16 | 1.000000 |
| rad38              | 1.12909e-16 | 1.000000 | 1.12909e-16 | 1.000000 |
| Ph+MeAc            | 9.26337e-17 | 1.000000 | 9.26337e-17 | 1.000000 |
| rad60syn           | 1.66167e-17 | 1.000000 | 1.66167e-17 | 1.000000 |
| rad10              | 8.42064e-18 | 1.000000 | 8.42064e-18 | 1.000000 |
| rad60anti          | 6.78717e-18 | 1.000000 | 6.78717e-18 | 1.000000 |
| rad46              | 2.95047e-18 | 1.000000 | 2.95047e-18 | 1.000000 |
| rad26              | 1.64524e-18 | 1.000000 | 1.64524e-18 | 1.000000 |
| PAH3+H             | 1.04600e-18 | 1.000000 | 1.04600e-18 | 1.000000 |
| rad35              | 7.12148e-19 | 1.000000 | 7.12148e-19 | 1.000000 |
| rad31              | 3.64051e-19 | 1.000000 | 3.64051e-19 | 1.000000 |
| rad59              | 2.63402e-19 | 1.000000 | 2.63402e-19 | 1.000000 |
| PAH9+H             | 2.60784e-19 | 1.000000 | 2.60784e-19 | 1.000000 |
| PhCCCH3+H          | 1.84045e-19 | 1.000000 | 1.84045e-19 | 1.000000 |
| rad39              | 7.29104e-20 | 1.000000 | 7.29104e-20 | 1.000000 |
| rad27              | 5.38362e-20 | 1.000000 | 5.38362e-20 | 1.000000 |
| rad54              | 2.68179e-20 | 1.000000 | 2.68179e-20 | 1.000000 |
| rad19syn           | 1.08547e-20 | 1.000000 | 1.08547e-20 | 1.000000 |
| rad70              | 9.68698e-21 | 1.000000 | 9.68698e-21 | 1.000000 |
| rad50              | 1.67513e-21 | 1.000000 | 1.67513e-21 | 1.000000 |
| rad55              | 6.45888e-23 | 1.000000 | 6.45888e-23 | 1.000000 |
| rad34              | 3.91733e-23 | 1.000000 | 3.91733e-23 | 1.000000 |
| PhcycC3H3_A+H      | 6.12541e-24 | 1.000000 | 6.12541e-24 | 1.000000 |
| rad5               | 4.66180e-24 | 1.000000 | 4.66180e-24 | 1.000000 |
| rad52              | 3.36162e-24 | 1.000000 | 3.36162e-24 | 1.000000 |
| rad58              | 7.16881e-25 | 1.000000 | 7.16881e-25 | 1.000000 |
| rad51              | 3.83366e-25 | 1.000000 | 3.83366e-25 | 1.000000 |
| rad12              | 1.47671e-25 | 1.000000 | 1.47671e-25 | 1.000000 |
| rad62              | 1.30769e-25 | 1.000000 | 1.30769e-25 | 1.000000 |
| rad37              | 2.35153e-26 | 1.000000 | 2.35153e-26 | 1.000000 |
| rad47              | 2.76278e-27 | 1.000000 | 2.76278e-27 | 1.000000 |
| rad43              | 1.81862e-28 | 1.000000 | 1.81862e-28 | 1.000000 |
| PAH1+H             | 1.09743e-28 | 1.000000 | 1.09743e-28 | 1.000000 |
| rad65              | 1.00139e-29 | 1.000000 | 1.00139e-29 | 1.000000 |

|           |             |         |             |         |
|-----------|-------------|---------|-------------|---------|
| PAH10+CH3 | 6.69926e-30 | 1.00000 | 6.69926e-30 | 1.00000 |
| rad42     | 2.27992e-30 | 1.00000 | 2.27992e-30 | 1.00000 |
| rad41     | 7.21684e-34 | 1.00000 | 7.21684e-34 | 1.00000 |

1000000.00 Pa, 270.000000 K

| =====              |                 |           |                      |           |
|--------------------|-----------------|-----------|----------------------|-----------|
| Rate constant      | True (fraction) |           | Effective (fraction) |           |
| -----              |                 |           |                      |           |
| Total              | 2.15887e-16     | (1.00 )   | 2.15887e-16          | (1.00 )   |
| Formation of rad11 | 1.64133e-16     | (0.760 )  | 1.64133e-16          | (0.760 )  |
| Formation of rad6  | 4.32452e-17     | (0.200 )  | 4.32452e-17          | (0.200 )  |
| H-abstraction      | 8.50919e-18     | (0.0394 ) | 8.50919e-18          | (0.0394 ) |
| -----              |                 |           |                      |           |
| species            | PYtrue          | Cumul     | PYeffective          | Cumul     |
| -----              |                 |           |                      |           |
| rad11              | 0.759125        | 0.759125  | 0.759125             | 0.759125  |
| rad6               | 0.201382        | 0.960507  | 0.201382             | 0.960507  |
| Benzene+2-propynyl | 0.0394150       | 0.999922  | 0.0394150            | 0.999922  |
| rad21              | 5.53721e-05     | 0.999978  | 5.53721e-05          | 0.999978  |
| rad20              | 1.31709e-05     | 0.999991  | 1.31709e-05          | 0.999991  |
| rad22              | 6.03640e-06     | 0.999997  | 6.03640e-06          | 0.999997  |
| rad13              | 1.37726e-06     | 0.999998  | 1.37726e-06          | 0.999998  |
| rad45              | 9.24303e-07     | 0.999999  | 9.24303e-07          | 0.999999  |
| rad7               | 6.20950e-07     | 1.000000  | 6.20950e-07          | 1.000000  |
| rad18              | 3.89729e-07     | 1.000000  | 3.89729e-07          | 1.000000  |
| rad25              | 9.96568e-08     | 1.000000  | 9.96568e-08          | 1.000000  |
| rad36              | 6.71710e-08     | 1.000000  | 6.71710e-08          | 1.000000  |
| PhCHCCH2+H         | 3.37489e-08     | 1.000000  | 3.37489e-08          | 1.000000  |
| C2H2+PhCH2         | 2.11756e-08     | 1.000000  | 2.11756e-08          | 1.000000  |
| Indene+H           | 1.62469e-08     | 1.000000  | 1.62469e-08          | 1.000000  |
| rad33              | 1.17870e-08     | 1.000000  | 1.17870e-08          | 1.000000  |
| rad24              | 8.70431e-09     | 1.000000  | 8.70431e-09          | 1.000000  |
| Phenyl+Allene      | 4.42804e-09     | 1.000000  | 0.000000             | 1.000000  |
| rad23              | 3.25066e-09     | 1.000000  | 3.25066e-09          | 1.000000  |
| rad9               | 2.90481e-09     | 1.000000  | 2.90481e-09          | 1.000000  |
| PhCH2CCH+H         | 1.93707e-10     | 1.000000  | 1.93707e-10          | 1.000000  |
| rad3               | 1.88107e-10     | 1.000000  | 1.88107e-10          | 1.000000  |
| rad4               | 1.08766e-10     | 1.000000  | 1.08766e-10          | 1.000000  |
| rad28              | 1.94358e-11     | 1.000000  | 1.94358e-11          | 1.000000  |
| rad2               | 1.66919e-13     | 1.000000  | 1.66919e-13          | 1.000000  |
| rad8               | 1.24170e-13     | 1.000000  | 1.24170e-13          | 1.000000  |
| rad30              | 5.78191e-14     | 1.000000  | 5.78191e-14          | 1.000000  |
| PhCCH+CH3          | 2.58949e-14     | 1.000000  | 2.58949e-14          | 1.000000  |
| PAH7+H             | 2.19188e-14     | 1.000000  | 2.19188e-14          | 1.000000  |
| rad1               | 1.56424e-14     | 1.000000  | 1.56424e-14          | 1.000000  |
| rad15              | 1.50897e-14     | 1.000000  | 1.50897e-14          | 1.000000  |
| rad14              | 5.13114e-16     | 1.000000  | 5.13114e-16          | 1.000000  |
| rad38              | 2.00328e-16     | 1.000000  | 2.00328e-16          | 1.000000  |
| Ph+MeAc            | 2.00108e-16     | 1.000000  | 2.00108e-16          | 1.000000  |
| rad60syn           | 3.52742e-17     | 1.000000  | 3.52742e-17          | 1.000000  |
| rad10              | 1.78712e-17     | 1.000000  | 1.78712e-17          | 1.000000  |
| rad60anti          | 1.46212e-17     | 1.000000  | 1.46212e-17          | 1.000000  |
| rad46              | 5.70443e-18     | 1.000000  | 5.70443e-18          | 1.000000  |
| rad26              | 3.36520e-18     | 1.000000  | 3.36520e-18          | 1.000000  |
| PAH3+H             | 2.64240e-18     | 1.000000  | 2.64240e-18          | 1.000000  |
| rad35              | 1.64068e-18     | 1.000000  | 1.64068e-18          | 1.000000  |
| rad59              | 6.54159e-19     | 1.000000  | 6.54159e-19          | 1.000000  |
| rad31              | 5.42668e-19     | 1.000000  | 5.42668e-19          | 1.000000  |
| PAH9+H             | 5.41990e-19     | 1.000000  | 5.41990e-19          | 1.000000  |
| PhCCCH3+H          | 4.50104e-19     | 1.000000  | 4.50104e-19          | 1.000000  |
| rad39              | 1.57982e-19     | 1.000000  | 1.57982e-19          | 1.000000  |
| rad27              | 1.20713e-19     | 1.000000  | 1.20713e-19          | 1.000000  |
| rad54              | 6.77080e-20     | 1.000000  | 6.77080e-20          | 1.000000  |
| rad70              | 2.95500e-20     | 1.000000  | 2.95500e-20          | 1.000000  |
| rad19syn           | 2.69982e-20     | 1.000000  | 2.69982e-20          | 1.000000  |
| rad50              | 4.27292e-21     | 1.000000  | 4.27292e-21          | 1.000000  |
| rad55              | 1.84374e-22     | 1.000000  | 1.84374e-22          | 1.000000  |
| rad34              | 1.29484e-22     | 1.000000  | 1.29484e-22          | 1.000000  |
| PhcycC3H3_A+H      | 1.82540e-23     | 1.000000  | 1.82540e-23          | 1.000000  |
| rad5               | 1.33450e-23     | 1.000000  | 1.33450e-23          | 1.000000  |
| rad52              | 9.92534e-24     | 1.000000  | 9.92534e-24          | 1.000000  |
| rad58              | 2.42498e-24     | 1.000000  | 2.42498e-24          | 1.000000  |
| rad51              | 1.26022e-24     | 1.000000  | 1.26022e-24          | 1.000000  |
| rad62              | 4.23291e-25     | 1.000000  | 4.23291e-25          | 1.000000  |
| rad12              | 4.00714e-25     | 1.000000  | 4.00714e-25          | 1.000000  |
| rad37              | 6.66240e-26     | 1.000000  | 6.66240e-26          | 1.000000  |
| rad47              | 1.00268e-26     | 1.000000  | 1.00268e-26          | 1.000000  |
| rad43              | 6.34368e-28     | 1.000000  | 6.34368e-28          | 1.000000  |
| PAH1+H             | 3.52901e-28     | 1.000000  | 3.52901e-28          | 1.000000  |
| rad65              | 3.55704e-29     | 1.000000  | 3.55704e-29          | 1.000000  |

|           |             |         |             |         |
|-----------|-------------|---------|-------------|---------|
| PAH10+CH3 | 2.18646e-29 | 1.00000 | 2.18646e-29 | 1.00000 |
| rad42     | 8.23322e-30 | 1.00000 | 8.23322e-30 | 1.00000 |
| rad41     | 2.79457e-33 | 1.00000 | 2.79457e-33 | 1.00000 |

1000000.00 Pa, 280.000000 K

| =====              |                 |           |                      |           |
|--------------------|-----------------|-----------|----------------------|-----------|
| Rate constant      | True (fraction) |           | Effective (fraction) |           |
| -----              |                 |           |                      |           |
| Total              | 2.79491e-16     | (1.00 )   | 2.79491e-16          | (1.00 )   |
| Formation of rad11 | 2.09281e-16     | (0.749 )  | 2.09281e-16          | (0.749 )  |
| Formation of rad6  | 5.79792e-17     | (0.207 )  | 5.79792e-17          | (0.207 )  |
| H-abstraction      | 1.22310e-17     | (0.0438 ) | 1.22310e-17          | (0.0438 ) |
| -----              |                 |           |                      |           |
| species            | PYtrue          | Cumul     | PYeffective          | Cumul     |
| rad11              | 0.747530        | 0.747530  | 0.747530             | 0.747530  |
| rad6               | 0.208621        | 0.956150  | 0.208621             | 0.956150  |
| Benzene+2-propynyl | 0.0437616       | 0.999912  | 0.0437616            | 0.999912  |
| rad21              | 6.07154e-05     | 0.999973  | 6.07154e-05          | 0.999973  |
| rad20              | 1.56533e-05     | 0.999988  | 1.56533e-05          | 0.999988  |
| rad22              | 7.30616e-06     | 0.999996  | 7.30616e-06          | 0.999996  |
| rad13              | 1.57092e-06     | 0.999997  | 1.57092e-06          | 0.999997  |
| rad45              | 1.14602e-06     | 0.999998  | 1.14602e-06          | 0.999998  |
| rad7               | 7.32854e-07     | 0.999999  | 7.32854e-07          | 0.999999  |
| rad18              | 5.16305e-07     | 1.000000  | 5.16305e-07          | 1.000000  |
| rad25              | 1.20077e-07     | 1.000000  | 1.20077e-07          | 1.000000  |
| rad36              | 8.35776e-08     | 1.000000  | 8.35776e-08          | 1.000000  |
| PhCHCCH2+H         | 4.45813e-08     | 1.000000  | 4.45813e-08          | 1.000000  |
| C2H2+PhCH2         | 3.15408e-08     | 1.000000  | 3.15408e-08          | 1.000000  |
| Indene+H           | 2.37542e-08     | 1.000000  | 2.37542e-08          | 1.000000  |
| rad33              | 1.32781e-08     | 1.000000  | 1.32781e-08          | 1.000000  |
| rad24              | 9.29924e-09     | 1.000000  | 9.29924e-09          | 1.000000  |
| Phenyl+Allene      | 6.48222e-09     | 1.000000  | 0.000000             | 1.000000  |
| rad23              | 4.55065e-09     | 1.000000  | 4.55065e-09          | 1.000000  |
| rad9               | 3.88748e-09     | 1.000000  | 3.88748e-09          | 1.000000  |
| PhCH2CCH+H         | 3.19023e-10     | 1.000000  | 3.19023e-10          | 1.000000  |
| rad3               | 2.55758e-10     | 1.000000  | 2.55758e-10          | 1.000000  |
| rad4               | 1.48211e-10     | 1.000000  | 1.48211e-10          | 1.000000  |
| rad28              | 2.77681e-11     | 1.000000  | 2.77681e-11          | 1.000000  |
| rad2               | 2.79859e-13     | 1.000000  | 2.79859e-13          | 1.000000  |
| rad8               | 2.24524e-13     | 1.000000  | 2.24524e-13          | 1.000000  |
| rad30              | 1.03149e-13     | 1.000000  | 1.03149e-13          | 1.000000  |
| PhCCH+CH3          | 4.95132e-14     | 1.000000  | 4.95132e-14          | 1.000000  |
| PAH7+H             | 4.23325e-14     | 1.000000  | 4.23325e-14          | 1.000000  |
| rad15              | 2.75720e-14     | 1.000000  | 2.75720e-14          | 1.000000  |
| rad1               | 2.64537e-14     | 1.000000  | 2.64537e-14          | 1.000000  |
| rad14              | 9.31388e-16     | 1.000000  | 9.31388e-16          | 1.000000  |
| Ph+MeAc            | 4.22201e-16     | 1.000000  | 4.22201e-16          | 1.000000  |
| rad38              | 3.55668e-16     | 1.000000  | 3.55668e-16          | 1.000000  |
| rad60syn           | 7.33375e-17     | 1.000000  | 7.33375e-17          | 1.000000  |
| rad10              | 3.74145e-17     | 1.000000  | 3.74145e-17          | 1.000000  |
| rad60anti          | 3.07958e-17     | 1.000000  | 3.07958e-17          | 1.000000  |
| rad46              | 1.09854e-17     | 1.000000  | 1.09854e-17          | 1.000000  |
| rad26              | 6.70687e-18     | 1.000000  | 6.70687e-18          | 1.000000  |
| PAH3+H             | 6.39353e-18     | 1.000000  | 6.39353e-18          | 1.000000  |
| rad35              | 3.67871e-18     | 1.000000  | 3.67871e-18          | 1.000000  |
| rad59              | 1.55941e-18     | 1.000000  | 1.55941e-18          | 1.000000  |
| PAH9+H             | 1.12091e-18     | 1.000000  | 1.12091e-18          | 1.000000  |
| PhCCCH3+H          | 1.06953e-18     | 1.000000  | 1.06953e-18          | 1.000000  |
| rad31              | 8.14647e-19     | 1.000000  | 8.14647e-19          | 1.000000  |
| rad39              | 3.33084e-19     | 1.000000  | 3.33084e-19          | 1.000000  |
| rad27              | 2.64934e-19     | 1.000000  | 2.64934e-19          | 1.000000  |
| rad54              | 1.60668e-19     | 1.000000  | 1.60668e-19          | 1.000000  |
| rad70              | 8.29348e-20     | 1.000000  | 8.29348e-20          | 1.000000  |
| rad19syn           | 6.35679e-20     | 1.000000  | 6.35679e-20          | 1.000000  |
| rad50              | 1.05494e-20     | 1.000000  | 1.05494e-20          | 1.000000  |
| rad55              | 4.85133e-22     | 1.000000  | 4.85133e-22          | 1.000000  |
| rad34              | 3.89027e-22     | 1.000000  | 3.89027e-22          | 1.000000  |
| PhcycC3H3_A+H      | 4.99577e-23     | 1.000000  | 4.99577e-23          | 1.000000  |
| rad5               | 3.62251e-23     | 1.000000  | 3.62251e-23          | 1.000000  |
| rad52              | 2.77501e-23     | 1.000000  | 2.77501e-23          | 1.000000  |
| rad58              | 7.48606e-24     | 1.000000  | 7.48606e-24          | 1.000000  |
| rad51              | 3.85680e-24     | 1.000000  | 3.85680e-24          | 1.000000  |
| rad62              | 1.26432e-24     | 1.000000  | 1.26432e-24          | 1.000000  |
| rad12              | 1.03047e-24     | 1.000000  | 1.03047e-24          | 1.000000  |
| rad37              | 1.77572e-25     | 1.000000  | 1.77572e-25          | 1.000000  |
| rad47              | 3.33268e-26     | 1.000000  | 3.33268e-26          | 1.000000  |
| rad43              | 2.03807e-27     | 1.000000  | 2.03807e-27          | 1.000000  |
| PAH1+H             | 1.03300e-27     | 1.000000  | 1.03300e-27          | 1.000000  |
| rad65              | 1.16221e-28     | 1.000000  | 1.16221e-28          | 1.000000  |

|           |             |         |             |         |
|-----------|-------------|---------|-------------|---------|
| PAH10+CH3 | 6.53984e-29 | 1.00000 | 6.53984e-29 | 1.00000 |
| rad42     | 2.70246e-29 | 1.00000 | 2.70246e-29 | 1.00000 |
| rad41     | 9.83290e-33 | 1.00000 | 9.83290e-33 | 1.00000 |

1000000.00 Pa, 290.000000 K

| =====              |                 |           |                      |           |
|--------------------|-----------------|-----------|----------------------|-----------|
| Rate constant      | True (fraction) |           | Effective (fraction) |           |
| -----              |                 |           |                      |           |
| Total              | 3.55893e-16     | (1.00 )   | 3.55893e-16          | (1.00 )   |
| Formation of rad11 | 2.62555e-16     | (0.738 )  | 2.62555e-16          | (0.738 )  |
| Formation of rad6  | 7.62093e-17     | (0.214 )  | 7.62093e-17          | (0.214 )  |
| H-abstraction      | 1.71289e-17     | (0.0481 ) | 1.71289e-17          | (0.0481 ) |
| -----              |                 |           |                      |           |
| species            | PYtrue          | Cumul     | PYeffective          | Cumul     |
| -----              |                 |           |                      |           |
| rad11              | 0.736340        | 0.736340  | 0.736340             | 0.736340  |
| rad6               | 0.215431        | 0.951772  | 0.215431             | 0.951772  |
| Benzene+2-propynyl | 0.0481294       | 0.999901  | 0.0481294            | 0.999901  |
| rad21              | 6.65843e-05     | 0.999968  | 6.65843e-05          | 0.999968  |
| rad20              | 1.85825e-05     | 0.999986  | 1.85825e-05          | 0.999986  |
| rad22              | 8.84829e-06     | 0.999995  | 8.84829e-06          | 0.999995  |
| rad13              | 1.78409e-06     | 0.999997  | 1.78409e-06          | 0.999997  |
| rad45              | 1.42179e-06     | 0.999998  | 1.42179e-06          | 0.999998  |
| rad7               | 8.63515e-07     | 0.999999  | 8.63515e-07          | 0.999999  |
| rad18              | 6.82877e-07     | 1.000000  | 6.82877e-07          | 1.000000  |
| rad25              | 1.44853e-07     | 1.000000  | 1.44853e-07          | 1.000000  |
| rad36              | 1.04144e-07     | 1.000000  | 1.04144e-07          | 1.000000  |
| PhCHCCH2+H         | 5.88841e-08     | 1.000000  | 5.88841e-08          | 1.000000  |
| C2H2+PhCH2         | 4.68520e-08     | 1.000000  | 4.68520e-08          | 1.000000  |
| Indene+H           | 3.47536e-08     | 1.000000  | 3.47536e-08          | 1.000000  |
| rad33              | 1.48693e-08     | 1.000000  | 1.48693e-08          | 1.000000  |
| rad24              | 9.94924e-09     | 1.000000  | 9.94924e-09          | 1.000000  |
| Phenyl+Allene      | 9.42734e-09     | 1.000000  | 0.000000             | 1.000000  |
| rad23              | 6.38135e-09     | 1.000000  | 6.38135e-09          | 1.000000  |
| rad9               | 5.19644e-09     | 1.000000  | 5.19644e-09          | 1.000000  |
| PhCH2CCH+H         | 5.17226e-10     | 1.000000  | 5.17226e-10          | 1.000000  |
| rad3               | 3.46492e-10     | 1.000000  | 3.46492e-10          | 1.000000  |
| rad4               | 2.01329e-10     | 1.000000  | 2.01329e-10          | 1.000000  |
| rad28              | 3.94981e-11     | 1.000000  | 3.94981e-11          | 1.000000  |
| rad2               | 4.66215e-13     | 1.000000  | 4.66215e-13          | 1.000000  |
| rad8               | 3.99660e-13     | 1.000000  | 3.99660e-13          | 1.000000  |
| rad30              | 1.82370e-13     | 1.000000  | 1.82371e-13          | 1.000000  |
| PhCCH+CH3          | 9.32611e-14     | 1.000000  | 9.32611e-14          | 1.000000  |
| PAH7+H             | 7.99033e-14     | 1.000000  | 7.99033e-14          | 1.000000  |
| rad15              | 4.98417e-14     | 1.000000  | 4.98417e-14          | 1.000000  |
| rad1               | 4.45147e-14     | 1.000000  | 4.45147e-14          | 1.000000  |
| rad14              | 1.67105e-15     | 1.000000  | 1.67105e-15          | 1.000000  |
| Ph+MeAc            | 8.68054e-16     | 1.000000  | 8.68054e-16          | 1.000000  |
| rad38              | 6.30797e-16     | 1.000000  | 6.30797e-16          | 1.000000  |
| rad60syn           | 1.48965e-16     | 1.000000  | 1.48965e-16          | 1.000000  |
| rad10              | 7.69946e-17     | 1.000000  | 7.69946e-17          | 1.000000  |
| rad60anti          | 6.32700e-17     | 1.000000  | 6.32700e-17          | 1.000000  |
| rad46              | 2.10255e-17     | 1.000000  | 2.10255e-17          | 1.000000  |
| PAH3+H             | 1.48086e-17     | 1.000000  | 1.48086e-17          | 1.000000  |
| rad26              | 1.30175e-17     | 1.000000  | 1.30175e-17          | 1.000000  |
| rad35              | 8.00229e-18     | 1.000000  | 8.00229e-18          | 1.000000  |
| rad59              | 3.56562e-18     | 1.000000  | 3.56562e-18          | 1.000000  |
| PhCCCH3+H          | 2.46177e-18     | 1.000000  | 2.46177e-18          | 1.000000  |
| PAH9+H             | 2.29801e-18     | 1.000000  | 2.29801e-18          | 1.000000  |
| rad31              | 1.23188e-18     | 1.000000  | 1.23188e-18          | 1.000000  |
| rad39              | 6.81375e-19     | 1.000000  | 6.81375e-19          | 1.000000  |
| rad27              | 5.67319e-19     | 1.000000  | 5.67319e-19          | 1.000000  |
| rad54              | 3.59643e-19     | 1.000000  | 3.59643e-19          | 1.000000  |
| rad70              | 2.15651e-19     | 1.000000  | 2.15651e-19          | 1.000000  |
| rad19syn           | 1.41967e-19     | 1.000000  | 1.41967e-19          | 1.000000  |
| rad50              | 2.51861e-20     | 1.000000  | 2.51861e-20          | 1.000000  |
| rad55              | 1.18482e-21     | 1.000000  | 1.18482e-21          | 1.000000  |
| rad34              | 1.07219e-21     | 1.000000  | 1.07219e-21          | 1.000000  |
| PhcycC3H3_A+H      | 1.26500e-22     | 1.000000  | 1.26500e-22          | 1.000000  |
| rad5               | 9.33197e-23     | 1.000000  | 9.33197e-23          | 1.000000  |
| rad52              | 7.36352e-23     | 1.000000  | 7.36352e-23          | 1.000000  |
| rad58              | 2.12624e-23     | 1.000000  | 2.12624e-23          | 1.000000  |
| rad51              | 1.10470e-23     | 1.000000  | 1.10470e-23          | 1.000000  |
| rad62              | 3.50779e-24     | 1.000000  | 3.50779e-24          | 1.000000  |
| rad12              | 2.51159e-24     | 1.000000  | 2.51159e-24          | 1.000000  |
| rad37              | 4.45838e-25     | 1.000000  | 4.45838e-25          | 1.000000  |
| rad47              | 1.02343e-25     | 1.000000  | 1.02343e-25          | 1.000000  |
| rad43              | 6.07225e-27     | 1.000000  | 6.07225e-27          | 1.000000  |
| PAH1+H             | 2.77731e-27     | 1.000000  | 2.77731e-27          | 1.000000  |
| rad65              | 3.51950e-28     | 1.000000  | 3.51950e-28          | 1.000000  |

|           |             |         |             |         |
|-----------|-------------|---------|-------------|---------|
| PAH10+CH3 | 1.80529e-28 | 1.00000 | 1.80529e-28 | 1.00000 |
| rad42     | 8.14159e-29 | 1.00000 | 8.14159e-29 | 1.00000 |
| rad41     | 3.17389e-32 | 1.00000 | 3.17389e-32 | 1.00000 |

1000000.00 Pa, 300.000000 K

| =====              |                 |           |                      |           |
|--------------------|-----------------|-----------|----------------------|-----------|
| Rate constant      | True (fraction) |           | Effective (fraction) |           |
| -----              |                 |           |                      |           |
| Total              | 6.34395e-16     | (1.00 )   | 6.34395e-16          | (1.00 )   |
| Formation of rad11 | 4.51153e-16     | (0.711 )  | 4.51153e-16          | (0.711 )  |
| Formation of rad6  | 1.51589e-16     | (0.239 )  | 1.51589e-16          | (0.239 )  |
| H-abstraction      | 3.16530e-17     | (0.0499 ) | 3.16530e-17          | (0.0499 ) |
| -----              |                 |           |                      |           |
| species            | PYtrue          | Cumul     | PYeffective          | Cumul     |
| -----              |                 |           |                      |           |
| rad11              | 0.708217        | 0.708217  | 0.708217             | 0.708217  |
| rad6               | 0.241667        | 0.949884  | 0.241667             | 0.949884  |
| Benzene+2-propynyl | 0.0498949       | 0.999779  | 0.0498949            | 0.999779  |
| rad21              | 0.000121028     | 0.999900  | 0.000121028          | 0.999900  |
| rad20              | 5.06046e-05     | 0.999950  | 5.06046e-05          | 0.999950  |
| rad22              | 3.29996e-05     | 0.999983  | 3.29996e-05          | 0.999983  |
| rad45              | 6.12933e-06     | 0.999989  | 6.12933e-06          | 0.999989  |
| rad18              | 4.10900e-06     | 0.999993  | 4.10900e-06          | 0.999993  |
| rad13              | 2.60793e-06     | 0.999996  | 2.60793e-06          | 0.999996  |
| rad7               | 1.62907e-06     | 0.999998  | 1.62907e-06          | 0.999998  |
| C2H2+PhCH2         | 7.88965e-07     | 0.999999  | 7.88965e-07          | 0.999999  |
| Indene+H           | 5.32876e-07     | 0.999999  | 5.32876e-07          | 0.999999  |
| rad25              | 4.19714e-07     | 0.999999  | 4.19714e-07          | 0.999999  |
| PhCHCCH2+H         | 2.60411e-07     | 1.000000  | 2.60411e-07          | 1.000000  |
| rad36              | 2.33652e-07     | 1.000000  | 2.33652e-07          | 1.000000  |
| rad23              | 7.54389e-08     | 1.000000  | 7.54389e-08          | 1.000000  |
| Phenyl+Allene      | 4.16946e-08     | 1.000000  | 0.000000             | 1.000000  |
| rad9               | 2.53762e-08     | 1.000000  | 2.53762e-08          | 1.000000  |
| rad33              | 1.88173e-08     | 1.000000  | 1.88173e-08          | 1.000000  |
| rad24              | 1.73636e-08     | 1.000000  | 1.73636e-08          | 1.000000  |
| PhCH2CCH+H         | 5.93501e-09     | 1.000000  | 5.93501e-09          | 1.000000  |
| rad3               | 1.29513e-09     | 1.000000  | 1.29513e-09          | 1.000000  |
| rad4               | 7.29461e-10     | 1.000000  | 7.29461e-10          | 1.000000  |
| rad28              | 1.87863e-10     | 1.000000  | 1.87863e-10          | 1.000000  |
| rad15              | 2.82943e-11     | 1.000000  | 2.82943e-11          | 1.000000  |
| rad30              | 1.06224e-11     | 1.000000  | 1.06224e-11          | 1.000000  |
| rad2               | 7.90321e-12     | 1.000000  | 7.90321e-12          | 1.000000  |
| PhCCH+CH3          | 4.79499e-12     | 1.000000  | 4.79499e-12          | 1.000000  |
| PAH7+H             | 3.24067e-12     | 1.000000  | 3.24067e-12          | 1.000000  |
| rad1               | 7.25420e-13     | 1.000000  | 7.25420e-13          | 1.000000  |
| Ph+MeAc            | 1.03769e-13     | 1.000000  | 1.03769e-13          | 1.000000  |
| rad38              | 9.90076e-14     | 1.000000  | 9.90076e-14          | 1.000000  |
| rad14              | 4.45194e-14     | 1.000000  | 4.45194e-14          | 1.000000  |
| rad19anti          | 2.61366e-14     | 1.000000  | 2.61366e-14          | 1.000000  |
| rad60syn           | 2.45518e-14     | 1.000000  | 2.45518e-14          | 1.000000  |
| rad12              | 1.57945e-14     | 1.000000  | 1.57945e-14          | 1.000000  |
| rad10              | 1.26679e-14     | 1.000000  | 1.26679e-14          | 1.000000  |
| rad60anti          | 1.16892e-14     | 1.000000  | 1.16892e-14          | 1.000000  |
| PAH3+H             | 9.58257e-15     | 1.000000  | 9.58257e-15          | 1.000000  |
| rad46              | 8.65937e-15     | 1.000000  | 8.65937e-15          | 1.000000  |
| PAH9+H             | 5.97620e-15     | 1.000000  | 5.97620e-15          | 1.000000  |
| rad35              | 3.67528e-15     | 1.000000  | 3.67528e-15          | 1.000000  |
| PhCCCH3+H          | 2.27043e-15     | 1.000000  | 2.27043e-15          | 1.000000  |
| rad59              | 1.76578e-15     | 1.000000  | 1.76578e-15          | 1.000000  |
| rad26              | 7.62388e-16     | 1.000000  | 7.62388e-16          | 1.000000  |
| rad50              | 2.62914e-16     | 1.000000  | 2.62914e-16          | 1.000000  |
| rad70              | 2.31170e-16     | 1.000000  | 2.31170e-16          | 1.000000  |
| rad27              | 8.57841e-17     | 1.000000  | 8.57841e-17          | 1.000000  |
| rad39              | 5.55314e-17     | 1.000000  | 5.55314e-17          | 1.000000  |
| rad54              | 1.75848e-17     | 1.000000  | 1.75848e-17          | 1.000000  |
| rad19syn           | 1.60763e-17     | 1.000000  | 1.60763e-17          | 1.000000  |
| rad31              | 1.04718e-17     | 1.000000  | 1.04718e-17          | 1.000000  |
| rad51              | 7.26367e-18     | 1.000000  | 7.26367e-18          | 1.000000  |
| rad34              | 6.62667e-18     | 1.000000  | 6.62667e-18          | 1.000000  |
| rad52              | 6.60398e-18     | 1.000000  | 6.60398e-18          | 1.000000  |
| rad5               | 7.49766e-19     | 1.000000  | 7.49766e-19          | 1.000000  |
| rad58              | 3.99404e-19     | 1.000000  | 3.99404e-19          | 1.000000  |
| rad67              | 3.18400e-19     | 1.000000  | 3.18400e-19          | 1.000000  |
| PhcycC3H3_A+H      | 1.97716e-19     | 1.000000  | 1.97716e-19          | 1.000000  |
| rad62              | 1.86785e-19     | 1.000000  | 1.86785e-19          | 1.000000  |
| rad55              | 1.74889e-19     | 1.000000  | 1.74889e-19          | 1.000000  |
| rad8               | 4.38828e-20     | 1.000000  | 4.38828e-20          | 1.000000  |
| rad65              | 2.74182e-20     | 1.000000  | 2.74182e-20          | 1.000000  |
| rad37              | 1.72588e-20     | 1.000000  | 1.72588e-20          | 1.000000  |
| rad43              | 5.54285e-21     | 1.000000  | 5.54285e-21          | 1.000000  |

|           |             |         |             |         |
|-----------|-------------|---------|-------------|---------|
| PAH10+CH3 | 3.65332e-21 | 1.00000 | 3.65332e-21 | 1.00000 |
| rad47     | 3.54105e-21 | 1.00000 | 3.54105e-21 | 1.00000 |
| PAH1+H    | 2.46166e-21 | 1.00000 | 2.46166e-21 | 1.00000 |
| rad73     | 9.03869e-22 | 1.00000 | 9.03869e-22 | 1.00000 |
| rad42     | 8.08213e-22 | 1.00000 | 8.08213e-22 | 1.00000 |
| rad71     | 3.38087e-22 | 1.00000 | 3.38087e-22 | 1.00000 |
| rad68syn  | 1.75038e-22 | 1.00000 | 1.75038e-22 | 1.00000 |
| rad68anti | 1.25060e-22 | 1.00000 | 1.25060e-22 | 1.00000 |
| rad53     | 9.80822e-23 | 1.00000 | 9.80822e-23 | 1.00000 |
| rad41     | 2.36442e-23 | 1.00000 | 2.36442e-23 | 1.00000 |
| rad64     | 1.28490e-23 | 1.00000 | 1.28490e-23 | 1.00000 |
| rad56     | 3.82339e-24 | 1.00000 | 3.82339e-24 | 1.00000 |
| PAH8+H    | 2.77583e-24 | 1.00000 | 2.77583e-24 | 1.00000 |
| rad40syn  | 2.13262e-24 | 1.00000 | 2.13262e-24 | 1.00000 |
| rad61     | 5.71455e-25 | 1.00000 | 5.71455e-25 | 1.00000 |
| rad72     | 5.23120e-25 | 1.00000 | 5.23120e-25 | 1.00000 |
| rad40anti | 5.07284e-25 | 1.00000 | 5.07284e-25 | 1.00000 |

1000000.00 Pa, 400.000000 K

| Rate constant      | True (fraction) |           | Effective (fraction) |           |
|--------------------|-----------------|-----------|----------------------|-----------|
| Total              | 5.11288e-15     | (1.00 )   | 5.11288e-15          | (1.00 )   |
| Formation of rad11 | 3.08094e-15     | (0.603 )  | 3.08094e-15          | (0.603 )  |
| Formation of rad6  | 1.54092e-15     | (0.301 )  | 1.54092e-15          | (0.301 )  |
| H-abstraction      | 4.91025e-16     | (0.0960 ) | 4.91025e-16          | (0.0960 ) |

  

| species            | PYtrue      | Cumul    | PYeffective | Cumul    |
|--------------------|-------------|----------|-------------|----------|
| rad11              | 0.594617    | 0.594617 | 0.594618    | 0.594618 |
| rad6               | 0.308613    | 0.903230 | 0.308613    | 0.903231 |
| Benzene+2-propynyl | 0.0960368   | 0.999267 | 0.0960369   | 0.999268 |
| rad21              | 0.000255958 | 0.999523 | 0.000255958 | 0.999524 |
| rad22              | 0.000179726 | 0.999703 | 0.000179726 | 0.999703 |
| rad20              | 0.000173069 | 0.999876 | 0.000173069 | 0.999877 |
| rad45              | 3.94581e-05 | 0.999915 | 3.94582e-05 | 0.999916 |
| rad18              | 3.19227e-05 | 0.999947 | 3.19227e-05 | 0.999948 |
| C2H2+PhCH2         | 1.57233e-05 | 0.999963 | 1.57234e-05 | 0.999964 |
| Indene+H           | 1.16516e-05 | 0.999974 | 1.16516e-05 | 0.999975 |
| rad7               | 8.24301e-06 | 0.999983 | 8.24301e-06 | 0.999984 |
| rad13              | 6.62749e-06 | 0.999989 | 6.62750e-06 | 0.999990 |
| PhCHCCH2+H         | 2.98396e-06 | 0.999992 | 2.98396e-06 | 0.999993 |
| rad23              | 2.84883e-06 | 0.999995 | 2.84883e-06 | 0.999996 |
| rad25              | 2.08129e-06 | 0.999997 | 2.08129e-06 | 0.999998 |
| rad36              | 1.64059e-06 | 0.999999 | 1.64059e-06 | 1.000000 |
| Phenyl+Allene      | 8.94938e-07 | 1.000000 | 0.000000    | 1.000000 |
| rad9               | 3.09685e-07 | 1.000000 | 3.09685e-07 | 1.000000 |
| PhCH2CCH+H         | 2.09267e-07 | 1.000000 | 2.09267e-07 | 1.000000 |
| rad33              | 4.03997e-08 | 1.000000 | 4.03996e-08 | 1.000000 |
| rad24              | 3.68088e-08 | 1.000000 | 3.68088e-08 | 1.000000 |
| rad3               | 1.56884e-08 | 1.000000 | 1.56884e-08 | 1.000000 |
| rad4               | 9.25007e-09 | 1.000000 | 9.25007e-09 | 1.000000 |
| rad28              | 3.71401e-09 | 1.000000 | 3.71401e-09 | 1.000000 |
| PhCCH+CH3          | 1.66157e-09 | 1.000000 | 1.66157e-09 | 1.000000 |
| rad2               | 8.38406e-10 | 1.000000 | 8.38407e-10 | 1.000000 |
| rad15              | 8.23718e-10 | 1.000000 | 8.23719e-10 | 1.000000 |
| rad30              | 5.95818e-10 | 1.000000 | 5.95818e-10 | 1.000000 |
| PAH9+H             | 5.10173e-10 | 1.000000 | 5.10174e-10 | 1.000000 |
| rad38              | 4.27679e-10 | 1.000000 | 4.27679e-10 | 1.000000 |
| PAH7+H             | 2.99911e-10 | 1.000000 | 2.99911e-10 | 1.000000 |
| rad46              | 9.65505e-11 | 1.000000 | 9.65505e-11 | 1.000000 |
| rad1               | 9.26888e-11 | 1.000000 | 9.26888e-11 | 1.000000 |
| rad35              | 8.83938e-11 | 1.000000 | 8.83939e-11 | 1.000000 |
| Ph+MeAc            | 8.31808e-11 | 1.000000 | 8.31809e-11 | 1.000000 |
| rad50              | 3.20721e-11 | 1.000000 | 3.20722e-11 | 1.000000 |
| rad10              | 1.54799e-11 | 1.000000 | 1.54799e-11 | 1.000000 |
| PhCCCH3+H          | 1.05814e-11 | 1.000000 | 1.05815e-11 | 1.000000 |
| rad39              | 9.57378e-12 | 1.000000 | 9.57378e-12 | 1.000000 |
| rad51              | 4.97165e-12 | 1.000000 | 4.97166e-12 | 1.000000 |
| rad14              | 4.95851e-12 | 1.000000 | 4.95852e-12 | 1.000000 |
| rad19anti          | 3.18814e-12 | 1.000000 | 3.18814e-12 | 1.000000 |
| rad60syn           | 2.72761e-12 | 1.000000 | 2.72762e-12 | 1.000000 |
| PAH3+H             | 2.62898e-12 | 1.000000 | 2.62899e-12 | 1.000000 |
| rad52              | 2.02559e-12 | 1.000000 | 2.02559e-12 | 1.000000 |
| rad60anti          | 1.37549e-12 | 1.000000 | 1.37549e-12 | 1.000000 |
| rad26              | 1.29215e-12 | 1.000000 | 1.29215e-12 | 1.000000 |
| rad59              | 4.05002e-13 | 1.000000 | 4.05002e-13 | 1.000000 |
| rad12              | 2.08361e-13 | 1.000000 | 2.08361e-13 | 1.000000 |
| PAH10+CH3          | 1.59493e-13 | 1.000000 | 1.59493e-13 | 1.000000 |
| rad37              | 1.44560e-13 | 1.000000 | 1.44561e-13 | 1.000000 |

|               |             |         |             |         |
|---------------|-------------|---------|-------------|---------|
| rad65         | 1.08660e-13 | 1.00000 | 1.08660e-13 | 1.00000 |
| rad70         | 1.00185e-13 | 1.00000 | 1.00185e-13 | 1.00000 |
| PAH1+H        | 7.38683e-14 | 1.00000 | 7.38684e-14 | 1.00000 |
| rad27         | 3.38702e-14 | 1.00000 | 3.38703e-14 | 1.00000 |
| rad73         | 3.17511e-14 | 1.00000 | 3.17511e-14 | 1.00000 |
| rad71         | 3.13939e-14 | 1.00000 | 3.13939e-14 | 1.00000 |
| rad19syn      | 2.81339e-14 | 1.00000 | 2.81340e-14 | 1.00000 |
| rad67         | 1.59036e-14 | 1.00000 | 1.59036e-14 | 1.00000 |
| rad54         | 1.40786e-14 | 1.00000 | 1.40786e-14 | 1.00000 |
| PhcycC3H3_A+H | 9.66481e-15 | 1.00000 | 9.66481e-15 | 1.00000 |
| rad34         | 6.63828e-15 | 1.00000 | 6.63829e-15 | 1.00000 |
| rad58         | 4.83430e-15 | 1.00000 | 4.83431e-15 | 1.00000 |
| rad5          | 4.39808e-15 | 1.00000 | 4.39808e-15 | 1.00000 |
| rad62         | 1.60754e-15 | 1.00000 | 1.60754e-15 | 1.00000 |
| rad31         | 1.44235e-15 | 1.00000 | 1.44235e-15 | 1.00000 |
| rad64         | 1.11394e-15 | 1.00000 | 1.11395e-15 | 1.00000 |
| rad55         | 6.43663e-16 | 1.00000 | 6.43663e-16 | 1.00000 |
| rad72         | 5.28083e-16 | 1.00000 | 5.28083e-16 | 1.00000 |
| rad43         | 2.94059e-16 | 1.00000 | 2.94059e-16 | 1.00000 |
| PAH8+H        | 2.73505e-16 | 1.00000 | 2.73506e-16 | 1.00000 |
| rad61         | 1.62756e-16 | 1.00000 | 1.62757e-16 | 1.00000 |
| rad68syn      | 1.28205e-16 | 1.00000 | 1.28206e-16 | 1.00000 |
| rad53         | 1.01069e-16 | 1.00000 | 1.01069e-16 | 1.00000 |
| rad56         | 8.70335e-17 | 1.00000 | 8.70336e-17 | 1.00000 |
| rad68anti     | 8.40403e-17 | 1.00000 | 8.40404e-17 | 1.00000 |
| rad40syn      | 3.79850e-17 | 1.00000 | 3.79850e-17 | 1.00000 |
| rad42         | 3.76565e-17 | 1.00000 | 3.76566e-17 | 1.00000 |
| rad47         | 3.50781e-17 | 1.00000 | 3.50781e-17 | 1.00000 |
| rad40anti     | 2.11349e-17 | 1.00000 | 2.11349e-17 | 1.00000 |
| rad41         | 7.30951e-18 | 1.00000 | 7.30952e-18 | 1.00000 |
| rad8          | 2.58122e-19 | 1.00000 | 2.58122e-19 | 1.00000 |

1000000.00 Pa, 500.000000 K

| Rate constant      | True (fraction) |          | Effective (fraction) |          |
|--------------------|-----------------|----------|----------------------|----------|
| Total              | 2.11551e-14     | (1.00 )  | 2.11548e-14          | (1.00 )  |
| Formation of rad11 | 1.10850e-14     | (0.524 ) | 1.10848e-14          | (0.524 ) |
| Formation of rad6  | 7.08033e-15     | (0.335 ) | 7.08023e-15          | (0.335 ) |
| H-abstraction      | 2.98976e-15     | (0.141 ) | 2.98976e-15          | (0.141 ) |

  

| species            | PYtrue      | Cumul    | PYeffective | Cumul    |
|--------------------|-------------|----------|-------------|----------|
| rad11              | 0.502168    | 0.502168 | 0.502175    | 0.502175 |
| rad6               | 0.354074    | 0.856243 | 0.354079    | 0.856254 |
| Benzene+2-propynyl | 0.141326    | 0.997568 | 0.141328    | 0.997581 |
| rad22              | 0.000776014 | 0.998344 | 0.000776024 | 0.998357 |
| rad21              | 0.000463116 | 0.998807 | 0.000463122 | 0.998820 |
| rad20              | 0.000400449 | 0.999208 | 0.000400454 | 0.999221 |
| C2H2+PhCH2         | 0.000177594 | 0.999385 | 0.000177598 | 0.999398 |
| Indene+H           | 0.000165915 | 0.999551 | 0.000165916 | 0.999564 |
| rad45              | 0.000154269 | 0.999706 | 0.000154270 | 0.999719 |
| rad18              | 0.000134388 | 0.999840 | 0.000134390 | 0.999853 |
| rad23              | 4.72809e-05 | 0.999887 | 4.72815e-05 | 0.999900 |
| rad7               | 3.67352e-05 | 0.999924 | 3.67356e-05 | 0.999937 |
| PhCHCCH2+H         | 2.73349e-05 | 0.999951 | 2.73352e-05 | 0.999964 |
| Phenyl+Allene      | 1.26193e-05 | 0.999964 | 0.00000     | 0.999964 |
| rad13              | 1.17758e-05 | 0.999976 | 1.17759e-05 | 0.999976 |
| rad36              | 7.58200e-06 | 0.999983 | 7.58210e-06 | 0.999984 |
| rad25              | 7.23078e-06 | 0.999991 | 7.23086e-06 | 0.999991 |
| PhCH2CCH+H         | 4.25319e-06 | 0.999995 | 4.25325e-06 | 0.999995 |
| rad9               | 2.93405e-06 | 0.999998 | 2.93408e-06 | 0.999998 |
| PAH9+H             | 7.38482e-07 | 0.999998 | 7.38491e-07 | 0.999999 |
| rad38              | 3.76484e-07 | 0.999999 | 3.76489e-07 | 0.999999 |
| rad46              | 1.22778e-07 | 0.999999 | 1.22780e-07 | 0.999999 |
| PAH7+H             | 1.18776e-07 | 0.999999 | 1.18778e-07 | 0.999999 |
| rad35              | 1.09369e-07 | 0.999999 | 1.09371e-07 | 0.999999 |
| rad50              | 1.04466e-07 | 0.999999 | 1.04468e-07 | 1.000000 |
| PhCCH+CH3          | 1.03608e-07 | 0.999999 | 1.03609e-07 | 1.000000 |
| rad24              | 9.47393e-08 | 0.999999 | 9.47399e-08 | 1.000000 |
| rad3               | 8.41057e-08 | 1.000000 | 8.41068e-08 | 1.000000 |
| rad33              | 6.50497e-08 | 1.000000 | 6.50505e-08 | 1.000000 |
| rad28              | 5.37788e-08 | 1.000000 | 5.37794e-08 | 1.000000 |
| rad4               | 5.21283e-08 | 1.000000 | 5.21290e-08 | 1.000000 |
| rad39              | 4.52606e-08 | 1.000000 | 4.52612e-08 | 1.000000 |
| rad51              | 2.94086e-08 | 1.000000 | 2.94089e-08 | 1.000000 |
| rad30              | 1.60452e-08 | 1.000000 | 1.60454e-08 | 1.000000 |
| rad2               | 1.52294e-08 | 1.000000 | 1.52296e-08 | 1.000000 |
| rad15              | 1.26769e-08 | 1.000000 | 1.26770e-08 | 1.000000 |
| Ph+MeAc            | 1.26075e-08 | 1.000000 | 1.26076e-08 | 1.000000 |

|               |             |          |             |          |
|---------------|-------------|----------|-------------|----------|
| rad52         | 8.90059e-09 | 1.000000 | 8.90074e-09 | 1.000000 |
| rad19anti     | 4.01608e-09 | 1.000000 | 4.01613e-09 | 1.000000 |
| PAH3+H        | 3.36482e-09 | 1.000000 | 3.36485e-09 | 1.000000 |
| PhCCCH3+H     | 3.04851e-09 | 1.000000 | 3.04854e-09 | 1.000000 |
| rad1          | 2.10060e-09 | 1.000000 | 2.10062e-09 | 1.000000 |
| PAH10+CH3     | 1.94981e-09 | 1.000000 | 1.94983e-09 | 1.000000 |
| rad10         | 1.06337e-09 | 1.000000 | 1.06338e-09 | 1.000000 |
| PAH1+H        | 9.76854e-10 | 1.000000 | 9.76869e-10 | 1.000000 |
| rad37         | 8.91871e-10 | 1.000000 | 8.91886e-10 | 1.000000 |
| rad71         | 8.71262e-10 | 1.000000 | 8.71278e-10 | 1.000000 |
| rad65         | 7.53750e-10 | 1.000000 | 7.53760e-10 | 1.000000 |
| rad73         | 6.48716e-10 | 1.000000 | 6.48724e-10 | 1.000000 |
| rad60syn      | 3.48926e-10 | 1.000000 | 3.48930e-10 | 1.000000 |
| rad26         | 3.38408e-10 | 1.000000 | 3.38412e-10 | 1.000000 |
| rad59         | 3.26831e-10 | 1.000000 | 3.26835e-10 | 1.000000 |
| rad67         | 2.27154e-10 | 1.000000 | 2.27157e-10 | 1.000000 |
| rad60anti     | 2.07612e-10 | 1.000000 | 2.07615e-10 | 1.000000 |
| rad19syn      | 2.03277e-10 | 1.000000 | 2.03279e-10 | 1.000000 |
| rad70         | 1.35746e-10 | 1.000000 | 1.35748e-10 | 1.000000 |
| PhcycC3H3_A+H | 1.26622e-10 | 1.000000 | 1.26623e-10 | 1.000000 |
| rad54         | 8.33034e-11 | 1.000000 | 8.33045e-11 | 1.000000 |
| rad14         | 7.22325e-11 | 1.000000 | 7.22333e-11 | 1.000000 |
| rad58         | 3.49860e-11 | 1.000000 | 3.49864e-11 | 1.000000 |
| rad34         | 3.46349e-11 | 1.000000 | 3.46353e-11 | 1.000000 |
| rad72         | 2.70444e-11 | 1.000000 | 2.70447e-11 | 1.000000 |
| rad64         | 1.82798e-11 | 1.000000 | 1.82800e-11 | 1.000000 |
| PAH8+H        | 9.97840e-12 | 1.000000 | 9.97846e-12 | 1.000000 |
| rad62         | 7.10146e-12 | 1.000000 | 7.10155e-12 | 1.000000 |
| rad55         | 6.15742e-12 | 1.000000 | 6.15751e-12 | 1.000000 |
| rad61         | 3.99187e-12 | 1.000000 | 3.99192e-12 | 1.000000 |
| rad12         | 3.40556e-12 | 1.000000 | 3.40561e-12 | 1.000000 |
| rad68syn      | 2.95297e-12 | 1.000000 | 2.95301e-12 | 1.000000 |
| rad68anti     | 1.91896e-12 | 1.000000 | 1.91898e-12 | 1.000000 |
| rad56         | 1.90218e-12 | 1.000000 | 1.90221e-12 | 1.000000 |
| rad53         | 1.77844e-12 | 1.000000 | 1.77847e-12 | 1.000000 |
| rad43         | 1.52014e-12 | 1.000000 | 1.52015e-12 | 1.000000 |
| rad40syn      | 1.16024e-12 | 1.000000 | 1.16026e-12 | 1.000000 |
| rad27         | 7.94359e-13 | 1.000000 | 7.94369e-13 | 1.000000 |
| rad40anti     | 6.97058e-13 | 1.000000 | 6.97067e-13 | 1.000000 |
| rad42         | 6.56691e-13 | 1.000000 | 6.56699e-13 | 1.000000 |
| rad5          | 4.22014e-13 | 1.000000 | 4.22019e-13 | 1.000000 |
| rad47         | 3.16753e-13 | 1.000000 | 3.16757e-13 | 1.000000 |
| rad31         | 1.90925e-13 | 1.000000 | 1.90928e-13 | 1.000000 |
| rad41         | 1.26441e-13 | 1.000000 | 1.26442e-13 | 1.000000 |
| rad8          | 3.90386e-18 | 1.000000 | 3.90391e-18 | 1.000000 |

1000000.00 Pa, 600.000000 K

=====

| Rate constant      | True (fraction)      | Effective (fraction) |
|--------------------|----------------------|----------------------|
| Total              | 6.08120e-14 (1.00 )  | 6.08049e-14 (1.00 )  |
| Formation of rad11 | 2.83304e-14 (0.466 ) | 2.83264e-14 (0.466 ) |
| Formation of rad6  | 2.13840e-14 (0.352 ) | 2.13810e-14 (0.352 ) |
| H-abstraction      | 1.10975e-14 (0.182 ) | 1.10975e-14 (0.183 ) |

| species            | PYtrue      | Cumul    | PYeffective | Cumul    |
|--------------------|-------------|----------|-------------|----------|
| rad11              | 0.411557    | 0.411557 | 0.411605    | 0.411605 |
| rad6               | 0.398696    | 0.810253 | 0.398742    | 0.810347 |
| Benzene+2-propynyl | 0.182488    | 0.992741 | 0.182509    | 0.992857 |
| rad22              | 0.00226785  | 0.995009 | 0.00226812  | 0.995125 |
| Indene+H           | 0.00123089  | 0.996240 | 0.00123103  | 0.996356 |
| C2H2+PhCH2         | 0.00110261  | 0.997343 | 0.00110275  | 0.997459 |
| rad21              | 0.000669658 | 0.998012 | 0.000669736 | 0.998128 |
| rad20              | 0.000619397 | 0.998632 | 0.000619468 | 0.998748 |
| rad45              | 0.000305108 | 0.998937 | 0.000305144 | 0.999053 |
| rad18              | 0.000294119 | 0.999231 | 0.000294154 | 0.999347 |
| PhCHCCH2+H         | 0.000180064 | 0.999411 | 0.000180085 | 0.999527 |
| rad23              | 0.000169481 | 0.999580 | 0.000169501 | 0.999697 |
| rad7               | 0.000134538 | 0.999715 | 0.000134554 | 0.999831 |
| Phenyl+Allene      | 0.000116054 | 0.999831 | 0.000000    | 0.999831 |
| PhCH2CCH+H         | 5.02449e-05 | 0.999881 | 5.02507e-05 | 0.999882 |
| rad9               | 1.88326e-05 | 0.999900 | 1.88348e-05 | 0.999900 |
| rad36              | 1.86576e-05 | 0.999919 | 1.86598e-05 | 0.999919 |
| PAH9+H             | 1.82809e-05 | 0.999937 | 1.82830e-05 | 0.999937 |
| rad13              | 1.72741e-05 | 0.999954 | 1.72761e-05 | 0.999955 |
| rad25              | 1.55131e-05 | 0.999970 | 1.55149e-05 | 0.999970 |
| rad38              | 9.08754e-06 | 0.999979 | 9.08853e-06 | 0.999979 |
| PAH7+H             | 3.69914e-06 | 0.999983 | 3.69957e-06 | 0.999983 |
| rad50              | 3.46326e-06 | 0.999986 | 3.46367e-06 | 0.999986 |



|              |             |          |             |          |
|--------------|-------------|----------|-------------|----------|
| rad46        | 3.24897e-06 | 0.999989 | 3.24935e-06 | 0.999990 |
| rad35        | 2.57061e-06 | 0.999992 | 2.57091e-06 | 0.999992 |
| PhCCH+CH3    | 1.84127e-06 | 0.999994 | 1.84148e-06 | 0.999994 |
| rad39        | 1.60598e-06 | 0.999995 | 1.60616e-06 | 0.999996 |
| rad51        | 1.10335e-06 | 0.999997 | 1.10347e-06 | 0.999997 |
| rad28        | 5.29369e-07 | 0.999997 | 5.29431e-07 | 0.999997 |
| Ph+MeAc      | 3.18857e-07 | 0.999997 | 3.18894e-07 | 0.999998 |
| rad24        | 3.18360e-07 | 0.999998 | 3.18397e-07 | 0.999998 |
| rad52        | 3.13762e-07 | 0.999998 | 3.13798e-07 | 0.999998 |
| rad3         | 2.63188e-07 | 0.999998 | 2.63219e-07 | 0.999998 |
| rad30        | 1.91771e-07 | 0.999998 | 1.91793e-07 | 0.999999 |
| rad19anti    | 1.72532e-07 | 0.999999 | 1.72552e-07 | 0.999999 |
| rad4         | 1.71987e-07 | 0.999999 | 1.72007e-07 | 0.999999 |
| PAH3+H       | 1.12710e-07 | 0.999999 | 1.12724e-07 | 0.999999 |
| rad33        | 1.05361e-07 | 0.999999 | 1.05374e-07 | 0.999999 |
| rad15        | 9.45338e-08 | 0.999999 | 9.45452e-08 | 0.999999 |
| PAH10+CH3    | 7.95878e-08 | 0.999999 | 7.95970e-08 | 0.999999 |
| PhCCCH3+H    | 6.49710e-08 | 0.999999 | 6.49785e-08 | 0.999999 |
| rad2         | 6.03854e-08 | 0.999999 | 6.03924e-08 | 1.000000 |
| rad71        | 4.23048e-08 | 0.999999 | 4.23097e-08 | 1.000000 |
| PAH1+H       | 4.21547e-08 | 0.999999 | 4.21596e-08 | 1.000000 |
| rad37        | 3.06482e-08 | 0.999999 | 3.06518e-08 | 1.000000 |
| rad73        | 3.00378e-08 | 0.999999 | 3.00412e-08 | 1.000000 |
| rad65        | 2.82965e-08 | 0.999999 | 2.82997e-08 | 1.000000 |
| rad19syn     | 1.70214e-08 | 0.999999 | 1.70233e-08 | 1.000000 |
| PhycC3H3_A+H | 1.15385e-08 | 1.000000 | 1.15399e-08 | 1.000000 |
| rad59        | 1.04499e-08 | 1.000000 | 1.04511e-08 | 1.000000 |
| rad67        | 1.01400e-08 | 1.000000 | 1.01412e-08 | 1.000000 |
| rad1         | 9.92050e-09 | 1.000000 | 9.92164e-09 | 1.000000 |
| rad60syn     | 8.87098e-09 | 1.000000 | 8.87206e-09 | 1.000000 |
| rad54        | 7.16206e-09 | 1.000000 | 7.16289e-09 | 1.000000 |
| rad70        | 5.84823e-09 | 1.000000 | 5.84890e-09 | 1.000000 |
| rad60anti    | 5.46237e-09 | 1.000000 | 5.46300e-09 | 1.000000 |
| rad10        | 5.46083e-09 | 1.000000 | 5.46147e-09 | 1.000000 |
| rad26        | 2.83592e-09 | 1.000000 | 2.83624e-09 | 1.000000 |
| rad34        | 1.57105e-09 | 1.000000 | 1.57123e-09 | 1.000000 |
| rad72        | 1.43335e-09 | 1.000000 | 1.43352e-09 | 1.000000 |
| rad58        | 1.34901e-09 | 1.000000 | 1.34916e-09 | 1.000000 |
| rad64        | 8.20152e-10 | 1.000000 | 8.20245e-10 | 1.000000 |
| rad47        | 5.68996e-10 | 1.000000 | 5.69061e-10 | 1.000000 |
| rad55        | 5.42772e-10 | 1.000000 | 5.42835e-10 | 1.000000 |
| PAH8+H       | 5.32702e-10 | 1.000000 | 5.32763e-10 | 1.000000 |
| rad62        | 3.60786e-10 | 1.000000 | 3.60828e-10 | 1.000000 |
| rad14        | 2.62911e-10 | 1.000000 | 2.62941e-10 | 1.000000 |
| rad61        | 1.87903e-10 | 1.000000 | 1.87925e-10 | 1.000000 |
| rad56        | 1.84840e-10 | 1.000000 | 1.84862e-10 | 1.000000 |
| rad53        | 1.68121e-10 | 1.000000 | 1.68141e-10 | 1.000000 |
| rad68syn     | 1.47952e-10 | 1.000000 | 1.47970e-10 | 1.000000 |
| rad68anti    | 9.60298e-11 | 1.000000 | 9.60412e-11 | 1.000000 |
| rad12        | 7.48205e-11 | 1.000000 | 7.48292e-11 | 1.000000 |
| rad43        | 6.86944e-11 | 1.000000 | 6.87024e-11 | 1.000000 |
| rad40syn     | 6.04462e-11 | 1.000000 | 6.04532e-11 | 1.000000 |
| rad40anti    | 3.66952e-11 | 1.000000 | 3.66994e-11 | 1.000000 |
| rad42        | 3.51309e-11 | 1.000000 | 3.51350e-11 | 1.000000 |
| rad31        | 7.64008e-12 | 1.000000 | 7.64097e-12 | 1.000000 |
| rad41        | 6.28360e-12 | 1.000000 | 6.28433e-12 | 1.000000 |
| rad5         | 2.44571e-12 | 1.000000 | 2.44600e-12 | 1.000000 |
| rad27        | 2.30863e-12 | 1.000000 | 2.30890e-12 | 1.000000 |
| rad8         | 1.78928e-16 | 1.000000 | 1.78949e-16 | 1.000000 |

1000000.00 Pa, 700.000000 K

=====

| Rate constant      | True (fraction)      | Effective (fraction) |
|--------------------|----------------------|----------------------|
| Total              | 1.39564e-13 (1.00 )  | 1.39473e-13 (1.00 )  |
| Formation of rad11 | 5.88273e-14 (0.422 ) | 5.87786e-14 (0.421 ) |
| Formation of rad6  | 5.01684e-14 (0.359 ) | 5.01268e-14 (0.359 ) |
| H-abstraction      | 3.05678e-14 (0.219 ) | 3.05678e-14 (0.219 ) |

| species            | PYtrue      | Cumul    | PYeffective | Cumul    |
|--------------------|-------------|----------|-------------|----------|
| rad6               | 0.454308    | 0.454308 | 0.454602    | 0.454602 |
| rad11              | 0.308574    | 0.762882 | 0.308774    | 0.763377 |
| Benzene+2-propynyl | 0.219024    | 0.981906 | 0.219166    | 0.982543 |
| Indene+H           | 0.00449179  | 0.986398 | 0.00449470  | 0.987038 |
| rad22              | 0.00419337  | 0.990592 | 0.00419608  | 0.991234 |
| C2H2+PhCH2         | 0.00402094  | 0.994612 | 0.00402355  | 0.995257 |
| rad21              | 0.000858808 | 0.995471 | 0.000859362 | 0.996117 |
| PhCHCCH2+H         | 0.000810840 | 0.996282 | 0.000811364 | 0.996928 |
| rad20              | 0.000734027 | 0.997016 | 0.000734502 | 0.997662 |

|               |             |          |             |          |
|---------------|-------------|----------|-------------|----------|
| Phenyl+Allene | 0.000647692 | 0.997664 | 0.00000     | 0.997662 |
| rad23         | 0.000455167 | 0.998119 | 0.000455462 | 0.998118 |
| rad45         | 0.000451576 | 0.998571 | 0.000451868 | 0.998570 |
| rad7          | 0.000375398 | 0.998946 | 0.000375641 | 0.998945 |
| rad18         | 0.000363433 | 0.999309 | 0.000363669 | 0.999309 |
| PhCH2CCH+H    | 0.000325389 | 0.999635 | 0.000325599 | 0.999635 |
| PAH9+H        | 7.78257e-05 | 0.999713 | 7.78761e-05 | 0.999713 |
| rad9          | 6.55039e-05 | 0.999778 | 6.55465e-05 | 0.999778 |
| rad38         | 3.86263e-05 | 0.999817 | 3.86513e-05 | 0.999817 |
| rad36         | 3.51850e-05 | 0.999852 | 3.52077e-05 | 0.999852 |
| rad13         | 2.54144e-05 | 0.999877 | 2.54308e-05 | 0.999877 |
| rad25         | 2.23040e-05 | 0.999900 | 2.23184e-05 | 0.999900 |
| PAH7+H        | 1.74376e-05 | 0.999917 | 1.74490e-05 | 0.999917 |
| rad50         | 1.56747e-05 | 0.999933 | 1.56848e-05 | 0.999933 |
| rad46         | 1.40707e-05 | 0.999947 | 1.40798e-05 | 0.999947 |
| PhCCH+CH3     | 1.36351e-05 | 0.999960 | 1.36438e-05 | 0.999961 |
| rad35         | 1.08451e-05 | 0.999971 | 1.08521e-05 | 0.999971 |
| rad39         | 7.41451e-06 | 0.999979 | 7.41932e-06 | 0.999979 |
| rad51         | 5.11245e-06 | 0.999984 | 5.11577e-06 | 0.999984 |
| rad28         | 3.72402e-06 | 0.999988 | 3.72644e-06 | 0.999988 |
| Ph+MeAc       | 2.49331e-06 | 0.999990 | 2.49493e-06 | 0.999990 |
| rad19anti     | 2.34048e-06 | 0.999992 | 2.34200e-06 | 0.999993 |
| rad52         | 1.43599e-06 | 0.999994 | 1.43692e-06 | 0.999994 |
| rad24         | 1.35627e-06 | 0.999995 | 1.35715e-06 | 0.999995 |
| rad30         | 9.18630e-07 | 0.999996 | 9.19229e-07 | 0.999996 |
| rad3          | 5.58786e-07 | 0.999997 | 5.59148e-07 | 0.999997 |
| PAH3+H        | 5.30015e-07 | 0.999997 | 5.30359e-07 | 0.999997 |
| PhCCCH3+H     | 4.17293e-07 | 0.999998 | 4.17563e-07 | 0.999998 |
| rad4          | 3.90458e-07 | 0.999998 | 3.90711e-07 | 0.999998 |
| PAH10+CH3     | 3.82666e-07 | 0.999998 | 3.82914e-07 | 0.999999 |
| rad15         | 2.70870e-07 | 0.999999 | 2.71046e-07 | 0.999999 |
| rad33         | 2.34725e-07 | 0.999999 | 2.34878e-07 | 0.999999 |
| PAH1+H        | 2.06034e-07 | 0.999999 | 2.06167e-07 | 0.999999 |
| rad71         | 2.03815e-07 | 0.999999 | 2.03947e-07 | 0.999999 |
| rad2          | 1.53697e-07 | 0.999999 | 1.53797e-07 | 1.000000 |
| rad37         | 1.43587e-07 | 1.000000 | 1.43680e-07 | 1.000000 |
| rad73         | 1.43247e-07 | 1.000000 | 1.43340e-07 | 1.000000 |
| rad19syn      | 1.40257e-07 | 1.000000 | 1.40349e-07 | 1.000000 |
| rad65         | 1.31064e-07 | 1.000000 | 1.31150e-07 | 1.000000 |
| rad67         | 1.01693e-07 | 1.000000 | 1.01759e-07 | 1.000000 |
| PhcycC3H3_A+H | 1.00429e-07 | 1.000000 | 1.00494e-07 | 1.000000 |
| rad54         | 5.98007e-08 | 1.000000 | 5.98395e-08 | 1.000000 |
| rad59         | 4.94802e-08 | 1.000000 | 4.95123e-08 | 1.000000 |
| rad60syn      | 4.39527e-08 | 1.000000 | 4.39812e-08 | 1.000000 |
| rad70         | 3.28635e-08 | 1.000000 | 3.28848e-08 | 1.000000 |
| rad1          | 2.93570e-08 | 1.000000 | 2.93760e-08 | 1.000000 |
| rad60anti     | 2.69257e-08 | 1.000000 | 2.69431e-08 | 1.000000 |
| rad47         | 2.68553e-08 | 1.000000 | 2.68728e-08 | 1.000000 |
| rad10         | 1.23086e-08 | 1.000000 | 1.23166e-08 | 1.000000 |
| rad26         | 1.13457e-08 | 1.000000 | 1.13531e-08 | 1.000000 |
| rad34         | 8.35816e-09 | 1.000000 | 8.36359e-09 | 1.000000 |
| rad72         | 7.05438e-09 | 1.000000 | 7.05896e-09 | 1.000000 |
| rad58         | 6.33234e-09 | 1.000000 | 6.33644e-09 | 1.000000 |
| rad55         | 4.60182e-09 | 1.000000 | 4.60480e-09 | 1.000000 |
| rad64         | 4.03569e-09 | 1.000000 | 4.03831e-09 | 1.000000 |
| PAH8+H        | 2.79467e-09 | 1.000000 | 2.79648e-09 | 1.000000 |
| rad62         | 2.25056e-09 | 1.000000 | 2.25202e-09 | 1.000000 |
| rad56         | 1.71064e-09 | 1.000000 | 1.71174e-09 | 1.000000 |
| rad53         | 1.51549e-09 | 1.000000 | 1.51647e-09 | 1.000000 |
| rad12         | 1.50898e-09 | 1.000000 | 1.50996e-09 | 1.000000 |
| rad61         | 9.26175e-10 | 1.000000 | 9.26779e-10 | 1.000000 |
| rad68syn      | 7.67607e-10 | 1.000000 | 7.68105e-10 | 1.000000 |
| rad14         | 6.68902e-10 | 1.000000 | 6.69335e-10 | 1.000000 |
| rad68anti     | 4.98150e-10 | 1.000000 | 4.98473e-10 | 1.000000 |
| rad43         | 4.11749e-10 | 1.000000 | 4.12016e-10 | 1.000000 |
| rad40syn      | 3.15872e-10 | 1.000000 | 3.16076e-10 | 1.000000 |
| rad42         | 2.12791e-10 | 1.000000 | 2.12929e-10 | 1.000000 |
| rad40anti     | 1.92255e-10 | 1.000000 | 1.92379e-10 | 1.000000 |
| rad31         | 8.23328e-11 | 1.000000 | 8.23866e-11 | 1.000000 |
| rad41         | 3.67853e-11 | 1.000000 | 3.68091e-11 | 1.000000 |
| rad5          | 6.82210e-12 | 1.000000 | 6.82652e-12 | 1.000000 |
| rad27         | 4.55859e-12 | 1.000000 | 4.56154e-12 | 1.000000 |
| rad8          | 2.26459e-14 | 1.000000 | 2.26606e-14 | 1.000000 |

1000000.00 Pa, 800.000000 K

=====

| Rate constant      | True (fraction)      | Effective (fraction) |
|--------------------|----------------------|----------------------|
| Total              | 2.75392e-13 (1.00 )  | 2.74754e-13 (1.00 )  |
| Formation of rad11 | 1.06471e-13 (0.387 ) | 1.06141e-13 (0.386 ) |

Formation of rad6 | 9.97133e-14 (0.362 ) 9.94044e-14 (0.362 )  
H-abstraction | 6.92082e-14 (0.251 ) 6.92082e-14 (0.252 )

| species            | PYtrue      | Cumul    | PYeffective | Cumul    |
|--------------------|-------------|----------|-------------|----------|
| rad6               | 0.509717    | 0.509717 | 0.510902    | 0.510902 |
| Benzene+2-propynyl | 0.251308    | 0.761025 | 0.251892    | 0.762794 |
| rad11              | 0.203247    | 0.964272 | 0.203720    | 0.966514 |
| Indene+H           | 0.00985586  | 0.974128 | 0.00987877  | 0.976393 |
| C2H2+PhCH2         | 0.00937310  | 0.983501 | 0.00939489  | 0.985788 |
| rad22              | 0.00481915  | 0.988320 | 0.00483035  | 0.990618 |
| PhCHCCH2+H         | 0.00252672  | 0.990846 | 0.00253260  | 0.993151 |
| Phenyl+Allene      | 0.00231912  | 0.993166 | 0.000000    | 0.993151 |
| PhCH2CCH+H         | 0.00132739  | 0.994493 | 0.00133047  | 0.994481 |
| rad21              | 0.00118088  | 0.995674 | 0.00118363  | 0.995665 |
| rad23              | 0.000896574 | 0.996570 | 0.000898657 | 0.996563 |
| rad20              | 0.000842653 | 0.997413 | 0.000844614 | 0.997408 |
| rad7               | 0.000767237 | 0.998180 | 0.000769018 | 0.998177 |
| rad45              | 0.000711517 | 0.998892 | 0.000713171 | 0.998890 |
| rad18              | 0.000285282 | 0.999177 | 0.000285944 | 0.999176 |
| PAH9+H             | 0.000167843 | 0.999345 | 0.000168232 | 0.999344 |
| rad9               | 0.000139512 | 0.999484 | 0.000139836 | 0.999484 |
| rad38              | 8.32950e-05 | 0.999568 | 8.34889e-05 | 0.999568 |
| rad36              | 6.92095e-05 | 0.999637 | 6.93703e-05 | 0.999637 |
| PhCCH+CH3          | 6.36865e-05 | 0.999701 | 6.38345e-05 | 0.999701 |
| rad13              | 4.59653e-05 | 0.999747 | 4.60722e-05 | 0.999747 |
| PAH7+H             | 4.19470e-05 | 0.999789 | 4.20445e-05 | 0.999789 |
| rad50              | 3.47554e-05 | 0.999823 | 3.48362e-05 | 0.999824 |
| rad46              | 3.05953e-05 | 0.999854 | 3.06664e-05 | 0.999854 |
| rad25              | 2.70973e-05 | 0.999881 | 2.71603e-05 | 0.999882 |
| rad35              | 2.34642e-05 | 0.999905 | 2.35187e-05 | 0.999905 |
| rad28              | 1.96856e-05 | 0.999924 | 1.97314e-05 | 0.999925 |
| rad39              | 1.67154e-05 | 0.999941 | 1.67543e-05 | 0.999942 |
| rad19anti          | 1.23107e-05 | 0.999953 | 1.23394e-05 | 0.999954 |
| Ph+MeAc            | 1.21386e-05 | 0.999965 | 1.21669e-05 | 0.999966 |
| rad51              | 1.14569e-05 | 0.999977 | 1.14835e-05 | 0.999978 |
| rad24              | 5.36575e-06 | 0.999982 | 5.37822e-06 | 0.999983 |
| rad52              | 3.19850e-06 | 0.999985 | 3.20594e-06 | 0.999986 |
| rad30              | 2.53432e-06 | 0.999988 | 2.54021e-06 | 0.999989 |
| PhCCCH3+H          | 1.85396e-06 | 0.999990 | 1.85827e-06 | 0.999991 |
| PAH3+H             | 1.30122e-06 | 0.999991 | 1.30424e-06 | 0.999992 |
| rad3               | 1.05504e-06 | 0.999992 | 1.05750e-06 | 0.999993 |
| PAH10+CH3          | 9.42619e-07 | 0.999993 | 9.44808e-07 | 0.999994 |
| rad33              | 8.49683e-07 | 0.999994 | 8.51654e-07 | 0.999995 |
| rad4               | 7.82623e-07 | 0.999995 | 7.84444e-07 | 0.999996 |
| rad67              | 6.87701e-07 | 0.999995 | 6.89299e-07 | 0.999996 |
| PAH1+H             | 4.73626e-07 | 0.999996 | 4.74728e-07 | 0.999997 |
| rad71              | 4.67704e-07 | 0.999996 | 4.68791e-07 | 0.999997 |
| rad19syn           | 3.93430e-07 | 0.999997 | 3.94345e-07 | 0.999998 |
| rad37              | 3.51983e-07 | 0.999997 | 3.52800e-07 | 0.999998 |
| rad73              | 3.26532e-07 | 0.999997 | 3.27291e-07 | 0.999998 |
| rad2               | 3.17244e-07 | 0.999998 | 3.17982e-07 | 0.999999 |
| rad15              | 3.08797e-07 | 0.999998 | 3.09514e-07 | 0.999999 |
| rad65              | 2.93530e-07 | 0.999998 | 2.94212e-07 | 0.999999 |
| PhcycC3H3_A+H      | 2.65263e-07 | 0.999999 | 2.65880e-07 | 0.999999 |
| rad54              | 1.64572e-07 | 0.999999 | 1.64955e-07 | 1.000000 |
| rad59              | 1.24791e-07 | 0.999999 | 1.25081e-07 | 1.000000 |
| rad47              | 1.23930e-07 | 0.999999 | 1.24219e-07 | 1.000000 |
| rad60syn           | 1.21409e-07 | 0.999999 | 1.21692e-07 | 1.000000 |
| rad70              | 1.05209e-07 | 0.999999 | 1.05454e-07 | 1.000000 |
| rad60anti          | 7.37320e-08 | 0.999999 | 7.39034e-08 | 1.000000 |
| rad1               | 7.02430e-08 | 0.999999 | 7.04063e-08 | 1.000000 |
| rad26              | 3.72859e-08 | 0.999999 | 3.73726e-08 | 1.000000 |
| rad10              | 2.69148e-08 | 0.999999 | 2.69774e-08 | 1.000000 |
| rad34              | 2.31833e-08 | 0.999999 | 2.32371e-08 | 1.000000 |
| rad12              | 2.06001e-08 | 0.999999 | 2.06480e-08 | 1.000000 |
| rad72              | 1.64113e-08 | 0.999999 | 1.64494e-08 | 1.000000 |
| rad58              | 1.46783e-08 | 1.000000 | 1.47124e-08 | 1.000000 |
| rad55              | 1.23321e-08 | 1.000000 | 1.23608e-08 | 1.000000 |
| rad64              | 9.27106e-09 | 1.000000 | 9.29263e-09 | 1.000000 |
| rad62              | 7.94707e-09 | 1.000000 | 7.96556e-09 | 1.000000 |
| PAH8+H             | 6.66931e-09 | 1.000000 | 6.68482e-09 | 1.000000 |
| rad56              | 4.49513e-09 | 1.000000 | 4.50557e-09 | 1.000000 |
| rad53              | 3.96311e-09 | 1.000000 | 3.97232e-09 | 1.000000 |
| rad61              | 2.29625e-09 | 1.000000 | 2.30159e-09 | 1.000000 |
| rad14              | 1.90398e-09 | 1.000000 | 1.90841e-09 | 1.000000 |
| rad68syn           | 1.82800e-09 | 1.000000 | 1.83225e-09 | 1.000000 |
| rad43              | 1.61399e-09 | 1.000000 | 1.61775e-09 | 1.000000 |
| rad68anti          | 1.18671e-09 | 1.000000 | 1.18947e-09 | 1.000000 |
| rad40syn           | 7.55865e-10 | 1.000000 | 7.57624e-10 | 1.000000 |

|           |             |          |             |         |
|-----------|-------------|----------|-------------|---------|
| rad42     | 7.23683e-10 | 1.000000 | 7.25366e-10 | 1.00000 |
| rad40anti | 4.62801e-10 | 1.000000 | 4.63877e-10 | 1.00000 |
| rad31     | 4.55969e-10 | 1.000000 | 4.57029e-10 | 1.00000 |
| rad41     | 1.42186e-10 | 1.000000 | 1.42516e-10 | 1.00000 |
| rad5      | 1.42401e-11 | 1.000000 | 1.42732e-11 | 1.00000 |
| rad27     | 1.35668e-11 | 1.000000 | 1.35984e-11 | 1.00000 |
| rad8      | 4.46179e-12 | 1.000000 | 4.47217e-12 | 1.00000 |

1000000.00 Pa, 900.000000 K

| Rate constant      | True (fraction)      | Effective (fraction) |
|--------------------|----------------------|----------------------|
| Total              | 4.88072e-13 (1.00 )  | 4.84984e-13 (1.00 )  |
| Formation of rad11 | 1.74945e-13 (0.358 ) | 1.73408e-13 (0.358 ) |
| Formation of rad6  | 1.76509e-13 (0.362 ) | 1.74958e-13 (0.361 ) |
| H-abstraction      | 1.36618e-13 (0.280 ) | 1.36618e-13 (0.282 ) |

| species            | PYtrue      | Cumul    | PYeffective | Cumul    |
|--------------------|-------------|----------|-------------|----------|
| rad6               | 0.542752    | 0.542752 | 0.546208    | 0.546208 |
| Benzene+2-propynyl | 0.279914    | 0.822666 | 0.281696    | 0.827904 |
| rad11              | 0.118213    | 0.940879 | 0.118965    | 0.946870 |
| C2H2+PhCH2         | 0.0158673   | 0.956746 | 0.0159683   | 0.962838 |
| Indene+H           | 0.0155916   | 0.972338 | 0.0156909   | 0.978529 |
| Phenyl+Allene      | 0.00632774  | 0.978665 | 0.000000    | 0.978529 |
| PhCHCCH2+H         | 0.00588730  | 0.984553 | 0.00592479  | 0.984454 |
| PhCH2CCH+H         | 0.00392627  | 0.988479 | 0.00395127  | 0.988405 |
| rad22              | 0.00371781  | 0.992197 | 0.00374149  | 0.992147 |
| rad21              | 0.00157646  | 0.993773 | 0.00158650  | 0.993733 |
| rad7               | 0.00124818  | 0.995021 | 0.00125612  | 0.994989 |
| rad23              | 0.00116411  | 0.996186 | 0.00117153  | 0.996161 |
| rad45              | 0.00103337  | 0.997219 | 0.00103995  | 0.997201 |
| rad20              | 0.000943666 | 0.998163 | 0.000949669 | 0.998151 |
| PhCCH+CH3          | 0.000274267 | 0.998437 | 0.000276014 | 0.998427 |
| PAH9+H             | 0.000267499 | 0.998704 | 0.000269202 | 0.998696 |
| rad9               | 0.000245448 | 0.998950 | 0.000247011 | 0.998943 |
| rad18              | 0.000172426 | 0.999122 | 0.000173524 | 0.999116 |
| rad38              | 0.000132533 | 0.999255 | 0.000133377 | 0.999250 |
| rad13              | 0.000112272 | 0.999367 | 0.000112986 | 0.999363 |
| rad36              | 0.000104630 | 0.999472 | 0.000105296 | 0.999468 |
| PAH7+H             | 8.81724e-05 | 0.999560 | 8.87342e-05 | 0.999557 |
| rad28              | 7.90554e-05 | 0.999639 | 7.95586e-05 | 0.999636 |
| rad50              | 5.63313e-05 | 0.999695 | 5.66900e-05 | 0.999693 |
| Ph+MeAc            | 4.94393e-05 | 0.999745 | 4.97542e-05 | 0.999743 |
| rad46              | 4.89602e-05 | 0.999794 | 4.92719e-05 | 0.999792 |
| rad35              | 3.77778e-05 | 0.999831 | 3.80184e-05 | 0.999830 |
| rad19anti          | 3.47152e-05 | 0.999866 | 3.49363e-05 | 0.999865 |
| rad25              | 3.30726e-05 | 0.999899 | 3.32832e-05 | 0.999898 |
| rad39              | 2.96178e-05 | 0.999929 | 2.98064e-05 | 0.999928 |
| rad51              | 1.86859e-05 | 0.999947 | 1.88048e-05 | 0.999947 |
| rad24              | 1.16984e-05 | 0.999959 | 1.17729e-05 | 0.999959 |
| PhCCCH3+H          | 6.86262e-06 | 0.999966 | 6.90633e-06 | 0.999965 |
| rad52              | 5.19646e-06 | 0.999971 | 5.22955e-06 | 0.999971 |
| rad30              | 5.01918e-06 | 0.999976 | 5.05115e-06 | 0.999976 |
| rad33              | 3.95581e-06 | 0.999980 | 3.98100e-06 | 0.999980 |
| PAH3+H             | 2.60650e-06 | 0.999983 | 2.62310e-06 | 0.999982 |
| rad3               | 2.53190e-06 | 0.999985 | 2.54803e-06 | 0.999985 |
| rad67              | 2.32222e-06 | 0.999988 | 2.33701e-06 | 0.999987 |
| rad4               | 1.97736e-06 | 0.999990 | 1.98996e-06 | 0.999989 |
| PAH10+CH3          | 1.78559e-06 | 0.999991 | 1.79696e-06 | 0.999991 |
| rad19syn           | 1.20722e-06 | 0.999993 | 1.21491e-06 | 0.999992 |
| rad2               | 8.21057e-07 | 0.999993 | 8.26286e-07 | 0.999993 |
| PAH1+H             | 8.05330e-07 | 0.999994 | 8.10462e-07 | 0.999994 |
| rad71              | 7.78709e-07 | 0.999995 | 7.83662e-07 | 0.999995 |
| rad37              | 6.70284e-07 | 0.999996 | 6.74552e-07 | 0.999995 |
| PhcycC3H3_A+H      | 5.95956e-07 | 0.999996 | 5.99751e-07 | 0.999996 |
| rad73              | 5.41281e-07 | 0.999997 | 5.44728e-07 | 0.999996 |
| rad65              | 4.78858e-07 | 0.999997 | 4.81908e-07 | 0.999997 |
| rad54              | 4.76547e-07 | 0.999998 | 4.79581e-07 | 0.999997 |
| rad70              | 3.26679e-07 | 0.999998 | 3.28760e-07 | 0.999998 |
| rad15              | 3.03730e-07 | 0.999998 | 3.05663e-07 | 0.999998 |
| rad60syn           | 2.64873e-07 | 0.999999 | 2.66560e-07 | 0.999998 |
| rad59              | 2.58190e-07 | 0.999999 | 2.59834e-07 | 0.999999 |
| rad47              | 2.37060e-07 | 0.999999 | 2.38569e-07 | 0.999999 |
| rad1               | 2.08430e-07 | 0.999999 | 2.09758e-07 | 0.999999 |
| rad12              | 1.85468e-07 | 1.000000 | 1.86648e-07 | 0.999999 |
| rad26              | 1.80611e-07 | 1.000000 | 1.81762e-07 | 0.999999 |
| rad60anti          | 1.60490e-07 | 1.000000 | 1.61512e-07 | 1.000000 |
| rad10              | 8.21438e-08 | 1.000000 | 8.26667e-08 | 1.000000 |
| rad34              | 6.22626e-08 | 1.000000 | 6.26591e-08 | 1.000000 |

|           |             |         |             |          |
|-----------|-------------|---------|-------------|----------|
| rad55     | 3.17490e-08 | 1.00000 | 3.19512e-08 | 1.000000 |
| rad72     | 2.75545e-08 | 1.00000 | 2.77299e-08 | 1.000000 |
| rad58     | 2.65267e-08 | 1.00000 | 2.66956e-08 | 1.000000 |
| rad62     | 2.52919e-08 | 1.00000 | 2.54530e-08 | 1.000000 |
| rad64     | 1.54891e-08 | 1.00000 | 1.55877e-08 | 1.000000 |
| PAH8+H    | 1.15936e-08 | 1.00000 | 1.16675e-08 | 1.000000 |
| rad14     | 8.09543e-09 | 1.00000 | 8.14693e-09 | 1.000000 |
| rad56     | 7.95731e-09 | 1.00000 | 8.00801e-09 | 1.000000 |
| rad53     | 7.54204e-09 | 1.00000 | 7.59003e-09 | 1.000000 |
| rad43     | 5.37086e-09 | 1.00000 | 5.40506e-09 | 1.000000 |
| rad61     | 4.36188e-09 | 1.00000 | 4.38966e-09 | 1.000000 |
| rad68syn  | 3.36962e-09 | 1.00000 | 3.39108e-09 | 1.000000 |
| rad68anti | 2.19283e-09 | 1.00000 | 2.20679e-09 | 1.000000 |
| rad42     | 2.18895e-09 | 1.00000 | 2.20289e-09 | 1.000000 |
| rad31     | 2.02116e-09 | 1.00000 | 2.03403e-09 | 1.000000 |
| rad40syn  | 1.34848e-09 | 1.00000 | 1.35707e-09 | 1.000000 |
| rad40anti | 8.30087e-10 | 1.00000 | 8.35373e-10 | 1.000000 |
| rad41     | 4.71127e-10 | 1.00000 | 4.74127e-10 | 1.000000 |
| rad8      | 4.09150e-10 | 1.00000 | 4.11755e-10 | 1.000000 |
| rad27     | 8.94542e-11 | 1.00000 | 9.00236e-11 | 1.000000 |
| rad5      | 3.49243e-11 | 1.00000 | 3.51467e-11 | 1.000000 |

1000000.00 Pa, 1000.00000 K

| Rate constant      | True (fraction)      | Effective (fraction) |
|--------------------|----------------------|----------------------|
| Total              | 7.98668e-13 (1.00 )  | 7.86323e-13 (1.00 )  |
| Formation of rad11 | 2.67704e-13 (0.335 ) | 2.61747e-13 (0.333 ) |
| Formation of rad6  | 2.87049e-13 (0.359 ) | 2.80662e-13 (0.357 ) |
| H-abstraction      | 2.43915e-13 (0.305 ) | 2.43915e-13 (0.310 ) |

| species            | PYtrue      | Cumul    | PYeffective | Cumul    |
|--------------------|-------------|----------|-------------|----------|
| rad6               | 0.532038    | 0.532038 | 0.540390    | 0.540390 |
| Benzene+2-propynyl | 0.305402    | 0.837440 | 0.310197    | 0.850586 |
| rad11              | 0.0732245   | 0.910664 | 0.0743746   | 0.924961 |
| C2H2+PhCH2         | 0.0214611   | 0.932125 | 0.0217981   | 0.946759 |
| Indene+H           | 0.0194003   | 0.951526 | 0.0197049   | 0.966464 |
| Phenyl+Allene      | 0.0154567   | 0.966982 | 0.000000    | 0.966464 |
| PhCHCCH2+H         | 0.0111302   | 0.978113 | 0.0113050   | 0.977769 |
| PhCH2CCH+H         | 0.00932762  | 0.987440 | 0.00947411  | 0.987243 |
| rad22              | 0.00214636  | 0.989587 | 0.00218005  | 0.989423 |
| rad7               | 0.00184170  | 0.991428 | 0.00187061  | 0.991294 |
| rad21              | 0.00165871  | 0.993087 | 0.00168475  | 0.992979 |
| rad45              | 0.00127239  | 0.994359 | 0.00129237  | 0.994271 |
| rad23              | 0.00107347  | 0.995433 | 0.00109033  | 0.995361 |
| PhCCH+CH3          | 0.00106820  | 0.996501 | 0.00108497  | 0.996446 |
| rad20              | 0.000863892 | 0.997365 | 0.000877451 | 0.997324 |
| rad9               | 0.000416780 | 0.997782 | 0.000423323 | 0.997747 |
| PAH9+H             | 0.000347196 | 0.998129 | 0.000352647 | 0.998100 |
| rad13              | 0.000333918 | 0.998463 | 0.000339160 | 0.998439 |
| PAH7+H             | 0.000242272 | 0.998705 | 0.000246076 | 0.998685 |
| rad28              | 0.000214939 | 0.998920 | 0.000218314 | 0.998903 |
| Ph+MeAc            | 0.000178865 | 0.999099 | 0.000181673 | 0.999085 |
| rad38              | 0.000171265 | 0.999270 | 0.000173954 | 0.999259 |
| rad36              | 0.000126222 | 0.999396 | 0.000128204 | 0.999387 |
| rad18              | 0.000103286 | 0.999500 | 0.000104908 | 0.999492 |
| rad50              | 7.33808e-05 | 0.999573 | 7.45326e-05 | 0.999567 |
| rad19anti          | 7.06698e-05 | 0.999644 | 7.17796e-05 | 0.999638 |
| rad46              | 6.34187e-05 | 0.999707 | 6.44144e-05 | 0.999703 |
| rad39              | 5.84729e-05 | 0.999766 | 5.93908e-05 | 0.999762 |
| rad35              | 4.98429e-05 | 0.999816 | 5.06254e-05 | 0.999813 |
| rad25              | 4.17771e-05 | 0.999857 | 4.24329e-05 | 0.999855 |
| rad51              | 2.44066e-05 | 0.999882 | 2.47897e-05 | 0.999880 |
| PhCCCH3+H          | 2.19064e-05 | 0.999904 | 2.22504e-05 | 0.999902 |
| rad33              | 1.61152e-05 | 0.999920 | 1.63682e-05 | 0.999919 |
| rad24              | 1.49932e-05 | 0.999935 | 1.52287e-05 | 0.999934 |
| rad30              | 7.96336e-06 | 0.999943 | 8.08836e-06 | 0.999942 |
| rad19syn           | 6.93432e-06 | 0.999950 | 7.04317e-06 | 0.999949 |
| rad52              | 6.77565e-06 | 0.999956 | 6.88202e-06 | 0.999956 |
| rad3               | 6.00227e-06 | 0.999962 | 6.09650e-06 | 0.999962 |
| rad67              | 5.05510e-06 | 0.999967 | 5.13446e-06 | 0.999967 |
| PAH3+H             | 4.99189e-06 | 0.999972 | 5.07026e-06 | 0.999972 |
| rad4               | 4.78267e-06 | 0.999977 | 4.85775e-06 | 0.999977 |
| PhcycC3H3_A+H      | 2.92165e-06 | 0.999980 | 2.96752e-06 | 0.999980 |
| PAH10+CH3          | 2.90323e-06 | 0.999983 | 2.94881e-06 | 0.999983 |
| rad54              | 2.83306e-06 | 0.999986 | 2.87754e-06 | 0.999986 |
| rad2               | 2.31836e-06 | 0.999988 | 2.35476e-06 | 0.999988 |
| PAH1+H             | 1.39045e-06 | 0.999990 | 1.41228e-06 | 0.999990 |
| rad37              | 1.18599e-06 | 0.999991 | 1.20461e-06 | 0.999991 |

|           |             |          |             |          |
|-----------|-------------|----------|-------------|----------|
| rad12     | 1.10477e-06 | 0.999992 | 1.12212e-06 | 0.999992 |
| rad70     | 1.06269e-06 | 0.999993 | 1.07938e-06 | 0.999993 |
| rad71     | 1.02862e-06 | 0.999994 | 1.04477e-06 | 0.999994 |
| rad26     | 7.99982e-07 | 0.999995 | 8.12540e-07 | 0.999995 |
| rad73     | 7.13505e-07 | 0.999995 | 7.24708e-07 | 0.999996 |
| rad65     | 6.26511e-07 | 0.999996 | 6.36346e-07 | 0.999996 |
| rad1      | 6.22439e-07 | 0.999997 | 6.32211e-07 | 0.999997 |
| rad60syn  | 5.01203e-07 | 0.999997 | 5.09071e-07 | 0.999997 |
| rad59     | 5.00841e-07 | 0.999998 | 5.08704e-07 | 0.999998 |
| rad15     | 4.25559e-07 | 0.999998 | 4.32241e-07 | 0.999998 |
| rad47     | 3.10946e-07 | 0.999998 | 3.15828e-07 | 0.999999 |
| rad60anti | 3.05420e-07 | 0.999999 | 3.10215e-07 | 0.999999 |
| rad10     | 2.80495e-07 | 0.999999 | 2.84899e-07 | 0.999999 |
| rad34     | 2.01715e-07 | 0.999999 | 2.04882e-07 | 0.999999 |
| rad55     | 1.82627e-07 | 0.999999 | 1.85494e-07 | 1.000000 |
| rad62     | 7.95912e-08 | 1.000000 | 8.08408e-08 | 1.000000 |
| rad58     | 4.69337e-08 | 1.000000 | 4.76706e-08 | 1.000000 |
| rad14     | 4.17364e-08 | 1.000000 | 4.23916e-08 | 1.000000 |
| rad72     | 3.65375e-08 | 1.000000 | 3.71111e-08 | 1.000000 |
| rad53     | 3.30875e-08 | 1.000000 | 3.36069e-08 | 1.000000 |
| rad56     | 2.96672e-08 | 1.000000 | 3.01330e-08 | 1.000000 |
| rad64     | 2.45800e-08 | 1.000000 | 2.49659e-08 | 1.000000 |
| PAH8+H    | 2.11081e-08 | 1.000000 | 2.14394e-08 | 1.000000 |
| rad43     | 1.52347e-08 | 1.000000 | 1.54739e-08 | 1.000000 |
| rad8      | 1.04430e-08 | 1.000000 | 1.06070e-08 | 1.000000 |
| rad68syn  | 7.82041e-09 | 1.000000 | 7.94322e-09 | 1.000000 |
| rad31     | 7.19708e-09 | 1.000000 | 7.31005e-09 | 1.000000 |
| rad61     | 6.87815e-09 | 1.000000 | 6.98612e-09 | 1.000000 |
| rad42     | 6.25702e-09 | 1.000000 | 6.35526e-09 | 1.000000 |
| rad68anti | 5.11755e-09 | 1.000000 | 5.19789e-09 | 1.000000 |
| rad40syn  | 2.69369e-09 | 1.000000 | 2.73598e-09 | 1.000000 |
| rad40anti | 1.61748e-09 | 1.000000 | 1.64288e-09 | 1.000000 |
| rad41     | 1.30559e-09 | 1.000000 | 1.32609e-09 | 1.000000 |
| rad27     | 8.65497e-10 | 1.000000 | 8.79086e-10 | 1.000000 |
| rad5      | 8.82494e-11 | 1.000000 | 8.96351e-11 | 1.000000 |

1000000.00 Pa, 1100.00000 K

=====

| Rate constant      | True (fraction)      | Effective (fraction) |
|--------------------|----------------------|----------------------|
| Total              | 1.22919e-12 (1.00 )  | 1.18217e-12 (1.00 )  |
| Formation of rad11 | 3.87976e-13 (0.316 ) | 3.65880e-13 (0.309 ) |
| Formation of rad6  | 4.37724e-13 (0.356 ) | 4.12795e-13 (0.349 ) |
| H-abstraction      | 4.03491e-13 (0.328 ) | 4.03491e-13 (0.341 ) |

| species            | PYtrue      | Cumul    | PYeffective | Cumul    |
|--------------------|-------------|----------|-------------|----------|
| rad6               | 0.473972    | 0.473972 | 0.492826    | 0.492826 |
| Benzene+2-propynyl | 0.328257    | 0.802230 | 0.341315    | 0.834141 |
| rad11              | 0.0557001   | 0.857930 | 0.0579158   | 0.892057 |
| Phenyl+Allene      | 0.0382567   | 0.896186 | 0.000000    | 0.892057 |
| C2H2+PhCH2         | 0.0263512   | 0.922538 | 0.0273994   | 0.919456 |
| Indene+H           | 0.0219300   | 0.944467 | 0.0228024   | 0.942259 |
| PhCH2CCH+H         | 0.0197116   | 0.964179 | 0.0204956   | 0.962754 |
| PhCHCCH2+H         | 0.0190954   | 0.983274 | 0.0198550   | 0.982609 |
| PhCCH+CH3          | 0.00338718  | 0.986662 | 0.00352192  | 0.986131 |
| rad7               | 0.00293501  | 0.989597 | 0.00305175  | 0.989183 |
| rad45              | 0.00142733  | 0.991024 | 0.00148410  | 0.990667 |
| rad21              | 0.00134435  | 0.992368 | 0.00139782  | 0.992065 |
| rad22              | 0.00109450  | 0.993463 | 0.00113804  | 0.993203 |
| rad13              | 0.000902218 | 0.994365 | 0.000938106 | 0.994141 |
| rad23              | 0.000854154 | 0.995219 | 0.000888132 | 0.995029 |
| PAH7+H             | 0.000814119 | 0.996033 | 0.000846503 | 0.995876 |
| rad9               | 0.000722950 | 0.996756 | 0.000751705 | 0.996627 |
| rad20              | 0.000608989 | 0.997365 | 0.000633213 | 0.997261 |
| Ph+MeAc            | 0.000551203 | 0.997916 | 0.000573129 | 0.997834 |
| PAH9+H             | 0.000414602 | 0.998331 | 0.000431094 | 0.998265 |
| rad28              | 0.000382721 | 0.998714 | 0.000397945 | 0.998663 |
| rad38              | 0.000203105 | 0.998917 | 0.000211184 | 0.998874 |
| rad39              | 0.000153984 | 0.999071 | 0.000160109 | 0.999034 |
| rad36              | 0.000139468 | 0.999210 | 0.000145016 | 0.999179 |
| rad19anti          | 0.000124019 | 0.999334 | 0.000128953 | 0.999308 |
| rad50              | 8.71304e-05 | 0.999421 | 9.05962e-05 | 0.999399 |
| rad46              | 7.51956e-05 | 0.999497 | 7.81866e-05 | 0.999477 |
| rad18              | 7.31642e-05 | 0.999570 | 7.60742e-05 | 0.999553 |
| rad35              | 6.08714e-05 | 0.999631 | 6.32928e-05 | 0.999616 |
| PhCCCH3+H          | 5.87550e-05 | 0.999689 | 6.10921e-05 | 0.999677 |
| rad25              | 4.89302e-05 | 0.999738 | 5.08766e-05 | 0.999728 |
| rad33              | 4.40341e-05 | 0.999782 | 4.57857e-05 | 0.999774 |
| rad19syn           | 3.90686e-05 | 0.999822 | 4.06226e-05 | 0.999815 |

|               |             |          |             |          |
|---------------|-------------|----------|-------------|----------|
| rad51         | 2.89991e-05 | 0.999851 | 3.01526e-05 | 0.999845 |
| PhcycC3H3_A+H | 1.89537e-05 | 0.999869 | 1.97077e-05 | 0.999864 |
| rad24         | 1.70080e-05 | 0.999886 | 1.76845e-05 | 0.999882 |
| rad54         | 1.65138e-05 | 0.999903 | 1.71707e-05 | 0.999899 |
| rad3          | 1.15209e-05 | 0.999915 | 1.19792e-05 | 0.999911 |
| rad30         | 1.13779e-05 | 0.999926 | 1.18305e-05 | 0.999923 |
| PAH3+H        | 9.33192e-06 | 0.999935 | 9.70309e-06 | 0.999933 |
| rad4          | 9.22034e-06 | 0.999944 | 9.58710e-06 | 0.999942 |
| rad67         | 9.14880e-06 | 0.999954 | 9.51267e-06 | 0.999952 |
| rad52         | 8.04667e-06 | 0.999962 | 8.36682e-06 | 0.999960 |
| rad2          | 5.41966e-06 | 0.999967 | 5.63525e-06 | 0.999966 |
| PAH10+CH3     | 5.21823e-06 | 0.999972 | 5.42580e-06 | 0.999971 |
| PAH1+H        | 4.08344e-06 | 0.999976 | 4.24588e-06 | 0.999976 |
| rad70         | 3.35892e-06 | 0.999980 | 3.49253e-06 | 0.999979 |
| rad12         | 3.34746e-06 | 0.999983 | 3.48062e-06 | 0.999982 |
| rad37         | 2.57080e-06 | 0.999986 | 2.67306e-06 | 0.999985 |
| rad26         | 2.12472e-06 | 0.999988 | 2.20923e-06 | 0.999987 |
| rad1          | 1.46009e-06 | 0.999989 | 1.51816e-06 | 0.999989 |
| rad71         | 1.22860e-06 | 0.999990 | 1.27748e-06 | 0.999990 |
| rad55         | 1.12567e-06 | 0.999992 | 1.17044e-06 | 0.999991 |
| rad59         | 9.24708e-07 | 0.999992 | 9.61489e-07 | 0.999992 |
| rad10         | 9.02715e-07 | 0.999993 | 9.38620e-07 | 0.999993 |
| rad15         | 8.85303e-07 | 0.999994 | 9.20519e-07 | 0.999994 |
| rad60syn      | 8.63095e-07 | 0.999995 | 8.97432e-07 | 0.999995 |
| rad73         | 8.51521e-07 | 0.999996 | 8.85398e-07 | 0.999996 |
| rad65         | 7.47542e-07 | 0.999997 | 7.77275e-07 | 0.999997 |
| rad34         | 7.05310e-07 | 0.999997 | 7.33367e-07 | 0.999997 |
| rad60anti     | 5.30647e-07 | 0.999998 | 5.51756e-07 | 0.999998 |
| rad47         | 3.53828e-07 | 0.999998 | 3.67903e-07 | 0.999998 |
| rad62         | 2.61299e-07 | 0.999999 | 2.71693e-07 | 0.999999 |
| rad53         | 2.38654e-07 | 0.999999 | 2.48147e-07 | 0.999999 |
| rad56         | 2.23712e-07 | 0.999999 | 2.32611e-07 | 0.999999 |
| rad14         | 1.79271e-07 | 0.999999 | 1.86402e-07 | 0.999999 |
| rad58         | 8.90375e-08 | 0.999999 | 9.25795e-08 | 0.999999 |
| rad8          | 8.11076e-08 | 0.999999 | 8.43341e-08 | 0.999999 |
| PAH8+H        | 7.72356e-08 | 0.999999 | 8.03076e-08 | 1.000000 |
| rad64         | 6.56048e-08 | 1.000000 | 6.82148e-08 | 1.000000 |
| rad72         | 4.37034e-08 | 1.000000 | 4.54420e-08 | 1.000000 |
| rad43         | 3.74800e-08 | 1.000000 | 3.89709e-08 | 1.000000 |
| rad68syn      | 3.16341e-08 | 1.000000 | 3.28925e-08 | 1.000000 |
| rad68anti     | 2.07065e-08 | 1.000000 | 2.15301e-08 | 1.000000 |
| rad31         | 1.93886e-08 | 1.000000 | 2.01599e-08 | 1.000000 |
| rad42         | 1.92507e-08 | 1.000000 | 2.00165e-08 | 1.000000 |
| rad61         | 1.10355e-08 | 1.000000 | 1.14744e-08 | 1.000000 |
| rad40syn      | 1.02382e-08 | 1.000000 | 1.06455e-08 | 1.000000 |
| rad27         | 6.08881e-09 | 1.000000 | 6.33101e-09 | 1.000000 |
| rad40anti     | 5.94183e-09 | 1.000000 | 6.17818e-09 | 1.000000 |
| rad41         | 3.10145e-09 | 1.000000 | 3.22482e-09 | 1.000000 |
| rad5          | 1.91185e-10 | 1.000000 | 1.98791e-10 | 1.000000 |

1000000.00 Pa, 1200.00000 K

=====

| Rate constant      | True (fraction)      | Effective (fraction) |
|--------------------|----------------------|----------------------|
| Total              | 1.80237e-12 (1.00 )  | 1.64931e-12 (1.00 )  |
| Formation of rad11 | 5.38789e-13 (0.299 ) | 4.68518e-13 (0.284 ) |
| Formation of rad6  | 6.34764e-13 (0.352 ) | 5.51975e-13 (0.335 ) |
| H-abstraction      | 6.28816e-13 (0.349 ) | 6.28816e-13 (0.381 ) |

| species            | PYtrue      | Cumul    | PYeffective | Cumul    |
|--------------------|-------------|----------|-------------|----------|
| rad6               | 0.370294    | 0.370294 | 0.404659    | 0.404659 |
| Benzene+2-propynyl | 0.348883    | 0.719177 | 0.381260    | 0.785919 |
| Phenyl+Allene      | 0.0849219   | 0.804099 | 0.000000    | 0.785919 |
| rad11              | 0.0487958   | 0.852895 | 0.0533242   | 0.839243 |
| PhCH2CCH+H         | 0.0365850   | 0.889480 | 0.0399802   | 0.879224 |
| C2H2+PhCH2         | 0.0306644   | 0.920144 | 0.0335102   | 0.912734 |
| PhCHCCH2+H         | 0.0299920   | 0.950136 | 0.0327753   | 0.945509 |
| Indene+H           | 0.0239376   | 0.974074 | 0.0261591   | 0.971668 |
| PhCCH+CH3          | 0.00769490  | 0.981769 | 0.00840904  | 0.980077 |
| rad7               | 0.00488545  | 0.986654 | 0.00533884  | 0.985416 |
| PAH7+H             | 0.00210713  | 0.988761 | 0.00230268  | 0.987719 |
| rad13              | 0.00166093  | 0.990422 | 0.00181507  | 0.989534 |
| rad45              | 0.00152557  | 0.991948 | 0.00166715  | 0.991201 |
| Ph+MeAc            | 0.00126037  | 0.993208 | 0.00137733  | 0.992578 |
| rad9               | 0.00113593  | 0.994344 | 0.00124135  | 0.993820 |
| rad21              | 0.00105140  | 0.995396 | 0.00114898  | 0.994969 |
| rad23              | 0.000672304 | 0.996068 | 0.000734698 | 0.995703 |
| rad22              | 0.000595929 | 0.996664 | 0.000651236 | 0.996354 |
| PAH9+H             | 0.000474271 | 0.997138 | 0.000518285 | 0.996873 |

|               |             |          |             |          |
|---------------|-------------|----------|-------------|----------|
| rad28         | 0.000453251 | 0.997591 | 0.000495315 | 0.997368 |
| rad20         | 0.000407099 | 0.997998 | 0.000444879 | 0.997813 |
| rad39         | 0.000357945 | 0.998356 | 0.000391163 | 0.998204 |
| rad38         | 0.000230760 | 0.998587 | 0.000252175 | 0.998456 |
| rad19anti     | 0.000196911 | 0.998784 | 0.000215185 | 0.998671 |
| rad36         | 0.000148015 | 0.998932 | 0.000161751 | 0.998833 |
| rad19syn      | 0.000144167 | 0.999076 | 0.000157546 | 0.998991 |
| PhCCCH3+H     | 0.000117542 | 0.999194 | 0.000128451 | 0.999119 |
| rad50         | 9.87061e-05 | 0.999292 | 0.000107866 | 0.999227 |
| rad46         | 8.52442e-05 | 0.999378 | 9.31550e-05 | 0.999320 |
| PhcycC3H3_A+H | 8.20023e-05 | 0.999460 | 8.96121e-05 | 0.999410 |
| rad33         | 8.12360e-05 | 0.999541 | 8.87749e-05 | 0.999499 |
| rad35         | 7.14647e-05 | 0.999612 | 7.80967e-05 | 0.999577 |
| rad18         | 6.37390e-05 | 0.999676 | 6.96540e-05 | 0.999646 |
| rad54         | 5.79777e-05 | 0.999734 | 6.33583e-05 | 0.999710 |
| rad25         | 4.92570e-05 | 0.999783 | 5.38282e-05 | 0.999764 |
| rad51         | 3.28396e-05 | 0.999816 | 3.58873e-05 | 0.999799 |
| rad24         | 1.87304e-05 | 0.999835 | 2.04687e-05 | 0.999820 |
| rad3          | 1.62598e-05 | 0.999851 | 1.77688e-05 | 0.999838 |
| PAH3+H        | 1.50377e-05 | 0.999866 | 1.64332e-05 | 0.999854 |
| rad30         | 1.49660e-05 | 0.999881 | 1.63548e-05 | 0.999870 |
| rad67         | 1.47040e-05 | 0.999896 | 1.60686e-05 | 0.999887 |
| PAH1+H        | 1.32855e-05 | 0.999909 | 1.45185e-05 | 0.999901 |
| rad4          | 1.30094e-05 | 0.999922 | 1.42167e-05 | 0.999915 |
| PAH10+CH3     | 1.05999e-05 | 0.999933 | 1.15836e-05 | 0.999927 |
| rad52         | 9.11368e-06 | 0.999942 | 9.95948e-06 | 0.999937 |
| rad2          | 8.84158e-06 | 0.999951 | 9.66211e-06 | 0.999947 |
| rad70         | 8.45039e-06 | 0.999959 | 9.23463e-06 | 0.999956 |
| rad12         | 6.47904e-06 | 0.999966 | 7.08030e-06 | 0.999963 |
| rad37         | 5.73971e-06 | 0.999971 | 6.27235e-06 | 0.999969 |
| rad55         | 4.12110e-06 | 0.999976 | 4.50355e-06 | 0.999974 |
| rad26         | 3.42225e-06 | 0.999979 | 3.73985e-06 | 0.999977 |
| rad10         | 2.39838e-06 | 0.999981 | 2.62096e-06 | 0.999980 |
| rad15         | 2.37083e-06 | 0.999984 | 2.59085e-06 | 0.999983 |
| rad1          | 2.36844e-06 | 0.999986 | 2.58824e-06 | 0.999985 |
| rad34         | 1.94620e-06 | 0.999988 | 2.12682e-06 | 0.999987 |
| rad59         | 1.47061e-06 | 0.999989 | 1.60708e-06 | 0.999989 |
| rad71         | 1.39422e-06 | 0.999991 | 1.52362e-06 | 0.999990 |
| rad60syn      | 1.29968e-06 | 0.999992 | 1.42030e-06 | 0.999992 |
| rad53         | 9.98521e-07 | 0.999993 | 1.09118e-06 | 0.999993 |
| rad56         | 9.83545e-07 | 0.999994 | 1.07483e-06 | 0.999994 |
| rad73         | 9.66088e-07 | 0.999995 | 1.05575e-06 | 0.999995 |
| rad65         | 8.51153e-07 | 0.999996 | 9.30145e-07 | 0.999996 |
| rad60anti     | 8.04370e-07 | 0.999997 | 8.79019e-07 | 0.999997 |
| rad62         | 7.24628e-07 | 0.999998 | 7.91882e-07 | 0.999998 |
| rad14         | 4.72871e-07 | 0.999998 | 5.16755e-07 | 0.999998 |
| rad47         | 3.78867e-07 | 0.999998 | 4.14028e-07 | 0.999999 |
| PAH8+H        | 2.97177e-07 | 0.999999 | 3.24755e-07 | 0.999999 |
| rad8          | 2.90702e-07 | 0.999999 | 3.17680e-07 | 0.999999 |
| rad64         | 2.17672e-07 | 0.999999 | 2.37873e-07 | 0.999999 |
| rad58         | 1.47783e-07 | 0.999999 | 1.61497e-07 | 1.000000 |
| rad68syn      | 1.10913e-07 | 0.999999 | 1.21206e-07 | 1.000000 |
| rad43         | 7.37950e-08 | 1.000000 | 8.06434e-08 | 1.000000 |
| rad68anti     | 7.24211e-08 | 1.000000 | 7.91418e-08 | 1.000000 |
| rad42         | 5.49814e-08 | 1.000000 | 6.00838e-08 | 1.000000 |
| rad72         | 4.96113e-08 | 1.000000 | 5.42155e-08 | 1.000000 |
| rad40syn      | 3.77893e-08 | 1.000000 | 4.12963e-08 | 1.000000 |
| rad31         | 3.67689e-08 | 1.000000 | 4.01811e-08 | 1.000000 |
| rad40anti     | 2.19667e-08 | 1.000000 | 2.40054e-08 | 1.000000 |
| rad27         | 2.11215e-08 | 1.000000 | 2.30816e-08 | 1.000000 |
| rad61         | 1.99506e-08 | 1.000000 | 2.18021e-08 | 1.000000 |
| rad41         | 5.95937e-09 | 1.000000 | 6.51242e-09 | 1.000000 |
| rad5          | 3.42660e-10 | 1.000000 | 3.74460e-10 | 1.000000 |

1000000.00 Pa, 1300.00000 K

=====

| Rate constant      | True (fraction)      | Effective (fraction) |
|--------------------|----------------------|----------------------|
| Total              | 2.54148e-12 (1.00 )  | 2.17315e-12 (1.00 )  |
| Formation of rad11 | 7.22991e-13 (0.284 ) | 5.57300e-13 (0.256 ) |
| Formation of rad6  | 8.84215e-13 (0.348 ) | 6.81575e-13 (0.314 ) |
| H-abstraction      | 9.34273e-13 (0.368 ) | 9.34273e-13 (0.430 ) |

| species            | PYtrue    | Cumul    | PYeffective | Cumul    |
|--------------------|-----------|----------|-------------|----------|
| Benzene+2-propynyl | 0.367610  | 0.367610 | 0.429917    | 0.429917 |
| rad6               | 0.256913  | 0.624523 | 0.300458    | 0.730375 |
| Phenyl+Allene      | 0.144928  | 0.769451 | 0.000000    | 0.730375 |
| PhCH2CCH+H         | 0.0552035 | 0.824654 | 0.0645602   | 0.794935 |
| rad11              | 0.0417861 | 0.866440 | 0.0488685   | 0.843803 |



|               |             |          |             |          |
|---------------|-------------|----------|-------------|----------|
| PhCHCCH2+H    | 0.0403264   | 0.906767 | 0.0471615   | 0.890965 |
| C2H2+PhCH2    | 0.0329877   | 0.939755 | 0.0385788   | 0.929544 |
| Indene+H      | 0.0245761   | 0.964331 | 0.0287415   | 0.958285 |
| PhCCH+CH3     | 0.0121285   | 0.976459 | 0.0141842   | 0.972469 |
| rad7          | 0.00697874  | 0.983438 | 0.00816159  | 0.980631 |
| PAH7+H        | 0.00367081  | 0.987109 | 0.00429298  | 0.984924 |
| Ph+MeAc       | 0.00202859  | 0.989137 | 0.00237242  | 0.987296 |
| rad13         | 0.00201332  | 0.991151 | 0.00235456  | 0.989651 |
| rad45         | 0.00151193  | 0.992663 | 0.00176819  | 0.991419 |
| rad9          | 0.00148572  | 0.994148 | 0.00173754  | 0.993157 |
| rad21         | 0.000859671 | 0.995008 | 0.00100538  | 0.994162 |
| rad39         | 0.000585705 | 0.995594 | 0.000684978 | 0.994847 |
| rad23         | 0.000542352 | 0.996136 | 0.000634274 | 0.995481 |
| PAH9+H        | 0.000504215 | 0.996640 | 0.000589677 | 0.996071 |
| rad22         | 0.000395721 | 0.997036 | 0.000462792 | 0.996534 |
| rad28         | 0.000390111 | 0.997426 | 0.000456231 | 0.996990 |
| rad19syn      | 0.000334144 | 0.997760 | 0.000390779 | 0.997381 |
| rad20         | 0.000294244 | 0.998054 | 0.000344116 | 0.997725 |
| rad19anti     | 0.000270160 | 0.998325 | 0.000315950 | 0.998041 |
| rad38         | 0.000243748 | 0.998568 | 0.000285061 | 0.998326 |
| PhcycC3H3_A+H | 0.000215491 | 0.998784 | 0.000252015 | 0.998578 |
| PhCCCH3+H     | 0.000167851 | 0.998952 | 0.000196301 | 0.998774 |
| rad36         | 0.000146255 | 0.999098 | 0.000171044 | 0.998945 |
| rad54         | 0.000126450 | 0.999224 | 0.000147882 | 0.999093 |
| rad33         | 0.000105759 | 0.999330 | 0.000123684 | 0.999217 |
| rad50         | 0.000103767 | 0.999434 | 0.000121355 | 0.999338 |
| rad46         | 8.97418e-05 | 0.999524 | 0.000104952 | 0.999443 |
| rad35         | 7.79857e-05 | 0.999602 | 9.12036e-05 | 0.999534 |
| rad18         | 5.83318e-05 | 0.999660 | 6.82184e-05 | 0.999603 |
| rad25         | 4.61671e-05 | 0.999706 | 5.39921e-05 | 0.999657 |
| rad51         | 3.44938e-05 | 0.999741 | 4.03403e-05 | 0.999697 |
| PAH1+H        | 2.96699e-05 | 0.999770 | 3.46987e-05 | 0.999732 |
| PAH3+H        | 2.10246e-05 | 0.999791 | 2.45881e-05 | 0.999756 |
| rad67         | 2.02995e-05 | 0.999812 | 2.37401e-05 | 0.999780 |
| rad24         | 1.88030e-05 | 0.999830 | 2.19900e-05 | 0.999802 |
| PAH10+CH3     | 1.87416e-05 | 0.999849 | 2.19182e-05 | 0.999824 |
| rad30         | 1.77595e-05 | 0.999867 | 2.07696e-05 | 0.999845 |
| rad3          | 1.65210e-05 | 0.999883 | 1.93211e-05 | 0.999864 |
| rad70         | 1.51342e-05 | 0.999899 | 1.76993e-05 | 0.999882 |
| rad4          | 1.31976e-05 | 0.999912 | 1.54344e-05 | 0.999897 |
| rad2          | 9.85649e-06 | 0.999922 | 1.15271e-05 | 0.999909 |
| rad37         | 9.81337e-06 | 0.999931 | 1.14767e-05 | 0.999920 |
| rad52         | 9.57691e-06 | 0.999941 | 1.12001e-05 | 0.999931 |
| rad12         | 9.29303e-06 | 0.999950 | 1.08681e-05 | 0.999942 |
| rad55         | 9.27526e-06 | 0.999960 | 1.08473e-05 | 0.999953 |
| rad15         | 6.54296e-06 | 0.999966 | 7.65194e-06 | 0.999961 |
| rad10         | 4.58762e-06 | 0.999971 | 5.36519e-06 | 0.999966 |
| rad26         | 4.00018e-06 | 0.999975 | 4.67818e-06 | 0.999971 |
| rad34         | 3.69441e-06 | 0.999978 | 4.32058e-06 | 0.999975 |
| rad1          | 2.62827e-06 | 0.999981 | 3.07374e-06 | 0.999978 |
| rad56         | 2.55864e-06 | 0.999984 | 2.99231e-06 | 0.999981 |
| rad53         | 2.49367e-06 | 0.999986 | 2.91633e-06 | 0.999984 |
| rad59         | 2.02685e-06 | 0.999988 | 2.37039e-06 | 0.999986 |
| rad60syn      | 1.70934e-06 | 0.999990 | 1.99906e-06 | 0.999988 |
| rad71         | 1.46472e-06 | 0.999991 | 1.71298e-06 | 0.999990 |
| rad62         | 1.40298e-06 | 0.999993 | 1.64077e-06 | 0.999992 |
| rad60anti     | 1.06360e-06 | 0.999994 | 1.24388e-06 | 0.999993 |
| rad73         | 1.01509e-06 | 0.999995 | 1.18715e-06 | 0.999994 |
| rad65         | 9.00378e-07 | 0.999996 | 1.05299e-06 | 0.999995 |
| rad14         | 7.63984e-07 | 0.999996 | 8.93468e-07 | 0.999996 |
| PAH8+H        | 7.14190e-07 | 0.999997 | 8.35234e-07 | 0.999997 |
| rad8          | 5.86849e-07 | 0.999998 | 6.86317e-07 | 0.999998 |
| rad64         | 5.07774e-07 | 0.999998 | 5.93838e-07 | 0.999998 |
| rad47         | 3.75763e-07 | 0.999999 | 4.39451e-07 | 0.999999 |
| rad68syn      | 2.46001e-07 | 0.999999 | 2.87696e-07 | 0.999999 |
| rad58         | 2.15440e-07 | 0.999999 | 2.51956e-07 | 0.999999 |
| rad68anti     | 1.60346e-07 | 0.999999 | 1.87523e-07 | 0.999999 |
| rad42         | 1.12288e-07 | 0.999999 | 1.31320e-07 | 1.000000 |
| rad43         | 1.10178e-07 | 0.999999 | 1.28852e-07 | 1.000000 |
| rad40syn      | 8.78029e-08 | 1.000000 | 1.02684e-07 | 1.000000 |
| rad72         | 5.20993e-08 | 1.000000 | 6.09299e-08 | 1.000000 |
| rad40anti     | 5.14552e-08 | 1.000000 | 6.01763e-08 | 1.000000 |
| rad31         | 4.87433e-08 | 1.000000 | 5.70049e-08 | 1.000000 |
| rad27         | 3.87801e-08 | 1.000000 | 4.53530e-08 | 1.000000 |
| rad61         | 3.47369e-08 | 1.000000 | 4.06245e-08 | 1.000000 |
| rad41         | 8.87414e-09 | 1.000000 | 1.03782e-08 | 1.000000 |
| rad5          | 5.47158e-10 | 1.000000 | 6.39895e-10 | 1.000000 |

1000000.00 Pa, 1400.00000 K  
=====

| Rate constant      | True (fraction)      | Effective (fraction) |
|--------------------|----------------------|----------------------|
| Total              | 3.47024e-12 (1.00 )  | 2.80301e-12 (1.00 )  |
| Formation of rad11 | 9.43269e-13 (0.272 ) | 6.48507e-13 (0.231 ) |
| Formation of rad6  | 1.19194e-12 (0.343 ) | 8.19468e-13 (0.292 ) |
| H-abstraction      | 1.33503e-12 (0.385 ) | 1.33503e-12 (0.476 ) |

| species            | PYtrue      | Cumul    | PYeffective | Cumul    |
|--------------------|-------------|----------|-------------|----------|
| Benzene+2-propynyl | 0.384709    | 0.384709 | 0.476285    | 0.476285 |
| Phenyl+Allene      | 0.192272    | 0.576981 | 0.00000     | 0.476285 |
| rad6               | 0.180120    | 0.757102 | 0.222996    | 0.699282 |
| PhCH2CCH+H         | 0.0672322   | 0.824334 | 0.0832360   | 0.782518 |
| PhCHCCH2+H         | 0.0458884   | 0.870222 | 0.0568115   | 0.839329 |
| rad11              | 0.0332319   | 0.903454 | 0.0411424   | 0.880471 |
| C2H2+PhCH2         | 0.0326449   | 0.936099 | 0.0404157   | 0.920887 |
| Indene+H           | 0.0235127   | 0.959612 | 0.0291096   | 0.949997 |
| PhCCH+CH3          | 0.0145011   | 0.974113 | 0.0179529   | 0.967950 |
| rad7               | 0.00780755  | 0.981920 | 0.00966609  | 0.977616 |
| PAH7+H             | 0.00471649  | 0.986637 | 0.00583921  | 0.983455 |
| Ph+MeAc            | 0.00248933  | 0.989126 | 0.00308189  | 0.986537 |
| rad13              | 0.00185321  | 0.990979 | 0.00229435  | 0.988831 |
| rad9               | 0.00162594  | 0.992605 | 0.00201299  | 0.990844 |
| rad45              | 0.00138458  | 0.993990 | 0.00171416  | 0.992558 |
| rad39              | 0.000714734 | 0.994705 | 0.000884868 | 0.993443 |
| rad21              | 0.000703253 | 0.995408 | 0.000870654 | 0.994314 |
| rad19syn           | 0.000524535 | 0.995932 | 0.000649396 | 0.994963 |
| PAH9+H             | 0.000495034 | 0.996427 | 0.000612872 | 0.995576 |
| rad23              | 0.000471961 | 0.996899 | 0.000584308 | 0.996161 |
| PhcycC3H3_A+H      | 0.000368332 | 0.997268 | 0.000456010 | 0.996617 |
| rad22              | 0.000331351 | 0.997599 | 0.000410226 | 0.997027 |
| rad19anti          | 0.000314571 | 0.997914 | 0.000389452 | 0.997416 |
| rad28              | 0.000297480 | 0.998211 | 0.000368292 | 0.997784 |
| rad38              | 0.000237704 | 0.998449 | 0.000294286 | 0.998079 |
| rad20              | 0.000222623 | 0.998671 | 0.000275616 | 0.998354 |
| rad54              | 0.000198234 | 0.998870 | 0.000245422 | 0.998600 |
| PhCCCH3+H          | 0.000184580 | 0.999054 | 0.000228517 | 0.998828 |
| rad36              | 0.000133774 | 0.999188 | 0.000165618 | 0.998994 |
| rad33              | 0.000103534 | 0.999292 | 0.000128180 | 0.999122 |
| rad50              | 0.000100764 | 0.999392 | 0.000124749 | 0.999247 |
| rad46              | 8.72366e-05 | 0.999480 | 0.000108003 | 0.999355 |
| rad35              | 7.81955e-05 | 0.999558 | 9.68092e-05 | 0.999452 |
| rad18              | 4.97620e-05 | 0.999607 | 6.16072e-05 | 0.999513 |
| PAH1+H             | 4.75587e-05 | 0.999655 | 5.88797e-05 | 0.999572 |
| rad25              | 4.24399e-05 | 0.999697 | 5.25422e-05 | 0.999625 |
| rad51              | 3.34713e-05 | 0.999731 | 4.14388e-05 | 0.999666 |
| PAH10+CH3          | 2.62719e-05 | 0.999757 | 3.25257e-05 | 0.999699 |
| PAH3+H             | 2.50326e-05 | 0.999782 | 3.09913e-05 | 0.999730 |
| rad67              | 2.37348e-05 | 0.999806 | 2.93846e-05 | 0.999759 |
| rad70              | 2.01504e-05 | 0.999826 | 2.49469e-05 | 0.999784 |
| rad30              | 1.88079e-05 | 0.999845 | 2.32849e-05 | 0.999807 |
| rad24              | 1.72051e-05 | 0.999862 | 2.13006e-05 | 0.999829 |
| rad15              | 1.54263e-05 | 0.999878 | 1.90983e-05 | 0.999848 |
| rad55              | 1.49416e-05 | 0.999893 | 1.84983e-05 | 0.999866 |
| rad3               | 1.30767e-05 | 0.999906 | 1.61894e-05 | 0.999882 |
| rad37              | 1.26565e-05 | 0.999918 | 1.56693e-05 | 0.999898 |
| rad12              | 1.06415e-05 | 0.999929 | 1.31746e-05 | 0.999911 |
| rad4               | 1.04230e-05 | 0.999939 | 1.29041e-05 | 0.999924 |
| rad52              | 9.29662e-06 | 0.999949 | 1.15096e-05 | 0.999936 |
| rad2               | 8.24035e-06 | 0.999957 | 1.02019e-05 | 0.999946 |
| rad10              | 6.39041e-06 | 0.999963 | 7.91155e-06 | 0.999954 |
| rad34              | 5.08130e-06 | 0.999968 | 6.29086e-06 | 0.999960 |
| rad56              | 4.71528e-06 | 0.999973 | 5.83769e-06 | 0.999966 |
| rad53              | 4.41596e-06 | 0.999977 | 5.46716e-06 | 0.999971 |
| rad26              | 4.21790e-06 | 0.999982 | 5.22193e-06 | 0.999977 |
| rad59              | 2.38420e-06 | 0.999984 | 2.95174e-06 | 0.999980 |
| rad1               | 2.19017e-06 | 0.999986 | 2.71152e-06 | 0.999982 |
| rad62              | 2.02750e-06 | 0.999988 | 2.51013e-06 | 0.999985 |
| rad60syn           | 1.94247e-06 | 0.999990 | 2.40486e-06 | 0.999987 |
| rad71              | 1.42113e-06 | 0.999992 | 1.75941e-06 | 0.999989 |
| rad60anti          | 1.21330e-06 | 0.999993 | 1.50211e-06 | 0.999990 |
| PAH8+H             | 1.12422e-06 | 0.999994 | 1.39183e-06 | 0.999992 |
| rad73              | 9.85118e-07 | 0.999995 | 1.21961e-06 | 0.999993 |
| rad14              | 8.87668e-07 | 0.999996 | 1.09897e-06 | 0.999994 |
| rad65              | 8.81380e-07 | 0.999997 | 1.09118e-06 | 0.999995 |
| rad64              | 8.48572e-07 | 0.999998 | 1.05056e-06 | 0.999996 |
| rad8               | 7.96962e-07 | 0.999998 | 9.86673e-07 | 0.999997 |
| rad68syn           | 3.69014e-07 | 0.999999 | 4.56854e-07 | 0.999998 |
| rad47              | 3.45101e-07 | 0.999999 | 4.27248e-07 | 0.999998 |
| rad58              | 2.66772e-07 | 0.999999 | 3.30274e-07 | 0.999998 |

|           |             |          |             |          |
|-----------|-------------|----------|-------------|----------|
| rad68anti | 2.40287e-07 | 1.000000 | 2.97485e-07 | 0.999999 |
| rad42     | 1.71414e-07 | 1.000000 | 2.12217e-07 | 0.999999 |
| rad40syn  | 1.35526e-07 | 1.000000 | 1.67787e-07 | 0.999999 |
| rad43     | 1.32214e-07 | 1.000000 | 1.63686e-07 | 0.999999 |
| rad40anti | 7.99109e-08 | 1.000000 | 9.89328e-08 | 0.999999 |
| rad61     | 5.12748e-08 | 1.000000 | 6.34805e-08 | 0.999999 |
| rad72     | 5.05197e-08 | 1.000000 | 6.25457e-08 | 1.000000 |
| rad31     | 4.95423e-08 | 1.000000 | 6.13353e-08 | 1.000000 |
| rad27     | 4.61095e-08 | 1.000000 | 5.70854e-08 | 1.000000 |
| rad41     | 1.08416e-08 | 1.000000 | 1.34224e-08 | 1.000000 |
| rad5      | 8.93439e-10 | 1.000000 | 1.10611e-09 | 1.000000 |

1000000.00 Pa, 1500.00000 K

| Rate constant      | True (fraction)      | Effective (fraction) |
|--------------------|----------------------|----------------------|
| Total              | 4.61271e-12 (1.00 )  | 3.60045e-12 (1.00 )  |
| Formation of rad11 | 1.20217e-12 (0.261 ) | 7.62179e-13 (0.212 ) |
| Formation of rad6  | 1.56360e-12 (0.339 ) | 9.91325e-13 (0.275 ) |
| H-abstraction      | 1.84694e-12 (0.400 ) | 1.84694e-12 (0.513 ) |

| species            | PYtrue      | Cumul    | PYeffective | Cumul    |
|--------------------|-------------|----------|-------------|----------|
| Benzene+2-propynyl | 0.400402    | 0.400402 | 0.512976    | 0.512976 |
| Phenyl+Allene      | 0.219452    | 0.619854 | 0.000000    | 0.512976 |
| rad6               | 0.142147    | 0.762000 | 0.182111    | 0.695087 |
| PhCH2CCH+H         | 0.0719098   | 0.833910 | 0.0921275   | 0.787214 |
| PhCHCCH2+H         | 0.0471612   | 0.881071 | 0.0604207   | 0.847635 |
| C2H2+PhCH2         | 0.0307587   | 0.911830 | 0.0394065   | 0.887041 |
| rad11              | 0.0260877   | 0.937918 | 0.0334222   | 0.920464 |
| Indene+H           | 0.0215696   | 0.959487 | 0.0276339   | 0.948098 |
| PhCCH+CH3          | 0.0149650   | 0.974452 | 0.0191724   | 0.967270 |
| rad7               | 0.00746499  | 0.981917 | 0.00956380  | 0.976834 |
| PAH7+H             | 0.00513688  | 0.987054 | 0.00658111  | 0.983415 |
| Ph+MeAc            | 0.00263937  | 0.989694 | 0.00338143  | 0.986796 |
| rad9               | 0.00160485  | 0.991298 | 0.00205605  | 0.988852 |
| rad13              | 0.00146331  | 0.992762 | 0.00187471  | 0.990727 |
| rad45              | 0.00121187  | 0.993974 | 0.00155259  | 0.992280 |
| rad39              | 0.000741954 | 0.994716 | 0.000950550 | 0.993230 |
| rad19syn           | 0.000648345 | 0.995364 | 0.000830630 | 0.994061 |
| rad21              | 0.000569853 | 0.995934 | 0.000730069 | 0.994791 |
| PhcycC3H3_A+H      | 0.000482521 | 0.996416 | 0.000618185 | 0.995409 |
| rad23              | 0.000472752 | 0.996889 | 0.000605664 | 0.996015 |
| PAH9+H             | 0.000463813 | 0.997353 | 0.000594214 | 0.996609 |
| rad22              | 0.000331616 | 0.997684 | 0.000424850 | 0.997034 |
| rad19anti          | 0.000329731 | 0.998014 | 0.000422435 | 0.997456 |
| rad54              | 0.000258096 | 0.998272 | 0.000330659 | 0.997787 |
| rad28              | 0.000240082 | 0.998512 | 0.000307581 | 0.998094 |
| rad38              | 0.000220851 | 0.998733 | 0.000282943 | 0.998377 |
| PhCCCH3+H          | 0.000176960 | 0.998910 | 0.000226713 | 0.998604 |
| rad20              | 0.000171614 | 0.999082 | 0.000219864 | 0.998824 |
| rad36              | 0.000117034 | 0.999199 | 0.000149937 | 0.998974 |
| rad50              | 9.33082e-05 | 0.999292 | 0.000119542 | 0.999093 |
| rad33              | 8.62959e-05 | 0.999378 | 0.000110557 | 0.999204 |
| rad46              | 8.08390e-05 | 0.999459 | 0.000103567 | 0.999308 |
| rad35              | 7.43789e-05 | 0.999534 | 9.52902e-05 | 0.999403 |
| PAH1+H             | 6.30141e-05 | 0.999597 | 8.07306e-05 | 0.999484 |
| rad18              | 4.13000e-05 | 0.999638 | 5.29118e-05 | 0.999536 |
| rad25              | 3.77553e-05 | 0.999676 | 4.83703e-05 | 0.999585 |
| PAH10+CH3          | 3.11893e-05 | 0.999707 | 3.99581e-05 | 0.999625 |
| rad51              | 3.09791e-05 | 0.999738 | 3.96888e-05 | 0.999665 |
| rad15              | 2.88172e-05 | 0.999767 | 3.69192e-05 | 0.999701 |
| PAH3+H             | 2.64321e-05 | 0.999793 | 3.38635e-05 | 0.999735 |
| rad67              | 2.49043e-05 | 0.999818 | 3.19061e-05 | 0.999767 |
| rad70              | 2.26283e-05 | 0.999841 | 2.89903e-05 | 0.999796 |
| rad55              | 1.99268e-05 | 0.999861 | 2.55292e-05 | 0.999822 |
| rad30              | 1.84667e-05 | 0.999879 | 2.36586e-05 | 0.999845 |
| rad24              | 1.49628e-05 | 0.999894 | 1.91696e-05 | 0.999865 |
| rad37              | 1.37503e-05 | 0.999908 | 1.76162e-05 | 0.999882 |
| rad12              | 1.07425e-05 | 0.999919 | 1.37628e-05 | 0.999896 |
| rad3               | 9.14662e-06 | 0.999928 | 1.17182e-05 | 0.999908 |
| rad52              | 8.60687e-06 | 0.999936 | 1.10267e-05 | 0.999919 |
| rad10              | 7.32564e-06 | 0.999944 | 9.38530e-06 | 0.999928 |
| rad4               | 7.27012e-06 | 0.999951 | 9.31415e-06 | 0.999937 |
| rad56              | 7.11902e-06 | 0.999958 | 9.12051e-06 | 0.999946 |
| rad53              | 6.42061e-06 | 0.999964 | 8.22579e-06 | 0.999955 |
| rad2               | 5.92630e-06 | 0.999970 | 7.59247e-06 | 0.999962 |
| rad34              | 5.80928e-06 | 0.999976 | 7.44256e-06 | 0.999970 |
| rad26              | 4.61399e-06 | 0.999981 | 5.91121e-06 | 0.999976 |
| rad62              | 2.50589e-06 | 0.999983 | 3.21043e-06 | 0.999979 |

|           |             |          |             |          |
|-----------|-------------|----------|-------------|----------|
| rad59     | 2.49810e-06 | 0.999986 | 3.20044e-06 | 0.999982 |
| rad60syn  | 1.99229e-06 | 0.999988 | 2.55242e-06 | 0.999985 |
| rad1      | 1.57033e-06 | 0.999989 | 2.01182e-06 | 0.999987 |
| PAH8+H    | 1.38438e-06 | 0.999991 | 1.77360e-06 | 0.999988 |
| rad71     | 1.31530e-06 | 0.999992 | 1.68510e-06 | 0.999990 |
| rad60anti | 1.24736e-06 | 0.999993 | 1.59805e-06 | 0.999992 |
| rad64     | 1.16736e-06 | 0.999994 | 1.49557e-06 | 0.999993 |
| rad73     | 9.11946e-07 | 0.999995 | 1.16834e-06 | 0.999994 |
| rad8      | 8.69417e-07 | 0.999996 | 1.11385e-06 | 0.999995 |
| rad14     | 8.48575e-07 | 0.999997 | 1.08715e-06 | 0.999997 |
| rad65     | 8.24933e-07 | 0.999998 | 1.05686e-06 | 0.999998 |
| rad68syn  | 4.42279e-07 | 0.999998 | 5.66629e-07 | 0.999998 |
| rad47     | 3.03290e-07 | 0.999999 | 3.88561e-07 | 0.999999 |
| rad58     | 2.88932e-07 | 0.999999 | 3.70165e-07 | 0.999999 |
| rad68anti | 2.87837e-07 | 0.999999 | 3.68763e-07 | 0.999999 |
| rad42     | 2.24007e-07 | 0.999999 | 2.86987e-07 | 1.000000 |
| rad40syn  | 1.65133e-07 | 1.000000 | 2.11560e-07 | 1.000000 |
| rad43     | 1.42250e-07 | 1.000000 | 1.82244e-07 | 1.000000 |
| rad40anti | 9.77536e-08 | 1.000000 | 1.25237e-07 | 1.000000 |
| rad61     | 6.53346e-08 | 1.000000 | 8.37034e-08 | 1.000000 |
| rad72     | 4.67323e-08 | 1.000000 | 5.98709e-08 | 1.000000 |
| rad31     | 4.39794e-08 | 1.000000 | 5.63443e-08 | 1.000000 |
| rad27     | 4.30346e-08 | 1.000000 | 5.51336e-08 | 1.000000 |
| rad41     | 1.20650e-08 | 1.000000 | 1.54570e-08 | 1.000000 |
| rad5      | 1.65240e-09 | 1.000000 | 2.11697e-09 | 1.000000 |

1000000.00 Pa, 1750.00000 K

| Rate constant      | True (fraction)      | Effective (fraction) |
|--------------------|----------------------|----------------------|
| Total              | 8.61869e-12 (1.00 )  | 6.22082e-12 (1.00 )  |
| Formation of rad11 | 2.04015e-12 (0.237 ) | 1.02997e-12 (0.166 ) |
| Formation of rad6  | 2.80256e-12 (0.325 ) | 1.41488e-12 (0.227 ) |
| H-abstraction      | 3.77597e-12 (0.438 ) | 3.77597e-12 (0.607 ) |

| species            | PYtrue      | Cumul    | PYeffective | Cumul    |
|--------------------|-------------|----------|-------------|----------|
| Benzene+2-propynyl | 0.438115    | 0.438115 | 0.606989    | 0.606989 |
| Phenyl+Allene      | 0.278217    | 0.716332 | 0.000000    | 0.606989 |
| PhCH2CCH+H         | 0.0834591   | 0.799791 | 0.115629    | 0.722619 |
| rad6               | 0.0819015   | 0.881692 | 0.113471    | 0.836090 |
| PhCHCCH2+H         | 0.0476960   | 0.929388 | 0.0660808   | 0.902171 |
| C2H2+PhCH2         | 0.0227175   | 0.952106 | 0.0314741   | 0.933645 |
| PhCCH+CH3          | 0.0134533   | 0.965559 | 0.0186390   | 0.952284 |
| Indene+H           | 0.00897898  | 0.974538 | 0.0124400   | 0.964724 |
| PAH7+H             | 0.00525007  | 0.979788 | 0.00727376  | 0.971998 |
| PhcycC3H3_A+H      | 0.00369654  | 0.983485 | 0.00512140  | 0.977119 |
| rad11              | 0.00368926  | 0.987174 | 0.00511130  | 0.982230 |
| Ph+MeAc            | 0.00319762  | 0.990371 | 0.00443017  | 0.986660 |
| rad19syn           | 0.00205796  | 0.992429 | 0.00285121  | 0.989512 |
| rad7               | 0.00110894  | 0.993538 | 0.00153639  | 0.991048 |
| rad39              | 0.00103249  | 0.994571 | 0.00143048  | 0.992478 |
| rad54              | 0.000605651 | 0.995177 | 0.000839105 | 0.993318 |
| rad50              | 0.000584142 | 0.995761 | 0.000809303 | 0.994127 |
| PAH9+H             | 0.000486117 | 0.996247 | 0.000673494 | 0.994800 |
| rad51              | 0.000469424 | 0.996716 | 0.000650370 | 0.995451 |
| rad71              | 0.000410530 | 0.997127 | 0.000568773 | 0.996020 |
| rad38              | 0.000393907 | 0.997521 | 0.000545742 | 0.996565 |
| rad19anti          | 0.000216397 | 0.997737 | 0.000299809 | 0.996865 |
| PAH1+H             | 0.000213544 | 0.997951 | 0.000295856 | 0.997161 |
| rad22              | 0.000179718 | 0.998130 | 0.000248993 | 0.997410 |
| rad46              | 0.000177171 | 0.998307 | 0.000245464 | 0.997655 |
| PhCCCH3+H          | 0.000158264 | 0.998466 | 0.000219268 | 0.997875 |
| rad28              | 0.000133198 | 0.998599 | 0.000184540 | 0.998059 |
| rad73              | 0.000128190 | 0.998727 | 0.000177602 | 0.998237 |
| rad13              | 0.000123074 | 0.998850 | 0.000170514 | 0.998407 |
| rad23              | 0.000118675 | 0.998969 | 0.000164419 | 0.998572 |
| PAH3+H             | 9.15721e-05 | 0.999060 | 0.000126869 | 0.998699 |
| rad35              | 8.02586e-05 | 0.999141 | 0.000111195 | 0.998810 |
| rad52              | 8.00091e-05 | 0.999221 | 0.000110849 | 0.998921 |
| rad72              | 7.89876e-05 | 0.999300 | 0.000109434 | 0.999030 |
| PAH10+CH3          | 7.83381e-05 | 0.999378 | 0.000108534 | 0.999139 |
| rad56              | 7.05526e-05 | 0.999449 | 9.77480e-05 | 0.999236 |
| rad55              | 6.30143e-05 | 0.999512 | 8.73034e-05 | 0.999324 |
| rad70              | 5.47579e-05 | 0.999566 | 7.58648e-05 | 0.999400 |
| rad67              | 5.31991e-05 | 0.999620 | 7.37052e-05 | 0.999473 |
| rad9               | 5.28475e-05 | 0.999672 | 7.32179e-05 | 0.999546 |
| rad21              | 5.01492e-05 | 0.999723 | 6.94796e-05 | 0.999616 |
| rad53              | 4.70217e-05 | 0.999770 | 6.51466e-05 | 0.999681 |
| PAH8+H             | 4.67977e-05 | 0.999816 | 6.48365e-05 | 0.999746 |

|           |             |          |             |          |
|-----------|-------------|----------|-------------|----------|
| rad45     | 2.75242e-05 | 0.999844 | 3.81337e-05 | 0.999784 |
| rad34     | 2.07228e-05 | 0.999865 | 2.87105e-05 | 0.999813 |
| rad30     | 1.76246e-05 | 0.999882 | 2.44181e-05 | 0.999837 |
| rad20     | 1.36535e-05 | 0.999896 | 1.89164e-05 | 0.999856 |
| rad37     | 1.24206e-05 | 0.999908 | 1.72082e-05 | 0.999873 |
| rad62     | 1.22306e-05 | 0.999921 | 1.69450e-05 | 0.999890 |
| rad65     | 7.78515e-06 | 0.999928 | 1.07860e-05 | 0.999901 |
| rad33     | 7.37261e-06 | 0.999936 | 1.02145e-05 | 0.999911 |
| rad59     | 6.58333e-06 | 0.999942 | 9.12095e-06 | 0.999920 |
| rad64     | 5.53551e-06 | 0.999948 | 7.66921e-06 | 0.999928 |
| rad68syn  | 5.38521e-06 | 0.999953 | 7.46099e-06 | 0.999935 |
| rad36     | 4.85183e-06 | 0.999958 | 6.72201e-06 | 0.999942 |
| rad18     | 4.72698e-06 | 0.999963 | 6.54905e-06 | 0.999949 |
| rad25     | 4.15360e-06 | 0.999967 | 5.75466e-06 | 0.999955 |
| rad40syn  | 3.48718e-06 | 0.999970 | 4.83136e-06 | 0.999959 |
| rad68anti | 3.42834e-06 | 0.999974 | 4.74981e-06 | 0.999964 |
| rad60syn  | 3.40236e-06 | 0.999977 | 4.71385e-06 | 0.999969 |
| rad15     | 3.37164e-06 | 0.999981 | 4.67128e-06 | 0.999973 |
| rad40anti | 2.67117e-06 | 0.999983 | 3.70080e-06 | 0.999977 |
| rad26     | 2.54399e-06 | 0.999986 | 3.52460e-06 | 0.999981 |
| rad60anti | 2.48198e-06 | 0.999988 | 3.43868e-06 | 0.999984 |
| rad42     | 2.47237e-06 | 0.999991 | 3.42537e-06 | 0.999988 |
| rad58     | 2.17639e-06 | 0.999993 | 3.01530e-06 | 0.999991 |
| rad47     | 1.74980e-06 | 0.999995 | 2.42428e-06 | 0.999993 |
| rad24     | 1.11177e-06 | 0.999996 | 1.54032e-06 | 0.999995 |
| rad10     | 8.98809e-07 | 0.999997 | 1.24527e-06 | 0.999996 |
| rad12     | 5.88536e-07 | 0.999997 | 8.15391e-07 | 0.999997 |
| rad61     | 5.66319e-07 | 0.999998 | 7.84614e-07 | 0.999997 |
| rad43     | 4.27720e-07 | 0.999998 | 5.92589e-07 | 0.999998 |
| rad3      | 3.42738e-07 | 0.999999 | 4.74851e-07 | 0.999998 |
| rad2      | 2.35847e-07 | 0.999999 | 3.26757e-07 | 0.999999 |
| rad8      | 2.31635e-07 | 0.999999 | 3.20921e-07 | 0.999999 |
| rad4      | 2.12166e-07 | 0.999999 | 2.93947e-07 | 0.999999 |
| rad14     | 1.03338e-07 | 0.999999 | 1.43171e-07 | 1.000000 |
| rad41     | 9.03590e-08 | 1.000000 | 1.25188e-07 | 1.000000 |
| rad1      | 6.46994e-08 | 1.000000 | 8.96386e-08 | 1.000000 |
| rad5      | 5.00562e-09 | 1.000000 | 6.93506e-09 | 1.000000 |
| rad27     | 4.11906e-09 | 1.000000 | 5.70679e-09 | 1.000000 |

1000000.00 Pa, 2000.00000 K

=====

| Rate constant      | True (fraction)      | Effective (fraction) |
|--------------------|----------------------|----------------------|
| Total              | 1.44111e-11 (1.00 )  | 9.93794e-12 (1.00 )  |
| Formation of rad11 | 3.16882e-12 (0.220 ) | 1.32842e-12 (0.134 ) |
| Formation of rad6  | 4.53302e-12 (0.315 ) | 1.90031e-12 (0.191 ) |
| H-abstraction      | 6.70922e-12 (0.466 ) | 6.70922e-12 (0.675 ) |

| species            | PYtrue      | Cumul    | PYeffective | Cumul    |
|--------------------|-------------|----------|-------------|----------|
| Benzene+2-propynyl | 0.465560    | 0.465560 | 0.675111    | 0.675111 |
| Phenyl+Allene      | 0.310395    | 0.775955 | 0.000000    | 0.675111 |
| PhCH2CCH+H         | 0.0812097   | 0.857165 | 0.117762    | 0.792873 |
| PhCHCCH2+H         | 0.0450582   | 0.902223 | 0.0653391   | 0.858212 |
| rad6               | 0.0350923   | 0.937315 | 0.0508874   | 0.909100 |
| C2H2+PhCH2         | 0.0194831   | 0.956798 | 0.0282524   | 0.937352 |
| PhCCH+CH3          | 0.0125870   | 0.969385 | 0.0182525   | 0.955605 |
| Indene+H           | 0.00749578  | 0.976881 | 0.0108697   | 0.966474 |
| PAH7+H             | 0.00497384  | 0.981855 | 0.00721260  | 0.973687 |
| PhcycC3H3_A+H      | 0.00461925  | 0.986474 | 0.00669840  | 0.980385 |
| Ph+MeAc            | 0.00336179  | 0.989836 | 0.00487493  | 0.985260 |
| rad19syn           | 0.00232849  | 0.992164 | 0.00337654  | 0.988637 |
| rad11              | 0.00149534  | 0.993660 | 0.00216840  | 0.990805 |
| rad39              | 0.000851261 | 0.994511 | 0.00123441  | 0.992039 |
| rad54              | 0.000763292 | 0.995274 | 0.00110685  | 0.993146 |
| rad7               | 0.000544856 | 0.995819 | 0.000790097 | 0.993936 |
| rad50              | 0.000463489 | 0.996283 | 0.000672107 | 0.994609 |
| PAH9+H             | 0.000436804 | 0.996719 | 0.000633410 | 0.995242 |
| rad51              | 0.000371525 | 0.997091 | 0.000538750 | 0.995781 |
| rad71              | 0.000321623 | 0.997413 | 0.000466388 | 0.996247 |
| rad38              | 0.000320400 | 0.997733 | 0.000464614 | 0.996712 |
| PAH1+H             | 0.000312687 | 0.998046 | 0.000453428 | 0.997165 |
| rad19anti          | 0.000215584 | 0.998261 | 0.000312620 | 0.997478 |
| rad46              | 0.000142570 | 0.998404 | 0.000206742 | 0.997685 |
| PhCCCH3+H          | 0.000135204 | 0.998539 | 0.000196060 | 0.997881 |
| rad56              | 0.000133282 | 0.998672 | 0.000193273 | 0.998074 |
| rad73              | 0.000100594 | 0.998773 | 0.000145872 | 0.998220 |
| rad23              | 9.68624e-05 | 0.998870 | 0.000140460 | 0.998360 |
| rad55              | 8.45056e-05 | 0.998954 | 0.000122542 | 0.998483 |
| rad28              | 8.35265e-05 | 0.999038 | 0.000121122 | 0.998604 |

|           |             |          |             |          |
|-----------|-------------|----------|-------------|----------|
| PAH3+H    | 8.09430e-05 | 0.999119 | 0.000117376 | 0.998721 |
| rad53     | 8.08260e-05 | 0.999199 | 0.000117206 | 0.998838 |
| PAH10+CH3 | 7.55666e-05 | 0.999275 | 0.000109579 | 0.998948 |
| rad35     | 7.25539e-05 | 0.999348 | 0.000105211 | 0.999053 |
| rad22     | 7.07988e-05 | 0.999418 | 0.000102666 | 0.999156 |
| rad13     | 6.75318e-05 | 0.999486 | 9.79283e-05 | 0.999254 |
| rad52     | 6.35208e-05 | 0.999549 | 9.21115e-05 | 0.999346 |
| rad72     | 6.17331e-05 | 0.999611 | 8.95192e-05 | 0.999435 |
| rad70     | 5.20179e-05 | 0.999663 | 7.54314e-05 | 0.999511 |
| rad67     | 4.90233e-05 | 0.999712 | 7.10889e-05 | 0.999582 |
| rad9      | 4.86940e-05 | 0.999761 | 7.06114e-05 | 0.999653 |
| PAH8+H    | 4.09766e-05 | 0.999802 | 5.94202e-05 | 0.999712 |
| rad21     | 2.93426e-05 | 0.999831 | 4.25497e-05 | 0.999755 |
| rad62     | 2.58021e-05 | 0.999857 | 3.74158e-05 | 0.999792 |
| rad45     | 2.09539e-05 | 0.999878 | 3.03853e-05 | 0.999822 |
| rad34     | 1.91627e-05 | 0.999897 | 2.77879e-05 | 0.999850 |
| rad30     | 1.57375e-05 | 0.999913 | 2.28210e-05 | 0.999873 |
| rad37     | 1.04692e-05 | 0.999923 | 1.51814e-05 | 0.999888 |
| rad64     | 7.87192e-06 | 0.999931 | 1.14151e-05 | 0.999900 |
| rad20     | 7.26175e-06 | 0.999939 | 1.05303e-05 | 0.999910 |
| rad65     | 6.92014e-06 | 0.999945 | 1.00349e-05 | 0.999920 |
| rad42     | 6.01998e-06 | 0.999951 | 8.72957e-06 | 0.999929 |
| rad59     | 5.85276e-06 | 0.999957 | 8.48707e-06 | 0.999937 |
| rad68syn  | 4.69310e-06 | 0.999962 | 6.80548e-06 | 0.999944 |
| rad33     | 4.57685e-06 | 0.999967 | 6.63690e-06 | 0.999951 |
| rad36     | 3.71329e-06 | 0.999970 | 5.38468e-06 | 0.999956 |
| rad40syn  | 3.09115e-06 | 0.999973 | 4.48249e-06 | 0.999961 |
| rad15     | 3.08279e-06 | 0.999976 | 4.47037e-06 | 0.999965 |
| rad60syn  | 3.05225e-06 | 0.999980 | 4.42609e-06 | 0.999970 |
| rad68anti | 2.98883e-06 | 0.999982 | 4.33412e-06 | 0.999974 |
| rad25     | 2.59947e-06 | 0.999985 | 3.76949e-06 | 0.999978 |
| rad40anti | 2.38180e-06 | 0.999987 | 3.45386e-06 | 0.999981 |
| rad60anti | 2.22404e-06 | 0.999990 | 3.22509e-06 | 0.999984 |
| rad18     | 2.08245e-06 | 0.999992 | 3.01977e-06 | 0.999987 |
| rad58     | 1.90071e-06 | 0.999994 | 2.75622e-06 | 0.999990 |
| rad26     | 1.38824e-06 | 0.999995 | 2.01309e-06 | 0.999992 |
| rad47     | 1.25351e-06 | 0.999996 | 1.81771e-06 | 0.999994 |
| rad24     | 7.79235e-07 | 0.999997 | 1.12997e-06 | 0.999995 |
| rad43     | 6.59707e-07 | 0.999998 | 9.56642e-07 | 0.999996 |
| rad61     | 5.94110e-07 | 0.999998 | 8.61524e-07 | 0.999997 |
| rad12     | 5.84014e-07 | 0.999999 | 8.46885e-07 | 0.999998 |
| rad10     | 4.78244e-07 | 0.999999 | 6.93505e-07 | 0.999998 |
| rad8      | 1.96266e-07 | 1.000000 | 2.84606e-07 | 0.999999 |
| rad3      | 1.86988e-07 | 1.000000 | 2.71152e-07 | 0.999999 |
| rad41     | 1.62333e-07 | 1.000000 | 2.35401e-07 | 0.999999 |
| rad2      | 1.22716e-07 | 1.000000 | 1.77952e-07 | 0.999999 |
| rad4      | 1.14905e-07 | 1.000000 | 1.66624e-07 | 1.000000 |
| rad14     | 7.41236e-08 | 1.000000 | 1.07487e-07 | 1.000000 |
| rad1      | 3.32001e-08 | 1.000000 | 4.81437e-08 | 1.000000 |
| rad5      | 8.09120e-09 | 1.000000 | 1.17331e-08 | 1.000000 |
| rad27     | 2.85224e-09 | 1.000000 | 4.13603e-09 | 1.000000 |

1000000.00 Pa, 2250.00000 K

=====

| Rate constant      | True (fraction)      | Effective (fraction) |
|--------------------|----------------------|----------------------|
| Total              | 2.23655e-11 (1.00 )  | 1.54550e-11 (1.00 )  |
| Formation of rad11 | 4.62280e-12 (0.207 ) | 1.83229e-12 (0.119 ) |
| Formation of rad6  | 6.82518e-12 (0.305 ) | 2.70521e-12 (0.175 ) |
| H-abstraction      | 1.09175e-11 (0.488 ) | 1.09175e-11 (0.706 ) |

| species            | PYtrue      | Cumul    | PYeffective | Cumul    |
|--------------------|-------------|----------|-------------|----------|
| Benzene+2-propynyl | 0.488140    | 0.488140 | 0.706405    | 0.706405 |
| Phenyl+Allene      | 0.308980    | 0.797120 | 0.000000    | 0.706405 |
| PhCH2CCH+H         | 0.0838278   | 0.880948 | 0.121310    | 0.827716 |
| PhCHCCH2+H         | 0.0443778   | 0.925326 | 0.0642209   | 0.891937 |
| rad6               | 0.0178749   | 0.943201 | 0.0258675   | 0.917804 |
| C2H2+PhCH2         | 0.0173207   | 0.960521 | 0.0250654   | 0.942869 |
| PhCCH+CH3          | 0.0122501   | 0.972772 | 0.0177276   | 0.960597 |
| Indene+H           | 0.00641734  | 0.979189 | 0.00928681  | 0.969884 |
| PAH7+H             | 0.00483914  | 0.984028 | 0.00700291  | 0.976887 |
| PhcycC3H3_A+H      | 0.00429738  | 0.988325 | 0.00621889  | 0.983106 |
| Ph+MeAc            | 0.00331360  | 0.991639 | 0.00479522  | 0.987901 |
| rad19syn           | 0.00216873  | 0.993808 | 0.00313847  | 0.991039 |
| rad39              | 0.000760352 | 0.994568 | 0.00110033  | 0.992140 |
| rad54              | 0.000744311 | 0.995312 | 0.00107712  | 0.993217 |
| rad11              | 0.000707651 | 0.996020 | 0.00102406  | 0.994241 |
| PAH9+H             | 0.000395057 | 0.996415 | 0.000571702 | 0.994813 |
| rad7               | 0.000387702 | 0.996803 | 0.000561056 | 0.995374 |

|           |             |          |             |          |
|-----------|-------------|----------|-------------|----------|
| rad50     | 0.000369994 | 0.997173 | 0.000535432 | 0.995909 |
| PAH1+H    | 0.000323767 | 0.997497 | 0.000468536 | 0.996378 |
| rad51     | 0.000295897 | 0.997792 | 0.000428205 | 0.996806 |
| rad38     | 0.000265018 | 0.998057 | 0.000383517 | 0.997189 |
| rad71     | 0.000253890 | 0.998311 | 0.000367413 | 0.997557 |
| rad19anti | 0.000234791 | 0.998546 | 0.000339774 | 0.997896 |
| rad56     | 0.000133415 | 0.998680 | 0.000193069 | 0.998090 |
| PhCCCH3+H | 0.000128679 | 0.998808 | 0.000186216 | 0.998276 |
| rad46     | 0.000116204 | 0.998924 | 0.000168164 | 0.998444 |
| rad55     | 8.23792e-05 | 0.999007 | 0.000119214 | 0.998563 |
| rad53     | 7.99576e-05 | 0.999087 | 0.000115710 | 0.998679 |
| rad73     | 7.94447e-05 | 0.999166 | 0.000114968 | 0.998794 |
| PAH10+CH3 | 7.06484e-05 | 0.999237 | 0.000102238 | 0.998896 |
| PAH3+H    | 6.86307e-05 | 0.999305 | 9.93181e-05 | 0.998995 |
| rad35     | 6.63509e-05 | 0.999372 | 9.60187e-05 | 0.999091 |
| rad23     | 5.55747e-05 | 0.999427 | 8.04241e-05 | 0.999172 |
| rad70     | 5.24892e-05 | 0.999480 | 7.59594e-05 | 0.999248 |
| rad52     | 5.07684e-05 | 0.999531 | 7.34688e-05 | 0.999321 |
| rad13     | 4.93193e-05 | 0.999580 | 7.13717e-05 | 0.999393 |
| rad28     | 4.89188e-05 | 0.999629 | 7.07921e-05 | 0.999463 |
| rad72     | 4.87175e-05 | 0.999678 | 7.05009e-05 | 0.999534 |
| rad67     | 4.69174e-05 | 0.999725 | 6.78961e-05 | 0.999602 |
| rad9      | 4.25218e-05 | 0.999767 | 6.15348e-05 | 0.999663 |
| PAH8+H    | 3.34151e-05 | 0.999800 | 4.83562e-05 | 0.999712 |
| rad22     | 2.86242e-05 | 0.999829 | 4.14230e-05 | 0.999753 |
| rad62     | 2.85392e-05 | 0.999858 | 4.13000e-05 | 0.999794 |
| rad34     | 1.86508e-05 | 0.999876 | 2.69903e-05 | 0.999821 |
| rad21     | 1.75540e-05 | 0.999894 | 2.54030e-05 | 0.999847 |
| rad45     | 1.60449e-05 | 0.999910 | 2.32191e-05 | 0.999870 |
| rad30     | 1.42985e-05 | 0.999924 | 2.06920e-05 | 0.999891 |
| rad37     | 1.01650e-05 | 0.999934 | 1.47101e-05 | 0.999905 |
| rad64     | 7.98834e-06 | 0.999942 | 1.15602e-05 | 0.999917 |
| rad42     | 6.84741e-06 | 0.999949 | 9.90917e-06 | 0.999927 |
| rad65     | 6.41314e-06 | 0.999956 | 9.28070e-06 | 0.999936 |
| rad59     | 5.07646e-06 | 0.999961 | 7.34633e-06 | 0.999944 |
| rad20     | 4.05550e-06 | 0.999965 | 5.86887e-06 | 0.999949 |
| rad68syn  | 4.03336e-06 | 0.999969 | 5.83684e-06 | 0.999955 |
| rad33     | 3.66117e-06 | 0.999972 | 5.29821e-06 | 0.999961 |
| rad36     | 2.85980e-06 | 0.999975 | 4.13851e-06 | 0.999965 |
| rad15     | 2.82155e-06 | 0.999978 | 4.08317e-06 | 0.999969 |
| rad60syn  | 2.73246e-06 | 0.999981 | 3.95425e-06 | 0.999973 |
| rad40syn  | 2.59277e-06 | 0.999983 | 3.75208e-06 | 0.999976 |
| rad68anti | 2.57122e-06 | 0.999986 | 3.72090e-06 | 0.999980 |
| rad40anti | 1.98832e-06 | 0.999988 | 2.87738e-06 | 0.999983 |
| rad60anti | 1.98277e-06 | 0.999990 | 2.86933e-06 | 0.999986 |
| rad25     | 1.67593e-06 | 0.999992 | 2.42530e-06 | 0.999988 |
| rad58     | 1.51468e-06 | 0.999993 | 2.19195e-06 | 0.999991 |
| rad18     | 1.07171e-06 | 0.999994 | 1.55091e-06 | 0.999992 |
| rad26     | 1.03962e-06 | 0.999995 | 1.50447e-06 | 0.999994 |
| rad47     | 9.13081e-07 | 0.999996 | 1.32135e-06 | 0.999995 |
| rad43     | 6.89818e-07 | 0.999997 | 9.98260e-07 | 0.999996 |
| rad12     | 5.95621e-07 | 0.999997 | 8.61944e-07 | 0.999997 |
| rad24     | 5.61894e-07 | 0.999998 | 8.13140e-07 | 0.999998 |
| rad61     | 5.48023e-07 | 0.999999 | 7.93061e-07 | 0.999998 |
| rad10     | 3.90791e-07 | 0.999999 | 5.65528e-07 | 0.999999 |
| rad8      | 1.79444e-07 | 0.999999 | 2.59680e-07 | 0.999999 |
| rad41     | 1.74623e-07 | 0.999999 | 2.52703e-07 | 0.999999 |
| rad3      | 1.33875e-07 | 0.999999 | 1.93736e-07 | 1.000000 |
| rad2      | 8.25435e-08 | 1.000000 | 1.19452e-07 | 1.000000 |
| rad4      | 8.13867e-08 | 1.000000 | 1.17778e-07 | 1.000000 |
| rad14     | 6.26885e-08 | 1.000000 | 9.07187e-08 | 1.000000 |
| rad1      | 2.18345e-08 | 1.000000 | 3.15975e-08 | 1.000000 |
| rad5      | 9.06468e-09 | 1.000000 | 1.31178e-08 | 1.000000 |
| rad27     | 2.39960e-09 | 1.000000 | 3.47255e-09 | 1.000000 |

1000000.00 Pa, 2500.00000 K

| Rate constant      | True (fraction)      | Effective (fraction) |
|--------------------|----------------------|----------------------|
| Total              | 3.28090e-11 (1.00 )  | 2.29417e-11 (1.00 )  |
| Formation of rad11 | 6.43164e-12 (0.196 ) | 2.50715e-12 (0.109 ) |
| Formation of rad6  | 9.73932e-12 (0.297 ) | 3.79653e-12 (0.165 ) |
| H-abstraction      | 1.66381e-11 (0.507 ) | 1.66381e-11 (0.725 ) |

  

| species            | PYtrue    | Cumul    | PYeffective | Cumul    |
|--------------------|-----------|----------|-------------|----------|
| Benzene+2-propynyl | 0.507119  | 0.507119 | 0.725231    | 0.725231 |
| Phenyl+Allene      | 0.300749  | 0.807867 | 0.000000    | 0.725231 |
| PhCH2CCH+H         | 0.0865204 | 0.894388 | 0.123733    | 0.848964 |
| PhCHCCH2+H         | 0.0434843 | 0.937872 | 0.0621868   | 0.911151 |

|               |             |          |             |          |
|---------------|-------------|----------|-------------|----------|
| C2H2+PhCH2    | 0.0156809   | 0.953553 | 0.0224253   | 0.933576 |
| PhCCH+CH3     | 0.0119607   | 0.965514 | 0.0171050   | 0.950681 |
| rad6          | 0.0104318   | 0.975946 | 0.0149186   | 0.965600 |
| Indene+H      | 0.00543288  | 0.981378 | 0.00776959  | 0.973369 |
| PAH7+H        | 0.00478586  | 0.986164 | 0.00684428  | 0.980214 |
| PhcycC3H3_A+H | 0.00363806  | 0.989802 | 0.00520278  | 0.985416 |
| Ph+MeAc       | 0.00318489  | 0.992987 | 0.00455471  | 0.989971 |
| rad19syn      | 0.00195567  | 0.994943 | 0.00279679  | 0.992768 |
| rad54         | 0.000719464 | 0.995662 | 0.00102890  | 0.993797 |
| rad39         | 0.000690192 | 0.996353 | 0.000987047 | 0.994784 |
| rad11         | 0.000355443 | 0.996708 | 0.000508320 | 0.995292 |
| PAH9+H        | 0.000331967 | 0.997040 | 0.000474746 | 0.995767 |
| rad50         | 0.000289533 | 0.997330 | 0.000414060 | 0.996181 |
| rad7          | 0.000281001 | 0.997611 | 0.000401861 | 0.996583 |
| PAH1+H        | 0.000280992 | 0.997892 | 0.000401847 | 0.996985 |
| rad19anti     | 0.000249329 | 0.998141 | 0.000356565 | 0.997341 |
| rad51         | 0.000228294 | 0.998369 | 0.000326483 | 0.997668 |
| rad38         | 0.000219075 | 0.998588 | 0.000313300 | 0.997981 |
| rad71         | 0.000191783 | 0.998780 | 0.000274269 | 0.998255 |
| PhCCCH3+H     | 0.000124840 | 0.998905 | 0.000178534 | 0.998434 |
| rad56         | 0.000110930 | 0.999016 | 0.000158641 | 0.998593 |
| rad46         | 9.43750e-05 | 0.999110 | 0.000134966 | 0.998728 |
| rad55         | 7.79960e-05 | 0.999188 | 0.000111542 | 0.998839 |
| rad53         | 6.88881e-05 | 0.999257 | 9.85171e-05 | 0.998938 |
| PAH10+CH3     | 6.66075e-05 | 0.999324 | 9.52553e-05 | 0.999033 |
| PAH3+H        | 6.17743e-05 | 0.999385 | 8.83435e-05 | 0.999121 |
| rad73         | 6.01572e-05 | 0.999446 | 8.60307e-05 | 0.999207 |
| rad35         | 5.87618e-05 | 0.999504 | 8.40351e-05 | 0.999291 |
| rad70         | 5.54758e-05 | 0.999560 | 7.93357e-05 | 0.999371 |
| rad67         | 4.59299e-05 | 0.999606 | 6.56844e-05 | 0.999436 |
| rad52         | 3.95145e-05 | 0.999645 | 5.65096e-05 | 0.999493 |
| rad72         | 3.67191e-05 | 0.999682 | 5.25119e-05 | 0.999545 |
| rad13         | 3.64039e-05 | 0.999718 | 5.20610e-05 | 0.999597 |
| rad23         | 3.48731e-05 | 0.999753 | 4.98720e-05 | 0.999647 |
| rad9          | 3.29428e-05 | 0.999786 | 4.71116e-05 | 0.999694 |
| rad28         | 3.11791e-05 | 0.999817 | 4.45892e-05 | 0.999739 |
| PAH8+H        | 2.71655e-05 | 0.999845 | 3.88493e-05 | 0.999778 |
| rad62         | 2.26382e-05 | 0.999867 | 3.23749e-05 | 0.999810 |
| rad34         | 1.94272e-05 | 0.999887 | 2.77827e-05 | 0.999838 |
| rad22         | 1.34978e-05 | 0.999900 | 1.93032e-05 | 0.999857 |
| rad30         | 1.32678e-05 | 0.999913 | 1.89743e-05 | 0.999876 |
| rad45         | 1.19380e-05 | 0.999925 | 1.70726e-05 | 0.999893 |
| rad21         | 1.05837e-05 | 0.999936 | 1.51358e-05 | 0.999908 |
| rad37         | 1.03853e-05 | 0.999946 | 1.48519e-05 | 0.999923 |
| rad64         | 7.00779e-06 | 0.999953 | 1.00218e-05 | 0.999933 |
| rad42         | 5.27280e-06 | 0.999959 | 7.54062e-06 | 0.999941 |
| rad65         | 5.14548e-06 | 0.999964 | 7.35856e-06 | 0.999948 |
| rad59         | 4.67373e-06 | 0.999968 | 6.68389e-06 | 0.999955 |
| rad68syn      | 3.73667e-06 | 0.999972 | 5.34382e-06 | 0.999960 |
| rad33         | 2.94981e-06 | 0.999975 | 4.21850e-06 | 0.999964 |
| rad60syn      | 2.56718e-06 | 0.999978 | 3.67133e-06 | 0.999968 |
| rad68anti     | 2.38507e-06 | 0.999980 | 3.41090e-06 | 0.999972 |
| rad20         | 2.35921e-06 | 0.999982 | 3.37389e-06 | 0.999975 |
| rad15         | 2.30490e-06 | 0.999985 | 3.29624e-06 | 0.999978 |
| rad40syn      | 2.22083e-06 | 0.999987 | 3.17600e-06 | 0.999981 |
| rad36         | 2.13971e-06 | 0.999989 | 3.05999e-06 | 0.999984 |
| rad60anti     | 1.85886e-06 | 0.999991 | 2.65835e-06 | 0.999987 |
| rad40anti     | 1.66526e-06 | 0.999993 | 2.38149e-06 | 0.999989 |
| rad58         | 1.25782e-06 | 0.999994 | 1.79882e-06 | 0.999991 |
| rad25         | 1.07917e-06 | 0.999995 | 1.54333e-06 | 0.999993 |
| rad26         | 8.17345e-07 | 0.999996 | 1.16888e-06 | 0.999994 |
| rad47         | 6.50042e-07 | 0.999996 | 9.29623e-07 | 0.999995 |
| rad18         | 5.85238e-07 | 0.999997 | 8.36949e-07 | 0.999996 |
| rad43         | 5.80294e-07 | 0.999998 | 8.29877e-07 | 0.999997 |
| rad12         | 5.50810e-07 | 0.999998 | 7.87713e-07 | 0.999997 |
| rad61         | 4.70031e-07 | 0.999999 | 6.72192e-07 | 0.999998 |
| rad24         | 4.06639e-07 | 0.999999 | 5.81532e-07 | 0.999999 |
| rad10         | 3.22237e-07 | 0.999999 | 4.60832e-07 | 0.999999 |
| rad8          | 1.66778e-07 | 1.000000 | 2.38510e-07 | 0.999999 |
| rad41         | 1.39210e-07 | 1.000000 | 1.99085e-07 | 1.000000 |
| rad3          | 9.73387e-08 | 1.000000 | 1.39204e-07 | 1.000000 |
| rad4          | 5.85770e-08 | 1.000000 | 8.37713e-08 | 1.000000 |
| rad2          | 5.64734e-08 | 1.000000 | 8.07626e-08 | 1.000000 |
| rad14         | 5.13632e-08 | 1.000000 | 7.34546e-08 | 1.000000 |
| rad1          | 1.44768e-08 | 1.000000 | 2.07033e-08 | 1.000000 |
| rad5          | 8.94131e-09 | 1.000000 | 1.27870e-08 | 1.000000 |
| rad27         | 2.01960e-09 | 1.000000 | 2.88823e-09 | 1.000000 |

1000000.00 Pa, 2750.00000 K

=====



| Rate constant      | True (fraction)      | Effective (fraction) |
|--------------------|----------------------|----------------------|
| Total              | 4.60596e-11 (1.00 )  | 3.25072e-11 (1.00 )  |
| Formation of rad11 | 8.62280e-12 (0.187 ) | 3.29989e-12 (0.102 ) |
| Formation of rad6  | 1.33313e-11 (0.289 ) | 5.10181e-12 (0.157 ) |
| H-abstraction      | 2.41055e-11 (0.523 ) | 2.41055e-11 (0.742 ) |

| species            | PYtrue      | Cumul    | PYeffective | Cumul    |
|--------------------|-------------|----------|-------------|----------|
| Benzene+2-propynyl | 0.523355    | 0.523355 | 0.741543    | 0.741543 |
| Phenyl+Allene      | 0.294236    | 0.817591 | 0.00000     | 0.741543 |
| PhCH2CCH+H         | 0.0872108   | 0.904802 | 0.123569    | 0.865113 |
| PhCHCCH2+H         | 0.0418274   | 0.946629 | 0.0592654   | 0.924378 |
| C2H2+PhCH2         | 0.0143727   | 0.961002 | 0.0203646   | 0.944743 |
| PhCCH+CH3          | 0.0114016   | 0.972403 | 0.0161550   | 0.960898 |
| rad6               | 0.00605239  | 0.978456 | 0.00857567  | 0.969473 |
| PAH7+H             | 0.00465354  | 0.983109 | 0.00659361  | 0.976067 |
| Indene+H           | 0.00449073  | 0.987600 | 0.00636294  | 0.982430 |
| PhcycC3H3_A+H      | 0.00323752  | 0.990837 | 0.00458724  | 0.987017 |
| Ph+MeAc            | 0.00304912  | 0.993887 | 0.00432031  | 0.991337 |
| rad19syn           | 0.00184373  | 0.995730 | 0.00261238  | 0.993950 |
| rad54              | 0.000729453 | 0.996460 | 0.00103356  | 0.994983 |
| rad39              | 0.000612075 | 0.997072 | 0.000867246 | 0.995851 |
| PAH9+H             | 0.000273252 | 0.997345 | 0.000387170 | 0.996238 |
| rad19anti          | 0.000247906 | 0.997593 | 0.000351258 | 0.996589 |
| PAH1+H             | 0.000247188 | 0.997840 | 0.000350242 | 0.996939 |
| rad50              | 0.000225191 | 0.998065 | 0.000319075 | 0.997258 |
| rad7               | 0.000191483 | 0.998257 | 0.000271312 | 0.997530 |
| rad11              | 0.000186211 | 0.998443 | 0.000263843 | 0.997793 |
| rad38              | 0.000181636 | 0.998625 | 0.000257360 | 0.998051 |
| rad51              | 0.000173111 | 0.998798 | 0.000245281 | 0.998296 |
| rad71              | 0.000139240 | 0.998937 | 0.000197290 | 0.998493 |
| PhCCCH3+H          | 0.000118167 | 0.999055 | 0.000167432 | 0.998661 |
| rad56              | 9.91427e-05 | 0.999154 | 0.000140476 | 0.998801 |
| rad55              | 7.83748e-05 | 0.999233 | 0.000111049 | 0.998912 |
| rad46              | 7.69267e-05 | 0.999310 | 0.000108998 | 0.999021 |
| rad53              | 6.41951e-05 | 0.999374 | 9.09581e-05 | 0.999112 |
| PAH10+CH3          | 6.37547e-05 | 0.999438 | 9.03342e-05 | 0.999203 |
| PAH3+H             | 6.07284e-05 | 0.999498 | 8.60464e-05 | 0.999289 |
| rad70              | 5.95969e-05 | 0.999558 | 8.44432e-05 | 0.999373 |
| rad35              | 5.20902e-05 | 0.999610 | 7.38067e-05 | 0.999447 |
| rad67              | 4.54461e-05 | 0.999655 | 6.43929e-05 | 0.999511 |
| rad73              | 4.39799e-05 | 0.999699 | 6.23152e-05 | 0.999574 |
| rad52              | 3.04088e-05 | 0.999730 | 4.30863e-05 | 0.999617 |
| rad72              | 2.64522e-05 | 0.999756 | 3.74801e-05 | 0.999654 |
| PAH8+H             | 2.56213e-05 | 0.999782 | 3.63028e-05 | 0.999690 |
| rad13              | 2.53767e-05 | 0.999807 | 3.59562e-05 | 0.999726 |
| rad9               | 2.29834e-05 | 0.999830 | 3.25653e-05 | 0.999759 |
| rad23              | 2.22911e-05 | 0.999853 | 3.15844e-05 | 0.999791 |
| rad34              | 2.11649e-05 | 0.999874 | 2.99885e-05 | 0.999821 |
| rad28              | 1.92785e-05 | 0.999893 | 2.73158e-05 | 0.999848 |
| rad62              | 1.72759e-05 | 0.999910 | 2.44782e-05 | 0.999872 |
| rad30              | 1.24142e-05 | 0.999923 | 1.75897e-05 | 0.999890 |
| rad37              | 1.01960e-05 | 0.999933 | 1.44468e-05 | 0.999904 |
| rad45              | 8.50459e-06 | 0.999941 | 1.20501e-05 | 0.999916 |
| rad22              | 6.80402e-06 | 0.999948 | 9.64064e-06 | 0.999926 |
| rad21              | 6.45597e-06 | 0.999955 | 9.14750e-06 | 0.999935 |
| rad64              | 6.32914e-06 | 0.999961 | 8.96777e-06 | 0.999944 |
| rad59              | 4.62134e-06 | 0.999966 | 6.54800e-06 | 0.999951 |
| rad68syn           | 3.95425e-06 | 0.999970 | 5.60280e-06 | 0.999956 |
| rad65              | 3.88601e-06 | 0.999973 | 5.50611e-06 | 0.999962 |
| rad42              | 3.80175e-06 | 0.999977 | 5.38670e-06 | 0.999967 |
| rad68anti          | 2.52541e-06 | 0.999980 | 3.57828e-06 | 0.999971 |
| rad60syn           | 2.51745e-06 | 0.999982 | 3.56698e-06 | 0.999974 |
| rad33              | 2.23014e-06 | 0.999984 | 3.15989e-06 | 0.999978 |
| rad40syn           | 2.19847e-06 | 0.999987 | 3.11502e-06 | 0.999981 |
| rad60anti          | 1.82631e-06 | 0.999988 | 2.58772e-06 | 0.999983 |
| rad15              | 1.68702e-06 | 0.999990 | 2.39035e-06 | 0.999986 |
| rad40anti          | 1.61008e-06 | 0.999992 | 2.28132e-06 | 0.999988 |
| rad36              | 1.53180e-06 | 0.999993 | 2.17040e-06 | 0.999990 |
| rad20              | 1.43304e-06 | 0.999995 | 2.03048e-06 | 0.999992 |
| rad58              | 1.18838e-06 | 0.999996 | 1.68382e-06 | 0.999994 |
| rad25              | 6.96212e-07 | 0.999997 | 9.86461e-07 | 0.999995 |
| rad26              | 5.83171e-07 | 0.999997 | 8.26298e-07 | 0.999996 |
| rad43              | 4.89710e-07 | 0.999998 | 6.93873e-07 | 0.999996 |
| rad12              | 4.58837e-07 | 0.999998 | 6.50127e-07 | 0.999997 |
| rad47              | 4.57452e-07 | 0.999999 | 6.48165e-07 | 0.999998 |
| rad61              | 4.12066e-07 | 0.999999 | 5.83856e-07 | 0.999998 |
| rad18              | 3.32653e-07 | 0.999999 | 4.71337e-07 | 0.999999 |
| rad24              | 2.92231e-07 | 1.000000 | 4.14063e-07 | 0.999999 |

|       |             |          |             |          |
|-------|-------------|----------|-------------|----------|
| rad10 | 2.40776e-07 | 1.000000 | 3.41157e-07 | 0.999999 |
| rad8  | 1.53054e-07 | 1.000000 | 2.16863e-07 | 1.000000 |
| rad41 | 1.08530e-07 | 1.000000 | 1.53776e-07 | 1.000000 |
| rad3  | 6.72232e-08 | 1.000000 | 9.52487e-08 | 1.000000 |
| rad4  | 4.02195e-08 | 1.000000 | 5.69871e-08 | 1.000000 |
| rad14 | 4.01283e-08 | 1.000000 | 5.68579e-08 | 1.000000 |
| rad2  | 3.70065e-08 | 1.000000 | 5.24346e-08 | 1.000000 |
| rad1  | 9.18529e-09 | 1.000000 | 1.30147e-08 | 1.000000 |
| rad5  | 8.05378e-09 | 1.000000 | 1.14115e-08 | 1.000000 |
| rad27 | 1.62400e-09 | 1.000000 | 2.30105e-09 | 1.000000 |

1000000.00 Pa, 3000.00000 K

=====

| Rate constant      | True (fraction)      | Effective (fraction)  |
|--------------------|----------------------|-----------------------|
| Total              | 6.24269e-11 (1.00 )  | 4.43665e-11 (1.00 )   |
| Formation of rad11 | 1.12221e-11 (0.180 ) | 4.20313e-12 (0.0947 ) |
| Formation of rad6  | 1.76534e-11 (0.283 ) | 6.61195e-12 (0.149 )  |
| H-abstraction      | 3.35514e-11 (0.537 ) | 3.35514e-11 (0.756 )  |

| species            | PYtrue      | Cumul    | PYeffective | Cumul    |
|--------------------|-------------|----------|-------------|----------|
| Benzene+2-propynyl | 0.537451    | 0.537451 | 0.756233    | 0.756233 |
| Phenyl+Allene      | 0.289305    | 0.826756 | 0.000000    | 0.756233 |
| PhCH2CCH+H         | 0.0862496   | 0.913006 | 0.121360    | 0.877593 |
| PhCHCCH2+H         | 0.0397849   | 0.952791 | 0.0559803   | 0.933573 |
| C2H2+PhCH2         | 0.0133776   | 0.966168 | 0.0188233   | 0.952396 |
| PhCCH+CH3          | 0.0106547   | 0.976823 | 0.0149919   | 0.967388 |
| PAH7+H             | 0.00443532  | 0.981258 | 0.00624082  | 0.973629 |
| Indene+H           | 0.00364184  | 0.984900 | 0.00512432  | 0.978753 |
| rad6               | 0.00343182  | 0.988332 | 0.00482883  | 0.983582 |
| PhcycC3H3_A+H      | 0.00315491  | 0.991487 | 0.00443919  | 0.988021 |
| Ph+MeAc            | 0.00292808  | 0.994415 | 0.00412002  | 0.992141 |
| rad19syn           | 0.00182785  | 0.996243 | 0.00257193  | 0.994713 |
| rad54              | 0.000760578 | 0.997003 | 0.00107019  | 0.995783 |
| rad39              | 0.000532579 | 0.997536 | 0.000749378 | 0.996533 |
| PAH1+H             | 0.000233849 | 0.997770 | 0.000329044 | 0.996862 |
| rad19anti          | 0.000233165 | 0.998003 | 0.000328081 | 0.997190 |
| PAH9+H             | 0.000226640 | 0.998229 | 0.000318901 | 0.997509 |
| rad50              | 0.000178636 | 0.998408 | 0.000251353 | 0.997760 |
| rad38              | 0.000152298 | 0.998560 | 0.000214295 | 0.997975 |
| rad51              | 0.000133079 | 0.998693 | 0.000187253 | 0.998162 |
| rad7               | 0.000124618 | 0.998818 | 0.000175347 | 0.998337 |
| PhCCCH3+H          | 0.000109548 | 0.998928 | 0.000154142 | 0.998491 |
| rad56              | 0.000101749 | 0.999029 | 0.000143168 | 0.998634 |
| rad11              | 0.000101698 | 0.999131 | 0.000143096 | 0.998778 |
| rad71              | 9.98980e-05 | 0.999231 | 0.000140563 | 0.998918 |
| rad55              | 8.23119e-05 | 0.999313 | 0.000115819 | 0.999034 |
| rad53              | 6.70053e-05 | 0.999380 | 9.42812e-05 | 0.999128 |
| rad70              | 6.38137e-05 | 0.999444 | 8.97903e-05 | 0.999218 |
| rad46              | 6.37429e-05 | 0.999508 | 8.96906e-05 | 0.999308 |
| PAH3+H             | 6.30593e-05 | 0.999571 | 8.87289e-05 | 0.999396 |
| PAH10+CH3          | 6.17424e-05 | 0.999633 | 8.68763e-05 | 0.999483 |
| rad35              | 4.68825e-05 | 0.999680 | 6.59670e-05 | 0.999549 |
| rad67              | 4.52350e-05 | 0.999725 | 6.36490e-05 | 0.999613 |
| rad73              | 3.19852e-05 | 0.999757 | 4.50057e-05 | 0.999658 |
| PAH8+H             | 2.87077e-05 | 0.999785 | 4.03939e-05 | 0.999698 |
| rad52              | 2.38127e-05 | 0.999809 | 3.35062e-05 | 0.999732 |
| rad34              | 2.33590e-05 | 0.999833 | 3.28678e-05 | 0.999765 |
| rad72              | 1.86529e-05 | 0.999851 | 2.62459e-05 | 0.999791 |
| rad13              | 1.69891e-05 | 0.999868 | 2.39050e-05 | 0.999815 |
| rad9               | 1.49351e-05 | 0.999883 | 2.10148e-05 | 0.999836 |
| rad62              | 1.44388e-05 | 0.999898 | 2.03165e-05 | 0.999856 |
| rad23              | 1.40102e-05 | 0.999912 | 1.97134e-05 | 0.999876 |
| rad30              | 1.16280e-05 | 0.999923 | 1.63614e-05 | 0.999892 |
| rad28              | 1.13756e-05 | 0.999935 | 1.60064e-05 | 0.999908 |
| rad37              | 9.53077e-06 | 0.999944 | 1.34105e-05 | 0.999922 |
| rad64              | 6.17623e-06 | 0.999950 | 8.69043e-06 | 0.999930 |
| rad45              | 5.84250e-06 | 0.999956 | 8.22082e-06 | 0.999939 |
| rad59              | 4.75375e-06 | 0.999961 | 6.68886e-06 | 0.999945 |
| rad68syn           | 4.58116e-06 | 0.999966 | 6.44602e-06 | 0.999952 |
| rad21              | 4.01764e-06 | 0.999970 | 5.65312e-06 | 0.999957 |
| rad22              | 3.58460e-06 | 0.999973 | 5.04380e-06 | 0.999962 |
| rad42              | 2.99557e-06 | 0.999976 | 4.21500e-06 | 0.999967 |
| rad65              | 2.95816e-06 | 0.999979 | 4.16234e-06 | 0.999971 |
| rad68anti          | 2.92510e-06 | 0.999982 | 4.11583e-06 | 0.999975 |
| rad60syn           | 2.51792e-06 | 0.999985 | 3.54291e-06 | 0.999978 |
| rad40syn           | 2.50085e-06 | 0.999987 | 3.51890e-06 | 0.999982 |
| rad60anti          | 1.83498e-06 | 0.999989 | 2.58195e-06 | 0.999985 |
| rad40anti          | 1.81387e-06 | 0.999991 | 2.55224e-06 | 0.999987 |

|       |             |          |             |          |
|-------|-------------|----------|-------------|----------|
| rad33 | 1.60740e-06 | 0.999992 | 2.26173e-06 | 0.999989 |
| rad58 | 1.24842e-06 | 0.999994 | 1.75662e-06 | 0.999991 |
| rad15 | 1.14421e-06 | 0.999995 | 1.60999e-06 | 0.999993 |
| rad36 | 1.05664e-06 | 0.999996 | 1.48677e-06 | 0.999994 |
| rad20 | 9.12063e-07 | 0.999997 | 1.28334e-06 | 0.999995 |
| rad25 | 4.54741e-07 | 0.999997 | 6.39854e-07 | 0.999996 |
| rad43 | 4.47027e-07 | 0.999998 | 6.28999e-07 | 0.999997 |
| rad61 | 3.86439e-07 | 0.999998 | 5.43749e-07 | 0.999997 |
| rad26 | 3.81703e-07 | 0.999998 | 5.37084e-07 | 0.999998 |
| rad12 | 3.55117e-07 | 0.999999 | 4.99676e-07 | 0.999998 |
| rad47 | 3.27956e-07 | 0.999999 | 4.61458e-07 | 0.999999 |
| rad24 | 2.08943e-07 | 0.999999 | 2.93997e-07 | 0.999999 |
| rad18 | 1.96295e-07 | 0.999999 | 2.76202e-07 | 0.999999 |
| rad10 | 1.65906e-07 | 1.000000 | 2.33442e-07 | 1.000000 |
| rad8  | 1.38584e-07 | 1.000000 | 1.94997e-07 | 1.000000 |
| rad41 | 9.34260e-08 | 1.000000 | 1.31457e-07 | 1.000000 |
| rad3  | 4.47671e-08 | 1.000000 | 6.29906e-08 | 1.000000 |
| rad14 | 3.08372e-08 | 1.000000 | 4.33902e-08 | 1.000000 |
| rad4  | 2.67906e-08 | 1.000000 | 3.76963e-08 | 1.000000 |
| rad2  | 2.35015e-08 | 1.000000 | 3.30684e-08 | 1.000000 |
| rad5  | 6.84762e-09 | 1.000000 | 9.63510e-09 | 1.000000 |
| rad1  | 5.66927e-09 | 1.000000 | 7.97707e-09 | 1.000000 |
| rad27 | 1.26502e-09 | 1.000000 | 1.77997e-09 | 1.000000 |

1000000.00 Pa, 3250.00000 K

| =====              |                 |          |                      |           |
|--------------------|-----------------|----------|----------------------|-----------|
| Rate constant      | True (fraction) |          | Effective (fraction) |           |
| -----              |                 |          |                      |           |
| Total              | 8.22129e-11     | (1.00 )  | 5.87789e-11          | (1.00 )   |
| Formation of rad11 | 1.42538e-11     | (0.173 ) | 5.22824e-12          | (0.0889 ) |
| Formation of rad6  | 2.27549e-11     | (0.277 ) | 8.34639e-12          | (0.142 )  |
| H-abstraction      | 4.52043e-11     | (0.550 ) | 4.52043e-11          | (0.769 )  |
| -----              |                 |          |                      |           |
| species            | PYtrue          | Cumul    | PYeffective          | Cumul     |
| -----              |                 |          |                      |           |
| Benzene+2-propynyl | 0.549844        | 0.549844 | 0.769056             | 0.769056  |
| Phenyl+Allene      | 0.285041        | 0.834885 | 0.000000             | 0.769056  |
| PhCH2CCH+H         | 0.0844011       | 0.919286 | 0.118050             | 0.887106  |
| PhCHCCH2+H         | 0.0377326       | 0.957018 | 0.0527760            | 0.939882  |
| C2H2+PhCH2         | 0.0126638       | 0.969682 | 0.0177127            | 0.957595  |
| PhCCH+CH3          | 0.00986301      | 0.979545 | 0.0137952            | 0.971390  |
| PAH7+H             | 0.00416997      | 0.983715 | 0.00583246           | 0.977223  |
| PhcycC3H3_A+H      | 0.00329081      | 0.987006 | 0.00460280           | 0.981825  |
| Indene+H           | 0.00292518      | 0.989931 | 0.00409140           | 0.985917  |
| Ph+MeAc            | 0.00282932      | 0.992760 | 0.00395731           | 0.989874  |
| rad6               | 0.00193310      | 0.994693 | 0.00270380           | 0.992578  |
| rad19syn           | 0.00186607      | 0.996560 | 0.00261003           | 0.995188  |
| rad54              | 0.000795516     | 0.997355 | 0.00111267           | 0.996301  |
| rad39              | 0.000460748     | 0.997816 | 0.000644442          | 0.996945  |
| PAH1+H             | 0.000236127     | 0.998052 | 0.000330266          | 0.997275  |
| rad19anti          | 0.000211647     | 0.998264 | 0.000296026          | 0.997571  |
| PAH9+H             | 0.000190560     | 0.998454 | 0.000266532          | 0.997838  |
| rad50              | 0.000147199     | 0.998601 | 0.000205884          | 0.998044  |
| rad38              | 0.000129442     | 0.998731 | 0.000181049          | 0.998225  |
| rad56              | 0.000114571     | 0.998845 | 0.000160249          | 0.998385  |
| rad51              | 0.000106533     | 0.998952 | 0.000149006          | 0.998534  |
| PhCCCH3+H          | 0.000100656     | 0.999053 | 0.000140786          | 0.998675  |
| rad55              | 8.75324e-05     | 0.999140 | 0.000122430          | 0.998797  |
| rad7               | 7.95124e-05     | 0.999220 | 0.000111213          | 0.998909  |
| rad53              | 7.46741e-05     | 0.999294 | 0.000104445          | 0.999013  |
| rad71              | 7.34083e-05     | 0.999368 | 0.000102675          | 0.999116  |
| rad70              | 6.75729e-05     | 0.999435 | 9.45133e-05          | 0.999210  |
| PAH3+H             | 6.69035e-05     | 0.999502 | 9.35768e-05          | 0.999304  |
| PAH10+CH3          | 6.00877e-05     | 0.999562 | 8.40439e-05          | 0.999388  |
| rad11              | 5.80616e-05     | 0.999620 | 8.12095e-05          | 0.999469  |
| rad46              | 5.39724e-05     | 0.999674 | 7.54902e-05          | 0.999545  |
| rad67              | 4.50683e-05     | 0.999719 | 6.30363e-05          | 0.999608  |
| rad35              | 4.28209e-05     | 0.999762 | 5.98927e-05          | 0.999667  |
| PAH8+H             | 3.54582e-05     | 0.999798 | 4.95947e-05          | 0.999717  |
| rad34              | 2.56368e-05     | 0.999823 | 3.58577e-05          | 0.999753  |
| rad73              | 2.39968e-05     | 0.999847 | 3.35638e-05          | 0.999786  |
| rad52              | 1.93915e-05     | 0.999867 | 2.71225e-05          | 0.999814  |
| rad62              | 1.39919e-05     | 0.999881 | 1.95702e-05          | 0.999833  |
| rad72              | 1.33007e-05     | 0.999894 | 1.86034e-05          | 0.999852  |
| rad13              | 1.12094e-05     | 0.999905 | 1.56784e-05          | 0.999867  |
| rad30              | 1.08834e-05     | 0.999916 | 1.52224e-05          | 0.999883  |
| rad9               | 9.33097e-06     | 0.999925 | 1.30511e-05          | 0.999896  |
| rad23              | 8.68094e-06     | 0.999934 | 1.21419e-05          | 0.999908  |
| rad37              | 8.60032e-06     | 0.999943 | 1.20291e-05          | 0.999920  |
| rad28              | 6.54725e-06     | 0.999949 | 9.15750e-06          | 0.999929  |

|           |             |          |             |          |
|-----------|-------------|----------|-------------|----------|
| rad64     | 6.38871e-06 | 0.999956 | 8.93579e-06 | 0.999938 |
| rad68syn  | 5.47345e-06 | 0.999961 | 7.65560e-06 | 0.999946 |
| rad59     | 4.95559e-06 | 0.999966 | 6.93127e-06 | 0.999953 |
| rad45     | 3.91681e-06 | 0.999970 | 5.47838e-06 | 0.999958 |
| rad68anti | 3.49253e-06 | 0.999973 | 4.88495e-06 | 0.999963 |
| rad40syn  | 3.04401e-06 | 0.999976 | 4.25761e-06 | 0.999967 |
| rad42     | 2.82122e-06 | 0.999979 | 3.94600e-06 | 0.999971 |
| rad21     | 2.56963e-06 | 0.999982 | 3.59411e-06 | 0.999975 |
| rad60syn  | 2.53085e-06 | 0.999984 | 3.53986e-06 | 0.999978 |
| rad65     | 2.35330e-06 | 0.999987 | 3.29153e-06 | 0.999982 |
| rad40anti | 2.21562e-06 | 0.999989 | 3.09894e-06 | 0.999985 |
| rad22     | 1.97268e-06 | 0.999991 | 2.75916e-06 | 0.999987 |
| rad60anti | 1.85487e-06 | 0.999993 | 2.59438e-06 | 0.999990 |
| rad58     | 1.38286e-06 | 0.999994 | 1.93418e-06 | 0.999992 |
| rad33     | 1.13225e-06 | 0.999995 | 1.58366e-06 | 0.999994 |
| rad15     | 7.42965e-07 | 0.999996 | 1.03918e-06 | 0.999995 |
| rad36     | 7.10688e-07 | 0.999997 | 9.94026e-07 | 0.999996 |
| rad20     | 6.09291e-07 | 0.999997 | 8.52203e-07 | 0.999996 |
| rad43     | 4.44824e-07 | 0.999998 | 6.22167e-07 | 0.999997 |
| rad61     | 3.86172e-07 | 0.999998 | 5.40131e-07 | 0.999998 |
| rad25     | 3.03440e-07 | 0.999998 | 4.24417e-07 | 0.999998 |
| rad12     | 2.63517e-07 | 0.999999 | 3.68577e-07 | 0.999998 |
| rad47     | 2.46428e-07 | 0.999999 | 3.44674e-07 | 0.999999 |
| rad26     | 2.37360e-07 | 0.999999 | 3.31991e-07 | 0.999999 |
| rad24     | 1.49380e-07 | 0.999999 | 2.08935e-07 | 0.999999 |
| rad8      | 1.24298e-07 | 0.999999 | 1.73854e-07 | 0.999999 |
| rad18     | 1.20274e-07 | 1.000000 | 1.68224e-07 | 1.000000 |
| rad10     | 1.08932e-07 | 1.000000 | 1.52361e-07 | 1.000000 |
| rad41     | 9.20290e-08 | 1.000000 | 1.28719e-07 | 1.000000 |
| rad3      | 2.94615e-08 | 1.000000 | 4.12073e-08 | 1.000000 |
| rad14     | 2.41720e-08 | 1.000000 | 3.38090e-08 | 1.000000 |
| rad4      | 1.77605e-08 | 1.000000 | 2.48412e-08 | 1.000000 |
| rad2      | 1.47769e-08 | 1.000000 | 2.06682e-08 | 1.000000 |
| rad5      | 5.65347e-09 | 1.000000 | 7.90738e-09 | 1.000000 |
| rad1      | 3.48837e-09 | 1.000000 | 4.87913e-09 | 1.000000 |
| rad27     | 9.77050e-10 | 1.000000 | 1.36658e-09 | 1.000000 |

1000000.00 Pa, 3500.00000 K

=====

| Rate constant      | True (fraction)      | Effective (fraction)  |
|--------------------|----------------------|-----------------------|
| Total              | 1.05713e-10 (1.00 )  | 7.60110e-11 (1.00 )   |
| Formation of rad11 | 1.77412e-11 (0.168 ) | 6.39021e-12 (0.0841 ) |
| Formation of rad6  | 2.86822e-11 (0.271 ) | 1.03311e-11 (0.136 )  |
| H-abstraction      | 5.92897e-11 (0.561 ) | 5.92897e-11 (0.780 )  |

| species            | PYtrue      | Cumul    | PYeffective | Cumul    |
|--------------------|-------------|----------|-------------|----------|
| Benzene+2-propynyl | 0.560855    | 0.560855 | 0.780015    | 0.780015 |
| Phenyl+Allene      | 0.280970    | 0.841824 | 0.000000    | 0.780015 |
| PhCH2CCH+H         | 0.0822155   | 0.924040 | 0.114342    | 0.894357 |
| PhCHCCH2+H         | 0.0358628   | 0.959903 | 0.0498765   | 0.944233 |
| C2H2+PhCH2         | 0.0121746   | 0.972077 | 0.0169319   | 0.961165 |
| PhCCH+CH3          | 0.00911819  | 0.981195 | 0.0126812   | 0.973847 |
| PAH7+H             | 0.00389136  | 0.985087 | 0.00541196  | 0.979258 |
| PhcycC3H3_A+H      | 0.00353843  | 0.988625 | 0.00492110  | 0.984180 |
| Ph+MeAc            | 0.00275296  | 0.991378 | 0.00382870  | 0.988008 |
| Indene+H           | 0.00234751  | 0.993726 | 0.00326482  | 0.991273 |
| rad19syn           | 0.00192245  | 0.995648 | 0.00267367  | 0.993947 |
| rad6               | 0.00110198  | 0.996750 | 0.00153259  | 0.995479 |
| rad54              | 0.000823705 | 0.997574 | 0.00114557  | 0.996625 |
| rad39              | 0.000400299 | 0.997974 | 0.000556720 | 0.997182 |
| PAH1+H             | 0.000248050 | 0.998222 | 0.000344978 | 0.997527 |
| rad19anti          | 0.000188623 | 0.998411 | 0.000262330 | 0.997789 |
| PAH9+H             | 0.000161908 | 0.998573 | 0.000225174 | 0.998014 |
| rad56              | 0.000132928 | 0.998705 | 0.000184871 | 0.998199 |
| rad50              | 0.000126450 | 0.998832 | 0.000175861 | 0.998375 |
| rad38              | 0.000111146 | 0.998943 | 0.000154578 | 0.998529 |
| PhCCCH3+H          | 9.25306e-05 | 0.999036 | 0.000128688 | 0.998658 |
| rad55              | 9.24432e-05 | 0.999128 | 0.000128566 | 0.998787 |
| rad51              | 8.98566e-05 | 0.999218 | 0.000124969 | 0.998912 |
| rad53              | 8.45684e-05 | 0.999302 | 0.000117614 | 0.999029 |
| PAH3+H             | 7.11319e-05 | 0.999374 | 9.89276e-05 | 0.999128 |
| rad70              | 7.06299e-05 | 0.999444 | 9.82292e-05 | 0.999226 |
| PAH10+CH3          | 5.84643e-05 | 0.999503 | 8.13097e-05 | 0.999308 |
| rad71              | 5.73032e-05 | 0.999560 | 7.96950e-05 | 0.999387 |
| rad7               | 5.07735e-05 | 0.999611 | 7.06138e-05 | 0.999458 |
| rad46              | 4.65520e-05 | 0.999657 | 6.47429e-05 | 0.999523 |
| PAH8+H             | 4.48921e-05 | 0.999702 | 6.24343e-05 | 0.999585 |
| rad67              | 4.47696e-05 | 0.999747 | 6.22636e-05 | 0.999647 |

|           |             |          |             |          |
|-----------|-------------|----------|-------------|----------|
| rad35     | 3.94994e-05 | 0.999786 | 5.49342e-05 | 0.999702 |
| rad11     | 3.47274e-05 | 0.999821 | 4.82974e-05 | 0.999751 |
| rad34     | 2.77711e-05 | 0.999849 | 3.86230e-05 | 0.999789 |
| rad73     | 1.91825e-05 | 0.999868 | 2.66782e-05 | 0.999816 |
| rad52     | 1.65242e-05 | 0.999885 | 2.29814e-05 | 0.999839 |
| rad62     | 1.55687e-05 | 0.999900 | 2.16523e-05 | 0.999861 |
| rad30     | 1.01782e-05 | 0.999910 | 1.41555e-05 | 0.999875 |
| rad72     | 9.97321e-06 | 0.999920 | 1.38703e-05 | 0.999889 |
| rad37     | 7.60407e-06 | 0.999928 | 1.05754e-05 | 0.999899 |
| rad13     | 7.43737e-06 | 0.999935 | 1.03436e-05 | 0.999910 |
| rad64     | 6.78269e-06 | 0.999942 | 9.43308e-06 | 0.999919 |
| rad68syn  | 6.51051e-06 | 0.999949 | 9.05457e-06 | 0.999928 |
| rad9      | 5.74934e-06 | 0.999954 | 7.99594e-06 | 0.999936 |
| rad23     | 5.35454e-06 | 0.999960 | 7.44686e-06 | 0.999944 |
| rad59     | 5.16180e-06 | 0.999965 | 7.17883e-06 | 0.999951 |
| rad68anti | 4.15112e-06 | 0.999969 | 5.77322e-06 | 0.999956 |
| rad28     | 3.76399e-06 | 0.999973 | 5.23482e-06 | 0.999962 |
| rad40syn  | 3.74839e-06 | 0.999977 | 5.21311e-06 | 0.999967 |
| rad42     | 3.18120e-06 | 0.999980 | 4.42429e-06 | 0.999971 |
| rad40anti | 2.75539e-06 | 0.999983 | 3.83209e-06 | 0.999975 |
| rad45     | 2.59084e-06 | 0.999985 | 3.60324e-06 | 0.999979 |
| rad60syn  | 2.53815e-06 | 0.999988 | 3.52996e-06 | 0.999982 |
| rad65     | 1.97956e-06 | 0.999990 | 2.75309e-06 | 0.999985 |
| rad60anti | 1.87113e-06 | 0.999992 | 2.60231e-06 | 0.999988 |
| rad21     | 1.69672e-06 | 0.999993 | 2.35973e-06 | 0.999990 |
| rad58     | 1.55345e-06 | 0.999995 | 2.16048e-06 | 0.999992 |
| rad22     | 1.13660e-06 | 0.999996 | 1.58073e-06 | 0.999994 |
| rad33     | 7.94247e-07 | 0.999997 | 1.10461e-06 | 0.999995 |
| rad43     | 4.74145e-07 | 0.999997 | 6.59420e-07 | 0.999996 |
| rad15     | 4.73930e-07 | 0.999998 | 6.59125e-07 | 0.999996 |
| rad36     | 4.71229e-07 | 0.999998 | 6.55366e-07 | 0.999997 |
| rad20     | 4.26720e-07 | 0.999999 | 5.93464e-07 | 0.999997 |
| rad61     | 4.00474e-07 | 0.999999 | 5.56964e-07 | 0.999998 |
| rad25     | 2.07938e-07 | 0.999999 | 2.89192e-07 | 0.999998 |
| rad47     | 1.96866e-07 | 0.999999 | 2.73793e-07 | 0.999999 |
| rad12     | 1.92114e-07 | 1.000000 | 2.67185e-07 | 0.999999 |
| rad26     | 1.44533e-07 | 1.000000 | 2.01011e-07 | 0.999999 |
| rad8      | 1.10732e-07 | 1.000000 | 1.54001e-07 | 0.999999 |
| rad24     | 1.07293e-07 | 1.000000 | 1.49219e-07 | 0.999999 |
| rad41     | 1.01382e-07 | 1.000000 | 1.40998e-07 | 0.999999 |
| rad18     | 7.65224e-08 | 1.000000 | 1.06424e-07 | 1.000000 |
| rad10     | 7.00402e-08 | 1.000000 | 9.74088e-08 | 1.000000 |
| rad14     | 1.98785e-08 | 1.000000 | 2.76462e-08 | 1.000000 |
| rad3      | 1.95336e-08 | 1.000000 | 2.71666e-08 | 1.000000 |
| rad4      | 1.19486e-08 | 1.000000 | 1.66176e-08 | 1.000000 |
| rad2      | 9.36653e-09 | 1.000000 | 1.30266e-08 | 1.000000 |
| rad5      | 4.62776e-09 | 1.000000 | 6.43610e-09 | 1.000000 |
| rad1      | 2.18322e-09 | 1.000000 | 3.03634e-09 | 1.000000 |
| rad27     | 7.64767e-10 | 1.000000 | 1.06361e-09 | 1.000000 |

1000000.00 Pa, 3750.00000 K

=====

| Rate constant      | True (fraction)      | Effective (fraction)  |
|--------------------|----------------------|-----------------------|
| Total              | 1.33217e-10 (1.00 )  | 9.63218e-11 (1.00 )   |
| Formation of rad11 | 2.17064e-11 (0.163 ) | 7.70203e-12 (0.0800 ) |
| Formation of rad6  | 3.54800e-11 (0.266 ) | 1.25893e-11 (0.131 )  |
| H-abstraction      | 7.60305e-11 (0.571 ) | 7.60305e-11 (0.789 )  |

| species            | PYtrue      | Cumul    | PYeffective | Cumul    |
|--------------------|-------------|----------|-------------|----------|
| Benzene+2-propynyl | 0.570727    | 0.570727 | 0.789339    | 0.789339 |
| Phenyl+Allene      | 0.276955    | 0.847682 | 0.00000     | 0.789339 |
| PhCH2CCH+H         | 0.0799873   | 0.927670 | 0.110626    | 0.899965 |
| PhCHCCH2+H         | 0.0342342   | 0.961904 | 0.0473474   | 0.947312 |
| C2H2+PhCH2         | 0.0118494   | 0.973753 | 0.0163882   | 0.963700 |
| PhCCH+CH3          | 0.00845809  | 0.982211 | 0.0116979   | 0.975398 |
| PhcycC3H3_A+H      | 0.00382285  | 0.986034 | 0.00528716  | 0.980685 |
| PAH7+H             | 0.00361929  | 0.989654 | 0.00500563  | 0.985691 |
| Ph+MeAc            | 0.00269544  | 0.992349 | 0.00372791  | 0.989419 |
| rad19syn           | 0.00197545  | 0.994324 | 0.00273213  | 0.992151 |
| Indene+H           | 0.00189448  | 0.996219 | 0.00262014  | 0.994771 |
| rad54              | 0.000840774 | 0.997060 | 0.00116282  | 0.995934 |
| rad6               | 0.000644502 | 0.997704 | 0.000891369 | 0.996825 |
| rad39              | 0.000350943 | 0.998055 | 0.000485368 | 0.997311 |
| PAH1+H             | 0.000265843 | 0.998321 | 0.000367671 | 0.997678 |
| rad19anti          | 0.000167011 | 0.998488 | 0.000230984 | 0.997909 |
| rad56              | 0.000153341 | 0.998641 | 0.000212077 | 0.998121 |
| PAH9+H             | 0.000138316 | 0.998780 | 0.000191297 | 0.998313 |
| rad50              | 0.000112325 | 0.998892 | 0.000155350 | 0.998468 |

|           |             |          |             |          |
|-----------|-------------|----------|-------------|----------|
| rad55     | 9.62451e-05 | 0.998988 | 0.000133111 | 0.998601 |
| rad38     | 9.59270e-05 | 0.999084 | 0.000132671 | 0.998734 |
| rad53     | 9.48654e-05 | 0.999179 | 0.000131203 | 0.998865 |
| PhCCCH3+H | 8.55893e-05 | 0.999265 | 0.000118374 | 0.998983 |
| rad51     | 7.94605e-05 | 0.999344 | 0.000109897 | 0.999093 |
| PAH3+H    | 7.51326e-05 | 0.999419 | 0.000103911 | 0.999197 |
| rad70     | 7.29064e-05 | 0.999492 | 0.000100833 | 0.999298 |
| PAH10+CH3 | 5.67383e-05 | 0.999549 | 7.84713e-05 | 0.999376 |
| PAH8+H    | 5.61944e-05 | 0.999605 | 7.77193e-05 | 0.999454 |
| rad71     | 4.86422e-05 | 0.999654 | 6.72743e-05 | 0.999521 |
| rad67     | 4.42550e-05 | 0.999698 | 6.12066e-05 | 0.999583 |
| rad46     | 4.06269e-05 | 0.999739 | 5.61886e-05 | 0.999639 |
| rad35     | 3.66415e-05 | 0.999775 | 5.06767e-05 | 0.999689 |
| rad7      | 3.28813e-05 | 0.999808 | 4.54761e-05 | 0.999735 |
| rad34     | 2.96399e-05 | 0.999838 | 4.09932e-05 | 0.999776 |
| rad11     | 2.17606e-05 | 0.999859 | 3.00957e-05 | 0.999806 |
| rad62     | 1.89123e-05 | 0.999878 | 2.61563e-05 | 0.999832 |
| rad73     | 1.65839e-05 | 0.999895 | 2.29362e-05 | 0.999855 |
| rad52     | 1.46237e-05 | 0.999910 | 2.02252e-05 | 0.999875 |
| rad30     | 9.51440e-06 | 0.999919 | 1.31588e-05 | 0.999888 |
| rad72     | 8.15120e-06 | 0.999927 | 1.12734e-05 | 0.999900 |
| rad68syn  | 7.60354e-06 | 0.999935 | 1.05160e-05 | 0.999910 |
| rad64     | 7.23556e-06 | 0.999942 | 1.00071e-05 | 0.999920 |
| rad37     | 6.66012e-06 | 0.999949 | 9.21123e-06 | 0.999929 |
| rad59     | 5.34050e-06 | 0.999954 | 7.38610e-06 | 0.999937 |
| rad13     | 5.02571e-06 | 0.999959 | 6.95075e-06 | 0.999944 |
| rad68anti | 4.84452e-06 | 0.999964 | 6.70015e-06 | 0.999951 |
| rad40syn  | 4.55128e-06 | 0.999969 | 6.29460e-06 | 0.999957 |
| rad42     | 4.01567e-06 | 0.999973 | 5.55383e-06 | 0.999962 |
| rad9      | 3.55944e-06 | 0.999976 | 4.92286e-06 | 0.999967 |
| rad40anti | 3.38513e-06 | 0.999979 | 4.68176e-06 | 0.999972 |
| rad23     | 3.31812e-06 | 0.999983 | 4.58909e-06 | 0.999977 |
| rad60syn  | 2.53280e-06 | 0.999985 | 3.50296e-06 | 0.999980 |
| rad28     | 2.19965e-06 | 0.999988 | 3.04220e-06 | 0.999983 |
| rad60anti | 1.87770e-06 | 0.999989 | 2.59693e-06 | 0.999986 |
| rad65     | 1.74846e-06 | 0.999991 | 2.41818e-06 | 0.999988 |
| rad58     | 1.73594e-06 | 0.999993 | 2.40089e-06 | 0.999991 |
| rad45     | 1.70633e-06 | 0.999995 | 2.35993e-06 | 0.999993 |
| rad21     | 1.15817e-06 | 0.999996 | 1.60180e-06 | 0.999994 |
| rad22     | 6.86077e-07 | 0.999996 | 9.48873e-07 | 0.999995 |
| rad33     | 5.61347e-07 | 0.999997 | 7.76367e-07 | 0.999996 |
| rad43     | 5.30203e-07 | 0.999998 | 7.33293e-07 | 0.999997 |
| rad61     | 4.20888e-07 | 0.999998 | 5.82106e-07 | 0.999998 |
| rad20     | 3.12079e-07 | 0.999998 | 4.31618e-07 | 0.999998 |
| rad36     | 3.10812e-07 | 0.999999 | 4.29867e-07 | 0.999998 |
| rad15     | 3.02545e-07 | 0.999999 | 4.18432e-07 | 0.999999 |
| rad47     | 1.66563e-07 | 0.999999 | 2.30362e-07 | 0.999999 |
| rad25     | 1.46561e-07 | 0.999999 | 2.02700e-07 | 0.999999 |
| rad12     | 1.39912e-07 | 0.999999 | 1.93503e-07 | 0.999999 |
| rad41     | 1.19786e-07 | 0.999999 | 1.65669e-07 | 1.000000 |
| rad8      | 9.80991e-08 | 1.000000 | 1.35675e-07 | 1.000000 |
| rad26     | 8.80572e-08 | 1.000000 | 1.21786e-07 | 1.000000 |
| rad24     | 7.77100e-08 | 1.000000 | 1.07476e-07 | 1.000000 |
| rad18     | 5.05018e-08 | 1.000000 | 6.98462e-08 | 1.000000 |
| rad10     | 4.49646e-08 | 1.000000 | 6.21879e-08 | 1.000000 |
| rad14     | 1.73522e-08 | 1.000000 | 2.39987e-08 | 1.000000 |
| rad3      | 1.32083e-08 | 1.000000 | 1.82675e-08 | 1.000000 |
| rad4      | 8.25221e-09 | 1.000000 | 1.14131e-08 | 1.000000 |
| rad2      | 6.06146e-09 | 1.000000 | 8.38323e-09 | 1.000000 |
| rad5      | 3.80533e-09 | 1.000000 | 5.26293e-09 | 1.000000 |
| rad1      | 1.40825e-09 | 1.000000 | 1.94766e-09 | 1.000000 |
| rad27     | 6.16844e-10 | 1.000000 | 8.53122e-10 | 1.000000 |

1000000.00 Pa, 4000.00000 K

=====

| Rate constant      | True (fraction)      | Effective (fraction)  |
|--------------------|----------------------|-----------------------|
| Total              | 1.65008e-10 (1.00 )  | 1.19960e-10 (1.00 )   |
| Formation of rad11 | 2.61707e-11 (0.159 ) | 9.17364e-12 (0.0765 ) |
| Formation of rad6  | 4.31906e-11 (0.262 ) | 1.51396e-11 (0.126 )  |
| H-abstraction      | 9.56470e-11 (0.580 ) | 9.56470e-11 (0.797 )  |

| species            | PYtrue     | Cumul    | PYeffective | Cumul    |
|--------------------|------------|----------|-------------|----------|
| Benzene+2-propynyl | 0.579650   | 0.579650 | 0.797322    | 0.797322 |
| Phenyl+Allene      | 0.273005   | 0.852654 | 0.000000    | 0.797322 |
| PhCH2CCH+H         | 0.0778485  | 0.930503 | 0.107082    | 0.904405 |
| PhCHCCH2+H         | 0.0328405  | 0.963343 | 0.0451728   | 0.949577 |
| C2H2+PhCH2         | 0.0116377  | 0.974981 | 0.0160080   | 0.965585 |
| PhCCH+CH3          | 0.00788922 | 0.982870 | 0.0108518   | 0.976437 |

|               |             |          |             |          |
|---------------|-------------|----------|-------------|----------|
| PhcycC3H3_A+H | 0.00410008  | 0.986970 | 0.00563975  | 0.982077 |
| PAH7+H        | 0.00336311  | 0.990333 | 0.00462604  | 0.986703 |
| Ph+MeAc       | 0.00265218  | 0.992985 | 0.00364814  | 0.990351 |
| rad19syn      | 0.00201500  | 0.995000 | 0.00277168  | 0.993123 |
| Indene+H      | 0.00154403  | 0.996544 | 0.00212384  | 0.995247 |
| rad54         | 0.000846098 | 0.997391 | 0.00116383  | 0.996410 |
| rad6          | 0.000389884 | 0.997780 | 0.000536294 | 0.996947 |
| rad39         | 0.000310810 | 0.998091 | 0.000427527 | 0.997374 |
| PAH1+H        | 0.000287573 | 0.998379 | 0.000395562 | 0.997770 |
| rad56         | 0.000173553 | 0.998552 | 0.000238726 | 0.998009 |
| rad19anti     | 0.000147974 | 0.998700 | 0.000203541 | 0.998212 |
| PAH9+H        | 0.000118394 | 0.998819 | 0.000162854 | 0.998375 |
| rad53         | 0.000104477 | 0.998923 | 0.000143711 | 0.998519 |
| rad50         | 0.000101933 | 0.999025 | 0.000140211 | 0.998659 |
| rad55         | 9.86684e-05 | 0.999124 | 0.000135721 | 0.998795 |
| rad38         | 8.28868e-05 | 0.999207 | 0.000114013 | 0.998909 |
| PhCCCH3+H     | 7.98918e-05 | 0.999287 | 0.000109893 | 0.999018 |
| PAH3+H        | 7.86190e-05 | 0.999365 | 0.000108142 | 0.999127 |
| rad70         | 7.44176e-05 | 0.999440 | 0.000102363 | 0.999229 |
| rad51         | 7.26252e-05 | 0.999512 | 9.98977e-05 | 0.999329 |
| PAH8+H        | 6.87000e-05 | 0.999581 | 9.44987e-05 | 0.999423 |
| PAH10+CH3     | 5.48994e-05 | 0.999636 | 7.55153e-05 | 0.999499 |
| rad71         | 4.48468e-05 | 0.999681 | 6.16876e-05 | 0.999561 |
| rad67         | 4.35185e-05 | 0.999724 | 5.98609e-05 | 0.999620 |
| rad46         | 3.56573e-05 | 0.999760 | 4.90474e-05 | 0.999670 |
| rad35         | 3.41050e-05 | 0.999794 | 4.69122e-05 | 0.999716 |
| rad34         | 3.11887e-05 | 0.999825 | 4.29006e-05 | 0.999759 |
| rad62         | 2.38088e-05 | 0.999849 | 3.27495e-05 | 0.999792 |
| rad7          | 2.17539e-05 | 0.999871 | 2.99229e-05 | 0.999822 |
| rad73         | 1.53812e-05 | 0.999886 | 2.11571e-05 | 0.999843 |
| rad11         | 1.42552e-05 | 0.999900 | 1.96084e-05 | 0.999863 |
| rad52         | 1.32632e-05 | 0.999914 | 1.82439e-05 | 0.999881 |
| rad30         | 8.89466e-06 | 0.999923 | 1.22348e-05 | 0.999893 |
| rad68syn      | 6.68957e-06 | 0.999931 | 1.19527e-05 | 0.999905 |
| rad64         | 7.68090e-06 | 0.999939 | 1.05653e-05 | 0.999916 |
| rad72         | 7.36757e-06 | 0.999946 | 1.01342e-05 | 0.999926 |
| rad37         | 5.81984e-06 | 0.999952 | 8.00533e-06 | 0.999934 |
| rad68anti     | 5.53286e-06 | 0.999958 | 7.61057e-06 | 0.999942 |
| rad59         | 5.47939e-06 | 0.999963 | 7.53702e-06 | 0.999949 |
| rad40syn      | 5.40487e-06 | 0.999968 | 7.43453e-06 | 0.999956 |
| rad42         | 5.28544e-06 | 0.999974 | 7.27028e-06 | 0.999964 |
| rad40anti     | 4.06742e-06 | 0.999978 | 5.59484e-06 | 0.999969 |
| rad13         | 3.48183e-06 | 0.999981 | 4.78934e-06 | 0.999974 |
| rad60syn      | 2.51375e-06 | 0.999984 | 3.45772e-06 | 0.999978 |
| rad9          | 2.24221e-06 | 0.999986 | 3.08421e-06 | 0.999981 |
| rad23         | 2.08159e-06 | 0.999988 | 2.86327e-06 | 0.999984 |
| rad58         | 1.91590e-06 | 0.999990 | 2.63536e-06 | 0.999986 |
| rad60anti     | 1.87330e-06 | 0.999992 | 2.57676e-06 | 0.999989 |
| rad65         | 1.59696e-06 | 0.999994 | 2.19664e-06 | 0.999991 |
| rad28         | 1.32096e-06 | 0.999995 | 1.81701e-06 | 0.999993 |
| rad45         | 1.12717e-06 | 0.999996 | 1.55045e-06 | 0.999994 |
| rad21         | 8.16489e-07 | 0.999997 | 1.12310e-06 | 0.999995 |
| rad43         | 6.10025e-07 | 0.999997 | 8.39102e-07 | 0.999996 |
| rad61         | 4.42225e-07 | 0.999998 | 6.08293e-07 | 0.999997 |
| rad22         | 4.33306e-07 | 0.999998 | 5.96021e-07 | 0.999997 |
| rad33         | 4.02227e-07 | 0.999999 | 5.53272e-07 | 0.999998 |
| rad20         | 2.37039e-07 | 0.999999 | 3.26052e-07 | 0.999998 |
| rad36         | 2.05421e-07 | 0.999999 | 2.82561e-07 | 0.999999 |
| rad15         | 1.95668e-07 | 0.999999 | 2.69146e-07 | 0.999999 |
| rad47         | 1.46968e-07 | 0.999999 | 2.02157e-07 | 0.999999 |
| rad41         | 1.46324e-07 | 1.000000 | 2.01271e-07 | 0.999999 |
| rad25         | 1.06152e-07 | 1.000000 | 1.46015e-07 | 0.999999 |
| rad12         | 1.02837e-07 | 1.000000 | 1.41455e-07 | 1.000000 |
| rad8          | 8.64787e-08 | 1.000000 | 1.18954e-07 | 1.000000 |
| rad24         | 5.69171e-08 | 1.000000 | 7.82908e-08 | 1.000000 |
| rad26         | 5.44337e-08 | 1.000000 | 7.48749e-08 | 1.000000 |
| rad18         | 3.45037e-08 | 1.000000 | 4.74607e-08 | 1.000000 |
| rad10         | 2.91940e-08 | 1.000000 | 4.01570e-08 | 1.000000 |
| rad14         | 1.59820e-08 | 1.000000 | 2.19837e-08 | 1.000000 |
| rad3          | 9.16704e-09 | 1.000000 | 1.26095e-08 | 1.000000 |
| rad4          | 5.88016e-09 | 1.000000 | 8.08830e-09 | 1.000000 |
| rad2          | 4.03614e-09 | 1.000000 | 5.55181e-09 | 1.000000 |
| rad5          | 3.16481e-09 | 1.000000 | 4.35326e-09 | 1.000000 |
| rad1          | 9.42590e-10 | 1.000000 | 1.29655e-09 | 1.000000 |
| rad27         | 5.17212e-10 | 1.000000 | 7.11436e-10 | 1.000000 |

100000.000 Pa, 20.0000000 K

=====

Rate constant | True (fraction) | Effective (fraction)

-----

|                    |                        |                        |
|--------------------|------------------------|------------------------|
| Total              | 1.56740e-51 (1.00 )    | 1.56740e-51 (1.00 )    |
| Formation of rad11 | 1.56740e-51 (1.000 )   | 1.56740e-51 (1.000 )   |
| Formation of rad6  | 3.73945e-60 (2.39e-09) | 3.73945e-60 (2.39e-09) |
| H-abstraction      | 1.53631e-76 (9.80e-26) | 1.53631e-76 (9.80e-26) |

| species            | PYtrue      | Cumul    | PYeffective | Cumul    |
|--------------------|-------------|----------|-------------|----------|
| rad11              | 0.999756    | 0.999756 | 0.999756    | 0.999756 |
| rad6               | 0.000231726 | 0.999988 | 0.000231726 | 0.999988 |
| rad21              | 1.10889e-05 | 0.999999 | 1.10889e-05 | 0.999999 |
| rad20              | 6.36506e-07 | 0.999999 | 6.36506e-07 | 0.999999 |
| rad22              | 2.53436e-07 | 1.000000 | 2.53436e-07 | 1.000000 |
| rad45              | 2.55245e-08 | 1.000000 | 2.55245e-08 | 1.000000 |
| rad25              | 4.93335e-09 | 1.000000 | 4.93335e-09 | 1.000000 |
| rad18              | 3.28914e-09 | 1.000000 | 3.28914e-09 | 1.000000 |
| rad24              | 2.72252e-09 | 1.000000 | 2.72252e-09 | 1.000000 |
| rad36              | 1.92413e-09 | 1.000000 | 1.92413e-09 | 1.000000 |
| PhCHCCH2+H         | 2.83483e-10 | 1.000000 | 2.83483e-10 | 1.000000 |
| rad13              | 1.05483e-10 | 1.000000 | 1.05483e-10 | 1.000000 |
| Indene+H           | 4.65740e-11 | 1.000000 | 4.65740e-11 | 1.000000 |
| rad7               | 3.21587e-11 | 1.000000 | 3.21587e-11 | 1.000000 |
| C2H2+PhCH2         | 2.80285e-11 | 1.000000 | 2.80285e-11 | 1.000000 |
| rad23              | 1.47915e-11 | 1.000000 | 1.47915e-11 | 1.000000 |
| rad9               | 1.46885e-11 | 1.000000 | 1.46885e-11 | 1.000000 |
| rad33              | 7.54693e-13 | 1.000000 | 7.54693e-13 | 1.000000 |
| Phenyl+Allene      | 1.80077e-13 | 1.000000 | 0.000000    | 1.000000 |
| rad3               | 4.07234e-16 | 1.000000 | 4.07234e-16 | 1.000000 |
| rad4               | 2.36699e-16 | 1.000000 | 2.36699e-16 | 1.000000 |
| rad28              | 1.30669e-17 | 1.000000 | 1.30669e-17 | 1.000000 |
| rad30              | 3.17402e-18 | 1.000000 | 3.17402e-18 | 1.000000 |
| PhCH2CCH+H         | 6.67275e-19 | 1.000000 | 6.67275e-19 | 1.000000 |
| rad15              | 4.62852e-19 | 1.000000 | 4.62852e-19 | 1.000000 |
| rad8               | 1.65743e-19 | 1.000000 | 1.65743e-19 | 1.000000 |
| rad38              | 1.92119e-20 | 1.000000 | 1.92119e-20 | 1.000000 |
| rad2               | 6.85785e-21 | 1.000000 | 6.85785e-21 | 1.000000 |
| rad1               | 6.37887e-22 | 1.000000 | 6.37887e-22 | 1.000000 |
| rad46              | 7.67140e-23 | 1.000000 | 7.67140e-23 | 1.000000 |
| PhCCH+CH3          | 2.95009e-23 | 1.000000 | 2.95009e-23 | 1.000000 |
| rad60syn           | 5.37755e-24 | 1.000000 | 5.37755e-24 | 1.000000 |
| PAH9+H             | 5.01852e-24 | 1.000000 | 5.01852e-24 | 1.000000 |
| PAH7+H             | 4.79976e-24 | 1.000000 | 4.79976e-24 | 1.000000 |
| rad35              | 2.93133e-24 | 1.000000 | 2.93133e-24 | 1.000000 |
| rad14              | 2.56750e-24 | 1.000000 | 2.56750e-24 | 1.000000 |
| rad31              | 6.24938e-25 | 1.000000 | 6.24938e-25 | 1.000000 |
| rad60anti          | 5.57205e-25 | 1.000000 | 5.57205e-25 | 1.000000 |
| Benzene+2-propynyl | 9.80165e-26 | 1.000000 | 9.80165e-26 | 1.000000 |
| rad10              | 9.13365e-27 | 1.000000 | 9.13365e-27 | 1.000000 |
| Ph+MeAc            | 8.54508e-28 | 1.000000 | 8.54508e-28 | 1.000000 |
| rad26              | 1.18299e-28 | 1.000000 | 1.18299e-28 | 1.000000 |
| rad27              | 9.94921e-30 | 1.000000 | 9.94921e-30 | 1.000000 |
| PhCCCH3+H          | 2.89024e-30 | 1.000000 | 2.89024e-30 | 1.000000 |
| rad39              | 1.98951e-30 | 1.000000 | 1.98951e-30 | 1.000000 |
| PAH3+H             | 1.00389e-30 | 1.000000 | 1.00389e-30 | 1.000000 |
| rad59              | 4.70908e-31 | 1.000000 | 4.70908e-31 | 1.000000 |
| rad50              | 4.13836e-33 | 1.000000 | 4.13836e-33 | 1.000000 |
| rad12              | 3.99695e-38 | 1.000000 | 3.99695e-38 | 1.000000 |
| rad37              | 9.11540e-40 | 1.000000 | 9.11540e-40 | 1.000000 |
| rad19syn           | 3.81229e-40 | 1.000000 | 3.81229e-40 | 1.000000 |
| rad5               | 2.06929e-40 | 1.000000 | 2.06929e-40 | 1.000000 |
| rad52              | 6.45647e-41 | 1.000000 | 6.45647e-41 | 1.000000 |
| rad54              | 1.95702e-41 | 1.000000 | 1.95702e-41 | 1.000000 |
| rad70              | 4.12336e-43 | 1.000000 | 4.12336e-43 | 1.000000 |
| rad51              | 2.14452e-45 | 1.000000 | 2.14452e-45 | 1.000000 |
| rad55              | 6.92137e-48 | 1.000000 | 6.92137e-48 | 1.000000 |
| rad58              | 6.89551e-48 | 1.000000 | 6.89551e-48 | 1.000000 |
| rad34              | 1.72104e-48 | 1.000000 | 1.72104e-48 | 1.000000 |
| PhcycC3H3_A+H      | 2.66976e-49 | 1.000000 | 2.66976e-49 | 1.000000 |
| rad62              | 1.82623e-49 | 1.000000 | 1.82623e-49 | 1.000000 |
| PAH10+CH3          | 2.22490e-50 | 1.000000 | 2.22490e-50 | 1.000000 |
| rad65              | 6.95622e-52 | 1.000000 | 6.95622e-52 | 1.000000 |
| rad47              | 2.54916e-52 | 1.000000 | 2.54916e-52 | 1.000000 |
| rad43              | 2.35891e-52 | 1.000000 | 2.35891e-52 | 1.000000 |
| PAH1+H             | 4.21612e-56 | 1.000000 | 4.21612e-56 | 1.000000 |
| rad42              | 7.43217e-60 | 1.000000 | 7.43217e-60 | 1.000000 |
| rad41              | 5.98612e-64 | 1.000000 | 5.98612e-64 | 1.000000 |

100000.000 Pa, 30.0000000 K

=====

|               |                 |                      |
|---------------|-----------------|----------------------|
| Rate constant | True (fraction) | Effective (fraction) |
|---------------|-----------------|----------------------|

-----



|                    |                        |                        |
|--------------------|------------------------|------------------------|
| Total              | 5.03204e-39 (1.00 )    | 5.03204e-39 (1.00 )    |
| Formation of rad11 | 5.03203e-39 (1.000 )   | 5.03203e-39 (1.000 )   |
| Formation of rad6  | 9.92181e-45 (1.97e-06) | 9.92181e-45 (1.97e-06) |
| H-abstraction      | 3.33191e-55 (6.62e-17) | 3.33191e-55 (6.62e-17) |

| species            | PYtrue      | Cumul    | PYeffective | Cumul    |
|--------------------|-------------|----------|-------------|----------|
| rad11              | 0.999505    | 0.999505 | 0.999505    | 0.999505 |
| rad6               | 0.000470607 | 0.999976 | 0.000470607 | 0.999976 |
| rad21              | 2.08165e-05 | 0.999996 | 2.08165e-05 | 0.999996 |
| rad20              | 2.39135e-06 | 0.999999 | 2.39135e-06 | 0.999999 |
| rad22              | 9.86870e-07 | 1.000000 | 9.86870e-07 | 1.000000 |
| rad45              | 1.07887e-07 | 1.000000 | 1.07887e-07 | 1.000000 |
| rad18              | 2.53078e-08 | 1.000000 | 2.53078e-08 | 1.000000 |
| rad25              | 1.00675e-08 | 1.000000 | 1.00675e-08 | 1.000000 |
| rad36              | 7.53101e-09 | 1.000000 | 7.53101e-09 | 1.000000 |
| rad24              | 2.75630e-09 | 1.000000 | 2.75630e-09 | 1.000000 |
| PhCHCCH2+H         | 5.85964e-10 | 1.000000 | 5.85964e-10 | 1.000000 |
| Indene+H           | 4.49533e-10 | 1.000000 | 4.49533e-10 | 1.000000 |
| rad13              | 4.22393e-10 | 1.000000 | 4.22393e-10 | 1.000000 |
| C2H2+PhCH2         | 2.21220e-10 | 1.000000 | 2.21220e-10 | 1.000000 |
| rad7               | 1.33410e-10 | 1.000000 | 1.33410e-10 | 1.000000 |
| rad23              | 1.31454e-10 | 1.000000 | 1.31454e-10 | 1.000000 |
| rad9               | 3.05315e-11 | 1.000000 | 3.05315e-11 | 1.000000 |
| rad33              | 2.88211e-12 | 1.000000 | 2.88211e-12 | 1.000000 |
| Phenyl+Allene      | 4.28021e-13 | 1.000000 | 0.000000    | 1.000000 |
| rad3               | 3.44366e-15 | 1.000000 | 3.44366e-15 | 1.000000 |
| rad4               | 1.93287e-15 | 1.000000 | 1.93287e-15 | 1.000000 |
| rad28              | 1.10828e-16 | 1.000000 | 1.10828e-16 | 1.000000 |
| Benzene+2-propynyl | 6.62139e-17 | 1.000000 | 6.62139e-17 | 1.000000 |
| rad30              | 5.10178e-17 | 1.000000 | 5.10178e-17 | 1.000000 |
| rad15              | 7.47321e-18 | 1.000000 | 7.47321e-18 | 1.000000 |
| PhCH2CCH+H         | 1.61577e-18 | 1.000000 | 1.61577e-18 | 1.000000 |
| rad8               | 1.41565e-18 | 1.000000 | 1.41565e-18 | 1.000000 |
| rad38              | 2.08247e-19 | 1.000000 | 2.08247e-19 | 1.000000 |
| rad2               | 1.19386e-19 | 1.000000 | 1.19386e-19 | 1.000000 |
| rad1               | 1.00128e-20 | 1.000000 | 1.00128e-20 | 1.000000 |
| rad46              | 8.51719e-22 | 1.000000 | 8.51719e-22 | 1.000000 |
| PhCCH+CH3          | 5.41484e-22 | 1.000000 | 5.41484e-22 | 1.000000 |
| PAH9+H             | 9.54939e-23 | 1.000000 | 9.54939e-23 | 1.000000 |
| rad60syn           | 9.22675e-23 | 1.000000 | 9.22675e-23 | 1.000000 |
| rad35              | 5.56367e-23 | 1.000000 | 5.56367e-23 | 1.000000 |
| rad14              | 4.56212e-23 | 1.000000 | 4.56212e-23 | 1.000000 |
| PAH7+H             | 2.40160e-23 | 1.000000 | 2.40160e-23 | 1.000000 |
| rad60anti          | 9.77564e-24 | 1.000000 | 9.77564e-24 | 1.000000 |
| rad31              | 3.23631e-24 | 1.000000 | 3.23631e-24 | 1.000000 |
| rad10              | 3.30206e-25 | 1.000000 | 3.30206e-25 | 1.000000 |
| Ph+MeAc            | 2.00615e-26 | 1.000000 | 2.00615e-26 | 1.000000 |
| rad26              | 6.39133e-28 | 1.000000 | 6.39133e-28 | 1.000000 |
| rad27              | 3.69737e-28 | 1.000000 | 3.69737e-28 | 1.000000 |
| PhCCCH3+H          | 1.13865e-28 | 1.000000 | 1.13865e-28 | 1.000000 |
| rad39              | 4.15967e-29 | 1.000000 | 4.15967e-29 | 1.000000 |
| PAH3+H             | 1.77939e-29 | 1.000000 | 1.77939e-29 | 1.000000 |
| rad59              | 8.35139e-30 | 1.000000 | 8.35139e-30 | 1.000000 |
| rad50              | 4.65112e-32 | 1.000000 | 4.65112e-32 | 1.000000 |
| rad12              | 4.31891e-37 | 1.000000 | 4.31891e-37 | 1.000000 |
| rad5               | 1.02129e-38 | 1.000000 | 1.02129e-38 | 1.000000 |
| rad37              | 9.81755e-39 | 1.000000 | 9.81755e-39 | 1.000000 |
| rad19syn           | 4.19408e-39 | 1.000000 | 4.19408e-39 | 1.000000 |
| rad52              | 6.99336e-40 | 1.000000 | 6.99336e-40 | 1.000000 |
| rad54              | 1.66925e-40 | 1.000000 | 1.66925e-40 | 1.000000 |
| rad70              | 2.18464e-42 | 1.000000 | 2.18464e-42 | 1.000000 |
| rad51              | 2.27029e-44 | 1.000000 | 2.27029e-44 | 1.000000 |
| rad58              | 1.06195e-46 | 1.000000 | 1.06195e-46 | 1.000000 |
| rad55              | 5.52445e-47 | 1.000000 | 5.52445e-47 | 1.000000 |
| rad34              | 9.15403e-48 | 1.000000 | 9.15403e-48 | 1.000000 |
| rad62              | 7.29732e-48 | 1.000000 | 7.29732e-48 | 1.000000 |
| PhcycC3H3_A+H      | 2.96294e-48 | 1.000000 | 2.96294e-48 | 1.000000 |
| PAH10+CH3          | 2.22239e-49 | 1.000000 | 2.22239e-49 | 1.000000 |
| rad43              | 1.94252e-50 | 1.000000 | 1.94252e-50 | 1.000000 |
| rad65              | 1.39244e-50 | 1.000000 | 1.39244e-50 | 1.000000 |
| rad47              | 2.54307e-51 | 1.000000 | 2.54307e-51 | 1.000000 |
| PAH1+H             | 7.36979e-55 | 1.000000 | 7.36979e-55 | 1.000000 |
| rad42              | 2.71902e-58 | 1.000000 | 2.71902e-58 | 1.000000 |
| rad41              | 4.37097e-62 | 1.000000 | 4.37097e-62 | 1.000000 |

100000.000 Pa, 40.0000000 K

=====  
Rate constant | True (fraction) | Effective (fraction)  
-----

|                    |                        |                        |
|--------------------|------------------------|------------------------|
| Total              | 9.35697e-33 (1.00 )    | 9.35697e-33 (1.00 )    |
| Formation of rad11 | 9.35644e-33 (1.000 )   | 9.35644e-33 (1.000 )   |
| Formation of rad6  | 5.26139e-37 (5.62e-05) | 5.26139e-37 (5.62e-05) |
| H-abstraction      | 1.44763e-44 (1.55e-12) | 1.44763e-44 (1.55e-12) |

| species            | PYtrue      | Cumul    | PYeffective | Cumul    |
|--------------------|-------------|----------|-------------|----------|
| rad11              | 0.999206    | 0.999206 | 0.999206    | 0.999206 |
| rad6               | 0.000757746 | 0.999964 | 0.000757746 | 0.999964 |
| rad21              | 2.91838e-05 | 0.999993 | 2.91838e-05 | 0.999993 |
| rad20              | 4.94409e-06 | 0.999998 | 4.94409e-06 | 0.999998 |
| rad22              | 2.11225e-06 | 1.000000 | 2.11225e-06 | 1.000000 |
| rad45              | 2.36319e-07 | 1.000000 | 2.36319e-07 | 1.000000 |
| rad18              | 7.90577e-08 | 1.000000 | 7.90577e-08 | 1.000000 |
| rad36              | 1.59861e-08 | 1.000000 | 1.59861e-08 | 1.000000 |
| rad25              | 1.53600e-08 | 1.000000 | 1.53600e-08 | 1.000000 |
| rad24              | 2.47652e-09 | 1.000000 | 2.47652e-09 | 1.000000 |
| Indene+H           | 1.68838e-09 | 1.000000 | 1.68838e-09 | 1.000000 |
| rad13              | 1.08377e-09 | 1.000000 | 1.08377e-09 | 1.000000 |
| PhCHCCH2+H         | 9.17480e-10 | 1.000000 | 9.17480e-10 | 1.000000 |
| C2H2+PhCH2         | 7.15103e-10 | 1.000000 | 7.15103e-10 | 1.000000 |
| rad23              | 4.41392e-10 | 1.000000 | 4.41392e-10 | 1.000000 |
| rad7               | 3.60005e-10 | 1.000000 | 3.60005e-10 | 1.000000 |
| rad9               | 4.83563e-11 | 1.000000 | 4.83563e-11 | 1.000000 |
| rad33              | 7.19605e-12 | 1.000000 | 7.19605e-12 | 1.000000 |
| Benzene+2-propynyl | 1.54712e-12 | 1.000000 | 1.54712e-12 | 1.000000 |
| Phenyl+Allene      | 8.71377e-13 | 1.000000 | 0.000000    | 1.000000 |
| rad3               | 1.60634e-14 | 1.000000 | 1.60634e-14 | 1.000000 |
| rad4               | 8.86392e-15 | 1.000000 | 8.86392e-15 | 1.000000 |
| rad28              | 5.69798e-16 | 1.000000 | 5.69798e-16 | 1.000000 |
| rad30              | 2.49539e-16 | 1.000000 | 2.49539e-16 | 1.000000 |
| rad15              | 3.68455e-17 | 1.000000 | 3.68455e-17 | 1.000000 |
| rad8               | 5.33863e-18 | 1.000000 | 5.33863e-18 | 1.000000 |
| PhCH2CCH+H         | 3.53328e-18 | 1.000000 | 3.53328e-18 | 1.000000 |
| rad2               | 1.02968e-18 | 1.000000 | 1.02968e-18 | 1.000000 |
| rad38              | 7.81795e-19 | 1.000000 | 7.81795e-19 | 1.000000 |
| rad1               | 8.22636e-20 | 1.000000 | 8.22636e-20 | 1.000000 |
| PhCCH+CH3          | 6.52972e-21 | 1.000000 | 6.52972e-21 | 1.000000 |
| rad46              | 3.30620e-21 | 1.000000 | 3.30620e-21 | 1.000000 |
| rad60syn           | 5.14830e-22 | 1.000000 | 5.14830e-22 | 1.000000 |
| PAH9+H             | 5.10931e-22 | 1.000000 | 5.10931e-22 | 1.000000 |
| rad14              | 4.74380e-22 | 1.000000 | 4.74380e-22 | 1.000000 |
| rad35              | 2.96434e-22 | 1.000000 | 2.96434e-22 | 1.000000 |
| PAH7+H             | 7.90109e-23 | 1.000000 | 7.90109e-23 | 1.000000 |
| rad60anti          | 5.77417e-23 | 1.000000 | 5.77417e-23 | 1.000000 |
| rad31              | 1.21608e-23 | 1.000000 | 1.21608e-23 | 1.000000 |
| rad10              | 5.32361e-24 | 1.000000 | 5.32361e-24 | 1.000000 |
| Ph+MeAc            | 5.81960e-25 | 1.000000 | 5.81960e-25 | 1.000000 |
| rad27              | 6.94198e-27 | 1.000000 | 6.94198e-27 | 1.000000 |
| PhCCCH3+H          | 2.70209e-27 | 1.000000 | 2.70209e-27 | 1.000000 |
| rad26              | 2.11713e-27 | 1.000000 | 2.11713e-27 | 1.000000 |
| rad39              | 8.88576e-28 | 1.000000 | 8.88576e-28 | 1.000000 |
| PAH3+H             | 1.17099e-28 | 1.000000 | 1.17099e-28 | 1.000000 |
| rad59              | 5.48828e-29 | 1.000000 | 5.48828e-29 | 1.000000 |
| rad50              | 2.37190e-31 | 1.000000 | 2.37190e-31 | 1.000000 |
| rad12              | 2.11581e-36 | 1.000000 | 2.11581e-36 | 1.000000 |
| rad5               | 5.17446e-37 | 1.000000 | 5.17446e-37 | 1.000000 |
| rad37              | 4.82304e-38 | 1.000000 | 4.82304e-38 | 1.000000 |
| rad19syn           | 4.81058e-38 | 1.000000 | 4.81058e-38 | 1.000000 |
| rad52              | 3.87267e-39 | 1.000000 | 3.87267e-39 | 1.000000 |
| rad54              | 1.27000e-39 | 1.000000 | 1.27000e-39 | 1.000000 |
| rad70              | 8.85007e-42 | 1.000000 | 8.85007e-42 | 1.000000 |
| rad51              | 1.32395e-43 | 1.000000 | 1.32395e-43 | 1.000000 |
| rad58              | 7.32557e-46 | 1.000000 | 7.32557e-46 | 1.000000 |
| rad55              | 3.43499e-46 | 1.000000 | 3.43499e-46 | 1.000000 |
| rad62              | 1.60148e-46 | 1.000000 | 1.60148e-46 | 1.000000 |
| rad34              | 3.86154e-47 | 1.000000 | 3.86154e-47 | 1.000000 |
| PhcycC3H3_A+H      | 2.50584e-47 | 1.000000 | 2.50584e-47 | 1.000000 |
| PAH10+CH3          | 1.18096e-48 | 1.000000 | 1.18096e-48 | 1.000000 |
| rad43              | 7.27187e-49 | 1.000000 | 7.27187e-49 | 1.000000 |
| rad65              | 1.16297e-49 | 1.000000 | 1.16297e-49 | 1.000000 |
| rad47              | 1.56353e-50 | 1.000000 | 1.56353e-50 | 1.000000 |
| PAH1+H             | 7.35656e-54 | 1.000000 | 7.35656e-54 | 1.000000 |
| rad42              | 4.32466e-57 | 1.000000 | 4.32466e-57 | 1.000000 |
| rad41              | 1.06949e-60 | 1.000000 | 1.06949e-60 | 1.000000 |

100000.000 Pa, 50.0000000 K

=====

|               |                 |                      |
|---------------|-----------------|----------------------|
| Rate constant | True (fraction) | Effective (fraction) |
|---------------|-----------------|----------------------|

-----

|                    |                        |                        |
|--------------------|------------------------|------------------------|
| Total              | 5.52690e-29 (1.00 )    | 5.52690e-29 (1.00 )    |
| Formation of rad11 | 5.52459e-29 (1.000 )   | 5.52459e-29 (1.000 )   |
| Formation of rad6  | 2.30840e-32 (0.000418) | 2.30840e-32 (0.000418) |
| H-abstraction      | 3.35357e-38 (6.07e-10) | 3.35357e-38 (6.07e-10) |

| species            | PYtrue      | Cumul    | PYeffective | Cumul    |
|--------------------|-------------|----------|-------------|----------|
| rad11              | 0.998598    | 0.998598 | 0.998598    | 0.998598 |
| rad6               | 0.00135318  | 0.999951 | 0.00135318  | 0.999951 |
| rad21              | 3.66883e-05 | 0.999988 | 3.66883e-05 | 0.999988 |
| rad20              | 8.13836e-06 | 0.999996 | 8.13836e-06 | 0.999996 |
| rad22              | 3.59745e-06 | 1.000000 | 3.59745e-06 | 1.000000 |
| rad45              | 4.08180e-07 | 1.000000 | 4.08180e-07 | 1.000000 |
| rad18              | 1.74808e-07 | 1.000000 | 1.74808e-07 | 1.000000 |
| rad36              | 2.71309e-08 | 1.000000 | 2.71309e-08 | 1.000000 |
| rad25              | 2.10314e-08 | 1.000000 | 2.10314e-08 | 1.000000 |
| Indene+H           | 4.37175e-09 | 1.000000 | 4.37175e-09 | 1.000000 |
| rad13              | 3.22413e-09 | 1.000000 | 3.22413e-09 | 1.000000 |
| rad24              | 2.22821e-09 | 1.000000 | 2.22821e-09 | 1.000000 |
| C2H2+PhCH2         | 1.64713e-09 | 1.000000 | 1.64713e-09 | 1.000000 |
| PhCHCCH2+H         | 1.30167e-09 | 1.000000 | 1.30167e-09 | 1.000000 |
| rad7               | 1.16006e-09 | 1.000000 | 1.16006e-09 | 1.000000 |
| rad23              | 1.02948e-09 | 1.000000 | 1.02948e-09 | 1.000000 |
| Benzene+2-propynyl | 6.06773e-10 | 1.000000 | 6.06773e-10 | 1.000000 |
| rad9               | 6.96882e-11 | 1.000000 | 6.96882e-11 | 1.000000 |
| rad33              | 2.11030e-11 | 1.000000 | 2.11030e-11 | 1.000000 |
| Phenyl+Allene      | 1.69618e-12 | 1.000000 | 0.000000    | 1.000000 |
| rad3               | 8.95950e-14 | 1.000000 | 8.95950e-14 | 1.000000 |
| rad4               | 4.89197e-14 | 1.000000 | 4.89197e-14 | 1.000000 |
| rad28              | 3.62753e-15 | 1.000000 | 3.62753e-15 | 1.000000 |
| rad30              | 7.77424e-16 | 1.000000 | 7.77424e-16 | 1.000000 |
| rad15              | 1.16012e-16 | 1.000000 | 1.16012e-16 | 1.000000 |
| rad8               | 1.50663e-17 | 1.000000 | 1.50663e-17 | 1.000000 |
| rad2               | 9.88513e-18 | 1.000000 | 9.88513e-18 | 1.000000 |
| PhCH2CCH+H         | 8.12527e-18 | 1.000000 | 8.12527e-18 | 1.000000 |
| rad38              | 2.00032e-18 | 1.000000 | 2.00032e-18 | 1.000000 |
| rad1               | 7.66909e-19 | 1.000000 | 7.66909e-19 | 1.000000 |
| PhCCH+CH3          | 8.20422e-20 | 1.000000 | 8.20422e-20 | 1.000000 |
| rad46              | 8.80316e-21 | 1.000000 | 8.80316e-21 | 1.000000 |
| rad14              | 5.36963e-21 | 1.000000 | 5.36963e-21 | 1.000000 |
| rad60syn           | 1.91522e-21 | 1.000000 | 1.91522e-21 | 1.000000 |
| PAH9+H             | 1.69897e-21 | 1.000000 | 1.69897e-21 | 1.000000 |
| rad35              | 9.80461e-22 | 1.000000 | 9.80461e-22 | 1.000000 |
| PAH7+H             | 2.54021e-22 | 1.000000 | 2.54021e-22 | 1.000000 |
| rad60anti          | 2.33512e-22 | 1.000000 | 2.33512e-22 | 1.000000 |
| rad10              | 8.20460e-23 | 1.000000 | 8.20460e-23 | 1.000000 |
| rad31              | 6.00424e-23 | 1.000000 | 6.00424e-23 | 1.000000 |
| Ph+MeAc            | 1.08855e-23 | 1.000000 | 1.08855e-23 | 1.000000 |
| rad27              | 1.18604e-25 | 1.000000 | 1.18604e-25 | 1.000000 |
| PhCCCH3+H          | 5.27219e-26 | 1.000000 | 5.27219e-26 | 1.000000 |
| rad39              | 1.48310e-26 | 1.000000 | 1.48310e-26 | 1.000000 |
| rad26              | 6.48906e-27 | 1.000000 | 6.48906e-27 | 1.000000 |
| PAH3+H             | 5.77563e-28 | 1.000000 | 5.77563e-28 | 1.000000 |
| rad59              | 2.69878e-28 | 1.000000 | 2.69878e-28 | 1.000000 |
| rad50              | 9.98981e-31 | 1.000000 | 9.98981e-31 | 1.000000 |
| rad5               | 1.79279e-35 | 1.000000 | 1.79279e-35 | 1.000000 |
| rad12              | 8.52106e-36 | 1.000000 | 8.52106e-36 | 1.000000 |
| rad19syn           | 8.29107e-37 | 1.000000 | 8.29107e-37 | 1.000000 |
| rad37              | 1.95498e-37 | 1.000000 | 1.95498e-37 | 1.000000 |
| rad52              | 1.92503e-38 | 1.000000 | 1.92503e-38 | 1.000000 |
| rad54              | 1.55820e-38 | 1.000000 | 1.55820e-38 | 1.000000 |
| rad70              | 3.73130e-41 | 1.000000 | 3.73130e-41 | 1.000000 |
| rad51              | 7.29092e-43 | 1.000000 | 7.29092e-43 | 1.000000 |
| rad62              | 4.65890e-45 | 1.000000 | 4.65890e-45 | 1.000000 |
| rad58              | 4.36226e-45 | 1.000000 | 4.36226e-45 | 1.000000 |
| rad55              | 3.31389e-45 | 1.000000 | 3.31389e-45 | 1.000000 |
| PhcycC3H3_A+H      | 3.32473e-46 | 1.000000 | 3.32473e-46 | 1.000000 |
| rad34              | 1.74419e-46 | 1.000000 | 1.74419e-46 | 1.000000 |
| rad43              | 3.10512e-47 | 1.000000 | 3.10512e-47 | 1.000000 |
| PAH10+CH3          | 5.68457e-48 | 1.000000 | 5.68457e-48 | 1.000000 |
| rad65              | 8.15250e-49 | 1.000000 | 8.15250e-49 | 1.000000 |
| rad47              | 9.77833e-50 | 1.000000 | 9.77833e-50 | 1.000000 |
| PAH1+H             | 1.00750e-52 | 1.000000 | 1.00750e-52 | 1.000000 |
| rad42              | 9.15248e-56 | 1.000000 | 9.15248e-56 | 1.000000 |
| rad41              | 3.27391e-59 | 1.000000 | 3.27391e-59 | 1.000000 |

100000.000 Pa, 60.0000000 K

=====

|               |                 |                      |
|---------------|-----------------|----------------------|
| Rate constant | True (fraction) | Effective (fraction) |
|---------------|-----------------|----------------------|

-----

|                    |                        |                        |
|--------------------|------------------------|------------------------|
| Total              | 1.83429e-26 (1.00 )    | 1.83429e-26 (1.00 )    |
| Formation of rad11 | 1.83139e-26 (0.998 )   | 1.83139e-26 (0.998 )   |
| Formation of rad6  | 2.90471e-29 (0.00158 ) | 2.90471e-29 (0.00158 ) |
| H-abstraction      | 5.71259e-34 (3.11e-08) | 5.71259e-34 (3.11e-08) |

| species            | PYtrue      | Cumul    | PYeffective | Cumul    |
|--------------------|-------------|----------|-------------|----------|
| rad11              | 0.997181    | 0.997181 | 0.997181    | 0.997181 |
| rad6               | 0.00275659  | 0.999938 | 0.00275659  | 0.999938 |
| rad21              | 4.35797e-05 | 0.999981 | 4.35797e-05 | 0.999981 |
| rad20              | 1.18779e-05 | 0.999993 | 1.18779e-05 | 0.999993 |
| rad22              | 5.43143e-06 | 0.999998 | 5.43143e-06 | 0.999998 |
| rad45              | 6.23510e-07 | 0.999999 | 6.23510e-07 | 0.999999 |
| rad18              | 3.22011e-07 | 0.999999 | 3.22011e-07 | 0.999999 |
| rad36              | 4.09715e-08 | 0.999999 | 4.09715e-08 | 0.999999 |
| Benzene+2-propynyl | 3.11432e-08 | 0.999999 | 3.11432e-08 | 0.999999 |
| rad25              | 2.72061e-08 | 0.999999 | 2.72061e-08 | 0.999999 |
| rad13              | 9.94147e-09 | 1.000000 | 9.94147e-09 | 1.000000 |
| Indene+H           | 9.26311e-09 | 1.000000 | 9.26311e-09 | 1.000000 |
| rad7               | 3.85880e-09 | 1.000000 | 3.85880e-09 | 1.000000 |
| C2H2+PhCH2         | 3.17518e-09 | 1.000000 | 3.17518e-09 | 1.000000 |
| rad24              | 2.02801e-09 | 1.000000 | 2.02801e-09 | 1.000000 |
| rad23              | 1.98570e-09 | 1.000000 | 1.98570e-09 | 1.000000 |
| PhCHCCH2+H         | 1.75577e-09 | 1.000000 | 1.75577e-09 | 1.000000 |
| rad9               | 9.57310e-11 | 1.000000 | 9.57310e-11 | 1.000000 |
| rad33              | 6.29710e-11 | 1.000000 | 6.29710e-11 | 1.000000 |
| Phenyl+Allene      | 3.16204e-12 | 1.000000 | 0.000000    | 1.000000 |
| rad3               | 4.27666e-13 | 1.000000 | 4.27666e-13 | 1.000000 |
| rad4               | 2.31810e-13 | 1.000000 | 2.31810e-13 | 1.000000 |
| rad28              | 1.84980e-14 | 1.000000 | 1.84980e-14 | 1.000000 |
| rad30              | 1.91245e-15 | 1.000000 | 1.91245e-15 | 1.000000 |
| rad15              | 2.88953e-16 | 1.000000 | 2.88953e-16 | 1.000000 |
| rad2               | 6.63281e-17 | 1.000000 | 6.63281e-17 | 1.000000 |
| rad8               | 3.65670e-17 | 1.000000 | 3.65670e-17 | 1.000000 |
| PhCH2CCH+H         | 2.04757e-17 | 1.000000 | 2.04757e-17 | 1.000000 |
| rad1               | 5.04510e-18 | 1.000000 | 5.04510e-18 | 1.000000 |
| rad38              | 4.21112e-18 | 1.000000 | 4.21112e-18 | 1.000000 |
| PhCCH+CH3          | 6.22313e-19 | 1.000000 | 6.22313e-19 | 1.000000 |
| rad14              | 3.88160e-20 | 1.000000 | 3.88160e-20 | 1.000000 |
| rad46              | 1.93784e-20 | 1.000000 | 1.93784e-20 | 1.000000 |
| rad60syn           | 5.78026e-21 | 1.000000 | 5.78026e-21 | 1.000000 |
| PAH9+H             | 4.41659e-21 | 1.000000 | 4.41659e-21 | 1.000000 |
| rad35              | 2.53301e-21 | 1.000000 | 2.53301e-21 | 1.000000 |
| PAH7+H             | 9.19602e-22 | 1.000000 | 9.19602e-22 | 1.000000 |
| rad60anti          | 7.78237e-22 | 1.000000 | 7.78237e-22 | 1.000000 |
| rad10              | 7.43965e-22 | 1.000000 | 7.43965e-22 | 1.000000 |
| rad31              | 2.65824e-22 | 1.000000 | 2.65824e-22 | 1.000000 |
| Ph+MeAc            | 1.02140e-22 | 1.000000 | 1.02140e-22 | 1.000000 |
| rad27              | 1.12982e-24 | 1.000000 | 1.12982e-24 | 1.000000 |
| PhCCCH3+H          | 5.38584e-25 | 1.000000 | 5.38584e-25 | 1.000000 |
| rad39              | 1.29630e-25 | 1.000000 | 1.29630e-25 | 1.000000 |
| rad26              | 2.04429e-26 | 1.000000 | 2.04429e-26 | 1.000000 |
| PAH3+H             | 2.58769e-27 | 1.000000 | 2.58769e-27 | 1.000000 |
| rad59              | 1.20367e-27 | 1.000000 | 1.20367e-27 | 1.000000 |
| rad50              | 4.04720e-30 | 1.000000 | 4.04720e-30 | 1.000000 |
| rad5               | 3.28588e-34 | 1.000000 | 3.28588e-34 | 1.000000 |
| rad12              | 3.30415e-35 | 1.000000 | 3.30415e-35 | 1.000000 |
| rad19syn           | 1.15585e-35 | 1.000000 | 1.15585e-35 | 1.000000 |
| rad37              | 7.65027e-37 | 1.000000 | 7.65027e-37 | 1.000000 |
| rad54              | 1.85411e-37 | 1.000000 | 1.85411e-37 | 1.000000 |
| rad52              | 9.86247e-38 | 1.000000 | 9.86247e-38 | 1.000000 |
| rad70              | 1.74360e-40 | 1.000000 | 1.74360e-40 | 1.000000 |
| rad51              | 4.30939e-42 | 1.000000 | 4.30939e-42 | 1.000000 |
| rad62              | 1.10236e-43 | 1.000000 | 1.10236e-43 | 1.000000 |
| rad55              | 3.76067e-44 | 1.000000 | 3.76067e-44 | 1.000000 |
| rad58              | 2.62631e-44 | 1.000000 | 2.62631e-44 | 1.000000 |
| PhcycC3H3_A+H      | 4.76884e-45 | 1.000000 | 4.76884e-45 | 1.000000 |
| rad43              | 9.40408e-46 | 1.000000 | 9.40408e-46 | 1.000000 |
| rad34              | 8.90590e-46 | 1.000000 | 8.90590e-46 | 1.000000 |
| PAH10+CH3          | 2.81691e-47 | 1.000000 | 2.81691e-47 | 1.000000 |
| rad65              | 5.75123e-48 | 1.000000 | 5.75123e-48 | 1.000000 |
| rad47              | 6.96644e-49 | 1.000000 | 6.96644e-49 | 1.000000 |
| PAH1+H             | 1.53142e-51 | 1.000000 | 1.53142e-51 | 1.000000 |
| rad42              | 2.26917e-54 | 1.000000 | 2.26917e-54 | 1.000000 |
| rad41              | 1.11237e-57 | 1.000000 | 1.11237e-57 | 1.000000 |

100000.000 Pa, 70.0000000 K

=====

|               |                 |                      |
|---------------|-----------------|----------------------|
| Rate constant | True (fraction) | Effective (fraction) |
|---------------|-----------------|----------------------|

-----

|                    |                        |                        |
|--------------------|------------------------|------------------------|
| Total              | 1.17336e-24 (1.00 )    | 1.17336e-24 (1.00 )    |
| Formation of rad11 | 1.16857e-24 (0.996 )   | 1.16857e-24 (0.996 )   |
| Formation of rad6  | 4.79505e-27 (0.00409 ) | 4.79505e-27 (0.00409 ) |
| H-abstraction      | 5.89821e-31 (5.03e-07) | 5.89821e-31 (5.03e-07) |

| species            | PYtrue      | Cumul    | PYeffective | Cumul    |
|--------------------|-------------|----------|-------------|----------|
| rad11              | 0.994423    | 0.994423 | 0.994423    | 0.994423 |
| rad6               | 0.00550155  | 0.999924 | 0.00550155  | 0.999924 |
| rad21              | 4.99916e-05 | 0.999974 | 4.99916e-05 | 0.999974 |
| rad20              | 1.60905e-05 | 0.999990 | 1.60905e-05 | 0.999990 |
| rad22              | 7.61191e-06 | 0.999998 | 7.61191e-06 | 0.999998 |
| rad45              | 8.83411e-07 | 0.999999 | 8.83411e-07 | 0.999999 |
| rad18              | 5.29862e-07 | 0.999999 | 5.29862e-07 | 0.999999 |
| Benzene+2-propynyl | 5.02676e-07 | 1.000000 | 5.02676e-07 | 1.000000 |
| rad36              | 5.75790e-08 | 1.000000 | 5.75790e-08 | 1.000000 |
| rad25              | 3.39726e-08 | 1.000000 | 3.39726e-08 | 1.000000 |
| rad13              | 2.59809e-08 | 1.000000 | 2.59809e-08 | 1.000000 |
| Indene+H           | 1.73098e-08 | 1.000000 | 1.73098e-08 | 1.000000 |
| rad7               | 1.07452e-08 | 1.000000 | 1.07452e-08 | 1.000000 |
| C2H2+PhCH2         | 5.48729e-09 | 1.000000 | 5.48729e-09 | 1.000000 |
| rad23              | 3.41005e-09 | 1.000000 | 3.41005e-09 | 1.000000 |
| PhCHCCH2+H         | 2.29670e-09 | 1.000000 | 2.29670e-09 | 1.000000 |
| rad24              | 1.86535e-09 | 1.000000 | 1.86535e-09 | 1.000000 |
| rad33              | 1.57295e-10 | 1.000000 | 1.57295e-10 | 1.000000 |
| rad9               | 1.27745e-10 | 1.000000 | 1.27745e-10 | 1.000000 |
| Phenyl+Allene      | 5.66497e-12 | 1.000000 | 0.000000    | 1.000000 |
| rad3               | 1.51089e-12 | 1.000000 | 1.51089e-12 | 1.000000 |
| rad4               | 8.14579e-13 | 1.000000 | 8.14579e-13 | 1.000000 |
| rad28              | 6.79175e-14 | 1.000000 | 6.79175e-14 | 1.000000 |
| rad30              | 4.07379e-15 | 1.000000 | 4.07379e-15 | 1.000000 |
| rad15              | 6.24144e-16 | 1.000000 | 6.24144e-16 | 1.000000 |
| rad2               | 3.01031e-16 | 1.000000 | 3.01031e-16 | 1.000000 |
| rad8               | 8.09382e-17 | 1.000000 | 8.09382e-17 | 1.000000 |
| PhCH2CCH+H         | 5.97615e-17 | 1.000000 | 5.97615e-17 | 1.000000 |
| rad1               | 2.25759e-17 | 1.000000 | 2.25759e-17 | 1.000000 |
| rad38              | 7.89146e-18 | 1.000000 | 7.89146e-18 | 1.000000 |
| PhCCH+CH3          | 3.09317e-18 | 1.000000 | 3.09317e-18 | 1.000000 |
| rad14              | 1.85776e-19 | 1.000000 | 1.85776e-19 | 1.000000 |
| rad46              | 3.81343e-20 | 1.000000 | 3.81343e-20 | 1.000000 |
| rad60syn           | 1.53869e-20 | 1.000000 | 1.53869e-20 | 1.000000 |
| PAH9+H             | 9.90127e-21 | 1.000000 | 9.90127e-21 | 1.000000 |
| rad35              | 5.63915e-21 | 1.000000 | 5.63915e-21 | 1.000000 |
| rad10              | 4.28269e-21 | 1.000000 | 4.28269e-21 | 1.000000 |
| PAH7+H             | 3.79556e-21 | 1.000000 | 3.79556e-21 | 1.000000 |
| rad60anti          | 2.30254e-21 | 1.000000 | 2.30254e-21 | 1.000000 |
| rad31              | 8.95615e-22 | 1.000000 | 8.95615e-22 | 1.000000 |
| Ph+MeAc            | 6.14957e-22 | 1.000000 | 6.14957e-22 | 1.000000 |
| rad27              | 6.77550e-24 | 1.000000 | 6.77550e-24 | 1.000000 |
| PhCCCH3+H          | 3.44117e-24 | 1.000000 | 3.44117e-24 | 1.000000 |
| rad39              | 7.30408e-25 | 1.000000 | 7.30408e-25 | 1.000000 |
| rad26              | 7.08072e-26 | 1.000000 | 7.08072e-26 | 1.000000 |
| PAH3+H             | 1.16574e-26 | 1.000000 | 1.16574e-26 | 1.000000 |
| rad59              | 5.38752e-27 | 1.000000 | 5.38752e-27 | 1.000000 |
| rad50              | 1.70629e-29 | 1.000000 | 1.70629e-29 | 1.000000 |
| rad5               | 4.10721e-33 | 1.000000 | 4.10721e-33 | 1.000000 |
| rad19syn           | 1.36758e-34 | 1.000000 | 1.36758e-34 | 1.000000 |
| rad12              | 1.35412e-34 | 1.000000 | 1.35412e-34 | 1.000000 |
| rad37              | 3.17360e-36 | 1.000000 | 3.17360e-36 | 1.000000 |
| rad54              | 2.02561e-36 | 1.000000 | 2.02561e-36 | 1.000000 |
| rad52              | 5.65363e-37 | 1.000000 | 5.65363e-37 | 1.000000 |
| rad70              | 9.55587e-40 | 1.000000 | 9.55587e-40 | 1.000000 |
| rad51              | 2.96442e-41 | 1.000000 | 2.96442e-41 | 1.000000 |
| rad62              | 2.19823e-42 | 1.000000 | 2.19823e-42 | 1.000000 |
| rad55              | 4.31483e-43 | 1.000000 | 4.31483e-43 | 1.000000 |
| rad58              | 1.75464e-43 | 1.000000 | 1.75464e-43 | 1.000000 |
| PhcycC3H3_A+H      | 6.50655e-44 | 1.000000 | 6.50655e-44 | 1.000000 |
| rad43              | 2.24159e-44 | 1.000000 | 2.24159e-44 | 1.000000 |
| rad34              | 5.40732e-45 | 1.000000 | 5.40732e-45 | 1.000000 |
| PAH10+CH3          | 1.56299e-46 | 1.000000 | 1.56299e-46 | 1.000000 |
| rad65              | 4.55596e-47 | 1.000000 | 4.55596e-47 | 1.000000 |
| rad47              | 6.12178e-48 | 1.000000 | 6.12178e-48 | 1.000000 |
| PAH1+H             | 2.26563e-50 | 1.000000 | 2.26563e-50 | 1.000000 |
| rad42              | 5.86033e-53 | 1.000000 | 5.86033e-53 | 1.000000 |
| rad41              | 3.78765e-56 | 1.000000 | 3.78765e-56 | 1.000000 |

100000.000 Pa, 80.0000000 K

=====

|               |                 |                      |
|---------------|-----------------|----------------------|
| Rate constant | True (fraction) | Effective (fraction) |
|---------------|-----------------|----------------------|

-----

|                    |                        |                        |
|--------------------|------------------------|------------------------|
| Total              | 2.68112e-23 (1.00 )    | 2.68112e-23 (1.00 )    |
| Formation of rad11 | 2.65890e-23 (0.992 )   | 2.65890e-23 (0.992 )   |
| Formation of rad6  | 2.22189e-25 (0.00829 ) | 2.22189e-25 (0.00829 ) |
| H-abstraction      | 1.05871e-28 (3.95e-06) | 1.05871e-28 (3.95e-06) |

| species            | PYtrue      | Cumul    | PYeffective | Cumul    |
|--------------------|-------------|----------|-------------|----------|
| rad11              | 0.989958    | 0.989958 | 0.989958    | 0.989958 |
| rad6               | 0.00994894  | 0.999907 | 0.00994894  | 0.999907 |
| rad21              | 5.60120e-05 | 0.999963 | 5.60120e-05 | 0.999963 |
| rad20              | 2.07211e-05 | 0.999984 | 2.07211e-05 | 0.999984 |
| rad22              | 1.01444e-05 | 0.999994 | 1.01444e-05 | 0.999994 |
| Benzene+2-propynyl | 3.94877e-06 | 0.999998 | 3.94877e-06 | 0.999998 |
| rad45              | 1.19002e-06 | 0.999999 | 1.19002e-06 | 0.999999 |
| rad18              | 8.07880e-07 | 1.000000 | 8.07880e-07 | 1.000000 |
| rad36              | 7.70907e-08 | 1.000000 | 7.70907e-08 | 1.000000 |
| rad13              | 5.64256e-08 | 1.000000 | 5.64256e-08 | 1.000000 |
| rad25              | 4.14236e-08 | 1.000000 | 4.14236e-08 | 1.000000 |
| Indene+H           | 2.96972e-08 | 1.000000 | 2.96972e-08 | 1.000000 |
| rad7               | 2.47242e-08 | 1.000000 | 2.47242e-08 | 1.000000 |
| C2H2+PhCH2         | 8.81733e-09 | 1.000000 | 8.81733e-09 | 1.000000 |
| rad23              | 5.41888e-09 | 1.000000 | 5.41888e-09 | 1.000000 |
| PhCHCCH2+H         | 2.94558e-09 | 1.000000 | 2.94558e-09 | 1.000000 |
| rad24              | 1.73071e-09 | 1.000000 | 1.73071e-09 | 1.000000 |
| rad33              | 3.25433e-10 | 1.000000 | 3.25433e-10 | 1.000000 |
| rad9               | 1.67344e-10 | 1.000000 | 1.67344e-10 | 1.000000 |
| Phenyl+Allene      | 9.82987e-12 | 1.000000 | 0.000000    | 1.000000 |
| rad3               | 4.17227e-12 | 1.000000 | 4.17227e-12 | 1.000000 |
| rad4               | 2.24029e-12 | 1.000000 | 2.24029e-12 | 1.000000 |
| rad28              | 1.93552e-13 | 1.000000 | 1.93552e-13 | 1.000000 |
| rad30              | 7.89363e-15 | 1.000000 | 7.89363e-15 | 1.000000 |
| rad15              | 1.22817e-15 | 1.000000 | 1.22817e-15 | 1.000000 |
| rad2               | 1.02817e-15 | 1.000000 | 1.02817e-15 | 1.000000 |
| PhCH2CCH+H         | 2.11275e-16 | 1.000000 | 2.11275e-16 | 1.000000 |
| rad8               | 1.68881e-16 | 1.000000 | 1.68881e-16 | 1.000000 |
| rad1               | 7.63087e-17 | 1.000000 | 7.63087e-17 | 1.000000 |
| rad38              | 1.37204e-17 | 1.000000 | 1.37204e-17 | 1.000000 |
| PhCCH+CH3          | 1.15378e-17 | 1.000000 | 1.15378e-17 | 1.000000 |
| rad14              | 6.67445e-19 | 1.000000 | 6.67445e-19 | 1.000000 |
| rad46              | 6.99405e-20 | 1.000000 | 6.99405e-20 | 1.000000 |
| rad60syn           | 3.78426e-20 | 1.000000 | 3.78426e-20 | 1.000000 |
| PAH9+H             | 2.01741e-20 | 1.000000 | 2.01741e-20 | 1.000000 |
| rad10              | 1.80448e-20 | 1.000000 | 1.80448e-20 | 1.000000 |
| PAH7+H             | 1.63593e-20 | 1.000000 | 1.63593e-20 | 1.000000 |
| rad35              | 1.14014e-20 | 1.000000 | 1.14014e-20 | 1.000000 |
| rad60anti          | 6.29400e-21 | 1.000000 | 6.29400e-21 | 1.000000 |
| Ph+MeAc            | 2.78507e-21 | 1.000000 | 2.78507e-21 | 1.000000 |
| rad31              | 2.40296e-21 | 1.000000 | 2.40296e-21 | 1.000000 |
| rad27              | 2.97691e-23 | 1.000000 | 2.97691e-23 | 1.000000 |
| PhCCCH3+H          | 1.61641e-23 | 1.000000 | 1.61641e-23 | 1.000000 |
| rad39              | 3.10066e-24 | 1.000000 | 3.10066e-24 | 1.000000 |
| rad26              | 2.85178e-25 | 1.000000 | 2.85178e-25 | 1.000000 |
| PAH3+H             | 5.70010e-26 | 1.000000 | 5.70010e-26 | 1.000000 |
| rad59              | 2.60856e-26 | 1.000000 | 2.60856e-26 | 1.000000 |
| rad50              | 7.90552e-29 | 1.000000 | 7.90552e-29 | 1.000000 |
| rad5               | 4.08637e-32 | 1.000000 | 4.08637e-32 | 1.000000 |
| rad19syn           | 1.65503e-33 | 1.000000 | 1.65503e-33 | 1.000000 |
| rad12              | 6.35771e-34 | 1.000000 | 6.35771e-34 | 1.000000 |
| rad54              | 2.40194e-35 | 1.000000 | 2.40194e-35 | 1.000000 |
| rad37              | 1.51870e-35 | 1.000000 | 1.51870e-35 | 1.000000 |
| rad52              | 3.93686e-36 | 1.000000 | 3.93686e-36 | 1.000000 |
| rad70              | 6.76301e-39 | 1.000000 | 6.76301e-39 | 1.000000 |
| rad51              | 2.59581e-40 | 1.000000 | 2.59581e-40 | 1.000000 |
| rad62              | 4.41197e-41 | 1.000000 | 4.41197e-41 | 1.000000 |
| rad55              | 5.58876e-42 | 1.000000 | 5.58876e-42 | 1.000000 |
| rad58              | 1.45138e-42 | 1.000000 | 1.45138e-42 | 1.000000 |
| PhcycC3H3_A+H      | 9.64144e-43 | 1.000000 | 9.64144e-43 | 1.000000 |
| rad43              | 5.07659e-43 | 1.000000 | 5.07659e-43 | 1.000000 |
| rad34              | 4.28384e-44 | 1.000000 | 4.28384e-44 | 1.000000 |
| PAH10+CH3          | 1.08077e-45 | 1.000000 | 1.08077e-45 | 1.000000 |
| rad65              | 4.54109e-46 | 1.000000 | 4.54109e-46 | 1.000000 |
| rad47              | 7.31577e-47 | 1.000000 | 7.31577e-47 | 1.000000 |
| PAH1+H             | 3.67348e-49 | 1.000000 | 3.67348e-49 | 1.000000 |
| rad42              | 1.76887e-51 | 1.000000 | 1.76887e-51 | 1.000000 |
| rad41              | 1.45826e-54 | 1.000000 | 1.45826e-54 | 1.000000 |

100000.000 Pa, 90.0000000 K

=====

|               |                 |                      |
|---------------|-----------------|----------------------|
| Rate constant | True (fraction) | Effective (fraction) |
|---------------|-----------------|----------------------|

-----

|                    |                        |                        |
|--------------------|------------------------|------------------------|
| Total              | 3.08379e-22 (1.00 )    | 3.08379e-22 (1.00 )    |
| Formation of rad11 | 3.03962e-22 (0.986 )   | 3.03962e-22 (0.986 )   |
| Formation of rad6  | 4.41076e-24 (0.0143 )  | 4.41076e-24 (0.0143 )  |
| H-abstraction      | 5.92916e-27 (1.92e-05) | 5.92916e-27 (1.92e-05) |

| species            | PYtrue      | Cumul    | PYeffective | Cumul    |
|--------------------|-------------|----------|-------------|----------|
| rad11              | 0.983660    | 0.983660 | 0.983660    | 0.983660 |
| rad6               | 0.0162172   | 0.999877 | 0.0162172   | 0.999877 |
| rad21              | 6.17140e-05 | 0.999939 | 6.17140e-05 | 0.999939 |
| rad20              | 2.57317e-05 | 0.999965 | 2.57317e-05 | 0.999965 |
| Benzene+2-propynyl | 1.92269e-05 | 0.999984 | 1.92269e-05 | 0.999984 |
| rad22              | 1.30439e-05 | 0.999997 | 1.30439e-05 | 0.999997 |
| rad45              | 1.54684e-06 | 0.999999 | 1.54684e-06 | 0.999999 |
| rad18              | 1.16664e-06 | 1.000000 | 1.16664e-06 | 1.000000 |
| rad13              | 1.05482e-07 | 1.000000 | 1.05482e-07 | 1.000000 |
| rad36              | 9.97330e-08 | 1.000000 | 9.97330e-08 | 1.000000 |
| rad25              | 4.96785e-08 | 1.000000 | 4.96785e-08 | 1.000000 |
| rad7               | 4.88820e-08 | 1.000000 | 4.88820e-08 | 1.000000 |
| Indene+H           | 4.79378e-08 | 1.000000 | 4.79378e-08 | 1.000000 |
| C2H2+PhCH2         | 1.34684e-08 | 1.000000 | 1.34684e-08 | 1.000000 |
| rad23              | 8.15418e-09 | 1.000000 | 8.15418e-09 | 1.000000 |
| PhCHCCH2+H         | 3.73081e-09 | 1.000000 | 3.73081e-09 | 1.000000 |
| rad24              | 1.61758e-09 | 1.000000 | 1.61758e-09 | 1.000000 |
| rad33              | 5.79436e-10 | 1.000000 | 5.79436e-10 | 1.000000 |
| rad9               | 2.16726e-10 | 1.000000 | 2.16726e-10 | 1.000000 |
| Phenyl+Allene      | 1.66424e-11 | 1.000000 | 0.000000    | 1.000000 |
| rad3               | 9.61997e-12 | 1.000000 | 9.61997e-12 | 1.000000 |
| rad4               | 5.14917e-12 | 1.000000 | 5.14917e-12 | 1.000000 |
| rad28              | 4.59956e-13 | 1.000000 | 4.59956e-13 | 1.000000 |
| rad30              | 1.43380e-14 | 1.000000 | 1.43380e-14 | 1.000000 |
| rad2               | 2.87494e-15 | 1.000000 | 2.87494e-15 | 1.000000 |
| rad15              | 2.26903e-15 | 1.000000 | 2.26903e-15 | 1.000000 |
| PhCH2CCH+H         | 8.49674e-16 | 1.000000 | 8.49674e-16 | 1.000000 |
| rad8               | 3.39214e-16 | 1.000000 | 3.39214e-16 | 1.000000 |
| rad1               | 2.11721e-16 | 1.000000 | 2.11721e-16 | 1.000000 |
| PhCCH+CH3          | 3.53639e-17 | 1.000000 | 3.53639e-17 | 1.000000 |
| rad38              | 2.26965e-17 | 1.000000 | 2.26965e-17 | 1.000000 |
| rad14              | 1.96673e-18 | 1.000000 | 1.96673e-18 | 1.000000 |
| rad46              | 1.22662e-19 | 1.000000 | 1.22662e-19 | 1.000000 |
| rad60syn           | 8.84960e-20 | 1.000000 | 8.84960e-20 | 1.000000 |
| PAH7+H             | 6.87225e-20 | 1.000000 | 6.87225e-20 | 1.000000 |
| rad10              | 6.13325e-20 | 1.000000 | 6.13325e-20 | 1.000000 |
| PAH9+H             | 3.85841e-20 | 1.000000 | 3.85841e-20 | 1.000000 |
| rad35              | 2.16216e-20 | 1.000000 | 2.16216e-20 | 1.000000 |
| rad60anti          | 1.62906e-20 | 1.000000 | 1.62906e-20 | 1.000000 |
| Ph+MeAc            | 1.04188e-20 | 1.000000 | 1.04188e-20 | 1.000000 |
| rad31              | 5.45645e-21 | 1.000000 | 5.45645e-21 | 1.000000 |
| rad27              | 1.05821e-22 | 1.000000 | 1.05821e-22 | 1.000000 |
| PhCCCH3+H          | 6.17769e-23 | 1.000000 | 6.17769e-23 | 1.000000 |
| rad39              | 1.08974e-23 | 1.000000 | 1.08974e-23 | 1.000000 |
| rad26              | 1.34881e-24 | 1.000000 | 1.34881e-24 | 1.000000 |
| PAH3+H             | 3.15975e-25 | 1.000000 | 3.15975e-25 | 1.000000 |
| rad59              | 1.42246e-25 | 1.000000 | 1.42246e-25 | 1.000000 |
| rad50              | 4.09316e-28 | 1.000000 | 4.09316e-28 | 1.000000 |
| rad5               | 3.47839e-31 | 1.000000 | 3.47839e-31 | 1.000000 |
| rad19syn           | 2.51090e-32 | 1.000000 | 2.51090e-32 | 1.000000 |
| rad12              | 3.54888e-33 | 1.000000 | 3.54888e-33 | 1.000000 |
| rad54              | 4.00725e-34 | 1.000000 | 4.00725e-34 | 1.000000 |
| rad37              | 8.80239e-35 | 1.000000 | 8.80239e-35 | 1.000000 |
| rad52              | 3.61743e-35 | 1.000000 | 3.61743e-35 | 1.000000 |
| rad70              | 7.33707e-38 | 1.000000 | 7.33707e-38 | 1.000000 |
| rad51              | 3.20715e-39 | 1.000000 | 3.20715e-39 | 1.000000 |
| rad62              | 1.05843e-39 | 1.000000 | 1.05843e-39 | 1.000000 |
| rad55              | 1.04924e-40 | 1.000000 | 1.04924e-40 | 1.000000 |
| PhcycC3H3_A+H      | 1.97593e-41 | 1.000000 | 1.97593e-41 | 1.000000 |
| rad58              | 1.75198e-41 | 1.000000 | 1.75198e-41 | 1.000000 |
| rad43              | 1.27421e-41 | 1.000000 | 1.27421e-41 | 1.000000 |
| rad34              | 5.25815e-43 | 1.000000 | 5.25815e-43 | 1.000000 |
| PAH10+CH3          | 1.09703e-44 | 1.000000 | 1.09703e-44 | 1.000000 |
| rad65              | 6.49520e-45 | 1.000000 | 6.49520e-45 | 1.000000 |
| rad47              | 1.33642e-45 | 1.000000 | 1.33642e-45 | 1.000000 |
| PAH1+H             | 8.37086e-48 | 1.000000 | 8.37086e-48 | 1.000000 |
| rad42              | 7.43307e-50 | 1.000000 | 7.43307e-50 | 1.000000 |
| rad41              | 7.47958e-53 | 1.000000 | 7.47958e-53 | 1.000000 |

100000.000 Pa, 100.000000 K

=====

|               |                 |                      |
|---------------|-----------------|----------------------|
| Rate constant | True (fraction) | Effective (fraction) |
|---------------|-----------------|----------------------|

-----

|                    |                        |                        |
|--------------------|------------------------|------------------------|
| Total              | 2.19347e-21 (1.00 )    | 2.19347e-21 (1.00 )    |
| Formation of rad11 | 2.14498e-21 (0.978 )   | 2.14498e-21 (0.978 )   |
| Formation of rad6  | 4.83503e-23 (0.0220 )  | 4.83503e-23 (0.0220 )  |
| H-abstraction      | 1.47101e-25 (6.71e-05) | 1.47101e-25 (6.71e-05) |

| species            | PYtrue      | Cumul    | PYeffective | Cumul    |
|--------------------|-------------|----------|-------------|----------|
| rad11              | 0.975599    | 0.975599 | 0.975599    | 0.975599 |
| rad6               | 0.0242159   | 0.999814 | 0.0242159   | 0.999814 |
| rad21              | 6.71671e-05 | 0.999882 | 6.71671e-05 | 0.999882 |
| Benzene+2-propynyl | 6.70630e-05 | 0.999949 | 6.70630e-05 | 0.999949 |
| rad20              | 3.11002e-05 | 0.999980 | 3.11002e-05 | 0.999980 |
| rad22              | 1.63375e-05 | 0.999996 | 1.63375e-05 | 0.999996 |
| rad45              | 1.95907e-06 | 0.999998 | 1.95907e-06 | 0.999998 |
| rad18              | 1.61852e-06 | 1.000000 | 1.61852e-06 | 1.000000 |
| rad13              | 1.75852e-07 | 1.000000 | 1.75852e-07 | 1.000000 |
| rad36              | 1.25842e-07 | 1.000000 | 1.25842e-07 | 1.000000 |
| rad7               | 8.61870e-08 | 1.000000 | 8.61870e-08 | 1.000000 |
| Indene+H           | 7.40010e-08 | 1.000000 | 7.40010e-08 | 1.000000 |
| rad25              | 5.88921e-08 | 1.000000 | 5.88921e-08 | 1.000000 |
| C2H2+PhCH2         | 1.98444e-08 | 1.000000 | 1.98444e-08 | 1.000000 |
| rad23              | 1.17955e-08 | 1.000000 | 1.17955e-08 | 1.000000 |
| PhCHCCH2+H         | 4.69062e-09 | 1.000000 | 4.69062e-09 | 1.000000 |
| rad24              | 1.52159e-09 | 1.000000 | 1.52159e-09 | 1.000000 |
| rad33              | 9.20694e-10 | 1.000000 | 9.20694e-10 | 1.000000 |
| rad9               | 2.78881e-10 | 1.000000 | 2.78881e-10 | 1.000000 |
| Phenyl+Allene      | 2.76429e-11 | 1.000000 | 0.000000    | 1.000000 |
| rad3               | 1.94393e-11 | 1.000000 | 1.94393e-11 | 1.000000 |
| rad4               | 1.03795e-11 | 1.000000 | 1.03795e-11 | 1.000000 |
| rad28              | 9.58395e-13 | 1.000000 | 9.58395e-13 | 1.000000 |
| rad30              | 2.49044e-14 | 1.000000 | 2.49044e-14 | 1.000000 |
| rad2               | 6.96487e-15 | 1.000000 | 6.96487e-15 | 1.000000 |
| rad15              | 4.01541e-15 | 1.000000 | 4.01541e-15 | 1.000000 |
| PhCH2CCH+H         | 3.40515e-15 | 1.000000 | 3.40515e-15 | 1.000000 |
| rad8               | 6.64828e-16 | 1.000000 | 6.64828e-16 | 1.000000 |
| rad1               | 5.09963e-16 | 1.000000 | 5.09963e-16 | 1.000000 |
| PhCCH+CH3          | 9.44414e-17 | 1.000000 | 9.44414e-17 | 1.000000 |
| rad38              | 3.63237e-17 | 1.000000 | 3.63237e-17 | 1.000000 |
| rad14              | 5.03649e-18 | 1.000000 | 5.03649e-18 | 1.000000 |
| PAH7+H             | 2.74584e-19 | 1.000000 | 2.74584e-19 | 1.000000 |
| rad46              | 2.09273e-19 | 1.000000 | 2.09273e-19 | 1.000000 |
| rad60syn           | 2.00411e-19 | 1.000000 | 2.00411e-19 | 1.000000 |
| rad10              | 1.79167e-19 | 1.000000 | 1.79167e-19 | 1.000000 |
| PAH9+H             | 7.07828e-20 | 1.000000 | 7.07828e-20 | 1.000000 |
| rad60anti          | 4.05612e-20 | 1.000000 | 4.05612e-20 | 1.000000 |
| rad35              | 3.93082e-20 | 1.000000 | 3.93082e-20 | 1.000000 |
| Ph+MeAc            | 3.41315e-20 | 1.000000 | 3.41315e-20 | 1.000000 |
| rad31              | 1.09735e-20 | 1.000000 | 1.09735e-20 | 1.000000 |
| rad27              | 3.24454e-22 | 1.000000 | 3.24454e-22 | 1.000000 |
| PhCCCH3+H          | 2.04978e-22 | 1.000000 | 2.04978e-22 | 1.000000 |
| rad39              | 3.36501e-23 | 1.000000 | 3.36501e-23 | 1.000000 |
| rad26              | 6.91864e-24 | 1.000000 | 6.91864e-24 | 1.000000 |
| PAH3+H             | 1.93988e-24 | 1.000000 | 1.93988e-24 | 1.000000 |
| rad59              | 8.50656e-25 | 1.000000 | 8.50656e-25 | 1.000000 |
| rad50              | 2.27196e-27 | 1.000000 | 2.27196e-27 | 1.000000 |
| rad5               | 2.60447e-30 | 1.000000 | 2.60447e-30 | 1.000000 |
| rad19syn           | 5.19204e-31 | 1.000000 | 5.19204e-31 | 1.000000 |
| rad12              | 2.21762e-32 | 1.000000 | 2.21762e-32 | 1.000000 |
| rad54              | 1.19141e-32 | 1.000000 | 1.19141e-32 | 1.000000 |
| rad37              | 5.89644e-34 | 1.000000 | 5.89644e-34 | 1.000000 |
| rad52              | 4.52745e-34 | 1.000000 | 4.52745e-34 | 1.000000 |
| rad70              | 1.52858e-36 | 1.000000 | 1.52858e-36 | 1.000000 |
| rad51              | 6.00542e-38 | 1.000000 | 6.00542e-38 | 1.000000 |
| rad62              | 3.37020e-38 | 1.000000 | 3.37020e-38 | 1.000000 |
| rad55              | 3.99199e-39 | 1.000000 | 3.99199e-39 | 1.000000 |
| PhcycC3H3_A+H      | 7.47943e-40 | 1.000000 | 7.47943e-40 | 1.000000 |
| rad43              | 3.81340e-40 | 1.000000 | 3.81340e-40 | 1.000000 |
| rad58              | 3.76450e-40 | 1.000000 | 3.76450e-40 | 1.000000 |
| rad34              | 1.26341e-41 | 1.000000 | 1.26341e-41 | 1.000000 |
| PAH10+CH3          | 1.96923e-43 | 1.000000 | 1.96923e-43 | 1.000000 |
| rad65              | 1.47910e-43 | 1.000000 | 1.47910e-43 | 1.000000 |
| rad47              | 4.05933e-44 | 1.000000 | 4.05933e-44 | 1.000000 |
| PAH1+H             | 3.68425e-46 | 1.000000 | 3.68425e-46 | 1.000000 |
| rad42              | 4.95846e-48 | 1.000000 | 4.95846e-48 | 1.000000 |
| rad41              | 5.74074e-51 | 1.000000 | 5.74074e-51 | 1.000000 |

100000.000 Pa, 110.000000 K

=====

| Rate constant | True (fraction) | Effective (fraction) |
|---------------|-----------------|----------------------|
|---------------|-----------------|----------------------|

-----



|                    |                        |                        |
|--------------------|------------------------|------------------------|
| Total              | 1.09987e-20 (1.00 )    | 1.09987e-20 (1.00 )    |
| Formation of rad11 | 1.06527e-20 (0.969 )   | 1.06527e-20 (0.969 )   |
| Formation of rad6  | 3.44008e-22 (0.0313 )  | 3.44008e-22 (0.0313 )  |
| H-abstraction      | 2.02040e-24 (0.000184) | 2.02040e-24 (0.000184) |

| species            | PYtrue      | Cumul    | PYeffective | Cumul    |
|--------------------|-------------|----------|-------------|----------|
| rad11              | 0.965965    | 0.965965 | 0.965965    | 0.965965 |
| rad6               | 0.0337172   | 0.999682 | 0.0337172   | 0.999682 |
| Benzene+2-propynyl | 0.000183695 | 0.999865 | 0.000183695 | 0.999865 |
| rad21              | 7.24391e-05 | 0.999938 | 7.24391e-05 | 0.999938 |
| rad20              | 3.68186e-05 | 0.999975 | 3.68186e-05 | 0.999975 |
| rad22              | 2.00644e-05 | 0.999995 | 2.00644e-05 | 0.999995 |
| rad45              | 2.43391e-06 | 0.999997 | 2.43391e-06 | 0.999997 |
| rad18              | 2.17841e-06 | 0.999999 | 2.17841e-06 | 0.999999 |
| rad13              | 2.68630e-07 | 1.000000 | 2.68630e-07 | 1.000000 |
| rad36              | 1.55883e-07 | 1.000000 | 1.55883e-07 | 1.000000 |
| rad7               | 1.39369e-07 | 1.000000 | 1.39369e-07 | 1.000000 |
| Indene+H           | 1.10493e-07 | 1.000000 | 1.10493e-07 | 1.000000 |
| rad25              | 6.92607e-08 | 1.000000 | 6.92607e-08 | 1.000000 |
| C2H2+PhCH2         | 2.84907e-08 | 1.000000 | 2.84907e-08 | 1.000000 |
| rad23              | 1.65752e-08 | 1.000000 | 1.65752e-08 | 1.000000 |
| PhCHCCH2+H         | 5.87602e-09 | 1.000000 | 5.87602e-09 | 1.000000 |
| rad24              | 1.43976e-09 | 1.000000 | 1.43976e-09 | 1.000000 |
| rad33              | 1.34176e-09 | 1.000000 | 1.34176e-09 | 1.000000 |
| rad9               | 3.57856e-10 | 1.000000 | 3.57856e-10 | 1.000000 |
| Phenyl+Allene      | 4.52222e-11 | 1.000000 | 0.000000    | 1.000000 |
| rad3               | 3.56067e-11 | 1.000000 | 3.56067e-11 | 1.000000 |
| rad4               | 1.89757e-11 | 1.000000 | 1.89757e-11 | 1.000000 |
| rad28              | 1.81215e-12 | 1.000000 | 1.81215e-12 | 1.000000 |
| rad30              | 4.19433e-14 | 1.000000 | 4.19433e-14 | 1.000000 |
| rad2               | 1.51910e-14 | 1.000000 | 1.51910e-14 | 1.000000 |
| PhCH2CCH+H         | 1.25022e-14 | 1.000000 | 1.25022e-14 | 1.000000 |
| rad15              | 6.90199e-15 | 1.000000 | 6.90199e-15 | 1.000000 |
| rad8               | 1.28245e-15 | 1.000000 | 1.28245e-15 | 1.000000 |
| rad1               | 1.10763e-15 | 1.000000 | 1.10763e-15 | 1.000000 |
| PhCCH+CH3          | 2.28543e-16 | 1.000000 | 2.28543e-16 | 1.000000 |
| rad38              | 5.69074e-17 | 1.000000 | 5.69074e-17 | 1.000000 |
| rad14              | 1.16538e-17 | 1.000000 | 1.16538e-17 | 1.000000 |
| PAH7+H             | 1.03264e-18 | 1.000000 | 1.03264e-18 | 1.000000 |
| rad10              | 4.69491e-19 | 1.000000 | 4.69491e-19 | 1.000000 |
| rad60syn           | 4.44631e-19 | 1.000000 | 4.44631e-19 | 1.000000 |
| rad46              | 3.51552e-19 | 1.000000 | 3.51552e-19 | 1.000000 |
| PAH9+H             | 1.26483e-19 | 1.000000 | 1.26483e-19 | 1.000000 |
| Ph+MeAc            | 1.01756e-19 | 1.000000 | 1.01756e-19 | 1.000000 |
| rad60anti          | 9.81635e-20 | 1.000000 | 9.81635e-20 | 1.000000 |
| rad35              | 6.96043e-20 | 1.000000 | 6.96043e-20 | 1.000000 |
| rad31              | 2.01773e-20 | 1.000000 | 2.01773e-20 | 1.000000 |
| rad27              | 8.95777e-22 | 1.000000 | 8.95777e-22 | 1.000000 |
| PhCCCH3+H          | 6.16833e-22 | 1.000000 | 6.16833e-22 | 1.000000 |
| rad39              | 9.49693e-23 | 1.000000 | 9.49693e-23 | 1.000000 |
| rad26              | 3.43789e-23 | 1.000000 | 3.43789e-23 | 1.000000 |
| PAH3+H             | 1.21623e-23 | 1.000000 | 1.21623e-23 | 1.000000 |
| rad59              | 5.14679e-24 | 1.000000 | 5.14679e-24 | 1.000000 |
| rad50              | 1.25549e-26 | 1.000000 | 1.25549e-26 | 1.000000 |
| rad5               | 1.73618e-29 | 1.000000 | 1.73618e-29 | 1.000000 |
| rad19syn           | 1.17785e-29 | 1.000000 | 1.17785e-29 | 1.000000 |
| rad54              | 4.69191e-31 | 1.000000 | 4.69191e-31 | 1.000000 |
| rad12              | 1.39179e-31 | 1.000000 | 1.39179e-31 | 1.000000 |
| rad52              | 6.94072e-33 | 1.000000 | 6.94072e-33 | 1.000000 |
| rad37              | 4.09730e-33 | 1.000000 | 4.09730e-33 | 1.000000 |
| rad70              | 6.42032e-35 | 1.000000 | 6.42032e-35 | 1.000000 |
| rad51              | 1.61346e-36 | 1.000000 | 1.61346e-36 | 1.000000 |
| rad62              | 1.31047e-36 | 1.000000 | 1.31047e-36 | 1.000000 |
| rad55              | 3.18498e-37 | 1.000000 | 3.18498e-37 | 1.000000 |
| PhcycC3H3_A+H      | 5.30707e-38 | 1.000000 | 5.30707e-38 | 1.000000 |
| rad58              | 1.50477e-38 | 1.000000 | 1.50477e-38 | 1.000000 |
| rad43              | 1.26394e-38 | 1.000000 | 1.26394e-38 | 1.000000 |
| rad34              | 6.32868e-40 | 1.000000 | 6.32868e-40 | 1.000000 |
| PAH10+CH3          | 6.13328e-42 | 1.000000 | 6.13328e-42 | 1.000000 |
| rad65              | 5.19835e-42 | 1.000000 | 5.19835e-42 | 1.000000 |
| rad47              | 1.94869e-42 | 1.000000 | 1.94869e-42 | 1.000000 |
| PAH1+H             | 3.23399e-44 | 1.000000 | 3.23399e-44 | 1.000000 |
| rad42              | 4.97174e-46 | 1.000000 | 4.97174e-46 | 1.000000 |
| rad41              | 6.25068e-49 | 1.000000 | 6.25068e-49 | 1.000000 |

100000.000 Pa, 120.000000 K

=====

| Rate constant | True (fraction) | Effective (fraction) |
|---------------|-----------------|----------------------|
|---------------|-----------------|----------------------|

-----

|                    |                        |                        |
|--------------------|------------------------|------------------------|
| Total              | 4.24245e-20 (1.00 )    | 4.24245e-20 (1.00 )    |
| Formation of rad11 | 4.06372e-20 (0.958 )   | 4.06372e-20 (0.958 )   |
| Formation of rad6  | 1.76944e-21 (0.0417 )  | 1.76944e-21 (0.0417 )  |
| H-abstraction      | 1.78210e-23 (0.000420) | 1.78210e-23 (0.000420) |

| species            | PYtrue      | Cumul    | PYeffective | Cumul    |
|--------------------|-------------|----------|-------------|----------|
| rad11              | 0.955004    | 0.955004 | 0.955004    | 0.955004 |
| rad6               | 0.0444248   | 0.999428 | 0.0444248   | 0.999428 |
| Benzene+2-propynyl | 0.000420064 | 0.999849 | 0.000420064 | 0.999849 |
| rad21              | 7.75961e-05 | 0.999926 | 7.75961e-05 | 0.999926 |
| rad20              | 4.28910e-05 | 0.999969 | 4.28910e-05 | 0.999969 |
| rad22              | 2.42789e-05 | 0.999993 | 2.42789e-05 | 0.999993 |
| rad45              | 2.98085e-06 | 0.999996 | 2.98085e-06 | 0.999996 |
| rad18              | 2.86442e-06 | 0.999999 | 2.86442e-06 | 0.999999 |
| rad13              | 3.83522e-07 | 1.000000 | 3.83522e-07 | 1.000000 |
| rad7               | 2.10940e-07 | 1.000000 | 2.10940e-07 | 1.000000 |
| rad36              | 1.90470e-07 | 1.000000 | 1.90470e-07 | 1.000000 |
| Indene+H           | 1.60898e-07 | 1.000000 | 1.60898e-07 | 1.000000 |
| rad25              | 8.10283e-08 | 1.000000 | 8.10283e-08 | 1.000000 |
| C2H2+PhCH2         | 4.01499e-08 | 1.000000 | 4.01499e-08 | 1.000000 |
| rad23              | 2.27974e-08 | 1.000000 | 2.27974e-08 | 1.000000 |
| PhCHCCH2+H         | 7.35480e-09 | 1.000000 | 7.35480e-09 | 1.000000 |
| rad33              | 1.82935e-09 | 1.000000 | 1.82935e-09 | 1.000000 |
| rad24              | 1.36991e-09 | 1.000000 | 1.36991e-09 | 1.000000 |
| rad9               | 4.59113e-10 | 1.000000 | 4.59113e-10 | 1.000000 |
| Phenyl+Allene      | 7.30743e-11 | 1.000000 | 0.000000    | 1.000000 |
| rad3               | 6.05351e-11 | 1.000000 | 6.05351e-11 | 1.000000 |
| rad4               | 3.22139e-11 | 1.000000 | 3.22139e-11 | 1.000000 |
| rad28              | 3.18477e-12 | 1.000000 | 3.18477e-12 | 1.000000 |
| rad30              | 6.91792e-14 | 1.000000 | 6.91792e-14 | 1.000000 |
| PhCH2CCH+H         | 4.10719e-14 | 1.000000 | 4.10719e-14 | 1.000000 |
| rad2               | 3.06405e-14 | 1.000000 | 3.06405e-14 | 1.000000 |
| rad15              | 1.16390e-14 | 1.000000 | 1.16390e-14 | 1.000000 |
| rad8               | 2.44793e-15 | 1.000000 | 2.44793e-15 | 1.000000 |
| rad1               | 2.22772e-15 | 1.000000 | 2.22772e-15 | 1.000000 |
| PhCCH+CH3          | 5.15036e-16 | 1.000000 | 5.15036e-16 | 1.000000 |
| rad38              | 8.80309e-17 | 1.000000 | 8.80309e-17 | 1.000000 |
| rad14              | 2.50342e-17 | 1.000000 | 2.50342e-17 | 1.000000 |
| PAH7+H             | 3.62817e-18 | 1.000000 | 3.62817e-18 | 1.000000 |
| rad10              | 1.13723e-18 | 1.000000 | 1.13723e-18 | 1.000000 |
| rad60syn           | 9.73408e-19 | 1.000000 | 9.73408e-19 | 1.000000 |
| rad46              | 5.86580e-19 | 1.000000 | 5.86580e-19 | 1.000000 |
| Ph+MeAc            | 2.83402e-19 | 1.000000 | 2.83402e-19 | 1.000000 |
| rad60anti          | 2.32504e-19 | 1.000000 | 2.32504e-19 | 1.000000 |
| PAH9+H             | 2.22673e-19 | 1.000000 | 2.22673e-19 | 1.000000 |
| rad35              | 1.21541e-19 | 1.000000 | 1.21541e-19 | 1.000000 |
| rad31              | 3.46922e-20 | 1.000000 | 3.46922e-20 | 1.000000 |
| rad27              | 2.29500e-21 | 1.000000 | 2.29500e-21 | 1.000000 |
| PhCCCH3+H          | 1.73573e-21 | 1.000000 | 1.73573e-21 | 1.000000 |
| rad39              | 2.51695e-22 | 1.000000 | 2.51695e-22 | 1.000000 |
| rad26              | 1.54657e-22 | 1.000000 | 1.54657e-22 | 1.000000 |
| PAH3+H             | 7.20592e-23 | 1.000000 | 7.20592e-23 | 1.000000 |
| rad59              | 2.92631e-23 | 1.000000 | 2.92631e-23 | 1.000000 |
| rad50              | 6.52030e-26 | 1.000000 | 6.52030e-26 | 1.000000 |
| rad19syn           | 2.25273e-28 | 1.000000 | 2.25273e-28 | 1.000000 |
| rad5               | 1.04119e-28 | 1.000000 | 1.04119e-28 | 1.000000 |
| rad54              | 1.52698e-29 | 1.000000 | 1.52698e-29 | 1.000000 |
| rad12              | 8.17561e-31 | 1.000000 | 8.17561e-31 | 1.000000 |
| rad52              | 1.06720e-31 | 1.000000 | 1.06720e-31 | 1.000000 |
| rad37              | 2.72664e-32 | 1.000000 | 2.72664e-32 | 1.000000 |
| rad70              | 4.33872e-33 | 1.000000 | 4.33872e-33 | 1.000000 |
| rad51              | 4.99980e-35 | 1.000000 | 4.99980e-35 | 1.000000 |
| rad62              | 4.91608e-35 | 1.000000 | 4.91608e-35 | 1.000000 |
| rad55              | 3.75776e-35 | 1.000000 | 3.75776e-35 | 1.000000 |
| PhcycC3H3_A+H      | 5.01459e-36 | 1.000000 | 5.01459e-36 | 1.000000 |
| rad58              | 9.11692e-37 | 1.000000 | 9.11692e-37 | 1.000000 |
| rad43              | 3.94013e-37 | 1.000000 | 3.94013e-37 | 1.000000 |
| rad34              | 5.38625e-38 | 1.000000 | 5.38625e-38 | 1.000000 |
| rad65              | 2.34272e-40 | 1.000000 | 2.34272e-40 | 1.000000 |
| PAH10+CH3          | 2.28194e-40 | 1.000000 | 2.28194e-40 | 1.000000 |
| rad47              | 1.23147e-40 | 1.000000 | 1.23147e-40 | 1.000000 |
| PAH1+H             | 4.11060e-42 | 1.000000 | 4.11060e-42 | 1.000000 |
| rad42              | 6.03442e-44 | 1.000000 | 6.03442e-44 | 1.000000 |
| rad41              | 7.87860e-47 | 1.000000 | 7.87860e-47 | 1.000000 |

100000.000 Pa, 130.000000 K

| Rate constant | True (fraction) | Effective (fraction) |
|---------------|-----------------|----------------------|
|---------------|-----------------|----------------------|

|                    |                        |                        |
|--------------------|------------------------|------------------------|
| Total              | 1.33719e-19 (1.00 )    | 1.33719e-19 (1.00 )    |
| Formation of rad11 | 1.26517e-19 (0.946 )   | 1.26517e-19 (0.946 )   |
| Formation of rad6  | 7.08974e-21 (0.0530 )  | 7.08974e-21 (0.0530 )  |
| H-abstraction      | 1.11864e-22 (0.000837) | 1.11864e-22 (0.000837) |

| species            | PYtrue      | Cumul    | PYeffective | Cumul    |
|--------------------|-------------|----------|-------------|----------|
| rad11              | 0.942967    | 0.942967 | 0.942967    | 0.942967 |
| rad6               | 0.0560257   | 0.998993 | 0.0560257   | 0.998993 |
| Benzene+2-propynyl | 0.000836559 | 0.999830 | 0.000836559 | 0.999830 |
| rad21              | 8.27015e-05 | 0.999912 | 8.27015e-05 | 0.999912 |
| rad20              | 4.93303e-05 | 0.999962 | 4.93303e-05 | 0.999962 |
| rad22              | 2.90504e-05 | 0.999991 | 2.90504e-05 | 0.999991 |
| rad18              | 3.69857e-06 | 0.999995 | 3.69857e-06 | 0.999995 |
| rad45              | 3.61200e-06 | 0.999998 | 3.61200e-06 | 0.999998 |
| rad13              | 5.19176e-07 | 0.999999 | 5.19176e-07 | 0.999999 |
| rad7               | 3.03290e-07 | 0.999999 | 3.03290e-07 | 0.999999 |
| rad36              | 2.30388e-07 | 0.999999 | 2.30388e-07 | 0.999999 |
| Indene+H           | 2.29913e-07 | 0.999999 | 2.29913e-07 | 0.999999 |
| rad25              | 9.44937e-08 | 1.000000 | 9.44937e-08 | 1.000000 |
| C2H2+PhCH2         | 5.58377e-08 | 1.000000 | 5.58377e-08 | 1.000000 |
| rad23              | 3.08645e-08 | 1.000000 | 3.08645e-08 | 1.000000 |
| PhCHCCH2+H         | 9.21696e-09 | 1.000000 | 9.21696e-09 | 1.000000 |
| rad33              | 2.36726e-09 | 1.000000 | 2.36726e-09 | 1.000000 |
| rad24              | 1.31044e-09 | 1.000000 | 1.31044e-09 | 1.000000 |
| rad9               | 5.90022e-10 | 1.000000 | 5.90022e-10 | 1.000000 |
| Phenyl+Allene      | 1.16889e-10 | 1.000000 | 0.000000    | 1.000000 |
| rad3               | 9.71632e-11 | 1.000000 | 9.71632e-11 | 1.000000 |
| rad4               | 5.16506e-11 | 1.000000 | 5.16506e-11 | 1.000000 |
| rad28              | 5.29252e-12 | 1.000000 | 5.29252e-12 | 1.000000 |
| PhCH2CCH+H         | 1.21329e-13 | 1.000000 | 1.21329e-13 | 1.000000 |
| rad30              | 1.12563e-13 | 1.000000 | 1.12563e-13 | 1.000000 |
| rad2               | 5.82692e-14 | 1.000000 | 5.82692e-14 | 1.000000 |
| rad15              | 1.93961e-14 | 1.000000 | 1.93961e-14 | 1.000000 |
| rad8               | 4.63814e-15 | 1.000000 | 4.63814e-15 | 1.000000 |
| rad1               | 4.22919e-15 | 1.000000 | 4.22919e-15 | 1.000000 |
| PhCCH+CH3          | 1.10221e-15 | 1.000000 | 1.10221e-15 | 1.000000 |
| rad38              | 1.35334e-16 | 1.000000 | 1.35334e-16 | 1.000000 |
| rad14              | 5.09075e-17 | 1.000000 | 5.09075e-17 | 1.000000 |
| PAH7+H             | 1.18795e-17 | 1.000000 | 1.18795e-17 | 1.000000 |
| rad10              | 2.60243e-18 | 1.000000 | 2.60243e-18 | 1.000000 |
| rad60syn           | 2.11182e-18 | 1.000000 | 2.11182e-18 | 1.000000 |
| rad46              | 9.78379e-19 | 1.000000 | 9.78379e-19 | 1.000000 |
| Ph+MeAc            | 7.50784e-19 | 1.000000 | 7.50784e-19 | 1.000000 |
| rad60anti          | 5.41334e-19 | 1.000000 | 5.41334e-19 | 1.000000 |
| PAH9+H             | 3.89601e-19 | 1.000000 | 3.89601e-19 | 1.000000 |
| rad35              | 2.11450e-19 | 1.000000 | 2.11450e-19 | 1.000000 |
| rad31              | 5.66912e-20 | 1.000000 | 5.66912e-20 | 1.000000 |
| rad27              | 5.57530e-21 | 1.000000 | 5.57530e-21 | 1.000000 |
| PhCCCH3+H          | 4.66790e-21 | 1.000000 | 4.66790e-21 | 1.000000 |
| rad39              | 6.38316e-22 | 1.000000 | 6.38316e-22 | 1.000000 |
| rad26              | 6.18150e-22 | 1.000000 | 6.18150e-22 | 1.000000 |
| PAH3+H             | 3.87410e-22 | 1.000000 | 3.87410e-22 | 1.000000 |
| rad59              | 1.50671e-22 | 1.000000 | 1.50671e-22 | 1.000000 |
| rad50              | 3.10193e-25 | 1.000000 | 3.10193e-25 | 1.000000 |
| rad19syn           | 3.28083e-27 | 1.000000 | 3.28083e-27 | 1.000000 |
| rad5               | 5.68321e-28 | 1.000000 | 5.68321e-28 | 1.000000 |
| rad54              | 3.47281e-28 | 1.000000 | 3.47281e-28 | 1.000000 |
| rad12              | 4.39524e-30 | 1.000000 | 4.39524e-30 | 1.000000 |
| rad52              | 1.42397e-30 | 1.000000 | 1.42397e-30 | 1.000000 |
| rad70              | 3.43822e-31 | 1.000000 | 3.43822e-31 | 1.000000 |
| rad37              | 1.68263e-31 | 1.000000 | 1.68263e-31 | 1.000000 |
| rad55              | 2.51344e-33 | 1.000000 | 2.51344e-33 | 1.000000 |
| rad62              | 1.48581e-33 | 1.000000 | 1.48581e-33 | 1.000000 |
| rad51              | 1.36976e-33 | 1.000000 | 1.36976e-33 | 1.000000 |
| PhcycC3H3_A+H      | 3.37808e-34 | 1.000000 | 3.37808e-34 | 1.000000 |
| rad58              | 6.17984e-35 | 1.000000 | 6.17984e-35 | 1.000000 |
| rad43              | 1.02132e-35 | 1.000000 | 1.02132e-35 | 1.000000 |
| rad34              | 6.01496e-36 | 1.000000 | 6.01496e-36 | 1.000000 |
| rad65              | 1.03555e-38 | 1.000000 | 1.03555e-38 | 1.000000 |
| rad47              | 8.28257e-39 | 1.000000 | 8.28257e-39 | 1.000000 |
| PAH10+CH3          | 7.15265e-39 | 1.000000 | 7.15265e-39 | 1.000000 |
| PAH1+H             | 4.87751e-40 | 1.000000 | 4.87751e-40 | 1.000000 |
| rad42              | 6.69106e-42 | 1.000000 | 6.69106e-42 | 1.000000 |
| rad41              | 8.86332e-45 | 1.000000 | 8.86332e-45 | 1.000000 |

100000.000 Pa, 140.000000 K

=====

| Rate constant | True (fraction) | Effective (fraction) |
|---------------|-----------------|----------------------|
|---------------|-----------------|----------------------|

-----

|                    |                        |                        |
|--------------------|------------------------|------------------------|
| Total              | 3.59582e-19 (1.00 )    | 3.59582e-19 (1.00 )    |
| Formation of rad11 | 3.35703e-19 (0.934 )   | 3.35703e-19 (0.934 )   |
| Formation of rad6  | 2.33415e-20 (0.0649 )  | 2.33415e-20 (0.0649 )  |
| H-abstraction      | 5.37685e-22 (0.00150 ) | 5.37685e-22 (0.00150 ) |

| species            | PYtrue      | Cumul    | PYeffective | Cumul    |
|--------------------|-------------|----------|-------------|----------|
| rad11              | 0.930093    | 0.930093 | 0.930093    | 0.930093 |
| rad6               | 0.0682225   | 0.998316 | 0.0682225   | 0.998316 |
| Benzene+2-propynyl | 0.00149531  | 0.999811 | 0.00149531  | 0.999811 |
| rad21              | 8.78155e-05 | 0.999899 | 8.78155e-05 | 0.999899 |
| rad20              | 5.61565e-05 | 0.999955 | 5.61565e-05 | 0.999955 |
| rad22              | 3.44663e-05 | 0.999989 | 3.44663e-05 | 0.999989 |
| rad18              | 4.70762e-06 | 0.999994 | 4.70762e-06 | 0.999994 |
| rad45              | 4.34260e-06 | 0.999998 | 4.34260e-06 | 0.999998 |
| rad13              | 6.73515e-07 | 0.999999 | 6.73515e-07 | 0.999999 |
| rad7               | 4.18833e-07 | 1.000000 | 4.18833e-07 | 1.000000 |
| Indene+H           | 3.23893e-07 | 1.000000 | 3.23893e-07 | 1.000000 |
| rad36              | 2.76631e-07 | 1.000000 | 2.76631e-07 | 1.000000 |
| rad25              | 1.10020e-07 | 1.000000 | 1.10020e-07 | 1.000000 |
| C2H2+PhCH2         | 7.69465e-08 | 1.000000 | 7.69465e-08 | 1.000000 |
| rad23              | 4.13112e-08 | 1.000000 | 4.13112e-08 | 1.000000 |
| PhCHCCH2+H         | 1.15823e-08 | 1.000000 | 1.15823e-08 | 1.000000 |
| rad33              | 2.93863e-09 | 1.000000 | 2.93863e-09 | 1.000000 |
| rad24              | 1.26008e-09 | 1.000000 | 1.26008e-09 | 1.000000 |
| rad9               | 7.60545e-10 | 1.000000 | 7.60545e-10 | 1.000000 |
| Phenyl+Allene      | 1.85397e-10 | 1.000000 | 0.000000    | 1.000000 |
| rad3               | 1.49092e-10 | 1.000000 | 1.49092e-10 | 1.000000 |
| rad4               | 7.91977e-11 | 1.000000 | 7.91977e-11 | 1.000000 |
| rad28              | 8.42225e-12 | 1.000000 | 8.42225e-12 | 1.000000 |
| PhCH2CCH+H         | 3.26679e-13 | 1.000000 | 3.26679e-13 | 1.000000 |
| rad30              | 1.81657e-13 | 1.000000 | 1.81657e-13 | 1.000000 |
| rad2               | 1.05976e-13 | 1.000000 | 1.05976e-13 | 1.000000 |
| rad15              | 3.21113e-14 | 1.000000 | 3.21113e-14 | 1.000000 |
| rad8               | 8.73674e-15 | 1.000000 | 8.73674e-15 | 1.000000 |
| rad1               | 7.68639e-15 | 1.000000 | 7.68639e-15 | 1.000000 |
| PhCCH+CH3          | 2.27212e-15 | 1.000000 | 2.27212e-15 | 1.000000 |
| rad38              | 2.07796e-16 | 1.000000 | 2.07796e-16 | 1.000000 |
| rad14              | 9.94037e-17 | 1.000000 | 9.94037e-17 | 1.000000 |
| PAH7+H             | 3.63473e-17 | 1.000000 | 3.63473e-17 | 1.000000 |
| rad10              | 5.71771e-18 | 1.000000 | 5.71771e-18 | 1.000000 |
| rad60syn           | 4.55042e-18 | 1.000000 | 4.55042e-18 | 1.000000 |
| Ph+MeAc            | 1.91550e-18 | 1.000000 | 1.91550e-18 | 1.000000 |
| rad46              | 1.63887e-18 | 1.000000 | 1.63887e-18 | 1.000000 |
| rad60anti          | 1.24223e-18 | 1.000000 | 1.24223e-18 | 1.000000 |
| PAH9+H             | 6.82027e-19 | 1.000000 | 6.82027e-19 | 1.000000 |
| rad35              | 3.69822e-19 | 1.000000 | 3.69822e-19 | 1.000000 |
| rad31              | 8.91141e-20 | 1.000000 | 8.91141e-20 | 1.000000 |
| rad27              | 1.30445e-20 | 1.000000 | 1.30445e-20 | 1.000000 |
| PhCCCH3+H          | 1.21851e-20 | 1.000000 | 1.21851e-20 | 1.000000 |
| rad26              | 2.20775e-21 | 1.000000 | 2.20775e-21 | 1.000000 |
| PAH3+H             | 1.86999e-21 | 1.000000 | 1.86999e-21 | 1.000000 |
| rad39              | 1.56925e-21 | 1.000000 | 1.56925e-21 | 1.000000 |
| rad59              | 6.96642e-22 | 1.000000 | 6.96642e-22 | 1.000000 |
| rad50              | 1.34698e-24 | 1.000000 | 1.34698e-24 | 1.000000 |
| rad19syn           | 3.63194e-26 | 1.000000 | 3.63194e-26 | 1.000000 |
| rad54              | 5.52521e-27 | 1.000000 | 5.52521e-27 | 1.000000 |
| rad5               | 2.85703e-27 | 1.000000 | 2.85703e-27 | 1.000000 |
| rad12              | 2.16703e-29 | 1.000000 | 2.16703e-29 | 1.000000 |
| rad70              | 1.63326e-29 | 1.000000 | 1.63326e-29 | 1.000000 |
| rad52              | 1.56123e-29 | 1.000000 | 1.56123e-29 | 1.000000 |
| rad37              | 9.57684e-31 | 1.000000 | 9.57684e-31 | 1.000000 |
| rad55              | 1.00970e-31 | 1.000000 | 1.00970e-31 | 1.000000 |
| rad62              | 3.41490e-32 | 1.000000 | 3.41490e-32 | 1.000000 |
| rad51              | 2.93918e-32 | 1.000000 | 2.93918e-32 | 1.000000 |
| PhcycC3H3_A+H      | 1.47571e-32 | 1.000000 | 1.47571e-32 | 1.000000 |
| rad58              | 3.13294e-33 | 1.000000 | 3.13294e-33 | 1.000000 |
| rad34              | 6.66023e-34 | 1.000000 | 6.66023e-34 | 1.000000 |
| rad43              | 2.10665e-34 | 1.000000 | 2.10665e-34 | 1.000000 |
| rad47              | 4.79911e-37 | 1.000000 | 4.79911e-37 | 1.000000 |
| rad65              | 3.53318e-37 | 1.000000 | 3.53318e-37 | 1.000000 |
| PAH10+CH3          | 1.70125e-37 | 1.000000 | 1.70125e-37 | 1.000000 |
| PAH1+H             | 5.21748e-38 | 1.000000 | 5.21748e-38 | 1.000000 |
| rad42              | 7.29963e-40 | 1.000000 | 7.29963e-40 | 1.000000 |
| rad41              | 9.13404e-43 | 1.000000 | 9.13404e-43 | 1.000000 |

100000.000 Pa, 150.000000 K

| Rate constant | True (fraction) | Effective (fraction) |
|---------------|-----------------|----------------------|
|---------------|-----------------|----------------------|

|                    |                        |                        |
|--------------------|------------------------|------------------------|
| Total              | 8.51464e-19 (1.00 )    | 8.51464e-19 (1.00 )    |
| Formation of rad11 | 7.83711e-19 (0.920 )   | 7.83711e-19 (0.920 )   |
| Formation of rad6  | 6.56651e-20 (0.0771 )  | 6.56651e-20 (0.0771 )  |
| H-abstraction      | 2.08816e-21 (0.00245 ) | 2.08816e-21 (0.00245 ) |

| species            | PYtrue      | Cumul    | PYeffective | Cumul    |
|--------------------|-------------|----------|-------------|----------|
| rad11              | 0.916586    | 0.916586 | 0.916586    | 0.916586 |
| rad6               | 0.0807514   | 0.997337 | 0.0807514   | 0.997337 |
| Benzene+2-propynyl | 0.00245244  | 0.999789 | 0.00245244  | 0.999789 |
| rad21              | 9.29955e-05 | 0.999882 | 9.29955e-05 | 0.999882 |
| rad20              | 6.33948e-05 | 0.999946 | 6.33948e-05 | 0.999946 |
| rad22              | 4.06341e-05 | 0.999986 | 4.06341e-05 | 0.999986 |
| rad18              | 5.92379e-06 | 0.999992 | 5.92379e-06 | 0.999992 |
| rad45              | 5.19157e-06 | 0.999998 | 5.19157e-06 | 0.999998 |
| rad13              | 8.44020e-07 | 0.999998 | 8.44020e-07 | 0.999998 |
| rad7               | 5.60156e-07 | 0.999999 | 5.60156e-07 | 0.999999 |
| Indene+H           | 4.51473e-07 | 0.999999 | 4.51473e-07 | 0.999999 |
| rad36              | 3.30431e-07 | 1.000000 | 3.30431e-07 | 1.000000 |
| rad25              | 1.28050e-07 | 1.000000 | 1.28050e-07 | 1.000000 |
| C2H2+PhCH2         | 1.05387e-07 | 1.000000 | 1.05387e-07 | 1.000000 |
| rad23              | 5.48521e-08 | 1.000000 | 5.48521e-08 | 1.000000 |
| PhCHCCH2+H         | 1.46105e-08 | 1.000000 | 1.46105e-08 | 1.000000 |
| rad33              | 3.52750e-09 | 1.000000 | 3.52750e-09 | 1.000000 |
| rad24              | 1.21783e-09 | 1.000000 | 1.21783e-09 | 1.000000 |
| rad9               | 9.84157e-10 | 1.000000 | 9.84157e-10 | 1.000000 |
| Phenyl+Allene      | 2.91938e-10 | 1.000000 | 0.000000    | 1.000000 |
| rad3               | 2.20771e-10 | 1.000000 | 2.20771e-10 | 1.000000 |
| rad4               | 1.17226e-10 | 1.000000 | 1.17226e-10 | 1.000000 |
| rad28              | 1.29561e-11 | 1.000000 | 1.29561e-11 | 1.000000 |
| PhCH2CCH+H         | 8.13239e-13 | 1.000000 | 8.13239e-13 | 1.000000 |
| rad30              | 2.91899e-13 | 1.000000 | 2.91899e-13 | 1.000000 |
| rad2               | 1.86318e-13 | 1.000000 | 1.86318e-13 | 1.000000 |
| rad15              | 5.30099e-14 | 1.000000 | 5.30099e-14 | 1.000000 |
| rad8               | 1.63691e-14 | 1.000000 | 1.63691e-14 | 1.000000 |
| rad1               | 1.35170e-14 | 1.000000 | 1.35170e-14 | 1.000000 |
| PhCCH+CH3          | 4.55871e-15 | 1.000000 | 4.55871e-15 | 1.000000 |
| rad38              | 3.19866e-16 | 1.000000 | 3.19866e-16 | 1.000000 |
| rad14              | 1.88350e-16 | 1.000000 | 1.88350e-16 | 1.000000 |
| PAH7+H             | 1.04530e-16 | 1.000000 | 1.04530e-16 | 1.000000 |
| rad10              | 1.22066e-17 | 1.000000 | 1.22066e-17 | 1.000000 |
| rad60syn           | 9.74548e-18 | 1.000000 | 9.74548e-18 | 1.000000 |
| Ph+MeAc            | 4.74616e-18 | 1.000000 | 4.74616e-18 | 1.000000 |
| rad60anti          | 2.81334e-18 | 1.000000 | 2.81334e-18 | 1.000000 |
| rad46              | 2.76585e-18 | 1.000000 | 2.76585e-18 | 1.000000 |
| PAH9+H             | 1.20068e-18 | 1.000000 | 1.20068e-18 | 1.000000 |
| rad35              | 6.55415e-19 | 1.000000 | 6.55415e-19 | 1.000000 |
| rad31              | 1.35985e-19 | 1.000000 | 1.35985e-19 | 1.000000 |
| PhCCCH3+H          | 3.12077e-20 | 1.000000 | 3.12077e-20 | 1.000000 |
| rad27              | 2.97209e-20 | 1.000000 | 2.97209e-20 | 1.000000 |
| PAH3+H             | 8.13924e-21 | 1.000000 | 8.13924e-21 | 1.000000 |
| rad26              | 7.14405e-21 | 1.000000 | 7.14405e-21 | 1.000000 |
| rad39              | 3.77221e-21 | 1.000000 | 3.77221e-21 | 1.000000 |
| rad59              | 2.90849e-21 | 1.000000 | 2.90849e-21 | 1.000000 |
| rad50              | 5.37448e-24 | 1.000000 | 5.37448e-24 | 1.000000 |
| rad19syn           | 3.14963e-25 | 1.000000 | 3.14963e-25 | 1.000000 |
| rad54              | 6.42128e-26 | 1.000000 | 6.42128e-26 | 1.000000 |
| rad5               | 1.33709e-26 | 1.000000 | 1.33709e-26 | 1.000000 |
| rad70              | 4.65471e-28 | 1.000000 | 4.65471e-28 | 1.000000 |
| rad52              | 1.40244e-28 | 1.000000 | 1.40244e-28 | 1.000000 |
| rad12              | 9.89559e-29 | 1.000000 | 9.89559e-29 | 1.000000 |
| rad37              | 5.04980e-30 | 1.000000 | 5.04980e-30 | 1.000000 |
| rad55              | 2.53254e-30 | 1.000000 | 2.53254e-30 | 1.000000 |
| rad62              | 5.95544e-31 | 1.000000 | 5.95544e-31 | 1.000000 |
| rad51              | 4.84616e-31 | 1.000000 | 4.84616e-31 | 1.000000 |
| PhcycC3H3_A+H      | 4.07923e-31 | 1.000000 | 4.07923e-31 | 1.000000 |
| rad58              | 1.03223e-31 | 1.000000 | 1.03223e-31 | 1.000000 |
| rad34              | 6.37938e-32 | 1.000000 | 6.37938e-32 | 1.000000 |
| rad43              | 3.44927e-33 | 1.000000 | 3.44927e-33 | 1.000000 |
| rad47              | 2.02667e-35 | 1.000000 | 2.02667e-35 | 1.000000 |
| rad65              | 8.93090e-36 | 1.000000 | 8.93090e-36 | 1.000000 |
| PAH10+CH3          | 3.09592e-36 | 1.000000 | 3.09592e-36 | 1.000000 |
| PAH1+H             | 2.47081e-36 | 1.000000 | 2.47081e-36 | 1.000000 |
| rad42              | 5.19828e-38 | 1.000000 | 5.19828e-38 | 1.000000 |
| rad41              | 6.25623e-41 | 1.000000 | 6.25623e-41 | 1.000000 |

100000.000 Pa, 160.000000 K

| Rate constant | True (fraction) | Effective (fraction) |
|---------------|-----------------|----------------------|
|---------------|-----------------|----------------------|

|                    |                        |                        |
|--------------------|------------------------|------------------------|
| Total              | 1.81800e-18 (1.00 )    | 1.81800e-18 (1.00 )    |
| Formation of rad11 | 1.64862e-18 (0.907 )   | 1.64862e-18 (0.907 )   |
| Formation of rad6  | 1.62558e-19 (0.0894 )  | 1.62558e-19 (0.0894 )  |
| H-abstraction      | 6.82130e-21 (0.00375 ) | 6.82130e-21 (0.00375 ) |

| species            | PYtrue      | Cumul    | PYeffective | Cumul    |
|--------------------|-------------|----------|-------------|----------|
| rad11              | 0.902625    | 0.902625 | 0.902625    | 0.902625 |
| rad6               | 0.0933897   | 0.996014 | 0.0933897   | 0.996014 |
| Benzene+2-propynyl | 0.00375209  | 0.999766 | 0.00375209  | 0.999766 |
| rad21              | 9.82951e-05 | 0.999865 | 9.82951e-05 | 0.999865 |
| rad20              | 7.10740e-05 | 0.999936 | 7.10740e-05 | 0.999936 |
| rad22              | 4.76844e-05 | 0.999983 | 4.76844e-05 | 0.999983 |
| rad18              | 7.38567e-06 | 0.999991 | 7.38567e-06 | 0.999991 |
| rad45              | 6.18223e-06 | 0.999997 | 6.18223e-06 | 0.999997 |
| rad13              | 1.02795e-06 | 0.999998 | 1.02795e-06 | 0.999998 |
| rad7               | 7.30178e-07 | 0.999999 | 7.30178e-07 | 0.999999 |
| Indene+H           | 6.24381e-07 | 0.999999 | 6.24381e-07 | 0.999999 |
| rad36              | 3.93319e-07 | 1.000000 | 3.93319e-07 | 1.000000 |
| rad25              | 1.49115e-07 | 1.000000 | 1.49115e-07 | 1.000000 |
| C2H2+PhCH2         | 1.43784e-07 | 1.000000 | 1.43784e-07 | 1.000000 |
| rad23              | 7.24450e-08 | 1.000000 | 7.24450e-08 | 1.000000 |
| PhCHCCH2+H         | 1.85145e-08 | 1.000000 | 1.85145e-08 | 1.000000 |
| rad33              | 4.11970e-09 | 1.000000 | 4.11970e-09 | 1.000000 |
| rad9               | 1.27910e-09 | 1.000000 | 1.27910e-09 | 1.000000 |
| rad24              | 1.18286e-09 | 1.000000 | 1.18286e-09 | 1.000000 |
| Phenyl+Allene      | 4.56790e-10 | 1.000000 | 0.000000    | 1.000000 |
| rad3               | 3.17747e-10 | 1.000000 | 3.17747e-10 | 1.000000 |
| rad4               | 1.68700e-10 | 1.000000 | 1.68700e-10 | 1.000000 |
| rad28              | 1.94052e-11 | 1.000000 | 1.94052e-11 | 1.000000 |
| PhCH2CCH+H         | 1.89559e-12 | 1.000000 | 1.89559e-12 | 1.000000 |
| rad30              | 4.68254e-13 | 1.000000 | 4.68254e-13 | 1.000000 |
| rad2               | 3.19241e-13 | 1.000000 | 3.19241e-13 | 1.000000 |
| rad15              | 8.74672e-14 | 1.000000 | 8.74672e-14 | 1.000000 |
| rad8               | 3.04972e-14 | 1.000000 | 3.04972e-14 | 1.000000 |
| rad1               | 2.31866e-14 | 1.000000 | 2.31866e-14 | 1.000000 |
| PhCCH+CH3          | 8.96918e-15 | 1.000000 | 8.96918e-15 | 1.000000 |
| rad38              | 4.95008e-16 | 1.000000 | 4.95008e-16 | 1.000000 |
| rad14              | 3.49003e-16 | 1.000000 | 3.49003e-16 | 1.000000 |
| PAH7+H             | 2.84478e-16 | 1.000000 | 2.84478e-16 | 1.000000 |
| rad10              | 2.55485e-17 | 1.000000 | 2.55485e-17 | 1.000000 |
| rad60syn           | 2.07399e-17 | 1.000000 | 2.07399e-17 | 1.000000 |
| Ph+MeAc            | 1.14839e-17 | 1.000000 | 1.14839e-17 | 1.000000 |
| rad60anti          | 6.29091e-18 | 1.000000 | 6.29091e-18 | 1.000000 |
| rad46              | 4.71227e-18 | 1.000000 | 4.71227e-18 | 1.000000 |
| PAH9+H             | 2.13358e-18 | 1.000000 | 2.13358e-18 | 1.000000 |
| rad35              | 1.18485e-18 | 1.000000 | 1.18485e-18 | 1.000000 |
| rad31              | 2.02867e-19 | 1.000000 | 2.02867e-19 | 1.000000 |
| PhCCCH3+H          | 7.89744e-20 | 1.000000 | 7.89744e-20 | 1.000000 |
| rad27              | 6.64462e-20 | 1.000000 | 6.64462e-20 | 1.000000 |
| PAH3+H             | 3.22581e-20 | 1.000000 | 3.22581e-20 | 1.000000 |
| rad26              | 2.12572e-20 | 1.000000 | 2.12572e-20 | 1.000000 |
| rad59              | 1.10787e-20 | 1.000000 | 1.10787e-20 | 1.000000 |
| rad39              | 8.91508e-21 | 1.000000 | 8.91508e-21 | 1.000000 |
| rad50              | 1.98991e-23 | 1.000000 | 1.98991e-23 | 1.000000 |
| rad19syn           | 2.21698e-24 | 1.000000 | 2.21698e-24 | 1.000000 |
| rad54              | 5.71944e-25 | 1.000000 | 5.71944e-25 | 1.000000 |
| rad5               | 5.87877e-26 | 1.000000 | 5.87877e-26 | 1.000000 |
| rad70              | 9.04739e-27 | 1.000000 | 9.04739e-27 | 1.000000 |
| rad52              | 1.05023e-27 | 1.000000 | 1.05023e-27 | 1.000000 |
| rad12              | 4.22891e-28 | 1.000000 | 4.22891e-28 | 1.000000 |
| rad55              | 4.40201e-29 | 1.000000 | 4.40201e-29 | 1.000000 |
| rad37              | 2.48360e-29 | 1.000000 | 2.48360e-29 | 1.000000 |
| rad62              | 8.10110e-30 | 1.000000 | 8.10110e-30 | 1.000000 |
| PhcycC3H3_A+H      | 7.91582e-30 | 1.000000 | 7.91582e-30 | 1.000000 |
| rad51              | 6.24601e-30 | 1.000000 | 6.24601e-30 | 1.000000 |
| rad34              | 2.83180e-30 | 1.000000 | 2.83180e-30 | 1.000000 |
| rad58              | 2.33779e-30 | 1.000000 | 2.33779e-30 | 1.000000 |
| rad43              | 4.57219e-32 | 1.000000 | 4.57219e-32 | 1.000000 |
| rad47              | 5.56668e-34 | 1.000000 | 5.56668e-34 | 1.000000 |
| rad65              | 1.70276e-34 | 1.000000 | 1.70276e-34 | 1.000000 |
| PAH1+H             | 7.35537e-35 | 1.000000 | 7.35537e-35 | 1.000000 |
| PAH10+CH3          | 4.44619e-35 | 1.000000 | 4.44619e-35 | 1.000000 |
| rad42              | 2.21891e-36 | 1.000000 | 2.21891e-36 | 1.000000 |
| rad41              | 2.72671e-39 | 1.000000 | 2.72671e-39 | 1.000000 |

100000.000 Pa, 170.000000 K

=====  
Rate constant | True (fraction) | Effective (fraction)  
-----

|                    |                        |                        |
|--------------------|------------------------|------------------------|
| Total              | 3.56414e-18 (1.00 )    | 3.56414e-18 (1.00 )    |
| Formation of rad11 | 3.18264e-18 (0.893 )   | 3.18264e-18 (0.893 )   |
| Formation of rad6  | 3.62173e-19 (0.102 )   | 3.62173e-19 (0.102 )   |
| H-abstraction      | 1.93278e-20 (0.00542 ) | 1.93278e-20 (0.00542 ) |

| species            | PYtrue      | Cumul    | PYeffective | Cumul    |
|--------------------|-------------|----------|-------------|----------|
| rad11              | 0.888361    | 0.888361 | 0.888361    | 0.888361 |
| rad6               | 0.105957    | 0.994319 | 0.105957    | 0.994319 |
| Benzene+2-propynyl | 0.00542285  | 0.999741 | 0.00542285  | 0.999741 |
| rad21              | 0.000103764 | 0.999845 | 0.000103764 | 0.999845 |
| rad20              | 7.92245e-05 | 0.999924 | 7.92245e-05 | 0.999924 |
| rad22              | 5.57746e-05 | 0.999980 | 5.57746e-05 | 0.999980 |
| rad18              | 9.13902e-06 | 0.999989 | 9.13902e-06 | 0.999989 |
| rad45              | 7.34313e-06 | 0.999997 | 7.34313e-06 | 0.999997 |
| rad13              | 1.22248e-06 | 0.999998 | 1.22248e-06 | 0.999998 |
| rad7               | 9.32307e-07 | 0.999999 | 9.32307e-07 | 0.999999 |
| Indene+H           | 8.58547e-07 | 1.000000 | 8.58547e-07 | 1.000000 |
| rad36              | 4.67179e-07 | 1.000000 | 4.67179e-07 | 1.000000 |
| C2H2+PhCH2         | 1.95738e-07 | 1.000000 | 1.95738e-07 | 1.000000 |
| rad25              | 1.73859e-07 | 1.000000 | 1.73859e-07 | 1.000000 |
| rad23              | 9.53776e-08 | 1.000000 | 9.53776e-08 | 1.000000 |
| PhCHCCH2+H         | 2.35789e-08 | 1.000000 | 2.35789e-08 | 1.000000 |
| rad33              | 4.70341e-09 | 1.000000 | 4.70341e-09 | 1.000000 |
| rad9               | 1.67006e-09 | 1.000000 | 1.67006e-09 | 1.000000 |
| rad24              | 1.15453e-09 | 1.000000 | 1.15453e-09 | 1.000000 |
| Phenyl+Allene      | 7.10594e-10 | 1.000000 | 0.000000    | 1.000000 |
| rad3               | 4.46970e-10 | 1.000000 | 4.46970e-10 | 1.000000 |
| rad4               | 2.37346e-10 | 1.000000 | 2.37346e-10 | 1.000000 |
| rad28              | 2.84541e-11 | 1.000000 | 2.84541e-11 | 1.000000 |
| PhCH2CCH+H         | 4.18076e-12 | 1.000000 | 4.18076e-12 | 1.000000 |
| rad30              | 7.51100e-13 | 1.000000 | 7.51100e-13 | 1.000000 |
| rad2               | 5.36393e-13 | 1.000000 | 5.36393e-13 | 1.000000 |
| rad15              | 1.44440e-13 | 1.000000 | 1.44440e-13 | 1.000000 |
| rad8               | 5.64630e-14 | 1.000000 | 5.64630e-14 | 1.000000 |
| rad1               | 3.90368e-14 | 1.000000 | 3.90368e-14 | 1.000000 |
| PhCCH+CH3          | 1.73962e-14 | 1.000000 | 1.73962e-14 | 1.000000 |
| rad38              | 7.71644e-16 | 1.000000 | 7.71644e-16 | 1.000000 |
| PAH7+H             | 7.37366e-16 | 1.000000 | 7.37366e-16 | 1.000000 |
| rad14              | 6.35956e-16 | 1.000000 | 6.35956e-16 | 1.000000 |
| rad10              | 5.27641e-17 | 1.000000 | 5.27641e-17 | 1.000000 |
| rad60syn           | 4.38192e-17 | 1.000000 | 4.38192e-17 | 1.000000 |
| Ph+MeAc            | 2.72308e-17 | 1.000000 | 2.72308e-17 | 1.000000 |
| rad60anti          | 1.38862e-17 | 1.000000 | 1.38862e-17 | 1.000000 |
| rad46              | 8.11263e-18 | 1.000000 | 8.11263e-18 | 1.000000 |
| PAH9+H             | 3.83619e-18 | 1.000000 | 3.83619e-18 | 1.000000 |
| rad35              | 2.19530e-18 | 1.000000 | 2.19530e-18 | 1.000000 |
| rad31              | 2.97522e-19 | 1.000000 | 2.97522e-19 | 1.000000 |
| PhCCCH3+H          | 1.98309e-19 | 1.000000 | 1.98309e-19 | 1.000000 |
| rad27              | 1.46464e-19 | 1.000000 | 1.46464e-19 | 1.000000 |
| PAH3+H             | 1.17655e-19 | 1.000000 | 1.17655e-19 | 1.000000 |
| rad26              | 5.89375e-20 | 1.000000 | 5.89375e-20 | 1.000000 |
| rad59              | 3.89205e-20 | 1.000000 | 3.89205e-20 | 1.000000 |
| rad39              | 2.07814e-20 | 1.000000 | 2.07814e-20 | 1.000000 |
| rad50              | 6.90497e-23 | 1.000000 | 6.90497e-23 | 1.000000 |
| rad19syn           | 1.30859e-23 | 1.000000 | 1.30859e-23 | 1.000000 |
| rad54              | 4.07380e-24 | 1.000000 | 4.07380e-24 | 1.000000 |
| rad5               | 2.44636e-25 | 1.000000 | 2.44636e-25 | 1.000000 |
| rad70              | 1.28040e-25 | 1.000000 | 1.28040e-25 | 1.000000 |
| rad52              | 6.70699e-27 | 1.000000 | 6.70699e-27 | 1.000000 |
| rad12              | 1.70605e-27 | 1.000000 | 1.70605e-27 | 1.000000 |
| rad55              | 5.61436e-28 | 1.000000 | 5.61436e-28 | 1.000000 |
| rad37              | 1.14662e-28 | 1.000000 | 1.14662e-28 | 1.000000 |
| PhcycC3H3_A+H      | 1.13191e-28 | 1.000000 | 1.13191e-28 | 1.000000 |
| rad62              | 8.85113e-29 | 1.000000 | 8.85113e-29 | 1.000000 |
| rad34              | 6.76410e-29 | 1.000000 | 6.76410e-29 | 1.000000 |
| rad51              | 6.46442e-29 | 1.000000 | 6.46442e-29 | 1.000000 |
| rad58              | 3.83404e-29 | 1.000000 | 3.83404e-29 | 1.000000 |
| rad43              | 5.01542e-31 | 1.000000 | 5.01542e-31 | 1.000000 |
| rad47              | 1.04456e-32 | 1.000000 | 1.04456e-32 | 1.000000 |
| rad65              | 2.51190e-33 | 1.000000 | 2.51190e-33 | 1.000000 |
| PAH1+H             | 1.46681e-33 | 1.000000 | 1.46681e-33 | 1.000000 |
| PAH10+CH3          | 5.18485e-34 | 1.000000 | 5.18485e-34 | 1.000000 |
| rad42              | 5.65897e-35 | 1.000000 | 5.65897e-35 | 1.000000 |
| rad41              | 7.34035e-38 | 1.000000 | 7.34035e-38 | 1.000000 |

100000.000 Pa, 180.000000 K

| Rate constant | True (fraction) | Effective (fraction) |
|---------------|-----------------|----------------------|
|---------------|-----------------|----------------------|

|                    |                        |                        |
|--------------------|------------------------|------------------------|
| Total              | 6.50681e-18 (1.00 )    | 6.50681e-18 (1.00 )    |
| Formation of rad11 | 5.71915e-18 (0.879 )   | 5.71915e-18 (0.879 )   |
| Formation of rad6  | 7.39013e-19 (0.114 )   | 7.39013e-19 (0.114 )   |
| H-abstraction      | 4.86496e-20 (0.00748 ) | 4.86496e-20 (0.00748 ) |

| species            | PYtrue      | Cumul    | PYeffective | Cumul    |
|--------------------|-------------|----------|-------------|----------|
| rad11              | 0.873924    | 0.873924 | 0.873924    | 0.873924 |
| rad6               | 0.118313    | 0.992236 | 0.118313    | 0.992236 |
| Benzene+2-propynyl | 0.00747672  | 0.999713 | 0.00747672  | 0.999713 |
| rad21              | 0.000109451 | 0.999823 | 0.000109451 | 0.999823 |
| rad20              | 8.78768e-05 | 0.999910 | 8.78768e-05 | 0.999910 |
| rad22              | 6.50932e-05 | 0.999976 | 6.50932e-05 | 0.999976 |
| rad18              | 1.12375e-05 | 0.999987 | 1.12375e-05 | 0.999987 |
| rad45              | 8.70910e-06 | 0.999996 | 8.70910e-06 | 0.999996 |
| rad13              | 1.42486e-06 | 0.999997 | 1.42486e-06 | 0.999997 |
| Indene+H           | 1.17554e-06 | 0.999998 | 1.17554e-06 | 0.999998 |
| rad7               | 1.17059e-06 | 0.999999 | 1.17059e-06 | 0.999999 |
| rad36              | 5.54323e-07 | 1.000000 | 5.54323e-07 | 1.000000 |
| C2H2+PhCH2         | 2.66170e-07 | 1.000000 | 2.66170e-07 | 1.000000 |
| rad25              | 2.03050e-07 | 1.000000 | 2.03050e-07 | 1.000000 |
| rad23              | 1.25384e-07 | 1.000000 | 1.25384e-07 | 1.000000 |
| PhCHCCH2+H         | 3.01836e-08 | 1.000000 | 3.01836e-08 | 1.000000 |
| rad33              | 5.26910e-09 | 1.000000 | 5.26910e-09 | 1.000000 |
| rad9               | 2.19040e-09 | 1.000000 | 2.19040e-09 | 1.000000 |
| rad24              | 1.13227e-09 | 1.000000 | 1.13227e-09 | 1.000000 |
| Phenyl+Allene      | 1.09937e-09 | 1.000000 | 0.000000    | 1.000000 |
| rad3               | 6.17179e-10 | 1.000000 | 6.17179e-10 | 1.000000 |
| rad4               | 3.27874e-10 | 1.000000 | 3.27874e-10 | 1.000000 |
| rad28              | 4.10198e-11 | 1.000000 | 4.10198e-11 | 1.000000 |
| PhCH2CCH+H         | 8.79910e-12 | 1.000000 | 8.79910e-12 | 1.000000 |
| rad30              | 1.20559e-12 | 1.000000 | 1.20559e-12 | 1.000000 |
| rad2               | 8.87955e-13 | 1.000000 | 8.87955e-13 | 1.000000 |
| rad15              | 2.38814e-13 | 1.000000 | 2.38814e-13 | 1.000000 |
| rad8               | 1.03788e-13 | 1.000000 | 1.03788e-13 | 1.000000 |
| rad1               | 6.48074e-14 | 1.000000 | 6.48074e-14 | 1.000000 |
| PhCCH+CH3          | 3.33814e-14 | 1.000000 | 3.33814e-14 | 1.000000 |
| PAH7+H             | 1.83042e-15 | 1.000000 | 1.83042e-15 | 1.000000 |
| rad38              | 1.21311e-15 | 1.000000 | 1.21311e-15 | 1.000000 |
| rad14              | 1.14411e-15 | 1.000000 | 1.14411e-15 | 1.000000 |
| rad10              | 1.08014e-16 | 1.000000 | 1.08014e-16 | 1.000000 |
| rad60syn           | 9.17941e-17 | 1.000000 | 9.17941e-17 | 1.000000 |
| Ph+MeAc            | 6.34181e-17 | 1.000000 | 6.34181e-17 | 1.000000 |
| rad60anti          | 3.02389e-17 | 1.000000 | 3.02389e-17 | 1.000000 |
| rad46              | 1.41145e-17 | 1.000000 | 1.41145e-17 | 1.000000 |
| PAH9+H             | 6.98821e-18 | 1.000000 | 6.98821e-18 | 1.000000 |
| rad35              | 4.17781e-18 | 1.000000 | 4.17781e-18 | 1.000000 |
| PhCCCH3+H          | 4.95201e-19 | 1.000000 | 4.95201e-19 | 1.000000 |
| rad31              | 4.30857e-19 | 1.000000 | 4.30857e-19 | 1.000000 |
| PAH3+H             | 3.98755e-19 | 1.000000 | 3.98755e-19 | 1.000000 |
| rad27              | 3.19149e-19 | 1.000000 | 3.19149e-19 | 1.000000 |
| rad26              | 1.53962e-19 | 1.000000 | 1.53962e-19 | 1.000000 |
| rad59              | 1.27343e-19 | 1.000000 | 1.27343e-19 | 1.000000 |
| rad39              | 4.78591e-20 | 1.000000 | 4.78591e-20 | 1.000000 |
| rad50              | 2.26537e-22 | 1.000000 | 2.26537e-22 | 1.000000 |
| rad19syn           | 6.65991e-23 | 1.000000 | 6.65991e-23 | 1.000000 |
| rad54              | 2.40456e-23 | 1.000000 | 2.40456e-23 | 1.000000 |
| rad70              | 1.39039e-24 | 1.000000 | 1.39039e-24 | 1.000000 |
| rad5               | 9.69265e-25 | 1.000000 | 9.69265e-25 | 1.000000 |
| rad52              | 3.73479e-26 | 1.000000 | 3.73479e-26 | 1.000000 |
| rad12              | 6.54068e-27 | 1.000000 | 6.54068e-27 | 1.000000 |
| rad55              | 5.52238e-27 | 1.000000 | 5.52238e-27 | 1.000000 |
| PhcycC3H3_A+H      | 1.25106e-27 | 1.000000 | 1.25106e-27 | 1.000000 |
| rad34              | 1.09450e-27 | 1.000000 | 1.09450e-27 | 1.000000 |
| rad62              | 7.98870e-28 | 1.000000 | 7.98870e-28 | 1.000000 |
| rad51              | 5.52758e-28 | 1.000000 | 5.52758e-28 | 1.000000 |
| rad37              | 4.99599e-28 | 1.000000 | 4.99599e-28 | 1.000000 |
| rad58              | 4.79513e-28 | 1.000000 | 4.79513e-28 | 1.000000 |
| rad43              | 4.64999e-30 | 1.000000 | 4.64999e-30 | 1.000000 |
| rad47              | 1.45127e-31 | 1.000000 | 1.45127e-31 | 1.000000 |
| rad65              | 2.95792e-32 | 1.000000 | 2.95792e-32 | 1.000000 |
| PAH1+H             | 2.15472e-32 | 1.000000 | 2.15472e-32 | 1.000000 |
| PAH10+CH3          | 5.03858e-33 | 1.000000 | 5.03858e-33 | 1.000000 |
| rad42              | 1.03325e-33 | 1.000000 | 1.03325e-33 | 1.000000 |
| rad41              | 1.41973e-36 | 1.000000 | 1.41973e-36 | 1.000000 |

100000.000 Pa, 190.000000 K

=====

|               |                 |                      |
|---------------|-----------------|----------------------|
| Rate constant | True (fraction) | Effective (fraction) |
|---------------|-----------------|----------------------|

-----



|                    |                        |                        |
|--------------------|------------------------|------------------------|
| Total              | 1.11858e-17 (1.00 )    | 1.11858e-17 (1.00 )    |
| Formation of rad11 | 9.67466e-18 (0.865 )   | 9.67466e-18 (0.865 )   |
| Formation of rad6  | 1.40029e-18 (0.125 )   | 1.40029e-18 (0.125 )   |
| H-abstraction      | 1.10851e-19 (0.00991 ) | 1.10851e-19 (0.00991 ) |

| species            | PYtrue      | Cumul    | PYeffective | Cumul    |
|--------------------|-------------|----------|-------------|----------|
| rad11              | 0.859420    | 0.859420 | 0.859420    | 0.859420 |
| rad6               | 0.130351    | 0.989771 | 0.130351    | 0.989771 |
| Benzene+2-propynyl | 0.00990995  | 0.999681 | 0.00990995  | 0.999681 |
| rad21              | 0.000115396 | 0.999797 | 0.000115396 | 0.999797 |
| rad20              | 9.70601e-05 | 0.999894 | 9.70601e-05 | 0.999894 |
| rad22              | 7.58637e-05 | 0.999970 | 7.58637e-05 | 0.999970 |
| rad18              | 1.37436e-05 | 0.999983 | 1.37436e-05 | 0.999983 |
| rad45              | 1.03224e-05 | 0.999994 | 1.03224e-05 | 0.999994 |
| rad13              | 1.63243e-06 | 0.999995 | 1.63243e-06 | 0.999995 |
| Indene+H           | 1.60450e-06 | 0.999997 | 1.60450e-06 | 0.999997 |
| rad7               | 1.44987e-06 | 0.999998 | 1.44987e-06 | 0.999998 |
| rad36              | 6.57579e-07 | 0.999999 | 6.57579e-07 | 0.999999 |
| C2H2+PhCH2         | 3.61800e-07 | 0.999999 | 3.61800e-07 | 0.999999 |
| rad25              | 2.37609e-07 | 1.000000 | 2.37609e-07 | 1.000000 |
| rad23              | 1.64805e-07 | 1.000000 | 1.64805e-07 | 1.000000 |
| PhCHCCH2+H         | 3.88351e-08 | 1.000000 | 3.88351e-08 | 1.000000 |
| rad33              | 5.80965e-09 | 1.000000 | 5.80965e-09 | 1.000000 |
| rad9               | 2.88516e-09 | 1.000000 | 2.88516e-09 | 1.000000 |
| Phenyl+Allene      | 1.69176e-09 | 1.000000 | 0.000000    | 1.000000 |
| rad24              | 1.11564e-09 | 1.000000 | 1.11564e-09 | 1.000000 |
| rad3               | 8.39375e-10 | 1.000000 | 8.39375e-10 | 1.000000 |
| rad4               | 4.46237e-10 | 1.000000 | 4.46237e-10 | 1.000000 |
| rad28              | 5.83300e-11 | 1.000000 | 5.83300e-11 | 1.000000 |
| PhCH2CCH+H         | 1.77928e-11 | 1.000000 | 1.77928e-11 | 1.000000 |
| rad30              | 1.93642e-12 | 1.000000 | 1.93642e-12 | 1.000000 |
| rad2               | 1.45335e-12 | 1.000000 | 1.45335e-12 | 1.000000 |
| rad15              | 3.95205e-13 | 1.000000 | 3.95205e-13 | 1.000000 |
| rad8               | 1.89229e-13 | 1.000000 | 1.89229e-13 | 1.000000 |
| rad1               | 1.06468e-13 | 1.000000 | 1.06468e-13 | 1.000000 |
| PhCCH+CH3          | 6.35197e-14 | 1.000000 | 6.35197e-14 | 1.000000 |
| PAH7+H             | 4.37144e-15 | 1.000000 | 4.37144e-15 | 1.000000 |
| rad14              | 2.03749e-15 | 1.000000 | 2.03749e-15 | 1.000000 |
| rad38              | 1.92440e-15 | 1.000000 | 1.92440e-15 | 1.000000 |
| rad10              | 2.19838e-16 | 1.000000 | 2.19838e-16 | 1.000000 |
| rad60syn           | 1.90377e-16 | 1.000000 | 1.90377e-16 | 1.000000 |
| Ph+MeAc            | 1.45256e-16 | 1.000000 | 1.45256e-16 | 1.000000 |
| rad60anti          | 6.49092e-17 | 1.000000 | 6.49092e-17 | 1.000000 |
| rad46              | 2.48026e-17 | 1.000000 | 2.48026e-17 | 1.000000 |
| PAH9+H             | 1.29014e-17 | 1.000000 | 1.29014e-17 | 1.000000 |
| rad35              | 8.15905e-18 | 1.000000 | 8.15905e-18 | 1.000000 |
| PAH3+H             | 1.26614e-18 | 1.000000 | 1.26614e-18 | 1.000000 |
| PhCCCH3+H          | 1.23069e-18 | 1.000000 | 1.23069e-18 | 1.000000 |
| rad27              | 6.88187e-19 | 1.000000 | 6.88187e-19 | 1.000000 |
| rad31              | 6.18306e-19 | 1.000000 | 6.18306e-19 | 1.000000 |
| rad59              | 3.91218e-19 | 1.000000 | 3.91218e-19 | 1.000000 |
| rad26              | 3.82349e-19 | 1.000000 | 3.82349e-19 | 1.000000 |
| rad39              | 1.08966e-19 | 1.000000 | 1.08966e-19 | 1.000000 |
| rad50              | 7.07893e-22 | 1.000000 | 7.07893e-22 | 1.000000 |
| rad19syn           | 2.99032e-22 | 1.000000 | 2.99032e-22 | 1.000000 |
| rad54              | 1.21101e-22 | 1.000000 | 1.21101e-22 | 1.000000 |
| rad70              | 1.20384e-23 | 1.000000 | 1.20384e-23 | 1.000000 |
| rad5               | 3.67348e-24 | 1.000000 | 3.67348e-24 | 1.000000 |
| rad52              | 1.84949e-25 | 1.000000 | 1.84949e-25 | 1.000000 |
| rad55              | 4.35385e-26 | 1.000000 | 4.35385e-26 | 1.000000 |
| rad12              | 2.39474e-26 | 1.000000 | 2.39474e-26 | 1.000000 |
| rad34              | 1.31981e-26 | 1.000000 | 1.31981e-26 | 1.000000 |
| PhcycC3H3_A+H      | 1.10667e-26 | 1.000000 | 1.10667e-26 | 1.000000 |
| rad62              | 6.09399e-27 | 1.000000 | 6.09399e-27 | 1.000000 |
| rad58              | 4.74869e-27 | 1.000000 | 4.74869e-27 | 1.000000 |
| rad51              | 4.00453e-27 | 1.000000 | 4.00453e-27 | 1.000000 |
| rad37              | 2.06330e-27 | 1.000000 | 2.06330e-27 | 1.000000 |
| rad43              | 3.70456e-29 | 1.000000 | 3.70456e-29 | 1.000000 |
| rad47              | 1.56107e-30 | 1.000000 | 1.56107e-30 | 1.000000 |
| rad65              | 2.85668e-31 | 1.000000 | 2.85668e-31 | 1.000000 |
| PAH1+H             | 2.42450e-31 | 1.000000 | 2.42450e-31 | 1.000000 |
| PAH10+CH3          | 4.16274e-32 | 1.000000 | 4.16274e-32 | 1.000000 |
| rad42              | 1.40611e-32 | 1.000000 | 1.40611e-32 | 1.000000 |
| rad41              | 2.05057e-35 | 1.000000 | 2.05057e-35 | 1.000000 |

100000.000 Pa, 200.000000 K

=====

| Rate constant | True (fraction) | Effective (fraction) |
|---------------|-----------------|----------------------|
|---------------|-----------------|----------------------|

-----

|                    |                       |                       |
|--------------------|-----------------------|-----------------------|
| Total              | 1.82690e-17 (1.00 )   | 1.82690e-17 (1.00 )   |
| Formation of rad11 | 1.55456e-17 (0.851 )  | 1.55456e-17 (0.851 )  |
| Formation of rad6  | 2.49126e-18 (0.136 )  | 2.49126e-18 (0.136 )  |
| H-abstraction      | 2.32112e-19 (0.0127 ) | 2.32112e-19 (0.0127 ) |

| species            | PYtrue      | Cumul    | PYeffective | Cumul    |
|--------------------|-------------|----------|-------------|----------|
| rad11              | 0.844941    | 0.844941 | 0.844941    | 0.844941 |
| rad6               | 0.142001    | 0.986941 | 0.142001    | 0.986941 |
| Benzene+2-propynyl | 0.0127053   | 0.999647 | 0.0127053   | 0.999647 |
| rad21              | 0.000121638 | 0.999768 | 0.000121638 | 0.999768 |
| rad20              | 0.000106800 | 0.999875 | 0.000106800 | 0.999875 |
| rad22              | 8.83502e-05 | 0.999963 | 8.83502e-05 | 0.999963 |
| rad18              | 1.67285e-05 | 0.999980 | 1.67285e-05 | 0.999980 |
| rad45              | 1.22340e-05 | 0.999992 | 1.22340e-05 | 0.999992 |
| Indene+H           | 2.18450e-06 | 0.999994 | 2.18450e-06 | 0.999994 |
| rad13              | 1.84273e-06 | 0.999996 | 1.84273e-06 | 0.999996 |
| rad7               | 1.77595e-06 | 0.999998 | 1.77595e-06 | 0.999998 |
| rad36              | 7.80389e-07 | 0.999999 | 7.80389e-07 | 0.999999 |
| C2H2+PhCH2         | 4.91748e-07 | 0.999999 | 4.91748e-07 | 0.999999 |
| rad25              | 2.78618e-07 | 1.000000 | 2.78618e-07 | 1.000000 |
| rad23              | 2.16799e-07 | 1.000000 | 2.16799e-07 | 1.000000 |
| PhCHCCH2+H         | 5.02082e-08 | 1.000000 | 5.02082e-08 | 1.000000 |
| rad33              | 6.32005e-09 | 1.000000 | 6.32005e-09 | 1.000000 |
| rad9               | 3.81498e-09 | 1.000000 | 3.81498e-09 | 1.000000 |
| Phenyl+Allene      | 2.58949e-09 | 1.000000 | 0.000000    | 1.000000 |
| rad3               | 1.12740e-09 | 1.000000 | 1.12740e-09 | 1.000000 |
| rad24              | 1.10424e-09 | 1.000000 | 1.10424e-09 | 1.000000 |
| rad4               | 5.99958e-10 | 1.000000 | 5.99958e-10 | 1.000000 |
| rad28              | 8.20233e-11 | 1.000000 | 8.20233e-11 | 1.000000 |
| PhCH2CCH+H         | 3.47565e-11 | 1.000000 | 3.47565e-11 | 1.000000 |
| rad30              | 3.11080e-12 | 1.000000 | 3.11080e-12 | 1.000000 |
| rad2               | 2.35805e-12 | 1.000000 | 2.35805e-12 | 1.000000 |
| rad15              | 6.54051e-13 | 1.000000 | 6.54051e-13 | 1.000000 |
| rad8               | 3.41882e-13 | 1.000000 | 3.41882e-13 | 1.000000 |
| rad1               | 1.73540e-13 | 1.000000 | 1.73540e-13 | 1.000000 |
| PhCCH+CH3          | 1.20023e-13 | 1.000000 | 1.20023e-13 | 1.000000 |
| PAH7+H             | 1.00802e-14 | 1.000000 | 1.00802e-14 | 1.000000 |
| rad14              | 3.59758e-15 | 1.000000 | 3.59758e-15 | 1.000000 |
| rad38              | 3.08036e-15 | 1.000000 | 3.08036e-15 | 1.000000 |
| rad10              | 4.45665e-16 | 1.000000 | 4.45665e-16 | 1.000000 |
| rad60syn           | 3.90308e-16 | 1.000000 | 3.90308e-16 | 1.000000 |
| Ph+MeAc            | 3.27482e-16 | 1.000000 | 3.27482e-16 | 1.000000 |
| rad60anti          | 1.37215e-16 | 1.000000 | 1.37215e-16 | 1.000000 |
| rad46              | 4.39749e-17 | 1.000000 | 4.39749e-17 | 1.000000 |
| PAH9+H             | 2.41268e-17 | 1.000000 | 2.41268e-17 | 1.000000 |
| rad35              | 1.62908e-17 | 1.000000 | 1.62908e-17 | 1.000000 |
| PAH3+H             | 3.79196e-18 | 1.000000 | 3.79196e-18 | 1.000000 |
| PhCCCH3+H          | 3.04374e-18 | 1.000000 | 3.04374e-18 | 1.000000 |
| rad27              | 1.46836e-18 | 1.000000 | 1.46836e-18 | 1.000000 |
| rad59              | 1.13606e-18 | 1.000000 | 1.13606e-18 | 1.000000 |
| rad26              | 9.09150e-19 | 1.000000 | 9.09150e-19 | 1.000000 |
| rad31              | 8.81857e-19 | 1.000000 | 8.81857e-19 | 1.000000 |
| rad39              | 2.45304e-19 | 1.000000 | 2.45304e-19 | 1.000000 |
| rad50              | 2.11960e-21 | 1.000000 | 2.11960e-21 | 1.000000 |
| rad19syn           | 1.20677e-21 | 1.000000 | 1.20677e-21 | 1.000000 |
| rad54              | 5.32890e-22 | 1.000000 | 5.32890e-22 | 1.000000 |
| rad70              | 8.56977e-23 | 1.000000 | 8.56977e-23 | 1.000000 |
| rad5               | 1.33634e-23 | 1.000000 | 1.33634e-23 | 1.000000 |
| rad52              | 8.28106e-25 | 1.000000 | 8.28106e-25 | 1.000000 |
| rad55              | 2.83758e-25 | 1.000000 | 2.83758e-25 | 1.000000 |
| rad34              | 1.24484e-25 | 1.000000 | 1.24484e-25 | 1.000000 |
| rad12              | 8.40302e-26 | 1.000000 | 8.40302e-26 | 1.000000 |
| PhcycC3H3_A+H      | 8.05834e-26 | 1.000000 | 8.05834e-26 | 1.000000 |
| rad62              | 4.00062e-26 | 1.000000 | 4.00062e-26 | 1.000000 |
| rad58              | 3.83350e-26 | 1.000000 | 3.83350e-26 | 1.000000 |
| rad51              | 2.51017e-26 | 1.000000 | 2.51017e-26 | 1.000000 |
| rad37              | 8.10258e-27 | 1.000000 | 8.10258e-27 | 1.000000 |
| rad43              | 2.56802e-28 | 1.000000 | 2.56802e-28 | 1.000000 |
| rad47              | 1.34395e-29 | 1.000000 | 1.34395e-29 | 1.000000 |
| rad65              | 2.31267e-30 | 1.000000 | 2.31267e-30 | 1.000000 |
| PAH1+H             | 2.16094e-30 | 1.000000 | 2.16094e-30 | 1.000000 |
| PAH10+CH3          | 2.96678e-31 | 1.000000 | 2.96678e-31 | 1.000000 |
| rad42              | 1.48103e-31 | 1.000000 | 1.48103e-31 | 1.000000 |
| rad41              | 2.29443e-34 | 1.000000 | 2.29443e-34 | 1.000000 |

100000.000 Pa, 210.000000 K

=====

|               |                 |                      |
|---------------|-----------------|----------------------|
| Rate constant | True (fraction) | Effective (fraction) |
|---------------|-----------------|----------------------|

-----

|                    |                       |                       |
|--------------------|-----------------------|-----------------------|
| Total              | 2.85520e-17 (1.00 )   | 2.85520e-17 (1.00 )   |
| Formation of rad11 | 2.39009e-17 (0.837 )  | 2.39009e-17 (0.837 )  |
| Formation of rad6  | 4.19900e-18 (0.147 )  | 4.19900e-18 (0.147 )  |
| H-abstraction      | 4.52111e-19 (0.0158 ) | 4.52111e-19 (0.0158 ) |

| species            | PYtrue      | Cumul    | PYeffective | Cumul    |
|--------------------|-------------|----------|-------------|----------|
| rad11              | 0.830560    | 0.830560 | 0.830560    | 0.830560 |
| rad6               | 0.153213    | 0.983773 | 0.153213    | 0.983773 |
| Benzene+2-propynyl | 0.0158346   | 0.999607 | 0.0158346   | 0.999607 |
| rad21              | 0.000128207 | 0.999736 | 0.000128207 | 0.999736 |
| rad20              | 0.000117117 | 0.999853 | 0.000117117 | 0.999853 |
| rad22              | 0.000102863 | 0.999956 | 0.000102863 | 0.999956 |
| rad18              | 2.02724e-05 | 0.999976 | 2.02724e-05 | 0.999976 |
| rad45              | 1.45051e-05 | 0.999990 | 1.45051e-05 | 0.999990 |
| Indene+H           | 2.96771e-06 | 0.999993 | 2.96771e-06 | 0.999993 |
| rad7               | 2.15576e-06 | 0.999995 | 2.15576e-06 | 0.999995 |
| rad13              | 2.05349e-06 | 0.999997 | 2.05349e-06 | 0.999997 |
| rad36              | 9.26932e-07 | 0.999998 | 9.26932e-07 | 0.999998 |
| C2H2+PhCH2         | 6.68345e-07 | 0.999999 | 6.68345e-07 | 0.999999 |
| rad25              | 3.27348e-07 | 0.999999 | 3.27348e-07 | 0.999999 |
| rad23              | 2.85623e-07 | 1.000000 | 2.85623e-07 | 1.000000 |
| PhCHCCH2+H         | 6.52002e-08 | 1.000000 | 6.52002e-08 | 1.000000 |
| rad33              | 6.79716e-09 | 1.000000 | 6.79716e-09 | 1.000000 |
| rad9               | 5.06131e-09 | 1.000000 | 5.06131e-09 | 1.000000 |
| Phenyl+Allene      | 3.94214e-09 | 1.000000 | 0.000000    | 1.000000 |
| rad3               | 1.49866e-09 | 1.000000 | 1.49866e-09 | 1.000000 |
| rad24              | 1.09773e-09 | 1.000000 | 1.09773e-09 | 1.000000 |
| rad4               | 7.98549e-10 | 1.000000 | 7.98549e-10 | 1.000000 |
| rad28              | 1.14281e-10 | 1.000000 | 1.14281e-10 | 1.000000 |
| PhCH2CCH+H         | 6.58724e-11 | 1.000000 | 6.58724e-11 | 1.000000 |
| rad30              | 4.99368e-12 | 1.000000 | 4.99368e-12 | 1.000000 |
| rad2               | 3.79976e-12 | 1.000000 | 3.79976e-12 | 1.000000 |
| rad15              | 1.08120e-12 | 1.000000 | 1.08120e-12 | 1.000000 |
| rad8               | 6.11569e-13 | 1.000000 | 6.11569e-13 | 1.000000 |
| rad1               | 2.81179e-13 | 1.000000 | 2.81179e-13 | 1.000000 |
| PhCCH+CH3          | 2.25372e-13 | 1.000000 | 2.25372e-13 | 1.000000 |
| PAH7+H             | 2.25067e-14 | 1.000000 | 2.25067e-14 | 1.000000 |
| rad14              | 6.30364e-15 | 1.000000 | 6.30364e-15 | 1.000000 |
| rad38              | 4.97313e-15 | 1.000000 | 4.97313e-15 | 1.000000 |
| rad10              | 9.00804e-16 | 1.000000 | 9.00804e-16 | 1.000000 |
| rad60syn           | 7.89888e-16 | 1.000000 | 7.89888e-16 | 1.000000 |
| Ph+MeAc            | 7.27104e-16 | 1.000000 | 7.27104e-16 | 1.000000 |
| rad60anti          | 2.85395e-16 | 1.000000 | 2.85395e-16 | 1.000000 |
| rad46              | 7.85604e-17 | 1.000000 | 7.85604e-17 | 1.000000 |
| PAH9+H             | 4.56531e-17 | 1.000000 | 4.56531e-17 | 1.000000 |
| rad35              | 3.30623e-17 | 1.000000 | 3.30623e-17 | 1.000000 |
| PAH3+H             | 1.07700e-17 | 1.000000 | 1.07700e-17 | 1.000000 |
| PhCCCH3+H          | 7.48639e-18 | 1.000000 | 7.48639e-18 | 1.000000 |
| rad59              | 3.13500e-18 | 1.000000 | 3.13500e-18 | 1.000000 |
| rad27              | 3.09766e-18 | 1.000000 | 3.09766e-18 | 1.000000 |
| rad26              | 2.08161e-18 | 1.000000 | 2.08161e-18 | 1.000000 |
| rad31              | 1.25304e-18 | 1.000000 | 1.25304e-18 | 1.000000 |
| rad39              | 5.45888e-19 | 1.000000 | 5.45888e-19 | 1.000000 |
| rad50              | 6.11064e-21 | 1.000000 | 6.11064e-21 | 1.000000 |
| rad19syn           | 4.44202e-21 | 1.000000 | 4.44202e-21 | 1.000000 |
| rad54              | 2.08827e-21 | 1.000000 | 2.08827e-21 | 1.000000 |
| rad70              | 5.14101e-22 | 1.000000 | 5.14101e-22 | 1.000000 |
| rad5               | 4.67603e-23 | 1.000000 | 4.67603e-23 | 1.000000 |
| rad52              | 3.39785e-24 | 1.000000 | 3.39785e-24 | 1.000000 |
| rad55              | 1.56694e-24 | 1.000000 | 1.56694e-24 | 1.000000 |
| rad34              | 9.48096e-25 | 1.000000 | 9.48096e-25 | 1.000000 |
| PhcycC3H3_A+H      | 4.94076e-25 | 1.000000 | 4.94076e-25 | 1.000000 |
| rad12              | 2.83238e-25 | 1.000000 | 2.83238e-25 | 1.000000 |
| rad58              | 2.58203e-25 | 1.000000 | 2.58203e-25 | 1.000000 |
| rad62              | 2.29232e-25 | 1.000000 | 2.29232e-25 | 1.000000 |
| rad51              | 1.38458e-25 | 1.000000 | 1.38458e-25 | 1.000000 |
| rad37              | 3.03126e-26 | 1.000000 | 3.03126e-26 | 1.000000 |
| rad43              | 1.56387e-27 | 1.000000 | 1.56387e-27 | 1.000000 |
| rad47              | 9.52427e-29 | 1.000000 | 9.52427e-29 | 1.000000 |
| rad65              | 1.59703e-29 | 1.000000 | 1.59703e-29 | 1.000000 |
| PAH1+H             | 1.56915e-29 | 1.000000 | 1.56915e-29 | 1.000000 |
| PAH10+CH3          | 1.84266e-30 | 1.000000 | 1.84266e-30 | 1.000000 |
| rad42              | 1.24712e-30 | 1.000000 | 1.24712e-30 | 1.000000 |
| rad41              | 2.05345e-33 | 1.000000 | 2.05345e-33 | 1.000000 |

100000.000 Pa, 220.000000 K

=====

| Rate constant | True (fraction) | Effective (fraction) |
|---------------|-----------------|----------------------|
|---------------|-----------------|----------------------|

-----

|                    |             |           |             |           |
|--------------------|-------------|-----------|-------------|-----------|
| Total              | 4.29529e-17 | (1.00 )   | 4.29529e-17 | (1.00 )   |
| Formation of rad11 | 3.53712e-17 | (0.823 )  | 3.53712e-17 | (0.823 )  |
| Formation of rad6  | 6.75433e-18 | (0.157 )  | 6.75433e-18 | (0.157 )  |
| H-abstraction      | 8.27372e-19 | (0.0193 ) | 8.27372e-19 | (0.0193 ) |

| species            | PYtrue      | Cumul    | PYeffective | Cumul    |
|--------------------|-------------|----------|-------------|----------|
| rad11              | 0.816340    | 0.816340 | 0.816340    | 0.816340 |
| rad6               | 0.163962    | 0.980301 | 0.163962    | 0.980301 |
| Benzene+2-propynyl | 0.0192623   | 0.999564 | 0.0192623   | 0.999564 |
| rad21              | 0.000135128 | 0.999699 | 0.000135128 | 0.999699 |
| rad20              | 0.000128023 | 0.999827 | 0.000128023 | 0.999827 |
| rad22              | 0.000119762 | 0.999946 | 0.000119762 | 0.999946 |
| rad18              | 2.44642e-05 | 0.999971 | 2.44642e-05 | 0.999971 |
| rad45              | 1.72089e-05 | 0.999988 | 1.72089e-05 | 0.999988 |
| Indene+H           | 4.02324e-06 | 0.999992 | 4.02324e-06 | 0.999992 |
| rad7               | 2.59755e-06 | 0.999995 | 2.59755e-06 | 0.999995 |
| rad13              | 2.26271e-06 | 0.999997 | 2.26271e-06 | 0.999997 |
| rad36              | 1.10225e-06 | 0.999998 | 1.10225e-06 | 0.999998 |
| C2H2+PhCH2         | 9.08161e-07 | 0.999999 | 9.08161e-07 | 0.999999 |
| rad25              | 3.85275e-07 | 0.999999 | 3.85275e-07 | 0.999999 |
| rad23              | 3.77025e-07 | 1.000000 | 3.77025e-07 | 1.000000 |
| PhCHCCH2+H         | 8.50012e-08 | 1.000000 | 8.50012e-08 | 1.000000 |
| rad33              | 7.23943e-09 | 1.000000 | 7.23943e-09 | 1.000000 |
| rad9               | 6.73323e-09 | 1.000000 | 6.73323e-09 | 1.000000 |
| Phenyl+Allene      | 5.96816e-09 | 1.000000 | 0.000000    | 1.000000 |
| rad3               | 1.97494e-09 | 1.000000 | 1.97494e-09 | 1.000000 |
| rad24              | 1.09582e-09 | 1.000000 | 1.09582e-09 | 1.000000 |
| rad4               | 1.05400e-09 | 1.000000 | 1.05400e-09 | 1.000000 |
| rad28              | 1.58002e-10 | 1.000000 | 1.58002e-10 | 1.000000 |
| PhCH2CCH+H         | 1.21552e-10 | 1.000000 | 1.21552e-10 | 1.000000 |
| rad30              | 8.00101e-12 | 1.000000 | 8.00101e-12 | 1.000000 |
| rad2               | 6.08915e-12 | 1.000000 | 6.08915e-12 | 1.000000 |
| rad15              | 1.78281e-12 | 1.000000 | 1.78281e-12 | 1.000000 |
| rad8               | 1.08234e-12 | 1.000000 | 1.08234e-12 | 1.000000 |
| rad1               | 4.53486e-13 | 1.000000 | 4.53486e-13 | 1.000000 |
| PhCCH+CH3          | 4.20661e-13 | 1.000000 | 4.20661e-13 | 1.000000 |
| PAH7+H             | 4.87647e-14 | 1.000000 | 4.87647e-14 | 1.000000 |
| rad14              | 1.09640e-14 | 1.000000 | 1.09640e-14 | 1.000000 |
| rad38              | 8.09185e-15 | 1.000000 | 8.09185e-15 | 1.000000 |
| rad10              | 1.81603e-15 | 1.000000 | 1.81603e-15 | 1.000000 |
| Ph+MeAc            | 1.59036e-15 | 1.000000 | 1.59036e-15 | 1.000000 |
| rad60syn           | 1.57584e-15 | 1.000000 | 1.57584e-15 | 1.000000 |
| rad60anti          | 5.83532e-16 | 1.000000 | 5.83532e-16 | 1.000000 |
| rad46              | 1.41204e-16 | 1.000000 | 1.41204e-16 | 1.000000 |
| PAH9+H             | 8.72732e-17 | 1.000000 | 8.72732e-17 | 1.000000 |
| rad35              | 6.77496e-17 | 1.000000 | 6.77496e-17 | 1.000000 |
| PAH3+H             | 2.91362e-17 | 1.000000 | 2.91362e-17 | 1.000000 |
| PhCCCH3+H          | 1.82928e-17 | 1.000000 | 1.82928e-17 | 1.000000 |
| rad59              | 8.25592e-18 | 1.000000 | 8.25592e-18 | 1.000000 |
| rad27              | 6.45341e-18 | 1.000000 | 6.45341e-18 | 1.000000 |
| rad26              | 4.61007e-18 | 1.000000 | 4.61007e-18 | 1.000000 |
| rad31              | 1.77735e-18 | 1.000000 | 1.77735e-18 | 1.000000 |
| rad39              | 1.20033e-18 | 1.000000 | 1.20033e-18 | 1.000000 |
| rad50              | 1.70252e-20 | 1.000000 | 1.70252e-20 | 1.000000 |
| rad19syn           | 1.50837e-20 | 1.000000 | 1.50837e-20 | 1.000000 |
| rad54              | 7.39911e-21 | 1.000000 | 7.39911e-21 | 1.000000 |
| rad70              | 2.65168e-21 | 1.000000 | 2.65168e-21 | 1.000000 |
| rad5               | 1.57483e-22 | 1.000000 | 1.57483e-22 | 1.000000 |
| rad52              | 1.29110e-23 | 1.000000 | 1.29110e-23 | 1.000000 |
| rad55              | 7.47786e-24 | 1.000000 | 7.47786e-24 | 1.000000 |
| rad34              | 5.98378e-24 | 1.000000 | 5.98378e-24 | 1.000000 |
| PhcycC3H3_A+H      | 2.59859e-24 | 1.000000 | 2.59859e-24 | 1.000000 |
| rad58              | 1.47945e-24 | 1.000000 | 1.47945e-24 | 1.000000 |
| rad62              | 1.15943e-24 | 1.000000 | 1.15943e-24 | 1.000000 |
| rad12              | 9.18033e-25 | 1.000000 | 9.18033e-25 | 1.000000 |
| rad51              | 6.81074e-25 | 1.000000 | 6.81074e-25 | 1.000000 |
| rad37              | 1.08081e-25 | 1.000000 | 1.08081e-25 | 1.000000 |
| rad43              | 8.43356e-27 | 1.000000 | 8.43356e-27 | 1.000000 |
| rad47              | 5.69165e-28 | 1.000000 | 5.69165e-28 | 1.000000 |
| rad65              | 9.54591e-29 | 1.000000 | 9.54591e-29 | 1.000000 |
| PAH1+H             | 9.50727e-29 | 1.000000 | 9.50727e-29 | 1.000000 |
| PAH10+CH3          | 1.00549e-29 | 1.000000 | 1.00549e-29 | 1.000000 |
| rad42              | 8.63197e-30 | 1.000000 | 8.63197e-30 | 1.000000 |
| rad41              | 1.51106e-32 | 1.000000 | 1.51106e-32 | 1.000000 |

100000.000 Pa, 230.000000 K

=====

| Rate constant | True (fraction) | Effective (fraction) |
|---------------|-----------------|----------------------|
|---------------|-----------------|----------------------|

-----

|                    |             |           |             |           |
|--------------------|-------------|-----------|-------------|-----------|
| Total              | 6.25016e-17 | (1.00 )   | 6.25016e-17 | (1.00 )   |
| Formation of rad11 | 5.06355e-17 | (0.810 )  | 5.06355e-17 | (0.810 )  |
| Formation of rad6  | 1.04318e-17 | (0.167 )  | 1.04318e-17 | (0.167 )  |
| H-abstraction      | 1.43428e-18 | (0.0229 ) | 1.43428e-18 | (0.0229 ) |

| species            | PYtrue      | Cumul    | PYeffective | Cumul    |
|--------------------|-------------|----------|-------------|----------|
| rad11              | 0.802327    | 0.802327 | 0.802327    | 0.802327 |
| rad6               | 0.174239    | 0.976566 | 0.174239    | 0.976566 |
| Benzene+2-propynyl | 0.0229478   | 0.999513 | 0.0229478   | 0.999513 |
| rad21              | 0.000142417 | 0.999656 | 0.000142417 | 0.999656 |
| rad20              | 0.000139523 | 0.999795 | 0.000139523 | 0.999795 |
| rad22              | 0.000139463 | 0.999935 | 0.000139463 | 0.999935 |
| rad18              | 2.94005e-05 | 0.999964 | 2.94005e-05 | 0.999964 |
| rad45              | 2.04321e-05 | 0.999985 | 2.04321e-05 | 0.999985 |
| Indene+H           | 5.44186e-06 | 0.999990 | 5.44186e-06 | 0.999990 |
| rad7               | 3.11110e-06 | 0.999993 | 3.11110e-06 | 0.999993 |
| rad13              | 2.46860e-06 | 0.999996 | 2.46860e-06 | 0.999996 |
| rad36              | 1.31243e-06 | 0.999997 | 1.31243e-06 | 0.999997 |
| C2H2+PhCH2         | 1.23332e-06 | 0.999998 | 1.23332e-06 | 0.999998 |
| rad23              | 4.98741e-07 | 0.999999 | 4.98741e-07 | 0.999999 |
| rad25              | 4.54087e-07 | 0.999999 | 4.54087e-07 | 0.999999 |
| PhCHCCH2+H         | 1.11186e-07 | 0.999999 | 1.11186e-07 | 0.999999 |
| Phenyl+Allene      | 8.98401e-09 | 0.999999 | 0.00000     | 0.999999 |
| rad9               | 8.97633e-09 | 0.999999 | 8.97633e-09 | 0.999999 |
| rad33              | 7.64664e-09 | 0.999999 | 7.64664e-09 | 0.999999 |
| rad3               | 2.58354e-09 | 0.999999 | 2.58354e-09 | 0.999999 |
| rad4               | 1.38140e-09 | 0.999999 | 1.38140e-09 | 0.999999 |
| rad24              | 1.09824e-09 | 0.999999 | 1.09824e-09 | 0.999999 |
| PhCH2CCH+H         | 2.18991e-10 | 0.999999 | 2.18991e-10 | 0.999999 |
| rad28              | 2.17016e-10 | 0.999999 | 2.17016e-10 | 0.999999 |
| rad30              | 1.27785e-11 | 0.999999 | 1.27785e-11 | 0.999999 |
| rad2               | 9.71270e-12 | 0.999999 | 9.71270e-12 | 0.999999 |
| rad15              | 2.92797e-12 | 0.999999 | 2.92797e-12 | 0.999999 |
| rad8               | 1.89392e-12 | 0.999999 | 1.89392e-12 | 0.999999 |
| PhCCH+CH3          | 7.80474e-13 | 0.999999 | 7.80474e-13 | 0.999999 |
| rad1               | 7.28690e-13 | 0.999999 | 7.28690e-13 | 0.999999 |
| PAH7+H             | 1.02705e-13 | 0.999999 | 1.02705e-13 | 0.999999 |
| rad14              | 1.89273e-14 | 0.999999 | 1.89273e-14 | 0.999999 |
| rad38              | 1.32567e-14 | 0.999999 | 1.32567e-14 | 0.999999 |
| rad10              | 3.65120e-15 | 0.999999 | 3.65120e-15 | 0.999999 |
| Ph+MeAc            | 3.42714e-15 | 0.999999 | 3.42714e-15 | 0.999999 |
| rad60syn           | 3.09557e-15 | 0.999999 | 3.09557e-15 | 0.999999 |
| rad60anti          | 1.17196e-15 | 0.999999 | 1.17196e-15 | 0.999999 |
| rad46              | 2.54955e-16 | 0.999999 | 2.54955e-16 | 0.999999 |
| PAH9+H             | 1.68245e-16 | 0.999999 | 1.68245e-16 | 0.999999 |
| rad35              | 1.39247e-16 | 0.999999 | 1.39247e-16 | 0.999999 |
| PAH3+H             | 7.53365e-17 | 0.999999 | 7.53365e-17 | 0.999999 |
| PhCCCH3+H          | 4.43376e-17 | 0.999999 | 4.43376e-17 | 0.999999 |
| rad59              | 2.08178e-17 | 0.999999 | 2.08178e-17 | 0.999999 |
| rad27              | 1.32591e-17 | 0.999999 | 1.32591e-17 | 0.999999 |
| rad26              | 9.91092e-18 | 0.999999 | 9.91092e-18 | 0.999999 |
| rad39              | 2.60626e-18 | 0.999999 | 2.60626e-18 | 0.999999 |
| rad31              | 2.52100e-18 | 0.999999 | 2.52100e-18 | 0.999999 |
| rad19syn           | 4.76508e-20 | 0.999999 | 4.76508e-20 | 0.999999 |
| rad50              | 4.59700e-20 | 0.999999 | 4.59700e-20 | 0.999999 |
| rad54              | 2.39874e-20 | 0.999999 | 2.39874e-20 | 0.999999 |
| rad70              | 1.19551e-20 | 0.999999 | 1.19551e-20 | 0.999999 |
| rad5               | 5.10076e-22 | 0.999999 | 5.10076e-22 | 0.999999 |
| rad52              | 4.57896e-23 | 0.999999 | 4.57896e-23 | 0.999999 |
| rad34              | 3.19890e-23 | 0.999999 | 3.19890e-23 | 0.999999 |
| rad55              | 3.13410e-23 | 0.999999 | 3.13410e-23 | 0.999999 |
| PhcycC3H3_A+H      | 1.19083e-23 | 0.999999 | 1.19083e-23 | 0.999999 |
| rad58              | 7.33170e-24 | 0.999999 | 7.33170e-24 | 0.999999 |
| rad62              | 5.22591e-24 | 0.999999 | 5.22591e-24 | 0.999999 |
| rad51              | 3.01959e-24 | 0.999999 | 3.01959e-24 | 0.999999 |
| rad12              | 2.86053e-24 | 0.999999 | 2.86053e-24 | 0.999999 |
| rad37              | 3.66940e-25 | 0.999999 | 3.66940e-25 | 0.999999 |
| rad43              | 4.05724e-26 | 0.999999 | 4.05724e-26 | 0.999999 |
| rad47              | 2.92840e-27 | 0.999999 | 2.92840e-27 | 0.999999 |
| rad65              | 5.00238e-28 | 0.999999 | 5.00238e-28 | 0.999999 |
| PAH1+H             | 4.90548e-28 | 0.999999 | 4.90548e-28 | 0.999999 |
| rad42              | 5.02904e-29 | 0.999999 | 5.02904e-29 | 0.999999 |
| PAH10+CH3          | 4.85650e-29 | 0.999999 | 4.85650e-29 | 0.999999 |
| rad41              | 9.36191e-32 | 0.999999 | 9.36191e-32 | 0.999999 |

100000.000 Pa, 240.000000 K

=====

| Rate constant | True (fraction) | Effective (fraction) |
|---------------|-----------------|----------------------|
|---------------|-----------------|----------------------|

-----

|                    |                       |                       |
|--------------------|-----------------------|-----------------------|
| Total              | 8.83273e-17 (1.00 )   | 8.83273e-17 (1.00 )   |
| Formation of rad11 | 7.04077e-17 (0.797 )  | 7.04077e-17 (0.797 )  |
| Formation of rad6  | 1.55481e-17 (0.176 )  | 1.55481e-17 (0.176 )  |
| H-abstraction      | 2.37143e-18 (0.0268 ) | 2.37143e-18 (0.0268 ) |

| species            | PYtrue      | Cumul    | PYeffective | Cumul    |
|--------------------|-------------|----------|-------------|----------|
| rad11              | 0.788560    | 0.788560 | 0.788560    | 0.788560 |
| rad6               | 0.184050    | 0.972611 | 0.184050    | 0.972611 |
| Benzene+2-propynyl | 0.0268483   | 0.999459 | 0.0268483   | 0.999459 |
| rad22              | 0.000162449 | 0.999621 | 0.000162449 | 0.999621 |
| rad20              | 0.000151608 | 0.999773 | 0.000151608 | 0.999773 |
| rad21              | 0.000150080 | 0.999923 | 0.000150080 | 0.999923 |
| rad18              | 3.51834e-05 | 0.999958 | 3.51834e-05 | 0.999958 |
| rad45              | 2.42771e-05 | 0.999983 | 2.42771e-05 | 0.999983 |
| Indene+H           | 7.34171e-06 | 0.999990 | 7.34171e-06 | 0.999990 |
| rad7               | 3.70790e-06 | 0.999994 | 3.70790e-06 | 0.999994 |
| rad13              | 2.66967e-06 | 0.999996 | 2.66967e-06 | 0.999996 |
| C2H2+PhCH2         | 1.67319e-06 | 0.999998 | 1.67319e-06 | 0.999998 |
| rad36              | 1.56470e-06 | 0.999999 | 1.56470e-06 | 0.999999 |
| rad23              | 6.61173e-07 | 1.00000  | 6.61173e-07 | 1.00000  |
| rad25              | 5.35694e-07 | 1.00000  | 5.35694e-07 | 1.00000  |
| PhCHCCH2+H         | 1.45831e-07 | 1.00000  | 1.45831e-07 | 1.00000  |
| Phenyl+Allene      | 1.34446e-08 | 1.00000  | 0.00000     | 1.00000  |
| rad9               | 1.19841e-08 | 1.00000  | 1.19841e-08 | 1.00000  |
| rad33              | 8.01955e-09 | 1.00000  | 8.01955e-09 | 1.00000  |
| rad3               | 3.35844e-09 | 1.00000  | 3.35844e-09 | 1.00000  |
| rad4               | 1.79968e-09 | 1.00000  | 1.79968e-09 | 1.00000  |
| rad24              | 1.10474e-09 | 1.00000  | 1.10474e-09 | 1.00000  |
| PhCH2CCH+H         | 3.86086e-10 | 1.00000  | 3.86086e-10 | 1.00000  |
| rad28              | 2.96382e-10 | 1.00000  | 2.96382e-10 | 1.00000  |
| rad30              | 2.03167e-11 | 1.00000  | 2.03167e-11 | 1.00000  |
| rad2               | 1.54295e-11 | 1.00000  | 1.54295e-11 | 1.00000  |
| rad15              | 4.78255e-12 | 1.00000  | 4.78255e-12 | 1.00000  |
| rad8               | 3.27491e-12 | 1.00000  | 3.27491e-12 | 1.00000  |
| PhCCH+CH3          | 1.43902e-12 | 1.00000  | 1.43902e-12 | 1.00000  |
| rad1               | 1.16729e-12 | 1.00000  | 1.16729e-12 | 1.00000  |
| PAH7+H             | 2.10534e-13 | 1.00000  | 2.10534e-13 | 1.00000  |
| rad14              | 3.24177e-14 | 1.00000  | 3.24177e-14 | 1.00000  |
| rad38              | 2.18437e-14 | 1.00000  | 2.18437e-14 | 1.00000  |
| rad10              | 7.31678e-15 | 1.00000  | 7.31678e-15 | 1.00000  |
| Ph+MeAc            | 7.27495e-15 | 1.00000  | 7.27495e-15 | 1.00000  |
| rad60syn           | 5.98156e-15 | 1.00000  | 5.98156e-15 | 1.00000  |
| rad60anti          | 2.31041e-15 | 1.00000  | 2.31041e-15 | 1.00000  |
| rad46              | 4.61746e-16 | 1.00000  | 4.61746e-16 | 1.00000  |
| PAH9+H             | 3.26423e-16 | 1.00000  | 3.26423e-16 | 1.00000  |
| rad35              | 2.85369e-16 | 1.00000  | 2.85369e-16 | 1.00000  |
| PAH3+H             | 1.86674e-16 | 1.00000  | 1.86674e-16 | 1.00000  |
| PhCCCH3+H          | 1.06375e-16 | 1.00000  | 1.06375e-16 | 1.00000  |
| rad59              | 5.03918e-17 | 1.00000  | 5.03918e-17 | 1.00000  |
| rad27              | 2.68290e-17 | 1.00000  | 2.68290e-17 | 1.00000  |
| rad26              | 2.07425e-17 | 1.00000  | 2.07425e-17 | 1.00000  |
| rad39              | 5.58240e-18 | 1.00000  | 5.58240e-18 | 1.00000  |
| rad31              | 3.58092e-18 | 1.00000  | 3.58092e-18 | 1.00000  |
| rad19syn           | 1.40889e-19 | 1.00000  | 1.40889e-19 | 1.00000  |
| rad50              | 1.20509e-19 | 1.00000  | 1.20509e-19 | 1.00000  |
| rad54              | 7.18131e-20 | 1.00000  | 7.18131e-20 | 1.00000  |
| rad70              | 4.77681e-20 | 1.00000  | 4.77681e-20 | 1.00000  |
| rad5               | 1.58579e-21 | 1.00000  | 1.58579e-21 | 1.00000  |
| rad52              | 1.52437e-22 | 1.00000  | 1.52437e-22 | 1.00000  |
| rad34              | 1.47582e-22 | 1.00000  | 1.47582e-22 | 1.00000  |
| rad55              | 1.16911e-22 | 1.00000  | 1.16911e-22 | 1.00000  |
| PhcycC3H3_A+H      | 4.81884e-23 | 1.00000  | 4.81884e-23 | 1.00000  |
| rad58              | 3.18783e-23 | 1.00000  | 3.18783e-23 | 1.00000  |
| rad62              | 2.11697e-23 | 1.00000  | 2.11697e-23 | 1.00000  |
| rad51              | 1.21719e-23 | 1.00000  | 1.21719e-23 | 1.00000  |
| rad12              | 8.55692e-24 | 1.00000  | 8.55692e-24 | 1.00000  |
| rad37              | 1.18394e-24 | 1.00000  | 1.18394e-24 | 1.00000  |
| rad43              | 1.75394e-25 | 1.00000  | 1.75394e-25 | 1.00000  |
| rad47              | 1.32066e-26 | 1.00000  | 1.32066e-26 | 1.00000  |
| rad65              | 2.32493e-27 | 1.00000  | 2.32493e-27 | 1.00000  |
| PAH1+H             | 2.19375e-27 | 1.00000  | 2.19375e-27 | 1.00000  |
| rad42              | 2.51691e-28 | 1.00000  | 2.51691e-28 | 1.00000  |
| PAH10+CH3          | 2.09183e-28 | 1.00000  | 2.09183e-28 | 1.00000  |
| rad41              | 4.98376e-31 | 1.00000  | 4.98376e-31 | 1.00000  |

100000.000 Pa, 250.000000 K

=====

| Rate constant | True (fraction) | Effective (fraction) |
|---------------|-----------------|----------------------|
|---------------|-----------------|----------------------|

-----

|                    |                       |                       |
|--------------------|-----------------------|-----------------------|
| Total              | 1.21641e-16 (1.00 )   | 1.21641e-16 (1.00 )   |
| Formation of rad11 | 9.54219e-17 (0.784 )  | 9.54219e-17 (0.784 )  |
| Formation of rad6  | 2.24583e-17 (0.185 )  | 2.24583e-17 (0.185 )  |
| H-abstraction      | 3.76121e-18 (0.0309 ) | 3.76121e-18 (0.0309 ) |

| species            | PYtrue      | Cumul    | PYeffective | Cumul    |
|--------------------|-------------|----------|-------------|----------|
| rad11              | 0.775064    | 0.775064 | 0.775064    | 0.775064 |
| rad6               | 0.193410    | 0.968474 | 0.193410    | 0.968474 |
| Benzene+2-propynyl | 0.0309205   | 0.999394 | 0.0309205   | 0.999394 |
| rad22              | 0.000189262 | 0.999584 | 0.000189262 | 0.999584 |
| rad20              | 0.000164259 | 0.999748 | 0.000164259 | 0.999748 |
| rad21              | 0.000158114 | 0.999906 | 0.000158114 | 0.999906 |
| rad18              | 4.19189e-05 | 0.999948 | 4.19189e-05 | 0.999948 |
| rad45              | 2.88639e-05 | 0.999977 | 2.88639e-05 | 0.999977 |
| Indene+H           | 9.87511e-06 | 0.999987 | 9.87511e-06 | 0.999987 |
| rad7               | 4.40143e-06 | 0.999991 | 4.40143e-06 | 0.999991 |
| rad13              | 2.86470e-06 | 0.999994 | 2.86470e-06 | 0.999994 |
| C2H2+PhCH2         | 2.26638e-06 | 0.999996 | 2.26638e-06 | 0.999996 |
| rad36              | 1.86774e-06 | 0.999998 | 1.86774e-06 | 0.999998 |
| rad23              | 8.78274e-07 | 0.999999 | 8.78274e-07 | 0.999999 |
| rad25              | 6.32217e-07 | 1.000000 | 6.32217e-07 | 1.000000 |
| PhCHCCH2+H         | 1.91663e-07 | 1.000000 | 1.91663e-07 | 1.000000 |
| Phenyl+Allene      | 1.99985e-08 | 1.000000 | 0.000000    | 1.000000 |
| rad9               | 1.60127e-08 | 1.000000 | 1.60127e-08 | 1.000000 |
| rad33              | 8.35979e-09 | 1.000000 | 8.35979e-09 | 1.000000 |
| rad3               | 4.34194e-09 | 1.000000 | 4.34194e-09 | 1.000000 |
| rad4               | 2.33259e-09 | 1.000000 | 2.33259e-09 | 1.000000 |
| rad24              | 1.11511e-09 | 1.000000 | 1.11511e-09 | 1.000000 |
| PhCH2CCH+H         | 6.67303e-10 | 1.000000 | 6.67303e-10 | 1.000000 |
| rad28              | 4.02745e-10 | 1.000000 | 4.02745e-10 | 1.000000 |
| rad30              | 3.21142e-11 | 1.000000 | 3.21142e-11 | 1.000000 |
| rad2               | 2.44185e-11 | 1.000000 | 2.44185e-11 | 1.000000 |
| rad15              | 7.75861e-12 | 1.000000 | 7.75861e-12 | 1.000000 |
| rad8               | 5.59349e-12 | 1.000000 | 5.59349e-12 | 1.000000 |
| PhCCH+CH3          | 2.63539e-12 | 1.000000 | 2.63539e-12 | 1.000000 |
| rad1               | 1.86472e-12 | 1.000000 | 1.86472e-12 | 1.000000 |
| PAH7+H             | 4.20453e-13 | 1.000000 | 4.20453e-13 | 1.000000 |
| rad14              | 5.50531e-14 | 1.000000 | 5.50531e-14 | 1.000000 |
| rad38              | 3.61585e-14 | 1.000000 | 3.61585e-14 | 1.000000 |
| Ph+MeAc            | 1.52042e-14 | 1.000000 | 1.52042e-14 | 1.000000 |
| rad10              | 1.45993e-14 | 1.000000 | 1.45993e-14 | 1.000000 |
| rad60syn           | 1.13592e-14 | 1.000000 | 1.13592e-14 | 1.000000 |
| rad60anti          | 4.46810e-15 | 1.000000 | 4.46810e-15 | 1.000000 |
| rad46              | 8.37583e-16 | 1.000000 | 8.37583e-16 | 1.000000 |
| PAH9+H             | 6.35983e-16 | 1.000000 | 6.35983e-16 | 1.000000 |
| rad35              | 5.80284e-16 | 1.000000 | 5.80284e-16 | 1.000000 |
| PAH3+H             | 4.44142e-16 | 1.000000 | 4.44142e-16 | 1.000000 |
| PhCCCH3+H          | 2.51940e-16 | 1.000000 | 2.51940e-16 | 1.000000 |
| rad59              | 1.17322e-16 | 1.000000 | 1.17322e-16 | 1.000000 |
| rad27              | 5.33913e-17 | 1.000000 | 5.33913e-17 | 1.000000 |
| rad26              | 4.23550e-17 | 1.000000 | 4.23550e-17 | 1.000000 |
| rad39              | 1.17786e-17 | 1.000000 | 1.17786e-17 | 1.000000 |
| rad31              | 5.10024e-18 | 1.000000 | 5.10024e-18 | 1.000000 |
| rad19syn           | 3.91533e-19 | 1.000000 | 3.91533e-19 | 1.000000 |
| rad50              | 3.07000e-19 | 1.000000 | 3.07000e-19 | 1.000000 |
| rad54              | 1.99959e-19 | 1.000000 | 1.99959e-19 | 1.000000 |
| rad70              | 1.71139e-19 | 1.000000 | 1.71139e-19 | 1.000000 |
| rad5               | 4.72080e-21 | 1.000000 | 4.72080e-21 | 1.000000 |
| rad34              | 5.97078e-22 | 1.000000 | 5.97078e-22 | 1.000000 |
| rad52              | 4.78293e-22 | 1.000000 | 4.78293e-22 | 1.000000 |
| rad55              | 3.92543e-22 | 1.000000 | 3.92543e-22 | 1.000000 |
| PhcycC3H3_A+H      | 1.74216e-22 | 1.000000 | 1.74216e-22 | 1.000000 |
| rad58              | 1.23144e-22 | 1.000000 | 1.23144e-22 | 1.000000 |
| rad62              | 7.76810e-23 | 1.000000 | 7.76810e-23 | 1.000000 |
| rad51              | 4.49419e-23 | 1.000000 | 4.49419e-23 | 1.000000 |
| rad12              | 2.45228e-23 | 1.000000 | 2.45228e-23 | 1.000000 |
| rad37              | 3.62260e-24 | 1.000000 | 3.62260e-24 | 1.000000 |
| rad43              | 6.86323e-25 | 1.000000 | 6.86323e-25 | 1.000000 |
| rad47              | 5.30208e-26 | 1.000000 | 5.30208e-26 | 1.000000 |
| rad65              | 9.68526e-27 | 1.000000 | 9.68526e-27 | 1.000000 |
| PAH1+H             | 8.63370e-27 | 1.000000 | 8.63370e-27 | 1.000000 |
| rad42              | 1.10112e-27 | 1.000000 | 1.10112e-27 | 1.000000 |
| PAH10+CH3          | 8.09657e-28 | 1.000000 | 8.09657e-28 | 1.000000 |
| rad41              | 2.31971e-30 | 1.000000 | 2.31971e-30 | 1.000000 |

100000.000 Pa, 260.000000 K

=====

| Rate constant | True (fraction) | Effective (fraction) |
|---------------|-----------------|----------------------|
|---------------|-----------------|----------------------|

-----

|                    |             |           |             |           |
|--------------------|-------------|-----------|-------------|-----------|
| Total              | 1.63720e-16 | (1.00 )   | 1.63720e-16 | (1.00 )   |
| Formation of rad11 | 1.26419e-16 | (0.772 )  | 1.26419e-16 | (0.772 )  |
| Formation of rad6  | 3.15515e-17 | (0.193 )  | 3.15515e-17 | (0.193 )  |
| H-abstraction      | 5.75028e-18 | (0.0351 ) | 5.75028e-18 | (0.0351 ) |

| species            | PYtrue      | Cumul    | PYeffective | Cumul    |
|--------------------|-------------|----------|-------------|----------|
| rad11              | 0.761856    | 0.761856 | 0.761856    | 0.761856 |
| rad6               | 0.202344    | 0.964200 | 0.202344    | 0.964200 |
| Benzene+2-propynyl | 0.0351226   | 0.999323 | 0.0351226   | 0.999323 |
| rad22              | 0.000220521 | 0.999543 | 0.000220521 | 0.999543 |
| rad20              | 0.000177440 | 0.999721 | 0.000177440 | 0.999721 |
| rad21              | 0.000166503 | 0.999887 | 0.000166503 | 0.999887 |
| rad18              | 4.97130e-05 | 0.999937 | 4.97130e-05 | 0.999937 |
| rad45              | 3.43320e-05 | 0.999971 | 3.43320e-05 | 0.999971 |
| Indene+H           | 1.32362e-05 | 0.999984 | 1.32362e-05 | 0.999984 |
| rad7               | 5.20741e-06 | 0.999990 | 5.20741e-06 | 0.999990 |
| C2H2+PhCH2         | 3.06334e-06 | 0.999993 | 3.06334e-06 | 0.999993 |
| rad13              | 3.05272e-06 | 0.999996 | 3.05272e-06 | 0.999996 |
| rad36              | 2.23177e-06 | 0.999998 | 2.23177e-06 | 0.999998 |
| rad23              | 1.16870e-06 | 0.999999 | 1.16870e-06 | 0.999999 |
| rad25              | 7.45972e-07 | 1.000000 | 7.45972e-07 | 1.000000 |
| PhCHCCH2+H         | 2.52252e-07 | 1.000000 | 2.52252e-07 | 1.000000 |
| Phenyl+Allene      | 2.95620e-08 | 1.000000 | 0.000000    | 1.000000 |
| rad9               | 2.13993e-08 | 1.000000 | 2.13993e-08 | 1.000000 |
| rad33              | 8.66955e-09 | 1.000000 | 8.66955e-09 | 1.000000 |
| rad3               | 5.58636e-09 | 1.000000 | 5.58636e-09 | 1.000000 |
| rad4               | 3.00975e-09 | 1.000000 | 3.00975e-09 | 1.000000 |
| PhCH2CCH+H         | 1.13230e-09 | 1.000000 | 1.13230e-09 | 1.000000 |
| rad24              | 1.12914e-09 | 1.000000 | 1.12914e-09 | 1.000000 |
| rad28              | 5.44814e-10 | 1.000000 | 5.44814e-10 | 1.000000 |
| rad30              | 5.04065e-11 | 1.000000 | 5.04065e-11 | 1.000000 |
| rad2               | 3.85001e-11 | 1.000000 | 3.85001e-11 | 1.000000 |
| rad15              | 1.24849e-11 | 1.000000 | 1.24849e-11 | 1.000000 |
| rad8               | 9.43272e-12 | 1.000000 | 9.43272e-12 | 1.000000 |
| PhCCH+CH3          | 4.79019e-12 | 1.000000 | 4.79019e-12 | 1.000000 |
| rad1               | 2.97089e-12 | 1.000000 | 2.97089e-12 | 1.000000 |
| PAH7+H             | 8.18580e-13 | 1.000000 | 8.18580e-13 | 1.000000 |
| rad14              | 9.26280e-14 | 1.000000 | 9.26280e-14 | 1.000000 |
| rad38              | 6.00593e-14 | 1.000000 | 6.00593e-14 | 1.000000 |
| Ph+MeAc            | 3.12546e-14 | 1.000000 | 3.12546e-14 | 1.000000 |
| rad10              | 2.89609e-14 | 1.000000 | 2.89609e-14 | 1.000000 |
| rad60syn           | 2.11835e-14 | 1.000000 | 2.11835e-14 | 1.000000 |
| rad60anti          | 8.47153e-15 | 1.000000 | 8.47153e-15 | 1.000000 |
| rad46              | 1.51952e-15 | 1.000000 | 1.51952e-15 | 1.000000 |
| PAH9+H             | 1.24133e-15 | 1.000000 | 1.24133e-15 | 1.000000 |
| rad35              | 1.16617e-15 | 1.000000 | 1.16617e-15 | 1.000000 |
| PAH3+H             | 1.01605e-15 | 1.000000 | 1.01605e-15 | 1.000000 |
| PhCCCH3+H          | 5.87106e-16 | 1.000000 | 5.87106e-16 | 1.000000 |
| rad59              | 2.63079e-16 | 1.000000 | 2.63079e-16 | 1.000000 |
| rad27              | 1.04361e-16 | 1.000000 | 1.04361e-16 | 1.000000 |
| rad26              | 8.45195e-17 | 1.000000 | 8.45195e-17 | 1.000000 |
| rad39              | 2.44335e-17 | 1.000000 | 2.44335e-17 | 1.000000 |
| rad31              | 7.29196e-18 | 1.000000 | 7.29196e-18 | 1.000000 |
| rad19syn           | 1.02579e-18 | 1.000000 | 1.02579e-18 | 1.000000 |
| rad50              | 7.60132e-19 | 1.000000 | 7.60132e-19 | 1.000000 |
| rad70              | 5.55348e-19 | 1.000000 | 5.55348e-19 | 1.000000 |
| rad54              | 5.20744e-19 | 1.000000 | 5.20744e-19 | 1.000000 |
| rad5               | 1.34267e-20 | 1.000000 | 1.34267e-20 | 1.000000 |
| rad34              | 2.14777e-21 | 1.000000 | 2.14777e-21 | 1.000000 |
| rad52              | 1.41865e-21 | 1.000000 | 1.41865e-21 | 1.000000 |
| rad55              | 1.19794e-21 | 1.000000 | 1.19794e-21 | 1.000000 |
| PhcycC3H3_A+H      | 5.68566e-22 | 1.000000 | 5.68566e-22 | 1.000000 |
| rad58              | 4.27320e-22 | 1.000000 | 4.27320e-22 | 1.000000 |
| rad62              | 2.60130e-22 | 1.000000 | 2.60130e-22 | 1.000000 |
| rad51              | 1.52996e-22 | 1.000000 | 1.52996e-22 | 1.000000 |
| rad12              | 6.71815e-23 | 1.000000 | 6.71815e-23 | 1.000000 |
| rad37              | 1.04930e-23 | 1.000000 | 1.04930e-23 | 1.000000 |
| rad43              | 2.44859e-24 | 1.000000 | 2.44859e-24 | 1.000000 |
| rad47              | 1.92037e-25 | 1.000000 | 1.92037e-25 | 1.000000 |
| rad65              | 3.65187e-26 | 1.000000 | 3.65187e-26 | 1.000000 |
| PAH1+H             | 3.03026e-26 | 1.000000 | 3.03026e-26 | 1.000000 |
| rad42              | 4.27463e-27 | 1.000000 | 4.27463e-27 | 1.000000 |
| PAH10+CH3          | 2.83781e-27 | 1.000000 | 2.83781e-27 | 1.000000 |
| rad41              | 9.58287e-30 | 1.000000 | 9.58287e-30 | 1.000000 |

100000.000 Pa, 270.000000 K

=====

| Rate constant | True (fraction) | Effective (fraction) |
|---------------|-----------------|----------------------|
|---------------|-----------------|----------------------|

-----



|                    |                       |                       |
|--------------------|-----------------------|-----------------------|
| Total              | 2.15887e-16 (1.00 )   | 2.15887e-16 (1.00 )   |
| Formation of rad11 | 1.64133e-16 (0.760 )  | 1.64133e-16 (0.760 )  |
| Formation of rad6  | 4.32452e-17 (0.200 )  | 4.32452e-17 (0.200 )  |
| H-abstraction      | 8.50919e-18 (0.0394 ) | 8.50919e-18 (0.0394 ) |

| species            | PYtrue      | Cumul    | PYeffective | Cumul    |
|--------------------|-------------|----------|-------------|----------|
| rad11              | 0.748943    | 0.748943 | 0.748943    | 0.748943 |
| rad6               | 0.210882    | 0.959825 | 0.210882    | 0.959825 |
| Benzene+2-propynyl | 0.0394150   | 0.999240 | 0.0394150   | 0.999240 |
| rad22              | 0.000256915 | 0.999497 | 0.000256915 | 0.999497 |
| rad20              | 0.000191104 | 0.999688 | 0.000191104 | 0.999688 |
| rad21              | 0.000175219 | 0.999863 | 0.000175219 | 0.999863 |
| rad18              | 5.86678e-05 | 0.999922 | 5.86678e-05 | 0.999922 |
| rad45              | 4.08419e-05 | 0.999963 | 4.08419e-05 | 0.999963 |
| Indene+H           | 1.76701e-05 | 0.999981 | 1.76701e-05 | 0.999981 |
| rad7               | 6.14407e-06 | 0.999987 | 6.14407e-06 | 0.999987 |
| C2H2+PhCH2         | 4.12933e-06 | 0.999991 | 4.12933e-06 | 0.999991 |
| rad13              | 3.23305e-06 | 0.999994 | 3.23305e-06 | 0.999994 |
| rad36              | 2.66882e-06 | 0.999997 | 2.66882e-06 | 0.999997 |
| rad23              | 1.55732e-06 | 0.999998 | 1.55732e-06 | 0.999998 |
| rad25              | 8.79428e-07 | 0.999999 | 8.79428e-07 | 0.999999 |
| PhCHCCH2+H         | 3.32242e-07 | 1.000000 | 3.32242e-07 | 1.000000 |
| Phenyl+Allene      | 4.34177e-08 | 1.000000 | 0.000000    | 1.000000 |
| rad9               | 2.85857e-08 | 1.000000 | 2.85857e-08 | 1.000000 |
| rad33              | 8.95142e-09 | 1.000000 | 8.95142e-09 | 1.000000 |
| rad3               | 7.15623e-09 | 1.000000 | 7.15623e-09 | 1.000000 |
| rad4               | 3.86800e-09 | 1.000000 | 3.86800e-09 | 1.000000 |
| PhCH2CCH+H         | 1.88829e-09 | 1.000000 | 1.88829e-09 | 1.000000 |
| rad24              | 1.14663e-09 | 1.000000 | 1.14663e-09 | 1.000000 |
| rad28              | 7.33947e-10 | 1.000000 | 7.33947e-10 | 1.000000 |
| rad30              | 7.84746e-11 | 1.000000 | 7.84746e-11 | 1.000000 |
| rad2               | 6.04636e-11 | 1.000000 | 6.04636e-11 | 1.000000 |
| rad15              | 1.99050e-11 | 1.000000 | 1.99050e-11 | 1.000000 |
| rad8               | 1.56995e-11 | 1.000000 | 1.56995e-11 | 1.000000 |
| PhCCH+CH3          | 8.63210e-12 | 1.000000 | 8.63210e-12 | 1.000000 |
| rad1               | 4.71981e-12 | 1.000000 | 4.71981e-12 | 1.000000 |
| PAH7+H             | 1.55427e-12 | 1.000000 | 1.55427e-12 | 1.000000 |
| rad14              | 1.54262e-13 | 1.000000 | 1.54262e-13 | 1.000000 |
| rad38              | 9.99777e-14 | 1.000000 | 9.99777e-14 | 1.000000 |
| Ph+MeAc            | 6.31097e-14 | 1.000000 | 6.31097e-14 | 1.000000 |
| rad10              | 5.70002e-14 | 1.000000 | 5.70002e-14 | 1.000000 |
| rad60syn           | 3.87658e-14 | 1.000000 | 3.87658e-14 | 1.000000 |
| rad60anti          | 1.57382e-14 | 1.000000 | 1.57382e-14 | 1.000000 |
| rad46              | 2.75291e-15 | 1.000000 | 2.75291e-15 | 1.000000 |
| PAH9+H             | 2.42076e-15 | 1.000000 | 2.42076e-15 | 1.000000 |
| rad35              | 2.30887e-15 | 1.000000 | 2.30887e-15 | 1.000000 |
| PAH3+H             | 2.23708e-15 | 1.000000 | 2.23708e-15 | 1.000000 |
| PhCCCH3+H          | 1.34137e-15 | 1.000000 | 1.34137e-15 | 1.000000 |
| rad59              | 5.68695e-16 | 1.000000 | 5.68695e-16 | 1.000000 |
| rad27              | 2.00104e-16 | 1.000000 | 2.00104e-16 | 1.000000 |
| rad26              | 1.65004e-16 | 1.000000 | 1.65004e-16 | 1.000000 |
| rad39              | 4.97139e-17 | 1.000000 | 4.97139e-17 | 1.000000 |
| rad31              | 1.04757e-17 | 1.000000 | 1.04757e-17 | 1.000000 |
| rad19syn           | 2.53959e-18 | 1.000000 | 2.53959e-18 | 1.000000 |
| rad50              | 1.82850e-18 | 1.000000 | 1.82850e-18 | 1.000000 |
| rad70              | 1.64670e-18 | 1.000000 | 1.64670e-18 | 1.000000 |
| rad54              | 1.27414e-18 | 1.000000 | 1.27414e-18 | 1.000000 |
| rad5               | 3.64246e-20 | 1.000000 | 3.64246e-20 | 1.000000 |
| rad34              | 6.95197e-21 | 1.000000 | 6.95197e-21 | 1.000000 |
| rad52              | 3.98718e-21 | 1.000000 | 3.98718e-21 | 1.000000 |
| rad55              | 3.35113e-21 | 1.000000 | 3.35113e-21 | 1.000000 |
| PhcycC3H3_A+H      | 1.69050e-21 | 1.000000 | 1.69050e-21 | 1.000000 |
| rad58              | 1.34518e-21 | 1.000000 | 1.34518e-21 | 1.000000 |
| rad62              | 8.00563e-22 | 1.000000 | 8.00563e-22 | 1.000000 |
| rad51              | 4.83096e-22 | 1.000000 | 4.83096e-22 | 1.000000 |
| rad12              | 1.75620e-22 | 1.000000 | 1.75620e-22 | 1.000000 |
| rad37              | 2.87452e-23 | 1.000000 | 2.87452e-23 | 1.000000 |
| rad43              | 8.02093e-24 | 1.000000 | 8.02093e-24 | 1.000000 |
| rad47              | 6.34742e-25 | 1.000000 | 6.34742e-25 | 1.000000 |
| rad65              | 1.25746e-25 | 1.000000 | 1.25746e-25 | 1.000000 |
| PAH1+H             | 9.59559e-26 | 1.000000 | 9.59559e-26 | 1.000000 |
| rad42              | 1.49168e-26 | 1.000000 | 1.49168e-26 | 1.000000 |
| PAH10+CH3          | 9.07527e-27 | 1.000000 | 9.07527e-27 | 1.000000 |
| rad41              | 3.55895e-29 | 1.000000 | 3.55895e-29 | 1.000000 |

100000.000 Pa, 280.000000 K

=====

| Rate constant | True (fraction) | Effective (fraction) |
|---------------|-----------------|----------------------|
|---------------|-----------------|----------------------|

-----

|                    |                       |                       |
|--------------------|-----------------------|-----------------------|
| Total              | 2.79491e-16 (1.00 )   | 2.79491e-16 (1.00 )   |
| Formation of rad11 | 2.09281e-16 (0.749 )  | 2.09281e-16 (0.749 )  |
| Formation of rad6  | 5.79792e-17 (0.207 )  | 5.79792e-17 (0.207 )  |
| H-abstraction      | 1.22310e-17 (0.0438 ) | 1.22310e-17 (0.0438 ) |

| species            | PYtrue      | Cumul    | PYeffective | Cumul    |
|--------------------|-------------|----------|-------------|----------|
| rad11              | 0.736327    | 0.736327 | 0.736327    | 0.736327 |
| rad6               | 0.219059    | 0.955386 | 0.219059    | 0.955386 |
| Benzene+2-propynyl | 0.0437616   | 0.999148 | 0.0437616   | 0.999148 |
| rad22              | 0.000299211 | 0.999447 | 0.000299211 | 0.999447 |
| rad20              | 0.000205184 | 0.999652 | 0.000205184 | 0.999652 |
| rad21              | 0.000184224 | 0.999837 | 0.000184224 | 0.999837 |
| rad18              | 6.88770e-05 | 0.999905 | 6.88770e-05 | 0.999905 |
| rad45              | 4.85771e-05 | 0.999954 | 4.85771e-05 | 0.999954 |
| Indene+H           | 2.34818e-05 | 0.999978 | 2.34818e-05 | 0.999978 |
| rad7               | 7.23242e-06 | 0.999985 | 7.23242e-06 | 0.999985 |
| C2H2+PhCH2         | 5.54804e-06 | 0.999990 | 5.54804e-06 | 0.999990 |
| rad13              | 3.40526e-06 | 0.999994 | 3.40526e-06 | 0.999994 |
| rad36              | 3.19296e-06 | 0.999997 | 3.19296e-06 | 0.999997 |
| rad23              | 2.07711e-06 | 0.999999 | 2.07711e-06 | 0.999999 |
| rad25              | 1.03516e-06 | 1.00000  | 1.03516e-06 | 1.00000  |
| PhCHCCH2+H         | 4.37640e-07 | 1.00000  | 4.37640e-07 | 1.00000  |
| Phenyl+Allene      | 6.33409e-08 | 1.00000  | 0.00000     | 1.00000  |
| rad9               | 3.81460e-08 | 1.00000  | 3.81461e-08 | 1.00000  |
| rad33              | 9.20826e-09 | 1.00000  | 9.20826e-09 | 1.00000  |
| rad3               | 9.13065e-09 | 1.00000  | 9.13065e-09 | 1.00000  |
| rad4               | 4.95293e-09 | 1.00000  | 4.95293e-09 | 1.00000  |
| PhCH2CCH+H         | 3.09717e-09 | 1.00000  | 3.09717e-09 | 1.00000  |
| rad24              | 1.16742e-09 | 1.00000  | 1.16742e-09 | 1.00000  |
| rad28              | 9.84878e-10 | 1.00000  | 9.84878e-10 | 1.00000  |
| rad30              | 1.21053e-10 | 1.00000  | 1.21053e-10 | 1.00000  |
| rad2               | 9.45412e-11 | 1.00000  | 9.45412e-11 | 1.00000  |
| rad15              | 3.14088e-11 | 1.00000  | 3.14088e-11 | 1.00000  |
| rad8               | 2.57779e-11 | 1.00000  | 2.57779e-11 | 1.00000  |
| PhCCH+CH3          | 1.54000e-11 | 1.00000  | 1.54000e-11 | 1.00000  |
| rad1               | 7.47391e-12 | 1.00000  | 7.47391e-12 | 1.00000  |
| PAH7+H             | 2.87864e-12 | 1.00000  | 2.87864e-12 | 1.00000  |
| rad14              | 2.54023e-13 | 1.00000  | 2.54023e-13 | 1.00000  |
| rad38              | 1.66580e-13 | 1.00000  | 1.66580e-13 | 1.00000  |
| Ph+MeAc            | 1.24965e-13 | 1.00000  | 1.24965e-13 | 1.00000  |
| rad10              | 1.11036e-13 | 1.00000  | 1.11036e-13 | 1.00000  |
| rad60syn           | 6.95648e-14 | 1.00000  | 6.95648e-14 | 1.00000  |
| rad60anti          | 2.86319e-14 | 1.00000  | 2.86319e-14 | 1.00000  |
| rad46              | 4.97258e-15 | 1.00000  | 4.97258e-15 | 1.00000  |
| PAH3+H             | 4.74336e-15 | 1.00000  | 4.74336e-15 | 1.00000  |
| PAH9+H             | 4.70291e-15 | 1.00000  | 4.70291e-15 | 1.00000  |
| rad35              | 4.49222e-15 | 1.00000  | 4.49222e-15 | 1.00000  |
| PhCCCH3+H          | 2.99424e-15 | 1.00000  | 2.99424e-15 | 1.00000  |
| rad59              | 1.18585e-15 | 1.00000  | 1.18585e-15 | 1.00000  |
| rad27              | 3.75925e-16 | 1.00000  | 3.75925e-16 | 1.00000  |
| rad26              | 3.15335e-16 | 1.00000  | 3.15335e-16 | 1.00000  |
| rad39              | 9.89573e-17 | 1.00000  | 9.89573e-17 | 1.00000  |
| rad31              | 1.51350e-17 | 1.00000  | 1.51350e-17 | 1.00000  |
| rad19syn           | 5.95375e-18 | 1.00000  | 5.95375e-18 | 1.00000  |
| rad70              | 4.49658e-18 | 1.00000  | 4.49658e-18 | 1.00000  |
| rad50              | 4.27007e-18 | 1.00000  | 4.27007e-18 | 1.00000  |
| rad54              | 2.94022e-18 | 1.00000  | 2.94022e-18 | 1.00000  |
| rad5               | 9.41823e-20 | 1.00000  | 9.41823e-20 | 1.00000  |
| rad34              | 2.04608e-20 | 1.00000  | 2.04608e-20 | 1.00000  |
| rad52              | 1.06407e-20 | 1.00000  | 1.06407e-20 | 1.00000  |
| rad55              | 8.65795e-21 | 1.00000  | 8.65795e-21 | 1.00000  |
| PhcycC3H3_A+H      | 4.61722e-21 | 1.00000  | 4.61722e-21 | 1.00000  |
| rad58              | 3.87516e-21 | 1.00000  | 3.87516e-21 | 1.00000  |
| rad62              | 2.27929e-21 | 1.00000  | 2.27929e-21 | 1.00000  |
| rad51              | 1.42257e-21 | 1.00000  | 1.42257e-21 | 1.00000  |
| rad12              | 4.37611e-22 | 1.00000  | 4.37611e-22 | 1.00000  |
| rad37              | 7.44805e-23 | 1.00000  | 7.44806e-23 | 1.00000  |
| rad43              | 2.42860e-23 | 1.00000  | 2.42860e-23 | 1.00000  |
| rad47              | 1.93353e-24 | 1.00000  | 1.93353e-24 | 1.00000  |
| rad65              | 3.98629e-25 | 1.00000  | 3.98629e-25 | 1.00000  |
| PAH1+H             | 2.76944e-25 | 1.00000  | 2.76944e-25 | 1.00000  |
| rad42              | 4.73166e-26 | 1.00000  | 4.73166e-26 | 1.00000  |
| PAH10+CH3          | 2.66747e-26 | 1.00000  | 2.66747e-26 | 1.00000  |
| rad41              | 1.20146e-28 | 1.00000  | 1.20146e-28 | 1.00000  |

100000.000 Pa, 290.000000 K

=====

|               |                 |                      |
|---------------|-----------------|----------------------|
| Rate constant | True (fraction) | Effective (fraction) |
|---------------|-----------------|----------------------|

-----

|                    |                       |                       |
|--------------------|-----------------------|-----------------------|
| Total              | 3.55893e-16 (1.00 )   | 3.55893e-16 (1.00 )   |
| Formation of rad11 | 2.62555e-16 (0.738 )  | 2.62555e-16 (0.738 )  |
| Formation of rad6  | 7.62093e-17 (0.214 )  | 7.62093e-17 (0.214 )  |
| H-abstraction      | 1.71289e-17 (0.0481 ) | 1.71289e-17 (0.0481 ) |

| species            | PYtrue      | Cumul    | PYeffective | Cumul    |
|--------------------|-------------|----------|-------------|----------|
| rad11              | 0.724001    | 0.724001 | 0.724001    | 0.724001 |
| rad6               | 0.226911    | 0.950912 | 0.226911    | 0.950912 |
| Benzene+2-propynyl | 0.0481294   | 0.999041 | 0.0481294   | 0.999041 |
| rad22              | 0.000348247 | 0.999390 | 0.000348247 | 0.999390 |
| rad20              | 0.000219601 | 0.999609 | 0.000219601 | 0.999609 |
| rad21              | 0.000193467 | 0.999803 | 0.000193467 | 0.999803 |
| rad18              | 8.04204e-05 | 0.999883 | 8.04204e-05 | 0.999883 |
| rad45              | 5.77449e-05 | 0.999941 | 5.77449e-05 | 0.999941 |
| Indene+H           | 3.10471e-05 | 0.999972 | 3.10471e-05 | 0.999972 |
| rad7               | 8.49653e-06 | 0.999980 | 8.49653e-06 | 0.999980 |
| C2H2+PhCH2         | 7.42554e-06 | 0.999988 | 7.42554e-06 | 0.999988 |
| rad36              | 3.82042e-06 | 0.999992 | 3.82042e-06 | 0.999992 |
| rad13              | 3.56915e-06 | 0.999995 | 3.56915e-06 | 0.999995 |
| rad23              | 2.77161e-06 | 0.999998 | 2.77161e-06 | 0.999998 |
| rad25              | 1.21576e-06 | 0.999999 | 1.21576e-06 | 0.999999 |
| PhCHCCH2+H         | 5.76153e-07 | 1.000000 | 5.76153e-07 | 1.000000 |
| Phenyl+Allene      | 9.17590e-08 | 1.000000 | 0.000000    | 1.000000 |
| rad9               | 5.08211e-08 | 1.000000 | 5.08211e-08 | 1.000000 |
| rad3               | 1.16058e-08 | 1.000000 | 1.16058e-08 | 1.000000 |
| rad33              | 9.44309e-09 | 1.000000 | 9.44309e-09 | 1.000000 |
| rad4               | 6.32057e-09 | 1.000000 | 6.32057e-09 | 1.000000 |
| PhCH2CCH+H         | 4.99852e-09 | 1.000000 | 4.99852e-09 | 1.000000 |
| rad28              | 1.31659e-09 | 1.000000 | 1.31659e-09 | 1.000000 |
| rad24              | 1.19135e-09 | 1.000000 | 1.19135e-09 | 1.000000 |
| rad30              | 1.84850e-10 | 1.000000 | 1.84850e-10 | 1.000000 |
| rad2               | 1.47070e-10 | 1.000000 | 1.47070e-10 | 1.000000 |
| rad15              | 4.90046e-11 | 1.000000 | 4.90046e-11 | 1.000000 |
| rad8               | 4.17356e-11 | 1.000000 | 4.17356e-11 | 1.000000 |
| PhCCH+CH3          | 2.71540e-11 | 1.000000 | 2.71540e-11 | 1.000000 |
| rad1               | 1.17883e-11 | 1.000000 | 1.17883e-11 | 1.000000 |
| PAH7+H             | 5.20047e-12 | 1.000000 | 5.20047e-12 | 1.000000 |
| rad14              | 4.13132e-13 | 1.000000 | 4.13132e-13 | 1.000000 |
| rad38              | 2.77407e-13 | 1.000000 | 2.77407e-13 | 1.000000 |
| Ph+MeAc            | 2.42230e-13 | 1.000000 | 2.42230e-13 | 1.000000 |
| rad10              | 2.13502e-13 | 1.000000 | 2.13502e-13 | 1.000000 |
| rad60syn           | 1.22326e-13 | 1.000000 | 1.22326e-13 | 1.000000 |
| rad60anti          | 5.09778e-14 | 1.000000 | 5.09778e-14 | 1.000000 |
| PAH3+H             | 9.69052e-15 | 1.000000 | 9.69052e-15 | 1.000000 |
| PAH9+H             | 9.07387e-15 | 1.000000 | 9.07387e-15 | 1.000000 |
| rad46              | 8.93944e-15 | 1.000000 | 8.93944e-15 | 1.000000 |
| rad35              | 8.57188e-15 | 1.000000 | 8.57188e-15 | 1.000000 |
| PhCCCH3+H          | 6.51044e-15 | 1.000000 | 6.51044e-15 | 1.000000 |
| rad59              | 2.38636e-15 | 1.000000 | 2.38636e-15 | 1.000000 |
| rad27              | 6.91181e-16 | 1.000000 | 6.91181e-16 | 1.000000 |
| rad26              | 5.90041e-16 | 1.000000 | 5.90041e-16 | 1.000000 |
| rad39              | 1.92219e-16 | 1.000000 | 1.92219e-16 | 1.000000 |
| rad31              | 2.20070e-17 | 1.000000 | 2.20070e-17 | 1.000000 |
| rad19syn           | 1.32439e-17 | 1.000000 | 1.32439e-17 | 1.000000 |
| rad70              | 1.13865e-17 | 1.000000 | 1.13865e-17 | 1.000000 |
| rad50              | 9.67234e-18 | 1.000000 | 9.67234e-18 | 1.000000 |
| rad54              | 6.42074e-18 | 1.000000 | 6.42074e-18 | 1.000000 |
| rad5               | 2.32129e-19 | 1.000000 | 2.32129e-19 | 1.000000 |
| rad34              | 5.52590e-20 | 1.000000 | 5.52590e-20 | 1.000000 |
| rad52              | 2.70168e-20 | 1.000000 | 2.70168e-20 | 1.000000 |
| rad55              | 2.07985e-20 | 1.000000 | 2.07985e-20 | 1.000000 |
| PhcycC3H3_A+H      | 1.16705e-20 | 1.000000 | 1.16705e-20 | 1.000000 |
| rad58              | 1.02961e-20 | 1.000000 | 1.02961e-20 | 1.000000 |
| rad62              | 6.04056e-21 | 1.000000 | 6.04056e-21 | 1.000000 |
| rad51              | 3.92581e-21 | 1.000000 | 3.92581e-21 | 1.000000 |
| rad12              | 1.03923e-21 | 1.000000 | 1.03923e-21 | 1.000000 |
| rad37              | 1.82710e-22 | 1.000000 | 1.82710e-22 | 1.000000 |
| rad43              | 6.83913e-23 | 1.000000 | 6.83913e-23 | 1.000000 |
| rad47              | 5.47347e-24 | 1.000000 | 5.47347e-24 | 1.000000 |
| rad65              | 1.17186e-24 | 1.000000 | 1.17186e-24 | 1.000000 |
| PAH1+H             | 7.35067e-25 | 1.000000 | 7.35067e-25 | 1.000000 |
| rad42              | 1.37754e-25 | 1.000000 | 1.37754e-25 | 1.000000 |
| PAH10+CH3          | 7.25621e-26 | 1.000000 | 7.25621e-26 | 1.000000 |
| rad41              | 3.72196e-28 | 1.000000 | 3.72196e-28 | 1.000000 |

100000.000 Pa, 300.000000 K

=====

|               |                 |                      |
|---------------|-----------------|----------------------|
| Rate constant | True (fraction) | Effective (fraction) |
|---------------|-----------------|----------------------|

-----

|                    |             |           |             |           |
|--------------------|-------------|-----------|-------------|-----------|
| Total              | 6.34395e-16 | (1.00 )   | 6.34395e-16 | (1.00 )   |
| Formation of rad11 | 4.51153e-16 | (0.711 )  | 4.51153e-16 | (0.711 )  |
| Formation of rad6  | 1.51589e-16 | (0.239 )  | 1.51589e-16 | (0.239 )  |
| H-abstraction      | 3.16530e-17 | (0.0499 ) | 3.16530e-17 | (0.0499 ) |

| species            | PYtrue      | Cumul    | PYeffective | Cumul    |
|--------------------|-------------|----------|-------------|----------|
| rad11              | 0.683057    | 0.683057 | 0.683057    | 0.683057 |
| rad6               | 0.264970    | 0.948027 | 0.264970    | 0.948027 |
| Benzene+2-propynyl | 0.0498949   | 0.997922 | 0.0498949   | 0.997922 |
| rad22              | 0.000920189 | 0.998842 | 0.000920189 | 0.998842 |
| rad20              | 0.000294254 | 0.999137 | 0.000294254 | 0.999137 |
| rad21              | 0.000256357 | 0.999393 | 0.000256357 | 0.999393 |
| rad18              | 0.000172979 | 0.999566 | 0.000172979 | 0.999566 |
| rad45              | 0.000168895 | 0.999735 | 0.000168895 | 0.999735 |
| Indene+H           | 0.000166772 | 0.999902 | 0.000166772 | 0.999902 |
| C2H2+PhCH2         | 4.77069e-05 | 0.999949 | 4.77070e-05 | 0.999949 |
| rad23              | 1.91555e-05 | 0.999968 | 1.91555e-05 | 0.999968 |
| rad7               | 1.62379e-05 | 0.999985 | 1.62379e-05 | 0.999985 |
| rad36              | 5.83214e-06 | 0.999990 | 5.83214e-06 | 0.999990 |
| rad13              | 3.79221e-06 | 0.999994 | 3.79221e-06 | 0.999994 |
| rad25              | 2.72511e-06 | 0.999997 | 2.72511e-06 | 0.999997 |
| PhCHCCH2+H         | 2.37496e-06 | 0.999999 | 2.37496e-06 | 0.999999 |
| Phenyl+Allene      | 3.64476e-07 | 1.000000 | 0.000000    | 0.999999 |
| rad9               | 2.30873e-07 | 1.000000 | 2.30873e-07 | 1.000000 |
| PhCH2CCH+H         | 4.94531e-08 | 1.000000 | 4.94531e-08 | 1.000000 |
| rad3               | 2.98418e-08 | 1.000000 | 2.98418e-08 | 1.000000 |
| rad4               | 1.53756e-08 | 1.000000 | 1.53756e-08 | 1.000000 |
| rad33              | 1.01038e-08 | 1.000000 | 1.01039e-08 | 1.000000 |
| rad28              | 4.34388e-09 | 1.000000 | 4.34388e-09 | 1.000000 |
| rad30              | 2.07359e-09 | 1.000000 | 2.07359e-09 | 1.000000 |
| rad24              | 1.88775e-09 | 1.000000 | 1.88775e-09 | 1.000000 |
| rad2               | 1.40460e-09 | 1.000000 | 1.40460e-09 | 1.000000 |
| rad15              | 7.20661e-10 | 1.000000 | 7.20661e-10 | 1.000000 |
| PhCCH+CH3          | 6.76401e-10 | 1.000000 | 6.76401e-10 | 1.000000 |
| rad1               | 1.09475e-10 | 1.000000 | 1.09475e-10 | 1.000000 |
| PAH7+H             | 9.89801e-11 | 1.000000 | 9.89801e-11 | 1.000000 |
| rad38              | 1.72533e-11 | 1.000000 | 1.72533e-11 | 1.000000 |
| Ph+MeAc            | 1.32088e-11 | 1.000000 | 1.32088e-11 | 1.000000 |
| rad10              | 1.24169e-11 | 1.000000 | 1.24169e-11 | 1.000000 |
| PAH9+H             | 5.23641e-12 | 1.000000 | 5.23642e-12 | 1.000000 |
| rad14              | 3.76830e-12 | 1.000000 | 3.76830e-12 | 1.000000 |
| rad60syn           | 2.74788e-12 | 1.000000 | 2.74788e-12 | 1.000000 |
| rad19anti          | 2.08970e-12 | 1.000000 | 2.08971e-12 | 1.000000 |
| PhCCCH3+H          | 1.72651e-12 | 1.000000 | 1.72651e-12 | 1.000000 |
| rad35              | 1.51308e-12 | 1.000000 | 1.51308e-12 | 1.000000 |
| rad46              | 1.31076e-12 | 1.000000 | 1.31076e-12 | 1.000000 |
| rad60anti          | 1.24408e-12 | 1.000000 | 1.24408e-12 | 1.000000 |
| PAH3+H             | 5.72583e-13 | 1.000000 | 5.72583e-13 | 1.000000 |
| rad59              | 1.12302e-13 | 1.000000 | 1.12302e-13 | 1.000000 |
| rad26              | 6.37700e-14 | 1.000000 | 6.37700e-14 | 1.000000 |
| rad50              | 2.59840e-14 | 1.000000 | 2.59841e-14 | 1.000000 |
| rad12              | 1.80204e-14 | 1.000000 | 1.80204e-14 | 1.000000 |
| rad27              | 1.54099e-14 | 1.000000 | 1.54099e-14 | 1.000000 |
| rad39              | 8.79587e-15 | 1.000000 | 8.79587e-15 | 1.000000 |
| rad70              | 2.36038e-15 | 1.000000 | 2.36038e-15 | 1.000000 |
| rad19syn           | 1.32227e-15 | 1.000000 | 1.32227e-15 | 1.000000 |
| rad52              | 5.25878e-16 | 1.000000 | 5.25879e-16 | 1.000000 |
| rad51              | 4.78961e-16 | 1.000000 | 4.78961e-16 | 1.000000 |
| rad54              | 2.96034e-16 | 1.000000 | 2.96034e-16 | 1.000000 |
| rad5               | 2.63633e-16 | 1.000000 | 2.63634e-16 | 1.000000 |
| rad31              | 1.69953e-16 | 1.000000 | 1.69953e-16 | 1.000000 |
| rad34              | 4.49357e-17 | 1.000000 | 4.49357e-17 | 1.000000 |
| rad67              | 3.75561e-17 | 1.000000 | 3.75562e-17 | 1.000000 |
| rad62              | 1.68034e-17 | 1.000000 | 1.68034e-17 | 1.000000 |
| PhcycC3H3_A+H      | 1.38393e-17 | 1.000000 | 1.38393e-17 | 1.000000 |
| rad37              | 1.14318e-17 | 1.000000 | 1.14318e-17 | 1.000000 |
| rad65              | 5.62850e-18 | 1.000000 | 5.62851e-18 | 1.000000 |
| rad58              | 5.55145e-18 | 1.000000 | 5.55145e-18 | 1.000000 |
| rad55              | 3.03521e-18 | 1.000000 | 3.03521e-18 | 1.000000 |
| rad43              | 2.01394e-18 | 1.000000 | 2.01394e-18 | 1.000000 |
| PAH10+CH3          | 7.68613e-19 | 1.000000 | 7.68614e-19 | 1.000000 |
| PAH1+H             | 2.16822e-19 | 1.000000 | 2.16822e-19 | 1.000000 |
| rad42              | 2.91034e-20 | 1.000000 | 2.91034e-20 | 1.000000 |
| rad73              | 1.80276e-20 | 1.000000 | 1.80276e-20 | 1.000000 |
| rad47              | 1.11639e-20 | 1.000000 | 1.11639e-20 | 1.000000 |
| rad71              | 4.82469e-21 | 1.000000 | 4.82469e-21 | 1.000000 |
| rad41              | 4.04052e-21 | 1.000000 | 4.04052e-21 | 1.000000 |
| rad53              | 1.74170e-21 | 1.000000 | 1.74170e-21 | 1.000000 |
| rad64              | 9.70789e-22 | 1.000000 | 9.70789e-22 | 1.000000 |

|           |             |         |             |          |
|-----------|-------------|---------|-------------|----------|
| rad68syn  | 2.72637e-22 | 1.00000 | 2.72637e-22 | 1.000000 |
| rad68anti | 1.93180e-22 | 1.00000 | 1.93180e-22 | 1.000000 |
| rad56     | 9.15887e-23 | 1.00000 | 9.15887e-23 | 1.000000 |
| rad61     | 3.27318e-23 | 1.00000 | 3.27318e-23 | 1.000000 |
| PAH8+H    | 2.40492e-23 | 1.00000 | 2.40492e-23 | 1.000000 |
| rad40syn  | 8.95062e-24 | 1.00000 | 8.95062e-24 | 1.000000 |
| rad40anti | 3.50662e-24 | 1.00000 | 3.50662e-24 | 1.000000 |
| rad72     | 2.61464e-24 | 1.00000 | 2.61464e-24 | 1.000000 |
| rad8      | 5.37871e-27 | 1.00000 | 5.37871e-27 | 1.000000 |

100000.000 Pa, 400.000000 K

| Rate constant      | True (fraction)       | Effective (fraction)  |
|--------------------|-----------------------|-----------------------|
| Total              | 5.11288e-15 (1.00 )   | 5.11285e-15 (1.00 )   |
| Formation of rad11 | 3.08094e-15 (0.603 )  | 3.08092e-15 (0.603 )  |
| Formation of rad6  | 1.54092e-15 (0.301 )  | 1.54091e-15 (0.301 )  |
| H-abstraction      | 4.91025e-16 (0.0960 ) | 4.91025e-16 (0.0960 ) |

| species            | PYtrue      | Cumul    | PYeffective | Cumul    |
|--------------------|-------------|----------|-------------|----------|
| rad11              | 0.534114    | 0.534114 | 0.534117    | 0.534117 |
| rad6               | 0.363737    | 0.897851 | 0.363739    | 0.897856 |
| Benzene+2-propynyl | 0.0960368   | 0.993887 | 0.0960374   | 0.993894 |
| rad22              | 0.00275994  | 0.996647 | 0.00275995  | 0.996654 |
| Indene+H           | 0.00107967  | 0.997727 | 0.00107967  | 0.997733 |
| rad45              | 0.000542592 | 0.998270 | 0.000542596 | 0.998276 |
| C2H2+PhCH2         | 0.000366160 | 0.998636 | 0.000366163 | 0.998642 |
| rad20              | 0.000358763 | 0.998995 | 0.000358766 | 0.999001 |
| rad18              | 0.000342405 | 0.999337 | 0.000342407 | 0.999343 |
| rad21              | 0.000294671 | 0.999632 | 0.000294673 | 0.999638 |
| rad23              | 0.000229168 | 0.999861 | 0.000229169 | 0.999867 |
| rad7               | 7.32368e-05 | 0.999934 | 7.32373e-05 | 0.999940 |
| PhCHCCH2+H         | 2.25278e-05 | 0.999957 | 2.25280e-05 | 0.999963 |
| rad36              | 2.09868e-05 | 0.999978 | 2.09868e-05 | 0.999984 |
| rad25              | 6.93636e-06 | 0.999984 | 6.93641e-06 | 0.999991 |
| Phenyl+Allene      | 6.27619e-06 | 0.999991 | 0.00000     | 0.999991 |
| rad13              | 5.35707e-06 | 0.999996 | 5.35710e-06 | 0.999996 |
| rad9               | 2.32708e-06 | 0.999998 | 2.32710e-06 | 0.999999 |
| PhCH2CCH+H         | 1.36264e-06 | 1.000000 | 1.36265e-06 | 1.000000 |
| rad3               | 2.08183e-07 | 1.000000 | 2.08184e-07 | 1.000000 |
| rad4               | 1.13051e-07 | 1.000000 | 1.13052e-07 | 1.000000 |
| PhCCH+CH3          | 6.99756e-08 | 1.000000 | 6.99760e-08 | 1.000000 |
| rad28              | 6.46540e-08 | 1.000000 | 6.46544e-08 | 1.000000 |
| rad2               | 5.39539e-08 | 1.000000 | 5.39542e-08 | 1.000000 |
| rad30              | 2.86861e-08 | 1.000000 | 2.86863e-08 | 1.000000 |
| PAH9+H             | 1.60248e-08 | 1.000000 | 1.60249e-08 | 1.000000 |
| rad33              | 1.36579e-08 | 1.000000 | 1.36580e-08 | 1.000000 |
| rad38              | 9.84154e-09 | 1.000000 | 9.84162e-09 | 1.000000 |
| rad15              | 7.70208e-09 | 1.000000 | 7.70212e-09 | 1.000000 |
| rad1               | 5.16422e-09 | 1.000000 | 5.16425e-09 | 1.000000 |
| PAH7+H             | 4.06176e-09 | 1.000000 | 4.06178e-09 | 1.000000 |
| Ph+MeAc            | 3.52060e-09 | 1.000000 | 3.52062e-09 | 1.000000 |
| rad35              | 3.17668e-09 | 1.000000 | 3.17670e-09 | 1.000000 |
| rad24              | 2.91502e-09 | 1.000000 | 2.91504e-09 | 1.000000 |
| rad10              | 2.32148e-09 | 1.000000 | 2.32149e-09 | 1.000000 |
| rad46              | 1.71541e-09 | 1.000000 | 1.71543e-09 | 1.000000 |
| PhCCCH3+H          | 1.26691e-09 | 1.000000 | 1.26692e-09 | 1.000000 |
| rad50              | 2.77470e-10 | 1.000000 | 2.77471e-10 | 1.000000 |
| rad19anti          | 1.56500e-10 | 1.000000 | 1.56501e-10 | 1.000000 |
| rad14              | 8.79602e-11 | 1.000000 | 8.79608e-11 | 1.000000 |
| rad60syn           | 7.99330e-11 | 1.000000 | 7.99335e-11 | 1.000000 |
| rad26              | 7.39741e-11 | 1.000000 | 7.39746e-11 | 1.000000 |
| rad39              | 7.28202e-11 | 1.000000 | 7.28207e-11 | 1.000000 |
| PAH3+H             | 4.08572e-11 | 1.000000 | 4.08575e-11 | 1.000000 |
| rad60anti          | 3.85954e-11 | 1.000000 | 3.85957e-11 | 1.000000 |
| rad51              | 2.46221e-11 | 1.000000 | 2.46222e-11 | 1.000000 |
| rad52              | 1.32117e-11 | 1.000000 | 1.32118e-11 | 1.000000 |
| rad59              | 7.04124e-12 | 1.000000 | 7.04128e-12 | 1.000000 |
| rad37              | 1.14381e-12 | 1.000000 | 1.14382e-12 | 1.000000 |
| rad27              | 8.46257e-13 | 1.000000 | 8.46262e-13 | 1.000000 |
| rad19syn           | 6.48809e-13 | 1.000000 | 6.48813e-13 | 1.000000 |
| rad65              | 6.40853e-13 | 1.000000 | 6.40857e-13 | 1.000000 |
| rad70              | 5.53032e-13 | 1.000000 | 5.53036e-13 | 1.000000 |
| PAH10+CH3          | 5.24490e-13 | 1.000000 | 5.24494e-13 | 1.000000 |
| rad12              | 2.33934e-13 | 1.000000 | 2.33935e-13 | 1.000000 |
| PAH1+H             | 2.07959e-13 | 1.000000 | 2.07959e-13 | 1.000000 |
| rad54              | 1.77788e-13 | 1.000000 | 1.77789e-13 | 1.000000 |
| rad5               | 1.67576e-13 | 1.000000 | 1.67577e-13 | 1.000000 |
| rad67              | 9.86685e-14 | 1.000000 | 9.86693e-14 | 1.000000 |

|               |             |         |             |         |
|---------------|-------------|---------|-------------|---------|
| PhcycC3H3_A+H | 8.63408e-14 | 1.00000 | 8.63413e-14 | 1.00000 |
| rad73         | 3.60489e-14 | 1.00000 | 3.60491e-14 | 1.00000 |
| rad34         | 2.48257e-14 | 1.00000 | 2.48259e-14 | 1.00000 |
| rad58         | 2.46071e-14 | 1.00000 | 2.46072e-14 | 1.00000 |
| rad71         | 2.31831e-14 | 1.00000 | 2.31832e-14 | 1.00000 |
| rad62         | 1.69419e-14 | 1.00000 | 1.69420e-14 | 1.00000 |
| rad31         | 1.52793e-14 | 1.00000 | 1.52794e-14 | 1.00000 |
| rad43         | 9.15733e-15 | 1.00000 | 9.15732e-15 | 1.00000 |
| rad55         | 6.58618e-15 | 1.00000 | 6.58622e-15 | 1.00000 |
| rad64         | 2.22945e-15 | 1.00000 | 2.22946e-15 | 1.00000 |
| rad53         | 4.89762e-16 | 1.00000 | 4.89765e-16 | 1.00000 |
| rad56         | 2.88682e-16 | 1.00000 | 2.88684e-16 | 1.00000 |
| rad61         | 1.93705e-16 | 1.00000 | 1.93706e-16 | 1.00000 |
| PAH8+H        | 1.68578e-16 | 1.00000 | 1.68580e-16 | 1.00000 |
| rad68syn      | 1.63292e-16 | 1.00000 | 1.63294e-16 | 1.00000 |
| rad72         | 1.32514e-16 | 1.00000 | 1.32515e-16 | 1.00000 |
| rad42         | 1.31340e-16 | 1.00000 | 1.31341e-16 | 1.00000 |
| rad68anti     | 1.08366e-16 | 1.00000 | 1.08367e-16 | 1.00000 |
| rad41         | 6.14416e-17 | 1.00000 | 6.14420e-17 | 1.00000 |
| rad47         | 3.44961e-17 | 1.00000 | 3.44962e-17 | 1.00000 |
| rad40syn      | 3.15850e-17 | 1.00000 | 3.15852e-17 | 1.00000 |
| rad40anti     | 1.55344e-17 | 1.00000 | 1.55345e-17 | 1.00000 |
| rad8          | 1.37107e-25 | 1.00000 | 1.37108e-25 | 1.00000 |

100000.000 Pa, 500.000000 K

| Rate constant      | True (fraction) |          | Effective (fraction) |          |
|--------------------|-----------------|----------|----------------------|----------|
| Total              | 2.11551e-14     | (1.00 )  | 2.11539e-14          | (1.00 )  |
| Formation of rad11 | 1.10850e-14     | (0.524 ) | 1.10842e-14          | (0.524 ) |
| Formation of rad6  | 7.08033e-15     | (0.335 ) | 7.07985e-15          | (0.335 ) |
| H-abstraction      | 2.98976e-15     | (0.141 ) | 2.98976e-15          | (0.141 ) |

  

| species            | PYtrue      | Cumul    | PYeffective | Cumul    |
|--------------------|-------------|----------|-------------|----------|
| rad6               | 0.464572    | 0.464572 | 0.464599    | 0.464599 |
| rad11              | 0.378662    | 0.843234 | 0.378684    | 0.843283 |
| Benzene+2-propynyl | 0.141326    | 0.984559 | 0.141334    | 0.984617 |
| rad22              | 0.00554266  | 0.990102 | 0.00554298  | 0.990160 |
| Indene+H           | 0.00467681  | 0.994779 | 0.00467709  | 0.994837 |
| C2H2+PhCH2         | 0.00173496  | 0.996514 | 0.00173506  | 0.996572 |
| rad23              | 0.000984831 | 0.997499 | 0.000984890 | 0.997557 |
| rad45              | 0.000957851 | 0.998456 | 0.000957902 | 0.998515 |
| rad18              | 0.000399181 | 0.998856 | 0.000399205 | 0.998914 |
| rad20              | 0.000329917 | 0.999186 | 0.000329936 | 0.999244 |
| rad21              | 0.000269543 | 0.999455 | 0.000269558 | 0.999514 |
| rad7               | 0.000238906 | 0.999694 | 0.000238920 | 0.999753 |
| PhCHCCH2+H         | 0.000142043 | 0.999836 | 0.000142052 | 0.999895 |
| Phenyl+Allene      | 5.90676e-05 | 0.999895 | 0.000000    | 0.999895 |
| rad36              | 4.48275e-05 | 0.999940 | 4.48302e-05 | 0.999939 |
| PhCH2CCH+H         | 1.78579e-05 | 0.999958 | 1.78590e-05 | 0.999957 |
| rad9               | 1.48720e-05 | 0.999973 | 1.48729e-05 | 0.999972 |
| rad25              | 1.00305e-05 | 0.999983 | 1.00311e-05 | 0.999982 |
| rad13              | 6.95652e-06 | 0.999990 | 6.95693e-06 | 0.999989 |
| PAH9+H             | 3.15804e-06 | 0.999993 | 3.15822e-06 | 0.999992 |
| PhCCH+CH3          | 1.81611e-06 | 0.999995 | 1.81622e-06 | 0.999994 |
| rad38              | 1.47840e-06 | 0.999996 | 1.47849e-06 | 0.999996 |
| rad28              | 7.58828e-07 | 0.999997 | 7.58873e-07 | 0.999996 |
| rad3               | 7.29846e-07 | 0.999998 | 7.29889e-07 | 0.999997 |
| rad35              | 5.30284e-07 | 0.999998 | 5.30315e-07 | 0.999998 |
| rad2               | 4.25168e-07 | 0.999999 | 4.25193e-07 | 0.999998 |
| rad4               | 4.21224e-07 | 0.999999 | 4.21249e-07 | 0.999998 |
| rad46              | 3.86014e-07 | 0.999999 | 3.86036e-07 | 0.999999 |
| PAH7+H             | 2.82120e-07 | 1.000000 | 2.82137e-07 | 0.999999 |
| Ph+MeAc            | 2.06705e-07 | 1.000000 | 2.06717e-07 | 0.999999 |
| rad30              | 2.02979e-07 | 1.000000 | 2.02990e-07 | 1.000000 |
| rad50              | 1.78456e-07 | 1.000000 | 1.78467e-07 | 1.000000 |
| PhCCCH3+H          | 8.71271e-08 | 1.000000 | 8.71323e-08 | 1.000000 |
| rad39              | 6.82107e-08 | 1.000000 | 6.82147e-08 | 1.000000 |
| rad1               | 5.19170e-08 | 1.000000 | 5.19201e-08 | 1.000000 |
| rad15              | 4.81479e-08 | 1.000000 | 4.81507e-08 | 1.000000 |
| rad10              | 3.89283e-08 | 1.000000 | 3.89306e-08 | 1.000000 |
| rad51              | 3.36229e-08 | 1.000000 | 3.36249e-08 | 1.000000 |
| rad33              | 1.94005e-08 | 1.000000 | 1.94016e-08 | 1.000000 |
| rad19anti          | 1.81464e-08 | 1.000000 | 1.81476e-08 | 1.000000 |
| rad52              | 1.24708e-08 | 1.000000 | 1.24715e-08 | 1.000000 |
| PAH3+H             | 6.36453e-09 | 1.000000 | 6.36490e-09 | 1.000000 |
| rad24              | 6.30066e-09 | 1.000000 | 6.30103e-09 | 1.000000 |
| rad26              | 4.66580e-09 | 1.000000 | 4.66609e-09 | 1.000000 |
| PAH10+CH3          | 1.78899e-09 | 1.000000 | 1.78909e-09 | 1.000000 |

|               |             |         |             |         |
|---------------|-------------|---------|-------------|---------|
| rad60syn      | 1.58264e-09 | 1.00000 | 1.58274e-09 | 1.00000 |
| rad37         | 1.47792e-09 | 1.00000 | 1.47800e-09 | 1.00000 |
| rad65         | 9.27248e-10 | 1.00000 | 9.27308e-10 | 1.00000 |
| rad60anti     | 8.63371e-10 | 1.00000 | 8.63423e-10 | 1.00000 |
| PAH1+H        | 7.81403e-10 | 1.00000 | 7.81449e-10 | 1.00000 |
| rad59         | 7.20646e-10 | 1.00000 | 7.20689e-10 | 1.00000 |
| rad19syn      | 5.60521e-10 | 1.00000 | 5.60554e-10 | 1.00000 |
| rad14         | 4.42194e-10 | 1.00000 | 4.42221e-10 | 1.00000 |
| rad71         | 3.43434e-10 | 1.00000 | 3.43453e-10 | 1.00000 |
| rad73         | 3.16225e-10 | 1.00000 | 3.16244e-10 | 1.00000 |
| rad67         | 2.72186e-10 | 1.00000 | 2.72201e-10 | 1.00000 |
| PhcycC3H3_A+H | 2.39708e-10 | 1.00000 | 2.39721e-10 | 1.00000 |
| rad54         | 2.11541e-10 | 1.00000 | 2.11554e-10 | 1.00000 |
| rad70         | 1.44257e-10 | 1.00000 | 1.44266e-10 | 1.00000 |
| rad58         | 3.91557e-11 | 1.00000 | 3.91580e-11 | 1.00000 |
| rad34         | 2.77135e-11 | 1.00000 | 2.77151e-11 | 1.00000 |
| rad55         | 1.35182e-11 | 1.00000 | 1.35190e-11 | 1.00000 |
| rad64         | 1.22617e-11 | 1.00000 | 1.22624e-11 | 1.00000 |
| rad62         | 7.24381e-12 | 1.00000 | 7.24424e-12 | 1.00000 |
| rad72         | 7.03727e-12 | 1.00000 | 7.03768e-12 | 1.00000 |
| rad27         | 6.61067e-12 | 1.00000 | 6.61105e-12 | 1.00000 |
| rad5          | 4.40472e-12 | 1.00000 | 4.40498e-12 | 1.00000 |
| PAH8+H        | 3.37863e-12 | 1.00000 | 3.37882e-12 | 1.00000 |
| rad12         | 3.13724e-12 | 1.00000 | 3.13743e-12 | 1.00000 |
| rad43         | 3.00263e-12 | 1.00000 | 3.00281e-12 | 1.00000 |
| rad53         | 2.37336e-12 | 1.00000 | 2.37350e-12 | 1.00000 |
| rad61         | 2.07941e-12 | 1.00000 | 2.07953e-12 | 1.00000 |
| rad56         | 2.00081e-12 | 1.00000 | 2.00093e-12 | 1.00000 |
| rad68syn      | 1.38911e-12 | 1.00000 | 1.38920e-12 | 1.00000 |
| rad31         | 1.29798e-12 | 1.00000 | 1.29806e-12 | 1.00000 |
| rad68anti     | 9.08297e-13 | 1.00000 | 9.08348e-13 | 1.00000 |
| rad40syn      | 4.46467e-13 | 1.00000 | 4.46493e-13 | 1.00000 |
| rad42         | 3.87031e-13 | 1.00000 | 3.87054e-13 | 1.00000 |
| rad40anti     | 2.54229e-13 | 1.00000 | 2.54243e-13 | 1.00000 |
| rad47         | 1.33654e-13 | 1.00000 | 1.33663e-13 | 1.00000 |
| rad41         | 9.12479e-14 | 1.00000 | 9.12539e-14 | 1.00000 |
| rad8          | 1.88676e-23 | 1.00000 | 1.88688e-23 | 1.00000 |

100000.000 Pa, 600.000000 K

| Rate constant      | True (fraction) |          | Effective (fraction) |          |
|--------------------|-----------------|----------|----------------------|----------|
| Total              | 6.08120e-14     | (1.00 )  | 6.07925e-14          | (1.00 )  |
| Formation of rad11 | 2.83304e-14     | (0.466 ) | 2.83193e-14          | (0.466 ) |
| Formation of rad6  | 2.13840e-14     | (0.352 ) | 2.13757e-14          | (0.352 ) |
| H-abstraction      | 1.10975e-14     | (0.182 ) | 1.10975e-14          | (0.183 ) |

  

| species            | PYtrue      | Cumul    | PYeffective | Cumul    |
|--------------------|-------------|----------|-------------|----------|
| rad6               | 0.561322    | 0.561322 | 0.561503    | 0.561503 |
| rad11              | 0.226283    | 0.787606 | 0.226355    | 0.787858 |
| Benzene+2-propynyl | 0.182488    | 0.970094 | 0.182547    | 0.970405 |
| Indene+H           | 0.0128120   | 0.982906 | 0.0128162   | 0.983221 |
| rad22              | 0.00688019  | 0.989786 | 0.00688239  | 0.990104 |
| C2H2+PhCH2         | 0.00509081  | 0.994877 | 0.00509245  | 0.995196 |
| rad23              | 0.00159594  | 0.996473 | 0.00159645  | 0.996792 |
| rad45              | 0.000939149 | 0.997412 | 0.000939450 | 0.997732 |
| PhCHCCH2+H         | 0.000564781 | 0.997977 | 0.000564962 | 0.998297 |
| rad7               | 0.000523208 | 0.998500 | 0.000523375 | 0.998820 |
| Phenyl+Allene      | 0.000320637 | 0.998821 | 0.000000    | 0.998820 |
| rad18              | 0.000308530 | 0.999129 | 0.000308629 | 0.999129 |
| rad20              | 0.000253500 | 0.999383 | 0.000253581 | 0.999382 |
| rad21              | 0.000216784 | 0.999599 | 0.000216854 | 0.999599 |
| PhCH2CCH+H         | 0.000124146 | 0.999723 | 0.000124186 | 0.999723 |
| rad36              | 5.56645e-05 | 0.999779 | 5.56823e-05 | 0.999779 |
| PAH9+H             | 5.33131e-05 | 0.999832 | 5.33302e-05 | 0.999832 |
| rad9               | 5.21221e-05 | 0.999885 | 5.21388e-05 | 0.999885 |
| rad38              | 2.53223e-05 | 0.999910 | 2.53304e-05 | 0.999910 |
| PhCCH+CH3          | 1.84306e-05 | 0.999928 | 1.84366e-05 | 0.999928 |
| rad25              | 9.16970e-06 | 0.999938 | 9.17264e-06 | 0.999938 |
| rad13              | 9.10757e-06 | 0.999947 | 9.11052e-06 | 0.999947 |
| rad46              | 8.20831e-06 | 0.999955 | 8.21099e-06 | 0.999955 |
| rad35              | 7.97861e-06 | 0.999963 | 7.98117e-06 | 0.999963 |
| PAH7+H             | 7.96603e-06 | 0.999971 | 7.96858e-06 | 0.999971 |
| rad50              | 6.87162e-06 | 0.999978 | 6.87382e-06 | 0.999978 |
| rad28              | 6.11073e-06 | 0.999984 | 6.11269e-06 | 0.999984 |
| rad39              | 3.02712e-06 | 0.999987 | 3.02808e-06 | 0.999987 |
| Ph+MeAc            | 2.72187e-06 | 0.999990 | 2.72274e-06 | 0.999990 |
| rad51              | 1.91687e-06 | 0.999991 | 1.91748e-06 | 0.999991 |
| rad3               | 1.81561e-06 | 0.999993 | 1.81619e-06 | 0.999993 |

|               |             |          |             |          |
|---------------|-------------|----------|-------------|----------|
| rad2          | 1.21680e-06 | 0.999994 | 1.21720e-06 | 0.999994 |
| rad4          | 1.12581e-06 | 0.999996 | 1.12617e-06 | 0.999996 |
| PhCCCH3+H     | 9.34146e-07 | 0.999997 | 9.34439e-07 | 0.999997 |
| rad30         | 8.72669e-07 | 0.999997 | 8.72950e-07 | 0.999997 |
| rad19anti     | 6.79233e-07 | 0.999998 | 6.79451e-07 | 0.999998 |
| rad52         | 5.82765e-07 | 0.999999 | 5.82952e-07 | 0.999999 |
| PAH3+H        | 2.28373e-07 | 0.999999 | 2.28446e-07 | 0.999999 |
| rad1          | 1.82968e-07 | 0.999999 | 1.83027e-07 | 0.999999 |
| rad15         | 1.62478e-07 | 0.999999 | 1.62530e-07 | 0.999999 |
| PAH10+CH3     | 1.32501e-07 | 0.999999 | 1.32544e-07 | 0.999999 |
| rad10         | 1.07760e-07 | 0.999999 | 1.07794e-07 | 1.000000 |
| PAH1+H        | 6.54390e-08 | 1.000000 | 6.54599e-08 | 1.000000 |
| rad37         | 6.28008e-08 | 1.000000 | 6.28210e-08 | 1.000000 |
| rad71         | 5.59666e-08 | 1.000000 | 5.59846e-08 | 1.000000 |
| rad65         | 5.08808e-08 | 1.000000 | 5.08971e-08 | 1.000000 |
| rad73         | 4.17541e-08 | 1.000000 | 4.17674e-08 | 1.000000 |
| rad33         | 3.36410e-08 | 1.000000 | 3.36518e-08 | 1.000000 |
| rad26         | 2.96834e-08 | 1.000000 | 2.96928e-08 | 1.000000 |
| rad19syn      | 2.43570e-08 | 1.000000 | 2.43648e-08 | 1.000000 |
| rad60syn      | 2.26783e-08 | 1.000000 | 2.26856e-08 | 1.000000 |
| rad59         | 2.21806e-08 | 1.000000 | 2.21877e-08 | 1.000000 |
| rad24         | 2.20262e-08 | 1.000000 | 2.20333e-08 | 1.000000 |
| rad67         | 1.91551e-08 | 1.000000 | 1.91613e-08 | 1.000000 |
| PhcycC3H3_A+H | 1.41939e-08 | 1.000000 | 1.41985e-08 | 1.000000 |
| rad60anti     | 1.36035e-08 | 1.000000 | 1.36079e-08 | 1.000000 |
| rad54         | 9.70779e-09 | 1.000000 | 9.71094e-09 | 1.000000 |
| rad70         | 8.95069e-09 | 1.000000 | 8.95356e-09 | 1.000000 |
| rad58         | 2.35312e-09 | 1.000000 | 2.35387e-09 | 1.000000 |
| rad34         | 2.29597e-09 | 1.000000 | 2.29670e-09 | 1.000000 |
| rad72         | 1.73275e-09 | 1.000000 | 1.73331e-09 | 1.000000 |
| rad64         | 1.21678e-09 | 1.000000 | 1.21718e-09 | 1.000000 |
| rad14         | 9.70288e-10 | 1.000000 | 9.70595e-10 | 1.000000 |
| rad55         | 6.97110e-10 | 1.000000 | 6.97333e-10 | 1.000000 |
| PAH8+H        | 6.51104e-10 | 1.000000 | 6.51313e-10 | 1.000000 |
| rad62         | 5.52785e-10 | 1.000000 | 5.52962e-10 | 1.000000 |
| rad61         | 2.66857e-10 | 1.000000 | 2.66943e-10 | 1.000000 |
| rad56         | 1.98491e-10 | 1.000000 | 1.98554e-10 | 1.000000 |
| rad68syn      | 1.93767e-10 | 1.000000 | 1.93829e-10 | 1.000000 |
| rad53         | 1.89423e-10 | 1.000000 | 1.89484e-10 | 1.000000 |
| rad43         | 1.45545e-10 | 1.000000 | 1.45592e-10 | 1.000000 |
| rad68anti     | 1.25934e-10 | 1.000000 | 1.25974e-10 | 1.000000 |
| rad47         | 9.53676e-11 | 1.000000 | 9.53984e-11 | 1.000000 |
| rad40syn      | 7.59008e-11 | 1.000000 | 7.59252e-11 | 1.000000 |
| rad42         | 4.70544e-11 | 1.000000 | 4.70695e-11 | 1.000000 |
| rad12         | 4.57870e-11 | 1.000000 | 4.58017e-11 | 1.000000 |
| rad40anti     | 4.55822e-11 | 1.000000 | 4.55968e-11 | 1.000000 |
| rad31         | 3.29177e-11 | 1.000000 | 3.29282e-11 | 1.000000 |
| rad5          | 1.43557e-11 | 1.000000 | 1.43603e-11 | 1.000000 |
| rad27         | 1.33087e-11 | 1.000000 | 1.33130e-11 | 1.000000 |
| rad41         | 9.63814e-12 | 1.000000 | 9.64121e-12 | 1.000000 |
| rad8          | 1.26550e-20 | 1.000000 | 1.26591e-20 | 1.000000 |

100000.000 Pa, 700.000000 K

=====

| Rate constant      | True (fraction)      | Effective (fraction) |
|--------------------|----------------------|----------------------|
| Total              | 1.39564e-13 (1.00 )  | 1.39405e-13 (1.00 )  |
| Formation of rad11 | 5.88273e-14 (0.422 ) | 5.87420e-14 (0.421 ) |
| Formation of rad6  | 5.01684e-14 (0.359 ) | 5.00956e-14 (0.359 ) |
| H-abstraction      | 3.05678e-14 (0.219 ) | 3.05678e-14 (0.219 ) |

| species            | PYtrue      | Cumul    | PYeffective | Cumul    |
|--------------------|-------------|----------|-------------|----------|
| rad6               | 0.623049    | 0.623049 | 0.623757    | 0.623757 |
| Benzene+2-propynyl | 0.219024    | 0.842073 | 0.219273    | 0.843029 |
| rad11              | 0.112156    | 0.954229 | 0.112283    | 0.955313 |
| Indene+H           | 0.0222777   | 0.976507 | 0.0223030   | 0.977616 |
| C2H2+PhCH2         | 0.0102265   | 0.986734 | 0.0102381   | 0.987854 |
| rad22              | 0.00554608  | 0.992280 | 0.00555237  | 0.993406 |
| rad23              | 0.00176768  | 0.994047 | 0.00176969  | 0.995176 |
| PhCHCCH2+H         | 0.00155903  | 0.995606 | 0.00156080  | 0.996737 |
| Phenyl+Allene      | 0.00113341  | 0.996740 | 0.000000    | 0.996737 |
| rad7               | 0.000815112 | 0.997555 | 0.000816039 | 0.997553 |
| rad45              | 0.000555859 | 0.998111 | 0.000556489 | 0.998109 |
| PhCH2CCH+H         | 0.000510442 | 0.998621 | 0.000511021 | 0.998620 |
| PAH9+H             | 0.000200141 | 0.998821 | 0.000200369 | 0.998821 |
| rad20              | 0.000199743 | 0.999021 | 0.000199970 | 0.999021 |
| rad21              | 0.000190229 | 0.999211 | 0.000190444 | 0.999211 |
| rad18              | 0.000182844 | 0.999394 | 0.000183052 | 0.999394 |
| PhCCH+CH3          | 0.000111330 | 0.999505 | 0.000111457 | 0.999506 |



|               |             |          |             |          |
|---------------|-------------|----------|-------------|----------|
| rad38         | 9.68871e-05 | 0.999602 | 9.69968e-05 | 0.999603 |
| rad9          | 9.37905e-05 | 0.999696 | 9.38965e-05 | 0.999696 |
| rad36         | 4.11581e-05 | 0.999737 | 4.12048e-05 | 0.999738 |
| PAH7+H        | 3.89449e-05 | 0.999776 | 3.89891e-05 | 0.999777 |
| rad50         | 3.44965e-05 | 0.999811 | 3.45356e-05 | 0.999811 |
| rad46         | 3.39585e-05 | 0.999845 | 3.39970e-05 | 0.999845 |
| rad28         | 3.35250e-05 | 0.999878 | 3.35631e-05 | 0.999879 |
| rad35         | 2.85749e-05 | 0.999907 | 2.86073e-05 | 0.999907 |
| Ph+MeAc       | 1.73473e-05 | 0.999924 | 1.73669e-05 | 0.999925 |
| rad39         | 1.61368e-05 | 0.999940 | 1.61552e-05 | 0.999941 |
| rad13         | 1.29459e-05 | 0.999953 | 1.29606e-05 | 0.999954 |
| rad51         | 1.07140e-05 | 0.999964 | 1.07262e-05 | 0.999965 |
| rad25         | 6.70266e-06 | 0.999971 | 6.71026e-06 | 0.999971 |
| rad19anti     | 5.79469e-06 | 0.999976 | 5.80126e-06 | 0.999977 |
| PhCCCH3+H     | 4.66411e-06 | 0.999981 | 4.66940e-06 | 0.999982 |
| rad52         | 3.08517e-06 | 0.999984 | 3.08867e-06 | 0.999985 |
| rad3          | 3.00998e-06 | 0.999987 | 3.01340e-06 | 0.999988 |
| rad2          | 2.43752e-06 | 0.999990 | 2.44029e-06 | 0.999990 |
| rad30         | 2.31300e-06 | 0.999992 | 2.31562e-06 | 0.999993 |
| rad4          | 2.02776e-06 | 0.999994 | 2.03007e-06 | 0.999995 |
| PAH3+H        | 1.14769e-06 | 0.999995 | 1.14900e-06 | 0.999996 |
| PAH10+CH3     | 7.84631e-07 | 0.999996 | 7.85521e-07 | 0.999997 |
| rad1          | 4.37007e-07 | 0.999996 | 4.37503e-07 | 0.999997 |
| PAH1+H        | 4.01122e-07 | 0.999997 | 4.01576e-07 | 0.999997 |
| rad71         | 3.97228e-07 | 0.999997 | 3.97678e-07 | 0.999998 |
| rad37         | 3.21842e-07 | 0.999997 | 3.22208e-07 | 0.999998 |
| rad73         | 2.83510e-07 | 0.999998 | 2.83831e-07 | 0.999998 |
| rad65         | 2.80096e-07 | 0.999998 | 2.80415e-07 | 0.999999 |
| rad15         | 2.17725e-07 | 0.999998 | 2.17973e-07 | 0.999999 |
| rad10         | 1.75324e-07 | 0.999998 | 1.75522e-07 | 0.999999 |
| rad67         | 1.53247e-07 | 0.999999 | 1.53421e-07 | 0.999999 |
| rad19syn      | 1.42685e-07 | 0.999999 | 1.42847e-07 | 0.999999 |
| rad24         | 1.22471e-07 | 0.999999 | 1.22609e-07 | 0.999999 |
| rad59         | 1.07729e-07 | 0.999999 | 1.07852e-07 | 1.000000 |
| rad60syn      | 9.62638e-08 | 0.999999 | 9.63730e-08 | 1.000000 |
| rad26         | 9.05534e-08 | 0.999999 | 9.06557e-08 | 1.000000 |
| rad33         | 8.39244e-08 | 0.999999 | 8.40195e-08 | 1.000000 |
| PhcycC3H3_A+H | 8.14839e-08 | 0.999999 | 8.15766e-08 | 1.000000 |
| rad60anti     | 5.88773e-08 | 0.999999 | 5.89441e-08 | 1.000000 |
| rad70         | 5.55974e-08 | 0.999999 | 5.56605e-08 | 1.000000 |
| rad54         | 5.49503e-08 | 0.999999 | 5.50127e-08 | 1.000000 |
| rad34         | 1.45597e-08 | 0.999999 | 1.45763e-08 | 1.000000 |
| rad72         | 1.33412e-08 | 0.999999 | 1.33563e-08 | 1.000000 |
| rad58         | 1.32788e-08 | 1.000000 | 1.32938e-08 | 1.000000 |
| rad64         | 7.73995e-09 | 1.000000 | 7.74874e-09 | 1.000000 |
| PAH8+H        | 4.82558e-09 | 1.000000 | 4.83105e-09 | 1.000000 |
| rad47         | 4.67967e-09 | 1.000000 | 4.68498e-09 | 1.000000 |
| rad62         | 4.57239e-09 | 1.000000 | 4.57758e-09 | 1.000000 |
| rad55         | 3.90517e-09 | 1.000000 | 3.90960e-09 | 1.000000 |
| rad61         | 1.79414e-09 | 1.000000 | 1.79617e-09 | 1.000000 |
| rad14         | 1.69727e-09 | 1.000000 | 1.69920e-09 | 1.000000 |
| rad68syn      | 1.34468e-09 | 1.000000 | 1.34621e-09 | 1.000000 |
| rad56         | 1.29195e-09 | 1.000000 | 1.29342e-09 | 1.000000 |
| rad43         | 1.20947e-09 | 1.000000 | 1.21085e-09 | 1.000000 |
| rad53         | 1.16137e-09 | 1.000000 | 1.16269e-09 | 1.000000 |
| rad68anti     | 8.72865e-10 | 1.000000 | 8.73860e-10 | 1.000000 |
| rad12         | 6.31869e-10 | 1.000000 | 6.32587e-10 | 1.000000 |
| rad40syn      | 5.49534e-10 | 1.000000 | 5.50158e-10 | 1.000000 |
| rad42         | 3.86473e-10 | 1.000000 | 3.86912e-10 | 1.000000 |
| rad40anti     | 3.34054e-10 | 1.000000 | 3.34433e-10 | 1.000000 |
| rad31         | 2.22642e-10 | 1.000000 | 2.22894e-10 | 1.000000 |
| rad41         | 8.47077e-11 | 1.000000 | 8.48034e-11 | 1.000000 |
| rad5          | 2.54879e-11 | 1.000000 | 2.55168e-11 | 1.000000 |
| rad27         | 2.26382e-11 | 1.000000 | 2.26639e-11 | 1.000000 |
| rad8          | 2.26770e-17 | 1.000000 | 2.27028e-17 | 1.000000 |

100000.000 Pa, 800.000000 K

| Rate constant      | True (fraction)      | Effective (fraction) |
|--------------------|----------------------|----------------------|
| Total              | 2.75392e-13 (1.00 )  | 2.74505e-13 (1.00 )  |
| Formation of rad11 | 1.06471e-13 (0.387 ) | 1.06013e-13 (0.386 ) |
| Formation of rad6  | 9.97133e-14 (0.362 ) | 9.92841e-14 (0.362 ) |
| H-abstraction      | 6.92082e-14 (0.251 ) | 6.92082e-14 (0.252 ) |

  

| species            | PYtrue    | Cumul    | PYeffective | Cumul    |
|--------------------|-----------|----------|-------------|----------|
| rad6               | 0.635860  | 0.635860 | 0.637915    | 0.637915 |
| Benzene+2-propynyl | 0.251308  | 0.887168 | 0.252120    | 0.890035 |
| rad11              | 0.0510875 | 0.938255 | 0.0512526   | 0.941288 |

|               |             |          |             |          |
|---------------|-------------|----------|-------------|----------|
| Indene+H      | 0.0288306   | 0.967086 | 0.0289238   | 0.970212 |
| C2H2+PhCH2    | 0.0160583   | 0.983144 | 0.0161102   | 0.986322 |
| PhCHCCH2+H    | 0.00344285  | 0.986587 | 0.00345398  | 0.989776 |
| rad22         | 0.00334284  | 0.989930 | 0.00335366  | 0.993130 |
| Phenyl+Allene | 0.00322275  | 0.993152 | 0.000000    | 0.993130 |
| rad23         | 0.00156816  | 0.994720 | 0.00157322  | 0.994703 |
| PhCH2CCH+H    | 0.00153875  | 0.996259 | 0.00154373  | 0.996247 |
| rad7          | 0.00102905  | 0.997288 | 0.00103237  | 0.997279 |
| PhCCH+CH3     | 0.000485833 | 0.997774 | 0.000487404 | 0.997766 |
| rad45         | 0.000398534 | 0.998173 | 0.000399823 | 0.998166 |
| PAH9+H        | 0.000345886 | 0.998519 | 0.000347004 | 0.998513 |
| rad21         | 0.000221527 | 0.998740 | 0.000222243 | 0.998736 |
| rad20         | 0.000201895 | 0.998942 | 0.000202548 | 0.998938 |
| rad38         | 0.000168616 | 0.999111 | 0.000169161 | 0.999107 |
| rad9          | 0.000134473 | 0.999245 | 0.000134907 | 0.999242 |
| rad28         | 0.000121083 | 0.999366 | 0.000121475 | 0.999364 |
| rad18         | 0.000100597 | 0.999467 | 0.000100922 | 0.999465 |
| PAH7+H        | 9.24568e-05 | 0.999559 | 9.27558e-05 | 0.999557 |
| Ph+MeAc       | 7.62446e-05 | 0.999635 | 7.64909e-05 | 0.999634 |
| rad50         | 6.53576e-05 | 0.999701 | 6.55689e-05 | 0.999699 |
| rad46         | 6.06021e-05 | 0.999761 | 6.07981e-05 | 0.999760 |
| rad35         | 4.87588e-05 | 0.999810 | 4.89165e-05 | 0.999809 |
| rad36         | 3.57804e-05 | 0.999846 | 3.58961e-05 | 0.999845 |
| rad39         | 3.47507e-05 | 0.999881 | 3.48631e-05 | 0.999880 |
| rad13         | 2.36459e-05 | 0.999904 | 2.37223e-05 | 0.999904 |
| rad51         | 2.09542e-05 | 0.999925 | 2.10219e-05 | 0.999925 |
| rad19anti     | 1.96347e-05 | 0.999945 | 1.96981e-05 | 0.999944 |
| PhCCCH3+H     | 1.67022e-05 | 0.999962 | 1.67562e-05 | 0.999961 |
| rad52         | 5.93433e-06 | 0.999968 | 5.95352e-06 | 0.999967 |
| rad25         | 5.40578e-06 | 0.999973 | 5.42325e-06 | 0.999972 |
| rad30         | 4.20863e-06 | 0.999977 | 4.22224e-06 | 0.999977 |
| rad3          | 4.12115e-06 | 0.999981 | 4.13447e-06 | 0.999981 |
| rad2          | 3.72893e-06 | 0.999985 | 3.74098e-06 | 0.999985 |
| rad4          | 2.96386e-06 | 0.999988 | 2.97344e-06 | 0.999987 |
| PAH3+H        | 2.24997e-06 | 0.999990 | 2.25724e-06 | 0.999990 |
| PAH10+CH3     | 1.62790e-06 | 0.999992 | 1.63317e-06 | 0.999991 |
| rad71         | 8.37188e-07 | 0.999993 | 8.39891e-07 | 0.999992 |
| PAH1+H        | 8.19227e-07 | 0.999993 | 8.21875e-07 | 0.999993 |
| rad1          | 7.64707e-07 | 0.999994 | 7.67175e-07 | 0.999994 |
| rad37         | 6.66124e-07 | 0.999995 | 6.68278e-07 | 0.999994 |
| rad24         | 6.56346e-07 | 0.999996 | 6.58469e-07 | 0.999995 |
| rad67         | 6.31005e-07 | 0.999996 | 6.33045e-07 | 0.999996 |
| rad73         | 5.89016e-07 | 0.999997 | 5.90920e-07 | 0.999996 |
| rad19syn      | 5.73024e-07 | 0.999997 | 5.74876e-07 | 0.999997 |
| rad65         | 5.44957e-07 | 0.999998 | 5.46719e-07 | 0.999997 |
| rad33         | 3.41978e-07 | 0.999998 | 3.43083e-07 | 0.999998 |
| rad26         | 2.87641e-07 | 0.999999 | 2.88571e-07 | 0.999998 |
| rad10         | 2.77306e-07 | 0.999999 | 2.78202e-07 | 0.999998 |
| PhcycC3H3_A+H | 2.18005e-07 | 0.999999 | 2.18710e-07 | 0.999999 |
| rad59         | 2.11944e-07 | 0.999999 | 2.12629e-07 | 0.999999 |
| rad54         | 1.97822e-07 | 0.999999 | 1.98462e-07 | 0.999999 |
| rad60syn      | 1.93974e-07 | 1.000000 | 1.94601e-07 | 0.999999 |
| rad15         | 1.62857e-07 | 1.000000 | 1.63384e-07 | 0.999999 |
| rad70         | 1.34451e-07 | 1.000000 | 1.34886e-07 | 1.000000 |
| rad60anti     | 1.18431e-07 | 1.000000 | 1.18813e-07 | 1.000000 |
| rad34         | 3.23422e-08 | 1.000000 | 3.24467e-08 | 1.000000 |
| rad72         | 2.88842e-08 | 1.000000 | 2.89775e-08 | 1.000000 |
| rad58         | 2.62158e-08 | 1.000000 | 2.63006e-08 | 1.000000 |
| rad47         | 2.02357e-08 | 1.000000 | 2.03010e-08 | 1.000000 |
| rad62         | 1.93336e-08 | 1.000000 | 1.93961e-08 | 1.000000 |
| rad64         | 1.58251e-08 | 1.000000 | 1.58763e-08 | 1.000000 |
| rad55         | 1.19157e-08 | 1.000000 | 1.19542e-08 | 1.000000 |
| PAH8+H        | 1.04353e-08 | 1.000000 | 1.04690e-08 | 1.000000 |
| rad12         | 8.07959e-09 | 1.000000 | 8.10575e-09 | 1.000000 |
| rad43         | 5.33050e-09 | 1.000000 | 5.34774e-09 | 1.000000 |
| rad61         | 3.80962e-09 | 1.000000 | 3.82193e-09 | 1.000000 |
| rad14         | 3.50425e-09 | 1.000000 | 3.51558e-09 | 1.000000 |
| rad68syn      | 2.83549e-09 | 1.000000 | 2.84466e-09 | 1.000000 |
| rad56         | 2.78448e-09 | 1.000000 | 2.79348e-09 | 1.000000 |
| rad53         | 2.58550e-09 | 1.000000 | 2.59386e-09 | 1.000000 |
| rad68anti     | 1.84026e-09 | 1.000000 | 1.84620e-09 | 1.000000 |
| rad42         | 1.55065e-09 | 1.000000 | 1.55566e-09 | 1.000000 |
| rad40syn      | 1.18919e-09 | 1.000000 | 1.19304e-09 | 1.000000 |
| rad31         | 8.13776e-10 | 1.000000 | 8.16401e-10 | 1.000000 |
| rad40anti     | 7.32568e-10 | 1.000000 | 7.34936e-10 | 1.000000 |
| rad41         | 3.76434e-10 | 1.000000 | 3.77651e-10 | 1.000000 |
| rad27         | 5.57706e-11 | 1.000000 | 5.59509e-11 | 1.000000 |
| rad5          | 4.27622e-11 | 1.000000 | 4.29005e-11 | 1.000000 |
| rad8          | 3.43937e-14 | 1.000000 | 3.45049e-14 | 1.000000 |

100000.000 Pa, 900.000000 K

| =====              |                 |          |                      |          |
|--------------------|-----------------|----------|----------------------|----------|
| Rate constant      | True (fraction) |          | Effective (fraction) |          |
| -----              |                 |          |                      |          |
| Total              | 4.88072e-13     | (1.00 )  | 4.83618e-13          | (1.00 )  |
| Formation of rad11 | 1.74945e-13     | (0.358 ) | 1.72728e-13          | (0.357 ) |
| Formation of rad6  | 1.76509e-13     | (0.362 ) | 1.74272e-13          | (0.360 ) |
| H-abstraction      | 1.36618e-13     | (0.280 ) | 1.36618e-13          | (0.282 ) |
| -----              |                 |          |                      |          |
| species            | PYtrue          | Cumul    | PYeffective          | Cumul    |
| -----              |                 |          |                      |          |
| rad6               | 0.609989        | 0.609989 | 0.615607             | 0.615607 |
| Benzene+2-propynyl | 0.279914        | 0.889903 | 0.282491             | 0.898098 |
| Indene+H           | 0.0337724       | 0.923676 | 0.0340834            | 0.932181 |
| rad11              | 0.0239674       | 0.947643 | 0.0241881            | 0.956370 |
| C2H2+PhCH2         | 0.0228936       | 0.970537 | 0.0231044            | 0.979474 |
| Phenyl+Allene      | 0.00912501      | 0.979662 | 0.000000             | 0.979474 |
| PhCHCCH2+H         | 0.00706074      | 0.986722 | 0.00712576           | 0.986600 |
| PhCH2CCH+H         | 0.00414676      | 0.990869 | 0.00418495           | 0.990785 |
| PhCCH+CH3          | 0.00178757      | 0.992657 | 0.00180403           | 0.992589 |
| rad22              | 0.00168194      | 0.994339 | 0.00169742           | 0.994286 |
| rad7               | 0.00121138      | 0.995550 | 0.00122253           | 0.995509 |
| rad23              | 0.00116172      | 0.996712 | 0.00117241           | 0.996681 |
| PAH9+H             | 0.000468150     | 0.997180 | 0.000472461          | 0.997154 |
| rad45              | 0.000400488     | 0.997580 | 0.000404176          | 0.997558 |
| rad28              | 0.000304556     | 0.997885 | 0.000307361          | 0.997865 |
| rad21              | 0.000281591     | 0.998166 | 0.000284184          | 0.998149 |
| Ph+MeAc            | 0.000273008     | 0.998439 | 0.000275522          | 0.998425 |
| PAH7+H             | 0.000259793     | 0.998699 | 0.000262186          | 0.998687 |
| rad38              | 0.000228659     | 0.998928 | 0.000230764          | 0.998918 |
| rad20              | 0.000225151     | 0.999153 | 0.000227224          | 0.999145 |
| rad9               | 0.000178864     | 0.999332 | 0.000180511          | 0.999325 |
| rad50              | 9.15194e-05     | 0.999423 | 9.23620e-05          | 0.999418 |
| rad46              | 8.29453e-05     | 0.999506 | 8.37089e-05          | 0.999502 |
| rad39              | 7.46578e-05     | 0.999581 | 7.53456e-05          | 0.999577 |
| rad35              | 6.61486e-05     | 0.999647 | 6.67577e-05          | 0.999644 |
| rad13              | 5.97042e-05     | 0.999707 | 6.02539e-05          | 0.999704 |
| rad18              | 5.73862e-05     | 0.999764 | 5.79146e-05          | 0.999762 |
| PhCCCH3+H          | 5.37753e-05     | 0.999818 | 5.42705e-05          | 0.999816 |
| rad19anti          | 4.89494e-05     | 0.999867 | 4.94001e-05          | 0.999865 |
| rad36              | 3.84631e-05     | 0.999905 | 3.88174e-05          | 0.999904 |
| rad51              | 2.97040e-05     | 0.999935 | 2.99775e-05          | 0.999934 |
| rad52              | 8.35703e-06     | 0.999944 | 8.43403e-06          | 0.999943 |
| rad30              | 6.72167e-06     | 0.999950 | 6.78356e-06          | 0.999949 |
| rad3               | 6.47863e-06     | 0.999957 | 6.53829e-06          | 0.999956 |
| rad2               | 6.20299e-06     | 0.999963 | 6.26011e-06          | 0.999962 |
| rad25              | 5.45401e-06     | 0.999968 | 5.50423e-06          | 0.999968 |
| rad4               | 4.93547e-06     | 0.999973 | 4.98092e-06          | 0.999973 |
| PAH3+H             | 3.47196e-06     | 0.999977 | 3.50394e-06          | 0.999976 |
| rad19syn           | 3.17951e-06     | 0.999980 | 3.20879e-06          | 0.999979 |
| PAH10+CH3          | 2.67846e-06     | 0.999983 | 2.70313e-06          | 0.999982 |
| rad67              | 2.19569e-06     | 0.999985 | 2.21590e-06          | 0.999984 |
| rad33              | 1.85659e-06     | 0.999987 | 1.87369e-06          | 0.999986 |
| rad24              | 1.71372e-06     | 0.999988 | 1.72950e-06          | 0.999988 |
| rad1               | 1.44431e-06     | 0.999990 | 1.45761e-06          | 0.999989 |
| PAH1+H             | 1.28453e-06     | 0.999991 | 1.29636e-06          | 0.999991 |
| rad71              | 1.22399e-06     | 0.999992 | 1.23526e-06          | 0.999992 |
| rad37              | 1.21435e-06     | 0.999994 | 1.22553e-06          | 0.999993 |
| rad54              | 1.06748e-06     | 0.999995 | 1.07731e-06          | 0.999994 |
| rad26              | 9.30315e-07     | 0.999996 | 9.38881e-07          | 0.999995 |
| PhcycC3H3_A+H      | 8.89883e-07     | 0.999996 | 8.98077e-07          | 0.999996 |
| rad73              | 8.56031e-07     | 0.999997 | 8.63916e-07          | 0.999997 |
| rad65              | 7.70939e-07     | 0.999998 | 7.78038e-07          | 0.999998 |
| rad10              | 5.23323e-07     | 0.999999 | 5.28142e-07          | 0.999998 |
| rad59              | 3.34460e-07     | 0.999999 | 3.37540e-07          | 0.999999 |
| rad60syn           | 3.26599e-07     | 0.999999 | 3.29607e-07          | 0.999999 |
| rad70              | 3.14942e-07     | 1.000000 | 3.17843e-07          | 0.999999 |
| rad60anti          | 1.98361e-07     | 1.000000 | 2.00188e-07          | 0.999999 |
| rad15              | 1.31199e-07     | 1.000000 | 1.32407e-07          | 1.000000 |
| rad34              | 6.41564e-08     | 1.000000 | 6.47473e-08          | 1.000000 |
| rad62              | 6.12027e-08     | 1.000000 | 6.17664e-08          | 1.000000 |
| rad12              | 6.05390e-08     | 1.000000 | 6.10964e-08          | 1.000000 |
| rad55              | 5.77722e-08     | 1.000000 | 5.83042e-08          | 1.000000 |
| rad72              | 4.27076e-08     | 1.000000 | 4.31009e-08          | 1.000000 |
| rad58              | 3.84558e-08     | 1.000000 | 3.88100e-08          | 1.000000 |
| rad47              | 3.46310e-08     | 1.000000 | 3.49500e-08          | 1.000000 |
| rad64              | 2.36725e-08     | 1.000000 | 2.38905e-08          | 1.000000 |
| rad43              | 1.91518e-08     | 1.000000 | 1.93282e-08          | 1.000000 |
| PAH8+H             | 1.60594e-08     | 1.000000 | 1.62073e-08          | 1.000000 |
| rad14              | 1.15215e-08     | 1.000000 | 1.16276e-08          | 1.000000 |

|           |             |         |             |         |
|-----------|-------------|---------|-------------|---------|
| rad53     | 6.72248e-09 | 1.00000 | 6.78439e-09 | 1.00000 |
| rad61     | 6.13351e-09 | 1.00000 | 6.18999e-09 | 1.00000 |
| rad56     | 5.69155e-09 | 1.00000 | 5.74397e-09 | 1.00000 |
| rad42     | 4.56340e-09 | 1.00000 | 4.60543e-09 | 1.00000 |
| rad68syn  | 4.33604e-09 | 1.00000 | 4.37596e-09 | 1.00000 |
| rad68anti | 2.81710e-09 | 1.00000 | 2.84304e-09 | 1.00000 |
| rad31     | 2.44429e-09 | 1.00000 | 2.46679e-09 | 1.00000 |
| rad40syn  | 1.88038e-09 | 1.00000 | 1.89769e-09 | 1.00000 |
| rad41     | 1.41377e-09 | 1.00000 | 1.42679e-09 | 1.00000 |
| rad40anti | 1.19256e-09 | 1.00000 | 1.20353e-09 | 1.00000 |
| rad27     | 2.79059e-10 | 1.00000 | 2.81629e-10 | 1.00000 |
| rad5      | 7.53686e-11 | 1.00000 | 7.60631e-11 | 1.00000 |
| rad8      | 1.17705e-11 | 1.00000 | 1.18789e-11 | 1.00000 |

100000.000 Pa, 1000.00000 K

| Rate constant      | True (fraction)      | Effective (fraction) |
|--------------------|----------------------|----------------------|
| Total              | 7.98668e-13 (1.00 )  | 7.78032e-13 (1.00 )  |
| Formation of rad11 | 2.67704e-13 (0.335 ) | 2.57746e-13 (0.331 ) |
| Formation of rad6  | 2.87049e-13 (0.359 ) | 2.76371e-13 (0.355 ) |
| H-abstraction      | 2.43915e-13 (0.305 ) | 2.43915e-13 (0.314 ) |

| species            | PYtrue      | Cumul    | PYeffective | Cumul    |
|--------------------|-------------|----------|-------------|----------|
| rad6               | 0.543326    | 0.543326 | 0.557738    | 0.557738 |
| Benzene+2-propynyl | 0.305402    | 0.848728 | 0.313502    | 0.871240 |
| Indene+H           | 0.0397258   | 0.888454 | 0.0407794   | 0.912019 |
| C2H2+PhCH2         | 0.0322525   | 0.920707 | 0.0331079   | 0.945127 |
| Phenyl+Allene      | 0.0258379   | 0.946544 | 0.00000     | 0.945127 |
| rad11              | 0.0148363   | 0.961381 | 0.0152298   | 0.960357 |
| PhCHCCH2+H         | 0.0142040   | 0.975585 | 0.0145807   | 0.974938 |
| PhCH2CCH+H         | 0.0105263   | 0.986111 | 0.0108055   | 0.985743 |
| PhCCH+CH3          | 0.00524876  | 0.991360 | 0.00538797  | 0.991131 |
| rad7               | 0.00153805  | 0.992898 | 0.00157884  | 0.992710 |
| PAH7+H             | 0.000841332 | 0.993739 | 0.000863649 | 0.993574 |
| rad22              | 0.000824127 | 0.994563 | 0.000845985 | 0.994420 |
| rad23              | 0.000805289 | 0.995369 | 0.000826653 | 0.995246 |
| Ph+MeAc            | 0.000781784 | 0.996150 | 0.000802516 | 0.996049 |
| PAH9+H             | 0.000599624 | 0.996750 | 0.000615528 | 0.996664 |
| rad28              | 0.000519081 | 0.997269 | 0.000532849 | 0.997197 |
| rad45              | 0.000463180 | 0.997732 | 0.000475466 | 0.997673 |
| rad21              | 0.000325201 | 0.998058 | 0.000333827 | 0.998006 |
| rad38              | 0.000292565 | 0.998350 | 0.000300326 | 0.998307 |
| rad9               | 0.000230575 | 0.998581 | 0.000236691 | 0.998543 |
| rad20              | 0.000229521 | 0.998810 | 0.000235608 | 0.998779 |
| rad39              | 0.000194701 | 0.999005 | 0.000199865 | 0.998979 |
| rad13              | 0.000185030 | 0.999190 | 0.000189937 | 0.999169 |
| PhCCCH3+H          | 0.000139749 | 0.999330 | 0.000143455 | 0.999312 |
| rad50              | 0.000118154 | 0.999448 | 0.000121288 | 0.999434 |
| rad19anti          | 0.000108334 | 0.999556 | 0.000111208 | 0.999545 |
| rad46              | 0.000106344 | 0.999662 | 0.000109165 | 0.999654 |
| rad35              | 8.58426e-05 | 0.999748 | 8.81189e-05 | 0.999742 |
| rad36              | 4.44960e-05 | 0.999793 | 4.56761e-05 | 0.999788 |
| rad18              | 4.03466e-05 | 0.999833 | 4.14167e-05 | 0.999829 |
| rad51              | 3.85084e-05 | 0.999872 | 3.95298e-05 | 0.999869 |
| rad19syn           | 1.59468e-05 | 0.999888 | 1.63697e-05 | 0.999885 |
| rad52              | 1.08093e-05 | 0.999898 | 1.10959e-05 | 0.999896 |
| rad30              | 1.05832e-05 | 0.999909 | 1.08640e-05 | 0.999907 |
| rad2               | 1.04084e-05 | 0.999919 | 1.06845e-05 | 0.999918 |
| rad3               | 9.92657e-06 | 0.999929 | 1.01899e-05 | 0.999928 |
| rad33              | 8.45965e-06 | 0.999938 | 8.68406e-06 | 0.999937 |
| rad4               | 7.77346e-06 | 0.999946 | 7.97965e-06 | 0.999945 |
| rad25              | 7.06476e-06 | 0.999953 | 7.25209e-06 | 0.999952 |
| rad67              | 5.90756e-06 | 0.999959 | 6.06425e-06 | 0.999958 |
| rad54              | 5.63530e-06 | 0.999964 | 5.78476e-06 | 0.999964 |
| PAH3+H             | 5.49184e-06 | 0.999970 | 5.63750e-06 | 0.999969 |
| PhcycC3H3_A+H      | 4.71545e-06 | 0.999974 | 4.84052e-06 | 0.999974 |
| PAH10+CH3          | 4.52263e-06 | 0.999979 | 4.64259e-06 | 0.999979 |
| rad24              | 2.64752e-06 | 0.999982 | 2.71774e-06 | 0.999981 |
| rad1               | 2.61813e-06 | 0.999984 | 2.68757e-06 | 0.999984 |
| rad37              | 2.54071e-06 | 0.999987 | 2.60810e-06 | 0.999987 |
| PAH1+H             | 2.32563e-06 | 0.999989 | 2.38732e-06 | 0.999989 |
| rad26              | 2.10515e-06 | 0.999991 | 2.16098e-06 | 0.999991 |
| rad71              | 1.60526e-06 | 0.999993 | 1.64784e-06 | 0.999993 |
| rad73              | 1.12016e-06 | 0.999994 | 1.14987e-06 | 0.999994 |
| rad10              | 1.08987e-06 | 0.999995 | 1.11878e-06 | 0.999995 |
| rad65              | 9.98985e-07 | 0.999996 | 1.02548e-06 | 0.999996 |
| rad70              | 9.01304e-07 | 0.999997 | 9.25207e-07 | 0.999997 |
| rad60syn           | 5.60207e-07 | 0.999997 | 5.75065e-07 | 0.999998 |

|           |             |          |             |          |
|-----------|-------------|----------|-------------|----------|
| rad59     | 5.45113e-07 | 0.999998 | 5.59571e-07 | 0.999998 |
| rad60anti | 3.39424e-07 | 0.999998 | 3.48426e-07 | 0.999999 |
| rad55     | 3.15929e-07 | 0.999999 | 3.24308e-07 | 0.999999 |
| rad12     | 2.73164e-07 | 0.999999 | 2.80409e-07 | 0.999999 |
| rad34     | 1.65033e-07 | 0.999999 | 1.69410e-07 | 0.999999 |
| rad62     | 1.61206e-07 | 0.999999 | 1.65481e-07 | 1.000000 |
| rad15     | 1.56981e-07 | 0.999999 | 1.61145e-07 | 1.000000 |
| rad72     | 5.62511e-08 | 0.999999 | 5.77430e-08 | 1.000000 |
| rad58     | 5.52892e-08 | 1.000000 | 5.67557e-08 | 1.000000 |
| rad43     | 4.92142e-08 | 1.000000 | 5.05195e-08 | 1.000000 |
| rad14     | 4.68058e-08 | 1.000000 | 4.80473e-08 | 1.000000 |
| rad47     | 4.55785e-08 | 1.000000 | 4.67874e-08 | 1.000000 |
| rad64     | 3.73885e-08 | 1.000000 | 3.83802e-08 | 1.000000 |
| rad53     | 3.31657e-08 | 1.000000 | 3.40454e-08 | 1.000000 |
| PAH8+H    | 2.38614e-08 | 1.000000 | 2.44942e-08 | 1.000000 |
| rad56     | 2.31105e-08 | 1.000000 | 2.37235e-08 | 1.000000 |
| rad42     | 1.03593e-08 | 1.000000 | 1.06341e-08 | 1.000000 |
| rad61     | 9.68270e-09 | 1.000000 | 9.93953e-09 | 1.000000 |
| rad68syn  | 7.11213e-09 | 1.000000 | 7.30077e-09 | 1.000000 |
| rad31     | 5.81649e-09 | 1.000000 | 5.97077e-09 | 1.000000 |
| rad68anti | 4.63987e-09 | 1.000000 | 4.76294e-09 | 1.000000 |
| rad41     | 3.66130e-09 | 1.000000 | 3.75841e-09 | 1.000000 |
| rad40syn  | 2.97329e-09 | 1.000000 | 3.05215e-09 | 1.000000 |
| rad27     | 2.02998e-09 | 1.000000 | 2.08382e-09 | 1.000000 |
| rad40anti | 1.92478e-09 | 1.000000 | 1.97584e-09 | 1.000000 |
| rad8      | 6.75299e-10 | 1.000000 | 6.93212e-10 | 1.000000 |
| rad5      | 1.24657e-10 | 1.000000 | 1.27963e-10 | 1.000000 |

100000.000 Pa, 1100.00000 K

| Rate constant      | True (fraction)      | Effective (fraction) |
|--------------------|----------------------|----------------------|
| Total              | 1.22919e-12 (1.00 )  | 1.15133e-12 (1.00 )  |
| Formation of rad11 | 3.87976e-13 (0.316 ) | 3.51389e-13 (0.305 ) |
| Formation of rad6  | 4.37724e-13 (0.356 ) | 3.96446e-13 (0.344 ) |
| H-abstraction      | 4.03491e-13 (0.328 ) | 4.03491e-13 (0.350 ) |

| species            | PYtrue      | Cumul    | PYeffective | Cumul    |
|--------------------|-------------|----------|-------------|----------|
| rad6               | 0.429757    | 0.429757 | 0.458822    | 0.458822 |
| Benzene+2-propynyl | 0.328257    | 0.758014 | 0.350458    | 0.809280 |
| Phenyl+Allene      | 0.0633476   | 0.821362 | 0.000000    | 0.809280 |
| Indene+H           | 0.0475167   | 0.868878 | 0.0507303   | 0.860010 |
| C2H2+PhCH2         | 0.0443252   | 0.913204 | 0.0473230   | 0.907334 |
| PhCHCCH2+H         | 0.0263889   | 0.939592 | 0.0281736   | 0.935507 |
| PhCH2CCH+H         | 0.0234644   | 0.963057 | 0.0250513   | 0.960558 |
| rad11              | 0.0127991   | 0.975856 | 0.0136646   | 0.974223 |
| PhCCH+CH3          | 0.0116321   | 0.987488 | 0.0124188   | 0.986642 |
| rad7               | 0.00223230  | 0.989720 | 0.00238327  | 0.989025 |
| PAH7+H             | 0.00220762  | 0.991928 | 0.00235693  | 0.991382 |
| Ph+MeAc            | 0.00172294  | 0.993651 | 0.00183947  | 0.993222 |
| PAH9+H             | 0.000750055 | 0.994401 | 0.000800788 | 0.994022 |
| rad28              | 0.000609781 | 0.995011 | 0.000651023 | 0.994673 |
| rad23              | 0.000589326 | 0.995600 | 0.000629184 | 0.995303 |
| rad45              | 0.000544860 | 0.996145 | 0.000581710 | 0.995884 |
| rad13              | 0.000492981 | 0.996638 | 0.000526323 | 0.996411 |
| rad39              | 0.000457684 | 0.997096 | 0.000488638 | 0.996899 |
| rad22              | 0.000424667 | 0.997520 | 0.000453388 | 0.997353 |
| rad38              | 0.000364805 | 0.997885 | 0.000389477 | 0.997742 |
| rad9               | 0.000346701 | 0.998232 | 0.000370149 | 0.998112 |
| rad21              | 0.000310316 | 0.998542 | 0.000331303 | 0.998443 |
| PhCCCH3+H          | 0.000274098 | 0.998816 | 0.000292636 | 0.998736 |
| rad19anti          | 0.000208406 | 0.999025 | 0.000222501 | 0.998959 |
| rad20              | 0.000188386 | 0.999213 | 0.000201127 | 0.999160 |
| rad50              | 0.000146824 | 0.999360 | 0.000156754 | 0.999317 |
| rad46              | 0.000132337 | 0.999492 | 0.000141288 | 0.999458 |
| rad35              | 0.000109421 | 0.999602 | 0.000116821 | 0.999575 |
| rad19syn           | 5.77917e-05 | 0.999659 | 6.17003e-05 | 0.999636 |
| rad36              | 5.20626e-05 | 0.999711 | 5.55837e-05 | 0.999692 |
| rad51              | 4.78568e-05 | 0.999759 | 5.10934e-05 | 0.999743 |
| rad18              | 3.44368e-05 | 0.999794 | 3.67658e-05 | 0.999780 |
| rad33              | 2.17688e-05 | 0.999815 | 2.32410e-05 | 0.999803 |
| rad54              | 2.15756e-05 | 0.999837 | 2.30347e-05 | 0.999826 |
| PhcycC3H3_A+H      | 1.99890e-05 | 0.999857 | 2.13410e-05 | 0.999847 |
| rad30              | 1.61498e-05 | 0.999873 | 1.72420e-05 | 0.999865 |
| rad2               | 1.45440e-05 | 0.999888 | 1.55276e-05 | 0.999880 |
| rad52              | 1.34309e-05 | 0.999901 | 1.43392e-05 | 0.999894 |
| rad3               | 1.25235e-05 | 0.999914 | 1.33705e-05 | 0.999908 |
| rad67              | 1.21686e-05 | 0.999926 | 1.29916e-05 | 0.999921 |
| rad4               | 9.90612e-06 | 0.999936 | 1.05761e-05 | 0.999931 |

|           |             |          |             |          |
|-----------|-------------|----------|-------------|----------|
| rad25     | 9.70111e-06 | 0.999945 | 1.03572e-05 | 0.999942 |
| PAH3+H    | 9.12059e-06 | 0.999955 | 9.73742e-06 | 0.999952 |
| PAH10+CH3 | 7.92038e-06 | 0.999963 | 8.45606e-06 | 0.999960 |
| rad37     | 5.48338e-06 | 0.999968 | 5.85424e-06 | 0.999966 |
| PAH1+H    | 5.42921e-06 | 0.999973 | 5.79640e-06 | 0.999972 |
| rad1      | 3.74686e-06 | 0.999977 | 4.00026e-06 | 0.999976 |
| rad24     | 3.53283e-06 | 0.999981 | 3.77176e-06 | 0.999979 |
| rad26     | 3.16175e-06 | 0.999984 | 3.37558e-06 | 0.999983 |
| rad70     | 2.57343e-06 | 0.999986 | 2.74747e-06 | 0.999986 |
| rad10     | 2.33680e-06 | 0.999989 | 2.49484e-06 | 0.999988 |
| rad71     | 2.00008e-06 | 0.999991 | 2.13535e-06 | 0.999990 |
| rad73     | 1.39483e-06 | 0.999992 | 1.48917e-06 | 0.999992 |
| rad55     | 1.29074e-06 | 0.999993 | 1.37804e-06 | 0.999993 |
| rad65     | 1.24239e-06 | 0.999995 | 1.32642e-06 | 0.999994 |
| rad60syn  | 9.55379e-07 | 0.999996 | 1.02000e-06 | 0.999995 |
| rad59     | 9.22800e-07 | 0.999997 | 9.85212e-07 | 0.999996 |
| rad12     | 7.96371e-07 | 0.999997 | 8.50231e-07 | 0.999997 |
| rad60anti | 5.79944e-07 | 0.999998 | 6.19167e-07 | 0.999998 |
| rad34     | 4.78994e-07 | 0.999998 | 5.11390e-07 | 0.999998 |
| rad62     | 3.83867e-07 | 0.999999 | 4.09828e-07 | 0.999999 |
| rad15     | 3.17620e-07 | 0.999999 | 3.39102e-07 | 0.999999 |
| rad53     | 1.68223e-07 | 0.999999 | 1.79600e-07 | 0.999999 |
| rad14     | 1.49453e-07 | 0.999999 | 1.59561e-07 | 0.999999 |
| rad56     | 1.26807e-07 | 1.000000 | 1.35383e-07 | 1.000000 |
| rad43     | 9.06940e-08 | 1.000000 | 9.68279e-08 | 1.000000 |
| rad58     | 8.41895e-08 | 1.000000 | 8.98836e-08 | 1.000000 |
| rad64     | 7.69669e-08 | 1.000000 | 8.21723e-08 | 1.000000 |
| rad72     | 7.01682e-08 | 1.000000 | 7.49143e-08 | 1.000000 |
| rad47     | 5.45135e-08 | 1.000000 | 5.82003e-08 | 1.000000 |
| PAH8+H    | 4.30532e-08 | 1.000000 | 4.59650e-08 | 1.000000 |
| rad42     | 2.17382e-08 | 1.000000 | 2.32084e-08 | 1.000000 |
| rad68syn  | 1.64716e-08 | 1.000000 | 1.75856e-08 | 1.000000 |
| rad61     | 1.50036e-08 | 1.000000 | 1.60184e-08 | 1.000000 |
| rad68anti | 1.07977e-08 | 1.000000 | 1.15279e-08 | 1.000000 |
| rad31     | 1.03772e-08 | 1.000000 | 1.10790e-08 | 1.000000 |
| rad27     | 9.61385e-09 | 1.000000 | 1.02641e-08 | 1.000000 |
| rad8      | 8.10605e-09 | 1.000000 | 8.65430e-09 | 1.000000 |
| rad41     | 6.50610e-09 | 1.000000 | 6.94614e-09 | 1.000000 |
| rad40syn  | 5.78933e-09 | 1.000000 | 6.18087e-09 | 1.000000 |
| rad40anti | 3.59886e-09 | 1.000000 | 3.84225e-09 | 1.000000 |
| rad5      | 1.83973e-10 | 1.000000 | 1.96416e-10 | 1.000000 |

100000.000 Pa, 1200.00000 K

=====

| Rate constant      | True (fraction)      | Effective (fraction) |
|--------------------|----------------------|----------------------|
| Total              | 1.80237e-12 (1.00 )  | 1.58564e-12 (1.00 )  |
| Formation of rad11 | 5.38789e-13 (0.299 ) | 4.39288e-13 (0.277 ) |
| Formation of rad6  | 6.34764e-13 (0.352 ) | 5.17538e-13 (0.326 ) |
| H-abstraction      | 6.28816e-13 (0.349 ) | 6.28816e-13 (0.397 ) |

| species            | PYtrue      | Cumul    | PYeffective | Cumul    |
|--------------------|-------------|----------|-------------|----------|
| Benzene+2-propynyl | 0.348883    | 0.348883 | 0.396569    | 0.396569 |
| rad6               | 0.290793    | 0.639676 | 0.330539    | 0.727108 |
| Phenyl+Allene      | 0.120246    | 0.759921 | 0.000000    | 0.727108 |
| C2H2+PhCH2         | 0.0543984   | 0.814320 | 0.0618336   | 0.788941 |
| Indene+H           | 0.0531490   | 0.867469 | 0.0604137   | 0.849355 |
| PhCH2CCH+H         | 0.0420187   | 0.909488 | 0.0477618   | 0.897117 |
| PhCHCCH2+H         | 0.0410926   | 0.950580 | 0.0467092   | 0.943826 |
| PhCCH+CH3          | 0.0189314   | 0.969512 | 0.0215190   | 0.965345 |
| rad11              | 0.0128305   | 0.982342 | 0.0145842   | 0.979929 |
| PAH7+H             | 0.00414992  | 0.986492 | 0.00471713  | 0.984647 |
| rad7               | 0.00329416  | 0.989786 | 0.00374441  | 0.988391 |
| Ph+MeAc            | 0.00283536  | 0.992621 | 0.00322290  | 0.991614 |
| PAH9+H             | 0.000853894 | 0.993475 | 0.000970607 | 0.992584 |
| rad13              | 0.000807535 | 0.994283 | 0.000917910 | 0.993502 |
| rad39              | 0.000803609 | 0.995087 | 0.000913444 | 0.994416 |
| rad45              | 0.000586142 | 0.995673 | 0.000666255 | 0.995082 |
| rad28              | 0.000517728 | 0.996190 | 0.000588492 | 0.995671 |
| rad9               | 0.000497737 | 0.996688 | 0.000565769 | 0.996236 |
| rad23              | 0.000457427 | 0.997146 | 0.000519948 | 0.996756 |
| rad38              | 0.000413504 | 0.997559 | 0.000470022 | 0.997226 |
| PhCCCH3+H          | 0.000395749 | 0.997955 | 0.000449841 | 0.997676 |
| rad19anti          | 0.000331460 | 0.998286 | 0.000376764 | 0.998053 |
| rad21              | 0.000264706 | 0.998551 | 0.000300887 | 0.998354 |
| rad22              | 0.000243945 | 0.998795 | 0.000277288 | 0.998631 |
| rad50              | 0.000164618 | 0.998960 | 0.000187119 | 0.998818 |
| rad46              | 0.000149339 | 0.999109 | 0.000169751 | 0.998988 |
| rad19syn           | 0.000146221 | 0.999255 | 0.000166207 | 0.999154 |

|               |             |          |             |          |
|---------------|-------------|----------|-------------|----------|
| rad20         | 0.000134298 | 0.999389 | 0.000152654 | 0.999307 |
| rad35         | 0.000127168 | 0.999517 | 0.000144549 | 0.999451 |
| PhcycC3H3_A+H | 5.96050e-05 | 0.999576 | 6.77521e-05 | 0.999519 |
| rad36         | 5.58740e-05 | 0.999632 | 6.35111e-05 | 0.999583 |
| rad54         | 5.54368e-05 | 0.999687 | 6.30139e-05 | 0.999646 |
| rad51         | 5.35277e-05 | 0.999741 | 6.08440e-05 | 0.999707 |
| rad33         | 3.23048e-05 | 0.999773 | 3.67202e-05 | 0.999743 |
| rad18         | 3.22953e-05 | 0.999806 | 3.67094e-05 | 0.999780 |
| rad30         | 2.16905e-05 | 0.999827 | 2.46551e-05 | 0.999805 |
| rad67         | 1.95105e-05 | 0.999847 | 2.21772e-05 | 0.999827 |
| rad2          | 1.50699e-05 | 0.999862 | 1.71297e-05 | 0.999844 |
| rad52         | 1.50386e-05 | 0.999877 | 1.70941e-05 | 0.999861 |
| PAH3+H        | 1.37596e-05 | 0.999891 | 1.56403e-05 | 0.999877 |
| PAH10+CH3     | 1.30195e-05 | 0.999904 | 1.47990e-05 | 0.999891 |
| PAH1+H        | 1.23236e-05 | 0.999916 | 1.40081e-05 | 0.999905 |
| rad3          | 1.21128e-05 | 0.999928 | 1.37684e-05 | 0.999919 |
| rad25         | 1.12438e-05 | 0.999939 | 1.27806e-05 | 0.999932 |
| rad37         | 9.90076e-06 | 0.999949 | 1.12540e-05 | 0.999943 |
| rad4          | 9.61889e-06 | 0.999959 | 1.09336e-05 | 0.999954 |
| rad70         | 5.91215e-06 | 0.999965 | 6.72023e-06 | 0.999961 |
| rad10         | 4.41868e-06 | 0.999969 | 5.02262e-06 | 0.999966 |
| rad24         | 4.13863e-06 | 0.999973 | 4.70430e-06 | 0.999971 |
| rad1          | 3.90979e-06 | 0.999977 | 4.44419e-06 | 0.999975 |
| rad55         | 3.49808e-06 | 0.999981 | 3.97620e-06 | 0.999979 |
| rad26         | 3.45256e-06 | 0.999984 | 3.92446e-06 | 0.999983 |
| rad71         | 2.23220e-06 | 0.999986 | 2.53730e-06 | 0.999986 |
| rad73         | 1.55700e-06 | 0.999988 | 1.76982e-06 | 0.999987 |
| rad12         | 1.50798e-06 | 0.999990 | 1.71410e-06 | 0.999989 |
| rad60syn      | 1.42490e-06 | 0.999991 | 1.61965e-06 | 0.999991 |
| rad59         | 1.40159e-06 | 0.999992 | 1.59317e-06 | 0.999992 |
| rad65         | 1.39191e-06 | 0.999994 | 1.58215e-06 | 0.999994 |
| rad34         | 1.17404e-06 | 0.999995 | 1.33451e-06 | 0.999995 |
| rad60anti     | 8.68082e-07 | 0.999996 | 9.86737e-07 | 0.999996 |
| rad15         | 8.52573e-07 | 0.999997 | 9.69105e-07 | 0.999997 |
| rad62         | 7.74139e-07 | 0.999997 | 8.79954e-07 | 0.999998 |
| rad53         | 5.46803e-07 | 0.999998 | 6.21540e-07 | 0.999999 |
| rad56         | 4.43025e-07 | 0.999998 | 5.03579e-07 | 0.999999 |
| rad14         | 2.77149e-07 | 0.999999 | 3.15029e-07 | 0.999999 |
| rad64         | 1.72598e-07 | 0.999999 | 1.96189e-07 | 1.000000 |
| rad43         | 1.27100e-07 | 0.999999 | 1.44472e-07 | 1.000000 |
| rad58         | 1.20556e-07 | 0.999999 | 1.37033e-07 | 1.000000 |
| PAH8+H        | 1.02862e-07 | 0.999999 | 1.16921e-07 | 1.000000 |
| rad72         | 7.82994e-08 | 0.999999 | 8.90013e-08 | 1.000000 |
| rad47         | 5.78027e-08 | 0.999999 | 6.57034e-08 | 1.000000 |
| rad68syn      | 4.43175e-08 | 0.999999 | 5.03749e-08 | 1.000000 |
| rad42         | 4.34936e-08 | 0.999999 | 4.94383e-08 | 1.000000 |
| rad8          | 3.20091e-08 | 0.999999 | 3.63842e-08 | 1.000000 |
| rad68anti     | 2.90620e-08 | 0.999999 | 3.30342e-08 | 1.000000 |
| rad61         | 2.15369e-08 | 0.999999 | 2.44806e-08 | 1.000000 |
| rad27         | 2.06561e-08 | 1.000000 | 2.34794e-08 | 1.000000 |
| rad40syn      | 1.40600e-08 | 1.000000 | 1.59818e-08 | 1.000000 |
| rad31         | 1.36335e-08 | 1.000000 | 1.54969e-08 | 1.000000 |
| rad41         | 8.64286e-09 | 1.000000 | 9.82416e-09 | 1.000000 |
| rad40anti     | 8.25792e-09 | 1.000000 | 9.38662e-09 | 1.000000 |
| rad5          | 2.44461e-10 | 1.000000 | 2.77875e-10 | 1.000000 |

100000.000 Pa, 1300.00000 K

=====

| Rate constant      | True (fraction)      | Effective (fraction) |
|--------------------|----------------------|----------------------|
| Total              | 2.54148e-12 (1.00 )  | 2.09340e-12 (1.00 )  |
| Formation of rad11 | 7.22991e-13 (0.284 ) | 5.21425e-13 (0.249 ) |
| Formation of rad6  | 8.84215e-13 (0.348 ) | 6.37700e-13 (0.305 ) |
| H-abstraction      | 9.34273e-13 (0.368 ) | 9.34273e-13 (0.446 ) |

| species            | PYtrue     | Cumul    | PYeffective | Cumul    |
|--------------------|------------|----------|-------------|----------|
| Benzene+2-propynyl | 0.367610   | 0.367610 | 0.446295    | 0.446295 |
| rad6               | 0.178244   | 0.545854 | 0.216396    | 0.662691 |
| Phenyl+Allene      | 0.176307   | 0.722161 | 0.000000    | 0.662691 |
| PhCH2CCH+H         | 0.0596733  | 0.781835 | 0.0724462   | 0.735137 |
| C2H2+PhCH2         | 0.0572173  | 0.839052 | 0.0694645   | 0.804602 |
| Indene+H           | 0.0525348  | 0.891587 | 0.0637796   | 0.868382 |
| PhCHCCH2+H         | 0.0522816  | 0.943868 | 0.0634723   | 0.931854 |
| PhCCH+CH3          | 0.0234666  | 0.967335 | 0.0284895   | 0.960343 |
| rad11              | 0.0115386  | 0.978873 | 0.0140084   | 0.974352 |
| PAH7+H             | 0.00577303 | 0.984647 | 0.00700869  | 0.981360 |
| rad7               | 0.00410554 | 0.988752 | 0.00498431  | 0.986345 |
| Ph+MeAc            | 0.00359105 | 0.992343 | 0.00435970  | 0.990704 |
| rad39              | 0.00105694 | 0.993400 | 0.00128317  | 0.991988 |

|               |             |          |             |          |
|---------------|-------------|----------|-------------|----------|
| PAH9+H        | 0.000848048 | 0.994248 | 0.00102956  | 0.993017 |
| rad13         | 0.000819040 | 0.995067 | 0.000994355 | 0.994012 |
| rad9          | 0.000591353 | 0.995658 | 0.000717928 | 0.994729 |
| rad45         | 0.000546735 | 0.996205 | 0.000663759 | 0.995393 |
| PhCCCH3+H     | 0.000436527 | 0.996642 | 0.000529963 | 0.995923 |
| rad19anti     | 0.000431698 | 0.997073 | 0.000524100 | 0.996447 |
| rad38         | 0.000408541 | 0.997482 | 0.000495987 | 0.996943 |
| rad23         | 0.000362011 | 0.997844 | 0.000439497 | 0.997383 |
| rad28         | 0.000358593 | 0.998203 | 0.000435348 | 0.997818 |
| rad19syn      | 0.000271658 | 0.998474 | 0.000329804 | 0.998148 |
| rad21         | 0.000209799 | 0.998684 | 0.000254705 | 0.998403 |
| rad22         | 0.000162465 | 0.998847 | 0.000197240 | 0.998600 |
| rad50         | 0.000160074 | 0.999007 | 0.000194337 | 0.998794 |
| rad46         | 0.000146673 | 0.999153 | 0.000178068 | 0.998972 |
| PhcycC3H3_A+H | 0.000129075 | 0.999282 | 0.000156702 | 0.999129 |
| rad35         | 0.000129017 | 0.999411 | 0.000156633 | 0.999286 |
| rad54         | 0.000101869 | 0.999513 | 0.000123673 | 0.999409 |
| rad20         | 9.10566e-05 | 0.999604 | 0.000110547 | 0.999520 |
| rad36         | 5.21055e-05 | 0.999656 | 6.32586e-05 | 0.999583 |
| rad51         | 5.18160e-05 | 0.999708 | 6.29070e-05 | 0.999646 |
| rad33         | 3.32969e-05 | 0.999741 | 4.04240e-05 | 0.999686 |
| rad18         | 2.78811e-05 | 0.999769 | 3.38489e-05 | 0.999720 |
| rad67         | 2.51037e-05 | 0.999794 | 3.04770e-05 | 0.999751 |
| rad30         | 2.47082e-05 | 0.999819 | 2.99969e-05 | 0.999781 |
| PAH1+H        | 2.23020e-05 | 0.999841 | 2.70756e-05 | 0.999808 |
| PAH10+CH3     | 1.86400e-05 | 0.999860 | 2.26298e-05 | 0.999830 |
| PAH3+H        | 1.78769e-05 | 0.999878 | 2.17034e-05 | 0.999852 |
| rad52         | 1.45890e-05 | 0.999893 | 1.77118e-05 | 0.999870 |
| rad37         | 1.40210e-05 | 0.999907 | 1.70221e-05 | 0.999887 |
| rad2          | 1.16368e-05 | 0.999918 | 1.41276e-05 | 0.999901 |
| rad25         | 1.05557e-05 | 0.999929 | 1.28151e-05 | 0.999914 |
| rad70         | 1.02689e-05 | 0.999939 | 1.24669e-05 | 0.999926 |
| rad3          | 9.07220e-06 | 0.999948 | 1.10141e-05 | 0.999937 |
| rad4          | 7.21740e-06 | 0.999955 | 8.76227e-06 | 0.999946 |
| rad55         | 6.71472e-06 | 0.999962 | 8.15198e-06 | 0.999954 |
| rad10         | 6.19203e-06 | 0.999968 | 7.51738e-06 | 0.999962 |
| rad24         | 4.04136e-06 | 0.999972 | 4.90640e-06 | 0.999967 |
| rad26         | 3.23846e-06 | 0.999976 | 3.93163e-06 | 0.999971 |
| rad1          | 3.03010e-06 | 0.999979 | 3.67868e-06 | 0.999974 |
| rad15         | 2.32451e-06 | 0.999981 | 2.82206e-06 | 0.999977 |
| rad34         | 2.17031e-06 | 0.999983 | 2.63484e-06 | 0.999980 |
| rad71         | 2.14701e-06 | 0.999985 | 2.60657e-06 | 0.999982 |
| rad12         | 2.05183e-06 | 0.999987 | 2.49101e-06 | 0.999985 |
| rad59         | 1.81583e-06 | 0.999989 | 2.20450e-06 | 0.999987 |
| rad60syn      | 1.78740e-06 | 0.999991 | 2.16999e-06 | 0.999989 |
| rad73         | 1.49887e-06 | 0.999992 | 1.81969e-06 | 0.999991 |
| rad65         | 1.35126e-06 | 0.999994 | 1.64049e-06 | 0.999993 |
| rad62         | 1.24041e-06 | 0.999995 | 1.50591e-06 | 0.999994 |
| rad53         | 1.21260e-06 | 0.999996 | 1.47215e-06 | 0.999996 |
| rad60anti     | 1.09369e-06 | 0.999997 | 1.32778e-06 | 0.999997 |
| rad56         | 1.03699e-06 | 0.999998 | 1.25895e-06 | 0.999998 |
| rad64         | 3.24780e-07 | 0.999999 | 3.94298e-07 | 0.999999 |
| rad14         | 3.12910e-07 | 0.999999 | 3.79888e-07 | 0.999999 |
| PAH8+H        | 2.28271e-07 | 0.999999 | 2.77132e-07 | 0.999999 |
| rad58         | 1.54525e-07 | 0.999999 | 1.87601e-07 | 0.999999 |
| rad43         | 1.45060e-07 | 0.999999 | 1.76109e-07 | 1.000000 |
| rad68syn      | 9.60999e-08 | 1.000000 | 1.16670e-07 | 1.000000 |
| rad72         | 7.52165e-08 | 1.000000 | 9.13165e-08 | 1.000000 |
| rad42         | 7.38252e-08 | 1.000000 | 8.96271e-08 | 1.000000 |
| rad68anti     | 6.29278e-08 | 1.000000 | 7.63969e-08 | 1.000000 |
| rad8          | 6.28601e-08 | 1.000000 | 7.63149e-08 | 1.000000 |
| rad47         | 5.29056e-08 | 1.000000 | 6.42298e-08 | 1.000000 |
| rad40syn      | 3.04711e-08 | 1.000000 | 3.69933e-08 | 1.000000 |
| rad61         | 2.81599e-08 | 1.000000 | 3.41874e-08 | 1.000000 |
| rad27         | 2.42785e-08 | 1.000000 | 2.94751e-08 | 1.000000 |
| rad40anti     | 1.75353e-08 | 1.000000 | 2.12886e-08 | 1.000000 |
| rad31         | 1.37253e-08 | 1.000000 | 1.66631e-08 | 1.000000 |
| rad41         | 9.44993e-09 | 1.000000 | 1.14726e-08 | 1.000000 |
| rad5          | 3.13622e-10 | 1.000000 | 3.80751e-10 | 1.000000 |

100000.000 Pa, 1400.00000 K

=====

| Rate constant      | True (fraction)      | Effective (fraction) |
|--------------------|----------------------|----------------------|
| Total              | 3.47024e-12 (1.00 )  | 2.72124e-12 (1.00 )  |
| Formation of rad11 | 9.43269e-13 (0.272 ) | 6.12385e-13 (0.225 ) |
| Formation of rad6  | 1.19194e-12 (0.343 ) | 7.73822e-13 (0.284 ) |
| H-abstraction      | 1.33503e-12 (0.385 ) | 1.33503e-12 (0.491 ) |
| species            | PYtrue Cumul         | PYeffective Cumul    |



|                    |             |          |             |          |
|--------------------|-------------|----------|-------------|----------|
| Benzene+2-propynyl | 0.384709    | 0.384709 | 0.490597    | 0.490597 |
| Phenyl+Allene      | 0.215835    | 0.600544 | 0.00000     | 0.490597 |
| rad6               | 0.115153    | 0.715697 | 0.146848    | 0.637445 |
| PhCH2CCH+H         | 0.0712378   | 0.786935 | 0.0908449   | 0.728290 |
| PhCHCCH2+H         | 0.0573213   | 0.844256 | 0.0730983   | 0.801388 |
| C2H2+PhCH2         | 0.0537923   | 0.898048 | 0.0685983   | 0.869987 |
| Indene+H           | 0.0472003   | 0.945249 | 0.0601916   | 0.930178 |
| PhCCH+CH3          | 0.0243971   | 0.969646 | 0.0311122   | 0.961290 |
| rad11              | 0.00864281  | 0.978288 | 0.0110217   | 0.972312 |
| PAH7+H             | 0.00659801  | 0.984886 | 0.00841407  | 0.980726 |
| rad7               | 0.00396478  | 0.988851 | 0.00505605  | 0.985782 |
| Ph+MeAc            | 0.00383870  | 0.992690 | 0.00489526  | 0.990677 |
| rad39              | 0.00114557  | 0.993835 | 0.00146087  | 0.992138 |
| PAH9+H             | 0.000763367 | 0.994599 | 0.000973480 | 0.993112 |
| rad13              | 0.000642653 | 0.995241 | 0.000819538 | 0.993931 |
| rad9               | 0.000599244 | 0.995841 | 0.000764181 | 0.994695 |
| rad19anti          | 0.000485377 | 0.996326 | 0.000618971 | 0.995314 |
| rad45              | 0.000457310 | 0.996783 | 0.000583180 | 0.995898 |
| PhCCCH3+H          | 0.000405710 | 0.997189 | 0.000517380 | 0.996415 |
| rad19syn           | 0.000402598 | 0.997592 | 0.000513412 | 0.996928 |
| rad38              | 0.000365535 | 0.997957 | 0.000466145 | 0.997395 |
| rad23              | 0.000307840 | 0.998265 | 0.000392570 | 0.997787 |
| rad28              | 0.000244756 | 0.998510 | 0.000312122 | 0.998099 |
| PhcycC3H3_A+H      | 0.000217092 | 0.998727 | 0.000276844 | 0.998376 |
| rad21              | 0.000155635 | 0.998883 | 0.000198472 | 0.998575 |
| rad54              | 0.000151205 | 0.999034 | 0.000192822 | 0.998767 |
| rad50              | 0.000140545 | 0.999174 | 0.000179228 | 0.998947 |
| rad46              | 0.000130360 | 0.999305 | 0.000166241 | 0.999113 |
| rad22              | 0.000126439 | 0.999431 | 0.000161240 | 0.999274 |
| rad35              | 0.000118628 | 0.999550 | 0.000151279 | 0.999425 |
| rad20              | 6.00571e-05 | 0.999610 | 7.65872e-05 | 0.999502 |
| rad51              | 4.52094e-05 | 0.999655 | 5.76527e-05 | 0.999560 |
| rad36              | 4.36196e-05 | 0.999699 | 5.56258e-05 | 0.999615 |
| PAH1+H             | 3.33929e-05 | 0.999732 | 4.25840e-05 | 0.999658 |
| rad67              | 2.78124e-05 | 0.999760 | 3.54674e-05 | 0.999693 |
| rad33              | 2.77117e-05 | 0.999788 | 3.53391e-05 | 0.999729 |
| rad30              | 2.49089e-05 | 0.999812 | 3.17648e-05 | 0.999760 |
| PAH10+CH3          | 2.36425e-05 | 0.999836 | 3.01499e-05 | 0.999791 |
| PAH3+H             | 2.05121e-05 | 0.999857 | 2.61578e-05 | 0.999817 |
| rad18              | 2.02447e-05 | 0.999877 | 2.58170e-05 | 0.999843 |
| rad37              | 1.65462e-05 | 0.999893 | 2.11003e-05 | 0.999864 |
| rad70              | 1.42026e-05 | 0.999908 | 1.81118e-05 | 0.999882 |
| rad52              | 1.27684e-05 | 0.999920 | 1.62828e-05 | 0.999898 |
| rad55              | 1.03680e-05 | 0.999931 | 1.32217e-05 | 0.999911 |
| rad25              | 8.83595e-06 | 0.999940 | 1.12680e-05 | 0.999922 |
| rad2               | 7.35796e-06 | 0.999947 | 9.38321e-06 | 0.999932 |
| rad10              | 6.17106e-06 | 0.999953 | 7.86962e-06 | 0.999940 |
| rad3               | 5.76936e-06 | 0.999959 | 7.35731e-06 | 0.999947 |
| rad15              | 5.26043e-06 | 0.999964 | 6.70833e-06 | 0.999954 |
| rad4               | 4.59282e-06 | 0.999969 | 5.85696e-06 | 0.999960 |
| rad24              | 3.45936e-06 | 0.999972 | 4.41151e-06 | 0.999964 |
| rad34              | 3.13963e-06 | 0.999975 | 4.00378e-06 | 0.999968 |
| rad26              | 3.05802e-06 | 0.999978 | 3.89971e-06 | 0.999972 |
| rad12              | 2.26591e-06 | 0.999981 | 2.88958e-06 | 0.999975 |
| rad53              | 2.14622e-06 | 0.999983 | 2.73694e-06 | 0.999978 |
| rad59              | 2.06723e-06 | 0.999985 | 2.63622e-06 | 0.999980 |
| rad60syn           | 1.96280e-06 | 0.999987 | 2.50304e-06 | 0.999983 |
| rad56              | 1.94194e-06 | 0.999989 | 2.47644e-06 | 0.999985 |
| rad1               | 1.92178e-06 | 0.999991 | 2.45073e-06 | 0.999988 |
| rad71              | 1.85340e-06 | 0.999993 | 2.36353e-06 | 0.999990 |
| rad62              | 1.67324e-06 | 0.999994 | 2.13378e-06 | 0.999992 |
| rad73              | 1.29594e-06 | 0.999996 | 1.65263e-06 | 0.999994 |
| rad60anti          | 1.20622e-06 | 0.999997 | 1.53823e-06 | 0.999995 |
| rad65              | 1.18443e-06 | 0.999998 | 1.51044e-06 | 0.999997 |
| rad64              | 5.12392e-07 | 0.999998 | 6.53422e-07 | 0.999998 |
| PAH8+H             | 3.81336e-07 | 0.999999 | 4.86295e-07 | 0.999998 |
| rad14              | 2.73252e-07 | 0.999999 | 3.48462e-07 | 0.999998 |
| rad58              | 1.79614e-07 | 0.999999 | 2.29051e-07 | 0.999999 |
| rad68syn           | 1.55606e-07 | 0.999999 | 1.98435e-07 | 0.999999 |
| rad43              | 1.49108e-07 | 1.000000 | 1.90148e-07 | 0.999999 |
| rad42              | 1.07659e-07 | 1.000000 | 1.37292e-07 | 0.999999 |
| rad68anti          | 1.01785e-07 | 1.000000 | 1.29800e-07 | 0.999999 |
| rad8               | 8.32027e-08 | 1.000000 | 1.06104e-07 | 0.999999 |
| rad72              | 6.47741e-08 | 1.000000 | 8.26028e-08 | 0.999999 |
| rad40syn           | 5.00917e-08 | 1.000000 | 6.38791e-08 | 0.999999 |
| rad47              | 4.37040e-08 | 1.000000 | 5.57333e-08 | 1.000000 |
| rad61              | 3.49522e-08 | 1.000000 | 4.45724e-08 | 1.000000 |
| rad40anti          | 2.87017e-08 | 1.000000 | 3.66016e-08 | 1.000000 |
| rad27              | 2.07023e-08 | 1.000000 | 2.64005e-08 | 1.000000 |

|       |             |         |             |          |
|-------|-------------|---------|-------------|----------|
| rad31 | 1.16916e-08 | 1.00000 | 1.49097e-08 | 1.000000 |
| rad41 | 9.61269e-09 | 1.00000 | 1.22585e-08 | 1.000000 |
| rad5  | 4.26413e-10 | 1.00000 | 5.43778e-10 | 1.000000 |

100000.000 Pa, 1500.00000 K

| Rate constant      | True (fraction)      | Effective (fraction) |
|--------------------|----------------------|----------------------|
| Total              | 4.61271e-12 (1.00 )  | 3.50447e-12 (1.00 )  |
| Formation of rad11 | 1.20217e-12 (0.261 ) | 7.20463e-13 (0.206 ) |
| Formation of rad6  | 1.56360e-12 (0.339 ) | 9.37067e-13 (0.267 ) |
| H-abstraction      | 1.84694e-12 (0.400 ) | 1.84694e-12 (0.527 ) |

| species            | PYtrue      | Cumul    | PYeffective | Cumul    |
|--------------------|-------------|----------|-------------|----------|
| Benzene+2-propynyl | 0.400402    | 0.400402 | 0.527024    | 0.527024 |
| Phenyl+Allene      | 0.240258    | 0.640660 | 0.000000    | 0.527024 |
| rad6               | 0.0854607   | 0.726121 | 0.112486    | 0.639511 |
| PhCH2CCH+H         | 0.0773295   | 0.803451 | 0.101783    | 0.741294 |
| PhCHCCH2+H         | 0.0581223   | 0.861573 | 0.0765024   | 0.817796 |
| C2H2+PhCH2         | 0.0479524   | 0.909525 | 0.0631167   | 0.880913 |
| Indene+H           | 0.0405725   | 0.950098 | 0.0534032   | 0.934316 |
| PhCCH+CH3          | 0.0233308   | 0.973429 | 0.0307088   | 0.965025 |
| PAH7+H             | 0.00683493  | 0.980264 | 0.00899633  | 0.974022 |
| rad11              | 0.00597404  | 0.986238 | 0.00786327  | 0.981885 |
| Ph+MeAc            | 0.00378681  | 0.990024 | 0.00498436  | 0.986869 |
| rad7               | 0.00317049  | 0.993195 | 0.00417311  | 0.991042 |
| rad39              | 0.00112546  | 0.994320 | 0.00148137  | 0.992524 |
| PAH9+H             | 0.000659917 | 0.994980 | 0.000868611 | 0.993392 |
| rad9               | 0.000554769 | 0.995535 | 0.000730208 | 0.994122 |
| rad19syn           | 0.000516253 | 0.996051 | 0.000679510 | 0.994802 |
| rad19anti          | 0.000504970 | 0.996556 | 0.000664659 | 0.995467 |
| rad13              | 0.000451835 | 0.997008 | 0.000594720 | 0.996061 |
| rad45              | 0.000361830 | 0.997370 | 0.000476254 | 0.996538 |
| PhCCCH3+H          | 0.000349483 | 0.997719 | 0.000460002 | 0.996998 |
| rad38              | 0.000313707 | 0.998033 | 0.000412912 | 0.997411 |
| PhcycC3H3_A+H      | 0.000306920 | 0.998340 | 0.000403979 | 0.997814 |
| rad23              | 0.000297559 | 0.998638 | 0.000391659 | 0.998206 |
| rad54              | 0.000200705 | 0.998838 | 0.000264175 | 0.998470 |
| rad28              | 0.000185625 | 0.999024 | 0.000244327 | 0.998715 |
| rad50              | 0.000118193 | 0.999142 | 0.000155569 | 0.998870 |
| rad22              | 0.000112632 | 0.999255 | 0.000148250 | 0.999018 |
| rad21              | 0.000111625 | 0.999366 | 0.000146925 | 0.999165 |
| rad46              | 0.000111115 | 0.999478 | 0.000146254 | 0.999312 |
| rad35              | 0.000104689 | 0.999582 | 0.000137796 | 0.999449 |
| PAH1+H             | 4.52151e-05 | 0.999627 | 5.95136e-05 | 0.999509 |
| rad20              | 3.93660e-05 | 0.999667 | 5.18150e-05 | 0.999561 |
| rad51              | 3.77172e-05 | 0.999705 | 4.96450e-05 | 0.999610 |
| rad36              | 3.45591e-05 | 0.999739 | 4.54879e-05 | 0.999656 |
| rad67              | 2.86080e-05 | 0.999768 | 3.76549e-05 | 0.999694 |
| PAH10+CH3          | 2.79447e-05 | 0.999796 | 3.67819e-05 | 0.999730 |
| rad30              | 2.35926e-05 | 0.999819 | 3.10535e-05 | 0.999761 |
| PAH3+H             | 2.18520e-05 | 0.999841 | 2.87624e-05 | 0.999790 |
| rad33              | 2.08355e-05 | 0.999862 | 2.74245e-05 | 0.999818 |
| rad37              | 1.76412e-05 | 0.999880 | 2.32200e-05 | 0.999841 |
| rad70              | 1.73255e-05 | 0.999897 | 2.28044e-05 | 0.999864 |
| rad55              | 1.42878e-05 | 0.999911 | 1.88060e-05 | 0.999882 |
| rad18              | 1.35480e-05 | 0.999925 | 1.78323e-05 | 0.999900 |
| rad52              | 1.06958e-05 | 0.999935 | 1.40782e-05 | 0.999914 |
| rad15              | 8.92633e-06 | 0.999944 | 1.17492e-05 | 0.999926 |
| rad25              | 6.99317e-06 | 0.999951 | 9.20468e-06 | 0.999935 |
| rad10              | 4.95503e-06 | 0.999956 | 6.52201e-06 | 0.999942 |
| rad2               | 4.24533e-06 | 0.999961 | 5.58783e-06 | 0.999947 |
| rad34              | 3.96501e-06 | 0.999964 | 5.21891e-06 | 0.999953 |
| rad3               | 3.44590e-06 | 0.999968 | 4.53562e-06 | 0.999957 |
| rad53              | 3.39281e-06 | 0.999971 | 4.46573e-06 | 0.999962 |
| rad56              | 3.26696e-06 | 0.999975 | 4.30009e-06 | 0.999966 |
| rad26              | 3.06872e-06 | 0.999978 | 4.03917e-06 | 0.999970 |
| rad24              | 2.78315e-06 | 0.999980 | 3.66328e-06 | 0.999974 |
| rad4               | 2.74211e-06 | 0.999983 | 3.60926e-06 | 0.999977 |
| rad12              | 2.24614e-06 | 0.999985 | 2.95645e-06 | 0.999980 |
| rad59              | 2.18242e-06 | 0.999988 | 2.87258e-06 | 0.999983 |
| rad62              | 2.07833e-06 | 0.999990 | 2.73557e-06 | 0.999986 |
| rad60syn           | 2.00279e-06 | 0.999992 | 2.63614e-06 | 0.999988 |
| rad71              | 1.52111e-06 | 0.999993 | 2.00215e-06 | 0.999990 |
| rad60anti          | 1.23564e-06 | 0.999994 | 1.62640e-06 | 0.999992 |
| rad1               | 1.11162e-06 | 0.999996 | 1.46316e-06 | 0.999994 |
| rad73              | 1.06653e-06 | 0.999997 | 1.40380e-06 | 0.999995 |
| rad65              | 9.95614e-07 | 0.999998 | 1.31046e-06 | 0.999996 |
| rad64              | 7.34939e-07 | 0.999998 | 9.67354e-07 | 0.999997 |

|           |             |          |             |          |
|-----------|-------------|----------|-------------|----------|
| PAH8+H    | 5.34758e-07 | 0.999999 | 7.03868e-07 | 0.999998 |
| rad14     | 2.14577e-07 | 0.999999 | 2.82435e-07 | 0.999998 |
| rad68syn  | 2.13468e-07 | 0.999999 | 2.80974e-07 | 0.999998 |
| rad58     | 1.95640e-07 | 1.000000 | 2.57508e-07 | 0.999999 |
| rad43     | 1.49940e-07 | 1.000000 | 1.97357e-07 | 0.999999 |
| rad42     | 1.46458e-07 | 1.000000 | 1.92774e-07 | 0.999999 |
| rad68anti | 1.39529e-07 | 1.000000 | 1.83654e-07 | 0.999999 |
| rad8      | 9.05548e-08 | 1.000000 | 1.19192e-07 | 0.999999 |
| rad40syn  | 6.96930e-08 | 1.000000 | 9.17322e-08 | 0.999999 |
| rad72     | 5.29235e-08 | 1.000000 | 6.96599e-08 | 1.000000 |
| rad61     | 4.31081e-08 | 1.000000 | 5.67405e-08 | 1.000000 |
| rad40anti | 3.99196e-08 | 1.000000 | 5.25438e-08 | 1.000000 |
| rad47     | 3.46029e-08 | 1.000000 | 4.55456e-08 | 1.000000 |
| rad27     | 1.52424e-08 | 1.000000 | 2.00627e-08 | 1.000000 |
| rad41     | 9.96639e-09 | 1.000000 | 1.31181e-08 | 1.000000 |
| rad31     | 9.27530e-09 | 1.000000 | 1.22085e-08 | 1.000000 |
| rad5      | 6.44088e-10 | 1.000000 | 8.47771e-10 | 1.000000 |

100000.000 Pa, 1750.00000 K

| Rate constant      | True (fraction)      | Effective (fraction) |
|--------------------|----------------------|----------------------|
| Total              | 8.61869e-12 (1.00 )  | 6.16559e-12 (1.00 )  |
| Formation of rad11 | 2.04015e-12 (0.237 ) | 1.00670e-12 (0.163 ) |
| Formation of rad6  | 2.80256e-12 (0.325 ) | 1.38291e-12 (0.224 ) |
| H-abstraction      | 3.77597e-12 (0.438 ) | 3.77597e-12 (0.612 ) |

| species            | PYtrue      | Cumul    | PYeffective | Cumul    |
|--------------------|-------------|----------|-------------|----------|
| Benzene+2-propynyl | 0.438115    | 0.438115 | 0.612427    | 0.612427 |
| Phenyl+Allene      | 0.284626    | 0.722740 | 0.000000    | 0.612427 |
| PhCH2CCH+H         | 0.0853869   | 0.808127 | 0.119360    | 0.731788 |
| PhCHCCH2+H         | 0.0548852   | 0.863013 | 0.0767223   | 0.808510 |
| rad6               | 0.0462415   | 0.909254 | 0.0646398   | 0.873150 |
| C2H2+PhCH2         | 0.0315744   | 0.940828 | 0.0441368   | 0.917287 |
| PhCCH+CH3          | 0.0195273   | 0.960356 | 0.0272966   | 0.944583 |
| Indene+H           | 0.0186961   | 0.979052 | 0.0261346   | 0.970718 |
| PAH7+H             | 0.00644190  | 0.985494 | 0.00900498  | 0.979723 |
| Ph+MeAc            | 0.00399919  | 0.989493 | 0.00559035  | 0.985313 |
| PhcycC3H3_A+H      | 0.00184673  | 0.991340 | 0.00258149  | 0.987895 |
| rad39              | 0.00130834  | 0.992648 | 0.00182889  | 0.989723 |
| rad19syn           | 0.00127111  | 0.993919 | 0.00177685  | 0.991500 |
| rad11              | 0.000734699 | 0.994654 | 0.00102701  | 0.992527 |
| PAH9+H             | 0.000582242 | 0.995236 | 0.000813903 | 0.993341 |
| rad50              | 0.000544962 | 0.995781 | 0.000761786 | 0.994103 |
| rad7               | 0.000505741 | 0.996287 | 0.000706960 | 0.994810 |
| rad38              | 0.000442279 | 0.996729 | 0.000618248 | 0.995428 |
| rad54              | 0.000424007 | 0.997153 | 0.000592707 | 0.996021 |
| rad51              | 0.000423306 | 0.997576 | 0.000591727 | 0.996613 |
| rad71              | 0.000357020 | 0.997933 | 0.000499070 | 0.997112 |
| rad19anti          | 0.000351492 | 0.998285 | 0.000491341 | 0.997603 |
| PhCCCH3+H          | 0.000254208 | 0.998539 | 0.000355349 | 0.997958 |
| rad46              | 0.000186198 | 0.998725 | 0.000260281 | 0.998219 |
| rad23              | 0.000135886 | 0.998861 | 0.000189951 | 0.998409 |
| PAH1+H             | 0.000135831 | 0.998997 | 0.000189874 | 0.998599 |
| rad73              | 0.000112098 | 0.999109 | 0.000156699 | 0.998755 |
| rad28              | 0.000107180 | 0.999216 | 0.000149823 | 0.998905 |
| rad35              | 8.85902e-05 | 0.999305 | 0.000123837 | 0.999029 |
| rad52              | 7.36025e-05 | 0.999378 | 0.000102887 | 0.999132 |
| rad72              | 6.81994e-05 | 0.999447 | 9.53340e-05 | 0.999227 |
| PAH10+CH3          | 6.34161e-05 | 0.999510 | 8.86476e-05 | 0.999316 |
| rad22              | 5.25577e-05 | 0.999563 | 7.34691e-05 | 0.999389 |
| PAH3+H             | 4.72237e-05 | 0.999610 | 6.60125e-05 | 0.999455 |
| rad13              | 4.21193e-05 | 0.999652 | 5.88773e-05 | 0.999514 |
| rad67              | 4.09034e-05 | 0.999693 | 5.71778e-05 | 0.999571 |
| rad55              | 4.02598e-05 | 0.999733 | 5.62779e-05 | 0.999628 |
| rad9               | 3.82444e-05 | 0.999771 | 5.34606e-05 | 0.999681 |
| rad70              | 3.35212e-05 | 0.999805 | 4.68583e-05 | 0.999728 |
| rad56              | 3.05967e-05 | 0.999835 | 4.27702e-05 | 0.999771 |
| rad53              | 2.23873e-05 | 0.999858 | 3.12946e-05 | 0.999802 |
| rad45              | 2.21009e-05 | 0.999880 | 3.08942e-05 | 0.999833 |
| rad30              | 1.91837e-05 | 0.999899 | 2.68163e-05 | 0.999860 |
| rad37              | 1.64276e-05 | 0.999916 | 2.29637e-05 | 0.999883 |
| PAH8+H             | 1.44981e-05 | 0.999930 | 2.02664e-05 | 0.999903 |
| rad34              | 1.04745e-05 | 0.999941 | 1.46420e-05 | 0.999918 |
| rad21              | 9.66117e-06 | 0.999950 | 1.35051e-05 | 0.999931 |
| rad65              | 7.01210e-06 | 0.999957 | 9.80199e-06 | 0.999941 |
| rad62              | 6.49141e-06 | 0.999964 | 9.07416e-06 | 0.999950 |
| rad36              | 3.82227e-06 | 0.999967 | 5.34304e-06 | 0.999955 |
| rad59              | 3.76446e-06 | 0.999971 | 5.26223e-06 | 0.999961 |

|           |             |          |             |          |
|-----------|-------------|----------|-------------|----------|
| rad64     | 3.36636e-06 | 0.999975 | 4.70575e-06 | 0.999965 |
| rad20     | 2.89872e-06 | 0.999978 | 4.05203e-06 | 0.999969 |
| rad60syn  | 2.45420e-06 | 0.999980 | 3.43066e-06 | 0.999973 |
| rad15     | 2.25354e-06 | 0.999982 | 3.15016e-06 | 0.999976 |
| rad26     | 1.99936e-06 | 0.999984 | 2.79484e-06 | 0.999979 |
| rad33     | 1.99778e-06 | 0.999986 | 2.79265e-06 | 0.999981 |
| rad68syn  | 1.85909e-06 | 0.999988 | 2.59877e-06 | 0.999984 |
| rad60anti | 1.72829e-06 | 0.999990 | 2.41593e-06 | 0.999986 |
| rad18     | 1.29224e-06 | 0.999991 | 1.80638e-06 | 0.999988 |
| rad68anti | 1.18630e-06 | 0.999992 | 1.65830e-06 | 0.999990 |
| rad40syn  | 1.12235e-06 | 0.999993 | 1.56890e-06 | 0.999991 |
| rad42     | 1.05023e-06 | 0.999994 | 1.46808e-06 | 0.999993 |
| rad58     | 8.87801e-07 | 0.999995 | 1.24103e-06 | 0.999994 |
| rad40anti | 8.47958e-07 | 0.999996 | 1.18534e-06 | 0.999995 |
| rad25     | 7.61950e-07 | 0.999997 | 1.06510e-06 | 0.999996 |
| rad10     | 7.10734e-07 | 0.999998 | 9.93512e-07 | 0.999997 |
| rad61     | 3.68124e-07 | 0.999998 | 5.14592e-07 | 0.999998 |
| rad43     | 2.83358e-07 | 0.999998 | 3.96099e-07 | 0.999998 |
| rad24     | 2.51585e-07 | 0.999999 | 3.51683e-07 | 0.999999 |
| rad12     | 2.25072e-07 | 0.999999 | 3.14622e-07 | 0.999999 |
| rad2      | 1.71603e-07 | 0.999999 | 2.39880e-07 | 0.999999 |
| rad47     | 1.53911e-07 | 0.999999 | 2.15147e-07 | 0.999999 |
| rad3      | 1.34070e-07 | 0.999999 | 1.87412e-07 | 1.000000 |
| rad4      | 8.44744e-08 | 0.999999 | 1.18084e-07 | 1.000000 |
| rad1      | 4.85375e-08 | 0.999999 | 6.78493e-08 | 1.000000 |
| rad41     | 4.67215e-08 | 0.999999 | 6.53107e-08 | 1.000000 |
| rad14     | 2.69864e-08 | 0.999999 | 3.77235e-08 | 1.000000 |
| rad8      | 2.44915e-08 | 1.000000 | 3.42359e-08 | 1.000000 |
| rad5      | 1.99873e-09 | 1.000000 | 2.79397e-09 | 1.000000 |
| rad27     | 1.41306e-09 | 1.000000 | 1.97527e-09 | 1.000000 |

10000.000 Pa, 2000.00000 K

| =====              |                 |          |                      |          |
|--------------------|-----------------|----------|----------------------|----------|
| Rate constant      | True (fraction) |          | Effective (fraction) |          |
| -----              |                 |          |                      |          |
| Total              | 1.44111e-11     | (1.00 )  | 1.00515e-11          | (1.00 )  |
| Formation of rad11 | 3.16882e-12     | (0.220 ) | 1.37516e-12          | (0.137 ) |
| Formation of rad6  | 4.53302e-12     | (0.315 ) | 1.96717e-12          | (0.196 ) |
| H-abstraction      | 6.70922e-12     | (0.466 ) | 6.70922e-12          | (0.667 ) |
| species            | PYtrue          | Cumul    | PYeffective          | Cumul    |
| -----              |                 |          |                      |          |
| Benzene+2-propynyl | 0.465560        | 0.465560 | 0.667481             | 0.667481 |
| Phenyl+Allene      | 0.302512        | 0.768072 | 0.000000             | 0.667481 |
| PhCH2CCH+H         | 0.0887972       | 0.856869 | 0.127310             | 0.794791 |
| PhCHCCH2+H         | 0.0521766       | 0.909046 | 0.0748065            | 0.869598 |
| C2H2+PhCH2         | 0.0250622       | 0.934108 | 0.0359320            | 0.905530 |
| PhCCH+CH3          | 0.0172826       | 0.951390 | 0.0247784            | 0.930308 |
| rad6               | 0.0155885       | 0.966979 | 0.0223496            | 0.952658 |
| Indene+H           | 0.0141051       | 0.981084 | 0.0202227            | 0.972880 |
| PAH7+H             | 0.00602420      | 0.987108 | 0.00863698           | 0.981517 |
| Ph+MeAc            | 0.00382814      | 0.990936 | 0.00548846           | 0.987006 |
| PhcycC3H3_A+H      | 0.00228293      | 0.993219 | 0.00327307           | 0.990279 |
| rad19syn           | 0.00144055      | 0.994660 | 0.00206534           | 0.992344 |
| rad39              | 0.00102217      | 0.995682 | 0.00146550           | 0.993810 |
| rad54              | 0.000536070     | 0.996218 | 0.000768568          | 0.994578 |
| PAH9+H             | 0.000457421     | 0.996676 | 0.000655814          | 0.995234 |
| rad19anti          | 0.000371927     | 0.997048 | 0.000533237          | 0.995767 |
| rad50              | 0.000339104     | 0.997387 | 0.000486179          | 0.996254 |
| rad38              | 0.000310342     | 0.997697 | 0.000444944          | 0.996698 |
| rad51              | 0.000256682     | 0.997954 | 0.000368009          | 0.997066 |
| rad11              | 0.000243866     | 0.998198 | 0.000349634          | 0.997416 |
| rad71              | 0.000209348     | 0.998407 | 0.000300145          | 0.997716 |
| PhCCCH3+H          | 0.000203917     | 0.998611 | 0.000292358          | 0.998009 |
| rad7               | 0.000198190     | 0.998809 | 0.000284147          | 0.998293 |
| PAH1+H             | 0.000182049     | 0.998991 | 0.000261007          | 0.998554 |
| rad46              | 0.000125546     | 0.999117 | 0.000179997          | 0.998734 |
| rad23              | 8.96459e-05     | 0.999206 | 0.000128526          | 0.998862 |
| rad35              | 7.32471e-05     | 0.999279 | 0.000105015          | 0.998967 |
| rad73              | 6.59932e-05     | 0.999345 | 9.46160e-05          | 0.999062 |
| rad56              | 6.00358e-05     | 0.999405 | 8.60742e-05          | 0.999148 |
| PAH10+CH3          | 5.99844e-05     | 0.999465 | 8.60011e-05          | 0.999234 |
| rad55              | 5.40965e-05     | 0.999520 | 7.75591e-05          | 0.999312 |
| rad28              | 5.09205e-05     | 0.999570 | 7.30055e-05          | 0.999385 |
| rad52              | 4.53153e-05     | 0.999616 | 6.49692e-05          | 0.999450 |
| PAH3+H             | 4.43724e-05     | 0.999660 | 6.36175e-05          | 0.999513 |
| rad72              | 3.98053e-05     | 0.999700 | 5.70696e-05          | 0.999570 |
| rad53              | 3.92169e-05     | 0.999739 | 5.62260e-05          | 0.999626 |
| rad70              | 3.84832e-05     | 0.999778 | 5.51739e-05          | 0.999682 |
| rad67              | 3.83799e-05     | 0.999816 | 5.50259e-05          | 0.999737 |

|           |             |          |             |          |
|-----------|-------------|----------|-------------|----------|
| rad9      | 2.56671e-05 | 0.999842 | 3.67992e-05 | 0.999773 |
| rad13     | 2.03382e-05 | 0.999862 | 2.91592e-05 | 0.999803 |
| rad30     | 1.68889e-05 | 0.999879 | 2.42140e-05 | 0.999827 |
| rad22     | 1.61260e-05 | 0.999895 | 2.31201e-05 | 0.999850 |
| rad37     | 1.48782e-05 | 0.999910 | 2.13311e-05 | 0.999871 |
| PAH8+H    | 1.34725e-05 | 0.999923 | 1.93158e-05 | 0.999891 |
| rad45     | 1.25663e-05 | 0.999936 | 1.80166e-05 | 0.999909 |
| rad62     | 1.24161e-05 | 0.999948 | 1.78011e-05 | 0.999926 |
| rad34     | 1.19482e-05 | 0.999960 | 1.71303e-05 | 0.999944 |
| rad65     | 4.84342e-06 | 0.999965 | 6.94409e-06 | 0.999950 |
| rad21     | 4.66354e-06 | 0.999970 | 6.68619e-06 | 0.999957 |
| rad64     | 4.46438e-06 | 0.999974 | 6.40066e-06 | 0.999964 |
| rad59     | 3.59855e-06 | 0.999978 | 5.15930e-06 | 0.999969 |
| rad42     | 2.55279e-06 | 0.999980 | 3.65997e-06 | 0.999972 |
| rad60syn  | 2.33945e-06 | 0.999983 | 3.35412e-06 | 0.999976 |
| rad36     | 2.19796e-06 | 0.999985 | 3.15126e-06 | 0.999979 |
| rad68syn  | 1.87659e-06 | 0.999987 | 2.69049e-06 | 0.999982 |
| rad60anti | 1.65090e-06 | 0.999989 | 2.36691e-06 | 0.999984 |
| rad15     | 1.48186e-06 | 0.999990 | 2.12456e-06 | 0.999986 |
| rad20     | 1.20889e-06 | 0.999991 | 1.73320e-06 | 0.999988 |
| rad68anti | 1.19915e-06 | 0.999992 | 1.71924e-06 | 0.999990 |
| rad33     | 1.15490e-06 | 0.999994 | 1.65580e-06 | 0.999991 |
| rad40syn  | 1.09365e-06 | 0.999995 | 1.56798e-06 | 0.999993 |
| rad26     | 8.97837e-07 | 0.999996 | 1.28724e-06 | 0.999994 |
| rad40anti | 8.19959e-07 | 0.999996 | 1.17559e-06 | 0.999995 |
| rad58     | 7.71640e-07 | 0.999997 | 1.10631e-06 | 0.999996 |
| rad18     | 4.21254e-07 | 0.999998 | 6.03961e-07 | 0.999997 |
| rad25     | 3.99517e-07 | 0.999998 | 5.72794e-07 | 0.999998 |
| rad43     | 3.77324e-07 | 0.999998 | 5.40975e-07 | 0.999998 |
| rad61     | 3.37004e-07 | 0.999999 | 4.83167e-07 | 0.999999 |
| rad10     | 2.83609e-07 | 0.999999 | 4.06614e-07 | 0.999999 |
| rad12     | 1.93092e-07 | 0.999999 | 2.76839e-07 | 0.999999 |
| rad24     | 1.57057e-07 | 0.999999 | 2.25176e-07 | 0.999999 |
| rad47     | 8.41107e-08 | 0.999999 | 1.20591e-07 | 1.000000 |
| rad41     | 7.51524e-08 | 0.999999 | 1.07747e-07 | 1.000000 |
| rad2      | 6.28923e-08 | 1.000000 | 9.01695e-08 | 1.000000 |
| rad3      | 6.08593e-08 | 1.000000 | 8.72553e-08 | 1.000000 |
| rad4      | 3.78944e-08 | 1.000000 | 5.43299e-08 | 1.000000 |
| rad8      | 2.15552e-08 | 1.000000 | 3.09041e-08 | 1.000000 |
| rad1      | 1.77204e-08 | 1.000000 | 2.54059e-08 | 1.000000 |
| rad14     | 1.58923e-08 | 1.000000 | 2.27850e-08 | 1.000000 |
| rad5      | 2.22538e-09 | 1.000000 | 3.19056e-09 | 1.000000 |
| rad27     | 7.62255e-10 | 1.000000 | 1.09286e-09 | 1.000000 |

100000.000 Pa, 2250.00000 K

| Rate constant      | True (fraction)      | Effective (fraction) |
|--------------------|----------------------|----------------------|
| Total              | 2.23655e-11 (1.00 )  | 1.56544e-11 (1.00 )  |
| Formation of rad11 | 4.62280e-12 (0.207 ) | 1.91282e-12 (0.122 ) |
| Formation of rad6  | 6.82518e-12 (0.305 ) | 2.82412e-12 (0.180 ) |
| H-abstraction      | 1.09175e-11 (0.488 ) | 1.09175e-11 (0.697 ) |

| species            | PYtrue      | Cumul    | PYeffective | Cumul    |
|--------------------|-------------|----------|-------------|----------|
| Benzene+2-propynyl | 0.488140    | 0.488140 | 0.697406    | 0.697406 |
| Phenyl+Allene      | 0.300063    | 0.788203 | 0.000000    | 0.697406 |
| PhCH2CCH+H         | 0.0919853   | 0.880188 | 0.131419    | 0.828825 |
| PhCHCCH2+H         | 0.0499583   | 0.930147 | 0.0713756   | 0.900201 |
| C2H2+PhCH2         | 0.0207229   | 0.950870 | 0.0296068   | 0.929808 |
| PhCCH+CH3          | 0.0156952   | 0.966565 | 0.0224237   | 0.952231 |
| Indene+H           | 0.0108186   | 0.977383 | 0.0154566   | 0.967688 |
| PAH7+H             | 0.00571154  | 0.983095 | 0.00816009  | 0.975848 |
| rad6               | 0.00563768  | 0.988733 | 0.00805457  | 0.983903 |
| Ph+MeAc            | 0.00358955  | 0.992322 | 0.00512840  | 0.989031 |
| PhcycC3H3_A+H      | 0.00205198  | 0.994374 | 0.00293167  | 0.991963 |
| rad19syn           | 0.00137838  | 0.995753 | 0.00196929  | 0.993932 |
| rad39              | 0.000853782 | 0.996606 | 0.00121980  | 0.995152 |
| rad54              | 0.000555844 | 0.997162 | 0.000794134 | 0.995946 |
| PAH9+H             | 0.000380534 | 0.997543 | 0.000543668 | 0.996489 |
| rad19anti          | 0.000377169 | 0.997920 | 0.000538860 | 0.997028 |
| rad38              | 0.000236815 | 0.998157 | 0.000338337 | 0.997367 |
| rad50              | 0.000223160 | 0.998380 | 0.000318828 | 0.997686 |
| PAH1+H             | 0.000177992 | 0.998558 | 0.000254297 | 0.997940 |
| PhCCCH3+H          | 0.000176264 | 0.998734 | 0.000251829 | 0.998192 |
| rad51              | 0.000161839 | 0.998896 | 0.000231219 | 0.998423 |
| rad71              | 0.000124563 | 0.999021 | 0.000177963 | 0.998601 |
| rad7               | 0.000102056 | 0.999123 | 0.000145807 | 0.998747 |
| rad11              | 0.000100528 | 0.999223 | 0.000143624 | 0.998890 |
| rad46              | 9.19648e-05 | 0.999315 | 0.000131390 | 0.999022 |

|           |             |          |             |          |
|-----------|-------------|----------|-------------|----------|
| rad35     | 6.41662e-05 | 0.999379 | 9.16739e-05 | 0.999113 |
| PAH10+CH3 | 5.68743e-05 | 0.999436 | 8.12562e-05 | 0.999195 |
| rad56     | 5.60297e-05 | 0.999492 | 8.00498e-05 | 0.999275 |
| rad55     | 5.57057e-05 | 0.999548 | 7.95865e-05 | 0.999354 |
| rad70     | 4.44394e-05 | 0.999592 | 6.34906e-05 | 0.999418 |
| PAH3+H    | 4.42841e-05 | 0.999637 | 6.32688e-05 | 0.999481 |
| rad73     | 3.94795e-05 | 0.999676 | 5.64045e-05 | 0.999537 |
| rad67     | 3.85277e-05 | 0.999715 | 5.50446e-05 | 0.999592 |
| rad53     | 3.77784e-05 | 0.999752 | 5.39740e-05 | 0.999646 |
| rad23     | 3.68049e-05 | 0.999789 | 5.25833e-05 | 0.999699 |
| rad52     | 2.93226e-05 | 0.999819 | 4.18933e-05 | 0.999741 |
| rad72     | 2.35753e-05 | 0.999842 | 3.36821e-05 | 0.999775 |
| rad28     | 1.93353e-05 | 0.999861 | 2.76244e-05 | 0.999802 |
| rad9      | 1.55508e-05 | 0.999877 | 2.22174e-05 | 0.999824 |
| rad30     | 1.53502e-05 | 0.999892 | 2.19309e-05 | 0.999846 |
| rad37     | 1.43331e-05 | 0.999907 | 2.04777e-05 | 0.999867 |
| rad34     | 1.39245e-05 | 0.999921 | 1.98939e-05 | 0.999887 |
| rad62     | 1.19442e-05 | 0.999933 | 1.70647e-05 | 0.999904 |
| PAH8+H    | 1.18462e-05 | 0.999944 | 1.69246e-05 | 0.999921 |
| rad13     | 1.14397e-05 | 0.999956 | 1.63438e-05 | 0.999937 |
| rad45     | 7.13707e-06 | 0.999963 | 1.01967e-05 | 0.999947 |
| rad22     | 5.24974e-06 | 0.999968 | 7.50028e-06 | 0.999955 |
| rad64     | 4.33932e-06 | 0.999973 | 6.19958e-06 | 0.999961 |
| rad65     | 3.71883e-06 | 0.999976 | 5.31310e-06 | 0.999966 |
| rad59     | 3.62954e-06 | 0.999980 | 5.18553e-06 | 0.999971 |
| rad42     | 2.42997e-06 | 0.999982 | 3.47169e-06 | 0.999975 |
| rad21     | 2.42523e-06 | 0.999985 | 3.46492e-06 | 0.999978 |
| rad60syn  | 2.32014e-06 | 0.999987 | 3.31480e-06 | 0.999982 |
| rad68syn  | 1.96446e-06 | 0.999989 | 2.80662e-06 | 0.999984 |
| rad60anti | 1.64349e-06 | 0.999991 | 2.34805e-06 | 0.999987 |
| rad36     | 1.26077e-06 | 0.999992 | 1.80126e-06 | 0.999989 |
| rad68anti | 1.25734e-06 | 0.999993 | 1.79637e-06 | 0.999990 |
| rad40syn  | 1.03827e-06 | 0.999994 | 1.48338e-06 | 0.999992 |
| rad15     | 9.41873e-07 | 0.999995 | 1.34565e-06 | 0.999993 |
| rad40anti | 7.55623e-07 | 0.999996 | 1.07956e-06 | 0.999994 |
| rad33     | 7.45882e-07 | 0.999997 | 1.06564e-06 | 0.999995 |
| rad58     | 7.13860e-07 | 0.999997 | 1.01989e-06 | 0.999996 |
| rad20     | 5.69347e-07 | 0.999998 | 8.13428e-07 | 0.999997 |
| rad26     | 4.35228e-07 | 0.999998 | 6.21810e-07 | 0.999998 |
| rad43     | 3.60421e-07 | 0.999999 | 5.14934e-07 | 0.999998 |
| rad61     | 2.80991e-07 | 0.999999 | 4.01452e-07 | 0.999999 |
| rad25     | 2.25448e-07 | 0.999999 | 3.22096e-07 | 0.999999 |
| rad18     | 1.77531e-07 | 0.999999 | 2.53639e-07 | 0.999999 |
| rad10     | 1.53016e-07 | 1.000000 | 2.18614e-07 | 1.000000 |
| rad12     | 1.50706e-07 | 1.000000 | 2.15314e-07 | 1.000000 |
| rad24     | 1.01539e-07 | 1.000000 | 1.45068e-07 | 1.000000 |
| rad41     | 6.96841e-08 | 1.000000 | 9.95574e-08 | 1.000000 |
| rad47     | 4.80043e-08 | 1.000000 | 6.85839e-08 | 1.000000 |
| rad3      | 3.24789e-08 | 1.000000 | 4.64028e-08 | 1.000000 |
| rad2      | 2.81294e-08 | 1.000000 | 4.01884e-08 | 1.000000 |
| rad4      | 1.99285e-08 | 1.000000 | 2.84718e-08 | 1.000000 |
| rad8      | 1.95266e-08 | 1.000000 | 2.78977e-08 | 1.000000 |
| rad14     | 1.06340e-08 | 1.000000 | 1.51929e-08 | 1.000000 |
| rad1      | 7.78201e-09 | 1.000000 | 1.11182e-08 | 1.000000 |
| rad5      | 1.77574e-09 | 1.000000 | 2.53700e-09 | 1.000000 |
| rad27     | 4.82760e-10 | 1.000000 | 6.89718e-10 | 1.000000 |

100000.000 Pa, 2500.00000 K

| =====              |                 |          |                      |          |
|--------------------|-----------------|----------|----------------------|----------|
| Rate constant      | True (fraction) |          | Effective (fraction) |          |
| -----              |                 |          |                      |          |
| Total              | 3.28090e-11     | (1.00 )  | 2.31012e-11          | (1.00 )  |
| Formation of rad11 | 6.43164e-12     | (0.196 ) | 2.57057e-12          | (0.111 ) |
| Formation of rad6  | 9.73932e-12     | (0.297 ) | 3.89256e-12          | (0.169 ) |
| H-abstraction      | 1.66381e-11     | (0.507 ) | 1.66381e-11          | (0.720 ) |
| species            | PYtrue          | Cumul    | PYeffective          | Cumul    |
| -----              |                 |          |                      |          |
| Benzene+2-propynyl | 0.507119        | 0.507119 | 0.720225             | 0.720225 |
| Phenyl+Allene      | 0.295889        | 0.803008 | 0.000000             | 0.720225 |
| PhCH2CCH+H         | 0.0923044       | 0.895312 | 0.131094             | 0.851319 |
| PhCHCCH2+H         | 0.0469101       | 0.942222 | 0.0666233            | 0.917942 |
| C2H2+PhCH2         | 0.0175067       | 0.959729 | 0.0248635            | 0.942806 |
| PhCCH+CH3          | 0.0141050       | 0.973834 | 0.0200323            | 0.962838 |
| Indene+H           | 0.00810509      | 0.981939 | 0.0115111            | 0.974349 |
| PAH7+H             | 0.00537808      | 0.987317 | 0.00763807           | 0.981987 |
| Ph+MeAc            | 0.00334115      | 0.990658 | 0.00474520           | 0.986733 |
| rad6               | 0.00236066      | 0.993019 | 0.00335268           | 0.990085 |
| PhcycC3H3_A+H      | 0.00197986      | 0.994999 | 0.00281185           | 0.992897 |
| rad19syn           | 0.00140067      | 0.996399 | 0.00198928           | 0.994886 |

|           |             |          |             |          |
|-----------|-------------|----------|-------------|----------|
| rad39     | 0.000716615 | 0.997116 | 0.00101776  | 0.995904 |
| rad54     | 0.000602089 | 0.997718 | 0.000855109 | 0.996759 |
| rad19anti | 0.000352318 | 0.998070 | 0.000500371 | 0.997260 |
| PAH9+H    | 0.000310178 | 0.998380 | 0.000440525 | 0.997700 |
| rad38     | 0.000192133 | 0.998573 | 0.000272873 | 0.997973 |
| PAH1+H    | 0.000168458 | 0.998741 | 0.000239249 | 0.998212 |
| rad50     | 0.000157406 | 0.998898 | 0.000223553 | 0.998436 |
| PhCCCH3+H | 0.000152960 | 0.999051 | 0.000217239 | 0.998653 |
| rad51     | 0.000105912 | 0.999157 | 0.000150420 | 0.998803 |
| rad46     | 7.26221e-05 | 0.999230 | 0.000103141 | 0.998907 |
| rad71     | 7.15787e-05 | 0.999302 | 0.000101658 | 0.999008 |
| rad55     | 6.05357e-05 | 0.999362 | 8.59750e-05 | 0.999094 |
| PAH10+CH3 | 5.65700e-05 | 0.999419 | 8.03426e-05 | 0.999175 |
| rad35     | 5.65029e-05 | 0.999475 | 8.02472e-05 | 0.999255 |
| rad7      | 5.40656e-05 | 0.999529 | 7.67858e-05 | 0.999332 |
| rad56     | 5.36220e-05 | 0.999583 | 7.61555e-05 | 0.999408 |
| rad70     | 5.08989e-05 | 0.999634 | 7.22879e-05 | 0.999480 |
| PAH3+H    | 4.73617e-05 | 0.999681 | 6.72645e-05 | 0.999547 |
| rad11     | 4.49058e-05 | 0.999726 | 6.37766e-05 | 0.999611 |
| rad67     | 4.01540e-05 | 0.999766 | 5.70279e-05 | 0.999668 |
| rad53     | 3.83612e-05 | 0.999805 | 5.44816e-05 | 0.999723 |
| rad73     | 2.30883e-05 | 0.999828 | 3.27907e-05 | 0.999755 |
| rad52     | 2.00658e-05 | 0.999848 | 2.84981e-05 | 0.999784 |
| rad34     | 1.65484e-05 | 0.999864 | 2.35026e-05 | 0.999807 |
| rad23     | 1.61715e-05 | 0.999880 | 2.29673e-05 | 0.999830 |
| rad30     | 1.40344e-05 | 0.999894 | 1.99320e-05 | 0.999850 |
| rad37     | 1.34899e-05 | 0.999908 | 1.91588e-05 | 0.999869 |
| rad72     | 1.33186e-05 | 0.999921 | 1.89155e-05 | 0.999888 |
| PAH8+H    | 1.22582e-05 | 0.999933 | 1.74095e-05 | 0.999906 |
| rad62     | 9.53765e-06 | 0.999943 | 1.35456e-05 | 0.999919 |
| rad9      | 8.52123e-06 | 0.999952 | 1.21021e-05 | 0.999931 |
| rad28     | 8.15822e-06 | 0.999960 | 1.15866e-05 | 0.999943 |
| rad13     | 6.42643e-06 | 0.999966 | 9.12700e-06 | 0.999952 |
| rad64     | 4.21801e-06 | 0.999970 | 5.99053e-06 | 0.999958 |
| rad45     | 3.93197e-06 | 0.999974 | 5.58430e-06 | 0.999964 |
| rad59     | 3.84552e-06 | 0.999978 | 5.46151e-06 | 0.999969 |
| rad65     | 2.56143e-06 | 0.999981 | 3.63783e-06 | 0.999973 |
| rad68syn  | 2.36708e-06 | 0.999983 | 3.36180e-06 | 0.999976 |
| rad60syn  | 2.35483e-06 | 0.999985 | 3.34440e-06 | 0.999980 |
| rad22     | 2.08119e-06 | 0.999987 | 2.95576e-06 | 0.999982 |
| rad42     | 1.74388e-06 | 0.999989 | 2.47672e-06 | 0.999985 |
| rad60anti | 1.67966e-06 | 0.999991 | 2.38550e-06 | 0.999987 |
| rad68anti | 1.51567e-06 | 0.999992 | 2.15260e-06 | 0.999989 |
| rad21     | 1.29976e-06 | 0.999994 | 1.84595e-06 | 0.999991 |
| rad40syn  | 1.15478e-06 | 0.999995 | 1.64005e-06 | 0.999993 |
| rad40anti | 8.12929e-07 | 0.999996 | 1.15455e-06 | 0.999994 |
| rad58     | 7.57115e-07 | 0.999996 | 1.07528e-06 | 0.999995 |
| rad36     | 7.00651e-07 | 0.999997 | 9.95086e-07 | 0.999996 |
| rad15     | 5.48232e-07 | 0.999998 | 7.78618e-07 | 0.999997 |
| rad33     | 4.74271e-07 | 0.999998 | 6.73574e-07 | 0.999998 |
| rad43     | 3.25321e-07 | 0.999999 | 4.62031e-07 | 0.999998 |
| rad20     | 2.88538e-07 | 0.999999 | 4.09792e-07 | 0.999999 |
| rad61     | 2.51865e-07 | 0.999999 | 3.57706e-07 | 0.999999 |
| rad26     | 2.24749e-07 | 0.999999 | 3.19195e-07 | 0.999999 |
| rad25     | 1.29711e-07 | 0.999999 | 1.84220e-07 | 0.999999 |
| rad12     | 1.06118e-07 | 1.000000 | 1.50712e-07 | 1.000000 |
| rad10     | 8.40974e-08 | 1.000000 | 1.19438e-07 | 1.000000 |
| rad18     | 8.30431e-08 | 1.000000 | 1.17940e-07 | 1.000000 |
| rad24     | 6.52053e-08 | 1.000000 | 9.26065e-08 | 1.000000 |
| rad41     | 5.61811e-08 | 1.000000 | 7.97903e-08 | 1.000000 |
| rad47     | 2.84784e-08 | 1.000000 | 4.04459e-08 | 1.000000 |
| rad3      | 1.76137e-08 | 1.000000 | 2.50155e-08 | 1.000000 |
| rad8      | 1.75140e-08 | 1.000000 | 2.48740e-08 | 1.000000 |
| rad2      | 1.32698e-08 | 1.000000 | 1.88462e-08 | 1.000000 |
| rad4      | 1.06530e-08 | 1.000000 | 1.51297e-08 | 1.000000 |
| rad14     | 7.07674e-09 | 1.000000 | 1.00506e-08 | 1.000000 |
| rad1      | 3.56192e-09 | 1.000000 | 5.05875e-09 | 1.000000 |
| rad5      | 1.37374e-09 | 1.000000 | 1.95103e-09 | 1.000000 |
| rad27     | 3.14298e-10 | 1.000000 | 4.46375e-10 | 1.000000 |

100000.000 Pa, 2750.00000 K

| Rate constant      | True (fraction)      | Effective (fraction) |
|--------------------|----------------------|----------------------|
| Total              | 4.60596e-11 (1.00 )  | 3.25871e-11 (1.00 )  |
| Formation of rad11 | 8.62280e-12 (0.187 ) | 3.33125e-12 (0.102 ) |
| Formation of rad6  | 1.33313e-11 (0.289 ) | 5.15029e-12 (0.158 ) |
| H-abstraction      | 2.41055e-11 (0.523 ) | 2.41055e-11 (0.740 ) |
| species            | PYtrue Cumul         | PYeffective Cumul    |

|                    |             |          |             |          |
|--------------------|-------------|----------|-------------|----------|
| Benzene+2-propynyl | 0.523355    | 0.523355 | 0.739727    | 0.739727 |
| Phenyl+Allene      | 0.292503    | 0.815858 | 0.00000     | 0.739727 |
| PhCH2CCH+H         | 0.0905540   | 0.906412 | 0.127992    | 0.867719 |
| PhCHCCH2+H         | 0.0436265   | 0.950038 | 0.0616631   | 0.929382 |
| C2H2+PhCH2         | 0.0152567   | 0.965295 | 0.0215643   | 0.950947 |
| PhCCH+CH3          | 0.0125766   | 0.977871 | 0.0177762   | 0.968723 |
| Indene+H           | 0.00598590  | 0.983857 | 0.00846070  | 0.977184 |
| PAH7+H             | 0.00500249  | 0.988860 | 0.00707068  | 0.984254 |
| Ph+MeAc            | 0.00313090  | 0.991991 | 0.00442532  | 0.988680 |
| PhcycC3H3_A+H      | 0.00219232  | 0.994183 | 0.00309871  | 0.991778 |
| rad19syn           | 0.00150967  | 0.995693 | 0.00213383  | 0.993912 |
| rad6               | 0.00104026  | 0.996733 | 0.00147034  | 0.995383 |
| rad54              | 0.000668733 | 0.997402 | 0.000945213 | 0.996328 |
| rad39              | 0.000602051 | 0.998004 | 0.000850960 | 0.997179 |
| rad19anti          | 0.000311298 | 0.998315 | 0.000439999 | 0.997619 |
| PAH9+H             | 0.000259178 | 0.998574 | 0.000366332 | 0.997985 |
| PAH1+H             | 0.000175652 | 0.998750 | 0.000248273 | 0.998233 |
| rad38              | 0.000163702 | 0.998914 | 0.000231382 | 0.998465 |
| PhCCCH3+H          | 0.000132906 | 0.999047 | 0.000187855 | 0.998653 |
| rad50              | 0.000125376 | 0.999172 | 0.000177211 | 0.998830 |
| rad51              | 7.83014e-05 | 0.999250 | 0.000110674 | 0.998940 |
| rad55              | 6.88009e-05 | 0.999319 | 9.72456e-05 | 0.999038 |
| rad56              | 6.36183e-05 | 0.999383 | 8.99204e-05 | 0.999128 |
| rad46              | 6.16002e-05 | 0.999444 | 8.70678e-05 | 0.999215 |
| PAH10+CH3          | 5.75640e-05 | 0.999502 | 8.13632e-05 | 0.999296 |
| rad70              | 5.70816e-05 | 0.999559 | 8.06813e-05 | 0.999377 |
| PAH3+H             | 5.26531e-05 | 0.999612 | 7.44217e-05 | 0.999451 |
| rad35              | 5.10196e-05 | 0.999663 | 7.21125e-05 | 0.999523 |
| rad53              | 4.56638e-05 | 0.999708 | 6.45428e-05 | 0.999588 |
| rad71              | 4.26329e-05 | 0.999751 | 6.02589e-05 | 0.999648 |
| rad67              | 4.19967e-05 | 0.999793 | 5.93594e-05 | 0.999707 |
| rad7               | 2.86879e-05 | 0.999822 | 4.05485e-05 | 0.999748 |
| rad11              | 2.12673e-05 | 0.999843 | 3.00600e-05 | 0.999778 |
| rad34              | 1.95095e-05 | 0.999862 | 2.75754e-05 | 0.999806 |
| PAH8+H             | 1.61656e-05 | 0.999878 | 2.28491e-05 | 0.999828 |
| rad52              | 1.55505e-05 | 0.999894 | 2.19796e-05 | 0.999850 |
| rad73              | 1.43468e-05 | 0.999908 | 2.02782e-05 | 0.999871 |
| rad30              | 1.28941e-05 | 0.999921 | 1.82249e-05 | 0.999889 |
| rad37              | 1.21562e-05 | 0.999933 | 1.71820e-05 | 0.999906 |
| rad62              | 8.74744e-06 | 0.999942 | 1.23639e-05 | 0.999918 |
| rad72              | 7.54263e-06 | 0.999950 | 1.06610e-05 | 0.999929 |
| rad23              | 7.52671e-06 | 0.999957 | 1.06385e-05 | 0.999940 |
| rad64              | 4.57177e-06 | 0.999962 | 6.46190e-06 | 0.999946 |
| rad9               | 4.42457e-06 | 0.999966 | 6.25384e-06 | 0.999953 |
| rad59              | 4.17211e-06 | 0.999970 | 5.89701e-06 | 0.999958 |
| rad28              | 3.64029e-06 | 0.999974 | 5.14531e-06 | 0.999964 |
| rad13              | 3.59734e-06 | 0.999978 | 5.08459e-06 | 0.999969 |
| rad68syn           | 3.11394e-06 | 0.999981 | 4.40135e-06 | 0.999973 |
| rad60syn           | 2.41354e-06 | 0.999983 | 3.41137e-06 | 0.999976 |
| rad45              | 2.12046e-06 | 0.999985 | 2.99712e-06 | 0.999979 |
| rad68anti          | 1.99218e-06 | 0.999987 | 2.81582e-06 | 0.999982 |
| rad65              | 1.88319e-06 | 0.999989 | 2.66176e-06 | 0.999985 |
| rad60anti          | 1.73631e-06 | 0.999991 | 2.45416e-06 | 0.999987 |
| rad40syn           | 1.52843e-06 | 0.999992 | 2.16033e-06 | 0.999990 |
| rad42              | 1.48532e-06 | 0.999994 | 2.09940e-06 | 0.999992 |
| rad40anti          | 1.07137e-06 | 0.999995 | 1.51432e-06 | 0.999993 |
| rad22              | 9.11999e-07 | 0.999996 | 1.28905e-06 | 0.999994 |
| rad58              | 8.92804e-07 | 0.999997 | 1.26192e-06 | 0.999996 |
| rad21              | 7.21179e-07 | 0.999998 | 1.01934e-06 | 0.999997 |
| rad36              | 3.80786e-07 | 0.999998 | 5.38216e-07 | 0.999997 |
| rad43              | 3.26792e-07 | 0.999998 | 4.61899e-07 | 0.999998 |
| rad15              | 3.02257e-07 | 0.999999 | 4.27220e-07 | 0.999998 |
| rad33              | 2.97350e-07 | 0.999999 | 4.20286e-07 | 0.999999 |
| rad61              | 2.62146e-07 | 0.999999 | 3.70527e-07 | 0.999999 |
| rad20              | 1.57279e-07 | 0.999999 | 2.22303e-07 | 0.999999 |
| rad26              | 1.14728e-07 | 0.999999 | 1.62161e-07 | 0.999999 |
| rad25              | 7.66117e-08 | 0.999999 | 1.08286e-07 | 0.999999 |
| rad12              | 7.06121e-08 | 0.999999 | 9.98053e-08 | 1.000000 |
| rad41              | 5.42894e-08 | 1.000000 | 7.67342e-08 | 1.000000 |
| rad10              | 4.53339e-08 | 1.000000 | 6.40766e-08 | 1.000000 |
| rad24              | 4.17415e-08 | 1.000000 | 5.89990e-08 | 1.000000 |
| rad18              | 4.17210e-08 | 1.000000 | 5.89698e-08 | 1.000000 |
| rad47              | 1.91914e-08 | 1.000000 | 2.71259e-08 | 1.000000 |
| rad8               | 1.55676e-08 | 1.000000 | 2.20037e-08 | 1.000000 |
| rad3               | 9.63505e-09 | 1.000000 | 1.36185e-08 | 1.000000 |
| rad2               | 6.46160e-09 | 1.000000 | 9.13306e-09 | 1.000000 |
| rad4               | 5.76507e-09 | 1.000000 | 8.14855e-09 | 1.000000 |
| rad14              | 4.73006e-09 | 1.000000 | 6.68563e-09 | 1.000000 |
| rad1               | 1.66993e-09 | 1.000000 | 2.36033e-09 | 1.000000 |



|       |             |          |             |          |
|-------|-------------|----------|-------------|----------|
| rad5  | 1.04113e-09 | 1.000000 | 1.47157e-09 | 1.000000 |
| rad27 | 2.08769e-10 | 1.000000 | 2.95082e-10 | 1.000000 |

100000.000 Pa, 3000.00000 K

```

=====
Rate constant      | True (fraction)      | Effective (fraction)
-----
Total              | 6.24269e-11 (1.00   ) | 4.43808e-11 (1.00   )
Formation of rad11 | 1.12221e-11 (0.180   ) | 4.20869e-12 (0.0948  )
Formation of rad6  | 1.76534e-11 (0.283   ) | 6.62069e-12 (0.149   )
H-abstraction     | 3.35514e-11 (0.537   ) | 3.35514e-11 (0.756   )

```

| species            | PYtrue      | Cumul    | PYeffective | Cumul    |
|--------------------|-------------|----------|-------------|----------|
| Benzene+2-propynyl | 0.537451    | 0.537451 | 0.755990    | 0.755990 |
| Phenyl+Allene      | 0.289076    | 0.826527 | 0.000000    | 0.755990 |
| PhCH2CCH+H         | 0.0879805   | 0.914508 | 0.123755    | 0.879744 |
| PhCHCCH2+H         | 0.0406471   | 0.955155 | 0.0571748   | 0.936919 |
| C2H2+PhCH2         | 0.0137797   | 0.968934 | 0.0193828   | 0.956302 |
| PhCCH+CH3          | 0.0112496   | 0.980184 | 0.0158239   | 0.972126 |
| PAH7+H             | 0.00462543  | 0.984809 | 0.00650622  | 0.978632 |
| Indene+H           | 0.00443343  | 0.989243 | 0.00623615  | 0.984868 |
| Ph+MeAc            | 0.00296865  | 0.992212 | 0.00417575  | 0.989044 |
| PhcycC3H3_A+H      | 0.00255441  | 0.994766 | 0.00359308  | 0.992637 |
| rad19syn           | 0.00164542  | 0.996411 | 0.00231448  | 0.994952 |
| rad54              | 0.000733417 | 0.997145 | 0.00103164  | 0.995983 |
| rad39              | 0.000511514 | 0.997656 | 0.000719501 | 0.996703 |
| rad6               | 0.000477674 | 0.998134 | 0.000671907 | 0.997375 |
| rad19anti          | 0.000268226 | 0.998402 | 0.000377291 | 0.997752 |
| PAH9+H             | 0.000221688 | 0.998624 | 0.000311831 | 0.998064 |
| PAH1+H             | 0.000192734 | 0.998817 | 0.000271103 | 0.998335 |
| rad38              | 0.000143289 | 0.998960 | 0.000201553 | 0.998536 |
| PhCCCH3+H          | 0.000116733 | 0.999077 | 0.000164199 | 0.998701 |
| rad50              | 0.000111746 | 0.999188 | 0.000157184 | 0.998858 |
| rad56              | 8.17786e-05 | 0.999270 | 0.000115031 | 0.998973 |
| rad55              | 7.76652e-05 | 0.999348 | 0.000109245 | 0.999082 |
| rad51              | 6.73790e-05 | 0.999415 | 9.47765e-05 | 0.999177 |
| rad70              | 6.24769e-05 | 0.999478 | 8.78811e-05 | 0.999265 |
| PAH3+H             | 5.87354e-05 | 0.999536 | 8.26180e-05 | 0.999347 |
| PAH10+CH3          | 5.83672e-05 | 0.999595 | 8.21005e-05 | 0.999429 |
| rad53              | 5.68315e-05 | 0.999652 | 7.99402e-05 | 0.999509 |
| rad46              | 5.46487e-05 | 0.999706 | 7.68698e-05 | 0.999586 |
| rad35              | 4.68765e-05 | 0.999753 | 6.59375e-05 | 0.999652 |
| rad67              | 4.34125e-05 | 0.999797 | 6.10648e-05 | 0.999713 |
| rad71              | 2.93638e-05 | 0.999826 | 4.13036e-05 | 0.999755 |
| PAH8+H             | 2.29932e-05 | 0.999849 | 3.23426e-05 | 0.999787 |
| rad34              | 2.24471e-05 | 0.999871 | 3.15745e-05 | 0.999819 |
| rad7               | 1.55735e-05 | 0.999887 | 2.19060e-05 | 0.999840 |
| rad52              | 1.37139e-05 | 0.999901 | 1.92903e-05 | 0.999860 |
| rad30              | 1.19124e-05 | 0.999913 | 1.67562e-05 | 0.999876 |
| rad11              | 1.07401e-05 | 0.999923 | 1.51072e-05 | 0.999892 |
| rad37              | 1.06516e-05 | 0.999934 | 1.49827e-05 | 0.999907 |
| rad73              | 1.05318e-05 | 0.999945 | 1.48143e-05 | 0.999921 |
| rad62              | 9.35190e-06 | 0.999954 | 1.31546e-05 | 0.999935 |
| rad64              | 5.18203e-06 | 0.999959 | 7.28915e-06 | 0.999942 |
| rad72              | 4.71295e-06 | 0.999964 | 6.62930e-06 | 0.999948 |
| rad59              | 4.52192e-06 | 0.999968 | 6.36062e-06 | 0.999955 |
| rad68syn           | 4.08948e-06 | 0.999972 | 5.75232e-06 | 0.999961 |
| rad23              | 3.60682e-06 | 0.999976 | 5.07341e-06 | 0.999966 |
| rad68anti          | 2.61320e-06 | 0.999979 | 3.67577e-06 | 0.999969 |
| rad60syn           | 2.47076e-06 | 0.999981 | 3.47542e-06 | 0.999973 |
| rad9               | 2.27210e-06 | 0.999983 | 3.19597e-06 | 0.999976 |
| rad40syn           | 2.10042e-06 | 0.999985 | 2.95450e-06 | 0.999979 |
| rad13              | 2.05922e-06 | 0.999987 | 2.89652e-06 | 0.999982 |
| rad60anti          | 1.79267e-06 | 0.999989 | 2.52160e-06 | 0.999984 |
| rad28              | 1.68339e-06 | 0.999991 | 2.36789e-06 | 0.999987 |
| rad42              | 1.60312e-06 | 0.999993 | 2.25497e-06 | 0.999989 |
| rad65              | 1.59518e-06 | 0.999994 | 2.24381e-06 | 0.999991 |
| rad40anti          | 1.49032e-06 | 0.999996 | 2.09631e-06 | 0.999993 |
| rad45              | 1.14358e-06 | 0.999997 | 1.60858e-06 | 0.999995 |
| rad58              | 1.08081e-06 | 0.999998 | 1.52028e-06 | 0.999996 |
| rad22              | 4.30477e-07 | 0.999998 | 6.05517e-07 | 0.999997 |
| rad21              | 4.19144e-07 | 0.999999 | 5.89575e-07 | 0.999998 |
| rad43              | 3.52424e-07 | 0.999999 | 4.95727e-07 | 0.999998 |
| rad61              | 2.94096e-07 | 0.999999 | 4.13681e-07 | 0.999999 |
| rad36              | 2.06757e-07 | 1.000000 | 2.90829e-07 | 0.999999 |
| rad33              | 1.88252e-07 | 1.000000 | 2.64800e-07 | 0.999999 |
| rad15              | 1.64347e-07 | 1.000000 | 2.31173e-07 | 0.999999 |
| rad20              | 9.28488e-08 | 1.000000 | 1.30603e-07 | 0.999999 |
| rad41              | 6.11360e-08 | 1.000000 | 8.59951e-08 | 1.000000 |

|       |             |         |             |          |
|-------|-------------|---------|-------------|----------|
| rad26 | 5.84009e-08 | 1.00000 | 8.21478e-08 | 1.000000 |
| rad25 | 4.70625e-08 | 1.00000 | 6.61990e-08 | 1.000000 |
| rad12 | 4.62558e-08 | 1.00000 | 6.50646e-08 | 1.000000 |
| rad24 | 2.70000e-08 | 1.00000 | 3.79787e-08 | 1.000000 |
| rad10 | 2.44957e-08 | 1.00000 | 3.44560e-08 | 1.000000 |
| rad18 | 2.24541e-08 | 1.00000 | 3.15845e-08 | 1.000000 |
| rad47 | 1.53323e-08 | 1.00000 | 2.15667e-08 | 1.000000 |
| rad8  | 1.38018e-08 | 1.00000 | 1.94138e-08 | 1.000000 |
| rad3  | 5.43744e-09 | 1.00000 | 7.64838e-09 | 1.000000 |
| rad2  | 3.29947e-09 | 1.00000 | 4.64108e-09 | 1.000000 |
| rad14 | 3.27730e-09 | 1.00000 | 4.60992e-09 | 1.000000 |
| rad4  | 3.24099e-09 | 1.00000 | 4.55885e-09 | 1.000000 |
| rad1  | 8.19322e-10 | 1.00000 | 1.15247e-09 | 1.000000 |
| rad5  | 7.86185e-10 | 1.00000 | 1.10586e-09 | 1.000000 |
| rad27 | 1.43250e-10 | 1.00000 | 2.01498e-10 | 1.000000 |

100000.000 Pa, 3250.00000 K

| Rate constant      | True (fraction)      | Effective (fraction)  |
|--------------------|----------------------|-----------------------|
| Total              | 8.22129e-11 (1.00 )  | 5.87549e-11 (1.00 )   |
| Formation of rad11 | 1.42538e-11 (0.173 ) | 5.21897e-12 (0.0888 ) |
| Formation of rad6  | 2.27549e-11 (0.277 ) | 8.33160e-12 (0.142 )  |
| H-abstraction      | 4.52043e-11 (0.550 ) | 4.52043e-11 (0.769 )  |

| species            | PYtrue      | Cumul    | PYeffective | Cumul    |
|--------------------|-------------|----------|-------------|----------|
| Benzene+2-propynyl | 0.549844    | 0.549844 | 0.769371    | 0.769371 |
| Phenyl+Allene      | 0.285333    | 0.835177 | 0.000000    | 0.769371 |
| PhCH2CCH+H         | 0.0852452   | 0.920422 | 0.119280    | 0.888651 |
| PhCHCCH2+H         | 0.0381255   | 0.958548 | 0.0533472   | 0.941998 |
| C2H2+PhCH2         | 0.0128408   | 0.971389 | 0.0179675   | 0.959966 |
| PhCCH+CH3          | 0.0101513   | 0.981540 | 0.0142043   | 0.974170 |
| PAH7+H             | 0.00427023  | 0.985810 | 0.00597513  | 0.980145 |
| Indene+H           | 0.00332893  | 0.989139 | 0.00465801  | 0.984803 |
| PhcycC3H3_A+H      | 0.00296463  | 0.992104 | 0.00414828  | 0.988951 |
| Ph+MeAc            | 0.00284914  | 0.994953 | 0.00398665  | 0.992938 |
| rad19syn           | 0.00177287  | 0.996726 | 0.00248069  | 0.995419 |
| rad54              | 0.000785189 | 0.997511 | 0.00109868  | 0.996517 |
| rad39              | 0.000441259 | 0.997952 | 0.000617433 | 0.997135 |
| rad6               | 0.000231179 | 0.998183 | 0.000323478 | 0.997458 |
| rad19anti          | 0.000229716 | 0.998413 | 0.000321430 | 0.997780 |
| PAH1+H             | 0.000213693 | 0.998627 | 0.000299010 | 0.998079 |
| PAH9+H             | 0.000191314 | 0.998818 | 0.000267696 | 0.998346 |
| rad38              | 0.000126431 | 0.998944 | 0.000176909 | 0.998523 |
| rad50              | 0.000106098 | 0.999051 | 0.000148458 | 0.998672 |
| PhCCCH3+H          | 0.000104021 | 0.999155 | 0.000145552 | 0.998817 |
| rad56              | 0.000103978 | 0.999259 | 0.000145491 | 0.998963 |
| rad55              | 8.55044e-05 | 0.999344 | 0.000119642 | 0.999082 |
| rad53              | 6.94307e-05 | 0.999414 | 9.71511e-05 | 0.999179 |
| rad70              | 6.68954e-05 | 0.999480 | 9.36035e-05 | 0.999273 |
| PAH3+H             | 6.46928e-05 | 0.999545 | 9.05216e-05 | 0.999364 |
| rad51              | 6.44403e-05 | 0.999610 | 9.01683e-05 | 0.999454 |
| PAH10+CH3          | 5.84280e-05 | 0.999668 | 8.17557e-05 | 0.999536 |
| rad46              | 4.93349e-05 | 0.999717 | 6.90319e-05 | 0.999605 |
| rad67              | 4.42059e-05 | 0.999762 | 6.18554e-05 | 0.999666 |
| rad35              | 4.33625e-05 | 0.999805 | 6.06752e-05 | 0.999727 |
| PAH8+H             | 3.20928e-05 | 0.999837 | 4.49060e-05 | 0.999772 |
| rad34              | 2.51536e-05 | 0.999862 | 3.51963e-05 | 0.999807 |
| rad71              | 2.50971e-05 | 0.999887 | 3.51172e-05 | 0.999842 |
| rad52              | 1.30782e-05 | 0.999900 | 1.82998e-05 | 0.999861 |
| rad62              | 1.10692e-05 | 0.999911 | 1.54886e-05 | 0.999876 |
| rad30              | 1.10508e-05 | 0.999922 | 1.54629e-05 | 0.999892 |
| rad73              | 9.47380e-06 | 0.999932 | 1.32562e-05 | 0.999905 |
| rad37              | 9.20736e-06 | 0.999941 | 1.28834e-05 | 0.999918 |
| rad7               | 8.78916e-06 | 0.999950 | 1.22983e-05 | 0.999930 |
| rad64              | 5.85991e-06 | 0.999956 | 8.19950e-06 | 0.999938 |
| rad11              | 5.80800e-06 | 0.999962 | 8.12686e-06 | 0.999946 |
| rad68syn           | 5.19435e-06 | 0.999967 | 7.26820e-06 | 0.999954 |
| rad59              | 4.84273e-06 | 0.999972 | 6.77620e-06 | 0.999960 |
| rad72              | 3.61435e-06 | 0.999975 | 5.05739e-06 | 0.999965 |
| rad68anti          | 3.31555e-06 | 0.999979 | 4.63931e-06 | 0.999970 |
| rad40syn           | 2.81141e-06 | 0.999981 | 3.93388e-06 | 0.999974 |
| rad60syn           | 2.51230e-06 | 0.999984 | 3.51534e-06 | 0.999978 |
| rad40anti          | 2.02663e-06 | 0.999986 | 2.83577e-06 | 0.999980 |
| rad42              | 2.01437e-06 | 0.999988 | 2.81861e-06 | 0.999983 |
| rad60anti          | 1.83708e-06 | 0.999990 | 2.57054e-06 | 0.999986 |
| rad23              | 1.78253e-06 | 0.999992 | 2.49421e-06 | 0.999988 |
| rad65              | 1.50053e-06 | 0.999993 | 2.09962e-06 | 0.999990 |
| rad58              | 1.29094e-06 | 0.999994 | 1.80635e-06 | 0.999992 |

|       |             |          |             |          |
|-------|-------------|----------|-------------|----------|
| rad13 | 1.22566e-06 | 0.999996 | 1.71501e-06 | 0.999994 |
| rad9  | 1.18819e-06 | 0.999997 | 1.66257e-06 | 0.999996 |
| rad28 | 8.13968e-07 | 0.999998 | 1.13895e-06 | 0.999997 |
| rad45 | 6.26446e-07 | 0.999998 | 8.76558e-07 | 0.999998 |
| rad43 | 3.92483e-07 | 0.999999 | 5.49183e-07 | 0.999998 |
| rad61 | 3.33145e-07 | 0.999999 | 4.66154e-07 | 0.999999 |
| rad21 | 2.56372e-07 | 0.999999 | 3.58729e-07 | 0.999999 |
| rad22 | 2.18330e-07 | 0.999999 | 3.05498e-07 | 0.999999 |
| rad33 | 1.22051e-07 | 0.999999 | 1.70780e-07 | 0.999999 |
| rad36 | 1.13908e-07 | 1.000000 | 1.59387e-07 | 1.000000 |
| rad15 | 9.06349e-08 | 1.000000 | 1.26821e-07 | 1.000000 |
| rad41 | 7.36514e-08 | 1.000000 | 1.03057e-07 | 1.000000 |
| rad20 | 5.92536e-08 | 1.000000 | 8.29106e-08 | 1.000000 |
| rad12 | 3.05903e-08 | 1.000000 | 4.28036e-08 | 1.000000 |
| rad26 | 3.02873e-08 | 1.000000 | 4.23795e-08 | 1.000000 |
| rad25 | 3.02217e-08 | 1.000000 | 4.22879e-08 | 1.000000 |
| rad24 | 1.78000e-08 | 1.000000 | 2.49068e-08 | 1.000000 |
| rad47 | 1.39203e-08 | 1.000000 | 1.94780e-08 | 1.000000 |
| rad10 | 1.35337e-08 | 1.000000 | 1.89371e-08 | 1.000000 |
| rad18 | 1.29133e-08 | 1.000000 | 1.80690e-08 | 1.000000 |
| rad8  | 1.22270e-08 | 1.000000 | 1.71087e-08 | 1.000000 |
| rad3  | 3.21042e-09 | 1.000000 | 4.49219e-09 | 1.000000 |
| rad14 | 2.41570e-09 | 1.000000 | 3.38019e-09 | 1.000000 |
| rad4  | 1.92373e-09 | 1.000000 | 2.69179e-09 | 1.000000 |
| rad2  | 1.78594e-09 | 1.000000 | 2.49898e-09 | 1.000000 |
| rad5  | 6.01170e-10 | 1.000000 | 8.41191e-10 | 1.000000 |
| rad1  | 4.28137e-10 | 1.000000 | 5.99073e-10 | 1.000000 |
| rad27 | 1.02326e-10 | 1.000000 | 1.43180e-10 | 1.000000 |

100000.000 Pa, 3500.00000 K

| Rate constant      | True (fraction) |          | Effective (fraction) |           |
|--------------------|-----------------|----------|----------------------|-----------|
| Total              | 1.05713e-10     | (1.00 )  | 7.59702e-11          | (1.00 )   |
| Formation of rad11 | 1.77412e-11     | (0.168 ) | 6.37463e-12          | (0.0839 ) |
| Formation of rad6  | 2.86822e-11     | (0.271 ) | 1.03059e-11          | (0.136 )  |
| H-abstraction      | 5.92897e-11     | (0.561 ) | 5.92897e-11          | (0.780 )  |

  

| species            | PYtrue      | Cumul    | PYeffective | Cumul    |
|--------------------|-------------|----------|-------------|----------|
| Benzene+2-propynyl | 0.560855    | 0.560855 | 0.780434    | 0.780434 |
| Phenyl+Allene      | 0.281355    | 0.842210 | 0.00000     | 0.780434 |
| PhCH2CCH+H         | 0.0826151   | 0.924825 | 0.114960    | 0.895393 |
| PhCHCCH2+H         | 0.0360375   | 0.960862 | 0.0501465   | 0.945540 |
| C2H2+PhCH2         | 0.0122510   | 0.973113 | 0.0170474   | 0.962587 |
| PhCCH+CH3          | 0.00925490  | 0.982368 | 0.0128783   | 0.975466 |
| PAH7+H             | 0.00394424  | 0.986313 | 0.00548843  | 0.980954 |
| PhcycC3H3_A+H      | 0.00336811  | 0.989681 | 0.00468675  | 0.985641 |
| Ph+MeAc            | 0.00276284  | 0.992444 | 0.00384452  | 0.989485 |
| Indene+H           | 0.00254714  | 0.994991 | 0.00354437  | 0.993030 |
| rad19syn           | 0.00187754  | 0.996868 | 0.00261262  | 0.995642 |
| rad54              | 0.000820890 | 0.997689 | 0.00114228  | 0.996784 |
| rad39              | 0.000386173 | 0.998075 | 0.000537364 | 0.997322 |
| PAH1+H             | 0.000236140 | 0.998311 | 0.000328590 | 0.997650 |
| rad19anti          | 0.000197487 | 0.998509 | 0.000274805 | 0.997925 |
| PAH9+H             | 0.000165008 | 0.998674 | 0.000229609 | 0.998155 |
| rad56              | 0.000127533 | 0.998801 | 0.000177463 | 0.998332 |
| rad6               | 0.000118872 | 0.998920 | 0.000165411 | 0.998498 |
| rad38              | 0.000111274 | 0.999032 | 0.000154838 | 0.998653 |
| rad50              | 0.000102877 | 0.999134 | 0.000143155 | 0.998796 |
| PhCCCH3+H          | 9.40724e-05 | 0.999229 | 0.000130903 | 0.998927 |
| rad55              | 9.16751e-05 | 0.999320 | 0.000127566 | 0.999054 |
| rad53              | 8.19950e-05 | 0.999402 | 0.000114097 | 0.999168 |
| rad70              | 7.03142e-05 | 0.999473 | 9.78427e-05 | 0.999266 |
| PAH3+H             | 7.00608e-05 | 0.999543 | 9.74905e-05 | 0.999364 |
| rad51              | 6.44437e-05 | 0.999607 | 8.96742e-05 | 0.999453 |
| PAH10+CH3          | 5.77410e-05 | 0.999665 | 8.03468e-05 | 0.999534 |
| rad46              | 4.45812e-05 | 0.999709 | 6.20349e-05 | 0.999596 |
| rad67              | 4.44108e-05 | 0.999754 | 6.17976e-05 | 0.999657 |
| PAH8+H             | 4.29429e-05 | 0.999797 | 5.97554e-05 | 0.999717 |
| rad35              | 4.01777e-05 | 0.999837 | 5.59075e-05 | 0.999773 |
| rad34              | 2.75279e-05 | 0.999864 | 3.83053e-05 | 0.999811 |
| rad71              | 2.56658e-05 | 0.999890 | 3.57142e-05 | 0.999847 |
| rad62              | 1.39120e-05 | 0.999904 | 1.93587e-05 | 0.999867 |
| rad52              | 1.28263e-05 | 0.999917 | 1.78479e-05 | 0.999884 |
| rad30              | 1.02773e-05 | 0.999927 | 1.43009e-05 | 0.999899 |
| rad73              | 9.81538e-06 | 0.999937 | 1.36582e-05 | 0.999912 |
| rad37              | 7.92455e-06 | 0.999945 | 1.10271e-05 | 0.999923 |
| rad64              | 6.51253e-06 | 0.999951 | 9.06225e-06 | 0.999932 |
| rad68syn           | 6.35619e-06 | 0.999958 | 8.84468e-06 | 0.999941 |

|           |             |          |             |          |
|-----------|-------------|----------|-------------|----------|
| rad7      | 5.18820e-06 | 0.999963 | 7.21941e-06 | 0.999948 |
| rad59     | 5.11104e-06 | 0.999968 | 7.11202e-06 | 0.999956 |
| rad68anti | 4.05330e-06 | 0.999972 | 5.64020e-06 | 0.999961 |
| rad40syn  | 3.61595e-06 | 0.999976 | 5.03163e-06 | 0.999966 |
| rad72     | 3.50408e-06 | 0.999979 | 4.87595e-06 | 0.999971 |
| rad11     | 3.35749e-06 | 0.999983 | 4.67198e-06 | 0.999976 |
| rad42     | 2.71912e-06 | 0.999985 | 3.78368e-06 | 0.999980 |
| rad40anti | 2.64704e-06 | 0.999988 | 3.68338e-06 | 0.999983 |
| rad60syn  | 2.53303e-06 | 0.999990 | 3.52472e-06 | 0.999987 |
| rad60anti | 1.86518e-06 | 0.999992 | 2.59541e-06 | 0.999989 |
| rad58     | 1.50462e-06 | 0.999994 | 2.09369e-06 | 0.999991 |
| rad65     | 1.47698e-06 | 0.999995 | 2.05522e-06 | 0.999994 |
| rad23     | 9.14358e-07 | 0.999996 | 1.27233e-06 | 0.999995 |
| rad13     | 7.63235e-07 | 0.999997 | 1.06205e-06 | 0.999996 |
| rad9      | 6.43805e-07 | 0.999998 | 8.95861e-07 | 0.999997 |
| rad43     | 4.45930e-07 | 0.999998 | 6.20519e-07 | 0.999997 |
| rad28     | 4.15315e-07 | 0.999998 | 5.77914e-07 | 0.999998 |
| rad61     | 3.71509e-07 | 0.999999 | 5.16958e-07 | 0.999998 |
| rad45     | 3.51555e-07 | 0.999999 | 4.89192e-07 | 0.999999 |
| rad21     | 1.64773e-07 | 0.999999 | 2.29284e-07 | 0.999999 |
| rad22     | 1.18771e-07 | 0.999999 | 1.65270e-07 | 0.999999 |
| rad41     | 9.11468e-08 | 1.000000 | 1.26832e-07 | 0.999999 |
| rad33     | 8.14329e-08 | 1.000000 | 1.13314e-07 | 1.000000 |
| rad36     | 6.42114e-08 | 1.000000 | 8.93508e-08 | 1.000000 |
| rad15     | 5.15192e-08 | 1.000000 | 7.16893e-08 | 1.000000 |
| rad20     | 4.04937e-08 | 1.000000 | 5.63473e-08 | 1.000000 |
| rad12     | 2.06869e-08 | 1.000000 | 2.87860e-08 | 1.000000 |
| rad25     | 2.02576e-08 | 1.000000 | 2.81886e-08 | 1.000000 |
| rad26     | 1.62435e-08 | 1.000000 | 2.26030e-08 | 1.000000 |
| rad47     | 1.34202e-08 | 1.000000 | 1.86743e-08 | 1.000000 |
| rad24     | 1.20053e-08 | 1.000000 | 1.67054e-08 | 1.000000 |
| rad8      | 1.08166e-08 | 1.000000 | 1.50514e-08 | 1.000000 |
| rad18     | 7.88644e-09 | 1.000000 | 1.09740e-08 | 1.000000 |
| rad10     | 7.73010e-09 | 1.000000 | 1.07565e-08 | 1.000000 |
| rad3      | 1.99113e-09 | 1.000000 | 2.77069e-09 | 1.000000 |
| rad14     | 1.92369e-09 | 1.000000 | 2.67682e-09 | 1.000000 |
| rad4      | 1.21087e-09 | 1.000000 | 1.68493e-09 | 1.000000 |
| rad2      | 1.02669e-09 | 1.000000 | 1.42865e-09 | 1.000000 |
| rad5      | 4.69640e-10 | 1.000000 | 6.53511e-10 | 1.000000 |
| rad1      | 2.40047e-10 | 1.000000 | 3.34028e-10 | 1.000000 |
| rad27     | 7.65255e-11 | 1.000000 | 1.06485e-10 | 1.000000 |

100000.000 Pa, 3750.00000 K

=====

| Rate constant      | True (fraction)      | Effective (fraction)  |
|--------------------|----------------------|-----------------------|
| Total              | 1.33217e-10 (1.00 )  | 9.62771e-11 (1.00 )   |
| Formation of rad11 | 2.17064e-11 (0.163 ) | 7.68505e-12 (0.0798 ) |
| Formation of rad6  | 3.54800e-11 (0.266 ) | 1.25615e-11 (0.130 )  |
| H-abstraction      | 7.60305e-11 (0.571 ) | 7.60305e-11 (0.790 )  |

| species            | PYtrue      | Cumul    | PYeffective | Cumul    |
|--------------------|-------------|----------|-------------|----------|
| Benzene+2-propynyl | 0.570727    | 0.570727 | 0.789705    | 0.789705 |
| Phenyl+Allene      | 0.277291    | 0.848018 | 0.00000     | 0.789705 |
| PhCH2CCH+H         | 0.0801744   | 0.928193 | 0.110936    | 0.900641 |
| PhCHCCH2+H         | 0.0343111   | 0.962504 | 0.0474757   | 0.948117 |
| C2H2+PhCH2         | 0.0118817   | 0.974385 | 0.0164405   | 0.964557 |
| PhCCH+CH3          | 0.00852222  | 0.982908 | 0.0117920   | 0.976349 |
| PhcycC3H3_A+H      | 0.00373746  | 0.986645 | 0.00517146  | 0.981521 |
| PAH7+H             | 0.00364775  | 0.990293 | 0.00504730  | 0.986568 |
| Ph+MeAc            | 0.00270062  | 0.992993 | 0.00373679  | 0.990305 |
| Indene+H           | 0.00198954  | 0.994983 | 0.00275288  | 0.993058 |
| rad19syn           | 0.00195547  | 0.996938 | 0.00270576  | 0.995764 |
| rad54              | 0.000840954 | 0.997779 | 0.00116361  | 0.996927 |
| rad39              | 0.000341983 | 0.998121 | 0.000473195 | 0.997400 |
| PAH1+H             | 0.000259645 | 0.998381 | 0.000359265 | 0.997760 |
| rad19anti          | 0.000171180 | 0.998552 | 0.000236859 | 0.997997 |
| rad56              | 0.000150710 | 0.998703 | 0.000208534 | 0.998205 |
| PAH9+H             | 0.000141729 | 0.998845 | 0.000196107 | 0.998401 |
| rad50              | 9.96419e-05 | 0.998944 | 0.000137873 | 0.998539 |
| rad38              | 9.72930e-05 | 0.999042 | 0.000134622 | 0.998674 |
| rad55              | 9.60386e-05 | 0.999138 | 0.000132887 | 0.998807 |
| rad53              | 9.36733e-05 | 0.999231 | 0.000129614 | 0.998936 |
| PhCCCH3+H          | 8.62864e-05 | 0.999318 | 0.000119393 | 0.999056 |
| PAH3+H             | 7.46523e-05 | 0.999392 | 0.000103295 | 0.999159 |
| rad70              | 7.27853e-05 | 0.999465 | 0.000100712 | 0.999260 |
| rad6               | 6.50353e-05 | 0.999530 | 8.99878e-05 | 0.999350 |
| rad51              | 6.48794e-05 | 0.999595 | 8.97725e-05 | 0.999439 |
| PAH10+CH3          | 5.64867e-05 | 0.999651 | 7.81598e-05 | 0.999518 |

|           |             |          |             |          |
|-----------|-------------|----------|-------------|----------|
| PAH8+H    | 5.50881e-05 | 0.999707 | 7.62240e-05 | 0.999594 |
| rad67     | 4.41374e-05 | 0.999751 | 6.10723e-05 | 0.999655 |
| rad46     | 4.00456e-05 | 0.999791 | 5.54103e-05 | 0.999710 |
| rad35     | 3.72434e-05 | 0.999828 | 5.15329e-05 | 0.999762 |
| rad34     | 2.95284e-05 | 0.999857 | 4.08577e-05 | 0.999803 |
| rad71     | 2.86470e-05 | 0.999886 | 3.96382e-05 | 0.999842 |
| rad62     | 1.79803e-05 | 0.999904 | 2.48789e-05 | 0.999867 |
| rad52     | 1.25804e-05 | 0.999917 | 1.74073e-05 | 0.999885 |
| rad73     | 1.07751e-05 | 0.999927 | 1.49093e-05 | 0.999899 |
| rad30     | 9.57291e-06 | 0.999937 | 1.32459e-05 | 0.999913 |
| rad68syn  | 7.52120e-06 | 0.999945 | 1.04070e-05 | 0.999923 |
| rad64     | 7.10266e-06 | 0.999952 | 9.82783e-06 | 0.999933 |
| rad37     | 6.82771e-06 | 0.999958 | 9.44736e-06 | 0.999942 |
| rad59     | 5.32049e-06 | 0.999964 | 7.36187e-06 | 0.999950 |
| rad68anti | 4.79240e-06 | 0.999969 | 6.63112e-06 | 0.999956 |
| rad40syn  | 4.47774e-06 | 0.999973 | 6.19574e-06 | 0.999963 |
| rad72     | 3.95708e-06 | 0.999977 | 5.47534e-06 | 0.999968 |
| rad42     | 3.75218e-06 | 0.999981 | 5.19182e-06 | 0.999973 |
| rad40anti | 3.32437e-06 | 0.999984 | 4.59988e-06 | 0.999978 |
| rad7      | 3.20160e-06 | 0.999987 | 4.42998e-06 | 0.999982 |
| rad60syn  | 2.53331e-06 | 0.999990 | 3.50530e-06 | 0.999986 |
| rad11     | 2.06269e-06 | 0.999992 | 2.85410e-06 | 0.999989 |
| rad60anti | 1.87695e-06 | 0.999994 | 2.59710e-06 | 0.999991 |
| rad58     | 1.71096e-06 | 0.999995 | 2.36741e-06 | 0.999994 |
| rad65     | 1.46609e-06 | 0.999997 | 2.02860e-06 | 0.999996 |
| rad43     | 5.15363e-07 | 0.999997 | 7.13099e-07 | 0.999996 |
| rad13     | 4.97042e-07 | 0.999998 | 6.87750e-07 | 0.999997 |
| rad23     | 4.88852e-07 | 0.999998 | 6.76413e-07 | 0.999998 |
| rad61     | 4.05777e-07 | 0.999999 | 5.61466e-07 | 0.999998 |
| rad9      | 3.64472e-07 | 0.999999 | 5.04312e-07 | 0.999999 |
| rad28     | 2.24318e-07 | 0.999999 | 3.10384e-07 | 0.999999 |
| rad45     | 2.02875e-07 | 1.000000 | 2.80714e-07 | 0.999999 |
| rad41     | 1.14181e-07 | 1.000000 | 1.57990e-07 | 1.000000 |
| rad21     | 1.10752e-07 | 1.000000 | 1.53246e-07 | 1.000000 |
| rad22     | 6.89738e-08 | 1.000000 | 9.54376e-08 | 1.000000 |
| rad33     | 5.59076e-08 | 1.000000 | 7.73584e-08 | 1.000000 |
| rad36     | 3.71718e-08 | 1.000000 | 5.14339e-08 | 1.000000 |
| rad15     | 3.04084e-08 | 1.000000 | 4.20756e-08 | 1.000000 |
| rad20     | 2.92773e-08 | 1.000000 | 4.05105e-08 | 1.000000 |
| rad12     | 1.43769e-08 | 1.000000 | 1.98930e-08 | 1.000000 |
| rad25     | 1.41089e-08 | 1.000000 | 1.95222e-08 | 1.000000 |
| rad47     | 1.31325e-08 | 1.000000 | 1.81711e-08 | 1.000000 |
| rad8      | 9.54437e-09 | 1.000000 | 1.32064e-08 | 1.000000 |
| rad26     | 9.07513e-09 | 1.000000 | 1.25571e-08 | 1.000000 |
| rad24     | 8.29179e-09 | 1.000000 | 1.14732e-08 | 1.000000 |
| rad18     | 5.07461e-09 | 1.000000 | 7.02161e-09 | 1.000000 |
| rad10     | 4.58455e-09 | 1.000000 | 6.34356e-09 | 1.000000 |
| rad14     | 1.65536e-09 | 1.000000 | 2.29049e-09 | 1.000000 |
| rad3      | 1.29476e-09 | 1.000000 | 1.79154e-09 | 1.000000 |
| rad4      | 8.05659e-10 | 1.000000 | 1.11478e-09 | 1.000000 |
| rad2      | 6.24807e-10 | 1.000000 | 8.64532e-10 | 1.000000 |
| rad5      | 3.75873e-10 | 1.000000 | 5.20088e-10 | 1.000000 |
| rad1      | 1.44284e-10 | 1.000000 | 1.99643e-10 | 1.000000 |
| rad27     | 6.01853e-11 | 1.000000 | 8.32771e-11 | 1.000000 |

100000.000 Pa, 4000.00000 K

=====

| Rate constant      | True (fraction)      | Effective (fraction)  |
|--------------------|----------------------|-----------------------|
| Total              | 1.65008e-10 (1.00 )  | 1.19918e-10 (1.00 )   |
| Formation of rad11 | 2.61707e-11 (0.159 ) | 9.15768e-12 (0.0764 ) |
| Formation of rad6  | 4.31906e-11 (0.262 ) | 1.51133e-11 (0.126 )  |
| H-abstraction      | 9.56470e-11 (0.580 ) | 9.56470e-11 (0.798 )  |

| species            | PYtrue      | Cumul    | PYeffective | Cumul    |
|--------------------|-------------|----------|-------------|----------|
| Benzene+2-propynyl | 0.579650    | 0.579650 | 0.797603    | 0.797603 |
| Phenyl+Allene      | 0.273261    | 0.852911 | 0.000000    | 0.797603 |
| PhCH2CCH+H         | 0.0779355   | 0.930846 | 0.107240    | 0.904844 |
| PhCHCCH2+H         | 0.0328741   | 0.963720 | 0.0452352   | 0.950079 |
| C2H2+PhCH2         | 0.0116507   | 0.975371 | 0.0160315   | 0.966110 |
| PhCCH+CH3          | 0.00791898  | 0.983290 | 0.0108966   | 0.977007 |
| PhcycC3H3_A+H      | 0.00406003  | 0.987350 | 0.00558665  | 0.982594 |
| PAH7+H             | 0.00337888  | 0.990729 | 0.00464937  | 0.987243 |
| Ph+MeAc            | 0.00265508  | 0.993384 | 0.00365342  | 0.990896 |
| rad19syn           | 0.00200749  | 0.995391 | 0.00276233  | 0.993659 |
| Indene+H           | 0.00158645  | 0.996978 | 0.00218297  | 0.995842 |
| rad54              | 0.000847271 | 0.997825 | 0.00116586  | 0.997008 |
| rad39              | 0.000305660 | 0.998131 | 0.000420592 | 0.997428 |
| PAH1+H             | 0.000284444 | 0.998415 | 0.000391398 | 0.997820 |

|           |             |          |             |          |
|-----------|-------------|----------|-------------|----------|
| rad56     | 0.000172358 | 0.998587 | 0.000237166 | 0.998057 |
| rad19anti | 0.000149831 | 0.998737 | 0.000206169 | 0.998263 |
| PAH9+H    | 0.000121218 | 0.998859 | 0.000166797 | 0.998430 |
| rad53     | 0.000103981 | 0.998963 | 0.000143079 | 0.998573 |
| rad55     | 9.86924e-05 | 0.999061 | 0.000135802 | 0.998709 |
| rad50     | 9.55953e-05 | 0.999157 | 0.000131540 | 0.998840 |
| rad38     | 8.44787e-05 | 0.999241 | 0.000116244 | 0.998956 |
| PhCCCH3+H | 8.02020e-05 | 0.999321 | 0.000110359 | 0.999067 |
| PAH3+H    | 7.84336e-05 | 0.999400 | 0.000107926 | 0.999175 |
| rad70     | 7.43978e-05 | 0.999474 | 0.000102372 | 0.999277 |
| PAH8+H    | 6.80951e-05 | 0.999542 | 9.36999e-05 | 0.999371 |
| rad51     | 6.46890e-05 | 0.999607 | 8.90128e-05 | 0.999460 |
| PAH10+CH3 | 5.48688e-05 | 0.999662 | 7.54998e-05 | 0.999535 |
| rad67     | 4.35071e-05 | 0.999705 | 5.98663e-05 | 0.999595 |
| rad6      | 3.77412e-05 | 0.999743 | 5.19323e-05 | 0.999647 |
| rad46     | 3.57018e-05 | 0.999779 | 4.91261e-05 | 0.999696 |
| rad35     | 3.45588e-05 | 0.999813 | 4.75533e-05 | 0.999744 |
| rad71     | 3.26371e-05 | 0.999846 | 4.49090e-05 | 0.999789 |
| rad34     | 3.11480e-05 | 0.999877 | 4.28599e-05 | 0.999832 |
| rad62     | 2.32937e-05 | 0.999901 | 3.20523e-05 | 0.999864 |
| rad52     | 1.22047e-05 | 0.999913 | 1.67937e-05 | 0.999880 |
| rad73     | 1.19165e-05 | 0.999925 | 1.63972e-05 | 0.999897 |
| rad30     | 8.92866e-06 | 0.999934 | 1.22859e-05 | 0.999909 |
| rad68syn  | 8.64863e-06 | 0.999942 | 1.19006e-05 | 0.999921 |
| rad64     | 7.61919e-06 | 0.999950 | 1.04841e-05 | 0.999931 |
| rad37     | 5.90702e-06 | 0.999956 | 8.12814e-06 | 0.999940 |
| rad68anti | 5.50697e-06 | 0.999961 | 7.57762e-06 | 0.999947 |
| rad59     | 5.47380e-06 | 0.999967 | 7.53204e-06 | 0.999955 |
| rad40syn  | 5.36586e-06 | 0.999972 | 7.38351e-06 | 0.999962 |
| rad42     | 5.13710e-06 | 0.999977 | 7.06872e-06 | 0.999969 |
| rad72     | 4.72281e-06 | 0.999982 | 6.49863e-06 | 0.999976 |
| rad40anti | 4.03476e-06 | 0.999986 | 5.55188e-06 | 0.999981 |
| rad60syn  | 2.51613e-06 | 0.999989 | 3.46224e-06 | 0.999985 |
| rad7      | 2.05809e-06 | 0.999991 | 2.83197e-06 | 0.999987 |
| rad58     | 1.90385e-06 | 0.999992 | 2.61972e-06 | 0.999990 |
| rad60anti | 1.87451e-06 | 0.999994 | 2.57936e-06 | 0.999993 |
| rad65     | 1.44524e-06 | 0.999996 | 1.98866e-06 | 0.999995 |
| rad11     | 1.33683e-06 | 0.999997 | 1.83949e-06 | 0.999996 |
| rad43     | 6.02581e-07 | 0.999998 | 8.29160e-07 | 0.999997 |
| rad61     | 4.34810e-07 | 0.999998 | 5.98302e-07 | 0.999998 |
| rad13     | 3.37380e-07 | 0.999999 | 4.64239e-07 | 0.999998 |
| rad23     | 2.72944e-07 | 0.999999 | 3.75575e-07 | 0.999999 |
| rad9      | 2.16101e-07 | 0.999999 | 2.97357e-07 | 0.999999 |
| rad41     | 1.43350e-07 | 0.999999 | 1.97251e-07 | 0.999999 |
| rad28     | 1.28050e-07 | 0.999999 | 1.76198e-07 | 0.999999 |
| rad45     | 1.20538e-07 | 0.999999 | 1.65861e-07 | 1.000000 |
| rad21     | 7.74214e-08 | 0.999999 | 1.06532e-07 | 1.000000 |
| rad22     | 4.24827e-08 | 1.000000 | 5.84566e-08 | 1.000000 |
| rad33     | 3.94120e-08 | 1.000000 | 5.42313e-08 | 1.000000 |
| rad20     | 2.21420e-08 | 1.000000 | 3.04678e-08 | 1.000000 |
| rad36     | 2.21231e-08 | 1.000000 | 3.04416e-08 | 1.000000 |
| rad15     | 1.86728e-08 | 1.000000 | 2.56940e-08 | 1.000000 |
| rad47     | 1.27824e-08 | 1.000000 | 1.75888e-08 | 1.000000 |
| rad12     | 1.02750e-08 | 1.000000 | 1.41384e-08 | 1.000000 |
| rad25     | 1.01567e-08 | 1.000000 | 1.39757e-08 | 1.000000 |
| rad8      | 8.39398e-09 | 1.000000 | 1.15502e-08 | 1.000000 |
| rad24     | 5.86355e-09 | 1.000000 | 8.06829e-09 | 1.000000 |
| rad26     | 5.29272e-09 | 1.000000 | 7.28283e-09 | 1.000000 |
| rad18     | 3.41446e-09 | 1.000000 | 4.69835e-09 | 1.000000 |
| rad10     | 2.82520e-09 | 1.000000 | 3.88751e-09 | 1.000000 |
| rad14     | 1.51703e-09 | 1.000000 | 2.08744e-09 | 1.000000 |
| rad3      | 8.79016e-10 | 1.000000 | 1.20954e-09 | 1.000000 |
| rad4      | 5.63009e-10 | 1.000000 | 7.74705e-10 | 1.000000 |
| rad2      | 4.00548e-10 | 1.000000 | 5.51158e-10 | 1.000000 |
| rad5      | 3.07953e-10 | 1.000000 | 4.23747e-10 | 1.000000 |
| rad1      | 9.24409e-11 | 1.000000 | 1.27200e-10 | 1.000000 |
| rad27     | 4.98069e-11 | 1.000000 | 6.85347e-11 | 1.000000 |

10000.0000 Pa, 20.0000000 K

=====

| Rate constant      | True (fraction)        | Effective (fraction)   |             |          |
|--------------------|------------------------|------------------------|-------------|----------|
| Total              | 1.56740e-51 (1.00 )    | 1.56740e-51 (1.00 )    |             |          |
| Formation of rad11 | 1.56740e-51 (1.000 )   | 1.56740e-51 (1.000 )   |             |          |
| Formation of rad6  | 3.73945e-60 (2.39e-09) | 3.73945e-60 (2.39e-09) |             |          |
| H-abstraction      | 1.53631e-76 (9.80e-26) | 1.53631e-76 (9.80e-26) |             |          |
| species            | PYtrue                 | Cumul                  | PYeffective | Cumul    |
| rad11              | 0.997566               | 0.997566               | 0.997566    | 0.997566 |

|                    |             |          |             |          |
|--------------------|-------------|----------|-------------|----------|
| rad6               | 0.00231408  | 0.999880 | 0.00231408  | 0.999880 |
| rad21              | 6.46779e-05 | 0.999945 | 6.46779e-05 | 0.999945 |
| rad20              | 3.30722e-05 | 0.999978 | 3.30722e-05 | 0.999978 |
| rad22              | 1.79249e-05 | 0.999996 | 1.79249e-05 | 0.999996 |
| rad45              | 2.06010e-06 | 0.999998 | 2.06010e-06 | 0.999998 |
| rad18              | 1.90512e-06 | 1.000000 | 1.90512e-06 | 1.000000 |
| rad36              | 1.31939e-07 | 1.000000 | 1.31939e-07 | 1.000000 |
| Indene+H           | 9.13293e-08 | 1.000000 | 9.13293e-08 | 1.000000 |
| rad25              | 4.90801e-08 | 1.000000 | 4.90801e-08 | 1.000000 |
| C2H2+PhCH2         | 1.84649e-08 | 1.000000 | 1.84649e-08 | 1.000000 |
| rad23              | 1.38597e-08 | 1.000000 | 1.38597e-08 | 1.000000 |
| rad13              | 7.95978e-09 | 1.000000 | 7.95978e-09 | 1.000000 |
| rad7               | 3.21207e-09 | 1.000000 | 3.21207e-09 | 1.000000 |
| PhCHCCH2+H         | 2.83232e-09 | 1.000000 | 2.83232e-09 | 1.000000 |
| rad24              | 9.98569e-10 | 1.000000 | 9.98569e-10 | 1.000000 |
| rad9               | 1.46761e-10 | 1.000000 | 1.46761e-10 | 1.000000 |
| rad33              | 3.90252e-11 | 1.000000 | 3.90252e-11 | 1.000000 |
| Phenyl+Allene      | 1.79849e-12 | 1.000000 | 0.000000    | 1.000000 |
| rad3               | 3.54751e-13 | 1.000000 | 3.54751e-13 | 1.000000 |
| rad4               | 1.87491e-13 | 1.000000 | 1.87491e-13 | 1.000000 |
| rad30              | 2.13188e-14 | 1.000000 | 2.13188e-14 | 1.000000 |
| rad28              | 1.11845e-14 | 1.000000 | 1.11845e-14 | 1.000000 |
| rad15              | 3.13655e-15 | 1.000000 | 3.13655e-15 | 1.000000 |
| rad8               | 1.16354e-16 | 1.000000 | 1.16354e-16 | 1.000000 |
| rad2               | 5.98534e-17 | 1.000000 | 5.98534e-17 | 1.000000 |
| rad38              | 2.74837e-17 | 1.000000 | 2.74837e-17 | 1.000000 |
| PhCH2CCH+H         | 6.63890e-18 | 1.000000 | 6.63890e-18 | 1.000000 |
| rad1               | 4.24554e-18 | 1.000000 | 4.24554e-18 | 1.000000 |
| PhCCH+CH3          | 2.57386e-19 | 1.000000 | 2.57386e-19 | 1.000000 |
| rad46              | 1.15504e-19 | 1.000000 | 1.15504e-19 | 1.000000 |
| PAH9+H             | 5.59108e-20 | 1.000000 | 5.59108e-20 | 1.000000 |
| rad60syn           | 3.67268e-20 | 1.000000 | 3.67268e-20 | 1.000000 |
| rad35              | 3.25025e-20 | 1.000000 | 3.25025e-20 | 1.000000 |
| rad14              | 2.20557e-20 | 1.000000 | 2.20557e-20 | 1.000000 |
| rad60anti          | 3.57397e-21 | 1.000000 | 3.57397e-21 | 1.000000 |
| rad10              | 7.92611e-22 | 1.000000 | 7.92611e-22 | 1.000000 |
| PAH7+H             | 4.76483e-22 | 1.000000 | 4.76483e-22 | 1.000000 |
| rad31              | 1.62277e-22 | 1.000000 | 1.62277e-22 | 1.000000 |
| Ph+MeAc            | 7.34853e-24 | 1.000000 | 7.34853e-24 | 1.000000 |
| rad27              | 8.59312e-25 | 1.000000 | 8.59312e-25 | 1.000000 |
| PhCCCH3+H          | 2.55721e-25 | 1.000000 | 2.55721e-25 | 1.000000 |
| Benzene+2-propynyl | 9.80165e-26 | 1.000000 | 9.80165e-26 | 1.000000 |
| rad39              | 1.71273e-26 | 1.000000 | 1.71273e-26 | 1.000000 |
| rad26              | 1.00245e-26 | 1.000000 | 1.00245e-26 | 1.000000 |
| PAH3+H             | 4.09021e-27 | 1.000000 | 4.09021e-27 | 1.000000 |
| rad59              | 1.94213e-27 | 1.000000 | 1.94213e-27 | 1.000000 |
| rad50              | 3.73903e-30 | 1.000000 | 3.73903e-30 | 1.000000 |
| rad12              | 3.27380e-35 | 1.000000 | 3.27380e-35 | 1.000000 |
| rad5               | 1.51474e-35 | 1.000000 | 1.51474e-35 | 1.000000 |
| rad37              | 7.32678e-37 | 1.000000 | 7.32678e-37 | 1.000000 |
| rad19syn           | 3.69362e-37 | 1.000000 | 3.69362e-37 | 1.000000 |
| rad52              | 4.18865e-38 | 1.000000 | 4.18865e-38 | 1.000000 |
| rad54              | 5.19433e-39 | 1.000000 | 5.19433e-39 | 1.000000 |
| rad70              | 2.89428e-41 | 1.000000 | 2.89428e-41 | 1.000000 |
| rad51              | 1.14336e-42 | 1.000000 | 1.14336e-42 | 1.000000 |
| rad62              | 7.25294e-45 | 1.000000 | 7.25294e-45 | 1.000000 |
| rad58              | 6.73912e-45 | 1.000000 | 6.73912e-45 | 1.000000 |
| rad55              | 1.41764e-45 | 1.000000 | 1.41764e-45 | 1.000000 |
| PhcycC3H3_A+H      | 2.44925e-46 | 1.000000 | 2.44925e-46 | 1.000000 |
| rad34              | 9.82225e-47 | 1.000000 | 9.82225e-47 | 1.000000 |
| rad43              | 9.43530e-47 | 1.000000 | 9.43530e-47 | 1.000000 |
| PAH10+CH3          | 1.11872e-47 | 1.000000 | 1.11872e-47 | 1.000000 |
| rad65              | 3.33534e-48 | 1.000000 | 3.33534e-48 | 1.000000 |
| rad47              | 8.37420e-50 | 1.000000 | 8.37420e-50 | 1.000000 |
| PAH1+H             | 1.10952e-52 | 1.000000 | 1.10952e-52 | 1.000000 |
| rad42              | 1.60559e-55 | 1.000000 | 1.60559e-55 | 1.000000 |
| rad41              | 1.03906e-58 | 1.000000 | 1.03906e-58 | 1.000000 |

10000.0000 Pa, 30.0000000 K

=====

| Rate constant      | True (fraction)        | Effective (fraction)   |             |          |
|--------------------|------------------------|------------------------|-------------|----------|
| Total              | 5.03204e-39 (1.00 )    | 5.03204e-39 (1.00 )    |             |          |
| Formation of rad11 | 5.03203e-39 (1.000 )   | 5.03203e-39 (1.000 )   |             |          |
| Formation of rad6  | 9.92181e-45 (1.97e-06) | 9.92181e-45 (1.97e-06) |             |          |
| H-abstraction      | 3.33191e-55 (6.62e-17) | 3.33191e-55 (6.62e-17) |             |          |
| species            | PYtrue                 | Cumul                  | PYeffective | Cumul    |
| rad11              | 0.995082               | 0.995082               | 0.995082    | 0.995082 |

|                    |             |          |             |          |
|--------------------|-------------|----------|-------------|----------|
| rad6               | 0.00467547  | 0.999757 | 0.00467547  | 0.999757 |
| rad21              | 9.07211e-05 | 0.999848 | 9.07211e-05 | 0.999848 |
| rad20              | 7.69156e-05 | 0.999925 | 7.69156e-05 | 0.999925 |
| rad22              | 5.70066e-05 | 0.999982 | 5.70066e-05 | 0.999982 |
| rad18              | 9.70994e-06 | 0.999992 | 9.70994e-06 | 0.999992 |
| rad45              | 6.66559e-06 | 0.999998 | 6.66559e-06 | 0.999998 |
| Indene+H           | 8.82660e-07 | 0.999999 | 8.82660e-07 | 0.999999 |
| rad36              | 4.21044e-07 | 1.000000 | 4.21044e-07 | 1.000000 |
| C2H2+PhCH2         | 1.06632e-07 | 1.000000 | 1.06632e-07 | 1.000000 |
| rad25              | 9.96261e-08 | 1.000000 | 9.96261e-08 | 1.000000 |
| rad23              | 9.40523e-08 | 1.000000 | 9.40523e-08 | 1.000000 |
| rad13              | 2.46344e-08 | 1.000000 | 2.46344e-08 | 1.000000 |
| rad7               | 1.31302e-08 | 1.000000 | 1.31302e-08 | 1.000000 |
| PhCHCCH2+H         | 5.84913e-09 | 1.000000 | 5.84913e-09 | 1.000000 |
| rad24              | 4.17415e-10 | 1.000000 | 4.17415e-10 | 1.000000 |
| rad9               | 3.04791e-10 | 1.000000 | 3.04791e-10 | 1.000000 |
| rad33              | 9.09181e-11 | 1.000000 | 9.09181e-11 | 1.000000 |
| Phenyl+Allene      | 4.26967e-12 | 1.000000 | 0.000000    | 1.000000 |
| rad3               | 2.50537e-12 | 1.000000 | 2.50537e-12 | 1.000000 |
| rad4               | 1.30218e-12 | 1.000000 | 1.30218e-12 | 1.000000 |
| rad30              | 2.51712e-13 | 1.000000 | 2.51712e-13 | 1.000000 |
| rad28              | 8.02760e-14 | 1.000000 | 8.02760e-14 | 1.000000 |
| rad15              | 3.74281e-14 | 1.000000 | 3.74281e-14 | 1.000000 |
| rad2               | 8.78361e-16 | 1.000000 | 8.78361e-16 | 1.000000 |
| rad8               | 7.66361e-16 | 1.000000 | 7.66361e-16 | 1.000000 |
| rad38              | 2.02427e-16 | 1.000000 | 2.02427e-16 | 1.000000 |
| Benzene+2-propynyl | 6.62139e-17 | 1.000000 | 6.62139e-17 | 1.000000 |
| rad1               | 5.96237e-17 | 1.000000 | 5.96237e-17 | 1.000000 |
| PhCH2CCH+H         | 1.59946e-17 | 1.000000 | 1.59946e-17 | 1.000000 |
| PhCCH+CH3          | 3.89475e-18 | 1.000000 | 3.89475e-18 | 1.000000 |
| rad46              | 8.73535e-19 | 1.000000 | 8.73535e-19 | 1.000000 |
| PAH9+H             | 8.24031e-19 | 1.000000 | 8.24031e-19 | 1.000000 |
| rad35              | 4.77420e-19 | 1.000000 | 4.77420e-19 | 1.000000 |
| rad60syn           | 4.71409e-19 | 1.000000 | 4.71409e-19 | 1.000000 |
| rad14              | 3.29040e-19 | 1.000000 | 3.29040e-19 | 1.000000 |
| rad60anti          | 4.51677e-20 | 1.000000 | 4.51677e-20 | 1.000000 |
| rad10              | 2.38497e-20 | 1.000000 | 2.38497e-20 | 1.000000 |
| PAH7+H             | 2.20552e-21 | 1.000000 | 2.20552e-21 | 1.000000 |
| rad31              | 9.79780e-22 | 1.000000 | 9.79780e-22 | 1.000000 |
| Ph+MeAc            | 1.18786e-22 | 1.000000 | 1.18786e-22 | 1.000000 |
| rad27              | 2.59555e-23 | 1.000000 | 2.59555e-23 | 1.000000 |
| PhCCCH3+H          | 7.94047e-24 | 1.000000 | 7.94047e-24 | 1.000000 |
| rad39              | 2.69775e-25 | 1.000000 | 2.69775e-25 | 1.000000 |
| rad26              | 4.45614e-26 | 1.000000 | 4.45614e-26 | 1.000000 |
| PAH3+H             | 4.10728e-26 | 1.000000 | 4.10728e-26 | 1.000000 |
| rad59              | 1.96147e-26 | 1.000000 | 1.96147e-26 | 1.000000 |
| rad50              | 2.91214e-29 | 1.000000 | 2.91214e-29 | 1.000000 |
| rad5               | 4.67777e-34 | 1.000000 | 4.67777e-34 | 1.000000 |
| rad12              | 2.45425e-34 | 1.000000 | 2.45425e-34 | 1.000000 |
| rad37              | 5.47194e-36 | 1.000000 | 5.47194e-36 | 1.000000 |
| rad19syn           | 3.71043e-36 | 1.000000 | 3.71043e-36 | 1.000000 |
| rad52              | 3.14292e-37 | 1.000000 | 3.14292e-37 | 1.000000 |
| rad54              | 2.91409e-38 | 1.000000 | 2.91409e-38 | 1.000000 |
| rad70              | 1.13521e-40 | 1.000000 | 1.13521e-40 | 1.000000 |
| rad51              | 8.28016e-42 | 1.000000 | 8.28016e-42 | 1.000000 |
| rad62              | 1.76748e-43 | 1.000000 | 1.76748e-43 | 1.000000 |
| rad58              | 3.48990e-44 | 1.000000 | 3.48990e-44 | 1.000000 |
| rad55              | 7.80873e-45 | 1.000000 | 7.80873e-45 | 1.000000 |
| rad43              | 4.40776e-45 | 1.000000 | 4.40776e-45 | 1.000000 |
| PhcycC3H3_A+H      | 2.44224e-45 | 1.000000 | 2.44224e-45 | 1.000000 |
| rad34              | 3.38319e-46 | 1.000000 | 3.38319e-46 | 1.000000 |
| PAH10+CH3          | 7.67779e-47 | 1.000000 | 7.67779e-47 | 1.000000 |
| rad65              | 4.73435e-47 | 1.000000 | 4.73435e-47 | 1.000000 |
| rad47              | 4.89371e-49 | 1.000000 | 4.89371e-49 | 1.000000 |
| PAH1+H             | 1.29193e-51 | 1.000000 | 1.29193e-51 | 1.000000 |
| rad42              | 3.17273e-54 | 1.000000 | 3.17273e-54 | 1.000000 |
| rad41              | 3.58907e-57 | 1.000000 | 3.58907e-57 | 1.000000 |

10000.0000 Pa, 40.0000000 K

=====

| Rate constant      | True (fraction) |            | Effective (fraction) |            |
|--------------------|-----------------|------------|----------------------|------------|
| Total              | 9.35697e-33     | (1.00 )    | 9.35697e-33          | (1.00 )    |
| Formation of rad11 | 9.35644e-33     | (1.000 )   | 9.35644e-33          | (1.000 )   |
| Formation of rad6  | 5.26139e-37     | (5.62e-05) | 5.26139e-37          | (5.62e-05) |
| H-abstraction      | 1.44763e-44     | (1.55e-12) | 1.44763e-44          | (1.55e-12) |
| species            | PYtrue          | Cumul      | PYeffective          | Cumul      |
| rad11              | 0.992593        | 0.992593   | 0.992593             | 0.992593   |



|                    |             |          |             |          |
|--------------------|-------------|----------|-------------|----------|
| rad6               | 0.00704261  | 0.999636 | 0.00704261  | 0.999636 |
| rad20              | 0.000110924 | 0.999747 | 0.000110924 | 0.999747 |
| rad22              | 0.000107088 | 0.999854 | 0.000107088 | 0.999854 |
| rad21              | 0.000106842 | 0.999960 | 0.000106842 | 0.999960 |
| rad18              | 2.20442e-05 | 0.999983 | 2.20442e-05 | 0.999983 |
| rad45              | 1.26575e-05 | 0.999995 | 1.26575e-05 | 0.999995 |
| Indene+H           | 3.01170e-06 | 0.999998 | 3.01170e-06 | 0.999998 |
| rad36              | 7.95490e-07 | 0.999999 | 7.95490e-07 | 0.999999 |
| rad23              | 2.71359e-07 | 0.999999 | 2.71359e-07 | 0.999999 |
| C2H2+PhCH2         | 2.71203e-07 | 1.000000 | 2.71203e-07 | 1.000000 |
| rad25              | 1.51182e-07 | 1.000000 | 1.51182e-07 | 1.000000 |
| rad13              | 4.40536e-08 | 1.000000 | 4.40536e-08 | 1.000000 |
| rad7               | 3.00241e-08 | 1.000000 | 3.00241e-08 | 1.000000 |
| PhCHCCH2+H         | 9.15002e-09 | 1.000000 | 9.15002e-09 | 1.000000 |
| rad9               | 4.82311e-10 | 1.000000 | 4.82311e-10 | 1.000000 |
| rad24              | 2.27919e-10 | 1.000000 | 2.27919e-10 | 1.000000 |
| rad33              | 1.34406e-10 | 1.000000 | 1.34406e-10 | 1.000000 |
| Phenyl+Allene      | 8.68363e-12 | 1.000000 | 0.000000    | 1.000000 |
| rad3               | 7.62001e-12 | 1.000000 | 7.62001e-12 | 1.000000 |
| rad4               | 3.93383e-12 | 1.000000 | 3.93383e-12 | 1.000000 |
| Benzene+2-propynyl | 1.54712e-12 | 1.000000 | 1.54712e-12 | 1.000000 |
| rad30              | 9.63865e-13 | 1.000000 | 9.63865e-13 | 1.000000 |
| rad28              | 2.52746e-13 | 1.000000 | 2.52746e-13 | 1.000000 |
| rad15              | 1.45069e-13 | 1.000000 | 1.45069e-13 | 1.000000 |
| rad2               | 4.24230e-15 | 1.000000 | 4.24230e-15 | 1.000000 |
| rad8               | 2.36213e-15 | 1.000000 | 2.36213e-15 | 1.000000 |
| rad38              | 6.22952e-16 | 1.000000 | 6.22952e-16 | 1.000000 |
| rad1               | 2.83046e-16 | 1.000000 | 2.83046e-16 | 1.000000 |
| PhCH2CCH+H         | 3.48148e-17 | 1.000000 | 3.48148e-17 | 1.000000 |
| PhCCH+CH3          | 2.08658e-17 | 1.000000 | 2.08658e-17 | 1.000000 |
| PAH9+H             | 3.78125e-18 | 1.000000 | 3.78125e-18 | 1.000000 |
| rad46              | 2.77249e-18 | 1.000000 | 2.77249e-18 | 1.000000 |
| rad35              | 2.18144e-18 | 1.000000 | 2.18144e-18 | 1.000000 |
| rad60syn           | 2.09251e-18 | 1.000000 | 2.09251e-18 | 1.000000 |
| rad14              | 1.68112e-18 | 1.000000 | 1.68112e-18 | 1.000000 |
| rad60anti          | 2.08854e-19 | 1.000000 | 2.08854e-19 | 1.000000 |
| rad10              | 1.82511e-19 | 1.000000 | 1.82511e-19 | 1.000000 |
| PAH7+H             | 6.91165e-21 | 1.000000 | 6.91165e-21 | 1.000000 |
| rad31              | 2.83198e-21 | 1.000000 | 2.83198e-21 | 1.000000 |
| Ph+MeAc            | 9.39404e-22 | 1.000000 | 9.39404e-22 | 1.000000 |
| rad27              | 2.06469e-22 | 1.000000 | 2.06469e-22 | 1.000000 |
| PhCCCH3+H          | 6.93607e-23 | 1.000000 | 6.93607e-23 | 1.000000 |
| rad39              | 1.80174e-24 | 1.000000 | 1.80174e-24 | 1.000000 |
| rad26              | 1.99930e-25 | 1.000000 | 1.99930e-25 | 1.000000 |
| PAH3+H             | 1.80763e-25 | 1.000000 | 1.80763e-25 | 1.000000 |
| rad59              | 8.64987e-26 | 1.000000 | 8.64987e-26 | 1.000000 |
| rad50              | 1.23405e-28 | 1.000000 | 1.23405e-28 | 1.000000 |
| rad5               | 5.95424e-33 | 1.000000 | 5.95424e-33 | 1.000000 |
| rad12              | 1.00518e-33 | 1.000000 | 1.00518e-33 | 1.000000 |
| rad37              | 2.22598e-35 | 1.000000 | 2.22598e-35 | 1.000000 |
| rad19syn           | 2.16337e-35 | 1.000000 | 2.16337e-35 | 1.000000 |
| rad52              | 1.42739e-36 | 1.000000 | 1.42739e-36 | 1.000000 |
| rad54              | 1.17406e-37 | 1.000000 | 1.17406e-37 | 1.000000 |
| rad70              | 3.58980e-40 | 1.000000 | 3.58980e-40 | 1.000000 |
| rad51              | 3.88683e-41 | 1.000000 | 3.88683e-41 | 1.000000 |
| rad62              | 1.67217e-42 | 1.000000 | 1.67217e-42 | 1.000000 |
| rad58              | 1.18318e-43 | 1.000000 | 1.18318e-43 | 1.000000 |
| rad43              | 6.03669e-44 | 1.000000 | 6.03669e-44 | 1.000000 |
| rad55              | 3.20366e-44 | 1.000000 | 3.20366e-44 | 1.000000 |
| PhcycC3H3_A+H      | 1.40917e-44 | 1.000000 | 1.40917e-44 | 1.000000 |
| rad34              | 1.01956e-45 | 1.000000 | 1.01956e-45 | 1.000000 |
| PAH10+CH3          | 3.25275e-46 | 1.000000 | 3.25275e-46 | 1.000000 |
| rad65              | 3.17883e-46 | 1.000000 | 3.17883e-46 | 1.000000 |
| rad47              | 2.14728e-48 | 1.000000 | 2.14728e-48 | 1.000000 |
| PAH1+H             | 8.17664e-51 | 1.000000 | 8.17664e-51 | 1.000000 |
| rad42              | 2.74373e-53 | 1.000000 | 2.74373e-53 | 1.000000 |
| rad41              | 4.36923e-56 | 1.000000 | 4.36923e-56 | 1.000000 |

10000.0000 Pa, 50.0000000 K

=====

| Rate constant      | True (fraction)        | Effective (fraction)   |             |          |
|--------------------|------------------------|------------------------|-------------|----------|
| Total              | 5.52690e-29 (1.00 )    | 5.52690e-29 (1.00 )    |             |          |
| Formation of rad11 | 5.52459e-29 (1.000 )   | 5.52459e-29 (1.000 )   |             |          |
| Formation of rad6  | 2.30840e-32 (0.000418) | 2.30840e-32 (0.000418) |             |          |
| H-abstraction      | 3.35357e-38 (6.07e-10) | 3.35357e-38 (6.07e-10) |             |          |
| species            | PYtrue                 | Cumul                  | PYeffective | Cumul    |
| rad11              | 0.989791               | 0.989791               | 0.989791    | 0.989791 |

|                    |             |          |             |          |
|--------------------|-------------|----------|-------------|----------|
| rad6               | 0.00972161  | 0.999513 | 0.00972161  | 0.999513 |
| rad22              | 0.000165693 | 0.999678 | 0.000165693 | 0.999678 |
| rad20              | 0.000136508 | 0.999815 | 0.000136508 | 0.999815 |
| rad21              | 0.000118600 | 0.999933 | 0.000118600 | 0.999933 |
| rad18              | 3.73889e-05 | 0.999971 | 3.73889e-05 | 0.999971 |
| rad45              | 1.97643e-05 | 0.999991 | 1.97643e-05 | 0.999991 |
| Indene+H           | 6.93073e-06 | 0.999997 | 6.93073e-06 | 0.999997 |
| rad36              | 1.23841e-06 | 0.999999 | 1.23841e-06 | 0.999999 |
| rad23              | 5.68950e-07 | 0.999999 | 5.68950e-07 | 0.999999 |
| C2H2+PhCH2         | 5.13021e-07 | 1.000000 | 5.13021e-07 | 1.000000 |
| rad25              | 2.05831e-07 | 1.000000 | 2.05831e-07 | 1.000000 |
| rad13              | 6.70959e-08 | 1.000000 | 6.70959e-08 | 1.000000 |
| rad7               | 5.85891e-08 | 1.000000 | 5.85891e-08 | 1.000000 |
| PhCHCCH2+H         | 1.29693e-08 | 1.000000 | 1.29693e-08 | 1.000000 |
| rad9               | 6.94446e-10 | 1.000000 | 6.94446e-10 | 1.000000 |
| Benzene+2-propynyl | 6.06773e-10 | 1.000000 | 6.06773e-10 | 1.000000 |
| rad33              | 1.77725e-10 | 1.000000 | 1.77725e-10 | 1.000000 |
| rad24              | 1.43943e-10 | 1.000000 | 1.43943e-10 | 1.000000 |
| rad3               | 1.87149e-11 | 1.000000 | 1.87149e-11 | 1.000000 |
| Phenyl+Allene      | 1.68879e-11 | 1.000000 | 0.000000    | 1.000000 |
| rad4               | 9.62732e-12 | 1.000000 | 9.62732e-12 | 1.000000 |
| rad30              | 2.44049e-12 | 1.000000 | 2.44049e-12 | 1.000000 |
| rad28              | 6.67587e-13 | 1.000000 | 6.67587e-13 | 1.000000 |
| rad15              | 3.72308e-13 | 1.000000 | 3.72308e-13 | 1.000000 |
| rad2               | 1.60072e-14 | 1.000000 | 1.60072e-14 | 1.000000 |
| rad8               | 5.63332e-15 | 1.000000 | 5.63332e-15 | 1.000000 |
| rad38              | 1.39536e-15 | 1.000000 | 1.39536e-15 | 1.000000 |
| rad1               | 1.05883e-15 | 1.000000 | 1.05883e-15 | 1.000000 |
| PhCCH+CH3          | 9.93015e-17 | 1.000000 | 9.93015e-17 | 1.000000 |
| PhCH2CCH+H         | 7.97331e-17 | 1.000000 | 7.97331e-17 | 1.000000 |
| PAH9+H             | 1.12629e-17 | 1.000000 | 1.12629e-17 | 1.000000 |
| rad14              | 7.21615e-18 | 1.000000 | 7.21615e-18 | 1.000000 |
| rad35              | 6.46361e-18 | 1.000000 | 6.46361e-18 | 1.000000 |
| rad46              | 6.44394e-18 | 1.000000 | 6.44394e-18 | 1.000000 |
| rad60syn           | 6.41272e-18 | 1.000000 | 6.41272e-18 | 1.000000 |
| rad10              | 1.06259e-18 | 1.000000 | 1.06259e-18 | 1.000000 |
| rad60anti          | 6.96523e-19 | 1.000000 | 6.96523e-19 | 1.000000 |
| PAH7+H             | 2.07560e-20 | 1.000000 | 2.07560e-20 | 1.000000 |
| Ph+MeAc            | 8.47187e-21 | 1.000000 | 8.47187e-21 | 1.000000 |
| rad31              | 6.83514e-21 | 1.000000 | 6.83514e-21 | 1.000000 |
| rad27              | 1.31716e-21 | 1.000000 | 1.31716e-21 | 1.000000 |
| PhCCCH3+H          | 5.31098e-22 | 1.000000 | 5.31098e-22 | 1.000000 |
| rad39              | 1.29201e-23 | 1.000000 | 1.29201e-23 | 1.000000 |
| rad26              | 1.28518e-24 | 1.000000 | 1.28518e-24 | 1.000000 |
| PAH3+H             | 6.53050e-25 | 1.000000 | 6.53050e-25 | 1.000000 |
| rad59              | 3.12443e-25 | 1.000000 | 3.12443e-25 | 1.000000 |
| rad50              | 4.60899e-28 | 1.000000 | 4.60899e-28 | 1.000000 |
| rad5               | 9.40005e-32 | 1.000000 | 9.40005e-32 | 1.000000 |
| rad12              | 3.77472e-33 | 1.000000 | 3.77472e-33 | 1.000000 |
| rad19syn           | 1.52582e-34 | 1.000000 | 1.52582e-34 | 1.000000 |
| rad37              | 7.96920e-35 | 1.000000 | 7.96920e-35 | 1.000000 |
| rad52              | 6.19425e-36 | 1.000000 | 6.19425e-36 | 1.000000 |
| rad54              | 5.61745e-37 | 1.000000 | 5.61745e-37 | 1.000000 |
| rad70              | 1.22506e-39 | 1.000000 | 1.22506e-39 | 1.000000 |
| rad51              | 1.84089e-40 | 1.000000 | 1.84089e-40 | 1.000000 |
| rad62              | 1.62490e-41 | 1.000000 | 1.62490e-41 | 1.000000 |
| rad43              | 8.12147e-43 | 1.000000 | 8.12147e-43 | 1.000000 |
| rad58              | 4.15427e-43 | 1.000000 | 4.15427e-43 | 1.000000 |
| rad55              | 1.49472e-43 | 1.000000 | 1.49472e-43 | 1.000000 |
| PhcycC3H3_A+H      | 8.64798e-44 | 1.000000 | 8.64798e-44 | 1.000000 |
| rad34              | 3.49529e-45 | 1.000000 | 3.49529e-45 | 1.000000 |
| rad65              | 1.88960e-45 | 1.000000 | 1.88960e-45 | 1.000000 |
| PAH10+CH3          | 1.32422e-45 | 1.000000 | 1.32422e-45 | 1.000000 |
| rad47              | 1.05312e-47 | 1.000000 | 1.05312e-47 | 1.000000 |
| PAH1+H             | 5.24575e-50 | 1.000000 | 5.24575e-50 | 1.000000 |
| rad42              | 2.31956e-52 | 1.000000 | 2.31956e-52 | 1.000000 |
| rad41              | 4.97515e-55 | 1.000000 | 4.97515e-55 | 1.000000 |

10000.0000 Pa, 60.0000000 K

=====

| Rate constant      | True (fraction) |            | Effective (fraction) |            |
|--------------------|-----------------|------------|----------------------|------------|
| Total              | 1.83429e-26     | (1.00 )    | 1.83429e-26          | (1.00 )    |
| Formation of rad11 | 1.83139e-26     | (0.998 )   | 1.83139e-26          | (0.998 )   |
| Formation of rad6  | 2.90471e-29     | (0.00158 ) | 2.90471e-29          | (0.00158 ) |
| H-abstraction      | 5.71259e-34     | (3.11e-08) | 5.71259e-34          | (3.11e-08) |
| species            | PYtrue          | Cumul      | PYeffective          | Cumul      |
| rad11              | 0.986152        | 0.986152   | 0.986152             | 0.986152   |

|                    |             |          |             |          |
|--------------------|-------------|----------|-------------|----------|
| rad6               | 0.0132331   | 0.999385 | 0.0132331   | 0.999385 |
| rad22              | 0.000231619 | 0.999617 | 0.000231619 | 0.999617 |
| rad20              | 0.000155741 | 0.999772 | 0.000155741 | 0.999772 |
| rad21              | 0.000127404 | 0.999900 | 0.000127404 | 0.999900 |
| rad18              | 5.47012e-05 | 0.999955 | 5.47012e-05 | 0.999955 |
| rad45              | 2.78705e-05 | 0.999982 | 2.78705e-05 | 0.999982 |
| Indene+H           | 1.29941e-05 | 0.999995 | 1.29941e-05 | 0.999995 |
| rad36              | 1.74256e-06 | 0.999997 | 1.74256e-06 | 0.999997 |
| rad23              | 1.00979e-06 | 0.999998 | 1.00979e-06 | 0.999998 |
| C2H2+PhCH2         | 8.35316e-07 | 0.999999 | 8.35316e-07 | 0.999999 |
| rad25              | 2.64648e-07 | 0.999999 | 2.64648e-07 | 0.999999 |
| rad7               | 1.12277e-07 | 0.999999 | 1.12277e-07 | 0.999999 |
| rad13              | 9.80418e-08 | 0.999999 | 9.80418e-08 | 0.999999 |
| Benzene+2-propynyl | 3.11432e-08 | 0.999999 | 3.11432e-08 | 0.999999 |
| PhCHCCH2+H         | 1.74767e-08 | 1.000000 | 1.74767e-08 | 1.000000 |
| rad9               | 9.53048e-10 | 1.000000 | 9.53048e-10 | 1.000000 |
| rad33              | 2.31878e-10 | 1.000000 | 2.31878e-10 | 1.000000 |
| rad24              | 9.95830e-11 | 1.000000 | 9.95830e-11 | 1.000000 |
| rad3               | 4.45367e-11 | 1.000000 | 4.45367e-11 | 1.000000 |
| Phenyl+Allene      | 3.14541e-11 | 1.000000 | 0.000000    | 1.000000 |
| rad4               | 2.28637e-11 | 1.000000 | 2.28637e-11 | 1.000000 |
| rad30              | 4.99853e-12 | 1.000000 | 4.99853e-12 | 1.000000 |
| rad28              | 1.75096e-12 | 1.000000 | 1.75096e-12 | 1.000000 |
| rad15              | 7.73664e-13 | 1.000000 | 7.73664e-13 | 1.000000 |
| rad2               | 5.76272e-14 | 1.000000 | 5.76272e-14 | 1.000000 |
| rad8               | 1.17848e-14 | 1.000000 | 1.17848e-14 | 1.000000 |
| rad1               | 3.79451e-15 | 1.000000 | 3.79451e-15 | 1.000000 |
| rad38              | 2.65619e-15 | 1.000000 | 2.65619e-15 | 1.000000 |
| PhCCH+CH3          | 4.56232e-16 | 1.000000 | 4.56232e-16 | 1.000000 |
| PhCH2CCH+H         | 2.00252e-16 | 1.000000 | 2.00252e-16 | 1.000000 |
| rad14              | 2.99551e-17 | 1.000000 | 2.99551e-17 | 1.000000 |
| PAH9+H             | 2.68440e-17 | 1.000000 | 2.68440e-17 | 1.000000 |
| rad60syn           | 1.62769e-17 | 1.000000 | 1.62769e-17 | 1.000000 |
| rad35              | 1.53121e-17 | 1.000000 | 1.53121e-17 | 1.000000 |
| rad46              | 1.27904e-17 | 1.000000 | 1.27904e-17 | 1.000000 |
| rad10              | 5.63814e-18 | 1.000000 | 5.63814e-18 | 1.000000 |
| rad60anti          | 1.97583e-18 | 1.000000 | 1.97583e-18 | 1.000000 |
| PAH7+H             | 6.65195e-20 | 1.000000 | 6.65195e-20 | 1.000000 |
| Ph+MeAc            | 6.08981e-20 | 1.000000 | 6.08981e-20 | 1.000000 |
| rad31              | 1.62491e-20 | 1.000000 | 1.62491e-20 | 1.000000 |
| rad27              | 7.59528e-21 | 1.000000 | 7.59528e-21 | 1.000000 |
| PhCCCH3+H          | 3.59260e-21 | 1.000000 | 3.59260e-21 | 1.000000 |
| rad39              | 8.10698e-23 | 1.000000 | 8.10698e-23 | 1.000000 |
| rad26              | 9.38544e-24 | 1.000000 | 9.38544e-24 | 1.000000 |
| PAH3+H             | 2.28092e-24 | 1.000000 | 2.28092e-24 | 1.000000 |
| rad59              | 1.08931e-24 | 1.000000 | 1.08931e-24 | 1.000000 |
| rad50              | 1.71475e-27 | 1.000000 | 1.71475e-27 | 1.000000 |
| rad5               | 1.32651e-30 | 1.000000 | 1.32651e-30 | 1.000000 |
| rad12              | 1.62313e-32 | 1.000000 | 1.62313e-32 | 1.000000 |
| rad19syn           | 1.37458e-33 | 1.000000 | 1.37458e-33 | 1.000000 |
| rad37              | 2.90532e-34 | 1.000000 | 2.90532e-34 | 1.000000 |
| rad52              | 2.87479e-35 | 1.000000 | 2.87479e-35 | 1.000000 |
| rad54              | 3.58761e-36 | 1.000000 | 3.58761e-36 | 1.000000 |
| rad70              | 4.75749e-39 | 1.000000 | 4.75749e-39 | 1.000000 |
| rad51              | 9.77072e-40 | 1.000000 | 9.77072e-40 | 1.000000 |
| rad62              | 2.02857e-40 | 1.000000 | 2.02857e-40 | 1.000000 |
| rad43              | 1.33979e-41 | 1.000000 | 1.33979e-41 | 1.000000 |
| rad58              | 1.64291e-42 | 1.000000 | 1.64291e-42 | 1.000000 |
| rad55              | 8.98539e-43 | 1.000000 | 8.98539e-43 | 1.000000 |
| PhcycC3H3_A+H      | 6.67621e-43 | 1.000000 | 6.67621e-43 | 1.000000 |
| rad34              | 1.41086e-44 | 1.000000 | 1.41086e-44 | 1.000000 |
| rad65              | 1.17279e-44 | 1.000000 | 1.17279e-44 | 1.000000 |
| PAH10+CH3          | 5.90400e-45 | 1.000000 | 5.90400e-45 | 1.000000 |
| rad47              | 6.28612e-47 | 1.000000 | 6.28612e-47 | 1.000000 |
| PAH1+H             | 4.08283e-49 | 1.000000 | 4.08283e-49 | 1.000000 |
| rad42              | 2.49635e-51 | 1.000000 | 2.49635e-51 | 1.000000 |
| rad41              | 7.30887e-54 | 1.000000 | 7.30887e-54 | 1.000000 |

10000.0000 Pa, 70.0000000 K

=====

| Rate constant      | True (fraction) |            | Effective (fraction) |            |
|--------------------|-----------------|------------|----------------------|------------|
| Total              | 1.17336e-24     | (1.00 )    | 1.17336e-24          | (1.00 )    |
| Formation of rad11 | 1.16857e-24     | (0.996 )   | 1.16857e-24          | (0.996 )   |
| Formation of rad6  | 4.79505e-27     | (0.00409 ) | 4.79505e-27          | (0.00409 ) |
| H-abstraction      | 5.89821e-31     | (5.03e-07) | 5.89821e-31          | (5.03e-07) |
| species            | PYtrue          | Cumul      | PYeffective          | Cumul      |
| rad11              | 0.981136        | 0.981136   | 0.981136             | 0.981136   |

|                    |             |          |             |          |
|--------------------|-------------|----------|-------------|----------|
| rad6               | 0.0181183   | 0.999254 | 0.0181183   | 0.999254 |
| rad22              | 0.000304010 | 0.999558 | 0.000304010 | 0.999558 |
| rad20              | 0.000170062 | 0.999728 | 0.000170062 | 0.999728 |
| rad21              | 0.000133852 | 0.999862 | 0.000133852 | 0.999862 |
| rad18              | 7.32159e-05 | 0.999935 | 7.32159e-05 | 0.999935 |
| rad45              | 3.69013e-05 | 0.999972 | 3.69013e-05 | 0.999972 |
| Indene+H           | 2.15001e-05 | 0.999993 | 2.15001e-05 | 0.999993 |
| rad36              | 2.30333e-06 | 0.999996 | 2.30333e-06 | 0.999996 |
| rad23              | 1.61782e-06 | 0.999997 | 1.61782e-06 | 0.999997 |
| C2H2+PhCH2         | 1.24339e-06 | 0.999999 | 1.24339e-06 | 0.999999 |
| Benzene+2-propynyl | 5.02676e-07 | 0.999999 | 5.02676e-07 | 0.999999 |
| rad25              | 3.28289e-07 | 0.999999 | 3.28289e-07 | 0.999999 |
| rad7               | 2.13829e-07 | 1.000000 | 2.13829e-07 | 1.000000 |
| rad13              | 1.41098e-07 | 1.000000 | 1.41098e-07 | 1.000000 |
| PhCHCCH2+H         | 2.28369e-08 | 1.000000 | 2.28369e-08 | 1.000000 |
| rad9               | 1.27045e-09 | 1.000000 | 1.27045e-09 | 1.000000 |
| rad33              | 3.04568e-10 | 1.000000 | 3.04568e-10 | 1.000000 |
| rad3               | 1.01808e-10 | 1.000000 | 1.01808e-10 | 1.000000 |
| rad24              | 7.33636e-11 | 1.000000 | 7.33636e-11 | 1.000000 |
| Phenyl+Allene      | 5.62956e-11 | 1.000000 | 0.000000    | 1.000000 |
| rad4               | 5.22025e-11 | 1.000000 | 5.22025e-11 | 1.000000 |
| rad30              | 9.01086e-12 | 1.000000 | 9.01086e-12 | 1.000000 |
| rad28              | 4.36752e-12 | 1.000000 | 4.36752e-12 | 1.000000 |
| rad15              | 1.41616e-12 | 1.000000 | 1.41616e-12 | 1.000000 |
| rad2               | 1.86485e-13 | 1.000000 | 1.86485e-13 | 1.000000 |
| rad8               | 2.27456e-14 | 1.000000 | 2.27456e-14 | 1.000000 |
| rad1               | 1.22516e-14 | 1.000000 | 1.22516e-14 | 1.000000 |
| rad38              | 4.58532e-15 | 1.000000 | 4.58532e-15 | 1.000000 |
| PhCCH+CH3          | 1.76782e-15 | 1.000000 | 1.76782e-15 | 1.000000 |
| PhCH2CCH+H         | 5.83303e-16 | 1.000000 | 5.83303e-16 | 1.000000 |
| rad14              | 1.07891e-16 | 1.000000 | 1.07891e-16 | 1.000000 |
| PAH9+H             | 5.59498e-17 | 1.000000 | 5.59498e-17 | 1.000000 |
| rad60syn           | 3.68703e-17 | 1.000000 | 3.68703e-17 | 1.000000 |
| rad35              | 3.16973e-17 | 1.000000 | 3.16973e-17 | 1.000000 |
| rad10              | 2.47828e-17 | 1.000000 | 2.47828e-17 | 1.000000 |
| rad46              | 2.31220e-17 | 1.000000 | 2.31220e-17 | 1.000000 |
| rad60anti          | 5.05556e-18 | 1.000000 | 5.05556e-18 | 1.000000 |
| Ph+MeAc            | 3.17486e-19 | 1.000000 | 3.17486e-19 | 1.000000 |
| PAH7+H             | 2.38720e-19 | 1.000000 | 2.38720e-19 | 1.000000 |
| rad31              | 3.74793e-20 | 1.000000 | 3.74793e-20 | 1.000000 |
| rad27              | 3.52013e-20 | 1.000000 | 3.52013e-20 | 1.000000 |
| PhCCCH3+H          | 1.87538e-20 | 1.000000 | 1.87538e-20 | 1.000000 |
| rad39              | 3.86204e-22 | 1.000000 | 3.86204e-22 | 1.000000 |
| rad26              | 5.66543e-23 | 1.000000 | 5.66543e-23 | 1.000000 |
| PAH3+H             | 8.45751e-24 | 1.000000 | 8.45751e-24 | 1.000000 |
| rad59              | 4.02463e-24 | 1.000000 | 4.02463e-24 | 1.000000 |
| rad50              | 6.80550e-27 | 1.000000 | 6.80550e-27 | 1.000000 |
| rad5               | 1.47772e-29 | 1.000000 | 1.47772e-29 | 1.000000 |
| rad12              | 8.59656e-32 | 1.000000 | 8.59656e-32 | 1.000000 |
| rad19syn           | 1.36300e-32 | 1.000000 | 1.36300e-32 | 1.000000 |
| rad37              | 1.21812e-33 | 1.000000 | 1.21812e-33 | 1.000000 |
| rad52              | 1.53517e-34 | 1.000000 | 1.53517e-34 | 1.000000 |
| rad54              | 2.87174e-35 | 1.000000 | 2.87174e-35 | 1.000000 |
| rad70              | 2.21253e-38 | 1.000000 | 2.21253e-38 | 1.000000 |
| rad51              | 6.24918e-39 | 1.000000 | 6.24918e-39 | 1.000000 |
| rad62              | 3.01246e-39 | 1.000000 | 3.01246e-39 | 1.000000 |
| rad43              | 2.41910e-40 | 1.000000 | 2.41910e-40 | 1.000000 |
| rad58              | 7.76330e-42 | 1.000000 | 7.76330e-42 | 1.000000 |
| rad55              | 7.02881e-42 | 1.000000 | 7.02881e-42 | 1.000000 |
| PhcycC3H3_A+H      | 6.41414e-42 | 1.000000 | 6.41414e-42 | 1.000000 |
| rad65              | 8.45421e-44 | 1.000000 | 8.45421e-44 | 1.000000 |
| rad34              | 6.97737e-44 | 1.000000 | 6.97737e-44 | 1.000000 |
| PAH10+CH3          | 3.41766e-44 | 1.000000 | 3.41766e-44 | 1.000000 |
| rad47              | 4.88388e-46 | 1.000000 | 4.88388e-46 | 1.000000 |
| PAH1+H             | 3.99545e-48 | 1.000000 | 3.99545e-48 | 1.000000 |
| rad42              | 3.77947e-50 | 1.000000 | 3.77947e-50 | 1.000000 |
| rad41              | 1.52966e-52 | 1.000000 | 1.52966e-52 | 1.000000 |

10000.0000 Pa, 80.0000000 K

=====

| Rate constant      | True (fraction) |            | Effective (fraction) |            |
|--------------------|-----------------|------------|----------------------|------------|
| Total              | 2.68112e-23     | (1.00 )    | 2.68112e-23          | (1.00 )    |
| Formation of rad11 | 2.65890e-23     | (0.992 )   | 2.65890e-23          | (0.992 )   |
| Formation of rad6  | 2.22189e-25     | (0.00829 ) | 2.22189e-25          | (0.00829 ) |
| H-abstraction      | 1.05871e-28     | (3.95e-06) | 1.05871e-28          | (3.95e-06) |
| species            | PYtrue          | Cumul      | PYeffective          | Cumul      |
| rad11              | 0.974373        | 0.974373   | 0.974373             | 0.974373   |

|                    |             |          |             |          |
|--------------------|-------------|----------|-------------|----------|
| rad6               | 0.0247415   | 0.999115 | 0.0247415   | 0.999115 |
| rad22              | 0.000382249 | 0.999497 | 0.000382249 | 0.999497 |
| rad20              | 0.000180477 | 0.999677 | 0.000180477 | 0.999677 |
| rad21              | 0.000138327 | 0.999816 | 0.000138327 | 0.999816 |
| rad18              | 9.23539e-05 | 0.999908 | 9.23539e-05 | 0.999908 |
| rad45              | 4.68122e-05 | 0.999955 | 4.68122e-05 | 0.999955 |
| Indene+H           | 3.27235e-05 | 0.999988 | 3.27235e-05 | 0.999988 |
| Benzene+2-propynyl | 3.94877e-06 | 0.999992 | 3.94877e-06 | 0.999992 |
| rad36              | 2.91808e-06 | 0.999994 | 2.91808e-06 | 0.999994 |
| rad23              | 2.41963e-06 | 0.999997 | 2.41963e-06 | 0.999997 |
| C2H2+PhCH2         | 1.74520e-06 | 0.999999 | 1.74520e-06 | 0.999999 |
| rad25              | 3.97382e-07 | 0.999999 | 3.97382e-07 | 0.999999 |
| rad7               | 3.91690e-07 | 0.999999 | 3.91690e-07 | 0.999999 |
| rad13              | 1.98207e-07 | 1.000000 | 1.98207e-07 | 1.000000 |
| PhCHCCH2+H         | 2.92556e-08 | 1.000000 | 2.92556e-08 | 1.000000 |
| rad9               | 1.66239e-09 | 1.000000 | 1.66239e-09 | 1.000000 |
| rad33              | 3.98332e-10 | 1.000000 | 3.98332e-10 | 1.000000 |
| rad3               | 2.14534e-10 | 1.000000 | 2.14534e-10 | 1.000000 |
| rad4               | 1.09932e-10 | 1.000000 | 1.09932e-10 | 1.000000 |
| Phenyl+Allene      | 9.75736e-11 | 1.000000 | 0.000000    | 1.000000 |
| rad24              | 5.66316e-11 | 1.000000 | 5.66316e-11 | 1.000000 |
| rad30              | 1.49392e-11 | 1.000000 | 1.49392e-11 | 1.000000 |
| rad28              | 9.85088e-12 | 1.000000 | 9.85088e-12 | 1.000000 |
| rad15              | 2.38604e-12 | 1.000000 | 2.38604e-12 | 1.000000 |
| rad2               | 5.20437e-13 | 1.000000 | 5.20437e-13 | 1.000000 |
| rad8               | 4.16479e-14 | 1.000000 | 4.16479e-14 | 1.000000 |
| rad1               | 3.41653e-14 | 1.000000 | 3.41653e-14 | 1.000000 |
| rad38              | 7.42922e-15 | 1.000000 | 7.42922e-15 | 1.000000 |
| PhCCH+CH3          | 5.65699e-15 | 1.000000 | 5.65699e-15 | 1.000000 |
| PhCH2CCH+H         | 2.06214e-15 | 1.000000 | 2.06214e-15 | 1.000000 |
| rad14              | 3.26117e-16 | 1.000000 | 3.26117e-16 | 1.000000 |
| PAH9+H             | 1.06919e-16 | 1.000000 | 1.06919e-16 | 1.000000 |
| rad10              | 8.86754e-17 | 1.000000 | 8.86754e-17 | 1.000000 |
| rad60syn           | 7.76095e-17 | 1.000000 | 7.76095e-17 | 1.000000 |
| rad35              | 6.01125e-17 | 1.000000 | 6.01125e-17 | 1.000000 |
| rad46              | 3.94061e-17 | 1.000000 | 3.94061e-17 | 1.000000 |
| rad60anti          | 1.20132e-17 | 1.000000 | 1.20132e-17 | 1.000000 |
| Ph+MeAc            | 1.29112e-18 | 1.000000 | 1.29112e-18 | 1.000000 |
| PAH7+H             | 9.47440e-19 | 1.000000 | 9.47440e-19 | 1.000000 |
| rad27              | 1.30576e-19 | 1.000000 | 1.30576e-19 | 1.000000 |
| rad31              | 8.02528e-20 | 1.000000 | 8.02528e-20 | 1.000000 |
| PhCCCH3+H          | 7.72016e-20 | 1.000000 | 7.72016e-20 | 1.000000 |
| rad39              | 1.45807e-21 | 1.000000 | 1.45807e-21 | 1.000000 |
| rad26              | 2.71598e-22 | 1.000000 | 2.71598e-22 | 1.000000 |
| PAH3+H             | 3.61520e-23 | 1.000000 | 3.61520e-23 | 1.000000 |
| rad59              | 1.70870e-23 | 1.000000 | 1.70870e-23 | 1.000000 |
| rad50              | 3.03276e-26 | 1.000000 | 3.03276e-26 | 1.000000 |
| rad5               | 1.37273e-28 | 1.000000 | 1.37273e-28 | 1.000000 |
| rad12              | 5.06177e-31 | 1.000000 | 5.06177e-31 | 1.000000 |
| rad19syn           | 1.52334e-31 | 1.000000 | 1.52334e-31 | 1.000000 |
| rad37              | 6.47189e-33 | 1.000000 | 6.47189e-33 | 1.000000 |
| rad52              | 1.01989e-33 | 1.000000 | 1.01989e-33 | 1.000000 |
| rad54              | 2.90883e-34 | 1.000000 | 2.90883e-34 | 1.000000 |
| rad70              | 1.35489e-37 | 1.000000 | 1.35489e-37 | 1.000000 |
| rad62              | 5.25807e-38 | 1.000000 | 5.25807e-38 | 1.000000 |
| rad51              | 5.23621e-38 | 1.000000 | 5.23621e-38 | 1.000000 |
| rad43              | 4.74890e-39 | 1.000000 | 4.74890e-39 | 1.000000 |
| PhcycC3H3_A+H      | 7.82045e-41 | 1.000000 | 7.82045e-41 | 1.000000 |
| rad55              | 7.35164e-41 | 1.000000 | 7.35164e-41 | 1.000000 |
| rad58              | 4.83067e-41 | 1.000000 | 4.83067e-41 | 1.000000 |
| rad65              | 7.92408e-43 | 1.000000 | 7.92408e-43 | 1.000000 |
| rad34              | 4.61765e-43 | 1.000000 | 4.61765e-43 | 1.000000 |
| PAH10+CH3          | 3.31939e-43 | 1.000000 | 3.31939e-43 | 1.000000 |
| rad47              | 5.37044e-45 | 1.000000 | 5.37044e-45 | 1.000000 |
| PAH1+H             | 5.11751e-47 | 1.000000 | 5.11751e-47 | 1.000000 |
| rad42              | 8.43785e-49 | 1.000000 | 8.43785e-49 | 1.000000 |
| rad41              | 4.61489e-51 | 1.000000 | 4.61489e-51 | 1.000000 |

10000.0000 Pa, 90.0000000 K

=====

| Rate constant      | True (fraction) |            | Effective (fraction) |            |
|--------------------|-----------------|------------|----------------------|------------|
| Total              | 3.08379e-22     | (1.00 )    | 3.08379e-22          | (1.00 )    |
| Formation of rad11 | 3.03962e-22     | (0.986 )   | 3.03962e-22          | (0.986 )   |
| Formation of rad6  | 4.41076e-24     | (0.0143 )  | 4.41076e-24          | (0.0143 )  |
| H-abstraction      | 5.92916e-27     | (1.92e-05) | 5.92916e-27          | (1.92e-05) |
| species            | PYtrue          | Cumul      | PYeffective          | Cumul      |
| rad11              | 0.965733        | 0.965733   | 0.965733             | 0.965733   |

|                    |             |          |             |          |
|--------------------|-------------|----------|-------------|----------|
| rad6               | 0.0332259   | 0.998959 | 0.0332259   | 0.998959 |
| rad22              | 0.000465986 | 0.999425 | 0.000465986 | 0.999425 |
| rad20              | 0.000187736 | 0.999613 | 0.000187736 | 0.999613 |
| rad21              | 0.000141145 | 0.999754 | 0.000141145 | 0.999754 |
| rad18              | 0.000111678 | 0.999866 | 0.000111678 | 0.999866 |
| rad45              | 5.75922e-05 | 0.999923 | 5.75922e-05 | 0.999923 |
| Indene+H           | 4.69472e-05 | 0.999970 | 4.69472e-05 | 0.999970 |
| Benzene+2-propynyl | 1.92269e-05 | 0.999990 | 1.92269e-05 | 0.999990 |
| rad36              | 3.58633e-06 | 0.999993 | 3.58633e-06 | 0.999993 |
| rad23              | 3.44667e-06 | 0.999997 | 3.44667e-06 | 0.999997 |
| C2H2+PhCH2         | 2.35239e-06 | 0.999999 | 2.35239e-06 | 0.999999 |
| rad7               | 6.75680e-07 | 1.000000 | 6.75680e-07 | 1.000000 |
| rad25              | 4.72704e-07 | 1.000000 | 4.72704e-07 | 1.000000 |
| rad13              | 2.68854e-07 | 1.000000 | 2.68854e-07 | 1.000000 |
| PhCHCCH2+H         | 3.70080e-08 | 1.000000 | 3.70080e-08 | 1.000000 |
| rad9               | 2.15026e-09 | 1.000000 | 2.15026e-09 | 1.000000 |
| rad33              | 5.11561e-10 | 1.000000 | 5.11561e-10 | 1.000000 |
| rad3               | 4.11911e-10 | 1.000000 | 4.11911e-10 | 1.000000 |
| rad4               | 2.11014e-10 | 1.000000 | 2.11014e-10 | 1.000000 |
| Phenyl+Allene      | 1.64978e-10 | 1.000000 | 0.000000    | 1.000000 |
| rad24              | 4.53566e-11 | 1.000000 | 4.53566e-11 | 1.000000 |
| rad30              | 2.33820e-11 | 1.000000 | 2.33820e-11 | 1.000000 |
| rad28              | 1.99646e-11 | 1.000000 | 1.99646e-11 | 1.000000 |
| rad15              | 3.79888e-12 | 1.000000 | 3.79888e-12 | 1.000000 |
| rad2               | 1.26494e-12 | 1.000000 | 1.26494e-12 | 1.000000 |
| rad1               | 8.30653e-14 | 1.000000 | 8.30653e-14 | 1.000000 |
| rad8               | 7.36217e-14 | 1.000000 | 7.36217e-14 | 1.000000 |
| PhCCH+CH3          | 1.54645e-14 | 1.000000 | 1.54645e-14 | 1.000000 |
| rad38              | 1.15374e-14 | 1.000000 | 1.15374e-14 | 1.000000 |
| PhCH2CCH+H         | 8.30075e-15 | 1.000000 | 8.30075e-15 | 1.000000 |
| rad14              | 8.47099e-16 | 1.000000 | 8.47099e-16 | 1.000000 |
| rad10              | 2.67463e-16 | 1.000000 | 2.67463e-16 | 1.000000 |
| PAH9+H             | 1.92846e-16 | 1.000000 | 1.92846e-16 | 1.000000 |
| rad60syn           | 1.55593e-16 | 1.000000 | 1.55593e-16 | 1.000000 |
| rad35              | 1.07504e-16 | 1.000000 | 1.07504e-16 | 1.000000 |
| rad46              | 6.46839e-17 | 1.000000 | 6.46839e-17 | 1.000000 |
| rad60anti          | 2.69968e-17 | 1.000000 | 2.69968e-17 | 1.000000 |
| Ph+MeAc            | 4.39712e-18 | 1.000000 | 4.39712e-18 | 1.000000 |
| PAH7+H             | 3.97667e-18 | 1.000000 | 3.97667e-18 | 1.000000 |
| rad27              | 4.05061e-19 | 1.000000 | 4.05061e-19 | 1.000000 |
| PhCCCH3+H          | 2.65603e-19 | 1.000000 | 2.65603e-19 | 1.000000 |
| rad31              | 1.57441e-19 | 1.000000 | 1.57441e-19 | 1.000000 |
| rad39              | 4.64535e-21 | 1.000000 | 4.64535e-21 | 1.000000 |
| rad26              | 1.08813e-21 | 1.000000 | 1.08813e-21 | 1.000000 |
| PAH3+H             | 1.86991e-22 | 1.000000 | 1.86991e-22 | 1.000000 |
| rad59              | 8.71452e-23 | 1.000000 | 8.71452e-23 | 1.000000 |
| rad50              | 1.53669e-25 | 1.000000 | 1.53669e-25 | 1.000000 |
| rad5               | 1.10689e-27 | 1.000000 | 1.10689e-27 | 1.000000 |
| rad12              | 3.02720e-30 | 1.000000 | 3.02720e-30 | 1.000000 |
| rad19syn           | 2.22920e-30 | 1.000000 | 2.22920e-30 | 1.000000 |
| rad37              | 4.27716e-32 | 1.000000 | 4.27716e-32 | 1.000000 |
| rad52              | 9.13966e-33 | 1.000000 | 9.13966e-33 | 1.000000 |
| rad54              | 4.49066e-33 | 1.000000 | 4.49066e-33 | 1.000000 |
| rad70              | 1.30796e-36 | 1.000000 | 1.30796e-36 | 1.000000 |
| rad62              | 1.17485e-36 | 1.000000 | 1.17485e-36 | 1.000000 |
| rad51              | 6.31664e-37 | 1.000000 | 6.31664e-37 | 1.000000 |
| rad43              | 1.09359e-37 | 1.000000 | 1.09359e-37 | 1.000000 |
| PhcycC3H3_A+H      | 1.42901e-39 | 1.000000 | 1.42901e-39 | 1.000000 |
| rad55              | 1.21483e-39 | 1.000000 | 1.21483e-39 | 1.000000 |
| rad58              | 4.74030e-40 | 1.000000 | 4.74030e-40 | 1.000000 |
| rad65              | 1.09354e-41 | 1.000000 | 1.09354e-41 | 1.000000 |
| PAH10+CH3          | 6.01645e-42 | 1.000000 | 6.01645e-42 | 1.000000 |
| rad34              | 4.87968e-42 | 1.000000 | 4.87968e-42 | 1.000000 |
| rad47              | 9.17354e-44 | 1.000000 | 9.17354e-44 | 1.000000 |
| PAH1+H             | 1.01700e-45 | 1.000000 | 1.01700e-45 | 1.000000 |
| rad42              | 2.99178e-47 | 1.000000 | 2.99178e-47 | 1.000000 |
| rad41              | 2.08593e-49 | 1.000000 | 2.08593e-49 | 1.000000 |

10000.0000 Pa, 100.000000 K

=====

| Rate constant      | True (fraction)        | Effective (fraction)   |
|--------------------|------------------------|------------------------|
| Total              | 2.19347e-21 (1.00 )    | 2.19347e-21 (1.00 )    |
| Formation of rad11 | 2.14498e-21 (0.978 )   | 2.14498e-21 (0.978 )   |
| Formation of rad6  | 4.83503e-23 (0.0220 )  | 4.83503e-23 (0.0220 )  |
| H-abstraction      | 1.47101e-25 (6.71e-05) | 1.47101e-25 (6.71e-05) |

| species | PYtrue   | Cumul    | PYeffective | Cumul    |
|---------|----------|----------|-------------|----------|
| rad11   | 0.955275 | 0.955275 | 0.955275    | 0.955275 |

|                    |             |          |             |          |
|--------------------|-------------|----------|-------------|----------|
| rad6               | 0.0434886   | 0.998764 | 0.0434886   | 0.998764 |
| rad22              | 0.000555128 | 0.999319 | 0.000555128 | 0.999319 |
| rad20              | 0.000192428 | 0.999511 | 0.000192428 | 0.999511 |
| rad21              | 0.000142578 | 0.999654 | 0.000142578 | 0.999654 |
| rad18              | 0.000130860 | 0.999785 | 0.000130860 | 0.999785 |
| rad45              | 6.92658e-05 | 0.999854 | 6.92658e-05 | 0.999854 |
| Benzene+2-propynyl | 6.70630e-05 | 0.999921 | 6.70630e-05 | 0.999921 |
| Indene+H           | 6.44897e-05 | 0.999985 | 6.44897e-05 | 0.999985 |
| rad23              | 4.73778e-06 | 0.999990 | 4.73778e-06 | 0.999990 |
| rad36              | 4.30988e-06 | 0.999994 | 4.30988e-06 | 0.999994 |
| C2H2+PhCH2         | 3.08122e-06 | 0.999997 | 3.08122e-06 | 0.999997 |
| rad7               | 1.09406e-06 | 0.999999 | 1.09406e-06 | 0.999999 |
| rad25              | 5.55227e-07 | 0.999999 | 5.55227e-07 | 0.999999 |
| rad13              | 3.50873e-07 | 0.999999 | 3.50873e-07 | 0.999999 |
| PhCHCCH2+H         | 4.64635e-08 | 1.000000 | 4.64635e-08 | 1.000000 |
| rad9               | 2.76302e-09 | 1.000000 | 2.76302e-09 | 1.000000 |
| rad3               | 7.26524e-10 | 1.000000 | 7.26524e-10 | 1.000000 |
| rad33              | 6.40323e-10 | 1.000000 | 6.40323e-10 | 1.000000 |
| rad4               | 3.72191e-10 | 1.000000 | 3.72191e-10 | 1.000000 |
| Phenyl+Allene      | 2.73600e-10 | 1.000000 | 0.000000    | 1.000000 |
| rad24              | 3.74525e-11 | 1.000000 | 3.74525e-11 | 1.000000 |
| rad28              | 3.68696e-11 | 1.000000 | 3.68696e-11 | 1.000000 |
| rad30              | 3.51355e-11 | 1.000000 | 3.51355e-11 | 1.000000 |
| rad15              | 5.81311e-12 | 1.000000 | 5.81311e-12 | 1.000000 |
| rad2               | 2.74635e-12 | 1.000000 | 2.74635e-12 | 1.000000 |
| rad1               | 1.80551e-13 | 1.000000 | 1.80551e-13 | 1.000000 |
| rad8               | 1.27070e-13 | 1.000000 | 1.27070e-13 | 1.000000 |
| PhCCH+CH3          | 3.75068e-14 | 1.000000 | 3.75068e-14 | 1.000000 |
| PhCH2CCH+H         | 3.32745e-14 | 1.000000 | 3.32745e-14 | 1.000000 |
| rad38              | 1.74157e-14 | 1.000000 | 1.74157e-14 | 1.000000 |
| rad14              | 1.95423e-15 | 1.000000 | 1.95423e-15 | 1.000000 |
| rad10              | 7.07738e-16 | 1.000000 | 7.07738e-16 | 1.000000 |
| PAH9+H             | 3.34728e-16 | 1.000000 | 3.34728e-16 | 1.000000 |
| rad60syn           | 3.01705e-16 | 1.000000 | 3.01705e-16 | 1.000000 |
| rad35              | 1.84840e-16 | 1.000000 | 1.84840e-16 | 1.000000 |
| rad46              | 1.03745e-16 | 1.000000 | 1.03745e-16 | 1.000000 |
| rad60anti          | 5.80921e-17 | 1.000000 | 5.80921e-17 | 1.000000 |
| PAH7+H             | 1.66982e-17 | 1.000000 | 1.66982e-17 | 1.000000 |
| Ph+MeAc            | 1.31950e-17 | 1.000000 | 1.31950e-17 | 1.000000 |
| rad27              | 1.09740e-18 | 1.000000 | 1.09740e-18 | 1.000000 |
| PhCCCH3+H          | 8.02741e-19 | 1.000000 | 8.02741e-19 | 1.000000 |
| rad31              | 2.85068e-19 | 1.000000 | 2.85068e-19 | 1.000000 |
| rad39              | 1.31143e-20 | 1.000000 | 1.31143e-20 | 1.000000 |
| rad26              | 3.84964e-21 | 1.000000 | 3.84964e-21 | 1.000000 |
| PAH3+H             | 1.11270e-21 | 1.000000 | 1.11270e-21 | 1.000000 |
| rad59              | 5.05451e-22 | 1.000000 | 5.05451e-22 | 1.000000 |
| rad50              | 8.39682e-25 | 1.000000 | 8.39682e-25 | 1.000000 |
| rad5               | 7.84941e-27 | 1.000000 | 7.84941e-27 | 1.000000 |
| rad19syn           | 4.56997e-29 | 1.000000 | 4.56997e-29 | 1.000000 |
| rad12              | 1.77973e-29 | 1.000000 | 1.77973e-29 | 1.000000 |
| rad37              | 3.10657e-31 | 1.000000 | 3.10657e-31 | 1.000000 |
| rad54              | 1.36046e-31 | 1.000000 | 1.36046e-31 | 1.000000 |
| rad52              | 1.13894e-31 | 1.000000 | 1.13894e-31 | 1.000000 |
| rad62              | 3.60830e-35 | 1.000000 | 3.60830e-35 | 1.000000 |
| rad70              | 2.56754e-35 | 1.000000 | 2.56754e-35 | 1.000000 |
| rad51              | 1.16802e-35 | 1.000000 | 1.16802e-35 | 1.000000 |
| rad43              | 3.07387e-36 | 1.000000 | 3.07387e-36 | 1.000000 |
| PhcycC3H3_A+H      | 5.12144e-38 | 1.000000 | 5.12144e-38 | 1.000000 |
| rad55              | 4.26862e-38 | 1.000000 | 4.26862e-38 | 1.000000 |
| rad58              | 9.45282e-39 | 1.000000 | 9.45282e-39 | 1.000000 |
| rad65              | 2.42868e-40 | 1.000000 | 2.42868e-40 | 1.000000 |
| PAH10+CH3          | 1.73859e-40 | 1.000000 | 1.73859e-40 | 1.000000 |
| rad34              | 1.06315e-40 | 1.000000 | 1.06315e-40 | 1.000000 |
| rad47              | 2.57686e-42 | 1.000000 | 2.57686e-42 | 1.000000 |
| PAH1+H             | 4.17482e-44 | 1.000000 | 4.17482e-44 | 1.000000 |
| rad42              | 1.78771e-45 | 1.000000 | 1.78771e-45 | 1.000000 |
| rad41              | 1.46588e-47 | 1.000000 | 1.46588e-47 | 1.000000 |

10000.0000 Pa, 110.000000 K

=====

| Rate constant      | True (fraction) |            | Effective (fraction) |            |
|--------------------|-----------------|------------|----------------------|------------|
| Total              | 1.09987e-20     | (1.00 )    | 1.09987e-20          | (1.00 )    |
| Formation of rad11 | 1.06527e-20     | (0.969 )   | 1.06527e-20          | (0.969 )   |
| Formation of rad6  | 3.44008e-22     | (0.0313 )  | 3.44008e-22          | (0.0313 )  |
| H-abstraction      | 2.02040e-24     | (0.000184) | 2.02040e-24          | (0.000184) |
| species            | PYtrue          | Cumul      | PYeffective          | Cumul      |
| rad11              | 0.943180        | 0.943180   | 0.943180             | 0.943180   |

|                    |             |          |             |          |
|--------------------|-------------|----------|-------------|----------|
| rad6               | 0.0553131   | 0.998493 | 0.0553131   | 0.998493 |
| rad22              | 0.000649821 | 0.999143 | 0.000649821 | 0.999143 |
| rad20              | 0.000195028 | 0.999338 | 0.000195028 | 0.999338 |
| Benzene+2-propynyl | 0.000183695 | 0.999521 | 0.000183695 | 0.999521 |
| rad18              | 0.000149653 | 0.999671 | 0.000149653 | 0.999671 |
| rad21              | 0.000142864 | 0.999814 | 0.000142864 | 0.999814 |
| Indene+H           | 8.57256e-05 | 0.999900 | 8.57256e-05 | 0.999900 |
| rad45              | 8.18906e-05 | 0.999982 | 8.18906e-05 | 0.999982 |
| rad23              | 6.34177e-06 | 0.999988 | 6.34177e-06 | 0.999988 |
| rad36              | 5.09267e-06 | 0.999993 | 5.09267e-06 | 0.999993 |
| C2H2+PhCH2         | 3.95354e-06 | 0.999997 | 3.95354e-06 | 0.999997 |
| rad7               | 1.67236e-06 | 0.999999 | 1.67236e-06 | 0.999999 |
| rad25              | 6.46118e-07 | 0.999999 | 6.46118e-07 | 0.999999 |
| rad13              | 4.41372e-07 | 1.000000 | 4.41372e-07 | 1.000000 |
| PhCHCCH2+H         | 5.81130e-08 | 1.000000 | 5.81130e-08 | 1.000000 |
| rad9               | 3.53976e-09 | 1.000000 | 3.53976e-09 | 1.000000 |
| rad3               | 1.19360e-09 | 1.000000 | 1.19360e-09 | 1.000000 |
| rad33              | 7.79908e-10 | 1.000000 | 7.79908e-10 | 1.000000 |
| rad4               | 6.11628e-10 | 1.000000 | 6.11628e-10 | 1.000000 |
| Phenyl+Allene      | 4.46763e-10 | 1.000000 | 0.000000    | 1.000000 |
| rad28              | 6.31452e-11 | 1.000000 | 6.31452e-11 | 1.000000 |
| rad30              | 5.12738e-11 | 1.000000 | 5.12738e-11 | 1.000000 |
| rad24              | 3.17501e-11 | 1.000000 | 3.17501e-11 | 1.000000 |
| rad15              | 8.64835e-12 | 1.000000 | 8.64835e-12 | 1.000000 |
| rad2               | 5.45889e-12 | 1.000000 | 5.45889e-12 | 1.000000 |
| rad1               | 3.59540e-13 | 1.000000 | 3.59540e-13 | 1.000000 |
| rad8               | 2.15727e-13 | 1.000000 | 2.15727e-13 | 1.000000 |
| PhCH2CCH+H         | 1.22062e-13 | 1.000000 | 1.22062e-13 | 1.000000 |
| PhCCH+CH3          | 8.32156e-14 | 1.000000 | 8.32156e-14 | 1.000000 |
| rad38              | 2.58072e-14 | 1.000000 | 2.58072e-14 | 1.000000 |
| rad14              | 4.11860e-15 | 1.000000 | 4.11860e-15 | 1.000000 |
| rad10              | 1.69792e-15 | 1.000000 | 1.69792e-15 | 1.000000 |
| rad60syn           | 5.71247e-16 | 1.000000 | 5.71247e-16 | 1.000000 |
| PAH9+H             | 5.66818e-16 | 1.000000 | 5.66818e-16 | 1.000000 |
| rad35              | 3.09756e-16 | 1.000000 | 3.09756e-16 | 1.000000 |
| rad46              | 1.64232e-16 | 1.000000 | 1.64232e-16 | 1.000000 |
| rad60anti          | 1.20737e-16 | 1.000000 | 1.20737e-16 | 1.000000 |
| PAH7+H             | 6.65696e-17 | 1.000000 | 6.65696e-17 | 1.000000 |
| Ph+MeAc            | 3.61464e-17 | 1.000000 | 3.61464e-17 | 1.000000 |
| rad27              | 2.68569e-18 | 1.000000 | 2.68569e-18 | 1.000000 |
| PhCCCH3+H          | 2.21275e-18 | 1.000000 | 2.21275e-18 | 1.000000 |
| rad31              | 4.82820e-19 | 1.000000 | 4.82820e-19 | 1.000000 |
| rad39              | 3.39808e-20 | 1.000000 | 3.39808e-20 | 1.000000 |
| rad26              | 1.25488e-20 | 1.000000 | 1.25488e-20 | 1.000000 |
| PAH3+H             | 6.71033e-21 | 1.000000 | 6.71033e-21 | 1.000000 |
| rad59              | 2.94121e-21 | 1.000000 | 2.94121e-21 | 1.000000 |
| rad50              | 4.53943e-24 | 1.000000 | 4.53943e-24 | 1.000000 |
| rad5               | 4.92721e-26 | 1.000000 | 4.92721e-26 | 1.000000 |
| rad19syn           | 1.03826e-27 | 1.000000 | 1.03826e-27 | 1.000000 |
| rad12              | 1.00784e-28 | 1.000000 | 1.00784e-28 | 1.000000 |
| rad54              | 5.72411e-30 | 1.000000 | 5.72411e-30 | 1.000000 |
| rad37              | 2.21826e-30 | 1.000000 | 2.21826e-30 | 1.000000 |
| rad52              | 1.75570e-30 | 1.000000 | 1.75570e-30 | 1.000000 |
| rad62              | 1.37664e-33 | 1.000000 | 1.37664e-33 | 1.000000 |
| rad70              | 1.10542e-33 | 1.000000 | 1.10542e-33 | 1.000000 |
| rad51              | 3.13617e-34 | 1.000000 | 3.13617e-34 | 1.000000 |
| rad43              | 9.59219e-35 | 1.000000 | 9.59219e-35 | 1.000000 |
| PhcycC3H3_A+H      | 3.63838e-36 | 1.000000 | 3.63838e-36 | 1.000000 |
| rad55              | 3.31671e-36 | 1.000000 | 3.31671e-36 | 1.000000 |
| rad58              | 4.12253e-37 | 1.000000 | 4.12253e-37 | 1.000000 |
| rad65              | 8.35418e-39 | 1.000000 | 8.35418e-39 | 1.000000 |
| PAH10+CH3          | 6.35557e-39 | 1.000000 | 6.35557e-39 | 1.000000 |
| rad34              | 5.17734e-39 | 1.000000 | 5.17734e-39 | 1.000000 |
| rad47              | 1.12258e-40 | 1.000000 | 1.12258e-40 | 1.000000 |
| PAH1+H             | 3.61812e-42 | 1.000000 | 3.61812e-42 | 1.000000 |
| rad42              | 1.65291e-43 | 1.000000 | 1.65291e-43 | 1.000000 |
| rad41              | 1.47426e-45 | 1.000000 | 1.47426e-45 | 1.000000 |

10000.0000 Pa, 120.000000 K

=====

| Rate constant      | True (fraction)        | Effective (fraction)   |             |          |
|--------------------|------------------------|------------------------|-------------|----------|
| Total              | 4.24245e-20 (1.00 )    | 4.24245e-20 (1.00 )    |             |          |
| Formation of rad11 | 4.06372e-20 (0.958 )   | 4.06372e-20 (0.958 )   |             |          |
| Formation of rad6  | 1.76944e-21 (0.0417 )  | 1.76944e-21 (0.0417 )  |             |          |
| H-abstraction      | 1.78210e-23 (0.000420) | 1.78210e-23 (0.000420) |             |          |
| species            | PYtrue                 | Cumul                  | PYeffective | Cumul    |
| rad11              | 0.929676               | 0.929676               | 0.929676    | 0.929676 |



|                    |             |          |             |          |
|--------------------|-------------|----------|-------------|----------|
| rad6               | 0.0684175   | 0.998094 | 0.0684175   | 0.998094 |
| rad22              | 0.000750420 | 0.998844 | 0.000750420 | 0.998844 |
| Benzene+2-propynyl | 0.000420064 | 0.999264 | 0.000420064 | 0.999264 |
| rad20              | 0.000195922 | 0.999460 | 0.000195922 | 0.999460 |
| rad18              | 0.000167863 | 0.999628 | 0.000167863 | 0.999628 |
| rad21              | 0.000142206 | 0.999770 | 0.000142206 | 0.999770 |
| Indene+H           | 0.000111103 | 0.999881 | 0.000111103 | 0.999881 |
| rad45              | 9.55553e-05 | 0.999977 | 9.55553e-05 | 0.999977 |
| rad23              | 8.32048e-06 | 0.999985 | 8.32048e-06 | 0.999985 |
| rad36              | 5.94066e-06 | 0.999991 | 5.94066e-06 | 0.999991 |
| C2H2+PhCH2         | 4.99788e-06 | 0.999996 | 4.99788e-06 | 0.999996 |
| rad7               | 2.43360e-06 | 0.999999 | 2.43360e-06 | 0.999999 |
| rad25              | 7.46718e-07 | 0.999999 | 7.46718e-07 | 0.999999 |
| rad13              | 5.37396e-07 | 1.000000 | 5.37396e-07 | 1.000000 |
| PhCHCCH2+H         | 7.26050e-08 | 1.000000 | 7.26050e-08 | 1.000000 |
| rad9               | 4.53287e-09 | 1.000000 | 4.53287e-09 | 1.000000 |
| rad3               | 1.85138e-09 | 1.000000 | 1.85138e-09 | 1.000000 |
| rad4               | 9.49137e-10 | 1.000000 | 9.49137e-10 | 1.000000 |
| rad33              | 9.25791e-10 | 1.000000 | 9.25791e-10 | 1.000000 |
| Phenyl+Allene      | 7.20329e-10 | 1.000000 | 0.000000    | 1.000000 |
| rad28              | 1.01882e-10 | 1.000000 | 1.01882e-10 | 1.000000 |
| rad30              | 7.32500e-11 | 1.000000 | 7.32500e-11 | 1.000000 |
| rad24              | 2.75518e-11 | 1.000000 | 2.75518e-11 | 1.000000 |
| rad15              | 1.26101e-11 | 1.000000 | 1.26101e-11 | 1.000000 |
| rad2               | 1.01361e-11 | 1.000000 | 1.01361e-11 | 1.000000 |
| rad1               | 6.69240e-13 | 1.000000 | 6.69240e-13 | 1.000000 |
| PhCH2CCH+H         | 4.00225e-13 | 1.000000 | 4.00225e-13 | 1.000000 |
| rad8               | 3.61964e-13 | 1.000000 | 3.61964e-13 | 1.000000 |
| PhCCH+CH3          | 1.72871e-13 | 1.000000 | 1.72871e-13 | 1.000000 |
| rad38              | 3.78112e-14 | 1.000000 | 3.78112e-14 | 1.000000 |
| rad14              | 8.10490e-15 | 1.000000 | 8.10490e-15 | 1.000000 |
| rad10              | 3.78790e-15 | 1.000000 | 3.78790e-15 | 1.000000 |
| rad60syn           | 1.06226e-15 | 1.000000 | 1.06226e-15 | 1.000000 |
| PAH9+H             | 9.45881e-16 | 1.000000 | 9.45881e-16 | 1.000000 |
| rad35              | 5.11081e-16 | 1.000000 | 5.11081e-16 | 1.000000 |
| rad46              | 2.58474e-16 | 1.000000 | 2.58474e-16 | 1.000000 |
| PAH7+H             | 2.44232e-16 | 1.000000 | 2.44232e-16 | 1.000000 |
| rad60anti          | 2.43861e-16 | 1.000000 | 2.43861e-16 | 1.000000 |
| Ph+MeAc            | 9.26669e-17 | 1.000000 | 9.26669e-17 | 1.000000 |
| rad27              | 6.08759e-18 | 1.000000 | 6.08759e-18 | 1.000000 |
| PhCCCH3+H          | 5.71887e-18 | 1.000000 | 5.71887e-18 | 1.000000 |
| rad31              | 7.75186e-19 | 1.000000 | 7.75186e-19 | 1.000000 |
| rad39              | 8.28744e-20 | 1.000000 | 8.28744e-20 | 1.000000 |
| rad26              | 3.87363e-20 | 1.000000 | 3.87363e-20 | 1.000000 |
| PAH3+H             | 3.71074e-20 | 1.000000 | 3.71074e-20 | 1.000000 |
| rad59              | 1.56102e-20 | 1.000000 | 1.56102e-20 | 1.000000 |
| rad50              | 2.28080e-23 | 1.000000 | 2.28080e-23 | 1.000000 |
| rad5               | 2.76514e-25 | 1.000000 | 2.76514e-25 | 1.000000 |
| rad19syn           | 1.98500e-26 | 1.000000 | 1.98500e-26 | 1.000000 |
| rad12              | 5.40528e-28 | 1.000000 | 5.40528e-28 | 1.000000 |
| rad54              | 1.94618e-28 | 1.000000 | 1.94618e-28 | 1.000000 |
| rad52              | 2.69149e-29 | 1.000000 | 2.69149e-29 | 1.000000 |
| rad37              | 1.48081e-29 | 1.000000 | 1.48081e-29 | 1.000000 |
| rad70              | 8.41641e-32 | 1.000000 | 8.41641e-32 | 1.000000 |
| rad62              | 5.03066e-32 | 1.000000 | 5.03066e-32 | 1.000000 |
| rad51              | 9.81103e-33 | 1.000000 | 9.81103e-33 | 1.000000 |
| rad43              | 2.77943e-33 | 1.000000 | 2.77943e-33 | 1.000000 |
| rad55              | 4.30076e-34 | 1.000000 | 4.30076e-34 | 1.000000 |
| PhcycC3H3_A+H      | 3.58361e-34 | 1.000000 | 3.58361e-34 | 1.000000 |
| rad58              | 3.15276e-35 | 1.000000 | 3.15276e-35 | 1.000000 |
| rad34              | 4.60680e-37 | 1.000000 | 4.60680e-37 | 1.000000 |
| rad65              | 3.73371e-37 | 1.000000 | 3.73371e-37 | 1.000000 |
| PAH10+CH3          | 2.31729e-37 | 1.000000 | 2.31729e-37 | 1.000000 |
| rad47              | 6.39870e-39 | 1.000000 | 6.39870e-39 | 1.000000 |
| PAH1+H             | 4.73974e-40 | 1.000000 | 4.73974e-40 | 1.000000 |
| rad42              | 1.90420e-41 | 1.000000 | 1.90420e-41 | 1.000000 |
| rad41              | 1.73500e-43 | 1.000000 | 1.73500e-43 | 1.000000 |

10000.0000 Pa, 130.000000 K

=====

| Rate constant      | True (fraction) |            | Effective (fraction) |            |
|--------------------|-----------------|------------|----------------------|------------|
| Total              | 1.33719e-19     | (1.00 )    | 1.33719e-19          | (1.00 )    |
| Formation of rad11 | 1.26517e-19     | (0.946 )   | 1.26517e-19          | (0.946 )   |
| Formation of rad6  | 7.08974e-21     | (0.0530 )  | 7.08974e-21          | (0.0530 )  |
| H-abstraction      | 1.11864e-22     | (0.000837) | 1.11864e-22          | (0.000837) |
| species            | PYtrue          | Cumul      | PYeffective          | Cumul      |
| rad11              | 0.914998        | 0.914998   | 0.914998             | 0.914998   |

|                    |             |          |             |          |
|--------------------|-------------|----------|-------------|----------|
| rad6               | 0.0825057   | 0.997504 | 0.0825057   | 0.997504 |
| rad22              | 0.000857454 | 0.998361 | 0.000857454 | 0.998361 |
| Benzene+2-propynyl | 0.000836559 | 0.999198 | 0.000836559 | 0.999198 |
| rad20              | 0.000195426 | 0.999393 | 0.000195426 | 0.999393 |
| rad18              | 0.000185336 | 0.999578 | 0.000185336 | 0.999578 |
| Indene+H           | 0.000141160 | 0.999720 | 0.000141160 | 0.999720 |
| rad21              | 0.000140779 | 0.999860 | 0.000140779 | 0.999860 |
| rad45              | 0.000110377 | 0.999971 | 0.000110377 | 0.999971 |
| rad23              | 1.07522e-05 | 0.999981 | 1.07522e-05 | 0.999981 |
| rad36              | 6.86166e-06 | 0.999988 | 6.86166e-06 | 0.999988 |
| C2H2+PhCH2         | 6.25084e-06 | 0.999995 | 6.25084e-06 | 0.999995 |
| rad7               | 3.39912e-06 | 0.999998 | 3.39912e-06 | 0.999998 |
| rad25              | 8.58506e-07 | 0.999999 | 8.58506e-07 | 0.999999 |
| rad13              | 6.36315e-07 | 0.999999 | 6.36315e-07 | 0.999999 |
| PhCHCCH2+H         | 9.07949e-08 | 1.000000 | 9.07949e-08 | 1.000000 |
| rad9               | 5.81265e-09 | 1.000000 | 5.81265e-09 | 1.000000 |
| rad3               | 2.74250e-09 | 1.000000 | 2.74250e-09 | 1.000000 |
| rad4               | 1.40691e-09 | 1.000000 | 1.40691e-09 | 1.000000 |
| Phenyl+Allene      | 1.14920e-09 | 1.000000 | 0.000000    | 1.000000 |
| rad33              | 1.07411e-09 | 1.000000 | 1.07411e-09 | 1.000000 |
| rad28              | 1.56853e-10 | 1.000000 | 1.56853e-10 | 1.000000 |
| rad30              | 1.03032e-10 | 1.000000 | 1.03032e-10 | 1.000000 |
| rad24              | 2.44214e-11 | 1.000000 | 2.44214e-11 | 1.000000 |
| rad15              | 1.81233e-11 | 1.000000 | 1.81233e-11 | 1.000000 |
| rad2               | 1.78615e-11 | 1.000000 | 1.78615e-11 | 1.000000 |
| rad1               | 1.18290e-12 | 1.000000 | 1.18290e-12 | 1.000000 |
| PhCH2CCH+H         | 1.17892e-12 | 1.000000 | 1.17892e-12 | 1.000000 |
| rad8               | 6.02078e-13 | 1.000000 | 6.02078e-13 | 1.000000 |
| PhCCH+CH3          | 3.42182e-13 | 1.000000 | 3.42182e-13 | 1.000000 |
| rad38              | 5.50700e-14 | 1.000000 | 5.50700e-14 | 1.000000 |
| rad14              | 1.51402e-14 | 1.000000 | 1.51402e-14 | 1.000000 |
| rad10              | 8.01109e-15 | 1.000000 | 8.01109e-15 | 1.000000 |
| rad60syn           | 1.94670e-15 | 1.000000 | 1.94670e-15 | 1.000000 |
| PAH9+H             | 1.56731e-15 | 1.000000 | 1.56731e-15 | 1.000000 |
| rad35              | 8.36637e-16 | 1.000000 | 8.36637e-16 | 1.000000 |
| PAH7+H             | 8.17280e-16 | 1.000000 | 8.17280e-16 | 1.000000 |
| rad60anti          | 4.80709e-16 | 1.000000 | 4.80709e-16 | 1.000000 |
| rad46              | 4.06553e-16 | 1.000000 | 4.06553e-16 | 1.000000 |
| Ph+MeAc            | 2.26276e-16 | 1.000000 | 2.26276e-16 | 1.000000 |
| PhCCCH3+H          | 1.41441e-17 | 1.000000 | 1.41441e-17 | 1.000000 |
| rad27              | 1.30154e-17 | 1.000000 | 1.30154e-17 | 1.000000 |
| rad31              | 1.19335e-18 | 1.000000 | 1.19335e-18 | 1.000000 |
| rad39              | 1.93717e-19 | 1.000000 | 1.93717e-19 | 1.000000 |
| PAH3+H             | 1.80616e-19 | 1.000000 | 1.80616e-19 | 1.000000 |
| rad26              | 1.14882e-19 | 1.000000 | 1.14882e-19 | 1.000000 |
| rad59              | 7.28112e-20 | 1.000000 | 7.28112e-20 | 1.000000 |
| rad50              | 1.03854e-22 | 1.000000 | 1.03854e-22 | 1.000000 |
| rad5               | 1.40583e-24 | 1.000000 | 1.40583e-24 | 1.000000 |
| rad19syn           | 2.87858e-25 | 1.000000 | 2.87858e-25 | 1.000000 |
| rad54              | 4.51114e-27 | 1.000000 | 4.51114e-27 | 1.000000 |
| rad12              | 2.72958e-27 | 1.000000 | 2.72958e-27 | 1.000000 |
| rad52              | 3.52324e-28 | 1.000000 | 3.52324e-28 | 1.000000 |
| rad37              | 9.16091e-29 | 1.000000 | 9.16091e-29 | 1.000000 |
| rad70              | 8.56612e-30 | 1.000000 | 8.56612e-30 | 1.000000 |
| rad62              | 1.45297e-30 | 1.000000 | 1.45297e-30 | 1.000000 |
| rad51              | 2.66753e-31 | 1.000000 | 2.66753e-31 | 1.000000 |
| rad43              | 6.57895e-32 | 1.000000 | 6.57895e-32 | 1.000000 |
| rad55              | 3.00284e-32 | 1.000000 | 3.00284e-32 | 1.000000 |
| PhcycC3H3_A+H      | 2.46901e-32 | 1.000000 | 2.46901e-32 | 1.000000 |
| rad58              | 3.18587e-33 | 1.000000 | 3.18587e-33 | 1.000000 |
| rad34              | 5.83841e-35 | 1.000000 | 5.83841e-35 | 1.000000 |
| rad65              | 1.65024e-35 | 1.000000 | 1.65024e-35 | 1.000000 |
| PAH10+CH3          | 7.11231e-36 | 1.000000 | 7.11231e-36 | 1.000000 |
| rad47              | 3.91485e-37 | 1.000000 | 3.91485e-37 | 1.000000 |
| PAH1+H             | 5.97943e-38 | 1.000000 | 5.97943e-38 | 1.000000 |
| rad42              | 2.06107e-39 | 1.000000 | 2.06107e-39 | 1.000000 |
| rad41              | 1.85115e-41 | 1.000000 | 1.85115e-41 | 1.000000 |

10000.0000 Pa, 140.000000 K

=====

| Rate constant      | True (fraction) |            | Effective (fraction) |            |
|--------------------|-----------------|------------|----------------------|------------|
| Total              | 3.59582e-19     | (1.00 )    | 3.59582e-19          | (1.00 )    |
| Formation of rad11 | 3.35703e-19     | (0.934 )   | 3.35703e-19          | (0.934 )   |
| Formation of rad6  | 2.33415e-20     | (0.0649 )  | 2.33415e-20          | (0.0649 )  |
| H-abstraction      | 5.37685e-22     | (0.00150 ) | 5.37685e-22          | (0.00150 ) |
| species            | PYtrue          | Cumul      | PYeffective          | Cumul      |
| rad11              | 0.899360        | 0.899360   | 0.899360             | 0.899360   |

|                    |             |          |             |          |
|--------------------|-------------|----------|-------------|----------|
| rad6               | 0.0972994   | 0.996660 | 0.0972994   | 0.996660 |
| Benzene+2-propynyl | 0.00149531  | 0.998155 | 0.00149531  | 0.998155 |
| rad22              | 0.000971604 | 0.999126 | 0.000971604 | 0.999126 |
| rad18              | 0.000201939 | 0.999328 | 0.000201939 | 0.999328 |
| rad20              | 0.000193800 | 0.999522 | 0.000193800 | 0.999522 |
| Indene+H           | 0.000176534 | 0.999699 | 0.000176534 | 0.999699 |
| rad21              | 0.000138727 | 0.999837 | 0.000138727 | 0.999837 |
| rad45              | 0.000126498 | 0.999964 | 0.000126498 | 0.999964 |
| rad23              | 1.37359e-05 | 0.999978 | 1.37359e-05 | 0.999978 |
| rad36              | 7.86524e-06 | 0.999986 | 7.86524e-06 | 0.999986 |
| C2H2+PhCH2         | 7.75884e-06 | 0.999993 | 7.75884e-06 | 0.999993 |
| rad7               | 4.58995e-06 | 0.999998 | 4.58995e-06 | 0.999998 |
| rad25              | 9.83057e-07 | 0.999999 | 9.83058e-07 | 0.999999 |
| rad13              | 7.35980e-07 | 1.000000 | 7.35980e-07 | 1.000000 |
| PhCHCCH2+H         | 1.13812e-07 | 1.000000 | 1.13812e-07 | 1.000000 |
| rad9               | 7.47337e-09 | 1.000000 | 7.47337e-09 | 1.000000 |
| rad3               | 3.91606e-09 | 1.000000 | 3.91606e-09 | 1.000000 |
| rad4               | 2.01063e-09 | 1.000000 | 2.01063e-09 | 1.000000 |
| Phenyl+Allene      | 1.81699e-09 | 1.000000 | 0.000000    | 1.000000 |
| rad33              | 1.22186e-09 | 1.000000 | 1.22186e-09 | 1.000000 |
| rad28              | 2.32770e-10 | 1.000000 | 2.32770e-10 | 1.000000 |
| rad30              | 1.43279e-10 | 1.000000 | 1.43279e-10 | 1.000000 |
| rad2               | 3.02400e-11 | 1.000000 | 3.02400e-11 | 1.000000 |
| rad15              | 2.57785e-11 | 1.000000 | 2.57785e-11 | 1.000000 |
| rad24              | 2.20747e-11 | 1.000000 | 2.20747e-11 | 1.000000 |
| PhCH2CCH+H         | 3.16238e-12 | 1.000000 | 3.16238e-12 | 1.000000 |
| rad1               | 2.00986e-12 | 1.000000 | 2.00986e-12 | 1.000000 |
| rad8               | 9.94647e-13 | 1.000000 | 9.94647e-13 | 1.000000 |
| PhCCH+CH3          | 6.53928e-13 | 1.000000 | 6.53928e-13 | 1.000000 |
| rad38              | 8.00528e-14 | 1.000000 | 8.00528e-14 | 1.000000 |
| rad14              | 2.71820e-14 | 1.000000 | 2.71820e-14 | 1.000000 |
| rad10              | 1.63006e-14 | 1.000000 | 1.63006e-14 | 1.000000 |
| rad60syn           | 3.52251e-15 | 1.000000 | 3.52251e-15 | 1.000000 |
| PAH9+H             | 2.59347e-15 | 1.000000 | 2.59347e-15 | 1.000000 |
| PAH7+H             | 2.50409e-15 | 1.000000 | 2.50409e-15 | 1.000000 |
| rad35              | 1.36680e-15 | 1.000000 | 1.36680e-15 | 1.000000 |
| rad60anti          | 9.27549e-16 | 1.000000 | 9.27549e-16 | 1.000000 |
| rad46              | 6.41451e-16 | 1.000000 | 6.41451e-16 | 1.000000 |
| Ph+MeAc            | 5.32874e-16 | 1.000000 | 5.32874e-16 | 1.000000 |
| PhCCCH3+H          | 3.39808e-17 | 1.000000 | 3.39808e-17 | 1.000000 |
| rad27              | 2.65974e-17 | 1.000000 | 2.65974e-17 | 1.000000 |
| rad31              | 1.77799e-18 | 1.000000 | 1.77799e-18 | 1.000000 |
| PAH3+H             | 7.70387e-19 | 1.000000 | 7.70387e-19 | 1.000000 |
| rad39              | 4.39645e-19 | 1.000000 | 4.39645e-19 | 1.000000 |
| rad26              | 3.29503e-19 | 1.000000 | 3.29503e-19 | 1.000000 |
| rad59              | 2.97762e-19 | 1.000000 | 2.97762e-19 | 1.000000 |
| rad50              | 4.27808e-22 | 1.000000 | 4.27808e-22 | 1.000000 |
| rad5               | 6.56527e-24 | 1.000000 | 6.56527e-24 | 1.000000 |
| rad19syn           | 3.16249e-24 | 1.000000 | 3.16249e-24 | 1.000000 |
| rad54              | 7.21309e-26 | 1.000000 | 7.21309e-26 | 1.000000 |
| rad12              | 1.30451e-26 | 1.000000 | 1.30451e-26 | 1.000000 |
| rad52              | 3.73377e-27 | 1.000000 | 3.73377e-27 | 1.000000 |
| rad37              | 5.29975e-28 | 1.000000 | 5.29975e-28 | 1.000000 |
| rad70              | 4.31220e-28 | 1.000000 | 4.31220e-28 | 1.000000 |
| rad62              | 3.12774e-29 | 1.000000 | 3.12774e-29 | 1.000000 |
| rad51              | 5.57466e-30 | 1.000000 | 5.57466e-30 | 1.000000 |
| rad55              | 1.22876e-30 | 1.000000 | 1.22876e-30 | 1.000000 |
| rad43              | 1.21828e-30 | 1.000000 | 1.21828e-30 | 1.000000 |
| PhcycC3H3_A+H      | 1.07999e-30 | 1.000000 | 1.07999e-30 | 1.000000 |
| rad58              | 2.00123e-31 | 1.000000 | 2.00123e-31 | 1.000000 |
| rad34              | 8.04159e-33 | 1.000000 | 8.04159e-33 | 1.000000 |
| rad65              | 5.47314e-34 | 1.000000 | 5.47314e-34 | 1.000000 |
| PAH10+CH3          | 1.74481e-34 | 1.000000 | 1.74481e-34 | 1.000000 |
| rad47              | 2.10283e-35 | 1.000000 | 2.10283e-35 | 1.000000 |
| PAH1+H             | 7.03773e-36 | 1.000000 | 7.03773e-36 | 1.000000 |
| rad42              | 2.33709e-37 | 1.000000 | 2.33709e-37 | 1.000000 |
| rad41              | 1.85255e-39 | 1.000000 | 1.85255e-39 | 1.000000 |

10000.0000 Pa, 150.000000 K

=====

| Rate constant      | True (fraction)        | Effective (fraction)   |
|--------------------|------------------------|------------------------|
| Total              | 8.51464e-19 (1.00 )    | 8.51464e-19 (1.00 )    |
| Formation of rad11 | 7.83711e-19 (0.920 )   | 7.83711e-19 (0.920 )   |
| Formation of rad6  | 6.56651e-20 (0.0771 )  | 6.56651e-20 (0.0771 )  |
| H-abstraction      | 2.08816e-21 (0.00245 ) | 2.08816e-21 (0.00245 ) |

| species | PYtrue   | Cumul    | PYeffective | Cumul    |
|---------|----------|----------|-------------|----------|
| rad11   | 0.882946 | 0.882946 | 0.882946    | 0.882946 |

|                    |             |          |             |          |
|--------------------|-------------|----------|-------------|----------|
| rad6               | 0.112556    | 0.995503 | 0.112556    | 0.995503 |
| Benzene+2-propynyl | 0.00245244  | 0.997955 | 0.00245244  | 0.997955 |
| rad22              | 0.00109367  | 0.999049 | 0.00109367  | 0.999049 |
| Indene+H           | 0.000217983 | 0.999267 | 0.000217983 | 0.999267 |
| rad18              | 0.000217555 | 0.999484 | 0.000217555 | 0.999484 |
| rad20              | 0.000191255 | 0.999675 | 0.000191255 | 0.999675 |
| rad45              | 0.000144086 | 0.999820 | 0.000144086 | 0.999820 |
| rad21              | 0.000136171 | 0.999956 | 0.000136171 | 0.999956 |
| rad23              | 1.73968e-05 | 0.999973 | 1.73968e-05 | 0.999973 |
| C2H2+PhCH2         | 9.58042e-06 | 0.999983 | 9.58042e-06 | 0.999983 |
| rad36              | 8.96275e-06 | 0.999992 | 8.96275e-06 | 0.999992 |
| rad7               | 6.02799e-06 | 0.999998 | 6.02799e-06 | 0.999998 |
| rad25              | 1.12199e-06 | 0.999999 | 1.12199e-06 | 0.999999 |
| rad13              | 8.34756e-07 | 1.000000 | 8.34756e-07 | 1.000000 |
| PhCHCCH2+H         | 1.43148e-07 | 1.000000 | 1.43148e-07 | 1.000000 |
| rad9               | 9.64134e-09 | 1.000000 | 9.64134e-09 | 1.000000 |
| rad3               | 5.43032e-09 | 1.000000 | 5.43032e-09 | 1.000000 |
| Phenyl+Allene      | 2.85037e-09 | 1.000000 | 0.000000    | 1.000000 |
| rad4               | 2.79093e-09 | 1.000000 | 2.79093e-09 | 1.000000 |
| rad33              | 1.36681e-09 | 1.000000 | 1.36681e-09 | 1.000000 |
| rad28              | 3.35635e-10 | 1.000000 | 3.35635e-10 | 1.000000 |
| rad30              | 1.97576e-10 | 1.000000 | 1.97576e-10 | 1.000000 |
| rad2               | 4.96605e-11 | 1.000000 | 4.96605e-11 | 1.000000 |
| rad15              | 3.63928e-11 | 1.000000 | 3.63928e-11 | 1.000000 |
| rad24              | 2.03216e-11 | 1.000000 | 2.03216e-11 | 1.000000 |
| PhCH2CCH+H         | 7.83576e-12 | 1.000000 | 7.83576e-12 | 1.000000 |
| rad1               | 3.31432e-12 | 1.000000 | 3.31432e-12 | 1.000000 |
| rad8               | 1.63358e-12 | 1.000000 | 1.63358e-12 | 1.000000 |
| PhCCH+CH3          | 1.21856e-12 | 1.000000 | 1.21856e-12 | 1.000000 |
| rad38              | 1.16496e-13 | 1.000000 | 1.16496e-13 | 1.000000 |
| rad14              | 4.73361e-14 | 1.000000 | 4.73361e-14 | 1.000000 |
| rad10              | 3.22734e-14 | 1.000000 | 3.22734e-14 | 1.000000 |
| PAH7+H             | 7.08594e-15 | 1.000000 | 7.08594e-15 | 1.000000 |
| rad60syn           | 6.29938e-15 | 1.000000 | 6.29938e-15 | 1.000000 |
| PAH9+H             | 4.30378e-15 | 1.000000 | 4.30378e-15 | 1.000000 |
| rad35              | 2.23822e-15 | 1.000000 | 2.23822e-15 | 1.000000 |
| rad60anti          | 1.75533e-15 | 1.000000 | 1.75533e-15 | 1.000000 |
| Ph+MeAc            | 1.22097e-15 | 1.000000 | 1.22097e-15 | 1.000000 |
| rad46              | 1.01771e-15 | 1.000000 | 1.01771e-15 | 1.000000 |
| PhCCCH3+H          | 8.01649e-17 | 1.000000 | 8.01649e-17 | 1.000000 |
| rad27              | 5.24472e-17 | 1.000000 | 5.24472e-17 | 1.000000 |
| PAH3+H             | 2.90960e-18 | 1.000000 | 2.90960e-18 | 1.000000 |
| rad31              | 2.58326e-18 | 1.000000 | 2.58326e-18 | 1.000000 |
| rad59              | 1.07986e-18 | 1.000000 | 1.07986e-18 | 1.000000 |
| rad39              | 9.77635e-19 | 1.000000 | 9.77635e-19 | 1.000000 |
| rad26              | 9.17408e-19 | 1.000000 | 9.17408e-19 | 1.000000 |
| rad50              | 1.60741e-21 | 1.000000 | 1.60741e-21 | 1.000000 |
| rad5               | 2.85166e-23 | 1.000000 | 2.85166e-23 | 1.000000 |
| rad19syn           | 2.71413e-23 | 1.000000 | 2.71413e-23 | 1.000000 |
| rad54              | 8.36535e-25 | 1.000000 | 8.36535e-25 | 1.000000 |
| rad12              | 5.96635e-26 | 1.000000 | 5.96635e-26 | 1.000000 |
| rad52              | 3.20382e-26 | 1.000000 | 3.20382e-26 | 1.000000 |
| rad70              | 1.20203e-26 | 1.000000 | 1.20203e-26 | 1.000000 |
| rad37              | 2.90832e-27 | 1.000000 | 2.90832e-27 | 1.000000 |
| rad62              | 5.03323e-28 | 1.000000 | 5.03323e-28 | 1.000000 |
| rad51              | 8.82081e-29 | 1.000000 | 8.82081e-29 | 1.000000 |
| rad55              | 3.10308e-29 | 1.000000 | 3.10308e-29 | 1.000000 |
| PhcycC3H3_A+H      | 2.95909e-29 | 1.000000 | 2.95909e-29 | 1.000000 |
| rad43              | 1.76901e-29 | 1.000000 | 1.76901e-29 | 1.000000 |
| rad58              | 6.60255e-30 | 1.000000 | 6.60255e-30 | 1.000000 |
| rad34              | 1.12142e-30 | 1.000000 | 1.12142e-30 | 1.000000 |
| rad65              | 1.31684e-32 | 1.000000 | 1.31684e-32 | 1.000000 |
| PAH10+CH3          | 3.41794e-33 | 1.000000 | 3.41794e-33 | 1.000000 |
| rad47              | 7.61888e-34 | 1.000000 | 7.61888e-34 | 1.000000 |
| PAH1+H             | 3.39583e-34 | 1.000000 | 3.39583e-34 | 1.000000 |
| rad42              | 1.76444e-35 | 1.000000 | 1.76444e-35 | 1.000000 |
| rad41              | 1.25281e-37 | 1.000000 | 1.25281e-37 | 1.000000 |

10000.0000 Pa, 160.000000 K

=====

| Rate constant      | True (fraction) |            | Effective (fraction) |            |
|--------------------|-----------------|------------|----------------------|------------|
| Total              | 1.81800e-18     | (1.00 )    | 1.81800e-18          | (1.00 )    |
| Formation of rad11 | 1.64862e-18     | (0.907 )   | 1.64862e-18          | (0.907 )   |
| Formation of rad6  | 1.62558e-19     | (0.0894 )  | 1.62558e-19          | (0.0894 )  |
| H-abstraction      | 6.82130e-21     | (0.00375 ) | 6.82130e-21          | (0.00375 ) |
| species            | PYtrue          | Cumul      | PYeffective          | Cumul      |
| rad11              | 0.865910        | 0.865910   | 0.865910             | 0.865910   |

|                    |             |          |             |          |
|--------------------|-------------|----------|-------------|----------|
| rad6               | 0.128077    | 0.993986 | 0.128077    | 0.993986 |
| Benzene+2-propynyl | 0.00375209  | 0.997739 | 0.00375209  | 0.997739 |
| rad22              | 0.00122458  | 0.998963 | 0.00122458  | 0.998963 |
| Indene+H           | 0.000266401 | 0.999229 | 0.000266401 | 0.999229 |
| rad18              | 0.000232081 | 0.999462 | 0.000232081 | 0.999462 |
| rad20              | 0.000187966 | 0.999650 | 0.000187966 | 0.999650 |
| rad45              | 0.000163332 | 0.999813 | 0.000163332 | 0.999813 |
| rad21              | 0.000133211 | 0.999946 | 0.000133211 | 0.999946 |
| rad23              | 2.18921e-05 | 0.999968 | 2.18921e-05 | 0.999968 |
| C2H2+PhCH2         | 1.17888e-05 | 0.999980 | 1.17888e-05 | 0.999980 |
| rad36              | 1.01672e-05 | 0.999990 | 1.01672e-05 | 0.999990 |
| rad7               | 7.73732e-06 | 0.999998 | 7.73732e-06 | 0.999998 |
| rad25              | 1.27689e-06 | 0.999999 | 1.27689e-06 | 0.999999 |
| rad13              | 9.31484e-07 | 1.000000 | 9.31484e-07 | 1.000000 |
| PhCHCCH2+H         | 1.80769e-07 | 1.000000 | 1.80769e-07 | 1.000000 |
| rad9               | 1.24857e-08 | 1.000000 | 1.24857e-08 | 1.000000 |
| rad3               | 7.35609e-09 | 1.000000 | 7.35609e-09 | 1.000000 |
| Phenyl+Allene      | 4.43990e-09 | 1.000000 | 0.000000    | 1.000000 |
| rad4               | 3.78519e-09 | 1.000000 | 3.78519e-09 | 1.000000 |
| rad33              | 1.50750e-09 | 1.000000 | 1.50750e-09 | 1.000000 |
| rad28              | 4.73207e-10 | 1.000000 | 4.73207e-10 | 1.000000 |
| rad30              | 2.70723e-10 | 1.000000 | 2.70723e-10 | 1.000000 |
| rad2               | 7.96994e-11 | 1.000000 | 7.96994e-11 | 1.000000 |
| rad15              | 5.10925e-11 | 1.000000 | 5.10925e-11 | 1.000000 |
| rad24              | 1.90314e-11 | 1.000000 | 1.90314e-11 | 1.000000 |
| PhCH2CCH+H         | 1.81610e-11 | 1.000000 | 1.81610e-11 | 1.000000 |
| rad1               | 5.34418e-12 | 1.000000 | 5.34418e-12 | 1.000000 |
| rad8               | 2.66820e-12 | 1.000000 | 2.66820e-12 | 1.000000 |
| PhCCH+CH3          | 2.23068e-12 | 1.000000 | 2.23068e-12 | 1.000000 |
| rad38              | 1.70077e-13 | 1.000000 | 1.70077e-13 | 1.000000 |
| rad14              | 8.05003e-14 | 1.000000 | 8.05003e-14 | 1.000000 |
| rad10              | 6.27115e-14 | 1.000000 | 6.27115e-14 | 1.000000 |
| PAH7+H             | 1.86919e-14 | 1.000000 | 1.86919e-14 | 1.000000 |
| rad60syn           | 1.11369e-14 | 1.000000 | 1.11369e-14 | 1.000000 |
| PAH9+H             | 7.18360e-15 | 1.000000 | 7.18360e-15 | 1.000000 |
| rad35              | 3.68526e-15 | 1.000000 | 3.68526e-15 | 1.000000 |
| rad60anti          | 3.26210e-15 | 1.000000 | 3.26210e-15 | 1.000000 |
| Ph+MeAc            | 2.73849e-15 | 1.000000 | 2.73849e-15 | 1.000000 |
| rad46              | 1.62593e-15 | 1.000000 | 1.62593e-15 | 1.000000 |
| PhCCCH3+H          | 1.87097e-16 | 1.000000 | 1.87097e-16 | 1.000000 |
| rad27              | 1.00469e-16 | 1.000000 | 1.00469e-16 | 1.000000 |
| PAH3+H             | 9.87161e-18 | 1.000000 | 9.87161e-18 | 1.000000 |
| rad31              | 3.68242e-18 | 1.000000 | 3.68242e-18 | 1.000000 |
| rad59              | 3.52484e-18 | 1.000000 | 3.52484e-18 | 1.000000 |
| rad26              | 2.48883e-18 | 1.000000 | 2.48883e-18 | 1.000000 |
| rad39              | 2.14337e-18 | 1.000000 | 2.14337e-18 | 1.000000 |
| rad50              | 5.56951e-21 | 1.000000 | 5.56951e-21 | 1.000000 |
| rad19syn           | 1.88580e-22 | 1.000000 | 1.88580e-22 | 1.000000 |
| rad5               | 1.16410e-22 | 1.000000 | 1.16410e-22 | 1.000000 |
| rad54              | 7.41094e-24 | 1.000000 | 7.41094e-24 | 1.000000 |
| rad12              | 2.64490e-25 | 1.000000 | 2.64490e-25 | 1.000000 |
| rad52              | 2.27026e-25 | 1.000000 | 2.27026e-25 | 1.000000 |
| rad70              | 2.23843e-25 | 1.000000 | 2.23843e-25 | 1.000000 |
| rad37              | 1.53524e-26 | 1.000000 | 1.53524e-26 | 1.000000 |
| rad62              | 6.23993e-27 | 1.000000 | 6.23993e-27 | 1.000000 |
| rad51              | 1.07858e-27 | 1.000000 | 1.07858e-27 | 1.000000 |
| PhcycC3H3_A+H      | 5.65800e-28 | 1.000000 | 5.65800e-28 | 1.000000 |
| rad55              | 5.40603e-28 | 1.000000 | 5.40603e-28 | 1.000000 |
| rad43              | 2.06056e-28 | 1.000000 | 2.06056e-28 | 1.000000 |
| rad58              | 1.40247e-28 | 1.000000 | 1.40247e-28 | 1.000000 |
| rad34              | 5.17662e-29 | 1.000000 | 5.17662e-29 | 1.000000 |
| rad65              | 2.35523e-31 | 1.000000 | 2.35523e-31 | 1.000000 |
| PAH10+CH3          | 5.47442e-32 | 1.000000 | 5.47442e-32 | 1.000000 |
| rad47              | 1.72111e-32 | 1.000000 | 1.72111e-32 | 1.000000 |
| PAH1+H             | 1.01921e-32 | 1.000000 | 1.01921e-32 | 1.000000 |
| rad42              | 7.49878e-34 | 1.000000 | 7.49878e-34 | 1.000000 |
| rad41              | 5.33313e-36 | 1.000000 | 5.33313e-36 | 1.000000 |

10000.0000 Pa, 170.000000 K

=====

| Rate constant      | True (fraction)        | Effective (fraction)   |             |          |
|--------------------|------------------------|------------------------|-------------|----------|
| Total              | 3.56414e-18 (1.00 )    | 3.56414e-18 (1.00 )    |             |          |
| Formation of rad11 | 3.18264e-18 (0.893 )   | 3.18264e-18 (0.893 )   |             |          |
| Formation of rad6  | 3.62173e-19 (0.102 )   | 3.62173e-19 (0.102 )   |             |          |
| H-abstraction      | 1.93278e-20 (0.00542 ) | 1.93278e-20 (0.00542 ) |             |          |
| species            | PYtrue                 | Cumul                  | PYeffective | Cumul    |
| rad11              | 0.848375               | 0.848375               | 0.848375    | 0.848375 |

|                    |             |          |             |          |
|--------------------|-------------|----------|-------------|----------|
| rad6               | 0.143704    | 0.992080 | 0.143704    | 0.992080 |
| Benzene+2-propynyl | 0.00542285  | 0.997503 | 0.00542285  | 0.997503 |
| rad22              | 0.00136534  | 0.998868 | 0.00136534  | 0.998868 |
| Indene+H           | 0.000322831 | 0.999191 | 0.000322831 | 0.999191 |
| rad18              | 0.000245416 | 0.999436 | 0.000245416 | 0.999436 |
| rad45              | 0.000184449 | 0.999621 | 0.000184449 | 0.999621 |
| rad20              | 0.000184078 | 0.999805 | 0.000184078 | 0.999805 |
| rad21              | 0.000129931 | 0.999935 | 0.000129931 | 0.999935 |
| rad23              | 2.74196e-05 | 0.999962 | 2.74196e-05 | 0.999962 |
| C2H2+PhCH2         | 1.44755e-05 | 0.999977 | 1.44755e-05 | 0.999977 |
| rad36              | 1.14934e-05 | 0.999988 | 1.14934e-05 | 0.999988 |
| rad7               | 9.74522e-06 | 0.999998 | 9.74522e-06 | 0.999998 |
| rad25              | 1.44920e-06 | 0.999999 | 1.44920e-06 | 0.999999 |
| rad13              | 1.02542e-06 | 1.00000  | 1.02542e-06 | 1.00000  |
| PhCHCCH2+H         | 2.29271e-07 | 1.00000  | 2.29271e-07 | 1.00000  |
| rad9               | 1.62324e-08 | 1.00000  | 1.62324e-08 | 1.00000  |
| rad3               | 9.78060e-09 | 1.00000  | 9.78060e-09 | 1.00000  |
| Phenyl+Allene      | 6.86994e-09 | 1.00000  | 0.00000     | 1.00000  |
| rad4               | 5.03968e-09 | 1.00000  | 5.03968e-09 | 1.00000  |
| rad33              | 1.64306e-09 | 1.00000  | 1.64306e-09 | 1.00000  |
| rad28              | 6.55623e-10 | 1.00000  | 6.55623e-10 | 1.00000  |
| rad30              | 3.69125e-10 | 1.00000  | 3.69125e-10 | 1.00000  |
| rad2               | 1.25734e-10 | 1.00000  | 1.25734e-10 | 1.00000  |
| rad15              | 7.14193e-11 | 1.00000  | 7.14193e-11 | 1.00000  |
| PhCH2CCH+H         | 3.97826e-11 | 1.00000  | 3.97826e-11 | 1.00000  |
| rad24              | 1.81130e-11 | 1.00000  | 1.81130e-11 | 1.00000  |
| rad1               | 8.47569e-12 | 1.00000  | 8.47569e-12 | 1.00000  |
| rad8               | 4.33380e-12 | 1.00000  | 4.33380e-12 | 1.00000  |
| PhCCH+CH3          | 4.03321e-12 | 1.00000  | 4.03321e-12 | 1.00000  |
| rad38              | 2.49461e-13 | 1.00000  | 2.49461e-13 | 1.00000  |
| rad14              | 1.34333e-13 | 1.00000  | 1.34333e-13 | 1.00000  |
| rad10              | 1.20367e-13 | 1.00000  | 1.20367e-13 | 1.00000  |
| PAH7+H             | 4.63498e-14 | 1.00000  | 4.63498e-14 | 1.00000  |
| rad60syn           | 1.94628e-14 | 1.00000  | 1.94628e-14 | 1.00000  |
| PAH9+H             | 1.20819e-14 | 1.00000  | 1.20819e-14 | 1.00000  |
| rad35              | 6.11259e-15 | 1.00000  | 6.11259e-15 | 1.00000  |
| Ph+MeAc            | 6.03715e-15 | 1.00000  | 6.03715e-15 | 1.00000  |
| rad60anti          | 5.95796e-15 | 1.00000  | 5.95796e-15 | 1.00000  |
| rad46              | 2.61709e-15 | 1.00000  | 2.61709e-15 | 1.00000  |
| PhCCCH3+H          | 4.34082e-16 | 1.00000  | 4.34082e-16 | 1.00000  |
| rad27              | 1.87844e-16 | 1.00000  | 1.87844e-16 | 1.00000  |
| PAH3+H             | 3.05161e-17 | 1.00000  | 3.05161e-17 | 1.00000  |
| rad59              | 1.05054e-17 | 1.00000  | 1.05054e-17 | 1.00000  |
| rad26              | 6.60951e-18 | 1.00000  | 6.60951e-18 | 1.00000  |
| rad31              | 5.17588e-18 | 1.00000  | 5.17588e-18 | 1.00000  |
| rad39              | 4.65194e-18 | 1.00000  | 4.65194e-18 | 1.00000  |
| rad50              | 1.79860e-20 | 1.00000  | 1.79860e-20 | 1.00000  |
| rad19syn           | 1.09598e-21 | 1.00000  | 1.09598e-21 | 1.00000  |
| rad5               | 4.50297e-22 | 1.00000  | 4.50297e-22 | 1.00000  |
| rad54              | 5.24407e-23 | 1.00000  | 5.24407e-23 | 1.00000  |
| rad70              | 3.00523e-24 | 1.00000  | 3.00523e-24 | 1.00000  |
| rad52              | 1.36114e-24 | 1.00000  | 1.36114e-24 | 1.00000  |
| rad12              | 1.14940e-24 | 1.00000  | 1.14940e-24 | 1.00000  |
| rad37              | 7.88182e-26 | 1.00000  | 7.88182e-26 | 1.00000  |
| rad62              | 6.15561e-26 | 1.00000  | 6.15561e-26 | 1.00000  |
| rad51              | 1.04966e-26 | 1.00000  | 1.04966e-26 | 1.00000  |
| PhcycC3H3_A+H      | 7.94586e-27 | 1.00000  | 7.94586e-27 | 1.00000  |
| rad55              | 6.89763e-27 | 1.00000  | 6.89763e-27 | 1.00000  |
| rad58              | 2.10939e-27 | 1.00000  | 2.10939e-27 | 1.00000  |
| rad43              | 1.97560e-27 | 1.00000  | 1.97560e-27 | 1.00000  |
| rad34              | 1.18435e-27 | 1.00000  | 1.18435e-27 | 1.00000  |
| rad65              | 3.22885e-30 | 1.00000  | 3.22885e-30 | 1.00000  |
| PAH10+CH3          | 7.29384e-31 | 1.00000  | 7.29384e-31 | 1.00000  |
| rad47              | 2.72714e-31 | 1.00000  | 2.72714e-31 | 1.00000  |
| PAH1+H             | 2.03862e-31 | 1.00000  | 2.03863e-31 | 1.00000  |
| rad42              | 1.85455e-32 | 1.00000  | 1.85455e-32 | 1.00000  |
| rad41              | 1.38446e-34 | 1.00000  | 1.38446e-34 | 1.00000  |

10000.0000 Pa, 180.000000 K

=====

| Rate constant      | True (fraction)        | Effective (fraction)   |
|--------------------|------------------------|------------------------|
| Total              | 6.50681e-18 (1.00 )    | 6.50681e-18 (1.00 )    |
| Formation of rad11 | 5.71915e-18 (0.879 )   | 5.71915e-18 (0.879 )   |
| Formation of rad6  | 7.39013e-19 (0.114 )   | 7.39013e-19 (0.114 )   |
| H-abstraction      | 4.86496e-20 (0.00748 ) | 4.86496e-20 (0.00748 ) |

  

| species | PYtrue   | Cumul    | PYeffective | Cumul    |
|---------|----------|----------|-------------|----------|
| rad11   | 0.830440 | 0.830440 | 0.830441    | 0.830441 |

|                    |             |          |             |          |
|--------------------|-------------|----------|-------------|----------|
| rad6               | 0.159326    | 0.989766 | 0.159326    | 0.989767 |
| Benzene+2-propynyl | 0.00747672  | 0.997243 | 0.00747672  | 0.997244 |
| rad22              | 0.00151699  | 0.998760 | 0.00151699  | 0.998761 |
| Indene+H           | 0.000388491 | 0.999148 | 0.000388491 | 0.999149 |
| rad18              | 0.000257472 | 0.999406 | 0.000257472 | 0.999407 |
| rad45              | 0.000207674 | 0.999613 | 0.000207674 | 0.999614 |
| rad20              | 0.000179712 | 0.999793 | 0.000179712 | 0.999794 |
| rad21              | 0.000126401 | 0.999920 | 0.000126401 | 0.999921 |
| rad23              | 3.42257e-05 | 0.999954 | 3.42257e-05 | 0.999955 |
| C2H2+PhCH2         | 1.77535e-05 | 0.999971 | 1.77535e-05 | 0.999972 |
| rad36              | 1.29579e-05 | 0.999984 | 1.29579e-05 | 0.999985 |
| rad7               | 1.20831e-05 | 0.999997 | 1.20831e-05 | 0.999998 |
| rad25              | 1.64011e-06 | 0.999998 | 1.64011e-06 | 0.999999 |
| rad13              | 1.11613e-06 | 0.999999 | 1.11613e-06 | 1.000000 |
| PhCHCCH2+H         | 2.92060e-07 | 1.000000 | 2.92060e-07 | 1.000000 |
| rad9               | 2.11819e-08 | 1.000000 | 2.11819e-08 | 1.000000 |
| rad3               | 1.28124e-08 | 1.000000 | 1.28124e-08 | 1.000000 |
| Phenyl+Allene      | 1.05613e-08 | 1.000000 | 0.000000    | 1.000000 |
| rad4               | 6.61215e-09 | 1.000000 | 6.61215e-09 | 1.000000 |
| rad33              | 1.77310e-09 | 1.000000 | 1.77310e-09 | 1.000000 |
| rad28              | 8.96222e-10 | 1.000000 | 8.96222e-10 | 1.000000 |
| rad30              | 5.01254e-10 | 1.000000 | 5.01254e-10 | 1.000000 |
| rad2               | 1.95878e-10 | 1.000000 | 1.95878e-10 | 1.000000 |
| rad15              | 9.94697e-11 | 1.000000 | 9.94697e-11 | 1.000000 |
| PhCH2CCH+H         | 8.30561e-11 | 1.000000 | 8.30561e-11 | 1.000000 |
| rad24              | 1.75025e-11 | 1.000000 | 1.75025e-11 | 1.000000 |
| rad1               | 1.32820e-11 | 1.000000 | 1.32820e-11 | 1.000000 |
| PhCCH+CH3          | 7.23054e-12 | 1.000000 | 7.23054e-12 | 1.000000 |
| rad8               | 6.99740e-12 | 1.000000 | 6.99740e-12 | 1.000000 |
| rad38              | 3.67887e-13 | 1.000000 | 3.67887e-13 | 1.000000 |
| rad10              | 2.29265e-13 | 1.000000 | 2.29265e-13 | 1.000000 |
| rad14              | 2.20679e-13 | 1.000000 | 2.20679e-13 | 1.000000 |
| PAH7+H             | 1.08801e-13 | 1.000000 | 1.08801e-13 | 1.000000 |
| rad60syn           | 3.36123e-14 | 1.000000 | 3.36123e-14 | 1.000000 |
| PAH9+H             | 2.04912e-14 | 1.000000 | 2.04912e-14 | 1.000000 |
| Ph+MeAc            | 1.31170e-14 | 1.000000 | 1.31170e-14 | 1.000000 |
| rad60anti          | 1.06997e-14 | 1.000000 | 1.06997e-14 | 1.000000 |
| rad35              | 1.02217e-14 | 1.000000 | 1.02217e-14 | 1.000000 |
| rad46              | 4.24308e-15 | 1.000000 | 4.24308e-15 | 1.000000 |
| PhCCCH3+H          | 1.00386e-15 | 1.000000 | 1.00386e-15 | 1.000000 |
| rad27              | 3.43880e-16 | 1.000000 | 3.43880e-16 | 1.000000 |
| PAH3+H             | 8.70318e-17 | 1.000000 | 8.70318e-17 | 1.000000 |
| rad59              | 2.89479e-17 | 1.000000 | 2.89479e-17 | 1.000000 |
| rad26              | 1.72715e-17 | 1.000000 | 1.72715e-17 | 1.000000 |
| rad39              | 1.00202e-17 | 1.000000 | 1.00202e-17 | 1.000000 |
| rad31              | 7.20252e-18 | 1.000000 | 7.20252e-18 | 1.000000 |
| rad50              | 5.46383e-20 | 1.000000 | 5.46383e-20 | 1.000000 |
| rad19syn           | 5.47775e-21 | 1.000000 | 5.47775e-21 | 1.000000 |
| rad5               | 1.66088e-21 | 1.000000 | 1.66088e-21 | 1.000000 |
| rad54              | 3.07529e-22 | 1.000000 | 3.07529e-22 | 1.000000 |
| rad70              | 3.07512e-23 | 1.000000 | 3.07512e-23 | 1.000000 |
| rad52              | 7.06692e-24 | 1.000000 | 7.06692e-24 | 1.000000 |
| rad12              | 4.93584e-24 | 1.000000 | 4.93584e-24 | 1.000000 |
| rad62              | 4.98066e-25 | 1.000000 | 4.98066e-25 | 1.000000 |
| rad37              | 3.96049e-25 | 1.000000 | 3.96049e-25 | 1.000000 |
| PhcycC3H3_A+H      | 8.60355e-26 | 1.000000 | 8.60355e-26 | 1.000000 |
| rad51              | 8.37917e-26 | 1.000000 | 8.37917e-26 | 1.000000 |
| rad55              | 6.78429e-26 | 1.000000 | 6.78429e-26 | 1.000000 |
| rad58              | 2.39648e-26 | 1.000000 | 2.39648e-26 | 1.000000 |
| rad34              | 1.83417e-26 | 1.000000 | 1.83417e-26 | 1.000000 |
| rad43              | 1.59760e-26 | 1.000000 | 1.59760e-26 | 1.000000 |
| rad65              | 3.51271e-29 | 1.000000 | 3.51271e-29 | 1.000000 |
| PAH10+CH3          | 8.21179e-30 | 1.000000 | 8.21179e-30 | 1.000000 |
| rad47              | 3.23095e-30 | 1.000000 | 3.23095e-30 | 1.000000 |
| PAH1+H             | 2.99360e-30 | 1.000000 | 2.99360e-30 | 1.000000 |
| rad42              | 3.24677e-31 | 1.000000 | 3.24677e-31 | 1.000000 |
| rad41              | 2.56510e-33 | 1.000000 | 2.56510e-33 | 1.000000 |

10000.0000 Pa, 190.000000 K

=====

| Rate constant      | True (fraction) |            | Effective (fraction) |            |
|--------------------|-----------------|------------|----------------------|------------|
| Total              | 1.11858e-17     | (1.00 )    | 1.11858e-17          | (1.00 )    |
| Formation of rad11 | 9.67466e-18     | (0.865 )   | 9.67466e-18          | (0.865 )   |
| Formation of rad6  | 1.40029e-18     | (0.125 )   | 1.40029e-18          | (0.125 )   |
| H-abstraction      | 1.10851e-19     | (0.00991 ) | 1.10851e-19          | (0.00991 ) |
| species            | PYtrue          | Cumul      | PYeffective          | Cumul      |
| rad11              | 0.812184        | 0.812184   | 0.812184             | 0.812184   |

|                    |             |          |             |          |
|--------------------|-------------|----------|-------------|----------|
| rad6               | 0.174865    | 0.987048 | 0.174865    | 0.987048 |
| Benzene+2-propynyl | 0.00990995  | 0.996958 | 0.00990995  | 0.996958 |
| rad22              | 0.00168069  | 0.998639 | 0.00168069  | 0.998639 |
| Indene+H           | 0.000464794 | 0.999104 | 0.000464794 | 0.999104 |
| rad18              | 0.000268171 | 0.999372 | 0.000268171 | 0.999372 |
| rad45              | 0.000233254 | 0.999605 | 0.000233254 | 0.999605 |
| rad20              | 0.000174969 | 0.999780 | 0.000174969 | 0.999780 |
| rad21              | 0.000122680 | 0.999903 | 0.000122680 | 0.999903 |
| rad23              | 4.26170e-05 | 0.999946 | 4.26170e-05 | 0.999946 |
| C2H2+PhCH2         | 2.17627e-05 | 0.999967 | 2.17628e-05 | 0.999967 |
| rad7               | 1.47872e-05 | 0.999982 | 1.47872e-05 | 0.999982 |
| rad36              | 1.45786e-05 | 0.999997 | 1.45786e-05 | 0.999997 |
| rad25              | 1.85042e-06 | 0.999999 | 1.85042e-06 | 0.999999 |
| rad13              | 1.20349e-06 | 1.000000 | 1.20349e-06 | 1.000000 |
| PhCHCCH2+H         | 3.73598e-07 | 1.000000 | 3.73598e-07 | 1.000000 |
| rad9               | 2.77329e-08 | 1.000000 | 2.77329e-08 | 1.000000 |
| rad3               | 1.65865e-08 | 1.000000 | 1.65865e-08 | 1.000000 |
| Phenyl+Allene      | 1.61311e-08 | 1.000000 | 0.000000    | 1.000000 |
| rad4               | 8.57493e-09 | 1.000000 | 8.57493e-09 | 1.000000 |
| rad33              | 1.89763e-09 | 1.000000 | 1.89763e-09 | 1.000000 |
| rad28              | 1.21261e-09 | 1.000000 | 1.21261e-09 | 1.000000 |
| rad30              | 6.78238e-10 | 1.000000 | 6.78238e-10 | 1.000000 |
| rad2               | 3.02391e-10 | 1.000000 | 3.02391e-10 | 1.000000 |
| PhCH2CCH+H         | 1.66365e-10 | 1.000000 | 1.66365e-10 | 1.000000 |
| rad15              | 1.38068e-10 | 1.000000 | 1.38068e-10 | 1.000000 |
| rad1               | 2.06387e-11 | 1.000000 | 2.06387e-11 | 1.000000 |
| rad24              | 1.71541e-11 | 1.000000 | 1.71541e-11 | 1.000000 |
| PhCCH+CH3          | 1.28861e-11 | 1.000000 | 1.28861e-11 | 1.000000 |
| rad8               | 1.12252e-11 | 1.000000 | 1.12252e-11 | 1.000000 |
| rad38              | 5.45601e-13 | 1.000000 | 5.45601e-13 | 1.000000 |
| rad10              | 4.34706e-13 | 1.000000 | 4.34706e-13 | 1.000000 |
| rad14              | 3.57613e-13 | 1.000000 | 3.57613e-13 | 1.000000 |
| PAH7+H             | 2.43176e-13 | 1.000000 | 2.43176e-13 | 1.000000 |
| rad60syn           | 5.73419e-14 | 1.000000 | 5.73419e-14 | 1.000000 |
| PAH9+H             | 3.50424e-14 | 1.000000 | 3.50424e-14 | 1.000000 |
| Ph+MeAc            | 2.81341e-14 | 1.000000 | 2.81341e-14 | 1.000000 |
| rad60anti          | 1.88996e-14 | 1.000000 | 1.88996e-14 | 1.000000 |
| rad35              | 1.72305e-14 | 1.000000 | 1.72305e-14 | 1.000000 |
| rad46              | 6.92381e-15 | 1.000000 | 6.92381e-15 | 1.000000 |
| PhCCCH3+H          | 2.31659e-15 | 1.000000 | 2.31659e-15 | 1.000000 |
| rad27              | 6.17725e-16 | 1.000000 | 6.17725e-16 | 1.000000 |
| PAH3+H             | 2.31418e-16 | 1.000000 | 2.31418e-16 | 1.000000 |
| rad59              | 7.45223e-17 | 1.000000 | 7.45223e-17 | 1.000000 |
| rad26              | 4.46270e-17 | 1.000000 | 4.46270e-17 | 1.000000 |
| rad39              | 2.14509e-17 | 1.000000 | 2.14509e-17 | 1.000000 |
| rad31              | 9.95625e-18 | 1.000000 | 9.95625e-18 | 1.000000 |
| rad50              | 1.57337e-19 | 1.000000 | 1.57337e-19 | 1.000000 |
| rad19syn           | 2.40897e-20 | 1.000000 | 2.40897e-20 | 1.000000 |
| rad5               | 5.86793e-21 | 1.000000 | 5.86793e-21 | 1.000000 |
| rad54              | 1.54006e-21 | 1.000000 | 1.54006e-21 | 1.000000 |
| rad70              | 2.49721e-22 | 1.000000 | 2.49721e-22 | 1.000000 |
| rad52              | 3.24277e-23 | 1.000000 | 3.24277e-23 | 1.000000 |
| rad12              | 2.10101e-23 | 1.000000 | 2.10101e-23 | 1.000000 |
| rad62              | 3.39127e-24 | 1.000000 | 3.39127e-24 | 1.000000 |
| rad37              | 1.94889e-24 | 1.000000 | 1.94889e-24 | 1.000000 |
| PhcycC3H3_A+H      | 7.44652e-25 | 1.000000 | 7.44652e-25 | 1.000000 |
| rad51              | 5.63479e-25 | 1.000000 | 5.63479e-25 | 1.000000 |
| rad55              | 5.35044e-25 | 1.000000 | 5.35044e-25 | 1.000000 |
| rad58              | 2.14479e-25 | 1.000000 | 2.14479e-25 | 1.000000 |
| rad34              | 2.11408e-25 | 1.000000 | 2.11408e-25 | 1.000000 |
| rad43              | 1.11200e-25 | 1.000000 | 1.11200e-25 | 1.000000 |
| rad65              | 3.12264e-28 | 1.000000 | 3.12264e-28 | 1.000000 |
| PAH10+CH3          | 7.87924e-29 | 1.000000 | 7.87924e-29 | 1.000000 |
| PAH1+H             | 3.36530e-29 | 1.000000 | 3.36530e-29 | 1.000000 |
| rad47              | 2.97611e-29 | 1.000000 | 2.97611e-29 | 1.000000 |
| rad42              | 4.21885e-30 | 1.000000 | 4.21885e-30 | 1.000000 |
| rad41              | 3.54236e-32 | 1.000000 | 3.54236e-32 | 1.000000 |

10000.0000 Pa, 200.000000 K

=====

| Rate constant      | True (fraction)       | Effective (fraction)  |             |          |
|--------------------|-----------------------|-----------------------|-------------|----------|
| Total              | 1.82690e-17 (1.00 )   | 1.82690e-17 (1.00 )   |             |          |
| Formation of rad11 | 1.55456e-17 (0.851 )  | 1.55456e-17 (0.851 )  |             |          |
| Formation of rad6  | 2.49126e-18 (0.136 )  | 2.49126e-18 (0.136 )  |             |          |
| H-abstraction      | 2.32112e-19 (0.0127 ) | 2.32112e-19 (0.0127 ) |             |          |
| species            | PYtrue                | Cumul                 | PYeffective | Cumul    |
| rad11              | 0.793662              | 0.793662              | 0.793662    | 0.793662 |



|                    |             |          |             |          |
|--------------------|-------------|----------|-------------|----------|
| rad6               | 0.190276    | 0.983938 | 0.190276    | 0.983938 |
| Benzene+2-propynyl | 0.0127053   | 0.996643 | 0.0127053   | 0.996643 |
| rad22              | 0.00185752  | 0.998501 | 0.00185752  | 0.998501 |
| Indene+H           | 0.000553367 | 0.999054 | 0.000553367 | 0.999054 |
| rad18              | 0.000277444 | 0.999332 | 0.000277444 | 0.999332 |
| rad45              | 0.000261455 | 0.999593 | 0.000261455 | 0.999593 |
| rad20              | 0.000169932 | 0.999763 | 0.000169932 | 0.999763 |
| rad21              | 0.000118818 | 0.999882 | 0.000118818 | 0.999882 |
| rad23              | 5.29720e-05 | 0.999935 | 5.29720e-05 | 0.999935 |
| C2H2+PhCH2         | 2.66744e-05 | 0.999961 | 2.66744e-05 | 0.999961 |
| rad7               | 1.78991e-05 | 0.999979 | 1.78991e-05 | 0.999979 |
| rad36              | 1.63751e-05 | 0.999996 | 1.63751e-05 | 0.999996 |
| rad25              | 2.08040e-06 | 0.999998 | 2.08040e-06 | 0.999998 |
| rad13              | 1.28756e-06 | 0.999999 | 1.28756e-06 | 0.999999 |
| PhCHCCH2+H         | 4.79703e-07 | 0.999999 | 4.79703e-07 | 0.999999 |
| rad9               | 3.64105e-08 | 1.000000 | 3.64105e-08 | 1.000000 |
| Phenyl+Allene      | 2.44748e-08 | 1.000000 | 0.000000    | 1.000000 |
| rad3               | 2.12715e-08 | 1.000000 | 2.12715e-08 | 1.000000 |
| rad4               | 1.10186e-08 | 1.000000 | 1.10186e-08 | 1.000000 |
| rad33              | 2.01690e-09 | 1.000000 | 2.01690e-09 | 1.000000 |
| rad28              | 1.62812e-09 | 1.000000 | 1.62812e-09 | 1.000000 |
| rad30              | 9.14569e-10 | 1.000000 | 9.14569e-10 | 1.000000 |
| rad2               | 4.63811e-10 | 1.000000 | 4.63811e-10 | 1.000000 |
| PhCH2CCH+H         | 3.21402e-10 | 1.000000 | 3.21402e-10 | 1.000000 |
| rad15              | 1.90993e-10 | 1.000000 | 1.90993e-10 | 1.000000 |
| rad1               | 3.18846e-11 | 1.000000 | 3.18847e-11 | 1.000000 |
| PhCCH+CH3          | 2.28658e-11 | 1.000000 | 2.28658e-11 | 1.000000 |
| rad8               | 1.78812e-11 | 1.000000 | 1.78812e-11 | 1.000000 |
| rad24              | 1.70357e-11 | 1.000000 | 1.70357e-11 | 1.000000 |
| rad10              | 8.22028e-13 | 1.000000 | 8.22028e-13 | 1.000000 |
| rad38              | 8.13551e-13 | 1.000000 | 8.13551e-13 | 1.000000 |
| rad14              | 5.72283e-13 | 1.000000 | 5.72283e-13 | 1.000000 |
| PAH7+H             | 5.19951e-13 | 1.000000 | 5.19951e-13 | 1.000000 |
| rad60syn           | 9.65941e-14 | 1.000000 | 9.65941e-14 | 1.000000 |
| PAH9+H             | 6.03755e-14 | 1.000000 | 6.03755e-14 | 1.000000 |
| Ph+MeAc            | 5.96251e-14 | 1.000000 | 5.96251e-14 | 1.000000 |
| rad60anti          | 3.28418e-14 | 1.000000 | 3.28418e-14 | 1.000000 |
| rad35              | 2.92522e-14 | 1.000000 | 2.92522e-14 | 1.000000 |
| rad46              | 1.13578e-14 | 1.000000 | 1.13578e-14 | 1.000000 |
| PhCCCH3+H          | 5.33411e-15 | 1.000000 | 5.33411e-15 | 1.000000 |
| rad27              | 1.09045e-15 | 1.000000 | 1.09045e-15 | 1.000000 |
| PAH3+H             | 5.78698e-16 | 1.000000 | 5.78698e-16 | 1.000000 |
| rad59              | 1.80779e-16 | 1.000000 | 1.80779e-16 | 1.000000 |
| rad26              | 1.14457e-16 | 1.000000 | 1.14457e-16 | 1.000000 |
| rad39              | 4.56681e-17 | 1.000000 | 4.56681e-17 | 1.000000 |
| rad31              | 1.37095e-17 | 1.000000 | 1.37095e-17 | 1.000000 |
| rad50              | 4.32156e-19 | 1.000000 | 4.32156e-19 | 1.000000 |
| rad19syn           | 9.49644e-20 | 1.000000 | 9.49644e-20 | 1.000000 |
| rad5               | 1.99199e-20 | 1.000000 | 1.99199e-20 | 1.000000 |
| rad54              | 6.74698e-21 | 1.000000 | 6.74698e-21 | 1.000000 |
| rad70              | 1.66257e-21 | 1.000000 | 1.66257e-21 | 1.000000 |
| rad52              | 1.33791e-22 | 1.000000 | 1.33791e-22 | 1.000000 |
| rad12              | 8.84367e-23 | 1.000000 | 8.84367e-23 | 1.000000 |
| rad62              | 1.98439e-23 | 1.000000 | 1.98439e-23 | 1.000000 |
| rad37              | 9.34274e-24 | 1.000000 | 9.34274e-24 | 1.000000 |
| PhcycC3H3_A+H      | 5.30402e-24 | 1.000000 | 5.30402e-24 | 1.000000 |
| rad55              | 3.49101e-24 | 1.000000 | 3.49101e-24 | 1.000000 |
| rad51              | 3.26455e-24 | 1.000000 | 3.26455e-24 | 1.000000 |
| rad34              | 1.90395e-24 | 1.000000 | 1.90395e-24 | 1.000000 |
| rad58              | 1.56241e-24 | 1.000000 | 1.56241e-24 | 1.000000 |
| rad43              | 6.77015e-25 | 1.000000 | 6.77015e-25 | 1.000000 |
| rad65              | 2.32338e-27 | 1.000000 | 2.32338e-27 | 1.000000 |
| PAH10+CH3          | 6.48234e-28 | 1.000000 | 6.48234e-28 | 1.000000 |
| PAH1+H             | 2.99874e-28 | 1.000000 | 2.99874e-28 | 1.000000 |
| rad47              | 2.20418e-28 | 1.000000 | 2.20418e-28 | 1.000000 |
| rad42              | 4.23925e-29 | 1.000000 | 4.23925e-29 | 1.000000 |
| rad41              | 3.79136e-31 | 1.000000 | 3.79137e-31 | 1.000000 |

10000.0000 Pa, 210.000000 K

=====

| Rate constant      | True (fraction)       | Effective (fraction)  |             |          |
|--------------------|-----------------------|-----------------------|-------------|----------|
| Total              | 2.85520e-17 (1.00 )   | 2.85520e-17 (1.00 )   |             |          |
| Formation of rad11 | 2.39009e-17 (0.837 )  | 2.39009e-17 (0.837 )  |             |          |
| Formation of rad6  | 4.19900e-18 (0.147 )  | 4.19900e-18 (0.147 )  |             |          |
| H-abstraction      | 4.52111e-19 (0.0158 ) | 4.52111e-19 (0.0158 ) |             |          |
| species            | PYtrue                | Cumul                 | PYeffective | Cumul    |
| rad11              | 0.774917              | 0.774917              | 0.774917    | 0.774917 |

|                    |             |          |             |          |
|--------------------|-------------|----------|-------------|----------|
| rad6               | 0.205544    | 0.980461 | 0.205544    | 0.980461 |
| Benzene+2-propynyl | 0.0158346   | 0.996296 | 0.0158346   | 0.996296 |
| rad22              | 0.00204856  | 0.998344 | 0.00204856  | 0.998344 |
| Indene+H           | 0.000656081 | 0.999000 | 0.000656081 | 0.999000 |
| rad45              | 0.000292546 | 0.999293 | 0.000292546 | 0.999293 |
| rad18              | 0.000285237 | 0.999578 | 0.000285237 | 0.999578 |
| rad20              | 0.000164674 | 0.999743 | 0.000164674 | 0.999743 |
| rad21              | 0.000114855 | 0.999858 | 0.000114855 | 0.999858 |
| rad23              | 6.57547e-05 | 0.999923 | 6.57547e-05 | 0.999923 |
| C2H2+PhCH2         | 3.26974e-05 | 0.999956 | 3.26974e-05 | 0.999956 |
| rad7               | 2.14662e-05 | 0.999977 | 2.14662e-05 | 0.999977 |
| rad36              | 1.83678e-05 | 0.999996 | 1.83678e-05 | 0.999996 |
| rad25              | 2.32963e-06 | 0.999998 | 2.32963e-06 | 0.999998 |
| rad13              | 1.36853e-06 | 1.000000 | 1.36853e-06 | 1.000000 |
| PhCHCCH2+H         | 6.17918e-07 | 1.000000 | 6.17918e-07 | 1.000000 |
| rad9               | 4.79030e-08 | 1.000000 | 4.79030e-08 | 1.000000 |
| Phenyl+Allene      | 3.68787e-08 | 1.000000 | 0.000000    | 1.000000 |
| rad3               | 2.70767e-08 | 1.000000 | 2.70767e-08 | 1.000000 |
| rad4               | 1.40563e-08 | 1.000000 | 1.40563e-08 | 1.000000 |
| rad28              | 2.17366e-09 | 1.000000 | 2.17366e-09 | 1.000000 |
| rad33              | 2.13140e-09 | 1.000000 | 2.13140e-09 | 1.000000 |
| rad30              | 1.22895e-09 | 1.000000 | 1.22895e-09 | 1.000000 |
| rad2               | 7.08138e-10 | 1.000000 | 7.08138e-10 | 1.000000 |
| PhCH2CCH+H         | 6.01378e-10 | 1.000000 | 6.01378e-10 | 1.000000 |
| rad15              | 2.63244e-10 | 1.000000 | 2.63244e-10 | 1.000000 |
| rad1               | 4.90673e-11 | 1.000000 | 4.90673e-11 | 1.000000 |
| PhCCH+CH3          | 4.04299e-11 | 1.000000 | 4.04299e-11 | 1.000000 |
| rad8               | 2.82661e-11 | 1.000000 | 2.82661e-11 | 1.000000 |
| rad24              | 1.71245e-11 | 1.000000 | 1.71245e-11 | 1.000000 |
| rad10              | 1.55154e-12 | 1.000000 | 1.55154e-12 | 1.000000 |
| rad38              | 1.21894e-12 | 1.000000 | 1.21894e-12 | 1.000000 |
| PAH7+H             | 1.06775e-12 | 1.000000 | 1.06775e-12 | 1.000000 |
| rad14              | 9.04742e-13 | 1.000000 | 9.04742e-13 | 1.000000 |
| rad60syn           | 1.60610e-13 | 1.000000 | 1.60610e-13 | 1.000000 |
| Ph+MeAc            | 1.24907e-13 | 1.000000 | 1.24907e-13 | 1.000000 |
| PAH9+H             | 1.04663e-13 | 1.000000 | 1.04663e-13 | 1.000000 |
| rad60anti          | 5.61515e-14 | 1.000000 | 5.61515e-14 | 1.000000 |
| rad35              | 4.99412e-14 | 1.000000 | 4.99412e-14 | 1.000000 |
| rad46              | 1.87028e-14 | 1.000000 | 1.87028e-14 | 1.000000 |
| PhCCCH3+H          | 1.22428e-14 | 1.000000 | 1.22428e-14 | 1.000000 |
| rad27              | 1.89355e-15 | 1.000000 | 1.89355e-15 | 1.000000 |
| PAH3+H             | 1.37067e-15 | 1.000000 | 1.37067e-15 | 1.000000 |
| rad59              | 4.16136e-16 | 1.000000 | 4.16136e-16 | 1.000000 |
| rad26              | 2.92022e-16 | 1.000000 | 2.92022e-16 | 1.000000 |
| rad39              | 9.67022e-17 | 1.000000 | 9.67022e-17 | 1.000000 |
| rad31              | 1.88481e-17 | 1.000000 | 1.88481e-17 | 1.000000 |
| rad50              | 1.13788e-18 | 1.000000 | 1.13788e-18 | 1.000000 |
| rad19syn           | 3.40606e-19 | 1.000000 | 3.40606e-19 | 1.000000 |
| rad5               | 6.50914e-20 | 1.000000 | 6.50914e-20 | 1.000000 |
| rad54              | 2.63636e-20 | 1.000000 | 2.63636e-20 | 1.000000 |
| rad70              | 9.31751e-21 | 1.000000 | 9.31751e-21 | 1.000000 |
| rad52              | 5.03405e-22 | 1.000000 | 5.03405e-22 | 1.000000 |
| rad12              | 3.65380e-22 | 1.000000 | 3.65380e-22 | 1.000000 |
| rad62              | 1.01493e-22 | 1.000000 | 1.01493e-22 | 1.000000 |
| rad37              | 4.32135e-23 | 1.000000 | 4.32135e-23 | 1.000000 |
| PhcycC3H3_A+H      | 3.18272e-23 | 1.000000 | 3.18272e-23 | 1.000000 |
| rad55              | 1.93186e-23 | 1.000000 | 1.93186e-23 | 1.000000 |
| rad51              | 1.65967e-23 | 1.000000 | 1.65967e-23 | 1.000000 |
| rad34              | 1.38488e-23 | 1.000000 | 1.38488e-23 | 1.000000 |
| rad58              | 9.51008e-24 | 1.000000 | 9.51008e-24 | 1.000000 |
| rad43              | 3.65018e-24 | 1.000000 | 3.65018e-24 | 1.000000 |
| rad65              | 1.47531e-26 | 1.000000 | 1.47531e-26 | 1.000000 |
| PAH10+CH3          | 4.60040e-27 | 1.000000 | 4.60040e-27 | 1.000000 |
| PAH1+H             | 2.17885e-27 | 1.000000 | 2.17885e-27 | 1.000000 |
| rad47              | 1.35093e-27 | 1.000000 | 1.35093e-27 | 1.000000 |
| rad42              | 3.40484e-28 | 1.000000 | 3.40484e-28 | 1.000000 |
| rad41              | 3.24800e-30 | 1.000000 | 3.24800e-30 | 1.000000 |

10000.0000 Pa, 220.000000 K

=====

| Rate constant      | True (fraction)       | Effective (fraction)  |             |          |
|--------------------|-----------------------|-----------------------|-------------|----------|
| Total              | 4.29529e-17 (1.00 )   | 4.29529e-17 (1.00 )   |             |          |
| Formation of rad11 | 3.53712e-17 (0.823 )  | 3.53712e-17 (0.823 )  |             |          |
| Formation of rad6  | 6.75433e-18 (0.157 )  | 6.75433e-18 (0.157 )  |             |          |
| H-abstraction      | 8.27372e-19 (0.0193 ) | 8.27372e-19 (0.0193 ) |             |          |
| species            | PYtrue                | Cumul                 | PYeffective | Cumul    |
| rad11              | 0.755975              | 0.755975              | 0.755975    | 0.755975 |

|                    |             |          |             |          |
|--------------------|-------------|----------|-------------|----------|
| rad6               | 0.220672    | 0.976647 | 0.220672    | 0.976647 |
| Benzene+2-propynyl | 0.0192623   | 0.995909 | 0.0192623   | 0.995909 |
| rad22              | 0.00225476  | 0.998164 | 0.00225476  | 0.998164 |
| Indene+H           | 0.000775073 | 0.998939 | 0.000775073 | 0.998939 |
| rad45              | 0.000326797 | 0.999266 | 0.000326797 | 0.999266 |
| rad18              | 0.000291513 | 0.999557 | 0.000291513 | 0.999557 |
| rad20              | 0.000159252 | 0.999717 | 0.000159252 | 0.999717 |
| rad21              | 0.000110826 | 0.999828 | 0.000110826 | 0.999828 |
| rad23              | 8.15289e-05 | 0.999909 | 8.15289e-05 | 0.999909 |
| C2H2+PhCH2         | 4.00841e-05 | 0.999949 | 4.00841e-05 | 0.999949 |
| rad7               | 2.55417e-05 | 0.999975 | 2.55417e-05 | 0.999975 |
| rad36              | 2.05781e-05 | 0.999995 | 2.05781e-05 | 0.999995 |
| rad25              | 2.59690e-06 | 0.999998 | 2.59690e-06 | 0.999998 |
| rad13              | 1.44674e-06 | 0.999999 | 1.44674e-06 | 0.999999 |
| PhCHCCH2+H         | 7.97961e-07 | 1.00000  | 7.97961e-07 | 1.00000  |
| rad9               | 6.31055e-08 | 1.00000  | 6.31055e-08 | 1.00000  |
| Phenyl+Allene      | 5.51699e-08 | 1.00000  | 0.00000     | 1.00000  |
| rad3               | 3.42610e-08 | 1.00000  | 3.42610e-08 | 1.00000  |
| rad4               | 1.78289e-08 | 1.00000  | 1.78289e-08 | 1.00000  |
| rad28              | 2.89025e-09 | 1.00000  | 2.89025e-09 | 1.00000  |
| rad33              | 2.24173e-09 | 1.00000  | 2.24173e-09 | 1.00000  |
| rad30              | 1.64529e-09 | 1.00000  | 1.64529e-09 | 1.00000  |
| PhCH2CCH+H         | 1.09345e-09 | 1.00000  | 1.09345e-09 | 1.00000  |
| rad2               | 1.07756e-09 | 1.00000  | 1.07756e-09 | 1.00000  |
| rad15              | 3.61370e-10 | 1.00000  | 3.61370e-10 | 1.00000  |
| rad1               | 7.53138e-11 | 1.00000  | 7.53138e-11 | 1.00000  |
| PhCCH+CH3          | 7.12407e-11 | 1.00000  | 7.12407e-11 | 1.00000  |
| rad8               | 4.43156e-11 | 1.00000  | 4.43156e-11 | 1.00000  |
| rad24              | 1.74047e-11 | 1.00000  | 1.74047e-11 | 1.00000  |
| rad10              | 2.92274e-12 | 1.00000  | 2.92274e-12 | 1.00000  |
| PAH7+H             | 2.11286e-12 | 1.00000  | 2.11286e-12 | 1.00000  |
| rad38              | 1.83357e-12 | 1.00000  | 1.83357e-12 | 1.00000  |
| rad14              | 1.41292e-12 | 1.00000  | 1.41292e-12 | 1.00000  |
| rad60syn           | 2.63516e-13 | 1.00000  | 2.63516e-13 | 1.00000  |
| Ph+MeAc            | 2.58643e-13 | 1.00000  | 2.58643e-13 | 1.00000  |
| PAH9+H             | 1.82242e-13 | 1.00000  | 1.82242e-13 | 1.00000  |
| rad60anti          | 9.44746e-14 | 1.00000  | 9.44746e-14 | 1.00000  |
| rad35              | 8.55883e-14 | 1.00000  | 8.55883e-14 | 1.00000  |
| rad46              | 3.08679e-14 | 1.00000  | 3.08679e-14 | 1.00000  |
| PhCCCH3+H          | 2.79644e-14 | 1.00000  | 2.79644e-14 | 1.00000  |
| rad27              | 3.23701e-15 | 1.00000  | 3.23701e-15 | 1.00000  |
| PAH3+H             | 3.09289e-15 | 1.00000  | 3.09289e-15 | 1.00000  |
| rad59              | 9.14172e-16 | 1.00000  | 9.14172e-16 | 1.00000  |
| rad26              | 7.41317e-16 | 1.00000  | 7.41317e-16 | 1.00000  |
| rad39              | 2.03606e-16 | 1.00000  | 2.03606e-16 | 1.00000  |
| rad31              | 2.59223e-17 | 1.00000  | 2.59223e-17 | 1.00000  |
| rad50              | 2.88362e-18 | 1.00000  | 2.88362e-18 | 1.00000  |
| rad19syn           | 1.12457e-18 | 1.00000  | 1.12457e-18 | 1.00000  |
| rad5               | 2.04855e-19 | 1.00000  | 2.04855e-19 | 1.00000  |
| rad54              | 9.32946e-20 | 1.00000  | 9.32946e-20 | 1.00000  |
| rad70              | 4.49102e-20 | 1.00000  | 4.49102e-20 | 1.00000  |
| rad52              | 1.74726e-21 | 1.00000  | 1.74726e-21 | 1.00000  |
| rad12              | 1.46602e-21 | 1.00000  | 1.46602e-21 | 1.00000  |
| rad62              | 4.59927e-22 | 1.00000  | 4.59927e-22 | 1.00000  |
| rad37              | 1.90661e-22 | 1.00000  | 1.90661e-22 | 1.00000  |
| PhcycC3H3_A+H      | 1.63997e-22 | 1.00000  | 1.63997e-22 | 1.00000  |
| rad55              | 9.24868e-23 | 1.00000  | 9.24868e-23 | 1.00000  |
| rad34              | 8.35568e-23 | 1.00000  | 8.35568e-23 | 1.00000  |
| rad51              | 7.51481e-23 | 1.00000  | 7.51481e-23 | 1.00000  |
| rad58              | 4.94144e-23 | 1.00000  | 4.94144e-23 | 1.00000  |
| rad43              | 1.75962e-23 | 1.00000  | 1.75962e-23 | 1.00000  |
| rad65              | 8.12430e-26 | 1.00000  | 8.12430e-26 | 1.00000  |
| PAH10+CH3          | 2.83681e-26 | 1.00000  | 2.83681e-26 | 1.00000  |
| PAH1+H             | 1.32200e-26 | 1.00000  | 1.32200e-26 | 1.00000  |
| rad47              | 7.02204e-27 | 1.00000  | 7.02204e-27 | 1.00000  |
| rad42              | 2.24786e-27 | 1.00000  | 2.24786e-27 | 1.00000  |
| rad41              | 2.28955e-29 | 1.00000  | 2.28955e-29 | 1.00000  |

10000.0000 Pa, 230.000000 K

=====

| Rate constant      | True (fraction) |           | Effective (fraction) |           |
|--------------------|-----------------|-----------|----------------------|-----------|
| Total              | 6.25016e-17     | (1.00 )   | 6.25016e-17          | (1.00 )   |
| Formation of rad11 | 5.06355e-17     | (0.810 )  | 5.06355e-17          | (0.810 )  |
| Formation of rad6  | 1.04318e-17     | (0.167 )  | 1.04318e-17          | (0.167 )  |
| H-abstraction      | 1.43428e-18     | (0.0229 ) | 1.43428e-18          | (0.0229 ) |
| species            | PYtrue          | Cumul     | PYeffective          | Cumul     |
| rad11              | 0.736852        | 0.736852  | 0.736852             | 0.736852  |

|                    |             |          |             |          |
|--------------------|-------------|----------|-------------|----------|
| rad6               | 0.235681    | 0.972532 | 0.235681    | 0.972532 |
| Benzene+2-propynyl | 0.0229478   | 0.995480 | 0.0229478   | 0.995480 |
| rad22              | 0.00247692  | 0.997957 | 0.00247692  | 0.997957 |
| Indene+H           | 0.000912770 | 0.998870 | 0.000912770 | 0.998870 |
| rad45              | 0.000364460 | 0.999234 | 0.000364460 | 0.999234 |
| rad18              | 0.000296247 | 0.999531 | 0.000296247 | 0.999531 |
| rad20              | 0.000153719 | 0.999684 | 0.000153719 | 0.999684 |
| rad21              | 0.000106760 | 0.999791 | 0.000106760 | 0.999791 |
| rad23              | 0.000100973 | 0.999892 | 0.000100973 | 0.999892 |
| C2H2+PhCH2         | 4.91379e-05 | 0.999941 | 4.91379e-05 | 0.999941 |
| rad7               | 3.01843e-05 | 0.999971 | 3.01843e-05 | 0.999971 |
| rad36              | 2.30279e-05 | 0.999994 | 2.30279e-05 | 0.999994 |
| rad25              | 2.88013e-06 | 0.999997 | 2.88013e-06 | 0.999997 |
| rad13              | 1.52254e-06 | 0.999999 | 1.52254e-06 | 0.999999 |
| PhCHCCH2+H         | 1.03227e-06 | 1.000000 | 1.03227e-06 | 1.000000 |
| rad9               | 8.31739e-08 | 1.000000 | 8.31740e-08 | 1.000000 |
| Phenyl+Allene      | 8.19126e-08 | 1.000000 | 0.000000    | 1.000000 |
| rad3               | 4.31428e-08 | 1.000000 | 4.31428e-08 | 1.000000 |
| rad4               | 2.25106e-08 | 1.000000 | 2.25106e-08 | 1.000000 |
| rad28              | 3.83236e-09 | 1.000000 | 3.83236e-09 | 1.000000 |
| rad33              | 2.34861e-09 | 1.000000 | 2.34861e-09 | 1.000000 |
| rad30              | 2.19383e-09 | 1.000000 | 2.19383e-09 | 1.000000 |
| PhCH2CCH+H         | 1.93708e-09 | 1.000000 | 1.93708e-09 | 1.000000 |
| rad2               | 1.63536e-09 | 1.000000 | 1.63536e-09 | 1.000000 |
| rad15              | 4.93870e-10 | 1.000000 | 4.93870e-10 | 1.000000 |
| PhCCH+CH3          | 1.25055e-10 | 1.000000 | 1.25055e-10 | 1.000000 |
| rad1               | 1.15386e-10 | 1.000000 | 1.15386e-10 | 1.000000 |
| rad8               | 6.88699e-11 | 1.000000 | 6.88699e-11 | 1.000000 |
| rad24              | 1.78653e-11 | 1.000000 | 1.78653e-11 | 1.000000 |
| rad10              | 5.49090e-12 | 1.000000 | 5.49090e-12 | 1.000000 |
| PAH7+H             | 4.04020e-12 | 1.000000 | 4.04020e-12 | 1.000000 |
| rad38              | 2.76618e-12 | 1.000000 | 2.76618e-12 | 1.000000 |
| rad14              | 2.17881e-12 | 1.000000 | 2.17881e-12 | 1.000000 |
| Ph+MeAc            | 5.29188e-13 | 1.000000 | 5.29188e-13 | 1.000000 |
| rad60syn           | 4.26530e-13 | 1.000000 | 4.26530e-13 | 1.000000 |
| PAH9+H             | 3.18136e-13 | 1.000000 | 3.18136e-13 | 1.000000 |
| rad60anti          | 1.56440e-13 | 1.000000 | 1.56440e-13 | 1.000000 |
| rad35              | 1.46948e-13 | 1.000000 | 1.46948e-13 | 1.000000 |
| PhCCCH3+H          | 6.34309e-14 | 1.000000 | 6.34309e-14 | 1.000000 |
| rad46              | 5.09827e-14 | 1.000000 | 5.09827e-14 | 1.000000 |
| PAH3+H             | 6.68083e-15 | 1.000000 | 6.68083e-15 | 1.000000 |
| rad27              | 5.45064e-15 | 1.000000 | 5.45064e-15 | 1.000000 |
| rad59              | 1.92553e-15 | 1.000000 | 1.92553e-15 | 1.000000 |
| rad26              | 1.86916e-15 | 1.000000 | 1.86916e-15 | 1.000000 |
| rad39              | 4.25971e-16 | 1.000000 | 4.25971e-16 | 1.000000 |
| rad31              | 3.57209e-17 | 1.000000 | 3.57209e-17 | 1.000000 |
| rad50              | 7.05589e-18 | 1.000000 | 7.05590e-18 | 1.000000 |
| rad19syn           | 3.44894e-18 | 1.000000 | 3.44894e-18 | 1.000000 |
| rad5               | 6.20627e-19 | 1.000000 | 6.20627e-19 | 1.000000 |
| rad54              | 3.02575e-19 | 1.000000 | 3.02576e-19 | 1.000000 |
| rad70              | 1.89490e-19 | 1.000000 | 1.89490e-19 | 1.000000 |
| rad12              | 5.64792e-21 | 1.000000 | 5.64792e-21 | 1.000000 |
| rad52              | 5.64523e-21 | 1.000000 | 5.64523e-21 | 1.000000 |
| rad62              | 1.86719e-21 | 1.000000 | 1.86719e-21 | 1.000000 |
| rad37              | 7.94064e-22 | 1.000000 | 7.94064e-22 | 1.000000 |
| PhcycC3H3_A+H      | 7.37270e-22 | 1.000000 | 7.37270e-22 | 1.000000 |
| rad34              | 4.27639e-22 | 1.000000 | 4.27639e-22 | 1.000000 |
| rad55              | 3.89255e-22 | 1.000000 | 3.89255e-22 | 1.000000 |
| rad51              | 3.06685e-22 | 1.000000 | 3.06685e-22 | 1.000000 |
| rad58              | 2.23109e-22 | 1.000000 | 2.23109e-22 | 1.000000 |
| rad43              | 7.64377e-23 | 1.000000 | 7.64377e-23 | 1.000000 |
| rad65              | 3.93304e-25 | 1.000000 | 3.93304e-25 | 1.000000 |
| PAH10+CH3          | 1.53303e-25 | 1.000000 | 1.53303e-25 | 1.000000 |
| PAH1+H             | 6.83556e-26 | 1.000000 | 6.83556e-26 | 1.000000 |
| rad47              | 3.16079e-26 | 1.000000 | 3.16079e-26 | 1.000000 |
| rad42              | 1.24925e-26 | 1.000000 | 1.24925e-26 | 1.000000 |
| rad41              | 1.35978e-28 | 1.000000 | 1.35978e-28 | 1.000000 |

10000.0000 Pa, 240.000000 K

=====

| Rate constant      | True (fraction)       | Effective (fraction)  |
|--------------------|-----------------------|-----------------------|
| Total              | 8.83273e-17 (1.00 )   | 8.83273e-17 (1.00 )   |
| Formation of rad11 | 7.04077e-17 (0.797 )  | 7.04077e-17 (0.797 )  |
| Formation of rad6  | 1.55481e-17 (0.176 )  | 1.55481e-17 (0.176 )  |
| H-abstraction      | 2.37143e-18 (0.0268 ) | 2.37143e-18 (0.0268 ) |

| species | PYtrue   | Cumul    | PYeffective | Cumul    |
|---------|----------|----------|-------------|----------|
| rad11   | 0.717550 | 0.717550 | 0.717550    | 0.717550 |

|                    |             |          |             |          |
|--------------------|-------------|----------|-------------|----------|
| rad6               | 0.250606    | 0.968156 | 0.250606    | 0.968156 |
| Benzene+2-propynyl | 0.0268483   | 0.995004 | 0.0268483   | 0.995004 |
| rad22              | 0.00271561  | 0.997719 | 0.00271561  | 0.997719 |
| Indene+H           | 0.00107191  | 0.998791 | 0.00107191  | 0.998791 |
| rad45              | 0.000405769 | 0.999197 | 0.000405769 | 0.999197 |
| rad18              | 0.000299439 | 0.999497 | 0.000299439 | 0.999497 |
| rad20              | 0.000148113 | 0.999645 | 0.000148113 | 0.999645 |
| rad23              | 0.000124895 | 0.999770 | 0.000124895 | 0.999770 |
| rad21              | 0.000102680 | 0.999872 | 0.000102680 | 0.999872 |
| C2H2+PhCH2         | 6.02196e-05 | 0.999932 | 6.02197e-05 | 0.999932 |
| rad7               | 3.54578e-05 | 0.999968 | 3.54578e-05 | 0.999968 |
| rad36              | 2.57383e-05 | 0.999994 | 2.57383e-05 | 0.999994 |
| rad25              | 3.17636e-06 | 0.999997 | 3.17636e-06 | 0.999997 |
| rad13              | 1.59640e-06 | 0.999998 | 1.59640e-06 | 0.999998 |
| PhCHCCH2+H         | 1.33661e-06 | 1.000000 | 1.33661e-06 | 1.000000 |
| Phenyl+Allene      | 1.20663e-07 | 1.000000 | 0.000000    | 1.000000 |
| rad9               | 1.09588e-07 | 1.000000 | 1.09588e-07 | 1.000000 |
| rad3               | 5.41101e-08 | 1.000000 | 5.41101e-08 | 1.000000 |
| rad4               | 2.83154e-08 | 1.000000 | 2.83154e-08 | 1.000000 |
| rad28              | 5.07221e-09 | 1.000000 | 5.07221e-09 | 1.000000 |
| PhCH2CCH+H         | 3.35052e-09 | 1.000000 | 3.35052e-09 | 1.000000 |
| rad30              | 2.91248e-09 | 1.000000 | 2.91248e-09 | 1.000000 |
| rad2               | 2.47593e-09 | 1.000000 | 2.47593e-09 | 1.000000 |
| rad33              | 2.45277e-09 | 1.000000 | 2.45277e-09 | 1.000000 |
| rad15              | 6.71633e-10 | 1.000000 | 6.71633e-10 | 1.000000 |
| PhCCH+CH3          | 2.18521e-10 | 1.000000 | 2.18521e-10 | 1.000000 |
| rad1               | 1.76502e-10 | 1.000000 | 1.76502e-10 | 1.000000 |
| rad8               | 1.06039e-10 | 1.000000 | 1.06039e-10 | 1.000000 |
| rad24              | 1.84988e-11 | 1.000000 | 1.84988e-11 | 1.000000 |
| rad10              | 1.02742e-11 | 1.000000 | 1.02742e-11 | 1.000000 |
| PAH7+H             | 7.48386e-12 | 1.000000 | 7.48386e-12 | 1.000000 |
| rad38              | 4.18073e-12 | 1.000000 | 4.18073e-12 | 1.000000 |
| rad14              | 3.31586e-12 | 1.000000 | 3.31586e-12 | 1.000000 |
| Ph+MeAc            | 1.06911e-12 | 1.000000 | 1.06911e-12 | 1.000000 |
| rad60syn           | 6.80970e-13 | 1.000000 | 6.80970e-13 | 1.000000 |
| PAH9+H             | 5.55695e-13 | 1.000000 | 5.55695e-13 | 1.000000 |
| rad60anti          | 2.54991e-13 | 1.000000 | 2.54991e-13 | 1.000000 |
| rad35              | 2.52257e-13 | 1.000000 | 2.52257e-13 | 1.000000 |
| PhCCCH3+H          | 1.42513e-13 | 1.000000 | 1.42513e-13 | 1.000000 |
| rad46              | 8.41399e-14 | 1.000000 | 8.41399e-14 | 1.000000 |
| PAH3+H             | 1.38687e-14 | 1.000000 | 1.38687e-14 | 1.000000 |
| rad27              | 9.04443e-15 | 1.000000 | 9.04443e-15 | 1.000000 |
| rad26              | 4.66502e-15 | 1.000000 | 4.66502e-15 | 1.000000 |
| rad59              | 3.90355e-15 | 1.000000 | 3.90355e-15 | 1.000000 |
| rad39              | 8.84506e-16 | 1.000000 | 8.84506e-16 | 1.000000 |
| rad31              | 4.93832e-17 | 1.000000 | 4.93832e-17 | 1.000000 |
| rad50              | 1.67112e-17 | 1.000000 | 1.67112e-17 | 1.000000 |
| rad19syn           | 9.89218e-18 | 1.000000 | 9.89218e-18 | 1.000000 |
| rad5               | 1.80760e-18 | 1.000000 | 1.80760e-18 | 1.000000 |
| rad54              | 9.07633e-19 | 1.000000 | 9.07633e-19 | 1.000000 |
| rad70              | 7.10187e-19 | 1.000000 | 7.10187e-19 | 1.000000 |
| rad12              | 2.06891e-20 | 1.000000 | 2.06891e-20 | 1.000000 |
| rad52              | 1.70977e-20 | 1.000000 | 1.70977e-20 | 1.000000 |
| rad62              | 6.85408e-21 | 1.000000 | 6.85408e-21 | 1.000000 |
| rad37              | 3.09769e-21 | 1.000000 | 3.09769e-21 | 1.000000 |
| PhcycC3H3_A+H      | 2.93122e-21 | 1.000000 | 2.93122e-21 | 1.000000 |
| rad34              | 1.89191e-21 | 1.000000 | 1.89191e-21 | 1.000000 |
| rad55              | 1.45945e-21 | 1.000000 | 1.45945e-21 | 1.000000 |
| rad51              | 1.13907e-21 | 1.000000 | 1.13907e-21 | 1.000000 |
| rad58              | 8.88489e-22 | 1.000000 | 8.88489e-22 | 1.000000 |
| rad43              | 3.01259e-22 | 1.000000 | 3.01259e-22 | 1.000000 |
| rad65              | 1.69367e-24 | 1.000000 | 1.69367e-24 | 1.000000 |
| PAH10+CH3          | 7.32853e-25 | 1.000000 | 7.32853e-25 | 1.000000 |
| PAH1+H             | 3.06509e-25 | 1.000000 | 3.06509e-25 | 1.000000 |
| rad47              | 1.25412e-25 | 1.000000 | 1.25412e-25 | 1.000000 |
| rad42              | 5.96411e-26 | 1.000000 | 5.96411e-26 | 1.000000 |
| rad41              | 6.94342e-28 | 1.000000 | 6.94342e-28 | 1.000000 |

10000.0000 Pa, 250.000000 K

=====

| Rate constant      | True (fraction) |           | Effective (fraction) |           |
|--------------------|-----------------|-----------|----------------------|-----------|
| Total              | 1.21641e-16     | (1.00 )   | 1.21641e-16          | (1.00 )   |
| Formation of rad11 | 9.54219e-17     | (0.784 )  | 9.54219e-17          | (0.784 )  |
| Formation of rad6  | 2.24583e-17     | (0.185 )  | 2.24583e-17          | (0.185 )  |
| H-abstraction      | 3.76121e-18     | (0.0309 ) | 3.76121e-18          | (0.0309 ) |
| species            | PYtrue          | Cumul     | PYeffective          | Cumul     |
| rad11              | 0.698066        | 0.698066  | 0.698066             | 0.698066  |

|                    |             |          |             |          |
|--------------------|-------------|----------|-------------|----------|
| rad6               | 0.265489    | 0.963555 | 0.265489    | 0.963555 |
| Benzene+2-propynyl | 0.0309205   | 0.994475 | 0.0309205   | 0.994475 |
| rad22              | 0.00297103  | 0.997446 | 0.00297104  | 0.997446 |
| Indene+H           | 0.00125553  | 0.998702 | 0.00125553  | 0.998702 |
| rad45              | 0.000450917 | 0.999153 | 0.000450917 | 0.999153 |
| rad18              | 0.000301102 | 0.999454 | 0.000301102 | 0.999454 |
| rad23              | 0.000154246 | 0.999608 | 0.000154246 | 0.999608 |
| rad20              | 0.000142469 | 0.999751 | 0.000142469 | 0.999751 |
| rad21              | 9.86058e-05 | 0.999849 | 9.86058e-05 | 0.999849 |
| C2H2+PhCH2         | 7.37552e-05 | 0.999923 | 7.37552e-05 | 0.999923 |
| rad7               | 4.14302e-05 | 0.999964 | 4.14303e-05 | 0.999964 |
| rad36              | 2.87294e-05 | 0.999993 | 2.87294e-05 | 0.999993 |
| rad25              | 3.48173e-06 | 0.999997 | 3.48173e-06 | 0.999997 |
| PhCHCCH2+H         | 1.73086e-06 | 0.999998 | 1.73086e-06 | 0.999998 |
| rad13              | 1.66874e-06 | 1.000000 | 1.66874e-06 | 1.000000 |
| Phenyl+Allene      | 1.76287e-07 | 1.000000 | 0.000000    | 1.000000 |
| rad9               | 1.44223e-07 | 1.000000 | 1.44223e-07 | 1.000000 |
| rad3               | 6.76309e-08 | 1.000000 | 6.76309e-08 | 1.000000 |
| rad4               | 3.55039e-08 | 1.000000 | 3.55039e-08 | 1.000000 |
| rad28              | 6.70549e-09 | 1.000000 | 6.70549e-09 | 1.000000 |
| PhCH2CCH+H         | 5.66800e-09 | 1.000000 | 5.66800e-09 | 1.000000 |
| rad30              | 3.84815e-09 | 1.000000 | 3.84815e-09 | 1.000000 |
| rad2               | 3.73896e-09 | 1.000000 | 3.73896e-09 | 1.000000 |
| rad33              | 2.55498e-09 | 1.000000 | 2.55498e-09 | 1.000000 |
| rad15              | 9.08471e-10 | 1.000000 | 9.08471e-10 | 1.000000 |
| PhCCH+CH3          | 3.79694e-10 | 1.000000 | 3.79694e-10 | 1.000000 |
| rad1               | 2.69532e-10 | 1.000000 | 2.69532e-10 | 1.000000 |
| rad8               | 1.61690e-10 | 1.000000 | 1.61691e-10 | 1.000000 |
| rad24              | 1.93001e-11 | 1.000000 | 1.93001e-11 | 1.000000 |
| rad10              | 1.91140e-11 | 1.000000 | 1.91140e-11 | 1.000000 |
| PAH7+H             | 1.34578e-11 | 1.000000 | 1.34578e-11 | 1.000000 |
| rad38              | 6.32290e-12 | 1.000000 | 6.32290e-12 | 1.000000 |
| rad14              | 4.97731e-12 | 1.000000 | 4.97732e-12 | 1.000000 |
| Ph+MeAc            | 2.13072e-12 | 1.000000 | 2.13072e-12 | 1.000000 |
| rad60syn           | 1.07226e-12 | 1.000000 | 1.07226e-12 | 1.000000 |
| PAH9+H             | 9.69341e-13 | 1.000000 | 9.69341e-13 | 1.000000 |
| rad35              | 4.32138e-13 | 1.000000 | 4.32138e-13 | 1.000000 |
| rad60anti          | 4.09184e-13 | 1.000000 | 4.09184e-13 | 1.000000 |
| PhCCCH3+H          | 3.16228e-13 | 1.000000 | 3.16229e-13 | 1.000000 |
| rad46              | 1.38561e-13 | 1.000000 | 1.38561e-13 | 1.000000 |
| PAH3+H             | 2.77576e-14 | 1.000000 | 2.77576e-14 | 1.000000 |
| rad27              | 1.47941e-14 | 1.000000 | 1.47941e-14 | 1.000000 |
| rad26              | 1.14726e-14 | 1.000000 | 1.14726e-14 | 1.000000 |
| rad59              | 7.64049e-15 | 1.000000 | 7.64049e-15 | 1.000000 |
| rad39              | 1.81970e-15 | 1.000000 | 1.81970e-15 | 1.000000 |
| rad31              | 6.85641e-17 | 1.000000 | 6.85641e-17 | 1.000000 |
| rad50              | 3.83792e-17 | 1.000000 | 3.83792e-17 | 1.000000 |
| rad19syn           | 2.66688e-17 | 1.000000 | 2.66688e-17 | 1.000000 |
| rad5               | 5.05240e-18 | 1.000000 | 5.05241e-18 | 1.000000 |
| rad54              | 2.53584e-18 | 1.000000 | 2.53584e-18 | 1.000000 |
| rad70              | 2.39342e-18 | 1.000000 | 2.39342e-18 | 1.000000 |
| rad12              | 7.15577e-20 | 1.000000 | 7.15577e-20 | 1.000000 |
| rad52              | 4.88042e-20 | 1.000000 | 4.88042e-20 | 1.000000 |
| rad62              | 2.29318e-20 | 1.000000 | 2.29318e-20 | 1.000000 |
| rad37              | 1.12689e-20 | 1.000000 | 1.12689e-20 | 1.000000 |
| PhcycC3H3_A+H      | 1.04276e-20 | 1.000000 | 1.04276e-20 | 1.000000 |
| rad34              | 7.35251e-21 | 1.000000 | 7.35251e-21 | 1.000000 |
| rad55              | 4.92922e-21 | 1.000000 | 4.92922e-21 | 1.000000 |
| rad51              | 3.88132e-21 | 1.000000 | 3.88132e-21 | 1.000000 |
| rad58              | 3.16058e-21 | 1.000000 | 3.16058e-21 | 1.000000 |
| rad43              | 1.08407e-21 | 1.000000 | 1.08407e-21 | 1.000000 |
| rad65              | 6.55578e-24 | 1.000000 | 6.55578e-24 | 1.000000 |
| PAH10+CH3          | 3.12891e-24 | 1.000000 | 3.12891e-24 | 1.000000 |
| PAH1+H             | 1.21007e-24 | 1.000000 | 1.21007e-24 | 1.000000 |
| rad47              | 4.45320e-25 | 1.000000 | 4.45320e-25 | 1.000000 |
| rad42              | 2.48888e-25 | 1.000000 | 2.48888e-25 | 1.000000 |
| rad41              | 3.10168e-27 | 1.000000 | 3.10168e-27 | 1.000000 |

10000.0000 Pa, 260.000000 K

=====

| Rate constant      | True (fraction) |           | Effective (fraction) |           |
|--------------------|-----------------|-----------|----------------------|-----------|
| Total              | 1.63720e-16     | (1.00 )   | 1.63720e-16          | (1.00 )   |
| Formation of rad11 | 1.26419e-16     | (0.772 )  | 1.26419e-16          | (0.772 )  |
| Formation of rad6  | 3.15515e-17     | (0.193 )  | 3.15515e-17          | (0.193 )  |
| H-abstraction      | 5.75028e-18     | (0.0351 ) | 5.75028e-18          | (0.0351 ) |
| species            | PYtrue          | Cumul     | PYeffective          | Cumul     |
| rad11              | 0.678389        | 0.678389  | 0.678389             | 0.678389  |

|                    |             |          |             |          |
|--------------------|-------------|----------|-------------|----------|
| rad6               | 0.280377    | 0.958766 | 0.280377    | 0.958766 |
| Benzene+2-propynyl | 0.0351226   | 0.993888 | 0.0351226   | 0.993888 |
| rad22              | 0.00324303  | 0.997131 | 0.00324303  | 0.997131 |
| Indene+H           | 0.00146703  | 0.998599 | 0.00146703  | 0.998599 |
| rad45              | 0.000500038 | 0.999099 | 0.000500038 | 0.999099 |
| rad18              | 0.000301269 | 0.999400 | 0.000301269 | 0.999400 |
| rad23              | 0.000190128 | 0.999590 | 0.000190128 | 0.999590 |
| rad20              | 0.000136817 | 0.999727 | 0.000136817 | 0.999727 |
| rad21              | 9.45532e-05 | 0.999821 | 9.45532e-05 | 0.999821 |
| C2H2+PhCH2         | 9.02417e-05 | 0.999912 | 9.02417e-05 | 0.999912 |
| rad7               | 4.81727e-05 | 0.999960 | 4.81727e-05 | 0.999960 |
| rad36              | 3.20192e-05 | 0.999992 | 3.20192e-05 | 0.999992 |
| rad25              | 3.79162e-06 | 0.999996 | 3.79162e-06 | 0.999996 |
| PhCHCCH2+H         | 2.23976e-06 | 0.999998 | 2.23976e-06 | 0.999998 |
| rad13              | 1.74000e-06 | 1.000000 | 1.74000e-06 | 1.000000 |
| Phenyl+Allene      | 2.55359e-07 | 1.000000 | 0.000000    | 1.000000 |
| rad9               | 1.89434e-07 | 1.000000 | 1.89434e-07 | 1.000000 |
| rad3               | 8.42637e-08 | 1.000000 | 8.42637e-08 | 1.000000 |
| rad4               | 4.43895e-08 | 1.000000 | 4.43895e-08 | 1.000000 |
| PhCH2CCH+H         | 9.39055e-09 | 1.000000 | 9.39055e-09 | 1.000000 |
| rad28              | 8.85874e-09 | 1.000000 | 8.85874e-09 | 1.000000 |
| rad2               | 5.62903e-09 | 1.000000 | 5.62903e-09 | 1.000000 |
| rad30              | 5.05827e-09 | 1.000000 | 5.05827e-09 | 1.000000 |
| rad33              | 2.65597e-09 | 1.000000 | 2.65597e-09 | 1.000000 |
| rad15              | 1.22168e-09 | 1.000000 | 1.22168e-09 | 1.000000 |
| PhCCH+CH3          | 6.55152e-10 | 1.000000 | 6.55152e-10 | 1.000000 |
| rad1               | 4.10719e-10 | 1.000000 | 4.10719e-10 | 1.000000 |
| rad8               | 2.44066e-10 | 1.000000 | 2.44066e-10 | 1.000000 |
| rad10              | 3.52827e-11 | 1.000000 | 3.52827e-11 | 1.000000 |
| PAH7+H             | 2.35377e-11 | 1.000000 | 2.35377e-11 | 1.000000 |
| rad24              | 2.02649e-11 | 1.000000 | 2.02649e-11 | 1.000000 |
| rad38              | 9.55854e-12 | 1.000000 | 9.55854e-12 | 1.000000 |
| rad14              | 7.36496e-12 | 1.000000 | 7.36496e-12 | 1.000000 |
| Ph+MeAc            | 4.18372e-12 | 1.000000 | 4.18372e-12 | 1.000000 |
| PAH9+H             | 1.68547e-12 | 1.000000 | 1.68547e-12 | 1.000000 |
| rad60syn           | 1.66509e-12 | 1.000000 | 1.66509e-12 | 1.000000 |
| rad35              | 7.37453e-13 | 1.000000 | 7.37453e-13 | 1.000000 |
| PhCCCH3+H          | 6.90829e-13 | 1.000000 | 6.90829e-13 | 1.000000 |
| rad60anti          | 6.46549e-13 | 1.000000 | 6.46549e-13 | 1.000000 |
| rad46              | 2.27399e-13 | 1.000000 | 2.27399e-13 | 1.000000 |
| PAH3+H             | 5.37052e-14 | 1.000000 | 5.37052e-14 | 1.000000 |
| rad26              | 2.76650e-14 | 1.000000 | 2.76650e-14 | 1.000000 |
| rad27              | 2.38593e-14 | 1.000000 | 2.38593e-14 | 1.000000 |
| rad59              | 1.44759e-14 | 1.000000 | 1.44759e-14 | 1.000000 |
| rad39              | 3.70040e-15 | 1.000000 | 3.70040e-15 | 1.000000 |
| rad31              | 9.56820e-17 | 1.000000 | 9.56820e-17 | 1.000000 |
| rad50              | 8.55773e-17 | 1.000000 | 8.55773e-17 | 1.000000 |
| rad19syn           | 6.78350e-17 | 1.000000 | 6.78350e-17 | 1.000000 |
| rad5               | 1.35291e-17 | 1.000000 | 1.35291e-17 | 1.000000 |
| rad70              | 7.32890e-18 | 1.000000 | 7.32890e-18 | 1.000000 |
| rad54              | 6.63458e-18 | 1.000000 | 6.63458e-18 | 1.000000 |
| rad12              | 2.32748e-19 | 1.000000 | 2.32748e-19 | 1.000000 |
| rad52              | 1.31830e-19 | 1.000000 | 1.31830e-19 | 1.000000 |
| rad62              | 7.04269e-20 | 1.000000 | 7.04269e-20 | 1.000000 |
| rad37              | 3.81713e-20 | 1.000000 | 3.81713e-20 | 1.000000 |
| PhcycC3H3_A+H      | 3.35350e-20 | 1.000000 | 3.35350e-20 | 1.000000 |
| rad34              | 2.54490e-20 | 1.000000 | 2.54490e-20 | 1.000000 |
| rad55              | 1.51414e-20 | 1.000000 | 1.51414e-20 | 1.000000 |
| rad51              | 1.22165e-20 | 1.000000 | 1.22165e-20 | 1.000000 |
| rad58              | 1.01532e-20 | 1.000000 | 1.01532e-20 | 1.000000 |
| rad43              | 3.58336e-21 | 1.000000 | 3.58336e-21 | 1.000000 |
| rad65              | 2.30241e-23 | 1.000000 | 2.30241e-23 | 1.000000 |
| PAH10+CH3          | 1.20433e-23 | 1.000000 | 1.20433e-23 | 1.000000 |
| PAH1+H             | 4.26175e-24 | 1.000000 | 4.26175e-24 | 1.000000 |
| rad47              | 1.43355e-24 | 1.000000 | 1.43355e-24 | 1.000000 |
| rad42              | 9.21500e-25 | 1.000000 | 9.21500e-25 | 1.000000 |
| rad41              | 1.23031e-26 | 1.000000 | 1.23031e-26 | 1.000000 |

10000.0000 Pa, 270.000000 K

=====

| Rate constant      | True (fraction) |           | Effective (fraction) |           |
|--------------------|-----------------|-----------|----------------------|-----------|
| Total              | 2.15887e-16     | (1.00 )   | 2.15887e-16          | (1.00 )   |
| Formation of rad11 | 1.64133e-16     | (0.760 )  | 1.64133e-16          | (0.760 )  |
| Formation of rad6  | 4.32452e-17     | (0.200 )  | 4.32451e-17          | (0.200 )  |
| H-abstraction      | 8.50919e-18     | (0.0394 ) | 8.50919e-18          | (0.0394 ) |
| species            | PYtrue          | Cumul     | PYeffective          | Cumul     |
| rad11              | 0.658504        | 0.658504  | 0.658505             | 0.658505  |

|                    |             |          |             |          |
|--------------------|-------------|----------|-------------|----------|
| rad6               | 0.295319    | 0.953823 | 0.295319    | 0.953824 |
| Benzene+2-propynyl | 0.0394150   | 0.993238 | 0.0394151   | 0.993239 |
| rad22              | 0.00353092  | 0.996769 | 0.00353092  | 0.996770 |
| Indene+H           | 0.00171008  | 0.998479 | 0.00171008  | 0.998480 |
| rad45              | 0.000553200 | 0.999033 | 0.000553201 | 0.999034 |
| rad18              | 0.000299988 | 0.999333 | 0.000299988 | 0.999334 |
| rad23              | 0.000233799 | 0.999566 | 0.000233799 | 0.999567 |
| rad20              | 0.000131178 | 0.999698 | 0.000131178 | 0.999699 |
| C2H2+PhCH2         | 0.000110253 | 0.999808 | 0.000110253 | 0.999809 |
| rad21              | 9.05345e-05 | 0.999898 | 9.05345e-05 | 0.999899 |
| rad7               | 5.57572e-05 | 0.999954 | 5.57572e-05 | 0.999955 |
| rad36              | 3.56224e-05 | 0.999990 | 3.56225e-05 | 0.999991 |
| rad25              | 4.10077e-06 | 0.999994 | 4.10078e-06 | 0.999995 |
| PhCHCCH2+H         | 2.89383e-06 | 0.999997 | 2.89383e-06 | 0.999998 |
| rad13              | 1.81062e-06 | 0.999999 | 1.81062e-06 | 1.000000 |
| Phenyl+Allene      | 3.66630e-07 | 0.999999 | 0.000000    | 1.000000 |
| rad9               | 2.48145e-07 | 0.999999 | 2.48145e-07 | 1.000000 |
| rad3               | 1.04664e-07 | 0.999999 | 1.04664e-07 | 1.000000 |
| rad4               | 5.53449e-08 | 0.999999 | 5.53449e-08 | 1.000000 |
| PhCH2CCH+H         | 1.52534e-08 | 0.999999 | 1.52534e-08 | 1.000000 |
| rad28              | 1.16988e-08 | 0.999999 | 1.16988e-08 | 1.000000 |
| rad2               | 8.44206e-09 | 0.999999 | 8.44207e-09 | 1.000000 |
| rad30              | 6.61234e-09 | 0.999999 | 6.61235e-09 | 1.000000 |
| rad33              | 2.75645e-09 | 0.999999 | 2.75645e-09 | 1.000000 |
| rad15              | 1.63265e-09 | 0.999999 | 1.63265e-09 | 1.000000 |
| PhCCH+CH3          | 1.12085e-09 | 0.999999 | 1.12085e-09 | 1.000000 |
| rad1               | 6.24065e-10 | 0.999999 | 6.24065e-10 | 1.000000 |
| rad8               | 3.64572e-10 | 0.999999 | 3.64572e-10 | 1.000000 |
| rad10              | 6.44770e-11 | 0.999999 | 6.44770e-11 | 1.000000 |
| PAH7+H             | 4.01060e-11 | 0.999999 | 4.01060e-11 | 1.000000 |
| rad24              | 2.13900e-11 | 0.999999 | 2.13900e-11 | 1.000000 |
| rad38              | 1.44284e-11 | 0.999999 | 1.44284e-11 | 1.000000 |
| rad14              | 1.07376e-11 | 0.999999 | 1.07376e-11 | 1.000000 |
| Ph+MeAc            | 8.08134e-12 | 0.999999 | 8.08135e-12 | 1.000000 |
| PAH9+H             | 2.91604e-12 | 0.999999 | 2.91604e-12 | 1.000000 |
| rad60syn           | 2.55002e-12 | 0.999999 | 2.55002e-12 | 1.000000 |
| PhCCCH3+H          | 1.48108e-12 | 0.999999 | 1.48109e-12 | 1.000000 |
| rad35              | 1.25161e-12 | 0.999999 | 1.25161e-12 | 1.000000 |
| rad60anti          | 1.00612e-12 | 0.999999 | 1.00612e-12 | 1.000000 |
| rad46              | 3.71487e-13 | 0.999999 | 3.71487e-13 | 1.000000 |
| PAH3+H             | 1.00661e-13 | 0.999999 | 1.00661e-13 | 1.000000 |
| rad26              | 6.51028e-14 | 0.999999 | 6.51028e-14 | 1.000000 |
| rad27              | 3.79433e-14 | 0.999999 | 3.79433e-14 | 1.000000 |
| rad59              | 2.66028e-14 | 0.999999 | 2.66028e-14 | 1.000000 |
| rad39              | 7.41646e-15 | 0.999999 | 7.41647e-15 | 1.000000 |
| rad50              | 1.85401e-16 | 0.999999 | 1.85401e-16 | 1.000000 |
| rad19syn           | 1.63276e-16 | 0.999999 | 1.63276e-16 | 1.000000 |
| rad31              | 1.34292e-16 | 0.999999 | 1.34292e-16 | 1.000000 |
| rad5               | 3.46611e-17 | 0.999999 | 3.46611e-17 | 1.000000 |
| rad70              | 2.05731e-17 | 0.999999 | 2.05731e-17 | 1.000000 |
| rad54              | 1.63253e-17 | 0.999999 | 1.63254e-17 | 1.000000 |
| rad12              | 7.10889e-19 | 0.999999 | 7.10889e-19 | 1.000000 |
| rad52              | 3.38058e-19 | 0.999999 | 3.38058e-19 | 1.000000 |
| rad62              | 1.99824e-19 | 0.999999 | 1.99824e-19 | 1.000000 |
| rad37              | 1.20483e-19 | 0.999999 | 1.20483e-19 | 1.000000 |
| PhcycC3H3_A+H      | 9.83879e-20 | 0.999999 | 9.83879e-20 | 1.000000 |
| rad34              | 7.93921e-20 | 0.999999 | 7.93922e-20 | 1.000000 |
| rad55              | 4.26566e-20 | 0.999999 | 4.26566e-20 | 1.000000 |
| rad51              | 3.57307e-20 | 0.999999 | 3.57307e-20 | 1.000000 |
| rad58              | 2.97363e-20 | 0.999999 | 2.97363e-20 | 1.000000 |
| rad43              | 1.09439e-20 | 0.999999 | 1.09439e-20 | 1.000000 |
| rad65              | 7.39903e-23 | 0.999999 | 7.39903e-23 | 1.000000 |
| PAH10+CH3          | 4.21631e-23 | 0.999999 | 4.21631e-23 | 1.000000 |
| PAH1+H             | 1.35446e-23 | 0.999999 | 1.35446e-23 | 1.000000 |
| rad47              | 4.23023e-24 | 0.999999 | 4.23023e-24 | 1.000000 |
| rad42              | 3.06622e-24 | 0.999999 | 3.06622e-24 | 1.000000 |
| rad41              | 4.38911e-26 | 0.999999 | 4.38911e-26 | 1.000000 |

10000.0000 Pa, 280.000000 K

=====

| Rate constant      | True (fraction) |           | Effective (fraction) |           |
|--------------------|-----------------|-----------|----------------------|-----------|
| Total              | 2.79491e-16     | (1.00 )   | 2.79491e-16          | (1.00 )   |
| Formation of rad11 | 2.09281e-16     | (0.749 )  | 2.09281e-16          | (0.749 )  |
| Formation of rad6  | 5.79792e-17     | (0.207 )  | 5.79792e-17          | (0.207 )  |
| H-abstraction      | 1.22310e-17     | (0.0438 ) | 1.22310e-17          | (0.0438 ) |
| species            | PYtrue          | Cumul     | PYeffective          | Cumul     |
| rad11              | 0.638396        | 0.638396  | 0.638397             | 0.638397  |



|                    |             |          |             |          |
|--------------------|-------------|----------|-------------|----------|
| rad6               | 0.310363    | 0.948760 | 0.310364    | 0.948762 |
| Benzene+2-propynyl | 0.0437616   | 0.992521 | 0.0437616   | 0.992523 |
| rad22              | 0.00383346  | 0.996355 | 0.00383346  | 0.996357 |
| Indene+H           | 0.00198866  | 0.998343 | 0.00198866  | 0.998345 |
| rad45              | 0.000610380 | 0.998954 | 0.000610381 | 0.998956 |
| rad18              | 0.000297325 | 0.999251 | 0.000297325 | 0.999253 |
| rad23              | 0.000286671 | 0.999538 | 0.000286672 | 0.999540 |
| C2H2+PhCH2         | 0.000134445 | 0.999672 | 0.000134445 | 0.999674 |
| rad20              | 0.000125572 | 0.999798 | 0.000125573 | 0.999800 |
| rad21              | 8.65600e-05 | 0.999884 | 8.65601e-05 | 0.999886 |
| rad7               | 6.42557e-05 | 0.999949 | 6.42557e-05 | 0.999951 |
| rad36              | 3.95497e-05 | 0.999988 | 3.95498e-05 | 0.999990 |
| rad25              | 4.40350e-06 | 0.999993 | 4.40350e-06 | 0.999994 |
| PhCHCCH2+H         | 3.73030e-06 | 0.999996 | 3.73030e-06 | 0.999998 |
| rad13              | 1.88096e-06 | 0.999998 | 1.88097e-06 | 1.00000  |
| Phenyl+Allene      | 5.21584e-07 | 0.999999 | 0.00000     | 1.00000  |
| rad9               | 3.23941e-07 | 0.999999 | 3.23942e-07 | 1.00000  |
| rad3               | 1.29591e-07 | 0.999999 | 1.29592e-07 | 1.00000  |
| rad4               | 6.88059e-08 | 0.999999 | 6.88060e-08 | 1.00000  |
| PhCH2CCH+H         | 2.43122e-08 | 0.999999 | 2.43122e-08 | 1.00000  |
| rad28              | 1.54442e-08 | 0.999999 | 1.54442e-08 | 1.00000  |
| rad2               | 1.25997e-08 | 0.999999 | 1.25997e-08 | 1.00000  |
| rad30              | 8.59329e-09 | 0.999999 | 8.59330e-09 | 1.00000  |
| rad33              | 2.85707e-09 | 0.999999 | 2.85708e-09 | 1.00000  |
| rad15              | 2.16748e-09 | 0.999999 | 2.16748e-09 | 1.00000  |
| PhCCH+CH3          | 1.89809e-09 | 0.999999 | 1.89809e-09 | 1.00000  |
| rad1               | 9.44592e-10 | 0.999999 | 9.44592e-10 | 1.00000  |
| rad8               | 5.38733e-10 | 0.999999 | 5.38733e-10 | 1.00000  |
| rad10              | 1.16380e-10 | 0.999999 | 1.16380e-10 | 1.00000  |
| PAH7+H             | 6.66688e-11 | 0.999999 | 6.66688e-11 | 1.00000  |
| rad24              | 2.26714e-11 | 0.999999 | 2.26714e-11 | 1.00000  |
| rad38              | 2.17248e-11 | 0.999999 | 2.17248e-11 | 1.00000  |
| rad14              | 1.54180e-11 | 0.999999 | 1.54180e-11 | 1.00000  |
| Ph+MeAc            | 1.53309e-11 | 0.999999 | 1.53310e-11 | 1.00000  |
| PAH9+H             | 5.01122e-12 | 0.999999 | 5.01122e-12 | 1.00000  |
| rad60syn           | 3.85133e-12 | 0.999999 | 3.85134e-12 | 1.00000  |
| PhCCCH3+H          | 3.10683e-12 | 0.999999 | 3.10683e-12 | 1.00000  |
| rad35              | 2.10944e-12 | 0.999999 | 2.10944e-12 | 1.00000  |
| rad60anti          | 1.54212e-12 | 0.999999 | 1.54212e-12 | 1.00000  |
| rad46              | 6.03435e-13 | 0.999999 | 6.03435e-13 | 1.00000  |
| PAH3+H             | 1.83079e-13 | 0.999999 | 1.83079e-13 | 1.00000  |
| rad26              | 1.48908e-13 | 0.999999 | 1.48908e-13 | 1.00000  |
| rad27              | 5.94979e-14 | 0.999999 | 5.94980e-14 | 1.00000  |
| rad59              | 4.74997e-14 | 0.999999 | 4.74997e-14 | 1.00000  |
| rad39              | 1.46036e-14 | 0.999999 | 1.46036e-14 | 1.00000  |
| rad50              | 3.90383e-16 | 0.999999 | 3.90383e-16 | 1.00000  |
| rad19syn           | 3.72805e-16 | 0.999999 | 3.72805e-16 | 1.00000  |
| rad31              | 1.89646e-16 | 0.999999 | 1.89646e-16 | 1.00000  |
| rad5               | 8.48978e-17 | 0.999999 | 8.48978e-17 | 1.00000  |
| rad70              | 5.33544e-17 | 0.999999 | 5.33544e-17 | 1.00000  |
| rad54              | 3.79175e-17 | 0.999999 | 3.79175e-17 | 1.00000  |
| rad12              | 2.03991e-18 | 0.999999 | 2.03991e-18 | 1.00000  |
| rad52              | 8.25065e-19 | 0.999999 | 8.25065e-19 | 1.00000  |
| rad62              | 5.26913e-19 | 0.999999 | 5.26914e-19 | 1.00000  |
| rad37              | 3.55162e-19 | 0.999999 | 3.55163e-19 | 1.00000  |
| PhcycC3H3_A+H      | 2.65480e-19 | 0.999999 | 2.65480e-19 | 1.00000  |
| rad34              | 2.25552e-19 | 0.999999 | 2.25552e-19 | 1.00000  |
| rad55              | 1.11034e-19 | 0.999999 | 1.11034e-19 | 1.00000  |
| rad51              | 9.76253e-20 | 0.999999 | 9.76252e-20 | 1.00000  |
| rad58              | 8.00667e-20 | 0.999999 | 8.00668e-20 | 1.00000  |
| rad43              | 3.10561e-20 | 0.999999 | 3.10562e-20 | 1.00000  |
| rad65              | 2.19231e-22 | 0.999999 | 2.19231e-22 | 1.00000  |
| PAH10+CH3          | 1.35366e-22 | 0.999999 | 1.35366e-22 | 1.00000  |
| PAH1+H             | 3.92389e-23 | 0.999999 | 3.92389e-23 | 1.00000  |
| rad47              | 1.15513e-23 | 0.999999 | 1.15513e-23 | 1.00000  |
| rad42              | 9.27148e-24 | 0.999999 | 9.27149e-24 | 1.00000  |
| rad41              | 1.42390e-25 | 0.999999 | 1.42390e-25 | 1.00000  |

10000.0000 Pa, 290.000000 K

=====

| Rate constant      | True (fraction) |           | Effective (fraction) |           |
|--------------------|-----------------|-----------|----------------------|-----------|
| Total              | 3.55893e-16     | (1.00 )   | 3.55893e-16          | (1.00 )   |
| Formation of rad11 | 2.62555e-16     | (0.738 )  | 2.62555e-16          | (0.738 )  |
| Formation of rad6  | 7.62093e-17     | (0.214 )  | 7.62093e-17          | (0.214 )  |
| H-abstraction      | 1.71289e-17     | (0.0481 ) | 1.71289e-17          | (0.0481 ) |
| species            | PYtrue          | Cumul     | PYeffective          | Cumul     |
| rad11              | 0.618051        | 0.618051  | 0.618051             | 0.618051  |

|                    |             |          |             |          |
|--------------------|-------------|----------|-------------|----------|
| rad6               | 0.325553    | 0.943604 | 0.325553    | 0.943604 |
| Benzene+2-propynyl | 0.0481294   | 0.991733 | 0.0481294   | 0.991733 |
| rad22              | 0.00414881  | 0.995882 | 0.00414881  | 0.995882 |
| Indene+H           | 0.00230694  | 0.998189 | 0.00230694  | 0.998189 |
| rad45              | 0.000671453 | 0.998860 | 0.000671454 | 0.998860 |
| rad23              | 0.000350300 | 0.999211 | 0.000350300 | 0.999211 |
| rad18              | 0.000293358 | 0.999504 | 0.000293358 | 0.999504 |
| C2H2+PhCH2         | 0.000163555 | 0.999667 | 0.000163555 | 0.999667 |
| rad20              | 0.000120016 | 0.999787 | 0.000120016 | 0.999787 |
| rad21              | 8.26383e-05 | 0.999870 | 8.26384e-05 | 0.999870 |
| rad7               | 7.37359e-05 | 0.999944 | 7.37359e-05 | 0.999944 |
| rad36              | 4.38061e-05 | 0.999988 | 4.38061e-05 | 0.999988 |
| PhCHCCH2+H         | 4.79399e-06 | 0.999992 | 4.79399e-06 | 0.999992 |
| rad25              | 4.69388e-06 | 0.999997 | 4.69388e-06 | 0.999997 |
| rad13              | 1.95138e-06 | 0.999999 | 1.95138e-06 | 0.999999 |
| Phenyl+Allene      | 7.35044e-07 | 1.000000 | 0.000000    | 0.999999 |
| rad9               | 4.21167e-07 | 1.000000 | 4.21168e-07 | 0.999999 |
| rad3               | 1.59903e-07 | 1.000000 | 1.59903e-07 | 1.000000 |
| rad4               | 8.52734e-08 | 1.000000 | 8.52734e-08 | 1.000000 |
| PhCH2CCH+H         | 3.80485e-08 | 1.000000 | 3.80486e-08 | 1.000000 |
| rad28              | 2.03798e-08 | 1.000000 | 2.03798e-08 | 1.000000 |
| rad2               | 1.86921e-08 | 1.000000 | 1.86921e-08 | 1.000000 |
| rad30              | 1.10988e-08 | 1.000000 | 1.10988e-08 | 1.000000 |
| PhCCH+CH3          | 3.17600e-09 | 1.000000 | 3.17601e-09 | 1.000000 |
| rad33              | 2.95841e-09 | 1.000000 | 2.95842e-09 | 1.000000 |
| rad15              | 2.85758e-09 | 1.000000 | 2.85758e-09 | 1.000000 |
| rad1               | 1.42262e-09 | 1.000000 | 1.42262e-09 | 1.000000 |
| rad8               | 7.87309e-10 | 1.000000 | 7.87310e-10 | 1.000000 |
| rad10              | 2.07011e-10 | 1.000000 | 2.07012e-10 | 1.000000 |
| PAH7+H             | 1.08250e-10 | 1.000000 | 1.08250e-10 | 1.000000 |
| rad38              | 3.25975e-11 | 1.000000 | 3.25975e-11 | 1.000000 |
| Ph+MeAc            | 2.85158e-11 | 1.000000 | 2.85159e-11 | 1.000000 |
| rad24              | 2.41045e-11 | 1.000000 | 2.41045e-11 | 1.000000 |
| rad14              | 2.17970e-11 | 1.000000 | 2.17970e-11 | 1.000000 |
| PAH9+H             | 8.53975e-12 | 1.000000 | 8.53975e-12 | 1.000000 |
| PhCCCH3+H          | 6.35975e-12 | 1.000000 | 6.35975e-12 | 1.000000 |
| rad60syn           | 5.73643e-12 | 1.000000 | 5.73643e-12 | 1.000000 |
| rad35              | 3.52535e-12 | 1.000000 | 3.52535e-12 | 1.000000 |
| rad60anti          | 2.32845e-12 | 1.000000 | 2.32845e-12 | 1.000000 |
| rad46              | 9.73621e-13 | 1.000000 | 9.73621e-13 | 1.000000 |
| rad26              | 3.30023e-13 | 1.000000 | 3.30024e-13 | 1.000000 |
| PAH3+H             | 3.23540e-13 | 1.000000 | 3.23540e-13 | 1.000000 |
| rad27              | 9.19787e-14 | 1.000000 | 9.19788e-14 | 1.000000 |
| rad59              | 8.25079e-14 | 1.000000 | 8.25080e-14 | 1.000000 |
| rad39              | 2.81622e-14 | 1.000000 | 2.81623e-14 | 1.000000 |
| rad19syn           | 8.09283e-16 | 1.000000 | 8.09283e-16 | 1.000000 |
| rad50              | 7.98906e-16 | 1.000000 | 7.98906e-16 | 1.000000 |
| rad31              | 2.69552e-16 | 1.000000 | 2.69552e-16 | 1.000000 |
| rad5               | 1.98795e-16 | 1.000000 | 1.98795e-16 | 1.000000 |
| rad70              | 1.28708e-16 | 1.000000 | 1.28708e-16 | 1.000000 |
| rad54              | 8.33940e-17 | 1.000000 | 8.33940e-17 | 1.000000 |
| rad12              | 5.50895e-18 | 1.000000 | 5.50896e-18 | 1.000000 |
| rad52              | 1.92058e-18 | 1.000000 | 1.92058e-18 | 1.000000 |
| rad62              | 1.29836e-18 | 1.000000 | 1.29836e-18 | 1.000000 |
| rad37              | 9.80817e-19 | 1.000000 | 9.80817e-19 | 1.000000 |
| PhcycC3H3_A+H      | 6.63638e-19 | 1.000000 | 6.63638e-19 | 1.000000 |
| rad34              | 5.88841e-19 | 1.000000 | 5.88841e-19 | 1.000000 |
| rad55              | 2.68810e-19 | 1.000000 | 2.68810e-19 | 1.000000 |
| rad51              | 2.50349e-19 | 1.000000 | 2.50349e-19 | 1.000000 |
| rad58              | 1.99666e-19 | 1.000000 | 1.99666e-19 | 1.000000 |
| rad43              | 8.23220e-20 | 1.000000 | 8.23220e-20 | 1.000000 |
| rad65              | 6.02999e-22 | 1.000000 | 6.02999e-22 | 1.000000 |
| PAH10+CH3          | 4.01534e-22 | 1.000000 | 4.01535e-22 | 1.000000 |
| PAH1+H             | 1.04540e-22 | 1.000000 | 1.04540e-22 | 1.000000 |
| rad47              | 2.94237e-23 | 1.000000 | 2.94238e-23 | 1.000000 |
| rad42              | 2.57231e-23 | 1.000000 | 2.57232e-23 | 1.000000 |
| rad41              | 4.24071e-25 | 1.000000 | 4.24071e-25 | 1.000000 |

10000.0000 Pa, 300.000000 K

=====

| Rate constant      | True (fraction) |           | Effective (fraction) |           |
|--------------------|-----------------|-----------|----------------------|-----------|
| Total              | 6.34395e-16     | (1.00 )   | 6.34394e-16          | (1.00 )   |
| Formation of rad11 | 4.51153e-16     | (0.711 )  | 4.51152e-16          | (0.711 )  |
| Formation of rad6  | 1.51589e-16     | (0.239 )  | 1.51588e-16          | (0.239 )  |
| H-abstraction      | 3.16530e-17     | (0.0499 ) | 3.16530e-17          | (0.0499 ) |
| species            | PYtrue          | Cumul     | PYeffective          | Cumul     |
| rad11              | 0.506806        | 0.506806  | 0.506807             | 0.506807  |

|                    |             |          |             |          |
|--------------------|-------------|----------|-------------|----------|
| rad6               | 0.428513    | 0.935319 | 0.428514    | 0.935320 |
| Benzene+2-propynyl | 0.0498949   | 0.985214 | 0.0498949   | 0.985215 |
| rad22              | 0.00634573  | 0.991559 | 0.00634575  | 0.991561 |
| Indene+H           | 0.00520075  | 0.996760 | 0.00520076  | 0.996762 |
| rad45              | 0.00108614  | 0.997846 | 0.00108614  | 0.997848 |
| rad23              | 0.00103786  | 0.998884 | 0.00103786  | 0.998886 |
| C2H2+PhCH2         | 0.000506978 | 0.999391 | 0.000506979 | 0.999393 |
| rad18              | 0.000248121 | 0.999639 | 0.000248121 | 0.999641 |
| rad7               | 0.000133326 | 0.999772 | 0.000133326 | 0.999774 |
| rad20              | 9.53963e-05 | 0.999868 | 9.53962e-05 | 0.999870 |
| rad21              | 6.89901e-05 | 0.999937 | 6.89903e-05 | 0.999939 |
| rad36              | 3.70680e-05 | 0.999974 | 3.70681e-05 | 0.999976 |
| PhCHCCH2+H         | 1.39872e-05 | 0.999988 | 1.39872e-05 | 0.999990 |
| rad25              | 5.71081e-06 | 0.999994 | 5.71082e-06 | 0.999996 |
| rad13              | 2.31920e-06 | 0.999996 | 2.31921e-06 | 0.999998 |
| Phenyl+Allene      | 1.81231e-06 | 0.999998 | 0.00000     | 0.999998 |
| rad9               | 1.33418e-06 | 0.999999 | 1.33419e-06 | 0.999999 |
| rad3               | 3.85438e-07 | 0.999999 | 3.85439e-07 | 1.000000 |
| PhCH2CCH+H         | 2.06533e-07 | 1.000000 | 2.06534e-07 | 1.000000 |
| rad4               | 1.92599e-07 | 1.000000 | 1.92600e-07 | 1.000000 |
| rad2               | 1.23982e-07 | 1.000000 | 1.23983e-07 | 1.000000 |
| rad28              | 7.49691e-08 | 1.000000 | 7.49693e-08 | 1.000000 |
| PhCCH+CH3          | 4.40198e-08 | 1.000000 | 4.40199e-08 | 1.000000 |
| rad30              | 3.41456e-08 | 1.000000 | 3.41456e-08 | 1.000000 |
| rad1               | 9.37717e-09 | 1.000000 | 9.37718e-09 | 1.000000 |
| rad10              | 3.97393e-09 | 1.000000 | 3.97394e-09 | 1.000000 |
| rad33              | 3.83071e-09 | 1.000000 | 3.83072e-09 | 1.000000 |
| rad15              | 2.91504e-09 | 1.000000 | 2.91504e-09 | 1.000000 |
| Ph+MeAc            | 8.99616e-10 | 1.000000 | 8.99617e-10 | 1.000000 |
| PAH7+H             | 6.57452e-10 | 1.000000 | 6.57453e-10 | 1.000000 |
| PhCCCH3+H          | 4.91810e-10 | 1.000000 | 4.91810e-10 | 1.000000 |
| rad38              | 4.71283e-10 | 1.000000 | 4.71283e-10 | 1.000000 |
| PAH9+H             | 4.61540e-10 | 1.000000 | 4.61541e-10 | 1.000000 |
| rad35              | 1.35497e-10 | 1.000000 | 1.35497e-10 | 1.000000 |
| rad14              | 8.32739e-11 | 1.000000 | 8.32740e-11 | 1.000000 |
| rad19anti          | 8.08339e-11 | 1.000000 | 8.08341e-11 | 1.000000 |
| rad24              | 5.18133e-11 | 1.000000 | 5.18134e-11 | 1.000000 |
| rad26              | 4.71462e-11 | 1.000000 | 4.71463e-11 | 1.000000 |
| rad60syn           | 2.74651e-11 | 1.000000 | 2.74651e-11 | 1.000000 |
| rad46              | 2.65590e-11 | 1.000000 | 2.65590e-11 | 1.000000 |
| rad60anti          | 1.18159e-11 | 1.000000 | 1.18159e-11 | 1.000000 |
| PAH3+H             | 3.01187e-12 | 1.000000 | 3.01188e-12 | 1.000000 |
| rad39              | 1.07874e-12 | 1.000000 | 1.07874e-12 | 1.000000 |
| rad27              | 7.01235e-13 | 1.000000 | 7.01235e-13 | 1.000000 |
| rad59              | 6.23745e-13 | 1.000000 | 6.23746e-13 | 1.000000 |
| rad50              | 2.14387e-13 | 1.000000 | 2.14387e-13 | 1.000000 |
| rad19syn           | 3.66772e-14 | 1.000000 | 3.66773e-14 | 1.000000 |
| rad12              | 2.96439e-14 | 1.000000 | 2.96440e-14 | 1.000000 |
| rad5               | 2.40585e-14 | 1.000000 | 2.40586e-14 | 1.000000 |
| rad37              | 9.21969e-15 | 1.000000 | 9.21971e-15 | 1.000000 |
| rad54              | 3.92845e-15 | 1.000000 | 3.92846e-15 | 1.000000 |
| rad52              | 2.77250e-15 | 1.000000 | 2.77251e-15 | 1.000000 |
| rad70              | 2.70840e-15 | 1.000000 | 2.70840e-15 | 1.000000 |
| rad31              | 2.10538e-15 | 1.000000 | 2.10538e-15 | 1.000000 |
| rad51              | 1.73826e-15 | 1.000000 | 1.73826e-15 | 1.000000 |
| rad67              | 8.15067e-16 | 1.000000 | 8.15069e-16 | 1.000000 |
| rad62              | 2.90557e-16 | 1.000000 | 2.90557e-16 | 1.000000 |
| PhcycC3H3_A+H      | 2.38552e-16 | 1.000000 | 2.38552e-16 | 1.000000 |
| rad43              | 1.72314e-16 | 1.000000 | 1.72314e-16 | 1.000000 |
| PAH10+CH3          | 1.21002e-16 | 1.000000 | 1.21002e-16 | 1.000000 |
| rad55              | 3.57602e-17 | 1.000000 | 3.57602e-17 | 1.000000 |
| rad65              | 3.47745e-17 | 1.000000 | 3.47746e-17 | 1.000000 |
| rad34              | 2.79961e-17 | 1.000000 | 2.79961e-17 | 1.000000 |
| rad58              | 5.62295e-18 | 1.000000 | 5.62296e-18 | 1.000000 |
| PAH1+H             | 2.32860e-18 | 1.000000 | 2.32860e-18 | 1.000000 |
| rad42              | 1.91538e-19 | 1.000000 | 1.91539e-19 | 1.000000 |
| rad41              | 1.34253e-19 | 1.000000 | 1.34253e-19 | 1.000000 |
| rad53              | 1.40770e-20 | 1.000000 | 1.40770e-20 | 1.000000 |
| rad47              | 9.62818e-21 | 1.000000 | 9.62817e-21 | 1.000000 |
| rad73              | 6.04416e-21 | 1.000000 | 6.04417e-21 | 1.000000 |
| rad64              | 2.16777e-21 | 1.000000 | 2.16777e-21 | 1.000000 |
| rad71              | 8.49023e-22 | 1.000000 | 8.49025e-22 | 1.000000 |
| rad56              | 4.35033e-22 | 1.000000 | 4.35034e-22 | 1.000000 |
| rad61              | 1.41226e-22 | 1.000000 | 1.41226e-22 | 1.000000 |
| rad68syn           | 1.00868e-22 | 1.000000 | 1.00868e-22 | 1.000000 |
| rad68anti          | 7.08446e-23 | 1.000000 | 7.08448e-23 | 1.000000 |
| PAH8+H             | 6.11453e-24 | 1.000000 | 6.11454e-24 | 1.000000 |
| rad40syn           | 4.88268e-24 | 1.000000 | 4.88268e-24 | 1.000000 |
| rad40anti          | 2.73587e-24 | 1.000000 | 2.73588e-24 | 1.000000 |
| rad72              | 5.27576e-26 | 1.000000 | 5.27577e-26 | 1.000000 |

rad8 | 4.72578e-32 1.00000 | 4.72578e-32 1.00000

10000.0000 Pa, 400.000000 K

=====

| Rate constant      | True (fraction)       | Effective (fraction)  |
|--------------------|-----------------------|-----------------------|
| Total              | 5.11288e-15 (1.00 )   | 5.11279e-15 (1.00 )   |
| Formation of rad11 | 3.08094e-15 (0.603 )  | 3.08087e-15 (0.603 )  |
| Formation of rad6  | 1.54092e-15 (0.301 )  | 1.54089e-15 (0.301 )  |
| H-abstraction      | 4.91025e-16 (0.0960 ) | 4.91025e-16 (0.0960 ) |

| species            | PYtrue      | Cumul    | PYeffective | Cumul    |
|--------------------|-------------|----------|-------------|----------|
| rad6               | 0.602101    | 0.602101 | 0.602112    | 0.602112 |
| rad11              | 0.273602    | 0.875703 | 0.273607    | 0.875719 |
| Benzene+2-propynyl | 0.0960368   | 0.971739 | 0.0960386   | 0.971758 |
| Indene+H           | 0.0135040   | 0.985243 | 0.0135043   | 0.985262 |
| rad22              | 0.00749064  | 0.992734 | 0.00749078  | 0.992753 |
| rad23              | 0.00320214  | 0.995936 | 0.00320220  | 0.995955 |
| C2H2+PhCH2         | 0.00182017  | 0.997756 | 0.00182020  | 0.997775 |
| rad45              | 0.00150366  | 0.999260 | 0.00150369  | 0.999279 |
| rad7               | 0.000334137 | 0.999594 | 0.000334144 | 0.999613 |
| rad18              | 0.000138362 | 0.999733 | 0.000138365 | 0.999751 |
| PhCHCCH2+H         | 7.94197e-05 | 0.999812 | 7.94212e-05 | 0.999831 |
| rad36              | 5.76657e-05 | 0.999870 | 5.76669e-05 | 0.999888 |
| rad20              | 4.91145e-05 | 0.999919 | 4.91154e-05 | 0.999937 |
| rad21              | 3.56988e-05 | 0.999954 | 3.56994e-05 | 0.999973 |
| Phenyl+Allene      | 1.89158e-05 | 0.999973 | 0.000000    | 0.999973 |
| rad9               | 7.86481e-06 | 0.999981 | 7.86496e-06 | 0.999981 |
| rad25              | 4.87768e-06 | 0.999986 | 4.87778e-06 | 0.999986 |
| PhCH2CCH+H         | 3.55355e-06 | 0.999990 | 3.55362e-06 | 0.999989 |
| rad13              | 3.10806e-06 | 0.999993 | 3.10812e-06 | 0.999993 |
| rad2               | 1.74433e-06 | 0.999994 | 1.74437e-06 | 0.999994 |
| PhCCH+CH3          | 1.62259e-06 | 0.999996 | 1.62262e-06 | 0.999996 |
| rad3               | 1.54448e-06 | 0.999998 | 1.54450e-06 | 0.999997 |
| rad28              | 9.53916e-07 | 0.999999 | 9.53941e-07 | 0.999998 |
| rad4               | 8.16663e-07 | 0.999999 | 8.16679e-07 | 0.999999 |
| rad30              | 1.67182e-07 | 1.000000 | 1.67185e-07 | 0.999999 |
| rad1               | 1.62828e-07 | 1.000000 | 1.62831e-07 | 1.000000 |
| rad10              | 1.31709e-07 | 1.000000 | 1.31712e-07 | 1.000000 |
| Ph+MeAc            | 1.06993e-07 | 1.000000 | 1.06995e-07 | 1.000000 |
| PhCCCH3+H          | 7.91427e-08 | 1.000000 | 7.91442e-08 | 1.000000 |
| PAH9+H             | 6.61509e-08 | 1.000000 | 6.61521e-08 | 1.000000 |
| rad38              | 3.19954e-08 | 1.000000 | 3.19960e-08 | 1.000000 |
| rad15              | 1.65165e-08 | 1.000000 | 1.65167e-08 | 1.000000 |
| rad35              | 1.55031e-08 | 1.000000 | 1.55033e-08 | 1.000000 |
| PAH7+H             | 1.30792e-08 | 1.000000 | 1.30794e-08 | 1.000000 |
| rad26              | 7.85589e-09 | 1.000000 | 7.85604e-09 | 1.000000 |
| rad33              | 5.46979e-09 | 1.000000 | 5.46990e-09 | 1.000000 |
| rad46              | 3.83731e-09 | 1.000000 | 3.83738e-09 | 1.000000 |
| rad19anti          | 3.10715e-09 | 1.000000 | 3.10720e-09 | 1.000000 |
| rad14              | 5.11858e-10 | 1.000000 | 5.11868e-10 | 1.000000 |
| rad60syn           | 3.19412e-10 | 1.000000 | 3.19417e-10 | 1.000000 |
| rad39              | 2.62970e-10 | 1.000000 | 2.62975e-10 | 1.000000 |
| rad50              | 2.30093e-10 | 1.000000 | 2.30097e-10 | 1.000000 |
| rad60anti          | 1.48904e-10 | 1.000000 | 1.48906e-10 | 1.000000 |
| PAH3+H             | 9.66174e-11 | 1.000000 | 9.66190e-11 | 1.000000 |
| rad24              | 8.20040e-11 | 1.000000 | 8.20056e-11 | 1.000000 |
| rad59              | 1.81249e-11 | 1.000000 | 1.81252e-11 | 1.000000 |
| rad37              | 1.31165e-11 | 1.000000 | 1.31168e-11 | 1.000000 |
| rad27              | 1.03093e-11 | 1.000000 | 1.03096e-11 | 1.000000 |
| rad51              | 9.27783e-12 | 1.000000 | 9.27799e-12 | 1.000000 |
| rad52              | 7.23021e-12 | 1.000000 | 7.23034e-12 | 1.000000 |
| rad19syn           | 6.86788e-12 | 1.000000 | 6.86801e-12 | 1.000000 |
| rad5               | 2.41355e-12 | 1.000000 | 2.41359e-12 | 1.000000 |
| rad54              | 1.04017e-12 | 1.000000 | 1.04020e-12 | 1.000000 |
| rad70              | 7.01930e-13 | 1.000000 | 7.01943e-13 | 1.000000 |
| PAH10+CH3          | 4.82014e-13 | 1.000000 | 4.82024e-13 | 1.000000 |
| rad67              | 2.62800e-13 | 1.000000 | 2.62805e-13 | 1.000000 |
| rad65              | 2.61469e-13 | 1.000000 | 2.61474e-13 | 1.000000 |
| rad12              | 2.57436e-13 | 1.000000 | 2.57440e-13 | 1.000000 |
| PhcycC3H3_A+H      | 1.58523e-13 | 1.000000 | 1.58526e-13 | 1.000000 |
| rad43              | 1.50166e-13 | 1.000000 | 1.50170e-13 | 1.000000 |
| rad31              | 1.10621e-13 | 1.000000 | 1.10622e-13 | 1.000000 |
| rad62              | 9.71046e-14 | 1.000000 | 9.71072e-14 | 1.000000 |
| PAH1+H             | 4.02602e-14 | 1.000000 | 4.02609e-14 | 1.000000 |
| rad34              | 1.97604e-14 | 1.000000 | 1.97608e-14 | 1.000000 |
| rad55              | 1.85906e-14 | 1.000000 | 1.85910e-14 | 1.000000 |
| rad58              | 9.48276e-15 | 1.000000 | 9.48292e-15 | 1.000000 |
| rad73              | 1.71688e-15 | 1.000000 | 1.71691e-15 | 1.000000 |

|           |             |         |             |          |
|-----------|-------------|---------|-------------|----------|
| rad71     | 6.40215e-16 | 1.00000 | 6.40227e-16 | 1.000000 |
| rad41     | 3.49960e-16 | 1.00000 | 3.49967e-16 | 1.000000 |
| rad42     | 2.50266e-16 | 1.00000 | 2.50271e-16 | 1.000000 |
| rad64     | 2.37316e-16 | 1.00000 | 2.37321e-16 | 1.000000 |
| rad53     | 1.48814e-16 | 1.00000 | 1.48817e-16 | 1.000000 |
| rad56     | 4.55823e-17 | 1.00000 | 4.55831e-17 | 1.000000 |
| rad68syn  | 1.26687e-17 | 1.00000 | 1.26689e-17 | 1.000000 |
| rad61     | 1.09879e-17 | 1.00000 | 1.09881e-17 | 1.000000 |
| rad47     | 1.06223e-17 | 1.00000 | 1.06225e-17 | 1.000000 |
| rad68anti | 8.55249e-18 | 1.00000 | 8.55265e-18 | 1.000000 |
| PAH8+H    | 5.07830e-18 | 1.00000 | 5.07839e-18 | 1.000000 |
| rad40syn  | 1.42900e-18 | 1.00000 | 1.42904e-18 | 1.000000 |
| rad72     | 8.61305e-19 | 1.00000 | 8.61322e-19 | 1.000000 |
| rad40anti | 6.22854e-19 | 1.00000 | 6.22866e-19 | 1.000000 |
| rad8      | 5.88079e-30 | 1.00000 | 5.88090e-30 | 1.000000 |

10000.0000 Pa, 500.000000 K

| Rate constant      | True (fraction)      | Effective (fraction) |
|--------------------|----------------------|----------------------|
| Total              | 2.11551e-14 (1.00 )  | 2.11527e-14 (1.00 )  |
| Formation of rad11 | 1.10850e-14 (0.524 ) | 1.10836e-14 (0.524 ) |
| Formation of rad6  | 7.08033e-15 (0.335 ) | 7.07940e-15 (0.335 ) |
| H-abstraction      | 2.98976e-15 (0.141 ) | 2.98976e-15 (0.141 ) |

| species            | PYtrue      | Cumul    | PYeffective | Cumul    |
|--------------------|-------------|----------|-------------|----------|
| rad6               | 0.704522    | 0.704522 | 0.704600    | 0.704600 |
| Benzene+2-propynyl | 0.141326    | 0.845847 | 0.141342    | 0.845942 |
| rad11              | 0.112197    | 0.958044 | 0.112209    | 0.958152 |
| Indene+H           | 0.0249560   | 0.983000 | 0.0249588   | 0.983110 |
| rad22              | 0.00528064  | 0.988281 | 0.00528124  | 0.988392 |
| C2H2+PhCH2         | 0.00452533  | 0.992806 | 0.00452583  | 0.992917 |
| rad23              | 0.00445671  | 0.997263 | 0.00445721  | 0.997375 |
| rad45              | 0.00150599  | 0.998769 | 0.00150616  | 0.998881 |
| rad7               | 0.000529232 | 0.999298 | 0.000529292 | 0.999410 |
| PhCHCCH2+H         | 0.000301220 | 0.999599 | 0.000301254 | 0.999711 |
| Phenyl+Allene      | 0.000112636 | 0.999712 | 0.000000    | 0.999711 |
| rad36              | 7.00802e-05 | 0.999782 | 7.00881e-05 | 0.999781 |
| rad18              | 5.83000e-05 | 0.999840 | 5.83066e-05 | 0.999840 |
| PhCH2CCH+H         | 3.01667e-05 | 0.999871 | 3.01701e-05 | 0.999870 |
| rad9               | 2.74686e-05 | 0.999898 | 2.74717e-05 | 0.999897 |
| PhCCH+CH3          | 2.33244e-05 | 0.999921 | 2.33271e-05 | 0.999921 |
| rad20              | 2.22112e-05 | 0.999944 | 2.22137e-05 | 0.999943 |
| rad21              | 1.65897e-05 | 0.999960 | 1.65915e-05 | 0.999960 |
| rad28              | 8.70215e-06 | 0.999969 | 8.70310e-06 | 0.999968 |
| rad2               | 6.82038e-06 | 0.999976 | 6.82115e-06 | 0.999975 |
| rad13              | 3.70437e-06 | 0.999979 | 3.70478e-06 | 0.999979 |
| rad3               | 3.46185e-06 | 0.999983 | 3.46224e-06 | 0.999982 |
| Ph+MeAc            | 3.13116e-06 | 0.999986 | 3.13152e-06 | 0.999985 |
| PAH9+H             | 2.88124e-06 | 0.999989 | 2.88156e-06 | 0.999988 |
| rad25              | 2.59724e-06 | 0.999991 | 2.59754e-06 | 0.999991 |
| PhCCCH3+H          | 2.08751e-06 | 0.999994 | 2.08775e-06 | 0.999993 |
| rad4               | 1.95511e-06 | 0.999996 | 1.95533e-06 | 0.999995 |
| rad38              | 1.23477e-06 | 0.999997 | 1.23491e-06 | 0.999996 |
| rad1               | 8.16398e-07 | 0.999998 | 8.16491e-07 | 0.999997 |
| rad10              | 7.04424e-07 | 0.999998 | 7.04503e-07 | 0.999998 |
| rad35              | 5.62826e-07 | 0.999999 | 5.62889e-07 | 0.999998 |
| rad30              | 5.33664e-07 | 0.999999 | 5.33725e-07 | 0.999999 |
| PAH7+H             | 2.69758e-07 | 1.000000 | 2.69788e-07 | 0.999999 |
| rad46              | 2.39291e-07 | 1.000000 | 2.39318e-07 | 0.999999 |
| rad26              | 1.41876e-07 | 1.000000 | 1.41892e-07 | 0.999999 |
| rad19anti          | 8.55589e-08 | 1.000000 | 8.55686e-08 | 0.999999 |
| rad15              | 5.64529e-08 | 1.000000 | 5.64592e-08 | 1.000000 |
| rad50              | 5.08297e-08 | 1.000000 | 5.08354e-08 | 1.000000 |
| rad39              | 3.78242e-08 | 1.000000 | 3.78284e-08 | 1.000000 |
| rad33              | 7.69851e-09 | 1.000000 | 7.69937e-09 | 1.000000 |
| rad51              | 5.63206e-09 | 1.000000 | 5.63270e-09 | 1.000000 |
| PAH3+H             | 2.79507e-09 | 1.000000 | 2.79539e-09 | 1.000000 |
| rad52              | 2.70400e-09 | 1.000000 | 2.70430e-09 | 1.000000 |
| rad60syn           | 2.29735e-09 | 1.000000 | 2.29761e-09 | 1.000000 |
| rad37              | 1.59514e-09 | 1.000000 | 1.59532e-09 | 1.000000 |
| rad60anti          | 1.16157e-09 | 1.000000 | 1.16170e-09 | 1.000000 |
| rad14              | 1.15138e-09 | 1.000000 | 1.15150e-09 | 1.000000 |
| rad19syn           | 7.12986e-10 | 1.000000 | 7.13066e-10 | 1.000000 |
| rad59              | 4.01981e-10 | 1.000000 | 4.02026e-10 | 1.000000 |
| PAH10+CH3          | 2.85404e-10 | 1.000000 | 2.85436e-10 | 1.000000 |
| rad54              | 1.72339e-10 | 1.000000 | 1.72358e-10 | 1.000000 |
| rad65              | 1.63608e-10 | 1.000000 | 1.63626e-10 | 1.000000 |
| rad24              | 1.48154e-10 | 1.000000 | 1.48171e-10 | 1.000000 |

|               |             |         |             |          |
|---------------|-------------|---------|-------------|----------|
| PhcycC3H3_A+H | 9.06159e-11 | 1.00000 | 9.06262e-11 | 1.000000 |
| PAH1+H        | 8.68060e-11 | 1.00000 | 8.68164e-11 | 1.000000 |
| rad67         | 7.51959e-11 | 1.00000 | 7.52043e-11 | 1.000000 |
| rad70         | 5.51842e-11 | 1.00000 | 5.51904e-11 | 1.000000 |
| rad27         | 3.78269e-11 | 1.00000 | 3.78312e-11 | 1.000000 |
| rad5          | 2.22006e-11 | 1.00000 | 2.22031e-11 | 1.000000 |
| rad73         | 1.73011e-11 | 1.00000 | 1.73030e-11 | 1.000000 |
| rad71         | 1.45368e-11 | 1.00000 | 1.45385e-11 | 1.000000 |
| rad43         | 1.39335e-11 | 1.00000 | 1.39351e-11 | 1.000000 |
| rad62         | 9.07138e-12 | 1.00000 | 9.07241e-12 | 1.000000 |
| rad55         | 6.78671e-12 | 1.00000 | 6.78748e-12 | 1.000000 |
| rad58         | 6.19248e-12 | 1.00000 | 6.19318e-12 | 1.000000 |
| rad31         | 5.38674e-12 | 1.00000 | 5.38734e-12 | 1.000000 |
| rad34         | 5.08640e-12 | 1.00000 | 5.08698e-12 | 1.000000 |
| rad12         | 2.13701e-12 | 1.00000 | 2.13725e-12 | 1.000000 |
| rad64         | 1.03261e-12 | 1.00000 | 1.03273e-12 | 1.000000 |
| rad53         | 4.76233e-13 | 1.00000 | 4.76286e-13 | 1.000000 |
| rad56         | 2.97786e-13 | 1.00000 | 2.97820e-13 | 1.000000 |
| rad72         | 1.80632e-13 | 1.00000 | 1.80652e-13 | 1.000000 |
| PAH8+H        | 1.36981e-13 | 1.00000 | 1.36996e-13 | 1.000000 |
| rad61         | 1.17154e-13 | 1.00000 | 1.17167e-13 | 1.000000 |
| rad42         | 9.83088e-14 | 1.00000 | 9.83198e-14 | 1.000000 |
| rad68syn      | 8.86341e-14 | 1.00000 | 8.86445e-14 | 1.000000 |
| rad41         | 8.60649e-14 | 1.00000 | 8.60745e-14 | 1.000000 |
| rad68anti     | 5.84684e-14 | 1.00000 | 5.84750e-14 | 1.000000 |
| rad40syn      | 2.15888e-14 | 1.00000 | 2.15912e-14 | 1.000000 |
| rad47         | 1.30434e-14 | 1.00000 | 1.30449e-14 | 1.000000 |
| rad40anti     | 1.14569e-14 | 1.00000 | 1.14583e-14 | 1.000000 |
| rad8          | 4.38296e-27 | 1.00000 | 4.38345e-27 | 1.000000 |

10000.0000 Pa, 600.000000 K

| Rate constant      | True (fraction)      | Effective (fraction) |
|--------------------|----------------------|----------------------|
| Total              | 6.08120e-14 (1.00 )  | 6.07823e-14 (1.00 )  |
| Formation of rad11 | 2.83304e-14 (0.466 ) | 2.83135e-14 (0.466 ) |
| Formation of rad6  | 2.13840e-14 (0.352 ) | 2.13713e-14 (0.352 ) |
| H-abstraction      | 1.10975e-14 (0.182 ) | 1.10975e-14 (0.183 ) |

| species            | PYtrue      | Cumul    | PYeffective | Cumul    |
|--------------------|-------------|----------|-------------|----------|
| rad6               | 0.727594    | 0.727594 | 0.727949    | 0.727949 |
| Benzene+2-propynyl | 0.182488    | 0.910083 | 0.182577    | 0.910527 |
| rad11              | 0.0369698   | 0.947052 | 0.0369877   | 0.947514 |
| Indene+H           | 0.0348813   | 0.981934 | 0.0348984   | 0.982413 |
| C2H2+PhCH2         | 0.00862107  | 0.990555 | 0.00862528  | 0.991038 |
| rad23              | 0.00325754  | 0.993812 | 0.00325913  | 0.994297 |
| rad22              | 0.00246107  | 0.996273 | 0.00246227  | 0.996759 |
| rad45              | 0.00103998  | 0.997313 | 0.00104048  | 0.997800 |
| PhCHCCH2+H         | 0.000868524 | 0.998182 | 0.000868945 | 0.998669 |
| rad7               | 0.000626471 | 0.998808 | 0.000626776 | 0.999296 |
| Phenyl+Allene      | 0.000487532 | 0.999296 | 0.000000    | 0.999296 |
| PhCCH+CH3          | 0.000180073 | 0.999476 | 0.000180162 | 0.999476 |
| PhCH2CCH+H         | 0.000163975 | 0.999640 | 0.000164055 | 0.999640 |
| rad36              | 6.13243e-05 | 0.999701 | 6.13542e-05 | 0.999701 |
| rad9               | 5.41695e-05 | 0.999756 | 5.41959e-05 | 0.999755 |
| rad28              | 5.14651e-05 | 0.999807 | 5.14903e-05 | 0.999807 |
| PAH9+H             | 3.55287e-05 | 0.999843 | 3.55461e-05 | 0.999842 |
| Ph+MeAc            | 2.79085e-05 | 0.999870 | 2.79222e-05 | 0.999870 |
| rad18              | 2.12899e-05 | 0.999892 | 2.13002e-05 | 0.999892 |
| rad38              | 1.60111e-05 | 0.999908 | 1.60190e-05 | 0.999908 |
| PhCCCH3+H          | 1.47697e-05 | 0.999923 | 1.47769e-05 | 0.999922 |
| rad2               | 1.42787e-05 | 0.999937 | 1.42857e-05 | 0.999937 |
| rad20              | 1.05409e-05 | 0.999947 | 1.05461e-05 | 0.999947 |
| rad21              | 8.42070e-06 | 0.999956 | 8.42477e-06 | 0.999956 |
| PAH7+H             | 6.45059e-06 | 0.999962 | 6.45374e-06 | 0.999962 |
| rad3               | 6.44490e-06 | 0.999969 | 6.44805e-06 | 0.999969 |
| rad35              | 5.87864e-06 | 0.999975 | 5.88150e-06 | 0.999974 |
| rad46              | 4.40197e-06 | 0.999979 | 4.40412e-06 | 0.999979 |
| rad13              | 4.34118e-06 | 0.999983 | 4.34330e-06 | 0.999983 |
| rad4               | 3.93566e-06 | 0.999987 | 3.93758e-06 | 0.999987 |
| rad50              | 2.53398e-06 | 0.999990 | 2.53522e-06 | 0.999990 |
| rad1               | 2.11734e-06 | 0.999992 | 2.11837e-06 | 0.999992 |
| rad39              | 1.69944e-06 | 0.999994 | 1.70026e-06 | 0.999993 |
| rad30              | 1.32143e-06 | 0.999995 | 1.32207e-06 | 0.999995 |
| rad19anti          | 1.25244e-06 | 0.999996 | 1.25306e-06 | 0.999996 |
| rad10              | 1.14099e-06 | 0.999997 | 1.14155e-06 | 0.999997 |
| rad25              | 1.09654e-06 | 0.999998 | 1.09707e-06 | 0.999998 |
| rad51              | 5.84180e-07 | 0.999999 | 5.84465e-07 | 0.999999 |
| rad26              | 5.40887e-07 | 0.999999 | 5.41151e-07 | 0.999999 |

|               |             |          |             |          |
|---------------|-------------|----------|-------------|----------|
| rad52         | 1.94628e-07 | 1.000000 | 1.94723e-07 | 1.000000 |
| rad15         | 1.06538e-07 | 1.000000 | 1.06590e-07 | 1.000000 |
| PAH3+H        | 9.09302e-08 | 1.000000 | 9.09751e-08 | 1.000000 |
| rad37         | 4.21781e-08 | 1.000000 | 4.21987e-08 | 1.000000 |
| PAH10+CH3     | 3.98310e-08 | 1.000000 | 3.98503e-08 | 1.000000 |
| rad19syn      | 2.48154e-08 | 1.000000 | 2.48275e-08 | 1.000000 |
| PAH1+H        | 1.75686e-08 | 1.000000 | 1.75772e-08 | 1.000000 |
| rad60syn      | 1.62564e-08 | 1.000000 | 1.62643e-08 | 1.000000 |
| rad65         | 1.59120e-08 | 1.000000 | 1.59197e-08 | 1.000000 |
| rad33         | 1.27630e-08 | 1.000000 | 1.27692e-08 | 1.000000 |
| rad71         | 1.21433e-08 | 1.000000 | 1.21492e-08 | 1.000000 |
| rad59         | 9.74122e-09 | 1.000000 | 9.74597e-09 | 1.000000 |
| rad73         | 9.54543e-09 | 1.000000 | 9.55003e-09 | 1.000000 |
| rad60anti     | 9.17632e-09 | 1.000000 | 9.18080e-09 | 1.000000 |
| rad54         | 7.29051e-09 | 1.000000 | 7.29407e-09 | 1.000000 |
| rad67         | 6.95999e-09 | 1.000000 | 6.96339e-09 | 1.000000 |
| PhcycC3H3_A+H | 6.18099e-09 | 1.000000 | 6.18401e-09 | 1.000000 |
| rad70         | 3.09613e-09 | 1.000000 | 3.09764e-09 | 1.000000 |
| rad14         | 1.66796e-09 | 1.000000 | 1.66878e-09 | 1.000000 |
| rad58         | 7.08164e-10 | 1.000000 | 7.08509e-10 | 1.000000 |
| rad34         | 6.47410e-10 | 1.000000 | 6.47727e-10 | 1.000000 |
| rad24         | 5.42395e-10 | 1.000000 | 5.42659e-10 | 1.000000 |
| rad62         | 3.77357e-10 | 1.000000 | 3.77541e-10 | 1.000000 |
| rad55         | 3.73729e-10 | 1.000000 | 3.73911e-10 | 1.000000 |
| rad72         | 3.45160e-10 | 1.000000 | 3.45328e-10 | 1.000000 |
| rad43         | 3.21723e-10 | 1.000000 | 3.21880e-10 | 1.000000 |
| rad64         | 3.05706e-10 | 1.000000 | 3.05855e-10 | 1.000000 |
| PAH8+H        | 1.36955e-10 | 1.000000 | 1.37022e-10 | 1.000000 |
| rad31         | 8.50310e-11 | 1.000000 | 8.50725e-11 | 1.000000 |
| rad61         | 6.23984e-11 | 1.000000 | 6.24289e-11 | 1.000000 |
| rad53         | 6.01688e-11 | 1.000000 | 6.01981e-11 | 1.000000 |
| rad27         | 5.74250e-11 | 1.000000 | 5.74530e-11 | 1.000000 |
| rad56         | 5.68880e-11 | 1.000000 | 5.69158e-11 | 1.000000 |
| rad5          | 4.75099e-11 | 1.000000 | 4.75330e-11 | 1.000000 |
| rad68syn      | 4.40070e-11 | 1.000000 | 4.40284e-11 | 1.000000 |
| rad68anti     | 2.86485e-11 | 1.000000 | 2.86624e-11 | 1.000000 |
| rad12         | 2.05204e-11 | 1.000000 | 2.05304e-11 | 1.000000 |
| rad40syn      | 1.64550e-11 | 1.000000 | 1.64630e-11 | 1.000000 |
| rad42         | 1.50050e-11 | 1.000000 | 1.50124e-11 | 1.000000 |
| rad40anti     | 9.78292e-12 | 1.000000 | 9.78774e-12 | 1.000000 |
| rad41         | 6.50071e-12 | 1.000000 | 6.50388e-12 | 1.000000 |
| rad47         | 4.57945e-12 | 1.000000 | 4.58168e-12 | 1.000000 |
| rad8          | 1.70985e-23 | 1.000000 | 1.71069e-23 | 1.000000 |

10000.0000 Pa, 700.000000 K

| Rate constant      | True (fraction)      | Effective (fraction) |
|--------------------|----------------------|----------------------|
| Total              | 1.39564e-13 (1.00 )  | 1.39293e-13 (1.00 )  |
| Formation of rad11 | 5.88273e-14 (0.422 ) | 5.86813e-14 (0.421 ) |
| Formation of rad6  | 5.01684e-14 (0.359 ) | 5.00439e-14 (0.359 ) |
| H-abstraction      | 3.05678e-14 (0.219 ) | 3.05678e-14 (0.219 ) |

| species            | PYtrue      | Cumul    | PYeffective | Cumul    |
|--------------------|-------------|----------|-------------|----------|
| rad6               | 0.702785    | 0.702785 | 0.704150    | 0.704150 |
| Benzene+2-propynyl | 0.219024    | 0.921809 | 0.219450    | 0.923600 |
| Indene+H           | 0.0417864   | 0.963596 | 0.0418675   | 0.965467 |
| C2H2+PhCH2         | 0.0146000   | 0.978196 | 0.0146284   | 0.980096 |
| rad11              | 0.0112086   | 0.989405 | 0.0112304   | 0.991326 |
| PhCHCCH2+H         | 0.00225563  | 0.991660 | 0.00226001  | 0.993586 |
| Phenyl+Allene      | 0.00193881  | 0.993599 | 0.000000    | 0.993586 |
| rad23              | 0.00171822  | 0.995317 | 0.00172156  | 0.995308 |
| PhCCH+CH3          | 0.000951439 | 0.996269 | 0.000953286 | 0.996261 |
| rad22              | 0.000908962 | 0.997178 | 0.000910730 | 0.997172 |
| PhCH2CCH+H         | 0.000701625 | 0.997879 | 0.000702988 | 0.997875 |
| rad7               | 0.000649766 | 0.998529 | 0.000651027 | 0.998526 |
| rad45              | 0.000487008 | 0.999016 | 0.000487954 | 0.999014 |
| rad28              | 0.000185897 | 0.999202 | 0.000186259 | 0.999200 |
| PAH9+H             | 0.000161000 | 0.999363 | 0.000161313 | 0.999361 |
| Ph+MeAc            | 0.000147963 | 0.999511 | 0.000148251 | 0.999510 |
| rad38              | 7.58447e-05 | 0.999587 | 7.59920e-05 | 0.999586 |
| rad9               | 7.19241e-05 | 0.999659 | 7.20638e-05 | 0.999658 |
| PAH7+H             | 6.34337e-05 | 0.999722 | 6.35570e-05 | 0.999721 |
| PhCCCH3+H          | 6.10910e-05 | 0.999783 | 6.12097e-05 | 0.999782 |
| rad36              | 3.50033e-05 | 0.999818 | 3.50712e-05 | 0.999817 |
| rad46              | 2.46688e-05 | 0.999843 | 2.47167e-05 | 0.999842 |
| rad35              | 2.41767e-05 | 0.999867 | 2.42236e-05 | 0.999866 |
| rad2               | 2.28206e-05 | 0.999890 | 2.28649e-05 | 0.999889 |
| rad50              | 2.13780e-05 | 0.999911 | 2.14195e-05 | 0.999911 |

|               |             |          |             |          |
|---------------|-------------|----------|-------------|----------|
| rad39         | 1.82644e-05 | 0.999930 | 1.83000e-05 | 0.999929 |
| rad3          | 8.34535e-06 | 0.999938 | 8.36157e-06 | 0.999937 |
| rad18         | 8.33434e-06 | 0.999946 | 8.35056e-06 | 0.999946 |
| rad19anti     | 7.85146e-06 | 0.999954 | 7.86670e-06 | 0.999954 |
| rad20         | 7.12570e-06 | 0.999961 | 7.13954e-06 | 0.999961 |
| rad21         | 6.39686e-06 | 0.999968 | 6.40929e-06 | 0.999967 |
| rad51         | 6.16269e-06 | 0.999974 | 6.17466e-06 | 0.999973 |
| rad13         | 5.85505e-06 | 0.999980 | 5.86643e-06 | 0.999979 |
| rad4          | 5.54683e-06 | 0.999985 | 5.55760e-06 | 0.999985 |
| rad1          | 4.02199e-06 | 0.999989 | 4.02980e-06 | 0.999989 |
| rad30         | 2.95070e-06 | 0.999992 | 2.95643e-06 | 0.999992 |
| rad52         | 1.84028e-06 | 0.999994 | 1.84385e-06 | 0.999993 |
| rad10         | 1.31259e-06 | 0.999995 | 1.31514e-06 | 0.999995 |
| rad26         | 1.20851e-06 | 0.999996 | 1.21085e-06 | 0.999996 |
| PAH3+H        | 7.41353e-07 | 0.999997 | 7.42793e-07 | 0.999997 |
| rad25         | 4.93463e-07 | 0.999998 | 4.94422e-07 | 0.999997 |
| PAH10+CH3     | 4.76602e-07 | 0.999998 | 4.77528e-07 | 0.999998 |
| rad37         | 3.27243e-07 | 0.999998 | 3.27878e-07 | 0.999998 |
| rad19syn      | 2.93691e-07 | 0.999999 | 2.94261e-07 | 0.999998 |
| PAH1+H        | 2.22518e-07 | 0.999999 | 2.22950e-07 | 0.999999 |
| rad71         | 2.00247e-07 | 0.999999 | 2.00636e-07 | 0.999999 |
| rad65         | 1.63079e-07 | 0.999999 | 1.63396e-07 | 0.999999 |
| rad73         | 1.46002e-07 | 1.000000 | 1.46286e-07 | 0.999999 |
| rad15         | 1.00229e-07 | 1.000000 | 1.00424e-07 | 0.999999 |
| rad54         | 8.54419e-08 | 1.000000 | 8.56076e-08 | 0.999999 |
| rad67         | 8.51677e-08 | 1.000000 | 8.53329e-08 | 0.999999 |
| rad60syn      | 8.02788e-08 | 1.000000 | 8.04349e-08 | 0.999999 |
| rad59         | 7.27980e-08 | 1.000000 | 7.29395e-08 | 1.000000 |
| PhcycC3H3_A+H | 6.57810e-08 | 1.000000 | 6.59087e-08 | 1.000000 |
| rad60anti     | 4.77731e-08 | 1.000000 | 4.78660e-08 | 1.000000 |
| rad70         | 3.58316e-08 | 1.000000 | 3.59013e-08 | 1.000000 |
| rad33         | 3.17000e-08 | 1.000000 | 3.17616e-08 | 1.000000 |
| rad34         | 8.29951e-09 | 1.000000 | 8.31567e-09 | 1.000000 |
| rad58         | 7.62723e-09 | 1.000000 | 7.64205e-09 | 1.000000 |
| rad72         | 6.48799e-09 | 1.000000 | 6.50060e-09 | 1.000000 |
| rad62         | 6.05057e-09 | 1.000000 | 6.06232e-09 | 1.000000 |
| rad24         | 5.44910e-09 | 1.000000 | 5.45969e-09 | 1.000000 |
| rad55         | 4.16390e-09 | 1.000000 | 4.17199e-09 | 1.000000 |
| rad64         | 4.12874e-09 | 1.000000 | 4.13676e-09 | 1.000000 |
| rad43         | 3.85790e-09 | 1.000000 | 3.86539e-09 | 1.000000 |
| PAH8+H        | 2.40039e-09 | 1.000000 | 2.40505e-09 | 1.000000 |
| rad14         | 2.21677e-09 | 1.000000 | 2.22107e-09 | 1.000000 |
| rad61         | 9.50408e-10 | 1.000000 | 9.52248e-10 | 1.000000 |
| rad68syn      | 6.81329e-10 | 1.000000 | 6.82652e-10 | 1.000000 |
| rad56         | 6.22706e-10 | 1.000000 | 6.23916e-10 | 1.000000 |
| rad53         | 6.13485e-10 | 1.000000 | 6.14676e-10 | 1.000000 |
| rad68anti     | 4.42573e-10 | 1.000000 | 4.43433e-10 | 1.000000 |
| rad31         | 4.05921e-10 | 1.000000 | 4.06710e-10 | 1.000000 |
| rad42         | 3.35475e-10 | 1.000000 | 3.36127e-10 | 1.000000 |
| rad40syn      | 2.79760e-10 | 1.000000 | 2.80304e-10 | 1.000000 |
| rad12         | 2.67413e-10 | 1.000000 | 2.67932e-10 | 1.000000 |
| rad47         | 2.67280e-10 | 1.000000 | 2.67800e-10 | 1.000000 |
| rad40anti     | 1.71839e-10 | 1.000000 | 1.72172e-10 | 1.000000 |
| rad41         | 1.61159e-10 | 1.000000 | 1.61472e-10 | 1.000000 |
| rad27         | 8.60627e-11 | 1.000000 | 8.62297e-11 | 1.000000 |
| rad5          | 6.47335e-11 | 1.000000 | 6.48593e-11 | 1.000000 |
| rad8          | 1.60494e-19 | 1.000000 | 1.60805e-19 | 1.000000 |

10000.0000 Pa, 800.000000 K

=====

| Rate constant      | True (fraction)      | Effective (fraction) |
|--------------------|----------------------|----------------------|
| Total              | 2.75392e-13 (1.00 )  | 2.73404e-13 (1.00 )  |
| Formation of rad11 | 1.06471e-13 (0.387 ) | 1.05444e-13 (0.386 ) |
| Formation of rad6  | 9.97133e-14 (0.362 ) | 9.87519e-14 (0.361 ) |
| H-abstraction      | 6.92082e-14 (0.251 ) | 6.92082e-14 (0.253 ) |

| species            | PYtrue      | Cumul    | PYeffective | Cumul    |
|--------------------|-------------|----------|-------------|----------|
| rad6               | 0.646833    | 0.646833 | 0.651537    | 0.651537 |
| Benzene+2-propynyl | 0.251308    | 0.898141 | 0.253135    | 0.904672 |
| Indene+H           | 0.0498982   | 0.948039 | 0.0502610   | 0.954933 |
| C2H2+PhCH2         | 0.0243541   | 0.972393 | 0.0245311   | 0.979464 |
| Phenyl+Allene      | 0.00721836  | 0.979612 | 0.000000    | 0.979464 |
| PhCHCCH2+H         | 0.00567609  | 0.985288 | 0.00571736  | 0.985181 |
| rad11              | 0.00402415  | 0.989312 | 0.00405342  | 0.989234 |
| PhCCH+CH3          | 0.00349356  | 0.992806 | 0.00351895  | 0.992753 |
| PhCH2CCH+H         | 0.00253573  | 0.995341 | 0.00255417  | 0.995308 |
| rad23              | 0.000889566 | 0.996231 | 0.000896036 | 0.996204 |
| rad7               | 0.000656347 | 0.996887 | 0.000661119 | 0.996865 |



|               |             |          |             |          |
|---------------|-------------|----------|-------------|----------|
| Ph+MeAc       | 0.000530297 | 0.997417 | 0.000534153 | 0.997399 |
| rad28         | 0.000409756 | 0.997827 | 0.000412736 | 0.997812 |
| rad22         | 0.000348620 | 0.998176 | 0.000351154 | 0.998163 |
| PAH9+H        | 0.000344034 | 0.998520 | 0.000346536 | 0.998509 |
| PAH7+H        | 0.000312624 | 0.998833 | 0.000314897 | 0.998824 |
| rad45         | 0.000292900 | 0.999125 | 0.000295030 | 0.999119 |
| PhCCCH3+H     | 0.000177989 | 0.999303 | 0.000179283 | 0.999299 |
| rad38         | 0.000164824 | 0.999468 | 0.000166022 | 0.999465 |
| rad9          | 0.000111363 | 0.999580 | 0.000112172 | 0.999577 |
| rad39         | 8.11642e-05 | 0.999661 | 8.17541e-05 | 0.999658 |
| rad46         | 5.67070e-05 | 0.999717 | 5.71193e-05 | 0.999716 |
| rad50         | 5.58327e-05 | 0.999773 | 5.62386e-05 | 0.999772 |
| rad35         | 4.99700e-05 | 0.999823 | 5.03333e-05 | 0.999822 |
| rad19anti     | 2.90887e-05 | 0.999852 | 2.93002e-05 | 0.999851 |
| rad2          | 2.59894e-05 | 0.999878 | 2.61784e-05 | 0.999878 |
| rad36         | 2.45585e-05 | 0.999903 | 2.47371e-05 | 0.999902 |
| rad51         | 1.71494e-05 | 0.999920 | 1.72741e-05 | 0.999920 |
| rad13         | 1.06823e-05 | 0.999931 | 1.07599e-05 | 0.999930 |
| rad21         | 9.40380e-06 | 0.999940 | 9.47219e-06 | 0.999940 |
| rad20         | 9.00452e-06 | 0.999949 | 9.07000e-06 | 0.999949 |
| rad3          | 8.65653e-06 | 0.999958 | 8.71943e-06 | 0.999958 |
| rad4          | 6.11773e-06 | 0.999964 | 6.16221e-06 | 0.999964 |
| rad30         | 5.92900e-06 | 0.999970 | 5.97210e-06 | 0.999970 |
| rad1          | 5.10702e-06 | 0.999975 | 5.14415e-06 | 0.999975 |
| rad52         | 4.96038e-06 | 0.999980 | 4.99645e-06 | 0.999980 |
| rad18         | 4.83905e-06 | 0.999985 | 4.87424e-06 | 0.999985 |
| rad26         | 2.16508e-06 | 0.999987 | 2.18083e-06 | 0.999987 |
| rad19syn      | 2.03596e-06 | 0.999989 | 2.05076e-06 | 0.999989 |
| PAH3+H        | 2.02867e-06 | 0.999991 | 2.04342e-06 | 0.999991 |
| PAH10+CH3     | 1.51326e-06 | 0.999993 | 1.52427e-06 | 0.999993 |
| rad10         | 1.37149e-06 | 0.999994 | 1.38146e-06 | 0.999994 |
| rad37         | 1.06085e-06 | 0.999995 | 1.06856e-06 | 0.999995 |
| PAH1+H        | 6.97223e-07 | 0.999996 | 7.02292e-07 | 0.999996 |
| rad71         | 6.34098e-07 | 0.999996 | 6.38709e-07 | 0.999996 |
| rad54         | 5.97221e-07 | 0.999997 | 6.01563e-07 | 0.999997 |
| rad73         | 4.52182e-07 | 0.999997 | 4.55469e-07 | 0.999997 |
| rad65         | 4.49492e-07 | 0.999998 | 4.52761e-07 | 0.999998 |
| rad67         | 4.26539e-07 | 0.999998 | 4.29640e-07 | 0.999998 |
| PhcycC3H3_A+H | 3.84073e-07 | 0.999999 | 3.86866e-07 | 0.999999 |
| rad25         | 3.41208e-07 | 0.999999 | 3.43689e-07 | 0.999999 |
| rad60syn      | 2.12063e-07 | 0.999999 | 2.13605e-07 | 0.999999 |
| rad59         | 1.98424e-07 | 0.999999 | 1.99866e-07 | 0.999999 |
| rad70         | 1.40169e-07 | 0.999999 | 1.41189e-07 | 1.000000 |
| rad33         | 1.39762e-07 | 1.000000 | 1.40778e-07 | 1.000000 |
| rad60anti     | 1.27103e-07 | 1.000000 | 1.28028e-07 | 1.000000 |
| rad15         | 8.24101e-08 | 1.000000 | 8.30088e-08 | 1.000000 |
| rad24         | 5.36854e-08 | 1.000000 | 5.40757e-08 | 1.000000 |
| rad62         | 3.69940e-08 | 1.000000 | 3.72630e-08 | 1.000000 |
| rad34         | 2.90712e-08 | 1.000000 | 2.92826e-08 | 1.000000 |
| rad55         | 2.75209e-08 | 1.000000 | 2.77210e-08 | 1.000000 |
| rad43         | 2.15984e-08 | 1.000000 | 2.17554e-08 | 1.000000 |
| rad58         | 2.15171e-08 | 1.000000 | 2.16736e-08 | 1.000000 |
| rad72         | 2.13667e-08 | 1.000000 | 2.15220e-08 | 1.000000 |
| rad64         | 1.25756e-08 | 1.000000 | 1.26670e-08 | 1.000000 |
| PAH8+H        | 8.13432e-09 | 1.000000 | 8.19348e-09 | 1.000000 |
| rad12         | 4.38761e-09 | 1.000000 | 4.41951e-09 | 1.000000 |
| rad14         | 3.59310e-09 | 1.000000 | 3.61923e-09 | 1.000000 |
| rad61         | 3.10495e-09 | 1.000000 | 3.12753e-09 | 1.000000 |
| rad53         | 2.34809e-09 | 1.000000 | 2.36516e-09 | 1.000000 |
| rad42         | 2.27923e-09 | 1.000000 | 2.29580e-09 | 1.000000 |
| rad68syn      | 2.15230e-09 | 1.000000 | 2.16796e-09 | 1.000000 |
| rad56         | 2.03504e-09 | 1.000000 | 2.04984e-09 | 1.000000 |
| rad47         | 1.60833e-09 | 1.000000 | 1.62002e-09 | 1.000000 |
| rad68anti     | 1.39782e-09 | 1.000000 | 1.40799e-09 | 1.000000 |
| rad41         | 1.24263e-09 | 1.000000 | 1.25167e-09 | 1.000000 |
| rad31         | 1.05992e-09 | 1.000000 | 1.06762e-09 | 1.000000 |
| rad40syn      | 9.73173e-10 | 1.000000 | 9.80253e-10 | 1.000000 |
| rad40anti     | 6.29319e-10 | 1.000000 | 6.33895e-10 | 1.000000 |
| rad27         | 1.70590e-10 | 1.000000 | 1.71830e-10 | 1.000000 |
| rad5          | 7.66751e-11 | 1.000000 | 7.72326e-11 | 1.000000 |
| rad8          | 9.56941e-16 | 1.000000 | 9.63897e-16 | 1.000000 |

10000.0000 Pa, 900.000000 K

=====

| Rate constant      | True (fraction)      | Effective (fraction) |
|--------------------|----------------------|----------------------|
| Total              | 4.88072e-13 (1.00 )  | 4.76940e-13 (1.00 )  |
| Formation of rad11 | 1.74945e-13 (0.358 ) | 1.69404e-13 (0.355 ) |
| Formation of rad6  | 1.76509e-13 (0.362 ) | 1.70918e-13 (0.358 ) |
| H-abstraction      | 1.36618e-13 (0.280 ) | 1.36618e-13 (0.286 ) |

| species            | PYtrue      | Cumul    | PYeffective | Cumul    |
|--------------------|-------------|----------|-------------|----------|
| rad6               | 0.551933    | 0.551933 | 0.564814    | 0.564814 |
| Benzene+2-propynyl | 0.279914    | 0.831847 | 0.286447    | 0.851261 |
| Indene+H           | 0.0648922   | 0.896739 | 0.0664067   | 0.917668 |
| C2H2+PhCH2         | 0.0408874   | 0.937626 | 0.0418416   | 0.959510 |
| Phenyl+Allene      | 0.0228073   | 0.960434 | 0.00000     | 0.959510 |
| PhCHCCH2+H         | 0.0133969   | 0.973831 | 0.0137096   | 0.973219 |
| PhCCH+CH3          | 0.00955641  | 0.983387 | 0.00977939  | 0.982999 |
| PhCH2CCH+H         | 0.00767490  | 0.991062 | 0.00785408  | 0.990853 |
| rad11              | 0.00198531  | 0.993047 | 0.00203164  | 0.992884 |
| Ph+MeAc            | 0.00139699  | 0.994444 | 0.00142960  | 0.994314 |
| PAH7+H             | 0.00107461  | 0.995519 | 0.00109969  | 0.995414 |
| rad7               | 0.000676121 | 0.996195 | 0.000691902 | 0.996105 |
| rad28              | 0.000606427 | 0.996801 | 0.000620581 | 0.996726 |
| rad23              | 0.000550738 | 0.997352 | 0.000563591 | 0.997290 |
| PAH9+H             | 0.000538805 | 0.997891 | 0.000551380 | 0.997841 |
| PhCCCH3+H          | 0.000408004 | 0.998299 | 0.000417527 | 0.998259 |
| rad45              | 0.000279295 | 0.998578 | 0.000285813 | 0.998544 |
| rad38              | 0.000259212 | 0.998837 | 0.000265263 | 0.998810 |
| rad39              | 0.000254208 | 0.999092 | 0.000260142 | 0.999070 |
| rad9               | 0.000173075 | 0.999265 | 0.000177115 | 0.999247 |
| rad22              | 0.000159680 | 0.999424 | 0.000163407 | 0.999410 |
| rad50              | 9.31590e-05 | 0.999518 | 9.53336e-05 | 0.999506 |
| rad46              | 9.06661e-05 | 0.999608 | 9.27826e-05 | 0.999598 |
| rad19anti          | 8.53842e-05 | 0.999694 | 8.73774e-05 | 0.999686 |
| rad35              | 7.80293e-05 | 0.999772 | 7.98509e-05 | 0.999766 |
| rad51              | 2.92772e-05 | 0.999801 | 2.99605e-05 | 0.999796 |
| rad2               | 2.72852e-05 | 0.999828 | 2.79220e-05 | 0.999823 |
| rad13              | 2.67007e-05 | 0.999855 | 2.73240e-05 | 0.999851 |
| rad36              | 2.54139e-05 | 0.999880 | 2.60070e-05 | 0.999877 |
| rad21              | 1.94925e-05 | 0.999900 | 1.99475e-05 | 0.999897 |
| rad20              | 1.58491e-05 | 0.999916 | 1.62191e-05 | 0.999913 |
| rad30              | 1.11439e-05 | 0.999927 | 1.14040e-05 | 0.999924 |
| rad19syn           | 9.62467e-06 | 0.999936 | 9.84932e-06 | 0.999934 |
| rad3               | 9.27457e-06 | 0.999946 | 9.49104e-06 | 0.999944 |
| rad52              | 8.36863e-06 | 0.999954 | 8.56399e-06 | 0.999952 |
| rad4               | 6.94338e-06 | 0.999961 | 7.10543e-06 | 0.999959 |
| rad1               | 5.98995e-06 | 0.999967 | 6.12976e-06 | 0.999966 |
| rad18              | 4.23934e-06 | 0.999971 | 4.33828e-06 | 0.999970 |
| PAH3+H             | 3.83018e-06 | 0.999975 | 3.91958e-06 | 0.999974 |
| rad26              | 3.21172e-06 | 0.999978 | 3.28668e-06 | 0.999977 |
| PAH10+CH3          | 3.14695e-06 | 0.999981 | 3.22040e-06 | 0.999980 |
| rad54              | 2.94841e-06 | 0.999984 | 3.01722e-06 | 0.999983 |
| rad37              | 2.60432e-06 | 0.999987 | 2.66511e-06 | 0.999986 |
| rad67              | 1.96262e-06 | 0.999989 | 2.00842e-06 | 0.999988 |
| PhcycC3H3_A+H      | 1.89470e-06 | 0.999991 | 1.93892e-06 | 0.999990 |
| rad10              | 1.58336e-06 | 0.999992 | 1.62032e-06 | 0.999992 |
| PAH1+H             | 1.46641e-06 | 0.999994 | 1.50064e-06 | 0.999993 |
| rad71              | 1.13904e-06 | 0.999995 | 1.16562e-06 | 0.999994 |
| rad33              | 8.58825e-07 | 0.999996 | 8.78869e-07 | 0.999995 |
| rad73              | 8.04862e-07 | 0.999997 | 8.23647e-07 | 0.999996 |
| rad65              | 7.64472e-07 | 0.999997 | 7.82311e-07 | 0.999997 |
| rad60syn           | 4.38179e-07 | 0.999998 | 4.48406e-07 | 0.999997 |
| rad70              | 4.32598e-07 | 0.999998 | 4.42694e-07 | 0.999998 |
| rad25              | 3.98620e-07 | 0.999999 | 4.07924e-07 | 0.999998 |
| rad59              | 3.84890e-07 | 0.999999 | 3.93874e-07 | 0.999998 |
| rad60anti          | 2.61714e-07 | 0.999999 | 2.67822e-07 | 0.999999 |
| rad24              | 2.36969e-07 | 1.000000 | 2.42500e-07 | 0.999999 |
| rad55              | 1.39777e-07 | 1.000000 | 1.43039e-07 | 0.999999 |
| rad62              | 1.12436e-07 | 1.000000 | 1.15061e-07 | 0.999999 |
| rad15              | 8.49176e-08 | 1.000000 | 8.69001e-08 | 0.999999 |
| rad34              | 7.67950e-08 | 1.000000 | 7.85872e-08 | 0.999999 |
| rad43              | 6.43867e-08 | 1.000000 | 6.58894e-08 | 0.999999 |
| rad72              | 3.90220e-08 | 1.000000 | 3.99327e-08 | 0.999999 |
| rad58              | 3.80332e-08 | 1.000000 | 3.89208e-08 | 0.999999 |
| rad12              | 3.72318e-08 | 1.000000 | 3.81007e-08 | 0.999999 |
| rad64              | 2.37685e-08 | 1.000000 | 2.43232e-08 | 1.000000 |
| PAH8+H             | 1.60787e-08 | 1.000000 | 1.64539e-08 | 1.000000 |
| rad14              | 9.31900e-09 | 1.000000 | 9.53650e-09 | 1.000000 |
| rad53              | 8.80759e-09 | 1.000000 | 9.01318e-09 | 1.000000 |
| rad42              | 6.33971e-09 | 1.000000 | 6.48768e-09 | 1.000000 |
| rad61              | 6.21473e-09 | 1.000000 | 6.35978e-09 | 1.000000 |
| rad56              | 5.54996e-09 | 1.000000 | 5.67949e-09 | 1.000000 |
| rad41              | 4.20988e-09 | 1.000000 | 4.30814e-09 | 1.000000 |
| rad68syn           | 4.06378e-09 | 1.000000 | 4.15862e-09 | 1.000000 |
| rad47              | 3.32534e-09 | 1.000000 | 3.40296e-09 | 1.000000 |
| rad68anti          | 2.64308e-09 | 1.000000 | 2.70477e-09 | 1.000000 |
| rad31              | 2.11044e-09 | 1.000000 | 2.15970e-09 | 1.000000 |

|           |             |         |             |          |
|-----------|-------------|---------|-------------|----------|
| rad40syn  | 2.02603e-09 | 1.00000 | 2.07331e-09 | 1.000000 |
| rad40anti | 1.38836e-09 | 1.00000 | 1.42076e-09 | 1.000000 |
| rad27     | 6.16148e-10 | 1.00000 | 6.30529e-10 | 1.000000 |
| rad5      | 8.66768e-11 | 1.00000 | 8.87004e-11 | 1.000000 |
| rad8      | 9.90003e-13 | 1.00000 | 1.01311e-12 | 1.000000 |

10000.0000 Pa, 1000.00000 K

| =====              |                 |          |                      |          |
|--------------------|-----------------|----------|----------------------|----------|
| Rate constant      | True (fraction) |          | Effective (fraction) |          |
| -----              |                 |          |                      |          |
| Total              | 7.98668e-13     | (1.00 )  | 7.54715e-13          | (1.00 )  |
| Formation of rad11 | 2.67704e-13     | (0.335 ) | 2.46494e-13          | (0.327 ) |
| Formation of rad6  | 2.87049e-13     | (0.359 ) | 2.64307e-13          | (0.350 ) |
| H-abstraction      | 2.43915e-13     | (0.305 ) | 2.43915e-13          | (0.323 ) |
| species            | PYtrue          | Cumul    | PYeffective          | Cumul    |
| -----              |                 |          |                      |          |
| rad6               | 0.416493        | 0.416493 | 0.440748             | 0.440748 |
| Benzene+2-propynyl | 0.305402        | 0.721895 | 0.323188             | 0.763936 |
| Indene+H           | 0.0840880       | 0.805983 | 0.0889853            | 0.852921 |
| C2H2+PhCH2         | 0.0626005       | 0.868583 | 0.0662462            | 0.919167 |
| Phenyl+Allene      | 0.0550320       | 0.923615 | 0.000000             | 0.919167 |
| PhCHCCH2+H         | 0.0265362       | 0.950152 | 0.0280816            | 0.947249 |
| PhCCH+CH3          | 0.0190701       | 0.969222 | 0.0201807            | 0.967430 |
| PhCH2CCH+H         | 0.0181447       | 0.987366 | 0.0192014            | 0.986631 |
| Ph+MeAc            | 0.00271370      | 0.990080 | 0.00287174           | 0.989503 |
| PAH7+H             | 0.00257871      | 0.992659 | 0.00272888           | 0.992232 |
| rad11              | 0.00162878      | 0.994288 | 0.00172363           | 0.993955 |
| rad7               | 0.000766260     | 0.995054 | 0.000810889          | 0.994766 |
| PAH9+H             | 0.000715033     | 0.995769 | 0.000756676          | 0.995523 |
| PhCCCH3+H          | 0.000701495     | 0.996470 | 0.000742348          | 0.996265 |
| rad28              | 0.000628678     | 0.997099 | 0.000665290          | 0.996931 |
| rad39              | 0.000574583     | 0.997674 | 0.000608046          | 0.997539 |
| rad23              | 0.000429560     | 0.998103 | 0.000454576          | 0.997993 |
| rad38              | 0.000343284     | 0.998446 | 0.000363276          | 0.998356 |
| rad45              | 0.000311566     | 0.998758 | 0.000329711          | 0.998686 |
| rad9               | 0.000210656     | 0.998969 | 0.000222924          | 0.998909 |
| rad19anti          | 0.000190021     | 0.999159 | 0.000201087          | 0.999110 |
| rad50              | 0.000124237     | 0.999283 | 0.000131473          | 0.999242 |
| rad46              | 0.000120023     | 0.999403 | 0.000127013          | 0.999369 |
| rad35              | 0.000105104     | 0.999508 | 0.000111225          | 0.999480 |
| rad22              | 0.000100635     | 0.999609 | 0.000106495          | 0.999586 |
| rad13              | 7.92585e-05     | 0.999688 | 8.38740e-05          | 0.999670 |
| rad51              | 3.93045e-05     | 0.999727 | 4.15934e-05          | 0.999712 |
| rad21              | 3.86554e-05     | 0.999766 | 4.09065e-05          | 0.999753 |
| rad19syn           | 3.09353e-05     | 0.999797 | 3.27369e-05          | 0.999785 |
| rad36              | 2.89023e-05     | 0.999826 | 3.05855e-05          | 0.999816 |
| rad2               | 2.69547e-05     | 0.999853 | 2.85245e-05          | 0.999845 |
| rad20              | 2.69524e-05     | 0.999880 | 2.85220e-05          | 0.999873 |
| rad30              | 1.85167e-05     | 0.999898 | 1.95951e-05          | 0.999893 |
| rad52              | 1.11936e-05     | 0.999909 | 1.18454e-05          | 0.999905 |
| rad54              | 9.99020e-06     | 0.999919 | 1.05719e-05          | 0.999915 |
| rad3               | 9.33623e-06     | 0.999929 | 9.87997e-06          | 0.999925 |
| rad4               | 7.21097e-06     | 0.999936 | 7.63092e-06          | 0.999933 |
| PhcycC3H3_A+H      | 6.97126e-06     | 0.999943 | 7.37726e-06          | 0.999940 |
| rad1               | 6.43348e-06     | 0.999949 | 6.80812e-06          | 0.999947 |
| PAH3+H             | 6.27897e-06     | 0.999956 | 6.64463e-06          | 0.999953 |
| rad67              | 6.16959e-06     | 0.999962 | 6.52890e-06          | 0.999960 |
| PAH10+CH3          | 5.42617e-06     | 0.999967 | 5.74217e-06          | 0.999966 |
| rad37              | 5.30297e-06     | 0.999972 | 5.61180e-06          | 0.999971 |
| rad18              | 5.15821e-06     | 0.999978 | 5.45861e-06          | 0.999977 |
| rad33              | 3.80485e-06     | 0.999981 | 4.02643e-06          | 0.999981 |
| rad26              | 3.60810e-06     | 0.999985 | 3.81823e-06          | 0.999985 |
| PAH1+H             | 2.84032e-06     | 0.999988 | 3.00573e-06          | 0.999988 |
| rad10              | 2.18663e-06     | 0.999990 | 2.31397e-06          | 0.999990 |
| rad71              | 1.55716e-06     | 0.999992 | 1.64785e-06          | 0.999992 |
| rad70              | 1.16998e-06     | 0.999993 | 1.23811e-06          | 0.999993 |
| rad73              | 1.09653e-06     | 0.999994 | 1.16039e-06          | 0.999994 |
| rad65              | 1.02509e-06     | 0.999995 | 1.08479e-06          | 0.999995 |
| rad60syn           | 7.84166e-07     | 0.999996 | 8.29833e-07          | 0.999996 |
| rad25              | 7.53597e-07     | 0.999996 | 7.97488e-07          | 0.999997 |
| rad59              | 6.52421e-07     | 0.999997 | 6.90416e-07          | 0.999997 |
| rad24              | 5.37464e-07     | 0.999998 | 5.68764e-07          | 0.999998 |
| rad55              | 5.02270e-07     | 0.999998 | 5.31521e-07          | 0.999998 |
| rad60anti          | 4.67333e-07     | 0.999999 | 4.94550e-07          | 0.999999 |
| rad62              | 2.43050e-07     | 0.999999 | 2.57205e-07          | 0.999999 |
| rad34              | 1.93082e-07     | 0.999999 | 2.04326e-07          | 0.999999 |
| rad12              | 1.33973e-07     | 0.999999 | 1.41775e-07          | 1.000000 |
| rad43              | 1.13483e-07     | 0.999999 | 1.20092e-07          | 1.000000 |
| rad15              | 1.04950e-07     | 0.999999 | 1.11062e-07          | 1.000000 |

|           |             |          |             |          |
|-----------|-------------|----------|-------------|----------|
| rad58     | 5.56493e-08 | 0.999999 | 5.88902e-08 | 1.000000 |
| rad72     | 5.36855e-08 | 1.000000 | 5.68120e-08 | 1.000000 |
| rad64     | 3.93977e-08 | 1.000000 | 4.16921e-08 | 1.000000 |
| rad53     | 3.39281e-08 | 1.000000 | 3.59039e-08 | 1.000000 |
| rad14     | 2.93415e-08 | 1.000000 | 3.10503e-08 | 1.000000 |
| PAH8+H    | 2.41612e-08 | 1.000000 | 2.55683e-08 | 1.000000 |
| rad56     | 1.86866e-08 | 1.000000 | 1.97748e-08 | 1.000000 |
| rad42     | 1.13706e-08 | 1.000000 | 1.20328e-08 | 1.000000 |
| rad61     | 9.99284e-09 | 1.000000 | 1.05748e-08 | 1.000000 |
| rad41     | 7.52132e-09 | 1.000000 | 7.95931e-09 | 1.000000 |
| rad68syn  | 6.64423e-09 | 1.000000 | 7.03120e-09 | 1.000000 |
| rad47     | 4.54155e-09 | 1.000000 | 4.80604e-09 | 1.000000 |
| rad68anti | 4.33903e-09 | 1.000000 | 4.59172e-09 | 1.000000 |
| rad31     | 3.22110e-09 | 1.000000 | 3.40868e-09 | 1.000000 |
| rad40syn  | 3.18677e-09 | 1.000000 | 3.37237e-09 | 1.000000 |
| rad27     | 3.14350e-09 | 1.000000 | 3.32657e-09 | 1.000000 |
| rad40anti | 2.21577e-09 | 1.000000 | 2.34480e-09 | 1.000000 |
| rad8      | 1.01268e-10 | 1.000000 | 1.07165e-10 | 1.000000 |
| rad5      | 9.49710e-11 | 1.000000 | 1.00502e-10 | 1.000000 |

10000.0000 Pa, 1100.00000 K

| Rate constant      | True (fraction)      | Effective (fraction) |
|--------------------|----------------------|----------------------|
| Total              | 1.22919e-12 (1.00 )  | 1.10410e-12 (1.00 )  |
| Formation of rad11 | 3.87976e-13 (0.316 ) | 3.29198e-13 (0.298 ) |
| Formation of rad6  | 4.37724e-13 (0.356 ) | 3.71410e-13 (0.336 ) |
| H-abstraction      | 4.03491e-13 (0.328 ) | 4.03491e-13 (0.365 ) |

| species            | PYtrue      | Cumul    | PYeffective | Cumul    |
|--------------------|-------------|----------|-------------|----------|
| Benzene+2-propynyl | 0.328257    | 0.328257 | 0.365448    | 0.365448 |
| rad6               | 0.268704    | 0.596962 | 0.299148    | 0.664596 |
| Phenyl+Allene      | 0.101768    | 0.698730 | 0.000000    | 0.664596 |
| Indene+H           | 0.0979287   | 0.796659 | 0.109024    | 0.773620 |
| C2H2+PhCH2         | 0.0813910   | 0.878050 | 0.0906127   | 0.864233 |
| PhCHCCH2+H         | 0.0423696   | 0.920419 | 0.0471700   | 0.911403 |
| PhCH2CCH+H         | 0.0334336   | 0.953853 | 0.0372217   | 0.948624 |
| PhCCH+CH3          | 0.0288008   | 0.982654 | 0.0320638   | 0.980688 |
| PAH7+H             | 0.00453648  | 0.987190 | 0.00505046  | 0.985739 |
| Ph+MeAc            | 0.00405770  | 0.991248 | 0.00451744  | 0.990256 |
| rad11              | 0.00190211  | 0.993150 | 0.00211762  | 0.992374 |
| rad39              | 0.000964112 | 0.994114 | 0.00107334  | 0.993447 |
| rad7               | 0.000961069 | 0.995075 | 0.00106996  | 0.994517 |
| PhCCCH3+H          | 0.000920717 | 0.995996 | 0.00102504  | 0.995542 |
| PAH9+H             | 0.000806044 | 0.996802 | 0.000897370 | 0.996439 |
| rad28              | 0.000487316 | 0.997289 | 0.000542529 | 0.996982 |
| rad38              | 0.000384733 | 0.997674 | 0.000428323 | 0.997410 |
| rad23              | 0.000359581 | 0.998034 | 0.000400320 | 0.997811 |
| rad45              | 0.000320099 | 0.998354 | 0.000356365 | 0.998167 |
| rad19anti          | 0.000318471 | 0.998672 | 0.000354553 | 0.998521 |
| rad9               | 0.000245595 | 0.998918 | 0.000273420 | 0.998795 |
| rad13              | 0.000190026 | 0.999108 | 0.000211556 | 0.999006 |
| rad50              | 0.000136422 | 0.999244 | 0.000151878 | 0.999158 |
| rad46              | 0.000133273 | 0.999378 | 0.000148373 | 0.999307 |
| rad35              | 0.000121155 | 0.999499 | 0.000134882 | 0.999442 |
| rad19syn           | 7.25576e-05 | 0.999571 | 8.07784e-05 | 0.999522 |
| rad22              | 6.93346e-05 | 0.999641 | 7.71900e-05 | 0.999600 |
| rad21              | 5.17598e-05 | 0.999692 | 5.76241e-05 | 0.999657 |
| rad51              | 4.31020e-05 | 0.999735 | 4.79854e-05 | 0.999705 |
| rad20              | 3.13315e-05 | 0.999767 | 3.48814e-05 | 0.999740 |
| rad36              | 2.98218e-05 | 0.999797 | 3.32005e-05 | 0.999773 |
| rad30              | 2.58213e-05 | 0.999822 | 2.87468e-05 | 0.999802 |
| rad54              | 2.47035e-05 | 0.999847 | 2.75024e-05 | 0.999829 |
| rad2               | 2.29284e-05 | 0.999870 | 2.55262e-05 | 0.999855 |
| PhcycC3H3_A+H      | 1.92008e-05 | 0.999889 | 2.13761e-05 | 0.999876 |
| rad52              | 1.22774e-05 | 0.999902 | 1.36684e-05 | 0.999890 |
| rad67              | 1.15793e-05 | 0.999913 | 1.28912e-05 | 0.999903 |
| PAH3+H             | 9.07672e-06 | 0.999922 | 1.01052e-05 | 0.999913 |
| rad37              | 8.76060e-06 | 0.999931 | 9.75312e-06 | 0.999923 |
| rad33              | 7.95612e-06 | 0.999939 | 8.85752e-06 | 0.999932 |
| rad3               | 7.91192e-06 | 0.999947 | 8.80834e-06 | 0.999940 |
| PAH10+CH3          | 7.88841e-06 | 0.999955 | 8.78213e-06 | 0.999949 |
| rad18              | 6.23787e-06 | 0.999961 | 6.94460e-06 | 0.999956 |
| rad4               | 6.19349e-06 | 0.999967 | 6.89523e-06 | 0.999963 |
| rad1               | 5.66559e-06 | 0.999973 | 6.30749e-06 | 0.999969 |
| PAH1+H             | 5.28859e-06 | 0.999978 | 5.88778e-06 | 0.999975 |
| rad10              | 3.38583e-06 | 0.999981 | 3.76944e-06 | 0.999979 |
| rad26              | 3.16962e-06 | 0.999985 | 3.52874e-06 | 0.999983 |
| rad70              | 2.62409e-06 | 0.999987 | 2.92139e-06 | 0.999985 |

|           |             |          |             |          |
|-----------|-------------|----------|-------------|----------|
| rad71     | 1.71473e-06 | 0.999989 | 1.90900e-06 | 0.999987 |
| rad25     | 1.45264e-06 | 0.999990 | 1.61722e-06 | 0.999989 |
| rad55     | 1.32596e-06 | 0.999992 | 1.47620e-06 | 0.999990 |
| rad73     | 1.20612e-06 | 0.999993 | 1.34277e-06 | 0.999992 |
| rad60syn  | 1.18753e-06 | 0.999994 | 1.32208e-06 | 0.999993 |
| rad65     | 1.12440e-06 | 0.999995 | 1.25180e-06 | 0.999994 |
| rad59     | 9.67948e-07 | 0.999996 | 1.07761e-06 | 0.999995 |
| rad24     | 7.80713e-07 | 0.999997 | 8.69164e-07 | 0.999996 |
| rad60anti | 7.08286e-07 | 0.999998 | 7.88538e-07 | 0.999997 |
| rad62     | 4.41854e-07 | 0.999998 | 4.91915e-07 | 0.999998 |
| rad34     | 4.37102e-07 | 0.999999 | 4.86626e-07 | 0.999998 |
| rad12     | 2.81155e-07 | 0.999999 | 3.13009e-07 | 0.999998 |
| rad15     | 1.76110e-07 | 0.999999 | 1.96063e-07 | 0.999999 |
| rad43     | 1.40692e-07 | 0.999999 | 1.56632e-07 | 0.999999 |
| rad53     | 1.12485e-07 | 0.999999 | 1.25229e-07 | 0.999999 |
| rad58     | 7.12168e-08 | 0.999999 | 7.92853e-08 | 0.999999 |
| rad14     | 6.95616e-08 | 0.999999 | 7.74426e-08 | 0.999999 |
| rad56     | 6.76008e-08 | 1.000000 | 7.52597e-08 | 0.999999 |
| rad64     | 6.50837e-08 | 1.000000 | 7.24576e-08 | 0.999999 |
| rad72     | 5.92480e-08 | 1.000000 | 6.59604e-08 | 0.999999 |
| PAH8+H    | 3.13186e-08 | 1.000000 | 3.48670e-08 | 0.999999 |
| rad42     | 1.81158e-08 | 1.000000 | 2.01683e-08 | 0.999999 |
| rad61     | 1.29641e-08 | 1.000000 | 1.44329e-08 | 0.999999 |
| rad68syn  | 1.13390e-08 | 1.000000 | 1.26236e-08 | 0.999999 |
| rad27     | 9.49502e-09 | 1.000000 | 1.05707e-08 | 0.999999 |
| rad41     | 8.73507e-09 | 1.000000 | 9.72476e-09 | 0.999999 |
| rad68anti | 7.44640e-09 | 1.000000 | 8.29004e-09 | 0.999999 |
| rad47     | 4.79691e-09 | 1.000000 | 5.34039e-09 | 0.999999 |
| rad40syn  | 4.33942e-09 | 1.000000 | 4.83107e-09 | 0.999999 |
| rad31     | 3.79413e-09 | 1.000000 | 4.22400e-09 | 0.999999 |
| rad40anti | 2.86973e-09 | 1.000000 | 3.19486e-09 | 0.999999 |
| rad8      | 1.26803e-09 | 1.000000 | 1.41169e-09 | 0.999999 |
| rad5      | 1.00902e-10 | 1.000000 | 1.12333e-10 | 0.999999 |

10000.0000 Pa, 1200.00000 K

| Rate constant      | True (fraction)      | Effective (fraction) |
|--------------------|----------------------|----------------------|
| Total              | 1.80237e-12 (1.00 )  | 1.52990e-12 (1.00 )  |
| Formation of rad11 | 5.38789e-13 (0.299 ) | 4.13694e-13 (0.270 ) |
| Formation of rad6  | 6.34764e-13 (0.352 ) | 4.87386e-13 (0.319 ) |
| H-abstraction      | 6.28816e-13 (0.349 ) | 6.28816e-13 (0.411 ) |

| species            | PYtrue      | Cumul    | PYeffective | Cumul    |
|--------------------|-------------|----------|-------------|----------|
| Benzene+2-propynyl | 0.348883    | 0.348883 | 0.411019    | 0.411019 |
| Phenyl+Allene      | 0.151175    | 0.500058 | 0.00000     | 0.411019 |
| rad6               | 0.150458    | 0.650516 | 0.177254    | 0.588273 |
| Indene+H           | 0.0990336   | 0.749550 | 0.116671    | 0.704945 |
| C2H2+PhCH2         | 0.0891920   | 0.838742 | 0.105077    | 0.810022 |
| PhCHCCH2+H         | 0.0557297   | 0.894471 | 0.0656549   | 0.875677 |
| PhCH2CCH+H         | 0.0499331   | 0.944405 | 0.0588261   | 0.934503 |
| PhCCH+CH3          | 0.0347499   | 0.979154 | 0.0409388   | 0.975442 |
| PAH7+H             | 0.00626151  | 0.985416 | 0.00737670  | 0.982818 |
| Ph+MeAc            | 0.00491851  | 0.990334 | 0.00579449  | 0.988613 |
| rad11              | 0.00227825  | 0.992613 | 0.00268401  | 0.991297 |
| rad39              | 0.00127205  | 0.993885 | 0.00149860  | 0.992795 |
| rad7               | 0.00120865  | 0.995093 | 0.00142391  | 0.994219 |
| PhCCCH3+H          | 0.000964291 | 0.996058 | 0.00113603  | 0.995355 |
| PAH9+H             | 0.000779817 | 0.996837 | 0.000918699 | 0.996274 |
| rad19anti          | 0.000433091 | 0.997271 | 0.000510224 | 0.996784 |
| rad38              | 0.000368946 | 0.997640 | 0.000434655 | 0.997219 |
| rad28              | 0.000307266 | 0.997947 | 0.000361990 | 0.997581 |
| rad23              | 0.000283555 | 0.998230 | 0.000334056 | 0.997915 |
| rad45              | 0.000282419 | 0.998513 | 0.000332717 | 0.998248 |
| rad9               | 0.000269057 | 0.998782 | 0.000316976 | 0.998565 |
| rad13              | 0.000264458 | 0.999046 | 0.000311558 | 0.998876 |
| rad19syn           | 0.000134072 | 0.999180 | 0.000157950 | 0.999034 |
| rad46              | 0.000125804 | 0.999306 | 0.000148209 | 0.999182 |
| rad50              | 0.000125418 | 0.999432 | 0.000147755 | 0.999330 |
| rad35              | 0.000120220 | 0.999552 | 0.000141631 | 0.999472 |
| rad21              | 4.81355e-05 | 0.999600 | 5.67083e-05 | 0.999528 |
| rad54              | 4.75307e-05 | 0.999647 | 5.59959e-05 | 0.999584 |
| rad22              | 4.62524e-05 | 0.999694 | 5.44900e-05 | 0.999639 |
| PhcycC3H3_A+H      | 4.19229e-05 | 0.999736 | 4.93893e-05 | 0.999688 |
| rad51              | 3.93122e-05 | 0.999775 | 4.63137e-05 | 0.999735 |
| rad30              | 3.02848e-05 | 0.999805 | 3.56785e-05 | 0.999770 |
| rad36              | 2.63840e-05 | 0.999832 | 3.10830e-05 | 0.999801 |
| rad20              | 2.51116e-05 | 0.999857 | 2.95839e-05 | 0.999831 |
| rad2               | 1.58130e-05 | 0.999873 | 1.86292e-05 | 0.999850 |

|           |             |          |             |          |
|-----------|-------------|----------|-------------|----------|
| rad67     | 1.55730e-05 | 0.999888 | 1.83465e-05 | 0.999868 |
| rad37     | 1.20272e-05 | 0.999900 | 1.41692e-05 | 0.999882 |
| PAH3+H    | 1.16129e-05 | 0.999912 | 1.36812e-05 | 0.999896 |
| rad52     | 1.12348e-05 | 0.999923 | 1.32358e-05 | 0.999909 |
| PAH10+CH3 | 1.01585e-05 | 0.999933 | 1.19677e-05 | 0.999921 |
| PAH1+H    | 9.21057e-06 | 0.999942 | 1.08509e-05 | 0.999932 |
| rad33     | 9.14175e-06 | 0.999952 | 1.07699e-05 | 0.999943 |
| rad18     | 6.52491e-06 | 0.999958 | 7.68703e-06 | 0.999950 |
| rad3      | 5.49917e-06 | 0.999964 | 6.47856e-06 | 0.999957 |
| rad70     | 4.87903e-06 | 0.999968 | 5.74799e-06 | 0.999963 |
| rad10     | 4.82058e-06 | 0.999973 | 5.67913e-06 | 0.999968 |
| rad4      | 4.33346e-06 | 0.999978 | 5.10525e-06 | 0.999973 |
| rad1      | 3.96487e-06 | 0.999982 | 4.67102e-06 | 0.999978 |
| rad55     | 2.71162e-06 | 0.999984 | 3.19455e-06 | 0.999981 |
| rad26     | 2.40524e-06 | 0.999987 | 2.83361e-06 | 0.999984 |
| rad25     | 1.91094e-06 | 0.999989 | 2.25129e-06 | 0.999986 |
| rad71     | 1.55657e-06 | 0.999990 | 1.83380e-06 | 0.999988 |
| rad60syn  | 1.52805e-06 | 0.999992 | 1.80020e-06 | 0.999990 |
| rad59     | 1.25683e-06 | 0.999993 | 1.48067e-06 | 0.999991 |
| rad73     | 1.09491e-06 | 0.999994 | 1.28990e-06 | 0.999993 |
| rad65     | 1.02713e-06 | 0.999995 | 1.21006e-06 | 0.999994 |
| rad60anti | 9.14194e-07 | 0.999996 | 1.07701e-06 | 0.999995 |
| rad34     | 8.55984e-07 | 0.999997 | 1.00844e-06 | 0.999996 |
| rad24     | 8.39531e-07 | 0.999998 | 9.89047e-07 | 0.999997 |
| rad62     | 7.02516e-07 | 0.999998 | 8.27631e-07 | 0.999998 |
| rad12     | 4.12167e-07 | 0.999999 | 4.85573e-07 | 0.999998 |
| rad15     | 3.76296e-07 | 0.999999 | 4.43314e-07 | 0.999999 |
| rad53     | 2.86668e-07 | 0.999999 | 3.37724e-07 | 0.999999 |
| rad56     | 1.90037e-07 | 1.000000 | 2.23882e-07 | 0.999999 |
| rad43     | 1.43821e-07 | 1.000000 | 1.69436e-07 | 0.999999 |
| rad64     | 1.10347e-07 | 1.000000 | 1.29999e-07 | 1.000000 |
| rad14     | 9.60339e-08 | 1.000000 | 1.13137e-07 | 1.000000 |
| rad58     | 8.21124e-08 | 1.000000 | 9.67366e-08 | 1.000000 |
| rad72     | 5.38029e-08 | 1.000000 | 6.33850e-08 | 1.000000 |
| PAH8+H    | 4.49657e-08 | 1.000000 | 5.29740e-08 | 1.000000 |
| rad42     | 2.88490e-08 | 1.000000 | 3.39870e-08 | 1.000000 |
| rad68syn  | 2.18326e-08 | 1.000000 | 2.57209e-08 | 1.000000 |
| rad68anti | 1.43784e-08 | 1.000000 | 1.69392e-08 | 1.000000 |
| rad61     | 1.41680e-08 | 1.000000 | 1.66914e-08 | 1.000000 |
| rad27     | 1.32028e-08 | 1.000000 | 1.55542e-08 | 1.000000 |
| rad41     | 7.99702e-09 | 1.000000 | 9.42129e-09 | 1.000000 |
| rad40syn  | 6.55362e-09 | 1.000000 | 7.72084e-09 | 1.000000 |
| rad8      | 4.24173e-09 | 1.000000 | 4.99718e-09 | 1.000000 |
| rad47     | 4.14611e-09 | 1.000000 | 4.88453e-09 | 1.000000 |
| rad40anti | 3.93419e-09 | 1.000000 | 4.63487e-09 | 1.000000 |
| rad31     | 3.59009e-09 | 1.000000 | 4.22948e-09 | 1.000000 |
| rad5      | 1.07174e-10 | 1.000000 | 1.26261e-10 | 1.000000 |

10000.0000 Pa, 1300.00000 K

=====

| Rate constant      | True (fraction)      | Effective (fraction) |
|--------------------|----------------------|----------------------|
| Total              | 2.54148e-12 (1.00 )  | 2.05405e-12 (1.00 )  |
| Formation of rad11 | 7.22991e-13 (0.284 ) | 5.03726e-13 (0.245 ) |
| Formation of rad6  | 8.84215e-13 (0.348 ) | 6.16055e-13 (0.300 ) |
| H-abstraction      | 9.34273e-13 (0.368 ) | 9.34273e-13 (0.455 ) |

| species            | PYtrue      | Cumul    | PYeffective | Cumul    |
|--------------------|-------------|----------|-------------|----------|
| Benzene+2-propynyl | 0.367610    | 0.367610 | 0.454844    | 0.454844 |
| Phenyl+Allene      | 0.191788    | 0.559398 | 0.000000    | 0.454844 |
| Indene+H           | 0.0890468   | 0.648445 | 0.110177    | 0.565021 |
| C2H2+PhCH2         | 0.0854953   | 0.733940 | 0.105783    | 0.670804 |
| rad6               | 0.0810680   | 0.815008 | 0.100306    | 0.771110 |
| PhCH2CCH+H         | 0.0638746   | 0.878883 | 0.0790319   | 0.850141 |
| PhCHCCH2+H         | 0.0635223   | 0.942405 | 0.0785958   | 0.928737 |
| PhCCH+CH3          | 0.0357908   | 0.978196 | 0.0442839   | 0.973021 |
| PAH7+H             | 0.00729310  | 0.985489 | 0.00902376  | 0.982045 |
| Ph+MeAc            | 0.00514955  | 0.990639 | 0.00637152  | 0.988416 |
| rad11              | 0.00215885  | 0.992797 | 0.00267115  | 0.991087 |
| rad39              | 0.00141443  | 0.994212 | 0.00175007  | 0.992838 |
| rad7               | 0.00132775  | 0.995540 | 0.00164282  | 0.994480 |
| PhCCCH3+H          | 0.000859488 | 0.996399 | 0.00106344  | 0.995544 |
| PAH9+H             | 0.000679655 | 0.997079 | 0.000840931 | 0.996385 |
| rad19anti          | 0.000512682 | 0.997591 | 0.000634344 | 0.997019 |
| rad38              | 0.000317945 | 0.997909 | 0.000393393 | 0.997412 |
| rad9               | 0.000258412 | 0.998168 | 0.000319734 | 0.997732 |
| rad13              | 0.000229324 | 0.998397 | 0.000283742 | 0.998016 |
| rad45              | 0.000217073 | 0.998614 | 0.000268584 | 0.998285 |
| rad23              | 0.000213645 | 0.998828 | 0.000264344 | 0.998549 |

|               |             |          |             |          |
|---------------|-------------|----------|-------------|----------|
| rad19syn      | 0.000209479 | 0.999037 | 0.000259188 | 0.998808 |
| rad28         | 0.000179635 | 0.999217 | 0.000222262 | 0.999030 |
| rad35         | 0.000107698 | 0.999325 | 0.000133254 | 0.999164 |
| rad46         | 0.000106168 | 0.999431 | 0.000131361 | 0.999295 |
| rad50         | 0.000101408 | 0.999532 | 0.000125472 | 0.999420 |
| PhcycC3H3_A+H | 7.70959e-05 | 0.999609 | 9.53904e-05 | 0.999516 |
| rad54         | 7.63643e-05 | 0.999686 | 9.44854e-05 | 0.999610 |
| rad21         | 3.67567e-05 | 0.999722 | 4.54790e-05 | 0.999656 |
| rad22         | 3.19339e-05 | 0.999754 | 3.95119e-05 | 0.999695 |
| rad51         | 3.12586e-05 | 0.999786 | 3.86763e-05 | 0.999734 |
| rad30         | 3.11635e-05 | 0.999817 | 3.85586e-05 | 0.999773 |
| rad36         | 2.03477e-05 | 0.999837 | 2.51761e-05 | 0.999798 |
| rad67         | 1.75407e-05 | 0.999855 | 2.17032e-05 | 0.999819 |
| rad20         | 1.66686e-05 | 0.999871 | 2.06240e-05 | 0.999840 |
| PAH1+H        | 1.46055e-05 | 0.999886 | 1.80713e-05 | 0.999858 |
| rad37         | 1.44467e-05 | 0.999900 | 1.78749e-05 | 0.999876 |
| PAH3+H        | 1.36819e-05 | 0.999914 | 1.69287e-05 | 0.999893 |
| PAH10+CH3     | 1.24129e-05 | 0.999926 | 1.53585e-05 | 0.999908 |
| rad52         | 9.00068e-06 | 0.999935 | 1.11366e-05 | 0.999919 |
| rad2          | 8.99961e-06 | 0.999944 | 1.11352e-05 | 0.999931 |
| rad70         | 7.73944e-06 | 0.999952 | 9.57600e-06 | 0.999940 |
| rad33         | 7.71149e-06 | 0.999960 | 9.54144e-06 | 0.999950 |
| rad18         | 5.63506e-06 | 0.999966 | 6.97222e-06 | 0.999957 |
| rad10         | 5.20374e-06 | 0.999971 | 6.43857e-06 | 0.999963 |
| rad55         | 4.60340e-06 | 0.999975 | 5.69579e-06 | 0.999969 |
| rad3          | 3.24275e-06 | 0.999979 | 4.01226e-06 | 0.999973 |
| rad4          | 2.56640e-06 | 0.999981 | 3.17541e-06 | 0.999976 |
| rad1          | 2.27604e-06 | 0.999983 | 2.81614e-06 | 0.999979 |
| rad26         | 1.79088e-06 | 0.999985 | 2.21585e-06 | 0.999981 |
| rad25         | 1.76849e-06 | 0.999987 | 2.18815e-06 | 0.999983 |
| rad60syn      | 1.74350e-06 | 0.999989 | 2.15723e-06 | 0.999985 |
| rad59         | 1.48366e-06 | 0.999990 | 1.83573e-06 | 0.999987 |
| rad34         | 1.44764e-06 | 0.999992 | 1.79116e-06 | 0.999989 |
| rad71         | 1.21721e-06 | 0.999993 | 1.50605e-06 | 0.999990 |
| rad60anti     | 1.04817e-06 | 0.999994 | 1.29689e-06 | 0.999992 |
| rad62         | 9.92814e-07 | 0.999995 | 1.22841e-06 | 0.999993 |
| rad15         | 8.79193e-07 | 0.999996 | 1.08783e-06 | 0.999994 |
| rad73         | 8.57356e-07 | 0.999997 | 1.06081e-06 | 0.999995 |
| rad65         | 8.19793e-07 | 0.999997 | 1.01433e-06 | 0.999996 |
| rad24         | 7.40187e-07 | 0.999998 | 9.15836e-07 | 0.999997 |
| rad53         | 5.90325e-07 | 0.999999 | 7.30406e-07 | 0.999998 |
| rad12         | 4.76285e-07 | 0.999999 | 5.89309e-07 | 0.999998 |
| rad56         | 4.24489e-07 | 1.000000 | 5.25220e-07 | 0.999999 |
| rad64         | 1.81896e-07 | 1.000000 | 2.25060e-07 | 0.999999 |
| rad43         | 1.36506e-07 | 1.000000 | 1.68899e-07 | 0.999999 |
| rad58         | 9.13178e-08 | 1.000000 | 1.12987e-07 | 0.999999 |
| rad14         | 8.50128e-08 | 1.000000 | 1.05186e-07 | 1.000000 |
| PAH8+H        | 7.86447e-08 | 1.000000 | 9.73066e-08 | 1.000000 |
| rad42         | 4.44320e-08 | 1.000000 | 5.49758e-08 | 1.000000 |
| rad68syn      | 4.23523e-08 | 1.000000 | 5.24025e-08 | 1.000000 |
| rad72         | 4.20135e-08 | 1.000000 | 5.19832e-08 | 1.000000 |
| rad68anti     | 2.78795e-08 | 1.000000 | 3.44953e-08 | 1.000000 |
| rad61         | 1.45829e-08 | 1.000000 | 1.80435e-08 | 1.000000 |
| rad40syn      | 1.16047e-08 | 1.000000 | 1.43584e-08 | 1.000000 |
| rad27         | 1.09409e-08 | 1.000000 | 1.35371e-08 | 1.000000 |
| rad8          | 7.26015e-09 | 1.000000 | 8.98298e-09 | 1.000000 |
| rad41         | 6.82102e-09 | 1.000000 | 8.43968e-09 | 1.000000 |
| rad40anti     | 6.51893e-09 | 1.000000 | 8.06581e-09 | 1.000000 |
| rad47         | 3.11039e-09 | 1.000000 | 3.84847e-09 | 1.000000 |
| rad31         | 2.90627e-09 | 1.000000 | 3.59593e-09 | 1.000000 |
| rad5          | 1.19958e-10 | 1.000000 | 1.48424e-10 | 1.000000 |

10000.0000 Pa, 1400.00000 K

=====

| Rate constant      | True (fraction)      | Effective (fraction) |
|--------------------|----------------------|----------------------|
| Total              | 3.47024e-12 (1.00 )  | 2.70319e-12 (1.00 )  |
| Formation of rad11 | 9.43269e-13 (0.272 ) | 6.04410e-13 (0.224 ) |
| Formation of rad6  | 1.19194e-12 (0.343 ) | 7.63746e-13 (0.283 ) |
| H-abstraction      | 1.33503e-12 (0.385 ) | 1.33503e-12 (0.494 ) |

| species            | PYtrue    | Cumul    | PYeffective | Cumul    |
|--------------------|-----------|----------|-------------|----------|
| Benzene+2-propynyl | 0.384709  | 0.384709 | 0.493873    | 0.493873 |
| Phenyl+Allene      | 0.221037  | 0.605746 | 0.00000     | 0.493873 |
| C2H2+PhCH2         | 0.0758488 | 0.681594 | 0.0973718   | 0.591245 |
| Indene+H           | 0.0749258 | 0.756520 | 0.0961869   | 0.687432 |
| PhCH2CCH+H         | 0.0739838 | 0.830504 | 0.0949778   | 0.782409 |
| PhCHCCH2+H         | 0.0664262 | 0.896930 | 0.0852748   | 0.867684 |
| rad6               | 0.0484463 | 0.945376 | 0.0621934   | 0.929878 |

|               |             |          |             |          |
|---------------|-------------|----------|-------------|----------|
| PhCCH+CH3     | 0.0337834   | 0.979160 | 0.0433697   | 0.973247 |
| PAH7+H        | 0.00769969  | 0.986860 | 0.00988451  | 0.983132 |
| Ph+MeAc       | 0.00498478  | 0.991844 | 0.00639927  | 0.989531 |
| rad11         | 0.00158132  | 0.993426 | 0.00203004  | 0.991561 |
| rad39         | 0.00142307  | 0.994849 | 0.00182688  | 0.993388 |
| rad7          | 0.00116862  | 0.996017 | 0.00150022  | 0.994888 |
| PhCCCH3+H     | 0.000703930 | 0.996721 | 0.000903670 | 0.995792 |
| PAH9+H        | 0.000572416 | 0.997294 | 0.000734846 | 0.996527 |
| rad19anti     | 0.000559848 | 0.997854 | 0.000718711 | 0.997245 |
| rad19syn      | 0.000293012 | 0.998147 | 0.000376156 | 0.997622 |
| rad38         | 0.000264520 | 0.998411 | 0.000339579 | 0.997961 |
| rad9          | 0.000222027 | 0.998633 | 0.000285028 | 0.998246 |
| rad23         | 0.000168769 | 0.998802 | 0.000216659 | 0.998463 |
| rad13         | 0.000159909 | 0.998962 | 0.000205284 | 0.998668 |
| rad45         | 0.000152990 | 0.999115 | 0.000196403 | 0.998865 |
| PhcycC3H3_A+H | 0.000125084 | 0.999240 | 0.000160578 | 0.999025 |
| rad28         | 0.000112848 | 0.999353 | 0.000144869 | 0.999170 |
| rad54         | 0.000109676 | 0.999462 | 0.000140797 | 0.999311 |
| rad35         | 9.32400e-05 | 0.999556 | 0.000119698 | 0.999430 |
| rad46         | 8.63610e-05 | 0.999642 | 0.000110867 | 0.999541 |
| rad50         | 7.79358e-05 | 0.999720 | 0.000100051 | 0.999641 |
| rad30         | 2.97728e-05 | 0.999750 | 3.82210e-05 | 0.999680 |
| rad21         | 2.55906e-05 | 0.999775 | 3.28521e-05 | 0.999712 |
| rad22         | 2.41041e-05 | 0.999799 | 3.09438e-05 | 0.999743 |
| rad51         | 2.33520e-05 | 0.999823 | 2.99783e-05 | 0.999773 |
| PAH1+H        | 2.14191e-05 | 0.999844 | 2.74969e-05 | 0.999801 |
| rad67         | 1.84601e-05 | 0.999863 | 2.36983e-05 | 0.999825 |
| rad37         | 1.60441e-05 | 0.999879 | 2.05967e-05 | 0.999845 |
| PAH3+H        | 1.54785e-05 | 0.999894 | 1.98706e-05 | 0.999865 |
| PAH10+CH3     | 1.50535e-05 | 0.999909 | 1.93250e-05 | 0.999884 |
| rad36         | 1.43977e-05 | 0.999924 | 1.84831e-05 | 0.999903 |
| rad70         | 1.08945e-05 | 0.999934 | 1.39859e-05 | 0.999917 |
| rad20         | 1.02907e-05 | 0.999945 | 1.32108e-05 | 0.999930 |
| rad55         | 6.95593e-06 | 0.999952 | 8.92970e-06 | 0.999939 |
| rad52         | 6.81539e-06 | 0.999959 | 8.74937e-06 | 0.999948 |
| rad33         | 5.67499e-06 | 0.999964 | 7.28529e-06 | 0.999955 |
| rad2          | 4.55453e-06 | 0.999969 | 5.84693e-06 | 0.999961 |
| rad10         | 4.04753e-06 | 0.999973 | 5.19605e-06 | 0.999966 |
| rad18         | 3.90838e-06 | 0.999977 | 5.01740e-06 | 0.999971 |
| rad34         | 2.16435e-06 | 0.999979 | 2.77851e-06 | 0.999974 |
| rad60syn      | 1.85753e-06 | 0.999981 | 2.38462e-06 | 0.999976 |
| rad15         | 1.77357e-06 | 0.999983 | 2.27683e-06 | 0.999979 |
| rad3          | 1.75774e-06 | 0.999984 | 2.25651e-06 | 0.999981 |
| rad59         | 1.66312e-06 | 0.999986 | 2.13504e-06 | 0.999983 |
| rad26         | 1.44724e-06 | 0.999987 | 1.85791e-06 | 0.999985 |
| rad25         | 1.39691e-06 | 0.999989 | 1.79329e-06 | 0.999987 |
| rad4          | 1.39549e-06 | 0.999990 | 1.79148e-06 | 0.999988 |
| rad62         | 1.29488e-06 | 0.999991 | 1.66231e-06 | 0.999990 |
| rad1          | 1.15976e-06 | 0.999993 | 1.48885e-06 | 0.999992 |
| rad60anti     | 1.12340e-06 | 0.999994 | 1.44217e-06 | 0.999993 |
| rad53         | 1.07074e-06 | 0.999995 | 1.37456e-06 | 0.999994 |
| rad71         | 8.75719e-07 | 0.999996 | 1.12421e-06 | 0.999995 |
| rad56         | 8.36347e-07 | 0.999997 | 1.07366e-06 | 0.999997 |
| rad73         | 6.19340e-07 | 0.999997 | 7.95085e-07 | 0.999997 |
| rad65         | 6.17174e-07 | 0.999998 | 7.92296e-07 | 0.999998 |
| rad24         | 5.86532e-07 | 0.999998 | 7.52965e-07 | 0.999999 |
| rad12         | 4.76614e-07 | 0.999999 | 6.11857e-07 | 0.999999 |
| rad64         | 2.85242e-07 | 0.999999 | 3.66181e-07 | 1.000000 |
| PAH8+H        | 1.39543e-07 | 0.999999 | 1.79140e-07 | 1.000000 |
| rad43         | 1.30696e-07 | 0.999999 | 1.67782e-07 | 1.000000 |
| rad58         | 1.03481e-07 | 0.999999 | 1.32845e-07 | 1.000000 |
| rad68syn      | 7.42355e-08 | 1.000000 | 9.53007e-08 | 1.000000 |
| rad42         | 6.50781e-08 | 1.000000 | 8.35444e-08 | 1.000000 |
| rad14         | 6.20736e-08 | 1.000000 | 7.96877e-08 | 1.000000 |
| rad68anti     | 4.87995e-08 | 1.000000 | 6.26469e-08 | 1.000000 |
| rad72         | 3.00759e-08 | 1.000000 | 3.86102e-08 | 1.000000 |
| rad40syn      | 2.03778e-08 | 1.000000 | 2.61601e-08 | 1.000000 |
| rad61         | 1.59691e-08 | 1.000000 | 2.05005e-08 | 1.000000 |
| rad40anti     | 1.12180e-08 | 1.000000 | 1.44012e-08 | 1.000000 |
| rad8          | 9.02189e-09 | 1.000000 | 1.15820e-08 | 1.000000 |
| rad27         | 7.23711e-09 | 1.000000 | 9.29067e-09 | 1.000000 |
| rad41         | 6.25093e-09 | 1.000000 | 8.02464e-09 | 1.000000 |
| rad47         | 2.18871e-09 | 1.000000 | 2.80977e-09 | 1.000000 |
| rad31         | 2.17425e-09 | 1.000000 | 2.79121e-09 | 1.000000 |
| rad5          | 1.47818e-10 | 1.000000 | 1.89762e-10 | 1.000000 |

10000.0000 Pa, 1500.00000 K

=====

Rate constant | True (fraction) | Effective (fraction)

-----



|                    |                      |                      |
|--------------------|----------------------|----------------------|
| Total              | 4.61271e-12 (1.00 )  | 3.49743e-12 (1.00 )  |
| Formation of rad11 | 1.20217e-12 (0.261 ) | 7.17402e-13 (0.205 ) |
| Formation of rad6  | 1.56360e-12 (0.339 ) | 9.33086e-13 (0.267 ) |
| H-abstraction      | 1.84694e-12 (0.400 ) | 1.84694e-12 (0.528 ) |

| species            | PYtrue      | Cumul    | PYeffective | Cumul    |
|--------------------|-------------|----------|-------------|----------|
| Benzene+2-propynyl | 0.400402    | 0.400402 | 0.528085    | 0.528085 |
| Phenyl+Allene      | 0.241785    | 0.642187 | 0.000000    | 0.528085 |
| PhCH2CCH+H         | 0.0809031   | 0.723090 | 0.106702    | 0.634788 |
| PhCHCCH2+H         | 0.0664468   | 0.789537 | 0.0876360   | 0.722424 |
| C2H2+PhCH2         | 0.0650767   | 0.854614 | 0.0858285   | 0.808252 |
| Indene+H           | 0.0614534   | 0.916067 | 0.0810499   | 0.889302 |
| rad6               | 0.0338496   | 0.949917 | 0.0446437   | 0.933946 |
| PhCCH+CH3          | 0.0307496   | 0.980666 | 0.0405552   | 0.974501 |
| PAH7+H             | 0.00774440  | 0.988411 | 0.0102140   | 0.984715 |
| Ph+MeAc            | 0.00467796  | 0.993089 | 0.00616967  | 0.990885 |
| rad39              | 0.00136263  | 0.994451 | 0.00179716  | 0.992682 |
| rad11              | 0.00102795  | 0.995479 | 0.00135575  | 0.994037 |
| rad7               | 0.000853671 | 0.996333 | 0.00112589  | 0.995163 |
| rad19anti          | 0.000585604 | 0.996918 | 0.000772345 | 0.995936 |
| PhCCCH3+H          | 0.000561445 | 0.997480 | 0.000740481 | 0.996676 |
| PAH9+H             | 0.000491078 | 0.997971 | 0.000647675 | 0.997324 |
| rad19syn           | 0.000379918 | 0.998351 | 0.000501070 | 0.997825 |
| rad38              | 0.000224500 | 0.998575 | 0.000296091 | 0.998121 |
| PhcycC3H3_A+H      | 0.000183984 | 0.998759 | 0.000242653 | 0.998364 |
| rad9               | 0.000177469 | 0.998937 | 0.000234061 | 0.998598 |
| rad23              | 0.000147374 | 0.999084 | 0.000194369 | 0.998792 |
| rad54              | 0.000147190 | 0.999231 | 0.000194127 | 0.998986 |
| rad13              | 0.000103694 | 0.999335 | 0.000136761 | 0.999123 |
| rad45              | 0.000103468 | 0.999439 | 0.000136463 | 0.999259 |
| rad35              | 8.19830e-05 | 0.999521 | 0.000108127 | 0.999368 |
| rad28              | 8.13042e-05 | 0.999602 | 0.000107231 | 0.999475 |
| rad46              | 7.20009e-05 | 0.999674 | 9.49606e-05 | 0.999570 |
| rad50              | 6.12957e-05 | 0.999735 | 8.08423e-05 | 0.999651 |
| PAH1+H             | 2.97639e-05 | 0.999765 | 3.92551e-05 | 0.999690 |
| rad30              | 2.75515e-05 | 0.999793 | 3.63373e-05 | 0.999726 |
| rad22              | 2.02358e-05 | 0.999813 | 2.66887e-05 | 0.999753 |
| rad67              | 1.94036e-05 | 0.999832 | 2.55912e-05 | 0.999779 |
| PAH10+CH3          | 1.82841e-05 | 0.999850 | 2.41146e-05 | 0.999803 |
| rad51              | 1.76689e-05 | 0.999868 | 2.33032e-05 | 0.999826 |
| PAH3+H             | 1.72283e-05 | 0.999885 | 2.27222e-05 | 0.999849 |
| rad21              | 1.72200e-05 | 0.999903 | 2.27112e-05 | 0.999871 |
| rad37              | 1.70861e-05 | 0.999920 | 2.25347e-05 | 0.999894 |
| rad70              | 1.42018e-05 | 0.999934 | 1.87306e-05 | 0.999913 |
| rad55              | 9.78244e-06 | 0.999944 | 1.29019e-05 | 0.999926 |
| rad36              | 9.77902e-06 | 0.999953 | 1.28974e-05 | 0.999938 |
| rad20              | 6.24673e-06 | 0.999960 | 8.23873e-06 | 0.999947 |
| rad52              | 5.25885e-06 | 0.999965 | 6.93583e-06 | 0.999954 |
| rad33              | 3.96995e-06 | 0.999969 | 5.23589e-06 | 0.999959 |
| rad34              | 2.98242e-06 | 0.999972 | 3.93348e-06 | 0.999963 |
| rad15              | 2.59257e-06 | 0.999974 | 3.41931e-06 | 0.999966 |
| rad10              | 2.53985e-06 | 0.999977 | 3.34978e-06 | 0.999970 |
| rad18              | 2.41763e-06 | 0.999979 | 3.18857e-06 | 0.999973 |
| rad2               | 2.21222e-06 | 0.999982 | 2.91766e-06 | 0.999976 |
| rad60syn           | 1.91708e-06 | 0.999984 | 2.52841e-06 | 0.999978 |
| rad59              | 1.82078e-06 | 0.999985 | 2.40140e-06 | 0.999981 |
| rad53              | 1.79223e-06 | 0.999987 | 2.36375e-06 | 0.999983 |
| rad62              | 1.61545e-06 | 0.999989 | 2.13060e-06 | 0.999985 |
| rad56              | 1.52161e-06 | 0.999990 | 2.00683e-06 | 0.999987 |
| rad26              | 1.28753e-06 | 0.999992 | 1.69810e-06 | 0.999989 |
| rad60anti          | 1.16686e-06 | 0.999993 | 1.53896e-06 | 0.999990 |
| rad25              | 1.04077e-06 | 0.999994 | 1.37266e-06 | 0.999992 |
| rad3               | 9.39642e-07 | 0.999995 | 1.23928e-06 | 0.999993 |
| rad4               | 7.47560e-07 | 0.999995 | 9.85943e-07 | 0.999994 |
| rad71              | 6.17112e-07 | 0.999996 | 8.13897e-07 | 0.999995 |
| rad1               | 5.66715e-07 | 0.999997 | 7.47433e-07 | 0.999995 |
| rad65              | 4.73388e-07 | 0.999997 | 6.24348e-07 | 0.999996 |
| rad24              | 4.44482e-07 | 0.999998 | 5.86222e-07 | 0.999997 |
| rad73              | 4.40774e-07 | 0.999998 | 5.81333e-07 | 0.999997 |
| rad12              | 4.38953e-07 | 0.999998 | 5.78931e-07 | 0.999998 |
| rad64              | 4.27423e-07 | 0.999999 | 5.63721e-07 | 0.999998 |
| PAH8+H             | 2.38992e-07 | 0.999999 | 3.15204e-07 | 0.999999 |
| rad43              | 1.29796e-07 | 0.999999 | 1.71186e-07 | 0.999999 |
| rad58              | 1.20916e-07 | 0.999999 | 1.59474e-07 | 0.999999 |
| rad68syn           | 1.19740e-07 | 0.999999 | 1.57923e-07 | 0.999999 |
| rad42              | 9.19519e-08 | 1.000000 | 1.21274e-07 | 0.999999 |
| rad68anti          | 7.85803e-08 | 1.000000 | 1.03639e-07 | 0.999999 |
| rad14              | 4.30966e-08 | 1.000000 | 5.68393e-08 | 1.000000 |
| rad40syn           | 3.41197e-08 | 1.000000 | 4.49999e-08 | 1.000000 |

|           |             |          |             |          |
|-----------|-------------|----------|-------------|----------|
| rad72     | 2.09023e-08 | 1.000000 | 2.75678e-08 | 1.000000 |
| rad61     | 1.95710e-08 | 1.000000 | 2.58119e-08 | 1.000000 |
| rad40anti | 1.88145e-08 | 1.000000 | 2.48142e-08 | 1.000000 |
| rad8      | 9.64705e-09 | 1.000000 | 1.27234e-08 | 1.000000 |
| rad41     | 6.44717e-09 | 1.000000 | 8.50310e-09 | 1.000000 |
| rad27     | 4.44563e-09 | 1.000000 | 5.86326e-09 | 1.000000 |
| rad31     | 1.59340e-09 | 1.000000 | 2.10151e-09 | 1.000000 |
| rad47     | 1.55813e-09 | 1.000000 | 2.05500e-09 | 1.000000 |
| rad5      | 1.99167e-10 | 1.000000 | 2.62679e-10 | 1.000000 |

10000.0000 Pa, 1750.00000 K

| Rate constant      | True (fraction)      | Effective (fraction) |
|--------------------|----------------------|----------------------|
| Total              | 8.61869e-12 (1.00 )  | 6.21523e-12 (1.00 )  |
| Formation of rad11 | 2.04015e-12 (0.237 ) | 1.02761e-12 (0.165 ) |
| Formation of rad6  | 2.80256e-12 (0.325 ) | 1.41164e-12 (0.227 ) |
| H-abstraction      | 3.77597e-12 (0.438 ) | 3.77597e-12 (0.608 ) |

| species            | PYtrue      | Cumul    | PYeffective | Cumul    |
|--------------------|-------------|----------|-------------|----------|
| Benzene+2-propynyl | 0.438115    | 0.438115 | 0.607536    | 0.607536 |
| Phenyl+Allene      | 0.278867    | 0.716981 | 0.000000    | 0.607536 |
| PhCH2CCH+H         | 0.0913429   | 0.808324 | 0.126666    | 0.734202 |
| PhCHCCH2+H         | 0.0621029   | 0.870427 | 0.0861187   | 0.820321 |
| C2H2+PhCH2         | 0.0408404   | 0.911267 | 0.0566337   | 0.876955 |
| Indene+H           | 0.0306762   | 0.941944 | 0.0425388   | 0.919493 |
| PhCCH+CH3          | 0.0246679   | 0.966611 | 0.0342071   | 0.953701 |
| rad6               | 0.0158222   | 0.982434 | 0.0219408   | 0.975641 |
| PAH7+H             | 0.00698468  | 0.989418 | 0.00968569  | 0.985327 |
| Ph+MeAc            | 0.00457980  | 0.993998 | 0.00635085  | 0.991678 |
| rad39              | 0.00127770  | 0.995276 | 0.00177180  | 0.993450 |
| PhcycC3H3_A+H      | 0.000745897 | 0.996022 | 0.00103434  | 0.994484 |
| rad19syn           | 0.000724096 | 0.996746 | 0.00100411  | 0.995488 |
| rad19anti          | 0.000502793 | 0.997249 | 0.000697228 | 0.996185 |
| PAH9+H             | 0.000400886 | 0.997649 | 0.000555909 | 0.996741 |
| PhCCCH3+H          | 0.000367238 | 0.998017 | 0.000509249 | 0.997251 |
| rad54              | 0.000279636 | 0.998296 | 0.000387772 | 0.997638 |
| rad38              | 0.000262576 | 0.998559 | 0.000364115 | 0.998002 |
| rad50              | 0.000212963 | 0.998772 | 0.000295317 | 0.998298 |
| rad51              | 0.000155463 | 0.998927 | 0.000215582 | 0.998513 |
| rad7               | 0.000129633 | 0.999057 | 0.000179763 | 0.998693 |
| rad71              | 0.000126688 | 0.999184 | 0.000175679 | 0.998869 |
| rad11              | 0.000117827 | 0.999301 | 0.000163391 | 0.999032 |
| rad46              | 9.49502e-05 | 0.999396 | 0.000131668 | 0.999164 |
| PAH1+H             | 7.11291e-05 | 0.999468 | 9.86348e-05 | 0.999263 |
| rad35              | 6.59159e-05 | 0.999533 | 9.14056e-05 | 0.999354 |
| rad23              | 6.22384e-05 | 0.999596 | 8.63063e-05 | 0.999440 |
| rad28              | 4.18993e-05 | 0.999638 | 5.81019e-05 | 0.999498 |
| rad73              | 3.98530e-05 | 0.999677 | 5.52644e-05 | 0.999554 |
| PAH10+CH3          | 3.66645e-05 | 0.999714 | 5.08429e-05 | 0.999604 |
| PAH3+H             | 2.79737e-05 | 0.999742 | 3.87912e-05 | 0.999643 |
| rad52              | 2.78259e-05 | 0.999770 | 3.85863e-05 | 0.999682 |
| rad67              | 2.56333e-05 | 0.999796 | 3.55459e-05 | 0.999717 |
| rad70              | 2.53573e-05 | 0.999821 | 3.51632e-05 | 0.999753 |
| rad72              | 2.41640e-05 | 0.999845 | 3.35084e-05 | 0.999786 |
| rad55              | 2.40171e-05 | 0.999869 | 3.33046e-05 | 0.999819 |
| rad30              | 2.14353e-05 | 0.999891 | 2.97245e-05 | 0.999849 |
| rad37              | 1.68827e-05 | 0.999907 | 2.34113e-05 | 0.999872 |
| rad9               | 1.30788e-05 | 0.999921 | 1.81365e-05 | 0.999891 |
| rad56              | 1.07344e-05 | 0.999931 | 1.48855e-05 | 0.999905 |
| rad13              | 9.45142e-06 | 0.999941 | 1.31064e-05 | 0.999919 |
| rad53              | 9.11007e-06 | 0.999950 | 1.26330e-05 | 0.999931 |
| rad22              | 8.94853e-06 | 0.999959 | 1.24090e-05 | 0.999944 |
| rad45              | 7.81852e-06 | 0.999967 | 1.08420e-05 | 0.999954 |
| rad34              | 6.65991e-06 | 0.999973 | 9.23530e-06 | 0.999964 |
| PAH8+H             | 3.95175e-06 | 0.999977 | 5.47993e-06 | 0.999969 |
| rad62              | 3.48399e-06 | 0.999981 | 4.83127e-06 | 0.999974 |
| rad65              | 2.62588e-06 | 0.999983 | 3.64133e-06 | 0.999978 |
| rad59              | 2.53446e-06 | 0.999986 | 3.51456e-06 | 0.999981 |
| rad60syn           | 2.08112e-06 | 0.999988 | 2.88590e-06 | 0.999984 |
| rad64              | 1.56842e-06 | 0.999989 | 2.17494e-06 | 0.999986 |
| rad21              | 1.45429e-06 | 0.999991 | 2.01667e-06 | 0.999988 |
| rad60anti          | 1.42239e-06 | 0.999992 | 1.97244e-06 | 0.999990 |
| rad36              | 1.33517e-06 | 0.999994 | 1.85150e-06 | 0.999992 |
| rad26              | 7.06481e-07 | 0.999994 | 9.79680e-07 | 0.999993 |
| rad15              | 7.04896e-07 | 0.999995 | 9.77486e-07 | 0.999994 |
| rad68syn           | 6.68419e-07 | 0.999996 | 9.26902e-07 | 0.999995 |
| rad20              | 4.50098e-07 | 0.999996 | 6.24155e-07 | 0.999996 |
| rad68anti          | 4.28740e-07 | 0.999997 | 5.94536e-07 | 0.999996 |

|           |             |          |             |          |
|-----------|-------------|----------|-------------|----------|
| rad42     | 3.92887e-07 | 0.999997 | 5.44818e-07 | 0.999997 |
| rad33     | 3.77802e-07 | 0.999997 | 5.23900e-07 | 0.999997 |
| rad58     | 3.47346e-07 | 0.999998 | 4.81667e-07 | 0.999998 |
| rad40syn  | 3.36422e-07 | 0.999998 | 4.66518e-07 | 0.999998 |
| rad10     | 2.74809e-07 | 0.999998 | 3.81079e-07 | 0.999999 |
| rad40anti | 2.43923e-07 | 0.999999 | 3.38249e-07 | 0.999999 |
| rad18     | 2.17021e-07 | 0.999999 | 3.00944e-07 | 0.999999 |
| rad43     | 1.78717e-07 | 0.999999 | 2.47827e-07 | 0.999999 |
| rad61     | 1.37278e-07 | 0.999999 | 1.90365e-07 | 1.000000 |
| rad25     | 1.10842e-07 | 0.999999 | 1.53705e-07 | 1.000000 |
| rad2      | 7.44734e-08 | 0.999999 | 1.03273e-07 | 1.000000 |
| rad12     | 5.25375e-08 | 0.999999 | 7.28542e-08 | 1.000000 |
| rad24     | 4.46743e-08 | 0.999999 | 6.19500e-08 | 1.000000 |
| rad3      | 3.39586e-08 | 0.999999 | 4.70906e-08 | 1.000000 |
| rad4      | 2.15847e-08 | 0.999999 | 2.99316e-08 | 1.000000 |
| rad1      | 2.07578e-08 | 1.000000 | 2.87849e-08 | 1.000000 |
| rad41     | 1.93322e-08 | 1.000000 | 2.68081e-08 | 1.000000 |
| rad47     | 5.57605e-09 | 1.000000 | 7.73232e-09 | 1.000000 |
| rad14     | 5.10666e-09 | 1.000000 | 7.08142e-09 | 1.000000 |
| rad8      | 2.67192e-09 | 1.000000 | 3.70517e-09 | 1.000000 |
| rad5      | 4.62960e-10 | 1.000000 | 6.41988e-10 | 1.000000 |
| rad27     | 3.47341e-10 | 1.000000 | 4.81659e-10 | 1.000000 |

10000.0000 Pa, 2000.00000 K

=====

| Rate constant      | True (fraction)      | Effective (fraction) |
|--------------------|----------------------|----------------------|
| Total              | 1.44111e-11 (1.00 )  | 1.02141e-11 (1.00 )  |
| Formation of rad11 | 3.16882e-12 (0.220 ) | 1.44202e-12 (0.141 ) |
| Formation of rad6  | 4.53302e-12 (0.315 ) | 2.06283e-12 (0.202 ) |
| H-abstraction      | 6.70922e-12 (0.466 ) | 6.70922e-12 (0.657 ) |

| species            | PYtrue      | Cumul    | PYeffective | Cumul    |
|--------------------|-------------|----------|-------------|----------|
| Benzene+2-propynyl | 0.465560    | 0.465560 | 0.656860    | 0.656860 |
| Phenyl+Allene      | 0.291234    | 0.756794 | 0.000000    | 0.656860 |
| PhCH2CCH+H         | 0.0952414   | 0.852036 | 0.134377    | 0.791237 |
| PhCHCCH2+H         | 0.0574031   | 0.909439 | 0.0809906   | 0.872227 |
| C2H2+PhCH2         | 0.0297189   | 0.939158 | 0.0419307   | 0.914158 |
| PhCCH+CH3          | 0.0204294   | 0.959587 | 0.0288239   | 0.942982 |
| Indene+H           | 0.0203700   | 0.979957 | 0.0287402   | 0.971722 |
| PAH7+H             | 0.00647976  | 0.986437 | 0.00914234  | 0.980864 |
| Ph+MeAc            | 0.00410744  | 0.990544 | 0.00579519  | 0.986660 |
| rad6               | 0.00390781  | 0.994452 | 0.00551354  | 0.992173 |
| PhcycC3H3_A+H      | 0.00102183  | 0.995474 | 0.00144170  | 0.993615 |
| rad39              | 0.00101874  | 0.996493 | 0.00143735  | 0.995052 |
| rad19syn           | 0.000910856 | 0.997403 | 0.00128513  | 0.996337 |
| rad19anti          | 0.000492496 | 0.997896 | 0.000694865 | 0.997032 |
| rad54              | 0.000382637 | 0.998279 | 0.000539865 | 0.997572 |
| PAH9+H             | 0.000335294 | 0.998614 | 0.000473066 | 0.998045 |
| PhCCH3+H           | 0.000262320 | 0.998876 | 0.000370107 | 0.998415 |
| rad38              | 0.000201349 | 0.999077 | 0.000284083 | 0.998699 |
| rad50              | 0.000117539 | 0.999195 | 0.000165836 | 0.998865 |
| PAH1+H             | 9.70425e-05 | 0.999292 | 0.000136918 | 0.999002 |
| rad51              | 7.53042e-05 | 0.999367 | 0.000106247 | 0.999108 |
| rad46              | 6.80684e-05 | 0.999435 | 9.60380e-05 | 0.999204 |
| rad35              | 5.86345e-05 | 0.999494 | 8.27279e-05 | 0.999287 |
| rad71              | 5.34750e-05 | 0.999548 | 7.54482e-05 | 0.999363 |
| PAH10+CH3          | 4.06254e-05 | 0.999588 | 5.73184e-05 | 0.999420 |
| rad7               | 3.89492e-05 | 0.999627 | 5.49535e-05 | 0.999475 |
| rad55              | 3.49609e-05 | 0.999662 | 4.93264e-05 | 0.999524 |
| rad11              | 3.40758e-05 | 0.999696 | 4.80777e-05 | 0.999572 |
| rad70              | 3.35597e-05 | 0.999730 | 4.73495e-05 | 0.999620 |
| PAH3+H             | 3.13908e-05 | 0.999761 | 4.42894e-05 | 0.999664 |
| rad23              | 3.01586e-05 | 0.999791 | 4.25511e-05 | 0.999706 |
| rad67              | 2.86848e-05 | 0.999820 | 4.04716e-05 | 0.999747 |
| rad56              | 2.17002e-05 | 0.999842 | 3.06169e-05 | 0.999778 |
| rad30              | 1.82495e-05 | 0.999860 | 2.57483e-05 | 0.999803 |
| rad73              | 1.70223e-05 | 0.999877 | 2.40169e-05 | 0.999827 |
| rad53              | 1.66993e-05 | 0.999894 | 2.35610e-05 | 0.999851 |
| rad37              | 1.64323e-05 | 0.999910 | 2.31844e-05 | 0.999874 |
| rad52              | 1.44850e-05 | 0.999925 | 2.04370e-05 | 0.999894 |
| rad28              | 1.41077e-05 | 0.999939 | 1.99046e-05 | 0.999914 |
| rad72              | 1.00936e-05 | 0.999949 | 1.42411e-05 | 0.999929 |
| rad34              | 9.32752e-06 | 0.999958 | 1.31602e-05 | 0.999942 |
| rad9               | 6.07129e-06 | 0.999964 | 8.56597e-06 | 0.999950 |
| rad62              | 5.49019e-06 | 0.999970 | 7.74614e-06 | 0.999958 |
| PAH8+H             | 4.22929e-06 | 0.999974 | 5.96713e-06 | 0.999964 |
| rad13              | 3.69830e-06 | 0.999978 | 5.21796e-06 | 0.999969 |
| rad45              | 3.16626e-06 | 0.999981 | 4.46730e-06 | 0.999974 |

|           |             |          |             |          |
|-----------|-------------|----------|-------------|----------|
| rad59     | 2.80348e-06 | 0.999984 | 3.95544e-06 | 0.999978 |
| rad22     | 2.50398e-06 | 0.999986 | 3.53286e-06 | 0.999981 |
| rad64     | 2.19954e-06 | 0.999988 | 3.10334e-06 | 0.999984 |
| rad60syn  | 2.12286e-06 | 0.999990 | 2.99516e-06 | 0.999987 |
| rad65     | 1.51889e-06 | 0.999992 | 2.14300e-06 | 0.999989 |
| rad60anti | 1.46914e-06 | 0.999993 | 2.07281e-06 | 0.999992 |
| rad68syn  | 9.11263e-07 | 0.999994 | 1.28570e-06 | 0.999993 |
| rad42     | 8.19473e-07 | 0.999995 | 1.15620e-06 | 0.999994 |
| rad21     | 6.17716e-07 | 0.999996 | 8.71541e-07 | 0.999995 |
| rad68anti | 5.85479e-07 | 0.999996 | 8.26058e-07 | 0.999996 |
| rad36     | 5.49292e-07 | 0.999997 | 7.74995e-07 | 0.999996 |
| rad40syn  | 4.08457e-07 | 0.999997 | 5.76293e-07 | 0.999997 |
| rad58     | 3.77501e-07 | 0.999998 | 5.32618e-07 | 0.999998 |
| rad15     | 3.22139e-07 | 0.999998 | 4.54506e-07 | 0.999998 |
| rad40anti | 2.83969e-07 | 0.999998 | 4.00653e-07 | 0.999998 |
| rad26     | 2.27550e-07 | 0.999998 | 3.21051e-07 | 0.999999 |
| rad43     | 2.13487e-07 | 0.999999 | 3.01210e-07 | 0.999999 |
| rad33     | 1.85641e-07 | 0.999999 | 2.61922e-07 | 0.999999 |
| rad20     | 1.62084e-07 | 0.999999 | 2.28685e-07 | 1.000000 |
| rad61     | 1.27150e-07 | 0.999999 | 1.79396e-07 | 1.000000 |
| rad10     | 7.15102e-08 | 0.999999 | 1.00894e-07 | 1.000000 |
| rad18     | 6.02121e-08 | 0.999999 | 8.49539e-08 | 1.000000 |
| rad25     | 5.14929e-08 | 0.999999 | 7.26516e-08 | 1.000000 |
| rad12     | 3.45959e-08 | 0.999999 | 4.88116e-08 | 1.000000 |
| rad41     | 2.77121e-08 | 0.999999 | 3.90991e-08 | 1.000000 |
| rad24     | 2.41884e-08 | 0.999999 | 3.41275e-08 | 1.000000 |
| rad2      | 1.81154e-08 | 0.999999 | 2.55591e-08 | 1.000000 |
| rad3      | 1.18818e-08 | 0.999999 | 1.67641e-08 | 1.000000 |
| rad4      | 7.47735e-09 | 0.999999 | 1.05498e-08 | 1.000000 |
| rad1      | 5.10109e-09 | 0.999999 | 7.19715e-09 | 1.000000 |
| rad14     | 2.44809e-09 | 0.999999 | 3.45401e-09 | 1.000000 |
| rad47     | 2.36864e-09 | 0.999999 | 3.34193e-09 | 1.000000 |
| rad8      | 2.31270e-09 | 0.999999 | 3.26300e-09 | 1.000000 |
| rad5      | 3.60429e-10 | 0.999999 | 5.08533e-10 | 1.000000 |
| rad27     | 1.38108e-10 | 0.999999 | 1.94857e-10 | 1.000000 |

10000.0000 Pa, 2250.00000 K

| =====              |                 |          |                      |          |
|--------------------|-----------------|----------|----------------------|----------|
| Rate constant      | True (fraction) |          | Effective (fraction) |          |
| -----              |                 |          |                      |          |
| Total              | 2.23655e-11     | (1.00 )  | 1.57993e-11          | (1.00 )  |
| Formation of rad11 | 4.62280e-12     | (0.207 ) | 1.97134e-12          | (0.125 ) |
| Formation of rad6  | 6.82518e-12     | (0.305 ) | 2.91051e-12          | (0.184 ) |
| H-abstraction      | 1.09175e-11     | (0.488 ) | 1.09175e-11          | (0.691 ) |
| -----              |                 |          |                      |          |
| species            | PYtrue          | Cumul    | PYeffective          | Cumul    |
| Benzene+2-propynyl | 0.488140        | 0.488140 | 0.691009             | 0.691009 |
| Phenyl+Allene      | 0.293584        | 0.781724 | 0.000000             | 0.691009 |
| PhCH2CCH+H         | 0.0958744       | 0.877598 | 0.135720             | 0.826729 |
| PhCHCCH2+H         | 0.0526054       | 0.930204 | 0.0744680            | 0.901197 |
| C2H2+PhCH2         | 0.0226519       | 0.952856 | 0.0320658            | 0.933263 |
| PhCCH+CH3          | 0.0172500       | 0.970106 | 0.0244191            | 0.957682 |
| Indene+H           | 0.0136847       | 0.983790 | 0.0193721            | 0.977054 |
| PAH7+H             | 0.00598948      | 0.989780 | 0.00847870           | 0.985533 |
| Ph+MeAc            | 0.00370580      | 0.993486 | 0.00524592           | 0.990778 |
| PhcycC3H3_A+H      | 0.00121858      | 0.994704 | 0.00172503           | 0.992504 |
| rad19syn           | 0.00106200      | 0.995766 | 0.00150336           | 0.994007 |
| rad6               | 0.00101674      | 0.996783 | 0.00143929           | 0.995446 |
| rad39              | 0.000838032     | 0.997621 | 0.00118631           | 0.996632 |
| rad54              | 0.000469253     | 0.998090 | 0.000664271          | 0.997297 |
| rad19anti          | 0.000447896     | 0.998538 | 0.000634040          | 0.997931 |
| PAH9+H             | 0.000300803     | 0.998839 | 0.000425817          | 0.998357 |
| PhCCCH3+H          | 0.000201727     | 0.999041 | 0.000285564          | 0.998642 |
| rad38              | 0.000177274     | 0.999218 | 0.000250948          | 0.998893 |
| PAH1+H             | 0.000114066     | 0.999332 | 0.000161471          | 0.999055 |
| rad50              | 8.76765e-05     | 0.999420 | 0.000124115          | 0.999179 |
| rad46              | 5.93036e-05     | 0.999479 | 8.39497e-05          | 0.999263 |
| rad35              | 5.52942e-05     | 0.999534 | 7.82744e-05          | 0.999341 |
| rad51              | 4.77955e-05     | 0.999582 | 6.76591e-05          | 0.999409 |
| PAH10+CH3          | 4.59959e-05     | 0.999628 | 6.51117e-05          | 0.999474 |
| rad55              | 4.42107e-05     | 0.999672 | 6.25845e-05          | 0.999536 |
| rad70              | 4.18991e-05     | 0.999714 | 5.93123e-05          | 0.999596 |
| PAH3+H             | 3.69288e-05     | 0.999751 | 5.22763e-05          | 0.999648 |
| rad67              | 3.34193e-05     | 0.999785 | 4.73083e-05          | 0.999695 |
| rad56              | 2.72588e-05     | 0.999812 | 3.85874e-05          | 0.999734 |
| rad71              | 2.47321e-05     | 0.999837 | 3.50108e-05          | 0.999769 |
| rad53              | 2.17089e-05     | 0.999858 | 3.07311e-05          | 0.999800 |
| rad30              | 1.59879e-05     | 0.999874 | 2.26324e-05          | 0.999822 |
| rad37              | 1.56099e-05     | 0.999890 | 2.20973e-05          | 0.999844 |

|           |             |          |             |          |
|-----------|-------------|----------|-------------|----------|
| rad7      | 1.53060e-05 | 0.999905 | 2.16672e-05 | 0.999866 |
| rad34     | 1.24538e-05 | 0.999918 | 1.76295e-05 | 0.999884 |
| rad11     | 1.23005e-05 | 0.999930 | 1.74125e-05 | 0.999901 |
| rad52     | 1.01700e-05 | 0.999940 | 1.43966e-05 | 0.999915 |
| rad23     | 8.84110e-06 | 0.999949 | 1.25154e-05 | 0.999928 |
| rad73     | 8.17983e-06 | 0.999957 | 1.15793e-05 | 0.999939 |
| rad62     | 5.84872e-06 | 0.999963 | 8.27944e-06 | 0.999948 |
| PAH8+H    | 5.52404e-06 | 0.999969 | 7.81981e-06 | 0.999956 |
| rad72     | 4.51500e-06 | 0.999973 | 6.39141e-06 | 0.999962 |
| rad28     | 3.71896e-06 | 0.999977 | 5.26455e-06 | 0.999967 |
| rad59     | 3.19174e-06 | 0.999980 | 4.51822e-06 | 0.999972 |
| rad64     | 2.68826e-06 | 0.999983 | 3.80550e-06 | 0.999976 |
| rad9      | 2.68179e-06 | 0.999985 | 3.79632e-06 | 0.999979 |
| rad60syn  | 2.20623e-06 | 0.999988 | 3.12312e-06 | 0.999982 |
| rad13     | 1.64154e-06 | 0.999989 | 2.32376e-06 | 0.999985 |
| rad60anti | 1.54711e-06 | 0.999991 | 2.19009e-06 | 0.999987 |
| rad68syn  | 1.35196e-06 | 0.999992 | 1.91383e-06 | 0.999989 |
| rad45     | 1.32777e-06 | 0.999993 | 1.87960e-06 | 0.999991 |
| rad65     | 1.19018e-06 | 0.999995 | 1.68481e-06 | 0.999992 |
| rad68anti | 8.68247e-07 | 0.999995 | 1.22909e-06 | 0.999994 |
| rad42     | 8.35847e-07 | 0.999996 | 1.18322e-06 | 0.999995 |
| rad22     | 7.04181e-07 | 0.999997 | 9.96838e-07 | 0.999996 |
| rad40syn  | 5.76313e-07 | 0.999998 | 8.15825e-07 | 0.999997 |
| rad58     | 4.77225e-07 | 0.999998 | 6.75559e-07 | 0.999997 |
| rad40anti | 3.88872e-07 | 0.999998 | 5.50485e-07 | 0.999998 |
| rad21     | 2.84563e-07 | 0.999999 | 4.02825e-07 | 0.999998 |
| rad36     | 2.33558e-07 | 0.999999 | 3.30623e-07 | 0.999999 |
| rad43     | 2.29911e-07 | 0.999999 | 3.25463e-07 | 0.999999 |
| rad15     | 1.51664e-07 | 0.999999 | 2.14695e-07 | 0.999999 |
| rad61     | 1.38675e-07 | 1.000000 | 1.96308e-07 | 0.999999 |
| rad33     | 9.86850e-08 | 1.000000 | 1.39698e-07 | 0.999999 |
| rad26     | 7.74766e-08 | 1.000000 | 1.09676e-07 | 1.000000 |
| rad20     | 6.64798e-08 | 1.000000 | 9.41084e-08 | 1.000000 |
| rad41     | 2.97502e-08 | 1.000000 | 4.21142e-08 | 1.000000 |
| rad10     | 2.67152e-08 | 1.000000 | 3.78180e-08 | 1.000000 |
| rad25     | 2.59377e-08 | 1.000000 | 3.67174e-08 | 1.000000 |
| rad18     | 2.18404e-08 | 1.000000 | 3.09173e-08 | 1.000000 |
| rad12     | 2.13975e-08 | 1.000000 | 3.02903e-08 | 1.000000 |
| rad24     | 1.35148e-08 | 1.000000 | 1.91315e-08 | 1.000000 |
| rad2      | 5.53766e-09 | 1.000000 | 7.83909e-09 | 1.000000 |
| rad3      | 4.83845e-09 | 1.000000 | 6.84930e-09 | 1.000000 |
| rad4      | 2.99674e-09 | 1.000000 | 4.24219e-09 | 1.000000 |
| rad8      | 2.01867e-09 | 1.000000 | 2.85763e-09 | 1.000000 |
| rad1      | 1.54568e-09 | 1.000000 | 2.18806e-09 | 1.000000 |
| rad14     | 1.33900e-09 | 1.000000 | 1.89548e-09 | 1.000000 |
| rad47     | 1.30120e-09 | 1.000000 | 1.84197e-09 | 1.000000 |
| rad5      | 2.25363e-10 | 1.000000 | 3.19024e-10 | 1.000000 |
| rad27     | 6.66262e-11 | 1.000000 | 9.43157e-11 | 1.000000 |

10000.0000 Pa, 2500.00000 K

=====

| Rate constant      | True (fraction)      | Effective (fraction) |
|--------------------|----------------------|----------------------|
| Total              | 3.28090e-11 (1.00 )  | 2.31806e-11 (1.00 )  |
| Formation of rad11 | 6.43164e-12 (0.196 ) | 2.60215e-12 (0.112 ) |
| Formation of rad6  | 9.73932e-12 (0.297 ) | 3.94038e-12 (0.170 ) |
| H-abstraction      | 1.66381e-11 (0.507 ) | 1.66381e-11 (0.718 ) |

| species            | PYtrue      | Cumul    | PYeffective | Cumul    |
|--------------------|-------------|----------|-------------|----------|
| Benzene+2-propynyl | 0.507119    | 0.507119 | 0.717758    | 0.717758 |
| Phenyl+Allene      | 0.293469    | 0.800588 | 0.000000    | 0.717758 |
| PhCH2CCH+H         | 0.0940886   | 0.894676 | 0.133170    | 0.850928 |
| PhCHCCH2+H         | 0.0479919   | 0.942668 | 0.0679262   | 0.918855 |
| C2H2+PhCH2         | 0.0181993   | 0.960867 | 0.0257587   | 0.944613 |
| PhCCH+CH3          | 0.0147554   | 0.975623 | 0.0208844   | 0.965498 |
| Indene+H           | 0.00929151  | 0.984914 | 0.0131509   | 0.978649 |
| PAH7+H             | 0.00551017  | 0.990424 | 0.00779890  | 0.986448 |
| Ph+MeAc            | 0.00338657  | 0.993811 | 0.00479325  | 0.991241 |
| PhcycC3H3_A+H      | 0.00155996  | 0.995371 | 0.00220793  | 0.993449 |
| rad19syn           | 0.00125087  | 0.996622 | 0.00177044  | 0.995219 |
| rad39              | 0.000696333 | 0.997318 | 0.000985568 | 0.996205 |
| rad54              | 0.000564970 | 0.997883 | 0.000799641 | 0.997004 |
| rad19anti          | 0.000386672 | 0.998270 | 0.000547283 | 0.997552 |
| rad6               | 0.000330431 | 0.998600 | 0.000467683 | 0.998019 |
| PAH9+H             | 0.000270393 | 0.998871 | 0.000382705 | 0.998402 |
| rad38              | 0.000163582 | 0.999034 | 0.000231529 | 0.998634 |
| PhCCCH3+H          | 0.000162592 | 0.999197 | 0.000230127 | 0.998864 |
| PAH1+H             | 0.000135254 | 0.999332 | 0.000191433 | 0.999055 |
| rad50              | 8.30998e-05 | 0.999415 | 0.000117617 | 0.999173 |

|           |             |          |             |          |
|-----------|-------------|----------|-------------|----------|
| rad46     | 5.61515e-05 | 0.999471 | 7.94747e-05 | 0.999252 |
| rad55     | 5.53678e-05 | 0.999527 | 7.83661e-05 | 0.999331 |
| rad35     | 5.23608e-05 | 0.999579 | 7.41096e-05 | 0.999405 |
| PAH10+CH3 | 5.14051e-05 | 0.999630 | 7.27574e-05 | 0.999477 |
| rad70     | 4.97234e-05 | 0.999680 | 7.03767e-05 | 0.999548 |
| PAH3+H    | 4.37480e-05 | 0.999724 | 6.19193e-05 | 0.999610 |
| rad51     | 4.15052e-05 | 0.999765 | 5.87452e-05 | 0.999668 |
| rad56     | 3.89065e-05 | 0.999804 | 5.50670e-05 | 0.999724 |
| rad67     | 3.78072e-05 | 0.999842 | 5.35110e-05 | 0.999777 |
| rad53     | 3.03405e-05 | 0.999872 | 4.29428e-05 | 0.999820 |
| rad34     | 1.58379e-05 | 0.999888 | 2.24164e-05 | 0.999842 |
| rad30     | 1.42936e-05 | 0.999903 | 2.02307e-05 | 0.999863 |
| rad37     | 1.42012e-05 | 0.999917 | 2.01000e-05 | 0.999883 |
| rad71     | 1.34339e-05 | 0.999930 | 1.90139e-05 | 0.999902 |
| rad52     | 9.40950e-06 | 0.999940 | 1.33179e-05 | 0.999915 |
| PAH8+H    | 8.85935e-06 | 0.999949 | 1.25392e-05 | 0.999928 |
| rad7      | 6.64759e-06 | 0.999955 | 9.40878e-06 | 0.999937 |
| rad62     | 6.23761e-06 | 0.999961 | 8.82855e-06 | 0.999946 |
| rad11     | 4.93803e-06 | 0.999966 | 6.98915e-06 | 0.999953 |
| rad73     | 4.92995e-06 | 0.999971 | 6.97772e-06 | 0.999960 |
| rad59     | 3.63473e-06 | 0.999975 | 5.14447e-06 | 0.999965 |
| rad64     | 3.36655e-06 | 0.999978 | 4.76492e-06 | 0.999970 |
| rad23     | 2.90875e-06 | 0.999981 | 4.11695e-06 | 0.999974 |
| rad60syn  | 2.30123e-06 | 0.999983 | 3.25710e-06 | 0.999977 |
| rad72     | 2.17285e-06 | 0.999986 | 3.07539e-06 | 0.999980 |
| rad68syn  | 2.04933e-06 | 0.999988 | 2.90054e-06 | 0.999983 |
| rad60anti | 1.63418e-06 | 0.999989 | 2.31296e-06 | 0.999985 |
| rad68anti | 1.31390e-06 | 0.999991 | 1.85965e-06 | 0.999987 |
| rad28     | 1.18275e-06 | 0.999992 | 1.67403e-06 | 0.999989 |
| rad9      | 1.16305e-06 | 0.999993 | 1.64615e-06 | 0.999991 |
| rad65     | 1.05552e-06 | 0.999994 | 1.49395e-06 | 0.999992 |
| rad40syn  | 9.08982e-07 | 0.999995 | 1.28654e-06 | 0.999993 |
| rad42     | 8.66530e-07 | 0.999996 | 1.22646e-06 | 0.999995 |
| rad13     | 7.73839e-07 | 0.999997 | 1.09526e-06 | 0.999996 |
| rad58     | 6.35975e-07 | 0.999997 | 9.00136e-07 | 0.999997 |
| rad40anti | 6.16649e-07 | 0.999998 | 8.72784e-07 | 0.999997 |
| rad45     | 5.75971e-07 | 0.999998 | 8.15210e-07 | 0.999998 |
| rad43     | 2.56478e-07 | 0.999999 | 3.63011e-07 | 0.999999 |
| rad22     | 2.44455e-07 | 0.999999 | 3.45994e-07 | 0.999999 |
| rad61     | 1.74808e-07 | 0.999999 | 2.47418e-07 | 0.999999 |
| rad21     | 1.39522e-07 | 0.999999 | 1.97475e-07 | 0.999999 |
| rad36     | 1.02572e-07 | 0.999999 | 1.45177e-07 | 1.000000 |
| rad15     | 7.12539e-08 | 0.999999 | 1.00850e-07 | 1.000000 |
| rad33     | 5.45541e-08 | 0.999999 | 7.72140e-08 | 1.000000 |
| rad41     | 3.45140e-08 | 1.000000 | 4.88498e-08 | 1.000000 |
| rad26     | 3.09424e-08 | 1.000000 | 4.37949e-08 | 1.000000 |
| rad20     | 3.03426e-08 | 1.000000 | 4.29459e-08 | 1.000000 |
| rad25     | 1.37749e-08 | 1.000000 | 1.94965e-08 | 1.000000 |
| rad12     | 1.28538e-08 | 1.000000 | 1.81929e-08 | 1.000000 |
| rad10     | 1.13515e-08 | 1.000000 | 1.60666e-08 | 1.000000 |
| rad18     | 9.07597e-09 | 1.000000 | 1.28459e-08 | 1.000000 |
| rad24     | 7.74888e-09 | 1.000000 | 1.09675e-08 | 1.000000 |
| rad3      | 2.15199e-09 | 1.000000 | 3.04587e-09 | 1.000000 |
| rad2      | 1.96899e-09 | 1.000000 | 2.78685e-09 | 1.000000 |
| rad8      | 1.76388e-09 | 1.000000 | 2.49655e-09 | 1.000000 |
| rad4      | 1.30918e-09 | 1.000000 | 1.85297e-09 | 1.000000 |
| rad47     | 1.00362e-09 | 1.000000 | 1.42050e-09 | 1.000000 |
| rad14     | 7.81133e-10 | 1.000000 | 1.10559e-09 | 1.000000 |
| rad1      | 5.34870e-10 | 1.000000 | 7.57034e-10 | 1.000000 |
| rad5      | 1.52556e-10 | 1.000000 | 2.15923e-10 | 1.000000 |
| rad27     | 3.63385e-11 | 1.000000 | 5.14323e-11 | 1.000000 |

10000.0000 Pa, 2750.00000 K

=====

| Rate constant      | True (fraction)      | Effective (fraction) |
|--------------------|----------------------|----------------------|
| Total              | 4.60596e-11 (1.00 )  | 3.26199e-11 (1.00 )  |
| Formation of rad11 | 8.62280e-12 (0.187 ) | 3.34415e-12 (0.103 ) |
| Formation of rad6  | 1.33313e-11 (0.289 ) | 5.17023e-12 (0.158 ) |
| H-abstraction      | 2.41055e-11 (0.523 ) | 2.41055e-11 (0.739 ) |

  

| species            | PYtrue     | Cumul    | PYeffective | Cumul    |
|--------------------|------------|----------|-------------|----------|
| Benzene+2-propynyl | 0.523355   | 0.523355 | 0.738982    | 0.738982 |
| Phenyl+Allene      | 0.291790   | 0.815145 | 0.000000    | 0.738982 |
| PhCH2CCH+H         | 0.0912881  | 0.906433 | 0.128899    | 0.867882 |
| PhCHCCH2+H         | 0.0440298  | 0.950462 | 0.0621705   | 0.930052 |
| C2H2+PhCH2         | 0.0154894  | 0.965952 | 0.0218713   | 0.951923 |
| PhCCH+CH3          | 0.0128301  | 0.978782 | 0.0181162   | 0.970040 |
| Indene+H           | 0.00645611 | 0.985238 | 0.00911610  | 0.979156 |

|               |             |          |             |          |
|---------------|-------------|----------|-------------|----------|
| PAH7+H        | 0.00505992  | 0.990298 | 0.00714468  | 0.986300 |
| Ph+MeAc       | 0.00314802  | 0.993446 | 0.00444503  | 0.990745 |
| PhcycC3H3_A+H | 0.00199862  | 0.995445 | 0.00282207  | 0.993568 |
| rad19syn      | 0.00144448  | 0.996889 | 0.00203962  | 0.995607 |
| rad54         | 0.000654639 | 0.997544 | 0.000924361 | 0.996531 |
| rad39         | 0.000586417 | 0.998130 | 0.000828027 | 0.997360 |
| rad19anti     | 0.000326429 | 0.998457 | 0.000460921 | 0.997820 |
| PAH9+H        | 0.000242912 | 0.998699 | 0.000342993 | 0.998163 |
| PAH1+H        | 0.000160405 | 0.998860 | 0.000226494 | 0.998390 |
| rad38         | 0.000151609 | 0.999012 | 0.000214074 | 0.998604 |
| PhCCCH3+H     | 0.000136350 | 0.999148 | 0.000192527 | 0.998797 |
| rad6          | 0.000122903 | 0.999271 | 0.000173540 | 0.998970 |
| rad50         | 8.75526e-05 | 0.999358 | 0.000123625 | 0.999094 |
| rad55         | 6.67270e-05 | 0.999425 | 9.42193e-05 | 0.999188 |
| rad56         | 5.68981e-05 | 0.999482 | 8.03405e-05 | 0.999268 |
| rad70         | 5.65559e-05 | 0.999538 | 7.98571e-05 | 0.999348 |
| PAH10+CH3     | 5.53314e-05 | 0.999594 | 7.81281e-05 | 0.999426 |
| rad46         | 5.40702e-05 | 0.999648 | 7.63477e-05 | 0.999503 |
| PAH3+H        | 5.09958e-05 | 0.999699 | 7.20065e-05 | 0.999575 |
| rad35         | 4.94825e-05 | 0.999748 | 6.98700e-05 | 0.999644 |
| rad51         | 4.43911e-05 | 0.999793 | 6.26806e-05 | 0.999707 |
| rad53         | 4.20824e-05 | 0.999835 | 5.94207e-05 | 0.999767 |
| rad67         | 4.10244e-05 | 0.999876 | 5.79269e-05 | 0.999824 |
| rad34         | 1.91827e-05 | 0.999895 | 2.70861e-05 | 0.999852 |
| PAH8+H        | 1.44643e-05 | 0.999910 | 2.04238e-05 | 0.999872 |
| rad30         | 1.30000e-05 | 0.999923 | 1.83562e-05 | 0.999890 |
| rad37         | 1.25045e-05 | 0.999935 | 1.76565e-05 | 0.999908 |
| rad71         | 1.06668e-05 | 0.999946 | 1.50617e-05 | 0.999923 |
| rad52         | 1.00441e-05 | 0.999956 | 1.41823e-05 | 0.999937 |
| rad62         | 7.17556e-06 | 0.999963 | 1.01320e-05 | 0.999947 |
| rad73         | 4.42119e-06 | 0.999967 | 6.24276e-06 | 0.999954 |
| rad64         | 4.18343e-06 | 0.999972 | 5.90704e-06 | 0.999960 |
| rad59         | 4.07777e-06 | 0.999976 | 5.75784e-06 | 0.999965 |
| rad7          | 3.11900e-06 | 0.999979 | 4.40405e-06 | 0.999970 |
| rad68syn      | 2.95915e-06 | 0.999982 | 4.17835e-06 | 0.999974 |
| rad60syn      | 2.39064e-06 | 0.999984 | 3.37561e-06 | 0.999977 |
| rad11         | 2.17959e-06 | 0.999986 | 3.07761e-06 | 0.999980 |
| rad68anti     | 1.89392e-06 | 0.999988 | 2.67423e-06 | 0.999983 |
| rad60anti     | 1.71669e-06 | 0.999990 | 2.42399e-06 | 0.999985 |
| rad40syn      | 1.40669e-06 | 0.999991 | 1.98626e-06 | 0.999987 |
| rad72         | 1.37867e-06 | 0.999993 | 1.94669e-06 | 0.999989 |
| rad65         | 1.09885e-06 | 0.999994 | 1.55159e-06 | 0.999991 |
| rad23         | 1.09643e-06 | 0.999995 | 1.54818e-06 | 0.999992 |
| rad42         | 1.06256e-06 | 0.999996 | 1.50034e-06 | 0.999994 |
| rad40anti     | 9.73791e-07 | 0.999997 | 1.37500e-06 | 0.999995 |
| rad58         | 8.34639e-07 | 0.999998 | 1.17852e-06 | 0.999997 |
| rad9          | 5.15106e-07 | 0.999998 | 7.27334e-07 | 0.999997 |
| rad28         | 4.38136e-07 | 0.999999 | 6.18651e-07 | 0.999998 |
| rad13         | 3.89621e-07 | 0.999999 | 5.50150e-07 | 0.999998 |
| rad43         | 2.94718e-07 | 0.999999 | 4.16146e-07 | 0.999999 |
| rad45         | 2.61782e-07 | 1.000000 | 3.69638e-07 | 0.999999 |
| rad61         | 2.24295e-07 | 1.000000 | 3.16706e-07 | 1.000000 |
| rad22         | 9.73052e-08 | 1.000000 | 1.37396e-07 | 1.000000 |
| rad21         | 7.34253e-08 | 1.000000 | 1.03677e-07 | 1.000000 |
| rad36         | 4.71362e-08 | 1.000000 | 6.65569e-08 | 1.000000 |
| rad41         | 4.39162e-08 | 1.000000 | 6.20103e-08 | 1.000000 |
| rad15         | 3.41424e-08 | 1.000000 | 4.82095e-08 | 1.000000 |
| rad33         | 3.15708e-08 | 1.000000 | 4.45782e-08 | 1.000000 |
| rad20         | 1.55374e-08 | 1.000000 | 2.19389e-08 | 1.000000 |
| rad26         | 1.33957e-08 | 1.000000 | 1.89149e-08 | 1.000000 |
| rad25         | 7.77404e-09 | 1.000000 | 1.09770e-08 | 1.000000 |
| rad12         | 7.77180e-09 | 1.000000 | 1.09739e-08 | 1.000000 |
| rad10         | 5.21379e-09 | 1.000000 | 7.36190e-09 | 1.000000 |
| rad24         | 4.60456e-09 | 1.000000 | 6.50169e-09 | 1.000000 |
| rad18         | 4.22127e-09 | 1.000000 | 5.96047e-09 | 1.000000 |
| rad8          | 1.54830e-09 | 1.000000 | 2.18621e-09 | 1.000000 |
| rad3          | 1.04415e-09 | 1.000000 | 1.47435e-09 | 1.000000 |
| rad47         | 1.00304e-09 | 1.000000 | 1.41630e-09 | 1.000000 |
| rad2          | 7.98252e-10 | 1.000000 | 1.12714e-09 | 1.000000 |
| rad4          | 6.25955e-10 | 1.000000 | 8.83851e-10 | 1.000000 |
| rad14         | 4.86626e-10 | 1.000000 | 6.87124e-10 | 1.000000 |
| rad1          | 2.08148e-10 | 1.000000 | 2.93909e-10 | 1.000000 |
| rad5          | 1.08006e-10 | 1.000000 | 1.52505e-10 | 1.000000 |
| rad27         | 2.19808e-11 | 1.000000 | 3.10371e-11 | 1.000000 |

10000.0000 Pa, 3000.00000 K

| Rate constant | True (fraction)     | Effective (fraction) |
|---------------|---------------------|----------------------|
| Total         | 6.24269e-11 (1.00 ) | 4.43900e-11 (1.00 )  |

|                    |                      |                       |
|--------------------|----------------------|-----------------------|
| Formation of rad11 | 1.12221e-11 (0.180 ) | 4.21224e-12 (0.0949 ) |
| Formation of rad6  | 1.76534e-11 (0.283 ) | 6.62628e-12 (0.149 )  |
| H-abstraction      | 3.35514e-11 (0.537 ) | 3.35514e-11 (0.756 )  |

| species            | PYtrue      | Cumul    | PYeffective | Cumul    |
|--------------------|-------------|----------|-------------|----------|
| Benzene+2-propynyl | 0.537451    | 0.537451 | 0.755834    | 0.755834 |
| Phenyl+Allene      | 0.288929    | 0.826381 | 0.00000     | 0.755834 |
| PhCH2CCH+H         | 0.0882705   | 0.914651 | 0.124138    | 0.879971 |
| PhCHCCH2+H         | 0.0407929   | 0.955444 | 0.0573683   | 0.937340 |
| C2H2+PhCH2         | 0.0138563   | 0.969300 | 0.0194866   | 0.956826 |
| PhCCH+CH3          | 0.0113467   | 0.980647 | 0.0159572   | 0.972783 |
| PAH7+H             | 0.00465033  | 0.985297 | 0.00653987  | 0.979323 |
| Indene+H           | 0.00461749  | 0.989915 | 0.00649372  | 0.985817 |
| Ph+MeAc            | 0.00297509  | 0.992890 | 0.00418396  | 0.990001 |
| PhcycC3H3_A+H      | 0.00246672  | 0.995357 | 0.00346902  | 0.993470 |
| rad19syn           | 0.00161780  | 0.996974 | 0.00227515  | 0.995745 |
| rad54              | 0.000728496 | 0.997703 | 0.00102450  | 0.996770 |
| rad39              | 0.000501777 | 0.998205 | 0.000705665 | 0.997475 |
| rad19anti          | 0.000274573 | 0.998479 | 0.000386139 | 0.997861 |
| PAH9+H             | 0.000216190 | 0.998695 | 0.000304033 | 0.998165 |
| PAH1+H             | 0.000185924 | 0.998881 | 0.000261470 | 0.998427 |
| rad38              | 0.000138839 | 0.999020 | 0.000195253 | 0.998622 |
| PhCCCH3+H          | 0.000117957 | 0.999138 | 0.000165886 | 0.998788 |
| rad50              | 9.33530e-05 | 0.999231 | 0.000131285 | 0.998919 |
| rad56              | 7.87882e-05 | 0.999310 | 0.000110803 | 0.999030 |
| rad55              | 7.68811e-05 | 0.999387 | 0.000108120 | 0.999138 |
| rad70              | 6.22433e-05 | 0.999449 | 8.75348e-05 | 0.999226 |
| PAH3+H             | 5.80031e-05 | 0.999507 | 8.15715e-05 | 0.999307 |
| PAH10+CH3          | 5.74569e-05 | 0.999565 | 8.08036e-05 | 0.999388 |
| rad53              | 5.52806e-05 | 0.999620 | 7.77425e-05 | 0.999466 |
| rad46              | 5.14909e-05 | 0.999672 | 7.24134e-05 | 0.999538 |
| rad6               | 5.08475e-05 | 0.999722 | 7.15087e-05 | 0.999610 |
| rad51              | 5.01764e-05 | 0.999773 | 7.05648e-05 | 0.999680 |
| rad35              | 4.64579e-05 | 0.999819 | 6.53350e-05 | 0.999746 |
| rad67              | 4.30413e-05 | 0.999862 | 6.05303e-05 | 0.999806 |
| rad34              | 2.22981e-05 | 0.999884 | 3.13585e-05 | 0.999838 |
| PAH8+H             | 2.21433e-05 | 0.999907 | 3.11407e-05 | 0.999869 |
| rad71              | 1.21477e-05 | 0.999919 | 1.70837e-05 | 0.999886 |
| rad30              | 1.19599e-05 | 0.999931 | 1.68196e-05 | 0.999903 |
| rad52              | 1.09871e-05 | 0.999942 | 1.54515e-05 | 0.999918 |
| rad37              | 1.08158e-05 | 0.999952 | 1.52106e-05 | 0.999933 |
| rad62              | 8.61201e-06 | 0.999961 | 1.21113e-05 | 0.999945 |
| rad73              | 5.23309e-06 | 0.999966 | 7.35946e-06 | 0.999953 |
| rad64              | 5.01097e-06 | 0.999971 | 7.04708e-06 | 0.999960 |
| rad59              | 4.48176e-06 | 0.999976 | 6.30283e-06 | 0.999966 |
| rad68syn           | 4.01447e-06 | 0.999980 | 5.64566e-06 | 0.999972 |
| rad68anti          | 2.56560e-06 | 0.999982 | 3.60809e-06 | 0.999975 |
| rad60syn           | 2.46200e-06 | 0.999985 | 3.46240e-06 | 0.999979 |
| rad40syn           | 2.04038e-06 | 0.999987 | 2.86944e-06 | 0.999982 |
| rad60anti          | 1.78496e-06 | 0.999989 | 2.51025e-06 | 0.999984 |
| rad7               | 1.58128e-06 | 0.999990 | 2.22381e-06 | 0.999986 |
| rad40anti          | 1.44198e-06 | 0.999992 | 2.02790e-06 | 0.999989 |
| rad42              | 1.40191e-06 | 0.999993 | 1.97155e-06 | 0.999990 |
| rad72              | 1.36083e-06 | 0.999994 | 1.91378e-06 | 0.999992 |
| rad65              | 1.20824e-06 | 0.999996 | 1.69918e-06 | 0.999994 |
| rad11              | 1.05789e-06 | 0.999997 | 1.48774e-06 | 0.999996 |
| rad58              | 1.05349e-06 | 0.999998 | 1.48155e-06 | 0.999997 |
| rad23              | 4.53864e-07 | 0.999998 | 6.38282e-07 | 0.999998 |
| rad43              | 3.37840e-07 | 0.999999 | 4.75116e-07 | 0.999998 |
| rad61              | 2.76182e-07 | 0.999999 | 3.88403e-07 | 0.999999 |
| rad9               | 2.38889e-07 | 0.999999 | 3.35958e-07 | 0.999999 |
| rad13              | 2.10692e-07 | 0.999999 | 2.96303e-07 | 0.999999 |
| rad28              | 1.80766e-07 | 0.999999 | 2.54216e-07 | 0.999999 |
| rad45              | 1.25694e-07 | 1.000000 | 1.76768e-07 | 1.000000 |
| rad41              | 5.62663e-08 | 1.000000 | 7.91287e-08 | 1.000000 |
| rad22              | 4.31834e-08 | 1.000000 | 6.07300e-08 | 1.000000 |
| rad21              | 4.15292e-08 | 1.000000 | 5.84038e-08 | 1.000000 |
| rad36              | 2.28487e-08 | 1.000000 | 3.21328e-08 | 1.000000 |
| rad33              | 1.91846e-08 | 1.000000 | 2.69799e-08 | 1.000000 |
| rad15              | 1.70306e-08 | 1.000000 | 2.39506e-08 | 1.000000 |
| rad20              | 8.90050e-09 | 1.000000 | 1.25170e-08 | 1.000000 |
| rad26              | 6.17031e-09 | 1.000000 | 8.67752e-09 | 1.000000 |
| rad12              | 4.82568e-09 | 1.000000 | 6.78648e-09 | 1.000000 |
| rad25              | 4.66994e-09 | 1.000000 | 6.56746e-09 | 1.000000 |
| rad24              | 2.84583e-09 | 1.000000 | 4.00218e-09 | 1.000000 |
| rad10              | 2.56764e-09 | 1.000000 | 3.61095e-09 | 1.000000 |
| rad18              | 2.17448e-09 | 1.000000 | 3.05804e-09 | 1.000000 |
| rad8               | 1.36542e-09 | 1.000000 | 1.92023e-09 | 1.000000 |
| rad47              | 1.09048e-09 | 1.000000 | 1.53358e-09 | 1.000000 |



|       |             |          |             |          |
|-------|-------------|----------|-------------|----------|
| rad3  | 5.52644e-10 | 1.000000 | 7.77196e-10 | 1.000000 |
| rad2  | 3.66509e-10 | 1.000000 | 5.15432e-10 | 1.000000 |
| rad4  | 3.29148e-10 | 1.000000 | 4.62890e-10 | 1.000000 |
| rad14 | 3.26097e-10 | 1.000000 | 4.58600e-10 | 1.000000 |
| rad1  | 9.12525e-11 | 1.000000 | 1.28331e-10 | 1.000000 |
| rad5  | 7.88303e-11 | 1.000000 | 1.10861e-10 | 1.000000 |
| rad27 | 1.44391e-11 | 1.000000 | 2.03061e-11 | 1.000000 |

10000.0000 Pa, 3250.00000 K

| Rate constant      | True (fraction)      | Effective (fraction)  |
|--------------------|----------------------|-----------------------|
| Total              | 8.22129e-11 (1.00 )  | 5.87539e-11 (1.00 )   |
| Formation of rad11 | 1.42538e-11 (0.173 ) | 5.21862e-12 (0.0888 ) |
| Formation of rad6  | 2.27549e-11 (0.277 ) | 8.33103e-12 (0.142 )  |
| H-abstraction      | 4.52043e-11 (0.550 ) | 4.52043e-11 (0.769 )  |

| species            | PYtrue      | Cumul    | PYeffective | Cumul    |
|--------------------|-------------|----------|-------------|----------|
| Benzene+2-propynyl | 0.549844    | 0.549844 | 0.769383    | 0.769383 |
| Phenyl+Allene      | 0.285344    | 0.835188 | 0.000000    | 0.769383 |
| PhCH2CCH+H         | 0.0853595   | 0.920548 | 0.119442    | 0.888825 |
| PhCHCCH2+H         | 0.0381781   | 0.958726 | 0.0534217   | 0.942246 |
| C2H2+PhCH2         | 0.0128659   | 0.971592 | 0.0180030   | 0.960249 |
| PhCCH+CH3          | 0.0101888   | 0.981781 | 0.0142569   | 0.974506 |
| PAH7+H             | 0.00428147  | 0.986062 | 0.00599094  | 0.980497 |
| Indene+H           | 0.00340051  | 0.989463 | 0.00475825  | 0.985255 |
| PhcycC3H3_A+H      | 0.00292473  | 0.992387 | 0.00409250  | 0.989348 |
| Ph+MeAc            | 0.00285164  | 0.995239 | 0.00399022  | 0.993338 |
| rad19syn           | 0.00176129  | 0.997000 | 0.00246451  | 0.995803 |
| rad54              | 0.000783668 | 0.997784 | 0.00109656  | 0.996899 |
| rad39              | 0.000435830 | 0.998220 | 0.000609845 | 0.997509 |
| rad19anti          | 0.000232310 | 0.998452 | 0.000325066 | 0.997834 |
| PAH1+H             | 0.000210626 | 0.998663 | 0.000294724 | 0.998129 |
| PAH9+H             | 0.000190046 | 0.998853 | 0.000265927 | 0.998395 |
| rad38              | 0.000125166 | 0.998978 | 0.000175142 | 0.998570 |
| PhCCCH3+H          | 0.000104462 | 0.999082 | 0.000146171 | 0.998716 |
| rad56              | 0.000102644 | 0.999185 | 0.000143627 | 0.998860 |
| rad50              | 9.74462e-05 | 0.999283 | 0.000136354 | 0.998996 |
| rad55              | 8.52249e-05 | 0.999368 | 0.000119253 | 0.999115 |
| rad53              | 6.87618e-05 | 0.999437 | 9.62168e-05 | 0.999212 |
| rad70              | 6.67942e-05 | 0.999503 | 9.34632e-05 | 0.999305 |
| PAH3+H             | 6.43800e-05 | 0.999568 | 9.00852e-05 | 0.999395 |
| PAH10+CH3          | 5.80791e-05 | 0.999626 | 8.12689e-05 | 0.999476 |
| rad51              | 5.58995e-05 | 0.999682 | 7.82190e-05 | 0.999555 |
| rad46              | 4.81442e-05 | 0.999730 | 6.73666e-05 | 0.999622 |
| rad67              | 4.40772e-05 | 0.999774 | 6.16762e-05 | 0.999684 |
| rad35              | 4.33412e-05 | 0.999817 | 6.06462e-05 | 0.999744 |
| PAH8+H             | 3.16594e-05 | 0.999849 | 4.43001e-05 | 0.999789 |
| rad34              | 2.50860e-05 | 0.999874 | 3.51022e-05 | 0.999824 |
| rad6               | 2.31844e-05 | 0.999897 | 3.24413e-05 | 0.999856 |
| rad71              | 1.58405e-05 | 0.999913 | 2.21653e-05 | 0.999878 |
| rad52              | 1.17659e-05 | 0.999925 | 1.64637e-05 | 0.999895 |
| rad30              | 1.10746e-05 | 0.999936 | 1.54963e-05 | 0.999910 |
| rad62              | 1.07103e-05 | 0.999947 | 1.49867e-05 | 0.999925 |
| rad37              | 9.28496e-06 | 0.999956 | 1.29922e-05 | 0.999938 |
| rad73              | 6.66127e-06 | 0.999963 | 9.32096e-06 | 0.999948 |
| rad64              | 5.78482e-06 | 0.999968 | 8.09458e-06 | 0.999956 |
| rad68syn           | 5.15757e-06 | 0.999973 | 7.21685e-06 | 0.999963 |
| rad59              | 4.82653e-06 | 0.999978 | 6.75364e-06 | 0.999970 |
| rad68anti          | 3.29223e-06 | 0.999982 | 4.60673e-06 | 0.999974 |
| rad40syn           | 2.78127e-06 | 0.999984 | 3.89177e-06 | 0.999978 |
| rad60syn           | 2.50952e-06 | 0.999987 | 3.51151e-06 | 0.999982 |
| rad40anti          | 2.00224e-06 | 0.999989 | 2.80167e-06 | 0.999984 |
| rad42              | 1.91563e-06 | 0.999991 | 2.68048e-06 | 0.999987 |
| rad60anti          | 1.83445e-06 | 0.999993 | 2.56690e-06 | 0.999990 |
| rad72              | 1.78442e-06 | 0.999994 | 2.49689e-06 | 0.999992 |
| rad65              | 1.31422e-06 | 0.999996 | 1.83896e-06 | 0.999994 |
| rad58              | 1.27821e-06 | 0.999997 | 1.78857e-06 | 0.999996 |
| rad7               | 8.61716e-07 | 0.999998 | 1.20578e-06 | 0.999997 |
| rad11              | 5.60939e-07 | 0.999998 | 7.84911e-07 | 0.999998 |
| rad43              | 3.85770e-07 | 0.999999 | 5.39798e-07 | 0.999998 |
| rad61              | 3.24785e-07 | 0.999999 | 4.54463e-07 | 0.999999 |
| rad23              | 2.03079e-07 | 0.999999 | 2.84164e-07 | 0.999999 |
| rad13              | 1.21945e-07 | 0.999999 | 1.70634e-07 | 0.999999 |
| rad9               | 1.17375e-07 | 1.000000 | 1.64241e-07 | 0.999999 |
| rad28              | 8.18244e-08 | 1.000000 | 1.14495e-07 | 1.000000 |
| rad41              | 7.13227e-08 | 1.000000 | 9.97999e-08 | 1.000000 |
| rad45              | 6.37389e-08 | 1.000000 | 8.91883e-08 | 1.000000 |
| rad21              | 2.50850e-08 | 1.000000 | 3.51008e-08 | 1.000000 |

|       |             |          |             |          |
|-------|-------------|----------|-------------|----------|
| rad22 | 2.11142e-08 | 1.000000 | 2.95446e-08 | 1.000000 |
| rad33 | 1.21967e-08 | 1.000000 | 1.70665e-08 | 1.000000 |
| rad36 | 1.16776e-08 | 1.000000 | 1.63402e-08 | 1.000000 |
| rad15 | 8.93123e-09 | 1.000000 | 1.24973e-08 | 1.000000 |
| rad20 | 5.61646e-09 | 1.000000 | 7.85896e-09 | 1.000000 |
| rad12 | 3.10238e-09 | 1.000000 | 4.34109e-09 | 1.000000 |
| rad26 | 3.01888e-09 | 1.000000 | 4.22425e-09 | 1.000000 |
| rad25 | 2.96946e-09 | 1.000000 | 4.15509e-09 | 1.000000 |
| rad24 | 1.82591e-09 | 1.000000 | 2.55496e-09 | 1.000000 |
| rad10 | 1.34780e-09 | 1.000000 | 1.88594e-09 | 1.000000 |
| rad18 | 1.22194e-09 | 1.000000 | 1.70983e-09 | 1.000000 |
| rad8  | 1.20703e-09 | 1.000000 | 1.68896e-09 | 1.000000 |
| rad47 | 1.18056e-09 | 1.000000 | 1.65193e-09 | 1.000000 |
| rad3  | 3.16231e-10 | 1.000000 | 4.42494e-10 | 1.000000 |
| rad14 | 2.36957e-10 | 1.000000 | 3.31567e-10 | 1.000000 |
| rad4  | 1.89157e-10 | 1.000000 | 2.64684e-10 | 1.000000 |
| rad2  | 1.87461e-10 | 1.000000 | 2.62308e-10 | 1.000000 |
| rad5  | 5.92905e-11 | 1.000000 | 8.29637e-11 | 1.000000 |
| rad1  | 4.47733e-11 | 1.000000 | 6.26503e-11 | 1.000000 |
| rad27 | 1.01216e-11 | 1.000000 | 1.41629e-11 | 1.000000 |

10000.0000 Pa, 3500.00000 K

| Rate constant      | True (fraction) |          | Effective (fraction) |           |
|--------------------|-----------------|----------|----------------------|-----------|
| Total              | 1.05713e-10     | (1.00 )  | 7.59658e-11          | (1.00 )   |
| Formation of rad11 | 1.77412e-11     | (0.168 ) | 6.37293e-12          | (0.0839 ) |
| Formation of rad6  | 2.86822e-11     | (0.271 ) | 1.03031e-11          | (0.136 )  |
| H-abstraction      | 5.92897e-11     | (0.561 ) | 5.92897e-11          | (0.780 )  |

  

| species            | PYtrue      | Cumul    | PYeffective | Cumul    |
|--------------------|-------------|----------|-------------|----------|
| Benzene+2-propynyl | 0.560855    | 0.560855 | 0.780479    | 0.780479 |
| Phenyl+Allene      | 0.281397    | 0.842252 | 0.00000     | 0.780479 |
| PhCH2CCH+H         | 0.0826608   | 0.924913 | 0.115030    | 0.895509 |
| PhCHCCH2+H         | 0.0360567   | 0.960969 | 0.0501762   | 0.945685 |
| C2H2+PhCH2         | 0.0122591   | 0.973229 | 0.0170596   | 0.962745 |
| PhCCH+CH3          | 0.00926957  | 0.982498 | 0.0128994   | 0.975644 |
| PAH7+H             | 0.00394965  | 0.986448 | 0.00549629  | 0.981141 |
| PhcycC3H3_A+H      | 0.00334989  | 0.989798 | 0.00466167  | 0.985802 |
| Ph+MeAc            | 0.00276388  | 0.992562 | 0.00384620  | 0.989648 |
| Indene+H           | 0.00257425  | 0.995136 | 0.00358231  | 0.993231 |
| rad19syn           | 0.00187281  | 0.997009 | 0.00260619  | 0.995837 |
| rad54              | 0.000820565 | 0.997829 | 0.00114189  | 0.996979 |
| rad39              | 0.000383352 | 0.998212 | 0.000533470 | 0.997512 |
| PAH1+H             | 0.000234735 | 0.998447 | 0.000326655 | 0.997839 |
| PAH19anti          | 0.000198524 | 0.998646 | 0.000276264 | 0.998115 |
| PAH9+H             | 0.000165151 | 0.998811 | 0.000229823 | 0.998345 |
| rad56              | 0.000126936 | 0.998938 | 0.000176642 | 0.998522 |
| rad38              | 0.000111189 | 0.999049 | 0.000154730 | 0.998676 |
| rad50              | 9.89531e-05 | 0.999148 | 0.000137702 | 0.998814 |
| PhCCCH3+H          | 9.42336e-05 | 0.999242 | 0.000131134 | 0.998945 |
| rad55              | 9.15882e-05 | 0.999334 | 0.000127453 | 0.999073 |
| rad53              | 8.17091e-05 | 0.999416 | 0.000113705 | 0.999186 |
| rad70              | 7.02734e-05 | 0.999486 | 9.77916e-05 | 0.999284 |
| PAH3+H             | 6.99339e-05 | 0.999556 | 9.73189e-05 | 0.999382 |
| rad51              | 6.02854e-05 | 0.999616 | 8.38924e-05 | 0.999465 |
| PAH10+CH3          | 5.76220e-05 | 0.999674 | 8.01862e-05 | 0.999546 |
| rad67              | 4.43743e-05 | 0.999718 | 6.17507e-05 | 0.999607 |
| rad46              | 4.42162e-05 | 0.999762 | 6.15307e-05 | 0.999669 |
| PAH8+H             | 4.27176e-05 | 0.999805 | 5.94453e-05 | 0.999728 |
| rad35              | 4.02629e-05 | 0.999845 | 5.60293e-05 | 0.999784 |
| rad34              | 2.74981e-05 | 0.999873 | 3.82662e-05 | 0.999823 |
| rad71              | 2.06686e-05 | 0.999893 | 2.87622e-05 | 0.999851 |
| rad62              | 1.37309e-05 | 0.999907 | 1.91078e-05 | 0.999871 |
| rad52              | 1.22128e-05 | 0.999919 | 1.69952e-05 | 0.999888 |
| rad6               | 1.15440e-05 | 0.999931 | 1.60645e-05 | 0.999904 |
| rad30              | 1.02900e-05 | 0.999941 | 1.43194e-05 | 0.999918 |
| rad73              | 8.32382e-06 | 0.999949 | 1.15834e-05 | 0.999930 |
| rad37              | 7.96193e-06 | 0.999957 | 1.10797e-05 | 0.999941 |
| rad64              | 6.47959e-06 | 0.999964 | 9.01694e-06 | 0.999950 |
| rad68syn           | 6.33805e-06 | 0.999970 | 8.81996e-06 | 0.999958 |
| rad59              | 5.10506e-06 | 0.999975 | 7.10419e-06 | 0.999966 |
| rad68anti          | 4.04181e-06 | 0.999979 | 5.62453e-06 | 0.999971 |
| rad40syn           | 3.60059e-06 | 0.999983 | 5.01053e-06 | 0.999976 |
| rad42              | 2.66862e-06 | 0.999986 | 3.71363e-06 | 0.999980 |
| rad40anti          | 2.63450e-06 | 0.999988 | 3.66615e-06 | 0.999984 |
| rad60syn           | 2.53256e-06 | 0.999991 | 3.52427e-06 | 0.999987 |
| rad72              | 2.49402e-06 | 0.999993 | 3.47064e-06 | 0.999991 |
| rad60anti          | 1.86457e-06 | 0.999995 | 2.59471e-06 | 0.999993 |

|       |             |          |             |          |
|-------|-------------|----------|-------------|----------|
| rad58 | 1.49875e-06 | 0.999997 | 2.08564e-06 | 0.999995 |
| rad65 | 1.38880e-06 | 0.999998 | 1.93264e-06 | 0.999997 |
| rad7  | 5.00187e-07 | 0.999999 | 6.96054e-07 | 0.999998 |
| rad43 | 4.42781e-07 | 0.999999 | 6.16170e-07 | 0.999998 |
| rad61 | 3.67656e-07 | 0.999999 | 5.11626e-07 | 0.999999 |
| rad11 | 3.21468e-07 | 1.000000 | 4.47350e-07 | 0.999999 |
| rad23 | 9.74130e-08 | 1.000000 | 1.35559e-07 | 1.000000 |
| rad41 | 9.00033e-08 | 1.000000 | 1.25248e-07 | 1.000000 |
| rad13 | 7.49731e-08 | 1.000000 | 1.04332e-07 | 1.000000 |
| rad9  | 6.12924e-08 | 1.000000 | 8.52940e-08 | 1.000000 |
| rad28 | 4.02532e-08 | 1.000000 | 5.60159e-08 | 1.000000 |
| rad45 | 3.39776e-08 | 1.000000 | 4.72830e-08 | 1.000000 |
| rad21 | 1.60379e-08 | 1.000000 | 2.23182e-08 | 1.000000 |
| rad22 | 1.12484e-08 | 1.000000 | 1.56531e-08 | 1.000000 |
| rad33 | 8.06526e-09 | 1.000000 | 1.12235e-08 | 1.000000 |
| rad36 | 6.26314e-09 | 1.000000 | 8.71573e-09 | 1.000000 |
| rad15 | 4.93582e-09 | 1.000000 | 6.86862e-09 | 1.000000 |
| rad20 | 3.82958e-09 | 1.000000 | 5.32919e-09 | 1.000000 |
| rad12 | 2.06838e-09 | 1.000000 | 2.87833e-09 | 1.000000 |
| rad25 | 1.98266e-09 | 1.000000 | 2.75904e-09 | 1.000000 |
| rad26 | 1.56638e-09 | 1.000000 | 2.17976e-09 | 1.000000 |
| rad47 | 1.24180e-09 | 1.000000 | 1.72807e-09 | 1.000000 |
| rad24 | 1.21180e-09 | 1.000000 | 1.68633e-09 | 1.000000 |
| rad8  | 1.06686e-09 | 1.000000 | 1.48463e-09 | 1.000000 |
| rad10 | 7.49024e-10 | 1.000000 | 1.04233e-09 | 1.000000 |
| rad18 | 7.37176e-10 | 1.000000 | 1.02585e-09 | 1.000000 |
| rad3  | 1.93340e-10 | 1.000000 | 2.69051e-10 | 1.000000 |
| rad14 | 1.87697e-10 | 1.000000 | 2.61197e-10 | 1.000000 |
| rad4  | 1.17406e-10 | 1.000000 | 1.63380e-10 | 1.000000 |
| rad2  | 1.04710e-10 | 1.000000 | 1.45713e-10 | 1.000000 |
| rad5  | 4.59588e-11 | 1.000000 | 6.39560e-11 | 1.000000 |
| rad1  | 2.42756e-11 | 1.000000 | 3.37816e-11 | 1.000000 |
| rad27 | 7.51127e-12 | 1.000000 | 1.04526e-11 | 1.000000 |

10000.0000 Pa, 3750.00000 K

| Rate constant      | True (fraction)      | Effective (fraction)  |
|--------------------|----------------------|-----------------------|
| Total              | 1.33217e-10 (1.00 )  | 9.62719e-11 (1.00 )   |
| Formation of rad11 | 2.17064e-11 (0.163 ) | 7.68308e-12 (0.0798 ) |
| Formation of rad6  | 3.54800e-11 (0.266 ) | 1.25583e-11 (0.130 )  |
| H-abstraction      | 7.60305e-11 (0.571 ) | 7.60305e-11 (0.790 )  |

| species            | PYtrue      | Cumul    | PYeffective | Cumul    |
|--------------------|-------------|----------|-------------|----------|
| Benzene+2-propynyl | 0.570727    | 0.570727 | 0.789748    | 0.789748 |
| Phenyl+Allene      | 0.277330    | 0.848057 | 0.000000    | 0.789748 |
| PhCH2CCH+H         | 0.0801929   | 0.928250 | 0.110967    | 0.900715 |
| PhCHCCH2+H         | 0.0343181   | 0.962568 | 0.0474879   | 0.948203 |
| C2H2+PhCH2         | 0.0118840   | 0.974452 | 0.0164446   | 0.964648 |
| PhCCH+CH3          | 0.00852793  | 0.982980 | 0.0118006   | 0.976448 |
| PhcycC3H3_A+H      | 0.00372931  | 0.986709 | 0.00516047  | 0.981609 |
| PAH7+H             | 0.00365054  | 0.990360 | 0.00505145  | 0.986660 |
| Ph+MeAc            | 0.00270109  | 0.993061 | 0.00373765  | 0.990398 |
| Indene+H           | 0.00199890  | 0.995060 | 0.00276599  | 0.993164 |
| rad19syn           | 0.00195371  | 0.997014 | 0.00270346  | 0.995867 |
| rad54              | 0.000841023 | 0.997855 | 0.00116377  | 0.997031 |
| rad39              | 0.000340606 | 0.998195 | 0.000471316 | 0.997502 |
| PAH1+H             | 0.000258998 | 0.998454 | 0.000358389 | 0.997861 |
| rad19anti          | 0.000171576 | 0.998626 | 0.000237419 | 0.998098 |
| rad56              | 0.000150447 | 0.998776 | 0.000208182 | 0.998306 |
| PAH9+H             | 0.000142200 | 0.998918 | 0.000196771 | 0.998503 |
| rad50              | 9.79643e-05 | 0.999016 | 0.000135559 | 0.998639 |
| rad38              | 9.75630e-05 | 0.999114 | 0.000135003 | 0.998774 |
| rad55              | 9.60232e-05 | 0.999210 | 0.000132872 | 0.998907 |
| rad53              | 9.35561e-05 | 0.999304 | 0.000129459 | 0.999036 |
| PhCCCH3+H          | 8.63439e-05 | 0.999390 | 0.000119479 | 0.999156 |
| PAH3+H             | 7.46059e-05 | 0.999465 | 0.000103236 | 0.999259 |
| rad70              | 7.27725e-05 | 0.999537 | 0.000100700 | 0.999360 |
| rad51              | 6.29138e-05 | 0.999600 | 8.70576e-05 | 0.999447 |
| PAH10+CH3          | 5.64592e-05 | 0.999657 | 7.81259e-05 | 0.999525 |
| PAH8+H             | 5.49705e-05 | 0.999712 | 7.60656e-05 | 0.999601 |
| rad67              | 4.41344e-05 | 0.999756 | 6.10713e-05 | 0.999662 |
| rad46              | 3.99997e-05 | 0.999796 | 5.53499e-05 | 0.999717 |
| rad35              | 3.73344e-05 | 0.999833 | 5.16617e-05 | 0.999769 |
| rad34              | 2.95165e-05 | 0.999863 | 4.08438e-05 | 0.999810 |
| rad71              | 2.59482e-05 | 0.999889 | 3.59060e-05 | 0.999846 |
| rad62              | 1.78863e-05 | 0.999906 | 2.47502e-05 | 0.999870 |
| rad52              | 1.23064e-05 | 0.999919 | 1.70291e-05 | 0.999887 |
| rad73              | 9.98853e-06 | 0.999929 | 1.38217e-05 | 0.999901 |

|           |             |          |             |          |
|-----------|-------------|----------|-------------|----------|
| rad30     | 9.57995e-06 | 0.999938 | 1.32563e-05 | 0.999914 |
| rad68syn  | 7.51245e-06 | 0.999946 | 1.03954e-05 | 0.999925 |
| rad64     | 7.08854e-06 | 0.999953 | 9.80878e-06 | 0.999935 |
| rad37     | 6.84609e-06 | 0.999960 | 9.47330e-06 | 0.999944 |
| rad6      | 6.21102e-06 | 0.999966 | 8.59456e-06 | 0.999953 |
| rad59     | 5.31878e-06 | 0.999971 | 7.35989e-06 | 0.999960 |
| rad68anti | 4.78682e-06 | 0.999976 | 6.62380e-06 | 0.999967 |
| rad40syn  | 4.46993e-06 | 0.999981 | 6.18528e-06 | 0.999973 |
| rad42     | 3.72551e-06 | 0.999984 | 5.15519e-06 | 0.999978 |
| rad72     | 3.39455e-06 | 0.999988 | 4.69724e-06 | 0.999983 |
| rad40anti | 3.31793e-06 | 0.999991 | 4.59121e-06 | 0.999987 |
| rad60syn  | 2.53361e-06 | 0.999994 | 3.50589e-06 | 0.999991 |
| rad60anti | 1.87706e-06 | 0.999995 | 2.59739e-06 | 0.999993 |
| rad58     | 1.70833e-06 | 0.999997 | 2.36393e-06 | 0.999996 |
| rad65     | 1.42532e-06 | 0.999999 | 1.97230e-06 | 0.999998 |
| rad43     | 5.13878e-07 | 0.999999 | 7.11083e-07 | 0.999998 |
| rad61     | 4.04053e-07 | 0.999999 | 5.59111e-07 | 0.999999 |
| rad7      | 3.06319e-07 | 1.000000 | 4.23870e-07 | 0.999999 |
| rad11     | 1.96842e-07 | 1.000000 | 2.72381e-07 | 1.000000 |
| rad41     | 1.13611e-07 | 1.000000 | 1.57210e-07 | 1.000000 |
| rad23     | 4.97514e-08 | 1.000000 | 6.88439e-08 | 1.000000 |
| rad13     | 4.85649e-08 | 1.000000 | 6.72018e-08 | 1.000000 |
| rad9      | 3.39580e-08 | 1.000000 | 4.69896e-08 | 1.000000 |
| rad28     | 2.13164e-08 | 1.000000 | 2.94967e-08 | 1.000000 |
| rad45     | 1.89314e-08 | 1.000000 | 2.61966e-08 | 1.000000 |
| rad21     | 1.07590e-08 | 1.000000 | 1.48879e-08 | 1.000000 |
| rad22     | 6.45523e-09 | 1.000000 | 8.93249e-09 | 1.000000 |
| rad33     | 5.51555e-09 | 1.000000 | 7.63219e-09 | 1.000000 |
| rad36     | 3.50487e-09 | 1.000000 | 4.84988e-09 | 1.000000 |
| rad15     | 2.86912e-09 | 1.000000 | 3.97017e-09 | 1.000000 |
| rad20     | 2.77263e-09 | 1.000000 | 3.83666e-09 | 1.000000 |
| rad12     | 1.42770e-09 | 1.000000 | 1.97558e-09 | 1.000000 |
| rad25     | 1.37906e-09 | 1.000000 | 1.90828e-09 | 1.000000 |
| rad47     | 1.26635e-09 | 1.000000 | 1.75232e-09 | 1.000000 |
| rad8      | 9.41052e-10 | 1.000000 | 1.30219e-09 | 1.000000 |
| rad26     | 8.58996e-10 | 1.000000 | 1.18864e-09 | 1.000000 |
| rad24     | 8.28973e-10 | 1.000000 | 1.14709e-09 | 1.000000 |
| rad18     | 4.70981e-10 | 1.000000 | 6.51722e-10 | 1.000000 |
| rad10     | 4.37897e-10 | 1.000000 | 6.05942e-10 | 1.000000 |
| rad14     | 1.61285e-10 | 1.000000 | 2.23178e-10 | 1.000000 |
| rad3      | 1.24939e-10 | 1.000000 | 1.72885e-10 | 1.000000 |
| rad4      | 7.77082e-11 | 1.000000 | 1.07529e-10 | 1.000000 |
| rad2      | 6.28035e-11 | 1.000000 | 8.69049e-11 | 1.000000 |
| rad5      | 3.66531e-11 | 1.000000 | 5.07189e-11 | 1.000000 |
| rad1      | 1.43372e-11 | 1.000000 | 1.98391e-11 | 1.000000 |
| rad27     | 5.89027e-12 | 1.000000 | 8.15071e-12 | 1.000000 |

10000.0000 Pa, 4000.00000 K

| =====              |                 |          |                      |           |
|--------------------|-----------------|----------|----------------------|-----------|
| Rate constant      | True (fraction) |          | Effective (fraction) |           |
| -----              |                 |          |                      |           |
| Total              | 1.65008e-10     | (1.00 )  | 1.19913e-10          | (1.00 )   |
| Formation of rad11 | 2.61707e-11     | (0.159 ) | 9.15582e-12          | (0.0764 ) |
| Formation of rad6  | 4.31906e-11     | (0.262 ) | 1.51102e-11          | (0.126 )  |
| H-abstraction      | 9.56470e-11     | (0.580 ) | 9.56470e-11          | (0.798 )  |
| -----              |                 |          |                      |           |
| species            | PYtrue          | Cumul    | PYeffective          | Cumul     |
| -----              |                 |          |                      |           |
| Benzene+2-propynyl | 0.579650        | 0.579650 | 0.797636             | 0.797636  |
| Phenyl+Allene      | 0.273291        | 0.852940 | 0.000000             | 0.797636  |
| PhCH2CCH+H         | 0.0779426       | 0.930883 | 0.107255             | 0.904891  |
| PhCHCCH2+H         | 0.0328765       | 0.963760 | 0.0452402            | 0.950131  |
| C2H2+PhCH2         | 0.0116510       | 0.975411 | 0.0160326            | 0.966164  |
| PhCCH+CH3          | 0.00792117      | 0.983332 | 0.0109001            | 0.977064  |
| PhcycC3H3_A+H      | 0.00405667      | 0.987388 | 0.00558224           | 0.982646  |
| PAH7+H             | 0.00338041      | 0.990769 | 0.00465167           | 0.987298  |
| Ph+MeAc            | 0.00265532      | 0.993424 | 0.00365390           | 0.990952  |
| rad19syn           | 0.00200701      | 0.995431 | 0.00276180           | 0.993713  |
| Indene+H           | 0.00158876      | 0.997020 | 0.00218624           | 0.995900  |
| rad54              | 0.000847443     | 0.997867 | 0.00116614           | 0.997066  |
| rad39              | 0.000305044     | 0.998172 | 0.000419761          | 0.997485  |
| PAH1+H             | 0.000284154     | 0.998457 | 0.000391015          | 0.997877  |
| rad56              | 0.000172252     | 0.998629 | 0.000237031          | 0.998114  |
| rad19anti          | 0.000149963     | 0.998779 | 0.000206358          | 0.998320  |
| PAH9+H             | 0.000121659     | 0.998900 | 0.000167411          | 0.998487  |
| rad53              | 0.000103939     | 0.999004 | 0.000143027          | 0.998630  |
| rad55              | 9.87012e-05     | 0.999103 | 0.000135820          | 0.998766  |
| rad50              | 9.49635e-05     | 0.999198 | 0.000130676          | 0.998897  |
| rad38              | 8.47952e-05     | 0.999283 | 0.000116684          | 0.999014  |
| PhCCCH3+H          | 8.02209e-05     | 0.999363 | 0.000110389          | 0.999124  |

|           |             |          |             |          |
|-----------|-------------|----------|-------------|----------|
| PAH3+H    | 7.84218e-05 | 0.999441 | 0.000107914 | 0.999232 |
| rad70     | 7.43974e-05 | 0.999516 | 0.000102376 | 0.999334 |
| PAH8+H    | 6.80358e-05 | 0.999584 | 9.36218e-05 | 0.999428 |
| rad51     | 6.38134e-05 | 0.999648 | 8.78115e-05 | 0.999516 |
| PAH10+CH3 | 5.48746e-05 | 0.999703 | 7.55114e-05 | 0.999591 |
| rad67     | 4.35143e-05 | 0.999746 | 5.98788e-05 | 0.999651 |
| rad46     | 3.57619e-05 | 0.999782 | 4.92108e-05 | 0.999700 |
| rad35     | 3.46287e-05 | 0.999816 | 4.76514e-05 | 0.999748 |
| rad71     | 3.11974e-05 | 0.999848 | 4.29299e-05 | 0.999791 |
| rad34     | 3.11447e-05 | 0.999879 | 4.28572e-05 | 0.999834 |
| rad62     | 2.32448e-05 | 0.999902 | 3.19864e-05 | 0.999866 |
| rad52     | 1.20931e-05 | 0.999914 | 1.66410e-05 | 0.999882 |
| rad73     | 1.15101e-05 | 0.999926 | 1.58387e-05 | 0.999898 |
| rad30     | 8.93253e-06 | 0.999935 | 1.22918e-05 | 0.999910 |
| rad68syn  | 8.64467e-06 | 0.999943 | 1.18957e-05 | 0.999922 |
| rad64     | 7.61351e-06 | 0.999951 | 1.04767e-05 | 0.999933 |
| rad37     | 5.91618e-06 | 0.999957 | 8.14107e-06 | 0.999941 |
| rad68anti | 5.50449e-06 | 0.999962 | 7.57452e-06 | 0.999949 |
| rad59     | 5.47376e-06 | 0.999968 | 7.53228e-06 | 0.999956 |
| rad40syn  | 5.36207e-06 | 0.999973 | 7.37857e-06 | 0.999963 |
| rad42     | 5.12289e-06 | 0.999978 | 7.04946e-06 | 0.999970 |
| rad72     | 4.40998e-06 | 0.999983 | 6.06840e-06 | 0.999977 |
| rad40anti | 4.03157e-06 | 0.999987 | 5.54770e-06 | 0.999982 |
| rad6      | 3.57370e-06 | 0.999990 | 4.91766e-06 | 0.999987 |
| rad60syn  | 2.51660e-06 | 0.999993 | 3.46303e-06 | 0.999990 |
| rad58     | 1.90276e-06 | 0.999995 | 2.61832e-06 | 0.999993 |
| rad60anti | 1.87481e-06 | 0.999997 | 2.57987e-06 | 0.999996 |
| rad65     | 1.42720e-06 | 0.999998 | 1.96393e-06 | 0.999998 |
| rad43     | 6.01912e-07 | 0.999999 | 8.28273e-07 | 0.999998 |
| rad61     | 4.34096e-07 | 0.999999 | 5.97345e-07 | 0.999999 |
| rad7      | 1.96283e-07 | 0.999999 | 2.70099e-07 | 0.999999 |
| rad41     | 1.43071e-07 | 0.999999 | 1.96875e-07 | 1.000000 |
| rad11     | 1.27458e-07 | 0.999999 | 1.75390e-07 | 1.000000 |
| rad13     | 3.29015e-08 | 1.000000 | 4.52746e-08 | 1.000000 |
| rad23     | 2.68962e-08 | 1.000000 | 3.70109e-08 | 1.000000 |
| rad9      | 1.98790e-08 | 1.000000 | 2.73549e-08 | 1.000000 |
| rad28     | 1.20383e-08 | 1.000000 | 1.65656e-08 | 1.000000 |
| rad45     | 1.09673e-08 | 1.000000 | 1.50917e-08 | 1.000000 |
| rad21     | 7.51725e-09 | 1.000000 | 1.03442e-08 | 1.000000 |
| rad22     | 3.94874e-09 | 1.000000 | 5.43373e-09 | 1.000000 |
| rad33     | 3.88193e-09 | 1.000000 | 5.34180e-09 | 1.000000 |
| rad20     | 2.10230e-09 | 1.000000 | 2.89291e-09 | 1.000000 |
| rad36     | 2.03573e-09 | 1.000000 | 2.80130e-09 | 1.000000 |
| rad15     | 1.74753e-09 | 1.000000 | 2.40471e-09 | 1.000000 |
| rad47     | 1.25689e-09 | 1.000000 | 1.72957e-09 | 1.000000 |
| rad12     | 1.01722e-09 | 1.000000 | 1.39977e-09 | 1.000000 |
| rad25     | 9.92498e-10 | 1.000000 | 1.36574e-09 | 1.000000 |
| rad8      | 8.27531e-10 | 1.000000 | 1.13874e-09 | 1.000000 |
| rad24     | 5.82854e-10 | 1.000000 | 8.02044e-10 | 1.000000 |
| rad26     | 4.95723e-10 | 1.000000 | 6.82150e-10 | 1.000000 |
| rad18     | 3.15357e-10 | 1.000000 | 4.33953e-10 | 1.000000 |
| rad10     | 2.67874e-10 | 1.000000 | 3.68614e-10 | 1.000000 |
| rad14     | 1.47809e-10 | 1.000000 | 2.03396e-10 | 1.000000 |
| rad3      | 8.45943e-11 | 1.000000 | 1.16408e-10 | 1.000000 |
| rad4      | 5.42307e-11 | 1.000000 | 7.46251e-11 | 1.000000 |
| rad2      | 3.99572e-11 | 1.000000 | 5.49838e-11 | 1.000000 |
| rad5      | 2.99849e-11 | 1.000000 | 4.12612e-11 | 1.000000 |
| rad1      | 9.09979e-12 | 1.000000 | 1.25219e-11 | 1.000000 |
| rad27     | 4.87043e-12 | 1.000000 | 6.70202e-12 | 1.000000 |

1000.00000 Pa, 20.0000000 K

=====

| Rate constant      | True (fraction)        | Effective (fraction)   |
|--------------------|------------------------|------------------------|
| Total              | 1.56740e-51 (1.00 )    | 1.56740e-51 (1.00 )    |
| Formation of rad11 | 1.56740e-51 (1.000 )   | 1.56740e-51 (1.000 )   |
| Formation of rad6  | 3.73945e-60 (2.39e-09) | 3.73945e-60 (2.39e-09) |
| H-abstraction      | 1.53631e-76 (9.80e-26) | 1.53631e-76 (9.80e-26) |

| species  | PYtrue      | Cumul    | PYeffective | Cumul    |
|----------|-------------|----------|-------------|----------|
| rad11    | 0.975987    | 0.975987 | 0.975987    | 0.975987 |
| rad6     | 0.0228310   | 0.998818 | 0.0228310   | 0.998818 |
| rad22    | 0.000585682 | 0.999404 | 0.000585682 | 0.999404 |
| rad20    | 0.000175760 | 0.999579 | 0.000175760 | 0.999579 |
| rad18    | 0.000135750 | 0.999715 | 0.000135750 | 0.999715 |
| rad21    | 0.000127704 | 0.999843 | 0.000127704 | 0.999843 |
| Indene+H | 7.42004e-05 | 0.999917 | 7.42004e-05 | 0.999917 |
| rad45    | 7.00164e-05 | 0.999987 | 7.00164e-05 | 0.999987 |
| rad23    | 5.37325e-06 | 0.999992 | 5.37325e-06 | 0.999992 |

|                    |             |          |             |          |
|--------------------|-------------|----------|-------------|----------|
| rad36              | 4.37425e-06 | 0.999997 | 4.37425e-06 | 0.999997 |
| C2H2+PhCH2         | 2.70280e-06 | 1.000000 | 2.70280e-06 | 1.000000 |
| rad25              | 4.66431e-07 | 1.000000 | 4.66431e-07 | 1.000000 |
| rad7               | 3.10224e-07 | 1.000000 | 3.10224e-07 | 1.000000 |
| rad13              | 1.50011e-07 | 1.000000 | 1.50011e-07 | 1.000000 |
| PhCHCCH2+H         | 2.80749e-08 | 1.000000 | 2.80749e-08 | 1.000000 |
| rad9               | 1.45530e-09 | 1.000000 | 1.45530e-09 | 1.000000 |
| rad33              | 2.72578e-10 | 1.000000 | 2.72578e-10 | 1.000000 |
| rad3               | 1.30005e-10 | 1.000000 | 1.30005e-10 | 1.000000 |
| rad4               | 6.62024e-11 | 1.000000 | 6.62024e-11 | 1.000000 |
| rad30              | 2.89414e-11 | 1.000000 | 2.89414e-11 | 1.000000 |
| rad24              | 1.82003e-11 | 1.000000 | 1.82003e-11 | 1.000000 |
| Phenyl+Allene      | 1.77598e-11 | 1.000000 | 0.000000    | 1.000000 |
| rad15              | 4.41655e-12 | 1.000000 | 4.41655e-12 | 1.000000 |
| rad28              | 4.37069e-12 | 1.000000 | 4.37069e-12 | 1.000000 |
| rad2               | 2.44158e-13 | 1.000000 | 2.44158e-13 | 1.000000 |
| rad8               | 2.25558e-14 | 1.000000 | 2.25558e-14 | 1.000000 |
| rad1               | 1.57174e-14 | 1.000000 | 1.57174e-14 | 1.000000 |
| rad38              | 1.28946e-14 | 1.000000 | 1.28946e-14 | 1.000000 |
| PhCCH+CH3          | 1.10132e-15 | 1.000000 | 1.10132e-15 | 1.000000 |
| PAH9+H             | 2.60569e-16 | 1.000000 | 2.60569e-16 | 1.000000 |
| rad35              | 1.50613e-16 | 1.000000 | 1.50613e-16 | 1.000000 |
| rad14              | 9.22574e-17 | 1.000000 | 9.22574e-17 | 1.000000 |
| PhCH2CCH+H         | 6.31266e-17 | 1.000000 | 6.31266e-17 | 1.000000 |
| rad60syn           | 5.68389e-17 | 1.000000 | 5.68389e-17 | 1.000000 |
| rad46              | 5.67907e-17 | 1.000000 | 5.67907e-17 | 1.000000 |
| rad10              | 3.34100e-17 | 1.000000 | 3.34100e-17 | 1.000000 |
| rad60anti          | 4.24078e-18 | 1.000000 | 4.24078e-18 | 1.000000 |
| rad31              | 4.29941e-20 | 1.000000 | 4.29941e-20 | 1.000000 |
| PAH7+H             | 3.54491e-20 | 1.000000 | 3.54491e-20 | 1.000000 |
| rad27              | 3.39776e-20 | 1.000000 | 3.39776e-20 | 1.000000 |
| Ph+MeAc            | 2.86296e-20 | 1.000000 | 2.86296e-20 | 1.000000 |
| PhCCCH3+H          | 1.09287e-20 | 1.000000 | 1.09287e-20 | 1.000000 |
| rad39              | 7.15463e-23 | 1.000000 | 7.15463e-23 | 1.000000 |
| rad26              | 5.15390e-23 | 1.000000 | 5.15390e-23 | 1.000000 |
| PAH3+H             | 1.24580e-24 | 1.000000 | 1.24580e-24 | 1.000000 |
| rad59              | 6.08189e-25 | 1.000000 | 6.08189e-25 | 1.000000 |
| Benzene+2-propynyl | 9.80165e-26 | 1.000000 | 9.80165e-26 | 1.000000 |
| rad50              | 1.07718e-27 | 1.000000 | 1.07718e-27 | 1.000000 |
| rad5               | 3.61975e-31 | 1.000000 | 3.61975e-31 | 1.000000 |
| rad12              | 2.05145e-32 | 1.000000 | 2.05145e-32 | 1.000000 |
| rad19syn           | 2.70797e-34 | 1.000000 | 2.70797e-34 | 1.000000 |
| rad37              | 1.99237e-34 | 1.000000 | 1.99237e-34 | 1.000000 |
| rad52              | 7.50232e-36 | 1.000000 | 7.50232e-36 | 1.000000 |
| rad54              | 4.93920e-37 | 1.000000 | 4.93920e-37 | 1.000000 |
| rad70              | 3.55761e-40 | 1.000000 | 3.55761e-40 | 1.000000 |
| rad51              | 1.44238e-40 | 1.000000 | 1.44238e-40 | 1.000000 |
| rad62              | 5.16595e-41 | 1.000000 | 5.16595e-41 | 1.000000 |
| rad43              | 4.85247e-42 | 1.000000 | 4.85247e-42 | 1.000000 |
| PhcycC3H3_A+H      | 1.13977e-43 | 1.000000 | 1.13977e-43 | 1.000000 |
| rad58              | 1.11062e-43 | 1.000000 | 1.11062e-43 | 1.000000 |
| rad55              | 1.07010e-43 | 1.000000 | 1.07010e-43 | 1.000000 |
| rad65              | 3.83717e-45 | 1.000000 | 3.83717e-45 | 1.000000 |
| PAH10+CH3          | 1.72329e-45 | 1.000000 | 1.72329e-45 | 1.000000 |
| rad34              | 5.84626e-46 | 1.000000 | 5.84626e-46 | 1.000000 |
| rad47              | 2.98227e-48 | 1.000000 | 2.98227e-48 | 1.000000 |
| PAH1+H             | 8.52121e-50 | 1.000000 | 8.52121e-50 | 1.000000 |
| rad42              | 2.96640e-52 | 1.000000 | 2.96640e-52 | 1.000000 |
| rad41              | 1.19316e-54 | 1.000000 | 1.19316e-54 | 1.000000 |

1000.00000 Pa, 30.0000000 K

=====

| Rate constant      | True (fraction)        | Effective (fraction)   |
|--------------------|------------------------|------------------------|
| Total              | 5.03204e-39 (1.00 )    | 5.03204e-39 (1.00 )    |
| Formation of rad11 | 5.03203e-39 (1.000 )   | 5.03203e-39 (1.000 )   |
| Formation of rad6  | 9.92181e-45 (1.97e-06) | 9.92181e-45 (1.97e-06) |
| H-abstraction      | 3.33191e-55 (6.62e-17) | 3.33191e-55 (6.62e-17) |

| species  | PYtrue      | Cumul    | PYeffective | Cumul    |
|----------|-------------|----------|-------------|----------|
| rad11    | 0.952152    | 0.952152 | 0.952152    | 0.952152 |
| rad6     | 0.0454859   | 0.997638 | 0.0454859   | 0.997638 |
| rad22    | 0.00134955  | 0.998987 | 0.00134955  | 0.998987 |
| Indene+H | 0.000330344 | 0.999318 | 0.000330344 | 0.999318 |
| rad18    | 0.000230158 | 0.999548 | 0.000230158 | 0.999548 |
| rad45    | 0.000162203 | 0.999710 | 0.000162203 | 0.999710 |
| rad20    | 0.000143149 | 0.999853 | 0.000143149 | 0.999853 |
| rad21    | 9.86871e-05 | 0.999952 | 9.86871e-05 | 0.999952 |
| rad23    | 2.68646e-05 | 0.999979 | 2.68646e-05 | 0.999979 |

|                    |             |          |             |          |
|--------------------|-------------|----------|-------------|----------|
| rad36              | 1.01157e-05 | 0.999989 | 1.01157e-05 | 0.999989 |
| C2H2+PhCH2         | 8.14984e-06 | 0.999997 | 8.14984e-06 | 0.999997 |
| rad7               | 1.22269e-06 | 0.999998 | 1.22269e-06 | 0.999998 |
| rad25              | 8.99317e-07 | 0.999999 | 8.99317e-07 | 0.999999 |
| rad13              | 2.46852e-07 | 0.999999 | 2.46852e-07 | 0.999999 |
| PhCHCCH2+H         | 5.74607e-08 | 1.000000 | 5.74607e-08 | 1.000000 |
| rad9               | 2.99650e-09 | 1.000000 | 2.99650e-09 | 1.000000 |
| rad3               | 6.10625e-10 | 1.000000 | 6.10625e-10 | 1.000000 |
| rad33              | 3.75388e-10 | 1.000000 | 3.75388e-10 | 1.000000 |
| rad4               | 3.09916e-10 | 1.000000 | 3.09916e-10 | 1.000000 |
| rad30              | 1.50853e-10 | 1.000000 | 1.50853e-10 | 1.000000 |
| Phenyl+Allene      | 4.16700e-11 | 1.000000 | 0.00000     | 1.000000 |
| rad15              | 2.35320e-11 | 1.000000 | 2.35320e-11 | 1.000000 |
| rad28              | 2.12324e-11 | 1.000000 | 2.12324e-11 | 1.000000 |
| rad24              | 6.21719e-12 | 1.000000 | 6.21719e-12 | 1.000000 |
| rad2               | 2.43171e-12 | 1.000000 | 2.43171e-12 | 1.000000 |
| rad1               | 1.55253e-13 | 1.000000 | 1.55253e-13 | 1.000000 |
| rad8               | 8.27993e-14 | 1.000000 | 8.27993e-14 | 1.000000 |
| rad38              | 7.03115e-14 | 1.000000 | 7.03115e-14 | 1.000000 |
| PhCCH+CH3          | 1.14179e-14 | 1.000000 | 1.14179e-14 | 1.000000 |
| PAH9+H             | 2.88979e-15 | 1.000000 | 2.88979e-15 | 1.000000 |
| rad35              | 1.66406e-15 | 1.000000 | 1.66406e-15 | 1.000000 |
| rad14              | 9.34107e-16 | 1.000000 | 9.34107e-16 | 1.000000 |
| rad10              | 6.86609e-16 | 1.000000 | 6.86609e-16 | 1.000000 |
| rad60syn           | 3.45490e-16 | 1.000000 | 3.45490e-16 | 1.000000 |
| rad46              | 3.18442e-16 | 1.000000 | 3.18442e-16 | 1.000000 |
| PhCH2CCH+H         | 1.44777e-16 | 1.000000 | 1.44777e-16 | 1.000000 |
| Benzene+2-propynyl | 6.62139e-17 | 1.000000 | 6.62139e-17 | 1.000000 |
| rad60anti          | 2.34035e-17 | 1.000000 | 2.34035e-17 | 1.000000 |
| rad27              | 6.53217e-19 | 1.000000 | 6.53217e-19 | 1.000000 |
| Ph+MeAc            | 3.12234e-19 | 1.000000 | 3.12234e-19 | 1.000000 |
| PhCCCH3+H          | 2.31974e-19 | 1.000000 | 2.31974e-19 | 1.000000 |
| rad31              | 1.98096e-19 | 1.000000 | 1.98096e-19 | 1.000000 |
| PAH7+H             | 1.40742e-19 | 1.000000 | 1.40742e-19 | 1.000000 |
| rad26              | 2.18330e-21 | 1.000000 | 2.18330e-21 | 1.000000 |
| rad39              | 7.69341e-22 | 1.000000 | 7.69341e-22 | 1.000000 |
| PAH3+H             | 4.11177e-24 | 1.000000 | 4.11177e-24 | 1.000000 |
| rad59              | 2.02321e-24 | 1.000000 | 2.02321e-24 | 1.000000 |
| rad50              | 5.66111e-27 | 1.000000 | 5.66111e-27 | 1.000000 |
| rad5               | 7.50085e-30 | 1.000000 | 7.50085e-30 | 1.000000 |
| rad12              | 1.08149e-30 | 1.000000 | 1.08149e-30 | 1.000000 |
| rad19syn           | 2.04693e-33 | 1.000000 | 2.04693e-33 | 1.000000 |
| rad37              | 1.84463e-33 | 1.000000 | 1.84463e-33 | 1.000000 |
| rad52              | 3.33115e-35 | 1.000000 | 3.33115e-35 | 1.000000 |
| rad54              | 2.11858e-36 | 1.000000 | 2.11858e-36 | 1.000000 |
| rad62              | 6.19566e-40 | 1.000000 | 6.19566e-40 | 1.000000 |
| rad51              | 5.54228e-40 | 1.000000 | 5.54228e-40 | 1.000000 |
| rad70              | 5.00442e-40 | 1.000000 | 5.00442e-40 | 1.000000 |
| rad43              | 1.05461e-40 | 1.000000 | 1.05461e-40 | 1.000000 |
| PhcycC3H3_A+H      | 6.28909e-43 | 1.000000 | 6.28909e-43 | 1.000000 |
| rad55              | 4.12190e-43 | 1.000000 | 4.12190e-43 | 1.000000 |
| rad58              | 1.48909e-43 | 1.000000 | 1.48909e-43 | 1.000000 |
| PAH10+CH3          | 2.80574e-44 | 1.000000 | 2.80574e-44 | 1.000000 |
| rad65              | 2.67634e-44 | 1.000000 | 2.67634e-44 | 1.000000 |
| rad34              | 5.65625e-46 | 1.000000 | 5.65625e-46 | 1.000000 |
| rad47              | 6.44653e-48 | 1.000000 | 6.44653e-48 | 1.000000 |
| PAH1+H             | 6.55348e-49 | 1.000000 | 6.55348e-49 | 1.000000 |
| rad42              | 1.87598e-51 | 1.000000 | 1.87598e-51 | 1.000000 |
| rad41              | 1.53320e-53 | 1.000000 | 1.53320e-53 | 1.000000 |

1000.00000 Pa, 40.0000000 K

=====

| Rate constant      | True (fraction)        | Effective (fraction)   |
|--------------------|------------------------|------------------------|
| Total              | 9.35697e-33 (1.00 )    | 9.35697e-33 (1.00 )    |
| Formation of rad11 | 9.35644e-33 (1.000 )   | 9.35644e-33 (1.000 )   |
| Formation of rad6  | 5.26139e-37 (5.62e-05) | 5.26139e-37 (5.62e-05) |
| H-abstraction      | 1.44763e-44 (1.55e-12) | 1.44763e-44 (1.55e-12) |

| species  | PYtrue      | Cumul    | PYeffective | Cumul    |
|----------|-------------|----------|-------------|----------|
| rad11    | 0.929351    | 0.929351 | 0.929351    | 0.929351 |
| rad6     | 0.0671485   | 0.996499 | 0.0671485   | 0.996499 |
| rad22    | 0.00204600  | 0.998545 | 0.00204600  | 0.998545 |
| Indene+H | 0.000677726 | 0.999223 | 0.000677726 | 0.999223 |
| rad18    | 0.000251797 | 0.999475 | 0.000251797 | 0.999475 |
| rad45    | 0.000245068 | 0.999720 | 0.000245068 | 0.999720 |
| rad20    | 0.000108948 | 0.999829 | 0.000108948 | 0.999829 |
| rad21    | 7.36866e-05 | 0.999903 | 7.36866e-05 | 0.999903 |
| rad23    | 6.34720e-05 | 0.999966 | 6.34720e-05 | 0.999966 |

|                    |             |          |             |          |
|--------------------|-------------|----------|-------------|----------|
| rad36              | 1.52671e-05 | 0.999981 | 1.52671e-05 | 0.999981 |
| C2H2+PhCH2         | 1.43351e-05 | 0.999996 | 1.43351e-05 | 0.999996 |
| rad7               | 2.65318e-06 | 0.999998 | 2.65318e-06 | 0.999998 |
| rad25              | 1.29687e-06 | 1.000000 | 1.29687e-06 | 1.000000 |
| rad13              | 3.16731e-07 | 1.000000 | 3.16731e-07 | 1.000000 |
| PhCHCCH2+H         | 8.90926e-08 | 1.000000 | 8.90926e-08 | 1.000000 |
| rad9               | 4.70137e-09 | 1.000000 | 4.70137e-09 | 1.000000 |
| rad3               | 1.44242e-09 | 1.000000 | 1.44242e-09 | 1.000000 |
| rad4               | 7.31450e-10 | 1.000000 | 7.31450e-10 | 1.000000 |
| rad33              | 4.50351e-10 | 1.000000 | 4.50351e-10 | 1.000000 |
| rad30              | 3.43873e-10 | 1.000000 | 3.43873e-10 | 1.000000 |
| Phenyl+Allene      | 8.39325e-11 | 1.000000 | 0.000000    | 1.000000 |
| rad15              | 5.46280e-11 | 1.000000 | 5.46280e-11 | 1.000000 |
| rad28              | 5.15232e-11 | 1.000000 | 5.15232e-11 | 1.000000 |
| rad2               | 8.89481e-12 | 1.000000 | 8.89481e-12 | 1.000000 |
| rad24              | 5.81193e-12 | 1.000000 | 5.81193e-12 | 1.000000 |
| Benzene+2-propynyl | 1.54712e-12 | 1.000000 | 1.54712e-12 | 1.000000 |
| rad1               | 5.66890e-13 | 1.000000 | 5.66890e-13 | 1.000000 |
| rad8               | 1.80900e-13 | 1.000000 | 1.80900e-13 | 1.000000 |
| rad38              | 1.79973e-13 | 1.000000 | 1.79973e-13 | 1.000000 |
| PhCCH+CH3          | 4.41186e-14 | 1.000000 | 4.41186e-14 | 1.000000 |
| PAH9+H             | 1.10970e-14 | 1.000000 | 1.10970e-14 | 1.000000 |
| rad35              | 6.36018e-15 | 1.000000 | 6.36018e-15 | 1.000000 |
| rad10              | 3.84509e-15 | 1.000000 | 3.84509e-15 | 1.000000 |
| rad14              | 3.49357e-15 | 1.000000 | 3.49357e-15 | 1.000000 |
| rad60syn           | 9.51935e-16 | 1.000000 | 9.51935e-16 | 1.000000 |
| rad46              | 8.42917e-16 | 1.000000 | 8.42917e-16 | 1.000000 |
| PhCH2CCH+H         | 3.01523e-16 | 1.000000 | 3.01523e-16 | 1.000000 |
| rad60anti          | 6.65211e-17 | 1.000000 | 6.65211e-17 | 1.000000 |
| rad27              | 3.46012e-18 | 1.000000 | 3.46012e-18 | 1.000000 |
| Ph+MeAc            | 1.43745e-18 | 1.000000 | 1.43745e-18 | 1.000000 |
| PhCCCH3+H          | 1.38274e-18 | 1.000000 | 1.38274e-18 | 1.000000 |
| rad31              | 4.69112e-19 | 1.000000 | 4.69112e-19 | 1.000000 |
| PAH7+H             | 3.87256e-19 | 1.000000 | 3.87256e-19 | 1.000000 |
| rad26              | 1.92386e-20 | 1.000000 | 1.92386e-20 | 1.000000 |
| rad39              | 3.26923e-21 | 1.000000 | 3.26923e-21 | 1.000000 |
| PAH3+H             | 9.64968e-24 | 1.000000 | 9.64968e-24 | 1.000000 |
| rad59              | 4.76017e-24 | 1.000000 | 4.76017e-24 | 1.000000 |
| rad50              | 1.87657e-26 | 1.000000 | 1.87657e-26 | 1.000000 |
| rad5               | 5.67141e-29 | 1.000000 | 5.67141e-29 | 1.000000 |
| rad12              | 1.55890e-29 | 1.000000 | 1.55890e-29 | 1.000000 |
| rad37              | 1.76893e-32 | 1.000000 | 1.76893e-32 | 1.000000 |
| rad19syn           | 8.49720e-33 | 1.000000 | 8.49720e-33 | 1.000000 |
| rad52              | 1.08114e-34 | 1.000000 | 1.08114e-34 | 1.000000 |
| rad54              | 6.75585e-36 | 1.000000 | 6.75585e-36 | 1.000000 |
| rad62              | 3.39714e-39 | 1.000000 | 3.39714e-39 | 1.000000 |
| rad51              | 1.72864e-39 | 1.000000 | 1.72864e-39 | 1.000000 |
| rad43              | 8.44851e-40 | 1.000000 | 8.44851e-40 | 1.000000 |
| rad70              | 7.74382e-40 | 1.000000 | 7.74382e-40 | 1.000000 |
| PhcycC3H3_A+H      | 2.23614e-42 | 1.000000 | 2.23614e-42 | 1.000000 |
| rad55              | 1.27902e-42 | 1.000000 | 1.27902e-42 | 1.000000 |
| PAH10+CH3          | 3.81319e-43 | 1.000000 | 3.81319e-43 | 1.000000 |
| rad58              | 2.24107e-43 | 1.000000 | 2.24107e-43 | 1.000000 |
| rad65              | 1.10582e-43 | 1.000000 | 1.10582e-43 | 1.000000 |
| rad34              | 6.91365e-46 | 1.000000 | 6.91365e-46 | 1.000000 |
| rad47              | 1.54599e-47 | 1.000000 | 1.54599e-47 | 1.000000 |
| PAH1+H             | 3.08314e-48 | 1.000000 | 3.08314e-48 | 1.000000 |
| rad42              | 7.57828e-51 | 1.000000 | 7.57828e-51 | 1.000000 |
| rad41              | 1.00796e-52 | 1.000000 | 1.00796e-52 | 1.000000 |

1000.00000 Pa, 50.0000000 K

=====

| Rate constant      | True (fraction)        | Effective (fraction)   |
|--------------------|------------------------|------------------------|
| Total              | 5.52690e-29 (1.00 )    | 5.52690e-29 (1.00 )    |
| Formation of rad11 | 5.52459e-29 (1.000 )   | 5.52459e-29 (1.000 )   |
| Formation of rad6  | 2.30840e-32 (0.000418) | 2.30840e-32 (0.000418) |
| H-abstraction      | 3.35357e-38 (6.07e-10) | 3.35357e-38 (6.07e-10) |

| species  | PYtrue      | Cumul    | PYeffective | Cumul    |
|----------|-------------|----------|-------------|----------|
| rad11    | 0.906790    | 0.906790 | 0.906790    | 0.906790 |
| rad6     | 0.0885796   | 0.995370 | 0.0885796   | 0.995370 |
| rad22    | 0.00268719  | 0.998057 | 0.00268719  | 0.998057 |
| Indene+H | 0.00107472  | 0.999132 | 0.00107472  | 0.999132 |
| rad45    | 0.000319569 | 0.999451 | 0.000319569 | 0.999451 |
| rad18    | 0.000244864 | 0.999696 | 0.000244864 | 0.999696 |
| rad23    | 0.000113961 | 0.999810 | 0.000113961 | 0.999810 |
| rad20    | 8.51113e-05 | 0.999895 | 8.51113e-05 | 0.999895 |
| rad21    | 5.69276e-05 | 0.999952 | 5.69276e-05 | 0.999952 |



|                    |             |          |             |          |
|--------------------|-------------|----------|-------------|----------|
| C2H2+PhCH2         | 2.10668e-05 | 0.999973 | 2.10668e-05 | 0.999973 |
| rad36              | 1.98882e-05 | 0.999993 | 1.98882e-05 | 0.999993 |
| rad7               | 4.61204e-06 | 0.999998 | 4.61204e-06 | 0.999998 |
| rad25              | 1.67571e-06 | 0.999999 | 1.67571e-06 | 0.999999 |
| rad13              | 3.77157e-07 | 1.000000 | 3.77157e-07 | 1.000000 |
| PhCHCCH2+H         | 1.25140e-07 | 1.000000 | 1.25140e-07 | 1.000000 |
| rad9               | 6.70994e-09 | 1.000000 | 6.70994e-09 | 1.000000 |
| rad3               | 2.68471e-09 | 1.000000 | 2.68471e-09 | 1.000000 |
| rad4               | 1.36121e-09 | 1.000000 | 1.36121e-09 | 1.000000 |
| Benzene+2-propynyl | 6.06773e-10 | 1.000000 | 6.06773e-10 | 1.000000 |
| rad30              | 5.92723e-10 | 1.000000 | 5.92723e-10 | 1.000000 |
| rad33              | 5.16722e-10 | 1.000000 | 5.16722e-10 | 1.000000 |
| Phenyl+Allene      | 1.61839e-10 | 1.000000 | 0.000000    | 1.000000 |
| rad28              | 9.89074e-11 | 1.000000 | 9.89074e-11 | 1.000000 |
| rad15              | 9.57704e-11 | 1.000000 | 9.57704e-11 | 1.000000 |
| rad2               | 2.30184e-11 | 1.000000 | 2.30184e-11 | 1.000000 |
| rad24              | 6.31946e-12 | 1.000000 | 6.31946e-12 | 1.000000 |
| rad1               | 1.46738e-12 | 1.000000 | 1.46738e-12 | 1.000000 |
| rad38              | 3.50336e-13 | 1.000000 | 3.50336e-13 | 1.000000 |
| rad8               | 3.37670e-13 | 1.000000 | 3.37670e-13 | 1.000000 |
| PhCCH+CH3          | 1.24433e-13 | 1.000000 | 1.24433e-13 | 1.000000 |
| PAH9+H             | 2.88131e-14 | 1.000000 | 2.88131e-14 | 1.000000 |
| rad35              | 1.64221e-14 | 1.000000 | 1.64221e-14 | 1.000000 |
| rad10              | 1.38007e-14 | 1.000000 | 1.38007e-14 | 1.000000 |
| rad14              | 9.37518e-15 | 1.000000 | 9.37518e-15 | 1.000000 |
| rad60syn           | 2.03781e-15 | 1.000000 | 2.03781e-15 | 1.000000 |
| rad46              | 1.70607e-15 | 1.000000 | 1.70607e-15 | 1.000000 |
| PhCH2CCH+H         | 6.64510e-16 | 1.000000 | 6.64510e-16 | 1.000000 |
| rad60anti          | 1.61573e-16 | 1.000000 | 1.61573e-16 | 1.000000 |
| rad27              | 1.18461e-17 | 1.000000 | 1.18461e-17 | 1.000000 |
| Ph+MeAc            | 5.64948e-18 | 1.000000 | 5.64948e-18 | 1.000000 |
| PhCCCH3+H          | 5.54387e-18 | 1.000000 | 5.54387e-18 | 1.000000 |
| PAH7+H             | 1.01860e-18 | 1.000000 | 1.01860e-18 | 1.000000 |
| rad31              | 8.83202e-19 | 1.000000 | 8.83202e-19 | 1.000000 |
| rad26              | 1.01667e-19 | 1.000000 | 1.01667e-19 | 1.000000 |
| rad39              | 1.10397e-20 | 1.000000 | 1.10397e-20 | 1.000000 |
| PAH3+H             | 2.29514e-23 | 1.000000 | 2.29514e-23 | 1.000000 |
| rad59              | 1.13266e-23 | 1.000000 | 1.13266e-23 | 1.000000 |
| rad50              | 5.87407e-26 | 1.000000 | 5.87407e-26 | 1.000000 |
| rad5               | 3.78764e-28 | 1.000000 | 3.78764e-28 | 1.000000 |
| rad12              | 1.42604e-28 | 1.000000 | 1.42604e-28 | 1.000000 |
| rad37              | 1.76494e-31 | 1.000000 | 1.76494e-31 | 1.000000 |
| rad19syn           | 3.37517e-32 | 1.000000 | 3.37517e-32 | 1.000000 |
| rad52              | 3.66732e-34 | 1.000000 | 3.66732e-34 | 1.000000 |
| rad54              | 2.28658e-35 | 1.000000 | 2.28658e-35 | 1.000000 |
| rad62              | 1.72118e-38 | 1.000000 | 1.72118e-38 | 1.000000 |
| rad51              | 6.09215e-39 | 1.000000 | 6.09215e-39 | 1.000000 |
| rad43              | 5.83095e-39 | 1.000000 | 5.83095e-39 | 1.000000 |
| rad70              | 1.50217e-39 | 1.000000 | 1.50217e-39 | 1.000000 |
| PhcycC3H3_A+H      | 8.27393e-42 | 1.000000 | 8.27393e-42 | 1.000000 |
| rad55              | 4.40913e-42 | 1.000000 | 4.40913e-42 | 1.000000 |
| PAH10+CH3          | 4.20049e-42 | 1.000000 | 4.20049e-42 | 1.000000 |
| rad65              | 4.55552e-43 | 1.000000 | 4.55552e-43 | 1.000000 |
| rad58              | 4.27674e-43 | 1.000000 | 4.27674e-43 | 1.000000 |
| rad34              | 1.16556e-45 | 1.000000 | 1.16556e-45 | 1.000000 |
| rad47              | 5.02016e-47 | 1.000000 | 5.02016e-47 | 1.000000 |
| PAH1+H             | 1.45858e-47 | 1.000000 | 1.45858e-47 | 1.000000 |
| rad42              | 3.30942e-50 | 1.000000 | 3.30942e-50 | 1.000000 |
| rad41              | 6.75243e-52 | 1.000000 | 6.75243e-52 | 1.000000 |

1000.00000 Pa, 60.0000000 K

=====

| Rate constant      | True (fraction)        | Effective (fraction)   |
|--------------------|------------------------|------------------------|
| Total              | 1.83429e-26 (1.00 )    | 1.83429e-26 (1.00 )    |
| Formation of rad11 | 1.83139e-26 (0.998 )   | 1.83139e-26 (0.998 )   |
| Formation of rad6  | 2.90471e-29 (0.00158 ) | 2.90471e-29 (0.00158 ) |
| H-abstraction      | 5.71259e-34 (3.11e-08) | 5.71259e-34 (3.11e-08) |

| species  | PYtrue      | Cumul    | PYeffective | Cumul    |
|----------|-------------|----------|-------------|----------|
| rad11    | 0.883755    | 0.883755 | 0.883755    | 0.883755 |
| rad6     | 0.110483    | 0.994238 | 0.110483    | 0.994238 |
| rad22    | 0.00328536  | 0.997523 | 0.00328536  | 0.997523 |
| Indene+H | 0.00150797  | 0.999031 | 0.00150797  | 0.999031 |
| rad45    | 0.000387314 | 0.999419 | 0.000387314 | 0.999419 |
| rad18    | 0.000228041 | 0.999647 | 0.000228041 | 0.999647 |
| rad23    | 0.000177675 | 0.999824 | 0.000177675 | 0.999824 |
| rad20    | 6.85354e-05 | 0.999893 | 6.85354e-05 | 0.999893 |
| rad21    | 4.54899e-05 | 0.999938 | 4.54899e-05 | 0.999938 |

|                    |             |          |             |          |
|--------------------|-------------|----------|-------------|----------|
| C2H2+PhCH2         | 2.83645e-05 | 0.999967 | 2.83645e-05 | 0.999967 |
| rad36              | 2.40810e-05 | 0.999991 | 2.40810e-05 | 0.999991 |
| rad7               | 7.19272e-06 | 0.999998 | 7.19272e-06 | 0.999998 |
| rad25              | 2.04015e-06 | 1.00000  | 2.04015e-06 | 1.00000  |
| rad13              | 4.34708e-07 | 1.00000  | 4.34708e-07 | 1.00000  |
| PhCHCCH2+H         | 1.67044e-07 | 1.00000  | 1.67044e-07 | 1.00000  |
| Benzene+2-propynyl | 3.11432e-08 | 1.00000  | 3.11432e-08 | 1.00000  |
| rad9               | 9.12423e-09 | 1.00000  | 9.12423e-09 | 1.00000  |
| rad3               | 4.48398e-09 | 1.00000  | 4.48398e-09 | 1.00000  |
| rad4               | 2.27390e-09 | 1.00000  | 2.27390e-09 | 1.00000  |
| rad30              | 8.92343e-10 | 1.00000  | 8.92343e-10 | 1.00000  |
| rad33              | 5.81330e-10 | 1.00000  | 5.81330e-10 | 1.00000  |
| Phenyl+Allene      | 2.98860e-10 | 1.00000  | 0.00000     | 1.00000  |
| rad28              | 1.71772e-10 | 1.00000  | 1.71772e-10 | 1.00000  |
| rad15              | 1.46542e-10 | 1.00000  | 1.46542e-10 | 1.00000  |
| rad2               | 5.11955e-11 | 1.00000  | 5.11955e-11 | 1.00000  |
| rad24              | 6.92543e-12 | 1.00000  | 6.92543e-12 | 1.00000  |
| rad1               | 3.26765e-12 | 1.00000  | 3.26765e-12 | 1.00000  |
| rad38              | 5.93282e-13 | 1.00000  | 5.93282e-13 | 1.00000  |
| rad8               | 5.82126e-13 | 1.00000  | 5.82126e-13 | 1.00000  |
| PhCCH+CH3          | 3.13312e-13 | 1.00000  | 3.13312e-13 | 1.00000  |
| PAH9+H             | 6.11760e-14 | 1.00000  | 6.11760e-14 | 1.00000  |
| rad10              | 4.10520e-14 | 1.00000  | 4.10520e-14 | 1.00000  |
| rad35              | 3.46491e-14 | 1.00000  | 3.46491e-14 | 1.00000  |
| rad14              | 2.19815e-14 | 1.00000  | 2.19815e-14 | 1.00000  |
| rad60syn           | 3.85440e-15 | 1.00000  | 3.85440e-15 | 1.00000  |
| rad46              | 3.01598e-15 | 1.00000  | 3.01598e-15 | 1.00000  |
| PhCH2CCH+H         | 1.61869e-15 | 1.00000  | 1.61869e-15 | 1.00000  |
| rad60anti          | 3.64967e-16 | 1.00000  | 3.64967e-16 | 1.00000  |
| rad27              | 3.36737e-17 | 1.00000  | 3.36737e-17 | 1.00000  |
| Ph+MeAc            | 2.20113e-17 | 1.00000  | 2.20113e-17 | 1.00000  |
| PhCCCH3+H          | 1.94125e-17 | 1.00000  | 1.94125e-17 | 1.00000  |
| PAH7+H             | 2.82040e-18 | 1.00000  | 2.82040e-18 | 1.00000  |
| rad31              | 1.50083e-18 | 1.00000  | 1.50083e-18 | 1.00000  |
| rad26              | 4.43343e-19 | 1.00000  | 4.43343e-19 | 1.00000  |
| rad39              | 3.59036e-20 | 1.00000  | 3.59036e-20 | 1.00000  |
| PAH3+H             | 5.97185e-23 | 1.00000  | 5.97185e-23 | 1.00000  |
| rad59              | 2.94501e-23 | 1.00000  | 2.94501e-23 | 1.00000  |
| rad50              | 1.91457e-25 | 1.00000  | 1.91457e-25 | 1.00000  |
| rad5               | 2.88801e-27 | 1.00000  | 2.88801e-27 | 1.00000  |
| rad12              | 1.14057e-27 | 1.00000  | 1.14057e-27 | 1.00000  |
| rad37              | 1.91434e-30 | 1.00000  | 1.91434e-30 | 1.00000  |
| rad19syn           | 1.56372e-31 | 1.00000  | 1.56372e-31 | 1.00000  |
| rad52              | 1.40945e-33 | 1.00000  | 1.40945e-33 | 1.00000  |
| rad54              | 9.38400e-35 | 1.00000  | 9.38400e-35 | 1.00000  |
| rad62              | 1.02300e-37 | 1.00000  | 1.02300e-37 | 1.00000  |
| rad43              | 4.64168e-38 | 1.00000  | 4.64168e-38 | 1.00000  |
| rad51              | 2.59212e-38 | 1.00000  | 2.59212e-38 | 1.00000  |
| rad70              | 3.65813e-39 | 1.00000  | 3.65813e-39 | 1.00000  |
| PAH10+CH3          | 4.89240e-41 | 1.00000  | 4.89240e-41 | 1.00000  |
| PhcycC3H3_A+H      | 3.70214e-41 | 1.00000  | 3.70214e-41 | 1.00000  |
| rad55              | 1.88632e-41 | 1.00000  | 1.88632e-41 | 1.00000  |
| rad65              | 2.13250e-42 | 1.00000  | 2.13250e-42 | 1.00000  |
| rad58              | 1.03309e-42 | 1.00000  | 1.03309e-42 | 1.00000  |
| rad34              | 2.66912e-45 | 1.00000  | 2.66912e-45 | 1.00000  |
| rad47              | 2.21655e-46 | 1.00000  | 2.21655e-46 | 1.00000  |
| PAH1+H             | 8.14476e-47 | 1.00000  | 8.14476e-47 | 1.00000  |
| rad42              | 1.81962e-49 | 1.00000  | 1.81962e-49 | 1.00000  |
| rad41              | 5.75865e-51 | 1.00000  | 5.75865e-51 | 1.00000  |

1000.00000 Pa, 70.0000000 K

=====

| Rate constant      | True (fraction)        | Effective (fraction)   |
|--------------------|------------------------|------------------------|
| Total              | 1.17336e-24 (1.00 )    | 1.17336e-24 (1.00 )    |
| Formation of rad11 | 1.16857e-24 (0.996 )   | 1.16857e-24 (0.996 )   |
| Formation of rad6  | 4.79505e-27 (0.00409 ) | 4.79505e-27 (0.00409 ) |
| H-abstraction      | 5.89821e-31 (5.03e-07) | 5.89821e-31 (5.03e-07) |

| species  | PYtrue      | Cumul    | PYeffective | Cumul    |
|----------|-------------|----------|-------------|----------|
| rad11    | 0.859660    | 0.859660 | 0.859660    | 0.859660 |
| rad6     | 0.133437    | 0.993097 | 0.133437    | 0.993097 |
| rad22    | 0.00384557  | 0.996942 | 0.00384557  | 0.996942 |
| Indene+H | 0.00197299  | 0.998915 | 0.00197299  | 0.998915 |
| rad45    | 0.000449217 | 0.999364 | 0.000449217 | 0.999364 |
| rad23    | 0.000254193 | 0.999618 | 0.000254193 | 0.999618 |
| rad18    | 0.000208566 | 0.999827 | 0.000208566 | 0.999827 |
| rad20    | 5.65608e-05 | 0.999884 | 5.65608e-05 | 0.999884 |
| rad21    | 3.73256e-05 | 0.999921 | 3.73256e-05 | 0.999921 |

|                    |             |          |             |          |
|--------------------|-------------|----------|-------------|----------|
| C2H2+PhCH2         | 3.62731e-05 | 0.999957 | 3.62731e-05 | 0.999957 |
| rad36              | 2.79053e-05 | 0.999985 | 2.79053e-05 | 0.999985 |
| rad7               | 1.05487e-05 | 0.999996 | 1.05487e-05 | 0.999996 |
| rad25              | 2.38934e-06 | 0.999998 | 2.38934e-06 | 0.999998 |
| Benzene+2-propynyl | 5.02676e-07 | 0.999999 | 5.02676e-07 | 0.999999 |
| rad13              | 4.92706e-07 | 0.999999 | 4.92706e-07 | 0.999999 |
| PhCHCCH2+H         | 2.16112e-07 | 0.999999 | 2.16112e-07 | 0.999999 |
| rad9               | 1.20445e-08 | 0.999999 | 1.20445e-08 | 0.999999 |
| rad3               | 7.08005e-09 | 0.999999 | 7.08005e-09 | 0.999999 |
| rad4               | 3.59181e-09 | 0.999999 | 3.59181e-09 | 0.999999 |
| rad30              | 1.24232e-09 | 0.999999 | 1.24232e-09 | 0.999999 |
| rad33              | 6.47628e-10 | 0.999999 | 6.47628e-10 | 0.999999 |
| Phenyl+Allene      | 5.29957e-10 | 0.999999 | 0.00000     | 0.999999 |
| rad28              | 2.84332e-10 | 0.999999 | 2.84332e-10 | 0.999999 |
| rad15              | 2.07272e-10 | 0.999999 | 2.07272e-10 | 0.999999 |
| rad2               | 1.05513e-10 | 0.999999 | 1.05513e-10 | 0.999999 |
| rad24              | 7.50479e-12 | 0.999999 | 7.50479e-12 | 0.999999 |
| rad1               | 6.74718e-12 | 0.999999 | 6.74718e-12 | 0.999999 |
| rad8               | 9.54125e-13 | 0.999999 | 9.54125e-13 | 0.999999 |
| rad38              | 9.24270e-13 | 0.999999 | 9.24270e-13 | 0.999999 |
| PhCCH+CH3          | 7.50459e-13 | 0.999999 | 7.50459e-13 | 0.999999 |
| PAH9+H             | 1.15080e-13 | 0.999999 | 1.15080e-13 | 0.999999 |
| rad10              | 1.11114e-13 | 0.999999 | 1.11114e-13 | 0.999999 |
| rad35              | 6.47311e-14 | 0.999999 | 6.47311e-14 | 0.999999 |
| rad14              | 4.82392e-14 | 0.999999 | 4.82392e-14 | 0.999999 |
| rad60syn           | 6.76019e-15 | 0.999999 | 6.76019e-15 | 0.999999 |
| rad46              | 4.92136e-15 | 0.999999 | 4.92136e-15 | 0.999999 |
| PhCH2CCH+H         | 4.63858e-15 | 0.999999 | 4.63858e-15 | 0.999999 |
| rad60anti          | 7.71741e-16 | 0.999999 | 7.71741e-16 | 0.999999 |
| rad27              | 8.65264e-17 | 0.999999 | 8.65264e-17 | 0.999999 |
| Ph+MeAc            | 8.10373e-17 | 0.999999 | 8.10373e-17 | 0.999999 |
| PhCCCH3+H          | 6.35645e-17 | 0.999999 | 6.35645e-17 | 0.999999 |
| PAH7+H             | 8.75948e-18 | 0.999999 | 8.75948e-18 | 0.999999 |
| rad31              | 2.42191e-18 | 0.999999 | 2.42191e-18 | 0.999999 |
| rad26              | 1.74707e-18 | 0.999999 | 1.74707e-18 | 0.999999 |
| rad39              | 1.13169e-19 | 0.999999 | 1.13169e-19 | 0.999999 |
| PAH3+H             | 1.82152e-22 | 0.999999 | 1.82152e-22 | 0.999999 |
| rad59              | 8.96836e-23 | 0.999999 | 8.96836e-23 | 0.999999 |
| rad50              | 6.90510e-25 | 0.999999 | 6.90510e-25 | 0.999999 |
| rad5               | 2.38900e-26 | 0.999999 | 2.38900e-26 | 0.999999 |
| rad12              | 8.09865e-27 | 0.999999 | 8.09865e-27 | 0.999999 |
| rad37              | 2.05263e-29 | 0.999999 | 2.05263e-29 | 0.999999 |
| rad19syn           | 9.33632e-31 | 0.999999 | 9.33632e-31 | 0.999999 |
| rad52              | 6.51836e-33 | 0.999999 | 6.51836e-33 | 0.999999 |
| rad54              | 5.13191e-34 | 0.999999 | 5.13191e-34 | 0.999999 |
| rad62              | 8.15834e-37 | 0.999999 | 8.15834e-37 | 0.999999 |
| rad43              | 4.87548e-37 | 0.999999 | 4.87548e-37 | 0.999999 |
| rad51              | 1.40387e-37 | 0.999999 | 1.40387e-37 | 0.999999 |
| rad70              | 1.15794e-38 | 0.999999 | 1.15794e-38 | 0.999999 |
| PAH10+CH3          | 6.98679e-40 | 0.999999 | 6.98679e-40 | 0.999999 |
| PhcycC3H3_A+H      | 2.21867e-40 | 0.999999 | 2.21867e-40 | 0.999999 |
| rad55              | 1.09567e-40 | 0.999999 | 1.09567e-40 | 0.999999 |
| rad65              | 1.24009e-41 | 0.999999 | 1.24009e-41 | 0.999999 |
| rad58              | 3.26743e-42 | 0.999999 | 3.26743e-42 | 0.999999 |
| rad34              | 8.62762e-45 | 0.999999 | 8.62762e-45 | 0.999999 |
| rad47              | 1.35994e-45 | 0.999999 | 1.35994e-45 | 0.999999 |
| PAH1+H             | 5.98735e-46 | 0.999999 | 5.98735e-46 | 0.999999 |
| rad42              | 1.41383e-48 | 0.999999 | 1.41383e-48 | 0.999999 |
| rad41              | 7.31271e-50 | 0.999999 | 7.31271e-50 | 0.999999 |

1000.00000 Pa, 80.0000000 K

=====

| Rate constant      | True (fraction)        | Effective (fraction)   |
|--------------------|------------------------|------------------------|
| Total              | 2.68112e-23 (1.00 )    | 2.68112e-23 (1.00 )    |
| Formation of rad11 | 2.65890e-23 (0.992 )   | 2.65890e-23 (0.992 )   |
| Formation of rad6  | 2.22189e-25 (0.00829 ) | 2.22189e-25 (0.00829 ) |
| H-abstraction      | 1.05871e-28 (3.95e-06) | 1.05871e-28 (3.95e-06) |

| species    | PYtrue      | Cumul    | PYeffective | Cumul    |
|------------|-------------|----------|-------------|----------|
| rad11      | 0.834150    | 0.834150 | 0.834150    | 0.834150 |
| rad6       | 0.157796    | 0.991946 | 0.157796    | 0.991946 |
| rad22      | 0.00436950  | 0.996316 | 0.00436950  | 0.996316 |
| Indene+H   | 0.00246864  | 0.998784 | 0.00246864  | 0.998784 |
| rad45      | 0.000505844 | 0.999290 | 0.000505844 | 0.999290 |
| rad23      | 0.000343274 | 0.999633 | 0.000343274 | 0.999633 |
| rad18      | 0.000189239 | 0.999823 | 0.000189239 | 0.999823 |
| rad20      | 4.75609e-05 | 0.999870 | 4.75609e-05 | 0.999870 |
| C2H2+PhCH2 | 4.48577e-05 | 0.999915 | 4.48577e-05 | 0.999915 |

|                    |             |          |             |          |
|--------------------|-------------|----------|-------------|----------|
| rad36              | 3.13995e-05 | 0.999946 | 3.13995e-05 | 0.999946 |
| rad21              | 3.12432e-05 | 0.999978 | 3.12432e-05 | 0.999978 |
| rad7               | 1.48515e-05 | 0.999992 | 1.48515e-05 | 0.999992 |
| Benzene+2-propynyl | 3.94877e-06 | 0.999996 | 3.94877e-06 | 0.999996 |
| rad25              | 2.72077e-06 | 0.999999 | 2.72077e-06 | 0.999999 |
| rad13              | 5.52685e-07 | 1.000000 | 5.52685e-07 | 1.000000 |
| PhCHCCH2+H         | 2.73911e-07 | 1.000000 | 2.73911e-07 | 1.000000 |
| rad9               | 1.55947e-08 | 1.000000 | 1.55947e-08 | 1.000000 |
| rad3               | 1.07896e-08 | 1.000000 | 1.07896e-08 | 1.000000 |
| rad4               | 5.47669e-09 | 1.000000 | 5.47669e-09 | 1.000000 |
| rad30              | 1.64553e-09 | 1.000000 | 1.64553e-09 | 1.000000 |
| Phenyl+Allene      | 9.08995e-10 | 1.000000 | 0.000000    | 1.000000 |
| rad33              | 7.17104e-10 | 1.000000 | 7.17104e-10 | 1.000000 |
| rad28              | 4.56665e-10 | 1.000000 | 4.56665e-10 | 1.000000 |
| rad15              | 2.78891e-10 | 1.000000 | 2.78891e-10 | 1.000000 |
| rad2               | 2.06726e-10 | 1.000000 | 2.06726e-10 | 1.000000 |
| rad1               | 1.32503e-11 | 1.000000 | 1.32503e-11 | 1.000000 |
| rad24              | 8.03413e-12 | 1.000000 | 8.03413e-12 | 1.000000 |
| PhCCH+CH3          | 1.72084e-12 | 1.000000 | 1.72084e-12 | 1.000000 |
| rad8               | 1.51195e-12 | 1.000000 | 1.51195e-12 | 1.000000 |
| rad38              | 1.36395e-12 | 1.000000 | 1.36395e-12 | 1.000000 |
| rad10              | 2.80738e-13 | 1.000000 | 2.80738e-13 | 1.000000 |
| PAH9+H             | 2.00088e-13 | 1.000000 | 2.00088e-13 | 1.000000 |
| rad35              | 1.11697e-13 | 1.000000 | 1.11697e-13 | 1.000000 |
| rad14              | 1.00628e-13 | 1.000000 | 1.00628e-13 | 1.000000 |
| PhCH2CCH+H         | 1.64556e-14 | 1.000000 | 1.64556e-14 | 1.000000 |
| rad60syn           | 1.12840e-14 | 1.000000 | 1.12840e-14 | 1.000000 |
| rad46              | 7.63335e-15 | 1.000000 | 7.63335e-15 | 1.000000 |
| rad60anti          | 1.53160e-15 | 1.000000 | 1.53160e-15 | 1.000000 |
| Ph+MeAc            | 2.69753e-16 | 1.000000 | 2.69753e-16 | 1.000000 |
| rad27              | 2.05241e-16 | 1.000000 | 2.05241e-16 | 1.000000 |
| PhCCCH3+H          | 1.94306e-16 | 1.000000 | 1.94306e-16 | 1.000000 |
| PAH7+H             | 3.16445e-17 | 1.000000 | 3.16445e-17 | 1.000000 |
| rad26              | 6.27496e-18 | 1.000000 | 6.27496e-18 | 1.000000 |
| rad31              | 3.78642e-18 | 1.000000 | 3.78642e-18 | 1.000000 |
| rad39              | 3.34207e-19 | 1.000000 | 3.34207e-19 | 1.000000 |
| PAH3+H             | 7.21265e-22 | 1.000000 | 7.21265e-22 | 1.000000 |
| rad59              | 3.53835e-22 | 1.000000 | 3.53835e-22 | 1.000000 |
| rad50              | 2.90388e-24 | 1.000000 | 2.90388e-24 | 1.000000 |
| rad5               | 1.93869e-25 | 1.000000 | 1.93869e-25 | 1.000000 |
| rad12              | 5.01136e-26 | 1.000000 | 5.01136e-26 | 1.000000 |
| rad37              | 1.99473e-28 | 1.000000 | 1.99473e-28 | 1.000000 |
| rad19syn           | 7.64899e-30 | 1.000000 | 7.64899e-30 | 1.000000 |
| rad52              | 3.91259e-32 | 1.000000 | 3.91259e-32 | 1.000000 |
| rad54              | 4.04665e-33 | 1.000000 | 4.04665e-33 | 1.000000 |
| rad62              | 9.29002e-36 | 1.000000 | 9.29002e-36 | 1.000000 |
| rad43              | 6.90068e-36 | 1.000000 | 6.90068e-36 | 1.000000 |
| rad51              | 1.04093e-36 | 1.000000 | 1.04093e-36 | 1.000000 |
| rad70              | 5.30509e-38 | 1.000000 | 5.30509e-38 | 1.000000 |
| PAH10+CH3          | 1.25811e-38 | 1.000000 | 1.25811e-38 | 1.000000 |
| PhcycC3H3_A+H      | 1.94189e-39 | 1.000000 | 1.94189e-39 | 1.000000 |
| rad55              | 9.37967e-40 | 1.000000 | 9.37967e-40 | 1.000000 |
| rad65              | 9.88878e-41 | 1.000000 | 9.88878e-41 | 1.000000 |
| rad58              | 1.50743e-41 | 1.000000 | 1.50743e-41 | 1.000000 |
| rad34              | 4.46059e-44 | 1.000000 | 4.46059e-44 | 1.000000 |
| rad47              | 1.22581e-44 | 1.000000 | 1.22581e-44 | 1.000000 |
| PAH1+H             | 6.33892e-45 | 1.000000 | 6.33892e-45 | 1.000000 |
| rad42              | 1.72756e-47 | 1.000000 | 1.72756e-47 | 1.000000 |
| rad41              | 1.51733e-48 | 1.000000 | 1.51733e-48 | 1.000000 |

1000.00000 Pa, 90.0000000 K

=====

| Rate constant      | True (fraction)        | Effective (fraction)   |
|--------------------|------------------------|------------------------|
| Total              | 3.08379e-22 (1.00 )    | 3.08379e-22 (1.00 )    |
| Formation of rad11 | 3.03962e-22 (0.986 )   | 3.03962e-22 (0.986 )   |
| Formation of rad6  | 4.41076e-24 (0.0143 )  | 4.41076e-24 (0.0143 )  |
| H-abstraction      | 5.92916e-27 (1.92e-05) | 5.92916e-27 (1.92e-05) |

| species    | PYtrue      | Cumul    | PYeffective | Cumul    |
|------------|-------------|----------|-------------|----------|
| rad11      | 0.807106    | 0.807106 | 0.807106    | 0.807106 |
| rad6       | 0.183667    | 0.990774 | 0.183667    | 0.990774 |
| rad22      | 0.00485771  | 0.995632 | 0.00485771  | 0.995632 |
| Indene+H   | 0.00299560  | 0.998627 | 0.00299560  | 0.998627 |
| rad45      | 0.000557645 | 0.999185 | 0.000557645 | 0.999185 |
| rad23      | 0.000444895 | 0.999630 | 0.000444895 | 0.999630 |
| rad18      | 0.000171103 | 0.999801 | 0.000171103 | 0.999801 |
| C2H2+PhCH2 | 5.42117e-05 | 0.999855 | 5.42117e-05 | 0.999855 |
| rad20      | 4.05630e-05 | 0.999896 | 4.05630e-05 | 0.999896 |

|                    |             |          |             |          |
|--------------------|-------------|----------|-------------|----------|
| rad36              | 3.45941e-05 | 0.999930 | 3.45941e-05 | 0.999930 |
| rad21              | 2.65466e-05 | 0.999957 | 2.65466e-05 | 0.999957 |
| rad7               | 2.02529e-05 | 0.999977 | 2.02529e-05 | 0.999977 |
| Benzene+2-propynyl | 1.92269e-05 | 0.999996 | 1.92269e-05 | 0.999996 |
| rad25              | 3.03150e-06 | 0.999999 | 3.03150e-06 | 0.999999 |
| rad13              | 6.15023e-07 | 1.000000 | 6.15023e-07 | 1.000000 |
| PhCHCCH2+H         | 3.42495e-07 | 1.000000 | 3.42495e-07 | 1.000000 |
| rad9               | 1.99393e-08 | 1.000000 | 1.99393e-08 | 1.000000 |
| rad3               | 1.59831e-08 | 1.000000 | 1.59831e-08 | 1.000000 |
| rad4               | 8.11821e-09 | 1.000000 | 8.11821e-09 | 1.000000 |
| rad30              | 2.10791e-09 | 1.000000 | 2.10791e-09 | 1.000000 |
| Phenyl+Allene      | 1.51859e-09 | 1.000000 | 0.000000    | 1.000000 |
| rad33              | 7.89954e-10 | 1.000000 | 7.89954e-10 | 1.000000 |
| rad28              | 7.14400e-10 | 1.000000 | 7.14400e-10 | 1.000000 |
| rad2               | 3.87547e-10 | 1.000000 | 3.87547e-10 | 1.000000 |
| rad15              | 3.62963e-10 | 1.000000 | 3.62963e-10 | 1.000000 |
| rad1               | 2.49081e-11 | 1.000000 | 2.49081e-11 | 1.000000 |
| rad24              | 8.51185e-12 | 1.000000 | 8.51185e-12 | 1.000000 |
| PhCCH+CH3          | 3.75661e-12 | 1.000000 | 3.75661e-12 | 1.000000 |
| rad8               | 2.34261e-12 | 1.000000 | 2.34261e-12 | 1.000000 |
| rad38              | 1.94062e-12 | 1.000000 | 1.94062e-12 | 1.000000 |
| rad10              | 6.65371e-13 | 1.000000 | 6.65371e-13 | 1.000000 |
| PAH9+H             | 3.29889e-13 | 1.000000 | 3.29889e-13 | 1.000000 |
| rad14              | 1.99439e-13 | 1.000000 | 1.99439e-13 | 1.000000 |
| rad35              | 1.82625e-13 | 1.000000 | 1.82625e-13 | 1.000000 |
| PhCH2CCH+H         | 6.70315e-14 | 1.000000 | 6.70315e-14 | 1.000000 |
| rad60syn           | 1.82236e-14 | 1.000000 | 1.82236e-14 | 1.000000 |
| rad46              | 1.14589e-14 | 1.000000 | 1.14589e-14 | 1.000000 |
| rad60anti          | 2.87701e-15 | 1.000000 | 2.87701e-15 | 1.000000 |
| Ph+MeAc            | 8.10085e-16 | 1.000000 | 8.10085e-16 | 1.000000 |
| PhCCCH3+H          | 5.51596e-16 | 1.000000 | 5.51596e-16 | 1.000000 |
| rad27              | 4.51550e-16 | 1.000000 | 4.51550e-16 | 1.000000 |
| PAH7+H             | 1.29452e-16 | 1.000000 | 1.29452e-16 | 1.000000 |
| rad26              | 2.05736e-17 | 1.000000 | 2.05736e-17 | 1.000000 |
| rad31              | 5.77402e-18 | 1.000000 | 5.77402e-18 | 1.000000 |
| rad39              | 9.14093e-19 | 1.000000 | 9.14093e-19 | 1.000000 |
| PAH3+H             | 3.96710e-21 | 1.000000 | 3.96710e-21 | 1.000000 |
| rad59              | 1.92286e-21 | 1.000000 | 1.92286e-21 | 1.000000 |
| rad50              | 1.43759e-23 | 1.000000 | 1.43759e-23 | 1.000000 |
| rad5               | 1.45960e-24 | 1.000000 | 1.45960e-24 | 1.000000 |
| rad12              | 2.75213e-25 | 1.000000 | 2.75213e-25 | 1.000000 |
| rad37              | 1.72104e-27 | 1.000000 | 1.72104e-27 | 1.000000 |
| rad19syn           | 9.69167e-29 | 1.000000 | 9.69167e-29 | 1.000000 |
| rad52              | 3.34556e-31 | 1.000000 | 3.34556e-31 | 1.000000 |
| rad54              | 5.39308e-32 | 1.000000 | 5.39308e-32 | 1.000000 |
| rad62              | 1.60369e-34 | 1.000000 | 1.60369e-34 | 1.000000 |
| rad43              | 1.31861e-34 | 1.000000 | 1.31861e-34 | 1.000000 |
| rad51              | 1.16436e-35 | 1.000000 | 1.16436e-35 | 1.000000 |
| rad70              | 4.54243e-37 | 1.000000 | 4.54243e-37 | 1.000000 |
| PAH10+CH3          | 2.89146e-37 | 1.000000 | 2.89146e-37 | 1.000000 |
| PhcycC3H3_A+H      | 2.90884e-38 | 1.000000 | 2.90884e-38 | 1.000000 |
| rad55              | 1.38336e-38 | 1.000000 | 1.38336e-38 | 1.000000 |
| rad65              | 1.21441e-39 | 1.000000 | 1.21441e-39 | 1.000000 |
| rad58              | 1.30924e-40 | 1.000000 | 1.30924e-40 | 1.000000 |
| rad34              | 4.71563e-43 | 1.000000 | 4.71563e-43 | 1.000000 |
| rad47              | 1.76806e-43 | 1.000000 | 1.76806e-43 | 1.000000 |
| PAH1+H             | 1.13228e-43 | 1.000000 | 1.13228e-43 | 1.000000 |
| rad42              | 3.84139e-46 | 1.000000 | 3.84139e-46 | 1.000000 |
| rad41              | 5.36337e-47 | 1.000000 | 5.36337e-47 | 1.000000 |

1000.00000 Pa, 100.000000 K

=====

| Rate constant      | True (fraction)        | Effective (fraction)   |
|--------------------|------------------------|------------------------|
| Total              | 2.19347e-21 (1.00 )    | 2.19347e-21 (1.00 )    |
| Formation of rad11 | 2.14498e-21 (0.978 )   | 2.14498e-21 (0.978 )   |
| Formation of rad6  | 4.83503e-23 (0.0220 )  | 4.83503e-23 (0.0220 )  |
| H-abstraction      | 1.47101e-25 (6.71e-05) | 1.47101e-25 (6.71e-05) |

| species            | PYtrue      | Cumul    | PYeffective | Cumul    |
|--------------------|-------------|----------|-------------|----------|
| rad11              | 0.778593    | 0.778593 | 0.778593    | 0.778593 |
| rad6               | 0.210965    | 0.989558 | 0.210965    | 0.989558 |
| rad22              | 0.00531038  | 0.994868 | 0.00531038  | 0.994868 |
| Indene+H           | 0.00355584  | 0.998424 | 0.00355584  | 0.998424 |
| rad45              | 0.000605035 | 0.999029 | 0.000605035 | 0.999029 |
| rad23              | 0.000559271 | 0.999588 | 0.000559271 | 0.999588 |
| rad18              | 0.000154482 | 0.999743 | 0.000154482 | 0.999743 |
| Benzene+2-propynyl | 6.70630e-05 | 0.999810 | 6.70630e-05 | 0.999810 |
| C2H2+PhCH2         | 6.44604e-05 | 0.999874 | 6.44604e-05 | 0.999874 |

|               |             |          |             |          |
|---------------|-------------|----------|-------------|----------|
| rad36         | 3.75175e-05 | 0.999912 | 3.75175e-05 | 0.999912 |
| rad20         | 3.49685e-05 | 0.999947 | 3.49685e-05 | 0.999947 |
| rad7          | 2.68634e-05 | 0.999974 | 2.68634e-05 | 0.999974 |
| rad21         | 2.28133e-05 | 0.999996 | 2.28133e-05 | 0.999996 |
| rad25         | 3.31849e-06 | 1.000000 | 3.31849e-06 | 1.000000 |
| rad13         | 6.79415e-07 | 1.000000 | 6.79415e-07 | 1.000000 |
| PhCHCCH2+H    | 4.24544e-07 | 1.000000 | 4.24544e-07 | 1.000000 |
| rad9          | 2.52947e-08 | 1.000000 | 2.52947e-08 | 1.000000 |
| rad3          | 2.30692e-08 | 1.000000 | 2.30692e-08 | 1.000000 |
| rad4          | 1.17265e-08 | 1.000000 | 1.17265e-08 | 1.000000 |
| rad30         | 2.63845e-09 | 1.000000 | 2.63845e-09 | 1.000000 |
| Phenyl+Allene | 2.48366e-09 | 1.000000 | 0.000000    | 1.000000 |
| rad28         | 1.08888e-09 | 1.000000 | 1.08888e-09 | 1.000000 |
| rad33         | 8.65627e-10 | 1.000000 | 8.65627e-10 | 1.000000 |
| rad2          | 6.96831e-10 | 1.000000 | 6.96831e-10 | 1.000000 |
| rad15         | 4.61729e-10 | 1.000000 | 4.61729e-10 | 1.000000 |
| rad1          | 4.49250e-11 | 1.000000 | 4.49250e-11 | 1.000000 |
| rad24         | 8.94203e-12 | 1.000000 | 8.94203e-12 | 1.000000 |
| PhCCH+CH3     | 7.80109e-12 | 1.000000 | 7.80109e-12 | 1.000000 |
| rad8          | 3.57567e-12 | 1.000000 | 3.57567e-12 | 1.000000 |
| rad38         | 2.69319e-12 | 1.000000 | 2.69319e-12 | 1.000000 |
| rad10         | 1.48546e-12 | 1.000000 | 1.48546e-12 | 1.000000 |
| PAH9+H        | 5.24498e-13 | 1.000000 | 5.24498e-13 | 1.000000 |
| rad14         | 3.75458e-13 | 1.000000 | 3.75458e-13 | 1.000000 |
| rad35         | 2.87700e-13 | 1.000000 | 2.87700e-13 | 1.000000 |
| PhCH2CCH+H    | 2.70111e-13 | 1.000000 | 2.70111e-13 | 1.000000 |
| rad60syn      | 2.87807e-14 | 1.000000 | 2.87807e-14 | 1.000000 |
| rad46         | 1.68477e-14 | 1.000000 | 1.68477e-14 | 1.000000 |
| rad60anti     | 5.16806e-15 | 1.000000 | 5.16806e-15 | 1.000000 |
| Ph+MeAc       | 2.22989e-15 | 1.000000 | 2.22989e-15 | 1.000000 |
| PhCCCH3+H     | 1.46258e-15 | 1.000000 | 1.46258e-15 | 1.000000 |
| rad27         | 9.26587e-16 | 1.000000 | 9.26587e-16 | 1.000000 |
| PAH7+H        | 5.43465e-16 | 1.000000 | 5.43465e-16 | 1.000000 |
| rad26         | 6.22607e-17 | 1.000000 | 6.22607e-17 | 1.000000 |
| rad31         | 8.60736e-18 | 1.000000 | 8.60736e-18 | 1.000000 |
| rad39         | 2.33277e-18 | 1.000000 | 2.33277e-18 | 1.000000 |
| PAH3+H        | 2.63994e-20 | 1.000000 | 2.63994e-20 | 1.000000 |
| rad59         | 1.24571e-20 | 1.000000 | 1.24571e-20 | 1.000000 |
| rad50         | 7.76830e-23 | 1.000000 | 7.76830e-23 | 1.000000 |
| rad5          | 9.90184e-24 | 1.000000 | 9.90185e-24 | 1.000000 |
| rad12         | 1.38656e-24 | 1.000000 | 1.38656e-24 | 1.000000 |
| rad37         | 1.32863e-26 | 1.000000 | 1.32863e-26 | 1.000000 |
| rad19syn      | 1.97285e-27 | 1.000000 | 1.97285e-27 | 1.000000 |
| rad52         | 4.28643e-30 | 1.000000 | 4.28643e-30 | 1.000000 |
| rad54         | 1.51734e-30 | 1.000000 | 1.51734e-30 | 1.000000 |
| rad62         | 4.45019e-33 | 1.000000 | 4.45019e-33 | 1.000000 |
| rad43         | 3.34792e-33 | 1.000000 | 3.34792e-33 | 1.000000 |
| rad51         | 2.14375e-34 | 1.000000 | 2.14375e-34 | 1.000000 |
| rad70         | 1.08639e-35 | 1.000000 | 1.08639e-35 | 1.000000 |
| PAH10+CH3     | 8.47149e-36 | 1.000000 | 8.47149e-36 | 1.000000 |
| PhcycC3H3_A+H | 9.71626e-37 | 1.000000 | 9.71626e-37 | 1.000000 |
| rad55         | 4.58394e-37 | 1.000000 | 4.58394e-37 | 1.000000 |
| rad65         | 2.53904e-38 | 1.000000 | 2.53904e-38 | 1.000000 |
| rad58         | 3.17576e-39 | 1.000000 | 3.17576e-39 | 1.000000 |
| rad34         | 1.38828e-41 | 1.000000 | 1.38828e-41 | 1.000000 |
| rad47         | 4.41926e-42 | 1.000000 | 4.41926e-42 | 1.000000 |
| PAH1+H        | 4.41018e-42 | 1.000000 | 4.41018e-42 | 1.000000 |
| rad42         | 1.79410e-44 | 1.000000 | 1.79410e-44 | 1.000000 |
| rad41         | 3.23527e-45 | 1.000000 | 3.23527e-45 | 1.000000 |

1000.00000 Pa, 110.000000 K

=====

| Rate constant      | True (fraction)        | Effective (fraction)   |
|--------------------|------------------------|------------------------|
| Total              | 1.09987e-20 (1.00 )    | 1.09987e-20 (1.00 )    |
| Formation of rad11 | 1.06527e-20 (0.969 )   | 1.06527e-20 (0.969 )   |
| Formation of rad6  | 3.44008e-22 (0.0313 )  | 3.44008e-22 (0.0313 )  |
| H-abstraction      | 2.02040e-24 (0.000184) | 2.02040e-24 (0.000184) |

| species            | PYtrue      | Cumul    | PYeffective | Cumul    |
|--------------------|-------------|----------|-------------|----------|
| rad11              | 0.748778    | 0.748778 | 0.748778    | 0.748778 |
| rad6               | 0.239478    | 0.988256 | 0.239478    | 0.988256 |
| rad22              | 0.00572752  | 0.993984 | 0.00572752  | 0.993984 |
| Indene+H           | 0.00415232  | 0.998136 | 0.00415232  | 0.998136 |
| rad23              | 0.000686841 | 0.998823 | 0.000686841 | 0.998823 |
| rad45              | 0.000648404 | 0.999472 | 0.000648404 | 0.999472 |
| Benzene+2-propynyl | 0.000183695 | 0.999655 | 0.000183695 | 0.999655 |
| rad18              | 0.000139405 | 0.999795 | 0.000139405 | 0.999795 |
| C2H2+PhCH2         | 7.57617e-05 | 0.999870 | 7.57617e-05 | 0.999870 |

|               |             |          |             |          |
|---------------|-------------|----------|-------------|----------|
| rad36         | 4.01961e-05 | 0.999911 | 4.01961e-05 | 0.999911 |
| rad7          | 3.47469e-05 | 0.999945 | 3.47469e-05 | 0.999945 |
| rad20         | 3.03946e-05 | 0.999976 | 3.03946e-05 | 0.999976 |
| rad21         | 1.97762e-05 | 0.999995 | 1.97762e-05 | 0.999995 |
| rad25         | 3.57864e-06 | 0.999999 | 3.57864e-06 | 0.999999 |
| rad13         | 7.45223e-07 | 1.000000 | 7.45223e-07 | 1.000000 |
| PhCHCCH2+H    | 5.23486e-07 | 1.000000 | 5.23486e-07 | 1.000000 |
| rad3          | 3.24920e-08 | 1.000000 | 3.24920e-08 | 1.000000 |
| rad9          | 3.19421e-08 | 1.000000 | 3.19421e-08 | 1.000000 |
| rad4          | 1.65311e-08 | 1.000000 | 1.65311e-08 | 1.000000 |
| Phenyl+Allene | 3.99057e-09 | 1.000000 | 0.000000    | 1.000000 |
| rad30         | 3.24930e-09 | 1.000000 | 3.24930e-09 | 1.000000 |
| rad28         | 1.61816e-09 | 1.000000 | 1.61816e-09 | 1.000000 |
| rad2          | 1.20561e-09 | 1.000000 | 1.20561e-09 | 1.000000 |
| rad33         | 9.43238e-10 | 1.000000 | 9.43238e-10 | 1.000000 |
| rad15         | 5.78177e-10 | 1.000000 | 5.78177e-10 | 1.000000 |
| rad1          | 7.79947e-11 | 1.000000 | 7.79947e-11 | 1.000000 |
| PhCCH+CH3     | 1.54838e-11 | 1.000000 | 1.54838e-11 | 1.000000 |
| rad24         | 9.33009e-12 | 1.000000 | 9.33009e-12 | 1.000000 |
| rad8          | 5.40326e-12 | 1.000000 | 5.40326e-12 | 1.000000 |
| rad38         | 3.67503e-12 | 1.000000 | 3.67503e-12 | 1.000000 |
| rad10         | 3.14612e-12 | 1.000000 | 3.14612e-12 | 1.000000 |
| PhCH2CCH+H    | 9.85953e-13 | 1.000000 | 9.85953e-13 | 1.000000 |
| PAH9+H        | 8.13563e-13 | 1.000000 | 8.13563e-13 | 1.000000 |
| rad14         | 6.73346e-13 | 1.000000 | 6.73346e-13 | 1.000000 |
| rad35         | 4.41756e-13 | 1.000000 | 4.41756e-13 | 1.000000 |
| rad60syn      | 4.47458e-14 | 1.000000 | 4.47458e-14 | 1.000000 |
| rad46         | 2.44604e-14 | 1.000000 | 2.44604e-14 | 1.000000 |
| rad60anti     | 8.95970e-15 | 1.000000 | 8.95970e-15 | 1.000000 |
| Ph+MeAc       | 5.73241e-15 | 1.000000 | 5.73241e-15 | 1.000000 |
| PhCCCH3+H     | 3.66637e-15 | 1.000000 | 3.66637e-15 | 1.000000 |
| PAH7+H        | 2.13012e-15 | 1.000000 | 2.13012e-15 | 1.000000 |
| rad27         | 1.78812e-15 | 1.000000 | 1.78812e-15 | 1.000000 |
| rad26         | 1.76746e-16 | 1.000000 | 1.76746e-16 | 1.000000 |
| rad31         | 1.25616e-17 | 1.000000 | 1.25616e-17 | 1.000000 |
| rad39         | 5.63322e-18 | 1.000000 | 5.63322e-18 | 1.000000 |
| PAH3+H        | 1.69097e-19 | 1.000000 | 1.69097e-19 | 1.000000 |
| rad59         | 7.68550e-20 | 1.000000 | 7.68550e-20 | 1.000000 |
| rad50         | 4.09927e-22 | 1.000000 | 4.09927e-22 | 1.000000 |
| rad5          | 5.98882e-23 | 1.000000 | 5.98882e-23 | 1.000000 |
| rad12         | 6.61015e-24 | 1.000000 | 6.61015e-24 | 1.000000 |
| rad37         | 9.32885e-26 | 1.000000 | 9.32885e-26 | 1.000000 |
| rad19syn      | 4.64507e-26 | 1.000000 | 4.64507e-26 | 1.000000 |
| rad52         | 7.09003e-29 | 1.000000 | 7.09003e-29 | 1.000000 |
| rad54         | 6.31543e-29 | 1.000000 | 6.31543e-29 | 1.000000 |
| rad62         | 1.71966e-31 | 1.000000 | 1.71966e-31 | 1.000000 |
| rad43         | 9.86826e-32 | 1.000000 | 9.86826e-32 | 1.000000 |
| rad51         | 6.35325e-33 | 1.000000 | 6.35325e-33 | 1.000000 |
| rad70         | 7.48078e-34 | 1.000000 | 7.48078e-34 | 1.000000 |
| PAH10+CH3     | 2.85909e-34 | 1.000000 | 2.85909e-34 | 1.000000 |
| PhcycC3H3_A+H | 7.28224e-35 | 1.000000 | 7.28224e-35 | 1.000000 |
| rad55         | 3.46133e-35 | 1.000000 | 3.46133e-35 | 1.000000 |
| rad65         | 8.90046e-37 | 1.000000 | 8.90046e-37 | 1.000000 |
| rad58         | 2.20441e-37 | 1.000000 | 2.20441e-37 | 1.000000 |
| rad34         | 1.08577e-39 | 1.000000 | 1.08577e-39 | 1.000000 |
| PAH1+H        | 3.73817e-40 | 1.000000 | 3.73817e-40 | 1.000000 |
| rad47         | 1.86521e-40 | 1.000000 | 1.86521e-40 | 1.000000 |
| rad42         | 1.60801e-42 | 1.000000 | 1.60801e-42 | 1.000000 |
| rad41         | 2.97463e-43 | 1.000000 | 2.97463e-43 | 1.000000 |

1000.00000 Pa, 120.000000 K

=====

| Rate constant      | True (fraction)        | Effective (fraction)   |
|--------------------|------------------------|------------------------|
| Total              | 4.24245e-20 (1.00 )    | 4.24245e-20 (1.00 )    |
| Formation of rad11 | 4.06372e-20 (0.958 )   | 4.06372e-20 (0.958 )   |
| Formation of rad6  | 1.76944e-21 (0.0417 )  | 1.76944e-21 (0.0417 )  |
| H-abstraction      | 1.78210e-23 (0.000420) | 1.78210e-23 (0.000420) |

| species            | PYtrue      | Cumul    | PYeffective | Cumul    |
|--------------------|-------------|----------|-------------|----------|
| rad11              | 0.717877    | 0.717877 | 0.717877    | 0.717877 |
| rad6               | 0.268939    | 0.986816 | 0.268939    | 0.986816 |
| rad22              | 0.00610877  | 0.992925 | 0.00610877  | 0.992925 |
| Indene+H           | 0.00478865  | 0.997714 | 0.00478865  | 0.997714 |
| rad23              | 0.000828229 | 0.998542 | 0.000828229 | 0.998542 |
| rad45              | 0.000688106 | 0.999230 | 0.000688106 | 0.999230 |
| Benzene+2-propynyl | 0.000420064 | 0.999650 | 0.000420064 | 0.999650 |
| rad18              | 0.000125788 | 0.999776 | 0.000125788 | 0.999776 |
| C2H2+PhCH2         | 8.83051e-05 | 0.999864 | 8.83051e-05 | 0.999864 |

|               |             |          |             |          |
|---------------|-------------|----------|-------------|----------|
| rad7          | 4.39243e-05 | 0.999908 | 4.39243e-05 | 0.999908 |
| rad36         | 4.26542e-05 | 0.999951 | 4.26542e-05 | 0.999951 |
| rad20         | 2.65871e-05 | 0.999977 | 2.65871e-05 | 0.999977 |
| rad21         | 1.72586e-05 | 0.999995 | 1.72586e-05 | 0.999995 |
| rad25         | 3.80882e-06 | 0.999998 | 3.80882e-06 | 0.999998 |
| rad13         | 8.11708e-07 | 0.999999 | 8.11708e-07 | 0.999999 |
| PhCHCCH2+H    | 6.43656e-07 | 1.000000 | 6.43656e-07 | 1.000000 |
| rad3          | 4.47385e-08 | 1.000000 | 4.47385e-08 | 1.000000 |
| rad9          | 4.02428e-08 | 1.000000 | 4.02428e-08 | 1.000000 |
| rad4          | 2.27843e-08 | 1.000000 | 2.27843e-08 | 1.000000 |
| Phenyl+Allene | 6.31443e-09 | 1.000000 | 0.000000    | 1.000000 |
| rad30         | 3.95585e-09 | 1.000000 | 3.95585e-09 | 1.000000 |
| rad28         | 2.34914e-09 | 1.000000 | 2.34914e-09 | 1.000000 |
| rad2          | 2.01610e-09 | 1.000000 | 2.01610e-09 | 1.000000 |
| rad33         | 1.02182e-09 | 1.000000 | 1.02182e-09 | 1.000000 |
| rad15         | 7.16120e-10 | 1.000000 | 7.16120e-10 | 1.000000 |
| rad1          | 1.30926e-10 | 1.000000 | 1.30926e-10 | 1.000000 |
| PhCCH+CH3     | 2.95896e-11 | 1.000000 | 2.95896e-11 | 1.000000 |
| rad24         | 9.68131e-12 | 1.000000 | 9.68131e-12 | 1.000000 |
| rad8          | 8.10879e-12 | 1.000000 | 8.10879e-12 | 1.000000 |
| rad10         | 6.37631e-12 | 1.000000 | 6.37631e-12 | 1.000000 |
| rad38         | 4.95913e-12 | 1.000000 | 4.95913e-12 | 1.000000 |
| PhCH2CCH+H    | 3.18945e-12 | 1.000000 | 3.18945e-12 | 1.000000 |
| PAH9+H        | 1.24133e-12 | 1.000000 | 1.24133e-12 | 1.000000 |
| rad14         | 1.15597e-12 | 1.000000 | 1.15597e-12 | 1.000000 |
| rad35         | 6.66565e-13 | 1.000000 | 6.66565e-13 | 1.000000 |
| rad60syn      | 6.87605e-14 | 1.000000 | 6.87605e-14 | 1.000000 |
| rad46         | 3.52691e-14 | 1.000000 | 3.52691e-14 | 1.000000 |
| rad60anti     | 1.51006e-14 | 1.000000 | 1.51006e-14 | 1.000000 |
| Ph+MeAc       | 1.39875e-14 | 1.000000 | 1.39875e-14 | 1.000000 |
| PhCCCH3+H     | 8.80503e-15 | 1.000000 | 8.80503e-15 | 1.000000 |
| PAH7+H        | 7.46347e-15 | 1.000000 | 7.46347e-15 | 1.000000 |
| rad27         | 3.27537e-15 | 1.000000 | 3.27537e-15 | 1.000000 |
| rad26         | 4.78390e-16 | 1.000000 | 4.78390e-16 | 1.000000 |
| rad31         | 1.79810e-17 | 1.000000 | 1.79810e-17 | 1.000000 |
| rad39         | 1.30562e-17 | 1.000000 | 1.30562e-17 | 1.000000 |
| PAH3+H        | 9.28246e-19 | 1.000000 | 9.28246e-19 | 1.000000 |
| rad59         | 4.04607e-19 | 1.000000 | 4.04607e-19 | 1.000000 |
| rad50         | 1.96691e-21 | 1.000000 | 1.96691e-21 | 1.000000 |
| rad5          | 3.23980e-22 | 1.000000 | 3.23980e-22 | 1.000000 |
| rad12         | 3.05047e-23 | 1.000000 | 3.05047e-23 | 1.000000 |
| rad19syn      | 9.03615e-25 | 1.000000 | 9.03615e-25 | 1.000000 |
| rad37         | 6.06127e-25 | 1.000000 | 6.06127e-25 | 1.000000 |
| rad54         | 2.16559e-27 | 1.000000 | 2.16559e-27 | 1.000000 |
| rad52         | 1.13889e-27 | 1.000000 | 1.13889e-27 | 1.000000 |
| rad62         | 6.43655e-30 | 1.000000 | 6.43655e-30 | 1.000000 |
| rad43         | 2.72169e-30 | 1.000000 | 2.72169e-30 | 1.000000 |
| rad51         | 2.32854e-31 | 1.000000 | 2.32854e-31 | 1.000000 |
| rad70         | 1.05883e-31 | 1.000000 | 1.05883e-31 | 1.000000 |
| PAH10+CH3     | 9.31059e-33 | 1.000000 | 9.31059e-33 | 1.000000 |
| PhcycC3H3_A+H | 8.57109e-33 | 1.000000 | 8.57109e-33 | 1.000000 |
| rad55         | 4.48603e-33 | 1.000000 | 4.48603e-33 | 1.000000 |
| rad65         | 4.44099e-35 | 1.000000 | 4.44099e-35 | 1.000000 |
| rad58         | 3.13383e-35 | 1.000000 | 3.13383e-35 | 1.000000 |
| rad34         | 1.56989e-37 | 1.000000 | 1.56989e-37 | 1.000000 |
| PAH1+H        | 4.87057e-38 | 1.000000 | 4.87057e-38 | 1.000000 |
| rad47         | 1.13389e-38 | 1.000000 | 1.13389e-38 | 1.000000 |
| rad42         | 2.07861e-40 | 1.000000 | 2.07861e-40 | 1.000000 |
| rad41         | 3.35565e-41 | 1.000000 | 3.35565e-41 | 1.000000 |

1000.00000 Pa, 130.000000 K

=====

| Rate constant      | True (fraction)        | Effective (fraction)   |
|--------------------|------------------------|------------------------|
| Total              | 1.33719e-19 (1.00 )    | 1.33719e-19 (1.00 )    |
| Formation of rad11 | 1.26517e-19 (0.946 )   | 1.26517e-19 (0.946 )   |
| Formation of rad6  | 7.08974e-21 (0.0530 )  | 7.08974e-21 (0.0530 )  |
| H-abstraction      | 1.11864e-22 (0.000837) | 1.11864e-22 (0.000837) |

| species            | PYtrue      | Cumul    | PYeffective | Cumul    |
|--------------------|-------------|----------|-------------|----------|
| rad11              | 0.686112    | 0.686112 | 0.686112    | 0.686112 |
| rad6               | 0.299062    | 0.985173 | 0.299062    | 0.985173 |
| rad22              | 0.00645336  | 0.991627 | 0.00645336  | 0.991627 |
| Indene+H           | 0.00546891  | 0.997095 | 0.00546891  | 0.997095 |
| rad23              | 0.000984190 | 0.998080 | 0.000984190 | 0.998080 |
| Benzene+2-propynyl | 0.000836559 | 0.998916 | 0.000836559 | 0.998916 |
| rad45              | 0.000724453 | 0.999641 | 0.000724453 | 0.999641 |
| rad18              | 0.000113498 | 0.999754 | 0.000113498 | 0.999754 |
| C2H2+PhCH2         | 0.000102312 | 0.999856 | 0.000102312 | 0.999856 |



|               |             |          |             |          |
|---------------|-------------|----------|-------------|----------|
| rad7          | 5.43809e-05 | 0.999911 | 5.43809e-05 | 0.999911 |
| rad36         | 4.49131e-05 | 0.999956 | 4.49131e-05 | 0.999956 |
| rad20         | 2.33703e-05 | 0.999979 | 2.33703e-05 | 0.999979 |
| rad21         | 1.51396e-05 | 0.999994 | 1.51396e-05 | 0.999994 |
| rad25         | 4.00596e-06 | 0.999998 | 4.00596e-06 | 0.999998 |
| rad13         | 8.78155e-07 | 0.999999 | 8.78155e-07 | 0.999999 |
| PhCHCCH2+H    | 7.90481e-07 | 1.000000 | 7.90481e-07 | 1.000000 |
| rad3          | 6.03531e-08 | 1.000000 | 6.03531e-08 | 1.000000 |
| rad9          | 5.06572e-08 | 1.000000 | 5.06572e-08 | 1.000000 |
| rad4          | 3.07705e-08 | 1.000000 | 3.07705e-08 | 1.000000 |
| Phenyl+Allene | 9.85709e-09 | 1.000000 | 0.000000    | 1.000000 |
| rad30         | 4.77703e-09 | 1.000000 | 4.77703e-09 | 1.000000 |
| rad28         | 3.34075e-09 | 1.000000 | 3.34075e-09 | 1.000000 |
| rad2          | 3.27524e-09 | 1.000000 | 3.27524e-09 | 1.000000 |
| rad33         | 1.10050e-09 | 1.000000 | 1.10050e-09 | 1.000000 |
| rad15         | 8.80323e-10 | 1.000000 | 8.80323e-10 | 1.000000 |
| rad1          | 2.13589e-10 | 1.000000 | 2.13589e-10 | 1.000000 |
| PhCCH+CH3     | 5.48608e-11 | 1.000000 | 5.48608e-11 | 1.000000 |
| rad10         | 1.24735e-11 | 1.000000 | 1.24735e-11 | 1.000000 |
| rad8          | 1.21081e-11 | 1.000000 | 1.21081e-11 | 1.000000 |
| rad24         | 1.00003e-11 | 1.000000 | 1.00003e-11 | 1.000000 |
| PhCH2CCH+H    | 9.20610e-12 | 1.000000 | 9.20610e-12 | 1.000000 |
| rad38         | 6.64486e-12 | 1.000000 | 6.64486e-12 | 1.000000 |
| rad14         | 1.90978e-12 | 1.000000 | 1.90978e-12 | 1.000000 |
| PAH9+H        | 1.87413e-12 | 1.000000 | 1.87413e-12 | 1.000000 |
| rad35         | 9.94207e-13 | 1.000000 | 9.94207e-13 | 1.000000 |
| rad60syn      | 1.04685e-13 | 1.000000 | 1.04685e-13 | 1.000000 |
| rad46         | 5.07045e-14 | 1.000000 | 5.07045e-14 | 1.000000 |
| Ph+MeAc       | 3.28089e-14 | 1.000000 | 3.28089e-14 | 1.000000 |
| rad60anti     | 2.48750e-14 | 1.000000 | 2.48750e-14 | 1.000000 |
| PAH7+H        | 2.32407e-14 | 1.000000 | 2.32407e-14 | 1.000000 |
| PhCCCH3+H     | 2.04998e-14 | 1.000000 | 2.04998e-14 | 1.000000 |
| rad27         | 5.74538e-15 | 1.000000 | 5.74538e-15 | 1.000000 |
| rad26         | 1.25183e-15 | 1.000000 | 1.25183e-15 | 1.000000 |
| rad39         | 2.93979e-17 | 1.000000 | 2.93979e-17 | 1.000000 |
| rad31         | 2.53040e-17 | 1.000000 | 2.53040e-17 | 1.000000 |
| PAH3+H        | 4.27338e-18 | 1.000000 | 4.27338e-18 | 1.000000 |
| rad59         | 1.78494e-18 | 1.000000 | 1.78494e-18 | 1.000000 |
| rad50         | 8.38240e-21 | 1.000000 | 8.38240e-21 | 1.000000 |
| rad5          | 1.58372e-21 | 1.000000 | 1.58372e-21 | 1.000000 |
| rad12         | 1.38083e-22 | 1.000000 | 1.38083e-22 | 1.000000 |
| rad19syn      | 1.30453e-23 | 1.000000 | 1.30453e-23 | 1.000000 |
| rad37         | 3.69538e-24 | 1.000000 | 3.69538e-24 | 1.000000 |
| rad54         | 5.07396e-26 | 1.000000 | 5.07396e-26 | 1.000000 |
| rad52         | 1.49540e-26 | 1.000000 | 1.49540e-26 | 1.000000 |
| rad62         | 1.83296e-28 | 1.000000 | 1.83296e-28 | 1.000000 |
| rad43         | 6.06246e-29 | 1.000000 | 6.06246e-29 | 1.000000 |
| rad70         | 2.95928e-29 | 1.000000 | 2.95928e-29 | 1.000000 |
| rad51         | 6.83498e-30 | 1.000000 | 6.83498e-30 | 1.000000 |
| PhcycC3H3_A+H | 6.50721e-31 | 1.000000 | 6.50721e-31 | 1.000000 |
| rad55         | 3.22828e-31 | 1.000000 | 3.22828e-31 | 1.000000 |
| PAH10+CH3     | 2.55413e-31 | 1.000000 | 2.55413e-31 | 1.000000 |
| rad58         | 9.24850e-33 | 1.000000 | 9.24850e-33 | 1.000000 |
| rad65         | 2.25838e-33 | 1.000000 | 2.25838e-33 | 1.000000 |
| rad34         | 3.05654e-35 | 1.000000 | 3.05654e-35 | 1.000000 |
| PAH1+H        | 6.20349e-36 | 1.000000 | 6.20349e-36 | 1.000000 |
| rad47         | 8.07644e-37 | 1.000000 | 8.07644e-37 | 1.000000 |
| rad42         | 2.70177e-38 | 1.000000 | 2.70177e-38 | 1.000000 |
| rad41         | 3.55369e-39 | 1.000000 | 3.55369e-39 | 1.000000 |

1000.00000 Pa, 140.000000 K

=====

| Rate constant      | True (fraction)        | Effective (fraction)   |
|--------------------|------------------------|------------------------|
| Total              | 3.59582e-19 (1.00 )    | 3.59582e-19 (1.00 )    |
| Formation of rad11 | 3.35703e-19 (0.934 )   | 3.35703e-19 (0.934 )   |
| Formation of rad6  | 2.33415e-20 (0.0649 )  | 2.33415e-20 (0.0649 )  |
| H-abstraction      | 5.37685e-22 (0.00150 ) | 5.37685e-22 (0.00150 ) |

| species            | PYtrue      | Cumul    | PYeffective | Cumul    |
|--------------------|-------------|----------|-------------|----------|
| rad11              | 0.653690    | 0.653690 | 0.653690    | 0.653690 |
| rad6               | 0.329570    | 0.983261 | 0.329570    | 0.983261 |
| rad22              | 0.00675995  | 0.990020 | 0.00675995  | 0.990020 |
| Indene+H           | 0.00619735  | 0.996218 | 0.00619735  | 0.996218 |
| Benzene+2-propynyl | 0.00149531  | 0.997713 | 0.00149531  | 0.997713 |
| rad23              | 0.00115555  | 0.998869 | 0.00115555  | 0.998869 |
| rad45              | 0.000757712 | 0.999626 | 0.000757712 | 0.999626 |
| C2H2+PhCH2         | 0.000118037 | 0.999744 | 0.000118037 | 0.999744 |
| rad18              | 0.000102397 | 0.999847 | 0.000102397 | 0.999847 |

|               |             |          |             |          |
|---------------|-------------|----------|-------------|----------|
| rad7          | 6.60733e-05 | 0.999913 | 6.60733e-05 | 0.999913 |
| rad36         | 4.69912e-05 | 0.999960 | 4.69912e-05 | 0.999960 |
| rad20         | 2.06191e-05 | 0.999981 | 2.06191e-05 | 0.999981 |
| rad21         | 1.33333e-05 | 0.999994 | 1.33333e-05 | 0.999994 |
| rad25         | 4.16724e-06 | 0.999998 | 4.16724e-06 | 0.999998 |
| PhCHCCH2+H    | 9.70717e-07 | 0.999999 | 9.70717e-07 | 0.999999 |
| rad13         | 9.43931e-07 | 1.000000 | 9.43931e-07 | 1.000000 |
| rad3          | 7.99558e-08 | 1.000000 | 7.99558e-08 | 1.000000 |
| rad9          | 6.37678e-08 | 1.000000 | 6.37678e-08 | 1.000000 |
| rad4          | 4.08149e-08 | 1.000000 | 4.08149e-08 | 1.000000 |
| Phenyl+Allene | 1.51989e-08 | 1.000000 | 0.000000    | 1.000000 |
| rad30         | 5.73569e-09 | 1.000000 | 5.73569e-09 | 1.000000 |
| rad2          | 5.19450e-09 | 1.000000 | 5.19450e-09 | 1.000000 |
| rad28         | 4.66840e-09 | 1.000000 | 4.66840e-09 | 1.000000 |
| rad33         | 1.17848e-09 | 1.000000 | 1.17848e-09 | 1.000000 |
| rad15         | 1.07665e-09 | 1.000000 | 1.07665e-09 | 1.000000 |
| rad1          | 3.40309e-10 | 1.000000 | 3.40309e-10 | 1.000000 |
| PhCCH+CH3     | 9.93606e-11 | 1.000000 | 9.93606e-11 | 1.000000 |
| PhCH2CCH+H    | 2.40589e-11 | 1.000000 | 2.40589e-11 | 1.000000 |
| rad10         | 2.37315e-11 | 1.000000 | 2.37315e-11 | 1.000000 |
| rad8          | 1.80065e-11 | 1.000000 | 1.80065e-11 | 1.000000 |
| rad24         | 1.02911e-11 | 1.000000 | 1.02911e-11 | 1.000000 |
| rad38         | 8.86737e-12 | 1.000000 | 8.86737e-12 | 1.000000 |
| rad14         | 3.05110e-12 | 1.000000 | 3.05110e-12 | 1.000000 |
| PAH9+H        | 2.81160e-12 | 1.000000 | 2.81160e-12 | 1.000000 |
| rad35         | 1.47202e-12 | 1.000000 | 1.47202e-12 | 1.000000 |
| rad60syn      | 1.58115e-13 | 1.000000 | 1.58115e-13 | 1.000000 |
| Ph+MeAc       | 7.46654e-14 | 1.000000 | 7.46654e-14 | 1.000000 |
| rad46         | 7.28741e-14 | 1.000000 | 7.28741e-14 | 1.000000 |
| PAH7+H        | 6.49579e-14 | 1.000000 | 6.49579e-14 | 1.000000 |
| PhCCCH3+H     | 4.67062e-14 | 1.000000 | 4.67062e-14 | 1.000000 |
| rad60anti     | 4.02047e-14 | 1.000000 | 4.02047e-14 | 1.000000 |
| rad27         | 9.72575e-15 | 1.000000 | 9.72575e-15 | 1.000000 |
| rad26         | 3.20043e-15 | 1.000000 | 3.20043e-15 | 1.000000 |
| rad39         | 6.49145e-17 | 1.000000 | 6.49145e-17 | 1.000000 |
| rad31         | 3.50966e-17 | 1.000000 | 3.50966e-17 | 1.000000 |
| PAH3+H        | 1.67282e-17 | 1.000000 | 1.67282e-17 | 1.000000 |
| rad59         | 6.70112e-18 | 1.000000 | 6.70112e-18 | 1.000000 |
| rad50         | 3.18000e-20 | 1.000000 | 3.18000e-20 | 1.000000 |
| rad5          | 7.07888e-21 | 1.000000 | 7.07888e-21 | 1.000000 |
| rad12         | 6.15977e-22 | 1.000000 | 6.15977e-22 | 1.000000 |
| rad19syn      | 1.40562e-22 | 1.000000 | 1.40562e-22 | 1.000000 |
| rad37         | 2.13244e-23 | 1.000000 | 2.13244e-23 | 1.000000 |
| rad54         | 8.20556e-25 | 1.000000 | 8.20556e-25 | 1.000000 |
| rad52         | 1.53452e-25 | 1.000000 | 1.53452e-25 | 1.000000 |
| rad62         | 3.75162e-27 | 1.000000 | 3.75162e-27 | 1.000000 |
| rad70         | 1.76789e-27 | 1.000000 | 1.76789e-27 | 1.000000 |
| rad43         | 1.04058e-27 | 1.000000 | 1.04058e-27 | 1.000000 |
| rad51         | 1.44596e-28 | 1.000000 | 1.44596e-28 | 1.000000 |
| PhcycC3H3_A+H | 2.93577e-29 | 1.000000 | 2.93577e-29 | 1.000000 |
| rad55         | 1.35396e-29 | 1.000000 | 1.35396e-29 | 1.000000 |
| PAH10+CH3     | 5.60717e-30 | 1.000000 | 5.60717e-30 | 1.000000 |
| rad58         | 8.57499e-31 | 1.000000 | 8.57499e-31 | 1.000000 |
| rad65         | 7.58383e-32 | 1.000000 | 7.58383e-32 | 1.000000 |
| rad34         | 8.00060e-33 | 1.000000 | 8.00060e-33 | 1.000000 |
| PAH1+H        | 7.44584e-34 | 1.000000 | 7.44584e-34 | 1.000000 |
| rad47         | 5.67705e-35 | 1.000000 | 5.67705e-35 | 1.000000 |
| rad42         | 4.56402e-36 | 1.000000 | 4.56402e-36 | 1.000000 |
| rad41         | 3.75984e-37 | 1.000000 | 3.75984e-37 | 1.000000 |

1000.00000 Pa, 150.000000 K

=====

| Rate constant      | True (fraction)        | Effective (fraction)   |
|--------------------|------------------------|------------------------|
| Total              | 8.51464e-19 (1.00 )    | 8.51464e-19 (1.00 )    |
| Formation of rad11 | 7.83711e-19 (0.920 )   | 7.83711e-19 (0.920 )   |
| Formation of rad6  | 6.56651e-20 (0.0771 )  | 6.56651e-20 (0.0771 )  |
| H-abstraction      | 2.08816e-21 (0.00245 ) | 2.08816e-21 (0.00245 ) |

| species            | PYtrue      | Cumul    | PYeffective | Cumul    |
|--------------------|-------------|----------|-------------|----------|
| rad11              | 0.620808    | 0.620808 | 0.620808    | 0.620808 |
| rad6               | 0.360211    | 0.981019 | 0.360211    | 0.981019 |
| rad22              | 0.00702675  | 0.988046 | 0.00702675  | 0.988046 |
| Indene+H           | 0.00697811  | 0.995024 | 0.00697811  | 0.995024 |
| Benzene+2-propynyl | 0.00245244  | 0.997477 | 0.00245244  | 0.997477 |
| rad23              | 0.00134312  | 0.998820 | 0.00134312  | 0.998820 |
| rad45              | 0.000788106 | 0.999608 | 0.000788106 | 0.999608 |
| C2H2+PhCH2         | 0.000135767 | 0.999743 | 0.000135767 | 0.999743 |
| rad18              | 9.23542e-05 | 0.999836 | 9.23542e-05 | 0.999836 |

|               |             |          |             |          |
|---------------|-------------|----------|-------------|----------|
| rad7          | 7.89363e-05 | 0.999915 | 7.89363e-05 | 0.999915 |
| rad36         | 4.89048e-05 | 0.999964 | 4.89048e-05 | 0.999964 |
| rad20         | 1.82419e-05 | 0.999982 | 1.82419e-05 | 0.999982 |
| rad21         | 1.17772e-05 | 0.999994 | 1.17772e-05 | 0.999994 |
| rad25         | 4.29033e-06 | 0.999998 | 4.29033e-06 | 0.999998 |
| PhCHCCH2+H    | 1.19271e-06 | 0.999999 | 1.19271e-06 | 0.999999 |
| rad13         | 1.00851e-06 | 1.00000  | 1.00851e-06 | 1.00000  |
| rad3          | 1.04261e-07 | 1.00000  | 1.04261e-07 | 1.00000  |
| rad9          | 8.03060e-08 | 1.00000  | 8.03060e-08 | 1.00000  |
| rad4          | 5.32941e-08 | 1.00000  | 5.32941e-08 | 1.00000  |
| Phenyl+Allene | 2.31675e-08 | 1.00000  | 0.00000     | 1.00000  |
| rad2          | 8.07841e-09 | 1.00000  | 8.07841e-09 | 1.00000  |
| rad30         | 6.85899e-09 | 1.00000  | 6.85899e-09 | 1.00000  |
| rad28         | 6.42998e-09 | 1.00000  | 6.42998e-09 | 1.00000  |
| rad15         | 1.31222e-09 | 1.00000  | 1.31222e-09 | 1.00000  |
| rad33         | 1.25515e-09 | 1.00000  | 1.25515e-09 | 1.00000  |
| rad1          | 5.31909e-10 | 1.00000  | 5.31909e-10 | 1.00000  |
| PhCCH+CH3     | 1.76765e-10 | 1.00000  | 1.76765e-10 | 1.00000  |
| PhCH2CCH+H    | 5.77757e-11 | 1.00000  | 5.77757e-11 | 1.00000  |
| rad10         | 4.41822e-11 | 1.00000  | 4.41822e-11 | 1.00000  |
| rad8          | 2.66777e-11 | 1.00000  | 2.66777e-11 | 1.00000  |
| rad38         | 1.18100e-11 | 1.00000  | 1.18100e-11 | 1.00000  |
| rad24         | 1.05568e-11 | 1.00000  | 1.05568e-11 | 1.00000  |
| rad14         | 4.73291e-12 | 1.00000  | 4.73291e-12 | 1.00000  |
| PAH9+H        | 4.20336e-12 | 1.00000  | 4.20336e-12 | 1.00000  |
| rad35         | 2.16979e-12 | 1.00000  | 2.16979e-12 | 1.00000  |
| rad60syn      | 2.37072e-13 | 1.00000  | 2.37072e-13 | 1.00000  |
| Ph+MeAc       | 1.65916e-13 | 1.00000  | 1.65916e-13 | 1.00000  |
| PAH7+H        | 1.65250e-13 | 1.00000  | 1.65250e-13 | 1.00000  |
| rad46         | 1.04878e-13 | 1.00000  | 1.04878e-13 | 1.00000  |
| PhCCCH3+H     | 1.04834e-13 | 1.00000  | 1.04834e-13 | 1.00000  |
| rad60anti     | 6.39288e-14 | 1.00000  | 6.39288e-14 | 1.00000  |
| rad27         | 1.59903e-14 | 1.00000  | 1.59903e-14 | 1.00000  |
| rad26         | 8.04981e-15 | 1.00000  | 8.04981e-15 | 1.00000  |
| rad39         | 1.41531e-16 | 1.00000  | 1.41531e-16 | 1.00000  |
| PAH3+H        | 5.69296e-17 | 1.00000  | 5.69296e-17 | 1.00000  |
| rad31         | 4.80985e-17 | 1.00000  | 4.80985e-17 | 1.00000  |
| rad59         | 2.19061e-17 | 1.00000  | 2.19061e-17 | 1.00000  |
| rad50         | 1.08648e-19 | 1.00000  | 1.08648e-19 | 1.00000  |
| rad5          | 2.92446e-20 | 1.00000  | 2.92446e-20 | 1.00000  |
| rad12         | 2.70359e-21 | 1.00000  | 2.70359e-21 | 1.00000  |
| rad19syn      | 1.17132e-21 | 1.00000  | 1.17132e-21 | 1.00000  |
| rad37         | 1.16897e-22 | 1.00000  | 1.16897e-22 | 1.00000  |
| rad54         | 9.62713e-24 | 1.00000  | 9.62713e-24 | 1.00000  |
| rad52         | 1.24410e-24 | 1.00000  | 1.24410e-24 | 1.00000  |
| rad62         | 5.60524e-26 | 1.00000  | 5.60524e-26 | 1.00000  |
| rad70         | 4.96343e-26 | 1.00000  | 4.96343e-26 | 1.00000  |
| rad43         | 1.38301e-26 | 1.00000  | 1.38301e-26 | 1.00000  |
| rad51         | 2.22666e-27 | 1.00000  | 2.22666e-27 | 1.00000  |
| PhcycC3H3_A+H | 8.01343e-28 | 1.00000  | 8.01343e-28 | 1.00000  |
| rad55         | 3.46986e-28 | 1.00000  | 3.46986e-28 | 1.00000  |
| PAH10+CH3     | 9.77190e-29 | 1.00000  | 9.77190e-29 | 1.00000  |
| rad58         | 2.92759e-29 | 1.00000  | 2.92759e-29 | 1.00000  |
| rad34         | 3.16264e-30 | 1.00000  | 3.16264e-30 | 1.00000  |
| rad65         | 1.73804e-30 | 1.00000  | 1.73804e-30 | 1.00000  |
| PAH1+H        | 3.69483e-32 | 1.00000  | 3.69483e-32 | 1.00000  |
| rad47         | 2.02694e-33 | 1.00000  | 2.02694e-33 | 1.00000  |
| rad42         | 5.06405e-34 | 1.00000  | 5.06405e-34 | 1.00000  |
| rad41         | 2.76508e-35 | 1.00000  | 2.76508e-35 | 1.00000  |

1000.00000 Pa, 160.000000 K

=====

| Rate constant      | True (fraction)        | Effective (fraction)   |
|--------------------|------------------------|------------------------|
| Total              | 1.81800e-18 (1.00 )    | 1.81800e-18 (1.00 )    |
| Formation of rad11 | 1.64862e-18 (0.907 )   | 1.64862e-18 (0.907 )   |
| Formation of rad6  | 1.62558e-19 (0.0894 )  | 1.62558e-19 (0.0894 )  |
| H-abstraction      | 6.82130e-21 (0.00375 ) | 6.82130e-21 (0.00375 ) |

| species            | PYtrue      | Cumul    | PYeffective | Cumul    |
|--------------------|-------------|----------|-------------|----------|
| rad11              | 0.587644    | 0.587644 | 0.587644    | 0.587644 |
| rad6               | 0.390758    | 0.978402 | 0.390758    | 0.978402 |
| Indene+H           | 0.00781504  | 0.986217 | 0.00781504  | 0.986217 |
| rad22              | 0.00725157  | 0.993469 | 0.00725157  | 0.993469 |
| Benzene+2-propynyl | 0.00375209  | 0.997221 | 0.00375209  | 0.997221 |
| rad23              | 0.00154764  | 0.998768 | 0.00154764  | 0.998768 |
| rad45              | 0.000815826 | 0.999584 | 0.000815826 | 0.999584 |
| C2H2+PhCH2         | 0.000155824 | 0.999740 | 0.000155824 | 0.999740 |
| rad7               | 9.28863e-05 | 0.999833 | 9.28863e-05 | 0.999833 |

|               |             |          |             |          |
|---------------|-------------|----------|-------------|----------|
| rad18         | 8.32508e-05 | 0.999916 | 8.32508e-05 | 0.999916 |
| rad36         | 5.06676e-05 | 0.999967 | 5.06676e-05 | 0.999967 |
| rad20         | 1.61699e-05 | 0.999983 | 1.61699e-05 | 0.999983 |
| rad21         | 1.04247e-05 | 0.999994 | 1.04247e-05 | 0.999994 |
| rad25         | 4.37356e-06 | 0.999998 | 4.37356e-06 | 0.999998 |
| PhCHCCH2+H    | 1.46666e-06 | 0.999999 | 1.46666e-06 | 0.999999 |
| rad13         | 1.07145e-06 | 1.00000  | 1.07145e-06 | 1.00000  |
| rad3          | 1.34091e-07 | 1.00000  | 1.34091e-07 | 1.00000  |
| rad9          | 1.01182e-07 | 1.00000  | 1.01182e-07 | 1.00000  |
| rad4          | 6.86448e-08 | 1.00000  | 6.86448e-08 | 1.00000  |
| Phenyl+Allene | 3.49271e-08 | 1.00000  | 0.00000     | 1.00000  |
| rad2          | 1.23648e-08 | 1.00000  | 1.23648e-08 | 1.00000  |
| rad28         | 8.75368e-09 | 1.00000  | 8.75368e-09 | 1.00000  |
| rad30         | 8.17887e-09 | 1.00000  | 8.17887e-09 | 1.00000  |
| rad15         | 1.59564e-09 | 1.00000  | 1.59564e-09 | 1.00000  |
| rad33         | 1.33001e-09 | 1.00000  | 1.33001e-09 | 1.00000  |
| rad1          | 8.18617e-10 | 1.00000  | 8.18617e-10 | 1.00000  |
| PhCCH+CH3     | 3.10170e-10 | 1.00000  | 3.10170e-10 | 1.00000  |
| PhCH2CCH+H    | 1.29142e-10 | 1.00000  | 1.29142e-10 | 1.00000  |
| rad10         | 8.08584e-11 | 1.00000  | 8.08584e-11 | 1.00000  |
| rad8          | 3.93688e-11 | 1.00000  | 3.93688e-11 | 1.00000  |
| rad38         | 1.57207e-11 | 1.00000  | 1.57207e-11 | 1.00000  |
| rad24         | 1.08003e-11 | 1.00000  | 1.08003e-11 | 1.00000  |
| rad14         | 7.15148e-12 | 1.00000  | 7.15148e-12 | 1.00000  |
| PAH9+H        | 6.27346e-12 | 1.00000  | 6.27346e-12 | 1.00000  |
| rad35         | 3.19009e-12 | 1.00000  | 3.19009e-12 | 1.00000  |
| PAH7+H        | 3.87807e-13 | 1.00000  | 3.87807e-13 | 1.00000  |
| Ph+MeAc       | 3.61466e-13 | 1.00000  | 3.61466e-13 | 1.00000  |
| rad60syn      | 3.52947e-13 | 1.00000  | 3.52947e-13 | 1.00000  |
| PhCCCH3+H     | 2.32762e-13 | 1.00000  | 2.32762e-13 | 1.00000  |
| rad46         | 1.51264e-13 | 1.00000  | 1.51264e-13 | 1.00000  |
| rad60anti     | 1.00186e-13 | 1.00000  | 1.00186e-13 | 1.00000  |
| rad27         | 2.56647e-14 | 1.00000  | 2.56647e-14 | 1.00000  |
| rad26         | 1.99920e-14 | 1.00000  | 1.99920e-14 | 1.00000  |
| rad39         | 3.06059e-16 | 1.00000  | 3.06059e-16 | 1.00000  |
| PAH3+H        | 1.72122e-16 | 1.00000  | 1.72122e-16 | 1.00000  |
| rad31         | 6.52814e-17 | 1.00000  | 6.52814e-17 | 1.00000  |
| rad59         | 6.37416e-17 | 1.00000  | 6.37416e-17 | 1.00000  |
| rad50         | 3.38863e-19 | 1.00000  | 3.38863e-19 | 1.00000  |
| rad5          | 1.12654e-19 | 1.00000  | 1.12654e-19 | 1.00000  |
| rad12         | 1.16144e-20 | 1.00000  | 1.16144e-20 | 1.00000  |
| rad19syn      | 7.84513e-21 | 1.00000  | 7.84514e-21 | 1.00000  |
| rad37         | 6.08825e-22 | 1.00000  | 6.08825e-22 | 1.00000  |
| rad54         | 8.62743e-23 | 1.00000  | 8.62743e-23 | 1.00000  |
| rad52         | 8.18881e-24 | 1.00000  | 8.18881e-24 | 1.00000  |
| rad70         | 9.03277e-25 | 1.00000  | 9.03277e-25 | 1.00000  |
| rad62         | 6.34752e-25 | 1.00000  | 6.34752e-25 | 1.00000  |
| rad43         | 1.45903e-25 | 1.00000  | 1.45903e-25 | 1.00000  |
| rad51         | 2.58475e-26 | 1.00000  | 2.58475e-26 | 1.00000  |
| PhcycC3H3_A+H | 1.50314e-26 | 1.00000  | 1.50314e-26 | 1.00000  |
| rad55         | 6.11287e-27 | 1.00000  | 6.11287e-27 | 1.00000  |
| PAH10+CH3     | 1.37507e-27 | 1.00000  | 1.37507e-27 | 1.00000  |
| rad58         | 6.07485e-28 | 1.00000  | 6.07485e-28 | 1.00000  |
| rad34         | 1.59754e-28 | 1.00000  | 1.59754e-28 | 1.00000  |
| rad65         | 2.86771e-29 | 1.00000  | 2.86771e-29 | 1.00000  |
| PAH1+H        | 1.12791e-30 | 1.00000  | 1.12791e-30 | 1.00000  |
| rad47         | 4.21471e-32 | 1.00000  | 4.21471e-32 | 1.00000  |
| rad42         | 2.39949e-32 | 1.00000  | 2.39949e-32 | 1.00000  |
| rad41         | 1.22687e-33 | 1.00000  | 1.22687e-33 | 1.00000  |

1000.00000 Pa, 170.000000 K

=====

| Rate constant      | True (fraction)        | Effective (fraction)   |
|--------------------|------------------------|------------------------|
| Total              | 3.56414e-18 (1.00 )    | 3.56414e-18 (1.00 )    |
| Formation of rad11 | 3.18264e-18 (0.893 )   | 3.18264e-18 (0.893 )   |
| Formation of rad6  | 3.62173e-19 (0.102 )   | 3.62173e-19 (0.102 )   |
| H-abstraction      | 1.93278e-20 (0.00542 ) | 1.93278e-20 (0.00542 ) |

| species            | PYtrue      | Cumul    | PYeffective | Cumul    |
|--------------------|-------------|----------|-------------|----------|
| rad11              | 0.554368    | 0.554368 | 0.554368    | 0.554368 |
| rad6               | 0.421009    | 0.975378 | 0.421009    | 0.975378 |
| Indene+H           | 0.00871133  | 0.984089 | 0.00871133  | 0.984089 |
| rad22              | 0.00743196  | 0.991521 | 0.00743196  | 0.991521 |
| Benzene+2-propynyl | 0.00542285  | 0.996944 | 0.00542285  | 0.996944 |
| rad23              | 0.00176967  | 0.998714 | 0.00176967  | 0.998714 |
| rad45              | 0.000841040 | 0.999555 | 0.000841040 | 0.999555 |
| C2H2+PhCH2         | 0.000178562 | 0.999733 | 0.000178562 | 0.999733 |
| rad7               | 0.000107823 | 0.999841 | 0.000107823 | 0.999841 |

|               |             |          |             |          |
|---------------|-------------|----------|-------------|----------|
| rad18         | 7.49830e-05 | 0.999916 | 7.49830e-05 | 0.999916 |
| rad36         | 5.22924e-05 | 0.999968 | 5.22924e-05 | 0.999968 |
| rad20         | 1.43512e-05 | 0.999983 | 1.43512e-05 | 0.999983 |
| rad21         | 9.24038e-06 | 0.999992 | 9.24038e-06 | 0.999992 |
| rad25         | 4.41609e-06 | 0.999996 | 4.41609e-06 | 0.999996 |
| PhCHCCH2+H    | 1.80498e-06 | 0.999998 | 1.80498e-06 | 0.999998 |
| rad13         | 1.13244e-06 | 0.999999 | 1.13244e-06 | 0.999999 |
| rad3          | 1.70391e-07 | 0.999999 | 1.70391e-07 | 0.999999 |
| rad9          | 1.27516e-07 | 1.000000 | 1.27516e-07 | 1.000000 |
| rad4          | 8.73705e-08 | 1.000000 | 8.73705e-08 | 1.000000 |
| Phenyl+Allene | 5.20903e-08 | 1.000000 | 0.000000    | 1.000000 |
| rad2          | 1.86799e-08 | 1.000000 | 1.86799e-08 | 1.000000 |
| rad28         | 1.18080e-08 | 1.000000 | 1.18080e-08 | 1.000000 |
| rad30         | 9.73242e-09 | 1.000000 | 9.73242e-09 | 1.000000 |
| rad15         | 1.93712e-09 | 1.000000 | 1.93712e-09 | 1.000000 |
| rad33         | 1.40267e-09 | 1.000000 | 1.40267e-09 | 1.000000 |
| rad1          | 1.24414e-09 | 1.000000 | 1.24414e-09 | 1.000000 |
| PhCCH+CH3     | 5.38286e-10 | 1.000000 | 5.38286e-10 | 1.000000 |
| PhCH2CCH+H    | 2.71536e-10 | 1.000000 | 2.71536e-10 | 1.000000 |
| rad10         | 1.45899e-10 | 1.000000 | 1.45899e-10 | 1.000000 |
| rad8          | 5.78389e-11 | 1.000000 | 5.78389e-11 | 1.000000 |
| rad38         | 2.09336e-11 | 1.000000 | 2.09336e-11 | 1.000000 |
| rad24         | 1.10239e-11 | 1.000000 | 1.10239e-11 | 1.000000 |
| rad14         | 1.05518e-11 | 1.000000 | 1.05518e-11 | 1.000000 |
| PAH9+H        | 9.35582e-12 | 1.000000 | 9.35582e-12 | 1.000000 |
| rad35         | 4.68289e-12 | 1.000000 | 4.68289e-12 | 1.000000 |
| PAH7+H        | 8.49405e-13 | 1.000000 | 8.49405e-13 | 1.000000 |
| Ph+MeAc       | 7.73883e-13 | 1.000000 | 7.73883e-13 | 1.000000 |
| rad60syn      | 5.21714e-13 | 1.000000 | 5.21715e-13 | 1.000000 |
| PhCCCH3+H     | 5.12175e-13 | 1.000000 | 5.12175e-13 | 1.000000 |
| rad46         | 2.18684e-13 | 1.000000 | 2.18684e-13 | 1.000000 |
| rad60anti     | 1.54924e-13 | 1.000000 | 1.54925e-13 | 1.000000 |
| rad26         | 4.90682e-14 | 1.000000 | 4.90682e-14 | 1.000000 |
| rad27         | 4.03719e-14 | 1.000000 | 4.03719e-14 | 1.000000 |
| rad39         | 6.58201e-16 | 1.000000 | 6.58201e-16 | 1.000000 |
| PAH3+H        | 4.71050e-16 | 1.000000 | 4.71050e-16 | 1.000000 |
| rad59         | 1.68223e-16 | 1.000000 | 1.68223e-16 | 1.000000 |
| rad31         | 8.79276e-17 | 1.000000 | 8.79276e-17 | 1.000000 |
| rad50         | 9.77032e-19 | 1.000000 | 9.77032e-19 | 1.000000 |
| rad5          | 4.07415e-19 | 1.000000 | 4.07415e-19 | 1.000000 |
| rad12         | 4.85161e-20 | 1.000000 | 4.85161e-20 | 1.000000 |
| rad19syn      | 4.37051e-20 | 1.000000 | 4.37051e-20 | 1.000000 |
| rad37         | 3.00768e-21 | 1.000000 | 3.00768e-21 | 1.000000 |
| rad54         | 6.17311e-22 | 1.000000 | 6.17311e-22 | 1.000000 |
| rad52         | 4.50493e-23 | 1.000000 | 4.50493e-23 | 1.000000 |
| rad70         | 1.16916e-23 | 1.000000 | 1.16916e-23 | 1.000000 |
| rad62         | 5.65828e-24 | 1.000000 | 5.65828e-24 | 1.000000 |
| rad43         | 1.25654e-24 | 1.000000 | 1.25654e-24 | 1.000000 |
| rad51         | 2.34987e-25 | 1.000000 | 2.34987e-25 | 1.000000 |
| PhcycC3H3_A+H | 2.05566e-25 | 1.000000 | 2.05566e-25 | 1.000000 |
| rad55         | 7.87357e-26 | 1.000000 | 7.87357e-26 | 1.000000 |
| PAH10+CH3     | 1.59167e-26 | 1.000000 | 1.59167e-26 | 1.000000 |
| rad58         | 8.77444e-27 | 1.000000 | 8.77444e-27 | 1.000000 |
| rad34         | 3.55701e-27 | 1.000000 | 3.55701e-27 | 1.000000 |
| rad65         | 3.56090e-28 | 1.000000 | 3.56090e-28 | 1.000000 |
| PAH1+H        | 2.27791e-29 | 1.000000 | 2.27791e-29 | 1.000000 |
| rad47         | 6.12617e-31 | 1.000000 | 6.12617e-31 | 1.000000 |
| rad42         | 6.05523e-31 | 1.000000 | 6.05523e-31 | 1.000000 |
| rad41         | 3.17709e-32 | 1.000000 | 3.17709e-32 | 1.000000 |

1000.00000 Pa, 180.000000 K

=====

| Rate constant      | True (fraction)        | Effective (fraction)   |
|--------------------|------------------------|------------------------|
| Total              | 6.50681e-18 (1.00 )    | 6.50681e-18 (1.00 )    |
| Formation of rad11 | 5.71915e-18 (0.879 )   | 5.71915e-18 (0.879 )   |
| Formation of rad6  | 7.39013e-19 (0.114 )   | 7.39013e-19 (0.114 )   |
| H-abstraction      | 4.86496e-20 (0.00748 ) | 4.86496e-20 (0.00748 ) |

| species            | PYtrue      | Cumul    | PYeffective | Cumul    |
|--------------------|-------------|----------|-------------|----------|
| rad11              | 0.521145    | 0.521145 | 0.521145    | 0.521145 |
| rad6               | 0.450791    | 0.971936 | 0.450791    | 0.971936 |
| Indene+H           | 0.00966931  | 0.981606 | 0.00966931  | 0.981606 |
| rad22              | 0.00756543  | 0.989171 | 0.00756543  | 0.989171 |
| Benzene+2-propynyl | 0.00747672  | 0.996648 | 0.00747672  | 0.996648 |
| rad23              | 0.00200953  | 0.998657 | 0.00200953  | 0.998657 |
| rad45              | 0.000863902 | 0.999521 | 0.000863902 | 0.999521 |
| C2H2+PhCH2         | 0.000204368 | 0.999726 | 0.000204368 | 0.999726 |
| rad7               | 0.000123632 | 0.999849 | 0.000123632 | 0.999849 |

|               |             |          |             |          |
|---------------|-------------|----------|-------------|----------|
| rad18         | 6.74612e-05 | 0.999917 | 6.74612e-05 | 0.999917 |
| rad36         | 5.37910e-05 | 0.999971 | 5.37910e-05 | 0.999971 |
| rad20         | 1.27450e-05 | 0.999983 | 1.27450e-05 | 0.999983 |
| rad21         | 8.19687e-06 | 0.999991 | 8.19687e-06 | 0.999991 |
| rad25         | 4.41806e-06 | 0.999996 | 4.41806e-06 | 0.999996 |
| PhCHCCH2+H    | 2.22257e-06 | 0.999998 | 2.22257e-06 | 0.999998 |
| rad13         | 1.19116e-06 | 0.999999 | 1.19116e-06 | 0.999999 |
| rad3          | 2.14220e-07 | 0.999999 | 2.14220e-07 | 0.999999 |
| rad9          | 1.60674e-07 | 1.000000 | 1.60674e-07 | 1.000000 |
| rad4          | 1.10043e-07 | 1.000000 | 1.10043e-07 | 1.000000 |
| Phenyl+Allene | 7.68581e-08 | 1.000000 | 0.000000    | 1.000000 |
| rad2          | 2.79130e-08 | 1.000000 | 2.79130e-08 | 1.000000 |
| rad28         | 1.58148e-08 | 1.000000 | 1.58148e-08 | 1.000000 |
| rad30         | 1.15623e-08 | 1.000000 | 1.15623e-08 | 1.000000 |
| rad15         | 2.34875e-09 | 1.000000 | 2.34875e-09 | 1.000000 |
| rad1          | 1.87122e-09 | 1.000000 | 1.87122e-09 | 1.000000 |
| rad33         | 1.47282e-09 | 1.000000 | 1.47282e-09 | 1.000000 |
| PhCCH+CH3     | 9.25360e-10 | 1.000000 | 9.25360e-10 | 1.000000 |
| PhCH2CCH+H    | 5.41680e-10 | 1.000000 | 5.41680e-10 | 1.000000 |
| rad10         | 2.59975e-10 | 1.000000 | 2.59975e-10 | 1.000000 |
| rad8          | 8.45380e-11 | 1.000000 | 8.45380e-11 | 1.000000 |
| rad38         | 2.78974e-11 | 1.000000 | 2.78974e-11 | 1.000000 |
| rad14         | 1.52302e-11 | 1.000000 | 1.52302e-11 | 1.000000 |
| PAH9+H        | 1.39448e-11 | 1.000000 | 1.39448e-11 | 1.000000 |
| rad24         | 1.12297e-11 | 1.000000 | 1.12297e-11 | 1.000000 |
| rad35         | 6.86597e-12 | 1.000000 | 6.86597e-12 | 1.000000 |
| PAH7+H        | 1.75319e-12 | 1.000000 | 1.75319e-12 | 1.000000 |
| Ph+MeAc       | 1.63006e-12 | 1.000000 | 1.63006e-12 | 1.000000 |
| PhCCCH3+H     | 1.11708e-12 | 1.000000 | 1.11708e-12 | 1.000000 |
| rad60syn      | 7.65510e-13 | 1.000000 | 7.65510e-13 | 1.000000 |
| rad46         | 3.16809e-13 | 1.000000 | 3.16809e-13 | 1.000000 |
| rad60anti     | 2.36572e-13 | 1.000000 | 2.36572e-13 | 1.000000 |
| rad26         | 1.18885e-13 | 1.000000 | 1.18885e-13 | 1.000000 |
| rad27         | 6.24246e-14 | 1.000000 | 6.24246e-14 | 1.000000 |
| rad39         | 1.40943e-15 | 1.000000 | 1.40943e-15 | 1.000000 |
| PAH3+H        | 1.18507e-15 | 1.000000 | 1.18507e-15 | 1.000000 |
| rad59         | 4.08941e-16 | 1.000000 | 4.08941e-16 | 1.000000 |
| rad31         | 1.17731e-16 | 1.000000 | 1.17731e-16 | 1.000000 |
| rad50         | 2.63262e-18 | 1.000000 | 2.63262e-18 | 1.000000 |
| rad5          | 1.39066e-18 | 1.000000 | 1.39066e-18 | 1.000000 |
| rad19syn      | 2.08436e-19 | 1.000000 | 2.08436e-19 | 1.000000 |
| rad12         | 1.95839e-19 | 1.000000 | 1.95839e-19 | 1.000000 |
| rad37         | 1.40652e-20 | 1.000000 | 1.40652e-20 | 1.000000 |
| rad54         | 3.65799e-21 | 1.000000 | 3.65799e-21 | 1.000000 |
| rad52         | 2.12678e-22 | 1.000000 | 2.12678e-22 | 1.000000 |
| rad70         | 1.14402e-22 | 1.000000 | 1.14402e-22 | 1.000000 |
| rad62         | 4.10801e-23 | 1.000000 | 4.10801e-23 | 1.000000 |
| rad43         | 9.07048e-24 | 1.000000 | 9.07048e-24 | 1.000000 |
| PhcycC3H3_A+H | 2.15872e-24 | 1.000000 | 2.15872e-24 | 1.000000 |
| rad51         | 1.73362e-24 | 1.000000 | 1.73362e-24 | 1.000000 |
| rad55         | 7.80980e-25 | 1.000000 | 7.80980e-25 | 1.000000 |
| PAH10+CH3     | 1.54477e-25 | 1.000000 | 1.54477e-25 | 1.000000 |
| rad58         | 9.49225e-26 | 1.000000 | 9.49225e-26 | 1.000000 |
| rad34         | 5.35287e-26 | 1.000000 | 5.35287e-26 | 1.000000 |
| rad65         | 3.46959e-27 | 1.000000 | 3.46959e-27 | 1.000000 |
| PAH1+H        | 3.35850e-28 | 1.000000 | 3.35850e-28 | 1.000000 |
| rad42         | 1.04805e-29 | 1.000000 | 1.04805e-29 | 1.000000 |
| rad47         | 6.60971e-30 | 1.000000 | 6.60971e-30 | 1.000000 |
| rad41         | 5.75281e-31 | 1.000000 | 5.75281e-31 | 1.000000 |

1000.00000 Pa, 190.000000 K

=====

| Rate constant      | True (fraction)        | Effective (fraction)   |
|--------------------|------------------------|------------------------|
| Total              | 1.11858e-17 (1.00 )    | 1.11858e-17 (1.00 )    |
| Formation of rad11 | 9.67466e-18 (0.865 )   | 9.67466e-18 (0.865 )   |
| Formation of rad6  | 1.40029e-18 (0.125 )   | 1.40029e-18 (0.125 )   |
| H-abstraction      | 1.10851e-19 (0.00991 ) | 1.10851e-19 (0.00991 ) |

| species            | PYtrue      | Cumul    | PYeffective | Cumul    |
|--------------------|-------------|----------|-------------|----------|
| rad11              | 0.488137    | 0.488137 | 0.488138    | 0.488138 |
| rad6               | 0.479943    | 0.968080 | 0.479943    | 0.968081 |
| Indene+H           | 0.0106901   | 0.978770 | 0.0106901   | 0.978771 |
| Benzene+2-propynyl | 0.00990995  | 0.988680 | 0.00990995  | 0.988681 |
| rad22              | 0.00764975  | 0.996330 | 0.00764975  | 0.996331 |
| rad23              | 0.00226719  | 0.998597 | 0.00226719  | 0.998598 |
| rad45              | 0.000884564 | 0.999482 | 0.000884564 | 0.999483 |
| C2H2+PhCH2         | 0.000233657 | 0.999716 | 0.000233657 | 0.999717 |
| rad7               | 0.000140183 | 0.999856 | 0.000140183 | 0.999857 |

|               |             |          |             |          |
|---------------|-------------|----------|-------------|----------|
| rad18         | 6.06092e-05 | 0.999916 | 6.06092e-05 | 0.999917 |
| rad36         | 5.51755e-05 | 0.999972 | 5.51755e-05 | 0.999973 |
| rad20         | 1.13199e-05 | 0.999983 | 1.13199e-05 | 0.999984 |
| rad21         | 7.27284e-06 | 0.999990 | 7.27284e-06 | 0.999991 |
| rad25         | 4.38056e-06 | 0.999995 | 4.38056e-06 | 0.999995 |
| PhCHCCH2+H    | 2.73714e-06 | 0.999997 | 2.73714e-06 | 0.999998 |
| rad13         | 1.24739e-06 | 0.999998 | 1.24739e-06 | 0.999999 |
| rad3          | 2.66753e-07 | 0.999999 | 2.66753e-07 | 1.000000 |
| rad9          | 2.02301e-07 | 0.999999 | 2.02301e-07 | 1.000000 |
| rad4          | 1.37300e-07 | 0.999999 | 1.37300e-07 | 1.000000 |
| Phenyl+Allene | 1.12187e-07 | 0.999999 | 0.000000    | 1.000000 |
| rad2          | 4.13123e-08 | 0.999999 | 4.13123e-08 | 1.000000 |
| rad28         | 2.10657e-08 | 0.999999 | 2.10657e-08 | 1.000000 |
| rad30         | 1.37169e-08 | 0.999999 | 1.37169e-08 | 1.000000 |
| rad15         | 2.84459e-09 | 0.999999 | 2.84459e-09 | 1.000000 |
| rad1          | 2.78919e-09 | 0.999999 | 2.78919e-09 | 1.000000 |
| PhCCH+CH3     | 1.57669e-09 | 0.999999 | 1.57669e-09 | 1.000000 |
| rad33         | 1.54020e-09 | 0.999999 | 1.54020e-09 | 1.000000 |
| PhCH2CCH+H    | 1.03227e-09 | 0.999999 | 1.03227e-09 | 1.000000 |
| rad10         | 4.57670e-10 | 0.999999 | 4.57670e-10 | 1.000000 |
| rad8          | 1.22835e-10 | 0.999999 | 1.22835e-10 | 1.000000 |
| rad38         | 3.72120e-11 | 0.999999 | 3.72120e-11 | 1.000000 |
| rad14         | 2.15344e-11 | 0.999999 | 2.15344e-11 | 1.000000 |
| PAH9+H        | 2.07663e-11 | 0.999999 | 2.07663e-11 | 1.000000 |
| rad24         | 1.14200e-11 | 0.999999 | 1.14200e-11 | 1.000000 |
| rad35         | 1.00530e-11 | 0.999999 | 1.00530e-11 | 1.000000 |
| PAH7+H        | 3.43717e-12 | 0.999999 | 3.43717e-12 | 1.000000 |
| Ph+MeAc       | 3.37920e-12 | 0.999999 | 3.37920e-12 | 1.000000 |
| PhCCCH3+H     | 2.41251e-12 | 0.999999 | 2.41251e-12 | 1.000000 |
| rad60syn      | 1.11459e-12 | 0.999999 | 1.11459e-12 | 1.000000 |
| rad46         | 4.59642e-13 | 0.999999 | 4.59642e-13 | 1.000000 |
| rad60anti     | 3.56892e-13 | 0.999999 | 3.56892e-13 | 1.000000 |
| rad26         | 2.83685e-13 | 0.999999 | 2.83685e-13 | 1.000000 |
| rad27         | 9.50747e-14 | 0.999999 | 9.50747e-14 | 1.000000 |
| rad39         | 3.00575e-15 | 0.999999 | 3.00575e-15 | 1.000000 |
| PAH3+H        | 2.77539e-15 | 0.999999 | 2.77539e-15 | 1.000000 |
| rad59         | 9.27215e-16 | 0.999999 | 9.27215e-16 | 1.000000 |
| rad31         | 1.56929e-16 | 0.999999 | 1.56929e-16 | 1.000000 |
| rad50         | 6.68961e-18 | 0.999999 | 6.68961e-18 | 1.000000 |
| rad5          | 4.49901e-18 | 0.999999 | 4.49901e-18 | 1.000000 |
| rad19syn      | 8.71383e-19 | 0.999999 | 8.71383e-19 | 1.000000 |
| rad12         | 7.60015e-19 | 0.999999 | 7.60015e-19 | 1.000000 |
| rad37         | 6.21623e-20 | 0.999999 | 6.21623e-20 | 1.000000 |
| rad54         | 1.84916e-20 | 0.999999 | 1.84916e-20 | 1.000000 |
| rad70         | 8.84151e-22 | 0.999999 | 8.84151e-22 | 1.000000 |
| rad52         | 8.81393e-22 | 0.999999 | 8.81393e-22 | 1.000000 |
| rad62         | 2.50002e-22 | 0.999999 | 2.50002e-22 | 1.000000 |
| rad43         | 5.61425e-23 | 0.999999 | 5.61425e-23 | 1.000000 |
| PhcycC3H3_A+H | 1.80896e-23 | 0.999999 | 1.80896e-23 | 1.000000 |
| rad51         | 1.06974e-23 | 0.999999 | 1.06974e-23 | 1.000000 |
| rad55         | 6.20556e-24 | 0.999999 | 6.20556e-24 | 1.000000 |
| PAH10+CH3     | 1.27633e-24 | 0.999999 | 1.27633e-24 | 1.000000 |
| rad58         | 8.05120e-25 | 0.999999 | 8.05120e-25 | 1.000000 |
| rad34         | 5.97939e-25 | 0.999999 | 5.97939e-25 | 1.000000 |
| rad65         | 2.74398e-26 | 0.999999 | 2.74398e-26 | 1.000000 |
| PAH1+H        | 3.78330e-27 | 0.999999 | 3.78330e-27 | 1.000000 |
| rad42         | 1.33052e-28 | 0.999999 | 1.33052e-28 | 1.000000 |
| rad47         | 5.52455e-29 | 0.999999 | 5.52455e-29 | 1.000000 |
| rad41         | 7.70078e-30 | 0.999999 | 7.70078e-30 | 1.000000 |

1000.00000 Pa, 200.000000 K

=====

| Rate constant      | True (fraction)       | Effective (fraction)  |
|--------------------|-----------------------|-----------------------|
| Total              | 1.82690e-17 (1.00 )   | 1.82690e-17 (1.00 )   |
| Formation of rad11 | 1.55456e-17 (0.851 )  | 1.55456e-17 (0.851 )  |
| Formation of rad6  | 2.49126e-18 (0.136 )  | 2.49126e-18 (0.136 )  |
| H-abstraction      | 2.32112e-19 (0.0127 ) | 2.32112e-19 (0.0127 ) |

| species            | PYtrue      | Cumul    | PYeffective | Cumul    |
|--------------------|-------------|----------|-------------|----------|
| rad6               | 0.508325    | 0.508325 | 0.508325    | 0.508325 |
| rad11              | 0.455505    | 0.963831 | 0.455505    | 0.963831 |
| Benzene+2-propynyl | 0.0127053   | 0.976536 | 0.0127053   | 0.976536 |
| Indene+H           | 0.0117734   | 0.988309 | 0.0117734   | 0.988309 |
| rad22              | 0.00768315  | 0.995992 | 0.00768315  | 0.995992 |
| rad23              | 0.00254221  | 0.998535 | 0.00254221  | 0.998535 |
| rad45              | 0.000903181 | 0.999438 | 0.000903182 | 0.999438 |
| C2H2+PhCH2         | 0.000266871 | 0.999705 | 0.000266871 | 0.999705 |
| rad7               | 0.000157332 | 0.999862 | 0.000157332 | 0.999862 |

|               |             |          |             |          |
|---------------|-------------|----------|-------------|----------|
| rad36         | 5.64579e-05 | 0.999919 | 5.64579e-05 | 0.999919 |
| rad18         | 5.43618e-05 | 0.999973 | 5.43618e-05 | 0.999973 |
| rad20         | 1.00506e-05 | 0.999983 | 1.00506e-05 | 0.999983 |
| rad21         | 6.45136e-06 | 0.999989 | 6.45136e-06 | 0.999989 |
| rad25         | 4.30568e-06 | 0.999994 | 4.30568e-06 | 0.999994 |
| PhCHCCH2+H    | 3.36952e-06 | 0.999997 | 3.36952e-06 | 0.999997 |
| rad13         | 1.30097e-06 | 0.999998 | 1.30097e-06 | 0.999998 |
| rad3          | 3.29244e-07 | 0.999999 | 3.29244e-07 | 0.999999 |
| rad9          | 2.54355e-07 | 0.999999 | 2.54355e-07 | 0.999999 |
| rad4          | 1.69830e-07 | 0.999999 | 1.69830e-07 | 0.999999 |
| Phenyl+Allene | 1.61987e-07 | 0.999999 | 0.00000     | 0.999999 |
| rad2          | 6.06080e-08 | 0.999999 | 6.06080e-08 | 0.999999 |
| rad28         | 2.79440e-08 | 0.999999 | 2.79440e-08 | 0.999999 |
| rad30         | 1.62505e-08 | 0.999999 | 1.62505e-08 | 0.999999 |
| rad1          | 4.12359e-09 | 0.999999 | 4.12359e-09 | 0.999999 |
| rad15         | 3.44089e-09 | 0.999999 | 3.44089e-09 | 0.999999 |
| PhCCH+CH3     | 2.66232e-09 | 0.999999 | 2.66232e-09 | 0.999999 |
| PhCH2CCH+H    | 1.88968e-09 | 0.999999 | 1.88968e-09 | 0.999999 |
| rad33         | 1.60463e-09 | 0.999999 | 1.60463e-09 | 0.999999 |
| rad10         | 7.95709e-10 | 0.999999 | 7.95709e-10 | 0.999999 |
| rad8          | 1.77297e-10 | 0.999999 | 1.77297e-10 | 0.999999 |
| rad38         | 4.96759e-11 | 0.999999 | 4.96759e-11 | 0.999999 |
| PAH9+H        | 3.08773e-11 | 0.999999 | 3.08773e-11 | 0.999999 |
| rad14         | 2.98567e-11 | 0.999999 | 2.98567e-11 | 0.999999 |
| rad35         | 1.46916e-11 | 0.999999 | 1.46916e-11 | 0.999999 |
| rad24         | 1.15970e-11 | 0.999999 | 1.15970e-11 | 0.999999 |
| Ph+MeAc       | 6.89422e-12 | 0.999999 | 6.89422e-12 | 0.999999 |
| PAH7+H        | 6.44248e-12 | 0.999999 | 6.44248e-12 | 0.999999 |
| PhCCCH3+H     | 5.15067e-12 | 0.999999 | 5.15067e-12 | 0.999999 |
| rad60syn      | 1.60980e-12 | 0.999999 | 1.60980e-12 | 0.999999 |
| rad46         | 6.67329e-13 | 0.999999 | 6.67329e-13 | 0.999999 |
| rad26         | 6.64837e-13 | 0.999999 | 6.64837e-13 | 0.999999 |
| rad60anti     | 5.32069e-13 | 0.999999 | 5.32069e-13 | 0.999999 |
| rad27         | 1.42827e-13 | 0.999999 | 1.42827e-13 | 0.999999 |
| rad39         | 6.38114e-15 | 0.999999 | 6.38114e-15 | 0.999999 |
| PAH3+H        | 6.11252e-15 | 0.999999 | 6.11252e-15 | 0.999999 |
| rad59         | 1.98068e-15 | 0.999999 | 1.98068e-15 | 0.999999 |
| rad31         | 2.08479e-16 | 0.999999 | 2.08479e-16 | 0.999999 |
| rad50         | 1.61514e-17 | 0.999999 | 1.61514e-17 | 0.999999 |
| rad5          | 1.38420e-17 | 0.999999 | 1.38420e-17 | 0.999999 |
| rad19syn      | 3.25568e-18 | 0.999999 | 3.25568e-18 | 0.999999 |
| rad12         | 2.82502e-18 | 0.999999 | 2.82502e-18 | 0.999999 |
| rad37         | 2.59352e-19 | 0.999999 | 2.59352e-19 | 0.999999 |
| rad54         | 8.16738e-20 | 0.999999 | 8.16738e-20 | 0.999999 |
| rad70         | 5.58859e-21 | 0.999999 | 5.58859e-21 | 0.999999 |
| rad52         | 3.26800e-21 | 0.999999 | 3.26800e-21 | 0.999999 |
| rad62         | 1.30605e-21 | 0.999999 | 1.30605e-21 | 0.999999 |
| rad43         | 3.03611e-22 | 0.999999 | 3.03611e-22 | 0.999999 |
| PhcycC3H3_A+H | 1.24735e-22 | 0.999999 | 1.24735e-22 | 0.999999 |
| rad51         | 5.66146e-23 | 0.999999 | 5.66146e-23 | 0.999999 |
| rad55         | 4.07570e-23 | 0.999999 | 4.07570e-23 | 0.999999 |
| PAH10+CH3     | 9.08660e-24 | 0.999999 | 9.08660e-24 | 0.999999 |
| rad58         | 5.54783e-24 | 0.999999 | 5.54783e-24 | 0.999999 |
| rad34         | 5.21135e-24 | 0.999999 | 5.21135e-24 | 0.999999 |
| rad65         | 1.81108e-25 | 0.999999 | 1.81108e-25 | 0.999999 |
| PAH1+H        | 3.37620e-26 | 0.999999 | 3.37620e-26 | 0.999999 |
| rad42         | 1.30091e-27 | 0.999999 | 1.30091e-27 | 0.999999 |
| rad47         | 3.70873e-28 | 0.999999 | 3.70873e-28 | 0.999999 |
| rad41         | 7.96753e-29 | 0.999999 | 7.96753e-29 | 0.999999 |

1000.00000 Pa, 210.000000 K

=====

| Rate constant      | True (fraction)       | Effective (fraction)  |
|--------------------|-----------------------|-----------------------|
| Total              | 2.85520e-17 (1.00 )   | 2.85520e-17 (1.00 )   |
| Formation of rad11 | 2.39009e-17 (0.837 )  | 2.39009e-17 (0.837 )  |
| Formation of rad6  | 4.19900e-18 (0.147 )  | 4.19900e-18 (0.147 )  |
| H-abstraction      | 4.52111e-19 (0.0158 ) | 4.52111e-19 (0.0158 ) |

| species            | PYtrue      | Cumul    | PYeffective | Cumul    |
|--------------------|-------------|----------|-------------|----------|
| rad6               | 0.535809    | 0.535809 | 0.535809    | 0.535809 |
| rad11              | 0.423410    | 0.959219 | 0.423410    | 0.959219 |
| Benzene+2-propynyl | 0.0158346   | 0.975053 | 0.0158346   | 0.975053 |
| Indene+H           | 0.0129174   | 0.987971 | 0.0129175   | 0.987971 |
| rad22              | 0.00766455  | 0.995635 | 0.00766455  | 0.995635 |
| rad23              | 0.00283369  | 0.998469 | 0.00283369  | 0.998469 |
| rad45              | 0.000919918 | 0.999389 | 0.000919918 | 0.999389 |
| C2H2+PhCH2         | 0.000304466 | 0.999693 | 0.000304467 | 0.999693 |
| rad7               | 0.000174926 | 0.999868 | 0.000174926 | 0.999868 |



|               |             |          |             |          |
|---------------|-------------|----------|-------------|----------|
| rad36         | 5.76509e-05 | 0.999926 | 5.76509e-05 | 0.999926 |
| rad18         | 4.86640e-05 | 0.999975 | 4.86640e-05 | 0.999975 |
| rad20         | 8.91673e-06 | 0.999984 | 8.91673e-06 | 0.999984 |
| rad21         | 5.71886e-06 | 0.999989 | 5.71886e-06 | 0.999989 |
| rad25         | 4.19636e-06 | 0.999993 | 4.19637e-06 | 0.999994 |
| PhCHCCH2+H    | 4.14393e-06 | 0.999998 | 4.14393e-06 | 0.999998 |
| rad13         | 1.35171e-06 | 0.999999 | 1.35171e-06 | 0.999999 |
| rad3          | 4.02989e-07 | 0.999999 | 4.02989e-07 | 0.999999 |
| rad9          | 3.19141e-07 | 1.000000 | 3.19141e-07 | 1.000000 |
| Phenyl+Allene | 2.31353e-07 | 1.000000 | 0.00000     | 1.000000 |
| rad4          | 2.08361e-07 | 1.00000  | 2.08361e-07 | 1.000000 |
| rad2          | 8.81624e-08 | 1.00000  | 8.81625e-08 | 1.00000  |
| rad28         | 3.69508e-08 | 1.00000  | 3.69508e-08 | 1.00000  |
| rad30         | 1.92235e-08 | 1.00000  | 1.92235e-08 | 1.00000  |
| rad1          | 6.04875e-09 | 1.00000  | 6.04875e-09 | 1.00000  |
| PhCCH+CH3     | 4.45247e-09 | 1.00000  | 4.45247e-09 | 1.00000  |
| rad15         | 4.15623e-09 | 1.00000  | 4.15623e-09 | 1.00000  |
| PhCH2CCH+H    | 3.33813e-09 | 1.00000  | 3.33813e-09 | 1.00000  |
| rad33         | 1.66595e-09 | 1.00000  | 1.66595e-09 | 1.00000  |
| rad10         | 1.36501e-09 | 1.00000  | 1.36501e-09 | 1.00000  |
| rad8          | 2.54048e-10 | 1.00000  | 2.54048e-10 | 1.00000  |
| rad38         | 6.63479e-11 | 1.00000  | 6.63479e-11 | 1.00000  |
| PAH9+H        | 4.58012e-11 | 1.00000  | 4.58012e-11 | 1.00000  |
| rad14         | 4.06238e-11 | 1.00000  | 4.06238e-11 | 1.00000  |
| rad35         | 2.14147e-11 | 1.00000  | 2.14147e-11 | 1.00000  |
| Ph+MeAc       | 1.38401e-11 | 1.00000  | 1.38401e-11 | 1.00000  |
| rad24         | 1.17626e-11 | 1.00000  | 1.17626e-11 | 1.00000  |
| PAH7+H        | 1.16071e-11 | 1.00000  | 1.16071e-11 | 1.00000  |
| PhCCCH3+H     | 1.08509e-11 | 1.00000  | 1.08509e-11 | 1.00000  |
| rad60syn      | 2.30550e-12 | 1.00000  | 2.30550e-12 | 1.00000  |
| rad26         | 1.52612e-12 | 1.00000  | 1.52612e-12 | 1.00000  |
| rad46         | 9.68694e-13 | 1.00000  | 9.68694e-13 | 1.00000  |
| rad60anti     | 7.84044e-13 | 1.00000  | 7.84044e-13 | 1.00000  |
| rad27         | 2.11819e-13 | 1.00000  | 2.11819e-13 | 1.00000  |
| rad39         | 1.34746e-14 | 1.00000  | 1.34746e-14 | 1.00000  |
| PAH3+H        | 1.27645e-14 | 1.00000  | 1.27645e-14 | 1.00000  |
| rad59         | 4.01873e-15 | 1.00000  | 4.01873e-15 | 1.00000  |
| rad31         | 2.76287e-16 | 1.00000  | 2.76287e-16 | 1.00000  |
| rad5          | 4.06179e-17 | 1.00000  | 4.06179e-17 | 1.00000  |
| rad50         | 3.72829e-17 | 1.00000  | 3.72830e-17 | 1.00000  |
| rad19syn      | 1.10430e-17 | 1.00000  | 1.10430e-17 | 1.00000  |
| rad12         | 1.00314e-17 | 1.00000  | 1.00314e-17 | 1.00000  |
| rad37         | 1.02076e-18 | 1.00000  | 1.02076e-18 | 1.00000  |
| rad54         | 3.21283e-19 | 1.00000  | 3.21283e-19 | 1.00000  |
| rad70         | 2.97145e-20 | 1.00000  | 2.97145e-20 | 1.00000  |
| rad52         | 1.10129e-20 | 1.00000  | 1.10129e-20 | 1.00000  |
| rad62         | 5.97224e-21 | 1.00000  | 5.97225e-21 | 1.00000  |
| rad43         | 1.45640e-21 | 1.00000  | 1.45640e-21 | 1.00000  |
| PhcycC3H3_A+H | 7.25307e-22 | 1.00000  | 7.25307e-22 | 1.00000  |
| rad51         | 2.62319e-22 | 1.00000  | 2.62320e-22 | 1.00000  |
| rad55         | 2.26833e-22 | 1.00000  | 2.26833e-22 | 1.00000  |
| PAH10+CH3     | 5.62994e-23 | 1.00000  | 5.62994e-23 | 1.00000  |
| rad34         | 3.66810e-23 | 1.00000  | 3.66810e-23 | 1.00000  |
| rad58         | 3.19474e-23 | 1.00000  | 3.19474e-23 | 1.00000  |
| rad65         | 1.02040e-24 | 1.00000  | 1.02040e-24 | 1.00000  |
| PAH1+H        | 2.45591e-25 | 1.00000  | 2.45591e-25 | 1.00000  |
| rad42         | 1.01441e-26 | 1.00000  | 1.01441e-26 | 1.00000  |
| rad47         | 2.06117e-27 | 1.00000  | 2.06117e-27 | 1.00000  |
| rad41         | 6.58723e-28 | 1.00000  | 6.58724e-28 | 1.00000  |

1000.00000 Pa, 220.000000 K

=====

| Rate constant      | True (fraction)       | Effective (fraction)  |
|--------------------|-----------------------|-----------------------|
| Total              | 4.29529e-17 (1.00 )   | 4.29529e-17 (1.00 )   |
| Formation of rad11 | 3.53712e-17 (0.823 )  | 3.53712e-17 (0.823 )  |
| Formation of rad6  | 6.75433e-18 (0.157 )  | 6.75433e-18 (0.157 )  |
| H-abstraction      | 8.27372e-19 (0.0193 ) | 8.27372e-19 (0.0193 ) |

| species            | PYtrue      | Cumul    | PYeffective | Cumul    |
|--------------------|-------------|----------|-------------|----------|
| rad6               | 0.562276    | 0.562276 | 0.562277    | 0.562277 |
| rad11              | 0.392007    | 0.954282 | 0.392007    | 0.954283 |
| Benzene+2-propynyl | 0.0192623   | 0.973545 | 0.0192623   | 0.973546 |
| Indene+H           | 0.0141185   | 0.987663 | 0.0141185   | 0.987664 |
| rad22              | 0.00759380  | 0.995257 | 0.00759381  | 0.995258 |
| rad23              | 0.00314022  | 0.998397 | 0.00314022  | 0.998398 |
| rad45              | 0.000934944 | 0.999332 | 0.000934944 | 0.999333 |
| C2H2+PhCH2         | 0.000346922 | 0.999679 | 0.000346922 | 0.999680 |
| rad7               | 0.000192796 | 0.999872 | 0.000192796 | 0.999873 |

|               |             |          |             |          |
|---------------|-------------|----------|-------------|----------|
| rad36         | 5.87679e-05 | 0.999931 | 5.87679e-05 | 0.999932 |
| rad18         | 4.34687e-05 | 0.999974 | 4.34687e-05 | 0.999975 |
| rad20         | 7.90203e-06 | 0.999982 | 7.90204e-06 | 0.999983 |
| PhCHCCH2+H    | 5.08826e-06 | 0.999987 | 5.08826e-06 | 0.999988 |
| rad21         | 5.06433e-06 | 0.999992 | 5.06433e-06 | 0.999993 |
| rad25         | 4.05629e-06 | 0.999996 | 4.05629e-06 | 0.999997 |
| rad13         | 1.39948e-06 | 0.999998 | 1.39948e-06 | 0.999999 |
| rad3          | 4.89273e-07 | 0.999998 | 4.89273e-07 | 0.999999 |
| rad9          | 3.99341e-07 | 0.999998 | 3.99341e-07 | 0.999999 |
| Phenyl+Allene | 3.26823e-07 | 0.999999 | 0.00000     | 0.999999 |
| rad4          | 2.53626e-07 | 0.999999 | 2.53626e-07 | 1.000000 |
| rad2          | 1.27148e-07 | 0.999999 | 1.27148e-07 | 1.000000 |
| rad28         | 4.87403e-08 | 0.999999 | 4.87403e-08 | 1.000000 |
| rad30         | 2.27020e-08 | 0.999999 | 2.27020e-08 | 1.000000 |
| rad1          | 8.80310e-09 | 0.999999 | 8.80310e-09 | 1.000000 |
| PhCCH+CH3     | 7.36916e-09 | 0.999999 | 7.36916e-09 | 1.000000 |
| PhCH2CCH+H    | 5.71160e-09 | 0.999999 | 5.71160e-09 | 1.000000 |
| rad15         | 5.01157e-09 | 0.999999 | 5.01158e-09 | 1.000000 |
| rad10         | 2.30772e-09 | 0.999999 | 2.30772e-09 | 1.000000 |
| rad33         | 1.72401e-09 | 0.999999 | 1.72401e-09 | 1.000000 |
| rad8          | 3.61179e-10 | 0.999999 | 3.61179e-10 | 1.000000 |
| rad38         | 8.86267e-11 | 0.999999 | 8.86268e-11 | 1.000000 |
| PAH9+H        | 6.77126e-11 | 0.999999 | 6.77126e-11 | 1.000000 |
| rad14         | 5.42788e-11 | 0.999999 | 5.42788e-11 | 1.000000 |
| rad35         | 3.11078e-11 | 0.999999 | 3.11078e-11 | 1.000000 |
| Ph+MeAc       | 2.73343e-11 | 0.999999 | 2.73343e-11 | 1.000000 |
| PhCCCH3+H     | 2.25174e-11 | 0.999999 | 2.25174e-11 | 1.000000 |
| PAH7+H        | 2.01913e-11 | 0.999999 | 2.01913e-11 | 1.000000 |
| rad24         | 1.19195e-11 | 0.999999 | 1.19195e-11 | 1.000000 |
| rad26         | 3.42328e-12 | 0.999999 | 3.42328e-12 | 1.000000 |
| rad60syn      | 3.27308e-12 | 0.999999 | 3.27308e-12 | 1.000000 |
| rad46         | 1.40475e-12 | 0.999999 | 1.40475e-12 | 1.000000 |
| rad60anti     | 1.14215e-12 | 0.999999 | 1.14215e-12 | 1.000000 |
| rad27         | 3.10265e-13 | 0.999999 | 3.10265e-13 | 1.000000 |
| rad39         | 2.82712e-14 | 0.999999 | 2.82712e-14 | 1.000000 |
| PAH3+H        | 2.54440e-14 | 0.999999 | 2.54440e-14 | 1.000000 |
| rad59         | 7.79576e-15 | 0.999999 | 7.79576e-15 | 1.000000 |
| rad31         | 3.65515e-16 | 0.999999 | 3.65515e-16 | 1.000000 |
| rad5          | 1.13956e-16 | 0.999999 | 1.13956e-16 | 1.000000 |
| rad50         | 8.27071e-17 | 0.999999 | 8.27072e-17 | 1.000000 |
| rad19syn      | 3.44389e-17 | 0.999999 | 3.44389e-17 | 1.000000 |
| rad12         | 3.39654e-17 | 0.999999 | 3.39654e-17 | 1.000000 |
| rad37         | 3.78762e-18 | 0.999999 | 3.78762e-18 | 1.000000 |
| rad54         | 1.14286e-18 | 0.999999 | 1.14286e-18 | 1.000000 |
| rad70         | 1.35965e-19 | 0.999999 | 1.35965e-19 | 1.000000 |
| rad52         | 3.41697e-20 | 0.999999 | 3.41697e-20 | 1.000000 |
| rad62         | 2.42838e-20 | 0.999999 | 2.42838e-20 | 1.000000 |
| rad43         | 6.27192e-21 | 0.999999 | 6.27192e-21 | 1.000000 |
| PhcycC3H3_A+H | 3.62788e-21 | 0.999999 | 3.62788e-21 | 1.000000 |
| rad55         | 1.09130e-21 | 0.999999 | 1.09130e-21 | 1.000000 |
| rad51         | 1.08192e-21 | 0.999999 | 1.08193e-21 | 1.000000 |
| PAH10+CH3     | 3.06283e-22 | 0.999999 | 3.06283e-22 | 1.000000 |
| rad34         | 2.14341e-22 | 0.999999 | 2.14341e-22 | 1.000000 |
| rad58         | 1.57298e-22 | 0.999999 | 1.57298e-22 | 1.000000 |
| rad65         | 4.99862e-24 | 0.999999 | 4.99862e-24 | 1.000000 |
| PAH1+H        | 1.49140e-24 | 0.999999 | 1.49140e-24 | 1.000000 |
| rad42         | 6.49287e-26 | 0.999999 | 6.49287e-26 | 1.000000 |
| rad47         | 9.72661e-27 | 0.999999 | 9.72662e-27 | 1.000000 |
| rad41         | 4.47573e-27 | 0.999999 | 4.47573e-27 | 1.000000 |

1000.00000 Pa, 230.000000 K

=====

| Rate constant      | True (fraction)       | Effective (fraction)  |
|--------------------|-----------------------|-----------------------|
| Total              | 6.25016e-17 (1.00 )   | 6.25016e-17 (1.00 )   |
| Formation of rad11 | 5.06355e-17 (0.810 )  | 5.06355e-17 (0.810 )  |
| Formation of rad6  | 1.04318e-17 (0.167 )  | 1.04318e-17 (0.167 )  |
| H-abstraction      | 1.43428e-18 (0.0229 ) | 1.43428e-18 (0.0229 ) |

| species            | PYtrue      | Cumul    | PYeffective | Cumul    |
|--------------------|-------------|----------|-------------|----------|
| rad6               | 0.587618    | 0.587618 | 0.587619    | 0.587619 |
| rad11              | 0.361453    | 0.949070 | 0.361454    | 0.949072 |
| Benzene+2-propynyl | 0.0229478   | 0.972018 | 0.0229478   | 0.972020 |
| Indene+H           | 0.0153716   | 0.987390 | 0.0153716   | 0.987392 |
| rad22              | 0.00747185  | 0.994862 | 0.00747185  | 0.994864 |
| rad23              | 0.00345989  | 0.998322 | 0.00345990  | 0.998323 |
| rad45              | 0.000948438 | 0.999270 | 0.000948438 | 0.999272 |
| C2H2+PhCH2         | 0.000394719 | 0.999665 | 0.000394719 | 0.999667 |
| rad7               | 0.000210771 | 0.999875 | 0.000210771 | 0.999877 |

|               |             |          |             |          |
|---------------|-------------|----------|-------------|----------|
| rad36         | 5.98226e-05 | 0.999935 | 5.98226e-05 | 0.999937 |
| rad18         | 3.87354e-05 | 0.999974 | 3.87355e-05 | 0.999976 |
| rad20         | 6.99291e-06 | 0.999981 | 6.99291e-06 | 0.999983 |
| PhCHCCH2+H    | 6.23434e-06 | 0.999987 | 6.23434e-06 | 0.999989 |
| rad21         | 4.47875e-06 | 0.999992 | 4.47875e-06 | 0.999994 |
| rad25         | 3.88971e-06 | 0.999996 | 3.88971e-06 | 0.999998 |
| rad13         | 1.44417e-06 | 0.999997 | 1.44417e-06 | 0.999999 |
| rad3          | 5.89295e-07 | 0.999998 | 5.89295e-07 | 1.000000 |
| rad9          | 4.98042e-07 | 0.999998 | 4.98042e-07 | 1.000000 |
| Phenyl+Allene | 4.56674e-07 | 0.999999 | 0.000000    | 1.000000 |
| rad4          | 3.06332e-07 | 0.999999 | 3.06332e-07 | 1.000000 |
| rad2          | 1.81751e-07 | 0.999999 | 1.81751e-07 | 1.000000 |
| rad28         | 6.41628e-08 | 0.999999 | 6.41629e-08 | 1.000000 |
| rad30         | 2.67581e-08 | 0.999999 | 2.67582e-08 | 1.000000 |
| rad1          | 1.27079e-08 | 0.999999 | 1.27079e-08 | 1.000000 |
| PhCCH+CH3     | 1.20598e-08 | 0.999999 | 1.20598e-08 | 1.000000 |
| PhCH2CCH+H    | 9.49534e-09 | 0.999999 | 9.49534e-09 | 1.000000 |
| rad15         | 6.03042e-09 | 0.999999 | 6.03042e-09 | 1.000000 |
| rad10         | 3.84031e-09 | 0.999999 | 3.84031e-09 | 1.000000 |
| rad33         | 1.77870e-09 | 0.999999 | 1.77870e-09 | 1.000000 |
| rad8          | 5.09274e-10 | 0.999999 | 5.09274e-10 | 1.000000 |
| rad38         | 1.18354e-10 | 0.999999 | 1.18354e-10 | 1.000000 |
| PAH9+H        | 9.96847e-11 | 0.999999 | 9.96847e-11 | 1.000000 |
| rad14         | 7.12592e-11 | 0.999999 | 7.12592e-11 | 1.000000 |
| Ph+MeAc       | 5.31097e-11 | 0.999999 | 5.31097e-11 | 1.000000 |
| PhCCCH3+H     | 4.59601e-11 | 0.999999 | 4.59601e-11 | 1.000000 |
| rad35         | 4.49981e-11 | 0.999999 | 4.49981e-11 | 1.000000 |
| PAH7+H        | 3.40433e-11 | 0.999999 | 3.40433e-11 | 1.000000 |
| rad24         | 1.20701e-11 | 0.999999 | 1.20701e-11 | 1.000000 |
| rad26         | 7.49036e-12 | 0.999999 | 7.49036e-12 | 1.000000 |
| rad60syn      | 4.60524e-12 | 0.999999 | 4.60524e-12 | 1.000000 |
| rad46         | 2.03354e-12 | 0.999999 | 2.03354e-12 | 1.000000 |
| rad60anti     | 1.64503e-12 | 0.999999 | 1.64503e-12 | 1.000000 |
| rad27         | 4.48959e-13 | 0.999999 | 4.48959e-13 | 1.000000 |
| rad39         | 5.88635e-14 | 0.999999 | 5.88636e-14 | 1.000000 |
| PAH3+H        | 4.86790e-14 | 0.999999 | 4.86790e-14 | 1.000000 |
| rad59         | 1.45363e-14 | 0.999999 | 1.45363e-14 | 1.000000 |
| rad31         | 4.82997e-16 | 0.999999 | 4.82997e-16 | 1.000000 |
| rad5          | 3.06295e-16 | 0.999999 | 3.06295e-16 | 1.000000 |
| rad50         | 1.77079e-16 | 0.999999 | 1.77079e-16 | 1.000000 |
| rad12         | 1.09507e-16 | 0.999999 | 1.09507e-16 | 1.000000 |
| rad19syn      | 9.97482e-17 | 0.999999 | 9.97492e-17 | 1.000000 |
| rad37         | 1.32426e-17 | 0.999999 | 1.32426e-17 | 1.000000 |
| rad54         | 3.72044e-18 | 0.999999 | 3.72045e-18 | 1.000000 |
| rad70         | 5.45450e-19 | 0.999999 | 5.45451e-19 | 1.000000 |
| rad52         | 9.86393e-20 | 0.999999 | 9.86393e-20 | 1.000000 |
| rad62         | 8.89274e-20 | 0.999999 | 8.89275e-20 | 1.000000 |
| rad43         | 2.44818e-20 | 0.999999 | 2.44818e-20 | 1.000000 |
| PhcycC3H3_A+H | 1.58660e-20 | 0.999999 | 1.58660e-20 | 1.000000 |
| rad55         | 4.61239e-21 | 0.999999 | 4.61239e-21 | 1.000000 |
| rad51         | 4.02544e-21 | 0.999999 | 4.02544e-21 | 1.000000 |
| PAH10+CH3     | 1.47552e-21 | 0.999999 | 1.47552e-21 | 1.000000 |
| rad34         | 1.06380e-21 | 0.999999 | 1.06380e-21 | 1.000000 |
| rad58         | 6.74681e-22 | 0.999999 | 6.74682e-22 | 1.000000 |
| rad65         | 2.16131e-23 | 0.999999 | 2.16131e-23 | 1.000000 |
| PAH1+H        | 7.71637e-24 | 0.999999 | 7.71637e-24 | 1.000000 |
| rad42         | 3.49511e-25 | 0.999999 | 3.49511e-25 | 1.000000 |
| rad47         | 3.98123e-26 | 0.999999 | 3.98123e-26 | 1.000000 |
| rad41         | 2.55980e-26 | 0.999999 | 2.55980e-26 | 1.000000 |

1000.00000 Pa, 240.000000 K

=====

| Rate constant      | True (fraction)       | Effective (fraction)  |
|--------------------|-----------------------|-----------------------|
| Total              | 8.83273e-17 (1.00 )   | 8.83272e-17 (1.00 )   |
| Formation of rad11 | 7.04077e-17 (0.797 )  | 7.04077e-17 (0.797 )  |
| Formation of rad6  | 1.55481e-17 (0.176 )  | 1.55481e-17 (0.176 )  |
| H-abstraction      | 2.37143e-18 (0.0268 ) | 2.37143e-18 (0.0268 ) |

| species            | PYtrue      | Cumul    | PYeffective | Cumul    |
|--------------------|-------------|----------|-------------|----------|
| rad6               | 0.611739    | 0.611739 | 0.611740    | 0.611740 |
| rad11              | 0.331893    | 0.943632 | 0.331893    | 0.943633 |
| Benzene+2-propynyl | 0.0268483   | 0.970480 | 0.0268483   | 0.970481 |
| Indene+H           | 0.0166697   | 0.987150 | 0.0166697   | 0.987151 |
| rad22              | 0.00730075  | 0.994451 | 0.00730076  | 0.994452 |
| rad23              | 0.00379030  | 0.998241 | 0.00379031  | 0.998242 |
| rad45              | 0.000960581 | 0.999202 | 0.000960582 | 0.999203 |
| C2H2+PhCH2         | 0.000448345 | 0.999650 | 0.000448346 | 0.999651 |
| rad7               | 0.000228672 | 0.999879 | 0.000228672 | 0.999880 |

|               |             |          |             |          |
|---------------|-------------|----------|-------------|----------|
| rad36         | 6.08288e-05 | 0.999940 | 6.08288e-05 | 0.999941 |
| rad18         | 3.44288e-05 | 0.999974 | 3.44288e-05 | 0.999975 |
| PhCHCCH2+H    | 7.61808e-06 | 0.999982 | 7.61808e-06 | 0.999983 |
| rad20         | 6.17805e-06 | 0.999988 | 6.17806e-06 | 0.999989 |
| rad21         | 3.95457e-06 | 0.999992 | 3.95458e-06 | 0.999993 |
| rad25         | 3.70122e-06 | 0.999995 | 3.70123e-06 | 0.999996 |
| rad13         | 1.48568e-06 | 0.999997 | 1.48569e-06 | 0.999998 |
| rad3          | 7.04090e-07 | 0.999998 | 7.04091e-07 | 0.999999 |
| Phenyl+Allene | 6.31243e-07 | 0.999998 | 0.00000     | 0.999999 |
| rad9          | 6.18765e-07 | 0.999999 | 6.18766e-07 | 0.999999 |
| rad4          | 3.67123e-07 | 0.999999 | 3.67123e-07 | 1.000000 |
| rad2          | 2.57396e-07 | 1.000000 | 2.57396e-07 | 1.000000 |
| rad28         | 8.43200e-08 | 1.000000 | 8.43200e-08 | 1.000000 |
| rad30         | 3.14696e-08 | 1.000000 | 3.14696e-08 | 1.000000 |
| PhCCH+CH3     | 1.94995e-08 | 1.000000 | 1.94995e-08 | 1.000000 |
| rad1          | 1.81895e-08 | 1.000000 | 1.81896e-08 | 1.000000 |
| PhCH2CCH+H    | 1.53784e-08 | 1.000000 | 1.53784e-08 | 1.000000 |
| rad15         | 7.23886e-09 | 1.000000 | 7.23887e-09 | 1.000000 |
| rad10         | 6.28356e-09 | 1.000000 | 6.28357e-09 | 1.000000 |
| rad33         | 1.82993e-09 | 1.000000 | 1.82993e-09 | 1.000000 |
| rad8          | 7.12013e-10 | 1.000000 | 7.12013e-10 | 1.000000 |
| rad38         | 1.57949e-10 | 1.000000 | 1.57949e-10 | 1.000000 |
| PAH9+H        | 1.46018e-10 | 1.000000 | 1.46019e-10 | 1.000000 |
| Ph+MeAc       | 1.01523e-10 | 1.000000 | 1.01523e-10 | 1.000000 |
| PhCCCH3+H     | 9.21610e-11 | 1.000000 | 9.21610e-11 | 1.000000 |
| rad14         | 9.19701e-11 | 1.000000 | 9.19701e-11 | 1.000000 |
| rad35         | 6.47698e-11 | 1.000000 | 6.47699e-11 | 1.000000 |
| PAH7+H        | 5.58144e-11 | 1.000000 | 5.58144e-11 | 1.000000 |
| rad26         | 1.59670e-11 | 1.000000 | 1.59670e-11 | 1.000000 |
| rad24         | 1.22169e-11 | 1.000000 | 1.22169e-11 | 1.000000 |
| rad60syn      | 6.42064e-12 | 1.000000 | 6.42065e-12 | 1.000000 |
| rad46         | 2.93677e-12 | 1.000000 | 2.93677e-12 | 1.000000 |
| rad60anti     | 2.34303e-12 | 1.000000 | 2.34303e-12 | 1.000000 |
| rad27         | 6.41823e-13 | 1.000000 | 6.41824e-13 | 1.000000 |
| rad39         | 1.21447e-13 | 1.000000 | 1.21447e-13 | 1.000000 |
| PAH3+H        | 8.97930e-14 | 1.000000 | 8.97931e-14 | 1.000000 |
| rad59         | 2.61690e-14 | 1.000000 | 2.61690e-14 | 1.000000 |
| rad5          | 7.89971e-16 | 1.000000 | 7.89971e-16 | 1.000000 |
| rad31         | 6.37802e-16 | 1.000000 | 6.37803e-16 | 1.000000 |
| rad50         | 3.67220e-16 | 1.000000 | 3.67220e-16 | 1.000000 |
| rad12         | 3.35808e-16 | 1.000000 | 3.35808e-16 | 1.000000 |
| rad19syn      | 2.70459e-16 | 1.000000 | 2.70459e-16 | 1.000000 |
| rad37         | 4.36053e-17 | 1.000000 | 4.36053e-17 | 1.000000 |
| rad54         | 1.11872e-17 | 1.000000 | 1.11872e-17 | 1.000000 |
| rad70         | 1.94807e-18 | 1.000000 | 1.94807e-18 | 1.000000 |
| rad62         | 2.96334e-19 | 1.000000 | 2.96335e-19 | 1.000000 |
| rad52         | 2.67158e-19 | 1.000000 | 2.67159e-19 | 1.000000 |
| rad43         | 8.72974e-20 | 1.000000 | 8.72975e-20 | 1.000000 |
| PhcycC3H3_A+H | 6.15046e-20 | 1.000000 | 6.15046e-20 | 1.000000 |
| rad55         | 1.73559e-20 | 1.000000 | 1.73559e-20 | 1.000000 |
| rad51         | 1.36558e-20 | 1.000000 | 1.36558e-20 | 1.000000 |
| PAH10+CH3     | 6.34759e-21 | 1.000000 | 6.34759e-21 | 1.000000 |
| rad34         | 4.57114e-21 | 1.000000 | 4.57114e-21 | 1.000000 |
| rad58         | 2.56024e-21 | 1.000000 | 2.56024e-21 | 1.000000 |
| rad65         | 8.35216e-23 | 1.000000 | 8.35216e-23 | 1.000000 |
| PAH1+H        | 3.46154e-23 | 1.000000 | 3.46154e-23 | 1.000000 |
| rad42         | 1.61516e-24 | 1.000000 | 1.61516e-24 | 1.000000 |
| rad47         | 1.43906e-25 | 1.000000 | 1.43906e-25 | 1.000000 |
| rad41         | 1.25778e-25 | 1.000000 | 1.25778e-25 | 1.000000 |

1000.00000 Pa, 250.000000 K

=====

| Rate constant      | True (fraction)       | Effective (fraction)  |
|--------------------|-----------------------|-----------------------|
| Total              | 1.21641e-16 (1.00 )   | 1.21641e-16 (1.00 )   |
| Formation of rad11 | 9.54219e-17 (0.784 )  | 9.54218e-17 (0.784 )  |
| Formation of rad6  | 2.24583e-17 (0.185 )  | 2.24583e-17 (0.185 )  |
| H-abstraction      | 3.76121e-18 (0.0309 ) | 3.76121e-18 (0.0309 ) |

| species            | PYtrue      | Cumul    | PYeffective | Cumul    |
|--------------------|-------------|----------|-------------|----------|
| rad6               | 0.634553    | 0.634553 | 0.634553    | 0.634553 |
| rad11              | 0.303464    | 0.938018 | 0.303464    | 0.938018 |
| Benzene+2-propynyl | 0.0309205   | 0.968938 | 0.0309205   | 0.968938 |
| Indene+H           | 0.0180048   | 0.986943 | 0.0180048   | 0.986943 |
| rad22              | 0.00708374  | 0.994027 | 0.00708375  | 0.994027 |
| rad23              | 0.00412862  | 0.998155 | 0.00412862  | 0.998155 |
| rad45              | 0.000971551 | 0.999127 | 0.000971551 | 0.999127 |
| C2H2+PhCH2         | 0.000508286 | 0.999635 | 0.000508287 | 0.999635 |
| rad7               | 0.000246325 | 0.999881 | 0.000246325 | 0.999881 |

|               |             |          |             |          |
|---------------|-------------|----------|-------------|----------|
| rad36         | 6.18003e-05 | 0.999943 | 6.18004e-05 | 0.999943 |
| rad18         | 3.05176e-05 | 0.999974 | 3.05176e-05 | 0.999974 |
| PhCHCCH2+H    | 9.27978e-06 | 0.999983 | 9.27979e-06 | 0.999983 |
| rad20         | 5.44792e-06 | 0.999988 | 5.44792e-06 | 0.999988 |
| rad25         | 3.49562e-06 | 0.999992 | 3.49562e-06 | 0.999992 |
| rad21         | 3.48545e-06 | 0.999995 | 3.48545e-06 | 0.999995 |
| rad13         | 1.52395e-06 | 0.999997 | 1.52395e-06 | 0.999997 |
| Phenyl+Allene | 8.63280e-07 | 0.999998 | 0.00000     | 0.999997 |
| rad3          | 8.34451e-07 | 0.999999 | 8.34452e-07 | 0.999998 |
| rad9          | 7.65489e-07 | 0.999999 | 7.65488e-07 | 0.999999 |
| rad4          | 4.36538e-07 | 1.000000 | 4.36538e-07 | 0.999999 |
| rad2          | 3.60984e-07 | 1.000000 | 3.60984e-07 | 0.999999 |
| rad28         | 1.10633e-07 | 1.000000 | 1.10633e-07 | 1.000000 |
| rad30         | 3.69193e-08 | 1.000000 | 3.69193e-08 | 1.000000 |
| PhCCH+CH3     | 3.11323e-08 | 1.000000 | 3.11324e-08 | 1.000000 |
| rad1          | 2.58046e-08 | 1.000000 | 2.58046e-08 | 1.000000 |
| PhCH2CCH+H    | 2.43190e-08 | 1.000000 | 2.43190e-08 | 1.000000 |
| rad10         | 1.00997e-08 | 1.000000 | 1.00997e-08 | 1.000000 |
| rad15         | 8.66563e-09 | 1.000000 | 8.66563e-09 | 1.000000 |
| rad33         | 1.87764e-09 | 1.000000 | 1.87764e-09 | 1.000000 |
| rad8          | 9.86920e-10 | 1.000000 | 9.86920e-10 | 1.000000 |
| PAH9+H        | 2.12677e-10 | 1.000000 | 2.12677e-10 | 1.000000 |
| rad38         | 2.10578e-10 | 1.000000 | 2.10578e-10 | 1.000000 |
| Ph+MeAc       | 1.90957e-10 | 1.000000 | 1.90957e-10 | 1.000000 |
| PhCCCH3+H     | 1.81395e-10 | 1.000000 | 1.81395e-10 | 1.000000 |
| rad14         | 1.16758e-10 | 1.000000 | 1.16758e-10 | 1.000000 |
| rad35         | 9.27121e-11 | 1.000000 | 9.27122e-11 | 1.000000 |
| PAH7+H        | 8.92378e-11 | 1.000000 | 8.92379e-11 | 1.000000 |
| rad26         | 3.31333e-11 | 1.000000 | 3.31333e-11 | 1.000000 |
| rad24         | 1.23625e-11 | 1.000000 | 1.23625e-11 | 1.000000 |
| rad60syn      | 8.86965e-12 | 1.000000 | 8.86966e-12 | 1.000000 |
| rad46         | 4.22895e-12 | 1.000000 | 4.22895e-12 | 1.000000 |
| rad60anti     | 3.30077e-12 | 1.000000 | 3.30077e-12 | 1.000000 |
| rad27         | 9.06477e-13 | 1.000000 | 9.06477e-13 | 1.000000 |
| rad39         | 2.47860e-13 | 1.000000 | 2.47860e-13 | 1.000000 |
| PAH3+H        | 1.60295e-13 | 1.000000 | 1.60295e-13 | 1.000000 |
| rad59         | 4.56509e-14 | 1.000000 | 4.56509e-14 | 1.000000 |
| rad5          | 1.95725e-15 | 1.000000 | 1.95725e-15 | 1.000000 |
| rad12         | 9.78615e-16 | 1.000000 | 9.78615e-16 | 1.000000 |
| rad31         | 8.42017e-16 | 1.000000 | 8.42018e-16 | 1.000000 |
| rad50         | 7.39720e-16 | 1.000000 | 7.39720e-16 | 1.000000 |
| rad19syn      | 6.90698e-16 | 1.000000 | 6.90699e-16 | 1.000000 |
| rad37         | 1.35206e-16 | 1.000000 | 1.35206e-16 | 1.000000 |
| rad54         | 3.12962e-17 | 1.000000 | 3.12962e-17 | 1.000000 |
| rad70         | 6.27315e-18 | 1.000000 | 6.27315e-18 | 1.000000 |
| rad62         | 9.06256e-19 | 1.000000 | 9.06257e-19 | 1.000000 |
| rad52         | 6.83360e-19 | 1.000000 | 6.83360e-19 | 1.000000 |
| rad43         | 2.86246e-19 | 1.000000 | 2.86246e-19 | 1.000000 |
| PhcycC3H3_A+H | 2.13820e-19 | 1.000000 | 2.13820e-19 | 1.000000 |
| rad55         | 5.88016e-20 | 1.000000 | 5.88017e-20 | 1.000000 |
| rad51         | 4.26040e-20 | 1.000000 | 4.26040e-20 | 1.000000 |
| PAH10+CH3     | 2.45865e-20 | 1.000000 | 2.45865e-20 | 1.000000 |
| rad34         | 1.72828e-20 | 1.000000 | 1.72828e-20 | 1.000000 |
| rad58         | 8.70722e-21 | 1.000000 | 8.70723e-21 | 1.000000 |
| rad65         | 2.91536e-22 | 1.000000 | 2.91536e-22 | 1.000000 |
| PAH1+H        | 1.36688e-22 | 1.000000 | 1.36688e-22 | 1.000000 |
| rad42         | 6.52081e-24 | 1.000000 | 6.52082e-24 | 1.000000 |
| rad41         | 5.40326e-25 | 1.000000 | 5.40326e-25 | 1.000000 |
| rad47         | 4.66385e-25 | 1.000000 | 4.66386e-25 | 1.000000 |

1000.00000 Pa, 260.000000 K

=====

| Rate constant      | True (fraction)       | Effective (fraction)  |
|--------------------|-----------------------|-----------------------|
| Total              | 1.63720e-16 (1.00 )   | 1.63720e-16 (1.00 )   |
| Formation of rad11 | 1.26419e-16 (0.772 )  | 1.26418e-16 (0.772 )  |
| Formation of rad6  | 3.15515e-17 (0.193 )  | 3.15514e-17 (0.193 )  |
| H-abstraction      | 5.75028e-18 (0.0351 ) | 5.75028e-18 (0.0351 ) |

| species            | PYtrue      | Cumul    | PYeffective | Cumul    |
|--------------------|-------------|----------|-------------|----------|
| rad6               | 0.655988    | 0.655988 | 0.655989    | 0.655989 |
| rad11              | 0.276286    | 0.932274 | 0.276287    | 0.932276 |
| Benzene+2-propynyl | 0.0351226   | 0.967397 | 0.0351226   | 0.967399 |
| Indene+H           | 0.0193678   | 0.986765 | 0.0193678   | 0.986767 |
| rad22              | 0.00682512  | 0.993590 | 0.00682513  | 0.993592 |
| rad23              | 0.00447161  | 0.998061 | 0.00447162  | 0.998063 |
| rad45              | 0.000981502 | 0.999043 | 0.000981502 | 0.999045 |
| C2H2+PhCH2         | 0.000575023 | 0.999618 | 0.000575023 | 0.999620 |
| rad7               | 0.000263561 | 0.999881 | 0.000263562 | 0.999883 |

|               |             |          |             |          |
|---------------|-------------|----------|-------------|----------|
| rad36         | 6.27502e-05 | 0.999944 | 6.27502e-05 | 0.999946 |
| rad18         | 2.69734e-05 | 0.999971 | 2.69734e-05 | 0.999973 |
| PhCHCCH2+H    | 1.12643e-05 | 0.999982 | 1.12643e-05 | 0.999984 |
| rad20         | 4.79425e-06 | 0.999987 | 4.79426e-06 | 0.999989 |
| rad25         | 3.27770e-06 | 0.999990 | 3.27770e-06 | 0.999992 |
| rad21         | 3.06592e-06 | 0.999994 | 3.06592e-06 | 0.999995 |
| rad13         | 1.55889e-06 | 0.999995 | 1.55890e-06 | 0.999997 |
| Phenyl+Allene | 1.16833e-06 | 0.999996 | 0.00000     | 0.999997 |
| rad3          | 9.80856e-07 | 0.999997 | 9.80856e-07 | 0.999998 |
| rad9          | 9.42667e-07 | 0.999998 | 9.42668e-07 | 0.999999 |
| rad4          | 5.14970e-07 | 0.999999 | 5.14970e-07 | 0.999999 |
| rad2          | 5.01134e-07 | 0.999999 | 5.01135e-07 | 1.000000 |
| rad28         | 1.44928e-07 | 0.999999 | 1.44928e-07 | 1.00000  |
| PhCCH+CH3     | 4.90578e-08 | 0.999999 | 4.90578e-08 | 1.00000  |
| rad30         | 4.31956e-08 | 0.999999 | 4.31956e-08 | 1.00000  |
| PhCH2CCH+H    | 3.76238e-08 | 0.999999 | 3.76238e-08 | 1.00000  |
| rad1          | 3.62696e-08 | 1.000000 | 3.62696e-08 | 1.00000  |
| rad10         | 1.59367e-08 | 1.000000 | 1.59367e-08 | 1.00000  |
| rad15         | 1.03421e-08 | 1.000000 | 1.03421e-08 | 1.00000  |
| rad33         | 1.92179e-09 | 1.000000 | 1.92179e-09 | 1.00000  |
| rad8          | 1.35624e-09 | 1.000000 | 1.35624e-09 | 1.00000  |
| Ph+MeAc       | 3.53448e-10 | 1.000000 | 3.53448e-10 | 1.00000  |
| PhCCCH3+H     | 3.50194e-10 | 1.000000 | 3.50195e-10 | 1.00000  |
| PAH9+H        | 3.07846e-10 | 1.000000 | 3.07846e-10 | 1.00000  |
| rad38         | 2.80377e-10 | 1.000000 | 2.80378e-10 | 1.00000  |
| rad14         | 1.45879e-10 | 1.000000 | 1.45879e-10 | 1.00000  |
| PAH7+H        | 1.39486e-10 | 1.000000 | 1.39487e-10 | 1.00000  |
| rad35         | 1.31908e-10 | 1.000000 | 1.31908e-10 | 1.00000  |
| rad26         | 6.69016e-11 | 1.000000 | 6.69017e-11 | 1.00000  |
| rad24         | 1.25094e-11 | 1.000000 | 1.25094e-11 | 1.00000  |
| rad60syn      | 1.21405e-11 | 1.000000 | 1.21405e-11 | 1.00000  |
| rad46         | 6.06968e-12 | 1.000000 | 6.06968e-12 | 1.00000  |
| rad60anti     | 4.60033e-12 | 1.000000 | 4.60034e-12 | 1.00000  |
| rad27         | 1.26481e-12 | 1.000000 | 1.26481e-12 | 1.00000  |
| rad39         | 4.99304e-13 | 1.000000 | 4.99304e-13 | 1.00000  |
| PAH3+H        | 2.77801e-13 | 1.000000 | 2.77802e-13 | 1.00000  |
| rad59         | 7.74031e-14 | 1.000000 | 7.74032e-14 | 1.00000  |
| rad5          | 4.66209e-15 | 1.000000 | 4.66208e-15 | 1.00000  |
| rad12         | 2.70893e-15 | 1.000000 | 2.70893e-15 | 1.00000  |
| rad19syn      | 1.66914e-15 | 1.000000 | 1.66915e-15 | 1.00000  |
| rad50         | 1.45067e-15 | 1.000000 | 1.45068e-15 | 1.00000  |
| rad31         | 1.11183e-15 | 1.000000 | 1.11183e-15 | 1.00000  |
| rad37         | 3.94902e-16 | 1.000000 | 3.94902e-16 | 1.00000  |
| rad54         | 8.19157e-17 | 1.000000 | 8.19158e-17 | 1.00000  |
| rad70         | 1.84082e-17 | 1.000000 | 1.84082e-17 | 1.00000  |
| rad62         | 2.56175e-18 | 1.000000 | 2.56175e-18 | 1.00000  |
| rad52         | 1.65916e-18 | 1.000000 | 1.65916e-18 | 1.00000  |
| rad43         | 8.68123e-19 | 1.000000 | 8.68124e-19 | 1.00000  |
| PhcycC3H3_A+H | 6.73420e-19 | 1.000000 | 6.73420e-19 | 1.00000  |
| rad55         | 1.81112e-19 | 1.000000 | 1.81112e-19 | 1.00000  |
| rad51         | 1.23112e-19 | 1.000000 | 1.23112e-19 | 1.00000  |
| PAH10+CH3     | 8.64379e-20 | 1.000000 | 8.64380e-20 | 1.00000  |
| rad34         | 5.82935e-20 | 1.000000 | 5.82936e-20 | 1.00000  |
| rad58         | 2.68324e-20 | 1.000000 | 2.68325e-20 | 1.00000  |
| rad65         | 9.27603e-22 | 1.000000 | 9.27604e-22 | 1.00000  |
| PAH1+H        | 4.81394e-22 | 1.000000 | 4.81395e-22 | 1.00000  |
| rad42         | 2.33468e-23 | 1.000000 | 2.33469e-23 | 1.00000  |
| rad41         | 2.06010e-24 | 1.000000 | 2.06011e-24 | 1.00000  |
| rad47         | 1.37290e-24 | 1.000000 | 1.37290e-24 | 1.00000  |

1000.00000 Pa, 270.000000 K

=====

| Rate constant      | True (fraction)       | Effective (fraction)  |
|--------------------|-----------------------|-----------------------|
| Total              | 2.15887e-16 (1.00 )   | 2.15887e-16 (1.00 )   |
| Formation of rad11 | 1.64133e-16 (0.760 )  | 1.64132e-16 (0.760 )  |
| Formation of rad6  | 4.32452e-17 (0.200 )  | 4.32451e-17 (0.200 )  |
| H-abstraction      | 8.50919e-18 (0.0394 ) | 8.50919e-18 (0.0394 ) |

| species            | PYtrue      | Cumul    | PYeffective | Cumul    |
|--------------------|-------------|----------|-------------|----------|
| rad6               | 0.675989    | 0.675989 | 0.675990    | 0.675990 |
| rad11              | 0.250464    | 0.926452 | 0.250465    | 0.926454 |
| Benzene+2-propynyl | 0.0394150   | 0.965868 | 0.0394151   | 0.965869 |
| Indene+H           | 0.0207486   | 0.986616 | 0.0207487   | 0.986618 |
| rad22              | 0.00653009  | 0.993146 | 0.00653010  | 0.993148 |
| rad23              | 0.00481580  | 0.997962 | 0.00481581  | 0.997964 |
| rad45              | 0.000990594 | 0.998953 | 0.000990594 | 0.998955 |
| C2H2+PhCH2         | 0.000649025 | 0.999602 | 0.000649026 | 0.999604 |
| rad7               | 0.000280222 | 0.999882 | 0.000280223 | 0.999884 |

|               |             |          |             |          |
|---------------|-------------|----------|-------------|----------|
| rad36         | 6.36900e-05 | 0.999946 | 6.36900e-05 | 0.999948 |
| rad18         | 2.37706e-05 | 0.999969 | 2.37707e-05 | 0.999971 |
| PhCHCCH2+H    | 1.36212e-05 | 0.999983 | 1.36212e-05 | 0.999985 |
| rad20         | 4.20988e-06 | 0.999987 | 4.20989e-06 | 0.999989 |
| rad25         | 3.05206e-06 | 0.999990 | 3.05206e-06 | 0.999992 |
| rad21         | 2.69121e-06 | 0.999993 | 2.69122e-06 | 0.999995 |
| rad13         | 1.59054e-06 | 0.999995 | 1.59054e-06 | 0.999997 |
| Phenyl+Allene | 1.56516e-06 | 0.999996 | 0.00000     | 0.999997 |
| rad9          | 1.15526e-06 | 0.999997 | 1.15526e-06 | 0.999998 |
| rad3          | 1.14338e-06 | 0.999998 | 1.14339e-06 | 0.999999 |
| rad2          | 6.88414e-07 | 0.999999 | 6.88415e-07 | 1.000000 |
| rad4          | 6.02632e-07 | 1.000000 | 6.02633e-07 | 1.000000 |
| rad28         | 1.89543e-07 | 1.000000 | 1.89543e-07 | 1.000000 |
| PhCCH+CH3     | 7.62777e-08 | 1.000000 | 7.62779e-08 | 1.000000 |
| PhCH2CCH+H    | 5.70431e-08 | 1.000000 | 5.70432e-08 | 1.000000 |
| rad1          | 5.04921e-08 | 1.000000 | 5.04922e-08 | 1.000000 |
| rad30         | 5.03917e-08 | 1.000000 | 5.03918e-08 | 1.000000 |
| rad10         | 2.46769e-08 | 1.000000 | 2.46770e-08 | 1.000000 |
| rad15         | 1.23027e-08 | 1.000000 | 1.23027e-08 | 1.000000 |
| rad33         | 1.96240e-09 | 1.000000 | 1.96240e-09 | 1.000000 |
| rad8          | 1.84802e-09 | 1.000000 | 1.84803e-09 | 1.000000 |
| PhCCCH3+H     | 6.62730e-10 | 1.000000 | 6.62731e-10 | 1.000000 |
| Ph+MeAc       | 6.43751e-10 | 1.000000 | 6.43752e-10 | 1.000000 |
| PAH9+H        | 4.42663e-10 | 1.000000 | 4.42663e-10 | 1.000000 |
| rad38         | 3.72734e-10 | 1.000000 | 3.72735e-10 | 1.000000 |
| PAH7+H        | 2.13629e-10 | 1.000000 | 2.13629e-10 | 1.000000 |
| rad35         | 1.86475e-10 | 1.000000 | 1.86475e-10 | 1.000000 |
| rad14         | 1.79484e-10 | 1.000000 | 1.79484e-10 | 1.000000 |
| rad26         | 1.31419e-10 | 1.000000 | 1.31419e-10 | 1.000000 |
| rad60syn      | 1.64663e-11 | 1.000000 | 1.64663e-11 | 1.000000 |
| rad24         | 1.26598e-11 | 1.000000 | 1.26598e-11 | 1.000000 |
| rad46         | 8.68030e-12 | 1.000000 | 8.68032e-12 | 1.000000 |
| rad60anti     | 6.34473e-12 | 1.000000 | 6.34474e-12 | 1.000000 |
| rad27         | 1.74352e-12 | 1.000000 | 1.74352e-12 | 1.000000 |
| rad39         | 9.90334e-13 | 1.000000 | 9.90334e-13 | 1.000000 |
| PAH3+H        | 4.68608e-13 | 1.000000 | 4.68609e-13 | 1.000000 |
| rad59         | 1.27882e-13 | 1.000000 | 1.27883e-13 | 1.000000 |
| rad5          | 1.06814e-14 | 1.000000 | 1.06814e-14 | 1.000000 |
| rad12         | 7.12289e-15 | 1.000000 | 7.12291e-15 | 1.000000 |
| rad19syn      | 3.83066e-15 | 1.000000 | 3.83067e-15 | 1.000000 |
| rad50         | 2.77434e-15 | 1.000000 | 2.77434e-15 | 1.000000 |
| rad31         | 1.46907e-15 | 1.000000 | 1.46907e-15 | 1.000000 |
| rad37         | 1.08747e-15 | 1.000000 | 1.08747e-15 | 1.000000 |
| rad54         | 2.01519e-16 | 1.000000 | 2.01519e-16 | 1.000000 |
| rad70         | 4.96696e-17 | 1.000000 | 4.96697e-17 | 1.000000 |
| rad62         | 6.73444e-18 | 1.000000 | 6.73445e-18 | 1.000000 |
| rad52         | 3.83852e-18 | 1.000000 | 3.83852e-18 | 1.000000 |
| rad43         | 2.44809e-18 | 1.000000 | 2.44809e-18 | 1.000000 |
| PhcycC3H3_A+H | 1.93861e-18 | 1.000000 | 1.93861e-18 | 1.000000 |
| rad55         | 5.11428e-19 | 1.000000 | 5.11428e-19 | 1.000000 |
| rad51         | 3.31479e-19 | 1.000000 | 3.31480e-19 | 1.000000 |
| PAH10+CH3     | 2.77956e-19 | 1.000000 | 2.77957e-19 | 1.000000 |
| rad34         | 1.77496e-19 | 1.000000 | 1.77496e-19 | 1.000000 |
| rad58         | 7.56319e-20 | 1.000000 | 7.56320e-20 | 1.000000 |
| rad65         | 2.71201e-21 | 1.000000 | 2.71201e-21 | 1.000000 |
| PAH1+H        | 1.52956e-21 | 1.000000 | 1.52956e-21 | 1.000000 |
| rad42         | 7.50928e-23 | 1.000000 | 7.50929e-23 | 1.000000 |
| rad41         | 7.06192e-24 | 1.000000 | 7.06193e-24 | 1.000000 |
| rad47         | 3.71161e-24 | 1.000000 | 3.71162e-24 | 1.000000 |

1000.00000 Pa, 280.000000 K

=====

| Rate constant      | True (fraction)       | Effective (fraction)  |
|--------------------|-----------------------|-----------------------|
| Total              | 2.79491e-16 (1.00 )   | 2.79491e-16 (1.00 )   |
| Formation of rad11 | 2.09281e-16 (0.749 )  | 2.09281e-16 (0.749 )  |
| Formation of rad6  | 5.79792e-17 (0.207 )  | 5.79791e-17 (0.207 )  |
| H-abstraction      | 1.22310e-17 (0.0438 ) | 1.22310e-17 (0.0438 ) |

| species            | PYtrue      | Cumul    | PYeffective | Cumul    |
|--------------------|-------------|----------|-------------|----------|
| rad6               | 0.694511    | 0.694511 | 0.694513    | 0.694513 |
| rad11              | 0.226082    | 0.920594 | 0.226082    | 0.920596 |
| Benzene+2-propynyl | 0.0437616   | 0.964355 | 0.0437617   | 0.964357 |
| Indene+H           | 0.0221375   | 0.986493 | 0.0221375   | 0.986495 |
| rad22              | 0.00620462  | 0.992697 | 0.00620464  | 0.992699 |
| rad23              | 0.00515748  | 0.997855 | 0.00515749  | 0.997857 |
| rad45              | 0.000998934 | 0.998854 | 0.000998934 | 0.998856 |
| C2H2+PhCH2         | 0.000730755 | 0.999585 | 0.000730757 | 0.999586 |
| rad7               | 0.000296164 | 0.999881 | 0.000296165 | 0.999883 |

|               |             |          |             |          |
|---------------|-------------|----------|-------------|----------|
| rad36         | 6.46296e-05 | 0.999945 | 6.46297e-05 | 0.999947 |
| rad18         | 2.08850e-05 | 0.999966 | 2.08851e-05 | 0.999968 |
| PhCHCCH2+H    | 1.64049e-05 | 0.999983 | 1.64050e-05 | 0.999985 |
| rad20         | 3.68839e-06 | 0.999986 | 3.68840e-06 | 0.999988 |
| rad25         | 2.82301e-06 | 0.999989 | 2.82302e-06 | 0.999991 |
| rad21         | 2.35714e-06 | 0.999991 | 2.35715e-06 | 0.999993 |
| Phenyl+Allene | 2.07612e-06 | 0.999994 | 0.00000     | 0.999993 |
| rad13         | 1.61886e-06 | 0.999995 | 1.61886e-06 | 0.999995 |
| rad9          | 1.40874e-06 | 0.999997 | 1.40874e-06 | 0.999996 |
| rad3          | 1.32173e-06 | 0.999998 | 1.32174e-06 | 0.999998 |
| rad2          | 9.35537e-07 | 0.999999 | 9.35539e-07 | 0.999999 |
| rad4          | 6.99539e-07 | 1.000000 | 6.99541e-07 | 0.999999 |
| rad28         | 2.47446e-07 | 1.000000 | 2.47446e-07 | 1.000000 |
| PhCCH+CH3     | 1.17009e-07 | 1.000000 | 1.17010e-07 | 1.000000 |
| PhCH2CCH+H    | 8.48803e-08 | 1.000000 | 8.48805e-08 | 1.000000 |
| rad1          | 6.96053e-08 | 1.000000 | 6.96054e-08 | 1.000000 |
| rad30         | 5.86057e-08 | 1.000000 | 5.86058e-08 | 1.000000 |
| rad10         | 3.74895e-08 | 1.000000 | 3.74895e-08 | 1.000000 |
| rad15         | 1.45841e-08 | 1.000000 | 1.45841e-08 | 1.000000 |
| rad8          | 2.49737e-09 | 1.000000 | 2.49738e-09 | 1.000000 |
| rad33         | 1.99949e-09 | 1.000000 | 1.99949e-09 | 1.000000 |
| PhCCCH3+H     | 1.22875e-09 | 1.000000 | 1.22875e-09 | 1.000000 |
| Ph+MeAc       | 1.15347e-09 | 1.000000 | 1.15347e-09 | 1.000000 |
| PAH9+H        | 6.32139e-10 | 1.000000 | 6.32140e-10 | 1.000000 |
| rad38         | 4.94643e-10 | 1.000000 | 4.94644e-10 | 1.000000 |
| PAH7+H        | 3.21215e-10 | 1.000000 | 3.21216e-10 | 1.000000 |
| rad35         | 2.61856e-10 | 1.000000 | 2.61857e-10 | 1.000000 |
| rad26         | 2.51138e-10 | 1.000000 | 2.51139e-10 | 1.000000 |
| rad14         | 2.17594e-10 | 1.000000 | 2.17594e-10 | 1.000000 |
| rad60syn      | 2.21330e-11 | 1.000000 | 2.21330e-11 | 1.000000 |
| rad24         | 1.28160e-11 | 1.000000 | 1.28160e-11 | 1.000000 |
| rad46         | 1.23659e-11 | 1.000000 | 1.23659e-11 | 1.000000 |
| rad60anti     | 8.66178e-12 | 1.000000 | 8.66180e-12 | 1.000000 |
| rad27         | 2.37455e-12 | 1.000000 | 2.37456e-12 | 1.000000 |
| rad39         | 1.92874e-12 | 1.000000 | 1.92875e-12 | 1.000000 |
| PAH3+H        | 7.71033e-13 | 1.000000 | 7.71035e-13 | 1.000000 |
| rad59         | 2.06304e-13 | 1.000000 | 2.06304e-13 | 1.000000 |
| rad5          | 2.35488e-14 | 1.000000 | 2.35489e-14 | 1.000000 |
| rad12         | 1.78001e-14 | 1.000000 | 1.78002e-14 | 1.000000 |
| rad19syn      | 8.37238e-15 | 1.000000 | 8.37240e-15 | 1.000000 |
| rad50         | 5.17984e-15 | 1.000000 | 5.17986e-15 | 1.000000 |
| rad37         | 2.82767e-15 | 1.000000 | 2.82768e-15 | 1.000000 |
| rad31         | 1.94338e-15 | 1.000000 | 1.94338e-15 | 1.000000 |
| rad54         | 4.67734e-16 | 1.000000 | 4.67735e-16 | 1.000000 |
| rad70         | 1.24187e-16 | 1.000000 | 1.24187e-16 | 1.000000 |
| rad62         | 1.65534e-17 | 1.000000 | 1.65534e-17 | 1.000000 |
| rad52         | 8.48709e-18 | 1.000000 | 8.48711e-18 | 1.000000 |
| rad43         | 6.45086e-18 | 1.000000 | 6.45087e-18 | 1.000000 |
| PhcycC3H3_A+H | 5.14153e-18 | 1.000000 | 5.14154e-18 | 1.000000 |
| rad55         | 1.33394e-18 | 1.000000 | 1.33395e-18 | 1.000000 |
| rad51         | 8.35945e-19 | 1.000000 | 8.35946e-19 | 1.000000 |
| PAH10+CH3     | 8.23491e-19 | 1.000000 | 8.23492e-19 | 1.000000 |
| rad34         | 4.92911e-19 | 1.000000 | 4.92912e-19 | 1.000000 |
| rad58         | 1.96589e-19 | 1.000000 | 1.96590e-19 | 1.000000 |
| rad65         | 7.33794e-21 | 1.000000 | 7.33796e-21 | 1.000000 |
| PAH1+H        | 4.42885e-21 | 1.000000 | 4.42886e-21 | 1.000000 |
| rad42         | 2.19410e-22 | 1.000000 | 2.19410e-22 | 1.000000 |
| rad41         | 2.20095e-23 | 1.000000 | 2.20096e-23 | 1.000000 |
| rad47         | 9.30299e-24 | 1.000000 | 9.30300e-24 | 1.000000 |

1000.00000 Pa, 290.000000 K

=====

| Rate constant      | True (fraction)       | Effective (fraction)  |
|--------------------|-----------------------|-----------------------|
| Total              | 3.55893e-16 (1.00 )   | 3.55892e-16 (1.00 )   |
| Formation of rad11 | 2.62555e-16 (0.738 )  | 2.62554e-16 (0.738 )  |
| Formation of rad6  | 7.62093e-17 (0.214 )  | 7.62091e-17 (0.214 )  |
| H-abstraction      | 1.71289e-17 (0.0481 ) | 1.71289e-17 (0.0481 ) |

| species            | PYtrue      | Cumul    | PYeffective | Cumul    |
|--------------------|-------------|----------|-------------|----------|
| rad6               | 0.711534    | 0.711534 | 0.711537    | 0.711537 |
| rad11              | 0.203203    | 0.914737 | 0.203204    | 0.914741 |
| Benzene+2-propynyl | 0.0481294   | 0.962867 | 0.0481295   | 0.962870 |
| Indene+H           | 0.0235242   | 0.986391 | 0.0235242   | 0.986395 |
| rad22              | 0.00585510  | 0.992246 | 0.00585512  | 0.992250 |
| rad23              | 0.00549288  | 0.997739 | 0.00549290  | 0.997743 |
| rad45              | 0.00100662  | 0.998745 | 0.00100662  | 0.998749 |
| C2H2+PhCH2         | 0.000820664 | 0.999566 | 0.000820667 | 0.999570 |
| rad7               | 0.000311264 | 0.999877 | 0.000311265 | 0.999881 |



|               |             |          |             |          |
|---------------|-------------|----------|-------------|----------|
| rad36         | 6.55769e-05 | 0.999943 | 6.55771e-05 | 0.999947 |
| PhCHCCH2+H    | 1.96754e-05 | 0.999963 | 1.96754e-05 | 0.999966 |
| rad18         | 1.82938e-05 | 0.999981 | 1.82938e-05 | 0.999985 |
| rad20         | 3.22406e-06 | 0.999984 | 3.22407e-06 | 0.999988 |
| Phenyl+Allene | 2.72763e-06 | 0.999987 | 0.00000     | 0.999988 |
| rad25         | 2.59446e-06 | 0.999989 | 2.59446e-06 | 0.999991 |
| rad21         | 2.05991e-06 | 0.999992 | 2.05992e-06 | 0.999993 |
| rad9          | 1.70911e-06 | 0.999993 | 1.70911e-06 | 0.999994 |
| rad13         | 1.64392e-06 | 0.999995 | 1.64393e-06 | 0.999996 |
| rad3          | 1.51514e-06 | 0.999996 | 1.51515e-06 | 0.999997 |
| rad2          | 1.25752e-06 | 0.999998 | 1.25752e-06 | 0.999999 |
| rad4          | 8.05496e-07 | 0.999998 | 8.05498e-07 | 1.000000 |
| rad28         | 3.22387e-07 | 0.999999 | 3.22388e-07 | 1.000000 |
| PhCCH+CH3     | 1.77074e-07 | 0.999999 | 1.77074e-07 | 1.000000 |
| PhCH2CCH+H    | 1.24114e-07 | 0.999999 | 1.24114e-07 | 1.000000 |
| rad1          | 9.50029e-08 | 0.999999 | 9.50031e-08 | 1.000000 |
| rad30         | 6.79401e-08 | 0.999999 | 6.79403e-08 | 1.000000 |
| rad10         | 5.58787e-08 | 0.999999 | 5.58788e-08 | 1.000000 |
| rad15         | 1.72261e-08 | 0.999999 | 1.72262e-08 | 1.000000 |
| rad8          | 3.34799e-09 | 0.999999 | 3.34800e-09 | 1.000000 |
| PhCCCH3+H     | 2.23069e-09 | 0.999999 | 2.23070e-09 | 1.000000 |
| rad33         | 2.03316e-09 | 0.999999 | 2.03317e-09 | 1.000000 |
| Ph+MeAc       | 2.03229e-09 | 0.999999 | 2.03229e-09 | 1.000000 |
| PAH9+H        | 8.96289e-10 | 0.999999 | 8.96292e-10 | 1.000000 |
| rad38         | 6.55143e-10 | 0.999999 | 6.55145e-10 | 1.000000 |
| PAH7+H        | 4.74992e-10 | 0.999999 | 4.74993e-10 | 1.000000 |
| rad26         | 4.66913e-10 | 0.999999 | 4.66913e-10 | 1.000000 |
| rad35         | 3.65182e-10 | 0.999999 | 3.65183e-10 | 1.000000 |
| rad14         | 2.60094e-10 | 0.999999 | 2.60095e-10 | 1.000000 |
| rad60syn      | 2.94868e-11 | 0.999999 | 2.94869e-11 | 1.000000 |
| rad46         | 1.75435e-11 | 0.999999 | 1.75436e-11 | 1.000000 |
| rad24         | 1.29796e-11 | 0.999999 | 1.29796e-11 | 1.000000 |
| rad60anti     | 1.17082e-11 | 0.999999 | 1.17082e-11 | 1.000000 |
| rad39         | 3.67852e-12 | 0.999999 | 3.67853e-12 | 1.000000 |
| rad27         | 3.19545e-12 | 0.999999 | 3.19546e-12 | 1.000000 |
| PAH3+H        | 1.23956e-12 | 0.999999 | 1.23956e-12 | 1.000000 |
| rad59         | 3.25524e-13 | 0.999999 | 3.25524e-13 | 1.000000 |
| rad5          | 4.99780e-14 | 0.999999 | 4.99782e-14 | 1.000000 |
| rad12         | 4.23204e-14 | 0.999999 | 4.23204e-14 | 1.000000 |
| rad19syn      | 1.74676e-14 | 0.999999 | 1.74677e-14 | 1.000000 |
| rad50         | 9.44754e-15 | 0.999999 | 9.44757e-15 | 1.000000 |
| rad37         | 6.95645e-15 | 0.999999 | 6.95648e-15 | 1.000000 |
| rad31         | 2.57538e-15 | 0.999999 | 2.57539e-15 | 1.000000 |
| rad54         | 1.02773e-15 | 0.999999 | 1.02773e-15 | 1.000000 |
| rad70         | 2.89646e-16 | 0.999999 | 2.89647e-16 | 1.000000 |
| rad62         | 3.82299e-17 | 0.999999 | 3.82300e-17 | 1.000000 |
| rad52         | 1.79758e-17 | 0.999999 | 1.79759e-17 | 1.000000 |
| rad43         | 1.59574e-17 | 0.999999 | 1.59574e-17 | 1.000000 |
| PhcycC3H3_A+H | 1.26517e-17 | 0.999999 | 1.26518e-17 | 1.000000 |
| rad55         | 3.23522e-18 | 0.999999 | 3.23523e-18 | 1.000000 |
| PAH10+CH3     | 2.26293e-18 | 0.999999 | 2.26294e-18 | 1.000000 |
| rad51         | 1.98365e-18 | 0.999999 | 1.98366e-18 | 1.000000 |
| rad34         | 1.25962e-18 | 0.999999 | 1.25962e-18 | 1.000000 |
| rad58         | 4.74607e-19 | 0.999999 | 4.74609e-19 | 1.000000 |
| rad65         | 1.84922e-20 | 0.999999 | 1.84922e-20 | 1.000000 |
| PAH1+H        | 1.17900e-20 | 0.999999 | 1.17900e-20 | 1.000000 |
| rad42         | 5.88048e-22 | 0.999999 | 5.88049e-22 | 1.000000 |
| rad41         | 6.29733e-23 | 0.999999 | 6.29735e-23 | 1.000000 |
| rad47         | 2.17944e-23 | 0.999999 | 2.17945e-23 | 1.000000 |

1000.00000 Pa, 300.000000 K

=====

| Rate constant      | True (fraction)       | Effective (fraction)  |
|--------------------|-----------------------|-----------------------|
| Total              | 6.34395e-16 (1.00 )   | 6.34393e-16 (1.00 )   |
| Formation of rad11 | 4.51153e-16 (0.711 )  | 4.51151e-16 (0.711 )  |
| Formation of rad6  | 1.51589e-16 (0.239 )  | 1.51588e-16 (0.239 )  |
| H-abstraction      | 3.16530e-17 (0.0499 ) | 3.16530e-17 (0.0499 ) |

| species            | PYtrue      | Cumul    | PYeffective | Cumul    |
|--------------------|-------------|----------|-------------|----------|
| rad6               | 0.799466    | 0.799466 | 0.799469    | 0.799469 |
| rad11              | 0.107329    | 0.906795 | 0.107329    | 0.906797 |
| Benzene+2-propynyl | 0.0498949   | 0.956689 | 0.0498950   | 0.956692 |
| Indene+H           | 0.0296156   | 0.986305 | 0.0296157   | 0.986308 |
| rad23              | 0.00651478  | 0.992820 | 0.00651480  | 0.992823 |
| rad22              | 0.00417623  | 0.996996 | 0.00417625  | 0.996999 |
| C2H2+PhCH2         | 0.00143989  | 0.998436 | 0.00143990  | 0.998439 |
| rad45              | 0.00108574  | 0.999522 | 0.00108575  | 0.999525 |
| rad7               | 0.000374174 | 0.999896 | 0.000374175 | 0.999899 |

|               |             |          |             |          |
|---------------|-------------|----------|-------------|----------|
| rad36         | 3.70102e-05 | 0.999933 | 3.70104e-05 | 0.999936 |
| PhCHCCH2+H    | 3.24984e-05 | 0.999965 | 3.24985e-05 | 0.999968 |
| rad18         | 1.01225e-05 | 0.999976 | 1.01225e-05 | 0.999979 |
| rad2          | 4.37434e-06 | 0.999980 | 4.37436e-06 | 0.999983 |
| Phenyl+Allene | 3.40460e-06 | 0.999983 | 0.00000     | 0.999983 |
| rad9          | 2.85572e-06 | 0.999986 | 2.85573e-06 | 0.999986 |
| rad3          | 2.49025e-06 | 0.999989 | 2.49025e-06 | 0.999988 |
| rad20         | 2.01521e-06 | 0.999991 | 2.01522e-06 | 0.999990 |
| rad13         | 1.73622e-06 | 0.999992 | 1.73623e-06 | 0.999992 |
| rad25         | 1.59736e-06 | 0.999994 | 1.59737e-06 | 0.999994 |
| rad21         | 1.36396e-06 | 0.999995 | 1.36396e-06 | 0.999995 |
| rad4          | 1.23902e-06 | 0.999997 | 1.23903e-06 | 0.999996 |
| PhCCH+CH3     | 1.16844e-06 | 0.999998 | 1.16845e-06 | 0.999997 |
| rad28         | 1.08226e-06 | 0.999999 | 1.08227e-06 | 0.999998 |
| rad1          | 3.29746e-07 | 0.999999 | 3.29748e-07 | 0.999999 |
| PhCH2CCH+H    | 3.18397e-07 | 1.000000 | 3.18399e-07 | 0.999999 |
| rad10         | 2.88562e-07 | 1.000000 | 2.88563e-07 | 0.999999 |
| rad30         | 1.00574e-07 | 1.000000 | 1.00574e-07 | 1.000000 |
| PhCCCH3+H     | 5.07243e-08 | 1.000000 | 5.07245e-08 | 1.000000 |
| Ph+MeAc       | 3.80557e-08 | 1.000000 | 3.80559e-08 | 1.000000 |
| rad26         | 1.00219e-08 | 1.000000 | 1.00219e-08 | 1.000000 |
| PAH9+H        | 6.59828e-09 | 1.000000 | 6.59831e-09 | 1.000000 |
| rad15         | 4.10864e-09 | 1.000000 | 4.10866e-09 | 1.000000 |
| rad38         | 2.75550e-09 | 1.000000 | 2.75551e-09 | 1.000000 |
| rad33         | 2.48179e-09 | 1.000000 | 2.48180e-09 | 1.000000 |
| rad35         | 2.15785e-09 | 1.000000 | 2.15786e-09 | 1.000000 |
| PAH7+H        | 1.60205e-09 | 1.000000 | 1.60205e-09 | 1.000000 |
| rad19anti     | 1.15845e-09 | 1.000000 | 1.15845e-09 | 1.000000 |
| rad14         | 4.62995e-10 | 1.000000 | 4.62997e-10 | 1.000000 |
| rad46         | 1.11600e-10 | 1.000000 | 1.11600e-10 | 1.000000 |
| rad39         | 1.03930e-10 | 1.000000 | 1.03931e-10 | 1.000000 |
| rad60syn      | 5.77585e-11 | 1.000000 | 5.77587e-11 | 1.000000 |
| rad60anti     | 2.39257e-11 | 1.000000 | 2.39257e-11 | 1.000000 |
| rad24         | 1.71467e-11 | 1.000000 | 1.71468e-11 | 1.000000 |
| rad27         | 1.13928e-11 | 1.000000 | 1.13929e-11 | 1.000000 |
| PAH3+H        | 4.07949e-12 | 1.000000 | 4.07950e-12 | 1.000000 |
| rad37         | 2.44930e-12 | 1.000000 | 2.44930e-12 | 1.000000 |
| rad59         | 8.69446e-13 | 1.000000 | 8.69450e-13 | 1.000000 |
| rad5          | 4.61581e-13 | 1.000000 | 4.61582e-13 | 1.000000 |
| rad19syn      | 4.17111e-13 | 1.000000 | 4.17113e-13 | 1.000000 |
| rad50         | 2.84824e-13 | 1.000000 | 2.84825e-13 | 1.000000 |
| rad54         | 3.84102e-14 | 1.000000 | 3.84103e-14 | 1.000000 |
| rad12         | 3.57234e-14 | 1.000000 | 3.57235e-14 | 1.000000 |
| rad31         | 1.40766e-14 | 1.000000 | 1.40766e-14 | 1.000000 |
| PAH10+CH3     | 8.98250e-15 | 1.000000 | 8.98253e-15 | 1.000000 |
| rad67         | 6.86701e-15 | 1.000000 | 6.86704e-15 | 1.000000 |
| rad43         | 4.26298e-15 | 1.000000 | 4.26300e-15 | 1.000000 |
| rad62         | 2.54704e-15 | 1.000000 | 2.54705e-15 | 1.000000 |
| PhcycC3H3_A+H | 2.27911e-15 | 1.000000 | 2.27912e-15 | 1.000000 |
| rad70         | 2.25494e-15 | 1.000000 | 2.25495e-15 | 1.000000 |
| rad52         | 1.89022e-15 | 1.000000 | 1.89022e-15 | 1.000000 |
| rad51         | 6.70835e-16 | 1.000000 | 6.70838e-16 | 1.000000 |
| rad55         | 3.32485e-16 | 1.000000 | 3.32485e-16 | 1.000000 |
| PAH1+H        | 8.08704e-17 | 1.000000 | 8.08707e-17 | 1.000000 |
| rad34         | 2.96394e-17 | 1.000000 | 2.96395e-17 | 1.000000 |
| rad65         | 1.48843e-17 | 1.000000 | 1.48844e-17 | 1.000000 |
| rad58         | 4.28801e-18 | 1.000000 | 4.28803e-18 | 1.000000 |
| rad42         | 1.13064e-18 | 1.000000 | 1.13065e-18 | 1.000000 |
| rad41         | 9.70437e-19 | 1.000000 | 9.70437e-19 | 1.000000 |
| rad53         | 1.12895e-19 | 1.000000 | 1.12895e-19 | 1.000000 |
| rad64         | 2.82182e-20 | 1.000000 | 2.82183e-20 | 1.000000 |
| rad56         | 2.62866e-21 | 1.000000 | 2.62866e-21 | 1.000000 |
| rad47         | 1.37361e-21 | 1.000000 | 1.37361e-21 | 1.000000 |
| rad61         | 5.71963e-22 | 1.000000 | 5.71966e-22 | 1.000000 |
| rad68syn      | 2.77609e-22 | 1.000000 | 2.77610e-22 | 1.000000 |
| rad68anti     | 1.99009e-22 | 1.000000 | 1.99010e-22 | 1.000000 |
| rad73         | 5.31957e-23 | 1.000000 | 5.31959e-23 | 1.000000 |
| rad40syn      | 3.51372e-24 | 1.000000 | 3.51374e-24 | 1.000000 |
| rad71         | 3.02932e-24 | 1.000000 | 3.02933e-24 | 1.000000 |
| PAH8+H        | 2.20441e-24 | 1.000000 | 2.20441e-24 | 1.000000 |
| rad40anti     | 1.40440e-24 | 1.000000 | 1.40441e-24 | 1.000000 |
| rad72         | 1.15456e-29 | 1.000000 | 1.15456e-29 | 1.000000 |
| rad8          | 3.91236e-35 | 1.000000 | 3.91237e-35 | 1.000000 |

1000.00000 Pa, 400.000000 K

=====

| Rate constant      | True (fraction)      | Effective (fraction) |
|--------------------|----------------------|----------------------|
| Total              | 5.11288e-15 (1.00 )  | 5.11274e-15 (1.00 )  |
| Formation of rad11 | 3.08094e-15 (0.603 ) | 3.08085e-15 (0.603 ) |

|                   |                       |                       |
|-------------------|-----------------------|-----------------------|
| Formation of rad6 | 1.54092e-15 (0.301 )  | 1.54087e-15 (0.301 )  |
| H-abstraction     | 4.91025e-16 (0.0960 ) | 4.91025e-16 (0.0960 ) |

| species            | PYtrue      | Cumul    | PYeffective | Cumul    |
|--------------------|-------------|----------|-------------|----------|
| rad6               | 0.828378    | 0.828378 | 0.828400    | 0.828400 |
| Benzene+2-propynyl | 0.0960368   | 0.924415 | 0.0960394   | 0.924440 |
| Indene+H           | 0.0370310   | 0.961446 | 0.0370320   | 0.961472 |
| rad11              | 0.0260231   | 0.987469 | 0.0260238   | 0.987496 |
| rad23              | 0.00642131  | 0.993891 | 0.00642148  | 0.993917 |
| C2H2+PhCH2         | 0.00307508  | 0.996966 | 0.00307517  | 0.996992 |
| rad22              | 0.00134847  | 0.998314 | 0.00134850  | 0.998341 |
| rad45              | 0.000985465 | 0.999300 | 0.000985489 | 0.999326 |
| rad7               | 0.000418526 | 0.999718 | 0.000418537 | 0.999745 |
| PhCHCCH2+H         | 0.000123678 | 0.999842 | 0.000123682 | 0.999868 |
| rad36              | 3.77599e-05 | 0.999880 | 3.77610e-05 | 0.999906 |
| Phenyl+Allene      | 2.72075e-05 | 0.999907 | 0.000000    | 0.999906 |
| rad2               | 2.38629e-05 | 0.999931 | 2.38636e-05 | 0.999930 |
| PhCCH+CH3          | 2.27852e-05 | 0.999953 | 2.27859e-05 | 0.999953 |
| rad28              | 1.02525e-05 | 0.999964 | 1.02527e-05 | 0.999963 |
| rad9               | 9.60009e-06 | 0.999973 | 9.60033e-06 | 0.999973 |
| rad3               | 4.67956e-06 | 0.999978 | 4.67969e-06 | 0.999977 |
| PhCH2CCH+H         | 4.66303e-06 | 0.999983 | 4.66316e-06 | 0.999982 |
| PhCCCH3+H          | 2.48918e-06 | 0.999985 | 2.48925e-06 | 0.999984 |
| rad4               | 2.46545e-06 | 0.999988 | 2.46552e-06 | 0.999987 |
| rad1               | 2.22145e-06 | 0.999990 | 2.22151e-06 | 0.999989 |
| rad10              | 2.21119e-06 | 0.999992 | 2.21125e-06 | 0.999991 |
| rad18              | 2.20083e-06 | 0.999994 | 2.20089e-06 | 0.999994 |
| Ph+MeAc            | 2.18285e-06 | 0.999996 | 2.18292e-06 | 0.999996 |
| rad13              | 1.77209e-06 | 0.999998 | 1.77213e-06 | 0.999998 |
| rad20              | 4.89770e-07 | 0.999999 | 4.89783e-07 | 0.999998 |
| rad25              | 4.56875e-07 | 0.999999 | 4.56887e-07 | 0.999998 |
| rad21              | 3.37183e-07 | 0.999999 | 3.37192e-07 | 0.999999 |
| rad26              | 3.36810e-07 | 1.000000 | 3.36819e-07 | 0.999999 |
| rad30              | 2.82253e-07 | 1.000000 | 2.82262e-07 | 0.999999 |
| PAH9+H             | 1.12135e-07 | 1.000000 | 1.12138e-07 | 1.000000 |
| PAH7+H             | 7.73066e-08 | 1.000000 | 7.73087e-08 | 1.000000 |
| rad38              | 4.14095e-08 | 1.000000 | 4.14106e-08 | 1.000000 |
| rad35              | 3.11496e-08 | 1.000000 | 3.11504e-08 | 1.000000 |
| rad19anti          | 2.62477e-08 | 1.000000 | 2.62483e-08 | 1.000000 |
| rad39              | 1.44693e-08 | 1.000000 | 1.44697e-08 | 1.000000 |
| rad15              | 1.34160e-08 | 1.000000 | 1.34164e-08 | 1.000000 |
| rad46              | 3.17283e-09 | 1.000000 | 3.17292e-09 | 1.000000 |
| rad33              | 2.82383e-09 | 1.000000 | 2.82390e-09 | 1.000000 |
| rad14              | 9.72899e-10 | 1.000000 | 9.72924e-10 | 1.000000 |
| rad37              | 5.51249e-10 | 1.000000 | 5.51264e-10 | 1.000000 |
| rad60syn           | 4.60718e-10 | 1.000000 | 4.60730e-10 | 1.000000 |
| rad60anti          | 2.11880e-10 | 1.000000 | 2.11886e-10 | 1.000000 |
| PAH3+H             | 1.17489e-10 | 1.000000 | 1.17491e-10 | 1.000000 |
| rad19syn           | 6.83512e-11 | 1.000000 | 6.83531e-11 | 1.000000 |
| rad27              | 6.30080e-11 | 1.000000 | 6.30098e-11 | 1.000000 |
| rad50              | 5.70006e-11 | 1.000000 | 5.70021e-11 | 1.000000 |
| rad59              | 2.25302e-11 | 1.000000 | 2.25308e-11 | 1.000000 |
| rad24              | 2.07480e-11 | 1.000000 | 2.07486e-11 | 1.000000 |
| rad5               | 1.02068e-11 | 1.000000 | 1.02071e-11 | 1.000000 |
| rad54              | 9.26508e-12 | 1.000000 | 9.26533e-12 | 1.000000 |
| PAH10+CH3          | 4.97349e-12 | 1.000000 | 4.97363e-12 | 1.000000 |
| rad67              | 1.14778e-12 | 1.000000 | 1.14781e-12 | 1.000000 |
| rad43              | 1.11670e-12 | 1.000000 | 1.11673e-12 | 1.000000 |
| PhcycC3H3_A+H      | 1.11366e-12 | 1.000000 | 1.11369e-12 | 1.000000 |
| rad52              | 1.05964e-12 | 1.000000 | 1.05967e-12 | 1.000000 |
| rad70              | 9.14124e-13 | 1.000000 | 9.14148e-13 | 1.000000 |
| rad51              | 8.90185e-13 | 1.000000 | 8.90209e-13 | 1.000000 |
| rad62              | 6.03435e-13 | 1.000000 | 6.03452e-13 | 1.000000 |
| rad31              | 3.69761e-13 | 1.000000 | 3.69771e-13 | 1.000000 |
| rad12              | 1.89920e-13 | 1.000000 | 1.89926e-13 | 1.000000 |
| rad55              | 1.42673e-13 | 1.000000 | 1.42678e-13 | 1.000000 |
| PAH1+H             | 8.49656e-14 | 1.000000 | 8.49679e-14 | 1.000000 |
| rad34              | 2.66267e-14 | 1.000000 | 2.66274e-14 | 1.000000 |
| rad65              | 2.51043e-14 | 1.000000 | 2.51050e-14 | 1.000000 |
| rad58              | 2.89823e-15 | 1.000000 | 2.89831e-15 | 1.000000 |
| rad41              | 8.86559e-16 | 1.000000 | 8.86584e-16 | 1.000000 |
| rad42              | 8.63138e-16 | 1.000000 | 8.63162e-16 | 1.000000 |
| rad53              | 1.99481e-16 | 1.000000 | 1.99487e-16 | 1.000000 |
| rad64              | 6.86665e-17 | 1.000000 | 6.86684e-17 | 1.000000 |
| rad73              | 2.19799e-17 | 1.000000 | 2.19805e-17 | 1.000000 |
| rad56              | 1.21095e-17 | 1.000000 | 1.21098e-17 | 1.000000 |
| rad71              | 5.62816e-18 | 1.000000 | 5.62831e-18 | 1.000000 |
| rad61              | 2.85401e-18 | 1.000000 | 2.85409e-18 | 1.000000 |
| rad68syn           | 1.58027e-18 | 1.000000 | 1.58032e-18 | 1.000000 |

|           |             |         |             |          |
|-----------|-------------|---------|-------------|----------|
| rad68anti | 1.10773e-18 | 1.00000 | 1.10777e-18 | 1.000000 |
| rad47     | 6.49426e-19 | 1.00000 | 6.49443e-19 | 1.000000 |
| PAH8+H    | 1.57855e-19 | 1.00000 | 1.57859e-19 | 1.000000 |
| rad40syn  | 7.74889e-20 | 1.00000 | 7.74910e-20 | 1.000000 |
| rad40anti | 3.84345e-20 | 1.00000 | 3.84356e-20 | 1.000000 |
| rad72     | 3.28077e-21 | 1.00000 | 3.28086e-21 | 1.000000 |
| rad8      | 1.16185e-32 | 1.00000 | 1.16189e-32 | 1.000000 |

1000.00000 Pa, 500.000000 K

| Rate constant      | True (fraction)      | Effective (fraction) |
|--------------------|----------------------|----------------------|
| Total              | 2.11551e-14 (1.00 )  | 2.11514e-14 (1.00 )  |
| Formation of rad11 | 1.10850e-14 (0.524 ) | 1.10828e-14 (0.524 ) |
| Formation of rad6  | 7.08033e-15 (0.335 ) | 7.07891e-15 (0.335 ) |
| H-abstraction      | 2.98976e-15 (0.141 ) | 2.98976e-15 (0.141 ) |

| species            | PYtrue      | Cumul    | PYeffective | Cumul    |
|--------------------|-------------|----------|-------------|----------|
| rad6               | 0.797399    | 0.797399 | 0.797537    | 0.797537 |
| Benzene+2-propynyl | 0.141326    | 0.938725 | 0.141350    | 0.938887 |
| Indene+H           | 0.0431322   | 0.981857 | 0.0431396   | 0.982027 |
| C2H2+PhCH2         | 0.00606592  | 0.987923 | 0.00606697  | 0.988094 |
| rad11              | 0.00531282  | 0.993236 | 0.00531374  | 0.993408 |
| rad23              | 0.00405046  | 0.997286 | 0.00405116  | 0.997459 |
| rad45              | 0.000807520 | 0.998094 | 0.000807659 | 0.998266 |
| PhCHCCH2+H         | 0.000438461 | 0.998532 | 0.000438537 | 0.998705 |
| rad7               | 0.000407894 | 0.998940 | 0.000407964 | 0.999113 |
| rad22              | 0.000320473 | 0.999261 | 0.000320528 | 0.999433 |
| PhCCH+CH3          | 0.000244646 | 0.999505 | 0.000244688 | 0.999678 |
| Phenyl+Allene      | 0.000172634 | 0.999678 | 0.000000    | 0.999678 |
| rad28              | 6.62526e-05 | 0.999744 | 6.62640e-05 | 0.999744 |
| rad2               | 5.35990e-05 | 0.999798 | 5.36083e-05 | 0.999798 |
| PhCH2CCH+H         | 4.11487e-05 | 0.999839 | 4.11559e-05 | 0.999839 |
| rad36              | 3.75585e-05 | 0.999877 | 3.75650e-05 | 0.999877 |
| Ph+MeAc            | 3.56170e-05 | 0.999912 | 3.56231e-05 | 0.999912 |
| PhCCCH3+H          | 3.21076e-05 | 0.999944 | 3.21132e-05 | 0.999944 |
| rad9               | 2.02031e-05 | 0.999964 | 2.02066e-05 | 0.999965 |
| rad3               | 7.35047e-06 | 0.999972 | 7.35173e-06 | 0.999972 |
| rad1               | 6.40198e-06 | 0.999978 | 6.40309e-06 | 0.999978 |
| rad10              | 5.03990e-06 | 0.999983 | 5.04077e-06 | 0.999983 |
| rad4               | 4.13928e-06 | 0.999987 | 4.14000e-06 | 0.999988 |
| PAH7+H             | 3.10823e-06 | 0.999991 | 3.10877e-06 | 0.999991 |
| rad26              | 2.25512e-06 | 0.999993 | 2.25551e-06 | 0.999993 |
| rad13              | 1.81508e-06 | 0.999995 | 1.81539e-06 | 0.999995 |
| PAH9+H             | 1.39957e-06 | 0.999996 | 1.39981e-06 | 0.999996 |
| rad30              | 7.17787e-07 | 0.999997 | 7.17911e-07 | 0.999997 |
| rad39              | 7.17676e-07 | 0.999997 | 7.17800e-07 | 0.999998 |
| rad38              | 5.38412e-07 | 0.999998 | 5.38505e-07 | 0.999998 |
| rad18              | 4.61301e-07 | 0.999998 | 4.61381e-07 | 0.999999 |
| rad19anti          | 3.49998e-07 | 0.999999 | 3.50059e-07 | 0.999999 |
| rad35              | 3.21409e-07 | 0.999999 | 3.21464e-07 | 0.999999 |
| rad20              | 1.33830e-07 | 0.999999 | 1.33852e-07 | 0.999999 |
| rad25              | 1.11726e-07 | 0.999999 | 1.11746e-07 | 1.000000 |
| rad21              | 9.62685e-08 | 0.999999 | 9.62847e-08 | 1.000000 |
| rad46              | 7.39292e-08 | 1.000000 | 7.39419e-08 | 1.000000 |
| rad15              | 2.78262e-08 | 1.000000 | 2.78310e-08 | 1.000000 |
| rad37              | 1.94649e-08 | 1.000000 | 1.94682e-08 | 1.000000 |
| rad50              | 7.58118e-09 | 1.000000 | 7.58250e-09 | 1.000000 |
| rad19syn           | 4.26035e-09 | 1.000000 | 4.26108e-09 | 1.000000 |
| rad33              | 3.54769e-09 | 1.000000 | 3.54830e-09 | 1.000000 |
| rad60syn           | 2.79435e-09 | 1.000000 | 2.79483e-09 | 1.000000 |
| PAH3+H             | 1.95530e-09 | 1.000000 | 1.95564e-09 | 1.000000 |
| rad60anti          | 1.38756e-09 | 1.000000 | 1.38780e-09 | 1.000000 |
| rad14              | 1.34689e-09 | 1.000000 | 1.34712e-09 | 1.000000 |
| rad54              | 7.70964e-10 | 1.000000 | 7.71098e-10 | 1.000000 |
| rad51              | 5.73235e-10 | 1.000000 | 5.73334e-10 | 1.000000 |
| PAH10+CH3          | 4.69823e-10 | 1.000000 | 4.69904e-10 | 1.000000 |
| rad59              | 3.30032e-10 | 1.000000 | 3.30089e-10 | 1.000000 |
| rad52              | 3.24387e-10 | 1.000000 | 3.24443e-10 | 1.000000 |
| PhcycC3H3_A+H      | 1.67543e-10 | 1.000000 | 1.67572e-10 | 1.000000 |
| rad27              | 1.35147e-10 | 1.000000 | 1.35170e-10 | 1.000000 |
| rad67              | 7.17427e-11 | 1.000000 | 7.17551e-11 | 1.000000 |
| rad70              | 6.74760e-11 | 1.000000 | 6.74876e-11 | 1.000000 |
| rad43              | 5.83777e-11 | 1.000000 | 5.83878e-11 | 1.000000 |
| rad5               | 3.93223e-11 | 1.000000 | 3.93292e-11 | 1.000000 |
| rad62              | 3.86919e-11 | 1.000000 | 3.86986e-11 | 1.000000 |
| PAH1+H             | 2.76740e-11 | 1.000000 | 2.76788e-11 | 1.000000 |
| rad24              | 2.68772e-11 | 1.000000 | 2.68818e-11 | 1.000000 |
| rad55              | 1.82106e-11 | 1.000000 | 1.82138e-11 | 1.000000 |

|           |             |          |             |          |
|-----------|-------------|----------|-------------|----------|
| rad65     | 1.69285e-11 | 1.000000 | 1.69315e-11 | 1.000000 |
| rad31     | 1.22766e-11 | 1.000000 | 1.22788e-11 | 1.000000 |
| rad34     | 3.76233e-12 | 1.000000 | 3.76298e-12 | 1.000000 |
| rad73     | 1.08208e-12 | 1.000000 | 1.08226e-12 | 1.000000 |
| rad12     | 1.01021e-12 | 1.000000 | 1.01039e-12 | 1.000000 |
| rad71     | 8.53543e-13 | 1.000000 | 8.53690e-13 | 1.000000 |
| rad58     | 8.00533e-13 | 1.000000 | 8.00671e-13 | 1.000000 |
| rad41     | 1.63316e-13 | 1.000000 | 1.63344e-13 | 1.000000 |
| rad42     | 1.55621e-13 | 1.000000 | 1.55647e-13 | 1.000000 |
| rad53     | 1.47588e-13 | 1.000000 | 1.47614e-13 | 1.000000 |
| rad64     | 1.12867e-13 | 1.000000 | 1.12887e-13 | 1.000000 |
| rad56     | 5.10873e-14 | 1.000000 | 5.10962e-14 | 1.000000 |
| rad61     | 1.07017e-14 | 1.000000 | 1.07036e-14 | 1.000000 |
| PAH8+H    | 1.03610e-14 | 1.000000 | 1.03628e-14 | 1.000000 |
| rad72     | 9.63055e-15 | 1.000000 | 9.63225e-15 | 1.000000 |
| rad68syn  | 8.41241e-15 | 1.000000 | 8.41387e-15 | 1.000000 |
| rad68anti | 5.59821e-15 | 1.000000 | 5.59918e-15 | 1.000000 |
| rad40syn  | 1.80424e-15 | 1.000000 | 1.80455e-15 | 1.000000 |
| rad40anti | 9.74527e-16 | 1.000000 | 9.74688e-16 | 1.000000 |
| rad47     | 3.26013e-16 | 1.000000 | 3.26069e-16 | 1.000000 |
| rad8      | 2.96970e-29 | 1.000000 | 2.97022e-29 | 1.000000 |

1000.00000 Pa, 600.000000 K

| =====              |                 |          |                      |          |
|--------------------|-----------------|----------|----------------------|----------|
| Rate constant      | True (fraction) |          | Effective (fraction) |          |
| -----              |                 |          |                      |          |
| Total              | 6.08120e-14     | (1.00 )  | 6.07463e-14          | (1.00 )  |
| Formation of rad11 | 2.83304e-14     | (0.466 ) | 2.82930e-14          | (0.466 ) |
| Formation of rad6  | 2.13840e-14     | (0.352 ) | 2.13558e-14          | (0.352 ) |
| H-abstraction      | 1.10975e-14     | (0.182 ) | 1.10975e-14          | (0.183 ) |
| -----              |                 |          |                      |          |
| species            | PYtrue          | Cumul    | PYeffective          | Cumul    |
| -----              |                 |          |                      |          |
| rad6               | 0.742656        | 0.742656 | 0.743460             | 0.743460 |
| Benzene+2-propynyl | 0.182488        | 0.925145 | 0.182686             | 0.926146 |
| Indene+H           | 0.0529180       | 0.978063 | 0.0529753            | 0.979121 |
| C2H2+PhCH2         | 0.0124037       | 0.990466 | 0.0124171            | 0.991538 |
| rad23              | 0.00195676      | 0.992423 | 0.00195887           | 0.993497 |
| PhCHCCH2+H         | 0.00156440      | 0.993987 | 0.00156610           | 0.995063 |
| PhCCH+CH3          | 0.00155577      | 0.995543 | 0.00155745           | 0.996621 |
| rad11              | 0.00116517      | 0.996708 | 0.00116643           | 0.997787 |
| Phenyl+Allene      | 0.00108045      | 0.997789 | 0.000000             | 0.997787 |
| rad45              | 0.000539486     | 0.998328 | 0.000540070          | 0.998327 |
| rad7               | 0.000382344     | 0.998711 | 0.000382757          | 0.998710 |
| PhCH2CCH+H         | 0.000287756     | 0.998998 | 0.000288067          | 0.998998 |
| Ph+MeAc            | 0.000240843     | 0.999239 | 0.000241104          | 0.999239 |
| rad28              | 0.000237853     | 0.999477 | 0.000238110          | 0.999477 |
| PhCCCH3+H          | 0.000168535     | 0.999646 | 0.000168717          | 0.999646 |
| rad2               | 8.53580e-05     | 0.999731 | 8.54510e-05          | 0.999731 |
| rad22              | 7.18372e-05     | 0.999803 | 7.19149e-05          | 0.999803 |
| PAH7+H             | 5.01250e-05     | 0.999853 | 5.01792e-05          | 0.999853 |
| rad36              | 3.18038e-05     | 0.999885 | 3.18382e-05          | 0.999885 |
| rad9               | 2.85092e-05     | 0.999913 | 2.85400e-05          | 0.999914 |
| PAH9+H             | 1.43928e-05     | 0.999928 | 1.44084e-05          | 0.999928 |
| rad1               | 1.26327e-05     | 0.999940 | 1.26463e-05          | 0.999941 |
| rad39              | 1.19301e-05     | 0.999952 | 1.19430e-05          | 0.999953 |
| rad3               | 1.13986e-05     | 0.999964 | 1.14109e-05          | 0.999964 |
| rad4               | 6.94568e-06     | 0.999971 | 6.95319e-06          | 0.999971 |
| rad38              | 6.14861e-06     | 0.999977 | 6.15526e-06          | 0.999977 |
| rad10              | 5.33740e-06     | 0.999982 | 5.34318e-06          | 0.999983 |
| rad26              | 5.12954e-06     | 0.999987 | 5.13509e-06          | 0.999988 |
| rad19anti          | 2.80323e-06     | 0.999990 | 2.80626e-06          | 0.999991 |
| rad35              | 2.64511e-06     | 0.999993 | 2.64798e-06          | 0.999993 |
| rad13              | 2.04233e-06     | 0.999995 | 2.04454e-06          | 0.999995 |
| rad30              | 1.88153e-06     | 0.999997 | 1.88357e-06          | 0.999997 |
| rad46              | 1.44098e-06     | 0.999998 | 1.44254e-06          | 0.999999 |
| rad50              | 6.55476e-07     | 0.999999 | 6.56185e-07          | 0.999999 |
| rad37              | 1.98607e-07     | 0.999999 | 1.98822e-07          | 1.000000 |
| rad51              | 1.41127e-07     | 0.999999 | 1.41279e-07          | 1.000000 |
| rad18              | 1.26508e-07     | 0.999999 | 1.26644e-07          | 1.000000 |
| rad19syn           | 1.01275e-07     | 0.999999 | 1.01385e-07          | 1.000000 |
| rad20              | 6.15922e-08     | 0.999999 | 6.16588e-08          | 1.000000 |
| rad21              | 4.86437e-08     | 0.999999 | 4.86963e-08          | 1.000000 |
| rad52              | 4.83320e-08     | 0.999999 | 4.83844e-08          | 1.000000 |
| PAH3+H             | 3.85552e-08     | 0.999999 | 3.85969e-08          | 1.000000 |
| rad15              | 3.72053e-08     | 0.999999 | 3.72455e-08          | 1.000000 |
| rad25              | 3.19650e-08     | 0.999999 | 3.19997e-08          | 1.000000 |
| rad54              | 2.22138e-08     | 0.999999 | 2.22378e-08          | 1.000000 |
| PAH10+CH3          | 2.10177e-08     | 1.000000 | 2.10405e-08          | 1.000000 |
| rad60syn           | 1.64987e-08     | 1.000000 | 1.65165e-08          | 1.000000 |

|               |             |          |             |         |
|---------------|-------------|----------|-------------|---------|
| rad60anti     | 8.81686e-09 | 1.000000 | 8.82634e-09 | 1.00000 |
| PhcycC3H3_A+H | 7.62175e-09 | 1.000000 | 7.63000e-09 | 1.00000 |
| rad33         | 5.76056e-09 | 1.000000 | 5.76680e-09 | 1.00000 |
| PAH1+H        | 5.15777e-09 | 1.000000 | 5.16335e-09 | 1.00000 |
| rad59         | 4.96693e-09 | 1.000000 | 4.97231e-09 | 1.00000 |
| rad65         | 3.86412e-09 | 1.000000 | 3.86831e-09 | 1.00000 |
| rad67         | 2.98781e-09 | 1.000000 | 2.99104e-09 | 1.00000 |
| rad71         | 2.78473e-09 | 1.000000 | 2.78774e-09 | 1.00000 |
| rad70         | 2.25017e-09 | 1.000000 | 2.25261e-09 | 1.00000 |
| rad73         | 2.19623e-09 | 1.000000 | 2.19860e-09 | 1.00000 |
| rad14         | 1.61140e-09 | 1.000000 | 1.61313e-09 | 1.00000 |
| rad43         | 1.12553e-09 | 1.000000 | 1.12675e-09 | 1.00000 |
| rad62         | 9.40907e-10 | 1.000000 | 9.41930e-10 | 1.00000 |
| rad55         | 6.96086e-10 | 1.000000 | 6.96839e-10 | 1.00000 |
| rad34         | 2.65888e-10 | 1.000000 | 2.66176e-10 | 1.00000 |
| rad58         | 1.75864e-10 | 1.000000 | 1.76054e-10 | 1.00000 |
| rad27         | 1.65447e-10 | 1.000000 | 1.65626e-10 | 1.00000 |
| rad31         | 1.39351e-10 | 1.000000 | 1.39502e-10 | 1.00000 |
| rad72         | 7.89098e-11 | 1.000000 | 7.89952e-11 | 1.00000 |
| rad64         | 7.39089e-11 | 1.000000 | 7.39888e-11 | 1.00000 |
| rad24         | 5.72619e-11 | 1.000000 | 5.73238e-11 | 1.00000 |
| rad5          | 5.57392e-11 | 1.000000 | 5.57994e-11 | 1.00000 |
| PAH8+H        | 3.22881e-11 | 1.000000 | 3.23231e-11 | 1.00000 |
| rad53         | 2.29069e-11 | 1.000000 | 2.29317e-11 | 1.00000 |
| rad56         | 1.73013e-11 | 1.000000 | 1.73200e-11 | 1.00000 |
| rad61         | 1.53990e-11 | 1.000000 | 1.54156e-11 | 1.00000 |
| rad41         | 1.22529e-11 | 1.000000 | 1.22662e-11 | 1.00000 |
| rad42         | 1.14236e-11 | 1.000000 | 1.14359e-11 | 1.00000 |
| rad68syn      | 1.04109e-11 | 1.000000 | 1.04222e-11 | 1.00000 |
| rad12         | 7.62983e-12 | 1.000000 | 7.63808e-12 | 1.00000 |
| rad68anti     | 6.78254e-12 | 1.000000 | 6.78988e-12 | 1.00000 |
| rad40syn      | 3.96777e-12 | 1.000000 | 3.97206e-12 | 1.00000 |
| rad40anti     | 2.40326e-12 | 1.000000 | 2.40586e-12 | 1.00000 |
| rad47         | 1.24391e-13 | 1.000000 | 1.24525e-13 | 1.00000 |
| rad8          | 4.14383e-25 | 1.000000 | 4.14831e-25 | 1.00000 |

1000.00000 Pa, 700.000000 K

| Rate constant      | True (fraction)      | Effective (fraction) |
|--------------------|----------------------|----------------------|
| Total              | 1.39564e-13 (1.00 )  | 1.38786e-13 (1.00 )  |
| Formation of rad11 | 5.88273e-14 (0.422 ) | 5.84078e-14 (0.421 ) |
| Formation of rad6  | 5.01684e-14 (0.359 ) | 4.98106e-14 (0.359 ) |
| H-abstraction      | 3.05678e-14 (0.219 ) | 3.05678e-14 (0.220 ) |

| species            | PYtrue      | Cumul    | PYeffective | Cumul    |
|--------------------|-------------|----------|-------------|----------|
| rad6               | 0.655157    | 0.655157 | 0.658826    | 0.658826 |
| Benzene+2-propynyl | 0.219024    | 0.874182 | 0.220251    | 0.879077 |
| Indene+H           | 0.0751652   | 0.949347 | 0.0755861   | 0.954663 |
| C2H2+PhCH2         | 0.0272410   | 0.976588 | 0.0273935   | 0.982057 |
| PhCCH+CH3          | 0.00628974  | 0.982878 | 0.00632496  | 0.988382 |
| Phenyl+Allene      | 0.00556917  | 0.988447 | 0.000000    | 0.988382 |
| PhCHCCH2+H         | 0.00523218  | 0.993679 | 0.00526147  | 0.993643 |
| PhCH2CCH+H         | 0.00153153  | 0.995210 | 0.00154011  | 0.995183 |
| Ph+MeAc            | 0.000960296 | 0.996171 | 0.000965672 | 0.996149 |
| rad23              | 0.000914827 | 0.997086 | 0.000919948 | 0.997069 |
| PhCCCH3+H          | 0.000534476 | 0.997620 | 0.000537470 | 0.997607 |
| rad28              | 0.000477356 | 0.998097 | 0.000480029 | 0.998087 |
| rad11              | 0.000385373 | 0.998483 | 0.000387531 | 0.998474 |
| PAH7+H             | 0.000348475 | 0.998831 | 0.000350427 | 0.998824 |
| rad7               | 0.000348331 | 0.999180 | 0.000350282 | 0.999175 |
| rad45              | 0.000299535 | 0.999479 | 0.000301212 | 0.999476 |
| rad2               | 0.000102414 | 0.999582 | 0.000102988 | 0.999579 |
| PAH9+H             | 9.21700e-05 | 0.999674 | 9.26864e-05 | 0.999672 |
| rad39              | 8.36511e-05 | 0.999757 | 8.41193e-05 | 0.999756 |
| rad38              | 4.22266e-05 | 0.999800 | 4.24630e-05 | 0.999798 |
| rad9               | 4.05084e-05 | 0.999840 | 4.07353e-05 | 0.999839 |
| rad36              | 2.12885e-05 | 0.999861 | 2.14078e-05 | 0.999860 |
| rad22              | 2.10398e-05 | 0.999882 | 2.11576e-05 | 0.999882 |
| rad1               | 1.78433e-05 | 0.999900 | 1.79432e-05 | 0.999899 |
| rad19anti          | 1.49714e-05 | 0.999915 | 1.50552e-05 | 0.999915 |
| rad35              | 1.46837e-05 | 0.999930 | 1.47660e-05 | 0.999929 |
| rad46              | 1.27735e-05 | 0.999943 | 1.28450e-05 | 0.999942 |
| rad3               | 1.21137e-05 | 0.999955 | 1.21816e-05 | 0.999954 |
| rad50              | 1.00581e-05 | 0.999965 | 1.01144e-05 | 0.999964 |
| rad4               | 8.00937e-06 | 0.999973 | 8.05418e-06 | 0.999973 |
| rad26              | 7.01771e-06 | 0.999980 | 7.05702e-06 | 0.999980 |
| rad30              | 5.15300e-06 | 0.999985 | 5.18186e-06 | 0.999985 |
| rad10              | 4.33078e-06 | 0.999989 | 4.35504e-06 | 0.999989 |

|               |             |          |             |          |
|---------------|-------------|----------|-------------|----------|
| rad51         | 2.82048e-06 | 0.999992 | 2.83627e-06 | 0.999992 |
| rad13         | 2.71601e-06 | 0.999995 | 2.73121e-06 | 0.999995 |
| rad19syn      | 1.02259e-06 | 0.999996 | 1.02832e-06 | 0.999996 |
| rad37         | 1.01060e-06 | 0.999997 | 1.01626e-06 | 0.999997 |
| rad52         | 8.52466e-07 | 0.999998 | 8.57241e-07 | 0.999998 |
| PAH3+H        | 4.40781e-07 | 0.999998 | 4.43250e-07 | 0.999998 |
| PAH10+CH3     | 3.44346e-07 | 0.999999 | 3.46275e-07 | 0.999998 |
| rad54         | 2.51556e-07 | 0.999999 | 2.52965e-07 | 0.999999 |
| PAH1+H        | 1.16489e-07 | 0.999999 | 1.17142e-07 | 0.999999 |
| PhcycC3H3_A+H | 1.07798e-07 | 0.999999 | 1.08402e-07 | 0.999999 |
| rad71         | 8.88766e-08 | 0.999999 | 8.93741e-08 | 0.999999 |
| rad60syn      | 8.74537e-08 | 0.999999 | 8.79432e-08 | 0.999999 |
| rad20         | 8.05202e-08 | 0.999999 | 8.09715e-08 | 0.999999 |
| rad21         | 7.54950e-08 | 0.999999 | 7.59178e-08 | 0.999999 |
| rad65         | 7.48639e-08 | 0.999999 | 7.52831e-08 | 0.999999 |
| rad18         | 7.29848e-08 | 1.000000 | 7.33936e-08 | 0.999999 |
| rad73         | 6.50249e-08 | 1.000000 | 6.53891e-08 | 0.999999 |
| rad60anti     | 4.94371e-08 | 1.000000 | 4.97140e-08 | 0.999999 |
| rad67         | 4.93922e-08 | 1.000000 | 4.96688e-08 | 0.999999 |
| rad59         | 4.83407e-08 | 1.000000 | 4.86114e-08 | 1.000000 |
| rad15         | 3.63756e-08 | 1.000000 | 3.65793e-08 | 1.000000 |
| rad70         | 3.15998e-08 | 1.000000 | 3.17767e-08 | 1.000000 |
| rad25         | 1.57931e-08 | 1.000000 | 1.58815e-08 | 1.000000 |
| rad33         | 1.43277e-08 | 1.000000 | 1.44080e-08 | 1.000000 |
| rad43         | 1.19544e-08 | 1.000000 | 1.20213e-08 | 1.000000 |
| rad62         | 1.12059e-08 | 1.000000 | 1.12686e-08 | 1.000000 |
| rad55         | 9.13109e-09 | 1.000000 | 9.18225e-09 | 1.000000 |
| rad34         | 5.12259e-09 | 1.000000 | 5.15128e-09 | 1.000000 |
| rad58         | 3.54739e-09 | 1.000000 | 3.56726e-09 | 1.000000 |
| rad72         | 2.86590e-09 | 1.000000 | 2.88195e-09 | 1.000000 |
| rad64         | 1.90110e-09 | 1.000000 | 1.91174e-09 | 1.000000 |
| rad14         | 1.82609e-09 | 1.000000 | 1.83632e-09 | 1.000000 |
| PAH8+H        | 1.15089e-09 | 1.000000 | 1.15733e-09 | 1.000000 |
| rad24         | 5.39034e-10 | 1.000000 | 5.42053e-10 | 1.000000 |
| rad61         | 4.83984e-10 | 1.000000 | 4.86694e-10 | 1.000000 |
| rad31         | 4.68045e-10 | 1.000000 | 4.70667e-10 | 1.000000 |
| rad53         | 4.01257e-10 | 1.000000 | 4.03504e-10 | 1.000000 |
| rad41         | 3.95796e-10 | 1.000000 | 3.98013e-10 | 1.000000 |
| rad42         | 3.36919e-10 | 1.000000 | 3.38806e-10 | 1.000000 |
| rad56         | 3.19232e-10 | 1.000000 | 3.21020e-10 | 1.000000 |
| rad68syn      | 3.06299e-10 | 1.000000 | 3.08015e-10 | 1.000000 |
| rad27         | 2.03622e-10 | 1.000000 | 2.04763e-10 | 1.000000 |
| rad68anti     | 1.99069e-10 | 1.000000 | 2.00183e-10 | 1.000000 |
| rad40syn      | 1.43521e-10 | 1.000000 | 1.44325e-10 | 1.000000 |
| rad12         | 1.21731e-10 | 1.000000 | 1.22413e-10 | 1.000000 |
| rad40anti     | 9.50557e-11 | 1.000000 | 9.55879e-11 | 1.000000 |
| rad5          | 5.41026e-11 | 1.000000 | 5.44055e-11 | 1.000000 |
| rad47         | 1.22087e-11 | 1.000000 | 1.22771e-11 | 1.000000 |
| rad8          | 1.31462e-20 | 1.000000 | 1.32199e-20 | 1.000000 |

1000.00000 Pa, 800.000000 K

=====

| Rate constant      | True (fraction)      | Effective (fraction) |
|--------------------|----------------------|----------------------|
| Total              | 2.75392e-13 (1.00 )  | 2.70089e-13 (1.00 )  |
| Formation of rad11 | 1.06471e-13 (0.387 ) | 1.03732e-13 (0.384 ) |
| Formation of rad6  | 9.97133e-14 (0.362 ) | 9.71485e-14 (0.360 ) |
| H-abstraction      | 6.92082e-14 (0.251 ) | 6.92082e-14 (0.256 ) |

| species            | PYtrue      | Cumul    | PYeffective | Cumul    |
|--------------------|-------------|----------|-------------|----------|
| rad6               | 0.521639    | 0.521639 | 0.531882    | 0.531882 |
| Benzene+2-propynyl | 0.251308    | 0.772947 | 0.256242    | 0.788124 |
| Indene+H           | 0.110902    | 0.883849 | 0.113079    | 0.901204 |
| C2H2+PhCH2         | 0.0538573   | 0.937706 | 0.0549148   | 0.956119 |
| Phenyl+Allene      | 0.0192573   | 0.956963 | 0.000000    | 0.956119 |
| PhCCH+CH3          | 0.0161908   | 0.973154 | 0.0165087   | 0.972627 |
| PhCHCCH2+H         | 0.0136692   | 0.986823 | 0.0139376   | 0.986565 |
| PhCH2CCH+H         | 0.00545785  | 0.992281 | 0.00556503  | 0.992130 |
| Ph+MeAc            | 0.00239821  | 0.994679 | 0.00244530  | 0.994575 |
| PAH7+H             | 0.00123960  | 0.995919 | 0.00126394  | 0.995839 |
| PhCCCH3+H          | 0.00110414  | 0.997023 | 0.00112582  | 0.996965 |
| rad28              | 0.000595593 | 0.997619 | 0.000607287 | 0.997572 |
| rad23              | 0.000506734 | 0.998125 | 0.000516685 | 0.998089 |
| rad7               | 0.000308836 | 0.998434 | 0.000314900 | 0.998404 |
| rad39              | 0.000293798 | 0.998728 | 0.000299567 | 0.998703 |
| PAH9+H             | 0.000261496 | 0.998990 | 0.000266630 | 0.998970 |
| rad11              | 0.000234600 | 0.999224 | 0.000239207 | 0.999209 |
| rad45              | 0.000207527 | 0.999432 | 0.000211602 | 0.999421 |
| rad38              | 0.000122624 | 0.999554 | 0.000125032 | 0.999546 |

|               |             |          |             |          |
|---------------|-------------|----------|-------------|----------|
| rad2          | 8.04178e-05 | 0.999635 | 8.19971e-05 | 0.999628 |
| rad9          | 7.78962e-05 | 0.999713 | 7.94259e-05 | 0.999707 |
| rad19anti     | 5.26988e-05 | 0.999765 | 5.37336e-05 | 0.999761 |
| rad46         | 4.00791e-05 | 0.999805 | 4.08661e-05 | 0.999802 |
| rad35         | 3.97548e-05 | 0.999845 | 4.05355e-05 | 0.999842 |
| rad50         | 3.70827e-05 | 0.999882 | 3.78109e-05 | 0.999880 |
| rad36         | 1.69396e-05 | 0.999899 | 1.72722e-05 | 0.999898 |
| rad1          | 1.51909e-05 | 0.999914 | 1.54891e-05 | 0.999913 |
| rad30         | 1.18101e-05 | 0.999926 | 1.20420e-05 | 0.999925 |
| rad22         | 1.14451e-05 | 0.999938 | 1.16699e-05 | 0.999937 |
| rad51         | 1.11938e-05 | 0.999949 | 1.14136e-05 | 0.999948 |
| rad3          | 9.44663e-06 | 0.999958 | 9.63211e-06 | 0.999958 |
| rad26         | 6.93963e-06 | 0.999965 | 7.07590e-06 | 0.999965 |
| rad4          | 6.58970e-06 | 0.999972 | 6.71909e-06 | 0.999972 |
| rad19syn      | 5.24240e-06 | 0.999977 | 5.34534e-06 | 0.999977 |
| rad13         | 4.60033e-06 | 0.999982 | 4.69066e-06 | 0.999982 |
| rad52         | 3.26292e-06 | 0.999985 | 3.32698e-06 | 0.999985 |
| rad10         | 2.97640e-06 | 0.999988 | 3.03485e-06 | 0.999988 |
| rad37         | 2.85024e-06 | 0.999991 | 2.90621e-06 | 0.999991 |
| PAH3+H        | 1.67402e-06 | 0.999992 | 1.70689e-06 | 0.999993 |
| PAH10+CH3     | 1.48046e-06 | 0.999994 | 1.50953e-06 | 0.999994 |
| rad54         | 1.39738e-06 | 0.999995 | 1.42482e-06 | 0.999996 |
| PhcycC3H3_A+H | 6.73781e-07 | 0.999996 | 6.87011e-07 | 0.999996 |
| PAH1+H        | 5.45335e-07 | 0.999997 | 5.56042e-07 | 0.999997 |
| rad71         | 4.04524e-07 | 0.999997 | 4.12466e-07 | 0.999997 |
| rad21         | 3.59153e-07 | 0.999997 | 3.66206e-07 | 0.999998 |
| rad20         | 3.04695e-07 | 0.999998 | 3.10678e-07 | 0.999998 |
| rad67         | 2.94575e-07 | 0.999998 | 3.00359e-07 | 0.999998 |
| rad65         | 2.94042e-07 | 0.999998 | 2.99815e-07 | 0.999998 |
| rad73         | 2.89420e-07 | 0.999998 | 2.95104e-07 | 0.999999 |
| rad60syn      | 2.78867e-07 | 0.999999 | 2.84342e-07 | 0.999999 |
| rad59         | 1.79500e-07 | 0.999999 | 1.83024e-07 | 0.999999 |
| rad70         | 1.64966e-07 | 0.999999 | 1.68205e-07 | 0.999999 |
| rad60anti     | 1.60755e-07 | 0.999999 | 1.63912e-07 | 1.000000 |
| rad18         | 1.15536e-07 | 0.999999 | 1.17805e-07 | 1.000000 |
| rad33         | 6.29268e-08 | 0.999999 | 6.41623e-08 | 1.000000 |
| rad62         | 5.69101e-08 | 0.999999 | 5.80275e-08 | 1.000000 |
| rad55         | 5.55584e-08 | 1.000000 | 5.66494e-08 | 1.000000 |
| rad43         | 5.36531e-08 | 1.000000 | 5.47066e-08 | 1.000000 |
| rad15         | 3.86706e-08 | 1.000000 | 3.94299e-08 | 1.000000 |
| rad34         | 2.62706e-08 | 1.000000 | 2.67865e-08 | 1.000000 |
| rad25         | 1.80795e-08 | 1.000000 | 1.84345e-08 | 1.000000 |
| rad58         | 1.43481e-08 | 1.000000 | 1.46298e-08 | 1.000000 |
| rad72         | 1.35586e-08 | 1.000000 | 1.38248e-08 | 1.000000 |
| rad24         | 9.48159e-09 | 1.000000 | 9.66774e-09 | 1.000000 |
| rad64         | 8.43312e-09 | 1.000000 | 8.59866e-09 | 1.000000 |
| PAH8+H        | 6.01928e-09 | 1.000000 | 6.13747e-09 | 1.000000 |
| rad41         | 2.76810e-09 | 1.000000 | 2.82246e-09 | 1.000000 |
| rad12         | 2.54668e-09 | 1.000000 | 2.59670e-09 | 1.000000 |
| rad61         | 2.40947e-09 | 1.000000 | 2.45679e-09 | 1.000000 |
| rad14         | 2.37276e-09 | 1.000000 | 2.41935e-09 | 1.000000 |
| rad42         | 2.35391e-09 | 1.000000 | 2.40013e-09 | 1.000000 |
| rad53         | 2.27126e-09 | 1.000000 | 2.31586e-09 | 1.000000 |
| rad56         | 1.46634e-09 | 1.000000 | 1.49512e-09 | 1.000000 |
| rad68syn      | 1.39315e-09 | 1.000000 | 1.42051e-09 | 1.000000 |
| rad68anti     | 9.05506e-10 | 1.000000 | 9.23286e-10 | 1.000000 |
| rad31         | 8.03347e-10 | 1.000000 | 8.19115e-10 | 1.000000 |
| rad40syn      | 7.98113e-10 | 1.000000 | 8.13790e-10 | 1.000000 |
| rad40anti     | 5.75454e-10 | 1.000000 | 5.86753e-10 | 1.000000 |
| rad27         | 3.00511e-10 | 1.000000 | 3.06412e-10 | 1.000000 |
| rad47         | 1.04039e-10 | 1.000000 | 1.06082e-10 | 1.000000 |
| rad5          | 4.49756e-11 | 1.000000 | 4.58587e-11 | 1.000000 |
| rad8          | 1.95367e-16 | 1.000000 | 1.99203e-16 | 1.000000 |

1000.00000 Pa, 900.000000 K

=====

| Rate constant      | True (fraction)      | Effective (fraction) |
|--------------------|----------------------|----------------------|
| Total              | 4.88072e-13 (1.00 )  | 4.65308e-13 (1.00 )  |
| Formation of rad11 | 1.74945e-13 (0.358 ) | 1.63614e-13 (0.352 ) |
| Formation of rad6  | 1.76509e-13 (0.362 ) | 1.65076e-13 (0.355 ) |
| H-abstraction      | 1.36618e-13 (0.280 ) | 1.36618e-13 (0.294 ) |

| species            | PYtrue    | Cumul    | PYeffective | Cumul    |
|--------------------|-----------|----------|-------------|----------|
| rad6               | 0.354536  | 0.354536 | 0.371880    | 0.371880 |
| Benzene+2-propynyl | 0.279914  | 0.634450 | 0.293608    | 0.665488 |
| Indene+H           | 0.149003  | 0.783453 | 0.156293    | 0.821781 |
| C2H2+PhCH2         | 0.0871160 | 0.870569 | 0.0913782   | 0.913159 |
| Phenyl+Allene      | 0.0466409 | 0.917210 | 0.000000    | 0.913159 |



|               |             |          |             |          |
|---------------|-------------|----------|-------------|----------|
| PhCCH+CH3     | 0.0296864   | 0.946896 | 0.0311388   | 0.944298 |
| PhCHCCH2+H    | 0.0272929   | 0.974189 | 0.0286282   | 0.972926 |
| PhCH2CCH+H    | 0.0136513   | 0.987840 | 0.0143191   | 0.987245 |
| Ph+MeAc       | 0.00423113  | 0.992071 | 0.00443813  | 0.991683 |
| PAH7+H        | 0.00283309  | 0.994905 | 0.00297169  | 0.994655 |
| PhCCCH3+H     | 0.00168013  | 0.996585 | 0.00176234  | 0.996417 |
| rad39         | 0.000653062 | 0.997238 | 0.000685011 | 0.997102 |
| rad28         | 0.000517427 | 0.997755 | 0.000542741 | 0.997645 |
| PAH9+H        | 0.000405568 | 0.998161 | 0.000425410 | 0.998070 |
| rad23         | 0.000350246 | 0.998511 | 0.000367380 | 0.998438 |
| rad7          | 0.000267452 | 0.998778 | 0.000280537 | 0.998718 |
| rad11         | 0.000205675 | 0.998984 | 0.000215738 | 0.998934 |
| rad38         | 0.000190382 | 0.999175 | 0.000199696 | 0.999134 |
| rad45         | 0.000178311 | 0.999353 | 0.000187035 | 0.999321 |
| rad19anti     | 0.000131274 | 0.999484 | 0.000137696 | 0.999458 |
| rad9          | 0.000119814 | 0.999604 | 0.000125676 | 0.999584 |
| rad46         | 6.29385e-05 | 0.999667 | 6.60176e-05 | 0.999650 |
| rad35         | 6.17493e-05 | 0.999729 | 6.47702e-05 | 0.999715 |
| rad50         | 6.07380e-05 | 0.999789 | 6.37094e-05 | 0.999779 |
| rad2          | 5.24114e-05 | 0.999842 | 5.49755e-05 | 0.999834 |
| rad30         | 2.09539e-05 | 0.999863 | 2.19790e-05 | 0.999856 |
| rad51         | 1.88159e-05 | 0.999882 | 1.97363e-05 | 0.999875 |
| rad19syn      | 1.70269e-05 | 0.999899 | 1.78599e-05 | 0.999893 |
| rad36         | 1.58068e-05 | 0.999914 | 1.65802e-05 | 0.999910 |
| rad1          | 1.08783e-05 | 0.999925 | 1.14104e-05 | 0.999921 |
| rad22         | 1.01545e-05 | 0.999935 | 1.06513e-05 | 0.999932 |
| rad13         | 9.92401e-06 | 0.999945 | 1.04095e-05 | 0.999942 |
| rad3          | 6.80911e-06 | 0.999952 | 7.14226e-06 | 0.999949 |
| rad26         | 5.55443e-06 | 0.999958 | 5.82617e-06 | 0.999955 |
| rad52         | 5.41124e-06 | 0.999963 | 5.67597e-06 | 0.999961 |
| rad37         | 5.40811e-06 | 0.999968 | 5.67270e-06 | 0.999967 |
| rad4          | 5.02064e-06 | 0.999974 | 5.26626e-06 | 0.999972 |
| rad54         | 4.86404e-06 | 0.999978 | 5.10200e-06 | 0.999977 |
| PAH3+H        | 3.30849e-06 | 0.999982 | 3.47035e-06 | 0.999980 |
| PAH10+CH3     | 2.91088e-06 | 0.999985 | 3.05330e-06 | 0.999983 |
| PhcycC3H3_A+H | 2.63894e-06 | 0.999987 | 2.76805e-06 | 0.999986 |
| rad10         | 2.17078e-06 | 0.999989 | 2.27698e-06 | 0.999988 |
| rad21         | 1.98040e-06 | 0.999991 | 2.07729e-06 | 0.999991 |
| rad20         | 1.38022e-06 | 0.999993 | 1.44774e-06 | 0.999992 |
| rad67         | 1.25739e-06 | 0.999994 | 1.31891e-06 | 0.999993 |
| PAH1+H        | 1.23948e-06 | 0.999995 | 1.30012e-06 | 0.999995 |
| rad71         | 7.19974e-07 | 0.999996 | 7.55197e-07 | 0.999995 |
| rad60syn      | 5.74661e-07 | 0.999997 | 6.02775e-07 | 0.999996 |
| rad70         | 5.11538e-07 | 0.999997 | 5.36563e-07 | 0.999996 |
| rad73         | 5.09978e-07 | 0.999998 | 5.34927e-07 | 0.999997 |
| rad65         | 4.92149e-07 | 0.999998 | 5.16226e-07 | 0.999998 |
| rad59         | 3.65264e-07 | 0.999998 | 3.83133e-07 | 0.999998 |
| rad33         | 3.54823e-07 | 0.999999 | 3.72182e-07 | 0.999998 |
| rad60anti     | 3.32514e-07 | 0.999999 | 3.48780e-07 | 0.999999 |
| rad18         | 2.80096e-07 | 0.999999 | 2.93798e-07 | 0.999999 |
| rad55         | 2.09915e-07 | 1.000000 | 2.20184e-07 | 0.999999 |
| rad62         | 1.42418e-07 | 1.000000 | 1.49386e-07 | 0.999999 |
| rad43         | 1.11439e-07 | 1.000000 | 1.16891e-07 | 0.999999 |
| rad34         | 7.53650e-08 | 1.000000 | 7.90516e-08 | 1.000000 |
| rad24         | 6.02431e-08 | 1.000000 | 6.31905e-08 | 1.000000 |
| rad15         | 4.30684e-08 | 1.000000 | 4.51754e-08 | 1.000000 |
| rad25         | 3.89395e-08 | 1.000000 | 4.08445e-08 | 1.000000 |
| rad58         | 2.54069e-08 | 1.000000 | 2.66498e-08 | 1.000000 |
| rad72         | 2.45668e-08 | 1.000000 | 2.57686e-08 | 1.000000 |
| rad12         | 1.86538e-08 | 1.000000 | 1.95664e-08 | 1.000000 |
| rad64         | 1.64993e-08 | 1.000000 | 1.73065e-08 | 1.000000 |
| PAH8+H        | 1.21677e-08 | 1.000000 | 1.27630e-08 | 1.000000 |
| rad53         | 8.81069e-09 | 1.000000 | 9.24173e-09 | 1.000000 |
| rad41         | 6.62449e-09 | 1.000000 | 6.94858e-09 | 1.000000 |
| rad42         | 5.34446e-09 | 1.000000 | 5.60592e-09 | 1.000000 |
| rad61         | 4.76881e-09 | 1.000000 | 5.00211e-09 | 1.000000 |
| rad14         | 4.66237e-09 | 1.000000 | 4.89047e-09 | 1.000000 |
| rad56         | 4.30216e-09 | 1.000000 | 4.51263e-09 | 1.000000 |
| rad68syn      | 2.66725e-09 | 1.000000 | 2.79774e-09 | 1.000000 |
| rad68anti     | 1.73778e-09 | 1.000000 | 1.82280e-09 | 1.000000 |
| rad40syn      | 1.70003e-09 | 1.000000 | 1.78320e-09 | 1.000000 |
| rad40anti     | 1.28676e-09 | 1.000000 | 1.34971e-09 | 1.000000 |
| rad31         | 1.00839e-09 | 1.000000 | 1.05772e-09 | 1.000000 |
| rad27         | 7.84707e-10 | 1.000000 | 8.23102e-10 | 1.000000 |
| rad47         | 2.11937e-10 | 1.000000 | 2.22306e-10 | 1.000000 |
| rad5          | 3.51181e-11 | 1.000000 | 3.68362e-11 | 1.000000 |
| rad8          | 2.60404e-13 | 1.000000 | 2.73143e-13 | 1.000000 |

1000.00000 Pa, 1000.00000 K

=====

| Rate constant      | True (fraction)      | Effective (fraction) |
|--------------------|----------------------|----------------------|
| Total              | 7.98668e-13 (1.00 )  | 7.31134e-13 (1.00 )  |
| Formation of rad11 | 2.67704e-13 (0.335 ) | 2.35114e-13 (0.322 ) |
| Formation of rad6  | 2.87049e-13 (0.359 ) | 2.52105e-13 (0.345 ) |
| H-abstraction      | 2.43915e-13 (0.305 ) | 2.43915e-13 (0.334 ) |

| species            | PYtrue      | Cumul    | PYeffective | Cumul    |
|--------------------|-------------|----------|-------------|----------|
| Benzene+2-propynyl | 0.305402    | 0.305402 | 0.333612    | 0.333612 |
| rad6               | 0.203396    | 0.508798 | 0.222183    | 0.555795 |
| Indene+H           | 0.168669    | 0.677467 | 0.184249    | 0.740044 |
| C2H2+PhCH2         | 0.112616    | 0.790083 | 0.123018    | 0.863062 |
| Phenyl+Allene      | 0.0845583   | 0.874641 | 0.00000     | 0.863062 |
| PhCHCCH2+H         | 0.0425662   | 0.917207 | 0.0464979   | 0.909560 |
| PhCCH+CH3          | 0.0410667   | 0.958274 | 0.0448599   | 0.954420 |
| PhCH2CCH+H         | 0.0256414   | 0.983915 | 0.0280098   | 0.982430 |
| Ph+MeAc            | 0.00568976  | 0.989605 | 0.00621531  | 0.988645 |
| PAH7+H             | 0.00469074  | 0.994296 | 0.00512401  | 0.993769 |
| PhCCCH3+H          | 0.00195660  | 0.996252 | 0.00213733  | 0.995906 |
| rad39              | 0.00104571  | 0.997298 | 0.00114230  | 0.997048 |
| PAH9+H             | 0.000450280 | 0.997748 | 0.000491872 | 0.997540 |
| rad28              | 0.000340241 | 0.998089 | 0.000371668 | 0.997912 |
| rad23              | 0.000258291 | 0.998347 | 0.000282149 | 0.998194 |
| rad7               | 0.000245267 | 0.998592 | 0.000267922 | 0.998462 |
| rad19anti          | 0.000238733 | 0.998831 | 0.000260784 | 0.998723 |
| rad11              | 0.000232649 | 0.999063 | 0.000254138 | 0.998977 |
| rad38              | 0.000209009 | 0.999272 | 0.000228314 | 0.999205 |
| rad45              | 0.000151234 | 0.999424 | 0.000165203 | 0.999371 |
| rad9               | 0.000116468 | 0.999540 | 0.000127226 | 0.999498 |
| rad35              | 7.05892e-05 | 0.999611 | 7.71098e-05 | 0.999575 |
| rad46              | 6.76348e-05 | 0.999678 | 7.38825e-05 | 0.999649 |
| rad50              | 6.40510e-05 | 0.999742 | 6.99675e-05 | 0.999719 |
| rad19syn           | 3.99692e-05 | 0.999782 | 4.36610e-05 | 0.999762 |
| rad2               | 3.18486e-05 | 0.999814 | 3.47904e-05 | 0.999797 |
| rad30              | 2.92190e-05 | 0.999843 | 3.19179e-05 | 0.999829 |
| rad13              | 2.47745e-05 | 0.999868 | 2.70629e-05 | 0.999856 |
| rad51              | 1.99009e-05 | 0.999888 | 2.17391e-05 | 0.999878 |
| rad36              | 1.37585e-05 | 0.999902 | 1.50293e-05 | 0.999893 |
| rad54              | 1.22011e-05 | 0.999914 | 1.33281e-05 | 0.999906 |
| rad22              | 1.05414e-05 | 0.999925 | 1.15151e-05 | 0.999918 |
| rad37              | 7.98156e-06 | 0.999933 | 8.71883e-06 | 0.999926 |
| PhcycC3H3_A+H      | 7.57668e-06 | 0.999940 | 8.27654e-06 | 0.999935 |
| rad1               | 7.22229e-06 | 0.999947 | 7.88944e-06 | 0.999943 |
| rad21              | 6.06392e-06 | 0.999954 | 6.62404e-06 | 0.999949 |
| rad52              | 5.70847e-06 | 0.999959 | 6.23576e-06 | 0.999956 |
| PAH3+H             | 4.91637e-06 | 0.999964 | 5.37048e-06 | 0.999961 |
| rad3               | 4.57426e-06 | 0.999969 | 4.99678e-06 | 0.999966 |
| PAH10+CH3          | 3.95395e-06 | 0.999973 | 4.31917e-06 | 0.999970 |
| rad20              | 3.78263e-06 | 0.999976 | 4.13202e-06 | 0.999974 |
| rad26              | 3.70636e-06 | 0.999980 | 4.04871e-06 | 0.999978 |
| rad67              | 3.54196e-06 | 0.999984 | 3.86912e-06 | 0.999982 |
| rad4               | 3.48940e-06 | 0.999987 | 3.81171e-06 | 0.999986 |
| PAH1+H             | 2.24223e-06 | 0.999989 | 2.44933e-06 | 0.999989 |
| rad10              | 2.07212e-06 | 0.999991 | 2.26352e-06 | 0.999991 |
| rad70              | 1.22066e-06 | 0.999993 | 1.33341e-06 | 0.999992 |
| rad33              | 1.21849e-06 | 0.999994 | 1.33104e-06 | 0.999993 |
| rad60syn           | 9.02852e-07 | 0.999995 | 9.86242e-07 | 0.999994 |
| rad71              | 7.76019e-07 | 0.999996 | 8.47693e-07 | 0.999995 |
| rad18              | 5.85743e-07 | 0.999996 | 6.39847e-07 | 0.999996 |
| rad55              | 5.72181e-07 | 0.999997 | 6.25032e-07 | 0.999997 |
| rad59              | 5.63687e-07 | 0.999997 | 6.15754e-07 | 0.999997 |
| rad73              | 5.47589e-07 | 0.999998 | 5.98169e-07 | 0.999998 |
| rad60anti          | 5.23909e-07 | 0.999998 | 5.72302e-07 | 0.999998 |
| rad65              | 5.19997e-07 | 0.999999 | 5.68029e-07 | 0.999999 |
| rad62              | 2.61616e-07 | 0.999999 | 2.85781e-07 | 0.999999 |
| rad34              | 1.77447e-07 | 0.999999 | 1.93838e-07 | 0.999999 |
| rad43              | 1.35373e-07 | 0.999999 | 1.47877e-07 | 1.000000 |
| rad24              | 1.29623e-07 | 1.000000 | 1.41596e-07 | 1.000000 |
| rad25              | 1.09044e-07 | 1.000000 | 1.19116e-07 | 1.000000 |
| rad12              | 4.73480e-08 | 1.000000 | 5.17215e-08 | 1.000000 |
| rad15              | 4.57347e-08 | 1.000000 | 4.99591e-08 | 1.000000 |
| rad58              | 3.09546e-08 | 1.000000 | 3.38139e-08 | 1.000000 |
| rad53              | 2.96834e-08 | 1.000000 | 3.24252e-08 | 1.000000 |
| rad72              | 2.66633e-08 | 1.000000 | 2.91260e-08 | 1.000000 |
| rad64              | 2.46905e-08 | 1.000000 | 2.69711e-08 | 1.000000 |
| PAH8+H             | 1.44320e-08 | 1.000000 | 1.57651e-08 | 1.000000 |
| rad56              | 1.37150e-08 | 1.000000 | 1.49818e-08 | 1.000000 |
| rad14              | 1.08415e-08 | 1.000000 | 1.18429e-08 | 1.000000 |
| rad42              | 8.20647e-09 | 1.000000 | 8.96446e-09 | 1.000000 |

|           |             |          |             |         |
|-----------|-------------|----------|-------------|---------|
| rad41     | 7.85979e-09 | 1.000000 | 8.58582e-09 | 1.00000 |
| rad61     | 5.84756e-09 | 1.00000  | 6.38770e-09 | 1.00000 |
| rad68syn  | 3.84806e-09 | 1.00000  | 4.20350e-09 | 1.00000 |
| rad27     | 2.64978e-09 | 1.00000  | 2.89454e-09 | 1.00000 |
| rad68anti | 2.52366e-09 | 1.00000  | 2.75677e-09 | 1.00000 |
| rad40syn  | 2.09345e-09 | 1.00000  | 2.28682e-09 | 1.00000 |
| rad40anti | 1.56734e-09 | 1.00000  | 1.71211e-09 | 1.00000 |
| rad31     | 1.01001e-09 | 1.00000  | 1.10331e-09 | 1.00000 |
| rad47     | 2.28039e-10 | 1.00000  | 2.49103e-10 | 1.00000 |
| rad5      | 2.82090e-11 | 1.00000  | 3.08146e-11 | 1.00000 |
| rad8      | 2.06019e-11 | 1.00000  | 2.25049e-11 | 1.00000 |

1000.00000 Pa, 1100.00000 K

| Rate constant      | True (fraction)      | Effective (fraction) |
|--------------------|----------------------|----------------------|
| Total              | 1.22919e-12 (1.00 )  | 1.07523e-12 (1.00 )  |
| Formation of rad11 | 3.87976e-13 (0.316 ) | 3.15633e-13 (0.294 ) |
| Formation of rad6  | 4.37724e-13 (0.356 ) | 3.56105e-13 (0.331 ) |
| H-abstraction      | 4.03491e-13 (0.328 ) | 4.03491e-13 (0.375 ) |

| species            | PYtrue      | Cumul    | PYeffective | Cumul    |
|--------------------|-------------|----------|-------------|----------|
| Benzene+2-propynyl | 0.328257    | 0.328257 | 0.375260    | 0.375260 |
| Indene+H           | 0.164083    | 0.492340 | 0.187577    | 0.562838 |
| Phenyl+Allene      | 0.125254    | 0.617594 | 0.000000    | 0.562838 |
| C2H2+PhCH2         | 0.121959    | 0.739553 | 0.139423    | 0.702260 |
| rad6               | 0.100690    | 0.840243 | 0.115107    | 0.817367 |
| PhCHCCH2+H         | 0.0553539   | 0.895597 | 0.0632799   | 0.880647 |
| PhCCH+CH3          | 0.0466133   | 0.942210 | 0.0532879   | 0.933935 |
| PhCH2CCH+H         | 0.0393274   | 0.981537 | 0.0449586   | 0.978894 |
| Ph+MeAc            | 0.00638344  | 0.987921 | 0.00729746  | 0.986191 |
| PAH7+H             | 0.00626891  | 0.994190 | 0.00716658  | 0.993358 |
| PhCCCH3+H          | 0.00187231  | 0.996062 | 0.00214040  | 0.995498 |
| rad39              | 0.00134723  | 0.997409 | 0.00154015  | 0.997038 |
| PAH9+H             | 0.000425373 | 0.997835 | 0.000486282 | 0.997525 |
| rad19anti          | 0.000341671 | 0.998176 | 0.000390595 | 0.997915 |
| rad11              | 0.000297043 | 0.998473 | 0.000339577 | 0.998255 |
| rad7               | 0.000245505 | 0.998719 | 0.000280659 | 0.998535 |
| rad38              | 0.000193723 | 0.998913 | 0.000221461 | 0.998757 |
| rad28              | 0.000184874 | 0.999097 | 0.000211346 | 0.998968 |
| rad23              | 0.000178242 | 0.999276 | 0.000203764 | 0.999172 |
| rad45              | 0.000113771 | 0.999389 | 0.000130062 | 0.999302 |
| rad9               | 9.94388e-05 | 0.999489 | 0.000113678 | 0.999416 |
| rad19syn           | 7.54528e-05 | 0.999564 | 8.62566e-05 | 0.999502 |
| rad35              | 6.94307e-05 | 0.999634 | 7.93726e-05 | 0.999581 |
| rad46              | 6.00895e-05 | 0.999694 | 6.86939e-05 | 0.999650 |
| rad50              | 5.31718e-05 | 0.999747 | 6.07854e-05 | 0.999711 |
| rad13              | 4.86723e-05 | 0.999796 | 5.56416e-05 | 0.999766 |
| rad30              | 3.41171e-05 | 0.999830 | 3.90024e-05 | 0.999805 |
| rad54              | 2.45157e-05 | 0.999854 | 2.80260e-05 | 0.999834 |
| rad2               | 1.77583e-05 | 0.999872 | 2.03010e-05 | 0.999854 |
| PhcycC3H3_A+H      | 1.74966e-05 | 0.999890 | 2.00019e-05 | 0.999874 |
| rad51              | 1.62789e-05 | 0.999906 | 1.86099e-05 | 0.999892 |
| rad36              | 1.04487e-05 | 0.999916 | 1.19448e-05 | 0.999904 |
| rad37              | 1.01621e-05 | 0.999926 | 1.16172e-05 | 0.999916 |
| rad22              | 8.56391e-06 | 0.999935 | 9.79017e-06 | 0.999926 |
| rad21              | 8.54867e-06 | 0.999944 | 9.77280e-06 | 0.999936 |
| PAH3+H             | 6.55015e-06 | 0.999950 | 7.48807e-06 | 0.999943 |
| rad67              | 5.72098e-06 | 0.999956 | 6.54015e-06 | 0.999950 |
| rad20              | 4.94176e-06 | 0.999961 | 5.64938e-06 | 0.999955 |
| PAH10+CH3          | 4.75569e-06 | 0.999966 | 5.43666e-06 | 0.999961 |
| rad52              | 4.69410e-06 | 0.999970 | 5.36625e-06 | 0.999966 |
| rad1               | 4.20923e-06 | 0.999974 | 4.81195e-06 | 0.999971 |
| PAH1+H             | 3.95882e-06 | 0.999978 | 4.52568e-06 | 0.999975 |
| rad3               | 2.73194e-06 | 0.999981 | 3.12313e-06 | 0.999978 |
| rad70              | 2.44604e-06 | 0.999984 | 2.79628e-06 | 0.999981 |
| rad10              | 2.42595e-06 | 0.999986 | 2.77332e-06 | 0.999984 |
| rad26              | 2.19170e-06 | 0.999988 | 2.50552e-06 | 0.999987 |
| rad4               | 2.11849e-06 | 0.999990 | 2.42183e-06 | 0.999989 |
| rad33              | 1.89069e-06 | 0.999992 | 2.16141e-06 | 0.999991 |
| rad55              | 1.24557e-06 | 0.999993 | 1.42391e-06 | 0.999993 |
| rad60syn           | 1.20084e-06 | 0.999995 | 1.37278e-06 | 0.999994 |
| rad18              | 7.98635e-07 | 0.999995 | 9.12988e-07 | 0.999995 |
| rad59              | 7.67553e-07 | 0.999996 | 8.77459e-07 | 0.999996 |
| rad60anti          | 7.00715e-07 | 0.999997 | 8.01048e-07 | 0.999997 |
| rad71              | 6.33820e-07 | 0.999998 | 7.24573e-07 | 0.999997 |
| rad73              | 4.46752e-07 | 0.999998 | 5.10722e-07 | 0.999998 |
| rad65              | 4.25978e-07 | 0.999998 | 4.86974e-07 | 0.999998 |
| rad62              | 4.22241e-07 | 0.999999 | 4.82701e-07 | 0.999999 |

|           |             |          |             |          |
|-----------|-------------|----------|-------------|----------|
| rad34     | 3.73790e-07 | 0.999999 | 4.27313e-07 | 0.999999 |
| rad25     | 2.27143e-07 | 0.999999 | 2.59668e-07 | 0.999999 |
| rad24     | 1.51584e-07 | 1.000000 | 1.73289e-07 | 1.000000 |
| rad43     | 1.27321e-07 | 1.000000 | 1.45552e-07 | 1.000000 |
| rad53     | 8.55061e-08 | 1.000000 | 9.77493e-08 | 1.000000 |
| rad12     | 7.05128e-08 | 1.000000 | 8.06095e-08 | 1.000000 |
| rad15     | 5.89021e-08 | 1.000000 | 6.73363e-08 | 1.000000 |
| rad56     | 4.44219e-08 | 1.000000 | 5.07827e-08 | 1.000000 |
| rad64     | 3.96138e-08 | 1.000000 | 4.52861e-08 | 1.000000 |
| rad58     | 3.39131e-08 | 1.000000 | 3.87691e-08 | 1.000000 |
| rad72     | 2.18298e-08 | 1.000000 | 2.49555e-08 | 1.000000 |
| rad14     | 1.89079e-08 | 1.000000 | 2.16154e-08 | 1.000000 |
| PAH8+H    | 1.45254e-08 | 1.000000 | 1.66053e-08 | 1.000000 |
| rad42     | 1.27020e-08 | 1.000000 | 1.45208e-08 | 1.000000 |
| rad68syn  | 6.44612e-09 | 1.000000 | 7.36912e-09 | 1.000000 |
| rad41     | 6.36854e-09 | 1.000000 | 7.28047e-09 | 1.000000 |
| rad61     | 5.61424e-09 | 1.000000 | 6.41814e-09 | 1.000000 |
| rad27     | 4.99721e-09 | 1.000000 | 5.71276e-09 | 1.000000 |
| rad68anti | 4.25944e-09 | 1.000000 | 4.86935e-09 | 1.000000 |
| rad40syn  | 2.24368e-09 | 1.000000 | 2.56495e-09 | 1.000000 |
| rad40anti | 1.51258e-09 | 1.000000 | 1.72916e-09 | 1.000000 |
| rad31     | 8.47974e-10 | 1.000000 | 9.69396e-10 | 1.000000 |
| rad8      | 1.88197e-10 | 1.000000 | 2.15145e-10 | 1.000000 |
| rad47     | 1.79325e-10 | 1.000000 | 2.05002e-10 | 1.000000 |
| rad5      | 2.39873e-11 | 1.000000 | 2.74221e-11 | 1.000000 |

1000.00000 Pa, 1200.00000 K

| Rate constant      | True (fraction)      | Effective (fraction) |
|--------------------|----------------------|----------------------|
| Total              | 1.80237e-12 (1.00 )  | 1.50968e-12 (1.00 )  |
| Formation of rad11 | 5.38789e-13 (0.299 ) | 4.04413e-13 (0.268 ) |
| Formation of rad6  | 6.34764e-13 (0.352 ) | 4.76451e-13 (0.316 ) |
| H-abstraction      | 6.28816e-13 (0.349 ) | 6.28816e-13 (0.417 ) |

| species            | PYtrue      | Cumul    | PYeffective | Cumul    |
|--------------------|-------------|----------|-------------|----------|
| Benzene+2-propynyl | 0.348883    | 0.348883 | 0.416523    | 0.416523 |
| Phenyl+Allene      | 0.162391    | 0.511274 | 0.000000    | 0.416523 |
| Indene+H           | 0.143530    | 0.654804 | 0.171356    | 0.587879 |
| C2H2+PhCH2         | 0.116936    | 0.771740 | 0.139607    | 0.727486 |
| PhCHCCH2+H         | 0.0637846   | 0.835524 | 0.0761508   | 0.803637 |
| PhCH2CCH+H         | 0.0525855   | 0.888110 | 0.0627804   | 0.866417 |
| PhCCH+CH3          | 0.0465988   | 0.934709 | 0.0556331   | 0.922050 |
| rad6               | 0.0459840   | 0.980693 | 0.0548992   | 0.976949 |
| PAH7+H             | 0.00730775  | 0.988000 | 0.00872456  | 0.985674 |
| Ph+MeAc            | 0.00640466  | 0.994405 | 0.00764635  | 0.993320 |
| PhCCCH3+H          | 0.00157312  | 0.995978 | 0.00187811  | 0.995198 |
| rad39              | 0.00150908  | 0.997487 | 0.00180166  | 0.997000 |
| rad19anti          | 0.000427380 | 0.997915 | 0.000510239 | 0.997510 |
| PAH9+H             | 0.000382822 | 0.998298 | 0.000457043 | 0.997967 |
| rad11              | 0.000352308 | 0.998650 | 0.000420611 | 0.998388 |
| rad7               | 0.000256514 | 0.998906 | 0.000306246 | 0.998694 |
| rad38              | 0.000170584 | 0.999077 | 0.000203656 | 0.998898 |
| rad19syn           | 0.000123143 | 0.999200 | 0.000147018 | 0.999045 |
| rad23              | 0.000114327 | 0.999314 | 0.000136492 | 0.999181 |
| rad28              | 9.18681e-05 | 0.999406 | 0.000109679 | 0.999291 |
| rad9               | 8.19275e-05 | 0.999488 | 9.78107e-05 | 0.999389 |
| rad45              | 7.64014e-05 | 0.999565 | 9.12139e-05 | 0.999480 |
| rad35              | 6.49058e-05 | 0.999629 | 7.74893e-05 | 0.999557 |
| rad13              | 5.60100e-05 | 0.999685 | 6.68688e-05 | 0.999624 |
| rad46              | 5.02253e-05 | 0.999736 | 5.99628e-05 | 0.999684 |
| rad54              | 4.22558e-05 | 0.999778 | 5.04482e-05 | 0.999735 |
| rad50              | 3.94674e-05 | 0.999817 | 4.71191e-05 | 0.999782 |
| rad30              | 3.54180e-05 | 0.999853 | 4.22846e-05 | 0.999824 |
| PhcycC3H3_A+H      | 3.45527e-05 | 0.999887 | 4.12516e-05 | 0.999865 |
| rad37              | 1.19250e-05 | 0.999899 | 1.42370e-05 | 0.999879 |
| rad51              | 1.16034e-05 | 0.999911 | 1.38530e-05 | 0.999893 |
| rad2               | 8.79379e-06 | 0.999920 | 1.04987e-05 | 0.999904 |
| PAH3+H             | 8.33853e-06 | 0.999928 | 9.95512e-06 | 0.999914 |
| rad21              | 7.37416e-06 | 0.999935 | 8.80380e-06 | 0.999923 |
| rad67              | 7.06599e-06 | 0.999943 | 8.43592e-06 | 0.999931 |
| rad36              | 7.06228e-06 | 0.999950 | 8.43142e-06 | 0.999939 |
| PAH1+H             | 6.83692e-06 | 0.999956 | 8.16244e-06 | 0.999948 |
| PAH10+CH3          | 5.83191e-06 | 0.999962 | 6.96258e-06 | 0.999955 |
| rad22              | 5.78783e-06 | 0.999968 | 6.90995e-06 | 0.999962 |
| rad70              | 4.27549e-06 | 0.999972 | 5.10441e-06 | 0.999967 |
| rad20              | 3.84519e-06 | 0.999976 | 4.59068e-06 | 0.999971 |
| rad52              | 3.40289e-06 | 0.999980 | 4.06262e-06 | 0.999975 |
| rad10              | 2.72172e-06 | 0.999982 | 3.24939e-06 | 0.999979 |

|           |             |          |             |          |
|-----------|-------------|----------|-------------|----------|
| rad55     | 2.30878e-06 | 0.999985 | 2.75639e-06 | 0.999981 |
| rad1      | 2.12915e-06 | 0.999987 | 2.54194e-06 | 0.999984 |
| rad33     | 1.71335e-06 | 0.999988 | 2.04553e-06 | 0.999986 |
| rad3      | 1.45312e-06 | 0.999990 | 1.73485e-06 | 0.999988 |
| rad60syn  | 1.43793e-06 | 0.999991 | 1.71671e-06 | 0.999989 |
| rad26     | 1.25213e-06 | 0.999993 | 1.49489e-06 | 0.999991 |
| rad4      | 1.13700e-06 | 0.999994 | 1.35744e-06 | 0.999992 |
| rad59     | 9.77034e-07 | 0.999995 | 1.16645e-06 | 0.999993 |
| rad60anti | 8.45664e-07 | 0.999996 | 1.00962e-06 | 0.999994 |
| rad18     | 8.26886e-07 | 0.999996 | 9.87203e-07 | 0.999995 |
| rad34     | 7.04398e-07 | 0.999997 | 8.40960e-07 | 0.999996 |
| rad62     | 6.25587e-07 | 0.999998 | 7.46874e-07 | 0.999997 |
| rad71     | 4.39845e-07 | 0.999998 | 5.25120e-07 | 0.999997 |
| rad73     | 3.10354e-07 | 0.999998 | 3.70524e-07 | 0.999998 |
| rad65     | 3.05362e-07 | 0.999999 | 3.64564e-07 | 0.999998 |
| rad25     | 2.80286e-07 | 0.999999 | 3.34626e-07 | 0.999999 |
| rad53     | 2.06441e-07 | 0.999999 | 2.46464e-07 | 0.999999 |
| rad24     | 1.34822e-07 | 0.999999 | 1.60960e-07 | 0.999999 |
| rad56     | 1.22364e-07 | 0.999999 | 1.46088e-07 | 0.999999 |
| rad43     | 1.14668e-07 | 1.000000 | 1.36900e-07 | 0.999999 |
| rad15     | 9.66948e-08 | 1.000000 | 1.15442e-07 | 0.999999 |
| rad12     | 8.04624e-08 | 1.000000 | 9.60626e-08 | 0.999999 |
| rad64     | 7.08135e-08 | 1.000000 | 8.45424e-08 | 0.999999 |
| rad58     | 3.89541e-08 | 1.000000 | 4.65063e-08 | 1.000000 |
| rad42     | 2.08070e-08 | 1.000000 | 2.48410e-08 | 1.000000 |
| rad14     | 2.02731e-08 | 1.000000 | 2.42036e-08 | 1.000000 |
| PAH8+H    | 1.98158e-08 | 1.000000 | 2.36576e-08 | 1.000000 |
| rad72     | 1.51433e-08 | 1.000000 | 1.80792e-08 | 1.000000 |
| rad68syn  | 1.33384e-08 | 1.000000 | 1.59244e-08 | 1.000000 |
| rad68anti | 8.82999e-09 | 1.000000 | 1.05419e-08 | 1.000000 |
| rad61     | 5.05596e-09 | 1.000000 | 6.03619e-09 | 1.000000 |
| rad27     | 4.73309e-09 | 1.000000 | 5.65072e-09 | 1.000000 |
| rad41     | 4.66818e-09 | 1.000000 | 5.57322e-09 | 1.000000 |
| rad40syn  | 3.29064e-09 | 1.000000 | 3.92862e-09 | 1.000000 |
| rad40anti | 1.88121e-09 | 1.000000 | 2.24593e-09 | 1.000000 |
| rad31     | 6.31962e-10 | 1.000000 | 7.54483e-10 | 1.000000 |
| rad8      | 5.07240e-10 | 1.000000 | 6.05580e-10 | 1.000000 |
| rad47     | 1.20379e-10 | 1.000000 | 1.43717e-10 | 1.000000 |
| rad5      | 2.23804e-11 | 1.000000 | 2.67194e-11 | 1.000000 |

1000.00000 Pa, 1300.00000 K

| Rate constant      | True (fraction)      | Effective (fraction) |
|--------------------|----------------------|----------------------|
| Total              | 2.54148e-12 (1.00 )  | 2.04996e-12 (1.00 )  |
| Formation of rad11 | 7.22991e-13 (0.284 ) | 5.01882e-13 (0.245 ) |
| Formation of rad6  | 8.84215e-13 (0.348 ) | 6.13800e-13 (0.299 ) |
| H-abstraction      | 9.34273e-13 (0.368 ) | 9.34273e-13 (0.456 ) |

| species            | PYtrue      | Cumul    | PYeffective | Cumul    |
|--------------------|-------------|----------|-------------|----------|
| Benzene+2-propynyl | 0.367610    | 0.367610 | 0.455753    | 0.455753 |
| Phenyl+Allene      | 0.193401    | 0.561011 | 0.000000    | 0.455753 |
| Indene+H           | 0.118079    | 0.679089 | 0.146391    | 0.602144 |
| C2H2+PhCH2         | 0.104115    | 0.783205 | 0.129079    | 0.731223 |
| PhCHCCH2+H         | 0.0682071   | 0.851412 | 0.0845613   | 0.815784 |
| PhCH2CCH+H         | 0.0641749   | 0.915587 | 0.0795624   | 0.895347 |
| PhCCH+CH3          | 0.0433429   | 0.958930 | 0.0537354   | 0.949082 |
| rad6               | 0.0219518   | 0.980881 | 0.0272153   | 0.976297 |
| PAH7+H             | 0.00784360  | 0.988725 | 0.00972423  | 0.986022 |
| Ph+MeAc            | 0.00605371  | 0.994779 | 0.00750522  | 0.993527 |
| rad39              | 0.00155178  | 0.996331 | 0.00192385  | 0.995451 |
| PhCCCH3+H          | 0.00123015  | 0.997561 | 0.00152511  | 0.996976 |
| rad19anti          | 0.000496427 | 0.998057 | 0.000615456 | 0.997591 |
| PAH9+H             | 0.000352185 | 0.998409 | 0.000436629 | 0.998028 |
| rad11              | 0.000325891 | 0.998735 | 0.000404030 | 0.998432 |
| rad7               | 0.000253093 | 0.998988 | 0.000313778 | 0.998746 |
| rad19syn           | 0.000182102 | 0.999170 | 0.000225765 | 0.998971 |
| rad38              | 0.000154250 | 0.999325 | 0.000191235 | 0.999163 |
| rad23              | 7.30973e-05 | 0.999398 | 9.06242e-05 | 0.999253 |
| rad54              | 6.54378e-05 | 0.999463 | 8.11277e-05 | 0.999334 |
| rad9               | 6.28922e-05 | 0.999526 | 7.79721e-05 | 0.999412 |
| rad35              | 6.13612e-05 | 0.999587 | 7.60738e-05 | 0.999488 |
| PhcycC3H3_A+H      | 6.08247e-05 | 0.999648 | 7.54087e-05 | 0.999564 |
| rad45              | 4.75480e-05 | 0.999696 | 5.89485e-05 | 0.999623 |
| rad28              | 4.72305e-05 | 0.999743 | 5.85550e-05 | 0.999681 |
| rad46              | 4.35347e-05 | 0.999787 | 5.39732e-05 | 0.999735 |
| rad13              | 4.24227e-05 | 0.999829 | 5.25945e-05 | 0.999788 |
| rad30              | 3.43005e-05 | 0.999863 | 4.25249e-05 | 0.999830 |
| rad50              | 2.94828e-05 | 0.999893 | 3.65520e-05 | 0.999867 |

|           |             |          |             |          |
|-----------|-------------|----------|-------------|----------|
| rad37     | 1.34325e-05 | 0.999906 | 1.66532e-05 | 0.999884 |
| PAH1+H    | 1.11375e-05 | 0.999917 | 1.38080e-05 | 0.999897 |
| PAH3+H    | 1.03598e-05 | 0.999928 | 1.28437e-05 | 0.999910 |
| rad67     | 8.31751e-06 | 0.999936 | 1.03118e-05 | 0.999921 |
| rad51     | 8.01725e-06 | 0.999944 | 9.93953e-06 | 0.999931 |
| PAH10+CH3 | 7.61594e-06 | 0.999952 | 9.44198e-06 | 0.999940 |
| rad70     | 6.70270e-06 | 0.999958 | 8.30984e-06 | 0.999948 |
| rad21     | 5.21165e-06 | 0.999964 | 6.46125e-06 | 0.999955 |
| rad36     | 4.42378e-06 | 0.999968 | 5.48449e-06 | 0.999960 |
| rad22     | 3.94468e-06 | 0.999972 | 4.89051e-06 | 0.999965 |
| rad2      | 3.93644e-06 | 0.999976 | 4.88029e-06 | 0.999970 |
| rad55     | 3.81322e-06 | 0.999980 | 4.72753e-06 | 0.999975 |
| rad52     | 2.43710e-06 | 0.999982 | 3.02145e-06 | 0.999978 |
| rad20     | 2.41225e-06 | 0.999985 | 2.99064e-06 | 0.999981 |
| rad10     | 2.37228e-06 | 0.999987 | 2.94108e-06 | 0.999984 |
| rad60syn  | 1.61567e-06 | 0.999989 | 2.00306e-06 | 0.999986 |
| rad33     | 1.24308e-06 | 0.999990 | 1.54114e-06 | 0.999987 |
| rad34     | 1.19362e-06 | 0.999991 | 1.47981e-06 | 0.999989 |
| rad59     | 1.19312e-06 | 0.999992 | 1.47920e-06 | 0.999990 |
| rad1      | 9.65204e-07 | 0.999993 | 1.19663e-06 | 0.999991 |
| rad60anti | 9.58842e-07 | 0.999994 | 1.18874e-06 | 0.999993 |
| rad62     | 8.65015e-07 | 0.999995 | 1.07242e-06 | 0.999994 |
| rad26     | 7.51583e-07 | 0.999996 | 9.31789e-07 | 0.999995 |
| rad18     | 7.21310e-07 | 0.999996 | 8.94263e-07 | 0.999996 |
| rad3      | 7.16346e-07 | 0.999997 | 8.88108e-07 | 0.999996 |
| rad4      | 5.64044e-07 | 0.999998 | 6.99287e-07 | 0.999997 |
| rad53     | 4.31213e-07 | 0.999998 | 5.34606e-07 | 0.999998 |
| rad56     | 2.87485e-07 | 0.999998 | 3.56417e-07 | 0.999998 |
| rad71     | 2.80404e-07 | 0.999999 | 3.47637e-07 | 0.999998 |
| rad25     | 2.41569e-07 | 0.999999 | 2.99490e-07 | 0.999999 |
| rad65     | 2.14014e-07 | 0.999999 | 2.65329e-07 | 0.999999 |
| rad73     | 1.99075e-07 | 0.999999 | 2.46808e-07 | 0.999999 |
| rad15     | 1.85985e-07 | 1.000000 | 2.30580e-07 | 0.999999 |
| rad64     | 1.26288e-07 | 1.000000 | 1.56568e-07 | 1.000000 |
| rad43     | 1.08987e-07 | 1.000000 | 1.35119e-07 | 1.000000 |
| rad24     | 1.05626e-07 | 1.000000 | 1.30951e-07 | 1.000000 |
| rad12     | 7.88426e-08 | 1.000000 | 9.77468e-08 | 1.000000 |
| rad58     | 4.94574e-08 | 1.000000 | 6.13160e-08 | 1.000000 |
| PAH8+H    | 3.99521e-08 | 1.000000 | 4.95314e-08 | 1.000000 |
| rad42     | 3.35236e-08 | 1.000000 | 4.15615e-08 | 1.000000 |
| rad68syn  | 2.81595e-08 | 1.000000 | 3.49114e-08 | 1.000000 |
| rad68anti | 1.86053e-08 | 1.000000 | 2.30663e-08 | 1.000000 |
| rad14     | 1.51086e-08 | 1.000000 | 1.87312e-08 | 1.000000 |
| rad72     | 9.59487e-09 | 1.000000 | 1.18954e-08 | 1.000000 |
| rad40syn  | 6.58792e-09 | 1.000000 | 8.16752e-09 | 1.000000 |
| rad61     | 5.30293e-09 | 1.000000 | 6.57445e-09 | 1.000000 |
| rad41     | 3.88370e-09 | 1.000000 | 4.81491e-09 | 1.000000 |
| rad40anti | 3.49970e-09 | 1.000000 | 4.33884e-09 | 1.000000 |
| rad27     | 2.98109e-09 | 1.000000 | 3.69588e-09 | 1.000000 |
| rad8      | 7.79832e-10 | 1.000000 | 9.66817e-10 | 1.000000 |
| rad31     | 4.42339e-10 | 1.000000 | 5.48400e-10 | 1.000000 |
| rad47     | 7.73192e-11 | 1.000000 | 9.58577e-11 | 1.000000 |
| rad5      | 2.36485e-11 | 1.000000 | 2.93188e-11 | 1.000000 |

1000.00000 Pa, 1400.00000 K

| Rate constant      | True (fraction)      | Effective (fraction) |
|--------------------|----------------------|----------------------|
| Total              | 3.47024e-12 (1.00 )  | 2.71245e-12 (1.00 )  |
| Formation of rad11 | 9.43269e-13 (0.272 ) | 6.08504e-13 (0.224 ) |
| Formation of rad6  | 1.19194e-12 (0.343 ) | 7.68919e-13 (0.283 ) |
| H-abstraction      | 1.33503e-12 (0.385 ) | 1.33503e-12 (0.492 ) |

| species            | PYtrue      | Cumul    | PYeffective | Cumul    |
|--------------------|-------------|----------|-------------|----------|
| Benzene+2-propynyl | 0.384709    | 0.384709 | 0.492186    | 0.492186 |
| Phenyl+Allene      | 0.218366    | 0.603075 | 0.00000     | 0.492186 |
| Indene+H           | 0.0945918   | 0.697667 | 0.121018    | 0.613204 |
| C2H2+PhCH2         | 0.0892012   | 0.786868 | 0.114122    | 0.727326 |
| PhCH2CCH+H         | 0.0736633   | 0.860531 | 0.0942427   | 0.821568 |
| PhCCCH2+H          | 0.0697820   | 0.930313 | 0.0892773   | 0.910846 |
| PhCCH+CH3          | 0.0389819   | 0.969295 | 0.0498723   | 0.960718 |
| rad6               | 0.0122568   | 0.981552 | 0.0156811   | 0.976399 |
| PAH7+H             | 0.00803250  | 0.989585 | 0.0102766   | 0.986676 |
| Ph+MeAc            | 0.00558318  | 0.995168 | 0.00714297  | 0.993819 |
| rad39              | 0.00151921  | 0.996687 | 0.00194363  | 0.995762 |
| PhCCCH3+H          | 0.000937513 | 0.997624 | 0.00119943  | 0.996962 |
| rad19anti          | 0.000550101 | 0.998175 | 0.000703785 | 0.997665 |
| PAH9+H             | 0.000339334 | 0.998514 | 0.000434135 | 0.998100 |
| rad19syn           | 0.000251204 | 0.998765 | 0.000321382 | 0.998421 |

|               |             |          |             |          |
|---------------|-------------|----------|-------------|----------|
| rad11         | 0.000232834 | 0.998998 | 0.000297881 | 0.998719 |
| rad7          | 0.000210282 | 0.999208 | 0.000269028 | 0.998988 |
| rad38         | 0.000147506 | 0.999356 | 0.000188715 | 0.999177 |
| PhcycC3H3_A+H | 9.80823e-05 | 0.999454 | 0.000125484 | 0.999302 |
| rad54         | 9.39322e-05 | 0.999548 | 0.000120174 | 0.999422 |
| rad35         | 5.99767e-05 | 0.999608 | 7.67328e-05 | 0.999499 |
| rad23         | 5.02309e-05 | 0.999658 | 6.42639e-05 | 0.999563 |
| rad9          | 4.53862e-05 | 0.999703 | 5.80660e-05 | 0.999621 |
| rad46         | 4.10003e-05 | 0.999744 | 5.24547e-05 | 0.999674 |
| rad30         | 3.20549e-05 | 0.999776 | 4.10101e-05 | 0.999715 |
| rad45         | 2.85485e-05 | 0.999805 | 3.65241e-05 | 0.999751 |
| rad28         | 2.78314e-05 | 0.999833 | 3.56067e-05 | 0.999787 |
| rad13         | 2.70910e-05 | 0.999860 | 3.46595e-05 | 0.999821 |
| rad50         | 2.47138e-05 | 0.999885 | 3.16181e-05 | 0.999853 |
| PAH1+H        | 1.69708e-05 | 0.999902 | 2.17120e-05 | 0.999875 |
| rad37         | 1.47865e-05 | 0.999916 | 1.89175e-05 | 0.999894 |
| PAH3+H        | 1.25990e-05 | 0.999929 | 1.61188e-05 | 0.999910 |
| PAH10+CH3     | 1.02477e-05 | 0.999939 | 1.31106e-05 | 0.999923 |
| rad67         | 1.01218e-05 | 0.999949 | 1.29496e-05 | 0.999936 |
| rad70         | 9.64087e-06 | 0.999959 | 1.23343e-05 | 0.999948 |
| rad51         | 6.06223e-06 | 0.999965 | 7.75585e-06 | 0.999956 |
| rad55         | 5.79436e-06 | 0.999971 | 7.41312e-06 | 0.999963 |
| rad21         | 3.44239e-06 | 0.999974 | 4.40410e-06 | 0.999968 |
| rad22         | 2.93645e-06 | 0.999977 | 3.75681e-06 | 0.999972 |
| rad36         | 2.67447e-06 | 0.999980 | 3.42164e-06 | 0.999975 |
| rad52         | 1.94281e-06 | 0.999982 | 2.48557e-06 | 0.999977 |
| rad34         | 1.84505e-06 | 0.999984 | 2.36050e-06 | 0.999980 |
| rad60syn      | 1.74808e-06 | 0.999985 | 2.23644e-06 | 0.999982 |
| rad2          | 1.67711e-06 | 0.999987 | 2.14565e-06 | 0.999984 |
| rad10         | 1.52398e-06 | 0.999989 | 1.94973e-06 | 0.999986 |
| rad20         | 1.42082e-06 | 0.999990 | 1.81776e-06 | 0.999988 |
| rad59         | 1.41315e-06 | 0.999991 | 1.80794e-06 | 0.999990 |
| rad62         | 1.13490e-06 | 0.999993 | 1.45197e-06 | 0.999991 |
| rad60anti     | 1.04712e-06 | 0.999994 | 1.33965e-06 | 0.999993 |
| rad33         | 8.40555e-07 | 0.999994 | 1.07538e-06 | 0.999994 |
| rad53         | 8.08726e-07 | 0.999995 | 1.03467e-06 | 0.999995 |
| rad56         | 5.99768e-07 | 0.999996 | 7.67328e-07 | 0.999995 |
| rad18         | 5.07905e-07 | 0.999996 | 6.49799e-07 | 0.999996 |
| rad26         | 4.99686e-07 | 0.999997 | 6.39287e-07 | 0.999997 |
| rad1          | 4.15150e-07 | 0.999997 | 5.31133e-07 | 0.999997 |
| rad3          | 3.46355e-07 | 0.999998 | 4.43118e-07 | 0.999998 |
| rad15         | 3.25416e-07 | 0.999998 | 4.16328e-07 | 0.999998 |
| rad4          | 2.74076e-07 | 0.999998 | 3.50646e-07 | 0.999999 |
| rad64         | 2.12241e-07 | 0.999998 | 2.71535e-07 | 0.999999 |
| rad25         | 1.81204e-07 | 0.999999 | 2.31827e-07 | 0.999999 |
| rad71         | 1.77626e-07 | 0.999999 | 2.27250e-07 | 0.999999 |
| rad65         | 1.66060e-07 | 0.999999 | 2.12453e-07 | 0.999999 |
| rad73         | 1.28679e-07 | 0.999999 | 1.64628e-07 | 1.000000 |
| rad43         | 1.10061e-07 | 0.999999 | 1.40809e-07 | 1.000000 |
| PAH8+H        | 8.66680e-08 | 0.999999 | 1.10880e-07 | 1.000000 |
| rad24         | 7.82515e-08 | 0.999999 | 1.00113e-07 | 1.000000 |
| rad12         | 7.06914e-08 | 0.999999 | 9.04407e-08 | 1.000000 |
| rad58         | 6.66815e-08 | 1.000000 | 8.53103e-08 | 1.000000 |
| rad68syn      | 5.46566e-08 | 1.000000 | 6.99260e-08 | 1.000000 |
| rad42         | 5.14303e-08 | 1.000000 | 6.57985e-08 | 1.000000 |
| rad68anti     | 3.60140e-08 | 1.000000 | 4.60753e-08 | 1.000000 |
| rad40syn      | 1.35971e-08 | 1.000000 | 1.73957e-08 | 1.000000 |
| rad14         | 9.85598e-09 | 1.000000 | 1.26095e-08 | 1.000000 |
| rad40anti     | 7.22272e-09 | 1.000000 | 9.24054e-09 | 1.000000 |
| rad61         | 7.10433e-09 | 1.000000 | 9.08906e-09 | 1.000000 |
| rad72         | 5.93141e-09 | 1.000000 | 7.58847e-09 | 1.000000 |
| rad41         | 3.98722e-09 | 1.000000 | 5.10115e-09 | 1.000000 |
| rad27         | 1.63269e-09 | 1.000000 | 2.08882e-09 | 1.000000 |
| rad8          | 9.31040e-10 | 1.000000 | 1.19114e-09 | 1.000000 |
| rad31         | 3.04645e-10 | 1.000000 | 3.89754e-10 | 1.000000 |
| rad47         | 5.37612e-11 | 1.000000 | 6.87804e-11 | 1.000000 |
| rad5          | 2.83022e-11 | 1.000000 | 3.62091e-11 | 1.000000 |

1000.00000 Pa, 1500.00000 K

=====

| Rate constant      | True (fraction)      | Effective (fraction) |             |          |
|--------------------|----------------------|----------------------|-------------|----------|
| Total              | 4.61271e-12 (1.00 )  | 3.51412e-12 (1.00 )  |             |          |
| Formation of rad11 | 1.20217e-12 (0.261 ) | 7.24657e-13 (0.206 ) |             |          |
| Formation of rad6  | 1.56360e-12 (0.339 ) | 9.42522e-13 (0.268 ) |             |          |
| H-abstraction      | 1.84694e-12 (0.400 ) | 1.84694e-12 (0.526 ) |             |          |
| species            | PYtrue               | Cumul                | PYeffective | Cumul    |
| Benzene+2-propynyl | 0.400402             | 0.400402             | 0.525577    | 0.525577 |

|               |             |          |             |          |
|---------------|-------------|----------|-------------|----------|
| Phenyl+Allene | 0.238166    | 0.638569 | 0.00000     | 0.525577 |
| PhCH2CCH+H    | 0.0810470   | 0.719616 | 0.106384    | 0.631961 |
| Indene+H      | 0.0752663   | 0.794882 | 0.0987962   | 0.730757 |
| C2H2+PhCH2    | 0.0751554   | 0.870037 | 0.0986501   | 0.829407 |
| PhCHCCH2+H    | 0.0695216   | 0.939559 | 0.0912557   | 0.920663 |
| PhCCH+CH3     | 0.0346519   | 0.974211 | 0.0454848   | 0.966148 |
| rad6          | 0.00811532  | 0.982326 | 0.0106524   | 0.976800 |
| PAH7+H        | 0.00801099  | 0.990337 | 0.0105154   | 0.987316 |
| Ph+MeAc       | 0.00511813  | 0.995455 | 0.00671816  | 0.994034 |
| rad39         | 0.00144661  | 0.996902 | 0.00189885  | 0.995933 |
| PhCCCH3+H     | 0.000716124 | 0.997618 | 0.000939998 | 0.996873 |
| rad19anti     | 0.000588505 | 0.998206 | 0.000772484 | 0.997645 |
| PAH9+H        | 0.000339074 | 0.998545 | 0.000445077 | 0.998090 |
| rad19syn      | 0.000328677 | 0.998874 | 0.000431428 | 0.998522 |
| rad38         | 0.000147639 | 0.999022 | 0.000193794 | 0.998716 |
| PhcycC3H3_A+H | 0.000147227 | 0.999169 | 0.000193253 | 0.998909 |
| rad11         | 0.000146160 | 0.999315 | 0.000191853 | 0.999101 |
| rad7          | 0.000146100 | 0.999461 | 0.000191774 | 0.999292 |
| rad54         | 0.000127382 | 0.999589 | 0.000167204 | 0.999460 |
| rad35         | 6.02488e-05 | 0.999649 | 7.90839e-05 | 0.999539 |
| rad46         | 4.15435e-05 | 0.999690 | 5.45311e-05 | 0.999593 |
| rad23         | 3.80233e-05 | 0.999728 | 4.99103e-05 | 0.999643 |
| rad9          | 3.14798e-05 | 0.999760 | 4.13210e-05 | 0.999684 |
| rad30         | 2.94880e-05 | 0.999789 | 3.87066e-05 | 0.999723 |
| PAH1+H        | 2.43432e-05 | 0.999814 | 3.19533e-05 | 0.999755 |
| rad50         | 2.42842e-05 | 0.999838 | 3.18760e-05 | 0.999787 |
| rad28         | 1.91651e-05 | 0.999857 | 2.51565e-05 | 0.999812 |
| rad45         | 1.69982e-05 | 0.999874 | 2.23122e-05 | 0.999834 |
| rad13         | 1.65443e-05 | 0.999891 | 2.17163e-05 | 0.999856 |
| rad37         | 1.59769e-05 | 0.999907 | 2.09716e-05 | 0.999877 |
| PAH3+H        | 1.49966e-05 | 0.999922 | 1.96849e-05 | 0.999897 |
| PAH10+CH3     | 1.36524e-05 | 0.999935 | 1.79204e-05 | 0.999915 |
| rad70         | 1.29721e-05 | 0.999948 | 1.70274e-05 | 0.999932 |
| rad67         | 1.26762e-05 | 0.999961 | 1.66390e-05 | 0.999948 |
| rad55         | 8.26300e-06 | 0.999969 | 1.08462e-05 | 0.999959 |
| rad51         | 5.53091e-06 | 0.999975 | 7.26000e-06 | 0.999967 |
| rad34         | 2.64995e-06 | 0.999977 | 3.47837e-06 | 0.999970 |
| rad22         | 2.43690e-06 | 0.999980 | 3.19872e-06 | 0.999973 |
| rad21         | 2.23069e-06 | 0.999982 | 2.92805e-06 | 0.999976 |
| rad52         | 1.85135e-06 | 0.999984 | 2.43013e-06 | 0.999979 |
| rad60syn      | 1.84830e-06 | 0.999986 | 2.42612e-06 | 0.999981 |
| rad59         | 1.63263e-06 | 0.999987 | 2.14303e-06 | 0.999983 |
| rad36         | 1.60382e-06 | 0.999989 | 2.10520e-06 | 0.999985 |
| rad62         | 1.43271e-06 | 0.999990 | 1.88060e-06 | 0.999987 |
| rad53         | 1.39212e-06 | 0.999992 | 1.82733e-06 | 0.999989 |
| rad56         | 1.13520e-06 | 0.999993 | 1.49009e-06 | 0.999990 |
| rad60anti     | 1.11711e-06 | 0.999994 | 1.46634e-06 | 0.999992 |
| rad20         | 8.28194e-07 | 0.999995 | 1.08710e-06 | 0.999993 |
| rad10         | 7.96829e-07 | 0.999996 | 1.04594e-06 | 0.999994 |
| rad2          | 7.11920e-07 | 0.999996 | 9.34485e-07 | 0.999995 |
| rad33         | 5.59243e-07 | 0.999997 | 7.34075e-07 | 0.999996 |
| rad15         | 4.18849e-07 | 0.999997 | 5.49790e-07 | 0.999996 |
| rad26         | 3.65301e-07 | 0.999998 | 4.79499e-07 | 0.999997 |
| rad64         | 3.33198e-07 | 0.999998 | 4.37363e-07 | 0.999997 |
| rad18         | 3.11507e-07 | 0.999998 | 4.08891e-07 | 0.999998 |
| rad1          | 1.77676e-07 | 0.999999 | 2.33222e-07 | 0.999998 |
| PAH8+H        | 1.76552e-07 | 0.999999 | 2.31747e-07 | 0.999998 |
| rad3          | 1.70761e-07 | 0.999999 | 2.24144e-07 | 0.999998 |
| rad65         | 1.56018e-07 | 0.999999 | 2.04793e-07 | 0.999998 |
| rad4          | 1.35655e-07 | 0.999999 | 1.78064e-07 | 0.999999 |
| rad25         | 1.30128e-07 | 0.999999 | 1.70808e-07 | 0.999999 |
| rad71         | 1.24933e-07 | 0.999999 | 1.63990e-07 | 0.999999 |
| rad43         | 1.15039e-07 | 1.000000 | 1.51003e-07 | 0.999999 |
| rad68syn      | 9.68560e-08 | 1.000000 | 1.27135e-07 | 0.999999 |
| rad73         | 9.47298e-08 | 1.000000 | 1.24344e-07 | 0.999999 |
| rad58         | 9.06280e-08 | 1.000000 | 1.18960e-07 | 1.000000 |
| rad42         | 7.51230e-08 | 1.000000 | 9.86079e-08 | 1.000000 |
| rad68anti     | 6.36497e-08 | 1.000000 | 8.35478e-08 | 1.000000 |
| rad12         | 6.01786e-08 | 1.000000 | 7.89919e-08 | 1.000000 |
| rad24         | 5.68266e-08 | 1.000000 | 7.45916e-08 | 1.000000 |
| rad40syn      | 2.61620e-08 | 1.000000 | 3.43408e-08 | 1.000000 |
| rad40anti     | 1.41617e-08 | 1.000000 | 1.85889e-08 | 1.000000 |
| rad61         | 1.09130e-08 | 1.000000 | 1.43247e-08 | 1.000000 |
| rad14         | 6.33679e-09 | 1.000000 | 8.31777e-09 | 1.000000 |
| rad41         | 4.68002e-09 | 1.000000 | 6.14307e-09 | 1.000000 |
| rad72         | 3.89655e-09 | 1.000000 | 5.11471e-09 | 1.000000 |
| rad8          | 9.84737e-10 | 1.000000 | 1.29258e-09 | 1.000000 |
| rad27         | 8.77541e-10 | 1.000000 | 1.15188e-09 | 1.000000 |
| rad31         | 2.12159e-10 | 1.000000 | 2.78484e-10 | 1.000000 |
| rad47         | 4.52797e-11 | 1.000000 | 5.94352e-11 | 1.000000 |



rad5 | 3.64297e-11 1.00000 | 4.78185e-11 1.000000

1000.00000 Pa, 1750.00000 K

=====  
-----

| Rate constant      | True (fraction)      | Effective (fraction) |
|--------------------|----------------------|----------------------|
| Total              | 8.61869e-12 (1.00 )  | 6.25847e-12 (1.00 )  |
| Formation of rad11 | 2.04015e-12 (0.237 ) | 1.04583e-12 (0.167 ) |
| Formation of rad6  | 2.80256e-12 (0.325 ) | 1.43666e-12 (0.230 ) |
| H-abstraction      | 3.77597e-12 (0.438 ) | 3.77597e-12 (0.603 ) |

-----

| species            | PYtrue      | Cumul    | PYeffective | Cumul    |
|--------------------|-------------|----------|-------------|----------|
| Benzene+2-propynyl | 0.438115    | 0.438115 | 0.603339    | 0.603339 |
| Phenyl+Allene      | 0.273849    | 0.711964 | 0.000000    | 0.603339 |
| PhCH2CCH+H         | 0.0931550   | 0.805119 | 0.128286    | 0.731624 |
| PhCHCCH2+H         | 0.0649792   | 0.870098 | 0.0894844   | 0.821109 |
| C2H2+PhCH2         | 0.0459634   | 0.916062 | 0.0632972   | 0.884406 |
| Indene+H           | 0.0374143   | 0.953476 | 0.0515239   | 0.935930 |
| PhCCH+CH3          | 0.0269998   | 0.980476 | 0.0371820   | 0.973112 |
| PAH7+H             | 0.00710903  | 0.987585 | 0.00979000  | 0.982902 |
| Ph+MeAc            | 0.00482016  | 0.992405 | 0.00663797  | 0.989540 |
| rad6               | 0.00321850  | 0.995623 | 0.00443225  | 0.993972 |
| rad39              | 0.00123890  | 0.996862 | 0.00170612  | 0.995678 |
| rad19anti          | 0.000555460 | 0.997418 | 0.000764938 | 0.996443 |
| rad19syn           | 0.000544102 | 0.997962 | 0.000749297 | 0.997193 |
| PhCCCH3+H          | 0.000435835 | 0.998398 | 0.000600200 | 0.997793 |
| PhcycC3H3_A+H      | 0.000418784 | 0.998816 | 0.000576718 | 0.998370 |
| PAH9+H             | 0.000289671 | 0.999106 | 0.000398914 | 0.998768 |
| rad54              | 0.000226838 | 0.999333 | 0.000312384 | 0.999081 |
| rad38              | 0.000162821 | 0.999496 | 0.000224225 | 0.999305 |
| rad50              | 5.43090e-05 | 0.999550 | 7.47901e-05 | 0.999380 |
| rad35              | 5.18054e-05 | 0.999602 | 7.13423e-05 | 0.999451 |
| rad46              | 4.73673e-05 | 0.999649 | 6.52306e-05 | 0.999516 |
| PAH1+H             | 4.72978e-05 | 0.999697 | 6.51350e-05 | 0.999582 |
| rad51              | 3.00234e-05 | 0.999727 | 4.13460e-05 | 0.999623 |
| PAH10+CH3          | 2.47326e-05 | 0.999751 | 3.40599e-05 | 0.999657 |
| rad30              | 2.26458e-05 | 0.999774 | 3.11861e-05 | 0.999688 |
| rad70              | 2.26393e-05 | 0.999797 | 3.11772e-05 | 0.999719 |
| PAH3+H             | 2.19630e-05 | 0.999819 | 3.02459e-05 | 0.999750 |
| rad7               | 2.06122e-05 | 0.999839 | 2.83856e-05 | 0.999778 |
| rad71              | 2.03329e-05 | 0.999860 | 2.80009e-05 | 0.999806 |
| rad67              | 1.84334e-05 | 0.999878 | 2.53851e-05 | 0.999831 |
| rad55              | 1.84142e-05 | 0.999896 | 2.53586e-05 | 0.999857 |
| rad37              | 1.63388e-05 | 0.999913 | 2.25006e-05 | 0.999879 |
| rad11              | 1.59685e-05 | 0.999929 | 2.19906e-05 | 0.999901 |
| rad23              | 1.18562e-05 | 0.999941 | 1.63275e-05 | 0.999918 |
| rad28              | 8.59555e-06 | 0.999949 | 1.18371e-05 | 0.999929 |
| rad73              | 6.44797e-06 | 0.999956 | 8.87966e-06 | 0.999938 |
| rad52              | 6.17152e-06 | 0.999962 | 8.49899e-06 | 0.999947 |
| rad34              | 5.49108e-06 | 0.999967 | 7.56191e-06 | 0.999954 |
| rad53              | 5.17697e-06 | 0.999972 | 7.12931e-06 | 0.999961 |
| rad56              | 5.09142e-06 | 0.999978 | 7.01151e-06 | 0.999968 |
| rad72              | 3.86080e-06 | 0.999981 | 5.31681e-06 | 0.999974 |
| rad62              | 2.54786e-06 | 0.999984 | 3.50873e-06 | 0.999977 |
| rad59              | 2.14202e-06 | 0.999986 | 2.94984e-06 | 0.999980 |
| rad9               | 2.12956e-06 | 0.999988 | 2.93268e-06 | 0.999983 |
| rad60syn           | 1.96518e-06 | 0.999990 | 2.70630e-06 | 0.999986 |
| rad13              | 1.40140e-06 | 0.999992 | 1.92991e-06 | 0.999988 |
| rad60anti          | 1.32595e-06 | 0.999993 | 1.82599e-06 | 0.999990 |
| rad45              | 1.24979e-06 | 0.999994 | 1.72112e-06 | 0.999991 |
| rad22              | 1.18354e-06 | 0.999995 | 1.62989e-06 | 0.999993 |
| PAH8+H             | 1.09867e-06 | 0.999996 | 1.51300e-06 | 0.999995 |
| rad64              | 9.18778e-07 | 0.999997 | 1.26527e-06 | 0.999996 |
| rad65              | 5.67336e-07 | 0.999998 | 7.81288e-07 | 0.999997 |
| rad68syn           | 3.41138e-07 | 0.999998 | 4.69790e-07 | 0.999997 |
| rad68anti          | 2.20398e-07 | 0.999998 | 3.03515e-07 | 0.999997 |
| rad36              | 2.12359e-07 | 0.999999 | 2.92445e-07 | 0.999998 |
| rad42              | 2.06281e-07 | 0.999999 | 2.84075e-07 | 0.999998 |
| rad58              | 1.86891e-07 | 0.999999 | 2.57372e-07 | 0.999998 |
| rad21              | 1.82448e-07 | 0.999999 | 2.51253e-07 | 0.999998 |
| rad43              | 1.39973e-07 | 0.999999 | 1.92760e-07 | 0.999999 |
| rad26              | 1.33975e-07 | 1.000000 | 1.84500e-07 | 0.999999 |
| rad40syn           | 1.22376e-07 | 1.000000 | 1.68527e-07 | 0.999999 |
| rad15              | 1.07842e-07 | 1.000000 | 1.48512e-07 | 0.999999 |
| rad40anti          | 7.95613e-08 | 1.000000 | 1.09566e-07 | 0.999999 |
| rad10              | 6.08218e-08 | 1.000000 | 8.37590e-08 | 0.999999 |
| rad20              | 5.86378e-08 | 1.000000 | 8.07511e-08 | 0.999999 |
| rad33              | 5.03257e-08 | 1.000000 | 6.93047e-08 | 0.999999 |
| rad61              | 4.44421e-08 | 1.000000 | 6.12025e-08 | 1.000000 |

|       |             |         |             |          |
|-------|-------------|---------|-------------|----------|
| rad18 | 2.88411e-08 | 1.00000 | 3.97177e-08 | 1.000000 |
| rad2  | 1.93592e-08 | 1.00000 | 2.66600e-08 | 1.000000 |
| rad25 | 1.34574e-08 | 1.00000 | 1.85325e-08 | 1.000000 |
| rad41 | 9.89222e-09 | 1.00000 | 1.36228e-08 | 1.000000 |
| rad12 | 7.01019e-09 | 1.00000 | 9.65395e-09 | 1.000000 |
| rad24 | 5.66453e-09 | 1.00000 | 7.80078e-09 | 1.000000 |
| rad3  | 5.55034e-09 | 1.00000 | 7.64351e-09 | 1.000000 |
| rad1  | 5.24741e-09 | 1.00000 | 7.22634e-09 | 1.000000 |
| rad4  | 3.53662e-09 | 1.00000 | 4.87037e-09 | 1.000000 |
| rad14 | 6.89596e-10 | 1.00000 | 9.49663e-10 | 1.000000 |
| rad8  | 2.75804e-10 | 1.00000 | 3.79817e-10 | 1.000000 |
| rad47 | 1.01229e-10 | 1.00000 | 1.39405e-10 | 1.000000 |
| rad5  | 6.63351e-11 | 1.00000 | 9.13519e-11 | 1.000000 |
| rad27 | 5.64908e-11 | 1.00000 | 7.77944e-11 | 1.000000 |

1000.00000 Pa, 2000.00000 K

| Rate constant      | True (fraction)      | Effective (fraction) |
|--------------------|----------------------|----------------------|
| Total              | 1.44111e-11 (1.00 )  | 1.02786e-11 (1.00 )  |
| Formation of rad11 | 3.16882e-12 (0.220 ) | 1.46856e-12 (0.143 ) |
| Formation of rad6  | 4.53302e-12 (0.315 ) | 2.10079e-12 (0.204 ) |
| H-abstraction      | 6.70922e-12 (0.466 ) | 6.70922e-12 (0.653 ) |

| species            | PYtrue      | Cumul    | PYeffective | Cumul    |
|--------------------|-------------|----------|-------------|----------|
| Benzene+2-propynyl | 0.465560    | 0.465560 | 0.652739    | 0.652739 |
| Phenyl+Allene      | 0.286758    | 0.752319 | 0.000000    | 0.652739 |
| PhCH2CCH+H         | 0.0969239   | 0.849243 | 0.135892    | 0.788631 |
| PhCHCCH2+H         | 0.0590005   | 0.908243 | 0.0827215   | 0.871352 |
| C2H2+PhCH2         | 0.0315621   | 0.939805 | 0.0442515   | 0.915604 |
| Indene+H           | 0.0227696   | 0.962575 | 0.0319241   | 0.947528 |
| PhCCH+CH3          | 0.0214405   | 0.984015 | 0.0300606   | 0.977588 |
| PAH7+H             | 0.00657842  | 0.990594 | 0.00922330  | 0.986812 |
| Ph+MeAc            | 0.00419233  | 0.994786 | 0.00587785  | 0.992689 |
| rad39              | 0.00101409  | 0.995800 | 0.00142181  | 0.994111 |
| rad19syn           | 0.000771095 | 0.996571 | 0.00108111  | 0.995192 |
| PhcycC3H3_A+H      | 0.000708822 | 0.997280 | 0.000993803 | 0.996186 |
| rad6               | 0.000608214 | 0.997888 | 0.000852742 | 0.997039 |
| rad19anti          | 0.000524336 | 0.998413 | 0.000735146 | 0.997774 |
| rad54              | 0.000338327 | 0.998751 | 0.000474352 | 0.998248 |
| PAH9+H             | 0.000287304 | 0.999038 | 0.000402813 | 0.998651 |
| PhCCCH3+H          | 0.000285963 | 0.999324 | 0.000400934 | 0.999052 |
| rad38              | 0.000162530 | 0.999487 | 0.000227874 | 0.999280 |
| PAH1+H             | 7.37121e-05 | 0.999560 | 0.000103348 | 0.999383 |
| rad35              | 5.28126e-05 | 0.999613 | 7.40459e-05 | 0.999457 |
| rad50              | 4.91512e-05 | 0.999662 | 6.89123e-05 | 0.999526 |
| rad46              | 4.87499e-05 | 0.999711 | 6.83497e-05 | 0.999595 |
| PAH10+CH3          | 3.44907e-05 | 0.999746 | 4.83575e-05 | 0.999643 |
| rad70              | 3.22449e-05 | 0.999778 | 4.52089e-05 | 0.999688 |
| rad55              | 2.96407e-05 | 0.999808 | 4.15578e-05 | 0.999730 |
| PAH3+H             | 2.83702e-05 | 0.999836 | 3.97764e-05 | 0.999770 |
| rad67              | 2.56528e-05 | 0.999862 | 3.59666e-05 | 0.999806 |
| rad51              | 2.05648e-05 | 0.999882 | 2.88328e-05 | 0.999834 |
| rad30              | 1.87711e-05 | 0.999901 | 2.63180e-05 | 0.999861 |
| rad37              | 1.65992e-05 | 0.999917 | 2.32729e-05 | 0.999884 |
| rad56              | 1.19871e-05 | 0.999929 | 1.68065e-05 | 0.999901 |
| rad53              | 1.09072e-05 | 0.999940 | 1.52925e-05 | 0.999916 |
| rad34              | 8.67193e-06 | 0.999949 | 1.21585e-05 | 0.999928 |
| rad71              | 7.41060e-06 | 0.999956 | 1.03900e-05 | 0.999939 |
| rad52              | 5.06866e-06 | 0.999962 | 7.10650e-06 | 0.999946 |
| rad7               | 5.06853e-06 | 0.999967 | 7.10632e-06 | 0.999953 |
| rad23              | 4.55504e-06 | 0.999971 | 6.38638e-06 | 0.999959 |
| rad11              | 4.04009e-06 | 0.999975 | 5.66439e-06 | 0.999965 |
| rad62              | 3.71958e-06 | 0.999979 | 5.21503e-06 | 0.999970 |
| rad59              | 2.61618e-06 | 0.999982 | 3.66802e-06 | 0.999974 |
| rad73              | 2.51699e-06 | 0.999984 | 3.52894e-06 | 0.999977 |
| rad28              | 2.21005e-06 | 0.999986 | 3.09859e-06 | 0.999980 |
| PAH8+H             | 2.14135e-06 | 0.999988 | 3.00227e-06 | 0.999983 |
| rad60syn           | 2.07519e-06 | 0.999990 | 2.90952e-06 | 0.999986 |
| rad64              | 1.58108e-06 | 0.999992 | 2.21675e-06 | 0.999989 |
| rad60anti          | 1.42809e-06 | 0.999993 | 2.00225e-06 | 0.999991 |
| rad72              | 1.33432e-06 | 0.999995 | 1.87078e-06 | 0.999992 |
| rad9               | 7.90656e-07 | 0.999996 | 1.10853e-06 | 0.999994 |
| rad68syn           | 6.89085e-07 | 0.999996 | 9.66133e-07 | 0.999995 |
| rad65              | 4.94451e-07 | 0.999997 | 6.93245e-07 | 0.999995 |
| rad13              | 4.64269e-07 | 0.999997 | 6.50928e-07 | 0.999996 |
| rad68anti          | 4.44180e-07 | 0.999998 | 6.22761e-07 | 0.999996 |
| rad45              | 4.11949e-07 | 0.999998 | 5.77572e-07 | 0.999997 |
| rad42              | 3.85801e-07 | 0.999998 | 5.40912e-07 | 0.999998 |

|           |             |          |             |          |
|-----------|-------------|----------|-------------|----------|
| rad22     | 3.03051e-07 | 0.999999 | 4.24892e-07 | 0.999998 |
| rad58     | 2.89058e-07 | 0.999999 | 4.05275e-07 | 0.999998 |
| rad40syn  | 2.52149e-07 | 0.999999 | 3.53526e-07 | 0.999999 |
| rad43     | 1.70010e-07 | 1.000000 | 2.38361e-07 | 0.999999 |
| rad40anti | 1.61879e-07 | 1.000000 | 2.26961e-07 | 0.999999 |
| rad36     | 7.14065e-08 | 1.000000 | 1.00115e-07 | 0.999999 |
| rad21     | 6.97310e-08 | 1.000000 | 9.77666e-08 | 0.999999 |
| rad61     | 6.91207e-08 | 1.000000 | 9.69106e-08 | 1.000000 |
| rad15     | 4.01889e-08 | 1.000000 | 5.63466e-08 | 1.000000 |
| rad26     | 3.22043e-08 | 1.000000 | 4.51520e-08 | 1.000000 |
| rad33     | 2.18121e-08 | 1.000000 | 3.05817e-08 | 1.000000 |
| rad20     | 1.85929e-08 | 1.000000 | 2.60681e-08 | 1.000000 |
| rad41     | 1.55274e-08 | 1.000000 | 2.17702e-08 | 1.000000 |
| rad10     | 1.08801e-08 | 1.000000 | 1.52545e-08 | 1.000000 |
| rad18     | 6.93778e-09 | 1.000000 | 9.72711e-09 | 1.000000 |
| rad25     | 5.69622e-09 | 1.000000 | 7.98639e-09 | 1.000000 |
| rad12     | 4.03758e-09 | 1.000000 | 5.66088e-09 | 1.000000 |
| rad2      | 3.21669e-09 | 1.000000 | 4.65018e-09 | 1.000000 |
| rad24     | 2.76892e-09 | 1.000000 | 3.88217e-09 | 1.000000 |
| rad3      | 1.57041e-09 | 1.000000 | 2.20180e-09 | 1.000000 |
| rad4      | 9.93075e-10 | 1.000000 | 1.39234e-09 | 1.000000 |
| rad1      | 9.17980e-10 | 1.000000 | 1.28706e-09 | 1.000000 |
| rad14     | 2.85272e-10 | 1.000000 | 3.99965e-10 | 1.000000 |
| rad8      | 2.35137e-10 | 1.000000 | 3.29674e-10 | 1.000000 |
| rad47     | 5.59489e-11 | 1.000000 | 7.84432e-11 | 1.000000 |
| rad5      | 4.11052e-11 | 1.000000 | 5.76315e-11 | 1.000000 |
| rad27     | 1.77650e-11 | 1.000000 | 2.49075e-11 | 1.000000 |

1000.00000 Pa, 2250.00000 K

| Rate constant      | True (fraction) |          | Effective (fraction) |          |
|--------------------|-----------------|----------|----------------------|----------|
| Total              | 2.23655e-11     | (1.00 )  | 1.58374e-11          | (1.00 )  |
| Formation of rad11 | 4.62280e-12     | (0.207 ) | 1.98671e-12          | (0.125 ) |
| Formation of rad6  | 6.82518e-12     | (0.305 ) | 2.93321e-12          | (0.185 ) |
| H-abstraction      | 1.09175e-11     | (0.488 ) | 1.09175e-11          | (0.689 ) |

  

| species            | PYtrue      | Cumul    | PYeffective | Cumul    |
|--------------------|-------------|----------|-------------|----------|
| Benzene+2-propynyl | 0.488140    | 0.488140 | 0.689348    | 0.689348 |
| Phenyl+Allene      | 0.291881    | 0.780022 | 0.000000    | 0.689348 |
| PhCH2CCH+H         | 0.0966371   | 0.876659 | 0.136470    | 0.825818 |
| PhCHCCH2+H         | 0.0531863   | 0.929845 | 0.0751094   | 0.900927 |
| C2H2+PhCH2         | 0.0231735   | 0.953019 | 0.0327253   | 0.933653 |
| PhCCH+CH3          | 0.0175956   | 0.970614 | 0.0248484   | 0.958501 |
| Indene+H           | 0.0144194   | 0.985034 | 0.0203629   | 0.978864 |
| PAH7+H             | 0.00603693  | 0.991071 | 0.00852525  | 0.987389 |
| Ph+MeAc            | 0.00373090  | 0.994801 | 0.00526875  | 0.992658 |
| PhcycC3H3_A+H      | 0.00106555  | 0.995867 | 0.00150476  | 0.994163 |
| rad19syn           | 0.00100123  | 0.996868 | 0.00141393  | 0.995577 |
| rad39              | 0.000833948 | 0.997702 | 0.00117770  | 0.996755 |
| rad19anti          | 0.000461668 | 0.998164 | 0.000651962 | 0.997406 |
| rad54              | 0.000451100 | 0.998615 | 0.000637038 | 0.998044 |
| PAH9+H             | 0.000278971 | 0.998894 | 0.000393959 | 0.998437 |
| PhCCCH3+H          | 0.000208471 | 0.999102 | 0.000294400 | 0.998732 |
| rad38              | 0.000162640 | 0.999265 | 0.000229679 | 0.998962 |
| rad6               | 0.000126866 | 0.999392 | 0.000179159 | 0.999141 |
| PAH1+H             | 0.000101380 | 0.999493 | 0.000143168 | 0.999284 |
| rad50              | 5.84094e-05 | 0.999552 | 8.24852e-05 | 0.999366 |
| rad35              | 5.28321e-05 | 0.999604 | 7.46090e-05 | 0.999441 |
| rad46              | 5.16927e-05 | 0.999656 | 7.29998e-05 | 0.999514 |
| PAH10+CH3          | 4.35578e-05 | 0.999700 | 6.15119e-05 | 0.999576 |
| rad55              | 4.18819e-05 | 0.999742 | 5.91453e-05 | 0.999635 |
| rad70              | 4.13947e-05 | 0.999783 | 5.84572e-05 | 0.999693 |
| PAH3+H             | 3.55995e-05 | 0.999819 | 5.02734e-05 | 0.999743 |
| rad67              | 3.23171e-05 | 0.999851 | 4.56379e-05 | 0.999789 |
| rad51              | 2.36354e-05 | 0.999875 | 3.33777e-05 | 0.999822 |
| rad56              | 2.18544e-05 | 0.999896 | 3.08625e-05 | 0.999853 |
| rad53              | 1.86557e-05 | 0.999915 | 2.63453e-05 | 0.999880 |
| rad30              | 1.61491e-05 | 0.999931 | 2.28056e-05 | 0.999902 |
| rad37              | 1.57880e-05 | 0.999947 | 2.22956e-05 | 0.999925 |
| rad34              | 1.21761e-05 | 0.999959 | 1.71950e-05 | 0.999942 |
| rad52              | 6.06595e-06 | 0.999965 | 8.56629e-06 | 0.999950 |
| rad62              | 4.70265e-06 | 0.999970 | 6.64102e-06 | 0.999957 |
| PAH8+H             | 4.41241e-06 | 0.999974 | 6.23118e-06 | 0.999963 |
| rad71              | 4.06784e-06 | 0.999978 | 5.74458e-06 | 0.999969 |
| rad59              | 3.11170e-06 | 0.999982 | 4.39433e-06 | 0.999973 |
| rad64              | 2.35994e-06 | 0.999984 | 3.33267e-06 | 0.999977 |
| rad60syn           | 2.18596e-06 | 0.999986 | 3.08700e-06 | 0.999980 |
| rad7               | 1.71481e-06 | 0.999988 | 2.42164e-06 | 0.999982 |

|           |             |          |             |          |
|-----------|-------------|----------|-------------|----------|
| rad73     | 1.68391e-06 | 0.999989 | 2.37800e-06 | 0.999985 |
| rad60anti | 1.52976e-06 | 0.999991 | 2.16031e-06 | 0.999987 |
| rad11     | 1.31765e-06 | 0.999992 | 1.86077e-06 | 0.999989 |
| rad68syn  | 1.24294e-06 | 0.999994 | 1.75528e-06 | 0.999990 |
| rad23     | 1.11176e-06 | 0.999995 | 1.57002e-06 | 0.999992 |
| rad68anti | 7.98972e-07 | 0.999995 | 1.12830e-06 | 0.999993 |
| rad65     | 6.19187e-07 | 0.999996 | 8.74408e-07 | 0.999994 |
| rad72     | 5.81043e-07 | 0.999997 | 8.20541e-07 | 0.999995 |
| rad42     | 5.39367e-07 | 0.999997 | 7.61691e-07 | 0.999996 |
| rad40syn  | 4.94569e-07 | 0.999998 | 6.98426e-07 | 0.999996 |
| rad28     | 4.66434e-07 | 0.999998 | 6.58694e-07 | 0.999997 |
| rad58     | 4.35655e-07 | 0.999999 | 6.15228e-07 | 0.999998 |
| rad40anti | 3.24035e-07 | 0.999999 | 4.57600e-07 | 0.999998 |
| rad9      | 3.00710e-07 | 0.999999 | 4.24661e-07 | 0.999998 |
| rad43     | 2.04860e-07 | 0.999999 | 2.89301e-07 | 0.999999 |
| rad13     | 1.81566e-07 | 1.000000 | 2.56407e-07 | 0.999999 |
| rad45     | 1.49290e-07 | 1.000000 | 2.10826e-07 | 0.999999 |
| rad61     | 1.10519e-07 | 1.000000 | 1.56073e-07 | 0.999999 |
| rad22     | 7.62298e-08 | 1.000000 | 1.07651e-07 | 0.999999 |
| rad21     | 2.98034e-08 | 1.000000 | 4.20881e-08 | 1.000000 |
| rad36     | 2.63336e-08 | 1.000000 | 3.71881e-08 | 1.000000 |
| rad41     | 2.22372e-08 | 1.000000 | 3.14032e-08 | 1.000000 |
| rad15     | 1.66306e-08 | 1.000000 | 2.34856e-08 | 1.000000 |
| rad33     | 1.05697e-08 | 1.000000 | 1.49265e-08 | 1.000000 |
| rad26     | 9.03888e-09 | 1.000000 | 1.27646e-08 | 1.000000 |
| rad20     | 6.93115e-09 | 1.000000 | 9.78808e-09 | 1.000000 |
| rad10     | 3.21158e-09 | 1.000000 | 4.53536e-09 | 1.000000 |
| rad25     | 2.69140e-09 | 1.000000 | 3.80076e-09 | 1.000000 |
| rad12     | 2.29648e-09 | 1.000000 | 3.24308e-09 | 1.000000 |
| rad18     | 2.24597e-09 | 1.000000 | 3.17176e-09 | 1.000000 |
| rad24     | 1.44171e-09 | 1.000000 | 2.03597e-09 | 1.000000 |
| rad2      | 7.71700e-10 | 1.000000 | 1.08979e-09 | 1.000000 |
| rad3      | 5.45289e-10 | 1.000000 | 7.70050e-10 | 1.000000 |
| rad4      | 3.39164e-10 | 1.000000 | 4.78963e-10 | 1.000000 |
| rad1      | 2.13466e-10 | 1.000000 | 3.01454e-10 | 1.000000 |
| rad8      | 2.02328e-10 | 1.000000 | 2.85727e-10 | 1.000000 |
| rad14     | 1.41502e-10 | 1.000000 | 1.99828e-10 | 1.000000 |
| rad47     | 5.66178e-11 | 1.000000 | 7.99553e-11 | 1.000000 |
| rad5      | 2.33467e-11 | 1.000000 | 3.29701e-11 | 1.000000 |
| rad27     | 7.34242e-12 | 1.000000 | 1.03689e-11 | 1.000000 |

1000.00000 Pa, 2500.00000 K

=====

| Rate constant      | True (fraction)      | Effective (fraction) |
|--------------------|----------------------|----------------------|
| Total              | 3.28090e-11 (1.00 )  | 2.31959e-11 (1.00 )  |
| Formation of rad11 | 6.43164e-12 (0.196 ) | 2.60825e-12 (0.112 ) |
| Formation of rad6  | 9.73932e-12 (0.297 ) | 3.94962e-12 (0.170 ) |
| H-abstraction      | 1.66381e-11 (0.507 ) | 1.66381e-11 (0.717 ) |

| species            | PYtrue      | Cumul    | PYeffective | Cumul    |
|--------------------|-------------|----------|-------------|----------|
| Benzene+2-propynyl | 0.507119    | 0.507119 | 0.717284    | 0.717284 |
| Phenyl+Allene      | 0.293001    | 0.800120 | 0.000000    | 0.717284 |
| PhCH2CCH+H         | 0.0943622   | 0.894482 | 0.133468    | 0.850752 |
| PhCHCCH2+H         | 0.0481708   | 0.942653 | 0.0681341   | 0.918886 |
| C2H2+PhCH2         | 0.0183320   | 0.960985 | 0.0259293   | 0.944815 |
| PhCCH+CH3          | 0.0148617   | 0.975846 | 0.0210208   | 0.965836 |
| Indene+H           | 0.00950630  | 0.985353 | 0.0134460   | 0.979282 |
| PAH7+H             | 0.00552821  | 0.990881 | 0.00781926  | 0.987101 |
| Ph+MeAc            | 0.00339389  | 0.994275 | 0.00480041  | 0.991902 |
| PhcycC3H3_A+H      | 0.00150030  | 0.995775 | 0.00212207  | 0.994024 |
| rad19syn           | 0.00122887  | 0.997004 | 0.00173814  | 0.995762 |
| rad39              | 0.000692834 | 0.997697 | 0.000979966 | 0.996742 |
| rad54              | 0.000559041 | 0.998256 | 0.000790721 | 0.997532 |
| rad19anti          | 0.000391900 | 0.998648 | 0.000554314 | 0.998087 |
| PAH9+H             | 0.000262337 | 0.998910 | 0.000371057 | 0.998458 |
| PhCCCH3+H          | 0.000164358 | 0.999074 | 0.000232473 | 0.998690 |
| rad38              | 0.000158394 | 0.999233 | 0.000224037 | 0.998914 |
| PAH1+H             | 0.000130232 | 0.999363 | 0.000184203 | 0.999099 |
| rad50              | 7.09523e-05 | 0.999434 | 0.000100357 | 0.999199 |
| rad55              | 5.45674e-05 | 0.999489 | 7.71813e-05 | 0.999276 |
| rad46              | 5.32898e-05 | 0.999542 | 7.53748e-05 | 0.999351 |
| rad35              | 5.15096e-05 | 0.999593 | 7.28566e-05 | 0.999424 |
| PAH10+CH3          | 5.05376e-05 | 0.999644 | 7.14817e-05 | 0.999496 |
| rad70              | 4.95439e-05 | 0.999694 | 7.00766e-05 | 0.999566 |
| PAH3+H             | 4.32224e-05 | 0.999737 | 6.11352e-05 | 0.999627 |
| rad67              | 3.74313e-05 | 0.999774 | 5.29437e-05 | 0.999680 |
| rad56              | 3.67720e-05 | 0.999811 | 5.20113e-05 | 0.999732 |
| rad6               | 3.60250e-05 | 0.999847 | 5.09548e-05 | 0.999783 |

|           |             |          |             |          |
|-----------|-------------|----------|-------------|----------|
| rad51     | 3.11389e-05 | 0.999878 | 4.40438e-05 | 0.999827 |
| rad53     | 2.91653e-05 | 0.999907 | 4.12523e-05 | 0.999868 |
| rad34     | 1.57333e-05 | 0.999923 | 2.22537e-05 | 0.999890 |
| rad30     | 1.43392e-05 | 0.999937 | 2.02817e-05 | 0.999911 |
| rad37     | 1.42911e-05 | 0.999952 | 2.02138e-05 | 0.999931 |
| PAH8+H    | 8.38515e-06 | 0.999960 | 1.18602e-05 | 0.999943 |
| rad52     | 7.67756e-06 | 0.999968 | 1.08594e-05 | 0.999954 |
| rad62     | 5.76085e-06 | 0.999973 | 8.14831e-06 | 0.999962 |
| rad71     | 4.27562e-06 | 0.999978 | 6.04756e-06 | 0.999968 |
| rad59     | 3.60374e-06 | 0.999981 | 5.09724e-06 | 0.999973 |
| rad64     | 3.23714e-06 | 0.999985 | 4.57871e-06 | 0.999978 |
| rad60syn  | 2.29334e-06 | 0.999987 | 3.24378e-06 | 0.999981 |
| rad73     | 2.06253e-06 | 0.999989 | 2.91729e-06 | 0.999984 |
| rad68syn  | 2.00452e-06 | 0.999991 | 2.83525e-06 | 0.999987 |
| rad60anti | 1.62746e-06 | 0.999993 | 2.30193e-06 | 0.999989 |
| rad68anti | 1.28544e-06 | 0.999994 | 1.81816e-06 | 0.999991 |
| rad40syn  | 8.74524e-07 | 0.999995 | 1.23695e-06 | 0.999992 |
| rad65     | 7.96526e-07 | 0.999996 | 1.12663e-06 | 0.999993 |
| rad42     | 7.40692e-07 | 0.999996 | 1.04765e-06 | 0.999994 |
| rad7      | 6.85923e-07 | 0.999997 | 9.70192e-07 | 0.999995 |
| rad58     | 6.18758e-07 | 0.999998 | 8.75191e-07 | 0.999996 |
| rad40anti | 5.89166e-07 | 0.999998 | 8.33332e-07 | 0.999997 |
| rad11     | 4.99353e-07 | 0.999999 | 7.06299e-07 | 0.999997 |
| rad72     | 4.22179e-07 | 0.999999 | 5.97142e-07 | 0.999998 |
| rad23     | 3.22610e-07 | 0.999999 | 4.56307e-07 | 0.999999 |
| rad43     | 2.46352e-07 | 1.000000 | 3.48448e-07 | 0.999999 |
| rad61     | 1.63133e-07 | 1.000000 | 2.30741e-07 | 0.999999 |
| rad28     | 1.29046e-07 | 1.000000 | 1.82526e-07 | 0.999999 |
| rad9      | 1.19646e-07 | 1.000000 | 1.69232e-07 | 0.999999 |
| rad13     | 7.99611e-08 | 1.000000 | 1.13099e-07 | 1.000000 |
| rad45     | 5.93252e-08 | 1.000000 | 8.39114e-08 | 1.000000 |
| rad41     | 3.13756e-08 | 1.000000 | 4.43786e-08 | 1.000000 |
| rad22     | 2.45301e-08 | 1.000000 | 3.46961e-08 | 1.000000 |
| rad21     | 1.40691e-08 | 1.000000 | 1.98997e-08 | 1.000000 |
| rad36     | 1.06248e-08 | 1.000000 | 1.50280e-08 | 1.000000 |
| rad15     | 7.28474e-09 | 1.000000 | 1.03037e-08 | 1.000000 |
| rad33     | 5.57838e-09 | 1.000000 | 7.89022e-09 | 1.000000 |
| rad26     | 3.25447e-09 | 1.000000 | 4.60322e-09 | 1.000000 |
| rad20     | 3.00629e-09 | 1.000000 | 4.25217e-09 | 1.000000 |
| rad25     | 1.38566e-09 | 1.000000 | 1.95991e-09 | 1.000000 |
| rad12     | 1.32270e-09 | 1.000000 | 1.87086e-09 | 1.000000 |
| rad10     | 1.20949e-09 | 1.000000 | 1.71074e-09 | 1.000000 |
| rad18     | 8.73337e-10 | 1.000000 | 1.23528e-09 | 1.000000 |
| rad24     | 7.96708e-10 | 1.000000 | 1.12689e-09 | 1.000000 |
| rad2      | 2.32816e-10 | 1.000000 | 3.29300e-10 | 1.000000 |
| rad3      | 2.22397e-10 | 1.000000 | 3.14564e-10 | 1.000000 |
| rad8      | 1.75669e-10 | 1.000000 | 2.48472e-10 | 1.000000 |
| rad4      | 1.35587e-10 | 1.000000 | 1.91779e-10 | 1.000000 |
| rad14     | 7.89182e-11 | 1.000000 | 1.11624e-10 | 1.000000 |
| rad47     | 7.09133e-11 | 1.000000 | 1.00302e-10 | 1.000000 |
| rad1      | 6.28582e-11 | 1.000000 | 8.89081e-11 | 1.000000 |
| rad5      | 1.52654e-11 | 1.000000 | 2.15918e-11 | 1.000000 |
| rad27     | 3.72517e-12 | 1.000000 | 5.26899e-12 | 1.000000 |

1000.00000 Pa, 2750.00000 K

=====

| Rate constant      | True (fraction)      | Effective (fraction) |
|--------------------|----------------------|----------------------|
| Total              | 4.60596e-11 (1.00 )  | 3.26249e-11 (1.00 )  |
| Formation of rad11 | 8.62280e-12 (0.187 ) | 3.34611e-12 (0.103 ) |
| Formation of rad6  | 1.33313e-11 (0.289 ) | 5.17327e-12 (0.159 ) |
| H-abstraction      | 2.41055e-11 (0.523 ) | 2.41055e-11 (0.739 ) |

| species            | PYtrue      | Cumul    | PYeffective | Cumul    |
|--------------------|-------------|----------|-------------|----------|
| Benzene+2-propynyl | 0.523355    | 0.523355 | 0.738869    | 0.738869 |
| Phenyl+Allene      | 0.291681    | 0.815036 | 0.000000    | 0.738869 |
| PhCH2CCH+H         | 0.0913815   | 0.906417 | 0.129012    | 0.867880 |
| PhCHCCH2+H         | 0.0440835   | 0.950501 | 0.0622367   | 0.930117 |
| C2H2+PhCH2         | 0.0155225   | 0.966023 | 0.0219145   | 0.952032 |
| PhCCH+CH3          | 0.0128628   | 0.978886 | 0.0181596   | 0.970191 |
| Indene+H           | 0.00652037  | 0.985406 | 0.00920537  | 0.979397 |
| PAH7+H             | 0.00506669  | 0.990473 | 0.00715309  | 0.986550 |
| Ph+MeAc            | 0.00315023  | 0.993623 | 0.00444746  | 0.990997 |
| PhcycC3H3_A+H      | 0.00197559  | 0.995599 | 0.00278912  | 0.993786 |
| rad19syn           | 0.00143657  | 0.997036 | 0.00202814  | 0.995814 |
| rad54              | 0.000652804 | 0.997688 | 0.000921623 | 0.996736 |
| rad39              | 0.000584267 | 0.998273 | 0.000824864 | 0.997561 |
| rad19anti          | 0.000328351 | 0.998601 | 0.000463563 | 0.998024 |
| PAH9+H             | 0.000240330 | 0.998841 | 0.000339296 | 0.998364 |

|           |             |          |             |          |
|-----------|-------------|----------|-------------|----------|
| PAH1+H    | 0.000158505 | 0.999000 | 0.000223776 | 0.998587 |
| rad38     | 0.000149888 | 0.999150 | 0.000211611 | 0.998799 |
| PhCCCH3+H | 0.000136816 | 0.999286 | 0.000193156 | 0.998992 |
| rad50     | 8.25092e-05 | 0.999369 | 0.000116486 | 0.999109 |
| rad55     | 6.64634e-05 | 0.999435 | 9.38323e-05 | 0.999203 |
| rad70     | 5.64901e-05 | 0.999492 | 7.97521e-05 | 0.999282 |
| rad56     | 5.60840e-05 | 0.999548 | 7.91789e-05 | 0.999362 |
| PAH10+CH3 | 5.50301e-05 | 0.999603 | 7.76910e-05 | 0.999439 |
| rad46     | 5.30292e-05 | 0.999656 | 7.48658e-05 | 0.999514 |
| PAH3+H    | 5.07923e-05 | 0.999707 | 7.17082e-05 | 0.999586 |
| rad35     | 4.92360e-05 | 0.999756 | 6.95113e-05 | 0.999655 |
| rad53     | 4.16453e-05 | 0.999798 | 5.87945e-05 | 0.999714 |
| rad67     | 4.09017e-05 | 0.999839 | 5.77447e-05 | 0.999772 |
| rad51     | 3.99134e-05 | 0.999879 | 5.63495e-05 | 0.999828 |
| rad34     | 1.91426e-05 | 0.999898 | 2.70255e-05 | 0.999855 |
| PAH8+H    | 1.42625e-05 | 0.999912 | 2.01356e-05 | 0.999875 |
| rad30     | 1.30142e-05 | 0.999925 | 1.83734e-05 | 0.999894 |
| rad37     | 1.25449e-05 | 0.999938 | 1.77108e-05 | 0.999911 |
| rad6      | 1.24848e-05 | 0.999950 | 1.76260e-05 | 0.999929 |
| rad52     | 9.31203e-06 | 0.999959 | 1.31466e-05 | 0.999942 |
| rad62     | 6.98643e-06 | 0.999966 | 9.86337e-06 | 0.999952 |
| rad71     | 6.51789e-06 | 0.999973 | 9.20187e-06 | 0.999961 |
| rad64     | 4.13472e-06 | 0.999977 | 5.83735e-06 | 0.999967 |
| rad59     | 4.06611e-06 | 0.999981 | 5.74050e-06 | 0.999973 |
| rad73     | 3.12991e-06 | 0.999984 | 4.41878e-06 | 0.999977 |
| rad68syn  | 2.94064e-06 | 0.999987 | 4.15157e-06 | 0.999981 |
| rad60syn  | 2.38781e-06 | 0.999990 | 3.37107e-06 | 0.999985 |
| rad68anti | 1.88217e-06 | 0.999991 | 2.65724e-06 | 0.999987 |
| rad60anti | 1.71426e-06 | 0.999993 | 2.42018e-06 | 0.999990 |
| rad40syn  | 1.39220e-06 | 0.999995 | 1.96550e-06 | 0.999992 |
| rad42     | 1.01190e-06 | 0.999996 | 1.42859e-06 | 0.999993 |
| rad65     | 9.89306e-07 | 0.999997 | 1.39669e-06 | 0.999995 |
| rad40anti | 9.62190e-07 | 0.999997 | 1.35841e-06 | 0.999996 |
| rad58     | 8.27599e-07 | 0.999998 | 1.16840e-06 | 0.999997 |
| rad72     | 5.80740e-07 | 0.999999 | 8.19884e-07 | 0.999998 |
| rad7      | 3.09976e-07 | 0.999999 | 4.37622e-07 | 0.999998 |
| rad43     | 2.90803e-07 | 0.999999 | 4.10553e-07 | 0.999999 |
| rad61     | 2.19540e-07 | 1.000000 | 3.09944e-07 | 0.999999 |
| rad11     | 2.14621e-07 | 1.000000 | 3.03001e-07 | 0.999999 |
| rad23     | 1.13065e-07 | 1.000000 | 1.59625e-07 | 1.000000 |
| rad9      | 5.06235e-08 | 1.000000 | 7.14695e-08 | 1.000000 |
| rad28     | 4.44478e-08 | 1.000000 | 6.27511e-08 | 1.000000 |
| rad41     | 4.26627e-08 | 1.000000 | 6.02310e-08 | 1.000000 |
| rad13     | 3.90730e-08 | 1.000000 | 5.51629e-08 | 1.000000 |
| rad45     | 2.57177e-08 | 1.000000 | 3.63082e-08 | 1.000000 |
| rad22     | 9.36041e-09 | 1.000000 | 1.32150e-08 | 1.000000 |
| rad21     | 7.28996e-09 | 1.000000 | 1.02919e-08 | 1.000000 |
| rad36     | 4.66641e-09 | 1.000000 | 6.58800e-09 | 1.000000 |
| rad15     | 3.37147e-09 | 1.000000 | 4.75982e-09 | 1.000000 |
| rad33     | 3.16719e-09 | 1.000000 | 4.47143e-09 | 1.000000 |
| rad20     | 1.50802e-09 | 1.000000 | 2.12900e-09 | 1.000000 |
| rad26     | 1.33976e-09 | 1.000000 | 1.89147e-09 | 1.000000 |
| rad12     | 7.84658e-10 | 1.000000 | 1.10777e-09 | 1.000000 |
| rad25     | 7.72485e-10 | 1.000000 | 1.09059e-09 | 1.000000 |
| rad10     | 5.25883e-10 | 1.000000 | 7.42440e-10 | 1.000000 |
| rad24     | 4.65445e-10 | 1.000000 | 6.57111e-10 | 1.000000 |
| rad18     | 3.93298e-10 | 1.000000 | 5.55254e-10 | 1.000000 |
| rad8      | 1.53869e-10 | 1.000000 | 2.17232e-10 | 1.000000 |
| rad3      | 1.03875e-10 | 1.000000 | 1.46649e-10 | 1.000000 |
| rad47     | 8.82843e-11 | 1.000000 | 1.24639e-10 | 1.000000 |
| rad2      | 8.68319e-11 | 1.000000 | 1.22589e-10 | 1.000000 |
| rad4      | 6.22894e-11 | 1.000000 | 8.79398e-11 | 1.000000 |
| rad14     | 4.83395e-11 | 1.000000 | 6.82451e-11 | 1.000000 |
| rad1      | 2.24884e-11 | 1.000000 | 3.17489e-11 | 1.000000 |
| rad5      | 1.06745e-11 | 1.000000 | 1.50702e-11 | 1.000000 |
| rad27     | 2.19455e-12 | 1.000000 | 3.09824e-12 | 1.000000 |

1000.00000 Pa, 3000.00000 K

| Rate constant      | True (fraction)      | Effective (fraction)  |
|--------------------|----------------------|-----------------------|
| Total              | 6.24269e-11 (1.00 )  | 4.43911e-11 (1.00 )   |
| Formation of rad11 | 1.12221e-11 (0.180 ) | 4.21267e-12 (0.0949 ) |
| Formation of rad6  | 1.76534e-11 (0.283 ) | 6.62696e-12 (0.149 )  |
| H-abstraction      | 3.35514e-11 (0.537 ) | 3.35514e-11 (0.756 )  |

  

| species            | PYtrue   | Cumul    | PYeffective | Cumul    |
|--------------------|----------|----------|-------------|----------|
| Benzene+2-propynyl | 0.537451 | 0.537451 | 0.755815    | 0.755815 |
| Phenyl+Allene      | 0.288912 | 0.826363 | 0.00000     | 0.755815 |

|               |             |          |             |          |
|---------------|-------------|----------|-------------|----------|
| PhCH2CCH+H    | 0.0883033   | 0.914666 | 0.124180    | 0.879995 |
| PhCHCCH2+H    | 0.0408093   | 0.955476 | 0.0573901   | 0.937385 |
| C2H2+PhCH2    | 0.0138645   | 0.969340 | 0.0194977   | 0.956883 |
| PhCCH+CH3     | 0.0113572   | 0.980697 | 0.0159716   | 0.972855 |
| PAH7+H        | 0.00465296  | 0.985350 | 0.00654345  | 0.979398 |
| Indene+H      | 0.00463737  | 0.989988 | 0.00652150  | 0.985920 |
| Ph+MeAc       | 0.00297580  | 0.992963 | 0.00418484  | 0.990104 |
| PhcycC3H3_A+H | 0.00245742  | 0.995421 | 0.00345585  | 0.993560 |
| rad19syn      | 0.00161485  | 0.997036 | 0.00227097  | 0.995831 |
| rad54         | 0.000727945 | 0.997764 | 0.00102371  | 0.996855 |
| rad39         | 0.000500626 | 0.998264 | 0.000704032 | 0.997559 |
| rad19anti     | 0.000275279 | 0.998540 | 0.000387123 | 0.997946 |
| PAH9+H        | 0.000215495 | 0.998755 | 0.000303051 | 0.998249 |
| PAH1+H        | 0.000185178 | 0.998940 | 0.000260416 | 0.998510 |
| rad38         | 0.000138340 | 0.999079 | 0.000194547 | 0.998704 |
| PhCCCH3+H     | 0.000118085 | 0.999197 | 0.000166063 | 0.998870 |
| rad50         | 9.12400e-05 | 0.999288 | 0.000128311 | 0.998998 |
| rad56         | 7.84658e-05 | 0.999366 | 0.000110346 | 0.999109 |
| rad55         | 7.67946e-05 | 0.999443 | 0.000107996 | 0.999217 |
| rad70         | 6.22183e-05 | 0.999505 | 8.74973e-05 | 0.999304 |
| PAH3+H        | 5.79245e-05 | 0.999563 | 8.14586e-05 | 0.999386 |
| PAH10+CH3     | 5.73542e-05 | 0.999621 | 8.06567e-05 | 0.999466 |
| rad53         | 5.51122e-05 | 0.999676 | 7.75043e-05 | 0.999544 |
| rad46         | 5.11311e-05 | 0.999727 | 7.19054e-05 | 0.999616 |
| rad51         | 4.82013e-05 | 0.999775 | 6.77852e-05 | 0.999684 |
| rad35         | 4.64070e-05 | 0.999821 | 6.52618e-05 | 0.999749 |
| rad67         | 4.30037e-05 | 0.999864 | 6.04761e-05 | 0.999809 |
| rad34         | 2.22820e-05 | 0.999887 | 3.13350e-05 | 0.999841 |
| PAH8+H        | 2.20522e-05 | 0.999909 | 3.10120e-05 | 0.999872 |
| rad30         | 1.19653e-05 | 0.999921 | 1.68268e-05 | 0.999888 |
| rad37         | 1.08339e-05 | 0.999932 | 1.52357e-05 | 0.999904 |
| rad52         | 1.06734e-05 | 0.999942 | 1.50100e-05 | 0.999919 |
| rad71         | 1.01874e-05 | 0.999952 | 1.43265e-05 | 0.999933 |
| rad62         | 8.53259e-06 | 0.999961 | 1.19994e-05 | 0.999945 |
| rad6          | 4.99358e-06 | 0.999966 | 7.02249e-06 | 0.999952 |
| rad64         | 4.99210e-06 | 0.999971 | 7.02039e-06 | 0.999959 |
| rad73         | 4.62882e-06 | 0.999976 | 6.50951e-06 | 0.999966 |
| rad59         | 4.47745e-06 | 0.999980 | 6.29663e-06 | 0.999972 |
| rad68syn      | 4.00641e-06 | 0.999984 | 5.63420e-06 | 0.999978 |
| rad68anti     | 2.56048e-06 | 0.999987 | 3.60080e-06 | 0.999981 |
| rad60syn      | 2.46109e-06 | 0.999989 | 3.46103e-06 | 0.999985 |
| rad40syn      | 2.03393e-06 | 0.999991 | 2.86031e-06 | 0.999987 |
| rad60anti     | 1.78415e-06 | 0.999993 | 2.50905e-06 | 0.999990 |
| rad40anti     | 1.43680e-06 | 0.999994 | 2.02057e-06 | 0.999992 |
| rad42         | 1.38035e-06 | 0.999996 | 1.94117e-06 | 0.999994 |
| rad65         | 1.16171e-06 | 0.999997 | 1.63371e-06 | 0.999996 |
| rad58         | 1.05054e-06 | 0.999998 | 1.47737e-06 | 0.999997 |
| rad72         | 9.79886e-07 | 0.999999 | 1.37801e-06 | 0.999998 |
| rad43         | 3.36265e-07 | 0.999999 | 4.72889e-07 | 0.999999 |
| rad61         | 2.74201e-07 | 1.000000 | 3.85607e-07 | 0.999999 |
| rad7          | 1.54805e-07 | 1.000000 | 2.17702e-07 | 0.999999 |
| rad11         | 1.03090e-07 | 1.000000 | 1.44975e-07 | 1.000000 |
| rad41         | 5.57413e-08 | 1.000000 | 7.83890e-08 | 1.000000 |
| rad23         | 4.49161e-08 | 1.000000 | 6.31653e-08 | 1.000000 |
| rad9          | 2.29377e-08 | 1.000000 | 3.22573e-08 | 1.000000 |
| rad13         | 2.08859e-08 | 1.000000 | 2.93718e-08 | 1.000000 |
| rad28         | 1.77067e-08 | 1.000000 | 2.49010e-08 | 1.000000 |
| rad45         | 1.20476e-08 | 1.000000 | 1.69425e-08 | 1.000000 |
| rad21         | 4.10071e-09 | 1.000000 | 5.76682e-09 | 1.000000 |
| rad22         | 4.06117e-09 | 1.000000 | 5.71122e-09 | 1.000000 |
| rad36         | 2.20991e-09 | 1.000000 | 3.10779e-09 | 1.000000 |
| rad33         | 1.91086e-09 | 1.000000 | 2.68723e-09 | 1.000000 |
| rad15         | 1.65477e-09 | 1.000000 | 2.32710e-09 | 1.000000 |
| rad20         | 8.58846e-10 | 1.000000 | 1.20779e-09 | 1.000000 |
| rad26         | 6.02844e-10 | 1.000000 | 8.47776e-10 | 1.000000 |
| rad12         | 4.83238e-10 | 1.000000 | 6.79579e-10 | 1.000000 |
| rad25         | 4.62088e-10 | 1.000000 | 6.49832e-10 | 1.000000 |
| rad24         | 2.85467e-10 | 1.000000 | 4.01452e-10 | 1.000000 |
| rad10         | 2.53033e-10 | 1.000000 | 3.55838e-10 | 1.000000 |
| rad18         | 1.99627e-10 | 1.000000 | 2.80735e-10 | 1.000000 |
| rad8          | 1.35608e-10 | 1.000000 | 1.90705e-10 | 1.000000 |
| rad47         | 1.03985e-10 | 1.000000 | 1.46233e-10 | 1.000000 |
| rad3          | 5.41899e-11 | 1.000000 | 7.62072e-11 | 1.000000 |
| rad2          | 3.83953e-11 | 1.000000 | 5.39951e-11 | 1.000000 |
| rad4          | 3.22552e-11 | 1.000000 | 4.53603e-11 | 1.000000 |
| rad14         | 3.22108e-11 | 1.000000 | 4.52980e-11 | 1.000000 |
| rad1          | 9.47850e-12 | 1.000000 | 1.33295e-11 | 1.000000 |
| rad5          | 7.75504e-12 | 1.000000 | 1.09059e-11 | 1.000000 |
| rad27         | 1.42983e-12 | 1.000000 | 2.01076e-12 | 1.000000 |

1000.00000 Pa, 3250.00000 K

| =====              |                 |          |                      |           |
|--------------------|-----------------|----------|----------------------|-----------|
| Rate constant      | True (fraction) |          | Effective (fraction) |           |
| -----              |                 |          |                      |           |
| Total              | 8.22129e-11     | (1.00 )  | 5.87537e-11          | (1.00 )   |
| Formation of rad11 | 1.42538e-11     | (0.173 ) | 5.21852e-12          | (0.0888 ) |
| Formation of rad6  | 2.27549e-11     | (0.277 ) | 8.33087e-12          | (0.142 )  |
| H-abstraction      | 4.52043e-11     | (0.550 ) | 4.52043e-11          | (0.769 )  |
| -----              |                 |          |                      |           |
| species            | PYtrue          | Cumul    | PYeffective          | Cumul     |
| -----              |                 |          |                      |           |
| Benzene+2-propynyl | 0.549844        | 0.549844 | 0.769387             | 0.769387  |
| Phenyl+Allene      | 0.285348        | 0.835192 | 0.000000             | 0.769387  |
| PhCH2CCH+H         | 0.0853712       | 0.920563 | 0.119458             | 0.888845  |
| PhCHCCH2+H         | 0.0381833       | 0.958746 | 0.0534292            | 0.942274  |
| C2H2+PhCH2         | 0.0128678       | 0.971614 | 0.0180057            | 0.960280  |
| PhCCH+CH3          | 0.0101923       | 0.981806 | 0.0142619            | 0.974542  |
| PAH7+H             | 0.00428261      | 0.986089 | 0.00599258           | 0.980534  |
| Indene+H           | 0.00340663      | 0.989495 | 0.00476683           | 0.985301  |
| PhcycC3H3_A+H      | 0.00292079      | 0.992416 | 0.00408700           | 0.989388  |
| Ph+MeAc            | 0.00285188      | 0.995268 | 0.00399058           | 0.993379  |
| rad19syn           | 0.00176016      | 0.997028 | 0.00246295           | 0.995842  |
| rad54              | 0.000783519     | 0.997812 | 0.00109637           | 0.996938  |
| rad39              | 0.000435257     | 0.998247 | 0.000609048          | 0.997547  |
| rad19anti          | 0.000232570     | 0.998480 | 0.000325430          | 0.997872  |
| PAH1+H             | 0.000210318     | 0.998690 | 0.000294293          | 0.998167  |
| PAH9+H             | 0.000189946     | 0.998880 | 0.000265787          | 0.998432  |
| rad38              | 0.000125077     | 0.999005 | 0.000175017          | 0.998607  |
| PhCCCH3+H          | 0.000104499     | 0.999109 | 0.000146223          | 0.998754  |
| rad56              | 0.000102510     | 0.999212 | 0.000143440          | 0.998897  |
| rad50              | 9.65625e-05     | 0.999309 | 0.000135118          | 0.999032  |
| rad55              | 8.51979e-05     | 0.999394 | 0.000119215          | 0.999151  |
| rad53              | 6.86952e-05     | 0.999462 | 9.61236e-05          | 0.999248  |
| rad70              | 6.67843e-05     | 0.999529 | 9.34499e-05          | 0.999341  |
| PAH3+H             | 6.43498e-05     | 0.999594 | 9.00432e-05          | 0.999431  |
| PAH10+CH3          | 5.80458e-05     | 0.999652 | 8.12225e-05          | 0.999512  |
| rad51              | 5.50149e-05     | 0.999707 | 7.69813e-05          | 0.999589  |
| rad46              | 4.80348e-05     | 0.999755 | 6.72144e-05          | 0.999656  |
| rad67              | 4.40674e-05     | 0.999799 | 6.16626e-05          | 0.999718  |
| rad35              | 4.33454e-05     | 0.999842 | 6.06525e-05          | 0.999779  |
| PAH8+H             | 3.16158e-05     | 0.999874 | 4.42393e-05          | 0.999823  |
| rad34              | 2.50793e-05     | 0.999899 | 3.50931e-05          | 0.999858  |
| rad71              | 1.48754e-05     | 0.999914 | 2.08148e-05          | 0.999879  |
| rad52              | 1.16307e-05     | 0.999925 | 1.62747e-05          | 0.999895  |
| rad30              | 1.10771e-05     | 0.999936 | 1.54999e-05          | 0.999911  |
| rad62              | 1.06743e-05     | 0.999947 | 1.49363e-05          | 0.999926  |
| rad37              | 9.29329e-06     | 0.999956 | 1.30039e-05          | 0.999939  |
| rad73              | 6.36809e-06     | 0.999963 | 8.91074e-06          | 0.999948  |
| rad64              | 5.77726e-06     | 0.999968 | 8.08402e-06          | 0.999956  |
| rad68syn           | 5.15388e-06     | 0.999974 | 7.21172e-06          | 0.999963  |
| rad59              | 4.82500e-06     | 0.999978 | 6.75155e-06          | 0.999970  |
| rad68anti          | 3.28988e-06     | 0.999982 | 4.60348e-06          | 0.999974  |
| rad40syn           | 2.77824e-06     | 0.999985 | 3.88754e-06          | 0.999978  |
| rad60syn           | 2.50930e-06     | 0.999987 | 3.51120e-06          | 0.999982  |
| rad6               | 2.24258e-06     | 0.999989 | 3.13800e-06          | 0.999985  |
| rad40anti          | 1.99978e-06     | 0.999991 | 2.79826e-06          | 0.999988  |
| rad42              | 1.90570e-06     | 0.999993 | 2.66661e-06          | 0.999990  |
| rad60anti          | 1.83423e-06     | 0.999995 | 2.56661e-06          | 0.999993  |
| rad72              | 1.59367e-06     | 0.999997 | 2.23000e-06          | 0.999995  |
| rad65              | 1.29415e-06     | 0.999998 | 1.81088e-06          | 0.999997  |
| rad58              | 1.27695e-06     | 0.999999 | 1.78681e-06          | 0.999999  |
| rad43              | 3.85100e-07     | 1.000000 | 5.38863e-07          | 0.999999  |
| rad61              | 3.23940e-07     | 1.000000 | 4.53282e-07          | 1.000000  |
| rad7               | 8.39109e-08     | 1.000000 | 1.17415e-07          | 1.000000  |
| rad41              | 7.10886e-08     | 1.000000 | 9.94730e-08          | 1.000000  |
| rad11              | 5.44806e-08     | 1.000000 | 7.62337e-08          | 1.000000  |
| rad23              | 1.96143e-08     | 1.000000 | 2.74460e-08          | 1.000000  |
| rad13              | 1.20405e-08     | 1.000000 | 1.68481e-08          | 1.000000  |
| rad9               | 1.11392e-08     | 1.000000 | 1.55869e-08          | 1.000000  |
| rad28              | 7.88705e-09     | 1.000000 | 1.10362e-08          | 1.000000  |
| rad45              | 6.02984e-09     | 1.000000 | 8.43745e-09          | 1.000000  |
| rad21              | 2.47303e-09     | 1.000000 | 3.46047e-09          | 1.000000  |
| rad22              | 1.95992e-09     | 1.000000 | 2.74248e-09          | 1.000000  |
| rad33              | 1.21178e-09     | 1.000000 | 1.69562e-09          | 1.000000  |
| rad36              | 1.11581e-09     | 1.000000 | 1.56133e-09          | 1.000000  |
| rad15              | 8.61698e-10     | 1.000000 | 1.20576e-09          | 1.000000  |
| rad20              | 5.41952e-10     | 1.000000 | 7.58340e-10          | 1.000000  |
| rad12              | 3.09635e-10     | 1.000000 | 4.33267e-10          | 1.000000  |
| rad25              | 2.93470e-10     | 1.000000 | 4.10646e-10          | 1.000000  |
| rad26              | 2.91827e-10     | 1.000000 | 4.08347e-10          | 1.000000  |



|       |             |         |             |          |
|-------|-------------|---------|-------------|----------|
| rad24 | 1.82508e-10 | 1.00000 | 2.55379e-10 | 1.000000 |
| rad10 | 1.31567e-10 | 1.00000 | 1.84099e-10 | 1.000000 |
| rad8  | 1.19857e-10 | 1.00000 | 1.67713e-10 | 1.000000 |
| rad47 | 1.15866e-10 | 1.00000 | 1.62129e-10 | 1.000000 |
| rad18 | 1.11338e-10 | 1.00000 | 1.55792e-10 | 1.000000 |
| rad3  | 3.08595e-11 | 1.00000 | 4.31812e-11 | 1.000000 |
| rad14 | 2.33685e-11 | 1.00000 | 3.26991e-11 | 1.000000 |
| rad2  | 1.93196e-11 | 1.00000 | 2.70337e-11 | 1.000000 |
| rad4  | 1.84461e-11 | 1.00000 | 2.58112e-11 | 1.000000 |
| rad5  | 5.82263e-12 | 1.00000 | 8.14750e-12 | 1.000000 |
| rad1  | 4.56877e-12 | 1.00000 | 6.39300e-12 | 1.000000 |
| rad27 | 1.00012e-12 | 1.00000 | 1.39945e-12 | 1.000000 |

1000.00000 Pa, 3500.00000 K

| Rate constant      | True (fraction) |          | Effective (fraction) |           |
|--------------------|-----------------|----------|----------------------|-----------|
| Total              | 1.05713e-10     | (1.00 )  | 7.59652e-11          | (1.00 )   |
| Formation of rad11 | 1.77412e-11     | (0.168 ) | 6.37269e-12          | (0.0839 ) |
| Formation of rad6  | 2.86822e-11     | (0.271 ) | 1.03027e-11          | (0.136 )  |
| H-abstraction      | 5.92897e-11     | (0.561 ) | 5.92897e-11          | (0.780 )  |

  

| species            | PYtrue      | Cumul    | PYeffective | Cumul    |
|--------------------|-------------|----------|-------------|----------|
| Benzene+2-propynyl | 0.560855    | 0.560855 | 0.780486    | 0.780486 |
| Phenyl+Allene      | 0.281403    | 0.842258 | 0.00000     | 0.780486 |
| PhCH2CCH+H         | 0.0826647   | 0.924922 | 0.115037    | 0.895522 |
| PhCHCCH2+H         | 0.0360584   | 0.960981 | 0.0501790   | 0.945701 |
| C2H2+PhCH2         | 0.0122594   | 0.973240 | 0.0170601   | 0.962762 |
| PhCCH+CH3          | 0.00927075  | 0.982511 | 0.0129012   | 0.975663 |
| PAH7+H             | 0.00395019  | 0.986461 | 0.00549710  | 0.981160 |
| PhcycC3H3_A+H      | 0.00334818  | 0.989809 | 0.00465935  | 0.985819 |
| Ph+MeAc            | 0.00276397  | 0.992573 | 0.00384635  | 0.989665 |
| Indene+H           | 0.00257591  | 0.995149 | 0.00358465  | 0.993250 |
| rad19syn           | 0.00187239  | 0.997022 | 0.00260561  | 0.995856 |
| rad54              | 0.000820548 | 0.997842 | 0.00114187  | 0.996998 |
| rad39              | 0.000383081 | 0.998225 | 0.000533097 | 0.997531 |
| PAH1+H             | 0.000234603 | 0.998460 | 0.000326475 | 0.997857 |
| rad19anti          | 0.000198618 | 0.998658 | 0.000276397 | 0.998134 |
| PAH9+H             | 0.000165211 | 0.998824 | 0.000229908 | 0.998363 |
| rad56              | 0.000126879 | 0.998950 | 0.000176565 | 0.998540 |
| rad38              | 0.000111221 | 0.999062 | 0.000154776 | 0.998695 |
| rad50              | 9.85952e-05 | 0.999160 | 0.000137205 | 0.998832 |
| PhCCCH3+H          | 9.42432e-05 | 0.999255 | 0.000131149 | 0.998963 |
| rad55              | 9.15807e-05 | 0.999346 | 0.000127444 | 0.999091 |
| rad53              | 8.16819e-05 | 0.999428 | 0.000113669 | 0.999204 |
| rad70              | 7.02698e-05 | 0.999498 | 9.77877e-05 | 0.999302 |
| PAH3+H             | 6.99229e-05 | 0.999568 | 9.73050e-05 | 0.999399 |
| rad51              | 5.98898e-05 | 0.999628 | 8.33430e-05 | 0.999483 |
| PAH10+CH3          | 5.76132e-05 | 0.999685 | 8.01750e-05 | 0.999563 |
| rad67              | 4.43734e-05 | 0.999730 | 6.17498e-05 | 0.999625 |
| rad46              | 4.41960e-05 | 0.999774 | 6.15033e-05 | 0.999686 |
| PAH8+H             | 4.26958e-05 | 0.999817 | 5.94155e-05 | 0.999746 |
| rad35              | 4.02780e-05 | 0.999857 | 5.60510e-05 | 0.999802 |
| rad34              | 2.74954e-05 | 0.999885 | 3.82627e-05 | 0.999840 |
| rad71              | 2.01788e-05 | 0.999905 | 2.80809e-05 | 0.999868 |
| rad62              | 1.37135e-05 | 0.999918 | 1.90837e-05 | 0.999887 |
| rad52              | 1.21556e-05 | 0.999931 | 1.69158e-05 | 0.999904 |
| rad30              | 1.02913e-05 | 0.999941 | 1.43214e-05 | 0.999918 |
| rad73              | 8.17812e-06 | 0.999949 | 1.13807e-05 | 0.999930 |
| rad37              | 7.96588e-06 | 0.999957 | 1.10853e-05 | 0.999941 |
| rad64              | 6.47652e-06 | 0.999963 | 9.01273e-06 | 0.999950 |
| rad68syn           | 6.33630e-06 | 0.999970 | 8.81763e-06 | 0.999959 |
| rad59              | 5.10463e-06 | 0.999975 | 7.10362e-06 | 0.999966 |
| rad68anti          | 4.04071e-06 | 0.999979 | 5.62306e-06 | 0.999971 |
| rad40syn           | 3.59910e-06 | 0.999983 | 5.00853e-06 | 0.999976 |
| rad42              | 2.66373e-06 | 0.999985 | 3.70685e-06 | 0.999980 |
| rad40anti          | 2.63329e-06 | 0.999988 | 3.66448e-06 | 0.999984 |
| rad60syn           | 2.53257e-06 | 0.999990 | 3.52432e-06 | 0.999987 |
| rad72              | 2.39473e-06 | 0.999993 | 3.33251e-06 | 0.999991 |
| rad60anti          | 1.86455e-06 | 0.999995 | 2.59470e-06 | 0.999993 |
| rad58              | 1.49821e-06 | 0.999996 | 2.08491e-06 | 0.999995 |
| rad65              | 1.38012e-06 | 0.999998 | 1.92057e-06 | 0.999997 |
| rad6               | 1.10924e-06 | 0.999999 | 1.54362e-06 | 0.999999 |
| rad43              | 4.42483e-07 | 0.999999 | 6.15760e-07 | 0.999999 |
| rad61              | 3.67294e-07 | 0.999999 | 5.11128e-07 | 1.000000 |
| rad41              | 8.98935e-08 | 1.000000 | 1.25096e-07 | 1.000000 |
| rad7               | 4.86318e-08 | 1.000000 | 6.76765e-08 | 1.000000 |
| rad11              | 3.12026e-08 | 1.000000 | 4.34217e-08 | 1.000000 |
| rad23              | 9.25714e-09 | 1.000000 | 1.28822e-08 | 1.000000 |

|       |             |          |             |         |
|-------|-------------|----------|-------------|---------|
| rad13 | 7.39481e-09 | 1.000000 | 1.02906e-08 | 1.00000 |
| rad9  | 5.78192e-09 | 1.000000 | 8.04612e-09 | 1.00000 |
| rad28 | 3.85173e-09 | 1.000000 | 5.36008e-09 | 1.00000 |
| rad45 | 3.19052e-09 | 1.000000 | 4.43994e-09 | 1.00000 |
| rad21 | 1.58072e-09 | 1.000000 | 2.19973e-09 | 1.00000 |
| rad22 | 1.03493e-09 | 1.000000 | 1.44021e-09 | 1.00000 |
| rad33 | 8.00667e-10 | 1.000000 | 1.11421e-09 | 1.00000 |
| rad36 | 5.94405e-10 | 1.000000 | 8.27174e-10 | 1.00000 |
| rad15 | 4.74874e-10 | 1.000000 | 6.60837e-10 | 1.00000 |
| rad20 | 3.70217e-10 | 1.000000 | 5.15196e-10 | 1.00000 |
| rad12 | 2.06177e-10 | 1.000000 | 2.86916e-10 | 1.00000 |
| rad25 | 1.95907e-10 | 1.000000 | 2.72624e-10 | 1.00000 |
| rad26 | 1.50696e-10 | 1.000000 | 2.09709e-10 | 1.00000 |
| rad47 | 1.23221e-10 | 1.000000 | 1.71475e-10 | 1.00000 |
| rad24 | 1.20919e-10 | 1.000000 | 1.68271e-10 | 1.00000 |
| rad8  | 1.05938e-10 | 1.000000 | 1.47423e-10 | 1.00000 |
| rad10 | 7.28459e-11 | 1.000000 | 1.01372e-10 | 1.00000 |
| rad18 | 6.68305e-11 | 1.000000 | 9.30012e-11 | 1.00000 |
| rad3  | 1.88413e-11 | 1.000000 | 2.62195e-11 | 1.00000 |
| rad14 | 1.85063e-11 | 1.000000 | 2.57534e-11 | 1.00000 |
| rad4  | 1.14382e-11 | 1.000000 | 1.59174e-11 | 1.00000 |
| rad2  | 1.07095e-11 | 1.000000 | 1.49034e-11 | 1.00000 |
| rad5  | 4.51059e-12 | 1.000000 | 6.27697e-12 | 1.00000 |
| rad1  | 2.45595e-12 | 1.000000 | 3.41771e-12 | 1.00000 |
| rad27 | 7.41949e-13 | 1.000000 | 1.03249e-12 | 1.00000 |

1000.00000 Pa, 3750.00000 K

| Rate constant      | True (fraction)      | Effective (fraction)  |
|--------------------|----------------------|-----------------------|
| Total              | 1.33217e-10 (1.00 )  | 9.62713e-11 (1.00 )   |
| Formation of rad11 | 2.17064e-11 (0.163 ) | 7.68284e-12 (0.0798 ) |
| Formation of rad6  | 3.54800e-11 (0.266 ) | 1.25579e-11 (0.130 )  |
| H-abstraction      | 7.60305e-11 (0.571 ) | 7.60305e-11 (0.790 )  |

| species            | PYtrue      | Cumul    | PYeffective | Cumul    |
|--------------------|-------------|----------|-------------|----------|
| Benzene+2-propynyl | 0.570727    | 0.570727 | 0.789753    | 0.789753 |
| Phenyl+Allene      | 0.277335    | 0.848062 | 0.00000     | 0.789753 |
| PhCH2CCH+H         | 0.0801942   | 0.928256 | 0.110970    | 0.900723 |
| PhCHCCH2+H         | 0.0343186   | 0.962575 | 0.0474889   | 0.948212 |
| C2H2+PhCH2         | 0.0118839   | 0.974459 | 0.0164446   | 0.964657 |
| PhCCH+CH3          | 0.00852832  | 0.982987 | 0.0118012   | 0.976458 |
| PhcycC3H3_A+H      | 0.00372859  | 0.986715 | 0.00515950  | 0.981618 |
| PAH7+H             | 0.00365082  | 0.990366 | 0.00505190  | 0.986669 |
| Ph+MeAc            | 0.00270112  | 0.993067 | 0.00373773  | 0.990407 |
| Indene+H           | 0.00199909  | 0.995067 | 0.00276628  | 0.993173 |
| rad19syn           | 0.00195357  | 0.997020 | 0.00270329  | 0.995877 |
| rad54              | 0.000841040 | 0.997861 | 0.00116380  | 0.997041 |
| rad39              | 0.000340486 | 0.998202 | 0.000471155 | 0.997512 |
| PAH1+H             | 0.000258940 | 0.998461 | 0.000358313 | 0.997870 |
| rad19anti          | 0.000171607 | 0.998632 | 0.000237463 | 0.998107 |
| rad56              | 0.000150424 | 0.998783 | 0.000208151 | 0.998316 |
| PAH9+H             | 0.000142283 | 0.998925 | 0.000196886 | 0.998512 |
| rad50              | 9.78326e-05 | 0.999023 | 0.000135378 | 0.998648 |
| rad38              | 9.76196e-05 | 0.999120 | 0.000135083 | 0.998783 |
| rad55              | 9.60223e-05 | 0.999216 | 0.000132873 | 0.998916 |
| rad53              | 9.35454e-05 | 0.999310 | 0.000129445 | 0.999045 |
| PhCCCH3+H          | 8.63456e-05 | 0.999396 | 0.000119482 | 0.999165 |
| PAH3+H             | 7.46029e-05 | 0.999471 | 0.000103233 | 0.999268 |
| rad70              | 7.27720e-05 | 0.999544 | 0.000100699 | 0.999369 |
| rad51              | 6.27429e-05 | 0.999606 | 8.68219e-05 | 0.999455 |
| PAH10+CH3          | 5.64592e-05 | 0.999663 | 7.81263e-05 | 0.999534 |
| PAH8+H             | 5.49594e-05 | 0.999718 | 7.60509e-05 | 0.999610 |
| rad67              | 4.41357e-05 | 0.999762 | 6.10738e-05 | 0.999671 |
| rad46              | 4.00081e-05 | 0.999802 | 5.53620e-05 | 0.999726 |
| rad35              | 3.73481e-05 | 0.999839 | 5.16810e-05 | 0.999778 |
| rad34              | 2.95156e-05 | 0.999869 | 4.08428e-05 | 0.999819 |
| rad71              | 2.56962e-05 | 0.999894 | 3.55576e-05 | 0.999854 |
| rad62              | 1.78774e-05 | 0.999912 | 2.47383e-05 | 0.999879 |
| rad52              | 1.22837e-05 | 0.999925 | 1.69978e-05 | 0.999896 |
| rad73              | 9.91569e-06 | 0.999935 | 1.37210e-05 | 0.999910 |
| rad30              | 9.58068e-06 | 0.999944 | 1.32574e-05 | 0.999923 |
| rad68syn           | 7.51163e-06 | 0.999952 | 1.03944e-05 | 0.999933 |
| rad64              | 7.08729e-06 | 0.999959 | 9.80715e-06 | 0.999943 |
| rad37              | 6.84802e-06 | 0.999966 | 9.47608e-06 | 0.999953 |
| rad59              | 5.31873e-06 | 0.999971 | 7.35988e-06 | 0.999960 |
| rad68anti          | 4.78631e-06 | 0.999976 | 6.62315e-06 | 0.999967 |
| rad40syn           | 4.46920e-06 | 0.999980 | 6.18433e-06 | 0.999973 |
| rad42              | 3.72298e-06 | 0.999984 | 5.15174e-06 | 0.999978 |

|           |             |          |             |          |
|-----------|-------------|----------|-------------|----------|
| rad72     | 3.34159e-06 | 0.999987 | 4.62398e-06 | 0.999983 |
| rad40anti | 3.31733e-06 | 0.999991 | 4.59040e-06 | 0.999987 |
| rad60syn  | 2.53368e-06 | 0.999993 | 3.50603e-06 | 0.999991 |
| rad60anti | 1.87709e-06 | 0.999995 | 2.59747e-06 | 0.999993 |
| rad58     | 1.70811e-06 | 0.999997 | 2.36364e-06 | 0.999996 |
| rad65     | 1.42165e-06 | 0.999998 | 1.96724e-06 | 0.999998 |
| rad6      | 5.95054e-07 | 0.999999 | 8.23415e-07 | 0.999998 |
| rad43     | 5.13745e-07 | 0.999999 | 7.10903e-07 | 0.999999 |
| rad61     | 4.03904e-07 | 1.000000 | 5.58910e-07 | 1.000000 |
| rad41     | 1.13558e-07 | 1.000000 | 1.57138e-07 | 1.000000 |
| rad7      | 2.97787e-08 | 1.000000 | 4.12067e-08 | 1.000000 |
| rad11     | 1.91119e-08 | 1.000000 | 2.64465e-08 | 1.000000 |
| rad13     | 4.78991e-09 | 1.000000 | 6.62814e-09 | 1.000000 |
| rad23     | 4.66637e-09 | 1.000000 | 6.45719e-09 | 1.000000 |
| rad9      | 3.19270e-09 | 1.000000 | 4.41796e-09 | 1.000000 |
| rad28     | 2.03263e-09 | 1.000000 | 2.81270e-09 | 1.000000 |
| rad45     | 1.76911e-09 | 1.000000 | 2.44805e-09 | 1.000000 |
| rad21     | 1.06060e-09 | 1.000000 | 1.46762e-09 | 1.000000 |
| rad22     | 5.89739e-10 | 1.000000 | 8.16061e-10 | 1.000000 |
| rad33     | 5.47452e-10 | 1.000000 | 7.57549e-10 | 1.000000 |
| rad36     | 3.31199e-10 | 1.000000 | 4.58302e-10 | 1.000000 |
| rad15     | 2.75781e-10 | 1.000000 | 3.81617e-10 | 1.000000 |
| rad20     | 2.68644e-10 | 1.000000 | 3.71740e-10 | 1.000000 |
| rad12     | 1.42260e-10 | 1.000000 | 1.96855e-10 | 1.000000 |
| rad25     | 1.36280e-10 | 1.000000 | 1.88580e-10 | 1.000000 |
| rad47     | 1.26219e-10 | 1.000000 | 1.74658e-10 | 1.000000 |
| rad8      | 9.34497e-11 | 1.000000 | 1.29313e-10 | 1.000000 |
| rad24     | 8.26492e-11 | 1.000000 | 1.14367e-10 | 1.000000 |
| rad26     | 8.24655e-11 | 1.000000 | 1.14113e-10 | 1.000000 |
| rad10     | 4.25334e-11 | 1.000000 | 5.88563e-11 | 1.000000 |
| rad18     | 4.25087e-11 | 1.000000 | 5.88222e-11 | 1.000000 |
| rad14     | 1.59051e-11 | 1.000000 | 2.20091e-11 | 1.000000 |
| rad3      | 1.21716e-11 | 1.000000 | 1.68427e-11 | 1.000000 |
| rad4      | 7.57366e-12 | 1.000000 | 1.04802e-11 | 1.000000 |
| rad2      | 6.39677e-12 | 1.000000 | 8.85164e-12 | 1.000000 |
| rad5      | 3.59668e-12 | 1.000000 | 4.97696e-12 | 1.000000 |
| rad1      | 1.44334e-12 | 1.000000 | 1.99724e-12 | 1.000000 |
| rad27     | 5.81935e-13 | 1.000000 | 8.05262e-13 | 1.000000 |

1000.00000 Pa, 4000.00000 K

=====

| Rate constant      | True (fraction)      | Effective (fraction)  |
|--------------------|----------------------|-----------------------|
| Total              | 1.65008e-10 (1.00 )  | 1.19912e-10 (1.00 )   |
| Formation of rad11 | 2.61707e-11 (0.159 ) | 9.15558e-12 (0.0764 ) |
| Formation of rad6  | 4.31906e-11 (0.262 ) | 1.51098e-11 (0.126 )  |
| H-abstraction      | 9.56470e-11 (0.580 ) | 9.56470e-11 (0.798 )  |

| species            | PYtrue      | Cumul    | PYeffective | Cumul    |
|--------------------|-------------|----------|-------------|----------|
| Benzene+2-propynyl | 0.579650    | 0.579650 | 0.797640    | 0.797640 |
| Phenyl+Allene      | 0.273295    | 0.852944 | 0.000000    | 0.797640 |
| PhCH2CCH+H         | 0.0779435   | 0.930888 | 0.107256    | 0.904896 |
| PhCHCCH2+H         | 0.0328766   | 0.963764 | 0.0452407   | 0.950137 |
| C2H2+PhCH2         | 0.0116508   | 0.975415 | 0.0160324   | 0.966169 |
| PhCCH+CH3          | 0.00792125  | 0.983336 | 0.0109002   | 0.977070 |
| PhcycC3H3_A+H      | 0.00405639  | 0.987393 | 0.00558189  | 0.982652 |
| PAH7+H             | 0.00338057  | 0.990773 | 0.00465190  | 0.987303 |
| Ph+MeAc            | 0.00265534  | 0.993429 | 0.00365395  | 0.990957 |
| rad19syn           | 0.00200699  | 0.995436 | 0.00276176  | 0.993719 |
| Indene+H           | 0.00158850  | 0.997024 | 0.00218589  | 0.995905 |
| rad54              | 0.000847464 | 0.997872 | 0.00116618  | 0.997071 |
| rad39              | 0.000304998 | 0.998177 | 0.000419700 | 0.997491 |
| PAH1+H             | 0.000284129 | 0.998461 | 0.000390983 | 0.997882 |
| rad56              | 0.000172243 | 0.998633 | 0.000237018 | 0.998119 |
| rad19anti          | 0.000149971 | 0.998783 | 0.000206370 | 0.998325 |
| PAH9+H             | 0.000121726 | 0.998905 | 0.000167504 | 0.998493 |
| rad53              | 0.000103935 | 0.999009 | 0.000143023 | 0.998636 |
| rad55              | 9.87029e-05 | 0.999107 | 0.000135823 | 0.998772 |
| rad50              | 9.49282e-05 | 0.999202 | 0.000130628 | 0.998902 |
| rad38              | 8.48465e-05 | 0.999287 | 0.000116755 | 0.999019 |
| PhCCCH3+H          | 8.02201e-05 | 0.999367 | 0.000110389 | 0.999129 |
| PAH3+H             | 7.84218e-05 | 0.999446 | 0.000107914 | 0.999237 |
| rad70              | 7.43978e-05 | 0.999520 | 0.000102377 | 0.999340 |
| PAH8+H             | 6.80304e-05 | 0.999588 | 9.36148e-05 | 0.999433 |
| rad51              | 6.37466e-05 | 0.999652 | 8.77201e-05 | 0.999521 |
| PAH10+CH3          | 5.48772e-05 | 0.999707 | 7.55151e-05 | 0.999597 |
| rad67              | 4.35164e-05 | 0.999750 | 5.98816e-05 | 0.999656 |
| rad46              | 3.57769e-05 | 0.999786 | 4.92317e-05 | 0.999706 |
| rad35              | 3.46386e-05 | 0.999821 | 4.76654e-05 | 0.999753 |

|           |             |          |             |          |
|-----------|-------------|----------|-------------|----------|
| rad34     | 3.11445e-05 | 0.999852 | 4.28571e-05 | 0.999796 |
| rad71     | 3.10692e-05 | 0.999883 | 4.27535e-05 | 0.999839 |
| rad62     | 2.32402e-05 | 0.999906 | 3.19803e-05 | 0.999871 |
| rad52     | 1.20857e-05 | 0.999918 | 1.66308e-05 | 0.999888 |
| rad73     | 1.14745e-05 | 0.999930 | 1.57898e-05 | 0.999903 |
| rad30     | 8.93295e-06 | 0.999939 | 1.22924e-05 | 0.999916 |
| rad68syn  | 8.64434e-06 | 0.999947 | 1.18953e-05 | 0.999927 |
| rad64     | 7.61309e-06 | 0.999955 | 1.04762e-05 | 0.999938 |
| rad37     | 5.91715e-06 | 0.999961 | 8.14246e-06 | 0.999946 |
| rad68anti | 5.50424e-06 | 0.999966 | 7.57426e-06 | 0.999954 |
| rad59     | 5.47385e-06 | 0.999972 | 7.53239e-06 | 0.999961 |
| rad40syn  | 5.36174e-06 | 0.999977 | 7.37813e-06 | 0.999969 |
| rad42     | 5.12159e-06 | 0.999982 | 7.04768e-06 | 0.999976 |
| rad72     | 4.38161e-06 | 0.999987 | 6.02941e-06 | 0.999982 |
| rad40anti | 4.03128e-06 | 0.999991 | 5.54734e-06 | 0.999987 |
| rad60syn  | 2.51668e-06 | 0.999993 | 3.46314e-06 | 0.999991 |
| rad58     | 1.90268e-06 | 0.999995 | 2.61823e-06 | 0.999993 |
| rad60anti | 1.87486e-06 | 0.999997 | 2.57994e-06 | 0.999996 |
| rad65     | 1.42577e-06 | 0.999998 | 1.96196e-06 | 0.999998 |
| rad43     | 6.01858e-07 | 0.999999 | 8.28197e-07 | 0.999999 |
| rad61     | 4.34041e-07 | 0.999999 | 5.97272e-07 | 0.999999 |
| rad6      | 3.41900e-07 | 1.000000 | 4.70480e-07 | 1.000000 |
| rad41     | 1.43046e-07 | 1.000000 | 1.96842e-07 | 1.000000 |
| rad7      | 1.90877e-08 | 1.000000 | 2.62661e-08 | 1.000000 |
| rad11     | 1.23822e-08 | 1.000000 | 1.70389e-08 | 1.000000 |
| rad13     | 3.24600e-09 | 1.000000 | 4.46672e-09 | 1.000000 |
| rad23     | 2.49025e-09 | 1.000000 | 3.42678e-09 | 1.000000 |
| rad9      | 1.86505e-09 | 1.000000 | 2.56645e-09 | 1.000000 |
| rad28     | 1.14580e-09 | 1.000000 | 1.57670e-09 | 1.000000 |
| rad45     | 1.02101e-09 | 1.000000 | 1.40498e-09 | 1.000000 |
| rad21     | 7.41221e-10 | 1.000000 | 1.01998e-09 | 1.000000 |
| rad33     | 3.85321e-10 | 1.000000 | 5.30231e-10 | 1.000000 |
| rad22     | 3.58478e-10 | 1.000000 | 4.93292e-10 | 1.000000 |
| rad20     | 2.04132e-10 | 1.000000 | 2.80901e-10 | 1.000000 |
| rad36     | 1.91726e-10 | 1.000000 | 2.63830e-10 | 1.000000 |
| rad15     | 1.67945e-10 | 1.000000 | 2.31105e-10 | 1.000000 |
| rad47     | 1.25517e-10 | 1.000000 | 1.72721e-10 | 1.000000 |
| rad12     | 1.01357e-10 | 1.000000 | 1.39475e-10 | 1.000000 |
| rad25     | 9.80993e-11 | 1.000000 | 1.34992e-10 | 1.000000 |
| rad8      | 8.21814e-11 | 1.000000 | 1.13088e-10 | 1.000000 |
| rad24     | 5.80874e-11 | 1.000000 | 7.99326e-11 | 1.000000 |
| rad26     | 4.75471e-11 | 1.000000 | 6.54281e-11 | 1.000000 |
| rad18     | 2.83351e-11 | 1.000000 | 3.89913e-11 | 1.000000 |
| rad10     | 2.60140e-11 | 1.000000 | 3.57972e-11 | 1.000000 |
| rad14     | 1.45802e-11 | 1.000000 | 2.00634e-11 | 1.000000 |
| rad3      | 8.24042e-12 | 1.000000 | 1.13394e-11 | 1.000000 |
| rad4      | 5.28935e-12 | 1.000000 | 7.27857e-12 | 1.000000 |
| rad2      | 4.05865e-12 | 1.000000 | 5.58500e-12 | 1.000000 |
| rad5      | 2.94239e-12 | 1.000000 | 4.04895e-12 | 1.000000 |
| rad1      | 9.12909e-13 | 1.000000 | 1.25623e-12 | 1.000000 |
| rad27     | 4.81322e-13 | 1.000000 | 6.62337e-13 | 1.000000 |

100.000000 Pa, 20.0000000 K

=====

| Rate constant      | True (fraction)        | Effective (fraction)   |
|--------------------|------------------------|------------------------|
| Total              | 1.56740e-51 (1.00 )    | 1.56740e-51 (1.00 )    |
| Formation of rad11 | 1.56740e-51 (1.000 )   | 1.56740e-51 (1.000 )   |
| Formation of rad6  | 3.73945e-60 (2.39e-09) | 3.73945e-60 (2.39e-09) |
| H-abstraction      | 1.53631e-76 (9.80e-26) | 1.53631e-76 (9.80e-26) |

| species    | PYtrue      | Cumul    | PYeffective | Cumul    |
|------------|-------------|----------|-------------|----------|
| rad11      | 0.788831    | 0.788831 | 0.788831    | 0.788831 |
| rad6       | 0.200678    | 0.989509 | 0.200678    | 0.989509 |
| rad22      | 0.00530849  | 0.994817 | 0.00530849  | 0.994817 |
| Indene+H   | 0.00373145  | 0.998549 | 0.00373145  | 0.998549 |
| rad23      | 0.000601371 | 0.999150 | 0.000601371 | 0.999150 |
| rad45      | 0.000563600 | 0.999714 | 0.000563600 | 0.999714 |
| rad18      | 0.000127460 | 0.999841 | 0.000127460 | 0.999841 |
| C2H2+PhCH2 | 5.41289e-05 | 0.999895 | 5.41289e-05 | 0.999895 |
| rad36      | 3.51182e-05 | 0.999931 | 3.51182e-05 | 0.999931 |
| rad20      | 2.64523e-05 | 0.999957 | 2.64523e-05 | 0.999957 |
| rad7       | 2.23104e-05 | 0.999979 | 2.23104e-05 | 0.999979 |
| rad21      | 1.71210e-05 | 0.999997 | 1.71210e-05 | 0.999997 |
| rad25      | 2.93912e-06 | 0.999999 | 2.93912e-06 | 0.999999 |
| rad13      | 5.86026e-07 | 1.000000 | 5.86026e-07 | 1.000000 |
| PhCHCCH2+H | 2.58057e-07 | 1.000000 | 2.58057e-07 | 1.000000 |
| rad3       | 1.50924e-08 | 1.000000 | 1.50924e-08 | 1.000000 |
| rad9       | 1.34267e-08 | 1.000000 | 1.34267e-08 | 1.000000 |

|                    |             |         |             |         |
|--------------------|-------------|---------|-------------|---------|
| rad4               | 7.63602e-09 | 1.00000 | 7.63602e-09 | 1.00000 |
| rad30              | 2.06211e-09 | 1.00000 | 2.06211e-09 | 1.00000 |
| rad33              | 7.29712e-10 | 1.00000 | 7.29712e-10 | 1.00000 |
| rad28              | 5.50065e-10 | 1.00000 | 5.50065e-10 | 1.00000 |
| rad15              | 3.37315e-10 | 1.00000 | 3.37315e-10 | 1.00000 |
| rad2               | 3.13323e-10 | 1.00000 | 3.13323e-10 | 1.00000 |
| Phenyl+Allene      | 1.57687e-10 | 1.00000 | 0.00000     | 1.00000 |
| rad1               | 1.98422e-11 | 1.00000 | 1.98422e-11 | 1.00000 |
| rad24              | 7.59518e-12 | 1.00000 | 7.59518e-12 | 1.00000 |
| rad38              | 1.95872e-12 | 1.00000 | 1.95872e-12 | 1.00000 |
| PhCCH+CH3          | 1.48953e-12 | 1.00000 | 1.48953e-12 | 1.00000 |
| rad8               | 6.57171e-13 | 1.00000 | 6.57171e-13 | 1.00000 |
| rad10              | 4.38991e-13 | 1.00000 | 4.38991e-13 | 1.00000 |
| PAH9+H             | 4.05136e-13 | 1.00000 | 4.05136e-13 | 1.00000 |
| rad35              | 2.32039e-13 | 1.00000 | 2.32039e-13 | 1.00000 |
| rad14              | 1.13910e-13 | 1.00000 | 1.13910e-13 | 1.00000 |
| rad46              | 9.25614e-15 | 1.00000 | 9.25614e-15 | 1.00000 |
| rad60syn           | 6.17447e-15 | 1.00000 | 6.17447e-15 | 1.00000 |
| PhCH2CCH+H         | 3.96977e-16 | 1.00000 | 3.96977e-16 | 1.00000 |
| rad27              | 2.58372e-16 | 1.00000 | 2.58372e-16 | 1.00000 |
| rad60anti          | 2.37493e-16 | 1.00000 | 2.37493e-16 | 1.00000 |
| PhCCCH3+H          | 1.47916e-16 | 1.00000 | 1.47916e-16 | 1.00000 |
| Ph+MeAc            | 3.69945e-17 | 1.00000 | 3.69945e-17 | 1.00000 |
| rad26              | 6.82160e-18 | 1.00000 | 6.82160e-18 | 1.00000 |
| rad31              | 4.78197e-18 | 1.00000 | 4.78197e-18 | 1.00000 |
| PAH7+H             | 1.78875e-18 | 1.00000 | 1.78875e-18 | 1.00000 |
| rad39              | 9.72177e-20 | 1.00000 | 9.72177e-20 | 1.00000 |
| PAH3+H             | 1.06361e-23 | 1.00000 | 1.06361e-23 | 1.00000 |
| rad59              | 5.33832e-24 | 1.00000 | 5.33832e-24 | 1.00000 |
| Benzene+2-propynyl | 9.80165e-26 | 1.00000 | 9.80165e-26 | 1.00000 |
| rad50              | 6.15348e-26 | 1.00000 | 6.15348e-26 | 1.00000 |
| rad12              | 1.40038e-26 | 1.00000 | 1.40038e-26 | 1.00000 |
| rad5               | 2.80613e-27 | 1.00000 | 2.80613e-27 | 1.00000 |
| rad37              | 8.53443e-30 | 1.00000 | 8.53443e-30 | 1.00000 |
| rad19syn           | 3.55955e-32 | 1.00000 | 3.55955e-32 | 1.00000 |
| rad52              | 1.42920e-34 | 1.00000 | 1.42920e-34 | 1.00000 |
| rad54              | 1.42146e-35 | 1.00000 | 1.42146e-35 | 1.00000 |
| rad62              | 1.74039e-38 | 1.00000 | 1.74039e-38 | 1.00000 |
| rad43              | 1.61556e-38 | 1.00000 | 1.61556e-38 | 1.00000 |
| rad51              | 1.36867e-39 | 1.00000 | 1.36867e-39 | 1.00000 |
| PAH10+CH3          | 6.56192e-41 | 1.00000 | 6.56192e-41 | 1.00000 |
| rad70              | 3.56740e-41 | 1.00000 | 3.56740e-41 | 1.00000 |
| PhcycC3H3_A+H      | 3.98620e-42 | 1.00000 | 3.98620e-42 | 1.00000 |
| rad55              | 1.96166e-42 | 1.00000 | 1.96166e-42 | 1.00000 |
| rad65              | 1.84823e-43 | 1.00000 | 1.84823e-43 | 1.00000 |
| rad58              | 9.08710e-45 | 1.00000 | 9.08710e-45 | 1.00000 |
| rad34              | 2.40628e-47 | 1.00000 | 2.40628e-47 | 1.00000 |
| PAH1+H             | 1.52833e-47 | 1.00000 | 1.52833e-47 | 1.00000 |
| rad47              | 3.77606e-48 | 1.00000 | 3.77606e-48 | 1.00000 |
| rad42              | 1.16160e-50 | 1.00000 | 1.16160e-50 | 1.00000 |
| rad41              | 4.76995e-52 | 1.00000 | 4.76995e-52 | 1.00000 |

100.000000 Pa, 30.0000000 K

=====

| Rate constant      | True (fraction)        | Effective (fraction)   |
|--------------------|------------------------|------------------------|
| Total              | 5.03204e-39 (1.00 )    | 5.03204e-39 (1.00 )    |
| Formation of rad11 | 5.03203e-39 (1.000 )   | 5.03203e-39 (1.000 )   |
| Formation of rad6  | 9.92181e-45 (1.97e-06) | 9.92181e-45 (1.97e-06) |
| H-abstraction      | 3.33191e-55 (6.62e-17) | 3.33191e-55 (6.62e-17) |

| species    | PYtrue      | Cumul    | PYeffective | Cumul    |
|------------|-------------|----------|-------------|----------|
| rad11      | 0.626667    | 0.626667 | 0.626667    | 0.626667 |
| rad6       | 0.354558    | 0.981225 | 0.354558    | 0.981225 |
| Indene+H   | 0.00877246  | 0.989997 | 0.00877246  | 0.989997 |
| rad22      | 0.00728646  | 0.997284 | 0.00728646  | 0.997284 |
| rad23      | 0.00175409  | 0.999038 | 0.00175409  | 0.999038 |
| rad45      | 0.000677597 | 0.999716 | 0.000677597 | 0.999716 |
| C2H2+PhCH2 | 0.000105168 | 0.999821 | 0.000105168 | 0.999821 |
| rad7       | 6.53219e-05 | 0.999886 | 6.53219e-05 | 0.999886 |
| rad18      | 5.24530e-05 | 0.999939 | 5.24530e-05 | 0.999939 |
| rad36      | 4.22023e-05 | 0.999981 | 4.22023e-05 | 0.999981 |
| rad20      | 8.60624e-06 | 0.999989 | 8.60624e-06 | 0.999989 |
| rad21      | 5.46511e-06 | 0.999995 | 5.46511e-06 | 0.999995 |
| rad25      | 3.81602e-06 | 0.999999 | 3.81602e-06 | 0.999999 |
| rad13      | 7.95017e-07 | 0.999999 | 7.95017e-07 | 0.999999 |
| PhCHCCH2+H | 4.88081e-07 | 1.000000 | 4.88081e-07 | 1.000000 |
| rad3       | 5.59248e-08 | 1.000000 | 5.59248e-08 | 1.000000 |
| rad4       | 2.82883e-08 | 1.000000 | 2.82883e-08 | 1.000000 |

|                    |             |         |             |         |
|--------------------|-------------|---------|-------------|---------|
| rad9               | 2.56331e-08 | 1.00000 | 2.56331e-08 | 1.00000 |
| rad30              | 4.56812e-09 | 1.00000 | 4.56812e-09 | 1.00000 |
| rad2               | 2.40642e-09 | 1.00000 | 2.40642e-09 | 1.00000 |
| rad28              | 2.11864e-09 | 1.00000 | 2.11864e-09 | 1.00000 |
| rad33              | 9.47773e-10 | 1.00000 | 9.47773e-10 | 1.00000 |
| rad15              | 7.62468e-10 | 1.00000 | 7.62468e-10 | 1.00000 |
| Phenyl+Allene      | 3.35130e-10 | 1.00000 | 0.00000     | 1.00000 |
| rad1               | 1.52331e-10 | 1.00000 | 1.52331e-10 | 1.00000 |
| PhCCH+CH3          | 1.17822e-11 | 1.00000 | 1.17822e-11 | 1.00000 |
| rad24              | 7.53104e-12 | 1.00000 | 7.53104e-12 | 1.00000 |
| rad38              | 6.82443e-12 | 1.00000 | 6.82443e-12 | 1.00000 |
| rad10              | 6.79860e-12 | 1.00000 | 6.79860e-12 | 1.00000 |
| PAH9+H             | 2.82989e-12 | 1.00000 | 2.82989e-12 | 1.00000 |
| rad35              | 1.61185e-12 | 1.00000 | 1.61185e-12 | 1.00000 |
| rad8               | 1.48061e-12 | 1.00000 | 1.48061e-12 | 1.00000 |
| rad14              | 8.21073e-13 | 1.00000 | 8.21073e-13 | 1.00000 |
| rad46              | 3.35378e-14 | 1.00000 | 3.35378e-14 | 1.00000 |
| rad60syn           | 1.65086e-14 | 1.00000 | 1.65086e-14 | 1.00000 |
| rad27              | 2.63940e-15 | 1.00000 | 2.63940e-15 | 1.00000 |
| PhCCCH3+H          | 2.38285e-15 | 1.00000 | 2.38285e-15 | 1.00000 |
| PhCH2CCH+H         | 6.16671e-16 | 1.00000 | 6.16671e-16 | 1.00000 |
| rad60anti          | 5.42481e-16 | 1.00000 | 5.42481e-16 | 1.00000 |
| Ph+MeAc            | 3.17187e-16 | 1.00000 | 3.17187e-16 | 1.00000 |
| rad26              | 2.17474e-16 | 1.00000 | 2.17474e-16 | 1.00000 |
| Benzene+2-propynyl | 6.62139e-17 | 1.00000 | 6.62139e-17 | 1.00000 |
| rad31              | 1.77788e-17 | 1.00000 | 1.77788e-17 | 1.00000 |
| PAH7+H             | 9.87825e-18 | 1.00000 | 9.87825e-18 | 1.00000 |
| rad39              | 8.06712e-19 | 1.00000 | 8.06712e-19 | 1.00000 |
| PAH3+H             | 1.28895e-23 | 1.00000 | 1.28895e-23 | 1.00000 |
| rad59              | 6.54376e-24 | 1.00000 | 6.54376e-24 | 1.00000 |
| rad12              | 9.03824e-25 | 1.00000 | 9.03824e-25 | 1.00000 |
| rad50              | 1.59488e-25 | 1.00000 | 1.59488e-25 | 1.00000 |
| rad5               | 3.93915e-26 | 1.00000 | 3.93915e-26 | 1.00000 |
| rad37              | 4.81939e-28 | 1.00000 | 4.81939e-28 | 1.00000 |
| rad19syn           | 1.08362e-31 | 1.00000 | 1.08362e-31 | 1.00000 |
| rad52              | 2.78493e-34 | 1.00000 | 2.78493e-34 | 1.00000 |
| rad54              | 3.80897e-35 | 1.00000 | 3.80897e-35 | 1.00000 |
| rad43              | 1.34598e-37 | 1.00000 | 1.34598e-37 | 1.00000 |
| rad62              | 6.26039e-38 | 1.00000 | 6.26039e-38 | 1.00000 |
| rad51              | 2.68364e-39 | 1.00000 | 2.68364e-39 | 1.00000 |
| PAH10+CH3          | 1.86972e-39 | 1.00000 | 1.86972e-39 | 1.00000 |
| rad70              | 1.87384e-41 | 1.00000 | 1.87384e-41 | 1.00000 |
| PhcycC3H3_A+H      | 1.08440e-41 | 1.00000 | 1.08440e-41 | 1.00000 |
| rad55              | 5.25031e-42 | 1.00000 | 5.25031e-42 | 1.00000 |
| rad65              | 3.89471e-43 | 1.00000 | 3.89471e-43 | 1.00000 |
| rad58              | 5.81724e-45 | 1.00000 | 5.81724e-45 | 1.00000 |
| PAH1+H             | 8.35780e-47 | 1.00000 | 8.35780e-47 | 1.00000 |
| rad34              | 5.00450e-47 | 1.00000 | 5.00450e-47 | 1.00000 |
| rad47              | 4.24159e-48 | 1.00000 | 4.24159e-48 | 1.00000 |
| rad42              | 3.48694e-50 | 1.00000 | 3.48694e-50 | 1.00000 |
| rad41              | 2.68518e-51 | 1.00000 | 2.68518e-51 | 1.00000 |

100.000000 Pa, 40.000000 K

=====

| Rate constant      | True (fraction)        | Effective (fraction)   |
|--------------------|------------------------|------------------------|
| Total              | 9.35697e-33 (1.00 )    | 9.35697e-33 (1.00 )    |
| Formation of rad11 | 9.35644e-33 (1.000 )   | 9.35644e-33 (1.000 )   |
| Formation of rad6  | 5.26139e-37 (5.62e-05) | 5.26139e-37 (5.62e-05) |
| H-abstraction      | 1.44763e-44 (1.55e-12) | 1.44763e-44 (1.55e-12) |

| species    | PYtrue      | Cumul    | PYeffective | Cumul    |
|------------|-------------|----------|-------------|----------|
| rad11      | 0.505304    | 0.505304 | 0.505304    | 0.505304 |
| rad6       | 0.469500    | 0.974804 | 0.469500    | 0.974804 |
| Indene+H   | 0.0136611   | 0.988465 | 0.0136611   | 0.988465 |
| rad22      | 0.00762441  | 0.996090 | 0.00762441  | 0.996090 |
| rad23      | 0.00289544  | 0.998985 | 0.00289544  | 0.998985 |
| rad45      | 0.000675697 | 0.999661 | 0.000675697 | 0.999661 |
| C2H2+PhCH2 | 0.000148581 | 0.999809 | 0.000148581 | 0.999809 |
| rad7       | 0.000109005 | 0.999918 | 0.000109005 | 0.999918 |
| rad36      | 4.20564e-05 | 0.999960 | 4.20564e-05 | 0.999960 |
| rad18      | 2.75540e-05 | 0.999988 | 2.75540e-05 | 0.999988 |
| rad20      | 4.03910e-06 | 0.999992 | 4.03910e-06 | 0.999992 |
| rad25      | 3.90893e-06 | 0.999996 | 3.90893e-06 | 0.999996 |
| rad21      | 2.54251e-06 | 0.999998 | 2.54251e-06 | 0.999998 |
| rad13      | 9.15288e-07 | 0.999999 | 9.15288e-07 | 0.999999 |
| PhCHCCH2+H | 7.04037e-07 | 1.000000 | 7.04037e-07 | 1.000000 |
| rad3       | 1.14167e-07 | 1.00000  | 1.14167e-07 | 1.00000  |
| rad4       | 5.77595e-08 | 1.00000  | 5.77595e-08 | 1.00000  |

|                    |             |         |             |         |
|--------------------|-------------|---------|-------------|---------|
| rad9               | 3.75154e-08 | 1.00000 | 3.75154e-08 | 1.00000 |
| rad2               | 7.53573e-09 | 1.00000 | 7.53573e-09 | 1.00000 |
| rad30              | 6.79729e-09 | 1.00000 | 6.79729e-09 | 1.00000 |
| rad28              | 4.50585e-09 | 1.00000 | 4.50585e-09 | 1.00000 |
| rad15              | 1.15004e-09 | 1.00000 | 1.15004e-09 | 1.00000 |
| rad33              | 1.07322e-09 | 1.00000 | 1.07322e-09 | 1.00000 |
| Phenyl+Allene      | 6.28071e-10 | 1.00000 | 0.00000     | 1.00000 |
| rad1               | 4.77460e-10 | 1.00000 | 4.77460e-10 | 1.00000 |
| PhCCH+CH3          | 3.86517e-11 | 1.00000 | 3.86517e-11 | 1.00000 |
| rad10              | 3.19170e-11 | 1.00000 | 3.19170e-11 | 1.00000 |
| rad38              | 1.32078e-11 | 1.00000 | 1.32078e-11 | 1.00000 |
| PAH9+H             | 8.02608e-12 | 1.00000 | 8.02608e-12 | 1.00000 |
| rad24              | 6.89583e-12 | 1.00000 | 6.89583e-12 | 1.00000 |
| rad35              | 4.54472e-12 | 1.00000 | 4.54472e-12 | 1.00000 |
| rad8               | 2.51036e-12 | 1.00000 | 2.51036e-12 | 1.00000 |
| rad14              | 2.43949e-12 | 1.00000 | 2.43949e-12 | 1.00000 |
| Benzene+2-propynyl | 1.54712e-12 | 1.00000 | 1.54712e-12 | 1.00000 |
| rad46              | 6.74797e-14 | 1.00000 | 6.74797e-14 | 1.00000 |
| rad60syn           | 2.88475e-14 | 1.00000 | 2.88475e-14 | 1.00000 |
| PhCCCH3+H          | 1.19299e-14 | 1.00000 | 1.19299e-14 | 1.00000 |
| rad27              | 9.15857e-15 | 1.00000 | 9.15857e-15 | 1.00000 |
| rad26              | 1.58639e-15 | 1.00000 | 1.58639e-15 | 1.00000 |
| Ph+MeAc            | 1.22953e-15 | 1.00000 | 1.22953e-15 | 1.00000 |
| rad60anti          | 1.05065e-15 | 1.00000 | 1.05065e-15 | 1.00000 |
| PhCH2CCH+H         | 9.48014e-16 | 1.00000 | 9.48014e-16 | 1.00000 |
| rad31              | 3.66832e-17 | 1.00000 | 3.66832e-17 | 1.00000 |
| PAH7+H             | 3.20848e-17 | 1.00000 | 3.20848e-17 | 1.00000 |
| rad39              | 2.89903e-18 | 1.00000 | 2.89903e-18 | 1.00000 |
| PAH3+H             | 1.66502e-23 | 1.00000 | 1.66502e-23 | 1.00000 |
| rad12              | 1.06355e-23 | 1.00000 | 1.06355e-23 | 1.00000 |
| rad59              | 8.50919e-24 | 1.00000 | 8.50919e-24 | 1.00000 |
| rad50              | 3.46099e-25 | 1.00000 | 3.46099e-25 | 1.00000 |
| rad5               | 2.19522e-25 | 1.00000 | 2.19522e-25 | 1.00000 |
| rad37              | 5.72556e-27 | 1.00000 | 5.72556e-27 | 1.00000 |
| rad19syn           | 2.72476e-31 | 1.00000 | 2.72476e-31 | 1.00000 |
| rad52              | 6.13237e-34 | 1.00000 | 6.13237e-34 | 1.00000 |
| rad54              | 9.55936e-35 | 1.00000 | 9.55936e-35 | 1.00000 |
| rad43              | 6.27074e-37 | 1.00000 | 6.27074e-37 | 1.00000 |
| rad62              | 1.78788e-37 | 1.00000 | 1.78788e-37 | 1.00000 |
| PAH10+CH3          | 1.64373e-38 | 1.00000 | 1.64373e-38 | 1.00000 |
| rad51              | 6.17956e-39 | 1.00000 | 6.17956e-39 | 1.00000 |
| rad70              | 4.26310e-41 | 1.00000 | 4.26310e-41 | 1.00000 |
| PhcycC3H3_A+H      | 2.89405e-41 | 1.00000 | 2.89405e-41 | 1.00000 |
| rad55              | 1.39254e-41 | 1.00000 | 1.39254e-41 | 1.00000 |
| rad65              | 8.85020e-43 | 1.00000 | 8.85020e-43 | 1.00000 |
| rad58              | 1.40102e-44 | 1.00000 | 1.40102e-44 | 1.00000 |
| PAH1+H             | 3.36695e-46 | 1.00000 | 3.36695e-46 | 1.00000 |
| rad34              | 1.38899e-46 | 1.00000 | 1.38899e-46 | 1.00000 |
| rad47              | 6.98526e-48 | 1.00000 | 6.98526e-48 | 1.00000 |
| rad42              | 1.05850e-49 | 1.00000 | 1.05850e-49 | 1.00000 |
| rad41              | 1.17493e-50 | 1.00000 | 1.17493e-50 | 1.00000 |

100.000000 Pa, 50.0000000 K

=====

| Rate constant      | True (fraction)        | Effective (fraction)   |
|--------------------|------------------------|------------------------|
| Total              | 5.52690e-29 (1.00 )    | 5.52690e-29 (1.00 )    |
| Formation of rad11 | 5.52459e-29 (1.000 )   | 5.52459e-29 (1.000 )   |
| Formation of rad6  | 2.30840e-32 (0.000418) | 2.30840e-32 (0.000418) |
| H-abstraction      | 3.35357e-38 (6.07e-10) | 3.35357e-38 (6.07e-10) |

| species    | PYtrue      | Cumul    | PYeffective | Cumul    |
|------------|-------------|----------|-------------|----------|
| rad6       | 0.558648    | 0.558648 | 0.558648    | 0.558648 |
| rad11      | 0.410969    | 0.969617 | 0.410969    | 0.969617 |
| Indene+H   | 0.0181552   | 0.987772 | 0.0181552   | 0.987772 |
| rad22      | 0.00725538  | 0.995028 | 0.00725538  | 0.995028 |
| rad23      | 0.00391306  | 0.998941 | 0.00391306  | 0.998941 |
| rad45      | 0.000656623 | 0.999597 | 0.000656623 | 0.999597 |
| C2H2+PhCH2 | 0.000187769 | 0.999785 | 0.000187769 | 0.999785 |
| rad7       | 0.000148289 | 0.999933 | 0.000148289 | 0.999933 |
| rad36      | 4.08363e-05 | 0.999974 | 4.08363e-05 | 0.999974 |
| rad18      | 1.63295e-05 | 0.999990 | 1.63295e-05 | 0.999990 |
| rad25      | 3.70176e-06 | 0.999994 | 3.70176e-06 | 0.999994 |
| rad20      | 2.22291e-06 | 0.999996 | 2.22291e-06 | 0.999996 |
| rad21      | 1.39205e-06 | 0.999998 | 1.39205e-06 | 0.999998 |
| rad13      | 9.92558e-07 | 0.999999 | 9.92558e-07 | 0.999999 |
| PhCHCCH2+H | 9.23495e-07 | 1.000000 | 9.23495e-07 | 1.000000 |
| rad3       | 1.86629e-07 | 1.000000 | 1.86629e-07 | 1.000000 |
| rad4       | 9.44554e-08 | 1.000000 | 9.44554e-08 | 1.000000 |

|                    |             |         |             |         |
|--------------------|-------------|---------|-------------|---------|
| rad9               | 5.01070e-08 | 1.00000 | 5.01070e-08 | 1.00000 |
| rad2               | 1.69050e-08 | 1.00000 | 1.69050e-08 | 1.00000 |
| rad30              | 8.88338e-09 | 1.00000 | 8.88338e-09 | 1.00000 |
| rad28              | 7.70895e-09 | 1.00000 | 7.70895e-09 | 1.00000 |
| rad15              | 1.52200e-09 | 1.00000 | 1.52200e-09 | 1.00000 |
| rad33              | 1.15419e-09 | 1.00000 | 1.15419e-09 | 1.00000 |
| Phenyl+Allene      | 1.14353e-09 | 1.00000 | 0.00000     | 1.00000 |
| rad1               | 1.07280e-09 | 1.00000 | 1.07280e-09 | 1.00000 |
| Benzene+2-propynyl | 6.06773e-10 | 1.00000 | 6.06773e-10 | 1.00000 |
| rad10              | 9.61909e-11 | 1.00000 | 9.61909e-11 | 1.00000 |
| PhCCH+CH3          | 9.23395e-11 | 1.00000 | 9.23395e-11 | 1.00000 |
| rad38              | 2.08355e-11 | 1.00000 | 2.08355e-11 | 1.00000 |
| PAH9+H             | 1.64087e-11 | 1.00000 | 1.64087e-11 | 1.00000 |
| rad35              | 9.23131e-12 | 1.00000 | 9.23131e-12 | 1.00000 |
| rad24              | 6.37911e-12 | 1.00000 | 6.37911e-12 | 1.00000 |
| rad14              | 5.22271e-12 | 1.00000 | 5.22271e-12 | 1.00000 |
| rad8               | 3.93673e-12 | 1.00000 | 3.93673e-12 | 1.00000 |
| rad46              | 1.10927e-13 | 1.00000 | 1.10927e-13 | 1.00000 |
| rad60syn           | 4.50422e-14 | 1.00000 | 4.50422e-14 | 1.00000 |
| PhCCCH3+H          | 3.92702e-14 | 1.00000 | 3.92702e-14 | 1.00000 |
| rad27              | 2.16303e-14 | 1.00000 | 2.16303e-14 | 1.00000 |
| rad26              | 6.75407e-15 | 1.00000 | 6.75407e-15 | 1.00000 |
| Ph+MeAc            | 3.72698e-15 | 1.00000 | 3.72698e-15 | 1.00000 |
| rad60anti          | 2.17141e-15 | 1.00000 | 2.17141e-15 | 1.00000 |
| PhCH2CCH+H         | 1.66389e-15 | 1.00000 | 1.66389e-15 | 1.00000 |
| PAH7+H             | 8.21059e-17 | 1.00000 | 8.21059e-17 | 1.00000 |
| rad31              | 6.09413e-17 | 1.00000 | 6.09413e-17 | 1.00000 |
| rad39              | 7.89665e-18 | 1.00000 | 7.89665e-18 | 1.00000 |
| rad12              | 6.98563e-23 | 1.00000 | 6.98563e-23 | 1.00000 |
| PAH3+H             | 2.60525e-23 | 1.00000 | 2.60525e-23 | 1.00000 |
| rad59              | 1.33668e-23 | 1.00000 | 1.33668e-23 | 1.00000 |
| rad5               | 1.00664e-24 | 1.00000 | 1.00664e-24 | 1.00000 |
| rad50              | 8.14221e-25 | 1.00000 | 8.14221e-25 | 1.00000 |
| rad37              | 4.32708e-26 | 1.00000 | 4.32708e-26 | 1.00000 |
| rad19syn           | 7.62082e-31 | 1.00000 | 7.62082e-31 | 1.00000 |
| rad52              | 1.61114e-33 | 1.00000 | 1.61114e-33 | 1.00000 |
| rad54              | 2.74968e-34 | 1.00000 | 2.74968e-34 | 1.00000 |
| rad43              | 2.90996e-36 | 1.00000 | 2.90996e-36 | 1.00000 |
| rad62              | 5.71202e-37 | 1.00000 | 5.71202e-37 | 1.00000 |
| PAH10+CH3          | 1.14832e-37 | 1.00000 | 1.14832e-37 | 1.00000 |
| rad51              | 1.72580e-38 | 1.00000 | 1.72580e-38 | 1.00000 |
| rad70              | 1.30742e-40 | 1.00000 | 1.30742e-40 | 1.00000 |
| PhcycC3H3_A+H      | 9.07572e-41 | 1.00000 | 9.07572e-41 | 1.00000 |
| rad55              | 4.34537e-41 | 1.00000 | 4.34537e-41 | 1.00000 |
| rad65              | 2.47508e-42 | 1.00000 | 2.47508e-42 | 1.00000 |
| rad58              | 4.36837e-44 | 1.00000 | 4.36837e-44 | 1.00000 |
| PAH1+H             | 1.43348e-45 | 1.00000 | 1.43348e-45 | 1.00000 |
| rad34              | 4.62466e-46 | 1.00000 | 4.62466e-46 | 1.00000 |
| rad47              | 1.60815e-47 | 1.00000 | 1.60815e-47 | 1.00000 |
| rad42              | 3.92041e-49 | 1.00000 | 3.92041e-49 | 1.00000 |
| rad41              | 5.88314e-50 | 1.00000 | 5.88314e-50 | 1.00000 |

100.000000 Pa, 60.0000000 K

=====

| Rate constant      | True (fraction)        | Effective (fraction)   |
|--------------------|------------------------|------------------------|
| Total              | 1.83429e-26 (1.00 )    | 1.83429e-26 (1.00 )    |
| Formation of rad11 | 1.83139e-26 (0.998 )   | 1.83139e-26 (0.998 )   |
| Formation of rad6  | 2.90471e-29 (0.00158 ) | 2.90471e-29 (0.00158 ) |
| H-abstraction      | 5.71259e-34 (3.11e-08) | 5.71259e-34 (3.11e-08) |

| species    | PYtrue      | Cumul    | PYeffective | Cumul    |
|------------|-------------|----------|-------------|----------|
| rad6       | 0.629403    | 0.629403 | 0.629403    | 0.629403 |
| rad11      | 0.335939    | 0.965342 | 0.335939    | 0.965342 |
| Indene+H   | 0.0221758   | 0.987518 | 0.0221758   | 0.987518 |
| rad22      | 0.00658624  | 0.994104 | 0.00658624  | 0.994104 |
| rad23      | 0.00478987  | 0.998894 | 0.00478987  | 0.998894 |
| rad45      | 0.000640992 | 0.999535 | 0.000640992 | 0.999535 |
| C2H2+PhCH2 | 0.000224241 | 0.999759 | 0.000224241 | 0.999759 |
| rad7       | 0.000182083 | 0.999941 | 0.000182083 | 0.999941 |
| rad36      | 3.98307e-05 | 0.999981 | 3.98307e-05 | 0.999981 |
| rad18      | 1.03792e-05 | 0.999991 | 1.03792e-05 | 0.999991 |
| rad25      | 3.37490e-06 | 0.999995 | 3.37490e-06 | 0.999995 |
| rad20      | 1.33880e-06 | 0.999996 | 1.33880e-06 | 0.999996 |
| PhCHCCH2+H | 1.15388e-06 | 0.999997 | 1.15388e-06 | 0.999997 |
| rad13      | 1.04441e-06 | 0.999998 | 1.04441e-06 | 0.999998 |
| rad21      | 8.35545e-07 | 0.999999 | 8.35545e-07 | 0.999999 |
| rad3       | 2.72055e-07 | 0.999999 | 2.72055e-07 | 0.999999 |
| rad4       | 1.37761e-07 | 1.000000 | 1.37761e-07 | 1.000000 |



|                    |             |          |             |          |
|--------------------|-------------|----------|-------------|----------|
| rad9               | 6.38774e-08 | 1.000000 | 6.38774e-08 | 1.000000 |
| rad2               | 3.19866e-08 | 1.000000 | 3.19866e-08 | 1.000000 |
| Benzene+2-propynyl | 3.11432e-08 | 1.000000 | 3.11432e-08 | 1.000000 |
| rad28              | 1.18201e-08 | 1.000000 | 1.18201e-08 | 1.000000 |
| rad30              | 1.08957e-08 | 1.000000 | 1.08957e-08 | 1.000000 |
| rad1               | 2.03409e-09 | 1.000000 | 2.03409e-09 | 1.000000 |
| Phenyl+Allene      | 2.00247e-09 | 1.000000 | 0.000000    | 1.000000 |
| rad15              | 1.89010e-09 | 1.000000 | 1.89010e-09 | 1.000000 |
| rad33              | 1.20898e-09 | 1.000000 | 1.20898e-09 | 1.000000 |
| rad10              | 2.31532e-10 | 1.000000 | 2.31532e-10 | 1.000000 |
| PhCCH+CH3          | 1.88903e-10 | 1.000000 | 1.88903e-10 | 1.000000 |
| rad38              | 2.97063e-11 | 1.000000 | 2.97063e-11 | 1.000000 |
| PAH9+H             | 2.83831e-11 | 1.000000 | 2.83831e-11 | 1.000000 |
| rad35              | 1.58577e-11 | 1.000000 | 1.58577e-11 | 1.000000 |
| rad14              | 9.44399e-12 | 1.000000 | 9.44399e-12 | 1.000000 |
| rad24              | 6.03173e-12 | 1.000000 | 6.03173e-12 | 1.000000 |
| rad8               | 5.91485e-12 | 1.000000 | 5.91485e-12 | 1.000000 |
| rad46              | 1.65089e-13 | 1.000000 | 1.65089e-13 | 1.000000 |
| PhCCCH3+H          | 1.05731e-13 | 1.000000 | 1.05731e-13 | 1.000000 |
| rad60syn           | 6.69546e-14 | 1.000000 | 6.69546e-14 | 1.000000 |
| rad27              | 4.21952e-14 | 1.000000 | 4.21952e-14 | 1.000000 |
| rad26              | 2.20890e-14 | 1.000000 | 2.20890e-14 | 1.000000 |
| Ph+MeAc            | 1.02612e-14 | 1.000000 | 1.02612e-14 | 1.000000 |
| rad60anti          | 4.52639e-15 | 1.000000 | 4.52639e-15 | 1.000000 |
| PhCH2CCH+H         | 3.52019e-15 | 1.000000 | 3.52019e-15 | 1.000000 |
| PAH7+H             | 1.88131e-16 | 1.000000 | 1.88131e-16 | 1.000000 |
| rad31              | 9.06870e-17 | 1.000000 | 9.06870e-17 | 1.000000 |
| rad39              | 1.91519e-17 | 1.000000 | 1.91519e-17 | 1.000000 |
| rad12              | 3.57871e-22 | 1.000000 | 3.57871e-22 | 1.000000 |
| PAH3+H             | 5.11815e-23 | 1.000000 | 5.11815e-23 | 1.000000 |
| rad59              | 2.63193e-23 | 1.000000 | 2.63193e-23 | 1.000000 |
| rad5               | 4.85738e-24 | 1.000000 | 4.85738e-24 | 1.000000 |
| rad50              | 2.17658e-24 | 1.000000 | 2.17658e-24 | 1.000000 |
| rad37              | 2.95959e-25 | 1.000000 | 2.95959e-25 | 1.000000 |
| rad19syn           | 2.66627e-30 | 1.000000 | 2.66627e-30 | 1.000000 |
| rad52              | 5.04850e-33 | 1.000000 | 5.04850e-33 | 1.000000 |
| rad54              | 1.00234e-33 | 1.000000 | 1.00234e-33 | 1.000000 |
| rad43              | 1.63972e-35 | 1.000000 | 1.63972e-35 | 1.000000 |
| rad62              | 2.31938e-36 | 1.000000 | 2.31938e-36 | 1.000000 |
| PAH10+CH3          | 8.65632e-37 | 1.000000 | 8.65632e-37 | 1.000000 |
| rad51              | 5.89319e-38 | 1.000000 | 5.89319e-38 | 1.000000 |
| rad70              | 5.23408e-40 | 1.000000 | 5.23408e-40 | 1.000000 |
| PhcycC3H3_A+H      | 3.66724e-40 | 1.000000 | 3.66724e-40 | 1.000000 |
| rad55              | 1.74750e-40 | 1.000000 | 1.74750e-40 | 1.000000 |
| rad65              | 8.62782e-42 | 1.000000 | 8.62782e-42 | 1.000000 |
| rad58              | 1.77131e-43 | 1.000000 | 1.77131e-43 | 1.000000 |
| PAH1+H             | 7.45072e-45 | 1.000000 | 7.45072e-45 | 1.000000 |
| rad34              | 2.00694e-45 | 1.000000 | 2.00694e-45 | 1.000000 |
| rad47              | 5.00542e-47 | 1.000000 | 5.00542e-47 | 1.000000 |
| rad42              | 1.95941e-48 | 1.000000 | 1.95941e-48 | 1.000000 |
| rad41              | 3.93871e-49 | 1.000000 | 3.93871e-49 | 1.000000 |

100.000000 Pa, 70.0000000 K

=====

| Rate constant      | True (fraction)        | Effective (fraction)   |
|--------------------|------------------------|------------------------|
| Total              | 1.17336e-24 (1.00 )    | 1.17336e-24 (1.00 )    |
| Formation of rad11 | 1.16857e-24 (0.996 )   | 1.16857e-24 (0.996 )   |
| Formation of rad6  | 4.79505e-27 (0.00409 ) | 4.79505e-27 (0.00409 ) |
| H-abstraction      | 5.89821e-31 (5.03e-07) | 5.89821e-31 (5.03e-07) |

| species            | PYtrue      | Cumul    | PYeffective | Cumul    |
|--------------------|-------------|----------|-------------|----------|
| rad6               | 0.686420    | 0.686420 | 0.686420    | 0.686420 |
| rad11              | 0.275376    | 0.961796 | 0.275376    | 0.961796 |
| Indene+H           | 0.0257060   | 0.987502 | 0.0257060   | 0.987502 |
| rad22              | 0.00581312  | 0.993315 | 0.00581312  | 0.993315 |
| rad23              | 0.00553100  | 0.998846 | 0.00553100  | 0.998846 |
| rad45              | 0.000631141 | 0.999477 | 0.000631141 | 0.999477 |
| C2H2+PhCH2         | 0.000258725 | 0.999735 | 0.000258725 | 0.999735 |
| rad7               | 0.000210528 | 0.999946 | 0.000210528 | 0.999946 |
| rad36              | 3.91875e-05 | 0.999985 | 3.91875e-05 | 0.999985 |
| rad18              | 6.90264e-06 | 0.999992 | 6.90264e-06 | 0.999992 |
| rad25              | 3.00863e-06 | 0.999995 | 3.00863e-06 | 0.999995 |
| PhCHCCH2+H         | 1.39920e-06 | 0.999997 | 1.39920e-06 | 0.999997 |
| rad13              | 1.07970e-06 | 0.999998 | 1.07970e-06 | 0.999998 |
| rad20              | 8.54454e-07 | 0.999998 | 8.54454e-07 | 0.999998 |
| rad21              | 5.32000e-07 | 0.999999 | 5.32000e-07 | 0.999999 |
| Benzene+2-propynyl | 5.02676e-07 | 0.999999 | 5.02676e-07 | 0.999999 |
| rad3               | 3.70129e-07 | 1.000000 | 3.70129e-07 | 1.000000 |

|               |             |         |             |         |
|---------------|-------------|---------|-------------|---------|
| rad4          | 1.87538e-07 | 1.00000 | 1.87538e-07 | 1.00000 |
| rad9          | 7.91187e-08 | 1.00000 | 7.91187e-08 | 1.00000 |
| rad2          | 5.47366e-08 | 1.00000 | 5.47366e-08 | 1.00000 |
| rad28         | 1.70085e-08 | 1.00000 | 1.70085e-08 | 1.00000 |
| rad30         | 1.28691e-08 | 1.00000 | 1.28691e-08 | 1.00000 |
| rad1          | 3.48926e-09 | 1.00000 | 3.48926e-09 | 1.00000 |
| Phenyl+Allene | 3.36400e-09 | 1.00000 | 0.00000     | 1.00000 |
| rad15         | 2.26048e-09 | 1.00000 | 2.26048e-09 | 1.00000 |
| rad33         | 1.24674e-09 | 1.00000 | 1.24674e-09 | 1.00000 |
| rad10         | 4.88720e-10 | 1.00000 | 4.88720e-10 | 1.00000 |
| PhCCH+CH3     | 3.54617e-10 | 1.00000 | 3.54617e-10 | 1.00000 |
| PAH9+H        | 4.44036e-11 | 1.00000 | 4.44036e-11 | 1.00000 |
| rad38         | 3.99131e-11 | 1.00000 | 3.99131e-11 | 1.00000 |
| rad35         | 2.46278e-11 | 1.00000 | 2.46278e-11 | 1.00000 |
| rad14         | 1.54128e-11 | 1.00000 | 1.54128e-11 | 1.00000 |
| rad8          | 8.61219e-12 | 1.00000 | 8.61219e-12 | 1.00000 |
| rad24         | 5.80997e-12 | 1.00000 | 5.80997e-12 | 1.00000 |
| PhCCCH3+H     | 2.55751e-13 | 1.00000 | 2.55751e-13 | 1.00000 |
| rad46         | 2.31882e-13 | 1.00000 | 2.31882e-13 | 1.00000 |
| rad60syn      | 9.63545e-14 | 1.00000 | 9.63545e-14 | 1.00000 |
| rad27         | 7.36714e-14 | 1.00000 | 7.36714e-14 | 1.00000 |
| rad26         | 6.24615e-14 | 1.00000 | 6.24615e-14 | 1.00000 |
| Ph+MeAc       | 2.70269e-14 | 1.00000 | 2.70269e-14 | 1.00000 |
| PhCH2CCH+H    | 1.00969e-14 | 1.00000 | 1.00969e-14 | 1.00000 |
| rad60anti     | 8.85372e-15 | 1.00000 | 8.85372e-15 | 1.00000 |
| PAH7+H        | 4.14393e-16 | 1.00000 | 4.14393e-16 | 1.00000 |
| rad31         | 1.26439e-16 | 1.00000 | 1.26439e-16 | 1.00000 |
| rad39         | 4.42101e-17 | 1.00000 | 4.42101e-17 | 1.00000 |
| rad12         | 1.64168e-21 | 1.00000 | 1.64168e-21 | 1.00000 |
| PAH3+H        | 1.40827e-22 | 1.00000 | 1.40827e-22 | 1.00000 |
| rad59         | 7.24986e-23 | 1.00000 | 7.24986e-23 | 1.00000 |
| rad5          | 2.72532e-23 | 1.00000 | 2.72532e-23 | 1.00000 |
| rad50         | 6.96838e-24 | 1.00000 | 6.96838e-24 | 1.00000 |
| rad37         | 2.09519e-24 | 1.00000 | 2.09519e-24 | 1.00000 |
| rad19syn      | 1.29756e-29 | 1.00000 | 1.29756e-29 | 1.00000 |
| rad52         | 1.97232e-32 | 1.00000 | 1.97232e-32 | 1.00000 |
| rad54         | 5.12033e-33 | 1.00000 | 5.12033e-33 | 1.00000 |
| rad43         | 1.27576e-34 | 1.00000 | 1.27576e-34 | 1.00000 |
| rad62         | 1.33869e-35 | 1.00000 | 1.33869e-35 | 1.00000 |
| PAH10+CH3     | 8.34750e-36 | 1.00000 | 8.34750e-36 | 1.00000 |
| rad51         | 2.57900e-37 | 1.00000 | 2.57900e-37 | 1.00000 |
| rad70         | 2.97366e-39 | 1.00000 | 2.97366e-39 | 1.00000 |
| PhcycC3H3_A+H | 2.10020e-39 | 1.00000 | 2.10020e-39 | 1.00000 |
| rad55         | 9.95990e-40 | 1.00000 | 9.95990e-40 | 1.00000 |
| rad65         | 3.92738e-41 | 1.00000 | 3.92738e-41 | 1.00000 |
| rad58         | 1.01917e-42 | 1.00000 | 1.01917e-42 | 1.00000 |
| PAH1+H        | 5.31428e-44 | 1.00000 | 5.31428e-44 | 1.00000 |
| rad34         | 1.24394e-44 | 1.00000 | 1.24394e-44 | 1.00000 |
| rad47         | 2.16623e-46 | 1.00000 | 2.16623e-46 | 1.00000 |
| rad42         | 1.48396e-47 | 1.00000 | 1.48396e-47 | 1.00000 |
| rad41         | 4.03059e-48 | 1.00000 | 4.03059e-48 | 1.00000 |

100.000000 Pa, 80.0000000 K

=====

| Rate constant      | True (fraction)        | Effective (fraction)   |
|--------------------|------------------------|------------------------|
| Total              | 2.68112e-23 (1.00 )    | 2.68112e-23 (1.00 )    |
| Formation of rad11 | 2.65890e-23 (0.992 )   | 2.65890e-23 (0.992 )   |
| Formation of rad6  | 2.22189e-25 (0.00829 ) | 2.22189e-25 (0.00829 ) |
| H-abstraction      | 1.05871e-28 (3.95e-06) | 1.05871e-28 (3.95e-06) |

| species            | PYtrue      | Cumul    | PYeffective | Cumul    |
|--------------------|-------------|----------|-------------|----------|
| rad6               | 0.732847    | 0.732847 | 0.732847    | 0.732847 |
| rad11              | 0.226003    | 0.958850 | 0.226003    | 0.958850 |
| Indene+H           | 0.0287608   | 0.987611 | 0.0287608   | 0.987611 |
| rad23              | 0.00614771  | 0.993759 | 0.00614771  | 0.993759 |
| rad22              | 0.00503493  | 0.998794 | 0.00503493  | 0.998794 |
| rad45              | 0.000625430 | 0.999419 | 0.000625430 | 0.999419 |
| C2H2+PhCH2         | 0.000291690 | 0.999711 | 0.000291690 | 0.999711 |
| rad7               | 0.000234154 | 0.999945 | 0.000234154 | 0.999945 |
| rad36              | 3.88059e-05 | 0.999984 | 3.88059e-05 | 0.999984 |
| rad18              | 4.73637e-06 | 0.999988 | 4.73637e-06 | 0.999988 |
| Benzene+2-propynyl | 3.94877e-06 | 0.999992 | 3.94877e-06 | 0.999992 |
| rad25              | 2.64192e-06 | 0.999995 | 2.64192e-06 | 0.999995 |
| PhCHCCH2+H         | 1.66310e-06 | 0.999997 | 1.66310e-06 | 0.999997 |
| rad13              | 1.10356e-06 | 0.999998 | 1.10356e-06 | 0.999998 |
| rad20              | 5.67665e-07 | 0.999998 | 5.67665e-07 | 0.999998 |
| rad3               | 4.81024e-07 | 0.999999 | 4.81024e-07 | 0.999999 |
| rad21              | 3.52833e-07 | 0.999999 | 3.52833e-07 | 0.999999 |

|               |             |          |             |          |
|---------------|-------------|----------|-------------|----------|
| rad4          | 2.43896e-07 | 0.999999 | 2.43896e-07 | 0.999999 |
| rad9          | 9.61247e-08 | 1.000000 | 9.61247e-08 | 1.000000 |
| rad2          | 8.77980e-08 | 1.000000 | 8.77980e-08 | 1.000000 |
| rad28         | 2.35221e-08 | 1.000000 | 2.35221e-08 | 1.000000 |
| rad30         | 1.48277e-08 | 1.000000 | 1.48277e-08 | 1.000000 |
| rad1          | 5.61217e-09 | 1.000000 | 5.61217e-09 | 1.000000 |
| Phenyl+Allene | 5.44909e-09 | 1.000000 | 0.000000    | 1.000000 |
| rad15         | 2.63778e-09 | 1.000000 | 2.63778e-09 | 1.000000 |
| rad33         | 1.27278e-09 | 1.000000 | 1.27278e-09 | 1.000000 |
| rad10         | 9.48631e-10 | 1.000000 | 9.48631e-10 | 1.000000 |
| PhCCH+CH3     | 6.32321e-10 | 1.000000 | 6.32321e-10 | 1.000000 |
| PAH9+H        | 6.50427e-11 | 1.000000 | 6.50427e-11 | 1.000000 |
| rad38         | 5.16301e-11 | 1.000000 | 5.16301e-11 | 1.000000 |
| rad35         | 3.57982e-11 | 1.000000 | 3.57982e-11 | 1.000000 |
| rad14         | 2.34655e-11 | 1.000000 | 2.34655e-11 | 1.000000 |
| rad8          | 1.22513e-11 | 1.000000 | 1.22513e-11 | 1.000000 |
| rad24         | 5.66804e-12 | 1.000000 | 5.66804e-12 | 1.000000 |
| PhCCCH3+H     | 5.81773e-13 | 1.000000 | 5.81773e-13 | 1.000000 |
| rad46         | 3.14126e-13 | 1.000000 | 3.14126e-13 | 1.000000 |
| rad26         | 1.61857e-13 | 1.000000 | 1.61857e-13 | 1.000000 |
| rad60syn      | 1.35449e-13 | 1.000000 | 1.35449e-13 | 1.000000 |
| rad27         | 1.19846e-13 | 1.000000 | 1.19846e-13 | 1.000000 |
| Ph+MeAc       | 6.88923e-14 | 1.000000 | 6.88923e-14 | 1.000000 |
| PhCH2CCH+H    | 4.19447e-14 | 1.000000 | 4.19447e-14 | 1.000000 |
| rad60anti     | 1.59931e-14 | 1.000000 | 1.59931e-14 | 1.000000 |
| PAH7+H        | 9.27665e-16 | 1.000000 | 9.27665e-16 | 1.000000 |
| rad31         | 1.68991e-16 | 1.000000 | 1.68991e-16 | 1.000000 |
| rad39         | 9.97720e-17 | 1.000000 | 9.97720e-17 | 1.000000 |
| rad12         | 7.09362e-21 | 1.000000 | 7.09362e-21 | 1.000000 |
| PAH3+H        | 7.08718e-22 | 1.000000 | 7.08718e-22 | 1.000000 |
| rad59         | 3.63826e-22 | 1.000000 | 3.63826e-22 | 1.000000 |
| rad5          | 1.72330e-22 | 1.000000 | 1.72330e-22 | 1.000000 |
| rad50         | 2.88162e-23 | 1.000000 | 2.88162e-23 | 1.000000 |
| rad37         | 1.52133e-23 | 1.000000 | 1.52133e-23 | 1.000000 |
| rad19syn      | 9.49745e-29 | 1.000000 | 9.49745e-29 | 1.000000 |
| rad52         | 1.06111e-31 | 1.000000 | 1.06111e-31 | 1.000000 |
| rad54         | 3.95346e-32 | 1.000000 | 3.95346e-32 | 1.000000 |
| rad43         | 1.43730e-33 | 1.000000 | 1.43730e-33 | 1.000000 |
| rad62         | 1.18572e-34 | 1.000000 | 1.18572e-34 | 1.000000 |
| PAH10+CH3     | 1.09948e-34 | 1.000000 | 1.09948e-34 | 1.000000 |
| rad51         | 1.59962e-36 | 1.000000 | 1.59962e-36 | 1.000000 |
| rad70         | 2.57320e-38 | 1.000000 | 2.57320e-38 | 1.000000 |
| PhcycC3H3_A+H | 1.83235e-38 | 1.000000 | 1.83235e-38 | 1.000000 |
| rad55         | 8.64724e-39 | 1.000000 | 8.64724e-39 | 1.000000 |
| rad65         | 2.58150e-40 | 1.000000 | 2.58150e-40 | 1.000000 |
| rad58         | 8.93772e-42 | 1.000000 | 8.93772e-42 | 1.000000 |
| PAH1+H        | 5.65286e-43 | 1.000000 | 5.65286e-43 | 1.000000 |
| rad34         | 1.18092e-43 | 1.000000 | 1.18092e-43 | 1.000000 |
| rad47         | 1.42544e-45 | 1.000000 | 1.42544e-45 | 1.000000 |
| rad42         | 1.87901e-46 | 1.000000 | 1.87901e-46 | 1.000000 |
| rad41         | 6.83014e-47 | 1.000000 | 6.83014e-47 | 1.000000 |

100.000000 Pa, 90.000000 K

=====

| Rate constant      | True (fraction)        | Effective (fraction)   |
|--------------------|------------------------|------------------------|
| Total              | 3.08379e-22 (1.00 )    | 3.08379e-22 (1.00 )    |
| Formation of rad11 | 3.03962e-22 (0.986 )   | 3.03962e-22 (0.986 )   |
| Formation of rad6  | 4.41076e-24 (0.0143 )  | 4.41076e-24 (0.0143 )  |
| H-abstraction      | 5.92916e-27 (1.92e-05) | 5.92916e-27 (1.92e-05) |

| species            | PYtrue      | Cumul    | PYeffective | Cumul    |
|--------------------|-------------|----------|-------------|----------|
| rad6               | 0.770908    | 0.770908 | 0.770908    | 0.770908 |
| rad11              | 0.185497    | 0.956406 | 0.185497    | 0.956406 |
| Indene+H           | 0.0313733   | 0.987779 | 0.0313733   | 0.987779 |
| rad23              | 0.00665290  | 0.994432 | 0.00665290  | 0.994432 |
| rad22              | 0.00430137  | 0.998733 | 0.00430137  | 0.998733 |
| rad45              | 0.000621877 | 0.999355 | 0.000621877 | 0.999355 |
| C2H2+PhCH2         | 0.000323534 | 0.999679 | 0.000323534 | 0.999679 |
| rad7               | 0.000253567 | 0.999932 | 0.000253567 | 0.999932 |
| rad36              | 3.85641e-05 | 0.999971 | 3.85641e-05 | 0.999971 |
| Benzene+2-propynyl | 1.92269e-05 | 0.999990 | 1.92269e-05 | 0.999990 |
| rad18              | 3.32402e-06 | 0.999993 | 3.32402e-06 | 0.999993 |
| rad25              | 2.29423e-06 | 0.999996 | 2.29423e-06 | 0.999996 |
| PhCHCCH2+H         | 1.94988e-06 | 0.999998 | 1.94988e-06 | 0.999998 |
| rad13              | 1.11921e-06 | 0.999999 | 1.11921e-06 | 0.999999 |
| rad3               | 6.05035e-07 | 0.999999 | 6.05035e-07 | 0.999999 |
| rad20              | 3.88286e-07 | 1.000000 | 3.88286e-07 | 1.000000 |
| rad4               | 3.07016e-07 | 1.000000 | 3.07016e-07 | 1.000000 |

|               |             |         |             |         |
|---------------|-------------|---------|-------------|---------|
| rad21         | 2.41033e-07 | 1.00000 | 2.41033e-07 | 1.00000 |
| rad2          | 1.34669e-07 | 1.00000 | 1.34669e-07 | 1.00000 |
| rad9          | 1.15254e-07 | 1.00000 | 1.15254e-07 | 1.00000 |
| rad28         | 3.16899e-08 | 1.00000 | 3.16899e-08 | 1.00000 |
| rad30         | 1.67946e-08 | 1.00000 | 1.67946e-08 | 1.00000 |
| rad1          | 8.63445e-09 | 1.00000 | 8.63445e-09 | 1.00000 |
| Phenyl+Allene | 8.56286e-09 | 1.00000 | 0.00000     | 1.00000 |
| rad15         | 3.02676e-09 | 1.00000 | 3.02676e-09 | 1.00000 |
| rad10         | 1.73742e-09 | 1.00000 | 1.73742e-09 | 1.00000 |
| rad33         | 1.29042e-09 | 1.00000 | 1.29042e-09 | 1.00000 |
| PhCCH+CH3     | 1.09006e-09 | 1.00000 | 1.09006e-09 | 1.00000 |
| PAH9+H        | 9.10666e-11 | 1.00000 | 9.10666e-11 | 1.00000 |
| rad38         | 6.51248e-11 | 1.00000 | 6.51248e-11 | 1.00000 |
| rad35         | 4.97136e-11 | 1.00000 | 4.97136e-11 | 1.00000 |
| rad14         | 3.39325e-11 | 1.00000 | 3.39325e-11 | 1.00000 |
| rad8          | 1.71394e-11 | 1.00000 | 1.71394e-11 | 1.00000 |
| rad24         | 5.57257e-12 | 1.00000 | 5.57257e-12 | 1.00000 |
| PhCCCH3+H     | 1.27203e-12 | 1.00000 | 1.27203e-12 | 1.00000 |
| rad46         | 4.15866e-13 | 1.00000 | 4.15866e-13 | 1.00000 |
| rad26         | 3.95550e-13 | 1.00000 | 3.95550e-13 | 1.00000 |
| PhCH2CCH+H    | 2.01480e-13 | 1.00000 | 2.01480e-13 | 1.00000 |
| rad60syn      | 1.87325e-13 | 1.00000 | 1.87325e-13 | 1.00000 |
| rad27         | 1.85693e-13 | 1.00000 | 1.85693e-13 | 1.00000 |
| Ph+MeAc       | 1.69588e-13 | 1.00000 | 1.69588e-13 | 1.00000 |
| rad60anti     | 2.69828e-14 | 1.00000 | 2.69828e-14 | 1.00000 |
| PAH7+H        | 2.24222e-15 | 1.00000 | 2.24222e-15 | 1.00000 |
| rad39         | 2.21783e-16 | 1.00000 | 2.21783e-16 | 1.00000 |
| rad31         | 2.19336e-16 | 1.00000 | 2.19336e-16 | 1.00000 |
| rad12         | 2.92367e-20 | 1.00000 | 2.92367e-20 | 1.00000 |
| PAH3+H        | 6.54736e-21 | 1.00000 | 6.54736e-21 | 1.00000 |
| rad59         | 3.29427e-21 | 1.00000 | 3.29427e-21 | 1.00000 |
| rad5          | 1.11722e-21 | 1.00000 | 1.11722e-21 | 1.00000 |
| rad50         | 1.55187e-22 | 1.00000 | 1.55187e-22 | 1.00000 |
| rad37         | 1.06665e-22 | 1.00000 | 1.06665e-22 | 1.00000 |
| rad19syn      | 1.18755e-27 | 1.00000 | 1.18755e-27 | 1.00000 |
| rad52         | 9.40998e-31 | 1.00000 | 9.40998e-31 | 1.00000 |
| rad54         | 5.30922e-31 | 1.00000 | 5.30922e-31 | 1.00000 |
| rad43         | 2.37742e-32 | 1.00000 | 2.37742e-32 | 1.00000 |
| PAH10+CH3     | 2.02173e-33 | 1.00000 | 2.02173e-33 | 1.00000 |
| rad62         | 1.78830e-33 | 1.00000 | 1.78830e-33 | 1.00000 |
| rad51         | 1.68310e-35 | 1.00000 | 1.68310e-35 | 1.00000 |
| rad70         | 3.88832e-37 | 1.00000 | 3.88832e-37 | 1.00000 |
| PhcycC3H3_A+H | 2.79144e-37 | 1.00000 | 2.79144e-37 | 1.00000 |
| rad55         | 1.31073e-37 | 1.00000 | 1.31073e-37 | 1.00000 |
| rad65         | 2.93316e-39 | 1.00000 | 2.93316e-39 | 1.00000 |
| rad58         | 1.36971e-40 | 1.00000 | 1.36971e-40 | 1.00000 |
| PAH1+H        | 1.03137e-41 | 1.00000 | 1.03137e-41 | 1.00000 |
| rad34         | 1.96502e-42 | 1.00000 | 1.96502e-42 | 1.00000 |
| rad47         | 1.69154e-44 | 1.00000 | 1.69154e-44 | 1.00000 |
| rad42         | 4.43013e-45 | 1.00000 | 4.43013e-45 | 1.00000 |
| rad41         | 2.01548e-45 | 1.00000 | 2.01548e-45 | 1.00000 |

100.000000 Pa, 100.000000 K

=====

| Rate constant      | True (fraction)        | Effective (fraction)   |
|--------------------|------------------------|------------------------|
| Total              | 2.19347e-21 (1.00 )    | 2.19347e-21 (1.00 )    |
| Formation of rad11 | 2.14498e-21 (0.978 )   | 2.14498e-21 (0.978 )   |
| Formation of rad6  | 4.83503e-23 (0.0220 )  | 4.83503e-23 (0.0220 )  |
| H-abstraction      | 1.47101e-25 (6.71e-05) | 1.47101e-25 (6.71e-05) |

| species            | PYtrue      | Cumul    | PYeffective | Cumul    |
|--------------------|-------------|----------|-------------|----------|
| rad6               | 0.802217    | 0.802217 | 0.802217    | 0.802217 |
| rad11              | 0.152143    | 0.954360 | 0.152143    | 0.954360 |
| Indene+H           | 0.0335862   | 0.987946 | 0.0335862   | 0.987946 |
| rad23              | 0.00705958  | 0.995006 | 0.00705958  | 0.995006 |
| rad22              | 0.00363576  | 0.998642 | 0.00363576  | 0.998642 |
| rad45              | 0.000618981 | 0.999261 | 0.000618981 | 0.999261 |
| C2H2+PhCH2         | 0.000354642 | 0.999615 | 0.000354642 | 0.999615 |
| rad7               | 0.000269346 | 0.999885 | 0.000269346 | 0.999885 |
| Benzene+2-propynyl | 6.70630e-05 | 0.999952 | 6.70630e-05 | 0.999952 |
| rad36              | 3.83690e-05 | 0.999990 | 3.83690e-05 | 0.999990 |
| rad18              | 2.37227e-06 | 0.999992 | 2.37227e-06 | 0.999992 |
| PhCHCCH2+H         | 2.26469e-06 | 0.999995 | 2.26469e-06 | 0.999995 |
| rad25              | 1.97486e-06 | 0.999997 | 1.97486e-06 | 0.999997 |
| rad13              | 1.12876e-06 | 0.999998 | 1.12876e-06 | 0.999998 |
| rad3               | 7.42296e-07 | 0.999998 | 7.42296e-07 | 0.999998 |
| rad4               | 3.76996e-07 | 0.999999 | 3.76996e-07 | 0.999999 |
| rad20              | 2.71474e-07 | 0.999999 | 2.71474e-07 | 0.999999 |

|               |             |          |             |          |
|---------------|-------------|----------|-------------|----------|
| rad2          | 1.99846e-07 | 0.999999 | 1.99846e-07 | 0.999999 |
| rad21         | 1.68363e-07 | 0.999999 | 1.68363e-07 | 0.999999 |
| rad9          | 1.36943e-07 | 1.000000 | 1.36943e-07 | 1.000000 |
| rad28         | 4.19271e-08 | 1.000000 | 4.19271e-08 | 1.000000 |
| rad30         | 1.87939e-08 | 1.000000 | 1.87939e-08 | 1.000000 |
| Phenyl+Allene | 1.31181e-08 | 1.000000 | 0.000000    | 1.000000 |
| rad1          | 1.28561e-08 | 1.000000 | 1.28561e-08 | 1.000000 |
| rad15         | 3.43278e-09 | 1.000000 | 3.43278e-09 | 1.000000 |
| rad10         | 3.04583e-09 | 1.000000 | 3.04583e-09 | 1.000000 |
| PhCCH+CH3     | 1.83296e-09 | 1.000000 | 1.83296e-09 | 1.000000 |
| rad33         | 1.30183e-09 | 1.000000 | 1.30183e-09 | 1.000000 |
| PAH9+H        | 1.23507e-10 | 1.000000 | 1.23507e-10 | 1.000000 |
| rad38         | 8.07712e-11 | 1.000000 | 8.07712e-11 | 1.000000 |
| rad35         | 6.68398e-11 | 1.000000 | 6.68398e-11 | 1.000000 |
| rad14         | 4.70957e-11 | 1.000000 | 4.70958e-11 | 1.000000 |
| rad8          | 2.36959e-11 | 1.000000 | 2.36959e-11 | 1.000000 |
| rad24         | 5.50174e-12 | 1.000000 | 5.50174e-12 | 1.000000 |
| PhCCCH3+H     | 2.70025e-12 | 1.000000 | 2.70025e-12 | 1.000000 |
| rad26         | 9.24519e-13 | 1.000000 | 9.24519e-13 | 1.000000 |
| PhCH2CCH+H    | 8.83776e-13 | 1.000000 | 8.83776e-13 | 1.000000 |
| rad46         | 5.42749e-13 | 1.000000 | 5.42749e-13 | 1.000000 |
| Ph+MeAc       | 4.02191e-13 | 1.000000 | 4.02191e-13 | 1.000000 |
| rad27         | 2.77545e-13 | 1.000000 | 2.77545e-13 | 1.000000 |
| rad60syn      | 2.56238e-13 | 1.000000 | 2.56238e-13 | 1.000000 |
| rad60anti     | 4.31985e-14 | 1.000000 | 4.31985e-14 | 1.000000 |
| PAH7+H        | 6.04846e-15 | 1.000000 | 6.04846e-15 | 1.000000 |
| rad39         | 4.85993e-16 | 1.000000 | 4.85993e-16 | 1.000000 |
| rad31         | 2.78600e-16 | 1.000000 | 2.78600e-16 | 1.000000 |
| rad12         | 1.15332e-19 | 1.000000 | 1.15332e-19 | 1.000000 |
| PAH3+H        | 6.35207e-20 | 1.000000 | 6.35207e-20 | 1.000000 |
| rad59         | 3.08498e-20 | 1.000000 | 3.08498e-20 | 1.000000 |
| rad5          | 6.83624e-21 | 1.000000 | 6.83624e-21 | 1.000000 |
| rad50         | 9.28696e-22 | 1.000000 | 9.28696e-22 | 1.000000 |
| rad37         | 6.90603e-22 | 1.000000 | 6.90603e-22 | 1.000000 |
| rad19syn      | 2.62821e-26 | 1.000000 | 2.62821e-26 | 1.000000 |
| rad52         | 1.57702e-29 | 1.000000 | 1.57702e-29 | 1.000000 |
| rad54         | 1.52227e-29 | 1.000000 | 1.52227e-29 | 1.000000 |
| rad43         | 5.70572e-31 | 1.000000 | 5.70572e-31 | 1.000000 |
| rad62         | 5.33897e-32 | 1.000000 | 5.33897e-32 | 1.000000 |
| PAH10+CH3     | 5.15661e-32 | 1.000000 | 5.15661e-32 | 1.000000 |
| rad51         | 3.70021e-34 | 1.000000 | 3.70021e-34 | 1.000000 |
| rad70         | 1.32194e-35 | 1.000000 | 1.32194e-35 | 1.000000 |
| PhcycC3H3_A+H | 9.54138e-36 | 1.000000 | 9.54138e-36 | 1.000000 |
| rad55         | 4.45725e-36 | 1.000000 | 4.45725e-36 | 1.000000 |
| rad65         | 7.12728e-38 | 1.000000 | 7.12728e-38 | 1.000000 |
| rad58         | 4.71907e-39 | 1.000000 | 4.71907e-39 | 1.000000 |
| PAH1+H        | 4.09764e-40 | 1.000000 | 4.09764e-40 | 1.000000 |
| rad34         | 7.35680e-41 | 1.000000 | 7.35680e-41 | 1.000000 |
| rad47         | 4.48071e-43 | 1.000000 | 4.48071e-43 | 1.000000 |
| rad42         | 2.10548e-43 | 1.000000 | 2.10548e-43 | 1.000000 |
| rad41         | 1.06589e-43 | 1.000000 | 1.06589e-43 | 1.000000 |

100.000000 Pa, 110.000000 K

=====

| Rate constant      | True (fraction)        | Effective (fraction)   |
|--------------------|------------------------|------------------------|
| Total              | 1.09987e-20 (1.00 )    | 1.09987e-20 (1.00 )    |
| Formation of rad11 | 1.06527e-20 (0.969 )   | 1.06527e-20 (0.969 )   |
| Formation of rad6  | 3.44008e-22 (0.0313 )  | 3.44008e-22 (0.0313 )  |
| H-abstraction      | 2.02040e-24 (0.000184) | 2.02040e-24 (0.000184) |

| species            | PYtrue      | Cumul    | PYeffective | Cumul    |
|--------------------|-------------|----------|-------------|----------|
| rad6               | 0.827980    | 0.827980 | 0.827980    | 0.827980 |
| rad11              | 0.124633    | 0.952613 | 0.124633    | 0.952613 |
| Indene+H           | 0.0354460   | 0.988059 | 0.0354460   | 0.988059 |
| rad23              | 0.00737995  | 0.995439 | 0.00737995  | 0.995439 |
| rad22              | 0.00304678  | 0.998486 | 0.00304678  | 0.998486 |
| rad45              | 0.000615769 | 0.999101 | 0.000615769 | 0.999101 |
| C2H2+PhCH2         | 0.000385392 | 0.999487 | 0.000385392 | 0.999487 |
| rad7               | 0.000282004 | 0.999769 | 0.000282004 | 0.999769 |
| Benzene+2-propynyl | 0.000183695 | 0.999953 | 0.000183695 | 0.999953 |
| rad36              | 3.81609e-05 | 0.999991 | 3.81609e-05 | 0.999991 |
| PhCHCCH2+H         | 2.61353e-06 | 0.999993 | 2.61353e-06 | 0.999993 |
| rad18              | 1.71482e-06 | 0.999995 | 1.71482e-06 | 0.999995 |
| rad25              | 1.68767e-06 | 0.999997 | 1.68767e-06 | 0.999997 |
| rad13              | 1.13368e-06 | 0.999998 | 1.13368e-06 | 0.999998 |
| rad3               | 8.92597e-07 | 0.999999 | 8.92597e-07 | 0.999999 |
| rad4               | 4.53766e-07 | 0.999999 | 4.53766e-07 | 0.999999 |
| rad2               | 2.88955e-07 | 1.000000 | 2.88955e-07 | 1.000000 |

|               |             |          |             |          |
|---------------|-------------|----------|-------------|----------|
| rad20         | 1.93049e-07 | 1.000000 | 1.93049e-07 | 1.000000 |
| rad9          | 1.61713e-07 | 1.000000 | 1.61713e-07 | 1.000000 |
| rad21         | 1.19641e-07 | 1.000000 | 1.19641e-07 | 1.000000 |
| rad28         | 5.47468e-08 | 1.000000 | 5.47468e-08 | 1.000000 |
| rad30         | 2.08513e-08 | 1.000000 | 2.08513e-08 | 1.000000 |
| Phenyl+Allene | 1.96645e-08 | 1.000000 | 0.000000    | 1.000000 |
| rad1          | 1.86565e-08 | 1.000000 | 1.86565e-08 | 1.000000 |
| rad10         | 5.15340e-09 | 1.000000 | 5.15340e-09 | 1.000000 |
| rad15         | 3.86170e-09 | 1.000000 | 3.86170e-09 | 1.000000 |
| PhCCH+CH3     | 3.02016e-09 | 1.000000 | 3.02016e-09 | 1.000000 |
| rad33         | 1.30853e-09 | 1.000000 | 1.30853e-09 | 1.000000 |
| PAH9+H        | 1.63733e-10 | 1.000000 | 1.63733e-10 | 1.000000 |
| rad38         | 9.90653e-11 | 1.000000 | 9.90653e-11 | 1.000000 |
| rad35         | 8.77935e-11 | 1.000000 | 8.77935e-11 | 1.000000 |
| rad14         | 6.31503e-11 | 1.000000 | 6.31503e-11 | 1.000000 |
| rad8          | 3.24859e-11 | 1.000000 | 3.24859e-11 | 1.000000 |
| PhCCCH3+H     | 5.59306e-12 | 1.000000 | 5.59306e-12 | 1.000000 |
| rad24         | 5.44200e-12 | 1.000000 | 5.44200e-12 | 1.000000 |
| PhCH2CCH+H    | 3.29257e-12 | 1.000000 | 3.29257e-12 | 1.000000 |
| rad26         | 2.08210e-12 | 1.000000 | 2.08210e-12 | 1.000000 |
| Ph+MeAc       | 9.19697e-13 | 1.000000 | 9.19697e-13 | 1.000000 |
| rad46         | 7.02505e-13 | 1.000000 | 7.02505e-13 | 1.000000 |
| rad27         | 4.03246e-13 | 1.000000 | 4.03246e-13 | 1.000000 |
| rad60syn      | 3.47857e-13 | 1.000000 | 3.47857e-13 | 1.000000 |
| rad60anti     | 6.65068e-14 | 1.000000 | 6.65068e-14 | 1.000000 |
| PAH7+H        | 1.74264e-14 | 1.000000 | 1.74264e-14 | 1.000000 |
| rad39         | 1.05031e-15 | 1.000000 | 1.05031e-15 | 1.000000 |
| rad31         | 3.48021e-16 | 1.000000 | 3.48021e-16 | 1.000000 |
| PAH3+H        | 4.82681e-19 | 1.000000 | 4.82681e-19 | 1.000000 |
| rad12         | 4.37093e-19 | 1.000000 | 4.37093e-19 | 1.000000 |
| rad59         | 2.24962e-19 | 1.000000 | 2.24962e-19 | 1.000000 |
| rad5          | 3.77840e-20 | 1.000000 | 3.77840e-20 | 1.000000 |
| rad50         | 5.17809e-21 | 1.000000 | 5.17809e-21 | 1.000000 |
| rad37         | 4.05867e-21 | 1.000000 | 4.05867e-21 | 1.000000 |
| rad19syn      | 6.75272e-25 | 1.000000 | 6.75272e-25 | 1.000000 |
| rad54         | 6.48994e-28 | 1.000000 | 6.48994e-28 | 1.000000 |
| rad52         | 3.58173e-28 | 1.000000 | 3.58173e-28 | 1.000000 |
| rad43         | 1.68848e-29 | 1.000000 | 1.68848e-29 | 1.000000 |
| rad62         | 2.57845e-30 | 1.000000 | 2.57845e-30 | 1.000000 |
| PAH10+CH3     | 1.59734e-30 | 1.000000 | 1.59734e-30 | 1.000000 |
| rad51         | 1.68730e-32 | 1.000000 | 1.68730e-32 | 1.000000 |
| rad70         | 1.02324e-33 | 1.000000 | 1.02324e-33 | 1.000000 |
| PhcycC3H3_A+H | 7.35203e-34 | 1.000000 | 7.35203e-34 | 1.000000 |
| rad55         | 3.41723e-34 | 1.000000 | 3.41723e-34 | 1.000000 |
| rad65         | 3.62275e-36 | 1.000000 | 3.62275e-36 | 1.000000 |
| rad58         | 3.68711e-37 | 1.000000 | 3.68711e-37 | 1.000000 |
| PAH1+H        | 3.49855e-38 | 1.000000 | 3.49855e-38 | 1.000000 |
| rad34         | 6.22332e-39 | 1.000000 | 6.22332e-39 | 1.000000 |
| rad47         | 2.59918e-41 | 1.000000 | 2.59918e-41 | 1.000000 |
| rad42         | 1.80640e-41 | 1.000000 | 1.80640e-41 | 1.000000 |
| rad41         | 9.16986e-42 | 1.000000 | 9.16986e-42 | 1.000000 |

100.000000 Pa, 120.000000 K

=====

| Rate constant      | True (fraction)        | Effective (fraction)   |
|--------------------|------------------------|------------------------|
| Total              | 4.24245e-20 (1.00 )    | 4.24245e-20 (1.00 )    |
| Formation of rad11 | 4.06372e-20 (0.958 )   | 4.06372e-20 (0.958 )   |
| Formation of rad6  | 1.76944e-21 (0.0417 )  | 1.76944e-21 (0.0417 )  |
| H-abstraction      | 1.78210e-23 (0.000420) | 1.78210e-23 (0.000420) |

| species            | PYtrue      | Cumul    | PYeffective | Cumul    |
|--------------------|-------------|----------|-------------|----------|
| rad6               | 0.849114    | 0.849114 | 0.849114    | 0.849114 |
| rad11              | 0.101939    | 0.951053 | 0.101939    | 0.951053 |
| Indene+H           | 0.0369993   | 0.988053 | 0.0369993   | 0.988053 |
| rad23              | 0.00762519  | 0.995678 | 0.00762519  | 0.995678 |
| rad22              | 0.00253493  | 0.998213 | 0.00253493  | 0.998213 |
| rad45              | 0.000611673 | 0.998824 | 0.000611673 | 0.998824 |
| Benzene+2-propynyl | 0.000420064 | 0.999244 | 0.000420064 | 0.999244 |
| C2H2+PhCH2         | 0.000416154 | 0.999661 | 0.000416154 | 0.999661 |
| rad7               | 0.000291994 | 0.999953 | 0.000291994 | 0.999953 |
| rad36              | 3.79052e-05 | 0.999990 | 3.79052e-05 | 0.999990 |
| PhCHCCH2+H         | 3.00331e-06 | 0.999993 | 3.00331e-06 | 0.999993 |
| rad25              | 1.43334e-06 | 0.999995 | 1.43334e-06 | 0.999995 |
| rad18              | 1.25201e-06 | 0.999996 | 1.25201e-06 | 0.999996 |
| rad13              | 1.13500e-06 | 0.999997 | 1.13500e-06 | 0.999997 |
| rad3               | 1.05530e-06 | 0.999998 | 1.05530e-06 | 0.999998 |
| rad4               | 5.37043e-07 | 0.999999 | 5.37043e-07 | 0.999999 |
| rad2               | 4.08919e-07 | 0.999999 | 4.08919e-07 | 0.999999 |

|               |             |          |             |          |
|---------------|-------------|----------|-------------|----------|
| rad9          | 1.90176e-07 | 1.000000 | 1.90176e-07 | 1.000000 |
| rad20         | 1.39134e-07 | 1.000000 | 1.39134e-07 | 1.000000 |
| rad21         | 8.61834e-08 | 1.000000 | 8.61834e-08 | 1.000000 |
| rad28         | 7.07834e-08 | 1.000000 | 7.07834e-08 | 1.000000 |
| Phenyl+Allene | 2.89256e-08 | 1.000000 | 0.000000    | 1.000000 |
| rad1          | 2.65072e-08 | 1.000000 | 2.65072e-08 | 1.000000 |
| rad30         | 2.29934e-08 | 1.000000 | 2.29934e-08 | 1.000000 |
| rad10         | 8.45827e-09 | 1.000000 | 8.45827e-09 | 1.000000 |
| PhCCH+CH3     | 4.88902e-09 | 1.000000 | 4.88902e-09 | 1.000000 |
| rad15         | 4.32000e-09 | 1.000000 | 4.32000e-09 | 1.000000 |
| rad33         | 1.31157e-09 | 1.000000 | 1.31157e-09 | 1.000000 |
| PAH9+H        | 2.13541e-10 | 1.000000 | 2.13541e-10 | 1.000000 |
| rad38         | 1.20649e-10 | 1.000000 | 1.20649e-10 | 1.000000 |
| rad35         | 1.13377e-10 | 1.000000 | 1.13377e-10 | 1.000000 |
| rad14         | 8.21780e-11 | 1.000000 | 8.21780e-11 | 1.000000 |
| rad8          | 4.42675e-11 | 1.000000 | 4.42675e-11 | 1.000000 |
| PhCCCH3+H     | 1.13411e-11 | 1.000000 | 1.13411e-11 | 1.000000 |
| PhCH2CCH+H    | 1.04692e-11 | 1.000000 | 1.04692e-11 | 1.000000 |
| rad24         | 5.38526e-12 | 1.000000 | 5.38526e-12 | 1.000000 |
| rad26         | 4.53959e-12 | 1.000000 | 4.53959e-12 | 1.000000 |
| Ph+MeAc       | 2.03439e-12 | 1.000000 | 2.03439e-12 | 1.000000 |
| rad46         | 9.05645e-13 | 1.000000 | 9.05645e-13 | 1.000000 |
| rad27         | 5.72339e-13 | 1.000000 | 5.72339e-13 | 1.000000 |
| rad60syn      | 4.69602e-13 | 1.000000 | 4.69602e-13 | 1.000000 |
| rad60anti     | 9.94387e-14 | 1.000000 | 9.94387e-14 | 1.000000 |
| PAH7+H        | 4.95503e-14 | 1.000000 | 4.95503e-14 | 1.000000 |
| rad39         | 2.24260e-15 | 1.000000 | 2.24260e-15 | 1.000000 |
| rad31         | 4.28939e-16 | 1.000000 | 4.28939e-16 | 1.000000 |
| PAH3+H        | 2.79681e-18 | 1.000000 | 2.79681e-18 | 1.000000 |
| rad12         | 1.59815e-18 | 1.000000 | 1.59815e-18 | 1.000000 |
| rad59         | 1.24883e-18 | 1.000000 | 1.24883e-18 | 1.000000 |
| rad5          | 1.86282e-19 | 1.000000 | 1.86282e-19 | 1.000000 |
| rad50         | 2.49579e-20 | 1.000000 | 2.49579e-20 | 1.000000 |
| rad37         | 2.16621e-20 | 1.000000 | 2.16621e-20 | 1.000000 |
| rad19syn      | 1.37439e-23 | 1.000000 | 1.37439e-23 | 1.000000 |
| rad54         | 2.26168e-26 | 1.000000 | 2.26168e-26 | 1.000000 |
| rad52         | 6.99033e-27 | 1.000000 | 6.99033e-27 | 1.000000 |
| rad43         | 4.69388e-28 | 1.000000 | 4.69388e-28 | 1.000000 |
| rad62         | 1.14693e-28 | 1.000000 | 1.14693e-28 | 1.000000 |
| PAH10+CH3     | 4.77988e-29 | 1.000000 | 4.77988e-29 | 1.000000 |
| rad51         | 9.71664e-31 | 1.000000 | 9.71664e-31 | 1.000000 |
| rad70         | 1.32465e-31 | 1.000000 | 1.32465e-31 | 1.000000 |
| PhcycC3H3_A+H | 9.50482e-32 | 1.000000 | 9.50482e-32 | 1.000000 |
| rad55         | 4.47159e-32 | 1.000000 | 4.47159e-32 | 1.000000 |
| rad65         | 2.84623e-34 | 1.000000 | 2.84623e-34 | 1.000000 |
| rad58         | 5.05239e-35 | 1.000000 | 5.05239e-35 | 1.000000 |
| PAH1+H        | 4.56418e-36 | 1.000000 | 4.56418e-36 | 1.000000 |
| rad34         | 8.57539e-37 | 1.000000 | 8.57539e-37 | 1.000000 |
| rad47         | 2.45167e-39 | 1.000000 | 2.45167e-39 | 1.000000 |
| rad42         | 2.18616e-39 | 1.000000 | 2.18616e-39 | 1.000000 |
| rad41         | 1.03123e-39 | 1.000000 | 1.03123e-39 | 1.000000 |

100.000000 Pa, 130.000000 K

=====

| Rate constant      | True (fraction)        | Effective (fraction)   |
|--------------------|------------------------|------------------------|
| Total              | 1.33719e-19 (1.00 )    | 1.33719e-19 (1.00 )    |
| Formation of rad11 | 1.26517e-19 (0.946 )   | 1.26517e-19 (0.946 )   |
| Formation of rad6  | 7.08974e-21 (0.0530 )  | 7.08974e-21 (0.0530 )  |
| H-abstraction      | 1.11864e-22 (0.000837) | 1.11864e-22 (0.000837) |

| species            | PYtrue      | Cumul    | PYeffective | Cumul    |
|--------------------|-------------|----------|-------------|----------|
| rad6               | 0.866340    | 0.866340 | 0.866340    | 0.866340 |
| rad11              | 0.0832316   | 0.949571 | 0.0832316   | 0.949571 |
| Indene+H           | 0.0382899   | 0.987861 | 0.0382899   | 0.987861 |
| rad23              | 0.00780510  | 0.995666 | 0.00780510  | 0.995666 |
| rad22              | 0.00209620  | 0.997763 | 0.00209620  | 0.997763 |
| Benzene+2-propynyl | 0.000836559 | 0.998599 | 0.000836559 | 0.998599 |
| rad45              | 0.000606404 | 0.999205 | 0.000606404 | 0.999205 |
| C2H2+PhCH2         | 0.000447289 | 0.999653 | 0.000447289 | 0.999653 |
| rad7               | 0.000299711 | 0.999952 | 0.000299711 | 0.999952 |
| rad36              | 3.75841e-05 | 0.999990 | 3.75841e-05 | 0.999990 |
| PhCHCCH2+H         | 3.44185e-06 | 0.999993 | 3.44185e-06 | 0.999993 |
| rad3               | 1.22929e-06 | 0.999995 | 1.22929e-06 | 0.999995 |
| rad25              | 1.21077e-06 | 0.999996 | 1.21077e-06 | 0.999996 |
| rad13              | 1.13347e-06 | 0.999997 | 1.13347e-06 | 0.999997 |
| rad18              | 9.21391e-07 | 0.999998 | 9.21391e-07 | 0.999998 |
| rad4               | 6.26320e-07 | 0.999999 | 6.26320e-07 | 0.999999 |
| rad2               | 5.68145e-07 | 0.999999 | 5.68145e-07 | 0.999999 |

|               |             |          |             |          |
|---------------|-------------|----------|-------------|----------|
| rad9          | 2.23039e-07 | 0.999999 | 2.23039e-07 | 0.999999 |
| rad20         | 1.01371e-07 | 1.000000 | 1.01371e-07 | 1.000000 |
| rad28         | 9.08256e-08 | 1.000000 | 9.08256e-08 | 1.000000 |
| rad21         | 6.27691e-08 | 1.000000 | 6.27691e-08 | 1.000000 |
| Phenyl+Allene | 4.18477e-08 | 1.000000 | 0.000000    | 1.000000 |
| rad1          | 3.69883e-08 | 1.000000 | 3.69883e-08 | 1.000000 |
| rad30         | 2.52486e-08 | 1.000000 | 2.52486e-08 | 1.000000 |
| rad10         | 1.35131e-08 | 1.000000 | 1.35131e-08 | 1.000000 |
| PhCCH+CH3     | 7.79008e-09 | 1.000000 | 7.79008e-09 | 1.000000 |
| rad15         | 4.81475e-09 | 1.000000 | 4.81475e-09 | 1.000000 |
| rad33         | 1.31172e-09 | 1.000000 | 1.31172e-09 | 1.000000 |
| PAH9+H        | 2.75265e-10 | 1.000000 | 2.75265e-10 | 1.000000 |
| rad38         | 1.46346e-10 | 1.000000 | 1.46346e-10 | 1.000000 |
| rad35         | 1.44623e-10 | 1.000000 | 1.44623e-10 | 1.000000 |
| rad14         | 1.04135e-10 | 1.000000 | 1.04135e-10 | 1.000000 |
| rad8          | 6.00557e-11 | 1.000000 | 6.00557e-11 | 1.000000 |
| PhCH2CCH+H    | 2.90769e-11 | 1.000000 | 2.90769e-11 | 1.000000 |
| PhCCCH3+H     | 2.25731e-11 | 1.000000 | 2.25731e-11 | 1.000000 |
| rad26         | 9.61602e-12 | 1.000000 | 9.61602e-12 | 1.000000 |
| rad24         | 5.32690e-12 | 1.000000 | 5.32690e-12 | 1.000000 |
| Ph+MeAc       | 4.37110e-12 | 1.000000 | 4.37110e-12 | 1.000000 |
| rad46         | 1.16643e-12 | 1.000000 | 1.16643e-12 | 1.000000 |
| rad27         | 7.96311e-13 | 1.000000 | 7.96311e-13 | 1.000000 |
| rad60syn      | 6.31095e-13 | 1.000000 | 6.31095e-13 | 1.000000 |
| rad60anti     | 1.45400e-13 | 1.000000 | 1.45400e-13 | 1.000000 |
| PAH7+H        | 1.32147e-13 | 1.000000 | 1.32147e-13 | 1.000000 |
| rad39         | 4.74336e-15 | 1.000000 | 4.74336e-15 | 1.000000 |
| rad31         | 5.22828e-16 | 1.000000 | 5.22828e-16 | 1.000000 |
| PAH3+H        | 1.28229e-17 | 1.000000 | 1.28229e-17 | 1.000000 |
| rad12         | 5.65471e-18 | 1.000000 | 5.65471e-18 | 1.000000 |
| rad59         | 5.48617e-18 | 1.000000 | 5.48617e-18 | 1.000000 |
| rad5          | 8.22580e-19 | 1.000000 | 8.22580e-19 | 1.000000 |
| rad37         | 1.05842e-19 | 1.000000 | 1.05842e-19 | 1.000000 |
| rad50         | 1.03194e-19 | 1.000000 | 1.03194e-19 | 1.000000 |
| rad19syn      | 2.01368e-22 | 1.000000 | 2.01368e-22 | 1.000000 |
| rad54         | 5.35333e-25 | 1.000000 | 5.35333e-25 | 1.000000 |
| rad52         | 1.00573e-25 | 1.000000 | 1.00573e-25 | 1.000000 |
| rad43         | 1.02982e-26 | 1.000000 | 1.02982e-26 | 1.000000 |
| rad62         | 3.53803e-27 | 1.000000 | 3.53803e-27 | 1.000000 |
| PAH10+CH3     | 1.17420e-27 | 1.000000 | 1.17420e-27 | 1.000000 |
| rad70         | 4.15189e-29 | 1.000000 | 4.15189e-29 | 1.000000 |
| rad51         | 3.42210e-29 | 1.000000 | 3.42210e-29 | 1.000000 |
| PhcycC3H3_A+H | 7.61673e-30 | 1.000000 | 7.61673e-30 | 1.000000 |
| rad55         | 3.27482e-30 | 1.000000 | 3.27482e-30 | 1.000000 |
| rad65         | 2.26562e-32 | 1.000000 | 2.26562e-32 | 1.000000 |
| rad58         | 1.28005e-32 | 1.000000 | 1.28005e-32 | 1.000000 |
| PAH1+H        | 5.83257e-34 | 1.000000 | 5.83257e-34 | 1.000000 |
| rad34         | 1.25005e-34 | 1.000000 | 1.25005e-34 | 1.000000 |
| rad42         | 2.72459e-37 | 1.000000 | 2.72459e-37 | 1.000000 |
| rad47         | 2.66189e-37 | 1.000000 | 2.66189e-37 | 1.000000 |
| rad41         | 1.13631e-37 | 1.000000 | 1.13631e-37 | 1.000000 |

100.000000 Pa, 140.000000 K

=====

| Rate constant      | True (fraction)        | Effective (fraction)   |
|--------------------|------------------------|------------------------|
| Total              | 3.59582e-19 (1.00 )    | 3.59582e-19 (1.00 )    |
| Formation of rad11 | 3.35703e-19 (0.934 )   | 3.35703e-19 (0.934 )   |
| Formation of rad6  | 2.33415e-20 (0.0649 )  | 2.33415e-20 (0.0649 )  |
| H-abstraction      | 5.37685e-22 (0.00150 ) | 5.37685e-22 (0.00150 ) |

| species            | PYtrue      | Cumul    | PYeffective | Cumul    |
|--------------------|-------------|----------|-------------|----------|
| rad6               | 0.880230    | 0.880230 | 0.880230    | 0.880230 |
| rad11              | 0.0678317   | 0.948062 | 0.0678317   | 0.948062 |
| Indene+H           | 0.0393589   | 0.987420 | 0.0393589   | 0.987420 |
| rad23              | 0.00792822  | 0.995349 | 0.00792822  | 0.995349 |
| rad22              | 0.00172426  | 0.997073 | 0.00172426  | 0.997073 |
| Benzene+2-propynyl | 0.00149531  | 0.998568 | 0.00149531  | 0.998568 |
| rad45              | 0.000599849 | 0.999168 | 0.000599849 | 0.999168 |
| C2H2+PhCH2         | 0.000479148 | 0.999647 | 0.000479148 | 0.999647 |
| rad7               | 0.000305494 | 0.999953 | 0.000305494 | 0.999953 |
| rad36              | 3.71913e-05 | 0.999990 | 3.71913e-05 | 0.999990 |
| PhCHCCH2+H         | 3.93813e-06 | 0.999994 | 3.93814e-06 | 0.999994 |
| rad3               | 1.41308e-06 | 0.999995 | 1.41308e-06 | 0.999995 |
| rad13              | 1.12967e-06 | 0.999996 | 1.12967e-06 | 0.999996 |
| rad25              | 1.01787e-06 | 0.999997 | 1.01787e-06 | 0.999997 |
| rad2               | 7.76760e-07 | 0.999998 | 7.76760e-07 | 0.999998 |
| rad4               | 7.20877e-07 | 0.999999 | 7.20877e-07 | 0.999999 |
| rad18              | 6.82431e-07 | 1.000000 | 6.82431e-07 | 1.000000 |



|               |             |          |             |          |
|---------------|-------------|----------|-------------|----------|
| rad9          | 2.61125e-07 | 1.000000 | 2.61125e-07 | 1.000000 |
| rad28         | 1.15864e-07 | 1.000000 | 1.15864e-07 | 1.000000 |
| rad20         | 7.45200e-08 | 1.000000 | 7.45200e-08 | 1.000000 |
| Phenyl+Allene | 5.96596e-08 | 1.000000 | 0.000000    | 1.000000 |
| rad1          | 5.08087e-08 | 1.000000 | 5.08087e-08 | 1.000000 |
| rad21         | 4.61318e-08 | 1.000000 | 4.61318e-08 | 1.000000 |
| rad30         | 2.76462e-08 | 1.000000 | 2.76462e-08 | 1.000000 |
| rad10         | 2.10668e-08 | 1.000000 | 2.10668e-08 | 1.000000 |
| PhCCH+CH3     | 1.22365e-08 | 1.000000 | 1.22365e-08 | 1.000000 |
| rad15         | 5.35367e-09 | 1.000000 | 5.35367e-09 | 1.000000 |
| rad33         | 1.30959e-09 | 1.000000 | 1.30959e-09 | 1.000000 |
| PAH9+H        | 3.51915e-10 | 1.000000 | 3.51915e-10 | 1.000000 |
| rad35         | 1.82846e-10 | 1.000000 | 1.82846e-10 | 1.000000 |
| rad38         | 1.77203e-10 | 1.000000 | 1.77203e-10 | 1.000000 |
| rad14         | 1.28851e-10 | 1.000000 | 1.28851e-10 | 1.000000 |
| rad8          | 8.12091e-11 | 1.000000 | 8.12091e-11 | 1.000000 |
| PhCH2CCH+H    | 7.22228e-11 | 1.000000 | 7.22228e-11 | 1.000000 |
| PhCCCH3+H     | 4.42040e-11 | 1.000000 | 4.42040e-11 | 1.000000 |
| rad26         | 1.98443e-11 | 1.000000 | 1.98443e-11 | 1.000000 |
| Ph+MeAc       | 9.15983e-12 | 1.000000 | 9.15983e-12 | 1.000000 |
| rad24         | 5.26444e-12 | 1.000000 | 5.26444e-12 | 1.000000 |
| rad46         | 1.50422e-12 | 1.000000 | 1.50422e-12 | 1.000000 |
| rad27         | 1.08887e-12 | 1.000000 | 1.08887e-12 | 1.000000 |
| rad60syn      | 8.44778e-13 | 1.000000 | 8.44778e-13 | 1.000000 |
| PAH7+H        | 3.25215e-13 | 1.000000 | 3.25215e-13 | 1.000000 |
| rad60anti     | 2.08939e-13 | 1.000000 | 2.08939e-13 | 1.000000 |
| rad39         | 9.96569e-15 | 1.000000 | 9.96569e-15 | 1.000000 |
| rad31         | 6.31345e-16 | 1.000000 | 6.31345e-16 | 1.000000 |
| PAH3+H        | 4.85236e-17 | 1.000000 | 4.85236e-17 | 1.000000 |
| rad59         | 1.99131e-17 | 1.000000 | 1.99131e-17 | 1.000000 |
| rad12         | 1.93896e-17 | 1.000000 | 1.93896e-17 | 1.000000 |
| rad5          | 3.28757e-18 | 1.000000 | 3.28757e-18 | 1.000000 |
| rad37         | 4.78033e-19 | 1.000000 | 4.78033e-19 | 1.000000 |
| rad50         | 3.71908e-19 | 1.000000 | 3.71908e-19 | 1.000000 |
| rad19syn      | 2.16418e-21 | 1.000000 | 2.16418e-21 | 1.000000 |
| rad54         | 8.72090e-24 | 1.000000 | 8.72090e-24 | 1.000000 |
| rad52         | 1.06607e-24 | 1.000000 | 1.06607e-24 | 1.000000 |
| rad43         | 1.70180e-25 | 1.000000 | 1.70180e-25 | 1.000000 |
| rad62         | 7.42921e-26 | 1.000000 | 7.42921e-26 | 1.000000 |
| PAH10+CH3     | 2.24262e-26 | 1.000000 | 2.24262e-26 | 1.000000 |
| rad70         | 2.57311e-27 | 1.000000 | 2.57311e-27 | 1.000000 |
| rad51         | 7.80133e-28 | 1.000000 | 7.80133e-28 | 1.000000 |
| PhcycC3H3_A+H | 3.52391e-28 | 1.000000 | 3.52391e-28 | 1.000000 |
| rad55         | 1.39244e-28 | 1.000000 | 1.39244e-28 | 1.000000 |
| rad58         | 1.26817e-30 | 1.000000 | 1.26817e-30 | 1.000000 |
| rad65         | 8.34570e-31 | 1.000000 | 8.34570e-31 | 1.000000 |
| PAH1+H        | 7.05501e-32 | 1.000000 | 7.05501e-32 | 1.000000 |
| rad34         | 2.73444e-32 | 1.000000 | 2.73444e-32 | 1.000000 |
| rad42         | 4.82590e-35 | 1.000000 | 4.82590e-35 | 1.000000 |
| rad47         | 2.99898e-35 | 1.000000 | 2.99898e-35 | 1.000000 |
| rad41         | 1.40832e-35 | 1.000000 | 1.40832e-35 | 1.000000 |

100.000000 Pa, 150.000000 K

=====

| Rate constant      | True (fraction)        | Effective (fraction)   |
|--------------------|------------------------|------------------------|
| Total              | 8.51464e-19 (1.00 )    | 8.51464e-19 (1.00 )    |
| Formation of rad11 | 7.83711e-19 (0.920 )   | 7.83711e-19 (0.920 )   |
| Formation of rad6  | 6.56651e-20 (0.0771 )  | 6.56651e-20 (0.0771 )  |
| H-abstraction      | 2.08816e-21 (0.00245 ) | 2.08816e-21 (0.00245 ) |

| species            | PYtrue      | Cumul    | PYeffective | Cumul    |
|--------------------|-------------|----------|-------------|----------|
| rad6               | 0.891253    | 0.891253 | 0.891253    | 0.891253 |
| rad11              | 0.0551768   | 0.946430 | 0.0551768   | 0.946430 |
| Indene+H           | 0.0402426   | 0.986672 | 0.0402426   | 0.986672 |
| rad23              | 0.00800186  | 0.994674 | 0.00800186  | 0.994674 |
| Benzene+2-propynyl | 0.00245244  | 0.997127 | 0.00245244  | 0.997127 |
| rad22              | 0.00141177  | 0.998538 | 0.00141177  | 0.998538 |
| rad45              | 0.000591996 | 0.999130 | 0.000591996 | 0.999130 |
| C2H2+PhCH2         | 0.000512080 | 0.999642 | 0.000512080 | 0.999642 |
| rad7               | 0.000309640 | 0.999952 | 0.000309640 | 0.999952 |
| rad36              | 3.67264e-05 | 0.999989 | 3.67264e-05 | 0.999989 |
| PhCHCCH2+H         | 4.50240e-06 | 0.999993 | 4.50240e-06 | 0.999993 |
| rad3               | 1.60478e-06 | 0.999995 | 1.60479e-06 | 0.999995 |
| rad13              | 1.12403e-06 | 0.999996 | 1.12403e-06 | 0.999996 |
| rad2               | 1.04688e-06 | 0.999997 | 1.04688e-06 | 0.999997 |
| rad25              | 8.52021e-07 | 0.999998 | 8.52021e-07 | 0.999998 |
| rad4               | 8.19820e-07 | 0.999999 | 8.19820e-07 | 0.999999 |
| rad18              | 5.08110e-07 | 0.999999 | 5.08110e-07 | 0.999999 |

|               |             |          |             |          |
|---------------|-------------|----------|-------------|----------|
| rad9          | 3.05389e-07 | 1.000000 | 3.05389e-07 | 1.000000 |
| rad28         | 1.47154e-07 | 1.000000 | 1.47155e-07 | 1.000000 |
| Phenyl+Allene | 8.39473e-08 | 1.000000 | 0.00000     | 1.000000 |
| rad1          | 6.88294e-08 | 1.000000 | 6.88294e-08 | 1.000000 |
| rad20         | 5.51928e-08 | 1.000000 | 5.51928e-08 | 1.000000 |
| rad21         | 3.41624e-08 | 1.000000 | 3.41624e-08 | 1.000000 |
| rad10         | 3.21109e-08 | 1.000000 | 3.21109e-08 | 1.000000 |
| rad30         | 3.02179e-08 | 1.000000 | 3.02179e-08 | 1.000000 |
| PhCCH+CH3     | 1.89740e-08 | 1.000000 | 1.89740e-08 | 1.000000 |
| rad15         | 5.94535e-09 | 1.000000 | 5.94535e-09 | 1.000000 |
| rad33         | 1.30563e-09 | 1.000000 | 1.30563e-09 | 1.000000 |
| PAH9+H        | 4.47358e-10 | 1.000000 | 4.47358e-10 | 1.000000 |
| rad35         | 2.29712e-10 | 1.000000 | 2.29712e-10 | 1.000000 |
| rad38         | 2.14550e-10 | 1.000000 | 2.14550e-10 | 1.000000 |
| PhCH2CCH+H    | 1.63667e-10 | 1.000000 | 1.63667e-10 | 1.000000 |
| rad14         | 1.56040e-10 | 1.000000 | 1.56040e-10 | 1.000000 |
| rad8          | 1.09549e-10 | 1.000000 | 1.09549e-10 | 1.000000 |
| PhCCCH3+H     | 8.53295e-11 | 1.000000 | 8.53296e-11 | 1.000000 |
| rad26         | 3.99810e-11 | 1.000000 | 3.99810e-11 | 1.000000 |
| Ph+MeAc       | 1.87882e-11 | 1.000000 | 1.87882e-11 | 1.000000 |
| rad24         | 5.19664e-12 | 1.000000 | 5.19664e-12 | 1.000000 |
| rad46         | 1.94531e-12 | 1.000000 | 1.94531e-12 | 1.000000 |
| rad27         | 1.46627e-12 | 1.000000 | 1.46627e-12 | 1.000000 |
| rad60syn      | 1.12672e-12 | 1.000000 | 1.12672e-12 | 1.000000 |
| PAH7+H        | 7.40163e-13 | 1.000000 | 7.40163e-13 | 1.000000 |
| rad60anti     | 2.96084e-13 | 1.000000 | 2.96084e-13 | 1.000000 |
| rad39         | 2.08442e-14 | 1.000000 | 2.08442e-14 | 1.000000 |
| rad31         | 7.56397e-16 | 1.000000 | 7.56397e-16 | 1.000000 |
| PAH3+H        | 1.57135e-16 | 1.000000 | 1.57135e-16 | 1.000000 |
| rad12         | 6.44406e-17 | 1.000000 | 6.44406e-17 | 1.000000 |
| rad59         | 6.19458e-17 | 1.000000 | 6.19458e-17 | 1.000000 |
| rad5          | 1.20324e-17 | 1.000000 | 1.20324e-17 | 1.000000 |
| rad37         | 2.01316e-18 | 1.000000 | 2.01316e-18 | 1.000000 |
| rad50         | 1.19268e-18 | 1.000000 | 1.19268e-18 | 1.000000 |
| rad19syn      | 1.78115e-20 | 1.000000 | 1.78115e-20 | 1.000000 |
| rad54         | 1.02857e-22 | 1.000000 | 1.02857e-22 | 1.000000 |
| rad52         | 8.64310e-24 | 1.000000 | 8.64310e-24 | 1.000000 |
| rad43         | 2.14167e-24 | 1.000000 | 2.14167e-24 | 1.000000 |
| rad62         | 1.10665e-24 | 1.000000 | 1.10665e-24 | 1.000000 |
| PAH10+CH3     | 3.32991e-25 | 1.000000 | 3.32991e-25 | 1.000000 |
| rad70         | 7.20797e-26 | 1.000000 | 7.20797e-26 | 1.000000 |
| rad51         | 1.23283e-26 | 1.000000 | 1.23283e-26 | 1.000000 |
| PhcycC3H3_A+H | 9.65325e-27 | 1.000000 | 9.65325e-27 | 1.000000 |
| rad55         | 3.58872e-27 | 1.000000 | 3.58872e-27 | 1.000000 |
| rad58         | 4.31388e-29 | 1.000000 | 4.31388e-29 | 1.000000 |
| rad65         | 1.92448e-29 | 1.000000 | 1.92448e-29 | 1.000000 |
| rad34         | 4.98897e-30 | 1.000000 | 4.98897e-30 | 1.000000 |
| PAH1+H        | 3.51997e-30 | 1.000000 | 3.51997e-30 | 1.000000 |
| rad42         | 6.46434e-33 | 1.000000 | 6.46434e-33 | 1.000000 |
| rad41         | 1.26199e-33 | 1.000000 | 1.26199e-33 | 1.000000 |
| rad47         | 1.12666e-33 | 1.000000 | 1.12666e-33 | 1.000000 |

100.000000 Pa, 160.000000 K

=====

| Rate constant      | True (fraction)        | Effective (fraction)   |
|--------------------|------------------------|------------------------|
| Total              | 1.81800e-18 (1.00 )    | 1.81800e-18 (1.00 )    |
| Formation of rad11 | 1.64862e-18 (0.907 )   | 1.64862e-18 (0.907 )   |
| Formation of rad6  | 1.62558e-19 (0.0894 )  | 1.62558e-19 (0.0894 )  |
| H-abstraction      | 6.82130e-21 (0.00375 ) | 6.82130e-21 (0.00375 ) |

| species            | PYtrue      | Cumul    | PYeffective | Cumul    |
|--------------------|-------------|----------|-------------|----------|
| rad6               | 0.899802    | 0.899802 | 0.899802    | 0.899802 |
| rad11              | 0.0447986   | 0.944601 | 0.0447986   | 0.944601 |
| Indene+H           | 0.0409737   | 0.985574 | 0.0409737   | 0.985574 |
| rad23              | 0.00803219  | 0.993607 | 0.00803219  | 0.993607 |
| Benzene+2-propynyl | 0.00375209  | 0.997359 | 0.00375209  | 0.997359 |
| rad22              | 0.00115124  | 0.998510 | 0.00115124  | 0.998510 |
| rad45              | 0.000582894 | 0.999093 | 0.000582895 | 0.999093 |
| C2H2+PhCH2         | 0.000546433 | 0.999639 | 0.000546433 | 0.999639 |
| rad7               | 0.000312406 | 0.999952 | 0.000312406 | 0.999952 |
| rad36              | 3.61927e-05 | 0.999988 | 3.61927e-05 | 0.999988 |
| PhCHCCH2+H         | 5.14636e-06 | 0.999993 | 5.14636e-06 | 0.999993 |
| rad3               | 1.80228e-06 | 0.999995 | 1.80228e-06 | 0.999995 |
| rad2               | 1.39293e-06 | 0.999996 | 1.39293e-06 | 0.999996 |
| rad13              | 1.11692e-06 | 0.999997 | 1.11692e-06 | 0.999997 |
| rad4               | 9.22118e-07 | 0.999998 | 9.22118e-07 | 0.999998 |
| rad25              | 7.10422e-07 | 0.999999 | 7.10422e-07 | 0.999999 |
| rad18              | 3.79979e-07 | 0.999999 | 3.79979e-07 | 0.999999 |

|               |             |          |             |          |
|---------------|-------------|----------|-------------|----------|
| rad9          | 3.56935e-07 | 1.000000 | 3.56935e-07 | 1.000000 |
| rad28         | 1.86294e-07 | 1.000000 | 1.86294e-07 | 1.000000 |
| Phenyl+Allene | 1.16742e-07 | 1.000000 | 0.00000     | 1.000000 |
| rad1          | 9.20930e-08 | 1.000000 | 9.20931e-08 | 1.000000 |
| rad10         | 4.79294e-08 | 1.000000 | 4.79294e-08 | 1.000000 |
| rad20         | 4.11396e-08 | 1.000000 | 4.11396e-08 | 1.000000 |
| rad30         | 3.29974e-08 | 1.000000 | 3.29975e-08 | 1.000000 |
| PhCCH+CH3     | 2.90780e-08 | 1.000000 | 2.90780e-08 | 1.000000 |
| rad21         | 2.54624e-08 | 1.000000 | 2.54624e-08 | 1.000000 |
| rad15         | 6.59932e-09 | 1.000000 | 6.59932e-09 | 1.000000 |
| rad33         | 1.30020e-09 | 1.000000 | 1.30021e-09 | 1.000000 |
| PAH9+H        | 5.66547e-10 | 1.000000 | 5.66547e-10 | 1.000000 |
| PhCH2CCH+H    | 3.43857e-10 | 1.000000 | 3.43857e-10 | 1.000000 |
| rad35         | 2.87324e-10 | 1.000000 | 2.87324e-10 | 1.000000 |
| rad38         | 2.60079e-10 | 1.000000 | 2.60079e-10 | 1.000000 |
| rad14         | 1.85320e-10 | 1.000000 | 1.85320e-10 | 1.000000 |
| PhCCCH3+H     | 1.62609e-10 | 1.000000 | 1.62609e-10 | 1.000000 |
| rad8          | 1.47518e-10 | 1.000000 | 1.47518e-10 | 1.000000 |
| rad26         | 7.87657e-11 | 1.000000 | 7.87657e-11 | 1.000000 |
| Ph+MeAc       | 3.78346e-11 | 1.000000 | 3.78346e-11 | 1.000000 |
| rad24         | 5.12307e-12 | 1.000000 | 5.12307e-12 | 1.000000 |
| rad46         | 2.52548e-12 | 1.000000 | 2.52548e-12 | 1.000000 |
| rad27         | 1.94773e-12 | 1.000000 | 1.94773e-12 | 1.000000 |
| PAH7+H        | 1.57186e-12 | 1.000000 | 1.57186e-12 | 1.000000 |
| rad60syn      | 1.49763e-12 | 1.000000 | 1.49763e-12 | 1.000000 |
| rad60anti     | 4.14781e-13 | 1.000000 | 4.14781e-13 | 1.000000 |
| rad39         | 4.34669e-14 | 1.000000 | 4.34669e-14 | 1.000000 |
| rad31         | 9.00258e-16 | 1.000000 | 9.00258e-16 | 1.000000 |
| PAH3+H        | 4.48301e-16 | 1.000000 | 4.48301e-16 | 1.000000 |
| rad12         | 2.07477e-16 | 1.000000 | 2.07477e-16 | 1.000000 |
| rad59         | 1.70061e-16 | 1.000000 | 1.70061e-16 | 1.000000 |
| rad5          | 4.07710e-17 | 1.000000 | 4.07710e-17 | 1.000000 |
| rad37         | 7.96097e-18 | 1.000000 | 7.96097e-18 | 1.000000 |
| rad50         | 3.46923e-18 | 1.000000 | 3.46923e-18 | 1.000000 |
| rad19syn      | 1.17138e-19 | 1.000000 | 1.17138e-19 | 1.000000 |
| rad54         | 9.25000e-22 | 1.000000 | 9.25000e-22 | 1.000000 |
| rad52         | 5.58462e-23 | 1.000000 | 5.58462e-23 | 1.000000 |
| rad43         | 2.11405e-23 | 1.000000 | 2.11405e-23 | 1.000000 |
| rad62         | 1.23024e-23 | 1.000000 | 1.23024e-23 | 1.000000 |
| PAH10+CH3     | 3.93096e-24 | 1.000000 | 3.93096e-24 | 1.000000 |
| rad70         | 1.30253e-24 | 1.000000 | 1.30253e-24 | 1.000000 |
| PhcycC3H3_A+H | 1.80381e-25 | 1.000000 | 1.80381e-25 | 1.000000 |
| rad51         | 1.43102e-25 | 1.000000 | 1.43102e-25 | 1.000000 |
| rad55         | 6.34119e-26 | 1.000000 | 6.34119e-26 | 1.000000 |
| rad58         | 8.87397e-28 | 1.000000 | 8.87397e-28 | 1.000000 |
| rad65         | 3.08457e-28 | 1.000000 | 3.08458e-28 | 1.000000 |
| rad34         | 2.35758e-28 | 1.000000 | 2.35758e-28 | 1.000000 |
| PAH1+H        | 1.07063e-28 | 1.000000 | 1.07063e-28 | 1.000000 |
| rad42         | 3.19669e-31 | 1.000000 | 3.19669e-31 | 1.000000 |
| rad41         | 6.04995e-32 | 1.000000 | 6.04996e-32 | 1.000000 |
| rad47         | 2.31512e-32 | 1.000000 | 2.31512e-32 | 1.000000 |

100.000000 Pa, 170.000000 K

=====

| Rate constant      | True (fraction)        | Effective (fraction)   |
|--------------------|------------------------|------------------------|
| Total              | 3.56414e-18 (1.00 )    | 3.56414e-18 (1.00 )    |
| Formation of rad11 | 3.18264e-18 (0.893 )   | 3.18264e-18 (0.893 )   |
| Formation of rad6  | 3.62173e-19 (0.102 )   | 3.62173e-19 (0.102 )   |
| H-abstraction      | 1.93278e-20 (0.00542 ) | 1.93278e-20 (0.00542 ) |

| species            | PYtrue      | Cumul    | PYeffective | Cumul    |
|--------------------|-------------|----------|-------------|----------|
| rad6               | 0.906212    | 0.906212 | 0.906212    | 0.906212 |
| Indene+H           | 0.0415810   | 0.947793 | 0.0415811   | 0.947793 |
| rad11              | 0.0363056   | 0.984099 | 0.0363056   | 0.984099 |
| rad23              | 0.00802440  | 0.992123 | 0.00802440  | 0.992123 |
| Benzene+2-propynyl | 0.00542285  | 0.997546 | 0.00542285  | 0.997546 |
| rad22              | 0.000935483 | 0.998481 | 0.000935484 | 0.998481 |
| C2H2+PhCH2         | 0.000582557 | 0.999064 | 0.000582557 | 0.999064 |
| rad45              | 0.000572622 | 0.999636 | 0.000572622 | 0.999637 |
| rad7               | 0.000314018 | 0.999951 | 0.000314018 | 0.999951 |
| rad36              | 3.55954e-05 | 0.999986 | 3.55954e-05 | 0.999986 |
| PhCHCCH2+H         | 5.88348e-06 | 0.999992 | 5.88349e-06 | 0.999992 |
| rad3               | 2.00325e-06 | 0.999994 | 2.00325e-06 | 0.999994 |
| rad2               | 1.83200e-06 | 0.999996 | 1.83200e-06 | 0.999996 |
| rad13              | 1.10864e-06 | 0.999997 | 1.10864e-06 | 0.999997 |
| rad4               | 1.02666e-06 | 0.999998 | 1.02666e-06 | 0.999998 |
| rad25              | 5.90258e-07 | 0.999999 | 5.90258e-07 | 0.999999 |
| rad9               | 4.17041e-07 | 0.999999 | 4.17041e-07 | 0.999999 |

|               |             |          |             |          |
|---------------|-------------|----------|-------------|----------|
| rad18         | 2.85216e-07 | 0.999999 | 2.85216e-07 | 0.999999 |
| rad28         | 2.35326e-07 | 0.999999 | 2.35326e-07 | 1.000000 |
| Phenyl+Allene | 1.60631e-07 | 1.000000 | 0.000000    | 1.000000 |
| rad1          | 1.21859e-07 | 1.000000 | 1.21859e-07 | 1.000000 |
| rad10         | 7.01489e-08 | 1.000000 | 7.01489e-08 | 1.000000 |
| PhCCH+CH3     | 4.40898e-08 | 1.000000 | 4.40898e-08 | 1.000000 |
| rad30         | 3.60215e-08 | 1.000000 | 3.60215e-08 | 1.000000 |
| rad20         | 3.08341e-08 | 1.000000 | 3.08341e-08 | 1.000000 |
| rad21         | 1.90843e-08 | 1.000000 | 1.90843e-08 | 1.000000 |
| rad15         | 7.32623e-09 | 1.000000 | 7.32623e-09 | 1.000000 |
| rad33         | 1.29365e-09 | 1.000000 | 1.29365e-09 | 1.000000 |
| PAH9+H        | 7.15792e-10 | 1.000000 | 7.15792e-10 | 1.000000 |
| PhCH2CCH+H    | 6.78351e-10 | 1.000000 | 6.78351e-10 | 1.000000 |
| rad35         | 3.58315e-10 | 1.000000 | 3.58315e-10 | 1.000000 |
| rad38         | 3.15938e-10 | 1.000000 | 3.15938e-10 | 1.000000 |
| PhCCCH3+H     | 3.06228e-10 | 1.000000 | 3.06228e-10 | 1.000000 |
| rad14         | 2.16234e-10 | 1.000000 | 2.16234e-10 | 1.000000 |
| rad8          | 1.98422e-10 | 1.000000 | 1.98422e-10 | 1.000000 |
| rad26         | 1.51912e-10 | 1.000000 | 1.51912e-10 | 1.000000 |
| Ph+MeAc       | 7.49822e-11 | 1.000000 | 7.49823e-11 | 1.000000 |
| rad24         | 5.04365e-12 | 1.000000 | 5.04365e-12 | 1.000000 |
| rad46         | 3.29326e-12 | 1.000000 | 3.29326e-12 | 1.000000 |
| PAH7+H        | 3.14748e-12 | 1.000000 | 3.14748e-12 | 1.000000 |
| rad27         | 2.55586e-12 | 1.000000 | 2.55586e-12 | 1.000000 |
| rad60syn      | 1.98414e-12 | 1.000000 | 1.98414e-12 | 1.000000 |
| rad60anti     | 5.75437e-13 | 1.000000 | 5.75437e-13 | 1.000000 |
| rad39         | 9.04343e-14 | 1.000000 | 9.04343e-14 | 1.000000 |
| PAH3+H        | 1.15301e-15 | 1.000000 | 1.15301e-15 | 1.000000 |
| rad31         | 1.06570e-15 | 1.000000 | 1.06570e-15 | 1.000000 |
| rad12         | 6.46685e-16 | 1.000000 | 6.46685e-16 | 1.000000 |
| rad59         | 4.21637e-16 | 1.000000 | 4.21637e-16 | 1.000000 |
| rad5          | 1.29108e-16 | 1.000000 | 1.29108e-16 | 1.000000 |
| rad37         | 2.97180e-17 | 1.000000 | 2.97180e-17 | 1.000000 |
| rad50         | 9.30190e-18 | 1.000000 | 9.30190e-18 | 1.000000 |
| rad19syn      | 6.38526e-19 | 1.000000 | 6.38526e-19 | 1.000000 |
| rad54         | 6.63123e-21 | 1.000000 | 6.63123e-21 | 1.000000 |
| rad52         | 2.98265e-22 | 1.000000 | 2.98266e-22 | 1.000000 |
| rad43         | 1.68903e-22 | 1.000000 | 1.68903e-22 | 1.000000 |
| rad62         | 1.06771e-22 | 1.000000 | 1.06771e-22 | 1.000000 |
| PAH10+CH3     | 3.78351e-23 | 1.000000 | 3.78352e-23 | 1.000000 |
| rad70         | 1.66996e-23 | 1.000000 | 1.66996e-23 | 1.000000 |
| PhcycC3H3_A+H | 2.44937e-24 | 1.000000 | 2.44937e-24 | 1.000000 |
| rad51         | 1.28138e-24 | 1.000000 | 1.28138e-24 | 1.000000 |
| rad55         | 8.18061e-25 | 1.000000 | 8.18061e-25 | 1.000000 |
| rad58         | 1.26926e-26 | 1.000000 | 1.26926e-26 | 1.000000 |
| rad34         | 5.13553e-27 | 1.000000 | 5.13553e-27 | 1.000000 |
| rad65         | 3.65244e-27 | 1.000000 | 3.65244e-27 | 1.000000 |
| PAH1+H        | 2.14811e-27 | 1.000000 | 2.14811e-27 | 1.000000 |
| rad42         | 8.16474e-30 | 1.000000 | 8.16474e-30 | 1.000000 |
| rad41         | 1.57155e-30 | 1.000000 | 1.57155e-30 | 1.000000 |
| rad47         | 3.29173e-31 | 1.000000 | 3.29173e-31 | 1.000000 |

100.000000 Pa, 180.000000 K

=====

| Rate constant      | True (fraction)        | Effective (fraction)   |
|--------------------|------------------------|------------------------|
| Total              | 6.50681e-18 (1.00 )    | 6.50681e-18 (1.00 )    |
| Formation of rad11 | 5.71915e-18 (0.879 )   | 5.71915e-18 (0.879 )   |
| Formation of rad6  | 7.39013e-19 (0.114 )   | 7.39013e-19 (0.114 )   |
| H-abstraction      | 4.86496e-20 (0.00748 ) | 4.86496e-20 (0.00748 ) |

| species            | PYtrue      | Cumul    | PYeffective | Cumul    |
|--------------------|-------------|----------|-------------|----------|
| rad6               | 0.910774    | 0.910774 | 0.910774    | 0.910774 |
| Indene+H           | 0.0420899   | 0.952864 | 0.0420899   | 0.952864 |
| rad11              | 0.0293710   | 0.982235 | 0.0293710   | 0.982235 |
| rad23              | 0.00798280  | 0.990218 | 0.00798281  | 0.990218 |
| Benzene+2-propynyl | 0.00747672  | 0.997695 | 0.00747672  | 0.997695 |
| rad22              | 0.000757832 | 0.998452 | 0.000757832 | 0.998452 |
| C2H2+PhCH2         | 0.000620812 | 0.999073 | 0.000620812 | 0.999073 |
| rad45              | 0.000561268 | 0.999635 | 0.000561268 | 0.999635 |
| rad7               | 0.000314668 | 0.999949 | 0.000314668 | 0.999949 |
| rad36              | 3.49401e-05 | 0.999984 | 3.49402e-05 | 0.999984 |
| PhCHCCH2+H         | 6.72919e-06 | 0.999991 | 6.72919e-06 | 0.999991 |
| rad2               | 2.38427e-06 | 0.999993 | 2.38428e-06 | 0.999993 |
| rad3               | 2.20534e-06 | 0.999995 | 2.20534e-06 | 0.999995 |
| rad4               | 1.13230e-06 | 0.999997 | 1.13230e-06 | 0.999997 |
| rad13              | 1.09942e-06 | 0.999998 | 1.09942e-06 | 0.999998 |
| rad25              | 4.88835e-07 | 0.999998 | 4.88835e-07 | 0.999998 |
| rad9               | 4.87182e-07 | 0.999999 | 4.87182e-07 | 0.999999 |

|               |             |          |             |          |
|---------------|-------------|----------|-------------|----------|
| rad28         | 2.96863e-07 | 0.999999 | 2.96864e-07 | 0.999999 |
| Phenyl+Allene | 2.18877e-07 | 0.999999 | 0.00000     | 0.999999 |
| rad18         | 2.14773e-07 | 0.999999 | 2.14773e-07 | 0.999999 |
| rad1          | 1.59641e-07 | 1.000000 | 1.59641e-07 | 0.999999 |
| rad10         | 1.00788e-07 | 1.000000 | 1.00788e-07 | 0.999999 |
| PhCCH+CH3     | 6.62049e-08 | 1.000000 | 6.62049e-08 | 0.999999 |
| rad30         | 3.93298e-08 | 1.000000 | 3.93298e-08 | 1.000000 |
| rad20         | 2.32228e-08 | 1.000000 | 2.32228e-08 | 1.000000 |
| rad21         | 1.43745e-08 | 1.000000 | 1.43745e-08 | 1.000000 |
| rad15         | 8.13805e-09 | 1.000000 | 8.13805e-09 | 1.000000 |
| rad33         | 1.28620e-09 | 1.000000 | 1.28620e-09 | 1.000000 |
| PhCH2CCH+H    | 1.26935e-09 | 1.000000 | 1.26935e-09 | 1.000000 |
| PAH9+H        | 9.03099e-10 | 1.000000 | 9.03099e-10 | 1.000000 |
| PhCCCH3+H     | 5.70301e-10 | 1.000000 | 5.70301e-10 | 1.000000 |
| rad35         | 4.45975e-10 | 1.000000 | 4.45975e-10 | 1.000000 |
| rad38         | 3.84839e-10 | 1.000000 | 3.84839e-10 | 1.000000 |
| rad26         | 2.87078e-10 | 1.000000 | 2.87078e-10 | 1.000000 |
| rad8          | 2.66750e-10 | 1.000000 | 2.66750e-10 | 1.000000 |
| rad14         | 2.48285e-10 | 1.000000 | 2.48285e-10 | 1.000000 |
| Ph+MeAc       | 1.46531e-10 | 1.000000 | 1.46531e-10 | 1.000000 |
| PAH7+H        | 6.00223e-12 | 1.000000 | 6.00223e-12 | 1.000000 |
| rad24         | 4.95858e-12 | 1.000000 | 4.95858e-12 | 1.000000 |
| rad46         | 4.31450e-12 | 1.000000 | 4.31450e-12 | 1.000000 |
| rad27         | 3.31719e-12 | 1.000000 | 3.31719e-12 | 1.000000 |
| rad60syn      | 2.62036e-12 | 1.000000 | 2.62036e-12 | 1.000000 |
| rad60anti     | 7.91619e-13 | 1.000000 | 7.91619e-13 | 1.000000 |
| rad39         | 1.87728e-13 | 1.000000 | 1.87728e-13 | 1.000000 |
| PAH3+H        | 2.72248e-15 | 1.000000 | 2.72248e-15 | 1.000000 |
| rad12         | 1.94998e-15 | 1.000000 | 1.94998e-15 | 1.000000 |
| rad31         | 1.25617e-15 | 1.000000 | 1.25617e-15 | 1.000000 |
| rad59         | 9.61401e-16 | 1.000000 | 9.61401e-16 | 1.000000 |
| rad5          | 3.85064e-16 | 1.000000 | 3.85064e-16 | 1.000000 |
| rad37         | 1.05126e-16 | 1.000000 | 1.05126e-16 | 1.000000 |
| rad50         | 2.32919e-17 | 1.000000 | 2.32919e-17 | 1.000000 |
| rad19syn      | 2.97356e-18 | 1.000000 | 2.97356e-18 | 1.000000 |
| rad54         | 3.93134e-20 | 1.000000 | 3.93134e-20 | 1.000000 |
| rad52         | 1.35753e-21 | 1.000000 | 1.35753e-21 | 1.000000 |
| rad43         | 1.12395e-21 | 1.000000 | 1.12395e-21 | 1.000000 |
| rad62         | 7.51626e-22 | 1.000000 | 7.51626e-22 | 1.000000 |
| PAH10+CH3     | 3.04127e-22 | 1.000000 | 3.04127e-22 | 1.000000 |
| rad70         | 1.61670e-22 | 1.000000 | 1.61670e-22 | 1.000000 |
| PhcycC3H3_A+H | 2.54964e-23 | 1.000000 | 2.54964e-23 | 1.000000 |
| rad51         | 9.22323e-24 | 1.000000 | 9.22323e-24 | 1.000000 |
| rad55         | 8.11948e-24 | 1.000000 | 8.11948e-24 | 1.000000 |
| rad58         | 1.35890e-25 | 1.000000 | 1.35890e-25 | 1.000000 |
| rad34         | 7.63953e-26 | 1.000000 | 7.63953e-26 | 1.000000 |
| rad65         | 3.35698e-26 | 1.000000 | 3.35698e-26 | 1.000000 |
| PAH1+H        | 3.14017e-26 | 1.000000 | 3.14017e-26 | 1.000000 |
| rad42         | 1.41412e-28 | 1.000000 | 1.41412e-28 | 1.000000 |
| rad41         | 2.79504e-29 | 1.000000 | 2.79504e-29 | 1.000000 |
| rad47         | 3.44673e-30 | 1.000000 | 3.44673e-30 | 1.000000 |

100.000000 Pa, 190.000000 K

=====

| Rate constant      | True (fraction)        | Effective (fraction)   |
|--------------------|------------------------|------------------------|
| Total              | 1.11858e-17 (1.00 )    | 1.11858e-17 (1.00 )    |
| Formation of rad11 | 9.67466e-18 (0.865 )   | 9.67465e-18 (0.865 )   |
| Formation of rad6  | 1.40029e-18 (0.125 )   | 1.40029e-18 (0.125 )   |
| H-abstraction      | 1.10851e-19 (0.00991 ) | 1.10851e-19 (0.00991 ) |

| species            | PYtrue      | Cumul    | PYeffective | Cumul    |
|--------------------|-------------|----------|-------------|----------|
| rad6               | 0.913745    | 0.913745 | 0.913746    | 0.913746 |
| Indene+H           | 0.0425224   | 0.956268 | 0.0425224   | 0.956269 |
| rad11              | 0.0237217   | 0.979989 | 0.0237217   | 0.979990 |
| Benzene+2-propynyl | 0.00990995  | 0.989899 | 0.00990996  | 0.989900 |
| rad23              | 0.00791101  | 0.997810 | 0.00791101  | 0.997811 |
| C2H2+PhCH2         | 0.000661568 | 0.998472 | 0.000661568 | 0.998473 |
| rad22              | 0.000612312 | 0.999084 | 0.000612312 | 0.999085 |
| rad45              | 0.000548922 | 0.999633 | 0.000548922 | 0.999634 |
| rad7               | 0.000314523 | 0.999948 | 0.000314523 | 0.999949 |
| rad36              | 3.42326e-05 | 0.999982 | 3.42327e-05 | 0.999983 |
| PhCHCCH2+H         | 7.70115e-06 | 0.999989 | 7.70115e-06 | 0.999990 |
| rad2               | 3.07348e-06 | 0.999993 | 3.07348e-06 | 0.999994 |
| rad3               | 2.40628e-06 | 0.999995 | 2.40628e-06 | 0.999996 |
| rad4               | 1.23794e-06 | 0.999996 | 1.23794e-06 | 0.999997 |
| rad13              | 1.08948e-06 | 0.999997 | 1.08948e-06 | 0.999998 |
| rad9               | 5.69054e-07 | 0.999998 | 5.69055e-07 | 0.999999 |
| rad25              | 4.03646e-07 | 0.999998 | 4.03646e-07 | 0.999999 |

|               |             |          |             |          |
|---------------|-------------|----------|-------------|----------|
| rad28         | 3.74256e-07 | 0.999999 | 3.74256e-07 | 1.000000 |
| Phenyl+Allene | 2.95579e-07 | 0.999999 | 0.00000     | 1.000000 |
| rad1          | 2.07264e-07 | 0.999999 | 2.07264e-07 | 1.000000 |
| rad18         | 1.62185e-07 | 0.999999 | 1.62185e-07 | 1.000000 |
| rad10         | 1.42304e-07 | 0.999999 | 1.42304e-07 | 1.000000 |
| PhCCH+CH3     | 9.85352e-08 | 1.000000 | 9.85352e-08 | 1.000000 |
| rad30         | 4.29661e-08 | 1.000000 | 4.29661e-08 | 1.000000 |
| rad20         | 1.75667e-08 | 1.000000 | 1.75667e-08 | 1.000000 |
| rad21         | 1.08750e-08 | 1.000000 | 1.08750e-08 | 1.000000 |
| rad15         | 9.04819e-09 | 1.000000 | 9.04820e-09 | 1.000000 |
| PhCH2CCH+H    | 2.27117e-09 | 1.000000 | 2.27117e-09 | 1.000000 |
| rad33         | 1.27812e-09 | 1.000000 | 1.27812e-09 | 1.000000 |
| PAH9+H        | 1.13857e-09 | 1.000000 | 1.13857e-09 | 1.000000 |
| PhCCCH3+H     | 1.05070e-09 | 1.000000 | 1.05070e-09 | 1.000000 |
| rad35         | 5.54385e-10 | 1.000000 | 5.54385e-10 | 1.000000 |
| rad26         | 5.31949e-10 | 1.000000 | 5.31949e-10 | 1.000000 |
| rad38         | 4.70202e-10 | 1.000000 | 4.70203e-10 | 1.000000 |
| rad8          | 3.58680e-10 | 1.000000 | 3.58680e-10 | 1.000000 |
| Ph+MeAc       | 2.82770e-10 | 1.000000 | 2.82770e-10 | 1.000000 |
| rad14         | 2.80957e-10 | 1.000000 | 2.80957e-10 | 1.000000 |
| PAH7+H        | 1.10000e-11 | 1.000000 | 1.10000e-11 | 1.000000 |
| rad46         | 5.67808e-12 | 1.000000 | 5.67808e-12 | 1.000000 |
| rad24         | 4.86810e-12 | 1.000000 | 4.86810e-12 | 1.000000 |
| rad27         | 4.26275e-12 | 1.000000 | 4.26275e-12 | 1.000000 |
| rad60syn      | 3.44983e-12 | 1.000000 | 3.44983e-12 | 1.000000 |
| rad60anti     | 1.08091e-12 | 1.000000 | 1.08091e-12 | 1.000000 |
| rad39         | 3.88639e-13 | 1.000000 | 3.88639e-13 | 1.000000 |
| PAH3+H        | 5.98704e-15 | 1.000000 | 5.98704e-15 | 1.000000 |
| rad12         | 5.68464e-15 | 1.000000 | 5.68465e-15 | 1.000000 |
| rad59         | 2.04518e-15 | 1.000000 | 2.04518e-15 | 1.000000 |
| rad31         | 1.47606e-15 | 1.000000 | 1.47606e-15 | 1.000000 |
| rad5          | 1.08848e-15 | 1.000000 | 1.08848e-15 | 1.000000 |
| rad37         | 3.53355e-16 | 1.000000 | 3.53355e-16 | 1.000000 |
| rad50         | 5.50365e-17 | 1.000000 | 5.50365e-17 | 1.000000 |
| rad19syn      | 1.21256e-17 | 1.000000 | 1.21256e-17 | 1.000000 |
| rad54         | 1.98575e-19 | 1.000000 | 1.98576e-19 | 1.000000 |
| rad43         | 6.38301e-21 | 1.000000 | 6.38301e-21 | 1.000000 |
| rad52         | 5.39898e-21 | 1.000000 | 5.39899e-21 | 1.000000 |
| rad62         | 4.42815e-21 | 1.000000 | 4.42815e-21 | 1.000000 |
| PAH10+CH3     | 2.08333e-21 | 1.000000 | 2.08333e-21 | 1.000000 |
| rad70         | 1.23601e-21 | 1.000000 | 1.23601e-21 | 1.000000 |
| PhcycC3H3_A+H | 2.11625e-22 | 1.000000 | 2.11625e-22 | 1.000000 |
| rad55         | 6.45079e-23 | 1.000000 | 6.45080e-23 | 1.000000 |
| rad51         | 5.51784e-23 | 1.000000 | 5.51784e-23 | 1.000000 |
| rad58         | 1.14080e-24 | 1.000000 | 1.14080e-24 | 1.000000 |
| rad34         | 8.45433e-25 | 1.000000 | 8.45433e-25 | 1.000000 |
| PAH1+H        | 3.50480e-25 | 1.000000 | 3.50480e-25 | 1.000000 |
| rad65         | 2.48826e-25 | 1.000000 | 2.48826e-25 | 1.000000 |
| rad42         | 1.78960e-27 | 1.000000 | 1.78960e-27 | 1.000000 |
| rad41         | 3.64092e-28 | 1.000000 | 3.64092e-28 | 1.000000 |
| rad47         | 2.78322e-29 | 1.000000 | 2.78322e-29 | 1.000000 |

100.000000 Pa, 200.000000 K

=====

| Rate constant      | True (fraction)       | Effective (fraction)  |
|--------------------|-----------------------|-----------------------|
| Total              | 1.82690e-17 (1.00 )   | 1.82690e-17 (1.00 )   |
| Formation of rad11 | 1.55456e-17 (0.851 )  | 1.55456e-17 (0.851 )  |
| Formation of rad6  | 2.49126e-18 (0.136 )  | 2.49126e-18 (0.136 )  |
| H-abstraction      | 2.32112e-19 (0.0127 ) | 2.32112e-19 (0.0127 ) |

| species            | PYtrue      | Cumul    | PYeffective | Cumul    |
|--------------------|-------------|----------|-------------|----------|
| rad6               | 0.915354    | 0.915354 | 0.915354    | 0.915354 |
| Indene+H           | 0.0428979   | 0.958251 | 0.0428979   | 0.958251 |
| rad11              | 0.0191295   | 0.977381 | 0.0191295   | 0.977381 |
| Benzene+2-propynyl | 0.0127053   | 0.990086 | 0.0127053   | 0.990086 |
| rad23              | 0.00781201  | 0.997898 | 0.00781201  | 0.997898 |
| C2H2+PhCH2         | 0.000705208 | 0.998603 | 0.000705208 | 0.998603 |
| rad45              | 0.000535667 | 0.999139 | 0.000535667 | 0.999139 |
| rad22              | 0.000493660 | 0.999633 | 0.000493660 | 0.999633 |
| rad7               | 0.000313731 | 0.999946 | 0.000313731 | 0.999946 |
| rad36              | 3.34781e-05 | 0.999980 | 3.34781e-05 | 0.999980 |
| PhCHCCH2+H         | 8.81962e-06 | 0.999989 | 8.81962e-06 | 0.999989 |
| rad2               | 3.92741e-06 | 0.999993 | 3.92741e-06 | 0.999993 |
| rad3               | 2.60396e-06 | 0.999995 | 2.60396e-06 | 0.999995 |
| rad4               | 1.34256e-06 | 0.999997 | 1.34256e-06 | 0.999997 |
| rad13              | 1.07900e-06 | 0.999998 | 1.07900e-06 | 0.999998 |
| rad9               | 6.64610e-07 | 0.999998 | 6.64610e-07 | 0.999998 |
| rad28              | 4.71791e-07 | 0.999999 | 4.71791e-07 | 0.999999 |

|               |             |          |             |          |
|---------------|-------------|----------|-------------|----------|
| Phenyl+Allene | 3.95840e-07 | 0.999999 | 0.00000     | 0.999999 |
| rad25         | 3.32409e-07 | 1.000000 | 3.32409e-07 | 0.999999 |
| rad1          | 2.66915e-07 | 1.000000 | 2.66915e-07 | 0.999999 |
| rad10         | 1.97637e-07 | 1.000000 | 1.97637e-07 | 1.000000 |
| PhCCH+CH3     | 1.45474e-07 | 1.000000 | 1.45474e-07 | 1.000000 |
| rad18         | 1.22786e-07 | 1.000000 | 1.22786e-07 | 1.000000 |
| rad30         | 4.69781e-08 | 1.000000 | 4.69782e-08 | 1.000000 |
| rad20         | 1.33414e-08 | 1.000000 | 1.33414e-08 | 1.000000 |
| rad15         | 1.00718e-08 | 1.000000 | 1.00718e-08 | 1.000000 |
| rad21         | 8.26075e-09 | 1.000000 | 8.26075e-09 | 1.000000 |
| PhCH2CCH+H    | 3.91081e-09 | 1.000000 | 3.91081e-09 | 1.000000 |
| PhCCCH3+H     | 1.91527e-09 | 1.000000 | 1.91527e-09 | 1.000000 |
| PAH9+H        | 1.43491e-09 | 1.000000 | 1.43492e-09 | 1.000000 |
| rad33         | 1.26958e-09 | 1.000000 | 1.26958e-09 | 1.000000 |
| rad26         | 9.67042e-10 | 1.000000 | 9.67042e-10 | 1.000000 |
| rad35         | 6.88577e-10 | 1.000000 | 6.88578e-10 | 1.000000 |
| rad38         | 5.76324e-10 | 1.000000 | 5.76325e-10 | 1.000000 |
| Ph+MeAc       | 5.39382e-10 | 1.000000 | 5.39382e-10 | 1.000000 |
| rad8          | 4.82828e-10 | 1.000000 | 4.82828e-10 | 1.000000 |
| rad14         | 3.13752e-10 | 1.000000 | 3.13753e-10 | 1.000000 |
| PAH7+H        | 1.95303e-11 | 1.000000 | 1.95303e-11 | 1.000000 |
| rad46         | 7.50370e-12 | 1.000000 | 7.50370e-12 | 1.000000 |
| rad27         | 5.42874e-12 | 1.000000 | 5.42875e-12 | 1.000000 |
| rad24         | 4.77249e-12 | 1.000000 | 4.77249e-12 | 1.000000 |
| rad60syn      | 4.52784e-12 | 1.000000 | 4.52784e-12 | 1.000000 |
| rad60anti     | 1.46599e-12 | 1.000000 | 1.46599e-12 | 1.000000 |
| rad39         | 8.01745e-13 | 1.000000 | 8.01745e-13 | 1.000000 |
| rad12         | 1.60116e-14 | 1.000000 | 1.60116e-14 | 1.000000 |
| PAH3+H        | 1.24037e-14 | 1.000000 | 1.24037e-14 | 1.000000 |
| rad59         | 4.10548e-15 | 1.000000 | 4.10548e-15 | 1.000000 |
| rad5          | 2.93070e-15 | 1.000000 | 2.93070e-15 | 1.000000 |
| rad31         | 1.73100e-15 | 1.000000 | 1.73100e-15 | 1.000000 |
| rad37         | 1.13060e-15 | 1.000000 | 1.13060e-15 | 1.000000 |
| rad50         | 1.23733e-16 | 1.000000 | 1.23733e-16 | 1.000000 |
| rad19syn      | 4.41749e-17 | 1.000000 | 4.41749e-17 | 1.000000 |
| rad54         | 8.75424e-19 | 1.000000 | 8.75425e-19 | 1.000000 |
| rad43         | 3.15677e-20 | 1.000000 | 3.15677e-20 | 1.000000 |
| rad62         | 2.23949e-20 | 1.000000 | 2.23949e-20 | 1.000000 |
| rad52         | 1.91492e-20 | 1.000000 | 1.91492e-20 | 1.000000 |
| PAH10+CH3     | 1.23645e-20 | 1.000000 | 1.23645e-20 | 1.000000 |
| rad70         | 7.73254e-21 | 1.000000 | 7.73254e-21 | 1.000000 |
| PhcycC3H3_A+H | 1.44515e-21 | 1.000000 | 1.44515e-21 | 1.000000 |
| rad55         | 4.23374e-22 | 1.000000 | 4.23374e-22 | 1.000000 |
| rad51         | 2.81898e-22 | 1.000000 | 2.81899e-22 | 1.000000 |
| rad58         | 7.78525e-24 | 1.000000 | 7.78525e-24 | 1.000000 |
| rad34         | 7.30735e-24 | 1.000000 | 7.30735e-24 | 1.000000 |
| PAH1+H        | 3.09806e-24 | 1.000000 | 3.09806e-24 | 1.000000 |
| rad65         | 1.53391e-24 | 1.000000 | 1.53392e-24 | 1.000000 |
| rad42         | 1.74187e-26 | 1.000000 | 1.74187e-26 | 1.000000 |
| rad41         | 3.65004e-27 | 1.000000 | 3.65004e-27 | 1.000000 |
| rad47         | 1.80038e-28 | 1.000000 | 1.80038e-28 | 1.000000 |

100.000000 Pa, 210.000000 K

=====

| Rate constant      | True (fraction)       | Effective (fraction)  |
|--------------------|-----------------------|-----------------------|
| Total              | 2.85520e-17 (1.00 )   | 2.85520e-17 (1.00 )   |
| Formation of rad11 | 2.39009e-17 (0.837 )  | 2.39009e-17 (0.837 )  |
| Formation of rad6  | 4.19900e-18 (0.147 )  | 4.19900e-18 (0.147 )  |
| H-abstraction      | 4.52111e-19 (0.0158 ) | 4.52111e-19 (0.0158 ) |

| species            | PYtrue      | Cumul    | PYeffective | Cumul    |
|--------------------|-------------|----------|-------------|----------|
| rad6               | 0.915799    | 0.915799 | 0.915800    | 0.915800 |
| Indene+H           | 0.0432328   | 0.959032 | 0.0432328   | 0.959033 |
| Benzene+2-propynyl | 0.0158346   | 0.974867 | 0.0158346   | 0.974868 |
| rad11              | 0.0154050   | 0.990272 | 0.0154050   | 0.990273 |
| rad23              | 0.00768829  | 0.997960 | 0.00768829  | 0.997961 |
| C2H2+PhCH2         | 0.000752130 | 0.998712 | 0.000752131 | 0.998713 |
| rad45              | 0.000521580 | 0.999234 | 0.000521581 | 0.999235 |
| rad22              | 0.000397311 | 0.999631 | 0.000397311 | 0.999632 |
| rad7               | 0.000312414 | 0.999944 | 0.000312414 | 0.999945 |
| rad36              | 3.26812e-05 | 0.999976 | 3.26812e-05 | 0.999977 |
| PhCHCCH2+H         | 1.01078e-05 | 0.999986 | 1.01078e-05 | 0.999987 |
| rad2               | 4.97850e-06 | 0.999991 | 4.97851e-06 | 0.999992 |
| rad3               | 2.79656e-06 | 0.999994 | 2.79656e-06 | 0.999995 |
| rad4               | 1.44531e-06 | 0.999996 | 1.44531e-06 | 0.999997 |
| rad13              | 1.06816e-06 | 0.999997 | 1.06816e-06 | 0.999998 |
| rad9               | 7.76082e-07 | 0.999997 | 7.76082e-07 | 0.999998 |
| rad28              | 5.94950e-07 | 0.999998 | 5.94950e-07 | 0.999999 |

|               |             |          |             |          |
|---------------|-------------|----------|-------------|----------|
| Phenyl+Allene | 5.25989e-07 | 0.999999 | 0.00000     | 0.999999 |
| rad1          | 3.41212e-07 | 0.999999 | 3.41212e-07 | 0.999999 |
| rad25         | 2.73081e-07 | 0.999999 | 2.73081e-07 | 1.000000 |
| rad10         | 2.70244e-07 | 0.999999 | 2.70245e-07 | 1.000000 |
| PhCCH+CH3     | 2.13203e-07 | 1.000000 | 2.13203e-07 | 1.000000 |
| rad18         | 9.31766e-08 | 1.000000 | 9.31767e-08 | 1.000000 |
| rad30         | 5.14183e-08 | 1.000000 | 5.14183e-08 | 1.000000 |
| rad15         | 1.12256e-08 | 1.000000 | 1.12256e-08 | 1.000000 |
| rad20         | 1.01704e-08 | 1.000000 | 1.01704e-08 | 1.000000 |
| PhCH2CCH+H    | 6.51487e-09 | 1.000000 | 6.51487e-09 | 1.000000 |
| rad21         | 6.29878e-09 | 1.000000 | 6.29879e-09 | 1.000000 |
| PhCCCH3+H     | 3.45389e-09 | 1.000000 | 3.45389e-09 | 1.000000 |
| PAH9+H        | 1.80797e-09 | 1.000000 | 1.80797e-09 | 1.000000 |
| rad26         | 1.72555e-09 | 1.000000 | 1.72555e-09 | 1.000000 |
| rad33         | 1.26078e-09 | 1.000000 | 1.26078e-09 | 1.000000 |
| Ph+MeAc       | 1.01753e-09 | 1.000000 | 1.01753e-09 | 1.000000 |
| rad35         | 8.54722e-10 | 1.000000 | 8.54723e-10 | 1.000000 |
| rad38         | 7.08578e-10 | 1.000000 | 7.08578e-10 | 1.000000 |
| rad8          | 6.51393e-10 | 1.000000 | 6.51393e-10 | 1.000000 |
| rad14         | 3.46214e-10 | 1.000000 | 3.46215e-10 | 1.000000 |
| PAH7+H        | 3.38407e-11 | 1.000000 | 3.38407e-11 | 1.000000 |
| rad46         | 9.95168e-12 | 1.000000 | 9.95168e-12 | 1.000000 |
| rad27         | 6.85724e-12 | 1.000000 | 6.85724e-12 | 1.000000 |
| rad60syn      | 5.92440e-12 | 1.000000 | 5.92440e-12 | 1.000000 |
| rad24         | 4.67203e-12 | 1.000000 | 4.67203e-12 | 1.000000 |
| rad60anti     | 1.97598e-12 | 1.000000 | 1.97599e-12 | 1.000000 |
| rad39         | 1.64643e-12 | 1.000000 | 1.64643e-12 | 1.000000 |
| rad12         | 4.35460e-14 | 1.000000 | 4.35460e-14 | 1.000000 |
| PAH3+H        | 2.44319e-14 | 1.000000 | 2.44320e-14 | 1.000000 |
| rad59         | 7.84770e-15 | 1.000000 | 7.84770e-15 | 1.000000 |
| rad5          | 7.54516e-15 | 1.000000 | 7.54517e-15 | 1.000000 |
| rad37         | 3.44758e-15 | 1.000000 | 3.44759e-15 | 1.000000 |
| rad31         | 2.02837e-15 | 1.000000 | 2.02837e-15 | 1.000000 |
| rad50         | 2.66401e-16 | 1.000000 | 2.66402e-16 | 1.000000 |
| rad19syn      | 1.46135e-16 | 1.000000 | 1.46135e-16 | 1.000000 |
| rad54         | 3.43420e-18 | 1.000000 | 3.43420e-18 | 1.000000 |
| rad43         | 1.38218e-19 | 1.000000 | 1.38218e-19 | 1.000000 |
| rad62         | 9.92373e-20 | 1.000000 | 9.92373e-20 | 1.000000 |
| PAH10+CH3     | 6.44328e-20 | 1.000000 | 6.44329e-20 | 1.000000 |
| rad52         | 6.15858e-20 | 1.000000 | 6.15858e-20 | 1.000000 |
| rad70         | 4.07288e-20 | 1.000000 | 4.07288e-20 | 1.000000 |
| PhcycC3H3_A+H | 8.32432e-21 | 1.000000 | 8.32432e-21 | 1.000000 |
| rad55         | 2.35359e-21 | 1.000000 | 2.35359e-21 | 1.000000 |
| rad51         | 1.25702e-21 | 1.000000 | 1.25702e-21 | 1.000000 |
| rad34         | 5.10534e-23 | 1.000000 | 5.10534e-23 | 1.000000 |
| rad58         | 4.44415e-23 | 1.000000 | 4.44415e-23 | 1.000000 |
| PAH1+H        | 2.23221e-23 | 1.000000 | 2.23221e-23 | 1.000000 |
| rad65         | 8.06151e-24 | 1.000000 | 8.06152e-24 | 1.000000 |
| rad42         | 1.35107e-25 | 1.000000 | 1.35107e-25 | 1.000000 |
| rad41         | 2.91527e-26 | 1.000000 | 2.91527e-26 | 1.000000 |
| rad47         | 9.62631e-28 | 1.000000 | 9.62631e-28 | 1.000000 |

100.000000 Pa, 220.000000 K

=====

| Rate constant      | True (fraction)       | Effective (fraction)  |
|--------------------|-----------------------|-----------------------|
| Total              | 4.29529e-17 (1.00 )   | 4.29528e-17 (1.00 )   |
| Formation of rad11 | 3.53712e-17 (0.823 )  | 3.53711e-17 (0.823 )  |
| Formation of rad6  | 6.75433e-18 (0.157 )  | 6.75432e-18 (0.157 )  |
| H-abstraction      | 8.27372e-19 (0.0193 ) | 8.27372e-19 (0.0193 ) |

| species            | PYtrue      | Cumul    | PYeffective | Cumul    |
|--------------------|-------------|----------|-------------|----------|
| rad6               | 0.915265    | 0.915265 | 0.915266    | 0.915266 |
| Indene+H           | 0.0435416   | 0.958806 | 0.0435417   | 0.958807 |
| Benzene+2-propynyl | 0.0192623   | 0.978069 | 0.0192623   | 0.978070 |
| rad11              | 0.0123907   | 0.990459 | 0.0123907   | 0.990460 |
| rad23              | 0.00754195  | 0.998001 | 0.00754196  | 0.998002 |
| C2H2+PhCH2         | 0.000802751 | 0.998804 | 0.000802751 | 0.998805 |
| rad45              | 0.000506733 | 0.999311 | 0.000506733 | 0.999312 |
| rad22              | 0.000319360 | 0.999630 | 0.000319360 | 0.999631 |
| rad7               | 0.000310682 | 0.999941 | 0.000310682 | 0.999942 |
| rad36              | 3.18461e-05 | 0.999973 | 3.18461e-05 | 0.999974 |
| PhCHCCH2+H         | 1.15923e-05 | 0.999984 | 1.15923e-05 | 0.999985 |
| rad2               | 6.26437e-06 | 0.999990 | 6.26437e-06 | 0.999992 |
| rad3               | 2.98265e-06 | 0.999993 | 2.98265e-06 | 0.999995 |
| rad4               | 1.54549e-06 | 0.999995 | 1.54549e-06 | 0.999996 |
| rad13              | 1.05709e-06 | 0.999996 | 1.05709e-06 | 0.999997 |
| rad9               | 9.06026e-07 | 0.999997 | 9.06027e-07 | 0.999998 |
| rad28              | 7.50728e-07 | 0.999998 | 7.50729e-07 | 0.999999 |



|               |             |          |             |          |
|---------------|-------------|----------|-------------|----------|
| Phenyl+Allene | 6.93824e-07 | 0.999998 | 0.00000     | 0.999999 |
| rad1          | 4.33279e-07 | 0.999999 | 4.33279e-07 | 0.999999 |
| rad10         | 3.64137e-07 | 0.999999 | 3.64137e-07 | 1.000000 |
| PhCCH+CH3     | 3.10393e-07 | 1.000000 | 3.10393e-07 | 1.000000 |
| rad25         | 2.23853e-07 | 1.000000 | 2.23853e-07 | 1.000000 |
| rad18         | 7.08667e-08 | 1.000000 | 7.08668e-08 | 1.000000 |
| rad30         | 5.63441e-08 | 1.000000 | 5.63442e-08 | 1.000000 |
| rad15         | 1.25288e-08 | 1.000000 | 1.25289e-08 | 1.000000 |
| PhCH2CCH+H    | 1.05443e-08 | 1.000000 | 1.05443e-08 | 1.000000 |
| rad20         | 7.78075e-09 | 1.000000 | 7.78075e-09 | 1.000000 |
| PhCCCH3+H     | 6.16000e-09 | 1.000000 | 6.16001e-09 | 1.000000 |
| rad21         | 4.82021e-09 | 1.000000 | 4.82021e-09 | 1.000000 |
| rad26         | 3.02317e-09 | 1.000000 | 3.02317e-09 | 1.000000 |
| PAH9+H        | 2.27737e-09 | 1.000000 | 2.27737e-09 | 1.000000 |
| Ph+MeAc       | 1.89851e-09 | 1.000000 | 1.89852e-09 | 1.000000 |
| rad33         | 1.25189e-09 | 1.000000 | 1.25189e-09 | 1.000000 |
| rad35         | 1.06032e-09 | 1.000000 | 1.06033e-09 | 1.000000 |
| rad8          | 8.81928e-10 | 1.000000 | 8.81929e-10 | 1.000000 |
| rad38         | 8.73642e-10 | 1.000000 | 8.73643e-10 | 1.000000 |
| rad14         | 3.77944e-10 | 1.000000 | 3.77944e-10 | 1.000000 |
| PAH7+H        | 5.76076e-11 | 1.000000 | 5.76076e-11 | 1.000000 |
| rad46         | 1.32354e-11 | 1.000000 | 1.32354e-11 | 1.000000 |
| rad27         | 8.59691e-12 | 1.000000 | 8.59691e-12 | 1.000000 |
| rad60syn      | 7.72760e-12 | 1.000000 | 7.72760e-12 | 1.000000 |
| rad24         | 4.56694e-12 | 1.000000 | 4.56694e-12 | 1.000000 |
| rad39         | 3.36154e-12 | 1.000000 | 3.36155e-12 | 1.000000 |
| rad60anti     | 2.64802e-12 | 1.000000 | 2.64803e-12 | 1.000000 |
| rad12         | 1.14272e-13 | 1.000000 | 1.14272e-13 | 1.000000 |
| PAH3+H        | 4.60928e-14 | 1.000000 | 4.60929e-14 | 1.000000 |
| rad5          | 1.86298e-14 | 1.000000 | 1.86298e-14 | 1.000000 |
| rad59         | 1.43889e-14 | 1.000000 | 1.43889e-14 | 1.000000 |
| rad37         | 1.00264e-14 | 1.000000 | 1.00264e-14 | 1.000000 |
| rad31         | 2.37781e-15 | 1.000000 | 2.37781e-15 | 1.000000 |
| rad50         | 5.52148e-16 | 1.000000 | 5.52149e-16 | 1.000000 |
| rad19syn      | 4.44775e-16 | 1.000000 | 4.44776e-16 | 1.000000 |
| rad54         | 1.21744e-17 | 1.000000 | 1.21744e-17 | 1.000000 |
| rad43         | 5.43011e-19 | 1.000000 | 5.43011e-19 | 1.000000 |
| rad62         | 3.91679e-19 | 1.000000 | 3.91679e-19 | 1.000000 |
| PAH10+CH3     | 2.98053e-19 | 1.000000 | 2.98053e-19 | 1.000000 |
| rad70         | 1.84817e-19 | 1.000000 | 1.84817e-19 | 1.000000 |
| rad52         | 1.82040e-19 | 1.000000 | 1.82040e-19 | 1.000000 |
| PhcycC3H3_A+H | 4.12672e-20 | 1.000000 | 4.12673e-20 | 1.000000 |
| rad55         | 1.13069e-20 | 1.000000 | 1.13069e-20 | 1.000000 |
| rad51         | 4.97883e-21 | 1.000000 | 4.97884e-21 | 1.000000 |
| rad34         | 2.96361e-22 | 1.000000 | 2.96362e-22 | 1.000000 |
| rad58         | 2.17136e-22 | 1.000000 | 2.17136e-22 | 1.000000 |
| PAH1+H        | 1.34287e-22 | 1.000000 | 1.34287e-22 | 1.000000 |
| rad65         | 3.68469e-23 | 1.000000 | 3.68469e-23 | 1.000000 |
| rad42         | 8.59739e-25 | 1.000000 | 8.59739e-25 | 1.000000 |
| rad41         | 1.90910e-25 | 1.000000 | 1.90910e-25 | 1.000000 |
| rad47         | 4.36615e-27 | 1.000000 | 4.36616e-27 | 1.000000 |

100.000000 Pa, 230.000000 K

=====

| Rate constant      | True (fraction)       | Effective (fraction)  |
|--------------------|-----------------------|-----------------------|
| Total              | 6.25016e-17 (1.00 )   | 6.25016e-17 (1.00 )   |
| Formation of rad11 | 5.06355e-17 (0.810 )  | 5.06355e-17 (0.810 )  |
| Formation of rad6  | 1.04318e-17 (0.167 )  | 1.04318e-17 (0.167 )  |
| H-abstraction      | 1.43428e-18 (0.0229 ) | 1.43428e-18 (0.0229 ) |

| species            | PYtrue      | Cumul    | PYeffective | Cumul    |
|--------------------|-------------|----------|-------------|----------|
| rad6               | 0.913908    | 0.913908 | 0.913909    | 0.913909 |
| Indene+H           | 0.0438366   | 0.957745 | 0.0438367   | 0.957746 |
| Benzene+2-propynyl | 0.0229478   | 0.980693 | 0.0229478   | 0.980694 |
| rad11              | 0.00995616  | 0.990649 | 0.00995616  | 0.990650 |
| rad23              | 0.00737480  | 0.998024 | 0.00737481  | 0.998025 |
| C2H2+PhCH2         | 0.000857508 | 0.998881 | 0.000857509 | 0.998882 |
| rad45              | 0.000491191 | 0.999372 | 0.000491191 | 0.999373 |
| rad7               | 0.000308623 | 0.999681 | 0.000308623 | 0.999682 |
| rad22              | 0.000256498 | 0.999937 | 0.000256499 | 0.999939 |
| rad36              | 3.09764e-05 | 0.999968 | 3.09764e-05 | 0.999970 |
| PhCHCCH2+H         | 1.33038e-05 | 0.999982 | 1.33038e-05 | 0.999983 |
| rad2               | 7.82831e-06 | 0.999990 | 7.82832e-06 | 0.999991 |
| rad3               | 3.16119e-06 | 0.999993 | 3.16119e-06 | 0.999994 |
| rad4               | 1.64262e-06 | 0.999994 | 1.64262e-06 | 0.999995 |
| rad9               | 1.05736e-06 | 0.999995 | 1.05737e-06 | 0.999997 |
| rad13              | 1.04591e-06 | 0.999996 | 1.04591e-06 | 0.999998 |
| rad28              | 9.48035e-07 | 0.999997 | 9.48035e-07 | 0.999998 |

|               |             |          |             |          |
|---------------|-------------|----------|-------------|----------|
| Phenyl+Allene | 9.08912e-07 | 0.999998 | 0.00000     | 0.999998 |
| rad1          | 5.46826e-07 | 0.999999 | 5.46826e-07 | 0.999999 |
| rad10         | 4.83893e-07 | 0.999999 | 4.83893e-07 | 1.000000 |
| PhCCH+CH3     | 4.49181e-07 | 1.000000 | 4.49181e-07 | 1.000000 |
| rad25         | 1.83145e-07 | 1.000000 | 1.83145e-07 | 1.000000 |
| rad30         | 6.18188e-08 | 1.000000 | 6.18188e-08 | 1.000000 |
| rad18         | 5.40174e-08 | 1.000000 | 5.40175e-08 | 1.000000 |
| PhCH2CCH+H    | 1.66391e-08 | 1.000000 | 1.66392e-08 | 1.000000 |
| rad15         | 1.40028e-08 | 1.000000 | 1.40028e-08 | 1.000000 |
| PhCCCH3+H     | 1.08602e-08 | 1.000000 | 1.08602e-08 | 1.000000 |
| rad20         | 5.97342e-09 | 1.000000 | 5.97343e-09 | 1.000000 |
| rad26         | 5.20173e-09 | 1.000000 | 5.20173e-09 | 1.000000 |
| rad21         | 3.70180e-09 | 1.000000 | 3.70180e-09 | 1.000000 |
| Ph+MeAc       | 3.50230e-09 | 1.000000 | 3.50230e-09 | 1.000000 |
| PAH9+H        | 2.86734e-09 | 1.000000 | 2.86735e-09 | 1.000000 |
| rad35         | 1.31448e-09 | 1.000000 | 1.31448e-09 | 1.000000 |
| rad33         | 1.24304e-09 | 1.000000 | 1.24304e-09 | 1.000000 |
| rad8          | 1.20004e-09 | 1.000000 | 1.20004e-09 | 1.000000 |
| rad38         | 1.07978e-09 | 1.000000 | 1.07978e-09 | 1.000000 |
| rad14         | 4.08623e-10 | 1.000000 | 4.08623e-10 | 1.000000 |
| PAH7+H        | 9.69327e-11 | 1.000000 | 9.69328e-11 | 1.000000 |
| rad46         | 1.76377e-11 | 1.000000 | 1.76378e-11 | 1.000000 |
| rad27         | 1.07036e-11 | 1.000000 | 1.07036e-11 | 1.000000 |
| rad60syn      | 1.00480e-11 | 1.000000 | 1.00480e-11 | 1.000000 |
| rad39         | 6.81428e-12 | 1.000000 | 6.81429e-12 | 1.000000 |
| rad24         | 4.45745e-12 | 1.000000 | 4.45745e-12 | 1.000000 |
| rad60anti     | 3.52933e-12 | 1.000000 | 3.52933e-12 | 1.000000 |
| rad12         | 2.89142e-13 | 1.000000 | 2.89143e-13 | 1.000000 |
| PAH3+H        | 8.37849e-14 | 1.000000 | 8.37850e-14 | 1.000000 |
| rad5          | 4.42150e-14 | 1.000000 | 4.42150e-14 | 1.000000 |
| rad37         | 2.78216e-14 | 1.000000 | 2.78217e-14 | 1.000000 |
| rad59         | 2.54548e-14 | 1.000000 | 2.54548e-14 | 1.000000 |
| rad31         | 2.79203e-15 | 1.000000 | 2.79203e-15 | 1.000000 |
| rad19syn      | 1.25860e-15 | 1.000000 | 1.25860e-15 | 1.000000 |
| rad50         | 1.10622e-15 | 1.000000 | 1.10622e-15 | 1.000000 |
| rad54         | 3.94788e-17 | 1.000000 | 3.94788e-17 | 1.000000 |
| rad43         | 1.93504e-18 | 1.000000 | 1.93504e-18 | 1.000000 |
| rad62         | 1.39511e-18 | 1.000000 | 1.39511e-18 | 1.000000 |
| PAH10+CH3     | 1.23520e-18 | 1.000000 | 1.23520e-18 | 1.000000 |
| rad70         | 7.36136e-19 | 1.000000 | 7.36137e-19 | 1.000000 |
| rad52         | 4.99969e-19 | 1.000000 | 4.99970e-19 | 1.000000 |
| PhcycC3H3_A+H | 1.78992e-19 | 1.000000 | 1.78992e-19 | 1.000000 |
| rad55         | 4.77125e-20 | 1.000000 | 4.77125e-20 | 1.000000 |
| rad51         | 1.77648e-20 | 1.000000 | 1.77648e-20 | 1.000000 |
| rad34         | 1.46232e-21 | 1.000000 | 1.46232e-21 | 1.000000 |
| rad58         | 9.25174e-22 | 1.000000 | 9.25174e-22 | 1.000000 |
| PAH1+H        | 6.88433e-22 | 1.000000 | 6.88434e-22 | 1.000000 |
| rad65         | 1.48856e-22 | 1.000000 | 1.48856e-22 | 1.000000 |
| rad42         | 4.59928e-24 | 1.000000 | 4.59928e-24 | 1.000000 |
| rad41         | 1.05032e-24 | 1.000000 | 1.05032e-24 | 1.000000 |
| rad47         | 1.71661e-26 | 1.000000 | 1.71662e-26 | 1.000000 |

100.000000 Pa, 240.000000 K

=====

| Rate constant      | True (fraction)       | Effective (fraction)  |
|--------------------|-----------------------|-----------------------|
| Total              | 8.83273e-17 (1.00 )   | 8.83272e-17 (1.00 )   |
| Formation of rad11 | 7.04077e-17 (0.797 )  | 7.04076e-17 (0.797 )  |
| Formation of rad6  | 1.55481e-17 (0.176 )  | 1.55481e-17 (0.176 )  |
| H-abstraction      | 2.37143e-18 (0.0268 ) | 2.37143e-18 (0.0268 ) |

| species            | PYtrue      | Cumul    | PYeffective | Cumul    |
|--------------------|-------------|----------|-------------|----------|
| rad6               | 0.911870    | 0.911870 | 0.911871    | 0.911871 |
| Indene+H           | 0.0441281   | 0.955998 | 0.0441281   | 0.955999 |
| Benzene+2-propynyl | 0.0268483   | 0.982847 | 0.0268483   | 0.982848 |
| rad11              | 0.00799371  | 0.990840 | 0.00799372  | 0.990841 |
| rad23              | 0.00718845  | 0.998029 | 0.00718845  | 0.998030 |
| C2H2+PhCH2         | 0.000916861 | 0.998946 | 0.000916862 | 0.998947 |
| rad45              | 0.000475013 | 0.999421 | 0.000475014 | 0.999422 |
| rad7               | 0.000306315 | 0.999727 | 0.000306316 | 0.999728 |
| rad22              | 0.000205949 | 0.999933 | 0.000205949 | 0.999934 |
| rad36              | 3.00752e-05 | 0.999963 | 3.00753e-05 | 0.999964 |
| PhCHCCH2+H         | 1.52777e-05 | 0.999978 | 1.52777e-05 | 0.999979 |
| rad2               | 9.71960e-06 | 0.999988 | 9.71962e-06 | 0.999989 |
| rad3               | 3.33162e-06 | 0.999991 | 3.33163e-06 | 0.999992 |
| rad4               | 1.73650e-06 | 0.999993 | 1.73650e-06 | 0.999994 |
| rad9               | 1.23341e-06 | 0.999994 | 1.23341e-06 | 0.999995 |
| rad28              | 1.19817e-06 | 0.999996 | 1.19817e-06 | 0.999997 |
| Phenyl+Allene      | 1.18293e-06 | 0.999997 | 0.00000     | 0.999997 |

|               |             |          |             |          |
|---------------|-------------|----------|-------------|----------|
| rad13         | 1.03471e-06 | 0.999998 | 1.03471e-06 | 0.999998 |
| rad1          | 6.86227e-07 | 0.999999 | 6.86228e-07 | 0.999998 |
| PhCCH+CH3     | 6.46500e-07 | 0.999999 | 6.46501e-07 | 0.999999 |
| rad10         | 6.34665e-07 | 1.000000 | 6.34666e-07 | 1.000000 |
| rad25         | 1.49586e-07 | 1.000000 | 1.49586e-07 | 1.000000 |
| rad30         | 6.79119e-08 | 1.000000 | 6.79120e-08 | 1.000000 |
| rad18         | 4.12658e-08 | 1.000000 | 4.12659e-08 | 1.000000 |
| PhCH2CCH+H    | 2.56752e-08 | 1.000000 | 2.56752e-08 | 1.000000 |
| PhCCCH3+H     | 1.89146e-08 | 1.000000 | 1.89147e-08 | 1.000000 |
| rad15         | 1.56714e-08 | 1.000000 | 1.56714e-08 | 1.000000 |
| rad26         | 8.79065e-09 | 1.000000 | 8.79065e-09 | 1.000000 |
| Ph+MeAc       | 6.38350e-09 | 1.000000 | 6.38351e-09 | 1.000000 |
| rad20         | 4.60193e-09 | 1.000000 | 4.60194e-09 | 1.000000 |
| PAH9+H        | 3.60748e-09 | 1.000000 | 3.60749e-09 | 1.000000 |
| rad21         | 2.85296e-09 | 1.000000 | 2.85296e-09 | 1.000000 |
| rad8          | 1.64350e-09 | 1.000000 | 1.64350e-09 | 1.000000 |
| rad35         | 1.62806e-09 | 1.000000 | 1.62806e-09 | 1.000000 |
| rad38         | 1.33715e-09 | 1.000000 | 1.33716e-09 | 1.000000 |
| rad33         | 1.23435e-09 | 1.000000 | 1.23435e-09 | 1.000000 |
| rad14         | 4.38018e-10 | 1.000000 | 4.38018e-10 | 1.000000 |
| PAH7+H        | 1.62087e-10 | 1.000000 | 1.62087e-10 | 1.000000 |
| rad46         | 2.35305e-11 | 1.000000 | 2.35306e-11 | 1.000000 |
| rad39         | 1.36929e-11 | 1.000000 | 1.36929e-11 | 1.000000 |
| rad27         | 1.32409e-11 | 1.000000 | 1.32410e-11 | 1.000000 |
| rad60syn      | 1.30234e-11 | 1.000000 | 1.30234e-11 | 1.000000 |
| rad60anti     | 4.67957e-12 | 1.000000 | 4.67957e-12 | 1.000000 |
| rad24         | 4.34375e-12 | 1.000000 | 4.34376e-12 | 1.000000 |
| rad12         | 7.04994e-13 | 1.000000 | 7.04995e-13 | 1.000000 |
| PAH3+H        | 1.47456e-13 | 1.000000 | 1.47456e-13 | 1.000000 |
| rad5          | 1.01038e-13 | 1.000000 | 1.01038e-13 | 1.000000 |
| rad37         | 7.36819e-14 | 1.000000 | 7.36820e-14 | 1.000000 |
| rad59         | 4.36553e-14 | 1.000000 | 4.36554e-14 | 1.000000 |
| rad19syn      | 3.33865e-15 | 1.000000 | 3.33865e-15 | 1.000000 |
| rad31         | 3.28799e-15 | 1.000000 | 3.28800e-15 | 1.000000 |
| rad50         | 2.14948e-15 | 1.000000 | 2.14948e-15 | 1.000000 |
| rad54         | 1.18223e-16 | 1.000000 | 1.18223e-16 | 1.000000 |
| rad43         | 6.31050e-18 | 1.000000 | 6.31051e-18 | 1.000000 |
| PAH10+CH3     | 4.62324e-18 | 1.000000 | 4.62325e-18 | 1.000000 |
| rad62         | 4.53192e-18 | 1.000000 | 4.53192e-18 | 1.000000 |
| rad70         | 2.61327e-18 | 1.000000 | 2.61328e-18 | 1.000000 |
| rad52         | 1.28712e-18 | 1.000000 | 1.28712e-18 | 1.000000 |
| PhcycC3H3_A+H | 6.88650e-19 | 1.000000 | 6.88650e-19 | 1.000000 |
| rad55         | 1.79236e-19 | 1.000000 | 1.79236e-19 | 1.000000 |
| rad51         | 5.77453e-20 | 1.000000 | 5.77454e-20 | 1.000000 |
| rad34         | 6.25123e-21 | 1.000000 | 6.25124e-21 | 1.000000 |
| rad58         | 3.49098e-21 | 1.000000 | 3.49098e-21 | 1.000000 |
| PAH1+H        | 3.06079e-21 | 1.000000 | 3.06080e-21 | 1.000000 |
| rad65         | 5.38567e-22 | 1.000000 | 5.38567e-22 | 1.000000 |
| rad42         | 2.11159e-23 | 1.000000 | 2.11159e-23 | 1.000000 |
| rad41         | 4.95606e-24 | 1.000000 | 4.95607e-24 | 1.000000 |
| rad47         | 5.95750e-26 | 1.000000 | 5.95751e-26 | 1.000000 |

100.000000 Pa, 250.000000 K

=====

| Rate constant      | True (fraction)       | Effective (fraction)  |
|--------------------|-----------------------|-----------------------|
| Total              | 1.21641e-16 (1.00 )   | 1.21641e-16 (1.00 )   |
| Formation of rad11 | 9.54219e-17 (0.784 )  | 9.54217e-17 (0.784 )  |
| Formation of rad6  | 2.24583e-17 (0.185 )  | 2.24583e-17 (0.185 )  |
| H-abstraction      | 3.76121e-18 (0.0309 ) | 3.76121e-18 (0.0309 ) |

| species            | PYtrue      | Cumul    | PYeffective | Cumul    |
|--------------------|-------------|----------|-------------|----------|
| rad6               | 0.909275    | 0.909275 | 0.909276    | 0.909276 |
| Indene+H           | 0.0444245   | 0.953699 | 0.0444246   | 0.953700 |
| Benzene+2-propynyl | 0.0309205   | 0.984620 | 0.0309205   | 0.984621 |
| rad23              | 0.00698437  | 0.991604 | 0.00698438  | 0.991605 |
| rad11              | 0.00641472  | 0.998019 | 0.00641472  | 0.998020 |
| C2H2+PhCH2         | 0.000981290 | 0.999000 | 0.000981300 | 0.999001 |
| rad45              | 0.000458264 | 0.999458 | 0.000458265 | 0.999459 |
| rad7               | 0.000303823 | 0.999762 | 0.000303824 | 0.999763 |
| rad22              | 0.000165401 | 0.999928 | 0.000165401 | 0.999929 |
| rad36              | 2.91456e-05 | 0.999957 | 2.91455e-05 | 0.999958 |
| PhCHCCH2+H         | 1.75549e-05 | 0.999974 | 1.75550e-05 | 0.999975 |
| rad2               | 1.19936e-05 | 0.999986 | 1.19936e-05 | 0.999987 |
| rad3               | 3.49384e-06 | 0.999990 | 3.49384e-06 | 0.999991 |
| rad4               | 1.82711e-06 | 0.999992 | 1.82711e-06 | 0.999993 |
| Phenyl+Allene      | 1.53012e-06 | 0.999993 | 0.000000    | 0.999993 |
| rad28              | 1.51542e-06 | 0.999995 | 1.51543e-06 | 0.999994 |
| rad9               | 1.43798e-06 | 0.999996 | 1.43799e-06 | 0.999996 |

|               |             |          |             |          |
|---------------|-------------|----------|-------------|----------|
| rad13         | 1.02359e-06 | 0.999997 | 1.02360e-06 | 0.999997 |
| PhCCH+CH3     | 9.25896e-07 | 0.999998 | 9.25897e-07 | 0.999998 |
| rad1          | 8.56596e-07 | 0.999999 | 8.56597e-07 | 0.999998 |
| rad10         | 8.22160e-07 | 1.000000 | 8.22161e-07 | 0.999999 |
| rad25         | 1.22001e-07 | 1.000000 | 1.22001e-07 | 0.999999 |
| rad30         | 7.47003e-08 | 1.000000 | 7.47004e-08 | 0.999999 |
| PhCH2CCH+H    | 3.88358e-08 | 1.000000 | 3.88358e-08 | 1.000000 |
| PhCCCH3+H     | 3.25182e-08 | 1.000000 | 3.25183e-08 | 1.000000 |
| rad18         | 3.15971e-08 | 1.000000 | 3.15972e-08 | 1.000000 |
| rad15         | 1.75616e-08 | 1.000000 | 1.75616e-08 | 1.000000 |
| rad26         | 1.45905e-08 | 1.000000 | 1.45906e-08 | 1.000000 |
| Ph+MeAc       | 1.14844e-08 | 1.000000 | 1.14844e-08 | 1.000000 |
| PAH9+H        | 4.53382e-09 | 1.000000 | 4.53382e-09 | 1.000000 |
| rad20         | 3.55797e-09 | 1.000000 | 3.55797e-09 | 1.000000 |
| rad8          | 2.26831e-09 | 1.000000 | 2.26831e-09 | 1.000000 |
| rad21         | 2.20670e-09 | 1.000000 | 2.20671e-09 | 1.000000 |
| rad35         | 2.01408e-09 | 1.000000 | 2.01408e-09 | 1.000000 |
| rad38         | 1.65818e-09 | 1.000000 | 1.65818e-09 | 1.000000 |
| rad33         | 1.22593e-09 | 1.000000 | 1.22593e-09 | 1.000000 |
| rad14         | 4.65985e-10 | 1.000000 | 4.65986e-10 | 1.000000 |
| PAH7+H        | 2.70537e-10 | 1.000000 | 2.70538e-10 | 1.000000 |
| rad46         | 3.13994e-11 | 1.000000 | 3.13994e-11 | 1.000000 |
| rad39         | 2.72243e-11 | 1.000000 | 2.72243e-11 | 1.000000 |
| rad60syn      | 1.68254e-11 | 1.000000 | 1.68254e-11 | 1.000000 |
| rad27         | 1.62801e-11 | 1.000000 | 1.62801e-11 | 1.000000 |
| rad60anti     | 6.17383e-12 | 1.000000 | 6.17384e-12 | 1.000000 |
| rad24         | 4.22608e-12 | 1.000000 | 4.22608e-12 | 1.000000 |
| rad12         | 1.65546e-12 | 1.000000 | 1.65546e-12 | 1.000000 |
| PAH3+H        | 2.52255e-13 | 1.000000 | 2.52256e-13 | 1.000000 |
| rad5          | 2.22591e-13 | 1.000000 | 2.22591e-13 | 1.000000 |
| rad37         | 1.86292e-13 | 1.000000 | 1.86292e-13 | 1.000000 |
| rad59         | 7.28642e-14 | 1.000000 | 7.28643e-14 | 1.000000 |
| rad19syn      | 8.35509e-15 | 1.000000 | 8.35510e-15 | 1.000000 |
| rad50         | 4.06146e-15 | 1.000000 | 4.06147e-15 | 1.000000 |
| rad31         | 3.88834e-15 | 1.000000 | 3.88834e-15 | 1.000000 |
| rad54         | 3.29356e-16 | 1.000000 | 3.29356e-16 | 1.000000 |
| rad43         | 1.89727e-17 | 1.000000 | 1.89728e-17 | 1.000000 |
| PAH10+CH3     | 1.57439e-17 | 1.000000 | 1.57439e-17 | 1.000000 |
| rad62         | 1.35407e-17 | 1.000000 | 1.35407e-17 | 1.000000 |
| rad70         | 8.37340e-18 | 1.000000 | 8.37341e-18 | 1.000000 |
| rad52         | 3.12754e-18 | 1.000000 | 3.12755e-18 | 1.000000 |
| PhcycC3H3_A+H | 2.37777e-18 | 1.000000 | 2.37777e-18 | 1.000000 |
| rad55         | 6.06225e-19 | 1.000000 | 6.06226e-19 | 1.000000 |
| rad51         | 1.72558e-19 | 1.000000 | 1.72558e-19 | 1.000000 |
| rad34         | 2.35278e-20 | 1.000000 | 2.35279e-20 | 1.000000 |
| PAH1+H        | 1.19817e-20 | 1.000000 | 1.19817e-20 | 1.000000 |
| rad58         | 1.18162e-20 | 1.000000 | 1.18162e-20 | 1.000000 |
| rad65         | 1.76429e-21 | 1.000000 | 1.76429e-21 | 1.000000 |
| rad42         | 8.46735e-23 | 1.000000 | 8.46736e-23 | 1.000000 |
| rad41         | 2.04140e-23 | 1.000000 | 2.04140e-23 | 1.000000 |
| rad47         | 1.85320e-25 | 1.000000 | 1.85321e-25 | 1.000000 |

100.000000 Pa, 260.000000 K

=====

| Rate constant      | True (fraction)       | Effective (fraction)  |
|--------------------|-----------------------|-----------------------|
| Total              | 1.63720e-16 (1.00 )   | 1.63720e-16 (1.00 )   |
| Formation of rad11 | 1.26419e-16 (0.772 )  | 1.26418e-16 (0.772 )  |
| Formation of rad6  | 3.15515e-17 (0.193 )  | 3.15514e-17 (0.193 )  |
| H-abstraction      | 5.75028e-18 (0.0351 ) | 5.75028e-18 (0.0351 ) |

| species            | PYtrue      | Cumul    | PYeffective | Cumul    |
|--------------------|-------------|----------|-------------|----------|
| rad6               | 0.906228    | 0.906228 | 0.906230    | 0.906230 |
| Indene+H           | 0.0447333   | 0.950962 | 0.0447334   | 0.950964 |
| Benzene+2-propynyl | 0.0351226   | 0.986084 | 0.0351226   | 0.986086 |
| rad23              | 0.00676403  | 0.992848 | 0.00676404  | 0.992850 |
| rad11              | 0.00514644  | 0.997995 | 0.00514645  | 0.997997 |
| C2H2+PhCH2         | 0.00105133  | 0.999046 | 0.00105133  | 0.999048 |
| rad45              | 0.000441008 | 0.999487 | 0.000441009 | 0.999489 |
| rad7               | 0.000301200 | 0.999788 | 0.000301201 | 0.999790 |
| rad22              | 0.000132941 | 0.999921 | 0.000132941 | 0.999923 |
| rad36              | 2.81904e-05 | 0.999949 | 2.81904e-05 | 0.999951 |
| PhCHCCH2+H         | 2.01834e-05 | 0.999969 | 2.01835e-05 | 0.999972 |
| rad2               | 1.47115e-05 | 0.999984 | 1.47116e-05 | 0.999986 |
| rad3               | 3.64818e-06 | 0.999988 | 3.64819e-06 | 0.999990 |
| Phenyl+Allene      | 1.96774e-06 | 0.999990 | 0.000000    | 0.999990 |
| rad28              | 1.91775e-06 | 0.999992 | 1.91776e-06 | 0.999992 |
| rad4               | 1.91469e-06 | 0.999994 | 1.91469e-06 | 0.999994 |
| rad9               | 1.67538e-06 | 0.999995 | 1.67539e-06 | 0.999995 |

|               |             |          |             |          |
|---------------|-------------|----------|-------------|----------|
| PhCCH+CH3     | 1.31994e-06 | 0.999997 | 1.31995e-06 | 0.999997 |
| rad1          | 1.06384e-06 | 0.999998 | 1.06384e-06 | 0.999998 |
| rad10         | 1.05258e-06 | 0.999999 | 1.05258e-06 | 0.999999 |
| rad13         | 1.01263e-06 | 1.000000 | 1.01263e-06 | 1.000000 |
| rad25         | 9.93843e-08 | 1.000000 | 9.93843e-08 | 1.000000 |
| rad30         | 8.22686e-08 | 1.000000 | 8.22688e-08 | 1.000000 |
| PhCH2CCH+H    | 5.77007e-08 | 1.000000 | 5.77008e-08 | 1.000000 |
| PhCCCH3+H     | 5.51390e-08 | 1.000000 | 5.51392e-08 | 1.000000 |
| rad18         | 2.42532e-08 | 1.000000 | 2.42533e-08 | 1.000000 |
| rad26         | 2.37814e-08 | 1.000000 | 2.37815e-08 | 1.000000 |
| Ph+MeAc       | 2.03703e-08 | 1.000000 | 2.03704e-08 | 1.000000 |
| rad15         | 1.97036e-08 | 1.000000 | 1.97036e-08 | 1.000000 |
| PAH9+H        | 5.68978e-09 | 1.000000 | 5.68979e-09 | 1.000000 |
| rad8          | 3.15763e-09 | 1.000000 | 3.15763e-09 | 1.000000 |
| rad20         | 2.76102e-09 | 1.000000 | 2.76102e-09 | 1.000000 |
| rad35         | 2.48788e-09 | 1.000000 | 2.48789e-09 | 1.000000 |
| rad38         | 2.05796e-09 | 1.000000 | 2.05797e-09 | 1.000000 |
| rad21         | 1.71326e-09 | 1.000000 | 1.71326e-09 | 1.000000 |
| rad33         | 1.21790e-09 | 1.000000 | 1.21790e-09 | 1.000000 |
| rad14         | 4.92471e-10 | 1.000000 | 4.92471e-10 | 1.000000 |
| PAH7+H        | 4.52091e-10 | 1.000000 | 4.52092e-10 | 1.000000 |
| rad39         | 5.34399e-11 | 1.000000 | 5.34400e-11 | 1.000000 |
| rad46         | 4.18744e-11 | 1.000000 | 4.18745e-11 | 1.000000 |
| rad60syn      | 2.16666e-11 | 1.000000 | 2.16666e-11 | 1.000000 |
| rad27         | 1.98999e-11 | 1.000000 | 1.99000e-11 | 1.000000 |
| rad60anti     | 8.10621e-12 | 1.000000 | 8.10622e-12 | 1.000000 |
| rad24         | 4.10467e-12 | 1.000000 | 4.10468e-12 | 1.000000 |
| rad12         | 3.74226e-12 | 1.000000 | 3.74227e-12 | 1.000000 |
| rad5          | 4.73187e-13 | 1.000000 | 4.73187e-13 | 1.000000 |
| rad37         | 4.49813e-13 | 1.000000 | 4.49814e-13 | 1.000000 |
| PAH3+H        | 4.20831e-13 | 1.000000 | 4.20831e-13 | 1.000000 |
| rad59         | 1.18734e-13 | 1.000000 | 1.18734e-13 | 1.000000 |
| rad19syn      | 1.98208e-14 | 1.000000 | 1.98209e-14 | 1.000000 |
| rad50         | 7.47817e-15 | 1.000000 | 7.47818e-15 | 1.000000 |
| rad31         | 4.62361e-15 | 1.000000 | 4.62362e-15 | 1.000000 |
| rad54         | 8.58550e-16 | 1.000000 | 8.58552e-16 | 1.000000 |
| rad43         | 5.29190e-17 | 1.000000 | 5.29192e-17 | 1.000000 |
| PAH10+CH3     | 4.91118e-17 | 1.000000 | 4.91119e-17 | 1.000000 |
| rad62         | 3.74744e-17 | 1.000000 | 3.74745e-17 | 1.000000 |
| rad70         | 2.44724e-17 | 1.000000 | 2.44724e-17 | 1.000000 |
| PhcycC3H3_A+H | 7.44272e-18 | 1.000000 | 7.44274e-18 | 1.000000 |
| rad52         | 7.21194e-18 | 1.000000 | 7.21196e-18 | 1.000000 |
| rad55         | 1.86411e-18 | 1.000000 | 1.86411e-18 | 1.000000 |
| rad51         | 4.77558e-19 | 1.000000 | 4.77559e-19 | 1.000000 |
| rad34         | 7.90405e-20 | 1.000000 | 7.90407e-20 | 1.000000 |
| PAH1+H        | 4.18424e-20 | 1.000000 | 4.18425e-20 | 1.000000 |
| rad58         | 3.62682e-20 | 1.000000 | 3.62683e-20 | 1.000000 |
| rad65         | 5.28150e-21 | 1.000000 | 5.28151e-21 | 1.000000 |
| rad42         | 3.01031e-22 | 1.000000 | 3.01032e-22 | 1.000000 |
| rad41         | 7.45189e-23 | 1.000000 | 7.45191e-23 | 1.000000 |
| rad47         | 5.23475e-25 | 1.000000 | 5.23476e-25 | 1.000000 |

100.000000 Pa, 270.000000 K

=====

| Rate constant      | True (fraction)       | Effective (fraction)  |
|--------------------|-----------------------|-----------------------|
| Total              | 2.15887e-16 (1.00 )   | 2.15886e-16 (1.00 )   |
| Formation of rad11 | 1.64133e-16 (0.760 )  | 1.64132e-16 (0.760 )  |
| Formation of rad6  | 4.32452e-17 (0.200 )  | 4.32450e-17 (0.200 )  |
| H-abstraction      | 8.50919e-18 (0.0394 ) | 8.50919e-18 (0.0394 ) |

| species            | PYtrue      | Cumul    | PYeffective | Cumul    |
|--------------------|-------------|----------|-------------|----------|
| rad6               | 0.902823    | 0.902823 | 0.902826    | 0.902826 |
| Indene+H           | 0.0450601   | 0.947883 | 0.0450602   | 0.947886 |
| Benzene+2-propynyl | 0.0394150   | 0.987298 | 0.0394151   | 0.987301 |
| rad23              | 0.00652892  | 0.993827 | 0.00652894  | 0.993830 |
| rad11              | 0.00412935  | 0.997956 | 0.00412936  | 0.997959 |
| C2H2+PhCH2         | 0.00112752  | 0.999084 | 0.00112752  | 0.999087 |
| rad45              | 0.000423314 | 0.999507 | 0.000423315 | 0.999510 |
| rad7               | 0.000298490 | 0.999806 | 0.000298491 | 0.999809 |
| rad22              | 0.000106998 | 0.999913 | 0.000106998 | 0.999916 |
| rad36              | 2.72127e-05 | 0.999940 | 2.72128e-05 | 0.999943 |
| PhCHCCH2+H         | 2.32196e-05 | 0.999963 | 2.32197e-05 | 0.999966 |
| rad2               | 1.79392e-05 | 0.999981 | 1.79392e-05 | 0.999984 |
| rad3               | 3.79540e-06 | 0.999985 | 3.79541e-06 | 0.999988 |
| Phenyl+Allene      | 2.51670e-06 | 0.999987 | 0.000000    | 0.999988 |
| rad28              | 2.42762e-06 | 0.999990 | 2.42762e-06 | 0.999990 |
| rad4               | 1.99970e-06 | 0.999992 | 1.99970e-06 | 0.999992 |
| rad9               | 1.95056e-06 | 0.999994 | 1.95056e-06 | 0.999994 |

|               |             |          |             |          |
|---------------|-------------|----------|-------------|----------|
| PhCCH+CH3     | 1.87344e-06 | 0.999996 | 1.87345e-06 | 0.999996 |
| rad10         | 1.33253e-06 | 0.999997 | 1.33253e-06 | 0.999998 |
| rad1          | 1.31468e-06 | 0.999998 | 1.31468e-06 | 0.999999 |
| rad13         | 1.00188e-06 | 0.999999 | 1.00188e-06 | 1.000000 |
| PhCCCH3+H     | 9.21315e-08 | 0.999999 | 9.21318e-08 | 1.000000 |
| rad30         | 9.07107e-08 | 1.000000 | 9.07109e-08 | 1.000000 |
| PhCH2CCH+H    | 8.43571e-08 | 1.000000 | 8.43574e-08 | 1.000000 |
| rad25         | 8.08861e-08 | 1.000000 | 8.08863e-08 | 1.000000 |
| rad26         | 3.80574e-08 | 1.000000 | 3.80575e-08 | 1.000000 |
| Ph+MeAc       | 3.55785e-08 | 1.000000 | 3.55786e-08 | 1.000000 |
| rad15         | 2.21313e-08 | 1.000000 | 2.21314e-08 | 1.000000 |
| rad18         | 1.86656e-08 | 1.000000 | 1.86656e-08 | 1.000000 |
| PAH9+H        | 7.12748e-09 | 1.000000 | 7.12750e-09 | 1.000000 |
| rad8          | 4.43412e-09 | 1.000000 | 4.43413e-09 | 1.000000 |
| rad35         | 3.06756e-09 | 1.000000 | 3.06757e-09 | 1.000000 |
| rad38         | 2.55471e-09 | 1.000000 | 2.55472e-09 | 1.000000 |
| rad20         | 2.15095e-09 | 1.000000 | 2.15096e-09 | 1.000000 |
| rad21         | 1.33542e-09 | 1.000000 | 1.33542e-09 | 1.000000 |
| rad33         | 1.21032e-09 | 1.000000 | 1.21032e-09 | 1.000000 |
| PAH7+H        | 7.57373e-10 | 1.000000 | 7.57375e-10 | 1.000000 |
| rad14         | 5.17501e-10 | 1.000000 | 5.17503e-10 | 1.000000 |
| rad39         | 1.03318e-10 | 1.000000 | 1.03318e-10 | 1.000000 |
| rad46         | 5.57665e-11 | 1.000000 | 5.57667e-11 | 1.000000 |
| rad60syn      | 2.78088e-11 | 1.000000 | 2.78089e-11 | 1.000000 |
| rad27         | 2.41852e-11 | 1.000000 | 2.41852e-11 | 1.000000 |
| rad60anti     | 1.05940e-11 | 1.000000 | 1.05941e-11 | 1.000000 |
| rad12         | 8.14220e-12 | 1.000000 | 8.14222e-12 | 1.000000 |
| rad24         | 3.97984e-12 | 1.000000 | 3.97985e-12 | 1.000000 |
| rad37         | 1.03776e-12 | 1.000000 | 1.03777e-12 | 1.000000 |
| rad5          | 9.71353e-13 | 1.000000 | 9.71353e-13 | 1.000000 |
| PAH3+H        | 6.86433e-13 | 1.000000 | 6.86435e-13 | 1.000000 |
| rad59         | 1.89378e-13 | 1.000000 | 1.89378e-13 | 1.000000 |
| rad19syn      | 4.47367e-14 | 1.000000 | 4.47369e-14 | 1.000000 |
| rad50         | 1.34388e-14 | 1.000000 | 1.34388e-14 | 1.000000 |
| rad31         | 5.53522e-15 | 1.000000 | 5.53524e-15 | 1.000000 |
| rad54         | 2.10387e-15 | 1.000000 | 2.10388e-15 | 1.000000 |
| PAH10+CH3     | 1.41236e-16 | 1.000000 | 1.41236e-16 | 1.000000 |
| rad43         | 1.37684e-16 | 1.000000 | 1.37684e-16 | 1.000000 |
| rad62         | 9.66377e-17 | 1.000000 | 9.66377e-17 | 1.000000 |
| rad70         | 6.58208e-17 | 1.000000 | 6.58210e-17 | 1.000000 |
| PhcycC3H3_A+H | 2.13070e-17 | 1.000000 | 2.13071e-17 | 1.000000 |
| rad52         | 1.58484e-17 | 1.000000 | 1.58485e-17 | 1.000000 |
| rad55         | 5.25551e-18 | 1.000000 | 5.25552e-18 | 1.000000 |
| rad51         | 1.23159e-18 | 1.000000 | 1.23159e-18 | 1.000000 |
| rad34         | 2.39823e-19 | 1.000000 | 2.39822e-19 | 1.000000 |
| PAH1+H        | 1.31858e-19 | 1.000000 | 1.31858e-19 | 1.000000 |
| rad58         | 1.01889e-19 | 1.000000 | 1.01890e-19 | 1.000000 |
| rad65         | 1.45627e-20 | 1.000000 | 1.45627e-20 | 1.000000 |
| rad42         | 9.61171e-22 | 1.000000 | 9.61180e-22 | 1.000000 |
| rad41         | 2.44234e-22 | 1.000000 | 2.44234e-22 | 1.000000 |
| rad47         | 1.35768e-24 | 1.000000 | 1.35769e-24 | 1.000000 |

100.000000 Pa, 280.000000 K

=====

| Rate constant      | True (fraction)       | Effective (fraction)  |
|--------------------|-----------------------|-----------------------|
| Total              | 2.79491e-16 (1.00 )   | 2.79490e-16 (1.00 )   |
| Formation of rad11 | 2.09281e-16 (0.749 )  | 2.09280e-16 (0.749 )  |
| Formation of rad6  | 5.79792e-17 (0.207 )  | 5.79790e-17 (0.207 )  |
| H-abstraction      | 1.22310e-17 (0.0438 ) | 1.22310e-17 (0.0438 ) |

| species            | PYtrue      | Cumul    | PYeffective | Cumul    |
|--------------------|-------------|----------|-------------|----------|
| rad6               | 0.899139    | 0.899139 | 0.899141    | 0.899141 |
| Indene+H           | 0.0454098   | 0.944548 | 0.0454099   | 0.944551 |
| Benzene+2-propynyl | 0.0437616   | 0.988310 | 0.0437617   | 0.988313 |
| rad23              | 0.00628061  | 0.994591 | 0.00628063  | 0.994594 |
| rad11              | 0.00331490  | 0.997905 | 0.00331491  | 0.997908 |
| C2H2+PhCH2         | 0.00121044  | 0.999116 | 0.00121044  | 0.999119 |
| rad45              | 0.000405260 | 0.999521 | 0.000405261 | 0.999524 |
| rad7               | 0.000295729 | 0.999817 | 0.000295731 | 0.999820 |
| rad22              | 8.62878e-05 | 0.999903 | 8.62881e-05 | 0.999906 |
| PhCHCCH2+H         | 2.67303e-05 | 0.999930 | 2.67304e-05 | 0.999933 |
| rad36              | 2.62158e-05 | 0.999956 | 2.62158e-05 | 0.999959 |
| rad2               | 2.17459e-05 | 0.999978 | 2.17459e-05 | 0.999981 |
| rad3               | 3.93657e-06 | 0.999982 | 3.93658e-06 | 0.999985 |
| Phenyl+Allene      | 3.20227e-06 | 0.999985 | 0.000000    | 0.999985 |
| rad28              | 3.07283e-06 | 0.999988 | 3.07284e-06 | 0.999988 |
| PhCCH+CH3          | 2.64739e-06 | 0.999991 | 2.64740e-06 | 0.999991 |
| rad9               | 2.26913e-06 | 0.999993 | 2.26913e-06 | 0.999993 |

|               |             |          |             |          |
|---------------|-------------|----------|-------------|----------|
| rad4          | 2.08275e-06 | 0.999995 | 2.08276e-06 | 0.999995 |
| rad10         | 1.66884e-06 | 0.999997 | 1.66885e-06 | 0.999997 |
| rad1          | 1.61663e-06 | 0.999998 | 1.61664e-06 | 0.999998 |
| rad13         | 9.91390e-07 | 0.999999 | 9.91390e-07 | 0.999999 |
| PhCCCH3+H     | 1.51563e-07 | 0.999999 | 1.51564e-07 | 0.999999 |
| PhCH2CCH+H    | 1.21532e-07 | 1.000000 | 1.21532e-07 | 0.999999 |
| rad30         | 1.00131e-07 | 1.000000 | 1.00131e-07 | 1.000000 |
| rad25         | 6.57882e-08 | 1.000000 | 6.57884e-08 | 1.000000 |
| Ph+MeAc       | 6.11128e-08 | 1.000000 | 6.11130e-08 | 1.000000 |
| rad26         | 5.97816e-08 | 1.000000 | 5.97818e-08 | 1.000000 |
| rad15         | 2.48831e-08 | 1.000000 | 2.48831e-08 | 1.000000 |
| rad18         | 1.44074e-08 | 1.000000 | 1.44075e-08 | 1.000000 |
| PAH9+H        | 8.90900e-09 | 1.000000 | 8.90902e-09 | 1.000000 |
| rad8          | 6.27686e-09 | 1.000000 | 6.27689e-09 | 1.000000 |
| rad35         | 3.77422e-09 | 1.000000 | 3.77422e-09 | 1.000000 |
| rad38         | 3.17034e-09 | 1.000000 | 3.17035e-09 | 1.000000 |
| rad20         | 1.68272e-09 | 1.000000 | 1.68273e-09 | 1.000000 |
| PAH7+H        | 1.27121e-09 | 1.000000 | 1.27122e-09 | 1.000000 |
| rad33         | 1.20327e-09 | 1.000000 | 1.20327e-09 | 1.000000 |
| rad21         | 1.04535e-09 | 1.000000 | 1.04535e-09 | 1.000000 |
| rad14         | 5.41174e-10 | 1.000000 | 5.41175e-10 | 1.000000 |
| rad39         | 1.96235e-10 | 1.000000 | 1.96236e-10 | 1.000000 |
| rad46         | 7.41114e-11 | 1.000000 | 7.41116e-11 | 1.000000 |
| rad60syn      | 3.55743e-11 | 1.000000 | 3.55744e-11 | 1.000000 |
| rad27         | 2.92250e-11 | 1.000000 | 2.92251e-11 | 1.000000 |
| rad12         | 1.70512e-11 | 1.000000 | 1.70513e-11 | 1.000000 |
| rad60anti     | 1.37829e-11 | 1.000000 | 1.37830e-11 | 1.000000 |
| rad24         | 3.85195e-12 | 1.000000 | 3.85197e-12 | 1.000000 |
| rad37         | 2.28932e-12 | 1.000000 | 2.28933e-12 | 1.000000 |
| rad5          | 1.92664e-12 | 1.000000 | 1.92665e-12 | 1.000000 |
| PAH3+H        | 1.09702e-12 | 1.000000 | 1.09702e-12 | 1.000000 |
| rad59         | 2.96257e-13 | 1.000000 | 2.96258e-13 | 1.000000 |
| rad19syn      | 9.63372e-14 | 1.000000 | 9.63372e-14 | 1.000000 |
| rad50         | 2.35974e-14 | 1.000000 | 2.35974e-14 | 1.000000 |
| rad31         | 6.67987e-15 | 1.000000 | 6.67989e-15 | 1.000000 |
| rad54         | 4.86534e-15 | 1.000000 | 4.86536e-15 | 1.000000 |
| PAH10+CH3     | 3.76700e-16 | 1.000000 | 3.76701e-16 | 1.000000 |
| rad43         | 3.35782e-16 | 1.000000 | 3.35783e-16 | 1.000000 |
| rad62         | 2.33407e-16 | 1.000000 | 2.33408e-16 | 1.000000 |
| rad70         | 1.64158e-16 | 1.000000 | 1.64158e-16 | 1.000000 |
| PhcycC3H3_A+H | 5.62270e-17 | 1.000000 | 5.62272e-17 | 1.000000 |
| rad52         | 3.32978e-17 | 1.000000 | 3.32978e-17 | 1.000000 |
| rad55         | 1.36869e-17 | 1.000000 | 1.36869e-17 | 1.000000 |
| rad51         | 2.97537e-18 | 1.000000 | 2.97538e-18 | 1.000000 |
| rad34         | 6.63940e-19 | 1.000000 | 6.63943e-19 | 1.000000 |
| PAH1+H        | 3.78735e-19 | 1.000000 | 3.78736e-19 | 1.000000 |
| rad58         | 2.64114e-19 | 1.000000 | 2.64115e-19 | 1.000000 |
| rad65         | 3.72408e-20 | 1.000000 | 3.72409e-20 | 1.000000 |
| rad42         | 2.78713e-21 | 1.000000 | 2.78714e-21 | 1.000000 |
| rad41         | 7.26843e-22 | 1.000000 | 7.26844e-22 | 1.000000 |
| rad47         | 3.26401e-24 | 1.000000 | 3.26401e-24 | 1.000000 |

100.000000 Pa, 290.000000 K

=====

| Rate constant      | True (fraction)       | Effective (fraction)  |
|--------------------|-----------------------|-----------------------|
| Total              | 3.55893e-16 (1.00 )   | 3.55892e-16 (1.00 )   |
| Formation of rad11 | 2.62555e-16 (0.738 )  | 2.62554e-16 (0.738 )  |
| Formation of rad6  | 7.62093e-17 (0.214 )  | 7.62090e-17 (0.214 )  |
| H-abstraction      | 1.71289e-17 (0.0481 ) | 1.71289e-17 (0.0481 ) |

| species            | PYtrue      | Cumul    | PYeffective | Cumul    |
|--------------------|-------------|----------|-------------|----------|
| rad6               | 0.895241    | 0.895241 | 0.895245    | 0.895245 |
| Benzene+2-propynyl | 0.0481294   | 0.943370 | 0.0481296   | 0.943374 |
| Indene+H           | 0.0457861   | 0.989156 | 0.0457863   | 0.989160 |
| rad23              | 0.00602078  | 0.995177 | 0.00602080  | 0.995181 |
| rad11              | 0.00266354  | 0.997841 | 0.00266355  | 0.997845 |
| C2H2+PhCH2         | 0.00130076  | 0.999142 | 0.00130077  | 0.999146 |
| rad45              | 0.000386931 | 0.999528 | 0.000386932 | 0.999532 |
| rad7               | 0.000292948 | 0.999821 | 0.000292949 | 0.999825 |
| rad22              | 6.97675e-05 | 0.999891 | 6.97678e-05 | 0.999895 |
| PhCHCCH2+H         | 3.07949e-05 | 0.999922 | 3.07950e-05 | 0.999926 |
| rad2               | 2.62015e-05 | 0.999948 | 2.62016e-05 | 0.999952 |
| rad36              | 2.52031e-05 | 0.999973 | 2.52031e-05 | 0.999977 |
| rad3               | 4.07308e-06 | 0.999977 | 4.07309e-06 | 0.999982 |
| Phenyl+Allene      | 4.05485e-06 | 0.999982 | 0.00000     | 0.999982 |
| rad28              | 3.88753e-06 | 0.999985 | 3.88754e-06 | 0.999985 |
| PhCCH+CH3          | 3.72401e-06 | 0.999989 | 3.72402e-06 | 0.999989 |
| rad9               | 2.63750e-06 | 0.999992 | 2.63751e-06 | 0.999992 |

|               |             |          |             |          |
|---------------|-------------|----------|-------------|----------|
| rad4          | 2.16466e-06 | 0.999994 | 2.16467e-06 | 0.999994 |
| rad10         | 2.06834e-06 | 0.999996 | 2.06835e-06 | 0.999996 |
| rad1          | 1.97794e-06 | 0.999998 | 1.97795e-06 | 0.999998 |
| rad13         | 9.81198e-07 | 0.999999 | 9.81198e-07 | 0.999999 |
| PhCCCH3+H     | 2.45271e-07 | 0.999999 | 2.45272e-07 | 0.999999 |
| PhCH2CCH+H    | 1.72749e-07 | 0.999999 | 1.72749e-07 | 0.999999 |
| rad30         | 1.10643e-07 | 1.000000 | 1.10644e-07 | 0.999999 |
| Ph+MeAc       | 1.03113e-07 | 1.000000 | 1.03114e-07 | 1.000000 |
| rad26         | 9.21550e-08 | 1.000000 | 9.21553e-08 | 1.000000 |
| rad25         | 5.34894e-08 | 1.000000 | 5.34896e-08 | 1.000000 |
| rad15         | 2.80019e-08 | 1.000000 | 2.80021e-08 | 1.000000 |
| rad18         | 1.11570e-08 | 1.000000 | 1.11571e-08 | 1.000000 |
| PAH9+H        | 1.11078e-08 | 1.000000 | 1.11078e-08 | 1.000000 |
| rad8          | 8.94320e-09 | 1.000000 | 8.94323e-09 | 1.000000 |
| rad35         | 4.63235e-09 | 1.000000 | 4.63236e-09 | 1.000000 |
| rad38         | 3.93093e-09 | 1.000000 | 3.93095e-09 | 1.000000 |
| PAH7+H        | 2.13285e-09 | 1.000000 | 2.13286e-09 | 1.000000 |
| rad20         | 1.32242e-09 | 1.000000 | 1.32243e-09 | 1.000000 |
| rad33         | 1.19683e-09 | 1.000000 | 1.19682e-09 | 1.000000 |
| rad21         | 8.22066e-10 | 1.000000 | 8.22070e-10 | 1.000000 |
| rad14         | 5.63644e-10 | 1.000000 | 5.63647e-10 | 1.000000 |
| rad39         | 3.65246e-10 | 1.000000 | 3.65247e-10 | 1.000000 |
| rad46         | 9.82197e-11 | 1.000000 | 9.82207e-11 | 1.000000 |
| rad60syn      | 4.53562e-11 | 1.000000 | 4.53563e-11 | 1.000000 |
| rad27         | 3.51099e-11 | 1.000000 | 3.51100e-11 | 1.000000 |
| rad12         | 3.43792e-11 | 1.000000 | 3.43794e-11 | 1.000000 |
| rad60anti     | 1.78525e-11 | 1.000000 | 1.78526e-11 | 1.000000 |
| rad37         | 4.83369e-12 | 1.000000 | 4.83371e-12 | 1.000000 |
| rad24         | 3.72147e-12 | 1.000000 | 3.72149e-12 | 1.000000 |
| rad5          | 3.69440e-12 | 1.000000 | 3.69441e-12 | 1.000000 |
| PAH3+H        | 1.72043e-12 | 1.000000 | 1.72044e-12 | 1.000000 |
| rad59         | 4.55280e-13 | 1.000000 | 4.55282e-13 | 1.000000 |
| rad19syn      | 1.98370e-13 | 1.000000 | 1.98371e-13 | 1.000000 |
| rad50         | 4.05162e-14 | 1.000000 | 4.05164e-14 | 1.000000 |
| rad54         | 1.06541e-14 | 1.000000 | 1.06542e-14 | 1.000000 |
| rad31         | 8.13576e-15 | 1.000000 | 8.13580e-15 | 1.000000 |
| PAH10+CH3     | 9.37093e-16 | 1.000000 | 9.37096e-16 | 1.000000 |
| rad43         | 7.71034e-16 | 1.000000 | 7.71038e-16 | 1.000000 |
| rad62         | 5.30444e-16 | 1.000000 | 5.30447e-16 | 1.000000 |
| rad70         | 3.82146e-16 | 1.000000 | 3.82147e-16 | 1.000000 |
| PhcycC3H3_A+H | 1.37730e-16 | 1.000000 | 1.37730e-16 | 1.000000 |
| rad52         | 6.70564e-17 | 1.000000 | 6.70567e-17 | 1.000000 |
| rad55         | 3.31465e-17 | 1.000000 | 3.31466e-17 | 1.000000 |
| rad51         | 6.76495e-18 | 1.000000 | 6.76498e-18 | 1.000000 |
| rad34         | 1.69209e-18 | 1.000000 | 1.69209e-18 | 1.000000 |
| PAH1+H        | 1.00031e-18 | 1.000000 | 1.00032e-18 | 1.000000 |
| rad58         | 6.36179e-19 | 1.000000 | 6.36182e-19 | 1.000000 |
| rad65         | 8.88690e-20 | 1.000000 | 8.88694e-20 | 1.000000 |
| rad42         | 7.41106e-21 | 1.000000 | 7.41108e-21 | 1.000000 |
| rad41         | 1.98345e-21 | 1.000000 | 1.98346e-21 | 1.000000 |
| rad47         | 7.33318e-24 | 1.000000 | 7.33321e-24 | 1.000000 |

100.000000 Pa, 300.000000 K

=====

| Rate constant      | True (fraction)       | Effective (fraction)  |
|--------------------|-----------------------|-----------------------|
| Total              | 6.34395e-16 (1.00 )   | 6.34392e-16 (1.00 )   |
| Formation of rad11 | 4.51153e-16 (0.711 )  | 4.51151e-16 (0.711 )  |
| Formation of rad6  | 1.51589e-16 (0.239 )  | 1.51588e-16 (0.239 )  |
| H-abstraction      | 3.16530e-17 (0.0499 ) | 3.16530e-17 (0.0499 ) |

| species            | PYtrue      | Cumul    | PYeffective | Cumul    |
|--------------------|-------------|----------|-------------|----------|
| rad6               | 0.895372    | 0.895372 | 0.895376    | 0.895376 |
| Benzene+2-propynyl | 0.0498949   | 0.945267 | 0.0498951   | 0.945271 |
| Indene+H           | 0.0464542   | 0.991721 | 0.0464543   | 0.991725 |
| rad23              | 0.00427199  | 0.995993 | 0.00427201  | 0.995997 |
| C2H2+PhCH2         | 0.00184420  | 0.997838 | 0.00184421  | 0.997842 |
| rad11              | 0.00135749  | 0.999195 | 0.00135750  | 0.999199 |
| rad45              | 0.000308952 | 0.999504 | 0.000308954 | 0.999508 |
| rad7               | 0.000286305 | 0.999790 | 0.000286306 | 0.999794 |
| rad2               | 5.42402e-05 | 0.999845 | 5.42404e-05 | 0.999849 |
| rad22              | 4.55205e-05 | 0.999890 | 4.55207e-05 | 0.999894 |
| PhCHCCH2+H         | 4.32932e-05 | 0.999933 | 4.32933e-05 | 0.999937 |
| PhCCH+CH3          | 1.76675e-05 | 0.999951 | 1.76676e-05 | 0.999955 |
| rad28              | 1.10294e-05 | 0.999962 | 1.10294e-05 | 0.999966 |
| rad36              | 1.05301e-05 | 0.999973 | 1.05302e-05 | 0.999977 |
| rad3               | 4.72699e-06 | 0.999977 | 4.72701e-06 | 0.999981 |
| rad10              | 4.40037e-06 | 0.999982 | 4.40039e-06 | 0.999986 |
| Phenyl+Allene      | 4.27157e-06 | 0.999986 | 0.00000     | 0.999986 |



|               |             |          |             |          |
|---------------|-------------|----------|-------------|----------|
| rad1          | 4.08736e-06 | 0.999990 | 4.08738e-06 | 0.999990 |
| rad4          | 2.35086e-06 | 0.999993 | 2.35087e-06 | 0.999992 |
| rad9          | 2.29558e-06 | 0.999995 | 2.29559e-06 | 0.999995 |
| PhCCCH3+H     | 2.28089e-06 | 0.999997 | 2.28090e-06 | 0.999997 |
| Ph+MeAc       | 1.10037e-06 | 0.999998 | 1.10038e-06 | 0.999998 |
| rad13         | 9.77022e-07 | 0.999999 | 9.77021e-07 | 0.999999 |
| rad26         | 5.74245e-07 | 1.000000 | 5.74247e-07 | 1.000000 |
| PhCH2CCH+H    | 3.79966e-07 | 1.000000 | 3.79968e-07 | 1.000000 |
| rad30         | 1.29490e-07 | 1.000000 | 1.29491e-07 | 1.000000 |
| rad25         | 3.27155e-08 | 1.000000 | 3.27156e-08 | 1.000000 |
| PAH7+H        | 2.99881e-08 | 1.000000 | 2.99883e-08 | 1.000000 |
| PAH9+H        | 2.92373e-08 | 1.000000 | 2.92375e-08 | 1.000000 |
| rad35         | 1.01452e-08 | 1.000000 | 1.01453e-08 | 1.000000 |
| rad18         | 8.94600e-09 | 1.000000 | 8.94605e-09 | 1.000000 |
| rad38         | 8.51972e-09 | 1.000000 | 8.51975e-09 | 1.000000 |
| rad19anti     | 8.29783e-09 | 1.000000 | 8.29786e-09 | 1.000000 |
| rad39         | 6.68247e-09 | 1.000000 | 6.68250e-09 | 1.000000 |
| rad15         | 2.30388e-09 | 1.000000 | 2.30389e-09 | 1.000000 |
| rad20         | 1.60358e-09 | 1.000000 | 1.60359e-09 | 1.000000 |
| rad33         | 1.50096e-09 | 1.000000 | 1.50096e-09 | 1.000000 |
| rad21         | 1.06295e-09 | 1.000000 | 1.06295e-09 | 1.000000 |
| rad14         | 6.47109e-10 | 1.000000 | 6.47112e-10 | 1.000000 |
| rad46         | 2.73784e-10 | 1.000000 | 2.73785e-10 | 1.000000 |
| rad37         | 1.98581e-10 | 1.000000 | 1.98581e-10 | 1.000000 |
| rad27         | 7.75466e-11 | 1.000000 | 7.75470e-11 | 1.000000 |
| rad60syn      | 7.04533e-11 | 1.000000 | 7.04536e-11 | 1.000000 |
| rad60anti     | 2.90539e-11 | 1.000000 | 2.90541e-11 | 1.000000 |
| PAH3+H        | 5.14213e-12 | 1.000000 | 5.14215e-12 | 1.000000 |
| rad19syn      | 3.88599e-12 | 1.000000 | 3.88601e-12 | 1.000000 |
| rad24         | 3.63630e-12 | 1.000000 | 3.63632e-12 | 1.000000 |
| rad5          | 1.66259e-12 | 1.000000 | 1.66260e-12 | 1.000000 |
| rad59         | 1.08322e-12 | 1.000000 | 1.08323e-12 | 1.000000 |
| rad54         | 3.41451e-13 | 1.000000 | 3.41453e-13 | 1.000000 |
| rad50         | 2.70019e-13 | 1.000000 | 2.70020e-13 | 1.000000 |
| PAH10+CH3     | 1.75008e-13 | 1.000000 | 1.75009e-13 | 1.000000 |
| rad43         | 4.05839e-14 | 1.000000 | 4.05841e-14 | 1.000000 |
| rad67         | 3.63365e-14 | 1.000000 | 3.63367e-14 | 1.000000 |
| rad31         | 3.41961e-14 | 1.000000 | 3.41963e-14 | 1.000000 |
| rad12         | 2.44324e-14 | 1.000000 | 2.44326e-14 | 1.000000 |
| rad62         | 2.12295e-14 | 1.000000 | 2.12296e-14 | 1.000000 |
| PhcycC3H3_A+H | 1.83214e-14 | 1.000000 | 1.83215e-14 | 1.000000 |
| rad70         | 6.93907e-15 | 1.000000 | 6.93910e-15 | 1.000000 |
| rad55         | 2.72779e-15 | 1.000000 | 2.72781e-15 | 1.000000 |
| PAH1+H        | 1.36425e-15 | 1.000000 | 1.36426e-15 | 1.000000 |
| rad52         | 9.74713e-16 | 1.000000 | 9.74722e-16 | 1.000000 |
| rad51         | 2.14097e-16 | 1.000000 | 2.14098e-16 | 1.000000 |
| rad34         | 1.31423e-16 | 1.000000 | 1.31423e-16 | 1.000000 |
| rad58         | 1.45305e-17 | 1.000000 | 1.45306e-17 | 1.000000 |
| rad42         | 5.96097e-18 | 1.000000 | 5.96100e-18 | 1.000000 |
| rad65         | 4.45008e-18 | 1.000000 | 4.45010e-18 | 1.000000 |
| rad41         | 2.64059e-18 | 1.000000 | 2.64060e-18 | 1.000000 |
| rad53         | 5.80446e-19 | 1.000000 | 5.80449e-19 | 1.000000 |
| rad64         | 1.96813e-19 | 1.000000 | 1.96814e-19 | 1.000000 |
| rad56         | 7.83065e-21 | 1.000000 | 7.83069e-21 | 1.000000 |
| rad68syn      | 8.04287e-22 | 1.000000 | 8.04290e-22 | 1.000000 |
| rad61         | 7.26472e-22 | 1.000000 | 7.26475e-22 | 1.000000 |
| rad68anti     | 5.82035e-22 | 1.000000 | 5.82038e-22 | 1.000000 |
| rad47         | 8.58832e-23 | 1.000000 | 8.58836e-23 | 1.000000 |
| rad40syn      | 4.20422e-24 | 1.000000 | 4.20424e-24 | 1.000000 |
| PAH8+H        | 1.68970e-24 | 1.000000 | 1.68970e-24 | 1.000000 |
| rad73         | 1.35399e-24 | 1.000000 | 1.35399e-24 | 1.000000 |
| rad40anti     | 1.15176e-24 | 1.000000 | 1.15176e-24 | 1.000000 |
| rad71         | 4.17398e-26 | 1.000000 | 4.17400e-26 | 1.000000 |
| rad72         | 4.75645e-32 | 1.000000 | 4.75647e-32 | 1.000000 |
| rad8          | 9.13471e-37 | 1.000000 | 9.13475e-37 | 1.000000 |

100.000000 Pa, 400.000000 K

| Rate constant      | True (fraction)       | Effective (fraction)  |
|--------------------|-----------------------|-----------------------|
| Total              | 5.11288e-15 (1.00 )   | 5.11265e-15 (1.00 )   |
| Formation of rad11 | 3.08094e-15 (0.603 )  | 3.08078e-15 (0.603 )  |
| Formation of rad6  | 1.54092e-15 (0.301 )  | 1.54084e-15 (0.301 )  |
| H-abstraction      | 4.91025e-16 (0.0960 ) | 4.91025e-16 (0.0960 ) |

  

| species            | PYtrue    | Cumul    | PYeffective | Cumul    |
|--------------------|-----------|----------|-------------|----------|
| rad6               | 0.845455  | 0.845455 | 0.845494    | 0.845494 |
| Benzene+2-propynyl | 0.0960368 | 0.941492 | 0.0960412   | 0.941536 |
| Indene+H           | 0.0511110 | 0.992603 | 0.0511134   | 0.992649 |

|               |             |          |             |          |
|---------------|-------------|----------|-------------|----------|
| C2H2+PhCH2    | 0.00383308  | 0.996436 | 0.00383326  | 0.996482 |
| rad23         | 0.00198124  | 0.998417 | 0.00198133  | 0.998464 |
| PhCCH+CH3     | 0.000261771 | 0.998679 | 0.000261783 | 0.998725 |
| rad7          | 0.000261583 | 0.998941 | 0.000261595 | 0.998987 |
| rad11         | 0.000259283 | 0.999200 | 0.000259294 | 0.999246 |
| PhCHCCH2+H    | 0.000216439 | 0.999416 | 0.000216448 | 0.999463 |
| rad45         | 0.000168143 | 0.999584 | 0.000168151 | 0.999631 |
| rad2          | 0.000148316 | 0.999733 | 0.000148323 | 0.999779 |
| rad28         | 7.38918e-05 | 0.999807 | 7.38952e-05 | 0.999853 |
| Phenyl+Allene | 4.63564e-05 | 0.999853 | 0.00000     | 0.999853 |
| PhCCCH3+H     | 4.50676e-05 | 0.999898 | 4.50698e-05 | 0.999898 |
| Ph+MeAc       | 2.96912e-05 | 0.999928 | 2.96926e-05 | 0.999928 |
| rad1          | 1.38032e-05 | 0.999942 | 1.38039e-05 | 0.999942 |
| rad10         | 1.26962e-05 | 0.999954 | 1.26967e-05 | 0.999954 |
| rad22         | 8.31643e-06 | 0.999963 | 8.31682e-06 | 0.999963 |
| PhCH2CCH+H    | 7.27279e-06 | 0.999970 | 7.27313e-06 | 0.999970 |
| rad36         | 6.44216e-06 | 0.999976 | 6.44246e-06 | 0.999976 |
| rad3          | 6.35238e-06 | 0.999983 | 6.35267e-06 | 0.999983 |
| rad26         | 5.55885e-06 | 0.999988 | 5.55911e-06 | 0.999988 |
| rad9          | 4.26723e-06 | 0.999992 | 4.26743e-06 | 0.999992 |
| rad4          | 3.34552e-06 | 0.999996 | 3.34568e-06 | 0.999996 |
| PAH7+H        | 1.97439e-06 | 0.999998 | 1.97448e-06 | 0.999998 |
| rad13         | 9.48845e-07 | 0.999999 | 9.48895e-07 | 0.999999 |
| rad39         | 4.73764e-07 | 0.999999 | 4.73786e-07 | 0.999999 |
| rad30         | 3.62293e-07 | 1.000000 | 3.62310e-07 | 1.000000 |
| PAH9+H        | 1.80708e-07 | 1.000000 | 1.80717e-07 | 1.000000 |
| rad19anti     | 1.20242e-07 | 1.000000 | 1.20248e-07 | 1.000000 |
| rad38         | 5.65265e-08 | 1.000000 | 5.65292e-08 | 1.000000 |
| rad35         | 5.46933e-08 | 1.000000 | 5.46958e-08 | 1.000000 |
| rad37         | 1.19357e-08 | 1.000000 | 1.19363e-08 | 1.000000 |
| rad25         | 6.25597e-09 | 1.000000 | 6.25626e-09 | 1.000000 |
| rad15         | 4.19825e-09 | 1.000000 | 4.19844e-09 | 1.000000 |
| rad46         | 3.20623e-09 | 1.000000 | 3.20639e-09 | 1.000000 |
| rad33         | 1.65911e-09 | 1.000000 | 1.65919e-09 | 1.000000 |
| rad18         | 1.58647e-09 | 1.000000 | 1.58655e-09 | 1.000000 |
| rad14         | 8.65927e-10 | 1.000000 | 8.65967e-10 | 1.000000 |
| rad60syn      | 6.64625e-10 | 1.000000 | 6.64656e-10 | 1.000000 |
| rad19syn      | 5.41638e-10 | 1.000000 | 5.41664e-10 | 1.000000 |
| rad20         | 4.01585e-10 | 1.000000 | 4.01604e-10 | 1.000000 |
| rad60anti     | 3.09738e-10 | 1.000000 | 3.09751e-10 | 1.000000 |
| rad21         | 2.75644e-10 | 1.000000 | 2.75657e-10 | 1.000000 |
| rad27         | 2.22276e-10 | 1.000000 | 2.22286e-10 | 1.000000 |
| PAH3+H        | 2.05564e-10 | 1.000000 | 2.05574e-10 | 1.000000 |
| rad54         | 6.87481e-11 | 1.000000 | 6.87513e-11 | 1.000000 |
| rad59         | 3.86031e-11 | 1.000000 | 3.86049e-11 | 1.000000 |
| PAH10+CH3     | 3.20764e-11 | 1.000000 | 3.20780e-11 | 1.000000 |
| rad50         | 2.16920e-11 | 1.000000 | 2.16930e-11 | 1.000000 |
| rad5          | 1.05120e-11 | 1.000000 | 1.05125e-11 | 1.000000 |
| PhcycC3H3_A+H | 7.13024e-12 | 1.000000 | 7.13058e-12 | 1.000000 |
| rad43         | 5.24215e-12 | 1.000000 | 5.24239e-12 | 1.000000 |
| rad67         | 3.87350e-12 | 1.000000 | 3.87368e-12 | 1.000000 |
| rad62         | 3.75253e-12 | 1.000000 | 3.75270e-12 | 1.000000 |
| rad24         | 2.73286e-12 | 1.000000 | 2.73299e-12 | 1.000000 |
| rad70         | 2.48745e-12 | 1.000000 | 2.48757e-12 | 1.000000 |
| rad55         | 9.48294e-13 | 1.000000 | 9.48343e-13 | 1.000000 |
| rad31         | 7.73902e-13 | 1.000000 | 7.73938e-13 | 1.000000 |
| PAH1+H        | 7.66193e-13 | 1.000000 | 7.66229e-13 | 1.000000 |
| rad52         | 2.43733e-13 | 1.000000 | 2.43743e-13 | 1.000000 |
| rad51         | 1.39049e-13 | 1.000000 | 1.39055e-13 | 1.000000 |
| rad34         | 8.02302e-14 | 1.000000 | 8.02339e-14 | 1.000000 |
| rad12         | 7.36693e-14 | 1.000000 | 7.36727e-14 | 1.000000 |
| rad58         | 6.63641e-15 | 1.000000 | 6.63671e-15 | 1.000000 |
| rad65         | 3.76797e-15 | 1.000000 | 3.76815e-15 | 1.000000 |
| rad42         | 3.49994e-15 | 1.000000 | 3.50010e-15 | 1.000000 |
| rad41         | 1.62215e-15 | 1.000000 | 1.62224e-15 | 1.000000 |
| rad53         | 7.47644e-16 | 1.000000 | 7.47678e-16 | 1.000000 |
| rad64         | 2.80980e-16 | 1.000000 | 2.80993e-16 | 1.000000 |
| rad56         | 2.19996e-17 | 1.000000 | 2.20005e-17 | 1.000000 |
| rad68syn      | 2.49375e-18 | 1.000000 | 2.49387e-18 | 1.000000 |
| rad61         | 2.37461e-18 | 1.000000 | 2.37472e-18 | 1.000000 |
| rad68anti     | 1.78234e-18 | 1.000000 | 1.78242e-18 | 1.000000 |
| rad73         | 1.19571e-18 | 1.000000 | 1.19577e-18 | 1.000000 |
| rad71         | 2.89684e-19 | 1.000000 | 2.89698e-19 | 1.000000 |
| PAH8+H        | 6.48833e-20 | 1.000000 | 6.48863e-20 | 1.000000 |
| rad40syn      | 4.45519e-20 | 1.000000 | 4.45540e-20 | 1.000000 |
| rad47         | 2.88546e-20 | 1.000000 | 2.88559e-20 | 1.000000 |
| rad40anti     | 1.86404e-20 | 1.000000 | 1.86413e-20 | 1.000000 |
| rad72         | 1.55816e-22 | 1.000000 | 1.55824e-22 | 1.000000 |
| rad8          | 1.44969e-33 | 1.000000 | 1.44976e-33 | 1.000000 |

100.000000 Pa, 500.000000 K

| =====              |                 |          |                      |          |
|--------------------|-----------------|----------|----------------------|----------|
| Rate constant      | True (fraction) |          | Effective (fraction) |          |
| -----              |                 |          |                      |          |
| Total              | 2.11551e-14     | (1.00 )  | 2.11448e-14          | (1.00 )  |
| Formation of rad11 | 1.10850e-14     | (0.524 ) | 1.10787e-14          | (0.524 ) |
| Formation of rad6  | 7.08033e-15     | (0.335 ) | 7.07632e-15          | (0.335 ) |
| H-abstraction      | 2.98976e-15     | (0.141 ) | 2.98976e-15          | (0.141 ) |
| -----              |                 |          |                      |          |
| species            | PYtrue          | Cumul    | PYeffective          | Cumul    |
| -----              |                 |          |                      |          |
| rad6               | 0.773263        | 0.773263 | 0.773640             | 0.773640 |
| Benzene+2-propynyl | 0.141326        | 0.914589 | 0.141394             | 0.915034 |
| Indene+H           | 0.0687232       | 0.983312 | 0.0687566            | 0.983791 |
| C2H2+PhCH2         | 0.0101607       | 0.993472 | 0.0101656            | 0.993956 |
| PhCCH+CH3          | 0.00210389      | 0.995576 | 0.00210491           | 0.996061 |
| PhCHCCH2+H         | 0.00118780      | 0.996764 | 0.00118837           | 0.997250 |
| rad23              | 0.000935234     | 0.997699 | 0.000935683          | 0.998185 |
| Phenyl+Allene      | 0.000486130     | 0.998185 | 0.000000             | 0.998185 |
| PhCCCH3+H          | 0.000331016     | 0.998517 | 0.000331177          | 0.998516 |
| Ph+MeAc            | 0.000291167     | 0.998808 | 0.000291309          | 0.998808 |
| rad28              | 0.000264850     | 0.999073 | 0.000264979          | 0.999073 |
| rad7               | 0.000236105     | 0.999309 | 0.000236220          | 0.999309 |
| rad2               | 0.000212925     | 0.999522 | 0.000213029          | 0.999522 |
| rad45              | 0.000128356     | 0.999650 | 0.000128418          | 0.999650 |
| rad11              | 0.000111447     | 0.999761 | 0.000111502          | 0.999762 |
| PhCH2CCH+H         | 9.49282e-05     | 0.999856 | 9.49747e-05          | 0.999857 |
| PAH7+H             | 4.15625e-05     | 0.999898 | 4.15827e-05          | 0.999899 |
| rad1               | 2.54266e-05     | 0.999923 | 2.54390e-05          | 0.999924 |
| rad10              | 1.63631e-05     | 0.999940 | 1.63710e-05          | 0.999940 |
| rad26              | 1.57487e-05     | 0.999955 | 1.57564e-05          | 0.999956 |
| rad39              | 1.01373e-05     | 0.999966 | 1.01422e-05          | 0.999966 |
| rad3               | 9.01016e-06     | 0.999975 | 9.01450e-06          | 0.999975 |
| rad36              | 5.97296e-06     | 0.999981 | 5.97586e-06          | 0.999981 |
| rad9               | 5.61784e-06     | 0.999986 | 5.62058e-06          | 0.999987 |
| rad4               | 5.07249e-06     | 0.999991 | 5.07495e-06          | 0.999992 |
| rad22              | 2.67671e-06     | 0.999994 | 2.67802e-06          | 0.999995 |
| rad30              | 1.27758e-06     | 0.999995 | 1.27820e-06          | 0.999996 |
| PAH9+H             | 1.24795e-06     | 0.999996 | 1.24856e-06          | 0.999997 |
| rad19anti          | 1.23007e-06     | 0.999998 | 1.23067e-06          | 0.999998 |
| rad13              | 9.70010e-07     | 0.999999 | 9.70482e-07          | 0.999999 |
| rad38              | 4.27112e-07     | 0.999999 | 4.27320e-07          | 1.000000 |
| rad35              | 3.26068e-07     | 0.999999 | 3.26226e-07          | 1.000000 |
| rad37              | 1.82426e-07     | 1.000000 | 1.82515e-07          | 1.000000 |
| rad46              | 4.05532e-08     | 1.000000 | 4.05730e-08          | 1.000000 |
| rad19syn           | 2.28509e-08     | 1.000000 | 2.28620e-08          | 1.000000 |
| rad60syn           | 5.89344e-09     | 1.000000 | 5.89630e-09          | 1.000000 |
| rad15              | 5.50658e-09     | 1.000000 | 5.50925e-09          | 1.000000 |
| PAH3+H             | 4.34304e-09     | 1.000000 | 4.34515e-09          | 1.000000 |
| rad54              | 3.75026e-09     | 1.000000 | 3.75209e-09          | 1.000000 |
| rad60anti          | 2.95883e-09     | 1.000000 | 2.96027e-09          | 1.000000 |
| rad25              | 2.13445e-09     | 1.000000 | 2.13549e-09          | 1.000000 |
| rad33              | 2.08546e-09     | 1.000000 | 2.08648e-09          | 1.000000 |
| rad50              | 1.73465e-09     | 1.000000 | 1.73550e-09          | 1.000000 |
| PAH10+CH3          | 1.51529e-09     | 1.000000 | 1.51602e-09          | 1.000000 |
| rad14              | 1.04046e-09     | 1.000000 | 1.04097e-09          | 1.000000 |
| rad18              | 7.79046e-10     | 1.000000 | 7.79425e-10          | 1.000000 |
| rad59              | 7.44471e-10     | 1.000000 | 7.44833e-10          | 1.000000 |
| PhcycC3H3_A+H      | 6.41508e-10     | 1.000000 | 6.41820e-10          | 1.000000 |
| rad20              | 3.40696e-10     | 1.000000 | 3.40861e-10          | 1.000000 |
| rad27              | 3.16483e-10     | 1.000000 | 3.16637e-10          | 1.000000 |
| rad21              | 2.52179e-10     | 1.000000 | 2.52301e-10          | 1.000000 |
| rad43              | 1.84231e-10     | 1.000000 | 1.84320e-10          | 1.000000 |
| rad70              | 1.77382e-10     | 1.000000 | 1.77469e-10          | 1.000000 |
| rad62              | 1.70789e-10     | 1.000000 | 1.70871e-10          | 1.000000 |
| rad67              | 1.63905e-10     | 1.000000 | 1.63985e-10          | 1.000000 |
| rad51              | 9.61234e-11     | 1.000000 | 9.61698e-11          | 1.000000 |
| PAH1+H             | 9.19941e-11     | 1.000000 | 9.20391e-11          | 1.000000 |
| rad55              | 7.56510e-11     | 1.000000 | 7.56878e-11          | 1.000000 |
| rad52              | 6.00032e-11     | 1.000000 | 6.00324e-11          | 1.000000 |
| rad31              | 2.06851e-11     | 1.000000 | 2.06952e-11          | 1.000000 |
| rad5               | 1.95955e-11     | 1.000000 | 1.96051e-11          | 1.000000 |
| rad34              | 8.92540e-12     | 1.000000 | 8.92976e-12          | 1.000000 |
| rad24              | 3.31921e-12     | 1.000000 | 3.32083e-12          | 1.000000 |
| rad65              | 2.84066e-12     | 1.000000 | 2.84204e-12          | 1.000000 |
| rad58              | 6.65103e-13     | 1.000000 | 6.65427e-13          | 1.000000 |
| rad42              | 4.21616e-13     | 1.000000 | 4.21821e-13          | 1.000000 |
| rad41              | 2.57181e-13     | 1.000000 | 2.57306e-13          | 1.000000 |
| rad12              | 2.50119e-13     | 1.000000 | 2.50241e-13          | 1.000000 |
| rad53              | 2.22192e-13     | 1.000000 | 2.22301e-13          | 1.000000 |

|           |             |          |             |         |
|-----------|-------------|----------|-------------|---------|
| rad73     | 1.65807e-13 | 1.000000 | 1.65888e-13 | 1.00000 |
| rad71     | 1.30562e-13 | 1.000000 | 1.30627e-13 | 1.00000 |
| rad64     | 9.85209e-14 | 1.000000 | 9.85688e-14 | 1.00000 |
| rad56     | 3.08568e-14 | 1.000000 | 3.08718e-14 | 1.00000 |
| rad61     | 5.02183e-15 | 1.000000 | 5.02427e-15 | 1.00000 |
| rad68syn  | 3.48305e-15 | 1.000000 | 3.48474e-15 | 1.00000 |
| PAH8+H    | 2.92529e-15 | 1.000000 | 2.92671e-15 | 1.00000 |
| rad68anti | 2.36643e-15 | 1.000000 | 2.36758e-15 | 1.00000 |
| rad72     | 1.46914e-15 | 1.000000 | 1.46986e-15 | 1.00000 |
| rad40syn  | 5.90489e-16 | 1.000000 | 5.90776e-16 | 1.00000 |
| rad40anti | 3.46029e-16 | 1.000000 | 3.46197e-16 | 1.00000 |
| rad47     | 8.44443e-18 | 1.000000 | 8.44853e-18 | 1.00000 |
| rad8      | 9.84899e-30 | 1.000000 | 9.85379e-30 | 1.00000 |

100.000000 Pa, 600.000000 K

| =====              |                 |          |                      |          |
|--------------------|-----------------|----------|----------------------|----------|
| Rate constant      | True (fraction) |          | Effective (fraction) |          |
| -----              |                 |          |                      |          |
| Total              | 6.08120e-14     | (1.00 )  | 6.06085e-14          | (1.00 )  |
| Formation of rad11 | 2.83304e-14     | (0.466 ) | 2.82145e-14          | (0.466 ) |
| Formation of rad6  | 2.13840e-14     | (0.352 ) | 2.12965e-14          | (0.351 ) |
| H-abstraction      | 1.10975e-14     | (0.182 ) | 1.10975e-14          | (0.183 ) |
| -----              |                 |          |                      |          |
| species            | PYtrue          | Cumul    | PYeffective          | Cumul    |
| -----              |                 |          |                      |          |
| rad6               | 0.648081        | 0.648081 | 0.650257             | 0.650257 |
| Benzene+2-propynyl | 0.182488        | 0.830569 | 0.183101             | 0.833358 |
| Indene+H           | 0.117122        | 0.947691 | 0.117515             | 0.950873 |
| C2H2+PhCH2         | 0.0293178       | 0.977008 | 0.0294162            | 0.980290 |
| PhCCH+CH3          | 0.00919063      | 0.986199 | 0.00922148           | 0.989511 |
| PhCHCCH2+H         | 0.00491290      | 0.991112 | 0.00492940           | 0.994440 |
| Phenyl+Allene      | 0.00334630      | 0.994458 | 0.000000             | 0.994440 |
| Ph+MeAc            | 0.00133285      | 0.995791 | 0.00133733           | 0.995778 |
| PhCCCH3+H          | 0.00117897      | 0.996970 | 0.00118294           | 0.996961 |
| PhCH2CCH+H         | 0.000729198     | 0.997699 | 0.000731646          | 0.997692 |
| rad23              | 0.000635349     | 0.998335 | 0.000637482          | 0.998330 |
| rad28              | 0.000477092     | 0.998812 | 0.000478694          | 0.998808 |
| PAH7+H             | 0.000316931     | 0.999129 | 0.000317995          | 0.999126 |
| rad2               | 0.000247354     | 0.999376 | 0.000248185          | 0.999375 |
| rad7               | 0.000200134     | 0.999576 | 0.000200807          | 0.999575 |
| rad45              | 0.000131649     | 0.999708 | 0.000132091          | 0.999708 |
| rad11              | 8.02514e-05     | 0.999788 | 8.05209e-05          | 0.999788 |
| rad39              | 7.71199e-05     | 0.999865 | 7.73788e-05          | 0.999865 |
| rad1               | 3.65742e-05     | 0.999902 | 3.66970e-05          | 0.999902 |
| rad26              | 1.95886e-05     | 0.999921 | 1.96544e-05          | 0.999922 |
| rad10              | 1.20550e-05     | 0.999933 | 1.20955e-05          | 0.999934 |
| rad3               | 1.20152e-05     | 0.999945 | 1.20556e-05          | 0.999946 |
| PAH9+H             | 8.94341e-06     | 0.999954 | 8.97347e-06          | 0.999955 |
| rad19anti          | 7.90879e-06     | 0.999962 | 7.93535e-06          | 0.999963 |
| rad36              | 7.85065e-06     | 0.999970 | 7.87701e-06          | 0.999971 |
| rad4               | 7.32216e-06     | 0.999977 | 7.34674e-06          | 0.999978 |
| rad9               | 7.20859e-06     | 0.999985 | 7.23279e-06          | 0.999985 |
| rad30              | 4.52964e-06     | 0.999989 | 4.54485e-06          | 0.999990 |
| rad38              | 3.42923e-06     | 0.999993 | 3.44075e-06          | 0.999993 |
| rad35              | 1.96169e-06     | 0.999995 | 1.96828e-06          | 0.999995 |
| rad22              | 1.57447e-06     | 0.999996 | 1.57976e-06          | 0.999997 |
| rad37              | 1.05030e-06     | 0.999997 | 1.05382e-06          | 0.999998 |
| rad13              | 1.03768e-06     | 0.999998 | 1.04117e-06          | 0.999999 |
| rad46              | 5.78840e-07     | 0.999999 | 5.80783e-07          | 1.000000 |
| rad19syn           | 3.23390e-07     | 0.999999 | 3.24476e-07          | 1.000000 |
| rad50              | 1.82941e-07     | 0.999999 | 1.83555e-07          | 1.000000 |
| rad54              | 6.33220e-08     | 0.999999 | 6.35346e-08          | 1.000000 |
| PAH3+H             | 4.90769e-08     | 0.999999 | 4.92417e-08          | 1.000000 |
| rad51              | 3.80365e-08     | 0.999999 | 3.81641e-08          | 1.000000 |
| rad60syn           | 3.70339e-08     | 1.000000 | 3.71582e-08          | 1.000000 |
| PAH10+CH3          | 2.95728e-08     | 1.000000 | 2.96720e-08          | 1.000000 |
| rad60anti          | 1.94158e-08     | 1.000000 | 1.94810e-08          | 1.000000 |
| PhcycC3H3_A+H      | 1.57499e-08     | 1.000000 | 1.58027e-08          | 1.000000 |
| rad52              | 1.31350e-08     | 1.000000 | 1.31792e-08          | 1.000000 |
| rad59              | 7.58535e-09     | 1.000000 | 7.61081e-09          | 1.000000 |
| rad15              | 6.67966e-09     | 1.000000 | 6.70209e-09          | 1.000000 |
| rad70              | 3.74677e-09     | 1.000000 | 3.75935e-09          | 1.000000 |
| PAH1+H             | 3.71098e-09     | 1.000000 | 3.72343e-09          | 1.000000 |
| rad67              | 3.20087e-09     | 1.000000 | 3.21161e-09          | 1.000000 |
| rad33              | 3.17306e-09     | 1.000000 | 3.18371e-09          | 1.000000 |
| rad43              | 2.56653e-09     | 1.000000 | 2.57514e-09          | 1.000000 |
| rad62              | 2.50870e-09     | 1.000000 | 2.51712e-09          | 1.000000 |
| rad55              | 1.65226e-09     | 1.000000 | 1.65781e-09          | 1.000000 |
| rad25              | 1.54054e-09     | 1.000000 | 1.54571e-09          | 1.000000 |
| rad14              | 1.09274e-09     | 1.000000 | 1.09642e-09          | 1.000000 |

|           |             |          |             |         |
|-----------|-------------|----------|-------------|---------|
| rad65     | 1.04196e-09 | 1.000000 | 1.04545e-09 | 1.00000 |
| rad18     | 8.78081e-10 | 1.000000 | 8.81026e-10 | 1.00000 |
| rad20     | 8.38056e-10 | 1.000000 | 8.40875e-10 | 1.00000 |
| rad71     | 7.49719e-10 | 1.000000 | 7.52236e-10 | 1.00000 |
| rad21     | 7.20366e-10 | 1.000000 | 7.22785e-10 | 1.00000 |
| rad73     | 5.90841e-10 | 1.000000 | 5.92824e-10 | 1.00000 |
| rad27     | 2.98965e-10 | 1.000000 | 2.99969e-10 | 1.00000 |
| rad34     | 2.79876e-10 | 1.000000 | 2.80816e-10 | 1.00000 |
| rad31     | 1.53142e-10 | 1.000000 | 1.53656e-10 | 1.00000 |
| rad58     | 5.87816e-11 | 1.000000 | 5.89790e-11 | 1.00000 |
| rad64     | 2.39295e-11 | 1.000000 | 2.40098e-11 | 1.00000 |
| rad72     | 2.12707e-11 | 1.000000 | 2.13421e-11 | 1.00000 |
| rad41     | 1.87940e-11 | 1.000000 | 1.88571e-11 | 1.00000 |
| rad5      | 1.84172e-11 | 1.000000 | 1.84791e-11 | 1.00000 |
| rad53     | 1.66161e-11 | 1.000000 | 1.66718e-11 | 1.00000 |
| rad42     | 1.51412e-11 | 1.000000 | 1.51920e-11 | 1.00000 |
| rad24     | 1.02552e-11 | 1.000000 | 1.02897e-11 | 1.00000 |
| PAH8+H    | 9.63503e-12 | 1.000000 | 9.66743e-12 | 1.00000 |
| rad56     | 7.73486e-12 | 1.000000 | 7.76083e-12 | 1.00000 |
| rad61     | 5.55913e-12 | 1.000000 | 5.57779e-12 | 1.00000 |
| rad68syn  | 3.03254e-12 | 1.000000 | 3.04272e-12 | 1.00000 |
| rad68anti | 1.98039e-12 | 1.000000 | 1.98703e-12 | 1.00000 |
| rad12     | 1.77909e-12 | 1.000000 | 1.78506e-12 | 1.00000 |
| rad40syn  | 1.29235e-12 | 1.000000 | 1.29669e-12 | 1.00000 |
| rad40anti | 8.46116e-13 | 1.000000 | 8.48962e-13 | 1.00000 |
| rad47     | 3.43312e-15 | 1.000000 | 3.44464e-15 | 1.00000 |
| rad8      | 2.29903e-25 | 1.000000 | 2.30675e-25 | 1.00000 |

100.000000 Pa, 700.000000 K

| Rate constant      | True (fraction)      | Effective (fraction) |
|--------------------|----------------------|----------------------|
| Total              | 1.39564e-13 (1.00 )  | 1.37722e-13 (1.00 )  |
| Formation of rad11 | 5.88273e-14 (0.422 ) | 5.78334e-14 (0.420 ) |
| Formation of rad6  | 5.01684e-14 (0.359 ) | 4.93208e-14 (0.358 ) |
| H-abstraction      | 3.05678e-14 (0.219 ) | 3.05678e-14 (0.222 ) |

| species            | PYtrue      | Cumul    | PYeffective | Cumul    |
|--------------------|-------------|----------|-------------|----------|
| rad6               | 0.460649    | 0.460649 | 0.466809    | 0.466809 |
| Benzene+2-propynyl | 0.219024    | 0.679673 | 0.221953    | 0.688762 |
| Indene+H           | 0.191330    | 0.871003 | 0.193888    | 0.882650 |
| C2H2+PhCH2         | 0.0664453   | 0.937448 | 0.0673338   | 0.949983 |
| PhCCH+CH3          | 0.0236214   | 0.961070 | 0.0239372   | 0.973921 |
| PhCHCCH2+H         | 0.0135687   | 0.974639 | 0.0137502   | 0.987671 |
| Phenyl+Allene      | 0.0131952   | 0.987834 | 0.000000    | 0.987671 |
| Ph+MeAc            | 0.00343541  | 0.991269 | 0.00348135  | 0.991152 |
| PhCH2CCH+H         | 0.00313940  | 0.994409 | 0.00318138  | 0.994333 |
| PhCCCH3+H          | 0.00245750  | 0.996866 | 0.00249037  | 0.996824 |
| PAH7+H             | 0.00116536  | 0.998031 | 0.00118095  | 0.998005 |
| rad28              | 0.000496744 | 0.998528 | 0.000503386 | 0.998508 |
| rad23              | 0.000437661 | 0.998966 | 0.000443513 | 0.998952 |
| rad39              | 0.000280838 | 0.999247 | 0.000284594 | 0.999236 |
| rad2               | 0.000201496 | 0.999448 | 0.000204190 | 0.999440 |
| rad7               | 0.000150208 | 0.999598 | 0.000152217 | 0.999593 |
| rad45              | 0.000106902 | 0.999705 | 0.000108331 | 0.999701 |
| rad11              | 6.15107e-05 | 0.999767 | 6.23332e-05 | 0.999763 |
| PAH9+H             | 4.92014e-05 | 0.999816 | 4.98593e-05 | 0.999813 |
| rad1               | 3.46549e-05 | 0.999851 | 3.51183e-05 | 0.999848 |
| rad19anti          | 3.05424e-05 | 0.999881 | 3.09508e-05 | 0.999879 |
| rad38              | 2.09585e-05 | 0.999902 | 2.12387e-05 | 0.999901 |
| rad26              | 1.51780e-05 | 0.999917 | 1.53810e-05 | 0.999916 |
| rad30              | 1.18158e-05 | 0.999929 | 1.19738e-05 | 0.999928 |
| rad9               | 1.18126e-05 | 0.999941 | 1.19706e-05 | 0.999940 |
| rad3               | 9.72861e-06 | 0.999951 | 9.85871e-06 | 0.999950 |
| rad35              | 9.05245e-06 | 0.999960 | 9.17349e-06 | 0.999959 |
| rad36              | 7.71337e-06 | 0.999967 | 7.81649e-06 | 0.999967 |
| rad10              | 6.67055e-06 | 0.999974 | 6.75974e-06 | 0.999973 |
| rad4               | 6.41000e-06 | 0.999981 | 6.49571e-06 | 0.999980 |
| rad46              | 5.28818e-06 | 0.999986 | 5.35889e-06 | 0.999985 |
| rad50              | 3.61041e-06 | 0.999989 | 3.65870e-06 | 0.999989 |
| rad37              | 3.10248e-06 | 0.999993 | 3.14397e-06 | 0.999992 |
| rad19syn           | 2.05717e-06 | 0.999995 | 2.08468e-06 | 0.999994 |
| rad13              | 1.17103e-06 | 0.999996 | 1.18669e-06 | 0.999995 |
| rad22              | 1.09272e-06 | 0.999997 | 1.10733e-06 | 0.999997 |
| rad51              | 1.00058e-06 | 0.999998 | 1.01396e-06 | 0.999998 |
| rad54              | 4.61137e-07 | 0.999998 | 4.67304e-07 | 0.999998 |
| PAH3+H             | 3.39660e-07 | 0.999999 | 3.44203e-07 | 0.999998 |
| PAH10+CH3          | 3.05654e-07 | 0.999999 | 3.09741e-07 | 0.999999 |
| rad52              | 3.03429e-07 | 0.999999 | 3.07486e-07 | 0.999999 |

|               |             |          |             |          |
|---------------|-------------|----------|-------------|----------|
| PhcycC3H3_A+H | 1.52888e-07 | 0.999999 | 1.54932e-07 | 0.999999 |
| rad60syn      | 1.44189e-07 | 1.000000 | 1.46117e-07 | 0.999999 |
| rad60anti     | 7.81835e-08 | 1.000000 | 7.92293e-08 | 0.999999 |
| PAH1+H        | 6.41674e-08 | 1.000000 | 6.50254e-08 | 0.999999 |
| rad59         | 4.53603e-08 | 1.000000 | 4.59669e-08 | 0.999999 |
| rad67         | 3.53205e-08 | 1.000000 | 3.57927e-08 | 0.999999 |
| rad70         | 3.47936e-08 | 1.000000 | 3.52588e-08 | 1.000000 |
| rad71         | 3.14271e-08 | 1.000000 | 3.18473e-08 | 1.000000 |
| rad65         | 2.65704e-08 | 1.000000 | 2.69257e-08 | 1.000000 |
| rad73         | 2.29956e-08 | 1.000000 | 2.33031e-08 | 1.000000 |
| rad43         | 1.93808e-08 | 1.000000 | 1.96400e-08 | 1.000000 |
| rad62         | 1.71744e-08 | 1.000000 | 1.74041e-08 | 1.000000 |
| rad55         | 1.45409e-08 | 1.000000 | 1.47354e-08 | 1.000000 |
| rad15         | 7.49204e-09 | 1.000000 | 7.59222e-09 | 1.000000 |
| rad33         | 6.68511e-09 | 1.000000 | 6.77450e-09 | 1.000000 |
| rad21         | 4.67498e-09 | 1.000000 | 4.73750e-09 | 1.000000 |
| rad20         | 4.26367e-09 | 1.000000 | 4.32069e-09 | 1.000000 |
| rad34         | 3.73012e-09 | 1.000000 | 3.77999e-09 | 1.000000 |
| rad18         | 1.75931e-09 | 1.000000 | 1.78284e-09 | 1.000000 |
| rad25         | 1.73003e-09 | 1.000000 | 1.75317e-09 | 1.000000 |
| rad58         | 1.35199e-09 | 1.000000 | 1.37006e-09 | 1.000000 |
| rad72         | 1.01339e-09 | 1.000000 | 1.02694e-09 | 1.000000 |
| rad14         | 9.86935e-10 | 1.000000 | 1.00013e-09 | 1.000000 |
| rad64         | 7.28425e-10 | 1.000000 | 7.38165e-10 | 1.000000 |
| rad41         | 5.45794e-10 | 1.000000 | 5.53092e-10 | 1.000000 |
| PAH8+H        | 5.16854e-10 | 1.000000 | 5.23765e-10 | 1.000000 |
| rad31         | 3.07590e-10 | 1.000000 | 3.11703e-10 | 1.000000 |
| rad42         | 2.78912e-10 | 1.000000 | 2.82641e-10 | 1.000000 |
| rad53         | 2.72581e-10 | 1.000000 | 2.76226e-10 | 1.000000 |
| rad27         | 2.66520e-10 | 1.000000 | 2.70084e-10 | 1.000000 |
| rad61         | 2.46816e-10 | 1.000000 | 2.50116e-10 | 1.000000 |
| rad56         | 1.43703e-10 | 1.000000 | 1.45624e-10 | 1.000000 |
| rad24         | 1.29671e-10 | 1.000000 | 1.31404e-10 | 1.000000 |
| rad68syn      | 1.11216e-10 | 1.000000 | 1.12704e-10 | 1.000000 |
| rad40syn      | 7.51173e-11 | 1.000000 | 7.61217e-11 | 1.000000 |
| rad68anti     | 7.23697e-11 | 1.000000 | 7.33374e-11 | 1.000000 |
| rad40anti     | 5.73980e-11 | 1.000000 | 5.81655e-11 | 1.000000 |
| rad12         | 3.63130e-11 | 1.000000 | 3.67986e-11 | 1.000000 |
| rad5          | 1.25771e-11 | 1.000000 | 1.27452e-11 | 1.000000 |
| rad47         | 4.32547e-13 | 1.000000 | 4.38331e-13 | 1.000000 |
| rad8          | 8.48343e-21 | 1.000000 | 8.59687e-21 | 1.000000 |

100.000000 Pa, 800.000000 K

| Rate constant      | True (fraction) |          | Effective (fraction) |          |
|--------------------|-----------------|----------|----------------------|----------|
| Total              | 2.75392e-13     | (1.00 )  | 2.66236e-13          | (1.00 )  |
| Formation of rad11 | 1.06471e-13     | (0.387 ) | 1.01743e-13          | (0.382 ) |
| Formation of rad6  | 9.97133e-14     | (0.362 ) | 9.52854e-14          | (0.358 ) |
| H-abstraction      | 6.92082e-14     | (0.251 ) | 6.92082e-14          | (0.260 ) |

  

| species            | PYtrue      | Cumul    | PYeffective | Cumul    |
|--------------------|-------------|----------|-------------|----------|
| rad6               | 0.271075    | 0.271075 | 0.280397    | 0.280397 |
| Benzene+2-propynyl | 0.251308    | 0.522383 | 0.259950    | 0.540348 |
| Indene+H           | 0.247883    | 0.770266 | 0.256407    | 0.796755 |
| C2H2+PhCH2         | 0.108194    | 0.878460 | 0.111916    | 0.908670 |
| PhCCH+CH3          | 0.0399576   | 0.918418 | 0.0413317   | 0.950002 |
| Phenyl+Allene      | 0.0332469   | 0.951665 | 0.000000    | 0.950002 |
| PhCHCCH2+H         | 0.0261283   | 0.977793 | 0.0270269   | 0.977029 |
| PhCH2CCH+H         | 0.00856893  | 0.986362 | 0.00886358  | 0.985893 |
| Ph+MeAc            | 0.00569862  | 0.992061 | 0.00589459  | 0.991787 |
| PhCCCH3+H          | 0.00337052  | 0.995431 | 0.00348644  | 0.995274 |
| PAH7+H             | 0.00260043  | 0.998032 | 0.00268987  | 0.997964 |
| rad39              | 0.000616329 | 0.998648 | 0.000637525 | 0.998601 |
| rad28              | 0.000352451 | 0.999000 | 0.000364572 | 0.998966 |
| rad23              | 0.000245603 | 0.999246 | 0.000254049 | 0.999220 |
| PAH9+H             | 0.000126218 | 0.999372 | 0.000130559 | 0.999350 |
| rad2               | 0.000102923 | 0.999475 | 0.000106464 | 0.999457 |
| rad7               | 0.000102466 | 0.999578 | 0.000105990 | 0.999563 |
| rad19anti          | 7.75967e-05 | 0.999655 | 8.02651e-05 | 0.999643 |
| rad45              | 7.36060e-05 | 0.999729 | 7.61371e-05 | 0.999719 |
| rad38              | 5.56203e-05 | 0.999784 | 5.75331e-05 | 0.999777 |
| rad11              | 4.72743e-05 | 0.999832 | 4.89001e-05 | 0.999826 |
| rad9               | 2.37826e-05 | 0.999855 | 2.46004e-05 | 0.999850 |
| rad35              | 2.17689e-05 | 0.999877 | 2.25176e-05 | 0.999873 |
| rad30              | 2.15264e-05 | 0.999899 | 2.22667e-05 | 0.999895 |
| rad1               | 1.86733e-05 | 0.999917 | 1.93154e-05 | 0.999914 |
| rad46              | 1.56889e-05 | 0.999933 | 1.62284e-05 | 0.999930 |
| rad50              | 1.28852e-05 | 0.999946 | 1.33283e-05 | 0.999944 |

|               |             |          |             |          |
|---------------|-------------|----------|-------------|----------|
| rad26         | 8.76614e-06 | 0.999955 | 9.06761e-06 | 0.999953 |
| rad19syn      | 7.62169e-06 | 0.999962 | 7.88382e-06 | 0.999961 |
| rad36         | 5.98371e-06 | 0.999968 | 6.18949e-06 | 0.999967 |
| rad37         | 5.62827e-06 | 0.999974 | 5.82183e-06 | 0.999973 |
| rad3          | 5.26526e-06 | 0.999979 | 5.44634e-06 | 0.999978 |
| rad51         | 3.84696e-06 | 0.999983 | 3.97925e-06 | 0.999982 |
| rad4          | 3.62986e-06 | 0.999987 | 3.75469e-06 | 0.999986 |
| rad10         | 2.98120e-06 | 0.999990 | 3.08372e-06 | 0.999989 |
| rad54         | 1.90930e-06 | 0.999992 | 1.97496e-06 | 0.999991 |
| rad13         | 1.53016e-06 | 0.999993 | 1.58279e-06 | 0.999993 |
| rad52         | 1.12507e-06 | 0.999994 | 1.16377e-06 | 0.999994 |
| PAH3+H        | 1.12132e-06 | 0.999995 | 1.15988e-06 | 0.999995 |
| PAH10+CH3     | 1.05424e-06 | 0.999996 | 1.09050e-06 | 0.999996 |
| rad22         | 8.17939e-07 | 0.999997 | 8.46069e-07 | 0.999997 |
| PhcycC3H3_A+H | 7.89256e-07 | 0.999998 | 8.16401e-07 | 0.999998 |
| rad60syn      | 3.54784e-07 | 0.999998 | 3.66985e-07 | 0.999998 |
| PAH1+H        | 3.03328e-07 | 0.999999 | 3.13760e-07 | 0.999998 |
| rad60anti     | 1.96826e-07 | 0.999999 | 2.03595e-07 | 0.999999 |
| rad67         | 1.68771e-07 | 0.999999 | 1.74575e-07 | 0.999999 |
| rad70         | 1.61287e-07 | 0.999999 | 1.66834e-07 | 0.999999 |
| rad59         | 1.41943e-07 | 0.999999 | 1.46824e-07 | 0.999999 |
| rad71         | 1.38464e-07 | 0.999999 | 1.43226e-07 | 0.999999 |
| rad65         | 1.01109e-07 | 1.000000 | 1.04586e-07 | 0.999999 |
| rad73         | 9.91014e-08 | 1.000000 | 1.02509e-07 | 0.999999 |
| rad55         | 6.96723e-08 | 1.000000 | 7.20684e-08 | 0.999999 |
| rad43         | 6.20057e-08 | 1.000000 | 6.41381e-08 | 1.000000 |
| rad62         | 6.16427e-08 | 1.000000 | 6.37626e-08 | 1.000000 |
| rad21         | 4.76186e-08 | 1.000000 | 4.92562e-08 | 1.000000 |
| rad20         | 3.35793e-08 | 1.000000 | 3.47341e-08 | 1.000000 |
| rad33         | 2.35312e-08 | 1.000000 | 2.43405e-08 | 1.000000 |
| rad34         | 1.91907e-08 | 1.000000 | 1.98507e-08 | 1.000000 |
| rad15         | 8.78366e-09 | 1.000000 | 9.08574e-09 | 1.000000 |
| rad18         | 6.33907e-09 | 1.000000 | 6.55708e-09 | 1.000000 |
| rad58         | 5.37898e-09 | 1.000000 | 5.56396e-09 | 1.000000 |
| rad72         | 4.63843e-09 | 1.000000 | 4.79794e-09 | 1.000000 |
| rad64         | 3.29693e-09 | 1.000000 | 3.41032e-09 | 1.000000 |
| PAH8+H        | 2.87459e-09 | 1.000000 | 2.97345e-09 | 1.000000 |
| rad41         | 2.83399e-09 | 1.000000 | 2.93146e-09 | 1.000000 |
| rad25         | 2.78091e-09 | 1.000000 | 2.87654e-09 | 1.000000 |
| rad24         | 2.55877e-09 | 1.000000 | 2.64677e-09 | 1.000000 |
| rad53         | 1.73947e-09 | 1.000000 | 1.79928e-09 | 1.000000 |
| rad42         | 1.50260e-09 | 1.000000 | 1.55428e-09 | 1.000000 |
| rad61         | 1.22918e-09 | 1.000000 | 1.27145e-09 | 1.000000 |
| rad14         | 9.58753e-10 | 1.000000 | 9.91726e-10 | 1.000000 |
| rad12         | 7.71969e-10 | 1.000000 | 7.98521e-10 | 1.000000 |
| rad56         | 7.41655e-10 | 1.000000 | 7.67158e-10 | 1.000000 |
| rad68syn      | 5.03782e-10 | 1.000000 | 5.21108e-10 | 1.000000 |
| rad40syn      | 4.44281e-10 | 1.000000 | 4.59560e-10 | 1.000000 |
| rad40anti     | 3.64103e-10 | 1.000000 | 3.76624e-10 | 1.000000 |
| rad68anti     | 3.28246e-10 | 1.000000 | 3.39535e-10 | 1.000000 |
| rad31         | 3.18015e-10 | 1.000000 | 3.28951e-10 | 1.000000 |
| rad27         | 2.76534e-10 | 1.000000 | 2.86044e-10 | 1.000000 |
| rad5          | 7.70292e-12 | 1.000000 | 7.96782e-12 | 1.000000 |
| rad47         | 3.56763e-12 | 1.000000 | 3.69032e-12 | 1.000000 |
| rad8          | 8.98932e-17 | 1.000000 | 9.29850e-17 | 1.000000 |

100.000000 Pa, 900.000000 K

=====

| Rate constant      | True (fraction)      | Effective (fraction) |
|--------------------|----------------------|----------------------|
| Total              | 4.88072e-13 (1.00 )  | 4.57569e-13 (1.00 )  |
| Formation of rad11 | 1.74945e-13 (0.358 ) | 1.59762e-13 (0.349 ) |
| Formation of rad6  | 1.76509e-13 (0.362 ) | 1.61189e-13 (0.352 ) |
| H-abstraction      | 1.36618e-13 (0.280 ) | 1.36618e-13 (0.299 ) |

| species            | PYtrue      | Cumul    | PYeffective | Cumul    |
|--------------------|-------------|----------|-------------|----------|
| Benzene+2-propynyl | 0.279914    | 0.279914 | 0.298574    | 0.298574 |
| Indene+H           | 0.263665    | 0.543579 | 0.281242    | 0.579815 |
| C2H2+PhCH2         | 0.137853    | 0.681432 | 0.147042    | 0.726858 |
| rad6               | 0.130190    | 0.811622 | 0.138869    | 0.865727 |
| Phenyl+Allene      | 0.0624972   | 0.874119 | 0.000000    | 0.865727 |
| PhCCH+CH3          | 0.0518339   | 0.925953 | 0.0552893   | 0.921016 |
| PhCHCCH2+H         | 0.0396614   | 0.965614 | 0.0423054   | 0.963321 |
| PhCH2CCH+H         | 0.0172859   | 0.982900 | 0.0184382   | 0.981760 |
| Ph+MeAc            | 0.00717062  | 0.990071 | 0.00764863  | 0.989408 |
| PAH7+H             | 0.00426819  | 0.994339 | 0.00455272  | 0.993961 |
| PhCCCH3+H          | 0.00355536  | 0.997894 | 0.00379237  | 0.997753 |
| rad39              | 0.000986439 | 0.998881 | 0.00105220  | 0.998805 |
| rad28              | 0.000187170 | 0.999068 | 0.000199648 | 0.999005 |

|               |             |          |             |          |
|---------------|-------------|----------|-------------|----------|
| PAH9+H        | 0.000173347 | 0.999241 | 0.000184903 | 0.999190 |
| rad19anti     | 0.000148962 | 0.999390 | 0.000158892 | 0.999349 |
| rad23         | 0.000133833 | 0.999524 | 0.000142755 | 0.999492 |
| rad38         | 7.54931e-05 | 0.999600 | 8.05258e-05 | 0.999572 |
| rad7          | 6.61740e-05 | 0.999666 | 7.05852e-05 | 0.999643 |
| rad45         | 4.84205e-05 | 0.999714 | 5.16483e-05 | 0.999694 |
| rad2          | 4.21770e-05 | 0.999756 | 4.49887e-05 | 0.999739 |
| rad11         | 3.76785e-05 | 0.999794 | 4.01903e-05 | 0.999780 |
| rad9          | 3.17008e-05 | 0.999826 | 3.38140e-05 | 0.999813 |
| rad35         | 3.03817e-05 | 0.999856 | 3.24071e-05 | 0.999846 |
| rad30         | 3.02235e-05 | 0.999886 | 3.22383e-05 | 0.999878 |
| rad46         | 2.07512e-05 | 0.999907 | 2.21346e-05 | 0.999900 |
| rad19syn      | 2.00304e-05 | 0.999927 | 2.13657e-05 | 0.999922 |
| rad50         | 1.66623e-05 | 0.999944 | 1.77730e-05 | 0.999939 |
| rad1          | 8.29403e-06 | 0.999952 | 8.84695e-06 | 0.999948 |
| rad37         | 7.66842e-06 | 0.999960 | 8.17961e-06 | 0.999956 |
| rad54         | 5.51702e-06 | 0.999965 | 5.88480e-06 | 0.999962 |
| rad51         | 5.05251e-06 | 0.999970 | 5.38932e-06 | 0.999968 |
| rad26         | 4.28418e-06 | 0.999975 | 4.56977e-06 | 0.999972 |
| rad36         | 4.25403e-06 | 0.999979 | 4.53762e-06 | 0.999977 |
| PhcycC3H3_A+H | 2.76267e-06 | 0.999982 | 2.94684e-06 | 0.999980 |
| rad3          | 2.50530e-06 | 0.999984 | 2.67231e-06 | 0.999982 |
| rad13         | 2.48331e-06 | 0.999987 | 2.64886e-06 | 0.999985 |
| PAH3+H        | 2.15880e-06 | 0.999989 | 2.30272e-06 | 0.999987 |
| rad4          | 1.82275e-06 | 0.999991 | 1.94426e-06 | 0.999989 |
| PAH10+CH3     | 1.66592e-06 | 0.999992 | 1.77697e-06 | 0.999991 |
| rad52         | 1.46270e-06 | 0.999994 | 1.56021e-06 | 0.999993 |
| rad10         | 1.40312e-06 | 0.999995 | 1.49665e-06 | 0.999994 |
| rad22         | 8.35495e-07 | 0.999996 | 8.91190e-07 | 0.999995 |
| PAH1+H        | 7.43007e-07 | 0.999997 | 7.92542e-07 | 0.999996 |
| rad60syn      | 6.23644e-07 | 0.999997 | 6.65218e-07 | 0.999996 |
| rad67         | 5.37464e-07 | 0.999998 | 5.73293e-07 | 0.999997 |
| rad70         | 4.86699e-07 | 0.999998 | 5.19144e-07 | 0.999998 |
| rad60anti     | 3.50741e-07 | 0.999999 | 3.74123e-07 | 0.999998 |
| rad21         | 3.26677e-07 | 0.999999 | 3.48454e-07 | 0.999998 |
| rad59         | 2.76166e-07 | 0.999999 | 2.94576e-07 | 0.999999 |
| rad55         | 2.27367e-07 | 1.000000 | 2.42524e-07 | 0.999999 |
| rad20         | 1.99008e-07 | 1.000000 | 2.12275e-07 | 0.999999 |
| rad71         | 1.92109e-07 | 1.000000 | 2.04915e-07 | 0.999999 |
| rad73         | 1.36119e-07 | 1.000000 | 1.45194e-07 | 0.999999 |
| rad62         | 1.35869e-07 | 1.000000 | 1.44927e-07 | 1.000000 |
| rad65         | 1.32306e-07 | 1.000000 | 1.41126e-07 | 1.000000 |
| rad33         | 9.73650e-08 | 1.000000 | 1.03856e-07 | 1.000000 |
| rad43         | 9.32346e-08 | 1.000000 | 9.94496e-08 | 1.000000 |
| rad34         | 6.01819e-08 | 1.000000 | 6.41938e-08 | 1.000000 |
| rad18         | 2.28705e-08 | 1.000000 | 2.43951e-08 | 1.000000 |
| rad24         | 1.29767e-08 | 1.000000 | 1.38418e-08 | 1.000000 |
| rad15         | 9.13422e-09 | 1.000000 | 9.74309e-09 | 1.000000 |
| rad58         | 8.40888e-09 | 1.000000 | 8.96949e-09 | 1.000000 |
| rad53         | 7.64148e-09 | 1.000000 | 8.15085e-09 | 1.000000 |
| rad72         | 6.55201e-09 | 1.000000 | 6.98879e-09 | 1.000000 |
| rad64         | 6.48893e-09 | 1.000000 | 6.92151e-09 | 1.000000 |
| rad25         | 6.32288e-09 | 1.000000 | 6.74439e-09 | 1.000000 |
| PAH8+H        | 4.78213e-09 | 1.000000 | 5.10092e-09 | 1.000000 |
| rad41         | 4.69431e-09 | 1.000000 | 5.00724e-09 | 1.000000 |
| rad12         | 4.25124e-09 | 1.000000 | 4.53464e-09 | 1.000000 |
| rad42         | 3.08185e-09 | 1.000000 | 3.28730e-09 | 1.000000 |
| rad56         | 2.86015e-09 | 1.000000 | 3.05081e-09 | 1.000000 |
| rad61         | 1.91783e-09 | 1.000000 | 2.04569e-09 | 1.000000 |
| rad14         | 1.36558e-09 | 1.000000 | 1.45662e-09 | 1.000000 |
| rad68syn      | 9.05055e-10 | 1.000000 | 9.65387e-10 | 1.000000 |
| rad40syn      | 7.72890e-10 | 1.000000 | 8.24414e-10 | 1.000000 |
| rad40anti     | 6.46126e-10 | 1.000000 | 6.89198e-10 | 1.000000 |
| rad68anti     | 5.94176e-10 | 1.000000 | 6.33786e-10 | 1.000000 |
| rad27         | 5.15410e-10 | 1.000000 | 5.49769e-10 | 1.000000 |
| rad31         | 2.56236e-10 | 1.000000 | 2.73317e-10 | 1.000000 |
| rad47         | 5.67278e-12 | 1.000000 | 6.05095e-12 | 1.000000 |
| rad5          | 4.56609e-12 | 1.000000 | 4.87048e-12 | 1.000000 |
| rad8          | 6.61051e-14 | 1.000000 | 7.05116e-14 | 1.000000 |

100.000000 Pa, 1000.000000 K

| Rate constant      | True (fraction)      | Effective (fraction) |
|--------------------|----------------------|----------------------|
| Total              | 7.98668e-13 (1.00 )  | 7.21576e-13 (1.00 )  |
| Formation of rad11 | 2.67704e-13 (0.335 ) | 2.30502e-13 (0.319 ) |
| Formation of rad6  | 2.87049e-13 (0.359 ) | 2.47159e-13 (0.343 ) |
| H-abstraction      | 2.43915e-13 (0.305 ) | 2.43915e-13 (0.338 ) |
| species            | PYtrue Cumul         | PYeffective Cumul    |



|                    |             |          |             |          |
|--------------------|-------------|----------|-------------|----------|
| Benzene+2-propynyl | 0.305402    | 0.305402 | 0.338030    | 0.338030 |
| Indene+H           | 0.241915    | 0.547317 | 0.267761    | 0.605792 |
| C2H2+PhCH2         | 0.147514    | 0.694831 | 0.163274    | 0.769066 |
| Phenyl+Allene      | 0.0965255   | 0.791357 | 0.00000     | 0.769066 |
| PhCCH+CH3          | 0.0562919   | 0.847649 | 0.0623061   | 0.831372 |
| rad6               | 0.0538520   | 0.901501 | 0.0596055   | 0.890978 |
| PhCHCCH2+H         | 0.0512925   | 0.952793 | 0.0567726   | 0.947750 |
| PhCH2CCH+H         | 0.0283916   | 0.981185 | 0.0314250   | 0.979175 |
| Ph+MeAc            | 0.00762245  | 0.988807 | 0.00843680  | 0.987612 |
| PAH7+H             | 0.00574237  | 0.994549 | 0.00635588  | 0.993968 |
| PhCCCH3+H          | 0.00313469  | 0.997684 | 0.00346960  | 0.997437 |
| rad39              | 0.00128578  | 0.998970 | 0.00142316  | 0.998860 |
| rad19anti          | 0.000234363 | 0.999204 | 0.000259402 | 0.999120 |
| PAH9+H             | 0.000191101 | 0.999395 | 0.000211517 | 0.999331 |
| rad28              | 8.29197e-05 | 0.999478 | 9.17788e-05 | 0.999423 |
| rad38              | 8.09950e-05 | 0.999559 | 8.96479e-05 | 0.999513 |
| rad23              | 7.45290e-05 | 0.999634 | 8.24913e-05 | 0.999595 |
| rad7               | 4.56041e-05 | 0.999679 | 5.04764e-05 | 0.999646 |
| rad19syn           | 4.18706e-05 | 0.999721 | 4.63440e-05 | 0.999692 |
| rad30              | 3.55254e-05 | 0.999757 | 3.93209e-05 | 0.999731 |
| rad35              | 3.48244e-05 | 0.999792 | 3.85450e-05 | 0.999770 |
| rad11              | 3.47067e-05 | 0.999826 | 3.84147e-05 | 0.999808 |
| rad45              | 3.05453e-05 | 0.999857 | 3.38088e-05 | 0.999842 |
| rad9               | 2.50655e-05 | 0.999882 | 2.77435e-05 | 0.999870 |
| rad46              | 2.05706e-05 | 0.999903 | 2.27683e-05 | 0.999893 |
| rad2               | 1.67400e-05 | 0.999919 | 1.85285e-05 | 0.999911 |
| rad50              | 1.39384e-05 | 0.999933 | 1.54275e-05 | 0.999927 |
| rad54              | 1.25262e-05 | 0.999946 | 1.38644e-05 | 0.999941 |
| rad37              | 9.12862e-06 | 0.999955 | 1.01039e-05 | 0.999951 |
| PhcycC3H3_A+H      | 7.48811e-06 | 0.999962 | 8.28819e-06 | 0.999959 |
| rad13              | 4.83750e-06 | 0.999967 | 5.35433e-06 | 0.999964 |
| rad51              | 4.08705e-06 | 0.999971 | 4.52371e-06 | 0.999969 |
| rad1               | 3.61850e-06 | 0.999975 | 4.00509e-06 | 0.999973 |
| PAH3+H             | 3.45106e-06 | 0.999978 | 3.81977e-06 | 0.999977 |
| rad36              | 2.76318e-06 | 0.999981 | 3.05840e-06 | 0.999980 |
| PAH10+CH3          | 2.06833e-06 | 0.999983 | 2.28930e-06 | 0.999982 |
| rad26              | 1.92886e-06 | 0.999985 | 2.13494e-06 | 0.999984 |
| PAH1+H             | 1.60943e-06 | 0.999987 | 1.78138e-06 | 0.999986 |
| rad67              | 1.31438e-06 | 0.999988 | 1.45481e-06 | 0.999987 |
| rad52              | 1.19567e-06 | 0.999989 | 1.32342e-06 | 0.999989 |
| rad3               | 1.16767e-06 | 0.999990 | 1.29242e-06 | 0.999990 |
| rad70              | 1.16133e-06 | 0.999992 | 1.28541e-06 | 0.999991 |
| rad10              | 9.43639e-07 | 0.999993 | 1.04446e-06 | 0.999992 |
| rad21              | 9.14049e-07 | 0.999993 | 1.01171e-06 | 0.999993 |
| rad22              | 9.09535e-07 | 0.999994 | 1.00671e-06 | 0.999994 |
| rad60syn           | 9.01394e-07 | 0.999995 | 9.97701e-07 | 0.999995 |
| rad4               | 8.81778e-07 | 0.999996 | 9.75988e-07 | 0.999996 |
| rad55              | 5.73875e-07 | 0.999997 | 6.35187e-07 | 0.999997 |
| rad20              | 5.35447e-07 | 0.999997 | 5.92653e-07 | 0.999998 |
| rad60anti          | 5.13406e-07 | 0.999998 | 5.68257e-07 | 0.999998 |
| rad59              | 4.42367e-07 | 0.999998 | 4.89629e-07 | 0.999999 |
| rad62              | 2.45788e-07 | 0.999998 | 2.72048e-07 | 0.999999 |
| rad33              | 2.36784e-07 | 0.999999 | 2.62082e-07 | 0.999999 |
| rad71              | 1.56243e-07 | 0.999999 | 1.72936e-07 | 0.999999 |
| rad34              | 1.55759e-07 | 0.999999 | 1.72401e-07 | 0.999999 |
| rad73              | 1.10312e-07 | 0.999999 | 1.22098e-07 | 1.000000 |
| rad65              | 1.07226e-07 | 0.999999 | 1.18683e-07 | 1.000000 |
| rad43              | 9.29963e-08 | 0.999999 | 1.02932e-07 | 1.000000 |
| rad18              | 5.03059e-08 | 0.999999 | 5.56805e-08 | 1.000000 |
| rad53              | 2.72316e-08 | 0.999999 | 3.01409e-08 | 1.000000 |
| rad24              | 2.11538e-08 | 0.999999 | 2.34139e-08 | 1.000000 |
| rad25              | 1.60349e-08 | 0.999999 | 1.77480e-08 | 1.000000 |
| rad64              | 1.27103e-08 | 0.999999 | 1.40683e-08 | 1.000000 |
| rad56              | 1.14151e-08 | 0.999999 | 1.26347e-08 | 1.000000 |
| rad58              | 1.07348e-08 | 0.999999 | 1.18817e-08 | 1.000000 |
| rad15              | 8.29531e-09 | 0.999999 | 9.18152e-09 | 1.000000 |
| rad12              | 8.21244e-09 | 0.999999 | 9.08990e-09 | 1.000000 |
| rad42              | 5.46972e-09 | 0.999999 | 6.05410e-09 | 1.000000 |
| rad72              | 5.36544e-09 | 1.000000 | 5.93867e-09 | 1.000000 |
| PAH8+H             | 4.62542e-09 | 1.000000 | 5.11959e-09 | 1.000000 |
| rad41              | 4.03215e-09 | 1.000000 | 4.46294e-09 | 1.000000 |
| rad14              | 2.31150e-09 | 1.000000 | 2.55846e-09 | 1.000000 |
| rad61              | 1.74118e-09 | 1.000000 | 1.92720e-09 | 1.000000 |
| rad68syn           | 1.72433e-09 | 1.000000 | 1.90856e-09 | 1.000000 |
| rad68anti          | 1.14486e-09 | 1.000000 | 1.26718e-09 | 1.000000 |
| rad27              | 1.09716e-09 | 1.000000 | 1.21438e-09 | 1.000000 |
| rad40syn           | 7.89154e-10 | 1.000000 | 8.73469e-10 | 1.000000 |
| rad40anti          | 6.08724e-10 | 1.000000 | 6.73759e-10 | 1.000000 |
| rad31              | 1.83684e-10 | 1.000000 | 2.03308e-10 | 1.000000 |

|       |             |          |             |         |
|-------|-------------|----------|-------------|---------|
| rad47 | 4.64494e-12 | 1.000000 | 5.14120e-12 | 1.00000 |
| rad8  | 3.21786e-12 | 1.000000 | 3.56165e-12 | 1.00000 |
| rad5  | 3.00069e-12 | 1.000000 | 3.32128e-12 | 1.00000 |

100.000000 Pa, 1100.00000 K

| =====              |                 |          |                      |          |
|--------------------|-----------------|----------|----------------------|----------|
| Rate constant      | True (fraction) |          | Effective (fraction) |          |
| -----              |                 |          |                      |          |
| Total              | 1.22919e-12     | (1.00 )  | 1.06791e-12          | (1.00 )  |
| Formation of rad11 | 3.87976e-13     | (0.316 ) | 3.12195e-13          | (0.292 ) |
| Formation of rad6  | 4.37724e-13     | (0.356 ) | 3.52227e-13          | (0.330 ) |
| H-abstraction      | 4.03491e-13     | (0.328 ) | 4.03491e-13          | (0.378 ) |
| -----              |                 |          |                      |          |
| species            | PYtrue          | Cumul    | PYeffective          | Cumul    |
| -----              |                 |          |                      |          |
| Benzene+2-propynyl | 0.328257        | 0.328257 | 0.377831             | 0.377831 |
| Indene+H           | 0.203504        | 0.531761 | 0.234237             | 0.612068 |
| C2H2+PhCH2         | 0.141591        | 0.673352 | 0.162973             | 0.775042 |
| Phenyl+Allene      | 0.131207        | 0.804558 | 0.000000             | 0.775042 |
| PhCHCCH2+H         | 0.0600132       | 0.864572 | 0.0690763            | 0.844118 |
| PhCCH+CH3          | 0.0550952       | 0.919667 | 0.0634158            | 0.907534 |
| PhCH2CCH+H         | 0.0406038       | 0.960271 | 0.0467359            | 0.954270 |
| rad6               | 0.0204252       | 0.980696 | 0.0235099            | 0.977780 |
| Ph+MeAc            | 0.00741832      | 0.988114 | 0.00853871           | 0.986318 |
| PAH7+H             | 0.00684002      | 0.994954 | 0.00787299           | 0.994191 |
| PhCCCH3+H          | 0.00249094      | 0.997445 | 0.00286713           | 0.997059 |
| rad39              | 0.00147705      | 0.998922 | 0.00170011           | 0.998759 |
| rad19anti          | 0.000321624     | 0.999244 | 0.000370196          | 0.999129 |
| PAH9+H             | 0.000207052     | 0.999451 | 0.000238321          | 0.999367 |
| rad38              | 8.60321e-05     | 0.999537 | 9.90250e-05          | 0.999466 |
| rad19syn           | 7.48268e-05     | 0.999612 | 8.61274e-05          | 0.999552 |
| rad23              | 4.07606e-05     | 0.999652 | 4.69164e-05          | 0.999599 |
| rad35              | 3.86309e-05     | 0.999691 | 4.44650e-05          | 0.999644 |
| rad30              | 3.74605e-05     | 0.999729 | 4.31179e-05          | 0.999687 |
| rad11              | 3.70436e-05     | 0.999766 | 4.26380e-05          | 0.999729 |
| rad7               | 3.56812e-05     | 0.999801 | 4.10699e-05          | 0.999770 |
| rad28              | 3.37946e-05     | 0.999835 | 3.88984e-05          | 0.999809 |
| rad54              | 2.40299e-05     | 0.999859 | 2.76589e-05          | 0.999837 |
| rad46              | 2.04869e-05     | 0.999880 | 2.35808e-05          | 0.999861 |
| rad45              | 1.81080e-05     | 0.999898 | 2.08427e-05          | 0.999881 |
| rad9               | 1.72847e-05     | 0.999915 | 1.98951e-05          | 0.999901 |
| PhcycC3H3_A+H      | 1.68487e-05     | 0.999932 | 1.93932e-05          | 0.999921 |
| rad50              | 1.06471e-05     | 0.999943 | 1.22551e-05          | 0.999933 |
| rad37              | 1.03946e-05     | 0.999953 | 1.19644e-05          | 0.999945 |
| rad13              | 7.68232e-06     | 0.999961 | 8.84257e-06          | 0.999954 |
| rad2               | 6.60695e-06     | 0.999967 | 7.60477e-06          | 0.999961 |
| PAH3+H             | 5.12389e-06     | 0.999972 | 5.89771e-06          | 0.999967 |
| PAH1+H             | 3.30089e-06     | 0.999976 | 3.79940e-06          | 0.999971 |
| rad51              | 2.80265e-06     | 0.999978 | 3.22591e-06          | 0.999974 |
| PAH10+CH3          | 2.79929e-06     | 0.999981 | 3.22205e-06          | 0.999978 |
| rad70              | 2.33552e-06     | 0.999984 | 2.68823e-06          | 0.999980 |
| rad67              | 2.29502e-06     | 0.999986 | 2.64162e-06          | 0.999983 |
| rad36              | 1.65963e-06     | 0.999988 | 1.91028e-06          | 0.999985 |
| rad1               | 1.50708e-06     | 0.999989 | 1.73467e-06          | 0.999987 |
| rad55              | 1.20576e-06     | 0.999990 | 1.38787e-06          | 0.999988 |
| rad60syn           | 1.16100e-06     | 0.999991 | 1.33634e-06          | 0.999989 |
| rad21              | 1.12643e-06     | 0.999993 | 1.29654e-06          | 0.999991 |
| rad26              | 8.57332e-07     | 0.999993 | 9.86809e-07          | 0.999992 |
| rad52              | 8.56405e-07     | 0.999994 | 9.85739e-07          | 0.999993 |
| rad10              | 8.54309e-07     | 0.999995 | 9.83325e-07          | 0.999994 |
| rad22              | 7.16232e-07     | 0.999996 | 8.24398e-07          | 0.999994 |
| rad60anti          | 6.69904e-07     | 0.999996 | 7.71072e-07          | 0.999995 |
| rad59              | 6.43701e-07     | 0.999997 | 7.40916e-07          | 0.999996 |
| rad20              | 6.38866e-07     | 0.999998 | 7.35347e-07          | 0.999997 |
| rad3               | 5.26817e-07     | 0.999998 | 6.06378e-07          | 0.999997 |
| rad4               | 4.05696e-07     | 0.999999 | 4.66965e-07          | 0.999998 |
| rad62              | 3.99962e-07     | 0.999999 | 4.60365e-07          | 0.999998 |
| rad34              | 3.45448e-07     | 0.999999 | 3.97617e-07          | 0.999999 |
| rad33              | 2.84023e-07     | 1.000000 | 3.26917e-07          | 0.999999 |
| rad71              | 1.01336e-07     | 1.000000 | 1.16640e-07          | 0.999999 |
| rad43              | 8.68987e-08     | 1.000000 | 1.00022e-07          | 0.999999 |
| rad53              | 7.90393e-08     | 1.000000 | 9.09754e-08          | 0.999999 |
| rad65              | 7.44136e-08     | 1.000000 | 8.56521e-08          | 0.999999 |
| rad73              | 7.16011e-08     | 1.000000 | 8.24143e-08          | 0.999999 |
| rad18              | 6.54703e-08     | 1.000000 | 7.53577e-08          | 0.999999 |
| rad56              | 3.92178e-08     | 1.000000 | 4.51406e-08          | 0.999999 |
| rad25              | 2.89627e-08     | 1.000000 | 3.33367e-08          | 0.999999 |
| rad64              | 2.82537e-08     | 1.000000 | 3.25207e-08          | 1.000000 |
| rad24              | 2.02199e-08     | 1.000000 | 2.32737e-08          | 1.000000 |
| rad58              | 1.55406e-08     | 1.000000 | 1.78875e-08          | 1.000000 |

|           |             |         |             |          |
|-----------|-------------|---------|-------------|----------|
| rad42     | 1.02623e-08 | 1.00000 | 1.18121e-08 | 1.000000 |
| rad12     | 9.98700e-09 | 1.00000 | 1.14953e-08 | 1.000000 |
| rad15     | 8.82012e-09 | 1.00000 | 1.01521e-08 | 1.000000 |
| PAH8+H    | 5.50957e-09 | 1.00000 | 6.34164e-09 | 1.000000 |
| rad68syn  | 4.41743e-09 | 1.00000 | 5.08456e-09 | 1.000000 |
| rad72     | 3.48385e-09 | 1.00000 | 4.01000e-09 | 1.000000 |
| rad14     | 3.07506e-09 | 1.00000 | 3.53946e-09 | 1.000000 |
| rad68anti | 2.94017e-09 | 1.00000 | 3.38421e-09 | 1.000000 |
| rad41     | 2.79618e-09 | 1.00000 | 3.21847e-09 | 1.000000 |
| rad61     | 1.45991e-09 | 1.00000 | 1.68039e-09 | 1.000000 |
| rad27     | 1.34320e-09 | 1.00000 | 1.54606e-09 | 1.000000 |
| rad40syn  | 1.02769e-09 | 1.00000 | 1.18289e-09 | 1.000000 |
| rad40anti | 6.17588e-10 | 1.00000 | 7.10859e-10 | 1.000000 |
| rad31     | 1.22867e-10 | 1.00000 | 1.41423e-10 | 1.000000 |
| rad8      | 2.24288e-11 | 1.00000 | 2.58160e-11 | 1.000000 |
| rad47     | 3.00942e-12 | 1.00000 | 3.46391e-12 | 1.000000 |
| rad5      | 2.28151e-12 | 1.00000 | 2.62607e-12 | 1.000000 |

100.000000 Pa, 1200.00000 K

| Rate constant      | True (fraction)      | Effective (fraction) |
|--------------------|----------------------|----------------------|
| Total              | 1.80237e-12 (1.00 )  | 1.50735e-12 (1.00 )  |
| Formation of rad11 | 5.38789e-13 (0.299 ) | 4.03341e-13 (0.268 ) |
| Formation of rad6  | 6.34764e-13 (0.352 ) | 4.75188e-13 (0.315 ) |
| H-abstraction      | 6.28816e-13 (0.349 ) | 6.28816e-13 (0.417 ) |

| species            | PYtrue      | Cumul    | PYeffective | Cumul    |
|--------------------|-------------|----------|-------------|----------|
| Benzene+2-propynyl | 0.348883    | 0.348883 | 0.417168    | 0.417168 |
| Indene+H           | 0.163732    | 0.512615 | 0.195778    | 0.612946 |
| Phenyl+Allene      | 0.163687    | 0.676302 | 0.000000    | 0.612946 |
| C2H2+PhCH2         | 0.127306    | 0.803608 | 0.152224    | 0.765169 |
| PhCHCCH2+H         | 0.0658247   | 0.869433 | 0.0787080   | 0.843877 |
| PhCH2CCH+H         | 0.0527000   | 0.922133 | 0.0630146   | 0.906892 |
| PhCCH+CH3          | 0.0509261   | 0.973059 | 0.0608937   | 0.967786 |
| rad6               | 0.00780500  | 0.980864 | 0.00933260  | 0.977118 |
| PAH7+H             | 0.00755003  | 0.988414 | 0.00902778  | 0.986146 |
| Ph+MeAc            | 0.00691408  | 0.995328 | 0.00826736  | 0.994413 |
| PhCCCH3+H          | 0.00187847  | 0.997207 | 0.00224613  | 0.996660 |
| rad39              | 0.00156683  | 0.998773 | 0.00187350  | 0.998533 |
| rad19anti          | 0.000404715 | 0.999178 | 0.000483928 | 0.999017 |
| PAH9+H             | 0.000229418 | 0.999408 | 0.000274321 | 0.999291 |
| rad19syn           | 0.000119520 | 0.999527 | 0.000142913 | 0.999434 |
| rad38              | 9.49290e-05 | 0.999622 | 0.000113509 | 0.999548 |
| rad35              | 4.28785e-05 | 0.999665 | 5.12709e-05 | 0.999599 |
| rad54              | 4.07532e-05 | 0.999706 | 4.87295e-05 | 0.999648 |
| rad11              | 4.01923e-05 | 0.999746 | 4.80590e-05 | 0.999696 |
| rad30              | 3.70037e-05 | 0.999783 | 4.42462e-05 | 0.999740 |
| PhcycC3H3_A+H      | 3.29458e-05 | 0.999816 | 3.93941e-05 | 0.999779 |
| rad7               | 3.19352e-05 | 0.999848 | 3.81857e-05 | 0.999818 |
| rad46              | 2.23332e-05 | 0.999870 | 2.67044e-05 | 0.999844 |
| rad23              | 2.22755e-05 | 0.999892 | 2.66354e-05 | 0.999871 |
| rad28              | 1.40615e-05 | 0.999906 | 1.68137e-05 | 0.999888 |
| rad9               | 1.19583e-05 | 0.999918 | 1.42988e-05 | 0.999902 |
| rad37              | 1.16914e-05 | 0.999930 | 1.39797e-05 | 0.999916 |
| rad45              | 1.02994e-05 | 0.999940 | 1.23153e-05 | 0.999928 |
| rad50              | 9.31748e-06 | 0.999950 | 1.11412e-05 | 0.999940 |
| rad13              | 7.65186e-06 | 0.999957 | 9.14947e-06 | 0.999949 |
| PAH3+H             | 7.15467e-06 | 0.999964 | 8.55498e-06 | 0.999957 |
| PAH1+H             | 6.15397e-06 | 0.999971 | 7.35849e-06 | 0.999965 |
| PAH10+CH3          | 4.17262e-06 | 0.999975 | 4.98931e-06 | 0.999970 |
| rad70              | 4.10003e-06 | 0.999979 | 4.90250e-06 | 0.999974 |
| rad67              | 3.57369e-06 | 0.999982 | 4.27314e-06 | 0.999979 |
| rad2               | 2.53262e-06 | 0.999985 | 3.02832e-06 | 0.999982 |
| rad55              | 2.21032e-06 | 0.999987 | 2.64293e-06 | 0.999984 |
| rad51              | 2.02887e-06 | 0.999989 | 2.42598e-06 | 0.999987 |
| rad60syn           | 1.38610e-06 | 0.999991 | 1.65739e-06 | 0.999988 |
| rad36              | 9.52942e-07 | 0.999992 | 1.13945e-06 | 0.999990 |
| rad21              | 8.85102e-07 | 0.999992 | 1.05834e-06 | 0.999991 |
| rad59              | 8.70758e-07 | 0.999993 | 1.04119e-06 | 0.999992 |
| rad60anti          | 8.09898e-07 | 0.999994 | 9.68416e-07 | 0.999993 |
| rad10              | 7.80683e-07 | 0.999995 | 9.33481e-07 | 0.999994 |
| rad52              | 6.78816e-07 | 0.999996 | 8.11681e-07 | 0.999994 |
| rad34              | 6.65767e-07 | 0.999996 | 7.96079e-07 | 0.999995 |
| rad62              | 5.97069e-07 | 0.999997 | 7.13929e-07 | 0.999996 |
| rad1               | 5.93898e-07 | 0.999997 | 7.10140e-07 | 0.999997 |
| rad22              | 4.67427e-07 | 0.999998 | 5.58914e-07 | 0.999997 |
| rad20              | 4.62373e-07 | 0.999998 | 5.52871e-07 | 0.999998 |
| rad26              | 4.02265e-07 | 0.999999 | 4.80999e-07 | 0.999998 |

|           |             |          |             |          |
|-----------|-------------|----------|-------------|----------|
| rad3      | 2.31415e-07 | 0.999999 | 2.76709e-07 | 0.999999 |
| rad33     | 2.21048e-07 | 0.999999 | 2.64313e-07 | 0.999999 |
| rad53     | 1.92169e-07 | 0.999999 | 2.29780e-07 | 0.999999 |
| rad4      | 1.80241e-07 | 1.000000 | 2.15518e-07 | 0.999999 |
| rad56     | 1.10980e-07 | 1.000000 | 1.32701e-07 | 0.999999 |
| rad43     | 8.78715e-08 | 1.000000 | 1.05070e-07 | 0.999999 |
| rad18     | 6.93661e-08 | 1.000000 | 8.29428e-08 | 1.000000 |
| rad71     | 6.03800e-08 | 1.000000 | 7.21977e-08 | 1.000000 |
| rad64     | 6.01559e-08 | 1.000000 | 7.19296e-08 | 1.000000 |
| rad65     | 5.55905e-08 | 1.000000 | 6.64708e-08 | 1.000000 |
| rad73     | 4.31470e-08 | 1.000000 | 5.15919e-08 | 1.000000 |
| rad25     | 3.25234e-08 | 1.000000 | 3.88890e-08 | 1.000000 |
| rad58     | 2.46670e-08 | 1.000000 | 2.94949e-08 | 1.000000 |
| rad42     | 1.85949e-08 | 1.000000 | 2.22343e-08 | 1.000000 |
| rad24     | 1.60219e-08 | 1.000000 | 1.91578e-08 | 1.000000 |
| PAH8+H    | 1.23465e-08 | 1.000000 | 1.47631e-08 | 1.000000 |
| rad15     | 1.20466e-08 | 1.000000 | 1.44044e-08 | 1.000000 |
| rad68syn  | 1.13147e-08 | 1.000000 | 1.35293e-08 | 1.000000 |
| rad12     | 1.00082e-08 | 1.000000 | 1.19671e-08 | 1.000000 |
| rad68anti | 7.50998e-09 | 1.000000 | 8.97987e-09 | 1.000000 |
| rad14     | 2.76364e-09 | 1.000000 | 3.30456e-09 | 1.000000 |
| rad41     | 2.32293e-09 | 1.000000 | 2.77758e-09 | 1.000000 |
| rad40syn  | 2.28770e-09 | 1.000000 | 2.73546e-09 | 1.000000 |
| rad72     | 2.05700e-09 | 1.000000 | 2.45962e-09 | 1.000000 |
| rad61     | 1.68677e-09 | 1.000000 | 2.01691e-09 | 1.000000 |
| rad40anti | 1.17860e-09 | 1.000000 | 1.40928e-09 | 1.000000 |
| rad27     | 9.43241e-10 | 1.000000 | 1.12786e-09 | 1.000000 |
| rad31     | 7.98309e-11 | 1.000000 | 9.54557e-11 | 1.000000 |
| rad8      | 5.37159e-11 | 1.000000 | 6.42293e-11 | 1.000000 |
| rad5      | 2.07390e-12 | 1.000000 | 2.47981e-12 | 1.000000 |
| rad47     | 1.96845e-12 | 1.000000 | 2.35372e-12 | 1.000000 |

100.000000 Pa, 1300.00000 K

| =====              |                 |          |                      |          |
|--------------------|-----------------|----------|----------------------|----------|
| Rate constant      | True (fraction) |          | Effective (fraction) |          |
| -----              |                 |          |                      |          |
| Total              | 2.54148e-12     | (1.00 )  | 2.05258e-12          | (1.00 )  |
| Formation of rad11 | 7.22991e-13     | (0.284 ) | 5.03065e-13          | (0.245 ) |
| Formation of rad6  | 8.84215e-13     | (0.348 ) | 6.15246e-13          | (0.300 ) |
| H-abstraction      | 9.34273e-13     | (0.368 ) | 9.34273e-13          | (0.455 ) |
| species            | PYtrue          | Cumul    | PYeffective          | Cumul    |
| -----              |                 |          |                      |          |
| Benzene+2-propynyl | 0.367610        | 0.367610 | 0.455169             | 0.455169 |
| Phenyl+Allene      | 0.192367        | 0.559977 | 0.000000             | 0.455169 |
| Indene+H           | 0.129239        | 0.689216 | 0.160022             | 0.615191 |
| C2H2+PhCH2         | 0.110158        | 0.799374 | 0.136396             | 0.751587 |
| PhCHCCH2+H         | 0.0691114       | 0.868485 | 0.0855722            | 0.837159 |
| PhCH2CCH+H         | 0.0637449       | 0.932230 | 0.0789285            | 0.916088 |
| PhCCH+CH3          | 0.0457138       | 0.977944 | 0.0566019            | 0.972690 |
| PAH7+H             | 0.00793555      | 0.985879 | 0.00982564           | 0.982515 |
| Ph+MeAc            | 0.00632485      | 0.992204 | 0.00783134           | 0.990347 |
| rad6               | 0.00339731      | 0.995601 | 0.00420650           | 0.994553 |
| rad39              | 0.00157839      | 0.997180 | 0.00195433           | 0.996508 |
| PhCCCH3+H          | 0.00139027      | 0.998570 | 0.00172141           | 0.998229 |
| rad19anti          | 0.000478807     | 0.999049 | 0.000592852          | 0.998822 |
| PAH9+H             | 0.000255905     | 0.999305 | 0.000316859          | 0.999139 |
| rad19syn           | 0.000175668     | 0.999480 | 0.000217510          | 0.999356 |
| rad38              | 0.000106676     | 0.999587 | 0.000132084          | 0.999488 |
| rad54              | 6.29967e-05     | 0.999650 | 7.80018e-05          | 0.999566 |
| PhcycC3H3_A+H      | 5.78455e-05     | 0.999708 | 7.16234e-05          | 0.999638 |
| rad35              | 4.73694e-05     | 0.999755 | 5.86521e-05          | 0.999697 |
| rad11              | 3.65310e-05     | 0.999792 | 4.52321e-05          | 0.999742 |
| rad30              | 3.51623e-05     | 0.999827 | 4.35375e-05          | 0.999785 |
| rad7               | 2.99739e-05     | 0.999857 | 3.71133e-05          | 0.999823 |
| rad46              | 2.58640e-05     | 0.999883 | 3.20244e-05          | 0.999855 |
| rad37              | 1.30563e-05     | 0.999896 | 1.61660e-05          | 0.999871 |
| rad23              | 1.27996e-05     | 0.999909 | 1.58483e-05          | 0.999887 |
| PAH1+H             | 1.03887e-05     | 0.999919 | 1.28632e-05          | 0.999899 |
| rad50              | 1.01901e-05     | 0.999929 | 1.26173e-05          | 0.999912 |
| PAH3+H             | 9.45455e-06     | 0.999939 | 1.17064e-05          | 0.999924 |
| rad9               | 8.10130e-06     | 0.999947 | 1.00309e-05          | 0.999934 |
| rad28              | 6.62764e-06     | 0.999953 | 8.20624e-06          | 0.999942 |
| rad70              | 6.46562e-06     | 0.999960 | 8.00569e-06          | 0.999950 |
| PAH10+CH3          | 6.29315e-06     | 0.999966 | 7.79211e-06          | 0.999958 |
| rad45              | 5.76481e-06     | 0.999972 | 7.13788e-06          | 0.999965 |
| rad67              | 5.43233e-06     | 0.999977 | 6.72626e-06          | 0.999972 |
| rad13              | 5.36896e-06     | 0.999983 | 6.64775e-06          | 0.999978 |
| rad55              | 3.65306e-06     | 0.999986 | 4.52317e-06          | 0.999983 |
| rad51              | 1.88030e-06     | 0.999988 | 2.32816e-06          | 0.999985 |

|           |             |          |             |          |
|-----------|-------------|----------|-------------|----------|
| rad60syn  | 1.57080e-06 | 0.999990 | 1.94494e-06 | 0.999987 |
| rad34     | 1.14190e-06 | 0.999991 | 1.41388e-06 | 0.999988 |
| rad59     | 1.11062e-06 | 0.999992 | 1.37515e-06 | 0.999990 |
| rad2      | 9.50691e-07 | 0.999993 | 1.17713e-06 | 0.999991 |
| rad60anti | 9.28621e-07 | 0.999994 | 1.14981e-06 | 0.999992 |
| rad62     | 8.31504e-07 | 0.999995 | 1.02956e-06 | 0.999993 |
| rad52     | 6.92088e-07 | 0.999996 | 8.56931e-07 | 0.999994 |
| rad21     | 5.94390e-07 | 0.999996 | 7.35963e-07 | 0.999995 |
| rad10     | 5.75641e-07 | 0.999997 | 7.12753e-07 | 0.999996 |
| rad36     | 5.38230e-07 | 0.999997 | 6.66426e-07 | 0.999996 |
| rad53     | 4.06103e-07 | 0.999998 | 5.02831e-07 | 0.999997 |
| rad22     | 3.12902e-07 | 0.999998 | 3.87431e-07 | 0.999997 |
| rad20     | 2.77937e-07 | 0.999998 | 3.44137e-07 | 0.999997 |
| rad56     | 2.67177e-07 | 0.999999 | 3.30815e-07 | 0.999998 |
| rad1      | 2.26599e-07 | 0.999999 | 2.80571e-07 | 0.999998 |
| rad26     | 2.08813e-07 | 0.999999 | 2.58550e-07 | 0.999998 |
| rad33     | 1.48292e-07 | 0.999999 | 1.83613e-07 | 0.999998 |
| rad64     | 1.15243e-07 | 0.999999 | 1.42692e-07 | 0.999999 |
| rad3      | 1.01672e-07 | 0.999999 | 1.25889e-07 | 0.999999 |
| rad43     | 9.39447e-08 | 0.999999 | 1.16321e-07 | 0.999999 |
| rad4      | 7.98241e-08 | 1.000000 | 9.88372e-08 | 0.999999 |
| rad18     | 6.58059e-08 | 1.000000 | 8.14800e-08 | 0.999999 |
| rad65     | 5.38550e-08 | 1.000000 | 6.66824e-08 | 0.999999 |
| rad58     | 3.90170e-08 | 1.000000 | 4.83102e-08 | 0.999999 |
| rad71     | 3.70040e-08 | 1.000000 | 4.58177e-08 | 0.999999 |
| PAH8+H    | 3.25874e-08 | 1.000000 | 4.03492e-08 | 0.999999 |
| rad42     | 3.12441e-08 | 1.000000 | 3.86860e-08 | 0.999999 |
| rad73     | 2.76946e-08 | 1.000000 | 3.42910e-08 | 0.999999 |
| rad25     | 2.67940e-08 | 1.000000 | 3.31759e-08 | 0.999999 |
| rad68syn  | 2.56948e-08 | 1.000000 | 3.18149e-08 | 0.999999 |
| rad15     | 2.03796e-08 | 1.000000 | 2.52337e-08 | 0.999999 |
| rad68anti | 1.69943e-08 | 1.000000 | 2.10421e-08 | 0.999999 |
| rad24     | 1.18593e-08 | 1.000000 | 1.46840e-08 | 0.999999 |
| rad12     | 9.08220e-09 | 1.000000 | 1.12455e-08 | 0.999999 |
| rad40syn  | 5.61419e-09 | 1.000000 | 6.95138e-09 | 0.999999 |
| rad40anti | 2.87389e-09 | 1.000000 | 3.55841e-09 | 0.999999 |
| rad61     | 2.81289e-09 | 1.000000 | 3.48288e-09 | 0.999999 |
| rad41     | 2.56368e-09 | 1.000000 | 3.17431e-09 | 0.999999 |
| rad14     | 1.87503e-09 | 1.000000 | 2.32164e-09 | 0.999999 |
| rad72     | 1.19948e-09 | 1.000000 | 1.48518e-09 | 0.999999 |
| rad27     | 4.91897e-10 | 1.000000 | 6.09061e-10 | 0.999999 |
| rad8      | 7.91474e-11 | 1.000000 | 9.79987e-11 | 0.999999 |
| rad31     | 5.19128e-11 | 1.000000 | 6.42775e-11 | 0.999999 |
| rad5      | 2.27259e-12 | 1.000000 | 2.81390e-12 | 0.999999 |
| rad47     | 1.61663e-12 | 1.000000 | 2.00169e-12 | 0.999999 |

100.000000 Pa, 1400.00000 K

=====

| Rate constant      | True (fraction)      | Effective (fraction) |
|--------------------|----------------------|----------------------|
| Total              | 3.47024e-12 (1.00 )  | 2.71853e-12 (1.00 )  |
| Formation of rad11 | 9.43269e-13 (0.272 ) | 6.11187e-13 (0.225 ) |
| Formation of rad6  | 1.19194e-12 (0.343 ) | 7.72309e-13 (0.284 ) |
| H-abstraction      | 1.33503e-12 (0.385 ) | 1.33503e-12 (0.491 ) |

| species            | PYtrue      | Cumul    | PYeffective | Cumul    |
|--------------------|-------------|----------|-------------|----------|
| Benzene+2-propynyl | 0.384709    | 0.384709 | 0.491086    | 0.491086 |
| Phenyl+Allene      | 0.216616    | 0.601325 | 0.00000     | 0.491086 |
| Indene+H           | 0.101481    | 0.702806 | 0.129542    | 0.620628 |
| C2H2+PhCH2         | 0.0932917   | 0.796098 | 0.119088    | 0.739717 |
| PhCH2CCH+H         | 0.0731649   | 0.869263 | 0.0933964   | 0.833113 |
| PhCHCCH2+H         | 0.0703647   | 0.939628 | 0.0898212   | 0.922934 |
| PhCCH+CH3          | 0.0405006   | 0.980128 | 0.0516995   | 0.974634 |
| PAH7+H             | 0.00807686  | 0.988205 | 0.0103102   | 0.984944 |
| Ph+MeAc            | 0.00575352  | 0.993959 | 0.00734444  | 0.992288 |
| rad6               | 0.00181490  | 0.995774 | 0.00231674  | 0.994605 |
| rad39              | 0.00153672  | 0.997310 | 0.00196164  | 0.996567 |
| PhCCCH3+H          | 0.00103074  | 0.998341 | 0.00131575  | 0.997883 |
| rad19anti          | 0.000539411 | 0.998880 | 0.000688565 | 0.998571 |
| PAH9+H             | 0.000282642 | 0.999163 | 0.000360796 | 0.998932 |
| rad19syn           | 0.000242342 | 0.999405 | 0.000309352 | 0.999241 |
| rad38              | 0.000119355 | 0.999525 | 0.000152359 | 0.999394 |
| PhcycC3H3_A+H      | 9.33587e-05 | 0.999618 | 0.000119173 | 0.999513 |
| rad54              | 9.06816e-05 | 0.999709 | 0.000115757 | 0.999629 |
| rad35              | 5.16891e-05 | 0.999760 | 6.59817e-05 | 0.999694 |
| rad30              | 3.26785e-05 | 0.999793 | 4.17146e-05 | 0.999736 |
| rad46              | 3.03892e-05 | 0.999824 | 3.87923e-05 | 0.999775 |
| rad11              | 2.61765e-05 | 0.999850 | 3.34147e-05 | 0.999808 |
| rad7               | 2.48193e-05 | 0.999875 | 3.16822e-05 | 0.999840 |

|           |             |          |             |          |
|-----------|-------------|----------|-------------|----------|
| PAH1+H    | 1.61141e-05 | 0.999891 | 2.05698e-05 | 0.999861 |
| rad37     | 1.44168e-05 | 0.999905 | 1.84032e-05 | 0.999879 |
| rad50     | 1.29223e-05 | 0.999918 | 1.64954e-05 | 0.999896 |
| PAH3+H    | 1.19326e-05 | 0.999930 | 1.52322e-05 | 0.999911 |
| rad70     | 9.37008e-06 | 0.999939 | 1.19611e-05 | 0.999923 |
| PAH10+CH3 | 9.16162e-06 | 0.999948 | 1.16949e-05 | 0.999934 |
| rad23     | 8.01644e-06 | 0.999956 | 1.02331e-05 | 0.999945 |
| rad67     | 7.98106e-06 | 0.999964 | 1.01879e-05 | 0.999955 |
| rad55     | 5.57253e-06 | 0.999970 | 7.11339e-06 | 0.999962 |
| rad9      | 5.35717e-06 | 0.999975 | 6.83848e-06 | 0.999969 |
| rad28     | 3.76308e-06 | 0.999979 | 4.80363e-06 | 0.999974 |
| rad13     | 3.28757e-06 | 0.999982 | 4.19662e-06 | 0.999978 |
| rad45     | 3.23398e-06 | 0.999986 | 4.12822e-06 | 0.999982 |
| rad51     | 2.30195e-06 | 0.999988 | 2.93846e-06 | 0.999985 |
| rad34     | 1.78346e-06 | 0.999990 | 2.27661e-06 | 0.999987 |
| rad60syn  | 1.71693e-06 | 0.999991 | 2.19168e-06 | 0.999989 |
| rad59     | 1.35272e-06 | 0.999993 | 1.72677e-06 | 0.999991 |
| rad62     | 1.09812e-06 | 0.999994 | 1.40177e-06 | 0.999992 |
| rad60anti | 1.02594e-06 | 0.999995 | 1.30963e-06 | 0.999994 |
| rad52     | 8.74390e-07 | 0.999996 | 1.11617e-06 | 0.999995 |
| rad53     | 7.68585e-07 | 0.999997 | 9.81104e-07 | 0.999996 |
| rad56     | 5.65906e-07 | 0.999997 | 7.22388e-07 | 0.999997 |
| rad21     | 3.82298e-07 | 0.999998 | 4.88008e-07 | 0.999997 |
| rad2      | 3.58861e-07 | 0.999998 | 4.58091e-07 | 0.999998 |
| rad10     | 3.23623e-07 | 0.999998 | 4.13109e-07 | 0.999998 |
| rad36     | 3.04716e-07 | 0.999999 | 3.88974e-07 | 0.999998 |
| rad22     | 2.32498e-07 | 0.999999 | 2.96787e-07 | 0.999999 |
| rad64     | 1.99497e-07 | 0.999999 | 2.54661e-07 | 0.999999 |
| rad20     | 1.59749e-07 | 0.999999 | 2.03922e-07 | 0.999999 |
| rad26     | 1.20931e-07 | 0.999999 | 1.54370e-07 | 0.999999 |
| rad43     | 1.01924e-07 | 0.999999 | 1.30108e-07 | 0.999999 |
| rad33     | 9.63995e-08 | 0.999999 | 1.23055e-07 | 1.000000 |
| rad1      | 8.65382e-08 | 1.000000 | 1.10467e-07 | 1.000000 |
| PAH8+H    | 7.83862e-08 | 1.000000 | 1.00061e-07 | 1.000000 |
| rad65     | 6.78217e-08 | 1.000000 | 8.65754e-08 | 1.000000 |
| rad58     | 5.90363e-08 | 1.000000 | 7.53605e-08 | 1.000000 |
| rad68syn  | 5.15788e-08 | 1.000000 | 6.58412e-08 | 1.000000 |
| rad18     | 4.95739e-08 | 1.000000 | 6.32819e-08 | 1.000000 |
| rad42     | 4.88790e-08 | 1.000000 | 6.23949e-08 | 1.000000 |
| rad3      | 4.59067e-08 | 1.000000 | 5.86004e-08 | 1.000000 |
| rad4      | 3.62709e-08 | 1.000000 | 4.63003e-08 | 1.000000 |
| rad68anti | 3.40015e-08 | 1.000000 | 4.34035e-08 | 1.000000 |
| rad15     | 3.38118e-08 | 1.000000 | 4.31613e-08 | 1.000000 |
| rad71     | 2.85446e-08 | 1.000000 | 3.64376e-08 | 1.000000 |
| rad73     | 2.36891e-08 | 1.000000 | 3.02396e-08 | 1.000000 |
| rad25     | 1.96461e-08 | 1.000000 | 2.50786e-08 | 1.000000 |
| rad40syn  | 1.25156e-08 | 1.000000 | 1.59764e-08 | 1.000000 |
| rad24     | 8.54738e-09 | 1.000000 | 1.09109e-08 | 1.000000 |
| rad12     | 7.78466e-09 | 1.000000 | 9.93725e-09 | 1.000000 |
| rad40anti | 6.56959e-09 | 1.000000 | 8.38619e-09 | 1.000000 |
| rad61     | 5.22664e-09 | 1.000000 | 6.67186e-09 | 1.000000 |
| rad41     | 3.24927e-09 | 1.000000 | 4.14773e-09 | 1.000000 |
| rad14     | 1.16105e-09 | 1.000000 | 1.48210e-09 | 1.000000 |
| rad72     | 7.90674e-10 | 1.000000 | 1.00930e-09 | 1.000000 |
| rad27     | 2.39096e-10 | 1.000000 | 3.05209e-10 | 1.000000 |
| rad8      | 9.32627e-11 | 1.000000 | 1.19052e-10 | 1.000000 |
| rad31     | 3.43905e-11 | 1.000000 | 4.38999e-11 | 1.000000 |
| rad5      | 2.88806e-12 | 1.000000 | 3.68665e-12 | 1.000000 |
| rad47     | 1.81887e-12 | 1.000000 | 2.32182e-12 | 1.000000 |

100.000000 Pa, 1500.00000 K

=====

| Rate constant      | True (fraction)      | Effective (fraction) |
|--------------------|----------------------|----------------------|
| Total              | 4.61271e-12 (1.00 )  | 3.52203e-12 (1.00 )  |
| Formation of rad11 | 1.20217e-12 (0.261 ) | 7.28094e-13 (0.207 ) |
| Formation of rad6  | 1.56360e-12 (0.339 ) | 9.46993e-13 (0.269 ) |
| H-abstraction      | 1.84694e-12 (0.400 ) | 1.84694e-12 (0.524 ) |

| species            | PYtrue     | Cumul    | PYeffective | Cumul    |
|--------------------|------------|----------|-------------|----------|
| Benzene+2-propynyl | 0.400402   | 0.400402 | 0.524397    | 0.524397 |
| Phenyl+Allene      | 0.236452   | 0.636854 | 0.000000    | 0.524397 |
| PhCH2CCH+H         | 0.0807208  | 0.717575 | 0.105718    | 0.630115 |
| Indene+H           | 0.0798268  | 0.797402 | 0.104547    | 0.734662 |
| C2H2+PhCH2         | 0.0781702  | 0.875572 | 0.102377    | 0.837039 |
| PhCHCCH2+H         | 0.0700840  | 0.945656 | 0.0917871   | 0.928826 |
| PhCCH+CH3          | 0.0357471  | 0.981403 | 0.0468170   | 0.975644 |
| PAH7+H             | 0.00804756 | 0.989451 | 0.0105397   | 0.986183 |
| Ph+MeAc            | 0.00523967 | 0.994690 | 0.00686229  | 0.993046 |

|               |             |          |             |          |
|---------------|-------------|----------|-------------|----------|
| rad39         | 0.00146275  | 0.996153 | 0.00191573  | 0.994961 |
| rad6          | 0.00116553  | 0.997319 | 0.00152647  | 0.996488 |
| PhCCCH3+H     | 0.000774488 | 0.998093 | 0.00101432  | 0.997502 |
| rad19anti     | 0.000583807 | 0.998677 | 0.000764598 | 0.998267 |
| rad19syn      | 0.000318116 | 0.998995 | 0.000416628 | 0.998683 |
| PAH9+H        | 0.000306929 | 0.999302 | 0.000401976 | 0.999085 |
| PhcycC3H3_A+H | 0.000140786 | 0.999443 | 0.000184383 | 0.999270 |
| rad38         | 0.000131541 | 0.999574 | 0.000172276 | 0.999442 |
| rad54         | 0.000123386 | 0.999698 | 0.000161596 | 0.999604 |
| rad35         | 5.55564e-05 | 0.999753 | 7.27606e-05 | 0.999676 |
| rad46         | 3.53237e-05 | 0.999789 | 4.62625e-05 | 0.999723 |
| rad30         | 3.00228e-05 | 0.999819 | 3.93201e-05 | 0.999762 |
| PAH1+H        | 2.33294e-05 | 0.999842 | 3.05539e-05 | 0.999792 |
| rad7          | 1.71802e-05 | 0.999859 | 2.25005e-05 | 0.999815 |
| rad50         | 1.71590e-05 | 0.999876 | 2.24727e-05 | 0.999837 |
| rad11         | 1.63646e-05 | 0.999893 | 2.14322e-05 | 0.999859 |
| rad37         | 1.56684e-05 | 0.999908 | 2.05205e-05 | 0.999879 |
| PAH3+H        | 1.45221e-05 | 0.999923 | 1.90192e-05 | 0.999898 |
| PAH10+CH3     | 1.27075e-05 | 0.999936 | 1.66427e-05 | 0.999915 |
| rad70         | 1.27016e-05 | 0.999948 | 1.66349e-05 | 0.999932 |
| rad67         | 1.11749e-05 | 0.999959 | 1.46355e-05 | 0.999946 |
| rad55         | 7.97609e-06 | 0.999967 | 1.04460e-05 | 0.999957 |
| rad23         | 5.47674e-06 | 0.999973 | 7.17276e-06 | 0.999964 |
| rad9          | 3.48867e-06 | 0.999976 | 4.56902e-06 | 0.999968 |
| rad51         | 3.24801e-06 | 0.999980 | 4.25385e-06 | 0.999973 |
| rad34         | 2.58469e-06 | 0.999982 | 3.38510e-06 | 0.999976 |
| rad28         | 2.53823e-06 | 0.999985 | 3.32426e-06 | 0.999979 |
| rad13         | 1.95146e-06 | 0.999987 | 2.55578e-06 | 0.999982 |
| rad45         | 1.83694e-06 | 0.999989 | 2.40579e-06 | 0.999984 |
| rad60syn      | 1.83064e-06 | 0.999990 | 2.39754e-06 | 0.999987 |
| rad59         | 1.59073e-06 | 0.999992 | 2.08334e-06 | 0.999989 |
| rad62         | 1.39306e-06 | 0.999993 | 1.82446e-06 | 0.999991 |
| rad53         | 1.33002e-06 | 0.999995 | 1.74189e-06 | 0.999992 |
| rad52         | 1.20365e-06 | 0.999996 | 1.57639e-06 | 0.999994 |
| rad60anti     | 1.10460e-06 | 0.999997 | 1.44666e-06 | 0.999995 |
| rad56         | 1.07923e-06 | 0.999998 | 1.41345e-06 | 0.999997 |
| rad64         | 3.17185e-07 | 0.999998 | 4.15409e-07 | 0.999997 |
| rad21         | 2.43573e-07 | 0.999999 | 3.19001e-07 | 0.999998 |
| rad22         | 1.97398e-07 | 0.999999 | 2.58527e-07 | 0.999998 |
| rad36         | 1.74675e-07 | 0.999999 | 2.28767e-07 | 0.999998 |
| PAH8+H        | 1.67403e-07 | 0.999999 | 2.19244e-07 | 0.999998 |
| rad10         | 1.50593e-07 | 0.999999 | 1.97227e-07 | 0.999999 |
| rad2          | 1.38949e-07 | 0.999999 | 1.81978e-07 | 0.999999 |
| rad43         | 1.10448e-07 | 1.000000 | 1.44651e-07 | 0.999999 |
| rad65         | 9.62264e-08 | 1.000000 | 1.26025e-07 | 0.999999 |
| rad68syn      | 9.32842e-08 | 1.000000 | 1.22172e-07 | 0.999999 |
| rad20         | 9.14219e-08 | 1.000000 | 1.19733e-07 | 0.999999 |
| rad58         | 8.49450e-08 | 1.000000 | 1.11251e-07 | 0.999999 |
| rad26         | 7.53083e-08 | 1.000000 | 9.86296e-08 | 0.999999 |
| rad42         | 7.20842e-08 | 1.000000 | 9.44072e-08 | 1.000000 |
| rad33         | 6.26682e-08 | 1.000000 | 8.20753e-08 | 1.000000 |
| rad68anti     | 6.13143e-08 | 1.000000 | 8.03018e-08 | 1.000000 |
| rad15         | 4.26211e-08 | 1.000000 | 5.58196e-08 | 1.000000 |
| rad71         | 3.45982e-08 | 1.000000 | 4.53123e-08 | 1.000000 |
| rad1          | 3.38308e-08 | 1.000000 | 4.43074e-08 | 1.000000 |
| rad18         | 3.13961e-08 | 1.000000 | 4.11186e-08 | 1.000000 |
| rad73         | 3.10656e-08 | 1.000000 | 4.06857e-08 | 1.000000 |
| rad40syn      | 2.49641e-08 | 1.000000 | 3.26948e-08 | 1.000000 |
| rad3          | 2.15859e-08 | 1.000000 | 2.82705e-08 | 1.000000 |
| rad4          | 1.71423e-08 | 1.000000 | 2.24508e-08 | 1.000000 |
| rad25         | 1.39055e-08 | 1.000000 | 1.82116e-08 | 1.000000 |
| rad40anti     | 1.34603e-08 | 1.000000 | 1.76287e-08 | 1.000000 |
| rad61         | 9.35426e-09 | 1.000000 | 1.22511e-08 | 1.000000 |
| rad12         | 6.44807e-09 | 1.000000 | 8.44490e-09 | 1.000000 |
| rad24         | 6.11080e-09 | 1.000000 | 8.00316e-09 | 1.000000 |
| rad41         | 4.22655e-09 | 1.000000 | 5.53540e-09 | 1.000000 |
| rad72         | 7.85107e-10 | 1.000000 | 1.02823e-09 | 1.000000 |
| rad14         | 7.21346e-10 | 1.000000 | 9.44728e-10 | 1.000000 |
| rad27         | 1.18578e-10 | 1.000000 | 1.55298e-10 | 1.000000 |
| rad8          | 9.83016e-11 | 1.000000 | 1.28743e-10 | 1.000000 |
| rad31         | 2.33937e-11 | 1.000000 | 3.06382e-11 | 1.000000 |
| rad5          | 3.90083e-12 | 1.000000 | 5.10883e-12 | 1.000000 |
| rad47         | 2.47069e-12 | 1.000000 | 3.23580e-12 | 1.000000 |

100.000000 Pa, 1750.00000 K

=====

| Rate constant      | True (fraction)      | Effective (fraction) |
|--------------------|----------------------|----------------------|
| Total              | 8.61869e-12 (1.00 )  | 6.27166e-12 (1.00 )  |
| Formation of rad11 | 2.04015e-12 (0.237 ) | 1.05139e-12 (0.168 ) |

|                   |                      |                      |
|-------------------|----------------------|----------------------|
| Formation of rad6 | 2.80256e-12 (0.325 ) | 1.44430e-12 (0.230 ) |
| H-abstraction     | 3.77597e-12 (0.438 ) | 3.77597e-12 (0.602 ) |

| species            | PYtrue      | Cumul    | PYeffective | Cumul    |
|--------------------|-------------|----------|-------------|----------|
| Benzene+2-propynyl | 0.438115    | 0.438115 | 0.602070    | 0.602070 |
| Phenyl+Allene      | 0.272319    | 0.710434 | 0.000000    | 0.602070 |
| PhCH2CCH+H         | 0.0933320   | 0.803765 | 0.128260    | 0.730329 |
| PhCHCCH2+H         | 0.0655524   | 0.869318 | 0.0900835   | 0.820413 |
| C2H2+PhCH2         | 0.0473597   | 0.916678 | 0.0650831   | 0.885496 |
| Indene+H           | 0.0392272   | 0.955905 | 0.0539072   | 0.939403 |
| PhCCH+CH3          | 0.0275609   | 0.983466 | 0.0378749   | 0.977278 |
| PAH7+H             | 0.00712465  | 0.990590 | 0.00979092  | 0.987069 |
| Ph+MeAc            | 0.00487641  | 0.995467 | 0.00670131  | 0.993770 |
| rad39              | 0.00123414  | 0.996701 | 0.00169599  | 0.995466 |
| rad19anti          | 0.000563228 | 0.997264 | 0.000774003 | 0.996240 |
| rad19syn           | 0.000510819 | 0.997775 | 0.000701981 | 0.996942 |
| PhCCCH3+H          | 0.000457458 | 0.998232 | 0.000628651 | 0.997571 |
| rad6               | 0.000430383 | 0.998663 | 0.000591444 | 0.998162 |
| PhcycC3H3_A+H      | 0.000362255 | 0.999025 | 0.000497823 | 0.998660 |
| PAH9+H             | 0.000269333 | 0.999294 | 0.000370125 | 0.999030 |
| rad54              | 0.000216490 | 0.999511 | 0.000297508 | 0.999328 |
| rad38              | 0.000145024 | 0.999656 | 0.000199296 | 0.999527 |
| rad35              | 4.91776e-05 | 0.999705 | 6.75813e-05 | 0.999595 |
| PAH1+H             | 4.29895e-05 | 0.999748 | 5.90772e-05 | 0.999654 |
| rad46              | 3.90209e-05 | 0.999787 | 5.36235e-05 | 0.999707 |
| rad50              | 2.72495e-05 | 0.999814 | 3.74471e-05 | 0.999745 |
| rad30              | 2.29650e-05 | 0.999837 | 3.15592e-05 | 0.999776 |
| PAH10+CH3          | 2.25251e-05 | 0.999860 | 3.09547e-05 | 0.999807 |
| rad70              | 2.21231e-05 | 0.999882 | 3.04022e-05 | 0.999838 |
| PAH3+H             | 2.09391e-05 | 0.999903 | 2.87750e-05 | 0.999867 |
| rad55              | 1.73528e-05 | 0.999920 | 2.38467e-05 | 0.999890 |
| rad67              | 1.70911e-05 | 0.999937 | 2.34871e-05 | 0.999914 |
| rad37              | 1.61700e-05 | 0.999953 | 2.22213e-05 | 0.999936 |
| rad51              | 8.76159e-06 | 0.999962 | 1.20404e-05 | 0.999948 |
| rad34              | 5.28466e-06 | 0.999967 | 7.26231e-06 | 0.999955 |
| rad53              | 4.48946e-06 | 0.999972 | 6.16955e-06 | 0.999962 |
| rad56              | 4.12459e-06 | 0.999976 | 5.66812e-06 | 0.999967 |
| rad52              | 2.49092e-06 | 0.999979 | 3.42309e-06 | 0.999971 |
| rad7               | 2.39960e-06 | 0.999981 | 3.29761e-06 | 0.999974 |
| rad62              | 2.37934e-06 | 0.999983 | 3.26975e-06 | 0.999977 |
| rad71              | 2.36043e-06 | 0.999986 | 3.24377e-06 | 0.999980 |
| rad59              | 2.07385e-06 | 0.999988 | 2.84994e-06 | 0.999983 |
| rad60syn           | 1.94552e-06 | 0.999990 | 2.67359e-06 | 0.999986 |
| rad11              | 1.78419e-06 | 0.999991 | 2.45189e-06 | 0.999988 |
| rad23              | 1.33178e-06 | 0.999993 | 1.83017e-06 | 0.999990 |
| rad60anti          | 1.30934e-06 | 0.999994 | 1.79933e-06 | 0.999992 |
| rad28              | 1.09669e-06 | 0.999995 | 1.50710e-06 | 0.999994 |
| rad64              | 8.03951e-07 | 0.999996 | 1.10481e-06 | 0.999995 |
| rad73              | 8.02013e-07 | 0.999997 | 1.10215e-06 | 0.999996 |
| PAH8+H             | 6.47483e-07 | 0.999997 | 8.89788e-07 | 0.999997 |
| rad72              | 4.30390e-07 | 0.999998 | 5.91456e-07 | 0.999997 |
| rad68syn           | 2.88474e-07 | 0.999998 | 3.96429e-07 | 0.999998 |
| rad9               | 2.36118e-07 | 0.999998 | 3.24480e-07 | 0.999998 |
| rad65              | 2.17955e-07 | 0.999999 | 2.99520e-07 | 0.999998 |
| rad68anti          | 1.86858e-07 | 0.999999 | 2.56785e-07 | 0.999999 |
| rad42              | 1.74803e-07 | 0.999999 | 2.40219e-07 | 0.999999 |
| rad58              | 1.60680e-07 | 0.999999 | 2.20810e-07 | 0.999999 |
| rad13              | 1.59289e-07 | 0.999999 | 2.18900e-07 | 0.999999 |
| rad45              | 1.38164e-07 | 0.999999 | 1.89869e-07 | 0.999999 |
| rad43              | 1.32528e-07 | 1.000000 | 1.82124e-07 | 1.000000 |
| rad22              | 1.22881e-07 | 1.000000 | 1.68867e-07 | 1.000000 |
| rad40syn           | 8.82801e-08 | 1.000000 | 1.21317e-07 | 1.000000 |
| rad40anti          | 5.34220e-08 | 1.000000 | 7.34142e-08 | 1.000000 |
| rad61              | 2.84796e-08 | 1.000000 | 3.91374e-08 | 1.000000 |
| rad36              | 2.35201e-08 | 1.000000 | 3.23221e-08 | 1.000000 |
| rad21              | 1.96313e-08 | 1.000000 | 2.69779e-08 | 1.000000 |
| rad26              | 1.83656e-08 | 1.000000 | 2.52385e-08 | 1.000000 |
| rad15              | 1.16556e-08 | 1.000000 | 1.60175e-08 | 1.000000 |
| rad10              | 9.18323e-09 | 1.000000 | 1.26198e-08 | 1.000000 |
| rad41              | 8.16498e-09 | 1.000000 | 1.12206e-08 | 1.000000 |
| rad20              | 6.44466e-09 | 1.000000 | 8.85642e-09 | 1.000000 |
| rad33              | 5.46892e-09 | 1.000000 | 7.51555e-09 | 1.000000 |
| rad2               | 3.30661e-09 | 1.000000 | 4.54405e-09 | 1.000000 |
| rad18              | 3.14651e-09 | 1.000000 | 4.32403e-09 | 1.000000 |
| rad25              | 1.42413e-09 | 1.000000 | 1.95708e-09 | 1.000000 |
| rad1               | 8.70349e-10 | 1.000000 | 1.19606e-09 | 1.000000 |
| rad12              | 7.41470e-10 | 1.000000 | 1.01894e-09 | 1.000000 |
| rad3               | 6.65306e-10 | 1.000000 | 9.14281e-10 | 1.000000 |
| rad24              | 6.00942e-10 | 1.000000 | 8.25829e-10 | 1.000000 |



|       |             |          |             |         |
|-------|-------------|----------|-------------|---------|
| rad4  | 4.24069e-10 | 1.000000 | 5.82769e-10 | 1.00000 |
| rad14 | 7.55455e-11 | 1.000000 | 1.03816e-10 | 1.00000 |
| rad8  | 2.76912e-11 | 1.000000 | 3.80540e-11 | 1.00000 |
| rad5  | 7.16662e-12 | 1.000000 | 9.84858e-12 | 1.00000 |
| rad27 | 6.81556e-12 | 1.000000 | 9.36609e-12 | 1.00000 |
| rad47 | 2.39665e-12 | 1.000000 | 3.29355e-12 | 1.00000 |

100.000000 Pa, 2000.00000 K

| Rate constant      | True (fraction)      | Effective (fraction) |
|--------------------|----------------------|----------------------|
| Total              | 1.44111e-11 (1.00 )  | 1.02912e-11 (1.00 )  |
| Formation of rad11 | 3.16882e-12 (0.220 ) | 1.47376e-12 (0.143 ) |
| Formation of rad6  | 4.53302e-12 (0.315 ) | 2.10823e-12 (0.205 ) |
| H-abstraction      | 6.70922e-12 (0.466 ) | 6.70922e-12 (0.652 ) |

| species            | PYtrue      | Cumul    | PYeffective | Cumul    |
|--------------------|-------------|----------|-------------|----------|
| Benzene+2-propynyl | 0.465560    | 0.465560 | 0.651937    | 0.651937 |
| Phenyl+Allene      | 0.285881    | 0.751442 | 0.000000    | 0.651937 |
| PhCH2CCH+H         | 0.0971526   | 0.848594 | 0.136045    | 0.787982 |
| PhCHCCH2+H         | 0.0592651   | 0.907859 | 0.0829904   | 0.870972 |
| C2H2+PhCH2         | 0.0319400   | 0.939799 | 0.0447265   | 0.915699 |
| Indene+H           | 0.0232389   | 0.963038 | 0.0325420   | 0.948241 |
| PhCCH+CH3          | 0.0216219   | 0.984660 | 0.0302777   | 0.978518 |
| PAH7+H             | 0.00659167  | 0.991252 | 0.00923053  | 0.987749 |
| Ph+MeAc            | 0.00420734  | 0.995459 | 0.00589166  | 0.993641 |
| rad39              | 0.00101457  | 0.996474 | 0.00142073  | 0.995061 |
| rad19syn           | 0.000749525 | 0.997223 | 0.00104958  | 0.996111 |
| PhcycC3H3_A+H      | 0.000662182 | 0.997885 | 0.000927275 | 0.997038 |
| rad19anti          | 0.000528706 | 0.998414 | 0.000740362 | 0.997779 |
| rad54              | 0.000331163 | 0.998745 | 0.000463738 | 0.998242 |
| PhCCCH3+H          | 0.000291189 | 0.999036 | 0.000407759 | 0.998650 |
| PAH9+H             | 0.000280352 | 0.999317 | 0.000392584 | 0.999043 |
| rad38              | 0.000157049 | 0.999474 | 0.000219921 | 0.999263 |
| rad6               | 7.01725e-05 | 0.999544 | 9.82648e-05 | 0.999361 |
| PAH1+H             | 7.01474e-05 | 0.999614 | 9.82297e-05 | 0.999459 |
| rad35              | 5.19621e-05 | 0.999666 | 7.27640e-05 | 0.999532 |
| rad46              | 4.60538e-05 | 0.999712 | 6.44905e-05 | 0.999596 |
| rad50              | 3.98274e-05 | 0.999752 | 5.57712e-05 | 0.999652 |
| PAH10+CH3          | 3.35617e-05 | 0.999786 | 4.69972e-05 | 0.999699 |
| rad70              | 3.20388e-05 | 0.999818 | 4.48646e-05 | 0.999744 |
| rad55              | 2.87973e-05 | 0.999846 | 4.03255e-05 | 0.999784 |
| PAH3+H             | 2.79544e-05 | 0.999874 | 3.91453e-05 | 0.999823 |
| rad67              | 2.52107e-05 | 0.999900 | 3.53033e-05 | 0.999859 |
| rad30              | 1.88754e-05 | 0.999918 | 2.64317e-05 | 0.999885 |
| rad37              | 1.66056e-05 | 0.999935 | 2.32533e-05 | 0.999908 |
| rad51              | 1.31519e-05 | 0.999948 | 1.84170e-05 | 0.999927 |
| rad56              | 1.05119e-05 | 0.999959 | 1.47201e-05 | 0.999942 |
| rad53              | 1.00221e-05 | 0.999969 | 1.40342e-05 | 0.999956 |
| rad34              | 8.57402e-06 | 0.999977 | 1.20064e-05 | 0.999968 |
| rad52              | 3.78895e-06 | 0.999981 | 5.30577e-06 | 0.999973 |
| rad62              | 3.44934e-06 | 0.999985 | 4.83021e-06 | 0.999978 |
| rad59              | 2.59023e-06 | 0.999987 | 3.62717e-06 | 0.999981 |
| rad60syn           | 2.06912e-06 | 0.999989 | 2.89744e-06 | 0.999984 |
| PAH8+H             | 1.84993e-06 | 0.999991 | 2.59051e-06 | 0.999987 |
| rad64              | 1.48748e-06 | 0.999993 | 2.08296e-06 | 0.999989 |
| rad60anti          | 1.42269e-06 | 0.999994 | 1.99223e-06 | 0.999991 |
| rad71              | 1.21198e-06 | 0.999995 | 1.69716e-06 | 0.999993 |
| rad68syn           | 6.57719e-07 | 0.999996 | 9.21024e-07 | 0.999994 |
| rad73              | 5.63764e-07 | 0.999996 | 7.89456e-07 | 0.999994 |
| rad7               | 5.39415e-07 | 0.999997 | 7.55356e-07 | 0.999995 |
| rad23              | 4.78995e-07 | 0.999997 | 6.70749e-07 | 0.999996 |
| rad68anti          | 4.24225e-07 | 0.999998 | 5.94053e-07 | 0.999996 |
| rad11              | 4.21845e-07 | 0.999998 | 5.90719e-07 | 0.999997 |
| rad65              | 3.54045e-07 | 0.999999 | 4.95778e-07 | 0.999997 |
| rad42              | 3.20399e-07 | 0.999999 | 4.48664e-07 | 0.999998 |
| rad58              | 2.77126e-07 | 0.999999 | 3.88066e-07 | 0.999998 |
| rad28              | 2.48627e-07 | 1.000000 | 3.48161e-07 | 0.999999 |
| rad40syn           | 2.30196e-07 | 1.000000 | 3.22350e-07 | 0.999999 |
| rad43              | 1.63373e-07 | 1.000000 | 2.28776e-07 | 0.999999 |
| rad72              | 1.56544e-07 | 1.000000 | 2.19213e-07 | 0.999999 |
| rad40anti          | 1.44746e-07 | 1.000000 | 2.02692e-07 | 1.000000 |
| rad9               | 8.14128e-08 | 1.000000 | 1.14004e-07 | 1.000000 |
| rad61              | 6.08812e-08 | 1.000000 | 8.52535e-08 | 1.000000 |
| rad13              | 4.90230e-08 | 1.000000 | 6.86481e-08 | 1.000000 |
| rad45              | 4.24330e-08 | 1.000000 | 5.94199e-08 | 1.000000 |
| rad22              | 3.08768e-08 | 1.000000 | 4.32378e-08 | 1.000000 |
| rad41              | 1.36976e-08 | 1.000000 | 1.91811e-08 | 1.000000 |
| rad36              | 7.38638e-09 | 1.000000 | 1.03434e-08 | 1.000000 |

|       |             |         |             |         |
|-------|-------------|---------|-------------|---------|
| rad21 | 7.16844e-09 | 1.00000 | 1.00382e-08 | 1.00000 |
| rad15 | 4.11073e-09 | 1.00000 | 5.75637e-09 | 1.00000 |
| rad26 | 3.56820e-09 | 1.00000 | 4.99665e-09 | 1.00000 |
| rad33 | 2.25604e-09 | 1.00000 | 3.15919e-09 | 1.00000 |
| rad20 | 1.92096e-09 | 1.00000 | 2.68997e-09 | 1.00000 |
| rad10 | 1.29068e-09 | 1.00000 | 1.80738e-09 | 1.00000 |
| rad18 | 7.02382e-10 | 1.00000 | 9.83560e-10 | 1.00000 |
| rad25 | 5.81171e-10 | 1.00000 | 8.13827e-10 | 1.00000 |
| rad2  | 4.50579e-10 | 1.00000 | 6.30958e-10 | 1.00000 |
| rad12 | 4.13614e-10 | 1.00000 | 5.79194e-10 | 1.00000 |
| rad24 | 2.84128e-10 | 1.00000 | 3.97871e-10 | 1.00000 |
| rad3  | 1.69077e-10 | 1.00000 | 2.36764e-10 | 1.00000 |
| rad1  | 1.22019e-10 | 1.00000 | 1.70866e-10 | 1.00000 |
| rad4  | 1.07110e-10 | 1.00000 | 1.49989e-10 | 1.00000 |
| rad14 | 2.94342e-11 | 1.00000 | 4.12173e-11 | 1.00000 |
| rad8  | 2.35103e-11 | 1.00000 | 3.29221e-11 | 1.00000 |
| rad5  | 4.13455e-12 | 1.00000 | 5.78972e-12 | 1.00000 |
| rad47 | 3.14950e-12 | 1.00000 | 4.41034e-12 | 1.00000 |
| rad27 | 1.90894e-12 | 1.00000 | 2.67315e-12 | 1.00000 |

100.000000 Pa, 2250.00000 K

| Rate constant      | True (fraction)      | Effective (fraction) |
|--------------------|----------------------|----------------------|
| Total              | 2.23655e-11 (1.00 )  | 1.58430e-11 (1.00 )  |
| Formation of rad11 | 4.62280e-12 (0.207 ) | 1.98898e-12 (0.126 ) |
| Formation of rad6  | 6.82518e-12 (0.305 ) | 2.93657e-12 (0.185 ) |
| H-abstraction      | 1.09175e-11 (0.488 ) | 1.09175e-11 (0.689 ) |

| species            | PYtrue      | Cumul    | PYeffective | Cumul    |
|--------------------|-------------|----------|-------------|----------|
| Benzene+2-propynyl | 0.488140    | 0.488140 | 0.689103    | 0.689103 |
| Phenyl+Allene      | 0.291630    | 0.779770 | 0.000000    | 0.689103 |
| PhCH2CCH+H         | 0.0967308   | 0.876501 | 0.136554    | 0.825657 |
| PhCCCH2+H          | 0.0532652   | 0.929766 | 0.0751939   | 0.900851 |
| C2H2+PhCH2         | 0.0232543   | 0.953020 | 0.0328279   | 0.933679 |
| PhCCH+CH3          | 0.0176436   | 0.970664 | 0.0249073   | 0.958586 |
| Indene+H           | 0.0145256   | 0.985189 | 0.0205056   | 0.979092 |
| PAH7+H             | 0.00604266  | 0.991232 | 0.00853036  | 0.987622 |
| Ph+MeAc            | 0.00373437  | 0.994966 | 0.00527179  | 0.992894 |
| PhcycC3H3_A+H      | 0.00104658  | 0.996013 | 0.00147746  | 0.994371 |
| rad19syn           | 0.000993540 | 0.997006 | 0.00140257  | 0.995774 |
| rad39              | 0.000833753 | 0.997840 | 0.00117700  | 0.996951 |
| rad19anti          | 0.000463328 | 0.998303 | 0.000654078 | 0.997605 |
| rad54              | 0.000448712 | 0.998752 | 0.000633443 | 0.998238 |
| PAH9+H             | 0.000276296 | 0.999028 | 0.000390045 | 0.998628 |
| PhCCCH3+H          | 0.000209541 | 0.999238 | 0.000295807 | 0.998924 |
| rad38              | 0.000160908 | 0.999399 | 0.000227153 | 0.999151 |
| PAH1+H             | 9.97789e-05 | 0.999499 | 0.000140857 | 0.999292 |
| rad50              | 5.50080e-05 | 0.999554 | 7.76543e-05 | 0.999370 |
| rad35              | 5.25306e-05 | 0.999606 | 7.41573e-05 | 0.999444 |
| rad46              | 5.07967e-05 | 0.999657 | 7.17093e-05 | 0.999516 |
| PAH10+CH3          | 4.32536e-05 | 0.999700 | 6.10608e-05 | 0.999577 |
| rad55              | 4.15801e-05 | 0.999742 | 5.86983e-05 | 0.999636 |
| rad70              | 4.13306e-05 | 0.999783 | 5.83460e-05 | 0.999694 |
| PAH3+H             | 3.54445e-05 | 0.999818 | 5.00367e-05 | 0.999744 |
| rad67              | 3.21854e-05 | 0.999851 | 4.54360e-05 | 0.999789 |
| rad56              | 2.11749e-05 | 0.999872 | 2.98924e-05 | 0.999819 |
| rad51              | 2.08379e-05 | 0.999893 | 2.94166e-05 | 0.999849 |
| rad53              | 1.82702e-05 | 0.999911 | 2.57918e-05 | 0.999875 |
| rad30              | 1.61738e-05 | 0.999927 | 2.28325e-05 | 0.999897 |
| rad37              | 1.58069e-05 | 0.999943 | 2.23145e-05 | 0.999920 |
| rad6               | 1.32663e-05 | 0.999956 | 1.87280e-05 | 0.999938 |
| rad34              | 1.21417e-05 | 0.999968 | 1.71404e-05 | 0.999956 |
| rad52              | 5.58956e-06 | 0.999974 | 7.89075e-06 | 0.999963 |
| rad62              | 4.55847e-06 | 0.999978 | 6.43516e-06 | 0.999970 |
| PAH8+H             | 4.27932e-06 | 0.999983 | 6.04107e-06 | 0.999976 |
| rad59              | 3.10237e-06 | 0.999986 | 4.37958e-06 | 0.999980 |
| rad64              | 2.31866e-06 | 0.999988 | 3.27325e-06 | 0.999984 |
| rad60syn           | 2.18375e-06 | 0.999990 | 3.08278e-06 | 0.999987 |
| rad71              | 1.68870e-06 | 0.999992 | 2.38393e-06 | 0.999989 |
| rad60anti          | 1.52782e-06 | 0.999994 | 2.15681e-06 | 0.999991 |
| rad68syn           | 1.22984e-06 | 0.999995 | 1.73615e-06 | 0.999993 |
| rad73              | 9.35536e-07 | 0.999996 | 1.32069e-06 | 0.999994 |
| rad68anti          | 7.90644e-07 | 0.999997 | 1.11615e-06 | 0.999995 |
| rad65              | 5.51130e-07 | 0.999997 | 7.78026e-07 | 0.999996 |
| rad42              | 5.02255e-07 | 0.999998 | 7.09029e-07 | 0.999997 |
| rad40syn           | 4.84752e-07 | 0.999998 | 6.84319e-07 | 0.999998 |
| rad58              | 4.30838e-07 | 0.999999 | 6.08211e-07 | 0.999998 |
| rad40anti          | 3.16249e-07 | 0.999999 | 4.46445e-07 | 0.999999 |

|       |             |          |             |          |
|-------|-------------|----------|-------------|----------|
| rad43 | 2.01715e-07 | 0.999999 | 2.84760e-07 | 0.999999 |
| rad7  | 1.73398e-07 | 0.999999 | 2.44784e-07 | 0.999999 |
| rad11 | 1.32309e-07 | 0.999999 | 1.86780e-07 | 0.999999 |
| rad72 | 1.28453e-07 | 0.999999 | 1.81336e-07 | 0.999999 |
| rad23 | 1.11788e-07 | 1.000000 | 1.57810e-07 | 1.000000 |
| rad61 | 1.07144e-07 | 1.000000 | 1.51254e-07 | 1.000000 |
| rad28 | 4.82901e-08 | 1.000000 | 6.81707e-08 | 1.000000 |
| rad9  | 2.97700e-08 | 1.000000 | 4.20261e-08 | 1.000000 |
| rad41 | 2.13010e-08 | 1.000000 | 3.00705e-08 | 1.000000 |
| rad13 | 1.84116e-08 | 1.000000 | 2.59916e-08 | 1.000000 |
| rad45 | 1.47827e-08 | 1.000000 | 2.08686e-08 | 1.000000 |
| rad22 | 7.48477e-09 | 1.000000 | 1.05662e-08 | 1.000000 |
| rad21 | 2.99285e-09 | 1.000000 | 4.22500e-09 | 1.000000 |
| rad36 | 2.62322e-09 | 1.000000 | 3.70316e-09 | 1.000000 |
| rad15 | 1.65393e-09 | 1.000000 | 2.33485e-09 | 1.000000 |
| rad33 | 1.06607e-09 | 1.000000 | 1.50496e-09 | 1.000000 |
| rad26 | 9.22873e-10 | 1.000000 | 1.30281e-09 | 1.000000 |
| rad20 | 6.91548e-10 | 1.000000 | 9.76251e-10 | 1.000000 |
| rad10 | 3.37673e-10 | 1.000000 | 4.76689e-10 | 1.000000 |
| rad25 | 2.69675e-10 | 1.000000 | 3.80697e-10 | 1.000000 |
| rad12 | 2.31619e-10 | 1.000000 | 3.26974e-10 | 1.000000 |
| rad18 | 2.16462e-10 | 1.000000 | 3.05577e-10 | 1.000000 |
| rad24 | 1.45495e-10 | 1.000000 | 2.05394e-10 | 1.000000 |
| rad2  | 8.98780e-11 | 1.000000 | 1.26880e-10 | 1.000000 |
| rad3  | 5.52804e-11 | 1.000000 | 7.80389e-11 | 1.000000 |
| rad4  | 3.44365e-11 | 1.000000 | 4.86137e-11 | 1.000000 |
| rad1  | 2.44773e-11 | 1.000000 | 3.45543e-11 | 1.000000 |
| rad8  | 2.01774e-11 | 1.000000 | 2.84842e-11 | 1.000000 |
| rad14 | 1.42004e-11 | 1.000000 | 2.00465e-11 | 1.000000 |
| rad47 | 4.81237e-12 | 1.000000 | 6.79360e-12 | 1.000000 |
| rad5  | 2.31066e-12 | 1.000000 | 3.26193e-12 | 1.000000 |
| rad27 | 7.45770e-13 | 1.000000 | 1.05280e-12 | 1.000000 |

100.000000 Pa, 2500.00000 K

| Rate constant      | True (fraction) |          | Effective (fraction) |          |
|--------------------|-----------------|----------|----------------------|----------|
| Total              | 3.28090e-11     | (1.00 )  | 2.31978e-11          | (1.00 )  |
| Formation of rad11 | 6.43164e-12     | (0.196 ) | 2.60898e-12          | (0.112 ) |
| Formation of rad6  | 9.73932e-12     | (0.297 ) | 3.95073e-12          | (0.170 ) |
| H-abstraction      | 1.66381e-11     | (0.507 ) | 1.66381e-11          | (0.717 ) |

  

| species            | PYtrue      | Cumul    | PYeffective | Cumul    |
|--------------------|-------------|----------|-------------|----------|
| Benzene+2-propynyl | 0.507119    | 0.507119 | 0.717227    | 0.717227 |
| Phenyl+Allene      | 0.292945    | 0.800064 | 0.000000    | 0.717227 |
| PhCH2CCH+H         | 0.0943922   | 0.894456 | 0.133501    | 0.850727 |
| PhCHCCH2+H         | 0.0481916   | 0.942647 | 0.0681583   | 0.918886 |
| C2H2+PhCH2         | 0.0183481   | 0.960996 | 0.0259500   | 0.944836 |
| PhCCH+CH3          | 0.0148739   | 0.975869 | 0.0210363   | 0.965872 |
| Indene+H           | 0.00953060  | 0.985400 | 0.0134793   | 0.979351 |
| PAH7+H             | 0.00553023  | 0.990930 | 0.00782149  | 0.987173 |
| Ph+MeAc            | 0.00339473  | 0.994325 | 0.00480124  | 0.991974 |
| PhcycC3H3_A+H      | 0.00149381  | 0.995819 | 0.00211272  | 0.994087 |
| rad19syn           | 0.00122645  | 0.997045 | 0.00173459  | 0.995821 |
| rad39              | 0.000692523 | 0.997738 | 0.000979445 | 0.996801 |
| rad54              | 0.000558371 | 0.998296 | 0.000789710 | 0.997590 |
| rad19anti          | 0.000392474 | 0.998689 | 0.000555081 | 0.998145 |
| PAH9+H             | 0.000261472 | 0.998950 | 0.000369803 | 0.998515 |
| PhCCCH3+H          | 0.000164569 | 0.999115 | 0.000232752 | 0.998748 |
| rad38              | 0.000157854 | 0.999272 | 0.000223255 | 0.998971 |
| PAH1+H             | 0.000129679 | 0.999402 | 0.000183407 | 0.999155 |
| rad50              | 6.96786e-05 | 0.999472 | 9.85474e-05 | 0.999253 |
| rad55              | 5.44772e-05 | 0.999526 | 7.70484e-05 | 0.999330 |
| rad46              | 5.29907e-05 | 0.999579 | 7.49454e-05 | 0.999405 |
| rad35              | 5.14194e-05 | 0.999631 | 7.27231e-05 | 0.999478 |
| PAH10+CH3          | 5.04435e-05 | 0.999681 | 7.13429e-05 | 0.999549 |
| rad70              | 4.95247e-05 | 0.999731 | 7.00436e-05 | 0.999619 |
| PAH3+H             | 4.31675e-05 | 0.999774 | 6.10525e-05 | 0.999680 |
| rad67              | 3.73923e-05 | 0.999811 | 5.28846e-05 | 0.999733 |
| rad56              | 3.65372e-05 | 0.999848 | 5.16752e-05 | 0.999785 |
| rad51              | 3.00520e-05 | 0.999878 | 4.25031e-05 | 0.999827 |
| rad53              | 2.90356e-05 | 0.999907 | 4.10655e-05 | 0.999869 |
| rad34              | 1.57220e-05 | 0.999923 | 2.22359e-05 | 0.999891 |
| rad30              | 1.43448e-05 | 0.999937 | 2.02881e-05 | 0.999911 |
| rad37              | 1.43008e-05 | 0.999951 | 2.02259e-05 | 0.999931 |
| PAH8+H             | 8.33443e-06 | 0.999960 | 1.17875e-05 | 0.999943 |
| rad52              | 7.49584e-06 | 0.999967 | 1.06015e-05 | 0.999954 |
| rad62              | 5.70850e-06 | 0.999973 | 8.07361e-06 | 0.999962 |
| rad59              | 3.60051e-06 | 0.999976 | 5.09227e-06 | 0.999967 |

|           |             |          |             |          |
|-----------|-------------|----------|-------------|----------|
| rad6      | 3.59307e-06 | 0.999980 | 5.08175e-06 | 0.999972 |
| rad71     | 3.31813e-06 | 0.999983 | 4.69288e-06 | 0.999977 |
| rad64     | 3.22292e-06 | 0.999987 | 4.55822e-06 | 0.999981 |
| rad60syn  | 2.29256e-06 | 0.999989 | 3.24239e-06 | 0.999984 |
| rad68syn  | 1.99972e-06 | 0.999991 | 2.82824e-06 | 0.999987 |
| rad73     | 1.76263e-06 | 0.999993 | 2.49292e-06 | 0.999990 |
| rad60anti | 1.62679e-06 | 0.999994 | 2.30079e-06 | 0.999992 |
| rad68anti | 1.28239e-06 | 0.999995 | 1.81371e-06 | 0.999994 |
| rad40syn  | 8.70838e-07 | 0.999996 | 1.23164e-06 | 0.999995 |
| rad65     | 7.68693e-07 | 0.999997 | 1.08717e-06 | 0.999996 |
| rad42     | 7.26897e-07 | 0.999998 | 1.02807e-06 | 0.999997 |
| rad58     | 6.16959e-07 | 0.999998 | 8.72574e-07 | 0.999998 |
| rad40anti | 5.86223e-07 | 0.999999 | 8.29106e-07 | 0.999999 |
| rad43     | 2.45243e-07 | 0.999999 | 3.46850e-07 | 0.999999 |
| rad72     | 2.39225e-07 | 1.000000 | 3.38341e-07 | 1.000000 |
| rad61     | 1.61886e-07 | 1.000000 | 2.28959e-07 | 1.000000 |
| rad7      | 6.79417e-08 | 1.000000 | 9.60909e-08 | 1.000000 |
| rad11     | 4.93360e-08 | 1.000000 | 6.97769e-08 | 1.000000 |
| rad23     | 3.14849e-08 | 1.000000 | 4.45297e-08 | 1.000000 |
| rad41     | 3.10326e-08 | 1.000000 | 4.38898e-08 | 1.000000 |
| rad28     | 1.28079e-08 | 1.000000 | 1.81144e-08 | 1.000000 |
| rad9      | 1.16379e-08 | 1.000000 | 1.64597e-08 | 1.000000 |
| rad13     | 7.98182e-09 | 1.000000 | 1.12888e-08 | 1.000000 |
| rad45     | 5.76992e-09 | 1.000000 | 8.16050e-09 | 1.000000 |
| rad22     | 2.35370e-09 | 1.000000 | 3.32887e-09 | 1.000000 |
| rad21     | 1.40090e-09 | 1.000000 | 1.98131e-09 | 1.000000 |
| rad36     | 1.04078e-09 | 1.000000 | 1.47200e-09 | 1.000000 |
| rad15     | 7.16211e-10 | 1.000000 | 1.01295e-09 | 1.000000 |
| rad33     | 5.57572e-10 | 1.000000 | 7.88584e-10 | 1.000000 |
| rad26     | 3.22816e-10 | 1.000000 | 4.56563e-10 | 1.000000 |
| rad20     | 2.95932e-10 | 1.000000 | 4.18541e-10 | 1.000000 |
| rad25     | 1.37966e-10 | 1.000000 | 1.95128e-10 | 1.000000 |
| rad12     | 1.32596e-10 | 1.000000 | 1.87533e-10 | 1.000000 |
| rad10     | 1.21549e-10 | 1.000000 | 1.71909e-10 | 1.000000 |
| rad18     | 8.21673e-11 | 1.000000 | 1.16210e-10 | 1.000000 |
| rad24     | 7.98946e-11 | 1.000000 | 1.12997e-10 | 1.000000 |
| rad2      | 2.51819e-11 | 1.000000 | 3.56150e-11 | 1.000000 |
| rad3      | 2.20193e-11 | 1.000000 | 3.11424e-11 | 1.000000 |
| rad8      | 1.75036e-11 | 1.000000 | 2.47557e-11 | 1.000000 |
| rad4      | 1.34333e-11 | 1.000000 | 1.89990e-11 | 1.000000 |
| rad14     | 7.84889e-12 | 1.000000 | 1.11008e-11 | 1.000000 |
| rad47     | 6.78294e-12 | 1.000000 | 9.59320e-12 | 1.000000 |
| rad1      | 6.70890e-12 | 1.000000 | 9.48852e-12 | 1.000000 |
| rad5      | 1.50638e-12 | 1.000000 | 2.13049e-12 | 1.000000 |
| rad27     | 3.71474e-13 | 1.000000 | 5.25382e-13 | 1.000000 |

100.000000 Pa, 2750.00000 K

=====

| Rate constant      | True (fraction)      | Effective (fraction) |
|--------------------|----------------------|----------------------|
| Total              | 4.60596e-11 (1.00 )  | 3.26254e-11 (1.00 )  |
| Formation of rad11 | 8.62280e-12 (0.187 ) | 3.34631e-12 (0.103 ) |
| Formation of rad6  | 1.33313e-11 (0.289 ) | 5.17358e-12 (0.159 ) |
| H-abstraction      | 2.41055e-11 (0.523 ) | 2.41055e-11 (0.739 ) |

| species            | PYtrue      | Cumul    | PYeffective | Cumul    |
|--------------------|-------------|----------|-------------|----------|
| Benzene+2-propynyl | 0.523355    | 0.523355 | 0.738857    | 0.738857 |
| Phenyl+Allene      | 0.291670    | 0.815025 | 0.000000    | 0.738857 |
| PhCH2CCH+H         | 0.0913910   | 0.906416 | 0.129024    | 0.867881 |
| PhCHCCH2+H         | 0.0440891   | 0.950505 | 0.0622439   | 0.930125 |
| C2H2+PhCH2         | 0.0155256   | 0.966031 | 0.0219187   | 0.952043 |
| PhCCH+CH3          | 0.0128660   | 0.978897 | 0.0181639   | 0.970207 |
| Indene+H           | 0.00652628  | 0.985423 | 0.00921361  | 0.979421 |
| PAH7+H             | 0.00506736  | 0.990490 | 0.00715398  | 0.986575 |
| Ph+MeAc            | 0.00315045  | 0.993641 | 0.00444770  | 0.991023 |
| PhcycC3H3_A+H      | 0.00197325  | 0.995614 | 0.00278579  | 0.993808 |
| rad19syn           | 0.00143577  | 0.997050 | 0.00202698  | 0.995835 |
| rad54              | 0.000652618 | 0.997702 | 0.000921345 | 0.996757 |
| rad39              | 0.000584062 | 0.998286 | 0.000824563 | 0.997581 |
| rad19anti          | 0.000328551 | 0.998615 | 0.000463839 | 0.998045 |
| PAH9+H             | 0.000240083 | 0.998855 | 0.000338942 | 0.998384 |
| PAH1+H             | 0.000158312 | 0.999013 | 0.000223500 | 0.998608 |
| rad38              | 0.000149728 | 0.999163 | 0.000211381 | 0.998819 |
| PhCCH3+H           | 0.000136859 | 0.999300 | 0.000193214 | 0.999012 |
| rad50              | 8.20126e-05 | 0.999382 | 0.000115783 | 0.999128 |
| rad55              | 6.64363e-05 | 0.999448 | 9.37930e-05 | 0.999222 |
| rad70              | 5.64834e-05 | 0.999505 | 7.97417e-05 | 0.999302 |
| rad56              | 5.60011e-05 | 0.999561 | 7.90604e-05 | 0.999381 |
| PAH10+CH3          | 5.50001e-05 | 0.999616 | 7.76479e-05 | 0.999458 |

|           |             |          |             |          |
|-----------|-------------|----------|-------------|----------|
| rad46     | 5.29291e-05 | 0.999669 | 7.47236e-05 | 0.999533 |
| PAH3+H    | 5.07723e-05 | 0.999720 | 7.16792e-05 | 0.999605 |
| rad35     | 4.92136e-05 | 0.999769 | 6.94783e-05 | 0.999674 |
| rad53     | 4.16007e-05 | 0.999810 | 5.87307e-05 | 0.999733 |
| rad67     | 4.08905e-05 | 0.999851 | 5.77279e-05 | 0.999791 |
| rad51     | 3.94704e-05 | 0.999891 | 5.57231e-05 | 0.999846 |
| rad34     | 1.91386e-05 | 0.999910 | 2.70194e-05 | 0.999873 |
| PAH8+H    | 1.42422e-05 | 0.999924 | 2.01067e-05 | 0.999893 |
| rad30     | 1.30157e-05 | 0.999937 | 1.83752e-05 | 0.999912 |
| rad37     | 1.25492e-05 | 0.999950 | 1.77166e-05 | 0.999930 |
| rad52     | 9.23972e-06 | 0.999959 | 1.30444e-05 | 0.999943 |
| rad62     | 6.96717e-06 | 0.999966 | 9.83604e-06 | 0.999952 |
| rad71     | 6.10668e-06 | 0.999972 | 8.62126e-06 | 0.999961 |
| rad64     | 4.12977e-06 | 0.999976 | 5.83030e-06 | 0.999967 |
| rad59     | 4.06498e-06 | 0.999980 | 5.73882e-06 | 0.999973 |
| rad73     | 3.00195e-06 | 0.999983 | 4.23806e-06 | 0.999977 |
| rad68syn  | 2.93878e-06 | 0.999986 | 4.14888e-06 | 0.999981 |
| rad60syn  | 2.38755e-06 | 0.999989 | 3.37067e-06 | 0.999984 |
| rad68anti | 1.88099e-06 | 0.999990 | 2.65553e-06 | 0.999987 |
| rad60anti | 1.71403e-06 | 0.999992 | 2.41982e-06 | 0.999989 |
| rad40syn  | 1.39075e-06 | 0.999994 | 1.96342e-06 | 0.999991 |
| rad6      | 1.22152e-06 | 0.999995 | 1.72451e-06 | 0.999993 |
| rad42     | 1.00674e-06 | 0.999996 | 1.42129e-06 | 0.999995 |
| rad65     | 9.78281e-07 | 0.999997 | 1.38111e-06 | 0.999996 |
| rad40anti | 9.61022e-07 | 0.999998 | 1.35674e-06 | 0.999997 |
| rad58     | 8.26908e-07 | 0.999999 | 1.16740e-06 | 0.999998 |
| rad72     | 5.01664e-07 | 0.999999 | 7.08240e-07 | 0.999999 |
| rad43     | 2.90406e-07 | 0.999999 | 4.09986e-07 | 1.000000 |
| rad61     | 2.19065e-07 | 1.000000 | 3.09269e-07 | 1.000000 |
| rad41     | 4.25354e-08 | 1.000000 | 6.00503e-08 | 1.000000 |
| rad7      | 3.05034e-08 | 1.000000 | 4.30637e-08 | 1.000000 |
| rad11     | 2.10949e-08 | 1.000000 | 2.97812e-08 | 1.000000 |
| rad23     | 1.08582e-08 | 1.000000 | 1.53294e-08 | 1.000000 |
| rad9      | 4.88781e-09 | 1.000000 | 6.90046e-09 | 1.000000 |
| rad28     | 4.33578e-09 | 1.000000 | 6.12113e-09 | 1.000000 |
| rad13     | 3.88144e-09 | 1.000000 | 5.47971e-09 | 1.000000 |
| rad45     | 2.48345e-09 | 1.000000 | 3.50607e-09 | 1.000000 |
| rad22     | 8.86651e-10 | 1.000000 | 1.25175e-09 | 1.000000 |
| rad21     | 7.24139e-10 | 1.000000 | 1.02232e-09 | 1.000000 |
| rad36     | 4.54175e-10 | 1.000000 | 6.41191e-10 | 1.000000 |
| rad15     | 3.30142e-10 | 1.000000 | 4.66085e-10 | 1.000000 |
| rad33     | 3.15710e-10 | 1.000000 | 4.45710e-10 | 1.000000 |
| rad20     | 1.47925e-10 | 1.000000 | 2.08837e-10 | 1.000000 |
| rad26     | 1.31560e-10 | 1.000000 | 1.85733e-10 | 1.000000 |
| rad12     | 7.84873e-11 | 1.000000 | 1.10806e-10 | 1.000000 |
| rad25     | 7.67776e-11 | 1.000000 | 1.08393e-10 | 1.000000 |
| rad10     | 5.20644e-11 | 1.000000 | 7.35030e-11 | 1.000000 |
| rad24     | 4.65724e-11 | 1.000000 | 6.57497e-11 | 1.000000 |
| rad18     | 3.65931e-11 | 1.000000 | 5.16611e-11 | 1.000000 |
| rad8      | 1.53283e-11 | 1.000000 | 2.16401e-11 | 1.000000 |
| rad3      | 1.02130e-11 | 1.000000 | 1.44184e-11 | 1.000000 |
| rad2      | 9.11293e-12 | 1.000000 | 1.28654e-11 | 1.000000 |
| rad47     | 8.70950e-12 | 1.000000 | 1.22958e-11 | 1.000000 |
| rad4      | 6.12461e-12 | 1.000000 | 8.64656e-12 | 1.000000 |
| rad14     | 4.79653e-12 | 1.000000 | 6.77161e-12 | 1.000000 |
| rad1      | 2.33035e-12 | 1.000000 | 3.28993e-12 | 1.000000 |
| rad5      | 1.05282e-12 | 1.000000 | 1.48635e-12 | 1.000000 |
| rad27     | 2.17923e-13 | 1.000000 | 3.07657e-13 | 1.000000 |

100.000000 Pa, 3000.00000 K

=====

| Rate constant      | True (fraction)      | Effective (fraction)  |
|--------------------|----------------------|-----------------------|
| Total              | 6.24269e-11 (1.00 )  | 4.43911e-11 (1.00 )   |
| Formation of rad11 | 1.12221e-11 (0.180 ) | 4.21269e-12 (0.0949 ) |
| Formation of rad6  | 1.76534e-11 (0.283 ) | 6.62699e-12 (0.149 )  |
| H-abstraction      | 3.35514e-11 (0.537 ) | 3.35514e-11 (0.756 )  |

| species            | PYtrue     | Cumul    | PYeffective | Cumul    |
|--------------------|------------|----------|-------------|----------|
| Benzene+2-propynyl | 0.537451   | 0.537451 | 0.755814    | 0.755814 |
| Phenyl+Allene      | 0.288911   | 0.826362 | 0.000000    | 0.755814 |
| PhCH2CCH+H         | 0.0883066  | 0.914669 | 0.124185    | 0.879999 |
| PhCHCCH2+H         | 0.0408109  | 0.955480 | 0.0573922   | 0.937391 |
| C2H2+PhCH2         | 0.0138651  | 0.969345 | 0.0194984   | 0.956889 |
| PhCCH+CH3          | 0.0113581  | 0.980703 | 0.0159729   | 0.972862 |
| PAH7+H             | 0.00465324 | 0.985356 | 0.00654382  | 0.979406 |
| Indene+H           | 0.00463885 | 0.989995 | 0.00652360  | 0.985930 |
| Ph+MeAc            | 0.00297586 | 0.992971 | 0.00418493  | 0.990115 |
| PhcycC3H3_A+H      | 0.00245651 | 0.995427 | 0.00345457  | 0.993569 |

|           |             |          |             |          |
|-----------|-------------|----------|-------------|----------|
| rad19syn  | 0.00161457  | 0.997042 | 0.00227056  | 0.995840 |
| rad54     | 0.000727894 | 0.997770 | 0.00102363  | 0.996863 |
| rad39     | 0.000500519 | 0.998270 | 0.000703878 | 0.997567 |
| rad19anti | 0.000275350 | 0.998546 | 0.000387223 | 0.997954 |
| PAH9+H    | 0.000215439 | 0.998761 | 0.000302971 | 0.998257 |
| PAH1+H    | 0.000185106 | 0.998946 | 0.000260314 | 0.998518 |
| rad38     | 0.000138300 | 0.999084 | 0.000194491 | 0.998712 |
| PhCCCH3+H | 0.000118094 | 0.999202 | 0.000166075 | 0.998878 |
| rad50     | 9.10407e-05 | 0.999293 | 0.000128030 | 0.999006 |
| rad56     | 7.84339e-05 | 0.999372 | 0.000110301 | 0.999117 |
| rad55     | 7.67863e-05 | 0.999449 | 0.000107984 | 0.999225 |
| rad70     | 6.22160e-05 | 0.999511 | 8.74938e-05 | 0.999312 |
| PAH3+H    | 5.79171e-05 | 0.999569 | 8.14482e-05 | 0.999394 |
| PAH10+CH3 | 5.73445e-05 | 0.999626 | 8.06434e-05 | 0.999474 |
| rad53     | 5.50960e-05 | 0.999681 | 7.74812e-05 | 0.999552 |
| rad46     | 5.10991e-05 | 0.999732 | 7.18605e-05 | 0.999624 |
| rad51     | 4.80126e-05 | 0.999780 | 6.75198e-05 | 0.999691 |
| rad35     | 4.64038e-05 | 0.999827 | 6.52572e-05 | 0.999756 |
| rad67     | 4.30007e-05 | 0.999870 | 6.04717e-05 | 0.999817 |
| rad34     | 2.22805e-05 | 0.999892 | 3.13330e-05 | 0.999848 |
| PAH8+H    | 2.20434e-05 | 0.999914 | 3.09994e-05 | 0.999879 |
| rad30     | 1.19659e-05 | 0.999926 | 1.68275e-05 | 0.999896 |
| rad37     | 1.08358e-05 | 0.999937 | 1.52383e-05 | 0.999911 |
| rad52     | 1.06436e-05 | 0.999948 | 1.49680e-05 | 0.999926 |
| rad71     | 9.99864e-06 | 0.999958 | 1.40610e-05 | 0.999940 |
| rad62     | 8.52482e-06 | 0.999966 | 1.19884e-05 | 0.999952 |
| rad64     | 4.99030e-06 | 0.999971 | 7.01781e-06 | 0.999959 |
| rad73     | 4.57069e-06 | 0.999976 | 6.42773e-06 | 0.999966 |
| rad59     | 4.47705e-06 | 0.999980 | 6.29607e-06 | 0.999972 |
| rad68syn  | 4.00562e-06 | 0.999984 | 5.63308e-06 | 0.999978 |
| rad68anti | 2.55999e-06 | 0.999987 | 3.60011e-06 | 0.999981 |
| rad60syn  | 2.46102e-06 | 0.999989 | 3.46092e-06 | 0.999985 |
| rad40syn  | 2.03330e-06 | 0.999991 | 2.85942e-06 | 0.999987 |
| rad60anti | 1.78408e-06 | 0.999993 | 2.50894e-06 | 0.999990 |
| rad40anti | 1.43630e-06 | 0.999994 | 2.01985e-06 | 0.999992 |
| rad42     | 1.37823e-06 | 0.999996 | 1.93819e-06 | 0.999994 |
| rad65     | 1.15722e-06 | 0.999997 | 1.62738e-06 | 0.999996 |
| rad58     | 1.05026e-06 | 0.999998 | 1.47697e-06 | 0.999997 |
| rad72     | 9.43178e-07 | 0.999999 | 1.32639e-06 | 0.999998 |
| rad6      | 4.85033e-07 | 0.999999 | 6.82097e-07 | 0.999999 |
| rad43     | 3.36111e-07 | 1.000000 | 4.72671e-07 | 1.000000 |
| rad61     | 2.74011e-07 | 1.000000 | 3.85340e-07 | 1.000000 |
| rad41     | 5.56899e-08 | 1.000000 | 7.83165e-08 | 1.000000 |
| rad7      | 1.52103e-08 | 1.000000 | 2.13902e-08 | 1.000000 |
| rad11     | 1.01211e-08 | 1.000000 | 1.42332e-08 | 1.000000 |
| rad23     | 4.27197e-09 | 1.000000 | 6.00766e-09 | 1.000000 |
| rad9      | 2.20778e-09 | 1.000000 | 3.10480e-09 | 1.000000 |
| rad13     | 2.07238e-09 | 1.000000 | 2.91436e-09 | 1.000000 |
| rad28     | 1.71583e-09 | 1.000000 | 2.41296e-09 | 1.000000 |
| rad45     | 1.16019e-09 | 1.000000 | 1.63157e-09 | 1.000000 |
| rad21     | 4.07145e-10 | 1.000000 | 5.72565e-10 | 1.000000 |
| rad22     | 3.81269e-10 | 1.000000 | 5.36176e-10 | 1.000000 |
| rad36     | 2.14594e-10 | 1.000000 | 3.01782e-10 | 1.000000 |
| rad33     | 1.90341e-10 | 1.000000 | 2.67674e-10 | 1.000000 |
| rad15     | 1.61863e-10 | 1.000000 | 2.27627e-10 | 1.000000 |
| rad20     | 8.42486e-11 | 1.000000 | 1.18478e-10 | 1.000000 |
| rad26     | 5.89888e-11 | 1.000000 | 8.29553e-11 | 1.000000 |
| rad12     | 4.83012e-11 | 1.000000 | 6.79257e-11 | 1.000000 |
| rad25     | 4.59105e-11 | 1.000000 | 6.45635e-11 | 1.000000 |
| rad24     | 2.85414e-11 | 1.000000 | 4.01376e-11 | 1.000000 |
| rad10     | 2.49303e-11 | 1.000000 | 3.50592e-11 | 1.000000 |
| rad18     | 1.84593e-11 | 1.000000 | 2.59592e-11 | 1.000000 |
| rad8      | 1.35088e-11 | 1.000000 | 1.89973e-11 | 1.000000 |
| rad47     | 1.03500e-11 | 1.000000 | 1.45552e-11 | 1.000000 |
| rad3      | 5.32047e-12 | 1.000000 | 7.48215e-12 | 1.000000 |
| rad2      | 3.97851e-12 | 1.000000 | 5.59496e-12 | 1.000000 |
| rad14     | 3.19481e-12 | 1.000000 | 4.49283e-12 | 1.000000 |
| rad4      | 3.16638e-12 | 1.000000 | 4.45285e-12 | 1.000000 |
| rad1      | 9.70187e-13 | 1.000000 | 1.36437e-12 | 1.000000 |
| rad5      | 7.64843e-13 | 1.000000 | 1.07559e-12 | 1.000000 |
| rad27     | 1.41916e-13 | 1.000000 | 1.99576e-13 | 1.000000 |

100.000000 Pa, 3250.00000 K

=====

| Rate constant      | True (fraction)      | Effective (fraction)  |
|--------------------|----------------------|-----------------------|
| Total              | 8.22129e-11 (1.00 )  | 5.87536e-11 (1.00 )   |
| Formation of rad11 | 1.42538e-11 (0.173 ) | 5.21850e-12 (0.0888 ) |
| Formation of rad6  | 2.27549e-11 (0.277 ) | 8.33085e-12 (0.142 )  |
| H-abstraction      | 4.52043e-11 (0.550 ) | 4.52043e-11 (0.769 )  |

| species            | PYtrue      | Cumul    | PYeffective | Cumul    |
|--------------------|-------------|----------|-------------|----------|
| Benzene+2-propynyl | 0.549844    | 0.549844 | 0.769387    | 0.769387 |
| Phenyl+Allene      | 0.285348    | 0.835192 | 0.00000     | 0.769387 |
| PhCH2CCH+H         | 0.0853725   | 0.920565 | 0.119460    | 0.888847 |
| PhCHCCH2+H         | 0.0381838   | 0.958748 | 0.0534300   | 0.942277 |
| C2H2+PhCH2         | 0.0128678   | 0.971616 | 0.0180058   | 0.960283 |
| PhCCH+CH3          | 0.0101926   | 0.981809 | 0.0142623   | 0.974545 |
| PAH7+H             | 0.00428273  | 0.986092 | 0.00599275  | 0.980538 |
| Indene+H           | 0.00340696  | 0.989498 | 0.00476730  | 0.985305 |
| PhcycC3H3_A+H      | 0.00292042  | 0.992419 | 0.00408648  | 0.989392 |
| Ph+MeAc            | 0.00285190  | 0.995271 | 0.00399062  | 0.993382 |
| rad19syn           | 0.00176006  | 0.997031 | 0.00246283  | 0.995845 |
| rad54              | 0.000783510 | 0.997814 | 0.00109635  | 0.996942 |
| rad39              | 0.000435205 | 0.998250 | 0.000608975 | 0.997551 |
| rad19anti          | 0.000232596 | 0.998482 | 0.000325466 | 0.997876 |
| PAH1+H             | 0.000210289 | 0.998692 | 0.000294253 | 0.998170 |
| PAH9+H             | 0.000189945 | 0.998882 | 0.000265786 | 0.998436 |
| rad38              | 0.000125074 | 0.999007 | 0.000175014 | 0.998611 |
| PhCCCH3+H          | 0.000104500 | 0.999112 | 0.000146225 | 0.998757 |
| rad56              | 0.000102497 | 0.999214 | 0.000143422 | 0.998901 |
| rad50              | 9.64824e-05 | 0.999311 | 0.000135006 | 0.999036 |
| rad55              | 8.51952e-05 | 0.999396 | 0.000119212 | 0.999155 |
| rad53              | 6.86884e-05 | 0.999465 | 9.61149e-05 | 0.999251 |
| rad70              | 6.67834e-05 | 0.999532 | 9.34488e-05 | 0.999344 |
| PAH3+H             | 6.43471e-05 | 0.999596 | 9.00398e-05 | 0.999435 |
| PAH10+CH3          | 5.80431e-05 | 0.999654 | 8.12189e-05 | 0.999516 |
| rad51              | 5.49325e-05 | 0.999709 | 7.68663e-05 | 0.999593 |
| rad46              | 4.80267e-05 | 0.999757 | 6.72032e-05 | 0.999660 |
| rad67              | 4.40669e-05 | 0.999801 | 6.16620e-05 | 0.999721 |
| rad35              | 4.33471e-05 | 0.999844 | 6.06549e-05 | 0.999782 |
| PAH8+H             | 3.16115e-05 | 0.999876 | 4.42336e-05 | 0.999826 |
| rad34              | 2.50787e-05 | 0.999901 | 3.50921e-05 | 0.999861 |
| rad71              | 1.47840e-05 | 0.999916 | 2.06870e-05 | 0.999882 |
| rad52              | 1.16183e-05 | 0.999927 | 1.62573e-05 | 0.999898 |
| rad30              | 1.10773e-05 | 0.999939 | 1.55003e-05 | 0.999914 |
| rad62              | 1.06709e-05 | 0.999949 | 1.49315e-05 | 0.999929 |
| rad37              | 9.29415e-06 | 0.999959 | 1.30052e-05 | 0.999942 |
| rad73              | 6.34040e-06 | 0.999965 | 8.87200e-06 | 0.999951 |
| rad64              | 5.77654e-06 | 0.999971 | 8.08303e-06 | 0.999959 |
| rad68syn           | 5.15352e-06 | 0.999976 | 7.21124e-06 | 0.999966 |
| rad59              | 4.82491e-06 | 0.999981 | 6.75138e-06 | 0.999973 |
| rad68anti          | 3.28966e-06 | 0.999984 | 4.60317e-06 | 0.999977 |
| rad40syn           | 2.77795e-06 | 0.999987 | 3.88714e-06 | 0.999981 |
| rad60syn           | 2.50929e-06 | 0.999989 | 3.51120e-06 | 0.999985 |
| rad40anti          | 1.99955e-06 | 0.999991 | 2.79793e-06 | 0.999988 |
| rad42              | 1.90475e-06 | 0.999993 | 2.66529e-06 | 0.999990 |
| rad60anti          | 1.83422e-06 | 0.999995 | 2.56658e-06 | 0.999993 |
| rad72              | 1.57557e-06 | 0.999996 | 2.20468e-06 | 0.999995 |
| rad65              | 1.29227e-06 | 0.999998 | 1.80826e-06 | 0.999997 |
| rad58              | 1.27683e-06 | 0.999999 | 1.78665e-06 | 0.999999 |
| rad43              | 3.85036e-07 | 0.999999 | 5.38774e-07 | 0.999999 |
| rad61              | 3.23861e-07 | 1.000000 | 4.53173e-07 | 1.000000 |
| rad6               | 2.17225e-07 | 1.000000 | 3.03959e-07 | 1.000000 |
| rad41              | 7.10661e-08 | 1.000000 | 9.94417e-08 | 1.000000 |
| rad7               | 8.24452e-09 | 1.000000 | 1.15364e-08 | 1.000000 |
| rad11              | 5.34938e-09 | 1.000000 | 7.48528e-09 | 1.000000 |
| rad23              | 1.85190e-09 | 1.000000 | 2.59133e-09 | 1.000000 |
| rad13              | 1.19464e-09 | 1.000000 | 1.67164e-09 | 1.000000 |
| rad9               | 1.07062e-09 | 1.000000 | 1.49811e-09 | 1.000000 |
| rad28              | 7.62317e-10 | 1.000000 | 1.06670e-09 | 1.000000 |
| rad45              | 5.80044e-10 | 1.000000 | 8.11647e-10 | 1.000000 |
| rad21              | 2.45550e-10 | 1.000000 | 3.43593e-10 | 1.000000 |
| rad22              | 1.82559e-10 | 1.000000 | 2.55452e-10 | 1.000000 |
| rad33              | 1.20689e-10 | 1.000000 | 1.68878e-10 | 1.000000 |
| rad36              | 1.08267e-10 | 1.000000 | 1.51496e-10 | 1.000000 |
| rad15              | 8.42877e-11 | 1.000000 | 1.17942e-10 | 1.000000 |
| rad20              | 5.32193e-11 | 1.000000 | 7.44688e-11 | 1.000000 |
| rad12              | 3.09422e-11 | 1.000000 | 4.32969e-11 | 1.000000 |
| rad25              | 2.91580e-11 | 1.000000 | 4.08003e-11 | 1.000000 |
| rad26              | 2.85215e-11 | 1.000000 | 3.99096e-11 | 1.000000 |
| rad24              | 1.82421e-11 | 1.000000 | 2.55259e-11 | 1.000000 |
| rad10              | 1.29420e-11 | 1.000000 | 1.81095e-11 | 1.000000 |
| rad8               | 1.19400e-11 | 1.000000 | 1.67075e-11 | 1.000000 |
| rad47              | 1.15662e-11 | 1.000000 | 1.61844e-11 | 1.000000 |
| rad18              | 1.02480e-11 | 1.000000 | 1.43399e-11 | 1.000000 |
| rad3               | 3.03003e-12 | 1.000000 | 4.23987e-12 | 1.000000 |
| rad14              | 2.31791e-12 | 1.000000 | 3.24341e-12 | 1.000000 |
| rad2               | 1.98811e-12 | 1.000000 | 2.78193e-12 | 1.000000 |

|       |             |         |             |         |
|-------|-------------|---------|-------------|---------|
| rad4  | 1.81110e-12 | 1.00000 | 2.53425e-12 | 1.00000 |
| rad5  | 5.74291e-13 | 1.00000 | 8.03594e-13 | 1.00000 |
| rad1  | 4.64593e-13 | 1.00000 | 6.50096e-13 | 1.00000 |
| rad27 | 9.92909e-14 | 1.00000 | 1.38936e-13 | 1.00000 |

100.000000 Pa, 3500.00000 K

=====

| Rate constant      | True (fraction)      | Effective (fraction)  |
|--------------------|----------------------|-----------------------|
| Total              | 1.05713e-10 (1.00 )  | 7.59651e-11 (1.00 )   |
| Formation of rad11 | 1.77412e-11 (0.168 ) | 6.37266e-12 (0.0839 ) |
| Formation of rad6  | 2.86822e-11 (0.271 ) | 1.03027e-11 (0.136 )  |
| H-abstraction      | 5.92897e-11 (0.561 ) | 5.92897e-11 (0.780 )  |

  

| species            | PYtrue      | Cumul    | PYeffective | Cumul    |
|--------------------|-------------|----------|-------------|----------|
| Benzene+2-propynyl | 0.560855    | 0.560855 | 0.780487    | 0.780487 |
| Phenyl+Allene      | 0.281404    | 0.842259 | 0.00000     | 0.780487 |
| PhCH2CCH+H         | 0.0826652   | 0.924924 | 0.115037    | 0.895524 |
| PhCHCCH2+H         | 0.0360585   | 0.960982 | 0.0501792   | 0.945703 |
| C2H2+PhCH2         | 0.0122593   | 0.973242 | 0.0170601   | 0.962763 |
| PhCCH+CH3          | 0.00927084  | 0.982512 | 0.0129013   | 0.975665 |
| PAH7+H             | 0.00395025  | 0.986463 | 0.00549719  | 0.981162 |
| PhcycC3H3_A+H      | 0.00334803  | 0.989811 | 0.00465913  | 0.985821 |
| Ph+MeAc            | 0.00276398  | 0.992575 | 0.00384636  | 0.989667 |
| Indene+H           | 0.00257592  | 0.995151 | 0.00358465  | 0.993252 |
| rad19syn           | 0.00187235  | 0.997023 | 0.00260558  | 0.995857 |
| rad54              | 0.000820548 | 0.997843 | 0.00114187  | 0.996999 |
| rad39              | 0.000383057 | 0.998226 | 0.000533064 | 0.997532 |
| PAH1+H             | 0.000234591 | 0.998461 | 0.000326458 | 0.997859 |
| rad19anti          | 0.000198627 | 0.998660 | 0.000276409 | 0.998135 |
| PAH9+H             | 0.000165222 | 0.998825 | 0.000229925 | 0.998365 |
| rad56              | 0.000126873 | 0.998952 | 0.000176557 | 0.998542 |
| rad38              | 0.000111228 | 0.999063 | 0.000154786 | 0.998697 |
| rad50              | 9.85644e-05 | 0.999162 | 0.000137162 | 0.998834 |
| PhCCCH3+H          | 9.42428e-05 | 0.999256 | 0.000131148 | 0.998965 |
| rad55              | 9.15803e-05 | 0.999347 | 0.000127444 | 0.999092 |
| rad53              | 8.16797e-05 | 0.999429 | 0.000113666 | 0.999206 |
| rad70              | 7.02694e-05 | 0.999499 | 9.77873e-05 | 0.999304 |
| PAH3+H             | 6.99220e-05 | 0.999569 | 9.73037e-05 | 0.999401 |
| rad51              | 5.98542e-05 | 0.999629 | 8.32935e-05 | 0.999484 |
| PAH10+CH3          | 5.76128e-05 | 0.999687 | 8.01742e-05 | 0.999564 |
| rad67              | 4.43734e-05 | 0.999731 | 6.17502e-05 | 0.999626 |
| rad46              | 4.41956e-05 | 0.999775 | 6.15028e-05 | 0.999688 |
| PAH8+H             | 4.26937e-05 | 0.999818 | 5.94126e-05 | 0.999747 |
| rad35              | 4.02802e-05 | 0.999858 | 5.60541e-05 | 0.999803 |
| rad34              | 2.74952e-05 | 0.999886 | 3.82623e-05 | 0.999841 |
| rad71              | 2.01330e-05 | 0.999906 | 2.80172e-05 | 0.999869 |
| rad62              | 1.37118e-05 | 0.999920 | 1.90814e-05 | 0.999889 |
| rad52              | 1.21505e-05 | 0.999932 | 1.69087e-05 | 0.999905 |
| rad30              | 1.02915e-05 | 0.999942 | 1.43216e-05 | 0.999920 |
| rad73              | 8.16455e-06 | 0.999950 | 1.13618e-05 | 0.999931 |
| rad37              | 7.96632e-06 | 0.999958 | 1.10859e-05 | 0.999942 |
| rad64              | 6.47621e-06 | 0.999965 | 9.01234e-06 | 0.999951 |
| rad68syn           | 6.33616e-06 | 0.999971 | 8.81739e-06 | 0.999960 |
| rad59              | 5.10458e-06 | 0.999976 | 7.10356e-06 | 0.999967 |
| rad68anti          | 4.04060e-06 | 0.999980 | 5.62292e-06 | 0.999973 |
| rad40syn           | 3.59896e-06 | 0.999984 | 5.00833e-06 | 0.999978 |
| rad42              | 2.66326e-06 | 0.999986 | 3.70620e-06 | 0.999982 |
| rad40anti          | 2.63317e-06 | 0.999989 | 3.66434e-06 | 0.999985 |
| rad60syn           | 2.53258e-06 | 0.999992 | 3.52433e-06 | 0.999989 |
| rad72              | 2.38540e-06 | 0.999994 | 3.31953e-06 | 0.999992 |
| rad60anti          | 1.86455e-06 | 0.999996 | 2.59471e-06 | 0.999995 |
| rad58              | 1.49816e-06 | 0.999997 | 2.08484e-06 | 0.999997 |
| rad65              | 1.37933e-06 | 0.999999 | 1.91948e-06 | 0.999999 |
| rad43              | 4.42457e-07 | 0.999999 | 6.15722e-07 | 0.999999 |
| rad61              | 3.67261e-07 | 1.000000 | 5.11082e-07 | 1.000000 |
| rad6               | 1.07323e-07 | 1.000000 | 1.49351e-07 | 1.000000 |
| rad41              | 8.98830e-08 | 1.000000 | 1.25082e-07 | 1.000000 |
| rad7               | 4.78001e-09 | 1.000000 | 6.65187e-09 | 1.000000 |
| rad11              | 3.06506e-09 | 1.000000 | 4.26534e-09 | 1.000000 |
| rad23              | 8.67971e-10 | 1.000000 | 1.20787e-09 | 1.000000 |
| rad13              | 7.33860e-10 | 1.000000 | 1.02124e-09 | 1.000000 |
| rad9               | 5.55273e-10 | 1.000000 | 7.72720e-10 | 1.000000 |
| rad28              | 3.71870e-10 | 1.000000 | 5.17496e-10 | 1.000000 |
| rad45              | 3.06755e-10 | 1.000000 | 4.26881e-10 | 1.000000 |
| rad21              | 1.56976e-10 | 1.000000 | 2.18448e-10 | 1.000000 |
| rad22              | 9.56503e-11 | 1.000000 | 1.33107e-10 | 1.000000 |
| rad33              | 7.97462e-11 | 1.000000 | 1.10975e-10 | 1.000000 |
| rad36              | 5.76589e-11 | 1.000000 | 8.02385e-11 | 1.000000 |



|       |             |          |             |         |
|-------|-------------|----------|-------------|---------|
| rad15 | 4.64660e-11 | 1.000000 | 6.46623e-11 | 1.00000 |
| rad20 | 3.64014e-11 | 1.000000 | 5.06564e-11 | 1.00000 |
| rad12 | 2.06029e-11 | 1.000000 | 2.86711e-11 | 1.00000 |
| rad25 | 1.94667e-11 | 1.000000 | 2.70899e-11 | 1.00000 |
| rad26 | 1.47234e-11 | 1.000000 | 2.04892e-11 | 1.00000 |
| rad47 | 1.23134e-11 | 1.000000 | 1.71353e-11 | 1.00000 |
| rad24 | 1.20848e-11 | 1.000000 | 1.68172e-11 | 1.00000 |
| rad8  | 1.05538e-11 | 1.000000 | 1.46868e-11 | 1.00000 |
| rad10 | 7.16189e-12 | 1.000000 | 9.96650e-12 | 1.00000 |
| rad18 | 6.12502e-12 | 1.000000 | 8.52357e-12 | 1.00000 |
| rad3  | 1.85049e-12 | 1.000000 | 2.57516e-12 | 1.00000 |
| rad14 | 1.83591e-12 | 1.000000 | 2.55485e-12 | 1.00000 |
| rad4  | 1.12372e-12 | 1.000000 | 1.56378e-12 | 1.00000 |
| rad2  | 1.09665e-12 | 1.000000 | 1.52610e-12 | 1.00000 |
| rad5  | 4.44920e-13 | 1.000000 | 6.19153e-13 | 1.00000 |
| rad1  | 2.48533e-13 | 1.000000 | 3.45859e-13 | 1.00000 |
| rad27 | 7.36833e-14 | 1.000000 | 1.02538e-13 | 1.00000 |

100.000000 Pa, 3750.00000 K

| Rate constant      | True (fraction)      | Effective (fraction)  |
|--------------------|----------------------|-----------------------|
| Total              | 1.33217e-10 (1.00 )  | 9.62711e-11 (1.00 )   |
| Formation of rad11 | 2.17064e-11 (0.163 ) | 7.68279e-12 (0.0798 ) |
| Formation of rad6  | 3.54800e-11 (0.266 ) | 1.25578e-11 (0.130 )  |
| H-abstraction      | 7.60305e-11 (0.571 ) | 7.60305e-11 (0.790 )  |

| species            | PYtrue      | Cumul    | PYeffective | Cumul    |
|--------------------|-------------|----------|-------------|----------|
| Benzene+2-propynyl | 0.570727    | 0.570727 | 0.789754    | 0.789754 |
| Phenyl+Allene      | 0.277336    | 0.848063 | 0.00000     | 0.789754 |
| PhCH2CCH+H         | 0.0801946   | 0.928257 | 0.110970    | 0.900724 |
| PhCHCCH2+H         | 0.0343186   | 0.962576 | 0.0474891   | 0.948213 |
| C2H2+PhCH2         | 0.0118839   | 0.974460 | 0.0164445   | 0.964658 |
| PhCCH+CH3          | 0.00852836  | 0.982988 | 0.0118012   | 0.976459 |
| PhcycC3H3_A+H      | 0.00372852  | 0.986717 | 0.00515941  | 0.981619 |
| PAH7+H             | 0.00365085  | 0.990368 | 0.00505191  | 0.986671 |
| Ph+MeAc            | 0.00270113  | 0.993069 | 0.00373773  | 0.990408 |
| Indene+H           | 0.00199902  | 0.995068 | 0.00276618  | 0.993174 |
| rad19syn           | 0.00195356  | 0.997021 | 0.00270328  | 0.995878 |
| rad54              | 0.000841040 | 0.997862 | 0.00116380  | 0.997042 |
| rad39              | 0.000340476 | 0.998203 | 0.000471140 | 0.997513 |
| PAH1+H             | 0.000258935 | 0.998462 | 0.000358305 | 0.997871 |
| rad19anti          | 0.000171610 | 0.998633 | 0.000237469 | 0.998108 |
| rad56              | 0.000150421 | 0.998784 | 0.000208148 | 0.998317 |
| PAH9+H             | 0.000142294 | 0.998926 | 0.000196902 | 0.998514 |
| rad50              | 9.78223e-05 | 0.999024 | 0.000135363 | 0.998649 |
| rad38              | 9.76274e-05 | 0.999122 | 0.000135094 | 0.998784 |
| rad55              | 9.60227e-05 | 0.999218 | 0.000132873 | 0.998917 |
| rad53              | 9.35446e-05 | 0.999311 | 0.000129444 | 0.999046 |
| PhCCCH3+H          | 8.63448e-05 | 0.999397 | 0.000119481 | 0.999166 |
| PAH3+H             | 7.46029e-05 | 0.999472 | 0.000103233 | 0.999269 |
| rad70              | 7.27716e-05 | 0.999545 | 0.000100699 | 0.999370 |
| rad51              | 6.27283e-05 | 0.999608 | 8.68013e-05 | 0.999457 |
| PAH10+CH3          | 5.64592e-05 | 0.999664 | 7.81265e-05 | 0.999535 |
| PAH8+H             | 5.49581e-05 | 0.999719 | 7.60495e-05 | 0.999611 |
| rad67              | 4.41361e-05 | 0.999763 | 6.10741e-05 | 0.999672 |
| rad46              | 4.00099e-05 | 0.999803 | 5.53645e-05 | 0.999727 |
| rad35              | 3.73499e-05 | 0.999840 | 5.16835e-05 | 0.999779 |
| rad34              | 2.95155e-05 | 0.999870 | 4.08426e-05 | 0.999820 |
| rad71              | 2.56729e-05 | 0.999896 | 3.55253e-05 | 0.999855 |
| rad62              | 1.78766e-05 | 0.999914 | 2.47371e-05 | 0.999880 |
| rad52              | 1.22818e-05 | 0.999926 | 1.69952e-05 | 0.999897 |
| rad73              | 9.90899e-06 | 0.999936 | 1.37118e-05 | 0.999911 |
| rad30              | 9.58077e-06 | 0.999945 | 1.32575e-05 | 0.999924 |
| rad68syn           | 7.51159e-06 | 0.999953 | 1.03943e-05 | 0.999934 |
| rad64              | 7.08717e-06 | 0.999960 | 9.80700e-06 | 0.999944 |
| rad37              | 6.84823e-06 | 0.999967 | 9.47635e-06 | 0.999954 |
| rad59              | 5.31873e-06 | 0.999972 | 7.35987e-06 | 0.999961 |
| rad68anti          | 4.78626e-06 | 0.999977 | 6.62308e-06 | 0.999968 |
| rad40syn           | 4.46912e-06 | 0.999981 | 6.18422e-06 | 0.999974 |
| rad42              | 3.72274e-06 | 0.999985 | 5.15140e-06 | 0.999979 |
| rad72              | 3.33666e-06 | 0.999988 | 4.61715e-06 | 0.999983 |
| rad40anti          | 3.31727e-06 | 0.999992 | 4.59034e-06 | 0.999988 |
| rad60syn           | 2.53369e-06 | 0.999994 | 3.50604e-06 | 0.999992 |
| rad60anti          | 1.87710e-06 | 0.999996 | 2.59748e-06 | 0.999994 |
| rad58              | 1.70809e-06 | 0.999998 | 2.36361e-06 | 0.999997 |
| rad65              | 1.42134e-06 | 0.999999 | 1.96680e-06 | 0.999999 |
| rad43              | 5.13732e-07 | 1.000000 | 7.10886e-07 | 0.999999 |
| rad61              | 4.03891e-07 | 1.000000 | 5.58890e-07 | 1.000000 |

|       |             |         |             |          |
|-------|-------------|---------|-------------|----------|
| rad41 | 1.13553e-07 | 1.00000 | 1.57131e-07 | 1.000000 |
| rad6  | 5.75397e-08 | 1.00000 | 7.96218e-08 | 1.00000  |
| rad7  | 2.92813e-09 | 1.00000 | 4.05186e-09 | 1.00000  |
| rad11 | 1.87824e-09 | 1.00000 | 2.59906e-09 | 1.00000  |
| rad13 | 4.75471e-10 | 1.00000 | 6.57944e-10 | 1.00000  |
| rad23 | 4.34201e-10 | 1.00000 | 6.00832e-10 | 1.00000  |
| rad9  | 3.06427e-10 | 1.00000 | 4.24024e-10 | 1.00000  |
| rad28 | 1.96121e-10 | 1.00000 | 2.71385e-10 | 1.00000  |
| rad45 | 1.70029e-10 | 1.00000 | 2.35280e-10 | 1.00000  |
| rad21 | 1.05341e-10 | 1.00000 | 1.45767e-10 | 1.00000  |
| rad33 | 5.45297e-11 | 1.00000 | 7.54566e-11 | 1.00000  |
| rad22 | 5.40712e-11 | 1.00000 | 7.48219e-11 | 1.00000  |
| rad36 | 3.21213e-11 | 1.00000 | 4.44483e-11 | 1.00000  |
| rad15 | 2.69956e-11 | 1.00000 | 3.73557e-11 | 1.00000  |
| rad20 | 2.64464e-11 | 1.00000 | 3.65956e-11 | 1.00000  |
| rad12 | 1.42162e-11 | 1.00000 | 1.96719e-11 | 1.00000  |
| rad25 | 1.35433e-11 | 1.00000 | 1.87408e-11 | 1.00000  |
| rad47 | 1.26183e-11 | 1.00000 | 1.74607e-11 | 1.00000  |
| rad8  | 9.31011e-12 | 1.00000 | 1.28830e-11 | 1.00000  |
| rad24 | 8.25977e-12 | 1.00000 | 1.14296e-11 | 1.00000  |
| rad26 | 8.05728e-12 | 1.00000 | 1.11494e-11 | 1.00000  |
| rad10 | 4.18107e-12 | 1.00000 | 5.78563e-12 | 1.00000  |
| rad18 | 3.87870e-12 | 1.00000 | 5.36722e-12 | 1.00000  |
| rad14 | 1.57811e-12 | 1.00000 | 2.18374e-12 | 1.00000  |
| rad3  | 1.19563e-12 | 1.00000 | 1.65447e-12 | 1.00000  |
| rad4  | 7.44531e-13 | 1.00000 | 1.03026e-12 | 1.00000  |
| rad2  | 6.52332e-13 | 1.00000 | 9.02672e-13 | 1.00000  |
| rad5  | 3.54806e-13 | 1.00000 | 4.90968e-13 | 1.00000  |
| rad1  | 1.45424e-13 | 1.00000 | 2.01234e-13 | 1.00000  |
| rad27 | 5.78085e-14 | 1.00000 | 7.99931e-14 | 1.00000  |

100.00000 Pa, 4000.00000 K

=====

| Rate constant      | True (fraction)      | Effective (fraction)  |
|--------------------|----------------------|-----------------------|
| Total              | 1.65008e-10 (1.00 )  | 1.19912e-10 (1.00 )   |
| Formation of rad11 | 2.61707e-11 (0.159 ) | 9.15556e-12 (0.0764 ) |
| Formation of rad6  | 4.31906e-11 (0.262 ) | 1.51098e-11 (0.126 )  |
| H-abstraction      | 9.56470e-11 (0.580 ) | 9.56470e-11 (0.798 )  |

| species            | PYtrue      | Cumul    | PYeffective | Cumul    |
|--------------------|-------------|----------|-------------|----------|
| Benzene+2-propynyl | 0.579650    | 0.579650 | 0.797641    | 0.797641 |
| Phenyl+Allene      | 0.273295    | 0.852945 | 0.000000    | 0.797641 |
| PhCH2CCH+H         | 0.0779435   | 0.930888 | 0.107256    | 0.904897 |
| PhCHCCH2+H         | 0.0328766   | 0.963765 | 0.0452406   | 0.950137 |
| C2H2+PhCH2         | 0.0116508   | 0.975415 | 0.0160323   | 0.966170 |
| PhCCH+CH3          | 0.00792125  | 0.983337 | 0.0109003   | 0.977070 |
| PhcycC3H3_A+H      | 0.00405637  | 0.987393 | 0.00558187  | 0.982652 |
| PAH7+H             | 0.00338058  | 0.990774 | 0.00465193  | 0.987304 |
| Ph+MeAc            | 0.00265534  | 0.993429 | 0.00365394  | 0.990958 |
| rad19syn           | 0.00200699  | 0.995436 | 0.00276178  | 0.993720 |
| Indene+H           | 0.00158842  | 0.997024 | 0.00218578  | 0.995905 |
| rad54              | 0.000847468 | 0.997872 | 0.00116618  | 0.997072 |
| rad39              | 0.000304994 | 0.998177 | 0.000419695 | 0.997491 |
| PAH1+H             | 0.000284127 | 0.998461 | 0.000390980 | 0.997882 |
| rad56              | 0.000172242 | 0.998633 | 0.000237017 | 0.998119 |
| rad19anti          | 0.000149971 | 0.998783 | 0.000206372 | 0.998326 |
| PAH9+H             | 0.000121735 | 0.998905 | 0.000167516 | 0.998493 |
| rad53              | 0.000103935 | 0.999009 | 0.000143023 | 0.998636 |
| rad55              | 9.87033e-05 | 0.999108 | 0.000135823 | 0.998772 |
| rad50              | 9.49261e-05 | 0.999203 | 0.000130626 | 0.998903 |
| rad38              | 8.48528e-05 | 0.999287 | 0.000116764 | 0.999019 |
| PhCCCH3+H          | 8.02197e-05 | 0.999368 | 0.000110388 | 0.999130 |
| PAH3+H             | 7.84218e-05 | 0.999446 | 0.000107914 | 0.999238 |
| rad70              | 7.43978e-05 | 0.999520 | 0.000102377 | 0.999340 |
| PAH8+H             | 6.80299e-05 | 0.999588 | 9.36142e-05 | 0.999434 |
| rad51              | 6.37415e-05 | 0.999652 | 8.77128e-05 | 0.999521 |
| PAH10+CH3          | 5.48776e-05 | 0.999707 | 7.55156e-05 | 0.999597 |
| rad67              | 4.35164e-05 | 0.999751 | 5.98821e-05 | 0.999657 |
| rad46              | 3.57789e-05 | 0.999786 | 4.92346e-05 | 0.999706 |
| rad35              | 3.46399e-05 | 0.999821 | 4.76671e-05 | 0.999754 |
| rad34              | 3.11445e-05 | 0.999852 | 4.28572e-05 | 0.999797 |
| rad71              | 3.10575e-05 | 0.999883 | 4.27374e-05 | 0.999839 |
| rad62              | 2.32398e-05 | 0.999906 | 3.19798e-05 | 0.999871 |
| rad52              | 1.20852e-05 | 0.999919 | 1.66301e-05 | 0.999888 |
| rad73              | 1.14713e-05 | 0.999930 | 1.57854e-05 | 0.999904 |
| rad30              | 8.93299e-06 | 0.999939 | 1.22925e-05 | 0.999916 |
| rad68syn           | 8.64434e-06 | 0.999948 | 1.18952e-05 | 0.999928 |
| rad64              | 7.61305e-06 | 0.999955 | 1.04761e-05 | 0.999938 |

|           |             |          |             |          |
|-----------|-------------|----------|-------------|----------|
| rad37     | 5.91727e-06 | 0.999961 | 8.14261e-06 | 0.999947 |
| rad68anti | 5.50424e-06 | 0.999967 | 7.57424e-06 | 0.999954 |
| rad59     | 5.47385e-06 | 0.999972 | 7.53241e-06 | 0.999962 |
| rad40syn  | 5.36170e-06 | 0.999977 | 7.37810e-06 | 0.999969 |
| rad42     | 5.12147e-06 | 0.999983 | 7.04750e-06 | 0.999976 |
| rad72     | 4.37900e-06 | 0.999987 | 6.02581e-06 | 0.999982 |
| rad40anti | 4.03125e-06 | 0.999991 | 5.54731e-06 | 0.999988 |
| rad60syn  | 2.51669e-06 | 0.999993 | 3.46315e-06 | 0.999991 |
| rad58     | 1.90267e-06 | 0.999995 | 2.61822e-06 | 0.999994 |
| rad60anti | 1.87487e-06 | 0.999997 | 2.57996e-06 | 0.999996 |
| rad65     | 1.42565e-06 | 0.999999 | 1.96181e-06 | 0.999998 |
| rad43     | 6.01849e-07 | 0.999999 | 8.28191e-07 | 0.999999 |
| rad61     | 4.34037e-07 | 1.000000 | 5.97267e-07 | 1.000000 |
| rad41     | 1.43044e-07 | 1.000000 | 1.96839e-07 | 1.000000 |
| rad6      | 3.30477e-08 | 1.000000 | 4.54762e-08 | 1.000000 |
| rad7      | 1.87758e-09 | 1.000000 | 2.58368e-09 | 1.000000 |
| rad11     | 1.21738e-09 | 1.000000 | 1.67521e-09 | 1.000000 |
| rad13     | 3.22290e-10 | 1.000000 | 4.43496e-10 | 1.000000 |
| rad23     | 2.29605e-10 | 1.000000 | 3.15955e-10 | 1.000000 |
| rad9      | 1.78896e-10 | 1.000000 | 2.46174e-10 | 1.000000 |
| rad28     | 1.10501e-10 | 1.000000 | 1.52058e-10 | 1.000000 |
| rad45     | 9.80858e-11 | 1.000000 | 1.34973e-10 | 1.000000 |
| rad21     | 7.36298e-11 | 1.000000 | 1.01320e-10 | 1.000000 |
| rad33     | 3.83832e-11 | 1.000000 | 5.28182e-11 | 1.000000 |
| rad22     | 3.26009e-11 | 1.000000 | 4.48612e-11 | 1.000000 |
| rad20     | 2.01174e-11 | 1.000000 | 2.76829e-11 | 1.000000 |
| rad36     | 1.85894e-11 | 1.000000 | 2.55804e-11 | 1.000000 |
| rad15     | 1.64457e-11 | 1.000000 | 2.26304e-11 | 1.000000 |
| rad47     | 1.25503e-11 | 1.000000 | 1.72701e-11 | 1.000000 |
| rad12     | 1.01292e-11 | 1.000000 | 1.39385e-11 | 1.000000 |
| rad25     | 9.74999e-12 | 1.000000 | 1.34167e-11 | 1.000000 |
| rad8      | 8.18780e-12 | 1.000000 | 1.12671e-11 | 1.000000 |
| rad24     | 5.80512e-12 | 1.000000 | 7.98827e-12 | 1.000000 |
| rad26     | 4.64634e-12 | 1.000000 | 6.39370e-12 | 1.000000 |
| rad18     | 2.57325e-12 | 1.000000 | 3.54098e-12 | 1.000000 |
| rad10     | 2.55719e-12 | 1.000000 | 3.51888e-12 | 1.000000 |
| rad14     | 1.44684e-12 | 1.000000 | 1.99096e-12 | 1.000000 |
| rad3      | 8.09456e-13 | 1.000000 | 1.11387e-12 | 1.000000 |
| rad4      | 5.20264e-13 | 1.000000 | 7.15920e-13 | 1.000000 |
| rad2      | 4.12358e-13 | 1.000000 | 5.67435e-13 | 1.000000 |
| rad5      | 2.90287e-13 | 1.000000 | 3.99457e-13 | 1.000000 |
| rad1      | 9.15973e-14 | 1.000000 | 1.26045e-13 | 1.000000 |
| rad27     | 4.78245e-14 | 1.000000 | 6.58102e-14 | 1.000000 |

10.000000 Pa, 20.000000 K

| Rate constant      | True (fraction)        | Effective (fraction)   |
|--------------------|------------------------|------------------------|
| Total              | 1.56740e-51 (1.00 )    | 1.56740e-51 (1.00 )    |
| Formation of rad11 | 1.56740e-51 (1.000 )   | 1.56740e-51 (1.000 )   |
| Formation of rad6  | 3.73945e-60 (2.39e-09) | 3.73945e-60 (2.39e-09) |
| H-abstraction      | 1.53631e-76 (9.80e-26) | 1.53631e-76 (9.80e-26) |

| species    | PYtrue      | Cumul    | PYeffective | Cumul    |
|------------|-------------|----------|-------------|----------|
| rad6       | 0.812327    | 0.812327 | 0.812327    | 0.812327 |
| rad11      | 0.142223    | 0.954550 | 0.142223    | 0.954550 |
| Indene+H   | 0.0341841   | 0.988734 | 0.0341841   | 0.988734 |
| rad23      | 0.00700910  | 0.995743 | 0.00700910  | 0.995743 |
| rad22      | 0.00309992  | 0.998843 | 0.00309992  | 0.998843 |
| rad45      | 0.000556746 | 0.999400 | 0.000556746 | 0.999400 |
| C2H2+PhCH2 | 0.000295871 | 0.999696 | 0.000295871 | 0.999696 |
| rad7       | 0.000261815 | 0.999958 | 0.000261815 | 0.999958 |
| rad36      | 3.46820e-05 | 0.999992 | 3.46820e-05 | 0.999992 |
| rad25      | 1.86802e-06 | 0.999994 | 1.86802e-06 | 0.999994 |
| rad18      | 1.54428e-06 | 0.999996 | 1.54428e-06 | 0.999996 |
| PhCHCCH2+H | 1.41184e-06 | 0.999997 | 1.41184e-06 | 0.999997 |
| rad13      | 1.05811e-06 | 0.999998 | 1.05811e-06 | 0.999998 |
| rad3       | 6.57891e-07 | 0.999999 | 6.57891e-07 | 0.999999 |
| rad4       | 3.32625e-07 | 0.999999 | 3.32625e-07 | 0.999999 |
| rad20      | 1.63463e-07 | 0.999999 | 1.63463e-07 | 0.999999 |
| rad2       | 1.50333e-07 | 0.999999 | 1.50333e-07 | 0.999999 |
| rad21      | 1.01071e-07 | 1.000000 | 1.01071e-07 | 1.000000 |
| rad9       | 7.53360e-08 | 1.000000 | 7.53360e-08 | 1.000000 |
| rad28      | 3.04584e-08 | 1.000000 | 3.04584e-08 | 1.000000 |
| rad30      | 1.45396e-08 | 1.000000 | 1.45396e-08 | 1.000000 |
| rad1       | 9.50332e-09 | 1.000000 | 9.50332e-09 | 1.000000 |
| rad15      | 2.49963e-09 | 1.000000 | 2.49963e-09 | 1.000000 |
| rad10      | 1.91284e-09 | 1.000000 | 1.91284e-09 | 1.000000 |
| rad33      | 1.21225e-09 | 1.000000 | 1.21225e-09 | 1.000000 |

|                    |             |          |             |          |
|--------------------|-------------|----------|-------------|----------|
| PhCCH+CH3          | 7.60245e-10 | 1.000000 | 7.60245e-10 | 1.000000 |
| Phenyl+Allene      | 7.13731e-10 | 1.000000 | 0.000000    | 1.000000 |
| PAH9+H             | 9.60301e-11 | 1.000000 | 9.60301e-11 | 1.000000 |
| rad38              | 5.86892e-11 | 1.000000 | 5.86892e-11 | 1.000000 |
| rad35              | 5.39790e-11 | 1.000000 | 5.39790e-11 | 1.000000 |
| rad14              | 3.24156e-11 | 1.000000 | 3.24156e-11 | 1.000000 |
| rad24              | 4.71855e-12 | 1.000000 | 4.71855e-12 | 1.000000 |
| rad8               | 4.65667e-12 | 1.000000 | 4.65667e-12 | 1.000000 |
| PhCCCH3+H          | 7.40504e-13 | 1.000000 | 7.40504e-13 | 1.000000 |
| rad46              | 3.07004e-13 | 1.000000 | 3.07004e-13 | 1.000000 |
| rad26              | 3.00993e-13 | 1.000000 | 3.00993e-13 | 1.000000 |
| rad27              | 1.85758e-13 | 1.000000 | 1.85758e-13 | 1.000000 |
| rad60syn           | 6.90120e-14 | 1.000000 | 6.90120e-14 | 1.000000 |
| Ph+MeAc            | 2.22044e-14 | 1.000000 | 2.22044e-14 | 1.000000 |
| rad60anti          | 9.31494e-16 | 1.000000 | 9.31494e-16 | 1.000000 |
| PAH7+H             | 6.10910e-16 | 1.000000 | 6.10910e-16 | 1.000000 |
| PhCH2CCH+H         | 2.58029e-16 | 1.000000 | 2.58029e-16 | 1.000000 |
| rad31              | 2.09703e-16 | 1.000000 | 2.09703e-16 | 1.000000 |
| rad39              | 5.55690e-17 | 1.000000 | 5.55690e-17 | 1.000000 |
| rad12              | 4.86710e-21 | 1.000000 | 4.86710e-21 | 1.000000 |
| rad5               | 3.71586e-24 | 1.000000 | 3.71586e-24 | 1.000000 |
| PAH3+H             | 1.75005e-24 | 1.000000 | 1.75005e-24 | 1.000000 |
| rad37              | 1.02542e-24 | 1.000000 | 1.02542e-24 | 1.000000 |
| rad59              | 9.14663e-25 | 1.000000 | 9.14663e-25 | 1.000000 |
| rad50              | 3.82021e-25 | 1.000000 | 3.82021e-25 | 1.000000 |
| Benzene+2-propynyl | 9.80165e-26 | 1.000000 | 9.80165e-26 | 1.000000 |
| rad19syn           | 4.53183e-31 | 1.000000 | 4.53183e-31 | 1.000000 |
| rad52              | 4.48772e-34 | 1.000000 | 4.48772e-34 | 1.000000 |
| rad54              | 1.49333e-34 | 1.000000 | 1.49333e-34 | 1.000000 |
| rad43              | 3.25086e-36 | 1.000000 | 3.25086e-36 | 1.000000 |
| PAH10+CH3          | 4.60916e-37 | 1.000000 | 4.60916e-37 | 1.000000 |
| rad62              | 3.07854e-37 | 1.000000 | 3.07854e-37 | 1.000000 |
| rad51              | 3.00616e-39 | 1.000000 | 3.00616e-39 | 1.000000 |
| rad70              | 6.03105e-41 | 1.000000 | 6.03105e-41 | 1.000000 |
| PhcycC3H3_A+H      | 4.13649e-41 | 1.000000 | 4.13649e-41 | 1.000000 |
| rad55              | 1.98718e-41 | 1.000000 | 1.98718e-41 | 1.000000 |
| rad65              | 3.33294e-43 | 1.000000 | 3.33294e-43 | 1.000000 |
| rad58              | 1.96039e-44 | 1.000000 | 1.96039e-44 | 1.000000 |
| PAH1+H             | 1.45083e-45 | 1.000000 | 1.45083e-45 | 1.000000 |
| rad34              | 1.86254e-46 | 1.000000 | 1.86254e-46 | 1.000000 |
| rad47              | 6.69800e-49 | 1.000000 | 6.69800e-49 | 1.000000 |
| rad42              | 1.51018e-49 | 1.000000 | 1.51018e-49 | 1.000000 |
| rad41              | 2.49627e-50 | 1.000000 | 2.49627e-50 | 1.000000 |

10.000000 Pa, 30.000000 K

| Rate constant      | True (fraction)        | Effective (fraction)   |
|--------------------|------------------------|------------------------|
| Total              | 5.03204e-39 (1.00 )    | 5.03204e-39 (1.00 )    |
| Formation of rad11 | 5.03203e-39 (1.000 )   | 5.03203e-39 (1.000 )   |
| Formation of rad6  | 9.92181e-45 (1.97e-06) | 9.92181e-45 (1.97e-06) |
| H-abstraction      | 3.33191e-55 (6.62e-17) | 3.33191e-55 (6.62e-17) |

| species    | PYtrue      | Cumul    | PYeffective | Cumul    |
|------------|-------------|----------|-------------|----------|
| rad6       | 0.911838    | 0.911838 | 0.911838    | 0.911838 |
| Indene+H   | 0.0431749   | 0.955013 | 0.0431749   | 0.955013 |
| rad11      | 0.0351948   | 0.990208 | 0.0351948   | 0.990208 |
| rad23      | 0.00791632  | 0.998124 | 0.00791632  | 0.998124 |
| rad22      | 0.000685353 | 0.998809 | 0.000685353 | 0.998809 |
| rad45      | 0.000491369 | 0.999301 | 0.000491369 | 0.999301 |
| C2H2+PhCH2 | 0.000376553 | 0.999677 | 0.000376553 | 0.999677 |
| rad7       | 0.000285208 | 0.999963 | 0.000285208 | 0.999963 |
| rad36      | 3.05995e-05 | 0.999993 | 3.05995e-05 | 0.999993 |
| PhCHCCH2+H | 1.90673e-06 | 0.999995 | 1.90673e-06 | 0.999995 |
| rad3       | 1.39585e-06 | 0.999996 | 1.39585e-06 | 0.999996 |
| rad13      | 9.68404e-07 | 0.999997 | 9.68404e-07 | 0.999997 |
| rad4       | 7.05807e-07 | 0.999998 | 7.05807e-07 | 0.999998 |
| rad2       | 6.92804e-07 | 0.999999 | 6.92804e-07 | 0.999999 |
| rad25      | 6.34189e-07 | 0.999999 | 6.34189e-07 | 0.999999 |
| rad18      | 1.22429e-07 | 1.000000 | 1.22429e-07 | 1.000000 |
| rad9       | 1.03715e-07 | 1.000000 | 1.03715e-07 | 1.000000 |
| rad28      | 8.16324e-08 | 1.000000 | 8.16324e-08 | 1.000000 |
| rad1       | 4.38167e-08 | 1.000000 | 4.38167e-08 | 1.000000 |
| rad30      | 1.91287e-08 | 1.000000 | 1.91287e-08 | 1.000000 |
| rad10      | 1.60186e-08 | 1.000000 | 1.60186e-08 | 1.000000 |
| rad20      | 1.15143e-08 | 1.000000 | 1.15143e-08 | 1.000000 |
| rad21      | 7.10671e-09 | 1.000000 | 7.10671e-09 | 1.000000 |
| PhCCH+CH3  | 3.74235e-09 | 1.000000 | 3.74235e-09 | 1.000000 |
| rad15      | 3.34092e-09 | 1.000000 | 3.34092e-09 | 1.000000 |

|                    |             |          |             |          |
|--------------------|-------------|----------|-------------|----------|
| rad33              | 1.11935e-09 | 1.000000 | 1.11935e-09 | 1.000000 |
| Phenyl+Allene      | 1.07183e-09 | 1.000000 | 0.00000     | 1.000000 |
| PAH9+H             | 2.99010e-10 | 1.000000 | 2.99010e-10 | 1.000000 |
| rad35              | 1.66459e-10 | 1.000000 | 1.66459e-10 | 1.000000 |
| rad38              | 1.23658e-10 | 1.000000 | 1.23658e-10 | 1.000000 |
| rad14              | 9.92549e-11 | 1.000000 | 9.92549e-11 | 1.000000 |
| PhCCCH3+H          | 7.37629e-12 | 1.000000 | 7.37629e-12 | 1.000000 |
| rad8               | 7.05983e-12 | 1.000000 | 7.05983e-12 | 1.000000 |
| rad26              | 5.32715e-12 | 1.000000 | 5.32715e-12 | 1.000000 |
| rad24              | 3.94236e-12 | 1.000000 | 3.94236e-12 | 1.000000 |
| rad27              | 7.94316e-13 | 1.000000 | 7.94316e-13 | 1.000000 |
| rad46              | 6.65498e-13 | 1.000000 | 6.65498e-13 | 1.000000 |
| Ph+MeAc            | 1.45816e-13 | 1.000000 | 1.45816e-13 | 1.000000 |
| rad60syn           | 1.06177e-13 | 1.000000 | 1.06177e-13 | 1.000000 |
| PAH7+H             | 3.55151e-15 | 1.000000 | 3.55151e-15 | 1.000000 |
| rad60anti          | 1.05180e-15 | 1.000000 | 1.05180e-15 | 1.000000 |
| rad31              | 4.52938e-16 | 1.000000 | 4.52938e-16 | 1.000000 |
| rad39              | 3.26143e-16 | 1.000000 | 3.26143e-16 | 1.000000 |
| PhCH2CCH+H         | 1.41000e-16 | 1.000000 | 1.41000e-16 | 1.000000 |
| Benzene+2-propynyl | 6.62139e-17 | 1.000000 | 6.62139e-17 | 1.000000 |
| rad12              | 1.66530e-19 | 1.000000 | 1.66530e-19 | 1.000000 |
| rad5               | 2.51035e-23 | 1.000000 | 2.51035e-23 | 1.000000 |
| rad37              | 2.27737e-23 | 1.000000 | 2.27737e-23 | 1.000000 |
| PAH3+H             | 7.31638e-25 | 1.000000 | 7.31638e-25 | 1.000000 |
| rad50              | 6.93809e-25 | 1.000000 | 6.93809e-25 | 1.000000 |
| rad59              | 3.78531e-25 | 1.000000 | 3.78531e-25 | 1.000000 |
| rad19syn           | 1.14786e-30 | 1.000000 | 1.14786e-30 | 1.000000 |
| rad52              | 5.83160e-34 | 1.000000 | 5.83160e-34 | 1.000000 |
| rad54              | 3.81729e-34 | 1.000000 | 3.81729e-34 | 1.000000 |
| rad43              | 1.63873e-35 | 1.000000 | 1.63873e-35 | 1.000000 |
| PAH10+CH3          | 5.16257e-36 | 1.000000 | 5.16257e-36 | 1.000000 |
| rad62              | 9.00285e-37 | 1.000000 | 9.00285e-37 | 1.000000 |
| rad51              | 3.17593e-39 | 1.000000 | 3.17593e-39 | 1.000000 |
| rad70              | 1.58261e-40 | 1.000000 | 1.58261e-40 | 1.000000 |
| PhcycC3H3_A+H      | 1.08491e-40 | 1.000000 | 1.08491e-40 | 1.000000 |
| rad55              | 5.20233e-41 | 1.000000 | 5.20233e-41 | 1.000000 |
| rad65              | 3.53174e-43 | 1.000000 | 3.53174e-43 | 1.000000 |
| rad58              | 5.15035e-44 | 1.000000 | 5.15035e-44 | 1.000000 |
| PAH1+H             | 7.12023e-45 | 1.000000 | 7.12023e-45 | 1.000000 |
| rad34              | 4.95647e-46 | 1.000000 | 4.95647e-46 | 1.000000 |
| rad47              | 5.15083e-49 | 1.000000 | 5.15083e-49 | 1.000000 |
| rad42              | 4.26251e-49 | 1.000000 | 4.26251e-49 | 1.000000 |
| rad41              | 8.03574e-50 | 1.000000 | 8.03574e-50 | 1.000000 |

10.000000 Pa, 40.000000 K

| Rate constant      | True (fraction)        | Effective (fraction)   |
|--------------------|------------------------|------------------------|
| Total              | 9.35697e-33 (1.00 )    | 9.35697e-33 (1.00 )    |
| Formation of rad11 | 9.35644e-33 (1.000 )   | 9.35644e-33 (1.000 )   |
| Formation of rad6  | 5.26139e-37 (5.62e-05) | 5.26139e-37 (5.62e-05) |
| H-abstraction      | 1.44763e-44 (1.55e-12) | 1.44763e-44 (1.55e-12) |

| species       | PYtrue      | Cumul    | PYeffective | Cumul    |
|---------------|-------------|----------|-------------|----------|
| rad6          | 0.932376    | 0.932376 | 0.932376    | 0.932376 |
| Indene+H      | 0.0463773   | 0.978753 | 0.0463773   | 0.978753 |
| rad11         | 0.0122885   | 0.991042 | 0.0122885   | 0.991042 |
| rad23         | 0.00760391  | 0.998646 | 0.00760391  | 0.998646 |
| rad45         | 0.000424410 | 0.999070 | 0.000424410 | 0.999070 |
| C2H2+PhCH2    | 0.000415706 | 0.999486 | 0.000415706 | 0.999486 |
| rad7          | 0.000274727 | 0.999761 | 0.000274727 | 0.999761 |
| rad22         | 0.000205072 | 0.999966 | 0.000205072 | 0.999966 |
| rad36         | 2.64135e-05 | 0.999992 | 2.64135e-05 | 0.999992 |
| PhCHCCH2+H    | 2.21150e-06 | 0.999994 | 2.21150e-06 | 0.999994 |
| rad3          | 1.91778e-06 | 0.999996 | 1.91778e-06 | 0.999996 |
| rad2          | 1.51446e-06 | 0.999998 | 1.51446e-06 | 0.999998 |
| rad4          | 9.70007e-07 | 0.999999 | 9.70007e-07 | 0.999999 |
| rad13         | 8.91442e-07 | 1.000000 | 8.91442e-07 | 1.000000 |
| rad25         | 2.74421e-07 | 1.000000 | 2.74421e-07 | 1.000000 |
| rad28         | 1.38488e-07 | 1.000000 | 1.38488e-07 | 1.000000 |
| rad9          | 1.22422e-07 | 1.000000 | 1.22422e-07 | 1.000000 |
| rad1          | 9.58974e-08 | 1.000000 | 9.58974e-08 | 1.000000 |
| rad10         | 4.75506e-08 | 1.000000 | 4.75506e-08 | 1.000000 |
| rad30         | 2.15283e-08 | 1.000000 | 2.15283e-08 | 1.000000 |
| rad18         | 2.10063e-08 | 1.000000 | 2.10063e-08 | 1.000000 |
| PhCCH+CH3     | 8.80075e-09 | 1.000000 | 8.80075e-09 | 1.000000 |
| rad15         | 3.80303e-09 | 1.000000 | 3.80303e-09 | 1.000000 |
| rad20         | 1.95386e-09 | 1.000000 | 1.95386e-09 | 1.000000 |
| Phenyl+Allene | 1.73176e-09 | 1.000000 | 0.00000     | 1.000000 |

|                    |             |         |             |         |
|--------------------|-------------|---------|-------------|---------|
| rad21              | 1.20865e-09 | 1.00000 | 1.20865e-09 | 1.00000 |
| rad33              | 1.04401e-09 | 1.00000 | 1.04401e-09 | 1.00000 |
| PAH9+H             | 5.23105e-10 | 1.00000 | 5.23105e-10 | 1.00000 |
| rad35              | 2.89058e-10 | 1.00000 | 2.89058e-10 | 1.00000 |
| rad38              | 1.86009e-10 | 1.00000 | 1.86009e-10 | 1.00000 |
| rad14              | 1.59086e-10 | 1.00000 | 1.59086e-10 | 1.00000 |
| PhCCCH3+H          | 2.63293e-11 | 1.00000 | 2.63293e-11 | 1.00000 |
| rad26              | 2.51638e-11 | 1.00000 | 2.51638e-11 | 1.00000 |
| rad8               | 9.56091e-12 | 1.00000 | 9.56091e-12 | 1.00000 |
| rad24              | 3.34460e-12 | 1.00000 | 3.34460e-12 | 1.00000 |
| rad27              | 1.64395e-12 | 1.00000 | 1.64395e-12 | 1.00000 |
| Benzene+2-propynyl | 1.54712e-12 | 1.00000 | 1.54712e-12 | 1.00000 |
| rad46              | 1.02794e-12 | 1.00000 | 1.02794e-12 | 1.00000 |
| Ph+MeAc            | 4.71360e-13 | 1.00000 | 4.71360e-13 | 1.00000 |
| rad60syn           | 1.34241e-13 | 1.00000 | 1.34241e-13 | 1.00000 |
| PAH7+H             | 9.97133e-15 | 1.00000 | 9.97133e-15 | 1.00000 |
| rad60anti          | 1.68387e-15 | 1.00000 | 1.68387e-15 | 1.00000 |
| rad39              | 9.42318e-16 | 1.00000 | 9.42318e-16 | 1.00000 |
| rad31              | 6.37732e-16 | 1.00000 | 6.37732e-16 | 1.00000 |
| PhCH2CCH+H         | 1.41139e-16 | 1.00000 | 1.41139e-16 | 1.00000 |
| rad12              | 1.24597e-18 | 1.00000 | 1.24597e-18 | 1.00000 |
| rad37              | 1.53190e-22 | 1.00000 | 1.53190e-22 | 1.00000 |
| rad5               | 9.41654e-23 | 1.00000 | 9.41654e-23 | 1.00000 |
| rad50              | 1.25381e-24 | 1.00000 | 1.25381e-24 | 1.00000 |
| PAH3+H             | 8.77896e-25 | 1.00000 | 8.77896e-25 | 1.00000 |
| rad59              | 4.45674e-25 | 1.00000 | 4.45674e-25 | 1.00000 |
| rad19syn           | 2.75223e-30 | 1.00000 | 2.75223e-30 | 1.00000 |
| rad54              | 9.39231e-34 | 1.00000 | 9.39231e-34 | 1.00000 |
| rad52              | 8.71241e-34 | 1.00000 | 8.71241e-34 | 1.00000 |
| rad43              | 6.00042e-35 | 1.00000 | 6.00042e-35 | 1.00000 |
| PAH10+CH3          | 2.84876e-35 | 1.00000 | 2.84876e-35 | 1.00000 |
| rad62              | 2.49452e-36 | 1.00000 | 2.49452e-36 | 1.00000 |
| rad51              | 5.04210e-39 | 1.00000 | 5.04210e-39 | 1.00000 |
| rad70              | 4.10764e-40 | 1.00000 | 4.10764e-40 | 1.00000 |
| PhcycC3H3_A+H      | 2.82542e-40 | 1.00000 | 2.82542e-40 | 1.00000 |
| rad55              | 1.35202e-40 | 1.00000 | 1.35202e-40 | 1.00000 |
| rad65              | 6.70501e-43 | 1.00000 | 6.70501e-43 | 1.00000 |
| rad58              | 1.34528e-43 | 1.00000 | 1.34528e-43 | 1.00000 |
| PAH1+H             | 2.61556e-44 | 1.00000 | 2.61556e-44 | 1.00000 |
| rad34              | 1.33853e-45 | 1.00000 | 1.33853e-45 | 1.00000 |
| rad42              | 1.19863e-48 | 1.00000 | 1.19863e-48 | 1.00000 |
| rad47              | 8.73097e-49 | 1.00000 | 8.73097e-49 | 1.00000 |
| rad41              | 2.37507e-49 | 1.00000 | 2.37507e-49 | 1.00000 |

10.000000 Pa, 50.000000 K

| Rate constant      | True (fraction)        | Effective (fraction)   |
|--------------------|------------------------|------------------------|
| Total              | 5.52690e-29 (1.00 )    | 5.52690e-29 (1.00 )    |
| Formation of rad11 | 5.52459e-29 (1.000 )   | 5.52459e-29 (1.000 )   |
| Formation of rad6  | 2.30840e-32 (0.000418) | 2.30840e-32 (0.000418) |
| H-abstraction      | 3.35357e-38 (6.07e-10) | 3.35357e-38 (6.07e-10) |

| species       | PYtrue      | Cumul    | PYeffective | Cumul    |
|---------------|-------------|----------|-------------|----------|
| rad6          | 0.938231    | 0.938231 | 0.938231    | 0.938231 |
| Indene+H      | 0.0482592   | 0.986490 | 0.0482592   | 0.986490 |
| rad23         | 0.00707504  | 0.993565 | 0.00707504  | 0.993565 |
| rad11         | 0.00524839  | 0.998814 | 0.00524839  | 0.998814 |
| C2H2+PhCH2    | 0.000443603 | 0.999257 | 0.000443603 | 0.999257 |
| rad45         | 0.000368221 | 0.999625 | 0.000368221 | 0.999625 |
| rad7          | 0.000263079 | 0.999889 | 0.000263079 | 0.999889 |
| rad22         | 7.87260e-05 | 0.999967 | 7.87260e-05 | 0.999967 |
| rad36         | 2.28986e-05 | 0.999990 | 2.28986e-05 | 0.999990 |
| rad2          | 2.54992e-06 | 0.999993 | 2.54992e-06 | 0.999993 |
| PhCHCCH2+H    | 2.47431e-06 | 0.999995 | 2.47431e-06 | 0.999995 |
| rad3          | 2.28651e-06 | 0.999997 | 2.28651e-06 | 0.999997 |
| rad4          | 1.15702e-06 | 0.999999 | 1.15702e-06 | 0.999999 |
| rad13         | 8.37609e-07 | 0.999999 | 8.37609e-07 | 0.999999 |
| rad28         | 2.01331e-07 | 1.000000 | 2.01331e-07 | 1.000000 |
| rad1          | 1.61745e-07 | 1.000000 | 1.61745e-07 | 1.000000 |
| rad9          | 1.39462e-07 | 1.000000 | 1.39462e-07 | 1.000000 |
| rad25         | 1.38705e-07 | 1.000000 | 1.38705e-07 | 1.000000 |
| rad10         | 9.74908e-08 | 1.000000 | 9.74908e-08 | 1.000000 |
| rad30         | 2.33390e-08 | 1.000000 | 2.33390e-08 | 1.000000 |
| PhCCH+CH3     | 1.60566e-08 | 1.000000 | 1.60566e-08 | 1.000000 |
| rad18         | 5.34739e-09 | 1.000000 | 5.34739e-09 | 1.000000 |
| rad15         | 4.16596e-09 | 1.000000 | 4.16596e-09 | 1.000000 |
| Phenyl+Allene | 2.89487e-09 | 1.000000 | 0.000000    | 1.000000 |
| rad33         | 9.93768e-10 | 1.000000 | 9.93768e-10 | 1.000000 |

|                    |             |         |             |         |
|--------------------|-------------|---------|-------------|---------|
| PAH9+H             | 7.59795e-10 | 1.00000 | 7.59795e-10 | 1.00000 |
| Benzene+2-propynyl | 6.06773e-10 | 1.00000 | 6.06773e-10 | 1.00000 |
| rad20              | 5.12214e-10 | 1.00000 | 5.12214e-10 | 1.00000 |
| rad35              | 4.16931e-10 | 1.00000 | 4.16931e-10 | 1.00000 |
| rad21              | 3.17858e-10 | 1.00000 | 3.17858e-10 | 1.00000 |
| rad38              | 2.49603e-10 | 1.00000 | 2.49603e-10 | 1.00000 |
| rad14              | 2.06787e-10 | 1.00000 | 2.06787e-10 | 1.00000 |
| rad26              | 7.40589e-11 | 1.00000 | 7.40589e-11 | 1.00000 |
| PhCCCH3+H          | 6.56102e-11 | 1.00000 | 6.56102e-11 | 1.00000 |
| rad8               | 1.28736e-11 | 1.00000 | 1.28736e-11 | 1.00000 |
| rad24              | 2.88048e-12 | 1.00000 | 2.88048e-12 | 1.00000 |
| rad27              | 2.65969e-12 | 1.00000 | 2.65969e-12 | 1.00000 |
| rad46              | 1.42277e-12 | 1.00000 | 1.42277e-12 | 1.00000 |
| Ph+MeAc            | 1.20153e-12 | 1.00000 | 1.20153e-12 | 1.00000 |
| rad60syn           | 1.66124e-13 | 1.00000 | 1.66124e-13 | 1.00000 |
| PAH7+H             | 2.19828e-14 | 1.00000 | 2.19828e-14 | 1.00000 |
| rad60anti          | 3.97997e-15 | 1.00000 | 3.97997e-15 | 1.00000 |
| rad39              | 2.16741e-15 | 1.00000 | 2.16741e-15 | 1.00000 |
| rad31              | 7.84011e-16 | 1.00000 | 7.84011e-16 | 1.00000 |
| PhCH2CCH+H         | 2.21743e-16 | 1.00000 | 2.21743e-16 | 1.00000 |
| rad12              | 5.53349e-18 | 1.00000 | 5.53349e-18 | 1.00000 |
| rad37              | 7.64119e-22 | 1.00000 | 7.64119e-22 | 1.00000 |
| rad5               | 3.29976e-22 | 1.00000 | 3.29976e-22 | 1.00000 |
| rad50              | 2.54357e-24 | 1.00000 | 2.54357e-24 | 1.00000 |
| PAH3+H             | 1.73162e-24 | 1.00000 | 1.73162e-24 | 1.00000 |
| rad59              | 8.68313e-25 | 1.00000 | 8.68313e-25 | 1.00000 |
| rad19syn           | 7.50722e-30 | 1.00000 | 7.50722e-30 | 1.00000 |
| rad54              | 2.66026e-33 | 1.00000 | 2.66026e-33 | 1.00000 |
| rad52              | 1.65960e-33 | 1.00000 | 1.65960e-33 | 1.00000 |
| rad43              | 2.33629e-34 | 1.00000 | 2.33629e-34 | 1.00000 |
| PAH10+CH3          | 1.45192e-34 | 1.00000 | 1.45192e-34 | 1.00000 |
| rad62              | 8.00136e-36 | 1.00000 | 8.00136e-36 | 1.00000 |
| rad51              | 1.17661e-38 | 1.00000 | 1.17661e-38 | 1.00000 |
| rad70              | 1.25506e-39 | 1.00000 | 1.25506e-39 | 1.00000 |
| PhcycC3H3_A+H      | 8.68185e-40 | 1.00000 | 8.68185e-40 | 1.00000 |
| rad55              | 4.14319e-40 | 1.00000 | 4.14319e-40 | 1.00000 |
| rad65              | 1.84512e-42 | 1.00000 | 1.84512e-42 | 1.00000 |
| rad58              | 4.14989e-43 | 1.00000 | 4.14989e-43 | 1.00000 |
| PAH1+H             | 1.02525e-43 | 1.00000 | 1.02525e-43 | 1.00000 |
| rad34              | 4.33929e-45 | 1.00000 | 4.33929e-45 | 1.00000 |
| rad42              | 4.06430e-48 | 1.00000 | 4.06430e-48 | 1.00000 |
| rad47              | 2.11487e-48 | 1.00000 | 2.11487e-48 | 1.00000 |
| rad41              | 8.37451e-49 | 1.00000 | 8.37451e-49 | 1.00000 |

10.000000 Pa, 60.000000 K

| Rate constant      | True (fraction)        | Effective (fraction)   |
|--------------------|------------------------|------------------------|
| Total              | 1.83429e-26 (1.00 )    | 1.83429e-26 (1.00 )    |
| Formation of rad11 | 1.83139e-26 (0.998 )   | 1.83139e-26 (0.998 )   |
| Formation of rad6  | 2.90471e-29 (0.00158 ) | 2.90471e-29 (0.00158 ) |
| H-abstraction      | 5.71259e-34 (3.11e-08) | 5.71259e-34 (3.11e-08) |

| species            | PYtrue      | Cumul    | PYeffective | Cumul    |
|--------------------|-------------|----------|-------------|----------|
| rad6               | 0.940156    | 0.940156 | 0.940156    | 0.940156 |
| Indene+H           | 0.0496507   | 0.989807 | 0.0496507   | 0.989807 |
| rad23              | 0.00651207  | 0.996319 | 0.00651207  | 0.996319 |
| rad11              | 0.00256955  | 0.998888 | 0.00256955  | 0.998888 |
| C2H2+PhCH2         | 0.000467267 | 0.999356 | 0.000467267 | 0.999356 |
| rad45              | 0.000321770 | 0.999677 | 0.000321770 | 0.999677 |
| rad7               | 0.000253353 | 0.999931 | 0.000253353 | 0.999931 |
| rad22              | 3.70733e-05 | 0.999968 | 3.70733e-05 | 0.999968 |
| rad36              | 1.99934e-05 | 0.999988 | 1.99934e-05 | 0.999988 |
| rad2               | 3.77412e-06 | 0.999992 | 3.77412e-06 | 0.999992 |
| PhCHCCH2+H         | 2.73157e-06 | 0.999994 | 2.73157e-06 | 0.999994 |
| rad3               | 2.55110e-06 | 0.999997 | 2.55110e-06 | 0.999997 |
| rad4               | 1.29161e-06 | 0.999998 | 1.29161e-06 | 0.999998 |
| rad13              | 7.98533e-07 | 0.999999 | 7.98533e-07 | 0.999999 |
| rad28              | 2.71708e-07 | 0.999999 | 2.71708e-07 | 0.999999 |
| rad1               | 2.39913e-07 | 0.999999 | 2.39913e-07 | 0.999999 |
| rad10              | 1.66053e-07 | 1.000000 | 1.66053e-07 | 1.000000 |
| rad9               | 1.56847e-07 | 1.000000 | 1.56847e-07 | 1.000000 |
| rad25              | 7.77760e-08 | 1.000000 | 7.77760e-08 | 1.000000 |
| Benzene+2-propynyl | 3.11432e-08 | 1.000000 | 3.11432e-08 | 1.000000 |
| PhCCH+CH3          | 2.59073e-08 | 1.000000 | 2.59073e-08 | 1.000000 |
| rad30              | 2.49442e-08 | 1.000000 | 2.49442e-08 | 1.000000 |
| Phenyl+Allene      | 4.71326e-09 | 1.000000 | 0.000000    | 1.000000 |
| rad15              | 4.49784e-09 | 1.000000 | 4.49784e-09 | 1.000000 |
| rad18              | 1.74960e-09 | 1.000000 | 1.74960e-09 | 1.000000 |

|               |             |          |             |          |
|---------------|-------------|----------|-------------|----------|
| PAH9+H        | 1.00961e-09 | 1.000000 | 1.00961e-09 | 1.000000 |
| rad33         | 9.59048e-10 | 1.000000 | 9.59048e-10 | 1.000000 |
| rad35         | 5.50212e-10 | 1.000000 | 5.50212e-10 | 1.000000 |
| rad38         | 3.16168e-10 | 1.000000 | 3.16168e-10 | 1.000000 |
| rad14         | 2.43765e-10 | 1.000000 | 2.43765e-10 | 1.000000 |
| rad20         | 1.76514e-10 | 1.000000 | 1.76514e-10 | 1.000000 |
| rad26         | 1.72182e-10 | 1.000000 | 1.72182e-10 | 1.000000 |
| PhCCCH3+H     | 1.37287e-10 | 1.000000 | 1.37287e-10 | 1.000000 |
| rad21         | 1.09941e-10 | 1.000000 | 1.09941e-10 | 1.000000 |
| rad8          | 1.73099e-11 | 1.000000 | 1.73099e-11 | 1.000000 |
| rad27         | 3.81762e-12 | 1.000000 | 3.81762e-12 | 1.000000 |
| Ph+MeAc       | 2.74194e-12 | 1.000000 | 2.74194e-12 | 1.000000 |
| rad24         | 2.51029e-12 | 1.000000 | 2.51029e-12 | 1.000000 |
| rad46         | 1.86587e-12 | 1.000000 | 1.86587e-12 | 1.000000 |
| rad60syn      | 2.06900e-13 | 1.000000 | 2.06900e-13 | 1.000000 |
| PAH7+H        | 4.34762e-14 | 1.000000 | 4.34762e-14 | 1.000000 |
| rad60anti     | 9.35973e-15 | 1.000000 | 9.35973e-15 | 1.000000 |
| rad39         | 4.51964e-15 | 1.000000 | 4.51964e-15 | 1.000000 |
| rad31         | 9.06929e-16 | 1.000000 | 9.06929e-16 | 1.000000 |
| PhCH2CCH+H    | 5.83237e-16 | 1.000000 | 5.83237e-16 | 1.000000 |
| rad12         | 1.93372e-17 | 1.000000 | 1.93372e-17 | 1.000000 |
| rad37         | 3.72419e-21 | 1.000000 | 3.72419e-21 | 1.000000 |
| rad5          | 1.29073e-21 | 1.000000 | 1.29073e-21 | 1.000000 |
| rad50         | 6.05720e-24 | 1.000000 | 6.05720e-24 | 1.000000 |
| PAH3+H        | 4.91363e-24 | 1.000000 | 4.91363e-24 | 1.000000 |
| rad59         | 2.44838e-24 | 1.000000 | 2.44838e-24 | 1.000000 |
| rad19syn      | 2.59435e-29 | 1.000000 | 2.59435e-29 | 1.000000 |
| rad54         | 9.62304e-33 | 1.000000 | 9.62304e-33 | 1.000000 |
| rad52         | 4.18982e-33 | 1.000000 | 4.18982e-33 | 1.000000 |
| rad43         | 1.13311e-33 | 1.000000 | 1.13311e-33 | 1.000000 |
| PAH10+CH3     | 8.55152e-34 | 1.000000 | 8.55152e-34 | 1.000000 |
| rad62         | 3.32732e-35 | 1.000000 | 3.32732e-35 | 1.000000 |
| rad51         | 3.92501e-38 | 1.000000 | 3.92501e-38 | 1.000000 |
| rad70         | 4.97445e-39 | 1.000000 | 4.97445e-39 | 1.000000 |
| PhcycC3H3_A+H | 3.46580e-39 | 1.000000 | 3.46580e-39 | 1.000000 |
| rad55         | 1.64863e-39 | 1.000000 | 1.64863e-39 | 1.000000 |
| rad65         | 6.99542e-42 | 1.000000 | 6.99542e-42 | 1.000000 |
| rad58         | 1.66420e-42 | 1.000000 | 1.66420e-42 | 1.000000 |
| PAH1+H        | 4.96920e-43 | 1.000000 | 4.96920e-43 | 1.000000 |
| rad34         | 1.84952e-44 | 1.000000 | 1.84952e-44 | 1.000000 |
| rad42         | 1.82539e-47 | 1.000000 | 1.82539e-47 | 1.000000 |
| rad47         | 7.18549e-48 | 1.000000 | 7.18549e-48 | 1.000000 |
| rad41         | 3.91546e-48 | 1.000000 | 3.91546e-48 | 1.000000 |

10.000000 Pa, 70.000000 K

| Rate constant      | True (fraction)        | Effective (fraction)   |
|--------------------|------------------------|------------------------|
| Total              | 1.17336e-24 (1.00 )    | 1.17336e-24 (1.00 )    |
| Formation of rad11 | 1.16857e-24 (0.996 )   | 1.16857e-24 (0.996 )   |
| Formation of rad6  | 4.79505e-27 (0.00409 ) | 4.79505e-27 (0.00409 ) |
| H-abstraction      | 5.89821e-31 (5.03e-07) | 5.89821e-31 (5.03e-07) |

| species            | PYtrue      | Cumul    | PYeffective | Cumul    |
|--------------------|-------------|----------|-------------|----------|
| rad6               | 0.940815    | 0.940815 | 0.940815    | 0.940815 |
| Indene+H           | 0.0507621   | 0.991577 | 0.0507621   | 0.991577 |
| rad23              | 0.00595966  | 0.997536 | 0.00595966  | 0.997536 |
| rad11              | 0.00139404  | 0.998930 | 0.00139404  | 0.998930 |
| C2H2+PhCH2         | 0.000488892 | 0.999419 | 0.000488892 | 0.999419 |
| rad45              | 0.000282643 | 0.999702 | 0.000282643 | 0.999702 |
| rad7               | 0.000245448 | 0.999947 | 0.000245448 | 0.999947 |
| rad22              | 2.07516e-05 | 0.999968 | 2.07516e-05 | 0.999968 |
| rad36              | 1.75484e-05 | 0.999986 | 1.75484e-05 | 0.999986 |
| rad2               | 5.18460e-06 | 0.999991 | 5.18460e-06 | 0.999991 |
| PhCHCCH2+H         | 2.99572e-06 | 0.999994 | 2.99572e-06 | 0.999994 |
| rad3               | 2.74355e-06 | 0.999997 | 2.74355e-06 | 0.999997 |
| rad4               | 1.38993e-06 | 0.999998 | 1.38993e-06 | 0.999998 |
| rad13              | 7.68862e-07 | 0.999999 | 7.68862e-07 | 0.999999 |
| Benzene+2-propynyl | 5.02676e-07 | 0.999999 | 5.02676e-07 | 0.999999 |
| rad28              | 3.51695e-07 | 1.000000 | 3.51695e-07 | 1.000000 |
| rad1               | 3.30395e-07 | 1.000000 | 3.30395e-07 | 1.000000 |
| rad10              | 2.53669e-07 | 1.000000 | 2.53669e-07 | 1.000000 |
| rad9               | 1.75302e-07 | 1.000000 | 1.75302e-07 | 1.000000 |
| rad25              | 4.69732e-08 | 1.000000 | 4.69732e-08 | 1.000000 |
| PhCCH+CH3          | 3.90343e-08 | 1.000000 | 3.90343e-08 | 1.000000 |
| rad30              | 2.64676e-08 | 1.000000 | 2.64676e-08 | 1.000000 |
| Phenyl+Allene      | 7.37482e-09 | 1.000000 | 0.000000    | 1.000000 |
| rad15              | 4.82113e-09 | 1.000000 | 4.82113e-09 | 1.000000 |
| PAH9+H             | 1.27401e-09 | 1.000000 | 1.27401e-09 | 1.000000 |



|               |             |         |             |         |
|---------------|-------------|---------|-------------|---------|
| rad33         | 9.34023e-10 | 1.00000 | 9.34023e-10 | 1.00000 |
| rad35         | 6.89486e-10 | 1.00000 | 6.89486e-10 | 1.00000 |
| rad18         | 6.85909e-10 | 1.00000 | 6.85909e-10 | 1.00000 |
| rad38         | 3.86670e-10 | 1.00000 | 3.86670e-10 | 1.00000 |
| rad26         | 3.49608e-10 | 1.00000 | 3.49608e-10 | 1.00000 |
| rad14         | 2.72189e-10 | 1.00000 | 2.72189e-10 | 1.00000 |
| PhCCCH3+H     | 2.60923e-10 | 1.00000 | 2.60923e-10 | 1.00000 |
| rad20         | 7.41425e-11 | 1.00000 | 7.41425e-11 | 1.00000 |
| rad21         | 4.63756e-11 | 1.00000 | 4.63756e-11 | 1.00000 |
| rad8          | 2.32036e-11 | 1.00000 | 2.32036e-11 | 1.00000 |
| Ph+MeAc       | 5.91835e-12 | 1.00000 | 5.91835e-12 | 1.00000 |
| rad27         | 5.11703e-12 | 1.00000 | 5.11703e-12 | 1.00000 |
| rad46         | 2.36970e-12 | 1.00000 | 2.36970e-12 | 1.00000 |
| rad24         | 2.20467e-12 | 1.00000 | 2.20467e-12 | 1.00000 |
| rad60syn      | 2.58526e-13 | 1.00000 | 2.58526e-13 | 1.00000 |
| PAH7+H        | 8.18097e-14 | 1.00000 | 8.18097e-14 | 1.00000 |
| rad60anti     | 1.89001e-14 | 1.00000 | 1.89001e-14 | 1.00000 |
| rad39         | 9.04664e-15 | 1.00000 | 9.04664e-15 | 1.00000 |
| PhCH2CCH+H    | 3.62590e-15 | 1.00000 | 3.62590e-15 | 1.00000 |
| rad31         | 1.01642e-15 | 1.00000 | 1.01642e-15 | 1.00000 |
| rad12         | 6.00999e-17 | 1.00000 | 6.00999e-17 | 1.00000 |
| rad37         | 1.99858e-20 | 1.00000 | 1.99858e-20 | 1.00000 |
| rad5          | 6.16826e-21 | 1.00000 | 6.16826e-21 | 1.00000 |
| PAH3+H        | 2.39488e-23 | 1.00000 | 2.39488e-23 | 1.00000 |
| rad50         | 1.84691e-23 | 1.00000 | 1.84691e-23 | 1.00000 |
| rad59         | 1.20173e-23 | 1.00000 | 1.20173e-23 | 1.00000 |
| rad19syn      | 1.26235e-28 | 1.00000 | 1.26235e-28 | 1.00000 |
| rad54         | 4.92794e-32 | 1.00000 | 4.92794e-32 | 1.00000 |
| rad52         | 1.54002e-32 | 1.00000 | 1.54002e-32 | 1.00000 |
| rad43         | 7.69736e-33 | 1.00000 | 7.69736e-33 | 1.00000 |
| PAH10+CH3     | 6.70591e-33 | 1.00000 | 6.70591e-33 | 1.00000 |
| rad62         | 1.99699e-34 | 1.00000 | 1.99699e-34 | 1.00000 |
| rad51         | 1.96525e-37 | 1.00000 | 1.96525e-37 | 1.00000 |
| rad70         | 2.82130e-38 | 1.00000 | 2.82130e-38 | 1.00000 |
| PhcycC3H3_A+H | 1.98182e-38 | 1.00000 | 1.98182e-38 | 1.00000 |
| rad55         | 9.39299e-39 | 1.00000 | 9.39299e-39 | 1.00000 |
| rad65         | 3.87132e-41 | 1.00000 | 3.87132e-41 | 1.00000 |
| rad58         | 9.56411e-42 | 1.00000 | 9.56411e-42 | 1.00000 |
| PAH1+H        | 3.35205e-42 | 1.00000 | 3.35205e-42 | 1.00000 |
| rad34         | 1.13847e-43 | 1.00000 | 1.13847e-43 | 1.00000 |
| rad42         | 1.19449e-46 | 1.00000 | 1.19449e-46 | 1.00000 |
| rad47         | 3.65204e-47 | 1.00000 | 3.65204e-47 | 1.00000 |
| rad41         | 2.68397e-47 | 1.00000 | 2.68397e-47 | 1.00000 |

10.000000 Pa, 80.000000 K

| Rate constant      | True (fraction)        | Effective (fraction)   |
|--------------------|------------------------|------------------------|
| Total              | 2.68112e-23 (1.00 )    | 2.68112e-23 (1.00 )    |
| Formation of rad11 | 2.65890e-23 (0.992 )   | 2.65890e-23 (0.992 )   |
| Formation of rad6  | 2.22189e-25 (0.00829 ) | 2.22189e-25 (0.00829 ) |
| H-abstraction      | 1.05871e-28 (3.95e-06) | 1.05871e-28 (3.95e-06) |

| species            | PYtrue      | Cumul    | PYeffective | Cumul    |
|--------------------|-------------|----------|-------------|----------|
| rad6               | 0.941038    | 0.941038 | 0.941038    | 0.941038 |
| Indene+H           | 0.0516618   | 0.992700 | 0.0516618   | 0.992700 |
| rad23              | 0.00543073  | 0.998131 | 0.00543073  | 0.998131 |
| rad11              | 0.000822107 | 0.998953 | 0.000822107 | 0.998953 |
| C2H2+PhCH2         | 0.000509404 | 0.999462 | 0.000509404 | 0.999462 |
| rad45              | 0.000249028 | 0.999711 | 0.000249028 | 0.999711 |
| rad7               | 0.000238956 | 0.999950 | 0.000238956 | 0.999950 |
| rad36              | 1.54508e-05 | 0.999966 | 1.54508e-05 | 0.999966 |
| rad22              | 1.33706e-05 | 0.999979 | 1.33706e-05 | 0.999979 |
| rad2               | 6.79584e-06 | 0.999986 | 6.79584e-06 | 0.999986 |
| Benzene+2-propynyl | 3.94877e-06 | 0.999990 | 3.94877e-06 | 0.999990 |
| PhCHCCH2+H         | 3.27387e-06 | 0.999993 | 3.27387e-06 | 0.999993 |
| rad3               | 2.88537e-06 | 0.999996 | 2.88537e-06 | 0.999996 |
| rad4               | 1.46282e-06 | 0.999997 | 1.46282e-06 | 0.999997 |
| rad13              | 7.45494e-07 | 0.999998 | 7.45494e-07 | 0.999998 |
| rad28              | 4.44058e-07 | 0.999999 | 4.44058e-07 | 0.999999 |
| rad1               | 4.34280e-07 | 0.999999 | 4.34280e-07 | 0.999999 |
| rad10              | 3.61428e-07 | 0.999999 | 3.61428e-07 | 0.999999 |
| rad9               | 1.95291e-07 | 1.000000 | 1.95291e-07 | 1.000000 |
| PhCCH+CH3          | 5.64948e-08 | 1.000000 | 5.64948e-08 | 1.000000 |
| rad25              | 2.99973e-08 | 1.000000 | 2.99973e-08 | 1.000000 |
| rad30              | 2.79656e-08 | 1.000000 | 2.79656e-08 | 1.000000 |
| Phenyl+Allene      | 1.11406e-08 | 1.000000 | 0.000000    | 1.000000 |
| rad15              | 5.14667e-09 | 1.000000 | 5.14667e-09 | 1.000000 |
| PAH9+H             | 1.55511e-09 | 1.000000 | 1.55511e-09 | 1.000000 |

|               |             |          |             |          |
|---------------|-------------|----------|-------------|----------|
| rad33         | 9.15395e-10 | 1.000000 | 9.15395e-10 | 1.000000 |
| rad35         | 8.35639e-10 | 1.000000 | 8.35639e-10 | 1.000000 |
| rad26         | 6.53102e-10 | 1.000000 | 6.53102e-10 | 1.000000 |
| PhCCCH3+H     | 4.69411e-10 | 1.000000 | 4.69411e-10 | 1.000000 |
| rad38         | 4.61995e-10 | 1.000000 | 4.61995e-10 | 1.000000 |
| rad18         | 3.09869e-10 | 1.000000 | 3.09869e-10 | 1.000000 |
| rad14         | 2.94012e-10 | 1.000000 | 2.94012e-10 | 1.000000 |
| rad20         | 3.64264e-11 | 1.000000 | 3.64264e-11 | 1.000000 |
| rad8          | 3.11003e-11 | 1.000000 | 3.11003e-11 | 1.000000 |
| rad21         | 2.28947e-11 | 1.000000 | 2.28947e-11 | 1.000000 |
| Ph+MeAc       | 1.24105e-11 | 1.000000 | 1.24105e-11 | 1.000000 |
| rad27         | 6.57263e-12 | 1.000000 | 6.57263e-12 | 1.000000 |
| rad46         | 2.94857e-12 | 1.000000 | 2.94857e-12 | 1.000000 |
| rad24         | 1.94525e-12 | 1.000000 | 1.94525e-12 | 1.000000 |
| rad60syn      | 3.23037e-13 | 1.000000 | 3.23037e-13 | 1.000000 |
| PAH7+H        | 1.51271e-13 | 1.000000 | 1.51271e-13 | 1.000000 |
| rad60anti     | 3.33946e-14 | 1.000000 | 3.33946e-14 | 1.000000 |
| PhCH2CCH+H    | 3.17205e-14 | 1.000000 | 3.17205e-14 | 1.000000 |
| rad39         | 1.79014e-14 | 1.000000 | 1.79014e-14 | 1.000000 |
| rad31         | 1.11950e-15 | 1.000000 | 1.11950e-15 | 1.000000 |
| rad12         | 1.76383e-16 | 1.000000 | 1.76383e-16 | 1.000000 |
| rad37         | 1.16751e-19 | 1.000000 | 1.16751e-19 | 1.000000 |
| rad5          | 3.50733e-20 | 1.000000 | 3.50733e-20 | 1.000000 |
| PAH3+H        | 3.14771e-22 | 1.000000 | 3.14771e-22 | 1.000000 |
| rad59         | 1.60957e-22 | 1.000000 | 1.60957e-22 | 1.000000 |
| rad50         | 8.32624e-23 | 1.000000 | 8.32624e-23 | 1.000000 |
| rad19syn      | 9.30113e-28 | 1.000000 | 9.30113e-28 | 1.000000 |
| rad54         | 3.83527e-31 | 1.000000 | 3.83527e-31 | 1.000000 |
| rad52         | 9.41087e-32 | 1.000000 | 9.41087e-32 | 1.000000 |
| rad43         | 7.69150e-32 | 1.000000 | 7.69150e-32 | 1.000000 |
| PAH10+CH3     | 7.41951e-32 | 1.000000 | 7.41951e-32 | 1.000000 |
| rad62         | 1.83831e-33 | 1.000000 | 1.83831e-33 | 1.000000 |
| rad51         | 1.55624e-36 | 1.000000 | 1.55624e-36 | 1.000000 |
| rad70         | 2.45019e-37 | 1.000000 | 2.45019e-37 | 1.000000 |
| PhcycC3H3_A+H | 1.73657e-37 | 1.000000 | 1.73657e-37 | 1.000000 |
| rad55         | 8.19811e-38 | 1.000000 | 8.19811e-38 | 1.000000 |
| rad65         | 3.31026e-40 | 1.000000 | 3.31026e-40 | 1.000000 |
| rad58         | 8.42546e-41 | 1.000000 | 8.42546e-41 | 1.000000 |
| PAH1+H        | 3.40030e-41 | 1.000000 | 3.40030e-41 | 1.000000 |
| rad34         | 1.08004e-42 | 1.000000 | 1.08004e-42 | 1.000000 |
| rad42         | 1.21768e-45 | 1.000000 | 1.21768e-45 | 1.000000 |
| rad47         | 2.92787e-46 | 1.000000 | 2.92787e-46 | 1.000000 |
| rad41         | 2.89470e-46 | 1.000000 | 2.89470e-46 | 1.000000 |

10.000000 Pa, 90.000000 K

| Rate constant      | True (fraction)        | Effective (fraction)   |
|--------------------|------------------------|------------------------|
| Total              | 3.08379e-22 (1.00 )    | 3.08379e-22 (1.00 )    |
| Formation of rad11 | 3.03962e-22 (0.986 )   | 3.03962e-22 (0.986 )   |
| Formation of rad6  | 4.41076e-24 (0.0143 )  | 4.41076e-24 (0.0143 )  |
| H-abstraction      | 5.92916e-27 (1.92e-05) | 5.92916e-27 (1.92e-05) |

| species            | PYtrue      | Cumul    | PYeffective | Cumul    |
|--------------------|-------------|----------|-------------|----------|
| rad6               | 0.941122    | 0.941122 | 0.941122    | 0.941122 |
| Indene+H           | 0.0523829   | 0.993505 | 0.0523829   | 0.993505 |
| rad23              | 0.00492954  | 0.998434 | 0.00492954  | 0.998434 |
| C2H2+PhCH2         | 0.000529372 | 0.998964 | 0.000529372 | 0.998964 |
| rad11              | 0.000521081 | 0.999485 | 0.000521081 | 0.999485 |
| rad7               | 0.000233533 | 0.999718 | 0.000233533 | 0.999718 |
| rad45              | 0.000219712 | 0.999938 | 0.000219712 | 0.999938 |
| Benzene+2-propynyl | 1.92269e-05 | 0.999957 | 1.92269e-05 | 0.999957 |
| rad36              | 1.36243e-05 | 0.999971 | 1.36243e-05 | 0.999971 |
| rad22              | 9.57842e-06 | 0.999980 | 9.57842e-06 | 0.999980 |
| rad2               | 8.63555e-06 | 0.999989 | 8.63555e-06 | 0.999989 |
| PhCHCCH2+H         | 3.57231e-06 | 0.999993 | 3.57231e-06 | 0.999993 |
| rad3               | 2.99135e-06 | 0.999996 | 2.99135e-06 | 0.999996 |
| rad4               | 1.51776e-06 | 0.999997 | 1.51776e-06 | 0.999997 |
| rad13              | 7.26557e-07 | 0.999998 | 7.26557e-07 | 0.999998 |
| rad1               | 5.53541e-07 | 0.999998 | 5.53541e-07 | 0.999998 |
| rad28              | 5.52360e-07 | 0.999999 | 5.52360e-07 | 0.999999 |
| rad10              | 4.91180e-07 | 1.000000 | 4.91180e-07 | 1.000000 |
| rad9               | 2.17272e-07 | 1.000000 | 2.17272e-07 | 1.000000 |
| PhCCH+CH3          | 7.98306e-08 | 1.000000 | 7.98306e-08 | 1.000000 |
| rad30              | 2.94760e-08 | 1.000000 | 2.94760e-08 | 1.000000 |
| rad25              | 2.00084e-08 | 1.000000 | 2.00084e-08 | 1.000000 |
| Phenyl+Allene      | 1.63667e-08 | 1.000000 | 0.00000     | 1.000000 |
| rad15              | 5.48234e-09 | 1.000000 | 5.48234e-09 | 1.000000 |
| PAH9+H             | 1.85604e-09 | 1.000000 | 1.85604e-09 | 1.000000 |

|               |             |          |             |          |
|---------------|-------------|----------|-------------|----------|
| rad26         | 1.15629e-09 | 1.000000 | 1.15629e-09 | 1.000000 |
| rad35         | 9.89980e-10 | 1.000000 | 9.89980e-10 | 1.000000 |
| rad33         | 9.01213e-10 | 1.000000 | 9.01213e-10 | 1.000000 |
| PhCCCH3+H     | 8.18299e-10 | 1.000000 | 8.18299e-10 | 1.000000 |
| rad38         | 5.43223e-10 | 1.000000 | 5.43223e-10 | 1.000000 |
| rad14         | 3.10802e-10 | 1.000000 | 3.10802e-10 | 1.000000 |
| rad18         | 1.57516e-10 | 1.000000 | 1.57516e-10 | 1.000000 |
| rad8          | 4.18980e-11 | 1.000000 | 4.18980e-11 | 1.000000 |
| Ph+MeAc       | 2.55689e-11 | 1.000000 | 2.55689e-11 | 1.000000 |
| rad20         | 2.03777e-11 | 1.000000 | 2.03777e-11 | 1.000000 |
| rad21         | 1.28751e-11 | 1.000000 | 1.28751e-11 | 1.000000 |
| rad27         | 8.21034e-12 | 1.000000 | 8.21034e-12 | 1.000000 |
| rad46         | 3.62103e-12 | 1.000000 | 3.62103e-12 | 1.000000 |
| rad24         | 1.72062e-12 | 1.000000 | 1.72062e-12 | 1.000000 |
| rad60syn      | 4.03765e-13 | 1.000000 | 4.03765e-13 | 1.000000 |
| PAH7+H        | 2.79799e-13 | 1.000000 | 2.79799e-13 | 1.000000 |
| PhCH2CCH+H    | 2.16883e-13 | 1.000000 | 2.16883e-13 | 1.000000 |
| rad60anti     | 5.37337e-14 | 1.000000 | 5.37337e-14 | 1.000000 |
| rad39         | 3.54841e-14 | 1.000000 | 3.54841e-14 | 1.000000 |
| rad31         | 1.22158e-15 | 1.000000 | 1.22158e-15 | 1.000000 |
| rad12         | 5.01848e-16 | 1.000000 | 5.01848e-16 | 1.000000 |
| rad37         | 6.82332e-19 | 1.000000 | 6.82332e-19 | 1.000000 |
| rad5          | 2.12009e-19 | 1.000000 | 2.12009e-19 | 1.000000 |
| PAH3+H        | 5.63551e-21 | 1.000000 | 5.63551e-21 | 1.000000 |
| rad59         | 2.83598e-21 | 1.000000 | 2.83598e-21 | 1.000000 |
| rad50         | 5.45877e-22 | 1.000000 | 5.45877e-22 | 1.000000 |
| rad19syn      | 1.17650e-26 | 1.000000 | 1.17650e-26 | 1.000000 |
| rad54         | 5.19245e-30 | 1.000000 | 5.19245e-30 | 1.000000 |
| PAH10+CH3     | 1.19734e-30 | 1.000000 | 1.19734e-30 | 1.000000 |
| rad52         | 1.19539e-30 | 1.000000 | 1.19539e-30 | 1.000000 |
| rad43         | 1.17017e-30 | 1.000000 | 1.17017e-30 | 1.000000 |
| rad62         | 2.80110e-32 | 1.000000 | 2.80110e-32 | 1.000000 |
| rad51         | 2.20858e-35 | 1.000000 | 2.20858e-35 | 1.000000 |
| rad70         | 3.71454e-36 | 1.000000 | 3.71454e-36 | 1.000000 |
| PhcycC3H3_A+H | 2.65778e-36 | 1.000000 | 2.65778e-36 | 1.000000 |
| rad55         | 1.24940e-36 | 1.000000 | 1.24940e-36 | 1.000000 |
| rad65         | 4.97039e-39 | 1.000000 | 4.97039e-39 | 1.000000 |
| rad58         | 1.29671e-39 | 1.000000 | 1.29671e-39 | 1.000000 |
| PAH1+H        | 5.93332e-40 | 1.000000 | 5.93332e-40 | 1.000000 |
| rad34         | 1.79692e-41 | 1.000000 | 1.79692e-41 | 1.000000 |
| rad42         | 2.19585e-44 | 1.000000 | 2.19585e-44 | 1.000000 |
| rad41         | 5.55815e-45 | 1.000000 | 5.55815e-45 | 1.000000 |
| rad47         | 4.18765e-45 | 1.000000 | 4.18765e-45 | 1.000000 |

10.000000 Pa, 100.000000 K

| Rate constant      | True (fraction)        | Effective (fraction)   |
|--------------------|------------------------|------------------------|
| Total              | 2.19347e-21 (1.00 )    | 2.19347e-21 (1.00 )    |
| Formation of rad11 | 2.14498e-21 (0.978 )   | 2.14498e-21 (0.978 )   |
| Formation of rad6  | 4.83503e-23 (0.0220 )  | 4.83503e-23 (0.0220 )  |
| H-abstraction      | 1.47101e-25 (6.71e-05) | 1.47101e-25 (6.71e-05) |

| species            | PYtrue      | Cumul    | PYeffective | Cumul    |
|--------------------|-------------|----------|-------------|----------|
| rad6               | 0.941159    | 0.941159 | 0.941159    | 0.941159 |
| Indene+H           | 0.0529501   | 0.994109 | 0.0529501   | 0.994109 |
| rad23              | 0.00445773  | 0.998567 | 0.00445773  | 0.998567 |
| C2H2+PhCH2         | 0.000549252 | 0.999116 | 0.000549252 | 0.999116 |
| rad11              | 0.000352521 | 0.999469 | 0.000352521 | 0.999469 |
| rad7               | 0.000228923 | 0.999697 | 0.000228923 | 0.999697 |
| rad45              | 0.000193880 | 0.999891 | 0.000193880 | 0.999891 |
| Benzene+2-propynyl | 6.70630e-05 | 0.999958 | 6.70630e-05 | 0.999958 |
| rad36              | 1.20177e-05 | 0.999970 | 1.20177e-05 | 0.999970 |
| rad2               | 1.07418e-05 | 0.999981 | 1.07418e-05 | 0.999981 |
| rad22              | 7.38727e-06 | 0.999989 | 7.38727e-06 | 0.999989 |
| PhCHCCH2+H         | 3.89773e-06 | 0.999992 | 3.89773e-06 | 0.999992 |
| rad3               | 3.07190e-06 | 0.999996 | 3.07190e-06 | 0.999996 |
| rad4               | 1.56001e-06 | 0.999997 | 1.56001e-06 | 0.999997 |
| rad13              | 7.10848e-07 | 0.999998 | 7.10848e-07 | 0.999998 |
| rad1               | 6.90869e-07 | 0.999998 | 6.90869e-07 | 0.999998 |
| rad28              | 6.81017e-07 | 0.999999 | 6.81017e-07 | 0.999999 |
| rad10              | 6.45490e-07 | 1.000000 | 6.45490e-07 | 1.000000 |
| rad9               | 2.41756e-07 | 1.000000 | 2.41756e-07 | 1.000000 |
| PhCCH+CH3          | 1.11204e-07 | 1.000000 | 1.11204e-07 | 1.000000 |
| rad30              | 3.10319e-08 | 1.000000 | 3.10319e-08 | 1.000000 |
| Phenyl+Allene      | 2.35238e-08 | 1.000000 | 0.000000    | 1.000000 |
| rad25              | 1.38229e-08 | 1.000000 | 1.38229e-08 | 1.000000 |
| rad15              | 5.83541e-09 | 1.000000 | 5.83541e-09 | 1.000000 |
| PAH9+H             | 2.18094e-09 | 1.000000 | 2.18094e-09 | 1.000000 |

|               |             |         |             |         |
|---------------|-------------|---------|-------------|---------|
| rad26         | 1.97438e-09 | 1.00000 | 1.97438e-09 | 1.00000 |
| PhCCCH3+H     | 1.40064e-09 | 1.00000 | 1.40064e-09 | 1.00000 |
| rad35         | 1.15427e-09 | 1.00000 | 1.15427e-09 | 1.00000 |
| rad33         | 8.90237e-10 | 1.00000 | 8.90237e-10 | 1.00000 |
| rad38         | 6.31701e-10 | 1.00000 | 6.31701e-10 | 1.00000 |
| rad14         | 3.23774e-10 | 1.00000 | 3.23774e-10 | 1.00000 |
| rad18         | 8.86335e-11 | 1.00000 | 8.86335e-11 | 1.00000 |
| rad8          | 5.70393e-11 | 1.00000 | 5.70393e-11 | 1.00000 |
| Ph+MeAc       | 5.19461e-11 | 1.00000 | 5.19461e-11 | 1.00000 |
| rad20         | 1.27023e-11 | 1.00000 | 1.27023e-11 | 1.00000 |
| rad27         | 1.00641e-11 | 1.00000 | 1.00641e-11 | 1.00000 |
| rad21         | 8.06801e-12 | 1.00000 | 8.06801e-12 | 1.00000 |
| rad46         | 4.41121e-12 | 1.00000 | 4.41121e-12 | 1.00000 |
| rad24         | 1.52344e-12 | 1.00000 | 1.52344e-12 | 1.00000 |
| PhCH2CCH+H    | 1.08969e-12 | 1.00000 | 1.08969e-12 | 1.00000 |
| PAH7+H        | 5.22256e-13 | 1.00000 | 5.22256e-13 | 1.00000 |
| rad60syn      | 5.05580e-13 | 1.00000 | 5.05580e-13 | 1.00000 |
| rad60anti     | 8.12206e-14 | 1.00000 | 8.12206e-14 | 1.00000 |
| rad39         | 7.07151e-14 | 1.00000 | 7.07151e-14 | 1.00000 |
| rad12         | 1.39753e-15 | 1.00000 | 1.39753e-15 | 1.00000 |
| rad31         | 1.32718e-15 | 1.00000 | 1.32718e-15 | 1.00000 |
| rad37         | 3.71056e-18 | 1.00000 | 3.71056e-18 | 1.00000 |
| rad5          | 1.22135e-18 | 1.00000 | 1.22135e-18 | 1.00000 |
| PAH3+H        | 7.00020e-20 | 1.00000 | 7.00020e-20 | 1.00000 |
| rad59         | 3.40358e-20 | 1.00000 | 3.40358e-20 | 1.00000 |
| rad50         | 3.82591e-21 | 1.00000 | 3.82591e-21 | 1.00000 |
| rad19syn      | 2.66226e-25 | 1.00000 | 2.66226e-25 | 1.00000 |
| rad54         | 1.49921e-28 | 1.00000 | 1.49921e-28 | 1.00000 |
| rad52         | 3.30138e-29 | 1.00000 | 3.30138e-29 | 1.00000 |
| PAH10+CH3     | 2.86297e-29 | 1.00000 | 2.86297e-29 | 1.00000 |
| rad43         | 2.77706e-29 | 1.00000 | 2.77706e-29 | 1.00000 |
| rad62         | 8.06192e-31 | 1.00000 | 8.06192e-31 | 1.00000 |
| rad51         | 7.12351e-34 | 1.00000 | 7.12351e-34 | 1.00000 |
| rad70         | 1.26172e-34 | 1.00000 | 1.26172e-34 | 1.00000 |
| PhcycC3H3_A+H | 9.11723e-35 | 1.00000 | 9.11723e-35 | 1.00000 |
| rad55         | 4.26690e-35 | 1.00000 | 4.26690e-35 | 1.00000 |
| rad65         | 1.67677e-37 | 1.00000 | 1.67677e-37 | 1.00000 |
| rad58         | 4.47383e-38 | 1.00000 | 4.47383e-38 | 1.00000 |
| PAH1+H        | 2.27267e-38 | 1.00000 | 2.27267e-38 | 1.00000 |
| rad34         | 6.71995e-40 | 1.00000 | 6.71995e-40 | 1.00000 |
| rad42         | 8.81916e-43 | 1.00000 | 8.81916e-43 | 1.00000 |
| rad41         | 2.33913e-43 | 1.00000 | 2.33913e-43 | 1.00000 |
| rad47         | 1.36461e-43 | 1.00000 | 1.36461e-43 | 1.00000 |

10.000000 Pa, 110.000000 K

| Rate constant      | True (fraction)        | Effective (fraction)   |
|--------------------|------------------------|------------------------|
| Total              | 1.09987e-20 (1.00 )    | 1.09987e-20 (1.00 )    |
| Formation of rad11 | 1.06527e-20 (0.969 )   | 1.06527e-20 (0.969 )   |
| Formation of rad6  | 3.44008e-22 (0.0313 )  | 3.44008e-22 (0.0313 )  |
| H-abstraction      | 2.02040e-24 (0.000184) | 2.02040e-24 (0.000184) |

| species            | PYtrue      | Cumul    | PYeffective | Cumul    |
|--------------------|-------------|----------|-------------|----------|
| rad6               | 0.941153    | 0.941153 | 0.941153    | 0.941153 |
| Indene+H           | 0.0533865   | 0.994540 | 0.0533865   | 0.994540 |
| rad23              | 0.00401598  | 0.998556 | 0.00401598  | 0.998556 |
| C2H2+PhCH2         | 0.000569458 | 0.999125 | 0.000569458 | 0.999125 |
| rad11              | 0.000253288 | 0.999378 | 0.000253288 | 0.999378 |
| rad7               | 0.000224934 | 0.999603 | 0.000224934 | 0.999603 |
| Benzene+2-propynyl | 0.000183695 | 0.999787 | 0.000183695 | 0.999787 |
| rad45              | 0.000170970 | 0.999958 | 0.000170970 | 0.999958 |
| rad2               | 1.31611e-05 | 0.999971 | 1.31611e-05 | 0.999971 |
| rad36              | 1.05951e-05 | 0.999982 | 1.05951e-05 | 0.999982 |
| rad22              | 5.97964e-06 | 0.999988 | 5.97964e-06 | 0.999988 |
| PhCHCCH2+H         | 4.25738e-06 | 0.999992 | 4.25738e-06 | 0.999992 |
| rad3               | 3.13448e-06 | 0.999995 | 3.13448e-06 | 0.999995 |
| rad4               | 1.59334e-06 | 0.999997 | 1.59334e-06 | 0.999997 |
| rad1               | 8.49578e-07 | 0.999997 | 8.49578e-07 | 0.999997 |
| rad28              | 8.35422e-07 | 0.999998 | 8.35422e-07 | 0.999998 |
| rad10              | 8.27567e-07 | 0.999999 | 8.27567e-07 | 0.999999 |
| rad13              | 6.97555e-07 | 1.000000 | 6.97555e-07 | 1.000000 |
| rad9               | 2.69324e-07 | 1.000000 | 2.69324e-07 | 1.000000 |
| PhCCH+CH3          | 1.53594e-07 | 1.000000 | 1.53594e-07 | 1.000000 |
| Phenyl+Allene      | 3.32245e-08 | 1.000000 | 0.000000    | 1.000000 |
| rad30              | 3.26644e-08 | 1.000000 | 3.26644e-08 | 1.000000 |
| rad25              | 9.83389e-09 | 1.000000 | 9.83389e-09 | 1.000000 |
| rad15              | 6.21313e-09 | 1.000000 | 6.21313e-09 | 1.000000 |
| rad26              | 3.28595e-09 | 1.000000 | 3.28595e-09 | 1.000000 |

|               |             |         |             |         |
|---------------|-------------|---------|-------------|---------|
| PAH9+H        | 2.53497e-09 | 1.00000 | 2.53497e-09 | 1.00000 |
| PhCCCH3+H     | 2.37120e-09 | 1.00000 | 2.37120e-09 | 1.00000 |
| rad35         | 1.33069e-09 | 1.00000 | 1.33069e-09 | 1.00000 |
| rad33         | 8.81638e-10 | 1.00000 | 8.81638e-10 | 1.00000 |
| rad38         | 7.29067e-10 | 1.00000 | 7.29067e-10 | 1.00000 |
| rad14         | 3.33859e-10 | 1.00000 | 3.33859e-10 | 1.00000 |
| Ph+MeAc       | 1.04177e-10 | 1.00000 | 1.04177e-10 | 1.00000 |
| rad8          | 7.88325e-11 | 1.00000 | 7.88325e-11 | 1.00000 |
| rad18         | 5.44813e-11 | 1.00000 | 5.44813e-11 | 1.00000 |
| rad27         | 1.21747e-11 | 1.00000 | 1.21747e-11 | 1.00000 |
| rad20         | 8.64812e-12 | 1.00000 | 8.64812e-12 | 1.00000 |
| rad21         | 5.51996e-12 | 1.00000 | 5.51996e-12 | 1.00000 |
| rad46         | 5.34998e-12 | 1.00000 | 5.34998e-12 | 1.00000 |
| PhCH2CCH+H    | 4.25526e-12 | 1.00000 | 4.25526e-12 | 1.00000 |
| rad24         | 1.34885e-12 | 1.00000 | 1.34885e-12 | 1.00000 |
| PAH7+H        | 9.86839e-13 | 1.00000 | 9.86839e-13 | 1.00000 |
| rad60syn      | 6.34947e-13 | 1.00000 | 6.34947e-13 | 1.00000 |
| rad39         | 1.41622e-13 | 1.00000 | 1.41622e-13 | 1.00000 |
| rad60anti     | 1.17778e-13 | 1.00000 | 1.17778e-13 | 1.00000 |
| rad12         | 3.82189e-15 | 1.00000 | 3.82189e-15 | 1.00000 |
| rad31         | 1.44047e-15 | 1.00000 | 1.44047e-15 | 1.00000 |
| rad37         | 1.81896e-17 | 1.00000 | 1.81896e-17 | 1.00000 |
| rad5          | 6.32690e-18 | 1.00000 | 6.32690e-18 | 1.00000 |
| PAH3+H        | 5.80707e-19 | 1.00000 | 5.80707e-19 | 1.00000 |
| rad59         | 2.71168e-19 | 1.00000 | 2.71168e-19 | 1.00000 |
| rad50         | 2.30374e-20 | 1.00000 | 2.30374e-20 | 1.00000 |
| rad19syn      | 6.98232e-24 | 1.00000 | 6.98232e-24 | 1.00000 |
| rad54         | 6.43719e-27 | 1.00000 | 6.43719e-27 | 1.00000 |
| rad52         | 1.01633e-27 | 1.00000 | 1.01633e-27 | 1.00000 |
| PAH10+CH3     | 8.69613e-28 | 1.00000 | 8.69613e-28 | 1.00000 |
| rad43         | 8.58328e-28 | 1.00000 | 8.58328e-28 | 1.00000 |
| rad62         | 3.75183e-29 | 1.00000 | 3.75183e-29 | 1.00000 |
| rad51         | 4.52610e-32 | 1.00000 | 4.52610e-32 | 1.00000 |
| rad70         | 9.66730e-33 | 1.00000 | 9.66730e-33 | 1.00000 |
| PhcycC3H3_A+H | 7.05658e-33 | 1.00000 | 7.05658e-33 | 1.00000 |
| rad55         | 3.28723e-33 | 1.00000 | 3.28723e-33 | 1.00000 |
| rad65         | 1.28224e-35 | 1.00000 | 1.28224e-35 | 1.00000 |
| rad58         | 3.48312e-36 | 1.00000 | 3.48312e-36 | 1.00000 |
| PAH1+H        | 1.90567e-36 | 1.00000 | 1.90567e-36 | 1.00000 |
| rad34         | 5.68122e-38 | 1.00000 | 5.68122e-38 | 1.00000 |
| rad42         | 7.83012e-41 | 1.00000 | 7.83012e-41 | 1.00000 |
| rad41         | 2.11319e-41 | 1.00000 | 2.11319e-41 | 1.00000 |
| rad47         | 1.01376e-41 | 1.00000 | 1.01376e-41 | 1.00000 |

10.000000 Pa, 120.000000 K

| Rate constant      | True (fraction)        | Effective (fraction)   |
|--------------------|------------------------|------------------------|
| Total              | 4.24245e-20 (1.00 )    | 4.24245e-20 (1.00 )    |
| Formation of rad11 | 4.06372e-20 (0.958 )   | 4.06372e-20 (0.958 )   |
| Formation of rad6  | 1.76944e-21 (0.0417 )  | 1.76944e-21 (0.0417 )  |
| H-abstraction      | 1.78210e-23 (0.000420) | 1.78210e-23 (0.000420) |

| species            | PYtrue      | Cumul    | PYeffective | Cumul    |
|--------------------|-------------|----------|-------------|----------|
| rad6               | 0.941063    | 0.941063 | 0.941063    | 0.941063 |
| Indene+H           | 0.0537136   | 0.994776 | 0.0537136   | 0.994776 |
| rad23              | 0.00360442  | 0.998381 | 0.00360442  | 0.998381 |
| C2H2+PhCH2         | 0.000590378 | 0.998971 | 0.000590378 | 0.998971 |
| Benzene+2-propynyl | 0.000420064 | 0.999391 | 0.000420064 | 0.999391 |
| rad7               | 0.000221422 | 0.999612 | 0.000221422 | 0.999612 |
| rad11              | 0.000192389 | 0.999805 | 0.000192389 | 0.999805 |
| rad45              | 0.000150571 | 0.999955 | 0.000150571 | 0.999955 |
| rad2               | 1.59479e-05 | 0.999971 | 1.59479e-05 | 0.999971 |
| rad36              | 9.33051e-06 | 0.999981 | 9.33051e-06 | 0.999981 |
| rad22              | 4.98969e-06 | 0.999986 | 4.98969e-06 | 0.999986 |
| PhCHCCH2+H         | 4.65941e-06 | 0.999990 | 4.65941e-06 | 0.999990 |
| rad3               | 3.18462e-06 | 0.999994 | 3.18462e-06 | 0.999994 |
| rad4               | 1.62055e-06 | 0.999995 | 1.62055e-06 | 0.999995 |
| rad10              | 1.04124e-06 | 0.999996 | 1.04124e-06 | 0.999996 |
| rad1               | 1.03360e-06 | 0.999997 | 1.03360e-06 | 0.999997 |
| rad28              | 1.02215e-06 | 0.999998 | 1.02215e-06 | 0.999998 |
| rad13              | 6.86092e-07 | 0.999999 | 6.86092e-07 | 0.999999 |
| rad9               | 3.00643e-07 | 0.999999 | 3.00643e-07 | 0.999999 |
| PhCCH+CH3          | 2.11102e-07 | 0.999999 | 2.11102e-07 | 0.999999 |
| Phenyl+Allene      | 4.62614e-08 | 0.999999 | 0.00000     | 0.999999 |
| rad30              | 3.44045e-08 | 1.000000 | 3.44045e-08 | 0.999999 |
| rad25              | 7.17554e-09 | 1.000000 | 7.17554e-09 | 0.999999 |
| rad15              | 6.62303e-09 | 1.000000 | 6.62303e-09 | 0.999999 |
| rad26              | 5.36572e-09 | 1.000000 | 5.36572e-09 | 0.999999 |

|               |             |          |             |          |
|---------------|-------------|----------|-------------|----------|
| PhCCCH3+H     | 3.98672e-09 | 1.000000 | 3.98672e-09 | 0.999999 |
| PAH9+H        | 2.92429e-09 | 1.000000 | 2.92429e-09 | 0.999999 |
| rad35         | 1.52181e-09 | 1.000000 | 1.52181e-09 | 0.999999 |
| rad33         | 8.74825e-10 | 1.000000 | 8.74825e-10 | 0.999999 |
| rad38         | 8.37273e-10 | 1.000000 | 8.37273e-10 | 0.999999 |
| rad14         | 3.41777e-10 | 1.000000 | 3.41777e-10 | 0.999999 |
| Ph+MeAc       | 2.06410e-10 | 1.000000 | 2.06410e-10 | 0.999999 |
| rad8          | 1.11000e-10 | 1.000000 | 1.11000e-10 | 0.999999 |
| rad18         | 3.61363e-11 | 1.000000 | 3.61363e-11 | 0.999999 |
| rad27         | 1.45883e-11 | 1.000000 | 1.45883e-11 | 0.999999 |
| PhCH2CCH+H    | 1.36705e-11 | 1.000000 | 1.36705e-11 | 0.999999 |
| rad46         | 6.47640e-12 | 1.000000 | 6.47640e-12 | 0.999999 |
| rad20         | 6.31244e-12 | 1.000000 | 6.31244e-12 | 0.999999 |
| rad21         | 4.04624e-12 | 1.000000 | 4.04624e-12 | 0.999999 |
| PAH7+H        | 1.88685e-12 | 1.000000 | 1.88685e-12 | 0.999999 |
| rad24         | 1.19340e-12 | 1.000000 | 1.19340e-12 | 0.999999 |
| rad60syn      | 8.00160e-13 | 1.000000 | 8.00160e-13 | 0.999999 |
| rad39         | 2.84676e-13 | 1.000000 | 2.84676e-13 | 0.999999 |
| rad60anti     | 1.66126e-13 | 1.000000 | 1.66126e-13 | 0.999999 |
| rad12         | 1.02830e-14 | 1.000000 | 1.02830e-14 | 0.999999 |
| rad31         | 1.56553e-15 | 1.000000 | 1.56553e-15 | 0.999999 |
| rad37         | 8.01623e-17 | 1.000000 | 8.01623e-17 | 0.999999 |
| rad5          | 2.90141e-17 | 1.000000 | 2.90141e-17 | 0.999999 |
| PAH3+H        | 3.47016e-18 | 1.000000 | 3.47016e-18 | 0.999999 |
| rad59         | 1.55318e-18 | 1.000000 | 1.55318e-18 | 0.999999 |
| rad50         | 1.13535e-19 | 1.000000 | 1.13535e-19 | 0.999999 |
| rad19syn      | 1.43688e-22 | 1.000000 | 1.43688e-22 | 0.999999 |
| rad54         | 2.25226e-25 | 1.000000 | 2.25226e-25 | 0.999999 |
| PAH10+CH3     | 2.51436e-26 | 1.000000 | 2.51437e-26 | 0.999999 |
| rad43         | 2.46331e-26 | 1.000000 | 2.46331e-26 | 0.999999 |
| rad52         | 2.24161e-26 | 1.000000 | 2.24162e-26 | 0.999999 |
| rad62         | 1.64932e-27 | 1.000000 | 1.64932e-27 | 0.999999 |
| rad51         | 3.09366e-30 | 1.000000 | 3.09366e-30 | 0.999999 |
| rad70         | 1.21292e-30 | 1.000000 | 1.21292e-30 | 0.999999 |
| PhcycC3H3_A+H | 9.30833e-31 | 1.000000 | 9.30833e-31 | 0.999999 |
| rad55         | 4.34576e-31 | 1.000000 | 4.34576e-31 | 0.999999 |
| rad65         | 1.15196e-33 | 1.000000 | 1.15196e-33 | 0.999999 |
| rad58         | 4.75926e-34 | 1.000000 | 4.75926e-34 | 0.999999 |
| PAH1+H        | 2.50158e-34 | 1.000000 | 2.50158e-34 | 0.999999 |
| rad34         | 7.84848e-36 | 1.000000 | 7.84848e-36 | 0.999999 |
| rad42         | 1.11836e-38 | 1.000000 | 1.11836e-38 | 0.999999 |
| rad41         | 3.00814e-39 | 1.000000 | 3.00814e-39 | 0.999999 |
| rad47         | 1.22547e-39 | 1.000000 | 1.22547e-39 | 0.999999 |

10.000000 Pa, 130.000000 K

| Rate constant      | True (fraction)        | Effective (fraction)   |
|--------------------|------------------------|------------------------|
| Total              | 1.33719e-19 (1.00 )    | 1.33719e-19 (1.00 )    |
| Formation of rad11 | 1.26517e-19 (0.946 )   | 1.26517e-19 (0.946 )   |
| Formation of rad6  | 7.08974e-21 (0.0530 )  | 7.08974e-21 (0.0530 )  |
| H-abstraction      | 1.11864e-22 (0.000837) | 1.11864e-22 (0.000837) |

| species            | PYtrue      | Cumul    | PYeffective | Cumul    |
|--------------------|-------------|----------|-------------|----------|
| rad6               | 0.940825    | 0.940825 | 0.940825    | 0.940825 |
| Indene+H           | 0.0539518   | 0.994777 | 0.0539518   | 0.994777 |
| rad23              | 0.00322284  | 0.998000 | 0.00322284  | 0.998000 |
| Benzene+2-propynyl | 0.000836559 | 0.998837 | 0.000836559 | 0.998837 |
| C2H2+PhCH2         | 0.000612382 | 0.999449 | 0.000612382 | 0.999449 |
| rad7               | 0.000218277 | 0.999667 | 0.000218277 | 0.999667 |
| rad11              | 0.000153668 | 0.999821 | 0.000153668 | 0.999821 |
| rad45              | 0.000132373 | 0.999953 | 0.000132373 | 0.999953 |
| rad2               | 1.91650e-05 | 0.999972 | 1.91650e-05 | 0.999972 |
| rad36              | 8.20410e-06 | 0.999981 | 8.20410e-06 | 0.999981 |
| PhCHCCH2+H         | 5.11309e-06 | 0.999986 | 5.11309e-06 | 0.999986 |
| rad22              | 4.24167e-06 | 0.999990 | 4.24167e-06 | 0.999990 |
| rad3               | 3.22649e-06 | 0.999993 | 3.22649e-06 | 0.999993 |
| rad4               | 1.64377e-06 | 0.999995 | 1.64377e-06 | 0.999995 |
| rad10              | 1.29099e-06 | 0.999996 | 1.29099e-06 | 0.999996 |
| rad28              | 1.24927e-06 | 0.999997 | 1.24927e-06 | 0.999997 |
| rad1               | 1.24750e-06 | 0.999999 | 1.24750e-06 | 0.999999 |
| rad13              | 6.76029e-07 | 0.999999 | 6.76029e-07 | 0.999999 |
| rad9               | 3.36475e-07 | 1.000000 | 3.36475e-07 | 1.000000 |
| PhCCH+CH3          | 2.89408e-07 | 1.000000 | 2.89408e-07 | 1.000000 |
| Phenyl+Allene      | 6.36600e-08 | 1.000000 | 0.000000    | 1.000000 |
| rad30              | 3.62838e-08 | 1.000000 | 3.62838e-08 | 1.000000 |
| rad26              | 8.63424e-09 | 1.000000 | 8.63424e-09 | 1.000000 |
| rad15              | 7.07307e-09 | 1.000000 | 7.07307e-09 | 1.000000 |
| PhCCCH3+H          | 6.67264e-09 | 1.000000 | 6.67264e-09 | 1.000000 |

|               |             |         |             |          |
|---------------|-------------|---------|-------------|----------|
| rad25         | 5.35557e-09 | 1.00000 | 5.35557e-09 | 1.000000 |
| PAH9+H        | 3.35618e-09 | 1.00000 | 3.35618e-09 | 1.000000 |
| rad35         | 1.73062e-09 | 1.00000 | 1.73062e-09 | 1.000000 |
| rad38         | 9.58612e-10 | 1.00000 | 9.58612e-10 | 1.000000 |
| rad33         | 8.69360e-10 | 1.00000 | 8.69360e-10 | 1.000000 |
| Ph+MeAc       | 4.04512e-10 | 1.00000 | 4.04512e-10 | 1.000000 |
| rad14         | 3.48101e-10 | 1.00000 | 3.48101e-10 | 1.000000 |
| rad8          | 1.59605e-10 | 1.00000 | 1.59605e-10 | 1.000000 |
| PhCH2CCH+H    | 3.77545e-11 | 1.00000 | 3.77545e-11 | 1.000000 |
| rad18         | 2.55558e-11 | 1.00000 | 2.55558e-11 | 1.000000 |
| rad27         | 1.73579e-11 | 1.00000 | 1.73579e-11 | 1.000000 |
| rad46         | 7.83981e-12 | 1.00000 | 7.83981e-12 | 1.000000 |
| rad20         | 4.85993e-12 | 1.00000 | 4.85993e-12 | 1.000000 |
| PAH7+H        | 3.64082e-12 | 1.00000 | 3.64082e-12 | 1.000000 |
| rad21         | 3.12591e-12 | 1.00000 | 3.12591e-12 | 1.000000 |
| rad24         | 1.05454e-12 | 1.00000 | 1.05454e-12 | 1.000000 |
| rad60syn      | 1.01179e-12 | 1.00000 | 1.01179e-12 | 1.000000 |
| rad39         | 5.73878e-13 | 1.00000 | 5.73878e-13 | 1.000000 |
| rad60anti     | 2.29975e-13 | 1.00000 | 2.29975e-13 | 1.000000 |
| rad12         | 2.72528e-14 | 1.00000 | 2.72528e-14 | 1.000000 |
| rad31         | 1.70677e-15 | 1.00000 | 1.70677e-15 | 1.000000 |
| rad37         | 3.20778e-16 | 1.00000 | 3.20778e-16 | 1.000000 |
| rad5          | 1.18395e-16 | 1.00000 | 1.18395e-16 | 1.000000 |
| PAH3+H        | 1.60375e-17 | 1.00000 | 1.60375e-17 | 1.000000 |
| rad59         | 6.87880e-18 | 1.00000 | 6.87880e-18 | 1.000000 |
| rad50         | 4.65306e-19 | 1.00000 | 4.65306e-19 | 1.000000 |
| rad19syn      | 2.11405e-21 | 1.00000 | 2.11405e-21 | 1.000000 |
| rad54         | 5.34062e-24 | 1.00000 | 5.34062e-24 | 1.000000 |
| PAH10+CH3     | 5.73677e-25 | 1.00000 | 5.73677e-25 | 1.000000 |
| rad43         | 5.38935e-25 | 1.00000 | 5.38935e-25 | 1.000000 |
| rad52         | 3.35831e-25 | 1.00000 | 3.35831e-25 | 1.000000 |
| rad62         | 5.05608e-26 | 1.00000 | 5.05608e-26 | 1.000000 |
| rad70         | 1.17573e-28 | 1.00000 | 1.17573e-28 | 1.000000 |
| rad51         | 1.12680e-28 | 1.00000 | 1.12680e-28 | 1.000000 |
| PhcycC3H3_A+H | 7.53047e-29 | 1.00000 | 7.53047e-29 | 1.000000 |
| rad55         | 3.19589e-29 | 1.00000 | 3.19589e-29 | 1.000000 |
| rad65         | 9.15969e-32 | 1.00000 | 9.15969e-32 | 1.000000 |
| rad58         | 4.96914e-32 | 1.00000 | 4.96914e-32 | 1.000000 |
| PAH1+H        | 3.28999e-32 | 1.00000 | 3.28999e-32 | 1.000000 |
| rad34         | 1.14757e-33 | 1.00000 | 1.14757e-33 | 1.000000 |
| rad42         | 1.67519e-36 | 1.00000 | 1.67519e-36 | 1.000000 |
| rad41         | 4.42785e-37 | 1.00000 | 4.42785e-37 | 1.000000 |
| rad47         | 1.62532e-37 | 1.00000 | 1.62532e-37 | 1.000000 |

10.000000 Pa, 140.000000 K

| Rate constant      | True (fraction)        | Effective (fraction)   |
|--------------------|------------------------|------------------------|
| Total              | 3.59582e-19 (1.00 )    | 3.59582e-19 (1.00 )    |
| Formation of rad11 | 3.35703e-19 (0.934 )   | 3.35703e-19 (0.934 )   |
| Formation of rad6  | 2.33415e-20 (0.0649 )  | 2.33415e-20 (0.0649 )  |
| H-abstraction      | 5.37685e-22 (0.00150 ) | 5.37685e-22 (0.00150 ) |

| species            | PYtrue      | Cumul    | PYeffective | Cumul    |
|--------------------|-------------|----------|-------------|----------|
| rad6               | 0.940369    | 0.940369 | 0.940369    | 0.940369 |
| Indene+H           | 0.0541189   | 0.994488 | 0.0541189   | 0.994488 |
| rad23              | 0.00287073  | 0.997358 | 0.00287073  | 0.997358 |
| Benzene+2-propynyl | 0.00149531  | 0.998854 | 0.00149531  | 0.998854 |
| C2H2+PhCH2         | 0.000635832 | 0.999489 | 0.000635832 | 0.999489 |
| rad7               | 0.000215409 | 0.999705 | 0.000215409 | 0.999705 |
| rad11              | 0.000128272 | 0.999833 | 0.000128272 | 0.999833 |
| rad45              | 0.000116131 | 0.999949 | 0.000116131 | 0.999949 |
| rad2               | 2.28839e-05 | 0.999972 | 2.28839e-05 | 0.999972 |
| rad36              | 7.20009e-06 | 0.999979 | 7.20009e-06 | 0.999979 |
| PhCHCCH2+H         | 5.62917e-06 | 0.999985 | 5.62917e-06 | 0.999985 |
| rad22              | 3.64561e-06 | 0.999989 | 3.64561e-06 | 0.999989 |
| rad3               | 3.26339e-06 | 0.999992 | 3.26339e-06 | 0.999992 |
| rad4               | 1.66470e-06 | 0.999994 | 1.66470e-06 | 0.999994 |
| rad10              | 1.58202e-06 | 0.999995 | 1.58202e-06 | 0.999995 |
| rad28              | 1.52681e-06 | 0.999997 | 1.52681e-06 | 0.999997 |
| rad1               | 1.49663e-06 | 0.999998 | 1.49663e-06 | 0.999998 |
| rad13              | 6.67036e-07 | 0.999999 | 6.67036e-07 | 0.999999 |
| PhCCH+CH3          | 3.96446e-07 | 0.999999 | 3.96446e-07 | 0.999999 |
| rad9               | 3.77706e-07 | 1.000000 | 3.77706e-07 | 1.000000 |
| Phenyl+Allene      | 8.67478e-08 | 1.000000 | 0.000000    | 1.000000 |
| rad30              | 3.83348e-08 | 1.000000 | 3.83348e-08 | 1.000000 |
| rad26              | 1.37322e-08 | 1.000000 | 1.37322e-08 | 1.000000 |
| PhCCCH3+H          | 1.11334e-08 | 1.000000 | 1.11334e-08 | 1.000000 |
| rad15              | 7.57185e-09 | 1.000000 | 7.57185e-09 | 1.000000 |

|               |             |          |             |          |
|---------------|-------------|----------|-------------|----------|
| rad25         | 4.08126e-09 | 1.000000 | 4.08126e-09 | 1.000000 |
| PAH9+H        | 3.83908e-09 | 1.000000 | 3.83908e-09 | 1.000000 |
| rad35         | 1.96054e-09 | 1.000000 | 1.96054e-09 | 1.000000 |
| rad38         | 1.09578e-09 | 1.000000 | 1.09578e-09 | 1.000000 |
| rad33         | 8.64909e-10 | 1.000000 | 8.64909e-10 | 1.000000 |
| Ph+MeAc       | 7.84992e-10 | 1.000000 | 7.84992e-10 | 1.000000 |
| rad14         | 3.53289e-10 | 1.000000 | 3.53289e-10 | 1.000000 |
| rad8          | 2.34614e-10 | 1.000000 | 2.34614e-10 | 1.000000 |
| PhCH2CCH+H    | 9.26172e-11 | 1.000000 | 9.26172e-11 | 1.000000 |
| rad27         | 2.05434e-11 | 1.000000 | 2.05434e-11 | 1.000000 |
| rad18         | 1.90522e-11 | 1.000000 | 1.90522e-11 | 1.000000 |
| rad46         | 9.50250e-12 | 1.000000 | 9.50250e-12 | 1.000000 |
| PAH7+H        | 7.06566e-12 | 1.000000 | 7.06566e-12 | 1.000000 |
| rad20         | 3.89451e-12 | 1.000000 | 3.89451e-12 | 1.000000 |
| rad21         | 2.51157e-12 | 1.000000 | 2.51157e-12 | 1.000000 |
| rad60syn      | 1.28339e-12 | 1.000000 | 1.28339e-12 | 1.000000 |
| rad39         | 1.15972e-12 | 1.000000 | 1.15972e-12 | 1.000000 |
| rad24         | 9.30315e-13 | 1.000000 | 9.30315e-13 | 1.000000 |
| rad60anti     | 3.14305e-13 | 1.000000 | 3.14306e-13 | 1.000000 |
| rad12         | 7.11644e-14 | 1.000000 | 7.11644e-14 | 1.000000 |
| rad31         | 1.86913e-15 | 1.000000 | 1.86913e-15 | 1.000000 |
| rad37         | 1.18051e-15 | 1.000000 | 1.18051e-15 | 1.000000 |
| rad5          | 4.35126e-16 | 1.000000 | 4.35126e-16 | 1.000000 |
| PAH3+H        | 6.05786e-17 | 1.000000 | 6.05786e-17 | 1.000000 |
| rad59         | 2.49186e-17 | 1.000000 | 2.49186e-17 | 1.000000 |
| rad50         | 1.63250e-18 | 1.000000 | 1.63250e-18 | 1.000000 |
| rad19syn      | 2.27251e-20 | 1.000000 | 2.27251e-20 | 1.000000 |
| rad54         | 8.70511e-23 | 1.000000 | 8.70511e-23 | 1.000000 |
| PAH10+CH3     | 9.81674e-24 | 1.000000 | 9.81674e-24 | 1.000000 |
| rad43         | 8.63258e-24 | 1.000000 | 8.63259e-24 | 1.000000 |
| rad52         | 3.57464e-24 | 1.000000 | 3.57464e-24 | 1.000000 |
| rad62         | 1.05420e-24 | 1.000000 | 1.05420e-24 | 1.000000 |
| rad70         | 5.69912e-27 | 1.000000 | 5.69912e-27 | 1.000000 |
| PhcycC3H3_A+H | 3.49477e-27 | 1.000000 | 3.49478e-27 | 1.000000 |
| rad51         | 2.57155e-27 | 1.000000 | 2.57155e-27 | 1.000000 |
| rad55         | 1.36049e-27 | 1.000000 | 1.36049e-27 | 1.000000 |
| PAH1+H        | 4.18626e-30 | 1.000000 | 4.18626e-30 | 1.000000 |
| rad65         | 3.30833e-30 | 1.000000 | 3.30833e-30 | 1.000000 |
| rad58         | 3.12844e-30 | 1.000000 | 3.12844e-30 | 1.000000 |
| rad34         | 2.58304e-31 | 1.000000 | 2.58304e-31 | 1.000000 |
| rad42         | 3.96665e-34 | 1.000000 | 3.96665e-34 | 1.000000 |
| rad41         | 9.53170e-35 | 1.000000 | 9.53170e-35 | 1.000000 |
| rad47         | 1.27541e-35 | 1.000000 | 1.27541e-35 | 1.000000 |

10.000000 Pa, 150.000000 K

| Rate constant      | True (fraction)        | Effective (fraction)   |
|--------------------|------------------------|------------------------|
| Total              | 8.51464e-19 (1.00 )    | 8.51464e-19 (1.00 )    |
| Formation of rad11 | 7.83711e-19 (0.920 )   | 7.83711e-19 (0.920 )   |
| Formation of rad6  | 6.56651e-20 (0.0771 )  | 6.56651e-20 (0.0771 )  |
| H-abstraction      | 2.08816e-21 (0.00245 ) | 2.08816e-21 (0.00245 ) |

| species            | PYtrue      | Cumul    | PYeffective | Cumul    |
|--------------------|-------------|----------|-------------|----------|
| rad6               | 0.939627    | 0.939627 | 0.939628    | 0.939628 |
| Indene+H           | 0.0542309   | 0.993858 | 0.0542309   | 0.993859 |
| rad23              | 0.00254736  | 0.996405 | 0.00254736  | 0.996406 |
| Benzene+2-propynyl | 0.00245244  | 0.998858 | 0.00245244  | 0.998859 |
| C2H2+PhCH2         | 0.000661086 | 0.999519 | 0.000661086 | 0.999520 |
| rad7               | 0.000212752 | 0.999731 | 0.000212752 | 0.999732 |
| rad11              | 0.000111140 | 0.999843 | 0.000111140 | 0.999844 |
| rad45              | 0.000101641 | 0.999944 | 0.000101641 | 0.999945 |
| rad2               | 2.71867e-05 | 0.999971 | 2.71867e-05 | 0.999972 |
| rad36              | 6.30548e-06 | 0.999978 | 6.30549e-06 | 0.999979 |
| PhCHCCH2+H         | 6.22052e-06 | 0.999984 | 6.22052e-06 | 0.999985 |
| rad3               | 3.29805e-06 | 0.999987 | 3.29805e-06 | 0.999988 |
| rad22              | 3.15276e-06 | 0.999990 | 3.15276e-06 | 0.999991 |
| rad10              | 1.92034e-06 | 0.999992 | 1.92034e-06 | 0.999993 |
| rad28              | 1.86731e-06 | 0.999994 | 1.86731e-06 | 0.999995 |
| rad1               | 1.78718e-06 | 0.999996 | 1.78718e-06 | 0.999997 |
| rad4               | 1.68474e-06 | 0.999998 | 1.68474e-06 | 0.999999 |
| rad13              | 6.58860e-07 | 0.999998 | 6.58860e-07 | 0.999999 |
| PhCCH+CH3          | 5.43405e-07 | 0.999999 | 5.43405e-07 | 1.000000 |
| rad9               | 4.25368e-07 | 0.999999 | 4.25368e-07 | 1.000000 |
| Phenyl+Allene      | 1.17240e-07 | 0.999999 | 0.000000    | 1.000000 |
| rad30              | 4.05922e-08 | 0.999999 | 4.05922e-08 | 1.000000 |
| rad26              | 2.16300e-08 | 0.999999 | 2.16300e-08 | 1.000000 |
| PhCCCH3+H          | 1.85324e-08 | 0.999999 | 1.85324e-08 | 1.000000 |
| rad15              | 8.12890e-09 | 1.000000 | 8.12890e-09 | 1.000000 |



|               |             |          |             |          |
|---------------|-------------|----------|-------------|----------|
| PAH9+H        | 4.38288e-09 | 1.000000 | 4.38288e-09 | 1.000000 |
| rad25         | 3.17188e-09 | 1.000000 | 3.17188e-09 | 1.000000 |
| rad35         | 2.21547e-09 | 1.000000 | 2.21547e-09 | 1.000000 |
| Ph+MeAc       | 1.50962e-09 | 1.000000 | 1.50962e-09 | 1.000000 |
| rad38         | 1.25194e-09 | 1.000000 | 1.25194e-09 | 1.000000 |
| rad33         | 8.61214e-10 | 1.000000 | 8.61214e-10 | 1.000000 |
| rad14         | 3.57726e-10 | 1.000000 | 3.57726e-10 | 1.000000 |
| rad8          | 3.52479e-10 | 1.000000 | 3.52479e-10 | 1.000000 |
| PhCH2CCH+H    | 2.06795e-10 | 1.000000 | 2.06795e-10 | 1.000000 |
| rad27         | 2.42132e-11 | 1.000000 | 2.42132e-11 | 1.000000 |
| rad18         | 1.48209e-11 | 1.000000 | 1.48209e-11 | 1.000000 |
| PAH7+H        | 1.37495e-11 | 1.000000 | 1.37495e-11 | 1.000000 |
| rad46         | 1.15432e-11 | 1.000000 | 1.15432e-11 | 1.000000 |
| rad20         | 3.21553e-12 | 1.000000 | 3.21553e-12 | 1.000000 |
| rad39         | 2.34856e-12 | 1.000000 | 2.34856e-12 | 1.000000 |
| rad21         | 2.07769e-12 | 1.000000 | 2.07769e-12 | 1.000000 |
| rad60syn      | 1.63241e-12 | 1.000000 | 1.63241e-12 | 1.000000 |
| rad24         | 8.19148e-13 | 1.000000 | 8.19149e-13 | 1.000000 |
| rad60anti     | 4.25731e-13 | 1.000000 | 4.25732e-13 | 1.000000 |
| rad12         | 1.82895e-13 | 1.000000 | 1.82895e-13 | 1.000000 |
| rad37         | 4.04044e-15 | 1.000000 | 4.04044e-15 | 1.000000 |
| rad31         | 2.05845e-15 | 1.000000 | 2.05845e-15 | 1.000000 |
| rad5          | 1.45890e-15 | 1.000000 | 1.45890e-15 | 1.000000 |
| PAH3+H        | 1.95040e-16 | 1.000000 | 1.95040e-16 | 1.000000 |
| rad59         | 7.70366e-17 | 1.000000 | 7.70366e-17 | 1.000000 |
| rad50         | 5.04041e-18 | 1.000000 | 5.04041e-18 | 1.000000 |
| rad19syn      | 1.86631e-19 | 1.000000 | 1.86631e-19 | 1.000000 |
| rad54         | 1.02635e-21 | 1.000000 | 1.02635e-21 | 1.000000 |
| PAH10+CH3     | 1.27190e-22 | 1.000000 | 1.27190e-22 | 1.000000 |
| rad43         | 1.03222e-22 | 1.000000 | 1.03222e-22 | 1.000000 |
| rad52         | 2.85930e-23 | 1.000000 | 2.85930e-23 | 1.000000 |
| rad62         | 1.55594e-23 | 1.000000 | 1.55594e-23 | 1.000000 |
| rad70         | 1.50081e-25 | 1.000000 | 1.50081e-25 | 1.000000 |
| PhcycC3H3_A+H | 9.55723e-26 | 1.000000 | 9.55723e-26 | 1.000000 |
| rad51         | 4.01208e-26 | 1.000000 | 4.01208e-26 | 1.000000 |
| rad55         | 3.50181e-26 | 1.000000 | 3.50181e-26 | 1.000000 |
| PAH1+H        | 2.02473e-28 | 1.000000 | 2.02473e-28 | 1.000000 |
| rad58         | 9.66693e-29 | 1.000000 | 9.66693e-29 | 1.000000 |
| rad65         | 7.43333e-29 | 1.000000 | 7.43333e-29 | 1.000000 |
| rad34         | 1.84002e-29 | 1.000000 | 1.84002e-29 | 1.000000 |
| rad42         | 6.48579e-32 | 1.000000 | 6.48579e-32 | 1.000000 |
| rad41         | 1.46697e-32 | 1.000000 | 1.46697e-32 | 1.000000 |
| rad47         | 4.29973e-34 | 1.000000 | 4.29973e-34 | 1.000000 |

10.000000 Pa, 160.000000 K

| Rate constant      | True (fraction)        | Effective (fraction)   |
|--------------------|------------------------|------------------------|
| Total              | 1.81800e-18 (1.00 )    | 1.81800e-18 (1.00 )    |
| Formation of rad11 | 1.64862e-18 (0.907 )   | 1.64862e-18 (0.907 )   |
| Formation of rad6  | 1.62558e-19 (0.0894 )  | 1.62558e-19 (0.0894 )  |
| H-abstraction      | 6.82130e-21 (0.00375 ) | 6.82130e-21 (0.00375 ) |

| species            | PYtrue      | Cumul    | PYeffective | Cumul    |
|--------------------|-------------|----------|-------------|----------|
| rad6               | 0.938546    | 0.938546 | 0.938546    | 0.938546 |
| Indene+H           | 0.0543021   | 0.992848 | 0.0543022   | 0.992848 |
| Benzene+2-propynyl | 0.00375209  | 0.996600 | 0.00375209  | 0.996601 |
| rad23              | 0.00225180  | 0.998852 | 0.00225180  | 0.998852 |
| C2H2+PhCH2         | 0.000688512 | 0.999541 | 0.000688512 | 0.999541 |
| rad7               | 0.000210251 | 0.999751 | 0.000210251 | 0.999751 |
| rad11              | 9.92729e-05 | 0.999850 | 9.92729e-05 | 0.999850 |
| rad45              | 8.87311e-05 | 0.999939 | 8.87311e-05 | 0.999939 |
| rad2               | 3.21656e-05 | 0.999971 | 3.21656e-05 | 0.999971 |
| PhCHCCH2+H         | 6.90275e-06 | 0.999978 | 6.90275e-06 | 0.999978 |
| rad36              | 5.50931e-06 | 0.999984 | 5.50932e-06 | 0.999984 |
| rad3               | 3.33280e-06 | 0.999987 | 3.33280e-06 | 0.999987 |
| rad22              | 2.73511e-06 | 0.999990 | 2.73511e-06 | 0.999990 |
| rad10              | 2.31282e-06 | 0.999992 | 2.31282e-06 | 0.999992 |
| rad28              | 2.28651e-06 | 0.999994 | 2.28651e-06 | 0.999994 |
| rad1               | 2.12632e-06 | 0.999996 | 2.12632e-06 | 0.999996 |
| rad4               | 1.70510e-06 | 0.999998 | 1.70510e-06 | 0.999998 |
| PhCCH+CH3          | 7.46172e-07 | 0.999999 | 7.46173e-07 | 0.999999 |
| rad13              | 6.51310e-07 | 0.999999 | 6.51310e-07 | 1.000000 |
| rad9               | 4.80670e-07 | 1.000000 | 4.80670e-07 | 1.000000 |
| Phenyl+Allene      | 1.57350e-07 | 1.000000 | 0.000000    | 1.000000 |
| rad30              | 4.30940e-08 | 1.000000 | 4.30940e-08 | 1.000000 |
| rad26              | 3.37830e-08 | 1.000000 | 3.37830e-08 | 1.000000 |
| PhCCCH3+H          | 3.07806e-08 | 1.000000 | 3.07806e-08 | 1.000000 |
| rad15              | 8.75485e-09 | 1.000000 | 8.75486e-09 | 1.000000 |

|               |             |         |             |         |
|---------------|-------------|---------|-------------|---------|
| PAH9+H        | 4.99914e-09 | 1.00000 | 4.99914e-09 | 1.00000 |
| Ph+MeAc       | 2.87734e-09 | 1.00000 | 2.87734e-09 | 1.00000 |
| rad25         | 2.51227e-09 | 1.00000 | 2.51227e-09 | 1.00000 |
| rad35         | 2.49992e-09 | 1.00000 | 2.49992e-09 | 1.00000 |
| rad38         | 1.43085e-09 | 1.00000 | 1.43085e-09 | 1.00000 |
| rad33         | 8.58080e-10 | 1.00000 | 8.58080e-10 | 1.00000 |
| rad8          | 5.40396e-10 | 1.00000 | 5.40396e-10 | 1.00000 |
| PhCH2CCH+H    | 4.28052e-10 | 1.00000 | 4.28053e-10 | 1.00000 |
| rad14         | 3.61738e-10 | 1.00000 | 3.61738e-10 | 1.00000 |
| rad27         | 2.84441e-11 | 1.00000 | 2.84441e-11 | 1.00000 |
| PAH7+H        | 2.67733e-11 | 1.00000 | 2.67733e-11 | 1.00000 |
| rad46         | 1.40614e-11 | 1.00000 | 1.40614e-11 | 1.00000 |
| rad18         | 1.19269e-11 | 1.00000 | 1.19269e-11 | 1.00000 |
| rad39         | 4.76295e-12 | 1.00000 | 4.76296e-12 | 1.00000 |
| rad20         | 2.71532e-12 | 1.00000 | 2.71532e-12 | 1.00000 |
| rad60syn      | 2.08144e-12 | 1.00000 | 2.08144e-12 | 1.00000 |
| rad21         | 1.75680e-12 | 1.00000 | 1.75680e-12 | 1.00000 |
| rad24         | 7.19731e-13 | 1.00000 | 7.19731e-13 | 1.00000 |
| rad60anti     | 5.72998e-13 | 1.00000 | 5.72998e-13 | 1.00000 |
| rad12         | 4.61524e-13 | 1.00000 | 4.61524e-13 | 1.00000 |
| rad37         | 1.29684e-14 | 1.00000 | 1.29684e-14 | 1.00000 |
| rad5          | 4.51318e-15 | 1.00000 | 4.51318e-15 | 1.00000 |
| rad31         | 2.28177e-15 | 1.00000 | 2.28177e-15 | 1.00000 |
| PAH3+H        | 5.52670e-16 | 1.00000 | 5.52670e-16 | 1.00000 |
| rad59         | 2.09916e-16 | 1.00000 | 2.09916e-16 | 1.00000 |
| rad50         | 1.40167e-17 | 1.00000 | 1.40167e-17 | 1.00000 |
| rad19syn      | 1.22298e-18 | 1.00000 | 1.22298e-18 | 1.00000 |
| rad54         | 9.21952e-21 | 1.00000 | 9.21952e-21 | 1.00000 |
| PAH10+CH3     | 1.28435e-21 | 1.00000 | 1.28435e-21 | 1.00000 |
| rad43         | 9.54405e-22 | 1.00000 | 9.54405e-22 | 1.00000 |
| rad52         | 1.80637e-22 | 1.00000 | 1.80637e-22 | 1.00000 |
| rad62         | 1.70962e-22 | 1.00000 | 1.70962e-22 | 1.00000 |
| rad70         | 2.63771e-24 | 1.00000 | 2.63772e-24 | 1.00000 |
| PhcycC3H3_A+H | 1.77942e-24 | 1.00000 | 1.77942e-24 | 1.00000 |
| rad55         | 6.17193e-25 | 1.00000 | 6.17193e-25 | 1.00000 |
| rad51         | 4.57224e-25 | 1.00000 | 4.57224e-25 | 1.00000 |
| PAH1+H        | 5.88236e-27 | 1.00000 | 5.88236e-27 | 1.00000 |
| rad58         | 1.92480e-27 | 1.00000 | 1.92480e-27 | 1.00000 |
| rad65         | 1.15880e-27 | 1.00000 | 1.15880e-27 | 1.00000 |
| rad34         | 6.64236e-28 | 1.00000 | 6.64236e-28 | 1.00000 |
| rad42         | 3.28027e-30 | 1.00000 | 3.28027e-30 | 1.00000 |
| rad41         | 8.05339e-31 | 1.00000 | 8.05339e-31 | 1.00000 |
| rad47         | 8.46814e-33 | 1.00000 | 8.46814e-33 | 1.00000 |

10.000000 Pa, 170.000000 K

| Rate constant      | True (fraction)        | Effective (fraction)   |
|--------------------|------------------------|------------------------|
| Total              | 3.56414e-18 (1.00 )    | 3.56414e-18 (1.00 )    |
| Formation of rad11 | 3.18264e-18 (0.893 )   | 3.18263e-18 (0.893 )   |
| Formation of rad6  | 3.62173e-19 (0.102 )   | 3.62173e-19 (0.102 )   |
| H-abstraction      | 1.93278e-20 (0.00542 ) | 1.93278e-20 (0.00542 ) |

| species            | PYtrue      | Cumul    | PYeffective | Cumul    |
|--------------------|-------------|----------|-------------|----------|
| rad6               | 0.937086    | 0.937086 | 0.937086    | 0.937086 |
| Indene+H           | 0.0543454   | 0.991431 | 0.0543454   | 0.991431 |
| Benzene+2-propynyl | 0.00542285  | 0.996854 | 0.00542285  | 0.996854 |
| rad23              | 0.00198297  | 0.998837 | 0.00198297  | 0.998837 |
| C2H2+PhCH2         | 0.000718494 | 0.999555 | 0.000718494 | 0.999555 |
| rad7               | 0.000207866 | 0.999763 | 0.000207866 | 0.999763 |
| rad11              | 9.08415e-05 | 0.999854 | 9.08416e-05 | 0.999854 |
| rad45              | 7.72524e-05 | 0.999931 | 7.72524e-05 | 0.999931 |
| rad2               | 3.79243e-05 | 0.999969 | 3.79243e-05 | 0.999969 |
| PhCHCCH2+H         | 7.69528e-06 | 0.999977 | 7.69528e-06 | 0.999977 |
| rad36              | 4.80207e-06 | 0.999982 | 4.80207e-06 | 0.999982 |
| rad3               | 3.36974e-06 | 0.999985 | 3.36974e-06 | 0.999985 |
| rad28              | 2.80427e-06 | 0.999988 | 2.80427e-06 | 0.999988 |
| rad10              | 2.76720e-06 | 0.999991 | 2.76720e-06 | 0.999991 |
| rad1               | 2.52227e-06 | 0.999993 | 2.52227e-06 | 0.999993 |
| rad22              | 2.37569e-06 | 0.999996 | 2.37569e-06 | 0.999996 |
| rad4               | 1.72688e-06 | 0.999997 | 1.72688e-06 | 0.999997 |
| PhCCH+CH3          | 1.02742e-06 | 0.999998 | 1.02742e-06 | 0.999998 |
| rad13              | 6.44238e-07 | 0.999999 | 6.44238e-07 | 0.999999 |
| rad9               | 5.45036e-07 | 0.999999 | 5.45036e-07 | 0.999999 |
| Phenyl+Allene      | 2.09928e-07 | 1.000000 | 0.000000    | 0.999999 |
| rad26              | 5.23469e-08 | 1.000000 | 5.23469e-08 | 1.000000 |
| PhCCCH3+H          | 5.09886e-08 | 1.000000 | 5.09886e-08 | 1.000000 |
| rad30              | 4.58817e-08 | 1.000000 | 4.58817e-08 | 1.000000 |
| rad15              | 9.46187e-09 | 1.000000 | 9.46187e-09 | 1.000000 |

|               |             |          |             |          |
|---------------|-------------|----------|-------------|----------|
| PAH9+H        | 5.70140e-09 | 1.000000 | 5.70140e-09 | 1.000000 |
| Ph+MeAc       | 5.43247e-09 | 1.000000 | 5.43247e-09 | 1.000000 |
| rad35         | 2.81906e-09 | 1.000000 | 2.81907e-09 | 1.000000 |
| rad25         | 2.02700e-09 | 1.000000 | 2.02700e-09 | 1.000000 |
| rad38         | 1.63691e-09 | 1.000000 | 1.63691e-09 | 1.000000 |
| rad33         | 8.55364e-10 | 1.000000 | 8.55364e-10 | 1.000000 |
| rad8          | 8.43108e-10 | 1.000000 | 8.43108e-10 | 1.000000 |
| PhCH2CCH+H    | 8.33048e-10 | 1.000000 | 8.33049e-10 | 1.000000 |
| rad14         | 3.65611e-10 | 1.000000 | 3.65611e-10 | 1.000000 |
| PAH7+H        | 5.21013e-11 | 1.000000 | 5.21013e-11 | 1.000000 |
| rad27         | 3.33222e-11 | 1.000000 | 3.33222e-11 | 1.000000 |
| rad46         | 1.71833e-11 | 1.000000 | 1.71833e-11 | 1.000000 |
| rad18         | 9.86024e-12 | 1.000000 | 9.86024e-12 | 1.000000 |
| rad39         | 9.66293e-12 | 1.000000 | 9.66294e-12 | 1.000000 |
| rad60syn      | 2.65983e-12 | 1.000000 | 2.65983e-12 | 1.000000 |
| rad20         | 2.33296e-12 | 1.000000 | 2.33296e-12 | 1.000000 |
| rad21         | 1.51066e-12 | 1.000000 | 1.51066e-12 | 1.000000 |
| rad12         | 1.13975e-12 | 1.000000 | 1.13975e-12 | 1.000000 |
| rad60anti     | 7.67640e-13 | 1.000000 | 7.67641e-13 | 1.000000 |
| rad24         | 6.30950e-13 | 1.000000 | 6.30950e-13 | 1.000000 |
| rad37         | 3.92501e-14 | 1.000000 | 3.92501e-14 | 1.000000 |
| rad5          | 1.30023e-14 | 1.000000 | 1.30023e-14 | 1.000000 |
| rad31         | 2.54777e-15 | 1.000000 | 2.54777e-15 | 1.000000 |
| PAH3+H        | 1.41274e-15 | 1.000000 | 1.41275e-15 | 1.000000 |
| rad59         | 5.16815e-16 | 1.000000 | 5.16815e-16 | 1.000000 |
| rad50         | 3.57695e-17 | 1.000000 | 3.57695e-17 | 1.000000 |
| rad19syn      | 6.63620e-18 | 1.000000 | 6.63620e-18 | 1.000000 |
| rad54         | 6.59701e-20 | 1.000000 | 6.59701e-20 | 1.000000 |
| PAH10+CH3     | 1.04263e-20 | 1.000000 | 1.04263e-20 | 1.000000 |
| rad43         | 7.06913e-21 | 1.000000 | 7.06913e-21 | 1.000000 |
| rad62         | 1.46294e-21 | 1.000000 | 1.46294e-21 | 1.000000 |
| rad52         | 9.39027e-22 | 1.000000 | 9.39027e-22 | 1.000000 |
| rad70         | 3.33988e-23 | 1.000000 | 3.33988e-23 | 1.000000 |
| PhcycC3H3_A+H | 2.40491e-23 | 1.000000 | 2.40491e-23 | 1.000000 |
| rad55         | 7.93506e-24 | 1.000000 | 7.93506e-24 | 1.000000 |
| rad51         | 4.01346e-24 | 1.000000 | 4.01346e-24 | 1.000000 |
| PAH1+H        | 1.12899e-25 | 1.000000 | 1.12899e-25 | 1.000000 |
| rad58         | 2.71911e-26 | 1.000000 | 2.71911e-26 | 1.000000 |
| rad34         | 1.37220e-26 | 1.000000 | 1.37220e-26 | 1.000000 |
| rad65         | 1.33510e-26 | 1.000000 | 1.33510e-26 | 1.000000 |
| rad42         | 8.38290e-29 | 1.000000 | 8.38290e-29 | 1.000000 |
| rad41         | 2.13373e-29 | 1.000000 | 2.13373e-29 | 1.000000 |
| rad47         | 1.16122e-31 | 1.000000 | 1.16122e-31 | 1.000000 |

10.000000 Pa, 180.000000 K

| Rate constant      | True (fraction)        | Effective (fraction)   |
|--------------------|------------------------|------------------------|
| Total              | 6.50681e-18 (1.00 )    | 6.50681e-18 (1.00 )    |
| Formation of rad11 | 5.71915e-18 (0.879 )   | 5.71915e-18 (0.879 )   |
| Formation of rad6  | 7.39013e-19 (0.114 )   | 7.39013e-19 (0.114 )   |
| H-abstraction      | 4.86496e-20 (0.00748 ) | 4.86496e-20 (0.00748 ) |

| species            | PYtrue      | Cumul    | PYeffective | Cumul    |
|--------------------|-------------|----------|-------------|----------|
| rad6               | 0.935225    | 0.935225 | 0.935225    | 0.935225 |
| Indene+H           | 0.0543726   | 0.989598 | 0.0543726   | 0.989598 |
| Benzene+2-propynyl | 0.00747672  | 0.997074 | 0.00747672  | 0.997074 |
| rad23              | 0.00173968  | 0.998814 | 0.00173968  | 0.998814 |
| C2H2+PhCH2         | 0.000751446 | 0.999565 | 0.000751446 | 0.999565 |
| rad7               | 0.000205565 | 0.999771 | 0.000205565 | 0.999771 |
| rad11              | 8.46978e-05 | 0.999856 | 8.46978e-05 | 0.999856 |
| rad45              | 6.70724e-05 | 0.999923 | 6.70724e-05 | 0.999923 |
| rad2               | 4.45766e-05 | 0.999967 | 4.45766e-05 | 0.999967 |
| PhCHCCH2+H         | 8.62270e-06 | 0.999976 | 8.62270e-06 | 0.999976 |
| rad36              | 4.17531e-06 | 0.999980 | 4.17531e-06 | 0.999980 |
| rad28              | 3.44555e-06 | 0.999984 | 3.44555e-06 | 0.999984 |
| rad3               | 3.41079e-06 | 0.999987 | 3.41079e-06 | 0.999987 |
| rad10              | 3.29203e-06 | 0.999990 | 3.29203e-06 | 0.999990 |
| rad1               | 2.98430e-06 | 0.999993 | 2.98430e-06 | 0.999993 |
| rad22              | 2.06351e-06 | 0.999995 | 2.06351e-06 | 0.999995 |
| rad4               | 1.75113e-06 | 0.999997 | 1.75113e-06 | 0.999997 |
| PhCCH+CH3          | 1.41956e-06 | 0.999998 | 1.41956e-06 | 0.999998 |
| rad13              | 6.37536e-07 | 0.999999 | 6.37536e-07 | 0.999999 |
| rad9               | 6.20155e-07 | 1.000000 | 6.20155e-07 | 1.000000 |
| Phenyl+Allene      | 2.78640e-07 | 1.000000 | 0.000000    | 1.000000 |
| PhCCCH3+H          | 8.41581e-08 | 1.000000 | 8.41581e-08 | 1.000000 |
| rad26              | 8.04602e-08 | 1.000000 | 8.04602e-08 | 1.000000 |
| rad30              | 4.90025e-08 | 1.000000 | 4.90025e-08 | 1.000000 |
| rad15              | 1.02639e-08 | 1.000000 | 1.02639e-08 | 1.000000 |

|               |             |         |             |          |
|---------------|-------------|---------|-------------|----------|
| Ph+MeAc       | 1.01479e-08 | 1.00000 | 1.01479e-08 | 1.000000 |
| PAH9+H        | 6.50566e-09 | 1.00000 | 6.50566e-09 | 1.000000 |
| rad35         | 3.17892e-09 | 1.00000 | 3.17892e-09 | 1.000000 |
| rad38         | 1.87542e-09 | 1.00000 | 1.87542e-09 | 1.000000 |
| rad25         | 1.66550e-09 | 1.00000 | 1.66550e-09 | 1.000000 |
| PhCH2CCH+H    | 1.54098e-09 | 1.00000 | 1.54098e-09 | 1.000000 |
| rad8          | 1.33359e-09 | 1.00000 | 1.33359e-09 | 1.000000 |
| rad33         | 8.52962e-10 | 1.00000 | 8.52962e-10 | 1.000000 |
| rad14         | 3.69604e-10 | 1.00000 | 3.69604e-10 | 1.000000 |
| PAH7+H        | 1.01245e-10 | 1.00000 | 1.01245e-10 | 1.000000 |
| rad27         | 3.89418e-11 | 1.00000 | 3.89419e-11 | 1.000000 |
| rad46         | 2.10687e-11 | 1.00000 | 2.10687e-11 | 1.000000 |
| rad39         | 1.95802e-11 | 1.00000 | 1.95802e-11 | 1.000000 |
| rad18         | 8.32944e-12 | 1.00000 | 8.32944e-12 | 1.000000 |
| rad60syn      | 3.40565e-12 | 1.00000 | 3.40565e-12 | 1.000000 |
| rad12         | 2.74444e-12 | 1.00000 | 2.74444e-12 | 1.000000 |
| rad20         | 2.03227e-12 | 1.00000 | 2.03227e-12 | 1.000000 |
| rad21         | 1.31652e-12 | 1.00000 | 1.31652e-12 | 1.000000 |
| rad60anti     | 1.02487e-12 | 1.00000 | 1.02487e-12 | 1.000000 |
| rad24         | 5.51829e-13 | 1.00000 | 5.51829e-13 | 1.000000 |
| rad37         | 1.12410e-13 | 1.00000 | 1.12410e-13 | 1.000000 |
| rad5          | 3.51462e-14 | 1.00000 | 3.51462e-14 | 1.000000 |
| PAH3+H        | 3.32106e-15 | 1.00000 | 3.32106e-15 | 1.000000 |
| rad31         | 2.86725e-15 | 1.00000 | 2.86725e-15 | 1.000000 |
| rad59         | 1.17199e-15 | 1.00000 | 1.17199e-15 | 1.000000 |
| rad50         | 8.50294e-17 | 1.00000 | 8.50295e-17 | 1.000000 |
| rad19syn      | 3.07416e-17 | 1.00000 | 3.07416e-17 | 1.000000 |
| rad54         | 3.90084e-19 | 1.00000 | 3.90084e-19 | 1.000000 |
| PAH10+CH3     | 7.00142e-20 | 1.00000 | 7.00142e-20 | 1.000000 |
| rad43         | 4.32809e-20 | 1.00000 | 4.32809e-20 | 1.000000 |
| rad62         | 1.01296e-20 | 1.00000 | 1.01296e-20 | 1.000000 |
| rad52         | 4.15266e-21 | 1.00000 | 4.15266e-21 | 1.000000 |
| rad70         | 3.22389e-22 | 1.00000 | 3.22389e-22 | 1.000000 |
| PhcycC3H3_A+H | 2.48934e-22 | 1.00000 | 2.48934e-22 | 1.000000 |
| rad55         | 7.84234e-23 | 1.00000 | 7.84235e-23 | 1.000000 |
| rad51         | 2.83380e-23 | 1.00000 | 2.83380e-23 | 1.000000 |
| PAH1+H        | 1.57730e-24 | 1.00000 | 1.57730e-24 | 1.000000 |
| rad58         | 2.90443e-25 | 1.00000 | 2.90443e-25 | 1.000000 |
| rad34         | 1.99597e-25 | 1.00000 | 1.99597e-25 | 1.000000 |
| rad65         | 1.19597e-25 | 1.00000 | 1.19597e-25 | 1.000000 |
| rad42         | 1.44480e-27 | 1.00000 | 1.44480e-27 | 1.000000 |
| rad41         | 3.77800e-28 | 1.00000 | 3.77800e-28 | 1.000000 |
| rad47         | 1.17622e-30 | 1.00000 | 1.17622e-30 | 1.000000 |

10.000000 Pa, 190.000000 K

| Rate constant      | True (fraction)        | Effective (fraction)   |
|--------------------|------------------------|------------------------|
| Total              | 1.11858e-17 (1.00 )    | 1.11858e-17 (1.00 )    |
| Formation of rad11 | 9.67466e-18 (0.865 )   | 9.67465e-18 (0.865 )   |
| Formation of rad6  | 1.40029e-18 (0.125 )   | 1.40029e-18 (0.125 )   |
| H-abstraction      | 1.10851e-19 (0.00991 ) | 1.10851e-19 (0.00991 ) |

| species            | PYtrue      | Cumul    | PYeffective | Cumul    |
|--------------------|-------------|----------|-------------|----------|
| rad6               | 0.932957    | 0.932957 | 0.932957    | 0.932957 |
| Indene+H           | 0.0543948   | 0.987352 | 0.0543949   | 0.987352 |
| Benzene+2-propynyl | 0.00990995  | 0.997262 | 0.00990996  | 0.997262 |
| rad23              | 0.00152063  | 0.998782 | 0.00152063  | 0.998782 |
| C2H2+PhCH2         | 0.000787818 | 0.999570 | 0.000787818 | 0.999570 |
| rad7               | 0.000203330 | 0.999773 | 0.000203330 | 0.999773 |
| rad11              | 8.01054e-05 | 0.999853 | 8.01054e-05 | 0.999854 |
| rad45              | 5.80719e-05 | 0.999912 | 5.80719e-05 | 0.999912 |
| rad2               | 5.22441e-05 | 0.999964 | 5.22441e-05 | 0.999964 |
| PhCHCCH2+H         | 9.71674e-06 | 0.999974 | 9.71675e-06 | 0.999974 |
| rad28              | 4.24171e-06 | 0.999978 | 4.24171e-06 | 0.999978 |
| rad10              | 3.89649e-06 | 0.999982 | 3.89649e-06 | 0.999982 |
| rad36              | 3.62148e-06 | 0.999985 | 3.62148e-06 | 0.999985 |
| rad1               | 3.52275e-06 | 0.999989 | 3.52275e-06 | 0.999989 |
| rad3               | 3.45779e-06 | 0.999992 | 3.45779e-06 | 0.999992 |
| PhCCH+CH3          | 1.96895e-06 | 0.999994 | 1.96895e-06 | 0.999994 |
| rad22              | 1.79106e-06 | 0.999996 | 1.79106e-06 | 0.999996 |
| rad4               | 1.77882e-06 | 0.999998 | 1.77882e-06 | 0.999998 |
| rad9               | 7.08034e-07 | 0.999999 | 7.08034e-07 | 0.999999 |
| rad13              | 6.31126e-07 | 0.999999 | 6.31126e-07 | 0.999999 |
| Phenyl+Allene      | 3.68197e-07 | 1.000000 | 0.000000    | 0.999999 |
| PhCCCH3+H          | 1.38208e-07 | 1.000000 | 1.38208e-07 | 0.999999 |
| rad26              | 1.22597e-07 | 1.000000 | 1.22597e-07 | 1.000000 |
| rad30              | 5.25096e-08 | 1.000000 | 5.25096e-08 | 1.000000 |
| Ph+MeAc            | 1.87256e-08 | 1.000000 | 1.87256e-08 | 1.000000 |

|               |             |          |             |          |
|---------------|-------------|----------|-------------|----------|
| rad15         | 1.11771e-08 | 1.000000 | 1.11771e-08 | 1.000000 |
| PAH9+H        | 7.43084e-09 | 1.000000 | 7.43085e-09 | 1.000000 |
| rad35         | 3.58652e-09 | 1.000000 | 3.58652e-09 | 1.000000 |
| PhCH2CCH+H    | 2.73277e-09 | 1.000000 | 2.73277e-09 | 1.000000 |
| rad38         | 2.15267e-09 | 1.000000 | 2.15267e-09 | 1.000000 |
| rad8          | 2.12928e-09 | 1.000000 | 2.12928e-09 | 1.000000 |
| rad25         | 1.39321e-09 | 1.000000 | 1.39321e-09 | 1.000000 |
| rad33         | 8.50800e-10 | 1.000000 | 8.50801e-10 | 1.000000 |
| rad14         | 3.73947e-10 | 1.000000 | 3.73948e-10 | 1.000000 |
| PAH7+H        | 1.96299e-10 | 1.000000 | 1.96299e-10 | 1.000000 |
| rad27         | 4.54041e-11 | 1.000000 | 4.54041e-11 | 1.000000 |
| rad39         | 3.95490e-11 | 1.000000 | 3.95490e-11 | 1.000000 |
| rad46         | 2.59204e-11 | 1.000000 | 2.59204e-11 | 1.000000 |
| rad18         | 7.16072e-12 | 1.000000 | 7.16072e-12 | 1.000000 |
| rad12         | 6.42120e-12 | 1.000000 | 6.42120e-12 | 1.000000 |
| rad60syn      | 4.36844e-12 | 1.000000 | 4.36844e-12 | 1.000000 |
| rad20         | 1.79083e-12 | 1.000000 | 1.79083e-12 | 1.000000 |
| rad60anti     | 1.36473e-12 | 1.000000 | 1.36473e-12 | 1.000000 |
| rad21         | 1.16025e-12 | 1.000000 | 1.16025e-12 | 1.000000 |
| rad24         | 4.81503e-13 | 1.000000 | 4.81503e-13 | 1.000000 |
| rad37         | 3.05318e-13 | 1.000000 | 3.05318e-13 | 1.000000 |
| rad5          | 8.96688e-14 | 1.000000 | 8.96689e-14 | 1.000000 |
| PAH3+H        | 7.28935e-15 | 1.000000 | 7.28935e-15 | 1.000000 |
| rad31         | 3.25378e-15 | 1.000000 | 3.25378e-15 | 1.000000 |
| rad59         | 2.48526e-15 | 1.000000 | 2.48526e-15 | 1.000000 |
| rad50         | 1.90556e-16 | 1.000000 | 1.90556e-16 | 1.000000 |
| rad19syn      | 1.24628e-16 | 1.000000 | 1.24628e-16 | 1.000000 |
| rad54         | 1.96372e-18 | 1.000000 | 1.96372e-18 | 1.000000 |
| PAH10+CH3     | 3.98590e-19 | 1.000000 | 3.98590e-19 | 1.000000 |
| rad43         | 2.24942e-19 | 1.000000 | 2.24942e-19 | 1.000000 |
| rad62         | 5.85662e-20 | 1.000000 | 5.85662e-20 | 1.000000 |
| rad52         | 1.60487e-20 | 1.000000 | 1.60487e-20 | 1.000000 |
| rad70         | 2.47469e-21 | 1.000000 | 2.47470e-21 | 1.000000 |
| PhcycC3H3_A+H | 2.05314e-21 | 1.000000 | 2.05314e-21 | 1.000000 |
| rad55         | 6.19950e-22 | 1.000000 | 6.19950e-22 | 1.000000 |
| rad51         | 1.66630e-22 | 1.000000 | 1.66630e-22 | 1.000000 |
| PAH1+H        | 1.68280e-23 | 1.000000 | 1.68280e-23 | 1.000000 |
| rad58         | 2.44894e-24 | 1.000000 | 2.44894e-24 | 1.000000 |
| rad34         | 2.18143e-24 | 1.000000 | 2.18143e-24 | 1.000000 |
| rad65         | 8.66202e-25 | 1.000000 | 8.66203e-25 | 1.000000 |
| rad42         | 1.81603e-26 | 1.000000 | 1.81603e-26 | 1.000000 |
| rad41         | 4.85341e-27 | 1.000000 | 4.85341e-27 | 1.000000 |
| rad47         | 9.21757e-30 | 1.000000 | 9.21758e-30 | 1.000000 |

10.000000 Pa, 200.000000 K

| Rate constant      | True (fraction)       | Effective (fraction)  |
|--------------------|-----------------------|-----------------------|
| Total              | 1.82690e-17 (1.00 )   | 1.82690e-17 (1.00 )   |
| Formation of rad11 | 1.55456e-17 (0.851 )  | 1.55456e-17 (0.851 )  |
| Formation of rad6  | 2.49126e-18 (0.136 )  | 2.49126e-18 (0.136 )  |
| H-abstraction      | 2.32112e-19 (0.0127 ) | 2.32112e-19 (0.0127 ) |

| species            | PYtrue      | Cumul    | PYeffective | Cumul    |
|--------------------|-------------|----------|-------------|----------|
| rad6               | 0.930290    | 0.930290 | 0.930291    | 0.930291 |
| Indene+H           | 0.0544226   | 0.984713 | 0.0544227   | 0.984714 |
| Benzene+2-propynyl | 0.0127053   | 0.997418 | 0.0127053   | 0.997419 |
| rad23              | 0.00132443  | 0.998743 | 0.00132444  | 0.998744 |
| C2H2+PhCH2         | 0.000828108 | 0.999571 | 0.000828108 | 0.999572 |
| rad7               | 0.000201144 | 0.999772 | 0.000201144 | 0.999773 |
| rad11              | 7.65829e-05 | 0.999848 | 7.65829e-05 | 0.999850 |
| rad2               | 6.10524e-05 | 0.999910 | 6.10524e-05 | 0.999911 |
| rad45              | 5.01414e-05 | 0.999960 | 5.01414e-05 | 0.999961 |
| PhCHCCH2+H         | 1.10189e-05 | 0.999971 | 1.10189e-05 | 0.999972 |
| rad28              | 5.23182e-06 | 0.999976 | 5.23183e-06 | 0.999977 |
| rad10              | 4.59008e-06 | 0.999981 | 4.59008e-06 | 0.999982 |
| rad1               | 4.14880e-06 | 0.999985 | 4.14880e-06 | 0.999986 |
| rad3               | 3.51245e-06 | 0.999988 | 3.51245e-06 | 0.999989 |
| rad36              | 3.13367e-06 | 0.999991 | 3.13367e-06 | 0.999992 |
| PhCCH+CH3          | 2.74169e-06 | 0.999994 | 2.74170e-06 | 0.999995 |
| rad4               | 1.81089e-06 | 0.999996 | 1.81089e-06 | 0.999997 |
| rad22              | 1.55284e-06 | 0.999997 | 1.55284e-06 | 0.999999 |
| rad9               | 8.11071e-07 | 0.999998 | 8.11071e-07 | 0.999999 |
| rad13              | 6.24954e-07 | 0.999999 | 6.24954e-07 | 1.000000 |
| Phenyl+Allene      | 4.84660e-07 | 0.999999 | 0.000000    | 1.000000 |
| PhCCCH3+H          | 2.25446e-07 | 1.000000 | 2.25446e-07 | 1.000000 |
| rad26              | 1.84976e-07 | 1.000000 | 1.84977e-07 | 1.000000 |
| rad30              | 5.64643e-08 | 1.000000 | 5.64643e-08 | 1.000000 |
| Ph+MeAc            | 3.40731e-08 | 1.000000 | 3.40731e-08 | 1.000000 |

|               |             |          |             |          |
|---------------|-------------|----------|-------------|----------|
| rad15         | 1.22204e-08 | 1.000000 | 1.22204e-08 | 1.000000 |
| PAH9+H        | 8.49955e-09 | 1.000000 | 8.49955e-09 | 1.000000 |
| PhCH2CCH+H    | 4.67803e-09 | 1.000000 | 4.67804e-09 | 1.000000 |
| rad35         | 4.05011e-09 | 1.000000 | 4.05011e-09 | 1.000000 |
| rad8          | 3.41603e-09 | 1.000000 | 3.41603e-09 | 1.000000 |
| rad38         | 2.47621e-09 | 1.000000 | 2.47622e-09 | 1.000000 |
| rad25         | 1.18601e-09 | 1.000000 | 1.18601e-09 | 1.000000 |
| rad33         | 8.48839e-10 | 1.000000 | 8.48838e-10 | 1.000000 |
| PAH7+H        | 3.79301e-10 | 1.000000 | 3.79301e-10 | 1.000000 |
| rad14         | 3.78856e-10 | 1.000000 | 3.78856e-10 | 1.000000 |
| rad39         | 7.94457e-11 | 1.000000 | 7.94457e-11 | 1.000000 |
| rad27         | 5.28136e-11 | 1.000000 | 5.28136e-11 | 1.000000 |
| rad46         | 3.19968e-11 | 1.000000 | 3.19969e-11 | 1.000000 |
| rad12         | 1.45554e-11 | 1.000000 | 1.45554e-11 | 1.000000 |
| rad18         | 6.24608e-12 | 1.000000 | 6.24608e-12 | 1.000000 |
| rad60syn      | 5.61268e-12 | 1.000000 | 5.61268e-12 | 1.000000 |
| rad60anti     | 1.81367e-12 | 1.000000 | 1.81367e-12 | 1.000000 |
| rad20         | 1.59405e-12 | 1.000000 | 1.59405e-12 | 1.000000 |
| rad21         | 1.03262e-12 | 1.000000 | 1.03262e-12 | 1.000000 |
| rad37         | 7.87765e-13 | 1.000000 | 7.87766e-13 | 1.000000 |
| rad24         | 4.19183e-13 | 1.000000 | 4.19183e-13 | 1.000000 |
| rad5          | 2.16981e-13 | 1.000000 | 2.16981e-13 | 1.000000 |
| PAH3+H        | 1.51192e-14 | 1.000000 | 1.51192e-14 | 1.000000 |
| rad59         | 4.98755e-15 | 1.000000 | 4.98755e-15 | 1.000000 |
| rad31         | 3.72443e-15 | 1.000000 | 3.72443e-15 | 1.000000 |
| rad19syn      | 4.51144e-16 | 1.000000 | 4.51144e-16 | 1.000000 |
| rad50         | 4.06504e-16 | 1.000000 | 4.06505e-16 | 1.000000 |
| rad54         | 8.62112e-18 | 1.000000 | 8.62112e-18 | 1.000000 |
| PAH10+CH3     | 1.96396e-18 | 1.000000 | 1.96396e-18 | 1.000000 |
| rad43         | 1.01463e-18 | 1.000000 | 1.01463e-18 | 1.000000 |
| rad62         | 2.90078e-19 | 1.000000 | 2.90078e-19 | 1.000000 |
| rad52         | 5.53985e-20 | 1.000000 | 5.53985e-20 | 1.000000 |
| rad70         | 1.56247e-20 | 1.000000 | 1.56247e-20 | 1.000000 |
| PhcycC3H3_A+H | 1.39243e-20 | 1.000000 | 1.39244e-20 | 1.000000 |
| rad55         | 4.04583e-21 | 1.000000 | 4.04584e-21 | 1.000000 |
| rad51         | 8.38960e-22 | 1.000000 | 8.38961e-22 | 1.000000 |
| PAH1+H        | 1.42289e-22 | 1.000000 | 1.42289e-22 | 1.000000 |
| rad34         | 1.87081e-23 | 1.000000 | 1.87081e-23 | 1.000000 |
| rad58         | 1.68611e-23 | 1.000000 | 1.68611e-23 | 1.000000 |
| rad65         | 5.23288e-24 | 1.000000 | 5.23288e-24 | 1.000000 |
| rad42         | 1.75398e-25 | 1.000000 | 1.75398e-25 | 1.000000 |
| rad41         | 4.77795e-26 | 1.000000 | 4.77795e-26 | 1.000000 |
| rad47         | 5.80462e-29 | 1.000000 | 5.80463e-29 | 1.000000 |

10.000000 Pa, 210.000000 K

| Rate constant      | True (fraction)       | Effective (fraction)  |
|--------------------|-----------------------|-----------------------|
| Total              | 2.85520e-17 (1.00 )   | 2.85520e-17 (1.00 )   |
| Formation of rad11 | 2.39009e-17 (0.837 )  | 2.39009e-17 (0.837 )  |
| Formation of rad6  | 4.19900e-18 (0.147 )  | 4.19900e-18 (0.147 )  |
| H-abstraction      | 4.52111e-19 (0.0158 ) | 4.52111e-19 (0.0158 ) |

| species            | PYtrue      | Cumul    | PYeffective | Cumul    |
|--------------------|-------------|----------|-------------|----------|
| rad6               | 0.927243    | 0.927243 | 0.927244    | 0.927244 |
| Indene+H           | 0.0544668   | 0.981710 | 0.0544669   | 0.981711 |
| Benzene+2-propynyl | 0.0158346   | 0.997545 | 0.0158346   | 0.997546 |
| rad23              | 0.00114961  | 0.998694 | 0.00114962  | 0.998695 |
| C2H2+PhCH2         | 0.000872877 | 0.999567 | 0.000872878 | 0.999568 |
| rad7               | 0.000198996 | 0.999766 | 0.000198997 | 0.999767 |
| rad11              | 7.38095e-05 | 0.999840 | 7.38095e-05 | 0.999841 |
| rad2               | 7.11262e-05 | 0.999911 | 7.11263e-05 | 0.999912 |
| rad45              | 4.31799e-05 | 0.999954 | 4.31800e-05 | 0.999955 |
| PhCHCCH2+H         | 1.25841e-05 | 0.999967 | 1.25841e-05 | 0.999968 |
| rad28              | 6.46429e-06 | 0.999973 | 6.46429e-06 | 0.999974 |
| rad10              | 5.38222e-06 | 0.999979 | 5.38222e-06 | 0.999980 |
| rad1               | 4.87428e-06 | 0.999984 | 4.87428e-06 | 0.999985 |
| PhCCH+CH3          | 3.83145e-06 | 0.999987 | 3.83145e-06 | 0.999988 |
| rad3               | 3.57637e-06 | 0.999991 | 3.57637e-06 | 0.999992 |
| rad36              | 2.70551e-06 | 0.999994 | 2.70552e-06 | 0.999995 |
| rad4               | 1.84824e-06 | 0.999995 | 1.84824e-06 | 0.999997 |
| rad22              | 1.34456e-06 | 0.999997 | 1.34456e-06 | 0.999998 |
| rad9               | 9.32146e-07 | 0.999998 | 9.32147e-07 | 0.999999 |
| Phenyl+Allene      | 6.35848e-07 | 0.999998 | 0.00000     | 0.999999 |
| rad13              | 6.18981e-07 | 0.999999 | 6.18981e-07 | 0.999999 |
| PhCCCH3+H          | 3.64613e-07 | 0.999999 | 3.64613e-07 | 1.000000 |
| rad26              | 2.76001e-07 | 1.000000 | 2.76001e-07 | 1.000000 |
| Ph+MeAc            | 6.10321e-08 | 1.000000 | 6.10321e-08 | 1.000000 |
| rad30              | 6.09375e-08 | 1.000000 | 6.09375e-08 | 1.000000 |

|               |             |          |             |         |
|---------------|-------------|----------|-------------|---------|
| rad15         | 1.34161e-08 | 1.000000 | 1.34161e-08 | 1.00000 |
| PAH9+H        | 9.73886e-09 | 1.000000 | 9.73887e-09 | 1.00000 |
| PhCH2CCH+H    | 7.77291e-09 | 1.000000 | 7.77292e-09 | 1.00000 |
| rad8          | 5.48222e-09 | 1.000000 | 5.48222e-09 | 1.00000 |
| rad35         | 4.57949e-09 | 1.000000 | 4.57949e-09 | 1.00000 |
| rad38         | 2.85523e-09 | 1.000000 | 2.85523e-09 | 1.00000 |
| rad25         | 1.02691e-09 | 1.000000 | 1.02691e-09 | 1.00000 |
| rad33         | 8.47050e-10 | 1.000000 | 8.47050e-10 | 1.00000 |
| PAH7+H        | 7.29264e-10 | 1.000000 | 7.29264e-10 | 1.00000 |
| rad14         | 3.84519e-10 | 1.000000 | 3.84520e-10 | 1.00000 |
| rad39         | 1.58323e-10 | 1.000000 | 1.58323e-10 | 1.00000 |
| rad27         | 6.12739e-11 | 1.000000 | 6.12739e-11 | 1.00000 |
| rad46         | 3.96288e-11 | 1.000000 | 3.96288e-11 | 1.00000 |
| rad12         | 3.18961e-11 | 1.000000 | 3.18961e-11 | 1.00000 |
| rad60syn      | 7.22246e-12 | 1.000000 | 7.22247e-12 | 1.00000 |
| rad18         | 5.51590e-12 | 1.000000 | 5.51590e-12 | 1.00000 |
| rad60anti     | 2.40663e-12 | 1.000000 | 2.40663e-12 | 1.00000 |
| rad37         | 1.93376e-12 | 1.000000 | 1.93376e-12 | 1.00000 |
| rad20         | 1.43210e-12 | 1.000000 | 1.43210e-12 | 1.00000 |
| rad21         | 9.27430e-13 | 1.000000 | 9.27431e-13 | 1.00000 |
| rad5          | 5.00020e-13 | 1.000000 | 5.00021e-13 | 1.00000 |
| rad24         | 3.64141e-13 | 1.000000 | 3.64141e-13 | 1.00000 |
| PAH3+H        | 2.99221e-14 | 1.000000 | 2.99221e-14 | 1.00000 |
| rad59         | 9.56363e-15 | 1.000000 | 9.56363e-15 | 1.00000 |
| rad31         | 4.30081e-15 | 1.000000 | 4.30081e-15 | 1.00000 |
| rad19syn      | 1.48215e-15 | 1.000000 | 1.48215e-15 | 1.00000 |
| rad50         | 8.31983e-16 | 1.000000 | 8.31984e-16 | 1.00000 |
| rad54         | 3.36514e-17 | 1.000000 | 3.36515e-17 | 1.00000 |
| PAH10+CH3     | 8.52062e-18 | 1.000000 | 8.52062e-18 | 1.00000 |
| rad43         | 4.04553e-18 | 1.000000 | 4.04554e-18 | 1.00000 |
| rad62         | 1.25669e-18 | 1.000000 | 1.25669e-18 | 1.00000 |
| rad52         | 1.73861e-19 | 1.000000 | 1.73862e-19 | 1.00000 |
| rad70         | 8.33686e-20 | 1.000000 | 8.33686e-20 | 1.00000 |
| PhcycC3H3_A+H | 7.96275e-20 | 1.000000 | 7.96276e-20 | 1.00000 |
| rad55         | 2.23527e-20 | 1.000000 | 2.23527e-20 | 1.00000 |
| rad51         | 3.69782e-21 | 1.000000 | 3.69783e-21 | 1.00000 |
| PAH1+H        | 9.82074e-22 | 1.000000 | 9.82074e-22 | 1.00000 |
| rad34         | 1.30070e-22 | 1.000000 | 1.30070e-22 | 1.00000 |
| rad58         | 9.73831e-23 | 1.000000 | 9.73832e-23 | 1.00000 |
| rad65         | 2.70292e-23 | 1.000000 | 2.70293e-23 | 1.00000 |
| rad42         | 1.34920e-24 | 1.000000 | 1.34920e-24 | 1.00000 |
| rad41         | 3.73762e-25 | 1.000000 | 3.73762e-25 | 1.00000 |
| rad47         | 3.03037e-28 | 1.000000 | 3.03037e-28 | 1.00000 |

10.000000 Pa, 220.000000 K

| Rate constant      | True (fraction)       | Effective (fraction)  |
|--------------------|-----------------------|-----------------------|
| Total              | 4.29529e-17 (1.00 )   | 4.29528e-17 (1.00 )   |
| Formation of rad11 | 3.53712e-17 (0.823 )  | 3.53711e-17 (0.823 )  |
| Formation of rad6  | 6.75433e-18 (0.157 )  | 6.75432e-18 (0.157 )  |
| H-abstraction      | 8.27372e-19 (0.0193 ) | 8.27372e-19 (0.0193 ) |

| species            | PYtrue      | Cumul    | PYeffective | Cumul    |
|--------------------|-------------|----------|-------------|----------|
| rad6               | 0.923842    | 0.923842 | 0.923842    | 0.923842 |
| Indene+H           | 0.0545376   | 0.978380 | 0.0545377   | 0.978380 |
| Benzene+2-propynyl | 0.0192623   | 0.997642 | 0.0192623   | 0.997642 |
| rad23              | 0.000994684 | 0.998637 | 0.000994684 | 0.998637 |
| C2H2+PhCH2         | 0.000922765 | 0.999560 | 0.000922766 | 0.999560 |
| rad7               | 0.000196883 | 0.999756 | 0.000196883 | 0.999757 |
| rad2               | 8.25814e-05 | 0.999839 | 8.25814e-05 | 0.999839 |
| rad11              | 7.15684e-05 | 0.999911 | 7.15684e-05 | 0.999911 |
| rad45              | 3.70931e-05 | 0.999948 | 3.70931e-05 | 0.999948 |
| PhCHCCH2+H         | 1.44856e-05 | 0.999962 | 1.44856e-05 | 0.999962 |
| rad28              | 7.99842e-06 | 0.999970 | 7.99842e-06 | 0.999970 |
| rad10              | 6.28169e-06 | 0.999976 | 6.28169e-06 | 0.999977 |
| rad1               | 5.71122e-06 | 0.999982 | 5.71122e-06 | 0.999982 |
| PhCCH+CH3          | 5.36989e-06 | 0.999988 | 5.36989e-06 | 0.999988 |
| rad3               | 3.65100e-06 | 0.999991 | 3.65101e-06 | 0.999991 |
| rad36              | 2.33111e-06 | 0.999994 | 2.33111e-06 | 0.999994 |
| rad4               | 1.89172e-06 | 0.999995 | 1.89172e-06 | 0.999996 |
| rad22              | 1.16273e-06 | 0.999997 | 1.16273e-06 | 0.999997 |
| rad9               | 1.07475e-06 | 0.999998 | 1.07475e-06 | 0.999998 |
| Phenyl+Allene      | 8.31874e-07 | 0.999998 | 0.00000     | 0.999998 |
| rad13              | 6.13186e-07 | 0.999999 | 6.13187e-07 | 0.999998 |
| PhCCCH3+H          | 5.83621e-07 | 1.000000 | 5.83621e-07 | 0.999999 |
| rad26              | 4.06671e-07 | 1.000000 | 4.06672e-07 | 0.999999 |
| Ph+MeAc            | 1.07453e-07 | 1.000000 | 1.07454e-07 | 0.999999 |
| rad30              | 6.60119e-08 | 1.000000 | 6.60120e-08 | 1.000000 |

|               |             |         |             |          |
|---------------|-------------|---------|-------------|----------|
| rad15         | 1.47906e-08 | 1.00000 | 1.47906e-08 | 1.000000 |
| PhCH2CCH+H    | 1.25933e-08 | 1.00000 | 1.25933e-08 | 1.000000 |
| PAH9+H        | 1.11816e-08 | 1.00000 | 1.11816e-08 | 1.000000 |
| rad8          | 8.76581e-09 | 1.00000 | 8.76581e-09 | 1.000000 |
| rad35         | 5.18633e-09 | 1.00000 | 5.18633e-09 | 1.000000 |
| rad38         | 3.30085e-09 | 1.00000 | 3.30086e-09 | 1.000000 |
| PAH7+H        | 1.39238e-09 | 1.00000 | 1.39238e-09 | 1.000000 |
| rad25         | 9.03677e-10 | 1.00000 | 9.03678e-10 | 1.000000 |
| rad33         | 8.45429e-10 | 1.00000 | 8.45430e-10 | 1.000000 |
| rad14         | 3.91107e-10 | 1.00000 | 3.91107e-10 | 1.000000 |
| rad39         | 3.12219e-10 | 1.00000 | 3.12219e-10 | 1.000000 |
| rad27         | 7.08827e-11 | 1.00000 | 7.08827e-11 | 1.000000 |
| rad12         | 6.74815e-11 | 1.00000 | 6.74816e-11 | 1.000000 |
| rad46         | 4.92404e-11 | 1.00000 | 4.92405e-11 | 1.000000 |
| rad60syn      | 9.30769e-12 | 1.00000 | 9.30770e-12 | 1.000000 |
| rad18         | 4.92366e-12 | 1.00000 | 4.92367e-12 | 1.000000 |
| rad37         | 4.52350e-12 | 1.00000 | 4.52350e-12 | 1.000000 |
| rad60anti     | 3.18983e-12 | 1.00000 | 3.18983e-12 | 1.000000 |
| rad20         | 1.29809e-12 | 1.00000 | 1.29809e-12 | 1.000000 |
| rad5          | 1.10121e-12 | 1.00000 | 1.10121e-12 | 1.000000 |
| rad21         | 8.40284e-13 | 1.00000 | 8.40285e-13 | 1.000000 |
| rad24         | 3.15704e-13 | 1.00000 | 3.15704e-13 | 1.000000 |
| PAH3+H        | 5.69457e-14 | 1.00000 | 5.69457e-14 | 1.000000 |
| rad59         | 1.76575e-14 | 1.00000 | 1.76575e-14 | 1.000000 |
| rad31         | 5.01036e-15 | 1.00000 | 5.01037e-15 | 1.000000 |
| rad19syn      | 4.47757e-15 | 1.00000 | 4.47758e-15 | 1.000000 |
| rad50         | 1.64424e-15 | 1.00000 | 1.64424e-15 | 1.000000 |
| rad54         | 1.18606e-16 | 1.00000 | 1.18606e-16 | 1.000000 |
| PAH10+CH3     | 3.30160e-17 | 1.00000 | 3.30160e-17 | 1.000000 |
| rad43         | 1.44753e-17 | 1.00000 | 1.44753e-17 | 1.000000 |
| rad62         | 4.84281e-18 | 1.00000 | 4.84281e-18 | 1.000000 |
| rad52         | 5.03246e-19 | 1.00000 | 5.03247e-19 | 1.000000 |
| PhcycC3H3_A+H | 3.91819e-19 | 1.00000 | 3.91820e-19 | 1.000000 |
| rad70         | 3.84193e-19 | 1.00000 | 3.84193e-19 | 1.000000 |
| rad55         | 1.06683e-19 | 1.00000 | 1.06683e-19 | 1.000000 |
| rad51         | 1.45199e-20 | 1.00000 | 1.45199e-20 | 1.000000 |
| PAH1+H        | 5.66983e-21 | 1.00000 | 5.66983e-21 | 1.000000 |
| rad34         | 7.52852e-22 | 1.00000 | 7.52853e-22 | 1.000000 |
| rad58         | 4.82167e-22 | 1.00000 | 4.82167e-22 | 1.000000 |
| rad65         | 1.21743e-22 | 1.00000 | 1.21743e-22 | 1.000000 |
| rad42         | 8.51139e-24 | 1.00000 | 8.51140e-24 | 1.000000 |
| rad41         | 2.39313e-24 | 1.00000 | 2.39314e-24 | 1.000000 |
| rad47         | 1.34577e-27 | 1.00000 | 1.34577e-27 | 1.000000 |

10.000000 Pa, 230.000000 K

| Rate constant      | True (fraction)       | Effective (fraction)  |
|--------------------|-----------------------|-----------------------|
| Total              | 6.25016e-17 (1.00 )   | 6.25016e-17 (1.00 )   |
| Formation of rad11 | 5.06355e-17 (0.810 )  | 5.06355e-17 (0.810 )  |
| Formation of rad6  | 1.04318e-17 (0.167 )  | 1.04318e-17 (0.167 )  |
| H-abstraction      | 1.43428e-18 (0.0229 ) | 1.43428e-18 (0.0229 ) |

| species            | PYtrue      | Cumul    | PYeffective | Cumul    |
|--------------------|-------------|----------|-------------|----------|
| rad6               | 0.920116    | 0.920116 | 0.920117    | 0.920117 |
| Indene+H           | 0.0546460   | 0.974762 | 0.0546461   | 0.974764 |
| Benzene+2-propynyl | 0.0229478   | 0.997710 | 0.0229478   | 0.997711 |
| C2H2+PhCH2         | 0.000978508 | 0.998689 | 0.000978508 | 0.998690 |
| rad23              | 0.000858100 | 0.999547 | 0.000858101 | 0.999548 |
| rad7               | 0.000194800 | 0.999742 | 0.000194800 | 0.999743 |
| rad2               | 9.55169e-05 | 0.999837 | 9.55170e-05 | 0.999838 |
| rad11              | 6.97112e-05 | 0.999907 | 6.97112e-05 | 0.999908 |
| rad45              | 3.17927e-05 | 0.999939 | 3.17928e-05 | 0.999940 |
| PhCHCCH2+H         | 1.68208e-05 | 0.999956 | 1.68208e-05 | 0.999957 |
| rad28              | 9.90594e-06 | 0.999965 | 9.90594e-06 | 0.999967 |
| PhCCH+CH3          | 7.54022e-06 | 0.999973 | 7.54022e-06 | 0.999974 |
| rad10              | 7.29596e-06 | 0.999980 | 7.29596e-06 | 0.999981 |
| rad1               | 6.67144e-06 | 0.999987 | 6.67144e-06 | 0.999988 |
| rad3               | 3.73759e-06 | 0.999991 | 3.73759e-06 | 0.999992 |
| rad36              | 2.00494e-06 | 0.999993 | 2.00494e-06 | 0.999994 |
| rad4               | 1.94205e-06 | 0.999995 | 1.94206e-06 | 0.999996 |
| rad9               | 1.24314e-06 | 0.999996 | 1.24314e-06 | 0.999997 |
| Phenyl+Allene      | 1.08590e-06 | 0.999997 | 0.00000     | 0.999997 |
| rad22              | 1.00436e-06 | 0.999998 | 1.00436e-06 | 0.999998 |
| PhCCCH3+H          | 9.23095e-07 | 0.999999 | 9.23097e-07 | 0.999999 |
| rad13              | 6.07554e-07 | 0.999999 | 6.07554e-07 | 0.999999 |
| rad26              | 5.90897e-07 | 1.00000  | 5.90897e-07 | 1.00000  |
| Ph+MeAc            | 1.85726e-07 | 1.00000  | 1.85727e-07 | 1.00000  |
| rad30              | 7.17857e-08 | 1.00000  | 7.17857e-08 | 1.00000  |



|               |             |         |             |         |
|---------------|-------------|---------|-------------|---------|
| PhCH2CCH+H    | 1.99696e-08 | 1.00000 | 1.99696e-08 | 1.00000 |
| rad15         | 1.63753e-08 | 1.00000 | 1.63753e-08 | 1.00000 |
| rad8          | 1.39168e-08 | 1.00000 | 1.39169e-08 | 1.00000 |
| PAH9+H        | 1.28676e-08 | 1.00000 | 1.28676e-08 | 1.00000 |
| rad35         | 5.88471e-09 | 1.00000 | 5.88472e-09 | 1.00000 |
| rad38         | 3.82678e-09 | 1.00000 | 3.82678e-09 | 1.00000 |
| PAH7+H        | 2.63403e-09 | 1.00000 | 2.63404e-09 | 1.00000 |
| rad33         | 8.43979e-10 | 1.00000 | 8.43980e-10 | 1.00000 |
| rad25         | 8.07463e-10 | 1.00000 | 8.07464e-10 | 1.00000 |
| rad39         | 6.07780e-10 | 1.00000 | 6.07781e-10 | 1.00000 |
| rad14         | 3.98759e-10 | 1.00000 | 3.98759e-10 | 1.00000 |
| rad12         | 1.37760e-10 | 1.00000 | 1.37760e-10 | 1.00000 |
| rad27         | 8.17239e-11 | 1.00000 | 8.17240e-11 | 1.00000 |
| rad46         | 6.13799e-11 | 1.00000 | 6.13800e-11 | 1.00000 |
| rad60syn      | 1.20124e-11 | 1.00000 | 1.20124e-11 | 1.00000 |
| rad37         | 1.01017e-11 | 1.00000 | 1.01017e-11 | 1.00000 |
| rad18         | 4.43722e-12 | 1.00000 | 4.43722e-12 | 1.00000 |
| rad60anti     | 4.22462e-12 | 1.00000 | 4.22462e-12 | 1.00000 |
| rad5          | 2.32502e-12 | 1.00000 | 2.32502e-12 | 1.00000 |
| rad20         | 1.18698e-12 | 1.00000 | 1.18699e-12 | 1.00000 |
| rad21         | 7.67984e-13 | 1.00000 | 7.67984e-13 | 1.00000 |
| rad24         | 2.73240e-13 | 1.00000 | 2.73240e-13 | 1.00000 |
| PAH3+H        | 1.04878e-13 | 1.00000 | 1.04878e-13 | 1.00000 |
| rad59         | 3.15881e-14 | 1.00000 | 3.15881e-14 | 1.00000 |
| rad19syn      | 1.25692e-14 | 1.00000 | 1.25693e-14 | 1.00000 |
| rad31         | 5.88814e-15 | 1.00000 | 5.88814e-15 | 1.00000 |
| rad50         | 3.15434e-15 | 1.00000 | 3.15434e-15 | 1.00000 |
| rad54         | 3.82096e-16 | 1.00000 | 3.82096e-16 | 1.00000 |
| PAH10+CH3     | 1.15612e-16 | 1.00000 | 1.15612e-16 | 1.00000 |
| rad43         | 4.70596e-17 | 1.00000 | 4.70597e-17 | 1.00000 |
| rad62         | 1.68279e-17 | 1.00000 | 1.68279e-17 | 1.00000 |
| PhcycC3H3_A+H | 1.68677e-18 | 1.00000 | 1.68677e-18 | 1.00000 |
| rad70         | 1.55638e-18 | 1.00000 | 1.55639e-18 | 1.00000 |
| rad52         | 1.35897e-18 | 1.00000 | 1.35898e-18 | 1.00000 |
| rad55         | 4.47126e-19 | 1.00000 | 4.47127e-19 | 1.00000 |
| rad51         | 5.14928e-20 | 1.00000 | 5.14928e-20 | 1.00000 |
| PAH1+H        | 2.79515e-20 | 1.00000 | 2.79515e-20 | 1.00000 |
| rad34         | 3.70878e-21 | 1.00000 | 3.70879e-21 | 1.00000 |
| rad58         | 2.08316e-21 | 1.00000 | 2.08316e-21 | 1.00000 |
| rad65         | 4.85726e-22 | 1.00000 | 4.85726e-22 | 1.00000 |
| rad42         | 4.51286e-23 | 1.00000 | 4.51287e-23 | 1.00000 |
| rad41         | 1.28572e-23 | 1.00000 | 1.28572e-23 | 1.00000 |
| rad47         | 5.19402e-27 | 1.00000 | 5.19402e-27 | 1.00000 |

10.000000 Pa, 240.000000 K

| Rate constant      | True (fraction)       | Effective (fraction)  |
|--------------------|-----------------------|-----------------------|
| Total              | 8.83273e-17 (1.00 )   | 8.83272e-17 (1.00 )   |
| Formation of rad11 | 7.04077e-17 (0.797 )  | 7.04076e-17 (0.797 )  |
| Formation of rad6  | 1.55481e-17 (0.176 )  | 1.55481e-17 (0.176 )  |
| H-abstraction      | 2.37143e-18 (0.0268 ) | 2.37143e-18 (0.0268 ) |

| species            | PYtrue      | Cumul    | PYeffective | Cumul    |
|--------------------|-------------|----------|-------------|----------|
| rad6               | 0.916098    | 0.916098 | 0.916099    | 0.916099 |
| Indene+H           | 0.0548033   | 0.970901 | 0.0548034   | 0.970902 |
| Benzene+2-propynyl | 0.0268483   | 0.997749 | 0.0268483   | 0.997750 |
| C2H2+PhCH2         | 0.00104097  | 0.998790 | 0.00104098  | 0.998791 |
| rad23              | 0.000738315 | 0.999529 | 0.000738316 | 0.999530 |
| rad7               | 0.000192745 | 0.999721 | 0.000192745 | 0.999723 |
| rad2               | 0.000110005 | 0.999831 | 0.000110005 | 0.999833 |
| rad11              | 6.81345e-05 | 0.999900 | 6.81346e-05 | 0.999901 |
| rad45              | 2.71965e-05 | 0.999927 | 2.71966e-05 | 0.999928 |
| PhCHCCH2+H         | 1.97198e-05 | 0.999946 | 1.97198e-05 | 0.999948 |
| rad28              | 1.22726e-05 | 0.999959 | 1.22726e-05 | 0.999960 |
| PhCCH+CH3          | 1.05943e-05 | 0.999969 | 1.05943e-05 | 0.999970 |
| rad10              | 8.43047e-06 | 0.999978 | 8.43049e-06 | 0.999979 |
| rad1               | 7.76592e-06 | 0.999986 | 7.76593e-06 | 0.999987 |
| rad3               | 3.83707e-06 | 0.999989 | 3.83707e-06 | 0.999990 |
| rad4               | 1.99987e-06 | 0.999991 | 1.99987e-06 | 0.999992 |
| rad36              | 1.72190e-06 | 0.999993 | 1.72190e-06 | 0.999994 |
| rad9               | 1.44253e-06 | 0.999995 | 1.44253e-06 | 0.999996 |
| PhCCCH3+H          | 1.44079e-06 | 0.999996 | 1.44080e-06 | 0.999997 |
| Phenyl+Allene      | 1.41512e-06 | 0.999997 | 0.00000     | 0.999997 |
| rad22              | 8.66813e-07 | 0.999998 | 8.66813e-07 | 0.999998 |
| rad26              | 8.45630e-07 | 0.999999 | 8.45631e-07 | 0.999999 |
| rad13              | 6.02077e-07 | 1.000000 | 6.02077e-07 | 0.999999 |
| Ph+MeAc            | 3.14890e-07 | 1.00000  | 3.14891e-07 | 1.000000 |
| rad30              | 7.83751e-08 | 1.00000  | 7.83752e-08 | 1.000000 |

|               |             |         |             |          |
|---------------|-------------|---------|-------------|----------|
| PhCH2CCH+H    | 3.10924e-08 | 1.00000 | 3.10924e-08 | 1.000000 |
| rad8          | 2.18782e-08 | 1.00000 | 2.18783e-08 | 1.000000 |
| rad15         | 1.82083e-08 | 1.00000 | 1.82083e-08 | 1.000000 |
| PAH9+H        | 1.48461e-08 | 1.00000 | 1.48461e-08 | 1.000000 |
| rad35         | 6.69177e-09 | 1.00000 | 6.69178e-09 | 1.000000 |
| PAH7+H        | 4.92555e-09 | 1.00000 | 4.92556e-09 | 1.000000 |
| rad38         | 4.44994e-09 | 1.00000 | 4.44995e-09 | 1.000000 |
| rad39         | 1.16523e-09 | 1.00000 | 1.16523e-09 | 1.000000 |
| rad33         | 8.42709e-10 | 1.00000 | 8.42709e-10 | 1.000000 |
| rad25         | 7.31762e-10 | 1.00000 | 7.31763e-10 | 1.000000 |
| rad14         | 4.07584e-10 | 1.00000 | 4.07585e-10 | 1.000000 |
| rad12         | 2.71393e-10 | 1.00000 | 2.71394e-10 | 1.000000 |
| rad27         | 9.38609e-11 | 1.00000 | 9.38611e-11 | 1.000000 |
| rad46         | 7.67592e-11 | 1.00000 | 7.67593e-11 | 1.000000 |
| rad37         | 2.15787e-11 | 1.00000 | 2.15787e-11 | 1.000000 |
| rad60syn      | 1.55261e-11 | 1.00000 | 1.55261e-11 | 1.000000 |
| rad60anti     | 5.59261e-12 | 1.00000 | 5.59262e-12 | 1.000000 |
| rad5          | 4.71932e-12 | 1.00000 | 4.71933e-12 | 1.000000 |
| rad18         | 4.03371e-12 | 1.00000 | 4.03372e-12 | 1.000000 |
| rad20         | 1.09501e-12 | 1.00000 | 1.09501e-12 | 1.000000 |
| rad21         | 7.08117e-13 | 1.00000 | 7.08118e-13 | 1.000000 |
| rad24         | 2.36157e-13 | 1.00000 | 2.36157e-13 | 1.000000 |
| PAH3+H        | 1.87886e-13 | 1.00000 | 1.87886e-13 | 1.000000 |
| rad59         | 5.50308e-14 | 1.00000 | 5.50309e-14 | 1.000000 |
| rad19syn      | 3.30580e-14 | 1.00000 | 3.30581e-14 | 1.000000 |
| rad31         | 6.97908e-15 | 1.00000 | 6.97909e-15 | 1.000000 |
| rad50         | 5.89957e-15 | 1.00000 | 5.89958e-15 | 1.000000 |
| rad54         | 1.13598e-15 | 1.00000 | 1.13598e-15 | 1.000000 |
| PAH10+CH3     | 3.69432e-16 | 1.00000 | 3.69432e-16 | 1.000000 |
| rad43         | 1.40432e-16 | 1.00000 | 1.40432e-16 | 1.000000 |
| rad62         | 5.33093e-17 | 1.00000 | 5.33093e-17 | 1.000000 |
| PhcycC3H3_A+H | 6.44152e-18 | 1.00000 | 6.44152e-18 | 1.000000 |
| rad70         | 5.62297e-18 | 1.00000 | 5.62297e-18 | 1.000000 |
| rad52         | 3.45459e-18 | 1.00000 | 3.45460e-18 | 1.000000 |
| rad55         | 1.66813e-18 | 1.00000 | 1.66813e-18 | 1.000000 |
| rad51         | 1.66710e-19 | 1.00000 | 1.66710e-19 | 1.000000 |
| PAH1+H        | 1.19749e-19 | 1.00000 | 1.19750e-19 | 1.000000 |
| rad34         | 1.58426e-20 | 1.00000 | 1.58426e-20 | 1.000000 |
| rad58         | 7.96963e-21 | 1.00000 | 7.96965e-21 | 1.000000 |
| rad65         | 1.73861e-21 | 1.00000 | 1.73862e-21 | 1.000000 |
| rad42         | 2.05315e-22 | 1.00000 | 2.05315e-22 | 1.000000 |
| rad41         | 5.91890e-23 | 1.00000 | 5.91891e-23 | 1.000000 |
| rad47         | 1.77376e-26 | 1.00000 | 1.77376e-26 | 1.000000 |

10.000000 Pa, 250.000000 K

| Rate constant      | True (fraction)       | Effective (fraction)  |
|--------------------|-----------------------|-----------------------|
| Total              | 1.21641e-16 (1.00 )   | 1.21641e-16 (1.00 )   |
| Formation of rad11 | 9.54219e-17 (0.784 )  | 9.54217e-17 (0.784 )  |
| Formation of rad6  | 2.24583e-17 (0.185 )  | 2.24582e-17 (0.185 )  |
| H-abstraction      | 3.76121e-18 (0.0309 ) | 3.76121e-18 (0.0309 ) |

| species            | PYtrue      | Cumul    | PYeffective | Cumul    |
|--------------------|-------------|----------|-------------|----------|
| rad6               | 0.911818    | 0.911818 | 0.911819    | 0.911819 |
| Indene+H           | 0.0550215   | 0.966839 | 0.0550216   | 0.966841 |
| Benzene+2-propynyl | 0.0309205   | 0.997760 | 0.0309205   | 0.997762 |
| C2H2+PhCH2         | 0.00111118  | 0.998871 | 0.00111118  | 0.998873 |
| rad23              | 0.000633801 | 0.999505 | 0.000633802 | 0.999507 |
| rad7               | 0.000190718 | 0.999695 | 0.000190718 | 0.999697 |
| rad2               | 0.000126083 | 0.999821 | 0.000126083 | 0.999823 |
| rad11              | 6.67661e-05 | 0.999888 | 6.67662e-05 | 0.999890 |
| PhCHCCH2+H         | 2.33544e-05 | 0.999911 | 2.33544e-05 | 0.999914 |
| rad45              | 2.32276e-05 | 0.999935 | 2.32276e-05 | 0.999937 |
| rad28              | 1.51985e-05 | 0.999950 | 1.51985e-05 | 0.999952 |
| PhCCH+CH3          | 1.48741e-05 | 0.999965 | 1.48741e-05 | 0.999967 |
| rad10              | 9.68797e-06 | 0.999974 | 9.68798e-06 | 0.999977 |
| rad1               | 9.00416e-06 | 0.999983 | 9.00418e-06 | 0.999986 |
| rad3               | 3.95006e-06 | 0.999987 | 3.95006e-06 | 0.999989 |
| PhCCCH3+H          | 2.21693e-06 | 0.999990 | 2.21694e-06 | 0.999992 |
| rad4               | 2.06561e-06 | 0.999992 | 2.06561e-06 | 0.999994 |
| Phenyl+Allene      | 1.84218e-06 | 0.999994 | 0.00000     | 0.999994 |
| rad9               | 1.67940e-06 | 0.999995 | 1.67940e-06 | 0.999995 |
| rad36              | 1.47725e-06 | 0.999997 | 1.47725e-06 | 0.999997 |
| rad26              | 1.19074e-06 | 0.999998 | 1.19074e-06 | 0.999998 |
| rad22              | 7.47742e-07 | 0.999999 | 7.47744e-07 | 0.999999 |
| rad13              | 5.96751e-07 | 0.999999 | 5.96752e-07 | 0.999999 |
| Ph+MeAc            | 5.23441e-07 | 1.000000 | 5.23441e-07 | 1.000000 |
| rad30              | 8.59204e-08 | 1.000000 | 8.59206e-08 | 1.000000 |

|               |             |          |             |          |
|---------------|-------------|----------|-------------|----------|
| PhCH2CCH+H    | 4.76602e-08 | 1.000000 | 4.76603e-08 | 1.000000 |
| rad8          | 3.39856e-08 | 1.000000 | 3.39856e-08 | 1.000000 |
| rad15         | 2.03357e-08 | 1.000000 | 2.03357e-08 | 1.000000 |
| PAH9+H        | 1.71780e-08 | 1.000000 | 1.71781e-08 | 1.000000 |
| PAH7+H        | 9.08354e-09 | 1.000000 | 9.08356e-09 | 1.000000 |
| rad35         | 7.62850e-09 | 1.000000 | 7.62852e-09 | 1.000000 |
| rad38         | 5.19149e-09 | 1.000000 | 5.19149e-09 | 1.000000 |
| rad39         | 2.19565e-09 | 1.000000 | 2.19565e-09 | 1.000000 |
| rad33         | 8.41635e-10 | 1.000000 | 8.41637e-10 | 1.000000 |
| rad25         | 6.71758e-10 | 1.000000 | 6.71760e-10 | 1.000000 |
| rad12         | 5.16259e-10 | 1.000000 | 5.16260e-10 | 1.000000 |
| rad14         | 4.17654e-10 | 1.000000 | 4.17655e-10 | 1.000000 |
| rad27         | 1.07329e-10 | 1.000000 | 1.07329e-10 | 1.000000 |
| rad46         | 9.63087e-11 | 1.000000 | 9.63089e-11 | 1.000000 |
| rad37         | 4.41839e-11 | 1.000000 | 4.41840e-11 | 1.000000 |
| rad60syn      | 2.00987e-11 | 1.000000 | 2.00988e-11 | 1.000000 |
| rad5          | 9.23284e-12 | 1.000000 | 9.23286e-12 | 1.000000 |
| rad60anti     | 7.40276e-12 | 1.000000 | 7.40277e-12 | 1.000000 |
| rad18         | 3.69640e-12 | 1.000000 | 3.69641e-12 | 1.000000 |
| rad20         | 1.01925e-12 | 1.000000 | 1.01925e-12 | 1.000000 |
| rad21         | 6.58819e-13 | 1.000000 | 6.58820e-13 | 1.000000 |
| PAH3+H        | 3.28764e-13 | 1.000000 | 3.28765e-13 | 1.000000 |
| rad24         | 2.03899e-13 | 1.000000 | 2.03899e-13 | 1.000000 |
| rad59         | 9.37459e-14 | 1.000000 | 9.37461e-14 | 1.000000 |
| rad19syn      | 8.19842e-14 | 1.000000 | 8.19843e-14 | 1.000000 |
| rad50         | 1.07939e-14 | 1.000000 | 1.07939e-14 | 1.000000 |
| rad31         | 8.34135e-15 | 1.000000 | 8.34136e-15 | 1.000000 |
| rad54         | 3.14026e-15 | 1.000000 | 3.14027e-15 | 1.000000 |
| PAH10+CH3     | 1.08609e-15 | 1.000000 | 1.08609e-15 | 1.000000 |
| rad43         | 3.87884e-16 | 1.000000 | 3.87885e-16 | 1.000000 |
| rad62         | 1.55349e-16 | 1.000000 | 1.55350e-16 | 1.000000 |
| PhcycC3H3_A+H | 2.20793e-17 | 1.000000 | 2.20793e-17 | 1.000000 |
| rad70         | 1.83351e-17 | 1.000000 | 1.83351e-17 | 1.000000 |
| rad52         | 8.32337e-18 | 1.000000 | 8.32338e-18 | 1.000000 |
| rad55         | 5.60328e-18 | 1.000000 | 5.60329e-18 | 1.000000 |
| rad51         | 4.96912e-19 | 1.000000 | 4.96913e-19 | 1.000000 |
| PAH1+H        | 4.52604e-19 | 1.000000 | 4.52605e-19 | 1.000000 |
| rad34         | 5.96154e-20 | 1.000000 | 5.96155e-20 | 1.000000 |
| rad58         | 2.73345e-20 | 1.000000 | 2.73346e-20 | 1.000000 |
| rad65         | 5.64193e-21 | 1.000000 | 5.64194e-21 | 1.000000 |
| rad42         | 8.15703e-22 | 1.000000 | 8.15705e-22 | 1.000000 |
| rad41         | 2.37674e-22 | 1.000000 | 2.37674e-22 | 1.000000 |
| rad47         | 5.44146e-26 | 1.000000 | 5.44147e-26 | 1.000000 |

10.000000 Pa, 260.000000 K

| Rate constant      | True (fraction)       | Effective (fraction)  |
|--------------------|-----------------------|-----------------------|
| Total              | 1.63720e-16 (1.00 )   | 1.63720e-16 (1.00 )   |
| Formation of rad11 | 1.26419e-16 (0.772 )  | 1.26418e-16 (0.772 )  |
| Formation of rad6  | 3.15515e-17 (0.193 )  | 3.15514e-17 (0.193 )  |
| H-abstraction      | 5.75028e-18 (0.0351 ) | 5.75028e-18 (0.0351 ) |

| species            | PYtrue      | Cumul    | PYeffective | Cumul    |
|--------------------|-------------|----------|-------------|----------|
| rad6               | 0.907304    | 0.907304 | 0.907306    | 0.907306 |
| Indene+H           | 0.0553138   | 0.962618 | 0.0553140   | 0.962620 |
| Benzene+2-propynyl | 0.0351226   | 0.997741 | 0.0351226   | 0.997743 |
| C2H2+PhCH2         | 0.00119033  | 0.998931 | 0.00119033  | 0.998933 |
| rad23              | 0.000543070 | 0.999474 | 0.000543071 | 0.999476 |
| rad7               | 0.000188717 | 0.999663 | 0.000188717 | 0.999665 |
| rad2               | 0.000143743 | 0.999806 | 0.000143744 | 0.999809 |
| rad11              | 6.55542e-05 | 0.999872 | 6.55542e-05 | 0.999874 |
| PhCHCCH2+H         | 2.79499e-05 | 0.999900 | 2.79500e-05 | 0.999902 |
| PhCCH+CH3          | 2.08371e-05 | 0.999921 | 2.08372e-05 | 0.999923 |
| rad45              | 1.98144e-05 | 0.999941 | 1.98144e-05 | 0.999943 |
| rad28              | 1.87985e-05 | 0.999959 | 1.87986e-05 | 0.999961 |
| rad10              | 1.10677e-05 | 0.999970 | 1.10678e-05 | 0.999973 |
| rad1               | 1.03937e-05 | 0.999981 | 1.03937e-05 | 0.999983 |
| rad3               | 4.07677e-06 | 0.999985 | 4.07678e-06 | 0.999987 |
| PhCCCH3+H          | 3.36040e-06 | 0.999988 | 3.36041e-06 | 0.999990 |
| Phenyl+Allene      | 2.39703e-06 | 0.999991 | 0.000000    | 0.999990 |
| rad4               | 2.13956e-06 | 0.999993 | 2.13956e-06 | 0.999993 |
| rad9               | 1.96176e-06 | 0.999995 | 1.96177e-06 | 0.999994 |
| rad26              | 1.64849e-06 | 0.999996 | 1.64850e-06 | 0.999996 |
| rad36              | 1.26657e-06 | 0.999998 | 1.26658e-06 | 0.999997 |
| Ph+MeAc            | 8.52943e-07 | 0.999999 | 8.52945e-07 | 0.999998 |
| rad22              | 6.45014e-07 | 0.999999 | 6.45016e-07 | 0.999999 |
| rad13              | 5.91575e-07 | 1.000000 | 5.91576e-07 | 0.999999 |
| rad30              | 9.45913e-08 | 1.000000 | 9.45915e-08 | 1.000000 |

|               |             |          |             |          |
|---------------|-------------|----------|-------------|----------|
| PhCH2CCH+H    | 7.20858e-08 | 1.000000 | 7.20859e-08 | 1.000000 |
| rad8          | 5.20884e-08 | 1.000000 | 5.20885e-08 | 1.000000 |
| rad15         | 2.28140e-08 | 1.000000 | 2.28141e-08 | 1.000000 |
| PAH9+H        | 1.99393e-08 | 1.000000 | 1.99394e-08 | 1.000000 |
| PAH7+H        | 1.64853e-08 | 1.000000 | 1.64854e-08 | 1.000000 |
| rad35         | 8.72085e-09 | 1.000000 | 8.72087e-09 | 1.000000 |
| rad38         | 6.07793e-09 | 1.000000 | 6.07795e-09 | 1.000000 |
| rad39         | 4.05899e-09 | 1.000000 | 4.05900e-09 | 1.000000 |
| rad12         | 9.49182e-10 | 1.000000 | 9.49184e-10 | 1.000000 |
| rad33         | 8.40775e-10 | 1.000000 | 8.40777e-10 | 1.000000 |
| rad25         | 6.23849e-10 | 1.000000 | 6.23850e-10 | 1.000000 |
| rad14         | 4.28995e-10 | 1.000000 | 4.28996e-10 | 1.000000 |
| rad27         | 1.22129e-10 | 1.000000 | 1.22129e-10 | 1.000000 |
| rad46         | 1.21251e-10 | 1.000000 | 1.21251e-10 | 1.000000 |
| rad37         | 8.69033e-11 | 1.000000 | 8.69036e-11 | 1.000000 |
| rad60syn      | 2.60616e-11 | 1.000000 | 2.60617e-11 | 1.000000 |
| rad5          | 1.74498e-11 | 1.000000 | 1.74498e-11 | 1.000000 |
| rad60anti     | 9.80094e-12 | 1.000000 | 9.80093e-12 | 1.000000 |
| rad18         | 3.41274e-12 | 1.000000 | 3.41275e-12 | 1.000000 |
| rad20         | 9.57405e-13 | 1.000000 | 9.57408e-13 | 1.000000 |
| rad21         | 6.18616e-13 | 1.000000 | 6.18618e-13 | 1.000000 |
| PAH3+H        | 5.63706e-13 | 1.000000 | 5.63706e-13 | 1.000000 |
| rad19syn      | 1.92666e-13 | 1.000000 | 1.92666e-13 | 1.000000 |
| rad24         | 1.75949e-13 | 1.000000 | 1.75949e-13 | 1.000000 |
| rad59         | 1.56662e-13 | 1.000000 | 1.56662e-13 | 1.000000 |
| rad50         | 1.93679e-14 | 1.000000 | 1.93679e-14 | 1.000000 |
| rad31         | 1.00507e-14 | 1.000000 | 1.00507e-14 | 1.000000 |
| rad54         | 8.11968e-15 | 1.000000 | 8.11970e-15 | 1.000000 |
| PAH10+CH3     | 2.95799e-15 | 1.000000 | 2.95800e-15 | 1.000000 |
| rad43         | 9.98542e-16 | 1.000000 | 9.98542e-16 | 1.000000 |
| rad62         | 4.19530e-16 | 1.000000 | 4.19531e-16 | 1.000000 |
| PhcycC3H3_A+H | 6.86204e-17 | 1.000000 | 6.86206e-17 | 1.000000 |
| rad70         | 5.45027e-17 | 1.000000 | 5.45028e-17 | 1.000000 |
| rad52         | 1.91025e-17 | 1.000000 | 1.91025e-17 | 1.000000 |
| rad55         | 1.71127e-17 | 1.000000 | 1.71128e-17 | 1.000000 |
| PAH1+H        | 1.52894e-18 | 1.000000 | 1.52894e-18 | 1.000000 |
| rad51         | 1.37298e-18 | 1.000000 | 1.37299e-18 | 1.000000 |
| rad34         | 2.00311e-19 | 1.000000 | 2.00311e-19 | 1.000000 |
| rad58         | 8.49443e-20 | 1.000000 | 8.49445e-20 | 1.000000 |
| rad65         | 1.67453e-20 | 1.000000 | 1.67454e-20 | 1.000000 |
| rad42         | 2.87279e-21 | 1.000000 | 2.87280e-21 | 1.000000 |
| rad41         | 8.45208e-22 | 1.000000 | 8.45210e-22 | 1.000000 |
| rad47         | 1.51887e-25 | 1.000000 | 1.51888e-25 | 1.000000 |

10.000000 Pa, 270.000000 K

| Rate constant      | True (fraction)       | Effective (fraction)  |
|--------------------|-----------------------|-----------------------|
| Total              | 2.15887e-16 (1.00 )   | 2.15886e-16 (1.00 )   |
| Formation of rad11 | 1.64133e-16 (0.760 )  | 1.64132e-16 (0.760 )  |
| Formation of rad6  | 4.32452e-17 (0.200 )  | 4.32450e-17 (0.200 )  |
| H-abstraction      | 8.50919e-18 (0.0394 ) | 8.50919e-18 (0.0394 ) |

| species            | PYtrue      | Cumul    | PYeffective | Cumul    |
|--------------------|-------------|----------|-------------|----------|
| rad6               | 0.902581    | 0.902581 | 0.902584    | 0.902584 |
| Indene+H           | 0.0556947   | 0.958276 | 0.0556949   | 0.958279 |
| Benzene+2-propynyl | 0.0394150   | 0.997691 | 0.0394152   | 0.997694 |
| C2H2+PhCH2         | 0.00127989  | 0.998971 | 0.00127989  | 0.998974 |
| rad23              | 0.000464682 | 0.999435 | 0.000464683 | 0.999438 |
| rad7               | 0.000186742 | 0.999622 | 0.000186742 | 0.999625 |
| rad2               | 0.000162926 | 0.999785 | 0.000162927 | 0.999788 |
| rad11              | 6.44614e-05 | 0.999849 | 6.44617e-05 | 0.999853 |
| PhCHCCH2+H         | 3.37984e-05 | 0.999883 | 3.37986e-05 | 0.999886 |
| PhCCH+CH3          | 2.90869e-05 | 0.999912 | 2.90870e-05 | 0.999915 |
| rad28              | 2.32017e-05 | 0.999936 | 2.32018e-05 | 0.999939 |
| rad45              | 1.68913e-05 | 0.999952 | 1.68913e-05 | 0.999956 |
| rad10              | 1.25653e-05 | 0.999965 | 1.25654e-05 | 0.999968 |
| rad1               | 1.19390e-05 | 0.999977 | 1.19391e-05 | 0.999980 |
| PhCCCH3+H          | 5.01566e-06 | 0.999982 | 5.01566e-06 | 0.999985 |
| rad3               | 4.21696e-06 | 0.999986 | 4.21697e-06 | 0.999989 |
| Phenyl+Allene      | 3.11939e-06 | 0.999989 | 0.000000    | 0.999989 |
| rad9               | 2.29971e-06 | 0.999992 | 2.29972e-06 | 0.999992 |
| rad26              | 2.24280e-06 | 0.999994 | 2.24281e-06 | 0.999994 |
| rad4               | 2.22173e-06 | 0.999996 | 2.22174e-06 | 0.999996 |
| Ph+MeAc            | 1.36253e-06 | 0.999997 | 1.36254e-06 | 0.999997 |
| rad36              | 1.08584e-06 | 0.999999 | 1.08585e-06 | 0.999998 |
| rad13              | 5.86546e-07 | 0.999999 | 5.86548e-07 | 0.999999 |
| rad22              | 5.56688e-07 | 1.000000 | 5.56689e-07 | 1.000000 |
| PhCH2CCH+H         | 1.07778e-07 | 1.000000 | 1.07779e-07 | 1.000000 |

|               |             |          |             |          |
|---------------|-------------|----------|-------------|----------|
| rad30         | 1.04594e-07 | 1.000000 | 1.04594e-07 | 1.000000 |
| rad8          | 7.86901e-08 | 1.000000 | 7.86903e-08 | 1.000000 |
| PAH7+H        | 2.93876e-08 | 1.000000 | 2.93877e-08 | 1.000000 |
| rad15         | 2.57128e-08 | 1.000000 | 2.57129e-08 | 1.000000 |
| PAH9+H        | 2.32255e-08 | 1.000000 | 2.32256e-08 | 1.000000 |
| rad35         | 1.00011e-08 | 1.000000 | 1.00011e-08 | 1.000000 |
| rad39         | 7.35049e-09 | 1.000000 | 7.35052e-09 | 1.000000 |
| rad38         | 7.14283e-09 | 1.000000 | 7.14285e-09 | 1.000000 |
| rad12         | 1.68875e-09 | 1.000000 | 1.68876e-09 | 1.000000 |
| rad33         | 8.40146e-10 | 1.000000 | 8.40149e-10 | 1.000000 |
| rad25         | 5.85319e-10 | 1.000000 | 5.85321e-10 | 1.000000 |
| rad14         | 4.41589e-10 | 1.000000 | 4.41590e-10 | 1.000000 |
| rad37         | 1.64531e-10 | 1.000000 | 1.64532e-10 | 1.000000 |
| rad46         | 1.53199e-10 | 1.000000 | 1.53200e-10 | 1.000000 |
| rad27         | 1.38221e-10 | 1.000000 | 1.38222e-10 | 1.000000 |
| rad60syn      | 3.38542e-11 | 1.000000 | 3.38543e-11 | 1.000000 |
| rad5          | 3.19248e-11 | 1.000000 | 3.19249e-11 | 1.000000 |
| rad60anti     | 1.29824e-11 | 1.000000 | 1.29824e-11 | 1.000000 |
| rad18         | 3.17313e-12 | 1.000000 | 3.17314e-12 | 1.000000 |
| PAH3+H        | 9.49359e-13 | 1.000000 | 9.49361e-13 | 1.000000 |
| rad20         | 9.07642e-13 | 1.000000 | 9.07645e-13 | 1.000000 |
| rad21         | 5.86329e-13 | 1.000000 | 5.86330e-13 | 1.000000 |
| rad19syn      | 4.30660e-13 | 1.000000 | 4.30661e-13 | 1.000000 |
| rad59         | 2.57449e-13 | 1.000000 | 2.57450e-13 | 1.000000 |
| rad24         | 1.51826e-13 | 1.000000 | 1.51826e-13 | 1.000000 |
| rad50         | 3.41400e-14 | 1.000000 | 3.41400e-14 | 1.000000 |
| rad54         | 1.97321e-14 | 1.000000 | 1.97322e-14 | 1.000000 |
| rad31         | 1.22069e-14 | 1.000000 | 1.22070e-14 | 1.000000 |
| PAH10+CH3     | 7.50793e-15 | 1.000000 | 7.50795e-15 | 1.000000 |
| rad43         | 2.40969e-15 | 1.000000 | 2.40970e-15 | 1.000000 |
| rad62         | 1.05646e-15 | 1.000000 | 1.05647e-15 | 1.000000 |
| PhcycC3H3_A+H | 1.95095e-16 | 1.000000 | 1.95096e-16 | 1.000000 |
| rad70         | 1.48966e-16 | 1.000000 | 1.48967e-16 | 1.000000 |
| rad55         | 4.79241e-17 | 1.000000 | 4.79242e-17 | 1.000000 |
| rad52         | 4.19091e-17 | 1.000000 | 4.19092e-17 | 1.000000 |
| PAH1+H        | 4.66872e-18 | 1.000000 | 4.66874e-18 | 1.000000 |
| rad51         | 3.53654e-18 | 1.000000 | 3.53655e-18 | 1.000000 |
| rad34         | 6.08038e-19 | 1.000000 | 6.08040e-19 | 1.000000 |
| rad58         | 2.41369e-19 | 1.000000 | 2.41370e-19 | 1.000000 |
| rad65         | 4.58028e-20 | 1.000000 | 4.58030e-20 | 1.000000 |
| rad42         | 9.08510e-21 | 1.000000 | 9.08512e-21 | 1.000000 |
| rad41         | 2.69686e-21 | 1.000000 | 2.69687e-21 | 1.000000 |
| rad47         | 3.89981e-25 | 1.000000 | 3.89982e-25 | 1.000000 |

10.000000 Pa, 280.000000 K

| Rate constant      | True (fraction)       | Effective (fraction)  |
|--------------------|-----------------------|-----------------------|
| Total              | 2.79491e-16 (1.00 )   | 2.79490e-16 (1.00 )   |
| Formation of rad11 | 2.09281e-16 (0.749 )  | 2.09280e-16 (0.749 )  |
| Formation of rad6  | 5.79792e-17 (0.207 )  | 5.79789e-17 (0.207 )  |
| H-abstraction      | 1.22310e-17 (0.0438 ) | 1.22310e-17 (0.0438 ) |

| species            | PYtrue      | Cumul    | PYeffective | Cumul    |
|--------------------|-------------|----------|-------------|----------|
| rad6               | 0.897667    | 0.897667 | 0.897671    | 0.897671 |
| Indene+H           | 0.0561803   | 0.953847 | 0.0561805   | 0.953851 |
| Benzene+2-propynyl | 0.0437616   | 0.997609 | 0.0437617   | 0.997613 |
| C2H2+PhCH2         | 0.00138162  | 0.998990 | 0.00138163  | 0.998994 |
| rad23              | 0.000397275 | 0.999388 | 0.000397276 | 0.999392 |
| rad7               | 0.000184792 | 0.999572 | 0.000184793 | 0.999577 |
| rad2               | 0.000183518 | 0.999756 | 0.000183519 | 0.999760 |
| rad11              | 6.34608e-05 | 0.999819 | 6.34610e-05 | 0.999824 |
| PhCHCCH2+H         | 4.12741e-05 | 0.999861 | 4.12742e-05 | 0.999865 |
| PhCCH+CH3          | 4.04076e-05 | 0.999901 | 4.04078e-05 | 0.999905 |
| rad28              | 2.85480e-05 | 0.999930 | 2.85481e-05 | 0.999934 |
| rad45              | 1.43977e-05 | 0.999944 | 1.43978e-05 | 0.999948 |
| rad10              | 1.41719e-05 | 0.999958 | 1.41719e-05 | 0.999962 |
| rad1               | 1.36420e-05 | 0.999972 | 1.36421e-05 | 0.999976 |
| PhCCCH3+H          | 7.37021e-06 | 0.999979 | 7.37024e-06 | 0.999983 |
| rad3               | 4.36989e-06 | 0.999984 | 4.36990e-06 | 0.999988 |
| Phenyl+Allene      | 4.06212e-06 | 0.999988 | 0.000000    | 0.999988 |
| rad26              | 2.99792e-06 | 0.999991 | 2.99793e-06 | 0.999991 |
| rad9               | 2.70584e-06 | 0.999993 | 2.70585e-06 | 0.999993 |
| rad4               | 2.31194e-06 | 0.999996 | 2.31195e-06 | 0.999996 |
| Ph+MeAc            | 2.13431e-06 | 0.999998 | 2.13431e-06 | 0.999998 |
| rad36              | 9.31357e-07 | 0.999999 | 9.31361e-07 | 0.999999 |
| rad13              | 5.81661e-07 | 0.999999 | 5.81663e-07 | 0.999999 |
| rad22              | 4.80998e-07 | 1.000000 | 4.81000e-07 | 1.000000 |
| PhCH2CCH+H         | 1.59520e-07 | 1.000000 | 1.59520e-07 | 1.000000 |

|               |             |         |             |         |
|---------------|-------------|---------|-------------|---------|
| rad8          | 1.17105e-07 | 1.00000 | 1.17105e-07 | 1.00000 |
| rad30         | 1.16183e-07 | 1.00000 | 1.16183e-07 | 1.00000 |
| PAH7+H        | 5.13750e-08 | 1.00000 | 5.13751e-08 | 1.00000 |
| rad15         | 2.91179e-08 | 1.00000 | 2.91180e-08 | 1.00000 |
| PAH9+H        | 2.71572e-08 | 1.00000 | 2.71573e-08 | 1.00000 |
| rad39         | 1.30232e-08 | 1.00000 | 1.30233e-08 | 1.00000 |
| rad35         | 1.15095e-08 | 1.00000 | 1.15096e-08 | 1.00000 |
| rad38         | 8.42873e-09 | 1.00000 | 8.42876e-09 | 1.00000 |
| rad12         | 2.91133e-09 | 1.00000 | 2.91134e-09 | 1.00000 |
| rad33         | 8.39765e-10 | 1.00000 | 8.39768e-10 | 1.00000 |
| rad25         | 5.54109e-10 | 1.00000 | 5.54111e-10 | 1.00000 |
| rad14         | 4.55369e-10 | 1.00000 | 4.55371e-10 | 1.00000 |
| rad37         | 3.00449e-10 | 1.00000 | 3.00450e-10 | 1.00000 |
| rad46         | 1.94285e-10 | 1.00000 | 1.94286e-10 | 1.00000 |
| rad27         | 1.55525e-10 | 1.00000 | 1.55525e-10 | 1.00000 |
| rad5          | 5.66406e-11 | 1.00000 | 5.66408e-11 | 1.00000 |
| rad60syn      | 4.40589e-11 | 1.00000 | 4.40590e-11 | 1.00000 |
| rad60anti     | 1.72087e-11 | 1.00000 | 1.72088e-11 | 1.00000 |
| rad18         | 2.97009e-12 | 1.00000 | 2.97010e-12 | 1.00000 |
| PAH3+H        | 1.57291e-12 | 1.00000 | 1.57291e-12 | 1.00000 |
| rad19syn      | 9.18313e-13 | 1.00000 | 9.18317e-13 | 1.00000 |
| rad20         | 8.68472e-13 | 1.00000 | 8.68475e-13 | 1.00000 |
| rad21         | 5.61002e-13 | 1.00000 | 5.61004e-13 | 1.00000 |
| rad59         | 4.16733e-13 | 1.00000 | 4.16734e-13 | 1.00000 |
| rad24         | 1.31087e-13 | 1.00000 | 1.31087e-13 | 1.00000 |
| rad50         | 5.91675e-14 | 1.00000 | 5.91677e-14 | 1.00000 |
| rad54         | 4.52501e-14 | 1.00000 | 4.52502e-14 | 1.00000 |
| PAH10+CH3     | 1.78531e-14 | 1.00000 | 1.78532e-14 | 1.00000 |
| rad31         | 1.49426e-14 | 1.00000 | 1.49426e-14 | 1.00000 |
| rad43         | 5.47805e-15 | 1.00000 | 5.47808e-15 | 1.00000 |
| rad62         | 2.49403e-15 | 1.00000 | 2.49404e-15 | 1.00000 |
| PhcycC3H3_A+H | 5.11405e-16 | 1.00000 | 5.11407e-16 | 1.00000 |
| rad70         | 3.77137e-16 | 1.00000 | 3.77138e-16 | 1.00000 |
| rad55         | 1.23995e-16 | 1.00000 | 1.23995e-16 | 1.00000 |
| rad52         | 8.81104e-17 | 1.00000 | 8.81108e-17 | 1.00000 |
| PAH1+H        | 1.30147e-17 | 1.00000 | 1.30148e-17 | 1.00000 |
| rad51         | 8.53363e-18 | 1.00000 | 8.53367e-18 | 1.00000 |
| rad34         | 1.68435e-18 | 1.00000 | 1.68435e-18 | 1.00000 |
| rad58         | 6.32177e-19 | 1.00000 | 6.32180e-19 | 1.00000 |
| rad65         | 1.16231e-19 | 1.00000 | 1.16232e-19 | 1.00000 |
| rad42         | 2.60880e-20 | 1.00000 | 2.60881e-20 | 1.00000 |
| rad41         | 7.80833e-21 | 1.00000 | 7.80835e-21 | 1.00000 |
| rad47         | 9.29627e-25 | 1.00000 | 9.29631e-25 | 1.00000 |

10.000000 Pa, 290.000000 K

| Rate constant      | True (fraction)       | Effective (fraction)  |
|--------------------|-----------------------|-----------------------|
| Total              | 3.55893e-16 (1.00 )   | 3.55891e-16 (1.00 )   |
| Formation of rad11 | 2.62555e-16 (0.738 )  | 2.62554e-16 (0.738 )  |
| Formation of rad6  | 7.62093e-17 (0.214 )  | 7.62089e-17 (0.214 )  |
| H-abstraction      | 1.71289e-17 (0.0481 ) | 1.71289e-17 (0.0481 ) |

| species            | PYtrue      | Cumul    | PYeffective | Cumul    |
|--------------------|-------------|----------|-------------|----------|
| rad6               | 0.892573    | 0.892573 | 0.892577    | 0.892577 |
| Indene+H           | 0.0567887   | 0.949362 | 0.0567891   | 0.949366 |
| Benzene+2-propynyl | 0.0481294   | 0.997491 | 0.0481296   | 0.997496 |
| C2H2+PhCH2         | 0.00149764  | 0.998989 | 0.00149765  | 0.998994 |
| rad23              | 0.000339567 | 0.999328 | 0.000339569 | 0.999333 |
| rad2               | 0.000205350 | 0.999534 | 0.000205351 | 0.999539 |
| rad7               | 0.000182866 | 0.999716 | 0.000182867 | 0.999722 |
| rad11              | 6.25319e-05 | 0.999779 | 6.25322e-05 | 0.999784 |
| PhCCH+CH3          | 5.58013e-05 | 0.999835 | 5.58016e-05 | 0.999840 |
| PhCHCCH2+H         | 5.08490e-05 | 0.999886 | 5.08493e-05 | 0.999891 |
| rad28              | 3.49851e-05 | 0.999921 | 3.49853e-05 | 0.999926 |
| rad10              | 1.58744e-05 | 0.999936 | 1.58745e-05 | 0.999942 |
| rad1               | 1.55005e-05 | 0.999952 | 1.55006e-05 | 0.999957 |
| rad45              | 1.22788e-05 | 0.999964 | 1.22789e-05 | 0.999969 |
| PhCCCH3+H          | 1.06621e-05 | 0.999975 | 1.06622e-05 | 0.999980 |
| Phenyl+Allene      | 5.29517e-06 | 0.999980 | 0.00000     | 0.999980 |
| rad3               | 4.53438e-06 | 0.999985 | 4.53441e-06 | 0.999985 |
| rad26              | 3.93698e-06 | 0.999989 | 3.93700e-06 | 0.999989 |
| Ph+MeAc            | 3.27947e-06 | 0.999992 | 3.27949e-06 | 0.999992 |
| rad9               | 3.19594e-06 | 0.999995 | 3.19596e-06 | 0.999995 |
| rad4               | 2.40974e-06 | 0.999998 | 2.40976e-06 | 0.999997 |
| rad36              | 7.99781e-07 | 0.999998 | 7.99785e-07 | 0.999998 |
| rad13              | 5.76915e-07 | 0.999999 | 5.76918e-07 | 0.999999 |
| rad22              | 4.16346e-07 | 0.999999 | 4.16348e-07 | 0.999999 |
| PhCH2CCH+H         | 2.33950e-07 | 1.000000 | 2.33952e-07 | 0.999999 |

|               |             |          |             |          |
|---------------|-------------|----------|-------------|----------|
| rad8          | 1.71623e-07 | 1.000000 | 1.71624e-07 | 1.000000 |
| rad30         | 1.29666e-07 | 1.000000 | 1.29667e-07 | 1.000000 |
| PAH7+H        | 8.79603e-08 | 1.000000 | 8.79607e-08 | 1.000000 |
| rad15         | 3.31352e-08 | 1.000000 | 3.31354e-08 | 1.000000 |
| PAH9+H        | 3.18860e-08 | 1.000000 | 3.18861e-08 | 1.000000 |
| rad39         | 2.25524e-08 | 1.000000 | 2.25525e-08 | 1.000000 |
| rad35         | 1.32963e-08 | 1.000000 | 1.32964e-08 | 1.000000 |
| rad38         | 9.98950e-09 | 1.000000 | 9.98959e-09 | 1.000000 |
| rad12         | 4.86998e-09 | 1.000000 | 4.87001e-09 | 1.000000 |
| rad33         | 8.39645e-10 | 1.000000 | 8.39650e-10 | 1.000000 |
| rad37         | 5.30181e-10 | 1.000000 | 5.30184e-10 | 1.000000 |
| rad25         | 5.28640e-10 | 1.000000 | 5.28643e-10 | 1.000000 |
| rad14         | 4.70222e-10 | 1.000000 | 4.70224e-10 | 1.000000 |
| rad46         | 2.47316e-10 | 1.000000 | 2.47317e-10 | 1.000000 |
| rad27         | 1.73910e-10 | 1.000000 | 1.73911e-10 | 1.000000 |
| rad5          | 9.76010e-11 | 1.000000 | 9.76019e-11 | 1.000000 |
| rad60syn      | 5.74453e-11 | 1.000000 | 5.74456e-11 | 1.000000 |
| rad60anti     | 2.28281e-11 | 1.000000 | 2.28282e-11 | 1.000000 |
| rad18         | 2.79768e-12 | 1.000000 | 2.79770e-12 | 1.000000 |
| PAH3+H        | 2.56584e-12 | 1.000000 | 2.56586e-12 | 1.000000 |
| rad19syn      | 1.87242e-12 | 1.000000 | 1.87243e-12 | 1.000000 |
| rad20         | 8.38691e-13 | 1.000000 | 8.38696e-13 | 1.000000 |
| rad59         | 6.65082e-13 | 1.000000 | 6.65084e-13 | 1.000000 |
| rad21         | 5.41866e-13 | 1.000000 | 5.41868e-13 | 1.000000 |
| rad24         | 1.13324e-13 | 1.000000 | 1.13325e-13 | 1.000000 |
| rad50         | 1.00830e-13 | 1.000000 | 1.00830e-13 | 1.000000 |
| rad54         | 9.82645e-14 | 1.000000 | 9.82644e-14 | 1.000000 |
| PAH10+CH3     | 3.99583e-14 | 1.000000 | 3.99586e-14 | 1.000000 |
| rad31         | 1.84355e-14 | 1.000000 | 1.84356e-14 | 1.000000 |
| rad43         | 1.17816e-14 | 1.000000 | 1.17817e-14 | 1.000000 |
| rad62         | 5.54543e-15 | 1.000000 | 5.54545e-15 | 1.000000 |
| PhcycC3H3_A+H | 1.24464e-15 | 1.000000 | 1.24465e-15 | 1.000000 |
| rad70         | 8.90170e-16 | 1.000000 | 8.90175e-16 | 1.000000 |
| rad55         | 2.98384e-16 | 1.000000 | 2.98385e-16 | 1.000000 |
| rad52         | 1.77833e-16 | 1.000000 | 1.77834e-16 | 1.000000 |
| PAH1+H        | 3.34087e-17 | 1.000000 | 3.34088e-17 | 1.000000 |
| rad51         | 1.93741e-17 | 1.000000 | 1.93742e-17 | 1.000000 |
| rad34         | 4.29575e-18 | 1.000000 | 4.29577e-18 | 1.000000 |
| rad58         | 1.53705e-18 | 1.000000 | 1.53706e-18 | 1.000000 |
| rad65         | 2.75272e-19 | 1.000000 | 2.75273e-19 | 1.000000 |
| rad42         | 6.86800e-20 | 1.000000 | 6.86804e-20 | 1.000000 |
| rad41         | 2.07160e-20 | 1.000000 | 2.07162e-20 | 1.000000 |
| rad47         | 2.07378e-24 | 1.000000 | 2.07379e-24 | 1.000000 |

10.000000 Pa, 300.000000 K

| Rate constant      | True (fraction)       | Effective (fraction)  |
|--------------------|-----------------------|-----------------------|
| Total              | 6.34395e-16 (1.00 )   | 6.34389e-16 (1.00 )   |
| Formation of rad11 | 4.51153e-16 (0.711 )  | 4.51149e-16 (0.711 )  |
| Formation of rad6  | 1.51589e-16 (0.239 )  | 1.51587e-16 (0.239 )  |
| H-abstraction      | 3.16530e-17 (0.0499 ) | 3.16530e-17 (0.0499 ) |

| species            | PYtrue      | Cumul    | PYeffective | Cumul    |
|--------------------|-------------|----------|-------------|----------|
| rad6               | 0.886523    | 0.886523 | 0.886531    | 0.886531 |
| Indene+H           | 0.0599283   | 0.946451 | 0.0599287   | 0.946460 |
| Benzene+2-propynyl | 0.0498949   | 0.996346 | 0.0498953   | 0.996355 |
| C2H2+PhCH2         | 0.00234715  | 0.998693 | 0.00234717  | 0.998702 |
| rad2               | 0.000296311 | 0.998990 | 0.000296314 | 0.998999 |
| PhCCH+CH3          | 0.000224859 | 0.999215 | 0.000224861 | 0.999224 |
| rad23              | 0.000197508 | 0.999412 | 0.000197510 | 0.999421 |
| rad7               | 0.000179239 | 0.999591 | 0.000179240 | 0.999600 |
| PhCHCCH2+H         | 0.000120199 | 0.999712 | 0.000120200 | 0.999721 |
| rad28              | 7.92734e-05 | 0.999791 | 7.92740e-05 | 0.999800 |
| rad11              | 5.80832e-05 | 0.999849 | 5.80837e-05 | 0.999858 |
| PhCCCH3+H          | 4.95493e-05 | 0.999898 | 4.95498e-05 | 0.999908 |
| rad1               | 2.23282e-05 | 0.999921 | 2.23285e-05 | 0.999930 |
| rad10              | 2.17113e-05 | 0.999942 | 2.17115e-05 | 0.999952 |
| Ph+MeAc            | 1.79602e-05 | 0.999960 | 1.79603e-05 | 0.999970 |
| rad26              | 1.03292e-05 | 0.999971 | 1.03293e-05 | 0.999980 |
| Phenyl+Allene      | 8.65755e-06 | 0.999979 | 0.000000    | 0.999980 |
| rad45              | 8.12191e-06 | 0.999988 | 8.12198e-06 | 0.999988 |
| rad3               | 5.50330e-06 | 0.999993 | 5.50336e-06 | 0.999993 |
| rad4               | 2.73683e-06 | 0.999996 | 2.73685e-06 | 0.999996 |
| PAH7+H             | 8.80897e-07 | 0.999997 | 8.80904e-07 | 0.999997 |
| PhCH2CCH+H         | 7.72813e-07 | 0.999997 | 7.72819e-07 | 0.999998 |
| rad13              | 6.16759e-07 | 0.999998 | 6.16764e-07 | 0.999998 |
| rad9               | 4.16358e-07 | 0.999998 | 4.16362e-07 | 0.999999 |
| rad22              | 3.08805e-07 | 0.999999 | 3.08808e-07 | 0.999999 |

|               |             |          |             |          |
|---------------|-------------|----------|-------------|----------|
| rad36         | 2.76818e-07 | 0.999999 | 2.76821e-07 | 0.999999 |
| rad39         | 2.02950e-07 | 0.999999 | 2.02952e-07 | 1.000000 |
| rad30         | 1.71615e-07 | 0.999999 | 1.71616e-07 | 1.000000 |
| PAH9+H        | 6.25235e-08 | 1.000000 | 6.25240e-08 | 1.000000 |
| rad19anti     | 3.53117e-08 | 1.000000 | 3.53121e-08 | 1.000000 |
| rad35         | 2.17326e-08 | 1.000000 | 2.17328e-08 | 1.000000 |
| rad38         | 1.72276e-08 | 1.000000 | 1.72277e-08 | 1.000000 |
| rad37         | 5.44632e-09 | 1.000000 | 5.44636e-09 | 1.000000 |
| rad33         | 1.15624e-09 | 1.000000 | 1.15625e-09 | 1.000000 |
| rad25         | 7.58452e-10 | 1.000000 | 7.58458e-10 | 1.000000 |
| rad14         | 5.80615e-10 | 1.000000 | 5.80619e-10 | 1.000000 |
| rad46         | 5.52176e-10 | 1.000000 | 5.52181e-10 | 1.000000 |
| rad15         | 3.11604e-10 | 1.000000 | 3.11607e-10 | 1.000000 |
| rad27         | 2.95009e-10 | 1.000000 | 2.95011e-10 | 1.000000 |
| rad60syn      | 1.17519e-10 | 1.000000 | 1.17519e-10 | 1.000000 |
| rad60anti     | 4.99662e-11 | 1.000000 | 4.99666e-11 | 1.000000 |
| rad19syn      | 2.53238e-11 | 1.000000 | 2.53240e-11 | 1.000000 |
| PAH3+H        | 1.28990e-11 | 1.000000 | 1.28992e-11 | 1.000000 |
| rad18         | 1.19118e-11 | 1.000000 | 1.19118e-11 | 1.000000 |
| rad20         | 5.64535e-12 | 1.000000 | 5.64540e-12 | 1.000000 |
| rad21         | 3.93419e-12 | 1.000000 | 3.93422e-12 | 1.000000 |
| rad59         | 2.63754e-12 | 1.000000 | 2.63756e-12 | 1.000000 |
| rad54         | 1.93168e-12 | 1.000000 | 1.93170e-12 | 1.000000 |
| PAH10+CH3     | 1.14854e-12 | 1.000000 | 1.14855e-12 | 1.000000 |
| rad5          | 8.25382e-13 | 1.000000 | 8.25389e-13 | 1.000000 |
| rad50         | 5.88394e-13 | 1.000000 | 5.88399e-13 | 1.000000 |
| rad43         | 2.07259e-13 | 1.000000 | 2.07261e-13 | 1.000000 |
| rad67         | 1.65424e-13 | 1.000000 | 1.65425e-13 | 1.000000 |
| rad62         | 1.12181e-13 | 1.000000 | 1.12182e-13 | 1.000000 |
| rad24         | 9.08086e-14 | 1.000000 | 9.08094e-14 | 1.000000 |
| rad31         | 7.72178e-14 | 1.000000 | 7.72184e-14 | 1.000000 |
| PhcycC3H3_A+H | 7.15082e-14 | 1.000000 | 7.15089e-14 | 1.000000 |
| rad70         | 2.46395e-14 | 1.000000 | 2.46396e-14 | 1.000000 |
| rad55         | 1.13855e-14 | 1.000000 | 1.13856e-14 | 1.000000 |
| PAH1+H        | 5.10647e-15 | 1.000000 | 5.10651e-15 | 1.000000 |
| rad12         | 4.33320e-15 | 1.000000 | 4.33324e-15 | 1.000000 |
| rad52         | 2.22006e-15 | 1.000000 | 2.22008e-15 | 1.000000 |
| rad51         | 4.56984e-16 | 1.000000 | 4.56988e-16 | 1.000000 |
| rad34         | 3.59450e-16 | 1.000000 | 3.59454e-16 | 1.000000 |
| rad58         | 4.71752e-17 | 1.000000 | 4.71756e-17 | 1.000000 |
| rad42         | 1.44946e-17 | 1.000000 | 1.44947e-17 | 1.000000 |
| rad65         | 9.22514e-18 | 1.000000 | 9.22522e-18 | 1.000000 |
| rad41         | 5.00086e-18 | 1.000000 | 5.00090e-18 | 1.000000 |
| rad53         | 5.92867e-19 | 1.000000 | 5.92872e-19 | 1.000000 |
| rad64         | 1.63467e-19 | 1.000000 | 1.63467e-19 | 1.000000 |
| rad56         | 2.09913e-21 | 1.000000 | 2.09915e-21 | 1.000000 |
| rad61         | 2.84118e-22 | 1.000000 | 2.84120e-22 | 1.000000 |
| rad68syn      | 2.03307e-22 | 1.000000 | 2.03309e-22 | 1.000000 |
| rad68anti     | 1.46876e-22 | 1.000000 | 1.46877e-22 | 1.000000 |
| rad47         | 2.16162e-23 | 1.000000 | 2.16164e-23 | 1.000000 |
| rad40syn      | 2.80614e-25 | 1.000000 | 2.80616e-25 | 1.000000 |
| rad73         | 1.38066e-25 | 1.000000 | 1.38068e-25 | 1.000000 |
| rad40anti     | 8.54429e-26 | 1.000000 | 8.54436e-26 | 1.000000 |
| PAH8+H        | 5.02773e-26 | 1.000000 | 5.02777e-26 | 1.000000 |
| rad71         | 3.50952e-27 | 1.000000 | 3.50954e-27 | 1.000000 |
| rad72         | 5.96759e-33 | 1.000000 | 5.96765e-33 | 1.000000 |
| rad8          | 8.67531e-37 | 1.000000 | 8.67538e-37 | 1.000000 |

10.000000 Pa, 400.000000 K

=====

| Rate constant      | True (fraction)       | Effective (fraction)  |
|--------------------|-----------------------|-----------------------|
| Total              | 5.11288e-15 (1.00 )   | 5.11211e-15 (1.00 )   |
| Formation of rad11 | 3.08094e-15 (0.603 )  | 3.08042e-15 (0.603 )  |
| Formation of rad6  | 1.54092e-15 (0.301 )  | 1.54066e-15 (0.301 )  |
| H-abstraction      | 4.91025e-16 (0.0960 ) | 4.91025e-16 (0.0961 ) |

| species            | PYtrue      | Cumul    | PYeffective | Cumul    |
|--------------------|-------------|----------|-------------|----------|
| rad6               | 0.799703    | 0.799703 | 0.799825    | 0.799825 |
| Benzene+2-propynyl | 0.0960368   | 0.895740 | 0.0960513   | 0.895876 |
| Indene+H           | 0.0913012   | 0.987041 | 0.0913151   | 0.987191 |
| C2H2+PhCH2         | 0.00772313  | 0.994764 | 0.00772430  | 0.994915 |
| PhCCH+CH3          | 0.00223265  | 0.996997 | 0.00223299  | 0.997148 |
| PhCHCCH2+H         | 0.000967186 | 0.997964 | 0.000967334 | 0.998116 |
| PhCCCH3+H          | 0.000468623 | 0.998432 | 0.000468694 | 0.998584 |
| rad2               | 0.000436269 | 0.998869 | 0.000436335 | 0.999021 |
| rad28              | 0.000273443 | 0.999142 | 0.000273483 | 0.999294 |
| Ph+MeAc            | 0.000247809 | 0.999390 | 0.000247846 | 0.999542 |
| rad7               | 0.000158077 | 0.999548 | 0.000158101 | 0.999700 |



|               |             |          |             |          |
|---------------|-------------|----------|-------------|----------|
| Phenyl+Allene | 0.000151744 | 0.999700 | 0.00000     | 0.999700 |
| rad23         | 7.70391e-05 | 0.999777 | 7.70508e-05 | 0.999777 |
| rad11         | 5.00569e-05 | 0.999827 | 5.00645e-05 | 0.999827 |
| rad1          | 4.06009e-05 | 0.999867 | 4.06071e-05 | 0.999868 |
| rad26         | 3.24973e-05 | 0.999900 | 3.25022e-05 | 0.999900 |
| rad10         | 3.18730e-05 | 0.999932 | 3.18778e-05 | 0.999932 |
| PAH7+H        | 2.37802e-05 | 0.999956 | 2.37838e-05 | 0.999956 |
| PhCH2CCH+H    | 2.04647e-05 | 0.999976 | 2.04678e-05 | 0.999976 |
| rad3          | 7.04235e-06 | 0.999983 | 7.04342e-06 | 0.999984 |
| rad39         | 5.70929e-06 | 0.999989 | 5.71015e-06 | 0.999989 |
| rad45         | 3.95391e-06 | 0.999993 | 3.95450e-06 | 0.999993 |
| rad4          | 3.70876e-06 | 0.999996 | 3.70933e-06 | 0.999997 |
| rad30         | 7.80179e-07 | 0.999997 | 7.80298e-07 | 0.999998 |
| rad13         | 5.96723e-07 | 0.999998 | 5.96814e-07 | 0.999998 |
| rad19anti     | 4.69675e-07 | 0.999998 | 4.69747e-07 | 0.999999 |
| PAH9+H        | 4.42183e-07 | 0.999999 | 4.42250e-07 | 0.999999 |
| rad9          | 4.07442e-07 | 0.999999 | 4.07504e-07 | 1.000000 |
| rad36         | 1.51488e-07 | 0.999999 | 1.51511e-07 | 1.000000 |
| rad22         | 1.43102e-07 | 0.999999 | 1.43124e-07 | 1.000000 |
| rad38         | 1.35380e-07 | 1.000000 | 1.35401e-07 | 1.000000 |
| rad35         | 1.33552e-07 | 1.000000 | 1.33572e-07 | 1.000000 |
| rad37         | 1.21170e-07 | 1.000000 | 1.21188e-07 | 1.000000 |
| rad46         | 7.58033e-09 | 1.000000 | 7.58148e-09 | 1.000000 |
| rad19syn      | 2.30898e-09 | 1.000000 | 2.30933e-09 | 1.000000 |
| rad60syn      | 1.74948e-09 | 1.000000 | 1.74974e-09 | 1.000000 |
| rad33         | 1.26221e-09 | 1.000000 | 1.26241e-09 | 1.000000 |
| rad60anti     | 8.26676e-10 | 1.000000 | 8.26801e-10 | 1.000000 |
| rad14         | 7.31017e-10 | 1.000000 | 7.31127e-10 | 1.000000 |
| PAH3+H        | 5.99639e-10 | 1.000000 | 5.99729e-10 | 1.000000 |
| rad25         | 5.85636e-10 | 1.000000 | 5.85725e-10 | 1.000000 |
| rad27         | 4.74990e-10 | 1.000000 | 4.75062e-10 | 1.000000 |
| rad15         | 3.03698e-10 | 1.000000 | 3.03745e-10 | 1.000000 |
| rad54         | 2.54832e-10 | 1.000000 | 2.54870e-10 | 1.000000 |
| PAH10+CH3     | 1.16349e-10 | 1.000000 | 1.16367e-10 | 1.000000 |
| rad59         | 1.12479e-10 | 1.000000 | 1.12496e-10 | 1.000000 |
| rad50         | 3.99758e-11 | 1.000000 | 3.99818e-11 | 1.000000 |
| PhcycC3H3_A+H | 1.95663e-11 | 1.000000 | 1.95692e-11 | 1.000000 |
| rad43         | 1.79646e-11 | 1.000000 | 1.79673e-11 | 1.000000 |
| rad62         | 1.37803e-11 | 1.000000 | 1.37824e-11 | 1.000000 |
| rad67         | 1.21116e-11 | 1.000000 | 1.21134e-11 | 1.000000 |
| rad18         | 1.17516e-11 | 1.000000 | 1.17534e-11 | 1.000000 |
| rad20         | 9.57858e-12 | 1.000000 | 9.57996e-12 | 1.000000 |
| rad21         | 7.16118e-12 | 1.000000 | 7.16227e-12 | 1.000000 |
| rad70         | 6.11321e-12 | 1.000000 | 6.11414e-12 | 1.000000 |
| rad55         | 2.77265e-12 | 1.000000 | 2.77306e-12 | 1.000000 |
| PAH1+H        | 1.98747e-12 | 1.000000 | 1.98777e-12 | 1.000000 |
| rad5          | 1.94550e-12 | 1.000000 | 1.94579e-12 | 1.000000 |
| rad31         | 1.44045e-12 | 1.000000 | 1.44067e-12 | 1.000000 |
| rad52         | 3.31361e-13 | 1.000000 | 3.31412e-13 | 1.000000 |
| rad34         | 1.64233e-13 | 1.000000 | 1.64258e-13 | 1.000000 |
| rad51         | 1.31702e-13 | 1.000000 | 1.31722e-13 | 1.000000 |
| rad24         | 6.09899e-14 | 1.000000 | 6.09991e-14 | 1.000000 |
| rad58         | 1.50033e-14 | 1.000000 | 1.50055e-14 | 1.000000 |
| rad42         | 7.23303e-15 | 1.000000 | 7.23414e-15 | 1.000000 |
| rad12         | 6.90654e-15 | 1.000000 | 6.90759e-15 | 1.000000 |
| rad65         | 3.32584e-15 | 1.000000 | 3.32634e-15 | 1.000000 |
| rad41         | 2.54166e-15 | 1.000000 | 2.54204e-15 | 1.000000 |
| rad53         | 9.97397e-16 | 1.000000 | 9.97553e-16 | 1.000000 |
| rad64         | 3.52790e-16 | 1.000000 | 3.52843e-16 | 1.000000 |
| rad56         | 1.89122e-17 | 1.000000 | 1.89150e-17 | 1.000000 |
| rad68syn      | 2.14815e-18 | 1.000000 | 2.14848e-18 | 1.000000 |
| rad61         | 1.69491e-18 | 1.000000 | 1.69517e-18 | 1.000000 |
| rad68anti     | 1.54229e-18 | 1.000000 | 1.54252e-18 | 1.000000 |
| rad73         | 2.54935e-19 | 1.000000 | 2.54973e-19 | 1.000000 |
| rad71         | 6.14182e-20 | 1.000000 | 6.14275e-20 | 1.000000 |
| PAH8+H        | 3.93919e-20 | 1.000000 | 3.93979e-20 | 1.000000 |
| rad40syn      | 2.83680e-20 | 1.000000 | 2.83723e-20 | 1.000000 |
| rad40anti     | 1.08848e-20 | 1.000000 | 1.08865e-20 | 1.000000 |
| rad47         | 5.36028e-21 | 1.000000 | 5.36110e-21 | 1.000000 |
| rad72         | 3.34103e-23 | 1.000000 | 3.34154e-23 | 1.000000 |
| rad8          | 1.31986e-33 | 1.000000 | 1.32006e-33 | 1.000000 |

10.000000 Pa, 500.000000 K

=====

| Rate constant      | True (fraction)      | Effective (fraction) |
|--------------------|----------------------|----------------------|
| Total              | 2.11551e-14 (1.00 )  | 2.11250e-14 (1.00 )  |
| Formation of rad11 | 1.10850e-14 (0.524 ) | 1.10666e-14 (0.524 ) |
| Formation of rad6  | 7.08033e-15 (0.335 ) | 7.06858e-15 (0.335 ) |
| H-abstraction      | 2.98976e-15 (0.141 ) | 2.98976e-15 (0.142 ) |

| species            | PYtrue      | Cumul    | PYeffective | Cumul    |
|--------------------|-------------|----------|-------------|----------|
| rad6               | 0.627086    | 0.627086 | 0.627981    | 0.627981 |
| Indene+H           | 0.181858    | 0.808944 | 0.182117    | 0.810099 |
| Benzene+2-propynyl | 0.141326    | 0.950270 | 0.141527    | 0.951626 |
| C2H2+PhCH2         | 0.0278162   | 0.978086 | 0.0278559   | 0.979482 |
| PhCCH+CH3          | 0.0108515   | 0.988938 | 0.0108670   | 0.990349 |
| PhCHCCH2+H         | 0.00456935  | 0.993507 | 0.00457587  | 0.994925 |
| PhCCCH3+H          | 0.00194350  | 0.995450 | 0.00194627  | 0.996871 |
| Phenyl+Allene      | 0.00142480  | 0.996875 | 0.000000    | 0.996871 |
| Ph+MeAc            | 0.00138660  | 0.998262 | 0.00138857  | 0.998259 |
| rad28              | 0.000437025 | 0.998699 | 0.000437648 | 0.998697 |
| rad2               | 0.000399975 | 0.999099 | 0.000400546 | 0.999098 |
| PhCH2CCH+H         | 0.000237667 | 0.999337 | 0.000238006 | 0.999336 |
| PAH7+H             | 0.000211772 | 0.999548 | 0.000212075 | 0.999548 |
| rad7               | 0.000124017 | 0.999672 | 0.000124194 | 0.999672 |
| rad23              | 8.71134e-05 | 0.999759 | 8.72380e-05 | 0.999759 |
| rad39              | 5.17368e-05 | 0.999811 | 5.18107e-05 | 0.999811 |
| rad1               | 4.77621e-05 | 0.999859 | 4.78302e-05 | 0.999859 |
| rad26              | 4.05764e-05 | 0.999899 | 4.06343e-05 | 0.999899 |
| rad11              | 3.96248e-05 | 0.999939 | 3.96814e-05 | 0.999939 |
| rad10              | 2.54018e-05 | 0.999965 | 2.54381e-05 | 0.999965 |
| rad45              | 8.77703e-06 | 0.999973 | 8.78947e-06 | 0.999973 |
| rad3               | 8.10094e-06 | 0.999981 | 8.11250e-06 | 0.999982 |
| rad4               | 4.56076e-06 | 0.999986 | 4.56727e-06 | 0.999986 |
| rad19anti          | 3.67496e-06 | 0.999990 | 3.68020e-06 | 0.999990 |
| rad30              | 3.50681e-06 | 0.999993 | 3.51181e-06 | 0.999993 |
| PAH9+H             | 2.84173e-06 | 0.999996 | 2.84579e-06 | 0.999996 |
| rad38              | 9.30760e-07 | 0.999997 | 9.32087e-07 | 0.999997 |
| rad37              | 8.72550e-07 | 0.999998 | 8.73796e-07 | 0.999998 |
| rad35              | 7.77274e-07 | 0.999999 | 7.78383e-07 | 0.999999 |
| rad13              | 5.43767e-07 | 0.999999 | 5.44542e-07 | 0.999999 |
| rad9               | 4.57713e-07 | 1.000000 | 4.58366e-07 | 1.000000 |
| rad36              | 4.09750e-07 | 1.000000 | 4.10334e-07 | 1.000000 |
| rad22              | 1.20987e-07 | 1.000000 | 1.21160e-07 | 1.000000 |
| rad46              | 7.30862e-08 | 1.000000 | 7.31905e-08 | 1.000000 |
| rad19syn           | 5.64004e-08 | 1.000000 | 5.64808e-08 | 1.000000 |
| rad60syn           | 1.54002e-08 | 1.000000 | 1.54221e-08 | 1.000000 |
| PAH3+H             | 9.95229e-09 | 1.000000 | 9.96644e-09 | 1.000000 |
| rad54              | 8.24369e-09 | 1.000000 | 8.25545e-09 | 1.000000 |
| rad60anti          | 7.67339e-09 | 1.000000 | 7.68433e-09 | 1.000000 |
| PAH10+CH3          | 2.97900e-09 | 1.000000 | 2.98325e-09 | 1.000000 |
| rad59              | 1.74333e-09 | 1.000000 | 1.74582e-09 | 1.000000 |
| rad33              | 1.38674e-09 | 1.000000 | 1.38872e-09 | 1.000000 |
| rad50              | 1.22751e-09 | 1.000000 | 1.22926e-09 | 1.000000 |
| PhcycC3H3_A+H      | 1.13174e-09 | 1.000000 | 1.13336e-09 | 1.000000 |
| rad14              | 7.02305e-10 | 1.000000 | 7.03308e-10 | 1.000000 |
| rad25              | 5.27650e-10 | 1.000000 | 5.28404e-10 | 1.000000 |
| rad27              | 4.45817e-10 | 1.000000 | 4.46453e-10 | 1.000000 |
| rad62              | 3.85982e-10 | 1.000000 | 3.86532e-10 | 1.000000 |
| rad43              | 3.81808e-10 | 1.000000 | 3.82353e-10 | 1.000000 |
| rad15              | 3.46693e-10 | 1.000000 | 3.47188e-10 | 1.000000 |
| rad67              | 3.15333e-10 | 1.000000 | 3.15783e-10 | 1.000000 |
| rad70              | 3.04714e-10 | 1.000000 | 3.05149e-10 | 1.000000 |
| PAH1+H             | 1.53034e-10 | 1.000000 | 1.53253e-10 | 1.000000 |
| rad55              | 1.40858e-10 | 1.000000 | 1.41059e-10 | 1.000000 |
| rad51              | 3.08314e-11 | 1.000000 | 3.08754e-11 | 1.000000 |
| rad52              | 2.56629e-11 | 1.000000 | 2.56995e-11 | 1.000000 |
| rad20              | 2.48469e-11 | 1.000000 | 2.48824e-11 | 1.000000 |
| rad31              | 2.30752e-11 | 1.000000 | 2.31082e-11 | 1.000000 |
| rad21              | 2.10582e-11 | 1.000000 | 2.10883e-11 | 1.000000 |
| rad18              | 1.51474e-11 | 1.000000 | 1.51691e-11 | 1.000000 |
| rad34              | 1.33671e-11 | 1.000000 | 1.33862e-11 | 1.000000 |
| rad5               | 2.06291e-12 | 1.000000 | 2.06586e-12 | 1.000000 |
| rad58              | 9.50003e-13 | 1.000000 | 9.51351e-13 | 1.000000 |
| rad65              | 9.03111e-13 | 1.000000 | 9.04401e-13 | 1.000000 |
| rad42              | 6.20338e-13 | 1.000000 | 6.21223e-13 | 1.000000 |
| rad41              | 2.73556e-13 | 1.000000 | 2.73945e-13 | 1.000000 |
| rad53              | 2.49343e-13 | 1.000000 | 2.49699e-13 | 1.000000 |
| rad24              | 2.02006e-13 | 1.000000 | 2.02294e-13 | 1.000000 |
| rad64              | 1.03491e-13 | 1.000000 | 1.03638e-13 | 1.000000 |
| rad73              | 4.36078e-14 | 1.000000 | 4.36700e-14 | 1.000000 |
| rad71              | 3.43476e-14 | 1.000000 | 3.43966e-14 | 1.000000 |
| rad56              | 2.16079e-14 | 1.000000 | 2.16387e-14 | 1.000000 |
| rad12              | 2.00830e-14 | 1.000000 | 2.01117e-14 | 1.000000 |
| rad61              | 3.23436e-15 | 1.000000 | 3.23897e-15 | 1.000000 |
| rad68syn           | 2.32917e-15 | 1.000000 | 2.33250e-15 | 1.000000 |
| rad68anti          | 1.60712e-15 | 1.000000 | 1.60941e-15 | 1.000000 |
| PAH8+H             | 1.28553e-15 | 1.000000 | 1.28736e-15 | 1.000000 |

|           |             |         |             |         |
|-----------|-------------|---------|-------------|---------|
| rad72     | 3.86720e-16 | 1.00000 | 3.87272e-16 | 1.00000 |
| rad40syn  | 2.95663e-16 | 1.00000 | 2.96085e-16 | 1.00000 |
| rad40anti | 1.80763e-16 | 1.00000 | 1.81021e-16 | 1.00000 |
| rad47     | 5.92492e-19 | 1.00000 | 5.93338e-19 | 1.00000 |
| rad8      | 8.01821e-30 | 1.00000 | 8.02965e-30 | 1.00000 |

10.000000 Pa, 600.000000 K

| Rate constant      | True (fraction)      | Effective (fraction) |
|--------------------|----------------------|----------------------|
| Total              | 6.08120e-14 (1.00 )  | 6.04080e-14 (1.00 )  |
| Formation of rad11 | 2.83304e-14 (0.466 ) | 2.81003e-14 (0.465 ) |
| Formation of rad6  | 2.13840e-14 (0.352 ) | 2.12103e-14 (0.351 ) |
| H-abstraction      | 1.10975e-14 (0.182 ) | 1.10975e-14 (0.184 ) |

| species            | PYtrue      | Cumul    | PYeffective | Cumul    |
|--------------------|-------------|----------|-------------|----------|
| rad6               | 0.386668    | 0.386668 | 0.389253    | 0.389253 |
| Indene+H           | 0.304032    | 0.690699 | 0.306064    | 0.695318 |
| Benzene+2-propynyl | 0.182488    | 0.873188 | 0.183709    | 0.879026 |
| C2H2+PhCH2         | 0.0685685   | 0.941756 | 0.0690270   | 0.948053 |
| PhCCH+CH3          | 0.0278765   | 0.969633 | 0.0280629   | 0.976116 |
| PhCHCCH2+H         | 0.0123964   | 0.982029 | 0.0124793   | 0.988596 |
| Phenyl+Allene      | 0.00664250  | 0.988671 | 0.000000    | 0.988596 |
| PhCCCH3+H          | 0.00412906  | 0.992801 | 0.00415667  | 0.992752 |
| Ph+MeAc            | 0.00377854  | 0.996579 | 0.00380381  | 0.996556 |
| PhCH2CCH+H         | 0.00129672  | 0.997876 | 0.00130540  | 0.997861 |
| PAH7+H             | 0.000830101 | 0.998706 | 0.000835654 | 0.998697 |
| rad28              | 0.000372051 | 0.999078 | 0.000374539 | 0.999072 |
| rad2               | 0.000307509 | 0.999385 | 0.000309565 | 0.999381 |
| rad39              | 0.000203214 | 0.999589 | 0.000204572 | 0.999586 |
| rad23              | 0.000136984 | 0.999726 | 0.000137900 | 0.999724 |
| rad7               | 7.89207e-05 | 0.999805 | 7.94484e-05 | 0.999803 |
| rad1               | 4.54186e-05 | 0.999850 | 4.57223e-05 | 0.999849 |
| rad26              | 2.67028e-05 | 0.999877 | 2.68814e-05 | 0.999876 |
| rad11              | 2.60956e-05 | 0.999903 | 2.62701e-05 | 0.999902 |
| rad45              | 2.14765e-05 | 0.999924 | 2.16201e-05 | 0.999924 |
| rad19anti          | 1.55783e-05 | 0.999940 | 1.56825e-05 | 0.999939 |
| rad10              | 1.23588e-05 | 0.999952 | 1.24415e-05 | 0.999952 |
| PAH9+H             | 1.15964e-05 | 0.999964 | 1.16739e-05 | 0.999963 |
| rad30              | 1.00677e-05 | 0.999974 | 1.01350e-05 | 0.999974 |
| rad3               | 7.64075e-06 | 0.999982 | 7.69184e-06 | 0.999981 |
| rad4               | 4.65972e-06 | 0.999986 | 4.69088e-06 | 0.999986 |
| rad38              | 4.04388e-06 | 0.999990 | 4.07092e-06 | 0.999990 |
| rad35              | 2.89278e-06 | 0.999993 | 2.91213e-06 | 0.999993 |
| rad37              | 2.77267e-06 | 0.999996 | 2.79121e-06 | 0.999996 |
| rad36              | 1.33178e-06 | 0.999997 | 1.34068e-06 | 0.999997 |
| rad9               | 6.45161e-07 | 0.999998 | 6.49475e-07 | 0.999998 |
| rad19syn           | 5.15973e-07 | 0.999998 | 5.19423e-07 | 0.999998 |
| rad46              | 4.48421e-07 | 0.999999 | 4.51419e-07 | 0.999999 |
| rad13              | 4.42332e-07 | 0.999999 | 4.45289e-07 | 0.999999 |
| rad22              | 1.33272e-07 | 0.999999 | 1.34163e-07 | 0.999999 |
| rad54              | 9.34138e-08 | 0.999999 | 9.40384e-08 | 0.999999 |
| PAH3+H             | 7.19654e-08 | 1.000000 | 7.24466e-08 | 0.999999 |
| rad60syn           | 6.95371e-08 | 1.000000 | 7.00021e-08 | 1.000000 |
| rad50              | 5.43214e-08 | 1.000000 | 5.46847e-08 | 1.000000 |
| rad60anti          | 3.59193e-08 | 1.000000 | 3.61596e-08 | 1.000000 |
| PAH10+CH3          | 3.23499e-08 | 1.000000 | 3.25663e-08 | 1.000000 |
| PhcycC3H3_A+H      | 1.99544e-08 | 1.000000 | 2.00878e-08 | 1.000000 |
| rad59              | 1.17776e-08 | 1.000000 | 1.18563e-08 | 1.000000 |
| rad51              | 9.92001e-09 | 1.000000 | 9.98635e-09 | 1.000000 |
| rad70              | 4.71771e-09 | 1.000000 | 4.74927e-09 | 1.000000 |
| rad67              | 3.72048e-09 | 1.000000 | 3.74536e-09 | 1.000000 |
| rad62              | 3.71655e-09 | 1.000000 | 3.74140e-09 | 1.000000 |
| PAH1+H             | 3.52732e-09 | 1.000000 | 3.55090e-09 | 1.000000 |
| rad52              | 3.52094e-09 | 1.000000 | 3.54448e-09 | 1.000000 |
| rad43              | 3.23890e-09 | 1.000000 | 3.26055e-09 | 1.000000 |
| rad55              | 2.19657e-09 | 1.000000 | 2.21126e-09 | 1.000000 |
| rad33              | 1.56822e-09 | 1.000000 | 1.57871e-09 | 1.000000 |
| rad14              | 5.19247e-10 | 1.000000 | 5.22719e-10 | 1.000000 |
| rad15              | 4.66610e-10 | 1.000000 | 4.69730e-10 | 1.000000 |
| rad25              | 4.57166e-10 | 1.000000 | 4.60223e-10 | 1.000000 |
| rad34              | 3.00113e-10 | 1.000000 | 3.02120e-10 | 1.000000 |
| rad27              | 2.88743e-10 | 1.000000 | 2.90673e-10 | 1.000000 |
| rad65              | 2.72017e-10 | 1.000000 | 2.73836e-10 | 1.000000 |
| rad71              | 1.93733e-10 | 1.000000 | 1.95028e-10 | 1.000000 |
| rad73              | 1.52650e-10 | 1.000000 | 1.53670e-10 | 1.000000 |
| rad21              | 1.00470e-10 | 1.000000 | 1.01142e-10 | 1.000000 |
| rad20              | 9.65727e-11 | 1.000000 | 9.72187e-11 | 1.000000 |
| rad31              | 8.99909e-11 | 1.000000 | 9.05928e-11 | 1.000000 |

|           |             |          |             |          |
|-----------|-------------|----------|-------------|----------|
| rad58     | 2.83601e-11 | 1.000000 | 2.85497e-11 | 1.000000 |
| rad18     | 2.50575e-11 | 1.000000 | 2.52250e-11 | 1.000000 |
| rad41     | 1.50640e-11 | 1.000000 | 1.51647e-11 | 1.000000 |
| rad42     | 1.49609e-11 | 1.000000 | 1.50609e-11 | 1.000000 |
| rad53     | 1.28619e-11 | 1.000000 | 1.29479e-11 | 1.000000 |
| rad64     | 9.80123e-12 | 1.000000 | 9.86676e-12 | 1.000000 |
| rad72     | 5.49797e-12 | 1.000000 | 5.53473e-12 | 1.000000 |
| rad56     | 3.30282e-12 | 1.000000 | 3.32490e-12 | 1.000000 |
| PAH8+H    | 2.93190e-12 | 1.000000 | 2.95151e-12 | 1.000000 |
| rad61     | 2.28878e-12 | 1.000000 | 2.30409e-12 | 1.000000 |
| rad24     | 1.47050e-12 | 1.000000 | 1.48034e-12 | 1.000000 |
| rad5      | 1.35196e-12 | 1.000000 | 1.36100e-12 | 1.000000 |
| rad68syn  | 9.10119e-13 | 1.000000 | 9.16206e-13 | 1.000000 |
| rad68anti | 5.98538e-13 | 1.000000 | 6.02540e-13 | 1.000000 |
| rad40syn  | 4.54577e-13 | 1.000000 | 4.57616e-13 | 1.000000 |
| rad40anti | 3.30151e-13 | 1.000000 | 3.32359e-13 | 1.000000 |
| rad12     | 1.65173e-13 | 1.000000 | 1.66277e-13 | 1.000000 |
| rad47     | 9.67133e-17 | 1.000000 | 9.73607e-17 | 1.000000 |
| rad8      | 1.60181e-25 | 1.000000 | 1.61252e-25 | 1.000000 |

10.0000000 Pa, 700.000000 K

| Rate constant      | True (fraction)      | Effective (fraction) |
|--------------------|----------------------|----------------------|
| Total              | 1.39564e-13 (1.00 )  | 1.36927e-13 (1.00 )  |
| Formation of rad11 | 5.88273e-14 (0.422 ) | 5.74041e-14 (0.419 ) |
| Formation of rad6  | 5.01684e-14 (0.359 ) | 4.89547e-14 (0.358 ) |
| H-abstraction      | 3.05678e-14 (0.219 ) | 3.05678e-14 (0.223 ) |

| species            | PYtrue      | Cumul    | PYeffective | Cumul    |
|--------------------|-------------|----------|-------------|----------|
| Indene+H           | 0.376439    | 0.376439 | 0.383688    | 0.383688 |
| Benzene+2-propynyl | 0.219024    | 0.595463 | 0.223242    | 0.606930 |
| rad6               | 0.183163    | 0.778626 | 0.186691    | 0.793621 |
| C2H2+PhCH2         | 0.114544    | 0.893170 | 0.116750    | 0.910371 |
| PhCCH+CH3          | 0.0458522   | 0.939023 | 0.0467352   | 0.957106 |
| PhCHCCH2+H         | 0.0229091   | 0.961932 | 0.0233503   | 0.980456 |
| Phenyl+Allene      | 0.0188942   | 0.980826 | 0.000000    | 0.980456 |
| Ph+MeAc            | 0.00632543  | 0.987151 | 0.00644724  | 0.986903 |
| PhCCCH3+H          | 0.00550021  | 0.992651 | 0.00560613  | 0.992510 |
| PhCH2CCH+H         | 0.00420817  | 0.996860 | 0.00428921  | 0.996799 |
| PAH7+H             | 0.00194076  | 0.998800 | 0.00197814  | 0.998777 |
| rad39              | 0.000470757 | 0.999271 | 0.000479823 | 0.999257 |
| rad28              | 0.000203799 | 0.999475 | 0.000207723 | 0.999464 |
| rad2               | 0.000157787 | 0.999633 | 0.000160825 | 0.999625 |
| rad23              | 0.000111157 | 0.999744 | 0.000113298 | 0.999739 |
| rad19anti          | 4.26008e-05 | 0.999786 | 4.34212e-05 | 0.999782 |
| rad7               | 4.07358e-05 | 0.999827 | 4.15203e-05 | 0.999823 |
| PAH9+H             | 3.34586e-05 | 0.999861 | 3.41029e-05 | 0.999858 |
| rad1               | 2.67502e-05 | 0.999887 | 2.72654e-05 | 0.999885 |
| rad45              | 2.03848e-05 | 0.999908 | 2.07774e-05 | 0.999906 |
| rad30              | 1.91509e-05 | 0.999927 | 1.95198e-05 | 0.999925 |
| rad11              | 1.45191e-05 | 0.999941 | 1.47987e-05 | 0.999940 |
| rad38              | 1.25790e-05 | 0.999954 | 1.28212e-05 | 0.999953 |
| rad26              | 1.17935e-05 | 0.999966 | 1.20206e-05 | 0.999965 |
| rad35              | 7.47455e-06 | 0.999973 | 7.61849e-06 | 0.999972 |
| rad37              | 5.19304e-06 | 0.999979 | 5.29305e-06 | 0.999978 |
| rad10              | 4.42652e-06 | 0.999983 | 4.51177e-06 | 0.999982 |
| rad3               | 4.06095e-06 | 0.999987 | 4.13916e-06 | 0.999986 |
| rad4               | 2.66719e-06 | 0.999990 | 2.71856e-06 | 0.999989 |
| rad19syn           | 2.52386e-06 | 0.999992 | 2.57247e-06 | 0.999992 |
| rad46              | 2.05311e-06 | 0.999994 | 2.09265e-06 | 0.999994 |
| rad36              | 1.53420e-06 | 0.999996 | 1.56375e-06 | 0.999995 |
| rad9               | 1.21260e-06 | 0.999997 | 1.23595e-06 | 0.999997 |
| rad50              | 8.06037e-07 | 0.999998 | 8.21561e-07 | 0.999997 |
| rad54              | 5.40983e-07 | 0.999998 | 5.51402e-07 | 0.999998 |
| rad13              | 3.40576e-07 | 0.999999 | 3.47135e-07 | 0.999998 |
| PAH3+H             | 3.07562e-07 | 0.999999 | 3.13485e-07 | 0.999999 |
| rad51              | 2.13459e-07 | 0.999999 | 2.17571e-07 | 0.999999 |
| PAH10+CH3          | 2.01144e-07 | 0.999999 | 2.05018e-07 | 0.999999 |
| rad60syn           | 1.93267e-07 | 1.000000 | 1.96990e-07 | 0.999999 |
| PhcycC3H3_A+H      | 1.62715e-07 | 1.000000 | 1.65849e-07 | 0.999999 |
| rad60anti          | 1.02901e-07 | 1.000000 | 1.04882e-07 | 0.999999 |
| rad22              | 9.99274e-08 | 1.000000 | 1.01852e-07 | 1.000000 |
| rad52              | 6.54129e-08 | 1.000000 | 6.66726e-08 | 1.000000 |
| rad59              | 4.64064e-08 | 1.000000 | 4.73000e-08 | 1.000000 |
| PAH1+H             | 3.78651e-08 | 1.000000 | 3.85943e-08 | 1.000000 |
| rad70              | 3.47989e-08 | 1.000000 | 3.54690e-08 | 1.000000 |
| rad67              | 2.66373e-08 | 1.000000 | 2.71502e-08 | 1.000000 |
| rad62              | 1.83795e-08 | 1.000000 | 1.87335e-08 | 1.000000 |

|           |             |         |             |          |
|-----------|-------------|---------|-------------|----------|
| rad55     | 1.60865e-08 | 1.00000 | 1.63963e-08 | 1.000000 |
| rad43     | 1.59328e-08 | 1.00000 | 1.62397e-08 | 1.000000 |
| rad71     | 6.67227e-09 | 1.00000 | 6.80076e-09 | 1.000000 |
| rad65     | 5.67330e-09 | 1.00000 | 5.78256e-09 | 1.000000 |
| rad73     | 4.88217e-09 | 1.00000 | 4.97619e-09 | 1.000000 |
| rad34     | 2.96936e-09 | 1.00000 | 3.02654e-09 | 1.000000 |
| rad33     | 2.24045e-09 | 1.00000 | 2.28359e-09 | 1.000000 |
| rad21     | 7.90941e-10 | 1.00000 | 8.06174e-10 | 1.000000 |
| rad15     | 6.07673e-10 | 1.00000 | 6.19375e-10 | 1.000000 |
| rad20     | 5.80723e-10 | 1.00000 | 5.91907e-10 | 1.000000 |
| rad25     | 4.03715e-10 | 1.00000 | 4.11491e-10 | 1.000000 |
| rad58     | 3.95786e-10 | 1.00000 | 4.03408e-10 | 1.000000 |
| rad41     | 3.34793e-10 | 1.00000 | 3.41241e-10 | 1.000000 |
| rad14     | 3.16893e-10 | 1.00000 | 3.22996e-10 | 1.000000 |
| rad72     | 2.15157e-10 | 1.00000 | 2.19300e-10 | 1.000000 |
| rad64     | 2.14007e-10 | 1.00000 | 2.18128e-10 | 1.000000 |
| rad53     | 1.94816e-10 | 1.00000 | 1.98568e-10 | 1.000000 |
| rad42     | 1.73291e-10 | 1.00000 | 1.76628e-10 | 1.000000 |
| rad27     | 1.68317e-10 | 1.00000 | 1.71559e-10 | 1.000000 |
| PAH8+H    | 1.67187e-10 | 1.00000 | 1.70407e-10 | 1.000000 |
| rad31     | 9.97119e-11 | 1.00000 | 1.01633e-10 | 1.000000 |
| rad61     | 9.20661e-11 | 1.00000 | 9.38385e-11 | 1.000000 |
| rad18     | 6.38525e-11 | 1.00000 | 6.50822e-11 | 1.000000 |
| rad56     | 5.57346e-11 | 1.00000 | 5.68079e-11 | 1.000000 |
| rad24     | 2.88624e-11 | 1.00000 | 2.94181e-11 | 1.000000 |
| rad40syn  | 2.87643e-11 | 1.00000 | 2.93183e-11 | 1.000000 |
| rad68syn  | 2.64370e-11 | 1.00000 | 2.69461e-11 | 1.000000 |
| rad40anti | 2.46656e-11 | 1.00000 | 2.51405e-11 | 1.000000 |
| rad68anti | 1.72996e-11 | 1.00000 | 1.76328e-11 | 1.000000 |
| rad12     | 5.18053e-12 | 1.00000 | 5.28030e-12 | 1.000000 |
| rad5      | 6.93980e-13 | 1.00000 | 7.07344e-13 | 1.000000 |
| rad47     | 9.25425e-15 | 1.00000 | 9.43248e-15 | 1.000000 |
| rad8      | 3.98481e-21 | 1.00000 | 4.06155e-21 | 1.000000 |

10.000000 Pa, 800.000000 K

=====

| Rate constant      | True (fraction)      | Effective (fraction) |
|--------------------|----------------------|----------------------|
| Total              | 2.75392e-13 (1.00 )  | 2.64579e-13 (1.00 )  |
| Formation of rad11 | 1.06471e-13 (0.387 ) | 1.00887e-13 (0.381 ) |
| Formation of rad6  | 9.97133e-14 (0.362 ) | 9.44839e-14 (0.357 ) |
| H-abstraction      | 6.92082e-14 (0.251 ) | 6.92082e-14 (0.262 ) |

| species            | PYtrue      | Cumul    | PYeffective | Cumul    |
|--------------------|-------------|----------|-------------|----------|
| Indene+H           | 0.372370    | 0.372370 | 0.387589    | 0.387589 |
| Benzene+2-propynyl | 0.251308    | 0.623678 | 0.261578    | 0.649168 |
| C2H2+PhCH2         | 0.146513    | 0.770191 | 0.152501    | 0.801669 |
| rad6               | 0.0716942   | 0.841885 | 0.0746241   | 0.876293 |
| PhCCH+CH3          | 0.0573381   | 0.899223 | 0.0596814   | 0.935974 |
| Phenyl+Allene      | 0.0392645   | 0.938488 | 0.000000    | 0.935974 |
| PhCHCCH2+H         | 0.0338246   | 0.972313 | 0.0352071   | 0.971181 |
| PhCH2CCH+H         | 0.00976864  | 0.982081 | 0.0101678   | 0.981349 |
| Ph+MeAc            | 0.00784794  | 0.989929 | 0.00816871  | 0.989518 |
| PhCCH3+H           | 0.00544900  | 0.995378 | 0.00567171  | 0.995190 |
| PAH7+H             | 0.00332663  | 0.998705 | 0.00346258  | 0.998652 |
| rad39              | 0.000791877 | 0.999497 | 0.000824241 | 0.999477 |
| rad19anti          | 8.80792e-05 | 0.999585 | 9.16787e-05 | 0.999568 |
| rad28              | 8.60262e-05 | 0.999671 | 8.95425e-05 | 0.999658 |
| PAH9+H             | 6.60099e-05 | 0.999737 | 6.87076e-05 | 0.999726 |
| rad23              | 5.37376e-05 | 0.999791 | 5.59338e-05 | 0.999782 |
| rad2               | 5.24492e-05 | 0.999843 | 5.45928e-05 | 0.999837 |
| rad30              | 2.76671e-05 | 0.999871 | 2.87978e-05 | 0.999866 |
| rad38              | 2.57287e-05 | 0.999896 | 2.67803e-05 | 0.999893 |
| rad7               | 1.92413e-05 | 0.999916 | 2.00277e-05 | 0.999913 |
| rad35              | 1.38334e-05 | 0.999929 | 1.43987e-05 | 0.999927 |
| rad45              | 1.22460e-05 | 0.999942 | 1.27465e-05 | 0.999940 |
| rad1               | 9.16295e-06 | 0.999951 | 9.53738e-06 | 0.999949 |
| rad19syn           | 8.24617e-06 | 0.999959 | 8.58319e-06 | 0.999958 |
| rad11              | 7.88927e-06 | 0.999967 | 8.21169e-06 | 0.999966 |
| rad37              | 7.06790e-06 | 0.999974 | 7.35676e-06 | 0.999973 |
| rad46              | 4.87020e-06 | 0.999979 | 5.06924e-06 | 0.999979 |
| rad26              | 4.22910e-06 | 0.999983 | 4.40194e-06 | 0.999983 |
| rad9               | 2.64919e-06 | 0.999986 | 2.75746e-06 | 0.999986 |
| rad50              | 2.33689e-06 | 0.999988 | 2.43240e-06 | 0.999988 |
| rad54              | 2.02143e-06 | 0.999990 | 2.10404e-06 | 0.999990 |
| rad3               | 1.46155e-06 | 0.999992 | 1.52128e-06 | 0.999992 |
| rad10              | 1.31377e-06 | 0.999993 | 1.36746e-06 | 0.999993 |
| rad36              | 1.01191e-06 | 0.999994 | 1.05327e-06 | 0.999994 |
| rad4               | 9.97939e-07 | 0.999995 | 1.03873e-06 | 0.999995 |

|               |             |          |             |          |
|---------------|-------------|----------|-------------|----------|
| PAH3+H        | 8.54131e-07 | 0.999996 | 8.89037e-07 | 0.999996 |
| PhcycC3H3_A+H | 7.96107e-07 | 0.999997 | 8.28642e-07 | 0.999997 |
| rad51         | 6.58134e-07 | 0.999997 | 6.85031e-07 | 0.999998 |
| PAH10+CH3     | 5.34758e-07 | 0.999998 | 5.56613e-07 | 0.999998 |
| rad60syn      | 3.89125e-07 | 0.999998 | 4.05029e-07 | 0.999999 |
| rad13         | 3.02288e-07 | 0.999999 | 3.14642e-07 | 0.999999 |
| rad60anti     | 2.12428e-07 | 0.999999 | 2.21110e-07 | 0.999999 |
| rad52         | 1.95522e-07 | 0.999999 | 2.03513e-07 | 0.999999 |
| PAH1+H        | 1.79788e-07 | 0.999999 | 1.87136e-07 | 0.999999 |
| rad70         | 1.52399e-07 | 0.999999 | 1.58628e-07 | 1.000000 |
| rad59         | 1.22122e-07 | 0.999999 | 1.27113e-07 | 1.000000 |
| rad67         | 1.08895e-07 | 0.999999 | 1.13345e-07 | 1.000000 |
| rad55         | 7.17598e-08 | 1.000000 | 7.46928e-08 | 1.000000 |
| rad22         | 5.83430e-08 | 1.000000 | 6.07275e-08 | 1.000000 |
| rad62         | 5.64504e-08 | 1.000000 | 5.87575e-08 | 1.000000 |
| rad43         | 3.80773e-08 | 1.000000 | 3.96335e-08 | 1.000000 |
| rad71         | 2.34666e-08 | 1.000000 | 2.44257e-08 | 1.000000 |
| rad65         | 1.73311e-08 | 1.000000 | 1.80394e-08 | 1.000000 |
| rad73         | 1.67965e-08 | 1.000000 | 1.74829e-08 | 1.000000 |
| rad34         | 1.54598e-08 | 1.000000 | 1.60917e-08 | 1.000000 |
| rad21         | 7.63120e-09 | 1.000000 | 7.94313e-09 | 1.000000 |
| rad33         | 5.39134e-09 | 1.000000 | 5.61168e-09 | 1.000000 |
| rad20         | 4.51004e-09 | 1.000000 | 4.69436e-09 | 1.000000 |
| rad58         | 1.45360e-09 | 1.000000 | 1.51301e-09 | 1.000000 |
| rad53         | 1.45311e-09 | 1.000000 | 1.51250e-09 | 1.000000 |
| rad41         | 1.26340e-09 | 1.000000 | 1.31503e-09 | 1.000000 |
| rad64         | 1.04139e-09 | 1.000000 | 1.08395e-09 | 1.000000 |
| PAH8+H        | 8.13604e-10 | 1.000000 | 8.46859e-10 | 1.000000 |
| rad15         | 8.12369e-10 | 1.000000 | 8.45567e-10 | 1.000000 |
| rad72         | 7.86074e-10 | 1.000000 | 8.18201e-10 | 1.000000 |
| rad42         | 7.80699e-10 | 1.000000 | 8.12603e-10 | 1.000000 |
| rad25         | 4.69929e-10 | 1.000000 | 4.89135e-10 | 1.000000 |
| rad24         | 4.68070e-10 | 1.000000 | 4.87199e-10 | 1.000000 |
| rad56         | 4.13633e-10 | 1.000000 | 4.30537e-10 | 1.000000 |
| rad61         | 3.69520e-10 | 1.000000 | 3.84622e-10 | 1.000000 |
| rad18         | 2.69974e-10 | 1.000000 | 2.81008e-10 | 1.000000 |
| rad14         | 2.19305e-10 | 1.000000 | 2.28268e-10 | 1.000000 |
| rad40syn      | 1.44490e-10 | 1.000000 | 1.50396e-10 | 1.000000 |
| rad40anti     | 1.28185e-10 | 1.000000 | 1.33424e-10 | 1.000000 |
| rad27         | 1.22118e-10 | 1.000000 | 1.27110e-10 | 1.000000 |
| rad68syn      | 1.18457e-10 | 1.000000 | 1.23299e-10 | 1.000000 |
| rad12         | 1.12403e-10 | 1.000000 | 1.16997e-10 | 1.000000 |
| rad68anti     | 7.81126e-11 | 1.000000 | 8.13054e-11 | 1.000000 |
| rad31         | 6.53814e-11 | 1.000000 | 6.80534e-11 | 1.000000 |
| rad5          | 3.53976e-13 | 1.000000 | 3.68443e-13 | 1.000000 |
| rad47         | 6.08818e-14 | 1.000000 | 6.33700e-14 | 1.000000 |
| rad8          | 2.34213e-17 | 1.000000 | 2.43785e-17 | 1.000000 |

10.000000 Pa, 900.000000 K

=====

| Rate constant      | True (fraction)      | Effective (fraction) |
|--------------------|----------------------|----------------------|
| Total              | 4.88072e-13 (1.00 )  | 4.55485e-13 (1.00 )  |
| Formation of rad11 | 1.74945e-13 (0.358 ) | 1.58724e-13 (0.348 ) |
| Formation of rad6  | 1.76509e-13 (0.362 ) | 1.60143e-13 (0.352 ) |
| H-abstraction      | 1.36618e-13 (0.280 ) | 1.36618e-13 (0.300 ) |

| species            | PYtrue      | Cumul    | PYeffective | Cumul    |
|--------------------|-------------|----------|-------------|----------|
| Indene+H           | 0.326411    | 0.326411 | 0.349763    | 0.349763 |
| Benzene+2-propynyl | 0.279914    | 0.606324 | 0.299940    | 0.649703 |
| C2H2+PhCH2         | 0.159923    | 0.766248 | 0.171364    | 0.821067 |
| Phenyl+Allene      | 0.0667668   | 0.833015 | 0.000000    | 0.821067 |
| PhCCH+CH3          | 0.0617455   | 0.894760 | 0.0661630   | 0.887230 |
| PhCHCCH2+H         | 0.0442484   | 0.939008 | 0.0474142   | 0.934645 |
| rad6               | 0.0235722   | 0.962581 | 0.0252587   | 0.959903 |
| PhCH2CCH+H         | 0.0181683   | 0.980749 | 0.0194681   | 0.979371 |
| Ph+MeAc            | 0.00831210  | 0.989061 | 0.00890680  | 0.988278 |
| PAH7+H             | 0.00473959  | 0.993801 | 0.00507867  | 0.993357 |
| PhCCCH3+H          | 0.00460793  | 0.998409 | 0.00493759  | 0.998294 |
| rad39              | 0.00109840  | 0.999507 | 0.00117698  | 0.999471 |
| rad19anti          | 0.000152118 | 0.999659 | 0.000163001 | 0.999634 |
| PAH9+H             | 9.77236e-05 | 0.999757 | 0.000104715 | 0.999739 |
| rad38              | 3.81704e-05 | 0.999795 | 4.09012e-05 | 0.999780 |
| rad30              | 3.38527e-05 | 0.999829 | 3.62746e-05 | 0.999816 |
| rad28              | 2.97329e-05 | 0.999859 | 3.18601e-05 | 0.999848 |
| rad23              | 2.36843e-05 | 0.999882 | 2.53788e-05 | 0.999873 |
| rad19syn           | 2.05185e-05 | 0.999903 | 2.19864e-05 | 0.999895 |
| rad35              | 2.01112e-05 | 0.999923 | 2.15500e-05 | 0.999917 |
| rad2               | 1.43174e-05 | 0.999937 | 1.53418e-05 | 0.999932 |

|               |             |          |             |          |
|---------------|-------------|----------|-------------|----------|
| rad7          | 8.84820e-06 | 0.999946 | 9.48120e-06 | 0.999942 |
| rad37         | 8.29179e-06 | 0.999954 | 8.88503e-06 | 0.999951 |
| rad46         | 7.20346e-06 | 0.999962 | 7.71879e-06 | 0.999958 |
| rad45         | 6.53964e-06 | 0.999968 | 7.00753e-06 | 0.999965 |
| rad54         | 5.60233e-06 | 0.999974 | 6.00314e-06 | 0.999971 |
| rad11         | 4.51956e-06 | 0.999978 | 4.84290e-06 | 0.999976 |
| rad9          | 3.51579e-06 | 0.999982 | 3.76733e-06 | 0.999980 |
| PhcycC3H3_A+H | 2.75600e-06 | 0.999984 | 2.95318e-06 | 0.999983 |
| rad50         | 2.72268e-06 | 0.999987 | 2.91747e-06 | 0.999986 |
| rad1          | 2.68895e-06 | 0.999990 | 2.88132e-06 | 0.999989 |
| PAH3+H        | 1.76423e-06 | 0.999992 | 1.89045e-06 | 0.999991 |
| rad26         | 1.37650e-06 | 0.999993 | 1.47498e-06 | 0.999992 |
| PAH10+CH3     | 8.61720e-07 | 0.999994 | 9.23366e-07 | 0.999993 |
| rad51         | 7.12977e-07 | 0.999995 | 7.63983e-07 | 0.999994 |
| rad60syn      | 6.33872e-07 | 0.999995 | 6.79221e-07 | 0.999995 |
| rad36         | 5.79110e-07 | 0.999996 | 6.20542e-07 | 0.999995 |
| PAH1+H        | 5.61998e-07 | 0.999996 | 6.02205e-07 | 0.999996 |
| rad3          | 4.80615e-07 | 0.999997 | 5.14999e-07 | 0.999996 |
| rad70         | 4.70970e-07 | 0.999997 | 5.04665e-07 | 0.999997 |
| rad10         | 4.23328e-07 | 0.999998 | 4.53614e-07 | 0.999997 |
| rad13         | 3.53456e-07 | 0.999998 | 3.78743e-07 | 0.999998 |
| rad60anti     | 3.53106e-07 | 0.999998 | 3.78368e-07 | 0.999998 |
| rad4          | 3.46547e-07 | 0.999999 | 3.71341e-07 | 0.999998 |
| rad67         | 3.23951e-07 | 0.999999 | 3.47128e-07 | 0.999999 |
| rad59         | 2.43720e-07 | 0.999999 | 2.61157e-07 | 0.999999 |
| rad55         | 2.28528e-07 | 1.000000 | 2.44878e-07 | 0.999999 |
| rad52         | 2.16245e-07 | 1.000000 | 2.31716e-07 | 0.999999 |
| rad62         | 1.26476e-07 | 1.000000 | 1.35525e-07 | 1.000000 |
| rad34         | 5.47004e-08 | 1.000000 | 5.86138e-08 | 1.000000 |
| rad43         | 5.16061e-08 | 1.000000 | 5.52981e-08 | 1.000000 |
| rad22         | 4.95918e-08 | 1.000000 | 5.31398e-08 | 1.000000 |
| rad21         | 4.32316e-08 | 1.000000 | 4.63246e-08 | 1.000000 |
| rad71         | 2.61395e-08 | 1.000000 | 2.80096e-08 | 1.000000 |
| rad20         | 2.37213e-08 | 1.000000 | 2.54184e-08 | 1.000000 |
| rad65         | 1.88155e-08 | 1.000000 | 2.01616e-08 | 1.000000 |
| rad73         | 1.85280e-08 | 1.000000 | 1.98535e-08 | 1.000000 |
| rad33         | 1.55387e-08 | 1.000000 | 1.66504e-08 | 1.000000 |
| rad53         | 7.23471e-09 | 1.000000 | 7.75233e-09 | 1.000000 |
| rad64         | 3.30501e-09 | 1.000000 | 3.54146e-09 | 1.000000 |
| rad58         | 3.02055e-09 | 1.000000 | 3.23664e-09 | 1.000000 |
| rad56         | 2.40806e-09 | 1.000000 | 2.58035e-09 | 1.000000 |
| rad42         | 1.99022e-09 | 1.000000 | 2.13260e-09 | 1.000000 |
| rad24         | 1.77626e-09 | 1.000000 | 1.90334e-09 | 1.000000 |
| rad41         | 1.59366e-09 | 1.000000 | 1.70767e-09 | 1.000000 |
| PAH8+H        | 1.14326e-09 | 1.000000 | 1.22505e-09 | 1.000000 |
| rad18         | 9.87109e-10 | 1.000000 | 1.05773e-09 | 1.000000 |
| rad72         | 8.91344e-10 | 1.000000 | 9.55120e-10 | 1.000000 |
| rad15         | 8.86577e-10 | 1.000000 | 9.50003e-10 | 1.000000 |
| rad25         | 8.19206e-10 | 1.000000 | 8.77820e-10 | 1.000000 |
| rad12         | 5.28817e-10 | 1.000000 | 5.66651e-10 | 1.000000 |
| rad61         | 4.57901e-10 | 1.000000 | 4.90662e-10 | 1.000000 |
| rad68syn      | 3.51446e-10 | 1.000000 | 3.76590e-10 | 1.000000 |
| rad68anti     | 2.34883e-10 | 1.000000 | 2.51687e-10 | 1.000000 |
| rad14         | 2.27909e-10 | 1.000000 | 2.44214e-10 | 1.000000 |
| rad40syn      | 2.12343e-10 | 1.000000 | 2.27535e-10 | 1.000000 |
| rad40anti     | 1.79464e-10 | 1.000000 | 1.92303e-10 | 1.000000 |
| rad27         | 1.58732e-10 | 1.000000 | 1.70088e-10 | 1.000000 |
| rad31         | 3.82776e-11 | 1.000000 | 4.10162e-11 | 1.000000 |
| rad5          | 1.83855e-13 | 1.000000 | 1.97009e-13 | 1.000000 |
| rad47         | 7.89546e-14 | 1.000000 | 8.46030e-14 | 1.000000 |
| rad8          | 1.01768e-14 | 1.000000 | 1.09049e-14 | 1.000000 |

10.000000 Pa, 1000.00000 K

=====

| Rate constant      | True (fraction)      | Effective (fraction) |
|--------------------|----------------------|----------------------|
| Total              | 7.98668e-13 (1.00 )  | 7.19822e-13 (1.00 )  |
| Formation of rad11 | 2.67704e-13 (0.335 ) | 2.29656e-13 (0.319 ) |
| Formation of rad6  | 2.87049e-13 (0.359 ) | 2.46251e-13 (0.342 ) |
| H-abstraction      | 2.43915e-13 (0.305 ) | 2.43915e-13 (0.339 ) |

| species            | PYtrue    | Cumul    | PYeffective | Cumul    |
|--------------------|-----------|----------|-------------|----------|
| Benzene+2-propynyl | 0.305402  | 0.305402 | 0.338854    | 0.338854 |
| Indene+H           | 0.268132  | 0.573534 | 0.297502    | 0.636357 |
| C2H2+PhCH2         | 0.157798  | 0.731332 | 0.175083    | 0.811439 |
| Phenyl+Allene      | 0.0987218 | 0.830054 | 0.000000    | 0.811439 |
| PhCCH+CH3          | 0.0608717 | 0.890926 | 0.0675393   | 0.878979 |
| PhCHCCH2+H         | 0.0534477 | 0.944373 | 0.0593021   | 0.938281 |
| PhCH2CCH+H         | 0.0288422 | 0.973216 | 0.0320015   | 0.970282 |

|               |             |          |             |          |
|---------------|-------------|----------|-------------|----------|
| Ph+MeAc       | 0.00811839  | 0.981334 | 0.00900771  | 0.979290 |
| rad6          | 0.00715874  | 0.988493 | 0.00794287  | 0.987233 |
| PAH7+H        | 0.00597783  | 0.994471 | 0.00663261  | 0.993865 |
| PhCCCH3+H     | 0.00357328  | 0.998044 | 0.00396468  | 0.997830 |
| rad39         | 0.00134089  | 0.999385 | 0.00148776  | 0.999318 |
| rad19anti     | 0.000230532 | 0.999615 | 0.000255783 | 0.999574 |
| PAH9+H        | 0.000131513 | 0.999747 | 0.000145918 | 0.999720 |
| rad38         | 5.16400e-05 | 0.999798 | 5.72965e-05 | 0.999777 |
| rad19syn      | 4.20268e-05 | 0.999841 | 4.66302e-05 | 0.999823 |
| rad30         | 3.72165e-05 | 0.999878 | 4.12930e-05 | 0.999865 |
| rad35         | 2.65462e-05 | 0.999904 | 2.94540e-05 | 0.999894 |
| rad54         | 1.25311e-05 | 0.999917 | 1.39037e-05 | 0.999908 |
| rad23         | 1.12062e-05 | 0.999928 | 1.24336e-05 | 0.999921 |
| rad46         | 9.89122e-06 | 0.999938 | 1.09746e-05 | 0.999932 |
| rad28         | 9.53968e-06 | 0.999947 | 1.05846e-05 | 0.999942 |
| rad37         | 9.29546e-06 | 0.999957 | 1.03136e-05 | 0.999952 |
| PhcycC3H3_A+H | 7.44873e-06 | 0.999964 | 8.26465e-06 | 0.999961 |
| rad7          | 4.57442e-06 | 0.999969 | 5.07548e-06 | 0.999966 |
| rad2          | 4.03914e-06 | 0.999973 | 4.48157e-06 | 0.999970 |
| rad45         | 3.51532e-06 | 0.999976 | 3.90037e-06 | 0.999974 |
| rad11         | 3.18467e-06 | 0.999979 | 3.53350e-06 | 0.999978 |
| PAH3+H        | 3.10457e-06 | 0.999983 | 3.44463e-06 | 0.999981 |
| rad50         | 2.71738e-06 | 0.999985 | 3.01503e-06 | 0.999984 |
| rad9          | 2.71213e-06 | 0.999988 | 3.00920e-06 | 0.999987 |
| PAH1+H        | 1.45254e-06 | 0.999989 | 1.61164e-06 | 0.999989 |
| PAH10+CH3     | 1.36984e-06 | 0.999991 | 1.51988e-06 | 0.999990 |
| rad70         | 1.14376e-06 | 0.999992 | 1.26904e-06 | 0.999992 |
| rad60syn      | 8.97567e-07 | 0.999993 | 9.95884e-07 | 0.999993 |
| rad1          | 8.40387e-07 | 0.999994 | 9.32440e-07 | 0.999994 |
| rad67         | 8.01295e-07 | 0.999995 | 8.89063e-07 | 0.999994 |
| rad55         | 5.72075e-07 | 0.999995 | 6.34738e-07 | 0.999995 |
| rad51         | 5.55305e-07 | 0.999996 | 6.16131e-07 | 0.999996 |
| rad13         | 5.53890e-07 | 0.999996 | 6.14561e-07 | 0.999996 |
| rad60anti     | 5.08856e-07 | 0.999997 | 5.64594e-07 | 0.999997 |
| rad26         | 4.57266e-07 | 0.999997 | 5.07353e-07 | 0.999997 |
| rad59         | 4.12638e-07 | 0.999998 | 4.57836e-07 | 0.999998 |
| rad36         | 3.20427e-07 | 0.999998 | 3.55526e-07 | 0.999998 |
| rad62         | 2.37942e-07 | 0.999998 | 2.64006e-07 | 0.999998 |
| rad10         | 2.09970e-07 | 0.999998 | 2.32969e-07 | 0.999999 |
| rad52         | 1.86811e-07 | 0.999999 | 2.07274e-07 | 0.999999 |
| rad3          | 1.70051e-07 | 0.999999 | 1.88677e-07 | 0.999999 |
| rad34         | 1.50628e-07 | 0.999999 | 1.67128e-07 | 0.999999 |
| rad4          | 1.27766e-07 | 0.999999 | 1.41761e-07 | 0.999999 |
| rad21         | 1.03290e-07 | 0.999999 | 1.14604e-07 | 0.999999 |
| rad43         | 5.86521e-08 | 0.999999 | 6.50766e-08 | 1.000000 |
| rad20         | 5.71609e-08 | 0.999999 | 6.34221e-08 | 1.000000 |
| rad22         | 5.15276e-08 | 0.999999 | 5.71717e-08 | 1.000000 |
| rad33         | 2.93420e-08 | 0.999999 | 3.25559e-08 | 1.000000 |
| rad53         | 2.67448e-08 | 0.999999 | 2.96743e-08 | 1.000000 |
| rad71         | 1.81284e-08 | 0.999999 | 2.01141e-08 | 1.000000 |
| rad65         | 1.50203e-08 | 0.999999 | 1.66656e-08 | 1.000000 |
| rad73         | 1.28383e-08 | 0.999999 | 1.42446e-08 | 1.000000 |
| rad56         | 1.09578e-08 | 0.999999 | 1.21580e-08 | 1.000000 |
| rad64         | 1.00392e-08 | 0.999999 | 1.11388e-08 | 1.000000 |
| rad58         | 6.20827e-09 | 0.999999 | 6.88828e-09 | 1.000000 |
| rad42         | 4.63154e-09 | 0.999999 | 5.13886e-09 | 1.000000 |
| rad24         | 2.44634e-09 | 0.999999 | 2.71431e-09 | 1.000000 |
| rad18         | 2.15318e-09 | 0.999999 | 2.38903e-09 | 1.000000 |
| rad25         | 1.75299e-09 | 0.999999 | 1.94501e-09 | 1.000000 |
| PAH8+H        | 1.35812e-09 | 0.999999 | 1.50688e-09 | 1.000000 |
| rad41         | 1.30013e-09 | 0.999999 | 1.44255e-09 | 1.000000 |
| rad68syn      | 1.25497e-09 | 0.999999 | 1.39243e-09 | 1.000000 |
| rad12         | 9.23802e-10 | 0.999999 | 1.02499e-09 | 1.000000 |
| rad68anti     | 8.40179e-10 | 0.999999 | 9.32202e-10 | 1.000000 |
| rad15         | 8.04477e-10 | 0.999999 | 8.92593e-10 | 1.000000 |
| rad72         | 6.21506e-10 | 0.999999 | 6.89582e-10 | 1.000000 |
| rad61         | 3.94331e-10 | 0.999999 | 4.37524e-10 | 1.000000 |
| rad14         | 2.95949e-10 | 0.999999 | 3.28367e-10 | 1.000000 |
| rad40syn      | 2.80092e-10 | 0.999999 | 3.10772e-10 | 1.000000 |
| rad27         | 2.19864e-10 | 0.999999 | 2.43947e-10 | 1.000000 |
| rad40anti     | 1.79401e-10 | 0.999999 | 1.99052e-10 | 1.000000 |
| rad31         | 2.26145e-11 | 0.999999 | 2.50916e-11 | 1.000000 |
| rad8          | 3.70447e-13 | 0.999999 | 4.11024e-13 | 1.000000 |
| rad5          | 1.13974e-13 | 0.999999 | 1.26458e-13 | 1.000000 |
| rad47         | 5.96563e-14 | 0.999999 | 6.61906e-14 | 1.000000 |

10.000000 Pa, 1100.00000 K

=====

Rate constant | True (fraction) | Effective (fraction)

-----



|                    |             |          |             |          |
|--------------------|-------------|----------|-------------|----------|
| Total              | 1.22919e-12 | (1.00 )  | 1.06699e-12 | (1.00 )  |
| Formation of rad11 | 3.87976e-13 | (0.316 ) | 3.11762e-13 | (0.292 ) |
| Formation of rad6  | 4.37724e-13 | (0.356 ) | 3.51738e-13 | (0.330 ) |
| H-abstraction      | 4.03491e-13 | (0.328 ) | 4.03491e-13 | (0.378 ) |

| species            | PYtrue      | Cumul    | PYeffective | Cumul    |
|--------------------|-------------|----------|-------------|----------|
| Benzene+2-propynyl | 0.328257    | 0.328257 | 0.378158    | 0.378158 |
| Indene+H           | 0.213615    | 0.541872 | 0.246088    | 0.624246 |
| C2H2+PhCH2         | 0.145911    | 0.687783 | 0.168092    | 0.792338 |
| Phenyl+Allene      | 0.131957    | 0.819741 | 0.000000    | 0.792338 |
| PhCHCCH2+H         | 0.0608534   | 0.880594 | 0.0701040   | 0.862442 |
| PhCCH+CH3          | 0.0569870   | 0.937581 | 0.0656497   | 0.928092 |
| PhCH2CCH+H         | 0.0407312   | 0.978312 | 0.0469230   | 0.975015 |
| Ph+MeAc            | 0.00761474  | 0.985927 | 0.00877233  | 0.983787 |
| PAH7+H             | 0.00693487  | 0.992862 | 0.00798905  | 0.991776 |
| PhCCCH3+H          | 0.00265789  | 0.995520 | 0.00306193  | 0.994838 |
| rad6               | 0.00217339  | 0.997693 | 0.00250379  | 0.997342 |
| rad39              | 0.00149930  | 0.999192 | 0.00172721  | 0.999069 |
| rad19anti          | 0.000315888 | 0.999508 | 0.000363909 | 0.999433 |
| PAH9+H             | 0.000168865 | 0.999677 | 0.000194535 | 0.999628 |
| rad19syn           | 7.45984e-05 | 0.999752 | 8.59386e-05 | 0.999714 |
| rad38              | 6.72435e-05 | 0.999819 | 7.74654e-05 | 0.999791 |
| rad30              | 3.81389e-05 | 0.999857 | 4.39367e-05 | 0.999835 |
| rad35              | 3.31969e-05 | 0.999890 | 3.82434e-05 | 0.999873 |
| rad54              | 2.39220e-05 | 0.999914 | 2.75586e-05 | 0.999901 |
| PhcycC3H3_A+H      | 1.67435e-05 | 0.999931 | 1.92889e-05 | 0.999920 |
| rad46              | 1.36413e-05 | 0.999945 | 1.57150e-05 | 0.999936 |
| rad37              | 1.03837e-05 | 0.999955 | 1.19623e-05 | 0.999948 |
| rad23              | 5.54068e-06 | 0.999961 | 6.38296e-06 | 0.999954 |
| PAH3+H             | 4.86998e-06 | 0.999965 | 5.61030e-06 | 0.999960 |
| rad50              | 3.38688e-06 | 0.999969 | 3.90174e-06 | 0.999964 |
| PAH1+H             | 3.18368e-06 | 0.999972 | 3.66766e-06 | 0.999967 |
| rad28              | 3.13429e-06 | 0.999975 | 3.61076e-06 | 0.999971 |
| rad11              | 2.96503e-06 | 0.999978 | 3.41576e-06 | 0.999975 |
| rad7               | 2.91514e-06 | 0.999981 | 3.35829e-06 | 0.999978 |
| PAH10+CH3          | 2.32839e-06 | 0.999983 | 2.68234e-06 | 0.999981 |
| rad70              | 2.31528e-06 | 0.999986 | 2.66724e-06 | 0.999983 |
| rad45              | 1.89044e-06 | 0.999988 | 2.17782e-06 | 0.999985 |
| rad9               | 1.79739e-06 | 0.999989 | 2.07062e-06 | 0.999987 |
| rad67              | 1.65599e-06 | 0.999991 | 1.90773e-06 | 0.999989 |
| rad2               | 1.23157e-06 | 0.999992 | 1.41878e-06 | 0.999991 |
| rad55              | 1.19872e-06 | 0.999993 | 1.38094e-06 | 0.999992 |
| rad60syn           | 1.15219e-06 | 0.999995 | 1.32734e-06 | 0.999994 |
| rad13              | 7.89842e-07 | 0.999995 | 9.09910e-07 | 0.999994 |
| rad60anti          | 6.63393e-07 | 0.999996 | 7.64238e-07 | 0.999995 |
| rad59              | 6.21110e-07 | 0.999997 | 7.15529e-07 | 0.999996 |
| rad51              | 5.07577e-07 | 0.999997 | 5.84737e-07 | 0.999996 |
| rad62              | 3.94134e-07 | 0.999998 | 4.54049e-07 | 0.999997 |
| rad34              | 3.40710e-07 | 0.999998 | 3.92504e-07 | 0.999997 |
| rad1               | 2.72984e-07 | 0.999998 | 3.14482e-07 | 0.999998 |
| rad52              | 2.02197e-07 | 0.999998 | 2.32934e-07 | 0.999998 |
| rad36              | 1.74759e-07 | 0.999999 | 2.01325e-07 | 0.999998 |
| rad26              | 1.65274e-07 | 0.999999 | 1.90399e-07 | 0.999998 |
| rad10              | 1.51520e-07 | 0.999999 | 1.74553e-07 | 0.999998 |
| rad21              | 1.17968e-07 | 0.999999 | 1.35901e-07 | 0.999999 |
| rad53              | 7.81458e-08 | 0.999999 | 9.00253e-08 | 0.999999 |
| rad43              | 6.79427e-08 | 0.999999 | 7.82713e-08 | 0.999999 |
| rad20              | 6.46381e-08 | 0.999999 | 7.44643e-08 | 0.999999 |
| rad3               | 6.40552e-08 | 0.999999 | 7.37928e-08 | 0.999999 |
| rad4               | 4.92340e-08 | 0.999999 | 5.67184e-08 | 0.999999 |
| rad22              | 4.11008e-08 | 0.999999 | 4.73489e-08 | 0.999999 |
| rad56              | 3.84954e-08 | 0.999999 | 4.43474e-08 | 0.999999 |
| rad33              | 3.10848e-08 | 0.999999 | 3.58102e-08 | 0.999999 |
| rad64              | 2.63650e-08 | 0.999999 | 3.03730e-08 | 0.999999 |
| rad65              | 1.45292e-08 | 0.999999 | 1.67379e-08 | 0.999999 |
| rad58              | 1.24038e-08 | 0.999999 | 1.42894e-08 | 0.999999 |
| rad71              | 1.08257e-08 | 0.999999 | 1.24714e-08 | 0.999999 |
| rad42              | 9.74873e-09 | 0.999999 | 1.12307e-08 | 0.999999 |
| rad73              | 7.81815e-09 | 0.999999 | 9.00670e-09 | 0.999999 |
| rad68syn           | 4.08279e-09 | 0.999999 | 4.70344e-09 | 0.999999 |
| PAH8+H             | 3.42600e-09 | 0.999999 | 3.94681e-09 | 0.999999 |
| rad18              | 3.06753e-09 | 0.999999 | 3.53385e-09 | 0.999999 |
| rad25              | 2.93363e-09 | 0.999999 | 3.37960e-09 | 0.999999 |
| rad68anti          | 2.72266e-09 | 0.999999 | 3.13655e-09 | 0.999999 |
| rad24              | 2.15906e-09 | 0.999999 | 2.48728e-09 | 0.999999 |
| rad41              | 1.24847e-09 | 0.999999 | 1.43826e-09 | 0.999999 |
| rad12              | 1.06207e-09 | 0.999999 | 1.22353e-09 | 0.999999 |
| rad15              | 8.14381e-10 | 0.999999 | 9.38179e-10 | 0.999999 |
| rad40syn           | 7.09999e-10 | 0.999999 | 8.17934e-10 | 0.999999 |

|           |             |          |             |          |
|-----------|-------------|----------|-------------|----------|
| rad61     | 5.25821e-10 | 0.999999 | 6.05756e-10 | 0.999999 |
| rad72     | 3.66669e-10 | 0.999999 | 4.22410e-10 | 0.999999 |
| rad40anti | 3.54974e-10 | 0.999999 | 4.08936e-10 | 0.999999 |
| rad14     | 3.34124e-10 | 0.999999 | 3.84916e-10 | 0.999999 |
| rad27     | 1.96564e-10 | 0.999999 | 2.26445e-10 | 0.999999 |
| rad31     | 1.36269e-11 | 0.999999 | 1.56985e-11 | 0.999999 |
| rad8      | 2.31671e-12 | 0.999999 | 2.66888e-12 | 0.999999 |
| rad5      | 8.91255e-14 | 0.999999 | 1.02674e-13 | 0.999999 |
| rad47     | 4.71942e-14 | 0.999999 | 5.43685e-14 | 0.999999 |

10.000000 Pa, 1200.00000 K

| Rate constant      | True (fraction)      | Effective (fraction) |
|--------------------|----------------------|----------------------|
| Total              | 1.80237e-12 (1.00 )  | 1.50733e-12 (1.00 )  |
| Formation of rad11 | 5.38789e-13 (0.299 ) | 4.03336e-13 (0.268 ) |
| Formation of rad6  | 6.34764e-13 (0.352 ) | 4.75182e-13 (0.315 ) |
| H-abstraction      | 6.28816e-13 (0.349 ) | 6.28816e-13 (0.417 ) |

| species            | PYtrue      | Cumul    | PYeffective | Cumul    |
|--------------------|-------------|----------|-------------|----------|
| Benzene+2-propynyl | 0.348883    | 0.348883 | 0.417171    | 0.417171 |
| Indene+H           | 0.167863    | 0.516746 | 0.200720    | 0.617891 |
| Phenyl+Allene      | 0.163693    | 0.680440 | 0.000000    | 0.617891 |
| C2H2+PhCH2         | 0.129201    | 0.809641 | 0.154490    | 0.772381 |
| PhCHCCH2+H         | 0.0661131   | 0.875754 | 0.0790537   | 0.851435 |
| PhCH2CCH+H         | 0.0526554   | 0.928409 | 0.0629618   | 0.914397 |
| PhCCH+CH3          | 0.0517209   | 0.980130 | 0.0618446   | 0.976242 |
| PAH7+H             | 0.00758128  | 0.987711 | 0.00906520  | 0.985307 |
| Ph+MeAc            | 0.00699560  | 0.994707 | 0.00836488  | 0.993672 |
| PhCCCH3+H          | 0.00194477  | 0.996652 | 0.00232543  | 0.995997 |
| rad39              | 0.00157475  | 0.998227 | 0.00188297  | 0.997880 |
| rad6               | 0.000732175 | 0.998959 | 0.000875485 | 0.998756 |
| rad19anti          | 0.000400072 | 0.999359 | 0.000478380 | 0.999234 |
| PAH9+H             | 0.000207159 | 0.999566 | 0.000247706 | 0.999482 |
| rad19syn           | 0.000118935 | 0.999685 | 0.000142215 | 0.999624 |
| rad38              | 8.39785e-05 | 0.999769 | 0.000100416 | 0.999724 |
| rad54              | 4.05277e-05 | 0.999809 | 4.84604e-05 | 0.999773 |
| rad35              | 3.96522e-05 | 0.999849 | 4.74135e-05 | 0.999820 |
| rad30              | 3.72744e-05 | 0.999886 | 4.45703e-05 | 0.999865 |
| PhcycC3H3_A+H      | 3.27335e-05 | 0.999919 | 3.91406e-05 | 0.999904 |
| rad46              | 1.83302e-05 | 0.999937 | 2.19180e-05 | 0.999926 |
| rad37              | 1.16334e-05 | 0.999949 | 1.39104e-05 | 0.999940 |
| PAH3+H             | 6.97945e-06 | 0.999956 | 8.34558e-06 | 0.999948 |
| PAH1+H             | 6.05701e-06 | 0.999962 | 7.24258e-06 | 0.999955 |
| rad50              | 5.04422e-06 | 0.999967 | 6.03158e-06 | 0.999961 |
| rad70              | 4.07451e-06 | 0.999971 | 4.87202e-06 | 0.999966 |
| PAH10+CH3          | 3.87893e-06 | 0.999975 | 4.63816e-06 | 0.999971 |
| rad11              | 3.27712e-06 | 0.999978 | 3.91857e-06 | 0.999975 |
| rad67              | 3.02966e-06 | 0.999981 | 3.62267e-06 | 0.999978 |
| rad23              | 2.86237e-06 | 0.999984 | 3.42263e-06 | 0.999982 |
| rad7               | 2.45462e-06 | 0.999987 | 2.93507e-06 | 0.999985 |
| rad55              | 2.19663e-06 | 0.999989 | 2.62659e-06 | 0.999987 |
| rad60syn           | 1.37740e-06 | 0.999990 | 1.64700e-06 | 0.999989 |
| rad9               | 1.19876e-06 | 0.999991 | 1.43340e-06 | 0.999990 |
| rad28              | 1.16164e-06 | 0.999993 | 1.38901e-06 | 0.999992 |
| rad45              | 1.02117e-06 | 0.999994 | 1.22104e-06 | 0.999993 |
| rad59              | 8.54689e-07 | 0.999994 | 1.02198e-06 | 0.999994 |
| rad60anti          | 8.03993e-07 | 0.999995 | 9.61365e-07 | 0.999995 |
| rad13              | 7.64262e-07 | 0.999996 | 9.13852e-07 | 0.999996 |
| rad51              | 6.75469e-07 | 0.999997 | 8.07684e-07 | 0.999997 |
| rad34              | 6.60506e-07 | 0.999997 | 7.89791e-07 | 0.999998 |
| rad62              | 5.92004e-07 | 0.999998 | 7.07881e-07 | 0.999998 |
| rad2               | 3.95371e-07 | 0.999998 | 4.72758e-07 | 0.999999 |
| rad52              | 2.93363e-07 | 0.999999 | 3.50784e-07 | 0.999999 |
| rad53              | 1.90437e-07 | 0.999999 | 2.27712e-07 | 0.999999 |
| rad10              | 1.17197e-07 | 0.999999 | 1.40135e-07 | 0.999999 |
| rad56              | 1.09606e-07 | 0.999999 | 1.31059e-07 | 1.000000 |
| rad36              | 9.54023e-08 | 0.999999 | 1.14076e-07 | 1.000000 |
| rad1               | 9.06511e-08 | 0.999999 | 1.08395e-07 | 1.000000 |
| rad21              | 9.02259e-08 | 0.999999 | 1.07886e-07 | 1.000000 |
| rad43              | 7.91732e-08 | 0.999999 | 9.46701e-08 | 1.000000 |
| rad26              | 6.80997e-08 | 0.999999 | 8.14288e-08 | 1.000000 |
| rad64              | 5.87164e-08 | 1.000000 | 7.02093e-08 | 1.000000 |
| rad20              | 4.60870e-08 | 1.000000 | 5.51078e-08 | 1.000000 |
| rad22              | 2.74896e-08 | 1.000000 | 3.28703e-08 | 1.000000 |
| rad3               | 2.53945e-08 | 1.000000 | 3.03651e-08 | 1.000000 |
| rad33              | 2.30512e-08 | 1.000000 | 2.75631e-08 | 1.000000 |
| rad58              | 2.26405e-08 | 1.000000 | 2.70721e-08 | 1.000000 |
| rad65              | 2.02779e-08 | 1.000000 | 2.42471e-08 | 1.000000 |

|           |             |          |             |         |
|-----------|-------------|----------|-------------|---------|
| rad4      | 1.97813e-08 | 1.000000 | 2.36532e-08 | 1.00000 |
| rad42     | 1.82468e-08 | 1.000000 | 2.18184e-08 | 1.00000 |
| PAH8+H    | 1.10911e-08 | 1.000000 | 1.32620e-08 | 1.00000 |
| rad68syn  | 1.10474e-08 | 1.000000 | 1.32097e-08 | 1.00000 |
| rad68anti | 7.33568e-09 | 1.000000 | 8.77152e-09 | 1.00000 |
| rad71     | 6.84070e-09 | 1.000000 | 8.17965e-09 | 1.00000 |
| rad73     | 5.43840e-09 | 1.000000 | 6.50285e-09 | 1.00000 |
| rad18     | 4.10639e-09 | 1.000000 | 4.91015e-09 | 1.00000 |
| rad25     | 3.23619e-09 | 1.000000 | 3.86963e-09 | 1.00000 |
| rad40syn  | 2.10412e-09 | 1.000000 | 2.51598e-09 | 1.00000 |
| rad24     | 1.65504e-09 | 1.000000 | 1.97898e-09 | 1.00000 |
| rad41     | 1.60698e-09 | 1.000000 | 1.92152e-09 | 1.00000 |
| rad61     | 1.11185e-09 | 1.000000 | 1.32947e-09 | 1.00000 |
| rad40anti | 1.03584e-09 | 1.000000 | 1.23859e-09 | 1.00000 |
| rad12     | 1.03367e-09 | 1.000000 | 1.23600e-09 | 1.00000 |
| rad15     | 1.01650e-09 | 1.000000 | 1.21547e-09 | 1.00000 |
| rad14     | 2.81773e-10 | 1.000000 | 3.36925e-10 | 1.00000 |
| rad72     | 2.11278e-10 | 1.000000 | 2.52632e-10 | 1.00000 |
| rad27     | 1.15935e-10 | 1.000000 | 1.38628e-10 | 1.00000 |
| rad31     | 8.42207e-12 | 1.000000 | 1.00706e-11 | 1.00000 |
| rad8      | 5.38688e-12 | 1.000000 | 6.44125e-12 | 1.00000 |
| rad5      | 9.05567e-14 | 1.000000 | 1.08282e-13 | 1.00000 |
| rad47     | 5.47221e-14 | 1.000000 | 6.54330e-14 | 1.00000 |

10.0000000 Pa, 1300.00000 K

| Rate constant      | True (fraction) |          | Effective (fraction) |          |
|--------------------|-----------------|----------|----------------------|----------|
| Total              | 2.54148e-12     | (1.00 )  | 2.05330e-12          | (1.00 )  |
| Formation of rad11 | 7.22991e-13     | (0.284 ) | 5.03386e-13          | (0.245 ) |
| Formation of rad6  | 8.84215e-13     | (0.348 ) | 6.15638e-13          | (0.300 ) |
| H-abstraction      | 9.34273e-13     | (0.368 ) | 9.34273e-13          | (0.455 ) |

  

| species            | PYtrue      | Cumul    | PYeffective | Cumul    |
|--------------------|-------------|----------|-------------|----------|
| Benzene+2-propynyl | 0.367610    | 0.367610 | 0.455011    | 0.455011 |
| Phenyl+Allene      | 0.192086    | 0.559696 | 0.000000    | 0.455011 |
| Indene+H           | 0.131258    | 0.690954 | 0.162466    | 0.617477 |
| C2H2+PhCH2         | 0.111167    | 0.802121 | 0.137597    | 0.755073 |
| PhCHCCH2+H         | 0.0692164   | 0.871337 | 0.0856728   | 0.840746 |
| PhCH2CCH+H         | 0.0636387   | 0.934976 | 0.0787694   | 0.919516 |
| PhCCH+CH3          | 0.0461074   | 0.981083 | 0.0570696   | 0.976585 |
| PAH7+H             | 0.00794427  | 0.989027 | 0.00983307  | 0.986418 |
| Ph+MeAc            | 0.00636614  | 0.995394 | 0.00787972  | 0.994298 |
| rad39              | 0.00158148  | 0.996975 | 0.00195749  | 0.996255 |
| PhCCCH3+H          | 0.00142122  | 0.998396 | 0.00175913  | 0.998015 |
| rad19anti          | 0.000475784 | 0.998872 | 0.000588904 | 0.998603 |
| rad6               | 0.000304742 | 0.999177 | 0.000377197 | 0.998981 |
| PAH9+H             | 0.000243463 | 0.999420 | 0.000301347 | 0.999282 |
| rad19syn           | 0.000174767 | 0.999595 | 0.000216319 | 0.999498 |
| rad38              | 0.000100543 | 0.999696 | 0.000124448 | 0.999623 |
| rad54              | 6.26662e-05 | 0.999758 | 7.75655e-05 | 0.999700 |
| PhcycC3H3_A+H      | 5.74775e-05 | 0.999816 | 7.11428e-05 | 0.999771 |
| rad35              | 4.55459e-05 | 0.999861 | 5.63747e-05 | 0.999828 |
| rad30              | 3.52990e-05 | 0.999897 | 4.36915e-05 | 0.999871 |
| rad46              | 2.36043e-05 | 0.999920 | 2.92164e-05 | 0.999901 |
| rad37              | 1.29948e-05 | 0.999933 | 1.60844e-05 | 0.999917 |
| PAH1+H             | 1.02933e-05 | 0.999943 | 1.27406e-05 | 0.999930 |
| PAH3+H             | 9.33344e-06 | 0.999953 | 1.15525e-05 | 0.999941 |
| rad50              | 7.75772e-06 | 0.999961 | 9.60216e-06 | 0.999951 |
| rad70              | 6.43387e-06 | 0.999967 | 7.96354e-06 | 0.999959 |
| PAH10+CH3          | 6.10095e-06 | 0.999973 | 7.55147e-06 | 0.999966 |
| rad67              | 5.03873e-06 | 0.999978 | 6.23669e-06 | 0.999972 |
| rad55              | 3.63243e-06 | 0.999982 | 4.49605e-06 | 0.999977 |
| rad11              | 3.20596e-06 | 0.999985 | 3.96819e-06 | 0.999981 |
| rad7               | 2.45946e-06 | 0.999987 | 3.04421e-06 | 0.999984 |
| rad23              | 1.57857e-06 | 0.999989 | 1.95388e-06 | 0.999986 |
| rad60syn           | 1.56411e-06 | 0.999991 | 1.93598e-06 | 0.999988 |
| rad34              | 1.13537e-06 | 0.999992 | 1.40531e-06 | 0.999989 |
| rad51              | 1.10919e-06 | 0.999993 | 1.37291e-06 | 0.999991 |
| rad59              | 1.09932e-06 | 0.999994 | 1.36068e-06 | 0.999992 |
| rad60anti          | 9.24168e-07 | 0.999995 | 1.14389e-06 | 0.999993 |
| rad62              | 8.26496e-07 | 0.999996 | 1.02300e-06 | 0.999994 |
| rad9               | 7.91727e-07 | 0.999996 | 9.79966e-07 | 0.999995 |
| rad45              | 5.57521e-07 | 0.999997 | 6.90076e-07 | 0.999996 |
| rad13              | 5.37526e-07 | 0.999998 | 6.65328e-07 | 0.999996 |
| rad28              | 5.26682e-07 | 0.999998 | 6.51905e-07 | 0.999997 |
| rad52              | 4.72533e-07 | 0.999999 | 5.84882e-07 | 0.999998 |
| rad53              | 4.03197e-07 | 0.999999 | 4.99060e-07 | 0.999998 |
| rad56              | 2.64861e-07 | 0.999999 | 3.27833e-07 | 0.999999 |

|           |             |          |             |          |
|-----------|-------------|----------|-------------|----------|
| rad2      | 1.32725e-07 | 0.999999 | 1.64281e-07 | 0.999999 |
| rad64     | 1.13904e-07 | 0.999999 | 1.40985e-07 | 0.999999 |
| rad43     | 9.01757e-08 | 1.000000 | 1.11615e-07 | 0.999999 |
| rad10     | 7.72401e-08 | 1.000000 | 9.56041e-08 | 0.999999 |
| rad21     | 6.00916e-08 | 1.000000 | 7.43790e-08 | 0.999999 |
| rad36     | 5.26114e-08 | 1.000000 | 6.51202e-08 | 0.999999 |
| rad58     | 3.76941e-08 | 1.000000 | 4.66561e-08 | 0.999999 |
| rad65     | 3.37266e-08 | 1.000000 | 4.17452e-08 | 0.999999 |
| rad26     | 3.26160e-08 | 1.000000 | 4.03705e-08 | 0.999999 |
| PAH8+H    | 3.16175e-08 | 1.000000 | 3.91348e-08 | 0.999999 |
| rad1      | 3.10372e-08 | 1.000000 | 3.84164e-08 | 0.999999 |
| rad42     | 3.09394e-08 | 1.000000 | 3.82954e-08 | 0.999999 |
| rad20     | 2.76579e-08 | 1.000000 | 3.42337e-08 | 0.999999 |
| rad68syn  | 2.54044e-08 | 1.000000 | 3.14444e-08 | 1.000000 |
| rad22     | 1.85930e-08 | 1.000000 | 2.30136e-08 | 1.000000 |
| rad68anti | 1.68045e-08 | 1.000000 | 2.07998e-08 | 1.000000 |
| rad33     | 1.52062e-08 | 1.000000 | 1.88215e-08 | 1.000000 |
| rad3      | 1.06121e-08 | 1.000000 | 1.31352e-08 | 1.000000 |
| rad4      | 8.34293e-09 | 1.000000 | 1.03265e-08 | 1.000000 |
| rad71     | 6.48579e-09 | 1.000000 | 8.02779e-09 | 1.000000 |
| rad73     | 6.20212e-09 | 1.000000 | 7.67671e-09 | 1.000000 |
| rad40syn  | 5.48018e-09 | 1.000000 | 6.78315e-09 | 1.000000 |
| rad18     | 4.83116e-09 | 1.000000 | 5.97978e-09 | 1.000000 |
| rad40anti | 2.78119e-09 | 1.000000 | 3.44243e-09 | 1.000000 |
| rad25     | 2.66970e-09 | 1.000000 | 3.30444e-09 | 1.000000 |
| rad61     | 2.46086e-09 | 1.000000 | 3.04595e-09 | 1.000000 |
| rad41     | 2.25238e-09 | 1.000000 | 2.78789e-09 | 1.000000 |
| rad15     | 1.63835e-09 | 1.000000 | 2.02788e-09 | 1.000000 |
| rad24     | 1.20943e-09 | 1.000000 | 1.49697e-09 | 1.000000 |
| rad12     | 9.24580e-10 | 1.000000 | 1.14441e-09 | 1.000000 |
| rad14     | 1.88565e-10 | 1.000000 | 2.33398e-10 | 1.000000 |
| rad72     | 1.47171e-10 | 1.000000 | 1.82162e-10 | 1.000000 |
| rad27     | 5.53735e-11 | 1.000000 | 6.85389e-11 | 1.000000 |
| rad8      | 7.88698e-12 | 1.000000 | 9.76217e-12 | 1.000000 |
| rad31     | 5.35860e-12 | 1.000000 | 6.63262e-12 | 1.000000 |
| rad5      | 1.17539e-13 | 1.000000 | 1.45485e-13 | 1.000000 |
| rad47     | 8.49439e-14 | 1.000000 | 1.05140e-13 | 1.000000 |

10.000000 Pa, 1400.00000 K

| Rate constant      | True (fraction) |          | Effective (fraction) |          |
|--------------------|-----------------|----------|----------------------|----------|
| Total              | 3.47024e-12     | (1.00 )  | 2.71971e-12          | (1.00 )  |
| Formation of rad11 | 9.43269e-13     | (0.272 ) | 6.11710e-13          | (0.225 ) |
| Formation of rad6  | 1.19194e-12     | (0.343 ) | 7.72970e-13          | (0.284 ) |
| H-abstraction      | 1.33503e-12     | (0.385 ) | 1.33503e-12          | (0.491 ) |

  

| species            | PYtrue      | Cumul    | PYeffective | Cumul    |
|--------------------|-------------|----------|-------------|----------|
| Benzene+2-propynyl | 0.384709    | 0.384709 | 0.490872    | 0.490872 |
| Phenyl+Allene      | 0.216275    | 0.600984 | 0.00000     | 0.490872 |
| Indene+H           | 0.102658    | 0.703641 | 0.130986    | 0.621859 |
| C2H2+PhCH2         | 0.0939506   | 0.797592 | 0.119877    | 0.741736 |
| PhCH2CCH+H         | 0.0730603   | 0.870652 | 0.0932213   | 0.834957 |
| PhCHCCH2+H         | 0.0704274   | 0.941080 | 0.0898621   | 0.924819 |
| PhCCH+CH3          | 0.0407416   | 0.981821 | 0.0519845   | 0.976804 |
| PAH7+H             | 0.00807994  | 0.989901 | 0.0103096   | 0.987113 |
| Ph+MeAc            | 0.00577950  | 0.995681 | 0.00737441  | 0.994488 |
| rad39              | 0.00153868  | 0.997219 | 0.00196329  | 0.996451 |
| PhCCCH3+H          | 0.00104777  | 0.998267 | 0.00133691  | 0.997788 |
| rad19anti          | 0.000537713 | 0.998805 | 0.000686101 | 0.998474 |
| PAH9+H             | 0.000275810 | 0.999081 | 0.000351922 | 0.998826 |
| rad19syn           | 0.000241157 | 0.999322 | 0.000307706 | 0.999134 |
| rad6               | 0.000162928 | 0.999485 | 0.000207890 | 0.999341 |
| rad38              | 0.000115972 | 0.999601 | 0.000147975 | 0.999489 |
| PhcycC3H3_A+H      | 9.27847e-05 | 0.999694 | 0.000118389 | 0.999608 |
| rad54              | 9.02558e-05 | 0.999784 | 0.000115163 | 0.999723 |
| rad35              | 5.06845e-05 | 0.999834 | 6.46714e-05 | 0.999788 |
| rad30              | 3.27753e-05 | 0.999867 | 4.18198e-05 | 0.999830 |
| rad46              | 2.91233e-05 | 0.999896 | 3.71601e-05 | 0.999867 |
| PAH1+H             | 1.60084e-05 | 0.999912 | 2.04260e-05 | 0.999887 |
| rad37              | 1.43626e-05 | 0.999927 | 1.83261e-05 | 0.999905 |
| PAH3+H             | 1.18472e-05 | 0.999939 | 1.51166e-05 | 0.999921 |
| rad50              | 1.15394e-05 | 0.999950 | 1.47238e-05 | 0.999935 |
| rad70              | 9.33433e-06 | 0.999959 | 1.19102e-05 | 0.999947 |
| PAH10+CH3          | 9.01924e-06 | 0.999968 | 1.15082e-05 | 0.999959 |
| rad67              | 7.71415e-06 | 0.999976 | 9.84292e-06 | 0.999969 |
| rad55              | 5.54459e-06 | 0.999982 | 7.07464e-06 | 0.999976 |
| rad11              | 2.43387e-06 | 0.999984 | 3.10552e-06 | 0.999979 |
| rad7               | 2.21117e-06 | 0.999986 | 2.82136e-06 | 0.999982 |

|           |             |          |             |          |
|-----------|-------------|----------|-------------|----------|
| rad51     | 1.86316e-06 | 0.999988 | 2.37732e-06 | 0.999984 |
| rad34     | 1.77576e-06 | 0.999990 | 2.26580e-06 | 0.999986 |
| rad60syn  | 1.71249e-06 | 0.999992 | 2.18506e-06 | 0.999988 |
| rad59     | 1.34478e-06 | 0.999993 | 1.71588e-06 | 0.999990 |
| rad62     | 1.09298e-06 | 0.999994 | 1.39460e-06 | 0.999991 |
| rad60anti | 1.02295e-06 | 0.999995 | 1.30525e-06 | 0.999993 |
| rad23     | 9.40029e-07 | 0.999996 | 1.19944e-06 | 0.999994 |
| rad53     | 7.63982e-07 | 0.999997 | 9.74806e-07 | 0.999995 |
| rad52     | 7.49468e-07 | 0.999998 | 9.56290e-07 | 0.999996 |
| rad56     | 5.62105e-07 | 0.999998 | 7.17223e-07 | 0.999997 |
| rad9      | 5.14862e-07 | 0.999999 | 6.56943e-07 | 0.999997 |
| rad13     | 3.30924e-07 | 0.999999 | 4.22245e-07 | 0.999998 |
| rad45     | 3.09039e-07 | 0.999999 | 3.94320e-07 | 0.999998 |
| rad28     | 3.01288e-07 | 1.000000 | 3.84431e-07 | 0.999998 |
| rad64     | 1.98003e-07 | 1.000000 | 2.52643e-07 | 0.999999 |
| rad43     | 1.00239e-07 | 1.000000 | 1.27901e-07 | 0.999999 |
| PAH8+H    | 7.74116e-08 | 1.000000 | 9.87738e-08 | 0.999999 |
| rad58     | 5.81220e-08 | 1.000000 | 7.41611e-08 | 0.999999 |
| rad65     | 5.63542e-08 | 1.000000 | 7.19056e-08 | 0.999999 |
| rad68syn  | 5.12268e-08 | 1.000000 | 6.53633e-08 | 0.999999 |
| rad42     | 4.85583e-08 | 1.000000 | 6.19583e-08 | 0.999999 |
| rad2      | 4.68000e-08 | 1.000000 | 5.97146e-08 | 0.999999 |
| rad10     | 4.05586e-08 | 1.000000 | 5.17513e-08 | 0.999999 |
| rad21     | 3.85400e-08 | 1.000000 | 4.91755e-08 | 0.999999 |
| rad68anti | 3.37713e-08 | 1.000000 | 4.30907e-08 | 0.999999 |
| rad36     | 2.94558e-08 | 1.000000 | 3.75843e-08 | 0.999999 |
| rad26     | 1.77474e-08 | 1.000000 | 2.26449e-08 | 0.999999 |
| rad20     | 1.58988e-08 | 1.000000 | 2.02862e-08 | 1.000000 |
| rad22     | 1.38886e-08 | 1.000000 | 1.77213e-08 | 1.000000 |
| rad40syn  | 1.23860e-08 | 1.000000 | 1.58040e-08 | 1.000000 |
| rad73     | 1.14741e-08 | 1.000000 | 1.46405e-08 | 1.000000 |
| rad71     | 1.12036e-08 | 1.000000 | 1.42953e-08 | 1.000000 |
| rad1      | 1.10911e-08 | 1.000000 | 1.41518e-08 | 1.000000 |
| rad33     | 9.82152e-09 | 1.000000 | 1.25319e-08 | 1.000000 |
| rad40anti | 6.48874e-09 | 1.000000 | 8.27933e-09 | 1.000000 |
| rad61     | 4.99034e-09 | 1.000000 | 6.36746e-09 | 1.000000 |
| rad3      | 4.68102e-09 | 1.000000 | 5.97278e-09 | 1.000000 |
| rad18     | 4.11370e-09 | 1.000000 | 5.24890e-09 | 1.000000 |
| rad4      | 3.70614e-09 | 1.000000 | 4.72889e-09 | 1.000000 |
| rad41     | 3.10753e-09 | 1.000000 | 3.96508e-09 | 1.000000 |
| rad15     | 2.84581e-09 | 1.000000 | 3.63114e-09 | 1.000000 |
| rad25     | 1.96229e-09 | 1.000000 | 2.50379e-09 | 1.000000 |
| rad24     | 8.67068e-10 | 1.000000 | 1.10634e-09 | 1.000000 |
| rad12     | 7.86803e-10 | 1.000000 | 1.00392e-09 | 1.000000 |
| rad72     | 1.92897e-10 | 1.000000 | 2.46129e-10 | 1.000000 |
| rad14     | 1.16596e-10 | 1.000000 | 1.48772e-10 | 1.000000 |
| rad27     | 2.57340e-11 | 1.000000 | 3.28355e-11 | 1.000000 |
| rad8      | 9.28406e-12 | 1.000000 | 1.18461e-11 | 1.000000 |
| rad31     | 3.51540e-12 | 1.000000 | 4.48550e-12 | 1.000000 |
| rad5      | 1.80064e-13 | 1.000000 | 2.29754e-13 | 1.000000 |
| rad47     | 1.40456e-13 | 1.000000 | 1.79215e-13 | 1.000000 |

10.000000 Pa, 1500.00000 K

=====

| Rate constant      | True (fraction)      | Effective (fraction) |
|--------------------|----------------------|----------------------|
| Total              | 4.61271e-12 (1.00 )  | 3.52345e-12 (1.00 )  |
| Formation of rad11 | 1.20217e-12 (0.261 ) | 7.28714e-13 (0.207 ) |
| Formation of rad6  | 1.56360e-12 (0.339 ) | 9.47799e-13 (0.269 ) |
| H-abstraction      | 1.84694e-12 (0.400 ) | 1.84694e-12 (0.524 ) |

| species            | PYtrue      | Cumul    | PYeffective | Cumul    |
|--------------------|-------------|----------|-------------|----------|
| Benzene+2-propynyl | 0.400402    | 0.400402 | 0.524185    | 0.524185 |
| Phenyl+Allene      | 0.236143    | 0.636545 | 0.00000     | 0.524185 |
| PhCH2CCH+H         | 0.0806471   | 0.717192 | 0.105578    | 0.629763 |
| Indene+H           | 0.0805805   | 0.797772 | 0.105492    | 0.735255 |
| C2H2+PhCH2         | 0.0786474   | 0.876420 | 0.102961    | 0.838216 |
| PhCHCCH2+H         | 0.0701487   | 0.946569 | 0.0918348   | 0.930051 |
| PhCCH+CH3          | 0.0359165   | 0.982485 | 0.0470199   | 0.977071 |
| PAH7+H             | 0.00805050  | 0.990536 | 0.0105392   | 0.987610 |
| Ph+MeAc            | 0.00525818  | 0.995794 | 0.00688372  | 0.994494 |
| rad39              | 0.00146467  | 0.997259 | 0.00191747  | 0.996411 |
| PhCCCH3+H          | 0.000784783 | 0.998043 | 0.00102739  | 0.997439 |
| rad19anti          | 0.000583045 | 0.998626 | 0.000763289 | 0.998202 |
| rad19syn           | 0.000316727 | 0.998943 | 0.000414641 | 0.998616 |
| PAH9+H             | 0.000303228 | 0.999246 | 0.000396969 | 0.999013 |
| PhcycC3H3_A+H      | 0.000140002 | 0.999386 | 0.000183283 | 0.999197 |
| rad38              | 0.000129691 | 0.999516 | 0.000169785 | 0.999366 |
| rad54              | 0.000122868 | 0.999639 | 0.000160852 | 0.999527 |

|           |             |          |             |          |
|-----------|-------------|----------|-------------|----------|
| rad6      | 0.000106802 | 0.999746 | 0.000139819 | 0.999667 |
| rad35     | 5.50152e-05 | 0.999801 | 7.20228e-05 | 0.999739 |
| rad46     | 3.46128e-05 | 0.999835 | 4.53131e-05 | 0.999785 |
| rad30     | 3.01045e-05 | 0.999865 | 3.94112e-05 | 0.999824 |
| PAH1+H    | 2.32044e-05 | 0.999889 | 3.03779e-05 | 0.999854 |
| rad50     | 1.63610e-05 | 0.999905 | 2.14188e-05 | 0.999876 |
| rad37     | 1.56243e-05 | 0.999921 | 2.04544e-05 | 0.999896 |
| PAH3+H    | 1.44619e-05 | 0.999935 | 1.89327e-05 | 0.999915 |
| rad70     | 1.26654e-05 | 0.999948 | 1.65809e-05 | 0.999932 |
| PAH10+CH3 | 1.25887e-05 | 0.999960 | 1.64804e-05 | 0.999948 |
| rad67     | 1.09980e-05 | 0.999971 | 1.43979e-05 | 0.999963 |
| rad55     | 7.94005e-06 | 0.999979 | 1.03947e-05 | 0.999973 |
| rad51     | 2.99429e-06 | 0.999982 | 3.91996e-06 | 0.999977 |
| rad34     | 2.57643e-06 | 0.999985 | 3.37292e-06 | 0.999980 |
| rad60syn  | 1.82815e-06 | 0.999987 | 2.39331e-06 | 0.999983 |
| rad7      | 1.61508e-06 | 0.999988 | 2.11437e-06 | 0.999985 |
| rad59     | 1.58527e-06 | 0.999990 | 2.07535e-06 | 0.999987 |
| rad11     | 1.57177e-06 | 0.999991 | 2.05768e-06 | 0.999989 |
| rad62     | 1.38768e-06 | 0.999993 | 1.81668e-06 | 0.999991 |
| rad53     | 1.32286e-06 | 0.999994 | 1.73181e-06 | 0.999992 |
| rad52     | 1.13142e-06 | 0.999995 | 1.48119e-06 | 0.999994 |
| rad60anti | 1.10285e-06 | 0.999996 | 1.44379e-06 | 0.999995 |
| rad56     | 1.07294e-06 | 0.999997 | 1.40463e-06 | 0.999997 |
| rad23     | 6.00107e-07 | 0.999998 | 7.85633e-07 | 0.999998 |
| rad9      | 3.31494e-07 | 0.999998 | 4.33974e-07 | 0.999998 |
| rad64     | 3.15300e-07 | 0.999999 | 4.12773e-07 | 0.999998 |
| rad28     | 2.10005e-07 | 0.999999 | 2.74927e-07 | 0.999999 |
| rad13     | 1.96853e-07 | 0.999999 | 2.57709e-07 | 0.999999 |
| rad45     | 1.74452e-07 | 0.999999 | 2.28382e-07 | 0.999999 |
| PAH8+H    | 1.66368e-07 | 0.999999 | 2.17800e-07 | 0.999999 |
| rad43     | 1.09629e-07 | 1.000000 | 1.43519e-07 | 1.000000 |
| rad68syn  | 9.28747e-08 | 1.000000 | 1.21587e-07 | 1.000000 |
| rad65     | 8.95751e-08 | 1.000000 | 1.17267e-07 | 1.000000 |
| rad58     | 8.42795e-08 | 1.000000 | 1.10334e-07 | 1.000000 |
| rad42     | 7.17095e-08 | 1.000000 | 9.38774e-08 | 1.000000 |
| rad68anti | 6.10462e-08 | 1.000000 | 7.99184e-08 | 1.000000 |
| rad40syn  | 2.48268e-08 | 1.000000 | 3.25019e-08 | 1.000000 |
| rad71     | 2.46171e-08 | 1.000000 | 3.22274e-08 | 1.000000 |
| rad21     | 2.45120e-08 | 1.000000 | 3.20898e-08 | 1.000000 |
| rad73     | 2.40288e-08 | 1.000000 | 3.14571e-08 | 1.000000 |
| rad10     | 1.80419e-08 | 1.000000 | 2.36194e-08 | 1.000000 |
| rad2      | 1.73642e-08 | 1.000000 | 2.27323e-08 | 1.000000 |
| rad36     | 1.67921e-08 | 1.000000 | 2.19832e-08 | 1.000000 |
| rad40anti | 1.33792e-08 | 1.000000 | 1.75153e-08 | 1.000000 |
| rad22     | 1.23328e-08 | 1.000000 | 1.61454e-08 | 1.000000 |
| rad26     | 1.03274e-08 | 1.000000 | 1.35200e-08 | 1.000000 |
| rad61     | 9.17013e-09 | 1.000000 | 1.20050e-08 | 1.000000 |
| rad20     | 9.08882e-09 | 1.000000 | 1.18986e-08 | 1.000000 |
| rad33     | 6.36281e-09 | 1.000000 | 8.32981e-09 | 1.000000 |
| rad1      | 4.15747e-09 | 1.000000 | 5.44271e-09 | 1.000000 |
| rad41     | 4.15303e-09 | 1.000000 | 5.43690e-09 | 1.000000 |
| rad15     | 3.78954e-09 | 1.000000 | 4.96104e-09 | 1.000000 |
| rad18     | 2.77485e-09 | 1.000000 | 3.63268e-09 | 1.000000 |
| rad3      | 2.17439e-09 | 1.000000 | 2.84659e-09 | 1.000000 |
| rad4      | 1.73119e-09 | 1.000000 | 2.26638e-09 | 1.000000 |
| rad25     | 1.38981e-09 | 1.000000 | 1.81946e-09 | 1.000000 |
| rad12     | 6.49286e-10 | 1.000000 | 8.50006e-10 | 1.000000 |
| rad24     | 6.18185e-10 | 1.000000 | 8.09291e-10 | 1.000000 |
| rad72     | 4.41476e-10 | 1.000000 | 5.77954e-10 | 1.000000 |
| rad14     | 7.23738e-11 | 1.000000 | 9.47482e-11 | 1.000000 |
| rad27     | 1.24482e-11 | 1.000000 | 1.62964e-11 | 1.000000 |
| rad8      | 9.78603e-12 | 1.000000 | 1.28113e-11 | 1.000000 |
| rad31     | 2.37889e-12 | 1.000000 | 3.11430e-12 | 1.000000 |
| rad5      | 2.86939e-13 | 1.000000 | 3.75645e-13 | 1.000000 |
| rad47     | 2.24261e-13 | 1.000000 | 2.93590e-13 | 1.000000 |

10.000000 Pa, 1750.00000 K

=====

| Rate constant      | True (fraction)      | Effective (fraction) |
|--------------------|----------------------|----------------------|
| Total              | 8.61869e-12 (1.00 )  | 6.27376e-12 (1.00 )  |
| Formation of rad11 | 2.04015e-12 (0.237 ) | 1.05227e-12 (0.168 ) |
| Formation of rad6  | 2.80256e-12 (0.325 ) | 1.44551e-12 (0.230 ) |
| H-abstraction      | 3.77597e-12 (0.438 ) | 3.77597e-12 (0.602 ) |

  

| species            | PYtrue    | Cumul    | PYeffective | Cumul    |
|--------------------|-----------|----------|-------------|----------|
| Benzene+2-propynyl | 0.438115  | 0.438115 | 0.601868    | 0.601868 |
| Phenyl+Allene      | 0.272076  | 0.710190 | 0.000000    | 0.601868 |
| PhCH2CCH+H         | 0.0933381 | 0.803528 | 0.128225    | 0.730093 |

|               |             |          |             |          |
|---------------|-------------|----------|-------------|----------|
| PhCHCCH2+H    | 0.0656237   | 0.869152 | 0.0901521   | 0.820246 |
| C2H2+PhCH2    | 0.0475724   | 0.916724 | 0.0653533   | 0.885599 |
| Indene+H      | 0.0395073   | 0.956232 | 0.0542737   | 0.939873 |
| PhCCH+CH3     | 0.0276418   | 0.983874 | 0.0379735   | 0.977846 |
| PAH7+H        | 0.00712589  | 0.990999 | 0.00978926  | 0.987635 |
| Ph+MeAc       | 0.00488449  | 0.995884 | 0.00671015  | 0.994345 |
| rad39         | 0.00123378  | 0.997118 | 0.00169492  | 0.996040 |
| rad19anti     | 0.000564026 | 0.997682 | 0.000774836 | 0.996815 |
| rad19syn      | 0.000506637 | 0.998188 | 0.000696002 | 0.997511 |
| PhCCCH3+H     | 0.000461108 | 0.998650 | 0.000633455 | 0.998145 |
| PhcycC3H3_A+H | 0.000355380 | 0.999005 | 0.000488209 | 0.998633 |
| PAH9+H        | 0.000266990 | 0.999272 | 0.000366782 | 0.999000 |
| rad54         | 0.000215158 | 0.999487 | 0.000295576 | 0.999295 |
| rad38         | 0.000142990 | 0.999630 | 0.000196435 | 0.999492 |
| rad35         | 4.88733e-05 | 0.999679 | 6.71405e-05 | 0.999559 |
| rad6          | 4.40641e-05 | 0.999723 | 6.05339e-05 | 0.999619 |
| PAH1+H        | 4.24652e-05 | 0.999765 | 5.83374e-05 | 0.999678 |
| rad46         | 3.80723e-05 | 0.999804 | 5.23026e-05 | 0.999730 |
| rad50         | 2.42075e-05 | 0.999828 | 3.32556e-05 | 0.999763 |
| rad30         | 2.30121e-05 | 0.999851 | 3.16133e-05 | 0.999795 |
| PAH10+CH3     | 2.22579e-05 | 0.999873 | 3.05772e-05 | 0.999825 |
| rad70         | 2.20580e-05 | 0.999895 | 3.03026e-05 | 0.999856 |
| PAH3+H        | 2.08187e-05 | 0.999916 | 2.86001e-05 | 0.999884 |
| rad55         | 1.72180e-05 | 0.999933 | 2.36536e-05 | 0.999908 |
| rad67         | 1.69339e-05 | 0.999950 | 2.32632e-05 | 0.999931 |
| rad37         | 1.61453e-05 | 0.999966 | 2.21799e-05 | 0.999953 |
| rad51         | 6.37701e-06 | 0.999973 | 8.76049e-06 | 0.999962 |
| rad34         | 5.25964e-06 | 0.999978 | 7.22553e-06 | 0.999969 |
| rad53         | 4.40495e-06 | 0.999982 | 6.05136e-06 | 0.999975 |
| rad56         | 4.00664e-06 | 0.999986 | 5.50417e-06 | 0.999981 |
| rad62         | 2.35838e-06 | 0.999989 | 3.23987e-06 | 0.999984 |
| rad52         | 2.07765e-06 | 0.999991 | 2.85421e-06 | 0.999987 |
| rad59         | 2.06572e-06 | 0.999993 | 2.83782e-06 | 0.999990 |
| rad60syn      | 1.94317e-06 | 0.999995 | 2.66947e-06 | 0.999993 |
| rad60anti     | 1.30735e-06 | 0.999996 | 1.79600e-06 | 0.999994 |
| rad64         | 7.90168e-07 | 0.999997 | 1.08551e-06 | 0.999995 |
| PAH8+H        | 5.96228e-07 | 0.999997 | 8.19076e-07 | 0.999996 |
| rad71         | 3.47785e-07 | 0.999998 | 4.77778e-07 | 0.999997 |
| rad68syn      | 2.82422e-07 | 0.999998 | 3.87982e-07 | 0.999997 |
| rad7          | 2.42448e-07 | 0.999998 | 3.33067e-07 | 0.999997 |
| rad68anti     | 1.83003e-07 | 0.999998 | 2.51403e-07 | 0.999998 |
| rad11         | 1.79962e-07 | 0.999999 | 2.47225e-07 | 0.999998 |
| rad65         | 1.78734e-07 | 0.999999 | 2.45539e-07 | 0.999998 |
| rad42         | 1.71017e-07 | 0.999999 | 2.34937e-07 | 0.999998 |
| rad73         | 1.69684e-07 | 0.999999 | 2.33106e-07 | 0.999999 |
| rad58         | 1.57685e-07 | 0.999999 | 2.16623e-07 | 0.999999 |
| rad43         | 1.31551e-07 | 0.999999 | 1.80720e-07 | 0.999999 |
| rad23         | 1.20101e-07 | 1.000000 | 1.64992e-07 | 0.999999 |
| rad28         | 1.05638e-07 | 1.000000 | 1.45123e-07 | 0.999999 |
| rad40syn      | 8.43834e-08 | 1.000000 | 1.15923e-07 | 1.000000 |
| rad40anti     | 5.04376e-08 | 1.000000 | 6.92896e-08 | 1.000000 |
| rad72         | 4.62706e-08 | 1.000000 | 6.35649e-08 | 1.000000 |
| rad61         | 2.66317e-08 | 1.000000 | 3.65858e-08 | 1.000000 |
| rad9          | 2.35110e-08 | 1.000000 | 3.22987e-08 | 1.000000 |
| rad13         | 1.62384e-08 | 1.000000 | 2.23078e-08 | 1.000000 |
| rad45         | 1.37651e-08 | 1.000000 | 1.89100e-08 | 1.000000 |
| rad22         | 1.12217e-08 | 1.000000 | 1.54161e-08 | 1.000000 |
| rad41         | 7.94478e-09 | 1.000000 | 1.09143e-08 | 1.000000 |
| rad36         | 2.35438e-09 | 1.000000 | 3.23438e-09 | 1.000000 |
| rad26         | 2.09503e-09 | 1.000000 | 2.87809e-09 | 1.000000 |
| rad21         | 1.98419e-09 | 1.000000 | 2.72581e-09 | 1.000000 |
| rad15         | 1.15573e-09 | 1.000000 | 1.58771e-09 | 1.000000 |
| rad10         | 1.05787e-09 | 1.000000 | 1.45327e-09 | 1.000000 |
| rad20         | 6.52613e-10 | 1.000000 | 8.96541e-10 | 1.000000 |
| rad33         | 5.53991e-10 | 1.000000 | 7.61057e-10 | 1.000000 |
| rad2          | 4.12971e-10 | 1.000000 | 5.67326e-10 | 1.000000 |
| rad18         | 3.10416e-10 | 1.000000 | 4.26439e-10 | 1.000000 |
| rad25         | 1.43352e-10 | 1.000000 | 1.96932e-10 | 1.000000 |
| rad1          | 1.06128e-10 | 1.000000 | 1.45795e-10 | 1.000000 |
| rad12         | 7.46622e-11 | 1.000000 | 1.02568e-10 | 1.000000 |
| rad3          | 6.83444e-11 | 1.000000 | 9.38894e-11 | 1.000000 |
| rad24         | 6.06477e-11 | 1.000000 | 8.33162e-11 | 1.000000 |
| rad4          | 4.35925e-11 | 1.000000 | 5.98862e-11 | 1.000000 |
| rad14         | 7.64675e-12 | 1.000000 | 1.05049e-11 | 1.000000 |
| rad8          | 2.76665e-12 | 1.000000 | 3.80073e-12 | 1.000000 |
| rad27         | 7.06621e-13 | 1.000000 | 9.70737e-13 | 1.000000 |
| rad5          | 6.81573e-13 | 1.000000 | 9.36322e-13 | 1.000000 |
| rad47         | 1.53058e-13 | 1.000000 | 2.10266e-13 | 1.000000 |

10.000000 Pa, 2000.00000 K

```

=====
Rate constant      | True (fraction)      Effective (fraction)
-----
Total              | 1.44111e-11 (1.00  ) 1.02928e-11 (1.00  )
Formation of rad11| 3.16882e-12 (0.220  ) 1.47442e-12 (0.143  )
Formation of rad6  | 4.53302e-12 (0.315  ) 2.10917e-12 (0.205  )
H-abstraction     | 6.70922e-12 (0.466  ) 6.70922e-12 (0.652  )

```

```

species           | PYtrue      Cumul      | PYeffective  Cumul
-----
Benzene+2-propynyl| 0.465560    0.465560    | 0.651836    0.651836
Phenyl+Allene     | 0.285771    0.751331    | 0.000000    0.651836
PhCH2CCH+H       | 0.0971761   0.848507    | 0.136057    0.787893
PhCHCCH2+H       | 0.0592956   0.907803    | 0.0830204   0.870914
C2H2+PhCH2       | 0.0319887   0.939791    | 0.0447878   0.915701
Indene+H          | 0.0232984   0.963090    | 0.0326204   0.948322
PhCCH+CH3        | 0.0216441   0.984734    | 0.0303041   0.978626
PAH7+H           | 0.00659312  0.991327    | 0.00923108  0.987857
Ph+MeAc          | 0.00420917  0.995536    | 0.00589330  0.993750
rad39            | 0.00101470  0.996551    | 0.00142069  0.995171
rad19syn         | 0.000747061 0.997298    | 0.00104597  0.996217
PhcycC3H3_A+H   | 0.000656923 0.997955    | 0.000919762 0.997137
rad19anti        | 0.000529175 0.998484    | 0.000740904 0.997878
rad54            | 0.000330330 0.998814    | 0.000462498 0.998340
PhCCCH3+H       | 0.000291893 0.999106    | 0.000408682 0.998749
PAH9+H          | 0.000279624 0.999386    | 0.000391504 0.999140
rad38            | 0.000156477 0.999542    | 0.000219085 0.999359
PAH1+H          | 6.97439e-05 0.999612    | 9.76496e-05 0.999457
rad35            | 5.18733e-05 0.999664    | 7.26284e-05 0.999530
rad46            | 4.57719e-05 0.999710    | 6.40859e-05 0.999594
rad50            | 3.88560e-05 0.999749    | 5.44027e-05 0.999648
PAH10+CH3       | 3.34584e-05 0.999782    | 4.68455e-05 0.999695
rad70            | 3.20151e-05 0.999814    | 4.48247e-05 0.999740
rad55            | 2.86998e-05 0.999843    | 4.01830e-05 0.999780
PAH3+H          | 2.79098e-05 0.999871    | 3.90769e-05 0.999819
rad67            | 2.51636e-05 0.999896    | 3.52318e-05 0.999854
rad30            | 1.88887e-05 0.999915    | 2.64462e-05 0.999881
rad37            | 1.66056e-05 0.999931    | 2.32497e-05 0.999904
rad51            | 1.23807e-05 0.999944    | 1.73344e-05 0.999921
rad56            | 1.03438e-05 0.999954    | 1.44824e-05 0.999936
rad53            | 9.92102e-06 0.999964    | 1.38906e-05 0.999950
rad34            | 8.56301e-06 0.999973    | 1.19892e-05 0.999962
rad6             | 7.03691e-06 0.999980    | 9.85245e-06 0.999972
rad52            | 3.65570e-06 0.999983    | 5.11839e-06 0.999977
rad62            | 3.41850e-06 0.999987    | 4.78628e-06 0.999981
rad59            | 2.58745e-06 0.999989    | 3.62272e-06 0.999985
rad60syn        | 2.06850e-06 0.999991    | 2.89613e-06 0.999988
PAH8+H          | 1.81809e-06 0.999993    | 2.54552e-06 0.999991
rad64            | 1.47693e-06 0.999995    | 2.06787e-06 0.999993
rad60anti       | 1.42213e-06 0.999996    | 1.99114e-06 0.999995
rad68syn        | 6.54277e-07 0.999997    | 9.16058e-07 0.999996
rad71            | 5.68435e-07 0.999997    | 7.95872e-07 0.999996
rad68anti       | 4.22035e-07 0.999998    | 5.90897e-07 0.999997
rad73            | 3.60929e-07 0.999998    | 5.05339e-07 0.999997
rad65            | 3.39387e-07 0.999998    | 4.75181e-07 0.999998
rad42            | 3.12969e-07 0.999999    | 4.38192e-07 0.999998
rad58            | 2.75859e-07 0.999999    | 3.86232e-07 0.999999
rad40syn        | 2.27790e-07 0.999999    | 3.18931e-07 0.999999
rad43            | 1.62616e-07 0.999999    | 2.27680e-07 0.999999
rad40anti       | 1.42869e-07 1.000000    | 2.00032e-07 0.999999
rad61            | 5.99877e-08 1.000000    | 8.39894e-08 1.000000
rad7             | 5.38453e-08 1.000000    | 7.53897e-08 1.000000
rad23            | 4.50713e-08 1.000000    | 6.31047e-08 1.000000
rad11            | 4.20620e-08 1.000000    | 5.88913e-08 1.000000
rad72            | 3.43048e-08 1.000000    | 4.80306e-08 1.000000
rad28            | 2.42739e-08 1.000000    | 3.39861e-08 1.000000
rad41            | 1.34902e-08 1.000000    | 1.88878e-08 1.000000
rad9             | 8.00115e-09 1.000000    | 1.12025e-08 1.000000
rad13            | 4.92353e-09 1.000000    | 6.89347e-09 1.000000
rad45            | 4.17738e-09 1.000000    | 5.84881e-09 1.000000
rad22            | 2.96041e-09 1.000000    | 4.14489e-09 1.000000
rad36            | 7.31028e-10 1.000000    | 1.02352e-09 1.000000
rad21            | 7.17924e-10 1.000000    | 1.00517e-09 1.000000
rad15            | 4.06634e-10 1.000000    | 5.69332e-10 1.000000
rad26            | 3.64075e-10 1.000000    | 5.09747e-10 1.000000
rad33            | 2.26361e-10 1.000000    | 3.16931e-10 1.000000
rad20            | 1.91855e-10 1.000000    | 2.68618e-10 1.000000
rad10            | 1.34965e-10 1.000000    | 1.88966e-10 1.000000
rad18            | 6.82672e-11 1.000000    | 9.55815e-11 1.000000
rad25            | 5.81038e-11 1.000000    | 8.13517e-11 1.000000

```



|       |             |          |             |          |
|-------|-------------|----------|-------------|----------|
| rad2  | 5.09982e-11 | 1.000000 | 7.14032e-11 | 1.000000 |
| rad12 | 4.14669e-11 | 1.000000 | 5.80581e-11 | 1.000000 |
| rad24 | 2.85069e-11 | 1.000000 | 3.99128e-11 | 1.000000 |
| rad3  | 1.69265e-11 | 1.000000 | 2.36989e-11 | 1.000000 |
| rad1  | 1.35435e-11 | 1.000000 | 1.89624e-11 | 1.000000 |
| rad4  | 1.07343e-11 | 1.000000 | 1.50292e-11 | 1.000000 |
| rad14 | 2.94493e-12 | 1.000000 | 4.12324e-12 | 1.000000 |
| rad8  | 2.34779e-12 | 1.000000 | 3.28717e-12 | 1.000000 |
| rad5  | 4.03607e-13 | 1.000000 | 5.65095e-13 | 1.000000 |
| rad47 | 2.89524e-13 | 1.000000 | 4.05367e-13 | 1.000000 |
| rad27 | 1.92357e-13 | 1.000000 | 2.69321e-13 | 1.000000 |

10.000000 Pa, 2250.00000 K

| Rate constant      | True (fraction) |          | Effective (fraction) |          |
|--------------------|-----------------|----------|----------------------|----------|
| Total              | 2.23655e-11     | (1.00 )  | 1.58436e-11          | (1.00 )  |
| Formation of rad11 | 4.62280e-12     | (0.207 ) | 1.98923e-12          | (0.126 ) |
| Formation of rad6  | 6.82518e-12     | (0.305 ) | 2.93693e-12          | (0.185 ) |
| H-abstraction      | 1.09175e-11     | (0.488 ) | 1.09175e-11          | (0.689 ) |

  

| species            | PYtrue      | Cumul    | PYeffective | Cumul    |
|--------------------|-------------|----------|-------------|----------|
| Benzene+2-propynyl | 0.488140    | 0.488140 | 0.689077    | 0.689077 |
| Phenyl+Allene      | 0.291602    | 0.779743 | 0.000000    | 0.689077 |
| PhCH2CCH+H         | 0.0967405   | 0.876483 | 0.136563    | 0.825639 |
| PhCHCCH2+H         | 0.0532733   | 0.929756 | 0.0752030   | 0.900842 |
| C2H2+PhCH2         | 0.0232632   | 0.953020 | 0.0328391   | 0.933681 |
| PhCCH+CH3          | 0.0176487   | 0.970668 | 0.0249135   | 0.958595 |
| Indene+H           | 0.0145368   | 0.985205 | 0.0205207   | 0.979115 |
| PAH7+H             | 0.00604327  | 0.991248 | 0.00853090  | 0.987646 |
| Ph+MeAc            | 0.00373474  | 0.994983 | 0.00527211  | 0.992919 |
| PhcycC3H3_A+H      | 0.00104461  | 0.996028 | 0.00147461  | 0.994393 |
| rad19syn           | 0.000992737 | 0.997020 | 0.00140138  | 0.995794 |
| rad39              | 0.000833753 | 0.997854 | 0.00117695  | 0.996971 |
| rad19anti          | 0.000463501 | 0.998318 | 0.000654295 | 0.997626 |
| rad54              | 0.000448459 | 0.998766 | 0.000633062 | 0.998259 |
| PAH9+H             | 0.000276032 | 0.999042 | 0.000389659 | 0.998648 |
| PhCCCH3+H          | 0.000209656 | 0.999252 | 0.000295958 | 0.998944 |
| rad38              | 0.000160738 | 0.999413 | 0.000226903 | 0.999171 |
| PAH1+H             | 9.96115e-05 | 0.999512 | 0.000140615 | 0.999312 |
| rad50              | 5.46697e-05 | 0.999567 | 7.71737e-05 | 0.999389 |
| rad35              | 5.25015e-05 | 0.999619 | 7.41126e-05 | 0.999463 |
| rad46              | 5.07079e-05 | 0.999670 | 7.15811e-05 | 0.999535 |
| PAH10+CH3          | 4.32224e-05 | 0.999713 | 6.10144e-05 | 0.999596 |
| rad55              | 4.15482e-05 | 0.999755 | 5.86510e-05 | 0.999654 |
| rad70              | 4.13239e-05 | 0.999796 | 5.83345e-05 | 0.999713 |
| PAH3+H             | 3.54289e-05 | 0.999832 | 5.00130e-05 | 0.999763 |
| rad67              | 3.21724e-05 | 0.999864 | 4.54157e-05 | 0.999808 |
| rad56              | 2.11036e-05 | 0.999885 | 2.97907e-05 | 0.999838 |
| rad51              | 2.05593e-05 | 0.999905 | 2.90222e-05 | 0.999867 |
| rad53              | 1.82297e-05 | 0.999924 | 2.57337e-05 | 0.999893 |
| rad30              | 1.61767e-05 | 0.999940 | 2.28356e-05 | 0.999916 |
| rad37              | 1.58089e-05 | 0.999956 | 2.23164e-05 | 0.999938 |
| rad34              | 1.21382e-05 | 0.999968 | 1.71347e-05 | 0.999955 |
| rad52              | 5.54216e-06 | 0.999973 | 7.82349e-06 | 0.999963 |
| rad62              | 4.54336e-06 | 0.999978 | 6.41357e-06 | 0.999969 |
| PAH8+H             | 4.26563e-06 | 0.999982 | 6.02153e-06 | 0.999975 |
| rad59              | 3.10144e-06 | 0.999985 | 4.37811e-06 | 0.999980 |
| rad64              | 2.31436e-06 | 0.999988 | 3.26703e-06 | 0.999983 |
| rad60syn           | 2.18354e-06 | 0.999990 | 3.08236e-06 | 0.999986 |
| rad60anti          | 1.52764e-06 | 0.999991 | 2.15647e-06 | 0.999988 |
| rad71              | 1.45195e-06 | 0.999993 | 2.04962e-06 | 0.999990 |
| rad6               | 1.30816e-06 | 0.999994 | 1.84665e-06 | 0.999992 |
| rad68syn           | 1.22849e-06 | 0.999995 | 1.73418e-06 | 0.999994 |
| rad73              | 8.61051e-07 | 0.999996 | 1.21549e-06 | 0.999995 |
| rad68anti          | 7.89784e-07 | 0.999997 | 1.11489e-06 | 0.999996 |
| rad65              | 5.44322e-07 | 0.999997 | 7.68382e-07 | 0.999997 |
| rad42              | 4.98369e-07 | 0.999998 | 7.03517e-07 | 0.999998 |
| rad40syn           | 4.83741e-07 | 0.999998 | 6.82866e-07 | 0.999998 |
| rad58              | 4.30355e-07 | 0.999999 | 6.07504e-07 | 0.999999 |
| rad40anti          | 3.15447e-07 | 0.999999 | 4.45295e-07 | 0.999999 |
| rad43              | 2.01386e-07 | 0.999999 | 2.84284e-07 | 1.000000 |
| rad61              | 1.06800e-07 | 0.999999 | 1.50763e-07 | 1.000000 |
| rad72              | 8.34204e-08 | 1.000000 | 1.17759e-07 | 1.000000 |
| rad41              | 2.12032e-08 | 1.000000 | 2.99313e-08 | 1.000000 |
| rad7               | 1.71791e-08 | 1.000000 | 2.42508e-08 | 1.000000 |
| rad11              | 1.31080e-08 | 1.000000 | 1.85037e-08 | 1.000000 |
| rad23              | 1.07050e-08 | 1.000000 | 1.51116e-08 | 1.000000 |
| rad28              | 4.72193e-09 | 1.000000 | 6.66564e-09 | 1.000000 |

|       |             |          |             |         |
|-------|-------------|----------|-------------|---------|
| rad9  | 2.90869e-09 | 1.000000 | 4.10602e-09 | 1.00000 |
| rad13 | 1.83686e-09 | 1.000000 | 2.59297e-09 | 1.00000 |
| rad45 | 1.44770e-09 | 1.000000 | 2.04362e-09 | 1.00000 |
| rad22 | 7.21927e-10 | 1.000000 | 1.01910e-09 | 1.00000 |
| rad21 | 2.98619e-10 | 1.000000 | 4.21541e-10 | 1.00000 |
| rad36 | 2.58370e-10 | 1.000000 | 3.64726e-10 | 1.00000 |
| rad15 | 1.63284e-10 | 1.000000 | 2.30498e-10 | 1.00000 |
| rad33 | 1.06561e-10 | 1.000000 | 1.50424e-10 | 1.00000 |
| rad26 | 9.16982e-11 | 1.000000 | 1.29445e-10 | 1.00000 |
| rad20 | 6.86133e-11 | 1.000000 | 9.68570e-11 | 1.00000 |
| rad10 | 3.38726e-11 | 1.000000 | 4.78160e-11 | 1.00000 |
| rad25 | 2.68880e-11 | 1.000000 | 3.79560e-11 | 1.00000 |
| rad12 | 2.31783e-11 | 1.000000 | 3.27194e-11 | 1.00000 |
| rad18 | 2.07790e-11 | 1.000000 | 2.93324e-11 | 1.00000 |
| rad24 | 1.45631e-11 | 1.000000 | 2.05578e-11 | 1.00000 |
| rad2  | 9.56047e-12 | 1.000000 | 1.34959e-11 | 1.00000 |
| rad3  | 5.47117e-12 | 1.000000 | 7.72334e-12 | 1.00000 |
| rad4  | 3.41118e-12 | 1.000000 | 4.81533e-12 | 1.00000 |
| rad1  | 2.56319e-12 | 1.000000 | 3.61831e-12 | 1.00000 |
| rad8  | 2.01449e-12 | 1.000000 | 2.84372e-12 | 1.00000 |
| rad14 | 1.41484e-12 | 1.000000 | 1.99725e-12 | 1.00000 |
| rad47 | 4.72781e-13 | 1.000000 | 6.67394e-13 | 1.00000 |
| rad5  | 2.27766e-13 | 1.000000 | 3.21523e-13 | 1.00000 |
| rad27 | 7.43676e-14 | 1.000000 | 1.04980e-13 | 1.00000 |

10.000000 Pa, 2500.00000 K

| Rate constant      | True (fraction) |          | Effective (fraction) |          |
|--------------------|-----------------|----------|----------------------|----------|
| Total              | 3.28090e-11     | (1.00 )  | 2.31980e-11          | (1.00 )  |
| Formation of rad11 | 6.43164e-12     | (0.196 ) | 2.60905e-12          | (0.112 ) |
| Formation of rad6  | 9.73932e-12     | (0.297 ) | 3.95084e-12          | (0.170 ) |
| H-abstraction      | 1.66381e-11     | (0.507 ) | 1.66381e-11          | (0.717 ) |

  

| species            | PYtrue      | Cumul    | PYeffective | Cumul    |
|--------------------|-------------|----------|-------------|----------|
| Benzene+2-propynyl | 0.507119    | 0.507119 | 0.717221    | 0.717221 |
| Phenyl+Allene      | 0.292940    | 0.800058 | 0.000000    | 0.717221 |
| PhCH2CCH+H         | 0.0943957   | 0.894454 | 0.133504    | 0.850725 |
| PhCHCCH2+H         | 0.0481937   | 0.942648 | 0.0681608   | 0.918886 |
| C2H2+PhCH2         | 0.0183496   | 0.960997 | 0.0259520   | 0.944838 |
| PhCCH+CH3          | 0.0148751   | 0.975872 | 0.0210379   | 0.965876 |
| Indene+H           | 0.00953277  | 0.985405 | 0.0134822   | 0.979358 |
| PAH7+H             | 0.00553043  | 0.990935 | 0.00782172  | 0.987180 |
| Ph+MeAc            | 0.00339481  | 0.994330 | 0.00480130  | 0.991981 |
| PhcycC3H3_A+H      | 0.00149316  | 0.995823 | 0.00211179  | 0.994093 |
| rad19syn           | 0.00122621  | 0.997050 | 0.00173423  | 0.995827 |
| rad39              | 0.000692493 | 0.997742 | 0.000979399 | 0.996806 |
| rad54              | 0.000558302 | 0.998300 | 0.000789609 | 0.997596 |
| rad19anti          | 0.000392533 | 0.998693 | 0.000555160 | 0.998151 |
| PAH9+H             | 0.000261390 | 0.998954 | 0.000369685 | 0.998521 |
| PhCCCH3+H          | 0.000164586 | 0.999119 | 0.000232775 | 0.998754 |
| rad38              | 0.000157803 | 0.999277 | 0.000223182 | 0.998977 |
| PAH1+H             | 0.000129623 | 0.999406 | 0.000183328 | 0.999160 |
| rad50              | 6.95549e-05 | 0.999476 | 9.83717e-05 | 0.999259 |
| rad55              | 5.44683e-05 | 0.999530 | 7.70352e-05 | 0.999336 |
| rad46              | 5.29621e-05 | 0.999583 | 7.49045e-05 | 0.999411 |
| rad35              | 5.14110e-05 | 0.999635 | 7.27107e-05 | 0.999483 |
| PAH10+CH3          | 5.04341e-05 | 0.999685 | 7.13293e-05 | 0.999555 |
| rad70              | 4.95228e-05 | 0.999735 | 7.00404e-05 | 0.999625 |
| PAH3+H             | 4.31623e-05 | 0.999778 | 6.10446e-05 | 0.999686 |
| rad67              | 3.73886e-05 | 0.999815 | 5.28788e-05 | 0.999739 |
| rad56              | 3.65137e-05 | 0.999852 | 5.16417e-05 | 0.999790 |
| rad51              | 2.99461e-05 | 0.999882 | 4.23529e-05 | 0.999833 |
| rad53              | 2.90227e-05 | 0.999911 | 4.10471e-05 | 0.999874 |
| rad34              | 1.57209e-05 | 0.999926 | 2.22341e-05 | 0.999896 |
| rad30              | 1.43454e-05 | 0.999941 | 2.02887e-05 | 0.999916 |
| rad37              | 1.43018e-05 | 0.999955 | 2.02271e-05 | 0.999936 |
| PAH8+H             | 8.32940e-06 | 0.999963 | 1.17803e-05 | 0.999948 |
| rad52              | 7.47819e-06 | 0.999971 | 1.05764e-05 | 0.999959 |
| rad62              | 5.70323e-06 | 0.999977 | 8.06616e-06 | 0.999967 |
| rad59              | 3.60020e-06 | 0.999980 | 5.09180e-06 | 0.999972 |
| rad71              | 3.22477e-06 | 0.999983 | 4.56080e-06 | 0.999976 |
| rad64              | 3.22150e-06 | 0.999987 | 4.55619e-06 | 0.999981 |
| rad60syn           | 2.29249e-06 | 0.999989 | 3.24229e-06 | 0.999984 |
| rad68syn           | 1.99925e-06 | 0.999991 | 2.82755e-06 | 0.999987 |
| rad73              | 1.73339e-06 | 0.999993 | 2.45155e-06 | 0.999989 |
| rad60anti          | 1.62673e-06 | 0.999994 | 2.30069e-06 | 0.999992 |
| rad68anti          | 1.28209e-06 | 0.999996 | 1.81327e-06 | 0.999994 |
| rad40syn           | 8.70473e-07 | 0.999996 | 1.23111e-06 | 0.999995 |

|           |             |          |             |          |
|-----------|-------------|----------|-------------|----------|
| rad65     | 7.65977e-07 | 0.999997 | 1.08333e-06 | 0.999996 |
| rad42     | 7.25521e-07 | 0.999998 | 1.02611e-06 | 0.999997 |
| rad58     | 6.16782e-07 | 0.999999 | 8.72319e-07 | 0.999998 |
| rad40anti | 5.85933e-07 | 0.999999 | 8.28687e-07 | 0.999999 |
| rad6      | 3.51620e-07 | 0.999999 | 4.97298e-07 | 0.999999 |
| rad43     | 2.45132e-07 | 1.000000 | 3.46693e-07 | 0.999999 |
| rad72     | 2.21387e-07 | 1.000000 | 3.13110e-07 | 1.000000 |
| rad61     | 1.61764e-07 | 1.000000 | 2.28783e-07 | 1.000000 |
| rad41     | 3.09983e-08 | 1.000000 | 4.38412e-08 | 1.000000 |
| rad7      | 6.71640e-09 | 1.000000 | 9.49905e-09 | 1.000000 |
| rad11     | 4.87809e-09 | 1.000000 | 6.89910e-09 | 1.000000 |
| rad23     | 3.01780e-09 | 1.000000 | 4.26810e-09 | 1.000000 |
| rad28     | 1.25008e-09 | 1.000000 | 1.76800e-09 | 1.000000 |
| rad9      | 1.13464e-09 | 1.000000 | 1.60473e-09 | 1.000000 |
| rad13     | 7.94816e-10 | 1.000000 | 1.12411e-09 | 1.000000 |
| rad45     | 5.64039e-10 | 1.000000 | 7.97725e-10 | 1.000000 |
| rad22     | 2.26386e-10 | 1.000000 | 3.20179e-10 | 1.000000 |
| rad21     | 1.39641e-10 | 1.000000 | 1.97495e-10 | 1.000000 |
| rad36     | 1.02359e-10 | 1.000000 | 1.44767e-10 | 1.000000 |
| rad15     | 7.06772e-11 | 1.000000 | 9.99590e-11 | 1.000000 |
| rad33     | 5.56769e-11 | 1.000000 | 7.87440e-11 | 1.000000 |
| rad26     | 3.18912e-11 | 1.000000 | 4.51038e-11 | 1.000000 |
| rad20     | 2.93013e-11 | 1.000000 | 4.14410e-11 | 1.000000 |
| rad25     | 1.37459e-11 | 1.000000 | 1.94409e-11 | 1.000000 |
| rad12     | 1.32609e-11 | 1.000000 | 1.87550e-11 | 1.000000 |
| rad10     | 1.20463e-11 | 1.000000 | 1.70372e-11 | 1.000000 |
| rad24     | 7.99114e-12 | 1.000000 | 1.13019e-11 | 1.000000 |
| rad18     | 7.82868e-12 | 1.000000 | 1.10722e-11 | 1.000000 |
| rad2      | 2.61115e-12 | 1.000000 | 3.69298e-12 | 1.000000 |
| rad3      | 2.17286e-12 | 1.000000 | 3.07310e-12 | 1.000000 |
| rad8      | 1.74750e-12 | 1.000000 | 2.47150e-12 | 1.000000 |
| rad4      | 1.32627e-12 | 1.000000 | 1.87575e-12 | 1.000000 |
| rad14     | 7.81301e-13 | 1.000000 | 1.10500e-12 | 1.000000 |
| rad1      | 6.85731e-13 | 1.000000 | 9.69833e-13 | 1.000000 |
| rad47     | 6.75287e-13 | 1.000000 | 9.55066e-13 | 1.000000 |
| rad5      | 1.48904e-13 | 1.000000 | 2.10596e-13 | 1.000000 |
| rad27     | 3.69695e-14 | 1.000000 | 5.22861e-14 | 1.000000 |

10.000000 Pa, 2750.00000 K

| Rate constant      | True (fraction)      | Effective (fraction) |
|--------------------|----------------------|----------------------|
| Total              | 4.60596e-11 (1.00 )  | 3.26255e-11 (1.00 )  |
| Formation of rad11 | 8.62280e-12 (0.187 ) | 3.34633e-12 (0.103 ) |
| Formation of rad6  | 1.33313e-11 (0.289 ) | 5.17360e-12 (0.159 ) |
| H-abstraction      | 2.41055e-11 (0.523 ) | 2.41055e-11 (0.739 ) |

| species            | PYtrue      | Cumul    | PYeffective | Cumul    |
|--------------------|-------------|----------|-------------|----------|
| Benzene+2-propynyl | 0.523355    | 0.523355 | 0.738856    | 0.738856 |
| Phenyl+Allene      | 0.291669    | 0.815024 | 0.000000    | 0.738856 |
| PhCH2CCH+H         | 0.0913925   | 0.906416 | 0.129025    | 0.867881 |
| PhCHCCH2+H         | 0.0440896   | 0.950506 | 0.0622444   | 0.930126 |
| C2H2+PhCH2         | 0.0155259   | 0.966032 | 0.0219190   | 0.952045 |
| PhCCH+CH3          | 0.0128664   | 0.978898 | 0.0181643   | 0.970209 |
| Indene+H           | 0.00652670  | 0.985425 | 0.00921422  | 0.979423 |
| PAH7+H             | 0.00506746  | 0.990492 | 0.00715408  | 0.986577 |
| Ph+MeAc            | 0.00315047  | 0.993643 | 0.00444775  | 0.991025 |
| PhcycC3H3_A+H      | 0.00197303  | 0.995616 | 0.00278546  | 0.993810 |
| rad19syn           | 0.00143569  | 0.997052 | 0.00202687  | 0.995837 |
| rad54              | 0.000652599 | 0.997704 | 0.000921317 | 0.996759 |
| rad39              | 0.000584043 | 0.998288 | 0.000824538 | 0.997583 |
| rad19anti          | 0.000328571 | 0.998617 | 0.000463867 | 0.998047 |
| PAH9+H             | 0.000240061 | 0.998857 | 0.000338912 | 0.998386 |
| PAH1+H             | 0.000158293 | 0.999015 | 0.000223474 | 0.998609 |
| rad38              | 0.000149713 | 0.999165 | 0.000211361 | 0.998821 |
| PhCCCH3+H          | 0.000136861 | 0.999302 | 0.000193217 | 0.999014 |
| rad50              | 8.19649e-05 | 0.999384 | 0.000115716 | 0.999130 |
| rad55              | 6.64339e-05 | 0.999450 | 9.37892e-05 | 0.999223 |
| rad70              | 5.64830e-05 | 0.999507 | 7.97410e-05 | 0.999303 |
| rad56              | 5.59930e-05 | 0.999563 | 7.90490e-05 | 0.999382 |
| PAH10+CH3          | 5.49977e-05 | 0.999618 | 7.76440e-05 | 0.999460 |
| rad46              | 5.29196e-05 | 0.999671 | 7.47106e-05 | 0.999535 |
| PAH3+H             | 5.07708e-05 | 0.999721 | 7.16764e-05 | 0.999606 |
| rad35              | 4.92117e-05 | 0.999771 | 6.94757e-05 | 0.999676 |
| rad53              | 4.15963e-05 | 0.999812 | 5.87244e-05 | 0.999734 |
| rad67              | 4.08894e-05 | 0.999853 | 5.77266e-05 | 0.999792 |
| rad51              | 3.94277e-05 | 0.999892 | 5.56628e-05 | 0.999848 |
| rad34              | 1.91383e-05 | 0.999912 | 2.70187e-05 | 0.999875 |
| PAH8+H             | 1.42402e-05 | 0.999926 | 2.01039e-05 | 0.999895 |

|           |             |          |             |          |
|-----------|-------------|----------|-------------|----------|
| rad30     | 1.30159e-05 | 0.999939 | 1.83754e-05 | 0.999913 |
| rad37     | 1.25496e-05 | 0.999951 | 1.77172e-05 | 0.999931 |
| rad52     | 9.23276e-06 | 0.999961 | 1.30345e-05 | 0.999944 |
| rad62     | 6.96527e-06 | 0.999968 | 9.83336e-06 | 0.999954 |
| rad71     | 6.06698e-06 | 0.999974 | 8.56515e-06 | 0.999962 |
| rad64     | 4.12929e-06 | 0.999978 | 5.82961e-06 | 0.999968 |
| rad59     | 4.06488e-06 | 0.999982 | 5.73868e-06 | 0.999974 |
| rad73     | 2.98959e-06 | 0.999985 | 4.22060e-06 | 0.999978 |
| rad68syn  | 2.93860e-06 | 0.999988 | 4.14863e-06 | 0.999982 |
| rad60syn  | 2.38752e-06 | 0.999990 | 3.37063e-06 | 0.999986 |
| rad68anti | 1.88088e-06 | 0.999992 | 2.65536e-06 | 0.999988 |
| rad60anti | 1.71401e-06 | 0.999994 | 2.41979e-06 | 0.999991 |
| rad40syn  | 1.39060e-06 | 0.999995 | 1.96321e-06 | 0.999993 |
| rad42     | 1.00624e-06 | 0.999996 | 1.42058e-06 | 0.999994 |
| rad65     | 9.77223e-07 | 0.999997 | 1.37961e-06 | 0.999996 |
| rad40anti | 9.60907e-07 | 0.999998 | 1.35658e-06 | 0.999997 |
| rad58     | 8.26841e-07 | 0.999999 | 1.16731e-06 | 0.999998 |
| rad72     | 4.94024e-07 | 0.999999 | 6.97444e-07 | 0.999999 |
| rad43     | 2.90367e-07 | 1.000000 | 4.09933e-07 | 0.999999 |
| rad61     | 2.19019e-07 | 1.000000 | 3.09205e-07 | 1.000000 |
| rad6      | 1.19226e-07 | 1.000000 | 1.68320e-07 | 1.000000 |
| rad41     | 4.25229e-08 | 1.000000 | 6.00325e-08 | 1.000000 |
| rad7      | 3.01493e-09 | 1.000000 | 4.25641e-09 | 1.000000 |
| rad11     | 2.08530e-09 | 1.000000 | 2.94398e-09 | 1.000000 |
| rad23     | 1.03777e-09 | 1.000000 | 1.46509e-09 | 1.000000 |
| rad9      | 4.76181e-10 | 1.000000 | 6.72257e-10 | 1.000000 |
| rad28     | 4.22852e-10 | 1.000000 | 5.96969e-10 | 1.000000 |
| rad13     | 3.86405e-10 | 1.000000 | 5.45516e-10 | 1.000000 |
| rad45     | 2.42675e-10 | 1.000000 | 3.42602e-10 | 1.000000 |
| rad22     | 8.48762e-11 | 1.000000 | 1.19826e-10 | 1.000000 |
| rad21     | 7.21741e-11 | 1.000000 | 1.01893e-10 | 1.000000 |
| rad36     | 4.46595e-11 | 1.000000 | 6.30490e-11 | 1.000000 |
| rad15     | 3.25855e-11 | 1.000000 | 4.60033e-11 | 1.000000 |
| rad33     | 3.15200e-11 | 1.000000 | 4.44991e-11 | 1.000000 |
| rad20     | 1.46427e-11 | 1.000000 | 2.06722e-11 | 1.000000 |
| rad26     | 1.29777e-11 | 1.000000 | 1.83216e-11 | 1.000000 |
| rad12     | 7.84806e-12 | 1.000000 | 1.10797e-11 | 1.000000 |
| rad25     | 7.64863e-12 | 1.000000 | 1.07981e-11 | 1.000000 |
| rad10     | 5.14372e-12 | 1.000000 | 7.26175e-12 | 1.000000 |
| rad24     | 4.65722e-12 | 1.000000 | 6.57492e-12 | 1.000000 |
| rad18     | 3.46963e-12 | 1.000000 | 4.89832e-12 | 1.000000 |
| rad8      | 1.53038e-12 | 1.000000 | 2.16055e-12 | 1.000000 |
| rad3      | 1.00776e-12 | 1.000000 | 1.42273e-12 | 1.000000 |
| rad2      | 9.34892e-13 | 1.000000 | 1.31986e-12 | 1.000000 |
| rad47     | 8.69802e-13 | 1.000000 | 1.22796e-12 | 1.000000 |
| rad4      | 6.04505e-13 | 1.000000 | 8.53425e-13 | 1.000000 |
| rad14     | 4.77432e-13 | 1.000000 | 6.74025e-13 | 1.000000 |
| rad1      | 2.35830e-13 | 1.000000 | 3.32937e-13 | 1.000000 |
| rad5      | 1.04164e-13 | 1.000000 | 1.47055e-13 | 1.000000 |
| rad27     | 2.16921e-14 | 1.000000 | 3.06243e-14 | 1.000000 |

10.000000 Pa, 3000.00000 K

=====

| Rate constant      | True (fraction)      | Effective (fraction)  |
|--------------------|----------------------|-----------------------|
| Total              | 6.24269e-11 (1.00 )  | 4.43911e-11 (1.00 )   |
| Formation of rad11 | 1.12221e-11 (0.180 ) | 4.21269e-12 (0.0949 ) |
| Formation of rad6  | 1.76534e-11 (0.283 ) | 6.62699e-12 (0.149 )  |
| H-abstraction      | 3.35514e-11 (0.537 ) | 3.35514e-11 (0.756 )  |

| species            | PYtrue      | Cumul    | PYeffective | Cumul    |
|--------------------|-------------|----------|-------------|----------|
| Benzene+2-propynyl | 0.537451    | 0.537451 | 0.755814    | 0.755814 |
| Phenyl+Allene      | 0.288911    | 0.826362 | 0.000000    | 0.755814 |
| PhCH2CCH+H         | 0.0883066   | 0.914669 | 0.124185    | 0.879999 |
| PhCHCCH2+H         | 0.0408111   | 0.955480 | 0.0573925   | 0.937392 |
| C2H2+PhCH2         | 0.0138651   | 0.969345 | 0.0194984   | 0.956890 |
| PhCCH+CH3          | 0.0113582   | 0.980703 | 0.0159730   | 0.972863 |
| PAH7+H             | 0.00465329  | 0.985356 | 0.00654386  | 0.979407 |
| Indene+H           | 0.00463895  | 0.989995 | 0.00652370  | 0.985931 |
| Ph+MeAc            | 0.00297587  | 0.992971 | 0.00418496  | 0.990116 |
| PhcycC3H3_A+H      | 0.00245642  | 0.995428 | 0.00345445  | 0.993570 |
| rad19syn           | 0.00161454  | 0.997042 | 0.00227053  | 0.995841 |
| rad54              | 0.000727890 | 0.997770 | 0.00102362  | 0.996864 |
| rad39              | 0.000500510 | 0.998270 | 0.000703863 | 0.997568 |
| rad19anti          | 0.000275357 | 0.998546 | 0.000387232 | 0.997955 |
| PAH9+H             | 0.000215435 | 0.998761 | 0.000302966 | 0.998258 |
| PAH1+H             | 0.000185099 | 0.998946 | 0.000260305 | 0.998519 |
| rad38              | 0.000138297 | 0.999085 | 0.000194486 | 0.998713 |
| PhCCCH3+H          | 0.000118094 | 0.999203 | 0.000166075 | 0.998879 |

|           |             |          |             |          |
|-----------|-------------|----------|-------------|----------|
| rad50     | 9.10217e-05 | 0.999294 | 0.000128003 | 0.999007 |
| rad56     | 7.84311e-05 | 0.999372 | 0.000110297 | 0.999117 |
| rad55     | 7.67854e-05 | 0.999449 | 0.000107983 | 0.999225 |
| rad70     | 6.22156e-05 | 0.999511 | 8.74935e-05 | 0.999313 |
| PAH3+H    | 5.79162e-05 | 0.999569 | 8.14475e-05 | 0.999394 |
| PAH10+CH3 | 5.73435e-05 | 0.999626 | 8.06422e-05 | 0.999475 |
| rad53     | 5.50946e-05 | 0.999682 | 7.74790e-05 | 0.999552 |
| rad46     | 5.10964e-05 | 0.999733 | 7.18566e-05 | 0.999624 |
| rad51     | 4.79945e-05 | 0.999781 | 6.74945e-05 | 0.999692 |
| rad35     | 4.64038e-05 | 0.999827 | 6.52572e-05 | 0.999757 |
| rad67     | 4.30005e-05 | 0.999870 | 6.04712e-05 | 0.999818 |
| rad34     | 2.22803e-05 | 0.999892 | 3.13327e-05 | 0.999849 |
| PAH8+H    | 2.20425e-05 | 0.999914 | 3.09982e-05 | 0.999880 |
| rad30     | 1.19659e-05 | 0.999926 | 1.68276e-05 | 0.999897 |
| rad37     | 1.08360e-05 | 0.999937 | 1.52386e-05 | 0.999912 |
| rad52     | 1.06408e-05 | 0.999948 | 1.49641e-05 | 0.999927 |
| rad71     | 9.98046e-06 | 0.999958 | 1.40354e-05 | 0.999941 |
| rad62     | 8.52403e-06 | 0.999966 | 1.19873e-05 | 0.999953 |
| rad64     | 4.99011e-06 | 0.999971 | 7.01756e-06 | 0.999960 |
| rad73     | 4.56510e-06 | 0.999976 | 6.41987e-06 | 0.999966 |
| rad59     | 4.47702e-06 | 0.999980 | 6.29602e-06 | 0.999973 |
| rad68syn  | 4.00555e-06 | 0.999984 | 5.63298e-06 | 0.999978 |
| rad68anti | 2.55994e-06 | 0.999987 | 3.60003e-06 | 0.999982 |
| rad60syn  | 2.46101e-06 | 0.999989 | 3.46090e-06 | 0.999985 |
| rad40syn  | 2.03324e-06 | 0.999991 | 2.85934e-06 | 0.999988 |
| rad60anti | 1.78407e-06 | 0.999993 | 2.50894e-06 | 0.999991 |
| rad40anti | 1.43625e-06 | 0.999995 | 2.01978e-06 | 0.999993 |
| rad42     | 1.37802e-06 | 0.999996 | 1.93790e-06 | 0.999995 |
| rad65     | 1.15679e-06 | 0.999997 | 1.62679e-06 | 0.999996 |
| rad58     | 1.05023e-06 | 0.999998 | 1.47693e-06 | 0.999998 |
| rad72     | 9.39644e-07 | 0.999999 | 1.32141e-06 | 0.999999 |
| rad43     | 3.36096e-07 | 0.999999 | 4.72649e-07 | 1.000000 |
| rad61     | 2.73992e-07 | 1.000000 | 3.85313e-07 | 1.000000 |
| rad41     | 5.56848e-08 | 1.000000 | 7.83094e-08 | 1.000000 |
| rad6      | 4.72979e-08 | 1.000000 | 6.65150e-08 | 1.000000 |
| rad7      | 1.50387e-09 | 1.000000 | 2.11488e-09 | 1.000000 |
| rad11     | 1.00076e-09 | 1.000000 | 1.40736e-09 | 1.000000 |
| rad23     | 4.06647e-10 | 1.000000 | 5.71864e-10 | 1.000000 |
| rad9      | 2.15022e-10 | 1.000000 | 3.02385e-10 | 1.000000 |
| rad13     | 2.06334e-10 | 1.000000 | 2.90166e-10 | 1.000000 |
| rad28     | 1.67294e-10 | 1.000000 | 2.35265e-10 | 1.000000 |
| rad45     | 1.13375e-10 | 1.000000 | 1.59438e-10 | 1.000000 |
| rad21     | 4.05828e-11 | 1.000000 | 5.70714e-11 | 1.000000 |
| rad22     | 3.62813e-11 | 1.000000 | 5.10222e-11 | 1.000000 |
| rad36     | 2.11056e-11 | 1.000000 | 2.96806e-11 | 1.000000 |
| rad33     | 1.90039e-11 | 1.000000 | 2.67249e-11 | 1.000000 |
| rad15     | 1.59821e-11 | 1.000000 | 2.24755e-11 | 1.000000 |
| rad20     | 8.34220e-12 | 1.000000 | 1.17316e-11 | 1.000000 |
| rad26     | 5.81636e-12 | 1.000000 | 8.17952e-12 | 1.000000 |
| rad12     | 4.82952e-12 | 1.000000 | 6.79171e-12 | 1.000000 |
| rad25     | 4.57374e-12 | 1.000000 | 6.43203e-12 | 1.000000 |
| rad24     | 2.85396e-12 | 1.000000 | 4.01349e-12 | 1.000000 |
| rad10     | 2.46071e-12 | 1.000000 | 3.46048e-12 | 1.000000 |
| rad18     | 1.74375e-12 | 1.000000 | 2.45221e-12 | 1.000000 |
| rad8      | 1.34879e-12 | 1.000000 | 1.89680e-12 | 1.000000 |
| rad47     | 1.03454e-12 | 1.000000 | 1.45487e-12 | 1.000000 |
| rad3      | 5.25261e-13 | 1.000000 | 7.38672e-13 | 1.000000 |
| rad2      | 4.05414e-13 | 1.000000 | 5.70130e-13 | 1.000000 |
| rad14     | 3.18034e-13 | 1.000000 | 4.47248e-13 | 1.000000 |
| rad4      | 3.12662e-13 | 1.000000 | 4.39693e-13 | 1.000000 |
| rad1      | 9.75913e-14 | 1.000000 | 1.37242e-13 | 1.000000 |
| rad5      | 7.56966e-14 | 1.000000 | 1.06452e-13 | 1.000000 |
| rad27     | 1.41323e-14 | 1.000000 | 1.98742e-14 | 1.000000 |

10.000000 Pa, 3250.00000 K

=====

| Rate constant      | True (fraction)      | Effective (fraction)  |
|--------------------|----------------------|-----------------------|
| Total              | 8.22129e-11 (1.00 )  | 5.87536e-11 (1.00 )   |
| Formation of rad11 | 1.42538e-11 (0.173 ) | 5.21850e-12 (0.0888 ) |
| Formation of rad6  | 2.27549e-11 (0.277 ) | 8.33085e-12 (0.142 )  |
| H-abstraction      | 4.52043e-11 (0.550 ) | 4.52043e-11 (0.769 )  |

| species            | PYtrue    | Cumul    | PYeffective | Cumul    |
|--------------------|-----------|----------|-------------|----------|
| Benzene+2-propynyl | 0.549844  | 0.549844 | 0.769387    | 0.769387 |
| Phenyl+Allene      | 0.285348  | 0.835192 | 0.00000     | 0.769387 |
| PhCH2CCH+H         | 0.0853725 | 0.920565 | 0.119460    | 0.888847 |
| PhCHCCH2+H         | 0.0381839 | 0.958748 | 0.0534300   | 0.942277 |
| C2H2+PhCH2         | 0.0128678 | 0.971616 | 0.0180058   | 0.960283 |

|               |             |          |             |          |
|---------------|-------------|----------|-------------|----------|
| PhCCH+CH3     | 0.0101926   | 0.981809 | 0.0142624   | 0.974545 |
| PAH7+H        | 0.00428274  | 0.986092 | 0.00599278  | 0.980538 |
| Indene+H      | 0.00340696  | 0.989499 | 0.00476730  | 0.985306 |
| PhcycC3H3_A+H | 0.00292038  | 0.992419 | 0.00408644  | 0.989392 |
| Ph+MeAc       | 0.00285191  | 0.995271 | 0.00399062  | 0.993383 |
| rad19syn      | 0.00176005  | 0.997031 | 0.00246281  | 0.995845 |
| rad54         | 0.000783510 | 0.997814 | 0.00109635  | 0.996942 |
| rad39         | 0.000435199 | 0.998250 | 0.000608968 | 0.997551 |
| rad19anti     | 0.000232598 | 0.998482 | 0.000325471 | 0.997876 |
| PAH1+H        | 0.000210286 | 0.998693 | 0.000294251 | 0.998170 |
| PAH9+H        | 0.000189946 | 0.998882 | 0.000265788 | 0.998436 |
| rad38         | 0.000125074 | 0.999008 | 0.000175014 | 0.998611 |
| PhCCCH3+H     | 0.000104500 | 0.999112 | 0.000146225 | 0.998757 |
| rad56         | 0.000102496 | 0.999215 | 0.000143421 | 0.998901 |
| rad50         | 9.64752e-05 | 0.999311 | 0.000134996 | 0.999036 |
| rad55         | 8.51952e-05 | 0.999396 | 0.000119212 | 0.999155 |
| rad53         | 6.86880e-05 | 0.999465 | 9.61142e-05 | 0.999251 |
| rad70         | 6.67834e-05 | 0.999532 | 9.34488e-05 | 0.999345 |
| PAH3+H        | 6.43467e-05 | 0.999596 | 9.00396e-05 | 0.999435 |
| PAH10+CH3     | 5.80427e-05 | 0.999654 | 8.12184e-05 | 0.999516 |
| rad51         | 5.49249e-05 | 0.999709 | 7.68555e-05 | 0.999593 |
| rad46         | 4.80263e-05 | 0.999757 | 6.72022e-05 | 0.999660 |
| rad67         | 4.40669e-05 | 0.999801 | 6.16620e-05 | 0.999722 |
| rad35         | 4.33473e-05 | 0.999844 | 6.06551e-05 | 0.999782 |
| PAH8+H        | 3.16111e-05 | 0.999876 | 4.42329e-05 | 0.999827 |
| rad34         | 2.50786e-05 | 0.999901 | 3.50921e-05 | 0.999862 |
| rad71         | 1.47752e-05 | 0.999916 | 2.06748e-05 | 0.999882 |
| rad52         | 1.16172e-05 | 0.999927 | 1.62557e-05 | 0.999899 |
| rad30         | 1.10774e-05 | 0.999939 | 1.55004e-05 | 0.999914 |
| rad62         | 1.06705e-05 | 0.999949 | 1.49311e-05 | 0.999929 |
| rad37         | 9.29424e-06 | 0.999959 | 1.30053e-05 | 0.999942 |
| rad73         | 6.33775e-06 | 0.999965 | 8.86829e-06 | 0.999951 |
| rad64         | 5.77649e-06 | 0.999971 | 8.08294e-06 | 0.999959 |
| rad68syn      | 5.15348e-06 | 0.999976 | 7.21120e-06 | 0.999966 |
| rad59         | 4.82486e-06 | 0.999981 | 6.75138e-06 | 0.999973 |
| rad68anti     | 3.28964e-06 | 0.999984 | 4.60315e-06 | 0.999978 |
| rad40syn      | 2.77792e-06 | 0.999987 | 3.88710e-06 | 0.999981 |
| rad60syn      | 2.50929e-06 | 0.999989 | 3.51120e-06 | 0.999985 |
| rad40anti     | 1.99953e-06 | 0.999991 | 2.79791e-06 | 0.999988 |
| rad42         | 1.90465e-06 | 0.999993 | 2.66515e-06 | 0.999990 |
| rad60anti     | 1.83422e-06 | 0.999995 | 2.56658e-06 | 0.999993 |
| rad72         | 1.57384e-06 | 0.999997 | 2.20224e-06 | 0.999995 |
| rad65         | 1.29210e-06 | 0.999998 | 1.80801e-06 | 0.999997 |
| rad58         | 1.27682e-06 | 0.999999 | 1.78664e-06 | 0.999999 |
| rad43         | 3.85030e-07 | 0.999999 | 5.38765e-07 | 0.999999 |
| rad61         | 3.23854e-07 | 1.000000 | 4.53164e-07 | 1.000000 |
| rad41         | 7.10639e-08 | 1.000000 | 9.94389e-08 | 1.000000 |
| rad6          | 2.11739e-08 | 1.000000 | 2.96285e-08 | 1.000000 |
| rad7          | 8.15449e-10 | 1.000000 | 1.14105e-09 | 1.000000 |
| rad11         | 5.29109e-10 | 1.000000 | 7.40376e-10 | 1.000000 |
| rad23         | 1.75467e-10 | 1.000000 | 2.45527e-10 | 1.000000 |
| rad13         | 1.18964e-10 | 1.000000 | 1.66464e-10 | 1.000000 |
| rad9          | 1.04251e-10 | 1.000000 | 1.45876e-10 | 1.000000 |
| rad28         | 7.43158e-11 | 1.000000 | 1.03989e-10 | 1.000000 |
| rad45         | 5.66900e-11 | 1.000000 | 7.93258e-11 | 1.000000 |
| rad21         | 2.44781e-11 | 1.000000 | 3.42518e-11 | 1.000000 |
| rad22         | 1.72528e-11 | 1.000000 | 2.41417e-11 | 1.000000 |
| rad33         | 1.20506e-11 | 1.000000 | 1.68622e-11 | 1.000000 |
| rad36         | 1.06510e-11 | 1.000000 | 1.49037e-11 | 1.000000 |
| rad15         | 8.32555e-12 | 1.000000 | 1.16498e-11 | 1.000000 |
| rad20         | 5.27241e-12 | 1.000000 | 7.37759e-12 | 1.000000 |
| rad12         | 3.09382e-12 | 1.000000 | 4.32914e-12 | 1.000000 |
| rad25         | 2.90496e-12 | 1.000000 | 4.06488e-12 | 1.000000 |
| rad26         | 2.81193e-12 | 1.000000 | 3.93470e-12 | 1.000000 |
| rad24         | 1.82406e-12 | 1.000000 | 2.55238e-12 | 1.000000 |
| rad10         | 1.27692e-12 | 1.000000 | 1.78677e-12 | 1.000000 |
| rad8          | 1.19222e-12 | 1.000000 | 1.66826e-12 | 1.000000 |
| rad47         | 1.15642e-12 | 1.000000 | 1.61817e-12 | 1.000000 |
| rad18         | 9.64901e-13 | 1.000000 | 1.35017e-12 | 1.000000 |
| rad3          | 2.99271e-13 | 1.000000 | 4.18765e-13 | 1.000000 |
| rad14         | 2.30769e-13 | 1.000000 | 3.22911e-13 | 1.000000 |
| rad2          | 2.01433e-13 | 1.000000 | 2.81862e-13 | 1.000000 |
| rad4          | 1.78931e-13 | 1.000000 | 2.50374e-13 | 1.000000 |
| rad5          | 5.68466e-14 | 1.000000 | 7.95444e-14 | 1.000000 |
| rad1          | 4.64885e-14 | 1.000000 | 6.50504e-14 | 1.000000 |
| rad27         | 9.89083e-15 | 1.000000 | 1.38401e-14 | 1.000000 |

10.000000 Pa, 3500.00000 K

=====  
Rate constant | True (fraction) | Effective (fraction)

|                    |             |          |             |           |
|--------------------|-------------|----------|-------------|-----------|
| Total              | 1.05713e-10 | (1.00 )  | 7.59651e-11 | (1.00 )   |
| Formation of rad11 | 1.77412e-11 | (0.168 ) | 6.37266e-12 | (0.0839 ) |
| Formation of rad6  | 2.86822e-11 | (0.271 ) | 1.03027e-11 | (0.136 )  |
| H-abstraction      | 5.92897e-11 | (0.561 ) | 5.92897e-11 | (0.780 )  |

| species            | PYtrue      | Cumul    | PYeffective | Cumul    |
|--------------------|-------------|----------|-------------|----------|
| Benzene+2-propynyl | 0.560855    | 0.560855 | 0.780487    | 0.780487 |
| Phenyl+Allene      | 0.281404    | 0.842259 | 0.00000     | 0.780487 |
| PhCH2CCH+H         | 0.0826652   | 0.924924 | 0.115038    | 0.895524 |
| PhCHCCH2+H         | 0.0360585   | 0.960982 | 0.0501792   | 0.945703 |
| C2H2+PhCH2         | 0.0122593   | 0.973242 | 0.0170601   | 0.962763 |
| PhCCH+CH3          | 0.00927084  | 0.982512 | 0.0129013   | 0.975665 |
| PAH7+H             | 0.00395025  | 0.986463 | 0.00549719  | 0.981162 |
| PhcycC3H3_A+H      | 0.00334801  | 0.989811 | 0.00465911  | 0.985821 |
| Ph+MeAc            | 0.00276398  | 0.992575 | 0.00384636  | 0.989667 |
| Indene+H           | 0.00257590  | 0.995151 | 0.00358463  | 0.993252 |
| rad19syn           | 0.00187235  | 0.997023 | 0.00260558  | 0.995858 |
| rad54              | 0.000820548 | 0.997843 | 0.00114188  | 0.996999 |
| rad39              | 0.000383055 | 0.998226 | 0.000533060 | 0.997533 |
| PAH1+H             | 0.000234590 | 0.998461 | 0.000326456 | 0.997859 |
| rad19anti          | 0.000198628 | 0.998660 | 0.000276411 | 0.998135 |
| PAH9+H             | 0.000165224 | 0.998825 | 0.000229927 | 0.998365 |
| rad56              | 0.000126873 | 0.998952 | 0.000176557 | 0.998542 |
| rad38              | 0.000111229 | 0.999063 | 0.000154787 | 0.998697 |
| rad50              | 9.85613e-05 | 0.999162 | 0.000137159 | 0.998834 |
| PhCCCH3+H          | 9.42424e-05 | 0.999256 | 0.000131148 | 0.998965 |
| rad55              | 9.15803e-05 | 0.999347 | 0.000127444 | 0.999092 |
| rad53              | 8.16793e-05 | 0.999429 | 0.000113665 | 0.999206 |
| rad70              | 7.02694e-05 | 0.999499 | 9.77873e-05 | 0.999304 |
| PAH3+H             | 6.99220e-05 | 0.999569 | 9.73037e-05 | 0.999401 |
| rad51              | 5.98511e-05 | 0.999629 | 8.32889e-05 | 0.999484 |
| PAH10+CH3          | 5.76128e-05 | 0.999687 | 8.01742e-05 | 0.999565 |
| rad67              | 4.43734e-05 | 0.999731 | 6.17502e-05 | 0.999626 |
| rad46              | 4.41956e-05 | 0.999775 | 6.15028e-05 | 0.999688 |
| PAH8+H             | 4.26935e-05 | 0.999818 | 5.94124e-05 | 0.999747 |
| rad35              | 4.02805e-05 | 0.999858 | 5.60545e-05 | 0.999803 |
| rad34              | 2.74951e-05 | 0.999886 | 3.82623e-05 | 0.999842 |
| rad71              | 2.01286e-05 | 0.999906 | 2.80110e-05 | 0.999870 |
| rad62              | 1.37117e-05 | 0.999920 | 1.90812e-05 | 0.999889 |
| rad52              | 1.21501e-05 | 0.999932 | 1.69081e-05 | 0.999906 |
| rad30              | 1.02915e-05 | 0.999942 | 1.43216e-05 | 0.999920 |
| rad73              | 8.16323e-06 | 0.999950 | 1.13600e-05 | 0.999931 |
| rad37              | 7.96636e-06 | 0.999958 | 1.10860e-05 | 0.999942 |
| rad64              | 6.47621e-06 | 0.999965 | 9.01230e-06 | 0.999951 |
| rad68syn           | 6.33612e-06 | 0.999971 | 8.81739e-06 | 0.999960 |
| rad59              | 5.10458e-06 | 0.999976 | 7.10356e-06 | 0.999967 |
| rad68anti          | 4.04059e-06 | 0.999980 | 5.62290e-06 | 0.999973 |
| rad40syn           | 3.59895e-06 | 0.999984 | 5.00831e-06 | 0.999978 |
| rad42              | 2.66321e-06 | 0.999986 | 3.70613e-06 | 0.999982 |
| rad40anti          | 2.63316e-06 | 0.999989 | 3.66431e-06 | 0.999985 |
| rad60syn           | 2.53258e-06 | 0.999992 | 3.52435e-06 | 0.999989 |
| rad72              | 2.38451e-06 | 0.999994 | 3.31830e-06 | 0.999992 |
| rad60anti          | 1.86455e-06 | 0.999996 | 2.59471e-06 | 0.999995 |
| rad58              | 1.49815e-06 | 0.999997 | 2.08484e-06 | 0.999997 |
| rad65              | 1.37925e-06 | 0.999999 | 1.91938e-06 | 0.999999 |
| rad43              | 4.42452e-07 | 0.999999 | 6.15717e-07 | 0.999999 |
| rad61              | 3.67258e-07 | 0.999999 | 5.11078e-07 | 1.000000 |
| rad41              | 8.98821e-08 | 1.000000 | 1.25080e-07 | 1.000000 |
| rad6               | 1.04583e-08 | 1.000000 | 1.45538e-08 | 1.000000 |
| rad7               | 4.72929e-10 | 1.000000 | 6.58132e-10 | 1.000000 |
| rad11              | 3.03258e-10 | 1.000000 | 4.22014e-10 | 1.000000 |
| rad23              | 8.18238e-11 | 1.000000 | 1.13866e-10 | 1.000000 |
| rad13              | 7.30896e-11 | 1.000000 | 1.01712e-10 | 1.000000 |
| rad9               | 5.40570e-11 | 1.000000 | 7.52259e-11 | 1.000000 |
| rad28              | 3.62473e-11 | 1.000000 | 5.04420e-11 | 1.000000 |
| rad45              | 2.99845e-11 | 1.000000 | 4.17264e-11 | 1.000000 |
| rad21              | 1.56498e-11 | 1.000000 | 2.17783e-11 | 1.000000 |
| rad22              | 8.97060e-12 | 1.000000 | 1.24835e-11 | 1.000000 |
| rad33              | 7.96302e-12 | 1.000000 | 1.10814e-11 | 1.000000 |
| rad36              | 5.67358e-12 | 1.000000 | 7.89539e-12 | 1.000000 |
| rad15              | 4.59118e-12 | 1.000000 | 6.38911e-12 | 1.000000 |
| rad20              | 3.60826e-12 | 1.000000 | 5.02128e-12 | 1.000000 |
| rad12              | 2.06004e-12 | 1.000000 | 2.86678e-12 | 1.000000 |
| rad25              | 1.93953e-12 | 1.000000 | 2.69905e-12 | 1.000000 |
| rad26              | 1.45159e-12 | 1.000000 | 2.02005e-12 | 1.000000 |
| rad47              | 1.23126e-12 | 1.000000 | 1.71342e-12 | 1.000000 |
| rad24              | 1.20837e-12 | 1.000000 | 1.68158e-12 | 1.000000 |
| rad8               | 1.05386e-12 | 1.000000 | 1.46655e-12 | 1.000000 |

|       |             |          |             |         |
|-------|-------------|----------|-------------|---------|
| rad10 | 7.06427e-13 | 1.000000 | 9.83064e-13 | 1.00000 |
| rad18 | 5.74868e-13 | 1.000000 | 7.99990e-13 | 1.00000 |
| rad3  | 1.82818e-13 | 1.000000 | 2.54412e-13 | 1.00000 |
| rad14 | 1.82801e-13 | 1.000000 | 2.54385e-13 | 1.00000 |
| rad4  | 1.11074e-13 | 1.000000 | 1.54571e-13 | 1.00000 |
| rad2  | 1.10526e-13 | 1.000000 | 1.53808e-13 | 1.00000 |
| rad5  | 4.40454e-14 | 1.000000 | 6.12936e-14 | 1.00000 |
| rad1  | 2.47411e-14 | 1.000000 | 3.44298e-14 | 1.00000 |
| rad27 | 7.34159e-15 | 1.000000 | 1.02166e-14 | 1.00000 |

10.000000 Pa, 3750.00000 K

| Rate constant      | True (fraction)      | Effective (fraction)  |
|--------------------|----------------------|-----------------------|
| Total              | 1.33217e-10 (1.00 )  | 9.62711e-11 (1.00 )   |
| Formation of rad11 | 2.17064e-11 (0.163 ) | 7.68279e-12 (0.0798 ) |
| Formation of rad6  | 3.54800e-11 (0.266 ) | 1.25578e-11 (0.130 )  |
| H-abstraction      | 7.60305e-11 (0.571 ) | 7.60305e-11 (0.790 )  |

| species            | PYtrue      | Cumul    | PYeffective | Cumul    |
|--------------------|-------------|----------|-------------|----------|
| Benzene+2-propynyl | 0.570727    | 0.570727 | 0.789754    | 0.789754 |
| Phenyl+Allene      | 0.277336    | 0.848063 | 0.00000     | 0.789754 |
| PhCH2CCH+H         | 0.0801946   | 0.928257 | 0.110971    | 0.900725 |
| PhCHCCH2+H         | 0.0343186   | 0.962576 | 0.0474891   | 0.948214 |
| C2H2+PhCH2         | 0.0118839   | 0.974460 | 0.0164445   | 0.964658 |
| PhCCH+CH3          | 0.00852836  | 0.982988 | 0.0118013   | 0.976459 |
| PhcycC3H3_A+H      | 0.00372852  | 0.986717 | 0.00515939  | 0.981619 |
| PAH7+H             | 0.00365085  | 0.990368 | 0.00505194  | 0.986671 |
| Ph+MeAc            | 0.00270113  | 0.993069 | 0.00373773  | 0.990408 |
| Indene+H           | 0.00199901  | 0.995068 | 0.00276616  | 0.993175 |
| rad19syn           | 0.00195356  | 0.997021 | 0.00270328  | 0.995878 |
| rad54              | 0.000841040 | 0.997862 | 0.00116381  | 0.997042 |
| rad39              | 0.000340475 | 0.998203 | 0.000471138 | 0.997513 |
| PAH1+H             | 0.000258935 | 0.998462 | 0.000358305 | 0.997871 |
| rad19anti          | 0.000171610 | 0.998633 | 0.000237469 | 0.998109 |
| rad56              | 0.000150421 | 0.998784 | 0.000208148 | 0.998317 |
| PAH9+H             | 0.000142296 | 0.998926 | 0.000196904 | 0.998514 |
| rad50              | 9.78214e-05 | 0.999024 | 0.000135362 | 0.998649 |
| rad38              | 9.76282e-05 | 0.999122 | 0.000135095 | 0.998784 |
| rad55              | 9.60227e-05 | 0.999218 | 0.000132873 | 0.998917 |
| rad53              | 9.35446e-05 | 0.999311 | 0.000129444 | 0.999046 |
| PhCCCH3+H          | 8.63448e-05 | 0.999397 | 0.000119481 | 0.999166 |
| PAH3+H             | 7.46029e-05 | 0.999472 | 0.000103233 | 0.999269 |
| rad70              | 7.27716e-05 | 0.999545 | 0.000100699 | 0.999370 |
| rad51              | 6.27271e-05 | 0.999608 | 8.67996e-05 | 0.999457 |
| PAH10+CH3          | 5.64592e-05 | 0.999664 | 7.81267e-05 | 0.999535 |
| PAH8+H             | 5.49581e-05 | 0.999719 | 7.60493e-05 | 0.999611 |
| rad67              | 4.41361e-05 | 0.999763 | 6.10741e-05 | 0.999672 |
| rad46              | 4.00102e-05 | 0.999803 | 5.53647e-05 | 0.999727 |
| rad35              | 3.73500e-05 | 0.999840 | 5.16837e-05 | 0.999779 |
| rad34              | 2.95155e-05 | 0.999870 | 4.08426e-05 | 0.999820 |
| rad71              | 2.56707e-05 | 0.999896 | 3.55223e-05 | 0.999855 |
| rad62              | 1.78765e-05 | 0.999914 | 2.47369e-05 | 0.999880 |
| rad52              | 1.22817e-05 | 0.999926 | 1.69950e-05 | 0.999897 |
| rad73              | 9.90835e-06 | 0.999936 | 1.37109e-05 | 0.999911 |
| rad30              | 9.58077e-06 | 0.999945 | 1.32575e-05 | 0.999924 |
| rad68syn           | 7.51159e-06 | 0.999953 | 1.03943e-05 | 0.999934 |
| rad64              | 7.08717e-06 | 0.999960 | 9.80700e-06 | 0.999944 |
| rad37              | 6.84827e-06 | 0.999967 | 9.47639e-06 | 0.999954 |
| rad59              | 5.31873e-06 | 0.999972 | 7.35989e-06 | 0.999961 |
| rad68anti          | 4.78626e-06 | 0.999977 | 6.62308e-06 | 0.999968 |
| rad40syn           | 4.46912e-06 | 0.999981 | 6.18422e-06 | 0.999974 |
| rad42              | 3.72272e-06 | 0.999985 | 5.15138e-06 | 0.999979 |
| rad72              | 3.33618e-06 | 0.999988 | 4.61652e-06 | 0.999984 |
| rad40anti          | 3.31727e-06 | 0.999992 | 4.59032e-06 | 0.999988 |
| rad60syn           | 2.53369e-06 | 0.999994 | 3.50604e-06 | 0.999992 |
| rad60anti          | 1.87710e-06 | 0.999996 | 2.59748e-06 | 0.999994 |
| rad58              | 1.70809e-06 | 0.999998 | 2.36361e-06 | 0.999997 |
| rad65              | 1.42131e-06 | 0.999999 | 1.96676e-06 | 0.999999 |
| rad43              | 5.13732e-07 | 1.000000 | 7.10883e-07 | 0.999999 |
| rad61              | 4.03889e-07 | 1.00000  | 5.58890e-07 | 1.000000 |
| rad41              | 1.13553e-07 | 1.00000  | 1.57130e-07 | 1.00000  |
| rad6               | 5.60557e-09 | 1.00000  | 7.75679e-09 | 1.00000  |
| rad7               | 2.89780e-10 | 1.00000  | 4.00989e-10 | 1.00000  |
| rad11              | 1.85881e-10 | 1.00000  | 2.57217e-10 | 1.00000  |
| rad13              | 4.73608e-11 | 1.00000  | 6.55366e-11 | 1.00000  |
| rad23              | 4.07065e-11 | 1.00000  | 5.63285e-11 | 1.00000  |
| rad9               | 2.98229e-11 | 1.00000  | 4.12679e-11 | 1.00000  |
| rad28              | 1.91130e-11 | 1.00000  | 2.64481e-11 | 1.00000  |



|       |             |         |             |         |
|-------|-------------|---------|-------------|---------|
| rad45 | 1.66214e-11 | 1.00000 | 2.30001e-11 | 1.00000 |
| rad21 | 1.05028e-11 | 1.00000 | 1.45334e-11 | 1.00000 |
| rad33 | 5.44537e-12 | 1.00000 | 7.53515e-12 | 1.00000 |
| rad22 | 5.02962e-12 | 1.00000 | 6.95983e-12 | 1.00000 |
| rad36 | 3.16121e-12 | 1.00000 | 4.37438e-12 | 1.00000 |
| rad15 | 2.66808e-12 | 1.00000 | 3.69200e-12 | 1.00000 |
| rad20 | 2.62288e-12 | 1.00000 | 3.62945e-12 | 1.00000 |
| rad12 | 1.42147e-12 | 1.00000 | 1.96699e-12 | 1.00000 |
| rad25 | 1.34943e-12 | 1.00000 | 1.86730e-12 | 1.00000 |
| rad47 | 1.26179e-12 | 1.00000 | 1.74603e-12 | 1.00000 |
| rad8  | 9.29706e-13 | 1.00000 | 1.28649e-12 | 1.00000 |
| rad24 | 8.25908e-13 | 1.00000 | 1.14287e-12 | 1.00000 |
| rad26 | 7.94425e-13 | 1.00000 | 1.09930e-12 | 1.00000 |
| rad10 | 4.12289e-13 | 1.00000 | 5.70513e-13 | 1.00000 |
| rad18 | 3.62860e-13 | 1.00000 | 5.02113e-13 | 1.00000 |
| rad14 | 1.57146e-13 | 1.00000 | 2.17453e-13 | 1.00000 |
| rad3  | 1.18133e-13 | 1.00000 | 1.63468e-13 | 1.00000 |
| rad4  | 7.36233e-14 | 1.00000 | 1.01877e-13 | 1.00000 |
| rad2  | 6.54156e-14 | 1.00000 | 9.05201e-14 | 1.00000 |
| rad5  | 3.51269e-14 | 1.00000 | 4.86076e-14 | 1.00000 |
| rad1  | 1.44030e-14 | 1.00000 | 1.99304e-14 | 1.00000 |
| rad27 | 5.76080e-15 | 1.00000 | 7.97158e-15 | 1.00000 |

10.000000 Pa, 4000.00000 K

=====

| Rate constant      | True (fraction)      | Effective (fraction)  |
|--------------------|----------------------|-----------------------|
| Total              | 1.65008e-10 (1.00 )  | 1.19912e-10 (1.00 )   |
| Formation of rad11 | 2.61707e-11 (0.159 ) | 9.15556e-12 (0.0764 ) |
| Formation of rad6  | 4.31906e-11 (0.262 ) | 1.51098e-11 (0.126 )  |
| H-abstraction      | 9.56470e-11 (0.580 ) | 9.56470e-11 (0.798 )  |

| species            | PYtrue      | Cumul    | PYeffective | Cumul    |
|--------------------|-------------|----------|-------------|----------|
| Benzene+2-propynyl | 0.579650    | 0.579650 | 0.797641    | 0.797641 |
| Phenyl+Allene      | 0.273295    | 0.852945 | 0.000000    | 0.797641 |
| PhCH2CCH+H         | 0.0779435   | 0.930888 | 0.107256    | 0.904897 |
| PhCHCCH2+H         | 0.0328766   | 0.963765 | 0.0452408   | 0.950138 |
| C2H2+PhCH2         | 0.0116508   | 0.975415 | 0.0160323   | 0.966170 |
| PhCCH+CH3          | 0.00792125  | 0.983337 | 0.0109003   | 0.977070 |
| PhcycC3H3_A+H      | 0.00405636  | 0.987393 | 0.00558187  | 0.982652 |
| PAH7+H             | 0.00338058  | 0.990774 | 0.00465193  | 0.987304 |
| Ph+MeAc            | 0.00265534  | 0.993429 | 0.00365394  | 0.990958 |
| rad19syn           | 0.00200699  | 0.995436 | 0.00276178  | 0.993720 |
| Indene+H           | 0.00158840  | 0.997024 | 0.00218576  | 0.995906 |
| rad54              | 0.000847468 | 0.997872 | 0.00116618  | 0.997072 |
| rad39              | 0.000304994 | 0.998177 | 0.000419695 | 0.997491 |
| PAH1+H             | 0.000284127 | 0.998461 | 0.000390980 | 0.997882 |
| rad56              | 0.000172242 | 0.998633 | 0.000237017 | 0.998119 |
| rad19anti          | 0.000149971 | 0.998783 | 0.000206372 | 0.998326 |
| PAH9+H             | 0.000121736 | 0.998905 | 0.000167518 | 0.998493 |
| rad53              | 0.000103935 | 0.999009 | 0.000143023 | 0.998636 |
| rad55              | 9.87033e-05 | 0.999108 | 0.000135823 | 0.998772 |
| rad50              | 9.49261e-05 | 0.999203 | 0.000130625 | 0.998903 |
| rad38              | 8.48536e-05 | 0.999287 | 0.000116765 | 0.999020 |
| PhCCCH3+H          | 8.02193e-05 | 0.999368 | 0.000110388 | 0.999130 |
| PAH3+H             | 7.84218e-05 | 0.999446 | 0.000107914 | 0.999238 |
| rad70              | 7.43978e-05 | 0.999520 | 0.000102377 | 0.999340 |
| PAH8+H             | 6.80299e-05 | 0.999588 | 9.36140e-05 | 0.999434 |
| rad51              | 6.37407e-05 | 0.999652 | 8.77122e-05 | 0.999522 |
| PAH10+CH3          | 5.48776e-05 | 0.999707 | 7.55158e-05 | 0.999597 |
| rad67              | 4.35168e-05 | 0.999751 | 5.98821e-05 | 0.999657 |
| rad46              | 3.57792e-05 | 0.999786 | 4.92348e-05 | 0.999706 |
| rad35              | 3.46400e-05 | 0.999821 | 4.76673e-05 | 0.999754 |
| rad34              | 3.11445e-05 | 0.999852 | 4.28572e-05 | 0.999797 |
| rad71              | 3.10565e-05 | 0.999883 | 4.27360e-05 | 0.999839 |
| rad62              | 2.32398e-05 | 0.999906 | 3.19798e-05 | 0.999871 |
| rad52              | 1.20851e-05 | 0.999919 | 1.66300e-05 | 0.999888 |
| rad73              | 1.14710e-05 | 0.999930 | 1.57850e-05 | 0.999904 |
| rad30              | 8.93299e-06 | 0.999939 | 1.22925e-05 | 0.999916 |
| rad68syn           | 8.64434e-06 | 0.999948 | 1.18952e-05 | 0.999928 |
| rad64              | 7.61305e-06 | 0.999955 | 1.04761e-05 | 0.999939 |
| rad37              | 5.91727e-06 | 0.999961 | 8.14263e-06 | 0.999947 |
| rad68anti          | 5.50424e-06 | 0.999967 | 7.57424e-06 | 0.999954 |
| rad59              | 5.47385e-06 | 0.999972 | 7.53243e-06 | 0.999962 |
| rad40syn           | 5.36170e-06 | 0.999977 | 7.37810e-06 | 0.999969 |
| rad42              | 5.12147e-06 | 0.999983 | 7.04750e-06 | 0.999976 |
| rad72              | 4.37875e-06 | 0.999987 | 6.02547e-06 | 0.999982 |
| rad40anti          | 4.03125e-06 | 0.999991 | 5.54731e-06 | 0.999988 |
| rad60syn           | 2.51669e-06 | 0.999993 | 3.46315e-06 | 0.999991 |

|           |             |          |             |          |
|-----------|-------------|----------|-------------|----------|
| rad58     | 1.90267e-06 | 0.999995 | 2.61822e-06 | 0.999994 |
| rad60anti | 1.87487e-06 | 0.999997 | 2.57996e-06 | 0.999996 |
| rad65     | 1.42564e-06 | 0.999999 | 1.96179e-06 | 0.999998 |
| rad43     | 6.01849e-07 | 0.999999 | 8.28191e-07 | 0.999999 |
| rad61     | 4.34037e-07 | 1.000000 | 5.97267e-07 | 1.000000 |
| rad41     | 1.43043e-07 | 1.000000 | 1.96838e-07 | 1.000000 |
| rad6      | 3.21867e-09 | 1.000000 | 4.42914e-09 | 1.000000 |
| rad7      | 1.85851e-10 | 1.000000 | 2.55746e-10 | 1.000000 |
| rad11     | 1.20505e-10 | 1.000000 | 1.65824e-10 | 1.000000 |
| rad13     | 3.21059e-11 | 1.000000 | 4.41801e-11 | 1.000000 |
| rad23     | 2.13957e-11 | 1.000000 | 2.94420e-11 | 1.000000 |
| rad9      | 1.74045e-11 | 1.000000 | 2.39500e-11 | 1.000000 |
| rad28     | 1.07666e-11 | 1.000000 | 1.48156e-11 | 1.000000 |
| rad45     | 9.58887e-12 | 1.000000 | 1.31950e-11 | 1.000000 |
| rad21     | 7.34155e-12 | 1.000000 | 1.01025e-11 | 1.000000 |
| rad33     | 3.83317e-12 | 1.000000 | 5.27473e-12 | 1.000000 |
| rad22     | 3.00657e-12 | 1.000000 | 4.13727e-12 | 1.000000 |
| rad20     | 1.99616e-12 | 1.000000 | 2.74686e-12 | 1.000000 |
| rad36     | 1.82963e-12 | 1.000000 | 2.51771e-12 | 1.000000 |
| rad15     | 1.62573e-12 | 1.000000 | 2.23714e-12 | 1.000000 |
| rad47     | 1.25502e-12 | 1.000000 | 1.72700e-12 | 1.000000 |
| rad12     | 1.01283e-12 | 1.000000 | 1.39372e-12 | 1.000000 |
| rad25     | 9.71510e-13 | 1.000000 | 1.33687e-12 | 1.000000 |
| rad8      | 8.17666e-13 | 1.000000 | 1.12517e-12 | 1.000000 |
| rad24     | 5.80466e-13 | 1.000000 | 7.98762e-13 | 1.000000 |
| rad26     | 4.58161e-13 | 1.000000 | 6.30466e-13 | 1.000000 |
| rad10     | 2.52076e-13 | 1.000000 | 3.46876e-13 | 1.000000 |
| rad18     | 2.39916e-13 | 1.000000 | 3.30143e-13 | 1.000000 |
| rad14     | 1.44085e-13 | 1.000000 | 1.98272e-13 | 1.000000 |
| rad3      | 7.99733e-14 | 1.000000 | 1.10050e-13 | 1.000000 |
| rad4      | 5.14631e-14 | 1.000000 | 7.08172e-14 | 1.000000 |
| rad2      | 4.11487e-14 | 1.000000 | 5.66237e-14 | 1.000000 |
| rad5      | 2.87412e-14 | 1.000000 | 3.95501e-14 | 1.000000 |
| rad1      | 9.02614e-15 | 1.000000 | 1.24207e-14 | 1.000000 |
| rad27     | 4.76644e-15 | 1.000000 | 6.55897e-15 | 1.000000 |

1.00000000 Pa, 20.0000000 K

| =====              |                 |            |                      |            |
|--------------------|-----------------|------------|----------------------|------------|
| Rate constant      | True (fraction) |            | Effective (fraction) |            |
| -----              |                 |            |                      |            |
| Total              | 1.56740e-51     | (1.00 )    | 1.56740e-51          | (1.00 )    |
| Formation of rad11 | 1.56740e-51     | (1.000 )   | 1.56740e-51          | (1.000 )   |
| Formation of rad6  | 3.73945e-60     | (2.39e-09) | 3.73945e-60          | (2.39e-09) |
| H-abstraction      | 1.53631e-76     | (9.80e-26) | 1.53631e-76          | (9.80e-26) |
| species            | PYtrue          | Cumul      | PYeffective          | Cumul      |
| -----              |                 |            |                      |            |
| rad6               | 0.942283        | 0.942283   | 0.942283             | 0.942283   |
| Indene+H           | 0.0525601       | 0.994843   | 0.0525601            | 0.994843   |
| rad23              | 0.00400580      | 0.998849   | 0.00400580           | 0.998849   |
| C2H2+PhCH2         | 0.000454885     | 0.999304   | 0.000454885          | 0.999304   |
| rad11              | 0.000279138     | 0.999583   | 0.000279138          | 0.999583   |
| rad7               | 0.000218460     | 0.999801   | 0.000218460          | 0.999801   |
| rad45              | 0.000163881     | 0.999965   | 0.000163881          | 0.999965   |
| rad36              | 1.02085e-05     | 0.999975   | 1.02085e-05          | 0.999975   |
| rad2               | 9.29971e-06     | 0.999985   | 9.29971e-06          | 0.999985   |
| rad22              | 5.79988e-06     | 0.999991   | 5.79988e-06          | 0.999991   |
| rad3               | 2.89647e-06     | 0.999993   | 2.89647e-06          | 0.999993   |
| PhCHCCH2+H         | 2.47199e-06     | 0.999996   | 2.47199e-06          | 0.999996   |
| rad4               | 1.46433e-06     | 0.999997   | 1.46433e-06          | 0.999997   |
| rad13              | 6.72605e-07     | 0.999998   | 6.72605e-07          | 0.999998   |
| rad1               | 5.87776e-07     | 0.999999   | 5.87776e-07          | 0.999999   |
| rad10              | 5.35974e-07     | 0.999999   | 5.35974e-07          | 0.999999   |
| rad28              | 5.17616e-07     | 1.000000   | 5.17616e-07          | 1.000000   |
| rad9               | 1.37094e-07     | 1.000000   | 1.37094e-07          | 1.000000   |
| PhCCH+CH3          | 5.94720e-08     | 1.000000   | 5.94720e-08          | 1.000000   |
| rad30              | 2.39077e-08     | 1.000000   | 2.39077e-08          | 1.000000   |
| rad25              | 1.27568e-08     | 1.000000   | 1.27568e-08          | 1.000000   |
| rad15              | 4.24955e-09     | 1.000000   | 4.24955e-09          | 1.000000   |
| PAH9+H             | 1.67492e-09     | 1.000000   | 1.67492e-09          | 1.000000   |
| rad26              | 1.05421e-09     | 1.000000   | 1.05421e-09          | 1.000000   |
| Phenyl+Allene      | 9.46702e-10     | 1.000000   | 0.000000             | 1.000000   |
| rad35              | 9.16592e-10     | 1.000000   | 9.16592e-10          | 1.000000   |
| rad33              | 8.50450e-10     | 1.000000   | 8.50450e-10          | 1.000000   |
| PhCCCH3+H          | 5.60046e-10     | 1.000000   | 5.60046e-10          | 1.000000   |
| rad38              | 4.66688e-10     | 1.000000   | 4.66688e-10          | 1.000000   |
| rad14              | 2.90510e-10     | 1.000000   | 2.90510e-10          | 1.000000   |
| rad18              | 4.09549e-11     | 1.000000   | 4.09549e-11          | 1.000000   |
| rad8               | 1.36043e-11     | 1.000000   | 1.36043e-11          | 1.000000   |
| rad27              | 8.24088e-12     | 1.000000   | 8.24088e-12          | 1.000000   |

|                    |             |          |             |          |
|--------------------|-------------|----------|-------------|----------|
| rad20              | 6.91017e-12 | 1.000000 | 6.91017e-12 | 1.000000 |
| Ph+MeAc            | 5.90846e-12 | 1.000000 | 5.90846e-12 | 1.000000 |
| rad21              | 4.42918e-12 | 1.000000 | 4.42918e-12 | 1.000000 |
| rad46              | 2.58575e-12 | 1.000000 | 2.58575e-12 | 1.000000 |
| rad24              | 1.25369e-12 | 1.000000 | 1.25369e-12 | 1.000000 |
| rad60syn           | 1.70639e-13 | 1.000000 | 1.70639e-13 | 1.000000 |
| PAH7+H             | 1.13943e-13 | 1.000000 | 1.13943e-13 | 1.000000 |
| rad39              | 1.02342e-14 | 1.000000 | 1.02342e-14 | 1.000000 |
| rad31              | 1.06112e-15 | 1.000000 | 1.06112e-15 | 1.000000 |
| rad60anti          | 3.28170e-16 | 1.000000 | 3.28170e-16 | 1.000000 |
| rad12              | 1.35756e-16 | 1.000000 | 1.35756e-16 | 1.000000 |
| PhCH2CCH+H         | 3.01112e-17 | 1.000000 | 3.01112e-17 | 1.000000 |
| rad37              | 5.21362e-21 | 1.000000 | 5.21362e-21 | 1.000000 |
| rad5               | 6.19538e-22 | 1.000000 | 6.19538e-22 | 1.000000 |
| PAH3+H             | 8.96914e-25 | 1.000000 | 8.96914e-25 | 1.000000 |
| rad50              | 5.71358e-25 | 1.000000 | 5.71358e-25 | 1.000000 |
| rad59              | 4.39946e-25 | 1.000000 | 4.39946e-25 | 1.000000 |
| Benzene+2-propynyl | 9.80165e-26 | 1.000000 | 9.80165e-26 | 1.000000 |
| rad19syn           | 4.52266e-30 | 1.000000 | 4.52266e-30 | 1.000000 |
| rad54              | 1.47014e-33 | 1.000000 | 1.47014e-33 | 1.000000 |
| rad52              | 3.16155e-34 | 1.000000 | 3.16155e-34 | 1.000000 |
| PAH10+CH3          | 2.57884e-34 | 1.000000 | 2.57884e-34 | 1.000000 |
| rad43              | 1.72859e-34 | 1.000000 | 1.72859e-34 | 1.000000 |
| rad62              | 4.50219e-36 | 1.000000 | 4.50219e-36 | 1.000000 |
| rad51              | 4.79691e-39 | 1.000000 | 4.79691e-39 | 1.000000 |
| rad70              | 5.77294e-40 | 1.000000 | 5.77294e-40 | 1.000000 |
| PhcycC3H3_A+H      | 3.92676e-40 | 1.000000 | 3.92676e-40 | 1.000000 |
| rad55              | 1.88633e-40 | 1.000000 | 1.88633e-40 | 1.000000 |
| rad65              | 8.40427e-43 | 1.000000 | 8.40427e-43 | 1.000000 |
| rad58              | 1.85976e-43 | 1.000000 | 1.85976e-43 | 1.000000 |
| PAH1+H             | 7.17981e-44 | 1.000000 | 7.17981e-44 | 1.000000 |
| rad34              | 1.67283e-45 | 1.000000 | 1.67283e-45 | 1.000000 |
| rad42              | 1.37119e-48 | 1.000000 | 1.37119e-48 | 1.000000 |
| rad47              | 3.53202e-49 | 1.000000 | 3.53202e-49 | 1.000000 |
| rad41              | 2.56466e-49 | 1.000000 | 2.56466e-49 | 1.000000 |

1.00000000 Pa, 30.0000000 K

| =====              |                 |            |                      |            |
|--------------------|-----------------|------------|----------------------|------------|
| Rate constant      | True (fraction) |            | Effective (fraction) |            |
| -----              |                 |            |                      |            |
| Total              | 5.03204e-39     | (1.00 )    | 5.03204e-39          | (1.00 )    |
| Formation of rad11 | 5.03203e-39     | (1.000 )   | 5.03203e-39          | (1.000 )   |
| Formation of rad6  | 9.92181e-45     | (1.97e-06) | 9.92181e-45          | (1.97e-06) |
| H-abstraction      | 3.33191e-55     | (6.62e-17) | 3.33191e-55          | (6.62e-17) |
| species            | PYtrue          | Cumul      | PYeffective          | Cumul      |
| -----              |                 |            |                      |            |
| rad6               | 0.941839        | 0.941839   | 0.941839             | 0.941839   |
| Indene+H           | 0.0556631       | 0.997502   | 0.0556631            | 0.997502   |
| rad23              | 0.00166245      | 0.999165   | 0.00166245           | 0.999165   |
| C2H2+PhCH2         | 0.000471231     | 0.999636   | 0.000471231          | 0.999636   |
| rad7               | 0.000191054     | 0.999827   | 0.000191054          | 0.999827   |
| rad11              | 7.67692e-05     | 0.999904   | 7.67692e-05          | 0.999904   |
| rad45              | 5.75805e-05     | 0.999961   | 5.75805e-05          | 0.999961   |
| rad2               | 2.19650e-05     | 0.999983   | 2.19650e-05          | 0.999983   |
| rad36              | 3.58572e-06     | 0.999987   | 3.58572e-06          | 0.999987   |
| rad3               | 2.89097e-06     | 0.999990   | 2.89097e-06          | 0.999990   |
| PhCHCCH2+H         | 2.63021e-06     | 0.999992   | 2.63021e-06          | 0.999992   |
| rad22              | 1.79974e-06     | 0.999994   | 1.79974e-06          | 0.999994   |
| rad10              | 1.47366e-06     | 0.999996   | 1.47366e-06          | 0.999996   |
| rad4               | 1.46176e-06     | 0.999997   | 1.46176e-06          | 0.999997   |
| rad1               | 1.38906e-06     | 0.999998   | 1.38906e-06          | 0.999998   |
| rad28              | 1.09651e-06     | 0.999999   | 1.09651e-06          | 0.999999   |
| rad13              | 5.84562e-07     | 1.00000    | 5.84562e-07          | 1.00000    |
| PhCCH+CH3          | 1.57658e-07     | 1.00000    | 1.57658e-07          | 1.00000    |
| rad9               | 1.46978e-07     | 1.00000    | 1.46978e-07          | 1.00000    |
| rad30              | 2.49825e-08     | 1.00000    | 2.49825e-08          | 1.00000    |
| rad26              | 6.83821e-09     | 1.00000    | 6.83821e-09          | 1.00000    |
| rad15              | 4.46549e-09     | 1.00000    | 4.46549e-09          | 1.00000    |
| PhCCCH3+H          | 2.96093e-09     | 1.00000    | 2.96093e-09          | 1.00000    |
| PAH9+H             | 2.71419e-09     | 1.00000    | 2.71419e-09          | 1.00000    |
| rad25              | 2.14555e-09     | 1.00000    | 2.14555e-09          | 1.00000    |
| rad35              | 1.47036e-09     | 1.00000    | 1.47036e-09          | 1.00000    |
| Phenyl+Allene      | 1.26062e-09     | 1.00000    | 0.00000              | 1.00000    |
| rad33              | 7.90045e-10     | 1.00000    | 7.90045e-10          | 1.00000    |
| rad38              | 7.19247e-10     | 1.00000    | 7.19247e-10          | 1.00000    |
| rad14              | 2.93119e-10     | 1.00000    | 2.93119e-10          | 1.00000    |
| rad8               | 3.27600e-11     | 1.00000    | 3.27600e-11          | 1.00000    |
| Ph+MeAc            | 2.98604e-11     | 1.00000    | 2.98604e-11          | 1.00000    |
| rad27              | 1.74556e-11     | 1.00000    | 1.74556e-11          | 1.00000    |

|                    |             |         |             |         |
|--------------------|-------------|---------|-------------|---------|
| rad46              | 4.13995e-12 | 1.00000 | 4.13995e-12 | 1.00000 |
| rad18              | 2.97497e-12 | 1.00000 | 2.97497e-12 | 1.00000 |
| rad20              | 1.08725e-12 | 1.00000 | 1.08725e-12 | 1.00000 |
| rad21              | 7.13852e-13 | 1.00000 | 7.13852e-13 | 1.00000 |
| PAH7+H             | 5.14327e-13 | 1.00000 | 5.14327e-13 | 1.00000 |
| rad24              | 4.41013e-13 | 1.00000 | 4.41013e-13 | 1.00000 |
| rad60syn           | 1.87125e-13 | 1.00000 | 1.87125e-13 | 1.00000 |
| rad39              | 4.68610e-14 | 1.00000 | 4.68610e-14 | 1.00000 |
| rad12              | 1.86139e-15 | 1.00000 | 1.86139e-15 | 1.00000 |
| rad31              | 1.26707e-15 | 1.00000 | 1.26707e-15 | 1.00000 |
| rad60anti          | 2.71178e-16 | 1.00000 | 2.71178e-16 | 1.00000 |
| Benzene+2-propynyl | 6.62139e-17 | 1.00000 | 6.62139e-17 | 1.00000 |
| PhCH2CCH+H         | 5.22052e-17 | 1.00000 | 5.22052e-17 | 1.00000 |
| rad37              | 5.44575e-20 | 1.00000 | 5.44575e-20 | 1.00000 |
| rad5               | 2.95383e-21 | 1.00000 | 2.95383e-21 | 1.00000 |
| PAH3+H             | 2.14510e-24 | 1.00000 | 2.14510e-24 | 1.00000 |
| rad59              | 1.05011e-24 | 1.00000 | 1.05011e-24 | 1.00000 |
| rad50              | 4.66851e-25 | 1.00000 | 4.66851e-25 | 1.00000 |
| rad19syn           | 1.12587e-29 | 1.00000 | 1.12587e-29 | 1.00000 |
| rad54              | 3.67452e-33 | 1.00000 | 3.67452e-33 | 1.00000 |
| PAH10+CH3          | 1.36196e-33 | 1.00000 | 1.36196e-33 | 1.00000 |
| rad52              | 7.22707e-34 | 1.00000 | 7.22707e-34 | 1.00000 |
| rad43              | 5.42460e-34 | 1.00000 | 5.42460e-34 | 1.00000 |
| rad62              | 1.20339e-35 | 1.00000 | 1.20339e-35 | 1.00000 |
| rad51              | 1.22431e-38 | 1.00000 | 1.22431e-38 | 1.00000 |
| rad70              | 1.42855e-39 | 1.00000 | 1.42855e-39 | 1.00000 |
| PhcycC3H3_A+H      | 9.68919e-40 | 1.00000 | 9.68919e-40 | 1.00000 |
| rad55              | 4.65961e-40 | 1.00000 | 4.65961e-40 | 1.00000 |
| rad65              | 2.13042e-42 | 1.00000 | 2.13042e-42 | 1.00000 |
| rad58              | 4.58243e-43 | 1.00000 | 4.58243e-43 | 1.00000 |
| PAH1+H             | 2.17459e-43 | 1.00000 | 2.17459e-43 | 1.00000 |
| rad34              | 3.96108e-45 | 1.00000 | 3.96108e-45 | 1.00000 |
| rad42              | 3.11841e-48 | 1.00000 | 3.11841e-48 | 1.00000 |
| rad41              | 5.76775e-49 | 1.00000 | 5.76775e-49 | 1.00000 |
| rad47              | 4.34625e-49 | 1.00000 | 4.34625e-49 | 1.00000 |

1.00000000 Pa, 40.0000000 K

=====

| Rate constant      | True (fraction)        | Effective (fraction)   |
|--------------------|------------------------|------------------------|
| Total              | 9.35697e-33 (1.00 )    | 9.35697e-33 (1.00 )    |
| Formation of rad11 | 9.35644e-33 (1.000 )   | 9.35644e-33 (1.000 )   |
| Formation of rad6  | 5.26139e-37 (5.62e-05) | 5.26139e-37 (5.62e-05) |
| H-abstraction      | 1.44763e-44 (1.55e-12) | 1.44763e-44 (1.55e-12) |

| species       | PYtrue      | Cumul    | PYeffective | Cumul    |
|---------------|-------------|----------|-------------|----------|
| rad6          | 0.941351    | 0.941351 | 0.941351    | 0.941351 |
| Indene+H      | 0.0570613   | 0.998412 | 0.0570613   | 0.998412 |
| rad23         | 0.000788641 | 0.999201 | 0.000788641 | 0.999201 |
| C2H2+PhCH2    | 0.000484404 | 0.999685 | 0.000484404 | 0.999685 |
| rad7          | 0.000177868 | 0.999863 | 0.000177868 | 0.999863 |
| rad11         | 6.08469e-05 | 0.999924 | 6.08469e-05 | 0.999924 |
| rad2          | 3.45741e-05 | 0.999959 | 3.45741e-05 | 0.999959 |
| rad45         | 2.49876e-05 | 0.999984 | 2.49876e-05 | 0.999984 |
| rad3          | 2.81720e-06 | 0.999986 | 2.81720e-06 | 0.999986 |
| PhCHCCH2+H    | 2.78297e-06 | 0.999989 | 2.78297e-06 | 0.999989 |
| rad10         | 2.39813e-06 | 0.999992 | 2.39813e-06 | 0.999992 |
| rad1          | 2.18913e-06 | 0.999994 | 2.18913e-06 | 0.999994 |
| rad28         | 1.69660e-06 | 0.999996 | 1.69660e-06 | 0.999996 |
| rad36         | 1.55511e-06 | 0.999997 | 1.55511e-06 | 0.999997 |
| rad4          | 1.42490e-06 | 0.999998 | 1.42490e-06 | 0.999998 |
| rad22         | 8.05333e-07 | 0.999999 | 8.05333e-07 | 0.999999 |
| rad13         | 5.45445e-07 | 1.000000 | 5.45445e-07 | 1.000000 |
| PhCCH+CH3     | 2.71952e-07 | 1.000000 | 2.71952e-07 | 1.000000 |
| rad9          | 1.56729e-07 | 1.000000 | 1.56729e-07 | 1.000000 |
| rad30         | 2.58771e-08 | 1.000000 | 2.58771e-08 | 1.000000 |
| rad26         | 1.85337e-08 | 1.000000 | 1.85337e-08 | 1.000000 |
| PhCCCH3+H     | 7.59956e-09 | 1.000000 | 7.59956e-09 | 1.000000 |
| rad15         | 4.65099e-09 | 1.000000 | 4.65099e-09 | 1.000000 |
| PAH9+H        | 3.38228e-09 | 1.000000 | 3.38228e-09 | 1.000000 |
| Phenyl+Allene | 2.04844e-09 | 1.000000 | 0.000000    | 1.000000 |
| rad35         | 1.81785e-09 | 1.000000 | 1.81785e-09 | 1.000000 |
| rad25         | 9.71927e-10 | 1.000000 | 9.71927e-10 | 1.000000 |
| rad38         | 8.85505e-10 | 1.000000 | 8.85505e-10 | 1.000000 |
| rad33         | 7.68432e-10 | 1.000000 | 7.68432e-10 | 1.000000 |
| rad14         | 2.81489e-10 | 1.000000 | 2.81489e-10 | 1.000000 |
| Ph+MeAc       | 8.10606e-11 | 1.000000 | 8.10606e-11 | 1.000000 |
| rad8          | 6.98366e-11 | 1.000000 | 6.98366e-11 | 1.000000 |
| rad27         | 2.59970e-11 | 1.000000 | 2.59970e-11 | 1.000000 |

|                    |             |         |             |         |
|--------------------|-------------|---------|-------------|---------|
| rad46              | 5.29191e-12 | 1.00000 | 5.29191e-12 | 1.00000 |
| Benzene+2-propynyl | 1.54712e-12 | 1.00000 | 1.54712e-12 | 1.00000 |
| PAH7+H             | 1.29648e-12 | 1.00000 | 1.29648e-12 | 1.00000 |
| rad18              | 9.29669e-13 | 1.00000 | 9.29669e-13 | 1.00000 |
| rad20              | 4.44156e-13 | 1.00000 | 4.44156e-13 | 1.00000 |
| rad21              | 2.92527e-13 | 1.00000 | 2.92527e-13 | 1.00000 |
| rad60syn           | 1.99911e-13 | 1.00000 | 1.99911e-13 | 1.00000 |
| rad24              | 1.92535e-13 | 1.00000 | 1.92535e-13 | 1.00000 |
| rad39              | 1.21848e-13 | 1.00000 | 1.21848e-13 | 1.00000 |
| rad12              | 8.37620e-15 | 1.00000 | 8.37620e-15 | 1.00000 |
| rad31              | 1.45823e-15 | 1.00000 | 1.45823e-15 | 1.00000 |
| rad60anti          | 8.60828e-16 | 1.00000 | 8.60828e-16 | 1.00000 |
| PhCH2CCH+H         | 1.06879e-16 | 1.00000 | 1.06879e-16 | 1.00000 |
| rad37              | 2.59655e-19 | 1.00000 | 2.59655e-19 | 1.00000 |
| rad5               | 9.43015e-21 | 1.00000 | 9.43015e-21 | 1.00000 |
| PAH3+H             | 4.75672e-24 | 1.00000 | 4.75672e-24 | 1.00000 |
| rad59              | 2.32524e-24 | 1.00000 | 2.32524e-24 | 1.00000 |
| rad50              | 6.40121e-25 | 1.00000 | 6.40121e-25 | 1.00000 |
| rad19syn           | 2.66247e-29 | 1.00000 | 2.66247e-29 | 1.00000 |
| rad54              | 8.85905e-33 | 1.00000 | 8.85905e-33 | 1.00000 |
| PAH10+CH3          | 4.48920e-33 | 1.00000 | 4.48920e-33 | 1.00000 |
| rad52              | 1.71670e-33 | 1.00000 | 1.71670e-33 | 1.00000 |
| rad43              | 1.42889e-33 | 1.00000 | 1.42889e-33 | 1.00000 |
| rad62              | 3.00320e-35 | 1.00000 | 3.00320e-35 | 1.00000 |
| rad51              | 3.00453e-38 | 1.00000 | 3.00453e-38 | 1.00000 |
| rad70              | 3.51925e-39 | 1.00000 | 3.51925e-39 | 1.00000 |
| PhcycC3H3_A+H      | 2.38706e-39 | 1.00000 | 2.38706e-39 | 1.00000 |
| rad55              | 1.14801e-39 | 1.00000 | 1.14801e-39 | 1.00000 |
| rad65              | 5.27269e-42 | 1.00000 | 5.27269e-42 | 1.00000 |
| rad58              | 1.12904e-42 | 1.00000 | 1.12904e-42 | 1.00000 |
| PAH1+H             | 5.69415e-43 | 1.00000 | 5.69415e-43 | 1.00000 |
| rad34              | 9.62241e-45 | 1.00000 | 9.62241e-45 | 1.00000 |
| rad42              | 7.40845e-48 | 1.00000 | 7.40846e-48 | 1.00000 |
| rad41              | 1.36441e-48 | 1.00000 | 1.36441e-48 | 1.00000 |
| rad47              | 7.28143e-49 | 1.00000 | 7.28143e-49 | 1.00000 |

1.00000000 Pa, 50.0000000 K

| =====              |                 |            |                      |            |
|--------------------|-----------------|------------|----------------------|------------|
| Rate constant      | True (fraction) |            | Effective (fraction) |            |
| -----              |                 |            |                      |            |
| Total              | 5.52690e-29     | (1.00 )    | 5.52690e-29          | (1.00 )    |
| Formation of rad11 | 5.52459e-29     | (1.000 )   | 5.52459e-29          | (1.000 )   |
| Formation of rad6  | 2.30840e-32     | (0.000418) | 2.30840e-32          | (0.000418) |
| H-abstraction      | 3.35357e-38     | (6.07e-10) | 3.35357e-38          | (6.07e-10) |
| species            | PYtrue          | Cumul      | PYeffective          | Cumul      |
| -----              |                 |            |                      |            |
| rad6               | 0.940842        | 0.940842   | 0.940842             | 0.940842   |
| Indene+H           | 0.0579449       | 0.998787   | 0.0579449            | 0.998787   |
| C2H2+PhCH2         | 0.000499102     | 0.999286   | 0.000499102          | 0.999286   |
| rad23              | 0.000411511     | 0.999698   | 0.000411511          | 0.999698   |
| rad7               | 0.000169550     | 0.999867   | 0.000169550          | 0.999867   |
| rad11              | 5.55014e-05     | 0.999923   | 5.55014e-05          | 0.999923   |
| rad2               | 4.74627e-05     | 0.999970   | 4.74627e-05          | 0.999970   |
| rad45              | 1.22838e-05     | 0.999982   | 1.22838e-05          | 0.999982   |
| rad10              | 3.32100e-06     | 0.999986   | 3.32100e-06          | 0.999986   |
| rad1               | 3.01049e-06     | 0.999989   | 3.01049e-06          | 0.999989   |
| PhCHCCH2+H         | 2.97155e-06     | 0.999992   | 2.97155e-06          | 0.999992   |
| rad3               | 2.78329e-06     | 0.999994   | 2.78329e-06          | 0.999994   |
| rad28              | 2.34567e-06     | 0.999997   | 2.34567e-06          | 0.999997   |
| rad4               | 1.40837e-06     | 0.999998   | 1.40837e-06          | 0.999998   |
| rad36              | 7.63887e-07     | 0.999999   | 7.63887e-07          | 0.999999   |
| rad13              | 5.22118e-07     | 0.999999   | 5.22118e-07          | 0.999999   |
| PhCCH+CH3          | 4.08816e-07     | 1.000000   | 4.08816e-07          | 1.000000   |
| rad22              | 4.08230e-07     | 1.000000   | 4.08230e-07          | 1.000000   |
| rad9               | 1.68883e-07     | 1.000000   | 1.68883e-07          | 1.000000   |
| rad26              | 3.74426e-08     | 1.000000   | 3.74426e-08          | 1.000000   |
| rad30              | 2.68977e-08     | 1.000000   | 2.68977e-08          | 1.000000   |
| PhCCCH3+H          | 1.52331e-08     | 1.000000   | 1.52331e-08          | 1.000000   |
| rad15              | 4.86647e-09     | 1.000000   | 4.86647e-09          | 1.000000   |
| PAH9+H             | 3.90521e-09     | 1.000000   | 3.90521e-09          | 1.000000   |
| Phenyl+Allene      | 3.42645e-09     | 1.000000   | 0.000000             | 1.000000   |
| rad35              | 2.08383e-09     | 1.000000   | 2.08383e-09          | 1.000000   |
| rad38              | 1.01928e-09     | 1.000000   | 1.01928e-09          | 1.000000   |
| rad33              | 7.57733e-10     | 1.000000   | 7.57733e-10          | 1.000000   |
| rad25              | 6.45345e-10     | 1.000000   | 6.45345e-10          | 1.000000   |
| Benzene+2-propynyl | 6.06773e-10     | 1.000000   | 6.06773e-10          | 1.000000   |
| rad14              | 2.73762e-10     | 1.000000   | 2.73762e-10          | 1.000000   |
| Ph+MeAc            | 1.79499e-10     | 1.000000   | 1.79499e-10          | 1.000000   |
| rad8               | 1.32133e-10     | 1.000000   | 1.32133e-10          | 1.000000   |

|               |             |         |             |         |
|---------------|-------------|---------|-------------|---------|
| rad27         | 3.44594e-11 | 1.00000 | 3.44594e-11 | 1.00000 |
| rad46         | 6.32942e-12 | 1.00000 | 6.32942e-12 | 1.00000 |
| PAH7+H        | 2.68417e-12 | 1.00000 | 2.68417e-12 | 1.00000 |
| rad18         | 4.18389e-13 | 1.00000 | 4.18389e-13 | 1.00000 |
| rad39         | 2.63476e-13 | 1.00000 | 2.63476e-13 | 1.00000 |
| rad20         | 2.29809e-13 | 1.00000 | 2.29809e-13 | 1.00000 |
| rad60syn      | 2.23305e-13 | 1.00000 | 2.23305e-13 | 1.00000 |
| rad21         | 1.51343e-13 | 1.00000 | 1.51343e-13 | 1.00000 |
| rad24         | 9.53315e-14 | 1.00000 | 9.53315e-14 | 1.00000 |
| rad12         | 2.60649e-14 | 1.00000 | 2.60649e-14 | 1.00000 |
| rad60anti     | 3.53208e-15 | 1.00000 | 3.53208e-15 | 1.00000 |
| rad31         | 1.67560e-15 | 1.00000 | 1.67560e-15 | 1.00000 |
| PhCH2CCH+H    | 2.49392e-16 | 1.00000 | 2.49392e-16 | 1.00000 |
| rad37         | 1.04714e-18 | 1.00000 | 1.04714e-18 | 1.00000 |
| rad5          | 2.95946e-20 | 1.00000 | 2.95946e-20 | 1.00000 |
| PAH3+H        | 1.16840e-23 | 1.00000 | 1.16840e-23 | 1.00000 |
| rad59         | 5.70081e-24 | 1.00000 | 5.70081e-24 | 1.00000 |
| rad50         | 1.26941e-24 | 1.00000 | 1.26941e-24 | 1.00000 |
| rad19syn      | 7.17590e-29 | 1.00000 | 7.17590e-29 | 1.00000 |
| rad54         | 2.46316e-32 | 1.00000 | 2.46316e-32 | 1.00000 |
| PAH10+CH3     | 1.49872e-32 | 1.00000 | 1.49872e-32 | 1.00000 |
| rad52         | 4.63215e-33 | 1.00000 | 4.63215e-33 | 1.00000 |
| rad43         | 4.21643e-33 | 1.00000 | 4.21643e-33 | 1.00000 |
| rad62         | 8.64166e-35 | 1.00000 | 8.64166e-35 | 1.00000 |
| rad51         | 8.53038e-38 | 1.00000 | 8.53038e-38 | 1.00000 |
| rad70         | 1.02489e-38 | 1.00000 | 1.02489e-38 | 1.00000 |
| PhcycC3H3_A+H | 6.96732e-39 | 1.00000 | 6.96732e-39 | 1.00000 |
| rad55         | 3.34807e-39 | 1.00000 | 3.34807e-39 | 1.00000 |
| rad65         | 1.52956e-41 | 1.00000 | 1.52956e-41 | 1.00000 |
| rad58         | 3.29981e-42 | 1.00000 | 3.29981e-42 | 1.00000 |
| PAH1+H        | 1.72507e-42 | 1.00000 | 1.72507e-42 | 1.00000 |
| rad34         | 2.82910e-44 | 1.00000 | 2.82910e-44 | 1.00000 |
| rad42         | 2.15909e-47 | 1.00000 | 2.15909e-47 | 1.00000 |
| rad41         | 3.97346e-48 | 1.00000 | 3.97346e-48 | 1.00000 |
| rad47         | 1.64188e-48 | 1.00000 | 1.64188e-48 | 1.00000 |

1.00000000 Pa, 60.0000000 K

| Rate constant      | True (fraction)        | Effective (fraction)   |
|--------------------|------------------------|------------------------|
| Total              | 1.83429e-26 (1.00 )    | 1.83429e-26 (1.00 )    |
| Formation of rad11 | 1.83139e-26 (0.998 )   | 1.83139e-26 (0.998 )   |
| Formation of rad6  | 2.90471e-29 (0.00158 ) | 2.90471e-29 (0.00158 ) |
| H-abstraction      | 5.71259e-34 (3.11e-08) | 5.71259e-34 (3.11e-08) |

| species            | PYtrue      | Cumul    | PYeffective | Cumul    |
|--------------------|-------------|----------|-------------|----------|
| rad6               | 0.940337    | 0.940337 | 0.940337    | 0.940337 |
| Indene+H           | 0.0586126   | 0.998950 | 0.0586126   | 0.998950 |
| C2H2+PhCH2         | 0.000515236 | 0.999465 | 0.000515236 | 0.999465 |
| rad23              | 0.000230741 | 0.999696 | 0.000230741 | 0.999696 |
| rad7               | 0.000163620 | 0.999859 | 0.000163620 | 0.999859 |
| rad2               | 6.08883e-05 | 0.999920 | 6.08883e-05 | 0.999920 |
| rad11              | 5.24702e-05 | 0.999973 | 5.24702e-05 | 0.999973 |
| rad45              | 6.58978e-06 | 0.999979 | 6.58978e-06 | 0.999979 |
| rad10              | 4.26533e-06 | 0.999983 | 4.26533e-06 | 0.999983 |
| rad1               | 3.87040e-06 | 0.999987 | 3.87040e-06 | 0.999987 |
| PhCHCCH2+H         | 3.19688e-06 | 0.999990 | 3.19688e-06 | 0.999990 |
| rad28              | 3.06469e-06 | 0.999994 | 3.06469e-06 | 0.999994 |
| rad3               | 2.78313e-06 | 0.999996 | 2.78313e-06 | 0.999996 |
| rad4               | 1.40906e-06 | 0.999998 | 1.40906e-06 | 0.999998 |
| PhCCH+CH3          | 5.76851e-07 | 0.999998 | 5.76851e-07 | 0.999998 |
| rad13              | 5.06273e-07 | 0.999999 | 5.06273e-07 | 0.999999 |
| rad36              | 4.09457e-07 | 0.999999 | 4.09457e-07 | 0.999999 |
| rad22              | 2.25334e-07 | 0.999999 | 2.25334e-07 | 0.999999 |
| rad9               | 1.83425e-07 | 1.000000 | 1.83425e-07 | 1.000000 |
| rad26              | 6.56053e-08 | 1.000000 | 6.56053e-08 | 1.000000 |
| Benzene+2-propynyl | 3.11432e-08 | 1.000000 | 3.11432e-08 | 1.000000 |
| rad30              | 2.80405e-08 | 1.000000 | 2.80405e-08 | 1.000000 |
| PhCCCH3+H          | 2.70986e-08 | 1.000000 | 2.70986e-08 | 1.000000 |
| Phenyl+Allene      | 5.52227e-09 | 1.000000 | 0.000000    | 1.000000 |
| rad15              | 5.11136e-09 | 1.000000 | 5.11136e-09 | 1.000000 |
| PAH9+H             | 4.36321e-09 | 1.000000 | 4.36321e-09 | 1.000000 |
| rad35              | 2.31232e-09 | 1.000000 | 2.31232e-09 | 1.000000 |
| rad38              | 1.13928e-09 | 1.000000 | 1.13928e-09 | 1.000000 |
| rad33              | 7.51777e-10 | 1.000000 | 7.51777e-10 | 1.000000 |
| rad25              | 5.11626e-10 | 1.000000 | 5.11626e-10 | 1.000000 |
| Ph+MeAc            | 3.62562e-10 | 1.000000 | 3.62562e-10 | 1.000000 |
| rad14              | 2.69875e-10 | 1.000000 | 2.69875e-10 | 1.000000 |
| rad8               | 2.31243e-10 | 1.000000 | 2.31243e-10 | 1.000000 |

|               |             |          |             |          |
|---------------|-------------|----------|-------------|----------|
| rad27         | 4.31323e-11 | 1.000000 | 4.31323e-11 | 1.000000 |
| rad46         | 7.35525e-12 | 1.000000 | 7.35525e-12 | 1.000000 |
| PAH7+H        | 5.08171e-12 | 1.000000 | 5.08171e-12 | 1.000000 |
| rad39         | 5.26081e-13 | 1.000000 | 5.26081e-13 | 1.000000 |
| rad60syn      | 2.60576e-13 | 1.000000 | 2.60576e-13 | 1.000000 |
| rad18         | 2.29005e-13 | 1.000000 | 2.29005e-13 | 1.000000 |
| rad20         | 1.37388e-13 | 1.000000 | 1.37388e-13 | 1.000000 |
| rad21         | 9.03937e-14 | 1.000000 | 9.03937e-14 | 1.000000 |
| rad12         | 6.86558e-14 | 1.000000 | 6.86558e-14 | 1.000000 |
| rad24         | 5.15340e-14 | 1.000000 | 5.15340e-14 | 1.000000 |
| rad60anti     | 9.94037e-15 | 1.000000 | 9.94037e-15 | 1.000000 |
| rad31         | 1.92300e-15 | 1.000000 | 1.92300e-15 | 1.000000 |
| PhCH2CCH+H    | 7.90676e-16 | 1.000000 | 7.90676e-16 | 1.000000 |
| rad37         | 4.39907e-18 | 1.000000 | 4.39907e-18 | 1.000000 |
| rad5          | 1.06344e-19 | 1.000000 | 1.06344e-19 | 1.000000 |
| PAH3+H        | 3.57223e-23 | 1.000000 | 3.57223e-23 | 1.000000 |
| rad59         | 1.73909e-23 | 1.000000 | 1.73909e-23 | 1.000000 |
| rad50         | 3.49954e-24 | 1.000000 | 3.49954e-24 | 1.000000 |
| rad19syn      | 2.45546e-28 | 1.000000 | 2.45546e-28 | 1.000000 |
| rad54         | 8.76626e-32 | 1.000000 | 8.76626e-32 | 1.000000 |
| PAH10+CH3     | 6.06143e-32 | 1.000000 | 6.06143e-32 | 1.000000 |
| rad52         | 1.58138e-32 | 1.000000 | 1.58138e-32 | 1.000000 |
| rad43         | 1.57991e-32 | 1.000000 | 1.57991e-32 | 1.000000 |
| rad62         | 3.19459e-34 | 1.000000 | 3.19459e-34 | 1.000000 |
| rad51         | 3.11071e-37 | 1.000000 | 3.11071e-37 | 1.000000 |
| rad70         | 3.88737e-38 | 1.000000 | 3.88737e-38 | 1.000000 |
| PhcycC3H3_A+H | 2.65275e-38 | 1.000000 | 2.65275e-38 | 1.000000 |
| rad55         | 1.27291e-38 | 1.000000 | 1.27291e-38 | 1.000000 |
| rad65         | 5.74995e-41 | 1.000000 | 5.74995e-41 | 1.000000 |
| rad58         | 1.25917e-41 | 1.000000 | 1.25917e-41 | 1.000000 |
| PAH1+H        | 6.80165e-42 | 1.000000 | 6.80165e-42 | 1.000000 |
| rad34         | 1.10175e-43 | 1.000000 | 1.10175e-43 | 1.000000 |
| rad42         | 8.41617e-47 | 1.000000 | 8.41617e-47 | 1.000000 |
| rad41         | 1.55136e-47 | 1.000000 | 1.55136e-47 | 1.000000 |
| rad47         | 5.17919e-48 | 1.000000 | 5.17919e-48 | 1.000000 |

1.00000000 Pa, 70.0000000 K

=====

| Rate constant      | True (fraction)        | Effective (fraction)   |
|--------------------|------------------------|------------------------|
| Total              | 1.17336e-24 (1.00 )    | 1.17336e-24 (1.00 )    |
| Formation of rad11 | 1.16857e-24 (0.996 )   | 1.16857e-24 (0.996 )   |
| Formation of rad6  | 4.79505e-27 (0.00409 ) | 4.79505e-27 (0.00409 ) |
| H-abstraction      | 5.89821e-31 (5.03e-07) | 5.89821e-31 (5.03e-07) |

| species            | PYtrue      | Cumul    | PYeffective | Cumul    |
|--------------------|-------------|----------|-------------|----------|
| rad6               | 0.939871    | 0.939871 | 0.939871    | 0.939871 |
| Indene+H           | 0.0591475   | 0.999018 | 0.0591475   | 0.999018 |
| C2H2+PhCH2         | 0.000532389 | 0.999550 | 0.000532389 | 0.999550 |
| rad7               | 0.000159090 | 0.999709 | 0.000159090 | 0.999709 |
| rad23              | 0.000137083 | 0.999847 | 0.000137083 | 0.999847 |
| rad2               | 7.50637e-05 | 0.999922 | 7.50637e-05 | 0.999922 |
| rad11              | 5.03653e-05 | 0.999972 | 5.03653e-05 | 0.999972 |
| rad10              | 5.24979e-06 | 0.999977 | 5.24979e-06 | 0.999977 |
| rad1               | 4.78337e-06 | 0.999982 | 4.78337e-06 | 0.999982 |
| rad28              | 3.87556e-06 | 0.999986 | 3.87556e-06 | 0.999986 |
| rad45              | 3.78105e-06 | 0.999990 | 3.78105e-06 | 0.999990 |
| PhCHCCH2+H         | 3.45940e-06 | 0.999993 | 3.45940e-06 | 0.999993 |
| rad3               | 2.80868e-06 | 0.999996 | 2.80868e-06 | 0.999996 |
| rad4               | 1.42290e-06 | 0.999997 | 1.42290e-06 | 0.999997 |
| PhCCH+CH3          | 7.87831e-07 | 0.999998 | 7.87831e-07 | 0.999998 |
| Benzene+2-propynyl | 5.02676e-07 | 0.999999 | 5.02676e-07 | 0.999999 |
| rad13              | 4.94698e-07 | 0.999999 | 4.94698e-07 | 0.999999 |
| rad36              | 2.34752e-07 | 0.999999 | 2.34753e-07 | 0.999999 |
| rad9               | 2.00247e-07 | 1.000000 | 2.00247e-07 | 1.000000 |
| rad22              | 1.32936e-07 | 1.000000 | 1.32936e-07 | 1.000000 |
| rad26              | 1.06070e-07 | 1.000000 | 1.06070e-07 | 1.000000 |
| PhCCCH3+H          | 4.51664e-08 | 1.000000 | 4.51664e-08 | 1.000000 |
| rad30              | 2.92822e-08 | 1.000000 | 2.92822e-08 | 1.000000 |
| Phenyl+Allene      | 8.52378e-09 | 1.000000 | 0.000000    | 1.000000 |
| rad15              | 5.38149e-09 | 1.000000 | 5.38149e-09 | 1.000000 |
| PAH9+H             | 4.79092e-09 | 1.000000 | 4.79092e-09 | 1.000000 |
| rad35              | 2.52212e-09 | 1.000000 | 2.52212e-09 | 1.000000 |
| rad38              | 1.25360e-09 | 1.000000 | 1.25360e-09 | 1.000000 |
| rad33              | 7.48388e-10 | 1.000000 | 7.48388e-10 | 1.000000 |
| Ph+MeAc            | 7.01355e-10 | 1.000000 | 7.01355e-10 | 1.000000 |
| rad25              | 4.43880e-10 | 1.000000 | 4.43880e-10 | 1.000000 |
| rad8               | 3.86209e-10 | 1.000000 | 3.86209e-10 | 1.000000 |
| rad14              | 2.68927e-10 | 1.000000 | 2.68927e-10 | 1.000000 |

|               |             |          |             |          |
|---------------|-------------|----------|-------------|----------|
| rad27         | 5.22079e-11 | 1.000000 | 5.22079e-11 | 1.000000 |
| PAH7+H        | 9.23837e-12 | 1.000000 | 9.23837e-12 | 1.000000 |
| rad46         | 8.41925e-12 | 1.000000 | 8.41925e-12 | 1.000000 |
| rad39         | 1.01747e-12 | 1.000000 | 1.01747e-12 | 1.000000 |
| rad60syn      | 3.11865e-13 | 1.000000 | 3.11865e-13 | 1.000000 |
| rad12         | 1.67141e-13 | 1.000000 | 1.67141e-13 | 1.000000 |
| rad18         | 1.42931e-13 | 1.000000 | 1.42931e-13 | 1.000000 |
| rad20         | 9.16130e-14 | 1.000000 | 9.16130e-14 | 1.000000 |
| rad21         | 6.02170e-14 | 1.000000 | 6.02170e-14 | 1.000000 |
| rad24         | 2.98027e-14 | 1.000000 | 2.98027e-14 | 1.000000 |
| rad60anti     | 2.11190e-14 | 1.000000 | 2.11190e-14 | 1.000000 |
| PhCH2CCH+H    | 4.87482e-15 | 1.000000 | 4.87482e-15 | 1.000000 |
| rad31         | 2.20338e-15 | 1.000000 | 2.20338e-15 | 1.000000 |
| rad37         | 2.12350e-17 | 1.000000 | 2.12350e-17 | 1.000000 |
| rad5          | 4.78049e-19 | 1.000000 | 4.78049e-19 | 1.000000 |
| PAH3+H        | 1.54667e-22 | 1.000000 | 1.54667e-22 | 1.000000 |
| rad59         | 7.52420e-23 | 1.000000 | 7.52420e-23 | 1.000000 |
| rad50         | 1.47141e-23 | 1.000000 | 1.47141e-23 | 1.000000 |
| rad19syn      | 1.18575e-27 | 1.000000 | 1.18575e-27 | 1.000000 |
| rad54         | 4.42777e-31 | 1.000000 | 4.42777e-31 | 1.000000 |
| PAH10+CH3     | 3.37595e-31 | 1.000000 | 3.37595e-31 | 1.000000 |
| rad43         | 8.38363e-32 | 1.000000 | 8.38363e-32 | 1.000000 |
| rad52         | 7.60289e-32 | 1.000000 | 7.60289e-32 | 1.000000 |
| rad62         | 1.68265e-33 | 1.000000 | 1.68265e-33 | 1.000000 |
| rad51         | 1.61427e-36 | 1.000000 | 1.61427e-36 | 1.000000 |
| rad70         | 2.11810e-37 | 1.000000 | 2.11810e-37 | 1.000000 |
| PhcycC3H3_A+H | 1.45252e-37 | 1.000000 | 1.45252e-37 | 1.000000 |
| rad55         | 6.95654e-38 | 1.000000 | 6.95654e-38 | 1.000000 |
| rad65         | 3.09493e-40 | 1.000000 | 3.09493e-40 | 1.000000 |
| rad58         | 6.91432e-41 | 1.000000 | 6.91432e-41 | 1.000000 |
| PAH1+H        | 3.86606e-41 | 1.000000 | 3.86606e-41 | 1.000000 |
| rad34         | 6.23870e-43 | 1.000000 | 6.23870e-43 | 1.000000 |
| rad42         | 4.80479e-46 | 1.000000 | 4.80479e-46 | 1.000000 |
| rad41         | 8.88734e-47 | 1.000000 | 8.88734e-47 | 1.000000 |
| rad47         | 2.45521e-47 | 1.000000 | 2.45521e-47 | 1.000000 |

1.00000000 Pa, 80.0000000 K

=====

| Rate constant      | True (fraction)        | Effective (fraction)   |
|--------------------|------------------------|------------------------|
| Total              | 2.68112e-23 (1.00 )    | 2.68112e-23 (1.00 )    |
| Formation of rad11 | 2.65890e-23 (0.992 )   | 2.65890e-23 (0.992 )   |
| Formation of rad6  | 2.22189e-25 (0.00829 ) | 2.22189e-25 (0.00829 ) |
| H-abstraction      | 1.05871e-28 (3.95e-06) | 1.05871e-28 (3.95e-06) |

| species            | PYtrue      | Cumul    | PYeffective | Cumul    |
|--------------------|-------------|----------|-------------|----------|
| rad6               | 0.939459    | 0.939459 | 0.939459    | 0.939459 |
| Indene+H           | 0.0595770   | 0.999036 | 0.0595770   | 0.999036 |
| C2H2+PhCH2         | 0.000550361 | 0.999587 | 0.000550361 | 0.999587 |
| rad7               | 0.000155467 | 0.999742 | 0.000155467 | 0.999742 |
| rad2               | 9.02057e-05 | 0.999832 | 9.02057e-05 | 0.999832 |
| rad23              | 8.55160e-05 | 0.999918 | 8.55160e-05 | 0.999918 |
| rad11              | 4.87605e-05 | 0.999967 | 4.87605e-05 | 0.999967 |
| rad10              | 6.29180e-06 | 0.999973 | 6.29180e-06 | 0.999973 |
| rad1               | 5.76433e-06 | 0.999979 | 5.76433e-06 | 0.999979 |
| rad28              | 4.80558e-06 | 0.999983 | 4.80558e-06 | 0.999983 |
| Benzene+2-propynyl | 3.94877e-06 | 0.999987 | 3.94877e-06 | 0.999987 |
| PhCHCCH2+H         | 3.76441e-06 | 0.999991 | 3.76441e-06 | 0.999991 |
| rad3               | 2.85519e-06 | 0.999994 | 2.85519e-06 | 0.999994 |
| rad45              | 2.29248e-06 | 0.999996 | 2.29248e-06 | 0.999996 |
| rad4               | 1.44750e-06 | 0.999998 | 1.44750e-06 | 0.999998 |
| PhCCH+CH3          | 1.05897e-06 | 0.999999 | 1.05897e-06 | 0.999999 |
| rad13              | 4.85846e-07 | 0.999999 | 4.85846e-07 | 0.999999 |
| rad9               | 2.19455e-07 | 0.999999 | 2.19455e-07 | 0.999999 |
| rad26              | 1.63374e-07 | 1.000000 | 1.63374e-07 | 1.000000 |
| rad36              | 1.42235e-07 | 1.000000 | 1.42235e-07 | 1.000000 |
| rad22              | 8.28995e-08 | 1.000000 | 8.28995e-08 | 1.000000 |
| PhCCCH3+H          | 7.26075e-08 | 1.000000 | 7.26075e-08 | 1.000000 |
| rad30              | 3.06148e-08 | 1.000000 | 3.06148e-08 | 1.000000 |
| Phenyl+Allene      | 1.27115e-08 | 1.000000 | 0.000000    | 1.000000 |
| rad15              | 5.67598e-09 | 1.000000 | 5.67598e-09 | 1.000000 |
| PAH9+H             | 5.20779e-09 | 1.000000 | 5.20779e-09 | 1.000000 |
| rad35              | 2.72348e-09 | 1.000000 | 2.72348e-09 | 1.000000 |
| rad38              | 1.36694e-09 | 1.000000 | 1.36694e-09 | 1.000000 |
| Ph+MeAc            | 1.33218e-09 | 1.000000 | 1.33218e-09 | 1.000000 |
| rad33              | 7.46587e-10 | 1.000000 | 7.46587e-10 | 1.000000 |
| rad8               | 6.28767e-10 | 1.000000 | 6.28767e-10 | 1.000000 |
| rad25              | 4.04597e-10 | 1.000000 | 4.04597e-10 | 1.000000 |
| rad14              | 2.70298e-10 | 1.000000 | 2.70298e-10 | 1.000000 |



|               |             |         |             |         |
|---------------|-------------|---------|-------------|---------|
| rad27         | 6.18558e-11 | 1.00000 | 6.18558e-11 | 1.00000 |
| PAH7+H        | 1.65791e-11 | 1.00000 | 1.65791e-11 | 1.00000 |
| rad46         | 9.55910e-12 | 1.00000 | 9.55910e-12 | 1.00000 |
| rad39         | 1.95599e-12 | 1.00000 | 1.95599e-12 | 1.00000 |
| rad12         | 3.93305e-13 | 1.00000 | 3.93305e-13 | 1.00000 |
| rad60syn      | 3.78313e-13 | 1.00000 | 3.78313e-13 | 1.00000 |
| rad18         | 9.80774e-14 | 1.00000 | 9.80774e-14 | 1.00000 |
| rad20         | 6.66723e-14 | 1.00000 | 6.66723e-14 | 1.00000 |
| rad21         | 4.37963e-14 | 1.00000 | 4.37963e-14 | 1.00000 |
| PhCH2CCH+H    | 4.05148e-14 | 1.00000 | 4.05148e-14 | 1.00000 |
| rad60anti     | 3.77420e-14 | 1.00000 | 3.77420e-14 | 1.00000 |
| rad24         | 1.82150e-14 | 1.00000 | 1.82150e-14 | 1.00000 |
| rad31         | 2.52147e-15 | 1.00000 | 2.52147e-15 | 1.00000 |
| rad37         | 1.14569e-16 | 1.00000 | 1.14569e-16 | 1.00000 |
| rad5          | 2.61712e-18 | 1.00000 | 2.61712e-18 | 1.00000 |
| PAH3+H        | 1.11450e-21 | 1.00000 | 1.11450e-21 | 1.00000 |
| rad59         | 5.45561e-22 | 1.00000 | 5.45561e-22 | 1.00000 |
| rad50         | 1.04573e-22 | 1.00000 | 1.04573e-22 | 1.00000 |
| rad19syn      | 8.69003e-27 | 1.00000 | 8.69003e-27 | 1.00000 |
| rad54         | 3.40696e-30 | 1.00000 | 3.40696e-30 | 1.00000 |
| PAH10+CH3     | 2.78643e-30 | 1.00000 | 2.78643e-30 | 1.00000 |
| rad43         | 6.74950e-31 | 1.00000 | 6.74950e-31 | 1.00000 |
| rad52         | 5.54154e-31 | 1.00000 | 5.54154e-31 | 1.00000 |
| rad62         | 1.35405e-32 | 1.00000 | 1.35405e-32 | 1.00000 |
| rad51         | 1.27883e-35 | 1.00000 | 1.27883e-35 | 1.00000 |
| rad70         | 1.77344e-36 | 1.00000 | 1.77344e-36 | 1.00000 |
| PhcycC3H3_A+H | 1.22316e-36 | 1.00000 | 1.22316e-36 | 1.00000 |
| rad55         | 5.84477e-37 | 1.00000 | 5.84477e-37 | 1.00000 |
| rad65         | 2.55415e-39 | 1.00000 | 2.55415e-39 | 1.00000 |
| rad58         | 5.84182e-40 | 1.00000 | 5.84182e-40 | 1.00000 |
| PAH1+H        | 3.39059e-40 | 1.00000 | 3.39059e-40 | 1.00000 |
| rad34         | 5.47740e-42 | 1.00000 | 5.47740e-42 | 1.00000 |
| rad42         | 4.27714e-45 | 1.00000 | 4.27714e-45 | 1.00000 |
| rad41         | 7.95230e-46 | 1.00000 | 7.95230e-46 | 1.00000 |
| rad47         | 1.84479e-46 | 1.00000 | 1.84479e-46 | 1.00000 |

1.00000000 Pa, 90.0000000 K

| =====              |                 |            |                      |            |
|--------------------|-----------------|------------|----------------------|------------|
| Rate constant      | True (fraction) |            | Effective (fraction) |            |
| -----              |                 |            |                      |            |
| Total              | 3.08379e-22     | (1.00 )    | 3.08379e-22          | (1.00 )    |
| Formation of rad11 | 3.03962e-22     | (0.986 )   | 3.03962e-22          | (0.986 )   |
| Formation of rad6  | 4.41076e-24     | (0.0143 )  | 4.41076e-24          | (0.0143 )  |
| H-abstraction      | 5.92916e-27     | (1.92e-05) | 5.92916e-27          | (1.92e-05) |
| -----              |                 |            |                      |            |
| species            | PYtrue          | Cumul      | PYeffective          | Cumul      |
| -----              |                 |            |                      |            |
| rad6               | 0.939097        | 0.939097   | 0.939098             | 0.939098   |
| Indene+H           | 0.0599191       | 0.999016   | 0.0599191            | 0.999017   |
| C2H2+PhCH2         | 0.000569200     | 0.999585   | 0.000569200          | 0.999586   |
| rad7               | 0.000152477     | 0.999738   | 0.000152477          | 0.999739   |
| rad2               | 0.000106537     | 0.999844   | 0.000106537          | 0.999845   |
| rad23              | 5.56908e-05     | 0.999900   | 5.56908e-05          | 0.999901   |
| rad11              | 4.74711e-05     | 0.999947   | 4.74711e-05          | 0.999948   |
| Benzene+2-propynyl | 1.92269e-05     | 0.999967   | 1.92269e-05          | 0.999968   |
| rad10              | 7.40806e-06     | 0.999974   | 7.40806e-06          | 0.999975   |
| rad1               | 6.82888e-06     | 0.999981   | 6.82888e-06          | 0.999982   |
| rad28              | 5.88893e-06     | 0.999987   | 5.88893e-06          | 0.999988   |
| PhCHCCH2+H         | 4.12300e-06     | 0.999991   | 4.12300e-06          | 0.999992   |
| rad3               | 2.92019e-06     | 0.999994   | 2.92019e-06          | 0.999995   |
| rad4               | 1.48164e-06     | 0.999995   | 1.48164e-06          | 0.999996   |
| rad45              | 1.45760e-06     | 0.999997   | 1.45760e-06          | 0.999998   |
| PhCCH+CH3          | 1.41520e-06     | 0.999998   | 1.41520e-06          | 0.999999   |
| rad13              | 4.78861e-07     | 0.999999   | 4.78861e-07          | 1.000000   |
| rad26              | 2.44115e-07     | 0.999999   | 2.44115e-07          | 1.000000   |
| rad9               | 2.41375e-07     | 0.999999   | 2.41375e-07          | 1.000000   |
| PhCCCH3+H          | 1.14462e-07     | 0.999999   | 1.14462e-07          | 1.000000   |
| rad36              | 9.03858e-08     | 0.999999   | 9.03858e-08          | 1.000000   |
| rad22              | 5.42580e-08     | 0.999999   | 5.42580e-08          | 1.000000   |
| rad30              | 3.20469e-08     | 0.999999   | 3.20469e-08          | 1.000000   |
| Phenyl+Allene      | 1.84825e-08     | 0.999999   | 0.000000             | 1.000000   |
| rad15              | 5.99744e-09     | 0.999999   | 5.99744e-09          | 1.000000   |
| PAH9+H             | 5.62809e-09     | 1.000000   | 5.62809e-09          | 1.000000   |
| rad35              | 2.92358e-09     | 1.000000   | 2.92358e-09          | 1.000000   |
| Ph+MeAc            | 2.51178e-09     | 1.000000   | 2.51178e-09          | 1.000000   |
| rad38              | 1.48295e-09     | 1.000000   | 1.48295e-09          | 1.000000   |
| rad8               | 1.01111e-09     | 1.000000   | 1.01111e-09          | 1.000000   |
| rad33              | 7.45858e-10     | 1.000000   | 7.45858e-10          | 1.000000   |
| rad25              | 3.79614e-10     | 1.000000   | 3.79614e-10          | 1.000000   |
| rad14              | 2.73623e-10     | 1.000000   | 2.73623e-10          | 1.000000   |

|               |             |          |             |          |
|---------------|-------------|----------|-------------|----------|
| rad27         | 7.22376e-11 | 1.000000 | 7.22376e-11 | 1.000000 |
| PAH7+H        | 2.98149e-11 | 1.000000 | 2.98149e-11 | 1.000000 |
| rad46         | 1.08132e-11 | 1.000000 | 1.08132e-11 | 1.000000 |
| rad39         | 3.78187e-12 | 1.000000 | 3.78187e-12 | 1.000000 |
| rad12         | 9.12770e-13 | 1.000000 | 9.12770e-13 | 1.000000 |
| rad60syn      | 4.63191e-13 | 1.000000 | 4.63191e-13 | 1.000000 |
| PhCH2CCH+H    | 2.70257e-13 | 1.000000 | 2.70257e-13 | 1.000000 |
| rad18         | 7.22302e-14 | 1.000000 | 7.22302e-14 | 1.000000 |
| rad60anti     | 6.06782e-14 | 1.000000 | 6.06782e-14 | 1.000000 |
| rad20         | 5.20739e-14 | 1.000000 | 5.20739e-14 | 1.000000 |
| rad21         | 3.42046e-14 | 1.000000 | 3.42046e-14 | 1.000000 |
| rad24         | 1.16760e-14 | 1.000000 | 1.16760e-14 | 1.000000 |
| rad31         | 2.88367e-15 | 1.000000 | 2.88367e-15 | 1.000000 |
| rad37         | 6.20820e-16 | 1.000000 | 6.20820e-16 | 1.000000 |
| rad5          | 1.53691e-17 | 1.000000 | 1.53691e-17 | 1.000000 |
| PAH3+H        | 1.19859e-20 | 1.000000 | 1.19859e-20 | 1.000000 |
| rad59         | 5.83867e-21 | 1.000000 | 5.83867e-21 | 1.000000 |
| rad50         | 9.71684e-22 | 1.000000 | 9.71684e-22 | 1.000000 |
| rad19syn      | 1.09935e-25 | 1.000000 | 1.09935e-25 | 1.000000 |
| rad54         | 4.58738e-29 | 1.000000 | 4.58738e-29 | 1.000000 |
| PAH10+CH3     | 3.78087e-29 | 1.000000 | 3.78087e-29 | 1.000000 |
| rad43         | 9.25262e-30 | 1.000000 | 9.25262e-30 | 1.000000 |
| rad52         | 7.02230e-30 | 1.000000 | 7.02230e-30 | 1.000000 |
| rad62         | 1.89664e-31 | 1.000000 | 1.89664e-31 | 1.000000 |
| rad51         | 1.77207e-34 | 1.000000 | 1.77207e-34 | 1.000000 |
| rad70         | 2.60954e-35 | 1.000000 | 2.60954e-35 | 1.000000 |
| PhcycC3H3_A+H | 1.81130e-35 | 1.000000 | 1.81130e-35 | 1.000000 |
| rad55         | 8.63309e-36 | 1.000000 | 8.63309e-36 | 1.000000 |
| rad65         | 3.69863e-38 | 1.000000 | 3.69863e-38 | 1.000000 |
| rad58         | 8.68253e-39 | 1.000000 | 8.68253e-39 | 1.000000 |
| PAH1+H        | 5.24486e-39 | 1.000000 | 5.24486e-39 | 1.000000 |
| rad34         | 8.50959e-41 | 1.000000 | 8.50959e-41 | 1.000000 |
| rad42         | 6.76870e-44 | 1.000000 | 6.76870e-44 | 1.000000 |
| rad41         | 1.26731e-44 | 1.000000 | 1.26731e-44 | 1.000000 |
| rad47         | 2.49160e-45 | 1.000000 | 2.49160e-45 | 1.000000 |

1.00000000 Pa, 100.000000 K

=====

| Rate constant      | True (fraction)        | Effective (fraction)   |
|--------------------|------------------------|------------------------|
| Total              | 2.19347e-21 (1.00 )    | 2.19347e-21 (1.00 )    |
| Formation of rad11 | 2.14498e-21 (0.978 )   | 2.14498e-21 (0.978 )   |
| Formation of rad6  | 4.83503e-23 (0.0220 )  | 4.83503e-23 (0.0220 )  |
| H-abstraction      | 1.47101e-25 (6.71e-05) | 1.47101e-25 (6.71e-05) |

| species            | PYtrue      | Cumul    | PYeffective | Cumul    |
|--------------------|-------------|----------|-------------|----------|
| rad6               | 0.938754    | 0.938754 | 0.938754    | 0.938754 |
| Indene+H           | 0.0601943   | 0.998948 | 0.0601943   | 0.998948 |
| C2H2+PhCH2         | 0.000589139 | 0.999537 | 0.000589139 | 0.999537 |
| rad7               | 0.000149945 | 0.999687 | 0.000149945 | 0.999687 |
| rad2               | 0.000124269 | 0.999812 | 0.000124269 | 0.999812 |
| Benzene+2-propynyl | 6.70630e-05 | 0.999879 | 6.70630e-05 | 0.999879 |
| rad11              | 4.63986e-05 | 0.999925 | 4.63986e-05 | 0.999925 |
| rad23              | 3.77195e-05 | 0.999963 | 3.77195e-05 | 0.999963 |
| rad10              | 8.61384e-06 | 0.999971 | 8.61384e-06 | 0.999971 |
| rad1               | 7.99231e-06 | 0.999979 | 7.99231e-06 | 0.999979 |
| rad28              | 7.16714e-06 | 0.999987 | 7.16714e-06 | 0.999987 |
| PhCHCCH2+H         | 4.55271e-06 | 0.999991 | 4.55271e-06 | 0.999991 |
| rad3               | 3.00246e-06 | 0.999994 | 3.00246e-06 | 0.999994 |
| PhCCH+CH3          | 1.89207e-06 | 0.999996 | 1.89207e-06 | 0.999996 |
| rad4               | 1.52473e-06 | 0.999998 | 1.52473e-06 | 0.999998 |
| rad45              | 9.67156e-07 | 0.999999 | 9.67156e-07 | 0.999999 |
| rad13              | 4.73215e-07 | 0.999999 | 4.73215e-07 | 0.999999 |
| rad26              | 3.57555e-07 | 0.999999 | 3.57555e-07 | 0.999999 |
| rad9               | 2.66526e-07 | 1.000000 | 2.66526e-07 | 1.000000 |
| PhCCCH3+H          | 1.78576e-07 | 1.000000 | 1.78576e-07 | 1.000000 |
| rad36              | 5.99491e-08 | 1.000000 | 5.99491e-08 | 1.000000 |
| rad22              | 3.70920e-08 | 1.000000 | 3.70920e-08 | 1.000000 |
| rad30              | 3.35993e-08 | 1.000000 | 3.35993e-08 | 1.000000 |
| Phenyl+Allene      | 2.63776e-08 | 1.000000 | 0.000000    | 1.000000 |
| rad15              | 6.35119e-09 | 1.000000 | 6.35119e-09 | 1.000000 |
| PAH9+H             | 6.06434e-09 | 1.000000 | 6.06434e-09 | 1.000000 |
| Ph+MeAc            | 4.71227e-09 | 1.000000 | 4.71227e-09 | 1.000000 |
| rad35              | 3.12850e-09 | 1.000000 | 3.12850e-09 | 1.000000 |
| rad8               | 1.61728e-09 | 1.000000 | 1.61728e-09 | 1.000000 |
| rad38              | 1.60498e-09 | 1.000000 | 1.60498e-09 | 1.000000 |
| rad33              | 7.45887e-10 | 1.000000 | 7.45887e-10 | 1.000000 |
| rad25              | 3.62627e-10 | 1.000000 | 3.62627e-10 | 1.000000 |
| rad14              | 2.78684e-10 | 1.000000 | 2.78684e-10 | 1.000000 |

|               |             |         |             |          |
|---------------|-------------|---------|-------------|----------|
| rad27         | 8.35007e-11 | 1.00000 | 8.35007e-11 | 1.000000 |
| PAH7+H        | 5.40753e-11 | 1.00000 | 5.40753e-11 | 1.000000 |
| rad46         | 1.22252e-11 | 1.00000 | 1.22252e-11 | 1.000000 |
| rad39         | 7.37431e-12 | 1.00000 | 7.37431e-12 | 1.000000 |
| rad12         | 2.10049e-12 | 1.00000 | 2.10049e-12 | 1.000000 |
| PhCH2CCH+H    | 1.34479e-12 | 1.00000 | 1.34479e-12 | 1.000000 |
| rad60syn      | 5.71928e-13 | 1.00000 | 5.71928e-13 | 1.000000 |
| rad60anti     | 9.13794e-14 | 1.00000 | 9.13794e-14 | 1.000000 |
| rad18         | 5.61360e-14 | 1.00000 | 5.61360e-14 | 1.000000 |
| rad20         | 4.30415e-14 | 1.00000 | 4.30415e-14 | 1.000000 |
| rad21         | 2.82869e-14 | 1.00000 | 2.82869e-14 | 1.000000 |
| rad24         | 7.81137e-15 | 1.00000 | 7.81137e-15 | 1.000000 |
| rad31         | 3.29761e-15 | 1.00000 | 3.29761e-15 | 1.000000 |
| rad37         | 3.08879e-15 | 1.00000 | 3.08879e-15 | 1.000000 |
| rad5          | 8.53185e-17 | 1.00000 | 8.53185e-17 | 1.000000 |
| PAH3+H        | 1.20275e-19 | 1.00000 | 1.20275e-19 | 1.000000 |
| rad59         | 5.70545e-20 | 1.00000 | 5.70545e-20 | 1.000000 |
| rad50         | 7.95550e-21 | 1.00000 | 7.95550e-21 | 1.000000 |
| rad19syn      | 2.51033e-24 | 1.00000 | 2.51033e-24 | 1.000000 |
| rad54         | 1.34051e-27 | 1.00000 | 1.34051e-27 | 1.000000 |
| PAH10+CH3     | 9.53662e-28 | 1.00000 | 9.53662e-28 | 1.000000 |
| rad43         | 2.51107e-28 | 1.00000 | 2.51107e-28 | 1.000000 |
| rad52         | 1.62448e-28 | 1.00000 | 1.62448e-28 | 1.000000 |
| rad62         | 5.95894e-30 | 1.00000 | 5.95894e-30 | 1.000000 |
| rad51         | 5.67424e-33 | 1.00000 | 5.67424e-33 | 1.000000 |
| rad70         | 8.80030e-34 | 1.00000 | 8.80030e-34 | 1.000000 |
| PhcycC3H3_A+H | 6.15036e-34 | 1.00000 | 6.15036e-34 | 1.000000 |
| rad55         | 2.92323e-34 | 1.00000 | 2.92323e-34 | 1.000000 |
| rad65         | 1.22606e-36 | 1.00000 | 1.22606e-36 | 1.000000 |
| rad58         | 2.95980e-37 | 1.00000 | 2.95980e-37 | 1.000000 |
| PAH1+H        | 1.86399e-37 | 1.00000 | 1.86399e-37 | 1.000000 |
| rad34         | 3.04628e-39 | 1.00000 | 3.04628e-39 | 1.000000 |
| rad42         | 2.47821e-42 | 1.00000 | 2.47821e-42 | 1.000000 |
| rad41         | 4.68241e-43 | 1.00000 | 4.68241e-43 | 1.000000 |
| rad47         | 7.84586e-44 | 1.00000 | 7.84586e-44 | 1.000000 |

1.00000000 Pa, 110.000000 K

=====

| Rate constant      | True (fraction)        | Effective (fraction)   |
|--------------------|------------------------|------------------------|
| Total              | 1.09987e-20 (1.00 )    | 1.09987e-20 (1.00 )    |
| Formation of rad11 | 1.06527e-20 (0.969 )   | 1.06527e-20 (0.969 )   |
| Formation of rad6  | 3.44008e-22 (0.0313 )  | 3.44008e-22 (0.0313 )  |
| H-abstraction      | 2.02040e-24 (0.000184) | 2.02040e-24 (0.000184) |

| species            | PYtrue      | Cumul    | PYeffective | Cumul    |
|--------------------|-------------|----------|-------------|----------|
| rad6               | 0.938374    | 0.938374 | 0.938374    | 0.938374 |
| Indene+H           | 0.0604261   | 0.998800 | 0.0604261   | 0.998800 |
| C2H2+PhCH2         | 0.000610529 | 0.999410 | 0.000610529 | 0.999410 |
| Benzene+2-propynyl | 0.000183695 | 0.999594 | 0.000183695 | 0.999594 |
| rad7               | 0.000147752 | 0.999742 | 0.000147752 | 0.999742 |
| rad2               | 0.000143583 | 0.999885 | 0.000143583 | 0.999885 |
| rad11              | 4.54826e-05 | 0.999931 | 4.54826e-05 | 0.999931 |
| rad23              | 2.65061e-05 | 0.999957 | 2.65061e-05 | 0.999957 |
| rad10              | 9.92183e-06 | 0.999967 | 9.92183e-06 | 0.999967 |
| rad1               | 9.26841e-06 | 0.999976 | 9.26841e-06 | 0.999976 |
| rad28              | 8.68969e-06 | 0.999985 | 8.68969e-06 | 0.999985 |
| PhCHCCH2+H         | 5.07906e-06 | 0.999990 | 5.07906e-06 | 0.999990 |
| rad3               | 3.10132e-06 | 0.999993 | 3.10132e-06 | 0.999993 |
| PhCCH+CH3          | 2.53972e-06 | 0.999996 | 2.53972e-06 | 0.999996 |
| rad4               | 1.57647e-06 | 0.999997 | 1.57647e-06 | 0.999997 |
| rad45              | 6.67582e-07 | 0.999998 | 6.67582e-07 | 0.999998 |
| rad26              | 5.16288e-07 | 0.999999 | 5.16288e-07 | 0.999999 |
| rad13              | 4.68553e-07 | 0.999999 | 4.68553e-07 | 0.999999 |
| rad9               | 2.95607e-07 | 0.999999 | 2.95607e-07 | 0.999999 |
| PhCCCH3+H          | 2.76939e-07 | 1.000000 | 2.76939e-07 | 1.000000 |
| rad36              | 4.13704e-08 | 1.000000 | 4.13704e-08 | 1.000000 |
| Phenyl+Allene      | 3.71249e-08 | 1.000000 | 0.000000    | 1.000000 |
| rad30              | 3.53018e-08 | 1.000000 | 3.53018e-08 | 1.000000 |
| rad22              | 2.63918e-08 | 1.000000 | 2.63918e-08 | 1.000000 |
| Ph+MeAc            | 8.78277e-09 | 1.000000 | 8.78277e-09 | 1.000000 |
| rad15              | 6.74462e-09 | 1.000000 | 6.74462e-09 | 1.000000 |
| PAH9+H             | 6.52882e-09 | 1.000000 | 6.52882e-09 | 1.000000 |
| rad35              | 3.34393e-09 | 1.000000 | 3.34393e-09 | 1.000000 |
| rad8               | 2.58022e-09 | 1.000000 | 2.58022e-09 | 1.000000 |
| rad38              | 1.73647e-09 | 1.000000 | 1.73647e-09 | 1.000000 |
| rad33              | 7.46454e-10 | 1.000000 | 7.46454e-10 | 1.000000 |
| rad25              | 3.50483e-10 | 1.000000 | 3.50483e-10 | 1.000000 |
| rad14              | 2.85349e-10 | 1.000000 | 2.85349e-10 | 1.000000 |

|               |             |          |             |          |
|---------------|-------------|----------|-------------|----------|
| PAH7+H        | 9.90414e-11 | 1.000000 | 9.90414e-11 | 1.000000 |
| rad27         | 9.57696e-11 | 1.000000 | 9.57696e-11 | 1.000000 |
| rad39         | 1.44787e-11 | 1.000000 | 1.44787e-11 | 1.000000 |
| rad46         | 1.38470e-11 | 1.000000 | 1.38470e-11 | 1.000000 |
| PhCH2CCH+H    | 5.24467e-12 | 1.000000 | 5.24467e-12 | 1.000000 |
| rad12         | 4.78482e-12 | 1.000000 | 4.78482e-12 | 1.000000 |
| rad60syn      | 7.12140e-13 | 1.000000 | 7.12140e-13 | 1.000000 |
| rad60anti     | 1.32131e-13 | 1.000000 | 1.32131e-13 | 1.000000 |
| rad18         | 4.54836e-14 | 1.000000 | 4.54836e-14 | 1.000000 |
| rad20         | 3.72084e-14 | 1.000000 | 3.72084e-14 | 1.000000 |
| rad21         | 2.44798e-14 | 1.000000 | 2.44799e-14 | 1.000000 |
| rad37         | 1.35741e-14 | 1.000000 | 1.35741e-14 | 1.000000 |
| rad24         | 5.43701e-15 | 1.000000 | 5.43701e-15 | 1.000000 |
| rad31         | 3.77184e-15 | 1.000000 | 3.77184e-15 | 1.000000 |
| rad5          | 4.19418e-16 | 1.000000 | 4.19418e-16 | 1.000000 |
| PAH3+H        | 9.15220e-19 | 1.000000 | 9.15220e-19 | 1.000000 |
| rad59         | 4.18126e-19 | 1.000000 | 4.18126e-19 | 1.000000 |
| rad50         | 5.05386e-20 | 1.000000 | 5.05386e-20 | 1.000000 |
| rad19syn      | 6.63460e-23 | 1.000000 | 6.63460e-23 | 1.000000 |
| rad54         | 5.84954e-26 | 1.000000 | 5.84954e-26 | 1.000000 |
| PAH10+CH3     | 3.43312e-26 | 1.000000 | 3.43312e-26 | 1.000000 |
| rad43         | 9.86311e-27 | 1.000000 | 9.86311e-27 | 1.000000 |
| rad52         | 4.26286e-27 | 1.000000 | 4.26286e-27 | 1.000000 |
| rad62         | 3.30413e-28 | 1.000000 | 3.30413e-28 | 1.000000 |
| rad51         | 3.29848e-31 | 1.000000 | 3.29848e-31 | 1.000000 |
| rad70         | 6.96971e-32 | 1.000000 | 6.96971e-32 | 1.000000 |
| PhcycC3H3_A+H | 4.90643e-32 | 1.000000 | 4.90643e-32 | 1.000000 |
| rad55         | 2.32502e-32 | 1.000000 | 2.32502e-32 | 1.000000 |
| rad65         | 1.00760e-34 | 1.000000 | 1.00760e-34 | 1.000000 |
| rad58         | 2.37094e-35 | 1.000000 | 2.37094e-35 | 1.000000 |
| PAH1+H        | 1.55669e-35 | 1.000000 | 1.55669e-35 | 1.000000 |
| rad34         | 2.57209e-37 | 1.000000 | 2.57209e-37 | 1.000000 |
| rad42         | 2.14752e-40 | 1.000000 | 2.14752e-40 | 1.000000 |
| rad41         | 4.10364e-41 | 1.000000 | 4.10364e-41 | 1.000000 |
| rad47         | 5.87983e-42 | 1.000000 | 5.87983e-42 | 1.000000 |

1.00000000 Pa, 120.000000 K

=====

| Rate constant      | True (fraction)        | Effective (fraction)   |
|--------------------|------------------------|------------------------|
| Total              | 4.24245e-20 (1.00 )    | 4.24245e-20 (1.00 )    |
| Formation of rad11 | 4.06372e-20 (0.958 )   | 4.06372e-20 (0.958 )   |
| Formation of rad6  | 1.76944e-21 (0.0417 )  | 1.76944e-21 (0.0417 )  |
| H-abstraction      | 1.78210e-23 (0.000420) | 1.78210e-23 (0.000420) |

| species            | PYtrue      | Cumul    | PYeffective | Cumul    |
|--------------------|-------------|----------|-------------|----------|
| rad6               | 0.937883    | 0.937883 | 0.937883    | 0.937883 |
| Indene+H           | 0.0606397   | 0.998523 | 0.0606397   | 0.998523 |
| C2H2+PhCH2         | 0.000633807 | 0.999156 | 0.000633807 | 0.999156 |
| Benzene+2-propynyl | 0.000420064 | 0.999576 | 0.000420064 | 0.999576 |
| rad2               | 0.000164614 | 0.999741 | 0.000164614 | 0.999741 |
| rad7               | 0.000145812 | 0.999887 | 0.000145812 | 0.999887 |
| rad11              | 4.46823e-05 | 0.999932 | 4.46823e-05 | 0.999932 |
| rad23              | 1.92929e-05 | 0.999951 | 1.92929e-05 | 0.999951 |
| rad10              | 1.13413e-05 | 0.999962 | 1.13413e-05 | 0.999962 |
| rad1               | 1.06685e-05 | 0.999973 | 1.06685e-05 | 0.999973 |
| rad28              | 1.05151e-05 | 0.999983 | 1.05151e-05 | 0.999983 |
| PhCHCCH2+H         | 5.73814e-06 | 0.999989 | 5.73814e-06 | 0.999989 |
| PhCCH+CH3          | 3.42880e-06 | 0.999993 | 3.42880e-06 | 0.999993 |
| rad3               | 3.21627e-06 | 0.999996 | 3.21627e-06 | 0.999996 |
| rad4               | 1.63664e-06 | 0.999997 | 1.63664e-06 | 0.999997 |
| rad26              | 7.36928e-07 | 0.999998 | 7.36928e-07 | 0.999998 |
| rad45              | 4.78305e-07 | 0.999999 | 4.78305e-07 | 0.999999 |
| rad13              | 4.64616e-07 | 0.999999 | 4.64616e-07 | 0.999999 |
| PhCCCH3+H          | 4.27592e-07 | 1.000000 | 4.27592e-07 | 1.000000 |
| rad9               | 3.29508e-07 | 1.000000 | 3.29508e-07 | 1.000000 |
| Phenyl+Allene      | 5.17074e-08 | 1.000000 | 0.000000    | 1.000000 |
| rad30              | 3.71912e-08 | 1.000000 | 3.71912e-08 | 1.000000 |
| rad36              | 2.96394e-08 | 1.000000 | 2.96394e-08 | 1.000000 |
| rad22              | 1.94877e-08 | 1.000000 | 1.94877e-08 | 1.000000 |
| Ph+MeAc            | 1.62193e-08 | 1.000000 | 1.62193e-08 | 1.000000 |
| rad15              | 7.18695e-09 | 1.000000 | 7.18695e-09 | 1.000000 |
| PAH9+H             | 7.03431e-09 | 1.000000 | 7.03431e-09 | 1.000000 |
| rad8               | 4.10702e-09 | 1.000000 | 4.10702e-09 | 1.000000 |
| rad35              | 3.57565e-09 | 1.000000 | 3.57565e-09 | 1.000000 |
| rad38              | 1.88112e-09 | 1.000000 | 1.88112e-09 | 1.000000 |
| rad33              | 7.47387e-10 | 1.000000 | 7.47387e-10 | 1.000000 |
| rad25              | 3.41445e-10 | 1.000000 | 3.41445e-10 | 1.000000 |
| rad14              | 2.93514e-10 | 1.000000 | 2.93514e-10 | 1.000000 |

|               |             |         |             |          |
|---------------|-------------|---------|-------------|----------|
| PAH7+H        | 1.82985e-10 | 1.00000 | 1.82985e-10 | 1.000000 |
| rad27         | 1.09138e-10 | 1.00000 | 1.09138e-10 | 1.000000 |
| rad39         | 2.85475e-11 | 1.00000 | 2.85475e-11 | 1.000000 |
| PhCH2CCH+H    | 1.69309e-11 | 1.00000 | 1.69309e-11 | 1.000000 |
| rad46         | 1.57422e-11 | 1.00000 | 1.57422e-11 | 1.000000 |
| rad12         | 1.07454e-11 | 1.00000 | 1.07454e-11 | 1.000000 |
| rad60syn      | 8.94044e-13 | 1.00000 | 8.94044e-13 | 1.000000 |
| rad60anti     | 1.86298e-13 | 1.00000 | 1.86298e-13 | 1.000000 |
| rad37         | 5.24663e-14 | 1.00000 | 5.24663e-14 | 1.000000 |
| rad18         | 3.80797e-14 | 1.00000 | 3.80797e-14 | 1.000000 |
| rad20         | 3.33207e-14 | 1.00000 | 3.33207e-14 | 1.000000 |
| rad21         | 2.19557e-14 | 1.00000 | 2.19557e-14 | 1.000000 |
| rad31         | 4.31564e-15 | 1.00000 | 4.31564e-15 | 1.000000 |
| rad24         | 3.92863e-15 | 1.00000 | 3.92863e-15 | 1.000000 |
| rad5          | 1.79706e-15 | 1.00000 | 1.79706e-15 | 1.000000 |
| PAH3+H        | 5.27759e-18 | 1.00000 | 5.27759e-18 | 1.000000 |
| rad59         | 2.31227e-18 | 1.00000 | 2.31227e-18 | 1.000000 |
| rad50         | 2.52363e-19 | 1.00000 | 2.52363e-19 | 1.000000 |
| rad19syn      | 1.36783e-21 | 1.00000 | 1.36783e-21 | 1.000000 |
| rad54         | 2.05816e-24 | 1.00000 | 2.05816e-24 | 1.000000 |
| PAH10+CH3     | 1.09189e-24 | 1.00000 | 1.09189e-24 | 1.000000 |
| rad43         | 3.28540e-25 | 1.00000 | 3.28540e-25 | 1.000000 |
| rad52         | 8.52841e-26 | 1.00000 | 8.52841e-26 | 1.000000 |
| rad62         | 1.59870e-26 | 1.00000 | 1.59870e-26 | 1.000000 |
| rad51         | 1.74431e-29 | 1.00000 | 1.74431e-29 | 1.000000 |
| rad70         | 9.56410e-30 | 1.00000 | 9.56410e-30 | 1.000000 |
| PhcycC3H3_A+H | 7.11117e-30 | 1.00000 | 7.11117e-30 | 1.000000 |
| rad55         | 3.38301e-30 | 1.00000 | 3.38301e-30 | 1.000000 |
| rad65         | 9.27972e-33 | 1.00000 | 9.27972e-33 | 1.000000 |
| rad58         | 3.58486e-33 | 1.00000 | 3.58486e-33 | 1.000000 |
| PAH1+H        | 2.21726e-33 | 1.00000 | 2.21726e-33 | 1.000000 |
| rad34         | 3.72926e-35 | 1.00000 | 3.72926e-35 | 1.000000 |
| rad42         | 3.20270e-38 | 1.00000 | 3.20270e-38 | 1.000000 |
| rad41         | 6.19329e-39 | 1.00000 | 6.19329e-39 | 1.000000 |
| rad47         | 7.61267e-40 | 1.00000 | 7.61267e-40 | 1.000000 |

1.00000000 Pa, 130.000000 K

=====

| Rate constant      | True (fraction)        | Effective (fraction)   |
|--------------------|------------------------|------------------------|
| Total              | 1.33719e-19 (1.00 )    | 1.33719e-19 (1.00 )    |
| Formation of rad11 | 1.26517e-19 (0.946 )   | 1.26517e-19 (0.946 )   |
| Formation of rad6  | 7.08974e-21 (0.0530 )  | 7.08974e-21 (0.0530 )  |
| H-abstraction      | 1.11864e-22 (0.000837) | 1.11864e-22 (0.000837) |

| species            | PYtrue      | Cumul    | PYeffective | Cumul    |
|--------------------|-------------|----------|-------------|----------|
| rad6               | 0.937195    | 0.937195 | 0.937195    | 0.937195 |
| Indene+H           | 0.0608611   | 0.998056 | 0.0608611   | 0.998056 |
| Benzene+2-propynyl | 0.000836559 | 0.998893 | 0.000836559 | 0.998893 |
| C2H2+PhCH2         | 0.000659480 | 0.999553 | 0.000659480 | 0.999553 |
| rad2               | 0.000187441 | 0.999740 | 0.000187441 | 0.999740 |
| rad7               | 0.000144057 | 0.999884 | 0.000144057 | 0.999884 |
| rad11              | 4.39684e-05 | 0.999928 | 4.39684e-05 | 0.999928 |
| rad23              | 1.45237e-05 | 0.999942 | 1.45237e-05 | 0.999942 |
| rad10              | 1.28775e-05 | 0.999955 | 1.28775e-05 | 0.999955 |
| rad28              | 1.27127e-05 | 0.999968 | 1.27127e-05 | 0.999968 |
| rad1               | 1.22008e-05 | 0.999980 | 1.22008e-05 | 0.999980 |
| PhCHCCH2+H         | 6.58062e-06 | 0.999987 | 6.58062e-06 | 0.999987 |
| PhCCH+CH3          | 4.65886e-06 | 0.999992 | 4.65886e-06 | 0.999992 |
| rad3               | 3.34673e-06 | 0.999995 | 3.34673e-06 | 0.999995 |
| rad4               | 1.70501e-06 | 0.999997 | 1.70501e-06 | 0.999997 |
| rad26              | 1.04075e-06 | 0.999998 | 1.04075e-06 | 0.999998 |
| PhCCCH3+H          | 6.57324e-07 | 0.999998 | 6.57324e-07 | 0.999998 |
| rad13              | 4.61208e-07 | 0.999999 | 4.61208e-07 | 0.999999 |
| rad9               | 3.69355e-07 | 0.999999 | 3.69355e-07 | 0.999999 |
| rad45              | 3.55058e-07 | 0.999999 | 3.55058e-07 | 0.999999 |
| Phenyl+Allene      | 7.14630e-08 | 1.000000 | 0.000000    | 0.999999 |
| rad30              | 3.93113e-08 | 1.000000 | 3.93113e-08 | 1.000000 |
| Ph+MeAc            | 2.96042e-08 | 1.000000 | 2.96042e-08 | 1.000000 |
| rad36              | 2.20054e-08 | 1.000000 | 2.20054e-08 | 1.000000 |
| rad22              | 1.48923e-08 | 1.000000 | 1.48923e-08 | 1.000000 |
| rad15              | 7.68936e-09 | 1.000000 | 7.68936e-09 | 1.000000 |
| PAH9+H             | 7.59493e-09 | 1.000000 | 7.59493e-09 | 1.000000 |
| rad8               | 6.51580e-09 | 1.000000 | 6.51580e-09 | 1.000000 |
| rad35              | 3.82982e-09 | 1.000000 | 3.82982e-09 | 1.000000 |
| rad38              | 2.04311e-09 | 1.000000 | 2.04311e-09 | 1.000000 |
| rad33              | 7.48545e-10 | 1.000000 | 7.48545e-10 | 1.000000 |
| PAH7+H             | 3.40375e-10 | 1.000000 | 3.40375e-10 | 1.000000 |
| rad25              | 3.34485e-10 | 1.000000 | 3.34485e-10 | 1.000000 |

|               |             |          |             |          |
|---------------|-------------|----------|-------------|----------|
| rad14         | 3.03090e-10 | 1.000000 | 3.03090e-10 | 1.000000 |
| rad27         | 1.23661e-10 | 1.000000 | 1.23661e-10 | 1.000000 |
| rad39         | 5.63798e-11 | 1.000000 | 5.63798e-11 | 1.000000 |
| PhCH2CCH+H    | 4.72415e-11 | 1.000000 | 4.72415e-11 | 1.000000 |
| rad12         | 2.36841e-11 | 1.000000 | 2.36841e-11 | 1.000000 |
| rad46         | 1.79908e-11 | 1.000000 | 1.79908e-11 | 1.000000 |
| rad60syn      | 1.13130e-12 | 1.000000 | 1.13130e-12 | 1.000000 |
| rad60anti     | 2.58673e-13 | 1.000000 | 2.58673e-13 | 1.000000 |
| rad37         | 1.80190e-13 | 1.000000 | 1.80190e-13 | 1.000000 |
| rad18         | 3.27262e-14 | 1.000000 | 3.27262e-14 | 1.000000 |
| rad20         | 3.06762e-14 | 1.000000 | 3.06762e-14 | 1.000000 |
| rad21         | 2.02513e-14 | 1.000000 | 2.02513e-14 | 1.000000 |
| rad5          | 6.75808e-15 | 1.000000 | 6.75808e-15 | 1.000000 |
| rad31         | 4.93894e-15 | 1.000000 | 4.93894e-15 | 1.000000 |
| rad24         | 2.94157e-15 | 1.000000 | 2.94157e-15 | 1.000000 |
| PAH3+H        | 2.41292e-17 | 1.000000 | 2.41293e-17 | 1.000000 |
| rad59         | 1.01255e-17 | 1.000000 | 1.01255e-17 | 1.000000 |
| rad50         | 1.03277e-18 | 1.000000 | 1.03277e-18 | 1.000000 |
| rad19syn      | 2.00776e-20 | 1.000000 | 2.00776e-20 | 1.000000 |
| rad54         | 4.87175e-23 | 1.000000 | 4.87175e-23 | 1.000000 |
| PAH10+CH3     | 2.49712e-23 | 1.000000 | 2.49712e-23 | 1.000000 |
| rad43         | 7.62415e-24 | 1.000000 | 7.62415e-24 | 1.000000 |
| rad52         | 1.20255e-24 | 1.000000 | 1.20255e-24 | 1.000000 |
| rad62         | 5.05707e-25 | 1.000000 | 5.05707e-25 | 1.000000 |
| rad70         | 7.08972e-28 | 1.000000 | 7.08972e-28 | 1.000000 |
| PhcycC3H3_A+H | 5.91343e-28 | 1.000000 | 5.91343e-28 | 1.000000 |
| rad51         | 5.75856e-28 | 1.000000 | 5.75856e-28 | 1.000000 |
| rad55         | 2.53860e-28 | 1.000000 | 2.53860e-28 | 1.000000 |
| rad65         | 5.44377e-31 | 1.000000 | 5.44377e-31 | 1.000000 |
| PAH1+H        | 3.43502e-31 | 1.000000 | 3.43502e-31 | 1.000000 |
| rad58         | 3.28799e-31 | 1.000000 | 3.28799e-31 | 1.000000 |
| rad34         | 5.96120e-33 | 1.000000 | 5.96120e-33 | 1.000000 |
| rad42         | 5.26504e-36 | 1.000000 | 5.26504e-36 | 1.000000 |
| rad41         | 1.02689e-36 | 1.000000 | 1.02689e-36 | 1.000000 |
| rad47         | 1.24586e-37 | 1.000000 | 1.24586e-37 | 1.000000 |

1.00000000 Pa, 140.000000 K

| =====              |                 |            |                      |            |
|--------------------|-----------------|------------|----------------------|------------|
| Rate constant      | True (fraction) |            | Effective (fraction) |            |
| -----              |                 |            |                      |            |
| Total              | 3.59582e-19     | (1.00 )    | 3.59582e-19          | (1.00 )    |
| Formation of rad11 | 3.35703e-19     | (0.934 )   | 3.35703e-19          | (0.934 )   |
| Formation of rad6  | 2.33415e-20     | (0.0649 )  | 2.33415e-20          | (0.0649 )  |
| H-abstraction      | 5.37685e-22     | (0.00150 ) | 5.37685e-22          | (0.00150 ) |
| -----              |                 |            |                      |            |
| species            | PYtrue          | Cumul      | PYeffective          | Cumul      |
| -----              |                 |            |                      |            |
| rad6               | 0.936225        | 0.936225   | 0.936225             | 0.936225   |
| Indene+H           | 0.0611160       | 0.997341   | 0.0611160            | 0.997341   |
| Benzene+2-propynyl | 0.00149531      | 0.998836   | 0.00149531           | 0.998836   |
| C2H2+PhCH2         | 0.000688134     | 0.999524   | 0.000688134          | 0.999524   |
| rad2               | 0.000212076     | 0.999736   | 0.000212076          | 0.999736   |
| rad7               | 0.000142438     | 0.999879   | 0.000142438          | 0.999879   |
| rad11              | 4.33186e-05     | 0.999922   | 4.33186e-05          | 0.999922   |
| rad28              | 1.53643e-05     | 0.999938   | 1.53643e-05          | 0.999938   |
| rad10              | 1.45310e-05     | 0.999952   | 1.45310e-05          | 0.999952   |
| rad1               | 1.38697e-05     | 0.999966   | 1.38697e-05          | 0.999966   |
| rad23              | 1.12900e-05     | 0.999977   | 1.12900e-05          | 0.999977   |
| PhCHCCH2+H         | 7.67743e-06     | 0.999985   | 7.67743e-06          | 0.999985   |
| PhCCH+CH3          | 6.36996e-06     | 0.999991   | 6.36996e-06          | 0.999991   |
| rad3               | 3.49188e-06     | 0.999995   | 3.49188e-06          | 0.999995   |
| rad4               | 1.78124e-06     | 0.999997   | 1.78124e-06          | 0.999997   |
| rad26              | 1.45408e-06     | 0.999998   | 1.45408e-06          | 0.999998   |
| PhCCCH3+H          | 1.00534e-06     | 0.999999   | 1.00534e-06          | 0.999999   |
| rad13              | 4.58175e-07     | 1.000000   | 4.58175e-07          | 1.000000   |
| rad9               | 4.16573e-07     | 1.000000   | 4.16573e-07          | 1.000000   |
| rad45              | 2.72561e-07     | 1.000000   | 2.72561e-07          | 1.000000   |
| Phenyl+Allene      | 9.82307e-08     | 1.000000   | 0.000000             | 1.000000   |
| Ph+MeAc            | 5.33001e-08     | 1.000000   | 5.33001e-08          | 1.000000   |
| rad30              | 4.17146e-08     | 1.000000   | 4.17146e-08          | 1.000000   |
| rad36              | 1.68986e-08     | 1.000000   | 1.68986e-08          | 1.000000   |
| rad22              | 1.17444e-08     | 1.000000   | 1.17444e-08          | 1.000000   |
| rad8               | 1.02880e-08     | 1.000000   | 1.02880e-08          | 1.000000   |
| rad15              | 8.26544e-09     | 1.000000   | 8.26544e-09          | 1.000000   |
| PAH9+H             | 8.22689e-09     | 1.000000   | 8.22689e-09          | 1.000000   |
| rad35              | 4.11339e-09     | 1.000000   | 4.11339e-09          | 1.000000   |
| rad38              | 2.22734e-09     | 1.000000   | 2.22734e-09          | 1.000000   |
| rad33              | 7.49807e-10     | 1.000000   | 7.49807e-10          | 1.000000   |
| PAH7+H             | 6.36028e-10     | 1.000000   | 6.36028e-10          | 1.000000   |
| rad25              | 3.28957e-10     | 1.000000   | 3.28957e-10          | 1.000000   |

|               |             |         |             |         |
|---------------|-------------|---------|-------------|---------|
| rad14         | 3.13982e-10 | 1.00000 | 3.13982e-10 | 1.00000 |
| rad27         | 1.39357e-10 | 1.00000 | 1.39357e-10 | 1.00000 |
| PhCH2CCH+H    | 1.17706e-10 | 1.00000 | 1.17706e-10 | 1.00000 |
| rad39         | 1.11272e-10 | 1.00000 | 1.11272e-10 | 1.00000 |
| rad12         | 5.10262e-11 | 1.00000 | 5.10262e-11 | 1.00000 |
| rad46         | 2.06954e-11 | 1.00000 | 2.06954e-11 | 1.00000 |
| rad60syn      | 1.44241e-12 | 1.00000 | 1.44241e-12 | 1.00000 |
| rad37         | 5.57572e-13 | 1.00000 | 5.57572e-13 | 1.00000 |
| rad60anti     | 3.56001e-13 | 1.00000 | 3.56001e-13 | 1.00000 |
| rad20         | 2.88634e-14 | 1.00000 | 2.88634e-14 | 1.00000 |
| rad18         | 2.87287e-14 | 1.00000 | 2.87287e-14 | 1.00000 |
| rad5          | 2.26258e-14 | 1.00000 | 2.26258e-14 | 1.00000 |
| rad21         | 1.90956e-14 | 1.00000 | 1.90956e-14 | 1.00000 |
| rad31         | 5.65242e-15 | 1.00000 | 5.65242e-15 | 1.00000 |
| rad24         | 2.27801e-15 | 1.00000 | 2.27801e-15 | 1.00000 |
| PAH3+H        | 9.15525e-17 | 1.00000 | 9.15525e-17 | 1.00000 |
| rad59         | 3.68026e-17 | 1.00000 | 3.68026e-17 | 1.00000 |
| rad50         | 3.60587e-18 | 1.00000 | 3.60588e-18 | 1.00000 |
| rad19syn      | 2.14694e-19 | 1.00000 | 2.14694e-19 | 1.00000 |
| rad54         | 7.89121e-22 | 1.00000 | 7.89121e-22 | 1.00000 |
| PAH10+CH3     | 4.03973e-22 | 1.00000 | 4.03974e-22 | 1.00000 |
| rad43         | 1.23060e-22 | 1.00000 | 1.23060e-22 | 1.00000 |
| rad52         | 1.23223e-23 | 1.00000 | 1.23223e-23 | 1.00000 |
| rad62         | 1.05712e-23 | 1.00000 | 1.05712e-23 | 1.00000 |
| rad70         | 2.95180e-26 | 1.00000 | 2.95180e-26 | 1.00000 |
| PhcycC3H3_A+H | 2.73533e-26 | 1.00000 | 2.73533e-26 | 1.00000 |
| rad51         | 1.24127e-26 | 1.00000 | 1.24127e-26 | 1.00000 |
| rad55         | 1.07659e-26 | 1.00000 | 1.07659e-26 | 1.00000 |
| PAH1+H        | 5.87302e-29 | 1.00000 | 5.87302e-29 | 1.00000 |
| rad65         | 1.81395e-29 | 1.00000 | 1.81395e-29 | 1.00000 |
| rad58         | 1.69001e-29 | 1.00000 | 1.69001e-29 | 1.00000 |
| rad34         | 1.70833e-30 | 1.00000 | 1.70833e-30 | 1.00000 |
| rad42         | 1.65304e-33 | 1.00000 | 1.65304e-33 | 1.00000 |
| rad41         | 3.18671e-34 | 1.00000 | 3.18671e-34 | 1.00000 |
| rad47         | 7.73515e-36 | 1.00000 | 7.73515e-36 | 1.00000 |

1.00000000 Pa, 150.000000 K

| Rate constant      | True (fraction)        | Effective (fraction)   |
|--------------------|------------------------|------------------------|
| Total              | 8.51464e-19 (1.00 )    | 8.51464e-19 (1.00 )    |
| Formation of rad11 | 7.83711e-19 (0.920 )   | 7.83711e-19 (0.920 )   |
| Formation of rad6  | 6.56651e-20 (0.0771 )  | 6.56651e-20 (0.0771 )  |
| H-abstraction      | 2.08816e-21 (0.00245 ) | 2.08816e-21 (0.00245 ) |

| species            | PYtrue      | Cumul    | PYeffective | Cumul    |
|--------------------|-------------|----------|-------------|----------|
| rad6               | 0.934888    | 0.934888 | 0.934888    | 0.934888 |
| Indene+H           | 0.0614299   | 0.996317 | 0.0614299   | 0.996317 |
| Benzene+2-propynyl | 0.00245244  | 0.998770 | 0.00245244  | 0.998770 |
| C2H2+PhCH2         | 0.000720453 | 0.999490 | 0.000720453 | 0.999490 |
| rad2               | 0.000238461 | 0.999729 | 0.000238461 | 0.999729 |
| rad7               | 0.000140911 | 0.999870 | 0.000140911 | 0.999870 |
| rad11              | 4.27162e-05 | 0.999912 | 4.27162e-05 | 0.999912 |
| rad28              | 1.85665e-05 | 0.999931 | 1.85665e-05 | 0.999931 |
| rad10              | 1.62978e-05 | 0.999947 | 1.62978e-05 | 0.999947 |
| rad1               | 1.56756e-05 | 0.999963 | 1.56756e-05 | 0.999963 |
| PhCHCCH2+H         | 9.12722e-06 | 0.999972 | 9.12722e-06 | 0.999972 |
| rad23              | 9.04427e-06 | 0.999981 | 9.04427e-06 | 0.999981 |
| PhCCH+CH3          | 8.75829e-06 | 0.999990 | 8.75829e-06 | 0.999990 |
| rad3               | 3.65060e-06 | 0.999994 | 3.65060e-06 | 0.999994 |
| rad26              | 2.00836e-06 | 0.999996 | 2.00836e-06 | 0.999996 |
| rad4               | 1.86482e-06 | 0.999997 | 1.86482e-06 | 0.999997 |
| PhCCCH3+H          | 1.52818e-06 | 0.999999 | 1.52818e-06 | 0.999999 |
| rad9               | 4.72991e-07 | 0.999999 | 4.72991e-07 | 0.999999 |
| rad13              | 4.55397e-07 | 1.000000 | 4.55397e-07 | 1.000000 |
| rad45              | 2.15893e-07 | 1.00000  | 2.15893e-07 | 1.00000  |
| Phenyl+Allene      | 1.34561e-07 | 1.00000  | 0.00000     | 1.00000  |
| Ph+MeAc            | 9.45106e-08 | 1.00000  | 9.45106e-08 | 1.00000  |
| rad30              | 4.44643e-08 | 1.00000  | 4.44643e-08 | 1.00000  |
| rad8               | 1.61401e-08 | 1.00000  | 1.61401e-08 | 1.00000  |
| rad36              | 1.33933e-08 | 1.00000  | 1.33933e-08 | 1.00000  |
| rad22              | 9.52892e-09 | 1.00000  | 9.52892e-09 | 1.00000  |
| PAH9+H             | 8.94956e-09 | 1.00000  | 8.94956e-09 | 1.00000  |
| rad15              | 8.93189e-09 | 1.00000  | 8.93189e-09 | 1.00000  |
| rad35              | 4.43444e-09 | 1.00000  | 4.43444e-09 | 1.00000  |
| rad38              | 2.43978e-09 | 1.00000  | 2.43978e-09 | 1.00000  |
| PAH7+H             | 1.19091e-09 | 1.00000  | 1.19091e-09 | 1.00000  |
| rad33              | 7.51073e-10 | 1.00000  | 7.51073e-10 | 1.00000  |
| rad14              | 3.26073e-10 | 1.00000  | 3.26073e-10 | 1.00000  |

|               |             |         |             |         |
|---------------|-------------|---------|-------------|---------|
| rad25         | 3.24433e-10 | 1.00000 | 3.24433e-10 | 1.00000 |
| PhCH2CCH+H    | 2.68371e-10 | 1.00000 | 2.68371e-10 | 1.00000 |
| rad39         | 2.18937e-10 | 1.00000 | 2.18938e-10 | 1.00000 |
| rad27         | 1.56194e-10 | 1.00000 | 1.56194e-10 | 1.00000 |
| rad12         | 1.07077e-10 | 1.00000 | 1.07077e-10 | 1.00000 |
| rad46         | 2.39903e-11 | 1.00000 | 2.39903e-11 | 1.00000 |
| rad60syn      | 1.85275e-12 | 1.00000 | 1.85275e-12 | 1.00000 |
| rad37         | 1.57523e-12 | 1.00000 | 1.57523e-12 | 1.00000 |
| rad60anti     | 4.87766e-13 | 1.00000 | 4.87766e-13 | 1.00000 |
| rad5          | 6.84544e-14 | 1.00000 | 6.84545e-14 | 1.00000 |
| rad20         | 2.76319e-14 | 1.00000 | 2.76319e-14 | 1.00000 |
| rad18         | 2.56643e-14 | 1.00000 | 2.56643e-14 | 1.00000 |
| rad21         | 1.83240e-14 | 1.00000 | 1.83240e-14 | 1.00000 |
| rad31         | 6.46751e-15 | 1.00000 | 6.46751e-15 | 1.00000 |
| rad24         | 1.82064e-15 | 1.00000 | 1.82064e-15 | 1.00000 |
| PAH3+H        | 2.99424e-16 | 1.00000 | 2.99424e-16 | 1.00000 |
| rad59         | 1.15397e-16 | 1.00000 | 1.15397e-16 | 1.00000 |
| rad50         | 1.11029e-17 | 1.00000 | 1.11029e-17 | 1.00000 |
| rad19syn      | 1.74977e-18 | 1.00000 | 1.74977e-18 | 1.00000 |
| rad54         | 9.21448e-21 | 1.00000 | 9.21448e-21 | 1.00000 |
| PAH10+CH3     | 4.78613e-21 | 1.00000 | 4.78613e-21 | 1.00000 |
| rad43         | 1.44159e-21 | 1.00000 | 1.44159e-21 | 1.00000 |
| rad62         | 1.54182e-22 | 1.00000 | 1.54182e-22 | 1.00000 |
| rad52         | 9.63872e-23 | 1.00000 | 9.63872e-23 | 1.00000 |
| PhcycC3H3_A+H | 7.36648e-25 | 1.00000 | 7.36648e-25 | 1.00000 |
| rad70         | 7.32903e-25 | 1.00000 | 7.32903e-25 | 1.00000 |
| rad55         | 2.73348e-25 | 1.00000 | 2.73348e-25 | 1.00000 |
| rad51         | 1.86169e-25 | 1.00000 | 1.86169e-25 | 1.00000 |
| PAH1+H        | 2.76603e-27 | 1.00000 | 2.76603e-27 | 1.00000 |
| rad58         | 4.83601e-28 | 1.00000 | 4.83601e-28 | 1.00000 |
| rad65         | 3.88125e-28 | 1.00000 | 3.88125e-28 | 1.00000 |
| rad34         | 1.02035e-28 | 1.00000 | 1.02035e-28 | 1.00000 |
| rad42         | 3.81283e-31 | 1.00000 | 3.81283e-31 | 1.00000 |
| rad41         | 8.30159e-32 | 1.00000 | 8.30159e-32 | 1.00000 |
| rad47         | 2.34064e-34 | 1.00000 | 2.34064e-34 | 1.00000 |

1.00000000 Pa, 160.000000 K

| =====              |                 |            |                      |            |
|--------------------|-----------------|------------|----------------------|------------|
| Rate constant      | True (fraction) |            | Effective (fraction) |            |
| -----              |                 |            |                      |            |
| Total              | 1.81800e-18     | (1.00 )    | 1.81800e-18          | (1.00 )    |
| Formation of rad11 | 1.64862e-18     | (0.907 )   | 1.64862e-18          | (0.907 )   |
| Formation of rad6  | 1.62558e-19     | (0.0894 )  | 1.62558e-19          | (0.0894 )  |
| H-abstraction      | 6.82130e-21     | (0.00375 ) | 6.82130e-21          | (0.00375 ) |
| species            | PYtrue          | Cumul      | PYeffective          | Cumul      |
| -----              |                 |            |                      |            |
| rad6               | 0.933113        | 0.933113   | 0.933113             | 0.933113   |
| Indene+H           | 0.0618291       | 0.994942   | 0.0618291            | 0.994942   |
| Benzene+2-propynyl | 0.00375209      | 0.998694   | 0.00375209           | 0.998694   |
| C2H2+PhCH2         | 0.000757243     | 0.999451   | 0.000757243          | 0.999451   |
| rad2               | 0.000266460     | 0.999718   | 0.000266461          | 0.999718   |
| rad7               | 0.000139444     | 0.999857   | 0.000139444          | 0.999857   |
| rad11              | 4.21481e-05     | 0.999899   | 4.21481e-05          | 0.999899   |
| rad28              | 2.24315e-05     | 0.999922   | 2.24315e-05          | 0.999922   |
| rad10              | 1.81686e-05     | 0.999940   | 1.81686e-05          | 0.999940   |
| rad1               | 1.76143e-05     | 0.999957   | 1.76143e-05          | 0.999957   |
| PhCCH+CH3          | 1.20966e-05     | 0.999970   | 1.20966e-05          | 0.999970   |
| PhCHCCH2+H         | 1.10661e-05     | 0.999981   | 1.10661e-05          | 0.999981   |
| rad23              | 7.44838e-06     | 0.999988   | 7.44838e-06          | 0.999988   |
| rad3               | 3.82137e-06     | 0.999992   | 3.82137e-06          | 0.999992   |
| rad26              | 2.73949e-06     | 0.999995   | 2.73949e-06          | 0.999995   |
| PhCCCH3+H          | 2.30598e-06     | 0.999997   | 2.30598e-06          | 0.999997   |
| rad4               | 1.95505e-06     | 0.999999   | 1.95505e-06          | 0.999999   |
| rad9               | 5.40973e-07     | 0.999999   | 5.40973e-07          | 0.999999   |
| rad13              | 4.52777e-07     | 1.000000   | 4.52777e-07          | 1.000000   |
| Phenyl+Allene      | 1.84021e-07     | 1.00000    | 0.00000              | 1.00000    |
| rad45              | 1.75995e-07     | 1.00000    | 1.75995e-07          | 1.00000    |
| Ph+MeAc            | 1.64852e-07     | 1.00000    | 1.64853e-07          | 1.00000    |
| rad30              | 4.76374e-08     | 1.00000    | 4.76374e-08          | 1.00000    |
| rad8               | 2.51207e-08     | 1.00000    | 2.51207e-08          | 1.00000    |
| rad36              | 1.09275e-08     | 1.00000    | 1.09275e-08          | 1.00000    |
| PAH9+H             | 9.78671e-09     | 1.00000    | 9.78671e-09          | 1.00000    |
| rad15              | 9.70948e-09     | 1.00000    | 9.70948e-09          | 1.00000    |
| rad22              | 7.92910e-09     | 1.00000    | 7.92910e-09          | 1.00000    |
| rad35              | 4.80269e-09     | 1.00000    | 4.80269e-09          | 1.00000    |
| rad38              | 2.68783e-09     | 1.00000    | 2.68783e-09          | 1.00000    |
| PAH7+H             | 2.22806e-09     | 1.00000    | 2.22806e-09          | 1.00000    |
| rad33              | 7.52257e-10     | 1.00000    | 7.52257e-10          | 1.00000    |
| PhCH2CCH+H         | 5.70451e-10     | 1.00000    | 5.70451e-10          | 1.00000    |



|               |             |         |             |         |
|---------------|-------------|---------|-------------|---------|
| rad39         | 4.28300e-10 | 1.00000 | 4.28300e-10 | 1.00000 |
| rad14         | 3.39227e-10 | 1.00000 | 3.39227e-10 | 1.00000 |
| rad25         | 3.20621e-10 | 1.00000 | 3.20621e-10 | 1.00000 |
| rad12         | 2.18243e-10 | 1.00000 | 2.18243e-10 | 1.00000 |
| rad27         | 1.74096e-10 | 1.00000 | 1.74096e-10 | 1.00000 |
| rad46         | 2.80544e-11 | 1.00000 | 2.80544e-11 | 1.00000 |
| rad37         | 4.10947e-12 | 1.00000 | 4.10947e-12 | 1.00000 |
| rad60syn      | 2.39755e-12 | 1.00000 | 2.39755e-12 | 1.00000 |
| rad60anti     | 6.67387e-13 | 1.00000 | 6.67387e-13 | 1.00000 |
| rad5          | 1.89699e-13 | 1.00000 | 1.89699e-13 | 1.00000 |
| rad20         | 2.68242e-14 | 1.00000 | 2.68242e-14 | 1.00000 |
| rad18         | 2.32644e-14 | 1.00000 | 2.32644e-14 | 1.00000 |
| rad21         | 1.78332e-14 | 1.00000 | 1.78332e-14 | 1.00000 |
| rad31         | 7.39677e-15 | 1.00000 | 7.39677e-15 | 1.00000 |
| rad24         | 1.49784e-15 | 1.00000 | 1.49784e-15 | 1.00000 |
| PAH3+H        | 8.69924e-16 | 1.00000 | 8.69924e-16 | 1.00000 |
| rad59         | 3.21820e-16 | 1.00000 | 3.21820e-16 | 1.00000 |
| rad50         | 3.09486e-17 | 1.00000 | 3.09486e-17 | 1.00000 |
| rad19syn      | 1.13528e-17 | 1.00000 | 1.13528e-17 | 1.00000 |
| rad54         | 8.17233e-20 | 1.00000 | 8.17233e-20 | 1.00000 |
| PAH10+CH3     | 4.33653e-20 | 1.00000 | 4.33653e-20 | 1.00000 |
| rad43         | 1.28501e-20 | 1.00000 | 1.28501e-20 | 1.00000 |
| rad62         | 1.65958e-21 | 1.00000 | 1.65958e-21 | 1.00000 |
| rad52         | 6.02604e-22 | 1.00000 | 6.02604e-22 | 1.00000 |
| PhcycC3H3_A+H | 1.34240e-23 | 1.00000 | 1.34240e-23 | 1.00000 |
| rad70         | 1.23882e-23 | 1.00000 | 1.23882e-23 | 1.00000 |
| rad55         | 4.72485e-24 | 1.00000 | 4.72485e-24 | 1.00000 |
| rad51         | 2.06316e-24 | 1.00000 | 2.06317e-24 | 1.00000 |
| PAH1+H        | 7.58073e-26 | 1.00000 | 7.58073e-26 | 1.00000 |
| rad58         | 9.22302e-27 | 1.00000 | 9.22303e-27 | 1.00000 |
| rad65         | 5.82835e-27 | 1.00000 | 5.82835e-27 | 1.00000 |
| rad34         | 3.26017e-27 | 1.00000 | 3.26017e-27 | 1.00000 |
| rad42         | 1.93732e-29 | 1.00000 | 1.93732e-29 | 1.00000 |
| rad41         | 4.78124e-30 | 1.00000 | 4.78124e-30 | 1.00000 |
| rad47         | 4.43149e-33 | 1.00000 | 4.43149e-33 | 1.00000 |

1.00000000 Pa, 170.000000 K

=====

| Rate constant      | True (fraction)        | Effective (fraction)   |
|--------------------|------------------------|------------------------|
| Total              | 3.56414e-18 (1.00 )    | 3.56414e-18 (1.00 )    |
| Formation of rad11 | 3.18264e-18 (0.893 )   | 3.18263e-18 (0.893 )   |
| Formation of rad6  | 3.62173e-19 (0.102 )   | 3.62173e-19 (0.102 )   |
| H-abstraction      | 1.93278e-20 (0.00542 ) | 1.93278e-20 (0.00542 ) |

| species            | PYtrue      | Cumul    | PYeffective | Cumul    |
|--------------------|-------------|----------|-------------|----------|
| rad6               | 0.930842    | 0.930842 | 0.930843    | 0.930843 |
| Indene+H           | 0.0623415   | 0.993183 | 0.0623415   | 0.993184 |
| Benzene+2-propynyl | 0.00542285  | 0.998606 | 0.00542285  | 0.998607 |
| C2H2+PhCH2         | 0.000799480 | 0.999405 | 0.000799480 | 0.999406 |
| rad2               | 0.000295865 | 0.999701 | 0.000295866 | 0.999702 |
| rad7               | 0.000138012 | 0.999839 | 0.000138012 | 0.999840 |
| rad11              | 4.16040e-05 | 0.999881 | 4.16040e-05 | 0.999882 |
| rad28              | 2.70885e-05 | 0.999908 | 2.70885e-05 | 0.999909 |
| rad10              | 2.01289e-05 | 0.999928 | 2.01290e-05 | 0.999929 |
| rad1               | 1.96771e-05 | 0.999948 | 1.96771e-05 | 0.999949 |
| PhCCH+CH3          | 1.67609e-05 | 0.999965 | 1.67609e-05 | 0.999966 |
| PhCHCCH2+H         | 1.36800e-05 | 0.999978 | 1.36800e-05 | 0.999979 |
| rad23              | 6.28843e-06 | 0.999985 | 6.28843e-06 | 0.999986 |
| rad3               | 4.00231e-06 | 0.999989 | 4.00231e-06 | 0.999990 |
| rad26              | 3.68642e-06 | 0.999992 | 3.68642e-06 | 0.999993 |
| PhCCCH3+H          | 3.45037e-06 | 0.999996 | 3.45037e-06 | 0.999997 |
| rad4               | 2.05105e-06 | 0.999998 | 2.05105e-06 | 0.999999 |
| rad9               | 6.23608e-07 | 0.999998 | 6.23608e-07 | 0.999999 |
| rad13              | 4.50239e-07 | 0.999999 | 4.50240e-07 | 1.000000 |
| Ph+MeAc            | 2.82614e-07 | 0.999999 | 2.82614e-07 | 1.000000 |
| Phenyl+Allene      | 2.51640e-07 | 0.999999 | 0.000000    | 1.000000 |
| rad45              | 1.47223e-07 | 1.000000 | 1.47223e-07 | 1.000000 |
| rad30              | 5.13296e-08 | 1.000000 | 5.13296e-08 | 1.000000 |
| rad8               | 3.87350e-08 | 1.000000 | 3.87350e-08 | 1.000000 |
| PAH9+H             | 1.07682e-08 | 1.000000 | 1.07682e-08 | 1.000000 |
| rad15              | 1.06244e-08 | 1.000000 | 1.06244e-08 | 1.000000 |
| rad36              | 9.15148e-09 | 1.000000 | 9.15149e-09 | 1.000000 |
| rad22              | 6.74501e-09 | 1.000000 | 6.74501e-09 | 1.000000 |
| rad35              | 5.23021e-09 | 1.000000 | 5.23021e-09 | 1.000000 |
| PAH7+H             | 4.15162e-09 | 1.000000 | 4.15162e-09 | 1.000000 |
| rad38              | 2.98091e-09 | 1.000000 | 2.98091e-09 | 1.000000 |
| PhCH2CCH+H         | 1.14669e-09 | 1.000000 | 1.14670e-09 | 1.000000 |
| rad39              | 8.30566e-10 | 1.000000 | 8.30566e-10 | 1.000000 |

|               |             |          |             |          |
|---------------|-------------|----------|-------------|----------|
| rad33         | 7.53296e-10 | 1.000000 | 7.53296e-10 | 1.000000 |
| rad12         | 4.31199e-10 | 1.000000 | 4.31199e-10 | 1.000000 |
| rad14         | 3.53279e-10 | 1.000000 | 3.53279e-10 | 1.000000 |
| rad25         | 3.17314e-10 | 1.000000 | 3.17314e-10 | 1.000000 |
| rad27         | 1.92943e-10 | 1.000000 | 1.92943e-10 | 1.000000 |
| rad46         | 3.31290e-11 | 1.000000 | 3.31291e-11 | 1.000000 |
| rad37         | 9.99321e-12 | 1.000000 | 9.99321e-12 | 1.000000 |
| rad60syn      | 3.12627e-12 | 1.000000 | 3.12627e-12 | 1.000000 |
| rad60anti     | 9.13988e-13 | 1.000000 | 9.13988e-13 | 1.000000 |
| rad5          | 4.87059e-13 | 1.000000 | 4.87059e-13 | 1.000000 |
| rad20         | 2.63394e-14 | 1.000000 | 2.63395e-14 | 1.000000 |
| rad18         | 2.13520e-14 | 1.000000 | 2.13520e-14 | 1.000000 |
| rad21         | 1.75575e-14 | 1.000000 | 1.75575e-14 | 1.000000 |
| rad31         | 8.45412e-15 | 1.000000 | 8.45412e-15 | 1.000000 |
| PAH3+H        | 2.29898e-15 | 1.000000 | 2.29898e-15 | 1.000000 |
| rad24         | 1.26479e-15 | 1.000000 | 1.26479e-15 | 1.000000 |
| rad59         | 8.17529e-16 | 1.000000 | 8.17530e-16 | 1.000000 |
| rad50         | 7.97063e-17 | 1.000000 | 7.97064e-17 | 1.000000 |
| rad19syn      | 6.08467e-17 | 1.000000 | 6.08467e-17 | 1.000000 |
| rad54         | 5.75572e-19 | 1.000000 | 5.75572e-19 | 1.000000 |
| PAH10+CH3     | 3.12650e-19 | 1.000000 | 3.12650e-19 | 1.000000 |
| rad43         | 9.08852e-20 | 1.000000 | 9.08852e-20 | 1.000000 |
| rad62         | 1.38293e-20 | 1.000000 | 1.38293e-20 | 1.000000 |
| rad52         | 3.12934e-21 | 1.000000 | 3.12934e-21 | 1.000000 |
| PhcycC3H3_A+H | 1.76880e-22 | 1.000000 | 1.76880e-22 | 1.000000 |
| rad70         | 1.52231e-22 | 1.000000 | 1.52231e-22 | 1.000000 |
| rad55         | 5.93294e-23 | 1.000000 | 5.93294e-23 | 1.000000 |
| rad51         | 1.77537e-23 | 1.000000 | 1.77537e-23 | 1.000000 |
| PAH1+H        | 1.36983e-24 | 1.000000 | 1.36983e-24 | 1.000000 |
| rad58         | 1.26188e-25 | 1.000000 | 1.26188e-25 | 1.000000 |
| rad65         | 6.51235e-26 | 1.000000 | 6.51235e-26 | 1.000000 |
| rad34         | 6.42958e-26 | 1.000000 | 6.42958e-26 | 1.000000 |
| rad42         | 4.88618e-28 | 1.000000 | 4.88618e-28 | 1.000000 |
| rad41         | 1.26308e-28 | 1.000000 | 1.26308e-28 | 1.000000 |
| rad47         | 5.86593e-32 | 1.000000 | 5.86593e-32 | 1.000000 |

1.00000000 Pa, 180.000000 K

| Rate constant      | True (fraction)        | Effective (fraction)   |
|--------------------|------------------------|------------------------|
| Total              | 6.50681e-18 (1.00 )    | 6.50681e-18 (1.00 )    |
| Formation of rad11 | 5.71915e-18 (0.879 )   | 5.71915e-18 (0.879 )   |
| Formation of rad6  | 7.39013e-19 (0.114 )   | 7.39013e-19 (0.114 )   |
| H-abstraction      | 4.86496e-20 (0.00748 ) | 4.86496e-20 (0.00748 ) |

| species            | PYtrue      | Cumul    | PYeffective | Cumul    |
|--------------------|-------------|----------|-------------|----------|
| rad6               | 0.928033    | 0.928033 | 0.928033    | 0.928033 |
| Indene+H           | 0.0629967   | 0.991030 | 0.0629967   | 0.991030 |
| Benzene+2-propynyl | 0.00747672  | 0.998507 | 0.00747672  | 0.998507 |
| C2H2+PhCH2         | 0.000848353 | 0.999355 | 0.000848353 | 0.999355 |
| rad2               | 0.000326392 | 0.999681 | 0.000326392 | 0.999681 |
| rad7               | 0.000136596 | 0.999818 | 0.000136596 | 0.999818 |
| rad11              | 4.10763e-05 | 0.999859 | 4.10763e-05 | 0.999859 |
| rad28              | 3.26812e-05 | 0.999892 | 3.26812e-05 | 0.999892 |
| PhCCH+CH3          | 2.32631e-05 | 0.999915 | 2.32631e-05 | 0.999915 |
| rad10              | 2.21603e-05 | 0.999937 | 2.21603e-05 | 0.999937 |
| rad1               | 2.18509e-05 | 0.999959 | 2.18510e-05 | 0.999959 |
| PhCHCCH2+H         | 1.72195e-05 | 0.999976 | 1.72195e-05 | 0.999976 |
| rad23              | 5.42641e-06 | 0.999982 | 5.42641e-06 | 0.999982 |
| PhCCCH3+H          | 5.11414e-06 | 0.999987 | 5.11414e-06 | 0.999987 |
| rad26              | 4.88888e-06 | 0.999992 | 4.88889e-06 | 0.999992 |
| rad3               | 4.19113e-06 | 0.999996 | 4.19113e-06 | 0.999996 |
| rad4               | 2.15175e-06 | 0.999998 | 2.15175e-06 | 0.999998 |
| rad9               | 7.24956e-07 | 0.999999 | 7.24956e-07 | 0.999999 |
| Ph+MeAc            | 4.75908e-07 | 0.999999 | 4.75908e-07 | 0.999999 |
| rad13              | 4.47727e-07 | 1.000000 | 4.47727e-07 | 1.000000 |
| Phenyl+Allene      | 3.44563e-07 | 1.000000 | 0.000000    | 1.000000 |
| rad45              | 1.25986e-07 | 1.000000 | 1.25986e-07 | 1.000000 |
| rad8               | 5.91045e-08 | 1.000000 | 5.91045e-08 | 1.000000 |
| rad30              | 5.56611e-08 | 1.000000 | 5.56611e-08 | 1.000000 |
| PAH9+H             | 1.19321e-08 | 1.000000 | 1.19321e-08 | 1.000000 |
| rad15              | 1.17100e-08 | 1.000000 | 1.17100e-08 | 1.000000 |
| rad36              | 7.84271e-09 | 1.000000 | 7.84271e-09 | 1.000000 |
| PAH7+H             | 7.67855e-09 | 1.000000 | 7.67855e-09 | 1.000000 |
| rad22              | 5.84770e-09 | 1.000000 | 5.84770e-09 | 1.000000 |
| rad35              | 5.73213e-09 | 1.000000 | 5.73213e-09 | 1.000000 |
| rad38              | 3.33113e-09 | 1.000000 | 3.33113e-09 | 1.000000 |
| PhCH2CCH+H         | 2.20409e-09 | 1.000000 | 2.20409e-09 | 1.000000 |
| rad39              | 1.59164e-09 | 1.000000 | 1.59164e-09 | 1.000000 |

|               |             |         |             |          |
|---------------|-------------|---------|-------------|----------|
| rad12         | 8.24932e-10 | 1.00000 | 8.24933e-10 | 1.000000 |
| rad33         | 7.54140e-10 | 1.00000 | 7.54140e-10 | 1.000000 |
| rad14         | 3.68036e-10 | 1.00000 | 3.68036e-10 | 1.000000 |
| rad25         | 3.14365e-10 | 1.00000 | 3.14365e-10 | 1.000000 |
| rad27         | 2.12567e-10 | 1.00000 | 2.12568e-10 | 1.000000 |
| rad46         | 3.95427e-11 | 1.00000 | 3.95427e-11 | 1.000000 |
| rad37         | 2.28270e-11 | 1.00000 | 2.28270e-11 | 1.000000 |
| rad60syn      | 4.10887e-12 | 1.00000 | 4.10887e-12 | 1.000000 |
| rad60anti     | 1.25502e-12 | 1.00000 | 1.25502e-12 | 1.000000 |
| rad5          | 1.16982e-12 | 1.00000 | 1.16982e-12 | 1.000000 |
| rad20         | 2.61114e-14 | 1.00000 | 2.61114e-14 | 1.000000 |
| rad18         | 1.98068e-14 | 1.00000 | 1.98068e-14 | 1.000000 |
| rad21         | 1.74537e-14 | 1.00000 | 1.74537e-14 | 1.000000 |
| rad31         | 9.65540e-15 | 1.00000 | 9.65540e-15 | 1.000000 |
| PAH3+H        | 5.62977e-15 | 1.00000 | 5.62977e-15 | 1.000000 |
| rad59         | 1.92736e-15 | 1.00000 | 1.92736e-15 | 1.000000 |
| rad24         | 1.09283e-15 | 1.00000 | 1.09283e-15 | 1.000000 |
| rad19syn      | 2.77664e-16 | 1.00000 | 2.77664e-16 | 1.000000 |
| rad50         | 1.92689e-16 | 1.00000 | 1.92689e-16 | 1.000000 |
| rad54         | 3.33886e-18 | 1.00000 | 3.33886e-18 | 1.000000 |
| PAH10+CH3     | 1.85528e-18 | 1.00000 | 1.85528e-18 | 1.000000 |
| rad43         | 5.28221e-19 | 1.00000 | 5.28221e-19 | 1.000000 |
| rad62         | 9.28231e-20 | 1.00000 | 9.28232e-20 | 1.000000 |
| rad52         | 1.39269e-20 | 1.00000 | 1.39269e-20 | 1.000000 |
| PhcycC3H3_A+H | 1.77847e-21 | 1.00000 | 1.77847e-21 | 1.000000 |
| rad70         | 1.43312e-21 | 1.00000 | 1.43312e-21 | 1.000000 |
| rad55         | 5.70492e-22 | 1.00000 | 5.70492e-22 | 1.000000 |
| rad51         | 1.23548e-22 | 1.00000 | 1.23548e-22 | 1.000000 |
| PAH1+H        | 1.79805e-23 | 1.00000 | 1.79805e-23 | 1.000000 |
| rad58         | 1.31128e-24 | 1.00000 | 1.31128e-24 | 1.000000 |
| rad34         | 9.03838e-25 | 1.00000 | 9.03838e-25 | 1.000000 |
| rad65         | 5.68060e-25 | 1.00000 | 5.68060e-25 | 1.000000 |
| rad42         | 8.26669e-27 | 1.00000 | 8.26669e-27 | 1.000000 |
| rad41         | 2.20192e-27 | 1.00000 | 2.20192e-27 | 1.000000 |
| rad47         | 5.75354e-31 | 1.00000 | 5.75354e-31 | 1.000000 |

1.00000000 Pa, 190.000000 K

| =====              |                 |            |                      |            |
|--------------------|-----------------|------------|----------------------|------------|
| Rate constant      | True (fraction) |            | Effective (fraction) |            |
| -----              |                 |            |                      |            |
| Total              | 1.11858e-17     | (1.00 )    | 1.11858e-17          | (1.00 )    |
| Formation of rad11 | 9.67466e-18     | (0.865 )   | 9.67465e-18          | (0.865 )   |
| Formation of rad6  | 1.40029e-18     | (0.125 )   | 1.40029e-18          | (0.125 )   |
| H-abstraction      | 1.10851e-19     | (0.00991 ) | 1.10851e-19          | (0.00991 ) |
| species            | PYtrue          | Cumul      | PYeffective          | Cumul      |
| -----              |                 |            |                      |            |
| rad6               | 0.924653        | 0.924653   | 0.924654             | 0.924654   |
| Indene+H           | 0.0638278       | 0.988481   | 0.0638278            | 0.988482   |
| Benzene+2-propynyl | 0.00090995      | 0.998391   | 0.00090996           | 0.998392   |
| C2H2+PhCH2         | 0.000905328     | 0.999296   | 0.000905329          | 0.999297   |
| rad2               | 0.000357697     | 0.999654   | 0.000357697          | 0.999655   |
| rad7               | 0.000135181     | 0.999789   | 0.000135181          | 0.999790   |
| rad11              | 4.05588e-05     | 0.999830   | 4.05588e-05          | 0.999831   |
| rad28              | 3.93656e-05     | 0.999869   | 3.93656e-05          | 0.999870   |
| PhCCH+CH3          | 3.22924e-05     | 0.999901   | 3.22924e-05          | 0.999902   |
| rad10              | 2.42392e-05     | 0.999925   | 2.42392e-05          | 0.999926   |
| rad1               | 2.41188e-05     | 0.999950   | 2.41188e-05          | 0.999951   |
| PhCHCCH2+H         | 2.20183e-05     | 0.999972   | 2.20183e-05          | 0.999973   |
| PhCCCH3+H          | 7.50266e-06     | 0.999979   | 7.50267e-06          | 0.999980   |
| rad26              | 6.38446e-06     | 0.999985   | 6.38446e-06          | 0.999986   |
| rad23              | 4.77157e-06     | 0.999990   | 4.77157e-06          | 0.999991   |
| rad3               | 4.38522e-06     | 0.999995   | 4.38522e-06          | 0.999996   |
| rad4               | 2.25591e-06     | 0.999997   | 2.25591e-06          | 0.999998   |
| rad9               | 8.50384e-07     | 0.999998   | 8.50385e-07          | 0.999999   |
| Ph+MeAc            | 7.86950e-07     | 0.999999   | 7.86950e-07          | 1.000000   |
| Phenyl+Allene      | 4.73000e-07     | 0.999999   | 0.00000              | 1.000000   |
| rad13              | 4.45194e-07     | 0.999999   | 4.45194e-07          | 1.000000   |
| rad45              | 1.09949e-07     | 1.000000   | 1.09949e-07          | 1.000000   |
| rad8               | 8.91634e-08     | 1.000000   | 8.91634e-08          | 1.000000   |
| rad30              | 6.07834e-08     | 1.000000   | 6.07834e-08          | 1.000000   |
| PAH7+H             | 1.40494e-08     | 1.000000   | 1.40494e-08          | 1.000000   |
| PAH9+H             | 1.33276e-08     | 1.000000   | 1.33276e-08          | 1.000000   |
| rad15              | 1.30089e-08     | 1.000000   | 1.30089e-08          | 1.000000   |
| rad36              | 6.85668e-09     | 1.000000   | 6.85668e-09          | 1.000000   |
| rad35              | 6.32775e-09     | 1.000000   | 6.32775e-09          | 1.000000   |
| rad22              | 5.15220e-09     | 1.000000   | 5.15220e-09          | 1.000000   |
| PhCH2CCH+H         | 4.08600e-09     | 1.000000   | 4.08600e-09          | 1.000000   |
| rad38              | 3.75429e-09     | 1.000000   | 3.75429e-09          | 1.000000   |
| rad39              | 3.00503e-09     | 1.000000   | 3.00503e-09          | 1.000000   |

|               |             |          |             |          |
|---------------|-------------|----------|-------------|----------|
| rad12         | 1.52761e-09 | 1.000000 | 1.52761e-09 | 1.000000 |
| rad33         | 7.54753e-10 | 1.000000 | 7.54754e-10 | 1.000000 |
| rad14         | 3.83284e-10 | 1.000000 | 3.83284e-10 | 1.000000 |
| rad25         | 3.11665e-10 | 1.000000 | 3.11665e-10 | 1.000000 |
| rad27         | 2.32763e-10 | 1.000000 | 2.32763e-10 | 1.000000 |
| rad37         | 4.92955e-11 | 1.000000 | 4.92955e-11 | 1.000000 |
| rad46         | 4.77486e-11 | 1.000000 | 4.77486e-11 | 1.000000 |
| rad60syn      | 5.44498e-12 | 1.000000 | 5.44498e-12 | 1.000000 |
| rad5          | 2.64923e-12 | 1.000000 | 2.64923e-12 | 1.000000 |
| rad60anti     | 1.73011e-12 | 1.000000 | 1.73011e-12 | 1.000000 |
| rad20         | 2.60967e-14 | 1.000000 | 2.60967e-14 | 1.000000 |
| rad18         | 1.85447e-14 | 1.000000 | 1.85447e-14 | 1.000000 |
| rad21         | 1.74943e-14 | 1.000000 | 1.74943e-14 | 1.000000 |
| PAH3+H        | 1.29602e-14 | 1.000000 | 1.29602e-14 | 1.000000 |
| rad31         | 1.10190e-14 | 1.000000 | 1.10191e-14 | 1.000000 |
| rad59         | 4.27854e-15 | 1.000000 | 4.27854e-15 | 1.000000 |
| rad19syn      | 1.10557e-15 | 1.000000 | 1.10557e-15 | 1.000000 |
| rad24         | 9.63220e-16 | 1.000000 | 9.63220e-16 | 1.000000 |
| rad50         | 4.42596e-16 | 1.000000 | 4.42596e-16 | 1.000000 |
| rad54         | 1.64317e-17 | 1.000000 | 1.64317e-17 | 1.000000 |
| PAH10+CH3     | 9.31846e-18 | 1.000000 | 9.31847e-18 | 1.000000 |
| rad43         | 2.59627e-18 | 1.000000 | 2.59627e-18 | 1.000000 |
| rad62         | 5.18279e-19 | 1.000000 | 5.18279e-19 | 1.000000 |
| rad52         | 5.44671e-20 | 1.000000 | 5.44671e-20 | 1.000000 |
| PhcycC3H3_A+H | 1.42066e-20 | 1.000000 | 1.42066e-20 | 1.000000 |
| rad70         | 1.07621e-20 | 1.000000 | 1.07621e-20 | 1.000000 |
| rad55         | 4.37360e-21 | 1.000000 | 4.37361e-21 | 1.000000 |
| rad51         | 7.18318e-22 | 1.000000 | 7.18319e-22 | 1.000000 |
| PAH1+H        | 1.80188e-22 | 1.000000 | 1.80188e-22 | 1.000000 |
| rad58         | 1.07837e-23 | 1.000000 | 1.07837e-23 | 1.000000 |
| rad34         | 9.58447e-24 | 1.000000 | 9.58448e-24 | 1.000000 |
| rad65         | 4.01626e-24 | 1.000000 | 4.01626e-24 | 1.000000 |
| rad42         | 1.01881e-25 | 1.000000 | 1.01881e-25 | 1.000000 |
| rad41         | 2.77661e-26 | 1.000000 | 2.77661e-26 | 1.000000 |
| rad47         | 4.37811e-30 | 1.000000 | 4.37811e-30 | 1.000000 |

1.00000000 Pa, 200.000000 K

| =====              |                 |           |                      |           |
|--------------------|-----------------|-----------|----------------------|-----------|
| Rate constant      | True (fraction) |           | Effective (fraction) |           |
| -----              |                 |           |                      |           |
| Total              | 1.82690e-17     | (1.00 )   | 1.82690e-17          | (1.00 )   |
| Formation of rad11 | 1.55456e-17     | (0.851 )  | 1.55456e-17          | (0.851 )  |
| Formation of rad6  | 2.49126e-18     | (0.136 )  | 2.49126e-18          | (0.136 )  |
| H-abstraction      | 2.32112e-19     | (0.0127 ) | 2.32112e-19          | (0.0127 ) |
| -----              |                 |           |                      |           |
| species            | PYtrue          | Cumul     | PYeffective          | Cumul     |
| -----              |                 |           |                      |           |
| rad6               | 0.920680        | 0.920680  | 0.920681             | 0.920681  |
| Indene+H           | 0.0648715       | 0.985551  | 0.0648716            | 0.985553  |
| Benzene+2-propynyl | 0.0127053       | 0.998257  | 0.0127053            | 0.998258  |
| C2H2+PhCH2         | 0.000972223     | 0.999229  | 0.000972224          | 0.999230  |
| rad2               | 0.000389382     | 0.999618  | 0.000389382          | 0.999619  |
| rad7               | 0.000133754     | 0.999752  | 0.000133754          | 0.999753  |
| rad28              | 4.73032e-05     | 0.999799  | 4.73032e-05          | 0.999800  |
| PhCCH+CH3          | 4.47653e-05     | 0.999844  | 4.47654e-05          | 0.999845  |
| rad11              | 4.00468e-05     | 0.999884  | 4.00469e-05          | 0.999885  |
| PhCHCCH2+H         | 2.85148e-05     | 0.999913  | 2.85148e-05          | 0.999914  |
| rad1               | 2.64601e-05     | 0.999939  | 2.64601e-05          | 0.999940  |
| rad10              | 2.63397e-05     | 0.999966  | 2.63397e-05          | 0.999967  |
| PhCCCH3+H          | 1.08872e-05     | 0.999976  | 1.08872e-05          | 0.999977  |
| rad26              | 8.20503e-06     | 0.999985  | 8.20503e-06          | 0.999986  |
| rad3               | 4.58168e-06     | 0.999989  | 4.58168e-06          | 0.999990  |
| rad23              | 4.26326e-06     | 0.999993  | 4.26326e-06          | 0.999995  |
| rad4               | 2.36213e-06     | 0.999996  | 2.36213e-06          | 0.999997  |
| Ph+MeAc            | 1.27772e-06     | 0.999997  | 1.27772e-06          | 0.999998  |
| rad9               | 1.00701e-06     | 0.999998  | 1.00701e-06          | 0.999999  |
| Phenyl+Allene      | 6.51604e-07     | 0.999999  | 0.00000              | 0.999999  |
| rad13              | 4.42606e-07     | 0.999999  | 4.42606e-07          | 1.000000  |
| rad8               | 1.32896e-07     | 0.999999  | 1.32896e-07          | 1.000000  |
| rad45              | 9.75711e-08     | 0.999999  | 9.75712e-08          | 1.000000  |
| rad30              | 6.68891e-08     | 0.999999  | 6.68892e-08          | 1.000000  |
| PAH7+H             | 2.53524e-08     | 1.000000  | 2.53524e-08          | 1.000000  |
| PAH9+H             | 1.50188e-08     | 1.000000  | 1.50188e-08          | 1.000000  |
| rad15              | 1.45762e-08     | 1.000000  | 1.45763e-08          | 1.000000  |
| PhCH2CCH+H         | 7.35440e-09     | 1.000000  | 7.35440e-09          | 1.000000  |
| rad35              | 7.04188e-09     | 1.000000  | 7.04189e-09          | 1.000000  |
| rad36              | 6.09786e-09     | 1.000000  | 6.09787e-09          | 1.000000  |
| rad39              | 5.57476e-09     | 1.000000  | 5.57476e-09          | 1.000000  |
| rad22              | 4.60150e-09     | 1.000000  | 4.60150e-09          | 1.000000  |
| rad38              | 4.27119e-09     | 1.000000  | 4.27119e-09          | 1.000000  |

|               |             |          |             |         |
|---------------|-------------|----------|-------------|---------|
| rad12         | 2.73901e-09 | 1.000000 | 2.73901e-09 | 1.00000 |
| rad33         | 7.55109e-10 | 1.000000 | 7.55109e-10 | 1.00000 |
| rad14         | 3.98786e-10 | 1.000000 | 3.98786e-10 | 1.00000 |
| rad25         | 3.09135e-10 | 1.000000 | 3.09136e-10 | 1.00000 |
| rad27         | 2.53294e-10 | 1.000000 | 2.53294e-10 | 1.00000 |
| rad37         | 1.01188e-10 | 1.000000 | 1.01188e-10 | 1.00000 |
| rad46         | 5.83749e-11 | 1.000000 | 5.83750e-11 | 1.00000 |
| rad60syn      | 7.27721e-12 | 1.000000 | 7.27721e-12 | 1.00000 |
| rad5          | 5.69442e-12 | 1.000000 | 5.69442e-12 | 1.00000 |
| rad60anti     | 2.39685e-12 | 1.000000 | 2.39686e-12 | 1.00000 |
| PAH3+H        | 2.83618e-14 | 1.000000 | 2.83618e-14 | 1.00000 |
| rad20         | 2.62671e-14 | 1.000000 | 2.62671e-14 | 1.00000 |
| rad21         | 1.76613e-14 | 1.000000 | 1.76613e-14 | 1.00000 |
| rad18         | 1.75056e-14 | 1.000000 | 1.75056e-14 | 1.00000 |
| rad31         | 1.25673e-14 | 1.000000 | 1.25673e-14 | 1.00000 |
| rad59         | 9.04421e-15 | 1.000000 | 9.04422e-15 | 1.00000 |
| rad19syn      | 3.91767e-15 | 1.000000 | 3.91768e-15 | 1.00000 |
| rad50         | 9.74832e-16 | 1.000000 | 9.74833e-16 | 1.00000 |
| rad24         | 8.63538e-16 | 1.000000 | 8.63538e-16 | 1.00000 |
| rad54         | 7.02630e-17 | 1.000000 | 7.02631e-17 | 1.00000 |
| PAH10+CH3     | 4.05360e-17 | 1.000000 | 4.05360e-17 | 1.00000 |
| rad43         | 1.10482e-17 | 1.000000 | 1.10482e-17 | 1.00000 |
| rad62         | 2.47108e-18 | 1.000000 | 2.47108e-18 | 1.00000 |
| rad52         | 1.90981e-19 | 1.000000 | 1.90981e-19 | 1.00000 |
| PhcycC3H3_A+H | 9.31139e-20 | 1.000000 | 9.31140e-20 | 1.00000 |
| rad70         | 6.65932e-20 | 1.000000 | 6.65932e-20 | 1.00000 |
| rad55         | 2.76095e-20 | 1.000000 | 2.76095e-20 | 1.00000 |
| rad51         | 3.58121e-21 | 1.000000 | 3.58121e-21 | 1.00000 |
| PAH1+H        | 1.43263e-21 | 1.000000 | 1.43263e-21 | 1.00000 |
| rad34         | 7.99072e-23 | 1.000000 | 7.99073e-23 | 1.00000 |
| rad58         | 7.25192e-23 | 1.000000 | 7.25193e-23 | 1.00000 |
| rad65         | 2.37162e-23 | 1.000000 | 2.37163e-23 | 1.00000 |
| rad42         | 9.64131e-25 | 1.000000 | 9.64132e-25 | 1.00000 |
| rad41         | 2.67908e-25 | 1.000000 | 2.67909e-25 | 1.00000 |
| rad47         | 2.68329e-29 | 1.000000 | 2.68329e-29 | 1.00000 |

1.00000000 Pa, 210.000000 K

| =====              |                 |           |                      |           |
|--------------------|-----------------|-----------|----------------------|-----------|
| Rate constant      | True (fraction) |           | Effective (fraction) |           |
| -----              |                 |           |                      |           |
| Total              | 2.85520e-17     | (1.00 )   | 2.85520e-17          | (1.00 )   |
| Formation of rad11 | 2.39009e-17     | (0.837 )  | 2.39009e-17          | (0.837 )  |
| Formation of rad6  | 4.19900e-18     | (0.147 )  | 4.19900e-18          | (0.147 )  |
| H-abstraction      | 4.52111e-19     | (0.0158 ) | 4.52111e-19          | (0.0158 ) |
| -----              |                 |           |                      |           |
| species            | PYtrue          | Cumul     | PYeffective          | Cumul     |
| -----              |                 |           |                      |           |
| rad6               | 0.916097        | 0.916097  | 0.916098             | 0.916098  |
| Indene+H           | 0.0661693       | 0.982266  | 0.0661693            | 0.982267  |
| Benzene+2-propynyl | 0.00158346      | 0.998100  | 0.00158346           | 0.998101  |
| C2H2+PhCH2         | 0.00105130      | 0.999152  | 0.00105130           | 0.999153  |
| rad2               | 0.000421015     | 0.999573  | 0.000421015          | 0.999574  |
| rad7               | 0.000132305     | 0.999705  | 0.000132305          | 0.999706  |
| PhCCH+CH3          | 6.18845e-05     | 0.999767  | 6.18846e-05          | 0.999768  |
| rad28              | 5.66525e-05     | 0.999824  | 5.66526e-05          | 0.999825  |
| rad11              | 3.95368e-05     | 0.999863  | 3.95368e-05          | 0.999864  |
| PhCHCCH2+H         | 3.72768e-05     | 0.999900  | 3.72768e-05          | 0.999901  |
| rad1               | 2.88518e-05     | 0.999929  | 2.88519e-05          | 0.999930  |
| rad10              | 2.84332e-05     | 0.999958  | 2.84332e-05          | 0.999959  |
| PhCCCH3+H          | 1.56199e-05     | 0.999973  | 1.56199e-05          | 0.999974  |
| rad26              | 1.03733e-05     | 0.999984  | 1.03733e-05          | 0.999985  |
| rad3               | 4.77744e-06     | 0.999988  | 4.77744e-06          | 0.999989  |
| rad23              | 3.86031e-06     | 0.999992  | 3.86031e-06          | 0.999993  |
| rad4               | 2.46894e-06     | 0.999995  | 2.46894e-06          | 0.999996  |
| Ph+MeAc            | 2.03719e-06     | 0.999997  | 2.03719e-06          | 0.999998  |
| rad9               | 1.20425e-06     | 0.999998  | 1.20425e-06          | 0.999999  |
| Phenyl+Allene      | 9.01447e-07     | 0.999999  | 0.00000              | 0.999999  |
| rad13              | 4.39936e-07     | 0.999999  | 4.39937e-07          | 0.999999  |
| rad8               | 1.95616e-07     | 1.000000  | 1.95616e-07          | 1.000000  |
| rad45              | 8.78117e-08     | 1.000000  | 8.78118e-08          | 1.000000  |
| rad30              | 7.42238e-08     | 1.000000  | 7.42239e-08          | 1.000000  |
| PAH7+H             | 4.50025e-08     | 1.000000  | 4.50025e-08          | 1.000000  |
| PAH9+H             | 1.70898e-08     | 1.000000  | 1.70898e-08          | 1.000000  |
| rad15              | 1.64833e-08     | 1.000000  | 1.64834e-08          | 1.000000  |
| PhCH2CCH+H         | 1.29176e-08     | 1.000000  | 1.29176e-08          | 1.000000  |
| rad39              | 1.01396e-08     | 1.000000  | 1.01396e-08          | 1.000000  |
| rad35              | 7.90661e-09     | 1.000000  | 7.90662e-09          | 1.000000  |
| rad36              | 5.50199e-09     | 1.000000  | 5.50200e-09          | 1.000000  |
| rad38              | 4.90923e-09     | 1.000000  | 4.90923e-09          | 1.000000  |
| rad12              | 4.75893e-09     | 1.000000  | 4.75893e-09          | 1.000000  |

|               |             |          |             |          |
|---------------|-------------|----------|-------------|----------|
| rad22         | 4.15666e-09 | 1.000000 | 4.15666e-09 | 1.000000 |
| rad33         | 7.55186e-10 | 1.000000 | 7.55186e-10 | 1.000000 |
| rad14         | 4.14294e-10 | 1.000000 | 4.14294e-10 | 1.000000 |
| rad25         | 3.06713e-10 | 1.000000 | 3.06713e-10 | 1.000000 |
| rad27         | 2.73900e-10 | 1.000000 | 2.73901e-10 | 1.000000 |
| rad37         | 1.98350e-10 | 1.000000 | 1.98350e-10 | 1.000000 |
| rad46         | 7.22984e-11 | 1.000000 | 7.22985e-11 | 1.000000 |
| rad5          | 1.16809e-11 | 1.000000 | 1.16809e-11 | 1.000000 |
| rad60syn      | 9.81018e-12 | 1.000000 | 9.81019e-12 | 1.000000 |
| rad60anti     | 3.33893e-12 | 1.000000 | 3.33893e-12 | 1.000000 |
| PAH3+H        | 5.95030e-14 | 1.000000 | 5.95031e-14 | 1.000000 |
| rad20         | 2.66045e-14 | 1.000000 | 2.66045e-14 | 1.000000 |
| rad59         | 1.83613e-14 | 1.000000 | 1.83614e-14 | 1.000000 |
| rad21         | 1.79439e-14 | 1.000000 | 1.79439e-14 | 1.000000 |
| rad18         | 1.66456e-14 | 1.000000 | 1.66456e-14 | 1.000000 |
| rad31         | 1.43271e-14 | 1.000000 | 1.43271e-14 | 1.000000 |
| rad19syn      | 1.25542e-14 | 1.000000 | 1.25542e-14 | 1.000000 |
| rad50         | 2.07288e-15 | 1.000000 | 2.07288e-15 | 1.000000 |
| rad24         | 7.85379e-16 | 1.000000 | 7.85380e-16 | 1.000000 |
| rad54         | 2.66138e-16 | 1.000000 | 2.66138e-16 | 1.000000 |
| PAH10+CH3     | 1.55625e-16 | 1.000000 | 1.55625e-16 | 1.000000 |
| rad43         | 4.14931e-17 | 1.000000 | 4.14931e-17 | 1.000000 |
| rad62         | 1.02770e-17 | 1.000000 | 1.02770e-17 | 1.000000 |
| rad52         | 6.09999e-19 | 1.000000 | 6.10000e-19 | 1.000000 |
| PhcycC3H3_A+H | 5.13913e-19 | 1.000000 | 5.13914e-19 | 1.000000 |
| rad70         | 3.48544e-19 | 1.000000 | 3.48544e-19 | 1.000000 |
| rad55         | 1.47288e-19 | 1.000000 | 1.47289e-19 | 1.000000 |
| rad51         | 1.56308e-20 | 1.000000 | 1.56308e-20 | 1.000000 |
| PAH1+H        | 9.31845e-21 | 1.000000 | 9.31846e-21 | 1.000000 |
| rad34         | 5.40946e-22 | 1.000000 | 5.40946e-22 | 1.000000 |
| rad58         | 4.09443e-22 | 1.000000 | 4.09443e-22 | 1.000000 |
| rad65         | 1.19803e-22 | 1.000000 | 1.19803e-22 | 1.000000 |
| rad42         | 7.26544e-24 | 1.000000 | 7.26545e-24 | 1.000000 |
| rad41         | 2.05269e-24 | 1.000000 | 2.05269e-24 | 1.000000 |
| rad47         | 1.36590e-28 | 1.000000 | 1.36590e-28 | 1.000000 |

1.00000000 Pa, 220.000000 K

| =====              |                 |           |                      |           |
|--------------------|-----------------|-----------|----------------------|-----------|
| Rate constant      | True (fraction) |           | Effective (fraction) |           |
| -----              |                 |           |                      |           |
| Total              | 4.29529e-17     | (1.00 )   | 4.29528e-17          | (1.00 )   |
| Formation of rad11 | 3.53712e-17     | (0.823 )  | 3.53711e-17          | (0.823 )  |
| Formation of rad6  | 6.75433e-18     | (0.157 )  | 6.75432e-18          | (0.157 )  |
| H-abstraction      | 8.27372e-19     | (0.0193 ) | 8.27372e-19          | (0.0193 ) |
| -----              |                 |           |                      |           |
| species            | PYtrue          | Cumul     | PYeffective          | Cumul     |
| -----              |                 |           |                      |           |
| rad6               | 0.910886        | 0.910886  | 0.910887             | 0.910887  |
| Indene+H           | 0.0677678       | 0.978653  | 0.0677679            | 0.978654  |
| Benzene+2-propynyl | 0.0192623       | 0.997916  | 0.0192623            | 0.997917  |
| C2H2+PhCH2         | 0.00114534      | 0.999061  | 0.00114534           | 0.999062  |
| rad2               | 0.000452145     | 0.999513  | 0.000452146          | 0.999514  |
| rad7               | 0.000130827     | 0.999644  | 0.000130827          | 0.999645  |
| PhCCH+CH3          | 8.52070e-05     | 0.999729  | 8.52071e-05          | 0.999730  |
| rad28              | 6.75580e-05     | 0.999797  | 6.75580e-05          | 0.999798  |
| PhCHCCH2+H         | 4.90305e-05     | 0.999846  | 4.90306e-05          | 0.999847  |
| rad11              | 3.90251e-05     | 0.999885  | 3.90252e-05          | 0.999886  |
| rad1               | 3.12694e-05     | 0.999916  | 3.12694e-05          | 0.999917  |
| rad10              | 3.04901e-05     | 0.999947  | 3.04902e-05          | 0.999948  |
| PhCCCH3+H          | 2.21500e-05     | 0.999969  | 2.21500e-05          | 0.999970  |
| rad26              | 1.28994e-05     | 0.999982  | 1.28995e-05          | 0.999983  |
| rad3               | 4.96938e-06     | 0.999987  | 4.96939e-06          | 0.999988  |
| rad23              | 3.53434e-06     | 0.999990  | 3.53434e-06          | 0.999991  |
| Ph+MeAc            | 3.19045e-06     | 0.999993  | 3.19045e-06          | 0.999994  |
| rad4               | 2.57480e-06     | 0.999996  | 2.57480e-06          | 0.999997  |
| rad9               | 1.45461e-06     | 0.999997  | 1.45462e-06          | 0.999998  |
| Phenyl+Allene      | 1.25280e-06     | 0.999999  | 0.00000              | 0.999998  |
| rad13              | 4.37159e-07     | 0.999999  | 4.37159e-07          | 0.999999  |
| rad8               | 2.84283e-07     | 0.999999  | 2.84283e-07          | 0.999999  |
| rad30              | 8.31003e-08     | 0.999999  | 8.31005e-08          | 0.999999  |
| rad45              | 7.99618e-08     | 1.000000  | 7.99619e-08          | 0.999999  |
| PAH7+H             | 7.84184e-08     | 1.000000  | 7.84185e-08          | 0.999999  |
| PhCH2CCH+H         | 2.22252e-08     | 1.000000  | 2.22252e-08          | 0.999999  |
| PAH9+H             | 1.96510e-08     | 1.000000  | 1.96510e-08          | 0.999999  |
| rad15              | 1.88223e-08     | 1.000000  | 1.88223e-08          | 1.000000  |
| rad39              | 1.80517e-08     | 1.000000  | 1.80517e-08          | 1.000000  |
| rad35              | 8.96351e-09     | 1.000000  | 8.96353e-09          | 1.000000  |
| rad12              | 8.02143e-09     | 1.000000  | 8.02144e-09          | 1.000000  |
| rad38              | 5.70480e-09     | 1.000000  | 5.70481e-09          | 1.000000  |
| rad36              | 5.02516e-09     | 1.000000  | 5.02517e-09          | 1.000000  |

|               |             |          |             |          |
|---------------|-------------|----------|-------------|----------|
| rad22         | 3.79060e-09 | 1.000000 | 3.79061e-09 | 1.000000 |
| rad33         | 7.54965e-10 | 1.000000 | 7.54966e-10 | 1.000000 |
| rad14         | 4.29552e-10 | 1.000000 | 4.29553e-10 | 1.000000 |
| rad37         | 3.72785e-10 | 1.000000 | 3.72785e-10 | 1.000000 |
| rad25         | 3.04351e-10 | 1.000000 | 3.04351e-10 | 1.000000 |
| rad27         | 2.94310e-10 | 1.000000 | 2.94311e-10 | 1.000000 |
| rad46         | 9.07450e-11 | 1.000000 | 9.07451e-11 | 1.000000 |
| rad5          | 2.29701e-11 | 1.000000 | 2.29701e-11 | 1.000000 |
| rad60syn      | 1.33373e-11 | 1.000000 | 1.33374e-11 | 1.000000 |
| rad60anti     | 4.67804e-12 | 1.000000 | 4.67805e-12 | 1.000000 |
| PAH3+H        | 1.20441e-13 | 1.000000 | 1.20441e-13 | 1.000000 |
| rad19syn      | 3.68545e-14 | 1.000000 | 3.68546e-14 | 1.000000 |
| rad59         | 3.60302e-14 | 1.000000 | 3.60303e-14 | 1.000000 |
| rad20         | 2.70987e-14 | 1.000000 | 2.70988e-14 | 1.000000 |
| rad21         | 1.83365e-14 | 1.000000 | 1.83365e-14 | 1.000000 |
| rad31         | 1.63326e-14 | 1.000000 | 1.63326e-14 | 1.000000 |
| rad18         | 1.59317e-14 | 1.000000 | 1.59317e-14 | 1.000000 |
| rad50         | 4.27608e-15 | 1.000000 | 4.27608e-15 | 1.000000 |
| rad54         | 9.06970e-16 | 1.000000 | 9.06970e-16 | 1.000000 |
| rad24         | 7.22974e-16 | 1.000000 | 7.22975e-16 | 1.000000 |
| PAH10+CH3     | 5.35527e-16 | 1.000000 | 5.35528e-16 | 1.000000 |
| rad43         | 1.39714e-16 | 1.000000 | 1.39714e-16 | 1.000000 |
| rad62         | 3.79341e-17 | 1.000000 | 3.79342e-17 | 1.000000 |
| PhcycC3H3_A+H | 2.43932e-18 | 1.000000 | 2.43932e-18 | 1.000000 |
| rad52         | 1.79722e-18 | 1.000000 | 1.79722e-18 | 1.000000 |
| rad70         | 1.57613e-18 | 1.000000 | 1.57613e-18 | 1.000000 |
| rad55         | 6.78089e-19 | 1.000000 | 6.78090e-19 | 1.000000 |
| rad51         | 6.07193e-20 | 1.000000 | 6.07194e-20 | 1.000000 |
| PAH1+H        | 5.08486e-20 | 1.000000 | 5.08486e-20 | 1.000000 |
| rad34         | 3.05309e-21 | 1.000000 | 3.05309e-21 | 1.000000 |
| rad58         | 1.98279e-21 | 1.000000 | 1.98279e-21 | 1.000000 |
| rad65         | 5.27752e-22 | 1.000000 | 5.27753e-22 | 1.000000 |
| rad42         | 4.49080e-23 | 1.000000 | 4.49081e-23 | 1.000000 |
| rad41         | 1.28700e-23 | 1.000000 | 1.28700e-23 | 1.000000 |
| rad47         | 5.92329e-28 | 1.000000 | 5.92330e-28 | 1.000000 |

1.00000000 Pa, 230.000000 K

=====

| Rate constant      | True (fraction)       | Effective (fraction)  |
|--------------------|-----------------------|-----------------------|
| Total              | 6.25016e-17 (1.00 )   | 6.25015e-17 (1.00 )   |
| Formation of rad11 | 5.06355e-17 (0.810 )  | 5.06354e-17 (0.810 )  |
| Formation of rad6  | 1.04318e-17 (0.167 )  | 1.04318e-17 (0.167 )  |
| H-abstraction      | 1.43428e-18 (0.0229 ) | 1.43428e-18 (0.0229 ) |

| species            | PYtrue      | Cumul    | PYeffective | Cumul    |
|--------------------|-------------|----------|-------------|----------|
| rad6               | 0.905029    | 0.905029 | 0.905031    | 0.905031 |
| Indene+H           | 0.0697199   | 0.974749 | 0.0697200   | 0.974751 |
| Benzene+2-propynyl | 0.0229478   | 0.997697 | 0.0229479   | 0.997699 |
| C2H2+PhCH2         | 0.00125787  | 0.998954 | 0.00125787  | 0.998956 |
| rad2               | 0.000482317 | 0.999437 | 0.000482318 | 0.999439 |
| rad7               | 0.000129314 | 0.999566 | 0.000129314 | 0.999568 |
| PhCCH+CH3          | 0.000116721 | 0.999683 | 0.000116721 | 0.999685 |
| rad28              | 8.01362e-05 | 0.999763 | 8.01364e-05 | 0.999765 |
| PhCHCCH2+H         | 6.46907e-05 | 0.999828 | 6.46908e-05 | 0.999830 |
| rad11              | 3.85091e-05 | 0.999866 | 3.85092e-05 | 0.999868 |
| rad1               | 3.36874e-05 | 0.999900 | 3.36875e-05 | 0.999902 |
| rad10              | 3.24807e-05 | 0.999932 | 3.24808e-05 | 0.999934 |
| PhCCCH3+H          | 3.10408e-05 | 0.999963 | 3.10408e-05 | 0.999965 |
| rad26              | 1.57789e-05 | 0.999979 | 1.57789e-05 | 0.999981 |
| rad3               | 5.15437e-06 | 0.999984 | 5.15438e-06 | 0.999986 |
| Ph+MeAc            | 4.90954e-06 | 0.999989 | 4.90955e-06 | 0.999991 |
| rad23              | 3.26554e-06 | 0.999992 | 3.26555e-06 | 0.999994 |
| rad4               | 2.67820e-06 | 0.999995 | 2.67821e-06 | 0.999997 |
| rad9               | 1.77453e-06 | 0.999997 | 1.77453e-06 | 0.999999 |
| Phenyl+Allene      | 1.74901e-06 | 0.999999 | 0.00000     | 0.999999 |
| rad13              | 4.34252e-07 | 0.999999 | 4.34253e-07 | 0.999999 |
| rad8               | 4.07852e-07 | 0.999999 | 4.07853e-07 | 1.000000 |
| PAH7+H             | 1.33943e-07 | 1.000000 | 1.33943e-07 | 1.000000 |
| rad30              | 9.39167e-08 | 1.000000 | 9.39169e-08 | 1.000000 |
| rad45              | 7.35287e-08 | 1.000000 | 7.35288e-08 | 1.000000 |
| PhCH2CCH+H         | 3.75591e-08 | 1.000000 | 3.75591e-08 | 1.000000 |
| rad39              | 3.14223e-08 | 1.000000 | 3.14224e-08 | 1.000000 |
| PAH9+H             | 2.28473e-08 | 1.000000 | 2.28474e-08 | 1.000000 |
| rad15              | 2.17122e-08 | 1.000000 | 2.17122e-08 | 1.000000 |
| rad12              | 1.31343e-08 | 1.000000 | 1.31343e-08 | 1.000000 |
| rad35              | 1.02665e-08 | 1.000000 | 1.02665e-08 | 1.000000 |
| rad38              | 6.70607e-09 | 1.000000 | 6.70608e-09 | 1.000000 |
| rad36              | 4.63691e-09 | 1.000000 | 4.63692e-09 | 1.000000 |

|               |             |          |             |          |
|---------------|-------------|----------|-------------|----------|
| rad22         | 3.48422e-09 | 1.000000 | 3.48422e-09 | 1.000000 |
| rad33         | 7.54428e-10 | 1.000000 | 7.54430e-10 | 1.000000 |
| rad37         | 6.74121e-10 | 1.000000 | 6.74122e-10 | 1.000000 |
| rad14         | 4.44311e-10 | 1.000000 | 4.44311e-10 | 1.000000 |
| rad27         | 3.14248e-10 | 1.000000 | 3.14248e-10 | 1.000000 |
| rad25         | 3.02009e-10 | 1.000000 | 3.02010e-10 | 1.000000 |
| rad46         | 1.15429e-10 | 1.000000 | 1.15429e-10 | 1.000000 |
| rad5          | 4.34667e-11 | 1.000000 | 4.34667e-11 | 1.000000 |
| rad60syn      | 1.82786e-11 | 1.000000 | 1.82786e-11 | 1.000000 |
| rad60anti     | 6.59051e-12 | 1.000000 | 6.59052e-12 | 1.000000 |
| PAH3+H        | 2.36290e-13 | 1.000000 | 2.36290e-13 | 1.000000 |
| rad19syn      | 1.00156e-13 | 1.000000 | 1.00157e-13 | 1.000000 |
| rad59         | 6.86560e-14 | 1.000000 | 6.86561e-14 | 1.000000 |
| rad20         | 2.77448e-14 | 1.000000 | 2.77448e-14 | 1.000000 |
| rad21         | 1.88369e-14 | 1.000000 | 1.88370e-14 | 1.000000 |
| rad31         | 1.86267e-14 | 1.000000 | 1.86267e-14 | 1.000000 |
| rad18         | 1.53391e-14 | 1.000000 | 1.53391e-14 | 1.000000 |
| rad50         | 8.58584e-15 | 1.000000 | 8.58585e-15 | 1.000000 |
| rad54         | 2.81616e-15 | 1.000000 | 2.81617e-15 | 1.000000 |
| PAH10+CH3     | 1.67291e-15 | 1.000000 | 1.67291e-15 | 1.000000 |
| rad24         | 6.72311e-16 | 1.000000 | 6.72312e-16 | 1.000000 |
| rad43         | 4.27274e-16 | 1.000000 | 4.27275e-16 | 1.000000 |
| rad62         | 1.26050e-16 | 1.000000 | 1.26051e-16 | 1.000000 |
| PhcycC3H3_A+H | 1.01312e-17 | 1.000000 | 1.01312e-17 | 1.000000 |
| rad70         | 6.26556e-18 | 1.000000 | 6.26557e-18 | 1.000000 |
| rad52         | 4.93248e-18 | 1.000000 | 4.93249e-18 | 1.000000 |
| rad55         | 2.74068e-18 | 1.000000 | 2.74068e-18 | 1.000000 |
| PAH1+H        | 2.37705e-19 | 1.000000 | 2.37706e-19 | 1.000000 |
| rad51         | 2.12700e-19 | 1.000000 | 2.12701e-19 | 1.000000 |
| rad34         | 1.46858e-20 | 1.000000 | 1.46858e-20 | 1.000000 |
| rad58         | 8.38189e-21 | 1.000000 | 8.38191e-21 | 1.000000 |
| rad65         | 2.05905e-21 | 1.000000 | 2.05905e-21 | 1.000000 |
| rad42         | 2.33376e-22 | 1.000000 | 2.33377e-22 | 1.000000 |
| rad41         | 6.77118e-23 | 1.000000 | 6.77119e-23 | 1.000000 |
| rad47         | 2.23488e-27 | 1.000000 | 2.23488e-27 | 1.000000 |

1.00000000 Pa, 240.000000 K

| Rate constant      | True (fraction)       | Effective (fraction)  |
|--------------------|-----------------------|-----------------------|
| Total              | 8.83273e-17 (1.00 )   | 8.83271e-17 (1.00 )   |
| Formation of rad11 | 7.04077e-17 (0.797 )  | 7.04076e-17 (0.797 )  |
| Formation of rad6  | 1.55481e-17 (0.176 )  | 1.55481e-17 (0.176 )  |
| H-abstraction      | 2.37143e-18 (0.0268 ) | 2.37143e-18 (0.0268 ) |

| species            | PYtrue      | Cumul    | PYeffective | Cumul    |
|--------------------|-------------|----------|-------------|----------|
| rad6               | 0.898501    | 0.898501 | 0.898503    | 0.898503 |
| Indene+H           | 0.0720848   | 0.970586 | 0.0720849   | 0.970588 |
| Benzene+2-propynyl | 0.0268483   | 0.997434 | 0.0268483   | 0.997436 |
| C2H2+PhCH2         | 0.00139313  | 0.998827 | 0.00139313  | 0.998830 |
| rad2               | 0.000511092 | 0.999339 | 0.000511094 | 0.999341 |
| PhCCH+CH3          | 0.000158926 | 0.999497 | 0.000158926 | 0.999500 |
| rad7               | 0.000127755 | 0.999625 | 0.000127755 | 0.999627 |
| rad28              | 9.44618e-05 | 0.999720 | 9.44620e-05 | 0.999722 |
| PhCHCCH2+H         | 8.53939e-05 | 0.999805 | 8.53942e-05 | 0.999807 |
| PhCCCH3+H          | 4.29867e-05 | 0.999848 | 4.29868e-05 | 0.999850 |
| rad11              | 3.79860e-05 | 0.999886 | 3.79861e-05 | 0.999888 |
| rad1               | 3.60807e-05 | 0.999922 | 3.60808e-05 | 0.999924 |
| rad10              | 3.43767e-05 | 0.999956 | 3.43768e-05 | 0.999959 |
| rad26              | 1.89903e-05 | 0.999975 | 1.89904e-05 | 0.999978 |
| Ph+MeAc            | 7.42629e-06 | 0.999983 | 7.42631e-06 | 0.999985 |
| rad3               | 5.32945e-06 | 0.999988 | 5.32946e-06 | 0.999990 |
| rad23              | 3.03988e-06 | 0.999991 | 3.03988e-06 | 0.999993 |
| rad4               | 2.77768e-06 | 0.999994 | 2.77768e-06 | 0.999996 |
| Phenyl+Allene      | 2.45166e-06 | 0.999996 | 0.00000     | 0.999996 |
| rad9               | 2.18553e-06 | 0.999999 | 2.18553e-06 | 0.999998 |
| rad8               | 5.77641e-07 | 0.999999 | 5.77643e-07 | 0.999999 |
| rad13              | 4.31192e-07 | 1.000000 | 4.31193e-07 | 0.999999 |
| PAH7+H             | 2.24040e-07 | 1.000000 | 2.24040e-07 | 1.000000 |
| rad30              | 1.07177e-07 | 1.000000 | 1.07177e-07 | 1.000000 |
| rad45              | 6.81659e-08 | 1.000000 | 6.81660e-08 | 1.000000 |
| PhCH2CCH+H         | 6.24567e-08 | 1.000000 | 6.24569e-08 | 1.000000 |
| rad39              | 5.34465e-08 | 1.000000 | 5.34466e-08 | 1.000000 |
| PAH9+H             | 2.68687e-08 | 1.000000 | 2.68688e-08 | 1.000000 |
| rad15              | 2.53062e-08 | 1.000000 | 2.53063e-08 | 1.000000 |
| rad12              | 2.09221e-08 | 1.000000 | 2.09221e-08 | 1.000000 |
| rad35              | 1.18851e-08 | 1.000000 | 1.18851e-08 | 1.000000 |
| rad38              | 7.97664e-09 | 1.000000 | 7.97666e-09 | 1.000000 |
| rad36              | 4.31580e-09 | 1.000000 | 4.31581e-09 | 1.000000 |



|               |             |         |             |          |
|---------------|-------------|---------|-------------|----------|
| rad22         | 3.22378e-09 | 1.00000 | 3.22379e-09 | 1.000000 |
| rad37         | 1.17654e-09 | 1.00000 | 1.17655e-09 | 1.000000 |
| rad33         | 7.53550e-10 | 1.00000 | 7.53552e-10 | 1.000000 |
| rad14         | 4.58323e-10 | 1.00000 | 4.58324e-10 | 1.00000  |
| rad27         | 3.33448e-10 | 1.00000 | 3.33449e-10 | 1.00000  |
| rad25         | 2.99651e-10 | 1.00000 | 2.99652e-10 | 1.00000  |
| rad46         | 1.48738e-10 | 1.00000 | 1.48739e-10 | 1.00000  |
| rad5          | 7.94019e-11 | 1.00000 | 7.94021e-11 | 1.00000  |
| rad60syn      | 2.52305e-11 | 1.00000 | 2.52306e-11 | 1.00000  |
| rad60anti     | 9.33007e-12 | 1.00000 | 9.33009e-12 | 1.00000  |
| PAH3+H        | 4.50769e-13 | 1.00000 | 4.50770e-13 | 1.00000  |
| rad19syn      | 2.54117e-13 | 1.00000 | 2.54117e-13 | 1.00000  |
| rad59         | 1.27452e-13 | 1.00000 | 1.27453e-13 | 1.00000  |
| rad20         | 2.85421e-14 | 1.00000 | 2.85421e-14 | 1.00000  |
| rad31         | 2.12646e-14 | 1.00000 | 2.12647e-14 | 1.00000  |
| rad21         | 1.94464e-14 | 1.00000 | 1.94464e-14 | 1.00000  |
| rad50         | 1.68151e-14 | 1.00000 | 1.68151e-14 | 1.00000  |
| rad18         | 1.48485e-14 | 1.00000 | 1.48485e-14 | 1.00000  |
| rad54         | 8.04871e-15 | 1.00000 | 8.04873e-15 | 1.00000  |
| PAH10+CH3     | 4.79414e-15 | 1.00000 | 4.79415e-15 | 1.00000  |
| rad43         | 1.19957e-15 | 1.00000 | 1.19957e-15 | 1.00000  |
| rad24         | 6.30553e-16 | 1.00000 | 6.30555e-16 | 1.00000  |
| rad62         | 3.81477e-16 | 1.00000 | 3.81478e-16 | 1.00000  |
| PhcycC3H3_A+H | 3.73534e-17 | 1.00000 | 3.73535e-17 | 1.00000  |
| rad70         | 2.22111e-17 | 1.00000 | 2.22112e-17 | 1.00000  |
| rad52         | 1.27065e-17 | 1.00000 | 1.27065e-17 | 1.00000  |
| rad55         | 9.86377e-18 | 1.00000 | 9.86377e-18 | 1.00000  |
| PAH1+H        | 9.68901e-19 | 1.00000 | 9.68904e-19 | 1.00000  |
| rad51         | 6.78999e-19 | 1.00000 | 6.79001e-19 | 1.00000  |
| rad34         | 6.13293e-20 | 1.00000 | 6.13294e-20 | 1.00000  |
| rad58         | 3.13879e-20 | 1.00000 | 3.13880e-20 | 1.00000  |
| rad65         | 7.20607e-21 | 1.00000 | 7.20609e-21 | 1.00000  |
| rad42         | 1.04110e-21 | 1.00000 | 1.04110e-21 | 1.00000  |
| rad41         | 3.05316e-22 | 1.00000 | 3.05317e-22 | 1.00000  |
| rad47         | 7.46729e-27 | 1.00000 | 7.46730e-27 | 1.00000  |

1.00000000 Pa, 250.000000 K

| Rate constant      | True (fraction)       | Effective (fraction)  |
|--------------------|-----------------------|-----------------------|
| Total              | 1.21641e-16 (1.00 )   | 1.21641e-16 (1.00 )   |
| Formation of rad11 | 9.54219e-17 (0.784 )  | 9.54215e-17 (0.784 )  |
| Formation of rad6  | 2.24583e-17 (0.185 )  | 2.24582e-17 (0.185 )  |
| H-abstraction      | 3.76121e-18 (0.0309 ) | 3.76121e-18 (0.0309 ) |

| species            | PYtrue      | Cumul    | PYeffective | Cumul    |
|--------------------|-------------|----------|-------------|----------|
| rad6               | 0.891269    | 0.891269 | 0.891272    | 0.891272 |
| Indene+H           | 0.0749282   | 0.966197 | 0.0749284   | 0.966200 |
| Benzene+2-propynyl | 0.0309205   | 0.997118 | 0.0309206   | 0.997121 |
| C2H2+PhCH2         | 0.00155640  | 0.998674 | 0.00155641  | 0.998677 |
| rad2               | 0.000538061 | 0.999212 | 0.000538063 | 0.999216 |
| PhCCH+CH3          | 0.000214921 | 0.999427 | 0.000214922 | 0.999430 |
| rad7               | 0.000126145 | 0.999553 | 0.000126145 | 0.999557 |
| PhCHCCH2+H         | 0.000112530 | 0.999666 | 0.000112530 | 0.999669 |
| rad28              | 0.000110554 | 0.999776 | 0.000110555 | 0.999780 |
| PhCCCH3+H          | 5.88279e-05 | 0.999835 | 5.88281e-05 | 0.999839 |
| rad1               | 3.84251e-05 | 0.999874 | 3.84252e-05 | 0.999877 |
| rad11              | 3.74529e-05 | 0.999911 | 3.74530e-05 | 0.999914 |
| rad10              | 3.61514e-05 | 0.999947 | 3.61515e-05 | 0.999951 |
| rad26              | 2.24961e-05 | 0.999970 | 2.24962e-05 | 0.999973 |
| Ph+MeAc            | 1.10463e-05 | 0.999981 | 1.10464e-05 | 0.999984 |
| rad3               | 5.49183e-06 | 0.999986 | 5.49185e-06 | 0.999990 |
| Phenyl+Allene      | 3.44745e-06 | 0.999990 | 0.00000     | 0.999990 |
| rad4               | 2.87185e-06 | 0.999993 | 2.87186e-06 | 0.999992 |
| rad23              | 2.84727e-06 | 0.999996 | 2.84728e-06 | 0.999995 |
| rad9               | 2.71556e-06 | 0.999998 | 2.71557e-06 | 0.999998 |
| rad8               | 8.07690e-07 | 0.999999 | 8.07693e-07 | 0.999999 |
| rad13              | 4.27953e-07 | 0.999999 | 4.27954e-07 | 0.999999 |
| PAH7+H             | 3.66789e-07 | 1.000000 | 3.66791e-07 | 1.000000 |
| rad30              | 1.23515e-07 | 1.000000 | 1.23516e-07 | 1.000000 |
| PhCH2CCH+H         | 1.02310e-07 | 1.000000 | 1.02310e-07 | 1.000000 |
| rad39              | 8.88114e-08 | 1.000000 | 8.88118e-08 | 1.000000 |
| rad45              | 6.36255e-08 | 1.000000 | 6.36257e-08 | 1.000000 |
| rad12              | 3.24703e-08 | 1.000000 | 3.24704e-08 | 1.000000 |
| PAH9+H             | 3.19625e-08 | 1.000000 | 3.19627e-08 | 1.000000 |
| rad15              | 2.98001e-08 | 1.000000 | 2.98002e-08 | 1.000000 |
| rad35              | 1.39086e-08 | 1.000000 | 1.39087e-08 | 1.000000 |
| rad38              | 9.60007e-09 | 1.000000 | 9.60010e-09 | 1.000000 |
| rad36              | 4.04650e-09 | 1.000000 | 4.04652e-09 | 1.000000 |

|               |             |         |             |         |
|---------------|-------------|---------|-------------|---------|
| rad22         | 2.99929e-09 | 1.00000 | 2.99930e-09 | 1.00000 |
| rad37         | 1.98723e-09 | 1.00000 | 1.98723e-09 | 1.00000 |
| rad33         | 7.52301e-10 | 1.00000 | 7.52304e-10 | 1.00000 |
| rad14         | 4.71366e-10 | 1.00000 | 4.71367e-10 | 1.00000 |
| rad27         | 3.51660e-10 | 1.00000 | 3.51661e-10 | 1.00000 |
| rad25         | 2.97246e-10 | 1.00000 | 2.97247e-10 | 1.00000 |
| rad46         | 1.93983e-10 | 1.00000 | 1.93984e-10 | 1.00000 |
| rad5          | 1.40391e-10 | 1.00000 | 1.40392e-10 | 1.00000 |
| rad60syn      | 3.50341e-11 | 1.00000 | 3.50343e-11 | 1.00000 |
| rad60anti     | 1.32586e-11 | 1.00000 | 1.32586e-11 | 1.00000 |
| PAH3+H        | 8.38006e-13 | 1.00000 | 8.38009e-13 | 1.00000 |
| rad19syn      | 6.06094e-13 | 1.00000 | 6.06096e-13 | 1.00000 |
| rad59         | 2.31001e-13 | 1.00000 | 2.31002e-13 | 1.00000 |
| rad50         | 3.21592e-14 | 1.00000 | 3.21593e-14 | 1.00000 |
| rad20         | 2.94934e-14 | 1.00000 | 2.94934e-14 | 1.00000 |
| rad31         | 2.43179e-14 | 1.00000 | 2.43180e-14 | 1.00000 |
| rad54         | 2.13498e-14 | 1.00000 | 2.13499e-14 | 1.00000 |
| rad21         | 2.01684e-14 | 1.00000 | 2.01684e-14 | 1.00000 |
| rad18         | 1.44449e-14 | 1.00000 | 1.44450e-14 | 1.00000 |
| PAH10+CH3     | 1.27139e-14 | 1.00000 | 1.27139e-14 | 1.00000 |
| rad43         | 3.11917e-15 | 1.00000 | 3.11918e-15 | 1.00000 |
| rad62         | 1.06165e-15 | 1.00000 | 1.06165e-15 | 1.00000 |
| rad24         | 5.95674e-16 | 1.00000 | 5.95677e-16 | 1.00000 |
| PhcycC3H3_A+H | 1.23750e-16 | 1.00000 | 1.23750e-16 | 1.00000 |
| rad70         | 7.10576e-17 | 1.00000 | 7.10578e-17 | 1.00000 |
| rad55         | 3.19896e-17 | 1.00000 | 3.19897e-17 | 1.00000 |
| rad52         | 3.09039e-17 | 1.00000 | 3.09040e-17 | 1.00000 |
| PAH1+H        | 3.49547e-18 | 1.00000 | 3.49549e-18 | 1.00000 |
| rad51         | 1.99220e-18 | 1.00000 | 1.99221e-18 | 1.00000 |
| rad34         | 2.25879e-19 | 1.00000 | 2.25880e-19 | 1.00000 |
| rad58         | 1.05420e-19 | 1.00000 | 1.05421e-19 | 1.00000 |
| rad65         | 2.28624e-20 | 1.00000 | 2.28624e-20 | 1.00000 |
| rad42         | 4.05764e-21 | 1.00000 | 4.05766e-21 | 1.00000 |
| rad41         | 1.20115e-21 | 1.00000 | 1.20116e-21 | 1.00000 |
| rad47         | 2.24262e-26 | 1.00000 | 2.24263e-26 | 1.00000 |

1.00000000 Pa, 260.000000 K

| =====              |                 |           |                      |           |
|--------------------|-----------------|-----------|----------------------|-----------|
| Rate constant      | True (fraction) |           | Effective (fraction) |           |
| -----              |                 |           |                      |           |
| Total              | 1.63720e-16     | (1.00 )   | 1.63720e-16          | (1.00 )   |
| Formation of rad11 | 1.26419e-16     | (0.772 )  | 1.26418e-16          | (0.772 )  |
| Formation of rad6  | 3.15515e-17     | (0.193 )  | 3.15513e-17          | (0.193 )  |
| H-abstraction      | 5.75028e-18     | (0.0351 ) | 5.75028e-18          | (0.0351 ) |
| -----              |                 |           |                      |           |
| species            | PYtrue          | Cumul     | PYeffective          | Cumul     |
| rad6               | 0.883289        | 0.883289  | 0.883294             | 0.883294  |
| Indene+H           | 0.0783225       | 0.961612  | 0.0783229            | 0.961617  |
| Benzene+2-propynyl | 0.0351226       | 0.996734  | 0.0351227            | 0.996740  |
| C2H2+PhCH2         | 0.00175403      | 0.998488  | 0.00175404           | 0.998494  |
| rad2               | 0.000562851     | 0.999051  | 0.000562853          | 0.999056  |
| PhCCH+CH3          | 0.000288481     | 0.999340  | 0.000288483          | 0.999345  |
| PhCHCCH2+H         | 0.000147774     | 0.999488  | 0.000147774          | 0.999493  |
| rad28              | 0.000128363     | 0.999616  | 0.000128364          | 0.999621  |
| rad7               | 0.000124473     | 0.999740  | 0.000124473          | 0.999746  |
| PhCCCH3+H          | 7.95617e-05     | 0.999820  | 7.95620e-05          | 0.999825  |
| rad1               | 4.06978e-05     | 0.999861  | 4.06979e-05          | 0.999866  |
| rad10              | 3.77809e-05     | 0.999898  | 3.77811e-05          | 0.999904  |
| rad11              | 3.69067e-05     | 0.999935  | 3.69068e-05          | 0.999941  |
| rad26              | 2.62429e-05     | 0.999962  | 2.62431e-05          | 0.999967  |
| Ph+MeAc            | 1.61643e-05     | 0.999978  | 1.61644e-05          | 0.999983  |
| rad3               | 5.63906e-06     | 0.999983  | 5.63909e-06          | 0.999989  |
| Phenyl+Allene      | 4.85691e-06     | 0.999988  | 0.000000             | 0.999989  |
| rad9               | 3.40048e-06     | 0.999992  | 3.40050e-06          | 0.999992  |
| rad4               | 2.95945e-06     | 0.999995  | 2.95947e-06          | 0.999995  |
| rad23              | 2.68041e-06     | 0.999997  | 2.68043e-06          | 0.999998  |
| rad8               | 1.11508e-06     | 0.999998  | 1.11509e-06          | 0.999999  |
| PAH7+H             | 5.87663e-07     | 0.999999  | 5.87666e-07          | 0.999999  |
| rad13              | 4.24505e-07     | 0.999999  | 4.24506e-07          | 1.000000  |
| PhCH2CCH+H         | 1.65178e-07     | 1.000000  | 1.65179e-07          | 1.000000  |
| rad39              | 1.44190e-07     | 1.000000  | 1.44191e-07          | 1.000000  |
| rad30              | 1.43720e-07     | 1.000000  | 1.43721e-07          | 1.000000  |
| rad45              | 5.97286e-08     | 1.000000  | 5.97289e-08          | 1.000000  |
| rad12              | 4.91676e-08     | 1.000000  | 4.91679e-08          | 1.000000  |
| PAH9+H             | 3.84481e-08     | 1.000000  | 3.84482e-08          | 1.000000  |
| rad15              | 3.54410e-08     | 1.000000  | 3.54412e-08          | 1.000000  |
| rad35              | 1.64510e-08     | 1.000000  | 1.64510e-08          | 1.000000  |
| rad38              | 1.16851e-08     | 1.000000  | 1.16852e-08          | 1.000000  |
| rad36              | 3.81794e-09     | 1.000000  | 3.81796e-09          | 1.000000  |

|               |             |         |             |         |
|---------------|-------------|---------|-------------|---------|
| rad37         | 3.25607e-09 | 1.00000 | 3.25607e-09 | 1.00000 |
| rad22         | 2.80335e-09 | 1.00000 | 2.80336e-09 | 1.00000 |
| rad33         | 7.50640e-10 | 1.00000 | 7.50644e-10 | 1.00000 |
| rad14         | 4.83231e-10 | 1.00000 | 4.83233e-10 | 1.00000 |
| rad27         | 3.68652e-10 | 1.00000 | 3.68654e-10 | 1.00000 |
| rad25         | 2.94760e-10 | 1.00000 | 2.94761e-10 | 1.00000 |
| rad46         | 2.55700e-10 | 1.00000 | 2.55702e-10 | 1.00000 |
| rad5          | 2.40797e-10 | 1.00000 | 2.40798e-10 | 1.00000 |
| rad60syn      | 4.88604e-11 | 1.00000 | 4.88607e-11 | 1.00000 |
| rad60anti     | 1.88854e-11 | 1.00000 | 1.88854e-11 | 1.00000 |
| PAH3+H        | 1.52027e-12 | 1.00000 | 1.52028e-12 | 1.00000 |
| rad19syn      | 1.36651e-12 | 1.00000 | 1.36652e-12 | 1.00000 |
| rad59         | 4.09319e-13 | 1.00000 | 4.09321e-13 | 1.00000 |
| rad50         | 6.00924e-14 | 1.00000 | 6.00927e-14 | 1.00000 |
| rad54         | 5.29169e-14 | 1.00000 | 5.29171e-14 | 1.00000 |
| PAH10+CH3     | 3.14289e-14 | 1.00000 | 3.14290e-14 | 1.00000 |
| rad20         | 3.06045e-14 | 1.00000 | 3.06047e-14 | 1.00000 |
| rad31         | 2.78791e-14 | 1.00000 | 2.78793e-14 | 1.00000 |
| rad21         | 2.10087e-14 | 1.00000 | 2.10088e-14 | 1.00000 |
| rad18         | 1.41162e-14 | 1.00000 | 1.41163e-14 | 1.00000 |
| rad43         | 7.56773e-15 | 1.00000 | 7.56776e-15 | 1.00000 |
| rad62         | 2.73880e-15 | 1.00000 | 2.73881e-15 | 1.00000 |
| rad24         | 5.66206e-16 | 1.00000 | 5.66209e-16 | 1.00000 |
| PhcycC3H3_A+H | 3.72239e-16 | 1.00000 | 3.72241e-16 | 1.00000 |
| rad70         | 2.07234e-16 | 1.00000 | 2.07235e-16 | 1.00000 |
| rad55         | 9.44384e-17 | 1.00000 | 9.44389e-17 | 1.00000 |
| rad52         | 7.12803e-17 | 1.00000 | 7.12807e-17 | 1.00000 |
| PAH1+H        | 1.13056e-17 | 1.00000 | 1.13057e-17 | 1.00000 |
| rad51         | 5.41050e-18 | 1.00000 | 5.41053e-18 | 1.00000 |
| rad34         | 7.43640e-19 | 1.00000 | 7.43642e-19 | 1.00000 |
| rad58         | 3.20960e-19 | 1.00000 | 3.20962e-19 | 1.00000 |
| rad65         | 6.63489e-20 | 1.00000 | 6.63493e-20 | 1.00000 |
| rad42         | 1.40258e-20 | 1.00000 | 1.40259e-20 | 1.00000 |
| rad41         | 4.18633e-21 | 1.00000 | 4.18635e-21 | 1.00000 |
| rad47         | 6.13071e-26 | 1.00000 | 6.13073e-26 | 1.00000 |

1.00000000 Pa, 270.000000 K

| Rate constant      | True (fraction)       | Effective (fraction)  |
|--------------------|-----------------------|-----------------------|
| Total              | 2.15887e-16 (1.00 )   | 2.15885e-16 (1.00 )   |
| Formation of rad11 | 1.64133e-16 (0.760 )  | 1.64131e-16 (0.760 )  |
| Formation of rad6  | 4.32452e-17 (0.200 )  | 4.32448e-17 (0.200 )  |
| H-abstraction      | 8.50919e-18 (0.0394 ) | 8.50919e-18 (0.0394 ) |

| species            | PYtrue      | Cumul    | PYeffective | Cumul    |
|--------------------|-------------|----------|-------------|----------|
| rad6               | 0.874509    | 0.874509 | 0.874514    | 0.874514 |
| Indene+H           | 0.0823455   | 0.956854 | 0.0823460   | 0.956860 |
| Benzene+2-propynyl | 0.0394150   | 0.996269 | 0.0394153   | 0.996276 |
| C2H2+PhCH2         | 0.00199361  | 0.998263 | 0.00199363  | 0.998269 |
| rad2               | 0.000585136 | 0.998848 | 0.000585140 | 0.998854 |
| PhCCH+CH3          | 0.000384120 | 0.999232 | 0.000384122 | 0.999239 |
| PhCHCCH2+H         | 0.000193104 | 0.999425 | 0.000193104 | 0.999432 |
| rad28              | 0.000147767 | 0.999573 | 0.000147768 | 0.999579 |
| rad7               | 0.000122730 | 0.999696 | 0.000122731 | 0.999702 |
| PhCCCH3+H          | 0.000106348 | 0.999802 | 0.000106348 | 0.999809 |
| rad1               | 4.28777e-05 | 0.999845 | 4.28781e-05 | 0.999851 |
| rad10              | 3.92445e-05 | 0.999884 | 3.92448e-05 | 0.999891 |
| rad11              | 3.63441e-05 | 0.999921 | 3.63444e-05 | 0.999927 |
| rad26              | 3.01641e-05 | 0.999951 | 3.01643e-05 | 0.999957 |
| Ph+MeAc            | 2.32780e-05 | 0.999974 | 2.32782e-05 | 0.999980 |
| Phenyl+Allene      | 6.84501e-06 | 0.999981 | 0.00000     | 0.999980 |
| rad3               | 5.76897e-06 | 0.999987 | 5.76900e-06 | 0.999986 |
| rad9               | 4.28566e-06 | 0.999991 | 4.28569e-06 | 0.999991 |
| rad4               | 3.03941e-06 | 0.999994 | 3.03942e-06 | 0.999994 |
| rad23              | 2.53391e-06 | 0.999997 | 2.53392e-06 | 0.999996 |
| rad8               | 1.52018e-06 | 0.999998 | 1.52019e-06 | 0.999998 |
| PAH7+H             | 9.21546e-07 | 0.999999 | 9.21552e-07 | 0.999999 |
| rad13              | 4.20813e-07 | 0.999999 | 4.20817e-07 | 0.999999 |
| PhCH2CCH+H         | 2.62870e-07 | 1.000000 | 2.62872e-07 | 0.999999 |
| rad39              | 2.28807e-07 | 1.000000 | 2.28807e-07 | 0.999999 |
| rad30              | 1.68763e-07 | 1.000000 | 1.68764e-07 | 1.000000 |
| rad12              | 7.27417e-08 | 1.000000 | 7.27422e-08 | 1.000000 |
| rad45              | 5.63439e-08 | 1.000000 | 5.63442e-08 | 1.000000 |
| PAH9+H             | 4.67331e-08 | 1.000000 | 4.67335e-08 | 1.000000 |
| rad15              | 4.25385e-08 | 1.000000 | 4.25388e-08 | 1.000000 |
| rad35              | 1.96550e-08 | 1.000000 | 1.96552e-08 | 1.000000 |
| rad38              | 1.43721e-08 | 1.000000 | 1.43722e-08 | 1.000000 |
| rad37              | 5.18627e-09 | 1.000000 | 5.18630e-09 | 1.000000 |

|               |             |         |             |          |
|---------------|-------------|---------|-------------|----------|
| rad36         | 3.62200e-09 | 1.00000 | 3.62203e-09 | 1.000000 |
| rad22         | 2.63041e-09 | 1.00000 | 2.63043e-09 | 1.000000 |
| rad33         | 7.48517e-10 | 1.00000 | 7.48521e-10 | 1.000000 |
| rad14         | 4.93735e-10 | 1.00000 | 4.93739e-10 | 1.000000 |
| rad5          | 4.01411e-10 | 1.00000 | 4.01414e-10 | 1.000000 |
| rad27         | 3.84222e-10 | 1.00000 | 3.84225e-10 | 1.000000 |
| rad46         | 3.40047e-10 | 1.00000 | 3.40049e-10 | 1.000000 |
| rad25         | 2.92162e-10 | 1.00000 | 2.92164e-10 | 1.000000 |
| rad60syn      | 6.83174e-11 | 1.00000 | 6.83178e-11 | 1.000000 |
| rad60anti     | 2.69174e-11 | 1.00000 | 2.69176e-11 | 1.000000 |
| rad19syn      | 2.92560e-12 | 1.00000 | 2.92562e-12 | 1.000000 |
| PAH3+H        | 2.69352e-12 | 1.00000 | 2.69354e-12 | 1.000000 |
| rad59         | 7.09596e-13 | 1.00000 | 7.09601e-13 | 1.000000 |
| rad54         | 1.23242e-13 | 1.00000 | 1.23243e-13 | 1.000000 |
| rad50         | 1.09712e-13 | 1.00000 | 1.09712e-13 | 1.000000 |
| PAH10+CH3     | 7.28643e-14 | 1.00000 | 7.28648e-14 | 1.000000 |
| rad31         | 3.20698e-14 | 1.00000 | 3.20701e-14 | 1.000000 |
| rad20         | 3.18836e-14 | 1.00000 | 3.18839e-14 | 1.000000 |
| rad21         | 2.19749e-14 | 1.00000 | 2.19751e-14 | 1.000000 |
| rad43         | 1.72386e-14 | 1.00000 | 1.72387e-14 | 1.000000 |
| rad18         | 1.38525e-14 | 1.00000 | 1.38526e-14 | 1.000000 |
| rad62         | 6.59392e-15 | 1.00000 | 6.59396e-15 | 1.000000 |
| PhcycC3H3_A+H | 1.02583e-15 | 1.00000 | 1.02584e-15 | 1.000000 |
| rad70         | 5.55759e-16 | 1.00000 | 5.55763e-16 | 1.000000 |
| rad24         | 5.41077e-16 | 1.00000 | 5.41081e-16 | 1.000000 |
| rad55         | 2.56007e-16 | 1.00000 | 2.56008e-16 | 1.000000 |
| rad52         | 1.56456e-16 | 1.00000 | 1.56457e-16 | 1.000000 |
| PAH1+H        | 3.31478e-17 | 1.00000 | 3.31480e-17 | 1.000000 |
| rad51         | 1.36832e-17 | 1.00000 | 1.36833e-17 | 1.000000 |
| rad34         | 2.21390e-18 | 1.00000 | 2.21392e-18 | 1.000000 |
| rad58         | 8.94005e-19 | 1.00000 | 8.94011e-19 | 1.000000 |
| rad65         | 1.77503e-19 | 1.00000 | 1.77504e-19 | 1.000000 |
| rad42         | 4.35564e-20 | 1.00000 | 4.35567e-20 | 1.000000 |
| rad41         | 1.30955e-20 | 1.00000 | 1.30956e-20 | 1.000000 |
| rad47         | 1.54203e-25 | 1.00000 | 1.54204e-25 | 1.000000 |

1.00000000 Pa, 280.000000 K

| =====              |                 |           |                      |           |
|--------------------|-----------------|-----------|----------------------|-----------|
| Rate constant      | True (fraction) |           | Effective (fraction) |           |
| -----              |                 |           |                      |           |
| Total              | 2.79491e-16     | (1.00 )   | 2.79489e-16          | (1.00 )   |
| Formation of rad11 | 2.09281e-16     | (0.749 )  | 2.09279e-16          | (0.749 )  |
| Formation of rad6  | 5.79792e-17     | (0.207 )  | 5.79786e-17          | (0.207 )  |
| H-abstraction      | 1.22310e-17     | (0.0438 ) | 1.22310e-17          | (0.0438 ) |
| -----              |                 |           |                      |           |
| species            | PYtrue          | Cumul     | PYeffective          | Cumul     |
| -----              |                 |           |                      |           |
| rad6               | 0.864862        | 0.864862  | 0.864870             | 0.864870  |
| Indene+H           | 0.0870797       | 0.951942  | 0.0870805            | 0.951951  |
| Benzene+2-propynyl | 0.0437616       | 0.995703  | 0.0437620            | 0.995713  |
| C2H2+PhCH2         | 0.00228410      | 0.997988  | 0.00228412           | 0.997997  |
| rad2               | 0.000604642     | 0.998592  | 0.000604647          | 0.998602  |
| PhCCH+CH3          | 0.000507136     | 0.999099  | 0.000507141          | 0.999109  |
| PhCHCCH2+H         | 0.000250819     | 0.999350  | 0.000250821          | 0.999360  |
| rad28              | 0.000168559     | 0.999519  | 0.000168561          | 0.999528  |
| PhCCCH3+H          | 0.000140507     | 0.999659  | 0.000140508          | 0.999669  |
| rad7               | 0.000120905     | 0.999780  | 0.000120906          | 0.999790  |
| rad1               | 4.49463e-05     | 0.999825  | 4.49467e-05          | 0.999835  |
| rad10              | 4.05246e-05     | 0.999866  | 4.05251e-05          | 0.999875  |
| rad11              | 3.57618e-05     | 0.999901  | 3.57622e-05          | 0.999911  |
| rad26              | 3.41825e-05     | 0.999936  | 3.41828e-05          | 0.999945  |
| Ph+MeAc            | 3.30021e-05     | 0.999969  | 3.30024e-05          | 0.999978  |
| Phenyl+Allene      | 9.63372e-06     | 0.999978  | 0.000000             | 0.999978  |
| rad3               | 5.87973e-06     | 0.999984  | 5.87978e-06          | 0.999984  |
| rad9               | 5.42769e-06     | 0.999989  | 5.42774e-06          | 0.999989  |
| rad4               | 3.11073e-06     | 0.999993  | 3.11076e-06          | 0.999992  |
| rad23              | 2.40374e-06     | 0.999995  | 2.40376e-06          | 0.999995  |
| rad8               | 2.04676e-06     | 0.999997  | 2.04679e-06          | 0.999997  |
| PAH7+H             | 1.41487e-06     | 0.999998  | 1.41489e-06          | 0.999998  |
| rad13              | 4.16841e-07     | 0.999999  | 4.16845e-07          | 0.999999  |
| PhCH2CCH+H         | 4.12284e-07     | 0.999999  | 4.12288e-07          | 0.999999  |
| rad39              | 3.55042e-07     | 1.000000  | 3.55045e-07          | 0.999999  |
| rad30              | 1.99820e-07     | 1.000000  | 1.99822e-07          | 1.000000  |
| rad12              | 1.05283e-07     | 1.000000  | 1.05284e-07          | 1.000000  |
| PAH9+H             | 5.73320e-08     | 1.000000  | 5.73326e-08          | 1.000000  |
| rad45              | 5.33742e-08     | 1.000000  | 5.33747e-08          | 1.000000  |
| rad15              | 5.14737e-08     | 1.000000  | 5.14742e-08          | 1.000000  |
| rad35              | 2.36988e-08     | 1.000000  | 2.36990e-08          | 1.000000  |
| rad38              | 1.78390e-08     | 1.000000  | 1.78392e-08          | 1.000000  |
| rad37              | 8.04518e-09     | 1.000000  | 8.04526e-09          | 1.000000  |

|               |             |         |             |         |
|---------------|-------------|---------|-------------|---------|
| rad36         | 3.45265e-09 | 1.00000 | 3.45268e-09 | 1.00000 |
| rad22         | 2.47624e-09 | 1.00000 | 2.47626e-09 | 1.00000 |
| rad33         | 7.45871e-10 | 1.00000 | 7.45877e-10 | 1.00000 |
| rad5          | 6.51410e-10 | 1.00000 | 6.51416e-10 | 1.00000 |
| rad14         | 5.02723e-10 | 1.00000 | 5.02728e-10 | 1.00000 |
| rad46         | 4.55243e-10 | 1.00000 | 4.55247e-10 | 1.00000 |
| rad27         | 3.98198e-10 | 1.00000 | 3.98201e-10 | 1.00000 |
| rad25         | 2.89415e-10 | 1.00000 | 2.89419e-10 | 1.00000 |
| rad60syn      | 9.55751e-11 | 1.00000 | 9.55760e-11 | 1.00000 |
| rad60anti     | 3.83184e-11 | 1.00000 | 3.83188e-11 | 1.00000 |
| rad19syn      | 5.96995e-12 | 1.00000 | 5.97000e-12 | 1.00000 |
| PAH3+H        | 4.66230e-12 | 1.00000 | 4.66235e-12 | 1.00000 |
| rad59         | 1.20391e-12 | 1.00000 | 1.20393e-12 | 1.00000 |
| rad54         | 2.70976e-13 | 1.00000 | 2.70979e-13 | 1.00000 |
| rad50         | 1.95654e-13 | 1.00000 | 1.95656e-13 | 1.00000 |
| PAH10+CH3     | 1.59257e-13 | 1.00000 | 1.59258e-13 | 1.00000 |
| rad43         | 3.70627e-14 | 1.00000 | 3.70629e-14 | 1.00000 |
| rad31         | 3.70497e-14 | 1.00000 | 3.70500e-14 | 1.00000 |
| rad20         | 3.33415e-14 | 1.00000 | 3.33419e-14 | 1.00000 |
| rad21         | 2.30770e-14 | 1.00000 | 2.30772e-14 | 1.00000 |
| rad62         | 1.49015e-14 | 1.00000 | 1.49017e-14 | 1.00000 |
| rad18         | 1.36460e-14 | 1.00000 | 1.36462e-14 | 1.00000 |
| PhcycC3H3_A+H | 2.61052e-15 | 1.00000 | 2.61055e-15 | 1.00000 |
| rad70         | 1.38084e-15 | 1.00000 | 1.38086e-15 | 1.00000 |
| rad55         | 6.42131e-16 | 1.00000 | 6.42138e-16 | 1.00000 |
| rad24         | 5.19495e-16 | 1.00000 | 5.19499e-16 | 1.00000 |
| rad52         | 3.27703e-16 | 1.00000 | 3.27707e-16 | 1.00000 |
| PAH1+H        | 8.89561e-17 | 1.00000 | 8.89570e-17 | 1.00000 |
| rad51         | 3.23946e-17 | 1.00000 | 3.23950e-17 | 1.00000 |
| rad34         | 6.02041e-18 | 1.00000 | 6.02046e-18 | 1.00000 |
| rad58         | 2.29668e-18 | 1.00000 | 2.29670e-18 | 1.00000 |
| rad65         | 4.40747e-19 | 1.00000 | 4.40751e-19 | 1.00000 |
| rad42         | 1.22875e-19 | 1.00000 | 1.22877e-19 | 1.00000 |
| rad41         | 3.71837e-20 | 1.00000 | 3.71841e-20 | 1.00000 |
| rad47         | 3.60155e-25 | 1.00000 | 3.60158e-25 | 1.00000 |

1.00000000 Pa, 290.000000 K

| =====              |                 |           |                      |           |
|--------------------|-----------------|-----------|----------------------|-----------|
| Rate constant      | True (fraction) |           | Effective (fraction) |           |
| -----              |                 |           |                      |           |
| Total              | 3.55893e-16     | (1.00 )   | 3.55889e-16          | (1.00 )   |
| Formation of rad11 | 2.62555e-16     | (0.738 )  | 2.62551e-16          | (0.738 )  |
| Formation of rad6  | 7.62093e-17     | (0.214 )  | 7.62082e-17          | (0.214 )  |
| H-abstraction      | 1.71289e-17     | (0.0481 ) | 1.71289e-17          | (0.0481 ) |
| species            | PYtrue          | Cumul     | PYeffective          | Cumul     |
| -----              |                 |           |                      |           |
| rad6               | 0.854277        | 0.854277  | 0.854288             | 0.854288  |
| Indene+H           | 0.0926099       | 0.946887  | 0.0926110            | 0.946899  |
| Benzene+2-propynyl | 0.0481294       | 0.995016  | 0.0481300            | 0.995029  |
| C2H2+PhCH2         | 0.00263585      | 0.997652  | 0.00263589           | 0.997665  |
| PhCCH+CH3          | 0.000663619     | 0.998316  | 0.000663629          | 0.998329  |
| rad2               | 0.000621149     | 0.998937  | 0.000621158          | 0.998950  |
| PhCHCCH2+H         | 0.000323536     | 0.999261  | 0.000323541          | 0.999273  |
| rad28              | 0.000190459     | 0.999451  | 0.000190462          | 0.999464  |
| PhCCCH3+H          | 0.000183504     | 0.999635  | 0.000183507          | 0.999647  |
| rad7               | 0.000118985     | 0.999754  | 0.000118987          | 0.999766  |
| rad1               | 4.68863e-05     | 0.999800  | 4.68869e-05          | 0.999813  |
| Ph+MeAc            | 4.60764e-05     | 0.999847  | 4.60771e-05          | 0.999859  |
| rad10              | 4.16074e-05     | 0.999888  | 4.16080e-05          | 0.999901  |
| rad26              | 3.82142e-05     | 0.999926  | 3.82147e-05          | 0.999939  |
| rad11              | 3.51558e-05     | 0.999962  | 3.51563e-05          | 0.999974  |
| Phenyl+Allene      | 1.35156e-05     | 0.999975  | 0.00000              | 0.999974  |
| rad9               | 6.89588e-06     | 0.999982  | 6.89597e-06          | 0.999981  |
| rad3               | 5.96990e-06     | 0.999988  | 5.96999e-06          | 0.999987  |
| rad4               | 3.17262e-06     | 0.999991  | 3.17267e-06          | 0.999990  |
| rad8               | 2.72193e-06     | 0.999994  | 2.72197e-06          | 0.999993  |
| rad23              | 2.28692e-06     | 0.999996  | 2.28695e-06          | 0.999995  |
| PAH7+H             | 2.12776e-06     | 0.999998  | 2.12779e-06          | 0.999997  |
| PhCH2CCH+H         | 6.37018e-07     | 0.999999  | 6.37027e-07          | 0.999998  |
| rad39              | 5.39050e-07     | 0.999999  | 5.39057e-07          | 0.999999  |
| rad13              | 4.12544e-07     | 1.000000  | 4.12550e-07          | 0.999999  |
| rad30              | 2.38295e-07     | 1.000000  | 2.38298e-07          | 0.999999  |
| rad12              | 1.49253e-07     | 1.000000  | 1.49255e-07          | 0.999999  |
| PAH9+H             | 7.08825e-08     | 1.000000  | 7.08835e-08          | 0.999999  |
| rad15              | 6.27084e-08     | 1.000000  | 6.27092e-08          | 1.000000  |
| rad45              | 5.07469e-08     | 1.000000  | 5.07476e-08          | 1.000000  |
| rad35              | 2.87997e-08     | 1.000000  | 2.88002e-08          | 1.000000  |
| rad38              | 2.23089e-08     | 1.000000  | 2.23092e-08          | 1.000000  |
| rad37              | 1.21742e-08     | 1.000000  | 1.21743e-08          | 1.000000  |

|               |             |         |             |          |
|---------------|-------------|---------|-------------|----------|
| rad36         | 3.30539e-09 | 1.00000 | 3.30544e-09 | 1.000000 |
| rad22         | 2.33758e-09 | 1.00000 | 2.33761e-09 | 1.000000 |
| rad5          | 1.03049e-09 | 1.00000 | 1.03050e-09 | 1.000000 |
| rad33         | 7.42631e-10 | 1.00000 | 7.42641e-10 | 1.000000 |
| rad46         | 6.12080e-10 | 1.00000 | 6.12089e-10 | 1.000000 |
| rad14         | 5.10065e-10 | 1.00000 | 5.10071e-10 | 1.000000 |
| rad27         | 4.10433e-10 | 1.00000 | 4.10440e-10 | 1.000000 |
| rad25         | 2.86486e-10 | 1.00000 | 2.86490e-10 | 1.000000 |
| rad60syn      | 1.33507e-10 | 1.00000 | 1.33508e-10 | 1.000000 |
| rad60anti     | 5.43757e-11 | 1.00000 | 5.43764e-11 | 1.000000 |
| rad19syn      | 1.16476e-11 | 1.00000 | 1.16477e-11 | 1.000000 |
| PAH3+H        | 7.88522e-12 | 1.00000 | 7.88533e-12 | 1.000000 |
| rad59         | 1.99912e-12 | 1.00000 | 1.99915e-12 | 1.000000 |
| rad54         | 5.64774e-13 | 1.00000 | 5.64782e-13 | 1.000000 |
| rad50         | 3.40676e-13 | 1.00000 | 3.40681e-13 | 1.000000 |
| PAH10+CH3     | 3.29633e-13 | 1.00000 | 3.29637e-13 | 1.000000 |
| rad43         | 7.55498e-14 | 1.00000 | 7.55509e-14 | 1.000000 |
| rad31         | 4.30301e-14 | 1.00000 | 4.30306e-14 | 1.000000 |
| rad20         | 3.49910e-14 | 1.00000 | 3.49915e-14 | 1.000000 |
| rad62         | 3.17683e-14 | 1.00000 | 3.17688e-14 | 1.000000 |
| rad21         | 2.43265e-14 | 1.00000 | 2.43268e-14 | 1.000000 |
| rad18         | 1.34899e-14 | 1.00000 | 1.34901e-14 | 1.000000 |
| PhcycC3H3_A+H | 6.17735e-15 | 1.00000 | 6.17744e-15 | 1.000000 |
| rad70         | 3.19960e-15 | 1.00000 | 3.19964e-15 | 1.000000 |
| rad55         | 1.50030e-15 | 1.00000 | 1.50032e-15 | 1.000000 |
| rad52         | 6.56487e-16 | 1.00000 | 6.56496e-16 | 1.000000 |
| rad24         | 5.00871e-16 | 1.00000 | 5.00878e-16 | 1.000000 |
| PAH1+H        | 2.20351e-16 | 1.00000 | 2.20354e-16 | 1.000000 |
| rad51         | 7.21308e-17 | 1.00000 | 7.21318e-17 | 1.000000 |
| rad34         | 1.50859e-17 | 1.00000 | 1.50862e-17 | 1.000000 |
| rad58         | 5.48063e-18 | 1.00000 | 5.48071e-18 | 1.000000 |
| rad65         | 1.02192e-18 | 1.00000 | 1.02194e-18 | 1.000000 |
| rad42         | 3.17945e-19 | 1.00000 | 3.17948e-19 | 1.000000 |
| rad41         | 9.67757e-20 | 1.00000 | 9.67766e-20 | 1.000000 |
| rad47         | 7.87269e-25 | 1.00000 | 7.87280e-25 | 1.000000 |

1.00000000 Pa, 300.000000 K

| Rate constant      | True (fraction)       | Effective (fraction)  |
|--------------------|-----------------------|-----------------------|
| Total              | 6.34395e-16 (1.00 )   | 6.34375e-16 (1.00 )   |
| Formation of rad11 | 4.51153e-16 (0.711 )  | 4.51138e-16 (0.711 )  |
| Formation of rad6  | 1.51589e-16 (0.239 )  | 1.51584e-16 (0.239 )  |
| H-abstraction      | 3.16530e-17 (0.0499 ) | 3.16530e-17 (0.0499 ) |

| species            | PYtrue      | Cumul    | PYeffective | Cumul    |
|--------------------|-------------|----------|-------------|----------|
| rad6               | 0.811364    | 0.811364 | 0.811388    | 0.811388 |
| Indene+H           | 0.128477    | 0.939841 | 0.128482    | 0.939870 |
| Benzene+2-propynyl | 0.0498949   | 0.989736 | 0.0498964   | 0.989766 |
| C2H2+PhCH2         | 0.00563395  | 0.995370 | 0.00563412  | 0.995401 |
| PhCCH+CH3          | 0.00190605  | 0.997276 | 0.00190611  | 0.997307 |
| PhCHCCH2+H         | 0.000808368 | 0.998084 | 0.000808394 | 0.998115 |
| rad2               | 0.000635695 | 0.998720 | 0.000635715 | 0.998751 |
| PhCCCH3+H          | 0.000505674 | 0.999226 | 0.000505689 | 0.999256 |
| rad28              | 0.000285186 | 0.999511 | 0.000285195 | 0.999542 |
| Ph+MeAc            | 0.000145303 | 0.999656 | 0.000145308 | 0.999687 |
| rad7               | 0.000113547 | 0.999770 | 0.000113551 | 0.999801 |
| rad26              | 5.09964e-05 | 0.999821 | 5.09980e-05 | 0.999852 |
| rad1               | 4.79021e-05 | 0.999869 | 4.79037e-05 | 0.999899 |
| rad10              | 4.06485e-05 | 0.999909 | 4.06498e-05 | 0.999940 |
| rad11              | 3.17800e-05 | 0.999941 | 3.17809e-05 | 0.999972 |
| Phenyl+Allene      | 3.06198e-05 | 0.999972 | 0.00000     | 0.999972 |
| PAH7+H             | 9.96812e-06 | 0.999982 | 9.96849e-06 | 0.999982 |
| rad3               | 6.28593e-06 | 0.999988 | 6.28612e-06 | 0.999988 |
| rad4               | 3.12602e-06 | 0.999991 | 3.12611e-06 | 0.999991 |
| rad23              | 2.67532e-06 | 0.999994 | 2.67540e-06 | 0.999994 |
| PhCH2CCH+H         | 2.43718e-06 | 0.999996 | 2.43726e-06 | 0.999996 |
| rad39              | 2.20663e-06 | 0.999998 | 2.20670e-06 | 0.999999 |
| rad13              | 4.49526e-07 | 0.999999 | 4.49540e-07 | 0.999999 |
| rad30              | 4.34968e-07 | 0.999999 | 4.34981e-07 | 0.999999 |
| PAH9+H             | 1.75929e-07 | 1.000000 | 1.75934e-07 | 1.000000 |
| rad19anti          | 1.54077e-07 | 1.000000 | 1.54081e-07 | 1.000000 |
| rad45              | 6.80187e-08 | 1.000000 | 6.80208e-08 | 1.000000 |
| rad35              | 6.00912e-08 | 1.000000 | 6.00930e-08 | 1.000000 |
| rad37              | 5.02525e-08 | 1.000000 | 5.02540e-08 | 1.000000 |
| rad38              | 4.88938e-08 | 1.000000 | 4.88954e-08 | 1.000000 |
| rad9               | 8.02700e-09 | 1.000000 | 8.02725e-09 | 1.000000 |
| rad22              | 4.07862e-09 | 1.000000 | 4.07875e-09 | 1.000000 |
| rad36              | 2.31828e-09 | 1.000000 | 2.31835e-09 | 1.000000 |

|               |             |          |             |         |
|---------------|-------------|----------|-------------|---------|
| rad46         | 1.66050e-09 | 1.000000 | 1.66055e-09 | 1.00000 |
| rad33         | 1.00416e-09 | 1.000000 | 1.00419e-09 | 1.00000 |
| rad14         | 6.02827e-10 | 1.000000 | 6.02845e-10 | 1.00000 |
| rad27         | 5.46535e-10 | 1.000000 | 5.46551e-10 | 1.00000 |
| rad25         | 3.94653e-10 | 1.000000 | 3.94664e-10 | 1.00000 |
| rad60syn      | 3.55631e-10 | 1.000000 | 3.55642e-10 | 1.00000 |
| rad60anti     | 1.52906e-10 | 1.000000 | 1.52911e-10 | 1.00000 |
| rad19syn      | 6.80917e-11 | 1.000000 | 6.80937e-11 | 1.00000 |
| PAH3+H        | 3.82813e-11 | 1.000000 | 3.82824e-11 | 1.00000 |
| rad59         | 7.95027e-12 | 1.000000 | 7.95051e-12 | 1.00000 |
| rad15         | 4.91953e-12 | 1.000000 | 4.91967e-12 | 1.00000 |
| rad54         | 3.90412e-12 | 1.000000 | 3.90423e-12 | 1.00000 |
| PAH10+CH3     | 2.49492e-12 | 1.000000 | 2.49500e-12 | 1.00000 |
| rad50         | 1.58106e-12 | 1.000000 | 1.58111e-12 | 1.00000 |
| rad20         | 7.75269e-13 | 1.000000 | 7.75292e-13 | 1.00000 |
| rad21         | 6.32838e-13 | 1.000000 | 6.32857e-13 | 1.00000 |
| rad67         | 5.04546e-13 | 1.000000 | 5.04561e-13 | 1.00000 |
| rad43         | 4.72390e-13 | 1.000000 | 4.72405e-13 | 1.00000 |
| rad18         | 3.00896e-13 | 1.000000 | 3.00905e-13 | 1.00000 |
| rad62         | 2.15781e-13 | 1.000000 | 2.15788e-13 | 1.00000 |
| rad31         | 1.36766e-13 | 1.000000 | 1.36769e-13 | 1.00000 |
| PhcycC3H3_A+H | 7.48974e-14 | 1.000000 | 7.48997e-14 | 1.00000 |
| rad5          | 4.77598e-14 | 1.000000 | 4.77612e-14 | 1.00000 |
| rad70         | 2.86430e-14 | 1.000000 | 2.86439e-14 | 1.00000 |
| rad55         | 1.29140e-14 | 1.000000 | 1.29144e-14 | 1.00000 |
| rad52         | 4.23828e-15 | 1.000000 | 4.23840e-15 | 1.00000 |
| PAH1+H        | 3.75536e-15 | 1.000000 | 3.75547e-15 | 1.00000 |
| rad24         | 8.15374e-16 | 1.000000 | 8.15398e-16 | 1.00000 |
| rad51         | 5.68092e-16 | 1.000000 | 5.68109e-16 | 1.00000 |
| rad34         | 2.41253e-16 | 1.000000 | 2.41261e-16 | 1.00000 |
| rad12         | 8.33448e-17 | 1.000000 | 8.33474e-17 | 1.00000 |
| rad58         | 4.50918e-17 | 1.000000 | 4.50932e-17 | 1.00000 |
| rad65         | 9.41798e-18 | 1.000000 | 9.41827e-18 | 1.00000 |
| rad42         | 7.75361e-18 | 1.000000 | 7.75385e-18 | 1.00000 |
| rad41         | 2.50101e-18 | 1.000000 | 2.50108e-18 | 1.00000 |
| rad53         | 1.45469e-19 | 1.000000 | 1.45473e-19 | 1.00000 |
| rad64         | 3.39742e-20 | 1.000000 | 3.39753e-20 | 1.00000 |
| rad56         | 3.55617e-22 | 1.000000 | 3.55628e-22 | 1.00000 |
| rad61         | 4.64150e-23 | 1.000000 | 4.64165e-23 | 1.00000 |
| rad68syn      | 3.69556e-23 | 1.000000 | 3.69567e-23 | 1.00000 |
| rad68anti     | 2.65961e-23 | 1.000000 | 2.65969e-23 | 1.00000 |
| rad47         | 4.06588e-24 | 1.000000 | 4.06601e-24 | 1.00000 |
| rad40syn      | 6.04956e-26 | 1.000000 | 6.04975e-26 | 1.00000 |
| rad73         | 2.31307e-26 | 1.000000 | 2.31314e-26 | 1.00000 |
| rad40anti     | 1.64407e-26 | 1.000000 | 1.64413e-26 | 1.00000 |
| PAH8+H        | 1.44621e-26 | 1.000000 | 1.44626e-26 | 1.00000 |
| rad71         | 5.70760e-28 | 1.000000 | 5.70779e-28 | 1.00000 |
| rad72         | 1.00844e-33 | 1.000000 | 1.00847e-33 | 1.00000 |
| rad8          | 1.11359e-36 | 1.000000 | 1.11363e-36 | 1.00000 |

1.00000000 Pa, 400.000000 K

=====

| Rate constant      | True (fraction)       | Effective (fraction)  |
|--------------------|-----------------------|-----------------------|
| Total              | 5.11288e-15 (1.00 )   | 5.11084e-15 (1.00 )   |
| Formation of rad11 | 3.08094e-15 (0.603 )  | 3.07958e-15 (0.603 )  |
| Formation of rad6  | 1.54092e-15 (0.301 )  | 1.54024e-15 (0.301 )  |
| H-abstraction      | 4.91025e-16 (0.0960 ) | 4.91025e-16 (0.0961 ) |

| species            | PYtrue      | Cumul    | PYeffective | Cumul    |
|--------------------|-------------|----------|-------------|----------|
| rad6               | 0.585762    | 0.585762 | 0.585996    | 0.585996 |
| Indene+H           | 0.276239    | 0.862001 | 0.276351    | 0.862347 |
| Benzene+2-propynyl | 0.0960368   | 0.958038 | 0.0960752   | 0.958422 |
| C2H2+PhCH2         | 0.0225911   | 0.980629 | 0.0226001   | 0.981022 |
| PhCCH+CH3          | 0.0101626   | 0.990792 | 0.0101666   | 0.991189 |
| PhCHCCH2+H         | 0.00407078  | 0.994863 | 0.00407241  | 0.995261 |
| PhCCCH3+H          | 0.00238326  | 0.997246 | 0.00238422  | 0.997646 |
| Ph+MeAc            | 0.00102679  | 0.998273 | 0.00102720  | 0.998673 |
| rad2               | 0.000509540 | 0.998782 | 0.000509743 | 0.999182 |
| Phenyl+Allene      | 0.000399655 | 0.999182 | 0.00000     | 0.999182 |
| rad28              | 0.000385859 | 0.999568 | 0.000386014 | 0.999568 |
| PAH7+H             | 0.000102383 | 0.999670 | 0.000102424 | 0.999671 |
| rad7               | 8.14918e-05 | 0.999752 | 8.15244e-05 | 0.999752 |
| rad26              | 5.69060e-05 | 0.999808 | 5.69288e-05 | 0.999809 |
| rad1               | 4.74197e-05 | 0.999856 | 4.74386e-05 | 0.999857 |
| PhCH2CCH+H         | 4.63097e-05 | 0.999902 | 4.63282e-05 | 0.999903 |
| rad10              | 3.25175e-05 | 0.999935 | 3.25304e-05 | 0.999936 |
| rad39              | 2.40278e-05 | 0.999959 | 2.40374e-05 | 0.999960 |
| rad11              | 2.29631e-05 | 0.999982 | 2.29723e-05 | 0.999983 |

|               |             |          |             |          |
|---------------|-------------|----------|-------------|----------|
| rad3          | 5.35863e-06 | 0.999987 | 5.36077e-06 | 0.999988 |
| rad23         | 2.87731e-06 | 0.999990 | 2.87846e-06 | 0.999991 |
| rad4          | 2.82204e-06 | 0.999993 | 2.82317e-06 | 0.999994 |
| rad30         | 2.22526e-06 | 0.999995 | 2.22615e-06 | 0.999996 |
| rad19anti     | 1.38887e-06 | 0.999996 | 1.38942e-06 | 0.999997 |
| PAH9+H        | 1.20030e-06 | 0.999998 | 1.20077e-06 | 0.999999 |
| rad37         | 4.92185e-07 | 0.999998 | 4.92382e-07 | 0.999999 |
| rad35         | 3.69788e-07 | 0.999998 | 3.69936e-07 | 0.999999 |
| rad38         | 3.61381e-07 | 0.999999 | 3.61526e-07 | 1.000000 |
| rad13         | 3.57740e-07 | 0.999999 | 3.57883e-07 | 1.000000 |
| rad45         | 1.00283e-07 | 0.999999 | 1.00323e-07 | 1.000000 |
| rad46         | 1.85356e-08 | 0.999999 | 1.85430e-08 | 1.000000 |
| rad9          | 7.88010e-09 | 0.999999 | 7.88325e-09 | 1.000000 |
| rad60syn      | 4.33300e-09 | 0.999999 | 4.33474e-09 | 1.000000 |
| rad19syn      | 4.16405e-09 | 0.999999 | 4.16571e-09 | 1.000000 |
| rad36         | 3.84230e-09 | 0.999999 | 3.84383e-09 | 1.000000 |
| rad22         | 3.25190e-09 | 0.999999 | 3.25320e-09 | 1.000000 |
| rad60anti     | 2.01532e-09 | 0.999999 | 2.01613e-09 | 1.000000 |
| PAH3+H        | 1.18721e-09 | 0.999999 | 1.18769e-09 | 1.000000 |
| rad33         | 8.85266e-10 | 0.999999 | 8.85620e-10 | 1.000000 |
| rad14         | 5.16344e-10 | 0.999999 | 5.16551e-10 | 1.000000 |
| rad27         | 4.91208e-10 | 0.999999 | 4.91404e-10 | 1.000000 |
| rad54         | 3.97499e-10 | 0.999999 | 3.97657e-10 | 1.000000 |
| rad25         | 3.22163e-10 | 0.999999 | 3.22293e-10 | 1.000000 |
| rad59         | 2.28131e-10 | 0.999999 | 2.28223e-10 | 1.000000 |
| PAH10+CH3     | 1.89702e-10 | 0.999999 | 1.89778e-10 | 1.000000 |
| rad50         | 6.79722e-11 | 0.999999 | 6.79994e-11 | 1.000000 |
| rad43         | 3.07023e-11 | 0.999999 | 3.07146e-11 | 1.000000 |
| PhcycC3H3_A+H | 2.38574e-11 | 0.999999 | 2.38670e-11 | 1.000000 |
| rad62         | 2.17180e-11 | 0.999999 | 2.17266e-11 | 1.000000 |
| rad67         | 2.14696e-11 | 0.999999 | 2.14782e-11 | 1.000000 |
| rad70         | 7.61848e-12 | 0.999999 | 7.62153e-12 | 1.000000 |
| rad15         | 4.93408e-12 | 0.999999 | 4.93605e-12 | 1.000000 |
| rad55         | 3.50324e-12 | 0.999999 | 3.50463e-12 | 1.000000 |
| PAH1+H        | 2.22296e-12 | 0.999999 | 2.22385e-12 | 1.000000 |
| rad20         | 1.58709e-12 | 0.999999 | 1.58772e-12 | 1.000000 |
| rad31         | 1.45794e-12 | 0.999999 | 1.45852e-12 | 1.000000 |
| rad21         | 1.44706e-12 | 0.999999 | 1.44764e-12 | 1.000000 |
| rad52         | 4.42477e-13 | 0.999999 | 4.42655e-13 | 1.000000 |
| rad18         | 3.52483e-13 | 0.999999 | 3.52625e-13 | 1.000000 |
| rad34         | 1.77407e-13 | 0.999999 | 1.77478e-13 | 1.000000 |
| rad51         | 1.41346e-13 | 0.999999 | 1.41403e-13 | 1.000000 |
| rad5          | 6.28108e-14 | 0.999999 | 6.28360e-14 | 1.000000 |
| rad58         | 1.75166e-14 | 0.999999 | 1.75237e-14 | 1.000000 |
| rad42         | 7.47615e-15 | 0.999999 | 7.47914e-15 | 1.000000 |
| rad65         | 3.35681e-15 | 0.999999 | 3.35815e-15 | 1.000000 |
| rad41         | 2.38476e-15 | 0.999999 | 2.38571e-15 | 1.000000 |
| rad24         | 1.57775e-15 | 0.999999 | 1.57838e-15 | 1.000000 |
| rad53         | 9.20479e-16 | 0.999999 | 9.20846e-16 | 1.000000 |
| rad64         | 3.20851e-16 | 0.999999 | 3.20979e-16 | 1.000000 |
| rad12         | 1.33342e-16 | 0.999999 | 1.33395e-16 | 1.000000 |
| rad56         | 1.66438e-17 | 0.999999 | 1.66505e-17 | 1.000000 |
| rad68syn      | 1.91531e-18 | 0.999999 | 1.91607e-18 | 1.000000 |
| rad68anti     | 1.37686e-18 | 0.999999 | 1.37742e-18 | 1.000000 |
| rad61         | 1.14309e-18 | 0.999999 | 1.14355e-18 | 1.000000 |
| rad73         | 6.45268e-20 | 0.999999 | 6.45525e-20 | 1.000000 |
| PAH8+H        | 2.01282e-20 | 0.999999 | 2.01363e-20 | 1.000000 |
| rad40syn      | 1.92063e-20 | 0.999999 | 1.92140e-20 | 1.000000 |
| rad71         | 1.52503e-20 | 0.999999 | 1.52564e-20 | 1.000000 |
| rad40anti     | 6.11505e-21 | 0.999999 | 6.11749e-21 | 1.000000 |
| rad47         | 7.43766e-22 | 0.999999 | 7.44063e-22 | 1.000000 |
| rad72         | 8.38249e-24 | 0.999999 | 8.38584e-24 | 1.000000 |
| rad8          | 1.06321e-33 | 0.999999 | 1.06363e-33 | 1.000000 |

1.00000000 Pa, 500.000000 K

=====

| Rate constant      | True (fraction)      | Effective (fraction) |
|--------------------|----------------------|----------------------|
| Total              | 2.11551e-14 (1.00 )  | 2.11047e-14 (1.00 )  |
| Formation of rad11 | 1.10850e-14 (0.524 ) | 1.10543e-14 (0.524 ) |
| Formation of rad6  | 7.08033e-15 (0.335 ) | 7.06070e-15 (0.335 ) |
| H-abstraction      | 2.98976e-15 (0.141 ) | 2.98976e-15 (0.142 ) |

| species            | PYtrue    | Cumul    | PYeffective | Cumul    |
|--------------------|-----------|----------|-------------|----------|
| Indene+H           | 0.447340  | 0.447340 | 0.448408    | 0.448408 |
| rad6               | 0.302466  | 0.749806 | 0.303189    | 0.751597 |
| Benzene+2-propynyl | 0.141326  | 0.891132 | 0.141663    | 0.893260 |
| C2H2+PhCH2         | 0.0587089 | 0.949841 | 0.0588491   | 0.952109 |
| PhCCH+CH3          | 0.0269075 | 0.976749 | 0.0269717   | 0.979081 |



|               |             |          |             |          |
|---------------|-------------|----------|-------------|----------|
| PhCHCCH2+H    | 0.0107069   | 0.987455 | 0.0107325   | 0.989813 |
| PhCCCH3+H     | 0.00534848  | 0.992804 | 0.00536124  | 0.995174 |
| Ph+MeAc       | 0.00317864  | 0.995983 | 0.00318622  | 0.998361 |
| Phenyl+Allene | 0.00238141  | 0.998364 | 0.000000    | 0.998361 |
| PAH7+H        | 0.000447954 | 0.998812 | 0.000449024 | 0.998810 |
| PhCH2CCH+H    | 0.000360175 | 0.999172 | 0.000361035 | 0.999171 |
| rad2          | 0.000283119 | 0.999455 | 0.000283795 | 0.999454 |
| rad28         | 0.000258986 | 0.999714 | 0.000259604 | 0.999714 |
| rad39         | 0.000108459 | 0.999823 | 0.000108718 | 0.999823 |
| rad7          | 4.29476e-05 | 0.999866 | 4.30501e-05 | 0.999866 |
| rad1          | 3.38077e-05 | 0.999899 | 3.38884e-05 | 0.999900 |
| rad26         | 3.27696e-05 | 0.999932 | 3.28479e-05 | 0.999933 |
| rad10         | 1.55781e-05 | 0.999948 | 1.56152e-05 | 0.999948 |
| rad11         | 1.23750e-05 | 0.999960 | 1.24044e-05 | 0.999961 |
| rad23         | 8.75144e-06 | 0.999969 | 8.77238e-06 | 0.999969 |
| rad30         | 6.95702e-06 | 0.999976 | 6.97363e-06 | 0.999976 |
| rad19anti     | 6.50941e-06 | 0.999982 | 6.52495e-06 | 0.999983 |
| PAH9+H        | 4.99377e-06 | 0.999987 | 5.00570e-06 | 0.999988 |
| rad3          | 3.91114e-06 | 0.999991 | 3.92048e-06 | 0.999992 |
| rad4          | 2.20221e-06 | 0.999993 | 2.20746e-06 | 0.999994 |
| rad37         | 1.87776e-06 | 0.999995 | 1.88224e-06 | 0.999996 |
| rad38         | 1.59755e-06 | 0.999997 | 1.60136e-06 | 0.999997 |
| rad35         | 1.41145e-06 | 0.999998 | 1.41481e-06 | 0.999999 |
| rad45         | 7.80736e-07 | 0.999999 | 7.82599e-07 | 1.000000 |
| rad13         | 2.18676e-07 | 0.999999 | 2.19198e-07 | 1.000000 |
| rad46         | 1.12014e-07 | 0.999999 | 1.12282e-07 | 1.000000 |
| rad19syn      | 7.33168e-08 | 1.000000 | 7.34918e-08 | 1.000000 |
| rad36         | 3.68762e-08 | 1.000000 | 3.69643e-08 | 1.000000 |
| rad60syn      | 2.52157e-08 | 1.000000 | 2.52760e-08 | 1.000000 |
| PAH3+H        | 1.36752e-08 | 1.000000 | 1.37079e-08 | 1.000000 |
| rad60anti     | 1.23759e-08 | 1.000000 | 1.24055e-08 | 1.000000 |
| rad9          | 1.04538e-08 | 1.000000 | 1.04788e-08 | 1.000000 |
| rad54         | 1.00241e-08 | 1.000000 | 1.00480e-08 | 1.000000 |
| rad22         | 5.53818e-09 | 1.000000 | 5.55141e-09 | 1.000000 |
| PAH10+CH3     | 3.42848e-09 | 1.000000 | 3.43667e-09 | 1.000000 |
| rad59         | 2.44017e-09 | 1.000000 | 2.44600e-09 | 1.000000 |
| PhcycC3H3_A+H | 1.24755e-09 | 1.000000 | 1.25053e-09 | 1.000000 |
| rad50         | 1.18978e-09 | 1.000000 | 1.19262e-09 | 1.000000 |
| rad33         | 6.43239e-10 | 1.000000 | 6.44774e-10 | 1.000000 |
| rad62         | 4.74122e-10 | 1.000000 | 4.75254e-10 | 1.000000 |
| rad43         | 4.62409e-10 | 1.000000 | 4.63513e-10 | 1.000000 |
| rad67         | 3.85761e-10 | 1.000000 | 3.86682e-10 | 1.000000 |
| rad70         | 3.38951e-10 | 1.000000 | 3.39760e-10 | 1.000000 |
| rad14         | 3.05867e-10 | 1.000000 | 3.06596e-10 | 1.000000 |
| rad27         | 2.82867e-10 | 1.000000 | 2.83542e-10 | 1.000000 |
| rad25         | 2.06552e-10 | 1.000000 | 2.07045e-10 | 1.000000 |
| PAH1+H        | 1.63729e-10 | 1.000000 | 1.64120e-10 | 1.000000 |
| rad55         | 1.58063e-10 | 1.000000 | 1.58440e-10 | 1.000000 |
| rad52         | 1.64179e-11 | 1.000000 | 1.64570e-11 | 1.000000 |
| rad34         | 1.41146e-11 | 1.000000 | 1.41483e-11 | 1.000000 |
| rad51         | 1.26358e-11 | 1.000000 | 1.26660e-11 | 1.000000 |
| rad31         | 1.17106e-11 | 1.000000 | 1.17386e-11 | 1.000000 |
| rad15         | 6.84018e-12 | 1.000000 | 6.85651e-12 | 1.000000 |
| rad21         | 4.19014e-12 | 1.000000 | 4.20014e-12 | 1.000000 |
| rad20         | 3.90952e-12 | 1.000000 | 3.91886e-12 | 1.000000 |
| rad58         | 1.00952e-12 | 1.000000 | 1.01193e-12 | 1.000000 |
| rad42         | 6.27860e-13 | 1.000000 | 6.29359e-13 | 1.000000 |
| rad18         | 4.29129e-13 | 1.000000 | 4.30154e-13 | 1.000000 |
| rad65         | 3.61550e-13 | 1.000000 | 3.62413e-13 | 1.000000 |
| rad53         | 2.40223e-13 | 1.000000 | 2.40796e-13 | 1.000000 |
| rad41         | 2.06882e-13 | 1.000000 | 2.07376e-13 | 1.000000 |
| rad64         | 9.86849e-14 | 1.000000 | 9.89208e-14 | 1.000000 |
| rad5          | 4.53987e-14 | 1.000000 | 4.55071e-14 | 1.000000 |
| rad56         | 1.48225e-14 | 1.000000 | 1.48579e-14 | 1.000000 |
| rad24         | 1.41693e-14 | 1.000000 | 1.42032e-14 | 1.000000 |
| rad73         | 9.90077e-15 | 1.000000 | 9.92443e-15 | 1.000000 |
| rad71         | 7.79961e-15 | 1.000000 | 7.81823e-15 | 1.000000 |
| rad68syn      | 1.68800e-15 | 1.000000 | 1.69202e-15 | 1.000000 |
| rad61         | 1.38822e-15 | 1.000000 | 1.39153e-15 | 1.000000 |
| rad68anti     | 1.18214e-15 | 1.000000 | 1.18496e-15 | 1.000000 |
| rad12         | 4.62462e-16 | 1.000000 | 4.63566e-16 | 1.000000 |
| PAH8+H        | 3.82269e-16 | 1.000000 | 3.83181e-16 | 1.000000 |
| rad40syn      | 1.08262e-16 | 1.000000 | 1.08520e-16 | 1.000000 |
| rad72         | 8.78690e-17 | 1.000000 | 8.80782e-17 | 1.000000 |
| rad40anti     | 6.18541e-17 | 1.000000 | 6.20017e-17 | 1.000000 |
| rad47         | 5.16867e-20 | 1.000000 | 5.18101e-20 | 1.000000 |
| rad8          | 4.27166e-30 | 1.000000 | 4.28185e-30 | 1.000000 |

1.00000000 Pa, 600.000000 K

=====

| Rate constant      | True (fraction)      | Effective (fraction) |
|--------------------|----------------------|----------------------|
| Total              | 6.08120e-14 (1.00 )  | 6.03090e-14 (1.00 )  |
| Formation of rad11 | 2.83304e-14 (0.466 ) | 2.80438e-14 (0.465 ) |
| Formation of rad6  | 2.13840e-14 (0.352 ) | 2.11677e-14 (0.351 ) |
| H-abstraction      | 1.10975e-14 (0.182 ) | 1.10975e-14 (0.184 ) |

| species            | PYtrue      | Cumul    | PYeffective | Cumul    |
|--------------------|-------------|----------|-------------|----------|
| Indene+H           | 0.516394    | 0.516394 | 0.520700    | 0.520700 |
| Benzene+2-propynyl | 0.182488    | 0.698882 | 0.184010    | 0.704710 |
| rad6               | 0.112163    | 0.811044 | 0.113098    | 0.817808 |
| C2H2+PhCH2         | 0.101419    | 0.912463 | 0.102265    | 0.920073 |
| PhCCH+CH3          | 0.0443472   | 0.956810 | 0.0447170   | 0.964790 |
| PhCHCCH2+H         | 0.0186682   | 0.975479 | 0.0188239   | 0.983614 |
| Phenyl+Allene      | 0.00827077  | 0.983749 | 0.000000    | 0.983614 |
| PhCCCH3+H          | 0.00718358  | 0.990933 | 0.00724349  | 0.990857 |
| Ph+MeAc            | 0.00569884  | 0.996632 | 0.00574637  | 0.996604 |
| PhCH2CCH+H         | 0.00153821  | 0.998170 | 0.00155103  | 0.998155 |
| PAH7+H             | 0.00115704  | 0.999327 | 0.00116669  | 0.999321 |
| rad39              | 0.000282942 | 0.999610 | 0.000285303 | 0.999607 |
| rad2               | 0.000136890 | 0.999747 | 0.000138032 | 0.999745 |
| rad28              | 0.000107144 | 0.999854 | 0.000108038 | 0.999853 |
| rad1               | 2.01952e-05 | 0.999874 | 2.03637e-05 | 0.999873 |
| rad19anti          | 1.97146e-05 | 0.999894 | 1.98791e-05 | 0.999893 |
| rad23              | 1.91201e-05 | 0.999913 | 1.92796e-05 | 0.999912 |
| rad7               | 1.68696e-05 | 0.999930 | 1.70103e-05 | 0.999929 |
| rad30              | 1.41579e-05 | 0.999944 | 1.42760e-05 | 0.999944 |
| PAH9+H             | 1.39168e-05 | 0.999958 | 1.40329e-05 | 0.999958 |
| rad26              | 1.17406e-05 | 0.999970 | 1.18385e-05 | 0.999970 |
| rad11              | 5.09313e-06 | 0.999975 | 5.13560e-06 | 0.999975 |
| rad10              | 4.84395e-06 | 0.999980 | 4.88435e-06 | 0.999980 |
| rad38              | 4.70021e-06 | 0.999984 | 4.73941e-06 | 0.999984 |
| rad37              | 3.93086e-06 | 0.999988 | 3.96364e-06 | 0.999988 |
| rad35              | 3.62059e-06 | 0.999992 | 3.65078e-06 | 0.999992 |
| rad45              | 2.56314e-06 | 0.999995 | 2.58453e-06 | 0.999994 |
| rad3               | 2.29674e-06 | 0.999997 | 2.31590e-06 | 0.999997 |
| rad4               | 1.40244e-06 | 0.999998 | 1.41413e-06 | 0.999998 |
| rad19syn           | 5.68528e-07 | 0.999999 | 5.73269e-07 | 0.999999 |
| rad46              | 4.37346e-07 | 0.999999 | 4.40993e-07 | 0.999999 |
| rad36              | 1.70522e-07 | 0.999999 | 1.71944e-07 | 0.999999 |
| rad13              | 1.07955e-07 | 1.000000 | 1.08855e-07 | 0.999999 |
| rad54              | 1.00188e-07 | 1.000000 | 1.01024e-07 | 1.000000 |
| rad60syn           | 8.59377e-08 | 1.000000 | 8.66549e-08 | 1.000000 |
| PAH3+H             | 7.99329e-08 | 1.000000 | 8.05996e-08 | 1.000000 |
| rad60anti          | 4.39981e-08 | 1.000000 | 4.43650e-08 | 1.000000 |
| PAH10+CH3          | 2.60721e-08 | 1.000000 | 2.62895e-08 | 1.000000 |
| PhcycC3H3_A+H      | 2.05177e-08 | 1.000000 | 2.06888e-08 | 1.000000 |
| rad9               | 1.94516e-08 | 1.000000 | 1.96139e-08 | 1.000000 |
| rad50              | 1.72565e-08 | 1.000000 | 1.74004e-08 | 1.000000 |
| rad59              | 1.32970e-08 | 1.000000 | 1.34079e-08 | 1.000000 |
| rad22              | 9.64664e-09 | 1.000000 | 9.72709e-09 | 1.000000 |
| rad70              | 4.86983e-09 | 1.000000 | 4.91044e-09 | 1.000000 |
| rad62              | 3.92070e-09 | 1.000000 | 3.95340e-09 | 1.000000 |
| rad67              | 3.71109e-09 | 1.000000 | 3.74204e-09 | 1.000000 |
| PAH1+H             | 3.32508e-09 | 1.000000 | 3.35281e-09 | 1.000000 |
| rad43              | 2.85165e-09 | 1.000000 | 2.87543e-09 | 1.000000 |
| rad55              | 2.28501e-09 | 1.000000 | 2.30407e-09 | 1.000000 |
| rad51              | 1.84044e-09 | 1.000000 | 1.85579e-09 | 1.000000 |
| rad52              | 7.54972e-10 | 1.000000 | 7.61269e-10 | 1.000000 |
| rad33              | 4.38327e-10 | 1.000000 | 4.41983e-10 | 1.000000 |
| rad34              | 2.97422e-10 | 1.000000 | 2.99902e-10 | 1.000000 |
| rad14              | 1.35055e-10 | 1.000000 | 1.36181e-10 | 1.000000 |
| rad27              | 1.16695e-10 | 1.000000 | 1.17668e-10 | 1.000000 |
| rad25              | 1.10435e-10 | 1.000000 | 1.11356e-10 | 1.000000 |
| rad65              | 5.07610e-11 | 1.000000 | 5.11843e-11 | 1.000000 |
| rad71              | 3.38648e-11 | 1.000000 | 3.41471e-11 | 1.000000 |
| rad73              | 2.66773e-11 | 1.000000 | 2.68998e-11 | 1.000000 |
| rad31              | 2.36114e-11 | 1.000000 | 2.38083e-11 | 1.000000 |
| rad58              | 1.91411e-11 | 1.000000 | 1.93007e-11 | 1.000000 |
| rad21              | 1.71134e-11 | 1.000000 | 1.72561e-11 | 1.000000 |
| rad42              | 1.30220e-11 | 1.000000 | 1.31306e-11 | 1.000000 |
| rad20              | 1.28053e-11 | 1.000000 | 1.29121e-11 | 1.000000 |
| rad15              | 1.23609e-11 | 1.000000 | 1.24640e-11 | 1.000000 |
| rad53              | 1.10560e-11 | 1.000000 | 1.11482e-11 | 1.000000 |
| rad41              | 6.64572e-12 | 1.000000 | 6.70115e-12 | 1.000000 |
| rad64              | 5.52553e-12 | 1.000000 | 5.57161e-12 | 1.000000 |
| rad56              | 1.52320e-12 | 1.000000 | 1.53591e-12 | 1.000000 |
| rad72              | 9.61369e-13 | 1.000000 | 9.69388e-13 | 1.000000 |
| PAH8+H             | 6.03730e-13 | 1.000000 | 6.08764e-13 | 1.000000 |

|           |             |          |             |          |
|-----------|-------------|----------|-------------|----------|
| rad61     | 6.00082e-13 | 1.000000 | 6.05087e-13 | 1.000000 |
| rad18     | 5.86470e-13 | 1.000000 | 5.91361e-13 | 1.000000 |
| rad68syn  | 2.70094e-13 | 1.000000 | 2.72346e-13 | 1.000000 |
| rad68anti | 1.81693e-13 | 1.000000 | 1.83208e-13 | 1.000000 |
| rad24     | 1.60388e-13 | 1.000000 | 1.61726e-13 | 1.000000 |
| rad40syn  | 1.07595e-13 | 1.000000 | 1.08492e-13 | 1.000000 |
| rad40anti | 8.21918e-14 | 1.000000 | 8.28768e-14 | 1.000000 |
| rad5      | 2.33444e-14 | 1.000000 | 2.35390e-14 | 1.000000 |
| rad12     | 7.11901e-15 | 1.000000 | 7.17838e-15 | 1.000000 |
| rad47     | 2.56224e-18 | 1.000000 | 2.58360e-18 | 1.000000 |
| rad8      | 5.54021e-26 | 1.000000 | 5.58641e-26 | 1.000000 |

1.00000000 Pa, 700.000000 K

| Rate constant      | True (fraction)      | Effective (fraction) |
|--------------------|----------------------|----------------------|
| Total              | 1.39564e-13 (1.00 )  | 1.36704e-13 (1.00 )  |
| Formation of rad11 | 5.88273e-14 (0.422 ) | 5.72839e-14 (0.419 ) |
| Formation of rad6  | 5.01684e-14 (0.359 ) | 4.88521e-14 (0.357 ) |
| H-abstraction      | 3.05678e-14 (0.219 ) | 3.05678e-14 (0.224 ) |

| species            | PYtrue      | Cumul    | PYeffective | Cumul    |
|--------------------|-------------|----------|-------------|----------|
| Indene+H           | 0.486256    | 0.486256 | 0.496428    | 0.496428 |
| Benzene+2-propynyl | 0.219024    | 0.705280 | 0.223606    | 0.720034 |
| C2H2+PhCH2         | 0.136192    | 0.841472 | 0.139041    | 0.859075 |
| PhCCH+CH3          | 0.0563624   | 0.897834 | 0.0575415   | 0.916617 |
| rad6               | 0.0325838   | 0.930418 | 0.0332655   | 0.949882 |
| PhCHCCH2+H         | 0.0269443   | 0.957363 | 0.0275079   | 0.977390 |
| Phenyl+Allene      | 0.0204905   | 0.977853 | 0.000000    | 0.977390 |
| Ph+MeAc            | 0.00749969  | 0.985353 | 0.00765659  | 0.985047 |
| PhCCCH3+H          | 0.00718305  | 0.992536 | 0.00733331  | 0.992380 |
| PhCH2CCH+H         | 0.00447324  | 0.997009 | 0.00456682  | 0.996947 |
| PAH7+H             | 0.00220921  | 0.999218 | 0.00225542  | 0.999202 |
| rad39              | 0.000536555 | 0.999755 | 0.000547779 | 0.999750 |
| rad19anti          | 4.60684e-05 | 0.999801 | 4.70321e-05 | 0.999797 |
| rad2               | 4.56857e-05 | 0.999847 | 4.66414e-05 | 0.999844 |
| rad28              | 3.28312e-05 | 0.999879 | 3.35180e-05 | 0.999877 |
| PAH9+H             | 3.04113e-05 | 0.999910 | 3.10475e-05 | 0.999908 |
| rad30              | 2.20999e-05 | 0.999932 | 2.25622e-05 | 0.999931 |
| rad23              | 1.49276e-05 | 0.999947 | 1.52398e-05 | 0.999946 |
| rad38              | 1.07918e-05 | 0.999958 | 1.10177e-05 | 0.999957 |
| rad1               | 7.65294e-06 | 0.999965 | 7.81301e-06 | 0.999965 |
| rad35              | 7.30656e-06 | 0.999973 | 7.45941e-06 | 0.999972 |
| rad37              | 5.85115e-06 | 0.999978 | 5.97354e-06 | 0.999978 |
| rad7               | 5.51490e-06 | 0.999984 | 5.63027e-06 | 0.999984 |
| rad26              | 3.15117e-06 | 0.999987 | 3.21710e-06 | 0.999987 |
| rad19syn           | 2.60426e-06 | 0.999990 | 2.65873e-06 | 0.999990 |
| rad45              | 2.30765e-06 | 0.999992 | 2.35592e-06 | 0.999992 |
| rad11              | 1.81508e-06 | 0.999994 | 1.85305e-06 | 0.999994 |
| rad46              | 1.29907e-06 | 0.999995 | 1.32624e-06 | 0.999995 |
| rad10              | 1.16948e-06 | 0.999996 | 1.19395e-06 | 0.999997 |
| rad3               | 8.02359e-07 | 0.999997 | 8.19142e-07 | 0.999997 |
| rad54              | 5.52611e-07 | 0.999998 | 5.64171e-07 | 0.999998 |
| rad4               | 5.26499e-07 | 0.999998 | 5.37514e-07 | 0.999998 |
| PAH3+H             | 2.98344e-07 | 0.999999 | 3.04586e-07 | 0.999999 |
| rad60syn           | 2.07622e-07 | 0.999999 | 2.11965e-07 | 0.999999 |
| rad36              | 1.85179e-07 | 0.999999 | 1.89053e-07 | 0.999999 |
| PhcycC3H3_A+H      | 1.62928e-07 | 0.999999 | 1.66336e-07 | 0.999999 |
| rad50              | 1.48843e-07 | 0.999999 | 1.51957e-07 | 0.999999 |
| PAH10+CH3          | 1.14965e-07 | 0.999999 | 1.17370e-07 | 1.000000 |
| rad60anti          | 1.09957e-07 | 0.999999 | 1.12257e-07 | 1.000000 |
| rad9               | 5.28660e-08 | 0.999999 | 5.39720e-08 | 1.000000 |
| rad13              | 5.10688e-08 | 1.000000 | 5.21371e-08 | 1.000000 |
| rad59              | 4.64584e-08 | 1.000000 | 4.74302e-08 | 1.000000 |
| rad70              | 3.44093e-08 | 1.000000 | 3.51291e-08 | 1.000000 |
| PAH1+H             | 3.02145e-08 | 1.000000 | 3.08466e-08 | 1.000000 |
| rad51              | 2.92369e-08 | 1.000000 | 2.98485e-08 | 1.000000 |
| rad67              | 2.26532e-08 | 1.000000 | 2.31271e-08 | 1.000000 |
| rad62              | 1.77702e-08 | 1.000000 | 1.81420e-08 | 1.000000 |
| rad55              | 1.62359e-08 | 1.000000 | 1.65755e-08 | 1.000000 |
| rad43              | 1.01887e-08 | 1.000000 | 1.04018e-08 | 1.000000 |
| rad52              | 9.68597e-09 | 1.000000 | 9.88862e-09 | 1.000000 |
| rad22              | 7.33664e-09 | 1.000000 | 7.49012e-09 | 1.000000 |
| rad34              | 2.76355e-09 | 1.000000 | 2.82137e-09 | 1.000000 |
| rad71              | 8.79738e-10 | 1.000000 | 8.98140e-10 | 1.000000 |
| rad65              | 7.82202e-10 | 1.000000 | 7.98568e-10 | 1.000000 |
| rad73              | 6.43772e-10 | 1.000000 | 6.57239e-10 | 1.000000 |
| rad33              | 3.87123e-10 | 1.000000 | 3.95221e-10 | 1.000000 |
| rad53              | 1.73202e-10 | 1.000000 | 1.76826e-10 | 1.000000 |

|           |             |          |             |         |
|-----------|-------------|----------|-------------|---------|
| rad58     | 1.70252e-10 | 1.000000 | 1.73814e-10 | 1.00000 |
| rad42     | 1.17195e-10 | 1.000000 | 1.19647e-10 | 1.00000 |
| rad21     | 1.07277e-10 | 1.000000 | 1.09521e-10 | 1.00000 |
| rad41     | 9.64419e-11 | 1.000000 | 9.84599e-11 | 1.00000 |
| rad64     | 9.19302e-11 | 1.000000 | 9.38536e-11 | 1.00000 |
| rad20     | 6.27259e-11 | 1.000000 | 6.40381e-11 | 1.00000 |
| rad25     | 6.07570e-11 | 1.000000 | 6.20280e-11 | 1.00000 |
| rad14     | 5.39110e-11 | 1.000000 | 5.50388e-11 | 1.00000 |
| rad27     | 4.51049e-11 | 1.000000 | 4.60485e-11 | 1.00000 |
| rad56     | 3.26556e-11 | 1.000000 | 3.33387e-11 | 1.00000 |
| PAH8+H    | 3.24351e-11 | 1.000000 | 3.31136e-11 | 1.00000 |
| rad72     | 2.83665e-11 | 1.000000 | 2.89599e-11 | 1.00000 |
| rad15     | 2.36426e-11 | 1.000000 | 2.41372e-11 | 1.00000 |
| rad61     | 1.94076e-11 | 1.000000 | 1.98136e-11 | 1.00000 |
| rad31     | 1.64568e-11 | 1.000000 | 1.68011e-11 | 1.00000 |
| rad68syn  | 6.46552e-12 | 1.000000 | 6.60077e-12 | 1.00000 |
| rad40syn  | 6.18181e-12 | 1.000000 | 6.31113e-12 | 1.00000 |
| rad40anti | 5.48888e-12 | 1.000000 | 5.60370e-12 | 1.00000 |
| rad68anti | 4.32591e-12 | 1.000000 | 4.41641e-12 | 1.00000 |
| rad24     | 4.19849e-12 | 1.000000 | 4.28632e-12 | 1.00000 |
| rad18     | 1.15288e-12 | 1.000000 | 1.17700e-12 | 1.00000 |
| rad12     | 5.13600e-13 | 1.000000 | 5.24344e-13 | 1.00000 |
| rad5      | 1.05031e-14 | 1.000000 | 1.07229e-14 | 1.00000 |
| rad47     | 1.29903e-16 | 1.000000 | 1.32620e-16 | 1.00000 |
| rad8      | 8.40447e-22 | 1.000000 | 8.58032e-22 | 1.00000 |

1.00000000 Pa, 800.000000 K

| Rate constant      | True (fraction) |          | Effective (fraction) |          |
|--------------------|-----------------|----------|----------------------|----------|
| Total              | 2.75392e-13     | (1.00 )  | 2.64269e-13          | (1.00 )  |
| Formation of rad11 | 1.06471e-13     | (0.387 ) | 1.00727e-13          | (0.381 ) |
| Formation of rad6  | 9.97133e-14     | (0.362 ) | 9.43341e-14          | (0.357 ) |
| H-abstraction      | 6.92082e-14     | (0.251 ) | 6.92082e-14          | (0.262 ) |

  

| species            | PYtrue      | Cumul    | PYeffective | Cumul    |
|--------------------|-------------|----------|-------------|----------|
| Indene+H           | 0.415404    | 0.415404 | 0.432889    | 0.432889 |
| Benzene+2-propynyl | 0.251308    | 0.666712 | 0.261885    | 0.694774 |
| C2H2+PhCH2         | 0.157166    | 0.823878 | 0.163781    | 0.858555 |
| PhCCH+CH3          | 0.0623814   | 0.886260 | 0.0650070   | 0.923562 |
| Phenyl+Allene      | 0.0403895   | 0.926649 | 0.000000    | 0.923562 |
| PhCHCCH2+H         | 0.0358022   | 0.962452 | 0.0373091   | 0.960871 |
| PhCH2CCH+H         | 0.00997266  | 0.972424 | 0.0103924   | 0.971264 |
| rad6               | 0.00851121  | 0.980935 | 0.00886948  | 0.980133 |
| Ph+MeAc            | 0.00834537  | 0.989281 | 0.00869662  | 0.988830 |
| PhCCH3+H           | 0.00613547  | 0.995416 | 0.00639371  | 0.995223 |
| PAH7+H             | 0.00348764  | 0.998904 | 0.00363443  | 0.998858 |
| rad39              | 0.000831086 | 0.999735 | 0.000866067 | 0.999724 |
| rad19anti          | 8.99696e-05 | 0.999825 | 9.37561e-05 | 0.999818 |
| PAH9+H             | 5.52002e-05 | 0.999880 | 5.75236e-05 | 0.999875 |
| rad30              | 2.92269e-05 | 0.999909 | 3.04570e-05 | 0.999906 |
| rad38              | 2.03075e-05 | 0.999930 | 2.11622e-05 | 0.999927 |
| rad35              | 1.24427e-05 | 0.999942 | 1.29663e-05 | 0.999940 |
| rad2               | 1.08156e-05 | 0.999953 | 1.12708e-05 | 0.999951 |
| rad28              | 8.91213e-06 | 0.999962 | 9.28726e-06 | 0.999960 |
| rad19syn           | 8.32478e-06 | 0.999970 | 8.67514e-06 | 0.999969 |
| rad37              | 7.26074e-06 | 0.999977 | 7.56634e-06 | 0.999977 |
| rad23              | 6.65989e-06 | 0.999984 | 6.94020e-06 | 0.999984 |
| rad46              | 2.89992e-06 | 0.999987 | 3.02198e-06 | 0.999987 |
| rad54              | 2.03346e-06 | 0.999989 | 2.11905e-06 | 0.999989 |
| rad1               | 1.84122e-06 | 0.999991 | 1.91871e-06 | 0.999991 |
| rad7               | 1.79274e-06 | 0.999993 | 1.86819e-06 | 0.999992 |
| rad45              | 1.29057e-06 | 0.999994 | 1.34489e-06 | 0.999994 |
| PAH3+H             | 8.03010e-07 | 0.999995 | 8.36808e-07 | 0.999995 |
| PhcycC3H3_A+H      | 7.94617e-07 | 0.999996 | 8.28062e-07 | 0.999995 |
| rad26              | 7.67387e-07 | 0.999996 | 7.99681e-07 | 0.999996 |
| rad11              | 6.82987e-07 | 0.999997 | 7.11734e-07 | 0.999997 |
| rad50              | 4.22578e-07 | 0.999997 | 4.40365e-07 | 0.999997 |
| rad60syn           | 3.95878e-07 | 0.999998 | 4.12540e-07 | 0.999998 |
| PAH10+CH3          | 3.02526e-07 | 0.999998 | 3.15260e-07 | 0.999998 |
| rad10              | 2.53968e-07 | 0.999998 | 2.64658e-07 | 0.999998 |
| rad60anti          | 2.15411e-07 | 0.999999 | 2.24477e-07 | 0.999999 |
| rad3               | 2.10871e-07 | 0.999999 | 2.19746e-07 | 0.999999 |
| rad9               | 1.61126e-07 | 0.999999 | 1.67908e-07 | 0.999999 |
| PAH1+H             | 1.52705e-07 | 0.999999 | 1.59132e-07 | 0.999999 |
| rad70              | 1.50316e-07 | 0.999999 | 1.56642e-07 | 0.999999 |
| rad4               | 1.43551e-07 | 0.999999 | 1.49593e-07 | 1.000000 |
| rad59              | 1.18169e-07 | 0.999999 | 1.23143e-07 | 1.000000 |
| rad36              | 1.10242e-07 | 1.000000 | 1.14882e-07 | 1.000000 |

|           |             |          |             |          |
|-----------|-------------|----------|-------------|----------|
| rad67     | 9.31194e-08 | 1.000000 | 9.70385e-08 | 1.000000 |
| rad51     | 7.98031e-08 | 1.000000 | 8.31619e-08 | 1.000000 |
| rad55     | 7.18756e-08 | 1.000000 | 7.49009e-08 | 1.000000 |
| rad62     | 5.38016e-08 | 1.000000 | 5.60660e-08 | 1.000000 |
| rad13     | 3.04787e-08 | 1.000000 | 3.17616e-08 | 1.000000 |
| rad52     | 2.69018e-08 | 1.000000 | 2.80341e-08 | 1.000000 |
| rad43     | 2.22043e-08 | 1.000000 | 2.31389e-08 | 1.000000 |
| rad34     | 1.47466e-08 | 1.000000 | 1.53673e-08 | 1.000000 |
| rad22     | 3.60217e-09 | 1.000000 | 3.75378e-09 | 1.000000 |
| rad71     | 2.61682e-09 | 1.000000 | 2.72696e-09 | 1.000000 |
| rad65     | 2.13651e-09 | 1.000000 | 2.22643e-09 | 1.000000 |
| rad73     | 1.87369e-09 | 1.000000 | 1.95256e-09 | 1.000000 |
| rad53     | 1.39457e-09 | 1.000000 | 1.45327e-09 | 1.000000 |
| rad21     | 8.43035e-10 | 1.000000 | 8.78519e-10 | 1.000000 |
| rad58     | 7.38440e-10 | 1.000000 | 7.69522e-10 | 1.000000 |
| rad33     | 6.55618e-10 | 1.000000 | 6.83212e-10 | 1.000000 |
| rad64     | 6.27585e-10 | 1.000000 | 6.53999e-10 | 1.000000 |
| rad42     | 5.48159e-10 | 1.000000 | 5.71231e-10 | 1.000000 |
| rad20     | 4.18470e-10 | 1.000000 | 4.36083e-10 | 1.000000 |
| rad56     | 3.48676e-10 | 1.000000 | 3.63352e-10 | 1.000000 |
| rad41     | 3.00418e-10 | 1.000000 | 3.13063e-10 | 1.000000 |
| PAH8+H    | 1.38997e-10 | 1.000000 | 1.44847e-10 | 1.000000 |
| rad72     | 8.76472e-11 | 1.000000 | 9.13358e-11 | 1.000000 |
| rad61     | 6.47334e-11 | 1.000000 | 6.74580e-11 | 1.000000 |
| rad24     | 5.61150e-11 | 1.000000 | 5.84769e-11 | 1.000000 |
| rad25     | 4.98418e-11 | 1.000000 | 5.19396e-11 | 1.000000 |
| rad68syn  | 4.83430e-11 | 1.000000 | 5.03777e-11 | 1.000000 |
| rad15     | 4.55949e-11 | 1.000000 | 4.75140e-11 | 1.000000 |
| rad68anti | 3.25966e-11 | 1.000000 | 3.39686e-11 | 1.000000 |
| rad14     | 2.76726e-11 | 1.000000 | 2.88373e-11 | 1.000000 |
| rad40syn  | 2.72942e-11 | 1.000000 | 2.84430e-11 | 1.000000 |
| rad27     | 2.42847e-11 | 1.000000 | 2.53068e-11 | 1.000000 |
| rad40anti | 2.35653e-11 | 1.000000 | 2.45572e-11 | 1.000000 |
| rad12     | 1.17658e-11 | 1.000000 | 1.22610e-11 | 1.000000 |
| rad31     | 8.25650e-12 | 1.000000 | 8.60406e-12 | 1.000000 |
| rad18     | 4.09713e-12 | 1.000000 | 4.26957e-12 | 1.000000 |
| rad5      | 5.24527e-15 | 1.000000 | 5.46604e-15 | 1.000000 |
| rad47     | 7.23492e-16 | 1.000000 | 7.53940e-16 | 1.000000 |
| rad8      | 3.25337e-18 | 1.000000 | 3.39029e-18 | 1.000000 |

1.00000000 Pa, 900.000000 K

| Rate constant      | True (fraction)      | Effective (fraction) |
|--------------------|----------------------|----------------------|
| Total              | 4.88072e-13 (1.00 )  | 4.55193e-13 (1.00 )  |
| Formation of rad11 | 1.74945e-13 (0.358 ) | 1.58579e-13 (0.348 ) |
| Formation of rad6  | 1.76509e-13 (0.362 ) | 1.59996e-13 (0.351 ) |
| H-abstraction      | 1.36618e-13 (0.280 ) | 1.36618e-13 (0.300 ) |

| species            | PYtrue      | Cumul    | PYeffective | Cumul    |
|--------------------|-------------|----------|-------------|----------|
| Indene+H           | 0.339966    | 0.339966 | 0.364522    | 0.364522 |
| Benzene+2-propynyl | 0.279914    | 0.619879 | 0.300132    | 0.664654 |
| C2H2+PhCH2         | 0.164114    | 0.783994 | 0.175968    | 0.840623 |
| Phenyl+Allene      | 0.0673651   | 0.851359 | 0.000000    | 0.840623 |
| PhCCH+CH3          | 0.0636902   | 0.915049 | 0.0682907   | 0.908913 |
| PhCHCCH2+H         | 0.0450377   | 0.960086 | 0.0482908   | 0.957204 |
| PhCH2CCH+H         | 0.0182833   | 0.978370 | 0.0196039   | 0.976808 |
| Ph+MeAc            | 0.00847801  | 0.986848 | 0.00909044  | 0.985898 |
| PhCCCH3+H          | 0.00483117  | 0.991679 | 0.00518013  | 0.991079 |
| PAH7+H             | 0.00481488  | 0.996494 | 0.00516266  | 0.996241 |
| rad6               | 0.00200487  | 0.998499 | 0.00214969  | 0.998391 |
| rad39              | 0.00111648  | 0.999615 | 0.00119712  | 0.999588 |
| rad19anti          | 0.000152520 | 0.999768 | 0.000163537 | 0.999752 |
| PAH9+H             | 8.70073e-05 | 0.999855 | 9.32917e-05 | 0.999845 |
| rad30              | 3.45009e-05 | 0.999889 | 3.69929e-05 | 0.999882 |
| rad38              | 3.28607e-05 | 0.999922 | 3.52343e-05 | 0.999917 |
| rad19syn           | 2.05673e-05 | 0.999943 | 2.20529e-05 | 0.999939 |
| rad35              | 1.86634e-05 | 0.999961 | 2.00115e-05 | 0.999959 |
| rad37              | 8.31016e-06 | 0.999970 | 8.91044e-06 | 0.999968 |
| rad54              | 5.60949e-06 | 0.999975 | 6.01466e-06 | 0.999974 |
| rad46              | 5.27936e-06 | 0.999980 | 5.66070e-06 | 0.999980 |
| PhcycC3H3_A+H      | 2.75337e-06 | 0.999983 | 2.95225e-06 | 0.999983 |
| rad23              | 2.75306e-06 | 0.999986 | 2.95192e-06 | 0.999986 |
| rad2               | 2.21632e-06 | 0.999988 | 2.37640e-06 | 0.999988 |
| rad28              | 2.18667e-06 | 0.999990 | 2.34462e-06 | 0.999990 |
| PAH3+H             | 1.70681e-06 | 0.999992 | 1.83009e-06 | 0.999992 |
| rad50              | 7.48803e-07 | 0.999993 | 8.02895e-07 | 0.999993 |
| rad45              | 6.47267e-07 | 0.999993 | 6.94020e-07 | 0.999994 |
| rad60syn           | 6.35359e-07 | 0.999994 | 6.81251e-07 | 0.999994 |

|           |             |          |             |          |
|-----------|-------------|----------|-------------|----------|
| PAH10+CH3 | 6.29381e-07 | 0.999995 | 6.74842e-07 | 0.999995 |
| rad7      | 6.03427e-07 | 0.999995 | 6.47014e-07 | 0.999996 |
| PAH1+H    | 5.31600e-07 | 0.999996 | 5.69998e-07 | 0.999996 |
| rad70     | 4.68457e-07 | 0.999996 | 5.02294e-07 | 0.999997 |
| rad1      | 4.05518e-07 | 0.999997 | 4.34809e-07 | 0.999997 |
| rad60anti | 3.53410e-07 | 0.999997 | 3.78937e-07 | 0.999998 |
| rad67     | 2.90843e-07 | 0.999997 | 3.11851e-07 | 0.999998 |
| rad11     | 2.88563e-07 | 0.999998 | 3.09407e-07 | 0.999998 |
| rad9      | 2.66510e-07 | 0.999998 | 2.85760e-07 | 0.999998 |
| rad59     | 2.38917e-07 | 0.999998 | 2.56175e-07 | 0.999999 |
| rad55     | 2.28532e-07 | 0.999998 | 2.45038e-07 | 0.999999 |
| rad26     | 1.82791e-07 | 0.999999 | 1.95994e-07 | 0.999999 |
| rad62     | 1.23940e-07 | 0.999999 | 1.32892e-07 | 0.999999 |
| rad51     | 9.87742e-08 | 0.999999 | 1.05909e-07 | 0.999999 |
| rad10     | 6.23620e-08 | 0.999999 | 6.68664e-08 | 0.999999 |
| rad36     | 5.84245e-08 | 0.999999 | 6.26445e-08 | 1.000000 |
| rad3      | 5.51820e-08 | 0.999999 | 5.91678e-08 | 1.000000 |
| rad34     | 5.39023e-08 | 0.999999 | 5.77958e-08 | 1.000000 |
| rad52     | 3.97979e-08 | 0.999999 | 4.26726e-08 | 1.000000 |
| rad4      | 3.97783e-08 | 0.999999 | 4.26515e-08 | 1.000000 |
| rad43     | 3.53523e-08 | 0.999999 | 3.79058e-08 | 1.000000 |
| rad13     | 2.73652e-08 | 0.999999 | 2.93418e-08 | 1.000000 |
| rad53     | 7.17271e-09 | 0.999999 | 7.69078e-09 | 1.000000 |
| rad21     | 4.28217e-09 | 0.999999 | 4.59148e-09 | 1.000000 |
| rad64     | 2.85008e-09 | 0.999999 | 3.05595e-09 | 1.000000 |
| rad65     | 2.75199e-09 | 0.999999 | 2.95077e-09 | 1.000000 |
| rad71     | 2.65466e-09 | 0.999999 | 2.84641e-09 | 1.000000 |
| rad56     | 2.33986e-09 | 0.999999 | 2.50887e-09 | 1.000000 |
| rad22     | 2.27534e-09 | 0.999999 | 2.43969e-09 | 1.000000 |
| rad58     | 2.25548e-09 | 0.999999 | 2.41839e-09 | 1.000000 |
| rad20     | 2.09126e-09 | 0.999999 | 2.24231e-09 | 1.000000 |
| rad73     | 1.88813e-09 | 0.999999 | 2.02451e-09 | 1.000000 |
| rad42     | 1.75103e-09 | 0.999999 | 1.87751e-09 | 1.000000 |
| rad33     | 1.58912e-09 | 0.999999 | 1.70390e-09 | 1.000000 |
| rad41     | 4.25935e-10 | 0.999999 | 4.56700e-10 | 1.000000 |
| rad68syn  | 2.72936e-10 | 0.999999 | 2.92650e-10 | 1.000000 |
| PAH8+H    | 2.41240e-10 | 0.999999 | 2.58665e-10 | 1.000000 |
| rad24     | 1.88614e-10 | 0.999999 | 2.02237e-10 | 1.000000 |
| rad68anti | 1.83929e-10 | 0.999999 | 1.97214e-10 | 1.000000 |
| rad72     | 9.03953e-11 | 0.999999 | 9.69240e-11 | 1.000000 |
| rad61     | 8.46749e-11 | 0.999999 | 9.07911e-11 | 1.000000 |
| rad25     | 7.49876e-11 | 0.999999 | 8.04043e-11 | 1.000000 |
| rad15     | 6.35814e-11 | 0.999999 | 6.81740e-11 | 1.000000 |
| rad40syn  | 5.40437e-11 | 0.999999 | 5.79473e-11 | 1.000000 |
| rad12     | 5.38818e-11 | 0.999999 | 5.77737e-11 | 1.000000 |
| rad40anti | 3.56281e-11 | 0.999999 | 3.82015e-11 | 1.000000 |
| rad27     | 2.30318e-11 | 0.999999 | 2.46955e-11 | 1.000000 |
| rad14     | 2.27581e-11 | 0.999999 | 2.44019e-11 | 1.000000 |
| rad18     | 1.53767e-11 | 0.999999 | 1.64874e-11 | 1.000000 |
| rad31     | 4.20190e-12 | 0.999999 | 4.50541e-12 | 1.000000 |
| rad5      | 2.83778e-15 | 0.999999 | 3.04276e-15 | 1.000000 |
| rad8      | 1.11874e-15 | 0.999999 | 1.19955e-15 | 1.000000 |
| rad47     | 9.85359e-16 | 0.999999 | 1.05653e-15 | 1.000000 |

1.00000000 Pa, 1000.00000 K

=====

| Rate constant      | True (fraction)      | Effective (fraction) |
|--------------------|----------------------|----------------------|
| Total              | 7.98668e-13 (1.00 )  | 7.19617e-13 (1.00 )  |
| Formation of rad11 | 2.67704e-13 (0.335 ) | 2.29557e-13 (0.319 ) |
| Formation of rad6  | 2.87049e-13 (0.359 ) | 2.46146e-13 (0.342 ) |
| H-abstraction      | 2.43915e-13 (0.305 ) | 2.43915e-13 (0.339 ) |

| species            | PYtrue      | Cumul    | PYeffective | Cumul    |
|--------------------|-------------|----------|-------------|----------|
| Benzene+2-propynyl | 0.305402    | 0.305402 | 0.338950    | 0.338950 |
| Indene+H           | 0.271959    | 0.577361 | 0.301833    | 0.640784 |
| C2H2+PhCH2         | 0.159288    | 0.736649 | 0.176786    | 0.817569 |
| Phenyl+Allene      | 0.0989774   | 0.835626 | 0.000000    | 0.817569 |
| PhCCH+CH3          | 0.0615474   | 0.897174 | 0.0683082   | 0.885878 |
| PhCHCCH2+H         | 0.0537301   | 0.950904 | 0.0596324   | 0.945510 |
| PhCH2CCH+H         | 0.0288913   | 0.979795 | 0.0320651   | 0.977575 |
| Ph+MeAc            | 0.00817146  | 0.987966 | 0.00906907  | 0.986644 |
| PAH7+H             | 0.00600825  | 0.993975 | 0.00666827  | 0.993313 |
| PhCCCH3+H          | 0.00363793  | 0.997613 | 0.00403756  | 0.997350 |
| rad39              | 0.00134810  | 0.998961 | 0.00149619  | 0.998846 |
| rad6               | 0.000477836 | 0.999439 | 0.000530327 | 0.999377 |
| rad19anti          | 0.000230062 | 0.999669 | 0.000255334 | 0.999632 |
| PAH9+H             | 0.000124449 | 0.999793 | 0.000138120 | 0.999770 |
| rad38              | 4.81527e-05 | 0.999841 | 5.34424e-05 | 0.999824 |

|               |             |          |             |          |
|---------------|-------------|----------|-------------|----------|
| rad19syn      | 4.20362e-05 | 0.999883 | 4.66540e-05 | 0.999870 |
| rad30         | 3.74547e-05 | 0.999921 | 4.15690e-05 | 0.999912 |
| rad35         | 2.55670e-05 | 0.999946 | 2.83755e-05 | 0.999940 |
| rad54         | 1.25295e-05 | 0.999959 | 1.39058e-05 | 0.999954 |
| rad37         | 9.28490e-06 | 0.999968 | 1.03048e-05 | 0.999964 |
| rad46         | 8.62455e-06 | 0.999977 | 9.57200e-06 | 0.999974 |
| PhcycC3H3_A+H | 7.44345e-06 | 0.999984 | 8.26107e-06 | 0.999982 |
| PAH3+H        | 3.06290e-06 | 0.999987 | 3.39936e-06 | 0.999986 |
| PAH1+H        | 1.43152e-06 | 0.999989 | 1.58877e-06 | 0.999987 |
| rad50         | 1.38938e-06 | 0.999990 | 1.54200e-06 | 0.999989 |
| rad23         | 1.25984e-06 | 0.999991 | 1.39823e-06 | 0.999990 |
| PAH10+CH3     | 1.23134e-06 | 0.999993 | 1.36660e-06 | 0.999991 |
| rad70         | 1.14156e-06 | 0.999994 | 1.26695e-06 | 0.999993 |
| rad60syn      | 8.97115e-07 | 0.999995 | 9.95666e-07 | 0.999994 |
| rad67         | 7.39573e-07 | 0.999995 | 8.20819e-07 | 0.999995 |
| rad55         | 5.71795e-07 | 0.999996 | 6.34607e-07 | 0.999995 |
| rad28         | 5.55510e-07 | 0.999996 | 6.16533e-07 | 0.999996 |
| rad60anti     | 5.08301e-07 | 0.999997 | 5.64138e-07 | 0.999996 |
| rad2          | 5.03570e-07 | 0.999997 | 5.58888e-07 | 0.999997 |
| rad59         | 4.09031e-07 | 0.999998 | 4.53963e-07 | 0.999997 |
| rad45         | 3.36923e-07 | 0.999998 | 3.73935e-07 | 0.999998 |
| rad7          | 2.47107e-07 | 0.999998 | 2.74252e-07 | 0.999998 |
| rad62         | 2.36509e-07 | 0.999999 | 2.62490e-07 | 0.999998 |
| rad9          | 2.33970e-07 | 0.999999 | 2.59672e-07 | 0.999999 |
| rad11         | 1.69769e-07 | 0.999999 | 1.88419e-07 | 0.999999 |
| rad34         | 1.50013e-07 | 0.999999 | 1.66493e-07 | 0.999999 |
| rad51         | 1.37478e-07 | 0.999999 | 1.52581e-07 | 0.999999 |
| rad1          | 1.03026e-07 | 0.999999 | 1.14344e-07 | 0.999999 |
| rad52         | 6.74412e-08 | 1.000000 | 7.48500e-08 | 0.999999 |
| rad43         | 4.95527e-08 | 1.000000 | 5.49961e-08 | 0.999999 |
| rad26         | 4.89028e-08 | 1.000000 | 5.42748e-08 | 0.999999 |
| rad13         | 4.19087e-08 | 1.000000 | 4.65124e-08 | 0.999999 |
| rad36         | 3.11436e-08 | 1.000000 | 3.45648e-08 | 0.999999 |
| rad53         | 2.66867e-08 | 1.000000 | 2.96182e-08 | 0.999999 |
| rad10         | 2.44752e-08 | 1.000000 | 2.71638e-08 | 0.999999 |
| rad3          | 1.71129e-08 | 1.000000 | 1.89927e-08 | 1.000000 |
| rad4          | 1.28929e-08 | 1.000000 | 1.43093e-08 | 1.000000 |
| rad56         | 1.09026e-08 | 1.000000 | 1.21002e-08 | 1.000000 |
| rad21         | 9.99429e-09 | 1.000000 | 1.10922e-08 | 1.000000 |
| rad64         | 9.72146e-09 | 1.000000 | 1.07893e-08 | 1.000000 |
| rad58         | 5.67191e-09 | 1.000000 | 6.29498e-09 | 1.000000 |
| rad20         | 5.13829e-09 | 1.000000 | 5.70273e-09 | 1.000000 |
| rad42         | 4.49522e-09 | 1.000000 | 4.98903e-09 | 1.000000 |
| rad65         | 4.11154e-09 | 1.000000 | 4.56320e-09 | 1.000000 |
| rad33         | 2.87974e-09 | 1.000000 | 3.19608e-09 | 1.000000 |
| rad22         | 2.11177e-09 | 1.000000 | 2.34376e-09 | 1.000000 |
| rad71         | 1.79207e-09 | 1.000000 | 1.98893e-09 | 1.000000 |
| rad73         | 1.30874e-09 | 1.000000 | 1.45250e-09 | 1.000000 |
| rad68syn      | 1.19945e-09 | 1.000000 | 1.33120e-09 | 1.000000 |
| rad68anti     | 8.04136e-10 | 1.000000 | 8.92470e-10 | 1.000000 |
| PAH8+H        | 7.48513e-10 | 1.000000 | 8.30741e-10 | 1.000000 |
| rad41         | 5.92387e-10 | 1.000000 | 6.57461e-10 | 1.000000 |
| rad24         | 2.49111e-10 | 1.000000 | 2.76477e-10 | 1.000000 |
| rad40syn      | 1.74893e-10 | 1.000000 | 1.94105e-10 | 1.000000 |
| rad25         | 1.61761e-10 | 1.000000 | 1.79531e-10 | 1.000000 |
| rad61         | 1.45891e-10 | 1.000000 | 1.61917e-10 | 1.000000 |
| rad12         | 9.31789e-11 | 1.000000 | 1.03415e-10 | 1.000000 |
| rad40anti     | 8.42804e-11 | 1.000000 | 9.35385e-11 | 1.000000 |
| rad15         | 6.53407e-11 | 1.000000 | 7.25185e-11 | 1.000000 |
| rad72         | 6.04122e-11 | 1.000000 | 6.70483e-11 | 1.000000 |
| rad18         | 4.18654e-11 | 1.000000 | 4.64643e-11 | 1.000000 |
| rad14         | 2.64905e-11 | 1.000000 | 2.94004e-11 | 1.000000 |
| rad27         | 2.45081e-11 | 1.000000 | 2.72003e-11 | 1.000000 |
| rad31         | 2.33563e-12 | 1.000000 | 2.59220e-12 | 1.000000 |
| rad8          | 3.76214e-14 | 1.000000 | 4.17541e-14 | 1.000000 |
| rad5          | 1.99536e-15 | 1.000000 | 2.21455e-15 | 1.000000 |
| rad47         | 1.17707e-15 | 1.000000 | 1.30637e-15 | 1.000000 |

1.00000000 Pa, 1100.00000 K

=====

| Rate constant      | True (fraction)      | Effective (fraction) |             |          |
|--------------------|----------------------|----------------------|-------------|----------|
| Total              | 1.22919e-12 (1.00 )  | 1.06690e-12 (1.00 )  |             |          |
| Formation of rad11 | 3.87976e-13 (0.316 ) | 3.11717e-13 (0.292 ) |             |          |
| Formation of rad6  | 4.37724e-13 (0.356 ) | 3.51688e-13 (0.330 ) |             |          |
| H-abstraction      | 4.03491e-13 (0.328 ) | 4.03491e-13 (0.378 ) |             |          |
| species            | PYtrue               | Cumul                | PYeffective | Cumul    |
| Benzene+2-propynyl | 0.328257             | 0.328257             | 0.378192    | 0.378192 |

|               |             |          |             |          |
|---------------|-------------|----------|-------------|----------|
| Indene+H      | 0.214694    | 0.542952 | 0.247354    | 0.625546 |
| C2H2+PhCH2    | 0.146443    | 0.689395 | 0.168720    | 0.794265 |
| Phenyl+Allene | 0.132034    | 0.821429 | 0.00000     | 0.794265 |
| PhCHCCH2+H    | 0.0609475   | 0.882377 | 0.0702190   | 0.864484 |
| PhCCH+CH3     | 0.0572199   | 0.939597 | 0.0659241   | 0.930408 |
| PhCH2CCH+H    | 0.0407426   | 0.980339 | 0.0469404   | 0.977349 |
| Ph+MeAc       | 0.00763295  | 0.987972 | 0.00879411  | 0.986143 |
| PAH7+H        | 0.00694582  | 0.994918 | 0.00800243  | 0.994145 |
| PhCCCH3+H     | 0.00267629  | 0.997594 | 0.00308341  | 0.997229 |
| rad39         | 0.00150192  | 0.999096 | 0.00173039  | 0.998959 |
| rad19anti     | 0.000315273 | 0.999411 | 0.000363233 | 0.999322 |
| PAH9+H        | 0.000164810 | 0.999576 | 0.000189881 | 0.999512 |
| rad6          | 0.000125428 | 0.999702 | 0.000144509 | 0.999657 |
| rad19syn      | 7.45688e-05 | 0.999776 | 8.59122e-05 | 0.999743 |
| rad38         | 6.52455e-05 | 0.999842 | 7.51704e-05 | 0.999818 |
| rad30         | 3.82231e-05 | 0.999880 | 4.40376e-05 | 0.999862 |
| rad35         | 3.26206e-05 | 0.999912 | 3.75828e-05 | 0.999899 |
| rad54         | 2.39091e-05 | 0.999936 | 2.75462e-05 | 0.999927 |
| PhcycC3H3_A+H | 1.67320e-05 | 0.999953 | 1.92772e-05 | 0.999946 |
| rad46         | 1.29137e-05 | 0.999966 | 1.48781e-05 | 0.999961 |
| rad37         | 1.03727e-05 | 0.999976 | 1.19506e-05 | 0.999973 |
| PAH3+H        | 4.84263e-06 | 0.999981 | 5.57929e-06 | 0.999979 |
| PAH1+H        | 3.17032e-06 | 0.999984 | 3.65258e-06 | 0.999982 |
| rad50         | 2.61626e-06 | 0.999987 | 3.01425e-06 | 0.999985 |
| rad70         | 2.31304e-06 | 0.999989 | 2.66490e-06 | 0.999988 |
| PAH10+CH3     | 2.25905e-06 | 0.999992 | 2.60270e-06 | 0.999991 |
| rad67         | 1.58645e-06 | 0.999993 | 1.82779e-06 | 0.999992 |
| rad55         | 1.19792e-06 | 0.999994 | 1.38014e-06 | 0.999994 |
| rad60syn      | 1.15125e-06 | 0.999995 | 1.32638e-06 | 0.999995 |
| rad60anti     | 6.62693e-07 | 0.999996 | 7.63500e-07 | 0.999996 |
| rad59         | 6.18664e-07 | 0.999997 | 7.12773e-07 | 0.999997 |
| rad23         | 6.14141e-07 | 0.999997 | 7.07562e-07 | 0.999997 |
| rad62         | 3.93339e-07 | 0.999998 | 4.53173e-07 | 0.999998 |
| rad34         | 3.40200e-07 | 0.999998 | 3.91951e-07 | 0.999998 |
| rad51         | 2.64052e-07 | 0.999998 | 3.04220e-07 | 0.999999 |
| rad45         | 1.79073e-07 | 0.999999 | 2.06314e-07 | 0.999999 |
| rad11         | 1.69103e-07 | 0.999999 | 1.94826e-07 | 0.999999 |
| rad9          | 1.64244e-07 | 0.999999 | 1.89228e-07 | 0.999999 |
| rad28         | 1.60138e-07 | 0.999999 | 1.84498e-07 | 0.999999 |
| rad7          | 1.42926e-07 | 0.999999 | 1.64668e-07 | 0.999999 |
| rad52         | 1.32772e-07 | 0.999999 | 1.52969e-07 | 1.000000 |
| rad2          | 1.32691e-07 | 0.999999 | 1.52877e-07 | 1.000000 |
| rad53         | 7.80511e-08 | 0.999999 | 8.99241e-08 | 1.000000 |
| rad13         | 6.62627e-08 | 1.000000 | 7.63425e-08 | 1.000000 |
| rad43         | 6.41835e-08 | 1.000000 | 7.39473e-08 | 1.000000 |
| rad56         | 3.84183e-08 | 1.000000 | 4.42625e-08 | 1.000000 |
| rad1          | 2.91614e-08 | 1.000000 | 3.35974e-08 | 1.000000 |
| rad64         | 2.61641e-08 | 1.000000 | 3.01442e-08 | 1.000000 |
| rad36         | 1.67548e-08 | 1.000000 | 1.93035e-08 | 1.000000 |
| rad26         | 1.55178e-08 | 1.000000 | 1.78784e-08 | 1.000000 |
| rad10         | 1.46854e-08 | 1.000000 | 1.69194e-08 | 1.000000 |
| rad58         | 1.20700e-08 | 1.000000 | 1.39061e-08 | 1.000000 |
| rad21         | 1.14913e-08 | 1.000000 | 1.32394e-08 | 1.000000 |
| rad42         | 9.68190e-09 | 1.000000 | 1.11547e-08 | 1.000000 |
| rad65         | 8.17484e-09 | 1.000000 | 9.41841e-09 | 1.000000 |
| rad3          | 6.06198e-09 | 1.000000 | 6.98415e-09 | 1.000000 |
| rad20         | 6.00971e-09 | 1.000000 | 6.92390e-09 | 1.000000 |
| rad4          | 4.67948e-09 | 1.000000 | 5.39133e-09 | 1.000000 |
| rad68syn      | 4.04730e-09 | 1.000000 | 4.66298e-09 | 1.000000 |
| PAH8+H        | 3.12201e-09 | 1.000000 | 3.59693e-09 | 1.000000 |
| rad33         | 3.05243e-09 | 1.000000 | 3.51676e-09 | 1.000000 |
| rad68anti     | 2.69960e-09 | 1.000000 | 3.11026e-09 | 1.000000 |
| rad22         | 1.76017e-09 | 1.000000 | 2.02793e-09 | 1.000000 |
| rad71         | 1.22378e-09 | 1.000000 | 1.40994e-09 | 1.000000 |
| rad73         | 1.05151e-09 | 1.000000 | 1.21147e-09 | 1.000000 |
| rad41         | 9.46378e-10 | 1.000000 | 1.09034e-09 | 1.000000 |
| rad40syn      | 6.59662e-10 | 1.000000 | 7.60012e-10 | 1.000000 |
| rad61         | 3.94255e-10 | 1.000000 | 4.54229e-10 | 1.000000 |
| rad40anti     | 3.10714e-10 | 1.000000 | 3.57980e-10 | 1.000000 |
| rad25         | 2.79554e-10 | 1.000000 | 3.22081e-10 | 1.000000 |
| rad24         | 2.17119e-10 | 1.000000 | 2.50148e-10 | 1.000000 |
| rad12         | 1.06643e-10 | 1.000000 | 1.22865e-10 | 1.000000 |
| rad18         | 9.82289e-11 | 1.000000 | 1.13171e-10 | 1.000000 |
| rad15         | 6.71609e-11 | 1.000000 | 7.73772e-11 | 1.000000 |
| rad72         | 3.59910e-11 | 1.000000 | 4.14659e-11 | 1.000000 |
| rad14         | 2.99738e-11 | 1.000000 | 3.45334e-11 | 1.000000 |
| rad27         | 1.94229e-11 | 1.000000 | 2.23775e-11 | 1.000000 |
| rad31         | 1.37549e-12 | 1.000000 | 1.58473e-12 | 1.000000 |
| rad8          | 2.31363e-13 | 1.000000 | 2.66558e-13 | 1.000000 |
| rad47         | 2.02742e-15 | 1.000000 | 2.33584e-15 | 1.000000 |



rad5 | 1.94511e-15 1.000000 | 2.24100e-15 1.00000

1.00000000 Pa, 1200.00000 K

| Rate constant      | True (fraction)      | Effective (fraction) |
|--------------------|----------------------|----------------------|
| Total              | 1.80237e-12 (1.00 )  | 1.50734e-12 (1.00 )  |
| Formation of rad11 | 5.38789e-13 (0.299 ) | 4.03337e-13 (0.268 ) |
| Formation of rad6  | 6.34764e-13 (0.352 ) | 4.75183e-13 (0.315 ) |
| H-abstraction      | 6.28816e-13 (0.349 ) | 6.28816e-13 (0.417 ) |

| species            | PYtrue      | Cumul    | PYeffective | Cumul    |
|--------------------|-------------|----------|-------------|----------|
| Benzene+2-propynyl | 0.348883    | 0.348883 | 0.417171    | 0.417171 |
| Indene+H           | 0.168223    | 0.517106 | 0.201150    | 0.618320 |
| Phenyl+Allene      | 0.163692    | 0.680798 | 0.000000    | 0.618320 |
| C2H2+PhCH2         | 0.129420    | 0.810218 | 0.154751    | 0.773071 |
| PhCHCCH2+H         | 0.0661437   | 0.876362 | 0.0790900   | 0.852161 |
| PhCH2CCH+H         | 0.0526494   | 0.929011 | 0.0629543   | 0.915116 |
| PhCCH+CH3          | 0.0518109   | 0.980822 | 0.0619519   | 0.977067 |
| PAH7+H             | 0.00758493  | 0.988407 | 0.00906953  | 0.986137 |
| Ph+MeAc            | 0.00700328  | 0.995410 | 0.00837404  | 0.994511 |
| PhCCCH3+H          | 0.00195072  | 0.997361 | 0.00233254  | 0.996844 |
| rad39              | 0.00157568  | 0.998937 | 0.00188410  | 0.998728 |
| rad19anti          | 0.000399619 | 0.999336 | 0.000477837 | 0.999205 |
| PAH9+H             | 0.000204933 | 0.999541 | 0.000245045 | 0.999450 |
| rad19syn           | 0.000118871 | 0.999660 | 0.000142137 | 0.999593 |
| rad38              | 8.28820e-05 | 0.999743 | 9.91049e-05 | 0.999692 |
| rad54              | 4.05033e-05 | 0.999784 | 4.84310e-05 | 0.999740 |
| rad6               | 4.03378e-05 | 0.999824 | 4.82332e-05 | 0.999788 |
| rad35              | 3.93301e-05 | 0.999863 | 4.70283e-05 | 0.999835 |
| rad30              | 3.73073e-05 | 0.999901 | 4.46095e-05 | 0.999880 |
| PhcycC3H3_A+H      | 3.27111e-05 | 0.999933 | 3.91137e-05 | 0.999919 |
| rad46              | 1.79289e-05 | 0.999951 | 2.14382e-05 | 0.999941 |
| rad37              | 1.16247e-05 | 0.999963 | 1.39000e-05 | 0.999954 |
| PAH3+H             | 6.96155e-06 | 0.999970 | 8.32415e-06 | 0.999963 |
| PAH1+H             | 6.04681e-06 | 0.999976 | 7.23035e-06 | 0.999970 |
| rad50              | 4.61612e-06 | 0.999981 | 5.51964e-06 | 0.999976 |
| rad70              | 4.07180e-06 | 0.999985 | 4.86878e-06 | 0.999980 |
| PAH10+CH3          | 3.84337e-06 | 0.999988 | 4.59565e-06 | 0.999985 |
| rad67              | 2.97381e-06 | 0.999991 | 3.55588e-06 | 0.999989 |
| rad55              | 2.19517e-06 | 0.999994 | 2.62484e-06 | 0.999991 |
| rad60syn           | 1.37653e-06 | 0.999995 | 1.64596e-06 | 0.999993 |
| rad59              | 8.53041e-07 | 0.999996 | 1.02001e-06 | 0.999994 |
| rad60anti          | 8.03400e-07 | 0.999997 | 9.60649e-07 | 0.999995 |
| rad34              | 6.59959e-07 | 0.999997 | 7.89134e-07 | 0.999996 |
| rad62              | 5.91421e-07 | 0.999998 | 7.07182e-07 | 0.999996 |
| rad51              | 5.39927e-07 | 0.999998 | 6.45606e-07 | 0.999997 |
| rad23              | 3.14651e-07 | 0.999999 | 3.76238e-07 | 0.999997 |
| rad52              | 2.54755e-07 | 0.999999 | 3.04618e-07 | 0.999998 |
| rad11              | 2.32647e-07 | 0.999999 | 2.78184e-07 | 0.999998 |
| rad53              | 1.90258e-07 | 0.999999 | 2.27498e-07 | 0.999998 |
| rad7               | 1.38327e-07 | 1.000000 | 1.65402e-07 | 0.999998 |
| rad9               | 1.11846e-07 | 1.000000 | 1.33738e-07 | 0.999998 |
| rad56              | 1.09464e-07 | 1.000000 | 1.30890e-07 | 0.999999 |
| rad45              | 9.64903e-08 | 1.000000 | 1.15376e-07 | 0.999999 |
| rad43              | 7.77694e-08 | 1.000000 | 9.29916e-08 | 0.999999 |
| rad13              | 6.93791e-08 | 1.000000 | 8.29588e-08 | 0.999999 |
| rad64              | 5.85706e-08 | 1.000000 | 7.00345e-08 | 0.999999 |
| rad28              | 5.70633e-08 | 1.000000 | 6.82324e-08 | 0.999999 |
| rad2               | 3.90243e-08 | 1.000000 | 4.66626e-08 | 0.999999 |
| rad58              | 2.24363e-08 | 1.000000 | 2.68278e-08 | 0.999999 |
| rad42              | 1.82076e-08 | 1.000000 | 2.17715e-08 | 0.999999 |
| rad65              | 1.67413e-08 | 1.000000 | 2.00182e-08 | 0.999999 |
| rad68syn           | 1.10204e-08 | 1.000000 | 1.31774e-08 | 0.999999 |
| PAH8+H             | 1.09390e-08 | 1.000000 | 1.30801e-08 | 0.999999 |
| rad10              | 1.02190e-08 | 1.000000 | 1.22191e-08 | 0.999999 |
| rad36              | 9.11766e-09 | 1.000000 | 1.09022e-08 | 0.999999 |
| rad1               | 8.91483e-09 | 1.000000 | 1.06598e-08 | 0.999999 |
| rad21              | 8.87518e-09 | 1.000000 | 1.06123e-08 | 0.999999 |
| rad68anti          | 7.31810e-09 | 1.000000 | 8.75049e-09 | 0.999999 |
| rad26              | 6.01881e-09 | 1.000000 | 7.19690e-09 | 0.999999 |
| rad20              | 4.39812e-09 | 1.000000 | 5.25898e-09 | 0.999999 |
| rad3               | 2.35586e-09 | 1.000000 | 2.81697e-09 | 0.999999 |
| rad33              | 2.27942e-09 | 1.000000 | 2.72557e-09 | 0.999999 |
| rad40syn           | 2.08049e-09 | 1.000000 | 2.48771e-09 | 0.999999 |
| rad4               | 1.84413e-09 | 1.000000 | 2.20509e-09 | 0.999999 |
| rad73              | 1.66267e-09 | 1.000000 | 1.98810e-09 | 0.999999 |
| rad41              | 1.49271e-09 | 1.000000 | 1.78489e-09 | 0.999999 |
| rad71              | 1.47997e-09 | 1.000000 | 1.76965e-09 | 0.999999 |

|           |             |         |             |          |
|-----------|-------------|---------|-------------|----------|
| rad22     | 1.25268e-09 | 1.00000 | 1.49787e-09 | 0.999999 |
| rad61     | 1.04396e-09 | 1.00000 | 1.24830e-09 | 0.999999 |
| rad40anti | 1.01639e-09 | 1.00000 | 1.21533e-09 | 0.999999 |
| rad25     | 3.15117e-10 | 1.00000 | 3.76796e-10 | 0.999999 |
| rad18     | 2.31087e-10 | 1.00000 | 2.76318e-10 | 0.999999 |
| rad24     | 1.65853e-10 | 1.00000 | 1.98316e-10 | 0.999999 |
| rad12     | 1.03555e-10 | 1.00000 | 1.23824e-10 | 0.999999 |
| rad15     | 7.88093e-11 | 1.00000 | 9.42348e-11 | 0.999999 |
| rad72     | 2.64780e-11 | 1.00000 | 3.16606e-11 | 0.999999 |
| rad14     | 2.61743e-11 | 1.00000 | 3.12974e-11 | 0.999999 |
| rad27     | 1.10759e-11 | 1.00000 | 1.32438e-11 | 0.999999 |
| rad31     | 8.43945e-13 | 1.00000 | 1.00913e-12 | 0.999999 |
| rad8      | 5.37157e-13 | 1.00000 | 6.42296e-13 | 0.999999 |
| rad47     | 4.04911e-15 | 1.00000 | 4.84165e-15 | 0.999999 |
| rad5      | 2.65947e-15 | 1.00000 | 3.18002e-15 | 0.999999 |

1.00000000 Pa, 1300.00000 K

| Rate constant      | True (fraction)      | Effective (fraction) |
|--------------------|----------------------|----------------------|
| Total              | 2.54148e-12 (1.00 )  | 2.05337e-12 (1.00 )  |
| Formation of rad11 | 7.22991e-13 (0.284 ) | 5.03419e-13 (0.245 ) |
| Formation of rad6  | 8.84215e-13 (0.348 ) | 6.15679e-13 (0.300 ) |
| H-abstraction      | 9.34273e-13 (0.368 ) | 9.34273e-13 (0.455 ) |

| species            | PYtrue      | Cumul    | PYeffective | Cumul    |
|--------------------|-------------|----------|-------------|----------|
| Benzene+2-propynyl | 0.367610    | 0.367610 | 0.454995    | 0.454995 |
| Phenyl+Allene      | 0.192057    | 0.559667 | 0.000000    | 0.454995 |
| Indene+H           | 0.131421    | 0.691088 | 0.162661    | 0.617655 |
| C2H2+PhCH2         | 0.111281    | 0.802369 | 0.137734    | 0.755389 |
| PhCHCCH2+H         | 0.0692277   | 0.871596 | 0.0856841   | 0.841073 |
| PhCH2CCH+H         | 0.0636273   | 0.935224 | 0.0787522   | 0.919825 |
| PhCCH+CH3          | 0.0461509   | 0.981375 | 0.0571214   | 0.976947 |
| PAH7+H             | 0.00794547  | 0.989320 | 0.00983418  | 0.986781 |
| Ph+MeAc            | 0.00637025  | 0.995690 | 0.00788459  | 0.994666 |
| rad39              | 0.00158189  | 0.997272 | 0.00195792  | 0.996624 |
| PhCCCH3+H          | 0.00142369  | 0.998696 | 0.00176211  | 0.998386 |
| rad19anti          | 0.000475511 | 0.999171 | 0.000588546 | 0.998974 |
| PAH9+H             | 0.000242256 | 0.999414 | 0.000299843 | 0.999274 |
| rad19syn           | 0.000174671 | 0.999588 | 0.000216192 | 0.999490 |
| rad38              | 9.99480e-05 | 0.999688 | 0.000123706 | 0.999614 |
| rad54              | 6.26312e-05 | 0.999751 | 7.75194e-05 | 0.999691 |
| PhcycC3H3_A+H      | 5.74393e-05 | 0.999808 | 7.10932e-05 | 0.999763 |
| rad35              | 4.53697e-05 | 0.999854 | 5.61546e-05 | 0.999819 |
| rad30              | 3.53161e-05 | 0.999889 | 4.37110e-05 | 0.999862 |
| rad46              | 2.33841e-05 | 0.999912 | 2.89428e-05 | 0.999891 |
| rad6               | 1.73297e-05 | 0.999930 | 2.14491e-05 | 0.999913 |
| rad37              | 1.29878e-05 | 0.999943 | 1.60752e-05 | 0.999929 |
| PAH1+H             | 1.02835e-05 | 0.999953 | 1.27281e-05 | 0.999942 |
| PAH3+H             | 9.32130e-06 | 0.999962 | 1.15371e-05 | 0.999953 |
| rad50              | 7.52070e-06 | 0.999970 | 9.30842e-06 | 0.999962 |
| rad70              | 6.43052e-06 | 0.999976 | 7.95915e-06 | 0.999970 |
| PAH10+CH3          | 6.08007e-06 | 0.999982 | 7.52538e-06 | 0.999978 |
| rad67              | 4.99974e-06 | 0.999987 | 6.18821e-06 | 0.999984 |
| rad55              | 3.63027e-06 | 0.999991 | 4.49322e-06 | 0.999989 |
| rad60syn           | 1.56346e-06 | 0.999993 | 1.93511e-06 | 0.999991 |
| rad34              | 1.13469e-06 | 0.999994 | 1.40442e-06 | 0.999992 |
| rad59              | 1.09818e-06 | 0.999995 | 1.35923e-06 | 0.999993 |
| rad51              | 1.03408e-06 | 0.999996 | 1.27990e-06 | 0.999995 |
| rad60anti          | 9.23732e-07 | 0.999997 | 1.14331e-06 | 0.999996 |
| rad62              | 8.25958e-07 | 0.999998 | 1.02230e-06 | 0.999997 |
| rad52              | 4.51144e-07 | 0.999998 | 5.58385e-07 | 0.999997 |
| rad53              | 4.02901e-07 | 0.999998 | 4.98674e-07 | 0.999998 |
| rad11              | 2.65579e-07 | 0.999999 | 3.28710e-07 | 0.999998 |
| rad56              | 2.64625e-07 | 0.999999 | 3.27528e-07 | 0.999998 |
| rad7               | 1.75082e-07 | 0.999999 | 2.16701e-07 | 0.999999 |
| rad23              | 1.70895e-07 | 0.999999 | 2.11519e-07 | 0.999999 |
| rad64              | 1.13769e-07 | 0.999999 | 1.40814e-07 | 0.999999 |
| rad43              | 8.96476e-08 | 0.999999 | 1.10958e-07 | 0.999999 |
| rad9               | 7.44222e-08 | 1.000000 | 9.21130e-08 | 0.999999 |
| rad45              | 5.27277e-08 | 1.000000 | 6.52616e-08 | 0.999999 |
| rad13              | 5.09342e-08 | 1.000000 | 6.30418e-08 | 0.999999 |
| rad58              | 3.75636e-08 | 1.000000 | 4.64928e-08 | 0.999999 |
| rad65              | 3.17658e-08 | 1.000000 | 3.93169e-08 | 0.999999 |
| PAH8+H             | 3.15134e-08 | 1.000000 | 3.90044e-08 | 0.999999 |
| rad42              | 3.09072e-08 | 1.000000 | 3.82541e-08 | 1.000000 |
| rad28              | 2.67332e-08 | 1.000000 | 3.30879e-08 | 1.000000 |
| rad68syn           | 2.53753e-08 | 1.000000 | 3.14073e-08 | 1.000000 |
| rad68anti          | 1.67855e-08 | 1.000000 | 2.07755e-08 | 1.000000 |

|           |             |          |             |          |
|-----------|-------------|----------|-------------|----------|
| rad2      | 1.25085e-08 | 1.000000 | 1.54820e-08 | 1.000000 |
| rad10     | 6.53771e-09 | 1.000000 | 8.09180e-09 | 1.000000 |
| rad21     | 5.94645e-09 | 1.000000 | 7.35997e-09 | 1.000000 |
| rad40syn  | 5.46531e-09 | 1.000000 | 6.76450e-09 | 1.000000 |
| rad36     | 5.03166e-09 | 1.000000 | 6.22772e-09 | 1.000000 |
| rad73     | 4.10932e-09 | 1.000000 | 5.08615e-09 | 1.000000 |
| rad71     | 3.51421e-09 | 1.000000 | 4.34957e-09 | 1.000000 |
| rad1      | 2.92131e-09 | 1.000000 | 3.61573e-09 | 1.000000 |
| rad26     | 2.85262e-09 | 1.000000 | 3.53071e-09 | 1.000000 |
| rad40anti | 2.77047e-09 | 1.000000 | 3.42904e-09 | 1.000000 |
| rad20     | 2.67841e-09 | 1.000000 | 3.31509e-09 | 1.000000 |
| rad61     | 2.42324e-09 | 1.000000 | 2.99927e-09 | 1.000000 |
| rad41     | 2.20908e-09 | 1.000000 | 2.73419e-09 | 1.000000 |
| rad33     | 1.51103e-09 | 1.000000 | 1.87021e-09 | 1.000000 |
| rad3      | 9.83651e-10 | 1.000000 | 1.21748e-09 | 1.000000 |
| rad22     | 8.77239e-10 | 1.000000 | 1.08576e-09 | 1.000000 |
| rad4      | 7.77188e-10 | 1.000000 | 9.61929e-10 | 1.000000 |
| rad18     | 3.63163e-10 | 1.000000 | 4.49491e-10 | 1.000000 |
| rad25     | 2.63079e-10 | 1.000000 | 3.25616e-10 | 1.000000 |
| rad15     | 1.26780e-10 | 1.000000 | 1.56917e-10 | 1.000000 |
| rad24     | 1.21081e-10 | 1.000000 | 1.49864e-10 | 1.000000 |
| rad12     | 9.25281e-11 | 1.000000 | 1.14524e-10 | 1.000000 |
| rad72     | 4.47127e-11 | 1.000000 | 5.53415e-11 | 1.000000 |
| rad14     | 1.80256e-11 | 1.000000 | 2.23104e-11 | 1.000000 |
| rad27     | 5.28030e-12 | 1.000000 | 6.53548e-12 | 1.000000 |
| rad8      | 7.86908e-13 | 1.000000 | 9.73968e-13 | 1.000000 |
| rad31     | 5.35957e-13 | 1.000000 | 6.63358e-13 | 1.000000 |
| rad47     | 7.74728e-15 | 1.000000 | 9.58888e-15 | 1.000000 |
| rad5      | 4.77894e-15 | 1.000000 | 5.91494e-15 | 1.000000 |

1.00000000 Pa, 1400.00000 K

| Rate constant      | True (fraction) |          | Effective (fraction) |          |
|--------------------|-----------------|----------|----------------------|----------|
| Total              | 3.47024e-12     | (1.00 )  | 2.71983e-12          | (1.00 )  |
| Formation of rad11 | 9.43269e-13     | (0.272 ) | 6.11763e-13          | (0.225 ) |
| Formation of rad6  | 1.19194e-12     | (0.343 ) | 7.73037e-13          | (0.284 ) |
| H-abstraction      | 1.33503e-12     | (0.385 ) | 1.33503e-12          | (0.491 ) |

  

| species            | PYtrue      | Cumul    | PYeffective | Cumul    |
|--------------------|-------------|----------|-------------|----------|
| Benzene+2-propynyl | 0.384709    | 0.384709 | 0.490851    | 0.490851 |
| Phenyl+Allene      | 0.216240    | 0.600949 | 0.000000    | 0.490851 |
| Indene+H           | 0.102752    | 0.703701 | 0.131101    | 0.621952 |
| C2H2+PhCH2         | 0.0940245   | 0.797726 | 0.119966    | 0.741918 |
| PhCH2CCH+H         | 0.0730492   | 0.870775 | 0.0932033   | 0.835121 |
| PhCHCCH2+H         | 0.0704348   | 0.941210 | 0.0898679   | 0.924989 |
| PhCCH+CH3          | 0.0407678   | 0.981977 | 0.0520157   | 0.977005 |
| PAH7+H             | 0.00808049  | 0.990058 | 0.0103099   | 0.987315 |
| Ph+MeAc            | 0.00578220  | 0.995840 | 0.00737752  | 0.994692 |
| rad39              | 0.00153895  | 0.997379 | 0.00196355  | 0.996656 |
| PhCCCH3+H          | 0.00104905  | 0.998428 | 0.00133849  | 0.997994 |
| rad19anti          | 0.000537572 | 0.998966 | 0.000685890 | 0.998680 |
| PAH9+H             | 0.000275159 | 0.999241 | 0.000351076 | 0.999031 |
| rad19syn           | 0.000241033 | 0.999482 | 0.000307534 | 0.999339 |
| rad38              | 0.000115649 | 0.999597 | 0.000147557 | 0.999486 |
| PhcycC3H3_A+H      | 9.27250e-05 | 0.999690 | 0.000118308 | 0.999605 |
| rad54              | 9.02115e-05 | 0.999780 | 0.000115101 | 0.999720 |
| rad35              | 5.05893e-05 | 0.999831 | 6.45469e-05 | 0.999784 |
| rad30              | 3.27872e-05 | 0.999864 | 4.18332e-05 | 0.999826 |
| rad46              | 2.90016e-05 | 0.999893 | 3.70032e-05 | 0.999863 |
| PAH1+H             | 1.59975e-05 | 0.999909 | 2.04112e-05 | 0.999884 |
| rad37              | 1.43569e-05 | 0.999923 | 1.83179e-05 | 0.999902 |
| PAH3+H             | 1.18387e-05 | 0.999935 | 1.51050e-05 | 0.999917 |
| rad50              | 1.14064e-05 | 0.999946 | 1.45534e-05 | 0.999931 |
| rad6               | 1.00106e-05 | 0.999956 | 1.27725e-05 | 0.999944 |
| rad70              | 9.33064e-06 | 0.999966 | 1.19049e-05 | 0.999956 |
| PAH10+CH3          | 9.00448e-06 | 0.999975 | 1.14889e-05 | 0.999968 |
| rad67              | 7.68825e-06 | 0.999982 | 9.80942e-06 | 0.999977 |
| rad55              | 5.54169e-06 | 0.999988 | 7.07066e-06 | 0.999985 |
| rad51              | 1.82098e-06 | 0.999990 | 2.32339e-06 | 0.999987 |
| rad34              | 1.77497e-06 | 0.999992 | 2.26469e-06 | 0.999989 |
| rad60syn           | 1.71207e-06 | 0.999993 | 2.18444e-06 | 0.999991 |
| rad59              | 1.34399e-06 | 0.999995 | 1.71479e-06 | 0.999993 |
| rad62              | 1.09244e-06 | 0.999996 | 1.39384e-06 | 0.999994 |
| rad60anti          | 1.02267e-06 | 0.999997 | 1.30483e-06 | 0.999996 |
| rad53              | 7.63515e-07 | 0.999998 | 9.74166e-07 | 0.999997 |
| rad52              | 7.37451e-07 | 0.999998 | 9.40913e-07 | 0.999998 |
| rad56              | 5.61719e-07 | 0.999999 | 7.16699e-07 | 0.999998 |
| rad11              | 2.18508e-07 | 0.999999 | 2.78795e-07 | 0.999999 |

|           |             |          |             |          |
|-----------|-------------|----------|-------------|----------|
| rad64     | 1.97852e-07 | 0.999999 | 2.52440e-07 | 0.999999 |
| rad7      | 1.82946e-07 | 0.999999 | 2.33421e-07 | 0.999999 |
| rad43     | 1.00025e-07 | 1.000000 | 1.27622e-07 | 0.999999 |
| rad23     | 9.87868e-08 | 1.000000 | 1.26042e-07 | 0.999999 |
| PAH8+H    | 7.73119e-08 | 1.000000 | 9.86421e-08 | 0.999999 |
| rad58     | 5.80321e-08 | 1.000000 | 7.40430e-08 | 1.000000 |
| rad65     | 5.52513e-08 | 1.000000 | 7.04953e-08 | 1.000000 |
| rad68syn  | 5.11914e-08 | 1.000000 | 6.53152e-08 | 1.000000 |
| rad9      | 4.85274e-08 | 1.000000 | 6.19161e-08 | 1.000000 |
| rad42     | 4.85251e-08 | 1.000000 | 6.19131e-08 | 1.000000 |
| rad68anti | 3.37481e-08 | 1.000000 | 4.30593e-08 | 1.000000 |
| rad13     | 3.20343e-08 | 1.000000 | 4.08726e-08 | 1.000000 |
| rad45     | 2.92856e-08 | 1.000000 | 3.73655e-08 | 1.000000 |
| rad28     | 1.66460e-08 | 1.000000 | 2.12386e-08 | 1.000000 |
| rad40syn  | 1.23726e-08 | 1.000000 | 1.57862e-08 | 1.000000 |
| rad73     | 1.03003e-08 | 1.000000 | 1.31422e-08 | 1.000000 |
| rad71     | 9.53732e-09 | 1.000000 | 1.21686e-08 | 1.000000 |
| rad40anti | 6.48018e-09 | 1.000000 | 8.26808e-09 | 1.000000 |
| rad61     | 4.96624e-09 | 1.000000 | 6.33641e-09 | 1.000000 |
| rad2      | 4.32599e-09 | 1.000000 | 5.51953e-09 | 1.000000 |
| rad21     | 3.82539e-09 | 1.000000 | 4.88083e-09 | 1.000000 |
| rad10     | 3.47790e-09 | 1.000000 | 4.43746e-09 | 1.000000 |
| rad41     | 3.08968e-09 | 1.000000 | 3.94212e-09 | 1.000000 |
| rad36     | 2.82259e-09 | 1.000000 | 3.60135e-09 | 1.000000 |
| rad26     | 1.58129e-09 | 1.000000 | 2.01757e-09 | 1.000000 |
| rad20     | 1.55040e-09 | 1.000000 | 1.97817e-09 | 1.000000 |
| rad1      | 1.02445e-09 | 1.000000 | 1.30710e-09 | 1.000000 |
| rad33     | 9.78491e-10 | 1.000000 | 1.24846e-09 | 1.000000 |
| rad22     | 6.72599e-10 | 1.000000 | 8.58171e-10 | 1.000000 |
| rad3      | 4.36289e-10 | 1.000000 | 5.56663e-10 | 1.000000 |
| rad18     | 3.49291e-10 | 1.000000 | 4.45660e-10 | 1.000000 |
| rad4      | 3.47110e-10 | 1.000000 | 4.42878e-10 | 1.000000 |
| rad15     | 2.40837e-10 | 1.000000 | 3.07283e-10 | 1.000000 |
| rad25     | 1.94471e-10 | 1.000000 | 2.48127e-10 | 1.000000 |
| rad72     | 1.35463e-10 | 1.000000 | 1.72837e-10 | 1.000000 |
| rad24     | 8.67800e-11 | 1.000000 | 1.10723e-10 | 1.000000 |
| rad12     | 7.87037e-11 | 1.000000 | 1.00418e-10 | 1.000000 |
| rad14     | 1.13351e-11 | 1.000000 | 1.44625e-11 | 1.000000 |
| rad27     | 2.46789e-12 | 1.000000 | 3.14878e-12 | 1.000000 |
| rad8      | 9.26733e-13 | 1.000000 | 1.18242e-12 | 1.000000 |
| rad31     | 3.51497e-13 | 1.000000 | 4.48476e-13 | 1.000000 |
| rad47     | 1.36473e-14 | 1.000000 | 1.74125e-14 | 1.000000 |
| rad5      | 9.84269e-15 | 1.000000 | 1.25583e-14 | 1.000000 |

1.00000000 Pa, 1500.00000 K

| Rate constant      | True (fraction)      | Effective (fraction) |
|--------------------|----------------------|----------------------|
| Total              | 4.61271e-12 (1.00 )  | 3.52360e-12 (1.00 )  |
| Formation of rad11 | 1.20217e-12 (0.261 ) | 7.28776e-13 (0.207 ) |
| Formation of rad6  | 1.56360e-12 (0.339 ) | 9.47879e-13 (0.269 ) |
| H-abstraction      | 1.84694e-12 (0.400 ) | 1.84694e-12 (0.524 ) |

| species            | PYtrue      | Cumul    | PYeffective | Cumul    |
|--------------------|-------------|----------|-------------|----------|
| Benzene+2-propynyl | 0.400402    | 0.400402 | 0.524164    | 0.524164 |
| Phenyl+Allene      | 0.236112    | 0.636514 | 0.000000    | 0.524164 |
| Indene+H           | 0.0806423   | 0.717157 | 0.105568    | 0.629732 |
| PhCH2CCH+H         | 0.0806393   | 0.797796 | 0.105564    | 0.735296 |
| C2H2+PhCH2         | 0.0787002   | 0.876496 | 0.103026    | 0.838322 |
| PhCHCCH2+H         | 0.0701565   | 0.946653 | 0.0918412   | 0.930163 |
| PhCCH+CH3          | 0.0359347   | 0.982587 | 0.0470418   | 0.977205 |
| PAH7+H             | 0.00805098  | 0.990638 | 0.0105394   | 0.987744 |
| Ph+MeAc            | 0.00526012  | 0.995898 | 0.00688597  | 0.994630 |
| rad39              | 0.00146493  | 0.997363 | 0.00191773  | 0.996548 |
| PhCCCH3+H          | 0.000785539 | 0.998149 | 0.00102834  | 0.997576 |
| rad19anti          | 0.000582993 | 0.998732 | 0.000763189 | 0.998339 |
| rad19syn           | 0.000316582 | 0.999048 | 0.000414435 | 0.998754 |
| PAH9+H             | 0.000302880 | 0.999351 | 0.000396498 | 0.999150 |
| PhcycC3H3_A+H      | 0.000139922 | 0.999491 | 0.000183170 | 0.999333 |
| rad38              | 0.000129517 | 0.999621 | 0.000169550 | 0.999503 |
| rad54              | 0.000122814 | 0.999744 | 0.000160776 | 0.999664 |
| rad35              | 5.49649e-05 | 0.999798 | 7.19541e-05 | 0.999736 |
| rad46              | 3.45450e-05 | 0.999833 | 4.52226e-05 | 0.999781 |
| rad30              | 3.01143e-05 | 0.999863 | 3.94223e-05 | 0.999820 |
| PAH1+H             | 2.31915e-05 | 0.999886 | 3.03598e-05 | 0.999851 |
| rad50              | 1.62846e-05 | 0.999903 | 2.13180e-05 | 0.999872 |
| rad37              | 1.56196e-05 | 0.999918 | 2.04476e-05 | 0.999893 |
| PAH3+H             | 1.44559e-05 | 0.999933 | 1.89241e-05 | 0.999911 |
| rad70              | 1.26617e-05 | 0.999945 | 1.65753e-05 | 0.999928 |

|           |             |          |             |          |
|-----------|-------------|----------|-------------|----------|
| PAH10+CH3 | 1.25765e-05 | 0.999958 | 1.64638e-05 | 0.999945 |
| rad67     | 1.09810e-05 | 0.999969 | 1.43752e-05 | 0.999959 |
| rad55     | 7.93634e-06 | 0.999977 | 1.03894e-05 | 0.999969 |
| rad6      | 7.25843e-06 | 0.999984 | 9.50198e-06 | 0.999979 |
| rad51     | 2.97004e-06 | 0.999987 | 3.88806e-06 | 0.999983 |
| rad34     | 2.57558e-06 | 0.999990 | 3.37167e-06 | 0.999986 |
| rad60syn  | 1.82793e-06 | 0.999991 | 2.39293e-06 | 0.999988 |
| rad59     | 1.58472e-06 | 0.999993 | 2.07455e-06 | 0.999991 |
| rad62     | 1.38713e-06 | 0.999994 | 1.81587e-06 | 0.999992 |
| rad53     | 1.32212e-06 | 0.999996 | 1.73078e-06 | 0.999994 |
| rad52     | 1.12452e-06 | 0.999997 | 1.47209e-06 | 0.999996 |
| rad60anti | 1.10269e-06 | 0.999998 | 1.44352e-06 | 0.999997 |
| rad56     | 1.07230e-06 | 0.999999 | 1.40374e-06 | 0.999998 |
| rad64     | 3.15108e-07 | 0.999999 | 4.12505e-07 | 0.999999 |
| PAH8+H    | 1.66263e-07 | 1.000000 | 2.17654e-07 | 0.999999 |
| rad11     | 1.47048e-07 | 1.000000 | 1.92500e-07 | 0.999999 |
| rad7      | 1.44572e-07 | 1.000000 | 1.89258e-07 | 0.999999 |
| rad43     | 1.09533e-07 | 1.000000 | 1.43389e-07 | 1.000000 |
| rad68syn  | 9.28333e-08 | 1.000000 | 1.21528e-07 | 1.000000 |
| rad65     | 8.89395e-08 | 1.000000 | 1.16430e-07 | 1.000000 |
| rad58     | 8.42141e-08 | 1.000000 | 1.10244e-07 | 1.000000 |
| rad42     | 7.16705e-08 | 1.000000 | 9.38235e-08 | 1.000000 |
| rad68anti | 6.10193e-08 | 1.000000 | 7.98801e-08 | 1.000000 |
| rad23     | 6.02895e-08 | 1.000000 | 7.89246e-08 | 1.000000 |
| rad9      | 3.12743e-08 | 1.000000 | 4.09409e-08 | 1.000000 |
| rad40syn  | 2.48129e-08 | 1.000000 | 3.24823e-08 | 1.000000 |
| rad71     | 2.36644e-08 | 1.000000 | 3.09788e-08 | 1.000000 |
| rad73     | 2.33569e-08 | 1.000000 | 3.05763e-08 | 1.000000 |
| rad13     | 1.92592e-08 | 1.000000 | 2.52120e-08 | 1.000000 |
| rad45     | 1.65689e-08 | 1.000000 | 2.16901e-08 | 1.000000 |
| rad40anti | 1.33709e-08 | 1.000000 | 1.75037e-08 | 1.000000 |
| rad28     | 1.30765e-08 | 1.000000 | 1.71183e-08 | 1.000000 |
| rad61     | 9.15166e-09 | 1.000000 | 1.19803e-08 | 1.000000 |
| rad41     | 4.14446e-09 | 1.000000 | 5.42549e-09 | 1.000000 |
| rad21     | 2.43688e-09 | 1.000000 | 3.19009e-09 | 1.000000 |
| rad36     | 1.61270e-09 | 1.000000 | 2.11118e-09 | 1.000000 |
| rad2      | 1.60403e-09 | 1.000000 | 2.09983e-09 | 1.000000 |
| rad10     | 1.58991e-09 | 1.000000 | 2.08134e-09 | 1.000000 |
| rad26     | 9.48282e-10 | 1.000000 | 1.24139e-09 | 1.000000 |
| rad20     | 8.89101e-10 | 1.000000 | 1.16391e-09 | 1.000000 |
| rad22     | 6.62525e-10 | 1.000000 | 8.67307e-10 | 1.000000 |
| rad33     | 6.34794e-10 | 1.000000 | 8.31001e-10 | 1.000000 |
| rad72     | 4.08679e-10 | 1.000000 | 5.34997e-10 | 1.000000 |
| rad1      | 3.83392e-10 | 1.000000 | 5.01898e-10 | 1.000000 |
| rad15     | 3.42707e-10 | 1.000000 | 4.48634e-10 | 1.000000 |
| rad18     | 2.49481e-10 | 1.000000 | 3.26594e-10 | 1.000000 |
| rad3      | 2.04141e-10 | 1.000000 | 2.67239e-10 | 1.000000 |
| rad4      | 1.63285e-10 | 1.000000 | 2.13755e-10 | 1.000000 |
| rad25     | 1.38089e-10 | 1.000000 | 1.80771e-10 | 1.000000 |
| rad12     | 6.49352e-11 | 1.000000 | 8.50058e-11 | 1.000000 |
| rad24     | 6.18623e-11 | 1.000000 | 8.09835e-11 | 1.000000 |
| rad14     | 7.09810e-12 | 1.000000 | 9.29204e-12 | 1.000000 |
| rad27     | 1.20132e-12 | 1.000000 | 1.57263e-12 | 1.000000 |
| rad8      | 9.77110e-13 | 1.000000 | 1.27912e-12 | 1.000000 |
| rad31     | 2.37881e-13 | 1.000000 | 3.11409e-13 | 1.000000 |
| rad47     | 2.22081e-14 | 1.000000 | 2.90725e-14 | 1.000000 |
| rad5      | 1.96937e-14 | 1.000000 | 2.57809e-14 | 1.000000 |

1.00000000 Pa, 1750.00000 K

=====

| Rate constant      | True (fraction)      | Effective (fraction) |
|--------------------|----------------------|----------------------|
| Total              | 8.61869e-12 (1.00 )  | 6.27398e-12 (1.00 )  |
| Formation of rad11 | 2.04015e-12 (0.237 ) | 1.05237e-12 (0.168 ) |
| Formation of rad6  | 2.80256e-12 (0.325 ) | 1.44564e-12 (0.230 ) |
| H-abstraction      | 3.77597e-12 (0.438 ) | 3.77597e-12 (0.602 ) |

| species            | PYtrue      | Cumul    | PYeffective | Cumul    |
|--------------------|-------------|----------|-------------|----------|
| Benzene+2-propynyl | 0.438115    | 0.438115 | 0.601847    | 0.601847 |
| Phenyl+Allene      | 0.272050    | 0.710164 | 0.000000    | 0.601847 |
| PhCH2CCH+H         | 0.0933387   | 0.803503 | 0.128221    | 0.730068 |
| PhCHCCH2+H         | 0.0656316   | 0.869135 | 0.0901598   | 0.820228 |
| C2H2+PhCH2         | 0.0475953   | 0.916730 | 0.0653827   | 0.885611 |
| Indene+H           | 0.0395350   | 0.956265 | 0.0543101   | 0.939921 |
| PhCCH+CH3          | 0.0276505   | 0.983916 | 0.0379841   | 0.977905 |
| PAH7+H             | 0.00712600  | 0.991042 | 0.00978915  | 0.987694 |
| Ph+MeAc            | 0.00488535  | 0.995927 | 0.00671111  | 0.994405 |
| rad39              | 0.00123375  | 0.997161 | 0.00169484  | 0.996100 |
| rad19anti          | 0.000564105 | 0.997725 | 0.000774925 | 0.996875 |

|               |             |          |             |          |
|---------------|-------------|----------|-------------|----------|
| rad19syn      | 0.000506204 | 0.998231 | 0.000695382 | 0.997570 |
| PhCCCH3+H     | 0.000461460 | 0.998692 | 0.000633919 | 0.998204 |
| PhcycC3H3_A+H | 0.000354673 | 0.999047 | 0.000487220 | 0.998691 |
| PAH9+H        | 0.000266756 | 0.999314 | 0.000366449 | 0.999058 |
| rad54         | 0.000215019 | 0.999529 | 0.000295376 | 0.999353 |
| rad38         | 0.000142786 | 0.999672 | 0.000196149 | 0.999549 |
| rad35         | 4.88430e-05 | 0.999720 | 6.70968e-05 | 0.999616 |
| PAH1+H        | 4.24114e-05 | 0.999763 | 5.82613e-05 | 0.999675 |
| rad46         | 3.79773e-05 | 0.999801 | 5.21704e-05 | 0.999727 |
| rad50         | 2.39034e-05 | 0.999825 | 3.28366e-05 | 0.999760 |
| rad30         | 2.30173e-05 | 0.999848 | 3.16193e-05 | 0.999791 |
| PAH10+CH3     | 2.22305e-05 | 0.999870 | 3.05385e-05 | 0.999822 |
| rad70         | 2.20513e-05 | 0.999892 | 3.02924e-05 | 0.999852 |
| PAH3+H        | 2.08066e-05 | 0.999913 | 2.85824e-05 | 0.999881 |
| rad55         | 1.72040e-05 | 0.999930 | 2.36336e-05 | 0.999904 |
| rad67         | 1.69180e-05 | 0.999947 | 2.32406e-05 | 0.999928 |
| rad37         | 1.61427e-05 | 0.999963 | 2.21756e-05 | 0.999950 |
| rad51         | 6.13860e-06 | 0.999969 | 8.43272e-06 | 0.999958 |
| rad34         | 5.25708e-06 | 0.999975 | 7.22174e-06 | 0.999965 |
| rad53         | 4.39622e-06 | 0.999979 | 6.03919e-06 | 0.999971 |
| rad6          | 4.02751e-06 | 0.999983 | 5.53269e-06 | 0.999977 |
| rad56         | 3.99447e-06 | 0.999987 | 5.48731e-06 | 0.999982 |
| rad62         | 2.35622e-06 | 0.999989 | 3.23679e-06 | 0.999986 |
| rad59         | 2.06490e-06 | 0.999991 | 2.83660e-06 | 0.999989 |
| rad52         | 2.03632e-06 | 0.999993 | 2.79734e-06 | 0.999991 |
| rad60syn      | 1.94294e-06 | 0.999995 | 2.66906e-06 | 0.999994 |
| rad60anti     | 1.30715e-06 | 0.999997 | 1.79566e-06 | 0.999996 |
| rad64         | 7.88758e-07 | 0.999997 | 1.08353e-06 | 0.999997 |
| PAH8+H        | 5.91047e-07 | 0.999998 | 8.11938e-07 | 0.999998 |
| rad68syn      | 2.81809e-07 | 0.999998 | 3.87127e-07 | 0.999998 |
| rad68anti     | 1.82612e-07 | 0.999999 | 2.50858e-07 | 0.999998 |
| rad65         | 1.74812e-07 | 0.999999 | 2.40142e-07 | 0.999999 |
| rad42         | 1.70628e-07 | 0.999999 | 2.34395e-07 | 0.999999 |
| rad58         | 1.57384e-07 | 0.999999 | 2.16202e-07 | 0.999999 |
| rad71         | 1.46691e-07 | 0.999999 | 2.01513e-07 | 0.999999 |
| rad43         | 1.31446e-07 | 0.999999 | 1.80570e-07 | 0.999999 |
| rad73         | 1.06502e-07 | 0.999999 | 1.46304e-07 | 1.000000 |
| rad40syn      | 8.39889e-08 | 0.999999 | 1.15377e-07 | 1.000000 |
| rad40anti     | 5.01355e-08 | 1.000000 | 6.88721e-08 | 1.000000 |
| rad61         | 2.64442e-08 | 1.000000 | 3.63270e-08 | 1.000000 |
| rad7          | 2.37186e-08 | 1.000000 | 3.25827e-08 | 1.000000 |
| rad11         | 1.77491e-08 | 1.000000 | 2.43822e-08 | 1.000000 |
| rad23         | 1.03854e-08 | 1.000000 | 1.42667e-08 | 1.000000 |
| rad28         | 9.19896e-09 | 1.000000 | 1.26368e-08 | 1.000000 |
| rad41         | 7.92118e-09 | 1.000000 | 1.08815e-08 | 1.000000 |
| rad72         | 7.89263e-09 | 1.000000 | 1.08423e-08 | 1.000000 |
| rad9          | 2.31225e-09 | 1.000000 | 3.17640e-09 | 1.000000 |
| rad13         | 1.61650e-09 | 1.000000 | 2.22062e-09 | 1.000000 |
| rad45         | 1.35528e-09 | 1.000000 | 1.86178e-09 | 1.000000 |
| rad22         | 1.01085e-09 | 1.000000 | 1.38862e-09 | 1.000000 |
| rad36         | 2.32832e-10 | 1.000000 | 3.19847e-10 | 1.000000 |
| rad26         | 2.08726e-10 | 1.000000 | 2.86732e-10 | 1.000000 |
| rad21         | 1.98225e-10 | 1.000000 | 2.72306e-10 | 1.000000 |
| rad15         | 1.13930e-10 | 1.000000 | 1.56508e-10 | 1.000000 |
| rad10         | 1.03653e-10 | 1.000000 | 1.42391e-10 | 1.000000 |
| rad20         | 6.47921e-11 | 1.000000 | 8.90059e-11 | 1.000000 |
| rad33         | 5.54261e-11 | 1.000000 | 7.61400e-11 | 1.000000 |
| rad2          | 4.20539e-11 | 1.000000 | 5.77704e-11 | 1.000000 |
| rad18         | 3.03569e-11 | 1.000000 | 4.17018e-11 | 1.000000 |
| rad25         | 1.43152e-11 | 1.000000 | 1.96651e-11 | 1.000000 |
| rad1          | 1.06660e-11 | 1.000000 | 1.46522e-11 | 1.000000 |
| rad12         | 7.47094e-12 | 1.000000 | 1.02630e-11 | 1.000000 |
| rad3          | 6.71408e-12 | 1.000000 | 9.22329e-12 | 1.000000 |
| rad24         | 6.07005e-12 | 1.000000 | 8.33852e-12 | 1.000000 |
| rad4          | 4.28817e-12 | 1.000000 | 5.89075e-12 | 1.000000 |
| rad14         | 7.62523e-13 | 1.000000 | 1.04750e-12 | 1.000000 |
| rad8          | 2.76600e-13 | 1.000000 | 3.79972e-13 | 1.000000 |
| rad27         | 6.99873e-14 | 1.000000 | 9.61432e-14 | 1.000000 |
| rad5          | 6.36346e-14 | 1.000000 | 8.74161e-14 | 1.000000 |
| rad47         | 1.44402e-14 | 1.000000 | 1.98369e-14 | 1.000000 |

1.00000000 Pa, 2000.00000 K

| Rate constant      | True (fraction)      | Effective (fraction) |
|--------------------|----------------------|----------------------|
| Total              | 1.44111e-11 (1.00 )  | 1.02930e-11 (1.00 )  |
| Formation of rad11 | 3.16882e-12 (0.220 ) | 1.47448e-12 (0.143 ) |
| Formation of rad6  | 4.53302e-12 (0.315 ) | 2.10926e-12 (0.205 ) |
| H-abstraction      | 6.70922e-12 (0.466 ) | 6.70922e-12 (0.652 ) |

| species            | PYtrue      | Cumul    | PYeffective | Cumul    |
|--------------------|-------------|----------|-------------|----------|
| Benzene+2-propynyl | 0.465560    | 0.465560 | 0.651826    | 0.651826 |
| Phenyl+Allene      | 0.285760    | 0.751320 | 0.00000     | 0.651826 |
| PhCH2CCH+H         | 0.0971788   | 0.848499 | 0.136059    | 0.787885 |
| PhCHCCH2+H         | 0.0592988   | 0.907797 | 0.0830239   | 0.870908 |
| C2H2+PhCH2         | 0.0319937   | 0.939791 | 0.0447940   | 0.915702 |
| Indene+H           | 0.0233041   | 0.963095 | 0.0326278   | 0.948330 |
| PhCCH+CH3          | 0.0216463   | 0.984741 | 0.0303068   | 0.978637 |
| PAH7+H             | 0.00659328  | 0.991335 | 0.00923115  | 0.987868 |
| Ph+MeAc            | 0.00420936  | 0.995544 | 0.00589348  | 0.993762 |
| rad39              | 0.00101471  | 0.996559 | 0.00142069  | 0.995182 |
| rad19syn           | 0.000746815 | 0.997306 | 0.00104561  | 0.996228 |
| PhcycC3H3_A+H      | 0.000656394 | 0.997962 | 0.000919006 | 0.997147 |
| rad19anti          | 0.000529223 | 0.998491 | 0.000740960 | 0.997888 |
| rad54              | 0.000330246 | 0.998822 | 0.000462372 | 0.998350 |
| PhCCCH3+H          | 0.000291957 | 0.999113 | 0.000408767 | 0.998759 |
| PAH9+H             | 0.000279553 | 0.999393 | 0.000391400 | 0.999150 |
| rad38              | 0.000156421 | 0.999549 | 0.000219003 | 0.999369 |
| PAH1+H             | 6.97032e-05 | 0.999619 | 9.75912e-05 | 0.999467 |
| rad35              | 5.18647e-05 | 0.999671 | 7.26152e-05 | 0.999540 |
| rad46              | 4.57442e-05 | 0.999717 | 6.40460e-05 | 0.999604 |
| rad50              | 3.87602e-05 | 0.999756 | 5.42678e-05 | 0.999658 |
| PAH10+CH3          | 3.34481e-05 | 0.999789 | 4.68305e-05 | 0.999705 |
| rad70              | 3.20127e-05 | 0.999821 | 4.48208e-05 | 0.999750 |
| rad55              | 2.86900e-05 | 0.999850 | 4.01685e-05 | 0.999790 |
| PAH3+H             | 2.79054e-05 | 0.999878 | 3.90700e-05 | 0.999829 |
| rad67              | 2.51589e-05 | 0.999903 | 3.52248e-05 | 0.999864 |
| rad30              | 1.88900e-05 | 0.999922 | 2.64477e-05 | 0.999891 |
| rad37              | 1.66057e-05 | 0.999938 | 2.32494e-05 | 0.999914 |
| rad51              | 1.23047e-05 | 0.999951 | 1.72276e-05 | 0.999931 |
| rad56              | 1.03268e-05 | 0.999961 | 1.44585e-05 | 0.999946 |
| rad53              | 9.91086e-06 | 0.999971 | 1.38761e-05 | 0.999959 |
| rad34              | 8.56189e-06 | 0.999979 | 1.19874e-05 | 0.999971 |
| rad52              | 3.64256e-06 | 0.999983 | 5.09992e-06 | 0.999976 |
| rad62              | 3.41539e-06 | 0.999986 | 4.78186e-06 | 0.999981 |
| rad59              | 2.58717e-06 | 0.999989 | 3.62227e-06 | 0.999985 |
| rad60syn           | 2.06844e-06 | 0.999991 | 2.89601e-06 | 0.999988 |
| PAH8+H             | 1.81490e-06 | 0.999993 | 2.54102e-06 | 0.999990 |
| rad64              | 1.47587e-06 | 0.999994 | 2.06636e-06 | 0.999992 |
| rad60anti          | 1.42207e-06 | 0.999996 | 1.99103e-06 | 0.999994 |
| rad6               | 6.77857e-07 | 0.999996 | 9.49064e-07 | 0.999995 |
| rad68syn           | 6.53930e-07 | 0.999997 | 9.15563e-07 | 0.999996 |
| rad71              | 5.04969e-07 | 0.999998 | 7.07003e-07 | 0.999997 |
| rad68anti          | 4.21815e-07 | 0.999998 | 5.90580e-07 | 0.999998 |
| rad73              | 3.40924e-07 | 0.999998 | 4.77326e-07 | 0.999998 |
| rad65              | 3.37943e-07 | 0.999999 | 4.73151e-07 | 0.999998 |
| rad42              | 3.12220e-07 | 0.999999 | 4.37136e-07 | 0.999999 |
| rad58              | 2.75733e-07 | 0.999999 | 3.86052e-07 | 0.999999 |
| rad40syn           | 2.27549e-07 | 1.000000 | 3.18589e-07 | 1.000000 |
| rad43              | 1.62539e-07 | 1.000000 | 2.27570e-07 | 1.000000 |
| rad40anti          | 1.42680e-07 | 1.000000 | 1.99766e-07 | 1.000000 |
| rad61              | 5.98984e-08 | 1.000000 | 8.38630e-08 | 1.000000 |
| rad72              | 2.22497e-08 | 1.000000 | 3.11516e-08 | 1.000000 |
| rad41              | 1.34693e-08 | 1.000000 | 1.88582e-08 | 1.000000 |
| rad7               | 5.32760e-09 | 1.000000 | 7.45911e-09 | 1.000000 |
| rad23              | 4.18300e-09 | 1.000000 | 5.85657e-09 | 1.000000 |
| rad11              | 4.17023e-09 | 1.000000 | 5.83871e-09 | 1.000000 |
| rad28              | 2.29811e-09 | 1.000000 | 3.21757e-09 | 1.000000 |
| rad9               | 7.86113e-10 | 1.000000 | 1.10063e-09 | 1.000000 |
| rad13              | 4.90709e-10 | 1.000000 | 6.87035e-10 | 1.000000 |
| rad45              | 4.11527e-10 | 1.000000 | 5.76173e-10 | 1.000000 |
| rad22              | 2.83899e-10 | 1.000000 | 3.97483e-10 | 1.000000 |
| rad36              | 7.23332e-11 | 1.000000 | 1.01273e-10 | 1.000000 |
| rad21              | 7.16946e-11 | 1.000000 | 1.00379e-10 | 1.000000 |
| rad15              | 4.02777e-11 | 1.000000 | 5.63924e-11 | 1.000000 |
| rad26              | 3.59294e-11 | 1.000000 | 5.03042e-11 | 1.000000 |
| rad33              | 2.26361e-11 | 1.000000 | 3.16926e-11 | 1.000000 |
| rad20              | 1.90283e-11 | 1.000000 | 2.66413e-11 | 1.000000 |
| rad10              | 1.32687e-11 | 1.000000 | 1.85774e-11 | 1.000000 |
| rad18              | 6.70904e-12 | 1.000000 | 9.39322e-12 | 1.000000 |
| rad25              | 5.80049e-12 | 1.000000 | 8.12120e-12 | 1.000000 |
| rad2               | 5.15732e-12 | 1.000000 | 7.22072e-12 | 1.000000 |
| rad12              | 4.14753e-12 | 1.000000 | 5.80692e-12 | 1.000000 |
| rad24              | 2.85154e-12 | 1.000000 | 3.99241e-12 | 1.000000 |
| rad3               | 1.67198e-12 | 1.000000 | 2.34092e-12 | 1.000000 |
| rad1               | 1.35362e-12 | 1.000000 | 1.89519e-12 | 1.000000 |
| rad4               | 1.06137e-12 | 1.000000 | 1.48601e-12 | 1.000000 |
| rad14              | 2.93741e-13 | 1.000000 | 4.11263e-13 | 1.000000 |
| rad8               | 2.34719e-13 | 1.000000 | 3.28627e-13 | 1.000000 |

|       |             |          |             |         |
|-------|-------------|----------|-------------|---------|
| rad5  | 3.94274e-14 | 1.000000 | 5.52020e-14 | 1.00000 |
| rad47 | 2.87017e-14 | 1.000000 | 4.01849e-14 | 1.00000 |
| rad27 | 1.91208e-14 | 1.000000 | 2.67708e-14 | 1.00000 |

1.00000000 Pa, 2250.00000 K

| =====              |                 |          |                      |          |
|--------------------|-----------------|----------|----------------------|----------|
| Rate constant      | True (fraction) |          | Effective (fraction) |          |
| -----              |                 |          |                      |          |
| Total              | 2.23655e-11     | (1.00 )  | 1.58437e-11          | (1.00 )  |
| Formation of rad11 | 4.62280e-12     | (0.207 ) | 1.98925e-12          | (0.126 ) |
| Formation of rad6  | 6.82518e-12     | (0.305 ) | 2.93696e-12          | (0.185 ) |
| H-abstraction      | 1.09175e-11     | (0.488 ) | 1.09175e-11          | (0.689 ) |
| -----              |                 |          |                      |          |
| species            | PYtrue          | Cumul    | PYeffective          | Cumul    |
| Benzene+2-propynyl | 0.488140        | 0.488140 | 0.689074             | 0.689074 |
| Phenyl+Allene      | 0.291600        | 0.779740 | 0.000000             | 0.689074 |
| PhCH2CCH+H         | 0.0967415       | 0.876482 | 0.136563             | 0.825637 |
| PhCHCCH2+H         | 0.0532744       | 0.929756 | 0.0752040            | 0.900841 |
| C2H2+PhCH2         | 0.0232641       | 0.953020 | 0.0328403            | 0.933682 |
| PhCCH+CH3          | 0.0176492       | 0.970669 | 0.0249142            | 0.958596 |
| Indene+H           | 0.0145377       | 0.985207 | 0.0205220            | 0.979118 |
| PAH7+H             | 0.00604332      | 0.991250 | 0.00853097           | 0.987649 |
| Ph+MeAc            | 0.00373478      | 0.994985 | 0.00527212           | 0.992921 |
| PhcycC3H3_A+H      | 0.00104441      | 0.996029 | 0.00147433           | 0.994395 |
| rad19syn           | 0.000992655     | 0.997022 | 0.00140127           | 0.995797 |
| rad39              | 0.000833753     | 0.997856 | 0.00117695           | 0.996973 |
| rad19anti          | 0.000463518     | 0.998319 | 0.000654319          | 0.997628 |
| rad54              | 0.000448434     | 0.998768 | 0.000633023          | 0.998261 |
| PAH9+H             | 0.000276007     | 0.999044 | 0.000389621          | 0.998650 |
| PhCCCH3+H          | 0.000209664     | 0.999253 | 0.000295969          | 0.998946 |
| rad38              | 0.000160721     | 0.999414 | 0.000226879          | 0.999173 |
| PAH1+H             | 9.95951e-05     | 0.999514 | 0.000140592          | 0.999314 |
| rad50              | 5.46364e-05     | 0.999568 | 7.71264e-05          | 0.999391 |
| rad35              | 5.24984e-05     | 0.999621 | 7.41086e-05          | 0.999465 |
| rad46              | 5.06993e-05     | 0.999672 | 7.15686e-05          | 0.999537 |
| PAH10+CH3          | 4.32193e-05     | 0.999715 | 6.10099e-05          | 0.999598 |
| rad55              | 4.15451e-05     | 0.999756 | 5.86465e-05          | 0.999656 |
| rad70              | 4.13233e-05     | 0.999798 | 5.83331e-05          | 0.999715 |
| PAH3+H             | 3.54274e-05     | 0.999833 | 5.00106e-05          | 0.999765 |
| rad67              | 3.21711e-05     | 0.999865 | 4.54138e-05          | 0.999810 |
| rad56              | 2.10966e-05     | 0.999886 | 2.97806e-05          | 0.999840 |
| rad51              | 2.05320e-05     | 0.999907 | 2.89836e-05          | 0.999869 |
| rad53              | 1.82257e-05     | 0.999925 | 2.57280e-05          | 0.999895 |
| rad30              | 1.61769e-05     | 0.999941 | 2.28359e-05          | 0.999917 |
| rad37              | 1.58091e-05     | 0.999957 | 2.23166e-05          | 0.999940 |
| rad34              | 1.21378e-05     | 0.999969 | 1.71341e-05          | 0.999957 |
| rad52              | 5.53750e-06     | 0.999975 | 7.81690e-06          | 0.999965 |
| rad62              | 4.54186e-06     | 0.999979 | 6.41145e-06          | 0.999971 |
| PAH8+H             | 4.26428e-06     | 0.999984 | 6.01959e-06          | 0.999977 |
| rad59              | 3.10134e-06     | 0.999987 | 4.37796e-06          | 0.999982 |
| rad64              | 2.31393e-06     | 0.999989 | 3.26643e-06          | 0.999985 |
| rad60syn           | 2.18352e-06     | 0.999991 | 3.08232e-06          | 0.999988 |
| rad60anti          | 1.52762e-06     | 0.999993 | 2.15643e-06          | 0.999990 |
| rad71              | 1.42875e-06     | 0.999994 | 2.01686e-06          | 0.999992 |
| rad68syn           | 1.22836e-06     | 0.999995 | 1.73398e-06          | 0.999994 |
| rad73              | 8.53757e-07     | 0.999996 | 1.20519e-06          | 0.999995 |
| rad68anti          | 7.89702e-07     | 0.999997 | 1.11477e-06          | 0.999996 |
| rad65              | 5.43657e-07     | 0.999998 | 7.67443e-07          | 0.999997 |
| rad42              | 4.97984e-07     | 0.999998 | 7.02969e-07          | 0.999998 |
| rad40syn           | 4.83641e-07     | 0.999999 | 6.82722e-07          | 0.999998 |
| rad58              | 4.30307e-07     | 0.999999 | 6.07437e-07          | 0.999999 |
| rad40anti          | 3.15368e-07     | 0.999999 | 4.45184e-07          | 0.999999 |
| rad43              | 2.01354e-07     | 1.000000 | 2.84238e-07          | 1.000000 |
| rad6               | 1.27775e-07     | 1.000000 | 1.80371e-07          | 1.000000 |
| rad61              | 1.06766e-07     | 1.000000 | 1.50714e-07          | 1.000000 |
| rad72              | 7.90076e-08     | 1.000000 | 1.11530e-07          | 1.000000 |
| rad41              | 2.11936e-08     | 1.000000 | 2.99175e-08          | 1.000000 |
| rad7               | 1.70324e-09     | 1.000000 | 2.40435e-09          | 1.000000 |
| rad11              | 1.30077e-09     | 1.000000 | 1.83620e-09          | 1.000000 |
| rad23              | 1.02384e-09     | 1.000000 | 1.44528e-09          | 1.000000 |
| rad28              | 4.59446e-10     | 1.000000 | 6.48570e-10          | 1.000000 |
| rad9               | 2.85655e-10     | 1.000000 | 4.03240e-10          | 1.000000 |
| rad13              | 1.83088e-10     | 1.000000 | 2.58453e-10          | 1.000000 |
| rad45              | 1.42667e-10     | 1.000000 | 2.01393e-10          | 1.000000 |
| rad22              | 7.02169e-11     | 1.000000 | 9.91204e-11          | 1.000000 |
| rad21              | 2.98156e-11     | 1.000000 | 4.20888e-11          | 1.000000 |
| rad36              | 2.55756e-11     | 1.000000 | 3.61035e-11          | 1.000000 |
| rad15              | 1.61913e-11     | 1.000000 | 2.28561e-11          | 1.000000 |
| rad33              | 1.06534e-11     | 1.000000 | 1.50387e-11          | 1.000000 |



|       |             |          |             |         |
|-------|-------------|----------|-------------|---------|
| rad26 | 9.05685e-12 | 1.000000 | 1.27849e-11 | 1.00000 |
| rad20 | 6.79760e-12 | 1.000000 | 9.59570e-12 | 1.00000 |
| rad10 | 3.32973e-12 | 1.000000 | 4.70036e-12 | 1.00000 |
| rad25 | 2.68389e-12 | 1.000000 | 3.78866e-12 | 1.00000 |
| rad12 | 2.31791e-12 | 1.000000 | 3.27203e-12 | 1.00000 |
| rad18 | 2.04126e-12 | 1.000000 | 2.88151e-12 | 1.00000 |
| rad24 | 1.45641e-12 | 1.000000 | 2.05592e-12 | 1.00000 |
| rad2  | 9.54834e-13 | 1.000000 | 1.34787e-12 | 1.00000 |
| rad3  | 5.41323e-13 | 1.000000 | 7.64147e-13 | 1.00000 |
| rad4  | 3.37752e-13 | 1.000000 | 4.76783e-13 | 1.00000 |
| rad1  | 2.53475e-13 | 1.000000 | 3.57814e-13 | 1.00000 |
| rad8  | 2.01394e-13 | 1.000000 | 2.84295e-13 | 1.00000 |
| rad14 | 1.41114e-13 | 1.000000 | 1.99200e-13 | 1.00000 |
| rad47 | 4.71953e-14 | 1.000000 | 6.66224e-14 | 1.00000 |
| rad5  | 2.25155e-14 | 1.000000 | 3.17835e-14 | 1.00000 |
| rad27 | 7.40144e-15 | 1.000000 | 1.04481e-14 | 1.00000 |

1.0000000 Pa, 2500.00000 K

| Rate constant      | True (fraction)      | Effective (fraction) |
|--------------------|----------------------|----------------------|
| Total              | 3.28090e-11 (1.00 )  | 2.31980e-11 (1.00 )  |
| Formation of rad11 | 6.43164e-12 (0.196 ) | 2.60906e-12 (0.112 ) |
| Formation of rad6  | 9.73932e-12 (0.297 ) | 3.95085e-12 (0.170 ) |
| H-abstraction      | 1.66381e-11 (0.507 ) | 1.66381e-11 (0.717 ) |

| species            | PYtrue      | Cumul    | PYeffective | Cumul    |
|--------------------|-------------|----------|-------------|----------|
| Benzene+2-propynyl | 0.507119    | 0.507119 | 0.717221    | 0.717221 |
| Phenyl+Allene      | 0.292939    | 0.800058 | 0.00000     | 0.717221 |
| PhCH2CCH+H         | 0.0943957   | 0.894453 | 0.133504    | 0.850725 |
| PhCHCCH2+H         | 0.0481939   | 0.942647 | 0.0681609   | 0.918886 |
| C2H2+PhCH2         | 0.0183497   | 0.960997 | 0.0259521   | 0.944838 |
| PhCCH+CH3          | 0.0148752   | 0.975872 | 0.0210380   | 0.965876 |
| Indene+H           | 0.00953292  | 0.985405 | 0.0134824   | 0.979358 |
| PAH7+H             | 0.00553043  | 0.990936 | 0.00782174  | 0.987180 |
| Ph+MeAc            | 0.00339482  | 0.994330 | 0.00480131  | 0.991981 |
| PhcycC3H3_A+H      | 0.00149310  | 0.995823 | 0.00211170  | 0.994093 |
| rad19syn           | 0.00122619  | 0.997050 | 0.00173420  | 0.995827 |
| rad39              | 0.000692493 | 0.997742 | 0.000979395 | 0.996807 |
| rad54              | 0.000558297 | 0.998300 | 0.000789599 | 0.997596 |
| rad19anti          | 0.000392539 | 0.998693 | 0.000555170 | 0.998152 |
| PAH9+H             | 0.000261382 | 0.998954 | 0.000369675 | 0.998521 |
| PhCCCH3+H          | 0.000164587 | 0.999119 | 0.000232776 | 0.998754 |
| rad38              | 0.000157798 | 0.999277 | 0.000223175 | 0.998977 |
| PAH1+H             | 0.000129618 | 0.999406 | 0.000183320 | 0.999160 |
| rad50              | 6.95426e-05 | 0.999476 | 9.83547e-05 | 0.999259 |
| rad55              | 5.44678e-05 | 0.999530 | 7.70339e-05 | 0.999336 |
| rad46              | 5.29591e-05 | 0.999583 | 7.49004e-05 | 0.999411 |
| rad35              | 5.14100e-05 | 0.999635 | 7.27094e-05 | 0.999483 |
| PAH10+CH3          | 5.04331e-05 | 0.999685 | 7.13280e-05 | 0.999555 |
| rad70              | 4.95228e-05 | 0.999735 | 7.00399e-05 | 0.999625 |
| PAH3+H             | 4.31618e-05 | 0.999778 | 6.10439e-05 | 0.999686 |
| rad67              | 3.73883e-05 | 0.999815 | 5.28783e-05 | 0.999739 |
| rad56              | 3.65114e-05 | 0.999852 | 5.16384e-05 | 0.999790 |
| rad51              | 2.99358e-05 | 0.999882 | 4.23383e-05 | 0.999833 |
| rad53              | 2.90214e-05 | 0.999911 | 4.10452e-05 | 0.999874 |
| rad34              | 1.57208e-05 | 0.999926 | 2.22340e-05 | 0.999896 |
| rad30              | 1.43454e-05 | 0.999941 | 2.02888e-05 | 0.999916 |
| rad37              | 1.43019e-05 | 0.999955 | 2.02272e-05 | 0.999937 |
| PAH8+H             | 8.32891e-06 | 0.999963 | 1.17796e-05 | 0.999948 |
| rad52              | 7.47647e-06 | 0.999971 | 1.05740e-05 | 0.999959 |
| rad62              | 5.70274e-06 | 0.999977 | 8.06541e-06 | 0.999967 |
| rad59              | 3.60017e-06 | 0.999980 | 5.09176e-06 | 0.999972 |
| rad64              | 3.22136e-06 | 0.999983 | 4.55600e-06 | 0.999977 |
| rad71              | 3.21565e-06 | 0.999987 | 4.54791e-06 | 0.999981 |
| rad60syn           | 2.29248e-06 | 0.999989 | 3.24226e-06 | 0.999984 |
| rad68syn           | 1.99920e-06 | 0.999991 | 2.82748e-06 | 0.999987 |
| rad73              | 1.73054e-06 | 0.999993 | 2.44751e-06 | 0.999990 |
| rad60anti          | 1.62672e-06 | 0.999994 | 2.30068e-06 | 0.999992 |
| rad68anti          | 1.28206e-06 | 0.999996 | 1.81322e-06 | 0.999994 |
| rad40syn           | 8.70434e-07 | 0.999996 | 1.23106e-06 | 0.999995 |
| rad65              | 7.65711e-07 | 0.999997 | 1.08295e-06 | 0.999996 |
| rad42              | 7.25383e-07 | 0.999998 | 1.02592e-06 | 0.999997 |
| rad58              | 6.16767e-07 | 0.999999 | 8.72295e-07 | 0.999998 |
| rad40anti          | 5.85903e-07 | 0.999999 | 8.28646e-07 | 0.999999 |
| rad43              | 2.45121e-07 | 0.999999 | 3.46676e-07 | 0.999999 |
| rad72              | 2.19643e-07 | 1.000000 | 3.10642e-07 | 0.999999 |
| rad61              | 1.61752e-07 | 1.000000 | 2.28766e-07 | 1.000000 |
| rad6               | 3.44468e-08 | 1.000000 | 4.87184e-08 | 1.000000 |

|       |             |          |             |          |
|-------|-------------|----------|-------------|----------|
| rad41 | 3.09950e-08 | 1.000000 | 4.38365e-08 | 1.000000 |
| rad7  | 6.66346e-10 | 1.000000 | 9.42419e-10 | 1.000000 |
| rad11 | 4.84238e-10 | 1.000000 | 6.84861e-10 | 1.000000 |
| rad23 | 2.90419e-10 | 1.000000 | 4.10740e-10 | 1.000000 |
| rad28 | 1.22471e-10 | 1.000000 | 1.73211e-10 | 1.000000 |
| rad9  | 1.11417e-10 | 1.000000 | 1.57577e-10 | 1.000000 |
| rad13 | 7.92317e-11 | 1.000000 | 1.12058e-10 | 1.000000 |
| rad45 | 5.55960e-11 | 1.000000 | 7.86297e-11 | 1.000000 |
| rad22 | 2.20412e-11 | 1.000000 | 3.11730e-11 | 1.000000 |
| rad21 | 1.39425e-11 | 1.000000 | 1.97189e-11 | 1.000000 |
| rad36 | 1.01354e-11 | 1.000000 | 1.43346e-11 | 1.000000 |
| rad15 | 7.01188e-12 | 1.000000 | 9.91691e-12 | 1.000000 |
| rad33 | 5.56606e-12 | 1.000000 | 7.87213e-12 | 1.000000 |
| rad26 | 3.15242e-12 | 1.000000 | 4.45847e-12 | 1.000000 |
| rad20 | 2.90121e-12 | 1.000000 | 4.10319e-12 | 1.000000 |
| rad25 | 1.37211e-12 | 1.000000 | 1.94059e-12 | 1.000000 |
| rad12 | 1.32607e-12 | 1.000000 | 1.87547e-12 | 1.000000 |
| rad10 | 1.18502e-12 | 1.000000 | 1.67598e-12 | 1.000000 |
| rad24 | 7.99119e-13 | 1.000000 | 1.13020e-12 | 1.000000 |
| rad18 | 7.68309e-13 | 1.000000 | 1.08662e-12 | 1.000000 |
| rad2  | 2.58799e-13 | 1.000000 | 3.66021e-13 | 1.000000 |
| rad3  | 2.15175e-13 | 1.000000 | 3.04324e-13 | 1.000000 |
| rad8  | 1.74705e-13 | 1.000000 | 2.47086e-13 | 1.000000 |
| rad4  | 1.31407e-13 | 1.000000 | 1.85849e-13 | 1.000000 |
| rad14 | 7.79275e-14 | 1.000000 | 1.10213e-13 | 1.000000 |
| rad47 | 6.74996e-14 | 1.000000 | 9.54649e-14 | 1.000000 |
| rad1  | 6.73187e-14 | 1.000000 | 9.52090e-14 | 1.000000 |
| rad5  | 1.47605e-14 | 1.000000 | 2.08758e-14 | 1.000000 |
| rad27 | 3.68216e-15 | 1.000000 | 5.20769e-15 | 1.000000 |

1.00000000 Pa, 2750.00000 K

| Rate constant      | True (fraction) |          | Effective (fraction) |          |
|--------------------|-----------------|----------|----------------------|----------|
| Total              | 4.60596e-11     | (1.00 )  | 3.26255e-11          | (1.00 )  |
| Formation of rad11 | 8.62280e-12     | (0.187 ) | 3.34633e-12          | (0.103 ) |
| Formation of rad6  | 1.33313e-11     | (0.289 ) | 5.17360e-12          | (0.159 ) |
| H-abstraction      | 2.41055e-11     | (0.523 ) | 2.41055e-11          | (0.739 ) |

  

| species            | PYtrue      | Cumul    | PYeffective | Cumul    |
|--------------------|-------------|----------|-------------|----------|
| Benzene+2-propynyl | 0.523355    | 0.523355 | 0.738856    | 0.738856 |
| Phenyl+Allene      | 0.291669    | 0.815024 | 0.000000    | 0.738856 |
| PhCH2CCH+H         | 0.0913925   | 0.906416 | 0.129025    | 0.867881 |
| PhCHCCH2+H         | 0.0440897   | 0.950506 | 0.0622446   | 0.930126 |
| C2H2+PhCH2         | 0.0155259   | 0.966032 | 0.0219190   | 0.952045 |
| PhCCH+CH3          | 0.0128664   | 0.978898 | 0.0181644   | 0.970209 |
| Indene+H           | 0.00652675  | 0.985425 | 0.00921427  | 0.979424 |
| PAH7+H             | 0.00506746  | 0.990493 | 0.00715408  | 0.986578 |
| Ph+MeAc            | 0.00315047  | 0.993643 | 0.00444775  | 0.991026 |
| PhcycC3H3_A+H      | 0.00197301  | 0.995616 | 0.00278544  | 0.993811 |
| rad19syn           | 0.00143569  | 0.997052 | 0.00202686  | 0.995838 |
| rad54              | 0.000652594 | 0.997704 | 0.000921315 | 0.996759 |
| rad39              | 0.000584043 | 0.998288 | 0.000824532 | 0.997584 |
| rad19anti          | 0.000328573 | 0.998617 | 0.000463869 | 0.998048 |
| PAH9+H             | 0.000240059 | 0.998857 | 0.000338907 | 0.998386 |
| PAH1+H             | 0.000158292 | 0.999015 | 0.000223471 | 0.998610 |
| rad38              | 0.000149711 | 0.999165 | 0.000211358 | 0.998821 |
| PhCCH3+H           | 0.000136861 | 0.999302 | 0.000193217 | 0.999014 |
| rad50              | 8.19606e-05 | 0.999384 | 0.000115709 | 0.999130 |
| rad55              | 6.64334e-05 | 0.999450 | 9.37887e-05 | 0.999224 |
| rad70              | 5.64830e-05 | 0.999507 | 7.97407e-05 | 0.999304 |
| rad56              | 5.59920e-05 | 0.999563 | 7.90479e-05 | 0.999383 |
| PAH10+CH3          | 5.49972e-05 | 0.999618 | 7.76435e-05 | 0.999460 |
| rad46              | 5.29191e-05 | 0.999671 | 7.47093e-05 | 0.999535 |
| PAH3+H             | 5.07704e-05 | 0.999721 | 7.16761e-05 | 0.999607 |
| rad35              | 4.92117e-05 | 0.999771 | 6.94754e-05 | 0.999676 |
| rad53              | 4.15959e-05 | 0.999812 | 5.87239e-05 | 0.999735 |
| rad67              | 4.08894e-05 | 0.999853 | 5.77263e-05 | 0.999793 |
| rad51              | 3.94235e-05 | 0.999893 | 5.56570e-05 | 0.999848 |
| rad34              | 1.91382e-05 | 0.999912 | 2.70187e-05 | 0.999875 |
| PAH8+H             | 1.42400e-05 | 0.999926 | 2.01036e-05 | 0.999895 |
| rad30              | 1.30159e-05 | 0.999939 | 1.83754e-05 | 0.999914 |
| rad37              | 1.25497e-05 | 0.999952 | 1.77173e-05 | 0.999932 |
| rad52              | 9.23210e-06 | 0.999961 | 1.30336e-05 | 0.999945 |
| rad62              | 6.96508e-06 | 0.999968 | 9.83310e-06 | 0.999954 |
| rad71              | 6.06307e-06 | 0.999974 | 8.55966e-06 | 0.999963 |
| rad64              | 4.12925e-06 | 0.999978 | 5.82954e-06 | 0.999969 |
| rad59              | 4.06487e-06 | 0.999982 | 5.73866e-06 | 0.999975 |
| rad73              | 2.98838e-06 | 0.999985 | 4.21891e-06 | 0.999979 |

|           |             |          |             |          |
|-----------|-------------|----------|-------------|----------|
| rad68syn  | 2.93858e-06 | 0.999988 | 4.14861e-06 | 0.999983 |
| rad60syn  | 2.38752e-06 | 0.999990 | 3.37063e-06 | 0.999986 |
| rad68anti | 1.88087e-06 | 0.999992 | 2.65536e-06 | 0.999989 |
| rad60anti | 1.71401e-06 | 0.999994 | 2.41979e-06 | 0.999991 |
| rad40syn  | 1.39059e-06 | 0.999995 | 1.96319e-06 | 0.999993 |
| rad42     | 1.00619e-06 | 0.999996 | 1.42051e-06 | 0.999995 |
| rad65     | 9.77123e-07 | 0.999997 | 1.37947e-06 | 0.999996 |
| rad40anti | 9.60898e-07 | 0.999998 | 1.35656e-06 | 0.999998 |
| rad58     | 8.26832e-07 | 0.999999 | 1.16730e-06 | 0.999999 |
| rad72     | 4.93276e-07 | 1.000000 | 6.96392e-07 | 0.999999 |
| rad43     | 2.90364e-07 | 1.000000 | 4.09928e-07 | 1.000000 |
| rad61     | 2.19015e-07 | 1.000000 | 3.09199e-07 | 1.000000 |
| rad41     | 4.25217e-08 | 1.000000 | 6.00309e-08 | 1.000000 |
| rad6      | 1.16885e-08 | 1.000000 | 1.65015e-08 | 1.000000 |
| rad7      | 2.99244e-10 | 1.000000 | 4.22462e-10 | 1.000000 |
| rad11     | 2.07060e-10 | 1.000000 | 2.92322e-10 | 1.000000 |
| rad23     | 9.97743e-11 | 1.000000 | 1.40859e-10 | 1.000000 |
| rad9      | 4.67570e-11 | 1.000000 | 6.60103e-11 | 1.000000 |
| rad28     | 4.15055e-11 | 1.000000 | 5.85962e-11 | 1.000000 |
| rad13     | 3.85250e-11 | 1.000000 | 5.43884e-11 | 1.000000 |
| rad45     | 2.39242e-11 | 1.000000 | 3.37755e-11 | 1.000000 |
| rad22     | 8.24148e-12 | 1.000000 | 1.16351e-11 | 1.000000 |
| rad21     | 7.20654e-12 | 1.000000 | 1.01740e-11 | 1.000000 |
| rad36     | 4.42335e-12 | 1.000000 | 6.24475e-12 | 1.000000 |
| rad15     | 3.23394e-12 | 1.000000 | 4.56557e-12 | 1.000000 |
| rad33     | 3.15115e-12 | 1.000000 | 4.44871e-12 | 1.000000 |
| rad20     | 1.44967e-12 | 1.000000 | 2.04660e-12 | 1.000000 |
| rad26     | 1.28318e-12 | 1.000000 | 1.81155e-12 | 1.000000 |
| rad12     | 7.84787e-13 | 1.000000 | 1.10794e-12 | 1.000000 |
| rad25     | 7.63533e-13 | 1.000000 | 1.07793e-12 | 1.000000 |
| rad10     | 5.06421e-13 | 1.000000 | 7.14949e-13 | 1.000000 |
| rad24     | 4.65718e-13 | 1.000000 | 6.57487e-13 | 1.000000 |
| rad18     | 3.40242e-13 | 1.000000 | 4.80345e-13 | 1.000000 |
| rad8      | 1.53001e-13 | 1.000000 | 2.16002e-13 | 1.000000 |
| rad3      | 9.98677e-14 | 1.000000 | 1.40990e-13 | 1.000000 |
| rad2      | 9.21718e-14 | 1.000000 | 1.30125e-13 | 1.000000 |
| rad47     | 8.69692e-14 | 1.000000 | 1.22780e-13 | 1.000000 |
| rad4      | 5.99281e-14 | 1.000000 | 8.46048e-14 | 1.000000 |
| rad14     | 4.76216e-14 | 1.000000 | 6.72306e-14 | 1.000000 |
| rad1      | 2.30245e-14 | 1.000000 | 3.25053e-14 | 1.000000 |
| rad5      | 1.03334e-14 | 1.000000 | 1.45883e-14 | 1.000000 |
| rad27     | 2.16165e-15 | 1.000000 | 3.05175e-15 | 1.000000 |

1.00000000 Pa, 3000.00000 K

=====

| Rate constant      | True (fraction)      | Effective (fraction)  |
|--------------------|----------------------|-----------------------|
| Total              | 6.24269e-11 (1.00 )  | 4.43911e-11 (1.00 )   |
| Formation of rad11 | 1.12221e-11 (0.180 ) | 4.21269e-12 (0.0949 ) |
| Formation of rad6  | 1.76534e-11 (0.283 ) | 6.62699e-12 (0.149 )  |
| H-abstraction      | 3.35514e-11 (0.537 ) | 3.35514e-11 (0.756 )  |

| species            | PYtrue      | Cumul    | PYeffective | Cumul    |
|--------------------|-------------|----------|-------------|----------|
| Benzene+2-propynyl | 0.537451    | 0.537451 | 0.755814    | 0.755814 |
| Phenyl+Allene      | 0.288911    | 0.826362 | 0.000000    | 0.755814 |
| PhCH2CCH+H         | 0.0883066   | 0.914669 | 0.124185    | 0.879999 |
| PhCHCCH2+H         | 0.0408111   | 0.955480 | 0.0573925   | 0.937392 |
| C2H2+PhCH2         | 0.0138651   | 0.969345 | 0.0194984   | 0.956890 |
| PhCCH+CH3          | 0.0113582   | 0.980703 | 0.0159730   | 0.972863 |
| PAH7+H             | 0.00465329  | 0.985356 | 0.00654386  | 0.979407 |
| Indene+H           | 0.00463895  | 0.989995 | 0.00652370  | 0.985931 |
| Ph+MeAc            | 0.00297587  | 0.992971 | 0.00418496  | 0.990116 |
| PhcycC3H3_A+H      | 0.00245642  | 0.995427 | 0.00345445  | 0.993570 |
| rad19syn           | 0.00161454  | 0.997042 | 0.00227052  | 0.995841 |
| rad54              | 0.000727890 | 0.997770 | 0.00102362  | 0.996864 |
| rad39              | 0.000500510 | 0.998270 | 0.000703861 | 0.997568 |
| rad19anti          | 0.000275358 | 0.998546 | 0.000387232 | 0.997955 |
| PAH9+H             | 0.000215435 | 0.998761 | 0.000302964 | 0.998258 |
| PAH1+H             | 0.000185098 | 0.998946 | 0.000260302 | 0.998519 |
| rad38              | 0.000138297 | 0.999085 | 0.000194486 | 0.998713 |
| PhCCCH3+H          | 0.000118094 | 0.999203 | 0.000166075 | 0.998879 |
| rad50              | 9.10199e-05 | 0.999294 | 0.000128001 | 0.999007 |
| rad56              | 7.84307e-05 | 0.999372 | 0.000110297 | 0.999117 |
| rad55              | 7.67854e-05 | 0.999449 | 0.000107983 | 0.999225 |
| rad70              | 6.22156e-05 | 0.999511 | 8.74935e-05 | 0.999313 |
| PAH3+H             | 5.79162e-05 | 0.999569 | 8.14472e-05 | 0.999394 |
| PAH10+CH3          | 5.73435e-05 | 0.999626 | 8.06419e-05 | 0.999475 |
| rad53              | 5.50942e-05 | 0.999682 | 7.74787e-05 | 0.999552 |
| rad46              | 5.10964e-05 | 0.999733 | 7.18563e-05 | 0.999624 |

|           |             |          |             |          |
|-----------|-------------|----------|-------------|----------|
| rad51     | 4.79927e-05 | 0.999781 | 6.74920e-05 | 0.999692 |
| rad35     | 4.64038e-05 | 0.999827 | 6.52572e-05 | 0.999757 |
| rad67     | 4.30004e-05 | 0.999870 | 6.04712e-05 | 0.999818 |
| rad34     | 2.22803e-05 | 0.999892 | 3.13327e-05 | 0.999849 |
| PAH8+H    | 2.20424e-05 | 0.999914 | 3.09982e-05 | 0.999880 |
| rad30     | 1.19659e-05 | 0.999926 | 1.68276e-05 | 0.999897 |
| rad37     | 1.08360e-05 | 0.999937 | 1.52386e-05 | 0.999912 |
| rad52     | 1.06405e-05 | 0.999948 | 1.49637e-05 | 0.999927 |
| rad71     | 9.97870e-06 | 0.999958 | 1.40329e-05 | 0.999941 |
| rad62     | 8.52399e-06 | 0.999966 | 1.19872e-05 | 0.999953 |
| rad64     | 4.99011e-06 | 0.999971 | 7.01754e-06 | 0.999960 |
| rad73     | 4.56455e-06 | 0.999976 | 6.41909e-06 | 0.999966 |
| rad59     | 4.47702e-06 | 0.999980 | 6.29599e-06 | 0.999973 |
| rad68syn  | 4.00554e-06 | 0.999984 | 5.63295e-06 | 0.999978 |
| rad68anti | 2.55993e-06 | 0.999987 | 3.60003e-06 | 0.999982 |
| rad60syn  | 2.46101e-06 | 0.999989 | 3.46090e-06 | 0.999985 |
| rad40syn  | 2.03324e-06 | 0.999991 | 2.85932e-06 | 0.999988 |
| rad60anti | 1.78407e-06 | 0.999993 | 2.50894e-06 | 0.999991 |
| rad40anti | 1.43624e-06 | 0.999995 | 2.01978e-06 | 0.999993 |
| rad42     | 1.37800e-06 | 0.999996 | 1.93787e-06 | 0.999995 |
| rad65     | 1.15675e-06 | 0.999997 | 1.62673e-06 | 0.999996 |
| rad58     | 1.05023e-06 | 0.999998 | 1.47693e-06 | 0.999998 |
| rad72     | 9.39298e-07 | 0.999999 | 1.32093e-06 | 0.999999 |
| rad43     | 3.36095e-07 | 0.999999 | 4.72649e-07 | 1.000000 |
| rad61     | 2.73990e-07 | 1.000000 | 3.85311e-07 | 1.000000 |
| rad41     | 5.56844e-08 | 1.000000 | 7.83090e-08 | 1.000000 |
| rad6      | 4.63747e-09 | 1.000000 | 6.52162e-09 | 1.000000 |
| rad7      | 1.49310e-10 | 1.000000 | 2.09974e-10 | 1.000000 |
| rad11     | 9.93920e-11 | 1.000000 | 1.39774e-10 | 1.000000 |
| rad23     | 3.89688e-11 | 1.000000 | 5.48014e-11 | 1.000000 |
| rad9      | 2.11125e-11 | 1.000000 | 2.96903e-11 | 1.000000 |
| rad13     | 2.05743e-11 | 1.000000 | 2.89336e-11 | 1.000000 |
| rad28     | 1.64305e-11 | 1.000000 | 2.31061e-11 | 1.000000 |
| rad45     | 1.11788e-11 | 1.000000 | 1.57207e-11 | 1.000000 |
| rad21     | 4.05235e-12 | 1.000000 | 5.69879e-12 | 1.000000 |
| rad22     | 3.50774e-12 | 1.000000 | 4.93292e-12 | 1.000000 |
| rad36     | 2.09092e-12 | 1.000000 | 2.94044e-12 | 1.000000 |
| rad33     | 1.89992e-12 | 1.000000 | 2.67183e-12 | 1.000000 |
| rad15     | 1.58658e-12 | 1.000000 | 2.23120e-12 | 1.000000 |
| rad20     | 8.26107e-13 | 1.000000 | 1.16175e-12 | 1.000000 |
| rad26     | 5.75124e-13 | 1.000000 | 8.08795e-13 | 1.000000 |
| rad12     | 4.82938e-13 | 1.000000 | 6.79154e-13 | 1.000000 |
| rad25     | 4.56609e-13 | 1.000000 | 6.42126e-13 | 1.000000 |
| rad24     | 2.85392e-13 | 1.000000 | 4.01344e-13 | 1.000000 |
| rad10     | 2.42399e-13 | 1.000000 | 3.40884e-13 | 1.000000 |
| rad18     | 1.70894e-13 | 1.000000 | 2.40327e-13 | 1.000000 |
| rad8      | 1.34848e-13 | 1.000000 | 1.89636e-13 | 1.000000 |
| rad47     | 1.03449e-13 | 1.000000 | 1.45480e-13 | 1.000000 |
| rad3      | 5.20788e-14 | 1.000000 | 7.32382e-14 | 1.000000 |
| rad2      | 3.97866e-14 | 1.000000 | 5.59515e-14 | 1.000000 |
| rad14     | 3.17235e-14 | 1.000000 | 4.46125e-14 | 1.000000 |
| rad4      | 3.10101e-14 | 1.000000 | 4.36094e-14 | 1.000000 |
| rad1      | 9.48007e-15 | 1.000000 | 1.33318e-14 | 1.000000 |
| rad5      | 7.51133e-15 | 1.000000 | 1.05631e-14 | 1.000000 |
| rad27     | 1.40875e-15 | 1.000000 | 1.98111e-15 | 1.000000 |

1.00000000 Pa, 3250.00000 K

=====

| Rate constant      | True (fraction)      | Effective (fraction)  |
|--------------------|----------------------|-----------------------|
| Total              | 8.22129e-11 (1.00 )  | 5.87536e-11 (1.00 )   |
| Formation of rad11 | 1.42538e-11 (0.173 ) | 5.21849e-12 (0.0888 ) |
| Formation of rad6  | 2.27549e-11 (0.277 ) | 8.33083e-12 (0.142 )  |
| H-abstraction      | 4.52043e-11 (0.550 ) | 4.52043e-11 (0.769 )  |

| species            | PYtrue      | Cumul    | PYeffective | Cumul    |
|--------------------|-------------|----------|-------------|----------|
| Benzene+2-propynyl | 0.549844    | 0.549844 | 0.769388    | 0.769388 |
| Phenyl+Allene      | 0.285349    | 0.835192 | 0.000000    | 0.769388 |
| PhCH2CCH+H         | 0.0853725   | 0.920565 | 0.119460    | 0.888848 |
| PhCHCCH2+H         | 0.0381839   | 0.958749 | 0.0534299   | 0.942278 |
| C2H2+PhCH2         | 0.0128678   | 0.971617 | 0.0180057   | 0.960283 |
| PhCCH+CH3          | 0.0101926   | 0.981809 | 0.0142623   | 0.974546 |
| PAH7+H             | 0.00428274  | 0.986092 | 0.00599276  | 0.980539 |
| Indene+H           | 0.00340695  | 0.989499 | 0.00476729  | 0.985306 |
| PhcycC3H3_A+H      | 0.00292038  | 0.992419 | 0.00408643  | 0.989392 |
| Ph+MeAc            | 0.00285191  | 0.995271 | 0.00399061  | 0.993383 |
| rad19syn           | 0.00176005  | 0.997031 | 0.00246280  | 0.995846 |
| rad54              | 0.000783510 | 0.997815 | 0.00109635  | 0.996942 |
| rad39              | 0.000435199 | 0.998250 | 0.000608967 | 0.997551 |

|           |             |          |             |          |
|-----------|-------------|----------|-------------|----------|
| rad19anti | 0.000232598 | 0.998483 | 0.000325470 | 0.997876 |
| PAH1+H    | 0.000210285 | 0.998693 | 0.000294248 | 0.998171 |
| PAH9+H    | 0.000189946 | 0.998883 | 0.000265788 | 0.998436 |
| rad38     | 0.000125074 | 0.999008 | 0.000175014 | 0.998611 |
| PhCCCH3+H | 0.000104499 | 0.999112 | 0.000146224 | 0.998758 |
| rad56     | 0.000102496 | 0.999215 | 0.000143420 | 0.998901 |
| rad50     | 9.64743e-05 | 0.999311 | 0.000134995 | 0.999036 |
| rad55     | 8.51952e-05 | 0.999397 | 0.000119212 | 0.999155 |
| rad53     | 6.86880e-05 | 0.999465 | 9.61137e-05 | 0.999251 |
| rad70     | 6.67834e-05 | 0.999532 | 9.34486e-05 | 0.999345 |
| PAH3+H    | 6.43467e-05 | 0.999596 | 9.00394e-05 | 0.999435 |
| PAH10+CH3 | 5.80427e-05 | 0.999654 | 8.12183e-05 | 0.999516 |
| rad51     | 5.49240e-05 | 0.999709 | 7.68544e-05 | 0.999593 |
| rad46     | 4.80263e-05 | 0.999757 | 6.72021e-05 | 0.999660 |
| rad67     | 4.40669e-05 | 0.999802 | 6.16619e-05 | 0.999722 |
| rad35     | 4.33473e-05 | 0.999845 | 6.06552e-05 | 0.999783 |
| PAH8+H    | 3.16111e-05 | 0.999876 | 4.42329e-05 | 0.999827 |
| rad34     | 2.50786e-05 | 0.999902 | 3.50921e-05 | 0.999862 |
| rad71     | 1.47744e-05 | 0.999916 | 2.06735e-05 | 0.999883 |
| rad52     | 1.16170e-05 | 0.999928 | 1.62555e-05 | 0.999899 |
| rad30     | 1.10774e-05 | 0.999939 | 1.55003e-05 | 0.999914 |
| rad62     | 1.06705e-05 | 0.999950 | 1.49310e-05 | 0.999929 |
| rad37     | 9.29424e-06 | 0.999959 | 1.30053e-05 | 0.999942 |
| rad73     | 6.33748e-06 | 0.999965 | 8.86793e-06 | 0.999951 |
| rad64     | 5.77649e-06 | 0.999971 | 8.08292e-06 | 0.999959 |
| rad68syn  | 5.15348e-06 | 0.999976 | 7.21118e-06 | 0.999966 |
| rad59     | 4.82486e-06 | 0.999981 | 6.75136e-06 | 0.999973 |
| rad68anti | 3.28964e-06 | 0.999984 | 4.60314e-06 | 0.999978 |
| rad40syn  | 2.77792e-06 | 0.999987 | 3.88709e-06 | 0.999982 |
| rad60syn  | 2.50929e-06 | 0.999990 | 3.51119e-06 | 0.999985 |
| rad40anti | 1.99952e-06 | 0.999992 | 2.79788e-06 | 0.999988 |
| rad42     | 1.90464e-06 | 0.999994 | 2.66512e-06 | 0.999991 |
| rad60anti | 1.83422e-06 | 0.999995 | 2.56658e-06 | 0.999993 |
| rad72     | 1.57366e-06 | 0.999997 | 2.20200e-06 | 0.999995 |
| rad65     | 1.29208e-06 | 0.999998 | 1.80798e-06 | 0.999997 |
| rad58     | 1.27682e-06 | 1.000000 | 1.78663e-06 | 0.999999 |
| rad43     | 3.85029e-07 | 1.000000 | 5.38764e-07 | 1.000000 |
| rad61     | 3.23853e-07 | 1.000000 | 4.53160e-07 | 1.000000 |
| rad41     | 7.10639e-08 | 1.000000 | 9.94383e-08 | 1.000000 |
| rad6      | 2.07587e-09 | 1.000000 | 2.90473e-09 | 1.000000 |
| rad7      | 8.09795e-11 | 1.000000 | 1.13313e-10 | 1.000000 |
| rad11     | 5.25593e-11 | 1.000000 | 7.35453e-11 | 1.000000 |
| rad23     | 1.67451e-11 | 1.000000 | 2.34311e-11 | 1.000000 |
| rad13     | 1.18635e-11 | 1.000000 | 1.66004e-11 | 1.000000 |
| rad9      | 1.02352e-11 | 1.000000 | 1.43219e-11 | 1.000000 |
| rad28     | 7.30005e-12 | 1.000000 | 1.02148e-11 | 1.000000 |
| rad45     | 5.59044e-12 | 1.000000 | 7.82261e-12 | 1.000000 |
| rad21     | 2.44431e-12 | 1.000000 | 3.42028e-12 | 1.000000 |
| rad22     | 1.65916e-12 | 1.000000 | 2.32162e-12 | 1.000000 |
| rad33     | 1.20478e-12 | 1.000000 | 1.68583e-12 | 1.000000 |
| rad36     | 1.05539e-12 | 1.000000 | 1.47678e-12 | 1.000000 |
| rad15     | 8.26680e-13 | 1.000000 | 1.15676e-12 | 1.000000 |
| rad20     | 5.22366e-13 | 1.000000 | 7.30933e-13 | 1.000000 |
| rad12     | 3.09375e-13 | 1.000000 | 4.32903e-13 | 1.000000 |
| rad25     | 2.90027e-13 | 1.000000 | 4.05830e-13 | 1.000000 |
| rad26     | 2.78040e-13 | 1.000000 | 3.89057e-13 | 1.000000 |
| rad24     | 1.82404e-13 | 1.000000 | 2.55235e-13 | 1.000000 |
| rad10     | 1.25818e-13 | 1.000000 | 1.76055e-13 | 1.000000 |
| rad8      | 1.19196e-13 | 1.000000 | 1.66788e-13 | 1.000000 |
| rad47     | 1.15641e-13 | 1.000000 | 1.61814e-13 | 1.000000 |
| rad18     | 9.45157e-14 | 1.000000 | 1.32254e-13 | 1.000000 |
| rad3      | 2.96818e-14 | 1.000000 | 4.15331e-14 | 1.000000 |
| rad14     | 2.30194e-14 | 1.000000 | 3.22106e-14 | 1.000000 |
| rad2      | 1.96834e-14 | 1.000000 | 2.75427e-14 | 1.000000 |
| rad4      | 1.77532e-14 | 1.000000 | 2.48418e-14 | 1.000000 |
| rad5      | 5.64149e-15 | 1.000000 | 7.89403e-15 | 1.000000 |
| rad1      | 4.49402e-15 | 1.000000 | 6.28841e-15 | 1.000000 |
| rad27     | 9.86134e-16 | 1.000000 | 1.37988e-15 | 1.000000 |

1.00000000 Pa, 3500.00000 K

| Rate constant      | True (fraction)      | Effective (fraction)  |
|--------------------|----------------------|-----------------------|
| Total              | 1.05713e-10 (1.00 )  | 7.59650e-11 (1.00 )   |
| Formation of rad11 | 1.77412e-11 (0.168 ) | 6.37264e-12 (0.0839 ) |
| Formation of rad6  | 2.86822e-11 (0.271 ) | 1.03027e-11 (0.136 )  |
| H-abstraction      | 5.92897e-11 (0.561 ) | 5.92897e-11 (0.780 )  |
| species            | PYtrue               | Cumul                 |
|                    | PYeffective          | Cumul                 |

|                    |             |          |             |          |
|--------------------|-------------|----------|-------------|----------|
| Benzene+2-propynyl | 0.560855    | 0.560855 | 0.780487    | 0.780487 |
| Phenyl+Allene      | 0.281404    | 0.842259 | 0.00000     | 0.780487 |
| PhCH2CCH+H         | 0.0826656   | 0.924925 | 0.115037    | 0.895524 |
| PhCHCCH2+H         | 0.0360585   | 0.960983 | 0.0501791   | 0.945703 |
| C2H2+PhCH2         | 0.0122593   | 0.973242 | 0.0170600   | 0.962764 |
| PhCCH+CH3          | 0.00927084  | 0.982513 | 0.0129013   | 0.975665 |
| PAH7+H             | 0.00395025  | 0.986463 | 0.00549717  | 0.981162 |
| PhcycC3H3_A+H      | 0.00334801  | 0.989811 | 0.00465910  | 0.985821 |
| Ph+MeAc            | 0.00276398  | 0.992575 | 0.00384635  | 0.989667 |
| Indene+H           | 0.00257590  | 0.995151 | 0.00358462  | 0.993252 |
| rad19syn           | 0.00187235  | 0.997024 | 0.00260557  | 0.995858 |
| rad54              | 0.000820548 | 0.997844 | 0.00114187  | 0.996999 |
| rad39              | 0.000383055 | 0.998227 | 0.000533059 | 0.997533 |
| PAH1+H             | 0.000234590 | 0.998462 | 0.000326455 | 0.997859 |
| rad19anti          | 0.000198628 | 0.998661 | 0.000276411 | 0.998135 |
| PAH9+H             | 0.000165224 | 0.998826 | 0.000229927 | 0.998365 |
| rad56              | 0.000126873 | 0.998953 | 0.000176556 | 0.998542 |
| rad38              | 0.000111229 | 0.999064 | 0.000154787 | 0.998697 |
| rad50              | 9.85613e-05 | 0.999162 | 0.000137158 | 0.998834 |
| PhCCCH3+H          | 9.42424e-05 | 0.999257 | 0.000131148 | 0.998965 |
| rad55              | 9.15803e-05 | 0.999348 | 0.000127443 | 0.999092 |
| rad53              | 8.16793e-05 | 0.999430 | 0.000113665 | 0.999206 |
| rad70              | 7.02694e-05 | 0.999500 | 9.77871e-05 | 0.999304 |
| PAH3+H             | 6.99220e-05 | 0.999570 | 9.73035e-05 | 0.999401 |
| rad51              | 5.98507e-05 | 0.999630 | 8.32882e-05 | 0.999484 |
| PAH10+CH3          | 5.76128e-05 | 0.999688 | 8.01742e-05 | 0.999565 |
| rad67              | 4.43734e-05 | 0.999732 | 6.17501e-05 | 0.999626 |
| rad46              | 4.41956e-05 | 0.999776 | 6.15029e-05 | 0.999688 |
| PAH8+H             | 4.26935e-05 | 0.999819 | 5.94123e-05 | 0.999747 |
| rad35              | 4.02805e-05 | 0.999859 | 5.60544e-05 | 0.999803 |
| rad34              | 2.74951e-05 | 0.999887 | 3.82622e-05 | 0.999842 |
| rad71              | 2.01282e-05 | 0.999907 | 2.80105e-05 | 0.999870 |
| rad62              | 1.37116e-05 | 0.999920 | 1.90811e-05 | 0.999889 |
| rad52              | 1.21501e-05 | 0.999933 | 1.69080e-05 | 0.999906 |
| rad30              | 1.02915e-05 | 0.999943 | 1.43216e-05 | 0.999920 |
| rad73              | 8.16310e-06 | 0.999951 | 1.13598e-05 | 0.999931 |
| rad37              | 7.96636e-06 | 0.999959 | 1.10860e-05 | 0.999942 |
| rad64              | 6.47621e-06 | 0.999966 | 9.01228e-06 | 0.999951 |
| rad68syn           | 6.33612e-06 | 0.999972 | 8.81737e-06 | 0.999960 |
| rad59              | 5.10458e-06 | 0.999977 | 7.10355e-06 | 0.999967 |
| rad68anti          | 4.04059e-06 | 0.999981 | 5.62289e-06 | 0.999973 |
| rad40syn           | 3.59895e-06 | 0.999985 | 5.00830e-06 | 0.999978 |
| rad42              | 2.66321e-06 | 0.999987 | 3.70612e-06 | 0.999982 |
| rad40anti          | 2.63316e-06 | 0.999990 | 3.66431e-06 | 0.999985 |
| rad60syn           | 2.53258e-06 | 0.999992 | 3.52435e-06 | 0.999989 |
| rad72              | 2.38442e-06 | 0.999995 | 3.31816e-06 | 0.999992 |
| rad60anti          | 1.86455e-06 | 0.999997 | 2.59471e-06 | 0.999995 |
| rad58              | 1.49815e-06 | 0.999998 | 2.08483e-06 | 0.999997 |
| rad65              | 1.37925e-06 | 1.000000 | 1.91937e-06 | 0.999999 |
| rad43              | 4.42452e-07 | 1.000000 | 6.15716e-07 | 0.999999 |
| rad61              | 3.67258e-07 | 1.000000 | 5.11077e-07 | 1.000000 |
| rad41              | 8.98821e-08 | 1.000000 | 1.25080e-07 | 1.000000 |
| rad6               | 1.02515e-09 | 1.000000 | 1.42660e-09 | 1.000000 |
| rad7               | 4.69732e-11 | 1.000000 | 6.53676e-11 | 1.000000 |
| rad11              | 3.01288e-11 | 1.000000 | 4.19272e-11 | 1.000000 |
| rad23              | 7.77305e-12 | 1.000000 | 1.08170e-11 | 1.000000 |
| rad13              | 7.28937e-12 | 1.000000 | 1.01439e-11 | 1.000000 |
| rad9               | 5.30646e-12 | 1.000000 | 7.38450e-12 | 1.000000 |
| rad28              | 3.56059e-12 | 1.000000 | 4.95493e-12 | 1.000000 |
| rad45              | 2.95720e-12 | 1.000000 | 4.11523e-12 | 1.000000 |
| rad21              | 1.56278e-12 | 1.000000 | 2.17476e-12 | 1.000000 |
| rad22              | 8.57436e-13 | 1.000000 | 1.19321e-12 | 1.000000 |
| rad33              | 7.96135e-13 | 1.000000 | 1.10790e-12 | 1.000000 |
| rad36              | 5.62273e-13 | 1.000000 | 7.82458e-13 | 1.000000 |
| rad15              | 4.55960e-13 | 1.000000 | 6.34517e-13 | 1.000000 |
| rad20              | 3.57698e-13 | 1.000000 | 4.97772e-13 | 1.000000 |
| rad12              | 2.06001e-13 | 1.000000 | 2.86671e-13 | 1.000000 |
| rad25              | 1.93650e-13 | 1.000000 | 2.69483e-13 | 1.000000 |
| rad26              | 1.43525e-13 | 1.000000 | 1.99730e-13 | 1.000000 |
| rad47              | 1.23125e-13 | 1.000000 | 1.71341e-13 | 1.000000 |
| rad24              | 1.20836e-13 | 1.000000 | 1.68156e-13 | 1.000000 |
| rad8               | 1.05364e-13 | 1.000000 | 1.46624e-13 | 1.000000 |
| rad10              | 6.96072e-14 | 1.000000 | 9.68653e-14 | 1.000000 |
| rad18              | 5.62835e-14 | 1.000000 | 7.83240e-14 | 1.000000 |
| rad14              | 1.82348e-14 | 1.000000 | 2.53755e-14 | 1.000000 |
| rad3               | 1.81353e-14 | 1.000000 | 2.52370e-14 | 1.000000 |
| rad4               | 1.10240e-14 | 1.000000 | 1.53411e-14 | 1.000000 |
| rad2               | 1.07549e-14 | 1.000000 | 1.49665e-14 | 1.000000 |
| rad5               | 4.37138e-15 | 1.000000 | 6.08323e-15 | 1.000000 |
| rad1               | 2.38055e-15 | 1.000000 | 3.31278e-15 | 1.000000 |

rad27 | 7.32060e-16 1.00000 | 1.01873e-15 1.00000

1.00000000 Pa, 3750.00000 K

=====

| Rate constant      | True (fraction)      | Effective (fraction)  |
|--------------------|----------------------|-----------------------|
| Total              | 1.33217e-10 (1.00 )  | 9.62711e-11 (1.00 )   |
| Formation of rad11 | 2.17064e-11 (0.163 ) | 7.68279e-12 (0.0798 ) |
| Formation of rad6  | 3.54800e-11 (0.266 ) | 1.25578e-11 (0.130 )  |
| H-abstraction      | 7.60305e-11 (0.571 ) | 7.60305e-11 (0.790 )  |

| species            | PYtrue      | Cumul    | PYeffective | Cumul    |
|--------------------|-------------|----------|-------------|----------|
| Benzene+2-propynyl | 0.570727    | 0.570727 | 0.789754    | 0.789754 |
| Phenyl+Allene      | 0.277336    | 0.848063 | 0.00000     | 0.789754 |
| PhCH2CCH+H         | 0.0801946   | 0.928257 | 0.110971    | 0.900725 |
| PhCHCCH2+H         | 0.0343186   | 0.962576 | 0.0474891   | 0.948214 |
| C2H2+PhCH2         | 0.0118838   | 0.974460 | 0.0164445   | 0.964658 |
| PhCCH+CH3          | 0.00852836  | 0.982988 | 0.0118013   | 0.976459 |
| PhcycC3H3_A+H      | 0.00372851  | 0.986717 | 0.00515939  | 0.981619 |
| PAH7+H             | 0.00365085  | 0.990368 | 0.00505194  | 0.986671 |
| Ph+MeAc            | 0.00270113  | 0.993069 | 0.00373773  | 0.990408 |
| Indene+H           | 0.00199900  | 0.995068 | 0.00276616  | 0.993175 |
| rad19syn           | 0.00195356  | 0.997021 | 0.00270328  | 0.995878 |
| rad54              | 0.000841040 | 0.997862 | 0.00116381  | 0.997042 |
| rad39              | 0.000340475 | 0.998203 | 0.000471138 | 0.997513 |
| PAH1+H             | 0.000258935 | 0.998462 | 0.000358305 | 0.997871 |
| rad19anti          | 0.000171610 | 0.998633 | 0.000237469 | 0.998109 |
| rad56              | 0.000150421 | 0.998784 | 0.000208148 | 0.998317 |
| PAH9+H             | 0.000142296 | 0.998926 | 0.000196904 | 0.998514 |
| rad50              | 9.78214e-05 | 0.999024 | 0.000135362 | 0.998649 |
| rad38              | 9.76287e-05 | 0.999121 | 0.000135095 | 0.998784 |
| rad55              | 9.60227e-05 | 0.999217 | 0.000132873 | 0.998917 |
| rad53              | 9.35446e-05 | 0.999311 | 0.000129444 | 0.999046 |
| PhCCCH3+H          | 8.63448e-05 | 0.999397 | 0.000119481 | 0.999166 |
| PAH3+H             | 7.46029e-05 | 0.999472 | 0.000103233 | 0.999269 |
| rad70              | 7.27716e-05 | 0.999545 | 0.000100699 | 0.999370 |
| rad51              | 6.27266e-05 | 0.999607 | 8.67994e-05 | 0.999457 |
| PAH10+CH3          | 5.64592e-05 | 0.999664 | 7.81267e-05 | 0.999535 |
| PAH8+H             | 5.49581e-05 | 0.999719 | 7.60493e-05 | 0.999611 |
| rad67              | 4.41361e-05 | 0.999763 | 6.10741e-05 | 0.999672 |
| rad46              | 4.00102e-05 | 0.999803 | 5.53649e-05 | 0.999727 |
| rad35              | 3.73501e-05 | 0.999840 | 5.16839e-05 | 0.999779 |
| rad34              | 2.95155e-05 | 0.999870 | 4.08426e-05 | 0.999820 |
| rad71              | 2.56705e-05 | 0.999896 | 3.55219e-05 | 0.999855 |
| rad62              | 1.78765e-05 | 0.999913 | 2.47369e-05 | 0.999880 |
| rad52              | 1.22817e-05 | 0.999926 | 1.69950e-05 | 0.999897 |
| rad73              | 9.90830e-06 | 0.999936 | 1.37108e-05 | 0.999911 |
| rad30              | 9.58077e-06 | 0.999945 | 1.32576e-05 | 0.999924 |
| rad68syn           | 7.51159e-06 | 0.999953 | 1.03943e-05 | 0.999934 |
| rad64              | 7.08717e-06 | 0.999960 | 9.80700e-06 | 0.999944 |
| rad37              | 6.84827e-06 | 0.999967 | 9.47639e-06 | 0.999954 |
| rad59              | 5.31873e-06 | 0.999972 | 7.35989e-06 | 0.999961 |
| rad68anti          | 4.78626e-06 | 0.999977 | 6.62308e-06 | 0.999968 |
| rad40syn           | 4.46912e-06 | 0.999981 | 6.18422e-06 | 0.999974 |
| rad42              | 3.72271e-06 | 0.999985 | 5.15138e-06 | 0.999979 |
| rad72              | 3.33614e-06 | 0.999988 | 4.61643e-06 | 0.999984 |
| rad40anti          | 3.31727e-06 | 0.999992 | 4.59032e-06 | 0.999988 |
| rad60syn           | 2.53369e-06 | 0.999994 | 3.50604e-06 | 0.999992 |
| rad60anti          | 1.87710e-06 | 0.999996 | 2.59748e-06 | 0.999994 |
| rad58              | 1.70809e-06 | 0.999998 | 2.36361e-06 | 0.999997 |
| rad65              | 1.42131e-06 | 0.999999 | 1.96676e-06 | 0.999999 |
| rad43              | 5.13732e-07 | 1.000000 | 7.10883e-07 | 0.999999 |
| rad61              | 4.03889e-07 | 1.00000  | 5.58888e-07 | 1.000000 |
| rad41              | 1.13553e-07 | 1.00000  | 1.57130e-07 | 1.00000  |
| rad6               | 5.49362e-10 | 1.00000  | 7.60190e-10 | 1.00000  |
| rad7               | 2.87858e-11 | 1.00000  | 3.98330e-11 | 1.00000  |
| rad11              | 1.84697e-11 | 1.00000  | 2.55577e-11 | 1.00000  |
| rad13              | 4.72372e-12 | 1.00000  | 6.53655e-12 | 1.00000  |
| rad23              | 3.84853e-12 | 1.00000  | 5.32547e-12 | 1.00000  |
| rad9               | 2.92691e-12 | 1.00000  | 4.05018e-12 | 1.00000  |
| rad28              | 1.87736e-12 | 1.00000  | 2.59784e-12 | 1.00000  |
| rad45              | 1.63941e-12 | 1.00000  | 2.26857e-12 | 1.00000  |
| rad21              | 1.04881e-12 | 1.00000  | 1.45131e-12 | 1.00000  |
| rad33              | 5.44430e-13 | 1.00000  | 7.53364e-13 | 1.00000  |
| rad22              | 4.77540e-13 | 1.00000  | 6.60803e-13 | 1.00000  |
| rad36              | 3.13322e-13 | 1.00000  | 4.33565e-13 | 1.00000  |
| rad15              | 2.65012e-13 | 1.00000  | 3.66715e-13 | 1.00000  |
| rad20              | 2.60171e-13 | 1.00000  | 3.60017e-13 | 1.00000  |
| rad12              | 1.42145e-13 | 1.00000  | 1.96696e-13 | 1.00000  |

|       |             |         |             |         |
|-------|-------------|---------|-------------|---------|
| rad25 | 1.34739e-13 | 1.00000 | 1.86448e-13 | 1.00000 |
| rad47 | 1.26179e-13 | 1.00000 | 1.74602e-13 | 1.00000 |
| rad8  | 9.29517e-14 | 1.00000 | 1.28624e-13 | 1.00000 |
| rad24 | 8.25899e-14 | 1.00000 | 1.14285e-13 | 1.00000 |
| rad26 | 7.85428e-14 | 1.00000 | 1.08685e-13 | 1.00000 |
| rad10 | 4.06168e-14 | 1.00000 | 5.62042e-14 | 1.00000 |
| rad18 | 3.55083e-14 | 1.00000 | 4.91353e-14 | 1.00000 |
| rad14 | 1.56757e-14 | 1.00000 | 2.16915e-14 | 1.00000 |
| rad3  | 1.17194e-14 | 1.00000 | 1.62169e-14 | 1.00000 |
| rad4  | 7.30906e-15 | 1.00000 | 1.01140e-14 | 1.00000 |
| rad2  | 6.33796e-15 | 1.00000 | 8.77028e-15 | 1.00000 |
| rad5  | 3.48644e-15 | 1.00000 | 4.82443e-15 | 1.00000 |
| rad1  | 1.37958e-15 | 1.00000 | 1.90902e-15 | 1.00000 |
| rad27 | 5.74479e-16 | 1.00000 | 7.94942e-16 | 1.00000 |

1.00000000 Pa, 4000.00000 K

| Rate constant      | True (fraction)      | Effective (fraction)  |
|--------------------|----------------------|-----------------------|
| Total              | 1.65008e-10 (1.00 )  | 1.19912e-10 (1.00 )   |
| Formation of rad11 | 2.61707e-11 (0.159 ) | 9.15556e-12 (0.0764 ) |
| Formation of rad6  | 4.31906e-11 (0.262 ) | 1.51098e-11 (0.126 )  |
| H-abstraction      | 9.56470e-11 (0.580 ) | 9.56470e-11 (0.798 )  |

| species            | PYtrue      | Cumul    | PYeffective | Cumul    |
|--------------------|-------------|----------|-------------|----------|
| Benzene+2-propynyl | 0.579650    | 0.579650 | 0.797641    | 0.797641 |
| Phenyl+Allene      | 0.273295    | 0.852945 | 0.00000     | 0.797641 |
| PhCH2CCH+H         | 0.0779435   | 0.930888 | 0.107256    | 0.904897 |
| PhCHCCH2+H         | 0.0328766   | 0.963765 | 0.0452408   | 0.950138 |
| C2H2+PhCH2         | 0.0116508   | 0.975415 | 0.0160323   | 0.966170 |
| PhCCH+CH3          | 0.00792125  | 0.983337 | 0.0109003   | 0.977070 |
| PhcycC3H3_A+H      | 0.00405636  | 0.987393 | 0.00558187  | 0.982652 |
| PAH7+H             | 0.00338058  | 0.990774 | 0.00465193  | 0.987304 |
| Ph+MeAc            | 0.00265534  | 0.993429 | 0.00365394  | 0.990958 |
| rad19syn           | 0.00200699  | 0.995436 | 0.00276178  | 0.993720 |
| Indene+H           | 0.00158840  | 0.997024 | 0.00218576  | 0.995906 |
| rad54              | 0.000847468 | 0.997872 | 0.00116618  | 0.997072 |
| rad39              | 0.000304994 | 0.998177 | 0.000419695 | 0.997491 |
| PAH1+H             | 0.000284127 | 0.998461 | 0.000390980 | 0.997882 |
| rad56              | 0.000172242 | 0.998633 | 0.000237017 | 0.998119 |
| rad19anti          | 0.000149971 | 0.998783 | 0.000206372 | 0.998326 |
| PAH9+H             | 0.000121736 | 0.998905 | 0.000167518 | 0.998493 |
| rad53              | 0.000103935 | 0.999009 | 0.000143023 | 0.998636 |
| rad55              | 9.87033e-05 | 0.999108 | 0.000135823 | 0.998772 |
| rad50              | 9.49261e-05 | 0.999203 | 0.000130625 | 0.998903 |
| rad38              | 8.48536e-05 | 0.999287 | 0.000116765 | 0.999020 |
| PhCCCH3+H          | 8.02193e-05 | 0.999368 | 0.000110388 | 0.999130 |
| PAH3+H             | 7.84218e-05 | 0.999446 | 0.000107914 | 0.999238 |
| rad70              | 7.43978e-05 | 0.999520 | 0.000102377 | 0.999340 |
| PAH8+H             | 6.80299e-05 | 0.999588 | 9.36140e-05 | 0.999434 |
| rad51              | 6.37407e-05 | 0.999652 | 8.77122e-05 | 0.999522 |
| PAH10+CH3          | 5.48776e-05 | 0.999707 | 7.55158e-05 | 0.999597 |
| rad67              | 4.35168e-05 | 0.999751 | 5.98821e-05 | 0.999657 |
| rad46              | 3.57792e-05 | 0.999786 | 4.92350e-05 | 0.999706 |
| rad35              | 3.46400e-05 | 0.999821 | 4.76673e-05 | 0.999754 |
| rad34              | 3.11445e-05 | 0.999852 | 4.28572e-05 | 0.999797 |
| rad71              | 3.10563e-05 | 0.999883 | 4.27358e-05 | 0.999839 |
| rad62              | 2.32398e-05 | 0.999906 | 3.19798e-05 | 0.999871 |
| rad52              | 1.20851e-05 | 0.999919 | 1.66300e-05 | 0.999888 |
| rad73              | 1.14710e-05 | 0.999930 | 1.57849e-05 | 0.999904 |
| rad30              | 8.93299e-06 | 0.999939 | 1.22925e-05 | 0.999916 |
| rad68syn           | 8.64434e-06 | 0.999948 | 1.18952e-05 | 0.999928 |
| rad64              | 7.61305e-06 | 0.999955 | 1.04761e-05 | 0.999939 |
| rad37              | 5.91727e-06 | 0.999961 | 8.14263e-06 | 0.999947 |
| rad68anti          | 5.50424e-06 | 0.999967 | 7.57424e-06 | 0.999954 |
| rad59              | 5.47385e-06 | 0.999972 | 7.53243e-06 | 0.999962 |
| rad40syn           | 5.36170e-06 | 0.999977 | 7.37810e-06 | 0.999969 |
| rad42              | 5.12147e-06 | 0.999983 | 7.04750e-06 | 0.999976 |
| rad72              | 4.37871e-06 | 0.999987 | 6.02543e-06 | 0.999982 |
| rad40anti          | 4.03125e-06 | 0.999991 | 5.54731e-06 | 0.999988 |
| rad60syn           | 2.51669e-06 | 0.999993 | 3.46315e-06 | 0.999991 |
| rad58              | 1.90267e-06 | 0.999995 | 2.61822e-06 | 0.999994 |
| rad60anti          | 1.87487e-06 | 0.999997 | 2.57996e-06 | 0.999996 |
| rad65              | 1.42564e-06 | 0.999999 | 1.96179e-06 | 0.999998 |
| rad43              | 6.01849e-07 | 0.999999 | 8.28191e-07 | 0.999999 |
| rad61              | 4.34037e-07 | 1.000000 | 5.97267e-07 | 1.000000 |
| rad41              | 1.43043e-07 | 1.000000 | 1.96838e-07 | 1.000000 |
| rad6               | 3.15371e-10 | 1.000000 | 4.33975e-10 | 1.000000 |
| rad7               | 1.84639e-11 | 1.000000 | 2.54076e-11 | 1.000000 |



|       |             |          |             |         |
|-------|-------------|----------|-------------|---------|
| rad11 | 1.19749e-11 | 1.000000 | 1.64784e-11 | 1.00000 |
| rad13 | 3.20238e-12 | 1.000000 | 4.40671e-12 | 1.00000 |
| rad23 | 2.01280e-12 | 1.000000 | 2.76977e-12 | 1.00000 |
| rad9  | 1.70766e-12 | 1.000000 | 2.34988e-12 | 1.00000 |
| rad28 | 1.05743e-12 | 1.000000 | 1.45510e-12 | 1.00000 |
| rad45 | 9.45835e-13 | 1.000000 | 1.30154e-12 | 1.00000 |
| rad21 | 7.33133e-13 | 1.000000 | 1.00885e-12 | 1.00000 |
| rad33 | 3.83244e-13 | 1.000000 | 5.27372e-13 | 1.00000 |
| rad22 | 2.83422e-13 | 1.000000 | 3.90009e-13 | 1.00000 |
| rad20 | 1.98121e-13 | 1.000000 | 2.72628e-13 | 1.00000 |
| rad36 | 1.81359e-13 | 1.000000 | 2.49563e-13 | 1.00000 |
| rad15 | 1.61497e-13 | 1.000000 | 2.22231e-13 | 1.00000 |
| rad47 | 1.25502e-13 | 1.000000 | 1.72700e-13 | 1.00000 |
| rad12 | 1.01281e-13 | 1.000000 | 1.39371e-13 | 1.00000 |
| rad25 | 9.70080e-14 | 1.000000 | 1.33491e-13 | 1.00000 |
| rad8  | 8.17510e-14 | 1.000000 | 1.12495e-13 | 1.00000 |
| rad24 | 5.80458e-14 | 1.000000 | 7.98754e-14 | 1.00000 |
| rad26 | 4.52932e-14 | 1.000000 | 6.23270e-14 | 1.00000 |
| rad10 | 2.48239e-14 | 1.000000 | 3.41594e-14 | 1.00000 |
| rad18 | 2.34645e-14 | 1.000000 | 3.22890e-14 | 1.00000 |
| rad14 | 1.43730e-14 | 1.000000 | 1.97783e-14 | 1.00000 |
| rad3  | 7.93365e-15 | 1.000000 | 1.09173e-14 | 1.00000 |
| rad4  | 5.11028e-15 | 1.000000 | 7.03212e-15 | 1.00000 |
| rad2  | 3.96849e-15 | 1.000000 | 5.46094e-15 | 1.00000 |
| rad5  | 2.85277e-15 | 1.000000 | 3.92563e-15 | 1.00000 |
| rad1  | 8.60747e-16 | 1.000000 | 1.18445e-15 | 1.00000 |
| rad27 | 4.75349e-16 | 1.000000 | 6.54114e-16 | 1.00000 |

0.100000000 Pa, 20.0000000 K

| Rate constant      | True (fraction)        | Effective (fraction)   |
|--------------------|------------------------|------------------------|
| Total              | 1.56740e-51 (1.00 )    | 1.56740e-51 (1.00 )    |
| Formation of rad11 | 1.56740e-51 (1.000 )   | 1.56740e-51 (1.000 )   |
| Formation of rad6  | 3.73945e-60 (2.39e-09) | 3.73945e-60 (2.39e-09) |
| H-abstraction      | 1.53631e-76 (9.80e-26) | 1.53631e-76 (9.80e-26) |

| species       | PYtrue      | Cumul    | PYeffective | Cumul    |
|---------------|-------------|----------|-------------|----------|
| rad6          | 0.940047    | 0.940047 | 0.940047    | 0.940047 |
| Indene+H      | 0.0591132   | 0.999160 | 0.0591132   | 0.999160 |
| C2H2+PhCH2    | 0.000485884 | 0.999646 | 0.000485884 | 0.999646 |
| rad7          | 0.000144333 | 0.999790 | 0.000144333 | 0.999790 |
| rad2          | 0.000111464 | 0.999902 | 0.000111464 | 0.999902 |
| rad11         | 4.40248e-05 | 0.999946 | 4.40248e-05 | 0.999946 |
| rad23         | 2.47191e-05 | 0.999971 | 2.47191e-05 | 0.999971 |
| rad10         | 7.59498e-06 | 0.999978 | 7.59498e-06 | 0.999978 |
| rad1          | 7.04483e-06 | 0.999985 | 7.04483e-06 | 0.999985 |
| rad28         | 5.48573e-06 | 0.999991 | 5.48573e-06 | 0.999991 |
| PhCHCCH2+H    | 2.84085e-06 | 0.999994 | 2.84085e-06 | 0.999994 |
| rad3          | 2.78607e-06 | 0.999996 | 2.78607e-06 | 0.999996 |
| rad4          | 1.40850e-06 | 0.999998 | 1.40850e-06 | 0.999998 |
| PhCCH+CH3     | 1.04471e-06 | 0.999999 | 1.04471e-06 | 0.999999 |
| rad45         | 6.01202e-07 | 0.999999 | 6.01202e-07 | 0.999999 |
| rad13         | 4.57046e-07 | 1.000000 | 4.57046e-07 | 1.000000 |
| rad26         | 2.25543e-07 | 1.000000 | 2.25543e-07 | 1.000000 |
| rad9          | 1.51134e-07 | 1.000000 | 1.51134e-07 | 1.000000 |
| PhCCCH3+H     | 8.13114e-08 | 1.000000 | 8.13114e-08 | 1.000000 |
| rad36         | 3.74502e-08 | 1.000000 | 3.74502e-08 | 1.000000 |
| rad30         | 2.57763e-08 | 1.000000 | 2.57763e-08 | 1.000000 |
| rad22         | 2.32735e-08 | 1.000000 | 2.32735e-08 | 1.000000 |
| rad15         | 4.60690e-09 | 1.000000 | 4.60690e-09 | 1.000000 |
| PAH9+H        | 4.53145e-09 | 1.000000 | 4.53145e-09 | 1.000000 |
| rad35         | 2.41136e-09 | 1.000000 | 2.41136e-09 | 1.000000 |
| rad38         | 1.16551e-09 | 1.000000 | 1.16551e-09 | 1.000000 |
| Phenyl+Allene | 9.64928e-10 | 1.000000 | 0.000000    | 1.000000 |
| Ph+MeAc       | 7.33682e-10 | 1.000000 | 7.33682e-10 | 1.000000 |
| rad33         | 7.29193e-10 | 1.000000 | 7.29193e-10 | 1.000000 |
| rad8          | 6.11856e-10 | 1.000000 | 6.11856e-10 | 1.000000 |
| rad25         | 3.50906e-10 | 1.000000 | 3.50906e-10 | 1.000000 |
| rad14         | 2.55191e-10 | 1.000000 | 2.55191e-10 | 1.000000 |
| rad27         | 7.23941e-11 | 1.000000 | 7.23941e-11 | 1.000000 |
| PAH7+H        | 1.23960e-11 | 1.000000 | 1.23960e-11 | 1.000000 |
| rad46         | 7.19184e-12 | 1.000000 | 7.19184e-12 | 1.000000 |
| rad39         | 1.11109e-12 | 1.000000 | 1.11109e-12 | 1.000000 |
| rad12         | 2.97190e-13 | 1.000000 | 2.97190e-13 | 1.000000 |
| rad60syn      | 2.03980e-13 | 1.000000 | 2.03980e-13 | 1.000000 |
| rad18         | 2.74000e-14 | 1.000000 | 2.74000e-14 | 1.000000 |
| rad20         | 2.55699e-14 | 1.000000 | 2.55699e-14 | 1.000000 |
| rad21         | 1.68417e-14 | 1.000000 | 1.68417e-14 | 1.000000 |

|                    |             |         |             |         |
|--------------------|-------------|---------|-------------|---------|
| rad24              | 4.77976e-15 | 1.00000 | 4.77976e-15 | 1.00000 |
| rad31              | 2.65750e-15 | 1.00000 | 2.65750e-15 | 1.00000 |
| PhCH2CCH+H         | 1.92657e-16 | 1.00000 | 1.92657e-16 | 1.00000 |
| rad60anti          | 1.13805e-16 | 1.00000 | 1.13805e-16 | 1.00000 |
| rad37              | 3.86108e-18 | 1.00000 | 3.86108e-18 | 1.00000 |
| rad5               | 3.90579e-20 | 1.00000 | 3.90579e-20 | 1.00000 |
| PAH3+H             | 8.62510e-24 | 1.00000 | 8.62510e-24 | 1.00000 |
| rad59              | 4.22649e-24 | 1.00000 | 4.22649e-24 | 1.00000 |
| rad50              | 6.97938e-25 | 1.00000 | 6.97938e-25 | 1.00000 |
| Benzene+2-propynyl | 9.80165e-26 | 1.00000 | 9.80165e-26 | 1.00000 |
| rad19syn           | 4.06528e-29 | 1.00000 | 4.06528e-29 | 1.00000 |
| rad54              | 1.22253e-32 | 1.00000 | 1.22253e-32 | 1.00000 |
| PAH10+CH3          | 8.27450e-33 | 1.00000 | 8.27450e-33 | 1.00000 |
| rad52              | 2.70870e-33 | 1.00000 | 2.70870e-33 | 1.00000 |
| rad43              | 1.94318e-33 | 1.00000 | 1.94318e-33 | 1.00000 |
| rad62              | 3.77839e-35 | 1.00000 | 3.77839e-35 | 1.00000 |
| rad51              | 3.88648e-38 | 1.00000 | 3.88648e-38 | 1.00000 |
| rad70              | 3.52026e-39 | 1.00000 | 3.52026e-39 | 1.00000 |
| PhcycC3H3_A+H      | 2.30193e-39 | 1.00000 | 2.30193e-39 | 1.00000 |
| rad55              | 1.12381e-39 | 1.00000 | 1.12381e-39 | 1.00000 |
| rad65              | 5.79872e-42 | 1.00000 | 5.79872e-42 | 1.00000 |
| rad58              | 1.06490e-42 | 1.00000 | 1.06490e-42 | 1.00000 |
| PAH1+H             | 4.20934e-43 | 1.00000 | 4.20934e-43 | 1.00000 |
| rad34              | 6.02242e-45 | 1.00000 | 6.02242e-45 | 1.00000 |
| rad42              | 3.39400e-48 | 1.00000 | 3.39400e-48 | 1.00000 |
| rad41              | 5.87735e-49 | 1.00000 | 5.87735e-49 | 1.00000 |
| rad47              | 1.76900e-49 | 1.00000 | 1.76900e-49 | 1.00000 |

0.100000000 Pa, 30.0000000 K

| Rate constant      | True (fraction)        | Effective (fraction)   |
|--------------------|------------------------|------------------------|
| Total              | 5.03204e-39 (1.00 )    | 5.03204e-39 (1.00 )    |
| Formation of rad11 | 5.03203e-39 (1.000 )   | 5.03203e-39 (1.000 )   |
| Formation of rad6  | 9.92181e-45 (1.97e-06) | 9.92181e-45 (1.97e-06) |
| H-abstraction      | 3.33191e-55 (6.62e-17) | 3.33191e-55 (6.62e-17) |

| species       | PYtrue      | Cumul    | PYeffective | Cumul    |
|---------------|-------------|----------|-------------|----------|
| rad6          | 0.937769    | 0.937769 | 0.937769    | 0.937769 |
| Indene+H      | 0.0612983   | 0.999067 | 0.0612983   | 0.999067 |
| C2H2+PhCH2    | 0.000503824 | 0.999571 | 0.000503824 | 0.999571 |
| rad2          | 0.000207874 | 0.999779 | 0.000207874 | 0.999779 |
| rad7          | 0.000129244 | 0.999908 | 0.000129244 | 0.999908 |
| rad11         | 3.79513e-05 | 0.999946 | 3.79513e-05 | 0.999946 |
| rad10         | 1.36752e-05 | 0.999960 | 1.36752e-05 | 0.999960 |
| rad1          | 1.31458e-05 | 0.999973 | 1.31458e-05 | 0.999973 |
| rad28         | 1.11596e-05 | 0.999984 | 1.11596e-05 | 0.999984 |
| PhCHCCH2+H    | 3.37711e-06 | 0.999988 | 3.37711e-06 | 0.999988 |
| rad3          | 3.14473e-06 | 0.999991 | 3.14473e-06 | 0.999991 |
| rad23         | 3.04950e-06 | 0.999994 | 3.04950e-06 | 0.999994 |
| PhCCH+CH3     | 2.48546e-06 | 0.999996 | 2.48546e-06 | 0.999996 |
| rad4          | 1.59006e-06 | 0.999998 | 1.59006e-06 | 0.999998 |
| rad26         | 8.97535e-07 | 0.999999 | 8.97535e-07 | 0.999999 |
| rad13         | 4.25046e-07 | 0.999999 | 4.25046e-07 | 0.999999 |
| PhCCCH3+H     | 3.26089e-07 | 0.999999 | 3.26089e-07 | 0.999999 |
| rad9          | 1.58490e-07 | 1.000000 | 1.58490e-07 | 1.000000 |
| rad45         | 6.44763e-08 | 1.000000 | 6.44763e-08 | 1.000000 |
| rad30         | 2.67725e-08 | 1.000000 | 2.67725e-08 | 1.000000 |
| PAH9+H        | 5.05593e-09 | 1.000000 | 5.05593e-09 | 1.000000 |
| rad15         | 4.79180e-09 | 1.000000 | 4.79180e-09 | 1.000000 |
| rad36         | 4.01514e-09 | 1.000000 | 4.01514e-09 | 1.000000 |
| Ph+MeAc       | 3.02633e-09 | 1.000000 | 3.02633e-09 | 1.000000 |
| rad22         | 2.81793e-09 | 1.000000 | 2.81793e-09 | 1.000000 |
| rad35         | 2.67573e-09 | 1.000000 | 2.67573e-09 | 1.000000 |
| rad8          | 2.44005e-09 | 1.000000 | 2.44005e-09 | 1.000000 |
| Phenyl+Allene | 1.34615e-09 | 1.000000 | 0.000000    | 1.000000 |
| rad38         | 1.29969e-09 | 1.000000 | 1.29969e-09 | 1.000000 |
| rad33         | 7.19346e-10 | 1.000000 | 7.19346e-10 | 1.000000 |
| rad25         | 2.98175e-10 | 1.000000 | 2.98175e-10 | 1.000000 |
| rad14         | 2.73866e-10 | 1.000000 | 2.73866e-10 | 1.000000 |
| rad27         | 1.27250e-10 | 1.000000 | 1.27250e-10 | 1.000000 |
| PAH7+H        | 5.30960e-11 | 1.000000 | 5.30960e-11 | 1.000000 |
| rad46         | 8.24294e-12 | 1.000000 | 8.24294e-12 | 1.000000 |
| rad39         | 4.82888e-12 | 1.000000 | 4.82888e-12 | 1.000000 |
| rad12         | 2.50725e-12 | 1.000000 | 2.50725e-12 | 1.000000 |
| rad60syn      | 2.08600e-13 | 1.000000 | 2.08600e-13 | 1.000000 |
| rad20         | 9.29706e-15 | 1.000000 | 9.29706e-15 | 1.000000 |
| rad21         | 6.21351e-15 | 1.000000 | 6.21351e-15 | 1.000000 |
| rad18         | 5.19826e-15 | 1.000000 | 5.19826e-15 | 1.000000 |

|                    |             |          |             |          |
|--------------------|-------------|----------|-------------|----------|
| rad31              | 4.32305e-15 | 1.000000 | 4.32305e-15 | 1.000000 |
| rad24              | 5.32253e-16 | 1.000000 | 5.32253e-16 | 1.000000 |
| PhCH2CCH+H         | 4.55941e-16 | 1.000000 | 4.55941e-16 | 1.000000 |
| rad60anti          | 2.37228e-16 | 1.000000 | 2.37228e-16 | 1.000000 |
| Benzene+2-propynyl | 6.62139e-17 | 1.000000 | 6.62139e-17 | 1.000000 |
| rad37              | 2.41708e-17 | 1.000000 | 2.41708e-17 | 1.000000 |
| rad5               | 1.27976e-19 | 1.000000 | 1.27976e-19 | 1.000000 |
| PAH3+H             | 2.04967e-23 | 1.000000 | 2.04967e-23 | 1.000000 |
| rad59              | 1.00459e-23 | 1.000000 | 1.00459e-23 | 1.000000 |
| rad50              | 1.65222e-24 | 1.000000 | 1.65222e-24 | 1.000000 |
| rad19syn           | 9.11673e-29 | 1.000000 | 9.11673e-29 | 1.000000 |
| rad54              | 2.56264e-32 | 1.000000 | 2.56264e-32 | 1.000000 |
| PAH10+CH3          | 1.77249e-32 | 1.000000 | 1.77249e-32 | 1.000000 |
| rad52              | 6.15511e-33 | 1.000000 | 6.15511e-33 | 1.000000 |
| rad43              | 4.06681e-33 | 1.000000 | 4.06681e-33 | 1.000000 |
| rad62              | 7.44445e-35 | 1.000000 | 7.44445e-35 | 1.000000 |
| rad51              | 7.70275e-38 | 1.000000 | 7.70275e-38 | 1.000000 |
| rad70              | 5.58805e-39 | 1.000000 | 5.58805e-39 | 1.000000 |
| PhcycC3H3_A+H      | 3.53508e-39 | 1.000000 | 3.53508e-39 | 1.000000 |
| rad55              | 1.74814e-39 | 1.000000 | 1.74814e-39 | 1.000000 |
| rad65              | 9.99311e-42 | 1.000000 | 9.99311e-42 | 1.000000 |
| rad58              | 1.60172e-42 | 1.000000 | 1.60172e-42 | 1.000000 |
| PAH1+H             | 4.74348e-43 | 1.000000 | 4.74348e-43 | 1.000000 |
| rad34              | 6.16606e-45 | 1.000000 | 6.16606e-45 | 1.000000 |
| rad42              | 2.63257e-48 | 1.000000 | 2.63257e-48 | 1.000000 |
| rad41              | 4.34551e-49 | 1.000000 | 4.34551e-49 | 1.000000 |
| rad47              | 1.15210e-49 | 1.000000 | 1.15210e-49 | 1.000000 |

0.100000000 Pa, 40.0000000 K

| Rate constant      | True (fraction)        | Effective (fraction)   |
|--------------------|------------------------|------------------------|
| Total              | 9.35697e-33 (1.00 )    | 9.35697e-33 (1.00 )    |
| Formation of rad11 | 9.35644e-33 (1.000 )   | 9.35644e-33 (1.000 )   |
| Formation of rad6  | 5.26139e-37 (5.62e-05) | 5.26139e-37 (5.62e-05) |
| H-abstraction      | 1.44763e-44 (1.55e-12) | 1.44763e-44 (1.55e-12) |

| species            | PYtrue      | Cumul    | PYeffective | Cumul    |
|--------------------|-------------|----------|-------------|----------|
| rad6               | 0.935420    | 0.935420 | 0.935420    | 0.935420 |
| Indene+H           | 0.0635372   | 0.998957 | 0.0635372   | 0.998957 |
| C2H2+PhCH2         | 0.000525858 | 0.999483 | 0.000525858 | 0.999483 |
| rad2               | 0.000287427 | 0.999770 | 0.000287427 | 0.999770 |
| rad7               | 0.000121813 | 0.999892 | 0.000121813 | 0.999892 |
| rad11              | 3.50807e-05 | 0.999927 | 3.50807e-05 | 0.999927 |
| rad10              | 1.85105e-05 | 0.999946 | 1.85105e-05 | 0.999946 |
| rad1               | 1.81990e-05 | 0.999964 | 1.81990e-05 | 0.999964 |
| rad28              | 1.69464e-05 | 0.999981 | 1.69464e-05 | 0.999981 |
| PhCCH+CH3          | 4.28967e-06 | 0.999985 | 4.28967e-06 | 0.999985 |
| PhCHCCH2+H         | 4.22799e-06 | 0.999990 | 4.22799e-06 | 0.999990 |
| rad3               | 3.50448e-06 | 0.999993 | 3.50448e-06 | 0.999993 |
| rad26              | 1.92880e-06 | 0.999995 | 1.92880e-06 | 0.999995 |
| rad4               | 1.77251e-06 | 0.999997 | 1.77251e-06 | 0.999997 |
| rad23              | 1.34043e-06 | 0.999998 | 1.34043e-06 | 0.999998 |
| PhCCCH3+H          | 7.26461e-07 | 0.999999 | 7.26461e-07 | 0.999999 |
| rad13              | 4.11706e-07 | 0.999999 | 4.11706e-07 | 0.999999 |
| rad9               | 1.69842e-07 | 0.999999 | 1.69842e-07 | 0.999999 |
| rad30              | 2.80645e-08 | 0.999999 | 2.80645e-08 | 0.999999 |
| rad45              | 2.63114e-08 | 0.999999 | 2.63114e-08 | 0.999999 |
| Ph+MeAc            | 7.25827e-09 | 0.999999 | 7.25827e-09 | 0.999999 |
| rad8               | 5.49248e-09 | 0.999999 | 5.49248e-09 | 0.999999 |
| PAH9+H             | 5.43469e-09 | 0.999999 | 5.43469e-09 | 0.999999 |
| rad15              | 5.04081e-09 | 0.999999 | 5.04081e-09 | 0.999999 |
| rad35              | 2.86566e-09 | 0.999999 | 2.86566e-09 | 0.999999 |
| Phenyl+Allene      | 2.24443e-09 | 0.999999 | 0.000000    | 0.999999 |
| rad36              | 1.63750e-09 | 0.999999 | 1.63750e-09 | 0.999999 |
| rad38              | 1.39924e-09 | 0.999999 | 1.39924e-09 | 0.999999 |
| rad22              | 1.14869e-09 | 0.999999 | 1.14869e-09 | 0.999999 |
| rad33              | 7.15718e-10 | 0.999999 | 7.15718e-10 | 0.999999 |
| rad14              | 2.98220e-10 | 0.999999 | 2.98220e-10 | 0.999999 |
| rad25              | 2.83084e-10 | 0.999999 | 2.83084e-10 | 0.999999 |
| rad27              | 1.71636e-10 | 0.999999 | 1.71636e-10 | 0.999999 |
| PAH7+H             | 1.30774e-10 | 0.999999 | 1.30774e-10 | 0.999999 |
| rad39              | 1.22645e-11 | 0.999999 | 1.22645e-11 | 0.999999 |
| rad46              | 9.07033e-12 | 0.999999 | 9.07033e-12 | 0.999999 |
| rad12              | 8.82674e-12 | 0.999999 | 8.82674e-12 | 0.999999 |
| Benzene+2-propynyl | 1.54712e-12 | 0.999999 | 1.54712e-12 | 0.999999 |
| rad60syn           | 2.19196e-13 | 0.999999 | 2.19196e-13 | 0.999999 |
| rad20              | 6.42257e-15 | 0.999999 | 6.42257e-15 | 0.999999 |
| rad31              | 5.74926e-15 | 0.999999 | 5.74926e-15 | 0.999999 |

|               |             |          |             |          |
|---------------|-------------|----------|-------------|----------|
| rad21         | 4.34590e-15 | 0.999999 | 4.34590e-15 | 0.999999 |
| rad18         | 2.31154e-15 | 0.999999 | 2.31154e-15 | 0.999999 |
| rad60anti     | 1.02164e-15 | 0.999999 | 1.02164e-15 | 0.999999 |
| PhCH2CCH+H    | 9.74459e-16 | 0.999999 | 9.74459e-16 | 0.999999 |
| rad24         | 2.23530e-16 | 0.999999 | 2.23530e-16 | 0.999999 |
| rad37         | 8.11967e-17 | 0.999999 | 8.11967e-17 | 0.999999 |
| rad5          | 3.14831e-19 | 0.999999 | 3.14831e-19 | 0.999999 |
| PAH3+H        | 4.46189e-23 | 0.999999 | 4.46189e-23 | 0.999999 |
| rad59         | 2.18569e-23 | 0.999999 | 2.18569e-23 | 0.999999 |
| rad50         | 3.59143e-24 | 0.999999 | 3.59143e-24 | 0.999999 |
| rad19syn      | 1.96003e-28 | 0.999999 | 1.96003e-28 | 0.999999 |
| rad54         | 5.27291e-32 | 0.999999 | 5.27291e-32 | 0.999999 |
| PAH10+CH3     | 3.65283e-32 | 0.999999 | 3.65283e-32 | 0.999999 |
| rad52         | 1.33193e-32 | 0.999999 | 1.33193e-32 | 0.999999 |
| rad43         | 8.37378e-33 | 0.999999 | 8.37378e-33 | 0.999999 |
| rad62         | 1.46812e-34 | 0.999999 | 1.46812e-34 | 0.999999 |
| rad51         | 1.52246e-37 | 0.999999 | 1.52246e-37 | 0.999999 |
| rad70         | 9.41874e-39 | 0.999999 | 9.41874e-39 | 0.999999 |
| PhcycC3H3_A+H | 5.82162e-39 | 0.999999 | 5.82162e-39 | 0.999999 |
| rad55         | 2.90337e-39 | 0.999999 | 2.90337e-39 | 0.999999 |
| rad65         | 1.78608e-41 | 0.999999 | 1.78608e-41 | 0.999999 |
| rad58         | 2.59861e-42 | 0.999999 | 2.59861e-42 | 0.999999 |
| PAH1+H        | 6.26794e-43 | 0.999999 | 6.26794e-43 | 0.999999 |
| rad34         | 7.65912e-45 | 0.999999 | 7.65912e-45 | 0.999999 |
| rad42         | 2.73214e-48 | 0.999999 | 2.73214e-48 | 0.999999 |
| rad41         | 4.37836e-49 | 0.999999 | 4.37836e-49 | 0.999999 |
| rad47         | 1.14419e-49 | 0.999999 | 1.14419e-49 | 0.999999 |

0.100000000 Pa, 50.0000000 K

| =====              |                 |            |                      |            |
|--------------------|-----------------|------------|----------------------|------------|
| Rate constant      | True (fraction) |            | Effective (fraction) |            |
| -----              |                 |            |                      |            |
| Total              | 5.52690e-29     | (1.00 )    | 5.52690e-29          | (1.00 )    |
| Formation of rad11 | 5.52459e-29     | (1.000 )   | 5.52459e-29          | (1.000 )   |
| Formation of rad6  | 2.30840e-32     | (0.000418) | 2.30840e-32          | (0.000418) |
| H-abstraction      | 3.35357e-38     | (6.07e-10) | 3.35357e-38          | (6.07e-10) |
| -----              |                 |            |                      |            |
| species            | PYtrue          | Cumul      | PYeffective          | Cumul      |
| -----              |                 |            |                      |            |
| rad6               | 0.932956        | 0.932956   | 0.932956             | 0.932956   |
| Indene+H           | 0.0658938       | 0.998850   | 0.0658938            | 0.998850   |
| C2H2+PhCH2         | 0.000552146     | 0.999402   | 0.000552146          | 0.999402   |
| rad2               | 0.000355454     | 0.999757   | 0.000355454          | 0.999757   |
| rad7               | 0.000117017     | 0.999874   | 0.000117017          | 0.999874   |
| rad11              | 3.32745e-05     | 0.999908   | 3.32745e-05          | 0.999908   |
| rad28              | 2.31018e-05     | 0.999931   | 2.31018e-05          | 0.999931   |
| rad10              | 2.25565e-05     | 0.999953   | 2.25565e-05          | 0.999953   |
| rad1               | 2.25458e-05     | 0.999976   | 2.25458e-05          | 0.999976   |
| PhCCH+CH3          | 6.58435e-06     | 0.999982   | 6.58435e-06          | 0.999982   |
| PhCHCCH2+H         | 5.43204e-06     | 0.999988   | 5.43204e-06          | 0.999988   |
| rad3               | 3.82672e-06     | 0.999992   | 3.82672e-06          | 0.999992   |
| rad26              | 3.30659e-06     | 0.999995   | 3.30659e-06          | 0.999995   |
| rad4               | 1.93636e-06     | 0.999997   | 1.93636e-06          | 0.999997   |
| PhCCCH3+H          | 1.30926e-06     | 0.999998   | 1.30926e-06          | 0.999998   |
| rad23              | 8.26738e-07     | 0.999999   | 8.26738e-07          | 0.999999   |
| rad13              | 4.04085e-07     | 1.000000   | 4.04085e-07          | 1.000000   |
| rad9               | 1.85339e-07     | 1.000000   | 1.85339e-07          | 1.000000   |
| rad30              | 2.96597e-08     | 1.000000   | 2.96597e-08          | 1.000000   |
| rad45              | 1.54450e-08     | 1.000000   | 1.54450e-08          | 1.000000   |
| Ph+MeAc            | 1.45145e-08     | 1.000000   | 1.45145e-08          | 1.000000   |
| rad8               | 1.00599e-08     | 1.000000   | 1.00599e-08          | 1.000000   |
| PAH9+H             | 5.82823e-09     | 1.000000   | 5.82823e-09          | 1.000000   |
| rad15              | 5.35523e-09     | 1.000000   | 5.35523e-09          | 1.000000   |
| Phenyl+Allene      | 3.81302e-09     | 1.000000   | 0.000000             | 1.000000   |
| rad35              | 3.06162e-09     | 1.000000   | 3.06162e-09          | 1.000000   |
| rad38              | 1.50435e-09     | 1.000000   | 1.50435e-09          | 1.000000   |
| rad36              | 9.60471e-10     | 1.000000   | 9.60471e-10          | 1.000000   |
| rad33              | 7.13823e-10     | 1.000000   | 7.13823e-10          | 1.000000   |
| rad22              | 6.63752e-10     | 1.000000   | 6.63752e-10          | 1.000000   |
| Benzene+2-propynyl | 6.06773e-10     | 1.000000   | 6.06773e-10          | 1.000000   |
| rad14              | 3.21612e-10     | 1.000000   | 3.21612e-10          | 1.000000   |
| rad25              | 2.75517e-10     | 1.000000   | 2.75517e-10          | 1.000000   |
| PAH7+H             | 2.66210e-10     | 1.000000   | 2.66210e-10          | 1.000000   |
| rad27              | 2.09420e-10     | 1.000000   | 2.09420e-10          | 1.000000   |
| rad39              | 2.60612e-11     | 1.000000   | 2.60612e-11          | 1.000000   |
| rad12              | 2.29119e-11     | 1.000000   | 2.29119e-11          | 1.000000   |
| rad46              | 9.99219e-12     | 1.000000   | 9.99219e-12          | 1.000000   |
| rad60syn           | 2.45036e-13     | 1.000000   | 2.45036e-13          | 1.000000   |
| rad31              | 7.01799e-15     | 1.000000   | 7.01799e-15          | 1.000000   |
| rad20              | 5.28027e-15     | 1.000000   | 5.28027e-15          | 1.000000   |

|               |             |          |             |          |
|---------------|-------------|----------|-------------|----------|
| rad60anti     | 4.17219e-15 | 1.000000 | 4.17219e-15 | 1.000000 |
| rad21         | 3.60699e-15 | 1.000000 | 3.60699e-15 | 1.000000 |
| PhCH2CCH+H    | 2.28034e-15 | 1.000000 | 2.28034e-15 | 1.000000 |
| rad18         | 1.38822e-15 | 1.000000 | 1.38822e-15 | 1.000000 |
| rad37         | 2.48325e-16 | 1.000000 | 2.48325e-16 | 1.000000 |
| rad24         | 1.34384e-16 | 1.000000 | 1.34384e-16 | 1.000000 |
| rad5          | 8.06835e-19 | 1.000000 | 8.06835e-19 | 1.000000 |
| PAH3+H        | 1.07641e-22 | 1.000000 | 1.07641e-22 | 1.000000 |
| rad59         | 5.26684e-23 | 1.000000 | 5.26684e-23 | 1.000000 |
| rad50         | 8.61692e-24 | 1.000000 | 8.61692e-24 | 1.000000 |
| rad19syn      | 4.83902e-28 | 1.000000 | 4.83902e-28 | 1.000000 |
| rad54         | 1.26914e-31 | 1.000000 | 1.26914e-31 | 1.000000 |
| PAH10+CH3     | 8.80993e-32 | 1.000000 | 8.80993e-32 | 1.000000 |
| rad52         | 3.29782e-32 | 1.000000 | 3.29782e-32 | 1.000000 |
| rad43         | 2.02040e-32 | 1.000000 | 2.02040e-32 | 1.000000 |
| rad62         | 3.43668e-34 | 1.000000 | 3.43668e-34 | 1.000000 |
| rad51         | 3.56632e-37 | 1.000000 | 3.56632e-37 | 1.000000 |
| rad70         | 1.97005e-38 | 1.000000 | 1.97005e-38 | 1.000000 |
| PhcycC3H3_A+H | 1.19786e-38 | 1.000000 | 1.19786e-38 | 1.000000 |
| rad55         | 6.00830e-39 | 1.000000 | 6.00830e-39 | 1.000000 |
| rad65         | 3.89614e-41 | 1.000000 | 3.89614e-41 | 1.000000 |
| rad58         | 5.28980e-42 | 1.000000 | 5.28980e-42 | 1.000000 |
| PAH1+H        | 1.10327e-42 | 1.000000 | 1.10327e-42 | 1.000000 |
| rad34         | 1.29263e-44 | 1.000000 | 1.29263e-44 | 1.000000 |
| rad42         | 4.09096e-48 | 1.000000 | 4.09096e-48 | 1.000000 |
| rad41         | 6.43486e-49 | 1.000000 | 6.43486e-49 | 1.000000 |
| rad47         | 1.65484e-49 | 1.000000 | 1.65484e-49 | 1.000000 |

0.100000000 Pa, 60.0000000 K

| Rate constant      | True (fraction)        | Effective (fraction)   |
|--------------------|------------------------|------------------------|
| Total              | 1.83429e-26 (1.00 )    | 1.83429e-26 (1.00 )    |
| Formation of rad11 | 1.83139e-26 (0.998 )   | 1.83139e-26 (0.998 )   |
| Formation of rad6  | 2.90471e-29 (0.00158 ) | 2.90471e-29 (0.00158 ) |
| H-abstraction      | 5.71259e-34 (3.11e-08) | 5.71259e-34 (3.11e-08) |

| species            | PYtrue      | Cumul    | PYeffective | Cumul    |
|--------------------|-------------|----------|-------------|----------|
| rad6               | 0.930380    | 0.930380 | 0.930380    | 0.930380 |
| Indene+H           | 0.0683643   | 0.998744 | 0.0683643   | 0.998744 |
| C2H2+PhCH2         | 0.000582089 | 0.999326 | 0.000582089 | 0.999326 |
| rad7               | 0.000414528 | 0.999741 | 0.000414528 | 0.999741 |
| rad7               | 0.000113516 | 0.999854 | 0.000113516 | 0.999854 |
| rad11              | 3.19821e-05 | 0.999886 | 3.19821e-05 | 0.999886 |
| rad28              | 2.97935e-05 | 0.999916 | 2.97935e-05 | 0.999916 |
| rad1               | 2.63496e-05 | 0.999943 | 2.63496e-05 | 0.999943 |
| rad10              | 2.60150e-05 | 0.999969 | 2.60150e-05 | 0.999969 |
| PhCCH+CH3          | 9.52080e-06 | 0.999978 | 9.52080e-06 | 0.999978 |
| PhCHCCH2+H         | 7.05074e-06 | 0.999985 | 7.05074e-06 | 0.999985 |
| rad26              | 5.04008e-06 | 0.999990 | 5.04008e-06 | 0.999990 |
| rad3               | 4.11027e-06 | 0.999994 | 4.11027e-06 | 0.999994 |
| PhCCCH3+H          | 2.12013e-06 | 0.999996 | 2.12013e-06 | 0.999996 |
| rad4               | 2.08097e-06 | 0.999998 | 2.08097e-06 | 0.999998 |
| rad23              | 5.80342e-07 | 0.999999 | 5.80342e-07 | 0.999999 |
| rad13              | 3.99044e-07 | 0.999999 | 3.99044e-07 | 0.999999 |
| rad9               | 2.04775e-07 | 1.000000 | 2.04775e-07 | 1.000000 |
| rad30              | 3.15184e-08 | 1.000000 | 3.15184e-08 | 1.000000 |
| Benzene+2-propynyl | 3.11432e-08 | 1.000000 | 3.11432e-08 | 1.000000 |
| Ph+MeAc            | 2.66353e-08 | 1.000000 | 2.66353e-08 | 1.000000 |
| rad8               | 1.66166e-08 | 1.000000 | 1.66166e-08 | 1.000000 |
| rad45              | 1.04533e-08 | 1.000000 | 1.04533e-08 | 1.000000 |
| PAH9+H             | 6.26073e-09 | 1.000000 | 6.26073e-09 | 1.000000 |
| Phenyl+Allene      | 6.24462e-09 | 1.000000 | 0.000000    | 1.000000 |
| rad15              | 5.72741e-09 | 1.000000 | 5.72741e-09 | 1.000000 |
| rad35              | 3.27548e-09 | 1.000000 | 3.27548e-09 | 1.000000 |
| rad38              | 1.62104e-09 | 1.000000 | 1.62104e-09 | 1.000000 |
| rad33              | 7.12709e-10 | 1.000000 | 7.12709e-10 | 1.000000 |
| rad36              | 6.49516e-10 | 1.000000 | 6.49516e-10 | 1.000000 |
| PAH7+H             | 4.96059e-10 | 1.000000 | 4.96059e-10 | 1.000000 |
| rad22              | 4.43806e-10 | 1.000000 | 4.43806e-10 | 1.000000 |
| rad14              | 3.43020e-10 | 1.000000 | 3.43020e-10 | 1.000000 |
| rad25              | 2.70863e-10 | 1.000000 | 2.70863e-10 | 1.000000 |
| rad27              | 2.42259e-10 | 1.000000 | 2.42259e-10 | 1.000000 |
| rad12              | 5.13224e-11 | 1.000000 | 5.13224e-11 | 1.000000 |
| rad39              | 5.11733e-11 | 1.000000 | 5.11733e-11 | 1.000000 |
| rad46              | 1.10641e-11 | 1.000000 | 1.10641e-11 | 1.000000 |
| rad60syn           | 2.88876e-13 | 1.000000 | 2.88876e-13 | 1.000000 |
| rad60anti          | 1.16681e-14 | 1.000000 | 1.16681e-14 | 1.000000 |
| rad31              | 8.17409e-15 | 1.000000 | 8.17409e-15 | 1.000000 |

|               |             |          |             |          |
|---------------|-------------|----------|-------------|----------|
| PhCH2CCH+H    | 6.67553e-15 | 1.000000 | 6.67553e-15 | 1.000000 |
| rad20         | 4.70388e-15 | 1.000000 | 4.70388e-15 | 1.000000 |
| rad21         | 3.23803e-15 | 1.000000 | 3.23803e-15 | 1.000000 |
| rad18         | 9.71856e-16 | 1.000000 | 9.71856e-16 | 1.000000 |
| rad37         | 8.39180e-16 | 1.000000 | 8.39180e-16 | 1.000000 |
| rad24         | 9.28638e-17 | 1.000000 | 9.28638e-17 | 1.000000 |
| rad5          | 2.48742e-18 | 1.000000 | 2.48742e-18 | 1.000000 |
| PAH3+H        | 3.23850e-22 | 1.000000 | 3.23850e-22 | 1.000000 |
| rad59         | 1.58211e-22 | 1.000000 | 1.58211e-22 | 1.000000 |
| rad50         | 2.57210e-23 | 1.000000 | 2.57210e-23 | 1.000000 |
| rad19syn      | 1.52801e-27 | 1.000000 | 1.52801e-27 | 1.000000 |
| rad54         | 3.96046e-31 | 1.000000 | 3.96046e-31 | 1.000000 |
| PAH10+CH3     | 2.75823e-31 | 1.000000 | 2.75823e-31 | 1.000000 |
| rad52         | 1.04186e-31 | 1.000000 | 1.04186e-31 | 1.000000 |
| rad43         | 6.32791e-32 | 1.000000 | 6.32791e-32 | 1.000000 |
| rad62         | 1.05435e-33 | 1.000000 | 1.05435e-33 | 1.000000 |
| rad51         | 1.09379e-36 | 1.000000 | 1.09379e-36 | 1.000000 |
| rad70         | 5.58012e-38 | 1.000000 | 5.58012e-38 | 1.000000 |
| PhcycC3H3_A+H | 3.35382e-38 | 1.000000 | 3.35382e-38 | 1.000000 |
| rad55         | 1.68882e-38 | 1.000000 | 1.68882e-38 | 1.000000 |
| rad65         | 1.13715e-40 | 1.000000 | 1.13715e-40 | 1.000000 |
| rad58         | 1.46971e-41 | 1.000000 | 1.46971e-41 | 1.000000 |
| PAH1+H        | 2.76571e-42 | 1.000000 | 2.76571e-42 | 1.000000 |
| rad34         | 3.14818e-44 | 1.000000 | 3.14818e-44 | 1.000000 |
| rad42         | 9.19643e-48 | 1.000000 | 9.19643e-48 | 1.000000 |
| rad41         | 1.43034e-48 | 1.000000 | 1.43034e-48 | 1.000000 |
| rad47         | 3.55685e-49 | 1.000000 | 3.55685e-49 | 1.000000 |

0.100000000 Pa, 70.0000000 K

| Rate constant      | True (fraction) |            | Effective (fraction) |            |
|--------------------|-----------------|------------|----------------------|------------|
| Total              | 1.17336e-24     | (1.00 )    | 1.17336e-24          | (1.00 )    |
| Formation of rad11 | 1.16857e-24     | (0.996 )   | 1.16857e-24          | (0.996 )   |
| Formation of rad6  | 4.79505e-27     | (0.00409 ) | 4.79505e-27          | (0.00409 ) |
| H-abstraction      | 5.89821e-31     | (5.03e-07) | 5.89821e-31          | (5.03e-07) |

  

| species            | PYtrue      | Cumul    | PYeffective | Cumul    |
|--------------------|-------------|----------|-------------|----------|
| rad6               | 0.927694    | 0.927694 | 0.927694    | 0.927694 |
| Indene+H           | 0.0709458   | 0.998639 | 0.0709458   | 0.998639 |
| C2H2+PhCH2         | 0.000615461 | 0.999255 | 0.000615461 | 0.999255 |
| rad2               | 0.000466150 | 0.999721 | 0.000466150 | 0.999721 |
| rad7               | 0.000110769 | 0.999832 | 0.000110769 | 0.999832 |
| rad28              | 3.71761e-05 | 0.999869 | 3.71761e-05 | 0.999869 |
| rad11              | 3.09857e-05 | 0.999900 | 3.09857e-05 | 0.999900 |
| rad1               | 2.97049e-05 | 0.999930 | 2.97049e-05 | 0.999930 |
| rad10              | 2.89987e-05 | 0.999959 | 2.89987e-05 | 0.999959 |
| PhCCH+CH3          | 1.33049e-05 | 0.999972 | 1.33049e-05 | 0.999972 |
| PhCHCCH2+H         | 9.18359e-06 | 0.999981 | 9.18359e-06 | 0.999981 |
| rad26              | 7.14831e-06 | 0.999988 | 7.14831e-06 | 0.999988 |
| rad3               | 4.35806e-06 | 0.999993 | 4.35806e-06 | 0.999993 |
| PhCCCH3+H          | 3.22679e-06 | 0.999996 | 3.22679e-06 | 0.999996 |
| rad4               | 2.20784e-06 | 0.999998 | 2.20784e-06 | 0.999998 |
| Benzene+2-propynyl | 5.02676e-07 | 0.999998 | 5.02676e-07 | 0.999998 |
| rad23              | 4.36547e-07 | 0.999999 | 4.36547e-07 | 0.999999 |
| rad13              | 3.95400e-07 | 0.999999 | 3.95400e-07 | 0.999999 |
| rad9               | 2.28350e-07 | 1.000000 | 2.28350e-07 | 1.000000 |
| Ph+MeAc            | 4.67286e-08 | 1.000000 | 4.67286e-08 | 1.000000 |
| rad30              | 3.36295e-08 | 1.000000 | 3.36295e-08 | 1.000000 |
| rad8               | 2.58734e-08 | 1.000000 | 2.58734e-08 | 1.000000 |
| Phenyl+Allene      | 9.84668e-09 | 1.000000 | 0.000000    | 1.000000 |
| rad45              | 7.64152e-09 | 1.000000 | 7.64152e-09 | 1.000000 |
| PAH9+H             | 6.74132e-09 | 1.000000 | 6.74132e-09 | 1.000000 |
| rad15              | 6.15588e-09 | 1.000000 | 6.15588e-09 | 1.000000 |
| rad35              | 3.51148e-09 | 1.000000 | 3.51148e-09 | 1.000000 |
| rad38              | 1.75172e-09 | 1.000000 | 1.75172e-09 | 1.000000 |
| PAH7+H             | 8.86149e-10 | 1.000000 | 8.86149e-10 | 1.000000 |
| rad33              | 7.12025e-10 | 1.000000 | 7.12025e-10 | 1.000000 |
| rad36              | 4.74435e-10 | 1.000000 | 4.74435e-10 | 1.000000 |
| rad14              | 3.62292e-10 | 1.000000 | 3.62292e-10 | 1.000000 |
| rad22              | 3.21728e-10 | 1.000000 | 3.21728e-10 | 1.000000 |
| rad27              | 2.71061e-10 | 1.000000 | 2.71061e-10 | 1.000000 |
| rad25              | 2.67669e-10 | 1.000000 | 2.67669e-10 | 1.000000 |
| rad12              | 1.06132e-10 | 1.000000 | 1.06132e-10 | 1.000000 |
| rad39              | 9.71225e-11 | 1.000000 | 9.71225e-11 | 1.000000 |
| rad46              | 1.23187e-11 | 1.000000 | 1.23187e-11 | 1.000000 |
| rad60syn           | 3.51777e-13 | 1.000000 | 3.51777e-13 | 1.000000 |
| PhCH2CCH+H         | 2.80515e-14 | 1.000000 | 2.80515e-14 | 1.000000 |
| rad60anti          | 2.50003e-14 | 1.000000 | 2.50003e-14 | 1.000000 |

|               |             |          |             |          |
|---------------|-------------|----------|-------------|----------|
| rad31         | 9.24471e-15 | 1.000000 | 9.24471e-15 | 1.000000 |
| rad20         | 4.38646e-15 | 1.000000 | 4.38646e-15 | 1.000000 |
| rad37         | 3.47868e-15 | 1.000000 | 3.47868e-15 | 1.000000 |
| rad21         | 3.03925e-15 | 1.000000 | 3.03925e-15 | 1.000000 |
| rad18         | 7.46061e-16 | 1.000000 | 7.46061e-16 | 1.000000 |
| rad24         | 6.91647e-17 | 1.000000 | 6.91647e-17 | 1.000000 |
| rad5          | 1.02334e-17 | 1.000000 | 1.02334e-17 | 1.000000 |
| PAH3+H        | 1.36552e-21 | 1.000000 | 1.36552e-21 | 1.000000 |
| rad59         | 6.65968e-22 | 1.000000 | 6.65968e-22 | 1.000000 |
| rad50         | 1.07663e-22 | 1.000000 | 1.07663e-22 | 1.000000 |
| rad19syn      | 6.87187e-27 | 1.000000 | 6.87187e-27 | 1.000000 |
| rad54         | 1.77812e-30 | 1.000000 | 1.77812e-30 | 1.000000 |
| PAH10+CH3     | 1.24396e-30 | 1.000000 | 1.24396e-30 | 1.000000 |
| rad52         | 4.67991e-31 | 1.000000 | 4.67991e-31 | 1.000000 |
| rad43         | 2.85472e-31 | 1.000000 | 2.85472e-31 | 1.000000 |
| rad62         | 4.69234e-33 | 1.000000 | 4.69234e-33 | 1.000000 |
| rad51         | 4.86246e-36 | 1.000000 | 4.86246e-36 | 1.000000 |
| rad70         | 2.34974e-37 | 1.000000 | 2.34974e-37 | 1.000000 |
| PhcycC3H3_A+H | 1.40091e-37 | 1.000000 | 1.40091e-37 | 1.000000 |
| rad55         | 7.07316e-38 | 1.000000 | 7.07316e-38 | 1.000000 |
| rad65         | 4.89001e-40 | 1.000000 | 4.89001e-40 | 1.000000 |
| rad58         | 6.10597e-41 | 1.000000 | 6.10597e-41 | 1.000000 |
| PAH1+H        | 1.06955e-41 | 1.000000 | 1.06955e-41 | 1.000000 |
| rad34         | 1.19386e-43 | 1.000000 | 1.19386e-43 | 1.000000 |
| rad42         | 3.30926e-47 | 1.000000 | 3.30926e-47 | 1.000000 |
| rad41         | 5.11770e-48 | 1.000000 | 5.11770e-48 | 1.000000 |
| rad47         | 1.20830e-48 | 1.000000 | 1.20830e-48 | 1.000000 |

0.100000000 Pa, 80.0000000 K

| Rate constant      | True (fraction) |            | Effective (fraction) |            |
|--------------------|-----------------|------------|----------------------|------------|
| Total              | 2.68112e-23     | (1.00 )    | 2.68112e-23          | (1.00 )    |
| Formation of rad11 | 2.65890e-23     | (0.992 )   | 2.65890e-23          | (0.992 )   |
| Formation of rad6  | 2.22189e-25     | (0.00829 ) | 2.22189e-25          | (0.00829 ) |
| H-abstraction      | 1.05871e-28     | (3.95e-06) | 1.05871e-28          | (3.95e-06) |

  

| species            | PYtrue      | Cumul    | PYeffective | Cumul    |
|--------------------|-------------|----------|-------------|----------|
| rad6               | 0.924873    | 0.924873 | 0.924873    | 0.924873 |
| Indene+H           | 0.0736573   | 0.998531 | 0.0736573   | 0.998531 |
| C2H2+PhCH2         | 0.000652578 | 0.999183 | 0.000652578 | 0.999183 |
| rad2               | 0.000511352 | 0.999695 | 0.000511352 | 0.999695 |
| rad7               | 0.000108505 | 0.999803 | 0.000108505 | 0.999803 |
| rad28              | 4.54234e-05 | 0.999849 | 4.54234e-05 | 0.999849 |
| rad1               | 3.26763e-05 | 0.999881 | 3.26763e-05 | 0.999881 |
| rad10              | 3.15819e-05 | 0.999913 | 3.15819e-05 | 0.999913 |
| rad11              | 3.01776e-05 | 0.999943 | 3.01776e-05 | 0.999943 |
| PhCCH+CH3          | 1.82301e-05 | 0.999961 | 1.82301e-05 | 0.999961 |
| PhCHCCH2+H         | 1.19822e-05 | 0.999973 | 1.19822e-05 | 0.999973 |
| rad26              | 9.65651e-06 | 0.999983 | 9.65651e-06 | 0.999983 |
| PhCCCH3+H          | 4.72793e-06 | 0.999988 | 4.72793e-06 | 0.999988 |
| rad3               | 4.57352e-06 | 0.999992 | 4.57352e-06 | 0.999992 |
| Benzene+2-propynyl | 3.94877e-06 | 0.999996 | 3.94877e-06 | 0.999996 |
| rad4               | 2.31865e-06 | 0.999998 | 2.31865e-06 | 0.999998 |
| rad13              | 3.92590e-07 | 0.999999 | 3.92590e-07 | 0.999999 |
| rad23              | 3.43302e-07 | 0.999999 | 3.43302e-07 | 0.999999 |
| rad9               | 2.56812e-07 | 0.999999 | 2.56812e-07 | 0.999999 |
| Ph+MeAc            | 8.00196e-08 | 0.999999 | 8.00196e-08 | 0.999999 |
| rad8               | 3.88887e-08 | 1.000000 | 3.88887e-08 | 1.000000 |
| rad30              | 3.60203e-08 | 1.000000 | 3.60203e-08 | 1.000000 |
| Phenyl+Allene      | 1.51157e-08 | 1.000000 | 0.000000    | 1.000000 |
| PAH9+H             | 7.28174e-09 | 1.000000 | 7.28174e-09 | 1.000000 |
| rad15              | 6.64739e-09 | 1.000000 | 6.64739e-09 | 1.000000 |
| rad45              | 5.87094e-09 | 1.000000 | 5.87094e-09 | 1.000000 |
| rad35              | 3.77495e-09 | 1.000000 | 3.77495e-09 | 1.000000 |
| rad38              | 1.89971e-09 | 1.000000 | 1.89971e-09 | 1.000000 |
| PAH7+H             | 1.55655e-09 | 1.000000 | 1.55655e-09 | 1.000000 |
| rad33              | 7.11586e-10 | 1.000000 | 7.11586e-10 | 1.000000 |
| rad14              | 3.79491e-10 | 1.000000 | 3.79491e-10 | 1.000000 |
| rad36              | 3.64257e-10 | 1.000000 | 3.64257e-10 | 1.000000 |
| rad27              | 2.96424e-10 | 1.000000 | 2.96424e-10 | 1.000000 |
| rad25              | 2.65311e-10 | 1.000000 | 2.65311e-10 | 1.000000 |
| rad22              | 2.45754e-10 | 1.000000 | 2.45754e-10 | 1.000000 |
| rad12              | 2.09524e-10 | 1.000000 | 2.09524e-10 | 1.000000 |
| rad39              | 1.82399e-10 | 1.000000 | 1.82399e-10 | 1.000000 |
| rad46              | 1.38043e-11 | 1.000000 | 1.38043e-11 | 1.000000 |
| rad60syn           | 4.37263e-13 | 1.000000 | 4.37263e-13 | 1.000000 |
| PhCH2CCH+H         | 1.52338e-13 | 1.000000 | 1.52338e-13 | 1.000000 |
| rad60anti          | 4.55937e-14 | 1.000000 | 4.55937e-14 | 1.000000 |

|               |             |          |             |          |
|---------------|-------------|----------|-------------|----------|
| rad37         | 1.70102e-14 | 1.000000 | 1.70102e-14 | 1.000000 |
| rad31         | 1.02490e-14 | 1.000000 | 1.02490e-14 | 1.000000 |
| rad20         | 4.21178e-15 | 1.000000 | 4.21178e-15 | 1.000000 |
| rad21         | 2.93495e-15 | 1.000000 | 2.93495e-15 | 1.000000 |
| rad18         | 6.08774e-16 | 1.000000 | 6.08774e-16 | 1.000000 |
| rad5          | 5.48717e-17 | 1.000000 | 5.48717e-17 | 1.000000 |
| rad24         | 5.40569e-17 | 1.000000 | 5.40569e-17 | 1.000000 |
| PAH3+H        | 8.55964e-21 | 1.000000 | 8.55964e-21 | 1.000000 |
| rad59         | 4.15949e-21 | 1.000000 | 4.15949e-21 | 1.000000 |
| rad50         | 6.57873e-22 | 1.000000 | 6.57873e-22 | 1.000000 |
| rad19syn      | 4.77375e-26 | 1.000000 | 4.77375e-26 | 1.000000 |
| rad54         | 1.24237e-29 | 1.000000 | 1.24237e-29 | 1.000000 |
| PAH10+CH3     | 8.74089e-30 | 1.000000 | 8.74089e-30 | 1.000000 |
| rad52         | 3.24293e-30 | 1.000000 | 3.24293e-30 | 1.000000 |
| rad43         | 2.00668e-30 | 1.000000 | 2.00668e-30 | 1.000000 |
| rad62         | 3.27143e-32 | 1.000000 | 3.27143e-32 | 1.000000 |
| rad51         | 3.38357e-35 | 1.000000 | 3.38357e-35 | 1.000000 |
| rad70         | 1.57946e-36 | 1.000000 | 1.57946e-36 | 1.000000 |
| PhcycC3H3_A+H | 9.36595e-37 | 1.000000 | 9.36595e-37 | 1.000000 |
| rad55         | 4.73718e-37 | 1.000000 | 4.73718e-37 | 1.000000 |
| rad65         | 3.33361e-39 | 1.000000 | 3.33361e-39 | 1.000000 |
| rad58         | 4.06736e-40 | 1.000000 | 4.06736e-40 | 1.000000 |
| PAH1+H        | 6.79010e-41 | 1.000000 | 6.79010e-41 | 1.000000 |
| rad34         | 7.48344e-43 | 1.000000 | 7.48344e-43 | 1.000000 |
| rad42         | 2.00896e-46 | 1.000000 | 2.00896e-46 | 1.000000 |
| rad41         | 3.10458e-47 | 1.000000 | 3.10458e-47 | 1.000000 |
| rad47         | 6.84357e-48 | 1.000000 | 6.84357e-48 | 1.000000 |

0.100000000 Pa, 90.0000000 K

| Rate constant      | True (fraction) |            | Effective (fraction) |            |
|--------------------|-----------------|------------|----------------------|------------|
| Total              | 3.08379e-22     | (1.00 )    | 3.08379e-22          | (1.00 )    |
| Formation of rad11 | 3.03962e-22     | (0.986 )   | 3.03962e-22          | (0.986 )   |
| Formation of rad6  | 4.41076e-24     | (0.0143 )  | 4.41076e-24          | (0.0143 )  |
| H-abstraction      | 5.92916e-27     | (1.92e-05) | 5.92916e-27          | (1.92e-05) |

  

| species            | PYtrue      | Cumul    | PYeffective | Cumul    |
|--------------------|-------------|----------|-------------|----------|
| rad6               | 0.921865    | 0.921865 | 0.921865    | 0.921865 |
| Indene+H           | 0.0765427   | 0.998408 | 0.0765427   | 0.998408 |
| C2H2+PhCH2         | 0.000694262 | 0.999102 | 0.000694262 | 0.999102 |
| rad2               | 0.000550867 | 0.999653 | 0.000550867 | 0.999653 |
| rad7               | 0.000106567 | 0.999760 | 0.000106567 | 0.999760 |
| rad28              | 5.47275e-05 | 0.999814 | 5.47275e-05 | 0.999814 |
| rad1               | 3.53097e-05 | 0.999850 | 3.53097e-05 | 0.999850 |
| rad10              | 3.38163e-05 | 0.999884 | 3.38163e-05 | 0.999884 |
| rad11              | 2.94968e-05 | 0.999913 | 2.94968e-05 | 0.999913 |
| PhCCH+CH3          | 2.47038e-05 | 0.999938 | 2.47038e-05 | 0.999938 |
| Benzene+2-propynyl | 1.92269e-05 | 0.999957 | 1.92269e-05 | 0.999957 |
| PhCHCCH2+H         | 1.56614e-05 | 0.999973 | 1.56614e-05 | 0.999973 |
| rad26              | 1.25886e-05 | 0.999985 | 1.25886e-05 | 0.999985 |
| PhCCCH3+H          | 6.76183e-06 | 0.999992 | 6.76183e-06 | 0.999992 |
| rad3               | 4.75954e-06 | 0.999997 | 4.75954e-06 | 0.999997 |
| rad4               | 2.41489e-06 | 0.999999 | 2.41489e-06 | 0.999999 |
| rad13              | 3.90297e-07 | 1.000000 | 3.90297e-07 | 1.000000 |
| rad9               | 2.91495e-07 | 1.000000 | 2.91495e-07 | 1.000000 |
| rad23              | 2.78628e-07 | 1.000000 | 2.78628e-07 | 1.000000 |
| Ph+MeAc            | 1.35015e-07 | 1.000000 | 1.35015e-07 | 1.000000 |
| rad8               | 5.71855e-08 | 1.000000 | 5.71855e-08 | 1.000000 |
| rad30              | 3.87533e-08 | 1.000000 | 3.87533e-08 | 1.000000 |
| Phenyl+Allene      | 2.28249e-08 | 1.000000 | 0.000000    | 1.000000 |
| PAH9+H             | 7.89967e-09 | 1.000000 | 7.89967e-09 | 1.000000 |
| rad15              | 7.21640e-09 | 1.000000 | 7.21640e-09 | 1.000000 |
| rad45              | 4.67290e-09 | 1.000000 | 4.67290e-09 | 1.000000 |
| rad35              | 4.07393e-09 | 1.000000 | 4.07393e-09 | 1.000000 |
| PAH7+H             | 2.72327e-09 | 1.000000 | 2.72327e-09 | 1.000000 |
| rad38              | 2.07009e-09 | 1.000000 | 2.07009e-09 | 1.000000 |
| rad33              | 7.11265e-10 | 1.000000 | 7.11265e-10 | 1.000000 |
| rad12              | 4.00903e-10 | 1.000000 | 4.00903e-10 | 1.000000 |
| rad14              | 3.94717e-10 | 1.000000 | 3.94717e-10 | 1.000000 |
| rad39              | 3.42231e-10 | 1.000000 | 3.42231e-10 | 1.000000 |
| rad27              | 3.18762e-10 | 1.000000 | 3.18762e-10 | 1.000000 |
| rad36              | 2.89765e-10 | 1.000000 | 2.89765e-10 | 1.000000 |
| rad25              | 2.63464e-10 | 1.000000 | 2.63464e-10 | 1.000000 |
| rad22              | 1.94798e-10 | 1.000000 | 1.94798e-10 | 1.000000 |
| rad46              | 1.55949e-11 | 1.000000 | 1.55949e-11 | 1.000000 |
| PhCH2CCH+H         | 8.05240e-13 | 1.000000 | 8.05240e-13 | 1.000000 |
| rad60syn           | 5.52941e-13 | 1.000000 | 5.52941e-13 | 1.000000 |
| rad37              | 8.45395e-14 | 1.000000 | 8.45395e-14 | 1.000000 |



|               |             |         |             |         |
|---------------|-------------|---------|-------------|---------|
| rad60anti     | 7.55980e-14 | 1.00000 | 7.55980e-14 | 1.00000 |
| rad31         | 1.12013e-14 | 1.00000 | 1.12013e-14 | 1.00000 |
| rad20         | 4.12631e-15 | 1.00000 | 4.12631e-15 | 1.00000 |
| rad21         | 2.89023e-15 | 1.00000 | 2.89023e-15 | 1.00000 |
| rad18         | 5.18650e-16 | 1.00000 | 5.18650e-16 | 1.00000 |
| rad5          | 3.23304e-16 | 1.00000 | 3.23304e-16 | 1.00000 |
| rad24         | 4.37186e-17 | 1.00000 | 4.37186e-17 | 1.00000 |
| PAH3+H        | 7.05048e-20 | 1.00000 | 7.05048e-20 | 1.00000 |
| rad59         | 3.37191e-20 | 1.00000 | 3.37191e-20 | 1.00000 |
| rad50         | 4.91993e-21 | 1.00000 | 4.91993e-21 | 1.00000 |
| rad19syn      | 6.06691e-25 | 1.00000 | 6.06691e-25 | 1.00000 |
| rad54         | 1.62877e-28 | 1.00000 | 1.62877e-28 | 1.00000 |
| PAH10+CH3     | 1.14795e-28 | 1.00000 | 1.14795e-28 | 1.00000 |
| rad52         | 4.07953e-29 | 1.00000 | 4.07953e-29 | 1.00000 |
| rad43         | 2.64309e-29 | 1.00000 | 2.64309e-29 | 1.00000 |
| rad62         | 4.27957e-31 | 1.00000 | 4.27957e-31 | 1.00000 |
| rad51         | 4.41540e-34 | 1.00000 | 4.41540e-34 | 1.00000 |
| rad70         | 2.02233e-35 | 1.00000 | 2.02233e-35 | 1.00000 |
| PhcycC3H3_A+H | 1.19524e-35 | 1.00000 | 1.19524e-35 | 1.00000 |
| rad55         | 6.05189e-36 | 1.00000 | 6.05189e-36 | 1.00000 |
| rad65         | 4.30533e-38 | 1.00000 | 4.30533e-38 | 1.00000 |
| rad58         | 5.17890e-39 | 1.00000 | 5.17890e-39 | 1.00000 |
| PAH1+H        | 8.39260e-40 | 1.00000 | 8.39260e-40 | 1.00000 |
| rad34         | 9.18043e-42 | 1.00000 | 9.18043e-42 | 1.00000 |
| rad42         | 2.42562e-45 | 1.00000 | 2.42562e-45 | 1.00000 |
| rad41         | 3.76710e-46 | 1.00000 | 3.76710e-46 | 1.00000 |
| rad47         | 7.62721e-47 | 1.00000 | 7.62721e-47 | 1.00000 |

0.100000000 Pa, 100.000000 K

| Rate constant      | True (fraction)        | Effective (fraction)   |
|--------------------|------------------------|------------------------|
| Total              | 2.19347e-21 (1.00 )    | 2.19347e-21 (1.00 )    |
| Formation of rad11 | 2.14498e-21 (0.978 )   | 2.14497e-21 (0.978 )   |
| Formation of rad6  | 4.83503e-23 (0.0220 )  | 4.83503e-23 (0.0220 )  |
| H-abstraction      | 1.47101e-25 (6.71e-05) | 1.47101e-25 (6.71e-05) |

| species            | PYtrue      | Cumul    | PYeffective | Cumul    |
|--------------------|-------------|----------|-------------|----------|
| rad6               | 0.918579    | 0.918579 | 0.918579    | 0.918579 |
| Indene+H           | 0.0796657   | 0.998245 | 0.0796657   | 0.998245 |
| C2H2+PhCH2         | 0.000741747 | 0.998987 | 0.000741747 | 0.998987 |
| rad2               | 0.000585211 | 0.999572 | 0.000585211 | 0.999572 |
| rad7               | 0.000104853 | 0.999677 | 0.000104853 | 0.999677 |
| Benzene+2-propynyl | 6.70630e-05 | 0.999744 | 6.70630e-05 | 0.999744 |
| rad28              | 6.52834e-05 | 0.999809 | 6.52835e-05 | 0.999809 |
| rad1               | 3.76375e-05 | 0.999847 | 3.76375e-05 | 0.999847 |
| rad10              | 3.57380e-05 | 0.999883 | 3.57380e-05 | 0.999883 |
| PhCCH+CH3          | 3.32721e-05 | 0.999916 | 3.32721e-05 | 0.999916 |
| rad11              | 2.89046e-05 | 0.999945 | 2.89046e-05 | 0.999945 |
| PhCHCCH2+H         | 2.05099e-05 | 0.999965 | 2.05099e-05 | 0.999965 |
| rad26              | 1.59567e-05 | 0.999981 | 1.59567e-05 | 0.999981 |
| PhCCCH3+H          | 9.51458e-06 | 0.999991 | 9.51458e-06 | 0.999991 |
| rad3               | 4.91828e-06 | 0.999996 | 4.91828e-06 | 0.999996 |
| rad4               | 2.49763e-06 | 0.999998 | 2.49763e-06 | 0.999998 |
| rad13              | 3.88313e-07 | 0.999999 | 3.88313e-07 | 0.999999 |
| rad9               | 3.34369e-07 | 0.999999 | 3.34369e-07 | 0.999999 |
| rad23              | 2.31574e-07 | 0.999999 | 2.31574e-07 | 0.999999 |
| Ph+MeAc            | 2.25104e-07 | 0.999999 | 2.25104e-07 | 0.999999 |
| rad8               | 8.28777e-08 | 0.999999 | 8.28777e-08 | 0.999999 |
| rad30              | 4.19220e-08 | 0.999999 | 4.19220e-08 | 0.999999 |
| Phenyl+Allene      | 3.41501e-08 | 0.999999 | 0.00000     | 0.999999 |
| PAH9+H             | 8.61931e-09 | 1.000000 | 8.61931e-09 | 0.999999 |
| rad15              | 7.88450e-09 | 1.000000 | 7.88450e-09 | 0.999999 |
| PAH7+H             | 4.76589e-09 | 1.000000 | 4.76589e-09 | 0.999999 |
| rad35              | 4.41942e-09 | 1.000000 | 4.41942e-09 | 0.999999 |
| rad45              | 3.81963e-09 | 1.000000 | 3.81963e-09 | 0.999999 |
| rad38              | 2.26985e-09 | 1.000000 | 2.26985e-09 | 0.999999 |
| rad12              | 7.47117e-10 | 1.000000 | 7.47117e-10 | 0.999999 |
| rad33              | 7.10942e-10 | 1.000000 | 7.10942e-10 | 0.999999 |
| rad39              | 6.41942e-10 | 1.000000 | 6.41942e-10 | 0.999999 |
| rad14              | 4.08055e-10 | 1.000000 | 4.08055e-10 | 0.999999 |
| rad27              | 3.38357e-10 | 1.000000 | 3.38357e-10 | 0.999999 |
| rad25              | 2.61928e-10 | 1.000000 | 2.61928e-10 | 0.999999 |
| rad36              | 2.36759e-10 | 1.000000 | 2.36759e-10 | 0.999999 |
| rad22              | 1.58744e-10 | 1.000000 | 1.58744e-10 | 0.999999 |
| rad46              | 1.77950e-11 | 1.000000 | 1.77950e-11 | 0.999999 |
| PhCH2CCH+H         | 3.61206e-12 | 1.000000 | 3.61206e-12 | 0.999999 |
| rad60syn           | 7.11370e-13 | 1.000000 | 7.11370e-13 | 0.999999 |
| rad37              | 3.78276e-13 | 1.000000 | 3.78276e-13 | 0.999999 |

|               |             |          |             |          |
|---------------|-------------|----------|-------------|----------|
| rad60anti     | 1.18621e-13 | 1.000000 | 1.18621e-13 | 0.999999 |
| rad31         | 1.21125e-14 | 1.000000 | 1.21125e-14 | 0.999999 |
| rad20         | 4.10212e-15 | 1.000000 | 4.10212e-15 | 0.999999 |
| rad21         | 2.88695e-15 | 1.000000 | 2.88695e-15 | 0.999999 |
| rad5          | 1.76863e-15 | 1.000000 | 1.76863e-15 | 0.999999 |
| rad18         | 4.56209e-16 | 1.000000 | 4.56209e-16 | 0.999999 |
| rad24         | 3.62787e-17 | 1.000000 | 3.62787e-17 | 0.999999 |
| PAH3+H        | 5.71262e-19 | 1.000000 | 5.71262e-19 | 0.999999 |
| rad59         | 2.64660e-19 | 1.000000 | 2.64660e-19 | 0.999999 |
| rad50         | 3.44971e-20 | 1.000000 | 3.44971e-20 | 0.999999 |
| rad19syn      | 1.50719e-23 | 1.000000 | 1.50719e-23 | 0.999999 |
| rad54         | 5.59055e-27 | 1.000000 | 5.59055e-27 | 0.999999 |
| PAH10+CH3     | 3.82500e-27 | 1.000000 | 3.82500e-27 | 0.999999 |
| rad52         | 9.58833e-28 | 1.000000 | 9.58833e-28 | 0.999999 |
| rad43         | 8.99795e-28 | 1.000000 | 8.99795e-28 | 0.999999 |
| rad62         | 1.68587e-29 | 1.000000 | 1.68587e-29 | 0.999999 |
| rad51         | 1.74460e-32 | 1.000000 | 1.74460e-32 | 0.999999 |
| rad70         | 7.57799e-34 | 1.000000 | 7.57799e-34 | 0.999999 |
| PhcycC3H3_A+H | 4.47140e-34 | 1.000000 | 4.47140e-34 | 0.999999 |
| rad55         | 2.26525e-34 | 1.000000 | 2.26525e-34 | 0.999999 |
| rad65         | 1.62006e-36 | 1.000000 | 1.62006e-36 | 0.999999 |
| rad58         | 1.93526e-37 | 1.000000 | 1.93526e-37 | 0.999999 |
| PAH1+H        | 3.08904e-38 | 1.000000 | 3.08904e-38 | 0.999999 |
| rad34         | 3.36779e-40 | 1.000000 | 3.36779e-40 | 0.999999 |
| rad42         | 8.87961e-44 | 1.000000 | 8.87961e-44 | 0.999999 |
| rad41         | 1.39677e-44 | 1.000000 | 1.39677e-44 | 0.999999 |
| rad47         | 2.55138e-45 | 1.000000 | 2.55138e-45 | 0.999999 |

0.100000000 Pa, 110.000000 K

| Rate constant      | True (fraction)        | Effective (fraction)   |
|--------------------|------------------------|------------------------|
| Total              | 1.09987e-20 (1.00 )    | 1.09987e-20 (1.00 )    |
| Formation of rad11 | 1.06527e-20 (0.969 )   | 1.06527e-20 (0.969 )   |
| Formation of rad6  | 3.44008e-22 (0.0313 )  | 3.44008e-22 (0.0313 )  |
| H-abstraction      | 2.02040e-24 (0.000184) | 2.02040e-24 (0.000184) |

| species            | PYtrue      | Cumul    | PYeffective | Cumul    |
|--------------------|-------------|----------|-------------|----------|
| rad6               | 0.914902    | 0.914902 | 0.914902    | 0.914902 |
| Indene+H           | 0.0831035   | 0.998005 | 0.0831035   | 0.998005 |
| C2H2+PhCH2         | 0.000796642 | 0.998802 | 0.000796642 | 0.998802 |
| rad2               | 0.000614744 | 0.999417 | 0.000614744 | 0.999417 |
| Benzene+2-propynyl | 0.000183695 | 0.999601 | 0.000183695 | 0.999601 |
| rad7               | 0.000103290 | 0.999704 | 0.000103290 | 0.999704 |
| rad28              | 7.72709e-05 | 0.999781 | 7.72710e-05 | 0.999781 |
| PhCCH+CH3          | 4.46513e-05 | 0.999826 | 4.46513e-05 | 0.999826 |
| rad1               | 3.96822e-05 | 0.999865 | 3.96822e-05 | 0.999865 |
| rad10              | 3.73720e-05 | 0.999903 | 3.73720e-05 | 0.999903 |
| rad11              | 2.83739e-05 | 0.999931 | 2.83739e-05 | 0.999931 |
| PhCHCCH2+H         | 2.69034e-05 | 0.999958 | 2.69034e-05 | 0.999958 |
| rad26              | 1.97532e-05 | 0.999978 | 1.97532e-05 | 0.999978 |
| PhCCCH3+H          | 1.32298e-05 | 0.999991 | 1.32298e-05 | 0.999991 |
| rad3               | 5.05123e-06 | 0.999996 | 5.05123e-06 | 0.999996 |
| rad4               | 2.56765e-06 | 0.999999 | 2.56765e-06 | 0.999999 |
| rad9               | 3.88161e-07 | 0.999999 | 3.88161e-07 | 0.999999 |
| rad13              | 3.86480e-07 | 0.999999 | 3.86480e-07 | 0.999999 |
| Ph+MeAc            | 3.70799e-07 | 1.000000 | 3.70799e-07 | 1.000000 |
| rad23              | 1.96074e-07 | 1.000000 | 1.96074e-07 | 1.000000 |
| rad8               | 1.18827e-07 | 1.000000 | 1.18827e-07 | 1.000000 |
| Phenyl+Allene      | 5.08727e-08 | 1.000000 | 0.000000    | 1.000000 |
| rad30              | 4.56503e-08 | 1.000000 | 4.56503e-08 | 1.000000 |
| PAH9+H             | 9.47221e-09 | 1.000000 | 9.47221e-09 | 1.000000 |
| rad15              | 8.68056e-09 | 1.000000 | 8.68056e-09 | 1.000000 |
| PAH7+H             | 8.33631e-09 | 1.000000 | 8.33631e-09 | 1.000000 |
| rad35              | 4.82561e-09 | 1.000000 | 4.82561e-09 | 1.000000 |
| rad45              | 3.18776e-09 | 1.000000 | 3.18776e-09 | 1.000000 |
| rad38              | 2.50819e-09 | 1.000000 | 2.50819e-09 | 1.000000 |
| rad12              | 1.35656e-09 | 1.000000 | 1.35656e-09 | 1.000000 |
| rad39              | 1.19943e-09 | 1.000000 | 1.19943e-09 | 1.000000 |
| rad33              | 7.10496e-10 | 1.000000 | 7.10496e-10 | 1.000000 |
| rad14              | 4.19556e-10 | 1.000000 | 4.19556e-10 | 1.000000 |
| rad27              | 3.55404e-10 | 1.000000 | 3.55404e-10 | 1.000000 |
| rad25              | 2.60566e-10 | 1.000000 | 2.60566e-10 | 1.000000 |
| rad36              | 1.97548e-10 | 1.000000 | 1.97548e-10 | 1.000000 |
| rad22              | 1.32178e-10 | 1.000000 | 1.32178e-10 | 1.000000 |
| rad46              | 2.05495e-11 | 1.000000 | 2.05495e-11 | 1.000000 |
| PhCH2CCH+H         | 1.35771e-11 | 1.000000 | 1.35771e-11 | 1.000000 |
| rad37              | 1.45573e-12 | 1.000000 | 1.45573e-12 | 1.000000 |
| rad60syn           | 9.31512e-13 | 1.000000 | 9.31512e-13 | 1.000000 |

|               |             |         |             |         |
|---------------|-------------|---------|-------------|---------|
| rad60anti     | 1.80513e-13 | 1.00000 | 1.80513e-13 | 1.00000 |
| rad31         | 1.29910e-14 | 1.00000 | 1.29910e-14 | 1.00000 |
| rad5          | 8.34352e-15 | 1.00000 | 8.34352e-15 | 1.00000 |
| rad20         | 4.12335e-15 | 1.00000 | 4.12335e-15 | 1.00000 |
| rad21         | 2.91482e-15 | 1.00000 | 2.91482e-15 | 1.00000 |
| rad18         | 4.11227e-16 | 1.00000 | 4.11227e-16 | 1.00000 |
| rad24         | 3.07163e-17 | 1.00000 | 3.07163e-17 | 1.00000 |
| PAH3+H        | 3.83424e-18 | 1.00000 | 3.83424e-18 | 1.00000 |
| rad59         | 1.70570e-18 | 1.00000 | 1.70570e-18 | 1.00000 |
| rad50         | 2.00789e-19 | 1.00000 | 2.00789e-19 | 1.00000 |
| rad19syn      | 4.24336e-22 | 1.00000 | 4.24336e-22 | 1.00000 |
| rad54         | 2.87733e-25 | 1.00000 | 2.87733e-25 | 1.00000 |
| PAH10+CH3     | 1.90304e-25 | 1.00000 | 1.90304e-25 | 1.00000 |
| rad43         | 4.59848e-26 | 1.00000 | 4.59848e-26 | 1.00000 |
| rad52         | 2.46507e-26 | 1.00000 | 2.46507e-26 | 1.00000 |
| rad62         | 1.27810e-27 | 1.00000 | 1.27810e-27 | 1.00000 |
| rad51         | 1.31072e-30 | 1.00000 | 1.31072e-30 | 1.00000 |
| rad70         | 9.18828e-32 | 1.00000 | 9.18828e-32 | 1.00000 |
| PhcycC3H3_A+H | 5.42001e-32 | 1.00000 | 5.42001e-32 | 1.00000 |
| rad55         | 2.74614e-32 | 1.00000 | 2.74614e-32 | 1.00000 |
| rad65         | 2.41858e-34 | 1.00000 | 2.41858e-34 | 1.00000 |
| rad58         | 2.34535e-35 | 1.00000 | 2.34535e-35 | 1.00000 |
| PAH1+H        | 3.73000e-36 | 1.00000 | 3.73000e-36 | 1.00000 |
| rad34         | 4.06781e-38 | 1.00000 | 4.06781e-38 | 1.00000 |
| rad42         | 1.08211e-41 | 1.00000 | 1.08211e-41 | 1.00000 |
| rad41         | 1.73570e-42 | 1.00000 | 1.73570e-42 | 1.00000 |
| rad47         | 2.81705e-43 | 1.00000 | 2.81705e-43 | 1.00000 |

0.100000000 Pa, 120.000000 K

| Rate constant      | True (fraction)        | Effective (fraction)   |
|--------------------|------------------------|------------------------|
| Total              | 4.24245e-20 (1.00 )    | 4.24245e-20 (1.00 )    |
| Formation of rad11 | 4.06372e-20 (0.958 )   | 4.06372e-20 (0.958 )   |
| Formation of rad6  | 1.76944e-21 (0.0417 )  | 1.76944e-21 (0.0417 )  |
| H-abstraction      | 1.78210e-23 (0.000420) | 1.78210e-23 (0.000420) |

| species            | PYtrue      | Cumul    | PYeffective | Cumul    |
|--------------------|-------------|----------|-------------|----------|
| rad6               | 0.910689    | 0.910689 | 0.910689    | 0.910689 |
| Indene+H           | 0.0869426   | 0.997632 | 0.0869426   | 0.997632 |
| C2H2+PhCH2         | 0.000860926 | 0.998493 | 0.000860926 | 0.998493 |
| rad2               | 0.000639731 | 0.999133 | 0.000639731 | 0.999133 |
| Benzene+2-propynyl | 0.000420064 | 0.999553 | 0.000420064 | 0.999553 |
| rad7               | 0.000101821 | 0.999654 | 0.000101821 | 0.999654 |
| rad28              | 9.08355e-05 | 0.999745 | 9.08355e-05 | 0.999745 |
| PhCCH+CH3          | 5.97699e-05 | 0.999805 | 5.97699e-05 | 0.999805 |
| rad1               | 4.14605e-05 | 0.999846 | 4.14605e-05 | 0.999846 |
| rad10              | 3.87367e-05 | 0.999885 | 3.87367e-05 | 0.999885 |
| PhCHCCH2+H         | 3.53222e-05 | 0.999921 | 3.53222e-05 | 0.999921 |
| rad11              | 2.78847e-05 | 0.999948 | 2.78847e-05 | 0.999948 |
| rad26              | 2.39446e-05 | 0.999972 | 2.39446e-05 | 0.999972 |
| PhCCCH3+H          | 1.82213e-05 | 0.999991 | 1.82213e-05 | 0.999991 |
| rad3               | 5.15948e-06 | 0.999996 | 5.15948e-06 | 0.999996 |
| rad4               | 2.62547e-06 | 0.999998 | 2.62547e-06 | 0.999998 |
| Ph+MeAc            | 6.02924e-07 | 0.999999 | 6.02924e-07 | 0.999999 |
| rad9               | 4.56573e-07 | 0.999999 | 4.56573e-07 | 0.999999 |
| rad13              | 3.84666e-07 | 1.000000 | 3.84666e-07 | 1.000000 |
| rad8               | 1.68849e-07 | 1.000000 | 1.68849e-07 | 1.000000 |
| rad23              | 1.68503e-07 | 1.000000 | 1.68503e-07 | 1.000000 |
| Phenyl+Allene      | 7.56966e-08 | 1.000000 | 0.000000    | 1.000000 |
| rad30              | 5.00950e-08 | 1.000000 | 5.00950e-08 | 1.000000 |
| PAH7+H             | 1.45288e-08 | 1.000000 | 1.45288e-08 | 1.000000 |
| PAH9+H             | 1.04987e-08 | 1.000000 | 1.04987e-08 | 1.000000 |
| rad15              | 9.64186e-09 | 1.000000 | 9.64186e-09 | 1.000000 |
| rad35              | 5.31035e-09 | 1.000000 | 5.31035e-09 | 1.000000 |
| rad38              | 2.79700e-09 | 1.000000 | 2.79700e-09 | 1.000000 |
| rad45              | 2.70511e-09 | 1.000000 | 2.70511e-09 | 1.000000 |
| rad12              | 2.39803e-09 | 1.000000 | 2.39803e-09 | 1.000000 |
| rad39              | 2.22191e-09 | 1.000000 | 2.22191e-09 | 1.000000 |
| rad33              | 7.09795e-10 | 1.000000 | 7.09795e-10 | 1.000000 |
| rad14              | 4.29254e-10 | 1.000000 | 4.29254e-10 | 1.000000 |
| rad27              | 3.70037e-10 | 1.000000 | 3.70037e-10 | 1.000000 |
| rad25              | 2.59271e-10 | 1.000000 | 2.59271e-10 | 1.000000 |
| rad36              | 1.67629e-10 | 1.000000 | 1.67629e-10 | 1.000000 |
| rad22              | 1.11961e-10 | 1.000000 | 1.11961e-10 | 1.000000 |
| PhCH2CCH+H         | 4.38195e-11 | 1.000000 | 4.38195e-11 | 1.000000 |
| rad46              | 2.40577e-11 | 1.000000 | 2.40577e-11 | 1.000000 |
| rad37              | 4.81705e-12 | 1.000000 | 4.81705e-12 | 1.000000 |
| rad60syn           | 1.24139e-12 | 1.000000 | 1.24139e-12 | 1.000000 |

|               |             |         |             |         |
|---------------|-------------|---------|-------------|---------|
| rad60anti     | 2.70454e-13 | 1.00000 | 2.70454e-13 | 1.00000 |
| rad5          | 3.36165e-14 | 1.00000 | 3.36165e-14 | 1.00000 |
| rad31         | 1.38444e-14 | 1.00000 | 1.38445e-14 | 1.00000 |
| rad20         | 4.18034e-15 | 1.00000 | 4.18034e-15 | 1.00000 |
| rad21         | 2.96766e-15 | 1.00000 | 2.96766e-15 | 1.00000 |
| rad18         | 3.77881e-16 | 1.00000 | 3.77881e-16 | 1.00000 |
| rad24         | 2.64296e-17 | 1.00000 | 2.64296e-17 | 1.00000 |
| PAH3+H        | 2.06769e-17 | 1.00000 | 2.06769e-17 | 1.00000 |
| rad59         | 8.80434e-18 | 1.00000 | 8.80435e-18 | 1.00000 |
| rad50         | 9.60135e-19 | 1.00000 | 9.60135e-19 | 1.00000 |
| rad19syn      | 8.90294e-21 | 1.00000 | 8.90294e-21 | 1.00000 |
| rad54         | 1.07662e-23 | 1.00000 | 1.07662e-23 | 1.00000 |
| PAH10+CH3     | 7.03719e-24 | 1.00000 | 7.03719e-24 | 1.00000 |
| rad43         | 1.72757e-24 | 1.00000 | 1.72758e-24 | 1.00000 |
| rad52         | 4.73104e-25 | 1.00000 | 4.73104e-25 | 1.00000 |
| rad62         | 7.10669e-26 | 1.00000 | 7.10669e-26 | 1.00000 |
| rad51         | 7.33971e-29 | 1.00000 | 7.33971e-29 | 1.00000 |
| rad70         | 2.70950e-29 | 1.00000 | 2.70950e-29 | 1.00000 |
| PhcycC3H3_A+H | 1.79005e-29 | 1.00000 | 1.79005e-29 | 1.00000 |
| rad55         | 9.21839e-30 | 1.00000 | 9.21839e-30 | 1.00000 |
| rad65         | 3.07241e-32 | 1.00000 | 3.07241e-32 | 1.00000 |
| rad58         | 8.62683e-33 | 1.00000 | 8.62683e-33 | 1.00000 |
| PAH1+H        | 9.71664e-34 | 1.00000 | 9.71664e-34 | 1.00000 |
| rad34         | 1.06358e-35 | 1.00000 | 1.06358e-35 | 1.00000 |
| rad42         | 2.86459e-39 | 1.00000 | 2.86459e-39 | 1.00000 |
| rad41         | 4.65301e-40 | 1.00000 | 4.65301e-40 | 1.00000 |
| rad47         | 6.74033e-41 | 1.00000 | 6.74033e-41 | 1.00000 |

0.100000000 Pa, 130.000000 K

| Rate constant      | True (fraction)        | Effective (fraction)   |
|--------------------|------------------------|------------------------|
| Total              | 1.33719e-19 (1.00 )    | 1.33719e-19 (1.00 )    |
| Formation of rad11 | 1.26517e-19 (0.946 )   | 1.26517e-19 (0.946 )   |
| Formation of rad6  | 7.08974e-21 (0.0530 )  | 7.08974e-21 (0.0530 )  |
| H-abstraction      | 1.11864e-22 (0.000837) | 1.11864e-22 (0.000837) |

| species            | PYtrue      | Cumul    | PYeffective | Cumul    |
|--------------------|-------------|----------|-------------|----------|
| rad6               | 0.905784    | 0.905784 | 0.905784    | 0.905784 |
| Indene+H           | 0.0912762   | 0.997060 | 0.0912762   | 0.997060 |
| C2H2+PhCH2         | 0.000937006 | 0.997997 | 0.000937006 | 0.997997 |
| Benzene+2-propynyl | 0.000836559 | 0.998833 | 0.000836559 | 0.998833 |
| rad2               | 0.000660384 | 0.999494 | 0.000660384 | 0.999494 |
| rad28              | 0.000106070 | 0.999600 | 0.000106070 | 0.999600 |
| rad7               | 0.000100400 | 0.999700 | 0.000100400 | 0.999700 |
| PhCCH+CH3          | 7.98246e-05 | 0.999780 | 7.98246e-05 | 0.999780 |
| PhCHCCH2+H         | 4.63765e-05 | 0.999826 | 4.63765e-05 | 0.999826 |
| rad1               | 4.29853e-05 | 0.999869 | 4.29853e-05 | 0.999869 |
| rad10              | 3.98467e-05 | 0.999909 | 3.98467e-05 | 0.999909 |
| rad26              | 2.84706e-05 | 0.999938 | 2.84706e-05 | 0.999938 |
| rad11              | 2.74212e-05 | 0.999965 | 2.74212e-05 | 0.999965 |
| PhCCCH3+H          | 2.48898e-05 | 0.999990 | 2.48898e-05 | 0.999990 |
| rad3               | 5.24386e-06 | 0.999995 | 5.24386e-06 | 0.999995 |
| rad4               | 2.67152e-06 | 0.999998 | 2.67152e-06 | 0.999998 |
| Ph+MeAc            | 9.67045e-07 | 0.999999 | 9.67045e-07 | 0.999999 |
| rad9               | 5.44591e-07 | 0.999999 | 5.44591e-07 | 0.999999 |
| rad13              | 3.82758e-07 | 1.000000 | 3.82758e-07 | 1.000000 |
| rad8               | 2.37977e-07 | 1.000000 | 2.37977e-07 | 1.000000 |
| rad23              | 1.46574e-07 | 1.000000 | 1.46574e-07 | 1.000000 |
| Phenyl+Allene      | 1.12740e-07 | 1.000000 | 0.000000    | 1.000000 |
| rad30              | 5.54529e-08 | 1.000000 | 5.54529e-08 | 1.000000 |
| PAH7+H             | 2.51370e-08 | 1.000000 | 2.51370e-08 | 1.000000 |
| PAH9+H             | 1.17501e-08 | 1.000000 | 1.17501e-08 | 1.000000 |
| rad15              | 1.08162e-08 | 1.000000 | 1.08162e-08 | 1.000000 |
| rad35              | 5.89614e-09 | 1.000000 | 5.89615e-09 | 1.000000 |
| rad12              | 4.12505e-09 | 1.000000 | 4.12505e-09 | 1.000000 |
| rad39              | 4.06346e-09 | 1.000000 | 4.06346e-09 | 1.000000 |
| rad38              | 3.15165e-09 | 1.000000 | 3.15165e-09 | 1.000000 |
| rad45              | 2.32694e-09 | 1.000000 | 2.32694e-09 | 1.000000 |
| rad33              | 7.08699e-10 | 1.000000 | 7.08699e-10 | 1.000000 |
| rad14              | 4.37172e-10 | 1.000000 | 4.37172e-10 | 1.000000 |
| rad27              | 3.82363e-10 | 1.000000 | 3.82363e-10 | 1.000000 |
| rad25              | 2.57950e-10 | 1.000000 | 2.57950e-10 | 1.000000 |
| rad36              | 1.44216e-10 | 1.000000 | 1.44216e-10 | 1.000000 |
| PhCH2CCH+H         | 1.24929e-10 | 1.000000 | 1.24929e-10 | 1.000000 |
| rad22              | 9.61659e-11 | 1.000000 | 9.61659e-11 | 1.000000 |
| rad46              | 2.85952e-11 | 1.000000 | 2.85952e-11 | 1.000000 |
| rad37              | 1.39326e-11 | 1.000000 | 1.39326e-11 | 1.000000 |
| rad60syn           | 1.68241e-12 | 1.000000 | 1.68241e-12 | 1.000000 |

|               |             |         |             |         |
|---------------|-------------|---------|-------------|---------|
| rad60anti     | 4.02628e-13 | 1.00000 | 4.02628e-13 | 1.00000 |
| rad5          | 1.17341e-13 | 1.00000 | 1.17341e-13 | 1.00000 |
| rad31         | 1.46795e-14 | 1.00000 | 1.46795e-14 | 1.00000 |
| rad20         | 4.26701e-15 | 1.00000 | 4.26701e-15 | 1.00000 |
| rad21         | 3.04159e-15 | 1.00000 | 3.04159e-15 | 1.00000 |
| rad18         | 3.52634e-16 | 1.00000 | 3.52634e-16 | 1.00000 |
| PAH3+H        | 9.15682e-17 | 1.00000 | 9.15682e-17 | 1.00000 |
| rad59         | 3.73084e-17 | 1.00000 | 3.73084e-17 | 1.00000 |
| rad24         | 2.30429e-17 | 1.00000 | 2.30429e-17 | 1.00000 |
| rad50         | 3.86762e-18 | 1.00000 | 3.86762e-18 | 1.00000 |
| rad19syn      | 1.29465e-19 | 1.00000 | 1.29465e-19 | 1.00000 |
| rad54         | 2.56736e-22 | 1.00000 | 2.56736e-22 | 1.00000 |
| PAH10+CH3     | 1.67686e-22 | 1.00000 | 1.67686e-22 | 1.00000 |
| rad43         | 4.15145e-23 | 1.00000 | 4.15145e-23 | 1.00000 |
| rad52         | 6.37104e-24 | 1.00000 | 6.37104e-24 | 1.00000 |
| rad62         | 2.32811e-24 | 1.00000 | 2.32811e-24 | 1.00000 |
| rad51         | 2.41525e-27 | 1.00000 | 2.41525e-27 | 1.00000 |
| rad70         | 2.18193e-27 | 1.00000 | 2.18193e-27 | 1.00000 |
| PhcycC3H3_A+H | 1.76737e-27 | 1.00000 | 1.76737e-27 | 1.00000 |
| rad55         | 7.86957e-28 | 1.00000 | 7.86957e-28 | 1.00000 |
| rad65         | 1.85861e-30 | 1.00000 | 1.85861e-30 | 1.00000 |
| rad58         | 9.40473e-31 | 1.00000 | 9.40473e-31 | 1.00000 |
| PAH1+H        | 2.97037e-31 | 1.00000 | 2.97037e-31 | 1.00000 |
| rad34         | 3.27197e-33 | 1.00000 | 3.27197e-33 | 1.00000 |
| rad42         | 8.90720e-37 | 1.00000 | 8.90720e-37 | 1.00000 |
| rad41         | 1.44029e-37 | 1.00000 | 1.44029e-37 | 1.00000 |
| rad47         | 3.15047e-38 | 1.00000 | 3.15047e-38 | 1.00000 |

0.100000000 Pa, 140.000000 K

| Rate constant      | True (fraction)        | Effective (fraction)   |
|--------------------|------------------------|------------------------|
| Total              | 3.59582e-19 (1.00 )    | 3.59582e-19 (1.00 )    |
| Formation of rad11 | 3.35703e-19 (0.934 )   | 3.35703e-19 (0.934 )   |
| Formation of rad6  | 2.33415e-20 (0.0649 )  | 2.33415e-20 (0.0649 )  |
| H-abstraction      | 5.37685e-22 (0.00150 ) | 5.37685e-22 (0.00150 ) |

| species            | PYtrue      | Cumul    | PYeffective | Cumul    |
|--------------------|-------------|----------|-------------|----------|
| rad6               | 0.900017    | 0.900017 | 0.900017    | 0.900017 |
| Indene+H           | 0.0962036   | 0.996221 | 0.0962036   | 0.996221 |
| Benzene+2-propynyl | 0.00149531  | 0.997716 | 0.00149531  | 0.997716 |
| C2H2+PhCH2         | 0.00102780  | 0.998744 | 0.00102780  | 0.998744 |
| rad2               | 0.000676886 | 0.999421 | 0.000676886 | 0.999421 |
| rad28              | 0.000122999 | 0.999544 | 0.000122999 | 0.999544 |
| PhCCH+CH3          | 0.000106351 | 0.999650 | 0.000106351 | 0.999650 |
| rad7               | 9.89868e-05 | 0.999749 | 9.89868e-05 | 0.999749 |
| PhCHCCH2+H         | 6.08364e-05 | 0.999810 | 6.08364e-05 | 0.999810 |
| rad1               | 4.42681e-05 | 0.999854 | 4.42681e-05 | 0.999854 |
| rad10              | 4.07145e-05 | 0.999895 | 4.07145e-05 | 0.999895 |
| PhCCCH3+H          | 3.37430e-05 | 0.999929 | 3.37430e-05 | 0.999929 |
| rad26              | 3.32458e-05 | 0.999962 | 3.32458e-05 | 0.999962 |
| rad11              | 2.69705e-05 | 0.999989 | 2.69705e-05 | 0.999989 |
| rad3               | 5.30511e-06 | 0.999994 | 5.30511e-06 | 0.999994 |
| rad4               | 2.70619e-06 | 0.999997 | 2.70619e-06 | 0.999997 |
| Ph+MeAc            | 1.52951e-06 | 0.999998 | 1.52951e-06 | 0.999998 |
| rad9               | 6.58929e-07 | 0.999999 | 6.58929e-07 | 0.999999 |
| rad13              | 3.80648e-07 | 1.000000 | 3.80648e-07 | 1.000000 |
| rad8               | 3.32801e-07 | 1.000000 | 3.32801e-07 | 1.000000 |
| Phenyl+Allene      | 1.68275e-07 | 1.000000 | 0.000000    | 1.000000 |
| rad23              | 1.28777e-07 | 1.000000 | 1.28777e-07 | 1.000000 |
| rad30              | 6.19712e-08 | 1.000000 | 6.19712e-08 | 1.000000 |
| PAH7+H             | 4.30240e-08 | 1.000000 | 4.30240e-08 | 1.000000 |
| PAH9+H             | 1.32928e-08 | 1.000000 | 1.32928e-08 | 1.000000 |
| rad15              | 1.22649e-08 | 1.000000 | 1.22649e-08 | 1.000000 |
| rad39              | 7.31136e-09 | 1.000000 | 7.31136e-09 | 1.000000 |
| rad12              | 6.90618e-09 | 1.000000 | 6.90618e-09 | 1.000000 |
| rad35              | 6.61152e-09 | 1.000000 | 6.61152e-09 | 1.000000 |
| rad38              | 3.59211e-09 | 1.000000 | 3.59211e-09 | 1.000000 |
| rad45              | 2.02421e-09 | 1.000000 | 2.02421e-09 | 1.000000 |
| rad33              | 7.07065e-10 | 1.000000 | 7.07065e-10 | 1.000000 |
| rad14              | 4.43330e-10 | 1.000000 | 4.43330e-10 | 1.000000 |
| rad27              | 3.92470e-10 | 1.000000 | 3.92470e-10 | 1.000000 |
| PhCH2CCH+H         | 3.22350e-10 | 1.000000 | 3.22351e-10 | 1.000000 |
| rad25              | 2.56525e-10 | 1.000000 | 2.56525e-10 | 1.000000 |
| rad36              | 1.25500e-10 | 1.000000 | 1.25500e-10 | 1.000000 |
| rad22              | 8.35490e-11 | 1.000000 | 8.35490e-11 | 1.000000 |
| rad37              | 3.59228e-11 | 1.000000 | 3.59228e-11 | 1.000000 |
| rad46              | 3.45460e-11 | 1.000000 | 3.45460e-11 | 1.000000 |
| rad60syn           | 2.31609e-12 | 1.000000 | 2.31609e-12 | 1.000000 |

|               |             |         |             |         |
|---------------|-------------|---------|-------------|---------|
| rad60anti     | 5.98772e-13 | 1.00000 | 5.98772e-13 | 1.00000 |
| rad5          | 3.61834e-13 | 1.00000 | 3.61834e-13 | 1.00000 |
| rad31         | 1.55033e-14 | 1.00000 | 1.55033e-14 | 1.00000 |
| rad20         | 4.37928e-15 | 1.00000 | 4.37928e-15 | 1.00000 |
| rad21         | 3.13411e-15 | 1.00000 | 3.13411e-15 | 1.00000 |
| PAH3+H        | 3.43780e-16 | 1.00000 | 3.43780e-16 | 1.00000 |
| rad18         | 3.33223e-16 | 1.00000 | 3.33223e-16 | 1.00000 |
| rad59         | 1.34173e-16 | 1.00000 | 1.34173e-16 | 1.00000 |
| rad24         | 2.03106e-17 | 1.00000 | 2.03106e-17 | 1.00000 |
| rad50         | 1.35207e-17 | 1.00000 | 1.35207e-17 | 1.00000 |
| rad19syn      | 1.35035e-18 | 1.00000 | 1.35035e-18 | 1.00000 |
| rad54         | 4.08132e-21 | 1.00000 | 4.08133e-21 | 1.00000 |
| PAH10+CH3     | 2.67602e-21 | 1.00000 | 2.67602e-21 | 1.00000 |
| rad43         | 6.65461e-22 | 1.00000 | 6.65462e-22 | 1.00000 |
| rad52         | 6.23588e-23 | 1.00000 | 6.23588e-23 | 1.00000 |
| rad62         | 4.83209e-23 | 1.00000 | 4.83209e-23 | 1.00000 |
| rad70         | 9.03514e-26 | 1.00000 | 9.03514e-26 | 1.00000 |
| PhcycC3H3_A+H | 8.40050e-26 | 1.00000 | 8.40050e-26 | 1.00000 |
| rad51         | 5.05490e-26 | 1.00000 | 5.05490e-26 | 1.00000 |
| rad55         | 3.40945e-26 | 1.00000 | 3.40946e-26 | 1.00000 |
| PAH1+H        | 1.49730e-28 | 1.00000 | 1.49730e-28 | 1.00000 |
| rad65         | 6.10858e-29 | 1.00000 | 6.10858e-29 | 1.00000 |
| rad58         | 4.84746e-29 | 1.00000 | 4.84746e-29 | 1.00000 |
| rad34         | 3.67222e-30 | 1.00000 | 3.67222e-30 | 1.00000 |
| rad42         | 8.26795e-34 | 1.00000 | 8.26795e-34 | 1.00000 |
| rad41         | 1.29456e-34 | 1.00000 | 1.29456e-34 | 1.00000 |
| rad47         | 2.06822e-36 | 1.00000 | 2.06822e-36 | 1.00000 |

0.100000000 Pa, 150.000000 K

| Rate constant      | True (fraction)        | Effective (fraction)   |
|--------------------|------------------------|------------------------|
| Total              | 8.51464e-19 (1.00 )    | 8.51464e-19 (1.00 )    |
| Formation of rad11 | 7.83711e-19 (0.920 )   | 7.83710e-19 (0.920 )   |
| Formation of rad6  | 6.56651e-20 (0.0771 )  | 6.56651e-20 (0.0771 )  |
| H-abstraction      | 2.08816e-21 (0.00245 ) | 2.08816e-21 (0.00245 ) |

| species            | PYtrue      | Cumul    | PYeffective | Cumul    |
|--------------------|-------------|----------|-------------|----------|
| rad6               | 0.893221    | 0.893221 | 0.893221    | 0.893221 |
| Indene+H           | 0.101832    | 0.995053 | 0.101832    | 0.995053 |
| Benzene+2-propynyl | 0.00245244  | 0.997505 | 0.00245244  | 0.997505 |
| C2H2+PhCH2         | 0.00113685  | 0.998642 | 0.00113685  | 0.998642 |
| rad2               | 0.000689411 | 0.999331 | 0.000689411 | 0.999331 |
| rad28              | 0.000141559 | 0.999473 | 0.000141559 | 0.999473 |
| PhCCH+CH3          | 0.000141305 | 0.999614 | 0.000141305 | 0.999614 |
| rad7               | 9.75491e-05 | 0.999712 | 9.75492e-05 | 0.999712 |
| PhCHCCH2+H         | 7.96675e-05 | 0.999791 | 7.96675e-05 | 0.999791 |
| PhCCCH3+H          | 4.54188e-05 | 0.999837 | 4.54188e-05 | 0.999837 |
| rad1               | 4.53194e-05 | 0.999882 | 4.53195e-05 | 0.999882 |
| rad10              | 4.13516e-05 | 0.999924 | 4.13516e-05 | 0.999924 |
| rad26              | 3.81655e-05 | 0.999962 | 3.81655e-05 | 0.999962 |
| rad11              | 2.65217e-05 | 0.999988 | 2.65218e-05 | 0.999988 |
| rad3               | 5.34394e-06 | 0.999994 | 5.34394e-06 | 0.999994 |
| rad4               | 2.72982e-06 | 0.999996 | 2.72982e-06 | 0.999996 |
| Ph+MeAc            | 2.38536e-06 | 0.999999 | 2.38536e-06 | 0.999999 |
| rad9               | 8.08594e-07 | 1.000000 | 8.08594e-07 | 1.000000 |
| rad8               | 4.61864e-07 | 1.000000 | 4.61864e-07 | 1.000000 |
| rad13              | 3.78239e-07 | 1.00000  | 3.78239e-07 | 1.00000  |
| Phenyl+Allene      | 2.51817e-07 | 1.00000  | 0.00000     | 1.00000  |
| rad23              | 1.14081e-07 | 1.00000  | 1.14081e-07 | 1.00000  |
| PAH7+H             | 7.26349e-08 | 1.00000  | 7.26349e-08 | 1.00000  |
| rad30              | 6.99608e-08 | 1.00000  | 6.99608e-08 | 1.00000  |
| PAH9+H             | 1.52124e-08 | 1.00000  | 1.52124e-08 | 1.00000  |
| rad15              | 1.40669e-08 | 1.00000  | 1.40669e-08 | 1.00000  |
| rad39              | 1.29094e-08 | 1.00000  | 1.29094e-08 | 1.00000  |
| rad12              | 1.12614e-08 | 1.00000  | 1.12614e-08 | 1.00000  |
| rad35              | 7.49269e-09 | 1.00000  | 7.49269e-09 | 1.00000  |
| rad38              | 4.14445e-09 | 1.00000  | 4.14445e-09 | 1.00000  |
| rad45              | 1.77739e-09 | 1.00000  | 1.77739e-09 | 1.00000  |
| PhCH2CCH+H         | 7.67199e-10 | 1.00000  | 7.67200e-10 | 1.00000  |
| rad33              | 7.04749e-10 | 1.00000  | 7.04749e-10 | 1.00000  |
| rad14              | 4.47752e-10 | 1.00000  | 4.47752e-10 | 1.00000  |
| rad27              | 4.00443e-10 | 1.00000  | 4.00443e-10 | 1.00000  |
| rad25              | 2.54922e-10 | 1.00000  | 2.54922e-10 | 1.00000  |
| rad36              | 1.10263e-10 | 1.00000  | 1.10263e-10 | 1.00000  |
| rad37              | 8.40732e-11 | 1.00000  | 8.40732e-11 | 1.00000  |
| rad22              | 7.32784e-11 | 1.00000  | 7.32784e-11 | 1.00000  |
| rad46              | 4.24475e-11 | 1.00000  | 4.24475e-11 | 1.00000  |
| rad60syn           | 3.23388e-12 | 1.00000  | 3.23388e-12 | 1.00000  |

|               |             |         |             |         |
|---------------|-------------|---------|-------------|---------|
| rad5          | 1.00393e-12 | 1.00000 | 1.00394e-12 | 1.00000 |
| rad60anti     | 8.92045e-13 | 1.00000 | 8.92046e-13 | 1.00000 |
| rad31         | 1.63236e-14 | 1.00000 | 1.63236e-14 | 1.00000 |
| rad20         | 4.51442e-15 | 1.00000 | 4.51443e-15 | 1.00000 |
| rad21         | 3.24357e-15 | 1.00000 | 3.24357e-15 | 1.00000 |
| PAH3+H        | 1.12674e-15 | 1.00000 | 1.12674e-15 | 1.00000 |
| rad59         | 4.22001e-16 | 1.00000 | 4.22001e-16 | 1.00000 |
| rad18         | 3.18138e-16 | 1.00000 | 3.18138e-16 | 1.00000 |
| rad50         | 4.20988e-17 | 1.00000 | 4.20988e-17 | 1.00000 |
| rad24         | 1.80662e-17 | 1.00000 | 1.80662e-17 | 1.00000 |
| rad19syn      | 1.06232e-17 | 1.00000 | 1.06232e-17 | 1.00000 |
| rad54         | 4.60744e-20 | 1.00000 | 4.60744e-20 | 1.00000 |
| PAH10+CH3     | 3.03787e-20 | 1.00000 | 3.03787e-20 | 1.00000 |
| rad43         | 7.56802e-21 | 1.00000 | 7.56802e-21 | 1.00000 |
| rad62         | 6.85039e-22 | 1.00000 | 6.85039e-22 | 1.00000 |
| rad52         | 4.66154e-22 | 1.00000 | 4.66154e-22 | 1.00000 |
| PhcycC3H3_A+H | 2.22094e-24 | 1.00000 | 2.22094e-24 | 1.00000 |
| rad70         | 2.18769e-24 | 1.00000 | 2.18769e-24 | 1.00000 |
| rad55         | 8.51686e-25 | 1.00000 | 8.51687e-25 | 1.00000 |
| rad51         | 7.26364e-25 | 1.00000 | 7.26364e-25 | 1.00000 |
| PAH1+H        | 7.20251e-27 | 1.00000 | 7.20251e-27 | 1.00000 |
| rad58         | 1.34866e-27 | 1.00000 | 1.34866e-27 | 1.00000 |
| rad65         | 1.26549e-27 | 1.00000 | 1.26549e-27 | 1.00000 |
| rad34         | 2.21584e-28 | 1.00000 | 2.21584e-28 | 1.00000 |
| rad42         | 7.14876e-31 | 1.00000 | 7.14876e-31 | 1.00000 |
| rad41         | 1.48473e-31 | 1.00000 | 1.48473e-31 | 1.00000 |
| rad47         | 6.23009e-35 | 1.00000 | 6.23009e-35 | 1.00000 |

0.100000000 Pa, 160.000000 K

| Rate constant      | True (fraction)        | Effective (fraction)   |
|--------------------|------------------------|------------------------|
| Total              | 1.81800e-18 (1.00 )    | 1.81800e-18 (1.00 )    |
| Formation of rad11 | 1.64862e-18 (0.907 )   | 1.64862e-18 (0.907 )   |
| Formation of rad6  | 1.62558e-19 (0.0894 )  | 1.62558e-19 (0.0894 )  |
| H-abstraction      | 6.82130e-21 (0.00375 ) | 6.82130e-21 (0.00375 ) |

| species            | PYtrue      | Cumul    | PYeffective | Cumul    |
|--------------------|-------------|----------|-------------|----------|
| rad6               | 0.885229    | 0.885229 | 0.885229    | 0.885229 |
| Indene+H           | 0.108271    | 0.993500 | 0.108271    | 0.993500 |
| Benzene+2-propynyl | 0.00375209  | 0.997252 | 0.00375209  | 0.997252 |
| C2H2+PhCH2         | 0.00126843  | 0.998521 | 0.00126843  | 0.998521 |
| rad2               | 0.000698129 | 0.999219 | 0.000698130 | 0.999219 |
| PhCCH+CH3          | 0.000187158 | 0.999406 | 0.000187158 | 0.999406 |
| rad28              | 0.000161591 | 0.999568 | 0.000161591 | 0.999568 |
| PhCHCCH2+H         | 0.000104070 | 0.999672 | 0.000104070 | 0.999672 |
| rad7               | 9.60573e-05 | 0.999768 | 9.60573e-05 | 0.999768 |
| PhCCCH3+H          | 6.07107e-05 | 0.999828 | 6.07107e-05 | 0.999828 |
| rad1               | 4.61495e-05 | 0.999875 | 4.61495e-05 | 0.999875 |
| rad26              | 4.31114e-05 | 0.999918 | 4.31114e-05 | 0.999918 |
| rad10              | 4.17692e-05 | 0.999960 | 4.17692e-05 | 0.999960 |
| rad11              | 2.60657e-05 | 0.999986 | 2.60657e-05 | 0.999986 |
| rad3               | 5.36110e-06 | 0.999991 | 5.36110e-06 | 0.999991 |
| Ph+MeAc            | 3.66835e-06 | 0.999995 | 3.66835e-06 | 0.999995 |
| rad4               | 2.74278e-06 | 0.999997 | 2.74278e-06 | 0.999997 |
| rad9               | 1.00560e-06 | 0.999998 | 1.00560e-06 | 0.999998 |
| rad8               | 6.36110e-07 | 0.999999 | 6.36111e-07 | 0.999999 |
| Phenyl+Allene      | 3.77689e-07 | 0.999999 | 0.00000     | 0.999999 |
| rad13              | 3.75439e-07 | 1.000000 | 3.75439e-07 | 0.999999 |
| PAH7+H             | 1.20670e-07 | 1.000000 | 1.20670e-07 | 1.000000 |
| rad23              | 1.01759e-07 | 1.000000 | 1.01759e-07 | 1.000000 |
| rad30              | 7.98124e-08 | 1.00000  | 7.98124e-08 | 1.000000 |
| rad39              | 2.23254e-08 | 1.00000  | 2.23254e-08 | 1.000000 |
| rad12              | 1.79040e-08 | 1.00000  | 1.79041e-08 | 1.000000 |
| PAH9+H             | 1.76192e-08 | 1.00000  | 1.76192e-08 | 1.000000 |
| rad15              | 1.63233e-08 | 1.00000  | 1.63233e-08 | 1.000000 |
| rad35              | 8.58577e-09 | 1.00000  | 8.58578e-09 | 1.000000 |
| rad38              | 4.84275e-09 | 1.00000  | 4.84275e-09 | 1.000000 |
| PhCH2CCH+H         | 1.70870e-09 | 1.00000  | 1.70870e-09 | 1.000000 |
| rad45              | 1.57291e-09 | 1.00000  | 1.57291e-09 | 1.000000 |
| rad33              | 7.01607e-10 | 1.00000  | 7.01608e-10 | 1.000000 |
| rad14              | 4.50466e-10 | 1.00000  | 4.50466e-10 | 1.000000 |
| rad27              | 4.06361e-10 | 1.00000  | 4.06361e-10 | 1.000000 |
| rad25              | 2.53077e-10 | 1.00000  | 2.53077e-10 | 1.000000 |
| rad37              | 1.81369e-10 | 1.00000  | 1.81369e-10 | 1.000000 |
| rad36              | 9.76615e-11 | 1.00000  | 9.76615e-11 | 1.000000 |
| rad22              | 6.47795e-11 | 1.00000  | 6.47795e-11 | 1.000000 |
| rad46              | 5.30515e-11 | 1.00000  | 5.30515e-11 | 1.000000 |
| rad60syn           | 4.57127e-12 | 1.00000  | 4.57127e-12 | 1.000000 |

|               |             |         |             |          |
|---------------|-------------|---------|-------------|----------|
| rad5          | 2.54555e-12 | 1.00000 | 2.54555e-12 | 1.000000 |
| rad60anti     | 1.33268e-12 | 1.00000 | 1.33268e-12 | 1.000000 |
| rad31         | 1.71488e-14 | 1.00000 | 1.71488e-14 | 1.000000 |
| rad20         | 4.67054e-15 | 1.00000 | 4.67054e-15 | 1.000000 |
| rad21         | 3.36889e-15 | 1.00000 | 3.36889e-15 | 1.000000 |
| PAH3+H        | 3.30263e-15 | 1.00000 | 3.30264e-15 | 1.000000 |
| rad59         | 1.18956e-15 | 1.00000 | 1.18956e-15 | 1.000000 |
| rad18         | 3.06331e-16 | 1.00000 | 3.06331e-16 | 1.000000 |
| rad50         | 1.19191e-16 | 1.00000 | 1.19191e-16 | 1.000000 |
| rad19syn      | 6.60003e-17 | 1.00000 | 6.60003e-17 | 1.000000 |
| rad24         | 1.61933e-17 | 1.00000 | 1.61933e-17 | 1.000000 |
| rad54         | 3.91114e-19 | 1.00000 | 3.91114e-19 | 1.000000 |
| PAH10+CH3     | 2.59376e-19 | 1.00000 | 2.59377e-19 | 1.000000 |
| rad43         | 6.46014e-20 | 1.00000 | 6.46015e-20 | 1.000000 |
| rad62         | 7.07649e-21 | 1.00000 | 7.07649e-21 | 1.000000 |
| rad52         | 2.78383e-21 | 1.00000 | 2.78383e-21 | 1.000000 |
| PhcycC3H3_A+H | 3.91270e-23 | 1.00000 | 3.91270e-23 | 1.000000 |
| rad70         | 3.56770e-23 | 1.00000 | 3.56770e-23 | 1.000000 |
| rad55         | 1.42615e-23 | 1.00000 | 1.42615e-23 | 1.000000 |
| rad51         | 7.65091e-24 | 1.00000 | 7.65090e-24 | 1.000000 |
| PAH1+H        | 1.92788e-25 | 1.00000 | 1.92788e-25 | 1.000000 |
| rad58         | 2.47608e-26 | 1.00000 | 2.47608e-26 | 1.000000 |
| rad65         | 1.81984e-26 | 1.00000 | 1.81984e-26 | 1.000000 |
| rad34         | 6.89843e-27 | 1.00000 | 6.89843e-27 | 1.000000 |
| rad42         | 3.68602e-29 | 1.00000 | 3.68602e-29 | 1.000000 |
| rad41         | 8.89891e-30 | 1.00000 | 8.89892e-30 | 1.000000 |
| rad47         | 1.16154e-33 | 1.00000 | 1.16154e-33 | 1.000000 |

0.100000000 Pa, 170.000000 K

| Rate constant      | True (fraction)        | Effective (fraction)   |
|--------------------|------------------------|------------------------|
| Total              | 3.56414e-18 (1.00 )    | 3.56413e-18 (1.00 )    |
| Formation of rad11 | 3.18264e-18 (0.893 )   | 3.18263e-18 (0.893 )   |
| Formation of rad6  | 3.62173e-19 (0.102 )   | 3.62173e-19 (0.102 )   |
| H-abstraction      | 1.93278e-20 (0.00542 ) | 1.93278e-20 (0.00542 ) |

| species            | PYtrue      | Cumul    | PYeffective | Cumul    |
|--------------------|-------------|----------|-------------|----------|
| rad6               | 0.875882    | 0.875882 | 0.875883    | 0.875883 |
| Indene+H           | 0.115643    | 0.991526 | 0.115643    | 0.991527 |
| Benzene+2-propynyl | 0.00542285  | 0.996949 | 0.00542285  | 0.996950 |
| C2H2+PhCH2         | 0.00142777  | 0.998376 | 0.00142777  | 0.998377 |
| rad2               | 0.000703206 | 0.999080 | 0.000703206 | 0.999081 |
| PhCCH+CH3          | 0.000246992 | 0.999327 | 0.000246992 | 0.999328 |
| rad28              | 0.000182833 | 0.999509 | 0.000182833 | 0.999510 |
| PhCHCCH2+H         | 0.000135515 | 0.999645 | 0.000135515 | 0.999646 |
| rad7               | 9.44857e-05 | 0.999739 | 9.44857e-05 | 0.999740 |
| PhCCCH3+H          | 8.05905e-05 | 0.999820 | 8.05905e-05 | 0.999821 |
| rad26              | 4.79600e-05 | 0.999868 | 4.79600e-05 | 0.999869 |
| rad1               | 4.67680e-05 | 0.999915 | 4.67680e-05 | 0.999916 |
| rad10              | 4.19777e-05 | 0.999957 | 4.19778e-05 | 0.999958 |
| rad11              | 2.55945e-05 | 0.999982 | 2.55946e-05 | 0.999983 |
| Ph+MeAc            | 5.56312e-06 | 0.999988 | 5.56312e-06 | 0.999989 |
| rad3               | 5.35729e-06 | 0.999993 | 5.35729e-06 | 0.999994 |
| rad4               | 2.74543e-06 | 0.999996 | 2.74543e-06 | 0.999997 |
| rad9               | 1.26584e-06 | 0.999997 | 1.26584e-06 | 0.999998 |
| rad8               | 8.69355e-07 | 0.999998 | 8.69356e-07 | 0.999999 |
| Phenyl+Allene      | 5.67205e-07 | 0.999999 | 0.00000     | 0.999999 |
| rad13              | 3.72165e-07 | 0.999999 | 3.72165e-07 | 0.999999 |
| PAH7+H             | 1.96925e-07 | 0.999999 | 1.96925e-07 | 1.000000 |
| rad30              | 9.20141e-08 | 0.999999 | 9.20142e-08 | 1.000000 |
| rad23              | 9.12887e-08 | 0.999999 | 9.12888e-08 | 1.000000 |
| rad39              | 3.77688e-08 | 0.999999 | 3.77688e-08 | 1.000000 |
| rad12              | 2.77859e-08 | 1.000000 | 2.77859e-08 | 1.000000 |
| PAH9+H             | 2.06559e-08 | 1.000000 | 2.06559e-08 | 1.000000 |
| rad15              | 1.91634e-08 | 1.000000 | 1.91634e-08 | 1.000000 |
| rad35              | 9.94925e-09 | 1.000000 | 9.94925e-09 | 1.000000 |
| rad38              | 5.73141e-09 | 1.000000 | 5.73141e-09 | 1.000000 |
| PhCH2CCH+H         | 3.59983e-09 | 1.000000 | 3.59984e-09 | 1.000000 |
| rad45              | 1.40111e-09 | 1.000000 | 1.40111e-09 | 1.000000 |
| rad33              | 6.97500e-10 | 1.000000 | 6.97501e-10 | 1.000000 |
| rad14              | 4.51503e-10 | 1.000000 | 4.51503e-10 | 1.000000 |
| rad27              | 4.10303e-10 | 1.000000 | 4.10303e-10 | 1.000000 |
| rad37              | 3.65202e-10 | 1.000000 | 3.65202e-10 | 1.000000 |
| rad25              | 2.50929e-10 | 1.000000 | 2.50929e-10 | 1.000000 |
| rad36              | 8.70939e-11 | 1.000000 | 8.70940e-11 | 1.000000 |
| rad46              | 6.74053e-11 | 1.000000 | 6.74054e-11 | 1.000000 |
| rad22              | 5.76445e-11 | 1.000000 | 5.76445e-11 | 1.000000 |
| rad60syn           | 6.52760e-12 | 1.000000 | 6.52761e-12 | 1.000000 |



|               |             |          |             |         |
|---------------|-------------|----------|-------------|---------|
| rad5          | 5.97351e-12 | 1.000000 | 5.97352e-12 | 1.00000 |
| rad60anti     | 1.99607e-12 | 1.000000 | 1.99607e-12 | 1.00000 |
| rad31         | 1.79885e-14 | 1.000000 | 1.79885e-14 | 1.00000 |
| PAH3+H        | 8.82409e-15 | 1.000000 | 8.82409e-15 | 1.00000 |
| rad20         | 4.84626e-15 | 1.000000 | 4.84626e-15 | 1.00000 |
| rad21         | 3.50937e-15 | 1.000000 | 3.50937e-15 | 1.00000 |
| rad59         | 3.06363e-15 | 1.000000 | 3.06363e-15 | 1.00000 |
| rad19syn      | 3.36469e-16 | 1.000000 | 3.36469e-16 | 1.00000 |
| rad50         | 3.11776e-16 | 1.000000 | 3.11776e-16 | 1.00000 |
| rad18         | 2.97054e-16 | 1.000000 | 2.97054e-16 | 1.00000 |
| rad24         | 1.46088e-17 | 1.000000 | 1.46089e-17 | 1.00000 |
| rad54         | 2.61709e-18 | 1.000000 | 2.61709e-18 | 1.00000 |
| PAH10+CH3     | 1.74462e-18 | 1.000000 | 1.74462e-18 | 1.00000 |
| rad43         | 4.33679e-19 | 1.000000 | 4.33679e-19 | 1.00000 |
| rad62         | 5.61297e-20 | 1.000000 | 5.61297e-20 | 1.00000 |
| rad52         | 1.37863e-20 | 1.000000 | 1.37863e-20 | 1.00000 |
| PhcycC3H3_A+H | 4.94606e-22 | 1.000000 | 4.94607e-22 | 1.00000 |
| rad70         | 4.20424e-22 | 1.000000 | 4.20424e-22 | 1.00000 |
| rad55         | 1.72022e-22 | 1.000000 | 1.72022e-22 | 1.00000 |
| rad51         | 6.22519e-23 | 1.000000 | 6.22519e-23 | 1.00000 |
| PAH1+H        | 3.37134e-24 | 1.000000 | 3.37134e-24 | 1.00000 |
| rad58         | 3.24515e-25 | 1.000000 | 3.24515e-25 | 1.00000 |
| rad65         | 1.93506e-25 | 1.000000 | 1.93506e-25 | 1.00000 |
| rad34         | 1.32317e-25 | 1.000000 | 1.32317e-25 | 1.00000 |
| rad42         | 9.20726e-28 | 1.000000 | 9.20727e-28 | 1.00000 |
| rad41         | 2.34799e-28 | 1.000000 | 2.34799e-28 | 1.00000 |
| rad47         | 1.50316e-32 | 1.000000 | 1.50316e-32 | 1.00000 |

0.100000000 Pa, 180.000000 K

| Rate constant      | True (fraction)        | Effective (fraction)   |
|--------------------|------------------------|------------------------|
| Total              | 6.50681e-18 (1.00 )    | 6.50681e-18 (1.00 )    |
| Formation of rad11 | 5.71915e-18 (0.879 )   | 5.71914e-18 (0.879 )   |
| Formation of rad6  | 7.39013e-19 (0.114 )   | 7.39012e-19 (0.114 )   |
| H-abstraction      | 4.86496e-20 (0.00748 ) | 4.86496e-20 (0.00748 ) |

| species            | PYtrue      | Cumul    | PYeffective | Cumul    |
|--------------------|-------------|----------|-------------|----------|
| rad6               | 0.865035    | 0.865035 | 0.865035    | 0.865035 |
| Indene+H           | 0.124071    | 0.989106 | 0.124071    | 0.989106 |
| Benzene+2-propynyl | 0.00747672  | 0.996583 | 0.00747672  | 0.996583 |
| C2H2+PhCH2         | 0.00162102  | 0.998204 | 0.00162102  | 0.998204 |
| rad2               | 0.000704802 | 0.998909 | 0.000704802 | 0.998909 |
| PhCCH+CH3          | 0.000324588 | 0.999233 | 0.000324588 | 0.999233 |
| rad28              | 0.000204920 | 0.999438 | 0.000204921 | 0.999438 |
| PhCHCCH2+H         | 0.000175781 | 0.999614 | 0.000175781 | 0.999614 |
| PhCCCH3+H          | 0.000106228 | 0.999720 | 0.000106229 | 0.999720 |
| rad7               | 9.28118e-05 | 0.999813 | 9.28119e-05 | 0.999813 |
| rad26              | 5.25884e-05 | 0.999865 | 5.25885e-05 | 0.999865 |
| rad1               | 4.71842e-05 | 0.999913 | 4.71842e-05 | 0.999913 |
| rad10              | 4.19876e-05 | 0.999955 | 4.19876e-05 | 0.999955 |
| rad11              | 2.51015e-05 | 0.999980 | 2.51015e-05 | 0.999980 |
| Ph+MeAc            | 8.31892e-06 | 0.999988 | 8.31893e-06 | 0.999988 |
| rad3               | 5.33324e-06 | 0.999993 | 5.33325e-06 | 0.999993 |
| rad4               | 2.73812e-06 | 0.999996 | 2.73812e-06 | 0.999996 |
| rad9               | 1.61003e-06 | 0.999998 | 1.61003e-06 | 0.999998 |
| rad8               | 1.17872e-06 | 0.999999 | 1.17872e-06 | 0.999999 |
| Phenyl+Allene      | 8.51617e-07 | 1.000000 | 0.000000    | 0.999999 |
| rad13              | 3.68338e-07 | 1.000000 | 3.68338e-07 | 0.999999 |
| PAH7+H             | 3.15302e-07 | 1.000000 | 3.15302e-07 | 1.000000 |
| rad30              | 1.07171e-07 | 1.000000 | 1.07171e-07 | 1.000000 |
| rad23              | 8.22858e-08 | 1.000000 | 8.22859e-08 | 1.000000 |
| rad39              | 6.24576e-08 | 1.000000 | 6.24576e-08 | 1.000000 |
| rad12              | 4.21440e-08 | 1.000000 | 4.21440e-08 | 1.000000 |
| PAH9+H             | 2.45044e-08 | 1.000000 | 2.45044e-08 | 1.000000 |
| rad15              | 2.27505e-08 | 1.000000 | 2.27505e-08 | 1.000000 |
| rad35              | 1.16566e-08 | 1.000000 | 1.16567e-08 | 1.000000 |
| PhCH2CCH+H         | 7.23148e-09 | 1.000000 | 7.23149e-09 | 1.000000 |
| rad38              | 6.86777e-09 | 1.000000 | 6.86778e-09 | 1.000000 |
| rad45              | 1.25498e-09 | 1.000000 | 1.25498e-09 | 1.000000 |
| rad37              | 6.93341e-10 | 1.000000 | 6.93341e-10 | 1.000000 |
| rad33              | 6.92296e-10 | 1.000000 | 6.92297e-10 | 1.000000 |
| rad14              | 4.50893e-10 | 1.000000 | 4.50893e-10 | 1.000000 |
| rad27              | 4.12346e-10 | 1.000000 | 4.12346e-10 | 1.000000 |
| rad25              | 2.48423e-10 | 1.000000 | 2.48423e-10 | 1.000000 |
| rad46              | 8.69584e-11 | 1.000000 | 8.69585e-11 | 1.000000 |
| rad36              | 7.81230e-11 | 1.000000 | 7.81230e-11 | 1.000000 |
| rad22              | 5.15774e-11 | 1.000000 | 5.15774e-11 | 1.000000 |
| rad5               | 1.31061e-11 | 1.000000 | 1.31061e-11 | 1.000000 |

|               |             |         |             |          |
|---------------|-------------|---------|-------------|----------|
| rad60syn      | 9.39273e-12 | 1.00000 | 9.39274e-12 | 1.000000 |
| rad60anti     | 2.99391e-12 | 1.00000 | 2.99392e-12 | 1.000000 |
| PAH3+H        | 2.18117e-14 | 1.00000 | 2.18118e-14 | 1.000000 |
| rad31         | 1.88534e-14 | 1.00000 | 1.88534e-14 | 1.000000 |
| rad59         | 7.31677e-15 | 1.00000 | 7.31678e-15 | 1.000000 |
| rad20         | 5.04055e-15 | 1.00000 | 5.04055e-15 | 1.000000 |
| rad21         | 3.66452e-15 | 1.00000 | 3.66452e-15 | 1.000000 |
| rad19syn      | 1.45200e-15 | 1.00000 | 1.45200e-15 | 1.000000 |
| rad50         | 7.62648e-16 | 1.00000 | 7.62649e-16 | 1.000000 |
| rad18         | 2.89751e-16 | 1.00000 | 2.89751e-16 | 1.000000 |
| rad54         | 1.43409e-17 | 1.00000 | 1.43409e-17 | 1.000000 |
| rad24         | 1.32518e-17 | 1.00000 | 1.32518e-17 | 1.000000 |
| PAH10+CH3     | 9.59898e-18 | 1.00000 | 9.59899e-18 | 1.000000 |
| rad43         | 2.37790e-18 | 1.00000 | 2.37791e-18 | 1.000000 |
| rad62         | 3.56604e-19 | 1.00000 | 3.56604e-19 | 1.000000 |
| rad52         | 5.83562e-20 | 1.00000 | 5.83562e-20 | 1.000000 |
| PhcycC3H3_A+H | 4.74777e-21 | 1.00000 | 4.74777e-21 | 1.000000 |
| rad70         | 3.78083e-21 | 1.00000 | 3.78084e-21 | 1.000000 |
| rad55         | 1.58019e-21 | 1.00000 | 1.58019e-21 | 1.000000 |
| rad51         | 4.08116e-22 | 1.00000 | 4.08116e-22 | 1.000000 |
| PAH1+H        | 4.26374e-23 | 1.00000 | 4.26375e-23 | 1.000000 |
| rad58         | 3.21956e-24 | 1.00000 | 3.21956e-24 | 1.000000 |
| rad34         | 1.80664e-24 | 1.00000 | 1.80664e-24 | 1.000000 |
| rad65         | 1.59988e-24 | 1.00000 | 1.59988e-24 | 1.000000 |
| rad42         | 1.53283e-26 | 1.00000 | 1.53283e-26 | 1.000000 |
| rad41         | 4.03681e-27 | 1.00000 | 4.03681e-27 | 1.000000 |
| rad47         | 1.43496e-31 | 1.00000 | 1.43496e-31 | 1.000000 |

0.100000000 Pa, 190.000000 K

| Rate constant      | True (fraction)        | Effective (fraction)   |
|--------------------|------------------------|------------------------|
| Total              | 1.11858e-17 (1.00 )    | 1.11858e-17 (1.00 )    |
| Formation of rad11 | 9.67466e-18 (0.865 )   | 9.67464e-18 (0.865 )   |
| Formation of rad6  | 1.40029e-18 (0.125 )   | 1.40029e-18 (0.125 )   |
| H-abstraction      | 1.10851e-19 (0.00991 ) | 1.10851e-19 (0.00991 ) |

| species            | PYtrue      | Cumul    | PYeffective | Cumul    |
|--------------------|-------------|----------|-------------|----------|
| rad6               | 0.852547    | 0.852547 | 0.852548    | 0.852548 |
| Indene+H           | 0.133679    | 0.986226 | 0.133679    | 0.986227 |
| Benzene+2-propynyl | 0.00990995  | 0.996136 | 0.00990997  | 0.996137 |
| C2H2+PhCH2         | 0.00185548  | 0.997991 | 0.00185548  | 0.997992 |
| rad2               | 0.000703073 | 0.998694 | 0.000703074 | 0.998695 |
| PhCCH+CH3          | 0.000424494 | 0.999119 | 0.000424495 | 0.999120 |
| rad28              | 0.000227401 | 0.999346 | 0.000227401 | 0.999347 |
| PhCHCCH2+H         | 0.000226972 | 0.999573 | 0.000226972 | 0.999574 |
| PhCCCH3+H          | 0.000139003 | 0.999712 | 0.000139003 | 0.999713 |
| rad7               | 9.10163e-05 | 0.999803 | 9.10164e-05 | 0.999804 |
| rad26              | 5.68822e-05 | 0.999860 | 5.68823e-05 | 0.999861 |
| rad1               | 4.74067e-05 | 0.999907 | 4.74067e-05 | 0.999908 |
| rad10              | 4.18082e-05 | 0.999949 | 4.18083e-05 | 0.999950 |
| rad11              | 2.45807e-05 | 0.999974 | 2.45808e-05 | 0.999975 |
| Ph+MeAc            | 1.22646e-05 | 0.999986 | 1.22646e-05 | 0.999987 |
| rad3               | 5.28967e-06 | 0.999991 | 5.28968e-06 | 0.999992 |
| rad4               | 2.72119e-06 | 0.999994 | 2.72119e-06 | 0.999995 |
| rad9               | 2.06486e-06 | 0.999996 | 2.06486e-06 | 0.999997 |
| rad8               | 1.58501e-06 | 0.999998 | 1.58501e-06 | 0.999999 |
| Phenyl+Allene      | 1.27595e-06 | 0.999999 | 0.00000     | 0.999999 |
| PAH7+H             | 4.94939e-07 | 0.999999 | 4.94940e-07 | 0.999999 |
| rad13              | 3.63887e-07 | 1.000000 | 3.63887e-07 | 1.000000 |
| rad30              | 1.26019e-07 | 1.000000 | 1.26020e-07 | 1.000000 |
| rad39              | 1.00932e-07 | 1.00000  | 1.00932e-07 | 1.000000 |
| rad23              | 7.44616e-08 | 1.00000  | 7.44617e-08 | 1.000000 |
| rad12              | 6.25426e-08 | 1.00000  | 6.25426e-08 | 1.000000 |
| PAH9+H             | 2.93953e-08 | 1.00000  | 2.93954e-08 | 1.000000 |
| rad15              | 2.72886e-08 | 1.00000  | 2.72887e-08 | 1.000000 |
| PhCH2CCH+H         | 1.39340e-08 | 1.00000  | 1.39340e-08 | 1.00000  |
| rad35              | 1.37995e-08 | 1.00000  | 1.37995e-08 | 1.00000  |
| rad38              | 8.32524e-09 | 1.00000  | 8.32525e-09 | 1.00000  |
| rad37              | 1.25114e-09 | 1.00000  | 1.25114e-09 | 1.00000  |
| rad45              | 1.12928e-09 | 1.00000  | 1.12928e-09 | 1.00000  |
| rad33              | 6.85866e-10 | 1.00000  | 6.85867e-10 | 1.00000  |
| rad14              | 4.48670e-10 | 1.00000  | 4.48671e-10 | 1.00000  |
| rad27              | 4.12560e-10 | 1.00000  | 4.12561e-10 | 1.00000  |
| rad25              | 2.45507e-10 | 1.00000  | 2.45508e-10 | 1.00000  |
| rad46              | 1.13695e-10 | 1.00000  | 1.13695e-10 | 1.00000  |
| rad36              | 7.04238e-11 | 1.00000  | 7.04239e-11 | 1.00000  |
| rad22              | 4.63591e-11 | 1.00000  | 4.63592e-11 | 1.00000  |
| rad5               | 2.71059e-11 | 1.00000  | 2.71059e-11 | 1.00000  |

|               |             |         |             |         |
|---------------|-------------|---------|-------------|---------|
| rad60syn      | 1.35822e-11 | 1.00000 | 1.35822e-11 | 1.00000 |
| rad60anti     | 4.48920e-12 | 1.00000 | 4.48920e-12 | 1.00000 |
| PAH3+H        | 5.04545e-14 | 1.00000 | 5.04545e-14 | 1.00000 |
| rad31         | 1.97557e-14 | 1.00000 | 1.97558e-14 | 1.00000 |
| rad59         | 1.63906e-14 | 1.00000 | 1.63907e-14 | 1.00000 |
| rad19syn      | 5.43953e-15 | 1.00000 | 5.43953e-15 | 1.00000 |
| rad20         | 5.25261e-15 | 1.00000 | 5.25261e-15 | 1.00000 |
| rad21         | 3.83402e-15 | 1.00000 | 3.83403e-15 | 1.00000 |
| rad50         | 1.76067e-15 | 1.00000 | 1.76067e-15 | 1.00000 |
| rad18         | 2.84001e-16 | 1.00000 | 2.84001e-16 | 1.00000 |
| rad54         | 6.63658e-17 | 1.00000 | 6.63659e-17 | 1.00000 |
| PAH10+CH3     | 4.45369e-17 | 1.00000 | 4.45370e-17 | 1.00000 |
| rad24         | 1.20763e-17 | 1.00000 | 1.20763e-17 | 1.00000 |
| rad43         | 1.09798e-17 | 1.00000 | 1.09798e-17 | 1.00000 |
| rad62         | 1.87739e-18 | 1.00000 | 1.87739e-18 | 1.00000 |
| rad52         | 2.16343e-19 | 1.00000 | 2.16344e-19 | 1.00000 |
| PhcycC3H3_A+H | 3.61148e-20 | 1.00000 | 3.61148e-20 | 1.00000 |
| rad70         | 2.70658e-20 | 1.00000 | 2.70658e-20 | 1.00000 |
| rad55         | 1.15364e-20 | 1.00000 | 1.15364e-20 | 1.00000 |
| rad51         | 2.22964e-21 | 1.00000 | 2.22964e-21 | 1.00000 |
| PAH1+H        | 4.10906e-22 | 1.00000 | 4.10906e-22 | 1.00000 |
| rad58         | 2.52440e-23 | 1.00000 | 2.52440e-23 | 1.00000 |
| rad34         | 1.85935e-23 | 1.00000 | 1.85936e-23 | 1.00000 |
| rad65         | 1.06983e-23 | 1.00000 | 1.06983e-23 | 1.00000 |
| rad42         | 1.85634e-25 | 1.00000 | 1.85634e-25 | 1.00000 |
| rad41         | 5.01145e-26 | 1.00000 | 5.01146e-26 | 1.00000 |
| rad47         | 1.06009e-30 | 1.00000 | 1.06009e-30 | 1.00000 |

0.100000000 Pa, 200.000000 K

| Rate constant      | True (fraction)       | Effective (fraction)  |
|--------------------|-----------------------|-----------------------|
| Total              | 1.82690e-17 (1.00 )   | 1.82690e-17 (1.00 )   |
| Formation of rad11 | 1.55456e-17 (0.851 )  | 1.55456e-17 (0.851 )  |
| Formation of rad6  | 2.49126e-18 (0.136 )  | 2.49126e-18 (0.136 )  |
| H-abstraction      | 2.32112e-19 (0.0127 ) | 2.32112e-19 (0.0127 ) |

| species            | PYtrue      | Cumul    | PYeffective | Cumul    |
|--------------------|-------------|----------|-------------|----------|
| rad6               | 0.838298    | 0.838298 | 0.838300    | 0.838300 |
| Indene+H           | 0.144588    | 0.982886 | 0.144588    | 0.982888 |
| Benzene+2-propynyl | 0.0127053   | 0.995592 | 0.0127053   | 0.995594 |
| C2H2+PhCH2         | 0.00213958  | 0.997731 | 0.00213958  | 0.997733 |
| rad2               | 0.000698169 | 0.998429 | 0.000698170 | 0.998431 |
| PhCCH+CH3          | 0.000552070 | 0.998982 | 0.000552071 | 0.998984 |
| PhCHCCH2+H         | 0.000291526 | 0.999273 | 0.000291527 | 0.999275 |
| rad28              | 0.000249748 | 0.999523 | 0.000249748 | 0.999525 |
| PhCCCH3+H          | 0.000180501 | 0.999703 | 0.000180501 | 0.999705 |
| rad7               | 8.90821e-05 | 0.999792 | 8.90823e-05 | 0.999794 |
| rad26              | 6.07391e-05 | 0.999853 | 6.07392e-05 | 0.999855 |
| rad1               | 4.74434e-05 | 0.999901 | 4.74434e-05 | 0.999903 |
| rad10              | 4.14490e-05 | 0.999942 | 4.14491e-05 | 0.999944 |
| rad11              | 2.40271e-05 | 0.999966 | 2.40271e-05 | 0.999968 |
| Ph+MeAc            | 1.78230e-05 | 0.999984 | 1.78231e-05 | 0.999986 |
| rad3               | 5.22726e-06 | 0.999989 | 5.22727e-06 | 0.999991 |
| rad4               | 2.69497e-06 | 0.999992 | 2.69497e-06 | 0.999994 |
| rad9               | 2.66400e-06 | 0.999994 | 2.66400e-06 | 0.999996 |
| rad8               | 2.11286e-06 | 0.999997 | 2.11286e-06 | 0.999999 |
| Phenyl+Allene      | 1.90383e-06 | 0.999998 | 0.00000     | 0.999999 |
| PAH7+H             | 7.61427e-07 | 0.999999 | 7.61428e-07 | 0.999999 |
| rad13              | 3.58745e-07 | 1.000000 | 3.58745e-07 | 1.000000 |
| rad39              | 1.59396e-07 | 1.000000 | 1.59397e-07 | 1.000000 |
| rad30              | 1.49448e-07 | 1.000000 | 1.49449e-07 | 1.000000 |
| rad12              | 9.09061e-08 | 1.00000  | 9.09062e-08 | 1.00000  |
| rad23              | 6.75964e-08 | 1.00000  | 6.75965e-08 | 1.00000  |
| PAH9+H             | 3.56162e-08 | 1.00000  | 3.56163e-08 | 1.00000  |
| rad15              | 3.30285e-08 | 1.00000  | 3.30286e-08 | 1.00000  |
| PhCH2CCH+H         | 2.58675e-08 | 1.00000  | 2.58675e-08 | 1.00000  |
| rad35              | 1.64899e-08 | 1.00000  | 1.64900e-08 | 1.00000  |
| rad38              | 1.01964e-08 | 1.00000  | 1.01964e-08 | 1.00000  |
| rad37              | 2.15974e-09 | 1.00000  | 2.15975e-09 | 1.00000  |
| rad45              | 1.02008e-09 | 1.00000  | 1.02008e-09 | 1.00000  |
| rad33              | 6.78094e-10 | 1.00000  | 6.78095e-10 | 1.00000  |
| rad14              | 4.44867e-10 | 1.00000  | 4.44868e-10 | 1.00000  |
| rad27              | 4.11014e-10 | 1.00000  | 4.11015e-10 | 1.00000  |
| rad25              | 2.42137e-10 | 1.00000  | 2.42137e-10 | 1.00000  |
| rad46              | 1.50295e-10 | 1.00000  | 1.50295e-10 | 1.00000  |
| rad36              | 6.37515e-11 | 1.00000  | 6.37516e-11 | 1.00000  |
| rad5               | 5.31966e-11 | 1.00000  | 5.31967e-11 | 1.00000  |
| rad22              | 4.18249e-11 | 1.00000  | 4.18250e-11 | 1.00000  |

|               |             |         |             |         |
|---------------|-------------|---------|-------------|---------|
| rad60syn      | 1.96811e-11 | 1.00000 | 1.96812e-11 | 1.00000 |
| rad60anti     | 6.71546e-12 | 1.00000 | 6.71547e-12 | 1.00000 |
| PAH3+H        | 1.10194e-13 | 1.00000 | 1.10195e-13 | 1.00000 |
| rad59         | 3.47446e-14 | 1.00000 | 3.47447e-14 | 1.00000 |
| rad31         | 2.07093e-14 | 1.00000 | 2.07094e-14 | 1.00000 |
| rad19syn      | 1.80559e-14 | 1.00000 | 1.80559e-14 | 1.00000 |
| rad20         | 5.48171e-15 | 1.00000 | 5.48172e-15 | 1.00000 |
| rad21         | 4.01765e-15 | 1.00000 | 4.01766e-15 | 1.00000 |
| rad50         | 3.86326e-15 | 1.00000 | 3.86327e-15 | 1.00000 |
| rad18         | 2.79474e-16 | 1.00000 | 2.79474e-16 | 1.00000 |
| rad54         | 2.65918e-16 | 1.00000 | 2.65918e-16 | 1.00000 |
| PAH10+CH3     | 1.78611e-16 | 1.00000 | 1.78611e-16 | 1.00000 |
| rad43         | 4.37673e-17 | 1.00000 | 4.37674e-17 | 1.00000 |
| rad24         | 1.10481e-17 | 1.00000 | 1.10481e-17 | 1.00000 |
| rad62         | 8.41844e-18 | 1.00000 | 8.41845e-18 | 1.00000 |
| rad52         | 7.16421e-19 | 1.00000 | 7.16422e-19 | 1.00000 |
| PhcycC3H3_A+H | 2.25224e-19 | 1.00000 | 2.25224e-19 | 1.00000 |
| rad70         | 1.59536e-19 | 1.00000 | 1.59536e-19 | 1.00000 |
| rad55         | 6.92550e-20 | 1.00000 | 6.92552e-20 | 1.00000 |
| rad51         | 1.04293e-20 | 1.00000 | 1.04293e-20 | 1.00000 |
| PAH1+H        | 3.14119e-21 | 1.00000 | 3.14120e-21 | 1.00000 |
| rad58         | 1.61879e-22 | 1.00000 | 1.61879e-22 | 1.00000 |
| rad34         | 1.50470e-22 | 1.00000 | 1.50470e-22 | 1.00000 |
| rad65         | 5.97091e-23 | 1.00000 | 5.97092e-23 | 1.00000 |
| rad42         | 1.72521e-24 | 1.00000 | 1.72522e-24 | 1.00000 |
| rad41         | 4.75659e-25 | 1.00000 | 4.75660e-25 | 1.00000 |
| rad47         | 6.29925e-30 | 1.00000 | 6.29926e-30 | 1.00000 |

0.100000000 Pa, 210.000000 K

| Rate constant      | True (fraction)       | Effective (fraction)  |
|--------------------|-----------------------|-----------------------|
| Total              | 2.85520e-17 (1.00 )   | 2.85520e-17 (1.00 )   |
| Formation of rad11 | 2.39009e-17 (0.837 )  | 2.39009e-17 (0.837 )  |
| Formation of rad6  | 4.19900e-18 (0.147 )  | 4.19899e-18 (0.147 )  |
| H-abstraction      | 4.52111e-19 (0.0158 ) | 4.52111e-19 (0.0158 ) |

| species            | PYtrue      | Cumul    | PYeffective | Cumul    |
|--------------------|-------------|----------|-------------|----------|
| rad6               | 0.822185    | 0.822185 | 0.822186    | 0.822186 |
| Indene+H           | 0.156911    | 0.979096 | 0.156911    | 0.979098 |
| Benzene+2-propynyl | 0.00158346  | 0.994931 | 0.00158347  | 0.994933 |
| C2H2+PhCH2         | 0.00248286  | 0.997413 | 0.00248287  | 0.997415 |
| PhCCH+CH3          | 0.000713465 | 0.998127 | 0.000713467 | 0.998129 |
| rad2               | 0.000690235 | 0.998817 | 0.000690236 | 0.998819 |
| PhCHCCH2+H         | 0.000372198 | 0.999189 | 0.000372199 | 0.999191 |
| rad28              | 0.000271392 | 0.999461 | 0.000271393 | 0.999463 |
| PhCCCH3+H          | 0.000232496 | 0.999693 | 0.000232497 | 0.999695 |
| rad7               | 8.69954e-05 | 0.999780 | 8.69957e-05 | 0.999782 |
| rad26              | 6.40736e-05 | 0.999844 | 6.40738e-05 | 0.999846 |
| rad1               | 4.73012e-05 | 0.999892 | 4.73012e-05 | 0.999894 |
| rad10              | 4.09185e-05 | 0.999933 | 4.09186e-05 | 0.999934 |
| Ph+MeAc            | 2.55242e-05 | 0.999958 | 2.55242e-05 | 0.999960 |
| rad11              | 2.34365e-05 | 0.999981 | 2.34366e-05 | 0.999983 |
| rad3               | 5.14669e-06 | 0.999987 | 5.14670e-06 | 0.999989 |
| rad9               | 3.44917e-06 | 0.999990 | 3.44918e-06 | 0.999992 |
| Phenyl+Allene      | 2.82325e-06 | 0.999993 | 0.00000     | 0.999992 |
| rad8               | 2.79077e-06 | 0.999996 | 2.79078e-06 | 0.999995 |
| rad4               | 2.65976e-06 | 0.999998 | 2.65977e-06 | 0.999997 |
| PAH7+H             | 1.14801e-06 | 0.999999 | 1.14802e-06 | 0.999999 |
| rad13              | 3.52857e-07 | 1.000000 | 3.52858e-07 | 0.999999 |
| rad39              | 2.46084e-07 | 1.00000  | 2.46084e-07 | 0.999999 |
| rad30              | 1.78505e-07 | 1.00000  | 1.78506e-07 | 0.999999 |
| rad12              | 1.29536e-07 | 1.00000  | 1.29536e-07 | 1.000000 |
| rad23              | 6.15210e-08 | 1.00000  | 6.15211e-08 | 1.000000 |
| PhCH2CCH+H         | 4.64232e-08 | 1.00000  | 4.64233e-08 | 1.000000 |
| PAH9+H             | 4.35205e-08 | 1.00000  | 4.35206e-08 | 1.000000 |
| rad15              | 4.02732e-08 | 1.00000  | 4.02733e-08 | 1.000000 |
| rad35              | 1.98635e-08 | 1.00000  | 1.98636e-08 | 1.000000 |
| rad38              | 1.25964e-08 | 1.00000  | 1.25964e-08 | 1.000000 |
| rad37              | 3.58488e-09 | 1.00000  | 3.58490e-09 | 1.000000 |
| rad45              | 9.24376e-10 | 1.00000  | 9.24379e-10 | 1.000000 |
| rad33              | 6.68870e-10 | 1.00000  | 6.68872e-10 | 1.000000 |
| rad14              | 4.39516e-10 | 1.00000  | 4.39517e-10 | 1.000000 |
| rad27              | 4.07772e-10 | 1.00000  | 4.07773e-10 | 1.000000 |
| rad25              | 2.38270e-10 | 1.00000  | 2.38271e-10 | 1.000000 |
| rad46              | 2.00325e-10 | 1.00000  | 2.00325e-10 | 1.000000 |
| rad5               | 9.96084e-11 | 1.00000  | 9.96084e-11 | 1.000000 |
| rad36              | 5.79183e-11 | 1.00000  | 5.79185e-11 | 1.000000 |
| rad22              | 3.78487e-11 | 1.00000  | 3.78488e-11 | 1.000000 |

|               |             |         |             |          |
|---------------|-------------|---------|-------------|----------|
| rad60syn      | 2.84992e-11 | 1.00000 | 2.84993e-11 | 1.000000 |
| rad60anti     | 1.00008e-11 | 1.00000 | 1.00009e-11 | 1.000000 |
| PAH3+H        | 2.28820e-13 | 1.00000 | 2.28820e-13 | 1.000000 |
| rad59         | 7.01706e-14 | 1.00000 | 7.01708e-14 | 1.000000 |
| rad19syn      | 5.40030e-14 | 1.00000 | 5.40032e-14 | 1.000000 |
| rad31         | 2.17304e-14 | 1.00000 | 2.17304e-14 | 1.000000 |
| rad50         | 8.10102e-15 | 1.00000 | 8.10104e-15 | 1.000000 |
| rad20         | 5.72716e-15 | 1.00000 | 5.72718e-15 | 1.000000 |
| rad21         | 4.21517e-15 | 1.00000 | 4.21518e-15 | 1.000000 |
| rad54         | 9.41458e-16 | 1.00000 | 9.41460e-16 | 1.000000 |
| PAH10+CH3     | 6.31730e-16 | 1.00000 | 6.31732e-16 | 1.000000 |
| rad18         | 2.75901e-16 | 1.00000 | 2.75901e-16 | 1.000000 |
| rad43         | 1.53694e-16 | 1.00000 | 1.53694e-16 | 1.000000 |
| rad62         | 3.28803e-17 | 1.00000 | 3.28804e-17 | 1.000000 |
| rad24         | 1.01405e-17 | 1.00000 | 1.01406e-17 | 1.000000 |
| rad52         | 2.15327e-18 | 1.00000 | 2.15328e-18 | 1.000000 |
| PhcycC3H3_A+H | 1.18342e-18 | 1.00000 | 1.18343e-18 | 1.000000 |
| rad70         | 7.95651e-19 | 1.00000 | 7.95653e-19 | 1.000000 |
| rad55         | 3.51337e-19 | 1.00000 | 3.51338e-19 | 1.000000 |
| rad51         | 4.26872e-20 | 1.00000 | 4.26874e-20 | 1.000000 |
| PAH1+H        | 1.96656e-20 | 1.00000 | 1.96656e-20 | 1.000000 |
| rad34         | 9.89696e-22 | 1.00000 | 9.89696e-22 | 1.000000 |
| rad58         | 8.72592e-22 | 1.00000 | 8.72593e-22 | 1.000000 |
| rad65         | 2.85237e-22 | 1.00000 | 2.85237e-22 | 1.000000 |
| rad42         | 1.27693e-23 | 1.00000 | 1.27693e-23 | 1.000000 |
| rad41         | 3.58479e-24 | 1.00000 | 3.58480e-24 | 1.000000 |
| rad47         | 3.10688e-29 | 1.00000 | 3.10689e-29 | 1.000000 |

0.100000000 Pa, 220.000000 K

| Rate constant      | True (fraction)       | Effective (fraction)  |
|--------------------|-----------------------|-----------------------|
| Total              | 4.29529e-17 (1.00 )   | 4.29527e-17 (1.00 )   |
| Formation of rad11 | 3.53712e-17 (0.823 )  | 3.53710e-17 (0.823 )  |
| Formation of rad6  | 6.75433e-18 (0.157 )  | 6.75430e-18 (0.157 )  |
| H-abstraction      | 8.27372e-19 (0.0193 ) | 8.27372e-19 (0.0193 ) |

| species            | PYtrue      | Cumul    | PYeffective | Cumul    |
|--------------------|-------------|----------|-------------|----------|
| rad6               | 0.804123    | 0.804123 | 0.804125    | 0.804125 |
| Indene+H           | 0.170743    | 0.974866 | 0.170743    | 0.974869 |
| Benzene+2-propynyl | 0.0192623   | 0.994128 | 0.0192624   | 0.994131 |
| C2H2+PhCH2         | 0.00289591  | 0.997024 | 0.00289592  | 0.997027 |
| PhCCH+CH3          | 0.000915555 | 0.997940 | 0.000915559 | 0.997943 |
| rad2               | 0.000679412 | 0.998619 | 0.000679415 | 0.998622 |
| PhCHCCH2+H         | 0.000472006 | 0.999091 | 0.000472007 | 0.999094 |
| PhCCCH3+H          | 0.000296912 | 0.999388 | 0.000296914 | 0.999391 |
| rad28              | 0.000291750 | 0.999680 | 0.000291752 | 0.999683 |
| rad7               | 8.47450e-05 | 0.999765 | 8.47453e-05 | 0.999768 |
| rad26              | 6.68191e-05 | 0.999831 | 6.68194e-05 | 0.999834 |
| rad1               | 4.69867e-05 | 0.999878 | 4.69868e-05 | 0.999881 |
| rad10              | 4.02253e-05 | 0.999919 | 4.02255e-05 | 0.999922 |
| Ph+MeAc            | 3.60135e-05 | 0.999955 | 3.60137e-05 | 0.999958 |
| rad11              | 2.28059e-05 | 0.999977 | 2.28060e-05 | 0.999980 |
| rad3               | 5.04865e-06 | 0.999983 | 5.04867e-06 | 0.999985 |
| rad9               | 4.47102e-06 | 0.999987 | 4.47104e-06 | 0.999990 |
| Phenyl+Allene      | 4.15331e-06 | 0.999991 | 0.00000     | 0.999990 |
| rad8               | 3.65072e-06 | 0.999995 | 3.65073e-06 | 0.999994 |
| rad4               | 2.61587e-06 | 0.999997 | 2.61588e-06 | 0.999996 |
| PAH7+H             | 1.69670e-06 | 0.999999 | 1.69671e-06 | 0.999998 |
| rad39              | 3.71595e-07 | 0.999999 | 3.71597e-07 | 0.999998 |
| rad13              | 3.46172e-07 | 1.000000 | 3.46174e-07 | 0.999999 |
| rad30              | 2.14403e-07 | 1.00000  | 2.14404e-07 | 0.999999 |
| rad12              | 1.81104e-07 | 1.00000  | 1.81104e-07 | 0.999999 |
| PhCH2CCH+H         | 8.07560e-08 | 1.00000  | 8.07564e-08 | 0.999999 |
| rad23              | 5.61034e-08 | 1.00000  | 5.61037e-08 | 0.999999 |
| PAH9+H             | 5.35352e-08 | 1.00000  | 5.35354e-08 | 0.999999 |
| rad15              | 4.93819e-08 | 1.00000  | 4.93821e-08 | 0.999999 |
| rad35              | 2.40809e-08 | 1.00000  | 2.40810e-08 | 0.999999 |
| rad38              | 1.56658e-08 | 1.00000  | 1.56659e-08 | 0.999999 |
| rad37              | 5.74560e-09 | 1.00000  | 5.74562e-09 | 0.999999 |
| rad45              | 8.39837e-10 | 1.00000  | 8.39840e-10 | 0.999999 |
| rad33              | 6.58101e-10 | 1.00000  | 6.58103e-10 | 0.999999 |
| rad14              | 4.32653e-10 | 1.00000  | 4.32654e-10 | 0.999999 |
| rad27              | 4.02897e-10 | 1.00000  | 4.02899e-10 | 0.999999 |
| rad46              | 2.68452e-10 | 1.00000  | 2.68453e-10 | 0.999999 |
| rad25              | 2.33874e-10 | 1.00000  | 2.33875e-10 | 0.999999 |
| rad5               | 1.78756e-10 | 1.00000  | 1.78757e-10 | 0.999999 |
| rad36              | 5.27792e-11 | 1.00000  | 5.27794e-11 | 0.999999 |
| rad60syn           | 4.11329e-11 | 1.00000  | 4.11330e-11 | 0.999999 |

|               |             |         |             |          |
|---------------|-------------|---------|-------------|----------|
| rad22         | 3.43334e-11 | 1.00000 | 3.43335e-11 | 0.999999 |
| rad60anti     | 1.47968e-11 | 1.00000 | 1.47969e-11 | 0.999999 |
| PAH3+H        | 4.54269e-13 | 1.00000 | 4.54271e-13 | 0.999999 |
| rad19syn      | 1.47550e-13 | 1.00000 | 1.47550e-13 | 0.999999 |
| rad59         | 1.35750e-13 | 1.00000 | 1.35750e-13 | 0.999999 |
| rad31         | 2.28375e-14 | 1.00000 | 2.28376e-14 | 0.999999 |
| rad50         | 1.63056e-14 | 1.00000 | 1.63057e-14 | 0.999999 |
| rad20         | 5.98827e-15 | 1.00000 | 5.98829e-15 | 0.999999 |
| rad21         | 4.42636e-15 | 1.00000 | 4.42638e-15 | 0.999999 |
| rad54         | 2.99447e-15 | 1.00000 | 2.99448e-15 | 0.999999 |
| PAH10+CH3     | 2.00345e-15 | 1.00000 | 2.00346e-15 | 0.999999 |
| rad43         | 4.83457e-16 | 1.00000 | 4.83459e-16 | 0.999999 |
| rad18         | 2.73063e-16 | 1.00000 | 2.73064e-16 | 0.999999 |
| rad62         | 1.13926e-16 | 1.00000 | 1.13927e-16 | 0.999999 |
| rad24         | 9.33300e-18 | 1.00000 | 9.33304e-18 | 0.999999 |
| rad52         | 5.95085e-18 | 1.00000 | 5.95087e-18 | 0.999999 |
| PhcycC3H3_A+H | 5.35634e-18 | 1.00000 | 5.35637e-18 | 0.999999 |
| rad70         | 3.43242e-18 | 1.00000 | 3.43242e-18 | 0.999999 |
| rad55         | 1.53988e-18 | 1.00000 | 1.53989e-18 | 0.999999 |
| rad51         | 1.55597e-19 | 1.00000 | 1.55598e-19 | 0.999999 |
| PAH1+H        | 1.03477e-19 | 1.00000 | 1.03477e-19 | 0.999999 |
| rad34         | 5.43505e-21 | 1.00000 | 5.43508e-21 | 0.999999 |
| rad58         | 4.04268e-21 | 1.00000 | 4.04269e-21 | 0.999999 |
| rad65         | 1.19017e-21 | 1.00000 | 1.19018e-21 | 0.999999 |
| rad42         | 7.75635e-23 | 1.00000 | 7.75638e-23 | 0.999999 |
| rad41         | 2.21158e-23 | 1.00000 | 2.21159e-23 | 0.999999 |
| rad47         | 1.30514e-28 | 1.00000 | 1.30515e-28 | 0.999999 |

0.100000000 Pa, 230.000000 K

| Rate constant      | True (fraction) |           | Effective (fraction) |           |
|--------------------|-----------------|-----------|----------------------|-----------|
| Total              | 6.25016e-17     | (1.00 )   | 6.25013e-17          | (1.00 )   |
| Formation of rad11 | 5.06355e-17     | (0.810 )  | 5.06352e-17          | (0.810 )  |
| Formation of rad6  | 1.04318e-17     | (0.167 )  | 1.04318e-17          | (0.167 )  |
| H-abstraction      | 1.43428e-18     | (0.0229 ) | 1.43428e-18          | (0.0229 ) |

  

| species            | PYtrue      | Cumul    | PYeffective | Cumul    |
|--------------------|-------------|----------|-------------|----------|
| rad6               | 0.784058    | 0.784058 | 0.784063    | 0.784063 |
| Indene+H           | 0.186154    | 0.970212 | 0.186156    | 0.970219 |
| Benzene+2-propynyl | 0.0229478   | 0.993160 | 0.0229480   | 0.993166 |
| C2H2+PhCH2         | 0.00339012  | 0.996550 | 0.00339014  | 0.996557 |
| PhCCH+CH3          | 0.00116580  | 0.997716 | 0.00116581  | 0.997722 |
| rad2               | 0.000665846 | 0.998381 | 0.000665851 | 0.998388 |
| PhCHCCH2+H         | 0.000594167 | 0.998976 | 0.000594171 | 0.998982 |
| PhCCCH3+H          | 0.000375764 | 0.999351 | 0.000375765 | 0.999358 |
| rad28              | 0.000310256 | 0.999662 | 0.000310258 | 0.999668 |
| rad7               | 8.23234e-05 | 0.999744 | 8.23239e-05 | 0.999751 |
| rad26              | 6.89291e-05 | 0.999813 | 6.89295e-05 | 0.999820 |
| Ph+MeAc            | 5.00557e-05 | 0.999863 | 5.00559e-05 | 0.999870 |
| rad1               | 4.65060e-05 | 0.999909 | 4.65063e-05 | 0.999916 |
| rad10              | 3.93780e-05 | 0.999949 | 3.93783e-05 | 0.999956 |
| rad11              | 2.21327e-05 | 0.999971 | 2.21328e-05 | 0.999978 |
| Phenyl+Allene      | 6.05161e-06 | 0.999977 | 0.00000     | 0.999978 |
| rad9               | 5.78961e-06 | 0.999983 | 5.78965e-06 | 0.999984 |
| rad3               | 4.93389e-06 | 0.999988 | 4.93392e-06 | 0.999989 |
| rad8               | 4.72747e-06 | 0.999992 | 4.72750e-06 | 0.999993 |
| rad4               | 2.56364e-06 | 0.999995 | 2.56366e-06 | 0.999996 |
| PAH7+H             | 2.45916e-06 | 0.999997 | 2.45918e-06 | 0.999998 |
| rad39              | 5.49209e-07 | 0.999998 | 5.49212e-07 | 0.999999 |
| rad13              | 3.38655e-07 | 0.999998 | 3.38657e-07 | 0.999999 |
| rad30              | 2.58511e-07 | 0.999999 | 2.58513e-07 | 0.999999 |
| rad12              | 2.48617e-07 | 0.999999 | 2.48619e-07 | 1.000000 |
| PhCH2CCH+H         | 1.36467e-07 | 0.999999 | 1.36468e-07 | 1.000000 |
| PAH9+H             | 6.61669e-08 | 0.999999 | 6.61673e-08 | 1.000000 |
| rad15              | 6.07710e-08 | 0.999999 | 6.07714e-08 | 1.000000 |
| rad23              | 5.12404e-08 | 0.999999 | 5.12408e-08 | 1.000000 |
| rad35              | 2.93287e-08 | 0.999999 | 2.93289e-08 | 1.000000 |
| rad38              | 1.95736e-08 | 0.999999 | 1.95737e-08 | 1.000000 |
| rad37              | 8.92191e-09 | 0.999999 | 8.92196e-09 | 1.000000 |
| rad45              | 7.64642e-10 | 0.999999 | 7.64647e-10 | 1.000000 |
| rad33              | 6.45712e-10 | 0.999999 | 6.45716e-10 | 1.000000 |
| rad14              | 4.24318e-10 | 0.999999 | 4.24321e-10 | 1.000000 |
| rad27              | 3.96453e-10 | 0.999999 | 3.96455e-10 | 1.000000 |
| rad46              | 3.60681e-10 | 0.999999 | 3.60683e-10 | 1.000000 |
| rad5               | 3.08633e-10 | 0.999999 | 3.08635e-10 | 1.000000 |
| rad25              | 2.28920e-10 | 0.999999 | 2.28921e-10 | 1.000000 |
| rad60syn           | 5.90380e-11 | 0.999999 | 5.90384e-11 | 1.000000 |
| rad36              | 4.82204e-11 | 0.999999 | 4.82206e-11 | 1.000000 |

|               |             |          |             |         |
|---------------|-------------|----------|-------------|---------|
| rad22         | 3.12030e-11 | 0.999999 | 3.12032e-11 | 1.00000 |
| rad60anti     | 2.17116e-11 | 0.999999 | 2.17117e-11 | 1.00000 |
| PAH3+H        | 8.66112e-13 | 0.999999 | 8.66117e-13 | 1.00000 |
| rad19syn      | 3.72504e-13 | 0.999999 | 3.72507e-13 | 1.00000 |
| rad59         | 2.52649e-13 | 0.999999 | 2.52651e-13 | 1.00000 |
| rad50         | 3.16171e-14 | 0.999999 | 3.16173e-14 | 1.00000 |
| rad31         | 2.40531e-14 | 0.999999 | 2.40533e-14 | 1.00000 |
| rad54         | 8.67428e-15 | 0.999999 | 8.67433e-15 | 1.00000 |
| rad20         | 6.26422e-15 | 0.999999 | 6.26426e-15 | 1.00000 |
| PAH10+CH3     | 5.77539e-15 | 0.999999 | 5.77543e-15 | 1.00000 |
| rad21         | 4.65097e-15 | 0.999999 | 4.65100e-15 | 1.00000 |
| rad43         | 1.38115e-15 | 0.999999 | 1.38116e-15 | 1.00000 |
| rad62         | 3.55511e-16 | 0.999999 | 3.55513e-16 | 1.00000 |
| rad18         | 2.70773e-16 | 0.999999 | 2.70774e-16 | 1.00000 |
| PhcycC3H3_A+H | 2.12636e-17 | 0.999999 | 2.12638e-17 | 1.00000 |
| rad52         | 1.52835e-17 | 0.999999 | 1.52836e-17 | 1.00000 |
| rad70         | 1.30409e-17 | 0.999999 | 1.30410e-17 | 1.00000 |
| rad24         | 8.60928e-18 | 0.999999 | 8.60933e-18 | 1.00000 |
| rad55         | 5.93681e-18 | 0.999999 | 5.93684e-18 | 1.00000 |
| rad51         | 5.12303e-19 | 0.999999 | 5.12306e-19 | 1.00000 |
| PAH1+H        | 4.67491e-19 | 0.999999 | 4.67494e-19 | 1.00000 |
| rad34         | 2.54809e-20 | 0.999999 | 2.54811e-20 | 1.00000 |
| rad58         | 1.63925e-20 | 0.999999 | 1.63926e-20 | 1.00000 |
| rad65         | 4.40937e-21 | 0.999999 | 4.40939e-21 | 1.00000 |
| rad42         | 3.96402e-22 | 0.999999 | 3.96404e-22 | 1.00000 |
| rad41         | 1.14554e-22 | 0.999999 | 1.14555e-22 | 1.00000 |
| rad47         | 4.77060e-28 | 0.999999 | 4.77063e-28 | 1.00000 |

0.100000000 Pa, 240.000000 K

| Rate constant      | True (fraction)       | Effective (fraction)  |
|--------------------|-----------------------|-----------------------|
| Total              | 8.83273e-17 (1.00 )   | 8.83265e-17 (1.00 )   |
| Formation of rad11 | 7.04077e-17 (0.797 )  | 7.04071e-17 (0.797 )  |
| Formation of rad6  | 1.55481e-17 (0.176 )  | 1.55480e-17 (0.176 )  |
| H-abstraction      | 2.37143e-18 (0.0268 ) | 2.37143e-18 (0.0268 ) |

| species            | PYtrue      | Cumul    | PYeffective | Cumul    |
|--------------------|-------------|----------|-------------|----------|
| rad6               | 0.761972    | 0.761972 | 0.761979    | 0.761979 |
| Indene+H           | 0.203181    | 0.965153 | 0.203183    | 0.965162 |
| Benzene+2-propynyl | 0.0268483   | 0.992002 | 0.0268485   | 0.992010 |
| C2H2+PhCH2         | 0.00397742  | 0.995979 | 0.00397746  | 0.995988 |
| PhCCH+CH3          | 0.00147203  | 0.997451 | 0.00147204  | 0.997460 |
| PhCHCCH2+H         | 0.000741985 | 0.998193 | 0.000741992 | 0.998202 |
| rad2               | 0.000649695 | 0.998843 | 0.000649700 | 0.998852 |
| PhCCCH3+H          | 0.000471070 | 0.999314 | 0.000471073 | 0.999323 |
| rad28              | 0.000326394 | 0.999640 | 0.000326397 | 0.999649 |
| rad7               | 7.97267e-05 | 0.999720 | 7.97275e-05 | 0.999729 |
| rad26              | 7.03767e-05 | 0.999790 | 7.03773e-05 | 0.999799 |
| Ph+MeAc            | 6.85299e-05 | 0.999859 | 6.85305e-05 | 0.999868 |
| rad1               | 4.58653e-05 | 0.999905 | 4.58657e-05 | 0.999914 |
| rad10              | 3.83857e-05 | 0.999943 | 3.83861e-05 | 0.999952 |
| rad11              | 2.14158e-05 | 0.999965 | 2.14160e-05 | 0.999973 |
| Phenyl+Allene      | 8.72215e-06 | 0.999973 | 0.00000     | 0.999973 |
| rad9               | 7.47468e-06 | 0.999981 | 7.47475e-06 | 0.999981 |
| rad8               | 6.05759e-06 | 0.999987 | 6.05763e-06 | 0.999987 |
| rad3               | 4.80323e-06 | 0.999992 | 4.80327e-06 | 0.999992 |
| PAH7+H             | 3.49734e-06 | 0.999995 | 3.49737e-06 | 0.999995 |
| rad4               | 2.50341e-06 | 0.999998 | 2.50344e-06 | 0.999998 |
| rad39              | 7.95108e-07 | 0.999998 | 7.95114e-07 | 0.999999 |
| rad12              | 3.35355e-07 | 0.999999 | 3.35358e-07 | 0.999999 |
| rad13              | 3.30282e-07 | 0.999999 | 3.30285e-07 | 0.999999 |
| rad30              | 3.12349e-07 | 0.999999 | 3.12350e-07 | 0.999999 |
| PhCH2CCH+H         | 2.24441e-07 | 1.000000 | 2.24443e-07 | 1.000000 |
| PAH9+H             | 8.20050e-08 | 1.000000 | 8.20057e-08 | 1.000000 |
| rad15              | 7.49139e-08 | 1.000000 | 7.49146e-08 | 1.000000 |
| rad23              | 4.68506e-08 | 1.000000 | 4.68511e-08 | 1.000000 |
| rad35              | 3.58198e-08 | 1.000000 | 3.58201e-08 | 1.000000 |
| rad38              | 2.45186e-08 | 1.000000 | 2.45187e-08 | 1.000000 |
| rad37              | 1.34607e-08 | 1.000000 | 1.34608e-08 | 1.000000 |
| rad45              | 6.97366e-10 | 1.000000 | 6.97373e-10 | 1.000000 |
| rad33              | 6.31653e-10 | 1.000000 | 6.31659e-10 | 1.000000 |
| rad5               | 5.14361e-10 | 1.000000 | 5.14366e-10 | 1.000000 |
| rad46              | 4.84600e-10 | 1.000000 | 4.84604e-10 | 1.000000 |
| rad14              | 4.14563e-10 | 1.000000 | 4.14565e-10 | 1.000000 |
| rad27              | 3.88508e-10 | 1.000000 | 3.88512e-10 | 1.000000 |
| rad25              | 2.23392e-10 | 1.000000 | 2.23394e-10 | 1.000000 |
| rad60syn           | 8.41072e-11 | 1.000000 | 8.41078e-11 | 1.000000 |
| rad36              | 4.41526e-11 | 1.000000 | 4.41530e-11 | 1.000000 |

|               |             |          |             |          |
|---------------|-------------|----------|-------------|----------|
| rad60anti     | 3.15472e-11 | 1.000000 | 3.15475e-11 | 1.000000 |
| rad22         | 2.83981e-11 | 1.000000 | 2.83984e-11 | 1.000000 |
| PAH3+H        | 1.59184e-12 | 1.000000 | 1.59186e-12 | 1.000000 |
| rad19syn      | 8.77221e-13 | 1.000000 | 8.77229e-13 | 1.000000 |
| rad59         | 4.53986e-13 | 1.000000 | 4.53990e-13 | 1.000000 |
| rad50         | 5.92403e-14 | 1.000000 | 5.92408e-14 | 1.000000 |
| rad31         | 2.54040e-14 | 1.000000 | 2.54042e-14 | 1.000000 |
| rad54         | 2.31432e-14 | 1.000000 | 2.31434e-14 | 1.000000 |
| PAH10+CH3     | 1.53058e-14 | 1.000000 | 1.53059e-14 | 1.000000 |
| rad20         | 6.55417e-15 | 1.000000 | 6.55422e-15 | 1.000000 |
| rad21         | 4.88870e-15 | 1.000000 | 4.88873e-15 | 1.000000 |
| rad43         | 3.62488e-15 | 1.000000 | 3.62491e-15 | 1.000000 |
| rad62         | 1.01166e-15 | 1.000000 | 1.01167e-15 | 1.000000 |
| rad18         | 2.68871e-16 | 1.000000 | 2.68873e-16 | 1.000000 |
| PhcycC3H3_A+H | 7.51464e-17 | 1.000000 | 7.51471e-17 | 1.000000 |
| rad70         | 4.42874e-17 | 1.000000 | 4.42877e-17 | 1.000000 |
| rad52         | 3.67954e-17 | 1.000000 | 3.67956e-17 | 1.000000 |
| rad55         | 2.04338e-17 | 1.000000 | 2.04339e-17 | 1.000000 |
| rad24         | 7.95671e-18 | 1.000000 | 7.95678e-18 | 1.000000 |
| PAH1+H        | 1.84602e-18 | 1.000000 | 1.84604e-18 | 1.000000 |
| rad51         | 1.54117e-18 | 1.000000 | 1.54118e-18 | 1.000000 |
| rad34         | 1.03900e-19 | 1.000000 | 1.03900e-19 | 1.000000 |
| rad58         | 5.90537e-20 | 1.000000 | 5.90541e-20 | 1.000000 |
| rad65         | 1.46992e-20 | 1.000000 | 1.46994e-20 | 1.000000 |
| rad42         | 1.74048e-21 | 1.000000 | 1.74050e-21 | 1.000000 |
| rad41         | 5.08874e-22 | 1.000000 | 5.08877e-22 | 1.000000 |
| rad47         | 1.54465e-27 | 1.000000 | 1.54467e-27 | 1.000000 |

0.100000000 Pa, 250.000000 K

| Rate constant      | True (fraction)       | Effective (fraction)  |
|--------------------|-----------------------|-----------------------|
| Total              | 1.21641e-16 (1.00 )   | 1.21640e-16 (1.00 )   |
| Formation of rad11 | 9.54219e-17 (0.784 )  | 9.54207e-17 (0.784 )  |
| Formation of rad6  | 2.24583e-17 (0.185 )  | 2.24580e-17 (0.185 )  |
| H-abstraction      | 3.76121e-18 (0.0309 ) | 3.76121e-18 (0.0309 ) |

| species            | PYtrue      | Cumul    | PYeffective | Cumul    |
|--------------------|-------------|----------|-------------|----------|
| rad6               | 0.737882    | 0.737882 | 0.737892    | 0.737892 |
| Indene+H           | 0.221822    | 0.959705 | 0.221825    | 0.959717 |
| Benzene+2-propynyl | 0.0309205   | 0.990625 | 0.0309209   | 0.990638 |
| C2H2+PhCH2         | 0.00466996  | 0.995295 | 0.00467001  | 0.995308 |
| PhCCH+CH3          | 0.00184216  | 0.997137 | 0.00184219  | 0.997150 |
| PhCHCCH2+H         | 0.000918724 | 0.998056 | 0.000918735 | 0.998069 |
| rad2               | 0.000631126 | 0.998687 | 0.000631134 | 0.998700 |
| PhCCCH3+H          | 0.000584769 | 0.999272 | 0.000584776 | 0.999285 |
| rad28              | 0.000339725 | 0.999612 | 0.000339729 | 0.999624 |
| Ph+MeAc            | 9.24183e-05 | 0.999704 | 9.24194e-05 | 0.999717 |
| rad7               | 7.69560e-05 | 0.999781 | 7.69569e-05 | 0.999794 |
| rad26              | 7.11550e-05 | 0.999852 | 7.11558e-05 | 0.999865 |
| rad1               | 4.50711e-05 | 0.999897 | 4.50717e-05 | 0.999910 |
| rad10              | 3.72581e-05 | 0.999934 | 3.72586e-05 | 0.999947 |
| rad11              | 2.06552e-05 | 0.999955 | 2.06554e-05 | 0.999968 |
| Phenyl+Allene      | 1.24233e-05 | 0.999968 | 0.00000     | 0.999968 |
| rad9               | 9.60532e-06 | 0.999977 | 9.60544e-06 | 0.999977 |
| rad8               | 7.67803e-06 | 0.999985 | 7.67812e-06 | 0.999985 |
| PAH7+H             | 4.88365e-06 | 0.999990 | 4.88370e-06 | 0.999990 |
| rad3               | 4.65765e-06 | 0.999994 | 4.65770e-06 | 0.999995 |
| rad4               | 2.43562e-06 | 0.999997 | 2.43565e-06 | 0.999997 |
| rad39              | 1.12852e-06 | 0.999998 | 1.12853e-06 | 0.999998 |
| rad12              | 4.44771e-07 | 0.999998 | 4.44776e-07 | 0.999999 |
| rad30              | 3.77549e-07 | 0.999999 | 3.77553e-07 | 0.999999 |
| PhCH2CCH+H         | 3.59853e-07 | 0.999999 | 3.59858e-07 | 0.999999 |
| rad13              | 3.21046e-07 | 0.999999 | 3.21050e-07 | 1.000000 |
| PAH9+H             | 1.01723e-07 | 1.000000 | 1.01724e-07 | 1.000000 |
| rad15              | 9.23365e-08 | 1.000000 | 9.23376e-08 | 1.000000 |
| rad35              | 4.37920e-08 | 1.000000 | 4.37926e-08 | 1.000000 |
| rad23              | 4.28698e-08 | 1.000000 | 4.28703e-08 | 1.000000 |
| rad38              | 3.07311e-08 | 1.000000 | 3.07314e-08 | 1.000000 |
| rad37              | 1.97787e-08 | 1.000000 | 1.97789e-08 | 1.000000 |
| rad5               | 8.29824e-10 | 1.000000 | 8.29834e-10 | 1.000000 |
| rad46              | 6.49639e-10 | 1.000000 | 6.49646e-10 | 1.000000 |
| rad45              | 6.36886e-10 | 1.000000 | 6.36894e-10 | 1.000000 |
| rad33              | 6.15902e-10 | 1.000000 | 6.15910e-10 | 1.000000 |
| rad14              | 4.03446e-10 | 1.000000 | 4.03451e-10 | 1.000000 |
| rad27              | 3.79142e-10 | 1.000000 | 3.79146e-10 | 1.000000 |
| rad25              | 2.17283e-10 | 1.000000 | 2.17286e-10 | 1.000000 |
| rad60syn           | 1.18752e-10 | 1.000000 | 1.18753e-10 | 1.000000 |
| rad60anti          | 4.53401e-11 | 1.000000 | 4.53407e-11 | 1.000000 |



|               |             |          |             |         |
|---------------|-------------|----------|-------------|---------|
| rad36         | 4.05052e-11 | 1.000000 | 4.05057e-11 | 1.00000 |
| rad22         | 2.58720e-11 | 1.000000 | 2.58724e-11 | 1.00000 |
| PAH3+H        | 2.82923e-12 | 1.000000 | 2.82927e-12 | 1.00000 |
| rad19syn      | 1.94221e-12 | 1.000000 | 1.94223e-12 | 1.00000 |
| rad59         | 7.89969e-13 | 1.000000 | 7.89980e-13 | 1.00000 |
| rad50         | 1.07538e-13 | 1.000000 | 1.07540e-13 | 1.00000 |
| rad54         | 5.74004e-14 | 1.000000 | 5.74012e-14 | 1.00000 |
| PAH10+CH3     | 3.76442e-14 | 1.000000 | 3.76447e-14 | 1.00000 |
| rad31         | 2.69232e-14 | 1.000000 | 2.69235e-14 | 1.00000 |
| rad43         | 8.82424e-15 | 1.000000 | 8.82435e-15 | 1.00000 |
| rad20         | 6.85717e-15 | 1.000000 | 6.85725e-15 | 1.00000 |
| rad21         | 5.13918e-15 | 1.000000 | 5.13925e-15 | 1.00000 |
| rad62         | 2.65259e-15 | 1.000000 | 2.65263e-15 | 1.00000 |
| rad18         | 2.67217e-16 | 1.000000 | 2.67220e-16 | 1.00000 |
| PhcycC3H3_A+H | 2.39370e-16 | 1.000000 | 2.39373e-16 | 1.00000 |
| rad70         | 1.36095e-16 | 1.000000 | 1.36097e-16 | 1.00000 |
| rad52         | 8.36275e-17 | 1.000000 | 8.36285e-17 | 1.00000 |
| rad55         | 6.35618e-17 | 1.000000 | 6.35626e-17 | 1.00000 |
| rad24         | 7.36535e-18 | 1.000000 | 7.36544e-18 | 1.00000 |
| PAH1+H        | 6.46761e-18 | 1.000000 | 6.46769e-18 | 1.00000 |
| rad51         | 4.27574e-18 | 1.000000 | 4.27580e-18 | 1.00000 |
| rad34         | 3.74293e-19 | 1.000000 | 3.74298e-19 | 1.00000 |
| rad58         | 1.91389e-19 | 1.000000 | 1.91392e-19 | 1.00000 |
| rad65         | 4.45789e-20 | 1.000000 | 4.45795e-20 | 1.00000 |
| rad42         | 6.68225e-21 | 1.000000 | 6.68233e-21 | 1.00000 |
| rad41         | 1.97369e-21 | 1.000000 | 1.97370e-21 | 1.00000 |
| rad47         | 4.49738e-27 | 1.000000 | 4.49744e-27 | 1.00000 |

0.100000000 Pa, 260.000000 K

| Rate constant      | True (fraction)       | Effective (fraction)  |
|--------------------|-----------------------|-----------------------|
| Total              | 1.63720e-16 (1.00 )   | 1.63717e-16 (1.00 )   |
| Formation of rad11 | 1.26419e-16 (0.772 )  | 1.26416e-16 (0.772 )  |
| Formation of rad6  | 3.15515e-17 (0.193 )  | 3.15509e-17 (0.193 )  |
| H-abstraction      | 5.75028e-18 (0.0351 ) | 5.75028e-18 (0.0351 ) |

| species            | PYtrue      | Cumul    | PYeffective | Cumul    |
|--------------------|-------------|----------|-------------|----------|
| rad6               | 0.711854    | 0.711854 | 0.711867    | 0.711867 |
| Indene+H           | 0.242029    | 0.953883 | 0.242033    | 0.953899 |
| Benzene+2-propynyl | 0.0351226   | 0.989005 | 0.0351232   | 0.989023 |
| C2H2+PhCH2         | 0.00547965  | 0.994485 | 0.00547974  | 0.994502 |
| PhCCH+CH3          | 0.00228392  | 0.996769 | 0.00228396  | 0.996786 |
| PhCHCCH2+H         | 0.00112747  | 0.997896 | 0.00112749  | 0.997914 |
| PhCCCH3+H          | 0.000718607 | 0.998615 | 0.000718619 | 0.998632 |
| rad2               | 0.000610330 | 0.999225 | 0.000610342 | 0.999243 |
| rad28              | 0.000349908 | 0.999575 | 0.000349914 | 0.999593 |
| Ph+MeAc            | 0.000122784 | 0.999698 | 0.000122785 | 0.999715 |
| rad7               | 7.40163e-05 | 0.999772 | 7.40176e-05 | 0.999789 |
| rad26              | 7.12743e-05 | 0.999843 | 7.12756e-05 | 0.999861 |
| rad1               | 4.41308e-05 | 0.999887 | 4.41315e-05 | 0.999905 |
| rad10              | 3.60061e-05 | 0.999923 | 3.60067e-05 | 0.999941 |
| rad11              | 1.98522e-05 | 0.999943 | 1.98524e-05 | 0.999961 |
| Phenyl+Allene      | 1.74758e-05 | 0.999961 | 0.00000     | 0.999961 |
| rad9               | 1.22693e-05 | 0.999973 | 1.22696e-05 | 0.999973 |
| rad8               | 9.62459e-06 | 0.999983 | 9.62476e-06 | 0.999983 |
| PAH7+H             | 6.70077e-06 | 0.999989 | 6.70090e-06 | 0.999989 |
| rad3               | 4.49825e-06 | 0.999994 | 4.49833e-06 | 0.999994 |
| rad4               | 2.36075e-06 | 0.999996 | 2.36078e-06 | 0.999996 |
| rad39              | 1.57174e-06 | 0.999998 | 1.57177e-06 | 0.999998 |
| rad12              | 5.80368e-07 | 0.999998 | 5.80377e-07 | 0.999998 |
| PhCH2CCH+H         | 5.63317e-07 | 0.999999 | 5.63327e-07 | 0.999999 |
| rad30              | 4.55837e-07 | 0.999999 | 4.55844e-07 | 0.999999 |
| rad13              | 3.10961e-07 | 1.000000 | 3.10966e-07 | 1.000000 |
| PAH9+H             | 1.26078e-07 | 1.000000 | 1.26079e-07 | 1.000000 |
| rad15              | 1.13610e-07 | 1.000000 | 1.13612e-07 | 1.000000 |
| rad35              | 5.35059e-08 | 1.000000 | 5.35070e-08 | 1.000000 |
| rad23              | 3.92475e-08 | 1.000000 | 3.92481e-08 | 1.000000 |
| rad38              | 3.84730e-08 | 1.000000 | 3.84737e-08 | 1.000000 |
| rad37              | 2.83619e-08 | 1.000000 | 2.83624e-08 | 1.000000 |
| rad5               | 1.29927e-09 | 1.000000 | 1.29928e-09 | 1.000000 |
| rad46              | 8.67318e-10 | 1.000000 | 8.67333e-10 | 1.000000 |
| rad33              | 5.98471e-10 | 1.000000 | 5.98481e-10 | 1.000000 |
| rad45              | 5.82315e-10 | 1.000000 | 5.82325e-10 | 1.000000 |
| rad14              | 3.91046e-10 | 1.000000 | 3.91054e-10 | 1.000000 |
| rad27              | 3.68440e-10 | 1.000000 | 3.68447e-10 | 1.000000 |
| rad25              | 2.10600e-10 | 1.000000 | 2.10604e-10 | 1.000000 |
| rad60syn           | 1.65985e-10 | 1.000000 | 1.65988e-10 | 1.000000 |
| rad60anti          | 6.44023e-11 | 1.000000 | 6.44034e-11 | 1.000000 |

|               |             |          |             |         |
|---------------|-------------|----------|-------------|---------|
| rad36         | 3.72225e-11 | 1.000000 | 3.72231e-11 | 1.00000 |
| rad22         | 2.35877e-11 | 1.000000 | 2.35882e-11 | 1.00000 |
| PAH3+H        | 4.87582e-12 | 1.000000 | 4.87590e-12 | 1.00000 |
| rad19syn      | 4.06952e-12 | 1.000000 | 4.06960e-12 | 1.00000 |
| rad59         | 1.33454e-12 | 1.000000 | 1.33457e-12 | 1.00000 |
| rad50         | 1.89558e-13 | 1.000000 | 1.89562e-13 | 1.00000 |
| rad54         | 1.33361e-13 | 1.000000 | 1.33362e-13 | 1.00000 |
| PAH10+CH3     | 8.66011e-14 | 1.000000 | 8.66027e-14 | 1.00000 |
| rad31         | 2.86516e-14 | 1.000000 | 2.86521e-14 | 1.00000 |
| rad43         | 2.00855e-14 | 1.000000 | 2.00858e-14 | 1.00000 |
| rad20         | 7.17223e-15 | 1.000000 | 7.17235e-15 | 1.00000 |
| rad62         | 6.46402e-15 | 1.000000 | 6.46413e-15 | 1.00000 |
| rad21         | 5.40211e-15 | 1.000000 | 5.40220e-15 | 1.00000 |
| PhcycC3H3_A+H | 6.94493e-16 | 1.000000 | 6.94505e-16 | 1.00000 |
| rad70         | 3.82347e-16 | 1.000000 | 3.82355e-16 | 1.00000 |
| rad18         | 2.65689e-16 | 1.000000 | 2.65693e-16 | 1.00000 |
| rad55         | 1.80538e-16 | 1.000000 | 1.80542e-16 | 1.00000 |
| rad52         | 1.80454e-16 | 1.000000 | 1.80458e-16 | 1.00000 |
| PAH1+H        | 2.03625e-17 | 1.000000 | 2.03629e-17 | 1.00000 |
| rad51         | 1.10233e-17 | 1.000000 | 1.10235e-17 | 1.00000 |
| rad24         | 6.82741e-18 | 1.000000 | 6.82753e-18 | 1.00000 |
| rad34         | 1.20731e-18 | 1.000000 | 1.20733e-18 | 1.00000 |
| rad58         | 5.63984e-19 | 1.000000 | 5.63994e-19 | 1.00000 |
| rad65         | 1.24125e-19 | 1.000000 | 1.24127e-19 | 1.00000 |
| rad42         | 2.27723e-20 | 1.000000 | 2.27727e-20 | 1.00000 |
| rad41         | 6.78627e-21 | 1.000000 | 6.78639e-21 | 1.00000 |
| rad47         | 1.19258e-26 | 1.000000 | 1.19261e-26 | 1.00000 |

0.100000000 Pa, 270.000000 K

| Rate constant      | True (fraction) |           | Effective (fraction) |           |
|--------------------|-----------------|-----------|----------------------|-----------|
| Total              | 2.15887e-16     | (1.00 )   | 2.15882e-16          | (1.00 )   |
| Formation of rad11 | 1.64133e-16     | (0.760 )  | 1.64128e-16          | (0.760 )  |
| Formation of rad6  | 4.32452e-17     | (0.200 )  | 4.32441e-17          | (0.200 )  |
| H-abstraction      | 8.50919e-18     | (0.0394 ) | 8.50919e-18          | (0.0394 ) |

  

| species            | PYtrue      | Cumul    | PYeffective | Cumul    |
|--------------------|-------------|----------|-------------|----------|
| rad6               | 0.683998    | 0.683998 | 0.684015    | 0.684015 |
| Indene+H           | 0.263704    | 0.947702 | 0.263710    | 0.947725 |
| Benzene+2-propynyl | 0.0394150   | 0.987117 | 0.0394160   | 0.987141 |
| C2H2+PhCH2         | 0.00641773  | 0.993534 | 0.00641788  | 0.993559 |
| PhCCH+CH3          | 0.00280446  | 0.996339 | 0.00280452  | 0.996363 |
| PhCHCCH2+H         | 0.00137096  | 0.997710 | 0.00137098  | 0.997734 |
| PhCCCH3+H          | 0.000874032 | 0.998584 | 0.000874054 | 0.998608 |
| rad2               | 0.000587523 | 0.999171 | 0.000587536 | 0.999196 |
| rad28              | 0.000356712 | 0.999528 | 0.000356722 | 0.999552 |
| Ph+MeAc            | 0.000160741 | 0.999689 | 0.000160745 | 0.999713 |
| rad7               | 7.09185e-05 | 0.999760 | 7.09201e-05 | 0.999784 |
| rad26              | 7.07617e-05 | 0.999830 | 7.07634e-05 | 0.999855 |
| rad1               | 4.30526e-05 | 0.999874 | 4.30537e-05 | 0.999898 |
| rad10              | 3.46420e-05 | 0.999908 | 3.46428e-05 | 0.999932 |
| Phenyl+Allene      | 2.42693e-05 | 0.999932 | 0.00000     | 0.999932 |
| rad11              | 1.90093e-05 | 0.999951 | 1.90098e-05 | 0.999951 |
| rad9               | 1.55619e-05 | 0.999967 | 1.55622e-05 | 0.999967 |
| rad8               | 1.19302e-05 | 0.999979 | 1.19305e-05 | 0.999979 |
| PAH7+H             | 9.04108e-06 | 0.999988 | 9.04130e-06 | 0.999988 |
| rad3               | 4.32636e-06 | 0.999992 | 4.32646e-06 | 0.999992 |
| rad4               | 2.27936e-06 | 0.999995 | 2.27942e-06 | 0.999995 |
| rad39              | 2.14999e-06 | 0.999997 | 2.15005e-06 | 0.999997 |
| PhCH2CCH+H         | 8.62170e-07 | 0.999998 | 8.62191e-07 | 0.999998 |
| rad12              | 7.45558e-07 | 0.999998 | 7.45576e-07 | 0.999998 |
| rad30              | 5.48983e-07 | 0.999999 | 5.48996e-07 | 0.999999 |
| rad13              | 3.00058e-07 | 0.999999 | 3.00064e-07 | 0.999999 |
| PAH9+H             | 1.55901e-07 | 0.999999 | 1.55905e-07 | 0.999999 |
| rad15              | 1.39343e-07 | 0.999999 | 1.39346e-07 | 1.000000 |
| rad35              | 6.52417e-08 | 1.000000 | 6.52432e-08 | 1.000000 |
| rad38              | 4.80371e-08 | 1.000000 | 4.80383e-08 | 1.000000 |
| rad37              | 3.97611e-08 | 1.000000 | 3.97621e-08 | 1.000000 |
| rad23              | 3.59440e-08 | 1.000000 | 3.59449e-08 | 1.000000 |
| rad5               | 1.97874e-09 | 1.000000 | 1.97878e-09 | 1.000000 |
| rad46              | 1.15149e-09 | 1.000000 | 1.15152e-09 | 1.000000 |
| rad33              | 5.79409e-10 | 1.000000 | 5.79423e-10 | 1.000000 |
| rad45              | 5.32959e-10 | 1.000000 | 5.32972e-10 | 1.000000 |
| rad14              | 3.77459e-10 | 1.000000 | 3.77468e-10 | 1.000000 |
| rad27              | 3.56508e-10 | 1.000000 | 3.56517e-10 | 1.000000 |
| rad60syn           | 2.29499e-10 | 1.000000 | 2.29505e-10 | 1.000000 |
| rad25              | 2.03363e-10 | 1.000000 | 2.03367e-10 | 1.000000 |
| rad60anti          | 9.03635e-11 | 1.000000 | 9.03657e-11 | 1.000000 |

|               |             |          |             |          |
|---------------|-------------|----------|-------------|----------|
| rad36         | 3.42606e-11 | 1.000000 | 3.42614e-11 | 1.000000 |
| rad22         | 2.15161e-11 | 1.000000 | 2.15166e-11 | 1.000000 |
| PAH3+H        | 8.16674e-12 | 1.000000 | 8.16693e-12 | 1.000000 |
| rad19syn      | 8.11382e-12 | 1.000000 | 8.11401e-12 | 1.000000 |
| rad59         | 2.19365e-12 | 1.000000 | 2.19370e-12 | 1.000000 |
| rad50         | 3.25090e-13 | 1.000000 | 3.25097e-13 | 1.000000 |
| rad54         | 2.92077e-13 | 1.000000 | 2.92085e-13 | 1.000000 |
| PAH10+CH3     | 1.87583e-13 | 1.000000 | 1.87588e-13 | 1.000000 |
| rad43         | 4.30372e-14 | 1.000000 | 4.30382e-14 | 1.000000 |
| rad31         | 3.06405e-14 | 1.000000 | 3.06412e-14 | 1.000000 |
| rad62         | 1.47457e-14 | 1.000000 | 1.47461e-14 | 1.000000 |
| rad20         | 7.49835e-15 | 1.000000 | 7.49853e-15 | 1.000000 |
| rad21         | 5.67710e-15 | 1.000000 | 5.67723e-15 | 1.000000 |
| PhcycC3H3_A+H | 1.85177e-15 | 1.000000 | 1.85181e-15 | 1.000000 |
| rad70         | 9.90622e-16 | 1.000000 | 9.90650e-16 | 1.000000 |
| rad55         | 4.72353e-16 | 1.000000 | 4.72364e-16 | 1.000000 |
| rad52         | 3.71400e-16 | 1.000000 | 3.71409e-16 | 1.000000 |
| rad18         | 2.64182e-16 | 1.000000 | 2.64188e-16 | 1.000000 |
| PAH1+H        | 5.82441e-17 | 1.000000 | 5.82455e-17 | 1.000000 |
| rad51         | 2.65757e-17 | 1.000000 | 2.65764e-17 | 1.000000 |
| rad24         | 6.33688e-18 | 1.000000 | 6.33704e-18 | 1.000000 |
| rad34         | 3.52713e-18 | 1.000000 | 3.52722e-18 | 1.000000 |
| rad58         | 1.52491e-18 | 1.000000 | 1.52495e-18 | 1.000000 |
| rad65         | 3.19773e-19 | 1.000000 | 3.19780e-19 | 1.000000 |
| rad42         | 6.97753e-20 | 1.000000 | 6.97769e-20 | 1.000000 |
| rad41         | 2.09573e-20 | 1.000000 | 2.09577e-20 | 1.000000 |
| rad47         | 2.91157e-26 | 1.000000 | 2.91164e-26 | 1.000000 |

0.100000000 Pa, 280.000000 K

| Rate constant      | True (fraction)       | Effective (fraction)  |
|--------------------|-----------------------|-----------------------|
| Total              | 2.79491e-16 (1.00 )   | 2.79482e-16 (1.00 )   |
| Formation of rad11 | 2.09281e-16 (0.749 )  | 2.09274e-16 (0.749 )  |
| Formation of rad6  | 5.79792e-17 (0.207 )  | 5.79772e-17 (0.207 )  |
| H-abstraction      | 1.22310e-17 (0.0438 ) | 1.22310e-17 (0.0438 ) |

| species            | PYtrue      | Cumul    | PYeffective | Cumul    |
|--------------------|-------------|----------|-------------|----------|
| rad6               | 0.654474    | 0.654474 | 0.654496    | 0.654496 |
| Indene+H           | 0.286703    | 0.941178 | 0.286712    | 0.941209 |
| Benzene+2-propynyl | 0.00437616  | 0.984939 | 0.00437630  | 0.984972 |
| C2H2+PhCH2         | 0.00749436  | 0.992434 | 0.00749460  | 0.992466 |
| PhCCH+CH3          | 0.00340999  | 0.995844 | 0.00341011  | 0.995876 |
| PhCHCCH2+H         | 0.00165147  | 0.997495 | 0.00165153  | 0.997528 |
| PhCCCH3+H          | 0.00105210  | 0.998547 | 0.00105214  | 0.998580 |
| rad2               | 0.000562941 | 0.999110 | 0.000562961 | 0.999143 |
| rad28              | 0.000360030 | 0.999470 | 0.000360041 | 0.999503 |
| Ph+MeAc            | 0.000207422 | 0.999678 | 0.000207430 | 0.999711 |
| rad26              | 6.96577e-05 | 0.999747 | 6.96600e-05 | 0.999780 |
| rad7               | 6.76775e-05 | 0.999815 | 6.76798e-05 | 0.999848 |
| rad1               | 4.18464e-05 | 0.999857 | 4.18478e-05 | 0.999890 |
| Phenyl+Allene      | 3.32691e-05 | 0.999890 | 0.000000    | 0.999890 |
| rad10              | 3.31793e-05 | 0.999923 | 3.31805e-05 | 0.999923 |
| rad9               | 1.95840e-05 | 0.999943 | 1.95847e-05 | 0.999943 |
| rad11              | 1.81306e-05 | 0.999961 | 1.81311e-05 | 0.999961 |
| rad8               | 1.46230e-05 | 0.999976 | 1.46234e-05 | 0.999975 |
| PAH7+H             | 1.20055e-05 | 0.999988 | 1.20059e-05 | 0.999987 |
| rad3               | 4.14347e-06 | 0.999992 | 4.14360e-06 | 0.999991 |
| rad39              | 2.89127e-06 | 0.999995 | 2.89136e-06 | 0.999994 |
| rad4               | 2.19214e-06 | 0.999997 | 2.19221e-06 | 0.999997 |
| PhCH2CCH+H         | 1.29184e-06 | 0.999998 | 1.29189e-06 | 0.999998 |
| rad12              | 9.43509e-07 | 0.999999 | 9.43541e-07 | 0.999999 |
| rad30              | 6.58756e-07 | 1.000000 | 6.58778e-07 | 0.999999 |
| rad13              | 2.88390e-07 | 1.000000 | 2.88400e-07 | 1.000000 |
| PAH9+H             | 1.92098e-07 | 1.000000 | 1.92104e-07 | 1.000000 |
| rad15              | 1.70167e-07 | 1.000000 | 1.70173e-07 | 1.000000 |
| rad35              | 7.92944e-08 | 1.000000 | 7.92970e-08 | 1.000000 |
| rad38              | 5.97454e-08 | 1.000000 | 5.97474e-08 | 1.000000 |
| rad37              | 5.45830e-08 | 1.000000 | 5.45848e-08 | 1.000000 |
| rad23              | 3.29288e-08 | 1.000000 | 3.29299e-08 | 1.000000 |
| rad5               | 2.93724e-09 | 1.000000 | 2.93734e-09 | 1.000000 |
| rad46              | 1.51857e-09 | 1.000000 | 1.51863e-09 | 1.000000 |
| rad33              | 5.58807e-10 | 1.000000 | 5.58825e-10 | 1.000000 |
| rad45              | 4.88274e-10 | 1.000000 | 4.88290e-10 | 1.000000 |
| rad14              | 3.62798e-10 | 1.000000 | 3.62810e-10 | 1.000000 |
| rad27              | 3.43464e-10 | 1.000000 | 3.43475e-10 | 1.000000 |
| rad60syn           | 3.13742e-10 | 1.000000 | 3.13753e-10 | 1.000000 |
| rad25              | 1.95605e-10 | 1.000000 | 1.95612e-10 | 1.000000 |
| rad60anti          | 1.25211e-10 | 1.000000 | 1.25215e-10 | 1.000000 |

|               |             |         |             |         |
|---------------|-------------|---------|-------------|---------|
| rad36         | 3.15852e-11 | 1.00000 | 3.15863e-11 | 1.00000 |
| rad22         | 1.96344e-11 | 1.00000 | 1.96351e-11 | 1.00000 |
| rad19syn      | 1.54636e-11 | 1.00000 | 1.54642e-11 | 1.00000 |
| PAH3+H        | 1.33210e-11 | 1.00000 | 1.33214e-11 | 1.00000 |
| rad59         | 3.51509e-12 | 1.00000 | 3.51521e-12 | 1.00000 |
| rad54         | 6.06185e-13 | 1.00000 | 6.06205e-13 | 1.00000 |
| rad50         | 5.43327e-13 | 1.00000 | 5.43345e-13 | 1.00000 |
| PAH10+CH3     | 3.84692e-13 | 1.00000 | 3.84705e-13 | 1.00000 |
| rad43         | 8.73044e-14 | 1.00000 | 8.73073e-14 | 1.00000 |
| rad31         | 3.29552e-14 | 1.00000 | 3.29563e-14 | 1.00000 |
| rad62         | 3.16811e-14 | 1.00000 | 3.16821e-14 | 1.00000 |
| rad20         | 7.83456e-15 | 1.00000 | 7.83482e-15 | 1.00000 |
| rad21         | 5.96386e-15 | 1.00000 | 5.96406e-15 | 1.00000 |
| PhcycC3H3_A+H | 4.57280e-15 | 1.00000 | 4.57295e-15 | 1.00000 |
| rad70         | 2.38468e-15 | 1.00000 | 2.38476e-15 | 1.00000 |
| rad55         | 1.14697e-15 | 1.00000 | 1.14701e-15 | 1.00000 |
| rad52         | 7.31761e-16 | 1.00000 | 7.31786e-16 | 1.00000 |
| rad18         | 2.62608e-16 | 1.00000 | 2.62616e-16 | 1.00000 |
| PAH1+H        | 1.52798e-16 | 1.00000 | 1.52803e-16 | 1.00000 |
| rad51         | 6.02335e-17 | 1.00000 | 6.02355e-17 | 1.00000 |
| rad34         | 9.42597e-18 | 1.00000 | 9.42628e-18 | 1.00000 |
| rad24         | 5.88925e-18 | 1.00000 | 5.88944e-18 | 1.00000 |
| rad58         | 3.81303e-18 | 1.00000 | 3.81316e-18 | 1.00000 |
| rad65         | 7.67320e-19 | 1.00000 | 7.67346e-19 | 1.00000 |
| rad42         | 1.94362e-19 | 1.00000 | 1.94369e-19 | 1.00000 |
| rad41         | 5.87842e-20 | 1.00000 | 5.87861e-20 | 1.00000 |
| rad47         | 6.60551e-26 | 1.00000 | 6.60573e-26 | 1.00000 |

0.100000000 Pa, 290.000000 K

| Rate constant      | True (fraction)       | Effective (fraction)  |
|--------------------|-----------------------|-----------------------|
| Total              | 3.55893e-16 (1.00 )   | 3.55877e-16 (1.00 )   |
| Formation of rad11 | 2.62555e-16 (0.738 )  | 2.62543e-16 (0.738 )  |
| Formation of rad6  | 7.62093e-17 (0.214 )  | 7.62057e-17 (0.214 )  |
| H-abstraction      | 1.71289e-17 (0.0481 ) | 1.71289e-17 (0.0481 ) |

| species            | PYtrue      | Cumul    | PYeffective | Cumul    |
|--------------------|-------------|----------|-------------|----------|
| rad6               | 0.623489    | 0.623489 | 0.623517    | 0.623517 |
| Indene+H           | 0.310834    | 0.934323 | 0.310848    | 0.934365 |
| Benzene+2-propynyl | 0.0481294   | 0.982452 | 0.0481315   | 0.982496 |
| C2H2+PhCH2         | 0.00871819  | 0.991170 | 0.00871858  | 0.991215 |
| PhCCH+CH3          | 0.00410558  | 0.995276 | 0.00410577  | 0.995320 |
| PhCHCCH2+H         | 0.00197070  | 0.997247 | 0.00197079  | 0.997291 |
| PhCCCH3+H          | 0.00125339  | 0.998500 | 0.00125344  | 0.998545 |
| rad2               | 0.000536852 | 0.999037 | 0.000536876 | 0.999082 |
| rad28              | 0.000359866 | 0.999397 | 0.000359882 | 0.999441 |
| Ph+MeAc            | 0.000263937 | 0.999661 | 0.000263948 | 0.999705 |
| rad26              | 6.80141e-05 | 0.999729 | 6.80172e-05 | 0.999773 |
| rad7               | 6.43136e-05 | 0.999793 | 6.43165e-05 | 0.999838 |
| Phenyl+Allene      | 4.50199e-05 | 0.999838 | 0.000000    | 0.999838 |
| rad1               | 4.05232e-05 | 0.999879 | 4.05251e-05 | 0.999878 |
| rad10              | 3.16331e-05 | 0.999910 | 3.16345e-05 | 0.999910 |
| rad9               | 2.44411e-05 | 0.999935 | 2.44422e-05 | 0.999934 |
| rad8               | 1.77250e-05 | 0.999952 | 1.77258e-05 | 0.999952 |
| rad11              | 1.72211e-05 | 0.999970 | 1.72220e-05 | 0.999969 |
| PAH7+H             | 1.57021e-05 | 0.999985 | 1.57028e-05 | 0.999985 |
| rad3               | 3.95127e-06 | 0.999989 | 3.95145e-06 | 0.999989 |
| rad39              | 3.82589e-06 | 0.999993 | 3.82606e-06 | 0.999993 |
| rad4               | 2.09985e-06 | 0.999995 | 2.09995e-06 | 0.999995 |
| PhCH2CCH+H         | 1.89723e-06 | 0.999997 | 1.89731e-06 | 0.999997 |
| rad12              | 1.17699e-06 | 0.999998 | 1.17704e-06 | 0.999998 |
| rad30              | 7.86883e-07 | 0.999999 | 7.86919e-07 | 0.999999 |
| rad13              | 2.76033e-07 | 0.999999 | 2.76046e-07 | 0.999999 |
| PAH9+H             | 2.35630e-07 | 1.000000 | 2.35641e-07 | 0.999999 |
| rad15              | 2.06726e-07 | 1.000000 | 2.06735e-07 | 0.999999 |
| rad35              | 9.59695e-08 | 1.000000 | 9.59740e-08 | 1.000000 |
| rad38              | 7.39468e-08 | 1.000000 | 7.39501e-08 | 1.000000 |
| rad37              | 7.34769e-08 | 1.000000 | 7.34802e-08 | 1.000000 |
| rad23              | 3.01784e-08 | 1.000000 | 3.01798e-08 | 1.000000 |
| rad5               | 4.25744e-09 | 1.000000 | 4.25763e-09 | 1.000000 |
| rad46              | 1.98772e-09 | 1.000000 | 1.98781e-09 | 1.000000 |
| rad33              | 5.36791e-10 | 1.000000 | 5.36816e-10 | 1.000000 |
| rad45              | 4.47839e-10 | 1.000000 | 4.47860e-10 | 1.000000 |
| rad60syn           | 4.23974e-10 | 1.000000 | 4.23993e-10 | 1.000000 |
| rad14              | 3.47194e-10 | 1.000000 | 3.47210e-10 | 1.000000 |
| rad27              | 3.29441e-10 | 1.000000 | 3.29456e-10 | 1.000000 |
| rad25              | 1.87377e-10 | 1.000000 | 1.87386e-10 | 1.000000 |
| rad60anti          | 1.71324e-10 | 1.000000 | 1.71333e-10 | 1.000000 |

|               |             |         |             |          |
|---------------|-------------|---------|-------------|----------|
| rad36         | 2.91699e-11 | 1.00000 | 2.91712e-11 | 1.000000 |
| rad19syn      | 2.82776e-11 | 1.00000 | 2.82789e-11 | 1.000000 |
| PAH3+H        | 2.11955e-11 | 1.00000 | 2.11965e-11 | 1.000000 |
| rad22         | 1.79250e-11 | 1.00000 | 1.79258e-11 | 1.000000 |
| rad59         | 5.49981e-12 | 1.00000 | 5.50006e-12 | 1.000000 |
| rad54         | 1.19743e-12 | 1.00000 | 1.19748e-12 | 1.000000 |
| rad50         | 8.86150e-13 | 1.00000 | 8.86190e-13 | 1.000000 |
| PAH10+CH3     | 7.50440e-13 | 1.00000 | 7.50474e-13 | 1.000000 |
| rad43         | 1.68484e-13 | 1.00000 | 1.68491e-13 | 1.000000 |
| rad62         | 6.44388e-14 | 1.00000 | 6.44417e-14 | 1.000000 |
| rad31         | 3.56793e-14 | 1.00000 | 3.56809e-14 | 1.000000 |
| PhcycC3H3_A+H | 1.05290e-14 | 1.00000 | 1.05295e-14 | 1.000000 |
| rad20         | 8.17999e-15 | 1.00000 | 8.18036e-15 | 1.000000 |
| rad21         | 6.26221e-15 | 1.00000 | 6.26249e-15 | 1.000000 |
| rad70         | 5.36821e-15 | 1.00000 | 5.36845e-15 | 1.000000 |
| rad55         | 2.60177e-15 | 1.00000 | 2.60188e-15 | 1.000000 |
| rad52         | 1.38433e-15 | 1.00000 | 1.38439e-15 | 1.000000 |
| PAH1+H        | 3.70688e-16 | 1.00000 | 3.70704e-16 | 1.000000 |
| rad18         | 2.60892e-16 | 1.00000 | 2.60903e-16 | 1.000000 |
| rad51         | 1.28931e-16 | 1.00000 | 1.28936e-16 | 1.000000 |
| rad34         | 2.32425e-17 | 1.00000 | 2.32436e-17 | 1.000000 |
| rad58         | 8.87872e-18 | 1.00000 | 8.87911e-18 | 1.000000 |
| rad24         | 5.48119e-18 | 1.00000 | 5.48143e-18 | 1.000000 |
| rad65         | 1.72501e-18 | 1.00000 | 1.72509e-18 | 1.000000 |
| rad42         | 4.96937e-19 | 1.00000 | 4.96960e-19 | 1.000000 |
| rad41         | 1.51227e-19 | 1.00000 | 1.51234e-19 | 1.000000 |
| rad47         | 1.40375e-25 | 1.00000 | 1.40382e-25 | 1.000000 |

0.100000000 Pa, 300.000000 K

| Rate constant      | True (fraction)       | Effective (fraction)  |
|--------------------|-----------------------|-----------------------|
| Total              | 6.34395e-16 (1.00 )   | 6.34351e-16 (1.00 )   |
| Formation of rad11 | 4.51153e-16 (0.711 )  | 4.51120e-16 (0.711 )  |
| Formation of rad6  | 1.51589e-16 (0.239 )  | 1.51578e-16 (0.239 )  |
| H-abstraction      | 3.16530e-17 (0.0499 ) | 3.16530e-17 (0.0499 ) |

| species            | PYtrue      | Cumul    | PYeffective | Cumul    |
|--------------------|-------------|----------|-------------|----------|
| rad6               | 0.493233    | 0.493233 | 0.493267    | 0.493267 |
| Indene+H           | 0.425312    | 0.918545 | 0.425342    | 0.918609 |
| Benzene+2-propynyl | 0.0498949   | 0.968439 | 0.0498983   | 0.968507 |
| C2H2+PhCH2         | 0.0168993   | 0.985339 | 0.0169005   | 0.985407 |
| PhCCH+CH3          | 0.00763530  | 0.992974 | 0.00763583  | 0.993043 |
| PhCHCCH2+H         | 0.00328218  | 0.996256 | 0.00328240  | 0.996326 |
| PhCCCH3+H          | 0.00219179  | 0.998448 | 0.00219194  | 0.998518 |
| Ph+MeAc            | 0.000501107 | 0.998949 | 0.000501142 | 0.999019 |
| rad2               | 0.000417179 | 0.999366 | 0.000417208 | 0.999436 |
| rad28              | 0.000327708 | 0.999694 | 0.000327731 | 0.999764 |
| Phenyl+Allene      | 6.97323e-05 | 0.999764 | 0.00000     | 0.999764 |
| rad26              | 5.55665e-05 | 0.999819 | 5.55704e-05 | 0.999819 |
| rad7               | 5.29976e-05 | 0.999872 | 5.30012e-05 | 0.999872 |
| PAH7+H             | 3.80009e-05 | 0.999910 | 3.80036e-05 | 0.999910 |
| rad1               | 3.14360e-05 | 0.999942 | 3.14383e-05 | 0.999942 |
| rad10              | 2.42168e-05 | 0.999966 | 2.42185e-05 | 0.999966 |
| rad11              | 1.37233e-05 | 0.999980 | 1.37242e-05 | 0.999980 |
| rad39              | 7.95465e-06 | 0.999988 | 7.95520e-06 | 0.999988 |
| PhCH2CCH+H         | 4.56461e-06 | 0.999992 | 4.56492e-06 | 0.999992 |
| rad3               | 3.26798e-06 | 0.999995 | 3.26822e-06 | 0.999995 |
| rad4               | 1.62517e-06 | 0.999997 | 1.62529e-06 | 0.999997 |
| rad30              | 1.24610e-06 | 0.999998 | 1.24618e-06 | 0.999998 |
| PAH9+H             | 4.78914e-07 | 0.999999 | 4.78947e-07 | 0.999999 |
| rad19anti          | 4.43797e-07 | 0.999999 | 4.43828e-07 | 0.999999 |
| rad13              | 2.55178e-07 | 1.000000 | 2.55195e-07 | 1.000000 |
| rad35              | 1.67380e-07 | 1.000000 | 1.67392e-07 | 1.000000 |
| rad37              | 1.57091e-07 | 1.000000 | 1.57102e-07 | 1.000000 |
| rad38              | 1.30458e-07 | 1.000000 | 1.30467e-07 | 1.000000 |
| rad23              | 5.40513e-08 | 1.00000  | 5.40551e-08 | 1.00000  |
| rad46              | 3.94482e-09 | 1.00000  | 3.94510e-09 | 1.00000  |
| rad45              | 9.24502e-10 | 1.00000  | 9.24566e-10 | 1.00000  |
| rad60syn           | 8.02640e-10 | 1.00000  | 8.02696e-10 | 1.00000  |
| rad33              | 6.06689e-10 | 1.00000  | 6.06731e-10 | 1.00000  |
| rad27              | 3.47081e-10 | 1.00000  | 3.47105e-10 | 1.00000  |
| rad14              | 3.40320e-10 | 1.00000  | 3.40344e-10 | 1.00000  |
| rad60anti          | 3.35291e-10 | 1.00000  | 3.35315e-10 | 1.00000  |
| rad25              | 2.26264e-10 | 1.00000  | 2.26279e-10 | 1.00000  |
| rad19syn           | 7.41119e-11 | 1.00000  | 7.41171e-11 | 1.00000  |
| PAH3+H             | 5.87612e-11 | 1.00000  | 5.87652e-11 | 1.00000  |
| rad22              | 5.24363e-11 | 1.00000  | 5.24400e-11 | 1.00000  |
| rad9               | 3.34265e-11 | 1.00000  | 3.34289e-11 | 1.00000  |

|               |             |         |             |         |
|---------------|-------------|---------|-------------|---------|
| rad36         | 3.15097e-11 | 1.00000 | 3.15118e-11 | 1.00000 |
| rad59         | 1.25586e-11 | 1.00000 | 1.25595e-11 | 1.00000 |
| rad54         | 3.48816e-12 | 1.00000 | 3.48840e-12 | 1.00000 |
| PAH10+CH3     | 2.23030e-12 | 1.00000 | 2.23046e-12 | 1.00000 |
| rad50         | 2.19923e-12 | 1.00000 | 2.19938e-12 | 1.00000 |
| rad67         | 7.44919e-13 | 1.00000 | 7.44971e-13 | 1.00000 |
| rad43         | 4.40768e-13 | 1.00000 | 4.40799e-13 | 1.00000 |
| rad20         | 2.10883e-13 | 1.00000 | 2.10899e-13 | 1.00000 |
| rad21         | 2.07436e-13 | 1.00000 | 2.07451e-13 | 1.00000 |
| rad62         | 1.81439e-13 | 1.00000 | 1.81451e-13 | 1.00000 |
| rad31         | 8.95024e-14 | 1.00000 | 8.95086e-14 | 1.00000 |
| PhcycC3H3_A+H | 5.20731e-14 | 1.00000 | 5.20768e-14 | 1.00000 |
| rad70         | 2.06995e-14 | 1.00000 | 2.07009e-14 | 1.00000 |
| rad18         | 1.90291e-14 | 1.00000 | 1.90304e-14 | 1.00000 |
| rad15         | 1.90104e-14 | 1.00000 | 1.90117e-14 | 1.00000 |
| rad55         | 9.05749e-15 | 1.00000 | 9.05812e-15 | 1.00000 |
| rad52         | 4.11065e-15 | 1.00000 | 4.11093e-15 | 1.00000 |
| PAH1+H        | 2.46956e-15 | 1.00000 | 2.46973e-15 | 1.00000 |
| rad5          | 8.48876e-16 | 1.00000 | 8.48935e-16 | 1.00000 |
| rad51         | 4.36386e-16 | 1.00000 | 4.36416e-16 | 1.00000 |
| rad34         | 1.64560e-16 | 1.00000 | 1.64571e-16 | 1.00000 |
| rad58         | 3.16382e-17 | 1.00000 | 3.16404e-17 | 1.00000 |
| rad24         | 1.46283e-17 | 1.00000 | 1.46294e-17 | 1.00000 |
| rad65         | 6.76329e-18 | 1.00000 | 6.76376e-18 | 1.00000 |
| rad42         | 5.14284e-18 | 1.00000 | 5.14319e-18 | 1.00000 |
| rad41         | 1.60548e-18 | 1.00000 | 1.60559e-18 | 1.00000 |
| rad12         | 3.47027e-19 | 1.00000 | 3.47051e-19 | 1.00000 |
| rad53         | 1.12015e-19 | 1.00000 | 1.12024e-19 | 1.00000 |
| rad64         | 2.68931e-20 | 1.00000 | 2.68950e-20 | 1.00000 |
| rad56         | 3.14577e-22 | 1.00000 | 3.14600e-22 | 1.00000 |
| rad61         | 3.65911e-23 | 1.00000 | 3.65936e-23 | 1.00000 |
| rad68syn      | 3.32152e-23 | 1.00000 | 3.32175e-23 | 1.00000 |
| rad68anti     | 2.39388e-23 | 1.00000 | 2.39405e-23 | 1.00000 |
| rad47         | 3.08852e-25 | 1.00000 | 3.08873e-25 | 1.00000 |
| rad40syn      | 5.41865e-26 | 1.00000 | 5.41902e-26 | 1.00000 |
| rad40anti     | 1.36192e-26 | 1.00000 | 1.36201e-26 | 1.00000 |
| PAH8+H        | 1.22744e-26 | 1.00000 | 1.22752e-26 | 1.00000 |
| rad73         | 1.16567e-26 | 1.00000 | 1.16575e-26 | 1.00000 |
| rad71         | 1.53579e-28 | 1.00000 | 1.53590e-28 | 1.00000 |
| rad72         | 1.40556e-34 | 1.00000 | 1.40566e-34 | 1.00000 |
| rad8          | 7.67749e-37 | 1.00000 | 7.67803e-37 | 1.00000 |

0.100000000 Pa, 400.000000 K

=====

| Rate constant      | True (fraction)       | Effective (fraction)  |
|--------------------|-----------------------|-----------------------|
| Total              | 5.11288e-15 (1.00 )   | 5.10993e-15 (1.00 )   |
| Formation of rad11 | 3.08094e-15 (0.603 )  | 3.07897e-15 (0.603 )  |
| Formation of rad6  | 1.54092e-15 (0.301 )  | 1.53994e-15 (0.301 )  |
| H-abstraction      | 4.91025e-16 (0.0960 ) | 4.91025e-16 (0.0961 ) |

| species            | PYtrue      | Cumul    | PYeffective | Cumul    |
|--------------------|-------------|----------|-------------|----------|
| Indene+H           | 0.620235    | 0.620235 | 0.620594    | 0.620594 |
| rad6               | 0.202699    | 0.822935 | 0.202817    | 0.823411 |
| Benzene+2-propynyl | 0.0960368   | 0.918971 | 0.0960923   | 0.919503 |
| C2H2+PhCH2         | 0.0429192   | 0.961891 | 0.0429440   | 0.962447 |
| PhCCH+CH3          | 0.0210873   | 0.982978 | 0.0210996   | 0.983547 |
| PhCHCCH2+H         | 0.00850487  | 0.991483 | 0.00850978  | 0.992057 |
| PhCCCH3+H          | 0.00529232  | 0.996775 | 0.00529537  | 0.997352 |
| Ph+MeAc            | 0.00192775  | 0.998703 | 0.00192887  | 0.999281 |
| Phenyl+Allene      | 0.000578302 | 0.999281 | 0.000000    | 0.999281 |
| PAH7+H             | 0.000184960 | 0.999466 | 0.000185067 | 0.999466 |
| rad2               | 0.000176999 | 0.999643 | 0.000177101 | 0.999643 |
| rad28              | 0.000161479 | 0.999805 | 0.000161573 | 0.999805 |
| PhCH2CCH+H         | 6.08103e-05 | 0.999865 | 6.08455e-05 | 0.999866 |
| rad39              | 4.23711e-05 | 0.999908 | 4.23956e-05 | 0.999908 |
| rad26              | 2.45760e-05 | 0.999932 | 2.45903e-05 | 0.999933 |
| rad7               | 2.21255e-05 | 0.999954 | 2.21383e-05 | 0.999955 |
| rad1               | 1.64721e-05 | 0.999971 | 1.64817e-05 | 0.999971 |
| rad10              | 1.03824e-05 | 0.999981 | 1.03883e-05 | 0.999982 |
| rad11              | 5.81802e-06 | 0.999987 | 5.82138e-06 | 0.999987 |
| rad30              | 3.96451e-06 | 0.999991 | 3.96681e-06 | 0.999991 |
| rad19anti          | 2.25061e-06 | 0.999993 | 2.25191e-06 | 0.999994 |
| PAH9+H             | 1.97491e-06 | 0.999995 | 1.97605e-06 | 0.999996 |
| rad3               | 1.51787e-06 | 0.999997 | 1.51875e-06 | 0.999997 |
| rad37              | 8.54286e-07 | 0.999998 | 8.54780e-07 | 0.999998 |
| rad4               | 7.99365e-07 | 0.999999 | 7.99827e-07 | 0.999999 |
| rad35              | 6.25222e-07 | 0.999999 | 6.25584e-07 | 0.999999 |
| rad38              | 5.82560e-07 | 1.000000 | 5.82898e-07 | 1.000000 |

|               |             |          |             |          |
|---------------|-------------|----------|-------------|----------|
| rad13         | 1.16824e-07 | 1.000000 | 1.16891e-07 | 1.000000 |
| rad23         | 9.44253e-08 | 1.000000 | 9.44800e-08 | 1.000000 |
| rad46         | 2.70384e-08 | 1.000000 | 2.70540e-08 | 1.000000 |
| rad60syn      | 6.24285e-09 | 1.000000 | 6.24646e-09 | 1.000000 |
| rad19syn      | 4.59097e-09 | 1.000000 | 4.59362e-09 | 1.000000 |
| rad45         | 2.93563e-09 | 1.000000 | 2.93732e-09 | 1.000000 |
| rad60anti     | 2.85359e-09 | 1.000000 | 2.85525e-09 | 1.000000 |
| PAH3+H        | 1.42200e-09 | 1.000000 | 1.42281e-09 | 1.000000 |
| rad54         | 4.17645e-10 | 1.000000 | 4.17886e-10 | 1.000000 |
| rad33         | 3.04816e-10 | 1.000000 | 3.04993e-10 | 1.000000 |
| rad59         | 2.76913e-10 | 1.000000 | 2.77073e-10 | 1.000000 |
| PAH10+CH3     | 1.98534e-10 | 1.000000 | 1.98648e-10 | 1.000000 |
| rad27         | 1.65903e-10 | 1.000000 | 1.65998e-10 | 1.000000 |
| rad14         | 1.58748e-10 | 1.000000 | 1.58839e-10 | 1.000000 |
| rad36         | 1.12505e-10 | 1.000000 | 1.12570e-10 | 1.000000 |
| rad25         | 1.07054e-10 | 1.000000 | 1.07116e-10 | 1.000000 |
| rad50         | 7.69548e-11 | 1.000000 | 7.69993e-11 | 1.000000 |
| rad22         | 5.43986e-11 | 1.000000 | 5.44302e-11 | 1.000000 |
| rad9          | 3.95591e-11 | 1.000000 | 3.95819e-11 | 1.000000 |
| rad43         | 3.26914e-11 | 1.000000 | 3.27103e-11 | 1.000000 |
| rad67         | 2.44828e-11 | 1.000000 | 2.44970e-11 | 1.000000 |
| PhcycC3H3_A+H | 2.38333e-11 | 1.000000 | 2.38471e-11 | 1.000000 |
| rad62         | 2.26586e-11 | 1.000000 | 2.26716e-11 | 1.000000 |
| rad70         | 7.64809e-12 | 1.000000 | 7.65251e-12 | 1.000000 |
| rad55         | 3.51269e-12 | 1.000000 | 3.51473e-12 | 1.000000 |
| PAH1+H        | 2.19835e-12 | 1.000000 | 2.19962e-12 | 1.000000 |
| rad31         | 5.31809e-13 | 1.000000 | 5.32116e-13 | 1.000000 |
| rad52         | 4.56267e-13 | 1.000000 | 4.56531e-13 | 1.000000 |
| rad21         | 3.25566e-13 | 1.000000 | 3.25755e-13 | 1.000000 |
| rad20         | 2.96405e-13 | 1.000000 | 2.96577e-13 | 1.000000 |
| rad34         | 1.75401e-13 | 1.000000 | 1.75503e-13 | 1.000000 |
| rad51         | 1.37912e-13 | 1.000000 | 1.37992e-13 | 1.000000 |
| rad15         | 2.36180e-14 | 1.000000 | 2.36317e-14 | 1.000000 |
| rad58         | 1.74447e-14 | 1.000000 | 1.74547e-14 | 1.000000 |
| rad18         | 1.69538e-14 | 1.000000 | 1.69636e-14 | 1.000000 |
| rad42         | 7.30878e-15 | 1.000000 | 7.31301e-15 | 1.000000 |
| rad65         | 3.23140e-15 | 1.000000 | 3.23327e-15 | 1.000000 |
| rad41         | 2.23453e-15 | 1.000000 | 2.23582e-15 | 1.000000 |
| rad53         | 9.06069e-16 | 1.000000 | 9.06592e-16 | 1.000000 |
| rad5          | 8.09596e-16 | 1.000000 | 8.10064e-16 | 1.000000 |
| rad64         | 3.15776e-16 | 1.000000 | 3.15959e-16 | 1.000000 |
| rad24         | 4.92405e-17 | 1.000000 | 4.92690e-17 | 1.000000 |
| rad56         | 1.61256e-17 | 1.000000 | 1.61349e-17 | 1.000000 |
| rad68syn      | 1.86266e-18 | 1.000000 | 1.86374e-18 | 1.000000 |
| rad68anti     | 1.34032e-18 | 1.000000 | 1.34109e-18 | 1.000000 |
| rad61         | 9.64999e-19 | 1.000000 | 9.65554e-19 | 1.000000 |
| rad12         | 6.71411e-19 | 1.000000 | 6.71800e-19 | 1.000000 |
| rad40syn      | 1.53512e-20 | 1.000000 | 1.53600e-20 | 1.000000 |
| rad73         | 1.22699e-20 | 1.000000 | 1.22771e-20 | 1.000000 |
| PAH8+H        | 1.10754e-20 | 1.000000 | 1.10817e-20 | 1.000000 |
| rad40anti     | 4.12914e-21 | 1.000000 | 4.13154e-21 | 1.000000 |
| rad71         | 2.51106e-21 | 1.000000 | 2.51251e-21 | 1.000000 |
| rad47         | 7.52224e-23 | 1.000000 | 7.52660e-23 | 1.000000 |
| rad72         | 1.35003e-24 | 1.000000 | 1.35082e-24 | 1.000000 |
| rad8          | 3.96459e-34 | 1.000000 | 3.96689e-34 | 1.000000 |

0.100000000 Pa, 500.000000 K

=====

| Rate constant      | True (fraction)      | Effective (fraction) |
|--------------------|----------------------|----------------------|
| Total              | 2.11551e-14 (1.00 )  | 2.10979e-14 (1.00 )  |
| Formation of rad11 | 1.10850e-14 (0.524 ) | 1.10501e-14 (0.524 ) |
| Formation of rad6  | 7.08033e-15 (0.335 ) | 7.05804e-15 (0.335 ) |
| H-abstraction      | 2.98976e-15 (0.141 ) | 2.98976e-15 (0.142 ) |

| species            | PYtrue      | Cumul    | PYeffective | Cumul    |
|--------------------|-------------|----------|-------------|----------|
| Indene+H           | 0.658973    | 0.658973 | 0.660760    | 0.660760 |
| Benzene+2-propynyl | 0.141326    | 0.800299 | 0.141709    | 0.802469 |
| C2H2+PhCH2         | 0.0768990   | 0.877198 | 0.0771075   | 0.879576 |
| rad6               | 0.0559530   | 0.933151 | 0.0561047   | 0.935681 |
| PhCCH+CH3          | 0.0366363   | 0.969787 | 0.0367355   | 0.972416 |
| PhCHCCH2+H         | 0.0144844   | 0.984272 | 0.0145237   | 0.986940 |
| PhCCCH3+H          | 0.00765971  | 0.991931 | 0.00768047  | 0.994620 |
| Ph+MeAc            | 0.00412232  | 0.996054 | 0.00413350  | 0.998754 |
| Phenyl+Allene      | 0.00270377  | 0.998757 | 0.000000    | 0.998754 |
| PAH7+H             | 0.000553652 | 0.999311 | 0.000555152 | 0.999309 |
| PhCH2CCH+H         | 0.000394479 | 0.999706 | 0.000395549 | 0.999705 |
| rad39              | 0.000133106 | 0.999839 | 0.000133467 | 0.999838 |
| rad2               | 5.80805e-05 | 0.999897 | 5.82380e-05 | 0.999896 |

|               |             |          |             |          |
|---------------|-------------|----------|-------------|----------|
| rad28         | 4.78701e-05 | 0.999945 | 4.79999e-05 | 0.999944 |
| rad30         | 8.75341e-06 | 0.999953 | 8.77714e-06 | 0.999953 |
| rad19anti     | 7.65883e-06 | 0.999961 | 7.67959e-06 | 0.999961 |
| rad26         | 6.94352e-06 | 0.999968 | 6.96234e-06 | 0.999968 |
| rad1          | 6.93561e-06 | 0.999975 | 6.95441e-06 | 0.999975 |
| rad7          | 6.38137e-06 | 0.999981 | 6.39867e-06 | 0.999981 |
| PAH9+H        | 5.93839e-06 | 0.999987 | 5.95449e-06 | 0.999987 |
| rad10         | 2.94966e-06 | 0.999990 | 2.95765e-06 | 0.999990 |
| rad37         | 2.33030e-06 | 0.999993 | 2.33661e-06 | 0.999992 |
| rad38         | 1.87929e-06 | 0.999994 | 1.88439e-06 | 0.999994 |
| rad11         | 1.73074e-06 | 0.999996 | 1.73543e-06 | 0.999996 |
| rad35         | 1.70511e-06 | 0.999998 | 1.70973e-06 | 0.999998 |
| rad3          | 6.57478e-07 | 0.999999 | 6.59260e-07 | 0.999998 |
| rad23         | 6.40215e-07 | 0.999999 | 6.41950e-07 | 0.999999 |
| rad4          | 3.70299e-07 | 1.000000 | 3.71303e-07 | 0.999999 |
| rad46         | 1.25535e-07 | 1.000000 | 1.25875e-07 | 1.000000 |
| rad19syn      | 7.60871e-08 | 1.000000 | 7.62934e-08 | 1.000000 |
| rad45         | 5.95838e-08 | 1.000000 | 5.97453e-08 | 1.000000 |
| rad13         | 3.83728e-08 | 1.000000 | 3.84768e-08 | 1.000000 |
| rad60syn      | 2.85683e-08 | 1.000000 | 2.86457e-08 | 1.000000 |
| PAH3+H        | 1.44860e-08 | 1.000000 | 1.45253e-08 | 1.000000 |
| rad60anti     | 1.39242e-08 | 1.000000 | 1.39619e-08 | 1.000000 |
| rad54         | 1.02595e-08 | 1.000000 | 1.02874e-08 | 1.000000 |
| PAH10+CH3     | 3.37806e-09 | 1.000000 | 3.38722e-09 | 1.000000 |
| rad36         | 2.88439e-09 | 1.000000 | 2.89221e-09 | 1.000000 |
| rad59         | 2.59849e-09 | 1.000000 | 2.60553e-09 | 1.000000 |
| PhcycC3H3_A+H | 1.25746e-09 | 1.000000 | 1.26087e-09 | 1.000000 |
| rad50         | 1.16447e-09 | 1.000000 | 1.16763e-09 | 1.000000 |
| rad62         | 4.83407e-10 | 1.000000 | 4.84718e-10 | 1.000000 |
| rad43         | 4.62366e-10 | 1.000000 | 4.63620e-10 | 1.000000 |
| rad67         | 3.96772e-10 | 1.000000 | 3.97847e-10 | 1.000000 |
| rad70         | 3.42201e-10 | 1.000000 | 3.43128e-10 | 1.000000 |
| rad22         | 2.22403e-10 | 1.000000 | 2.23005e-10 | 1.000000 |
| PAH1+H        | 1.64276e-10 | 1.000000 | 1.64722e-10 | 1.000000 |
| rad55         | 1.59666e-10 | 1.000000 | 1.60100e-10 | 1.000000 |
| rad33         | 1.18481e-10 | 1.000000 | 1.18802e-10 | 1.000000 |
| rad9          | 8.14204e-11 | 1.000000 | 8.16412e-11 | 1.000000 |
| rad27         | 5.61900e-11 | 1.000000 | 5.63423e-11 | 1.000000 |
| rad14         | 5.30047e-11 | 1.000000 | 5.31484e-11 | 1.000000 |
| rad25         | 3.70500e-11 | 1.000000 | 3.71504e-11 | 1.000000 |
| rad34         | 1.41584e-11 | 1.000000 | 1.41968e-11 | 1.000000 |
| rad52         | 1.39018e-11 | 1.000000 | 1.39394e-11 | 1.000000 |
| rad51         | 8.00325e-12 | 1.000000 | 8.02494e-12 | 1.000000 |
| rad31         | 2.32558e-12 | 1.000000 | 2.33188e-12 | 1.000000 |
| rad58         | 1.01123e-12 | 1.000000 | 1.01397e-12 | 1.000000 |
| rad42         | 6.18425e-13 | 1.000000 | 6.20102e-13 | 1.000000 |
| rad21         | 5.90210e-13 | 1.000000 | 5.91810e-13 | 1.000000 |
| rad20         | 4.59678e-13 | 1.000000 | 4.60924e-13 | 1.000000 |
| rad53         | 2.36543e-13 | 1.000000 | 2.37184e-13 | 1.000000 |
| rad65         | 2.24110e-13 | 1.000000 | 2.24718e-13 | 1.000000 |
| rad41         | 1.72010e-13 | 1.000000 | 1.72477e-13 | 1.000000 |
| rad64         | 9.70431e-14 | 1.000000 | 9.73062e-14 | 1.000000 |
| rad15         | 5.20532e-14 | 1.000000 | 5.21943e-14 | 1.000000 |
| rad18         | 1.42511e-14 | 1.000000 | 1.42897e-14 | 1.000000 |
| rad56         | 1.26028e-14 | 1.000000 | 1.26369e-14 | 1.000000 |
| rad68syn      | 1.48838e-15 | 1.000000 | 1.49242e-15 | 1.000000 |
| rad73         | 1.39407e-15 | 1.000000 | 1.39786e-15 | 1.000000 |
| rad71         | 1.09540e-15 | 1.000000 | 1.09837e-15 | 1.000000 |
| rad68anti     | 1.04984e-15 | 1.000000 | 1.05269e-15 | 1.000000 |
| rad24         | 7.11643e-16 | 1.000000 | 7.13573e-16 | 1.000000 |
| rad61         | 5.77889e-16 | 1.000000 | 5.79456e-16 | 1.000000 |
| rad5          | 4.55372e-16 | 1.000000 | 4.56607e-16 | 1.000000 |
| PAH8+H        | 8.63646e-17 | 1.000000 | 8.65990e-17 | 1.000000 |
| rad40syn      | 4.16091e-17 | 1.000000 | 4.17220e-17 | 1.000000 |
| rad40anti     | 1.69042e-17 | 1.000000 | 1.69500e-17 | 1.000000 |
| rad72         | 1.23396e-17 | 1.000000 | 1.23730e-17 | 1.000000 |
| rad12         | 4.27536e-18 | 1.000000 | 4.28695e-18 | 1.000000 |
| rad47         | 4.90576e-21 | 1.000000 | 4.91906e-21 | 1.000000 |
| rad8          | 9.23727e-31 | 1.000000 | 9.26233e-31 | 1.000000 |

0.100000000 Pa, 600.000000 K

| Rate constant      | True (fraction)      | Effective (fraction) |
|--------------------|----------------------|----------------------|
| Total              | 6.08120e-14 (1.00 )  | 6.02895e-14 (1.00 )  |
| Formation of rad11 | 2.83304e-14 (0.466 ) | 2.80327e-14 (0.465 ) |
| Formation of rad6  | 2.13840e-14 (0.352 ) | 2.11593e-14 (0.351 ) |
| H-abstraction      | 1.10975e-14 (0.182 ) | 1.10975e-14 (0.184 ) |

  

| species | PYtrue | Cumul | PYeffective | Cumul |
|---------|--------|-------|-------------|-------|
|---------|--------|-------|-------------|-------|



|                    |             |          |             |          |
|--------------------|-------------|----------|-------------|----------|
| Indene+H           | 0.597850    | 0.597850 | 0.603030    | 0.603030 |
| Benzene+2-propynyl | 0.182488    | 0.780338 | 0.184070    | 0.787100 |
| C2H2+PhCH2         | 0.111359    | 0.891697 | 0.112324    | 0.899424 |
| PhCCH+CH3          | 0.0495016   | 0.941198 | 0.0499305   | 0.949355 |
| PhCHCCH2+H         | 0.0206025   | 0.961801 | 0.0207811   | 0.970136 |
| rad6               | 0.0119136   | 0.973715 | 0.0120168   | 0.982153 |
| Phenyl+Allene      | 0.00859123  | 0.982306 | 0.00000     | 0.982153 |
| PhCCCH3+H          | 0.00824387  | 0.990550 | 0.00831531  | 0.990468 |
| Ph+MeAc            | 0.00622874  | 0.996778 | 0.00628271  | 0.996751 |
| PhCH2CCH+H         | 0.00158014  | 0.998359 | 0.00159382  | 0.998345 |
| PAH7+H             | 0.00123583  | 0.999594 | 0.00124654  | 0.999591 |
| rad39              | 0.000301873 | 0.999896 | 0.000304488 | 0.999896 |
| rad19anti          | 2.06059e-05 | 0.999917 | 2.07844e-05 | 0.999916 |
| rad2               | 1.94474e-05 | 0.999936 | 1.96159e-05 | 0.999936 |
| rad30              | 1.52773e-05 | 0.999952 | 1.54097e-05 | 0.999951 |
| PAH9+H             | 1.44902e-05 | 0.999966 | 1.46158e-05 | 0.999966 |
| rad28              | 1.05555e-05 | 0.999977 | 1.06469e-05 | 0.999977 |
| rad38              | 4.86034e-06 | 0.999981 | 4.90247e-06 | 0.999982 |
| rad37              | 4.20146e-06 | 0.999986 | 4.23788e-06 | 0.999986 |
| rad35              | 3.80489e-06 | 0.999989 | 3.83786e-06 | 0.999990 |
| rad1               | 2.87046e-06 | 0.999992 | 2.89533e-06 | 0.999993 |
| rad23              | 1.64799e-06 | 0.999994 | 1.66227e-06 | 0.999994 |
| rad26              | 1.48258e-06 | 0.999995 | 1.49543e-06 | 0.999996 |
| rad7               | 1.47617e-06 | 0.999997 | 1.48897e-06 | 0.999997 |
| rad10              | 6.48866e-07 | 0.999998 | 6.54490e-07 | 0.999998 |
| rad19syn           | 5.75106e-07 | 0.999998 | 5.80091e-07 | 0.999998 |
| rad46              | 4.35780e-07 | 0.999999 | 4.39556e-07 | 0.999999 |
| rad11              | 4.22853e-07 | 0.999999 | 4.26517e-07 | 0.999999 |
| rad3               | 2.71257e-07 | 0.999999 | 2.73608e-07 | 1.000000 |
| rad45              | 2.10418e-07 | 1.000000 | 2.12241e-07 | 1.000000 |
| rad4               | 1.66293e-07 | 1.000000 | 1.67734e-07 | 1.000000 |
| rad54              | 1.00937e-07 | 1.000000 | 1.01811e-07 | 1.000000 |
| rad60syn           | 8.91954e-08 | 1.000000 | 8.99686e-08 | 1.000000 |
| PAH3+H             | 8.10537e-08 | 1.000000 | 8.17562e-08 | 1.000000 |
| rad60anti          | 4.55615e-08 | 1.000000 | 4.59563e-08 | 1.000000 |
| PAH10+CH3          | 2.30738e-08 | 1.000000 | 2.32738e-08 | 1.000000 |
| PhcycC3H3_A+H      | 2.05504e-08 | 1.000000 | 2.07285e-08 | 1.000000 |
| rad36              | 1.53478e-08 | 1.000000 | 1.54807e-08 | 1.000000 |
| rad59              | 1.35222e-08 | 1.000000 | 1.36394e-08 | 1.000000 |
| rad13              | 1.08849e-08 | 1.000000 | 1.09792e-08 | 1.000000 |
| rad50              | 1.03217e-08 | 1.000000 | 1.04111e-08 | 1.000000 |
| rad70              | 4.88095e-09 | 1.000000 | 4.92324e-09 | 1.000000 |
| rad62              | 3.91438e-09 | 1.000000 | 3.94830e-09 | 1.000000 |
| rad67              | 3.66620e-09 | 1.000000 | 3.69797e-09 | 1.000000 |
| PAH1+H             | 3.26802e-09 | 1.000000 | 3.29633e-09 | 1.000000 |
| rad43              | 2.61490e-09 | 1.000000 | 2.63757e-09 | 1.000000 |
| rad55              | 2.29253e-09 | 1.000000 | 2.31240e-09 | 1.000000 |
| rad22              | 4.93361e-10 | 1.000000 | 4.97636e-10 | 1.000000 |
| rad51              | 3.33551e-10 | 1.000000 | 3.36442e-10 | 1.000000 |
| rad9               | 3.00308e-10 | 1.000000 | 3.02910e-10 | 1.000000 |
| rad34              | 2.96189e-10 | 1.000000 | 2.98756e-10 | 1.000000 |
| rad52              | 2.39241e-10 | 1.000000 | 2.41314e-10 | 1.000000 |
| rad33              | 4.64941e-11 | 1.000000 | 4.68970e-11 | 1.000000 |
| rad58              | 1.73697e-11 | 1.000000 | 1.75201e-11 | 1.000000 |
| rad27              | 1.59510e-11 | 1.000000 | 1.60892e-11 | 1.000000 |
| rad14              | 1.48902e-11 | 1.000000 | 1.50193e-11 | 1.000000 |
| rad42              | 1.23296e-11 | 1.000000 | 1.24365e-11 | 1.000000 |
| rad25              | 1.15398e-11 | 1.000000 | 1.16397e-11 | 1.000000 |
| rad53              | 1.06697e-11 | 1.000000 | 1.07622e-11 | 1.000000 |
| rad65              | 9.50505e-12 | 1.000000 | 9.58743e-12 | 1.000000 |
| rad64              | 4.70976e-12 | 1.000000 | 4.75057e-12 | 1.000000 |
| rad71              | 3.96276e-12 | 1.000000 | 3.99710e-12 | 1.000000 |
| rad41              | 3.29960e-12 | 1.000000 | 3.32819e-12 | 1.000000 |
| rad31              | 3.12507e-12 | 1.000000 | 3.15215e-12 | 1.000000 |
| rad73              | 3.12225e-12 | 1.000000 | 3.14930e-12 | 1.000000 |
| rad21              | 1.60464e-12 | 1.000000 | 1.61854e-12 | 1.000000 |
| rad56              | 1.15529e-12 | 1.000000 | 1.16530e-12 | 1.000000 |
| rad20              | 1.01208e-12 | 1.000000 | 1.02085e-12 | 1.000000 |
| rad15              | 1.88512e-13 | 1.000000 | 1.90145e-13 | 1.000000 |
| rad68syn           | 1.48307e-13 | 1.000000 | 1.49593e-13 | 1.000000 |
| rad72              | 1.12504e-13 | 1.000000 | 1.13480e-13 | 1.000000 |
| rad68anti          | 1.02364e-13 | 1.000000 | 1.03251e-13 | 1.000000 |
| rad61              | 1.00422e-13 | 1.000000 | 1.01291e-13 | 1.000000 |
| PAH8+H             | 8.21812e-14 | 1.000000 | 8.28936e-14 | 1.000000 |
| rad40syn           | 1.81127e-14 | 1.000000 | 1.82697e-14 | 1.000000 |
| rad18              | 1.35497e-14 | 1.000000 | 1.36671e-14 | 1.000000 |
| rad24              | 1.27497e-14 | 1.000000 | 1.28603e-14 | 1.000000 |
| rad40anti          | 1.21205e-14 | 1.000000 | 1.22255e-14 | 1.000000 |
| rad12              | 3.92801e-16 | 1.000000 | 3.96205e-16 | 1.000000 |

|       |             |         |             |         |
|-------|-------------|---------|-------------|---------|
| rad5  | 2.07484e-16 | 1.00000 | 2.09282e-16 | 1.00000 |
| rad47 | 1.24276e-19 | 1.00000 | 1.25352e-19 | 1.00000 |
| rad8  | 8.05028e-27 | 1.00000 | 8.12004e-27 | 1.00000 |

0.100000000 Pa, 700.000000 K

| =====              |                 |          |                      |          |
|--------------------|-----------------|----------|----------------------|----------|
| Rate constant      | True (fraction) |          | Effective (fraction) |          |
| -----              |                 |          |                      |          |
| Total              | 1.39564e-13     | (1.00 )  | 1.36673e-13          | (1.00 )  |
| Formation of rad11 | 5.88273e-14     | (0.422 ) | 5.72670e-14          | (0.419 ) |
| Formation of rad6  | 5.01684e-14     | (0.359 ) | 4.88377e-14          | (0.357 ) |
| H-abstraction      | 3.05678e-14     | (0.219 ) | 3.05678e-14          | (0.224 ) |
| -----              |                 |          |                      |          |
| species            | PYtrue          | Cumul    | PYeffective          | Cumul    |
| -----              |                 |          |                      |          |
| Indene+H           | 0.509120        | 0.509120 | 0.519890             | 0.519890 |
| Benzene+2-propynyl | 0.219024        | 0.728145 | 0.223657             | 0.743548 |
| C2H2+PhCH2         | 0.140216        | 0.868361 | 0.143182             | 0.886730 |
| PhCCH+CH3          | 0.0583687       | 0.926730 | 0.0596034            | 0.946333 |
| PhCHCCH2+H         | 0.0276768       | 0.954407 | 0.0282623            | 0.974596 |
| Phenyl+Allene      | 0.0207148       | 0.975121 | 0.000000             | 0.974596 |
| Ph+MeAc            | 0.00768961      | 0.982811 | 0.00785224           | 0.982448 |
| PhCCCH3+H          | 0.00752183      | 0.990333 | 0.00768094           | 0.990129 |
| PhCH2CCH+H         | 0.00450778      | 0.994841 | 0.00460314           | 0.994732 |
| PAH7+H             | 0.00225206      | 0.997093 | 0.00229970           | 0.997032 |
| rad6               | 0.00222079      | 0.999314 | 0.00226777           | 0.999300 |
| rad39              | 0.000547014     | 0.999861 | 0.000558585          | 0.999858 |
| rad19anti          | 4.65467e-05     | 0.999907 | 4.75313e-05          | 0.999906 |
| PAH9+H             | 3.00388e-05     | 0.999937 | 3.06742e-05          | 0.999936 |
| rad30              | 2.26139e-05     | 0.999960 | 2.30922e-05          | 0.999959 |
| rad38              | 1.05575e-05     | 0.999970 | 1.07808e-05          | 0.999970 |
| rad35              | 7.29867e-06     | 0.999978 | 7.45306e-06          | 0.999978 |
| rad37              | 5.92600e-06     | 0.999984 | 6.05135e-06          | 0.999984 |
| rad2               | 5.08822e-06     | 0.999989 | 5.19585e-06          | 0.999989 |
| rad19syn           | 2.61284e-06     | 0.999991 | 2.66811e-06          | 0.999992 |
| rad28              | 2.01920e-06     | 0.999993 | 2.06192e-06          | 0.999994 |
| rad23              | 1.37030e-06     | 0.999995 | 1.39929e-06          | 0.999995 |
| rad46              | 1.19606e-06     | 0.999996 | 1.22136e-06          | 0.999996 |
| rad1               | 8.54184e-07     | 0.999997 | 8.72260e-07          | 0.999997 |
| rad54              | 5.53741e-07     | 0.999997 | 5.65455e-07          | 0.999998 |
| rad7               | 3.17310e-07     | 0.999998 | 3.24021e-07          | 0.999998 |
| PAH3+H             | 2.96857e-07     | 0.999998 | 3.03136e-07          | 0.999998 |
| rad26              | 2.74918e-07     | 0.999998 | 2.80733e-07          | 0.999999 |
| rad60syn           | 2.09660e-07     | 0.999998 | 2.14095e-07          | 0.999999 |
| rad45              | 1.98282e-07     | 0.999999 | 2.02476e-07          | 0.999999 |
| PhcycC3H3_A+H      | 1.62849e-07     | 0.999999 | 1.66293e-07          | 0.999999 |
| rad10              | 1.27007e-07     | 0.999999 | 1.29693e-07          | 0.999999 |
| rad60anti          | 1.10942e-07     | 0.999999 | 1.13289e-07          | 0.999999 |
| rad11              | 9.96252e-08     | 0.999999 | 1.01732e-07          | 1.000000 |
| PAH10+CH3          | 9.17693e-08     | 0.999999 | 9.37108e-08          | 1.000000 |
| rad3               | 7.84350e-08     | 0.999999 | 8.00945e-08          | 1.000000 |
| rad50              | 5.91797e-08     | 0.999999 | 6.04315e-08          | 1.000000 |
| rad4               | 5.19325e-08     | 0.999999 | 5.30311e-08          | 1.000000 |
| rad59              | 4.64309e-08     | 0.999999 | 4.74130e-08          | 1.000000 |
| rad70              | 3.43365e-08     | 0.999999 | 3.50628e-08          | 1.000000 |
| PAH1+H             | 2.89431e-08     | 0.999999 | 2.95554e-08          | 1.000000 |
| rad67              | 2.17528e-08     | 0.999999 | 2.22129e-08          | 1.000000 |
| rad62              | 1.75653e-08     | 0.999999 | 1.79369e-08          | 1.000000 |
| rad36              | 1.71740e-08     | 0.999999 | 1.75373e-08          | 1.000000 |
| rad55              | 1.62453e-08     | 0.999999 | 1.65890e-08          | 1.000000 |
| rad43              | 8.48358e-09     | 1.000000 | 8.66305e-09          | 1.000000 |
| rad51              | 4.11716e-09     | 1.000000 | 4.20424e-09          | 1.000000 |
| rad13              | 3.30005e-09     | 1.000000 | 3.36986e-09          | 1.000000 |
| rad34              | 2.73421e-09     | 1.000000 | 2.79205e-09          | 1.000000 |
| rad52              | 2.08620e-09     | 1.000000 | 2.13034e-09          | 1.000000 |
| rad9               | 1.69387e-09     | 1.000000 | 1.72970e-09          | 1.000000 |
| rad22              | 4.07392e-10     | 1.000000 | 4.16009e-10          | 1.000000 |
| rad53              | 1.69943e-10     | 1.000000 | 1.73538e-10          | 1.000000 |
| rad58              | 1.39378e-10     | 1.000000 | 1.42326e-10          | 1.000000 |
| rad65              | 1.15263e-10     | 1.000000 | 1.17701e-10          | 1.000000 |
| rad42              | 1.04978e-10     | 1.000000 | 1.07198e-10          | 1.000000 |
| rad71              | 9.00684e-11     | 1.000000 | 9.19741e-11          | 1.000000 |
| rad64              | 7.50709e-11     | 1.000000 | 7.66589e-11          | 1.000000 |
| rad73              | 6.59547e-11     | 1.000000 | 6.73499e-11          | 1.000000 |
| rad56              | 2.92451e-11     | 1.000000 | 2.98638e-11          | 1.000000 |
| rad41              | 2.81492e-11     | 1.000000 | 2.87446e-11          | 1.000000 |
| rad33              | 2.77012e-11     | 1.000000 | 2.82872e-11          | 1.000000 |
| rad21              | 8.24398e-12     | 1.000000 | 8.41835e-12          | 1.000000 |
| rad27              | 4.79049e-12     | 1.000000 | 4.89182e-12          | 1.000000 |
| rad14              | 4.35587e-12     | 1.000000 | 4.44801e-12          | 1.000000 |

|           |             |          |             |         |
|-----------|-------------|----------|-------------|---------|
| rad25     | 4.34026e-12 | 1.000000 | 4.43207e-12 | 1.00000 |
| rad20     | 4.04267e-12 | 1.000000 | 4.12818e-12 | 1.00000 |
| PAH8+H    | 3.96875e-12 | 1.000000 | 4.05271e-12 | 1.00000 |
| rad68syn  | 3.72857e-12 | 1.000000 | 3.80744e-12 | 1.00000 |
| rad72     | 2.90327e-12 | 1.000000 | 2.96468e-12 | 1.00000 |
| rad61     | 2.56076e-12 | 1.000000 | 2.61493e-12 | 1.00000 |
| rad68anti | 2.54788e-12 | 1.000000 | 2.60177e-12 | 1.00000 |
| rad31     | 1.80441e-12 | 1.000000 | 1.84257e-12 | 1.00000 |
| rad40syn  | 8.63150e-13 | 1.000000 | 8.81405e-13 | 1.00000 |
| rad15     | 7.51912e-13 | 1.000000 | 7.67818e-13 | 1.00000 |
| rad40anti | 6.74762e-13 | 1.000000 | 6.89035e-13 | 1.00000 |
| rad24     | 4.26529e-13 | 1.000000 | 4.35552e-13 | 1.00000 |
| rad12     | 4.90544e-14 | 1.000000 | 5.00921e-14 | 1.00000 |
| rad18     | 1.81858e-14 | 1.000000 | 1.85704e-14 | 1.00000 |
| rad5      | 9.43161e-17 | 1.000000 | 9.63115e-17 | 1.00000 |
| rad47     | 2.14242e-18 | 1.000000 | 2.18773e-18 | 1.00000 |
| rad8      | 9.58468e-23 | 1.000000 | 9.78743e-23 | 1.00000 |

0.100000000 Pa, 800.000000 K

| Rate constant      | True (fraction)      | Effective (fraction) |
|--------------------|----------------------|----------------------|
| Total              | 2.75392e-13 (1.00 )  | 2.64233e-13 (1.00 )  |
| Formation of rad11 | 1.06471e-13 (0.387 ) | 1.00708e-13 (0.381 ) |
| Formation of rad6  | 9.97133e-14 (0.362 ) | 9.43165e-14 (0.357 ) |
| H-abstraction      | 6.92082e-14 (0.251 ) | 6.92082e-14 (0.262 ) |

| species            | PYtrue      | Cumul    | PYeffective | Cumul    |
|--------------------|-------------|----------|-------------|----------|
| Indene+H           | 0.420827    | 0.420827 | 0.438600    | 0.438600 |
| Benzene+2-propynyl | 0.251308    | 0.672135 | 0.261921    | 0.700521 |
| C2H2+PhCH2         | 0.158603    | 0.830738 | 0.165302    | 0.865822 |
| PhCCH+CH3          | 0.0630713   | 0.893809 | 0.0657349   | 0.931557 |
| Phenyl+Allene      | 0.0405212   | 0.934330 | 0.000000    | 0.931557 |
| PhCHCCH2+H         | 0.0360530   | 0.970383 | 0.0375756   | 0.969133 |
| PhCH2CCH+H         | 0.00999564  | 0.980379 | 0.0104178   | 0.979551 |
| Ph+MeAc            | 0.00839756  | 0.988777 | 0.00875221  | 0.988303 |
| PhCCCH3+H          | 0.00622593  | 0.995003 | 0.00648887  | 0.994792 |
| PAH7+H             | 0.00350787  | 0.998510 | 0.00365601  | 0.998448 |
| rad39              | 0.000836027 | 0.999346 | 0.000871332 | 0.999319 |
| rad6               | 0.000421926 | 0.999768 | 0.000439744 | 0.999759 |
| rad19anti          | 9.01703e-05 | 0.999859 | 9.39781e-05 | 0.999853 |
| PAH9+H             | 5.39895e-05 | 0.999912 | 5.62696e-05 | 0.999909 |
| rad30              | 2.94324e-05 | 0.999942 | 3.06754e-05 | 0.999940 |
| rad38              | 1.96949e-05 | 0.999962 | 2.05266e-05 | 0.999960 |
| rad35              | 1.22893e-05 | 0.999974 | 1.28084e-05 | 0.999973 |
| rad19syn           | 8.33257e-06 | 0.999982 | 8.68446e-06 | 0.999982 |
| rad37              | 7.26128e-06 | 0.999990 | 7.56797e-06 | 0.999989 |
| rad46              | 2.67672e-06 | 0.999992 | 2.78976e-06 | 0.999992 |
| rad54              | 2.03458e-06 | 0.999994 | 2.12050e-06 | 0.999994 |
| rad2               | 1.05322e-06 | 0.999995 | 1.09770e-06 | 0.999995 |
| PAH3+H             | 7.97118e-07 | 0.999996 | 8.30789e-07 | 0.999996 |
| PhcycC3H3_A+H      | 7.94348e-07 | 0.999997 | 8.27896e-07 | 0.999997 |
| rad23              | 6.44775e-07 | 0.999998 | 6.72005e-07 | 0.999998 |
| rad60syn           | 3.96692e-07 | 0.999998 | 4.13445e-07 | 0.999998 |
| rad28              | 3.96286e-07 | 0.999998 | 4.13022e-07 | 0.999999 |
| PAH10+CH3          | 2.58083e-07 | 0.999999 | 2.68983e-07 | 0.999999 |
| rad60anti          | 2.15768e-07 | 0.999999 | 2.24880e-07 | 0.999999 |
| rad50              | 2.05729e-07 | 0.999999 | 2.14419e-07 | 0.999999 |
| rad1               | 1.80307e-07 | 0.999999 | 1.87922e-07 | 0.999999 |
| rad70              | 1.50067e-07 | 0.999999 | 1.56405e-07 | 1.000000 |
| PAH1+H             | 1.49076e-07 | 0.999999 | 1.55372e-07 | 1.000000 |
| rad59              | 1.17709e-07 | 1.000000 | 1.22681e-07 | 1.000000 |
| rad45              | 1.17658e-07 | 1.000000 | 1.22627e-07 | 1.000000 |
| rad67              | 9.06127e-08 | 1.000000 | 9.44402e-08 | 1.000000 |
| rad7               | 7.62214e-08 | 1.000000 | 7.94409e-08 | 1.000000 |
| rad55              | 7.18808e-08 | 1.000000 | 7.49165e-08 | 1.000000 |
| rad62              | 5.33396e-08 | 1.000000 | 5.55923e-08 | 1.000000 |
| rad26              | 5.19387e-08 | 1.000000 | 5.41322e-08 | 1.000000 |
| rad11              | 2.77763e-08 | 1.000000 | 2.89494e-08 | 1.000000 |
| rad10              | 2.45828e-08 | 1.000000 | 2.56209e-08 | 1.000000 |
| rad3               | 1.91466e-08 | 1.000000 | 1.99552e-08 | 1.000000 |
| rad43              | 1.88870e-08 | 1.000000 | 1.96846e-08 | 1.000000 |
| rad34              | 1.46647e-08 | 1.000000 | 1.52841e-08 | 1.000000 |
| rad51              | 1.42995e-08 | 1.000000 | 1.49034e-08 | 1.000000 |
| rad4               | 1.31741e-08 | 1.000000 | 1.37304e-08 | 1.000000 |
| rad36              | 1.04467e-08 | 1.000000 | 1.08878e-08 | 1.000000 |
| rad9               | 8.84078e-09 | 1.000000 | 9.21418e-09 | 1.000000 |
| rad52              | 7.80265e-09 | 1.000000 | 8.13215e-09 | 1.000000 |
| rad13              | 1.45852e-09 | 1.000000 | 1.52012e-09 | 1.000000 |

|           |             |         |             |         |
|-----------|-------------|---------|-------------|---------|
| rad53     | 1.38735e-09 | 1.00000 | 1.44594e-09 | 1.00000 |
| rad58     | 6.57194e-10 | 1.00000 | 6.84948e-10 | 1.00000 |
| rad64     | 5.80195e-10 | 1.00000 | 6.04698e-10 | 1.00000 |
| rad42     | 5.11519e-10 | 1.00000 | 5.33123e-10 | 1.00000 |
| rad65     | 4.15506e-10 | 1.00000 | 4.33054e-10 | 1.00000 |
| rad56     | 3.40738e-10 | 1.00000 | 3.55128e-10 | 1.00000 |
| rad71     | 2.55403e-10 | 1.00000 | 2.66190e-10 | 1.00000 |
| rad22     | 2.01646e-10 | 1.00000 | 2.10162e-10 | 1.00000 |
| rad73     | 1.83549e-10 | 1.00000 | 1.91301e-10 | 1.00000 |
| rad41     | 1.01341e-10 | 1.00000 | 1.05621e-10 | 1.00000 |
| rad21     | 6.99085e-11 | 1.00000 | 7.28609e-11 | 1.00000 |
| rad33     | 4.66086e-11 | 1.00000 | 4.85770e-11 | 1.00000 |
| rad68syn  | 4.03731e-11 | 1.00000 | 4.20781e-11 | 1.00000 |
| rad20     | 2.97861e-11 | 1.00000 | 3.10440e-11 | 1.00000 |
| rad68anti | 2.74227e-11 | 1.00000 | 2.85809e-11 | 1.00000 |
| PAH8+H    | 2.25208e-11 | 1.00000 | 2.34719e-11 | 1.00000 |
| rad61     | 1.04206e-11 | 1.00000 | 1.08607e-11 | 1.00000 |
| rad72     | 8.54468e-12 | 1.00000 | 8.90551e-12 | 1.00000 |
| rad40syn  | 5.65532e-12 | 1.00000 | 5.89417e-12 | 1.00000 |
| rad24     | 5.64253e-12 | 1.00000 | 5.88084e-12 | 1.00000 |
| rad40anti | 3.48276e-12 | 1.00000 | 3.62984e-12 | 1.00000 |
| rad25     | 3.33956e-12 | 1.00000 | 3.48059e-12 | 1.00000 |
| rad15     | 2.50766e-12 | 1.00000 | 2.61357e-12 | 1.00000 |
| rad27     | 2.21918e-12 | 1.00000 | 2.31290e-12 | 1.00000 |
| rad14     | 1.89843e-12 | 1.00000 | 1.97861e-12 | 1.00000 |
| rad12     | 1.16535e-12 | 1.00000 | 1.21456e-12 | 1.00000 |
| rad31     | 8.45753e-13 | 1.00000 | 8.81466e-13 | 1.00000 |
| rad18     | 4.77014e-14 | 1.00000 | 4.97159e-14 | 1.00000 |
| rad5      | 5.32495e-17 | 1.00000 | 5.54984e-17 | 1.00000 |
| rad47     | 1.15885e-17 | 1.00000 | 1.20778e-17 | 1.00000 |
| rad8      | 3.35885e-19 | 1.00000 | 3.50071e-19 | 1.00000 |

0.100000000 Pa, 900.000000 K

| Rate constant      | True (fraction) |          | Effective (fraction) |          |
|--------------------|-----------------|----------|----------------------|----------|
| Total              | 4.88072e-13     | (1.00 )  | 4.55162e-13          | (1.00 )  |
| Formation of rad11 | 1.74945e-13     | (0.358 ) | 1.58563e-13          | (0.348 ) |
| Formation of rad6  | 1.76509e-13     | (0.362 ) | 1.59980e-13          | (0.351 ) |
| H-abstraction      | 1.36618e-13     | (0.280 ) | 1.36618e-13          | (0.300 ) |

  

| species            | PYtrue      | Cumul    | PYeffective | Cumul    |
|--------------------|-------------|----------|-------------|----------|
| Indene+H           | 0.341026    | 0.341026 | 0.365684    | 0.365684 |
| Benzene+2-propynyl | 0.279914    | 0.620940 | 0.300153    | 0.665837 |
| C2H2+PhCH2         | 0.164576    | 0.785517 | 0.176476    | 0.842313 |
| Phenyl+Allene      | 0.0674292   | 0.852946 | 0.000000    | 0.842313 |
| PhCCH+CH3          | 0.0639038   | 0.916850 | 0.0685244   | 0.910838 |
| PhCHCCH2+H         | 0.0451185   | 0.961968 | 0.0483808   | 0.959218 |
| PhCH2CCH+H         | 0.0182954   | 0.980264 | 0.0196182   | 0.978837 |
| Ph+MeAc            | 0.00849140  | 0.988755 | 0.00910543  | 0.987942 |
| PhCCCH3+H          | 0.00485193  | 0.993607 | 0.00520275  | 0.993145 |
| PAH7+H             | 0.00482320  | 0.998430 | 0.00517194  | 0.998317 |
| rad39              | 0.00111849  | 0.999549 | 0.00119936  | 0.999516 |
| rad19anti          | 0.000152564 | 0.999701 | 0.000163596 | 0.999680 |
| PAH9+H             | 8.59200e-05 | 0.999787 | 9.21328e-05 | 0.999772 |
| rad6               | 7.87508e-05 | 0.999866 | 8.44450e-05 | 0.999856 |
| rad30              | 3.45736e-05 | 0.999900 | 3.70734e-05 | 0.999893 |
| rad38              | 3.23199e-05 | 0.999933 | 3.46569e-05 | 0.999928 |
| rad19syn           | 2.05721e-05 | 0.999953 | 2.20595e-05 | 0.999950 |
| rad35              | 1.85173e-05 | 0.999972 | 1.98561e-05 | 0.999970 |
| rad37              | 8.30375e-06 | 0.999980 | 8.90416e-06 | 0.999979 |
| rad54              | 5.61014e-06 | 0.999986 | 6.01578e-06 | 0.999985 |
| rad46              | 5.08324e-06 | 0.999991 | 5.45079e-06 | 0.999990 |
| PhcycC3H3_A+H      | 2.75306e-06 | 0.999994 | 2.95212e-06 | 0.999993 |
| PAH3+H             | 1.70094e-06 | 0.999995 | 1.82392e-06 | 0.999995 |
| rad60syn           | 6.35542e-07 | 0.999996 | 6.81495e-07 | 0.999996 |
| PAH10+CH3          | 5.95339e-07 | 0.999996 | 6.38385e-07 | 0.999996 |
| rad50              | 5.47497e-07 | 0.999997 | 5.87083e-07 | 0.999997 |
| PAH1+H             | 5.28108e-07 | 0.999998 | 5.66293e-07 | 0.999997 |
| rad70              | 4.68197e-07 | 0.999998 | 5.02049e-07 | 0.999998 |
| rad60anti          | 3.53457e-07 | 0.999998 | 3.79013e-07 | 0.999998 |
| rad67              | 2.87040e-07 | 0.999999 | 3.07794e-07 | 0.999999 |
| rad23              | 2.74457e-07 | 0.999999 | 2.94302e-07 | 0.999999 |
| rad59              | 2.38426e-07 | 0.999999 | 2.55666e-07 | 0.999999 |
| rad55              | 2.28529e-07 | 0.999999 | 2.45053e-07 | 0.999999 |
| rad2               | 1.97821e-07 | 1.000000 | 2.12124e-07 | 1.000000 |
| rad62              | 1.23608e-07 | 1.000000 | 1.32545e-07 | 1.000000 |
| rad28              | 7.77391e-08 | 1.000000 | 8.33595e-08 | 1.000000 |
| rad45              | 6.07701e-08 | 1.000000 | 6.51640e-08 | 1.000000 |

|           |             |          |             |         |
|-----------|-------------|----------|-------------|---------|
| rad34     | 5.38205e-08 | 1.000000 | 5.77120e-08 | 1.00000 |
| rad1      | 3.66145e-08 | 1.000000 | 3.92619e-08 | 1.00000 |
| rad51     | 3.61347e-08 | 1.000000 | 3.87475e-08 | 1.00000 |
| rad43     | 3.27905e-08 | 1.000000 | 3.51614e-08 | 1.00000 |
| rad52     | 2.18028e-08 | 1.00000  | 2.33792e-08 | 1.00000 |
| rad7      | 2.04389e-08 | 1.00000  | 2.19167e-08 | 1.00000 |
| rad9      | 1.97929e-08 | 1.00000  | 2.12241e-08 | 1.00000 |
| rad26     | 1.02007e-08 | 1.00000  | 1.09383e-08 | 1.00000 |
| rad11     | 9.58557e-09 | 1.00000  | 1.02787e-08 | 1.00000 |
| rad53     | 7.16607e-09 | 1.00000  | 7.68418e-09 | 1.00000 |
| rad36     | 5.59539e-09 | 1.00000  | 5.99996e-09 | 1.00000 |
| rad10     | 5.39856e-09 | 1.00000  | 5.78890e-09 | 1.00000 |
| rad3      | 4.90322e-09 | 1.00000  | 5.25774e-09 | 1.00000 |
| rad4      | 3.57086e-09 | 1.00000  | 3.82905e-09 | 1.00000 |
| rad64     | 2.80334e-09 | 1.00000  | 3.00603e-09 | 1.00000 |
| rad56     | 2.33256e-09 | 1.00000  | 2.50122e-09 | 1.00000 |
| rad58     | 2.17728e-09 | 1.00000  | 2.33471e-09 | 1.00000 |
| rad42     | 1.72112e-09 | 1.00000  | 1.84557e-09 | 1.00000 |
| rad13     | 1.31055e-09 | 1.00000  | 1.40531e-09 | 1.00000 |
| rad65     | 1.11374e-09 | 1.00000  | 1.19427e-09 | 1.00000 |
| rad21     | 3.94461e-10 | 1.00000  | 4.22983e-10 | 1.00000 |
| rad68syn  | 2.64911e-10 | 1.00000  | 2.84065e-10 | 1.00000 |
| rad71     | 2.59554e-10 | 1.00000  | 2.78322e-10 | 1.00000 |
| rad41     | 2.43028e-10 | 1.00000  | 2.60600e-10 | 1.00000 |
| rad73     | 1.91122e-10 | 1.00000  | 2.04940e-10 | 1.00000 |
| rad68anti | 1.78721e-10 | 1.00000  | 1.91643e-10 | 1.00000 |
| rad20     | 1.76509e-10 | 1.00000  | 1.89272e-10 | 1.00000 |
| rad33     | 1.38070e-10 | 1.00000  | 1.48053e-10 | 1.00000 |
| PAH8+H    | 1.15346e-10 | 1.00000  | 1.23686e-10 | 1.00000 |
| rad22     | 1.00191e-10 | 1.00000  | 1.07435e-10 | 1.00000 |
| rad61     | 3.19949e-11 | 1.00000  | 3.43083e-11 | 1.00000 |
| rad40syn  | 3.09829e-11 | 1.00000  | 3.32231e-11 | 1.00000 |
| rad24     | 1.88563e-11 | 1.00000  | 2.02196e-11 | 1.00000 |
| rad40anti | 1.41459e-11 | 1.00000  | 1.51686e-11 | 1.00000 |
| rad72     | 8.70937e-12 | 1.00000  | 9.33911e-12 | 1.00000 |
| rad25     | 6.16737e-12 | 1.00000  | 6.61330e-12 | 1.00000 |
| rad12     | 5.36854e-12 | 1.00000  | 5.75671e-12 | 1.00000 |
| rad15     | 4.71761e-12 | 1.00000  | 5.05871e-12 | 1.00000 |
| rad27     | 1.94296e-12 | 1.00000  | 2.08345e-12 | 1.00000 |
| rad14     | 1.59025e-12 | 1.00000  | 1.70523e-12 | 1.00000 |
| rad31     | 4.21250e-13 | 1.00000  | 4.51708e-13 | 1.00000 |
| rad18     | 1.96102e-13 | 1.00000  | 2.10280e-13 | 1.00000 |
| rad8      | 1.12313e-16 | 1.00000  | 1.20434e-16 | 1.00000 |
| rad5      | 3.60050e-17 | 1.00000  | 3.86083e-17 | 1.00000 |
| rad47     | 2.80649e-17 | 1.00000  | 3.00941e-17 | 1.00000 |

0.100000000 Pa, 1000.00000 K

=====

| Rate constant      | True (fraction)      | Effective (fraction) |
|--------------------|----------------------|----------------------|
| Total              | 7.98668e-13 (1.00 )  | 7.19596e-13 (1.00 )  |
| Formation of rad11 | 2.67704e-13 (0.335 ) | 2.29547e-13 (0.319 ) |
| Formation of rad6  | 2.87049e-13 (0.359 ) | 2.46135e-13 (0.342 ) |
| H-abstraction      | 2.43915e-13 (0.305 ) | 2.43915e-13 (0.339 ) |

| species            | PYtrue      | Cumul    | PYeffective | Cumul    |
|--------------------|-------------|----------|-------------|----------|
| Benzene+2-propynyl | 0.305402    | 0.305402 | 0.338961    | 0.338961 |
| Indene+H           | 0.272138    | 0.577540 | 0.302041    | 0.641002 |
| C2H2+PhCH2         | 0.159437    | 0.736977 | 0.176957    | 0.817959 |
| Phenyl+Allene      | 0.0990045   | 0.835982 | 0.00000     | 0.817959 |
| PhCCH+CH3          | 0.0616136   | 0.897595 | 0.0683839   | 0.886343 |
| PhCHCCH2+H         | 0.0537568   | 0.951352 | 0.0596637   | 0.946007 |
| PhCH2CCH+H         | 0.0288964   | 0.980248 | 0.0320716   | 0.978078 |
| Ph+MeAc            | 0.00817570  | 0.988424 | 0.00907409  | 0.987152 |
| PAH7+H             | 0.00601148  | 0.994436 | 0.00667200  | 0.993824 |
| PhCCCH3+H          | 0.00364243  | 0.998078 | 0.00404267  | 0.997867 |
| rad39              | 0.00134887  | 0.999427 | 0.00149709  | 0.999364 |
| rad19anti          | 0.000230027 | 0.999657 | 0.000255303 | 0.999619 |
| PAH9+H             | 0.000123767 | 0.999781 | 0.000137367 | 0.999757 |
| rad38              | 4.78151e-05 | 0.999829 | 5.30691e-05 | 0.999810 |
| rad19syn           | 4.20371e-05 | 0.999871 | 4.66562e-05 | 0.999856 |
| rad30              | 3.74797e-05 | 0.999908 | 4.15982e-05 | 0.999898 |
| rad35              | 2.54727e-05 | 0.999934 | 2.82717e-05 | 0.999926 |
| rad6               | 1.64668e-05 | 0.999950 | 1.82762e-05 | 0.999945 |
| rad54              | 1.25293e-05 | 0.999963 | 1.39060e-05 | 0.999958 |
| rad37              | 9.28219e-06 | 0.999972 | 1.03021e-05 | 0.999969 |
| rad46              | 8.50167e-06 | 0.999980 | 9.43588e-06 | 0.999978 |
| PhcycC3H3_A+H      | 7.44290e-06 | 0.999988 | 8.26075e-06 | 0.999986 |
| PAH3+H             | 3.05886e-06 | 0.999991 | 3.39497e-06 | 0.999990 |

|           |             |          |             |          |
|-----------|-------------|----------|-------------|----------|
| PAH1+H    | 1.42934e-06 | 0.999992 | 1.58640e-06 | 0.999991 |
| rad50     | 1.26042e-06 | 0.999994 | 1.39891e-06 | 0.999993 |
| PAH10+CH3 | 1.21483e-06 | 0.999995 | 1.34832e-06 | 0.999994 |
| rad70     | 1.14134e-06 | 0.999996 | 1.26675e-06 | 0.999995 |
| rad60syn  | 8.97094e-07 | 0.999997 | 9.95671e-07 | 0.999996 |
| rad67     | 7.33489e-07 | 0.999998 | 8.14083e-07 | 0.999997 |
| rad55     | 5.71765e-07 | 0.999998 | 6.34593e-07 | 0.999998 |
| rad60anti | 5.08256e-07 | 0.999999 | 5.64105e-07 | 0.999998 |
| rad59     | 4.08682e-07 | 0.999999 | 4.53589e-07 | 0.999999 |
| rad62     | 2.36352e-07 | 0.999999 | 2.62324e-07 | 0.999999 |
| rad34     | 1.49953e-07 | 0.999999 | 1.66431e-07 | 0.999999 |
| rad23     | 1.27355e-07 | 1.000000 | 1.41349e-07 | 0.999999 |
| rad51     | 9.69020e-08 | 1.000000 | 1.07550e-07 | 1.000000 |
| rad52     | 5.58488e-08 | 1.000000 | 6.19857e-08 | 1.000000 |
| rad43     | 4.83940e-08 | 1.000000 | 5.37116e-08 | 1.000000 |
| rad2      | 4.28396e-08 | 1.000000 | 4.75470e-08 | 1.000000 |
| rad45     | 3.20634e-08 | 1.000000 | 3.55866e-08 | 1.000000 |
| rad53     | 2.66808e-08 | 1.000000 | 2.96127e-08 | 1.000000 |
| rad9      | 2.02066e-08 | 1.000000 | 2.24269e-08 | 1.000000 |
| rad28     | 1.76060e-08 | 1.000000 | 1.95407e-08 | 1.000000 |
| rad56     | 1.08971e-08 | 1.000000 | 1.20945e-08 | 1.000000 |
| rad64     | 9.69041e-09 | 1.000000 | 1.07552e-08 | 1.000000 |
| rad1      | 8.90114e-09 | 1.000000 | 9.87917e-09 | 1.000000 |
| rad7      | 7.47540e-09 | 1.000000 | 8.29677e-09 | 1.000000 |
| rad11     | 6.07712e-09 | 1.000000 | 6.74492e-09 | 1.000000 |
| rad58     | 5.61976e-09 | 1.000000 | 6.23728e-09 | 1.000000 |
| rad42     | 4.48058e-09 | 1.000000 | 4.97292e-09 | 1.000000 |
| rad65     | 3.05215e-09 | 1.000000 | 3.38753e-09 | 1.000000 |
| rad36     | 3.00193e-09 | 1.000000 | 3.33179e-09 | 1.000000 |
| rad13     | 2.94071e-09 | 1.000000 | 3.26384e-09 | 1.000000 |
| rad26     | 2.44840e-09 | 1.000000 | 2.71743e-09 | 1.000000 |
| rad10     | 1.82222e-09 | 1.000000 | 2.02246e-09 | 1.000000 |
| rad3      | 1.53300e-09 | 1.000000 | 1.70145e-09 | 1.000000 |
| rad68syn  | 1.19405e-09 | 1.000000 | 1.32525e-09 | 1.000000 |
| rad4      | 1.16467e-09 | 1.000000 | 1.29266e-09 | 1.000000 |
| rad21     | 9.65672e-10 | 1.000000 | 1.07178e-09 | 1.000000 |
| rad68anti | 8.00628e-10 | 1.000000 | 8.88602e-10 | 1.000000 |
| PAH8+H    | 6.77059e-10 | 1.000000 | 7.51456e-10 | 1.000000 |
| rad41     | 5.02556e-10 | 1.000000 | 5.57779e-10 | 1.000000 |
| rad20     | 4.74927e-10 | 1.000000 | 5.27113e-10 | 1.000000 |
| rad33     | 2.74989e-10 | 1.000000 | 3.05205e-10 | 1.000000 |
| rad71     | 2.05611e-10 | 1.000000 | 2.28205e-10 | 1.000000 |
| rad73     | 1.89074e-10 | 1.000000 | 2.09850e-10 | 1.000000 |
| rad40syn  | 1.62207e-10 | 1.000000 | 1.80031e-10 | 1.000000 |
| rad61     | 1.16858e-10 | 1.000000 | 1.29698e-10 | 1.000000 |
| rad40anti | 7.26091e-11 | 1.000000 | 8.05873e-11 | 1.000000 |
| rad22     | 6.67978e-11 | 1.000000 | 7.41376e-11 | 1.000000 |
| rad24     | 2.48931e-11 | 1.000000 | 2.76285e-11 | 1.000000 |
| rad25     | 1.52289e-11 | 1.000000 | 1.69023e-11 | 1.000000 |
| rad12     | 9.30727e-12 | 1.000000 | 1.03300e-11 | 1.000000 |
| rad72     | 5.92294e-12 | 1.000000 | 6.57377e-12 | 1.000000 |
| rad15     | 5.46227e-12 | 1.000000 | 6.06249e-12 | 1.000000 |
| rad14     | 2.14509e-12 | 1.000000 | 2.38080e-12 | 1.000000 |
| rad27     | 2.11538e-12 | 1.000000 | 2.34783e-12 | 1.000000 |
| rad18     | 9.40916e-13 | 1.000000 | 1.04430e-12 | 1.000000 |
| rad31     | 2.33053e-13 | 1.000000 | 2.58661e-13 | 1.000000 |
| rad8      | 3.75951e-15 | 1.000000 | 4.17261e-15 | 1.000000 |
| rad47     | 7.12039e-17 | 1.000000 | 7.90279e-17 | 1.000000 |
| rad5      | 3.44787e-17 | 1.000000 | 3.82674e-17 | 1.000000 |

0.100000000 Pa, 1100.00000 K

=====

| Rate constant      | True (fraction)      | Effective (fraction) |
|--------------------|----------------------|----------------------|
| Total              | 1.22919e-12 (1.00 )  | 1.06689e-12 (1.00 )  |
| Formation of rad11 | 3.87976e-13 (0.316 ) | 3.11712e-13 (0.292 ) |
| Formation of rad6  | 4.37724e-13 (0.356 ) | 3.51682e-13 (0.330 ) |
| H-abstraction      | 4.03491e-13 (0.328 ) | 4.03491e-13 (0.378 ) |

| species            | PYtrue     | Cumul    | PYeffective | Cumul    |
|--------------------|------------|----------|-------------|----------|
| Benzene+2-propynyl | 0.328257   | 0.328257 | 0.378195    | 0.378195 |
| Indene+H           | 0.214720   | 0.542977 | 0.247386    | 0.625581 |
| C2H2+PhCH2         | 0.146496   | 0.689473 | 0.168783    | 0.794364 |
| Phenyl+Allene      | 0.132043   | 0.821517 | 0.000000    | 0.794364 |
| PhCHCCH2+H         | 0.0609564  | 0.882473 | 0.0702297   | 0.864593 |
| PhCCH+CH3          | 0.0572421  | 0.939715 | 0.0659505   | 0.930544 |
| PhCH2CCH+H         | 0.0407439  | 0.980459 | 0.0469423   | 0.977486 |
| Ph+MeAc            | 0.00763469 | 0.988094 | 0.00879611  | 0.986282 |
| PAH7+H             | 0.00694703 | 0.995041 | 0.00800387  | 0.994286 |

|               |             |          |             |          |
|---------------|-------------|----------|-------------|----------|
| PhCCCH3+H     | 0.00267726  | 0.997718 | 0.00308456  | 0.997371 |
| rad39         | 0.00150220  | 0.999220 | 0.00173074  | 0.999101 |
| rad19anti     | 0.000315224 | 0.999535 | 0.000363179 | 0.999465 |
| PAH9+H        | 0.000164427 | 0.999700 | 0.000189441 | 0.999654 |
| rad19syn      | 7.45655e-05 | 0.999774 | 8.59092e-05 | 0.999740 |
| rad38         | 6.50560e-05 | 0.999839 | 7.49530e-05 | 0.999815 |
| rad30         | 3.82322e-05 | 0.999878 | 4.40485e-05 | 0.999859 |
| rad35         | 3.25663e-05 | 0.999910 | 3.75206e-05 | 0.999896 |
| rad54         | 2.39079e-05 | 0.999934 | 2.75450e-05 | 0.999924 |
| PhcycC3H3_A+H | 1.67308e-05 | 0.999951 | 1.92760e-05 | 0.999943 |
| rad46         | 1.28445e-05 | 0.999964 | 1.47985e-05 | 0.999958 |
| rad37         | 1.03716e-05 | 0.999974 | 1.19494e-05 | 0.999970 |
| PAH3+H        | 4.84002e-06 | 0.999979 | 5.57634e-06 | 0.999976 |
| rad6          | 4.22222e-06 | 0.999983 | 4.86455e-06 | 0.999980 |
| PAH1+H        | 3.16901e-06 | 0.999986 | 3.65111e-06 | 0.999984 |
| rad50         | 2.54283e-06 | 0.999989 | 2.92967e-06 | 0.999987 |
| rad70         | 2.31282e-06 | 0.999991 | 2.66467e-06 | 0.999990 |
| PAH10+CH3     | 2.25184e-06 | 0.999993 | 2.59442e-06 | 0.999992 |
| rad67         | 1.57982e-06 | 0.999995 | 1.82015e-06 | 0.999994 |
| rad55         | 1.19784e-06 | 0.999996 | 1.38006e-06 | 0.999995 |
| rad60syn      | 1.15117e-06 | 0.999997 | 1.32630e-06 | 0.999997 |
| rad60anti     | 6.62633e-07 | 0.999998 | 7.63439e-07 | 0.999998 |
| rad59         | 6.18431e-07 | 0.999999 | 7.12514e-07 | 0.999998 |
| rad62         | 3.93260e-07 | 0.999999 | 4.53087e-07 | 0.999999 |
| rad34         | 3.40150e-07 | 0.999999 | 3.91897e-07 | 0.999999 |
| rad51         | 2.40845e-07 | 1.000000 | 2.77485e-07 | 0.999999 |
| rad52         | 1.26156e-07 | 1.000000 | 1.45348e-07 | 1.000000 |
| rad53         | 7.80417e-08 | 1.000000 | 8.99142e-08 | 1.000000 |
| rad43         | 6.37716e-08 | 1.000000 | 7.34731e-08 | 1.000000 |
| rad23         | 6.24936e-08 | 1.000000 | 7.20006e-08 | 1.000000 |
| rad56         | 3.84107e-08 | 1.000000 | 4.42541e-08 | 1.000000 |
| rad64         | 2.61448e-08 | 1.000000 | 3.01223e-08 | 1.000000 |
| rad45         | 1.71592e-08 | 1.000000 | 1.97697e-08 | 1.000000 |
| rad9          | 1.51281e-08 | 1.000000 | 1.74296e-08 | 1.000000 |
| rad58         | 1.20382e-08 | 1.000000 | 1.38695e-08 | 1.000000 |
| rad2          | 1.10394e-08 | 1.000000 | 1.27189e-08 | 1.000000 |
| rad42         | 9.67531e-09 | 1.000000 | 1.11472e-08 | 1.000000 |
| rad11         | 9.49737e-09 | 1.000000 | 1.09422e-08 | 1.000000 |
| rad65         | 7.56926e-09 | 1.000000 | 8.72081e-09 | 1.000000 |
| rad13         | 5.82704e-09 | 1.000000 | 6.71350e-09 | 1.000000 |
| rad7          | 5.09927e-09 | 1.000000 | 5.87503e-09 | 1.000000 |
| rad28         | 5.00573e-09 | 1.000000 | 5.76726e-09 | 1.000000 |
| rad68syn      | 4.04390e-09 | 1.000000 | 4.65911e-09 | 1.000000 |
| PAH8+H        | 3.09044e-09 | 1.000000 | 3.56060e-09 | 1.000000 |
| rad68anti     | 2.69739e-09 | 1.000000 | 3.10775e-09 | 1.000000 |
| rad1          | 2.46720e-09 | 1.000000 | 2.84254e-09 | 1.000000 |
| rad36         | 1.62191e-09 | 1.000000 | 1.86865e-09 | 1.000000 |
| rad21         | 1.13117e-09 | 1.000000 | 1.30325e-09 | 1.000000 |
| rad10         | 9.56703e-10 | 1.000000 | 1.10224e-09 | 1.000000 |
| rad41         | 9.13308e-10 | 1.000000 | 1.05225e-09 | 1.000000 |
| rad26         | 7.55207e-10 | 1.000000 | 8.70097e-10 | 1.000000 |
| rad40syn      | 6.54345e-10 | 1.000000 | 7.53895e-10 | 1.000000 |
| rad20         | 5.77624e-10 | 1.000000 | 6.65499e-10 | 1.000000 |
| rad3          | 5.52345e-10 | 1.000000 | 6.36374e-10 | 1.000000 |
| rad4          | 4.29272e-10 | 1.000000 | 4.94577e-10 | 1.000000 |
| rad73         | 4.06669e-10 | 1.000000 | 4.68536e-10 | 1.000000 |
| rad61         | 3.80712e-10 | 1.000000 | 4.38630e-10 | 1.000000 |
| rad71         | 3.08742e-10 | 1.000000 | 3.55711e-10 | 1.000000 |
| rad40anti     | 3.05986e-10 | 1.000000 | 3.52535e-10 | 1.000000 |
| rad33         | 3.00133e-10 | 1.000000 | 3.45792e-10 | 1.000000 |
| rad22         | 4.96441e-11 | 1.000000 | 5.71965e-11 | 1.000000 |
| rad25         | 2.74056e-11 | 1.000000 | 3.15748e-11 | 1.000000 |
| rad24         | 2.17025e-11 | 1.000000 | 2.50041e-11 | 1.000000 |
| rad12         | 1.06602e-11 | 1.000000 | 1.22820e-11 | 1.000000 |
| rad15         | 5.59047e-12 | 1.000000 | 6.44096e-12 | 1.000000 |
| rad18         | 4.97476e-12 | 1.000000 | 5.73158e-12 | 1.000000 |
| rad72         | 4.47838e-12 | 1.000000 | 5.15968e-12 | 1.000000 |
| rad14         | 2.70556e-12 | 1.000000 | 3.11716e-12 | 1.000000 |
| rad27         | 1.75907e-12 | 1.000000 | 2.02667e-12 | 1.000000 |
| rad31         | 1.37224e-13 | 1.000000 | 1.58100e-13 | 1.000000 |
| rad8          | 2.31161e-14 | 1.000000 | 2.66327e-14 | 1.000000 |
| rad47         | 1.77088e-16 | 1.000000 | 2.04029e-16 | 1.000000 |
| rad5          | 4.85020e-17 | 1.000000 | 5.58807e-17 | 1.000000 |

0.100000000 Pa, 1200.00000 K

=====

| Rate constant      | True (fraction)      | Effective (fraction) |
|--------------------|----------------------|----------------------|
| Total              | 1.80237e-12 (1.00 )  | 1.50733e-12 (1.00 )  |
| Formation of rad11 | 5.38789e-13 (0.299 ) | 4.03336e-13 (0.268 ) |

|                   |                      |                      |
|-------------------|----------------------|----------------------|
| Formation of rad6 | 6.34764e-13 (0.352 ) | 4.75183e-13 (0.315 ) |
| H-abstraction     | 6.28816e-13 (0.349 ) | 6.28816e-13 (0.417 ) |

| species            | PYtrue      | Cumul    | PYeffective | Cumul    |
|--------------------|-------------|----------|-------------|----------|
| Benzene+2-propynyl | 0.348883    | 0.348883 | 0.417171    | 0.417171 |
| Indene+H           | 0.168227    | 0.517110 | 0.201154    | 0.618325 |
| Phenyl+Allene      | 0.163693    | 0.680803 | 0.00000     | 0.618325 |
| C2H2+PhCH2         | 0.129443    | 0.810246 | 0.154778    | 0.773103 |
| PhCHCCH2+H         | 0.0661470   | 0.876393 | 0.0790940   | 0.852197 |
| PhCH2CCH+H         | 0.0526489   | 0.929041 | 0.0629537   | 0.915151 |
| PhCCH+CH3          | 0.0518198   | 0.980861 | 0.0619623   | 0.977113 |
| PAH7+H             | 0.00758538  | 0.988447 | 0.00907005  | 0.986184 |
| Ph+MeAc            | 0.00700407  | 0.995451 | 0.00837502  | 0.994559 |
| PhCCCH3+H          | 0.00195095  | 0.997402 | 0.00233282  | 0.996891 |
| rad39              | 0.00157580  | 0.998977 | 0.00188423  | 0.998776 |
| rad19anti          | 0.000399583 | 0.999377 | 0.000477794 | 0.999253 |
| PAH9+H             | 0.000204724 | 0.999582 | 0.000244795 | 0.999498 |
| rad19syn           | 0.000118864 | 0.999701 | 0.000142129 | 0.999640 |
| rad38              | 8.27791e-05 | 0.999783 | 9.89813e-05 | 0.999739 |
| rad54              | 4.05008e-05 | 0.999824 | 4.84281e-05 | 0.999788 |
| rad35              | 3.93001e-05 | 0.999863 | 4.69924e-05 | 0.999835 |
| rad30              | 3.73112e-05 | 0.999901 | 4.46142e-05 | 0.999879 |
| PhcycC3H3_A+H      | 3.27089e-05 | 0.999933 | 3.91111e-05 | 0.999918 |
| rad46              | 1.78909e-05 | 0.999951 | 2.13928e-05 | 0.999940 |
| rad37              | 1.16240e-05 | 0.999963 | 1.38992e-05 | 0.999954 |
| PAH3+H             | 6.95985e-06 | 0.999970 | 8.32216e-06 | 0.999962 |
| PAH1+H             | 6.04582e-06 | 0.999976 | 7.22918e-06 | 0.999969 |
| rad50              | 4.57554e-06 | 0.999980 | 5.47112e-06 | 0.999975 |
| rad70              | 4.07153e-06 | 0.999984 | 4.86847e-06 | 0.999980 |
| PAH10+CH3          | 3.83991e-06 | 0.999988 | 4.59150e-06 | 0.999984 |
| rad67              | 2.96852e-06 | 0.999991 | 3.54956e-06 | 0.999988 |
| rad55              | 2.19503e-06 | 0.999993 | 2.62466e-06 | 0.999990 |
| rad6               | 1.47304e-06 | 0.999995 | 1.76136e-06 | 0.999992 |
| rad60syn           | 1.37646e-06 | 0.999996 | 1.64587e-06 | 0.999994 |
| rad59              | 8.52885e-07 | 0.999997 | 1.01982e-06 | 0.999995 |
| rad60anti          | 8.03348e-07 | 0.999998 | 9.60584e-07 | 0.999996 |
| rad34              | 6.59907e-07 | 0.999999 | 7.89069e-07 | 0.999997 |
| rad62              | 5.91364e-07 | 0.999999 | 7.07112e-07 | 0.999997 |
| rad51              | 5.27079e-07 | 1.000000 | 6.30248e-07 | 0.999998 |
| rad52              | 2.51095e-07 | 1.000000 | 3.00243e-07 | 0.999998 |
| rad53              | 1.90240e-07 | 1.000000 | 2.27476e-07 | 0.999998 |
| rad56              | 1.09450e-07 | 1.000000 | 1.30873e-07 | 0.999999 |
| rad43              | 7.76294e-08 | 1.000000 | 9.28237e-08 | 0.999999 |
| rad64              | 5.85565e-08 | 1.000000 | 7.00182e-08 | 0.999999 |
| rad23              | 3.20517e-08 | 1.000000 | 3.83253e-08 | 0.999999 |
| rad58              | 2.24168e-08 | 1.000000 | 2.68045e-08 | 0.999999 |
| rad42              | 1.82039e-08 | 1.000000 | 2.17670e-08 | 0.999999 |
| rad11              | 1.80800e-08 | 1.000000 | 2.16188e-08 | 0.999999 |
| rad65              | 1.64061e-08 | 1.000000 | 1.96173e-08 | 0.999999 |
| rad68syn           | 1.10178e-08 | 1.000000 | 1.31743e-08 | 0.999999 |
| PAH8+H             | 1.09241e-08 | 1.000000 | 1.30624e-08 | 0.999999 |
| rad9               | 1.05549e-08 | 1.000000 | 1.26209e-08 | 0.999999 |
| rad45              | 9.28285e-09 | 1.000000 | 1.10997e-08 | 0.999999 |
| rad7               | 7.86484e-09 | 1.000000 | 9.40430e-09 | 0.999999 |
| rad68anti          | 7.31641e-09 | 1.000000 | 8.74844e-09 | 0.999999 |
| rad13              | 6.57824e-09 | 1.000000 | 7.86580e-09 | 0.999999 |
| rad2               | 3.21908e-09 | 1.000000 | 3.84916e-09 | 0.999999 |
| rad40syn           | 2.07817e-09 | 1.000000 | 2.48494e-09 | 0.999999 |
| rad28              | 1.92526e-09 | 1.000000 | 2.30210e-09 | 0.999999 |
| rad41              | 1.48128e-09 | 1.000000 | 1.77122e-09 | 0.999999 |
| rad73              | 1.30477e-09 | 1.000000 | 1.56016e-09 | 0.999999 |
| rad61              | 1.03738e-09 | 1.000000 | 1.24043e-09 | 0.999999 |
| rad40anti          | 1.01447e-09 | 1.000000 | 1.21304e-09 | 0.999999 |
| rad71              | 9.71851e-10 | 1.000000 | 1.16207e-09 | 0.999999 |
| rad36              | 8.85252e-10 | 1.000000 | 1.05852e-09 | 0.999999 |
| rad21              | 8.80525e-10 | 1.000000 | 1.05287e-09 | 0.999999 |
| rad1               | 7.48107e-10 | 1.000000 | 8.94538e-10 | 0.999999 |
| rad10              | 6.54894e-10 | 1.000000 | 7.83078e-10 | 0.999999 |
| rad20              | 4.30256e-10 | 1.000000 | 5.14471e-10 | 0.999999 |
| rad26              | 3.04502e-10 | 1.000000 | 3.64103e-10 | 0.999999 |
| rad33              | 2.26312e-10 | 1.000000 | 2.70609e-10 | 0.999999 |
| rad3               | 2.18122e-10 | 1.000000 | 2.60815e-10 | 0.999999 |
| rad4               | 1.71721e-10 | 1.000000 | 2.05332e-10 | 0.999999 |
| rad22              | 3.55778e-11 | 1.000000 | 4.25415e-11 | 0.999999 |
| rad25              | 3.12546e-11 | 1.000000 | 3.73721e-11 | 0.999999 |
| rad18              | 1.78508e-11 | 1.000000 | 2.13448e-11 | 0.999999 |
| rad24              | 1.65815e-11 | 1.000000 | 1.98270e-11 | 0.999999 |
| rad12              | 1.03533e-11 | 1.000000 | 1.23798e-11 | 0.999999 |
| rad72              | 8.96165e-12 | 1.000000 | 1.07157e-11 | 0.999999 |



|       |             |         |             |          |
|-------|-------------|---------|-------------|----------|
| rad15 | 6.14539e-12 | 1.00000 | 7.34825e-12 | 0.999999 |
| rad14 | 2.48705e-12 | 1.00000 | 2.97385e-12 | 0.999999 |
| rad27 | 1.03789e-12 | 1.00000 | 1.24104e-12 | 0.999999 |
| rad31 | 8.42461e-14 | 1.00000 | 1.00736e-13 | 0.999999 |
| rad8  | 5.36857e-14 | 1.00000 | 6.41940e-14 | 0.999999 |
| rad47 | 3.91422e-16 | 1.00000 | 4.68036e-16 | 0.999999 |
| rad5  | 9.65450e-17 | 1.00000 | 1.15442e-16 | 0.999999 |

0.100000000 Pa, 1300.00000 K

| Rate constant      | True (fraction)      | Effective (fraction) |
|--------------------|----------------------|----------------------|
| Total              | 2.54148e-12 (1.00 )  | 2.05338e-12 (1.00 )  |
| Formation of rad11 | 7.22991e-13 (0.284 ) | 5.03422e-13 (0.245 ) |
| Formation of rad6  | 8.84215e-13 (0.348 ) | 6.15682e-13 (0.300 ) |
| H-abstraction      | 9.34273e-13 (0.368 ) | 9.34273e-13 (0.455 ) |

| species            | PYtrue      | Cumul    | PYeffective | Cumul    |
|--------------------|-------------|----------|-------------|----------|
| Benzene+2-propynyl | 0.367610    | 0.367610 | 0.454993    | 0.454993 |
| Phenyl+Allene      | 0.192054    | 0.559664 | 0.000000    | 0.454993 |
| Indene+H           | 0.131423    | 0.691087 | 0.162663    | 0.617656 |
| C2H2+PhCH2         | 0.111294    | 0.802381 | 0.137749    | 0.755405 |
| PhCHCCH2+H         | 0.0692296   | 0.871610 | 0.0856854   | 0.841090 |
| PhCH2CCH+H         | 0.0636260   | 0.935236 | 0.0787507   | 0.919841 |
| PhCCH+CH3          | 0.0461554   | 0.981392 | 0.0571270   | 0.976968 |
| PAH7+H             | 0.00794566  | 0.989337 | 0.00983437  | 0.986802 |
| Ph+MeAc            | 0.00637076  | 0.995708 | 0.00788510  | 0.994687 |
| rad39              | 0.00158195  | 0.997290 | 0.00195799  | 0.996645 |
| PhCCCH3+H          | 0.00142376  | 0.998714 | 0.00176219  | 0.998408 |
| rad19anti          | 0.000475491 | 0.999189 | 0.000588520 | 0.998996 |
| PAH9+H             | 0.000242143 | 0.999431 | 0.000299702 | 0.999296 |
| rad19syn           | 0.000174661 | 0.999606 | 0.000216180 | 0.999512 |
| rad38              | 9.98917e-05 | 0.999706 | 0.000123637 | 0.999636 |
| rad54              | 6.26277e-05 | 0.999769 | 7.75147e-05 | 0.999713 |
| PhcycC3H3_A+H      | 5.74355e-05 | 0.999826 | 7.10885e-05 | 0.999784 |
| rad35              | 4.53533e-05 | 0.999871 | 5.61340e-05 | 0.999840 |
| rad30              | 3.53182e-05 | 0.999907 | 4.37136e-05 | 0.999884 |
| rad46              | 2.33633e-05 | 0.999930 | 2.89170e-05 | 0.999913 |
| rad37              | 1.29873e-05 | 0.999943 | 1.60745e-05 | 0.999929 |
| PAH1+H             | 1.02826e-05 | 0.999953 | 1.27268e-05 | 0.999942 |
| PAH3+H             | 9.32010e-06 | 0.999963 | 1.15356e-05 | 0.999953 |
| rad50              | 7.49825e-06 | 0.999970 | 9.28059e-06 | 0.999963 |
| rad70              | 6.43021e-06 | 0.999977 | 7.95873e-06 | 0.999971 |
| PAH10+CH3          | 6.07807e-06 | 0.999983 | 7.52289e-06 | 0.999978 |
| rad67              | 4.99606e-06 | 0.999988 | 6.18364e-06 | 0.999984 |
| rad55              | 3.63005e-06 | 0.999991 | 4.49294e-06 | 0.999989 |
| rad60syn           | 1.56341e-06 | 0.999993 | 1.93504e-06 | 0.999991 |
| rad34              | 1.13463e-06 | 0.999994 | 1.40433e-06 | 0.999992 |
| rad59              | 1.09807e-06 | 0.999995 | 1.35909e-06 | 0.999994 |
| rad51              | 1.02696e-06 | 0.999996 | 1.27108e-06 | 0.999995 |
| rad60anti          | 9.23694e-07 | 0.999997 | 1.14326e-06 | 0.999996 |
| rad62              | 8.25908e-07 | 0.999998 | 1.02223e-06 | 0.999997 |
| rad6               | 7.37177e-07 | 0.999999 | 9.12406e-07 | 0.999998 |
| rad52              | 4.49116e-07 | 0.999999 | 5.55874e-07 | 0.999998 |
| rad53              | 4.02871e-07 | 0.999999 | 4.98636e-07 | 0.999999 |
| rad56              | 2.64601e-07 | 1.000000 | 3.27499e-07 | 0.999999 |
| rad64              | 1.13757e-07 | 1.000000 | 1.40798e-07 | 0.999999 |
| rad43              | 8.95977e-08 | 1.000000 | 1.10896e-07 | 1.000000 |
| rad58              | 3.75511e-08 | 1.000000 | 4.64772e-08 | 1.000000 |
| rad65              | 3.15800e-08 | 1.000000 | 3.90868e-08 | 1.000000 |
| PAH8+H             | 3.15033e-08 | 1.000000 | 3.89918e-08 | 1.000000 |
| rad42              | 3.09041e-08 | 1.000000 | 3.82501e-08 | 1.000000 |
| rad68syn           | 2.53724e-08 | 1.000000 | 3.14037e-08 | 1.000000 |
| rad11              | 2.34861e-08 | 1.000000 | 2.90690e-08 | 1.000000 |
| rad23              | 1.72759e-08 | 1.000000 | 2.13825e-08 | 1.000000 |
| rad68anti          | 1.67836e-08 | 1.000000 | 2.07731e-08 | 1.000000 |
| rad7               | 1.35408e-08 | 1.000000 | 1.67595e-08 | 1.000000 |
| rad9               | 7.08985e-09 | 1.000000 | 8.77515e-09 | 1.000000 |
| rad40syn           | 5.46388e-09 | 1.000000 | 6.76266e-09 | 1.000000 |
| rad45              | 5.08653e-09 | 1.000000 | 6.29564e-09 | 1.000000 |
| rad13              | 4.96058e-09 | 1.000000 | 6.13972e-09 | 1.000000 |
| rad73              | 3.91098e-09 | 1.000000 | 4.84064e-09 | 1.000000 |
| rad71              | 3.23258e-09 | 1.000000 | 4.00099e-09 | 1.000000 |
| rad40anti          | 2.76944e-09 | 1.000000 | 3.42775e-09 | 1.000000 |
| rad61              | 2.41966e-09 | 1.000000 | 2.99483e-09 | 1.000000 |
| rad41              | 2.20494e-09 | 1.000000 | 2.72907e-09 | 1.000000 |
| rad28              | 1.04569e-09 | 1.000000 | 1.29427e-09 | 1.000000 |
| rad2               | 1.02899e-09 | 1.000000 | 1.27359e-09 | 1.000000 |
| rad21              | 5.91896e-10 | 1.000000 | 7.32592e-10 | 1.000000 |

|       |             |         |             |          |
|-------|-------------|---------|-------------|----------|
| rad36 | 4.89663e-10 | 1.00000 | 6.06058e-10 | 1.000000 |
| rad10 | 4.49496e-10 | 1.00000 | 5.56343e-10 | 1.000000 |
| rad20 | 2.64076e-10 | 1.00000 | 3.26848e-10 | 1.000000 |
| rad1  | 2.44472e-10 | 1.00000 | 3.02584e-10 | 1.000000 |
| rad26 | 1.57557e-10 | 1.00000 | 1.95009e-10 | 1.000000 |
| rad33 | 1.50558e-10 | 1.00000 | 1.86346e-10 | 1.000000 |
| rad3  | 9.21740e-11 | 1.00000 | 1.14085e-10 | 1.000000 |
| rad4  | 7.31966e-11 | 1.00000 | 9.05959e-11 | 1.000000 |
| rad72 | 3.50025e-11 | 1.00000 | 4.33228e-11 | 1.000000 |
| rad18 | 3.21869e-11 | 1.00000 | 3.98379e-11 | 1.000000 |
| rad25 | 2.62026e-11 | 1.00000 | 3.24312e-11 | 1.000000 |
| rad22 | 2.57354e-11 | 1.00000 | 3.18529e-11 | 1.000000 |
| rad24 | 1.21066e-11 | 1.00000 | 1.49844e-11 | 1.000000 |
| rad15 | 1.02130e-11 | 1.00000 | 1.26408e-11 | 1.000000 |
| rad12 | 9.25130e-12 | 1.00000 | 1.14504e-11 | 1.000000 |
| rad14 | 1.75351e-12 | 1.00000 | 2.17034e-12 | 1.000000 |
| rad27 | 5.04995e-13 | 1.00000 | 6.25035e-13 | 1.000000 |
| rad8  | 7.86630e-14 | 1.00000 | 9.73616e-14 | 1.000000 |
| rad31 | 5.35297e-14 | 1.00000 | 6.62543e-14 | 1.000000 |
| rad47 | 7.67646e-16 | 1.00000 | 9.50121e-16 | 1.000000 |
| rad5  | 2.41487e-16 | 1.00000 | 2.98890e-16 | 1.000000 |

0.100000000 Pa, 1400.00000 K

| Rate constant      | True (fraction)      | Effective (fraction) |
|--------------------|----------------------|----------------------|
| Total              | 3.47024e-12 (1.00 )  | 2.71984e-12 (1.00 )  |
| Formation of rad11 | 9.43269e-13 (0.272 ) | 6.11768e-13 (0.225 ) |
| Formation of rad6  | 1.19194e-12 (0.343 ) | 7.73043e-13 (0.284 ) |
| H-abstraction      | 1.33503e-12 (0.385 ) | 1.33503e-12 (0.491 ) |

| species            | PYtrue      | Cumul    | PYeffective | Cumul    |
|--------------------|-------------|----------|-------------|----------|
| Benzene+2-propynyl | 0.384709    | 0.384709 | 0.490849    | 0.490849 |
| Phenyl+Allene      | 0.216237    | 0.600946 | 0.00000     | 0.490849 |
| Indene+H           | 0.102754    | 0.703700 | 0.131103    | 0.621952 |
| C2H2+PhCH2         | 0.0940325   | 0.797732 | 0.119976    | 0.741928 |
| PhCH2CCH+H         | 0.0730480   | 0.870780 | 0.0932017   | 0.835129 |
| PhCHCCH2+H         | 0.0704361   | 0.941216 | 0.0898688   | 0.924998 |
| PhCCH+CH3          | 0.0407706   | 0.981987 | 0.0520190   | 0.977017 |
| PAH7+H             | 0.00808062  | 0.990068 | 0.0103100   | 0.987327 |
| Ph+MeAc            | 0.00578250  | 0.995850 | 0.00737786  | 0.994705 |
| rad39              | 0.00153900  | 0.997389 | 0.00196360  | 0.996668 |
| PhCCCH3+H          | 0.00104907  | 0.998438 | 0.00133851  | 0.998007 |
| rad19anti          | 0.000537563 | 0.998976 | 0.000685878 | 0.998693 |
| PAH9+H             | 0.000275098 | 0.999251 | 0.000350998 | 0.999044 |
| rad19syn           | 0.000241021 | 0.999492 | 0.000307517 | 0.999351 |
| rad38              | 0.000115619 | 0.999607 | 0.000147517 | 0.999499 |
| PhcycC3H3_A+H      | 9.27194e-05 | 0.999700 | 0.000118300 | 0.999617 |
| rad54              | 9.02066e-05 | 0.999790 | 0.000115095 | 0.999732 |
| rad35              | 5.05806e-05 | 0.999841 | 6.45354e-05 | 0.999797 |
| rad30              | 3.27887e-05 | 0.999874 | 4.18350e-05 | 0.999839 |
| rad46              | 2.89901e-05 | 0.999903 | 3.69885e-05 | 0.999876 |
| PAH1+H             | 1.59965e-05 | 0.999919 | 2.04098e-05 | 0.999896 |
| rad37              | 1.43564e-05 | 0.999933 | 1.83173e-05 | 0.999914 |
| PAH3+H             | 1.18379e-05 | 0.999945 | 1.51039e-05 | 0.999929 |
| rad50              | 1.13937e-05 | 0.999956 | 1.45372e-05 | 0.999944 |
| rad70              | 9.33027e-06 | 0.999966 | 1.19044e-05 | 0.999956 |
| PAH10+CH3          | 9.00306e-06 | 0.999975 | 1.14870e-05 | 0.999967 |
| rad67              | 7.68578e-06 | 0.999982 | 9.80630e-06 | 0.999977 |
| rad55              | 5.54140e-06 | 0.999988 | 7.07023e-06 | 0.999984 |
| rad51              | 1.81697e-06 | 0.999990 | 2.31827e-06 | 0.999987 |
| rad34              | 1.77489e-06 | 0.999991 | 2.26458e-06 | 0.999989 |
| rad60syn           | 1.71204e-06 | 0.999993 | 2.18439e-06 | 0.999991 |
| rad59              | 1.34391e-06 | 0.999994 | 1.71469e-06 | 0.999993 |
| rad62              | 1.09239e-06 | 0.999996 | 1.39377e-06 | 0.999994 |
| rad60anti          | 1.02264e-06 | 0.999997 | 1.30479e-06 | 0.999995 |
| rad53              | 7.63465e-07 | 0.999997 | 9.74103e-07 | 0.999996 |
| rad52              | 7.36313e-07 | 0.999998 | 9.39455e-07 | 0.999997 |
| rad56              | 5.61681e-07 | 0.999999 | 7.16646e-07 | 0.999998 |
| rad6               | 5.10484e-07 | 0.999999 | 6.51327e-07 | 0.999999 |
| rad64              | 1.97837e-07 | 0.999999 | 2.52420e-07 | 0.999999 |
| rad43              | 1.00006e-07 | 0.999999 | 1.27597e-07 | 0.999999 |
| PAH8+H             | 7.73021e-08 | 1.000000 | 9.86292e-08 | 0.999999 |
| rad58              | 5.80234e-08 | 1.000000 | 7.40321e-08 | 0.999999 |
| rad65              | 5.51466e-08 | 1.000000 | 7.03616e-08 | 0.999999 |
| rad68syn           | 5.11879e-08 | 1.000000 | 6.53104e-08 | 0.999999 |
| rad42              | 4.85218e-08 | 1.000000 | 6.19087e-08 | 0.999999 |
| rad68anti          | 3.37458e-08 | 1.000000 | 4.30562e-08 | 0.999999 |
| rad11              | 2.04002e-08 | 1.000000 | 2.60285e-08 | 0.999999 |

|           |             |          |             |          |
|-----------|-------------|----------|-------------|----------|
| rad7      | 1.60536e-08 | 1.000000 | 2.04828e-08 | 0.999999 |
| rad40syn  | 1.23713e-08 | 1.000000 | 1.57845e-08 | 1.000000 |
| rad73     | 1.01889e-08 | 1.000000 | 1.30000e-08 | 1.000000 |
| rad23     | 9.80159e-09 | 1.000000 | 1.25058e-08 | 1.000000 |
| rad71     | 9.37907e-09 | 1.000000 | 1.19667e-08 | 1.000000 |
| rad40anti | 6.47932e-09 | 1.000000 | 8.26699e-09 | 1.000000 |
| rad61     | 4.96394e-09 | 1.000000 | 6.33348e-09 | 1.000000 |
| rad9      | 4.64129e-09 | 1.000000 | 5.92179e-09 | 1.000000 |
| rad13     | 3.15431e-09 | 1.000000 | 4.02458e-09 | 1.000000 |
| rad41     | 3.08800e-09 | 1.000000 | 3.93996e-09 | 1.000000 |
| rad45     | 2.83113e-09 | 1.000000 | 3.61223e-09 | 1.000000 |
| rad28     | 7.92033e-10 | 1.000000 | 1.01055e-09 | 1.000000 |
| rad21     | 3.81312e-10 | 1.000000 | 4.86516e-10 | 1.000000 |
| rad2      | 3.56142e-10 | 1.000000 | 4.54401e-10 | 1.000000 |
| rad36     | 2.75210e-10 | 1.000000 | 3.51140e-10 | 1.000000 |
| rad10     | 2.59045e-10 | 1.000000 | 3.30515e-10 | 1.000000 |
| rad20     | 1.53372e-10 | 1.000000 | 1.95687e-10 | 1.000000 |
| rad72     | 1.30010e-10 | 1.000000 | 1.65879e-10 | 1.000000 |
| rad26     | 9.79617e-11 | 1.000000 | 1.24989e-10 | 1.000000 |
| rad33     | 9.76381e-11 | 1.000000 | 1.24576e-10 | 1.000000 |
| rad1      | 8.57463e-11 | 1.000000 | 1.09403e-10 | 1.000000 |
| rad3      | 4.12327e-11 | 1.000000 | 5.26086e-11 | 1.000000 |
| rad4      | 3.29570e-11 | 1.000000 | 4.20497e-11 | 1.000000 |
| rad18     | 3.26200e-11 | 1.000000 | 4.16197e-11 | 1.000000 |
| rad22     | 2.20880e-11 | 1.000000 | 2.81820e-11 | 1.000000 |
| rad15     | 2.14053e-11 | 1.000000 | 2.73110e-11 | 1.000000 |
| rad25     | 1.94019e-11 | 1.000000 | 2.47549e-11 | 1.000000 |
| rad24     | 8.67733e-12 | 1.000000 | 1.10714e-11 | 1.000000 |
| rad12     | 7.86926e-12 | 1.000000 | 1.00404e-11 | 1.000000 |
| rad14     | 1.11490e-12 | 1.000000 | 1.42249e-12 | 1.000000 |
| rad27     | 2.38794e-13 | 1.000000 | 3.04677e-13 | 1.000000 |
| rad8      | 9.26493e-14 | 1.000000 | 1.18211e-13 | 1.000000 |
| rad31     | 3.51192e-14 | 1.000000 | 4.48085e-14 | 1.000000 |
| rad47     | 1.36094e-15 | 1.000000 | 1.73642e-15 | 1.000000 |
| rad5      | 6.40401e-16 | 1.000000 | 8.17086e-16 | 1.000000 |

0.100000000 Pa, 1500.00000 K

| Rate constant      | True (fraction) |          | Effective (fraction) |          |
|--------------------|-----------------|----------|----------------------|----------|
| Total              | 4.61271e-12     | (1.00 )  | 3.52361e-12          | (1.00 )  |
| Formation of rad11 | 1.20217e-12     | (0.261 ) | 7.28781e-13          | (0.207 ) |
| Formation of rad6  | 1.56360e-12     | (0.339 ) | 9.47885e-13          | (0.269 ) |
| H-abstraction      | 1.84694e-12     | (0.400 ) | 1.84694e-12          | (0.524 ) |

  

| species            | PYtrue      | Cumul    | PYeffective | Cumul    |
|--------------------|-------------|----------|-------------|----------|
| Benzene+2-propynyl | 0.400402    | 0.400402 | 0.524162    | 0.524162 |
| Phenyl+Allene      | 0.236110    | 0.636512 | 0.000000    | 0.524162 |
| Indene+H           | 0.0806435   | 0.717155 | 0.105570    | 0.629732 |
| PhCH2CCH+H         | 0.0806387   | 0.797794 | 0.105563    | 0.735295 |
| C2H2+PhCH2         | 0.0787056   | 0.876500 | 0.103032    | 0.838327 |
| PhCHCCH2+H         | 0.0701571   | 0.946657 | 0.0918420   | 0.930169 |
| PhCCH+CH3          | 0.0359365   | 0.982593 | 0.0470441   | 0.977213 |
| PAH7+H             | 0.00805104  | 0.990644 | 0.0105395   | 0.987753 |
| Ph+MeAc            | 0.00526032  | 0.995905 | 0.00688623  | 0.994639 |
| rad39              | 0.00146496  | 0.997370 | 0.00191777  | 0.996557 |
| PhCCCH3+H          | 0.000785545 | 0.998155 | 0.00102834  | 0.997585 |
| rad19anti          | 0.000582991 | 0.998738 | 0.000763187 | 0.998349 |
| rad19syn           | 0.000316568 | 0.999055 | 0.000414415 | 0.998763 |
| PAH9+H             | 0.000302848 | 0.999358 | 0.000396454 | 0.999159 |
| PhcycC3H3_A+H      | 0.000139913 | 0.999498 | 0.000183159 | 0.999343 |
| rad38              | 0.000129501 | 0.999627 | 0.000169528 | 0.999512 |
| rad54              | 0.000122809 | 0.999750 | 0.000160768 | 0.999673 |
| rad35              | 5.49604e-05 | 0.999805 | 7.19481e-05 | 0.999745 |
| rad46              | 3.45386e-05 | 0.999839 | 4.52141e-05 | 0.999790 |
| rad30              | 3.01154e-05 | 0.999869 | 3.94237e-05 | 0.999829 |
| PAH1+H             | 2.31903e-05 | 0.999893 | 3.03581e-05 | 0.999860 |
| rad50              | 1.62773e-05 | 0.999909 | 2.13085e-05 | 0.999881 |
| rad37              | 1.56193e-05 | 0.999925 | 2.04470e-05 | 0.999902 |
| PAH3+H             | 1.44553e-05 | 0.999939 | 1.89233e-05 | 0.999920 |
| rad70              | 1.26613e-05 | 0.999952 | 1.65748e-05 | 0.999937 |
| PAH10+CH3          | 1.25753e-05 | 0.999964 | 1.64622e-05 | 0.999953 |
| rad67              | 1.09795e-05 | 0.999975 | 1.43731e-05 | 0.999968 |
| rad55              | 7.93598e-06 | 0.999983 | 1.03889e-05 | 0.999978 |
| rad51              | 2.96773e-06 | 0.999986 | 3.88502e-06 | 0.999982 |
| rad34              | 2.57549e-06 | 0.999989 | 3.37155e-06 | 0.999986 |
| rad60syn           | 1.82792e-06 | 0.999990 | 2.39290e-06 | 0.999988 |
| rad59              | 1.58468e-06 | 0.999992 | 2.07448e-06 | 0.999990 |
| rad62              | 1.38707e-06 | 0.999993 | 1.81580e-06 | 0.999992 |

|           |             |          |             |          |
|-----------|-------------|----------|-------------|----------|
| rad53     | 1.32205e-06 | 0.999995 | 1.73068e-06 | 0.999994 |
| rad52     | 1.12386e-06 | 0.999996 | 1.47122e-06 | 0.999995 |
| rad60anti | 1.10268e-06 | 0.999997 | 1.44350e-06 | 0.999996 |
| rad56     | 1.07224e-06 | 0.999998 | 1.40365e-06 | 0.999998 |
| rad6      | 4.44741e-07 | 0.999999 | 5.82207e-07 | 0.999998 |
| rad64     | 3.15089e-07 | 0.999999 | 4.12479e-07 | 0.999999 |
| PAH8+H    | 1.66253e-07 | 0.999999 | 2.17640e-07 | 0.999999 |
| rad43     | 1.09524e-07 | 0.999999 | 1.43377e-07 | 0.999999 |
| rad68syn  | 9.28291e-08 | 0.999999 | 1.21522e-07 | 0.999999 |
| rad65     | 8.88790e-08 | 0.999999 | 1.16350e-07 | 0.999999 |
| rad58     | 8.42075e-08 | 0.999999 | 1.10235e-07 | 1.000000 |
| rad42     | 7.16669e-08 | 0.999999 | 9.38181e-08 | 1.000000 |
| rad68anti | 6.10169e-08 | 1.000000 | 7.98761e-08 | 1.000000 |
| rad40syn  | 2.48115e-08 | 1.000000 | 3.24804e-08 | 1.000000 |
| rad71     | 2.35737e-08 | 1.000000 | 3.08600e-08 | 1.000000 |
| rad73     | 2.32930e-08 | 1.000000 | 3.04926e-08 | 1.000000 |
| rad11     | 1.40920e-08 | 1.000000 | 1.84476e-08 | 1.000000 |
| rad7      | 1.34114e-08 | 1.000000 | 1.75567e-08 | 1.000000 |
| rad40anti | 1.33701e-08 | 1.000000 | 1.75026e-08 | 1.000000 |
| rad61     | 9.14986e-09 | 1.000000 | 1.19780e-08 | 1.000000 |
| rad23     | 5.80833e-09 | 1.000000 | 7.60361e-09 | 1.000000 |
| rad41     | 4.14365e-09 | 1.000000 | 5.42441e-09 | 1.000000 |
| rad9      | 2.99653e-09 | 1.000000 | 3.92271e-09 | 1.000000 |
| rad13     | 1.90602e-09 | 1.000000 | 2.49514e-09 | 1.000000 |
| rad45     | 1.60450e-09 | 1.000000 | 2.10043e-09 | 1.000000 |
| rad28     | 7.67797e-10 | 1.000000 | 1.00512e-09 | 1.000000 |
| rad72     | 4.05558e-10 | 1.000000 | 5.30912e-10 | 1.000000 |
| rad21     | 2.43078e-10 | 1.000000 | 3.18211e-10 | 1.000000 |
| rad36     | 1.57494e-10 | 1.000000 | 2.06173e-10 | 1.000000 |
| rad2      | 1.32927e-10 | 1.000000 | 1.74013e-10 | 1.000000 |
| rad10     | 1.26310e-10 | 1.000000 | 1.65351e-10 | 1.000000 |
| rad20     | 8.80827e-11 | 1.000000 | 1.15308e-10 | 1.000000 |
| rad26     | 6.62136e-11 | 1.000000 | 8.66796e-11 | 1.000000 |
| rad33     | 6.33877e-11 | 1.000000 | 8.29795e-11 | 1.000000 |
| rad1      | 3.22465e-11 | 1.000000 | 4.22135e-11 | 1.000000 |
| rad15     | 3.21270e-11 | 1.000000 | 4.20571e-11 | 1.000000 |
| rad22     | 3.09168e-11 | 1.000000 | 4.04728e-11 | 1.000000 |
| rad18     | 2.38816e-11 | 1.000000 | 3.12631e-11 | 1.000000 |
| rad3      | 1.94206e-11 | 1.000000 | 2.54233e-11 | 1.000000 |
| rad4      | 1.56008e-11 | 1.000000 | 2.04228e-11 | 1.000000 |
| rad25     | 1.37868e-11 | 1.000000 | 1.80482e-11 | 1.000000 |
| rad12     | 6.49280e-12 | 1.000000 | 8.49961e-12 | 1.000000 |
| rad24     | 6.18593e-12 | 1.000000 | 8.09791e-12 | 1.000000 |
| rad14     | 7.01823e-13 | 1.000000 | 9.18748e-13 | 1.000000 |
| rad27     | 1.17057e-13 | 1.000000 | 1.53237e-13 | 1.000000 |
| rad8      | 9.76907e-14 | 1.000000 | 1.27886e-13 | 1.000000 |
| rad31     | 2.37736e-14 | 1.000000 | 3.11218e-14 | 1.000000 |
| rad47     | 2.21874e-15 | 1.000000 | 2.90452e-15 | 1.000000 |
| rad5      | 1.52020e-15 | 1.000000 | 1.99008e-15 | 1.000000 |

0.100000000 Pa, 1750.00000 K

=====

| Rate constant      | True (fraction)      | Effective (fraction) |
|--------------------|----------------------|----------------------|
| Total              | 8.61869e-12 (1.00 )  | 6.27399e-12 (1.00 )  |
| Formation of rad11 | 2.04015e-12 (0.237 ) | 1.05237e-12 (0.168 ) |
| Formation of rad6  | 2.80256e-12 (0.325 ) | 1.44565e-12 (0.230 ) |
| H-abstraction      | 3.77597e-12 (0.438 ) | 3.77597e-12 (0.602 ) |

| species            | PYtrue      | Cumul    | PYeffective | Cumul    |
|--------------------|-------------|----------|-------------|----------|
| Benzene+2-propynyl | 0.438115    | 0.438115 | 0.601846    | 0.601846 |
| Phenyl+Allene      | 0.272048    | 0.710163 | 0.000000    | 0.601846 |
| PhCH2CCH+H         | 0.0933387   | 0.803501 | 0.128221    | 0.730066 |
| PhCHCCH2+H         | 0.0656327   | 0.869134 | 0.0901605   | 0.820227 |
| C2H2+PhCH2         | 0.0475976   | 0.916732 | 0.0653857   | 0.885613 |
| Indene+H           | 0.0395371   | 0.956269 | 0.0543126   | 0.939925 |
| PhCCH+CH3          | 0.0276513   | 0.983920 | 0.0379851   | 0.977910 |
| PAH7+H             | 0.00712605  | 0.991046 | 0.00978914  | 0.987699 |
| Ph+MeAc            | 0.00488544  | 0.995932 | 0.00671121  | 0.994411 |
| rad39              | 0.00123375  | 0.997165 | 0.00169483  | 0.996106 |
| rad19anti          | 0.000564116 | 0.997729 | 0.000774932 | 0.996880 |
| rad19syn           | 0.000506162 | 0.998236 | 0.000695321 | 0.997576 |
| PhCCCH3+H          | 0.000461482 | 0.998697 | 0.000633945 | 0.998210 |
| PhcycC3H3_A+H      | 0.000354604 | 0.999052 | 0.000487126 | 0.998697 |
| PAH9+H             | 0.000266733 | 0.999318 | 0.000366416 | 0.999063 |
| rad54              | 0.000215005 | 0.999533 | 0.000295356 | 0.999359 |
| rad38              | 0.000142767 | 0.999676 | 0.000196121 | 0.999555 |
| rad35              | 4.88400e-05 | 0.999725 | 6.70922e-05 | 0.999622 |
| PAH1+H             | 4.24062e-05 | 0.999767 | 5.82540e-05 | 0.999680 |

|           |             |          |             |          |
|-----------|-------------|----------|-------------|----------|
| rad46     | 3.79680e-05 | 0.999805 | 5.21570e-05 | 0.999732 |
| rad50     | 2.38734e-05 | 0.999829 | 3.27953e-05 | 0.999765 |
| rad30     | 2.30178e-05 | 0.999852 | 3.16200e-05 | 0.999797 |
| PAH10+CH3 | 2.22278e-05 | 0.999875 | 3.05347e-05 | 0.999827 |
| rad70     | 2.20507e-05 | 0.999897 | 3.02914e-05 | 0.999858 |
| PAH3+H    | 2.08054e-05 | 0.999917 | 2.85806e-05 | 0.999886 |
| rad55     | 1.72027e-05 | 0.999935 | 2.36316e-05 | 0.999910 |
| rad67     | 1.69165e-05 | 0.999952 | 2.32384e-05 | 0.999933 |
| rad37     | 1.61425e-05 | 0.999968 | 2.21752e-05 | 0.999955 |
| rad51     | 6.11511e-06 | 0.999974 | 8.40042e-06 | 0.999964 |
| rad34     | 5.25683e-06 | 0.999979 | 7.22137e-06 | 0.999971 |
| rad53     | 4.39536e-06 | 0.999983 | 6.03797e-06 | 0.999977 |
| rad56     | 3.99327e-06 | 0.999987 | 5.48561e-06 | 0.999982 |
| rad62     | 2.35600e-06 | 0.999990 | 3.23648e-06 | 0.999986 |
| rad59     | 2.06482e-06 | 0.999992 | 2.83648e-06 | 0.999988 |
| rad52     | 2.03225e-06 | 0.999994 | 2.79174e-06 | 0.999991 |
| rad60syn  | 1.94292e-06 | 0.999996 | 2.66902e-06 | 0.999994 |
| rad60anti | 1.30714e-06 | 0.999997 | 1.79563e-06 | 0.999996 |
| rad64     | 7.88617e-07 | 0.999998 | 1.08334e-06 | 0.999997 |
| PAH8+H    | 5.90536e-07 | 0.999998 | 8.11232e-07 | 0.999997 |
| rad6      | 3.62342e-07 | 0.999999 | 4.97757e-07 | 0.999998 |
| rad68syn  | 2.81748e-07 | 0.999999 | 3.87043e-07 | 0.999998 |
| rad68anti | 1.82573e-07 | 0.999999 | 2.50804e-07 | 0.999999 |
| rad65     | 1.74425e-07 | 0.999999 | 2.39611e-07 | 0.999999 |
| rad42     | 1.70590e-07 | 1.000000 | 2.34341e-07 | 0.999999 |
| rad58     | 1.57354e-07 | 1.000000 | 2.16160e-07 | 0.999999 |
| rad43     | 1.31436e-07 | 1.000000 | 1.80555e-07 | 1.000000 |
| rad71     | 1.26874e-07 | 1.000000 | 1.74289e-07 | 1.000000 |
| rad73     | 1.00276e-07 | 1.000000 | 1.37751e-07 | 1.000000 |
| rad40syn  | 8.39502e-08 | 1.000000 | 1.15323e-07 | 1.000000 |
| rad40anti | 5.01057e-08 | 1.000000 | 6.88309e-08 | 1.000000 |
| rad61     | 2.64257e-08 | 1.000000 | 3.63015e-08 | 1.000000 |
| rad41     | 7.91887e-09 | 1.000000 | 1.08783e-08 | 1.000000 |
| rad72     | 4.11073e-09 | 1.000000 | 5.64698e-09 | 1.000000 |
| rad7      | 2.33048e-09 | 1.000000 | 3.20142e-09 | 1.000000 |
| rad11     | 1.75618e-09 | 1.000000 | 2.41250e-09 | 1.000000 |
| rad23     | 9.10631e-10 | 1.000000 | 1.25095e-09 | 1.000000 |
| rad28     | 8.05687e-10 | 1.000000 | 1.10679e-09 | 1.000000 |
| rad9      | 2.28156e-10 | 1.000000 | 3.13422e-10 | 1.000000 |
| rad13     | 1.61104e-10 | 1.000000 | 2.21311e-10 | 1.000000 |
| rad45     | 1.34093e-10 | 1.000000 | 1.84206e-10 | 1.000000 |
| rad22     | 9.32409e-11 | 1.000000 | 1.28086e-10 | 1.000000 |
| rad36     | 2.31122e-11 | 1.000000 | 3.17496e-11 | 1.000000 |
| rad21     | 1.98052e-11 | 1.000000 | 2.72068e-11 | 1.000000 |
| rad26     | 1.88975e-11 | 1.000000 | 2.59598e-11 | 1.000000 |
| rad15     | 1.12852e-11 | 1.000000 | 1.55026e-11 | 1.000000 |
| rad10     | 9.47125e-12 | 1.000000 | 1.30108e-11 | 1.000000 |
| rad20     | 6.45190e-12 | 1.000000 | 8.86308e-12 | 1.000000 |
| rad33     | 5.54090e-12 | 1.000000 | 7.61164e-12 | 1.000000 |
| rad2      | 3.81710e-12 | 1.000000 | 5.24361e-12 | 1.000000 |
| rad18     | 3.00650e-12 | 1.000000 | 4.13006e-12 | 1.000000 |
| rad25     | 1.43089e-12 | 1.000000 | 1.96563e-12 | 1.000000 |
| rad1      | 9.70118e-13 | 1.000000 | 1.33267e-12 | 1.000000 |
| rad12     | 7.47122e-13 | 1.000000 | 1.02634e-12 | 1.000000 |
| rad3      | 6.58782e-13 | 1.000000 | 9.04981e-13 | 1.000000 |
| rad24     | 6.07027e-13 | 1.000000 | 8.33887e-13 | 1.000000 |
| rad4      | 4.21351e-13 | 1.000000 | 5.78817e-13 | 1.000000 |
| rad14     | 7.59675e-14 | 1.000000 | 1.04358e-13 | 1.000000 |
| rad8      | 2.76593e-14 | 1.000000 | 3.79960e-14 | 1.000000 |
| rad27     | 6.92574e-15 | 1.000000 | 9.51402e-15 | 1.000000 |
| rad5      | 6.04263e-15 | 1.000000 | 8.30084e-15 | 1.000000 |
| rad47     | 1.43549e-15 | 1.000000 | 1.97196e-15 | 1.000000 |

0.100000000 Pa, 2000.00000 K

=====

| Rate constant      | True (fraction)      | Effective (fraction) |
|--------------------|----------------------|----------------------|
| Total              | 1.44111e-11 (1.00 )  | 1.02930e-11 (1.00 )  |
| Formation of rad11 | 3.16882e-12 (0.220 ) | 1.47449e-12 (0.143 ) |
| Formation of rad6  | 4.53302e-12 (0.315 ) | 2.10927e-12 (0.205 ) |
| H-abstraction      | 6.70922e-12 (0.466 ) | 6.70922e-12 (0.652 ) |

| species            | PYtrue    | Cumul    | PYeffective | Cumul    |
|--------------------|-----------|----------|-------------|----------|
| Benzene+2-propynyl | 0.465560  | 0.465560 | 0.651825    | 0.651825 |
| Phenyl+Allene      | 0.285759  | 0.751319 | 0.000000    | 0.651825 |
| PhCH2CCH+H         | 0.0971788 | 0.848498 | 0.136059    | 0.787884 |
| PhCHCCH2+H         | 0.0592993 | 0.907797 | 0.0830241   | 0.870908 |
| C2H2+PhCH2         | 0.0319942 | 0.939791 | 0.0447945   | 0.915702 |
| Indene+H           | 0.0233046 | 0.963096 | 0.0326284   | 0.948331 |

|               |             |          |             |          |
|---------------|-------------|----------|-------------|----------|
| PhCCH+CH3     | 0.0216465   | 0.984742 | 0.0303070   | 0.978638 |
| PAH7+H        | 0.00659328  | 0.991335 | 0.00923117  | 0.987869 |
| Ph+MeAc       | 0.00420938  | 0.995545 | 0.00589349  | 0.993762 |
| rad39         | 0.00101472  | 0.996559 | 0.00142069  | 0.995183 |
| rad19syn      | 0.000746789 | 0.997306 | 0.00104557  | 0.996229 |
| PhcycC3H3_A+H | 0.000656340 | 0.997963 | 0.000918932 | 0.997148 |
| rad19anti     | 0.000529228 | 0.998492 | 0.000740966 | 0.997888 |
| rad54         | 0.000330237 | 0.998822 | 0.000462363 | 0.998351 |
| PhCCCH3+H     | 0.000291962 | 0.999114 | 0.000408772 | 0.998760 |
| PAH9+H        | 0.000279546 | 0.999394 | 0.000391391 | 0.999151 |
| rad38         | 0.000156415 | 0.999550 | 0.000218995 | 0.999370 |
| PAH1+H        | 6.96995e-05 | 0.999620 | 9.75855e-05 | 0.999468 |
| rad35         | 5.18638e-05 | 0.999672 | 7.26140e-05 | 0.999540 |
| rad46         | 4.57415e-05 | 0.999717 | 6.40420e-05 | 0.999604 |
| rad50         | 3.87507e-05 | 0.999756 | 5.42544e-05 | 0.999659 |
| PAH10+CH3     | 3.34471e-05 | 0.999790 | 4.68289e-05 | 0.999705 |
| rad70         | 3.20125e-05 | 0.999822 | 4.48203e-05 | 0.999750 |
| rad55         | 2.86890e-05 | 0.999850 | 4.01672e-05 | 0.999790 |
| PAH3+H        | 2.79050e-05 | 0.999878 | 3.90694e-05 | 0.999829 |
| rad67         | 2.51585e-05 | 0.999903 | 3.52242e-05 | 0.999865 |
| rad30         | 1.88901e-05 | 0.999922 | 2.64479e-05 | 0.999891 |
| rad37         | 1.66057e-05 | 0.999939 | 2.32494e-05 | 0.999914 |
| rad51         | 1.22972e-05 | 0.999951 | 1.72171e-05 | 0.999932 |
| rad56         | 1.03252e-05 | 0.999961 | 1.44561e-05 | 0.999946 |
| rad53         | 9.90985e-06 | 0.999971 | 1.38746e-05 | 0.999960 |
| rad34         | 8.56178e-06 | 0.999980 | 1.19873e-05 | 0.999972 |
| rad52         | 3.64126e-06 | 0.999984 | 5.09809e-06 | 0.999977 |
| rad62         | 3.41509e-06 | 0.999987 | 4.78142e-06 | 0.999982 |
| rad59         | 2.58714e-06 | 0.999990 | 3.62224e-06 | 0.999985 |
| rad60syn      | 2.06844e-06 | 0.999992 | 2.89600e-06 | 0.999988 |
| PAH8+H        | 1.81458e-06 | 0.999993 | 2.54058e-06 | 0.999991 |
| rad64         | 1.47577e-06 | 0.999995 | 2.06621e-06 | 0.999993 |
| rad60anti     | 1.42207e-06 | 0.999996 | 1.99102e-06 | 0.999995 |
| rad68syn      | 6.53898e-07 | 0.999997 | 9.15513e-07 | 0.999996 |
| rad71         | 4.98713e-07 | 0.999997 | 6.98241e-07 | 0.999996 |
| rad68anti     | 4.21794e-07 | 0.999998 | 5.90547e-07 | 0.999997 |
| rad73         | 3.38952e-07 | 0.999998 | 4.74563e-07 | 0.999998 |
| rad65         | 3.37801e-07 | 0.999999 | 4.72951e-07 | 0.999998 |
| rad42         | 3.12146e-07 | 0.999999 | 4.37033e-07 | 0.999998 |
| rad58         | 2.75721e-07 | 0.999999 | 3.86032e-07 | 0.999999 |
| rad40syn      | 2.27525e-07 | 0.999999 | 3.18555e-07 | 0.999999 |
| rad43         | 1.62532e-07 | 1.000000 | 2.27559e-07 | 0.999999 |
| rad40anti     | 1.42662e-07 | 1.000000 | 1.99739e-07 | 1.000000 |
| rad6          | 6.52503e-08 | 1.000000 | 9.13563e-08 | 1.000000 |
| rad61         | 5.98893e-08 | 1.000000 | 8.38507e-08 | 1.000000 |
| rad72         | 2.10614e-08 | 1.000000 | 2.94879e-08 | 1.000000 |
| rad41         | 1.34672e-08 | 1.000000 | 1.88553e-08 | 1.000000 |
| rad7          | 5.28671e-10 | 1.000000 | 7.40186e-10 | 1.000000 |
| rad11         | 4.14568e-10 | 1.000000 | 5.80433e-10 | 1.000000 |
| rad23         | 3.91458e-10 | 1.000000 | 5.48077e-10 | 1.000000 |
| rad28         | 2.19335e-10 | 1.000000 | 3.07089e-10 | 1.000000 |
| rad9          | 7.75830e-11 | 1.000000 | 1.08623e-10 | 1.000000 |
| rad13         | 4.89902e-11 | 1.000000 | 6.85905e-11 | 1.000000 |
| rad45         | 4.07510e-11 | 1.000000 | 5.70551e-11 | 1.000000 |
| rad22         | 2.75086e-11 | 1.000000 | 3.85145e-11 | 1.000000 |
| rad36         | 7.18613e-12 | 1.000000 | 1.00612e-11 | 1.000000 |
| rad21         | 7.16507e-12 | 1.000000 | 1.00317e-11 | 1.000000 |
| rad15         | 4.00403e-12 | 1.000000 | 5.60601e-12 | 1.000000 |
| rad26         | 3.46830e-12 | 1.000000 | 4.85593e-12 | 1.000000 |
| rad33         | 2.26341e-12 | 1.000000 | 3.16897e-12 | 1.000000 |
| rad20         | 1.89557e-12 | 1.000000 | 2.65397e-12 | 1.000000 |
| rad10         | 1.26945e-12 | 1.000000 | 1.77734e-12 | 1.000000 |
| rad18         | 6.67141e-13 | 1.000000 | 9.34057e-13 | 1.000000 |
| rad25         | 5.79846e-13 | 1.000000 | 8.11837e-13 | 1.000000 |
| rad2          | 4.82044e-13 | 1.000000 | 6.74903e-13 | 1.000000 |
| rad12         | 4.14756e-13 | 1.000000 | 5.80694e-13 | 1.000000 |
| rad24         | 2.85159e-13 | 1.000000 | 3.99249e-13 | 1.000000 |
| rad3          | 1.65470e-13 | 1.000000 | 2.31672e-13 | 1.000000 |
| rad1          | 1.26709e-13 | 1.000000 | 1.77403e-13 | 1.000000 |
| rad4          | 1.05133e-13 | 1.000000 | 1.47196e-13 | 1.000000 |
| rad14         | 2.92955e-14 | 1.000000 | 4.10161e-14 | 1.000000 |
| rad8          | 2.34712e-14 | 1.000000 | 3.28618e-14 | 1.000000 |
| rad5          | 3.87346e-15 | 1.000000 | 5.42318e-15 | 1.000000 |
| rad47         | 2.86770e-15 | 1.000000 | 4.01502e-15 | 1.000000 |
| rad27         | 1.90346e-15 | 1.000000 | 2.66501e-15 | 1.000000 |

0.10000000 Pa, 2250.00000 K

=====

Rate constant | True (fraction) | Effective (fraction)

-----

|                    |                      |                      |
|--------------------|----------------------|----------------------|
| Total              | 2.23655e-11 (1.00 )  | 1.58437e-11 (1.00 )  |
| Formation of rad11 | 4.62280e-12 (0.207 ) | 1.98925e-12 (0.126 ) |
| Formation of rad6  | 6.82518e-12 (0.305 ) | 2.93696e-12 (0.185 ) |
| H-abstraction      | 1.09175e-11 (0.488 ) | 1.09175e-11 (0.689 ) |

| species            | PYtrue      | Cumul    | PYeffective | Cumul    |
|--------------------|-------------|----------|-------------|----------|
| Benzene+2-propynyl | 0.488140    | 0.488140 | 0.689074    | 0.689074 |
| Phenyl+Allene      | 0.291600    | 0.779740 | 0.000000    | 0.689074 |
| PhCH2CCH+H         | 0.0967415   | 0.876482 | 0.136563    | 0.825637 |
| PhCHCCH2+H         | 0.0532744   | 0.929756 | 0.0752040   | 0.900841 |
| C2H2+PhCH2         | 0.0232641   | 0.953020 | 0.0328403   | 0.933682 |
| PhCCH+CH3          | 0.0176492   | 0.970669 | 0.0249142   | 0.958596 |
| Indene+H           | 0.0145378   | 0.985207 | 0.0205220   | 0.979118 |
| PAH7+H             | 0.00604332  | 0.991250 | 0.00853097  | 0.987649 |
| Ph+MeAc            | 0.00373478  | 0.994985 | 0.00527212  | 0.992921 |
| PhcycC3H3_A+H      | 0.00104439  | 0.996030 | 0.00147430  | 0.994395 |
| rad19syn           | 0.000992650 | 0.997022 | 0.00140125  | 0.995797 |
| rad39              | 0.000833753 | 0.997856 | 0.00117695  | 0.996974 |
| rad19anti          | 0.000463520 | 0.998320 | 0.000654319 | 0.997628 |
| rad54              | 0.000448432 | 0.998768 | 0.000633020 | 0.998261 |
| PAH9+H             | 0.000276005 | 0.999044 | 0.000389615 | 0.998650 |
| PhCCCH3+H          | 0.000209665 | 0.999254 | 0.000295970 | 0.998946 |
| rad38              | 0.000160719 | 0.999414 | 0.000226877 | 0.999173 |
| PAH1+H             | 9.95936e-05 | 0.999514 | 0.000140589 | 0.999314 |
| rad50              | 5.46334e-05 | 0.999569 | 7.71218e-05 | 0.999391 |
| rad35              | 5.24984e-05 | 0.999621 | 7.41079e-05 | 0.999465 |
| rad46              | 5.06984e-05 | 0.999672 | 7.15674e-05 | 0.999537 |
| PAH10+CH3          | 4.32190e-05 | 0.999715 | 6.10093e-05 | 0.999598 |
| rad55              | 4.15448e-05 | 0.999757 | 5.86459e-05 | 0.999656 |
| rad70              | 4.13232e-05 | 0.999798 | 5.83331e-05 | 0.999715 |
| PAH3+H             | 3.54273e-05 | 0.999833 | 5.00103e-05 | 0.999765 |
| rad67              | 3.21710e-05 | 0.999865 | 4.54135e-05 | 0.999810 |
| rad56              | 2.10959e-05 | 0.999887 | 2.97796e-05 | 0.999840 |
| rad51              | 2.05293e-05 | 0.999907 | 2.89798e-05 | 0.999869 |
| rad53              | 1.82253e-05 | 0.999925 | 2.57274e-05 | 0.999895 |
| rad30              | 1.61770e-05 | 0.999942 | 2.28359e-05 | 0.999917 |
| rad37              | 1.58091e-05 | 0.999957 | 2.23166e-05 | 0.999940 |
| rad34              | 1.21378e-05 | 0.999969 | 1.71341e-05 | 0.999957 |
| rad52              | 5.53704e-06 | 0.999975 | 7.81624e-06 | 0.999965 |
| rad62              | 4.54171e-06 | 0.999980 | 6.41123e-06 | 0.999971 |
| PAH8+H             | 4.26415e-06 | 0.999984 | 6.01940e-06 | 0.999977 |
| rad59              | 3.10133e-06 | 0.999987 | 4.37793e-06 | 0.999982 |
| rad64              | 2.31389e-06 | 0.999989 | 3.26637e-06 | 0.999985 |
| rad60syn           | 2.18352e-06 | 0.999991 | 3.08232e-06 | 0.999988 |
| rad60anti          | 1.52762e-06 | 0.999993 | 2.15643e-06 | 0.999990 |
| rad71              | 1.42646e-06 | 0.999994 | 2.01364e-06 | 0.999992 |
| rad68syn           | 1.22834e-06 | 0.999996 | 1.73397e-06 | 0.999994 |
| rad73              | 8.53035e-07 | 0.999996 | 1.20417e-06 | 0.999995 |
| rad68anti          | 7.89692e-07 | 0.999997 | 1.11475e-06 | 0.999996 |
| rad65              | 5.43590e-07 | 0.999998 | 7.67350e-07 | 0.999997 |
| rad42              | 4.97946e-07 | 0.999998 | 7.02916e-07 | 0.999998 |
| rad40syn           | 4.83631e-07 | 0.999999 | 6.82709e-07 | 0.999998 |
| rad58              | 4.30303e-07 | 0.999999 | 6.07428e-07 | 0.999999 |
| rad40anti          | 3.15360e-07 | 1.000000 | 4.45171e-07 | 0.999999 |
| rad43              | 2.01351e-07 | 1.000000 | 2.84233e-07 | 1.000000 |
| rad61              | 1.06763e-07 | 1.000000 | 1.50709e-07 | 1.000000 |
| rad72              | 7.85730e-08 | 1.000000 | 1.10916e-07 | 1.000000 |
| rad41              | 2.11926e-08 | 1.000000 | 2.99161e-08 | 1.000000 |
| rad6               | 1.25207e-08 | 1.000000 | 1.76746e-08 | 1.000000 |
| rad7               | 1.69371e-10 | 1.000000 | 2.39089e-10 | 1.000000 |
| rad11              | 1.29449e-10 | 1.000000 | 1.82734e-10 | 1.000000 |
| rad23              | 9.84905e-11 | 1.000000 | 1.39032e-10 | 1.000000 |
| rad28              | 4.49922e-11 | 1.000000 | 6.35122e-11 | 1.000000 |
| rad9               | 2.81936e-11 | 1.000000 | 3.97991e-11 | 1.000000 |
| rad13              | 1.82870e-11 | 1.000000 | 2.58145e-11 | 1.000000 |
| rad45              | 1.41335e-11 | 1.000000 | 1.99513e-11 | 1.000000 |
| rad22              | 6.88073e-12 | 1.000000 | 9.71305e-12 | 1.000000 |
| rad21              | 2.97996e-12 | 1.000000 | 4.20661e-12 | 1.000000 |
| rad36              | 2.54203e-12 | 1.000000 | 3.58843e-12 | 1.000000 |
| rad15              | 1.61096e-12 | 1.000000 | 2.27408e-12 | 1.000000 |
| rad33              | 1.06528e-12 | 1.000000 | 1.50378e-12 | 1.000000 |
| rad26              | 8.89833e-13 | 1.000000 | 1.25612e-12 | 1.000000 |
| rad20              | 6.77139e-13 | 1.000000 | 9.55870e-13 | 1.000000 |
| rad10              | 3.23890e-13 | 1.000000 | 4.57213e-13 | 1.000000 |
| rad25              | 2.68303e-13 | 1.000000 | 3.78745e-13 | 1.000000 |
| rad12              | 2.31790e-13 | 1.000000 | 3.27203e-13 | 1.000000 |
| rad18              | 2.03158e-13 | 1.000000 | 2.86784e-13 | 1.000000 |
| rad24              | 1.45642e-13 | 1.000000 | 2.05592e-13 | 1.000000 |
| rad2               | 8.98350e-14 | 1.000000 | 1.26814e-13 | 1.000000 |

|       |             |          |             |          |
|-------|-------------|----------|-------------|----------|
| rad3  | 5.37212e-14 | 1.000000 | 7.58348e-14 | 1.000000 |
| rad4  | 3.35403e-14 | 1.000000 | 4.73466e-14 | 1.000000 |
| rad1  | 2.38967e-14 | 1.000000 | 3.37333e-14 | 1.000000 |
| rad8  | 2.01389e-14 | 1.000000 | 2.84286e-14 | 1.000000 |
| rad14 | 1.40769e-14 | 1.000000 | 1.98714e-14 | 1.000000 |
| rad47 | 4.71871e-15 | 1.000000 | 6.66109e-15 | 1.000000 |
| rad5  | 2.23213e-15 | 1.000000 | 3.15095e-15 | 1.000000 |
| rad27 | 7.38204e-16 | 1.000000 | 1.04207e-15 | 1.000000 |

0.100000000 Pa, 2500.00000 K

| Rate constant      | True (fraction)      | Effective (fraction) |
|--------------------|----------------------|----------------------|
| Total              | 3.28090e-11 (1.00 )  | 2.31980e-11 (1.00 )  |
| Formation of rad11 | 6.43164e-12 (0.196 ) | 2.60906e-12 (0.112 ) |
| Formation of rad6  | 9.73932e-12 (0.297 ) | 3.95085e-12 (0.170 ) |
| H-abstraction      | 1.66381e-11 (0.507 ) | 1.66381e-11 (0.717 ) |

| species            | PYtrue      | Cumul    | PYeffective | Cumul    |
|--------------------|-------------|----------|-------------|----------|
| Benzene+2-propynyl | 0.507119    | 0.507119 | 0.717221    | 0.717221 |
| Phenyl+Allene      | 0.292939    | 0.800058 | 0.00000     | 0.717221 |
| PhCH2CCH+H         | 0.0943957   | 0.894453 | 0.133505    | 0.850725 |
| PhCHCCH2+H         | 0.0481939   | 0.942647 | 0.0681609   | 0.918886 |
| C2H2+PhCH2         | 0.0183497   | 0.960997 | 0.0259521   | 0.944838 |
| PhCCH+CH3          | 0.0148752   | 0.975872 | 0.0210380   | 0.965876 |
| Indene+H           | 0.00953292  | 0.985405 | 0.0134824   | 0.979359 |
| PAH7+H             | 0.00553047  | 0.990936 | 0.00782174  | 0.987180 |
| Ph+MeAc            | 0.00339482  | 0.994330 | 0.00480131  | 0.991982 |
| PhcycC3H3_A+H      | 0.00149309  | 0.995824 | 0.00211169  | 0.994093 |
| rad19syn           | 0.00122618  | 0.997050 | 0.00173419  | 0.995828 |
| rad39              | 0.000692493 | 0.997742 | 0.000979395 | 0.996807 |
| rad54              | 0.000558297 | 0.998301 | 0.000789599 | 0.997597 |
| rad19anti          | 0.000392540 | 0.998693 | 0.000555170 | 0.998152 |
| PAH9+H             | 0.000261381 | 0.998954 | 0.000369672 | 0.998521 |
| PhCCCH3+H          | 0.000164587 | 0.999119 | 0.000232776 | 0.998754 |
| rad38              | 0.000157797 | 0.999277 | 0.000223174 | 0.998977 |
| PAH1+H             | 0.000129618 | 0.999406 | 0.000183319 | 0.999161 |
| rad50              | 6.95416e-05 | 0.999476 | 9.83530e-05 | 0.999259 |
| rad55              | 5.44673e-05 | 0.999530 | 7.70336e-05 | 0.999336 |
| rad46              | 5.29591e-05 | 0.999583 | 7.49001e-05 | 0.999411 |
| rad35              | 5.14100e-05 | 0.999635 | 7.27094e-05 | 0.999484 |
| PAH10+CH3          | 5.04331e-05 | 0.999685 | 7.13280e-05 | 0.999555 |
| rad70              | 4.95223e-05 | 0.999735 | 7.00399e-05 | 0.999625 |
| PAH3+H             | 4.31617e-05 | 0.999778 | 6.10439e-05 | 0.999686 |
| rad67              | 3.73882e-05 | 0.999815 | 5.28783e-05 | 0.999739 |
| rad56              | 3.65112e-05 | 0.999852 | 5.16381e-05 | 0.999791 |
| rad51              | 2.99348e-05 | 0.999882 | 4.23369e-05 | 0.999833 |
| rad53              | 2.90213e-05 | 0.999911 | 4.10449e-05 | 0.999874 |
| rad34              | 1.57208e-05 | 0.999926 | 2.22340e-05 | 0.999896 |
| rad30              | 1.43454e-05 | 0.999941 | 2.02888e-05 | 0.999917 |
| rad37              | 1.43019e-05 | 0.999955 | 2.02272e-05 | 0.999937 |
| PAH8+H             | 8.32886e-06 | 0.999963 | 1.17795e-05 | 0.999949 |
| rad52              | 7.47627e-06 | 0.999971 | 1.05737e-05 | 0.999959 |
| rad62              | 5.70269e-06 | 0.999977 | 8.06535e-06 | 0.999967 |
| rad59              | 3.60017e-06 | 0.999980 | 5.09173e-06 | 0.999972 |
| rad64              | 3.22135e-06 | 0.999983 | 4.55597e-06 | 0.999977 |
| rad71              | 3.21475e-06 | 0.999987 | 4.54664e-06 | 0.999981 |
| rad60syn           | 2.29248e-06 | 0.999989 | 3.24226e-06 | 0.999985 |
| rad68syn           | 1.99920e-06 | 0.999991 | 2.82747e-06 | 0.999987 |
| rad73              | 1.73026e-06 | 0.999993 | 2.44711e-06 | 0.999990 |
| rad60anti          | 1.62672e-06 | 0.999994 | 2.30068e-06 | 0.999992 |
| rad68anti          | 1.28206e-06 | 0.999996 | 1.81322e-06 | 0.999994 |
| rad40syn           | 8.70434e-07 | 0.999996 | 1.23105e-06 | 0.999995 |
| rad65              | 7.65686e-07 | 0.999997 | 1.08292e-06 | 0.999996 |
| rad42              | 7.25374e-07 | 0.999998 | 1.02590e-06 | 0.999997 |
| rad58              | 6.16762e-07 | 0.999999 | 8.72293e-07 | 0.999998 |
| rad40anti          | 5.85898e-07 | 0.999999 | 8.28640e-07 | 0.999999 |
| rad43              | 2.45120e-07 | 0.999999 | 3.46673e-07 | 0.999999 |
| rad72              | 2.19472e-07 | 1.000000 | 3.10399e-07 | 1.000000 |
| rad61              | 1.61750e-07 | 1.000000 | 2.28765e-07 | 1.000000 |
| rad41              | 3.09947e-08 | 1.000000 | 4.38359e-08 | 1.000000 |
| rad6               | 3.38907e-09 | 1.000000 | 4.79317e-09 | 1.000000 |
| rad7               | 6.63014e-11 | 1.000000 | 9.37702e-11 | 1.000000 |
| rad11              | 4.82058e-11 | 1.000000 | 6.81778e-11 | 1.000000 |
| rad23              | 2.81036e-11 | 1.000000 | 3.97472e-11 | 1.000000 |
| rad28              | 1.20694e-11 | 1.000000 | 1.70698e-11 | 1.000000 |
| rad9               | 1.09971e-11 | 1.000000 | 1.55532e-11 | 1.000000 |
| rad13              | 7.91513e-12 | 1.000000 | 1.11944e-11 | 1.000000 |
| rad45              | 5.50874e-12 | 1.000000 | 7.79108e-12 | 1.000000 |



|       |             |          |             |         |
|-------|-------------|----------|-------------|---------|
| rad22 | 2.16153e-12 | 1.000000 | 3.05707e-12 | 1.00000 |
| rad21 | 1.39356e-12 | 1.000000 | 1.97092e-12 | 1.00000 |
| rad36 | 1.00764e-12 | 1.000000 | 1.42511e-12 | 1.00000 |
| rad15 | 6.97881e-13 | 1.000000 | 9.87019e-13 | 1.00000 |
| rad33 | 5.56581e-13 | 1.000000 | 7.87179e-13 | 1.00000 |
| rad26 | 3.11054e-13 | 1.000000 | 4.39926e-13 | 1.00000 |
| rad20 | 2.88998e-13 | 1.000000 | 4.08732e-13 | 1.00000 |
| rad25 | 1.37170e-13 | 1.000000 | 1.94001e-13 | 1.00000 |
| rad12 | 1.32606e-13 | 1.000000 | 1.87546e-13 | 1.00000 |
| rad10 | 1.15949e-13 | 1.000000 | 1.63988e-13 | 1.00000 |
| rad24 | 7.99114e-14 | 1.000000 | 1.13019e-13 | 1.00000 |
| rad18 | 7.64824e-14 | 1.000000 | 1.08170e-13 | 1.00000 |
| rad2  | 2.42882e-14 | 1.000000 | 3.43509e-14 | 1.00000 |
| rad3  | 2.13760e-14 | 1.000000 | 3.02322e-14 | 1.00000 |
| rad8  | 1.74700e-14 | 1.000000 | 2.47079e-14 | 1.00000 |
| rad4  | 1.30604e-14 | 1.000000 | 1.84714e-14 | 1.00000 |
| rad14 | 7.77442e-15 | 1.000000 | 1.09954e-14 | 1.00000 |
| rad47 | 6.74967e-15 | 1.000000 | 9.54610e-15 | 1.00000 |
| rad1  | 6.32677e-15 | 1.000000 | 8.94799e-15 | 1.00000 |
| rad5  | 1.46636e-15 | 1.000000 | 2.07388e-15 | 1.00000 |
| rad27 | 3.67510e-16 | 1.000000 | 5.19771e-16 | 1.00000 |

0.100000000 Pa, 2750.00000 K

| Rate constant      | True (fraction)      | Effective (fraction) |
|--------------------|----------------------|----------------------|
| Total              | 4.60596e-11 (1.00 )  | 3.26255e-11 (1.00 )  |
| Formation of rad11 | 8.62280e-12 (0.187 ) | 3.34633e-12 (0.103 ) |
| Formation of rad6  | 1.33313e-11 (0.289 ) | 5.17360e-12 (0.159 ) |
| H-abstraction      | 2.41055e-11 (0.523 ) | 2.41055e-11 (0.739 ) |

| species            | PYtrue      | Cumul    | PYeffective | Cumul    |
|--------------------|-------------|----------|-------------|----------|
| Benzene+2-propynyl | 0.523355    | 0.523355 | 0.738856    | 0.738856 |
| Phenyl+Allene      | 0.291669    | 0.815024 | 0.00000     | 0.738856 |
| PhCH2CCH+H         | 0.0913925   | 0.906416 | 0.129025    | 0.867881 |
| PhCHCCH2+H         | 0.0440897   | 0.950506 | 0.0622446   | 0.930126 |
| C2H2+PhCH2         | 0.0155259   | 0.966032 | 0.0219190   | 0.952045 |
| PhCCH+CH3          | 0.0128664   | 0.978898 | 0.0181644   | 0.972029 |
| Indene+H           | 0.00652675  | 0.985425 | 0.00921427  | 0.979424 |
| PAH7+H             | 0.00506746  | 0.990493 | 0.00715408  | 0.986578 |
| Ph+MeAc            | 0.00315047  | 0.993643 | 0.00444775  | 0.991026 |
| PhcycC3H3_A+H      | 0.00197301  | 0.995616 | 0.00278544  | 0.993811 |
| rad19syn           | 0.00143568  | 0.997052 | 0.00202686  | 0.995838 |
| rad54              | 0.000652594 | 0.997704 | 0.000921315 | 0.996759 |
| rad39              | 0.000584043 | 0.998288 | 0.000824532 | 0.997584 |
| rad19anti          | 0.000328573 | 0.998617 | 0.000463869 | 0.998048 |
| PAH9+H             | 0.000240059 | 0.998857 | 0.000338907 | 0.998386 |
| PAH1+H             | 0.000158291 | 0.999015 | 0.000223471 | 0.998610 |
| rad38              | 0.000149711 | 0.999165 | 0.000211358 | 0.998821 |
| PhCCCH3+H          | 0.000136861 | 0.999302 | 0.000193216 | 0.999015 |
| rad50              | 8.19601e-05 | 0.999384 | 0.000115709 | 0.999130 |
| rad55              | 6.64334e-05 | 0.999450 | 9.37887e-05 | 0.999224 |
| rad70              | 5.64830e-05 | 0.999507 | 7.97407e-05 | 0.999304 |
| rad56              | 5.59920e-05 | 0.999563 | 7.90477e-05 | 0.999383 |
| PAH10+CH3          | 5.49972e-05 | 0.999618 | 7.76435e-05 | 0.999460 |
| rad46              | 5.29186e-05 | 0.999671 | 7.47090e-05 | 0.999535 |
| PAH3+H             | 5.07704e-05 | 0.999721 | 7.16761e-05 | 0.999607 |
| rad35              | 4.92117e-05 | 0.999771 | 6.94754e-05 | 0.999676 |
| rad53              | 4.15959e-05 | 0.999812 | 5.87239e-05 | 0.999735 |
| rad67              | 4.08893e-05 | 0.999853 | 5.77263e-05 | 0.999793 |
| rad51              | 3.94231e-05 | 0.999893 | 5.56565e-05 | 0.999848 |
| rad34              | 1.91382e-05 | 0.999912 | 2.70187e-05 | 0.999875 |
| PAH8+H             | 1.42400e-05 | 0.999926 | 2.01036e-05 | 0.999896 |
| rad30              | 1.30159e-05 | 0.999939 | 1.83754e-05 | 0.999914 |
| rad37              | 1.25497e-05 | 0.999952 | 1.77173e-05 | 0.999932 |
| rad52              | 9.23200e-06 | 0.999961 | 1.30335e-05 | 0.999945 |
| rad62              | 6.96508e-06 | 0.999968 | 9.83308e-06 | 0.999954 |
| rad71              | 6.06269e-06 | 0.999974 | 8.55914e-06 | 0.999963 |
| rad64              | 4.12924e-06 | 0.999978 | 5.82954e-06 | 0.999969 |
| rad59              | 4.06487e-06 | 0.999982 | 5.73866e-06 | 0.999975 |
| rad73              | 2.98826e-06 | 0.999985 | 4.21875e-06 | 0.999979 |
| rad68syn           | 2.93858e-06 | 0.999988 | 4.14861e-06 | 0.999983 |
| rad60syn           | 2.38752e-06 | 0.999990 | 3.37063e-06 | 0.999986 |
| rad68anti          | 1.88086e-06 | 0.999992 | 2.65533e-06 | 0.999989 |
| rad60anti          | 1.71401e-06 | 0.999994 | 2.41979e-06 | 0.999991 |
| rad40syn           | 1.39059e-06 | 0.999995 | 1.96319e-06 | 0.999993 |
| rad42              | 1.00618e-06 | 0.999996 | 1.42050e-06 | 0.999995 |
| rad65              | 9.77109e-07 | 0.999997 | 1.37946e-06 | 0.999996 |
| rad40anti          | 9.60893e-07 | 0.999998 | 1.35656e-06 | 0.999998 |

|       |             |          |             |          |
|-------|-------------|----------|-------------|----------|
| rad58 | 8.26832e-07 | 0.999999 | 1.16730e-06 | 0.999999 |
| rad72 | 4.93199e-07 | 1.000000 | 6.96287e-07 | 0.999999 |
| rad43 | 2.90363e-07 | 1.000000 | 4.09925e-07 | 1.000000 |
| rad61 | 2.19014e-07 | 1.000000 | 3.09197e-07 | 1.000000 |
| rad41 | 4.25216e-08 | 1.000000 | 6.00307e-08 | 1.000000 |
| rad6  | 1.15110e-09 | 1.000000 | 1.62509e-09 | 1.000000 |
| rad7  | 2.97827e-11 | 1.000000 | 4.20465e-11 | 1.000000 |
| rad11 | 2.06162e-11 | 1.000000 | 2.91052e-11 | 1.000000 |
| rad23 | 9.64621e-12 | 1.000000 | 1.36182e-11 | 1.000000 |
| rad9  | 4.61506e-12 | 1.000000 | 6.51540e-12 | 1.000000 |
| rad28 | 4.09733e-12 | 1.000000 | 5.78449e-12 | 1.000000 |
| rad13 | 3.84898e-12 | 1.000000 | 5.43388e-12 | 1.000000 |
| rad45 | 2.37082e-12 | 1.000000 | 3.34705e-12 | 1.000000 |
| rad22 | 8.06398e-13 | 1.000000 | 1.13845e-12 | 1.000000 |
| rad21 | 7.20326e-13 | 1.000000 | 1.01693e-12 | 1.000000 |
| rad36 | 4.39835e-13 | 1.000000 | 6.20945e-13 | 1.000000 |
| rad15 | 3.21932e-13 | 1.000000 | 4.54494e-13 | 1.000000 |
| rad33 | 3.15104e-13 | 1.000000 | 4.44853e-13 | 1.000000 |
| rad20 | 1.44423e-13 | 1.000000 | 2.03892e-13 | 1.000000 |
| rad26 | 1.26781e-13 | 1.000000 | 1.78985e-13 | 1.000000 |
| rad12 | 7.84782e-14 | 1.000000 | 1.10794e-13 | 1.000000 |
| rad25 | 7.63319e-14 | 1.000000 | 1.07763e-13 | 1.000000 |
| rad10 | 4.96955e-14 | 1.000000 | 7.01586e-14 | 1.000000 |
| rad24 | 4.65717e-14 | 1.000000 | 6.57487e-14 | 1.000000 |
| rad18 | 3.38732e-14 | 1.000000 | 4.78211e-14 | 1.000000 |
| rad8  | 1.52997e-14 | 1.000000 | 2.15997e-14 | 1.000000 |
| rad3  | 9.92666e-15 | 1.000000 | 1.40141e-14 | 1.000000 |
| rad47 | 8.69678e-15 | 1.000000 | 1.22779e-14 | 1.000000 |
| rad2  | 8.62709e-15 | 1.000000 | 1.21795e-14 | 1.000000 |
| rad4  | 5.95892e-15 | 1.000000 | 8.41266e-15 | 1.000000 |
| rad14 | 4.75126e-15 | 1.000000 | 6.70768e-15 | 1.000000 |
| rad1  | 2.15400e-15 | 1.000000 | 3.04094e-15 | 1.000000 |
| rad5  | 1.02713e-15 | 1.000000 | 1.45008e-15 | 1.000000 |
| rad27 | 2.15828e-16 | 1.000000 | 3.04700e-16 | 1.000000 |

0.10000000 Pa, 3000.00000 K

=====

| Rate constant      | True (fraction)      | Effective (fraction)  |
|--------------------|----------------------|-----------------------|
| Total              | 6.24269e-11 (1.00 )  | 4.43911e-11 (1.00 )   |
| Formation of rad11 | 1.12221e-11 (0.180 ) | 4.21269e-12 (0.0949 ) |
| Formation of rad6  | 1.76534e-11 (0.283 ) | 6.62699e-12 (0.149 )  |
| H-abstraction      | 3.35514e-11 (0.537 ) | 3.35514e-11 (0.756 )  |

| species            | PYtrue      | Cumul    | PYeffective | Cumul    |
|--------------------|-------------|----------|-------------|----------|
| Benzene+2-propynyl | 0.537451    | 0.537451 | 0.755814    | 0.755814 |
| Phenyl+Allene      | 0.288911    | 0.826362 | 0.000000    | 0.755814 |
| PhCH2CCH+H         | 0.0883066   | 0.914669 | 0.124185    | 0.879999 |
| PhCHCCH2+H         | 0.0408111   | 0.955480 | 0.0573925   | 0.937392 |
| C2H2+PhCH2         | 0.0138651   | 0.969345 | 0.0194984   | 0.956890 |
| PhCCH+CH3          | 0.0113582   | 0.980703 | 0.0159730   | 0.972863 |
| PAH7+H             | 0.00465329  | 0.985356 | 0.00654386  | 0.979407 |
| Indene+H           | 0.00463895  | 0.989995 | 0.00652370  | 0.985931 |
| Ph+MeAc            | 0.00297587  | 0.992971 | 0.00418496  | 0.990116 |
| PhcycC3H3_A+H      | 0.00245642  | 0.995427 | 0.00345445  | 0.993570 |
| rad19syn           | 0.00161454  | 0.997042 | 0.00227052  | 0.995841 |
| rad54              | 0.000727890 | 0.997770 | 0.00102362  | 0.996864 |
| rad39              | 0.000500510 | 0.998270 | 0.000703861 | 0.997568 |
| rad19anti          | 0.000275358 | 0.998546 | 0.000387232 | 0.997955 |
| PAH9+H             | 0.000215435 | 0.998761 | 0.000302964 | 0.998258 |
| PAH1+H             | 0.000185098 | 0.998946 | 0.000260302 | 0.998519 |
| rad38              | 0.000138297 | 0.999085 | 0.000194486 | 0.998713 |
| PhCCCH3+H          | 0.000118094 | 0.999203 | 0.000166074 | 0.998879 |
| rad50              | 9.10199e-05 | 0.999294 | 0.000128001 | 0.999007 |
| rad56              | 7.84307e-05 | 0.999372 | 0.000110297 | 0.999117 |
| rad55              | 7.67854e-05 | 0.999449 | 0.000107983 | 0.999225 |
| rad70              | 6.22156e-05 | 0.999511 | 8.74935e-05 | 0.999313 |
| PAH3+H             | 5.79162e-05 | 0.999569 | 8.14472e-05 | 0.999394 |
| PAH10+CH3          | 5.73435e-05 | 0.999626 | 8.06419e-05 | 0.999475 |
| rad53              | 5.50942e-05 | 0.999682 | 7.74787e-05 | 0.999552 |
| rad46              | 5.10964e-05 | 0.999733 | 7.18563e-05 | 0.999624 |
| rad51              | 4.79927e-05 | 0.999781 | 6.74918e-05 | 0.999692 |
| rad35              | 4.64038e-05 | 0.999827 | 6.52572e-05 | 0.999757 |
| rad67              | 4.30004e-05 | 0.999870 | 6.04712e-05 | 0.999818 |
| rad34              | 2.22803e-05 | 0.999892 | 3.13327e-05 | 0.999849 |
| PAH8+H             | 2.20424e-05 | 0.999914 | 3.09982e-05 | 0.999880 |
| rad30              | 1.19659e-05 | 0.999926 | 1.68276e-05 | 0.999897 |
| rad37              | 1.08360e-05 | 0.999937 | 1.52386e-05 | 0.999912 |
| rad52              | 1.06405e-05 | 0.999948 | 1.49636e-05 | 0.999927 |

|           |             |          |             |          |
|-----------|-------------|----------|-------------|----------|
| rad71     | 9.97852e-06 | 0.999958 | 1.40327e-05 | 0.999941 |
| rad62     | 8.52399e-06 | 0.999966 | 1.19872e-05 | 0.999953 |
| rad64     | 4.99011e-06 | 0.999971 | 7.01754e-06 | 0.999960 |
| rad73     | 4.56450e-06 | 0.999976 | 6.41901e-06 | 0.999966 |
| rad59     | 4.47702e-06 | 0.999980 | 6.29599e-06 | 0.999973 |
| rad68syn  | 4.00554e-06 | 0.999984 | 5.63295e-06 | 0.999978 |
| rad68anti | 2.55993e-06 | 0.999987 | 3.60001e-06 | 0.999982 |
| rad60syn  | 2.46101e-06 | 0.999989 | 3.46090e-06 | 0.999985 |
| rad40syn  | 2.03324e-06 | 0.999991 | 2.85932e-06 | 0.999988 |
| rad60anti | 1.78407e-06 | 0.999993 | 2.50894e-06 | 0.999991 |
| rad40anti | 1.43624e-06 | 0.999995 | 2.01978e-06 | 0.999993 |
| rad42     | 1.37800e-06 | 0.999996 | 1.93787e-06 | 0.999995 |
| rad65     | 1.15674e-06 | 0.999997 | 1.62672e-06 | 0.999996 |
| rad58     | 1.05023e-06 | 0.999998 | 1.47693e-06 | 0.999998 |
| rad72     | 9.39265e-07 | 0.999999 | 1.32088e-06 | 0.999999 |
| rad43     | 3.36095e-07 | 0.999999 | 4.72649e-07 | 1.000000 |
| rad61     | 2.73990e-07 | 1.000000 | 3.85311e-07 | 1.000000 |
| rad41     | 5.56844e-08 | 1.000000 | 7.83087e-08 | 1.000000 |
| rad6      | 4.56787e-10 | 1.000000 | 6.42377e-10 | 1.000000 |
| rad7      | 1.48628e-11 | 1.000000 | 2.09015e-11 | 1.000000 |
| rad11     | 9.89720e-12 | 1.000000 | 1.39184e-11 | 1.000000 |
| rad23     | 3.75557e-12 | 1.000000 | 5.28145e-12 | 1.000000 |
| rad9      | 2.08380e-12 | 1.000000 | 2.93045e-12 | 1.000000 |
| rad13     | 2.05571e-12 | 1.000000 | 2.89092e-12 | 1.000000 |
| rad28     | 1.62283e-12 | 1.000000 | 2.28217e-12 | 1.000000 |
| rad45     | 1.10790e-12 | 1.000000 | 1.55803e-12 | 1.000000 |
| rad21     | 4.05059e-13 | 1.000000 | 5.69632e-13 | 1.000000 |
| rad22     | 3.41990e-13 | 1.000000 | 4.80939e-13 | 1.000000 |
| rad36     | 2.07938e-13 | 1.000000 | 2.92422e-13 | 1.000000 |
| rad33     | 1.89986e-13 | 1.000000 | 2.67176e-13 | 1.000000 |
| rad15     | 1.57963e-13 | 1.000000 | 2.22142e-13 | 1.000000 |
| rad20     | 8.23198e-14 | 1.000000 | 1.15766e-13 | 1.000000 |
| rad26     | 5.68505e-14 | 1.000000 | 7.99484e-14 | 1.000000 |
| rad12     | 4.82938e-14 | 1.000000 | 6.79152e-14 | 1.000000 |
| rad25     | 4.56489e-14 | 1.000000 | 6.41957e-14 | 1.000000 |
| rad24     | 2.85392e-14 | 1.000000 | 4.01344e-14 | 1.000000 |
| rad10     | 2.38264e-14 | 1.000000 | 3.35069e-14 | 1.000000 |
| rad18     | 1.70147e-14 | 1.000000 | 2.39277e-14 | 1.000000 |
| rad8      | 1.34845e-14 | 1.000000 | 1.89631e-14 | 1.000000 |
| rad47     | 1.03449e-14 | 1.000000 | 1.45480e-14 | 1.000000 |
| rad3      | 5.17837e-15 | 1.000000 | 7.28231e-15 | 1.000000 |
| rad2      | 3.71851e-15 | 1.000000 | 5.22931e-15 | 1.000000 |
| rad14     | 3.16524e-15 | 1.000000 | 4.45126e-15 | 1.000000 |
| rad4      | 3.08445e-15 | 1.000000 | 4.33765e-15 | 1.000000 |
| rad1      | 8.83348e-16 | 1.000000 | 1.24225e-15 | 1.000000 |
| rad5      | 7.46762e-16 | 1.000000 | 1.05017e-15 | 1.000000 |
| rad27     | 1.40685e-16 | 1.000000 | 1.97844e-16 | 1.000000 |

0.100000000 Pa, 3250.00000 K

=====

| Rate constant      | True (fraction)      | Effective (fraction)  |
|--------------------|----------------------|-----------------------|
| Total              | 8.22129e-11 (1.00 )  | 5.87536e-11 (1.00 )   |
| Formation of rad11 | 1.42538e-11 (0.173 ) | 5.21849e-12 (0.0888 ) |
| Formation of rad6  | 2.27549e-11 (0.277 ) | 8.33083e-12 (0.142 )  |
| H-abstraction      | 4.52043e-11 (0.550 ) | 4.52043e-11 (0.769 )  |

| species            | PYtrue      | Cumul    | PYeffective | Cumul    |
|--------------------|-------------|----------|-------------|----------|
| Benzene+2-propynyl | 0.549844    | 0.549844 | 0.769388    | 0.769388 |
| Phenyl+Allene      | 0.285349    | 0.835192 | 0.000000    | 0.769388 |
| PhCH2CCH+H         | 0.0853725   | 0.920565 | 0.119460    | 0.888848 |
| PhCHCCH2+H         | 0.0381839   | 0.958749 | 0.0534299   | 0.942278 |
| C2H2+PhCH2         | 0.0128678   | 0.971617 | 0.0180057   | 0.960283 |
| PhCCH+CH3          | 0.0101926   | 0.981809 | 0.0142623   | 0.974546 |
| PAH7+H             | 0.00428274  | 0.986092 | 0.00599276  | 0.980539 |
| Indene+H           | 0.00340695  | 0.989499 | 0.00476729  | 0.985306 |
| PhcycC3H3_A+H      | 0.00292038  | 0.992419 | 0.00408643  | 0.989392 |
| Ph+MeAc            | 0.00285191  | 0.995271 | 0.00399061  | 0.993383 |
| rad19syn           | 0.00176005  | 0.997031 | 0.00246280  | 0.995846 |
| rad54              | 0.000783510 | 0.997815 | 0.00109635  | 0.996942 |
| rad39              | 0.000435199 | 0.998250 | 0.000608967 | 0.997551 |
| rad19anti          | 0.000232598 | 0.998483 | 0.000325470 | 0.997876 |
| PAH1+H             | 0.000210285 | 0.998693 | 0.000294248 | 0.998171 |
| PAH9+H             | 0.000189946 | 0.998883 | 0.000265788 | 0.998436 |
| rad38              | 0.000125074 | 0.999008 | 0.000175014 | 0.998611 |
| PhCCCH3+H          | 0.000104499 | 0.999112 | 0.000146224 | 0.998758 |
| rad56              | 0.000102496 | 0.999215 | 0.000143420 | 0.998901 |
| rad50              | 9.64743e-05 | 0.999311 | 0.000134995 | 0.999036 |
| rad55              | 8.51952e-05 | 0.999397 | 0.000119212 | 0.999155 |

|           |             |          |             |          |
|-----------|-------------|----------|-------------|----------|
| rad53     | 6.86880e-05 | 0.999465 | 9.61137e-05 | 0.999251 |
| rad70     | 6.67834e-05 | 0.999532 | 9.34486e-05 | 0.999345 |
| PAH3+H    | 6.43467e-05 | 0.999596 | 9.00394e-05 | 0.999435 |
| PAH10+CH3 | 5.80427e-05 | 0.999654 | 8.12183e-05 | 0.999516 |
| rad51     | 5.49240e-05 | 0.999709 | 7.68541e-05 | 0.999593 |
| rad46     | 4.80263e-05 | 0.999757 | 6.72021e-05 | 0.999660 |
| rad67     | 4.40669e-05 | 0.999802 | 6.16619e-05 | 0.999722 |
| rad35     | 4.33473e-05 | 0.999845 | 6.06552e-05 | 0.999783 |
| PAH8+H    | 3.16111e-05 | 0.999876 | 4.42329e-05 | 0.999827 |
| rad34     | 2.50786e-05 | 0.999902 | 3.50921e-05 | 0.999862 |
| rad71     | 1.47743e-05 | 0.999916 | 2.06734e-05 | 0.999883 |
| rad52     | 1.16170e-05 | 0.999928 | 1.62555e-05 | 0.999899 |
| rad30     | 1.10774e-05 | 0.999939 | 1.55003e-05 | 0.999914 |
| rad62     | 1.06705e-05 | 0.999950 | 1.49310e-05 | 0.999929 |
| rad37     | 9.29424e-06 | 0.999959 | 1.30053e-05 | 0.999942 |
| rad73     | 6.33743e-06 | 0.999965 | 8.86788e-06 | 0.999951 |
| rad64     | 5.77649e-06 | 0.999971 | 8.08292e-06 | 0.999959 |
| rad68syn  | 5.15348e-06 | 0.999976 | 7.21118e-06 | 0.999966 |
| rad59     | 4.82486e-06 | 0.999981 | 6.75136e-06 | 0.999973 |
| rad68anti | 3.28964e-06 | 0.999984 | 4.60314e-06 | 0.999978 |
| rad40syn  | 2.77792e-06 | 0.999987 | 3.88709e-06 | 0.999982 |
| rad60syn  | 2.50929e-06 | 0.999990 | 3.51119e-06 | 0.999985 |
| rad40anti | 1.99952e-06 | 0.999992 | 2.79788e-06 | 0.999988 |
| rad42     | 1.90464e-06 | 0.999994 | 2.66512e-06 | 0.999991 |
| rad60anti | 1.83422e-06 | 0.999995 | 2.56658e-06 | 0.999993 |
| rad72     | 1.57365e-06 | 0.999997 | 2.20198e-06 | 0.999995 |
| rad65     | 1.29208e-06 | 0.999998 | 1.80798e-06 | 0.999997 |
| rad58     | 1.27682e-06 | 1.000000 | 1.78663e-06 | 0.999999 |
| rad43     | 3.85029e-07 | 1.000000 | 5.38764e-07 | 1.000000 |
| rad61     | 3.23853e-07 | 1.000000 | 4.53160e-07 | 1.000000 |
| rad41     | 7.10639e-08 | 1.000000 | 9.94383e-08 | 1.000000 |
| rad6      | 2.04461e-10 | 1.000000 | 2.86098e-10 | 1.000000 |
| rad7      | 8.06189e-12 | 1.000000 | 1.12809e-11 | 1.000000 |
| rad11     | 5.23419e-12 | 1.000000 | 7.32409e-12 | 1.000000 |
| rad23     | 1.60729e-12 | 1.000000 | 2.24905e-12 | 1.000000 |
| rad13     | 1.18542e-12 | 1.000000 | 1.65874e-12 | 1.000000 |
| rad9      | 1.01015e-12 | 1.000000 | 1.41348e-12 | 1.000000 |
| rad28     | 7.21137e-13 | 1.000000 | 1.00907e-12 | 1.000000 |
| rad45     | 5.54093e-13 | 1.000000 | 7.75333e-13 | 1.000000 |
| rad21     | 2.44329e-13 | 1.000000 | 3.41885e-13 | 1.000000 |
| rad22     | 1.61049e-13 | 1.000000 | 2.25352e-13 | 1.000000 |
| rad33     | 1.20475e-13 | 1.000000 | 1.68579e-13 | 1.000000 |
| rad36     | 1.04968e-13 | 1.000000 | 1.46879e-13 | 1.000000 |
| rad15     | 8.23146e-14 | 1.000000 | 1.15181e-13 | 1.000000 |
| rad20     | 5.20673e-14 | 1.000000 | 7.28565e-14 | 1.000000 |
| rad12     | 3.09374e-14 | 1.000000 | 4.32901e-14 | 1.000000 |
| rad25     | 2.89955e-14 | 1.000000 | 4.05730e-14 | 1.000000 |
| rad26     | 2.74882e-14 | 1.000000 | 3.84639e-14 | 1.000000 |
| rad24     | 1.82403e-14 | 1.000000 | 2.55233e-14 | 1.000000 |
| rad10     | 1.23789e-14 | 1.000000 | 1.73216e-14 | 1.000000 |
| rad8      | 1.19193e-14 | 1.000000 | 1.66784e-14 | 1.000000 |
| rad47     | 1.15641e-14 | 1.000000 | 1.61813e-14 | 1.000000 |
| rad18     | 9.41078e-15 | 1.000000 | 1.31684e-14 | 1.000000 |
| rad3      | 2.95200e-15 | 1.000000 | 4.13068e-15 | 1.000000 |
| rad14     | 2.29688e-15 | 1.000000 | 3.21398e-15 | 1.000000 |
| rad2      | 1.83801e-15 | 1.000000 | 2.57191e-15 | 1.000000 |
| rad4      | 1.76629e-15 | 1.000000 | 2.47152e-15 | 1.000000 |
| rad5      | 5.60912e-16 | 1.000000 | 7.84873e-16 | 1.000000 |
| rad1      | 4.17396e-16 | 1.000000 | 5.84054e-16 | 1.000000 |
| rad27     | 9.84932e-17 | 1.000000 | 1.37820e-16 | 1.000000 |

0.100000000 Pa, 3500.00000 K

| Rate constant      | True (fraction)      | Effective (fraction)  |
|--------------------|----------------------|-----------------------|
| Total              | 1.05713e-10 (1.00 )  | 7.59650e-11 (1.00 )   |
| Formation of rad11 | 1.77412e-11 (0.168 ) | 6.37264e-12 (0.0839 ) |
| Formation of rad6  | 2.86822e-11 (0.271 ) | 1.03027e-11 (0.136 )  |
| H-abstraction      | 5.92897e-11 (0.561 ) | 5.92897e-11 (0.780 )  |

  

| species            | PYtrue     | Cumul    | PYeffective | Cumul    |
|--------------------|------------|----------|-------------|----------|
| Benzene+2-propynyl | 0.560855   | 0.560855 | 0.780487    | 0.780487 |
| Phenyl+Allene      | 0.281404   | 0.842259 | 0.000000    | 0.780487 |
| PhCH2CCH+H         | 0.0826656  | 0.924925 | 0.115037    | 0.895524 |
| PhCHCCH2+H         | 0.0360585  | 0.960983 | 0.0501791   | 0.945703 |
| C2H2+PhCH2         | 0.0122593  | 0.973242 | 0.0170600   | 0.962764 |
| PhCCH+CH3          | 0.00927084 | 0.982513 | 0.0129013   | 0.975665 |
| PAH7+H             | 0.00395025 | 0.986463 | 0.00549717  | 0.981162 |
| PhcycC3H3_A+H      | 0.00334801 | 0.989811 | 0.00465910  | 0.985821 |

|           |             |          |             |          |
|-----------|-------------|----------|-------------|----------|
| Ph+MeAc   | 0.00276398  | 0.992575 | 0.00384635  | 0.989667 |
| Indene+H  | 0.00257590  | 0.995151 | 0.00358462  | 0.993252 |
| rad19syn  | 0.00187235  | 0.997024 | 0.00260557  | 0.995858 |
| rad54     | 0.000820548 | 0.997844 | 0.00114187  | 0.996999 |
| rad39     | 0.000383055 | 0.998227 | 0.000533059 | 0.997533 |
| PAH1+H    | 0.000234590 | 0.998462 | 0.000326455 | 0.997859 |
| rad19anti | 0.000198628 | 0.998661 | 0.000276411 | 0.998135 |
| PAH9+H    | 0.000165224 | 0.998826 | 0.000229927 | 0.998365 |
| rad56     | 0.000126873 | 0.998953 | 0.000176556 | 0.998542 |
| rad38     | 0.000111229 | 0.999064 | 0.000154787 | 0.998697 |
| rad50     | 9.85613e-05 | 0.999162 | 0.000137158 | 0.998834 |
| PhCCCH3+H | 9.42424e-05 | 0.999257 | 0.000131148 | 0.998965 |
| rad55     | 9.15803e-05 | 0.999348 | 0.000127443 | 0.999092 |
| rad53     | 8.16793e-05 | 0.999430 | 0.000113665 | 0.999206 |
| rad70     | 7.02694e-05 | 0.999500 | 9.77871e-05 | 0.999304 |
| PAH3+H    | 6.99220e-05 | 0.999570 | 9.73035e-05 | 0.999401 |
| rad51     | 5.98507e-05 | 0.999630 | 8.32882e-05 | 0.999484 |
| PAH10+CH3 | 5.76128e-05 | 0.999688 | 8.01742e-05 | 0.999565 |
| rad67     | 4.43734e-05 | 0.999732 | 6.17501e-05 | 0.999626 |
| rad46     | 4.41956e-05 | 0.999776 | 6.15029e-05 | 0.999688 |
| PAH8+H    | 4.26935e-05 | 0.999819 | 5.94123e-05 | 0.999747 |
| rad35     | 4.02805e-05 | 0.999859 | 5.60544e-05 | 0.999803 |
| rad34     | 2.74951e-05 | 0.999887 | 3.82622e-05 | 0.999842 |
| rad71     | 2.01281e-05 | 0.999907 | 2.80103e-05 | 0.999870 |
| rad62     | 1.37116e-05 | 0.999920 | 1.90811e-05 | 0.999889 |
| rad52     | 1.21501e-05 | 0.999933 | 1.69080e-05 | 0.999906 |
| rad30     | 1.02915e-05 | 0.999943 | 1.43216e-05 | 0.999920 |
| rad73     | 8.16310e-06 | 0.999951 | 1.13598e-05 | 0.999931 |
| rad37     | 7.96636e-06 | 0.999959 | 1.10860e-05 | 0.999942 |
| rad64     | 6.47621e-06 | 0.999966 | 9.01228e-06 | 0.999951 |
| rad68syn  | 6.33612e-06 | 0.999972 | 8.81737e-06 | 0.999960 |
| rad59     | 5.10458e-06 | 0.999977 | 7.10355e-06 | 0.999967 |
| rad68anti | 4.04059e-06 | 0.999981 | 5.62289e-06 | 0.999973 |
| rad40syn  | 3.59895e-06 | 0.999985 | 5.00830e-06 | 0.999978 |
| rad42     | 2.66321e-06 | 0.999987 | 3.70612e-06 | 0.999982 |
| rad40anti | 2.63316e-06 | 0.999990 | 3.66431e-06 | 0.999985 |
| rad60syn  | 2.53258e-06 | 0.999992 | 3.52435e-06 | 0.999989 |
| rad72     | 2.38441e-06 | 0.999995 | 3.31816e-06 | 0.999992 |
| rad60anti | 1.86455e-06 | 0.999997 | 2.59471e-06 | 0.999995 |
| rad58     | 1.49815e-06 | 0.999998 | 2.08483e-06 | 0.999997 |
| rad65     | 1.37925e-06 | 1.000000 | 1.91936e-06 | 0.999999 |
| rad43     | 4.42452e-07 | 1.000000 | 6.15716e-07 | 0.999999 |
| rad61     | 3.67258e-07 | 1.000000 | 5.11077e-07 | 1.000000 |
| rad41     | 8.98821e-08 | 1.000000 | 1.25080e-07 | 1.000000 |
| rad6      | 1.00957e-10 | 1.000000 | 1.40492e-10 | 1.000000 |
| rad7      | 4.67681e-12 | 1.000000 | 6.50825e-12 | 1.000000 |
| rad11     | 3.00061e-12 | 1.000000 | 4.17564e-12 | 1.000000 |
| rad23     | 7.42819e-13 | 1.000000 | 1.03371e-12 | 1.000000 |
| rad13     | 7.28402e-13 | 1.000000 | 1.01364e-12 | 1.000000 |
| rad9      | 5.23650e-13 | 1.000000 | 7.28715e-13 | 1.000000 |
| rad28     | 3.51748e-13 | 1.000000 | 4.89492e-13 | 1.000000 |
| rad45     | 2.93120e-13 | 1.000000 | 4.07908e-13 | 1.000000 |
| rad21     | 1.56215e-13 | 1.000000 | 2.17389e-13 | 1.000000 |
| rad22     | 8.28110e-14 | 1.000000 | 1.15240e-13 | 1.000000 |
| rad33     | 7.96113e-14 | 1.000000 | 1.10787e-13 | 1.000000 |
| rad36     | 5.59278e-14 | 1.000000 | 7.78294e-14 | 1.000000 |
| rad15     | 4.54050e-14 | 1.000000 | 6.31859e-14 | 1.000000 |
| rad20     | 3.56647e-14 | 1.000000 | 4.96310e-14 | 1.000000 |
| rad12     | 2.06000e-14 | 1.000000 | 2.86671e-14 | 1.000000 |
| rad25     | 1.93604e-14 | 1.000000 | 2.69419e-14 | 1.000000 |
| rad26     | 1.41895e-14 | 1.000000 | 1.97462e-14 | 1.000000 |
| rad47     | 1.23125e-14 | 1.000000 | 1.71341e-14 | 1.000000 |
| rad24     | 1.20836e-14 | 1.000000 | 1.68156e-14 | 1.000000 |
| rad8      | 1.05361e-14 | 1.000000 | 1.46621e-14 | 1.000000 |
| rad10     | 6.85163e-15 | 1.000000 | 9.53472e-15 | 1.000000 |
| rad18     | 5.60429e-15 | 1.000000 | 7.79892e-15 | 1.000000 |
| rad14     | 1.81954e-15 | 1.000000 | 2.53206e-15 | 1.000000 |
| rad3      | 1.80387e-15 | 1.000000 | 2.51026e-15 | 1.000000 |
| rad4      | 1.09702e-15 | 1.000000 | 1.52662e-15 | 1.000000 |
| rad2      | 1.00322e-15 | 1.000000 | 1.39608e-15 | 1.000000 |
| rad5      | 4.34652e-16 | 1.000000 | 6.04863e-16 | 1.000000 |
| rad1      | 2.20513e-16 | 1.000000 | 3.06866e-16 | 1.000000 |
| rad27     | 7.31239e-17 | 1.000000 | 1.01759e-16 | 1.000000 |

0.100000000 Pa, 3750.00000 K

| Rate constant      | True (fraction)      | Effective (fraction)  |
|--------------------|----------------------|-----------------------|
| Total              | 1.33217e-10 (1.00 )  | 9.62711e-11 (1.00 )   |
| Formation of rad11 | 2.17064e-11 (0.163 ) | 7.68279e-12 (0.0798 ) |

Formation of rad6 | 3.54800e-11 (0.266 ) 1.25578e-11 (0.130 )  
H-abstraction | 7.60305e-11 (0.571 ) 7.60305e-11 (0.790 )

| species            | PYtrue      | Cumul    | PYeffective | Cumul    |
|--------------------|-------------|----------|-------------|----------|
| Benzene+2-propynyl | 0.570727    | 0.570727 | 0.789754    | 0.789754 |
| Phenyl+Allene      | 0.277336    | 0.848063 | 0.00000     | 0.789754 |
| PhCH2CCH+H         | 0.0801946   | 0.928257 | 0.110971    | 0.900725 |
| PhCHCCH2+H         | 0.0343186   | 0.962576 | 0.0474891   | 0.948214 |
| C2H2+PhCH2         | 0.0118838   | 0.974460 | 0.0164445   | 0.964658 |
| PhCCH+CH3          | 0.00852836  | 0.982988 | 0.0118013   | 0.976459 |
| PhcycC3H3_A+H      | 0.00372851  | 0.986717 | 0.00515939  | 0.981619 |
| PAH7+H             | 0.00365085  | 0.990368 | 0.00505194  | 0.986671 |
| Ph+MeAc            | 0.00270113  | 0.993069 | 0.00373773  | 0.990408 |
| Indene+H           | 0.00199900  | 0.995068 | 0.00276616  | 0.993175 |
| rad19syn           | 0.00195356  | 0.997021 | 0.00270328  | 0.995878 |
| rad54              | 0.000841040 | 0.997862 | 0.00116381  | 0.997042 |
| rad39              | 0.000340475 | 0.998203 | 0.000471138 | 0.997513 |
| PAH1+H             | 0.000258935 | 0.998462 | 0.000358305 | 0.997871 |
| rad19anti          | 0.000171610 | 0.998633 | 0.000237469 | 0.998109 |
| rad56              | 0.000150421 | 0.998784 | 0.000208148 | 0.998317 |
| PAH9+H             | 0.000142296 | 0.998926 | 0.000196904 | 0.998514 |
| rad50              | 9.78214e-05 | 0.999024 | 0.000135362 | 0.998649 |
| rad38              | 9.76287e-05 | 0.999121 | 0.000135095 | 0.998784 |
| rad55              | 9.60227e-05 | 0.999217 | 0.000132873 | 0.998917 |
| rad53              | 9.35446e-05 | 0.999311 | 0.000129444 | 0.999046 |
| PhCCCH3+H          | 8.63448e-05 | 0.999397 | 0.000119481 | 0.999166 |
| PAH3+H             | 7.46029e-05 | 0.999472 | 0.000103233 | 0.999269 |
| rad70              | 7.27716e-05 | 0.999545 | 0.000100699 | 0.999370 |
| rad51              | 6.27266e-05 | 0.999607 | 8.67994e-05 | 0.999457 |
| PAH10+CH3          | 5.64592e-05 | 0.999664 | 7.81267e-05 | 0.999535 |
| PAH8+H             | 5.49581e-05 | 0.999719 | 7.60493e-05 | 0.999611 |
| rad67              | 4.41361e-05 | 0.999763 | 6.10741e-05 | 0.999672 |
| rad46              | 4.00102e-05 | 0.999803 | 5.53649e-05 | 0.999727 |
| rad35              | 3.73501e-05 | 0.999840 | 5.16839e-05 | 0.999779 |
| rad34              | 2.95155e-05 | 0.999870 | 4.08426e-05 | 0.999820 |
| rad71              | 2.56704e-05 | 0.999896 | 3.55219e-05 | 0.999855 |
| rad62              | 1.78765e-05 | 0.999913 | 2.47369e-05 | 0.999880 |
| rad52              | 1.22817e-05 | 0.999926 | 1.69950e-05 | 0.999897 |
| rad73              | 9.90830e-06 | 0.999936 | 1.37108e-05 | 0.999911 |
| rad30              | 9.58077e-06 | 0.999945 | 1.32576e-05 | 0.999924 |
| rad68syn           | 7.51159e-06 | 0.999953 | 1.03943e-05 | 0.999934 |
| rad64              | 7.08717e-06 | 0.999960 | 9.80700e-06 | 0.999944 |
| rad37              | 6.84827e-06 | 0.999967 | 9.47639e-06 | 0.999954 |
| rad59              | 5.31873e-06 | 0.999972 | 7.35989e-06 | 0.999961 |
| rad68anti          | 4.78626e-06 | 0.999977 | 6.62308e-06 | 0.999968 |
| rad40syn           | 4.46912e-06 | 0.999981 | 6.18422e-06 | 0.999974 |
| rad42              | 3.72271e-06 | 0.999985 | 5.15138e-06 | 0.999979 |
| rad72              | 3.33614e-06 | 0.999988 | 4.61643e-06 | 0.999984 |
| rad40anti          | 3.31727e-06 | 0.999992 | 4.59032e-06 | 0.999988 |
| rad60syn           | 2.53369e-06 | 0.999994 | 3.50604e-06 | 0.999992 |
| rad60anti          | 1.87710e-06 | 0.999996 | 2.59748e-06 | 0.999994 |
| rad58              | 1.70809e-06 | 0.999998 | 2.36361e-06 | 0.999997 |
| rad65              | 1.42131e-06 | 0.999999 | 1.96676e-06 | 0.999999 |
| rad43              | 5.13732e-07 | 1.000000 | 7.10883e-07 | 0.999999 |
| rad61              | 4.03889e-07 | 1.00000  | 5.58888e-07 | 1.000000 |
| rad41              | 1.13553e-07 | 1.00000  | 1.57130e-07 | 1.00000  |
| rad6               | 5.40927e-11 | 1.00000  | 7.48513e-11 | 1.00000  |
| rad7               | 2.86623e-12 | 1.00000  | 3.96618e-12 | 1.00000  |
| rad11              | 1.83955e-12 | 1.00000  | 2.54551e-12 | 1.00000  |
| rad13              | 4.72041e-13 | 1.00000  | 6.53196e-13 | 1.00000  |
| rad23              | 3.66100e-13 | 1.00000  | 5.06596e-13 | 1.00000  |
| rad9               | 2.88785e-13 | 1.00000  | 3.99610e-13 | 1.00000  |
| rad28              | 1.85460e-13 | 1.00000  | 2.56635e-13 | 1.00000  |
| rad45              | 1.62510e-13 | 1.00000  | 2.24875e-13 | 1.00000  |
| rad21              | 1.04840e-13 | 1.00000  | 1.45075e-13 | 1.00000  |
| rad33              | 5.44417e-14 | 1.00000  | 7.53347e-14 | 1.00000  |
| rad22              | 4.58674e-14 | 1.00000  | 6.34697e-14 | 1.00000  |
| rad36              | 3.11676e-14 | 1.00000  | 4.31288e-14 | 1.00000  |
| rad15              | 2.63918e-14 | 1.00000  | 3.65201e-14 | 1.00000  |
| rad20              | 2.59482e-14 | 1.00000  | 3.59062e-14 | 1.00000  |
| rad12              | 1.42145e-14 | 1.00000  | 1.96695e-14 | 1.00000  |
| rad25              | 1.34709e-14 | 1.00000  | 1.86406e-14 | 1.00000  |
| rad47              | 1.26179e-14 | 1.00000  | 1.74602e-14 | 1.00000  |
| rad8               | 9.29500e-15 | 1.00000  | 1.28621e-14 | 1.00000  |
| rad24              | 8.25899e-15 | 1.00000  | 1.14285e-14 | 1.00000  |
| rad26              | 7.76434e-15 | 1.00000  | 1.07440e-14 | 1.00000  |
| rad10              | 3.99849e-15 | 1.00000  | 5.53298e-15 | 1.00000  |
| rad18              | 3.53574e-15 | 1.00000  | 4.89263e-15 | 1.00000  |
| rad14              | 1.56424e-15 | 1.00000  | 2.16454e-15 | 1.00000  |

|       |             |         |             |         |
|-------|-------------|---------|-------------|---------|
| rad3  | 1.16576e-15 | 1.00000 | 1.61314e-15 | 1.00000 |
| rad4  | 7.27471e-16 | 1.00000 | 1.00665e-15 | 1.00000 |
| rad2  | 5.90229e-16 | 1.00000 | 8.16742e-16 | 1.00000 |
| rad5  | 3.46674e-16 | 1.00000 | 4.79716e-16 | 1.00000 |
| rad1  | 1.27501e-16 | 1.00000 | 1.76432e-16 | 1.00000 |
| rad27 | 5.73873e-17 | 1.00000 | 7.94105e-17 | 1.00000 |

0.100000000 Pa, 4000.00000 K

| Rate constant      | True (fraction)      | Effective (fraction)  |
|--------------------|----------------------|-----------------------|
| Total              | 1.65008e-10 (1.00 )  | 1.19912e-10 (1.00 )   |
| Formation of rad11 | 2.61707e-11 (0.159 ) | 9.15556e-12 (0.0764 ) |
| Formation of rad6  | 4.31906e-11 (0.262 ) | 1.51098e-11 (0.126 )  |
| H-abstraction      | 9.56470e-11 (0.580 ) | 9.56470e-11 (0.798 )  |

| species            | PYtrue      | Cumul    | PYeffective | Cumul    |
|--------------------|-------------|----------|-------------|----------|
| Benzene+2-propynyl | 0.579650    | 0.579650 | 0.797641    | 0.797641 |
| Phenyl+Allene      | 0.273295    | 0.852945 | 0.00000     | 0.797641 |
| PhCH2CCH+H         | 0.0779435   | 0.930888 | 0.107256    | 0.904897 |
| PhCHCCH2+H         | 0.0328766   | 0.963765 | 0.0452408   | 0.950138 |
| C2H2+PhCH2         | 0.0116508   | 0.975415 | 0.0160323   | 0.966170 |
| PhCCH+CH3          | 0.00792125  | 0.983337 | 0.0109003   | 0.977070 |
| PhcycC3H3_A+H      | 0.00405636  | 0.987393 | 0.00558187  | 0.982652 |
| PAH7+H             | 0.00338058  | 0.990774 | 0.00465193  | 0.987304 |
| Ph+MeAc            | 0.00265534  | 0.993429 | 0.00365394  | 0.990958 |
| rad19syn           | 0.00200699  | 0.995436 | 0.00276178  | 0.993720 |
| Indene+H           | 0.00158840  | 0.997024 | 0.00218576  | 0.995906 |
| rad54              | 0.000847468 | 0.997872 | 0.00116618  | 0.997072 |
| rad39              | 0.000304994 | 0.998177 | 0.000419695 | 0.997491 |
| PAH1+H             | 0.000284127 | 0.998461 | 0.000390980 | 0.997882 |
| rad56              | 0.000172242 | 0.998633 | 0.000237017 | 0.998119 |
| rad19anti          | 0.000149971 | 0.998783 | 0.000206372 | 0.998326 |
| PAH9+H             | 0.000121736 | 0.998905 | 0.000167518 | 0.998493 |
| rad53              | 0.000103935 | 0.999009 | 0.000143023 | 0.998636 |
| rad55              | 9.87033e-05 | 0.999108 | 0.000135823 | 0.998772 |
| rad50              | 9.49261e-05 | 0.999203 | 0.000130625 | 0.998903 |
| rad38              | 8.48536e-05 | 0.999287 | 0.000116765 | 0.999020 |
| PhCCCH3+H          | 8.02193e-05 | 0.999368 | 0.000110388 | 0.999130 |
| PAH3+H             | 7.84218e-05 | 0.999446 | 0.000107914 | 0.999238 |
| rad70              | 7.43978e-05 | 0.999520 | 0.000102377 | 0.999340 |
| PAH8+H             | 6.80299e-05 | 0.999588 | 9.36140e-05 | 0.999434 |
| rad51              | 6.37407e-05 | 0.999652 | 8.77122e-05 | 0.999522 |
| PAH10+CH3          | 5.48776e-05 | 0.999707 | 7.55158e-05 | 0.999597 |
| rad67              | 4.35168e-05 | 0.999751 | 5.98821e-05 | 0.999657 |
| rad46              | 3.57792e-05 | 0.999786 | 4.92350e-05 | 0.999706 |
| rad35              | 3.46400e-05 | 0.999821 | 4.76673e-05 | 0.999754 |
| rad34              | 3.11445e-05 | 0.999852 | 4.28572e-05 | 0.999797 |
| rad71              | 3.10563e-05 | 0.999883 | 4.27358e-05 | 0.999839 |
| rad62              | 2.32398e-05 | 0.999906 | 3.19798e-05 | 0.999871 |
| rad52              | 1.20851e-05 | 0.999919 | 1.66300e-05 | 0.999888 |
| rad73              | 1.14710e-05 | 0.999930 | 1.57849e-05 | 0.999904 |
| rad30              | 8.93299e-06 | 0.999939 | 1.22925e-05 | 0.999916 |
| rad68syn           | 8.64434e-06 | 0.999948 | 1.18952e-05 | 0.999928 |
| rad64              | 7.61305e-06 | 0.999955 | 1.04761e-05 | 0.999939 |
| rad37              | 5.91727e-06 | 0.999961 | 8.14263e-06 | 0.999947 |
| rad68anti          | 5.50424e-06 | 0.999967 | 7.57424e-06 | 0.999954 |
| rad59              | 5.47385e-06 | 0.999972 | 7.53243e-06 | 0.999962 |
| rad40syn           | 5.36170e-06 | 0.999977 | 7.37810e-06 | 0.999969 |
| rad42              | 5.12142e-06 | 0.999983 | 7.04750e-06 | 0.999976 |
| rad72              | 4.37871e-06 | 0.999987 | 6.02543e-06 | 0.999982 |
| rad40anti          | 4.03125e-06 | 0.999991 | 5.54731e-06 | 0.999988 |
| rad60syn           | 2.51669e-06 | 0.999993 | 3.46315e-06 | 0.999991 |
| rad58              | 1.90267e-06 | 0.999995 | 2.61822e-06 | 0.999994 |
| rad60anti          | 1.87487e-06 | 0.999997 | 2.57996e-06 | 0.999996 |
| rad65              | 1.42564e-06 | 0.999999 | 1.96179e-06 | 0.999998 |
| rad43              | 6.01849e-07 | 0.999999 | 8.28191e-07 | 0.999999 |
| rad61              | 4.34037e-07 | 1.000000 | 5.97267e-07 | 1.000000 |
| rad41              | 1.43043e-07 | 1.000000 | 1.96838e-07 | 1.000000 |
| rad6               | 3.10470e-11 | 1.000000 | 4.27229e-11 | 1.000000 |
| rad7               | 1.83856e-12 | 1.000000 | 2.53000e-12 | 1.000000 |
| rad11              | 1.19274e-12 | 1.000000 | 1.64131e-12 | 1.000000 |
| rad13              | 3.20025e-13 | 1.000000 | 4.40378e-13 | 1.000000 |
| rad23              | 1.90580e-13 | 1.000000 | 2.62253e-13 | 1.000000 |
| rad9               | 1.68450e-13 | 1.000000 | 2.31800e-13 | 1.000000 |
| rad28              | 1.04457e-13 | 1.000000 | 1.43740e-13 | 1.000000 |
| rad45              | 9.37629e-14 | 1.000000 | 1.29025e-13 | 1.000000 |
| rad21              | 7.32852e-14 | 1.000000 | 1.00846e-13 | 1.000000 |
| rad33              | 3.83236e-14 | 1.000000 | 5.27362e-14 | 1.000000 |

|       |             |          |             |         |
|-------|-------------|----------|-------------|---------|
| rad22 | 2.70626e-14 | 1.000000 | 3.72402e-14 | 1.00000 |
| rad20 | 1.97648e-14 | 1.000000 | 2.71979e-14 | 1.00000 |
| rad36 | 1.80416e-14 | 1.000000 | 2.48266e-14 | 1.00000 |
| rad15 | 1.60838e-14 | 1.000000 | 2.21324e-14 | 1.00000 |
| rad47 | 1.25502e-14 | 1.000000 | 1.72700e-14 | 1.00000 |
| rad12 | 1.01281e-14 | 1.000000 | 1.39370e-14 | 1.00000 |
| rad25 | 9.69875e-15 | 1.000000 | 1.33462e-14 | 1.00000 |
| rad8  | 8.17493e-15 | 1.000000 | 1.12493e-14 | 1.00000 |
| rad24 | 5.80458e-15 | 1.000000 | 7.98754e-15 | 1.00000 |
| rad26 | 4.47665e-15 | 1.000000 | 6.16022e-15 | 1.00000 |
| rad10 | 2.44338e-15 | 1.000000 | 3.36228e-15 | 1.00000 |
| rad18 | 2.33651e-15 | 1.000000 | 3.21520e-15 | 1.00000 |
| rad14 | 1.43429e-15 | 1.000000 | 1.97369e-15 | 1.00000 |
| rad3  | 7.89187e-16 | 1.000000 | 1.08598e-15 | 1.00000 |
| rad4  | 5.08708e-16 | 1.000000 | 7.00021e-16 | 1.00000 |
| rad2  | 3.68668e-16 | 1.000000 | 5.07314e-16 | 1.00000 |
| rad5  | 2.83674e-16 | 1.000000 | 3.90357e-16 | 1.00000 |
| rad1  | 7.93832e-17 | 1.000000 | 1.09237e-16 | 1.00000 |
| rad27 | 4.74874e-17 | 1.000000 | 6.53460e-17 | 1.00000 |

0.100000000E-01 Pa, 20.0000000 K

| Rate constant      | True (fraction) |            | Effective (fraction) |            |
|--------------------|-----------------|------------|----------------------|------------|
| Total              | 1.56740e-51     | (1.00 )    | 1.56740e-51          | (1.00 )    |
| Formation of rad11 | 1.56740e-51     | (1.000 )   | 1.56740e-51          | (1.000 )   |
| Formation of rad6  | 3.73945e-60     | (2.39e-09) | 3.73945e-60          | (2.39e-09) |
| H-abstraction      | 1.53631e-76     | (9.80e-26) | 1.53631e-76          | (9.80e-26) |

  

| species       | PYtrue      | Cumul    | PYeffective | Cumul    |
|---------------|-------------|----------|-------------|----------|
| rad6          | 0.921709    | 0.921709 | 0.921709    | 0.921709 |
| Indene+H      | 0.0768278   | 0.998537 | 0.0768278   | 0.998537 |
| C2H2+PhCH2    | 0.000597138 | 0.999134 | 0.000597138 | 0.999134 |
| rad2          | 0.000560588 | 0.999695 | 0.000560588 | 0.999695 |
| rad7          | 0.000101987 | 0.999797 | 0.000101987 | 0.999797 |
| rad28         | 5.14002e-05 | 0.999848 | 5.14002e-05 | 0.999848 |
| rad1          | 3.54305e-05 | 0.999883 | 3.54305e-05 | 0.999883 |
| rad10         | 3.37467e-05 | 0.999917 | 3.37467e-05 | 0.999917 |
| rad11         | 2.78177e-05 | 0.999945 | 2.78177e-05 | 0.999945 |
| PhCCH+CH3     | 1.83183e-05 | 0.999963 | 1.83183e-05 | 0.999963 |
| rad26         | 1.21968e-05 | 0.999975 | 1.21968e-05 | 0.999975 |
| PhCHCCH2+H    | 1.18096e-05 | 0.999987 | 1.18096e-05 | 0.999987 |
| PhCCCH3+H     | 5.05425e-06 | 0.999992 | 5.05425e-06 | 0.999992 |
| rad3          | 4.65162e-06 | 0.999997 | 4.65162e-06 | 0.999997 |
| rad4          | 2.35164e-06 | 0.999999 | 2.35164e-06 | 0.999999 |
| rad13         | 3.82169e-07 | 1.000000 | 3.82169e-07 | 1.000000 |
| rad9          | 1.80279e-07 | 1.000000 | 1.80279e-07 | 1.000000 |
| rad23         | 1.46296e-07 | 1.000000 | 1.46296e-07 | 1.000000 |
| Ph+MeAc       | 4.48322e-08 | 1.00000  | 4.48322e-08 | 1.00000  |
| rad8          | 3.77004e-08 | 1.00000  | 3.77004e-08 | 1.00000  |
| rad30         | 3.13047e-08 | 1.00000  | 3.13047e-08 | 1.00000  |
| PAH9+H        | 6.22631e-09 | 1.00000  | 6.22631e-09 | 1.00000  |
| rad15         | 5.55363e-09 | 1.00000  | 5.55363e-09 | 1.00000  |
| rad35         | 3.29673e-09 | 1.00000  | 3.29673e-09 | 1.00000  |
| rad45         | 2.30808e-09 | 1.00000  | 2.30808e-09 | 1.00000  |
| rad38         | 1.59342e-09 | 1.00000  | 1.59342e-09 | 1.00000  |
| Phenyl+Allene | 1.29963e-09 | 1.00000  | 0.00000     | 1.00000  |
| PAH7+H        | 1.16977e-09 | 1.00000  | 1.16977e-09 | 1.00000  |
| rad33         | 6.99672e-10 | 1.00000  | 6.99672e-10 | 1.00000  |
| rad14         | 3.85494e-10 | 1.00000  | 3.85494e-10 | 1.00000  |
| rad27         | 3.17784e-10 | 1.00000  | 3.17784e-10 | 1.00000  |
| rad25         | 2.57008e-10 | 1.00000  | 2.57008e-10 | 1.00000  |
| rad12         | 1.62562e-10 | 1.00000  | 1.62562e-10 | 1.00000  |
| rad36         | 1.43776e-10 | 1.00000  | 1.43776e-10 | 1.00000  |
| rad39         | 1.04347e-10 | 1.00000  | 1.04347e-10 | 1.00000  |
| rad22         | 9.52338e-11 | 1.00000  | 9.52338e-11 | 1.00000  |
| rad46         | 1.00731e-11 | 1.00000  | 1.00731e-11 | 1.00000  |
| rad60syn      | 2.31932e-13 | 1.00000  | 2.31932e-13 | 1.00000  |
| rad31         | 1.04149e-14 | 1.00000  | 1.04149e-14 | 1.00000  |
| rad20         | 2.80830e-15 | 1.00000  | 2.80830e-15 | 1.00000  |
| rad21         | 1.97549e-15 | 1.00000  | 1.97549e-15 | 1.00000  |
| PhCH2CCH+H    | 1.74632e-15 | 1.00000  | 1.74632e-15 | 1.00000  |
| rad60anti     | 7.45831e-16 | 1.00000  | 7.45831e-16 | 1.00000  |
| rad37         | 3.18595e-16 | 1.00000  | 3.18595e-16 | 1.00000  |
| rad18         | 2.50538e-16 | 1.00000  | 2.50538e-16 | 1.00000  |
| rad24         | 2.19250e-17 | 1.00000  | 2.19250e-17 | 1.00000  |
| rad5          | 5.94328e-19 | 1.00000  | 5.94328e-19 | 1.00000  |
| PAH3+H        | 7.03188e-23 | 1.00000  | 7.03188e-23 | 1.00000  |
| rad59         | 3.46991e-23 | 1.00000  | 3.46991e-23 | 1.00000  |



|                    |             |         |             |         |
|--------------------|-------------|---------|-------------|---------|
| rad50              | 5.90526e-24 | 1.00000 | 5.90526e-24 | 1.00000 |
| Benzene+2-propynyl | 9.80165e-26 | 1.00000 | 9.80165e-26 | 1.00000 |
| rad19syn           | 1.59654e-28 | 1.00000 | 1.59654e-28 | 1.00000 |
| rad54              | 2.69126e-32 | 1.00000 | 2.69126e-32 | 1.00000 |
| PAH10+CH3          | 1.82336e-32 | 1.00000 | 1.82336e-32 | 1.00000 |
| rad52              | 1.16545e-32 | 1.00000 | 1.16545e-32 | 1.00000 |
| rad43              | 4.19031e-33 | 1.00000 | 4.19031e-33 | 1.00000 |
| rad62              | 5.22188e-35 | 1.00000 | 5.22188e-35 | 1.00000 |
| rad51              | 5.52656e-38 | 1.00000 | 5.52656e-38 | 1.00000 |
| rad70              | 1.19306e-39 | 1.00000 | 1.19306e-39 | 1.00000 |
| PhcycC3H3_A+H      | 6.49683e-40 | 1.00000 | 6.49683e-40 | 1.00000 |
| rad55              | 3.36415e-40 | 1.00000 | 3.36415e-40 | 1.00000 |
| rad65              | 3.22121e-42 | 1.00000 | 3.22121e-42 | 1.00000 |
| rad58              | 2.65903e-43 | 1.00000 | 2.65903e-43 | 1.00000 |
| PAH1+H             | 2.24442e-44 | 1.00000 | 2.24442e-44 | 1.00000 |
| rad34              | 2.08659e-46 | 1.00000 | 2.08659e-46 | 1.00000 |
| rad42              | 3.55226e-50 | 1.00000 | 3.55226e-50 | 1.00000 |
| rad41              | 5.05258e-51 | 1.00000 | 5.05258e-51 | 1.00000 |
| rad47              | 1.96879e-51 | 1.00000 | 1.96879e-51 | 1.00000 |

0.100000000E-01 Pa, 30.0000000 K

| Rate constant      | True (fraction)        | Effective (fraction)   |
|--------------------|------------------------|------------------------|
| Total              | 5.03204e-39 (1.00 )    | 5.03204e-39 (1.00 )    |
| Formation of rad11 | 5.03203e-39 (1.000 )   | 5.03203e-39 (1.000 )   |
| Formation of rad6  | 9.92181e-45 (1.97e-06) | 9.92181e-45 (1.97e-06) |
| H-abstraction      | 3.33191e-55 (6.62e-17) | 3.33191e-55 (6.62e-17) |

| species            | PYtrue      | Cumul    | PYeffective | Cumul    |
|--------------------|-------------|----------|-------------|----------|
| rad6               | 0.901618    | 0.901618 | 0.901618    | 0.901618 |
| Indene+H           | 0.0965771   | 0.998195 | 0.0965771   | 0.998195 |
| C2H2+PhCH2         | 0.000725252 | 0.998920 | 0.000725252 | 0.998920 |
| rad2               | 0.000662309 | 0.999583 | 0.000662309 | 0.999583 |
| rad28              | 9.70539e-05 | 0.999680 | 9.70539e-05 | 0.999680 |
| rad7               | 9.18831e-05 | 0.999772 | 9.18831e-05 | 0.999772 |
| PhCCH+CH3          | 4.45579e-05 | 0.999816 | 4.45579e-05 | 0.999816 |
| rad1               | 4.18839e-05 | 0.999858 | 4.18839e-05 | 0.999858 |
| rad10              | 3.84584e-05 | 0.999896 | 3.84584e-05 | 0.999896 |
| rad26              | 2.84424e-05 | 0.999925 | 2.84424e-05 | 0.999925 |
| PhCHCCH2+H         | 2.80702e-05 | 0.999953 | 2.80702e-05 | 0.999953 |
| rad11              | 2.44151e-05 | 0.999977 | 2.44151e-05 | 0.999977 |
| PhCCCH3+H          | 1.43245e-05 | 0.999992 | 1.43245e-05 | 0.999992 |
| rad3               | 4.91138e-06 | 0.999997 | 4.91138e-06 | 0.999997 |
| rad4               | 2.48332e-06 | 0.999999 | 2.48332e-06 | 0.999999 |
| rad13              | 3.68106e-07 | 1.000000 | 3.68106e-07 | 1.000000 |
| rad9               | 2.18615e-07 | 1.000000 | 2.18615e-07 | 1.000000 |
| Ph+MeAc            | 1.33219e-07 | 1.000000 | 1.33219e-07 | 1.000000 |
| rad8               | 1.08079e-07 | 1.000000 | 1.08079e-07 | 1.000000 |
| rad30              | 3.77605e-08 | 1.00000  | 3.77605e-08 | 1.00000  |
| rad23              | 3.38833e-08 | 1.00000  | 3.38833e-08 | 1.00000  |
| PAH9+H             | 7.55617e-09 | 1.00000  | 7.55617e-09 | 1.00000  |
| rad15              | 6.67231e-09 | 1.00000  | 6.67231e-09 | 1.00000  |
| PAH7+H             | 4.66949e-09 | 1.00000  | 4.66949e-09 | 1.00000  |
| rad35              | 4.00668e-09 | 1.00000  | 4.00668e-09 | 1.00000  |
| Phenyl+Allene      | 2.13356e-09 | 1.00000  | 0.00000     | 1.00000  |
| rad38              | 1.93039e-09 | 1.00000  | 1.93039e-09 | 1.00000  |
| rad12              | 8.28193e-10 | 1.00000  | 8.28193e-10 | 1.00000  |
| rad33              | 6.83991e-10 | 1.00000  | 6.83991e-10 | 1.00000  |
| rad45              | 4.77052e-10 | 1.00000  | 4.77052e-10 | 1.00000  |
| rad39              | 4.21138e-10 | 1.00000  | 4.21138e-10 | 1.00000  |
| rad14              | 4.14090e-10 | 1.00000  | 4.14090e-10 | 1.00000  |
| rad27              | 3.70502e-10 | 1.00000  | 3.70502e-10 | 1.00000  |
| rad25              | 2.46569e-10 | 1.00000  | 2.46569e-10 | 1.00000  |
| rad36              | 2.97075e-11 | 1.00000  | 2.97075e-11 | 1.00000  |
| rad22              | 1.95702e-11 | 1.00000  | 1.95702e-11 | 1.00000  |
| rad46              | 1.21507e-11 | 1.00000  | 1.21507e-11 | 1.00000  |
| rad60syn           | 2.60763e-13 | 1.00000  | 2.60763e-13 | 1.00000  |
| rad31              | 1.21600e-14 | 1.00000  | 1.21600e-14 | 1.00000  |
| PhCH2CCH+H         | 3.78732e-15 | 1.00000  | 3.78732e-15 | 1.00000  |
| rad20              | 2.18345e-15 | 1.00000  | 2.18345e-15 | 1.00000  |
| rad60anti          | 1.74088e-15 | 1.00000  | 1.74088e-15 | 1.00000  |
| rad21              | 1.56370e-15 | 1.00000  | 1.56370e-15 | 1.00000  |
| rad37              | 8.19053e-16 | 1.00000  | 8.19053e-16 | 1.00000  |
| rad18              | 9.21452e-17 | 1.00000  | 9.21452e-17 | 1.00000  |
| Benzene+2-propynyl | 6.62139e-17 | 1.00000  | 6.62139e-17 | 1.00000  |
| rad24              | 4.92113e-18 | 1.00000  | 4.92113e-18 | 1.00000  |
| rad5               | 1.26484e-18 | 1.00000  | 1.26484e-18 | 1.00000  |
| PAH3+H             | 1.38319e-22 | 1.00000  | 1.38319e-22 | 1.00000  |

|               |             |         |             |         |
|---------------|-------------|---------|-------------|---------|
| rad59         | 6.86639e-23 | 1.00000 | 6.86639e-23 | 1.00000 |
| rad50         | 1.20025e-23 | 1.00000 | 1.20025e-23 | 1.00000 |
| rad19syn      | 1.71395e-28 | 1.00000 | 1.71395e-28 | 1.00000 |
| rad54         | 1.92321e-32 | 1.00000 | 1.92321e-32 | 1.00000 |
| rad52         | 1.33353e-32 | 1.00000 | 1.33353e-32 | 1.00000 |
| PAH10+CH3     | 1.29375e-32 | 1.00000 | 1.29375e-32 | 1.00000 |
| rad43         | 2.97168e-33 | 1.00000 | 2.97168e-33 | 1.00000 |
| rad62         | 2.80269e-35 | 1.00000 | 2.80269e-35 | 1.00000 |
| rad51         | 3.00373e-38 | 1.00000 | 3.00373e-38 | 1.00000 |
| rad70         | 3.09435e-40 | 1.00000 | 3.09435e-40 | 1.00000 |
| PhcycC3H3_A+H | 1.56339e-40 | 1.00000 | 1.56339e-40 | 1.00000 |
| rad55         | 8.22674e-41 | 1.00000 | 8.22674e-41 | 1.00000 |
| rad65         | 1.05266e-42 | 1.00000 | 1.05266e-42 | 1.00000 |
| rad58         | 6.05153e-44 | 1.00000 | 6.05153e-44 | 1.00000 |
| PAH1+H        | 2.85061e-45 | 1.00000 | 2.85061e-45 | 1.00000 |
| rad34         | 2.32357e-47 | 1.00000 | 2.32357e-47 | 1.00000 |
| rad42         | 2.85904e-51 | 1.00000 | 2.85904e-51 | 1.00000 |
| rad41         | 3.87440e-52 | 1.00000 | 3.87440e-52 | 1.00000 |
| rad47         | 1.58865e-52 | 1.00000 | 1.58865e-52 | 1.00000 |

0.100000000E-01 Pa, 40.0000000 K

| Rate constant      | True (fraction)        | Effective (fraction)   |
|--------------------|------------------------|------------------------|
| Total              | 9.35697e-33 (1.00 )    | 9.35697e-33 (1.00 )    |
| Formation of rad11 | 9.35644e-33 (1.000 )   | 9.35644e-33 (1.000 )   |
| Formation of rad6  | 5.26139e-37 (5.62e-05) | 5.26139e-37 (5.62e-05) |
| H-abstraction      | 1.44763e-44 (1.55e-12) | 1.44763e-44 (1.55e-12) |

| species            | PYtrue      | Cumul    | PYeffective | Cumul    |
|--------------------|-------------|----------|-------------|----------|
| rad6               | 0.881983    | 0.881983 | 0.881983    | 0.881983 |
| Indene+H           | 0.115960    | 0.997943 | 0.115960    | 0.997943 |
| C2H2+PhCH2         | 0.000860049 | 0.998803 | 0.000860049 | 0.998803 |
| rad2               | 0.000673400 | 0.999476 | 0.000673400 | 0.999476 |
| rad28              | 0.000137201 | 0.999614 | 0.000137201 | 0.999614 |
| rad7               | 8.61670e-05 | 0.999700 | 8.61670e-05 | 0.999700 |
| PhCCH+CH3          | 7.43943e-05 | 0.999774 | 7.43943e-05 | 0.999774 |
| PhCHCCH2+H         | 4.70036e-05 | 0.999821 | 4.70036e-05 | 0.999821 |
| rad1               | 4.26376e-05 | 0.999864 | 4.26376e-05 | 0.999864 |
| rad26              | 4.14401e-05 | 0.999905 | 4.14401e-05 | 0.999905 |
| rad10              | 3.83746e-05 | 0.999944 | 3.83746e-05 | 0.999944 |
| PhCCCH3+H          | 2.52467e-05 | 0.999969 | 2.52467e-05 | 0.999969 |
| rad11              | 2.26039e-05 | 0.999992 | 2.26039e-05 | 0.999992 |
| rad3               | 4.79343e-06 | 0.999996 | 4.79343e-06 | 0.999996 |
| rad4               | 2.42444e-06 | 0.999999 | 2.42444e-06 | 0.999999 |
| rad13              | 3.58465e-07 | 0.999999 | 3.58465e-07 | 0.999999 |
| rad9               | 2.65705e-07 | 0.999999 | 2.65705e-07 | 0.999999 |
| Ph+MeAc            | 2.55229e-07 | 1.000000 | 2.55229e-07 | 1.000000 |
| rad8               | 1.93339e-07 | 1.000000 | 1.93339e-07 | 1.000000 |
| rad30              | 4.47493e-08 | 1.000000 | 4.47493e-08 | 1.000000 |
| rad23              | 1.36978e-08 | 1.000000 | 1.36978e-08 | 1.000000 |
| PAH7+H             | 1.07588e-08 | 1.000000 | 1.07588e-08 | 1.000000 |
| PAH9+H             | 8.98333e-09 | 1.000000 | 8.98333e-09 | 1.000000 |
| rad15              | 7.91001e-09 | 1.000000 | 7.91001e-09 | 1.000000 |
| rad35              | 4.76123e-09 | 1.000000 | 4.76123e-09 | 1.000000 |
| Phenyl+Allene      | 3.82782e-09 | 1.000000 | 0.000000    | 1.000000 |
| rad38              | 2.29568e-09 | 1.000000 | 2.29568e-09 | 1.000000 |
| rad12              | 2.03857e-09 | 1.000000 | 2.03857e-09 | 1.000000 |
| rad39              | 9.97678e-10 | 1.000000 | 9.97679e-10 | 1.000000 |
| rad33              | 6.69735e-10 | 1.000000 | 6.69735e-10 | 1.000000 |
| rad14              | 4.11694e-10 | 1.000000 | 4.11694e-10 | 1.000000 |
| rad27              | 3.75456e-10 | 1.000000 | 3.75456e-10 | 1.000000 |
| rad25              | 2.39868e-10 | 1.000000 | 2.39868e-10 | 1.000000 |
| rad45              | 1.81667e-10 | 1.000000 | 1.81667e-10 | 1.000000 |
| rad46              | 1.45511e-11 | 1.000000 | 1.45511e-11 | 1.000000 |
| rad36              | 1.13061e-11 | 1.000000 | 1.13061e-11 | 1.000000 |
| rad22              | 7.45633e-12 | 1.000000 | 7.45633e-12 | 1.000000 |
| Benzene+2-propynyl | 1.54712e-12 | 1.000000 | 1.54712e-12 | 1.000000 |
| rad60syn           | 3.03369e-13 | 1.000000 | 3.03369e-13 | 1.000000 |
| rad31              | 1.23836e-14 | 1.000000 | 1.23836e-14 | 1.000000 |
| PhCH2CCH+H         | 7.47825e-15 | 1.000000 | 7.47825e-15 | 1.000000 |
| rad60anti          | 4.17039e-15 | 1.000000 | 4.17039e-15 | 1.000000 |
| rad20              | 1.99992e-15 | 1.000000 | 1.99992e-15 | 1.000000 |
| rad37              | 1.68402e-15 | 1.000000 | 1.68402e-15 | 1.000000 |
| rad21              | 1.44363e-15 | 1.000000 | 1.44363e-15 | 1.000000 |
| rad18              | 5.74545e-17 | 1.000000 | 5.74545e-17 | 1.000000 |
| rad5               | 2.45161e-18 | 1.000000 | 2.45161e-18 | 1.000000 |
| rad24              | 1.97065e-18 | 1.000000 | 1.97065e-18 | 1.000000 |
| PAH3+H             | 2.55297e-22 | 1.000000 | 2.55297e-22 | 1.000000 |

|               |             |          |             |          |
|---------------|-------------|----------|-------------|----------|
| rad59         | 1.27262e-22 | 1.000000 | 1.27262e-22 | 1.000000 |
| rad50         | 2.26680e-23 | 1.000000 | 2.26680e-23 | 1.000000 |
| rad19syn      | 2.07446e-28 | 1.000000 | 2.07446e-28 | 1.000000 |
| rad54         | 1.80373e-32 | 1.000000 | 1.80373e-32 | 1.000000 |
| rad52         | 1.68287e-32 | 1.000000 | 1.68287e-32 | 1.000000 |
| PAH10+CH3     | 1.21022e-32 | 1.000000 | 1.21022e-32 | 1.000000 |
| rad43         | 2.77866e-33 | 1.000000 | 2.77866e-33 | 1.000000 |
| rad62         | 2.22950e-35 | 1.000000 | 2.22950e-35 | 1.000000 |
| rad51         | 2.40451e-38 | 1.000000 | 2.40451e-38 | 1.000000 |
| rad70         | 1.69009e-40 | 1.000000 | 1.69009e-40 | 1.000000 |
| PhcycC3H3_A+H | 8.25048e-41 | 1.000000 | 8.25048e-41 | 1.000000 |
| rad55         | 4.36740e-41 | 1.000000 | 4.36740e-41 | 1.000000 |
| rad65         | 6.43317e-43 | 1.000000 | 6.43317e-43 | 1.000000 |
| rad58         | 3.10988e-44 | 1.000000 | 3.10988e-44 | 1.000000 |
| PAH1+H        | 1.14021e-45 | 1.000000 | 1.14021e-45 | 1.000000 |
| rad34         | 8.83382e-48 | 1.000000 | 8.83382e-48 | 1.000000 |
| rad42         | 9.66374e-52 | 1.000000 | 9.66374e-52 | 1.000000 |
| rad41         | 1.28990e-52 | 1.000000 | 1.28990e-52 | 1.000000 |
| rad47         | 4.75282e-53 | 1.000000 | 4.75282e-53 | 1.000000 |

0.100000000E-01 Pa, 50.0000000 K

| Rate constant      | True (fraction) |            | Effective (fraction) |            |
|--------------------|-----------------|------------|----------------------|------------|
| Total              | 5.52690e-29     | (1.00 )    | 5.52690e-29          | (1.00 )    |
| Formation of rad11 | 5.52459e-29     | (1.000 )   | 5.52459e-29          | (1.000 )   |
| Formation of rad6  | 2.30840e-32     | (0.000418) | 2.30840e-32          | (0.000418) |
| H-abstraction      | 3.35357e-38     | (6.07e-10) | 3.35357e-38          | (6.07e-10) |

  

| species            | PYtrue      | Cumul    | PYeffective | Cumul    |
|--------------------|-------------|----------|-------------|----------|
| rad6               | 0.862149    | 0.862149 | 0.862149    | 0.862149 |
| Indene+H           | 0.135551    | 0.997700 | 0.135551    | 0.997700 |
| C2H2+PhCH2         | 0.00100660  | 0.998707 | 0.00100660  | 0.998707 |
| rad2               | 0.000661411 | 0.999368 | 0.000661411 | 0.999368 |
| rad28              | 0.000173788 | 0.999542 | 0.000173788 | 0.999542 |
| PhCCH+CH3          | 0.000108744 | 0.999651 | 0.000108744 | 0.999651 |
| rad7               | 8.19507e-05 | 0.999732 | 8.19507e-05 | 0.999732 |
| PhCHCCH2+H         | 6.87332e-05 | 0.999801 | 6.87332e-05 | 0.999801 |
| rad26              | 5.14356e-05 | 0.999853 | 5.14356e-05 | 0.999853 |
| rad1               | 4.19521e-05 | 0.999895 | 4.19521e-05 | 0.999895 |
| PhCCCH3+H          | 3.79290e-05 | 0.999933 | 3.79290e-05 | 0.999933 |
| rad10              | 3.72329e-05 | 0.999970 | 3.72329e-05 | 0.999970 |
| rad11              | 2.13256e-05 | 0.999991 | 2.13256e-05 | 0.999991 |
| rad3               | 4.60743e-06 | 0.999996 | 4.60743e-06 | 0.999996 |
| rad4               | 2.33140e-06 | 0.999998 | 2.33140e-06 | 0.999998 |
| Ph+MeAc            | 4.26748e-07 | 0.999998 | 4.26748e-07 | 0.999998 |
| rad13              | 3.49908e-07 | 0.999999 | 3.49908e-07 | 0.999999 |
| rad9               | 3.24533e-07 | 0.999999 | 3.24533e-07 | 0.999999 |
| rad8               | 2.95607e-07 | 0.999999 | 2.95607e-07 | 0.999999 |
| rad30              | 5.25603e-08 | 0.999999 | 5.25603e-08 | 0.999999 |
| PAH7+H             | 2.04257e-08 | 1.000000 | 2.04257e-08 | 1.000000 |
| PAH9+H             | 1.05874e-08 | 1.000000 | 1.05874e-08 | 1.000000 |
| rad15              | 9.32211e-09 | 1.000000 | 9.32211e-09 | 1.000000 |
| rad23              | 7.06109e-09 | 1.000000 | 7.06109e-09 | 1.000000 |
| Phenyl+Allene      | 6.89357e-09 | 1.000000 | 0.000000    | 1.000000 |
| rad35              | 5.60044e-09 | 1.000000 | 5.60044e-09 | 1.000000 |
| rad12              | 3.91851e-09 | 1.000000 | 3.91851e-09 | 1.000000 |
| rad38              | 2.71029e-09 | 1.000000 | 2.71029e-09 | 1.000000 |
| rad39              | 1.97151e-09 | 1.000000 | 1.97151e-09 | 1.000000 |
| rad33              | 6.55819e-10 | 1.000000 | 6.55819e-10 | 1.000000 |
| Benzene+2-propynyl | 6.06773e-10 | 1.000000 | 6.06773e-10 | 1.000000 |
| rad14              | 4.02123e-10 | 1.000000 | 4.02123e-10 | 1.000000 |
| rad27              | 3.68615e-10 | 1.000000 | 3.68615e-10 | 1.000000 |
| rad25              | 2.34076e-10 | 1.000000 | 2.34076e-10 | 1.000000 |
| rad45              | 9.00239e-11 | 1.000000 | 9.00239e-11 | 1.000000 |
| rad46              | 1.74594e-11 | 1.000000 | 1.74594e-11 | 1.000000 |
| rad36              | 5.59828e-12 | 1.000000 | 5.59828e-12 | 1.000000 |
| rad22              | 3.70029e-12 | 1.000000 | 3.70029e-12 | 1.000000 |
| rad60syn           | 3.76174e-13 | 1.000000 | 3.76174e-13 | 1.000000 |
| PhCH2CCH+H         | 1.63565e-14 | 1.000000 | 1.63565e-14 | 1.000000 |
| rad31              | 1.22522e-14 | 1.000000 | 1.22522e-14 | 1.000000 |
| rad60anti          | 1.11810e-14 | 1.000000 | 1.11810e-14 | 1.000000 |
| rad37              | 3.74209e-15 | 1.000000 | 3.74209e-15 | 1.000000 |
| rad20              | 1.92603e-15 | 1.000000 | 1.92603e-15 | 1.000000 |
| rad21              | 1.39717e-15 | 1.000000 | 1.39717e-15 | 1.000000 |
| rad18              | 4.32059e-17 | 1.000000 | 4.32059e-17 | 1.000000 |
| rad5               | 5.30558e-18 | 1.000000 | 5.30558e-18 | 1.000000 |
| rad24              | 1.01302e-18 | 1.000000 | 1.01302e-18 | 1.000000 |
| PAH3+H             | 5.34089e-22 | 1.000000 | 5.34089e-22 | 1.000000 |

|               |             |          |             |          |
|---------------|-------------|----------|-------------|----------|
| rad59         | 2.66998e-22 | 1.000000 | 2.66998e-22 | 1.000000 |
| rad50         | 4.81807e-23 | 1.000000 | 4.81807e-23 | 1.000000 |
| rad19syn      | 3.22364e-28 | 1.000000 | 3.22364e-28 | 1.000000 |
| rad52         | 2.69019e-32 | 1.000000 | 2.69019e-32 | 1.000000 |
| rad54         | 2.37295e-32 | 1.000000 | 2.37295e-32 | 1.000000 |
| PAH10+CH3     | 1.59195e-32 | 1.000000 | 1.59195e-32 | 1.000000 |
| rad43         | 3.65412e-33 | 1.000000 | 3.65412e-33 | 1.000000 |
| rad62         | 2.65374e-35 | 1.000000 | 2.65374e-35 | 1.000000 |
| rad51         | 2.87063e-38 | 1.000000 | 2.87063e-38 | 1.000000 |
| rad70         | 1.62928e-40 | 1.000000 | 1.62928e-40 | 1.000000 |
| PhcycC3H3_A+H | 7.81585e-41 | 1.000000 | 7.81585e-41 | 1.000000 |
| rad55         | 4.14835e-41 | 1.000000 | 4.14835e-41 | 1.000000 |
| rad65         | 6.58268e-43 | 1.000000 | 6.58268e-43 | 1.000000 |
| rad58         | 2.90608e-44 | 1.000000 | 2.90608e-44 | 1.000000 |
| PAH1+H        | 9.46921e-46 | 1.000000 | 9.46921e-46 | 1.000000 |
| rad34         | 7.18455e-48 | 1.000000 | 7.18455e-48 | 1.000000 |
| rad42         | 7.52615e-52 | 1.000000 | 7.52615e-52 | 1.000000 |
| rad41         | 1.00303e-52 | 1.000000 | 1.00303e-52 | 1.000000 |
| rad47         | 3.15388e-53 | 1.000000 | 3.15388e-53 | 1.000000 |

0.100000000E-01 Pa, 60.0000000 K

| Rate constant      | True (fraction)        | Effective (fraction)   |
|--------------------|------------------------|------------------------|
| Total              | 1.83429e-26 (1.00 )    | 1.83429e-26 (1.00 )    |
| Formation of rad11 | 1.83139e-26 (0.998 )   | 1.83139e-26 (0.998 )   |
| Formation of rad6  | 2.90471e-29 (0.00158 ) | 2.90471e-29 (0.00158 ) |
| H-abstraction      | 5.71259e-34 (3.11e-08) | 5.71259e-34 (3.11e-08) |

| species            | PYtrue      | Cumul    | PYeffective | Cumul    |
|--------------------|-------------|----------|-------------|----------|
| rad6               | 0.841803    | 0.841803 | 0.841803    | 0.841803 |
| Indene+H           | 0.155641    | 0.997444 | 0.155641    | 0.997444 |
| C2H2+PhCH2         | 0.00116778  | 0.998612 | 0.00116778  | 0.998612 |
| rad2               | 0.000642199 | 0.999254 | 0.000642199 | 0.999254 |
| rad28              | 0.000207417 | 0.999461 | 0.000207417 | 0.999461 |
| PhCCH+CH3          | 0.000148888 | 0.999610 | 0.000148888 | 0.999610 |
| PhCHCCH2+H         | 9.38525e-05 | 0.999704 | 9.38525e-05 | 0.999704 |
| rad7               | 7.84442e-05 | 0.999783 | 7.84442e-05 | 0.999783 |
| rad26              | 5.89712e-05 | 0.999842 | 5.89712e-05 | 0.999842 |
| PhCCCH3+H          | 5.27680e-05 | 0.999894 | 5.27680e-05 | 0.999894 |
| rad1               | 4.08216e-05 | 0.999935 | 4.08216e-05 | 0.999935 |
| rad10              | 3.58333e-05 | 0.999971 | 3.58333e-05 | 0.999971 |
| rad11              | 2.02987e-05 | 0.999991 | 2.02987e-05 | 0.999991 |
| rad3               | 4.41365e-06 | 0.999996 | 4.41365e-06 | 0.999996 |
| rad4               | 2.23457e-06 | 0.999998 | 2.23457e-06 | 0.999998 |
| Ph+MeAc            | 6.71024e-07 | 0.999999 | 6.71024e-07 | 0.999999 |
| rad8               | 4.19390e-07 | 0.999999 | 4.19390e-07 | 0.999999 |
| rad9               | 3.97884e-07 | 0.999999 | 3.97884e-07 | 0.999999 |
| rad13              | 3.41646e-07 | 1.000000 | 3.41646e-07 | 1.000000 |
| rad30              | 6.13716e-08 | 1.000000 | 6.13716e-08 | 1.000000 |
| PAH7+H             | 3.52381e-08 | 1.000000 | 3.52381e-08 | 1.000000 |
| Benzene+2-propynyl | 3.11432e-08 | 1.000000 | 3.11432e-08 | 1.000000 |
| PAH9+H             | 1.24117e-08 | 1.000000 | 1.24117e-08 | 1.000000 |
| Phenyl+Allene      | 1.20939e-08 | 1.000000 | 0.000000    | 1.000000 |
| rad15              | 1.09452e-08 | 1.000000 | 1.09452e-08 | 1.000000 |
| rad12              | 6.67544e-09 | 1.000000 | 6.67544e-09 | 1.000000 |
| rad35              | 6.54539e-09 | 1.000000 | 6.54539e-09 | 1.000000 |
| rad23              | 4.18162e-09 | 1.000000 | 4.18162e-09 | 1.000000 |
| rad39              | 3.57103e-09 | 1.000000 | 3.57103e-09 | 1.000000 |
| rad38              | 3.18600e-09 | 1.000000 | 3.18600e-09 | 1.000000 |
| rad33              | 6.41797e-10 | 1.000000 | 6.41797e-10 | 1.000000 |
| rad14              | 3.90617e-10 | 1.000000 | 3.90617e-10 | 1.000000 |
| rad27              | 3.58229e-10 | 1.000000 | 3.58229e-10 | 1.000000 |
| rad25              | 2.28555e-10 | 1.000000 | 2.28555e-10 | 1.000000 |
| rad45              | 5.17928e-11 | 1.000000 | 5.17928e-11 | 1.000000 |
| rad46              | 2.10040e-11 | 1.000000 | 2.10040e-11 | 1.000000 |
| rad36              | 3.21816e-12 | 1.000000 | 3.21816e-12 | 1.000000 |
| rad22              | 2.13282e-12 | 1.000000 | 2.13282e-12 | 1.000000 |
| rad60syn           | 4.91238e-13 | 1.000000 | 4.91238e-13 | 1.000000 |
| PhCH2CCH+H         | 4.54189e-14 | 1.000000 | 4.54189e-14 | 1.000000 |
| rad60anti          | 2.73368e-14 | 1.000000 | 2.73368e-14 | 1.000000 |
| rad31              | 1.20287e-14 | 1.000000 | 1.20287e-14 | 1.000000 |
| rad37              | 1.03970e-14 | 1.000000 | 1.03970e-14 | 1.000000 |
| rad20              | 1.89810e-15 | 1.000000 | 1.89810e-15 | 1.000000 |
| rad21              | 1.38202e-15 | 1.000000 | 1.38202e-15 | 1.000000 |
| rad18              | 3.56761e-17 | 1.000000 | 3.56761e-17 | 1.000000 |
| rad5               | 1.46020e-17 | 1.000000 | 1.46020e-17 | 1.000000 |
| rad24              | 6.00134e-19 | 1.000000 | 6.00134e-19 | 1.000000 |
| PAH3+H             | 1.43587e-21 | 1.000000 | 1.43587e-21 | 1.000000 |

|               |             |          |             |          |
|---------------|-------------|----------|-------------|----------|
| rad59         | 7.19219e-22 | 1.000000 | 7.19219e-22 | 1.000000 |
| rad50         | 1.30948e-22 | 1.000000 | 1.30948e-22 | 1.000000 |
| rad19syn      | 7.02518e-28 | 1.000000 | 7.02518e-28 | 1.000000 |
| rad52         | 5.97739e-32 | 1.000000 | 5.97739e-32 | 1.000000 |
| rad54         | 4.63251e-32 | 1.000000 | 4.63251e-32 | 1.000000 |
| PAH10+CH3     | 3.11380e-32 | 1.000000 | 3.11380e-32 | 1.000000 |
| rad43         | 7.14592e-33 | 1.000000 | 7.14592e-33 | 1.000000 |
| rad62         | 4.87436e-35 | 1.000000 | 4.87436e-35 | 1.000000 |
| rad51         | 5.27677e-38 | 1.000000 | 5.27677e-38 | 1.000000 |
| rad70         | 2.65744e-40 | 1.000000 | 2.65744e-40 | 1.000000 |
| PhcycC3H3_A+H | 1.26384e-40 | 1.000000 | 1.26384e-40 | 1.000000 |
| rad55         | 6.71590e-41 | 1.000000 | 6.71590e-41 | 1.000000 |
| rad65         | 1.10765e-42 | 1.000000 | 1.10765e-42 | 1.000000 |
| rad58         | 4.66774e-44 | 1.000000 | 4.66774e-44 | 1.000000 |
| PAH1+H        | 1.44633e-45 | 1.000000 | 1.44633e-45 | 1.000000 |
| rad34         | 1.09062e-47 | 1.000000 | 1.09062e-47 | 1.000000 |
| rad42         | 1.13615e-51 | 1.000000 | 1.13615e-51 | 1.000000 |
| rad41         | 1.52856e-52 | 1.000000 | 1.52856e-52 | 1.000000 |
| rad47         | 3.99503e-53 | 1.000000 | 3.99503e-53 | 1.000000 |

0.100000000E-01 Pa, 70.0000000 K

| Rate constant      | True (fraction)        | Effective (fraction)   |
|--------------------|------------------------|------------------------|
| Total              | 1.17336e-24 (1.00 )    | 1.17336e-24 (1.00 )    |
| Formation of rad11 | 1.16857e-24 (0.996 )   | 1.16857e-24 (0.996 )   |
| Formation of rad6  | 4.79505e-27 (0.00409 ) | 4.79505e-27 (0.00409 ) |
| H-abstraction      | 5.89821e-31 (5.03e-07) | 5.89821e-31 (5.03e-07) |

| species            | PYtrue      | Cumul    | PYeffective | Cumul    |
|--------------------|-------------|----------|-------------|----------|
| rad6               | 0.820725    | 0.820725 | 0.820725    | 0.820725 |
| Indene+H           | 0.176438    | 0.997162 | 0.176438    | 0.997162 |
| C2H2+PhCH2         | 0.00134668  | 0.998509 | 0.00134668  | 0.998509 |
| rad2               | 0.000620522 | 0.999130 | 0.000620522 | 0.999130 |
| rad28              | 0.000238182 | 0.999368 | 0.000238182 | 0.999368 |
| PhCCH+CH3          | 0.000196461 | 0.999564 | 0.000196461 | 0.999564 |
| PhCHCCH2+H         | 0.000123201 | 0.999688 | 0.000123201 | 0.999688 |
| rad7               | 7.53193e-05 | 0.999763 | 7.53193e-05 | 0.999763 |
| PhCCCH3+H          | 7.03199e-05 | 0.999833 | 7.03199e-05 | 0.999833 |
| rad26              | 6.44915e-05 | 0.999898 | 6.44915e-05 | 0.999898 |
| rad1               | 3.95420e-05 | 0.999937 | 3.95420e-05 | 0.999937 |
| rad10              | 3.43899e-05 | 0.999972 | 3.43899e-05 | 0.999972 |
| rad11              | 1.94087e-05 | 0.999991 | 1.94087e-05 | 0.999991 |
| rad3               | 4.22529e-06 | 0.999995 | 4.22529e-06 | 0.999995 |
| rad4               | 2.14057e-06 | 0.999997 | 2.14057e-06 | 0.999997 |
| Ph+MeAc            | 1.02289e-06 | 0.999998 | 1.02289e-06 | 0.999998 |
| rad8               | 5.70961e-07 | 0.999999 | 5.70961e-07 | 0.999999 |
| Benzene+2-propynyl | 5.02676e-07 | 0.999999 | 5.02676e-07 | 0.999999 |
| rad9               | 4.89787e-07 | 1.000000 | 4.89787e-07 | 1.000000 |
| rad13              | 3.33351e-07 | 1.000000 | 3.33351e-07 | 1.000000 |
| rad30              | 7.13985e-08 | 1.000000 | 7.13985e-08 | 1.000000 |
| PAH7+H             | 5.75993e-08 | 1.000000 | 5.75993e-08 | 1.000000 |
| Phenyl+Allene      | 2.07283e-08 | 1.000000 | 0.000000    | 1.000000 |
| PAH9+H             | 1.45073e-08 | 1.000000 | 1.45073e-08 | 1.000000 |
| rad15              | 1.28263e-08 | 1.000000 | 1.28263e-08 | 1.000000 |
| rad12              | 1.06180e-08 | 1.000000 | 1.06180e-08 | 1.000000 |
| rad35              | 7.62017e-09 | 1.000000 | 7.62017e-09 | 1.000000 |
| rad39              | 6.16939e-09 | 1.000000 | 6.16939e-09 | 1.000000 |
| rad38              | 3.73725e-09 | 1.000000 | 3.73725e-09 | 1.000000 |
| rad23              | 2.70959e-09 | 1.000000 | 2.70959e-09 | 1.000000 |
| rad33              | 6.27386e-10 | 1.000000 | 6.27386e-10 | 1.000000 |
| rad14              | 3.78580e-10 | 1.000000 | 3.78580e-10 | 1.000000 |
| rad27              | 3.46706e-10 | 1.000000 | 3.46706e-10 | 1.000000 |
| rad25              | 2.23048e-10 | 1.000000 | 2.23048e-10 | 1.000000 |
| rad45              | 3.28133e-11 | 1.000000 | 3.28133e-11 | 1.000000 |
| rad46              | 2.53652e-11 | 1.000000 | 2.53652e-11 | 1.000000 |
| rad36              | 2.03726e-12 | 1.000000 | 2.03726e-12 | 1.000000 |
| rad22              | 1.35417e-12 | 1.000000 | 1.35417e-12 | 1.000000 |
| rad60syn           | 6.62769e-13 | 1.000000 | 6.62769e-13 | 1.000000 |
| PhCH2CCH+H         | 1.79465e-13 | 1.000000 | 1.79465e-13 | 1.000000 |
| rad60anti          | 5.81276e-14 | 1.000000 | 5.81276e-14 | 1.000000 |
| rad37              | 4.06310e-14 | 1.000000 | 4.06310e-14 | 1.000000 |
| rad31              | 1.17868e-14 | 1.000000 | 1.17868e-14 | 1.000000 |
| rad20              | 1.89417e-15 | 1.000000 | 1.89417e-15 | 1.000000 |
| rad21              | 1.38347e-15 | 1.000000 | 1.38347e-15 | 1.000000 |
| rad5               | 5.83277e-17 | 1.000000 | 5.83277e-17 | 1.000000 |
| rad18              | 3.11141e-17 | 1.000000 | 3.11141e-17 | 1.000000 |
| rad24              | 3.89731e-19 | 1.000000 | 3.89731e-19 | 1.000000 |
| PAH3+H             | 5.70914e-21 | 1.000000 | 5.70914e-21 | 1.000000 |

|               |             |         |             |         |
|---------------|-------------|---------|-------------|---------|
| rad59         | 2.86348e-21 | 1.00000 | 2.86348e-21 | 1.00000 |
| rad50         | 5.23993e-22 | 1.00000 | 5.23993e-22 | 1.00000 |
| rad19syn      | 2.41121e-27 | 1.00000 | 2.41121e-27 | 1.00000 |
| rad52         | 2.07879e-31 | 1.00000 | 2.07879e-31 | 1.00000 |
| rad54         | 1.48016e-31 | 1.00000 | 1.48016e-31 | 1.00000 |
| PAH10+CH3     | 9.99055e-32 | 1.00000 | 9.99055e-32 | 1.00000 |
| rad43         | 2.29244e-32 | 1.00000 | 2.29244e-32 | 1.00000 |
| rad62         | 1.50406e-34 | 1.00000 | 1.50406e-34 | 1.00000 |
| rad51         | 1.62622e-37 | 1.00000 | 1.62622e-37 | 1.00000 |
| rad70         | 7.70389e-40 | 1.00000 | 7.70389e-40 | 1.00000 |
| PhcycC3H3_A+H | 3.65149e-40 | 1.00000 | 3.65149e-40 | 1.00000 |
| rad55         | 1.94107e-40 | 1.00000 | 1.94107e-40 | 1.00000 |
| rad65         | 3.25635e-42 | 1.00000 | 3.25635e-42 | 1.00000 |
| rad58         | 1.34517e-43 | 1.00000 | 1.34517e-43 | 1.00000 |
| PAH1+H        | 4.12350e-45 | 1.00000 | 4.12350e-45 | 1.00000 |
| rad34         | 3.11648e-47 | 1.00000 | 3.11648e-47 | 1.00000 |
| rad42         | 3.31470e-51 | 1.00000 | 3.31470e-51 | 1.00000 |
| rad41         | 4.58579e-52 | 1.00000 | 4.58579e-52 | 1.00000 |
| rad47         | 9.67854e-53 | 1.00000 | 9.67854e-53 | 1.00000 |

0.100000000E-01 Pa, 80.0000000 K

| Rate constant      | True (fraction)        | Effective (fraction)   |
|--------------------|------------------------|------------------------|
| Total              | 2.68112e-23 (1.00 )    | 2.68112e-23 (1.00 )    |
| Formation of rad11 | 2.65890e-23 (0.992 )   | 2.65889e-23 (0.992 )   |
| Formation of rad6  | 2.22189e-25 (0.00829 ) | 2.22189e-25 (0.00829 ) |
| H-abstraction      | 1.05871e-28 (3.95e-06) | 1.05871e-28 (3.95e-06) |

| species            | PYtrue      | Cumul    | PYeffective | Cumul    |
|--------------------|-------------|----------|-------------|----------|
| rad6               | 0.798689    | 0.798689 | 0.798689    | 0.798689 |
| Indene+H           | 0.198153    | 0.996842 | 0.198153    | 0.996842 |
| C2H2+PhCH2         | 0.00154750  | 0.998390 | 0.00154750  | 0.998390 |
| rad2               | 0.000597931 | 0.998987 | 0.000597931 | 0.998987 |
| rad28              | 0.000265967 | 0.999253 | 0.000265967 | 0.999253 |
| PhCCH+CH3          | 0.000253636 | 0.999507 | 0.000253636 | 0.999507 |
| PhCHCCH2+H         | 0.000157913 | 0.999665 | 0.000157913 | 0.999665 |
| PhCCH3+H           | 9.13360e-05 | 0.999756 | 9.13360e-05 | 0.999756 |
| rad7               | 7.24028e-05 | 0.999829 | 7.24028e-05 | 0.999829 |
| rad26              | 6.83458e-05 | 0.999897 | 6.83458e-05 | 0.999897 |
| rad1               | 3.82088e-05 | 0.999935 | 3.82088e-05 | 0.999935 |
| rad10              | 3.29594e-05 | 0.999968 | 3.29594e-05 | 0.999968 |
| rad11              | 1.85968e-05 | 0.999987 | 1.85968e-05 | 0.999987 |
| rad3               | 4.04392e-06 | 0.999991 | 4.04392e-06 | 0.999991 |
| Benzene+2-propynyl | 3.94877e-06 | 0.999995 | 3.94877e-06 | 0.999995 |
| rad4               | 2.05016e-06 | 0.999997 | 2.05016e-06 | 0.999997 |
| Ph+MeAc            | 1.53496e-06 | 0.999998 | 1.53496e-06 | 0.999998 |
| rad8               | 7.58941e-07 | 0.999999 | 7.58941e-07 | 0.999999 |
| rad9               | 6.06265e-07 | 1.000000 | 6.06265e-07 | 1.000000 |
| rad13              | 3.24820e-07 | 1.000000 | 3.24820e-07 | 1.000000 |
| PAH7+H             | 9.11378e-08 | 1.000000 | 9.11379e-08 | 1.000000 |
| rad30              | 8.29457e-08 | 1.000000 | 8.29458e-08 | 1.000000 |
| Phenyl+Allene      | 3.49890e-08 | 1.000000 | 0.000000    | 1.000000 |
| PAH9+H             | 1.69468e-08 | 1.000000 | 1.69468e-08 | 1.000000 |
| rad12              | 1.61921e-08 | 1.000000 | 1.61921e-08 | 1.000000 |
| rad15              | 1.50334e-08 | 1.000000 | 1.50334e-08 | 1.000000 |
| rad39              | 1.03647e-08 | 1.000000 | 1.03647e-08 | 1.000000 |
| rad35              | 8.85836e-09 | 1.000000 | 8.85836e-09 | 1.000000 |
| rad38              | 4.38476e-09 | 1.000000 | 4.38476e-09 | 1.000000 |
| rad23              | 1.86972e-09 | 1.000000 | 1.86972e-09 | 1.000000 |
| rad33              | 6.12344e-10 | 1.000000 | 6.12344e-10 | 1.000000 |
| rad14              | 3.66361e-10 | 1.000000 | 3.66361e-10 | 1.000000 |
| rad27              | 3.34793e-10 | 1.000000 | 3.34793e-10 | 1.000000 |
| rad25              | 2.17402e-10 | 1.000000 | 2.17402e-10 | 1.000000 |
| rad46              | 3.08162e-11 | 1.000000 | 3.08162e-11 | 1.000000 |
| rad45              | 2.22336e-11 | 1.000000 | 2.22336e-11 | 1.000000 |
| rad36              | 1.37946e-12 | 1.000000 | 1.37946e-12 | 1.000000 |
| rad22              | 9.19787e-13 | 1.000000 | 9.19787e-13 | 1.000000 |
| rad60syn           | 9.14960e-13 | 1.000000 | 9.14960e-13 | 1.000000 |
| PhCH2CCH+H         | 8.91717e-13 | 1.000000 | 8.91717e-13 | 1.000000 |
| rad37              | 2.07500e-13 | 1.000000 | 2.07500e-13 | 1.000000 |
| rad60anti          | 1.11116e-13 | 1.000000 | 1.11116e-13 | 1.000000 |
| rad31              | 1.15478e-14 | 1.000000 | 1.15478e-14 | 1.000000 |
| rad20              | 1.90415e-15 | 1.000000 | 1.90415e-15 | 1.000000 |
| rad21              | 1.39468e-15 | 1.000000 | 1.39468e-15 | 1.000000 |
| rad5               | 3.32642e-16 | 1.000000 | 3.32642e-16 | 1.000000 |
| rad18              | 2.81008e-17 | 1.000000 | 2.81008e-17 | 1.000000 |
| rad24              | 2.69858e-19 | 1.000000 | 2.69858e-19 | 1.000000 |
| PAH3+H             | 3.66292e-20 | 1.000000 | 3.66292e-20 | 1.000000 |

|               |             |         |             |         |
|---------------|-------------|---------|-------------|---------|
| rad59         | 1.83075e-20 | 1.00000 | 1.83075e-20 | 1.00000 |
| rad50         | 3.23156e-21 | 1.00000 | 3.23156e-21 | 1.00000 |
| rad19syn      | 1.56091e-26 | 1.00000 | 1.56091e-26 | 1.00000 |
| rad52         | 1.35617e-30 | 1.00000 | 1.35617e-30 | 1.00000 |
| rad54         | 9.10104e-31 | 1.00000 | 9.10104e-31 | 1.00000 |
| PAH10+CH3     | 6.18430e-31 | 1.00000 | 6.18430e-31 | 1.00000 |
| rad43         | 1.41908e-31 | 1.00000 | 1.41908e-31 | 1.00000 |
| rad62         | 9.10152e-34 | 1.00000 | 9.10152e-34 | 1.00000 |
| rad51         | 9.80661e-37 | 1.00000 | 9.80661e-37 | 1.00000 |
| rad70         | 4.54309e-39 | 1.00000 | 4.54309e-39 | 1.00000 |
| PhcycC3H3_A+H | 2.15338e-39 | 1.00000 | 2.15338e-39 | 1.00000 |
| rad55         | 1.14456e-39 | 1.00000 | 1.14456e-39 | 1.00000 |
| rad65         | 1.92584e-41 | 1.00000 | 1.92584e-41 | 1.00000 |
| rad58         | 7.93425e-43 | 1.00000 | 7.93425e-43 | 1.00000 |
| PAH1+H        | 2.46801e-44 | 1.00000 | 2.46801e-44 | 1.00000 |
| rad34         | 1.87966e-46 | 1.00000 | 1.87966e-46 | 1.00000 |
| rad42         | 2.10732e-50 | 1.00000 | 2.10732e-50 | 1.00000 |
| rad41         | 3.14447e-51 | 1.00000 | 3.14447e-51 | 1.00000 |
| rad47         | 5.00892e-52 | 1.00000 | 5.00892e-52 | 1.00000 |

0.100000000E-01 Pa, 90.0000000 K

| Rate constant      | True (fraction)        | Effective (fraction)   |
|--------------------|------------------------|------------------------|
| Total              | 3.08379e-22 (1.00 )    | 3.08379e-22 (1.00 )    |
| Formation of rad11 | 3.03962e-22 (0.986 )   | 3.03962e-22 (0.986 )   |
| Formation of rad6  | 4.41076e-24 (0.0143 )  | 4.41076e-24 (0.0143 )  |
| H-abstraction      | 5.92916e-27 (1.92e-05) | 5.92916e-27 (1.92e-05) |

| species            | PYtrue      | Cumul    | PYeffective | Cumul    |
|--------------------|-------------|----------|-------------|----------|
| rad6               | 0.775461    | 0.775461 | 0.775461    | 0.775461 |
| Indene+H           | 0.221003    | 0.996464 | 0.221003    | 0.996464 |
| C2H2+PhCH2         | 0.00177549  | 0.998239 | 0.00177549  | 0.998239 |
| rad2               | 0.000574885 | 0.998814 | 0.000574885 | 0.998814 |
| PhCCH+CH3          | 0.000323162 | 0.999137 | 0.000323162 | 0.999137 |
| rad28              | 0.000290513 | 0.999428 | 0.000290513 | 0.999428 |
| PhCHCCH2+H         | 0.000199417 | 0.999627 | 0.000199417 | 0.999627 |
| PhCCH3+H           | 0.000116764 | 0.999744 | 0.000116764 | 0.999744 |
| rad26              | 7.08055e-05 | 0.999815 | 7.08055e-05 | 0.999815 |
| rad7               | 6.95880e-05 | 0.999884 | 6.95880e-05 | 0.999884 |
| rad1               | 3.68492e-05 | 0.999921 | 3.68492e-05 | 0.999921 |
| rad10              | 3.15492e-05 | 0.999953 | 3.15492e-05 | 0.999953 |
| Benzene+2-propynyl | 1.92269e-05 | 0.999972 | 1.92269e-05 | 0.999972 |
| rad11              | 1.78278e-05 | 0.999990 | 1.78278e-05 | 0.999990 |
| rad3               | 3.86796e-06 | 0.999994 | 3.86796e-06 | 0.999994 |
| Ph+MeAc            | 2.28345e-06 | 0.999996 | 2.28345e-06 | 0.999996 |
| rad4               | 1.96252e-06 | 0.999998 | 1.96252e-06 | 0.999998 |
| rad8               | 9.94521e-07 | 0.999999 | 9.94521e-07 | 0.999999 |
| rad9               | 7.55661e-07 | 1.000000 | 7.55661e-07 | 1.000000 |
| rad13              | 3.15895e-07 | 1.00000  | 3.15895e-07 | 1.00000  |
| PAH7+H             | 1.41083e-07 | 1.00000  | 1.41083e-07 | 1.00000  |
| rad30              | 9.64088e-08 | 1.00000  | 9.64088e-08 | 1.00000  |
| Phenyl+Allene      | 5.84105e-08 | 1.00000  | 0.00000     | 1.00000  |
| rad12              | 2.40081e-08 | 1.00000  | 2.40081e-08 | 1.00000  |
| PAH9+H             | 1.98258e-08 | 1.00000  | 1.98258e-08 | 1.00000  |
| rad15              | 1.76568e-08 | 1.00000  | 1.76568e-08 | 1.00000  |
| rad39              | 1.70690e-08 | 1.00000  | 1.70690e-08 | 1.00000  |
| rad35              | 1.03036e-08 | 1.00000  | 1.03036e-08 | 1.00000  |
| rad38              | 5.15609e-09 | 1.00000  | 5.15609e-09 | 1.00000  |
| rad23              | 1.35105e-09 | 1.00000  | 1.35105e-09 | 1.00000  |
| rad33              | 5.96442e-10 | 1.00000  | 5.96442e-10 | 1.00000  |
| rad14              | 3.53972e-10 | 1.00000  | 3.53972e-10 | 1.00000  |
| rad27              | 3.22682e-10 | 1.00000  | 3.22682e-10 | 1.00000  |
| rad25              | 2.11505e-10 | 1.00000  | 2.11505e-10 | 1.00000  |
| rad46              | 3.77435e-11 | 1.00000  | 3.77435e-11 | 1.00000  |
| rad45              | 1.58242e-11 | 1.00000  | 1.58242e-11 | 1.00000  |
| PhCH2CCH+H         | 4.33064e-12 | 1.00000  | 4.33064e-12 | 1.00000  |
| rad60syn           | 1.28744e-12 | 1.00000  | 1.28744e-12 | 1.00000  |
| rad37              | 1.07395e-12 | 1.00000  | 1.07395e-12 | 1.00000  |
| rad36              | 9.81252e-13 | 1.00000  | 9.81252e-13 | 1.00000  |
| rad22              | 6.56382e-13 | 1.00000  | 6.56382e-13 | 1.00000  |
| rad60anti          | 1.97969e-13 | 1.00000  | 1.97969e-13 | 1.00000  |
| rad31              | 1.13155e-14 | 1.00000  | 1.13155e-14 | 1.00000  |
| rad5               | 2.10247e-15 | 1.00000  | 2.10247e-15 | 1.00000  |
| rad20              | 1.92244e-15 | 1.00000  | 1.92244e-15 | 1.00000  |
| rad21              | 1.41182e-15 | 1.00000  | 1.41182e-15 | 1.00000  |
| rad18              | 2.59842e-17 | 1.00000  | 2.59842e-17 | 1.00000  |
| PAH3+H             | 3.16467e-19 | 1.00000  | 3.16467e-19 | 1.00000  |
| rad24              | 1.95851e-19 | 1.00000  | 1.95851e-19 | 1.00000  |

|               |             |         |             |         |
|---------------|-------------|---------|-------------|---------|
| rad59         | 1.54952e-19 | 1.00000 | 1.54952e-19 | 1.00000 |
| rad50         | 2.43273e-20 | 1.00000 | 2.43273e-20 | 1.00000 |
| rad19syn      | 3.58825e-25 | 1.00000 | 3.58825e-25 | 1.00000 |
| rad52         | 2.94271e-29 | 1.00000 | 2.94271e-29 | 1.00000 |
| rad54         | 2.56447e-29 | 1.00000 | 2.56447e-29 | 1.00000 |
| PAH10+CH3     | 1.69172e-29 | 1.00000 | 1.69172e-29 | 1.00000 |
| rad43         | 3.94676e-30 | 1.00000 | 3.94676e-30 | 1.00000 |
| rad62         | 2.15186e-32 | 1.00000 | 2.15186e-32 | 1.00000 |
| rad51         | 2.31373e-35 | 1.00000 | 2.31373e-35 | 1.00000 |
| rad70         | 1.07709e-37 | 1.00000 | 1.07709e-37 | 1.00000 |
| PhcycC3H3_A+H | 5.11743e-38 | 1.00000 | 5.11743e-38 | 1.00000 |
| rad55         | 2.71867e-38 | 1.00000 | 2.71867e-38 | 1.00000 |
| rad65         | 4.54409e-40 | 1.00000 | 4.54409e-40 | 1.00000 |
| rad58         | 1.88941e-41 | 1.00000 | 1.88941e-41 | 1.00000 |
| PAH1+H        | 6.06874e-43 | 1.00000 | 6.06874e-43 | 1.00000 |
| rad34         | 4.67599e-45 | 1.00000 | 4.67599e-45 | 1.00000 |
| rad42         | 5.80173e-49 | 1.00000 | 5.80174e-49 | 1.00000 |
| rad41         | 1.01158e-49 | 1.00000 | 1.01158e-49 | 1.00000 |
| rad47         | 1.07932e-50 | 1.00000 | 1.07932e-50 | 1.00000 |

0.100000000E-01 Pa, 100.000000 K

| Rate constant      | True (fraction)        | Effective (fraction)   |
|--------------------|------------------------|------------------------|
| Total              | 2.19347e-21 (1.00 )    | 2.19347e-21 (1.00 )    |
| Formation of rad11 | 2.14498e-21 (0.978 )   | 2.14497e-21 (0.978 )   |
| Formation of rad6  | 4.83503e-23 (0.0220 )  | 4.83503e-23 (0.0220 )  |
| H-abstraction      | 1.47101e-25 (6.71e-05) | 1.47101e-25 (6.71e-05) |

| species            | PYtrue      | Cumul    | PYeffective | Cumul    |
|--------------------|-------------|----------|-------------|----------|
| rad6               | 0.750819    | 0.750819 | 0.750819    | 0.750819 |
| Indene+H           | 0.245176    | 0.995994 | 0.245176    | 0.995994 |
| C2H2+PhCH2         | 0.00203657  | 0.998031 | 0.00203657  | 0.998031 |
| rad2               | 0.000551442 | 0.998582 | 0.000551442 | 0.998582 |
| PhCCH+CH3          | 0.000408304 | 0.998991 | 0.000408304 | 0.998991 |
| rad28              | 0.000311478 | 0.999302 | 0.000311478 | 0.999302 |
| PhCHCCH2+H         | 0.000249378 | 0.999551 | 0.000249378 | 0.999551 |
| PhCCCH3+H          | 0.000147719 | 0.999699 | 0.000147719 | 0.999699 |
| rad26              | 7.20818e-05 | 0.999771 | 7.20818e-05 | 0.999771 |
| Benzene+2-propynyl | 6.70630e-05 | 0.999838 | 6.70630e-05 | 0.999838 |
| rad7               | 6.68027e-05 | 0.999905 | 6.68027e-05 | 0.999905 |
| rad1               | 3.54656e-05 | 0.999941 | 3.54656e-05 | 0.999941 |
| rad10              | 3.01512e-05 | 0.999971 | 3.01512e-05 | 0.999971 |
| rad11              | 1.70784e-05 | 0.999988 | 1.70784e-05 | 0.999988 |
| rad3               | 3.69512e-06 | 0.999991 | 3.69512e-06 | 0.999991 |
| Ph+MeAc            | 3.37407e-06 | 0.999995 | 3.37407e-06 | 0.999995 |
| rad4               | 1.87648e-06 | 0.999997 | 1.87648e-06 | 0.999997 |
| rad8               | 1.29140e-06 | 0.999998 | 1.29140e-06 | 0.999998 |
| rad9               | 9.48847e-07 | 0.999999 | 9.48847e-07 | 0.999999 |
| rad13              | 3.06448e-07 | 0.999999 | 3.06448e-07 | 0.999999 |
| PAH7+H             | 2.14598e-07 | 0.999999 | 2.14598e-07 | 0.999999 |
| rad30              | 1.12259e-07 | 1.000000 | 1.12259e-07 | 1.000000 |
| Phenyl+Allene      | 9.64652e-08 | 1.000000 | 0.000000    | 1.000000 |
| rad12              | 3.48582e-08 | 1.000000 | 3.48582e-08 | 1.000000 |
| rad39              | 2.76024e-08 | 1.000000 | 2.76024e-08 | 1.000000 |
| PAH9+H             | 2.32607e-08 | 1.000000 | 2.32607e-08 | 1.000000 |
| rad15              | 2.08067e-08 | 1.000000 | 2.08067e-08 | 1.000000 |
| rad35              | 1.20082e-08 | 1.000000 | 1.20082e-08 | 1.000000 |
| rad38              | 6.08531e-09 | 1.000000 | 6.08531e-09 | 1.000000 |
| rad23              | 1.01088e-09 | 1.000000 | 1.01088e-09 | 1.000000 |
| rad33              | 5.79469e-10 | 1.000000 | 5.79469e-10 | 1.000000 |
| rad14              | 3.41319e-10 | 1.000000 | 3.41319e-10 | 1.000000 |
| rad27              | 3.10366e-10 | 1.000000 | 3.10367e-10 | 1.000000 |
| rad25              | 2.05264e-10 | 1.000000 | 2.05264e-10 | 1.000000 |
| rad46              | 4.66624e-11 | 1.000000 | 4.66624e-11 | 1.000000 |
| PhCH2CCH+H         | 1.81824e-11 | 1.000000 | 1.81824e-11 | 1.000000 |
| rad45              | 1.16887e-11 | 1.000000 | 1.16887e-11 | 1.000000 |
| rad37              | 4.76342e-12 | 1.000000 | 4.76342e-12 | 1.000000 |
| rad60syn           | 1.84020e-12 | 1.000000 | 1.84020e-12 | 1.000000 |
| rad36              | 7.24522e-13 | 1.000000 | 7.24522e-13 | 1.000000 |
| rad22              | 4.86243e-13 | 1.000000 | 4.86243e-13 | 1.000000 |
| rad60anti          | 3.36840e-13 | 1.000000 | 3.36840e-13 | 1.000000 |
| rad5               | 1.17858e-14 | 1.000000 | 1.17858e-14 | 1.000000 |
| rad31              | 1.10883e-14 | 1.000000 | 1.10883e-14 | 1.000000 |
| rad20              | 1.94538e-15 | 1.000000 | 1.94538e-15 | 1.000000 |
| rad21              | 1.43237e-15 | 1.000000 | 1.43237e-15 | 1.000000 |
| rad18              | 2.44227e-17 | 1.000000 | 2.44227e-17 | 1.000000 |
| PAH3+H             | 2.58090e-18 | 1.000000 | 2.58090e-18 | 1.000000 |
| rad59              | 1.21918e-18 | 1.000000 | 1.21918e-18 | 1.000000 |



|               |             |          |             |          |
|---------------|-------------|----------|-------------|----------|
| rad50         | 1.66498e-19 | 1.000000 | 1.66498e-19 | 1.000000 |
| rad24         | 1.47290e-19 | 1.000000 | 1.47290e-19 | 1.000000 |
| rad19syn      | 1.98002e-23 | 1.000000 | 1.98002e-23 | 1.000000 |
| rad54         | 4.13654e-27 | 1.000000 | 4.13654e-27 | 1.000000 |
| PAH10+CH3     | 2.70914e-27 | 1.000000 | 2.70914e-27 | 1.000000 |
| rad52         | 1.39281e-27 | 1.000000 | 1.39281e-27 | 1.000000 |
| rad43         | 6.41389e-28 | 1.000000 | 6.41389e-28 | 1.000000 |
| rad62         | 8.47278e-30 | 1.000000 | 8.47278e-30 | 1.000000 |
| rad51         | 9.19865e-33 | 1.000000 | 9.19865e-33 | 1.000000 |
| rad70         | 2.29488e-35 | 1.000000 | 2.29488e-35 | 1.000000 |
| PhcycC3H3_A+H | 1.09466e-35 | 1.000000 | 1.09466e-35 | 1.000000 |
| rad55         | 5.81124e-36 | 1.000000 | 5.81124e-36 | 1.000000 |
| rad65         | 9.58015e-38 | 1.000000 | 9.58015e-38 | 1.000000 |
| rad58         | 4.05495e-39 | 1.000000 | 4.05495e-39 | 1.000000 |
| PAH1+H        | 1.36008e-40 | 1.000000 | 1.36008e-40 | 1.000000 |
| rad34         | 1.06262e-42 | 1.000000 | 1.06262e-42 | 1.000000 |
| rad42         | 1.41896e-46 | 1.000000 | 1.41896e-46 | 1.000000 |
| rad41         | 2.67743e-47 | 1.000000 | 2.67743e-47 | 1.000000 |
| rad47         | 2.14041e-48 | 1.000000 | 2.14041e-48 | 1.000000 |

0.100000000E-01 Pa, 110.000000 K

| Rate constant      | True (fraction)        | Effective (fraction)   |
|--------------------|------------------------|------------------------|
| Total              | 1.09987e-20 (1.00 )    | 1.09987e-20 (1.00 )    |
| Formation of rad11 | 1.06527e-20 (0.969 )   | 1.06527e-20 (0.969 )   |
| Formation of rad6  | 3.44008e-22 (0.0313 )  | 3.44008e-22 (0.0313 )  |
| H-abstraction      | 2.02040e-24 (0.000184) | 2.02040e-24 (0.000184) |

| species            | PYtrue      | Cumul    | PYeffective | Cumul    |
|--------------------|-------------|----------|-------------|----------|
| rad6               | 0.724577    | 0.724577 | 0.724577    | 0.724577 |
| Indene+H           | 0.270808    | 0.995385 | 0.270808    | 0.995385 |
| C2H2+PhCH2         | 0.00233713  | 0.997722 | 0.00233713  | 0.997722 |
| rad2               | 0.000527529 | 0.998250 | 0.000527529 | 0.998250 |
| PhCCH+CH3          | 0.000512782 | 0.998763 | 0.000512782 | 0.998763 |
| rad28              | 0.000328497 | 0.999091 | 0.000328497 | 0.999091 |
| PhCHCCH2+H         | 0.000309651 | 0.999401 | 0.000309651 | 0.999401 |
| PhCCH3+H           | 0.000185451 | 0.999586 | 0.000185451 | 0.999586 |
| Benzene+2-propynyl | 0.000183695 | 0.999770 | 0.000183695 | 0.999770 |
| rad26              | 7.23428e-05 | 0.999842 | 7.23428e-05 | 0.999842 |
| rad7               | 6.39969e-05 | 0.999906 | 6.39969e-05 | 0.999906 |
| rad1               | 3.40524e-05 | 0.999940 | 3.40524e-05 | 0.999940 |
| rad10              | 2.87537e-05 | 0.999969 | 2.87537e-05 | 0.999969 |
| rad11              | 1.63329e-05 | 0.999985 | 1.63329e-05 | 0.999985 |
| Ph+MeAc            | 4.94850e-06 | 0.999990 | 4.94850e-06 | 0.999990 |
| rad3               | 3.52331e-06 | 0.999994 | 3.52331e-06 | 0.999994 |
| rad4               | 1.79097e-06 | 0.999996 | 1.79097e-06 | 0.999996 |
| rad8               | 1.66565e-06 | 0.999997 | 1.66565e-06 | 0.999997 |
| rad9               | 1.19942e-06 | 0.999998 | 1.19942e-06 | 0.999998 |
| PAH7+H             | 3.21080e-07 | 0.999999 | 3.21080e-07 | 0.999999 |
| rad13              | 2.96379e-07 | 0.999999 | 2.96379e-07 | 0.999999 |
| Phenyl+Allene      | 1.57368e-07 | 0.999999 | 0.000000    | 0.999999 |
| rad30              | 1.31028e-07 | 0.999999 | 1.31028e-07 | 0.999999 |
| rad12              | 4.97292e-08 | 0.999999 | 4.97292e-08 | 0.999999 |
| rad39              | 4.37925e-08 | 0.999999 | 4.37925e-08 | 0.999999 |
| PAH9+H             | 2.73875e-08 | 0.999999 | 2.73875e-08 | 0.999999 |
| rad15              | 2.46118e-08 | 1.000000 | 2.46118e-08 | 0.999999 |
| rad35              | 1.40317e-08 | 1.000000 | 1.40317e-08 | 0.999999 |
| rad38              | 7.21271e-09 | 1.000000 | 7.21271e-09 | 0.999999 |
| rad23              | 7.76966e-10 | 1.000000 | 7.76966e-10 | 0.999999 |
| rad33              | 5.61252e-10 | 1.000000 | 5.61252e-10 | 0.999999 |
| rad14              | 3.28288e-10 | 1.000000 | 3.28288e-10 | 0.999999 |
| rad27              | 2.97781e-10 | 1.000000 | 2.97781e-10 | 0.999999 |
| rad25              | 1.98608e-10 | 1.000000 | 1.98608e-10 | 0.999999 |
| PhCH2CCH+H         | 6.48632e-11 | 1.000000 | 6.48632e-11 | 0.999999 |
| rad46              | 5.82392e-11 | 1.000000 | 5.82392e-11 | 0.999999 |
| rad37              | 1.74221e-11 | 1.000000 | 1.74221e-11 | 0.999999 |
| rad45              | 8.88524e-12 | 1.000000 | 8.88524e-12 | 0.999999 |
| rad60syn           | 2.65990e-12 | 1.000000 | 2.65990e-12 | 0.999999 |
| rad60anti          | 5.55220e-13 | 1.000000 | 5.55220e-13 | 0.999999 |
| rad36              | 5.50623e-13 | 1.000000 | 5.50623e-13 | 0.999999 |
| rad22              | 3.70758e-13 | 1.000000 | 3.70758e-13 | 0.999999 |
| rad5               | 5.46170e-14 | 1.000000 | 5.46170e-14 | 0.999999 |
| rad31              | 1.08621e-14 | 1.000000 | 1.08621e-14 | 0.999999 |
| rad20              | 1.97030e-15 | 1.000000 | 1.97030e-15 | 0.999999 |
| rad21              | 1.45445e-15 | 1.000000 | 1.45445e-15 | 0.999999 |
| rad18              | 2.32186e-17 | 1.000000 | 2.32186e-17 | 0.999999 |
| PAH3+H             | 1.68545e-17 | 1.000000 | 1.68545e-17 | 0.999999 |
| rad59              | 7.63253e-18 | 1.000000 | 7.63253e-18 | 0.999999 |

|               |             |          |             |          |
|---------------|-------------|----------|-------------|----------|
| rad50         | 9.27838e-19 | 1.000000 | 9.27838e-19 | 0.999999 |
| rad24         | 1.13864e-19 | 1.000000 | 1.13864e-19 | 0.999999 |
| rad19syn      | 7.85838e-22 | 1.000000 | 7.85838e-22 | 0.999999 |
| rad54         | 3.82166e-25 | 1.000000 | 3.82166e-25 | 0.999999 |
| PAH10+CH3     | 2.50638e-25 | 1.000000 | 2.50638e-25 | 0.999999 |
| rad43         | 5.99494e-26 | 1.000000 | 5.99494e-26 | 0.999999 |
| rad52         | 4.82573e-26 | 1.000000 | 4.82573e-26 | 0.999999 |
| rad62         | 1.40965e-27 | 1.000000 | 1.40965e-27 | 0.999999 |
| rad51         | 1.46500e-30 | 1.000000 | 1.46500e-30 | 0.999999 |
| rad70         | 1.20471e-32 | 1.000000 | 1.20471e-32 | 0.999999 |
| PhcycC3H3_A+H | 5.77600e-33 | 1.000000 | 5.77600e-33 | 0.999999 |
| rad55         | 3.06356e-33 | 1.000000 | 3.06356e-33 | 0.999999 |
| rad65         | 1.83607e-34 | 1.000000 | 1.83607e-34 | 0.999999 |
| rad58         | 2.14864e-36 | 1.000000 | 2.14864e-36 | 0.999999 |
| PAH1+H        | 7.59136e-38 | 1.000000 | 7.59137e-38 | 0.999999 |
| rad34         | 6.01788e-40 | 1.000000 | 6.01788e-40 | 0.999999 |
| rad42         | 8.23100e-44 | 1.000000 | 8.23101e-44 | 0.999999 |
| rad41         | 1.52519e-44 | 1.000000 | 1.52519e-44 | 0.999999 |
| rad47         | 1.06342e-45 | 1.000000 | 1.06342e-45 | 0.999999 |

0.100000000E-01 Pa, 120.000000 K

| Rate constant      | True (fraction)        | Effective (fraction)   |
|--------------------|------------------------|------------------------|
| Total              | 4.24245e-20 (1.00 )    | 4.24245e-20 (1.00 )    |
| Formation of rad11 | 4.06372e-20 (0.958 )   | 4.06372e-20 (0.958 )   |
| Formation of rad6  | 1.76944e-21 (0.0417 )  | 1.76944e-21 (0.0417 )  |
| H-abstraction      | 1.78210e-23 (0.000420) | 1.78210e-23 (0.000420) |

| species            | PYtrue      | Cumul    | PYeffective | Cumul    |
|--------------------|-------------|----------|-------------|----------|
| rad6               | 0.696608    | 0.696608 | 0.696609    | 0.696609 |
| Indene+H           | 0.297964    | 0.994572 | 0.297964    | 0.994573 |
| C2H2+PhCH2         | 0.00268357  | 0.997256 | 0.00268357  | 0.997257 |
| PhCCH+CH3          | 0.000640695 | 0.997896 | 0.000640695 | 0.997897 |
| rad2               | 0.000503053 | 0.998399 | 0.000503053 | 0.998400 |
| Benzene+2-propynyl | 0.000420064 | 0.998819 | 0.000420064 | 0.998820 |
| PhCHCCH2+H         | 0.000382220 | 0.999202 | 0.000382220 | 0.999203 |
| rad28              | 0.000341249 | 0.999543 | 0.000341249 | 0.999544 |
| PhCCCH3+H          | 0.000231311 | 0.999774 | 0.000231311 | 0.999775 |
| rad26              | 7.17280e-05 | 0.999846 | 7.17280e-05 | 0.999847 |
| rad7               | 6.11364e-05 | 0.999907 | 6.11364e-05 | 0.999908 |
| rad1               | 3.26024e-05 | 0.999940 | 3.26024e-05 | 0.999941 |
| rad10              | 2.73467e-05 | 0.999967 | 2.73467e-05 | 0.999968 |
| rad11              | 1.55806e-05 | 0.999983 | 1.55806e-05 | 0.999984 |
| Ph+MeAc            | 7.19139e-06 | 0.999990 | 7.19139e-06 | 0.999991 |
| rad3               | 3.35088e-06 | 0.999993 | 3.35088e-06 | 0.999994 |
| rad8               | 2.13552e-06 | 0.999995 | 2.13552e-06 | 0.999996 |
| rad4               | 1.70513e-06 | 0.999997 | 1.70513e-06 | 0.999998 |
| rad9               | 1.52398e-06 | 0.999999 | 1.52398e-06 | 1.000000 |
| PAH7+H             | 4.72462e-07 | 0.999999 | 4.72462e-07 | 1.000000 |
| rad13              | 2.85611e-07 | 0.999999 | 2.85611e-07 | 1.000000 |
| Phenyl+Allene      | 2.53142e-07 | 1.000000 | 0.000000    | 1.000000 |
| rad30              | 1.53293e-07 | 1.000000 | 1.53293e-07 | 1.000000 |
| rad12              | 6.98126e-08 | 1.000000 | 6.98126e-08 | 1.000000 |
| rad39              | 6.80792e-08 | 1.000000 | 6.80792e-08 | 1.000000 |
| PAH9+H             | 3.23598e-08 | 1.000000 | 3.23598e-08 | 1.000000 |
| rad15              | 2.92175e-08 | 1.000000 | 2.92175e-08 | 1.000000 |
| rad35              | 1.64403e-08 | 1.000000 | 1.64403e-08 | 1.000000 |
| rad38              | 8.58477e-09 | 1.000000 | 8.58477e-09 | 1.000000 |
| rad23              | 6.09861e-10 | 1.000000 | 6.09861e-10 | 1.000000 |
| rad33              | 5.41660e-10 | 1.000000 | 5.41661e-10 | 1.000000 |
| rad14              | 3.14782e-10 | 1.000000 | 3.14782e-10 | 1.000000 |
| rad27              | 2.84853e-10 | 1.000000 | 2.84853e-10 | 1.000000 |
| PhCH2CCH+H         | 1.99998e-10 | 1.000000 | 1.99998e-10 | 1.000000 |
| rad25              | 1.91485e-10 | 1.000000 | 1.91485e-10 | 1.000000 |
| rad46              | 7.33209e-11 | 1.000000 | 7.33209e-11 | 1.000000 |
| rad37              | 5.33389e-11 | 1.000000 | 5.33389e-11 | 1.000000 |
| rad45              | 6.90759e-12 | 1.000000 | 6.90759e-12 | 1.000000 |
| rad60syn           | 3.86836e-12 | 1.000000 | 3.86836e-12 | 1.000000 |
| rad60anti          | 8.93547e-13 | 1.000000 | 8.93547e-13 | 1.000000 |
| rad36              | 4.28046e-13 | 1.000000 | 4.28046e-13 | 1.000000 |
| rad22              | 2.89170e-13 | 1.000000 | 2.89170e-13 | 1.000000 |
| rad5               | 2.10234e-13 | 1.000000 | 2.10234e-13 | 1.000000 |
| rad31              | 1.06334e-14 | 1.000000 | 1.06334e-14 | 1.000000 |
| rad20              | 1.99507e-15 | 1.000000 | 1.99507e-15 | 1.000000 |
| rad21              | 1.47656e-15 | 1.000000 | 1.47656e-15 | 1.000000 |
| PAH3+H             | 8.69140e-17 | 1.000000 | 8.69140e-17 | 1.000000 |
| rad59              | 3.76777e-17 | 1.000000 | 3.76777e-17 | 1.000000 |
| rad18              | 2.22492e-17 | 1.000000 | 2.22492e-17 | 1.000000 |

|               |             |          |             |          |
|---------------|-------------|----------|-------------|----------|
| rad50         | 4.20648e-18 | 1.000000 | 4.20648e-18 | 1.000000 |
| rad24         | 8.99471e-20 | 1.000000 | 8.99471e-20 | 1.000000 |
| rad19syn      | 1.84820e-20 | 1.000000 | 1.84820e-20 | 1.000000 |
| rad54         | 1.70443e-23 | 1.000000 | 1.70443e-23 | 1.000000 |
| PAH10+CH3     | 1.12580e-23 | 1.000000 | 1.12580e-23 | 1.000000 |
| rad43         | 2.71175e-24 | 1.000000 | 2.71175e-24 | 1.000000 |
| rad52         | 1.01736e-24 | 1.000000 | 1.01736e-24 | 1.000000 |
| rad62         | 9.86150e-26 | 1.000000 | 9.86151e-26 | 1.000000 |
| rad51         | 1.01877e-28 | 1.000000 | 1.01877e-28 | 1.000000 |
| rad70         | 3.01062e-29 | 1.000000 | 3.01062e-29 | 1.000000 |
| PhcycC3H3_A+H | 1.83886e-29 | 1.000000 | 1.83886e-29 | 1.000000 |
| rad55         | 1.00948e-29 | 1.000000 | 1.00948e-29 | 1.000000 |
| rad65         | 3.58218e-32 | 1.000000 | 3.58218e-32 | 1.000000 |
| rad58         | 8.78618e-33 | 1.000000 | 8.78619e-33 | 1.000000 |
| PAH1+H        | 6.34600e-35 | 1.000000 | 6.34600e-35 | 1.000000 |
| rad34         | 5.10399e-37 | 1.000000 | 5.10399e-37 | 1.000000 |
| rad42         | 6.91138e-41 | 1.000000 | 6.91139e-41 | 1.000000 |
| rad41         | 1.15930e-41 | 1.000000 | 1.15930e-41 | 1.000000 |
| rad47         | 7.94451e-43 | 1.000000 | 7.94451e-43 | 1.000000 |

0.100000000E-01 Pa, 130.000000 K

| Rate constant      | True (fraction)        | Effective (fraction)   |
|--------------------|------------------------|------------------------|
| Total              | 1.33719e-19 (1.00 )    | 1.33719e-19 (1.00 )    |
| Formation of rad11 | 1.26517e-19 (0.946 )   | 1.26517e-19 (0.946 )   |
| Formation of rad6  | 7.08974e-21 (0.0530 )  | 7.08974e-21 (0.0530 )  |
| H-abstraction      | 1.11864e-22 (0.000837) | 1.11864e-22 (0.000837) |

| species            | PYtrue      | Cumul    | PYeffective | Cumul    |
|--------------------|-------------|----------|-------------|----------|
| rad6               | 0.666861    | 0.666861 | 0.666861    | 0.666861 |
| Indene+H           | 0.326619    | 0.993479 | 0.326619    | 0.993479 |
| C2H2+PhCH2         | 0.00308225  | 0.996561 | 0.00308225  | 0.996561 |
| Benzene+2-propynyl | 0.000836559 | 0.997398 | 0.000836559 | 0.997398 |
| PhCCH+CH3          | 0.000796441 | 0.998194 | 0.000796442 | 0.998194 |
| rad2               | 0.000477950 | 0.998672 | 0.000477950 | 0.998672 |
| PhCHCCH2+H         | 0.000469152 | 0.999142 | 0.000469152 | 0.999142 |
| rad28              | 0.000349517 | 0.999491 | 0.000349517 | 0.999491 |
| PhCCCH3+H          | 0.000286710 | 0.999778 | 0.000286710 | 0.999778 |
| rad26              | 7.03575e-05 | 0.999848 | 7.03576e-05 | 0.999848 |
| rad7               | 5.82004e-05 | 0.999906 | 5.82004e-05 | 0.999906 |
| rad1               | 3.11104e-05 | 0.999937 | 3.11105e-05 | 0.999937 |
| rad10              | 2.59227e-05 | 0.999963 | 2.59227e-05 | 0.999963 |
| rad11              | 1.48147e-05 | 0.999978 | 1.48147e-05 | 0.999978 |
| Ph+MeAc            | 1.03374e-05 | 0.999989 | 1.03374e-05 | 0.999989 |
| rad3               | 3.17670e-06 | 0.999992 | 3.17670e-06 | 0.999992 |
| rad8               | 2.72122e-06 | 0.999994 | 2.72123e-06 | 0.999994 |
| rad9               | 1.94235e-06 | 0.999996 | 1.94235e-06 | 0.999996 |
| rad4               | 1.61839e-06 | 0.999998 | 1.61839e-06 | 0.999998 |
| PAH7+H             | 6.83484e-07 | 0.999999 | 6.83484e-07 | 0.999999 |
| Phenyl+Allene      | 4.00978e-07 | 0.999999 | 0.000000    | 0.999999 |
| rad13              | 2.74109e-07 | 0.999999 | 2.74109e-07 | 0.999999 |
| rad30              | 1.79673e-07 | 1.000000 | 1.79673e-07 | 0.999999 |
| rad39              | 1.03624e-07 | 1.000000 | 1.03624e-07 | 0.999999 |
| rad12              | 9.65077e-08 | 1.000000 | 9.65077e-08 | 0.999999 |
| PAH9+H             | 3.83497e-08 | 1.000000 | 3.83497e-08 | 0.999999 |
| rad15              | 3.47861e-08 | 1.000000 | 3.47861e-08 | 0.999999 |
| rad35              | 1.93053e-08 | 1.000000 | 1.93053e-08 | 0.999999 |
| rad38              | 1.02544e-08 | 1.000000 | 1.02544e-08 | 0.999999 |
| PhCH2CCH+H         | 5.45307e-10 | 1.000000 | 5.45307e-10 | 0.999999 |
| rad33              | 5.20624e-10 | 1.000000 | 5.20625e-10 | 0.999999 |
| rad23              | 4.86681e-10 | 1.000000 | 4.86681e-10 | 0.999999 |
| rad14              | 3.00735e-10 | 1.000000 | 3.00736e-10 | 0.999999 |
| rad27              | 2.71532e-10 | 1.000000 | 2.71532e-10 | 0.999999 |
| rad25              | 1.83868e-10 | 1.000000 | 1.83868e-10 | 0.999999 |
| rad37              | 1.40454e-10 | 1.000000 | 1.40454e-10 | 0.999999 |
| rad46              | 9.29734e-11 | 1.000000 | 9.29734e-11 | 0.999999 |
| rad60syn           | 5.63361e-12 | 1.000000 | 5.63362e-12 | 0.999999 |
| rad45              | 5.46624e-12 | 1.000000 | 5.46624e-12 | 0.999999 |
| rad60anti          | 1.40983e-12 | 1.000000 | 1.40983e-12 | 0.999999 |
| rad5               | 6.88851e-13 | 1.000000 | 6.88852e-13 | 0.999999 |
| rad36              | 3.38780e-13 | 1.000000 | 3.38780e-13 | 0.999999 |
| rad22              | 2.29605e-13 | 1.000000 | 2.29605e-13 | 0.999999 |
| rad31              | 1.03989e-14 | 1.000000 | 1.03989e-14 | 0.999999 |
| rad20              | 2.01791e-15 | 1.000000 | 2.01791e-15 | 0.999999 |
| rad21              | 1.49741e-15 | 1.000000 | 1.49741e-15 | 0.999999 |
| PAH3+H             | 3.64602e-16 | 1.000000 | 3.64603e-16 | 0.999999 |
| rad59              | 1.51420e-16 | 1.000000 | 1.51420e-16 | 0.999999 |
| rad18              | 2.14334e-17 | 1.000000 | 2.14334e-17 | 0.999999 |

|               |             |          |             |          |
|---------------|-------------|----------|-------------|----------|
| rad50         | 1.59633e-17 | 1.000000 | 1.59633e-17 | 0.999999 |
| rad19syn      | 2.76169e-19 | 1.000000 | 2.76169e-19 | 0.999999 |
| rad24         | 7.22818e-20 | 1.000000 | 7.22818e-20 | 0.999999 |
| rad54         | 4.29131e-22 | 1.000000 | 4.29131e-22 | 0.999999 |
| PAH10+CH3     | 2.85497e-22 | 1.000000 | 2.85497e-22 | 0.999999 |
| rad43         | 6.91201e-23 | 1.000000 | 6.91201e-23 | 0.999999 |
| rad52         | 1.39079e-23 | 1.000000 | 1.39079e-23 | 0.999999 |
| rad62         | 3.45275e-24 | 1.000000 | 3.45275e-24 | 0.999999 |
| rad51         | 3.55967e-27 | 1.000000 | 3.55967e-27 | 0.999999 |
| rad70         | 2.66519e-27 | 1.000000 | 2.66519e-27 | 0.999999 |
| PhcycC3H3_A+H | 2.10692e-27 | 1.000000 | 2.10692e-27 | 0.999999 |
| rad55         | 9.53712e-28 | 1.000000 | 9.53713e-28 | 0.999999 |
| rad65         | 2.38417e-30 | 1.000000 | 2.38417e-30 | 0.999999 |
| rad58         | 1.11108e-30 | 1.000000 | 1.11108e-30 | 0.999999 |
| PAH1+H        | 4.32132e-32 | 1.000000 | 4.32132e-32 | 0.999999 |
| rad34         | 3.52703e-34 | 1.000000 | 3.52703e-34 | 0.999999 |
| rad42         | 4.80283e-38 | 1.000000 | 4.80283e-38 | 0.999999 |
| rad41         | 7.36255e-39 | 1.000000 | 7.36255e-39 | 0.999999 |
| rad47         | 3.54299e-39 | 1.000000 | 3.54299e-39 | 0.999999 |

0.100000000E-01 Pa, 140.000000 K

| Rate constant      | True (fraction)        | Effective (fraction)   |
|--------------------|------------------------|------------------------|
| Total              | 3.59582e-19 (1.00 )    | 3.59582e-19 (1.00 )    |
| Formation of rad11 | 3.35703e-19 (0.934 )   | 3.35703e-19 (0.934 )   |
| Formation of rad6  | 2.33415e-20 (0.0649 )  | 2.33415e-20 (0.0649 )  |
| H-abstraction      | 5.37685e-22 (0.00150 ) | 5.37685e-22 (0.00150 ) |

| species            | PYtrue      | Cumul    | PYeffective | Cumul    |
|--------------------|-------------|----------|-------------|----------|
| rad6               | 0.635368    | 0.635368 | 0.635368    | 0.635368 |
| Indene+H           | 0.356663    | 0.992030 | 0.356664    | 0.992031 |
| C2H2+PhCH2         | 0.00353918  | 0.995570 | 0.00353918  | 0.995571 |
| Benzene+2-propynyl | 0.00149531  | 0.997065 | 0.00149531  | 0.997066 |
| PhCCH+CH3          | 0.000984632 | 0.998050 | 0.000984632 | 0.998051 |
| PhCHCCH2+H         | 0.000572530 | 0.998622 | 0.000572531 | 0.998623 |
| rad2               | 0.000452210 | 0.999074 | 0.000452211 | 0.999075 |
| rad28              | 0.000353228 | 0.999427 | 0.000353228 | 0.999428 |
| PhCCCH3+H          | 0.000353084 | 0.999781 | 0.000353084 | 0.999782 |
| rad26              | 6.83400e-05 | 0.999849 | 6.83400e-05 | 0.999850 |
| rad7               | 5.51796e-05 | 0.999904 | 5.51796e-05 | 0.999905 |
| rad1               | 2.95744e-05 | 0.999934 | 2.95744e-05 | 0.999935 |
| rad10              | 2.44783e-05 | 0.999958 | 2.44783e-05 | 0.999959 |
| Ph+MeAc            | 1.46778e-05 | 0.999973 | 1.46778e-05 | 0.999974 |
| rad11              | 1.40318e-05 | 0.999987 | 1.40318e-05 | 0.999988 |
| rad8               | 3.44457e-06 | 0.999990 | 3.44458e-06 | 0.999991 |
| rad3               | 3.00019e-06 | 0.999993 | 3.00019e-06 | 0.999994 |
| rad9               | 2.47788e-06 | 0.999996 | 2.47788e-06 | 0.999997 |
| rad4               | 1.53043e-06 | 0.999997 | 1.53043e-06 | 0.999998 |
| PAH7+H             | 9.71926e-07 | 0.999998 | 9.71927e-07 | 0.999999 |
| Phenyl+Allene      | 6.24896e-07 | 0.999999 | 0.000000    | 0.999999 |
| rad13              | 2.61869e-07 | 0.999999 | 2.61869e-07 | 1.000000 |
| rad30              | 2.10814e-07 | 0.999999 | 2.10814e-07 | 1.000000 |
| rad39              | 1.54414e-07 | 1.000000 | 1.54414e-07 | 1.000000 |
| rad12              | 1.31417e-07 | 1.000000 | 1.31417e-07 | 1.000000 |
| PAH9+H             | 4.55473e-08 | 1.000000 | 4.55473e-08 | 1.000000 |
| rad15              | 4.14950e-08 | 1.000000 | 4.14950e-08 | 1.000000 |
| rad35              | 2.27041e-08 | 1.000000 | 2.27041e-08 | 1.000000 |
| rad38              | 1.22812e-08 | 1.000000 | 1.22812e-08 | 1.000000 |
| PhCH2CCH+H         | 1.34209e-09 | 1.000000 | 1.34209e-09 | 1.000000 |
| rad33              | 4.98139e-10 | 1.000000 | 4.98139e-10 | 1.000000 |
| rad23              | 3.93489e-10 | 1.000000 | 3.93489e-10 | 1.000000 |
| rad37              | 3.26517e-10 | 1.000000 | 3.26517e-10 | 1.000000 |
| rad14              | 2.86127e-10 | 1.000000 | 2.86127e-10 | 1.000000 |
| rad27              | 2.57797e-10 | 1.000000 | 2.57797e-10 | 1.000000 |
| rad25              | 1.75753e-10 | 1.000000 | 1.75753e-10 | 1.000000 |
| rad46              | 1.18526e-10 | 1.000000 | 1.18527e-10 | 1.000000 |
| rad60syn           | 8.18359e-12 | 1.000000 | 8.18359e-12 | 1.000000 |
| rad45              | 4.38699e-12 | 1.000000 | 4.38700e-12 | 1.000000 |
| rad60anti          | 2.18541e-12 | 1.000000 | 2.18542e-12 | 1.000000 |
| rad5               | 1.97125e-12 | 1.000000 | 1.97126e-12 | 1.000000 |
| rad36              | 2.71991e-13 | 1.000000 | 2.71992e-13 | 1.000000 |
| rad22              | 1.84914e-13 | 1.000000 | 1.84914e-13 | 1.000000 |
| rad31              | 1.01563e-14 | 1.000000 | 1.01563e-14 | 1.000000 |
| rad20              | 2.03728e-15 | 1.000000 | 2.03729e-15 | 1.000000 |
| rad21              | 1.51587e-15 | 1.000000 | 1.51587e-15 | 1.000000 |
| PAH3+H             | 1.28846e-15 | 1.000000 | 1.28846e-15 | 1.000000 |
| rad59              | 5.13507e-16 | 1.000000 | 5.13508e-16 | 1.000000 |
| rad50              | 5.22864e-17 | 1.000000 | 5.22865e-17 | 1.000000 |

|               |             |          |             |          |
|---------------|-------------|----------|-------------|----------|
| rad18         | 2.07150e-17 | 1.000000 | 2.07150e-17 | 1.000000 |
| rad19syn      | 2.85111e-18 | 1.000000 | 2.85111e-18 | 1.000000 |
| rad24         | 5.88848e-20 | 1.000000 | 5.88848e-20 | 1.000000 |
| rad54         | 6.87834e-21 | 1.000000 | 6.87834e-21 | 1.000000 |
| PAH10+CH3     | 4.60742e-21 | 1.000000 | 4.60743e-21 | 1.000000 |
| rad43         | 1.11988e-21 | 1.000000 | 1.11988e-21 | 1.000000 |
| rad52         | 1.33563e-22 | 1.000000 | 1.33563e-22 | 1.000000 |
| rad62         | 7.28630e-23 | 1.000000 | 7.28631e-23 | 1.000000 |
| rad70         | 1.13232e-25 | 1.000000 | 1.13232e-25 | 1.000000 |
| PhcycC3H3_A+H | 1.03835e-25 | 1.000000 | 1.03835e-25 | 1.000000 |
| rad51         | 7.53702e-26 | 1.000000 | 7.53703e-26 | 1.000000 |
| rad55         | 4.25909e-26 | 1.000000 | 4.25909e-26 | 1.000000 |
| PAH1+H        | 1.70382e-28 | 1.000000 | 1.70382e-28 | 1.000000 |
| rad65         | 7.99375e-29 | 1.000000 | 7.99376e-29 | 1.000000 |
| rad58         | 5.91423e-29 | 1.000000 | 5.91423e-29 | 1.000000 |
| rad34         | 4.07910e-30 | 1.000000 | 4.07910e-30 | 1.000000 |
| rad42         | 1.04840e-34 | 1.000000 | 1.04840e-34 | 1.000000 |
| rad41         | 1.48667e-35 | 1.000000 | 1.48667e-35 | 1.000000 |
| rad47         | 2.43752e-37 | 1.000000 | 2.43752e-37 | 1.000000 |

0.100000000E-01 Pa, 150.000000 K

| Rate constant      | True (fraction)        | Effective (fraction)   |
|--------------------|------------------------|------------------------|
| Total              | 8.51464e-19 (1.00 )    | 8.51463e-19 (1.00 )    |
| Formation of rad11 | 7.83711e-19 (0.920 )   | 7.83710e-19 (0.920 )   |
| Formation of rad6  | 6.56651e-20 (0.0771 )  | 6.56651e-20 (0.0771 )  |
| H-abstraction      | 2.08816e-21 (0.00245 ) | 2.08816e-21 (0.00245 ) |

| species            | PYtrue      | Cumul    | PYeffective | Cumul    |
|--------------------|-------------|----------|-------------|----------|
| rad6               | 0.602251    | 0.602251 | 0.602252    | 0.602252 |
| Indene+H           | 0.387904    | 0.990156 | 0.387904    | 0.990157 |
| C2H2+PhCH2         | 0.00405994  | 0.994216 | 0.00405994  | 0.994217 |
| Benzene+2-propynyl | 0.00245244  | 0.996668 | 0.00245244  | 0.996669 |
| PhCCH+CH3          | 0.00120996  | 0.997878 | 0.00120997  | 0.997879 |
| PhCHCCH2+H         | 0.000694392 | 0.998572 | 0.000694392 | 0.998573 |
| PhCCCH3+H          | 0.000431838 | 0.999004 | 0.000431838 | 0.999005 |
| rad2               | 0.000425884 | 0.999430 | 0.000425884 | 0.999431 |
| rad28              | 0.000352459 | 0.999783 | 0.000352459 | 0.999784 |
| rad26              | 6.57760e-05 | 0.999848 | 6.57760e-05 | 0.999849 |
| rad7               | 5.20755e-05 | 0.999900 | 5.20756e-05 | 0.999901 |
| rad1               | 2.79961e-05 | 0.999928 | 2.79961e-05 | 0.999929 |
| rad10              | 2.30141e-05 | 0.999952 | 2.30142e-05 | 0.999953 |
| Ph+MeAc            | 2.05646e-05 | 0.999972 | 2.05646e-05 | 0.999973 |
| rad11              | 1.32315e-05 | 0.999985 | 1.32315e-05 | 0.999986 |
| rad8               | 4.32847e-06 | 0.999990 | 4.32847e-06 | 0.999991 |
| rad9               | 3.15744e-06 | 0.999993 | 3.15745e-06 | 0.999994 |
| rad3               | 2.82133e-06 | 0.999996 | 2.82133e-06 | 0.999997 |
| rad4               | 1.44121e-06 | 0.999997 | 1.44121e-06 | 0.999998 |
| PAH7+H             | 1.35879e-06 | 0.999998 | 1.35880e-06 | 0.999999 |
| Phenyl+Allene      | 9.57695e-07 | 0.999999 | 0.000000    | 0.999999 |
| rad13              | 2.48929e-07 | 1.000000 | 2.48929e-07 | 1.000000 |
| rad30              | 2.47388e-07 | 1.000000 | 2.47388e-07 | 1.000000 |
| rad39              | 2.25353e-07 | 1.000000 | 2.25353e-07 | 1.000000 |
| rad12              | 1.76328e-07 | 1.000000 | 1.76328e-07 | 1.000000 |
| PAH9+H             | 5.41606e-08 | 1.000000 | 5.41607e-08 | 1.000000 |
| rad15              | 4.95364e-08 | 1.000000 | 4.95365e-08 | 1.000000 |
| rad35              | 2.67180e-08 | 1.000000 | 2.67180e-08 | 1.000000 |
| rad38              | 1.47318e-08 | 1.000000 | 1.47318e-08 | 1.000000 |
| PhCH2CCH+H         | 3.03234e-09 | 1.000000 | 3.03235e-09 | 1.000000 |
| rad37              | 6.85018e-10 | 1.000000 | 6.85019e-10 | 1.000000 |
| rad33              | 4.74271e-10 | 1.000000 | 4.74272e-10 | 1.000000 |
| rad23              | 3.21445e-10 | 1.000000 | 3.21445e-10 | 1.000000 |
| rad14              | 2.70974e-10 | 1.000000 | 2.70974e-10 | 1.000000 |
| rad27              | 2.43666e-10 | 1.000000 | 2.43666e-10 | 1.000000 |
| rad25              | 1.67164e-10 | 1.000000 | 1.67164e-10 | 1.000000 |
| rad46              | 1.51620e-10 | 1.000000 | 1.51621e-10 | 1.000000 |
| rad60syn           | 1.18224e-11 | 1.000000 | 1.18224e-11 | 1.000000 |
| rad5               | 5.03700e-12 | 1.000000 | 5.03701e-12 | 1.000000 |
| rad45              | 3.56051e-12 | 1.000000 | 3.56052e-12 | 1.000000 |
| rad60anti          | 3.33199e-12 | 1.000000 | 3.33200e-12 | 1.000000 |
| rad36              | 2.20882e-13 | 1.000000 | 2.20882e-13 | 1.000000 |
| rad22              | 1.50611e-13 | 1.000000 | 1.50612e-13 | 1.000000 |
| rad31              | 9.90425e-15 | 1.000000 | 9.90426e-15 | 1.000000 |
| PAH3+H             | 3.95492e-15 | 1.000000 | 3.95492e-15 | 1.000000 |
| rad20              | 2.05189e-15 | 1.000000 | 2.05189e-15 | 1.000000 |
| rad21              | 1.53100e-15 | 1.000000 | 1.53100e-15 | 1.000000 |
| rad59              | 1.51575e-15 | 1.000000 | 1.51575e-15 | 1.000000 |
| rad50              | 1.51746e-16 | 1.000000 | 1.51747e-16 | 1.000000 |

|               |             |         |             |         |
|---------------|-------------|---------|-------------|---------|
| rad19syn      | 2.18013e-17 | 1.00000 | 2.18013e-17 | 1.00000 |
| rad18         | 2.00548e-17 | 1.00000 | 2.00548e-17 | 1.00000 |
| rad54         | 7.66534e-20 | 1.00000 | 7.66535e-20 | 1.00000 |
| PAH10+CH3     | 5.16612e-20 | 1.00000 | 5.16612e-20 | 1.00000 |
| rad24         | 4.84986e-20 | 1.00000 | 4.84987e-20 | 1.00000 |
| rad43         | 1.25916e-20 | 1.00000 | 1.25916e-20 | 1.00000 |
| rad62         | 1.02755e-21 | 1.00000 | 1.02755e-21 | 1.00000 |
| rad52         | 9.63584e-22 | 1.00000 | 9.63585e-22 | 1.00000 |
| PhcycC3H3_A+H | 2.75383e-24 | 1.00000 | 2.75383e-24 | 1.00000 |
| rad70         | 2.74902e-24 | 1.00000 | 2.74903e-24 | 1.00000 |
| rad51         | 1.07283e-24 | 1.00000 | 1.07283e-24 | 1.00000 |
| rad55         | 1.06831e-24 | 1.00000 | 1.06831e-24 | 1.00000 |
| PAH1+H        | 8.33276e-27 | 1.00000 | 8.33277e-27 | 1.00000 |
| rad65         | 1.65536e-27 | 1.00000 | 1.65536e-27 | 1.00000 |
| rad58         | 1.64912e-27 | 1.00000 | 1.64912e-27 | 1.00000 |
| rad34         | 2.49302e-28 | 1.00000 | 2.49302e-28 | 1.00000 |
| rad42         | 7.77863e-31 | 1.00000 | 7.77864e-31 | 1.00000 |
| rad41         | 1.59533e-31 | 1.00000 | 1.59533e-31 | 1.00000 |
| rad47         | 7.43586e-36 | 1.00000 | 7.43587e-36 | 1.00000 |

0.100000000E-01 Pa, 160.000000 K

| Rate constant      | True (fraction)        | Effective (fraction)   |
|--------------------|------------------------|------------------------|
| Total              | 1.81800e-18 (1.00 )    | 1.81800e-18 (1.00 )    |
| Formation of rad11 | 1.64862e-18 (0.907 )   | 1.64862e-18 (0.907 )   |
| Formation of rad6  | 1.62558e-19 (0.0894 )  | 1.62558e-19 (0.0894 )  |
| H-abstraction      | 6.82130e-21 (0.00375 ) | 6.82130e-21 (0.00375 ) |

| species            | PYtrue      | Cumul    | PYeffective | Cumul    |
|--------------------|-------------|----------|-------------|----------|
| rad6               | 0.567725    | 0.567725 | 0.567725    | 0.567725 |
| Indene+H           | 0.420071    | 0.987796 | 0.420072    | 0.987797 |
| C2H2+PhCH2         | 0.00464946  | 0.992445 | 0.00464947  | 0.992446 |
| Benzene+2-propynyl | 0.00375209  | 0.996197 | 0.00375209  | 0.996198 |
| PhCCH+CH3          | 0.00147706  | 0.997674 | 0.00147706  | 0.997675 |
| PhCHCCH2+H         | 0.000836651 | 0.998511 | 0.000836652 | 0.998512 |
| PhCCCH3+H          | 0.000524290 | 0.999035 | 0.000524291 | 0.999036 |
| rad2               | 0.000399082 | 0.999434 | 0.000399083 | 0.999435 |
| rad28              | 0.000347440 | 0.999782 | 0.000347440 | 0.999783 |
| rad26              | 6.27615e-05 | 0.999845 | 6.27616e-05 | 0.999846 |
| rad7               | 4.88991e-05 | 0.999893 | 4.88992e-05 | 0.999894 |
| Ph+MeAc            | 2.84128e-05 | 0.999922 | 2.84128e-05 | 0.999923 |
| rad1               | 2.63811e-05 | 0.999948 | 2.63811e-05 | 0.999949 |
| rad10              | 2.15345e-05 | 0.999970 | 2.15345e-05 | 0.999971 |
| rad11              | 1.24158e-05 | 0.999982 | 1.24159e-05 | 0.999983 |
| rad8               | 5.39622e-06 | 0.999988 | 5.39623e-06 | 0.999989 |
| rad9               | 4.01151e-06 | 0.999992 | 4.01152e-06 | 0.999993 |
| rad3               | 2.64058e-06 | 0.999994 | 2.64058e-06 | 0.999995 |
| PAH7+H             | 1.86839e-06 | 0.999996 | 1.86839e-06 | 0.999997 |
| Phenyl+Allene      | 1.44316e-06 | 0.999998 | 0.00000     | 0.999997 |
| rad4               | 1.35094e-06 | 0.999999 | 1.35094e-06 | 0.999998 |
| rad39              | 3.22337e-07 | 0.999999 | 3.22338e-07 | 0.999999 |
| rad30              | 2.90070e-07 | 1.000000 | 2.90070e-07 | 0.999999 |
| rad13              | 2.35364e-07 | 1.000000 | 2.35364e-07 | 0.999999 |
| rad12              | 2.33177e-07 | 1.000000 | 2.33177e-07 | 1.000000 |
| PAH9+H             | 6.44154e-08 | 1.000000 | 6.44155e-08 | 1.000000 |
| rad15              | 5.91155e-08 | 1.000000 | 5.91156e-08 | 1.000000 |
| rad35              | 3.14327e-08 | 1.000000 | 3.14328e-08 | 1.000000 |
| rad38              | 1.76797e-08 | 1.000000 | 1.76797e-08 | 1.000000 |
| PhCH2CCH+H         | 6.37525e-09 | 1.000000 | 6.37526e-09 | 1.000000 |
| rad37              | 1.32023e-09 | 1.000000 | 1.32023e-09 | 1.000000 |
| rad33              | 4.49157e-10 | 1.000000 | 4.49158e-10 | 1.000000 |
| rad23              | 2.64742e-10 | 1.000000 | 2.64743e-10 | 1.000000 |
| rad14              | 2.55339e-10 | 1.000000 | 2.55340e-10 | 1.000000 |
| rad27              | 2.29192e-10 | 1.000000 | 2.29192e-10 | 1.000000 |
| rad46              | 1.94265e-10 | 1.000000 | 1.94266e-10 | 1.000000 |
| rad25              | 1.58148e-10 | 1.000000 | 1.58148e-10 | 1.000000 |
| rad60syn           | 1.69491e-11 | 1.000000 | 1.69492e-11 | 1.000000 |
| rad5               | 1.17026e-11 | 1.000000 | 1.17026e-11 | 1.000000 |
| rad60anti          | 4.99996e-12 | 1.000000 | 4.99996e-12 | 1.000000 |
| rad45              | 2.91566e-12 | 1.000000 | 2.91567e-12 | 1.000000 |
| rad36              | 1.81033e-13 | 1.000000 | 1.81033e-13 | 1.000000 |
| rad22              | 1.23776e-13 | 1.000000 | 1.23776e-13 | 1.000000 |
| PAH3+H             | 1.08108e-14 | 1.000000 | 1.08108e-14 | 1.000000 |
| rad31              | 9.64287e-15 | 1.000000 | 9.64288e-15 | 1.000000 |
| rad59              | 3.99302e-15 | 1.000000 | 3.99302e-15 | 1.000000 |
| rad20              | 2.06066e-15 | 1.000000 | 2.06066e-15 | 1.000000 |
| rad21              | 1.54198e-15 | 1.000000 | 1.54199e-15 | 1.000000 |
| rad50              | 3.98565e-16 | 1.000000 | 3.98565e-16 | 1.000000 |

|               |             |         |             |          |
|---------------|-------------|---------|-------------|----------|
| rad19syn      | 1.30425e-16 | 1.00000 | 1.30426e-16 | 1.000000 |
| rad18         | 1.94243e-17 | 1.00000 | 1.94244e-17 | 1.000000 |
| rad54         | 6.35553e-19 | 1.00000 | 6.35554e-19 | 1.000000 |
| PAH10+CH3     | 4.30571e-19 | 1.00000 | 4.30572e-19 | 1.000000 |
| rad43         | 1.05103e-19 | 1.00000 | 1.05104e-19 | 1.000000 |
| rad24         | 4.02978e-20 | 1.00000 | 4.02979e-20 | 1.000000 |
| rad62         | 1.04456e-20 | 1.00000 | 1.04456e-20 | 1.000000 |
| rad52         | 5.50674e-21 | 1.00000 | 5.50675e-21 | 1.000000 |
| PhcycC3H3_A+H | 4.82312e-23 | 1.00000 | 4.82313e-23 | 1.000000 |
| rad70         | 4.45552e-23 | 1.00000 | 4.45553e-23 | 1.000000 |
| rad55         | 1.77948e-23 | 1.00000 | 1.77949e-23 | 1.000000 |
| rad51         | 1.10788e-23 | 1.00000 | 1.10788e-23 | 1.000000 |
| PAH1+H        | 2.22910e-25 | 1.00000 | 2.22910e-25 | 1.000000 |
| rad58         | 3.00856e-26 | 1.00000 | 3.00856e-26 | 1.000000 |
| rad65         | 2.35668e-26 | 1.00000 | 2.35669e-26 | 1.000000 |
| rad34         | 7.76436e-27 | 1.00000 | 7.76437e-27 | 1.000000 |
| rad42         | 4.03446e-29 | 1.00000 | 4.03447e-29 | 1.000000 |
| rad41         | 9.68454e-30 | 1.00000 | 9.68455e-30 | 1.000000 |
| rad47         | 1.38728e-34 | 1.00000 | 1.38728e-34 | 1.000000 |

0.100000000E-01 Pa, 170.000000 K

| Rate constant      | True (fraction)        | Effective (fraction)   |
|--------------------|------------------------|------------------------|
| Total              | 3.56414e-18 (1.00 )    | 3.56413e-18 (1.00 )    |
| Formation of rad11 | 3.18264e-18 (0.893 )   | 3.18263e-18 (0.893 )   |
| Formation of rad6  | 3.62173e-19 (0.102 )   | 3.62172e-19 (0.102 )   |
| H-abstraction      | 1.93278e-20 (0.00542 ) | 1.93278e-20 (0.00542 ) |

| species            | PYtrue      | Cumul    | PYeffective | Cumul    |
|--------------------|-------------|----------|-------------|----------|
| rad6               | 0.532077    | 0.532077 | 0.532078    | 0.532078 |
| Indene+H           | 0.452833    | 0.984910 | 0.452834    | 0.984912 |
| Benzene+2-propynyl | 0.00542285  | 0.990333 | 0.00542286  | 0.990335 |
| C2H2+PhCH2         | 0.00531191  | 0.995645 | 0.00531192  | 0.995647 |
| PhCCH+CH3          | 0.00179033  | 0.997435 | 0.00179033  | 0.997437 |
| PhCHCCH2+H         | 0.00100102  | 0.998436 | 0.00100102  | 0.998438 |
| PhCCCH3+H          | 0.000631612 | 0.999068 | 0.000631613 | 0.999070 |
| rad2               | 0.000371973 | 0.999440 | 0.000371974 | 0.999442 |
| rad28              | 0.000338535 | 0.999778 | 0.000338535 | 0.999780 |
| rad26              | 5.93892e-05 | 0.999837 | 5.93893e-05 | 0.999839 |
| rad7               | 4.56693e-05 | 0.999883 | 4.56694e-05 | 0.999885 |
| Ph+MeAc            | 3.86987e-05 | 0.999922 | 3.86987e-05 | 0.999924 |
| rad1               | 2.47387e-05 | 0.999947 | 2.47388e-05 | 0.999949 |
| rad10              | 2.00467e-05 | 0.999967 | 2.00468e-05 | 0.999969 |
| rad11              | 1.15893e-05 | 0.999978 | 1.15893e-05 | 0.999980 |
| rad8               | 6.67075e-06 | 0.999985 | 6.67076e-06 | 0.999987 |
| rad9               | 5.07398e-06 | 0.999990 | 5.07399e-06 | 0.999992 |
| PAH7+H             | 2.52835e-06 | 0.999992 | 2.52835e-06 | 0.999994 |
| rad3               | 2.45881e-06 | 0.999995 | 2.45882e-06 | 0.999997 |
| Phenyl+Allene      | 2.13852e-06 | 0.999997 | 0.00000     | 0.999997 |
| rad4               | 1.26006e-06 | 0.999998 | 1.26006e-06 | 0.999998 |
| rad39              | 4.52308e-07 | 0.999999 | 4.52309e-07 | 0.999999 |
| rad30              | 3.39536e-07 | 0.999999 | 3.39537e-07 | 0.999999 |
| rad12              | 3.04007e-07 | 0.999999 | 3.04007e-07 | 0.999999 |
| rad13              | 2.21281e-07 | 1.000000 | 2.21282e-07 | 1.000000 |
| PAH9+H             | 7.65539e-08 | 1.000000 | 7.65541e-08 | 1.000000 |
| rad15              | 7.04477e-08 | 1.000000 | 7.04478e-08 | 1.000000 |
| rad35              | 3.69372e-08 | 1.000000 | 3.69373e-08 | 1.000000 |
| rad38              | 2.12057e-08 | 1.000000 | 2.12058e-08 | 1.000000 |
| PhCH2CCH+H         | 1.26071e-08 | 1.000000 | 1.26071e-08 | 1.000000 |
| rad37              | 2.37093e-09 | 1.000000 | 2.37093e-09 | 1.000000 |
| rad33              | 4.22999e-10 | 1.000000 | 4.23000e-10 | 1.000000 |
| rad46              | 2.48894e-10 | 1.000000 | 2.48894e-10 | 1.000000 |
| rad14              | 2.39324e-10 | 1.000000 | 2.39325e-10 | 1.000000 |
| rad23              | 2.19454e-10 | 1.000000 | 2.19454e-10 | 1.000000 |
| rad27              | 2.14460e-10 | 1.000000 | 2.14460e-10 | 1.000000 |
| rad25              | 1.48779e-10 | 1.000000 | 1.48779e-10 | 1.000000 |
| rad5               | 2.50850e-11 | 1.000000 | 2.50850e-11 | 1.000000 |
| rad60syn           | 2.40791e-11 | 1.000000 | 2.40791e-11 | 1.000000 |
| rad60anti          | 7.38807e-12 | 1.000000 | 7.38809e-12 | 1.000000 |
| rad45              | 2.40474e-12 | 1.000000 | 2.40475e-12 | 1.000000 |
| rad36              | 1.49480e-13 | 1.000000 | 1.49480e-13 | 1.000000 |
| rad22              | 1.02449e-13 | 1.000000 | 1.02449e-13 | 1.000000 |
| PAH3+H             | 2.68451e-14 | 1.000000 | 2.68452e-14 | 1.000000 |
| rad59              | 9.57606e-15 | 1.000000 | 9.57608e-15 | 1.000000 |
| rad31              | 9.37320e-15 | 1.000000 | 9.37322e-15 | 1.000000 |
| rad20              | 2.06277e-15 | 1.000000 | 2.06278e-15 | 1.000000 |
| rad21              | 1.54822e-15 | 1.000000 | 1.54822e-15 | 1.000000 |
| rad50              | 9.63417e-16 | 1.000000 | 9.63420e-16 | 1.000000 |

|               |             |          |             |          |
|---------------|-------------|----------|-------------|----------|
| rad19syn      | 6.37176e-16 | 1.000000 | 6.37177e-16 | 1.000000 |
| rad18         | 1.88039e-17 | 1.000000 | 1.88039e-17 | 1.000000 |
| rad54         | 4.13131e-18 | 1.000000 | 4.13132e-18 | 1.000000 |
| PAH10+CH3     | 2.81043e-18 | 1.000000 | 2.81044e-18 | 1.000000 |
| rad43         | 6.86166e-19 | 1.000000 | 6.86167e-19 | 1.000000 |
| rad62         | 8.10902e-20 | 1.000000 | 8.10904e-20 | 1.000000 |
| rad24         | 3.37242e-20 | 1.000000 | 3.37243e-20 | 1.000000 |
| rad52         | 2.59863e-20 | 1.000000 | 2.59864e-20 | 1.000000 |
| PhcycC3H3_A+H | 6.03548e-22 | 1.000000 | 6.03549e-22 | 1.000000 |
| rad70         | 5.19494e-22 | 1.000000 | 5.19494e-22 | 1.000000 |
| rad55         | 2.12510e-22 | 1.000000 | 2.12510e-22 | 1.000000 |
| rad51         | 8.79314e-23 | 1.000000 | 8.79316e-23 | 1.000000 |
| PAH1+H        | 3.87953e-24 | 1.000000 | 3.87953e-24 | 1.000000 |
| rad58         | 3.90318e-25 | 1.000000 | 3.90319e-25 | 1.000000 |
| rad65         | 2.46898e-25 | 1.000000 | 2.46899e-25 | 1.000000 |
| rad34         | 1.48313e-25 | 1.000000 | 1.48313e-25 | 1.000000 |
| rad42         | 1.00698e-27 | 1.000000 | 1.00698e-27 | 1.000000 |
| rad41         | 2.56000e-28 | 1.000000 | 2.56001e-28 | 1.000000 |
| rad47         | 1.78947e-33 | 1.000000 | 1.78947e-33 | 1.000000 |

0.100000000E-01 Pa, 180.000000 K

| Rate constant      | True (fraction)        | Effective (fraction)   |
|--------------------|------------------------|------------------------|
| Total              | 6.50681e-18 (1.00 )    | 6.50679e-18 (1.00 )    |
| Formation of rad11 | 5.71915e-18 (0.879 )   | 5.71913e-18 (0.879 )   |
| Formation of rad6  | 7.39013e-19 (0.114 )   | 7.39011e-19 (0.114 )   |
| H-abstraction      | 4.86496e-20 (0.00748 ) | 4.86496e-20 (0.00748 ) |

| species            | PYtrue      | Cumul    | PYeffective | Cumul    |
|--------------------|-------------|----------|-------------|----------|
| rad6               | 0.495663    | 0.495663 | 0.495664    | 0.495664 |
| Indene+H           | 0.485812    | 0.981476 | 0.485814    | 0.981478 |
| Benzene+2-propynyl | 0.00747672  | 0.988952 | 0.00747674  | 0.988955 |
| C2H2+PhCH2         | 0.00605058  | 0.995003 | 0.00605060  | 0.995006 |
| PhCCH+CH3          | 0.00215380  | 0.997157 | 0.00215380  | 0.997160 |
| PhCHCCH2+H         | 0.00118892  | 0.998346 | 0.00118893  | 0.998349 |
| PhCCCH3+H          | 0.000754769 | 0.999100 | 0.000754772 | 0.999103 |
| rad2               | 0.000344765 | 0.999445 | 0.000344766 | 0.999448 |
| rad28              | 0.000326215 | 0.999771 | 0.000326216 | 0.999774 |
| rad26              | 5.57481e-05 | 0.999827 | 5.57482e-05 | 0.999830 |
| Ph+MeAc            | 5.19558e-05 | 0.999879 | 5.19560e-05 | 0.999882 |
| rad7               | 4.24111e-05 | 0.999921 | 4.24112e-05 | 0.999924 |
| rad1               | 2.30809e-05 | 0.999944 | 2.30809e-05 | 0.999947 |
| rad10              | 1.85610e-05 | 0.999963 | 1.85610e-05 | 0.999966 |
| rad11              | 1.07577e-05 | 0.999974 | 1.07577e-05 | 0.999977 |
| rad8               | 8.17372e-06 | 0.999982 | 8.17375e-06 | 0.999985 |
| rad9               | 6.38186e-06 | 0.999988 | 6.38187e-06 | 0.999991 |
| PAH7+H             | 3.36956e-06 | 0.999992 | 3.36958e-06 | 0.999995 |
| Phenyl+Allene      | 3.11709e-06 | 0.999995 | 0.00000     | 0.999995 |
| rad3               | 2.27724e-06 | 0.999997 | 2.27725e-06 | 0.999997 |
| rad4               | 1.16914e-06 | 0.999998 | 1.16915e-06 | 0.999998 |
| rad39              | 6.23279e-07 | 0.999999 | 6.23281e-07 | 0.999999 |
| rad30              | 3.96450e-07 | 0.999999 | 3.96451e-07 | 0.999999 |
| rad12              | 3.90906e-07 | 1.000000 | 3.90907e-07 | 1.000000 |
| rad13              | 2.06819e-07 | 1.000000 | 2.06820e-07 | 1.000000 |
| PAH9+H             | 9.08347e-08 | 1.000000 | 9.08350e-08 | 1.000000 |
| rad15              | 8.37569e-08 | 1.000000 | 8.37572e-08 | 1.000000 |
| rad35              | 4.33227e-08 | 1.000000 | 4.33228e-08 | 1.000000 |
| rad38              | 2.53976e-08 | 1.000000 | 2.53977e-08 | 1.000000 |
| PhCH2CCH+H         | 2.36526e-08 | 1.000000 | 2.36527e-08 | 1.000000 |
| rad37              | 4.01284e-09 | 1.000000 | 4.01285e-09 | 1.000000 |
| rad33              | 3.96050e-10 | 1.000000 | 3.96051e-10 | 1.000000 |
| rad46              | 3.18424e-10 | 1.000000 | 3.18425e-10 | 1.000000 |
| rad14              | 2.23059e-10 | 1.000000 | 2.23060e-10 | 1.000000 |
| rad27              | 1.99583e-10 | 1.000000 | 1.99583e-10 | 1.000000 |
| rad23              | 1.82849e-10 | 1.000000 | 1.82850e-10 | 1.000000 |
| rad25              | 1.39145e-10 | 1.000000 | 1.39146e-10 | 1.000000 |
| rad5               | 5.01974e-11 | 1.000000 | 5.01975e-11 | 1.000000 |
| rad60syn           | 3.38678e-11 | 1.000000 | 3.38679e-11 | 1.000000 |
| rad60anti          | 1.07547e-11 | 1.000000 | 1.07547e-11 | 1.000000 |
| rad45              | 1.99482e-12 | 1.000000 | 1.99483e-12 | 1.000000 |
| rad36              | 1.24180e-13 | 1.000000 | 1.24180e-13 | 1.000000 |
| rad22              | 8.52808e-14 | 1.000000 | 8.52811e-14 | 1.000000 |
| PAH3+H             | 6.15223e-14 | 1.000000 | 6.15224e-14 | 1.000000 |
| rad59              | 2.12373e-14 | 1.000000 | 2.12373e-14 | 1.000000 |
| rad31              | 9.09736e-15 | 1.000000 | 9.09738e-15 | 1.000000 |
| rad19syn           | 2.62925e-15 | 1.000000 | 2.62926e-15 | 1.000000 |
| rad50              | 2.17186e-15 | 1.000000 | 2.17187e-15 | 1.000000 |
| rad20              | 2.05769e-15 | 1.000000 | 2.05769e-15 | 1.000000 |



|               |             |         |             |         |
|---------------|-------------|---------|-------------|---------|
| rad21         | 1.54924e-15 | 1.00000 | 1.54924e-15 | 1.00000 |
| rad54         | 2.19357e-17 | 1.00000 | 2.19357e-17 | 1.00000 |
| rad18         | 1.81796e-17 | 1.00000 | 1.81797e-17 | 1.00000 |
| PAH10+CH3     | 1.49652e-17 | 1.00000 | 1.49653e-17 | 1.00000 |
| rad43         | 3.64955e-18 | 1.00000 | 3.64956e-18 | 1.00000 |
| rad62         | 5.02921e-19 | 1.00000 | 5.02923e-19 | 1.00000 |
| rad52         | 1.04630e-19 | 1.00000 | 1.04630e-19 | 1.00000 |
| rad24         | 2.83899e-20 | 1.00000 | 2.83900e-20 | 1.00000 |
| PhcycC3H3_A+H | 5.72268e-21 | 1.00000 | 5.72270e-21 | 1.00000 |
| rad70         | 4.61182e-21 | 1.00000 | 4.61184e-21 | 1.00000 |
| rad55         | 1.92795e-21 | 1.00000 | 1.92796e-21 | 1.00000 |
| rad51         | 5.61078e-22 | 1.00000 | 5.61080e-22 | 1.00000 |
| PAH1+H        | 4.87439e-23 | 1.00000 | 4.87440e-23 | 1.00000 |
| rad58         | 3.82598e-24 | 1.00000 | 3.82599e-24 | 1.00000 |
| rad34         | 2.01450e-24 | 1.00000 | 2.01451e-24 | 1.00000 |
| rad65         | 2.00658e-24 | 1.00000 | 2.00658e-24 | 1.00000 |
| rad42         | 1.67242e-26 | 1.00000 | 1.67243e-26 | 1.00000 |
| rad41         | 4.39260e-27 | 1.00000 | 4.39261e-27 | 1.00000 |
| rad47         | 1.69876e-32 | 1.00000 | 1.69877e-32 | 1.00000 |

0.100000000E-01 Pa, 190.000000 K

| Rate constant      | True (fraction)        | Effective (fraction)   |
|--------------------|------------------------|------------------------|
| Total              | 1.11858e-17 (1.00 )    | 1.11858e-17 (1.00 )    |
| Formation of rad11 | 9.67466e-18 (0.865 )   | 9.67461e-18 (0.865 )   |
| Formation of rad6  | 1.40029e-18 (0.125 )   | 1.40029e-18 (0.125 )   |
| H-abstraction      | 1.10851e-19 (0.00991 ) | 1.10851e-19 (0.00991 ) |

| species            | PYtrue      | Cumul    | PYeffective | Cumul    |
|--------------------|-------------|----------|-------------|----------|
| Indene+H           | 0.518605    | 0.518605 | 0.518607    | 0.518607 |
| rad6               | 0.458881    | 0.977486 | 0.458883    | 0.977490 |
| Benzene+2-propynyl | 0.00990995  | 0.987396 | 0.00991000  | 0.987400 |
| C2H2+PhCH2         | 0.00686783  | 0.994264 | 0.00686786  | 0.994268 |
| PhCCH+CH3          | 0.00257092  | 0.996835 | 0.00257093  | 0.996839 |
| PhCHCCH2+H         | 0.00140147  | 0.998236 | 0.00140148  | 0.998240 |
| PhCCCH3+H          | 0.000894473 | 0.999131 | 0.000894477 | 0.999135 |
| rad2               | 0.000317698 | 0.999449 | 0.000317700 | 0.999453 |
| rad28              | 0.000311027 | 0.999760 | 0.000311028 | 0.999764 |
| Ph+MeAc            | 6.87670e-05 | 0.999828 | 6.87673e-05 | 0.999832 |
| rad26              | 5.19237e-05 | 0.999880 | 5.19239e-05 | 0.999884 |
| rad7               | 3.91540e-05 | 0.999919 | 3.91542e-05 | 0.999923 |
| rad1               | 2.14217e-05 | 0.999941 | 2.14218e-05 | 0.999945 |
| rad10              | 1.70890e-05 | 0.999958 | 1.70891e-05 | 0.999962 |
| rad11              | 9.92793e-06 | 0.999968 | 9.92803e-06 | 0.999972 |
| rad8               | 9.92466e-06 | 0.999978 | 9.92476e-06 | 0.999982 |
| rad9               | 7.97493e-06 | 0.999986 | 7.97496e-06 | 0.999990 |
| Phenyl+Allene      | 4.47113e-06 | 0.999990 | 0.00000     | 0.999990 |
| PAH7+H             | 4.42606e-06 | 0.999995 | 4.42608e-06 | 0.999999 |
| rad3               | 2.09727e-06 | 0.999997 | 2.09728e-06 | 0.999996 |
| rad4               | 1.07891e-06 | 0.999998 | 1.07891e-06 | 0.999997 |
| rad39              | 8.44352e-07 | 0.999999 | 8.44356e-07 | 0.999998 |
| rad12              | 4.95941e-07 | 0.999999 | 4.95943e-07 | 0.999999 |
| rad30              | 4.61447e-07 | 1.000000 | 4.61449e-07 | 0.999999 |
| rad13              | 1.92134e-07 | 1.000000 | 1.92135e-07 | 0.999999 |
| PAH9+H             | 1.07533e-07 | 1.000000 | 1.07533e-07 | 0.999999 |
| rad15              | 9.92734e-08 | 1.000000 | 9.92734e-08 | 1.000000 |
| rad35              | 5.06828e-08 | 1.000000 | 5.06830e-08 | 1.000000 |
| PhCH2CCH+H         | 4.23972e-08 | 1.000000 | 4.23974e-08 | 1.000000 |
| rad38              | 3.03504e-08 | 1.000000 | 3.03506e-08 | 1.000000 |
| rad37              | 6.45971e-09 | 1.000000 | 6.45974e-09 | 1.000000 |
| rad46              | 4.06339e-10 | 1.000000 | 4.06341e-10 | 1.000000 |
| rad33              | 3.68606e-10 | 1.000000 | 3.68607e-10 | 1.000000 |
| rad14              | 2.06696e-10 | 1.000000 | 2.06697e-10 | 1.000000 |
| rad27              | 1.84691e-10 | 1.000000 | 1.84692e-10 | 1.000000 |
| rad23              | 1.52982e-10 | 1.000000 | 1.52983e-10 | 1.000000 |
| rad25              | 1.29352e-10 | 1.000000 | 1.29353e-10 | 1.000000 |
| rad5               | 9.46732e-11 | 1.000000 | 9.46736e-11 | 1.000000 |
| rad60syn           | 4.71377e-11 | 1.000000 | 4.71379e-11 | 1.000000 |
| rad60anti          | 1.54304e-11 | 1.000000 | 1.54305e-11 | 1.000000 |
| rad45              | 1.66264e-12 | 1.000000 | 1.66265e-12 | 1.000000 |
| PAH3+H             | 1.31771e-13 | 1.000000 | 1.31772e-13 | 1.000000 |
| rad36              | 1.03685e-13 | 1.000000 | 1.03686e-13 | 1.000000 |
| rad22              | 7.13152e-14 | 1.000000 | 7.13155e-14 | 1.000000 |
| rad59              | 4.41006e-14 | 1.000000 | 4.41008e-14 | 1.000000 |
| rad19syn           | 9.41327e-15 | 1.000000 | 9.41331e-15 | 1.000000 |
| rad31              | 8.81840e-15 | 1.000000 | 8.81843e-15 | 1.000000 |
| rad50              | 4.61472e-15 | 1.000000 | 4.61474e-15 | 1.000000 |
| rad20              | 2.04509e-15 | 1.000000 | 2.04510e-15 | 1.000000 |

|               |             |         |             |          |
|---------------|-------------|---------|-------------|----------|
| rad21         | 1.54480e-15 | 1.00000 | 1.54481e-15 | 1.000000 |
| rad54         | 9.82738e-17 | 1.00000 | 9.82743e-17 | 1.000000 |
| PAH10+CH3     | 6.71435e-17 | 1.00000 | 6.71437e-17 | 1.000000 |
| rad18         | 1.75429e-17 | 1.00000 | 1.75429e-17 | 1.000000 |
| rad43         | 1.63333e-17 | 1.00000 | 1.63334e-17 | 1.000000 |
| rad62         | 2.58224e-18 | 1.00000 | 2.58225e-18 | 1.000000 |
| rad52         | 3.68905e-19 | 1.00000 | 3.68906e-19 | 1.000000 |
| PhcycC3H3_A+H | 4.29611e-20 | 1.00000 | 4.29613e-20 | 1.000000 |
| rad70         | 3.25597e-20 | 1.00000 | 3.25599e-20 | 1.000000 |
| rad24         | 2.40193e-20 | 1.00000 | 2.40194e-20 | 1.000000 |
| rad55         | 1.38857e-20 | 1.00000 | 1.38858e-20 | 1.000000 |
| rad51         | 2.98187e-21 | 1.00000 | 2.98189e-21 | 1.000000 |
| PAH1+H        | 4.66293e-22 | 1.00000 | 4.66295e-22 | 1.000000 |
| rad58         | 2.96192e-23 | 1.00000 | 2.96194e-23 | 1.000000 |
| rad34         | 2.06128e-23 | 1.00000 | 2.06128e-23 | 1.000000 |
| rad65         | 1.31786e-23 | 1.00000 | 1.31787e-23 | 1.000000 |
| rad42         | 2.01949e-25 | 1.00000 | 2.01950e-25 | 1.000000 |
| rad41         | 5.43942e-26 | 1.00000 | 5.43944e-26 | 1.000000 |
| rad47         | 1.24641e-31 | 1.00000 | 1.24642e-31 | 1.000000 |

0.100000000E-01 Pa, 200.000000 K

| Rate constant      | True (fraction)       | Effective (fraction)  |
|--------------------|-----------------------|-----------------------|
| Total              | 1.82690e-17 (1.00 )   | 1.82689e-17 (1.00 )   |
| Formation of rad11 | 1.55456e-17 (0.851 )  | 1.55455e-17 (0.851 )  |
| Formation of rad6  | 2.49126e-18 (0.136 )  | 2.49125e-18 (0.136 )  |
| H-abstraction      | 2.32112e-19 (0.0127 ) | 2.32112e-19 (0.0127 ) |

| species            | PYtrue      | Cumul    | PYeffective | Cumul    |
|--------------------|-------------|----------|-------------|----------|
| Indene+H           | 0.550799    | 0.550799 | 0.550802    | 0.550802 |
| rad6               | 0.422153    | 0.972952 | 0.422156    | 0.972958 |
| Benzene+2-propynyl | 0.0127053   | 0.985658 | 0.0127053   | 0.985663 |
| C2H2+PhCH2         | 0.00776510  | 0.993423 | 0.00776515  | 0.993429 |
| PhCCH+CH3          | 0.00304451  | 0.996467 | 0.00304453  | 0.996473 |
| PhCHCCH2+H         | 0.00163937  | 0.998107 | 0.00163938  | 0.998113 |
| PhCCCH3+H          | 0.00105114  | 0.999158 | 0.00105114  | 0.999164 |
| rad28              | 0.000293558 | 0.999451 | 0.000293560 | 0.999457 |
| rad2               | 0.000291027 | 0.999742 | 0.000291029 | 0.999748 |
| Ph+MeAc            | 8.97539e-05 | 0.999832 | 8.97544e-05 | 0.999838 |
| rad26              | 4.79964e-05 | 0.999880 | 4.79967e-05 | 0.999886 |
| rad7               | 3.59298e-05 | 0.999916 | 3.59300e-05 | 0.999922 |
| rad1               | 1.97764e-05 | 0.999936 | 1.97765e-05 | 0.999942 |
| rad10              | 1.56433e-05 | 0.999951 | 1.56434e-05 | 0.999957 |
| rad8               | 1.19403e-05 | 0.999963 | 1.19404e-05 | 0.999969 |
| rad9               | 9.89546e-06 | 0.999973 | 9.89546e-06 | 0.999979 |
| rad11              | 9.10803e-06 | 0.999982 | 9.10809e-06 | 0.999988 |
| Phenyl+Allene      | 6.31492e-06 | 0.999989 | 0.00000     | 0.999988 |
| PAH7+H             | 5.73495e-06 | 0.999994 | 5.73499e-06 | 0.999994 |
| rad3               | 1.92046e-06 | 0.999996 | 1.92047e-06 | 0.999996 |
| rad39              | 1.12571e-06 | 0.999997 | 1.12572e-06 | 0.999997 |
| rad4               | 9.90109e-07 | 0.999998 | 9.90118e-07 | 0.999998 |
| rad12              | 6.21094e-07 | 0.999999 | 6.21098e-07 | 0.999999 |
| rad30              | 5.35141e-07 | 1.000000 | 5.35144e-07 | 0.999999 |
| rad13              | 1.77394e-07 | 1.000000 | 1.77395e-07 | 0.999999 |
| PAH9+H             | 1.26937e-07 | 1.000000 | 1.26938e-07 | 1.000000 |
| rad15              | 1.17230e-07 | 1.000000 | 1.17230e-07 | 1.000000 |
| PhCH2CCH+H         | 7.30272e-08 | 1.000000 | 7.30277e-08 | 1.000000 |
| rad35              | 5.91129e-08 | 1.000000 | 5.91133e-08 | 1.000000 |
| rad38              | 3.61671e-08 | 1.000000 | 3.61673e-08 | 1.000000 |
| rad37              | 9.96338e-09 | 1.000000 | 9.96338e-09 | 1.000000 |
| rad46              | 5.16759e-10 | 1.000000 | 5.16762e-10 | 1.000000 |
| rad33              | 3.40983e-10 | 1.000000 | 3.40986e-10 | 1.000000 |
| rad14              | 1.90404e-10 | 1.000000 | 1.90405e-10 | 1.000000 |
| rad27              | 1.69929e-10 | 1.000000 | 1.69930e-10 | 1.000000 |
| rad5               | 1.69607e-10 | 1.000000 | 1.69608e-10 | 1.000000 |
| rad23              | 1.28437e-10 | 1.000000 | 1.28437e-10 | 1.000000 |
| rad25              | 1.19513e-10 | 1.000000 | 1.19514e-10 | 1.000000 |
| rad60syn           | 6.49078e-11 | 1.000000 | 6.49082e-11 | 1.000000 |
| rad60anti          | 2.18328e-11 | 1.000000 | 2.18329e-11 | 1.000000 |
| rad45              | 1.39136e-12 | 1.000000 | 1.39137e-12 | 1.000000 |
| PAH3+H             | 2.66447e-13 | 1.000000 | 2.66449e-13 | 1.000000 |
| rad36              | 8.69553e-14 | 1.000000 | 8.69559e-14 | 1.000000 |
| rad59              | 8.66040e-14 | 1.000000 | 8.66045e-14 | 1.000000 |
| rad22              | 5.98618e-14 | 1.000000 | 5.98621e-14 | 1.000000 |
| rad19syn           | 2.98779e-14 | 1.000000 | 2.98781e-14 | 1.000000 |
| rad50              | 9.32052e-15 | 1.000000 | 9.32058e-15 | 1.000000 |
| rad31              | 8.54013e-15 | 1.000000 | 8.54019e-15 | 1.000000 |
| rad20              | 2.02496e-15 | 1.000000 | 2.02497e-15 | 1.000000 |

|               |             |         |             |          |
|---------------|-------------|---------|-------------|----------|
| rad21         | 1.53484e-15 | 1.00000 | 1.53485e-15 | 1.000000 |
| rad54         | 3.81273e-16 | 1.00000 | 3.81276e-16 | 1.000000 |
| PAH10+CH3     | 2.60468e-16 | 1.00000 | 2.60469e-16 | 1.000000 |
| rad43         | 6.31208e-17 | 1.00000 | 6.31212e-17 | 1.000000 |
| rad18         | 1.68891e-17 | 1.00000 | 1.68892e-17 | 1.000000 |
| rad62         | 1.12935e-17 | 1.00000 | 1.12936e-17 | 1.000000 |
| rad52         | 1.16294e-18 | 1.00000 | 1.16295e-18 | 1.000000 |
| PhcycC3H3_A+H | 2.64396e-19 | 1.00000 | 2.64397e-19 | 1.000000 |
| rad70         | 1.89246e-19 | 1.00000 | 1.89247e-19 | 1.000000 |
| rad55         | 8.22149e-20 | 1.00000 | 8.22154e-20 | 1.000000 |
| rad24         | 2.04114e-20 | 1.00000 | 2.04116e-20 | 1.000000 |
| rad51         | 1.35750e-20 | 1.00000 | 1.35751e-20 | 1.000000 |
| PAH1+H        | 3.53750e-21 | 1.00000 | 3.53753e-21 | 1.000000 |
| rad58         | 1.87546e-22 | 1.00000 | 1.87546e-22 | 1.000000 |
| rad34         | 1.65820e-22 | 1.00000 | 1.65821e-22 | 1.000000 |
| rad65         | 7.22466e-23 | 1.00000 | 7.22471e-23 | 1.000000 |
| rad42         | 1.87093e-24 | 1.00000 | 1.87094e-24 | 1.000000 |
| rad41         | 5.14843e-25 | 1.00000 | 5.14846e-25 | 1.000000 |
| rad47         | 7.35121e-31 | 1.00000 | 7.35126e-31 | 1.000000 |

0.100000000E-01 Pa, 210.000000 K

| Rate constant      | True (fraction)       | Effective (fraction)  |
|--------------------|-----------------------|-----------------------|
| Total              | 2.85520e-17 (1.00 )   | 2.85518e-17 (1.00 )   |
| Formation of rad11 | 2.39009e-17 (0.837 )  | 2.39007e-17 (0.837 )  |
| Formation of rad6  | 4.19900e-18 (0.147 )  | 4.19896e-18 (0.147 )  |
| H-abstraction      | 4.52111e-19 (0.0158 ) | 4.52111e-19 (0.0158 ) |

| species            | PYtrue      | Cumul    | PYeffective | Cumul    |
|--------------------|-------------|----------|-------------|----------|
| Indene+H           | 0.581994    | 0.581994 | 0.582000    | 0.582000 |
| rad6               | 0.385902    | 0.967896 | 0.385906    | 0.967906 |
| Benzene+2-propynyl | 0.0158346   | 0.983731 | 0.0158348   | 0.983741 |
| C2H2+PhCH2         | 0.00874301  | 0.992474 | 0.00874309  | 0.992484 |
| PhCCH+CH3          | 0.00357664  | 0.996050 | 0.00357668  | 0.996060 |
| PhCHCCH2+H         | 0.00190294  | 0.997953 | 0.00190296  | 0.997963 |
| PhCCCH3+H          | 0.00122487  | 0.999178 | 0.00122488  | 0.999188 |
| rad28              | 0.000274411 | 0.999453 | 0.000274414 | 0.999463 |
| rad2               | 0.000265002 | 0.999718 | 0.000265005 | 0.999728 |
| Ph+MeAc            | 0.000115565 | 0.999833 | 0.000115566 | 0.999843 |
| rad26              | 4.40405e-05 | 0.999877 | 4.40409e-05 | 0.999887 |
| rad7               | 3.27706e-05 | 0.999910 | 3.27709e-05 | 0.999920 |
| rad1               | 1.81604e-05 | 0.999928 | 1.81605e-05 | 0.999938 |
| rad10              | 1.42367e-05 | 0.999942 | 1.42368e-05 | 0.999952 |
| rad8               | 1.42339e-05 | 0.999957 | 1.42340e-05 | 0.999967 |
| rad9               | 1.21876e-05 | 0.999969 | 1.21877e-05 | 0.999979 |
| Phenyl+Allene      | 8.78808e-06 | 0.999978 | 0.000000    | 0.999979 |
| rad11              | 8.30570e-06 | 0.999986 | 8.30576e-06 | 0.999987 |
| PAH7+H             | 7.33630e-06 | 0.999993 | 7.33637e-06 | 0.999994 |
| rad3               | 1.74836e-06 | 0.999995 | 1.74837e-06 | 0.999996 |
| rad39              | 1.47864e-06 | 0.999996 | 1.47866e-06 | 0.999998 |
| rad4               | 9.03533e-07 | 0.999997 | 9.03541e-07 | 0.999999 |
| rad12              | 7.68200e-07 | 0.999998 | 7.68207e-07 | 0.999999 |
| rad30              | 6.18111e-07 | 0.999999 | 6.18116e-07 | 1.000000 |
| rad13              | 1.62772e-07 | 0.999999 | 1.62773e-07 | 1.000000 |
| PAH9+H             | 1.49361e-07 | 0.999999 | 1.49362e-07 | 1.000000 |
| rad15              | 1.37867e-07 | 0.999999 | 1.37868e-07 | 1.000000 |
| PhCH2CCH+H         | 1.21449e-07 | 0.999999 | 1.21450e-07 | 1.000000 |
| rad35              | 6.87109e-08 | 0.999999 | 6.87115e-08 | 1.000000 |
| rad38              | 4.29585e-08 | 0.999999 | 4.29589e-08 | 1.000000 |
| rad37              | 1.48126e-08 | 0.999999 | 1.48128e-08 | 1.000000 |
| rad46              | 6.54549e-10 | 0.999999 | 6.54554e-10 | 1.000000 |
| rad33              | 3.13509e-10 | 0.999999 | 3.13512e-10 | 1.000000 |
| rad5               | 2.90487e-10 | 0.999999 | 2.90490e-10 | 1.000000 |
| rad14              | 1.74350e-10 | 0.999999 | 1.74352e-10 | 1.000000 |
| rad27              | 1.55439e-10 | 0.999999 | 1.55440e-10 | 1.000000 |
| rad25              | 1.09742e-10 | 0.999999 | 1.09743e-10 | 1.000000 |
| rad23              | 1.08159e-10 | 0.999999 | 1.08160e-10 | 1.000000 |
| rad60syn           | 8.84280e-11 | 0.999999 | 8.84288e-11 | 1.000000 |
| rad60anti          | 3.04831e-11 | 0.999999 | 3.04834e-11 | 1.000000 |
| rad45              | 1.16853e-12 | 0.999999 | 1.16854e-12 | 1.000000 |
| PAH3+H             | 5.12783e-13 | 0.999999 | 5.12787e-13 | 1.000000 |
| rad59              | 1.62125e-13 | 0.999999 | 1.62126e-13 | 1.000000 |
| rad19syn           | 8.55578e-14 | 0.999999 | 8.55585e-14 | 1.000000 |
| rad36              | 7.32164e-14 | 0.999999 | 7.32171e-14 | 1.000000 |
| rad22              | 5.04102e-14 | 0.999999 | 5.04106e-14 | 1.000000 |
| rad50              | 1.80178e-14 | 0.999999 | 1.80180e-14 | 1.000000 |
| rad31              | 8.26696e-15 | 0.999999 | 8.26703e-15 | 1.000000 |
| rad20              | 1.99749e-15 | 0.999999 | 1.99750e-15 | 1.000000 |

|               |             |          |             |         |
|---------------|-------------|----------|-------------|---------|
| rad21         | 1.51946e-15 | 0.999999 | 1.51948e-15 | 1.00000 |
| rad54         | 1.30817e-15 | 0.999999 | 1.30819e-15 | 1.00000 |
| PAH10+CH3     | 8.92066e-16 | 0.999999 | 8.92074e-16 | 1.00000 |
| rad43         | 2.15088e-16 | 0.999999 | 2.15090e-16 | 1.00000 |
| rad62         | 4.30501e-17 | 0.999999 | 4.30505e-17 | 1.00000 |
| rad18         | 1.62168e-17 | 0.999999 | 1.62169e-17 | 1.00000 |
| rad52         | 3.33340e-18 | 0.999999 | 3.33343e-18 | 1.00000 |
| PhcycC3H3_A+H | 1.37156e-18 | 0.999999 | 1.37157e-18 | 1.00000 |
| rad70         | 9.30992e-19 | 0.999999 | 9.31000e-19 | 1.00000 |
| rad55         | 4.11483e-19 | 0.999999 | 4.11485e-19 | 1.00000 |
| rad51         | 5.41415e-20 | 0.999999 | 5.41420e-20 | 1.00000 |
| PAH1+H        | 2.19817e-20 | 0.999999 | 2.19819e-20 | 1.00000 |
| rad24         | 1.74176e-20 | 0.999999 | 1.74177e-20 | 1.00000 |
| rad34         | 1.08434e-21 | 0.999999 | 1.08435e-21 | 1.00000 |
| rad58         | 9.98761e-22 | 0.999999 | 9.98770e-22 | 1.00000 |
| rad65         | 3.39232e-22 | 0.999999 | 3.39236e-22 | 1.00000 |
| rad42         | 1.38039e-23 | 0.999999 | 1.38040e-23 | 1.00000 |
| rad41         | 3.86907e-24 | 0.999999 | 3.86911e-24 | 1.00000 |
| rad47         | 3.59775e-30 | 0.999999 | 3.59778e-30 | 1.00000 |

0.100000000E-01 Pa, 220.000000 K

| Rate constant      | True (fraction)       | Effective (fraction)  |
|--------------------|-----------------------|-----------------------|
| Total              | 4.29529e-17 (1.00 )   | 4.29523e-17 (1.00 )   |
| Formation of rad11 | 3.53712e-17 (0.823 )  | 3.53707e-17 (0.823 )  |
| Formation of rad6  | 6.75433e-18 (0.157 )  | 6.75425e-18 (0.157 )  |
| H-abstraction      | 8.27372e-19 (0.0193 ) | 8.27372e-19 (0.0193 ) |

| species            | PYtrue      | Cumul    | PYeffective | Cumul    |
|--------------------|-------------|----------|-------------|----------|
| Indene+H           | 0.611822    | 0.611822 | 0.611830    | 0.611830 |
| rad6               | 0.350530    | 0.962353 | 0.350534    | 0.962364 |
| Benzene+2-propynyl | 0.0192623   | 0.981615 | 0.0192625   | 0.981627 |
| C2H2+PhCH2         | 0.00980142  | 0.991417 | 0.00980155  | 0.991428 |
| PhCCH+CH3          | 0.00416861  | 0.995585 | 0.00416865  | 0.995597 |
| PhCHCCH2+H         | 0.00219211  | 0.997777 | 0.00219212  | 0.997789 |
| PhCCCH3+H          | 0.00141546  | 0.999193 | 0.00141547  | 0.999205 |
| rad28              | 0.000254166 | 0.999447 | 0.000254169 | 0.999459 |
| rad2               | 0.000239865 | 0.999687 | 0.000239868 | 0.999699 |
| Ph+MeAc            | 0.000146862 | 0.999834 | 0.000146863 | 0.999846 |
| rad26              | 4.01227e-05 | 0.999874 | 4.01231e-05 | 0.999886 |
| rad7               | 2.97069e-05 | 0.999903 | 2.97073e-05 | 0.999915 |
| rad8               | 1.68146e-05 | 0.999920 | 1.68148e-05 | 0.999932 |
| rad1               | 1.65886e-05 | 0.999937 | 1.65888e-05 | 0.999949 |
| rad9               | 1.48976e-05 | 0.999952 | 1.48978e-05 | 0.999964 |
| rad10              | 1.28812e-05 | 0.999965 | 1.28814e-05 | 0.999977 |
| Phenyl+Allene      | 1.20591e-05 | 0.999977 | 0.00000     | 0.999977 |
| PAH7+H             | 9.27315e-06 | 0.999986 | 9.27326e-06 | 0.999986 |
| rad11              | 7.52845e-06 | 0.999993 | 7.52854e-06 | 0.999993 |
| rad39              | 1.91549e-06 | 0.999995 | 1.91552e-06 | 0.999995 |
| rad3               | 1.58244e-06 | 0.999997 | 1.58246e-06 | 0.999997 |
| rad12              | 9.38889e-07 | 0.999998 | 9.38900e-07 | 0.999998 |
| rad4               | 8.19915e-07 | 0.999999 | 8.19925e-07 | 0.999999 |
| rad30              | 7.10909e-07 | 0.999999 | 7.10918e-07 | 0.999999 |
| PhCH2CCH+H         | 1.95794e-07 | 1.000000 | 1.95797e-07 | 1.000000 |
| PAH9+H             | 1.75130e-07 | 1.000000 | 1.75132e-07 | 1.000000 |
| rad15              | 1.61424e-07 | 1.000000 | 1.61425e-07 | 1.000000 |
| rad13              | 1.48433e-07 | 1.00000  | 1.48435e-07 | 1.00000  |
| rad35              | 7.95779e-08 | 1.00000  | 7.95789e-08 | 1.00000  |
| rad38              | 5.08454e-08 | 1.00000  | 5.08460e-08 | 1.00000  |
| rad37              | 2.13317e-08 | 1.00000  | 2.13320e-08 | 1.00000  |
| rad46              | 8.25425e-10 | 1.00000  | 8.25435e-10 | 1.00000  |
| rad5               | 4.78197e-10 | 1.00000  | 4.78203e-10 | 1.00000  |
| rad33              | 2.86499e-10 | 1.00000  | 2.86502e-10 | 1.00000  |
| rad14              | 1.58699e-10 | 1.00000  | 1.58701e-10 | 1.00000  |
| rad27              | 1.41361e-10 | 1.00000  | 1.41363e-10 | 1.00000  |
| rad60syn           | 1.19217e-10 | 1.00000  | 1.19217e-10 | 1.00000  |
| rad25              | 1.00151e-10 | 1.00000  | 1.00153e-10 | 1.00000  |
| rad23              | 9.13476e-11 | 1.00000  | 9.13486e-11 | 1.00000  |
| rad60anti          | 4.20250e-11 | 1.00000  | 4.20255e-11 | 1.00000  |
| rad45              | 9.84778e-13 | 1.00000  | 9.84798e-13 | 1.00000  |
| PAH3+H             | 9.45485e-13 | 1.00000  | 9.45497e-13 | 1.00000  |
| rad59              | 2.91201e-13 | 1.00000  | 2.91204e-13 | 1.00000  |
| rad19syn           | 2.24222e-13 | 1.00000  | 2.24225e-13 | 1.00000  |
| rad36              | 6.18882e-14 | 1.00000  | 6.18889e-14 | 1.00000  |
| rad22              | 4.25758e-14 | 1.00000  | 4.25763e-14 | 1.00000  |
| rad50              | 3.35249e-14 | 1.00000  | 3.35253e-14 | 1.00000  |
| rad31              | 8.00373e-15 | 1.00000  | 8.00383e-15 | 1.00000  |
| rad54              | 4.03781e-15 | 1.00000  | 4.03786e-15 | 1.00000  |

|               |             |         |             |         |
|---------------|-------------|---------|-------------|---------|
| PAH10+CH3     | 2.74356e-15 | 1.00000 | 2.74359e-15 | 1.00000 |
| rad20         | 1.96310e-15 | 1.00000 | 1.96312e-15 | 1.00000 |
| rad21         | 1.49895e-15 | 1.00000 | 1.49897e-15 | 1.00000 |
| rad43         | 6.57401e-16 | 1.00000 | 6.57409e-16 | 1.00000 |
| rad62         | 1.45738e-16 | 1.00000 | 1.45740e-16 | 1.00000 |
| rad18         | 1.55268e-17 | 1.00000 | 1.55270e-17 | 1.00000 |
| rad52         | 8.80655e-18 | 1.00000 | 8.80666e-18 | 1.00000 |
| PhcycC3H3_A+H | 6.13330e-18 | 1.00000 | 6.13338e-18 | 1.00000 |
| rad70         | 3.96430e-18 | 1.00000 | 3.96435e-18 | 1.00000 |
| rad55         | 1.78040e-18 | 1.00000 | 1.78043e-18 | 1.00000 |
| rad51         | 1.92612e-19 | 1.00000 | 1.92615e-19 | 1.00000 |
| PAH1+H        | 1.14845e-19 | 1.00000 | 1.14847e-19 | 1.00000 |
| rad24         | 1.49249e-20 | 1.00000 | 1.49250e-20 | 1.00000 |
| rad34         | 5.92223e-21 | 1.00000 | 5.92231e-21 | 1.00000 |
| rad58         | 4.57506e-21 | 1.00000 | 4.57512e-21 | 1.00000 |
| rad65         | 1.39277e-21 | 1.00000 | 1.39278e-21 | 1.00000 |
| rad42         | 8.35891e-23 | 1.00000 | 8.35901e-23 | 1.00000 |
| rad41         | 2.38029e-23 | 1.00000 | 2.38032e-23 | 1.00000 |
| rad47         | 1.49964e-29 | 1.00000 | 1.49966e-29 | 1.00000 |

0.100000000E-01 Pa, 230.000000 K

| Rate constant      | True (fraction)       | Effective (fraction)  |
|--------------------|-----------------------|-----------------------|
| Total              | 6.25016e-17 (1.00 )   | 6.25006e-17 (1.00 )   |
| Formation of rad11 | 5.06355e-17 (0.810 )  | 5.06347e-17 (0.810 )  |
| Formation of rad6  | 1.04318e-17 (0.167 )  | 1.04317e-17 (0.167 )  |
| H-abstraction      | 1.43428e-18 (0.0229 ) | 1.43428e-18 (0.0229 ) |

| species            | PYtrue      | Cumul    | PYeffective | Cumul    |
|--------------------|-------------|----------|-------------|----------|
| Indene+H           | 0.639958    | 0.639958 | 0.639969    | 0.639969 |
| rad6               | 0.316402    | 0.956360 | 0.316407    | 0.956375 |
| Benzene+2-propynyl | 0.0229478   | 0.979308 | 0.0229482   | 0.979324 |
| C2H2+PhCH2         | 0.0109397   | 0.990248 | 0.0109399   | 0.990263 |
| PhCCH+CH3          | 0.00482088  | 0.995069 | 0.00482096  | 0.995084 |
| PhCHCCH2+H         | 0.00250640  | 0.997575 | 0.00250644  | 0.997591 |
| PhCCCH3+H          | 0.00162237  | 0.999197 | 0.00162238  | 0.999213 |
| rad28              | 0.000233366 | 0.999431 | 0.000233370 | 0.999447 |
| rad2               | 0.000215828 | 0.999646 | 0.000215832 | 0.999662 |
| Ph+MeAc            | 0.000184306 | 0.999831 | 0.000184309 | 0.999847 |
| rad26              | 3.63009e-05 | 0.999867 | 3.63016e-05 | 0.999883 |
| rad7               | 2.67666e-05 | 0.999894 | 2.67671e-05 | 0.999910 |
| rad8               | 1.96878e-05 | 0.999914 | 1.96881e-05 | 0.999930 |
| rad9               | 1.80732e-05 | 0.999932 | 1.80735e-05 | 0.999948 |
| Phenyl+Allene      | 1.63293e-05 | 0.999948 | 0.00000     | 0.999948 |
| rad1               | 1.50744e-05 | 0.999963 | 1.50747e-05 | 0.999963 |
| PAH7+H             | 1.15916e-05 | 0.999975 | 1.15917e-05 | 0.999974 |
| rad10              | 1.15875e-05 | 0.999986 | 1.15877e-05 | 0.999986 |
| rad11              | 6.78310e-06 | 0.999993 | 6.78321e-06 | 0.999993 |
| rad39              | 2.44970e-06 | 0.999995 | 2.44975e-06 | 0.999995 |
| rad3               | 1.42402e-06 | 0.999997 | 1.42405e-06 | 0.999997 |
| rad12              | 1.13454e-06 | 0.999998 | 1.13456e-06 | 0.999998 |
| rad30              | 8.14068e-07 | 0.999999 | 8.14082e-07 | 0.999998 |
| rad4               | 7.39922e-07 | 1.000000 | 7.39934e-07 | 0.999999 |
| PhCH2CCH+H         | 3.07028e-07 | 1.000000 | 3.07033e-07 | 1.000000 |
| PAH9+H             | 2.04603e-07 | 1.000000 | 2.04606e-07 | 1.000000 |
| rad15              | 1.88149e-07 | 1.000000 | 1.88152e-07 | 1.000000 |
| rad13              | 1.34530e-07 | 1.000000 | 1.34532e-07 | 1.000000 |
| rad35              | 9.18198e-08 | 1.000000 | 9.18213e-08 | 1.000000 |
| rad38              | 5.99590e-08 | 1.000000 | 5.99600e-08 | 1.000000 |
| rad37              | 2.98780e-08 | 1.000000 | 2.98784e-08 | 1.000000 |
| rad46              | 1.03610e-09 | 1.000000 | 1.03611e-09 | 1.000000 |
| rad5               | 7.60033e-10 | 1.000000 | 7.60046e-10 | 1.000000 |
| rad33              | 2.60244e-10 | 1.000000 | 2.60248e-10 | 1.000000 |
| rad60syn           | 1.59102e-10 | 1.000000 | 1.59105e-10 | 1.000000 |
| rad14              | 1.43599e-10 | 1.000000 | 1.43601e-10 | 1.000000 |
| rad27              | 1.27819e-10 | 1.000000 | 1.27821e-10 | 1.000000 |
| rad25              | 9.08427e-11 | 1.000000 | 9.08442e-11 | 1.000000 |
| rad23              | 7.73856e-11 | 1.000000 | 7.73868e-11 | 1.000000 |
| rad60anti          | 5.72461e-11 | 1.000000 | 5.72470e-11 | 1.000000 |
| PAH3+H             | 1.67929e-12 | 1.000000 | 1.67932e-12 | 1.000000 |
| rad45              | 8.32912e-13 | 1.000000 | 8.32925e-13 | 1.000000 |
| rad19syn           | 5.44151e-13 | 1.000000 | 5.44160e-13 | 1.000000 |
| rad59              | 5.04499e-13 | 1.000000 | 5.04508e-13 | 1.000000 |
| rad50              | 6.03174e-14 | 1.000000 | 6.03185e-14 | 1.000000 |
| rad36              | 5.25255e-14 | 1.000000 | 5.25264e-14 | 1.000000 |
| rad22              | 3.60633e-14 | 1.000000 | 3.60639e-14 | 1.000000 |
| rad54              | 1.13698e-14 | 1.000000 | 1.13700e-14 | 1.000000 |
| rad31              | 7.75564e-15 | 1.000000 | 7.75577e-15 | 1.000000 |

|               |             |         |             |         |
|---------------|-------------|---------|-------------|---------|
| PAH10+CH3     | 7.68361e-15 | 1.00000 | 7.68374e-15 | 1.00000 |
| rad20         | 1.92239e-15 | 1.00000 | 1.92242e-15 | 1.00000 |
| rad43         | 1.82774e-15 | 1.00000 | 1.82777e-15 | 1.00000 |
| rad21         | 1.47369e-15 | 1.00000 | 1.47372e-15 | 1.00000 |
| rad62         | 4.44916e-16 | 1.00000 | 4.44923e-16 | 1.00000 |
| PhcycC3H3_A+H | 2.40774e-17 | 1.00000 | 2.40778e-17 | 1.00000 |
| rad52         | 2.16830e-17 | 1.00000 | 2.16834e-17 | 1.00000 |
| rad70         | 1.48797e-17 | 1.00000 | 1.48799e-17 | 1.00000 |
| rad18         | 1.48224e-17 | 1.00000 | 1.48226e-17 | 1.00000 |
| rad55         | 6.78211e-18 | 1.00000 | 6.78221e-18 | 1.00000 |
| rad51         | 6.20132e-19 | 1.00000 | 6.20142e-19 | 1.00000 |
| PAH1+H        | 5.15440e-19 | 1.00000 | 5.15449e-19 | 1.00000 |
| rad34         | 2.76238e-20 | 1.00000 | 2.76242e-20 | 1.00000 |
| rad58         | 1.83595e-20 | 1.00000 | 1.83598e-20 | 1.00000 |
| rad24         | 1.28465e-20 | 1.00000 | 1.28467e-20 | 1.00000 |
| rad65         | 5.08362e-21 | 1.00000 | 5.08370e-21 | 1.00000 |
| rad42         | 4.25938e-22 | 1.00000 | 4.25946e-22 | 1.00000 |
| rad41         | 1.22962e-22 | 1.00000 | 1.22964e-22 | 1.00000 |
| rad47         | 5.43965e-29 | 1.00000 | 5.43974e-29 | 1.00000 |

0.100000000E-01 Pa, 240.000000 K

| Rate constant      | True (fraction)       | Effective (fraction)  |
|--------------------|-----------------------|-----------------------|
| Total              | 8.83273e-17 (1.00 )   | 8.83254e-17 (1.00 )   |
| Formation of rad11 | 7.04077e-17 (0.797 )  | 7.04062e-17 (0.797 )  |
| Formation of rad6  | 1.55481e-17 (0.176 )  | 1.55478e-17 (0.176 )  |
| H-abstraction      | 2.37143e-18 (0.0268 ) | 2.37143e-18 (0.0268 ) |

| species            | PYtrue      | Cumul    | PYeffective | Cumul    |
|--------------------|-------------|----------|-------------|----------|
| Indene+H           | 0.666131    | 0.666131 | 0.666145    | 0.666145 |
| rad6               | 0.283831    | 0.949963 | 0.283837    | 0.949982 |
| Benzene+2-propynyl | 0.0268483   | 0.976811 | 0.0268488   | 0.976831 |
| C2H2+PhCH2         | 0.0121567   | 0.988967 | 0.0121570   | 0.988988 |
| PhCCH+CH3          | 0.00553323  | 0.994501 | 0.00553336  | 0.994522 |
| PhCHCCH2+H         | 0.00284506  | 0.997346 | 0.00284511  | 0.997367 |
| PhCCCH3+H          | 0.00184478  | 0.999191 | 0.00184482  | 0.999212 |
| Ph+MeAc            | 0.000228547 | 0.999419 | 0.000228551 | 0.999440 |
| rad28              | 0.000212497 | 0.999632 | 0.000212502 | 0.999653 |
| rad2               | 0.000193069 | 0.999825 | 0.000193074 | 0.999846 |
| rad26              | 3.26240e-05 | 0.999857 | 3.26247e-05 | 0.999878 |
| rad7               | 2.39733e-05 | 0.999881 | 2.39739e-05 | 0.999902 |
| rad8               | 2.28542e-05 | 0.999904 | 2.28547e-05 | 0.999925 |
| Phenyl+Allene      | 2.18370e-05 | 0.999926 | 0.00000     | 0.999925 |
| rad9               | 2.17638e-05 | 0.999948 | 2.17642e-05 | 0.999947 |
| PAH7+H             | 1.43406e-05 | 0.999962 | 1.43408e-05 | 0.999961 |
| rad1               | 1.36298e-05 | 0.999976 | 1.36301e-05 | 0.999975 |
| rad10              | 1.03646e-05 | 0.999986 | 1.03648e-05 | 0.999985 |
| rad11              | 6.07545e-06 | 0.999992 | 6.07559e-06 | 0.999991 |
| rad39              | 3.09586e-06 | 0.999995 | 3.09593e-06 | 0.999994 |
| rad12              | 1.35626e-06 | 0.999997 | 1.35629e-06 | 0.999996 |
| rad3               | 1.27423e-06 | 0.999998 | 1.27424e-06 | 0.999997 |
| rad30              | 9.28108e-07 | 0.999999 | 9.28129e-07 | 0.999998 |
| rad4               | 6.64117e-07 | 0.999999 | 6.64131e-07 | 0.999999 |
| PhCH2CCH+H         | 4.69651e-07 | 1.000000 | 4.69661e-07 | 0.999999 |
| PAH9+H             | 2.38163e-07 | 1.00000  | 2.38168e-07 | 0.999999 |
| rad15              | 2.18296e-07 | 1.00000  | 2.18301e-07 | 1.000000 |
| rad13              | 1.21196e-07 | 1.00000  | 1.21199e-07 | 1.000000 |
| rad35              | 1.05549e-07 | 1.00000  | 1.05551e-07 | 1.000000 |
| rad38              | 7.04433e-08 | 1.00000  | 7.04449e-08 | 1.000000 |
| rad37              | 4.08378e-08 | 1.00000  | 4.08388e-08 | 1.000000 |
| rad46              | 1.29444e-09 | 1.00000  | 1.29446e-09 | 1.000000 |
| rad5               | 1.17073e-09 | 1.00000  | 1.17076e-09 | 1.000000 |
| rad33              | 2.35003e-10 | 1.00000  | 2.35008e-10 | 1.000000 |
| rad60syn           | 2.10275e-10 | 1.00000  | 2.10279e-10 | 1.000000 |
| rad14              | 1.29182e-10 | 1.00000  | 1.29185e-10 | 1.000000 |
| rad27              | 1.14923e-10 | 1.00000  | 1.14926e-10 | 1.000000 |
| rad25              | 8.19072e-11 | 1.00000  | 8.19090e-11 | 1.000000 |
| rad60anti          | 7.71029e-11 | 1.00000  | 7.71045e-11 | 1.000000 |
| rad23              | 6.57871e-11 | 1.00000  | 6.57886e-11 | 1.000000 |
| PAH3+H             | 2.88587e-12 | 1.00000  | 2.88594e-12 | 1.000000 |
| rad19syn           | 1.23482e-12 | 1.00000  | 1.23485e-12 | 1.000000 |
| rad59              | 8.46723e-13 | 1.00000  | 8.46742e-13 | 1.000000 |
| rad45              | 7.07314e-13 | 1.00000  | 7.07330e-13 | 1.000000 |
| rad50              | 1.05338e-13 | 1.00000  | 1.05340e-13 | 1.000000 |
| rad36              | 4.47823e-14 | 1.00000  | 4.47833e-14 | 1.000000 |
| rad22              | 3.06425e-14 | 1.00000  | 3.06432e-14 | 1.000000 |
| rad54              | 2.95429e-14 | 1.00000  | 2.95436e-14 | 1.000000 |
| PAH10+CH3          | 1.98218e-14 | 1.00000  | 1.98222e-14 | 1.000000 |

|               |             |         |             |          |
|---------------|-------------|---------|-------------|----------|
| rad31         | 7.52814e-15 | 1.00000 | 7.52830e-15 | 1.000000 |
| rad43         | 4.67656e-15 | 1.00000 | 4.67666e-15 | 1.000000 |
| rad20         | 1.87609e-15 | 1.00000 | 1.87614e-15 | 1.000000 |
| rad21         | 1.44421e-15 | 1.00000 | 1.44424e-15 | 1.000000 |
| rad62         | 1.24046e-15 | 1.00000 | 1.24049e-15 | 1.000000 |
| PhcycC3H3_A+H | 8.42280e-17 | 1.00000 | 8.42298e-17 | 1.000000 |
| rad52         | 5.02029e-17 | 1.00000 | 5.02040e-17 | 1.000000 |
| rad70         | 4.99691e-17 | 1.00000 | 4.99702e-17 | 1.000000 |
| rad55         | 2.30866e-17 | 1.00000 | 2.30870e-17 | 1.000000 |
| rad18         | 1.41074e-17 | 1.00000 | 1.41077e-17 | 1.000000 |
| PAH1+H        | 2.02306e-18 | 1.00000 | 2.02310e-18 | 1.000000 |
| rad51         | 1.82801e-18 | 1.00000 | 1.82805e-18 | 1.000000 |
| rad34         | 1.12111e-19 | 1.00000 | 1.12113e-19 | 1.000000 |
| rad58         | 6.55210e-20 | 1.00000 | 6.55225e-20 | 1.000000 |
| rad65         | 1.67196e-20 | 1.00000 | 1.67200e-20 | 1.000000 |
| rad24         | 1.11148e-20 | 1.00000 | 1.11149e-20 | 1.000000 |
| rad42         | 1.86499e-21 | 1.00000 | 1.86502e-21 | 1.000000 |
| rad41         | 5.44826e-22 | 1.00000 | 5.44838e-22 | 1.000000 |
| rad47         | 1.74816e-28 | 1.00000 | 1.74820e-28 | 1.000000 |

0.100000000E-01 Pa, 250.000000 K

| Rate constant      | True (fraction)       | Effective (fraction)  |
|--------------------|-----------------------|-----------------------|
| Total              | 1.21641e-16 (1.00 )   | 1.21638e-16 (1.00 )   |
| Formation of rad11 | 9.54219e-17 (0.784 )  | 9.54190e-17 (0.784 )  |
| Formation of rad6  | 2.24583e-17 (0.185 )  | 2.24576e-17 (0.185 )  |
| H-abstraction      | 3.76121e-18 (0.0309 ) | 3.76121e-18 (0.0309 ) |

| species            | PYtrue      | Cumul    | PYeffective | Cumul    |
|--------------------|-------------|----------|-------------|----------|
| Indene+H           | 0.690131    | 0.690131 | 0.690151    | 0.690151 |
| rad6               | 0.253074    | 0.943205 | 0.253082    | 0.943232 |
| Benzene+2-propynyl | 0.0309205   | 0.974126 | 0.0309214   | 0.974154 |
| C2H2+PhCH2         | 0.0134512   | 0.987577 | 0.0134517   | 0.987605 |
| PhCCH+CH3          | 0.00630475  | 0.993882 | 0.00630494  | 0.993910 |
| PhCHCCH2+H         | 0.00320699  | 0.997089 | 0.00320709  | 0.997117 |
| PhCCCH3+H          | 0.00208166  | 0.999170 | 0.00208173  | 0.999199 |
| Ph+MeAc            | 0.000280206 | 0.999450 | 0.000280215 | 0.999479 |
| rad28              | 0.000191976 | 0.999642 | 0.000191981 | 0.999671 |
| rad2               | 0.000171730 | 0.999814 | 0.000171735 | 0.999843 |
| rad26              | 2.91308e-05 | 0.999843 | 2.91317e-05 | 0.999872 |
| Phenyl+Allene      | 2.88624e-05 | 0.999872 | 0.000000    | 0.999872 |
| rad8               | 2.63109e-05 | 0.999898 | 2.63116e-05 | 0.999899 |
| rad9               | 2.60202e-05 | 0.999924 | 2.60209e-05 | 0.999925 |
| rad7               | 2.13458e-05 | 0.999946 | 2.13464e-05 | 0.999946 |
| PAH7+H             | 1.75728e-05 | 0.999963 | 1.75734e-05 | 0.999963 |
| rad1               | 1.22639e-05 | 0.999976 | 1.22643e-05 | 0.999976 |
| rad10              | 9.21940e-06 | 0.999985 | 9.21966e-06 | 0.999985 |
| rad11              | 5.41014e-06 | 0.999990 | 5.41029e-06 | 0.999990 |
| rad39              | 3.86967e-06 | 0.999994 | 3.86978e-06 | 0.999994 |
| rad12              | 1.60484e-06 | 0.999996 | 1.60489e-06 | 0.999996 |
| rad3               | 1.13388e-06 | 0.999997 | 1.13392e-06 | 0.999997 |
| rad30              | 1.05355e-06 | 0.999998 | 1.05358e-06 | 0.999998 |
| PhCH2CCH+H         | 7.02536e-07 | 0.999999 | 7.02556e-07 | 0.999999 |
| rad4               | 5.92941e-07 | 0.999999 | 5.92958e-07 | 0.999999 |
| PAH9+H             | 2.76230e-07 | 0.999999 | 2.76239e-07 | 1.000000 |
| rad15              | 2.52127e-07 | 1.000000 | 2.52135e-07 | 1.000000 |
| rad35              | 1.20884e-07 | 1.000000 | 1.20888e-07 | 1.000000 |
| rad13              | 1.08545e-07 | 1.000000 | 1.08547e-07 | 1.000000 |
| rad38              | 8.24571e-08 | 1.000000 | 8.24596e-08 | 1.000000 |
| rad37              | 5.46241e-08 | 1.000000 | 5.46256e-08 | 1.000000 |
| rad5               | 1.75342e-09 | 1.000000 | 1.75348e-09 | 1.000000 |
| rad46              | 1.60962e-09 | 1.000000 | 1.60967e-09 | 1.000000 |
| rad60syn           | 2.75334e-10 | 1.000000 | 2.75342e-10 | 1.000000 |
| rad33              | 2.10992e-10 | 1.000000 | 2.10998e-10 | 1.000000 |
| rad14              | 1.15553e-10 | 1.000000 | 1.15557e-10 | 1.000000 |
| rad27              | 1.02762e-10 | 1.000000 | 1.02765e-10 | 1.000000 |
| rad60anti          | 1.02748e-10 | 1.000000 | 1.02750e-10 | 1.000000 |
| rad25              | 7.34199e-11 | 1.000000 | 7.34220e-11 | 1.000000 |
| rad23              | 5.61663e-11 | 1.000000 | 5.61680e-11 | 1.000000 |
| PAH3+H             | 4.81627e-12 | 1.000000 | 4.81640e-12 | 1.000000 |
| rad19syn           | 2.64141e-12 | 1.000000 | 2.64149e-12 | 1.000000 |
| rad59              | 1.38164e-12 | 1.000000 | 1.38167e-12 | 1.000000 |
| rad45              | 6.03565e-13 | 1.000000 | 6.03582e-13 | 1.000000 |
| rad50              | 1.79126e-13 | 1.000000 | 1.79131e-13 | 1.000000 |
| rad54              | 7.15061e-14 | 1.000000 | 7.15081e-14 | 1.000000 |
| PAH10+CH3          | 4.75535e-14 | 1.000000 | 4.75549e-14 | 1.000000 |
| rad36              | 3.83859e-14 | 1.000000 | 3.83870e-14 | 1.000000 |
| rad22              | 2.61309e-14 | 1.000000 | 2.61317e-14 | 1.000000 |

|               |             |         |             |         |
|---------------|-------------|---------|-------------|---------|
| rad43         | 1.11189e-14 | 1.00000 | 1.11193e-14 | 1.00000 |
| rad31         | 7.32694e-15 | 1.00000 | 7.32716e-15 | 1.00000 |
| rad62         | 3.19168e-15 | 1.00000 | 3.19178e-15 | 1.00000 |
| rad20         | 1.82505e-15 | 1.00000 | 1.82510e-15 | 1.00000 |
| rad21         | 1.41110e-15 | 1.00000 | 1.41114e-15 | 1.00000 |
| PhcycC3H3_A+H | 2.65846e-16 | 1.00000 | 2.65853e-16 | 1.00000 |
| rad70         | 1.51999e-16 | 1.00000 | 1.52003e-16 | 1.00000 |
| rad52         | 1.10097e-16 | 1.00000 | 1.10101e-16 | 1.00000 |
| rad55         | 7.10967e-17 | 1.00000 | 7.10988e-17 | 1.00000 |
| rad18         | 1.33870e-17 | 1.00000 | 1.33873e-17 | 1.00000 |
| PAH1+H        | 7.04882e-18 | 1.00000 | 7.04903e-18 | 1.00000 |
| rad51         | 4.98000e-18 | 1.00000 | 4.98014e-18 | 1.00000 |
| rad34         | 4.02154e-19 | 1.00000 | 4.02166e-19 | 1.00000 |
| rad58         | 2.10570e-19 | 1.00000 | 2.10577e-19 | 1.00000 |
| rad65         | 5.00972e-20 | 1.00000 | 5.00987e-20 | 1.00000 |
| rad24         | 9.67606e-21 | 1.00000 | 9.67634e-21 | 1.00000 |
| rad42         | 7.14164e-21 | 1.00000 | 7.14184e-21 | 1.00000 |
| rad41         | 2.10804e-21 | 1.00000 | 2.10809e-21 | 1.00000 |
| rad47         | 5.05322e-28 | 1.00000 | 5.05337e-28 | 1.00000 |

0.100000000E-01 Pa, 260.000000 K

| Rate constant      | True (fraction)       | Effective (fraction)  |
|--------------------|-----------------------|-----------------------|
| Total              | 1.63720e-16 (1.00 )   | 1.63714e-16 (1.00 )   |
| Formation of rad11 | 1.26419e-16 (0.772 )  | 1.26414e-16 (0.772 )  |
| Formation of rad6  | 3.15515e-17 (0.193 )  | 3.15502e-17 (0.193 )  |
| H-abstraction      | 5.75028e-18 (0.0351 ) | 5.75028e-18 (0.0351 ) |

| species            | PYtrue      | Cumul    | PYeffective | Cumul    |
|--------------------|-------------|----------|-------------|----------|
| Indene+H           | 0.711812    | 0.711812 | 0.711839    | 0.711839 |
| rad6               | 0.224322    | 0.936135 | 0.224331    | 0.936170 |
| Benzene+2-propynyl | 0.0351226   | 0.971257 | 0.0351239   | 0.971294 |
| C2H2+PhCH2         | 0.0148221   | 0.986079 | 0.0148226   | 0.986117 |
| PhCCH+CH3          | 0.00713394  | 0.993213 | 0.00713421  | 0.993251 |
| PhCHCCH2+H         | 0.00359095  | 0.996804 | 0.00359109  | 0.996842 |
| PhCCCH3+H          | 0.00233172  | 0.999136 | 0.00233182  | 0.999174 |
| Ph+MeAc            | 0.000339869 | 0.999476 | 0.000339882 | 0.999514 |
| rad28              | 0.000172146 | 0.999648 | 0.000172152 | 0.999686 |
| rad2               | 0.000151907 | 0.999800 | 0.000151913 | 0.999838 |
| Phenyl+Allene      | 3.77321e-05 | 0.999838 | 0.00000     | 0.999838 |
| rad9               | 3.08952e-05 | 0.999868 | 3.08964e-05 | 0.999869 |
| rad8               | 3.00509e-05 | 0.999899 | 3.00520e-05 | 0.999899 |
| rad26              | 2.58507e-05 | 0.999924 | 2.58516e-05 | 0.999924 |
| PAH7+H             | 2.13444e-05 | 0.999946 | 2.13453e-05 | 0.999946 |
| rad7               | 1.88978e-05 | 0.999965 | 1.88985e-05 | 0.999965 |
| rad1               | 1.09839e-05 | 0.999976 | 1.09842e-05 | 0.999976 |
| rad10              | 8.15662e-06 | 0.999984 | 8.15693e-06 | 0.999984 |
| rad11              | 4.79051e-06 | 0.999989 | 4.79069e-06 | 0.999989 |
| rad39              | 4.78803e-06 | 0.999993 | 4.78821e-06 | 0.999993 |
| rad12              | 1.88078e-06 | 0.999995 | 1.88085e-06 | 0.999995 |
| rad30              | 1.19093e-06 | 0.999996 | 1.19098e-06 | 0.999996 |
| PhCH2CCH+H         | 1.02986e-06 | 0.999997 | 1.02990e-06 | 0.999998 |
| rad3               | 1.00361e-06 | 0.999998 | 1.00364e-06 | 0.999999 |
| rad4               | 5.26706e-07 | 0.999999 | 5.26727e-07 | 0.999999 |
| PAH9+H             | 3.19268e-07 | 0.999999 | 3.19280e-07 | 0.999999 |
| rad15              | 2.89918e-07 | 1.000000 | 2.89929e-07 | 1.000000 |
| rad35              | 1.37957e-07 | 1.000000 | 1.37963e-07 | 1.000000 |
| rad13              | 9.66585e-08 | 1.000000 | 9.66623e-08 | 1.000000 |
| rad38              | 9.61761e-08 | 1.000000 | 9.61797e-08 | 1.000000 |
| rad37              | 7.16703e-08 | 1.000000 | 7.16730e-08 | 1.000000 |
| rad5               | 2.56050e-09 | 1.000000 | 2.56060e-09 | 1.000000 |
| rad46              | 1.99242e-09 | 1.000000 | 1.99250e-09 | 1.000000 |
| rad60syn           | 3.57355e-10 | 1.000000 | 3.57369e-10 | 1.000000 |
| rad33              | 1.88382e-10 | 1.000000 | 1.88388e-10 | 1.000000 |
| rad60anti          | 1.35559e-10 | 1.000000 | 1.35564e-10 | 1.000000 |
| rad14              | 1.02793e-10 | 1.000000 | 1.02797e-10 | 1.000000 |
| rad27              | 9.13993e-11 | 1.000000 | 9.14027e-11 | 1.000000 |
| rad25              | 6.54394e-11 | 1.000000 | 6.54419e-11 | 1.000000 |
| rad23              | 4.82132e-11 | 1.000000 | 4.82151e-11 | 1.000000 |
| PAH3+H             | 7.82976e-12 | 1.000000 | 7.83006e-12 | 1.000000 |
| rad19syn           | 5.36170e-12 | 1.000000 | 5.36190e-12 | 1.000000 |
| rad59              | 2.19839e-12 | 1.000000 | 2.19847e-12 | 1.000000 |
| rad45              | 5.18139e-13 | 1.000000 | 5.18159e-13 | 1.000000 |
| rad50              | 2.97365e-13 | 1.000000 | 2.97376e-13 | 1.000000 |
| rad54              | 1.62468e-13 | 1.000000 | 1.62474e-13 | 1.000000 |
| PAH10+CH3          | 1.06934e-13 | 1.000000 | 1.06937e-13 | 1.000000 |
| rad36              | 3.31202e-14 | 1.000000 | 3.31215e-14 | 1.000000 |
| rad43              | 2.47646e-14 | 1.000000 | 2.47656e-14 | 1.000000 |



|               |             |          |             |         |
|---------------|-------------|----------|-------------|---------|
| rad22         | 2.23828e-14 | 1.000000 | 2.23837e-14 | 1.00000 |
| rad62         | 7.64448e-15 | 1.000000 | 7.64477e-15 | 1.00000 |
| rad31         | 7.15816e-15 | 1.000000 | 7.15843e-15 | 1.00000 |
| rad20         | 1.77014e-15 | 1.000000 | 1.77022e-15 | 1.00000 |
| rad21         | 1.37500e-15 | 1.000000 | 1.37505e-15 | 1.00000 |
| PhcycC3H3_A+H | 7.65000e-16 | 1.000000 | 7.65029e-16 | 1.00000 |
| rad70         | 4.23124e-16 | 1.000000 | 4.23141e-16 | 1.00000 |
| rad52         | 2.30029e-16 | 1.000000 | 2.30037e-16 | 1.00000 |
| rad55         | 2.00125e-16 | 1.000000 | 2.00133e-16 | 1.00000 |
| PAH1+H        | 2.20818e-17 | 1.000000 | 2.20826e-17 | 1.00000 |
| rad18         | 1.26665e-17 | 1.000000 | 1.26671e-17 | 1.00000 |
| rad51         | 1.26334e-17 | 1.000000 | 1.26339e-17 | 1.00000 |
| rad34         | 1.29216e-18 | 1.000000 | 1.29221e-18 | 1.00000 |
| rad58         | 6.15879e-19 | 1.000000 | 6.15903e-19 | 1.00000 |
| rad65         | 1.38004e-19 | 1.000000 | 1.38008e-19 | 1.00000 |
| rad42         | 2.42788e-20 | 1.000000 | 2.42798e-20 | 1.00000 |
| rad24         | 8.48789e-21 | 1.000000 | 8.48822e-21 | 1.00000 |
| rad41         | 7.23181e-21 | 1.000000 | 7.23208e-21 | 1.00000 |
| rad47         | 1.33068e-27 | 1.000000 | 1.33074e-27 | 1.00000 |

0.100000000E-01 Pa, 270.000000 K

| Rate constant      | True (fraction)       | Effective (fraction)  |
|--------------------|-----------------------|-----------------------|
| Total              | 2.15887e-16 (1.00 )   | 2.15876e-16 (1.00 )   |
| Formation of rad11 | 1.64133e-16 (0.760 )  | 1.64124e-16 (0.760 )  |
| Formation of rad6  | 4.32452e-17 (0.200 )  | 4.32430e-17 (0.200 )  |
| H-abstraction      | 8.50919e-18 (0.0394 ) | 8.50919e-18 (0.0394 ) |

| species            | PYtrue      | Cumul    | PYeffective | Cumul    |
|--------------------|-------------|----------|-------------|----------|
| Indene+H           | 0.731092    | 0.731092 | 0.731128    | 0.731128 |
| rad6               | 0.197703    | 0.928794 | 0.197713    | 0.928841 |
| Benzene+2-propynyl | 0.0394150   | 0.968209 | 0.0394170   | 0.968258 |
| C2H2+PhCH2         | 0.0162681   | 0.984478 | 0.0162689   | 0.984526 |
| PhCCH+CH3          | 0.00801877  | 0.992496 | 0.00801917  | 0.992546 |
| PhCHCCH2+H         | 0.00399546  | 0.996492 | 0.00399565  | 0.996541 |
| PhCCCH3+H          | 0.00259352  | 0.999085 | 0.00259365  | 0.999135 |
| Ph+MeAc            | 0.000408074 | 0.999493 | 0.000408094 | 0.999543 |
| rad28              | 0.000153278 | 0.999647 | 0.000153285 | 0.999696 |
| rad2               | 0.000133659 | 0.999780 | 0.000133666 | 0.999830 |
| Phenyl+Allene      | 4.88248e-05 | 0.999829 | 0.000000    | 0.999830 |
| rad9               | 3.64434e-05 | 0.999866 | 3.64453e-05 | 0.999866 |
| rad8               | 3.40638e-05 | 0.999900 | 3.40654e-05 | 0.999900 |
| PAH7+H             | 2.57154e-05 | 0.999925 | 2.57166e-05 | 0.999926 |
| rad26              | 2.28038e-05 | 0.999948 | 2.28049e-05 | 0.999949 |
| rad7               | 1.66381e-05 | 0.999965 | 1.66389e-05 | 0.999966 |
| rad1               | 9.79432e-06 | 0.999975 | 9.79478e-06 | 0.999975 |
| rad10              | 7.17901e-06 | 0.999982 | 7.17936e-06 | 0.999983 |
| rad39              | 5.86910e-06 | 0.999988 | 5.86938e-06 | 0.999988 |
| rad11              | 4.21866e-06 | 0.999992 | 4.21886e-06 | 0.999993 |
| rad12              | 2.18423e-06 | 0.999994 | 2.18434e-06 | 0.999995 |
| PhCH2CCH+H         | 1.48218e-06 | 0.999996 | 1.48226e-06 | 0.999996 |
| rad30              | 1.34078e-06 | 0.999997 | 1.34086e-06 | 0.999998 |
| rad3               | 8.83734e-07 | 0.999998 | 8.83777e-07 | 0.999999 |
| rad4               | 4.65599e-07 | 0.999998 | 4.65621e-07 | 0.999999 |
| PAH9+H             | 3.67786e-07 | 0.999999 | 3.67804e-07 | 0.999999 |
| rad15              | 3.31957e-07 | 0.999999 | 3.31973e-07 | 1.000000 |
| rad35              | 1.56910e-07 | 0.999999 | 1.56918e-07 | 1.000000 |
| rad38              | 1.11795e-07 | 0.999999 | 1.11800e-07 | 1.000000 |
| rad37              | 9.24264e-08 | 0.999999 | 9.24309e-08 | 1.000000 |
| rad13              | 8.56008e-08 | 0.999999 | 8.56050e-08 | 1.000000 |
| rad5               | 3.65431e-09 | 0.999999 | 3.65450e-09 | 1.000000 |
| rad46              | 2.45535e-09 | 0.999999 | 2.45547e-09 | 1.000000 |
| rad60syn           | 4.59945e-10 | 0.999999 | 4.59968e-10 | 1.000000 |
| rad60anti          | 1.77176e-10 | 0.999999 | 1.77185e-10 | 1.000000 |
| rad33              | 1.67292e-10 | 0.999999 | 1.67300e-10 | 1.000000 |
| rad14              | 9.09571e-11 | 0.999999 | 9.09616e-11 | 1.000000 |
| rad27              | 8.08778e-11 | 0.999999 | 8.08818e-11 | 1.000000 |
| rad25              | 5.80075e-11 | 0.999999 | 5.80103e-11 | 1.000000 |
| rad23              | 4.16780e-11 | 0.999999 | 4.16800e-11 | 1.000000 |
| PAH3+H             | 1.24304e-11 | 0.999999 | 1.24309e-11 | 1.000000 |
| rad19syn           | 1.03848e-11 | 0.999999 | 1.03852e-11 | 1.000000 |
| rad59              | 3.41933e-12 | 0.999999 | 3.41949e-12 | 1.000000 |
| rad50              | 4.82929e-13 | 0.999999 | 4.82952e-13 | 1.000000 |
| rad45              | 4.48221e-13 | 0.999999 | 4.48244e-13 | 1.000000 |
| rad54              | 3.48717e-13 | 0.999999 | 3.48734e-13 | 1.000000 |
| PAH10+CH3          | 2.26877e-13 | 0.999999 | 2.26888e-13 | 1.000000 |
| rad43              | 5.20188e-14 | 0.999999 | 5.20214e-14 | 1.000000 |
| rad36              | 2.88133e-14 | 0.999999 | 2.88148e-14 | 1.000000 |

|               |             |          |             |         |
|---------------|-------------|----------|-------------|---------|
| rad22         | 1.92809e-14 | 0.999999 | 1.92818e-14 | 1.00000 |
| rad62         | 1.71672e-14 | 0.999999 | 1.71680e-14 | 1.00000 |
| rad31         | 7.02848e-15 | 0.999999 | 7.02882e-15 | 1.00000 |
| PhcycC3H3_A+H | 2.02492e-15 | 0.999999 | 2.02502e-15 | 1.00000 |
| rad20         | 1.71231e-15 | 0.999999 | 1.71239e-15 | 1.00000 |
| rad21         | 1.33658e-15 | 0.999999 | 1.33664e-15 | 1.00000 |
| rad70         | 1.08730e-15 | 0.999999 | 1.08735e-15 | 1.00000 |
| rad55         | 5.19393e-16 | 0.999999 | 5.19418e-16 | 1.00000 |
| rad52         | 4.59972e-16 | 0.999999 | 4.59994e-16 | 1.00000 |
| PAH1+H        | 6.28776e-17 | 0.999999 | 6.28806e-17 | 1.00000 |
| rad51         | 3.00292e-17 | 0.999999 | 3.00307e-17 | 1.00000 |
| rad18         | 1.19517e-17 | 0.999999 | 1.19522e-17 | 1.00000 |
| rad34         | 3.76178e-18 | 0.999999 | 3.76196e-18 | 1.00000 |
| rad58         | 1.65422e-18 | 0.999999 | 1.65431e-18 | 1.00000 |
| rad65         | 3.52193e-19 | 0.999999 | 3.52210e-19 | 1.00000 |
| rad42         | 7.42231e-20 | 0.999999 | 7.42267e-20 | 1.00000 |
| rad41         | 2.22857e-20 | 0.999999 | 2.22868e-20 | 1.00000 |
| rad24         | 7.51653e-21 | 0.999999 | 7.51690e-21 | 1.00000 |
| rad47         | 3.22717e-27 | 0.999999 | 3.22733e-27 | 1.00000 |

0.100000000E-01 Pa, 280.000000 K

| Rate constant      | True (fraction)       | Effective (fraction)  |
|--------------------|-----------------------|-----------------------|
| Total              | 2.79491e-16 (1.00 )   | 2.79474e-16 (1.00 )   |
| Formation of rad11 | 2.09281e-16 (0.749 )  | 2.09267e-16 (0.749 )  |
| Formation of rad6  | 5.79792e-17 (0.207 )  | 5.79754e-17 (0.207 )  |
| H-abstraction      | 1.22310e-17 (0.0438 ) | 1.22310e-17 (0.0438 ) |

| species            | PYtrue      | Cumul    | PYeffective | Cumul    |
|--------------------|-------------|----------|-------------|----------|
| Indene+H           | 0.747943    | 0.747943 | 0.747991    | 0.747991 |
| rad6               | 0.173284    | 0.921227 | 0.173295    | 0.921285 |
| Benzene+2-propynyl | 0.0437616   | 0.964988 | 0.0437643   | 0.965050 |
| C2H2+PhCH2         | 0.0177883   | 0.982777 | 0.0177894   | 0.982839 |
| PhCCH+CH3          | 0.00895688  | 0.991733 | 0.00895743  | 0.991796 |
| PhCHCCH2+H         | 0.00441899  | 0.996152 | 0.00441926  | 0.996216 |
| PhCCCH3+H          | 0.00286549  | 0.999018 | 0.00286567  | 0.999081 |
| Ph+MeAc            | 0.000485299 | 0.999503 | 0.000485329 | 0.999567 |
| rad28              | 0.000135568 | 0.999639 | 0.000135576 | 0.999702 |
| rad2               | 0.000117004 | 0.999756 | 0.000117012 | 0.999819 |
| Phenyl+Allene      | 6.25759e-05 | 0.999818 | 0.00000     | 0.999819 |
| rad9               | 4.27218e-05 | 0.999861 | 4.27244e-05 | 0.999862 |
| rad8               | 3.83361e-05 | 0.999899 | 3.83385e-05 | 0.999900 |
| PAH7+H             | 3.07499e-05 | 0.999930 | 3.07518e-05 | 0.999931 |
| rad26              | 2.00019e-05 | 0.999950 | 2.00032e-05 | 0.999951 |
| rad7               | 1.45705e-05 | 0.999965 | 1.45714e-05 | 0.999966 |
| rad1               | 8.69756e-06 | 0.999973 | 8.69811e-06 | 0.999974 |
| rad39              | 7.13229e-06 | 0.999981 | 7.13273e-06 | 0.999982 |
| rad10              | 6.28725e-06 | 0.999987 | 6.28764e-06 | 0.999988 |
| rad11              | 3.69547e-06 | 0.999991 | 3.69571e-06 | 0.999991 |
| rad12              | 2.51505e-06 | 0.999993 | 2.51521e-06 | 0.999994 |
| PhCH2CCH+H         | 2.09756e-06 | 0.999995 | 2.09769e-06 | 0.999996 |
| rad30              | 1.50371e-06 | 0.999997 | 1.50381e-06 | 0.999998 |
| rad3               | 7.74357e-07 | 0.999998 | 7.74406e-07 | 0.999998 |
| PAH9+H             | 4.22347e-07 | 0.999998 | 4.22373e-07 | 0.999999 |
| rad4               | 4.09681e-07 | 0.999998 | 4.09707e-07 | 0.999999 |
| rad15              | 3.78550e-07 | 0.999999 | 3.78574e-07 | 1.000000 |
| rad35              | 1.77898e-07 | 0.999999 | 1.77909e-07 | 1.000000 |
| rad38              | 1.29531e-07 | 0.999999 | 1.29539e-07 | 1.000000 |
| rad37              | 1.17351e-07 | 0.999999 | 1.17359e-07 | 1.000000 |
| rad13              | 7.54062e-08 | 0.999999 | 7.54109e-08 | 1.000000 |
| rad5               | 5.10768e-09 | 0.999999 | 5.10800e-09 | 1.000000 |
| rad46              | 3.01295e-09 | 0.999999 | 3.01315e-09 | 1.000000 |
| rad60syn           | 5.87311e-10 | 0.999999 | 5.87348e-10 | 1.000000 |
| rad60anti          | 2.29530e-10 | 0.999999 | 2.29544e-10 | 1.000000 |
| rad33              | 1.47800e-10 | 0.999999 | 1.47810e-10 | 1.000000 |
| rad14              | 8.00736e-11 | 0.999999 | 8.00786e-11 | 1.000000 |
| rad27              | 7.12184e-11 | 0.999999 | 7.12228e-11 | 1.000000 |
| rad25              | 5.11494e-11 | 0.999999 | 5.11526e-11 | 1.000000 |
| rad23              | 3.63598e-11 | 0.999999 | 3.63621e-11 | 1.000000 |
| PAH3+H             | 1.93108e-11 | 0.999999 | 1.93119e-11 | 1.000000 |
| rad19syn           | 1.92787e-11 | 0.999999 | 1.92799e-11 | 1.000000 |
| rad59              | 5.20922e-12 | 0.999999 | 5.20955e-12 | 1.000000 |
| rad50              | 7.68512e-13 | 0.999999 | 7.68560e-13 | 1.000000 |
| rad54              | 7.10750e-13 | 0.999999 | 7.10794e-13 | 1.000000 |
| PAH10+CH3          | 4.56657e-13 | 0.999999 | 4.56686e-13 | 1.000000 |
| rad45              | 3.91571e-13 | 0.999999 | 3.91596e-13 | 1.000000 |
| rad43              | 1.03635e-13 | 0.999999 | 1.03642e-13 | 1.000000 |
| rad62              | 3.63657e-14 | 0.999999 | 3.63679e-14 | 1.000000 |

|               |             |          |             |         |
|---------------|-------------|----------|-------------|---------|
| rad36         | 2.53298e-14 | 0.999999 | 2.53314e-14 | 1.00000 |
| rad22         | 1.67301e-14 | 0.999999 | 1.67311e-14 | 1.00000 |
| rad31         | 6.94544e-15 | 0.999999 | 6.94587e-15 | 1.00000 |
| PhcycC3H3_A+H | 4.96815e-15 | 0.999999 | 4.96846e-15 | 1.00000 |
| rad70         | 2.59830e-15 | 0.999999 | 2.59847e-15 | 1.00000 |
| rad20         | 1.65243e-15 | 0.999999 | 1.65253e-15 | 1.00000 |
| rad21         | 1.29650e-15 | 0.999999 | 1.29657e-15 | 1.00000 |
| rad55         | 1.25218e-15 | 0.999999 | 1.25226e-15 | 1.00000 |
| rad52         | 8.83449e-16 | 0.999999 | 8.83503e-16 | 1.00000 |
| PAH1+H        | 1.64284e-16 | 0.999999 | 1.64294e-16 | 1.00000 |
| rad51         | 6.72260e-17 | 0.999999 | 6.72303e-17 | 1.00000 |
| rad18         | 1.12475e-17 | 0.999999 | 1.12482e-17 | 1.00000 |
| rad34         | 1.00211e-17 | 0.999999 | 1.00217e-17 | 1.00000 |
| rad58         | 4.11226e-18 | 0.999999 | 4.11251e-18 | 1.00000 |
| rad65         | 8.38170e-19 | 0.999999 | 8.38223e-19 | 1.00000 |
| rad42         | 2.06316e-19 | 0.999999 | 2.06329e-19 | 1.00000 |
| rad41         | 6.23856e-20 | 0.999999 | 6.23895e-20 | 1.00000 |
| rad24         | 6.73562e-21 | 0.999999 | 6.73604e-21 | 1.00000 |
| rad47         | 7.27518e-27 | 0.999999 | 7.27563e-27 | 1.00000 |

0.100000000E-01 Pa, 290.000000 K

| Rate constant      | True (fraction)       | Effective (fraction)  |
|--------------------|-----------------------|-----------------------|
| Total              | 3.55893e-16 (1.00 )   | 3.55865e-16 (1.00 )   |
| Formation of rad11 | 2.62555e-16 (0.738 )  | 2.62533e-16 (0.738 )  |
| Formation of rad6  | 7.62093e-17 (0.214 )  | 7.62029e-17 (0.214 )  |
| H-abstraction      | 1.71289e-17 (0.0481 ) | 1.71289e-17 (0.0481 ) |

| species            | PYtrue      | Cumul    | PYeffective | Cumul    |
|--------------------|-------------|----------|-------------|----------|
| Indene+H           | 0.762392    | 0.762392 | 0.762453    | 0.762453 |
| rad6               | 0.151078    | 0.913470 | 0.151090    | 0.913543 |
| Benzene+2-propynyl | 0.0481294   | 0.961600 | 0.0481332   | 0.961676 |
| C2H2+PhCH2         | 0.0193823   | 0.980982 | 0.0193838   | 0.981060 |
| PhCCH+CH3          | 0.00994553  | 0.990927 | 0.00994634  | 0.991006 |
| PhCHCCH2+H         | 0.00485994  | 0.995787 | 0.00486032  | 0.995866 |
| PhCCCH3+H          | 0.00314596  | 0.998933 | 0.00314621  | 0.999013 |
| Ph+MeAc            | 0.000571957 | 0.999505 | 0.000572002 | 0.999585 |
| rad28              | 0.000119150 | 0.999624 | 0.000119159 | 0.999704 |
| rad2               | 0.000101929 | 0.999726 | 0.000101936 | 0.999806 |
| Phenyl+Allene      | 7.94827e-05 | 0.999806 | 0.00000     | 0.999806 |
| rad9               | 4.97890e-05 | 0.999856 | 4.97930e-05 | 0.999856 |
| rad8               | 4.28516e-05 | 0.999898 | 4.28549e-05 | 0.999898 |
| PAH7+H             | 3.65161e-05 | 0.999935 | 3.65190e-05 | 0.999935 |
| rad26              | 1.74494e-05 | 0.999952 | 1.74508e-05 | 0.999952 |
| rad7               | 1.26943e-05 | 0.999965 | 1.26953e-05 | 0.999965 |
| rad39              | 8.59830e-06 | 0.999974 | 8.59898e-06 | 0.999974 |
| rad1               | 7.69389e-06 | 0.999981 | 7.69451e-06 | 0.999981 |
| rad10              | 5.48030e-06 | 0.999987 | 5.48073e-06 | 0.999987 |
| rad11              | 3.22077e-06 | 0.999990 | 3.22103e-06 | 0.999990 |
| PhCH2CCH+H         | 2.92275e-06 | 0.999993 | 2.92297e-06 | 0.999993 |
| rad12              | 2.87280e-06 | 0.999996 | 2.87304e-06 | 0.999996 |
| rad30              | 1.68033e-06 | 0.999998 | 1.68046e-06 | 0.999998 |
| rad3               | 6.75355e-07 | 0.999998 | 6.75409e-07 | 0.999998 |
| PAH9+H             | 4.83573e-07 | 0.999999 | 4.83611e-07 | 0.999999 |
| rad15              | 4.30020e-07 | 0.999999 | 4.30053e-07 | 0.999999 |
| rad4               | 3.58909e-07 | 1.000000 | 3.58937e-07 | 0.999999 |
| rad35              | 2.01092e-07 | 1.000000 | 2.01109e-07 | 1.000000 |
| rad38              | 1.49624e-07 | 1.000000 | 1.49635e-07 | 1.000000 |
| rad37              | 1.46909e-07 | 1.000000 | 1.46921e-07 | 1.000000 |
| rad13              | 6.60886e-08 | 1.000000 | 6.60938e-08 | 1.000000 |
| rad5               | 7.00405e-09 | 1.000000 | 7.00462e-09 | 1.000000 |
| rad46              | 3.68205e-09 | 1.000000 | 3.68235e-09 | 1.000000 |
| rad60syn           | 7.44319e-10 | 1.000000 | 7.44378e-10 | 1.000000 |
| rad60anti          | 2.94879e-10 | 1.000000 | 2.94903e-10 | 1.000000 |
| rad33              | 1.29940e-10 | 1.000000 | 1.29950e-10 | 1.000000 |
| rad14              | 7.01494e-11 | 1.000000 | 7.01551e-11 | 1.000000 |
| rad27              | 6.24223e-11 | 1.000000 | 6.24273e-11 | 1.000000 |
| rad25              | 4.48753e-11 | 1.000000 | 4.48788e-11 | 1.000000 |
| rad19syn           | 3.44315e-11 | 1.000000 | 3.44343e-11 | 1.000000 |
| rad23              | 3.20994e-11 | 1.000000 | 3.21019e-11 | 1.000000 |
| PAH3+H             | 2.94042e-11 | 1.000000 | 2.94066e-11 | 1.000000 |
| rad59              | 7.78579e-12 | 1.000000 | 7.78640e-12 | 1.000000 |
| rad54              | 1.38154e-12 | 1.000000 | 1.38164e-12 | 1.000000 |
| rad50              | 1.19984e-12 | 1.000000 | 1.19993e-12 | 1.000000 |
| PAH10+CH3          | 8.76007e-13 | 1.000000 | 8.76076e-13 | 1.000000 |
| rad45              | 3.46433e-13 | 1.000000 | 3.46461e-13 | 1.000000 |
| rad43              | 1.96763e-13 | 1.000000 | 1.96779e-13 | 1.000000 |
| rad62              | 7.30356e-14 | 1.000000 | 7.30414e-14 | 1.000000 |

|               |             |         |             |         |
|---------------|-------------|---------|-------------|---------|
| rad36         | 2.25649e-14 | 1.00000 | 2.25667e-14 | 1.00000 |
| rad22         | 1.46544e-14 | 1.00000 | 1.46556e-14 | 1.00000 |
| PhcycC3H3_A+H | 1.13741e-14 | 1.00000 | 1.13750e-14 | 1.00000 |
| rad31         | 6.91797e-15 | 1.00000 | 6.91852e-15 | 1.00000 |
| rad70         | 5.81122e-15 | 1.00000 | 5.81168e-15 | 1.00000 |
| rad55         | 2.82242e-15 | 1.00000 | 2.82264e-15 | 1.00000 |
| rad52         | 1.63434e-15 | 1.00000 | 1.63448e-15 | 1.00000 |
| rad20         | 1.59138e-15 | 1.00000 | 1.59150e-15 | 1.00000 |
| rad21         | 1.25539e-15 | 1.00000 | 1.25549e-15 | 1.00000 |
| PAH1+H        | 3.97093e-16 | 1.00000 | 3.97125e-16 | 1.00000 |
| rad51         | 1.42367e-16 | 1.00000 | 1.42379e-16 | 1.00000 |
| rad34         | 2.46388e-17 | 1.00000 | 2.46407e-17 | 1.00000 |
| rad18         | 1.05590e-17 | 1.00000 | 1.05598e-17 | 1.00000 |
| rad58         | 9.52613e-18 | 1.00000 | 9.52685e-18 | 1.00000 |
| rad65         | 1.87077e-18 | 1.00000 | 1.87091e-18 | 1.00000 |
| rad42         | 5.26464e-19 | 1.00000 | 5.26506e-19 | 1.00000 |
| rad41         | 1.60192e-19 | 1.00000 | 1.60205e-19 | 1.00000 |
| rad24         | 6.12531e-21 | 1.00000 | 6.12580e-21 | 1.00000 |
| rad47         | 1.53676e-26 | 1.00000 | 1.53688e-26 | 1.00000 |

0.100000000E-01 Pa, 300.000000 K

| Rate constant      | True (fraction)       | Effective (fraction)  |
|--------------------|-----------------------|-----------------------|
| Total              | 6.34395e-16 (1.00 )   | 6.34339e-16 (1.00 )   |
| Formation of rad11 | 4.51153e-16 (0.711 )  | 4.51111e-16 (0.711 )  |
| Formation of rad6  | 1.51589e-16 (0.239 )  | 1.51575e-16 (0.239 )  |
| H-abstraction      | 3.16530e-17 (0.0499 ) | 3.16530e-17 (0.0499 ) |

| species            | PYtrue      | Cumul    | PYeffective | Cumul    |
|--------------------|-------------|----------|-------------|----------|
| Indene+H           | 0.809631    | 0.809631 | 0.809702    | 0.809702 |
| rad6               | 0.0877325   | 0.897364 | 0.0877402   | 0.897443 |
| Benzene+2-propynyl | 0.0498949   | 0.947259 | 0.0498993   | 0.947342 |
| C2H2+PhCH2         | 0.0286050   | 0.975864 | 0.0286075   | 0.975949 |
| PhCCH+CH3          | 0.0132638   | 0.989127 | 0.0132650   | 0.989214 |
| PhCHCCH2+H         | 0.00582713  | 0.994955 | 0.00582764  | 0.995042 |
| PhCCCH3+H          | 0.00394577  | 0.998900 | 0.00394612  | 0.998988 |
| Ph+MeAc            | 0.000771898 | 0.999672 | 0.000771965 | 0.999760 |
| Phenyl+Allene      | 8.81216e-05 | 0.999760 | 0.000000    | 0.999760 |
| rad28              | 7.03175e-05 | 0.999831 | 7.03237e-05 | 0.999831 |
| PAH7+H             | 6.02562e-05 | 0.999891 | 6.02616e-05 | 0.999891 |
| rad2               | 5.93209e-05 | 0.999950 | 5.93261e-05 | 0.999950 |
| rad39              | 1.21247e-05 | 0.999962 | 1.21258e-05 | 0.999962 |
| rad26              | 1.00859e-05 | 0.999972 | 1.00868e-05 | 0.999972 |
| rad7               | 8.11253e-06 | 0.999981 | 8.11324e-06 | 0.999980 |
| PhCH2CCH+H         | 5.16414e-06 | 0.999986 | 5.16459e-06 | 0.999986 |
| rad1               | 4.47005e-06 | 0.999990 | 4.47045e-06 | 0.999990 |
| rad10              | 3.32474e-06 | 0.999993 | 3.32504e-06 | 0.999993 |
| rad11              | 2.02087e-06 | 0.999995 | 2.02104e-06 | 0.999995 |
| rad30              | 2.00120e-06 | 0.999997 | 2.00137e-06 | 0.999997 |
| PAH9+H             | 7.32193e-07 | 0.999998 | 7.32257e-07 | 0.999998 |
| rad19anti          | 6.52501e-07 | 0.999999 | 6.52559e-07 | 0.999999 |
| rad3               | 4.17260e-07 | 0.999999 | 4.17296e-07 | 0.999999 |
| rad35              | 2.61479e-07 | 1.000000 | 2.61503e-07 | 0.999999 |
| rad37              | 2.16938e-07 | 1.000000 | 2.16956e-07 | 1.000000 |
| rad4               | 2.07504e-07 | 1.000000 | 2.07523e-07 | 1.000000 |
| rad38              | 1.95763e-07 | 1.000000 | 1.95781e-07 | 1.000000 |
| rad13              | 4.49377e-08 | 1.000000 | 4.49417e-08 | 1.000000 |
| rad46              | 5.36196e-09 | 1.000000 | 5.36243e-09 | 1.000000 |
| rad60syn           | 1.03589e-09 | 1.000000 | 1.03598e-09 | 1.000000 |
| rad60anti          | 4.23084e-10 | 1.000000 | 4.23121e-10 | 1.000000 |
| rad23              | 2.46839e-10 | 1.000000 | 2.46861e-10 | 1.000000 |
| rad33              | 1.07847e-10 | 1.000000 | 1.07857e-10 | 1.000000 |
| rad19syn           | 6.99073e-11 | 1.000000 | 6.99135e-11 | 1.000000 |
| PAH3+H             | 6.11395e-11 | 1.000000 | 6.11448e-11 | 1.000000 |
| rad14              | 5.15883e-11 | 1.000000 | 5.15928e-11 | 1.000000 |
| rad27              | 4.97938e-11 | 1.000000 | 4.97981e-11 | 1.000000 |
| rad25              | 4.04198e-11 | 1.000000 | 4.04234e-11 | 1.000000 |
| rad59              | 1.31923e-11 | 1.000000 | 1.31934e-11 | 1.000000 |
| rad54              | 3.24786e-12 | 1.000000 | 3.24815e-12 | 1.000000 |
| rad45              | 3.16346e-12 | 1.000000 | 3.16373e-12 | 1.000000 |
| rad50              | 2.23485e-12 | 1.000000 | 2.23504e-12 | 1.000000 |
| PAH10+CH3          | 2.04832e-12 | 1.000000 | 2.04850e-12 | 1.000000 |
| rad67              | 7.75492e-13 | 1.000000 | 7.75561e-13 | 1.000000 |
| rad43              | 4.05751e-13 | 1.000000 | 4.05787e-13 | 1.000000 |
| rad22              | 2.44542e-13 | 1.000000 | 2.44564e-13 | 1.000000 |
| rad62              | 1.68099e-13 | 1.000000 | 1.68114e-13 | 1.000000 |
| rad36              | 1.07820e-13 | 1.000000 | 1.07829e-13 | 1.000000 |
| rad9               | 6.14750e-14 | 1.000000 | 6.14804e-14 | 1.000000 |

|               |             |         |             |         |
|---------------|-------------|---------|-------------|---------|
| PhcycC3H3_A+H | 4.92050e-14 | 1.00000 | 4.92093e-14 | 1.00000 |
| rad21         | 3.28166e-14 | 1.00000 | 3.28195e-14 | 1.00000 |
| rad20         | 3.14387e-14 | 1.00000 | 3.14415e-14 | 1.00000 |
| rad70         | 1.95783e-14 | 1.00000 | 1.95801e-14 | 1.00000 |
| rad31         | 1.47168e-14 | 1.00000 | 1.47181e-14 | 1.00000 |
| rad55         | 8.54020e-15 | 1.00000 | 8.54096e-15 | 1.00000 |
| rad52         | 3.87577e-15 | 1.00000 | 3.87612e-15 | 1.00000 |
| PAH1+H        | 2.35594e-15 | 1.00000 | 2.35615e-15 | 1.00000 |
| rad18         | 1.05834e-15 | 1.00000 | 1.05844e-15 | 1.00000 |
| rad51         | 4.10224e-16 | 1.00000 | 4.10260e-16 | 1.00000 |
| rad34         | 1.58408e-16 | 1.00000 | 1.58422e-16 | 1.00000 |
| rad15         | 3.58117e-17 | 1.00000 | 3.58149e-17 | 1.00000 |
| rad58         | 3.01062e-17 | 1.00000 | 3.01088e-17 | 1.00000 |
| rad5          | 9.78713e-18 | 1.00000 | 9.78794e-18 | 1.00000 |
| rad65         | 6.39583e-18 | 1.00000 | 6.39639e-18 | 1.00000 |
| rad42         | 4.95353e-18 | 1.00000 | 4.95396e-18 | 1.00000 |
| rad41         | 1.53796e-18 | 1.00000 | 1.53810e-18 | 1.00000 |
| rad24         | 2.06685e-19 | 1.00000 | 2.06703e-19 | 1.00000 |
| rad53         | 1.09907e-19 | 1.00000 | 1.09916e-19 | 1.00000 |
| rad64         | 2.64344e-20 | 1.00000 | 2.64367e-20 | 1.00000 |
| rad12         | 6.40546e-22 | 1.00000 | 6.40603e-22 | 1.00000 |
| rad56         | 3.11353e-22 | 1.00000 | 3.11380e-22 | 1.00000 |
| rad61         | 3.57397e-23 | 1.00000 | 3.57429e-23 | 1.00000 |
| rad68syn      | 3.29157e-23 | 1.00000 | 3.29187e-23 | 1.00000 |
| rad68anti     | 2.37252e-23 | 1.00000 | 2.37273e-23 | 1.00000 |
| rad40syn      | 5.34094e-26 | 1.00000 | 5.34141e-26 | 1.00000 |
| rad47         | 2.88393e-26 | 1.00000 | 2.88418e-26 | 1.00000 |
| rad40anti     | 1.32779e-26 | 1.00000 | 1.32791e-26 | 1.00000 |
| PAH8+H        | 1.19102e-26 | 1.00000 | 1.19113e-26 | 1.00000 |
| rad73         | 1.02319e-26 | 1.00000 | 1.02328e-26 | 1.00000 |
| rad71         | 9.99625e-29 | 1.00000 | 9.99715e-29 | 1.00000 |
| rad72         | 1.58000e-35 | 1.00000 | 1.58014e-35 | 1.00000 |
| rad8          | 1.78691e-37 | 1.00000 | 1.78706e-37 | 1.00000 |

0.100000000E-01 Pa, 400.000000 K

| Rate constant      | True (fraction) |           | Effective (fraction) |           |
|--------------------|-----------------|-----------|----------------------|-----------|
| Total              | 5.11288e-15     | (1.00 )   | 5.10971e-15          | (1.00 )   |
| Formation of rad11 | 3.08094e-15     | (0.603 )  | 3.07882e-15          | (0.603 )  |
| Formation of rad6  | 1.54092e-15     | (0.301 )  | 1.53986e-15          | (0.301 )  |
| H-abstraction      | 4.91025e-16     | (0.0960 ) | 4.91025e-16          | (0.0961 ) |

  

| species            | PYtrue      | Cumul    | PYeffective | Cumul    |
|--------------------|-------------|----------|-------------|----------|
| Indene+H           | 0.790199    | 0.790199 | 0.790689    | 0.790689 |
| Benzene+2-propynyl | 0.0960368   | 0.886235 | 0.0960964   | 0.886785 |
| C2H2+PhCH2         | 0.0512563   | 0.937492 | 0.0512881   | 0.938073 |
| PhCCH+CH3          | 0.0255223   | 0.963014 | 0.0255382   | 0.963611 |
| rad6               | 0.0168457   | 0.979860 | 0.0168562   | 0.980468 |
| PhCHCCH2+H         | 0.0103658   | 0.990226 | 0.0103723   | 0.990840 |
| PhCCCH3+H          | 0.00655127  | 0.996777 | 0.00655534  | 0.997395 |
| Ph+MeAc            | 0.00223579  | 0.999013 | 0.00223718  | 0.999632 |
| Phenyl+Allene      | 0.000620075 | 0.999633 | 0.00000     | 0.999632 |
| PAH7+H             | 0.000211530 | 0.999844 | 0.000211662 | 0.999844 |
| PhCH2CCH+H         | 6.34703e-05 | 0.999908 | 6.35097e-05 | 0.999908 |
| rad39              | 4.79801e-05 | 0.999956 | 4.80098e-05 | 0.999956 |
| rad28              | 1.40259e-05 | 0.999970 | 1.40346e-05 | 0.999970 |
| rad2               | 1.25776e-05 | 0.999982 | 1.25854e-05 | 0.999982 |
| rad30              | 4.61157e-06 | 0.999987 | 4.61443e-06 | 0.999987 |
| rad19anti          | 2.51268e-06 | 0.999989 | 2.51424e-06 | 0.999989 |
| PAH9+H             | 2.23198e-06 | 0.999992 | 2.23336e-06 | 0.999992 |
| rad26              | 1.98411e-06 | 0.999994 | 1.98534e-06 | 0.999994 |
| rad7               | 1.61700e-06 | 0.999995 | 1.61801e-06 | 0.999995 |
| rad1               | 1.17051e-06 | 0.999996 | 1.17124e-06 | 0.999996 |
| rad37              | 9.57189e-07 | 0.999997 | 9.57785e-07 | 0.999997 |
| rad10              | 7.24567e-07 | 0.999998 | 7.25017e-07 | 0.999998 |
| rad35              | 7.13815e-07 | 0.999999 | 7.14257e-07 | 0.999999 |
| rad38              | 6.53364e-07 | 0.999999 | 6.53769e-07 | 0.999999 |
| rad11              | 4.11345e-07 | 1.000000 | 4.11600e-07 | 1.000000 |
| rad3               | 9.71815e-08 | 1.000000 | 9.72410e-08 | 1.000000 |
| rad4               | 5.11791e-08 | 1.000000 | 5.12108e-08 | 1.000000 |
| rad46              | 2.92700e-08 | 1.000000 | 2.92881e-08 | 1.000000 |
| rad13              | 9.63010e-09 | 1.000000 | 9.63606e-09 | 1.000000 |
| rad60syn           | 6.70676e-09 | 1.000000 | 6.71092e-09 | 1.000000 |
| rad19syn           | 4.62475e-09 | 1.000000 | 4.62762e-09 | 1.000000 |
| rad60anti          | 3.04826e-09 | 1.000000 | 3.05016e-09 | 1.000000 |
| rad23              | 2.11554e-09 | 1.000000 | 2.11685e-09 | 1.000000 |
| PAH3+H             | 1.45445e-09 | 1.000000 | 1.45536e-09 | 1.000000 |
| rad54              | 4.18592e-10 | 1.000000 | 4.18852e-10 | 1.000000 |

|               |             |         |             |         |
|---------------|-------------|---------|-------------|---------|
| rad59         | 2.83935e-10 | 1.00000 | 2.84111e-10 | 1.00000 |
| PAH10+CH3     | 1.98161e-10 | 1.00000 | 1.98284e-10 | 1.00000 |
| rad50         | 7.80106e-11 | 1.00000 | 7.80589e-11 | 1.00000 |
| rad45         | 7.71443e-11 | 1.00000 | 7.71921e-11 | 1.00000 |
| rad43         | 3.26824e-11 | 1.00000 | 3.27027e-11 | 1.00000 |
| rad33         | 2.53237e-11 | 1.00000 | 2.53394e-11 | 1.00000 |
| rad67         | 2.48555e-11 | 1.00000 | 2.48709e-11 | 1.00000 |
| PhcycC3H3_A+H | 2.38025e-11 | 1.00000 | 2.38173e-11 | 1.00000 |
| rad62         | 2.26690e-11 | 1.00000 | 2.26830e-11 | 1.00000 |
| rad27         | 1.16997e-11 | 1.00000 | 1.17070e-11 | 1.00000 |
| rad14         | 1.16317e-11 | 1.00000 | 1.16389e-11 | 1.00000 |
| rad25         | 9.04352e-12 | 1.00000 | 9.04907e-12 | 1.00000 |
| rad70         | 7.64073e-12 | 1.00000 | 7.64547e-12 | 1.00000 |
| rad55         | 3.50872e-12 | 1.00000 | 3.51090e-12 | 1.00000 |
| rad36         | 2.95920e-12 | 1.00000 | 2.96103e-12 | 1.00000 |
| PAH1+H        | 2.19444e-12 | 1.00000 | 2.19581e-12 | 1.00000 |
| rad22         | 6.39808e-13 | 1.00000 | 6.40205e-13 | 1.00000 |
| rad52         | 4.56354e-13 | 1.00000 | 4.56638e-13 | 1.00000 |
| rad34         | 1.75120e-13 | 1.00000 | 1.75229e-13 | 1.00000 |
| rad51         | 1.37101e-13 | 1.00000 | 1.37186e-13 | 1.00000 |
| rad9          | 1.09158e-13 | 1.00000 | 1.09226e-13 | 1.00000 |
| rad31         | 6.30599e-14 | 1.00000 | 6.30991e-14 | 1.00000 |
| rad21         | 2.52701e-14 | 1.00000 | 2.52858e-14 | 1.00000 |
| rad20         | 2.18569e-14 | 1.00000 | 2.18705e-14 | 1.00000 |
| rad58         | 1.74212e-14 | 1.00000 | 1.74320e-14 | 1.00000 |
| rad42         | 7.28482e-15 | 1.00000 | 7.28935e-15 | 1.00000 |
| rad65         | 3.20792e-15 | 1.00000 | 3.20991e-15 | 1.00000 |
| rad41         | 2.20894e-15 | 1.00000 | 2.21031e-15 | 1.00000 |
| rad53         | 9.04415e-16 | 1.00000 | 9.04979e-16 | 1.00000 |
| rad18         | 5.38954e-16 | 1.00000 | 5.39289e-16 | 1.00000 |
| rad64         | 3.15181e-16 | 1.00000 | 3.15377e-16 | 1.00000 |
| rad15         | 6.75364e-17 | 1.00000 | 6.75783e-17 | 1.00000 |
| rad56         | 1.60317e-17 | 1.00000 | 1.60417e-17 | 1.00000 |
| rad5          | 8.42017e-18 | 1.00000 | 8.42539e-18 | 1.00000 |
| rad68syn      | 1.85313e-18 | 1.00000 | 1.85429e-18 | 1.00000 |
| rad24         | 1.40985e-18 | 1.00000 | 1.41072e-18 | 1.00000 |
| rad68anti     | 1.33375e-18 | 1.00000 | 1.33459e-18 | 1.00000 |
| rad61         | 9.32420e-19 | 1.00000 | 9.33000e-19 | 1.00000 |
| rad40syn      | 1.45612e-20 | 1.00000 | 1.45703e-20 | 1.00000 |
| PAH8+H        | 9.16709e-21 | 1.00000 | 9.17272e-21 | 1.00000 |
| rad40anti     | 3.72898e-21 | 1.00000 | 3.73131e-21 | 1.00000 |
| rad73         | 3.49884e-21 | 1.00000 | 3.50101e-21 | 1.00000 |
| rad12         | 2.05058e-21 | 1.00000 | 2.05184e-21 | 1.00000 |
| rad71         | 3.66513e-22 | 1.00000 | 3.66740e-22 | 1.00000 |
| rad47         | 7.50856e-24 | 1.00000 | 7.51322e-24 | 1.00000 |
| rad72         | 1.53060e-25 | 1.00000 | 1.53155e-25 | 1.00000 |
| rad8          | 5.30475e-35 | 1.00000 | 5.30805e-35 | 1.00000 |

0.100000000E-01 Pa, 500.000000 K

=====

| Rate constant      | True (fraction)      | Effective (fraction) |
|--------------------|----------------------|----------------------|
| Total              | 2.11551e-14 (1.00 )  | 2.10969e-14 (1.00 )  |
| Formation of rad11 | 1.10850e-14 (0.524 ) | 1.10495e-14 (0.524 ) |
| Formation of rad6  | 7.08033e-15 (0.335 ) | 7.05764e-15 (0.335 ) |
| H-abstraction      | 2.98976e-15 (0.141 ) | 2.98976e-15 (0.142 ) |

| species            | PYtrue      | Cumul    | PYeffective | Cumul    |
|--------------------|-------------|----------|-------------|----------|
| Indene+H           | 0.705088    | 0.705088 | 0.707034    | 0.707034 |
| Benzene+2-propynyl | 0.141326    | 0.846414 | 0.141716    | 0.848750 |
| C2H2+PhCH2         | 0.0806675   | 0.927082 | 0.0808901   | 0.929640 |
| PhCCH+CH3          | 0.0386943   | 0.965776 | 0.0388011   | 0.968441 |
| PhCHCCH2+H         | 0.0152936   | 0.981069 | 0.0153358   | 0.983777 |
| PhCCCH3+H          | 0.00817583  | 0.989245 | 0.00819839  | 0.991975 |
| Ph+MeAc            | 0.00430486  | 0.993550 | 0.00431674  | 0.996292 |
| Phenyl+Allene      | 0.00275181  | 0.996302 | 0.00000     | 0.996292 |
| rad6               | 0.00255301  | 0.998855 | 0.00256006  | 0.998852 |
| PAH7+H             | 0.000572457 | 0.999427 | 0.000574036 | 0.999426 |
| PhCH2CCH+H         | 0.000399021 | 0.999826 | 0.000400122 | 0.999826 |
| rad39              | 0.000137391 | 0.999964 | 0.000137771 | 0.999964 |
| rad30              | 9.10358e-06 | 0.999973 | 9.12871e-06 | 0.999973 |
| rad19anti          | 7.85448e-06 | 0.999981 | 7.87616e-06 | 0.999981 |
| PAH9+H             | 6.10677e-06 | 0.999987 | 6.12362e-06 | 0.999987 |
| rad2               | 2.95997e-06 | 0.999990 | 2.96814e-06 | 0.999990 |
| rad37              | 2.40844e-06 | 0.999992 | 2.41508e-06 | 0.999992 |
| rad28              | 2.17261e-06 | 0.999994 | 2.17860e-06 | 0.999995 |
| rad38              | 1.92838e-06 | 0.999996 | 1.93371e-06 | 0.999996 |
| rad35              | 1.75905e-06 | 0.999998 | 1.76390e-06 | 0.999998 |
| rad1               | 3.53529e-07 | 0.999998 | 3.54504e-07 | 0.999999 |

|               |             |          |             |          |
|---------------|-------------|----------|-------------|----------|
| rad26         | 3.19656e-07 | 0.999999 | 3.20538e-07 | 0.999999 |
| rad7          | 2.61140e-07 | 0.999999 | 2.61861e-07 | 0.999999 |
| rad10         | 1.48234e-07 | 0.999999 | 1.48643e-07 | 0.999999 |
| rad46         | 1.27620e-07 | 0.999999 | 1.27971e-07 | 0.999999 |
| rad19syn      | 7.63677e-08 | 0.999999 | 7.65784e-08 | 1.000000 |
| rad11         | 6.88281e-08 | 0.999999 | 6.90180e-08 | 1.000000 |
| rad23         | 3.33051e-08 | 0.999999 | 3.33970e-08 | 1.000000 |
| rad3          | 3.17726e-08 | 1.000000 | 3.18602e-08 | 1.000000 |
| rad60syn      | 2.90739e-08 | 1.000000 | 2.91541e-08 | 1.000000 |
| rad4          | 1.79108e-08 | 1.000000 | 1.79602e-08 | 1.000000 |
| PAH3+H        | 1.45802e-08 | 1.000000 | 1.46204e-08 | 1.000000 |
| rad60anti     | 1.41522e-08 | 1.000000 | 1.41913e-08 | 1.000000 |
| rad54         | 1.02819e-08 | 1.000000 | 1.03102e-08 | 1.000000 |
| rad45         | 3.51262e-09 | 1.000000 | 3.52231e-09 | 1.000000 |
| PAH10+CH3     | 3.35840e-09 | 1.000000 | 3.36766e-09 | 1.000000 |
| rad59         | 2.61722e-09 | 1.000000 | 2.62444e-09 | 1.000000 |
| rad13         | 1.73811e-09 | 1.000000 | 1.74291e-09 | 1.000000 |
| PhcycC3H3_A+H | 1.25829e-09 | 1.000000 | 1.26176e-09 | 1.000000 |
| rad50         | 1.15929e-09 | 1.000000 | 1.16249e-09 | 1.000000 |
| rad62         | 4.83957e-10 | 1.000000 | 4.85292e-10 | 1.000000 |
| rad43         | 4.60645e-10 | 1.000000 | 4.61916e-10 | 1.000000 |
| rad67         | 3.97789e-10 | 1.000000 | 3.98886e-10 | 1.000000 |
| rad70         | 3.42486e-10 | 1.000000 | 3.43430e-10 | 1.000000 |
| rad36         | 1.76010e-10 | 1.000000 | 1.76496e-10 | 1.000000 |
| PAH1+H        | 1.64296e-10 | 1.000000 | 1.64749e-10 | 1.000000 |
| rad55         | 1.59806e-10 | 1.000000 | 1.60248e-10 | 1.000000 |
| rad34         | 1.41613e-11 | 1.000000 | 1.42003e-11 | 1.000000 |
| rad52         | 1.35266e-11 | 1.000000 | 1.35640e-11 | 1.000000 |
| rad51         | 7.32809e-12 | 1.000000 | 7.34831e-12 | 1.000000 |
| rad22         | 6.41391e-12 | 1.000000 | 6.43160e-12 | 1.000000 |
| rad33         | 5.41319e-12 | 1.000000 | 5.42812e-12 | 1.000000 |
| rad27         | 2.65305e-12 | 1.000000 | 2.66037e-12 | 1.000000 |
| rad14         | 2.38725e-12 | 1.000000 | 2.39384e-12 | 1.000000 |
| rad25         | 1.77116e-12 | 1.000000 | 1.77605e-12 | 1.000000 |
| rad58         | 1.01107e-12 | 1.000000 | 1.01387e-12 | 1.000000 |
| rad42         | 6.16553e-13 | 1.000000 | 6.18254e-13 | 1.000000 |
| rad9          | 5.05200e-13 | 1.000000 | 5.06595e-13 | 1.000000 |
| rad31         | 2.42575e-13 | 1.000000 | 2.43244e-13 | 1.000000 |
| rad53         | 2.35953e-13 | 1.000000 | 2.36605e-13 | 1.000000 |
| rad65         | 2.04103e-13 | 1.000000 | 2.04666e-13 | 1.000000 |
| rad41         | 1.65594e-13 | 1.000000 | 1.66051e-13 | 1.000000 |
| rad64         | 9.67872e-14 | 1.000000 | 9.70548e-14 | 1.000000 |
| rad21         | 2.69798e-14 | 1.000000 | 2.70542e-14 | 1.000000 |
| rad20         | 1.98817e-14 | 1.000000 | 1.99366e-14 | 1.000000 |
| rad56         | 1.22518e-14 | 1.000000 | 1.22857e-14 | 1.000000 |
| rad68syn      | 1.45724e-15 | 1.000000 | 1.46126e-15 | 1.000000 |
| rad68anti     | 1.02920e-15 | 1.000000 | 1.03204e-15 | 1.000000 |
| rad61         | 4.31579e-16 | 1.000000 | 4.32770e-16 | 1.000000 |
| rad15         | 3.37368e-16 | 1.000000 | 3.38300e-16 | 1.000000 |
| rad18         | 2.97195e-16 | 1.000000 | 2.98014e-16 | 1.000000 |
| rad73         | 1.52561e-16 | 1.000000 | 1.52982e-16 | 1.000000 |
| rad71         | 1.16679e-16 | 1.000000 | 1.17001e-16 | 1.000000 |
| PAH8+H        | 3.90025e-17 | 1.000000 | 3.91102e-17 | 1.000000 |
| rad40syn      | 3.05283e-17 | 1.000000 | 3.06125e-17 | 1.000000 |
| rad24         | 2.52651e-17 | 1.000000 | 2.53348e-17 | 1.000000 |
| rad40anti     | 9.23916e-18 | 1.000000 | 9.26466e-18 | 1.000000 |
| rad5          | 4.66768e-18 | 1.000000 | 4.68056e-18 | 1.000000 |
| rad72         | 1.30968e-18 | 1.000000 | 1.31329e-18 | 1.000000 |
| rad12         | 9.39965e-20 | 1.000000 | 9.42559e-20 | 1.000000 |
| rad47         | 4.86557e-22 | 1.000000 | 4.87899e-22 | 1.000000 |
| rad8          | 9.28819e-32 | 1.000000 | 9.31384e-32 | 1.000000 |

0.100000000E-01 Pa, 600.000000 K

=====

| Rate constant      | True (fraction) |          | Effective (fraction) |          |
|--------------------|-----------------|----------|----------------------|----------|
| Total              | 6.08120e-14     | (1.00 )  | 6.02872e-14          | (1.00 )  |
| Formation of rad11 | 2.83304e-14     | (0.466 ) | 2.80314e-14          | (0.465 ) |
| Formation of rad6  | 2.13840e-14     | (0.352 ) | 2.11583e-14          | (0.351 ) |
| H-abstraction      | 1.10975e-14     | (0.182 ) | 1.10975e-14          | (0.184 ) |

  

| species            | PYtrue     | Cumul    | PYeffective | Cumul    |
|--------------------|------------|----------|-------------|----------|
| Indene+H           | 0.606858   | 0.606858 | 0.612140    | 0.612140 |
| Benzene+2-propynyl | 0.182488   | 0.789346 | 0.184077    | 0.796217 |
| C2H2+PhCH2         | 0.112696   | 0.902042 | 0.113676    | 0.909893 |
| PhCCH+CH3          | 0.0502136  | 0.952255 | 0.0506506   | 0.960543 |
| PhCHCCH2+H         | 0.0208667  | 0.973122 | 0.0210484   | 0.981592 |
| Phenyl+Allene      | 0.00862900 | 0.981751 | 0.000000    | 0.981592 |
| PhCCCH3+H          | 0.00839315 | 0.990144 | 0.00846618  | 0.990058 |

|               |             |          |             |          |
|---------------|-------------|----------|-------------|----------|
| Ph+MeAc       | 0.00630033  | 0.996444 | 0.00635517  | 0.996413 |
| PhCH2CCH+H    | 0.00158483  | 0.998029 | 0.00159863  | 0.998012 |
| PAH7+H        | 0.00124590  | 0.999275 | 0.00125674  | 0.999268 |
| rad6          | 0.000354328 | 0.999630 | 0.000357412 | 0.999626 |
| rad39         | 0.000304277 | 0.999934 | 0.000306926 | 0.999933 |
| rad19anti     | 2.07156e-05 | 0.999955 | 2.08959e-05 | 0.999954 |
| rad30         | 1.54255e-05 | 0.999970 | 1.55598e-05 | 0.999969 |
| PAH9+H        | 1.45636e-05 | 0.999985 | 1.46903e-05 | 0.999984 |
| rad38         | 4.88068e-06 | 0.999989 | 4.92315e-06 | 0.999989 |
| rad37         | 4.23559e-06 | 0.999994 | 4.27246e-06 | 0.999993 |
| rad35         | 3.82869e-06 | 0.999997 | 3.86201e-06 | 0.999997 |
| rad2          | 1.04592e-06 | 0.999999 | 1.05503e-06 | 0.999998 |
| rad19syn      | 5.75769e-07 | 0.999999 | 5.80781e-07 | 0.999999 |
| rad46         | 4.35580e-07 | 1.000000 | 4.39371e-07 | 0.999999 |
| rad28         | 3.07042e-07 | 1.000000 | 3.09715e-07 | 0.999999 |
| rad1          | 1.55784e-07 | 1.000000 | 1.57139e-07 | 1.000000 |
| rad23         | 1.17198e-07 | 1.000000 | 1.18218e-07 | 1.000000 |
| rad54         | 1.01009e-07 | 1.000000 | 1.01888e-07 | 1.000000 |
| rad60syn      | 8.95813e-08 | 1.000000 | 9.03611e-08 | 1.000000 |
| PAH3+H        | 8.11693e-08 | 1.000000 | 8.18755e-08 | 1.000000 |
| rad26         | 5.01343e-08 | 1.000000 | 5.05707e-08 | 1.000000 |
| rad60anti     | 4.57446e-08 | 1.000000 | 4.61428e-08 | 1.000000 |
| rad7          | 4.00400e-08 | 1.000000 | 4.03885e-08 | 1.000000 |
| rad10         | 3.45826e-08 | 1.000000 | 3.48837e-08 | 1.000000 |
| PAH10+CH3     | 2.26274e-08 | 1.000000 | 2.28243e-08 | 1.000000 |
| PhcycC3H3_A+H | 2.05526e-08 | 1.000000 | 2.07315e-08 | 1.000000 |
| rad3          | 1.56406e-08 | 1.000000 | 1.57767e-08 | 1.000000 |
| rad45         | 1.54623e-08 | 1.000000 | 1.55969e-08 | 1.000000 |
| rad59         | 1.35460e-08 | 1.000000 | 1.36639e-08 | 1.000000 |
| rad11         | 1.11824e-08 | 1.000000 | 1.12797e-08 | 1.000000 |
| rad4          | 9.71719e-09 | 1.000000 | 9.80177e-09 | 1.000000 |
| rad50         | 9.49532e-09 | 1.000000 | 9.57796e-09 | 1.000000 |
| rad70         | 4.88184e-09 | 1.000000 | 4.92433e-09 | 1.000000 |
| rad62         | 3.91184e-09 | 1.000000 | 3.94589e-09 | 1.000000 |
| rad67         | 3.65890e-09 | 1.000000 | 3.69075e-09 | 1.000000 |
| PAH1+H        | 3.26051e-09 | 1.000000 | 3.28890e-09 | 1.000000 |
| rad43         | 2.57861e-09 | 1.000000 | 2.60106e-09 | 1.000000 |
| rad55         | 2.29320e-09 | 1.000000 | 2.31317e-09 | 1.000000 |
| rad36         | 1.24169e-09 | 1.000000 | 1.25249e-09 | 1.000000 |
| rad13         | 3.21466e-10 | 1.000000 | 3.24264e-10 | 1.000000 |
| rad34         | 2.96026e-10 | 1.000000 | 2.98602e-10 | 1.000000 |
| rad52         | 1.77852e-10 | 1.000000 | 1.79400e-10 | 1.000000 |
| rad51         | 1.54152e-10 | 1.000000 | 1.55493e-10 | 1.000000 |
| rad22         | 1.98584e-11 | 1.000000 | 2.00312e-11 | 1.000000 |
| rad58         | 1.71574e-11 | 1.000000 | 1.73068e-11 | 1.000000 |
| rad42         | 1.22325e-11 | 1.000000 | 1.23390e-11 | 1.000000 |
| rad53         | 1.06222e-11 | 1.000000 | 1.07146e-11 | 1.000000 |
| rad9          | 4.98541e-12 | 1.000000 | 5.02880e-12 | 1.000000 |
| rad64         | 4.61198e-12 | 1.000000 | 4.65212e-12 | 1.000000 |
| rad65         | 4.59375e-12 | 1.000000 | 4.63373e-12 | 1.000000 |
| rad41         | 2.81201e-12 | 1.000000 | 2.83648e-12 | 1.000000 |
| rad33         | 1.42370e-12 | 1.000000 | 1.43609e-12 | 1.000000 |
| rad56         | 1.11033e-12 | 1.000000 | 1.11999e-12 | 1.000000 |
| rad27         | 7.01344e-13 | 1.000000 | 7.07449e-13 | 1.000000 |
| rad14         | 5.49252e-13 | 1.000000 | 5.54033e-13 | 1.000000 |
| rad25         | 4.00875e-13 | 1.000000 | 4.04364e-13 | 1.000000 |
| rad71         | 3.99413e-13 | 1.000000 | 4.02890e-13 | 1.000000 |
| rad73         | 3.15506e-13 | 1.000000 | 3.18253e-13 | 1.000000 |
| rad31         | 3.11876e-13 | 1.000000 | 3.14591e-13 | 1.000000 |
| rad68syn      | 1.33728e-13 | 1.000000 | 1.34892e-13 | 1.000000 |
| rad68anti     | 9.28669e-14 | 1.000000 | 9.36753e-14 | 1.000000 |
| rad21         | 6.28921e-14 | 1.000000 | 6.34395e-14 | 1.000000 |
| rad20         | 3.53092e-14 | 1.000000 | 3.56165e-14 | 1.000000 |
| rad61         | 3.16153e-14 | 1.000000 | 3.18904e-14 | 1.000000 |
| PAH8+H        | 1.57835e-14 | 1.000000 | 1.59209e-14 | 1.000000 |
| rad72         | 1.13350e-14 | 1.000000 | 1.14337e-14 | 1.000000 |
| rad40syn      | 6.22140e-15 | 1.000000 | 6.27556e-15 | 1.000000 |
| rad15         | 3.26398e-15 | 1.000000 | 3.29239e-15 | 1.000000 |
| rad40anti     | 2.58207e-15 | 1.000000 | 2.60454e-15 | 1.000000 |
| rad24         | 8.84057e-16 | 1.000000 | 8.91755e-16 | 1.000000 |
| rad18         | 2.16650e-16 | 1.000000 | 2.18535e-16 | 1.000000 |
| rad12         | 3.40867e-17 | 1.000000 | 3.43834e-17 | 1.000000 |
| rad5          | 2.31023e-18 | 1.000000 | 2.33033e-18 | 1.000000 |
| rad47         | 1.08597e-20 | 1.000000 | 1.09542e-20 | 1.000000 |
| rad8          | 7.63316e-28 | 1.000000 | 7.69961e-28 | 1.000000 |

0.100000000E-01 Pa, 700.00000 K

=====

Rate constant | True (fraction) | Effective (fraction)

-----



|                    |             |         |             |         |
|--------------------|-------------|---------|-------------|---------|
| Total              | 1.39564e-13 | (1.00)  | 1.36669e-13 | (1.00)  |
| Formation of rad11 | 5.88273e-14 | (0.422) | 5.72652e-14 | (0.419) |
| Formation of rad6  | 5.01684e-14 | (0.359) | 4.88362e-14 | (0.357) |
| H-abstraction      | 3.05678e-14 | (0.219) | 3.05678e-14 | (0.224) |

| species            | PYtrue      | Cumul    | PYeffective | Cumul    |
|--------------------|-------------|----------|-------------|----------|
| Indene+H           | 0.510489    | 0.510489 | 0.521300    | 0.521300 |
| Benzene+2-propynyl | 0.219024    | 0.729514 | 0.223663    | 0.744963 |
| C2H2+PhCH2         | 0.140645    | 0.870159 | 0.143623    | 0.888586 |
| PhCCH+CH3          | 0.0585858   | 0.928745 | 0.0598265   | 0.948413 |
| PhCHCCH2+H         | 0.0277539   | 0.956499 | 0.0283417   | 0.976754 |
| Phenyl+Allene      | 0.0207387   | 0.977237 | 0.000000    | 0.976754 |
| Ph+MeAc            | 0.00771078  | 0.984948 | 0.00787408  | 0.984629 |
| PhCCCH3+H          | 0.00755689  | 0.992505 | 0.00771693  | 0.992345 |
| PhCH2CCH+H         | 0.00451139  | 0.997016 | 0.00460693  | 0.996952 |
| PAH7+H             | 0.00225675  | 0.999273 | 0.00230454  | 0.999257 |
| rad39              | 0.000548160 | 0.999821 | 0.000559769 | 0.999817 |
| rad6               | 4.98492e-05 | 0.999871 | 5.09049e-05 | 0.999868 |
| rad19anti          | 4.65977e-05 | 0.999918 | 4.75846e-05 | 0.999915 |
| PAH9+H             | 3.00024e-05 | 0.999948 | 3.06378e-05 | 0.999946 |
| rad30              | 2.26700e-05 | 0.999970 | 2.31501e-05 | 0.999969 |
| rad38              | 1.05340e-05 | 0.999981 | 1.07570e-05 | 0.999980 |
| rad35              | 7.29844e-06 | 0.999988 | 7.45300e-06 | 0.999987 |
| rad37              | 5.93403e-06 | 0.999994 | 6.05969e-06 | 0.999993 |
| rad19syn           | 2.61370e-06 | 0.999997 | 2.66906e-06 | 0.999996 |
| rad46              | 1.18547e-06 | 0.999998 | 1.21057e-06 | 0.999997 |
| rad54              | 5.53852e-07 | 0.999998 | 5.65582e-07 | 0.999998 |
| rad2               | 3.21232e-07 | 0.999999 | 3.28036e-07 | 0.999998 |
| PAH3+H             | 2.96702e-07 | 0.999999 | 3.02985e-07 | 0.999998 |
| rad60syn           | 2.09879e-07 | 0.999999 | 2.14323e-07 | 0.999999 |
| PhcycC3H3_A+H      | 1.62839e-07 | 0.999999 | 1.66288e-07 | 0.999999 |
| rad23              | 1.14168e-07 | 1.000000 | 1.16586e-07 | 0.999999 |
| rad60anti          | 1.11047e-07 | 1.000000 | 1.13399e-07 | 0.999999 |
| PAH10+CH3          | 8.90843e-08 | 1.000000 | 9.09712e-08 | 0.999999 |
| rad1               | 5.59407e-08 | 1.000000 | 5.71255e-08 | 0.999999 |
| rad50              | 4.99446e-08 | 1.000000 | 5.10023e-08 | 0.999999 |
| rad59              | 4.64279e-08 | 1.000000 | 4.74111e-08 | 0.999999 |
| rad28              | 4.41981e-08 | 1.000000 | 4.51341e-08 | 0.999999 |
| rad70              | 3.43287e-08 | 1.000000 | 3.50557e-08 | 0.999999 |
| PAH1+H             | 2.88066e-08 | 1.000000 | 2.94167e-08 | 0.999999 |
| rad67              | 2.16509e-08 | 1.000000 | 2.21094e-08 | 0.999999 |
| rad62              | 1.75418e-08 | 1.000000 | 1.79133e-08 | 0.999999 |
| rad45              | 1.68277e-08 | 1.000000 | 1.71841e-08 | 0.999999 |
| rad55              | 1.62461e-08 | 1.000000 | 1.65902e-08 | 0.999999 |
| rad43              | 8.28412e-09 | 1.000000 | 8.45959e-09 | 0.999999 |
| rad26              | 8.17424e-09 | 1.000000 | 8.34733e-09 | 0.999999 |
| rad10              | 8.16643e-09 | 1.000000 | 8.33934e-09 | 0.999999 |
| rad7               | 6.56667e-09 | 1.000000 | 6.70574e-09 | 0.999999 |
| rad3               | 5.68218e-09 | 1.000000 | 5.80252e-09 | 0.999999 |
| rad4               | 3.84890e-09 | 1.000000 | 3.93041e-09 | 0.999999 |
| rad34              | 2.73117e-09 | 1.000000 | 2.78901e-09 | 0.999999 |
| rad11              | 2.01451e-09 | 1.000000 | 2.05717e-09 | 0.999999 |
| rad36              | 1.56234e-09 | 1.000000 | 1.59543e-09 | 0.999999 |
| rad51              | 1.53126e-09 | 1.000000 | 1.56369e-09 | 0.999999 |
| rad52              | 1.30368e-09 | 1.000000 | 1.33129e-09 | 0.999999 |
| rad53              | 1.69600e-10 | 1.000000 | 1.73192e-10 | 0.999999 |
| rad58              | 1.36197e-10 | 1.000000 | 1.39082e-10 | 0.999999 |
| rad42              | 1.03628e-10 | 1.000000 | 1.05823e-10 | 0.999999 |
| rad13              | 7.39678e-11 | 1.000000 | 7.55343e-11 | 0.999999 |
| rad64              | 7.33307e-11 | 1.000000 | 7.48837e-11 | 0.999999 |
| rad9               | 6.38911e-11 | 1.000000 | 6.52442e-11 | 0.999999 |
| rad65              | 4.66024e-11 | 1.000000 | 4.75893e-11 | 0.999999 |
| rad56              | 2.88867e-11 | 1.000000 | 2.94984e-11 | 0.999999 |
| rad41              | 2.01896e-11 | 1.000000 | 2.06173e-11 | 0.999999 |
| rad22              | 1.95912e-11 | 1.000000 | 2.00061e-11 | 0.999999 |
| rad71              | 8.84041e-12 | 1.000000 | 9.02764e-12 | 0.999999 |
| rad73              | 6.51118e-12 | 1.000000 | 6.64907e-12 | 0.999999 |
| rad68syn           | 3.44659e-12 | 1.000000 | 3.51958e-12 | 0.999999 |
| rad68anti          | 2.36469e-12 | 1.000000 | 2.41477e-12 | 0.999999 |
| rad33              | 9.21895e-13 | 1.000000 | 9.41418e-13 | 0.999999 |
| PAH8+H             | 7.77567e-13 | 1.000000 | 7.94038e-13 | 0.999999 |
| rad61              | 6.46761e-13 | 1.000000 | 6.60458e-13 | 0.999999 |
| rad21              | 4.95056e-13 | 1.000000 | 5.05540e-13 | 0.999999 |
| rad72              | 2.84566e-13 | 1.000000 | 2.90592e-13 | 0.999999 |
| rad40syn           | 2.57688e-13 | 1.000000 | 2.63146e-13 | 0.999999 |
| rad27              | 2.23225e-13 | 1.000000 | 2.27952e-13 | 0.999999 |
| rad20              | 2.04302e-13 | 1.000000 | 2.08629e-13 | 0.999999 |
| rad31              | 1.79103e-13 | 1.000000 | 1.82896e-13 | 0.999999 |
| rad25              | 1.67771e-13 | 1.000000 | 1.71324e-13 | 0.999999 |

|           |             |         |             |          |
|-----------|-------------|---------|-------------|----------|
| rad14     | 1.62192e-13 | 1.00000 | 1.65628e-13 | 0.999999 |
| rad40anti | 1.22259e-13 | 1.00000 | 1.24847e-13 | 0.999999 |
| rad24     | 4.03637e-14 | 1.00000 | 4.12185e-14 | 0.999999 |
| rad15     | 2.93845e-14 | 1.00000 | 3.00068e-14 | 0.999999 |
| rad12     | 4.81694e-15 | 1.00000 | 4.91895e-15 | 0.999999 |
| rad18     | 2.59111e-16 | 1.00000 | 2.64599e-16 | 0.999999 |
| rad5      | 1.23763e-18 | 1.00000 | 1.26384e-18 | 0.999999 |
| rad47     | 1.02543e-19 | 1.00000 | 1.04714e-19 | 0.999999 |
| rad8      | 9.34039e-24 | 1.00000 | 9.53816e-24 | 0.999999 |

0.100000000E-01 Pa, 800.000000 K

| Rate constant      | True (fraction)      | Effective (fraction) |
|--------------------|----------------------|----------------------|
| Total              | 2.75392e-13 (1.00 )  | 2.64229e-13 (1.00 )  |
| Formation of rad11 | 1.06471e-13 (0.387 ) | 1.00706e-13 (0.381 ) |
| Formation of rad6  | 9.97133e-14 (0.362 ) | 9.43147e-14 (0.357 ) |
| H-abstraction      | 6.92082e-14 (0.251 ) | 6.92082e-14 (0.262 ) |

| species            | PYtrue      | Cumul    | PYeffective | Cumul    |
|--------------------|-------------|----------|-------------|----------|
| Indene+H           | 0.420982    | 0.420982 | 0.438768    | 0.438768 |
| Benzene+2-propynyl | 0.251308    | 0.672290 | 0.261925    | 0.700693 |
| C2H2+PhCH2         | 0.158741    | 0.831031 | 0.165448    | 0.866141 |
| PhCCH+CH3          | 0.0631379   | 0.894169 | 0.0658053   | 0.931947 |
| Phenyl+Allene      | 0.0405348   | 0.934704 | 0.000000    | 0.931947 |
| PhCHCCH2+H         | 0.0360766   | 0.970781 | 0.0376008   | 0.969547 |
| PhCH2CCH+H         | 0.00999796  | 0.980779 | 0.0104204   | 0.979968 |
| Ph+MeAc            | 0.00840310  | 0.989182 | 0.00875807  | 0.988726 |
| PhCCCH3+H          | 0.00623361  | 0.995415 | 0.00649697  | 0.995223 |
| PAH7+H             | 0.00350996  | 0.998925 | 0.00365825  | 0.998881 |
| rad39              | 0.000836536 | 0.999762 | 0.000871881 | 0.999753 |
| rad19anti          | 9.01912e-05 | 0.999852 | 9.40013e-05 | 0.999847 |
| PAH9+H             | 5.38725e-05 | 0.999906 | 5.61486e-05 | 0.999903 |
| rad30              | 2.94533e-05 | 0.999935 | 3.06976e-05 | 0.999934 |
| rad38              | 1.96355e-05 | 0.999955 | 2.04651e-05 | 0.999954 |
| rad35              | 1.22747e-05 | 0.999967 | 1.27933e-05 | 0.999967 |
| rad19syn           | 8.33339e-06 | 0.999976 | 8.68545e-06 | 0.999976 |
| rad6               | 8.18283e-06 | 0.999984 | 8.52853e-06 | 0.999984 |
| rad37              | 7.26167e-06 | 0.999991 | 7.56844e-06 | 0.999992 |
| rad46              | 2.65499e-06 | 0.999994 | 2.76715e-06 | 0.999995 |
| rad54              | 2.03469e-06 | 0.999996 | 2.12065e-06 | 0.999997 |
| PAH3+H             | 7.96549e-07 | 0.999997 | 8.30202e-07 | 0.999997 |
| PhcycC3H3_A+H      | 7.94325e-07 | 0.999997 | 8.27884e-07 | 0.999998 |
| rad60syn           | 3.96778e-07 | 0.999998 | 4.13541e-07 | 0.999999 |
| PAH10+CH3          | 2.53608e-07 | 0.999998 | 2.64322e-07 | 0.999999 |
| rad60anti          | 2.15806e-07 | 0.999998 | 2.24923e-07 | 0.999999 |
| rad50              | 1.84589e-07 | 0.999998 | 1.92387e-07 | 0.999999 |
| rad70              | 1.50042e-07 | 0.999999 | 1.56382e-07 | 1.000000 |
| PAH1+H             | 1.48718e-07 | 0.999999 | 1.55001e-07 | 1.000000 |
| rad59              | 1.17665e-07 | 0.999999 | 1.22636e-07 | 1.000000 |
| rad67              | 9.03619e-08 | 0.999999 | 9.41799e-08 | 1.000000 |
| rad2               | 7.65538e-08 | 0.999999 | 7.97881e-08 | 1.000000 |
| rad55              | 7.18813e-08 | 0.999999 | 7.49183e-08 | 1.000000 |
| rad23              | 5.83338e-08 | 0.999999 | 6.07983e-08 | 1.000000 |
| rad62              | 5.32947e-08 | 0.999999 | 5.55463e-08 | 1.000000 |
| rad43              | 1.85517e-08 | 0.999999 | 1.93355e-08 | 1.000000 |
| rad34              | 1.46567e-08 | 0.999999 | 1.52759e-08 | 1.000000 |
| rad1               | 1.37107e-08 | 0.999999 | 1.42900e-08 | 1.000000 |
| rad45              | 1.08986e-08 | 0.999999 | 1.13590e-08 | 1.000000 |
| rad51              | 7.91353e-09 | 0.999999 | 8.24784e-09 | 1.000000 |
| rad28              | 7.53993e-09 | 0.999999 | 7.85843e-09 | 1.000000 |
| rad52              | 5.94064e-09 | 0.999999 | 6.19162e-09 | 1.000000 |
| rad10              | 1.82801e-09 | 0.999999 | 1.90524e-09 | 1.000000 |
| rad3               | 1.60094e-09 | 0.999999 | 1.66858e-09 | 1.000000 |
| rad26              | 1.46824e-09 | 0.999999 | 1.53027e-09 | 1.000000 |
| rad53              | 1.38665e-09 | 0.999999 | 1.44523e-09 | 1.000000 |
| rad7               | 1.36382e-09 | 0.999999 | 1.42144e-09 | 1.000000 |
| rad4               | 1.12111e-09 | 0.999999 | 1.16847e-09 | 1.000000 |
| rad36              | 9.98651e-10 | 0.999999 | 1.04083e-09 | 1.000000 |
| rad58              | 6.49271e-10 | 0.999999 | 6.76701e-10 | 1.000000 |
| rad64              | 5.75571e-10 | 0.999999 | 5.99888e-10 | 1.000000 |
| rad9               | 5.46935e-10 | 0.999999 | 5.70041e-10 | 1.000000 |
| rad42              | 5.07956e-10 | 0.999999 | 5.29415e-10 | 1.000000 |
| rad11              | 4.91526e-10 | 0.999999 | 5.12291e-10 | 1.000000 |
| rad56              | 3.39960e-10 | 0.999999 | 3.54323e-10 | 1.000000 |
| rad65              | 2.47724e-10 | 0.999999 | 2.58189e-10 | 1.000000 |
| rad41              | 8.12286e-11 | 0.999999 | 8.46602e-11 | 1.000000 |
| rad68syn           | 3.95958e-11 | 0.999999 | 4.12686e-11 | 1.000000 |
| rad13              | 3.26537e-11 | 0.999999 | 3.40332e-11 | 1.000000 |

|           |             |          |             |         |
|-----------|-------------|----------|-------------|---------|
| rad68anti | 2.69181e-11 | 0.999999 | 2.80553e-11 | 1.00000 |
| rad71     | 2.51960e-11 | 0.999999 | 2.62604e-11 | 1.00000 |
| rad73     | 1.87814e-11 | 0.999999 | 1.95749e-11 | 1.00000 |
| PAH8+H    | 1.08545e-11 | 0.999999 | 1.13130e-11 | 1.00000 |
| rad22     | 1.06243e-11 | 0.999999 | 1.10732e-11 | 1.00000 |
| rad21     | 6.09176e-12 | 0.999999 | 6.34912e-12 | 1.00000 |
| rad61     | 4.97105e-12 | 0.999999 | 5.18106e-12 | 1.00000 |
| rad40syn  | 3.48075e-12 | 0.999999 | 3.62780e-12 | 1.00000 |
| rad33     | 3.20580e-12 | 0.999999 | 3.34124e-12 | 1.00000 |
| rad20     | 2.38917e-12 | 0.999999 | 2.49010e-12 | 1.00000 |
| rad40anti | 1.46094e-12 | 0.999999 | 1.52266e-12 | 1.00000 |
| rad72     | 8.33332e-13 | 0.999999 | 8.68537e-13 | 1.00000 |
| rad24     | 5.59403e-13 | 0.999999 | 5.83037e-13 | 1.00000 |
| rad25     | 2.19079e-13 | 0.999999 | 2.28335e-13 | 1.00000 |
| rad15     | 1.59686e-13 | 0.999999 | 1.66432e-13 | 1.00000 |
| rad27     | 1.25634e-13 | 0.999999 | 1.30941e-13 | 1.00000 |
| rad12     | 1.15994e-13 | 0.999999 | 1.20895e-13 | 1.00000 |
| rad14     | 9.25773e-14 | 0.999999 | 9.64878e-14 | 1.00000 |
| rad31     | 8.41710e-14 | 0.999999 | 8.77276e-14 | 1.00000 |
| rad18     | 7.57115e-16 | 0.999999 | 7.89098e-16 | 1.00000 |
| rad5      | 8.70549e-19 | 0.999999 | 9.07331e-19 | 1.00000 |
| rad47     | 5.66488e-19 | 0.999999 | 5.90420e-19 | 1.00000 |
| rad8      | 3.33801e-20 | 0.999999 | 3.47903e-20 | 1.00000 |

0.100000000E-01 Pa, 900.000000 K

| Rate constant      | True (fraction) |          | Effective (fraction) |          |
|--------------------|-----------------|----------|----------------------|----------|
| Total              | 4.88072e-13     | (1.00 )  | 4.55159e-13          | (1.00 )  |
| Formation of rad11 | 1.74945e-13     | (0.358 ) | 1.58562e-13          | (0.348 ) |
| Formation of rad6  | 1.76509e-13     | (0.362 ) | 1.59979e-13          | (0.351 ) |
| H-abstraction      | 1.36618e-13     | (0.280 ) | 1.36618e-13          | (0.300 ) |

  

| species            | PYtrue      | Cumul    | PYeffective | Cumul    |
|--------------------|-------------|----------|-------------|----------|
| Indene+H           | 0.341022    | 0.341022 | 0.365682    | 0.365682 |
| Benzene+2-propynyl | 0.279914    | 0.620936 | 0.300155    | 0.665837 |
| C2H2+PhCH2         | 0.164620    | 0.785555 | 0.176524    | 0.842361 |
| Phenyl+Allene      | 0.0674357   | 0.852991 | 0.000000    | 0.842361 |
| PhCCH+CH3          | 0.0639237   | 0.916915 | 0.0685462   | 0.910907 |
| PhCHCCH2+H         | 0.0451260   | 0.962041 | 0.0483892   | 0.959296 |
| PhCH2CCH+H         | 0.0182966   | 0.980337 | 0.0196197   | 0.978916 |
| Ph+MeAc            | 0.00849299  | 0.988830 | 0.00910708  | 0.988023 |
| PhCCCH3+H          | 0.00485348  | 0.993684 | 0.00520444  | 0.993227 |
| PAH7+H             | 0.00482405  | 0.998508 | 0.00517289  | 0.998400 |
| rad39              | 0.00111869  | 0.999627 | 0.00119959  | 0.999600 |
| rad19anti          | 0.000152570 | 0.999779 | 0.000163603 | 0.999763 |
| PAH9+H             | 8.58163e-05 | 0.999865 | 9.20219e-05 | 0.999855 |
| rad30              | 3.45808e-05 | 0.999900 | 3.70815e-05 | 0.999892 |
| rad38              | 3.22682e-05 | 0.999932 | 3.46016e-05 | 0.999927 |
| rad19syn           | 2.05725e-05 | 0.999952 | 2.20602e-05 | 0.999949 |
| rad35              | 1.85033e-05 | 0.999971 | 1.98414e-05 | 0.999969 |
| rad37              | 8.30346e-06 | 0.999979 | 8.90392e-06 | 0.999978 |
| rad54              | 5.61021e-06 | 0.999985 | 6.01590e-06 | 0.999984 |
| rad46              | 5.06442e-06 | 0.999990 | 5.43064e-06 | 0.999989 |
| PhcycC3H3_A+H      | 2.75303e-06 | 0.999993 | 2.95211e-06 | 0.999992 |
| PAH3+H             | 1.70038e-06 | 0.999994 | 1.82333e-06 | 0.999994 |
| rad6               | 1.44229e-06 | 0.999996 | 1.54658e-06 | 0.999996 |
| rad60syn           | 6.35563e-07 | 0.999996 | 6.81522e-07 | 0.999996 |
| PAH10+CH3          | 5.92195e-07 | 0.999997 | 6.35018e-07 | 0.999997 |
| rad50              | 5.28148e-07 | 0.999998 | 5.66340e-07 | 0.999997 |
| PAH1+H             | 5.27777e-07 | 0.999998 | 5.65942e-07 | 0.999998 |
| rad70              | 4.68172e-07 | 0.999999 | 5.02026e-07 | 0.999998 |
| rad60anti          | 3.53463e-07 | 0.999999 | 3.79022e-07 | 0.999999 |
| rad67              | 2.86676e-07 | 0.999999 | 3.07406e-07 | 0.999999 |
| rad59              | 2.38380e-07 | 0.999999 | 2.55618e-07 | 0.999999 |
| rad55              | 2.28529e-07 | 1.000000 | 2.45054e-07 | 1.000000 |
| rad62              | 1.23578e-07 | 1.000000 | 1.32514e-07 | 1.000000 |
| rad34              | 5.38126e-08 | 1.000000 | 5.77039e-08 | 1.000000 |
| rad43              | 3.25555e-08 | 1.000000 | 3.49096e-08 | 1.000000 |
| rad51              | 3.01139e-08 | 1.000000 | 3.22916e-08 | 1.000000 |
| rad23              | 2.57382e-08 | 1.000000 | 2.75994e-08 | 1.000000 |
| rad52              | 2.00731e-08 | 1.000000 | 2.15247e-08 | 1.000000 |
| rad2               | 1.58056e-08 | 1.000000 | 1.69485e-08 | 1.000000 |
| rad53              | 7.16543e-09 | 1.000000 | 7.68360e-09 | 1.000000 |
| rad45              | 5.82550e-09 | 1.000000 | 6.24675e-09 | 1.000000 |
| rad1               | 3.03689e-09 | 1.000000 | 3.25649e-09 | 1.000000 |
| rad64              | 2.79885e-09 | 1.000000 | 3.00124e-09 | 1.000000 |
| rad56              | 2.33186e-09 | 1.000000 | 2.50048e-09 | 1.000000 |
| rad58              | 2.16976e-09 | 1.000000 | 2.32667e-09 | 1.000000 |

|           |             |         |             |         |
|-----------|-------------|---------|-------------|---------|
| rad42     | 1.71838e-09 | 1.00000 | 1.84264e-09 | 1.00000 |
| rad9      | 1.57234e-09 | 1.00000 | 1.68604e-09 | 1.00000 |
| rad28     | 1.41814e-09 | 1.00000 | 1.52069e-09 | 1.00000 |
| rad65     | 9.56282e-10 | 1.00000 | 1.02543e-09 | 1.00000 |
| rad36     | 5.44513e-10 | 1.00000 | 5.83889e-10 | 1.00000 |
| rad3      | 4.42938e-10 | 1.00000 | 4.74967e-10 | 1.00000 |
| rad10     | 4.15911e-10 | 1.00000 | 4.45986e-10 | 1.00000 |
| rad7      | 3.45800e-10 | 1.00000 | 3.70805e-10 | 1.00000 |
| rad4      | 3.25963e-10 | 1.00000 | 3.49534e-10 | 1.00000 |
| rad26     | 2.79188e-10 | 1.00000 | 2.99377e-10 | 1.00000 |
| rad68syn  | 2.64140e-10 | 1.00000 | 2.83240e-10 | 1.00000 |
| rad41     | 2.26230e-10 | 1.00000 | 2.42589e-10 | 1.00000 |
| rad11     | 1.86180e-10 | 1.00000 | 1.99643e-10 | 1.00000 |
| rad68anti | 1.78221e-10 | 1.00000 | 1.91108e-10 | 1.00000 |
| PAH8+H    | 1.03661e-10 | 1.00000 | 1.11156e-10 | 1.00000 |
| rad13     | 6.36708e-11 | 1.00000 | 6.82749e-11 | 1.00000 |
| rad21     | 3.82511e-11 | 1.00000 | 4.10172e-11 | 1.00000 |
| rad71     | 2.93366e-11 | 1.00000 | 3.14580e-11 | 1.00000 |
| rad40syn  | 2.88510e-11 | 1.00000 | 3.09374e-11 | 1.00000 |
| rad73     | 2.80058e-11 | 1.00000 | 3.00310e-11 | 1.00000 |
| rad61     | 2.71101e-11 | 1.00000 | 2.90705e-11 | 1.00000 |
| rad20     | 1.66676e-11 | 1.00000 | 1.78729e-11 | 1.00000 |
| rad33     | 1.28548e-11 | 1.00000 | 1.37844e-11 | 1.00000 |
| rad40anti | 1.21646e-11 | 1.00000 | 1.30442e-11 | 1.00000 |
| rad22     | 5.10691e-12 | 1.00000 | 5.47620e-12 | 1.00000 |
| rad24     | 1.88243e-12 | 1.00000 | 2.01855e-12 | 1.00000 |
| rad72     | 8.57666e-13 | 1.00000 | 9.19687e-13 | 1.00000 |
| rad25     | 5.62412e-13 | 1.00000 | 6.03082e-13 | 1.00000 |
| rad12     | 5.36006e-13 | 1.00000 | 5.74766e-13 | 1.00000 |
| rad15     | 3.78128e-13 | 1.00000 | 4.05471e-13 | 1.00000 |
| rad27     | 1.49548e-13 | 1.00000 | 1.60361e-13 | 1.00000 |
| rad14     | 1.16555e-13 | 1.00000 | 1.24983e-13 | 1.00000 |
| rad31     | 4.20166e-14 | 1.00000 | 4.50550e-14 | 1.00000 |
| rad18     | 5.11510e-15 | 1.00000 | 5.48499e-15 | 1.00000 |
| rad8      | 1.12184e-17 | 1.00000 | 1.20296e-17 | 1.00000 |
| rad47     | 2.12914e-18 | 1.00000 | 2.28310e-18 | 1.00000 |
| rad5      | 7.78176e-19 | 1.00000 | 8.34453e-19 | 1.00000 |

0.100000000E-01 Pa, 1000.00000 K

| Rate constant      | True (fraction)      | Effective (fraction) |
|--------------------|----------------------|----------------------|
| Total              | 7.98668e-13 (1.00 )  | 7.19594e-13 (1.00 )  |
| Formation of rad11 | 2.67704e-13 (0.335 ) | 2.29546e-13 (0.319 ) |
| Formation of rad6  | 2.87049e-13 (0.359 ) | 2.46133e-13 (0.342 ) |
| H-abstraction      | 2.43915e-13 (0.305 ) | 2.43915e-13 (0.339 ) |

| species            | PYtrue      | Cumul    | PYeffective | Cumul    |
|--------------------|-------------|----------|-------------|----------|
| Benzene+2-propynyl | 0.305402    | 0.305402 | 0.338962    | 0.338962 |
| Indene+H           | 0.272127    | 0.577529 | 0.302030    | 0.640991 |
| C2H2+PhCH2         | 0.159452    | 0.736981 | 0.176973    | 0.817965 |
| Phenyl+Allene      | 0.0990073   | 0.835988 | 0.000000    | 0.817965 |
| PhCCH+CH3          | 0.0616198   | 0.897608 | 0.0683910   | 0.886356 |
| PhCHCCH2+H         | 0.0537593   | 0.951367 | 0.0596667   | 0.946022 |
| PhCH2CCH+H         | 0.0288969   | 0.980264 | 0.0320723   | 0.978095 |
| Ph+MeAc            | 0.00817625  | 0.988440 | 0.00907467  | 0.987169 |
| PAH7+H             | 0.00601180  | 0.994452 | 0.00667239  | 0.993842 |
| PhCCH3+H           | 0.00364274  | 0.998095 | 0.00404303  | 0.997885 |
| rad39              | 0.00134895  | 0.999444 | 0.00149718  | 0.999382 |
| rad19anti          | 0.000230025 | 0.999674 | 0.000255302 | 0.999637 |
| PAH9+H             | 0.000123702 | 0.999797 | 0.000137295 | 0.999774 |
| rad38              | 4.77828e-05 | 0.999845 | 5.30335e-05 | 0.999827 |
| rad19syn           | 4.20371e-05 | 0.999887 | 4.66565e-05 | 0.999874 |
| rad30              | 3.74823e-05 | 0.999925 | 4.16011e-05 | 0.999916 |
| rad35              | 2.54638e-05 | 0.999950 | 2.82618e-05 | 0.999944 |
| rad54              | 1.25292e-05 | 0.999963 | 1.39061e-05 | 0.999958 |
| rad37              | 9.28205e-06 | 0.999972 | 1.03020e-05 | 0.999968 |
| rad46              | 8.48993e-06 | 0.999981 | 9.42284e-06 | 0.999978 |
| PhcycC3H3_A+H      | 7.44283e-06 | 0.999988 | 8.26073e-06 | 0.999986 |
| PAH3+H             | 3.05847e-06 | 0.999991 | 3.39455e-06 | 0.999989 |
| PAH1+H             | 1.42914e-06 | 0.999992 | 1.58618e-06 | 0.999991 |
| rad50              | 1.24803e-06 | 0.999994 | 1.38517e-06 | 0.999992 |
| PAH10+CH3          | 1.21337e-06 | 0.999995 | 1.34670e-06 | 0.999994 |
| rad70              | 1.14131e-06 | 0.999996 | 1.26673e-06 | 0.999995 |
| rad60syn           | 8.97094e-07 | 0.999997 | 9.95669e-07 | 0.999996 |
| rad67              | 7.32912e-07 | 0.999998 | 8.13447e-07 | 0.999997 |
| rad55              | 5.71763e-07 | 0.999998 | 6.34592e-07 | 0.999997 |
| rad60anti          | 5.08253e-07 | 0.999999 | 5.64103e-07 | 0.999998 |
| rad59              | 4.08649e-07 | 0.999999 | 4.53554e-07 | 0.999998 |

|           |             |          |             |          |
|-----------|-------------|----------|-------------|----------|
| rad6      | 3.18766e-07 | 0.999999 | 3.53795e-07 | 0.999999 |
| rad62     | 2.36338e-07 | 1.000000 | 2.62309e-07 | 0.999999 |
| rad34     | 1.49947e-07 | 1.000000 | 1.66424e-07 | 0.999999 |
| rad51     | 9.30053e-08 | 1.000000 | 1.03225e-07 | 0.999999 |
| rad52     | 5.47356e-08 | 1.000000 | 6.07503e-08 | 0.999999 |
| rad43     | 4.82938e-08 | 1.000000 | 5.36006e-08 | 0.999999 |
| rad53     | 2.66803e-08 | 1.000000 | 2.96121e-08 | 0.999999 |
| rad23     | 1.21228e-08 | 1.000000 | 1.34550e-08 | 0.999999 |
| rad56     | 1.08966e-08 | 1.000000 | 1.20940e-08 | 0.999999 |
| rad64     | 9.68749e-09 | 1.000000 | 1.07520e-08 | 0.999999 |
| rad58     | 5.61476e-09 | 1.000000 | 6.23174e-09 | 0.999999 |
| rad42     | 4.47926e-09 | 1.000000 | 4.97147e-09 | 0.999999 |
| rad2      | 3.61309e-09 | 1.000000 | 4.01012e-09 | 0.999999 |
| rad45     | 3.11076e-09 | 1.000000 | 3.45258e-09 | 0.999999 |
| rad65     | 2.95042e-09 | 1.000000 | 3.27463e-09 | 0.999999 |
| rad9      | 1.80766e-09 | 1.000000 | 2.00630e-09 | 0.999999 |
| rad68syn  | 1.19353e-09 | 1.000000 | 1.32468e-09 | 0.999999 |
| rad68anti | 8.00295e-10 | 1.000000 | 8.88231e-10 | 0.999999 |
| rad1      | 7.71643e-10 | 1.000000 | 8.56435e-10 | 0.999999 |
| PAH8+H    | 6.70685e-10 | 1.000000 | 7.44382e-10 | 0.999999 |
| rad41     | 4.94771e-10 | 1.000000 | 5.49140e-10 | 0.999999 |
| rad28     | 3.42951e-10 | 1.000000 | 3.80636e-10 | 0.999999 |
| rad36     | 2.94006e-10 | 1.000000 | 3.26314e-10 | 0.999999 |
| rad13     | 2.50303e-10 | 1.000000 | 2.77808e-10 | 0.999999 |
| rad11     | 2.41045e-10 | 1.000000 | 2.67533e-10 | 0.999999 |
| rad40syn  | 1.61087e-10 | 1.000000 | 1.78788e-10 | 0.999999 |
| rad7      | 1.51502e-10 | 1.000000 | 1.68150e-10 | 0.999999 |
| rad3      | 1.43870e-10 | 1.000000 | 1.59680e-10 | 0.999999 |
| rad10     | 1.29124e-10 | 1.000000 | 1.43312e-10 | 0.999999 |
| rad61     | 1.14265e-10 | 1.000000 | 1.26822e-10 | 0.999999 |
| rad4      | 1.09979e-10 | 1.000000 | 1.22064e-10 | 0.999999 |
| rad21     | 9.57420e-11 | 1.000000 | 1.06263e-10 | 0.999999 |
| rad73     | 8.15479e-11 | 1.000000 | 9.05094e-11 | 0.999999 |
| rad40anti | 7.15853e-11 | 1.000000 | 7.94515e-11 | 0.999999 |
| rad26     | 6.92777e-11 | 1.000000 | 7.68907e-11 | 0.999999 |
| rad71     | 5.32571e-11 | 1.000000 | 5.91094e-11 | 0.999999 |
| rad20     | 4.66280e-11 | 1.000000 | 5.17518e-11 | 0.999999 |
| rad33     | 2.70824e-11 | 1.000000 | 3.00585e-11 | 0.999999 |
| rad22     | 2.76175e-12 | 1.000000 | 3.06524e-12 | 0.999999 |
| rad24     | 2.48819e-12 | 1.000000 | 2.76161e-12 | 0.999999 |
| rad25     | 1.49746e-12 | 1.000000 | 1.66202e-12 | 0.999999 |
| rad12     | 9.30240e-13 | 1.000000 | 1.03246e-12 | 0.999999 |
| rad72     | 6.90089e-13 | 1.000000 | 7.65919e-13 | 0.999999 |
| rad15     | 4.70387e-13 | 1.000000 | 5.22076e-13 | 0.999999 |
| rad14     | 1.93789e-13 | 1.000000 | 2.15084e-13 | 0.999999 |
| rad27     | 1.91491e-13 | 1.000000 | 2.12534e-13 | 0.999999 |
| rad18     | 5.14110e-14 | 1.000000 | 5.70604e-14 | 0.999999 |
| rad31     | 2.32738e-14 | 1.000000 | 2.58312e-14 | 0.999999 |
| rad8      | 3.75840e-16 | 1.000000 | 4.17140e-16 | 0.999999 |
| rad47     | 6.67381e-18 | 1.000000 | 7.40720e-18 | 0.999999 |
| rad5      | 1.01204e-18 | 1.000000 | 1.12325e-18 | 0.999999 |

0.100000000E-01 Pa, 1100.00000 K

=====

| Rate constant      | True (fraction)      | Effective (fraction) |
|--------------------|----------------------|----------------------|
| Total              | 1.22919e-12 (1.00 )  | 1.06688e-12 (1.00 )  |
| Formation of rad11 | 3.87976e-13 (0.316 ) | 3.11712e-13 (0.292 ) |
| Formation of rad6  | 4.37724e-13 (0.356 ) | 3.51681e-13 (0.330 ) |
| H-abstraction      | 4.03491e-13 (0.328 ) | 4.03491e-13 (0.378 ) |

| species            | PYtrue      | Cumul    | PYeffective | Cumul    |
|--------------------|-------------|----------|-------------|----------|
| Benzene+2-propynyl | 0.328257    | 0.328257 | 0.378196    | 0.378196 |
| Indene+H           | 0.214715    | 0.542972 | 0.247379    | 0.625575 |
| C2H2+PhCH2         | 0.146502    | 0.689473 | 0.168789    | 0.794364 |
| Phenyl+Allene      | 0.132044    | 0.821517 | 0.000000    | 0.794364 |
| PhCHCCH2+H         | 0.0609573   | 0.882475 | 0.0702309   | 0.864595 |
| PhCCH+CH3          | 0.0572443   | 0.939719 | 0.0659529   | 0.930548 |
| PhCH2CCH+H         | 0.0407440   | 0.980463 | 0.0469424   | 0.977490 |
| Ph+MeAc            | 0.00763489  | 0.988098 | 0.00879642  | 0.986286 |
| PAH7+H             | 0.00694716  | 0.995045 | 0.00800405  | 0.994290 |
| PhCCCH3+H          | 0.00267732  | 0.997722 | 0.00308463  | 0.997375 |
| rad39              | 0.00150224  | 0.999225 | 0.00173077  | 0.999106 |
| rad19anti          | 0.000315220 | 0.999540 | 0.000363175 | 0.999469 |
| PAH9+H             | 0.000164390 | 0.999704 | 0.000189398 | 0.999658 |
| rad19syn           | 7.45655e-05 | 0.999779 | 8.59091e-05 | 0.999744 |
| rad38              | 6.50379e-05 | 0.999844 | 7.49324e-05 | 0.999819 |
| rad30              | 3.82331e-05 | 0.999882 | 4.40496e-05 | 0.999863 |
| rad35              | 3.25611e-05 | 0.999915 | 3.75147e-05 | 0.999901 |

|               |             |          |             |          |
|---------------|-------------|----------|-------------|----------|
| rad54         | 2.39077e-05 | 0.999938 | 2.75448e-05 | 0.999928 |
| PhcycC3H3_A+H | 1.67306e-05 | 0.999955 | 1.92759e-05 | 0.999948 |
| rad46         | 1.28379e-05 | 0.999968 | 1.47909e-05 | 0.999962 |
| rad37         | 1.03715e-05 | 0.999978 | 1.19494e-05 | 0.999974 |
| PAH3+H        | 4.83977e-06 | 0.999983 | 5.57606e-06 | 0.999980 |
| PAH1+H        | 3.16888e-06 | 0.999986 | 3.65097e-06 | 0.999984 |
| rad50         | 2.53576e-06 | 0.999989 | 2.92154e-06 | 0.999987 |
| rad70         | 2.31280e-06 | 0.999991 | 2.66464e-06 | 0.999989 |
| PAH10+CH3     | 2.25120e-06 | 0.999993 | 2.59369e-06 | 0.999992 |
| rad67         | 1.57919e-06 | 0.999995 | 1.81943e-06 | 0.999994 |
| rad55         | 1.19783e-06 | 0.999996 | 1.38006e-06 | 0.999995 |
| rad60syn      | 1.15117e-06 | 0.999997 | 1.32630e-06 | 0.999996 |
| rad60anti     | 6.62627e-07 | 0.999998 | 7.63433e-07 | 0.999997 |
| rad59         | 6.18408e-07 | 0.999999 | 7.12488e-07 | 0.999998 |
| rad62         | 3.93252e-07 | 0.999999 | 4.53078e-07 | 0.999998 |
| rad34         | 3.40146e-07 | 0.999999 | 3.91892e-07 | 0.999999 |
| rad51         | 2.38612e-07 | 1.000000 | 2.74912e-07 | 0.999999 |
| rad52         | 1.25520e-07 | 1.000000 | 1.44615e-07 | 0.999999 |
| rad6          | 9.73684e-08 | 1.000000 | 1.12182e-07 | 0.999999 |
| rad53         | 7.80404e-08 | 1.000000 | 8.99129e-08 | 0.999999 |
| rad43         | 6.37370e-08 | 1.000000 | 7.34332e-08 | 0.999999 |
| rad56         | 3.84100e-08 | 1.000000 | 4.42533e-08 | 0.999999 |
| rad64         | 2.61430e-08 | 1.000000 | 3.01201e-08 | 0.999999 |
| rad58         | 1.20351e-08 | 1.000000 | 1.38660e-08 | 0.999999 |
| rad42         | 9.67471e-09 | 1.000000 | 1.11465e-08 | 0.999999 |
| rad65         | 7.51102e-09 | 1.000000 | 8.65365e-09 | 0.999999 |
| rad23         | 5.99409e-09 | 1.000000 | 6.90601e-09 | 0.999999 |
| rad68syn      | 4.04358e-09 | 1.000000 | 4.65874e-09 | 0.999999 |
| PAH8+H        | 3.08765e-09 | 1.000000 | 3.55737e-09 | 0.999999 |
| rad68anti     | 2.69717e-09 | 1.000000 | 3.10750e-09 | 0.999999 |
| rad45         | 1.67275e-09 | 1.000000 | 1.92723e-09 | 0.999999 |
| rad9          | 1.42291e-09 | 1.000000 | 1.63937e-09 | 0.999999 |
| rad2          | 9.56931e-10 | 1.000000 | 1.10251e-09 | 0.999999 |
| rad41         | 9.10520e-10 | 1.000000 | 1.04904e-09 | 0.999999 |
| rad11         | 6.99016e-10 | 1.000000 | 8.05361e-10 | 0.999999 |
| rad40syn      | 6.53882e-10 | 1.000000 | 7.53360e-10 | 0.999999 |
| rad13         | 5.60036e-10 | 1.000000 | 6.45234e-10 | 1.000000 |
| rad61         | 3.79504e-10 | 1.000000 | 4.37238e-10 | 1.000000 |
| rad73         | 3.44626e-10 | 1.000000 | 3.97054e-10 | 1.000000 |
| rad40anti     | 3.05578e-10 | 1.000000 | 3.52066e-10 | 1.000000 |
| rad71         | 2.20702e-10 | 1.000000 | 2.54278e-10 | 1.000000 |
| rad1          | 2.18525e-10 | 1.000000 | 2.51769e-10 | 1.000000 |
| rad7          | 2.10626e-10 | 1.000000 | 2.42668e-10 | 1.000000 |
| rad36         | 1.59294e-10 | 1.000000 | 1.83528e-10 | 1.000000 |
| rad28         | 1.14793e-10 | 1.000000 | 1.32257e-10 | 1.000000 |
| rad21         | 1.12755e-10 | 1.000000 | 1.29908e-10 | 1.000000 |
| rad10         | 6.15025e-11 | 1.000000 | 7.08590e-11 | 1.000000 |
| rad20         | 5.73150e-11 | 1.000000 | 6.60344e-11 | 1.000000 |
| rad3          | 5.28314e-11 | 1.000000 | 6.08688e-11 | 1.000000 |
| rad4          | 4.12341e-11 | 1.000000 | 4.75071e-11 | 1.000000 |
| rad33         | 2.98808e-11 | 1.000000 | 3.44266e-11 | 1.000000 |
| rad26         | 2.37197e-11 | 1.000000 | 2.73282e-11 | 1.000000 |
| rad25         | 2.72965e-12 | 1.000000 | 3.14492e-12 | 1.000000 |
| rad24         | 2.16992e-12 | 1.000000 | 2.50004e-12 | 1.000000 |
| rad22         | 1.63540e-12 | 1.000000 | 1.88419e-12 | 1.000000 |
| rad72         | 1.44642e-12 | 1.000000 | 1.66647e-12 | 1.000000 |
| rad12         | 1.06581e-12 | 1.000000 | 1.22796e-12 | 1.000000 |
| rad15         | 4.66695e-13 | 1.000000 | 5.37695e-13 | 1.000000 |
| rad18         | 4.10243e-13 | 1.000000 | 4.72653e-13 | 1.000000 |
| rad14         | 2.60889e-13 | 1.000000 | 3.00579e-13 | 1.000000 |
| rad27         | 1.68544e-13 | 1.000000 | 1.94185e-13 | 1.000000 |
| rad31         | 1.37123e-14 | 1.000000 | 1.57984e-14 | 1.000000 |
| rad8          | 2.31132e-15 | 1.000000 | 2.66294e-15 | 1.000000 |
| rad47         | 1.74620e-17 | 1.000000 | 2.01185e-17 | 1.000000 |
| rad5          | 1.93078e-18 | 1.000000 | 2.22452e-18 | 1.000000 |

0.100000000E-01 Pa, 1200.00000 K

| Rate constant      | True (fraction) |          | Effective (fraction) |          |
|--------------------|-----------------|----------|----------------------|----------|
| Total              | 1.80237e-12     | (1.00 )  | 1.50733e-12          | (1.00 )  |
| Formation of rad11 | 5.38789e-13     | (0.299 ) | 4.03336e-13          | (0.268 ) |
| Formation of rad6  | 6.34764e-13     | (0.352 ) | 4.75183e-13          | (0.315 ) |
| H-abstraction      | 6.28816e-13     | (0.349 ) | 6.28816e-13          | (0.417 ) |
| species            | PYtrue          | Cumul    | PYeffective          | Cumul    |
| Benzene+2-propynyl | 0.348883        | 0.348883 | 0.417171             | 0.417171 |
| Indene+H           | 0.168225        | 0.517108 | 0.201152             | 0.618323 |
| Phenyl+Allene      | 0.163693        | 0.680800 | 0.000000             | 0.618323 |

|               |             |          |             |          |
|---------------|-------------|----------|-------------|----------|
| C2H2+PhCH2    | 0.129445    | 0.810245 | 0.154781    | 0.773104 |
| PhCHCCH2+H    | 0.0661470   | 0.876392 | 0.0790946   | 0.852199 |
| PhCH2CCH+H    | 0.0526489   | 0.929041 | 0.0629537   | 0.915152 |
| PhCCH+CH3     | 0.0518207   | 0.980862 | 0.0619635   | 0.977116 |
| PAH7+H        | 0.00758538  | 0.988447 | 0.00907010  | 0.986186 |
| Ph+MeAc       | 0.00700420  | 0.995451 | 0.00837514  | 0.994561 |
| PhCCCH3+H     | 0.00195097  | 0.997402 | 0.00233284  | 0.996894 |
| rad39         | 0.00157581  | 0.998978 | 0.00188425  | 0.998778 |
| rad19anti     | 0.000399580 | 0.999377 | 0.000477791 | 0.999256 |
| PAH9+H        | 0.000204704 | 0.999582 | 0.000244771 | 0.999501 |
| rad19syn      | 0.000118863 | 0.999701 | 0.000142129 | 0.999643 |
| rad38         | 8.27693e-05 | 0.999784 | 9.89696e-05 | 0.999742 |
| rad54         | 4.05005e-05 | 0.999824 | 4.84278e-05 | 0.999790 |
| rad35         | 3.92972e-05 | 0.999864 | 4.69889e-05 | 0.999837 |
| rad30         | 3.73116e-05 | 0.999901 | 4.46147e-05 | 0.999882 |
| PhcycC3H3_A+H | 3.27087e-05 | 0.999934 | 3.91108e-05 | 0.999921 |
| rad46         | 1.78873e-05 | 0.999952 | 2.13884e-05 | 0.999942 |
| rad37         | 1.16239e-05 | 0.999963 | 1.38991e-05 | 0.999956 |
| PAH3+H        | 6.95972e-06 | 0.999970 | 8.32193e-06 | 0.999965 |
| PAH1+H        | 6.04573e-06 | 0.999976 | 7.22906e-06 | 0.999972 |
| rad50         | 4.57163e-06 | 0.999981 | 5.46645e-06 | 0.999977 |
| rad70         | 4.07151e-06 | 0.999985 | 4.86843e-06 | 0.999982 |
| PAH10+CH3     | 3.83960e-06 | 0.999989 | 4.59113e-06 | 0.999987 |
| rad67         | 2.96801e-06 | 0.999992 | 3.54895e-06 | 0.999990 |
| rad55         | 2.19501e-06 | 0.999994 | 2.62464e-06 | 0.999993 |
| rad60syn      | 1.37645e-06 | 0.999995 | 1.64587e-06 | 0.999995 |
| rad59         | 8.52872e-07 | 0.999996 | 1.01981e-06 | 0.999996 |
| rad60anti     | 8.03342e-07 | 0.999997 | 9.60578e-07 | 0.999996 |
| rad34         | 6.59901e-07 | 0.999997 | 7.89063e-07 | 0.999997 |
| rad62         | 5.91359e-07 | 0.999998 | 7.07106e-07 | 0.999998 |
| rad51         | 5.25840e-07 | 0.999999 | 6.28762e-07 | 0.999999 |
| rad52         | 2.50742e-07 | 0.999999 | 2.99821e-07 | 0.999999 |
| rad53         | 1.90239e-07 | 0.999999 | 2.27475e-07 | 0.999999 |
| rad56         | 1.09449e-07 | 0.999999 | 1.30871e-07 | 0.999999 |
| rad43         | 7.76177e-08 | 0.999999 | 9.28097e-08 | 0.999999 |
| rad64         | 5.85551e-08 | 0.999999 | 7.00164e-08 | 0.999999 |
| rad6          | 4.43854e-08 | 0.999999 | 5.30731e-08 | 0.999999 |
| rad58         | 2.24149e-08 | 0.999999 | 2.68022e-08 | 1.000000 |
| rad42         | 1.82035e-08 | 0.999999 | 2.17665e-08 | 1.000000 |
| rad65         | 1.63738e-08 | 0.999999 | 1.95786e-08 | 1.000000 |
| rad68syn      | 1.10176e-08 | 0.999999 | 1.31740e-08 | 1.000000 |
| PAH8+H        | 1.09228e-08 | 0.999999 | 1.30607e-08 | 1.000000 |
| rad68anti     | 7.31621e-09 | 0.999999 | 8.74827e-09 | 1.000000 |
| rad23         | 3.08310e-09 | 0.999999 | 3.68657e-09 | 1.000000 |
| rad40syn      | 2.07796e-09 | 0.999999 | 2.48469e-09 | 1.000000 |
| rad11         | 1.60893e-09 | 0.999999 | 1.92385e-09 | 1.000000 |
| rad41         | 1.48033e-09 | 0.999999 | 1.77008e-09 | 1.000000 |
| rad73         | 1.27026e-09 | 0.999999 | 1.51889e-09 | 1.000000 |
| rad61         | 1.03678e-09 | 0.999999 | 1.23971e-09 | 1.000000 |
| rad40anti     | 1.01431e-09 | 0.999999 | 1.21284e-09 | 1.000000 |
| rad9          | 1.01164e-09 | 0.999999 | 1.20965e-09 | 1.000000 |
| rad71         | 9.22854e-10 | 0.999999 | 1.10349e-09 | 1.000000 |
| rad45         | 9.07104e-10 | 0.999999 | 1.08466e-09 | 1.000000 |
| rad13         | 6.48663e-10 | 0.999999 | 7.75629e-10 | 1.000000 |
| rad7          | 5.75004e-10 | 0.999999 | 6.87552e-10 | 1.000000 |
| rad2          | 2.82032e-10 | 0.999999 | 3.37235e-10 | 1.000000 |
| rad21         | 8.79223e-11 | 0.999999 | 1.05131e-10 | 1.000000 |
| rad36         | 8.70856e-11 | 0.999999 | 1.04131e-10 | 1.000000 |
| rad1          | 6.68163e-11 | 0.999999 | 7.98948e-11 | 1.000000 |
| rad28         | 5.61122e-11 | 0.999999 | 6.70953e-11 | 1.000000 |
| rad10         | 4.36054e-11 | 0.999999 | 5.21405e-11 | 1.000000 |
| rad20         | 4.28536e-11 | 0.999999 | 5.12415e-11 | 1.000000 |
| rad33         | 2.25928e-11 | 0.999999 | 2.70151e-11 | 1.000000 |
| rad3          | 2.10668e-11 | 0.999999 | 2.51903e-11 | 1.000000 |
| rad4          | 1.66420e-11 | 0.999999 | 1.98993e-11 | 1.000000 |
| rad26         | 1.12245e-11 | 0.999999 | 1.34216e-11 | 1.000000 |
| rad72         | 7.27265e-12 | 0.999999 | 8.69616e-12 | 1.000000 |
| rad25         | 3.12116e-12 | 0.999999 | 3.73208e-12 | 1.000000 |
| rad24         | 1.65804e-12 | 0.999999 | 1.98258e-12 | 1.000000 |
| rad18         | 1.65625e-12 | 0.999999 | 1.98042e-12 | 1.000000 |
| rad12         | 1.03522e-12 | 0.999999 | 1.23785e-12 | 1.000000 |
| rad22         | 1.01577e-12 | 0.999999 | 1.21459e-12 | 1.000000 |
| rad15         | 4.83296e-13 | 0.999999 | 5.77893e-13 | 1.000000 |
| rad14         | 2.44721e-13 | 0.999999 | 2.92620e-13 | 1.000000 |
| rad27         | 1.01470e-13 | 0.999999 | 1.21331e-13 | 1.000000 |
| rad31         | 8.42090e-15 | 0.999999 | 1.00692e-14 | 1.000000 |
| rad8          | 5.36822e-15 | 0.999999 | 6.41893e-15 | 1.000000 |
| rad47         | 3.90121e-17 | 0.999999 | 4.66481e-17 | 1.000000 |
| rad5          | 5.04989e-18 | 0.999999 | 6.03834e-18 | 1.000000 |

0.100000000E-01 Pa, 1300.00000 K

| =====              |                 |          |                      |          |
|--------------------|-----------------|----------|----------------------|----------|
| Rate constant      | True (fraction) |          | Effective (fraction) |          |
| -----              |                 |          |                      |          |
| Total              | 2.54148e-12     | (1.00 )  | 2.05338e-12          | (1.00 )  |
| Formation of rad11 | 7.22991e-13     | (0.284 ) | 5.03422e-13          | (0.245 ) |
| Formation of rad6  | 8.84215e-13     | (0.348 ) | 6.15682e-13          | (0.300 ) |
| H-abstraction      | 9.34273e-13     | (0.368 ) | 9.34273e-13          | (0.455 ) |
| -----              |                 |          |                      |          |
| species            | PYtrue          | Cumul    | PYeffective          | Cumul    |
| -----              |                 |          |                      |          |
| Benzene+2-propynyl | 0.367610        | 0.367610 | 0.454993             | 0.454993 |
| Phenyl+Allene      | 0.192054        | 0.559664 | 0.000000             | 0.454993 |
| Indene+H           | 0.131421        | 0.691086 | 0.162662             | 0.617655 |
| C2H2+PhCH2         | 0.111295        | 0.802381 | 0.137750             | 0.755405 |
| PhCHCCH2+H         | 0.0692296       | 0.871610 | 0.0856859            | 0.841091 |
| PhCH2CCH+H         | 0.0636260       | 0.935236 | 0.0787507            | 0.919842 |
| PhCCH+CH3          | 0.0461559       | 0.981392 | 0.0571276            | 0.976970 |
| PAH7+H             | 0.00794566      | 0.989338 | 0.00983443           | 0.986804 |
| Ph+MeAc            | 0.00637082      | 0.995709 | 0.00788521           | 0.994689 |
| rad39              | 0.00158196      | 0.997291 | 0.00195800           | 0.996647 |
| PhCCCH3+H          | 0.00142376      | 0.998714 | 0.00176219           | 0.998409 |
| rad19anti          | 0.000475489     | 0.999190 | 0.000588514          | 0.998998 |
| PAH9+H             | 0.000242133     | 0.999432 | 0.000299689          | 0.999298 |
| rad19syn           | 0.000174660     | 0.999607 | 0.000216178          | 0.999514 |
| rad38              | 9.98866e-05     | 0.999707 | 0.000123630          | 0.999637 |
| rad54              | 6.26274e-05     | 0.999769 | 7.75141e-05          | 0.999715 |
| PhcycC3H3_A+H      | 5.74351e-05     | 0.999827 | 7.10879e-05          | 0.999786 |
| rad35              | 4.53517e-05     | 0.999872 | 5.61324e-05          | 0.999842 |
| rad30              | 3.53184e-05     | 0.999907 | 4.37138e-05          | 0.999886 |
| rad46              | 2.33613e-05     | 0.999931 | 2.89145e-05          | 0.999915 |
| rad37              | 1.29873e-05     | 0.999944 | 1.60744e-05          | 0.999931 |
| PAH1+H             | 1.02825e-05     | 0.999954 | 1.27267e-05          | 0.999944 |
| PAH3+H             | 9.32004e-06     | 0.999963 | 1.15354e-05          | 0.999955 |
| rad50              | 7.49604e-06     | 0.999971 | 9.27792e-06          | 0.999964 |
| rad70              | 6.43021e-06     | 0.999977 | 7.95868e-06          | 0.999972 |
| PAH10+CH3          | 6.07788e-06     | 0.999983 | 7.52262e-06          | 0.999980 |
| rad67              | 4.99570e-06     | 0.999988 | 6.18321e-06          | 0.999986 |
| rad55              | 3.63003e-06     | 0.999992 | 4.49291e-06          | 0.999991 |
| rad60syn           | 1.56340e-06     | 0.999993 | 1.93503e-06          | 0.999993 |
| rad34              | 1.13462e-06     | 0.999995 | 1.40433e-06          | 0.999994 |
| rad59              | 1.09806e-06     | 0.999996 | 1.35907e-06          | 0.999995 |
| rad51              | 1.02628e-06     | 0.999997 | 1.27023e-06          | 0.999997 |
| rad60anti          | 9.23688e-07     | 0.999998 | 1.14325e-06          | 0.999998 |
| rad62              | 8.25901e-07     | 0.999998 | 1.02222e-06          | 0.999999 |
| rad52              | 4.48921e-07     | 0.999999 | 5.55634e-07          | 0.999999 |
| rad53              | 4.02868e-07     | 0.999999 | 4.98633e-07          | 1.000000 |
| rad56              | 2.64599e-07     | 1.000000 | 3.27496e-07          | 1.000000 |
| rad64              | 1.13756e-07     | 1.000000 | 1.40796e-07          | 1.000000 |
| rad43              | 8.95932e-08     | 1.000000 | 1.10890e-07          | 1.000000 |
| rad58              | 3.75499e-08     | 1.000000 | 4.64757e-08          | 1.000000 |
| rad65              | 3.15620e-08     | 1.000000 | 3.90645e-08          | 1.000000 |
| PAH8+H             | 3.15023e-08     | 1.000000 | 3.89906e-08          | 1.000000 |
| rad42              | 3.09038e-08     | 1.000000 | 3.82498e-08          | 1.000000 |
| rad6               | 2.95006e-08     | 1.000000 | 3.65132e-08          | 1.000000 |
| rad68syn           | 2.53722e-08     | 1.000000 | 3.14033e-08          | 1.000000 |
| rad68anti          | 1.67834e-08     | 1.000000 | 2.07729e-08          | 1.000000 |
| rad40syn           | 5.46374e-09     | 1.000000 | 6.76250e-09          | 1.000000 |
| rad73              | 3.89181e-09     | 1.000000 | 4.81692e-09          | 1.000000 |
| rad71              | 3.20537e-09     | 1.000000 | 3.96730e-09          | 1.000000 |
| rad40anti          | 2.76934e-09     | 1.000000 | 3.42763e-09          | 1.000000 |
| rad61              | 2.41932e-09     | 1.000000 | 2.99441e-09          | 1.000000 |
| rad11              | 2.21522e-09     | 1.000000 | 2.74180e-09          | 1.000000 |
| rad41              | 2.20459e-09     | 1.000000 | 2.72864e-09          | 1.000000 |
| rad23              | 1.65476e-09     | 1.000000 | 2.04811e-09          | 1.000000 |
| rad7               | 1.19159e-09     | 1.000000 | 1.47485e-09          | 1.000000 |
| rad9               | 6.84524e-10     | 1.000000 | 8.47240e-10          | 1.000000 |
| rad45              | 4.97819e-10     | 1.000000 | 6.16152e-10          | 1.000000 |
| rad13              | 4.92756e-10     | 1.000000 | 6.09890e-10          | 1.000000 |
| rad2               | 9.00821e-11     | 1.000000 | 1.11495e-10          | 1.000000 |
| rad21              | 5.91400e-11     | 1.000000 | 7.31982e-11          | 1.000000 |
| rad36              | 4.82276e-11     | 1.000000 | 5.96918e-11          | 1.000000 |
| rad28              | 4.03296e-11     | 1.000000 | 4.99162e-11          | 1.000000 |
| rad72              | 3.40642e-11     | 1.000000 | 4.21615e-11          | 1.000000 |
| rad10              | 3.31343e-11     | 1.000000 | 4.10106e-11          | 1.000000 |
| rad20              | 2.63414e-11     | 1.000000 | 3.26030e-11          | 1.000000 |
| rad1               | 2.18145e-11     | 1.000000 | 2.70000e-11          | 1.000000 |
| rad33              | 1.50432e-11     | 1.000000 | 1.86191e-11          | 1.000000 |
| rad3               | 8.94674e-12     | 1.000000 | 1.10734e-11          | 1.000000 |
| rad4               | 7.12640e-12     | 1.000000 | 8.82039e-12          | 1.000000 |



|       |             |          |             |         |
|-------|-------------|----------|-------------|---------|
| rad26 | 7.02560e-12 | 1.000000 | 8.69558e-12 | 1.00000 |
| rad18 | 3.09752e-12 | 1.000000 | 3.83382e-12 | 1.00000 |
| rad25 | 2.61863e-12 | 1.000000 | 3.24110e-12 | 1.00000 |
| rad24 | 1.21062e-12 | 1.000000 | 1.49839e-12 | 1.00000 |
| rad12 | 9.25073e-13 | 1.000000 | 1.14497e-12 | 1.00000 |
| rad15 | 8.63794e-13 | 1.000000 | 1.06912e-12 | 1.00000 |
| rad22 | 6.87876e-13 | 1.000000 | 8.51387e-13 | 1.00000 |
| rad14 | 1.73886e-13 | 1.000000 | 2.15219e-13 | 1.00000 |
| rad27 | 4.97814e-14 | 1.000000 | 6.16146e-14 | 1.00000 |
| rad8  | 7.86598e-15 | 1.000000 | 9.73578e-15 | 1.00000 |
| rad31 | 5.35145e-15 | 1.000000 | 6.62352e-15 | 1.00000 |
| rad47 | 7.66963e-17 | 1.000000 | 9.49276e-17 | 1.00000 |
| rad5  | 1.57322e-17 | 1.000000 | 1.94718e-17 | 1.00000 |

0.100000000E-01 Pa, 1400.00000 K

| Rate constant      | True (fraction) |          | Effective (fraction) |          |
|--------------------|-----------------|----------|----------------------|----------|
| Total              | 3.47024e-12     | (1.00 )  | 2.71984e-12          | (1.00 )  |
| Formation of rad11 | 9.43269e-13     | (0.272 ) | 6.11768e-13          | (0.225 ) |
| Formation of rad6  | 1.19194e-12     | (0.343 ) | 7.73043e-13          | (0.284 ) |
| H-abstraction      | 1.33503e-12     | (0.385 ) | 1.33503e-12          | (0.491 ) |

  

| species            | PYtrue      | Cumul    | PYeffective | Cumul    |
|--------------------|-------------|----------|-------------|----------|
| Benzene+2-propynyl | 0.384709    | 0.384709 | 0.490849    | 0.490849 |
| Phenyl+Allene      | 0.216237    | 0.600946 | 0.00000     | 0.490849 |
| Indene+H           | 0.102753    | 0.703699 | 0.131102    | 0.621951 |
| C2H2+PhCH2         | 0.0940337   | 0.797733 | 0.119977    | 0.741928 |
| PhCH2CCH+H         | 0.0730480   | 0.870781 | 0.0932017   | 0.835129 |
| PhCHCCH2+H         | 0.0704361   | 0.941217 | 0.0898693   | 0.924998 |
| PhCCH+CH3          | 0.0407709   | 0.981988 | 0.0520195   | 0.977018 |
| PAH7+H             | 0.00808062  | 0.990068 | 0.0103100   | 0.987328 |
| Ph+MeAc            | 0.00578254  | 0.995851 | 0.00737791  | 0.994706 |
| rad39              | 0.00153900  | 0.997390 | 0.00196361  | 0.996669 |
| PhCCCH3+H          | 0.00104907  | 0.998439 | 0.00133851  | 0.998008 |
| rad19anti          | 0.000537563 | 0.998977 | 0.000685873 | 0.998694 |
| PAH9+H             | 0.000275093 | 0.999252 | 0.000350990 | 0.999045 |
| rad19syn           | 0.000241019 | 0.999493 | 0.000307516 | 0.999352 |
| rad38              | 0.000115616 | 0.999608 | 0.000147514 | 0.999500 |
| PhcycC3H3_A+H      | 9.27188e-05 | 0.999701 | 0.000118299 | 0.999618 |
| rad54              | 9.02066e-05 | 0.999791 | 0.000115094 | 0.999733 |
| rad35              | 5.05798e-05 | 0.999842 | 6.45344e-05 | 0.999798 |
| rad30              | 3.27889e-05 | 0.999875 | 4.18352e-05 | 0.999840 |
| rad46              | 2.89890e-05 | 0.999904 | 3.69870e-05 | 0.999877 |
| PAH1+H             | 1.59963e-05 | 0.999920 | 2.04097e-05 | 0.999897 |
| rad37              | 1.43563e-05 | 0.999934 | 1.83172e-05 | 0.999915 |
| PAH3+H             | 1.18378e-05 | 0.999946 | 1.51038e-05 | 0.999930 |
| rad50              | 1.13925e-05 | 0.999957 | 1.45357e-05 | 0.999945 |
| rad70              | 9.33021e-06 | 0.999967 | 1.19044e-05 | 0.999957 |
| PAH10+CH3          | 9.00294e-06 | 0.999976 | 1.14868e-05 | 0.999968 |
| rad67              | 7.68560e-06 | 0.999983 | 9.80600e-06 | 0.999978 |
| rad55              | 5.54137e-06 | 0.999989 | 7.07023e-06 | 0.999985 |
| rad51              | 1.81659e-06 | 0.999991 | 2.31777e-06 | 0.999988 |
| rad34              | 1.77488e-06 | 0.999992 | 2.26457e-06 | 0.999990 |
| rad60syn           | 1.71203e-06 | 0.999994 | 2.18438e-06 | 0.999992 |
| rad59              | 1.34390e-06 | 0.999995 | 1.71468e-06 | 0.999994 |
| rad62              | 1.09238e-06 | 0.999997 | 1.39377e-06 | 0.999995 |
| rad60anti          | 1.02264e-06 | 0.999998 | 1.30479e-06 | 0.999996 |
| rad53              | 7.63459e-07 | 0.999998 | 9.74098e-07 | 0.999997 |
| rad52              | 7.36202e-07 | 0.999999 | 9.39313e-07 | 0.999998 |
| rad56              | 5.61677e-07 | 1.000000 | 7.16641e-07 | 0.999999 |
| rad64              | 1.97836e-07 | 1.000000 | 2.52418e-07 | 0.999999 |
| rad43              | 1.00004e-07 | 1.000000 | 1.27595e-07 | 0.999999 |
| PAH8+H             | 7.73009e-08 | 1.000000 | 9.86282e-08 | 1.000000 |
| rad58              | 5.80226e-08 | 1.000000 | 7.40306e-08 | 1.000000 |
| rad65              | 5.51365e-08 | 1.000000 | 7.03484e-08 | 1.000000 |
| rad68syn           | 5.11875e-08 | 1.000000 | 6.53098e-08 | 1.000000 |
| rad42              | 4.85215e-08 | 1.000000 | 6.19082e-08 | 1.000000 |
| rad68anti          | 3.37456e-08 | 1.000000 | 4.30559e-08 | 1.000000 |
| rad6               | 2.62973e-08 | 1.000000 | 3.35526e-08 | 1.000000 |
| rad40syn           | 1.23712e-08 | 1.000000 | 1.57843e-08 | 1.000000 |
| rad73              | 1.01781e-08 | 1.000000 | 1.29862e-08 | 1.000000 |
| rad71              | 9.36374e-09 | 1.000000 | 1.19472e-08 | 1.000000 |
| rad40anti          | 6.47926e-09 | 1.000000 | 8.26688e-09 | 1.000000 |
| rad61              | 4.96372e-09 | 1.000000 | 6.33318e-09 | 1.000000 |
| rad41              | 3.08785e-09 | 1.000000 | 3.93978e-09 | 1.000000 |
| rad11              | 1.97211e-09 | 1.000000 | 2.51621e-09 | 1.000000 |
| rad7               | 1.50203e-09 | 1.000000 | 1.91643e-09 | 1.000000 |
| rad23              | 9.26782e-10 | 1.000000 | 1.18247e-09 | 1.000000 |

|       |             |         |             |          |
|-------|-------------|---------|-------------|----------|
| rad9  | 4.49498e-10 | 1.00000 | 5.73513e-10 | 1.000000 |
| rad13 | 3.14183e-10 | 1.00000 | 4.00865e-10 | 1.000000 |
| rad45 | 2.77398e-10 | 1.00000 | 3.53931e-10 | 1.000000 |
| rad72 | 1.29482e-10 | 1.00000 | 1.65206e-10 | 1.000000 |
| rad28 | 4.04019e-11 | 1.00000 | 5.15485e-11 | 1.000000 |
| rad21 | 3.81092e-11 | 1.00000 | 4.86234e-11 | 1.000000 |
| rad2  | 3.09073e-11 | 1.00000 | 3.94345e-11 | 1.000000 |
| rad36 | 2.71318e-11 | 1.00000 | 3.46174e-11 | 1.000000 |
| rad10 | 2.06067e-11 | 1.00000 | 2.62920e-11 | 1.000000 |
| rad20 | 1.53081e-11 | 1.00000 | 1.95316e-11 | 1.000000 |
| rad33 | 9.75882e-12 | 1.00000 | 1.24512e-11 | 1.000000 |
| rad1  | 7.59238e-12 | 1.00000 | 9.68706e-12 | 1.000000 |
| rad26 | 5.27495e-12 | 1.00000 | 6.73032e-12 | 1.000000 |
| rad3  | 4.01235e-12 | 1.00000 | 5.11936e-12 | 1.000000 |
| rad4  | 3.21637e-12 | 1.00000 | 4.10375e-12 | 1.000000 |
| rad18 | 3.18931e-12 | 1.00000 | 4.06923e-12 | 1.000000 |
| rad15 | 1.98949e-12 | 1.00000 | 2.53839e-12 | 1.000000 |
| rad25 | 1.93951e-12 | 1.00000 | 2.47462e-12 | 1.000000 |
| rad24 | 8.67714e-13 | 1.00000 | 1.10711e-12 | 1.000000 |
| rad12 | 7.86890e-13 | 1.00000 | 1.00399e-12 | 1.000000 |
| rad22 | 7.49744e-13 | 1.00000 | 9.56598e-13 | 1.000000 |
| rad14 | 1.10932e-13 | 1.00000 | 1.41538e-13 | 1.000000 |
| rad27 | 2.36280e-14 | 1.00000 | 3.01469e-14 | 1.000000 |
| rad8  | 9.26468e-15 | 1.00000 | 1.18208e-14 | 1.000000 |
| rad31 | 3.51121e-15 | 1.00000 | 4.47994e-15 | 1.000000 |
| rad47 | 1.36058e-16 | 1.00000 | 1.73596e-16 | 1.000000 |
| rad5  | 4.89177e-17 | 1.00000 | 6.24138e-17 | 1.000000 |

0.100000000E-01 Pa, 1500.00000 K

| Rate constant      | True (fraction)      | Effective (fraction) |
|--------------------|----------------------|----------------------|
| Total              | 4.61271e-12 (1.00 )  | 3.52361e-12 (1.00 )  |
| Formation of rad11 | 1.20217e-12 (0.261 ) | 7.28782e-13 (0.207 ) |
| Formation of rad6  | 1.56360e-12 (0.339 ) | 9.47887e-13 (0.269 ) |
| H-abstraction      | 1.84694e-12 (0.400 ) | 1.84694e-12 (0.524 ) |

| species            | PYtrue      | Cumul    | PYeffective | Cumul    |
|--------------------|-------------|----------|-------------|----------|
| Benzene+2-propynyl | 0.400402    | 0.400402 | 0.524162    | 0.524162 |
| Phenyl+Allene      | 0.236109    | 0.636511 | 0.000000    | 0.524162 |
| Indene+H           | 0.0806435   | 0.717155 | 0.105570    | 0.629731 |
| PhCH2CCH+H         | 0.0806387   | 0.797793 | 0.105563    | 0.735294 |
| C2H2+PhCH2         | 0.0787062   | 0.876500 | 0.103033    | 0.838328 |
| PhCHCCH2+H         | 0.0701571   | 0.946657 | 0.0918421   | 0.930170 |
| PhCCH+CH3          | 0.0359368   | 0.982594 | 0.0470444   | 0.977214 |
| PAH7+H             | 0.00805110  | 0.990645 | 0.0105396   | 0.987754 |
| Ph+MeAc            | 0.00526035  | 0.995905 | 0.00688624  | 0.994640 |
| rad39              | 0.00146497  | 0.997370 | 0.00191777  | 0.996558 |
| PhCCCH3+H          | 0.000785539 | 0.998156 | 0.00102834  | 0.997586 |
| rad19anti          | 0.000582991 | 0.998739 | 0.000763188 | 0.998349 |
| rad19syn           | 0.000316567 | 0.999055 | 0.000414414 | 0.998764 |
| PAH9+H             | 0.000302845 | 0.999358 | 0.000396451 | 0.999160 |
| PhcycC3H3_A+H      | 0.000139913 | 0.999498 | 0.000183158 | 0.999343 |
| rad38              | 0.000129499 | 0.999627 | 0.000169526 | 0.999513 |
| rad54              | 0.000122809 | 0.999750 | 0.000160767 | 0.999674 |
| rad35              | 5.49599e-05 | 0.999805 | 7.19472e-05 | 0.999746 |
| rad46              | 3.45380e-05 | 0.999840 | 4.52133e-05 | 0.999791 |
| rad30              | 3.01155e-05 | 0.999870 | 3.94239e-05 | 0.999830 |
| PAH1+H             | 2.31902e-05 | 0.999893 | 3.03579e-05 | 0.999861 |
| rad50              | 1.62766e-05 | 0.999909 | 2.13075e-05 | 0.999882 |
| rad37              | 1.56192e-05 | 0.999925 | 2.04470e-05 | 0.999902 |
| PAH3+H             | 1.44553e-05 | 0.999939 | 1.89232e-05 | 0.999921 |
| rad70              | 1.26613e-05 | 0.999952 | 1.65747e-05 | 0.999938 |
| PAH10+CH3          | 1.25752e-05 | 0.999965 | 1.64621e-05 | 0.999954 |
| rad67              | 1.09793e-05 | 0.999976 | 1.43728e-05 | 0.999969 |
| rad55              | 7.93592e-06 | 0.999983 | 1.03888e-05 | 0.999979 |
| rad51              | 2.96751e-06 | 0.999986 | 3.88473e-06 | 0.999983 |
| rad34              | 2.57549e-06 | 0.999989 | 3.37154e-06 | 0.999986 |
| rad60syn           | 1.82792e-06 | 0.999991 | 2.39290e-06 | 0.999989 |
| rad59              | 1.58467e-06 | 0.999992 | 2.07447e-06 | 0.999991 |
| rad62              | 1.38707e-06 | 0.999994 | 1.81579e-06 | 0.999993 |
| rad53              | 1.32205e-06 | 0.999995 | 1.73067e-06 | 0.999994 |
| rad52              | 1.12379e-06 | 0.999996 | 1.47114e-06 | 0.999996 |
| rad60anti          | 1.10268e-06 | 0.999997 | 1.44350e-06 | 0.999997 |
| rad56              | 1.07223e-06 | 0.999998 | 1.40364e-06 | 0.999999 |
| rad64              | 3.15087e-07 | 0.999999 | 4.12476e-07 | 0.999999 |
| PAH8+H             | 1.66252e-07 | 0.999999 | 2.17639e-07 | 0.999999 |
| rad43              | 1.09523e-07 | 0.999999 | 1.43376e-07 | 0.999999 |
| rad68syn           | 9.28291e-08 | 0.999999 | 1.21522e-07 | 0.999999 |

|           |             |          |             |          |
|-----------|-------------|----------|-------------|----------|
| rad65     | 8.88730e-08 | 0.999999 | 1.16343e-07 | 1.000000 |
| rad58     | 8.42069e-08 | 0.999999 | 1.10234e-07 | 1.000000 |
| rad42     | 7.16663e-08 | 0.999999 | 9.38173e-08 | 1.000000 |
| rad68anti | 6.10163e-08 | 0.999999 | 7.98757e-08 | 1.000000 |
| rad6      | 2.83819e-08 | 0.999999 | 3.71544e-08 | 1.000000 |
| rad40syn  | 2.48114e-08 | 0.999999 | 3.24802e-08 | 1.000000 |
| rad71     | 2.35649e-08 | 0.999999 | 3.08485e-08 | 1.000000 |
| rad73     | 2.32868e-08 | 0.999999 | 3.04844e-08 | 1.000000 |
| rad40anti | 1.33700e-08 | 1.000000 | 1.75025e-08 | 1.000000 |
| rad61     | 9.14968e-09 | 1.000000 | 1.19778e-08 | 1.000000 |
| rad41     | 4.14357e-09 | 1.000000 | 5.42432e-09 | 1.000000 |
| rad11     | 1.37922e-09 | 1.000000 | 1.80553e-09 | 1.000000 |
| rad7      | 1.28899e-09 | 1.000000 | 1.68740e-09 | 1.000000 |
| rad23     | 5.37943e-10 | 1.000000 | 7.04212e-10 | 1.000000 |
| rad72     | 4.05255e-10 | 1.000000 | 5.30512e-10 | 1.000000 |
| rad9      | 2.90611e-10 | 1.000000 | 3.80435e-10 | 1.000000 |
| rad13     | 1.90074e-10 | 1.000000 | 2.48823e-10 | 1.000000 |
| rad45     | 1.57343e-10 | 1.000000 | 2.05976e-10 | 1.000000 |
| rad28     | 4.96607e-11 | 1.000000 | 6.50100e-11 | 1.000000 |
| rad21     | 2.42968e-11 | 1.000000 | 3.18067e-11 | 1.000000 |
| rad36     | 1.55384e-11 | 1.000000 | 2.03411e-11 | 1.000000 |
| rad2      | 1.13929e-11 | 1.000000 | 1.49143e-11 | 1.000000 |
| rad10     | 1.05241e-11 | 1.000000 | 1.37770e-11 | 1.000000 |
| rad20     | 8.79388e-12 | 1.000000 | 1.15119e-11 | 1.000000 |
| rad33     | 6.33643e-12 | 1.000000 | 8.29496e-12 | 1.000000 |
| rad26     | 4.19697e-12 | 1.000000 | 5.49417e-12 | 1.000000 |
| rad15     | 3.09955e-12 | 1.000000 | 4.05758e-12 | 1.000000 |
| rad1      | 2.82315e-12 | 1.000000 | 3.69575e-12 | 1.000000 |
| rad18     | 2.35399e-12 | 1.000000 | 3.08158e-12 | 1.000000 |
| rad3      | 1.89258e-12 | 1.000000 | 2.47755e-12 | 1.000000 |
| rad22     | 1.84356e-12 | 1.000000 | 2.41338e-12 | 1.000000 |
| rad4      | 1.52465e-12 | 1.000000 | 1.99589e-12 | 1.000000 |
| rad25     | 1.37836e-12 | 1.000000 | 1.80439e-12 | 1.000000 |
| rad12     | 6.49256e-13 | 1.000000 | 8.49933e-13 | 1.000000 |
| rad24     | 6.18581e-13 | 1.000000 | 8.09782e-13 | 1.000000 |
| rad14     | 6.99401e-14 | 1.000000 | 9.15575e-14 | 1.000000 |
| rad27     | 1.16036e-14 | 1.000000 | 1.51901e-14 | 1.000000 |
| rad8      | 9.76883e-15 | 1.000000 | 1.27883e-14 | 1.000000 |
| rad31     | 2.37700e-15 | 1.000000 | 3.11171e-15 | 1.000000 |
| rad47     | 2.21854e-16 | 1.000000 | 2.90426e-16 | 1.000000 |
| rad5      | 1.28964e-16 | 1.000000 | 1.68825e-16 | 1.000000 |

0.100000000E-01 Pa, 1750.00000 K

=====

| Rate constant      | True (fraction)      | Effective (fraction) |
|--------------------|----------------------|----------------------|
| Total              | 8.61869e-12 (1.00 )  | 6.27400e-12 (1.00 )  |
| Formation of rad11 | 2.04015e-12 (0.237 ) | 1.05237e-12 (0.168 ) |
| Formation of rad6  | 2.80256e-12 (0.325 ) | 1.44565e-12 (0.230 ) |
| H-abstraction      | 3.77597e-12 (0.438 ) | 3.77597e-12 (0.602 ) |

| species            | PYtrue      | Cumul    | PYeffective | Cumul    |
|--------------------|-------------|----------|-------------|----------|
| Benzene+2-propynyl | 0.438115    | 0.438115 | 0.601845    | 0.601845 |
| Phenyl+Allene      | 0.272047    | 0.710162 | 0.000000    | 0.601845 |
| PhCH2CCH+H         | 0.0933387   | 0.803501 | 0.128221    | 0.730066 |
| PhCHCCH2+H         | 0.0656327   | 0.869134 | 0.0901606   | 0.820227 |
| C2H2+PhCH2         | 0.0475978   | 0.916731 | 0.0653858   | 0.885612 |
| Indene+H           | 0.0395372   | 0.956269 | 0.0543127   | 0.939925 |
| PhCCH+CH3          | 0.0276514   | 0.983920 | 0.0379853   | 0.977910 |
| PAH7+H             | 0.00712605  | 0.991046 | 0.00978916  | 0.987700 |
| Ph+MeAc            | 0.00488545  | 0.995931 | 0.00671122  | 0.994411 |
| rad39              | 0.00123375  | 0.997165 | 0.00169483  | 0.996106 |
| rad19anti          | 0.000564116 | 0.997729 | 0.000774933 | 0.996881 |
| rad19syn           | 0.000506158 | 0.998235 | 0.000695318 | 0.997576 |
| PhCCCH3+H          | 0.000461483 | 0.998697 | 0.000633946 | 0.998210 |
| PhcycC3H3_A+H      | 0.000354596 | 0.999052 | 0.000487115 | 0.998697 |
| PAH9+H             | 0.000266731 | 0.999318 | 0.000366413 | 0.999063 |
| rad54              | 0.000215004 | 0.999533 | 0.000295354 | 0.999359 |
| rad38              | 0.000142764 | 0.999676 | 0.000196118 | 0.999555 |
| rad35              | 4.88397e-05 | 0.999725 | 6.70919e-05 | 0.999622 |
| PAH1+H             | 4.24057e-05 | 0.999767 | 5.82532e-05 | 0.999680 |
| rad46              | 3.79670e-05 | 0.999805 | 5.21559e-05 | 0.999732 |
| rad50              | 2.38705e-05 | 0.999829 | 3.27912e-05 | 0.999765 |
| rad30              | 2.30179e-05 | 0.999852 | 3.16200e-05 | 0.999797 |
| PAH10+CH3          | 2.22275e-05 | 0.999874 | 3.05343e-05 | 0.999827 |
| rad70              | 2.20506e-05 | 0.999896 | 3.02913e-05 | 0.999858 |
| PAH3+H             | 2.08053e-05 | 0.999917 | 2.85805e-05 | 0.999886 |
| rad55              | 1.72026e-05 | 0.999934 | 2.36314e-05 | 0.999910 |
| rad67              | 1.69163e-05 | 0.999951 | 2.32382e-05 | 0.999933 |

|           |             |          |             |          |
|-----------|-------------|----------|-------------|----------|
| rad37     | 1.61425e-05 | 0.999968 | 2.21752e-05 | 0.999955 |
| rad51     | 6.11275e-06 | 0.999974 | 8.39721e-06 | 0.999964 |
| rad34     | 5.25680e-06 | 0.999979 | 7.22134e-06 | 0.999971 |
| rad53     | 4.39528e-06 | 0.999983 | 6.03786e-06 | 0.999977 |
| rad56     | 3.99316e-06 | 0.999987 | 5.48546e-06 | 0.999982 |
| rad62     | 2.35599e-06 | 0.999990 | 3.23645e-06 | 0.999986 |
| rad59     | 2.06482e-06 | 0.999992 | 2.83647e-06 | 0.999988 |
| rad52     | 2.03185e-06 | 0.999994 | 2.79119e-06 | 0.999991 |
| rad60syn  | 1.94292e-06 | 0.999996 | 2.66902e-06 | 0.999994 |
| rad60anti | 1.30713e-06 | 0.999997 | 1.79563e-06 | 0.999996 |
| rad64     | 7.88606e-07 | 0.999998 | 1.08332e-06 | 0.999997 |
| PAH8+H    | 5.90485e-07 | 0.999998 | 8.11161e-07 | 0.999998 |
| rad68syn  | 2.81743e-07 | 0.999999 | 3.87034e-07 | 0.999998 |
| rad68anti | 1.82570e-07 | 0.999999 | 2.50799e-07 | 0.999998 |
| rad65     | 1.74387e-07 | 0.999999 | 2.39558e-07 | 0.999998 |
| rad42     | 1.70586e-07 | 0.999999 | 2.34336e-07 | 0.999999 |
| rad58     | 1.57351e-07 | 0.999999 | 2.16156e-07 | 0.999999 |
| rad43     | 1.31435e-07 | 0.999999 | 1.80554e-07 | 0.999999 |
| rad71     | 1.24913e-07 | 1.000000 | 1.71595e-07 | 0.999999 |
| rad73     | 9.96594e-08 | 1.000000 | 1.36904e-07 | 0.999999 |
| rad40syn  | 8.39462e-08 | 1.000000 | 1.15318e-07 | 1.000000 |
| rad40anti | 5.01027e-08 | 1.000000 | 6.88270e-08 | 1.000000 |
| rad6      | 3.31481e-08 | 1.000000 | 4.55362e-08 | 1.000000 |
| rad61     | 2.64240e-08 | 1.000000 | 3.62990e-08 | 1.000000 |
| rad41     | 7.91865e-09 | 1.000000 | 1.08780e-08 | 1.000000 |
| rad72     | 3.73632e-09 | 1.000000 | 5.13265e-09 | 1.000000 |
| rad7      | 2.30636e-10 | 1.000000 | 3.16829e-10 | 1.000000 |
| rad11     | 1.74522e-10 | 1.000000 | 2.39743e-10 | 1.000000 |
| rad23     | 8.09267e-11 | 1.000000 | 1.11170e-10 | 1.000000 |
| rad28     | 7.30266e-11 | 1.000000 | 1.00318e-10 | 1.000000 |
| rad9      | 2.25920e-11 | 1.000000 | 3.10350e-11 | 1.000000 |
| rad13     | 1.60925e-11 | 1.000000 | 2.21065e-11 | 1.000000 |
| rad45     | 1.33216e-11 | 1.000000 | 1.83002e-11 | 1.000000 |
| rad22     | 8.88436e-12 | 1.000000 | 1.22046e-11 | 1.000000 |
| rad36     | 2.30141e-12 | 1.000000 | 3.16149e-12 | 1.000000 |
| rad21     | 1.98018e-12 | 1.000000 | 2.72021e-12 | 1.000000 |
| rad26     | 1.64249e-12 | 1.000000 | 2.25632e-12 | 1.000000 |
| rad15     | 1.12185e-12 | 1.000000 | 1.54111e-12 | 1.000000 |
| rad10     | 8.62202e-13 | 1.000000 | 1.18442e-12 | 1.000000 |
| rad20     | 6.44707e-13 | 1.000000 | 8.85640e-13 | 1.000000 |
| rad33     | 5.54027e-13 | 1.000000 | 7.61077e-13 | 1.000000 |
| rad2      | 3.33362e-13 | 1.000000 | 4.57946e-13 | 1.000000 |
| rad18     | 2.99941e-13 | 1.000000 | 4.12035e-13 | 1.000000 |
| rad25     | 1.43078e-13 | 1.000000 | 1.96550e-13 | 1.000000 |
| rad1      | 8.61067e-14 | 1.000000 | 1.18287e-13 | 1.000000 |
| rad12     | 7.47128e-14 | 1.000000 | 1.02634e-13 | 1.000000 |
| rad3      | 6.50905e-14 | 1.000000 | 8.94156e-14 | 1.000000 |
| rad24     | 6.07027e-14 | 1.000000 | 8.33888e-14 | 1.000000 |
| rad4      | 4.16767e-14 | 1.000000 | 5.72519e-14 | 1.000000 |
| rad14     | 7.58719e-15 | 1.000000 | 1.04227e-14 | 1.000000 |
| rad8      | 2.76592e-15 | 1.000000 | 3.79959e-15 | 1.000000 |
| rad27     | 6.89585e-16 | 1.000000 | 9.47298e-16 | 1.000000 |
| rad5      | 5.82310e-16 | 1.000000 | 7.99929e-16 | 1.000000 |
| rad47     | 1.43465e-16 | 1.000000 | 1.97080e-16 | 1.000000 |

0.100000000E-01 Pa, 2000.00000 K

| Rate constant      | True (fraction)      | Effective (fraction) |
|--------------------|----------------------|----------------------|
| Total              | 1.44111e-11 (1.00 )  | 1.02930e-11 (1.00 )  |
| Formation of rad11 | 3.16882e-12 (0.220 ) | 1.47449e-12 (0.143 ) |
| Formation of rad6  | 4.53302e-12 (0.315 ) | 2.10927e-12 (0.205 ) |
| H-abstraction      | 6.70922e-12 (0.466 ) | 6.70922e-12 (0.652 ) |

| species            | PYtrue      | Cumul    | PYeffective | Cumul    |
|--------------------|-------------|----------|-------------|----------|
| Benzene+2-propynyl | 0.465560    | 0.465560 | 0.651825    | 0.651825 |
| Phenyl+Allene      | 0.285759    | 0.751319 | 0.000000    | 0.651825 |
| PhCH2CCH+H         | 0.0971788   | 0.848498 | 0.136059    | 0.787884 |
| PhCHCCH2+H         | 0.0592993   | 0.907797 | 0.0830241   | 0.870908 |
| C2H2+PhCH2         | 0.0319942   | 0.939791 | 0.0447948   | 0.915703 |
| Indene+H           | 0.0233046   | 0.963096 | 0.0326284   | 0.948331 |
| PhCCH+CH3          | 0.0216465   | 0.984742 | 0.0303071   | 0.978638 |
| PAH7+H             | 0.00659328  | 0.991335 | 0.00923114  | 0.987869 |
| Ph+MeAc            | 0.00420938  | 0.995545 | 0.00589349  | 0.993763 |
| rad39              | 0.00101472  | 0.996559 | 0.00142069  | 0.995183 |
| rad19syn           | 0.000746789 | 0.997306 | 0.00104557  | 0.996229 |
| PhcycC3H3_A+H      | 0.000656335 | 0.997963 | 0.000918925 | 0.997148 |
| rad19anti          | 0.000529228 | 0.998492 | 0.000740966 | 0.997889 |
| rad54              | 0.000330237 | 0.998822 | 0.000462359 | 0.998351 |

|           |             |          |             |          |
|-----------|-------------|----------|-------------|----------|
| PhCCCH3+H | 0.000291962 | 0.999114 | 0.000408772 | 0.998760 |
| PAH9+H    | 0.000279546 | 0.999394 | 0.000391387 | 0.999151 |
| rad38     | 0.000156414 | 0.999550 | 0.000218994 | 0.999370 |
| PAH1+H    | 6.96990e-05 | 0.999620 | 9.75848e-05 | 0.999468 |
| rad35     | 5.18637e-05 | 0.999672 | 7.26137e-05 | 0.999541 |
| rad46     | 4.57412e-05 | 0.999717 | 6.40416e-05 | 0.999605 |
| rad50     | 3.87498e-05 | 0.999756 | 5.42530e-05 | 0.999659 |
| PAH10+CH3 | 3.34470e-05 | 0.999790 | 4.68289e-05 | 0.999706 |
| rad70     | 3.20125e-05 | 0.999822 | 4.48203e-05 | 0.999751 |
| rad55     | 2.86889e-05 | 0.999850 | 4.01669e-05 | 0.999791 |
| PAH3+H    | 2.79050e-05 | 0.999878 | 3.90694e-05 | 0.999830 |
| rad67     | 2.51584e-05 | 0.999903 | 3.52238e-05 | 0.999865 |
| rad30     | 1.88901e-05 | 0.999922 | 2.64479e-05 | 0.999891 |
| rad37     | 1.66057e-05 | 0.999939 | 2.32494e-05 | 0.999915 |
| rad51     | 1.22964e-05 | 0.999951 | 1.72161e-05 | 0.999932 |
| rad56     | 1.03250e-05 | 0.999961 | 1.44559e-05 | 0.999946 |
| rad53     | 9.90974e-06 | 0.999971 | 1.38745e-05 | 0.999960 |
| rad34     | 8.56178e-06 | 0.999980 | 1.19873e-05 | 0.999972 |
| rad52     | 3.64113e-06 | 0.999984 | 5.09791e-06 | 0.999977 |
| rad62     | 3.41506e-06 | 0.999987 | 4.78139e-06 | 0.999982 |
| rad59     | 2.58714e-06 | 0.999990 | 3.62224e-06 | 0.999986 |
| rad60syn  | 2.06844e-06 | 0.999992 | 2.89599e-06 | 0.999989 |
| PAH8+H    | 1.81456e-06 | 0.999993 | 2.54053e-06 | 0.999991 |
| rad64     | 1.47576e-06 | 0.999995 | 2.06619e-06 | 0.999993 |
| rad60anti | 1.42207e-06 | 0.999996 | 1.99102e-06 | 0.999995 |
| rad68syn  | 6.53892e-07 | 0.999997 | 9.15510e-07 | 0.999996 |
| rad71     | 4.98093e-07 | 0.999997 | 6.97374e-07 | 0.999997 |
| rad68anti | 4.21792e-07 | 0.999998 | 5.90544e-07 | 0.999997 |
| rad73     | 3.38757e-07 | 0.999998 | 4.74291e-07 | 0.999998 |
| rad65     | 3.37787e-07 | 0.999999 | 4.72930e-07 | 0.999998 |
| rad42     | 3.12139e-07 | 0.999999 | 4.37023e-07 | 0.999999 |
| rad58     | 2.75720e-07 | 0.999999 | 3.86032e-07 | 0.999999 |
| rad40syn  | 2.27523e-07 | 0.999999 | 3.18552e-07 | 1.000000 |
| rad43     | 1.62531e-07 | 1.000000 | 2.27558e-07 | 1.000000 |
| rad40anti | 1.42660e-07 | 1.000000 | 1.99737e-07 | 1.000000 |
| rad61     | 5.98888e-08 | 1.000000 | 8.38493e-08 | 1.000000 |
| rad72     | 2.09437e-08 | 1.000000 | 2.93230e-08 | 1.000000 |
| rad41     | 1.34670e-08 | 1.000000 | 1.88550e-08 | 1.000000 |
| rad6      | 6.32638e-09 | 1.000000 | 8.85747e-09 | 1.000000 |
| rad7      | 5.26195e-11 | 1.000000 | 7.36718e-11 | 1.000000 |
| rad11     | 4.13051e-11 | 1.000000 | 5.78309e-11 | 1.000000 |
| rad23     | 3.69427e-11 | 1.000000 | 5.17232e-11 | 1.000000 |
| rad28     | 2.12044e-11 | 1.000000 | 2.96880e-11 | 1.000000 |
| rad9      | 7.68369e-12 | 1.000000 | 1.07579e-11 | 1.000000 |
| rad13     | 4.89693e-12 | 1.000000 | 6.85613e-12 | 1.000000 |
| rad45     | 4.04969e-12 | 1.000000 | 5.66990e-12 | 1.000000 |
| rad22     | 2.70213e-12 | 1.000000 | 3.78320e-12 | 1.000000 |
| rad21     | 7.16433e-13 | 1.000000 | 1.00307e-12 | 1.000000 |
| rad36     | 7.15797e-13 | 1.000000 | 1.00218e-12 | 1.000000 |
| rad15     | 3.98980e-13 | 1.000000 | 5.58605e-13 | 1.000000 |
| rad26     | 3.31868e-13 | 1.000000 | 4.64643e-13 | 1.000000 |
| rad33     | 2.26334e-13 | 1.000000 | 3.16887e-13 | 1.000000 |
| rad20     | 1.89447e-13 | 1.000000 | 2.65242e-13 | 1.000000 |
| rad10     | 1.21222e-13 | 1.000000 | 1.69721e-13 | 1.000000 |
| rad18     | 6.66356e-14 | 1.000000 | 9.32953e-14 | 1.000000 |
| rad25     | 5.79824e-14 | 1.000000 | 8.11802e-14 | 1.000000 |
| rad2      | 4.33412e-14 | 1.000000 | 6.06814e-14 | 1.000000 |
| rad12     | 4.14756e-14 | 1.000000 | 5.80694e-14 | 1.000000 |
| rad24     | 2.85159e-14 | 1.000000 | 3.99249e-14 | 1.000000 |
| rad3      | 1.64369e-14 | 1.000000 | 2.30130e-14 | 1.000000 |
| rad1      | 1.15640e-14 | 1.000000 | 1.61906e-14 | 1.000000 |
| rad4      | 1.04503e-14 | 1.000000 | 1.46314e-14 | 1.000000 |
| rad14     | 2.92714e-15 | 1.000000 | 4.09827e-15 | 1.000000 |
| rad8      | 2.34712e-15 | 1.000000 | 3.28617e-15 | 1.000000 |
| rad5      | 3.82269e-16 | 1.000000 | 5.35208e-16 | 1.000000 |
| rad47     | 2.86745e-16 | 1.000000 | 4.01467e-16 | 1.000000 |
| rad27     | 1.90030e-16 | 1.000000 | 2.66058e-16 | 1.000000 |

0.100000000E-01 Pa, 2250.00000 K

=====

| Rate constant      | True (fraction)      | Effective (fraction) |             |          |
|--------------------|----------------------|----------------------|-------------|----------|
| Total              | 2.23655e-11 (1.00 )  | 1.58437e-11 (1.00 )  |             |          |
| Formation of rad11 | 4.62280e-12 (0.207 ) | 1.98925e-12 (0.126 ) |             |          |
| Formation of rad6  | 6.82518e-12 (0.305 ) | 2.93696e-12 (0.185 ) |             |          |
| H-abstraction      | 1.09175e-11 (0.488 ) | 1.09175e-11 (0.689 ) |             |          |
| species            | PYtrue               | Cumul                | PYeffective | Cumul    |
| Benzene+2-propynyl | 0.488140             | 0.488140             | 0.689074    | 0.689074 |

|               |             |          |             |          |
|---------------|-------------|----------|-------------|----------|
| Phenyl+Allene | 0.291600    | 0.779740 | 0.00000     | 0.689074 |
| PhCH2CCH+H    | 0.0967415   | 0.876482 | 0.136563    | 0.825637 |
| PhCHCCH2+H    | 0.0532744   | 0.929756 | 0.0752040   | 0.900841 |
| C2H2+PhCH2    | 0.0232642   | 0.953020 | 0.0328403   | 0.933682 |
| PhCCH+CH3     | 0.0176492   | 0.970669 | 0.0249142   | 0.958596 |
| Indene+H      | 0.0145378   | 0.985207 | 0.0205221   | 0.979118 |
| PAH7+H        | 0.00604332  | 0.991251 | 0.00853097  | 0.987649 |
| Ph+MeAc       | 0.00373478  | 0.994985 | 0.00527212  | 0.992921 |
| PhcycC3H3_A+H | 0.00104439  | 0.996030 | 0.00147430  | 0.994395 |
| rad19syn      | 0.000992650 | 0.997022 | 0.00140125  | 0.995797 |
| rad39         | 0.000833753 | 0.997856 | 0.00117695  | 0.996974 |
| rad19anti     | 0.000463520 | 0.998320 | 0.000654319 | 0.997628 |
| rad54         | 0.000448432 | 0.998768 | 0.000633020 | 0.998261 |
| PAH9+H        | 0.000276004 | 0.999044 | 0.000389615 | 0.998651 |
| PhCCCH3+H     | 0.000209665 | 0.999254 | 0.000295970 | 0.998946 |
| rad38         | 0.000160719 | 0.999414 | 0.000226876 | 0.999173 |
| PAH1+H        | 9.95931e-05 | 0.999514 | 0.000140589 | 0.999314 |
| rad50         | 5.46328e-05 | 0.999569 | 7.71214e-05 | 0.999391 |
| rad35         | 5.24979e-05 | 0.999621 | 7.41079e-05 | 0.999465 |
| rad46         | 5.06984e-05 | 0.999672 | 7.15674e-05 | 0.999537 |
| PAH10+CH3     | 4.32190e-05 | 0.999715 | 6.10093e-05 | 0.999598 |
| rad55         | 4.15447e-05 | 0.999757 | 5.86459e-05 | 0.999656 |
| rad70         | 4.13232e-05 | 0.999798 | 5.83331e-05 | 0.999715 |
| PAH3+H        | 3.54273e-05 | 0.999833 | 5.00103e-05 | 0.999765 |
| rad67         | 3.21710e-05 | 0.999866 | 4.54135e-05 | 0.999810 |
| rad56         | 2.10958e-05 | 0.999887 | 2.97795e-05 | 0.999840 |
| rad51         | 2.05291e-05 | 0.999907 | 2.89794e-05 | 0.999869 |
| rad53         | 1.82253e-05 | 0.999925 | 2.57273e-05 | 0.999895 |
| rad30         | 1.61770e-05 | 0.999942 | 2.28359e-05 | 0.999917 |
| rad37         | 1.58091e-05 | 0.999957 | 2.23166e-05 | 0.999940 |
| rad34         | 1.21378e-05 | 0.999970 | 1.71341e-05 | 0.999957 |
| rad52         | 5.53699e-06 | 0.999975 | 7.81618e-06 | 0.999965 |
| rad62         | 4.54170e-06 | 0.999980 | 6.41120e-06 | 0.999971 |
| PAH8+H        | 4.26413e-06 | 0.999984 | 6.01937e-06 | 0.999977 |
| rad59         | 3.10133e-06 | 0.999987 | 4.37793e-06 | 0.999982 |
| rad64         | 2.31389e-06 | 0.999989 | 3.26637e-06 | 0.999985 |
| rad60syn      | 2.18352e-06 | 0.999991 | 3.08232e-06 | 0.999988 |
| rad60anti     | 1.52762e-06 | 0.999993 | 2.15643e-06 | 0.999990 |
| rad71         | 1.42624e-06 | 0.999994 | 2.01332e-06 | 0.999992 |
| rad68syn      | 1.22834e-06 | 0.999996 | 1.73396e-06 | 0.999994 |
| rad73         | 8.52963e-07 | 0.999996 | 1.20407e-06 | 0.999995 |
| rad68anti     | 7.89692e-07 | 0.999997 | 1.11475e-06 | 0.999996 |
| rad65         | 5.43585e-07 | 0.999998 | 7.67340e-07 | 0.999997 |
| rad42         | 4.97942e-07 | 0.999998 | 7.02910e-07 | 0.999998 |
| rad40syn      | 4.83630e-07 | 0.999999 | 6.82706e-07 | 0.999998 |
| rad58         | 4.30302e-07 | 0.999999 | 6.07428e-07 | 0.999999 |
| rad40anti     | 3.15359e-07 | 1.000000 | 4.45171e-07 | 0.999999 |
| rad43         | 2.01350e-07 | 1.000000 | 2.84232e-07 | 1.000000 |
| rad61         | 1.06762e-07 | 1.000000 | 1.50709e-07 | 1.000000 |
| rad72         | 7.85300e-08 | 1.000000 | 1.10855e-07 | 1.000000 |
| rad41         | 2.11925e-08 | 1.000000 | 2.99160e-08 | 1.000000 |
| rad6          | 1.23230e-09 | 1.000000 | 1.73955e-09 | 1.000000 |
| rad7          | 1.68789e-11 | 1.000000 | 2.38267e-11 | 1.000000 |
| rad11         | 1.29055e-11 | 1.000000 | 1.82178e-11 | 1.000000 |
| rad23         | 9.52213e-12 | 1.000000 | 1.34417e-11 | 1.000000 |
| rad28         | 4.43319e-12 | 1.000000 | 6.25804e-12 | 1.000000 |
| rad9          | 2.79247e-12 | 1.000000 | 3.94192e-12 | 1.000000 |
| rad13         | 1.82826e-12 | 1.000000 | 2.58083e-12 | 1.000000 |
| rad45         | 1.40481e-12 | 1.000000 | 1.98308e-12 | 1.000000 |
| rad22         | 6.80978e-13 | 1.000000 | 9.61287e-13 | 1.000000 |
| rad21         | 2.97974e-13 | 1.000000 | 4.20630e-13 | 1.000000 |
| rad36         | 2.53263e-13 | 1.000000 | 3.57512e-13 | 1.000000 |
| rad15         | 1.60616e-13 | 1.000000 | 2.26731e-13 | 1.000000 |
| rad33         | 1.06527e-13 | 1.000000 | 1.50377e-13 | 1.000000 |
| rad26         | 8.72767e-14 | 1.000000 | 1.23202e-13 | 1.000000 |
| rad20         | 6.76771e-14 | 1.000000 | 9.55348e-14 | 1.000000 |
| rad10         | 3.15132e-14 | 1.000000 | 4.44851e-14 | 1.000000 |
| rad25         | 2.68293e-14 | 1.000000 | 3.78730e-14 | 1.000000 |
| rad12         | 2.31790e-14 | 1.000000 | 3.27203e-14 | 1.000000 |
| rad18         | 2.02981e-14 | 1.000000 | 2.86533e-14 | 1.000000 |
| rad24         | 1.45642e-14 | 1.000000 | 2.05592e-14 | 1.000000 |
| rad2          | 8.16831e-15 | 1.000000 | 1.15306e-14 | 1.000000 |
| rad3          | 5.34663e-15 | 1.000000 | 7.54751e-15 | 1.000000 |
| rad4          | 3.33968e-15 | 1.000000 | 4.71438e-15 | 1.000000 |
| rad1          | 2.20463e-15 | 1.000000 | 3.11212e-15 | 1.000000 |
| rad8          | 2.01388e-15 | 1.000000 | 2.84286e-15 | 1.000000 |
| rad14         | 1.40671e-15 | 1.000000 | 1.98575e-15 | 1.000000 |
| rad47         | 4.71863e-16 | 1.000000 | 6.66097e-16 | 1.000000 |
| rad5          | 2.21767e-16 | 1.000000 | 3.13053e-16 | 1.000000 |
| rad27         | 7.37626e-17 | 1.000000 | 1.04126e-16 | 1.000000 |

0.100000000E-01 Pa, 2500.00000 K

| =====              |                 |          |                      |          |
|--------------------|-----------------|----------|----------------------|----------|
| Rate constant      | True (fraction) |          | Effective (fraction) |          |
| -----              |                 |          |                      |          |
| Total              | 3.28090e-11     | (1.00 )  | 2.31980e-11          | (1.00 )  |
| Formation of rad11 | 6.43164e-12     | (0.196 ) | 2.60906e-12          | (0.112 ) |
| Formation of rad6  | 9.73932e-12     | (0.297 ) | 3.95085e-12          | (0.170 ) |
| H-abstraction      | 1.66381e-11     | (0.507 ) | 1.66381e-11          | (0.717 ) |
| -----              |                 |          |                      |          |
| species            | PYtrue          | Cumul    | PYeffective          | Cumul    |
| -----              |                 |          |                      |          |
| Benzene+2-propynyl | 0.507119        | 0.507119 | 0.717221             | 0.717221 |
| Phenyl+Allene      | 0.292939        | 0.800058 | 0.00000              | 0.717221 |
| PhCH2CCH+H         | 0.0943957       | 0.894453 | 0.133505             | 0.850725 |
| PhCHCCH2+H         | 0.0481939       | 0.942647 | 0.0681609            | 0.918886 |
| C2H2+PhCH2         | 0.0183497       | 0.960997 | 0.0259521            | 0.944838 |
| PhCCH+CH3          | 0.0148752       | 0.975872 | 0.0210381            | 0.965876 |
| Indene+H           | 0.00953292      | 0.985405 | 0.0134824            | 0.979359 |
| PAH7+H             | 0.00553047      | 0.990936 | 0.00782174           | 0.987180 |
| Ph+MeAc            | 0.00339482      | 0.994330 | 0.00480131           | 0.991982 |
| PhcycC3H3_A+H      | 0.00149309      | 0.995824 | 0.00211169           | 0.994093 |
| rad19syn           | 0.00122618      | 0.997050 | 0.00173419           | 0.995828 |
| rad39              | 0.000692493     | 0.997742 | 0.000979395          | 0.996807 |
| rad54              | 0.000558297     | 0.998301 | 0.000789599          | 0.997597 |
| rad19anti          | 0.000392540     | 0.998693 | 0.000555170          | 0.998152 |
| PAH9+H             | 0.000261381     | 0.998954 | 0.000369672          | 0.998522 |
| PhCCCH3+H          | 0.000164587     | 0.999119 | 0.000232776          | 0.998754 |
| rad38              | 0.000157797     | 0.999277 | 0.000223174          | 0.998977 |
| PAH1+H             | 0.000129617     | 0.999406 | 0.000183319          | 0.999161 |
| rad50              | 6.95416e-05     | 0.999476 | 9.83527e-05          | 0.999259 |
| rad55              | 5.44673e-05     | 0.999530 | 7.70336e-05          | 0.999336 |
| rad46              | 5.29591e-05     | 0.999583 | 7.49001e-05          | 0.999411 |
| rad35              | 5.14100e-05     | 0.999635 | 7.27094e-05          | 0.999484 |
| PAH10+CH3          | 5.04331e-05     | 0.999685 | 7.13277e-05          | 0.999555 |
| rad70              | 4.95223e-05     | 0.999735 | 7.00399e-05          | 0.999625 |
| PAH3+H             | 4.31617e-05     | 0.999778 | 6.10439e-05          | 0.999686 |
| rad67              | 3.73882e-05     | 0.999815 | 5.28783e-05          | 0.999739 |
| rad56              | 3.65112e-05     | 0.999852 | 5.16378e-05          | 0.999791 |
| rad51              | 2.99347e-05     | 0.999882 | 4.23369e-05          | 0.999833 |
| rad53              | 2.90213e-05     | 0.999911 | 4.10449e-05          | 0.999874 |
| rad34              | 1.57208e-05     | 0.999926 | 2.22340e-05          | 0.999896 |
| rad30              | 1.43454e-05     | 0.999941 | 2.02888e-05          | 0.999917 |
| rad37              | 1.43019e-05     | 0.999955 | 2.02272e-05          | 0.999937 |
| PAH8+H             | 8.32886e-06     | 0.999963 | 1.17795e-05          | 0.999949 |
| rad52              | 7.47627e-06     | 0.999971 | 1.05737e-05          | 0.999959 |
| rad62              | 5.70269e-06     | 0.999977 | 8.06532e-06          | 0.999967 |
| rad59              | 3.60017e-06     | 0.999980 | 5.09173e-06          | 0.999972 |
| rad64              | 3.22135e-06     | 0.999983 | 4.55597e-06          | 0.999977 |
| rad71              | 3.21466e-06     | 0.999987 | 4.54650e-06          | 0.999981 |
| rad60syn           | 2.29248e-06     | 0.999989 | 3.24226e-06          | 0.999985 |
| rad68syn           | 1.99920e-06     | 0.999991 | 2.82747e-06          | 0.999988 |
| rad73              | 1.73023e-06     | 0.999993 | 2.44707e-06          | 0.999990 |
| rad60anti          | 1.62672e-06     | 0.999994 | 2.30068e-06          | 0.999992 |
| rad68anti          | 1.28205e-06     | 0.999996 | 1.81322e-06          | 0.999994 |
| rad40syn           | 8.70429e-07     | 0.999996 | 1.23105e-06          | 0.999995 |
| rad65              | 7.65686e-07     | 0.999997 | 1.08291e-06          | 0.999996 |
| rad42              | 7.25369e-07     | 0.999998 | 1.02590e-06          | 0.999997 |
| rad58              | 6.16762e-07     | 0.999999 | 8.72293e-07          | 0.999998 |
| rad40anti          | 5.85898e-07     | 0.999999 | 8.28640e-07          | 0.999999 |
| rad43              | 2.45120e-07     | 0.999999 | 3.46673e-07          | 0.999999 |
| rad72              | 2.19454e-07     | 1.000000 | 3.10376e-07          | 1.000000 |
| rad61              | 1.61750e-07     | 1.000000 | 2.28765e-07          | 1.000000 |
| rad41              | 3.09947e-08     | 1.000000 | 4.38359e-08          | 1.000000 |
| rad6               | 3.34677e-10     | 1.000000 | 4.73336e-10          | 1.000000 |
| rad7               | 6.60979e-12     | 1.000000 | 9.34821e-12          | 1.000000 |
| rad11              | 4.80690e-12     | 1.000000 | 6.79841e-12          | 1.000000 |
| rad23              | 2.73126e-12     | 1.000000 | 3.86282e-12          | 1.000000 |
| rad28              | 1.19479e-12     | 1.000000 | 1.68979e-12          | 1.000000 |
| rad9               | 1.08925e-12     | 1.000000 | 1.54053e-12          | 1.000000 |
| rad13              | 7.91370e-13     | 1.000000 | 1.11924e-12          | 1.000000 |
| rad45              | 5.47601e-13     | 1.000000 | 7.74476e-13          | 1.000000 |
| rad22              | 2.14189e-13     | 1.000000 | 3.02927e-13          | 1.000000 |
| rad21              | 1.39347e-13     | 1.000000 | 1.97079e-13          | 1.000000 |
| rad36              | 1.00404e-13     | 1.000000 | 1.42002e-13          | 1.000000 |
| rad15              | 6.95968e-14     | 1.000000 | 9.84310e-14          | 1.000000 |
| rad33              | 5.56581e-14     | 1.000000 | 7.87173e-14          | 1.000000 |
| rad26              | 3.06856e-14     | 1.000000 | 4.33987e-14          | 1.000000 |
| rad20              | 2.88846e-14     | 1.000000 | 4.08515e-14          | 1.000000 |
| rad25              | 1.37166e-14     | 1.000000 | 1.93994e-14          | 1.000000 |

|       |             |          |             |         |
|-------|-------------|----------|-------------|---------|
| rad12 | 1.32606e-14 | 1.000000 | 1.87546e-14 | 1.00000 |
| rad10 | 1.13579e-14 | 1.000000 | 1.60635e-14 | 1.00000 |
| rad24 | 7.99114e-15 | 1.000000 | 1.13019e-14 | 1.00000 |
| rad18 | 7.64237e-15 | 1.000000 | 1.08086e-14 | 1.00000 |
| rad2  | 2.20661e-15 | 1.000000 | 3.12081e-15 | 1.00000 |
| rad3  | 2.12901e-15 | 1.000000 | 3.01106e-15 | 1.00000 |
| rad8  | 1.74700e-15 | 1.000000 | 2.47079e-15 | 1.00000 |
| rad4  | 1.30124e-15 | 1.000000 | 1.84035e-15 | 1.00000 |
| rad14 | 7.76949e-16 | 1.000000 | 1.09884e-15 | 1.00000 |
| rad47 | 6.74967e-16 | 1.000000 | 9.54604e-16 | 1.00000 |
| rad1  | 5.82497e-16 | 1.000000 | 8.23830e-16 | 1.00000 |
| rad5  | 1.45913e-16 | 1.000000 | 2.06365e-16 | 1.00000 |
| rad27 | 3.67333e-17 | 1.000000 | 5.19522e-17 | 1.00000 |

0.100000000E-01 Pa, 2750.00000 K

| Rate constant      | True (fraction) |          | Effective (fraction) |          |
|--------------------|-----------------|----------|----------------------|----------|
| Total              | 4.60596e-11     | (1.00 )  | 3.26255e-11          | (1.00 )  |
| Formation of rad11 | 8.62280e-12     | (0.187 ) | 3.34633e-12          | (0.103 ) |
| Formation of rad6  | 1.33313e-11     | (0.289 ) | 5.17360e-12          | (0.159 ) |
| H-abstraction      | 2.41055e-11     | (0.523 ) | 2.41055e-11          | (0.739 ) |

  

| species            | PYtrue      | Cumul    | PYeffective | Cumul    |
|--------------------|-------------|----------|-------------|----------|
| Benzene+2-propynyl | 0.523355    | 0.523355 | 0.738856    | 0.738856 |
| Phenyl+Allene      | 0.291669    | 0.815024 | 0.000000    | 0.738856 |
| PhCH2CCH+H         | 0.0913925   | 0.906416 | 0.129025    | 0.867881 |
| PhCHCCH2+H         | 0.0440897   | 0.950506 | 0.0622446   | 0.930126 |
| C2H2+PhCH2         | 0.0155259   | 0.966032 | 0.0219190   | 0.952045 |
| PhCCH+CH3          | 0.0128664   | 0.978898 | 0.0181644   | 0.970209 |
| Indene+H           | 0.00652675  | 0.985425 | 0.00921427  | 0.979424 |
| PAH7+H             | 0.00506746  | 0.990493 | 0.00715408  | 0.986578 |
| Ph+MeAc            | 0.00315047  | 0.993643 | 0.00444775  | 0.991026 |
| PhcycC3H3_A+H      | 0.00197300  | 0.995616 | 0.00278544  | 0.993811 |
| rad19syn           | 0.00143568  | 0.997052 | 0.00202686  | 0.995838 |
| rad54              | 0.000652594 | 0.997704 | 0.000921315 | 0.996759 |
| rad39              | 0.000584043 | 0.998288 | 0.000824532 | 0.997584 |
| rad19anti          | 0.000328573 | 0.998617 | 0.000463869 | 0.998048 |
| PAH9+H             | 0.000240059 | 0.998857 | 0.000338907 | 0.998386 |
| PAH1+H             | 0.000158291 | 0.999015 | 0.000223471 | 0.998610 |
| rad38              | 0.000149711 | 0.999165 | 0.000211358 | 0.998821 |
| PhCCCH3+H          | 0.000136861 | 0.999302 | 0.000193216 | 0.999015 |
| rad50              | 8.19601e-05 | 0.999384 | 0.000115709 | 0.999130 |
| rad55              | 6.64334e-05 | 0.999450 | 9.37887e-05 | 0.999224 |
| rad70              | 5.64830e-05 | 0.999507 | 7.97407e-05 | 0.999304 |
| rad56              | 5.59920e-05 | 0.999563 | 7.90477e-05 | 0.999383 |
| PAH10+CH3          | 5.49972e-05 | 0.999618 | 7.76435e-05 | 0.999460 |
| rad46              | 5.29186e-05 | 0.999671 | 7.47090e-05 | 0.999535 |
| PAH3+H             | 5.07704e-05 | 0.999721 | 7.16761e-05 | 0.999607 |
| rad35              | 4.92117e-05 | 0.999771 | 6.94754e-05 | 0.999676 |
| rad53              | 4.15958e-05 | 0.999812 | 5.87239e-05 | 0.999735 |
| rad67              | 4.08893e-05 | 0.999853 | 5.77263e-05 | 0.999793 |
| rad51              | 3.94231e-05 | 0.999893 | 5.56562e-05 | 0.999848 |
| rad34              | 1.91382e-05 | 0.999912 | 2.70187e-05 | 0.999875 |
| PAH8+H             | 1.42400e-05 | 0.999926 | 2.01036e-05 | 0.999896 |
| rad30              | 1.30159e-05 | 0.999939 | 1.83754e-05 | 0.999914 |
| rad37              | 1.25497e-05 | 0.999951 | 1.77173e-05 | 0.999932 |
| rad52              | 9.23200e-06 | 0.999961 | 1.30335e-05 | 0.999945 |
| rad62              | 6.96508e-06 | 0.999968 | 9.83308e-06 | 0.999954 |
| rad71              | 6.06264e-06 | 0.999974 | 8.55909e-06 | 0.999963 |
| rad64              | 4.12924e-06 | 0.999978 | 5.82954e-06 | 0.999969 |
| rad59              | 4.06487e-06 | 0.999982 | 5.73866e-06 | 0.999975 |
| rad73              | 2.98825e-06 | 0.999985 | 4.21872e-06 | 0.999979 |
| rad68syn           | 2.93858e-06 | 0.999988 | 4.14861e-06 | 0.999983 |
| rad60syn           | 2.38752e-06 | 0.999990 | 3.37063e-06 | 0.999986 |
| rad68anti          | 1.88086e-06 | 0.999992 | 2.65533e-06 | 0.999989 |
| rad60anti          | 1.71401e-06 | 0.999994 | 2.41979e-06 | 0.999991 |
| rad40syn           | 1.39059e-06 | 0.999995 | 1.96319e-06 | 0.999993 |
| rad42              | 1.00618e-06 | 0.999996 | 1.42050e-06 | 0.999995 |
| rad65              | 9.77109e-07 | 0.999997 | 1.37945e-06 | 0.999996 |
| rad40anti          | 9.60893e-07 | 0.999998 | 1.35656e-06 | 0.999998 |
| rad58              | 8.26832e-07 | 0.999999 | 1.16730e-06 | 0.999999 |
| rad72              | 4.93194e-07 | 1.000000 | 6.96277e-07 | 0.999999 |
| rad43              | 2.90363e-07 | 1.000000 | 4.09925e-07 | 1.000000 |
| rad61              | 2.19014e-07 | 1.000000 | 3.09197e-07 | 1.000000 |
| rad41              | 4.25216e-08 | 1.000000 | 6.00307e-08 | 1.000000 |
| rad6               | 1.13764e-10 | 1.000000 | 1.60608e-10 | 1.000000 |
| rad7               | 2.96965e-12 | 1.000000 | 4.19245e-12 | 1.000000 |
| rad11              | 2.05599e-12 | 1.000000 | 2.90259e-12 | 1.000000 |



|       |             |         |             |         |
|-------|-------------|---------|-------------|---------|
| rad23 | 9.36546e-13 | 1.00000 | 1.32219e-12 | 1.00000 |
| rad9  | 4.57119e-13 | 1.00000 | 6.45346e-13 | 1.00000 |
| rad28 | 4.06114e-13 | 1.00000 | 5.73338e-13 | 1.00000 |
| rad13 | 3.84841e-13 | 1.00000 | 5.43307e-13 | 1.00000 |
| rad45 | 2.35689e-13 | 1.00000 | 3.32739e-13 | 1.00000 |
| rad22 | 7.98824e-14 | 1.00000 | 1.12776e-13 | 1.00000 |
| rad21 | 7.20278e-14 | 1.00000 | 1.01687e-13 | 1.00000 |
| rad36 | 4.38308e-14 | 1.00000 | 6.18790e-14 | 1.00000 |
| rad15 | 3.21096e-14 | 1.00000 | 4.53314e-14 | 1.00000 |
| rad33 | 3.15102e-14 | 1.00000 | 4.44850e-14 | 1.00000 |
| rad20 | 1.44351e-14 | 1.00000 | 2.03790e-14 | 1.00000 |
| rad26 | 1.25303e-14 | 1.00000 | 1.76900e-14 | 1.00000 |
| rad12 | 7.84782e-15 | 1.00000 | 1.10793e-14 | 1.00000 |
| rad25 | 7.63300e-15 | 1.00000 | 1.07760e-14 | 1.00000 |
| rad10 | 4.88428e-15 | 1.00000 | 6.89545e-15 | 1.00000 |
| rad24 | 4.65717e-15 | 1.00000 | 6.57487e-15 | 1.00000 |
| rad18 | 3.38490e-15 | 1.00000 | 4.77869e-15 | 1.00000 |
| rad8  | 1.52996e-15 | 1.00000 | 2.15996e-15 | 1.00000 |
| rad3  | 9.89077e-16 | 1.00000 | 1.39635e-15 | 1.00000 |
| rad47 | 8.69678e-16 | 1.00000 | 1.22779e-15 | 1.00000 |
| rad2  | 7.83314e-16 | 1.00000 | 1.10586e-15 | 1.00000 |
| rad4  | 5.93900e-16 | 1.00000 | 8.38451e-16 | 1.00000 |
| rad14 | 4.74842e-16 | 1.00000 | 6.70369e-16 | 1.00000 |
| rad1  | 1.97579e-16 | 1.00000 | 2.78935e-16 | 1.00000 |
| rad5  | 1.02249e-16 | 1.00000 | 1.44352e-16 | 1.00000 |
| rad27 | 2.15755e-17 | 1.00000 | 3.04598e-17 | 1.00000 |

0.100000000E-01 Pa, 3000.00000 K

| =====              |                 |          |                      |           |
|--------------------|-----------------|----------|----------------------|-----------|
| Rate constant      | True (fraction) |          | Effective (fraction) |           |
| -----              |                 |          |                      |           |
| Total              | 6.24269e-11     | (1.00 )  | 4.43911e-11          | (1.00 )   |
| Formation of rad11 | 1.12221e-11     | (0.180 ) | 4.21269e-12          | (0.0949 ) |
| Formation of rad6  | 1.76534e-11     | (0.283 ) | 6.62699e-12          | (0.149 )  |
| H-abstraction      | 3.35514e-11     | (0.537 ) | 3.35514e-11          | (0.756 )  |
| species            | PYtrue          | Cumul    | PYeffective          | Cumul     |
| -----              |                 |          |                      |           |
| Benzene+2-propynyl | 0.537451        | 0.537451 | 0.755814             | 0.755814  |
| Phenyl+Allene      | 0.288911        | 0.826362 | 0.000000             | 0.755814  |
| PhCH2CCH+H         | 0.0883066       | 0.914669 | 0.124185             | 0.879999  |
| PhCHCCH2+H         | 0.0408111       | 0.955480 | 0.0573925            | 0.937392  |
| C2H2+PhCH2         | 0.0138651       | 0.969345 | 0.0194984            | 0.956890  |
| PhCCH+CH3          | 0.0113582       | 0.980703 | 0.0159730            | 0.972863  |
| PAH7+H             | 0.00465329      | 0.985356 | 0.00654386           | 0.979407  |
| Indene+H           | 0.00463895      | 0.989995 | 0.00652370           | 0.985931  |
| Ph+MeAc            | 0.00297587      | 0.992971 | 0.00418496           | 0.990116  |
| PhcycC3H3_A+H      | 0.00245642      | 0.995427 | 0.00345445           | 0.993570  |
| rad19syn           | 0.00161454      | 0.997042 | 0.00227052           | 0.995841  |
| rad54              | 0.000727890     | 0.997770 | 0.00102362           | 0.996864  |
| rad39              | 0.000500510     | 0.998270 | 0.000703861          | 0.997568  |
| rad19anti          | 0.000275358     | 0.998546 | 0.000387232          | 0.997955  |
| PAH9+H             | 0.000215435     | 0.998761 | 0.000302964          | 0.998258  |
| PAH1+H             | 0.000185098     | 0.998946 | 0.000260302          | 0.998519  |
| rad38              | 0.000138297     | 0.999085 | 0.000194486          | 0.998713  |
| PhCCCH3+H          | 0.000118094     | 0.999203 | 0.000166074          | 0.998879  |
| rad50              | 9.10199e-05     | 0.999294 | 0.000128001          | 0.999007  |
| rad56              | 7.84307e-05     | 0.999372 | 0.000110297          | 0.999117  |
| rad55              | 7.67854e-05     | 0.999449 | 0.000107983          | 0.999225  |
| rad70              | 6.22156e-05     | 0.999511 | 8.74935e-05          | 0.999313  |
| PAH3+H             | 5.79162e-05     | 0.999569 | 8.14472e-05          | 0.999394  |
| PAH10+CH3          | 5.73435e-05     | 0.999626 | 8.06419e-05          | 0.999475  |
| rad53              | 5.50942e-05     | 0.999682 | 7.74787e-05          | 0.999552  |
| rad46              | 5.10964e-05     | 0.999733 | 7.18563e-05          | 0.999624  |
| rad51              | 4.79927e-05     | 0.999781 | 6.74918e-05          | 0.999692  |
| rad35              | 4.64038e-05     | 0.999827 | 6.52572e-05          | 0.999757  |
| rad67              | 4.30004e-05     | 0.999870 | 6.04712e-05          | 0.999818  |
| rad34              | 2.22803e-05     | 0.999892 | 3.13327e-05          | 0.999849  |
| PAH8+H             | 2.20424e-05     | 0.999914 | 3.09982e-05          | 0.999880  |
| rad30              | 1.19659e-05     | 0.999926 | 1.68276e-05          | 0.999897  |
| rad37              | 1.08360e-05     | 0.999937 | 1.52386e-05          | 0.999912  |
| rad52              | 1.06405e-05     | 0.999948 | 1.49636e-05          | 0.999927  |
| rad71              | 9.97847e-06     | 0.999958 | 1.40327e-05          | 0.999941  |
| rad62              | 8.52399e-06     | 0.999966 | 1.19872e-05          | 0.999953  |
| rad64              | 4.99011e-06     | 0.999971 | 7.01754e-06          | 0.999960  |
| rad73              | 4.56449e-06     | 0.999976 | 6.41901e-06          | 0.999966  |
| rad59              | 4.47702e-06     | 0.999980 | 6.29599e-06          | 0.999973  |
| rad68syn           | 4.00554e-06     | 0.999984 | 5.63295e-06          | 0.999978  |
| rad68anti          | 2.55993e-06     | 0.999987 | 3.60001e-06          | 0.999982  |
| rad60syn           | 2.46101e-06     | 0.999989 | 3.46090e-06          | 0.999985  |

|           |             |          |             |          |
|-----------|-------------|----------|-------------|----------|
| rad40syn  | 2.03324e-06 | 0.999991 | 2.85932e-06 | 0.999988 |
| rad60anti | 1.78407e-06 | 0.999993 | 2.50894e-06 | 0.999991 |
| rad40anti | 1.43624e-06 | 0.999995 | 2.01978e-06 | 0.999993 |
| rad42     | 1.37800e-06 | 0.999996 | 1.93787e-06 | 0.999995 |
| rad65     | 1.15674e-06 | 0.999997 | 1.62672e-06 | 0.999996 |
| rad58     | 1.05023e-06 | 0.999998 | 1.47693e-06 | 0.999998 |
| rad72     | 9.39261e-07 | 0.999999 | 1.32088e-06 | 0.999999 |
| rad43     | 3.36095e-07 | 0.999999 | 4.72649e-07 | 1.000000 |
| rad61     | 2.73990e-07 | 1.000000 | 3.85311e-07 | 1.000000 |
| rad41     | 5.56844e-08 | 1.000000 | 7.83087e-08 | 1.000000 |
| rad6      | 4.51507e-11 | 1.000000 | 6.34952e-11 | 1.000000 |
| rad7      | 1.48215e-12 | 1.000000 | 2.08434e-12 | 1.000000 |
| rad11     | 9.87102e-13 | 1.000000 | 1.38816e-12 | 1.000000 |
| rad23     | 3.63505e-13 | 1.000000 | 5.11193e-13 | 1.000000 |
| rad9      | 2.06394e-13 | 1.000000 | 2.90252e-13 | 1.000000 |
| rad13     | 2.05544e-13 | 1.000000 | 2.89055e-13 | 1.000000 |
| rad28     | 1.60911e-13 | 1.000000 | 2.26288e-13 | 1.000000 |
| rad45     | 1.10144e-13 | 1.000000 | 1.54896e-13 | 1.000000 |
| rad21     | 4.05037e-14 | 1.000000 | 5.69600e-14 | 1.000000 |
| rad22     | 3.38503e-14 | 1.000000 | 4.76036e-14 | 1.000000 |
| rad36     | 2.07232e-14 | 1.000000 | 2.91431e-14 | 1.000000 |
| rad33     | 1.89985e-14 | 1.000000 | 2.67174e-14 | 1.000000 |
| rad15     | 1.57570e-14 | 1.000000 | 2.21590e-14 | 1.000000 |
| rad20     | 8.22819e-15 | 1.000000 | 1.15712e-14 | 1.000000 |
| rad26     | 5.62307e-15 | 1.000000 | 7.90769e-15 | 1.000000 |
| rad12     | 4.82938e-15 | 1.000000 | 6.79152e-15 | 1.000000 |
| rad25     | 4.56476e-15 | 1.000000 | 6.41940e-15 | 1.000000 |
| rad24     | 2.85392e-15 | 1.000000 | 4.01344e-15 | 1.000000 |
| rad10     | 2.34630e-15 | 1.000000 | 3.29959e-15 | 1.000000 |
| rad18     | 1.70032e-15 | 1.000000 | 2.39115e-15 | 1.000000 |
| rad8      | 1.34844e-15 | 1.000000 | 1.89630e-15 | 1.000000 |
| rad47     | 1.03449e-15 | 1.000000 | 1.45480e-15 | 1.000000 |
| rad3      | 5.16103e-16 | 1.000000 | 7.25794e-16 | 1.000000 |
| rad2      | 3.38111e-16 | 1.000000 | 4.75484e-16 | 1.000000 |
| rad14     | 3.16345e-16 | 1.000000 | 4.44875e-16 | 1.000000 |
| rad4      | 3.07487e-16 | 1.000000 | 4.32417e-16 | 1.000000 |
| rad1      | 8.08123e-17 | 1.000000 | 1.13646e-16 | 1.000000 |
| rad5      | 7.43487e-17 | 1.000000 | 1.04556e-16 | 1.000000 |
| rad27     | 1.40649e-17 | 1.000000 | 1.97793e-17 | 1.000000 |

0.100000000E-01 Pa, 3250.00000 K

| Rate constant      | True (fraction)      | Effective (fraction)  |
|--------------------|----------------------|-----------------------|
| Total              | 8.22129e-11 (1.00 )  | 5.87536e-11 (1.00 )   |
| Formation of rad11 | 1.42538e-11 (0.173 ) | 5.21849e-12 (0.0888 ) |
| Formation of rad6  | 2.27549e-11 (0.277 ) | 8.33083e-12 (0.142 )  |
| H-abstraction      | 4.52043e-11 (0.550 ) | 4.52043e-11 (0.769 )  |

| species            | PYtrue      | Cumul    | PYeffective | Cumul    |
|--------------------|-------------|----------|-------------|----------|
| Benzene+2-propynyl | 0.549844    | 0.549844 | 0.769388    | 0.769388 |
| Phenyl+Allene      | 0.285349    | 0.835192 | 0.000000    | 0.769388 |
| PhCH2CCH+H         | 0.0853725   | 0.920565 | 0.119460    | 0.888848 |
| PhCHCCH2+H         | 0.0381839   | 0.958749 | 0.0534299   | 0.942278 |
| C2H2+PhCH2         | 0.0128678   | 0.971617 | 0.0180057   | 0.960283 |
| PhCCH+CH3          | 0.0101926   | 0.981809 | 0.0142623   | 0.974546 |
| PAH7+H             | 0.00428274  | 0.986092 | 0.00599276  | 0.980539 |
| Indene+H           | 0.00340695  | 0.989499 | 0.00476729  | 0.985306 |
| PhcycC3H3_A+H      | 0.00292038  | 0.992419 | 0.00408643  | 0.989392 |
| Ph+MeAc            | 0.00285191  | 0.995271 | 0.00399061  | 0.993383 |
| rad19syn           | 0.00176005  | 0.997031 | 0.00246280  | 0.995846 |
| rad54              | 0.000783510 | 0.997815 | 0.00109635  | 0.996942 |
| rad39              | 0.000435199 | 0.998250 | 0.000608967 | 0.997551 |
| rad19anti          | 0.000232598 | 0.998483 | 0.000325470 | 0.997876 |
| PAH1+H             | 0.000210285 | 0.998693 | 0.000294248 | 0.998171 |
| PAH9+H             | 0.000189946 | 0.998883 | 0.000265788 | 0.998436 |
| rad38              | 0.000125074 | 0.999008 | 0.000175014 | 0.998611 |
| PhCCCH3+H          | 0.000104499 | 0.999112 | 0.000146224 | 0.998758 |
| rad56              | 0.000102496 | 0.999215 | 0.000143420 | 0.998901 |
| rad50              | 9.64743e-05 | 0.999311 | 0.000134995 | 0.999036 |
| rad55              | 8.51952e-05 | 0.999397 | 0.000119212 | 0.999155 |
| rad53              | 6.86880e-05 | 0.999465 | 9.61137e-05 | 0.999251 |
| rad70              | 6.67834e-05 | 0.999532 | 9.34486e-05 | 0.999345 |
| PAH3+H             | 6.43467e-05 | 0.999596 | 9.00394e-05 | 0.999435 |
| PAH10+CH3          | 5.80427e-05 | 0.999654 | 8.12183e-05 | 0.999516 |
| rad51              | 5.49240e-05 | 0.999709 | 7.68541e-05 | 0.999593 |
| rad46              | 4.80263e-05 | 0.999757 | 6.72021e-05 | 0.999660 |
| rad67              | 4.40669e-05 | 0.999802 | 6.16619e-05 | 0.999722 |
| rad35              | 4.33473e-05 | 0.999845 | 6.06552e-05 | 0.999783 |

|           |             |          |             |          |
|-----------|-------------|----------|-------------|----------|
| PAH8+H    | 3.16111e-05 | 0.999876 | 4.42329e-05 | 0.999827 |
| rad34     | 2.50786e-05 | 0.999902 | 3.50921e-05 | 0.999862 |
| rad71     | 1.47743e-05 | 0.999916 | 2.06734e-05 | 0.999883 |
| rad52     | 1.16170e-05 | 0.999928 | 1.62555e-05 | 0.999899 |
| rad30     | 1.10774e-05 | 0.999939 | 1.55003e-05 | 0.999914 |
| rad62     | 1.06705e-05 | 0.999950 | 1.49310e-05 | 0.999929 |
| rad37     | 9.29424e-06 | 0.999959 | 1.30053e-05 | 0.999942 |
| rad73     | 6.33743e-06 | 0.999965 | 8.86788e-06 | 0.999951 |
| rad64     | 5.77649e-06 | 0.999971 | 8.08292e-06 | 0.999959 |
| rad68syn  | 5.15348e-06 | 0.999976 | 7.21118e-06 | 0.999966 |
| rad59     | 4.82486e-06 | 0.999981 | 6.75136e-06 | 0.999973 |
| rad68anti | 3.28964e-06 | 0.999984 | 4.60314e-06 | 0.999978 |
| rad40syn  | 2.77792e-06 | 0.999987 | 3.88709e-06 | 0.999982 |
| rad60syn  | 2.50929e-06 | 0.999990 | 3.51119e-06 | 0.999985 |
| rad40anti | 1.99952e-06 | 0.999992 | 2.79788e-06 | 0.999988 |
| rad42     | 1.90464e-06 | 0.999994 | 2.66512e-06 | 0.999991 |
| rad60anti | 1.83422e-06 | 0.999995 | 2.56658e-06 | 0.999993 |
| rad72     | 1.57365e-06 | 0.999997 | 2.20197e-06 | 0.999995 |
| rad65     | 1.29208e-06 | 0.999998 | 1.80798e-06 | 0.999997 |
| rad58     | 1.27682e-06 | 1.000000 | 1.78663e-06 | 0.999999 |
| rad43     | 3.85029e-07 | 1.000000 | 5.38764e-07 | 1.000000 |
| rad61     | 3.23853e-07 | 1.000000 | 4.53160e-07 | 1.000000 |
| rad41     | 7.10639e-08 | 1.000000 | 9.94383e-08 | 1.000000 |
| rad6      | 2.02086e-11 | 1.000000 | 2.82775e-11 | 1.000000 |
| rad7      | 8.04019e-13 | 1.000000 | 1.12505e-12 | 1.000000 |
| rad11     | 5.22069e-13 | 1.000000 | 7.30520e-13 | 1.000000 |
| rad23     | 1.54966e-13 | 1.000000 | 2.16841e-13 | 1.000000 |
| rad13     | 1.18529e-13 | 1.000000 | 1.65855e-13 | 1.000000 |
| rad9      | 1.00046e-13 | 1.000000 | 1.39992e-13 | 1.000000 |
| rad28     | 7.15131e-14 | 1.000000 | 1.00067e-13 | 1.000000 |
| rad45     | 5.50892e-14 | 1.000000 | 7.70852e-14 | 1.000000 |
| rad21     | 2.44316e-14 | 1.000000 | 3.41867e-14 | 1.000000 |
| rad22     | 1.59240e-14 | 1.000000 | 2.22822e-14 | 1.000000 |
| rad33     | 1.20475e-14 | 1.000000 | 1.68578e-14 | 1.000000 |
| rad36     | 1.04618e-14 | 1.000000 | 1.46390e-14 | 1.000000 |
| rad15     | 8.21179e-15 | 1.000000 | 1.14906e-14 | 1.000000 |
| rad20     | 5.20452e-15 | 1.000000 | 7.28260e-15 | 1.000000 |
| rad12     | 3.09374e-15 | 1.000000 | 4.32901e-15 | 1.000000 |
| rad25     | 2.89948e-15 | 1.000000 | 4.05719e-15 | 1.000000 |
| rad26     | 2.71976e-15 | 1.000000 | 3.80571e-15 | 1.000000 |
| rad24     | 1.82403e-15 | 1.000000 | 2.55233e-15 | 1.000000 |
| rad10     | 1.22041e-15 | 1.000000 | 1.70770e-15 | 1.000000 |
| rad8      | 1.19193e-15 | 1.000000 | 1.66784e-15 | 1.000000 |
| rad47     | 1.15640e-15 | 1.000000 | 1.61813e-15 | 1.000000 |
| rad18     | 9.40471e-16 | 1.000000 | 1.31599e-15 | 1.000000 |
| rad3      | 2.94266e-16 | 1.000000 | 4.11761e-16 | 1.000000 |
| rad14     | 2.29564e-16 | 1.000000 | 3.21225e-16 | 1.000000 |
| rad4      | 1.76113e-16 | 1.000000 | 2.46432e-16 | 1.000000 |
| rad2      | 1.67475e-16 | 1.000000 | 2.34344e-16 | 1.000000 |
| rad5      | 5.58486e-17 | 1.000000 | 7.81483e-17 | 1.000000 |
| rad1      | 3.81250e-17 | 1.000000 | 5.33476e-17 | 1.000000 |
| rad27     | 9.84725e-18 | 1.000000 | 1.37791e-17 | 1.000000 |

0.100000000E-01 Pa, 3500.00000 K

| Rate constant      | True (fraction)      | Effective (fraction)  |
|--------------------|----------------------|-----------------------|
| Total              | 1.05713e-10 (1.00 )  | 7.59650e-11 (1.00 )   |
| Formation of rad11 | 1.77412e-11 (0.168 ) | 6.37264e-12 (0.0839 ) |
| Formation of rad6  | 2.86822e-11 (0.271 ) | 1.03027e-11 (0.136 )  |
| H-abstraction      | 5.92897e-11 (0.561 ) | 5.92897e-11 (0.780 )  |

| species            | PYtrue      | Cumul    | PYeffective | Cumul    |
|--------------------|-------------|----------|-------------|----------|
| Benzene+2-propynyl | 0.560855    | 0.560855 | 0.780487    | 0.780487 |
| Phenyl+Allene      | 0.281404    | 0.842259 | 0.000000    | 0.780487 |
| PhCH2CCH+H         | 0.0826656   | 0.924925 | 0.115037    | 0.895524 |
| PhCHCCH2+H         | 0.0360585   | 0.960983 | 0.0501791   | 0.945703 |
| C2H2+PhCH2         | 0.0122593   | 0.973242 | 0.0170600   | 0.962764 |
| PhCCH+CH3          | 0.00927084  | 0.982513 | 0.0129013   | 0.975665 |
| PAH7+H             | 0.00395025  | 0.986463 | 0.00549717  | 0.981162 |
| PhcycC3H3_A+H      | 0.00334801  | 0.989811 | 0.00465910  | 0.985821 |
| Ph+MeAc            | 0.00276398  | 0.992575 | 0.00384635  | 0.989667 |
| Indene+H           | 0.00257590  | 0.995151 | 0.00358462  | 0.993252 |
| rad19syn           | 0.00187235  | 0.997024 | 0.00260557  | 0.995858 |
| rad54              | 0.000820548 | 0.997844 | 0.00114187  | 0.996999 |
| rad39              | 0.000383055 | 0.998227 | 0.000533059 | 0.997533 |
| PAH1+H             | 0.000234590 | 0.998462 | 0.000326455 | 0.997859 |
| rad19anti          | 0.000198628 | 0.998661 | 0.000276411 | 0.998135 |
| PAH9+H             | 0.000165224 | 0.998826 | 0.000229927 | 0.998365 |

|           |             |          |             |          |
|-----------|-------------|----------|-------------|----------|
| rad56     | 0.000126873 | 0.998953 | 0.000176556 | 0.998542 |
| rad38     | 0.000111229 | 0.999064 | 0.000154787 | 0.998697 |
| rad50     | 9.85613e-05 | 0.999162 | 0.000137158 | 0.998834 |
| PhCCCH3+H | 9.42424e-05 | 0.999257 | 0.000131148 | 0.998965 |
| rad55     | 9.15803e-05 | 0.999348 | 0.000127443 | 0.999092 |
| rad53     | 8.16793e-05 | 0.999430 | 0.000113665 | 0.999206 |
| rad70     | 7.02694e-05 | 0.999500 | 9.77871e-05 | 0.999304 |
| PAH3+H    | 6.99220e-05 | 0.999570 | 9.73035e-05 | 0.999401 |
| rad51     | 5.98507e-05 | 0.999630 | 8.32882e-05 | 0.999484 |
| PAH10+CH3 | 5.76128e-05 | 0.999688 | 8.01742e-05 | 0.999565 |
| rad67     | 4.43734e-05 | 0.999732 | 6.17501e-05 | 0.999626 |
| rad46     | 4.41956e-05 | 0.999776 | 6.15029e-05 | 0.999688 |
| PAH8+H    | 4.26935e-05 | 0.999819 | 5.94123e-05 | 0.999747 |
| rad35     | 4.02805e-05 | 0.999859 | 5.60544e-05 | 0.999803 |
| rad34     | 2.74951e-05 | 0.999887 | 3.82622e-05 | 0.999842 |
| rad71     | 2.01281e-05 | 0.999907 | 2.80103e-05 | 0.999870 |
| rad62     | 1.37116e-05 | 0.999920 | 1.90811e-05 | 0.999889 |
| rad52     | 1.21501e-05 | 0.999933 | 1.69080e-05 | 0.999906 |
| rad30     | 1.02915e-05 | 0.999943 | 1.43216e-05 | 0.999920 |
| rad73     | 8.16310e-06 | 0.999951 | 1.13598e-05 | 0.999931 |
| rad37     | 7.96636e-06 | 0.999959 | 1.10860e-05 | 0.999942 |
| rad64     | 6.47621e-06 | 0.999966 | 9.01228e-06 | 0.999951 |
| rad68syn  | 6.33612e-06 | 0.999972 | 8.81737e-06 | 0.999960 |
| rad59     | 5.10458e-06 | 0.999977 | 7.10355e-06 | 0.999967 |
| rad68anti | 4.04059e-06 | 0.999981 | 5.62289e-06 | 0.999973 |
| rad40syn  | 3.59895e-06 | 0.999985 | 5.00830e-06 | 0.999978 |
| rad42     | 2.66321e-06 | 0.999987 | 3.70612e-06 | 0.999982 |
| rad40anti | 2.63316e-06 | 0.999990 | 3.66431e-06 | 0.999985 |
| rad60syn  | 2.53258e-06 | 0.999992 | 3.52435e-06 | 0.999989 |
| rad72     | 2.38441e-06 | 0.999995 | 3.31814e-06 | 0.999992 |
| rad60anti | 1.86455e-06 | 0.999997 | 2.59471e-06 | 0.999995 |
| rad58     | 1.49815e-06 | 0.999998 | 2.08483e-06 | 0.999997 |
| rad65     | 1.37925e-06 | 1.000000 | 1.91936e-06 | 0.999999 |
| rad43     | 4.42452e-07 | 1.000000 | 6.15716e-07 | 0.999999 |
| rad61     | 3.67258e-07 | 1.000000 | 5.11077e-07 | 1.000000 |
| rad41     | 8.98821e-08 | 1.000000 | 1.25080e-07 | 1.000000 |
| rad6      | 9.97725e-12 | 1.000000 | 1.38843e-11 | 1.000000 |
| rad7      | 4.66456e-13 | 1.000000 | 6.49122e-13 | 1.000000 |
| rad11     | 2.99305e-13 | 1.000000 | 4.16513e-13 | 1.000000 |
| rad13     | 7.28323e-14 | 1.000000 | 1.01354e-13 | 1.000000 |
| rad23     | 7.13146e-14 | 1.000000 | 9.92411e-14 | 1.000000 |
| rad9      | 5.18582e-14 | 1.000000 | 7.21657e-14 | 1.000000 |
| rad28     | 3.48833e-14 | 1.000000 | 4.85437e-14 | 1.000000 |
| rad45     | 2.91439e-14 | 1.000000 | 4.05568e-14 | 1.000000 |
| rad21     | 1.56207e-14 | 1.000000 | 2.17378e-14 | 1.000000 |
| rad22     | 8.17847e-15 | 1.000000 | 1.13812e-14 | 1.000000 |
| rad33     | 7.96113e-15 | 1.000000 | 1.10787e-14 | 1.000000 |
| rad36     | 5.57447e-15 | 1.000000 | 7.75741e-15 | 1.000000 |
| rad15     | 4.53000e-15 | 1.000000 | 6.30397e-15 | 1.000000 |
| rad20     | 3.56513e-15 | 1.000000 | 4.96123e-15 | 1.000000 |
| rad12     | 2.06000e-15 | 1.000000 | 2.86671e-15 | 1.000000 |
| rad25     | 1.93600e-15 | 1.000000 | 2.69413e-15 | 1.000000 |
| rad26     | 1.40410e-15 | 1.000000 | 1.95395e-15 | 1.000000 |
| rad47     | 1.23125e-15 | 1.000000 | 1.71341e-15 | 1.000000 |
| rad24     | 1.20836e-15 | 1.000000 | 1.68155e-15 | 1.000000 |
| rad8      | 1.05361e-15 | 1.000000 | 1.46621e-15 | 1.000000 |
| rad10     | 6.75915e-16 | 1.000000 | 9.40606e-16 | 1.000000 |
| rad18     | 5.60082e-16 | 1.000000 | 7.79409e-16 | 1.000000 |
| rad14     | 1.81860e-16 | 1.000000 | 2.53076e-16 | 1.000000 |
| rad3      | 1.79837e-16 | 1.000000 | 2.50262e-16 | 1.000000 |
| rad4      | 1.09400e-16 | 1.000000 | 1.52241e-16 | 1.000000 |
| rad2      | 9.15552e-17 | 1.000000 | 1.27408e-16 | 1.000000 |
| rad5      | 4.32790e-17 | 1.000000 | 6.02271e-17 | 1.000000 |
| rad1      | 2.01243e-17 | 1.000000 | 2.80050e-17 | 1.000000 |
| rad27     | 7.31107e-18 | 1.000000 | 1.01741e-17 | 1.000000 |

0.100000000E-01 Pa, 3750.00000 K

| Rate constant      | True (fraction) |          | Effective (fraction) |           |
|--------------------|-----------------|----------|----------------------|-----------|
| Total              | 1.33217e-10     | (1.00 )  | 9.62711e-11          | (1.00 )   |
| Formation of rad11 | 2.17064e-11     | (0.163 ) | 7.68279e-12          | (0.0798 ) |
| Formation of rad6  | 3.54800e-11     | (0.266 ) | 1.25578e-11          | (0.130 )  |
| H-abstraction      | 7.60305e-11     | (0.571 ) | 7.60305e-11          | (0.790 )  |
| species            | PYtrue          | Cumul    | PYeffective          | Cumul     |
| Benzene+2-propynyl | 0.570727        | 0.570727 | 0.789754             | 0.789754  |
| Phenyl+Allene      | 0.277336        | 0.848063 | 0.000000             | 0.789754  |
| PhCH2CCH+H         | 0.0801946       | 0.928257 | 0.110971             | 0.900725  |

|               |             |          |             |          |
|---------------|-------------|----------|-------------|----------|
| PhCHCCH2+H    | 0.0343186   | 0.962576 | 0.0474891   | 0.948214 |
| C2H2+PhCH2    | 0.0118838   | 0.974460 | 0.0164445   | 0.964658 |
| PhCCH+CH3     | 0.00852836  | 0.982988 | 0.0118013   | 0.976459 |
| PhcycC3H3_A+H | 0.00372851  | 0.986717 | 0.00515939  | 0.981619 |
| PAH7+H        | 0.00365085  | 0.990368 | 0.00505194  | 0.986671 |
| Ph+MeAc       | 0.00270113  | 0.993069 | 0.00373773  | 0.990408 |
| Indene+H      | 0.00199900  | 0.995068 | 0.00276616  | 0.993175 |
| rad19syn      | 0.00195356  | 0.997021 | 0.00270328  | 0.995878 |
| rad54         | 0.000841040 | 0.997862 | 0.00116381  | 0.997042 |
| rad39         | 0.000340475 | 0.998203 | 0.000471138 | 0.997513 |
| PAH1+H        | 0.000258935 | 0.998462 | 0.000358305 | 0.997871 |
| rad19anti     | 0.000171610 | 0.998633 | 0.000237469 | 0.998109 |
| rad56         | 0.000150421 | 0.998784 | 0.000208148 | 0.998317 |
| PAH9+H        | 0.000142296 | 0.998926 | 0.000196904 | 0.998514 |
| rad50         | 9.78214e-05 | 0.999024 | 0.000135362 | 0.998649 |
| rad38         | 9.76287e-05 | 0.999121 | 0.000135095 | 0.998784 |
| rad55         | 9.60227e-05 | 0.999217 | 0.000132873 | 0.998917 |
| rad53         | 9.35446e-05 | 0.999311 | 0.000129444 | 0.999046 |
| PhCCCH3+H     | 8.63448e-05 | 0.999397 | 0.000119481 | 0.999166 |
| PAH3+H        | 7.46029e-05 | 0.999472 | 0.000103233 | 0.999269 |
| rad70         | 7.27716e-05 | 0.999545 | 0.000100699 | 0.999370 |
| rad51         | 6.27266e-05 | 0.999607 | 8.67994e-05 | 0.999457 |
| PAH10+CH3     | 5.64592e-05 | 0.999664 | 7.81267e-05 | 0.999535 |
| PAH8+H        | 5.49581e-05 | 0.999719 | 7.60493e-05 | 0.999611 |
| rad67         | 4.41361e-05 | 0.999763 | 6.10741e-05 | 0.999672 |
| rad46         | 4.00102e-05 | 0.999803 | 5.53649e-05 | 0.999727 |
| rad35         | 3.73501e-05 | 0.999840 | 5.16839e-05 | 0.999779 |
| rad34         | 2.95155e-05 | 0.999870 | 4.08426e-05 | 0.999820 |
| rad71         | 2.56704e-05 | 0.999896 | 3.55219e-05 | 0.999855 |
| rad62         | 1.78765e-05 | 0.999913 | 2.47369e-05 | 0.999880 |
| rad52         | 1.22817e-05 | 0.999926 | 1.69950e-05 | 0.999897 |
| rad73         | 9.90830e-06 | 0.999936 | 1.37108e-05 | 0.999911 |
| rad30         | 9.58077e-06 | 0.999945 | 1.32576e-05 | 0.999924 |
| rad68syn      | 7.51159e-06 | 0.999953 | 1.03943e-05 | 0.999934 |
| rad64         | 7.08717e-06 | 0.999960 | 9.80700e-06 | 0.999944 |
| rad37         | 6.84827e-06 | 0.999967 | 9.47639e-06 | 0.999954 |
| rad59         | 5.31873e-06 | 0.999972 | 7.35989e-06 | 0.999961 |
| rad68anti     | 4.78626e-06 | 0.999977 | 6.62308e-06 | 0.999968 |
| rad40syn      | 4.46912e-06 | 0.999981 | 6.18422e-06 | 0.999974 |
| rad42         | 3.72271e-06 | 0.999985 | 5.15138e-06 | 0.999979 |
| rad72         | 3.33614e-06 | 0.999988 | 4.61643e-06 | 0.999984 |
| rad40anti     | 3.31727e-06 | 0.999992 | 4.59032e-06 | 0.999988 |
| rad60syn      | 2.53369e-06 | 0.999994 | 3.50604e-06 | 0.999992 |
| rad60anti     | 1.87710e-06 | 0.999996 | 2.59748e-06 | 0.999994 |
| rad58         | 1.70809e-06 | 0.999998 | 2.36361e-06 | 0.999997 |
| rad65         | 1.42131e-06 | 0.999999 | 1.96676e-06 | 0.999999 |
| rad43         | 5.13732e-07 | 1.000000 | 7.10883e-07 | 0.999999 |
| rad61         | 4.03889e-07 | 1.000000 | 5.58888e-07 | 1.000000 |
| rad41         | 1.13553e-07 | 1.000000 | 1.57130e-07 | 1.000000 |
| rad6          | 5.34496e-12 | 1.000000 | 7.39616e-12 | 1.000000 |
| rad7          | 2.85890e-13 | 1.000000 | 3.95605e-13 | 1.000000 |
| rad11         | 1.83502e-13 | 1.000000 | 2.53924e-13 | 1.000000 |
| rad13         | 4.71998e-14 | 1.000000 | 6.53135e-14 | 1.000000 |
| rad23         | 3.49924e-14 | 1.000000 | 4.84213e-14 | 1.000000 |
| rad9          | 2.85951e-14 | 1.000000 | 3.95691e-14 | 1.000000 |
| rad28         | 1.83925e-14 | 1.000000 | 2.54509e-14 | 1.000000 |
| rad45         | 1.61584e-14 | 1.000000 | 2.23594e-14 | 1.000000 |
| rad21         | 1.04835e-14 | 1.000000 | 1.45068e-14 | 1.000000 |
| rad33         | 5.44417e-15 | 1.000000 | 7.53345e-15 | 1.000000 |
| rad22         | 4.52415e-15 | 1.000000 | 6.26037e-15 | 1.000000 |
| rad36         | 3.10668e-15 | 1.000000 | 4.29892e-15 | 1.000000 |
| rad15         | 2.63325e-15 | 1.000000 | 3.64381e-15 | 1.000000 |
| rad20         | 2.59395e-15 | 1.000000 | 3.58942e-15 | 1.000000 |
| rad12         | 1.42144e-15 | 1.000000 | 1.96695e-15 | 1.000000 |
| rad25         | 1.34706e-15 | 1.000000 | 1.86401e-15 | 1.000000 |
| rad47         | 1.26179e-15 | 1.000000 | 1.74602e-15 | 1.000000 |
| rad8          | 9.29496e-16 | 1.000000 | 1.28621e-15 | 1.000000 |
| rad24         | 8.25899e-16 | 1.000000 | 1.14285e-15 | 1.000000 |
| rad26         | 7.68282e-16 | 1.000000 | 1.06313e-15 | 1.000000 |
| rad10         | 3.94562e-16 | 1.000000 | 5.45981e-16 | 1.000000 |
| rad18         | 3.53361e-16 | 1.000000 | 4.88969e-16 | 1.000000 |
| rad14         | 1.56347e-16 | 1.000000 | 2.16347e-16 | 1.000000 |
| rad3          | 1.16230e-16 | 1.000000 | 1.60835e-16 | 1.000000 |
| rad4          | 7.25570e-17 | 1.000000 | 1.00402e-16 | 1.000000 |
| rad2          | 5.38913e-17 | 1.000000 | 7.45732e-17 | 1.000000 |
| rad5          | 3.45199e-17 | 1.000000 | 4.77674e-17 | 1.000000 |
| rad1          | 1.16304e-17 | 1.000000 | 1.60938e-17 | 1.000000 |
| rad27         | 5.73779e-18 | 1.000000 | 7.93979e-18 | 1.000000 |

0.100000000E-01 Pa, 4000.00000 K

| =====              |                 |          |                      |           |
|--------------------|-----------------|----------|----------------------|-----------|
| Rate constant      | True (fraction) |          | Effective (fraction) |           |
| Total              | 1.65008e-10     | (1.00 )  | 1.19912e-10          | (1.00 )   |
| Formation of rad11 | 2.61707e-11     | (0.159 ) | 9.15556e-12          | (0.0764 ) |
| Formation of rad6  | 4.31906e-11     | (0.262 ) | 1.51098e-11          | (0.126 )  |
| H-abstraction      | 9.56470e-11     | (0.580 ) | 9.56470e-11          | (0.798 )  |

| species            | PYtrue      | Cumul    | PYeffective | Cumul    |
|--------------------|-------------|----------|-------------|----------|
| Benzene+2-propynyl | 0.579650    | 0.579650 | 0.797641    | 0.797641 |
| Phenyl+Allene      | 0.273295    | 0.852945 | 0.00000     | 0.797641 |
| PhCH2CCH+H         | 0.0779435   | 0.930888 | 0.107256    | 0.904897 |
| PhCHCCH2+H         | 0.0328766   | 0.963765 | 0.0452408   | 0.950138 |
| C2H2+PhCH2         | 0.0116508   | 0.975415 | 0.0160323   | 0.966170 |
| PhCCH+CH3          | 0.00792125  | 0.983337 | 0.0109003   | 0.977070 |
| PhcycC3H3_A+H      | 0.00405636  | 0.987393 | 0.00558187  | 0.982652 |
| PAH7+H             | 0.00338058  | 0.990774 | 0.00465193  | 0.987304 |
| Ph+MeAc            | 0.00265534  | 0.993429 | 0.00365394  | 0.990958 |
| rad19syn           | 0.00200699  | 0.995436 | 0.00276178  | 0.993720 |
| Indene+H           | 0.00158840  | 0.997024 | 0.00218576  | 0.995906 |
| rad54              | 0.000847468 | 0.997872 | 0.00116618  | 0.997072 |
| rad39              | 0.000304994 | 0.998177 | 0.000419695 | 0.997491 |
| PAH1+H             | 0.000284127 | 0.998461 | 0.000390980 | 0.997882 |
| rad56              | 0.000172242 | 0.998633 | 0.000237017 | 0.998119 |
| rad19anti          | 0.000149971 | 0.998783 | 0.000206372 | 0.998326 |
| PAH9+H             | 0.000121736 | 0.998905 | 0.000167518 | 0.998493 |
| rad53              | 0.000103935 | 0.999009 | 0.000143023 | 0.998636 |
| rad55              | 9.87033e-05 | 0.999108 | 0.000135823 | 0.998772 |
| rad50              | 9.49261e-05 | 0.999203 | 0.000130625 | 0.998903 |
| rad38              | 8.48536e-05 | 0.999287 | 0.000116765 | 0.999020 |
| PhCCCH3+H          | 8.02193e-05 | 0.999368 | 0.000110388 | 0.999130 |
| PAH3+H             | 7.84218e-05 | 0.999446 | 0.000107914 | 0.999238 |
| rad70              | 7.43978e-05 | 0.999520 | 0.000102377 | 0.999340 |
| PAH8+H             | 6.80299e-05 | 0.999588 | 9.36140e-05 | 0.999434 |
| rad51              | 6.37407e-05 | 0.999652 | 8.77122e-05 | 0.999522 |
| PAH10+CH3          | 5.48776e-05 | 0.999707 | 7.55158e-05 | 0.999597 |
| rad67              | 4.35168e-05 | 0.999751 | 5.98821e-05 | 0.999657 |
| rad46              | 3.57792e-05 | 0.999786 | 4.92350e-05 | 0.999706 |
| rad35              | 3.46400e-05 | 0.999821 | 4.76673e-05 | 0.999754 |
| rad34              | 3.11445e-05 | 0.999852 | 4.28572e-05 | 0.999797 |
| rad71              | 3.10563e-05 | 0.999883 | 4.27358e-05 | 0.999839 |
| rad62              | 2.32398e-05 | 0.999906 | 3.19798e-05 | 0.999871 |
| rad52              | 1.20851e-05 | 0.999919 | 1.66300e-05 | 0.999888 |
| rad73              | 1.14710e-05 | 0.999930 | 1.57849e-05 | 0.999904 |
| rad30              | 8.93299e-06 | 0.999939 | 1.22925e-05 | 0.999916 |
| rad68syn           | 8.64434e-06 | 0.999948 | 1.18952e-05 | 0.999928 |
| rad64              | 7.61305e-06 | 0.999955 | 1.04761e-05 | 0.999939 |
| rad37              | 5.91727e-06 | 0.999961 | 8.14263e-06 | 0.999947 |
| rad68anti          | 5.50424e-06 | 0.999967 | 7.57424e-06 | 0.999954 |
| rad59              | 5.47385e-06 | 0.999972 | 7.53243e-06 | 0.999962 |
| rad40syn           | 5.36170e-06 | 0.999977 | 7.37810e-06 | 0.999969 |
| rad42              | 5.12142e-06 | 0.999983 | 7.04750e-06 | 0.999976 |
| rad72              | 4.37871e-06 | 0.999987 | 6.02543e-06 | 0.999982 |
| rad40anti          | 4.03125e-06 | 0.999991 | 5.54731e-06 | 0.999988 |
| rad60syn           | 2.51669e-06 | 0.999993 | 3.46315e-06 | 0.999991 |
| rad58              | 1.90267e-06 | 0.999995 | 2.61822e-06 | 0.999994 |
| rad60anti          | 1.87487e-06 | 0.999997 | 2.57996e-06 | 0.999996 |
| rad65              | 1.42564e-06 | 0.999999 | 1.96179e-06 | 0.999998 |
| rad43              | 6.01849e-07 | 0.999999 | 8.28191e-07 | 0.999999 |
| rad61              | 4.34037e-07 | 1.000000 | 5.97267e-07 | 1.000000 |
| rad41              | 1.43043e-07 | 1.000000 | 1.96838e-07 | 1.000000 |
| rad6               | 3.06729e-12 | 1.000000 | 4.22083e-12 | 1.000000 |
| rad7               | 1.83396e-13 | 1.000000 | 2.52368e-13 | 1.000000 |
| rad11              | 1.18986e-13 | 1.000000 | 1.63734e-13 | 1.000000 |
| rad13              | 3.19996e-14 | 1.000000 | 4.40338e-14 | 1.000000 |
| rad23              | 1.81342e-14 | 1.000000 | 2.49541e-14 | 1.000000 |
| rad9               | 1.66771e-14 | 1.000000 | 2.29489e-14 | 1.000000 |
| rad28              | 1.03591e-14 | 1.000000 | 1.42549e-14 | 1.000000 |
| rad45              | 9.32325e-15 | 1.000000 | 1.28295e-14 | 1.000000 |
| rad21              | 7.32818e-15 | 1.000000 | 1.00841e-14 | 1.000000 |
| rad33              | 3.83235e-15 | 1.000000 | 5.27360e-15 | 1.000000 |
| rad22              | 2.66579e-15 | 1.000000 | 3.66833e-15 | 1.000000 |
| rad20              | 1.97589e-15 | 1.000000 | 2.71898e-15 | 1.000000 |
| rad36              | 1.79838e-15 | 1.000000 | 2.47471e-15 | 1.000000 |
| rad15              | 1.60486e-15 | 1.000000 | 2.20841e-15 | 1.000000 |
| rad47              | 1.25502e-15 | 1.000000 | 1.72700e-15 | 1.000000 |
| rad12              | 1.01281e-15 | 1.000000 | 1.39370e-15 | 1.000000 |
| rad25              | 9.69853e-16 | 1.000000 | 1.33459e-15 | 1.000000 |
| rad8               | 8.17489e-16 | 1.000000 | 1.12493e-15 | 1.000000 |

|       |             |          |             |         |
|-------|-------------|----------|-------------|---------|
| rad24 | 5.80458e-16 | 1.000000 | 7.98754e-16 | 1.00000 |
| rad26 | 4.42915e-16 | 1.000000 | 6.09481e-16 | 1.00000 |
| rad10 | 2.41108e-16 | 1.000000 | 3.31782e-16 | 1.00000 |
| rad18 | 2.33513e-16 | 1.000000 | 3.21332e-16 | 1.00000 |
| rad14 | 1.43361e-16 | 1.000000 | 1.97276e-16 | 1.00000 |
| rad3  | 7.86879e-17 | 1.000000 | 1.08281e-16 | 1.00000 |
| rad4  | 5.07443e-17 | 1.000000 | 6.98281e-17 | 1.00000 |
| rad2  | 3.36362e-17 | 1.000000 | 4.62860e-17 | 1.00000 |
| rad5  | 2.82474e-17 | 1.000000 | 3.88706e-17 | 1.00000 |
| rad1  | 7.23860e-18 | 1.000000 | 9.96085e-18 | 1.00000 |
| rad27 | 4.74803e-18 | 1.000000 | 6.53365e-18 | 1.00000 |

0.100000000E-02 Pa, 20.0000000 K

| Rate constant      | True (fraction) |            | Effective (fraction) |            |
|--------------------|-----------------|------------|----------------------|------------|
| Total              | 1.56740e-51     | (1.00 )    | 1.56740e-51          | (1.00 )    |
| Formation of rad11 | 1.56740e-51     | (1.000 )   | 1.56740e-51          | (1.000 )   |
| Formation of rad6  | 3.73945e-60     | (2.39e-09) | 3.73945e-60          | (2.39e-09) |
| H-abstraction      | 1.53631e-76     | (9.80e-26) | 1.53631e-76          | (9.80e-26) |

  

| species            | PYtrue      | Cumul    | PYeffective | Cumul    |
|--------------------|-------------|----------|-------------|----------|
| rad6               | 0.765993    | 0.765993 | 0.765993    | 0.765993 |
| Indene+H           | 0.230896    | 0.996889 | 0.230896    | 0.996889 |
| C2H2+PhCH2         | 0.00156560  | 0.998455 | 0.00156560  | 0.998455 |
| rad2               | 0.000545274 | 0.999000 | 0.000545274 | 0.999000 |
| rad28              | 0.000282220 | 0.999282 | 0.000282220 | 0.999282 |
| PhCCH+CH3          | 0.000244668 | 0.999527 | 0.000244668 | 0.999527 |
| PhCHCCH2+H         | 0.000158635 | 0.999685 | 0.000158635 | 0.999685 |
| PhCCH3+H           | 8.98782e-05 | 0.999775 | 8.98782e-05 | 0.999775 |
| rad26              | 6.94653e-05 | 0.999845 | 6.94653e-05 | 0.999845 |
| rad7               | 6.66393e-05 | 0.999911 | 6.66393e-05 | 0.999911 |
| rad1               | 3.44626e-05 | 0.999946 | 3.44626e-05 | 0.999946 |
| rad10              | 2.94911e-05 | 0.999975 | 2.94911e-05 | 0.999975 |
| rad11              | 1.69260e-05 | 0.999992 | 1.69260e-05 | 0.999992 |
| rad3               | 3.61389e-06 | 0.999996 | 3.61389e-06 | 0.999996 |
| rad4               | 1.82701e-06 | 0.999998 | 1.82701e-06 | 0.999998 |
| Ph+MeAc            | 8.41079e-07 | 0.999999 | 8.41079e-07 | 0.999999 |
| rad8               | 6.86244e-07 | 0.999999 | 6.86244e-07 | 0.999999 |
| rad9               | 4.53263e-07 | 1.000000 | 4.53263e-07 | 1.000000 |
| rad13              | 3.08246e-07 | 1.000000 | 3.08246e-07 | 1.000000 |
| rad30              | 7.92889e-08 | 1.000000 | 7.92889e-08 | 1.000000 |
| PAH7+H             | 6.96925e-08 | 1.000000 | 6.96925e-08 | 1.000000 |
| PAH9+H             | 1.58468e-08 | 1.000000 | 1.58468e-08 | 1.000000 |
| rad15              | 1.37533e-08 | 1.000000 | 1.37533e-08 | 1.000000 |
| rad12              | 1.25001e-08 | 1.000000 | 1.25001e-08 | 1.000000 |
| rad35              | 8.48027e-09 | 1.000000 | 8.48027e-09 | 1.000000 |
| rad39              | 6.10310e-09 | 1.000000 | 6.10310e-09 | 1.000000 |
| Phenyl+Allene      | 4.12784e-09 | 1.000000 | 0.000000    | 1.000000 |
| rad38              | 4.01410e-09 | 1.000000 | 4.01410e-09 | 1.000000 |
| rad33              | 5.80135e-10 | 1.000000 | 5.80135e-10 | 1.000000 |
| rad23              | 5.13172e-10 | 1.000000 | 5.13172e-10 | 1.000000 |
| rad14              | 3.36787e-10 | 1.000000 | 3.36787e-10 | 1.000000 |
| rad27              | 3.02795e-10 | 1.000000 | 3.02795e-10 | 1.000000 |
| rad25              | 2.06099e-10 | 1.000000 | 2.06099e-10 | 1.000000 |
| rad46              | 2.41118e-11 | 1.000000 | 2.41118e-11 | 1.000000 |
| rad45              | 5.72258e-12 | 1.000000 | 5.72258e-12 | 1.000000 |
| rad60syn           | 4.50648e-13 | 1.000000 | 4.50648e-13 | 1.000000 |
| rad36              | 3.56472e-13 | 1.000000 | 3.56472e-13 | 1.000000 |
| rad22              | 2.38651e-13 | 1.000000 | 2.38651e-13 | 1.000000 |
| rad31              | 9.85820e-15 | 1.000000 | 9.85820e-15 | 1.000000 |
| PhCH2CCH+H         | 7.93277e-15 | 1.000000 | 7.93277e-15 | 1.000000 |
| rad60anti          | 5.91577e-15 | 1.000000 | 5.91577e-15 | 1.000000 |
| rad37              | 1.66499e-15 | 1.000000 | 1.66499e-15 | 1.000000 |
| rad20              | 1.45979e-15 | 1.000000 | 1.45979e-15 | 1.000000 |
| rad21              | 1.06650e-15 | 1.000000 | 1.06650e-15 | 1.000000 |
| rad18              | 1.57429e-17 | 1.000000 | 1.57429e-17 | 1.000000 |
| rad5               | 2.00382e-18 | 1.000000 | 2.00382e-18 | 1.000000 |
| rad24              | 7.24639e-20 | 1.000000 | 7.24639e-20 | 1.000000 |
| PAH3+H             | 1.49184e-22 | 1.000000 | 1.49184e-22 | 1.000000 |
| rad59              | 7.63094e-23 | 1.000000 | 7.63094e-23 | 1.000000 |
| rad50              | 1.58331e-23 | 1.000000 | 1.58331e-23 | 1.000000 |
| Benzene+2-propynyl | 9.80165e-26 | 1.000000 | 9.80165e-26 | 1.000000 |
| rad19syn           | 1.28426e-29 | 1.000000 | 1.28426e-29 | 1.000000 |
| rad52              | 1.24163e-33 | 1.000000 | 1.24163e-33 | 1.000000 |
| rad54              | 4.21113e-34 | 1.000000 | 4.21113e-34 | 1.000000 |
| PAH10+CH3          | 2.78707e-34 | 1.000000 | 2.78707e-34 | 1.000000 |
| rad43              | 6.39487e-35 | 1.000000 | 6.39487e-35 | 1.000000 |
| rad62              | 3.00336e-37 | 1.000000 | 3.00336e-37 | 1.000000 |

|               |             |         |             |         |
|---------------|-------------|---------|-------------|---------|
| rad51         | 3.30801e-40 | 1.00000 | 3.30801e-40 | 1.00000 |
| rad70         | 7.61980e-43 | 1.00000 | 7.61980e-43 | 1.00000 |
| PhcycC3H3_A+H | 3.39895e-43 | 1.00000 | 3.39895e-43 | 1.00000 |
| rad55         | 1.82123e-43 | 1.00000 | 1.82123e-43 | 1.00000 |
| rad65         | 3.94588e-45 | 1.00000 | 3.94588e-45 | 1.00000 |
| rad58         | 1.19163e-46 | 1.00000 | 1.19163e-46 | 1.00000 |
| PAH1+H        | 2.30008e-48 | 1.00000 | 2.30008e-48 | 1.00000 |
| rad34         | 1.57278e-50 | 1.00000 | 1.57278e-50 | 1.00000 |
| rad42         | 1.27995e-54 | 1.00000 | 1.27995e-54 | 1.00000 |
| rad41         | 1.63386e-55 | 1.00000 | 1.63386e-55 | 1.00000 |
| rad47         | 3.63467e-56 | 1.00000 | 3.63467e-56 | 1.00000 |

0.100000000E-02 Pa, 30.0000000 K

| Rate constant      | True (fraction) |            | Effective (fraction) |            |
|--------------------|-----------------|------------|----------------------|------------|
| Total              | 5.03204e-39     | (1.00 )    | 5.03204e-39          | (1.00 )    |
| Formation of rad11 | 5.03203e-39     | (1.000 )   | 5.03203e-39          | (1.000 )   |
| Formation of rad6  | 9.92181e-45     | (1.97e-06) | 9.92181e-45          | (1.97e-06) |
| H-abstraction      | 3.33191e-55     | (6.62e-17) | 3.33191e-55          | (6.62e-17) |

  

| species            | PYtrue      | Cumul    | PYeffective | Cumul    |
|--------------------|-------------|----------|-------------|----------|
| rad6               | 0.627757    | 0.627757 | 0.627757    | 0.627757 |
| Indene+H           | 0.367885    | 0.995642 | 0.367885    | 0.995642 |
| C2H2+PhCH2         | 0.00247082  | 0.998113 | 0.00247082  | 0.998113 |
| PhCCH+CH3          | 0.000470576 | 0.998583 | 0.000470576 | 0.998583 |
| rad2               | 0.000411909 | 0.998995 | 0.000411909 | 0.998995 |
| rad28              | 0.000336580 | 0.999332 | 0.000336580 | 0.999332 |
| PhCHCCH2+H         | 0.000305882 | 0.999638 | 0.000305882 | 0.999638 |
| PhCCCH3+H          | 0.000175887 | 0.999814 | 0.000175887 | 0.999814 |
| rad26              | 6.55514e-05 | 0.999879 | 6.55514e-05 | 0.999879 |
| rad7               | 5.17495e-05 | 0.999931 | 5.17495e-05 | 0.999931 |
| rad1               | 2.60488e-05 | 0.999957 | 2.60488e-05 | 0.999957 |
| rad10              | 2.17494e-05 | 0.999979 | 2.17494e-05 | 0.999979 |
| rad11              | 1.29850e-05 | 0.999992 | 1.29850e-05 | 0.999992 |
| rad3               | 2.66993e-06 | 0.999994 | 2.66993e-06 | 0.999994 |
| Ph+MeAc            | 1.73659e-06 | 0.999996 | 1.73659e-06 | 0.999996 |
| rad8               | 1.35882e-06 | 0.999998 | 1.35882e-06 | 0.999998 |
| rad4               | 1.34999e-06 | 0.999999 | 1.34999e-06 | 0.999999 |
| rad9               | 7.31796e-07 | 1.000000 | 7.31796e-07 | 1.000000 |
| rad13              | 2.52261e-07 | 1.000000 | 2.52261e-07 | 1.000000 |
| PAH7+H             | 1.94420e-07 | 1.000000 | 1.94420e-07 | 1.000000 |
| rad30              | 1.24863e-07 | 1.000000 | 1.24863e-07 | 1.000000 |
| rad12              | 3.08437e-08 | 1.000000 | 3.08437e-08 | 1.000000 |
| PAH9+H             | 2.49692e-08 | 1.000000 | 2.49692e-08 | 1.000000 |
| rad15              | 2.16312e-08 | 1.000000 | 2.16312e-08 | 1.000000 |
| rad39              | 1.72188e-08 | 1.000000 | 1.72188e-08 | 1.000000 |
| rad35              | 1.33692e-08 | 1.000000 | 1.33692e-08 | 1.000000 |
| Phenyl+Allene      | 7.83891e-09 | 1.000000 | 0.000000    | 1.000000 |
| rad38              | 6.32156e-09 | 1.000000 | 6.32156e-09 | 1.000000 |
| rad33              | 4.75685e-10 | 1.000000 | 4.75685e-10 | 1.000000 |
| rad14              | 2.64421e-10 | 1.000000 | 2.64421e-10 | 1.000000 |
| rad27              | 2.30116e-10 | 1.000000 | 2.30116e-10 | 1.000000 |
| rad25              | 1.68933e-10 | 1.000000 | 1.68933e-10 | 1.000000 |
| rad23              | 5.98533e-11 | 1.000000 | 5.98533e-11 | 1.000000 |
| rad46              | 3.79207e-11 | 1.000000 | 3.79207e-11 | 1.000000 |
| rad60syn           | 6.75612e-13 | 1.000000 | 6.75612e-13 | 1.000000 |
| rad45              | 6.10998e-13 | 1.000000 | 6.10998e-13 | 1.000000 |
| rad36              | 3.80488e-14 | 1.000000 | 3.80488e-14 | 1.000000 |
| rad22              | 2.65448e-14 | 1.000000 | 2.65448e-14 | 1.000000 |
| rad60anti          | 1.12993e-14 | 1.000000 | 1.12993e-14 | 1.000000 |
| PhCH2CCH+H         | 9.69469e-15 | 1.000000 | 9.69469e-15 | 1.000000 |
| rad31              | 7.45815e-15 | 1.000000 | 7.45815e-15 | 1.000000 |
| rad37              | 1.84164e-15 | 1.000000 | 1.84164e-15 | 1.000000 |
| rad20              | 1.17012e-15 | 1.000000 | 1.17012e-15 | 1.000000 |
| rad21              | 8.57837e-16 | 1.000000 | 8.57837e-16 | 1.000000 |
| Benzene+2-propynyl | 6.62139e-17 | 1.000000 | 6.62139e-17 | 1.000000 |
| rad18              | 8.61177e-18 | 1.000000 | 8.61177e-18 | 1.000000 |
| rad5               | 1.96070e-18 | 1.000000 | 1.96070e-18 | 1.000000 |
| rad24              | 8.50162e-21 | 1.000000 | 8.50162e-21 | 1.000000 |
| PAH3+H             | 1.10951e-22 | 1.000000 | 1.10951e-22 | 1.000000 |
| rad59              | 5.76230e-23 | 1.000000 | 5.76230e-23 | 1.000000 |
| rad50              | 1.35687e-23 | 1.000000 | 1.35687e-23 | 1.000000 |
| rad19syn           | 2.49803e-30 | 1.000000 | 2.49803e-30 | 1.000000 |
| rad52              | 2.61721e-34 | 1.000000 | 2.61721e-34 | 1.000000 |
| rad54              | 5.48587e-35 | 1.000000 | 5.48587e-35 | 1.000000 |
| PAH10+CH3          | 3.62185e-35 | 1.000000 | 3.62185e-35 | 1.000000 |
| rad43              | 8.30879e-36 | 1.000000 | 8.30879e-36 | 1.000000 |
| rad62              | 3.23820e-38 | 1.000000 | 3.23820e-38 | 1.000000 |



|               |             |         |             |         |
|---------------|-------------|---------|-------------|---------|
| rad51         | 3.58607e-41 | 1.00000 | 3.58607e-41 | 1.00000 |
| rad70         | 5.98037e-44 | 1.00000 | 5.98037e-44 | 1.00000 |
| PhcycC3H3_A+H | 2.60902e-44 | 1.00000 | 2.60902e-44 | 1.00000 |
| rad55         | 1.40109e-44 | 1.00000 | 1.40109e-44 | 1.00000 |
| rad65         | 3.35690e-46 | 1.00000 | 3.35690e-46 | 1.00000 |
| rad58         | 8.98142e-48 | 1.00000 | 8.98142e-48 | 1.00000 |
| PAH1+H        | 1.50008e-49 | 1.00000 | 1.50008e-49 | 1.00000 |
| rad34         | 1.00343e-51 | 1.00000 | 1.00343e-51 | 1.00000 |
| rad42         | 7.75605e-56 | 1.00000 | 7.75605e-56 | 1.00000 |
| rad41         | 9.85725e-57 | 1.00000 | 9.85725e-57 | 1.00000 |
| rad47         | 1.24410e-57 | 1.00000 | 1.24410e-57 | 1.00000 |

0.100000000E-02 Pa, 40.000000 K

| Rate constant      | True (fraction) |            | Effective (fraction) |            |
|--------------------|-----------------|------------|----------------------|------------|
| Total              | 9.35697e-33     | (1.00 )    | 9.35697e-33          | (1.00 )    |
| Formation of rad11 | 9.35644e-33     | (1.000 )   | 9.35644e-33          | (1.000 )   |
| Formation of rad6  | 5.26139e-37     | (5.62e-05) | 5.26139e-37          | (5.62e-05) |
| H-abstraction      | 1.44763e-44     | (1.55e-12) | 1.44763e-44          | (1.55e-12) |

  

| species            | PYtrue      | Cumul    | PYeffective | Cumul    |
|--------------------|-------------|----------|-------------|----------|
| rad6               | 0.520115    | 0.520115 | 0.520115    | 0.520115 |
| Indene+H           | 0.474477    | 0.994592 | 0.474477    | 0.994592 |
| C2H2+PhCH2         | 0.00323830  | 0.997830 | 0.00323830  | 0.997830 |
| PhCCH+CH3          | 0.000673057 | 0.998503 | 0.000673057 | 0.998503 |
| PhCHCCH2+H         | 0.000435775 | 0.998939 | 0.000435775 | 0.998939 |
| rad28              | 0.000326869 | 0.999266 | 0.000326869 | 0.999266 |
| rad2               | 0.000325565 | 0.999592 | 0.000325565 | 0.999592 |
| PhCCCH3+H          | 0.000252697 | 0.999844 | 0.000252697 | 0.999844 |
| rad26              | 5.59668e-05 | 0.999900 | 5.59668e-05 | 0.999900 |
| rad7               | 4.17886e-05 | 0.999942 | 4.17886e-05 | 0.999942 |
| rad1               | 2.06138e-05 | 0.999963 | 2.06138e-05 | 0.999963 |
| rad10              | 1.69972e-05 | 0.999980 | 1.69972e-05 | 0.999980 |
| rad11              | 1.04352e-05 | 0.999990 | 1.04352e-05 | 0.999990 |
| Ph+MeAc            | 2.70718e-06 | 0.999993 | 2.70718e-06 | 0.999993 |
| rad3               | 2.09084e-06 | 0.999995 | 2.09084e-06 | 0.999995 |
| rad8               | 1.97971e-06 | 0.999997 | 1.97971e-06 | 0.999997 |
| rad4               | 1.05751e-06 | 0.999998 | 1.05751e-06 | 0.999998 |
| rad9               | 1.00438e-06 | 0.999999 | 1.00438e-06 | 0.999999 |
| PAH7+H             | 3.37576e-07 | 0.999999 | 3.37576e-07 | 0.999999 |
| rad13              | 2.09085e-07 | 0.999999 | 2.09085e-07 | 0.999999 |
| rad30              | 1.64639e-07 | 1.000000 | 1.64639e-07 | 1.000000 |
| rad12              | 4.98110e-08 | 1.000000 | 4.98110e-08 | 1.000000 |
| PAH9+H             | 3.30041e-08 | 1.000000 | 3.30041e-08 | 1.000000 |
| rad39              | 3.08243e-08 | 1.000000 | 3.08243e-08 | 1.000000 |
| rad15              | 2.86540e-08 | 1.000000 | 2.86540e-08 | 1.000000 |
| rad35              | 1.76277e-08 | 1.000000 | 1.76277e-08 | 1.000000 |
| Phenyl+Allene      | 1.41560e-08 | 1.000000 | 0.000000    | 1.000000 |
| rad38              | 8.37443e-09 | 1.000000 | 8.37443e-09 | 1.000000 |
| rad33              | 3.94640e-10 | 1.000000 | 3.94640e-10 | 1.000000 |
| rad14              | 2.15124e-10 | 1.000000 | 2.15124e-10 | 1.000000 |
| rad27              | 1.83093e-10 | 1.000000 | 1.83093e-10 | 1.000000 |
| rad25              | 1.40277e-10 | 1.000000 | 1.40277e-10 | 1.000000 |
| rad46              | 5.10597e-11 | 1.000000 | 5.10597e-11 | 1.000000 |
| rad23              | 1.66737e-11 | 1.000000 | 1.66737e-11 | 1.000000 |
| Benzene+2-propynyl | 1.54712e-12 | 1.000000 | 1.54712e-12 | 1.000000 |
| rad60syn           | 9.26576e-13 | 1.000000 | 9.26576e-13 | 1.000000 |
| rad45              | 1.62597e-13 | 1.000000 | 1.62597e-13 | 1.000000 |
| rad60anti          | 2.13804e-14 | 1.000000 | 2.13804e-14 | 1.000000 |
| PhCH2CCH+H         | 1.27095e-14 | 1.000000 | 1.27095e-14 | 1.000000 |
| rad36              | 1.01193e-14 | 1.000000 | 1.01193e-14 | 1.000000 |
| rad22              | 7.42383e-15 | 1.000000 | 7.42383e-15 | 1.000000 |
| rad31              | 5.93198e-15 | 1.000000 | 5.93198e-15 | 1.000000 |
| rad37              | 2.25377e-15 | 1.000000 | 2.25377e-15 | 1.000000 |
| rad20              | 9.80352e-16 | 1.000000 | 9.80352e-16 | 1.000000 |
| rad21              | 7.19957e-16 | 1.000000 | 7.19957e-16 | 1.000000 |
| rad18              | 6.17862e-18 | 1.000000 | 6.17862e-18 | 1.000000 |
| rad5               | 2.23746e-18 | 1.000000 | 2.23746e-18 | 1.000000 |
| rad24              | 2.40174e-21 | 1.000000 | 2.40174e-21 | 1.000000 |
| PAH3+H             | 1.07800e-22 | 1.000000 | 1.07800e-22 | 1.000000 |
| rad59              | 5.63772e-23 | 1.000000 | 5.63772e-23 | 1.000000 |
| rad50              | 1.43009e-23 | 1.000000 | 1.43009e-23 | 1.000000 |
| rad19syn           | 1.30058e-30 | 1.000000 | 1.30058e-30 | 1.000000 |
| rad52              | 1.40457e-34 | 1.000000 | 1.40457e-34 | 1.000000 |
| rad54              | 2.48534e-35 | 1.000000 | 2.48534e-35 | 1.000000 |
| PAH10+CH3          | 1.64421e-35 | 1.000000 | 1.64421e-35 | 1.000000 |
| rad43              | 3.77131e-36 | 1.000000 | 3.77131e-36 | 1.000000 |
| rad62              | 1.38807e-38 | 1.000000 | 1.38807e-38 | 1.000000 |

|               |             |          |             |          |
|---------------|-------------|----------|-------------|----------|
| rad51         | 1.53717e-41 | 1.000000 | 1.53717e-41 | 1.000000 |
| rad70         | 2.36940e-44 | 1.000000 | 2.36940e-44 | 1.000000 |
| PhcycC3H3_A+H | 1.02948e-44 | 1.000000 | 1.02948e-44 | 1.000000 |
| rad55         | 5.53024e-45 | 1.000000 | 5.53024e-45 | 1.000000 |
| rad65         | 1.35228e-46 | 1.000000 | 1.35228e-46 | 1.000000 |
| rad58         | 3.53246e-48 | 1.000000 | 3.53246e-48 | 1.000000 |
| PAH1+H        | 5.79098e-50 | 1.000000 | 5.79098e-50 | 1.000000 |
| rad34         | 3.87954e-52 | 1.000000 | 3.87954e-52 | 1.000000 |
| rad42         | 3.01810e-56 | 1.000000 | 3.01810e-56 | 1.000000 |
| rad41         | 3.87043e-57 | 1.000000 | 3.87043e-57 | 1.000000 |
| rad47         | 3.27249e-58 | 1.000000 | 3.27249e-58 | 1.000000 |

0.100000000E-02 Pa, 50.0000000 K

| Rate constant      | True (fraction)        | Effective (fraction)   |
|--------------------|------------------------|------------------------|
| Total              | 5.52690e-29 (1.00 )    | 5.52690e-29 (1.00 )    |
| Formation of rad11 | 5.52459e-29 (1.000 )   | 5.52459e-29 (1.000 )   |
| Formation of rad6  | 2.30840e-32 (0.000418) | 2.30840e-32 (0.000418) |
| H-abstraction      | 3.35357e-38 (6.07e-10) | 3.35357e-38 (6.07e-10) |

| species            | PYtrue      | Cumul    | PYeffective | Cumul    |
|--------------------|-------------|----------|-------------|----------|
| Indene+H           | 0.560774    | 0.560774 | 0.560774    | 0.560774 |
| rad6               | 0.432849    | 0.993623 | 0.432850    | 0.993624 |
| C2H2+PhCH2         | 0.00393100  | 0.997554 | 0.00393100  | 0.997555 |
| PhCCH+CH3          | 0.000868719 | 0.998423 | 0.000868719 | 0.998424 |
| PhCHCCH2+H         | 0.000558742 | 0.998981 | 0.000558742 | 0.998982 |
| PhCCCH3+H          | 0.000326475 | 0.999308 | 0.000326475 | 0.999309 |
| rad28              | 0.000297644 | 0.999606 | 0.000297644 | 0.999607 |
| rad2               | 0.000262382 | 0.999868 | 0.000262382 | 0.999869 |
| rad26              | 4.69974e-05 | 0.999915 | 4.69974e-05 | 0.999916 |
| rad7               | 3.42362e-05 | 0.999949 | 3.42362e-05 | 0.999950 |
| rad1               | 1.66424e-05 | 0.999966 | 1.66424e-05 | 0.999967 |
| rad10              | 1.36058e-05 | 0.999979 | 1.36058e-05 | 0.999980 |
| rad11              | 8.52758e-06 | 0.999988 | 8.52758e-06 | 0.999989 |
| Ph+MeAc            | 3.87806e-06 | 0.999992 | 3.87806e-06 | 0.999993 |
| rad8               | 2.60069e-06 | 0.999994 | 2.60069e-06 | 0.999995 |
| rad3               | 1.67619e-06 | 0.999996 | 1.67619e-06 | 0.999997 |
| rad9               | 1.29565e-06 | 0.999997 | 1.29565e-06 | 0.999998 |
| rad4               | 8.48169e-07 | 0.999998 | 8.48169e-07 | 0.999999 |
| PAH7+H             | 5.00602e-07 | 0.999999 | 5.00602e-07 | 1.000000 |
| rad30              | 2.01836e-07 | 0.999999 | 2.01836e-07 | 1.000000 |
| rad13              | 1.74196e-07 | 0.999999 | 1.74196e-07 | 1.000000 |
| rad12              | 7.04297e-08 | 0.999999 | 7.04297e-08 | 1.000000 |
| rad39              | 4.76756e-08 | 0.999999 | 4.76756e-08 | 1.000000 |
| PAH9+H             | 4.06097e-08 | 0.999999 | 4.06097e-08 | 1.000000 |
| rad15              | 3.53914e-08 | 0.999999 | 3.53914e-08 | 1.000000 |
| Phenyl+Allene      | 2.53625e-08 | 0.999999 | 0.000000    | 1.000000 |
| rad35              | 2.16040e-08 | 0.999999 | 2.16040e-08 | 1.000000 |
| rad38              | 1.03412e-08 | 0.999999 | 1.03412e-08 | 1.000000 |
| Benzene+2-propynyl | 6.06773e-10 | 0.999999 | 6.06773e-10 | 1.000000 |
| rad33              | 3.29062e-10 | 0.999999 | 3.29062e-10 | 1.000000 |
| rad14              | 1.77424e-10 | 0.999999 | 1.77424e-10 | 1.000000 |
| rad27              | 1.48530e-10 | 0.999999 | 1.48530e-10 | 1.000000 |
| rad25              | 1.17092e-10 | 0.999999 | 1.17092e-10 | 1.000000 |
| rad46              | 6.46982e-11 | 0.999999 | 6.46982e-11 | 1.000000 |
| rad23              | 6.63457e-12 | 0.999999 | 6.63457e-12 | 1.000000 |
| rad60syn           | 1.26565e-12 | 0.999999 | 1.26565e-12 | 1.000000 |
| rad45              | 6.27910e-14 | 0.999999 | 6.27910e-14 | 1.000000 |
| rad60anti          | 4.71550e-14 | 0.999999 | 4.71550e-14 | 1.000000 |
| PhCH2CCH+H         | 2.12398e-14 | 0.999999 | 2.12398e-14 | 1.000000 |
| rad31              | 4.82814e-15 | 0.999999 | 4.82814e-15 | 1.000000 |
| rad36              | 3.90476e-15 | 0.999999 | 3.90476e-15 | 1.000000 |
| rad37              | 3.58939e-15 | 0.999999 | 3.58939e-15 | 1.000000 |
| rad22              | 3.02285e-15 | 0.999999 | 3.02285e-15 | 1.000000 |
| rad20              | 8.37089e-16 | 0.999999 | 8.37089e-16 | 1.000000 |
| rad21              | 6.15670e-16 | 0.999999 | 6.15670e-16 | 1.000000 |
| rad18              | 4.84792e-18 | 0.999999 | 4.84792e-18 | 1.000000 |
| rad5               | 3.41207e-18 | 0.999999 | 3.41207e-18 | 1.000000 |
| rad24              | 9.75652e-22 | 0.999999 | 9.75652e-22 | 1.000000 |
| PAH3+H             | 1.48612e-22 | 0.999999 | 1.48612e-22 | 1.000000 |
| rad59              | 7.80068e-23 | 0.999999 | 7.80068e-23 | 1.000000 |
| rad50              | 2.07211e-23 | 0.999999 | 2.07211e-23 | 1.000000 |
| rad19syn           | 1.30117e-30 | 0.999999 | 1.30117e-30 | 1.000000 |
| rad52              | 1.42262e-34 | 0.999999 | 1.42262e-34 | 1.000000 |
| rad54              | 2.36885e-35 | 0.999999 | 2.36885e-35 | 1.000000 |
| PAH10+CH3          | 1.57695e-35 | 0.999999 | 1.57695e-35 | 1.000000 |
| rad43              | 3.61655e-36 | 0.999999 | 3.61655e-36 | 1.000000 |
| rad62              | 1.31045e-38 | 0.999999 | 1.31045e-38 | 1.000000 |

|               |             |          |             |         |
|---------------|-------------|----------|-------------|---------|
| rad51         | 1.44627e-41 | 0.999999 | 1.44627e-41 | 1.00000 |
| rad70         | 2.23058e-44 | 0.999999 | 2.23058e-44 | 1.00000 |
| PhcycC3H3_A+H | 9.70986e-45 | 0.999999 | 9.70986e-45 | 1.00000 |
| rad55         | 5.21455e-45 | 0.999999 | 5.21455e-45 | 1.00000 |
| rad65         | 1.26779e-46 | 0.999999 | 1.26779e-46 | 1.00000 |
| rad58         | 3.33752e-48 | 0.999999 | 3.33752e-48 | 1.00000 |
| PAH1+H        | 5.60578e-50 | 0.999999 | 5.60578e-50 | 1.00000 |
| rad34         | 3.79260e-52 | 0.999999 | 3.79260e-52 | 1.00000 |
| rad42         | 3.05241e-56 | 0.999999 | 3.05241e-56 | 1.00000 |
| rad41         | 4.02910e-57 | 0.999999 | 4.02910e-57 | 1.00000 |
| rad47         | 2.39595e-58 | 0.999999 | 2.39595e-58 | 1.00000 |

0.100000000E-02 Pa, 60.0000000 K

| Rate constant      | True (fraction)        | Effective (fraction)   |
|--------------------|------------------------|------------------------|
| Total              | 1.83429e-26 (1.00 )    | 1.83429e-26 (1.00 )    |
| Formation of rad11 | 1.83139e-26 (0.998 )   | 1.83139e-26 (0.998 )   |
| Formation of rad6  | 2.90471e-29 (0.00158 ) | 2.90471e-29 (0.00158 ) |
| H-abstraction      | 5.71259e-34 (3.11e-08) | 5.71259e-34 (3.11e-08) |

| species            | PYtrue      | Cumul    | PYeffective | Cumul    |
|--------------------|-------------|----------|-------------|----------|
| Indene+H           | 0.631945    | 0.631945 | 0.631945    | 0.631945 |
| rad6               | 0.360744    | 0.992689 | 0.360744    | 0.992689 |
| C2H2+PhCH2         | 0.00457687  | 0.997266 | 0.00457687  | 0.997266 |
| PhCCH+CH3          | 0.00106512  | 0.998331 | 0.00106512  | 0.998331 |
| PhCHCCH2+H         | 0.000679501 | 0.999010 | 0.000679501 | 0.999010 |
| PhCCCH3+H          | 0.000400016 | 0.999410 | 0.000400016 | 0.999410 |
| rad28              | 0.000262989 | 0.999673 | 0.000262989 | 0.999673 |
| rad2               | 0.000213503 | 0.999887 | 0.000213503 | 0.999887 |
| rad26              | 3.92798e-05 | 0.999926 | 3.92798e-05 | 0.999926 |
| rad7               | 2.82300e-05 | 0.999954 | 2.82300e-05 | 0.999954 |
| rad1               | 1.35714e-05 | 0.999968 | 1.35714e-05 | 0.999968 |
| rad10              | 1.10210e-05 | 0.999979 | 1.10210e-05 | 0.999979 |
| rad11              | 7.02083e-06 | 0.999986 | 7.02083e-06 | 0.999986 |
| Ph+MeAc            | 5.34076e-06 | 0.999991 | 5.34076e-06 | 0.999991 |
| rad8               | 3.24635e-06 | 0.999995 | 3.24635e-06 | 0.999995 |
| rad9               | 1.61811e-06 | 0.999996 | 1.61811e-06 | 0.999996 |
| rad3               | 1.35927e-06 | 0.999998 | 1.35927e-06 | 0.999998 |
| rad4               | 6.88182e-07 | 0.999998 | 6.88182e-07 | 0.999998 |
| PAH7+H             | 6.87791e-07 | 0.999999 | 6.87791e-07 | 0.999999 |
| rad30              | 2.37861e-07 | 0.999999 | 2.37862e-07 | 0.999999 |
| rad13              | 1.45401e-07 | 0.999999 | 1.45401e-07 | 0.999999 |
| rad12              | 9.35044e-08 | 1.000000 | 9.35044e-08 | 1.000000 |
| rad39              | 6.87695e-08 | 1.000000 | 6.87695e-08 | 1.000000 |
| PAH9+H             | 4.80772e-08 | 1.000000 | 4.80772e-08 | 1.000000 |
| Phenyl+Allene      | 4.43517e-08 | 1.000000 | 0.000000    | 1.000000 |
| rad15              | 4.20939e-08 | 1.000000 | 4.20939e-08 | 1.000000 |
| Benzene+2-propynyl | 3.11432e-08 | 1.000000 | 3.11432e-08 | 1.000000 |
| rad35              | 2.54518e-08 | 1.000000 | 2.54518e-08 | 1.000000 |
| rad38              | 1.22968e-08 | 1.000000 | 1.22968e-08 | 1.000000 |
| rad33              | 2.74899e-10 | 1.000000 | 2.74899e-10 | 1.000000 |
| rad14              | 1.47208e-10 | 1.000000 | 1.47208e-10 | 1.000000 |
| rad27              | 1.21635e-10 | 1.000000 | 1.21635e-10 | 1.000000 |
| rad25              | 9.79236e-11 | 1.000000 | 9.79236e-11 | 1.000000 |
| rad46              | 7.94281e-11 | 1.000000 | 7.94281e-11 | 1.000000 |
| rad23              | 3.19964e-12 | 1.000000 | 3.19964e-12 | 1.000000 |
| rad60syn           | 1.73952e-12 | 1.000000 | 1.73952e-12 | 1.000000 |
| rad60anti          | 1.05025e-13 | 1.000000 | 1.05025e-13 | 1.000000 |
| PhCH2CCH+H         | 5.63442e-14 | 1.000000 | 5.63442e-14 | 1.000000 |
| rad45              | 2.96302e-14 | 1.000000 | 2.96302e-14 | 1.000000 |
| rad37              | 9.06562e-15 | 1.000000 | 9.06562e-15 | 1.000000 |
| rad31              | 3.97935e-15 | 1.000000 | 3.97935e-15 | 1.000000 |
| rad36              | 1.84108e-15 | 1.000000 | 1.84108e-15 | 1.000000 |
| rad22              | 1.50531e-15 | 1.000000 | 1.50531e-15 | 1.000000 |
| rad20              | 7.22153e-16 | 1.000000 | 7.22153e-16 | 1.000000 |
| rad21              | 5.31948e-16 | 1.000000 | 5.31948e-16 | 1.000000 |
| rad5               | 8.35578e-18 | 1.000000 | 8.35578e-18 | 1.000000 |
| rad18              | 3.96631e-18 | 1.000000 | 3.96631e-18 | 1.000000 |
| rad24              | 4.83819e-22 | 1.000000 | 4.83820e-22 | 1.000000 |
| PAH3+H             | 3.38719e-22 | 1.000000 | 3.38719e-22 | 1.000000 |
| rad59              | 1.78169e-22 | 1.000000 | 1.78169e-22 | 1.000000 |
| rad50              | 4.88501e-23 | 1.000000 | 4.88501e-23 | 1.000000 |
| rad19syn           | 2.52083e-30 | 1.000000 | 2.52083e-30 | 1.000000 |
| rad52              | 2.76598e-34 | 1.000000 | 2.76598e-34 | 1.000000 |
| rad54              | 4.56739e-35 | 1.000000 | 4.56739e-35 | 1.000000 |
| PAH10+CH3          | 3.08137e-35 | 1.000000 | 3.08137e-35 | 1.000000 |
| rad43              | 7.06704e-36 | 1.000000 | 7.06704e-36 | 1.000000 |
| rad62              | 2.56723e-38 | 1.000000 | 2.56723e-38 | 1.000000 |

|               |             |          |             |          |
|---------------|-------------|----------|-------------|----------|
| rad51         | 2.80927e-41 | 1.000000 | 2.80927e-41 | 1.000000 |
| rad70         | 4.50490e-44 | 1.000000 | 4.50490e-44 | 1.000000 |
| PhcycC3H3_A+H | 1.97054e-44 | 1.000000 | 1.97054e-44 | 1.000000 |
| rad55         | 1.05763e-44 | 1.000000 | 1.05763e-44 | 1.000000 |
| rad65         | 2.52428e-46 | 1.000000 | 2.52428e-46 | 1.000000 |
| rad58         | 6.80184e-48 | 1.000000 | 6.80184e-48 | 1.000000 |
| PAH1+H        | 1.19670e-49 | 1.000000 | 1.19670e-49 | 1.000000 |
| rad34         | 8.21306e-52 | 1.000000 | 8.21307e-52 | 1.000000 |
| rad42         | 7.10290e-56 | 1.000000 | 7.10290e-56 | 1.000000 |
| rad41         | 1.02795e-56 | 1.000000 | 1.02795e-56 | 1.000000 |
| rad47         | 4.09138e-58 | 1.000000 | 4.09138e-58 | 1.000000 |

0.100000000E-02 Pa, 70.0000000 K

| Rate constant      | True (fraction)        | Effective (fraction)   |
|--------------------|------------------------|------------------------|
| Total              | 1.17336e-24 (1.00 )    | 1.17336e-24 (1.00 )    |
| Formation of rad11 | 1.16857e-24 (0.996 )   | 1.16857e-24 (0.996 )   |
| Formation of rad6  | 4.79505e-27 (0.00409 ) | 4.79505e-27 (0.00409 ) |
| H-abstraction      | 5.89821e-31 (5.03e-07) | 5.89821e-31 (5.03e-07) |

| species            | PYtrue      | Cumul    | PYeffective | Cumul    |
|--------------------|-------------|----------|-------------|----------|
| Indene+H           | 0.691169    | 0.691169 | 0.691169    | 0.691169 |
| rad6               | 0.300595    | 0.991764 | 0.300595    | 0.991764 |
| C2H2+PhCH2         | 0.00519229  | 0.996956 | 0.00519229  | 0.996956 |
| PhCCH+CH3          | 0.00126706  | 0.998223 | 0.00126706  | 0.998223 |
| PhCHCCH2+H         | 0.000800930 | 0.999024 | 0.000800930 | 0.999024 |
| PhCCCH3+H          | 0.000475052 | 0.999499 | 0.000475052 | 0.999499 |
| rad28              | 0.000228348 | 0.999727 | 0.000228348 | 0.999727 |
| rad2               | 0.000174582 | 0.999902 | 0.000174582 | 0.999902 |
| rad26              | 3.27532e-05 | 0.999935 | 3.27532e-05 | 0.999935 |
| rad7               | 2.33419e-05 | 0.999958 | 2.33419e-05 | 0.999958 |
| rad1               | 1.11250e-05 | 0.999969 | 1.11250e-05 | 0.999969 |
| rad10              | 8.98311e-06 | 0.999978 | 8.98311e-06 | 0.999978 |
| Ph+MeAc            | 7.19685e-06 | 0.999985 | 7.19685e-06 | 0.999985 |
| rad11              | 5.79949e-06 | 0.999991 | 5.79949e-06 | 0.999991 |
| rad8               | 3.93356e-06 | 0.999995 | 3.93356e-06 | 0.999995 |
| rad9               | 1.98228e-06 | 0.999997 | 1.98228e-06 | 0.999997 |
| rad3               | 1.10885e-06 | 0.999998 | 1.10885e-06 | 0.999998 |
| PAH7+H             | 9.04768e-07 | 0.999999 | 9.04768e-07 | 0.999999 |
| rad4               | 5.61755e-07 | 0.999999 | 5.61755e-07 | 0.999999 |
| Benzene+2-propynyl | 5.02676e-07 | 1.000000 | 5.02676e-07 | 1.000000 |
| rad30              | 2.73573e-07 | 1.000000 | 2.73573e-07 | 1.000000 |
| rad13              | 1.21379e-07 | 1.000000 | 1.21379e-07 | 1.000000 |
| rad12              | 1.19810e-07 | 1.000000 | 1.19810e-07 | 1.000000 |
| rad39              | 9.53543e-08 | 1.000000 | 9.53543e-08 | 1.000000 |
| Phenyl+Allene      | 7.53941e-08 | 1.000000 | 0.000000    | 1.000000 |
| PAH9+H             | 5.55924e-08 | 1.000000 | 5.55924e-08 | 1.000000 |
| rad15              | 4.89226e-08 | 1.000000 | 4.89226e-08 | 1.000000 |
| rad35              | 2.92661e-08 | 1.000000 | 2.92661e-08 | 1.000000 |
| rad38              | 1.42906e-08 | 1.000000 | 1.42906e-08 | 1.000000 |
| rad33              | 2.29687e-10 | 1.000000 | 2.29687e-10 | 1.000000 |
| rad14              | 1.22434e-10 | 1.000000 | 1.22434e-10 | 1.000000 |
| rad27              | 1.00081e-10 | 1.000000 | 1.00081e-10 | 1.000000 |
| rad46              | 9.57550e-11 | 1.000000 | 9.57550e-11 | 1.000000 |
| rad25              | 8.19026e-11 | 1.000000 | 8.19026e-11 | 1.000000 |
| rad60syn           | 2.39357e-12 | 1.000000 | 2.39357e-12 | 1.000000 |
| rad23              | 1.73810e-12 | 1.000000 | 1.73810e-12 | 1.000000 |
| PhCH2CCH+H         | 2.83323e-13 | 1.000000 | 2.83323e-13 | 1.000000 |
| rad60anti          | 2.13984e-13 | 1.000000 | 2.13984e-13 | 1.000000 |
| rad37              | 4.71093e-14 | 1.000000 | 4.71093e-14 | 1.000000 |
| rad45              | 1.58271e-14 | 1.000000 | 1.58271e-14 | 1.000000 |
| rad31              | 3.30436e-15 | 1.000000 | 3.30436e-15 | 1.000000 |
| rad36              | 9.82652e-16 | 1.000000 | 9.82652e-16 | 1.000000 |
| rad22              | 8.48193e-16 | 1.000000 | 8.48193e-16 | 1.000000 |
| rad20              | 6.26684e-16 | 1.000000 | 6.26684e-16 | 1.000000 |
| rad21              | 4.62367e-16 | 1.000000 | 4.62367e-16 | 1.000000 |
| rad5               | 4.47731e-17 | 1.000000 | 4.47731e-17 | 1.000000 |
| rad18              | 3.31978e-18 | 1.000000 | 3.31978e-18 | 1.000000 |
| PAH3+H             | 1.81983e-21 | 1.000000 | 1.81983e-21 | 1.000000 |
| rad59              | 9.58304e-22 | 1.000000 | 9.58304e-22 | 1.000000 |
| rad24              | 2.72414e-22 | 1.000000 | 2.72414e-22 | 1.000000 |
| rad50              | 2.64779e-22 | 1.000000 | 2.64779e-22 | 1.000000 |
| rad19syn           | 1.20986e-29 | 1.000000 | 1.20986e-29 | 1.000000 |
| rad52              | 1.32569e-33 | 1.000000 | 1.32569e-33 | 1.000000 |
| rad54              | 2.23657e-34 | 1.000000 | 2.23657e-34 | 1.000000 |
| PAH10+CH3          | 1.54650e-34 | 1.000000 | 1.54650e-34 | 1.000000 |
| rad43              | 3.54876e-35 | 1.000000 | 3.54876e-35 | 1.000000 |
| rad62              | 1.30431e-37 | 1.000000 | 1.30431e-37 | 1.000000 |

|               |             |         |             |         |
|---------------|-------------|---------|-------------|---------|
| rad51         | 1.40234e-40 | 1.00000 | 1.40234e-40 | 1.00000 |
| rad70         | 2.39144e-43 | 1.00000 | 2.39144e-43 | 1.00000 |
| PhcycC3H3_A+H | 1.05308e-43 | 1.00000 | 1.05308e-43 | 1.00000 |
| rad55         | 5.64756e-44 | 1.00000 | 5.64756e-44 | 1.00000 |
| rad65         | 1.31345e-45 | 1.00000 | 1.31345e-45 | 1.00000 |
| rad58         | 3.65596e-47 | 1.00000 | 3.65596e-47 | 1.00000 |
| PAH1+H        | 6.83659e-49 | 1.00000 | 6.83659e-49 | 1.00000 |
| rad34         | 4.77477e-51 | 1.00000 | 4.77477e-51 | 1.00000 |
| rad42         | 4.96350e-55 | 1.00000 | 4.96350e-55 | 1.00000 |
| rad41         | 9.42669e-56 | 1.00000 | 9.42669e-56 | 1.00000 |
| rad47         | 1.93620e-57 | 1.00000 | 1.93620e-57 | 1.00000 |

0.100000000E-02 Pa, 80.0000000 K

| Rate constant      | True (fraction)        | Effective (fraction)   |
|--------------------|------------------------|------------------------|
| Total              | 2.68112e-23 (1.00 )    | 2.68112e-23 (1.00 )    |
| Formation of rad11 | 2.65890e-23 (0.992 )   | 2.65889e-23 (0.992 )   |
| Formation of rad6  | 2.22189e-25 (0.00829 ) | 2.22189e-25 (0.00829 ) |
| H-abstraction      | 1.05871e-28 (3.95e-06) | 1.05871e-28 (3.95e-06) |

| species            | PYtrue      | Cumul    | PYeffective | Cumul    |
|--------------------|-------------|----------|-------------|----------|
| Indene+H           | 0.740678    | 0.740678 | 0.740678    | 0.740678 |
| rad6               | 0.250144    | 0.990822 | 0.250145    | 0.990823 |
| C2H2+PhCH2         | 0.00578964  | 0.996612 | 0.00578964  | 0.996613 |
| PhCCH+CH3          | 0.00147871  | 0.998090 | 0.00147871  | 0.998091 |
| PhCHCCH2+H         | 0.000925377 | 0.999016 | 0.000925377 | 0.999017 |
| PhCCCH3+H          | 0.000553037 | 0.999569 | 0.000553037 | 0.999570 |
| rad28              | 0.000195947 | 0.999765 | 0.000195947 | 0.999766 |
| rad2               | 0.000143060 | 0.999908 | 0.000143060 | 0.999909 |
| rad26              | 2.72541e-05 | 0.999935 | 2.72541e-05 | 0.999936 |
| rad7               | 1.93118e-05 | 0.999954 | 1.93118e-05 | 0.999955 |
| Ph+MeAc            | 9.57416e-06 | 0.999964 | 9.57416e-06 | 0.999965 |
| rad1               | 9.14181e-06 | 0.999973 | 9.14181e-06 | 0.999974 |
| rad10              | 7.34406e-06 | 0.999980 | 7.34406e-06 | 0.999981 |
| rad11              | 4.79513e-06 | 0.999985 | 4.79513e-06 | 0.999986 |
| rad8               | 4.67819e-06 | 0.999990 | 4.67819e-06 | 0.999991 |
| Benzene+2-propynyl | 3.94877e-06 | 0.999994 | 3.94877e-06 | 0.999995 |
| rad9               | 2.39997e-06 | 0.999996 | 2.39997e-06 | 0.999997 |
| PAH7+H             | 1.15886e-06 | 0.999997 | 1.15886e-06 | 0.999998 |
| rad3               | 9.07102e-07 | 0.999998 | 9.07102e-07 | 0.999999 |
| rad4               | 4.59877e-07 | 0.999999 | 4.59877e-07 | 1.000000 |
| rad30              | 3.09681e-07 | 0.999999 | 3.09681e-07 | 1.000000 |
| rad12              | 1.50231e-07 | 0.999999 | 1.50231e-07 | 1.000000 |
| rad39              | 1.29044e-07 | 0.999999 | 1.29044e-07 | 1.000000 |
| Phenyl+Allene      | 1.24735e-07 | 1.000000 | 0.000000    | 1.000000 |
| rad13              | 1.01216e-07 | 1.000000 | 1.01216e-07 | 1.000000 |
| PAH9+H             | 6.33188e-08 | 1.000000 | 6.33188e-08 | 1.000000 |
| rad15              | 5.60217e-08 | 1.000000 | 5.60217e-08 | 1.000000 |
| rad35              | 3.31267e-08 | 1.000000 | 3.31267e-08 | 1.000000 |
| rad38              | 1.63675e-08 | 1.000000 | 1.63675e-08 | 1.000000 |
| rad33              | 1.91712e-10 | 1.000000 | 1.91712e-10 | 1.000000 |
| rad46              | 1.14257e-10 | 1.000000 | 1.14257e-10 | 1.000000 |
| rad14              | 1.01865e-10 | 1.000000 | 1.01865e-10 | 1.000000 |
| rad27              | 8.25100e-11 | 1.000000 | 8.25101e-11 | 1.000000 |
| rad25              | 6.84278e-11 | 1.000000 | 6.84278e-11 | 1.000000 |
| rad60syn           | 3.28950e-12 | 1.000000 | 3.28950e-12 | 1.000000 |
| PhCH2CCH+H         | 1.78180e-12 | 1.000000 | 1.78180e-12 | 1.000000 |
| rad23              | 1.02282e-12 | 1.000000 | 1.02282e-12 | 1.000000 |
| rad60anti          | 3.96097e-13 | 1.000000 | 3.96097e-13 | 1.000000 |
| rad37              | 3.58097e-13 | 1.000000 | 3.58097e-13 | 1.000000 |
| rad45              | 9.18858e-15 | 1.000000 | 9.18858e-15 | 1.000000 |
| rad31              | 2.75624e-15 | 1.000000 | 2.75624e-15 | 1.000000 |
| rad36              | 5.70097e-16 | 1.000000 | 5.70097e-16 | 1.000000 |
| rad20              | 5.45595e-16 | 1.000000 | 5.45595e-16 | 1.000000 |
| rad22              | 5.18891e-16 | 1.000000 | 5.18891e-16 | 1.000000 |
| rad5               | 4.16607e-16 | 1.000000 | 4.16607e-16 | 1.000000 |
| rad21              | 4.03226e-16 | 1.000000 | 4.03226e-16 | 1.000000 |
| rad18              | 2.81581e-18 | 1.000000 | 2.81581e-18 | 1.000000 |
| PAH3+H             | 2.54299e-20 | 1.000000 | 2.54299e-20 | 1.000000 |
| rad59              | 1.32024e-20 | 1.000000 | 1.32024e-20 | 1.000000 |
| rad50              | 3.05339e-21 | 1.000000 | 3.05339e-21 | 1.000000 |
| rad24              | 1.67646e-22 | 1.000000 | 1.67646e-22 | 1.000000 |
| rad19syn           | 6.09204e-28 | 1.000000 | 6.09205e-28 | 1.000000 |
| rad52              | 6.36997e-32 | 1.000000 | 6.36997e-32 | 1.000000 |
| rad54              | 6.03121e-33 | 1.000000 | 6.03121e-33 | 1.000000 |
| PAH10+CH3          | 4.18687e-33 | 1.000000 | 4.18688e-33 | 1.000000 |
| rad43              | 9.61989e-34 | 1.000000 | 9.61989e-34 | 1.000000 |
| rad62              | 3.64067e-36 | 1.000000 | 3.64068e-36 | 1.000000 |

|               |             |          |             |          |
|---------------|-------------|----------|-------------|----------|
| rad51         | 3.88323e-39 | 1.000000 | 3.88323e-39 | 1.000000 |
| rad70         | 7.14198e-42 | 1.000000 | 7.14198e-42 | 1.000000 |
| PhcycC3H3_A+H | 3.17000e-42 | 1.000000 | 3.17000e-42 | 1.000000 |
| rad55         | 1.69837e-42 | 1.000000 | 1.69837e-42 | 1.000000 |
| rad65         | 3.83151e-44 | 1.000000 | 3.83151e-44 | 1.000000 |
| rad58         | 1.10800e-45 | 1.000000 | 1.10800e-45 | 1.000000 |
| PAH1+H        | 2.22792e-47 | 1.000000 | 2.22792e-47 | 1.000000 |
| rad34         | 1.58651e-49 | 1.000000 | 1.58651e-49 | 1.000000 |
| rad42         | 2.21137e-53 | 1.000000 | 2.21137e-53 | 1.000000 |
| rad41         | 5.71914e-54 | 1.000000 | 5.71915e-54 | 1.000000 |
| rad47         | 5.35036e-56 | 1.000000 | 5.35036e-56 | 1.000000 |

0.100000000E-02 Pa, 90.000000 K

| Rate constant      | True (fraction)        | Effective (fraction)   |
|--------------------|------------------------|------------------------|
| Total              | 3.08379e-22 (1.00 )    | 3.08379e-22 (1.00 )    |
| Formation of rad11 | 3.03962e-22 (0.986 )   | 3.03962e-22 (0.986 )   |
| Formation of rad6  | 4.41076e-24 (0.0143 )  | 4.41076e-24 (0.0143 )  |
| H-abstraction      | 5.92916e-27 (1.92e-05) | 5.92916e-27 (1.92e-05) |

| species            | PYtrue      | Cumul    | PYeffective | Cumul    |
|--------------------|-------------|----------|-------------|----------|
| Indene+H           | 0.782133    | 0.782133 | 0.782133    | 0.782133 |
| rad6               | 0.207710    | 0.989843 | 0.207710    | 0.989843 |
| C2H2+PhCH2         | 0.00637893  | 0.996222 | 0.00637893  | 0.996222 |
| PhCCH+CH3          | 0.00170390  | 0.997926 | 0.00170390  | 0.997926 |
| PhCHCCH2+H         | 0.00105487  | 0.998981 | 0.00105487  | 0.998981 |
| PhCCCH3+H          | 0.000635251 | 0.999616 | 0.000635251 | 0.999616 |
| rad28              | 0.000166643 | 0.999783 | 0.000166643 | 0.999783 |
| rad2               | 0.000117267 | 0.999900 | 0.000117267 | 0.999900 |
| rad26              | 2.26239e-05 | 0.999922 | 2.26239e-05 | 0.999922 |
| Benzene+2-propynyl | 1.92269e-05 | 0.999942 | 1.92269e-05 | 0.999942 |
| rad7               | 1.59644e-05 | 0.999958 | 1.59644e-05 | 0.999958 |
| Ph+MeAc            | 1.26276e-05 | 0.999970 | 1.26276e-05 | 0.999970 |
| rad1               | 7.51663e-06 | 0.999978 | 7.51664e-06 | 0.999978 |
| rad10              | 6.00970e-06 | 0.999984 | 6.00970e-06 | 0.999984 |
| rad8               | 5.49567e-06 | 0.999989 | 5.49567e-06 | 0.999989 |
| rad11              | 3.96230e-06 | 0.999993 | 3.96230e-06 | 0.999993 |
| rad9               | 2.88437e-06 | 0.999996 | 2.88438e-06 | 0.999996 |
| PAH7+H             | 1.45877e-06 | 0.999998 | 1.45877e-06 | 0.999998 |
| rad3               | 7.42640e-07 | 0.999998 | 7.42640e-07 | 0.999998 |
| rad4               | 3.76800e-07 | 0.999999 | 3.76800e-07 | 0.999999 |
| rad30              | 3.46819e-07 | 0.999999 | 3.46819e-07 | 0.999999 |
| Phenyl+Allene      | 2.01034e-07 | 0.999999 | 0.00000     | 0.999999 |
| rad12              | 1.85730e-07 | 0.999999 | 1.85730e-07 | 0.999999 |
| rad39              | 1.71806e-07 | 1.000000 | 1.71806e-07 | 0.999999 |
| rad13              | 8.42336e-08 | 1.000000 | 8.42336e-08 | 1.000000 |
| PAH9+H             | 7.14098e-08 | 1.000000 | 7.14098e-08 | 1.000000 |
| rad15              | 6.35283e-08 | 1.000000 | 6.35283e-08 | 1.000000 |
| rad35              | 3.71053e-08 | 1.000000 | 3.71053e-08 | 1.000000 |
| rad38              | 1.85711e-08 | 1.000000 | 1.85711e-08 | 1.000000 |
| rad33              | 1.59707e-10 | 1.000000 | 1.59707e-10 | 1.000000 |
| rad46              | 1.35596e-10 | 1.000000 | 1.35596e-10 | 1.000000 |
| rad14              | 8.46636e-11 | 1.000000 | 8.46636e-11 | 1.000000 |
| rad27              | 6.80366e-11 | 1.000000 | 6.80366e-11 | 1.000000 |
| rad25              | 5.70565e-11 | 1.000000 | 5.70565e-11 | 1.000000 |
| PhCH2CCH+H         | 9.53999e-12 | 1.000000 | 9.53999e-12 | 1.000000 |
| rad60syn           | 4.51344e-12 | 1.000000 | 4.51344e-12 | 1.000000 |
| rad37              | 2.31127e-12 | 1.000000 | 2.31128e-12 | 1.000000 |
| rad60anti          | 6.79197e-13 | 1.000000 | 6.79197e-13 | 1.000000 |
| rad23              | 6.37094e-13 | 1.000000 | 6.37094e-13 | 1.000000 |
| rad45              | 5.65979e-15 | 1.000000 | 5.65979e-15 | 1.000000 |
| rad5               | 3.51340e-15 | 1.000000 | 3.51340e-15 | 1.000000 |
| rad31              | 2.30506e-15 | 1.000000 | 2.30506e-15 | 1.000000 |
| rad20              | 4.75695e-16 | 1.000000 | 4.75695e-16 | 1.000000 |
| rad21              | 3.52201e-16 | 1.000000 | 3.52202e-16 | 1.000000 |
| rad36              | 3.50962e-16 | 1.000000 | 3.50962e-16 | 1.000000 |
| rad22              | 3.36297e-16 | 1.000000 | 3.36297e-16 | 1.000000 |
| rad18              | 2.40727e-18 | 1.000000 | 2.40727e-18 | 1.000000 |
| PAH3+H             | 3.72633e-19 | 1.000000 | 3.72633e-19 | 1.000000 |
| rad59              | 1.87192e-19 | 1.000000 | 1.87192e-19 | 1.000000 |
| rad50              | 3.39074e-20 | 1.000000 | 3.39074e-20 | 1.000000 |
| rad24              | 1.10282e-22 | 1.000000 | 1.10282e-22 | 1.000000 |
| rad19syn           | 1.58977e-25 | 1.000000 | 1.58977e-25 | 1.000000 |
| rad52              | 1.34208e-29 | 1.000000 | 1.34208e-29 | 1.000000 |
| rad54              | 7.76777e-30 | 1.000000 | 7.76777e-30 | 1.000000 |
| PAH10+CH3          | 4.57298e-30 | 1.000000 | 4.57298e-30 | 1.000000 |
| rad43              | 1.13071e-30 | 1.000000 | 1.13071e-30 | 1.000000 |
| rad62              | 8.33366e-34 | 1.000000 | 8.33367e-34 | 1.000000 |

|               |             |          |             |          |
|---------------|-------------|----------|-------------|----------|
| rad51         | 9.07386e-37 | 1.000000 | 9.07386e-37 | 1.000000 |
| rad70         | 1.81253e-39 | 1.000000 | 1.81253e-39 | 1.000000 |
| PhcycC3H3_A+H | 8.11203e-40 | 1.000000 | 8.11203e-40 | 1.000000 |
| rad55         | 4.34160e-40 | 1.000000 | 4.34160e-40 | 1.000000 |
| rad65         | 9.47645e-42 | 1.000000 | 9.47645e-42 | 1.000000 |
| rad58         | 2.85537e-43 | 1.000000 | 2.85537e-43 | 1.000000 |
| PAH1+H        | 6.19193e-45 | 1.000000 | 6.19193e-45 | 1.000000 |
| rad34         | 4.48689e-47 | 1.000000 | 4.48689e-47 | 1.000000 |
| rad42         | 6.65109e-51 | 1.000000 | 6.65109e-51 | 1.000000 |
| rad41         | 1.77538e-51 | 1.000000 | 1.77538e-51 | 1.000000 |
| rad47         | 1.28159e-53 | 1.000000 | 1.28159e-53 | 1.000000 |

0.100000000E-02 Pa, 100.000000 K

| Rate constant      | True (fraction)        | Effective (fraction)   |
|--------------------|------------------------|------------------------|
| Total              | 2.19347e-21 (1.00 )    | 2.19347e-21 (1.00 )    |
| Formation of rad11 | 2.14498e-21 (0.978 )   | 2.14497e-21 (0.978 )   |
| Formation of rad6  | 4.83503e-23 (0.0220 )  | 4.83503e-23 (0.0220 )  |
| H-abstraction      | 1.47101e-25 (6.71e-05) | 1.47101e-25 (6.71e-05) |

| species            | PYtrue      | Cumul    | PYeffective | Cumul    |
|--------------------|-------------|----------|-------------|----------|
| Indene+H           | 0.816795    | 0.816795 | 0.816795    | 0.816795 |
| rad6               | 0.171996    | 0.988792 | 0.171996    | 0.988792 |
| C2H2+PhCH2         | 0.00696803  | 0.995760 | 0.00696803  | 0.995760 |
| PhCCH+CH3          | 0.00194589  | 0.997706 | 0.00194589  | 0.997706 |
| PhCHCCH2+H         | 0.00119108  | 0.998897 | 0.00119108  | 0.998897 |
| PhCCCH3+H          | 0.000722757 | 0.999619 | 0.000722758 | 0.999619 |
| rad28              | 0.000140673 | 0.999760 | 0.000140673 | 0.999760 |
| rad2               | 9.60381e-05 | 0.999856 | 9.60382e-05 | 0.999856 |
| Benzene+2-propynyl | 6.70630e-05 | 0.999923 | 6.70630e-05 | 0.999923 |
| rad26              | 1.87280e-05 | 0.999942 | 1.87280e-05 | 0.999942 |
| Ph+MeAc            | 1.65350e-05 | 0.999958 | 1.65350e-05 | 0.999958 |
| rad7               | 1.31736e-05 | 0.999972 | 1.31736e-05 | 0.999972 |
| rad8               | 6.40027e-06 | 0.999978 | 6.40028e-06 | 0.999978 |
| rad1               | 6.17664e-06 | 0.999984 | 6.17664e-06 | 0.999984 |
| rad10              | 4.91566e-06 | 0.999989 | 4.91567e-06 | 0.999989 |
| rad9               | 3.44949e-06 | 0.999993 | 3.44949e-06 | 0.999993 |
| rad11              | 3.26880e-06 | 0.999996 | 3.26880e-06 | 0.999996 |
| PAH7+H             | 1.81415e-06 | 0.999998 | 1.81415e-06 | 0.999998 |
| rad3               | 6.07657e-07 | 0.999998 | 6.07657e-07 | 0.999998 |
| rad30              | 3.85531e-07 | 0.999999 | 3.85531e-07 | 0.999999 |
| Phenyl+Allene      | 3.15790e-07 | 0.999999 | 0.00000     | 0.999999 |
| rad4               | 3.08584e-07 | 0.999999 | 3.08585e-07 | 0.999999 |
| rad12              | 2.27292e-07 | 1.000000 | 2.27292e-07 | 0.999999 |
| rad39              | 2.25900e-07 | 1.000000 | 2.25900e-07 | 0.999999 |
| PAH9+H             | 8.00061e-08 | 1.000000 | 8.00061e-08 | 1.000000 |
| rad15              | 7.15685e-08 | 1.000000 | 7.15685e-08 | 1.000000 |
| rad13              | 6.99177e-08 | 1.000000 | 6.99178e-08 | 1.000000 |
| rad35              | 4.12649e-08 | 1.000000 | 4.12650e-08 | 1.000000 |
| rad38              | 2.09429e-08 | 1.000000 | 2.09429e-08 | 1.000000 |
| rad46              | 1.60516e-10 | 1.000000 | 1.60516e-10 | 1.000000 |
| rad33              | 1.32705e-10 | 1.000000 | 1.32705e-10 | 1.000000 |
| rad14              | 7.02308e-11 | 1.000000 | 7.02308e-11 | 1.000000 |
| rad27              | 5.60459e-11 | 1.000000 | 5.60459e-11 | 1.000000 |
| rad25              | 4.74506e-11 | 1.000000 | 4.74506e-11 | 1.000000 |
| PhCH2CCH+H         | 4.05264e-11 | 1.000000 | 4.05264e-11 | 1.000000 |
| rad37              | 1.11105e-11 | 1.000000 | 1.11105e-11 | 1.000000 |
| rad60syn           | 6.17840e-12 | 1.000000 | 6.17840e-12 | 1.000000 |
| rad60anti          | 1.09968e-12 | 1.000000 | 1.09968e-12 | 1.000000 |
| rad23              | 4.13887e-13 | 1.000000 | 4.13887e-13 | 1.000000 |
| rad5               | 2.19976e-14 | 1.000000 | 2.19976e-14 | 1.000000 |
| rad45              | 3.64244e-15 | 1.000000 | 3.64244e-15 | 1.000000 |
| rad31              | 1.93046e-15 | 1.000000 | 1.93046e-15 | 1.000000 |
| rad20              | 4.14874e-16 | 1.000000 | 4.14874e-16 | 1.000000 |
| rad21              | 3.07759e-16 | 1.000000 | 3.07759e-16 | 1.000000 |
| rad22              | 2.27326e-16 | 1.000000 | 2.27327e-16 | 1.000000 |
| rad36              | 2.25776e-16 | 1.000000 | 2.25776e-16 | 1.000000 |
| PAH3+H             | 3.75531e-18 | 1.000000 | 3.75531e-18 | 1.000000 |
| rad18              | 2.06752e-18 | 1.000000 | 2.06752e-18 | 1.000000 |
| rad59              | 1.81143e-18 | 1.000000 | 1.81143e-18 | 1.000000 |
| rad50              | 2.69755e-19 | 1.000000 | 2.69755e-19 | 1.000000 |
| rad24              | 7.64695e-23 | 1.000000 | 7.64696e-23 | 1.000000 |
| rad19syn           | 1.72285e-23 | 1.000000 | 1.72285e-23 | 1.000000 |
| rad54              | 3.50618e-27 | 1.000000 | 3.50618e-27 | 1.000000 |
| PAH10+CH3          | 2.26931e-27 | 1.000000 | 2.26931e-27 | 1.000000 |
| rad52              | 1.22254e-27 | 1.000000 | 1.22254e-27 | 1.000000 |
| rad43              | 5.39984e-28 | 1.000000 | 5.39984e-28 | 1.000000 |
| rad62              | 7.06008e-30 | 1.000000 | 7.06009e-30 | 1.000000 |

|               |             |         |             |          |
|---------------|-------------|---------|-------------|----------|
| rad51         | 7.78146e-33 | 1.00000 | 7.78146e-33 | 1.000000 |
| rad70         | 1.39345e-36 | 1.00000 | 1.39345e-36 | 1.000000 |
| PhcycC3H3_A+H | 6.29103e-37 | 1.00000 | 6.29104e-37 | 1.000000 |
| rad55         | 3.36319e-37 | 1.00000 | 3.36319e-37 | 1.000000 |
| rad65         | 7.08266e-39 | 1.00000 | 7.08266e-39 | 1.000000 |
| rad58         | 2.23064e-40 | 1.00000 | 2.23064e-40 | 1.000000 |
| PAH1+H        | 5.22885e-42 | 1.00000 | 5.22885e-42 | 1.000000 |
| rad34         | 3.85079e-44 | 1.00000 | 3.85079e-44 | 1.000000 |
| rad42         | 5.30512e-48 | 1.00000 | 5.30512e-48 | 1.000000 |
| rad41         | 1.27005e-48 | 1.00000 | 1.27005e-48 | 1.000000 |
| rad47         | 9.42355e-51 | 1.00000 | 9.42356e-51 | 1.000000 |

0.100000000E-02 Pa, 110.000000 K

| Rate constant      | True (fraction)        | Effective (fraction)   |
|--------------------|------------------------|------------------------|
| Total              | 1.09987e-20 (1.00 )    | 1.09987e-20 (1.00 )    |
| Formation of rad11 | 1.06527e-20 (0.969 )   | 1.06527e-20 (0.969 )   |
| Formation of rad6  | 3.44008e-22 (0.0313 )  | 3.44008e-22 (0.0313 )  |
| H-abstraction      | 2.02040e-24 (0.000184) | 2.02040e-24 (0.000184) |

| species            | PYtrue      | Cumul    | PYeffective | Cumul    |
|--------------------|-------------|----------|-------------|----------|
| Indene+H           | 0.845647    | 0.845647 | 0.845647    | 0.845647 |
| rad6               | 0.141975    | 0.987622 | 0.141976    | 0.987623 |
| C2H2+PhCH2         | 0.00756299  | 0.995185 | 0.00756300  | 0.995186 |
| PhCCH+CH3          | 0.00220741  | 0.997392 | 0.00220741  | 0.997393 |
| PhCHCCH2+H         | 0.00133527  | 0.998727 | 0.00133527  | 0.998728 |
| PhCCCH3+H          | 0.000816382 | 0.999544 | 0.000816382 | 0.999545 |
| Benzene+2-propynyl | 0.000183695 | 0.999727 | 0.000183695 | 0.999728 |
| rad28              | 0.000117985 | 0.999845 | 0.000117985 | 0.999846 |
| rad2               | 7.85202e-05 | 0.999924 | 7.85202e-05 | 0.999925 |
| Ph+MeAc            | 2.14959e-05 | 0.999945 | 2.14959e-05 | 0.999946 |
| rad26              | 1.54556e-05 | 0.999961 | 1.54556e-05 | 0.999962 |
| rad7               | 1.08447e-05 | 0.999972 | 1.08448e-05 | 0.999973 |
| rad8               | 7.40460e-06 | 0.999979 | 7.40460e-06 | 0.999980 |
| rad1               | 5.06854e-06 | 0.999984 | 5.06854e-06 | 0.999985 |
| rad9               | 4.10975e-06 | 0.999988 | 4.10975e-06 | 0.999989 |
| rad10              | 4.01550e-06 | 0.999992 | 4.01550e-06 | 0.999993 |
| rad11              | 2.69054e-06 | 0.999995 | 2.69054e-06 | 0.999996 |
| PAH7+H             | 2.23532e-06 | 0.999997 | 2.23533e-06 | 0.999998 |
| rad3               | 4.96502e-07 | 0.999998 | 4.96503e-07 | 0.999999 |
| Phenyl+Allene      | 4.83858e-07 | 0.999998 | 0.00000     | 0.999999 |
| rad30              | 4.26275e-07 | 0.999999 | 4.26275e-07 | 0.999999 |
| rad39              | 2.93857e-07 | 0.999999 | 2.93858e-07 | 0.999999 |
| rad12              | 2.75889e-07 | 0.999999 | 2.75889e-07 | 1.000000 |
| rad4               | 2.52383e-07 | 0.999999 | 2.52383e-07 | 1.000000 |
| PAH9+H             | 8.92356e-08 | 0.999999 | 8.92356e-08 | 1.000000 |
| rad15              | 8.02566e-08 | 1.000000 | 8.02566e-08 | 1.000000 |
| rad13              | 5.78606e-08 | 1.000000 | 5.78606e-08 | 1.000000 |
| rad35              | 4.56607e-08 | 1.000000 | 4.56607e-08 | 1.000000 |
| rad38              | 2.35216e-08 | 1.000000 | 2.35216e-08 | 1.000000 |
| rad46              | 1.89829e-10 | 1.000000 | 1.89829e-10 | 1.000000 |
| PhCH2CCH+H         | 1.40403e-10 | 1.000000 | 1.40404e-10 | 1.000000 |
| rad33              | 1.09944e-10 | 1.000000 | 1.09944e-10 | 1.000000 |
| rad14              | 5.81123e-11 | 1.000000 | 5.81123e-11 | 1.000000 |
| rad27              | 4.60871e-11 | 1.000000 | 4.60871e-11 | 1.000000 |
| rad37              | 4.10173e-11 | 1.000000 | 4.10173e-11 | 1.000000 |
| rad25              | 3.93436e-11 | 1.000000 | 3.93436e-11 | 1.000000 |
| rad60syn           | 8.42626e-12 | 1.000000 | 8.42626e-12 | 1.000000 |
| rad60anti          | 1.70510e-12 | 1.000000 | 1.70510e-12 | 1.000000 |
| rad23              | 2.77687e-13 | 1.000000 | 2.77687e-13 | 1.000000 |
| rad5               | 1.04298e-13 | 1.000000 | 1.04298e-13 | 1.000000 |
| rad45              | 2.42424e-15 | 1.000000 | 2.42424e-15 | 1.000000 |
| rad31              | 1.61789e-15 | 1.000000 | 1.61789e-15 | 1.000000 |
| rad20              | 3.61677e-16 | 1.000000 | 3.61677e-16 | 1.000000 |
| rad21              | 2.68841e-16 | 1.000000 | 2.68841e-16 | 1.000000 |
| rad22              | 1.58608e-16 | 1.000000 | 1.58608e-16 | 1.000000 |
| rad36              | 1.50231e-16 | 1.000000 | 1.50231e-16 | 1.000000 |
| PAH3+H             | 2.62405e-17 | 1.000000 | 2.62406e-17 | 1.000000 |
| rad59              | 1.21210e-17 | 1.000000 | 1.21210e-17 | 1.000000 |
| rad18              | 1.78027e-18 | 1.000000 | 1.78027e-18 | 1.000000 |
| rad50              | 1.56372e-18 | 1.000000 | 1.56372e-18 | 1.000000 |
| rad19syn           | 8.10304e-22 | 1.000000 | 8.10304e-22 | 1.000000 |
| rad24              | 5.53775e-23 | 1.000000 | 5.53775e-23 | 1.000000 |
| rad54              | 3.81108e-25 | 1.000000 | 3.81108e-25 | 1.000000 |
| PAH10+CH3          | 2.49137e-25 | 1.000000 | 2.49137e-25 | 1.000000 |
| rad43              | 5.96037e-26 | 1.000000 | 5.96037e-26 | 1.000000 |
| rad52              | 5.02558e-26 | 1.000000 | 5.02558e-26 | 1.000000 |
| rad62              | 1.38221e-27 | 1.000000 | 1.38221e-27 | 1.000000 |



|               |             |          |             |         |
|---------------|-------------|----------|-------------|---------|
| rad51         | 1.43957e-30 | 1.000000 | 1.43957e-30 | 1.00000 |
| rad70         | 1.18604e-33 | 1.000000 | 1.18604e-33 | 1.00000 |
| PhcycC3H3_A+H | 5.40418e-34 | 1.000000 | 5.40419e-34 | 1.00000 |
| rad55         | 2.88553e-34 | 1.000000 | 2.88553e-34 | 1.00000 |
| rad65         | 1.72095e-34 | 1.000000 | 1.72096e-34 | 1.00000 |
| rad58         | 1.93094e-37 | 1.000000 | 1.93094e-37 | 1.00000 |
| PAH1+H        | 4.91119e-39 | 1.000000 | 4.91120e-39 | 1.00000 |
| rad34         | 3.67822e-41 | 1.000000 | 3.67823e-41 | 1.00000 |
| rad42         | 4.78094e-45 | 1.000000 | 4.78095e-45 | 1.00000 |
| rad41         | 1.00331e-45 | 1.000000 | 1.00331e-45 | 1.00000 |
| rad47         | 7.77111e-48 | 1.000000 | 7.77111e-48 | 1.00000 |

0.100000000E-02 Pa, 120.000000 K

| Rate constant      | True (fraction)        | Effective (fraction)   |
|--------------------|------------------------|------------------------|
| Total              | 4.24245e-20 (1.00 )    | 4.24245e-20 (1.00 )    |
| Formation of rad11 | 4.06372e-20 (0.958 )   | 4.06372e-20 (0.958 )   |
| Formation of rad6  | 1.76944e-21 (0.0417 )  | 1.76944e-21 (0.0417 )  |
| H-abstraction      | 1.78210e-23 (0.000420) | 1.78210e-23 (0.000420) |

| species            | PYtrue      | Cumul    | PYeffective | Cumul    |
|--------------------|-------------|----------|-------------|----------|
| Indene+H           | 0.869472    | 0.869472 | 0.869473    | 0.869473 |
| rad6               | 0.116804    | 0.986276 | 0.116804    | 0.986277 |
| C2H2+PhCH2         | 0.00816842  | 0.994444 | 0.00816843  | 0.994445 |
| PhCCH+CH3          | 0.00249070  | 0.996935 | 0.00249070  | 0.996936 |
| PhCHCCH2+H         | 0.00148843  | 0.998423 | 0.00148843  | 0.998424 |
| PhCCCH3+H          | 0.000916746 | 0.999340 | 0.000916746 | 0.999341 |
| Benzene+2-propynyl | 0.000420064 | 0.999760 | 0.000420064 | 0.999761 |
| rad28              | 9.83869e-05 | 0.999858 | 9.83870e-05 | 0.999859 |
| rad2               | 6.40592e-05 | 0.999922 | 6.40593e-05 | 0.999923 |
| Ph+MeAc            | 2.77304e-05 | 0.999950 | 2.77305e-05 | 0.999951 |
| rad26              | 1.27140e-05 | 0.999963 | 1.27140e-05 | 0.999964 |
| rad7               | 8.90314e-06 | 0.999972 | 8.90315e-06 | 0.999973 |
| rad8               | 8.51966e-06 | 0.999980 | 8.51967e-06 | 0.999981 |
| rad9               | 4.88013e-06 | 0.999985 | 4.88013e-06 | 0.999986 |
| rad1               | 4.15163e-06 | 0.999989 | 4.15163e-06 | 0.999990 |
| rad10              | 3.27408e-06 | 0.999993 | 3.27408e-06 | 0.999994 |
| PAH7+H             | 2.73333e-06 | 0.999995 | 2.73334e-06 | 0.999996 |
| rad11              | 2.20871e-06 | 0.999997 | 2.20872e-06 | 0.999998 |
| Phenyl+Allene      | 7.24186e-07 | 0.999998 | 0.000000    | 0.999998 |
| rad30              | 4.69442e-07 | 0.999999 | 4.69442e-07 | 0.999999 |
| rad3               | 4.04891e-07 | 0.999999 | 4.04891e-07 | 0.999999 |
| rad39              | 3.78499e-07 | 0.999999 | 3.78499e-07 | 1.000000 |
| rad12              | 3.32478e-07 | 1.000000 | 3.32478e-07 | 1.000000 |
| rad4               | 2.06033e-07 | 1.000000 | 2.06033e-07 | 1.000000 |
| PAH9+H             | 9.92175e-08 | 1.000000 | 9.92176e-08 | 1.000000 |
| rad15              | 8.96975e-08 | 1.000000 | 8.96975e-08 | 1.000000 |
| rad35              | 5.03412e-08 | 1.000000 | 5.03412e-08 | 1.000000 |
| rad13              | 4.77293e-08 | 1.000000 | 4.77293e-08 | 1.000000 |
| rad38              | 2.63444e-08 | 1.000000 | 2.63444e-08 | 1.000000 |
| PhCH2CCH+H         | 4.12484e-10 | 1.000000 | 4.12485e-10 | 1.000000 |
| rad46              | 2.24447e-10 | 1.000000 | 2.24448e-10 | 1.000000 |
| rad37              | 1.22457e-10 | 1.000000 | 1.22457e-10 | 1.000000 |
| rad33              | 9.08003e-11 | 1.000000 | 9.08004e-11 | 1.000000 |
| rad14              | 4.79492e-11 | 1.000000 | 4.79493e-11 | 1.000000 |
| rad27              | 3.78141e-11 | 1.000000 | 3.78141e-11 | 1.000000 |
| rad25              | 3.25175e-11 | 1.000000 | 3.25175e-11 | 1.000000 |
| rad60syn           | 1.14322e-11 | 1.000000 | 1.14322e-11 | 1.000000 |
| rad60anti          | 2.55701e-12 | 1.000000 | 2.55702e-12 | 1.000000 |
| rad5               | 3.94462e-13 | 1.000000 | 3.94462e-13 | 1.000000 |
| rad23              | 1.91110e-13 | 1.000000 | 1.91111e-13 | 1.000000 |
| rad45              | 1.65691e-15 | 1.000000 | 1.65691e-15 | 1.000000 |
| rad31              | 1.35646e-15 | 1.000000 | 1.35646e-15 | 1.000000 |
| rad20              | 3.15037e-16 | 1.000000 | 3.15038e-16 | 1.000000 |
| rad21              | 2.34673e-16 | 1.000000 | 2.34673e-16 | 1.000000 |
| PAH3+H             | 1.36441e-16 | 1.000000 | 1.36441e-16 | 1.000000 |
| rad22              | 1.13400e-16 | 1.000000 | 1.13401e-16 | 1.000000 |
| rad36              | 1.02675e-16 | 1.000000 | 1.02675e-16 | 1.000000 |
| rad59              | 6.03288e-17 | 1.000000 | 6.03288e-17 | 1.000000 |
| rad50              | 7.02832e-18 | 1.000000 | 7.02832e-18 | 1.000000 |
| rad18              | 1.53486e-18 | 1.000000 | 1.53486e-18 | 1.000000 |
| rad19syn           | 2.01614e-20 | 1.000000 | 2.01614e-20 | 1.000000 |
| rad24              | 4.16152e-23 | 1.000000 | 4.16153e-23 | 1.000000 |
| rad54              | 1.78040e-23 | 1.000000 | 1.78040e-23 | 1.000000 |
| PAH10+CH3          | 1.17571e-23 | 1.000000 | 1.17571e-23 | 1.000000 |
| rad43              | 2.82808e-24 | 1.000000 | 2.82808e-24 | 1.000000 |
| rad52              | 1.12102e-24 | 1.000000 | 1.12102e-24 | 1.000000 |
| rad62              | 1.01438e-25 | 1.000000 | 1.01438e-25 | 1.000000 |

|               |             |         |             |         |
|---------------|-------------|---------|-------------|---------|
| rad51         | 1.04835e-28 | 1.00000 | 1.04835e-28 | 1.00000 |
| rad70         | 3.03240e-29 | 1.00000 | 3.03240e-29 | 1.00000 |
| PhcycC3H3_A+H | 1.82840e-29 | 1.00000 | 1.82840e-29 | 1.00000 |
| rad55         | 1.01557e-29 | 1.00000 | 1.01557e-29 | 1.00000 |
| rad65         | 3.61209e-32 | 1.00000 | 3.61209e-32 | 1.00000 |
| rad58         | 8.74850e-33 | 1.00000 | 8.74851e-33 | 1.00000 |
| PAH1+H        | 5.57808e-36 | 1.00000 | 5.57808e-36 | 1.00000 |
| rad34         | 4.24823e-38 | 1.00000 | 4.24824e-38 | 1.00000 |
| rad42         | 5.21225e-42 | 1.00000 | 5.21225e-42 | 1.00000 |
| rad41         | 9.06659e-43 | 1.00000 | 9.06660e-43 | 1.00000 |
| rad47         | 7.80028e-45 | 1.00000 | 7.80028e-45 | 1.00000 |

0.100000000E-02 Pa, 130.000000 K

| Rate constant      | True (fraction)        | Effective (fraction)   |
|--------------------|------------------------|------------------------|
| Total              | 1.33719e-19 (1.00 )    | 1.33719e-19 (1.00 )    |
| Formation of rad11 | 1.26517e-19 (0.946 )   | 1.26517e-19 (0.946 )   |
| Formation of rad6  | 7.08974e-21 (0.0530 )  | 7.08973e-21 (0.0530 )  |
| H-abstraction      | 1.11864e-22 (0.000837) | 1.11864e-22 (0.000837) |

| species            | PYtrue      | Cumul    | PYeffective | Cumul    |
|--------------------|-------------|----------|-------------|----------|
| Indene+H           | 0.888916    | 0.888916 | 0.888917    | 0.888917 |
| rad6               | 0.0957694   | 0.984685 | 0.0957695   | 0.984686 |
| C2H2+PhCH2         | 0.000878793 | 0.993473 | 0.000878794 | 0.993474 |
| PhCCH+CH3          | 0.00279762  | 0.996271 | 0.00279762  | 0.996272 |
| PhCHCCH2+H         | 0.00165130  | 0.997922 | 0.00165130  | 0.997923 |
| PhCCCH3+H          | 0.00102430  | 0.998946 | 0.00102431  | 0.998947 |
| Benzene+2-propynyl | 0.000836559 | 0.999783 | 0.000836559 | 0.999784 |
| rad28              | 8.16162e-05 | 0.999864 | 8.16163e-05 | 0.999866 |
| rad2               | 5.21359e-05 | 0.999917 | 5.21360e-05 | 0.999918 |
| Ph+MeAc            | 3.54827e-05 | 0.999952 | 3.54828e-05 | 0.999953 |
| rad26              | 1.04247e-05 | 0.999963 | 1.04247e-05 | 0.999964 |
| rad8               | 9.75528e-06 | 0.999972 | 9.75529e-06 | 0.999973 |
| rad7               | 7.28797e-06 | 0.999980 | 7.28798e-06 | 0.999981 |
| rad9               | 5.77636e-06 | 0.999985 | 5.77636e-06 | 0.999986 |
| rad1               | 3.39360e-06 | 0.999989 | 3.39360e-06 | 0.999990 |
| PAH7+H             | 3.32019e-06 | 0.999992 | 3.32020e-06 | 0.999993 |
| rad10              | 2.66380e-06 | 0.999995 | 2.66380e-06 | 0.999996 |
| rad11              | 1.80806e-06 | 0.999997 | 1.80806e-06 | 0.999998 |
| Phenyl+Allene      | 1.06078e-06 | 0.999998 | 0.000000    | 0.999998 |
| rad30              | 5.15382e-07 | 0.999998 | 5.15382e-07 | 0.999998 |
| rad39              | 4.82990e-07 | 0.999999 | 4.82991e-07 | 0.999999 |
| rad12              | 3.98007e-07 | 0.999999 | 3.98008e-07 | 0.999999 |
| rad3               | 3.29443e-07 | 0.999999 | 3.29443e-07 | 0.999999 |
| rad4               | 1.67837e-07 | 0.999999 | 1.67837e-07 | 1.000000 |
| PAH9+H             | 1.10069e-07 | 1.000000 | 1.10069e-07 | 1.000000 |
| rad15              | 9.99923e-08 | 1.000000 | 9.99933e-08 | 1.000000 |
| rad35              | 5.53522e-08 | 1.000000 | 5.53523e-08 | 1.000000 |
| rad13              | 3.92439e-08 | 1.000000 | 3.92439e-08 | 1.000000 |
| rad38              | 2.94491e-08 | 1.000000 | 2.94492e-08 | 1.000000 |
| PhCH2CCH+H         | 1.06245e-09 | 1.000000 | 1.06245e-09 | 1.000000 |
| rad37              | 3.09125e-10 | 1.000000 | 3.09125e-10 | 1.000000 |
| rad46              | 2.65415e-10 | 1.000000 | 2.65416e-10 | 1.000000 |
| rad33              | 7.47510e-11 | 1.000000 | 7.47511e-11 | 1.000000 |
| rad14              | 3.94468e-11 | 1.000000 | 3.94468e-11 | 1.000000 |
| rad27              | 3.09502e-11 | 1.000000 | 3.09502e-11 | 1.000000 |
| rad25              | 2.67887e-11 | 1.000000 | 2.67887e-11 | 1.000000 |
| rad60syn           | 1.54120e-11 | 1.000000 | 1.54121e-11 | 1.000000 |
| rad60anti          | 3.73443e-12 | 1.000000 | 3.73444e-12 | 1.000000 |
| rad5               | 1.24626e-12 | 1.000000 | 1.24626e-12 | 1.000000 |
| rad23              | 1.34280e-13 | 1.000000 | 1.34280e-13 | 1.000000 |
| rad45              | 1.15724e-15 | 1.000000 | 1.15724e-15 | 1.000000 |
| rad31              | 1.13764e-15 | 1.000000 | 1.13764e-15 | 1.000000 |
| PAH3+H             | 5.62356e-16 | 1.000000 | 5.62357e-16 | 1.000000 |
| rad20              | 2.74131e-16 | 1.000000 | 2.74132e-16 | 1.000000 |
| rad59              | 2.38217e-16 | 1.000000 | 2.38217e-16 | 1.000000 |
| rad21              | 2.04665e-16 | 1.000000 | 2.04665e-16 | 1.000000 |
| rad22              | 8.26608e-17 | 1.000000 | 8.26608e-17 | 1.000000 |
| rad36              | 7.17220e-17 | 1.000000 | 7.17221e-17 | 1.000000 |
| rad50              | 2.58788e-17 | 1.000000 | 2.58788e-17 | 1.000000 |
| rad18              | 1.32389e-18 | 1.000000 | 1.32389e-18 | 1.000000 |
| rad19syn           | 3.07236e-19 | 1.000000 | 3.07236e-19 | 1.000000 |
| rad54              | 4.55976e-22 | 1.000000 | 4.55977e-22 | 1.000000 |
| PAH10+CH3          | 3.03657e-22 | 1.000000 | 3.03657e-22 | 1.000000 |
| rad43              | 7.33669e-23 | 1.000000 | 7.33669e-23 | 1.000000 |
| rad24              | 3.23010e-23 | 1.000000 | 3.23010e-23 | 1.000000 |
| rad52              | 1.56155e-23 | 1.000000 | 1.56155e-23 | 1.000000 |
| rad62              | 3.60534e-24 | 1.000000 | 3.60534e-24 | 1.000000 |

|               |             |          |             |          |
|---------------|-------------|----------|-------------|----------|
| rad51         | 3.71594e-27 | 1.000000 | 3.71594e-27 | 1.000000 |
| rad70         | 2.71908e-27 | 1.000000 | 2.71908e-27 | 1.000000 |
| PhcycC3H3_A+H | 2.14230e-27 | 1.000000 | 2.14230e-27 | 1.000000 |
| rad55         | 9.72010e-28 | 1.000000 | 9.72011e-28 | 1.000000 |
| rad65         | 2.44608e-30 | 1.000000 | 2.44608e-30 | 1.000000 |
| rad58         | 1.12910e-30 | 1.000000 | 1.12910e-30 | 1.000000 |
| PAH1+H        | 4.49139e-33 | 1.000000 | 4.49140e-33 | 1.000000 |
| rad34         | 3.48096e-35 | 1.000000 | 3.48097e-35 | 1.000000 |
| rad42         | 4.25386e-39 | 1.000000 | 4.25387e-39 | 1.000000 |
| rad41         | 6.50701e-40 | 1.000000 | 6.50702e-40 | 1.000000 |
| rad47         | 3.58113e-40 | 1.000000 | 3.58113e-40 | 1.000000 |

0.100000000E-02 Pa, 140.000000 K

| Rate constant      | True (fraction)        | Effective (fraction)   |
|--------------------|------------------------|------------------------|
| Total              | 3.59582e-19 (1.00 )    | 3.59581e-19 (1.00 )    |
| Formation of rad11 | 3.35703e-19 (0.934 )   | 3.35702e-19 (0.934 )   |
| Formation of rad6  | 2.33415e-20 (0.0649 )  | 2.33414e-20 (0.0649 )  |
| H-abstraction      | 5.37685e-22 (0.00150 ) | 5.37685e-22 (0.00150 ) |

| species            | PYtrue      | Cumul    | PYeffective | Cumul    |
|--------------------|-------------|----------|-------------|----------|
| Indene+H           | 0.904523    | 0.904523 | 0.904525    | 0.904525 |
| rad6               | 0.0782612   | 0.982785 | 0.0782613   | 0.982787 |
| C2H2+PhCH2         | 0.00942465  | 0.992209 | 0.00942467  | 0.992211 |
| PhCCH+CH3          | 0.00312978  | 0.995339 | 0.00312979  | 0.995341 |
| PhCHCCH2+H         | 0.00182445  | 0.997164 | 0.00182445  | 0.997166 |
| Benzene+2-propynyl | 0.00149531  | 0.998659 | 0.00149531  | 0.998661 |
| PhCCCH3+H          | 0.00113941  | 0.999798 | 0.00113942  | 0.999800 |
| rad28              | 6.73820e-05 | 0.999866 | 6.73821e-05 | 0.999868 |
| Ph+MeAc            | 4.50230e-05 | 0.999911 | 4.50231e-05 | 0.999913 |
| rad2               | 4.23254e-05 | 0.999953 | 4.23255e-05 | 0.999955 |
| rad8               | 1.11205e-05 | 0.999964 | 1.11205e-05 | 0.999966 |
| rad26              | 8.52017e-06 | 0.999973 | 8.52018e-06 | 0.999975 |
| rad9               | 6.81542e-06 | 0.999979 | 6.81543e-06 | 0.999982 |
| rad7               | 5.94831e-06 | 0.999985 | 5.94832e-06 | 0.999988 |
| PAH7+H             | 4.00922e-06 | 0.999989 | 4.00923e-06 | 0.999992 |
| rad1               | 2.76806e-06 | 0.999992 | 2.76807e-06 | 0.999994 |
| rad10              | 2.16230e-06 | 0.999994 | 2.16230e-06 | 0.999996 |
| Phenyl+Allene      | 1.52394e-06 | 0.999996 | 0.00000     | 0.999996 |
| rad11              | 1.47583e-06 | 0.999997 | 1.47583e-06 | 0.999998 |
| rad39              | 6.10923e-07 | 0.999998 | 6.10924e-07 | 0.999999 |
| rad30              | 5.64433e-07 | 0.999998 | 5.64434e-07 | 0.999999 |
| rad12              | 4.73438e-07 | 0.999999 | 4.73439e-07 | 1.000000 |
| rad3               | 2.67423e-07 | 0.999999 | 2.67423e-07 | 1.000000 |
| rad4               | 1.36415e-07 | 0.999999 | 1.36415e-07 | 1.000000 |
| PAH9+H             | 1.21911e-07 | 0.999999 | 1.21911e-07 | 1.00000  |
| rad15              | 1.11245e-07 | 1.000000 | 1.11245e-07 | 1.00000  |
| rad35              | 6.07391e-08 | 1.000000 | 6.07391e-08 | 1.00000  |
| rad38              | 3.28759e-08 | 1.000000 | 3.28760e-08 | 1.00000  |
| rad13              | 3.21634e-08 | 1.000000 | 3.21635e-08 | 1.00000  |
| PhCH2CCH+H         | 2.46263e-09 | 1.000000 | 2.46264e-09 | 1.00000  |
| rad37              | 6.83155e-10 | 1.000000 | 6.83156e-10 | 1.00000  |
| rad46              | 3.13958e-10 | 1.000000 | 3.13959e-10 | 1.00000  |
| rad33              | 6.13451e-11 | 1.000000 | 6.13452e-11 | 1.00000  |
| rad14              | 3.23556e-11 | 1.000000 | 3.23557e-11 | 1.00000  |
| rad27              | 2.52680e-11 | 1.000000 | 2.52680e-11 | 1.00000  |
| rad25              | 2.19986e-11 | 1.000000 | 2.19986e-11 | 1.00000  |
| rad60syn           | 2.06328e-11 | 1.000000 | 2.06328e-11 | 1.00000  |
| rad60anti          | 5.33835e-12 | 1.000000 | 5.33836e-12 | 1.00000  |
| rad5               | 3.40996e-12 | 1.000000 | 3.40997e-12 | 1.00000  |
| rad23              | 9.60048e-14 | 1.000000 | 9.60049e-14 | 1.00000  |
| PAH3+H             | 1.92973e-15 | 1.000000 | 1.92973e-15 | 1.00000  |
| rad31              | 9.54559e-16 | 1.000000 | 9.54560e-16 | 1.00000  |
| rad45              | 8.23085e-16 | 1.000000 | 8.23086e-16 | 1.00000  |
| rad59              | 7.84308e-16 | 1.000000 | 7.84310e-16 | 1.00000  |
| rad20              | 2.38287e-16 | 1.000000 | 2.38287e-16 | 1.00000  |
| rad21              | 1.78327e-16 | 1.000000 | 1.78327e-16 | 1.00000  |
| rad50              | 8.14607e-17 | 1.000000 | 8.14608e-17 | 1.00000  |
| rad22              | 6.12025e-17 | 1.000000 | 6.12026e-17 | 1.00000  |
| rad36              | 5.10308e-17 | 1.000000 | 5.10309e-17 | 1.00000  |
| rad19syn           | 3.18627e-18 | 1.000000 | 3.18627e-18 | 1.00000  |
| rad18              | 1.14191e-18 | 1.000000 | 1.14191e-18 | 1.00000  |
| rad54              | 7.34904e-21 | 1.000000 | 7.34905e-21 | 1.00000  |
| PAH10+CH3          | 4.93020e-21 | 1.000000 | 4.93020e-21 | 1.00000  |
| rad43              | 1.19564e-21 | 1.000000 | 1.19564e-21 | 1.00000  |
| rad52              | 1.50451e-22 | 1.000000 | 1.50451e-22 | 1.00000  |
| rad62              | 7.64851e-23 | 1.000000 | 7.64853e-23 | 1.00000  |
| rad24              | 2.58023e-23 | 1.000000 | 2.58023e-23 | 1.00000  |

|               |             |          |             |         |
|---------------|-------------|----------|-------------|---------|
| rad70         | 1.16027e-25 | 1.000000 | 1.16028e-25 | 1.00000 |
| PhcycC3H3_A+H | 1.06215e-25 | 1.000000 | 1.06215e-25 | 1.00000 |
| rad51         | 7.90468e-26 | 1.000000 | 7.90469e-26 | 1.00000 |
| rad55         | 4.36198e-26 | 1.000000 | 4.36199e-26 | 1.00000 |
| PAH1+H        | 1.72618e-28 | 1.000000 | 1.72618e-28 | 1.00000 |
| rad65         | 8.23468e-29 | 1.000000 | 8.23469e-29 | 1.00000 |
| rad58         | 6.04108e-29 | 1.000000 | 6.04108e-29 | 1.00000 |
| rad34         | 4.12316e-30 | 1.000000 | 4.12317e-30 | 1.00000 |
| rad42         | 1.07364e-35 | 1.000000 | 1.07364e-35 | 1.00000 |
| rad41         | 1.50042e-36 | 1.000000 | 1.50043e-36 | 1.00000 |
| rad47         | 2.47899e-38 | 1.000000 | 2.47900e-38 | 1.00000 |

0.100000000E-02 Pa, 150.000000 K

| Rate constant      | True (fraction)        | Effective (fraction)   |
|--------------------|------------------------|------------------------|
| Total              | 8.51464e-19 (1.00 )    | 8.51462e-19 (1.00 )    |
| Formation of rad11 | 7.83711e-19 (0.920 )   | 7.83709e-19 (0.920 )   |
| Formation of rad6  | 6.56651e-20 (0.0771 )  | 6.56650e-20 (0.0771 )  |
| H-abstraction      | 2.08816e-21 (0.00245 ) | 2.08816e-21 (0.00245 ) |

| species            | PYtrue      | Cumul    | PYeffective | Cumul    |
|--------------------|-------------|----------|-------------|----------|
| Indene+H           | 0.916766    | 0.916766 | 0.916768    | 0.916768 |
| rad6               | 0.0637471   | 0.980513 | 0.0637473   | 0.980515 |
| C2H2+PhCH2         | 0.0100814   | 0.990595 | 0.0100814   | 0.990597 |
| PhCCH+CH3          | 0.00348874  | 0.994083 | 0.00348874  | 0.994086 |
| Benzene+2-propynyl | 0.00245244  | 0.996536 | 0.00245245  | 0.996538 |
| PhCHCCH2+H         | 0.00200840  | 0.998544 | 0.00200840  | 0.998546 |
| PhCCCH3+H          | 0.00126237  | 0.999807 | 0.00126237  | 0.999809 |
| Ph+MeAc            | 5.66515e-05 | 0.999863 | 5.66516e-05 | 0.999865 |
| rad28              | 5.53880e-05 | 0.999919 | 5.53882e-05 | 0.999921 |
| rad2               | 3.42744e-05 | 0.999953 | 3.42744e-05 | 0.999955 |
| rad8               | 1.26240e-05 | 0.999966 | 1.26240e-05 | 0.999968 |
| rad9               | 8.01591e-06 | 0.999974 | 8.01593e-06 | 0.999976 |
| rad26              | 6.94200e-06 | 0.999981 | 6.94201e-06 | 0.999983 |
| rad7               | 4.84089e-06 | 0.999985 | 4.84090e-06 | 0.999988 |
| PAH7+H             | 4.81539e-06 | 0.999990 | 4.81540e-06 | 0.999992 |
| rad1               | 2.25307e-06 | 0.999992 | 2.25308e-06 | 0.999995 |
| Phenyl+Allene      | 2.15172e-06 | 0.999995 | 0.00000     | 0.999995 |
| rad10              | 1.75112e-06 | 0.999996 | 1.75113e-06 | 0.999996 |
| rad11              | 1.20123e-06 | 0.999998 | 1.20124e-06 | 0.999998 |
| rad39              | 7.66411e-07 | 0.999998 | 7.66413e-07 | 0.999998 |
| rad30              | 6.16940e-07 | 0.999999 | 6.16942e-07 | 0.999999 |
| rad12              | 5.59760e-07 | 0.999999 | 5.59761e-07 | 1.000000 |
| rad3               | 2.16558e-07 | 1.000000 | 2.16558e-07 | 1.000000 |
| PAH9+H             | 1.34876e-07 | 1.000000 | 1.34876e-07 | 1.000000 |
| rad15              | 1.23567e-07 | 1.000000 | 1.23567e-07 | 1.000000 |
| rad4               | 1.10623e-07 | 1.000000 | 1.10623e-07 | 1.000000 |
| rad35              | 6.65506e-08 | 1.000000 | 6.65507e-08 | 1.000000 |
| rad38              | 3.66690e-08 | 1.000000 | 3.66691e-08 | 1.000000 |
| rad13              | 2.62786e-08 | 1.000000 | 2.62787e-08 | 1.000000 |
| PhCH2CCH+H         | 5.24059e-09 | 1.000000 | 5.24060e-09 | 1.000000 |
| rad37              | 1.35738e-09 | 1.000000 | 1.35738e-09 | 1.000000 |
| rad46              | 3.71537e-10 | 1.000000 | 3.71538e-10 | 1.000000 |
| rad33              | 5.01907e-11 | 1.000000 | 5.01908e-11 | 1.000000 |
| rad60syn           | 2.74261e-11 | 1.000000 | 2.74262e-11 | 1.000000 |
| rad14              | 2.64623e-11 | 1.000000 | 2.64624e-11 | 1.000000 |
| rad27              | 2.05767e-11 | 1.000000 | 2.05768e-11 | 1.000000 |
| rad25              | 1.80093e-11 | 1.000000 | 1.80093e-11 | 1.000000 |
| rad5               | 8.30603e-12 | 1.000000 | 8.30605e-12 | 1.000000 |
| rad60anti          | 7.49727e-12 | 1.000000 | 7.49729e-12 | 1.000000 |
| rad23              | 6.96831e-14 | 1.000000 | 6.96832e-14 | 1.000000 |
| PAH3+H             | 5.72272e-15 | 1.000000 | 5.72273e-15 | 1.000000 |
| rad59              | 2.23566e-15 | 1.000000 | 2.23567e-15 | 1.000000 |
| rad31              | 8.01533e-16 | 1.000000 | 8.01534e-16 | 1.000000 |
| rad45              | 5.94727e-16 | 1.000000 | 5.94728e-16 | 1.000000 |
| rad50              | 2.26392e-16 | 1.000000 | 2.26392e-16 | 1.000000 |
| rad20              | 2.06924e-16 | 1.000000 | 2.06925e-16 | 1.000000 |
| rad21              | 1.55246e-16 | 1.000000 | 1.55246e-16 | 1.000000 |
| rad22              | 4.59041e-17 | 1.000000 | 4.59042e-17 | 1.000000 |
| rad36              | 3.68949e-17 | 1.000000 | 3.68949e-17 | 1.000000 |
| rad19syn           | 2.43047e-17 | 1.000000 | 2.43047e-17 | 1.000000 |
| rad18              | 9.84659e-19 | 1.000000 | 9.84661e-19 | 1.000000 |
| rad54              | 8.19074e-20 | 1.000000 | 8.19076e-20 | 1.000000 |
| PAH10+CH3          | 5.52975e-20 | 1.000000 | 5.52976e-20 | 1.000000 |
| rad43              | 1.34478e-20 | 1.000000 | 1.34478e-20 | 1.000000 |
| rad52              | 1.08118e-21 | 1.000000 | 1.08118e-21 | 1.000000 |
| rad62              | 1.07948e-21 | 1.000000 | 1.07948e-21 | 1.000000 |
| rad24              | 2.11501e-23 | 1.000000 | 2.11502e-23 | 1.000000 |

|               |             |         |             |         |
|---------------|-------------|---------|-------------|---------|
| rad70         | 2.81955e-24 | 1.00000 | 2.81955e-24 | 1.00000 |
| PhcycC3H3_A+H | 2.81950e-24 | 1.00000 | 2.81951e-24 | 1.00000 |
| rad51         | 1.12540e-24 | 1.00000 | 1.12541e-24 | 1.00000 |
| rad55         | 1.09529e-24 | 1.00000 | 1.09530e-24 | 1.00000 |
| PAH1+H        | 8.46087e-27 | 1.00000 | 8.46089e-27 | 1.00000 |
| rad65         | 1.70658e-27 | 1.00000 | 1.70659e-27 | 1.00000 |
| rad58         | 1.68583e-27 | 1.00000 | 1.68583e-27 | 1.00000 |
| rad34         | 2.52381e-28 | 1.00000 | 2.52382e-28 | 1.00000 |
| rad42         | 7.84687e-31 | 1.00000 | 7.84689e-31 | 1.00000 |
| rad41         | 1.60689e-31 | 1.00000 | 1.60689e-31 | 1.00000 |
| rad47         | 7.57853e-37 | 1.00000 | 7.57854e-37 | 1.00000 |

0.100000000E-02 Pa, 160.000000 K

| Rate constant      | True (fraction) |            | Effective (fraction) |            |
|--------------------|-----------------|------------|----------------------|------------|
| Total              | 1.81800e-18     | (1.00 )    | 1.81800e-18          | (1.00 )    |
| Formation of rad11 | 1.64862e-18     | (0.907 )   | 1.64862e-18          | (0.907 )   |
| Formation of rad6  | 1.62558e-19     | (0.0894 )  | 1.62558e-19          | (0.0894 )  |
| H-abstraction      | 6.82130e-21     | (0.00375 ) | 6.82130e-21          | (0.00375 ) |

  

| species            | PYtrue      | Cumul    | PYeffective | Cumul    |
|--------------------|-------------|----------|-------------|----------|
| Indene+H           | 0.926056    | 0.926056 | 0.926059    | 0.926059 |
| rad6               | 0.0517643   | 0.977821 | 0.0517644   | 0.977824 |
| C2H2+PhCH2         | 0.0107612   | 0.988582 | 0.0107613   | 0.988585 |
| PhCCH+CH3          | 0.00387599  | 0.992458 | 0.00387600  | 0.992461 |
| Benzene+2-propynyl | 0.00375209  | 0.996210 | 0.00375210  | 0.996213 |
| PhCHCCH2+H         | 0.00220363  | 0.998413 | 0.00220364  | 0.998417 |
| PhCCCH3+H          | 0.00139339  | 0.999807 | 0.00139339  | 0.999810 |
| Ph+MeAc            | 7.07007e-05 | 0.999878 | 7.07009e-05 | 0.999881 |
| rad28              | 4.53471e-05 | 0.999923 | 4.53472e-05 | 0.999926 |
| rad2               | 2.76865e-05 | 0.999951 | 2.76866e-05 | 0.999954 |
| rad8               | 1.42741e-05 | 0.999965 | 1.42742e-05 | 0.999968 |
| rad9               | 9.39852e-06 | 0.999974 | 9.39855e-06 | 0.999978 |
| PAH7+H             | 5.75580e-06 | 0.999980 | 5.75582e-06 | 0.999983 |
| rad26              | 5.63935e-06 | 0.999986 | 5.63937e-06 | 0.999989 |
| rad7               | 3.92863e-06 | 0.999990 | 3.92864e-06 | 0.999993 |
| Phenyl+Allene      | 2.99174e-06 | 0.999993 | 0.00000     | 0.999993 |
| rad1               | 1.83021e-06 | 0.999994 | 1.83021e-06 | 0.999995 |
| rad10              | 1.41490e-06 | 0.999996 | 1.41490e-06 | 0.999996 |
| rad11              | 9.75039e-07 | 0.999997 | 9.75042e-07 | 0.999997 |
| rad39              | 9.54184e-07 | 0.999998 | 9.54187e-07 | 0.999998 |
| rad30              | 6.73278e-07 | 0.999998 | 6.73280e-07 | 0.999999 |
| rad12              | 6.57998e-07 | 0.999999 | 6.58000e-07 | 0.999999 |
| rad3               | 1.74955e-07 | 0.999999 | 1.74956e-07 | 1.000000 |
| PAH9+H             | 1.49114e-07 | 0.999999 | 1.49114e-07 | 1.000000 |
| rad15              | 1.37080e-07 | 1.000000 | 1.37080e-07 | 1.000000 |
| rad4               | 8.95086e-08 | 1.000000 | 8.95089e-08 | 1.000000 |
| rad35              | 7.28400e-08 | 1.000000 | 7.28403e-08 | 1.000000 |
| rad38              | 4.08786e-08 | 1.000000 | 4.08788e-08 | 1.000000 |
| rad13              | 2.14069e-08 | 1.000000 | 2.14069e-08 | 1.000000 |
| PhCH2CCH+H         | 1.03975e-08 | 1.000000 | 1.03975e-08 | 1.000000 |
| rad37              | 2.47497e-09 | 1.000000 | 2.47498e-09 | 1.000000 |
| rad46              | 4.39909e-10 | 1.000000 | 4.39910e-10 | 1.000000 |
| rad33              | 4.09459e-11 | 1.000000 | 4.09460e-11 | 1.000000 |
| rad60syn           | 3.62046e-11 | 1.000000 | 3.62047e-11 | 1.000000 |
| rad14              | 2.15822e-11 | 1.000000 | 2.15822e-11 | 1.000000 |
| rad5               | 1.83948e-11 | 1.000000 | 1.83949e-11 | 1.000000 |
| rad27              | 1.67152e-11 | 1.000000 | 1.67153e-11 | 1.000000 |
| rad25              | 1.47001e-11 | 1.000000 | 1.47001e-11 | 1.000000 |
| rad60anti          | 1.03743e-11 | 1.000000 | 1.03743e-11 | 1.000000 |
| rad23              | 5.12685e-14 | 1.000000 | 5.12687e-14 | 1.000000 |
| PAH3+H             | 1.50897e-14 | 1.000000 | 1.50897e-14 | 1.000000 |
| rad59              | 5.67707e-15 | 1.000000 | 5.67709e-15 | 1.000000 |
| rad31              | 6.73805e-16 | 1.000000 | 6.73807e-16 | 1.000000 |
| rad50              | 5.69228e-16 | 1.000000 | 5.69229e-16 | 1.000000 |
| rad45              | 4.35859e-16 | 1.000000 | 4.35861e-16 | 1.000000 |
| rad20              | 1.79536e-16 | 1.000000 | 1.79537e-16 | 1.000000 |
| rad19syn           | 1.44562e-16 | 1.000000 | 1.44562e-16 | 1.000000 |
| rad21              | 1.35055e-16 | 1.000000 | 1.35055e-16 | 1.000000 |
| rad22              | 3.48081e-17 | 1.000000 | 3.48083e-17 | 1.000000 |
| rad36              | 2.70625e-17 | 1.000000 | 2.70626e-17 | 1.000000 |
| rad18              | 8.48716e-19 | 1.000000 | 8.48719e-19 | 1.000000 |
| rad54              | 6.77362e-19 | 1.000000 | 6.77364e-19 | 1.000000 |
| PAH10+CH3          | 4.59714e-19 | 1.000000 | 4.59716e-19 | 1.000000 |
| rad43              | 1.11983e-19 | 1.000000 | 1.11983e-19 | 1.000000 |
| rad62              | 1.09573e-20 | 1.000000 | 1.09573e-20 | 1.000000 |
| rad52              | 6.13366e-21 | 1.000000 | 6.13368e-21 | 1.000000 |
| PhcycC3H3_A+H      | 4.93612e-23 | 1.000000 | 4.93613e-23 | 1.000000 |

|        |             |          |             |         |
|--------|-------------|----------|-------------|---------|
| rad70  | 4.56797e-23 | 1.000000 | 4.56799e-23 | 1.00000 |
| rad55  | 1.82385e-23 | 1.000000 | 1.82386e-23 | 1.00000 |
| rad24  | 1.77462e-23 | 1.000000 | 1.77463e-23 | 1.00000 |
| rad51  | 1.15986e-23 | 1.000000 | 1.15987e-23 | 1.00000 |
| PAH1+H | 2.26360e-25 | 1.000000 | 2.26361e-25 | 1.00000 |
| rad58  | 3.07406e-26 | 1.000000 | 3.07407e-26 | 1.00000 |
| rad65  | 2.42767e-26 | 1.000000 | 2.42767e-26 | 1.00000 |
| rad34  | 7.86207e-27 | 1.000000 | 7.86209e-27 | 1.00000 |
| rad42  | 4.07255e-29 | 1.000000 | 4.07256e-29 | 1.00000 |
| rad41  | 9.76941e-30 | 1.000000 | 9.76944e-30 | 1.00000 |
| rad47  | 1.41428e-35 | 1.000000 | 1.41428e-35 | 1.00000 |

0.100000000E-02 Pa, 170.000000 K

| Rate constant      | True (fraction)        | Effective (fraction)   |
|--------------------|------------------------|------------------------|
| Total              | 3.56414e-18 (1.00 )    | 3.56412e-18 (1.00 )    |
| Formation of rad11 | 3.18264e-18 (0.893 )   | 3.18262e-18 (0.893 )   |
| Formation of rad6  | 3.62173e-19 (0.102 )   | 3.62172e-19 (0.102 )   |
| H-abstraction      | 1.93278e-20 (0.00542 ) | 1.93278e-20 (0.00542 ) |

| species            | PYtrue      | Cumul    | PYeffective | Cumul    |
|--------------------|-------------|----------|-------------|----------|
| Indene+H           | 0.932763    | 0.932763 | 0.932767    | 0.932767 |
| rad6               | 0.0419108   | 0.974674 | 0.0419110   | 0.974678 |
| C2H2+PhCH2         | 0.0114670   | 0.986141 | 0.0114670   | 0.986145 |
| Benzene+2-propynyl | 0.00542285  | 0.991564 | 0.00542287  | 0.991568 |
| PhCCH+CH3          | 0.00429307  | 0.995857 | 0.00429309  | 0.995861 |
| PhCHCCH2+H         | 0.00241063  | 0.998267 | 0.00241064  | 0.998272 |
| PhCCCH3+H          | 0.00153272  | 0.999800 | 0.00153273  | 0.999804 |
| Ph+MeAc            | 8.75367e-05 | 0.999888 | 8.75371e-05 | 0.999892 |
| rad28              | 3.69901e-05 | 0.999925 | 3.69902e-05 | 0.999929 |
| rad2               | 2.23120e-05 | 0.999947 | 2.23121e-05 | 0.999951 |
| rad8               | 1.60796e-05 | 0.999963 | 1.60797e-05 | 0.999967 |
| rad9               | 1.09863e-05 | 0.999974 | 1.09864e-05 | 0.999978 |
| PAH7+H             | 6.84993e-06 | 0.999981 | 6.84995e-06 | 0.999985 |
| rad26              | 4.56824e-06 | 0.999986 | 4.56826e-06 | 0.999990 |
| Phenyl+Allene      | 4.10319e-06 | 0.999990 | 0.00000     | 0.999990 |
| rad7               | 3.17977e-06 | 0.999993 | 3.17978e-06 | 0.999993 |
| rad1               | 1.48390e-06 | 0.999994 | 1.48391e-06 | 0.999994 |
| rad39              | 1.17969e-06 | 0.999995 | 1.17970e-06 | 0.999996 |
| rad10              | 1.14070e-06 | 0.999997 | 1.14071e-06 | 0.999997 |
| rad11              | 7.89360e-07 | 0.999997 | 7.89363e-07 | 0.999998 |
| rad12              | 7.69216e-07 | 0.999998 | 7.69219e-07 | 0.999998 |
| rad30              | 7.33858e-07 | 0.999999 | 7.33861e-07 | 0.999999 |
| PAH9+H             | 1.64794e-07 | 0.999999 | 1.64795e-07 | 0.999999 |
| rad15              | 1.51920e-07 | 0.999999 | 1.51921e-07 | 0.999999 |
| rad3               | 1.41024e-07 | 0.999999 | 1.41025e-07 | 0.999999 |
| rad35              | 7.96676e-08 | 0.999999 | 7.96680e-08 | 1.000000 |
| rad4               | 7.22702e-08 | 1.000000 | 7.22704e-08 | 1.000000 |
| rad38              | 4.55632e-08 | 1.000000 | 4.55634e-08 | 1.000000 |
| PhCH2CCH+H         | 1.94640e-08 | 1.000000 | 1.94641e-08 | 1.000000 |
| rad13              | 1.73894e-08 | 1.000000 | 1.73895e-08 | 1.000000 |
| rad37              | 4.20738e-09 | 1.000000 | 4.20740e-09 | 1.000000 |
| rad46              | 5.21197e-10 | 1.000000 | 5.21199e-10 | 1.000000 |
| rad60syn           | 4.74816e-11 | 1.000000 | 4.74818e-11 | 1.000000 |
| rad5               | 3.76473e-11 | 1.000000 | 3.76474e-11 | 1.000000 |
| rad33              | 3.33130e-11 | 1.000000 | 3.33132e-11 | 1.000000 |
| rad14              | 1.75555e-11 | 1.000000 | 1.75556e-11 | 1.000000 |
| rad60anti          | 1.41757e-11 | 1.000000 | 1.41758e-11 | 1.000000 |
| rad27              | 1.35464e-11 | 1.000000 | 1.35465e-11 | 1.000000 |
| rad25              | 1.19658e-11 | 1.000000 | 1.19658e-11 | 1.000000 |
| rad23              | 3.82012e-14 | 1.000000 | 3.82014e-14 | 1.000000 |
| PAH3+H             | 3.61589e-14 | 1.000000 | 3.61590e-14 | 1.000000 |
| rad59              | 1.31258e-14 | 1.000000 | 1.31259e-14 | 1.000000 |
| rad50              | 1.31921e-15 | 1.000000 | 1.31922e-15 | 1.000000 |
| rad19syn           | 7.01056e-16 | 1.000000 | 7.01059e-16 | 1.000000 |
| rad31              | 5.67353e-16 | 1.000000 | 5.67356e-16 | 1.000000 |
| rad45              | 3.23685e-16 | 1.000000 | 3.23686e-16 | 1.000000 |
| rad20              | 1.55666e-16 | 1.000000 | 1.55666e-16 | 1.000000 |
| rad21              | 1.17427e-16 | 1.000000 | 1.17427e-16 | 1.000000 |
| rad22              | 2.66456e-17 | 1.000000 | 2.66457e-17 | 1.000000 |
| rad36              | 2.01205e-17 | 1.000000 | 2.01205e-17 | 1.000000 |
| rad54              | 4.38588e-18 | 1.000000 | 4.38590e-18 | 1.000000 |
| PAH10+CH3          | 2.98887e-18 | 1.000000 | 2.98888e-18 | 1.000000 |
| rad18              | 7.31213e-19 | 1.000000 | 7.31216e-19 | 1.000000 |
| rad43              | 7.28362e-19 | 1.000000 | 7.28365e-19 | 1.000000 |
| rad62              | 8.48424e-20 | 1.000000 | 8.48428e-20 | 1.000000 |
| rad52              | 2.86895e-20 | 1.000000 | 2.86896e-20 | 1.000000 |
| PhcycC3H3_A+H      | 6.17042e-22 | 1.000000 | 6.17044e-22 | 1.000000 |

|        |             |          |             |          |
|--------|-------------|----------|-------------|----------|
| rad70  | 5.32018e-22 | 1.000000 | 5.32021e-22 | 1.000000 |
| rad55  | 2.17588e-22 | 1.000000 | 2.17588e-22 | 1.000000 |
| rad51  | 9.17748e-23 | 1.000000 | 9.17752e-23 | 1.000000 |
| rad24  | 1.52089e-23 | 1.000000 | 1.52089e-23 | 1.000000 |
| PAH1+H | 3.93780e-24 | 1.000000 | 3.93781e-24 | 1.000000 |
| rad58  | 3.98396e-25 | 1.000000 | 3.98397e-25 | 1.000000 |
| rad65  | 2.53923e-25 | 1.000000 | 2.53923e-25 | 1.000000 |
| rad34  | 1.50120e-25 | 1.000000 | 1.50120e-25 | 1.000000 |
| rad42  | 1.01642e-27 | 1.000000 | 1.01642e-27 | 1.000000 |
| rad41  | 2.58313e-28 | 1.000000 | 2.58314e-28 | 1.000000 |
| rad47  | 1.82386e-34 | 1.000000 | 1.82386e-34 | 1.000000 |

0.100000000E-02 Pa, 180.000000 K

| Rate constant      | True (fraction)        | Effective (fraction)   |
|--------------------|------------------------|------------------------|
| Total              | 6.50681e-18 (1.00 )    | 6.50677e-18 (1.00 )    |
| Formation of rad11 | 5.71915e-18 (0.879 )   | 5.71912e-18 (0.879 )   |
| Formation of rad6  | 7.39013e-19 (0.114 )   | 7.39009e-19 (0.114 )   |
| H-abstraction      | 4.86496e-20 (0.00748 ) | 4.86496e-20 (0.00748 ) |

| species            | PYtrue      | Cumul    | PYeffective | Cumul    |
|--------------------|-------------|----------|-------------|----------|
| Indene+H           | 0.937217    | 0.937217 | 0.937223    | 0.937223 |
| rad6               | 0.0338392   | 0.971056 | 0.0338394   | 0.971062 |
| C2H2+PhCH2         | 0.0122020   | 0.983258 | 0.0122021   | 0.983264 |
| Benzene+2-propynyl | 0.00747672  | 0.990735 | 0.00747676  | 0.990741 |
| PhCCH+CH3          | 0.00474155  | 0.995476 | 0.00474157  | 0.995483 |
| PhCHCCH2+H         | 0.00262985  | 0.998106 | 0.00262986  | 0.998112 |
| PhCCCH3+H          | 0.00168055  | 0.999787 | 0.00168056  | 0.999793 |
| Ph+MeAc            | 0.000107560 | 0.999894 | 0.000107561 | 0.999901 |
| rad28              | 3.00713e-05 | 0.999924 | 3.00714e-05 | 0.999931 |
| rad8               | 1.80487e-05 | 0.999942 | 1.80488e-05 | 0.999949 |
| rad2               | 1.79404e-05 | 0.999960 | 1.79405e-05 | 0.999967 |
| rad9               | 1.28050e-05 | 0.999973 | 1.28051e-05 | 0.999979 |
| PAH7+H             | 8.12005e-06 | 0.999981 | 8.12009e-06 | 0.999988 |
| Phenyl+Allene      | 5.55927e-06 | 0.999987 | 0.00000     | 0.999988 |
| rad26              | 3.69076e-06 | 0.999991 | 3.69078e-06 | 0.999991 |
| rad7               | 2.56715e-06 | 0.999993 | 2.56716e-06 | 0.999994 |
| rad39              | 1.44919e-06 | 0.999995 | 1.44920e-06 | 0.999995 |
| rad1               | 1.20104e-06 | 0.999996 | 1.20105e-06 | 0.999996 |
| rad10              | 9.17711e-07 | 0.999997 | 9.17716e-07 | 0.999997 |
| rad12              | 8.94513e-07 | 0.999998 | 8.94518e-07 | 0.999998 |
| rad30              | 7.99134e-07 | 0.999998 | 7.99138e-07 | 0.999999 |
| rad11              | 6.37448e-07 | 0.999999 | 6.37452e-07 | 1.000000 |
| PAH9+H             | 1.82113e-07 | 0.999999 | 1.82114e-07 | 1.000000 |
| rad15              | 1.68243e-07 | 0.999999 | 1.68244e-07 | 1.000000 |
| rad3               | 1.13430e-07 | 0.999999 | 1.13431e-07 | 1.000000 |
| rad35              | 8.71017e-08 | 1.000000 | 8.71022e-08 | 1.000000 |
| rad4               | 5.82356e-08 | 1.000000 | 5.82359e-08 | 1.000000 |
| rad38              | 5.07893e-08 | 1.000000 | 5.07896e-08 | 1.000000 |
| PhCH2CCH+H         | 3.47005e-08 | 1.000000 | 3.47007e-08 | 1.000000 |
| rad13              | 1.40888e-08 | 1.000000 | 1.40889e-08 | 1.000000 |
| rad37              | 6.75199e-09 | 1.000000 | 6.75203e-09 | 1.000000 |
| rad46              | 6.17967e-10 | 1.000000 | 6.17970e-10 | 1.000000 |
| rad5               | 7.21166e-11 | 1.000000 | 7.21171e-11 | 1.000000 |
| rad60syn           | 6.18943e-11 | 1.000000 | 6.18947e-11 | 1.000000 |
| rad33              | 2.70341e-11 | 1.000000 | 2.70341e-11 | 1.000000 |
| rad60anti          | 1.91613e-11 | 1.000000 | 1.91614e-11 | 1.000000 |
| rad14              | 1.42446e-11 | 1.000000 | 1.42446e-11 | 1.000000 |
| rad27              | 1.09539e-11 | 1.000000 | 1.09540e-11 | 1.000000 |
| rad25              | 9.71470e-12 | 1.000000 | 9.71476e-12 | 1.000000 |
| PAH3+H             | 8.00888e-14 | 1.000000 | 8.00893e-14 | 1.000000 |
| rad23              | 2.88180e-14 | 1.000000 | 2.88182e-14 | 1.000000 |
| rad59              | 2.81028e-14 | 1.000000 | 2.81029e-14 | 1.000000 |
| rad19syn           | 2.86990e-15 | 1.000000 | 2.86992e-15 | 1.000000 |
| rad50              | 2.85878e-15 | 1.000000 | 2.85879e-15 | 1.000000 |
| rad31              | 4.78773e-16 | 1.000000 | 4.78776e-16 | 1.000000 |
| rad45              | 2.43493e-16 | 1.000000 | 2.43495e-16 | 1.000000 |
| rad20              | 1.34904e-16 | 1.000000 | 1.34905e-16 | 1.000000 |
| rad21              | 1.02065e-16 | 1.000000 | 1.02066e-16 | 1.000000 |
| rad54              | 2.31823e-17 | 1.000000 | 2.31824e-17 | 1.000000 |
| rad22              | 2.05702e-17 | 1.000000 | 2.05703e-17 | 1.000000 |
| PAH10+CH3          | 1.58430e-17 | 1.000000 | 1.58431e-17 | 1.000000 |
| rad36              | 1.51576e-17 | 1.000000 | 1.51577e-17 | 1.000000 |
| rad43              | 3.85728e-18 | 1.000000 | 3.85730e-18 | 1.000000 |
| rad18              | 6.29713e-19 | 1.000000 | 6.29717e-19 | 1.000000 |
| rad62              | 5.24551e-19 | 1.000000 | 5.24553e-19 | 1.000000 |
| rad52              | 1.14435e-19 | 1.000000 | 1.14435e-19 | 1.000000 |
| PhcycC3H3_A+H      | 5.84258e-21 | 1.000000 | 5.84261e-21 | 1.000000 |

|        |             |          |             |         |
|--------|-------------|----------|-------------|---------|
| rad70  | 4.71613e-21 | 1.000000 | 4.71616e-21 | 1.00000 |
| rad55  | 1.97126e-21 | 1.000000 | 1.97127e-21 | 1.00000 |
| rad51  | 5.83526e-22 | 1.000000 | 5.83530e-22 | 1.00000 |
| PAH1+H | 4.94423e-23 | 1.000000 | 4.94425e-23 | 1.00000 |
| rad24  | 1.32880e-23 | 1.000000 | 1.32880e-23 | 1.00000 |
| rad58  | 3.89990e-24 | 1.000000 | 3.89992e-24 | 1.00000 |
| rad65  | 2.05952e-24 | 1.000000 | 2.05953e-24 | 1.00000 |
| rad34  | 2.03794e-24 | 1.000000 | 2.03795e-24 | 1.00000 |
| rad42  | 1.68771e-26 | 1.000000 | 1.68772e-26 | 1.00000 |
| rad41  | 4.43140e-27 | 1.000000 | 4.43143e-27 | 1.00000 |
| rad47  | 1.73041e-33 | 1.000000 | 1.73042e-33 | 1.00000 |

0.100000000E-02 Pa, 190.000000 K

| Rate constant      | True (fraction)        | Effective (fraction)   |
|--------------------|------------------------|------------------------|
| Total              | 1.11858e-17 (1.00 )    | 1.11857e-17 (1.00 )    |
| Formation of rad11 | 9.67466e-18 (0.865 )   | 9.67458e-18 (0.865 )   |
| Formation of rad6  | 1.40029e-18 (0.125 )   | 1.40028e-18 (0.125 )   |
| H-abstraction      | 1.10851e-19 (0.00991 ) | 1.10851e-19 (0.00991 ) |

| species            | PYtrue      | Cumul    | PYeffective | Cumul    |
|--------------------|-------------|----------|-------------|----------|
| Indene+H           | 0.939713    | 0.939713 | 0.939720    | 0.939720 |
| rad6               | 0.0272513   | 0.966965 | 0.0272515   | 0.966972 |
| C2H2+PhCH2         | 0.0129698   | 0.979934 | 0.0129699   | 0.979942 |
| Benzene+2-propynyl | 0.00990995  | 0.989844 | 0.00991003  | 0.989852 |
| PhCCH+CH3          | 0.00522299  | 0.995067 | 0.00522303  | 0.995075 |
| PhCHCCH2+H         | 0.00286178  | 0.997929 | 0.00286180  | 0.997936 |
| PhCCCH3+H          | 0.00183703  | 0.999766 | 0.00183705  | 0.999773 |
| Ph+MeAc            | 0.000131204 | 0.999897 | 0.000131205 | 0.999905 |
| rad28              | 2.43705e-05 | 0.999922 | 2.43707e-05 | 0.999929 |
| rad8               | 2.01896e-05 | 0.999942 | 2.01898e-05 | 0.999949 |
| rad9               | 1.48834e-05 | 0.999957 | 1.48835e-05 | 0.999964 |
| rad2               | 1.43948e-05 | 0.999971 | 1.43949e-05 | 0.999979 |
| PAH7+H             | 9.59154e-06 | 0.999981 | 9.59161e-06 | 0.999988 |
| Phenyl+Allene      | 7.44989e-06 | 0.999988 | 0.00000     | 0.999988 |
| rad26              | 2.97441e-06 | 0.999991 | 2.97443e-06 | 0.999991 |
| rad7               | 2.06761e-06 | 0.999993 | 2.06763e-06 | 0.999993 |
| rad39              | 1.76987e-06 | 0.999995 | 1.76987e-06 | 0.999995 |
| rad12              | 1.03501e-06 | 0.999996 | 1.03502e-06 | 0.999996 |
| rad1               | 9.70611e-07 | 0.999997 | 9.70619e-07 | 0.999997 |
| rad30              | 8.69613e-07 | 0.999998 | 8.69620e-07 | 0.999998 |
| rad10              | 7.36864e-07 | 0.999999 | 7.36870e-07 | 0.999999 |
| rad11              | 5.13566e-07 | 0.999999 | 5.13570e-07 | 0.999999 |
| PAH9+H             | 2.01292e-07 | 0.999999 | 2.01293e-07 | 0.999999 |
| rad15              | 1.86222e-07 | 1.000000 | 1.86223e-07 | 0.999999 |
| rad35              | 9.52193e-08 | 1.000000 | 9.52201e-08 | 1.000000 |
| rad3               | 9.10504e-08 | 1.000000 | 9.10511e-08 | 1.000000 |
| PhCH2CCH+H         | 5.93540e-08 | 1.000000 | 5.93544e-08 | 1.000000 |
| rad38              | 5.66344e-08 | 1.000000 | 5.66348e-08 | 1.000000 |
| rad4               | 4.68395e-08 | 1.000000 | 4.68399e-08 | 1.000000 |
| rad13              | 1.13866e-08 | 1.000000 | 1.13867e-08 | 1.000000 |
| rad37              | 1.03301e-08 | 1.000000 | 1.03302e-08 | 1.000000 |
| rad46              | 7.33314e-10 | 1.000000 | 7.33319e-10 | 1.000000 |
| rad5               | 1.30609e-10 | 1.000000 | 1.30610e-10 | 1.000000 |
| rad60syn           | 8.02305e-11 | 1.000000 | 8.02310e-11 | 1.000000 |
| rad60anti          | 2.56565e-11 | 1.000000 | 2.56567e-11 | 1.000000 |
| rad33              | 2.18867e-11 | 1.000000 | 2.18868e-11 | 1.000000 |
| rad14              | 1.15313e-11 | 1.000000 | 1.15314e-11 | 1.000000 |
| rad27              | 8.83913e-12 | 1.000000 | 8.83920e-12 | 1.000000 |
| rad25              | 7.86809e-12 | 1.000000 | 7.86815e-12 | 1.000000 |
| PAH3+H             | 1.66152e-13 | 1.000000 | 1.66154e-13 | 1.000000 |
| rad59              | 5.64561e-14 | 1.000000 | 5.64565e-14 | 1.000000 |
| rad23              | 2.20142e-14 | 1.000000 | 2.20144e-14 | 1.000000 |
| rad19syn           | 1.01927e-14 | 1.000000 | 1.01927e-14 | 1.000000 |
| rad50              | 5.85782e-15 | 1.000000 | 5.85787e-15 | 1.000000 |
| rad31              | 4.05191e-16 | 1.000000 | 4.05194e-16 | 1.000000 |
| rad45              | 1.85573e-16 | 1.000000 | 1.85575e-16 | 1.000000 |
| rad20              | 1.16879e-16 | 1.000000 | 1.16880e-16 | 1.000000 |
| rad54              | 1.03370e-16 | 1.000000 | 1.03370e-16 | 1.000000 |
| rad21              | 8.87036e-17 | 1.000000 | 8.87041e-17 | 1.000000 |
| PAH10+CH3          | 7.07435e-17 | 1.000000 | 7.07441e-17 | 1.000000 |
| rad43              | 1.71854e-17 | 1.000000 | 1.71855e-17 | 1.000000 |
| rad22              | 1.60038e-17 | 1.000000 | 1.60039e-17 | 1.000000 |
| rad36              | 1.15727e-17 | 1.000000 | 1.15728e-17 | 1.000000 |
| rad62              | 2.68436e-18 | 1.000000 | 2.68438e-18 | 1.000000 |
| rad18              | 5.42111e-19 | 1.000000 | 5.42115e-19 | 1.000000 |
| rad52              | 3.99724e-19 | 1.000000 | 3.99727e-19 | 1.000000 |
| PhcycC3H3_A+H      | 4.37949e-20 | 1.000000 | 4.37951e-20 | 1.000000 |



|        |             |          |             |          |
|--------|-------------|----------|-------------|----------|
| rad70  | 3.32425e-20 | 1.000000 | 3.32428e-20 | 1.000000 |
| rad55  | 1.41754e-20 | 1.000000 | 1.41755e-20 | 1.000000 |
| rad51  | 3.08975e-21 | 1.000000 | 3.08978e-21 | 1.000000 |
| PAH1+H | 4.72599e-22 | 1.000000 | 4.72602e-22 | 1.000000 |
| rad58  | 3.01475e-23 | 1.000000 | 3.01477e-23 | 1.000000 |
| rad34  | 2.08394e-23 | 1.000000 | 2.08396e-23 | 1.000000 |
| rad65  | 1.34970e-23 | 1.000000 | 1.34971e-23 | 1.000000 |
| rad24  | 1.18157e-23 | 1.000000 | 1.18158e-23 | 1.000000 |
| rad42  | 2.03732e-25 | 1.000000 | 2.03733e-25 | 1.000000 |
| rad41  | 5.48603e-26 | 1.000000 | 5.48607e-26 | 1.000000 |
| rad47  | 1.26869e-32 | 1.000000 | 1.26870e-32 | 1.000000 |

0.100000000E-02 Pa, 200.000000 K

| Rate constant      | True (fraction) |           | Effective (fraction) |           |
|--------------------|-----------------|-----------|----------------------|-----------|
| Total              | 1.82690e-17     | (1.00 )   | 1.82688e-17          | (1.00 )   |
| Formation of rad11 | 1.55456e-17     | (0.851 )  | 1.55455e-17          | (0.851 )  |
| Formation of rad6  | 2.49126e-18     | (0.136 )  | 2.49124e-18          | (0.136 )  |
| H-abstraction      | 2.32112e-19     | (0.0127 ) | 2.32112e-19          | (0.0127 ) |

  

| species            | PYtrue      | Cumul    | PYeffective | Cumul    |
|--------------------|-------------|----------|-------------|----------|
| Indene+H           | 0.940518    | 0.940518 | 0.940526    | 0.940526 |
| rad6               | 0.0218929   | 0.962411 | 0.0218931   | 0.962420 |
| C2H2+PhCH2         | 0.0137740   | 0.976185 | 0.0137741   | 0.976194 |
| Benzene+2-propynyl | 0.0127053   | 0.988890 | 0.0127054   | 0.988899 |
| PhCCH+CH3          | 0.00573900  | 0.994629 | 0.00573904  | 0.994638 |
| PhCHCCH2+H         | 0.00310687  | 0.997736 | 0.00310690  | 0.997745 |
| PhCCCH3+H          | 0.00200231  | 0.999738 | 0.00200233  | 0.999747 |
| Ph+MeAc            | 0.000158933 | 0.999897 | 0.000158934 | 0.999906 |
| rad8               | 2.25104e-05 | 0.999919 | 2.25106e-05 | 0.999929 |
| rad28              | 1.96940e-05 | 0.999939 | 1.96942e-05 | 0.999948 |
| rad9               | 1.72533e-05 | 0.999956 | 1.72535e-05 | 0.999966 |
| rad2               | 1.15274e-05 | 0.999968 | 1.15275e-05 | 0.999977 |
| PAH7+H             | 1.12932e-05 | 0.999979 | 1.12933e-05 | 0.999989 |
| Phenyl+Allene      | 9.88470e-06 | 0.999989 | 0.000000    | 0.999989 |
| rad26              | 2.39154e-06 | 0.999992 | 2.39156e-06 | 0.999991 |
| rad39              | 2.14990e-06 | 0.999994 | 2.14992e-06 | 0.999993 |
| rad7               | 1.66158e-06 | 0.999995 | 1.66160e-06 | 0.999995 |
| rad12              | 1.19183e-06 | 0.999997 | 1.19184e-06 | 0.999996 |
| rad30              | 9.45852e-07 | 0.999997 | 9.45862e-07 | 0.999997 |
| rad1               | 7.83326e-07 | 0.999998 | 7.83333e-07 | 0.999998 |
| rad10              | 5.90573e-07 | 0.999999 | 5.90579e-07 | 0.999998 |
| rad11              | 4.12850e-07 | 0.999999 | 4.12855e-07 | 0.999999 |
| PAH9+H             | 2.22588e-07 | 0.999999 | 2.22590e-07 | 0.999999 |
| rad15              | 2.06049e-07 | 1.000000 | 2.06051e-07 | 0.999999 |
| rad35              | 1.04107e-07 | 1.000000 | 1.04108e-07 | 0.999999 |
| PhCH2CCH+H         | 9.79780e-08 | 1.000000 | 9.79790e-08 | 0.999999 |
| rad3               | 7.29490e-08 | 1.000000 | 7.29498e-08 | 0.999999 |
| rad38              | 6.31871e-08 | 1.000000 | 6.31876e-08 | 0.999999 |
| rad4               | 3.76096e-08 | 1.000000 | 3.76100e-08 | 0.999999 |
| rad37              | 1.51859e-08 | 1.000000 | 1.51861e-08 | 0.999999 |
| rad13              | 9.18172e-09 | 1.000000 | 9.18181e-09 | 1.000000 |
| rad46              | 8.70965e-10 | 1.000000 | 8.70974e-10 | 1.000000 |
| rad5               | 2.25443e-10 | 1.000000 | 2.25445e-10 | 1.000000 |
| rad60syn           | 1.03460e-10 | 1.000000 | 1.03461e-10 | 1.000000 |
| rad60anti          | 3.40677e-11 | 1.000000 | 3.40680e-11 | 1.000000 |
| rad33              | 1.76808e-11 | 1.000000 | 1.76809e-11 | 1.000000 |
| rad14              | 9.31477e-12 | 1.000000 | 9.31486e-12 | 1.000000 |
| rad27              | 7.11888e-12 | 1.000000 | 7.11895e-12 | 1.000000 |
| rad25              | 6.35825e-12 | 1.000000 | 6.35831e-12 | 1.000000 |
| PAH3+H             | 3.26255e-13 | 1.000000 | 3.26258e-13 | 1.000000 |
| rad59              | 1.07525e-13 | 1.000000 | 1.07526e-13 | 1.000000 |
| rad19syn           | 3.21002e-14 | 1.000000 | 3.21005e-14 | 1.000000 |
| rad23              | 1.70420e-14 | 1.000000 | 1.70422e-14 | 1.000000 |
| rad50              | 1.14495e-14 | 1.000000 | 1.14496e-14 | 1.000000 |
| rad54              | 3.99173e-16 | 1.000000 | 3.99177e-16 | 1.000000 |
| rad31              | 3.44175e-16 | 1.000000 | 3.44179e-16 | 1.000000 |
| PAH10+CH3          | 2.73141e-16 | 1.000000 | 2.73144e-16 | 1.000000 |
| rad45              | 1.43396e-16 | 1.000000 | 1.43397e-16 | 1.000000 |
| rad20              | 1.01258e-16 | 1.000000 | 1.01259e-16 | 1.000000 |
| rad21              | 7.71005e-17 | 1.000000 | 7.71013e-17 | 1.000000 |
| rad43              | 6.61175e-17 | 1.000000 | 6.61180e-17 | 1.000000 |
| rad22              | 1.25436e-17 | 1.000000 | 1.25437e-17 | 1.000000 |
| rad62              | 1.17010e-17 | 1.000000 | 1.17011e-17 | 1.000000 |
| rad36              | 8.96171e-18 | 1.000000 | 8.96180e-18 | 1.000000 |
| rad52              | 1.24886e-18 | 1.000000 | 1.24888e-18 | 1.000000 |
| rad18              | 4.66577e-19 | 1.000000 | 4.66582e-19 | 1.000000 |
| PhcycC3H3_A+H      | 2.69113e-19 | 1.000000 | 2.69115e-19 | 1.000000 |

|        |             |         |             |          |
|--------|-------------|---------|-------------|----------|
| rad70  | 1.92895e-19 | 1.00000 | 1.92897e-19 | 1.000000 |
| rad55  | 8.37953e-20 | 1.00000 | 8.37961e-20 | 1.000000 |
| rad51  | 1.40152e-20 | 1.00000 | 1.40154e-20 | 1.000000 |
| PAH1+H | 3.58237e-21 | 1.00000 | 3.58240e-21 | 1.000000 |
| rad58  | 1.90611e-22 | 1.00000 | 1.90613e-22 | 1.000000 |
| rad34  | 1.67535e-22 | 1.00000 | 1.67537e-22 | 1.000000 |
| rad65  | 7.38316e-23 | 1.00000 | 7.38324e-23 | 1.000000 |
| rad24  | 1.06774e-23 | 1.00000 | 1.06775e-23 | 1.000000 |
| rad42  | 1.88681e-24 | 1.00000 | 1.88683e-24 | 1.000000 |
| rad41  | 5.19102e-25 | 1.00000 | 5.19107e-25 | 1.000000 |
| rad47  | 7.47631e-32 | 1.00000 | 7.47638e-32 | 1.000000 |

0.100000000E-02 Pa, 210.000000 K

| Rate constant      | True (fraction)       | Effective (fraction)  |
|--------------------|-----------------------|-----------------------|
| Total              | 2.85520e-17 (1.00 )   | 2.85517e-17 (1.00 )   |
| Formation of rad11 | 2.39009e-17 (0.837 )  | 2.39006e-17 (0.837 )  |
| Formation of rad6  | 4.19900e-18 (0.147 )  | 4.19895e-18 (0.147 )  |
| H-abstraction      | 4.52111e-19 (0.0158 ) | 4.52111e-19 (0.0158 ) |

| species            | PYtrue      | Cumul    | PYeffective | Cumul    |
|--------------------|-------------|----------|-------------|----------|
| Indene+H           | 0.939867    | 0.939867 | 0.939880    | 0.939880 |
| rad6               | 0.0175485   | 0.957416 | 0.0175486   | 0.957428 |
| Benzene+2-propynyl | 0.0158346   | 0.973250 | 0.0158348   | 0.973263 |
| C2H2+PhCH2         | 0.0146186   | 0.987869 | 0.0146188   | 0.987882 |
| PhCCH+CH3          | 0.00629107  | 0.994160 | 0.00629115  | 0.994173 |
| PhCHCCH2+H         | 0.00336556  | 0.997525 | 0.00336560  | 0.997539 |
| PhCCCH3+H          | 0.00217645  | 0.999702 | 0.00217648  | 0.999715 |
| Ph+MeAc            | 0.000191236 | 0.999893 | 0.000191238 | 0.999906 |
| rad8               | 2.50182e-05 | 0.999918 | 2.50186e-05 | 0.999931 |
| rad9               | 1.99496e-05 | 0.999938 | 1.99498e-05 | 0.999951 |
| rad28              | 1.58728e-05 | 0.999954 | 1.58730e-05 | 0.999967 |
| PAH7+H             | 1.32575e-05 | 0.999967 | 1.32577e-05 | 0.999981 |
| Phenyl+Allene      | 1.29968e-05 | 0.999980 | 0.000000    | 0.999981 |
| rad2               | 9.21428e-06 | 0.999989 | 9.21440e-06 | 0.999990 |
| rad39              | 2.59858e-06 | 0.999992 | 2.59862e-06 | 0.999992 |
| rad26              | 1.91876e-06 | 0.999994 | 1.91879e-06 | 0.999994 |
| rad12              | 1.36609e-06 | 0.999995 | 1.36610e-06 | 0.999996 |
| rad7               | 1.33250e-06 | 0.999997 | 1.33252e-06 | 0.999997 |
| rad30              | 1.02845e-06 | 0.999998 | 1.02847e-06 | 0.999998 |
| rad1               | 6.31446e-07 | 0.999998 | 6.31454e-07 | 0.999999 |
| rad10              | 4.72531e-07 | 0.999999 | 4.72537e-07 | 0.999999 |
| rad11              | 3.31209e-07 | 0.999999 | 3.31214e-07 | 0.999999 |
| PAH9+H             | 2.46288e-07 | 0.999999 | 2.46291e-07 | 1.000000 |
| rad15              | 2.27941e-07 | 1.000000 | 2.27943e-07 | 1.000000 |
| PhCH2CCH+H         | 1.56831e-07 | 1.000000 | 1.56833e-07 | 1.000000 |
| rad35              | 1.13864e-07 | 1.000000 | 1.13865e-07 | 1.000000 |
| rad38              | 7.05488e-08 | 1.000000 | 7.05497e-08 | 1.000000 |
| rad3               | 5.83450e-08 | 1.000000 | 5.83457e-08 | 1.000000 |
| rad4               | 3.01521e-08 | 1.000000 | 3.01525e-08 | 1.000000 |
| rad37              | 2.15863e-08 | 1.000000 | 2.15866e-08 | 1.000000 |
| rad13              | 7.38818e-09 | 1.000000 | 7.38828e-09 | 1.000000 |
| rad46              | 1.03539e-09 | 1.000000 | 1.03541e-09 | 1.000000 |
| rad5               | 3.73291e-10 | 1.000000 | 3.73296e-10 | 1.000000 |
| rad60syn           | 1.32769e-10 | 1.000000 | 1.32771e-10 | 1.000000 |
| rad60anti          | 4.48983e-11 | 1.000000 | 4.48989e-11 | 1.000000 |
| rad33              | 1.42544e-11 | 1.000000 | 1.42546e-11 | 1.000000 |
| rad14              | 7.50943e-12 | 1.000000 | 7.50952e-12 | 1.000000 |
| rad27              | 5.72326e-12 | 1.000000 | 5.72333e-12 | 1.000000 |
| rad25              | 5.12756e-12 | 1.000000 | 5.12763e-12 | 1.000000 |
| PAH3+H             | 6.11401e-13 | 1.000000 | 6.11410e-13 | 1.000000 |
| rad59              | 1.95752e-13 | 1.000000 | 1.95754e-13 | 1.000000 |
| rad19syn           | 9.12435e-14 | 1.000000 | 9.12447e-14 | 1.000000 |
| rad50              | 2.14949e-14 | 1.000000 | 2.14952e-14 | 1.000000 |
| rad23              | 1.33876e-14 | 1.000000 | 1.33878e-14 | 1.000000 |
| rad54              | 1.36344e-15 | 1.000000 | 1.36345e-15 | 1.000000 |
| PAH10+CH3          | 9.31237e-16 | 1.000000 | 9.31250e-16 | 1.000000 |
| rad31              | 2.93686e-16 | 1.000000 | 2.93689e-16 | 1.000000 |
| rad43              | 2.24334e-16 | 1.000000 | 2.24337e-16 | 1.000000 |
| rad45              | 1.12495e-16 | 1.000000 | 1.12496e-16 | 1.000000 |
| rad20              | 8.77398e-17 | 1.000000 | 8.77410e-17 | 1.000000 |
| rad21              | 6.70396e-17 | 1.000000 | 6.70404e-17 | 1.000000 |
| rad62              | 4.44603e-17 | 1.000000 | 4.44608e-17 | 1.000000 |
| rad22              | 9.90395e-18 | 1.000000 | 9.90405e-18 | 1.000000 |
| rad36              | 7.04855e-18 | 1.000000 | 7.04865e-18 | 1.000000 |
| rad52              | 3.54970e-18 | 1.000000 | 3.54975e-18 | 1.000000 |
| PhcycC3H3_A+H      | 1.39395e-18 | 1.000000 | 1.39397e-18 | 1.000000 |
| rad70              | 9.47415e-19 | 1.000000 | 9.47427e-19 | 1.000000 |

|        |             |         |             |         |
|--------|-------------|---------|-------------|---------|
| rad55  | 4.18730e-19 | 1.00000 | 4.18735e-19 | 1.00000 |
| rad18  | 4.01512e-19 | 1.00000 | 4.01517e-19 | 1.00000 |
| rad51  | 5.57052e-20 | 1.00000 | 5.57059e-20 | 1.00000 |
| PAH1+H | 2.22423e-20 | 1.00000 | 2.22426e-20 | 1.00000 |
| rad34  | 1.09486e-21 | 1.00000 | 1.09488e-21 | 1.00000 |
| rad58  | 1.01366e-21 | 1.00000 | 1.01367e-21 | 1.00000 |
| rad65  | 3.45951e-22 | 1.00000 | 3.45956e-22 | 1.00000 |
| rad42  | 1.39164e-23 | 1.00000 | 1.39166e-23 | 1.00000 |
| rad24  | 9.79329e-24 | 1.00000 | 9.79342e-24 | 1.00000 |
| rad41  | 3.89989e-24 | 1.00000 | 3.89995e-24 | 1.00000 |
| rad47  | 3.65577e-31 | 1.00000 | 3.65582e-31 | 1.00000 |

0.100000000E-02 Pa, 220.000000 K

| Rate constant      | True (fraction) |           | Effective (fraction) |           |
|--------------------|-----------------|-----------|----------------------|-----------|
| Total              | 4.29529e-17     | (1.00 )   | 4.29521e-17          | (1.00 )   |
| Formation of rad11 | 3.53712e-17     | (0.823 )  | 3.53706e-17          | (0.823 )  |
| Formation of rad6  | 6.75433e-18     | (0.157 )  | 6.75421e-18          | (0.157 )  |
| H-abstraction      | 8.27372e-19     | (0.0193 ) | 8.27372e-19          | (0.0193 ) |

  

| species            | PYtrue      | Cumul    | PYeffective | Cumul    |
|--------------------|-------------|----------|-------------|----------|
| Indene+H           | 0.937973    | 0.937973 | 0.937988    | 0.937988 |
| Benzene+2-propynyl | 0.0192623   | 0.957235 | 0.0192626   | 0.957251 |
| C2H2+PhCH2         | 0.0155075   | 0.972742 | 0.0155078   | 0.972758 |
| rad6               | 0.0140366   | 0.986779 | 0.0140369   | 0.986795 |
| PhCCH+CH3          | 0.00688066  | 0.993660 | 0.00688077  | 0.993676 |
| PhCHCCH2+H         | 0.00363823  | 0.997298 | 0.00363829  | 0.997314 |
| PhCCCH3+H          | 0.00235946  | 0.999657 | 0.00235950  | 0.999674 |
| Ph+MeAc            | 0.000228626 | 0.999886 | 0.000228629 | 0.999903 |
| rad8               | 2.77195e-05 | 0.999914 | 2.77200e-05 | 0.999930 |
| rad9               | 2.30109e-05 | 0.999937 | 2.30112e-05 | 0.999953 |
| Phenyl+Allene      | 1.69463e-05 | 0.999954 | 0.00000     | 0.999953 |
| PAH7+H             | 1.55210e-05 | 0.999969 | 1.55211e-05 | 0.999969 |
| rad28              | 1.27620e-05 | 0.999982 | 1.27623e-05 | 0.999982 |
| rad2               | 7.35317e-06 | 0.999989 | 7.35329e-06 | 0.999989 |
| rad39              | 3.12639e-06 | 0.999992 | 3.12644e-06 | 0.999992 |
| rad12              | 1.55884e-06 | 0.999994 | 1.55887e-06 | 0.999994 |
| rad26              | 1.53637e-06 | 0.999996 | 1.53640e-06 | 0.999995 |
| rad30              | 1.11808e-06 | 0.999997 | 1.11810e-06 | 0.999996 |
| rad7               | 1.06654e-06 | 0.999998 | 1.06656e-06 | 0.999997 |
| rad1               | 5.08529e-07 | 0.999998 | 5.08538e-07 | 0.999998 |
| rad10              | 3.77508e-07 | 0.999999 | 3.77514e-07 | 0.999998 |
| PAH9+H             | 2.72722e-07 | 0.999999 | 2.72726e-07 | 0.999998 |
| rad11              | 2.65210e-07 | 0.999999 | 2.65214e-07 | 0.999999 |
| rad15              | 2.52130e-07 | 0.999999 | 2.52134e-07 | 0.999999 |
| PhCH2CCH+H         | 2.44361e-07 | 1.000000 | 2.44364e-07 | 0.999999 |
| rad35              | 1.24597e-07 | 1.000000 | 1.24599e-07 | 0.999999 |
| rad38              | 7.88350e-08 | 1.000000 | 7.88364e-08 | 0.999999 |
| rad3               | 4.65912e-08 | 1.000000 | 4.65921e-08 | 0.999999 |
| rad37              | 2.98215e-08 | 1.000000 | 2.98220e-08 | 1.000000 |
| rad4               | 2.41405e-08 | 1.000000 | 2.41409e-08 | 1.000000 |
| rad13              | 5.93345e-09 | 1.000000 | 5.93356e-09 | 1.000000 |
| rad46              | 1.23194e-09 | 1.000000 | 1.23196e-09 | 1.000000 |
| rad5               | 5.96075e-10 | 1.000000 | 5.96085e-10 | 1.000000 |
| rad60syn           | 1.69604e-10 | 1.000000 | 1.69607e-10 | 1.000000 |
| rad60anti          | 5.87694e-11 | 1.000000 | 5.87704e-11 | 1.000000 |
| rad33              | 1.14710e-11 | 1.000000 | 1.14712e-11 | 1.000000 |
| rad14              | 6.04305e-12 | 1.000000 | 6.04315e-12 | 1.000000 |
| rad27              | 4.59385e-12 | 1.000000 | 4.59393e-12 | 1.000000 |
| rad25              | 4.12730e-12 | 1.000000 | 4.12736e-12 | 1.000000 |
| PAH3+H             | 1.10076e-12 | 1.000000 | 1.10078e-12 | 1.000000 |
| rad59              | 3.42878e-13 | 1.000000 | 3.42884e-13 | 1.000000 |
| rad19syn           | 2.37476e-13 | 1.000000 | 2.37481e-13 | 1.000000 |
| rad50              | 3.89747e-14 | 1.000000 | 3.89754e-14 | 1.000000 |
| rad23              | 1.06935e-14 | 1.000000 | 1.06937e-14 | 1.000000 |
| rad54              | 4.19057e-15 | 1.000000 | 4.19064e-15 | 1.000000 |
| PAH10+CH3          | 2.85183e-15 | 1.000000 | 2.85189e-15 | 1.000000 |
| rad43              | 6.82887e-16 | 1.000000 | 6.82898e-16 | 1.000000 |
| rad31              | 2.52019e-16 | 1.000000 | 2.52023e-16 | 1.000000 |
| rad62              | 1.50052e-16 | 1.000000 | 1.50055e-16 | 1.000000 |
| rad45              | 8.97787e-17 | 1.000000 | 8.97802e-17 | 1.000000 |
| rad20              | 7.60583e-17 | 1.000000 | 7.60595e-17 | 1.000000 |
| rad21              | 5.83270e-17 | 1.000000 | 5.83281e-17 | 1.000000 |
| rad52              | 9.30568e-18 | 1.000000 | 9.30584e-18 | 1.000000 |
| rad22              | 7.87956e-18 | 1.000000 | 7.87970e-18 | 1.000000 |
| PhcycC3H3_A+H      | 6.22472e-18 | 1.000000 | 6.22483e-18 | 1.000000 |
| rad36              | 5.64211e-18 | 1.000000 | 5.64220e-18 | 1.000000 |
| rad70              | 4.02805e-18 | 1.000000 | 4.02811e-18 | 1.000000 |

|        |             |          |             |          |
|--------|-------------|----------|-------------|----------|
| rad55  | 1.80904e-18 | 1.000000 | 1.80907e-18 | 1.000000 |
| rad18  | 3.45518e-19 | 1.000000 | 3.45524e-19 | 1.000000 |
| rad51  | 1.97543e-19 | 1.000000 | 1.97547e-19 | 1.000000 |
| PAH1+H | 1.16116e-19 | 1.000000 | 1.16118e-19 | 1.000000 |
| rad34  | 5.97611e-21 | 1.000000 | 5.97621e-21 | 1.000000 |
| rad58  | 4.63724e-21 | 1.000000 | 4.63732e-21 | 1.000000 |
| rad65  | 1.41758e-21 | 1.000000 | 1.41760e-21 | 1.000000 |
| rad42  | 8.42421e-23 | 1.000000 | 8.42436e-23 | 1.000000 |
| rad41  | 2.39854e-23 | 1.000000 | 2.39858e-23 | 1.000000 |
| rad24  | 9.10760e-24 | 1.000000 | 9.10775e-24 | 1.000000 |
| rad47  | 1.52248e-30 | 1.000000 | 1.52251e-30 | 1.000000 |

0.100000000E-02 Pa, 230.000000 K

| Rate constant      | True (fraction)       | Effective (fraction)  |
|--------------------|-----------------------|-----------------------|
| Total              | 6.25016e-17 (1.00 )   | 6.25003e-17 (1.00 )   |
| Formation of rad11 | 5.06355e-17 (0.810 )  | 5.06344e-17 (0.810 )  |
| Formation of rad6  | 1.04318e-17 (0.167 )  | 1.04316e-17 (0.167 )  |
| H-abstraction      | 1.43428e-18 (0.0229 ) | 1.43428e-18 (0.0229 ) |

| species            | PYtrue      | Cumul    | PYeffective | Cumul    |
|--------------------|-------------|----------|-------------|----------|
| Indene+H           | 0.935020    | 0.935020 | 0.935040    | 0.935040 |
| Benzene+2-propynyl | 0.0229478   | 0.957968 | 0.0229483   | 0.957989 |
| C2H2+PhCH2         | 0.0164449   | 0.974413 | 0.0164452   | 0.974434 |
| rad6               | 0.0112059   | 0.985619 | 0.0112062   | 0.985640 |
| PhCCH+CH3          | 0.00750908  | 0.993128 | 0.00750924  | 0.993149 |
| PhCHCCH2+H         | 0.00392520  | 0.997053 | 0.00392529  | 0.997075 |
| PhCCCH3+H          | 0.00255125  | 0.999604 | 0.00255131  | 0.999626 |
| Ph+MeAc            | 0.000271628 | 0.999876 | 0.000271634 | 0.999898 |
| rad8               | 3.06194e-05 | 0.999907 | 3.06202e-05 | 0.999928 |
| rad9               | 2.64790e-05 | 0.999933 | 2.64796e-05 | 0.999955 |
| Phenyl+Allene      | 2.19247e-05 | 0.999955 | 0.000000    | 0.999955 |
| PAH7+H             | 1.81242e-05 | 0.999973 | 1.81246e-05 | 0.999973 |
| rad28              | 1.02381e-05 | 0.999984 | 1.02383e-05 | 0.999983 |
| rad2               | 5.85924e-06 | 0.999989 | 5.85937e-06 | 0.999989 |
| rad39              | 3.74509e-06 | 0.999993 | 3.74517e-06 | 0.999993 |
| rad12              | 1.77111e-06 | 0.999995 | 1.77115e-06 | 0.999994 |
| rad26              | 1.22794e-06 | 0.999996 | 1.22797e-06 | 0.999996 |
| rad30              | 1.21543e-06 | 0.999997 | 1.21545e-06 | 0.999997 |
| rad7               | 8.52149e-07 | 0.999998 | 8.52168e-07 | 0.999998 |
| rad1               | 4.09237e-07 | 0.999999 | 4.09247e-07 | 0.999998 |
| PhCH2CCH+H         | 3.71789e-07 | 0.999999 | 3.71796e-07 | 0.999999 |
| PAH9+H             | 3.02256e-07 | 0.999999 | 3.02263e-07 | 0.999999 |
| rad10              | 3.01183e-07 | 1.000000 | 3.01190e-07 | 0.999999 |
| rad15              | 2.78875e-07 | 1.000000 | 2.78882e-07 | 0.999999 |
| rad11              | 2.11991e-07 | 1.000000 | 2.11996e-07 | 1.000000 |
| rad35              | 1.36427e-07 | 1.000000 | 1.36430e-07 | 1.000000 |
| rad38              | 8.81769e-08 | 1.000000 | 8.81788e-08 | 1.000000 |
| rad37              | 4.02053e-08 | 1.000000 | 4.02063e-08 | 1.000000 |
| rad3               | 3.71525e-08 | 1.000000 | 3.71534e-08 | 1.000000 |
| rad4               | 1.93044e-08 | 1.000000 | 1.93048e-08 | 1.000000 |
| rad13              | 4.75670e-09 | 1.000000 | 4.75681e-09 | 1.000000 |
| rad46              | 1.46699e-09 | 1.000000 | 1.46702e-09 | 1.000000 |
| rad5               | 9.21906e-10 | 1.000000 | 9.21926e-10 | 1.000000 |
| rad60syn           | 2.15714e-10 | 1.000000 | 2.15718e-10 | 1.000000 |
| rad60anti          | 7.64417e-11 | 1.000000 | 7.64434e-11 | 1.000000 |
| rad33              | 9.21579e-12 | 1.000000 | 9.21599e-12 | 1.000000 |
| rad14              | 4.85503e-12 | 1.000000 | 4.85515e-12 | 1.000000 |
| rad27              | 3.68199e-12 | 1.000000 | 3.68207e-12 | 1.000000 |
| rad25              | 3.31646e-12 | 1.000000 | 3.31653e-12 | 1.000000 |
| PAH3+H             | 1.91413e-12 | 1.000000 | 1.91418e-12 | 1.000000 |
| rad59              | 5.80877e-13 | 1.000000 | 5.80889e-13 | 1.000000 |
| rad19syn           | 5.72655e-13 | 1.000000 | 5.72668e-13 | 1.000000 |
| rad50              | 6.85572e-14 | 1.000000 | 6.85587e-14 | 1.000000 |
| rad54              | 1.17534e-14 | 1.000000 | 1.17536e-14 | 1.000000 |
| rad23              | 8.70847e-15 | 1.000000 | 8.70866e-15 | 1.000000 |
| PAH10+CH3          | 7.95525e-15 | 1.000000 | 7.95542e-15 | 1.000000 |
| rad43              | 1.89146e-15 | 1.000000 | 1.89150e-15 | 1.000000 |
| rad62              | 4.56787e-16 | 1.000000 | 4.56796e-16 | 1.000000 |
| rad31              | 2.17764e-16 | 1.000000 | 2.17769e-16 | 1.000000 |
| rad45              | 7.30878e-17 | 1.000000 | 7.30894e-17 | 1.000000 |
| rad20              | 6.59750e-17 | 1.000000 | 6.59764e-17 | 1.000000 |
| rad21              | 5.07903e-17 | 1.000000 | 5.07914e-17 | 1.000000 |
| PhcycC3H3_A+H      | 2.44047e-17 | 1.000000 | 2.44053e-17 | 1.000000 |
| rad52              | 2.27515e-17 | 1.000000 | 2.27520e-17 | 1.000000 |
| rad70              | 1.50974e-17 | 1.000000 | 1.50977e-17 | 1.000000 |
| rad55              | 6.88155e-18 | 1.000000 | 6.88170e-18 | 1.000000 |
| rad22              | 6.32104e-18 | 1.000000 | 6.32118e-18 | 1.000000 |

|        |             |         |             |          |
|--------|-------------|---------|-------------|----------|
| rad36  | 4.60911e-18 | 1.00000 | 4.60921e-18 | 1.000000 |
| rad51  | 6.34163e-19 | 1.00000 | 6.34176e-19 | 1.000000 |
| PAH1+H | 5.20766e-19 | 1.00000 | 5.20777e-19 | 1.000000 |
| rad18  | 2.97372e-19 | 1.00000 | 2.97378e-19 | 1.000000 |
| rad34  | 2.78595e-20 | 1.00000 | 2.78600e-20 | 1.000000 |
| rad58  | 1.85868e-20 | 1.00000 | 1.85871e-20 | 1.000000 |
| rad65  | 5.16493e-21 | 1.00000 | 5.16505e-21 | 1.000000 |
| rad42  | 4.29131e-22 | 1.00000 | 4.29140e-22 | 1.000000 |
| rad41  | 1.23869e-22 | 1.00000 | 1.23872e-22 | 1.000000 |
| rad24  | 8.58092e-24 | 1.00000 | 8.58110e-24 | 1.000000 |
| rad47  | 5.51769e-30 | 1.00000 | 5.51780e-30 | 1.000000 |

0.100000000E-02 Pa, 240.000000 K

| Rate constant      | True (fraction)       | Effective (fraction)  |
|--------------------|-----------------------|-----------------------|
| Total              | 8.83273e-17 (1.00 )   | 8.83248e-17 (1.00 )   |
| Formation of rad11 | 7.04077e-17 (0.797 )  | 7.04057e-17 (0.797 )  |
| Formation of rad6  | 1.55481e-17 (0.176 )  | 1.55477e-17 (0.176 )  |
| H-abstraction      | 2.37143e-18 (0.0268 ) | 2.37143e-18 (0.0268 ) |

| species            | PYtrue      | Cumul    | PYeffective | Cumul    |
|--------------------|-------------|----------|-------------|----------|
| Indene+H           | 0.931172    | 0.931172 | 0.931198    | 0.931198 |
| Benzene+2-propynyl | 0.0268483   | 0.958020 | 0.0268490   | 0.958047 |
| C2H2+PhCH2         | 0.0174349   | 0.975455 | 0.0174354   | 0.975483 |
| rad6               | 0.00893009  | 0.984385 | 0.00893033  | 0.984413 |
| PhCCH+CH3          | 0.00817744  | 0.992563 | 0.00817768  | 0.992591 |
| PhCHCCH2+H         | 0.00422672  | 0.996789 | 0.00422683  | 0.996818 |
| PhCCCH3+H          | 0.00275164  | 0.999541 | 0.00275172  | 0.999569 |
| Ph+MeAc            | 0.000320777 | 0.999862 | 0.000320786 | 0.999890 |
| rad8               | 3.37221e-05 | 0.999895 | 3.37231e-05 | 0.999924 |
| rad9               | 3.03993e-05 | 0.999926 | 3.04002e-05 | 0.999954 |
| Phenyl+Allene      | 2.81598e-05 | 0.999954 | 0.00000     | 0.999954 |
| PAH7+H             | 2.11128e-05 | 0.999975 | 2.11134e-05 | 0.999975 |
| rad28              | 8.19650e-06 | 0.999983 | 8.19672e-06 | 0.999984 |
| rad2               | 4.66261e-06 | 0.999988 | 4.66275e-06 | 0.999988 |
| rad39              | 4.46779e-06 | 0.999992 | 4.46792e-06 | 0.999993 |
| rad12              | 2.00378e-06 | 0.999994 | 2.00383e-06 | 0.999995 |
| rad30              | 1.32125e-06 | 0.999996 | 1.32129e-06 | 0.999996 |
| rad26              | 9.79789e-07 | 0.999997 | 9.79817e-07 | 0.999997 |
| rad7               | 6.79740e-07 | 0.999997 | 6.79759e-07 | 0.999998 |
| PhCH2CCH+H         | 5.53810e-07 | 0.999998 | 5.53825e-07 | 0.999998 |
| PAH9+H             | 3.35302e-07 | 0.999998 | 3.35312e-07 | 0.999999 |
| rad1               | 3.29158e-07 | 0.999999 | 3.29167e-07 | 0.999999 |
| rad15              | 3.08456e-07 | 0.999999 | 3.08465e-07 | 0.999999 |
| rad10              | 2.40003e-07 | 0.999999 | 2.40009e-07 | 0.999999 |
| rad11              | 1.69180e-07 | 0.999999 | 1.69185e-07 | 1.000000 |
| rad35              | 1.49486e-07 | 1.000000 | 1.49490e-07 | 1.000000 |
| rad38              | 9.87224e-08 | 1.000000 | 9.87252e-08 | 1.000000 |
| rad37              | 5.30760e-08 | 1.000000 | 5.30775e-08 | 1.000000 |
| rad3               | 2.95893e-08 | 1.000000 | 2.95900e-08 | 1.000000 |
| rad4               | 1.54217e-08 | 1.000000 | 1.54222e-08 | 1.000000 |
| rad13              | 3.80714e-09 | 1.000000 | 3.80726e-09 | 1.000000 |
| rad46              | 1.74811e-09 | 1.000000 | 1.74817e-09 | 1.000000 |
| rad5               | 1.38602e-09 | 1.000000 | 1.38606e-09 | 1.000000 |
| rad60syn           | 2.73203e-10 | 1.000000 | 2.73210e-10 | 1.000000 |
| rad60anti          | 9.88411e-11 | 1.000000 | 9.88439e-11 | 1.000000 |
| rad33              | 7.39290e-12 | 1.000000 | 7.39311e-12 | 1.000000 |
| rad14              | 3.89484e-12 | 1.000000 | 3.89494e-12 | 1.000000 |
| PAH3+H             | 3.22877e-12 | 1.000000 | 3.22887e-12 | 1.000000 |
| rad27              | 2.94736e-12 | 1.000000 | 2.94744e-12 | 1.000000 |
| rad25              | 2.66079e-12 | 1.000000 | 2.66087e-12 | 1.000000 |
| rad19syn           | 1.29197e-12 | 1.000000 | 1.29200e-12 | 1.000000 |
| rad59              | 9.55816e-13 | 1.000000 | 9.55843e-13 | 1.000000 |
| rad50              | 1.17407e-13 | 1.000000 | 1.17410e-13 | 1.000000 |
| rad54              | 3.04297e-14 | 1.000000 | 3.04305e-14 | 1.000000 |
| PAH10+CH3          | 2.04481e-14 | 1.000000 | 2.04486e-14 | 1.000000 |
| rad23              | 7.25537e-15 | 1.000000 | 7.25557e-15 | 1.000000 |
| rad43              | 4.82282e-15 | 1.000000 | 4.82296e-15 | 1.000000 |
| rad62              | 1.27022e-15 | 1.000000 | 1.27025e-15 | 1.000000 |
| rad31              | 1.89770e-16 | 1.000000 | 1.89776e-16 | 1.000000 |
| PhcycC3H3_A+H      | 8.52732e-17 | 1.000000 | 8.52756e-17 | 1.000000 |
| rad45              | 6.09063e-17 | 1.000000 | 6.09080e-17 | 1.000000 |
| rad20              | 5.72793e-17 | 1.000000 | 5.72809e-17 | 1.000000 |
| rad52              | 5.23456e-17 | 1.000000 | 5.23471e-17 | 1.000000 |
| rad70              | 5.06341e-17 | 1.000000 | 5.06355e-17 | 1.000000 |
| rad21              | 4.42766e-17 | 1.000000 | 4.42778e-17 | 1.000000 |
| rad55              | 2.33952e-17 | 1.000000 | 2.33958e-17 | 1.000000 |
| rad22              | 5.11867e-18 | 1.000000 | 5.11881e-18 | 1.000000 |

|        |             |          |             |         |
|--------|-------------|----------|-------------|---------|
| rad36  | 3.85617e-18 | 1.000000 | 3.85629e-18 | 1.00000 |
| PAH1+H | 2.04261e-18 | 1.000000 | 2.04266e-18 | 1.00000 |
| rad51  | 1.86451e-18 | 1.000000 | 1.86456e-18 | 1.00000 |
| rad18  | 2.56008e-19 | 1.000000 | 2.56015e-19 | 1.00000 |
| rad34  | 1.13009e-19 | 1.000000 | 1.13013e-19 | 1.00000 |
| rad58  | 6.62605e-20 | 1.000000 | 6.62624e-20 | 1.00000 |
| rad65  | 1.69597e-20 | 1.000000 | 1.69602e-20 | 1.00000 |
| rad42  | 1.87841e-21 | 1.000000 | 1.87845e-21 | 1.00000 |
| rad41  | 5.48695e-22 | 1.000000 | 5.48710e-22 | 1.00000 |
| rad24  | 8.18563e-24 | 1.000000 | 8.18585e-24 | 1.00000 |
| rad47  | 1.77173e-29 | 1.000000 | 1.77179e-29 | 1.00000 |

0.100000000E-02 Pa, 250.000000 K

| Rate constant      | True (fraction)       | Effective (fraction)  |
|--------------------|-----------------------|-----------------------|
| Total              | 1.21641e-16 (1.00 )   | 1.21637e-16 (1.00 )   |
| Formation of rad11 | 9.54219e-17 (0.784 )  | 9.54183e-17 (0.784 )  |
| Formation of rad6  | 2.24583e-17 (0.185 )  | 2.24575e-17 (0.185 )  |
| H-abstraction      | 3.76121e-18 (0.0309 ) | 3.76121e-18 (0.0309 ) |

| species            | PYtrue      | Cumul    | PYeffective | Cumul    |
|--------------------|-------------|----------|-------------|----------|
| Indene+H           | 0.926571    | 0.926571 | 0.926605    | 0.926605 |
| Benzene+2-propynyl | 0.0309205   | 0.957491 | 0.0309216   | 0.957526 |
| C2H2+PhCH2         | 0.0184816   | 0.975973 | 0.0184823   | 0.976009 |
| PhCCH+CH3          | 0.00888668  | 0.984860 | 0.00888700  | 0.984896 |
| rad6               | 0.00710480  | 0.991964 | 0.00710505  | 0.992001 |
| PhCHCCH2+H         | 0.00454293  | 0.996507 | 0.00454310  | 0.996544 |
| PhCCCH3+H          | 0.00296037  | 0.999468 | 0.00296048  | 0.999504 |
| Ph+MeAc            | 0.000376603 | 0.999844 | 0.000376616 | 0.999881 |
| rad8               | 3.70295e-05 | 0.999881 | 3.70309e-05 | 0.999918 |
| Phenyl+Allene      | 3.59207e-05 | 0.999917 | 0.00000     | 0.999918 |
| rad9               | 3.48210e-05 | 0.999952 | 3.48223e-05 | 0.999953 |
| PAH7+H             | 2.45366e-05 | 0.999977 | 2.45375e-05 | 0.999977 |
| rad28              | 6.54973e-06 | 0.999983 | 6.54996e-06 | 0.999984 |
| rad39              | 5.30906e-06 | 0.999988 | 5.30925e-06 | 0.999989 |
| rad2               | 3.70604e-06 | 0.999992 | 3.70617e-06 | 0.999993 |
| rad12              | 2.25765e-06 | 0.999994 | 2.25773e-06 | 0.999995 |
| rad30              | 1.43633e-06 | 0.999996 | 1.43638e-06 | 0.999996 |
| PhCH2CCH+H         | 8.09400e-07 | 0.999997 | 8.09430e-07 | 0.999997 |
| rad26              | 7.80594e-07 | 0.999997 | 7.80622e-07 | 0.999998 |
| rad7               | 5.41402e-07 | 0.999998 | 5.41422e-07 | 0.999999 |
| PAH9+H             | 3.72321e-07 | 0.999998 | 3.72334e-07 | 0.999999 |
| rad15              | 3.41173e-07 | 0.999999 | 3.41185e-07 | 0.999999 |
| rad1               | 2.64662e-07 | 0.999999 | 2.64672e-07 | 1.000000 |
| rad10              | 1.91053e-07 | 0.999999 | 1.91060e-07 | 1.000000 |
| rad35              | 1.63919e-07 | 0.999999 | 1.63925e-07 | 1.000000 |
| rad11              | 1.34818e-07 | 0.999999 | 1.34823e-07 | 1.00000  |
| rad38              | 1.10637e-07 | 1.000000 | 1.10642e-07 | 1.00000  |
| rad37              | 6.87950e-08 | 1.000000 | 6.87974e-08 | 1.00000  |
| rad3               | 2.35400e-08 | 1.000000 | 2.35409e-08 | 1.00000  |
| rad4               | 1.23097e-08 | 1.000000 | 1.23102e-08 | 1.00000  |
| rad13              | 3.04269e-09 | 1.000000 | 3.04280e-09 | 1.00000  |
| rad46              | 2.08427e-09 | 1.000000 | 2.08434e-09 | 1.00000  |
| rad5               | 2.03169e-09 | 1.000000 | 2.03177e-09 | 1.00000  |
| rad60syn           | 3.44589e-10 | 1.000000 | 3.44601e-10 | 1.00000  |
| rad60anti          | 1.27089e-10 | 1.000000 | 1.27094e-10 | 1.00000  |
| rad33              | 5.92267e-12 | 1.000000 | 5.92289e-12 | 1.00000  |
| PAH3+H             | 5.30160e-12 | 1.000000 | 5.30179e-12 | 1.00000  |
| rad14              | 3.12045e-12 | 1.000000 | 3.12056e-12 | 1.00000  |
| rad19syn           | 2.74912e-12 | 1.000000 | 2.74922e-12 | 1.00000  |
| rad27              | 2.35669e-12 | 1.000000 | 2.35677e-12 | 1.00000  |
| rad25              | 2.13179e-12 | 1.000000 | 2.13187e-12 | 1.00000  |
| rad59              | 1.53283e-12 | 1.000000 | 1.53289e-12 | 1.00000  |
| rad50              | 1.96314e-13 | 1.000000 | 1.96321e-13 | 1.00000  |
| rad54              | 7.34110e-14 | 1.000000 | 7.34136e-14 | 1.00000  |
| PAH10+CH3          | 4.88939e-14 | 1.000000 | 4.88957e-14 | 1.00000  |
| rad43              | 1.14304e-14 | 1.000000 | 1.14309e-14 | 1.00000  |
| rad23              | 6.20952e-15 | 1.000000 | 6.20975e-15 | 1.00000  |
| rad62              | 3.26044e-15 | 1.000000 | 3.26055e-15 | 1.00000  |
| PhcycC3H3_A+H      | 2.68862e-16 | 1.000000 | 2.68872e-16 | 1.00000  |
| rad31              | 1.67113e-16 | 1.000000 | 1.67120e-16 | 1.00000  |
| rad70              | 1.53839e-16 | 1.000000 | 1.53845e-16 | 1.00000  |
| rad52              | 1.14157e-16 | 1.000000 | 1.14160e-16 | 1.00000  |
| rad55              | 7.19637e-17 | 1.000000 | 7.19663e-17 | 1.00000  |
| rad45              | 5.21714e-17 | 1.000000 | 5.21732e-17 | 1.00000  |
| rad20              | 4.97861e-17 | 1.000000 | 4.97879e-17 | 1.00000  |
| rad21              | 3.86507e-17 | 1.000000 | 3.86521e-17 | 1.00000  |
| PAH1+H             | 7.11265e-18 | 1.000000 | 7.11290e-18 | 1.00000  |

|       |             |          |             |         |
|-------|-------------|----------|-------------|---------|
| rad51 | 5.06774e-18 | 1.000000 | 5.06793e-18 | 1.00000 |
| rad22 | 4.19139e-18 | 1.000000 | 4.19155e-18 | 1.00000 |
| rad36 | 3.31803e-18 | 1.000000 | 3.31815e-18 | 1.00000 |
| rad34 | 4.05190e-19 | 1.000000 | 4.05204e-19 | 1.00000 |
| rad18 | 2.20493e-19 | 1.000000 | 2.20500e-19 | 1.00000 |
| rad58 | 2.12742e-19 | 1.000000 | 2.12751e-19 | 1.00000 |
| rad65 | 5.07440e-20 | 1.000000 | 5.07458e-20 | 1.00000 |
| rad42 | 7.19102e-21 | 1.000000 | 7.19127e-21 | 1.00000 |
| rad41 | 2.12246e-21 | 1.000000 | 2.12253e-21 | 1.00000 |
| rad24 | 7.90281e-24 | 1.000000 | 7.90310e-24 | 1.00000 |
| rad47 | 5.11717e-29 | 1.000000 | 5.11735e-29 | 1.00000 |

0.100000000E-02 Pa, 260.000000 K

| Rate constant      | True (fraction) |           | Effective (fraction) |           |
|--------------------|-----------------|-----------|----------------------|-----------|
| Total              | 1.63720e-16     | (1.00 )   | 1.63713e-16          | (1.00 )   |
| Formation of rad11 | 1.26419e-16     | (0.772 )  | 1.26413e-16          | (0.772 )  |
| Formation of rad6  | 3.15515e-17     | (0.193 )  | 3.15500e-17          | (0.193 )  |
| H-abstraction      | 5.75028e-18     | (0.0351 ) | 5.75028e-18          | (0.0351 ) |

  

| species            | PYtrue      | Cumul    | PYeffective | Cumul    |
|--------------------|-------------|----------|-------------|----------|
| Indene+H           | 0.921339    | 0.921339 | 0.921381    | 0.921381 |
| Benzene+2-propynyl | 0.0351226   | 0.956462 | 0.0351242   | 0.956505 |
| C2H2+PhCH2         | 0.0195892   | 0.976051 | 0.0195901   | 0.976095 |
| PhCCH+CH3          | 0.00963746  | 0.985689 | 0.00963789  | 0.985733 |
| rad6               | 0.00564412  | 0.991333 | 0.00564438  | 0.991378 |
| PhCHCCH2+H         | 0.00487390  | 0.996207 | 0.00487413  | 0.996252 |
| PhCCCH3+H          | 0.00317704  | 0.999384 | 0.00317718  | 0.999429 |
| Ph+MeAc            | 0.000439626 | 0.999823 | 0.000439646 | 0.999869 |
| Phenyl+Allene      | 4.55230e-05 | 0.999869 | 0.00000     | 0.999869 |
| rad8               | 4.05422e-05 | 0.999909 | 4.05441e-05 | 0.999909 |
| rad9               | 3.97966e-05 | 0.999949 | 3.97984e-05 | 0.999949 |
| PAH7+H             | 2.84507e-05 | 0.999978 | 2.84520e-05 | 0.999977 |
| rad39              | 6.28495e-06 | 0.999984 | 6.28524e-06 | 0.999984 |
| rad28              | 5.22487e-06 | 0.999989 | 5.22510e-06 | 0.999989 |
| rad2               | 2.94289e-06 | 0.999992 | 2.94302e-06 | 0.999992 |
| rad12              | 2.53333e-06 | 0.999995 | 2.53345e-06 | 0.999994 |
| rad30              | 1.56149e-06 | 0.999996 | 1.56156e-06 | 0.999996 |
| PhCH2CCH+H         | 1.16276e-06 | 0.999997 | 1.16282e-06 | 0.999997 |
| rad26              | 6.21042e-07 | 0.999998 | 6.21070e-07 | 0.999998 |
| rad7               | 4.30633e-07 | 0.999998 | 4.30653e-07 | 0.999998 |
| PAH9+H             | 4.13821e-07 | 0.999999 | 4.13840e-07 | 0.999999 |
| rad15              | 3.77351e-07 | 0.999999 | 3.77368e-07 | 0.999999 |
| rad1               | 2.12789e-07 | 0.999999 | 2.12799e-07 | 0.999999 |
| rad35              | 1.79886e-07 | 0.999999 | 1.79894e-07 | 0.999999 |
| rad10              | 1.51960e-07 | 1.000000 | 1.51967e-07 | 1.000000 |
| rad38              | 1.24108e-07 | 1.000000 | 1.24114e-07 | 1.000000 |
| rad11              | 1.07293e-07 | 1.000000 | 1.07298e-07 | 1.000000 |
| rad37              | 8.77460e-08 | 1.000000 | 8.77500e-08 | 1.000000 |
| rad3               | 1.87107e-08 | 1.000000 | 1.87115e-08 | 1.000000 |
| rad4               | 9.81965e-09 | 1.000000 | 9.82012e-09 | 1.000000 |
| rad5               | 2.91108e-09 | 1.000000 | 2.91121e-09 | 1.000000 |
| rad46              | 2.48601e-09 | 1.000000 | 2.48612e-09 | 1.000000 |
| rad13              | 2.42853e-09 | 1.000000 | 2.42864e-09 | 1.000000 |
| rad60syn           | 4.32862e-10 | 1.000000 | 4.32882e-10 | 1.000000 |
| rad60anti          | 1.62530e-10 | 1.000000 | 1.62537e-10 | 1.000000 |
| PAH3+H             | 8.49798e-12 | 1.000000 | 8.49837e-12 | 1.000000 |
| rad19syn           | 5.55400e-12 | 1.000000 | 5.55425e-12 | 1.000000 |
| rad33              | 4.73928e-12 | 1.000000 | 4.73949e-12 | 1.000000 |
| rad14              | 2.49716e-12 | 1.000000 | 2.49727e-12 | 1.000000 |
| rad59              | 2.40242e-12 | 1.000000 | 2.40253e-12 | 1.000000 |
| rad27              | 1.88262e-12 | 1.000000 | 1.88270e-12 | 1.000000 |
| rad25              | 1.70586e-12 | 1.000000 | 1.70593e-12 | 1.000000 |
| rad50              | 3.21237e-13 | 1.000000 | 3.21252e-13 | 1.000000 |
| rad54              | 1.66304e-13 | 1.000000 | 1.66312e-13 | 1.000000 |
| PAH10+CH3          | 1.09620e-13 | 1.000000 | 1.09625e-13 | 1.000000 |
| rad43              | 2.53853e-14 | 1.000000 | 2.53865e-14 | 1.000000 |
| rad62              | 7.79228e-15 | 1.000000 | 7.79264e-15 | 1.000000 |
| rad23              | 5.48464e-15 | 1.000000 | 5.48489e-15 | 1.000000 |
| PhcycC3H3_A+H      | 7.72958e-16 | 1.000000 | 7.72993e-16 | 1.000000 |
| rad70              | 4.27794e-16 | 1.000000 | 4.27813e-16 | 1.000000 |
| rad52              | 2.37342e-16 | 1.000000 | 2.37352e-16 | 1.000000 |
| rad55              | 2.02356e-16 | 1.000000 | 2.02365e-16 | 1.000000 |
| rad31              | 1.49080e-16 | 1.000000 | 1.49088e-16 | 1.000000 |
| rad45              | 4.61552e-17 | 1.000000 | 4.61573e-17 | 1.000000 |
| rad20              | 4.33325e-17 | 1.000000 | 4.33344e-17 | 1.000000 |
| rad21              | 3.37943e-17 | 1.000000 | 3.37957e-17 | 1.000000 |
| PAH1+H             | 2.22696e-17 | 1.000000 | 2.22706e-17 | 1.000000 |

|       |             |          |             |          |
|-------|-------------|----------|-------------|----------|
| rad51 | 1.28302e-17 | 1.000000 | 1.28307e-17 | 1.000000 |
| rad22 | 3.47919e-18 | 1.000000 | 3.47935e-18 | 1.000000 |
| rad36 | 2.95032e-18 | 1.000000 | 2.95045e-18 | 1.000000 |
| rad34 | 1.30137e-18 | 1.000000 | 1.30142e-18 | 1.000000 |
| rad58 | 6.21703e-19 | 1.000000 | 6.21731e-19 | 1.000000 |
| rad18 | 1.90016e-19 | 1.000000 | 1.90026e-19 | 1.000000 |
| rad65 | 1.39609e-19 | 1.000000 | 1.39616e-19 | 1.000000 |
| rad42 | 2.44403e-20 | 1.000000 | 2.44415e-20 | 1.000000 |
| rad41 | 7.27954e-21 | 1.000000 | 7.27986e-21 | 1.000000 |
| rad24 | 7.72028e-24 | 1.000000 | 7.72064e-24 | 1.000000 |
| rad47 | 1.34647e-28 | 1.000000 | 1.34653e-28 | 1.000000 |

0.100000000E-02 Pa, 270.000000 K

| Rate constant      | True (fraction) |           | Effective (fraction) |           |
|--------------------|-----------------|-----------|----------------------|-----------|
| Total              | 2.15887e-16     | (1.00 )   | 2.15875e-16          | (1.00 )   |
| Formation of rad11 | 1.64133e-16     | (0.760 )  | 1.64123e-16          | (0.760 )  |
| Formation of rad6  | 4.32452e-17     | (0.200 )  | 4.32426e-17          | (0.200 )  |
| H-abstraction      | 8.50919e-18     | (0.0394 ) | 8.50919e-18          | (0.0394 ) |

  

| species            | PYtrue      | Cumul    | PYeffective | Cumul    |
|--------------------|-------------|----------|-------------|----------|
| Indene+H           | 0.915582    | 0.915582 | 0.915634    | 0.915634 |
| Benzene+2-propynyl | 0.0394150   | 0.954997 | 0.0394173   | 0.955051 |
| C2H2+PhCH2         | 0.0207617   | 0.975758 | 0.0207629   | 0.975814 |
| PhCCH+CH3          | 0.0104302   | 0.986189 | 0.0104308   | 0.986245 |
| PhCHCCH2+H         | 0.00521959  | 0.991408 | 0.00521988  | 0.991465 |
| rad6               | 0.00447763  | 0.995886 | 0.00447789  | 0.995943 |
| PhCCCH3+H          | 0.00340115  | 0.999287 | 0.00340135  | 0.999344 |
| Ph+MeAc            | 0.000510344 | 0.999797 | 0.000510374 | 0.999855 |
| Phenyl+Allene      | 5.73346e-05 | 0.999855 | 0.000000    | 0.999855 |
| rad9               | 4.53824e-05 | 0.999900 | 4.53849e-05 | 0.999900 |
| rad8               | 4.42585e-05 | 0.999944 | 4.42610e-05 | 0.999944 |
| PAH7+H             | 3.29154e-05 | 0.999977 | 3.29173e-05 | 0.999977 |
| rad39              | 7.41306e-06 | 0.999985 | 7.41349e-06 | 0.999985 |
| rad28              | 4.16151e-06 | 0.999989 | 4.16175e-06 | 0.999989 |
| rad12              | 2.83130e-06 | 0.999992 | 2.83146e-06 | 0.999992 |
| rad2               | 2.33502e-06 | 0.999994 | 2.33515e-06 | 0.999994 |
| rad30              | 1.69761e-06 | 0.999996 | 1.69771e-06 | 0.999996 |
| PhCH2CCH+H         | 1.64438e-06 | 0.999997 | 1.64447e-06 | 0.999997 |
| rad26              | 4.93499e-07 | 0.999998 | 4.93526e-07 | 0.999998 |
| PAH9+H             | 4.60369e-07 | 0.999998 | 4.60396e-07 | 0.999998 |
| rad15              | 4.17334e-07 | 0.999999 | 4.17358e-07 | 0.999999 |
| rad7               | 3.42108e-07 | 0.999999 | 3.42127e-07 | 0.999999 |
| rad35              | 1.97559e-07 | 0.999999 | 1.97570e-07 | 0.999999 |
| rad1               | 1.71106e-07 | 0.999999 | 1.71115e-07 | 0.999999 |
| rad38              | 1.39344e-07 | 0.999999 | 1.39353e-07 | 0.999999 |
| rad10              | 1.20786e-07 | 1.000000 | 1.20793e-07 | 1.000000 |
| rad37              | 1.10332e-07 | 1.000000 | 1.10338e-07 | 1.000000 |
| rad11              | 8.52864e-08 | 1.000000 | 8.52913e-08 | 1.000000 |
| rad3               | 1.48613e-08 | 1.000000 | 1.48622e-08 | 1.000000 |
| rad4               | 7.82977e-09 | 1.000000 | 7.83021e-09 | 1.000000 |
| rad5               | 4.08591e-09 | 1.000000 | 4.08615e-09 | 1.000000 |
| rad46              | 2.96573e-09 | 1.000000 | 2.96590e-09 | 1.000000 |
| rad13              | 1.93606e-09 | 1.000000 | 1.93617e-09 | 1.000000 |
| rad60syn           | 5.41554e-10 | 1.000000 | 5.41585e-10 | 1.000000 |
| rad60anti          | 2.06771e-10 | 1.000000 | 2.06783e-10 | 1.000000 |
| PAH3+H             | 1.33279e-11 | 1.000000 | 1.33287e-11 | 1.000000 |
| rad19syn           | 1.07119e-11 | 1.000000 | 1.07125e-11 | 1.000000 |
| rad33              | 3.78846e-12 | 1.000000 | 3.78867e-12 | 1.000000 |
| rad59              | 3.68818e-12 | 1.000000 | 3.68839e-12 | 1.000000 |
| rad14              | 1.99641e-12 | 1.000000 | 1.99652e-12 | 1.000000 |
| rad27              | 1.50277e-12 | 1.000000 | 1.50286e-12 | 1.000000 |
| rad25              | 1.36355e-12 | 1.000000 | 1.36363e-12 | 1.000000 |
| rad50              | 5.15347e-13 | 1.000000 | 5.15377e-13 | 1.000000 |
| rad54              | 3.56015e-13 | 1.000000 | 3.56035e-13 | 1.000000 |
| PAH10+CH3          | 2.31955e-13 | 1.000000 | 2.31969e-13 | 1.000000 |
| rad43              | 5.31849e-14 | 1.000000 | 5.31880e-14 | 1.000000 |
| rad62              | 1.74652e-14 | 1.000000 | 1.74662e-14 | 1.000000 |
| rad23              | 5.02377e-15 | 1.000000 | 5.02406e-15 | 1.000000 |
| PhcycC3H3_A+H      | 2.04430e-15 | 1.000000 | 2.04441e-15 | 1.000000 |
| rad70              | 1.09826e-15 | 1.000000 | 1.09832e-15 | 1.000000 |
| rad55              | 5.24700e-16 | 1.000000 | 5.24730e-16 | 1.000000 |
| rad52              | 4.72572e-16 | 1.000000 | 4.72600e-16 | 1.000000 |
| rad31              | 1.35163e-16 | 1.000000 | 1.35171e-16 | 1.000000 |
| PAH1+H             | 6.33811e-17 | 1.000000 | 6.33848e-17 | 1.000000 |
| rad45              | 4.23843e-17 | 1.000000 | 4.23867e-17 | 1.000000 |
| rad20              | 3.77762e-17 | 1.000000 | 3.77784e-17 | 1.000000 |
| rad51              | 3.04436e-17 | 1.000000 | 3.04454e-17 | 1.000000 |



|       |             |          |             |          |
|-------|-------------|----------|-------------|----------|
| rad21 | 2.96034e-17 | 1.000000 | 2.96052e-17 | 1.000000 |
| rad34 | 3.78713e-18 | 1.000000 | 3.78734e-18 | 1.000000 |
| rad22 | 2.93789e-18 | 1.000000 | 2.93807e-18 | 1.000000 |
| rad36 | 2.72462e-18 | 1.000000 | 2.72478e-18 | 1.000000 |
| rad58 | 1.66861e-18 | 1.000000 | 1.66871e-18 | 1.000000 |
| rad65 | 3.55901e-19 | 1.000000 | 3.55921e-19 | 1.000000 |
| rad18 | 1.63875e-19 | 1.000000 | 1.63885e-19 | 1.000000 |
| rad42 | 7.46987e-20 | 1.000000 | 7.47031e-20 | 1.000000 |
| rad41 | 2.24276e-20 | 1.000000 | 2.24289e-20 | 1.000000 |
| rad24 | 7.63142e-24 | 1.000000 | 7.63186e-24 | 1.000000 |
| rad47 | 3.26300e-28 | 1.000000 | 3.26319e-28 | 1.000000 |

0.100000000E-02 Pa, 280.000000 K

| Rate constant      | True (fraction)       | Effective (fraction)  |
|--------------------|-----------------------|-----------------------|
| Total              | 2.79491e-16 (1.00 )   | 2.79471e-16 (1.00 )   |
| Formation of rad11 | 2.09281e-16 (0.749 )  | 2.09265e-16 (0.749 )  |
| Formation of rad6  | 5.79792e-17 (0.207 )  | 5.79748e-17 (0.207 )  |
| H-abstraction      | 1.22310e-17 (0.0438 ) | 1.22310e-17 (0.0438 ) |

| species            | PYtrue      | Cumul    | PYeffective | Cumul    |
|--------------------|-------------|----------|-------------|----------|
| Indene+H           | 0.909388    | 0.909388 | 0.909453    | 0.909453 |
| Benzene+2-propynyl | 0.0437616   | 0.953150 | 0.0437647   | 0.953218 |
| C2H2+PhCH2         | 0.0220030   | 0.975153 | 0.0220046   | 0.975223 |
| PhCCH+CH3          | 0.0112650   | 0.986418 | 0.0112658   | 0.986488 |
| PhCHCCH2+H         | 0.00557984  | 0.991998 | 0.00558024  | 0.992069 |
| PhCCCH3+H          | 0.00363208  | 0.995630 | 0.00363234  | 0.995701 |
| rad6               | 0.00354785  | 0.999178 | 0.00354810  | 0.999249 |
| Ph+MeAc            | 0.000589226 | 0.999767 | 0.000589268 | 0.999838 |
| Phenyl+Allene      | 7.17811e-05 | 0.999839 | 0.000000    | 0.999838 |
| rad9               | 5.16381e-05 | 0.999890 | 5.16419e-05 | 0.999890 |
| rad8               | 4.81746e-05 | 0.999939 | 4.81781e-05 | 0.999938 |
| PAH7+H             | 3.79963e-05 | 0.999977 | 3.79990e-05 | 0.999976 |
| rad39              | 8.71257e-06 | 0.999985 | 8.71319e-06 | 0.999985 |
| rad28              | 3.30990e-06 | 0.999989 | 3.31013e-06 | 0.999988 |
| rad12              | 3.15182e-06 | 0.999992 | 3.15205e-06 | 0.999991 |
| PhCH2CCH+H         | 2.29215e-06 | 0.999994 | 2.29232e-06 | 0.999994 |
| rad2               | 1.85158e-06 | 0.999996 | 1.85172e-06 | 0.999996 |
| rad30              | 1.84559e-06 | 0.999998 | 1.84573e-06 | 0.999997 |
| PAH9+H             | 5.12585e-07 | 0.999998 | 5.12622e-07 | 0.999998 |
| rad15              | 4.61488e-07 | 0.999999 | 4.61522e-07 | 0.999998 |
| rad26              | 3.91725e-07 | 0.999999 | 3.91753e-07 | 0.999999 |
| rad7               | 2.71482e-07 | 0.999999 | 2.71502e-07 | 0.999999 |
| rad35              | 2.17123e-07 | 1.000000 | 2.17139e-07 | 0.999999 |
| rad38              | 1.56576e-07 | 1.000000 | 1.56587e-07 | 0.999999 |
| rad1               | 1.37638e-07 | 1.000000 | 1.37648e-07 | 1.000000 |
| rad37              | 1.36972e-07 | 1.000000 | 1.36981e-07 | 1.000000 |
| rad10              | 9.59633e-08 | 1.000000 | 9.59697e-08 | 1.000000 |
| rad11              | 6.77214e-08 | 1.000000 | 6.77262e-08 | 1.000000 |
| rad3               | 1.17978e-08 | 1.000000 | 1.17986e-08 | 1.000000 |
| rad4               | 6.24174e-09 | 1.000000 | 6.24219e-09 | 1.000000 |
| rad5               | 5.62801e-09 | 1.000000 | 5.62841e-09 | 1.000000 |
| rad46              | 3.53791e-09 | 1.000000 | 3.53817e-09 | 1.000000 |
| rad13              | 1.54187e-09 | 1.000000 | 1.54198e-09 | 1.000000 |
| rad60syn           | 6.74797e-10 | 1.000000 | 6.74846e-10 | 1.000000 |
| rad60anti          | 2.61711e-10 | 1.000000 | 2.61730e-10 | 1.000000 |
| PAH3+H             | 2.04901e-11 | 1.000000 | 2.04915e-11 | 1.000000 |
| rad19syn           | 1.98118e-11 | 1.000000 | 1.98132e-11 | 1.000000 |
| rad59              | 5.55598e-12 | 1.000000 | 5.55638e-12 | 1.000000 |
| rad33              | 3.02578e-12 | 1.000000 | 3.02599e-12 | 1.000000 |
| rad14              | 1.59477e-12 | 1.000000 | 1.59489e-12 | 1.000000 |
| rad27              | 1.19887e-12 | 1.000000 | 1.19896e-12 | 1.000000 |
| rad25              | 1.08893e-12 | 1.000000 | 1.08901e-12 | 1.000000 |
| rad50              | 8.11653e-13 | 1.000000 | 8.11712e-13 | 1.000000 |
| rad54              | 7.23940e-13 | 1.000000 | 7.23993e-13 | 1.000000 |
| PAH10+CH3          | 4.65769e-13 | 1.000000 | 4.65802e-13 | 1.000000 |
| rad43              | 1.05713e-13 | 1.000000 | 1.05721e-13 | 1.000000 |
| rad62              | 3.69328e-14 | 1.000000 | 3.69354e-14 | 1.000000 |
| PhcycC3H3_A+H      | 5.01202e-15 | 1.000000 | 5.01238e-15 | 1.000000 |
| rad23              | 4.79415e-15 | 1.000000 | 4.79449e-15 | 1.000000 |
| rad70              | 2.62230e-15 | 1.000000 | 2.62249e-15 | 1.000000 |
| rad55              | 1.26395e-15 | 1.000000 | 1.26404e-15 | 1.000000 |
| rad52              | 9.04316e-16 | 1.000000 | 9.04381e-16 | 1.000000 |
| PAH1+H             | 1.65527e-16 | 1.000000 | 1.65539e-16 | 1.000000 |
| rad31              | 1.25058e-16 | 1.000000 | 1.25067e-16 | 1.000000 |
| rad51              | 6.80515e-17 | 1.000000 | 6.80564e-17 | 1.000000 |
| rad45              | 4.05978e-17 | 1.000000 | 4.06007e-17 | 1.000000 |
| rad20              | 3.29936e-17 | 1.000000 | 3.29960e-17 | 1.000000 |

|       |             |         |             |          |
|-------|-------------|---------|-------------|----------|
| rad21 | 2.59877e-17 | 1.00000 | 2.59895e-17 | 1.000000 |
| rad34 | 1.00852e-17 | 1.00000 | 1.00859e-17 | 1.000000 |
| rad58 | 4.14531e-18 | 1.00000 | 4.14561e-18 | 1.000000 |
| rad36 | 2.62617e-18 | 1.00000 | 2.62636e-18 | 1.000000 |
| rad22 | 2.53560e-18 | 1.00000 | 2.53578e-18 | 1.000000 |
| rad65 | 8.46185e-19 | 1.00000 | 8.46245e-19 | 1.000000 |
| rad42 | 2.07592e-19 | 1.00000 | 2.07607e-19 | 1.000000 |
| rad18 | 1.41458e-19 | 1.00000 | 1.41468e-19 | 1.000000 |
| rad41 | 6.27698e-20 | 1.00000 | 6.27743e-20 | 1.000000 |
| rad24 | 7.63467e-24 | 1.00000 | 7.63521e-24 | 1.000000 |
| rad47 | 7.35072e-28 | 1.00000 | 7.35124e-28 | 1.000000 |

0.100000000E-02 Pa, 290.000000 K

| Rate constant      | True (fraction)       | Effective (fraction)  |
|--------------------|-----------------------|-----------------------|
| Total              | 3.55893e-16 (1.00 )   | 3.55862e-16 (1.00 )   |
| Formation of rad11 | 2.62555e-16 (0.738 )  | 2.62530e-16 (0.738 )  |
| Formation of rad6  | 7.62093e-17 (0.214 )  | 7.62022e-17 (0.214 )  |
| H-abstraction      | 1.71289e-17 (0.0481 ) | 1.71289e-17 (0.0481 ) |

| species            | PYtrue      | Cumul    | PYeffective | Cumul    |
|--------------------|-------------|----------|-------------|----------|
| Indene+H           | 0.902834    | 0.902834 | 0.902916    | 0.902916 |
| Benzene+2-propynyl | 0.0481294   | 0.950963 | 0.0481337   | 0.951049 |
| C2H2+PhCH2         | 0.0233168   | 0.974280 | 0.0233189   | 0.974368 |
| PhCCH+CH3          | 0.0121416   | 0.986422 | 0.0121427   | 0.986511 |
| PhCHCCH2+H         | 0.00595442  | 0.992376 | 0.00595495  | 0.992466 |
| PhCCCH3+H          | 0.00386910  | 0.996245 | 0.00386944  | 0.996335 |
| rad6               | 0.00280803  | 0.999053 | 0.00280828  | 0.999144 |
| Ph+MeAc            | 0.000676694 | 0.999730 | 0.000676754 | 0.999820 |
| Phenyl+Allene      | 8.93509e-05 | 0.999819 | 0.000000    | 0.999820 |
| rad9               | 5.86270e-05 | 0.999878 | 5.86322e-05 | 0.999879 |
| rad8               | 5.22846e-05 | 0.999930 | 5.22893e-05 | 0.999931 |
| PAH7+H             | 4.37640e-05 | 0.999974 | 4.37679e-05 | 0.999975 |
| rad39              | 1.02041e-05 | 0.999984 | 1.02051e-05 | 0.999985 |
| rad12              | 3.49494e-06 | 0.999988 | 3.49525e-06 | 0.999989 |
| PhCH2CCH+H         | 3.15260e-06 | 0.999991 | 3.15288e-06 | 0.999992 |
| rad28              | 2.62922e-06 | 0.999994 | 2.62945e-06 | 0.999995 |
| rad30              | 2.00634e-06 | 0.999996 | 2.00652e-06 | 0.999997 |
| rad2               | 1.46769e-06 | 0.999997 | 1.46783e-06 | 0.999998 |
| PAH9+H             | 5.71153e-07 | 0.999998 | 5.71204e-07 | 0.999999 |
| rad15              | 5.10201e-07 | 0.999998 | 5.10247e-07 | 0.999999 |
| rad26              | 3.10651e-07 | 0.999998 | 3.10679e-07 | 0.999999 |
| rad35              | 2.38782e-07 | 0.999999 | 2.38804e-07 | 1.000000 |
| rad7               | 2.15227e-07 | 0.999999 | 2.15246e-07 | 1.000000 |
| rad38              | 1.76059e-07 | 0.999999 | 1.76075e-07 | 1.000000 |
| rad37              | 1.68091e-07 | 0.999999 | 1.68106e-07 | 1.000000 |
| rad1               | 1.10786e-07 | 0.999999 | 1.10796e-07 | 1.000000 |
| rad10              | 7.62233e-08 | 0.999999 | 7.62301e-08 | 1.000000 |
| rad11              | 5.37236e-08 | 0.999999 | 5.37284e-08 | 1.000000 |
| rad3               | 9.36292e-09 | 1.000000 | 9.36377e-09 | 1.000000 |
| rad5               | 7.61954e-09 | 1.000000 | 7.62022e-09 | 1.000000 |
| rad4               | 4.97580e-09 | 1.000000 | 4.97624e-09 | 1.000000 |
| rad46              | 4.21934e-09 | 1.000000 | 4.21972e-09 | 1.000000 |
| rad13              | 1.22683e-09 | 1.000000 | 1.22695e-09 | 1.000000 |
| rad60syn           | 8.37397e-10 | 1.000000 | 8.37472e-10 | 1.000000 |
| rad60anti          | 3.29580e-10 | 1.000000 | 3.29610e-10 | 1.000000 |
| rad19syn           | 3.52674e-11 | 1.000000 | 3.52706e-11 | 1.000000 |
| PAH3+H             | 3.09230e-11 | 1.000000 | 3.09258e-11 | 1.000000 |
| rad59              | 8.22450e-12 | 1.000000 | 8.22523e-12 | 1.000000 |
| rad33              | 2.41490e-12 | 1.000000 | 2.41511e-12 | 1.000000 |
| rad54              | 1.40430e-12 | 1.000000 | 1.40443e-12 | 1.000000 |
| rad14              | 1.27310e-12 | 1.000000 | 1.27322e-12 | 1.000000 |
| rad50              | 1.25621e-12 | 1.000000 | 1.25632e-12 | 1.000000 |
| rad27              | 9.56068e-13 | 1.000000 | 9.56150e-13 | 1.000000 |
| PAH10+CH3          | 8.91605e-13 | 1.000000 | 8.91685e-13 | 1.000000 |
| rad25              | 8.68939e-13 | 1.000000 | 8.69017e-13 | 1.000000 |
| rad43              | 2.00295e-13 | 1.000000 | 2.00313e-13 | 1.000000 |
| rad62              | 7.40610e-14 | 1.000000 | 7.40676e-14 | 1.000000 |
| PhcycC3H3_A+H      | 1.14672e-14 | 1.000000 | 1.14682e-14 | 1.000000 |
| rad70              | 5.86058e-15 | 1.000000 | 5.86111e-15 | 1.000000 |
| rad23              | 4.78550e-15 | 1.000000 | 4.78593e-15 | 1.000000 |
| rad55              | 2.84689e-15 | 1.000000 | 2.84716e-15 | 1.000000 |
| rad52              | 1.66770e-15 | 1.000000 | 1.66784e-15 | 1.000000 |
| PAH1+H             | 3.99939e-16 | 1.000000 | 3.99974e-16 | 1.000000 |
| rad51              | 1.43930e-16 | 1.000000 | 1.43943e-16 | 1.000000 |
| rad31              | 1.18690e-16 | 1.000000 | 1.18700e-16 | 1.000000 |
| rad45              | 4.07398e-17 | 1.000000 | 4.07434e-17 | 1.000000 |
| rad20              | 2.88770e-17 | 1.000000 | 2.88795e-17 | 1.000000 |

|       |             |          |             |         |
|-------|-------------|----------|-------------|---------|
| rad34 | 2.47885e-17 | 1.000000 | 2.47907e-17 | 1.00000 |
| rad21 | 2.28683e-17 | 1.000000 | 2.28703e-17 | 1.00000 |
| rad58 | 9.59714e-18 | 1.000000 | 9.59805e-18 | 1.00000 |
| rad36 | 2.65358e-18 | 1.000000 | 2.65381e-18 | 1.00000 |
| rad22 | 2.25050e-18 | 1.000000 | 2.25071e-18 | 1.00000 |
| rad65 | 1.88709e-18 | 1.000000 | 1.88726e-18 | 1.00000 |
| rad42 | 5.29609e-19 | 1.000000 | 5.29657e-19 | 1.00000 |
| rad41 | 1.61146e-19 | 1.000000 | 1.61160e-19 | 1.00000 |
| rad18 | 1.22238e-19 | 1.000000 | 1.22249e-19 | 1.00000 |
| rad24 | 7.73364e-24 | 1.000000 | 7.73434e-24 | 1.00000 |
| rad47 | 1.55167e-27 | 1.000000 | 1.55181e-27 | 1.00000 |

0.100000000E-02 Pa, 300.000000 K

| Rate constant      | True (fraction)       | Effective (fraction)  |
|--------------------|-----------------------|-----------------------|
| Total              | 6.34395e-16 (1.00 )   | 6.34337e-16 (1.00 )   |
| Formation of rad11 | 4.51153e-16 (0.711 )  | 4.51110e-16 (0.711 )  |
| Formation of rad6  | 1.51589e-16 (0.239 )  | 1.51574e-16 (0.239 )  |
| H-abstraction      | 3.16530e-17 (0.0499 ) | 3.16530e-17 (0.0499 ) |

| species            | PYtrue      | Cumul    | PYeffective | Cumul    |
|--------------------|-------------|----------|-------------|----------|
| Indene+H           | 0.890144    | 0.890144 | 0.890225    | 0.890225 |
| Benzene+2-propynyl | 0.0498949   | 0.940039 | 0.0498994   | 0.940125 |
| C2H2+PhCH2         | 0.0315819   | 0.971621 | 0.0315847   | 0.971709 |
| PhCCH+CH3          | 0.0147194   | 0.986340 | 0.0147208   | 0.986430 |
| PhCHCCH2+H         | 0.00649429  | 0.992834 | 0.00649488  | 0.992925 |
| PhCCCH3+H          | 0.00441001  | 0.997244 | 0.00441041  | 0.997335 |
| rad6               | 0.00174127  | 0.998986 | 0.00174143  | 0.999077 |
| Ph+MeAc            | 0.000832183 | 0.999818 | 0.000832259 | 0.999909 |
| Phenyl+Allene      | 9.10077e-05 | 0.999909 | 0.00000     | 0.999909 |
| PAH7+H             | 6.53791e-05 | 0.999974 | 6.53851e-05 | 0.999974 |
| rad39              | 1.30282e-05 | 0.999987 | 1.30294e-05 | 0.999987 |
| PhCH2CCH+H         | 5.21654e-06 | 0.999993 | 5.21702e-06 | 0.999993 |
| rad30              | 2.18938e-06 | 0.999995 | 2.18958e-06 | 0.999995 |
| rad28              | 1.61354e-06 | 0.999996 | 1.61368e-06 | 0.999997 |
| rad2               | 9.41742e-07 | 0.999997 | 9.41828e-07 | 0.999997 |
| PAH9+H             | 7.92600e-07 | 0.999998 | 7.92672e-07 | 0.999998 |
| rad19anti          | 6.98505e-07 | 0.999999 | 6.98569e-07 | 0.999999 |
| rad35              | 2.84344e-07 | 0.999999 | 2.84369e-07 | 0.999999 |
| rad37              | 2.26489e-07 | 0.999999 | 2.26510e-07 | 0.999999 |
| rad38              | 2.11061e-07 | 0.999999 | 2.11080e-07 | 1.000000 |
| rad26              | 2.01588e-07 | 1.000000 | 2.01606e-07 | 1.000000 |
| rad7               | 1.53942e-07 | 1.000000 | 1.53956e-07 | 1.00000  |
| rad1               | 7.09640e-08 | 1.000000 | 7.09704e-08 | 1.00000  |
| rad10              | 5.41028e-08 | 1.000000 | 5.41077e-08 | 1.00000  |
| rad11              | 3.76413e-08 | 1.00000  | 3.76446e-08 | 1.00000  |
| rad3               | 6.38778e-09 | 1.00000  | 6.38836e-09 | 1.00000  |
| rad46              | 5.65066e-09 | 1.00000  | 5.65118e-09 | 1.00000  |
| rad4               | 3.17666e-09 | 1.00000  | 3.17695e-09 | 1.00000  |
| rad60syn           | 1.07700e-09 | 1.00000  | 1.07710e-09 | 1.00000  |
| rad13              | 8.90961e-10 | 1.00000  | 8.91042e-10 | 1.00000  |
| rad60anti          | 4.37499e-10 | 1.00000  | 4.37538e-10 | 1.00000  |
| rad19syn           | 6.93023e-11 | 1.00000  | 6.93086e-11 | 1.00000  |
| PAH3+H             | 6.10598e-11 | 1.00000  | 6.10654e-11 | 1.00000  |
| rad59              | 1.31883e-11 | 1.00000  | 1.31895e-11 | 1.00000  |
| rad54              | 3.22176e-12 | 1.00000  | 3.22205e-12 | 1.00000  |
| rad50              | 2.22789e-12 | 1.00000  | 2.22809e-12 | 1.00000  |
| rad33              | 2.14107e-12 | 1.00000  | 2.14126e-12 | 1.00000  |
| PAH10+CH3          | 2.02809e-12 | 1.00000  | 2.02827e-12 | 1.00000  |
| rad14              | 1.05477e-12 | 1.00000  | 1.05487e-12 | 1.00000  |
| rad25              | 9.04838e-13 | 1.00000  | 9.04920e-13 | 1.00000  |
| rad27              | 8.58411e-13 | 1.00000  | 8.58490e-13 | 1.00000  |
| rad67              | 7.75650e-13 | 1.00000  | 7.75720e-13 | 1.00000  |
| rad23              | 4.80115e-13 | 1.00000  | 4.80159e-13 | 1.00000  |
| rad43              | 4.01766e-13 | 1.00000  | 4.01803e-13 | 1.00000  |
| rad62              | 1.66732e-13 | 1.00000  | 1.66747e-13 | 1.00000  |
| PhcycC3H3_A+H      | 4.89417e-14 | 1.00000  | 4.89461e-14 | 1.00000  |
| rad70              | 1.94751e-14 | 1.00000  | 1.94769e-14 | 1.00000  |
| rad55              | 8.49269e-15 | 1.00000  | 8.49346e-15 | 1.00000  |
| rad45              | 5.78669e-15 | 1.00000  | 5.78721e-15 | 1.00000  |
| rad52              | 3.84568e-15 | 1.00000  | 3.84604e-15 | 1.00000  |
| PAH1+H             | 2.34554e-15 | 1.00000  | 2.34576e-15 | 1.00000  |
| rad21              | 6.57974e-16 | 1.00000  | 6.58035e-16 | 1.00000  |
| rad20              | 6.23188e-16 | 1.00000  | 6.23245e-16 | 1.00000  |
| rad31              | 5.35477e-16 | 1.00000  | 5.35526e-16 | 1.00000  |
| rad51              | 4.07683e-16 | 1.00000  | 4.07720e-16 | 1.00000  |
| rad22              | 3.92044e-16 | 1.00000  | 3.92080e-16 | 1.00000  |
| rad36              | 1.97228e-16 | 1.00000  | 1.97246e-16 | 1.00000  |

|           |             |         |             |         |
|-----------|-------------|---------|-------------|---------|
| rad34     | 1.57844e-16 | 1.00000 | 1.57858e-16 | 1.00000 |
| rad9      | 1.21773e-16 | 1.00000 | 1.21784e-16 | 1.00000 |
| rad58     | 2.99659e-17 | 1.00000 | 2.99686e-17 | 1.00000 |
| rad18     | 1.54425e-17 | 1.00000 | 1.54439e-17 | 1.00000 |
| rad65     | 6.36159e-18 | 1.00000 | 6.36217e-18 | 1.00000 |
| rad42     | 4.93590e-18 | 1.00000 | 4.93635e-18 | 1.00000 |
| rad41     | 1.53155e-18 | 1.00000 | 1.53170e-18 | 1.00000 |
| rad5      | 1.22887e-19 | 1.00000 | 1.22898e-19 | 1.00000 |
| rad53     | 1.09705e-19 | 1.00000 | 1.09715e-19 | 1.00000 |
| rad15     | 7.22882e-20 | 1.00000 | 7.22948e-20 | 1.00000 |
| rad64     | 2.63901e-20 | 1.00000 | 2.63926e-20 | 1.00000 |
| rad24     | 3.46069e-21 | 1.00000 | 3.46101e-21 | 1.00000 |
| rad56     | 3.11031e-22 | 1.00000 | 3.11059e-22 | 1.00000 |
| rad61     | 3.56533e-23 | 1.00000 | 3.56565e-23 | 1.00000 |
| rad68syn  | 3.28857e-23 | 1.00000 | 3.28887e-23 | 1.00000 |
| rad68anti | 2.37038e-23 | 1.00000 | 2.37060e-23 | 1.00000 |
| rad12     | 1.45153e-24 | 1.00000 | 1.45167e-24 | 1.00000 |
| rad40syn  | 5.33221e-26 | 1.00000 | 5.33270e-26 | 1.00000 |
| rad40anti | 1.32404e-26 | 1.00000 | 1.32416e-26 | 1.00000 |
| PAH8+H    | 1.18658e-26 | 1.00000 | 1.18669e-26 | 1.00000 |
| rad73     | 1.00791e-26 | 1.00000 | 1.00800e-26 | 1.00000 |
| rad47     | 2.86509e-27 | 1.00000 | 2.86535e-27 | 1.00000 |
| rad71     | 9.41571e-29 | 1.00000 | 9.41657e-29 | 1.00000 |
| rad72     | 1.61244e-36 | 1.00000 | 1.61259e-36 | 1.00000 |
| rad8      | 1.69064e-38 | 1.00000 | 1.69079e-38 | 1.00000 |

0.100000000E-02 Pa, 400.000000 K

| Rate constant      | True (fraction) |           | Effective (fraction) |           |
|--------------------|-----------------|-----------|----------------------|-----------|
| Total              | 5.11288e-15     | (1.00 )   | 5.10969e-15          | (1.00 )   |
| Formation of rad11 | 3.08094e-15     | (0.603 )  | 3.07881e-15          | (0.603 )  |
| Formation of rad6  | 1.54092e-15     | (0.301 )  | 1.53986e-15          | (0.301 )  |
| H-abstraction      | 4.91025e-16     | (0.0960 ) | 4.91025e-16          | (0.0961 ) |

  

| species            | PYtrue      | Cumul    | PYeffective | Cumul    |
|--------------------|-------------|----------|-------------|----------|
| Indene+H           | 0.804539    | 0.804539 | 0.805042    | 0.805042 |
| Benzene+2-propynyl | 0.0960368   | 0.900576 | 0.0960968   | 0.901139 |
| C2H2+PhCH2         | 0.0524214   | 0.952997 | 0.0524541   | 0.953593 |
| PhCCH+CH3          | 0.0261790   | 0.979176 | 0.0261955   | 0.979789 |
| PhCHCCH2+H         | 0.0106401   | 0.989816 | 0.0106468   | 0.990436 |
| PhCCH3+H           | 0.00673971  | 0.996556 | 0.00674392  | 0.997180 |
| Ph+MeAc            | 0.00227990  | 0.998836 | 0.00228133  | 0.999461 |
| Phenyl+Allene      | 0.000625171 | 0.999461 | 0.00000     | 0.999461 |
| PAH7+H             | 0.000215237 | 0.999676 | 0.000215372 | 0.999676 |
| rad6               | 0.000199164 | 0.999875 | 0.000199289 | 0.999876 |
| PhCH2CCH+H         | 6.37598e-05 | 0.999939 | 6.37997e-05 | 0.999939 |
| rad39              | 4.87491e-05 | 0.999988 | 4.87796e-05 | 0.999988 |
| rad30              | 4.70353e-06 | 0.999993 | 4.70647e-06 | 0.999993 |
| rad19anti          | 2.54864e-06 | 0.999995 | 2.55024e-06 | 0.999995 |
| PAH9+H             | 2.26768e-06 | 0.999998 | 2.26910e-06 | 0.999998 |
| rad37              | 9.70667e-07 | 0.999998 | 9.71271e-07 | 0.999999 |
| rad35              | 7.26210e-07 | 0.999999 | 7.26664e-07 | 0.999999 |
| rad38              | 6.63135e-07 | 1.000000 | 6.63550e-07 | 1.000000 |
| rad28              | 1.90678e-07 | 1.00000  | 1.90798e-07 | 1.00000  |
| rad2               | 1.50739e-07 | 1.00000  | 1.50833e-07 | 1.00000  |
| rad46              | 2.95593e-08 | 1.00000  | 2.95778e-08 | 1.00000  |
| rad26              | 2.48385e-08 | 1.00000  | 2.48541e-08 | 1.00000  |
| rad7               | 1.85297e-08 | 1.00000  | 1.85413e-08 | 1.00000  |
| rad1               | 1.40283e-08 | 1.00000  | 1.40371e-08 | 1.00000  |
| rad10              | 8.97017e-09 | 1.00000  | 8.97579e-09 | 1.00000  |
| rad60syn           | 6.76466e-09 | 1.00000  | 6.76890e-09 | 1.00000  |
| rad11              | 4.63114e-09 | 1.00000  | 4.63403e-09 | 1.00000  |
| rad19syn           | 4.62760e-09 | 1.00000  | 4.63049e-09 | 1.00000  |
| rad60anti          | 3.07207e-09 | 1.00000  | 3.07399e-09 | 1.00000  |
| PAH3+H             | 1.45765e-09 | 1.00000  | 1.45856e-09 | 1.00000  |
| rad3               | 1.16909e-09 | 1.00000  | 1.16981e-09 | 1.00000  |
| rad4               | 6.15693e-10 | 1.00000  | 6.16078e-10 | 1.00000  |
| rad54              | 4.18662e-10 | 1.00000  | 4.18924e-10 | 1.00000  |
| rad59              | 2.84635e-10 | 1.00000  | 2.84813e-10 | 1.00000  |
| PAH10+CH3          | 1.98083e-10 | 1.00000  | 1.98207e-10 | 1.00000  |
| rad13              | 1.13759e-10 | 1.00000  | 1.13830e-10 | 1.00000  |
| rad50              | 7.81096e-11 | 1.00000  | 7.81584e-11 | 1.00000  |
| rad23              | 4.85344e-11 | 1.00000  | 4.85648e-11 | 1.00000  |
| rad43              | 3.26742e-11 | 1.00000  | 3.26946e-11 | 1.00000  |
| rad67              | 2.48913e-11 | 1.00000  | 2.49068e-11 | 1.00000  |
| PhcycC3H3_A+H      | 2.37992e-11 | 1.00000  | 2.38141e-11 | 1.00000  |
| rad62              | 2.26680e-11 | 1.00000  | 2.26822e-11 | 1.00000  |
| rad70              | 7.63989e-12 | 1.00000  | 7.64467e-12 | 1.00000  |

|           |             |         |             |         |
|-----------|-------------|---------|-------------|---------|
| rad55     | 3.50827e-12 | 1.00000 | 3.51046e-12 | 1.00000 |
| rad45     | 2.32238e-12 | 1.00000 | 2.32384e-12 | 1.00000 |
| PAH1+H    | 2.19405e-12 | 1.00000 | 2.19542e-12 | 1.00000 |
| rad52     | 4.56321e-13 | 1.00000 | 4.56606e-13 | 1.00000 |
| rad33     | 3.00045e-13 | 1.00000 | 3.00233e-13 | 1.00000 |
| rad34     | 1.75091e-13 | 1.00000 | 1.75201e-13 | 1.00000 |
| rad14     | 1.57595e-13 | 1.00000 | 1.57694e-13 | 1.00000 |
| rad51     | 1.37008e-13 | 1.00000 | 1.37094e-13 | 1.00000 |
| rad25     | 1.36204e-13 | 1.00000 | 1.36289e-13 | 1.00000 |
| rad27     | 1.35510e-13 | 1.00000 | 1.35595e-13 | 1.00000 |
| rad36     | 8.92435e-14 | 1.00000 | 8.92993e-14 | 1.00000 |
| rad58     | 1.74187e-14 | 1.00000 | 1.74296e-14 | 1.00000 |
| rad22     | 7.50647e-15 | 1.00000 | 7.51116e-15 | 1.00000 |
| rad42     | 7.28224e-15 | 1.00000 | 7.28679e-15 | 1.00000 |
| rad31     | 4.81347e-15 | 1.00000 | 4.81648e-15 | 1.00000 |
| rad65     | 3.20527e-15 | 1.00000 | 3.20728e-15 | 1.00000 |
| rad41     | 2.20600e-15 | 1.00000 | 2.20738e-15 | 1.00000 |
| rad53     | 9.04243e-16 | 1.00000 | 9.04807e-16 | 1.00000 |
| rad9      | 4.62469e-16 | 1.00000 | 4.62759e-16 | 1.00000 |
| rad21     | 3.29900e-16 | 1.00000 | 3.30105e-16 | 1.00000 |
| rad64     | 3.15118e-16 | 1.00000 | 3.15315e-16 | 1.00000 |
| rad20     | 2.76850e-16 | 1.00000 | 2.77024e-16 | 1.00000 |
| rad56     | 1.60206e-17 | 1.00000 | 1.60305e-17 | 1.00000 |
| rad18     | 5.14256e-18 | 1.00000 | 5.14578e-18 | 1.00000 |
| rad68syn  | 1.85200e-18 | 1.00000 | 1.85316e-18 | 1.00000 |
| rad68anti | 1.33298e-18 | 1.00000 | 1.33381e-18 | 1.00000 |
| rad61     | 9.28587e-19 | 1.00000 | 9.29167e-19 | 1.00000 |
| rad15     | 2.91462e-19 | 1.00000 | 2.91644e-19 | 1.00000 |
| rad5      | 1.18636e-19 | 1.00000 | 1.18711e-19 | 1.00000 |
| rad24     | 2.69339e-20 | 1.00000 | 2.69507e-20 | 1.00000 |
| rad40syn  | 1.44655e-20 | 1.00000 | 1.44745e-20 | 1.00000 |
| PAH8+H    | 8.93422e-21 | 1.00000 | 8.93981e-21 | 1.00000 |
| rad40anti | 3.68073e-21 | 1.00000 | 3.68303e-21 | 1.00000 |
| rad73     | 2.49619e-21 | 1.00000 | 2.49775e-21 | 1.00000 |
| rad71     | 1.21150e-22 | 1.00000 | 1.21226e-22 | 1.00000 |
| rad12     | 2.60052e-23 | 1.00000 | 2.60215e-23 | 1.00000 |
| rad47     | 7.50685e-25 | 1.00000 | 7.51155e-25 | 1.00000 |
| rad72     | 1.56213e-26 | 1.00000 | 1.56311e-26 | 1.00000 |
| rad8      | 4.61990e-36 | 1.00000 | 4.62279e-36 | 1.00000 |

0.100000000E-02 Pa, 500.000000 K

| Rate constant      | True (fraction)      | Effective (fraction) |
|--------------------|----------------------|----------------------|
| Total              | 2.11551e-14 (1.00 )  | 2.10968e-14 (1.00 )  |
| Formation of rad11 | 1.10850e-14 (0.524 ) | 1.10494e-14 (0.524 ) |
| Formation of rad6  | 7.08033e-15 (0.335 ) | 7.05760e-15 (0.335 ) |
| H-abstraction      | 2.98976e-15 (0.141 ) | 2.98976e-15 (0.142 ) |

| species            | PYtrue      | Cumul    | PYeffective | Cumul    |
|--------------------|-------------|----------|-------------|----------|
| Indene+H           | 0.706825    | 0.706825 | 0.708779    | 0.708779 |
| Benzene+2-propynyl | 0.141326    | 0.848150 | 0.141716    | 0.850496 |
| C2H2+PhCH2         | 0.0810622   | 0.929213 | 0.0812863   | 0.931782 |
| PhCCH+CH3          | 0.0389243   | 0.968137 | 0.0390319   | 0.970814 |
| PhCHCCH2+H         | 0.0153825   | 0.983519 | 0.0154250   | 0.986239 |
| PhCCCH3+H          | 0.00823305  | 0.991752 | 0.00825582  | 0.994495 |
| Ph+MeAc            | 0.00432598  | 0.996078 | 0.00433795  | 0.998833 |
| Phenyl+Allene      | 0.00275697  | 0.998835 | 0.000000    | 0.998833 |
| PAH7+H             | 0.000574557 | 0.999410 | 0.000576145 | 0.999409 |
| PhCH2CCH+H         | 0.000399493 | 0.999809 | 0.000400598 | 0.999809 |
| rad39              | 0.000137870 | 0.999947 | 0.000138251 | 0.999948 |
| rad6               | 2.29922e-05 | 0.999970 | 2.30557e-05 | 0.999971 |
| rad30              | 9.14205e-06 | 0.999979 | 9.16733e-06 | 0.999980 |
| rad19anti          | 7.87627e-06 | 0.999987 | 7.89805e-06 | 0.999988 |
| PAH9+H             | 6.12528e-06 | 0.999993 | 6.14221e-06 | 0.999994 |
| rad37              | 2.41728e-06 | 0.999996 | 2.42396e-06 | 0.999996 |
| rad38              | 1.93379e-06 | 0.999998 | 1.93913e-06 | 0.999998 |
| rad35              | 1.76497e-06 | 0.999999 | 1.76985e-06 | 1.000000 |
| rad46              | 1.27845e-07 | 1.000000 | 1.28199e-07 | 1.000000 |
| rad19syn           | 7.63955e-08 | 1.000000 | 7.66067e-08 | 1.000000 |
| rad2               | 6.80190e-08 | 1.000000 | 6.82070e-08 | 1.000000 |
| rad60syn           | 2.91284e-08 | 1.000000 | 2.92089e-08 | 1.000000 |
| rad28              | 2.24749e-08 | 1.000000 | 2.25371e-08 | 1.000000 |
| PAH3+H             | 1.45897e-08 | 1.000000 | 1.46301e-08 | 1.000000 |
| rad60anti          | 1.41767e-08 | 1.000000 | 1.42159e-08 | 1.000000 |
| rad54              | 1.02841e-08 | 1.000000 | 1.03125e-08 | 1.000000 |
| rad1               | 8.13360e-09 | 1.000000 | 8.15609e-09 | 1.000000 |
| rad26              | 3.48277e-09 | 1.000000 | 3.49240e-09 | 1.000000 |
| rad10              | 3.42286e-09 | 1.000000 | 3.43232e-09 | 1.000000 |

|               |             |          |             |          |
|---------------|-------------|----------|-------------|----------|
| PAH10+CH3     | 3.35616e-09 | 1.000000 | 3.36544e-09 | 1.000000 |
| rad59         | 2.61913e-09 | 1.000000 | 2.62636e-09 | 1.000000 |
| rad7          | 2.30081e-09 | 1.000000 | 2.30717e-09 | 1.000000 |
| rad23         | 1.88600e-09 | 1.000000 | 1.89122e-09 | 1.000000 |
| PhcycC3H3_A+H | 1.25837e-09 | 1.000000 | 1.26185e-09 | 1.000000 |
| rad50         | 1.15871e-09 | 1.000000 | 1.16191e-09 | 1.000000 |
| rad3          | 9.37896e-10 | 1.000000 | 9.40490e-10 | 1.000000 |
| rad11         | 5.96445e-10 | 1.000000 | 5.98093e-10 | 1.000000 |
| rad4          | 5.30386e-10 | 1.000000 | 5.31852e-10 | 1.000000 |
| rad62         | 4.84004e-10 | 1.000000 | 4.85342e-10 | 1.000000 |
| rad43         | 4.60440e-10 | 1.000000 | 4.61714e-10 | 1.000000 |
| rad67         | 3.97887e-10 | 1.000000 | 3.98988e-10 | 1.000000 |
| rad70         | 3.42514e-10 | 1.000000 | 3.43460e-10 | 1.000000 |
| rad45         | 2.33266e-10 | 1.000000 | 2.33911e-10 | 1.000000 |
| PAH1+H        | 1.64298e-10 | 1.000000 | 1.64752e-10 | 1.000000 |
| rad55         | 1.59820e-10 | 1.000000 | 1.60262e-10 | 1.000000 |
| rad13         | 1.56435e-11 | 1.000000 | 1.56868e-11 | 1.000000 |
| rad34         | 1.41615e-11 | 1.000000 | 1.42006e-11 | 1.000000 |
| rad52         | 1.34864e-11 | 1.000000 | 1.35237e-11 | 1.000000 |
| rad36         | 1.21191e-11 | 1.000000 | 1.21526e-11 | 1.000000 |
| rad51         | 7.25600e-12 | 1.000000 | 7.27606e-12 | 1.000000 |
| rad58         | 1.01105e-12 | 1.000000 | 1.01385e-12 | 1.000000 |
| rad42         | 6.16350e-13 | 1.000000 | 6.18053e-13 | 1.000000 |
| rad53         | 2.35891e-13 | 1.000000 | 2.36542e-13 | 1.000000 |
| rad65         | 2.01968e-13 | 1.000000 | 2.02526e-13 | 1.000000 |
| rad22         | 1.84047e-13 | 1.000000 | 1.84556e-13 | 1.000000 |
| rad41         | 1.64903e-13 | 1.000000 | 1.65359e-13 | 1.000000 |
| rad64         | 9.67597e-14 | 1.000000 | 9.70272e-14 | 1.000000 |
| rad33         | 4.99882e-14 | 1.000000 | 5.01264e-14 | 1.000000 |
| rad27         | 3.61730e-14 | 1.000000 | 3.62730e-14 | 1.000000 |
| rad14         | 3.15609e-14 | 1.000000 | 3.16482e-14 | 1.000000 |
| rad25         | 2.72031e-14 | 1.000000 | 2.72782e-14 | 1.000000 |
| rad31         | 2.30600e-14 | 1.000000 | 2.31237e-14 | 1.000000 |
| rad56         | 1.22141e-14 | 1.000000 | 1.22479e-14 | 1.000000 |
| rad9          | 5.47055e-15 | 1.000000 | 5.48568e-15 | 1.000000 |
| rad68syn      | 1.45390e-15 | 1.000000 | 1.45791e-15 | 1.000000 |
| rad68anti     | 1.02697e-15 | 1.000000 | 1.02982e-15 | 1.000000 |
| rad61         | 4.15842e-16 | 1.000000 | 4.16991e-16 | 1.000000 |
| rad21         | 4.15503e-16 | 1.000000 | 4.16652e-16 | 1.000000 |
| rad20         | 2.67957e-16 | 1.000000 | 2.68698e-16 | 1.000000 |
| PAH8+H        | 3.39132e-17 | 1.000000 | 3.40069e-17 | 1.000000 |
| rad40syn      | 2.93371e-17 | 1.000000 | 2.94182e-17 | 1.000000 |
| rad73         | 1.99417e-17 | 1.000000 | 1.99968e-17 | 1.000000 |
| rad71         | 1.21271e-17 | 1.000000 | 1.21607e-17 | 1.000000 |
| rad40anti     | 8.41493e-18 | 1.000000 | 8.43820e-18 | 1.000000 |
| rad15         | 3.71864e-18 | 1.000000 | 3.72892e-18 | 1.000000 |
| rad18         | 2.39714e-18 | 1.000000 | 2.40377e-18 | 1.000000 |
| rad24         | 1.00044e-18 | 1.000000 | 1.00321e-18 | 1.000000 |
| rad72         | 1.31351e-19 | 1.000000 | 1.31715e-19 | 1.000000 |
| rad5          | 7.52158e-20 | 1.000000 | 7.54237e-20 | 1.000000 |
| rad12         | 7.21852e-21 | 1.000000 | 7.23848e-21 | 1.000000 |
| rad47         | 4.86125e-23 | 1.000000 | 4.87469e-23 | 1.000000 |
| rad8          | 8.46120e-33 | 1.000000 | 8.48460e-33 | 1.000000 |

0.100000000E-02 Pa, 600.000000 K

| Rate constant      | True (fraction)      | Effective (fraction) |
|--------------------|----------------------|----------------------|
| Total              | 6.08120e-14 (1.00 )  | 6.02870e-14 (1.00 )  |
| Formation of rad11 | 2.83304e-14 (0.466 ) | 2.80313e-14 (0.465 ) |
| Formation of rad6  | 2.13840e-14 (0.352 ) | 2.11582e-14 (0.351 ) |
| H-abstraction      | 1.10975e-14 (0.182 ) | 1.10975e-14 (0.184 ) |

| species            | PYtrue      | Cumul    | PYeffective | Cumul    |
|--------------------|-------------|----------|-------------|----------|
| Indene+H           | 0.606958    | 0.606958 | 0.612243    | 0.612243 |
| Benzene+2-propynyl | 0.182488    | 0.789447 | 0.184077    | 0.796320 |
| C2H2+PhCH2         | 0.112822    | 0.902269 | 0.113805    | 0.910125 |
| PhCCH+CH3          | 0.0502849   | 0.952554 | 0.0507228   | 0.960848 |
| PhCHCCH2+H         | 0.0208927   | 0.973447 | 0.0210747   | 0.981923 |
| Phenyl+Allene      | 0.00863292  | 0.982079 | 0.000000    | 0.981923 |
| PhCCCH3+H          | 0.00840770  | 0.990487 | 0.00848094  | 0.990404 |
| Ph+MeAc            | 0.00630808  | 0.996795 | 0.00636301  | 0.996767 |
| PhCH2CCH+H         | 0.00158531  | 0.998381 | 0.00159911  | 0.998366 |
| PAH7+H             | 0.00124693  | 0.999628 | 0.00125779  | 0.999624 |
| rad39              | 0.000304526 | 0.999932 | 0.000307179 | 0.999931 |
| rad19anti          | 2.07270e-05 | 0.999953 | 2.09075e-05 | 0.999952 |
| rad30              | 1.54405e-05 | 0.999968 | 1.55749e-05 | 0.999967 |
| PAH9+H             | 1.45711e-05 | 0.999983 | 1.46979e-05 | 0.999982 |
| rad38              | 4.88276e-06 | 0.999988 | 4.92528e-06 | 0.999987 |

|               |             |          |             |          |
|---------------|-------------|----------|-------------|----------|
| rad37         | 4.23937e-06 | 0.999992 | 4.27629e-06 | 0.999991 |
| rad35         | 3.83111e-06 | 0.999996 | 3.86446e-06 | 0.999995 |
| rad6          | 2.95075e-06 | 0.999999 | 2.97645e-06 | 0.999998 |
| rad19syn      | 5.75836e-07 | 0.999999 | 5.80850e-07 | 0.999999 |
| rad46         | 4.35562e-07 | 1.000000 | 4.39355e-07 | 0.999999 |
| rad54         | 1.01017e-07 | 1.000000 | 1.01896e-07 | 0.999999 |
| rad60syn      | 8.96205e-08 | 1.000000 | 9.04010e-08 | 0.999999 |
| PAH3+H        | 8.11809e-08 | 1.000000 | 8.18876e-08 | 0.999999 |
| rad2          | 5.16112e-08 | 1.000000 | 5.20606e-08 | 0.999999 |
| rad60anti     | 4.57634e-08 | 1.000000 | 4.61620e-08 | 0.999999 |
| PAH10+CH3     | 2.25872e-08 | 1.000000 | 2.27839e-08 | 1.000000 |
| PhcycC3H3_A+H | 2.05528e-08 | 1.000000 | 2.07318e-08 | 1.000000 |
| rad59         | 1.35484e-08 | 1.000000 | 1.36664e-08 | 1.000000 |
| rad50         | 9.41193e-09 | 1.000000 | 9.49383e-09 | 1.000000 |
| rad23         | 8.73037e-09 | 1.000000 | 8.80642e-09 | 1.000000 |
| rad1          | 7.86433e-09 | 1.000000 | 7.93282e-09 | 1.000000 |
| rad70         | 4.88193e-09 | 1.000000 | 4.92444e-09 | 1.000000 |
| rad62         | 3.91163e-09 | 1.000000 | 3.94570e-09 | 1.000000 |
| rad67         | 3.65825e-09 | 1.000000 | 3.69011e-09 | 1.000000 |
| PAH1+H        | 3.25979e-09 | 1.000000 | 3.28818e-09 | 1.000000 |
| rad28         | 2.87838e-09 | 1.000000 | 2.90344e-09 | 1.000000 |
| rad43         | 2.57537e-09 | 1.000000 | 2.59779e-09 | 1.000000 |
| rad55         | 2.29327e-09 | 1.000000 | 2.31324e-09 | 1.000000 |
| rad10         | 1.70105e-09 | 1.000000 | 1.71585e-09 | 1.000000 |
| rad45         | 1.25446e-09 | 1.000000 | 1.26537e-09 | 1.000000 |
| rad3          | 1.00557e-09 | 1.000000 | 1.01432e-09 | 1.000000 |
| rad26         | 6.54070e-10 | 1.000000 | 6.59766e-10 | 1.000000 |
| rad4          | 6.35726e-10 | 1.000000 | 6.41261e-10 | 1.000000 |
| rad7          | 3.27583e-10 | 1.000000 | 3.30435e-10 | 1.000000 |
| rad34         | 2.96009e-10 | 1.000000 | 2.98587e-10 | 1.000000 |
| rad52         | 1.71658e-10 | 1.000000 | 1.73153e-10 | 1.000000 |
| rad51         | 1.36050e-10 | 1.000000 | 1.37235e-10 | 1.000000 |
| rad36         | 1.09055e-10 | 1.000000 | 1.10005e-10 | 1.000000 |
| rad11         | 9.01388e-11 | 1.000000 | 9.09240e-11 | 1.000000 |
| rad58         | 1.71361e-11 | 1.000000 | 1.72853e-11 | 1.000000 |
| rad42         | 1.22234e-11 | 1.000000 | 1.23299e-11 | 1.000000 |
| rad53         | 1.06174e-11 | 1.000000 | 1.07098e-11 | 1.000000 |
| rad64         | 4.60213e-12 | 1.000000 | 4.64221e-12 | 1.000000 |
| rad65         | 4.09819e-12 | 1.000000 | 4.13388e-12 | 1.000000 |
| rad41         | 2.76824e-12 | 1.000000 | 2.79235e-12 | 1.000000 |
| rad13         | 2.68232e-12 | 1.000000 | 2.70568e-12 | 1.000000 |
| rad56         | 1.10581e-12 | 1.000000 | 1.11544e-12 | 1.000000 |
| rad22         | 7.56143e-13 | 1.000000 | 7.62728e-13 | 1.000000 |
| rad68syn      | 1.32258e-13 | 1.000000 | 1.33410e-13 | 1.000000 |
| rad9          | 1.27425e-13 | 1.000000 | 1.28535e-13 | 1.000000 |
| rad68anti     | 9.19096e-14 | 1.000000 | 9.27100e-14 | 1.000000 |
| rad71         | 3.99532e-14 | 1.000000 | 4.03011e-14 | 1.000000 |
| rad73         | 3.23649e-14 | 1.000000 | 3.26467e-14 | 1.000000 |
| rad31         | 3.08110e-14 | 1.000000 | 3.10793e-14 | 1.000000 |
| rad61         | 2.52455e-14 | 1.000000 | 2.54654e-14 | 1.000000 |
| rad33         | 1.68923e-14 | 1.000000 | 1.70395e-14 | 1.000000 |
| rad27         | 1.53520e-14 | 1.000000 | 1.54856e-14 | 1.000000 |
| rad25         | 1.04259e-14 | 1.000000 | 1.05167e-14 | 1.000000 |
| rad14         | 1.02170e-14 | 1.000000 | 1.03060e-14 | 1.000000 |
| PAH8+H        | 9.34007e-15 | 1.000000 | 9.42138e-15 | 1.000000 |
| rad40syn      | 5.09677e-15 | 1.000000 | 5.14115e-15 | 1.000000 |
| rad21         | 2.57162e-15 | 1.000000 | 2.59401e-15 | 1.000000 |
| rad40anti     | 1.69276e-15 | 1.000000 | 1.70751e-15 | 1.000000 |
| rad20         | 1.15021e-15 | 1.000000 | 1.16023e-15 | 1.000000 |
| rad72         | 1.12961e-15 | 1.000000 | 1.13944e-15 | 1.000000 |
| rad15         | 8.46582e-17 | 1.000000 | 8.53953e-17 | 1.000000 |
| rad24         | 7.53385e-17 | 1.000000 | 7.59946e-17 | 1.000000 |
| rad12         | 3.32611e-18 | 1.000000 | 3.35507e-18 | 1.000000 |
| rad18         | 1.97648e-18 | 1.000000 | 1.99370e-18 | 1.000000 |
| rad5          | 4.37274e-20 | 1.000000 | 4.41081e-20 | 1.000000 |
| rad47         | 1.07014e-21 | 1.000000 | 1.07946e-21 | 1.000000 |
| rad8          | 7.36801e-29 | 1.000000 | 7.43217e-29 | 1.000000 |

0.100000000E-02 Pa, 700.000000 K

=====

| Rate constant      | True (fraction) |          | Effective (fraction) |          |
|--------------------|-----------------|----------|----------------------|----------|
| Total              | 1.39564e-13     | (1.00 )  | 1.36669e-13          | (1.00 )  |
| Formation of rad11 | 5.88273e-14     | (0.422 ) | 5.72650e-14          | (0.419 ) |
| Formation of rad6  | 5.01684e-14     | (0.359 ) | 4.88360e-14          | (0.357 ) |
| H-abstraction      | 3.05678e-14     | (0.219 ) | 3.05678e-14          | (0.224 ) |
| species            | PYtrue          | Cumul    | PYeffective          | Cumul    |
| Indene+H           | 0.510461        | 0.510461 | 0.521273             | 0.521273 |

|                    |             |          |             |          |
|--------------------|-------------|----------|-------------|----------|
| Benzene+2-propynyl | 0.219024    | 0.729486 | 0.223663    | 0.744936 |
| C2H2+PhCH2         | 0.140685    | 0.870171 | 0.143665    | 0.888601 |
| PhCCH+CH3          | 0.0586069   | 0.928778 | 0.0598482   | 0.948449 |
| PhCHCCH2+H         | 0.0277614   | 0.956539 | 0.0283494   | 0.976799 |
| Phenyl+Allene      | 0.0207412   | 0.977280 | 0.000000    | 0.976799 |
| Ph+MeAc            | 0.00771313  | 0.984993 | 0.007787648 | 0.984675 |
| PhCCCH3+H          | 0.00756024  | 0.992553 | 0.00772037  | 0.992396 |
| PhCH2CCH+H         | 0.00451176  | 0.997065 | 0.00460732  | 0.997003 |
| PAH7+H             | 0.00225722  | 0.999322 | 0.00230503  | 0.999308 |
| rad39              | 0.000548275 | 0.999871 | 0.000559889 | 0.999868 |
| rad19anti          | 4.66031e-05 | 0.999917 | 4.75901e-05 | 0.999915 |
| PAH9+H             | 2.99989e-05 | 0.999947 | 3.06343e-05 | 0.999946 |
| rad30              | 2.26756e-05 | 0.999970 | 2.31559e-05 | 0.999969 |
| rad38              | 1.05317e-05 | 0.999981 | 1.07547e-05 | 0.999980 |
| rad35              | 7.29844e-06 | 0.999988 | 7.45303e-06 | 0.999987 |
| rad37              | 5.93509e-06 | 0.999994 | 6.06080e-06 | 0.999993 |
| rad19syn           | 2.61379e-06 | 0.999996 | 2.66915e-06 | 0.999996 |
| rad46              | 1.18443e-06 | 0.999998 | 1.20952e-06 | 0.999997 |
| rad54              | 5.53864e-07 | 0.999998 | 5.65595e-07 | 0.999998 |
| rad6               | 4.42265e-07 | 0.999999 | 4.51632e-07 | 0.999998 |
| PAH3+H             | 2.96687e-07 | 0.999999 | 3.02971e-07 | 0.999999 |
| rad60syn           | 2.09900e-07 | 0.999999 | 2.14347e-07 | 0.999999 |
| PhcycC3H3_A+H      | 1.62838e-07 | 0.999999 | 1.66287e-07 | 0.999999 |
| rad60anti          | 1.11058e-07 | 0.999999 | 1.13410e-07 | 0.999999 |
| PAH10+CH3          | 8.88633e-08 | 0.999999 | 9.07452e-08 | 0.999999 |
| rad50              | 4.90394e-08 | 0.999999 | 5.00781e-08 | 0.999999 |
| rad59              | 4.64277e-08 | 1.000000 | 4.74110e-08 | 0.999999 |
| rad70              | 3.43280e-08 | 1.000000 | 3.50551e-08 | 0.999999 |
| PAH1+H             | 2.87940e-08 | 1.000000 | 2.94039e-08 | 0.999999 |
| rad2               | 2.26069e-08 | 1.000000 | 2.30857e-08 | 0.999999 |
| rad67              | 2.16422e-08 | 1.000000 | 2.21006e-08 | 0.999999 |
| rad62              | 1.75399e-08 | 1.000000 | 1.79113e-08 | 0.999999 |
| rad55              | 1.62462e-08 | 1.000000 | 1.65903e-08 | 0.999999 |
| rad23              | 9.50096e-09 | 1.000000 | 9.70219e-09 | 0.999999 |
| rad43              | 8.26796e-09 | 1.000000 | 8.44305e-09 | 0.999999 |
| rad1               | 4.13620e-09 | 1.000000 | 4.22380e-09 | 0.999999 |
| rad34              | 2.73088e-09 | 1.000000 | 2.78872e-09 | 0.999999 |
| rad45              | 1.51572e-09 | 1.000000 | 1.54782e-09 | 1.000000 |
| rad51              | 1.27788e-09 | 1.000000 | 1.30494e-09 | 1.000000 |
| rad52              | 1.22700e-09 | 1.000000 | 1.25298e-09 | 1.000000 |
| rad10              | 5.90316e-10 | 1.000000 | 6.02819e-10 | 1.000000 |
| rad3               | 4.79552e-10 | 1.000000 | 4.89709e-10 | 1.000000 |
| rad28              | 4.27337e-10 | 1.000000 | 4.36387e-10 | 1.000000 |
| rad4               | 3.30399e-10 | 1.000000 | 3.37397e-10 | 1.000000 |
| rad53              | 1.69566e-10 | 1.000000 | 1.73158e-10 | 1.000000 |
| rad36              | 1.48194e-10 | 1.000000 | 1.51333e-10 | 1.000000 |
| rad26              | 1.39746e-10 | 1.000000 | 1.42706e-10 | 1.000000 |
| rad58              | 1.35887e-10 | 1.000000 | 1.38765e-10 | 1.000000 |
| rad42              | 1.03511e-10 | 1.000000 | 1.05703e-10 | 1.000000 |
| rad64              | 7.31609e-11 | 1.000000 | 7.47106e-11 | 1.000000 |
| rad7               | 5.71063e-11 | 1.000000 | 5.83158e-11 | 1.000000 |
| rad65              | 3.98744e-11 | 1.000000 | 4.07189e-11 | 1.000000 |
| rad56              | 2.88520e-11 | 1.000000 | 2.94631e-11 | 1.000000 |
| rad41              | 1.95452e-11 | 1.000000 | 1.99591e-11 | 1.000000 |
| rad11              | 1.74338e-11 | 1.000000 | 1.78030e-11 | 1.000000 |
| rad68syn           | 3.41900e-12 | 1.000000 | 3.49142e-12 | 1.000000 |
| rad9               | 3.07966e-12 | 1.000000 | 3.14489e-12 | 1.000000 |
| rad68anti          | 2.34676e-12 | 1.000000 | 2.39647e-12 | 1.000000 |
| rad71              | 8.86353e-13 | 1.000000 | 9.05131e-13 | 1.000000 |
| rad22              | 8.44742e-13 | 1.000000 | 8.62634e-13 | 1.000000 |
| rad13              | 7.05508e-13 | 1.000000 | 7.20452e-13 | 1.000000 |
| rad73              | 6.89746e-13 | 1.000000 | 7.04356e-13 | 1.000000 |
| PAH8+H             | 5.03608e-13 | 1.000000 | 5.14275e-13 | 1.000000 |
| rad61              | 4.85689e-13 | 1.000000 | 4.95976e-13 | 1.000000 |
| rad40syn           | 2.06948e-13 | 1.000000 | 2.11331e-13 | 1.000000 |
| rad40anti          | 7.65541e-14 | 1.000000 | 7.81755e-14 | 1.000000 |
| rad33              | 4.31608e-14 | 1.000000 | 4.40750e-14 | 1.000000 |
| rad21              | 4.09762e-14 | 1.000000 | 4.18442e-14 | 1.000000 |
| rad72              | 2.81803e-14 | 1.000000 | 2.87772e-14 | 1.000000 |
| rad31              | 1.78457e-14 | 1.000000 | 1.82236e-14 | 1.000000 |
| rad20              | 1.54404e-14 | 1.000000 | 1.57675e-14 | 1.000000 |
| rad25              | 9.67762e-15 | 1.000000 | 9.88253e-15 | 1.000000 |
| rad27              | 7.85279e-15 | 1.000000 | 8.01909e-15 | 1.000000 |
| rad14              | 5.55390e-15 | 1.000000 | 5.67154e-15 | 1.000000 |
| rad24              | 3.97601e-15 | 1.000000 | 4.06022e-15 | 1.000000 |
| rad15              | 1.42924e-15 | 1.000000 | 1.45951e-15 | 1.000000 |
| rad12              | 4.79735e-16 | 1.000000 | 4.89896e-16 | 1.000000 |
| rad18              | 4.11277e-18 | 1.000000 | 4.19989e-18 | 1.000000 |
| rad5               | 2.81778e-20 | 1.000000 | 2.87747e-20 | 1.000000 |
| rad47              | 9.15960e-21 | 1.000000 | 9.35354e-21 | 1.000000 |



rad8 | 9.26479e-25 1.000000 | 9.46106e-25 1.000000

0.100000000E-02 Pa, 800.000000 K

=====  
-----

| Rate constant      | True (fraction)      | Effective (fraction) |
|--------------------|----------------------|----------------------|
| Total              | 2.75392e-13 (1.00 )  | 2.64229e-13 (1.00 )  |
| Formation of rad11 | 1.06471e-13 (0.387 ) | 1.00706e-13 (0.381 ) |
| Formation of rad6  | 9.97133e-14 (0.362 ) | 9.43146e-14 (0.357 ) |
| H-abstraction      | 6.92082e-14 (0.251 ) | 6.92082e-14 (0.262 ) |

-----

| species            | PYtrue      | Cumul    | PYeffective | Cumul    |
|--------------------|-------------|----------|-------------|----------|
| Indene+H           | 0.420966    | 0.420966 | 0.438751    | 0.438751 |
| Benzene+2-propynyl | 0.251308    | 0.672273 | 0.261925    | 0.700676 |
| C2H2+PhCH2         | 0.158755    | 0.831028 | 0.165462    | 0.866138 |
| PhCCH+CH3          | 0.0631444   | 0.894173 | 0.0658122   | 0.931951 |
| Phenyl+Allene      | 0.0405361   | 0.934709 | 0.000000    | 0.931951 |
| PhCHCCH2+H         | 0.0360790   | 0.970788 | 0.0376033   | 0.969554 |
| PhCH2CCH+H         | 0.00999819  | 0.980786 | 0.0104206   | 0.979974 |
| Ph+MeAc            | 0.00840377  | 0.989190 | 0.00875881  | 0.988733 |
| PhCCCH3+H          | 0.00623435  | 0.995424 | 0.00649774  | 0.995231 |
| PAH7+H             | 0.00351017  | 0.998934 | 0.00365847  | 0.998889 |
| rad39              | 0.000836589 | 0.999771 | 0.000871932 | 0.999761 |
| rad19anti          | 9.01935e-05 | 0.999861 | 9.40042e-05 | 0.999855 |
| PAH9+H             | 5.38612e-05 | 0.999915 | 5.61368e-05 | 0.999911 |
| rad30              | 2.94554e-05 | 0.999944 | 3.06998e-05 | 0.999942 |
| rad38              | 1.96298e-05 | 0.999964 | 2.04591e-05 | 0.999963 |
| rad35              | 1.22733e-05 | 0.999976 | 1.27918e-05 | 0.999975 |
| rad19syn           | 8.33347e-06 | 0.999985 | 8.68552e-06 | 0.999984 |
| rad37              | 7.26186e-06 | 0.999992 | 7.56866e-06 | 0.999992 |
| rad46              | 2.65288e-06 | 0.999995 | 2.76496e-06 | 0.999994 |
| rad54              | 2.03470e-06 | 0.999997 | 2.12067e-06 | 0.999997 |
| PAH3+H             | 7.96496e-07 | 0.999997 | 8.30150e-07 | 0.999997 |
| PhcycC3H3_A+H      | 7.94325e-07 | 0.999998 | 8.27884e-07 | 0.999998 |
| rad60syn           | 3.96787e-07 | 0.999999 | 4.13551e-07 | 0.999999 |
| PAH10+CH3          | 2.53235e-07 | 0.999999 | 2.63934e-07 | 0.999999 |
| rad60anti          | 2.15810e-07 | 0.999999 | 2.24928e-07 | 0.999999 |
| rad50              | 1.82530e-07 | 0.999999 | 1.90242e-07 | 0.999999 |
| rad70              | 1.50040e-07 | 0.999999 | 1.56380e-07 | 0.999999 |
| PAH1+H             | 1.48685e-07 | 1.000000 | 1.54967e-07 | 1.000000 |
| rad59              | 1.17661e-07 | 1.000000 | 1.22632e-07 | 1.000000 |
| rad67              | 9.03402e-08 | 1.000000 | 9.41569e-08 | 1.000000 |
| rad6               | 8.26182e-08 | 1.000000 | 8.61090e-08 | 1.000000 |
| rad55              | 7.18814e-08 | 1.000000 | 7.49183e-08 | 1.000000 |
| rad62              | 5.32909e-08 | 1.000000 | 5.55423e-08 | 1.000000 |
| rad43              | 1.85243e-08 | 1.000000 | 1.93069e-08 | 1.000000 |
| rad34              | 1.46560e-08 | 1.000000 | 1.52751e-08 | 1.000000 |
| rad51              | 7.29176e-09 | 1.000000 | 7.59981e-09 | 1.000000 |
| rad2               | 6.36272e-09 | 1.000000 | 6.63153e-09 | 1.000000 |
| rad52              | 5.75935e-09 | 1.000000 | 6.00268e-09 | 1.000000 |
| rad23              | 5.12912e-09 | 1.000000 | 5.34582e-09 | 1.000000 |
| rad53              | 1.38658e-09 | 1.000000 | 1.44516e-09 | 1.000000 |
| rad1               | 1.18695e-09 | 1.000000 | 1.23710e-09 | 1.000000 |
| rad45              | 1.04009e-09 | 1.000000 | 1.08403e-09 | 1.000000 |
| rad58              | 6.48501e-10 | 1.000000 | 6.75899e-10 | 1.000000 |
| rad64              | 5.75123e-10 | 1.000000 | 5.99422e-10 | 1.000000 |
| rad42              | 5.07643e-10 | 1.000000 | 5.29090e-10 | 1.000000 |
| rad56              | 3.39886e-10 | 1.000000 | 3.54246e-10 | 1.000000 |
| rad65              | 2.31388e-10 | 1.000000 | 2.41164e-10 | 1.000000 |
| rad10              | 1.54588e-10 | 1.000000 | 1.61119e-10 | 1.000000 |
| rad3               | 1.48957e-10 | 1.000000 | 1.55250e-10 | 1.000000 |
| rad4               | 1.05311e-10 | 1.000000 | 1.09761e-10 | 1.000000 |
| rad36              | 9.74603e-11 | 1.000000 | 1.01578e-10 | 1.000000 |
| rad28              | 8.28031e-11 | 1.000000 | 8.63016e-11 | 1.000000 |
| rad41              | 7.95830e-11 | 1.000000 | 8.29449e-11 | 1.000000 |
| rad68syn           | 3.95202e-11 | 1.000000 | 4.11899e-11 | 1.000000 |
| rad9               | 3.81986e-11 | 1.000000 | 3.98124e-11 | 1.000000 |
| rad26              | 2.95253e-11 | 1.000000 | 3.07727e-11 | 1.000000 |
| rad68anti          | 2.68691e-11 | 1.000000 | 2.80043e-11 | 1.000000 |
| rad7               | 1.34160e-11 | 1.000000 | 1.39828e-11 | 1.000000 |
| PAH8+H             | 9.85848e-12 | 1.000000 | 1.02750e-11 | 1.000000 |
| rad11              | 5.36578e-12 | 1.000000 | 5.59248e-12 | 1.000000 |
| rad61              | 4.50929e-12 | 1.000000 | 4.69980e-12 | 1.000000 |
| rad40syn           | 3.29821e-12 | 1.000000 | 3.43756e-12 | 1.000000 |
| rad71              | 2.78267e-12 | 1.000000 | 2.90024e-12 | 1.000000 |
| rad73              | 2.73929e-12 | 1.000000 | 2.85503e-12 | 1.000000 |
| rad40anti          | 1.29282e-12 | 1.000000 | 1.34744e-12 | 1.000000 |
| rad13              | 8.38543e-13 | 1.000000 | 8.73969e-13 | 1.000000 |
| rad21              | 5.91422e-13 | 1.000000 | 6.16408e-13 | 1.000000 |

|       |             |         |             |         |
|-------|-------------|---------|-------------|---------|
| rad22 | 4.89675e-13 | 1.00000 | 5.10364e-13 | 1.00000 |
| rad33 | 2.89782e-13 | 1.00000 | 3.02025e-13 | 1.00000 |
| rad20 | 2.27628e-13 | 1.00000 | 2.37245e-13 | 1.00000 |
| rad72 | 8.25478e-14 | 1.00000 | 8.60352e-14 | 1.00000 |
| rad24 | 5.58423e-14 | 1.00000 | 5.82016e-14 | 1.00000 |
| rad25 | 1.94918e-14 | 1.00000 | 2.03154e-14 | 1.00000 |
| rad12 | 1.15860e-14 | 1.00000 | 1.20755e-14 | 1.00000 |
| rad15 | 1.11490e-14 | 1.00000 | 1.16200e-14 | 1.00000 |
| rad31 | 8.40669e-15 | 1.00000 | 8.76191e-15 | 1.00000 |
| rad27 | 8.22191e-15 | 1.00000 | 8.56927e-15 | 1.00000 |
| rad14 | 6.22225e-15 | 1.00000 | 6.48514e-15 | 1.00000 |
| rad18 | 2.76023e-17 | 1.00000 | 2.87685e-17 | 1.00000 |
| rad47 | 5.08814e-20 | 1.00000 | 5.30310e-20 | 1.00000 |
| rad5  | 2.41614e-20 | 1.00000 | 2.51822e-20 | 1.00000 |
| rad8  | 3.33361e-21 | 1.00000 | 3.47446e-21 | 1.00000 |

0.100000000E-02 Pa, 900.000000 K

| Rate constant      | True (fraction)      | Effective (fraction) |
|--------------------|----------------------|----------------------|
| Total              | 4.88072e-13 (1.00 )  | 4.55158e-13 (1.00 )  |
| Formation of rad11 | 1.74945e-13 (0.358 ) | 1.58562e-13 (0.348 ) |
| Formation of rad6  | 1.76509e-13 (0.362 ) | 1.59979e-13 (0.351 ) |
| H-abstraction      | 1.36618e-13 (0.280 ) | 1.36618e-13 (0.300 ) |

| species            | PYtrue      | Cumul    | PYeffective | Cumul    |
|--------------------|-------------|----------|-------------|----------|
| Indene+H           | 0.341015    | 0.341015 | 0.365675    | 0.365675 |
| Benzene+2-propynyl | 0.279914    | 0.620929 | 0.300155    | 0.665830 |
| C2H2+PhCH2         | 0.164624    | 0.785553 | 0.176529    | 0.842359 |
| Phenyl+Allene      | 0.0674364   | 0.852989 | 0.000000    | 0.842359 |
| PhCCH+CH3          | 0.0639257   | 0.916915 | 0.0685483   | 0.910907 |
| PhCHCCH2+H         | 0.0451267   | 0.962041 | 0.0483900   | 0.959297 |
| PhCH2CCH+H         | 0.0182967   | 0.980338 | 0.0196198   | 0.978917 |
| Ph+MeAc            | 0.00849313  | 0.988831 | 0.00910729  | 0.988024 |
| PhCCCH3+H          | 0.00485363  | 0.993685 | 0.00520461  | 0.993229 |
| PAH7+H             | 0.00482414  | 0.998509 | 0.00517298  | 0.998402 |
| rad39              | 0.00111871  | 0.999628 | 0.00119961  | 0.999601 |
| rad19anti          | 0.000152570 | 0.999780 | 0.000163603 | 0.999765 |
| PAH9+H             | 8.58062e-05 | 0.999866 | 9.20114e-05 | 0.999857 |
| rad30              | 3.45816e-05 | 0.999901 | 3.70823e-05 | 0.999894 |
| rad38              | 3.22632e-05 | 0.999933 | 3.45962e-05 | 0.999928 |
| rad19syn           | 2.05726e-05 | 0.999953 | 2.20602e-05 | 0.999951 |
| rad35              | 1.85020e-05 | 0.999972 | 1.98400e-05 | 0.999970 |
| rad37              | 8.30353e-06 | 0.999980 | 8.90392e-06 | 0.999979 |
| rad54              | 5.61021e-06 | 0.999986 | 6.01591e-06 | 0.999985 |
| rad46              | 5.06258e-06 | 0.999991 | 5.42867e-06 | 0.999991 |
| PhcycC3H3_A+H      | 2.75303e-06 | 0.999994 | 2.95211e-06 | 0.999994 |
| PAH3+H             | 1.70032e-06 | 0.999995 | 1.82328e-06 | 0.999995 |
| rad60syn           | 6.35566e-07 | 0.999996 | 6.81526e-07 | 0.999996 |
| PAH10+CH3          | 5.91925e-07 | 0.999997 | 6.34728e-07 | 0.999997 |
| PAH1+H             | 5.27746e-07 | 0.999997 | 5.65909e-07 | 0.999997 |
| rad50              | 5.26262e-07 | 0.999998 | 5.64318e-07 | 0.999998 |
| rad70              | 4.68169e-07 | 0.999998 | 5.02024e-07 | 0.999998 |
| rad60anti          | 3.53464e-07 | 0.999998 | 3.79023e-07 | 0.999999 |
| rad67              | 2.86642e-07 | 0.999999 | 3.07370e-07 | 0.999999 |
| rad59              | 2.38375e-07 | 0.999999 | 2.55613e-07 | 0.999999 |
| rad55              | 2.28529e-07 | 0.999999 | 2.45054e-07 | 1.000000 |
| rad62              | 1.23575e-07 | 0.999999 | 1.32511e-07 | 1.000000 |
| rad34              | 5.38118e-08 | 0.999999 | 5.77031e-08 | 1.000000 |
| rad43              | 3.25357e-08 | 0.999999 | 3.48885e-08 | 1.000000 |
| rad51              | 2.95271e-08 | 0.999999 | 3.16622e-08 | 1.000000 |
| rad52              | 1.99046e-08 | 0.999999 | 2.13439e-08 | 1.000000 |
| rad6               | 1.73891e-08 | 0.999999 | 1.86465e-08 | 1.000000 |
| rad53              | 7.16537e-09 | 0.999999 | 7.68353e-09 | 1.000000 |
| rad64              | 2.79841e-09 | 0.999999 | 3.00077e-09 | 1.000000 |
| rad56              | 2.33180e-09 | 0.999999 | 2.50041e-09 | 1.000000 |
| rad23              | 2.32164e-09 | 0.999999 | 2.48953e-09 | 1.000000 |
| rad58              | 2.16904e-09 | 0.999999 | 2.32589e-09 | 1.000000 |
| rad42              | 1.71813e-09 | 0.999999 | 1.84238e-09 | 1.000000 |
| rad2               | 1.42654e-09 | 0.999999 | 1.52970e-09 | 1.000000 |
| rad65              | 9.40930e-10 | 0.999999 | 1.00897e-09 | 1.000000 |
| rad45              | 5.67917e-10 | 0.999999 | 6.08985e-10 | 1.000000 |
| rad1               | 2.81029e-10 | 0.999999 | 3.01351e-10 | 1.000000 |
| rad68syn           | 2.64064e-10 | 0.999999 | 2.83160e-10 | 1.000000 |
| rad41              | 2.24813e-10 | 0.999999 | 2.41070e-10 | 1.000000 |
| rad68anti          | 1.78172e-10 | 0.999999 | 1.91056e-10 | 1.000000 |
| rad9               | 1.32371e-10 | 0.999999 | 1.41943e-10 | 1.000000 |
| PAH8+H             | 1.02639e-10 | 0.999999 | 1.10061e-10 | 1.000000 |
| rad36              | 5.36461e-11 | 0.999999 | 5.75255e-11 | 1.000000 |

|           |             |          |             |          |
|-----------|-------------|----------|-------------|----------|
| rad3      | 4.28015e-11 | 0.999999 | 4.58966e-11 | 1.000000 |
| rad10     | 3.61365e-11 | 0.999999 | 3.87496e-11 | 1.000000 |
| rad4      | 3.16452e-11 | 0.999999 | 3.39336e-11 | 1.000000 |
| rad40syn  | 2.86672e-11 | 0.999999 | 3.07402e-11 | 1.000000 |
| rad61     | 2.66845e-11 | 0.999999 | 2.86141e-11 | 1.000000 |
| rad28     | 1.90238e-11 | 0.999999 | 2.03995e-11 | 1.000000 |
| rad73     | 1.21048e-11 | 0.999999 | 1.29802e-11 | 1.000000 |
| rad40anti | 1.19950e-11 | 0.999999 | 1.28623e-11 | 1.000000 |
| rad71     | 6.89421e-12 | 0.999999 | 7.39274e-12 | 1.000000 |
| rad26     | 6.14766e-12 | 0.999999 | 6.59222e-12 | 1.000000 |
| rad13     | 5.07596e-12 | 0.999999 | 5.44302e-12 | 1.000000 |
| rad11     | 4.88562e-12 | 0.999999 | 5.23891e-12 | 1.000000 |
| rad7      | 4.31993e-12 | 0.999999 | 4.63232e-12 | 1.000000 |
| rad21     | 3.80620e-12 | 0.999999 | 4.08143e-12 | 1.000000 |
| rad20     | 1.65173e-12 | 0.999999 | 1.77117e-12 | 1.000000 |
| rad33     | 1.26858e-12 | 0.999999 | 1.36032e-12 | 1.000000 |
| rad22     | 2.40759e-13 | 0.999999 | 2.58169e-13 | 1.000000 |
| rad24     | 1.88190e-13 | 0.999999 | 2.01799e-13 | 1.000000 |
| rad72     | 9.22510e-14 | 0.999999 | 9.89224e-14 | 1.000000 |
| rad25     | 5.52989e-14 | 0.999999 | 5.92977e-14 | 1.000000 |
| rad12     | 5.35785e-14 | 0.999999 | 5.74529e-14 | 1.000000 |
| rad15     | 3.10566e-14 | 0.999999 | 3.33024e-14 | 1.000000 |
| rad27     | 1.35667e-14 | 0.999999 | 1.45478e-14 | 1.000000 |
| rad14     | 1.06653e-14 | 0.999999 | 1.14364e-14 | 1.000000 |
| rad31     | 4.19969e-15 | 0.999999 | 4.50338e-15 | 1.000000 |
| rad18     | 3.45953e-16 | 0.999999 | 3.70970e-16 | 1.000000 |
| rad8      | 1.12164e-18 | 0.999999 | 1.20274e-18 | 1.000000 |
| rad47     | 2.06311e-19 | 0.999999 | 2.21230e-19 | 1.000000 |
| rad5      | 2.69453e-20 | 0.999999 | 2.88939e-20 | 1.000000 |

0.100000000E-02 Pa, 1000.00000 K

| Rate constant      | True (fraction) |          | Effective (fraction) |          |
|--------------------|-----------------|----------|----------------------|----------|
| Total              | 7.98668e-13     | (1.00 )  | 7.19594e-13          | (1.00 )  |
| Formation of rad11 | 2.67704e-13     | (0.335 ) | 2.29546e-13          | (0.319 ) |
| Formation of rad6  | 2.87049e-13     | (0.359 ) | 2.46133e-13          | (0.342 ) |
| H-abstraction      | 2.43915e-13     | (0.305 ) | 2.43915e-13          | (0.339 ) |

  

| species            | PYtrue      | Cumul    | PYeffective | Cumul    |
|--------------------|-------------|----------|-------------|----------|
| Benzene+2-propynyl | 0.305402    | 0.305402 | 0.338962    | 0.338962 |
| Indene+H           | 0.272125    | 0.577527 | 0.302027    | 0.640989 |
| C2H2+PhCH2         | 0.159453    | 0.736980 | 0.176975    | 0.817964 |
| Phenyl+Allene      | 0.0990073   | 0.835987 | 0.000000    | 0.817964 |
| PhCCH+CH3          | 0.0616204   | 0.897608 | 0.0683917   | 0.886356 |
| PhCHCCH2+H         | 0.0537595   | 0.951367 | 0.0596670   | 0.946023 |
| PhCH2CCH+H         | 0.0288969   | 0.980264 | 0.0320723   | 0.978095 |
| Ph+MeAc            | 0.00817632  | 0.988441 | 0.00907480  | 0.987170 |
| PAH7+H             | 0.00601184  | 0.994452 | 0.00667246  | 0.993842 |
| PhCCCH3+H          | 0.00364277  | 0.998095 | 0.00404306  | 0.997885 |
| rad39              | 0.00134896  | 0.999444 | 0.00149719  | 0.999382 |
| rad19anti          | 0.000230025 | 0.999674 | 0.000255302 | 0.999638 |
| PAH9+H             | 0.000123695 | 0.999798 | 0.000137288 | 0.999775 |
| rad38              | 4.77796e-05 | 0.999846 | 5.30300e-05 | 0.999828 |
| rad19syn           | 4.20371e-05 | 0.999888 | 4.66565e-05 | 0.999875 |
| rad30              | 3.74825e-05 | 0.999925 | 4.16014e-05 | 0.999916 |
| rad35              | 2.54629e-05 | 0.999951 | 2.82609e-05 | 0.999945 |
| rad54              | 1.25292e-05 | 0.999963 | 1.39061e-05 | 0.999958 |
| rad37              | 9.28205e-06 | 0.999972 | 1.03021e-05 | 0.999969 |
| rad46              | 8.48875e-06 | 0.999981 | 9.42158e-06 | 0.999978 |
| PhcycC3H3_A+H      | 7.44283e-06 | 0.999988 | 8.26073e-06 | 0.999986 |
| PAH3+H             | 3.05843e-06 | 0.999991 | 3.39451e-06 | 0.999990 |
| PAH1+H             | 1.42912e-06 | 0.999993 | 1.58616e-06 | 0.999991 |
| rad50              | 1.24682e-06 | 0.999994 | 1.38383e-06 | 0.999993 |
| PAH10+CH3          | 1.21324e-06 | 0.999995 | 1.34656e-06 | 0.999994 |
| rad70              | 1.14131e-06 | 0.999996 | 1.26673e-06 | 0.999995 |
| rad60syn           | 8.97094e-07 | 0.999997 | 9.95669e-07 | 0.999996 |
| rad67              | 7.32857e-07 | 0.999998 | 8.13381e-07 | 0.999997 |
| rad55              | 5.71763e-07 | 0.999999 | 6.34592e-07 | 0.999998 |
| rad60anti          | 5.08253e-07 | 0.999999 | 5.64103e-07 | 0.999998 |
| rad59              | 4.08645e-07 | 1.000000 | 4.53550e-07 | 0.999999 |
| rad62              | 2.36337e-07 | 1.000000 | 2.62307e-07 | 0.999999 |
| rad34              | 1.49947e-07 | 1.000000 | 1.66424e-07 | 0.999999 |
| rad51              | 9.26247e-08 | 1.000000 | 1.02803e-07 | 0.999999 |
| rad52              | 5.46269e-08 | 1.000000 | 6.06296e-08 | 0.999999 |
| rad43              | 4.82851e-08 | 1.000000 | 5.35910e-08 | 1.000000 |
| rad53              | 2.66803e-08 | 1.000000 | 2.96121e-08 | 1.000000 |
| rad56              | 1.08965e-08 | 1.000000 | 1.20939e-08 | 1.000000 |
| rad64              | 9.68714e-09 | 1.000000 | 1.07517e-08 | 1.000000 |

|           |             |         |             |          |
|-----------|-------------|---------|-------------|----------|
| rad58     | 5.61427e-09 | 1.00000 | 6.23120e-09 | 1.000000 |
| rad6      | 5.06263e-09 | 1.00000 | 5.61895e-09 | 1.000000 |
| rad42     | 4.47914e-09 | 1.00000 | 4.97134e-09 | 1.000000 |
| rad65     | 2.94048e-09 | 1.00000 | 3.26360e-09 | 1.000000 |
| rad68syn  | 1.19348e-09 | 1.00000 | 1.32462e-09 | 1.000000 |
| rad23     | 1.10760e-09 | 1.00000 | 1.22931e-09 | 1.000000 |
| rad68anti | 8.00260e-10 | 1.00000 | 8.88198e-10 | 1.000000 |
| PAH8+H    | 6.70114e-10 | 1.00000 | 7.43748e-10 | 1.000000 |
| rad41     | 4.94100e-10 | 1.00000 | 5.48395e-10 | 1.000000 |
| rad2      | 3.37711e-10 | 1.00000 | 3.74821e-10 | 1.000000 |
| rad45     | 3.05419e-10 | 1.00000 | 3.38980e-10 | 1.000000 |
| rad9      | 1.66360e-10 | 1.00000 | 1.84641e-10 | 1.000000 |
| rad40syn  | 1.60988e-10 | 1.00000 | 1.78679e-10 | 1.000000 |
| rad61     | 1.14033e-10 | 1.00000 | 1.26563e-10 | 1.000000 |
| rad1      | 7.32488e-11 | 1.00000 | 8.12978e-11 | 1.000000 |
| rad40anti | 7.14957e-11 | 1.00000 | 7.93517e-11 | 1.000000 |
| rad73     | 7.10470e-11 | 1.00000 | 7.88539e-11 | 1.000000 |
| rad71     | 3.83780e-11 | 1.00000 | 4.25953e-11 | 1.000000 |
| rad36     | 2.90579e-11 | 1.00000 | 3.22509e-11 | 1.000000 |
| rad13     | 2.42414e-11 | 1.00000 | 2.69053e-11 | 1.000000 |
| rad11     | 1.66914e-11 | 1.00000 | 1.85255e-11 | 1.000000 |
| rad3      | 1.40972e-11 | 1.00000 | 1.56463e-11 | 1.000000 |
| rad4      | 1.08046e-11 | 1.00000 | 1.19919e-11 | 1.000000 |
| rad10     | 1.05514e-11 | 1.00000 | 1.17109e-11 | 1.000000 |
| rad21     | 9.56295e-12 | 1.00000 | 1.06138e-11 | 1.000000 |
| rad28     | 6.04252e-12 | 1.00000 | 6.70650e-12 | 1.000000 |
| rad20     | 4.65138e-12 | 1.00000 | 5.16250e-12 | 1.000000 |
| rad7      | 4.20089e-12 | 1.00000 | 4.66251e-12 | 1.000000 |
| rad33     | 2.70160e-12 | 1.00000 | 2.99846e-12 | 1.000000 |
| rad26     | 1.72460e-12 | 1.00000 | 1.91411e-12 | 1.000000 |
| rad24     | 2.48803e-13 | 1.00000 | 2.76143e-13 | 1.000000 |
| rad72     | 1.79042e-13 | 1.00000 | 1.98717e-13 | 1.000000 |
| rad25     | 1.49364e-13 | 1.00000 | 1.65778e-13 | 1.000000 |
| rad22     | 1.27460e-13 | 1.00000 | 1.41467e-13 | 1.000000 |
| rad12     | 9.30108e-14 | 1.00000 | 1.03232e-13 | 1.000000 |
| rad15     | 4.00566e-14 | 1.00000 | 4.44583e-14 | 1.000000 |
| rad14     | 1.89929e-14 | 1.00000 | 2.10800e-14 | 1.000000 |
| rad27     | 1.86797e-14 | 1.00000 | 2.07323e-14 | 1.000000 |
| rad18     | 4.60745e-15 | 1.00000 | 5.11375e-15 | 1.000000 |
| rad31     | 2.32690e-15 | 1.00000 | 2.58259e-15 | 1.000000 |
| rad8      | 3.75827e-17 | 1.00000 | 4.17125e-17 | 1.000000 |
| rad47     | 6.63020e-19 | 1.00000 | 7.35875e-19 | 1.000000 |
| rad5      | 4.38869e-20 | 1.00000 | 4.87095e-20 | 1.000000 |

0.100000000E-02 Pa, 1100.00000 K

| Rate constant      | True (fraction)      | Effective (fraction) |
|--------------------|----------------------|----------------------|
| Total              | 1.22919e-12 (1.00 )  | 1.06688e-12 (1.00 )  |
| Formation of rad11 | 3.87976e-13 (0.316 ) | 3.11712e-13 (0.292 ) |
| Formation of rad6  | 4.37724e-13 (0.356 ) | 3.51681e-13 (0.330 ) |
| H-abstraction      | 4.03491e-13 (0.328 ) | 4.03491e-13 (0.378 ) |

| species            | PYtrue      | Cumul    | PYeffective | Cumul    |
|--------------------|-------------|----------|-------------|----------|
| Benzene+2-propynyl | 0.328257    | 0.328257 | 0.378196    | 0.378196 |
| Indene+H           | 0.214714    | 0.542971 | 0.247379    | 0.625574 |
| C2H2+PhCH2         | 0.146502    | 0.689473 | 0.168789    | 0.794364 |
| Phenyl+Allene      | 0.132044    | 0.821517 | 0.000000    | 0.794364 |
| PhCHCCH2+H         | 0.0609574   | 0.882474 | 0.0702309   | 0.864595 |
| PhCCH+CH3          | 0.0572445   | 0.939719 | 0.0659535   | 0.930548 |
| PhCH2CCH+H         | 0.0407440   | 0.980463 | 0.0469425   | 0.977491 |
| Ph+MeAc            | 0.00763489  | 0.988097 | 0.00879642  | 0.986287 |
| PAH7+H             | 0.00694716  | 0.995045 | 0.00800405  | 0.994291 |
| PhCCCH3+H          | 0.00267733  | 0.997722 | 0.00308464  | 0.997376 |
| rad39              | 0.00150224  | 0.999224 | 0.00173078  | 0.999107 |
| rad19anti          | 0.000315220 | 0.999539 | 0.000363175 | 0.999470 |
| PAH9+H             | 0.000164386 | 0.999704 | 0.000189394 | 0.999659 |
| rad19syn           | 7.45655e-05 | 0.999778 | 8.59091e-05 | 0.999745 |
| rad38              | 6.50361e-05 | 0.999843 | 7.49299e-05 | 0.999820 |
| rad30              | 3.82332e-05 | 0.999882 | 4.40497e-05 | 0.999864 |
| rad35              | 3.25606e-05 | 0.999914 | 3.75141e-05 | 0.999902 |
| rad54              | 2.39077e-05 | 0.999938 | 2.75448e-05 | 0.999929 |
| PhcycC3H3_A+H      | 1.67306e-05 | 0.999955 | 1.92759e-05 | 0.999948 |
| rad46              | 1.28372e-05 | 0.999968 | 1.47902e-05 | 0.999963 |
| rad37              | 1.03715e-05 | 0.999978 | 1.19494e-05 | 0.999975 |
| PAH3+H             | 4.83975e-06 | 0.999983 | 5.57603e-06 | 0.999981 |
| PAH1+H             | 3.16887e-06 | 0.999986 | 3.65096e-06 | 0.999984 |
| rad50              | 2.53507e-06 | 0.999989 | 2.92074e-06 | 0.999987 |
| rad70              | 2.31279e-06 | 0.999991 | 2.66464e-06 | 0.999990 |

|           |             |          |             |          |
|-----------|-------------|----------|-------------|----------|
| PAH10+CH3 | 2.25115e-06 | 0.999993 | 2.59362e-06 | 0.999993 |
| rad67     | 1.57912e-06 | 0.999995 | 1.81936e-06 | 0.999994 |
| rad55     | 1.19782e-06 | 0.999996 | 1.38006e-06 | 0.999996 |
| rad60syn  | 1.15117e-06 | 0.999997 | 1.32630e-06 | 0.999997 |
| rad60anti | 6.62627e-07 | 0.999998 | 7.63433e-07 | 0.999998 |
| rad59     | 6.18406e-07 | 0.999998 | 7.12488e-07 | 0.999999 |
| rad62     | 3.93252e-07 | 0.999999 | 4.53078e-07 | 0.999999 |
| rad34     | 3.40145e-07 | 0.999999 | 3.91892e-07 | 0.999999 |
| rad51     | 2.38393e-07 | 0.999999 | 2.74660e-07 | 1.000000 |
| rad52     | 1.25457e-07 | 0.999999 | 1.44543e-07 | 1.000000 |
| rad53     | 7.80404e-08 | 1.000000 | 8.99129e-08 | 1.000000 |
| rad43     | 6.37339e-08 | 1.000000 | 7.34301e-08 | 1.000000 |
| rad56     | 3.84098e-08 | 1.000000 | 4.42533e-08 | 1.000000 |
| rad64     | 2.61428e-08 | 1.000000 | 3.01200e-08 | 1.000000 |
| rad58     | 1.20348e-08 | 1.000000 | 1.38657e-08 | 1.000000 |
| rad42     | 9.67464e-09 | 1.000000 | 1.11465e-08 | 1.000000 |
| rad65     | 7.50531e-09 | 1.000000 | 8.64712e-09 | 1.000000 |
| rad68syn  | 4.04355e-09 | 1.000000 | 4.65870e-09 | 1.000000 |
| PAH8+H    | 3.08739e-09 | 1.000000 | 3.55708e-09 | 1.000000 |
| rad68anti | 2.69715e-09 | 1.000000 | 3.10748e-09 | 1.000000 |
| rad6      | 2.24994e-09 | 1.000000 | 2.59223e-09 | 1.000000 |
| rad41     | 9.10279e-10 | 1.000000 | 1.04876e-09 | 1.000000 |
| rad40syn  | 6.53840e-10 | 1.000000 | 7.53310e-10 | 1.000000 |
| rad23     | 5.52087e-10 | 1.000000 | 6.36075e-10 | 1.000000 |
| rad61     | 3.79392e-10 | 1.000000 | 4.37110e-10 | 1.000000 |
| rad73     | 3.38559e-10 | 1.000000 | 3.90065e-10 | 1.000000 |
| rad40anti | 3.05541e-10 | 1.000000 | 3.52024e-10 | 1.000000 |
| rad71     | 2.12093e-10 | 1.000000 | 2.44359e-10 | 1.000000 |
| rad45     | 1.64687e-10 | 1.000000 | 1.89742e-10 | 1.000000 |
| rad9      | 1.35988e-10 | 1.000000 | 1.56677e-10 | 1.000000 |
| rad2      | 9.06094e-11 | 1.000000 | 1.04394e-10 | 1.000000 |
| rad11     | 6.28503e-11 | 1.000000 | 7.24116e-11 | 1.000000 |
| rad13     | 5.56028e-11 | 1.000000 | 6.40620e-11 | 1.000000 |
| rad1      | 2.09318e-11 | 1.000000 | 2.41162e-11 | 1.000000 |
| rad36     | 1.57653e-11 | 1.000000 | 1.81638e-11 | 1.000000 |
| rad7      | 1.42850e-11 | 1.000000 | 1.64582e-11 | 1.000000 |
| rad21     | 1.12708e-11 | 1.000000 | 1.29855e-11 | 1.000000 |
| rad20     | 5.72596e-12 | 1.000000 | 6.59703e-12 | 1.000000 |
| rad3      | 5.20537e-12 | 1.000000 | 5.99728e-12 | 1.000000 |
| rad10     | 4.70163e-12 | 1.000000 | 5.41690e-12 | 1.000000 |
| rad4      | 4.07031e-12 | 1.000000 | 4.68954e-12 | 1.000000 |
| rad33     | 2.98604e-12 | 1.000000 | 3.44031e-12 | 1.000000 |
| rad28     | 2.79810e-12 | 1.000000 | 3.22378e-12 | 1.000000 |
| rad72     | 1.14993e-12 | 1.000000 | 1.32487e-12 | 1.000000 |
| rad26     | 7.11947e-13 | 1.000000 | 8.20259e-13 | 1.000000 |
| rad25     | 2.72816e-13 | 1.000000 | 3.14320e-13 | 1.000000 |
| rad24     | 2.16988e-13 | 1.000000 | 2.49999e-13 | 1.000000 |
| rad12     | 1.06576e-13 | 1.000000 | 1.22790e-13 | 1.000000 |
| rad22     | 7.10106e-14 | 1.000000 | 8.18133e-14 | 1.000000 |
| rad18     | 3.97438e-14 | 1.000000 | 4.57901e-14 | 1.000000 |
| rad15     | 3.80215e-14 | 1.000000 | 4.38058e-14 | 1.000000 |
| rad14     | 2.59299e-14 | 1.000000 | 2.98748e-14 | 1.000000 |
| rad27     | 1.67050e-14 | 1.000000 | 1.92463e-14 | 1.000000 |
| rad31     | 1.37109e-15 | 1.000000 | 1.57968e-15 | 1.000000 |
| rad8      | 2.31129e-16 | 1.000000 | 2.66291e-16 | 1.000000 |
| rad47     | 1.74378e-18 | 1.000000 | 2.00907e-18 | 1.000000 |
| rad5      | 1.03663e-19 | 1.000000 | 1.19434e-19 | 1.000000 |

0.100000000E-02 Pa, 1200.00000 K

| Rate constant      | True (fraction)      | Effective (fraction) |
|--------------------|----------------------|----------------------|
| Total              | 1.80237e-12 (1.00 )  | 1.50733e-12 (1.00 )  |
| Formation of rad11 | 5.38789e-13 (0.299 ) | 4.03336e-13 (0.268 ) |
| Formation of rad6  | 6.34764e-13 (0.352 ) | 4.75183e-13 (0.315 ) |
| H-abstraction      | 6.28816e-13 (0.349 ) | 6.28816e-13 (0.417 ) |

| species            | PYtrue     | Cumul    | PYeffective | Cumul    |
|--------------------|------------|----------|-------------|----------|
| Benzene+2-propynyl | 0.348883   | 0.348883 | 0.417171    | 0.417171 |
| Indene+H           | 0.168224   | 0.517107 | 0.201151    | 0.618322 |
| Phenyl+Allene      | 0.163693   | 0.680800 | 0.000000    | 0.618322 |
| C2H2+PhCH2         | 0.129445   | 0.810245 | 0.154782    | 0.773104 |
| PhCHCCH2+H         | 0.0661470  | 0.876392 | 0.0790946   | 0.852199 |
| PhCH2CCH+H         | 0.0526489  | 0.929041 | 0.0629537   | 0.915152 |
| PhCCH+CH3          | 0.0518208  | 0.980862 | 0.0619641   | 0.977116 |
| PAH7+H             | 0.00758538 | 0.988447 | 0.00907010  | 0.986186 |
| Ph+MeAc            | 0.00700420 | 0.995451 | 0.00837514  | 0.994562 |
| PhCCCH3+H          | 0.00195097 | 0.997402 | 0.00233284  | 0.996894 |
| rad39              | 0.00157581 | 0.998978 | 0.00188425  | 0.998779 |

|               |             |          |             |          |
|---------------|-------------|----------|-------------|----------|
| rad19anti     | 0.000399579 | 0.999378 | 0.000477791 | 0.999257 |
| PAH9+H        | 0.000204702 | 0.999582 | 0.000244769 | 0.999501 |
| rad19syn      | 0.000118863 | 0.999701 | 0.000142129 | 0.999643 |
| rad38         | 8.27680e-05 | 0.999784 | 9.89685e-05 | 0.999742 |
| rad54         | 4.05005e-05 | 0.999824 | 4.84277e-05 | 0.999791 |
| rad35         | 3.92969e-05 | 0.999864 | 4.69886e-05 | 0.999838 |
| rad30         | 3.73116e-05 | 0.999901 | 4.46148e-05 | 0.999882 |
| PhcycC3H3_A+H | 3.27086e-05 | 0.999934 | 3.91108e-05 | 0.999922 |
| rad46         | 1.78869e-05 | 0.999952 | 2.13880e-05 | 0.999943 |
| rad37         | 1.16239e-05 | 0.999963 | 1.38991e-05 | 0.999957 |
| PAH3+H        | 6.95966e-06 | 0.999970 | 8.32193e-06 | 0.999965 |
| PAH1+H        | 6.04572e-06 | 0.999976 | 7.22906e-06 | 0.999972 |
| rad50         | 4.57125e-06 | 0.999981 | 5.46599e-06 | 0.999978 |
| rad70         | 4.07150e-06 | 0.999985 | 4.86843e-06 | 0.999983 |
| PAH10+CH3     | 3.83957e-06 | 0.999989 | 4.59110e-06 | 0.999987 |
| rad67         | 2.96797e-06 | 0.999992 | 3.54889e-06 | 0.999991 |
| rad55         | 2.19501e-06 | 0.999994 | 2.62464e-06 | 0.999993 |
| rad60syn      | 1.37645e-06 | 0.999995 | 1.64587e-06 | 0.999995 |
| rad59         | 8.52866e-07 | 0.999996 | 1.01981e-06 | 0.999996 |
| rad60anti     | 8.03342e-07 | 0.999997 | 9.60578e-07 | 0.999997 |
| rad34         | 6.59901e-07 | 0.999998 | 7.89063e-07 | 0.999998 |
| rad62         | 5.91358e-07 | 0.999998 | 7.07106e-07 | 0.999999 |
| rad51         | 5.25719e-07 | 0.999999 | 6.28622e-07 | 0.999999 |
| rad52         | 2.50707e-07 | 0.999999 | 2.99779e-07 | 0.999999 |
| rad53         | 1.90238e-07 | 0.999999 | 2.27474e-07 | 1.000000 |
| rad56         | 1.09448e-07 | 0.999999 | 1.30871e-07 | 1.000000 |
| rad43         | 7.76164e-08 | 0.999999 | 9.28086e-08 | 1.000000 |
| rad64         | 5.85550e-08 | 0.999999 | 7.00164e-08 | 1.000000 |
| rad58         | 2.24147e-08 | 0.999999 | 2.68020e-08 | 1.000000 |
| rad42         | 1.82035e-08 | 0.999999 | 2.17665e-08 | 1.000000 |
| rad65         | 1.63706e-08 | 0.999999 | 1.95748e-08 | 1.000000 |
| rad68syn      | 1.10175e-08 | 0.999999 | 1.31740e-08 | 1.000000 |
| PAH8+H        | 1.09227e-08 | 0.999999 | 1.30606e-08 | 1.000000 |
| rad68anti     | 7.31621e-09 | 0.999999 | 8.74827e-09 | 1.000000 |
| rad40syn      | 2.07794e-09 | 0.999999 | 2.48466e-09 | 1.000000 |
| rad6          | 1.50500e-09 | 0.999999 | 1.79958e-09 | 1.000000 |
| rad41         | 1.48025e-09 | 0.999999 | 1.76998e-09 | 1.000000 |
| rad73         | 1.26688e-09 | 0.999999 | 1.51485e-09 | 1.000000 |
| rad61         | 1.03672e-09 | 0.999999 | 1.23964e-09 | 1.000000 |
| rad40anti     | 1.01429e-09 | 0.999999 | 1.21282e-09 | 1.000000 |
| rad71         | 9.18055e-10 | 0.999999 | 1.09775e-09 | 1.000000 |
| rad23         | 2.85014e-10 | 0.999999 | 3.40801e-10 | 1.000000 |
| rad11         | 1.53395e-10 | 0.999999 | 1.83419e-10 | 1.000000 |
| rad9          | 9.80647e-11 | 0.999999 | 1.17259e-10 | 1.000000 |
| rad45         | 8.94303e-11 | 0.999999 | 1.06935e-10 | 1.000000 |
| rad13         | 6.46990e-11 | 0.999999 | 7.73630e-11 | 1.000000 |
| rad7          | 5.08626e-11 | 0.999999 | 6.08182e-11 | 1.000000 |
| rad2          | 2.67645e-11 | 0.999999 | 3.20031e-11 | 1.000000 |
| rad21         | 8.79060e-12 | 0.999999 | 1.05112e-11 | 1.000000 |
| rad36         | 8.62593e-12 | 0.999999 | 1.03143e-11 | 1.000000 |
| rad72         | 7.10733e-12 | 0.999999 | 8.49847e-12 | 1.000000 |
| rad1          | 6.40838e-12 | 0.999999 | 7.66269e-12 | 1.000000 |
| rad20         | 4.28327e-12 | 0.999999 | 5.12165e-12 | 1.000000 |
| rad10         | 3.46049e-12 | 0.999999 | 4.13781e-12 | 1.000000 |
| rad33         | 2.25869e-12 | 0.999999 | 2.70079e-12 | 1.000000 |
| rad3          | 2.08051e-12 | 0.999999 | 2.48774e-12 | 1.000000 |
| rad28         | 1.92049e-12 | 0.999999 | 2.29639e-12 | 1.000000 |
| rad4          | 1.64615e-12 | 0.999999 | 1.96835e-12 | 1.000000 |
| rad26         | 4.26057e-13 | 0.999999 | 5.09450e-13 | 1.000000 |
| rad25         | 3.12060e-13 | 0.999999 | 3.73141e-13 | 1.000000 |
| rad24         | 1.65803e-13 | 0.999999 | 1.98256e-13 | 1.000000 |
| rad18         | 1.63487e-13 | 0.999999 | 1.95486e-13 | 1.000000 |
| rad12         | 1.03520e-13 | 0.999999 | 1.23782e-13 | 1.000000 |
| rad22         | 4.07715e-14 | 0.999999 | 4.87518e-14 | 1.000000 |
| rad15         | 3.78681e-14 | 0.999999 | 4.52801e-14 | 1.000000 |
| rad14         | 2.44097e-14 | 0.999999 | 2.91874e-14 | 1.000000 |
| rad27         | 1.01019e-14 | 0.999999 | 1.20792e-14 | 1.000000 |
| rad31         | 8.42044e-16 | 0.999999 | 1.00685e-15 | 1.000000 |
| rad8          | 5.36819e-16 | 0.999999 | 6.41893e-16 | 1.000000 |
| rad47         | 3.89994e-18 | 0.999999 | 4.66328e-18 | 1.000000 |
| rad5          | 3.26518e-19 | 0.999999 | 3.90428e-19 | 1.000000 |

0.100000000E-02 Pa, 1300.00000 K

=====

| Rate constant      | True (fraction)      | Effective (fraction) |
|--------------------|----------------------|----------------------|
| Total              | 2.54148e-12 (1.00 )  | 2.05338e-12 (1.00 )  |
| Formation of rad11 | 7.22991e-13 (0.284 ) | 5.03422e-13 (0.245 ) |
| Formation of rad6  | 8.84215e-13 (0.348 ) | 6.15682e-13 (0.300 ) |
| H-abstraction      | 9.34273e-13 (0.368 ) | 9.34273e-13 (0.455 ) |

| species            | PYtrue      | Cumul    | PYeffective | Cumul    |
|--------------------|-------------|----------|-------------|----------|
| Benzene+2-propynyl | 0.367610    | 0.367610 | 0.454993    | 0.454993 |
| Phenyl+Allene      | 0.192054    | 0.559664 | 0.00000     | 0.454993 |
| Indene+H           | 0.131421    | 0.691086 | 0.162661    | 0.617654 |
| C2H2+PhCH2         | 0.111295    | 0.802381 | 0.137750    | 0.755405 |
| PhCHCCH2+H         | 0.0692296   | 0.871610 | 0.0856859   | 0.841091 |
| PhCH2CCH+H         | 0.0636260   | 0.935236 | 0.0787507   | 0.919842 |
| PhCCH+CH3          | 0.0461559   | 0.981392 | 0.0571276   | 0.976969 |
| PAH7+H             | 0.00794566  | 0.989338 | 0.00983443  | 0.986804 |
| Ph+MeAc            | 0.00637082  | 0.995709 | 0.00788521  | 0.994689 |
| rad39              | 0.00158196  | 0.997291 | 0.00195800  | 0.996647 |
| PhCCCH3+H          | 0.00142376  | 0.998714 | 0.00176219  | 0.998409 |
| rad19anti          | 0.000475489 | 0.999190 | 0.000588514 | 0.998997 |
| PAH9+H             | 0.000242131 | 0.999432 | 0.000299688 | 0.999297 |
| rad19syn           | 0.000174660 | 0.999607 | 0.000216178 | 0.999513 |
| rad38              | 9.98860e-05 | 0.999707 | 0.000123629 | 0.999637 |
| rad54              | 6.26274e-05 | 0.999769 | 7.75141e-05 | 0.999714 |
| PhcycC3H3_A+H      | 5.74351e-05 | 0.999827 | 7.10879e-05 | 0.999786 |
| rad35              | 4.53516e-05 | 0.999872 | 5.61319e-05 | 0.999842 |
| rad30              | 3.53184e-05 | 0.999907 | 4.37139e-05 | 0.999885 |
| rad46              | 2.33611e-05 | 0.999931 | 2.89142e-05 | 0.999914 |
| rad37              | 1.29873e-05 | 0.999944 | 1.60744e-05 | 0.999930 |
| PAH1+H             | 1.02825e-05 | 0.999954 | 1.27267e-05 | 0.999943 |
| PAH3+H             | 9.32004e-06 | 0.999963 | 1.15354e-05 | 0.999955 |
| rad50              | 7.49585e-06 | 0.999971 | 9.27765e-06 | 0.999964 |
| rad70              | 6.43021e-06 | 0.999977 | 7.95868e-06 | 0.999972 |
| PAH10+CH3          | 6.07786e-06 | 0.999983 | 7.52262e-06 | 0.999979 |
| rad67              | 4.99567e-06 | 0.999988 | 6.18315e-06 | 0.999986 |
| rad55              | 3.63003e-06 | 0.999992 | 4.49291e-06 | 0.999990 |
| rad60syn           | 1.56340e-06 | 0.999993 | 1.93503e-06 | 0.999992 |
| rad34              | 1.13462e-06 | 0.999995 | 1.40432e-06 | 0.999993 |
| rad59              | 1.09806e-06 | 0.999996 | 1.35907e-06 | 0.999995 |
| rad51              | 1.02621e-06 | 0.999997 | 1.27015e-06 | 0.999996 |
| rad60anti          | 9.23688e-07 | 0.999998 | 1.14325e-06 | 0.999997 |
| rad62              | 8.25901e-07 | 0.999998 | 1.02222e-06 | 0.999998 |
| rad52              | 4.48901e-07 | 0.999999 | 5.55607e-07 | 0.999999 |
| rad53              | 4.02868e-07 | 0.999999 | 4.98632e-07 | 0.999999 |
| rad56              | 2.64598e-07 | 1.000000 | 3.27496e-07 | 1.000000 |
| rad64              | 1.13755e-07 | 1.000000 | 1.40795e-07 | 1.000000 |
| rad43              | 8.95932e-08 | 1.000000 | 1.10890e-07 | 1.000000 |
| rad58              | 3.75497e-08 | 1.000000 | 4.64756e-08 | 1.000000 |
| rad65              | 3.15602e-08 | 1.000000 | 3.90624e-08 | 1.000000 |
| PAH8+H             | 3.15023e-08 | 1.000000 | 3.89905e-08 | 1.000000 |
| rad42              | 3.09037e-08 | 1.000000 | 3.82497e-08 | 1.000000 |
| rad68syn           | 2.53721e-08 | 1.000000 | 3.14033e-08 | 1.000000 |
| rad68anti          | 1.67834e-08 | 1.000000 | 2.07729e-08 | 1.000000 |
| rad40syn           | 5.46373e-09 | 1.000000 | 6.76250e-09 | 1.000000 |
| rad73              | 3.88993e-09 | 1.000000 | 4.81459e-09 | 1.000000 |
| rad71              | 3.20270e-09 | 1.000000 | 3.96400e-09 | 1.000000 |
| rad40anti          | 2.76933e-09 | 1.000000 | 3.42762e-09 | 1.000000 |
| rad61              | 2.41929e-09 | 1.000000 | 2.99437e-09 | 1.000000 |
| rad41              | 2.20456e-09 | 1.000000 | 2.72860e-09 | 1.000000 |
| rad6               | 1.35338e-09 | 1.000000 | 1.67508e-09 | 1.000000 |
| rad11              | 2.15660e-10 | 1.000000 | 2.66923e-10 | 1.000000 |
| rad23              | 1.52503e-10 | 1.000000 | 1.88754e-10 | 1.000000 |
| rad7               | 1.12603e-10 | 1.000000 | 1.39370e-10 | 1.000000 |
| rad9               | 6.67216e-11 | 1.000000 | 8.25816e-11 | 1.000000 |
| rad13              | 4.92107e-11 | 1.000000 | 6.09083e-11 | 1.000000 |
| rad45              | 4.91210e-11 | 1.000000 | 6.07971e-11 | 1.000000 |
| rad72              | 3.39722e-11 | 1.000000 | 4.20476e-11 | 1.000000 |
| rad2               | 8.50704e-12 | 1.000000 | 1.05292e-11 | 1.000000 |
| rad21              | 5.91338e-12 | 1.000000 | 7.31900e-12 | 1.000000 |
| rad36              | 4.77989e-12 | 1.000000 | 5.91610e-12 | 1.000000 |
| rad10              | 2.82152e-12 | 1.000000 | 3.49222e-12 | 1.000000 |
| rad20              | 2.63334e-12 | 1.000000 | 3.25930e-12 | 1.000000 |
| rad1               | 2.08369e-12 | 1.000000 | 2.57899e-12 | 1.000000 |
| rad28              | 1.89168e-12 | 1.000000 | 2.34135e-12 | 1.000000 |
| rad33              | 1.50411e-12 | 1.000000 | 1.86165e-12 | 1.000000 |
| rad3               | 8.84360e-13 | 1.000000 | 1.09458e-12 | 1.000000 |
| rad4               | 7.05494e-13 | 1.000000 | 8.73193e-13 | 1.000000 |
| rad26              | 3.37797e-13 | 1.000000 | 4.18094e-13 | 1.000000 |
| rad18              | 3.07631e-13 | 1.000000 | 3.80757e-13 | 1.000000 |
| rad25              | 2.61842e-13 | 1.000000 | 3.24084e-13 | 1.000000 |
| rad24              | 1.21061e-13 | 1.000000 | 1.49838e-13 | 1.000000 |
| rad12              | 9.25054e-14 | 1.000000 | 1.14495e-13 | 1.000000 |
| rad15              | 7.62087e-14 | 1.000000 | 9.43237e-14 | 1.000000 |
| rad22              | 2.68290e-14 | 1.000000 | 3.32065e-14 | 1.000000 |
| rad14              | 1.73657e-14 | 1.000000 | 2.14936e-14 | 1.000000 |

|       |             |         |             |         |
|-------|-------------|---------|-------------|---------|
| rad27 | 4.96384e-15 | 1.00000 | 6.14380e-15 | 1.00000 |
| rad8  | 7.86598e-16 | 1.00000 | 9.73573e-16 | 1.00000 |
| rad31 | 5.35123e-16 | 1.00000 | 6.62325e-16 | 1.00000 |
| rad47 | 7.66893e-18 | 1.00000 | 9.49189e-18 | 1.00000 |
| rad5  | 1.17842e-18 | 1.00000 | 1.45854e-18 | 1.00000 |

0.100000000E-02 Pa, 1400.00000 K

| Rate constant      | True (fraction) |          | Effective (fraction) |          |
|--------------------|-----------------|----------|----------------------|----------|
| Total              | 3.47024e-12     | (1.00 )  | 2.71984e-12          | (1.00 )  |
| Formation of rad11 | 9.43269e-13     | (0.272 ) | 6.11768e-13          | (0.225 ) |
| Formation of rad6  | 1.19194e-12     | (0.343 ) | 7.73043e-13          | (0.284 ) |
| H-abstraction      | 1.33503e-12     | (0.385 ) | 1.33503e-12          | (0.491 ) |

  

| species            | PYtrue      | Cumul    | PYeffective | Cumul    |
|--------------------|-------------|----------|-------------|----------|
| Benzene+2-propynyl | 0.384709    | 0.384709 | 0.490849    | 0.490849 |
| Phenyl+Allene      | 0.216237    | 0.600946 | 0.00000     | 0.490849 |
| Indene+H           | 0.102753    | 0.703699 | 0.131102    | 0.621951 |
| C2H2+PhCH2         | 0.0940337   | 0.797733 | 0.119977    | 0.741928 |
| PhCH2CCH+H         | 0.0730480   | 0.870781 | 0.0932017   | 0.835129 |
| PhCHCCH2+H         | 0.0704361   | 0.941217 | 0.0898693   | 0.924998 |
| PhCCH+CH3          | 0.0407709   | 0.981988 | 0.0520195   | 0.977018 |
| PAH7+H             | 0.00808062  | 0.990068 | 0.0103100   | 0.987328 |
| Ph+MeAc            | 0.00578254  | 0.995851 | 0.00737791  | 0.994706 |
| rad39              | 0.00153900  | 0.997390 | 0.00196361  | 0.996669 |
| PhCCCH3+H          | 0.00104907  | 0.998439 | 0.00133851  | 0.998008 |
| rad19anti          | 0.000537563 | 0.998977 | 0.000685873 | 0.998694 |
| PAH9+H             | 0.000275092 | 0.999252 | 0.000350989 | 0.999045 |
| rad19syn           | 0.000241019 | 0.999493 | 0.000307516 | 0.999352 |
| rad38              | 0.000115616 | 0.999608 | 0.000147513 | 0.999500 |
| PhcycC3H3_A+H      | 9.27188e-05 | 0.999701 | 0.000118299 | 0.999618 |
| rad54              | 9.02066e-05 | 0.999791 | 0.000115094 | 0.999733 |
| rad35              | 5.05796e-05 | 0.999842 | 6.45344e-05 | 0.999798 |
| rad30              | 3.27889e-05 | 0.999875 | 4.18352e-05 | 0.999840 |
| rad46              | 2.89889e-05 | 0.999904 | 3.69869e-05 | 0.999877 |
| PAH1+H             | 1.59963e-05 | 0.999920 | 2.04097e-05 | 0.999897 |
| rad37              | 1.43563e-05 | 0.999934 | 1.83172e-05 | 0.999915 |
| PAH3+H             | 1.18378e-05 | 0.999946 | 1.51038e-05 | 0.999930 |
| rad50              | 1.13924e-05 | 0.999957 | 1.45355e-05 | 0.999945 |
| rad70              | 9.33021e-06 | 0.999967 | 1.19044e-05 | 0.999957 |
| PAH10+CH3          | 9.00294e-06 | 0.999976 | 1.14868e-05 | 0.999968 |
| rad67              | 7.68554e-06 | 0.999983 | 9.80595e-06 | 0.999978 |
| rad55              | 5.54137e-06 | 0.999989 | 7.07023e-06 | 0.999985 |
| rad51              | 1.81655e-06 | 0.999991 | 2.31772e-06 | 0.999988 |
| rad34              | 1.77488e-06 | 0.999992 | 2.26456e-06 | 0.999990 |
| rad60syn           | 1.71203e-06 | 0.999994 | 2.18438e-06 | 0.999992 |
| rad59              | 1.34390e-06 | 0.999995 | 1.71468e-06 | 0.999994 |
| rad62              | 1.09238e-06 | 0.999997 | 1.39377e-06 | 0.999995 |
| rad60anti          | 1.02264e-06 | 0.999998 | 1.30479e-06 | 0.999996 |
| rad53              | 7.63459e-07 | 0.999998 | 9.74098e-07 | 0.999997 |
| rad52              | 7.36190e-07 | 0.999999 | 9.39303e-07 | 0.999998 |
| rad56              | 5.61676e-07 | 1.000000 | 7.16641e-07 | 0.999999 |
| rad64              | 1.97836e-07 | 1.000000 | 2.52418e-07 | 0.999999 |
| rad43              | 1.00004e-07 | 1.000000 | 1.27595e-07 | 0.999999 |
| PAH8+H             | 7.73009e-08 | 1.000000 | 9.86282e-08 | 1.000000 |
| rad58              | 5.80225e-08 | 1.000000 | 7.40306e-08 | 1.000000 |
| rad65              | 5.51355e-08 | 1.000000 | 7.03474e-08 | 1.000000 |
| rad68syn           | 5.11875e-08 | 1.000000 | 6.53098e-08 | 1.000000 |
| rad42              | 4.85214e-08 | 1.000000 | 6.19082e-08 | 1.000000 |
| rad68anti          | 3.37456e-08 | 1.000000 | 4.30559e-08 | 1.000000 |
| rad40syn           | 1.23711e-08 | 1.000000 | 1.57842e-08 | 1.000000 |
| rad73              | 1.01770e-08 | 1.000000 | 1.29848e-08 | 1.000000 |
| rad71              | 9.36227e-09 | 1.000000 | 1.19453e-08 | 1.000000 |
| rad40anti          | 6.47926e-09 | 1.000000 | 8.26688e-09 | 1.000000 |
| rad61              | 4.96371e-09 | 1.000000 | 6.33318e-09 | 1.000000 |
| rad41              | 3.08784e-09 | 1.000000 | 3.93976e-09 | 1.000000 |
| rad6               | 1.52075e-09 | 1.000000 | 1.94031e-09 | 1.000000 |
| rad11              | 1.94011e-10 | 1.000000 | 2.47538e-10 | 1.000000 |
| rad7               | 1.45429e-10 | 1.000000 | 1.85553e-10 | 1.000000 |
| rad72              | 1.29430e-10 | 1.000000 | 1.65140e-10 | 1.000000 |
| rad23              | 8.45139e-11 | 1.000000 | 1.07831e-10 | 1.000000 |
| rad9               | 4.39143e-11 | 1.000000 | 5.60301e-11 | 1.000000 |
| rad13              | 3.13912e-11 | 1.000000 | 4.00520e-11 | 1.000000 |
| rad45              | 2.73878e-11 | 1.000000 | 3.49440e-11 | 1.000000 |
| rad21              | 3.81063e-12 | 1.000000 | 4.86198e-12 | 1.000000 |
| rad2               | 2.88556e-12 | 1.000000 | 3.68167e-12 | 1.000000 |
| rad36              | 2.69035e-12 | 1.000000 | 3.43261e-12 | 1.000000 |
| rad28              | 2.46404e-12 | 1.000000 | 3.14386e-12 | 1.000000 |



|       |             |         |             |          |
|-------|-------------|---------|-------------|----------|
| rad10 | 1.82921e-12 | 1.00000 | 2.33388e-12 | 1.000000 |
| rad20 | 1.53045e-12 | 1.00000 | 1.95269e-12 | 1.000000 |
| rad33 | 9.75790e-13 | 1.00000 | 1.24501e-12 | 1.000000 |
| rad1  | 7.18494e-13 | 1.00000 | 9.16727e-13 | 1.000000 |
| rad3  | 3.96674e-13 | 1.00000 | 5.06115e-13 | 1.000000 |
| rad4  | 3.18465e-13 | 1.00000 | 4.06328e-13 | 1.000000 |
| rad18 | 3.17634e-13 | 1.00000 | 4.05268e-13 | 1.000000 |
| rad26 | 3.08701e-13 | 1.00000 | 3.93870e-13 | 1.000000 |
| rad25 | 1.93943e-13 | 1.00000 | 2.47451e-13 | 1.000000 |
| rad15 | 1.91016e-13 | 1.00000 | 2.43716e-13 | 1.000000 |
| rad24 | 8.67714e-14 | 1.00000 | 1.10711e-13 | 1.000000 |
| rad12 | 7.86883e-14 | 1.00000 | 1.00398e-13 | 1.000000 |
| rad22 | 4.15764e-14 | 1.00000 | 5.30469e-14 | 1.000000 |
| rad14 | 1.10843e-14 | 1.00000 | 1.41424e-14 | 1.000000 |
| rad27 | 2.35743e-15 | 1.00000 | 3.00784e-15 | 1.000000 |
| rad8  | 9.26462e-16 | 1.00000 | 1.18207e-15 | 1.000000 |
| rad31 | 3.51110e-16 | 1.00000 | 4.47980e-16 | 1.000000 |
| rad47 | 1.36054e-17 | 1.00000 | 1.73591e-17 | 1.000000 |
| rad5  | 4.07350e-18 | 1.00000 | 5.19736e-18 | 1.000000 |

0.100000000E-02 Pa, 1500.00000 K

| Rate constant      | True (fraction)      | Effective (fraction) |
|--------------------|----------------------|----------------------|
| Total              | 4.61271e-12 (1.00 )  | 3.52361e-12 (1.00 )  |
| Formation of rad11 | 1.20217e-12 (0.261 ) | 7.28782e-13 (0.207 ) |
| Formation of rad6  | 1.56360e-12 (0.339 ) | 9.47887e-13 (0.269 ) |
| H-abstraction      | 1.84694e-12 (0.400 ) | 1.84694e-12 (0.524 ) |

| species            | PYtrue      | Cumul    | PYeffective | Cumul    |
|--------------------|-------------|----------|-------------|----------|
| Benzene+2-propynyl | 0.400402    | 0.400402 | 0.524162    | 0.524162 |
| Phenyl+Allene      | 0.236109    | 0.636511 | 0.000000    | 0.524162 |
| Indene+H           | 0.0806435   | 0.717155 | 0.105570    | 0.629731 |
| PhCH2CCH+H         | 0.0806387   | 0.797793 | 0.105563    | 0.735294 |
| C2H2+PhCH2         | 0.0787062   | 0.876500 | 0.103033    | 0.838328 |
| PhCHCCH2+H         | 0.0701571   | 0.946657 | 0.0918421   | 0.930170 |
| PhCCH+CH3          | 0.0359368   | 0.982594 | 0.0470444   | 0.977214 |
| PAH7+H             | 0.00805110  | 0.990645 | 0.0105396   | 0.987754 |
| Ph+MeAc            | 0.00526035  | 0.995905 | 0.00688624  | 0.994640 |
| rad39              | 0.00146497  | 0.997370 | 0.00191777  | 0.996558 |
| PhCCCH3+H          | 0.000785539 | 0.998156 | 0.00102834  | 0.997586 |
| rad19anti          | 0.000582991 | 0.998739 | 0.000763188 | 0.998349 |
| rad19syn           | 0.000316567 | 0.999055 | 0.000414413 | 0.998764 |
| PAH9+H             | 0.000302845 | 0.999358 | 0.000396450 | 0.999160 |
| PhcycC3H3_A+H      | 0.000139913 | 0.999498 | 0.000183158 | 0.999343 |
| rad38              | 0.000129499 | 0.999627 | 0.000169526 | 0.999513 |
| rad54              | 0.000122808 | 0.999750 | 0.000160767 | 0.999674 |
| rad35              | 5.49599e-05 | 0.999805 | 7.19472e-05 | 0.999746 |
| rad46              | 3.45380e-05 | 0.999840 | 4.52132e-05 | 0.999791 |
| rad30              | 3.01156e-05 | 0.999870 | 3.94239e-05 | 0.999830 |
| PAH1+H             | 2.31901e-05 | 0.999893 | 3.03579e-05 | 0.999861 |
| rad50              | 1.62766e-05 | 0.999909 | 2.13074e-05 | 0.999882 |
| rad37              | 1.56192e-05 | 0.999925 | 2.04470e-05 | 0.999902 |
| PAH3+H             | 1.44553e-05 | 0.999939 | 1.89232e-05 | 0.999921 |
| rad70              | 1.26613e-05 | 0.999952 | 1.65747e-05 | 0.999938 |
| PAH10+CH3          | 1.25752e-05 | 0.999965 | 1.64620e-05 | 0.999954 |
| rad67              | 1.09793e-05 | 0.999976 | 1.43728e-05 | 0.999969 |
| rad55              | 7.93592e-06 | 0.999983 | 1.03888e-05 | 0.999979 |
| rad51              | 2.96749e-06 | 0.999986 | 3.88470e-06 | 0.999983 |
| rad34              | 2.57549e-06 | 0.999989 | 3.37154e-06 | 0.999986 |
| rad60syn           | 1.82792e-06 | 0.999991 | 2.39290e-06 | 0.999989 |
| rad59              | 1.58467e-06 | 0.999992 | 2.07447e-06 | 0.999991 |
| rad62              | 1.38706e-06 | 0.999994 | 1.81579e-06 | 0.999993 |
| rad53              | 1.32204e-06 | 0.999995 | 1.73067e-06 | 0.999994 |
| rad52              | 1.12378e-06 | 0.999996 | 1.47114e-06 | 0.999996 |
| rad60anti          | 1.10268e-06 | 0.999997 | 1.44350e-06 | 0.999997 |
| rad56              | 1.07223e-06 | 0.999998 | 1.40364e-06 | 0.999999 |
| rad64              | 3.15087e-07 | 0.999999 | 4.12476e-07 | 0.999999 |
| PAH8+H             | 1.66252e-07 | 0.999999 | 2.17639e-07 | 0.999999 |
| rad43              | 1.09523e-07 | 0.999999 | 1.43375e-07 | 0.999999 |
| rad68syn           | 9.28291e-08 | 0.999999 | 1.21521e-07 | 0.999999 |
| rad65              | 8.88724e-08 | 0.999999 | 1.16342e-07 | 1.000000 |
| rad58              | 8.42069e-08 | 0.999999 | 1.10234e-07 | 1.000000 |
| rad42              | 7.16663e-08 | 0.999999 | 9.38173e-08 | 1.000000 |
| rad68anti          | 6.10163e-08 | 0.999999 | 7.98757e-08 | 1.000000 |
| rad40syn           | 2.48114e-08 | 0.999999 | 3.24802e-08 | 1.000000 |
| rad71              | 2.35640e-08 | 0.999999 | 3.08474e-08 | 1.000000 |
| rad73              | 2.32862e-08 | 0.999999 | 3.04836e-08 | 1.000000 |
| rad40anti          | 1.33700e-08 | 0.999999 | 1.75025e-08 | 1.000000 |

|       |             |          |             |         |
|-------|-------------|----------|-------------|---------|
| rad61 | 9.14968e-09 | 0.999999 | 1.19777e-08 | 1.00000 |
| rad41 | 4.14357e-09 | 0.999999 | 5.42427e-09 | 1.00000 |
| rad6  | 1.97838e-09 | 0.999999 | 2.58988e-09 | 1.00000 |
| rad72 | 4.05226e-10 | 0.999999 | 5.30474e-10 | 1.00000 |
| rad11 | 1.36460e-10 | 0.999999 | 1.78638e-10 | 1.00000 |
| rad7  | 1.26317e-10 | 0.999999 | 1.65361e-10 | 1.00000 |
| rad23 | 4.82562e-11 | 0.999999 | 6.31718e-11 | 1.00000 |
| rad9  | 2.84209e-11 | 0.999999 | 3.72055e-11 | 1.00000 |
| rad13 | 1.89946e-11 | 0.999999 | 2.48656e-11 | 1.00000 |
| rad45 | 1.55412e-11 | 0.999999 | 2.03448e-11 | 1.00000 |
| rad28 | 3.66741e-12 | 0.999999 | 4.80097e-12 | 1.00000 |
| rad21 | 2.42953e-12 | 0.999999 | 3.18048e-12 | 1.00000 |
| rad36 | 1.54133e-12 | 0.999999 | 2.01774e-12 | 1.00000 |
| rad2  | 1.04481e-12 | 0.999999 | 1.36775e-12 | 1.00000 |
| rad10 | 9.52857e-13 | 0.999999 | 1.24737e-12 | 1.00000 |
| rad20 | 8.79202e-13 | 0.999999 | 1.15095e-12 | 1.00000 |
| rad33 | 6.33601e-13 | 0.999999 | 8.29439e-13 | 1.00000 |
| rad15 | 3.04838e-13 | 0.999999 | 3.99060e-13 | 1.00000 |
| rad26 | 2.84313e-13 | 0.999999 | 3.72191e-13 | 1.00000 |
| rad1  | 2.63292e-13 | 0.999999 | 3.44672e-13 | 1.00000 |
| rad18 | 2.34783e-13 | 0.999999 | 3.07352e-13 | 1.00000 |
| rad3  | 1.87067e-13 | 0.999999 | 2.44887e-13 | 1.00000 |
| rad4  | 1.50936e-13 | 0.999999 | 1.97589e-13 | 1.00000 |
| rad22 | 1.48778e-13 | 0.999999 | 1.94764e-13 | 1.00000 |
| rad25 | 1.37831e-13 | 0.999999 | 1.80433e-13 | 1.00000 |
| rad12 | 6.49250e-14 | 0.999999 | 8.49924e-14 | 1.00000 |
| rad24 | 6.18581e-14 | 0.999999 | 8.09777e-14 | 1.00000 |
| rad14 | 6.99005e-15 | 0.999999 | 9.15056e-15 | 1.00000 |
| rad27 | 1.15796e-15 | 0.999999 | 1.51586e-15 | 1.00000 |
| rad8  | 9.76883e-16 | 0.999999 | 1.27883e-15 | 1.00000 |
| rad31 | 2.37695e-16 | 0.999999 | 3.11164e-16 | 1.00000 |
| rad47 | 2.21852e-17 | 0.999999 | 2.90424e-17 | 1.00000 |
| rad5  | 1.15146e-17 | 0.999999 | 1.50737e-17 | 1.00000 |

0.100000000E-02 Pa, 1750.00000 K

| Rate constant      | True (fraction)      | Effective (fraction) |
|--------------------|----------------------|----------------------|
| Total              | 8.61869e-12 (1.00 )  | 6.27400e-12 (1.00 )  |
| Formation of rad11 | 2.04015e-12 (0.237 ) | 1.05237e-12 (0.168 ) |
| Formation of rad6  | 2.80256e-12 (0.325 ) | 1.44565e-12 (0.230 ) |
| H-abstraction      | 3.77597e-12 (0.438 ) | 3.77597e-12 (0.602 ) |

| species            | PYtrue      | Cumul    | PYeffective | Cumul    |
|--------------------|-------------|----------|-------------|----------|
| Benzene+2-propynyl | 0.438115    | 0.438115 | 0.601845    | 0.601845 |
| Phenyl+Allene      | 0.272047    | 0.710162 | 0.00000     | 0.601845 |
| PhCH2CCH+H         | 0.0933387   | 0.803501 | 0.128221    | 0.730066 |
| PhCHCCH2+H         | 0.0656327   | 0.869134 | 0.0901606   | 0.820227 |
| C2H2+PhCH2         | 0.0475978   | 0.916731 | 0.0653858   | 0.885612 |
| Indene+H           | 0.0395372   | 0.956269 | 0.0543127   | 0.939925 |
| PhCCH+CH3          | 0.0276514   | 0.983920 | 0.0379853   | 0.977910 |
| PAH7+H             | 0.00712605  | 0.991046 | 0.00978916  | 0.987700 |
| Ph+MeAc            | 0.00488545  | 0.995931 | 0.00671122  | 0.994411 |
| rad39              | 0.00123375  | 0.997165 | 0.00169483  | 0.996106 |
| rad19anti          | 0.000564116 | 0.997729 | 0.000774933 | 0.996881 |
| rad19syn           | 0.000506158 | 0.998235 | 0.000695318 | 0.997576 |
| PhCCCH3+H          | 0.000461483 | 0.998697 | 0.000633946 | 0.998210 |
| PhcycC3H3_A+H      | 0.000354596 | 0.999052 | 0.000487115 | 0.998697 |
| PAH9+H             | 0.000266731 | 0.999318 | 0.000366412 | 0.999063 |
| rad54              | 0.000215004 | 0.999533 | 0.000295354 | 0.999359 |
| rad38              | 0.000142764 | 0.999676 | 0.000196118 | 0.999555 |
| rad35              | 4.88397e-05 | 0.999725 | 6.70919e-05 | 0.999622 |
| PAH1+H             | 4.24056e-05 | 0.999767 | 5.82532e-05 | 0.999680 |
| rad46              | 3.79670e-05 | 0.999805 | 5.21559e-05 | 0.999732 |
| rad50              | 2.38701e-05 | 0.999829 | 3.27908e-05 | 0.999765 |
| rad30              | 2.30179e-05 | 0.999852 | 3.16201e-05 | 0.999797 |
| PAH10+CH3          | 2.22275e-05 | 0.999874 | 3.05343e-05 | 0.999827 |
| rad70              | 2.20506e-05 | 0.999896 | 3.02913e-05 | 0.999858 |
| PAH3+H             | 2.08052e-05 | 0.999917 | 2.85805e-05 | 0.999886 |
| rad55              | 1.72026e-05 | 0.999934 | 2.36314e-05 | 0.999910 |
| rad67              | 1.69163e-05 | 0.999951 | 2.32382e-05 | 0.999933 |
| rad37              | 1.61425e-05 | 0.999968 | 2.21752e-05 | 0.999955 |
| rad51              | 6.11253e-06 | 0.999974 | 8.39689e-06 | 0.999964 |
| rad34              | 5.25680e-06 | 0.999979 | 7.22134e-06 | 0.999971 |
| rad53              | 4.39527e-06 | 0.999983 | 6.03786e-06 | 0.999977 |
| rad56              | 3.99314e-06 | 0.999987 | 5.48546e-06 | 0.999982 |
| rad62              | 2.35598e-06 | 0.999990 | 3.23645e-06 | 0.999986 |
| rad59              | 2.06481e-06 | 0.999992 | 2.83647e-06 | 0.999988 |
| rad52              | 2.03181e-06 | 0.999994 | 2.79113e-06 | 0.999991 |

|           |             |          |             |          |
|-----------|-------------|----------|-------------|----------|
| rad60syn  | 1.94292e-06 | 0.999996 | 2.66902e-06 | 0.999994 |
| rad60anti | 1.30713e-06 | 0.999997 | 1.79563e-06 | 0.999996 |
| rad64     | 7.88600e-07 | 0.999998 | 1.08332e-06 | 0.999997 |
| PAH8+H    | 5.90480e-07 | 0.999998 | 8.11157e-07 | 0.999998 |
| rad68syn  | 2.81742e-07 | 0.999999 | 3.87034e-07 | 0.999998 |
| rad68anti | 1.82569e-07 | 0.999999 | 2.50799e-07 | 0.999998 |
| rad65     | 1.74383e-07 | 0.999999 | 2.39553e-07 | 0.999998 |
| rad42     | 1.70585e-07 | 0.999999 | 2.34336e-07 | 0.999999 |
| rad58     | 1.57351e-07 | 0.999999 | 2.16156e-07 | 0.999999 |
| rad43     | 1.31435e-07 | 0.999999 | 1.80554e-07 | 0.999999 |
| rad71     | 1.24718e-07 | 1.000000 | 1.71327e-07 | 0.999999 |
| rad73     | 9.95981e-08 | 1.000000 | 1.36820e-07 | 0.999999 |
| rad40syn  | 8.39457e-08 | 1.000000 | 1.15318e-07 | 1.000000 |
| rad40anti | 5.01024e-08 | 1.000000 | 6.88266e-08 | 1.000000 |
| rad61     | 2.64238e-08 | 1.000000 | 3.62987e-08 | 1.000000 |
| rad41     | 7.91859e-09 | 1.000000 | 1.08779e-08 | 1.000000 |
| rad72     | 3.69911e-09 | 1.000000 | 5.08153e-09 | 1.000000 |
| rad6      | 3.09150e-09 | 1.000000 | 4.24684e-09 | 1.000000 |
| rad7      | 2.29775e-11 | 1.000000 | 3.15645e-11 | 1.000000 |
| rad11     | 1.74172e-11 | 1.000000 | 2.39262e-11 | 1.000000 |
| rad23     | 7.23495e-12 | 1.000000 | 9.93874e-12 | 1.000000 |
| rad28     | 6.82393e-12 | 1.000000 | 9.37416e-12 | 1.000000 |
| rad9      | 2.24279e-12 | 1.000000 | 3.08096e-12 | 1.000000 |
| rad13     | 1.60866e-12 | 1.000000 | 2.20984e-12 | 1.000000 |
| rad45     | 1.32682e-12 | 1.000000 | 1.82267e-12 | 1.000000 |
| rad22     | 8.63376e-13 | 1.000000 | 1.18604e-12 | 1.000000 |
| rad36     | 2.29571e-13 | 1.000000 | 3.15366e-13 | 1.000000 |
| rad21     | 1.98013e-13 | 1.000000 | 2.72013e-13 | 1.000000 |
| rad26     | 1.45588e-13 | 1.000000 | 1.99997e-13 | 1.000000 |
| rad15     | 1.11972e-13 | 1.000000 | 1.53818e-13 | 1.000000 |
| rad10     | 8.10312e-14 | 1.000000 | 1.11314e-13 | 1.000000 |
| rad20     | 6.44634e-14 | 1.000000 | 8.85544e-14 | 1.000000 |
| rad33     | 5.54011e-14 | 1.000000 | 7.61053e-14 | 1.000000 |
| rad18     | 2.99810e-14 | 1.000000 | 4.11855e-14 | 1.000000 |
| rad2      | 2.97867e-14 | 1.000000 | 4.09184e-14 | 1.000000 |
| rad25     | 1.43077e-14 | 1.000000 | 1.96547e-14 | 1.000000 |
| rad1      | 7.85802e-15 | 1.000000 | 1.07947e-14 | 1.000000 |
| rad12     | 7.47122e-15 | 1.000000 | 1.02634e-14 | 1.000000 |
| rad3      | 6.47528e-15 | 1.000000 | 8.89518e-15 | 1.000000 |
| rad24     | 6.07027e-15 | 1.000000 | 8.33884e-15 | 1.000000 |
| rad4      | 4.14820e-15 | 1.000000 | 5.69843e-15 | 1.000000 |
| rad14     | 7.58562e-16 | 1.000000 | 1.04205e-15 | 1.000000 |
| rad8      | 2.76592e-16 | 1.000000 | 3.79959e-16 | 1.000000 |
| rad27     | 6.88697e-17 | 1.000000 | 9.46076e-17 | 1.000000 |
| rad5      | 5.66588e-17 | 1.000000 | 7.78333e-17 | 1.000000 |
| rad47     | 1.43457e-17 | 1.000000 | 1.97068e-17 | 1.000000 |

0.100000000E-02 Pa, 2000.00000 K

=====

| Rate constant      | True (fraction)      | Effective (fraction) |
|--------------------|----------------------|----------------------|
| Total              | 1.44111e-11 (1.00 )  | 1.02930e-11 (1.00 )  |
| Formation of rad11 | 3.16882e-12 (0.220 ) | 1.47449e-12 (0.143 ) |
| Formation of rad6  | 4.53302e-12 (0.315 ) | 2.10927e-12 (0.205 ) |
| H-abstraction      | 6.70922e-12 (0.466 ) | 6.70922e-12 (0.652 ) |

| species            | PYtrue      | Cumul    | PYeffective | Cumul    |
|--------------------|-------------|----------|-------------|----------|
| Benzene+2-propynyl | 0.465560    | 0.465560 | 0.651825    | 0.651825 |
| Phenyl+Allene      | 0.285759    | 0.751319 | 0.000000    | 0.651825 |
| PhCH2CCH+H         | 0.0971788   | 0.848498 | 0.136059    | 0.787884 |
| PhCHCCH2+H         | 0.0592993   | 0.907797 | 0.0830241   | 0.870908 |
| C2H2+PhCH2         | 0.0319942   | 0.939791 | 0.0447948   | 0.915703 |
| Indene+H           | 0.0233046   | 0.963096 | 0.0326284   | 0.948331 |
| PhCCH+CH3          | 0.0216466   | 0.984742 | 0.0303071   | 0.978638 |
| PAH7+H             | 0.00659328  | 0.991336 | 0.00923114  | 0.987869 |
| Ph+MeAc            | 0.00420938  | 0.995545 | 0.00589349  | 0.993763 |
| rad39              | 0.00101472  | 0.996560 | 0.00142069  | 0.995183 |
| rad19syn           | 0.000746783 | 0.997306 | 0.00104557  | 0.996229 |
| PhcycC3H3_A+H      | 0.000656335 | 0.997963 | 0.000918925 | 0.997148 |
| rad19anti          | 0.000529228 | 0.998492 | 0.000740966 | 0.997889 |
| rad54              | 0.000330237 | 0.998822 | 0.000462359 | 0.998351 |
| PhCCCH3+H          | 0.000291962 | 0.999114 | 0.000408772 | 0.998760 |
| PAH9+H             | 0.000279546 | 0.999394 | 0.000391387 | 0.999151 |
| rad38              | 0.000156414 | 0.999550 | 0.000218994 | 0.999370 |
| PAH1+H             | 6.96990e-05 | 0.999620 | 9.75848e-05 | 0.999468 |
| rad35              | 5.18637e-05 | 0.999672 | 7.26137e-05 | 0.999541 |
| rad46              | 4.57412e-05 | 0.999717 | 6.40416e-05 | 0.999605 |
| rad50              | 3.87497e-05 | 0.999756 | 5.42530e-05 | 0.999659 |
| PAH10+CH3          | 3.34470e-05 | 0.999790 | 4.68285e-05 | 0.999706 |

|           |             |          |             |          |
|-----------|-------------|----------|-------------|----------|
| rad70     | 3.20125e-05 | 0.999822 | 4.48203e-05 | 0.999751 |
| rad55     | 2.86889e-05 | 0.999850 | 4.01669e-05 | 0.999791 |
| PAH3+H    | 2.79049e-05 | 0.999878 | 3.90694e-05 | 0.999830 |
| rad67     | 2.51584e-05 | 0.999903 | 3.52238e-05 | 0.999865 |
| rad30     | 1.88901e-05 | 0.999922 | 2.64479e-05 | 0.999891 |
| rad37     | 1.66057e-05 | 0.999939 | 2.32494e-05 | 0.999915 |
| rad51     | 1.22963e-05 | 0.999951 | 1.72160e-05 | 0.999932 |
| rad56     | 1.03249e-05 | 0.999961 | 1.44559e-05 | 0.999946 |
| rad53     | 9.90974e-06 | 0.999971 | 1.38745e-05 | 0.999960 |
| rad34     | 8.56178e-06 | 0.999980 | 1.19873e-05 | 0.999972 |
| rad52     | 3.64112e-06 | 0.999984 | 5.09788e-06 | 0.999977 |
| rad62     | 3.41505e-06 | 0.999987 | 4.78139e-06 | 0.999982 |
| rad59     | 2.58714e-06 | 0.999990 | 3.62224e-06 | 0.999986 |
| rad60syn  | 2.06844e-06 | 0.999992 | 2.89599e-06 | 0.999989 |
| PAH8+H    | 1.81455e-06 | 0.999993 | 2.54053e-06 | 0.999991 |
| rad64     | 1.47576e-06 | 0.999995 | 2.06619e-06 | 0.999993 |
| rad60anti | 1.42207e-06 | 0.999996 | 1.99102e-06 | 0.999995 |
| rad68syn  | 6.53892e-07 | 0.999997 | 9.15510e-07 | 0.999996 |
| rad71     | 4.98032e-07 | 0.999998 | 6.97287e-07 | 0.999997 |
| rad68anti | 4.21792e-07 | 0.999998 | 5.90544e-07 | 0.999997 |
| rad73     | 3.38738e-07 | 0.999998 | 4.74263e-07 | 0.999998 |
| rad65     | 3.37785e-07 | 0.999999 | 4.72930e-07 | 0.999998 |
| rad42     | 3.12138e-07 | 0.999999 | 4.37019e-07 | 0.999999 |
| rad58     | 2.75720e-07 | 0.999999 | 3.86032e-07 | 0.999999 |
| rad40syn  | 2.27523e-07 | 0.999999 | 3.18551e-07 | 1.000000 |
| rad43     | 1.62531e-07 | 1.000000 | 2.27558e-07 | 1.000000 |
| rad40anti | 1.42660e-07 | 1.000000 | 1.99737e-07 | 1.000000 |
| rad61     | 5.98888e-08 | 1.000000 | 8.38493e-08 | 1.000000 |
| rad72     | 2.09320e-08 | 1.000000 | 2.93066e-08 | 1.000000 |
| rad41     | 1.34670e-08 | 1.000000 | 1.88550e-08 | 1.000000 |
| rad6      | 6.17508e-10 | 1.000000 | 8.64564e-10 | 1.000000 |
| rad7      | 5.25376e-12 | 1.000000 | 7.35573e-12 | 1.000000 |
| rad11     | 4.12596e-12 | 1.000000 | 5.77672e-12 | 1.000000 |
| rad23     | 3.50826e-12 | 1.000000 | 4.91188e-12 | 1.000000 |
| rad28     | 2.07081e-12 | 1.000000 | 2.89931e-12 | 1.000000 |
| rad9      | 7.62902e-13 | 1.000000 | 1.06813e-12 | 1.000000 |
| rad13     | 4.89629e-13 | 1.000000 | 6.85522e-13 | 1.000000 |
| rad45     | 4.03398e-13 | 1.000000 | 5.64793e-13 | 1.000000 |
| rad22     | 2.67449e-13 | 1.000000 | 3.74452e-13 | 1.000000 |
| rad21     | 7.16427e-14 | 1.000000 | 1.00306e-13 | 1.000000 |
| rad36     | 7.14129e-14 | 1.000000 | 9.99841e-14 | 1.000000 |
| rad15     | 3.98531e-14 | 1.000000 | 5.57979e-14 | 1.000000 |
| rad26     | 3.20159e-14 | 1.000000 | 4.48251e-14 | 1.000000 |
| rad33     | 2.26332e-14 | 1.000000 | 3.16884e-14 | 1.000000 |
| rad20     | 1.89433e-14 | 1.000000 | 2.65223e-14 | 1.000000 |
| rad10     | 1.17490e-14 | 1.000000 | 1.64495e-14 | 1.000000 |
| rad18     | 6.66222e-15 | 1.000000 | 9.32769e-15 | 1.000000 |
| rad25     | 5.79819e-15 | 1.000000 | 8.11799e-15 | 1.000000 |
| rad12     | 4.14756e-15 | 1.000000 | 5.80694e-15 | 1.000000 |
| rad2      | 3.93372e-15 | 1.000000 | 5.50754e-15 | 1.000000 |
| rad24     | 2.85159e-15 | 1.000000 | 3.99249e-15 | 1.000000 |
| rad3      | 1.63927e-15 | 1.000000 | 2.29512e-15 | 1.000000 |
| rad1      | 1.07131e-15 | 1.000000 | 1.49993e-15 | 1.000000 |
| rad4      | 1.04250e-15 | 1.000000 | 1.45960e-15 | 1.000000 |
| rad14     | 2.92681e-16 | 1.000000 | 4.09778e-16 | 1.000000 |
| rad8      | 2.34712e-16 | 1.000000 | 3.28617e-16 | 1.000000 |
| rad5      | 3.78494e-17 | 1.000000 | 5.29926e-17 | 1.000000 |
| rad47     | 2.86742e-17 | 1.000000 | 4.01464e-17 | 1.000000 |
| rad27     | 1.89935e-17 | 1.000000 | 2.65925e-17 | 1.000000 |

0.100000000E-02 Pa, 2250.00000 K

=====

| Rate constant      | True (fraction)      | Effective (fraction) |
|--------------------|----------------------|----------------------|
| Total              | 2.23655e-11 (1.00 )  | 1.58437e-11 (1.00 )  |
| Formation of rad11 | 4.62280e-12 (0.207 ) | 1.98925e-12 (0.126 ) |
| Formation of rad6  | 6.82518e-12 (0.305 ) | 2.93696e-12 (0.185 ) |
| H-abstraction      | 1.09175e-11 (0.488 ) | 1.09175e-11 (0.689 ) |

| species            | PYtrue     | Cumul    | PYeffective | Cumul    |
|--------------------|------------|----------|-------------|----------|
| Benzene+2-propynyl | 0.488140   | 0.488140 | 0.689074    | 0.689074 |
| Phenyl+Allene      | 0.291600   | 0.779740 | 0.000000    | 0.689074 |
| PhCH2CCH+H         | 0.0967415  | 0.876482 | 0.136563    | 0.825637 |
| PhCHCCH2+H         | 0.0532744  | 0.929756 | 0.0752040   | 0.900841 |
| C2H2+PhCH2         | 0.0232642  | 0.953020 | 0.0328403   | 0.933682 |
| PhCCH+CH3          | 0.0176492  | 0.970669 | 0.0249142   | 0.958596 |
| Indene+H           | 0.0145378  | 0.985207 | 0.0205221   | 0.979118 |
| PAH7+H             | 0.00604332 | 0.991251 | 0.00853097  | 0.987649 |
| Ph+MeAc            | 0.00373478 | 0.994985 | 0.00527212  | 0.992921 |

|               |             |          |             |          |
|---------------|-------------|----------|-------------|----------|
| PhcycC3H3_A+H | 0.00104439  | 0.996030 | 0.00147430  | 0.994395 |
| rad19syn      | 0.000992650 | 0.997022 | 0.00140125  | 0.995797 |
| rad39         | 0.000833753 | 0.997856 | 0.00117695  | 0.996974 |
| rad19anti     | 0.000463520 | 0.998320 | 0.000654319 | 0.997628 |
| rad54         | 0.000448432 | 0.998768 | 0.000633020 | 0.998261 |
| PAH9+H        | 0.000276004 | 0.999044 | 0.000389615 | 0.998651 |
| PhCCCH3+H     | 0.000209665 | 0.999254 | 0.000295970 | 0.998946 |
| rad38         | 0.000160719 | 0.999414 | 0.000226876 | 0.999173 |
| PAH1+H        | 9.95931e-05 | 0.999514 | 0.000140589 | 0.999314 |
| rad50         | 5.46328e-05 | 0.999569 | 7.71214e-05 | 0.999391 |
| rad35         | 5.24979e-05 | 0.999621 | 7.41079e-05 | 0.999465 |
| rad46         | 5.06983e-05 | 0.999672 | 7.15674e-05 | 0.999537 |
| PAH10+CH3     | 4.32190e-05 | 0.999715 | 6.10093e-05 | 0.999598 |
| rad55         | 4.15447e-05 | 0.999757 | 5.86459e-05 | 0.999656 |
| rad70         | 4.13232e-05 | 0.999798 | 5.83331e-05 | 0.999715 |
| PAH3+H        | 3.54273e-05 | 0.999833 | 5.00103e-05 | 0.999765 |
| rad67         | 3.21710e-05 | 0.999866 | 4.54135e-05 | 0.999810 |
| rad56         | 2.10958e-05 | 0.999887 | 2.97795e-05 | 0.999840 |
| rad51         | 2.05290e-05 | 0.999907 | 2.89794e-05 | 0.999869 |
| rad53         | 1.82253e-05 | 0.999925 | 2.57273e-05 | 0.999895 |
| rad30         | 1.61770e-05 | 0.999942 | 2.28359e-05 | 0.999917 |
| rad37         | 1.58091e-05 | 0.999957 | 2.23166e-05 | 0.999940 |
| rad34         | 1.21378e-05 | 0.999970 | 1.71341e-05 | 0.999957 |
| rad52         | 5.53699e-06 | 0.999975 | 7.81618e-06 | 0.999965 |
| rad62         | 4.54170e-06 | 0.999980 | 6.41120e-06 | 0.999971 |
| PAH8+H        | 4.26413e-06 | 0.999984 | 6.01937e-06 | 0.999977 |
| rad59         | 3.10133e-06 | 0.999987 | 4.37793e-06 | 0.999982 |
| rad64         | 2.31389e-06 | 0.999989 | 3.26637e-06 | 0.999985 |
| rad60syn      | 2.18352e-06 | 0.999991 | 3.08232e-06 | 0.999988 |
| rad60anti     | 1.52762e-06 | 0.999993 | 2.15643e-06 | 0.999990 |
| rad71         | 1.42621e-06 | 0.999994 | 2.01329e-06 | 0.999992 |
| rad68syn      | 1.22834e-06 | 0.999996 | 1.73396e-06 | 0.999994 |
| rad73         | 8.52958e-07 | 0.999996 | 1.20406e-06 | 0.999995 |
| rad68anti     | 7.89692e-07 | 0.999997 | 1.11475e-06 | 0.999996 |
| rad65         | 5.43585e-07 | 0.999998 | 7.67340e-07 | 0.999997 |
| rad42         | 4.97942e-07 | 0.999998 | 7.02910e-07 | 0.999998 |
| rad40syn      | 4.83630e-07 | 0.999999 | 6.82706e-07 | 0.999998 |
| rad58         | 4.30302e-07 | 0.999999 | 6.07428e-07 | 0.999999 |
| rad40anti     | 3.15359e-07 | 1.000000 | 4.45171e-07 | 0.999999 |
| rad43         | 2.01350e-07 | 1.000000 | 2.84232e-07 | 1.000000 |
| rad61         | 1.06762e-07 | 1.000000 | 1.50709e-07 | 1.000000 |
| rad72         | 7.85260e-08 | 1.000000 | 1.10849e-07 | 1.000000 |
| rad41         | 2.11925e-08 | 1.000000 | 2.99160e-08 | 1.000000 |
| rad6          | 1.21712e-10 | 1.000000 | 1.71812e-10 | 1.000000 |
| rad7          | 1.68614e-12 | 1.000000 | 2.38021e-12 | 1.000000 |
| rad11         | 1.28945e-12 | 1.000000 | 1.82022e-12 | 1.000000 |
| rad23         | 9.24061e-13 | 1.000000 | 1.30443e-12 | 1.000000 |
| rad28         | 4.38780e-13 | 1.000000 | 6.19396e-13 | 1.000000 |
| rad9          | 2.77272e-13 | 1.000000 | 3.91406e-13 | 1.000000 |
| rad13         | 1.82815e-13 | 1.000000 | 2.58067e-13 | 1.000000 |
| rad45         | 1.39954e-13 | 1.000000 | 1.97563e-13 | 1.000000 |
| rad22         | 6.77272e-14 | 1.000000 | 9.56057e-14 | 1.000000 |
| rad21         | 2.97971e-14 | 1.000000 | 4.20624e-14 | 1.000000 |
| rad36         | 2.52704e-14 | 1.000000 | 3.56725e-14 | 1.000000 |
| rad15         | 1.60470e-14 | 1.000000 | 2.26524e-14 | 1.000000 |
| rad33         | 1.06527e-14 | 1.000000 | 1.50376e-14 | 1.000000 |
| rad26         | 8.59643e-15 | 1.000000 | 1.21350e-14 | 1.000000 |
| rad20         | 6.76730e-15 | 1.000000 | 9.55289e-15 | 1.000000 |
| rad10         | 3.09411e-15 | 1.000000 | 4.36773e-15 | 1.000000 |
| rad25         | 2.68292e-15 | 1.000000 | 3.78730e-15 | 1.000000 |
| rad12         | 2.31790e-15 | 1.000000 | 3.27203e-15 | 1.000000 |
| rad18         | 2.02954e-15 | 1.000000 | 2.86497e-15 | 1.000000 |
| rad24         | 1.45642e-15 | 1.000000 | 2.05592e-15 | 1.000000 |
| rad2          | 7.47438e-16 | 1.000000 | 1.05511e-15 | 1.000000 |
| rad3          | 5.33767e-16 | 1.000000 | 7.53482e-16 | 1.000000 |
| rad4          | 3.33458e-16 | 1.000000 | 4.70720e-16 | 1.000000 |
| rad1          | 2.05802e-16 | 1.000000 | 2.90516e-16 | 1.000000 |
| rad8          | 2.01388e-16 | 1.000000 | 2.84285e-16 | 1.000000 |
| rad14         | 1.40659e-16 | 1.000000 | 1.98558e-16 | 1.000000 |
| rad47         | 4.71862e-17 | 1.000000 | 6.66097e-17 | 1.000000 |
| rad5          | 2.20686e-17 | 1.000000 | 3.11526e-17 | 1.000000 |
| rad27         | 7.37467e-18 | 1.000000 | 1.04103e-17 | 1.000000 |

0.100000000E-02 Pa, 2500.00000 K

| Rate constant      | True (fraction)      | Effective (fraction) |
|--------------------|----------------------|----------------------|
| Total              | 3.28090e-11 (1.00 )  | 2.31980e-11 (1.00 )  |
| Formation of rad11 | 6.43164e-12 (0.196 ) | 2.60906e-12 (0.112 ) |
| Formation of rad6  | 9.73932e-12 (0.297 ) | 3.95085e-12 (0.170 ) |

H-abstraction | 1.66381e-11 (0.507 ) 1.66381e-11 (0.717 )

| species            | PYtrue      | Cumul    | PYeffective | Cumul    |
|--------------------|-------------|----------|-------------|----------|
| Benzene+2-propynyl | 0.507119    | 0.507119 | 0.717221    | 0.717221 |
| Phenyl+Allene      | 0.292939    | 0.800058 | 0.00000     | 0.717221 |
| PhCH2CCH+H         | 0.0943957   | 0.894453 | 0.133505    | 0.850725 |
| PhCHCCH2+H         | 0.0481939   | 0.942647 | 0.0681609   | 0.918886 |
| C2H2+PhCH2         | 0.0183497   | 0.960997 | 0.0259521   | 0.944838 |
| PhCCH+CH3          | 0.0148752   | 0.975872 | 0.0210381   | 0.965876 |
| Indene+H           | 0.00953292  | 0.985405 | 0.0134824   | 0.979359 |
| PAH7+H             | 0.00553047  | 0.990936 | 0.00782174  | 0.987180 |
| Ph+MeAc            | 0.00339482  | 0.994330 | 0.00480131  | 0.991982 |
| PhcycC3H3_A+H      | 0.00149309  | 0.995824 | 0.00211168  | 0.994093 |
| rad19syn           | 0.00122618  | 0.997050 | 0.00173419  | 0.995828 |
| rad39              | 0.000692493 | 0.997742 | 0.000979395 | 0.996807 |
| rad54              | 0.000558297 | 0.998301 | 0.000789599 | 0.997597 |
| rad19anti          | 0.000392540 | 0.998693 | 0.000555170 | 0.998152 |
| PAH9+H             | 0.000261381 | 0.998954 | 0.000369672 | 0.998522 |
| PhCCCH3+H          | 0.000164587 | 0.999119 | 0.000232776 | 0.998754 |
| rad38              | 0.000157797 | 0.999277 | 0.000223174 | 0.998977 |
| PAH1+H             | 0.000129617 | 0.999406 | 0.000183319 | 0.999161 |
| rad50              | 6.95416e-05 | 0.999476 | 9.83527e-05 | 0.999259 |
| rad55              | 5.44673e-05 | 0.999530 | 7.70336e-05 | 0.999336 |
| rad46              | 5.29591e-05 | 0.999583 | 7.49001e-05 | 0.999411 |
| rad35              | 5.14100e-05 | 0.999635 | 7.27094e-05 | 0.999484 |
| PAH10+CH3          | 5.04331e-05 | 0.999685 | 7.13277e-05 | 0.999555 |
| rad70              | 4.95223e-05 | 0.999735 | 7.00399e-05 | 0.999625 |
| PAH3+H             | 4.31617e-05 | 0.999778 | 6.10439e-05 | 0.999686 |
| rad67              | 3.73882e-05 | 0.999815 | 5.28783e-05 | 0.999739 |
| rad56              | 3.65112e-05 | 0.999852 | 5.16378e-05 | 0.999791 |
| rad51              | 2.99347e-05 | 0.999882 | 4.23369e-05 | 0.999833 |
| rad53              | 2.90213e-05 | 0.999911 | 4.10449e-05 | 0.999874 |
| rad34              | 1.57208e-05 | 0.999926 | 2.22340e-05 | 0.999896 |
| rad30              | 1.43454e-05 | 0.999941 | 2.02888e-05 | 0.999917 |
| rad37              | 1.43019e-05 | 0.999955 | 2.02272e-05 | 0.999937 |
| PAH8+H             | 8.32886e-06 | 0.999963 | 1.17795e-05 | 0.999949 |
| rad52              | 7.47627e-06 | 0.999971 | 1.05737e-05 | 0.999959 |
| rad62              | 5.70269e-06 | 0.999977 | 8.06532e-06 | 0.999967 |
| rad59              | 3.60017e-06 | 0.999980 | 5.09173e-06 | 0.999972 |
| rad64              | 3.22135e-06 | 0.999983 | 4.55597e-06 | 0.999977 |
| rad71              | 3.21465e-06 | 0.999987 | 4.54650e-06 | 0.999981 |
| rad60syn           | 2.29248e-06 | 0.999989 | 3.24226e-06 | 0.999985 |
| rad68syn           | 1.99920e-06 | 0.999991 | 2.82747e-06 | 0.999988 |
| rad73              | 1.73023e-06 | 0.999993 | 2.44707e-06 | 0.999990 |
| rad60anti          | 1.62672e-06 | 0.999994 | 2.30068e-06 | 0.999992 |
| rad68anti          | 1.28205e-06 | 0.999996 | 1.81322e-06 | 0.999994 |
| rad40syn           | 8.70429e-07 | 0.999996 | 1.23105e-06 | 0.999995 |
| rad65              | 7.65686e-07 | 0.999997 | 1.08291e-06 | 0.999996 |
| rad42              | 7.25369e-07 | 0.999998 | 1.02590e-06 | 0.999997 |
| rad58              | 6.16762e-07 | 0.999999 | 8.72293e-07 | 0.999998 |
| rad40anti          | 5.85898e-07 | 0.999999 | 8.28640e-07 | 0.999999 |
| rad43              | 2.45120e-07 | 0.999999 | 3.46673e-07 | 0.999999 |
| rad72              | 2.19453e-07 | 1.000000 | 3.10373e-07 | 1.000000 |
| rad61              | 1.61750e-07 | 1.000000 | 2.28765e-07 | 1.000000 |
| rad41              | 3.09947e-08 | 1.000000 | 4.38359e-08 | 1.000000 |
| rad6               | 3.31424e-11 | 1.000000 | 4.68735e-11 | 1.000000 |
| rad7               | 6.60407e-13 | 1.000000 | 9.34012e-13 | 1.000000 |
| rad11              | 4.80324e-13 | 1.000000 | 6.79324e-13 | 1.000000 |
| rad23              | 2.66252e-13 | 1.000000 | 3.76560e-13 | 1.000000 |
| rad28              | 1.18646e-13 | 1.000000 | 1.67802e-13 | 1.000000 |
| rad9               | 1.08157e-13 | 1.000000 | 1.52967e-13 | 1.000000 |
| rad13              | 7.91341e-14 | 1.000000 | 1.11920e-13 | 1.000000 |
| rad45              | 5.45595e-14 | 1.000000 | 7.71634e-14 | 1.000000 |
| rad22              | 2.13245e-14 | 1.000000 | 3.01593e-14 | 1.000000 |
| rad21              | 1.39346e-14 | 1.000000 | 1.97077e-14 | 1.000000 |
| rad36              | 1.00192e-14 | 1.000000 | 1.41702e-14 | 1.000000 |
| rad15              | 6.95406e-15 | 1.000000 | 9.83515e-15 | 1.000000 |
| rad33              | 5.56576e-15 | 1.000000 | 7.87170e-15 | 1.000000 |
| rad26              | 3.03693e-15 | 1.000000 | 4.29514e-15 | 1.000000 |
| rad20              | 2.88829e-15 | 1.000000 | 4.08492e-15 | 1.000000 |
| rad25              | 1.37165e-15 | 1.000000 | 1.93993e-15 | 1.000000 |
| rad12              | 1.32606e-15 | 1.000000 | 1.87546e-15 | 1.000000 |
| rad10              | 1.12056e-15 | 1.000000 | 1.58481e-15 | 1.000000 |
| rad24              | 7.99114e-16 | 1.000000 | 1.13019e-15 | 1.000000 |
| rad18              | 7.64154e-16 | 1.000000 | 1.08075e-15 | 1.000000 |
| rad3               | 2.12625e-16 | 1.000000 | 3.00716e-16 | 1.000000 |
| rad2               | 2.01652e-16 | 1.000000 | 2.85197e-16 | 1.000000 |
| rad8               | 1.74700e-16 | 1.000000 | 2.47079e-16 | 1.000000 |
| rad4               | 1.29969e-16 | 1.000000 | 1.83816e-16 | 1.000000 |

|       |             |          |             |         |
|-------|-------------|----------|-------------|---------|
| rad14 | 7.76885e-17 | 1.000000 | 1.09875e-16 | 1.00000 |
| rad47 | 6.74962e-17 | 1.000000 | 9.54604e-17 | 1.00000 |
| rad1  | 5.42598e-17 | 1.000000 | 7.67401e-17 | 1.00000 |
| rad5  | 1.45372e-17 | 1.000000 | 2.05600e-17 | 1.00000 |
| rad27 | 3.67289e-18 | 1.000000 | 5.19460e-18 | 1.00000 |

0.100000000E-02 Pa, 2750.00000 K

| =====              |                 |          |                      |          |
|--------------------|-----------------|----------|----------------------|----------|
| Rate constant      | True (fraction) |          | Effective (fraction) |          |
| -----              |                 |          |                      |          |
| Total              | 4.60596e-11     | (1.00 )  | 3.26255e-11          | (1.00 )  |
| Formation of rad11 | 8.62280e-12     | (0.187 ) | 3.34633e-12          | (0.103 ) |
| Formation of rad6  | 1.33313e-11     | (0.289 ) | 5.17360e-12          | (0.159 ) |
| H-abstraction      | 2.41055e-11     | (0.523 ) | 2.41055e-11          | (0.739 ) |
| -----              |                 |          |                      |          |
| species            | PYtrue          | Cumul    | PYeffective          | Cumul    |
| Benzene+2-propynyl | 0.523355        | 0.523355 | 0.738856             | 0.738856 |
| Phenyl+Allene      | 0.291669        | 0.815024 | 0.000000             | 0.738856 |
| PhCH2CCH+H         | 0.0913925       | 0.906416 | 0.129025             | 0.867881 |
| PhCHCCH2+H         | 0.0440897       | 0.950506 | 0.0622446            | 0.930126 |
| C2H2+PhCH2         | 0.0155259       | 0.966032 | 0.0219190            | 0.952045 |
| PhCCH+CH3          | 0.0128664       | 0.978898 | 0.0181644            | 0.970209 |
| Indene+H           | 0.00652675      | 0.985425 | 0.00921427           | 0.979424 |
| PAH7+H             | 0.00506746      | 0.990493 | 0.00715408           | 0.986578 |
| Ph+MeAc            | 0.00315047      | 0.993643 | 0.00444775           | 0.991026 |
| PhcycC3H3_A+H      | 0.00197300      | 0.995616 | 0.00278544           | 0.993811 |
| rad19syn           | 0.00143568      | 0.997052 | 0.00202686           | 0.995838 |
| rad54              | 0.000652594     | 0.997704 | 0.000921315          | 0.996759 |
| rad39              | 0.000584043     | 0.998288 | 0.000824532          | 0.997584 |
| rad19anti          | 0.000328573     | 0.998617 | 0.000463869          | 0.998048 |
| PAH9+H             | 0.000240059     | 0.998857 | 0.000338907          | 0.998386 |
| PAH1+H             | 0.000158291     | 0.999015 | 0.000223471          | 0.998610 |
| rad38              | 0.000149711     | 0.999165 | 0.000211358          | 0.998821 |
| PhCCCH3+H          | 0.000136861     | 0.999302 | 0.000193216          | 0.999015 |
| rad50              | 8.19601e-05     | 0.999384 | 0.000115709          | 0.999130 |
| rad55              | 6.64334e-05     | 0.999450 | 9.37887e-05          | 0.999224 |
| rad70              | 5.64830e-05     | 0.999507 | 7.97407e-05          | 0.999304 |
| rad56              | 5.59920e-05     | 0.999563 | 7.90477e-05          | 0.999383 |
| PAH10+CH3          | 5.49972e-05     | 0.999618 | 7.76435e-05          | 0.999460 |
| rad46              | 5.29186e-05     | 0.999671 | 7.47090e-05          | 0.999535 |
| PAH3+H             | 5.07704e-05     | 0.999721 | 7.16761e-05          | 0.999607 |
| rad35              | 4.92117e-05     | 0.999771 | 6.94754e-05          | 0.999676 |
| rad53              | 4.15958e-05     | 0.999812 | 5.87239e-05          | 0.999735 |
| rad67              | 4.08893e-05     | 0.999853 | 5.77263e-05          | 0.999793 |
| rad51              | 3.94231e-05     | 0.999893 | 5.56562e-05          | 0.999848 |
| rad34              | 1.91382e-05     | 0.999912 | 2.70187e-05          | 0.999875 |
| PAH8+H             | 1.42400e-05     | 0.999926 | 2.01036e-05          | 0.999896 |
| rad30              | 1.30159e-05     | 0.999939 | 1.83754e-05          | 0.999914 |
| rad37              | 1.25497e-05     | 0.999951 | 1.77173e-05          | 0.999932 |
| rad52              | 9.23200e-06     | 0.999961 | 1.30335e-05          | 0.999945 |
| rad62              | 6.96508e-06     | 0.999968 | 9.83308e-06          | 0.999954 |
| rad71              | 6.06264e-06     | 0.999974 | 8.55909e-06          | 0.999963 |
| rad64              | 4.12924e-06     | 0.999978 | 5.82954e-06          | 0.999969 |
| rad59              | 4.06487e-06     | 0.999982 | 5.73866e-06          | 0.999975 |
| rad73              | 2.98825e-06     | 0.999985 | 4.21872e-06          | 0.999979 |
| rad68syn           | 2.93858e-06     | 0.999988 | 4.14861e-06          | 0.999983 |
| rad60syn           | 2.38752e-06     | 0.999990 | 3.37063e-06          | 0.999986 |
| rad68anti          | 1.88086e-06     | 0.999992 | 2.65533e-06          | 0.999989 |
| rad60anti          | 1.71401e-06     | 0.999994 | 2.41979e-06          | 0.999991 |
| rad40syn           | 1.39059e-06     | 0.999995 | 1.96319e-06          | 0.999993 |
| rad42              | 1.00618e-06     | 0.999996 | 1.42050e-06          | 0.999995 |
| rad65              | 9.77109e-07     | 0.999997 | 1.37945e-06          | 0.999996 |
| rad40anti          | 9.60893e-07     | 0.999998 | 1.35656e-06          | 0.999998 |
| rad58              | 8.26832e-07     | 0.999999 | 1.16730e-06          | 0.999999 |
| rad72              | 4.93194e-07     | 1.000000 | 6.96274e-07          | 0.999999 |
| rad43              | 2.90363e-07     | 1.000000 | 4.09925e-07          | 1.000000 |
| rad61              | 2.19014e-07     | 1.000000 | 3.09197e-07          | 1.000000 |
| rad41              | 4.25216e-08     | 1.000000 | 6.00307e-08          | 1.000000 |
| rad6               | 1.12726e-11     | 1.000000 | 1.59144e-11          | 1.000000 |
| rad7               | 2.96734e-13     | 1.000000 | 4.18921e-13          | 1.000000 |
| rad11              | 2.05455e-13     | 1.000000 | 2.90055e-13          | 1.000000 |
| rad23              | 9.11899e-14     | 1.000000 | 1.28739e-13          | 1.000000 |
| rad9               | 4.53895e-14     | 1.000000 | 6.40794e-14          | 1.000000 |
| rad28              | 4.03639e-14     | 1.000000 | 5.69847e-14          | 1.000000 |
| rad13              | 3.84829e-14     | 1.000000 | 5.43291e-14          | 1.000000 |
| rad45              | 2.34841e-14     | 1.000000 | 3.31543e-14          | 1.000000 |
| rad22              | 7.95469e-15     | 1.000000 | 1.12302e-14          | 1.000000 |
| rad21              | 7.20273e-15     | 1.000000 | 1.01686e-14          | 1.000000 |
| rad36              | 4.37413e-15     | 1.000000 | 6.17526e-15          | 1.000000 |

|       |             |         |             |         |
|-------|-------------|---------|-------------|---------|
| rad15 | 3.20859e-15 | 1.00000 | 4.52980e-15 | 1.00000 |
| rad33 | 3.15102e-15 | 1.00000 | 4.44850e-15 | 1.00000 |
| rad20 | 1.44343e-15 | 1.00000 | 2.03779e-15 | 1.00000 |
| rad26 | 1.24207e-15 | 1.00000 | 1.75351e-15 | 1.00000 |
| rad12 | 7.84782e-16 | 1.00000 | 1.10793e-15 | 1.00000 |
| rad25 | 7.63295e-16 | 1.00000 | 1.07760e-15 | 1.00000 |
| rad10 | 4.83047e-16 | 1.00000 | 6.81948e-16 | 1.00000 |
| rad24 | 4.65717e-16 | 1.00000 | 6.57484e-16 | 1.00000 |
| rad18 | 3.38458e-16 | 1.00000 | 4.77825e-16 | 1.00000 |
| rad8  | 1.52996e-16 | 1.00000 | 2.15996e-16 | 1.00000 |
| rad3  | 9.88010e-17 | 1.00000 | 1.39484e-16 | 1.00000 |
| rad47 | 8.69678e-17 | 1.00000 | 1.22779e-16 | 1.00000 |
| rad2  | 7.15516e-17 | 1.00000 | 1.01015e-16 | 1.00000 |
| rad4  | 5.93304e-17 | 1.00000 | 8.37608e-17 | 1.00000 |
| rad14 | 4.74808e-17 | 1.00000 | 6.70319e-17 | 1.00000 |
| rad1  | 1.83445e-17 | 1.00000 | 2.58982e-17 | 1.00000 |
| rad5  | 1.01903e-17 | 1.00000 | 1.43864e-17 | 1.00000 |
| rad27 | 2.15740e-18 | 1.00000 | 3.04574e-18 | 1.00000 |

0.100000000E-02 Pa, 3000.00000 K

| Rate constant      | True (fraction)      | Effective (fraction)  |
|--------------------|----------------------|-----------------------|
| Total              | 6.24269e-11 (1.00 )  | 4.43911e-11 (1.00 )   |
| Formation of rad11 | 1.12221e-11 (0.180 ) | 4.21269e-12 (0.0949 ) |
| Formation of rad6  | 1.76534e-11 (0.283 ) | 6.62699e-12 (0.149 )  |
| H-abstraction      | 3.35514e-11 (0.537 ) | 3.35514e-11 (0.756 )  |

| species            | PYtrue      | Cumul    | PYeffective | Cumul    |
|--------------------|-------------|----------|-------------|----------|
| Benzene+2-propynyl | 0.537451    | 0.537451 | 0.755814    | 0.755814 |
| Phenyl+Allene      | 0.288911    | 0.826362 | 0.000000    | 0.755814 |
| PhCH2CCH+H         | 0.0883066   | 0.914669 | 0.124185    | 0.879999 |
| PhCHCCH2+H         | 0.0408111   | 0.955480 | 0.0573925   | 0.937392 |
| C2H2+PhCH2         | 0.0138651   | 0.969345 | 0.0194984   | 0.956890 |
| PhCCH+CH3          | 0.0113582   | 0.980703 | 0.0159730   | 0.972863 |
| PAH7+H             | 0.00465329  | 0.985356 | 0.00654386  | 0.979407 |
| Indene+H           | 0.00463895  | 0.989995 | 0.00652370  | 0.985931 |
| Ph+MeAc            | 0.00297587  | 0.992971 | 0.00418496  | 0.990116 |
| PhcycC3H3_A+H      | 0.00245642  | 0.995427 | 0.00345445  | 0.993570 |
| rad19syn           | 0.00161454  | 0.997042 | 0.00227052  | 0.995841 |
| rad54              | 0.000727890 | 0.997770 | 0.00102362  | 0.996864 |
| rad39              | 0.000500510 | 0.998270 | 0.000703861 | 0.997568 |
| rad19anti          | 0.000275358 | 0.998546 | 0.000387232 | 0.997955 |
| PAH9+H             | 0.000215435 | 0.998761 | 0.000302964 | 0.998258 |
| PAH1+H             | 0.000185098 | 0.998946 | 0.000260302 | 0.998519 |
| rad38              | 0.000138297 | 0.999085 | 0.000194486 | 0.998713 |
| PhCCCH3+H          | 0.000118094 | 0.999203 | 0.000166074 | 0.998879 |
| rad50              | 9.10199e-05 | 0.999294 | 0.000128001 | 0.999007 |
| rad56              | 7.84307e-05 | 0.999372 | 0.000110297 | 0.999117 |
| rad55              | 7.67854e-05 | 0.999449 | 0.000107983 | 0.999225 |
| rad70              | 6.22156e-05 | 0.999511 | 8.74935e-05 | 0.999313 |
| PAH3+H             | 5.79162e-05 | 0.999569 | 8.14472e-05 | 0.999394 |
| PAH10+CH3          | 5.73435e-05 | 0.999626 | 8.06419e-05 | 0.999475 |
| rad53              | 5.50942e-05 | 0.999682 | 7.74787e-05 | 0.999552 |
| rad46              | 5.10964e-05 | 0.999733 | 7.18563e-05 | 0.999624 |
| rad51              | 4.79927e-05 | 0.999781 | 6.74918e-05 | 0.999692 |
| rad35              | 4.64038e-05 | 0.999827 | 6.52572e-05 | 0.999757 |
| rad67              | 4.30004e-05 | 0.999870 | 6.04712e-05 | 0.999818 |
| rad34              | 2.22803e-05 | 0.999892 | 3.13327e-05 | 0.999849 |
| PAH8+H             | 2.20424e-05 | 0.999914 | 3.09982e-05 | 0.999880 |
| rad30              | 1.19659e-05 | 0.999926 | 1.68276e-05 | 0.999897 |
| rad37              | 1.08360e-05 | 0.999937 | 1.52386e-05 | 0.999912 |
| rad52              | 1.06405e-05 | 0.999948 | 1.49636e-05 | 0.999927 |
| rad71              | 9.97847e-06 | 0.999958 | 1.40327e-05 | 0.999941 |
| rad62              | 8.52399e-06 | 0.999966 | 1.19872e-05 | 0.999953 |
| rad64              | 4.99011e-06 | 0.999971 | 7.01754e-06 | 0.999960 |
| rad73              | 4.56449e-06 | 0.999976 | 6.41901e-06 | 0.999966 |
| rad59              | 4.47702e-06 | 0.999980 | 6.29599e-06 | 0.999973 |
| rad68syn           | 4.00554e-06 | 0.999984 | 5.63295e-06 | 0.999978 |
| rad68anti          | 2.55993e-06 | 0.999987 | 3.60001e-06 | 0.999982 |
| rad60syn           | 2.46101e-06 | 0.999989 | 3.46090e-06 | 0.999985 |
| rad40syn           | 2.03324e-06 | 0.999991 | 2.85932e-06 | 0.999988 |
| rad60anti          | 1.78407e-06 | 0.999993 | 2.50894e-06 | 0.999991 |
| rad40anti          | 1.43624e-06 | 0.999995 | 2.01978e-06 | 0.999993 |
| rad42              | 1.37800e-06 | 0.999996 | 1.93787e-06 | 0.999995 |
| rad65              | 1.15674e-06 | 0.999997 | 1.62672e-06 | 0.999996 |
| rad58              | 1.05023e-06 | 0.999998 | 1.47693e-06 | 0.999998 |
| rad72              | 9.39261e-07 | 0.999999 | 1.32087e-06 | 0.999999 |
| rad43              | 3.36095e-07 | 0.999999 | 4.72649e-07 | 1.000000 |



|       |             |          |             |          |
|-------|-------------|----------|-------------|----------|
| rad61 | 2.73990e-07 | 1.000000 | 3.85311e-07 | 1.000000 |
| rad41 | 5.56844e-08 | 1.000000 | 7.83087e-08 | 1.000000 |
| rad6  | 4.47428e-12 | 1.000000 | 6.29216e-12 | 1.000000 |
| rad7  | 1.48109e-13 | 1.000000 | 2.08284e-13 | 1.000000 |
| rad11 | 9.86450e-14 | 1.000000 | 1.38724e-13 | 1.000000 |
| rad23 | 3.52815e-14 | 1.000000 | 4.96161e-14 | 1.000000 |
| rad13 | 2.05540e-14 | 1.000000 | 2.89048e-14 | 1.000000 |
| rad9  | 2.04934e-14 | 1.000000 | 2.88198e-14 | 1.000000 |
| rad28 | 1.59974e-14 | 1.000000 | 2.24971e-14 | 1.000000 |
| rad45 | 1.09755e-14 | 1.000000 | 1.54348e-14 | 1.000000 |
| rad21 | 4.05034e-15 | 1.000000 | 5.69598e-15 | 1.000000 |
| rad22 | 3.37076e-15 | 1.000000 | 4.74028e-15 | 1.000000 |
| rad36 | 2.06822e-15 | 1.000000 | 2.90852e-15 | 1.000000 |
| rad33 | 1.89985e-15 | 1.000000 | 2.67174e-15 | 1.000000 |
| rad15 | 1.57462e-15 | 1.000000 | 2.21438e-15 | 1.000000 |
| rad20 | 8.22777e-16 | 1.000000 | 1.15707e-15 | 1.000000 |
| rad26 | 5.57755e-16 | 1.000000 | 7.84369e-16 | 1.000000 |
| rad12 | 4.82938e-16 | 1.000000 | 6.79152e-16 | 1.000000 |
| rad25 | 4.56475e-16 | 1.000000 | 6.41938e-16 | 1.000000 |
| rad24 | 2.85392e-16 | 1.000000 | 4.01344e-16 | 1.000000 |
| rad10 | 2.32373e-16 | 1.000000 | 3.26784e-16 | 1.000000 |
| rad18 | 1.70018e-16 | 1.000000 | 2.39095e-16 | 1.000000 |
| rad8  | 1.34844e-16 | 1.000000 | 1.89630e-16 | 1.000000 |
| rad47 | 1.03449e-16 | 1.000000 | 1.45480e-16 | 1.000000 |
| rad3  | 5.15617e-17 | 1.000000 | 7.25113e-17 | 1.000000 |
| rad14 | 3.16325e-17 | 1.000000 | 4.44846e-17 | 1.000000 |
| rad2  | 3.09387e-17 | 1.000000 | 4.35088e-17 | 1.000000 |
| rad4  | 3.07216e-17 | 1.000000 | 4.32036e-17 | 1.000000 |
| rad1  | 7.48658e-18 | 1.000000 | 1.05283e-17 | 1.000000 |
| rad5  | 7.41054e-18 | 1.000000 | 1.04214e-17 | 1.000000 |
| rad27 | 1.40642e-18 | 1.000000 | 1.97783e-18 | 1.000000 |

0.100000000E-02 Pa, 3250.00000 K

| Rate constant      | True (fraction)      | Effective (fraction)  |
|--------------------|----------------------|-----------------------|
| Total              | 8.22129e-11 (1.00 )  | 5.87536e-11 (1.00 )   |
| Formation of rad11 | 1.42538e-11 (0.173 ) | 5.21849e-12 (0.0888 ) |
| Formation of rad6  | 2.27549e-11 (0.277 ) | 8.33083e-12 (0.142 )  |
| H-abstraction      | 4.52043e-11 (0.550 ) | 4.52043e-11 (0.769 )  |

| species            | PYtrue      | Cumul    | PYeffective | Cumul    |
|--------------------|-------------|----------|-------------|----------|
| Benzene+2-propynyl | 0.549844    | 0.549844 | 0.769388    | 0.769388 |
| Phenyl+Allene      | 0.285349    | 0.835192 | 0.000000    | 0.769388 |
| PhCH2CCH+H         | 0.0853725   | 0.920565 | 0.119460    | 0.888848 |
| PhCHCCH2+H         | 0.0381839   | 0.958749 | 0.0534299   | 0.942278 |
| C2H2+PhCH2         | 0.0128678   | 0.971617 | 0.0180057   | 0.960283 |
| PhCCH+CH3          | 0.0101926   | 0.981809 | 0.0142623   | 0.974546 |
| PAH7+H             | 0.00428274  | 0.986092 | 0.00599276  | 0.980539 |
| Indene+H           | 0.00340695  | 0.989499 | 0.00476729  | 0.985306 |
| PhcycC3H3_A+H      | 0.00292038  | 0.992419 | 0.00408643  | 0.989392 |
| Ph+MeAc            | 0.00285191  | 0.995271 | 0.00399061  | 0.993383 |
| rad19syn           | 0.00176005  | 0.997031 | 0.00246280  | 0.995846 |
| rad54              | 0.000783510 | 0.997815 | 0.00109635  | 0.996942 |
| rad39              | 0.000435199 | 0.998250 | 0.000608967 | 0.997551 |
| rad19anti          | 0.000232598 | 0.998483 | 0.000325470 | 0.997876 |
| PAH1+H             | 0.000210285 | 0.998693 | 0.000294248 | 0.998171 |
| PAH9+H             | 0.000189946 | 0.998883 | 0.000265788 | 0.998436 |
| rad38              | 0.000125074 | 0.999008 | 0.000175014 | 0.998611 |
| PhCCCH3+H          | 0.000104499 | 0.999112 | 0.000146224 | 0.998758 |
| rad56              | 0.000102496 | 0.999215 | 0.000143420 | 0.998901 |
| rad50              | 9.64743e-05 | 0.999311 | 0.000134995 | 0.999036 |
| rad55              | 8.51952e-05 | 0.999397 | 0.000119212 | 0.999155 |
| rad53              | 6.86880e-05 | 0.999465 | 9.61137e-05 | 0.999251 |
| rad70              | 6.67834e-05 | 0.999532 | 9.34486e-05 | 0.999345 |
| PAH3+H             | 6.43467e-05 | 0.999596 | 9.00394e-05 | 0.999435 |
| PAH10+CH3          | 5.80427e-05 | 0.999654 | 8.12183e-05 | 0.999516 |
| rad51              | 5.49240e-05 | 0.999709 | 7.68541e-05 | 0.999593 |
| rad46              | 4.80263e-05 | 0.999757 | 6.72021e-05 | 0.999660 |
| rad67              | 4.40669e-05 | 0.999802 | 6.16619e-05 | 0.999722 |
| rad35              | 4.33473e-05 | 0.999845 | 6.06552e-05 | 0.999783 |
| PAH8+H             | 3.16111e-05 | 0.999876 | 4.42329e-05 | 0.999827 |
| rad34              | 2.50786e-05 | 0.999902 | 3.50921e-05 | 0.999862 |
| rad71              | 1.47743e-05 | 0.999916 | 2.06734e-05 | 0.999883 |
| rad52              | 1.16170e-05 | 0.999928 | 1.62555e-05 | 0.999899 |
| rad30              | 1.10774e-05 | 0.999939 | 1.55003e-05 | 0.999914 |
| rad62              | 1.06705e-05 | 0.999950 | 1.49310e-05 | 0.999929 |
| rad37              | 9.29424e-06 | 0.999959 | 1.30053e-05 | 0.999942 |
| rad73              | 6.33743e-06 | 0.999965 | 8.86788e-06 | 0.999951 |

|           |             |          |             |          |
|-----------|-------------|----------|-------------|----------|
| rad64     | 5.77649e-06 | 0.999971 | 8.08292e-06 | 0.999959 |
| rad68syn  | 5.15348e-06 | 0.999976 | 7.21118e-06 | 0.999966 |
| rad59     | 4.82486e-06 | 0.999981 | 6.75136e-06 | 0.999973 |
| rad68anti | 3.28964e-06 | 0.999984 | 4.60314e-06 | 0.999978 |
| rad40syn  | 2.77792e-06 | 0.999987 | 3.88709e-06 | 0.999982 |
| rad60syn  | 2.50929e-06 | 0.999990 | 3.51119e-06 | 0.999985 |
| rad40anti | 1.99952e-06 | 0.999992 | 2.79788e-06 | 0.999988 |
| rad42     | 1.90464e-06 | 0.999994 | 2.66512e-06 | 0.999991 |
| rad60anti | 1.83422e-06 | 0.999995 | 2.56658e-06 | 0.999993 |
| rad72     | 1.57365e-06 | 0.999997 | 2.20197e-06 | 0.999995 |
| rad65     | 1.29208e-06 | 0.999998 | 1.80798e-06 | 0.999997 |
| rad58     | 1.27682e-06 | 1.000000 | 1.78663e-06 | 0.999999 |
| rad43     | 3.85029e-07 | 1.000000 | 5.38764e-07 | 1.000000 |
| rad61     | 3.23853e-07 | 1.000000 | 4.53160e-07 | 1.000000 |
| rad41     | 7.10639e-08 | 1.000000 | 9.94383e-08 | 1.000000 |
| rad6      | 2.00247e-12 | 1.000000 | 2.80203e-12 | 1.000000 |
| rad7      | 8.03484e-14 | 1.000000 | 1.12430e-13 | 1.000000 |
| rad11     | 5.21744e-14 | 1.000000 | 7.30064e-14 | 1.000000 |
| rad23     | 1.49807e-14 | 1.000000 | 2.09622e-14 | 1.000000 |
| rad13     | 1.18527e-14 | 1.000000 | 1.65852e-14 | 1.000000 |
| rad9      | 9.93332e-15 | 1.000000 | 1.38995e-14 | 1.000000 |
| rad28     | 7.11040e-15 | 1.000000 | 9.94945e-15 | 1.000000 |
| rad45     | 5.48979e-15 | 1.000000 | 7.68177e-15 | 1.000000 |
| rad21     | 2.44315e-15 | 1.000000 | 3.41865e-15 | 1.000000 |
| rad22     | 1.58556e-15 | 1.000000 | 2.21864e-15 | 1.000000 |
| rad33     | 1.20474e-15 | 1.000000 | 1.68578e-15 | 1.000000 |
| rad36     | 1.04416e-15 | 1.000000 | 1.46108e-15 | 1.000000 |
| rad15     | 8.20648e-16 | 1.000000 | 1.14832e-15 | 1.000000 |
| rad20     | 5.20430e-16 | 1.000000 | 7.28230e-16 | 1.000000 |
| rad12     | 3.09374e-16 | 1.000000 | 4.32901e-16 | 1.000000 |
| rad25     | 2.89947e-16 | 1.000000 | 4.05717e-16 | 1.000000 |
| rad26     | 2.69860e-16 | 1.000000 | 3.77609e-16 | 1.000000 |
| rad24     | 1.82403e-16 | 1.000000 | 2.55233e-16 | 1.000000 |
| rad10     | 1.20968e-16 | 1.000000 | 1.69268e-16 | 1.000000 |
| rad8      | 1.19193e-16 | 1.000000 | 1.66784e-16 | 1.000000 |
| rad47     | 1.15640e-16 | 1.000000 | 1.61813e-16 | 1.000000 |
| rad18     | 9.40399e-17 | 1.000000 | 1.31588e-16 | 1.000000 |
| rad3      | 2.94018e-17 | 1.000000 | 4.11413e-17 | 1.000000 |
| rad14     | 2.29550e-17 | 1.000000 | 3.21204e-17 | 1.000000 |
| rad4      | 1.75975e-17 | 1.000000 | 2.46239e-17 | 1.000000 |
| rad2      | 1.53622e-17 | 1.000000 | 2.14960e-17 | 1.000000 |
| rad5      | 5.56690e-18 | 1.000000 | 7.78965e-18 | 1.000000 |
| rad1      | 3.52773e-18 | 1.000000 | 4.93628e-18 | 1.000000 |
| rad27     | 9.84689e-19 | 1.000000 | 1.37786e-18 | 1.000000 |

0.100000000E-02 Pa, 3500.00000 K

| Rate constant      | True (fraction)      | Effective (fraction)  |
|--------------------|----------------------|-----------------------|
| Total              | 1.05713e-10 (1.00 )  | 7.59650e-11 (1.00 )   |
| Formation of rad11 | 1.77412e-11 (0.168 ) | 6.37264e-12 (0.0839 ) |
| Formation of rad6  | 2.86822e-11 (0.271 ) | 1.03027e-11 (0.136 )  |
| H-abstraction      | 5.92897e-11 (0.561 ) | 5.92897e-11 (0.780 )  |

| species            | PYtrue      | Cumul    | PYeffective | Cumul    |
|--------------------|-------------|----------|-------------|----------|
| Benzene+2-propynyl | 0.560855    | 0.560855 | 0.780487    | 0.780487 |
| Phenyl+Allene      | 0.281404    | 0.842259 | 0.000000    | 0.780487 |
| PhCH2CCH+H         | 0.0826656   | 0.924925 | 0.115037    | 0.895524 |
| PhCHCCH2+H         | 0.0360585   | 0.960983 | 0.0501791   | 0.945703 |
| C2H2+PhCH2         | 0.0122593   | 0.973242 | 0.0170600   | 0.962764 |
| PhCCH+CH3          | 0.00927084  | 0.982513 | 0.0129013   | 0.975665 |
| PAH7+H             | 0.00395025  | 0.986463 | 0.00549717  | 0.981162 |
| PhcycC3H3_A+H      | 0.00334801  | 0.989811 | 0.00465910  | 0.985821 |
| Ph+MeAc            | 0.00276398  | 0.992575 | 0.00384635  | 0.989667 |
| Indene+H           | 0.00257590  | 0.995151 | 0.00358462  | 0.993252 |
| rad19syn           | 0.00187235  | 0.997024 | 0.00260557  | 0.995858 |
| rad54              | 0.000820548 | 0.997844 | 0.00114187  | 0.996999 |
| rad39              | 0.000383055 | 0.998227 | 0.000533059 | 0.997533 |
| PAH1+H             | 0.000234590 | 0.998462 | 0.000326455 | 0.997859 |
| rad19anti          | 0.000198628 | 0.998661 | 0.000276411 | 0.998135 |
| PAH9+H             | 0.000165224 | 0.998826 | 0.000229927 | 0.998365 |
| rad56              | 0.000126873 | 0.998953 | 0.000176556 | 0.998542 |
| rad38              | 0.000111229 | 0.999064 | 0.000154787 | 0.998697 |
| rad50              | 9.85613e-05 | 0.999162 | 0.000137158 | 0.998834 |
| PhCCCH3+H          | 9.42424e-05 | 0.999257 | 0.000131148 | 0.998965 |
| rad55              | 9.15803e-05 | 0.999348 | 0.000127443 | 0.999092 |
| rad53              | 8.16793e-05 | 0.999430 | 0.000113665 | 0.999206 |
| rad70              | 7.02694e-05 | 0.999500 | 9.77871e-05 | 0.999304 |
| PAH3+H             | 6.99220e-05 | 0.999570 | 9.73035e-05 | 0.999401 |

|           |             |          |             |          |
|-----------|-------------|----------|-------------|----------|
| rad51     | 5.98507e-05 | 0.999630 | 8.32882e-05 | 0.999484 |
| PAH10+CH3 | 5.76128e-05 | 0.999688 | 8.01742e-05 | 0.999565 |
| rad67     | 4.43734e-05 | 0.999732 | 6.17501e-05 | 0.999626 |
| rad46     | 4.41956e-05 | 0.999776 | 6.15029e-05 | 0.999688 |
| PAH8+H    | 4.26935e-05 | 0.999819 | 5.94123e-05 | 0.999747 |
| rad35     | 4.02805e-05 | 0.999859 | 5.60544e-05 | 0.999803 |
| rad34     | 2.74951e-05 | 0.999887 | 3.82622e-05 | 0.999842 |
| rad71     | 2.01281e-05 | 0.999907 | 2.80103e-05 | 0.999870 |
| rad62     | 1.37116e-05 | 0.999920 | 1.90811e-05 | 0.999889 |
| rad52     | 1.21501e-05 | 0.999933 | 1.69080e-05 | 0.999906 |
| rad30     | 1.02915e-05 | 0.999943 | 1.43216e-05 | 0.999920 |
| rad73     | 8.16310e-06 | 0.999951 | 1.13598e-05 | 0.999931 |
| rad37     | 7.96636e-06 | 0.999959 | 1.10860e-05 | 0.999942 |
| rad64     | 6.47621e-06 | 0.999966 | 9.01228e-06 | 0.999951 |
| rad68syn  | 6.33612e-06 | 0.999972 | 8.81737e-06 | 0.999960 |
| rad59     | 5.10458e-06 | 0.999977 | 7.10355e-06 | 0.999967 |
| rad68anti | 4.04059e-06 | 0.999981 | 5.62289e-06 | 0.999973 |
| rad40syn  | 3.59895e-06 | 0.999985 | 5.00830e-06 | 0.999978 |
| rad42     | 2.66321e-06 | 0.999987 | 3.70612e-06 | 0.999982 |
| rad40anti | 2.63316e-06 | 0.999990 | 3.66431e-06 | 0.999985 |
| rad60syn  | 2.53258e-06 | 0.999992 | 3.52435e-06 | 0.999989 |
| rad72     | 2.38441e-06 | 0.999995 | 3.31814e-06 | 0.999992 |
| rad60anti | 1.86455e-06 | 0.999997 | 2.59471e-06 | 0.999995 |
| rad58     | 1.49815e-06 | 0.999998 | 2.08483e-06 | 0.999997 |
| rad65     | 1.37925e-06 | 1.000000 | 1.91936e-06 | 0.999999 |
| rad43     | 4.42452e-07 | 1.000000 | 6.15716e-07 | 0.999999 |
| rad61     | 3.67258e-07 | 1.000000 | 5.11077e-07 | 1.000000 |
| rad41     | 8.98821e-08 | 1.000000 | 1.25080e-07 | 1.000000 |
| rad6      | 9.88525e-13 | 1.000000 | 1.37563e-12 | 1.000000 |
| rad7      | 4.66162e-14 | 1.000000 | 6.48713e-14 | 1.000000 |
| rad11     | 2.99128e-14 | 1.000000 | 4.16267e-14 | 1.000000 |
| rad13     | 7.28309e-15 | 1.000000 | 1.01352e-14 | 1.000000 |
| rad23     | 6.86375e-15 | 1.000000 | 9.55160e-15 | 1.000000 |
| rad9      | 5.14850e-15 | 1.000000 | 7.16468e-15 | 1.000000 |
| rad28     | 3.46852e-15 | 1.000000 | 4.82680e-15 | 1.000000 |
| rad45     | 2.90444e-15 | 1.000000 | 4.04183e-15 | 1.000000 |
| rad21     | 1.56206e-15 | 1.000000 | 2.17377e-15 | 1.000000 |
| rad22     | 8.14241e-16 | 1.000000 | 1.13310e-15 | 1.000000 |
| rad33     | 7.96109e-16 | 1.000000 | 1.10787e-15 | 1.000000 |
| rad36     | 5.56397e-16 | 1.000000 | 7.74281e-16 | 1.000000 |
| rad15     | 4.52724e-16 | 1.000000 | 6.30009e-16 | 1.000000 |
| rad20     | 3.56500e-16 | 1.000000 | 4.96106e-16 | 1.000000 |
| rad12     | 2.06000e-16 | 1.000000 | 2.86671e-16 | 1.000000 |
| rad25     | 1.93599e-16 | 1.000000 | 2.69413e-16 | 1.000000 |
| rad26     | 1.39337e-16 | 1.000000 | 1.93901e-16 | 1.000000 |
| rad47     | 1.23125e-16 | 1.000000 | 1.71341e-16 | 1.000000 |
| rad24     | 1.20836e-16 | 1.000000 | 1.68155e-16 | 1.000000 |
| rad8      | 1.05361e-16 | 1.000000 | 1.46621e-16 | 1.000000 |
| rad10     | 6.70290e-17 | 1.000000 | 9.32774e-17 | 1.000000 |
| rad18     | 5.60038e-17 | 1.000000 | 7.79350e-17 | 1.000000 |
| rad14     | 1.81850e-17 | 1.000000 | 2.53063e-17 | 1.000000 |
| rad3      | 1.79698e-17 | 1.000000 | 2.50069e-17 | 1.000000 |
| rad4      | 1.09323e-17 | 1.000000 | 1.52134e-17 | 1.000000 |
| rad2      | 8.41442e-18 | 1.000000 | 1.17095e-17 | 1.000000 |
| rad5      | 4.31411e-18 | 1.000000 | 6.00352e-18 | 1.000000 |
| rad1      | 1.86115e-18 | 1.000000 | 2.58999e-18 | 1.000000 |
| rad27     | 7.31085e-19 | 1.000000 | 1.01738e-18 | 1.000000 |

0.100000000E-02 Pa, 3750.00000 K

=====

| Rate constant      | True (fraction)      | Effective (fraction)  |
|--------------------|----------------------|-----------------------|
| Total              | 1.33217e-10 (1.00 )  | 9.62711e-11 (1.00 )   |
| Formation of rad11 | 2.17064e-11 (0.163 ) | 7.68279e-12 (0.0798 ) |
| Formation of rad6  | 3.54800e-11 (0.266 ) | 1.25578e-11 (0.130 )  |
| H-abstraction      | 7.60305e-11 (0.571 ) | 7.60305e-11 (0.790 )  |

| species            | PYtrue     | Cumul    | PYeffective | Cumul    |
|--------------------|------------|----------|-------------|----------|
| Benzene+2-propynyl | 0.570727   | 0.570727 | 0.789754    | 0.789754 |
| Phenyl+Allene      | 0.277336   | 0.848063 | 0.00000     | 0.789754 |
| PhCH2CCH+H         | 0.0801946  | 0.928257 | 0.110971    | 0.900725 |
| PhCHCCH2+H         | 0.0343186  | 0.962576 | 0.0474891   | 0.948214 |
| C2H2+PhCH2         | 0.0118838  | 0.974460 | 0.0164445   | 0.964658 |
| PhCCH+CH3          | 0.00852836 | 0.982988 | 0.0118013   | 0.976459 |
| PhcycC3H3_A+H      | 0.00372851 | 0.986717 | 0.00515939  | 0.981619 |
| PAH7+H             | 0.00365085 | 0.990368 | 0.00505194  | 0.986671 |
| Ph+MeAc            | 0.00270113 | 0.993069 | 0.00373773  | 0.990408 |
| Indene+H           | 0.00199900 | 0.995068 | 0.00276616  | 0.993175 |
| rad19syn           | 0.00195356 | 0.997021 | 0.00270328  | 0.995878 |

|           |             |          |             |          |
|-----------|-------------|----------|-------------|----------|
| rad54     | 0.000841040 | 0.997862 | 0.00116381  | 0.997042 |
| rad39     | 0.000340475 | 0.998203 | 0.000471138 | 0.997513 |
| PAH1+H    | 0.000258935 | 0.998462 | 0.000358305 | 0.997871 |
| rad19anti | 0.000171610 | 0.998633 | 0.000237469 | 0.998109 |
| rad56     | 0.000150421 | 0.998784 | 0.000208148 | 0.998317 |
| PAH9+H    | 0.000142296 | 0.998926 | 0.000196904 | 0.998514 |
| rad50     | 9.78214e-05 | 0.999024 | 0.000135362 | 0.998649 |
| rad38     | 9.76287e-05 | 0.999121 | 0.000135095 | 0.998784 |
| rad55     | 9.60227e-05 | 0.999217 | 0.000132873 | 0.998917 |
| rad53     | 9.35446e-05 | 0.999311 | 0.000129444 | 0.999046 |
| PhCCCH3+H | 8.63448e-05 | 0.999397 | 0.000119481 | 0.999166 |
| PAH3+H    | 7.46029e-05 | 0.999472 | 0.000103233 | 0.999269 |
| rad70     | 7.27716e-05 | 0.999545 | 0.000100699 | 0.999370 |
| rad51     | 6.27266e-05 | 0.999607 | 8.67994e-05 | 0.999457 |
| PAH10+CH3 | 5.64592e-05 | 0.999664 | 7.81267e-05 | 0.999535 |
| PAH8+H    | 5.49581e-05 | 0.999719 | 7.60493e-05 | 0.999611 |
| rad67     | 4.41361e-05 | 0.999763 | 6.10741e-05 | 0.999672 |
| rad46     | 4.00102e-05 | 0.999803 | 5.53649e-05 | 0.999727 |
| rad35     | 3.73501e-05 | 0.999840 | 5.16839e-05 | 0.999779 |
| rad34     | 2.95155e-05 | 0.999870 | 4.08426e-05 | 0.999820 |
| rad71     | 2.56704e-05 | 0.999896 | 3.55219e-05 | 0.999855 |
| rad62     | 1.78765e-05 | 0.999913 | 2.47369e-05 | 0.999880 |
| rad52     | 1.22817e-05 | 0.999926 | 1.69950e-05 | 0.999897 |
| rad73     | 9.90830e-06 | 0.999936 | 1.37108e-05 | 0.999911 |
| rad30     | 9.58077e-06 | 0.999945 | 1.32576e-05 | 0.999924 |
| rad68syn  | 7.51159e-06 | 0.999953 | 1.03943e-05 | 0.999934 |
| rad64     | 7.08717e-06 | 0.999960 | 9.80700e-06 | 0.999944 |
| rad37     | 6.84827e-06 | 0.999967 | 9.47639e-06 | 0.999954 |
| rad59     | 5.31873e-06 | 0.999972 | 7.35989e-06 | 0.999961 |
| rad68anti | 4.78626e-06 | 0.999977 | 6.62308e-06 | 0.999968 |
| rad40syn  | 4.46912e-06 | 0.999981 | 6.18422e-06 | 0.999974 |
| rad42     | 3.72271e-06 | 0.999985 | 5.15138e-06 | 0.999979 |
| rad72     | 3.33614e-06 | 0.999988 | 4.61643e-06 | 0.999984 |
| rad40anti | 3.31727e-06 | 0.999992 | 4.59032e-06 | 0.999988 |
| rad60syn  | 2.53369e-06 | 0.999994 | 3.50604e-06 | 0.999992 |
| rad60anti | 1.87710e-06 | 0.999996 | 2.59748e-06 | 0.999994 |
| rad58     | 1.70809e-06 | 0.999998 | 2.36361e-06 | 0.999997 |
| rad65     | 1.42131e-06 | 0.999999 | 1.96676e-06 | 0.999999 |
| rad43     | 5.13732e-07 | 1.000000 | 7.10883e-07 | 0.999999 |
| rad61     | 4.03889e-07 | 1.000000 | 5.58888e-07 | 1.000000 |
| rad41     | 1.13553e-07 | 1.000000 | 1.57130e-07 | 1.000000 |
| rad6      | 5.29491e-13 | 1.000000 | 7.32694e-13 | 1.000000 |
| rad7      | 2.85719e-14 | 1.000000 | 3.95370e-14 | 1.000000 |
| rad11     | 1.83398e-14 | 1.000000 | 2.53779e-14 | 1.000000 |
| rad13     | 4.71990e-15 | 1.000000 | 6.53125e-15 | 1.000000 |
| rad23     | 3.35245e-15 | 1.000000 | 4.63901e-15 | 1.000000 |
| rad9      | 2.83868e-15 | 1.000000 | 3.92807e-15 | 1.000000 |
| rad28     | 1.82884e-15 | 1.000000 | 2.53069e-15 | 1.000000 |
| rad45     | 1.61041e-15 | 1.000000 | 2.22844e-15 | 1.000000 |
| rad21     | 1.04835e-15 | 1.000000 | 1.45067e-15 | 1.000000 |
| rad33     | 5.44417e-16 | 1.000000 | 7.53345e-16 | 1.000000 |
| rad22     | 4.50363e-16 | 1.000000 | 6.23196e-16 | 1.000000 |
| rad36     | 3.10096e-16 | 1.000000 | 4.29099e-16 | 1.000000 |
| rad15     | 2.63170e-16 | 1.000000 | 3.64167e-16 | 1.000000 |
| rad20     | 2.59386e-16 | 1.000000 | 3.58930e-16 | 1.000000 |
| rad12     | 1.42144e-16 | 1.000000 | 1.96695e-16 | 1.000000 |
| rad25     | 1.34705e-16 | 1.000000 | 1.86401e-16 | 1.000000 |
| rad47     | 1.26179e-16 | 1.000000 | 1.74602e-16 | 1.000000 |
| rad8      | 9.29496e-17 | 1.000000 | 1.28621e-16 | 1.000000 |
| rad24     | 8.25899e-17 | 1.000000 | 1.14285e-16 | 1.000000 |
| rad26     | 7.62436e-17 | 1.000000 | 1.05503e-16 | 1.000000 |
| rad10     | 3.91359e-17 | 1.000000 | 5.41551e-17 | 1.000000 |
| rad18     | 3.53336e-17 | 1.000000 | 4.88935e-17 | 1.000000 |
| rad14     | 1.56338e-17 | 1.000000 | 2.16337e-17 | 1.000000 |
| rad3      | 1.16146e-17 | 1.000000 | 1.60718e-17 | 1.000000 |
| rad4      | 7.25106e-18 | 1.000000 | 1.00338e-17 | 1.000000 |
| rad2      | 4.95750e-18 | 1.000000 | 6.86001e-18 | 1.000000 |
| rad5      | 3.44109e-18 | 1.000000 | 4.76167e-18 | 1.000000 |
| rad1      | 1.07552e-18 | 1.000000 | 1.48827e-18 | 1.000000 |
| rad27     | 5.73766e-19 | 1.000000 | 7.93960e-19 | 1.000000 |

0.100000000E-02 Pa, 4000.00000 K

| Rate constant      | True (fraction)      | Effective (fraction)  |
|--------------------|----------------------|-----------------------|
| Total              | 1.65008e-10 (1.00 )  | 1.19912e-10 (1.00 )   |
| Formation of rad11 | 2.61707e-11 (0.159 ) | 9.15556e-12 (0.0764 ) |
| Formation of rad6  | 4.31906e-11 (0.262 ) | 1.51098e-11 (0.126 )  |
| H-abstraction      | 9.56470e-11 (0.580 ) | 9.56470e-11 (0.798 )  |

| species            | PYtrue      | Cumul    | PYeffective | Cumul    |
|--------------------|-------------|----------|-------------|----------|
| Benzene+2-propynyl | 0.579650    | 0.579650 | 0.797641    | 0.797641 |
| Phenyl+Allene      | 0.273295    | 0.852945 | 0.00000     | 0.797641 |
| PhCH2CCH+H         | 0.0779435   | 0.930888 | 0.107256    | 0.904897 |
| PhCHCCH2+H         | 0.0328766   | 0.963765 | 0.0452408   | 0.950138 |
| C2H2+PhCH2         | 0.0116508   | 0.975415 | 0.0160323   | 0.966170 |
| PhCCH+CH3          | 0.00792125  | 0.983337 | 0.0109003   | 0.977070 |
| PhcycC3H3_A+H      | 0.00405636  | 0.987393 | 0.00558187  | 0.982652 |
| PAH7+H             | 0.00338058  | 0.990774 | 0.00465193  | 0.987304 |
| Ph+MeAc            | 0.00265534  | 0.993429 | 0.00365394  | 0.990958 |
| rad19syn           | 0.00200699  | 0.995436 | 0.00276178  | 0.993720 |
| Indene+H           | 0.00158840  | 0.997024 | 0.00218576  | 0.995906 |
| rad54              | 0.000847468 | 0.997872 | 0.00116618  | 0.997072 |
| rad39              | 0.000304994 | 0.998177 | 0.000419695 | 0.997491 |
| PAH1+H             | 0.000284127 | 0.998461 | 0.000390980 | 0.997882 |
| rad56              | 0.000172242 | 0.998633 | 0.000237017 | 0.998119 |
| rad19anti          | 0.000149971 | 0.998783 | 0.000206372 | 0.998326 |
| PAH9+H             | 0.000121736 | 0.998905 | 0.000167518 | 0.998493 |
| rad53              | 0.000103935 | 0.999009 | 0.000143023 | 0.998636 |
| rad55              | 9.87033e-05 | 0.999108 | 0.000135823 | 0.998772 |
| rad50              | 9.49261e-05 | 0.999203 | 0.000130625 | 0.998903 |
| rad38              | 8.48536e-05 | 0.999287 | 0.000116765 | 0.999020 |
| PhCCCH3+H          | 8.02193e-05 | 0.999368 | 0.000110388 | 0.999130 |
| PAH3+H             | 7.84218e-05 | 0.999446 | 0.000107914 | 0.999238 |
| rad70              | 7.43978e-05 | 0.999520 | 0.000102377 | 0.999340 |
| PAH8+H             | 6.80299e-05 | 0.999588 | 9.36140e-05 | 0.999434 |
| rad51              | 6.37407e-05 | 0.999652 | 8.77122e-05 | 0.999522 |
| PAH10+CH3          | 5.48776e-05 | 0.999707 | 7.55158e-05 | 0.999597 |
| rad67              | 4.35168e-05 | 0.999751 | 5.98821e-05 | 0.999657 |
| rad46              | 3.57792e-05 | 0.999786 | 4.92350e-05 | 0.999706 |
| rad35              | 3.46400e-05 | 0.999821 | 4.76673e-05 | 0.999754 |
| rad34              | 3.11445e-05 | 0.999852 | 4.28572e-05 | 0.999797 |
| rad71              | 3.10563e-05 | 0.999883 | 4.27358e-05 | 0.999839 |
| rad62              | 2.32398e-05 | 0.999906 | 3.19798e-05 | 0.999871 |
| rad52              | 1.20851e-05 | 0.999919 | 1.66300e-05 | 0.999888 |
| rad73              | 1.14710e-05 | 0.999930 | 1.57849e-05 | 0.999904 |
| rad30              | 8.93299e-06 | 0.999939 | 1.22925e-05 | 0.999916 |
| rad68syn           | 8.64434e-06 | 0.999948 | 1.18952e-05 | 0.999928 |
| rad64              | 7.61305e-06 | 0.999955 | 1.04761e-05 | 0.999939 |
| rad37              | 5.91727e-06 | 0.999961 | 8.14263e-06 | 0.999947 |
| rad68anti          | 5.50424e-06 | 0.999967 | 7.57424e-06 | 0.999954 |
| rad59              | 5.47385e-06 | 0.999972 | 7.53243e-06 | 0.999962 |
| rad40syn           | 5.36170e-06 | 0.999977 | 7.37810e-06 | 0.999969 |
| rad42              | 5.12142e-06 | 0.999983 | 7.04750e-06 | 0.999976 |
| rad72              | 4.37871e-06 | 0.999987 | 6.02543e-06 | 0.999982 |
| rad40anti          | 4.03125e-06 | 0.999991 | 5.54731e-06 | 0.999988 |
| rad60syn           | 2.51669e-06 | 0.999993 | 3.46315e-06 | 0.999991 |
| rad58              | 1.90267e-06 | 0.999995 | 2.61822e-06 | 0.999994 |
| rad60anti          | 1.87487e-06 | 0.999997 | 2.57996e-06 | 0.999996 |
| rad65              | 1.42564e-06 | 0.999999 | 1.96179e-06 | 0.999998 |
| rad43              | 6.01849e-07 | 0.999999 | 8.28191e-07 | 0.999999 |
| rad61              | 4.34037e-07 | 1.000000 | 5.97267e-07 | 1.000000 |
| rad41              | 1.43043e-07 | 1.000000 | 1.96838e-07 | 1.000000 |
| rad6               | 3.03812e-13 | 1.000000 | 4.18068e-13 | 1.000000 |
| rad7               | 1.83291e-14 | 1.000000 | 2.52222e-14 | 1.000000 |
| rad11              | 1.18922e-14 | 1.000000 | 1.63646e-14 | 1.000000 |
| rad13              | 3.19991e-15 | 1.000000 | 4.40331e-15 | 1.000000 |
| rad23              | 1.72922e-15 | 1.000000 | 2.37954e-15 | 1.000000 |
| rad9               | 1.65535e-15 | 1.000000 | 2.27788e-15 | 1.000000 |
| rad28              | 1.03005e-15 | 1.000000 | 1.41742e-15 | 1.000000 |
| rad45              | 9.29239e-16 | 1.000000 | 1.27871e-15 | 1.000000 |
| rad21              | 7.32814e-16 | 1.000000 | 1.00841e-15 | 1.000000 |
| rad33              | 3.83235e-16 | 1.000000 | 5.27360e-16 | 1.000000 |
| rad22              | 2.65335e-16 | 1.000000 | 3.65121e-16 | 1.000000 |
| rad20              | 1.97583e-16 | 1.000000 | 2.71888e-16 | 1.000000 |
| rad36              | 1.79513e-16 | 1.000000 | 2.47024e-16 | 1.000000 |
| rad15              | 1.60394e-16 | 1.000000 | 2.20715e-16 | 1.000000 |
| rad47              | 1.25502e-16 | 1.000000 | 1.72700e-16 | 1.000000 |
| rad12              | 1.01281e-16 | 1.000000 | 1.39370e-16 | 1.000000 |
| rad25              | 9.69849e-17 | 1.000000 | 1.33459e-16 | 1.000000 |
| rad8               | 8.17489e-17 | 1.000000 | 1.12493e-16 | 1.000000 |
| rad24              | 5.80458e-17 | 1.000000 | 7.98754e-17 | 1.000000 |
| rad26              | 4.39527e-17 | 1.000000 | 6.04821e-17 | 1.000000 |
| rad10              | 2.39157e-17 | 1.000000 | 3.29099e-17 | 1.000000 |
| rad18              | 2.33497e-17 | 1.000000 | 3.21310e-17 | 1.000000 |
| rad14              | 1.43354e-17 | 1.000000 | 1.97266e-17 | 1.000000 |
| rad3               | 7.86337e-18 | 1.000000 | 1.08206e-17 | 1.000000 |
| rad4               | 5.07144e-18 | 1.000000 | 6.97868e-18 | 1.000000 |
| rad2               | 3.09371e-18 | 1.000000 | 4.25719e-18 | 1.000000 |

|       |             |          |             |         |
|-------|-------------|----------|-------------|---------|
| rad5  | 2.81589e-18 | 1.000000 | 3.87489e-18 | 1.00000 |
| rad1  | 6.69479e-19 | 1.000000 | 9.21256e-19 | 1.00000 |
| rad27 | 4.74794e-19 | 1.000000 | 6.53353e-19 | 1.00000 |

0.100000000E-03 Pa, 20.0000000 K

| Rate constant      | True (fraction)        | Effective (fraction)   |
|--------------------|------------------------|------------------------|
| Total              | 1.56740e-51 (1.00 )    | 1.56740e-51 (1.00 )    |
| Formation of rad11 | 1.56740e-51 (1.000 )   | 1.56740e-51 (1.000 )   |
| Formation of rad6  | 3.73945e-60 (2.39e-09) | 3.73945e-60 (2.39e-09) |
| H-abstraction      | 1.53631e-76 (9.80e-26) | 1.53631e-76 (9.80e-26) |

| species            | PYtrue      | Cumul    | PYeffective | Cumul    |
|--------------------|-------------|----------|-------------|----------|
| Indene+H           | 0.807790    | 0.807790 | 0.807790    | 0.807790 |
| rad6               | 0.183596    | 0.991386 | 0.183596    | 0.991386 |
| C2H2+PhCH2         | 0.00565107  | 0.997037 | 0.00565107  | 0.997037 |
| PhCCH+CH3          | 0.00130829  | 0.998345 | 0.00130829  | 0.998345 |
| PhCHCCH2+H         | 0.000847761 | 0.999193 | 0.000847761 | 0.999193 |
| PhCCCH3+H          | 0.000495423 | 0.999689 | 0.000495423 | 0.999689 |
| rad28              | 0.000150412 | 0.999839 | 0.000150412 | 0.999839 |
| rad2               | 9.95361e-05 | 0.999938 | 9.95361e-05 | 0.999938 |
| rad26              | 1.98430e-05 | 0.999958 | 1.98430e-05 | 0.999958 |
| rad7               | 1.38689e-05 | 0.999972 | 1.38689e-05 | 0.999972 |
| rad1               | 6.29092e-06 | 0.999978 | 6.29092e-06 | 0.999978 |
| rad10              | 5.05935e-06 | 0.999984 | 5.05935e-06 | 0.999984 |
| Ph+MeAc            | 5.04199e-06 | 0.999989 | 5.04199e-06 | 0.999989 |
| rad8               | 3.89672e-06 | 0.999992 | 3.89672e-06 | 0.999992 |
| rad11              | 3.43061e-06 | 0.999996 | 3.43061e-06 | 0.999996 |
| rad9               | 1.76463e-06 | 0.999998 | 1.76463e-06 | 0.999998 |
| PAH7+H             | 8.40022e-07 | 0.999999 | 8.40022e-07 | 0.999999 |
| rad3               | 6.26591e-07 | 0.999999 | 6.26591e-07 | 0.999999 |
| rad4               | 3.16775e-07 | 0.999999 | 3.16775e-07 | 0.999999 |
| rad30              | 2.87809e-07 | 1.000000 | 2.87809e-07 | 1.000000 |
| rad12              | 1.07762e-07 | 1.000000 | 1.07762e-07 | 1.000000 |
| rad39              | 7.48169e-08 | 1.000000 | 7.48169e-08 | 1.000000 |
| rad13              | 7.36319e-08 | 1.000000 | 7.36319e-08 | 1.000000 |
| PAH9+H             | 5.76413e-08 | 1.000000 | 5.76413e-08 | 1.000000 |
| rad15              | 5.00754e-08 | 1.000000 | 5.00754e-08 | 1.000000 |
| rad35              | 3.07937e-08 | 1.000000 | 3.07937e-08 | 1.000000 |
| rad38              | 1.46207e-08 | 1.000000 | 1.46207e-08 | 1.000000 |
| Phenyl+Allene      | 1.33504e-08 | 1.000000 | 0.000000    | 1.000000 |
| rad33              | 1.39015e-10 | 1.000000 | 1.39015e-10 | 1.000000 |
| rad46              | 8.82831e-11 | 1.000000 | 8.82831e-11 | 1.000000 |
| rad14              | 7.37994e-11 | 1.000000 | 7.37994e-11 | 1.000000 |
| rad27              | 5.77831e-11 | 1.000000 | 5.77831e-11 | 1.000000 |
| rad25              | 5.00542e-11 | 1.000000 | 5.00542e-11 | 1.000000 |
| rad60syn           | 1.59318e-12 | 1.000000 | 1.59318e-12 | 1.000000 |
| rad23              | 2.05336e-13 | 1.000000 | 2.05336e-13 | 1.000000 |
| rad60anti          | 1.44752e-14 | 1.000000 | 1.44752e-14 | 1.000000 |
| PhCH2CCH+H         | 2.30812e-15 | 1.000000 | 2.30812e-15 | 1.000000 |
| rad31              | 1.79860e-15 | 1.000000 | 1.79860e-15 | 1.000000 |
| rad45              | 1.75641e-15 | 1.000000 | 1.75641e-15 | 1.000000 |
| rad20              | 3.29908e-16 | 1.000000 | 3.29908e-16 | 1.000000 |
| rad37              | 3.02308e-16 | 1.000000 | 3.02308e-16 | 1.000000 |
| rad21              | 2.42422e-16 | 1.000000 | 2.42422e-16 | 1.000000 |
| rad22              | 1.19305e-16 | 1.000000 | 1.19305e-16 | 1.000000 |
| rad36              | 1.09411e-16 | 1.000000 | 1.09411e-16 | 1.000000 |
| rad18              | 1.56320e-18 | 1.000000 | 1.56320e-18 | 1.000000 |
| rad5               | 2.37790e-19 | 1.000000 | 2.37790e-19 | 1.000000 |
| rad24              | 3.80886e-23 | 1.000000 | 3.80886e-23 | 1.000000 |
| PAH3+H             | 6.71054e-24 | 1.000000 | 6.71054e-24 | 1.000000 |
| rad59              | 3.56634e-24 | 1.000000 | 3.56634e-24 | 1.000000 |
| rad50              | 1.16182e-24 | 1.000000 | 1.16182e-24 | 1.000000 |
| Benzene+2-propynyl | 9.80165e-26 | 1.000000 | 9.80165e-26 | 1.000000 |
| rad19syn           | 1.48465e-32 | 1.000000 | 1.48465e-32 | 1.000000 |
| rad52              | 1.72699e-36 | 1.000000 | 1.72699e-36 | 1.000000 |
| rad54              | 1.99604e-37 | 1.000000 | 1.99604e-37 | 1.000000 |
| PAH10+CH3          | 1.31200e-37 | 1.000000 | 1.31200e-37 | 1.000000 |
| rad43              | 3.01004e-38 | 1.000000 | 3.01004e-38 | 1.000000 |
| rad62              | 9.51361e-41 | 1.000000 | 9.51361e-41 | 1.000000 |
| rad51              | 1.06012e-43 | 1.000000 | 1.06012e-43 | 1.000000 |
| rad70              | 1.24715e-46 | 1.000000 | 1.24715e-46 | 1.000000 |
| PhcycC3H3_A+H      | 5.31280e-47 | 1.000000 | 5.31280e-47 | 1.000000 |
| rad55              | 2.85928e-47 | 1.000000 | 2.85928e-47 | 1.000000 |
| rad65              | 7.62781e-49 | 1.000000 | 7.62781e-49 | 1.000000 |
| rad58              | 1.79293e-50 | 1.000000 | 1.79293e-50 | 1.000000 |
| PAH1+H             | 2.53797e-52 | 1.000000 | 2.53797e-52 | 1.000000 |
| rad34              | 1.66218e-54 | 1.000000 | 1.66218e-54 | 1.000000 |

|       |             |         |             |         |
|-------|-------------|---------|-------------|---------|
| rad42 | 1.20293e-58 | 1.00000 | 1.20293e-58 | 1.00000 |
| rad41 | 1.51390e-59 | 1.00000 | 1.51390e-59 | 1.00000 |
| rad47 | 4.50782e-61 | 1.00000 | 4.50782e-61 | 1.00000 |

0.100000000E-03 Pa, 30.0000000 K

| Rate constant      | True (fraction)        | Effective (fraction)   |
|--------------------|------------------------|------------------------|
| Total              | 5.03204e-39 (1.00 )    | 5.03204e-39 (1.00 )    |
| Formation of rad11 | 5.03203e-39 (1.000 )   | 5.03203e-39 (1.000 )   |
| Formation of rad6  | 9.92181e-45 (1.97e-06) | 9.92181e-45 (1.97e-06) |
| H-abstraction      | 3.33191e-55 (6.62e-17) | 3.33191e-55 (6.62e-17) |

| species            | PYtrue      | Cumul    | PYeffective | Cumul    |
|--------------------|-------------|----------|-------------|----------|
| Indene+H           | 0.930103    | 0.930103 | 0.930103    | 0.930103 |
| rad6               | 0.0594558   | 0.989559 | 0.0594558   | 0.989559 |
| C2H2+PhCH2         | 0.00690216  | 0.996461 | 0.00690216  | 0.996461 |
| PhCCH+CH3          | 0.00169381  | 0.998155 | 0.00169381  | 0.998155 |
| PhCHCCH2+H         | 0.00108782  | 0.999243 | 0.00108782  | 0.999243 |
| PhCCCH3+H          | 0.000641314 | 0.999884 | 0.000641314 | 0.999884 |
| rad28              | 5.41076e-05 | 0.999938 | 5.41076e-05 | 0.999938 |
| rad2               | 2.98876e-05 | 0.999968 | 2.98876e-05 | 0.999968 |
| Ph+MeAc            | 7.06157e-06 | 0.999975 | 7.06157e-06 | 0.999975 |
| rad26              | 6.46339e-06 | 0.999981 | 6.46339e-06 | 0.999981 |
| rad8               | 5.13765e-06 | 0.999987 | 5.13765e-06 | 0.999987 |
| rad7               | 4.39711e-06 | 0.999991 | 4.39711e-06 | 0.999991 |
| rad9               | 2.31517e-06 | 0.999993 | 2.31517e-06 | 0.999993 |
| rad1               | 1.89007e-06 | 0.999995 | 1.89007e-06 | 0.999995 |
| rad10              | 1.50661e-06 | 0.999997 | 1.50661e-06 | 0.999997 |
| PAH7+H             | 1.21308e-06 | 0.999998 | 1.21308e-06 | 0.999998 |
| rad11              | 1.08432e-06 | 0.999999 | 1.08432e-06 | 0.999999 |
| rad30              | 3.57039e-07 | 0.999999 | 3.57039e-07 | 0.999999 |
| rad3               | 1.87130e-07 | 1.00000  | 1.87130e-07 | 1.00000  |
| rad12              | 1.49922e-07 | 1.00000  | 1.49922e-07 | 1.00000  |
| rad39              | 1.11651e-07 | 1.00000  | 1.11651e-07 | 1.00000  |
| rad4               | 9.46180e-08 | 1.00000  | 9.46180e-08 | 1.00000  |
| PAH9+H             | 7.17956e-08 | 1.00000  | 7.17956e-08 | 1.00000  |
| rad15              | 6.27706e-08 | 1.00000  | 6.27706e-08 | 1.00000  |
| rad35              | 3.81474e-08 | 1.00000  | 3.81474e-08 | 1.00000  |
| rad13              | 2.38516e-08 | 1.00000  | 2.38516e-08 | 1.00000  |
| Phenyl+Allene      | 1.92097e-08 | 1.00000  | 0.00000     | 1.00000  |
| rad38              | 1.82985e-08 | 1.00000  | 1.82985e-08 | 1.00000  |
| rad46              | 1.13632e-10 | 1.00000  | 1.13632e-10 | 1.00000  |
| rad33              | 4.50473e-11 | 1.00000  | 4.50473e-11 | 1.00000  |
| rad14              | 2.42505e-11 | 1.00000  | 2.42505e-11 | 1.00000  |
| rad27              | 1.79378e-11 | 1.00000  | 1.79378e-11 | 1.00000  |
| rad25              | 1.65362e-11 | 1.00000  | 1.65362e-11 | 1.00000  |
| rad60syn           | 2.16794e-12 | 1.00000  | 2.16794e-12 | 1.00000  |
| rad60anti          | 1.48120e-14 | 1.00000  | 1.48120e-14 | 1.00000  |
| rad23              | 1.12196e-14 | 1.00000  | 1.12196e-14 | 1.00000  |
| PhCH2CCH+H         | 1.10751e-15 | 1.00000  | 1.10751e-15 | 1.00000  |
| rad31              | 5.43076e-16 | 1.00000  | 5.43076e-16 | 1.00000  |
| rad37              | 1.26399e-16 | 1.00000  | 1.26399e-16 | 1.00000  |
| rad20              | 1.07603e-16 | 1.00000  | 1.07603e-16 | 1.00000  |
| rad45              | 8.98387e-17 | 1.00000  | 8.98387e-17 | 1.00000  |
| rad21              | 7.91211e-17 | 1.00000  | 7.91211e-17 | 1.00000  |
| Benzene+2-propynyl | 6.62139e-17 | 1.00000  | 6.62139e-17 | 1.00000  |
| rad22              | 9.62900e-18 | 1.00000  | 9.62900e-18 | 1.00000  |
| rad36              | 5.59454e-18 | 1.00000  | 5.59454e-18 | 1.00000  |
| rad18              | 4.75322e-19 | 1.00000  | 4.75322e-19 | 1.00000  |
| rad5               | 9.14435e-20 | 1.00000  | 9.14435e-20 | 1.00000  |
| rad24              | 4.24076e-24 | 1.00000  | 4.24076e-24 | 1.00000  |
| PAH3+H             | 2.13055e-24 | 1.00000  | 2.13055e-24 | 1.00000  |
| rad59              | 1.13635e-24 | 1.00000  | 1.13635e-24 | 1.00000  |
| rad50              | 4.04099e-25 | 1.00000  | 4.04099e-25 | 1.00000  |
| rad19syn           | 3.04174e-33 | 1.00000  | 3.04174e-33 | 1.00000  |
| rad52              | 3.58763e-37 | 1.00000  | 3.58763e-37 | 1.00000  |
| rad54              | 3.85786e-38 | 1.00000  | 3.85786e-38 | 1.00000  |
| PAH10+CH3          | 2.53877e-38 | 1.00000  | 2.53877e-38 | 1.00000  |
| rad43              | 5.82811e-39 | 1.00000  | 5.82811e-39 | 1.00000  |
| rad62              | 1.80375e-41 | 1.00000  | 1.80375e-41 | 1.00000  |
| rad51              | 2.00823e-44 | 1.00000  | 2.00823e-44 | 1.00000  |
| rad70              | 2.30924e-47 | 1.00000  | 2.30924e-47 | 1.00000  |
| PhcycC3H3_A+H      | 9.82934e-48 | 1.00000  | 9.82934e-48 | 1.00000  |
| rad55              | 5.29022e-48 | 1.00000  | 5.29022e-48 | 1.00000  |
| rad65              | 1.41763e-49 | 1.00000  | 1.41763e-49 | 1.00000  |
| rad58              | 3.31510e-51 | 1.00000  | 3.31510e-51 | 1.00000  |
| PAH1+H             | 4.67267e-53 | 1.00000  | 4.67267e-53 | 1.00000  |
| rad34              | 3.07658e-55 | 1.00000  | 3.07658e-55 | 1.00000  |

|       |             |         |             |         |
|-------|-------------|---------|-------------|---------|
| rad42 | 2.24135e-59 | 1.00000 | 2.24135e-59 | 1.00000 |
| rad41 | 2.83636e-60 | 1.00000 | 2.83636e-60 | 1.00000 |
| rad47 | 4.14302e-62 | 1.00000 | 4.14302e-62 | 1.00000 |

0.100000000E-03 Pa, 40.0000000 K

| Rate constant      | True (fraction) |            | Effective (fraction) |            |
|--------------------|-----------------|------------|----------------------|------------|
| Total              | 9.35697e-33     | (1.00 )    | 9.35697e-33          | (1.00 )    |
| Formation of rad11 | 9.35644e-33     | (1.000 )   | 9.35644e-33          | (1.000 )   |
| Formation of rad6  | 5.26139e-37     | (5.62e-05) | 5.26138e-37          | (5.62e-05) |
| H-abstraction      | 1.44763e-44     | (1.55e-12) | 1.44763e-44          | (1.55e-12) |

  

| species            | PYtrue      | Cumul    | PYeffective | Cumul    |
|--------------------|-------------|----------|-------------|----------|
| Indene+H           | 0.963193    | 0.963193 | 0.963193    | 0.963193 |
| rad6               | 0.0254360   | 0.988629 | 0.0254360   | 0.988629 |
| C2H2+PhCH2         | 0.00747304  | 0.996102 | 0.00747304  | 0.996102 |
| PhCCH+CH3          | 0.00190287  | 0.998005 | 0.00190287  | 0.998005 |
| PhCHCCH2+H         | 0.00121213  | 0.999217 | 0.00121213  | 0.999217 |
| PhCCCH3+H          | 0.000719357 | 0.999936 | 0.000719357 | 0.999936 |
| rad28              | 2.46212e-05 | 0.999961 | 2.46212e-05 | 0.999961 |
| rad2               | 1.22915e-05 | 0.999973 | 1.22915e-05 | 0.999973 |
| Ph+MeAc            | 8.68473e-06 | 0.999982 | 8.68473e-06 | 0.999982 |
| rad8               | 5.85760e-06 | 0.999988 | 5.85760e-06 | 0.999988 |
| rad26              | 2.80127e-06 | 0.999991 | 2.80127e-06 | 0.999991 |
| rad9               | 2.67414e-06 | 0.999993 | 2.67414e-06 | 0.999993 |
| rad7               | 1.86694e-06 | 0.999995 | 1.86694e-06 | 0.999995 |
| PAH7+H             | 1.45257e-06 | 0.999997 | 1.45257e-06 | 0.999997 |
| rad1               | 7.78256e-07 | 0.999997 | 7.78256e-07 | 0.999997 |
| rad10              | 6.18257e-07 | 0.999998 | 6.18257e-07 | 0.999998 |
| rad11              | 4.59742e-07 | 0.999999 | 4.59742e-07 | 0.999999 |
| rad30              | 3.91744e-07 | 0.999999 | 3.91744e-07 | 0.999999 |
| rad12              | 1.77708e-07 | 0.999999 | 1.77708e-07 | 0.999999 |
| rad39              | 1.38762e-07 | 0.999999 | 1.38762e-07 | 0.999999 |
| PAH9+H             | 7.91013e-08 | 0.999999 | 7.91013e-08 | 0.999999 |
| rad3               | 7.68750e-08 | 0.999999 | 7.68750e-08 | 0.999999 |
| rad15              | 6.95187e-08 | 0.999999 | 6.95187e-08 | 0.999999 |
| rad35              | 4.18214e-08 | 0.999999 | 4.18214e-08 | 0.999999 |
| rad4               | 3.88821e-08 | 1.000000 | 3.88821e-08 | 1.000000 |
| Phenyl+Allene      | 3.07805e-08 | 1.000000 | 0.000000    | 1.000000 |
| rad38              | 2.02492e-08 | 1.000000 | 2.02492e-08 | 1.000000 |
| rad13              | 1.02134e-08 | 1.000000 | 1.02134e-08 | 1.000000 |
| rad46              | 1.29342e-10 | 1.000000 | 1.29342e-10 | 1.000000 |
| rad33              | 1.92981e-11 | 1.000000 | 1.92981e-11 | 1.000000 |
| rad14              | 1.06122e-11 | 1.000000 | 1.06122e-11 | 1.000000 |
| rad27              | 7.56093e-12 | 1.000000 | 7.56093e-12 | 1.000000 |
| rad25              | 7.21664e-12 | 1.000000 | 7.21664e-12 | 1.000000 |
| rad60syn           | 2.59253e-12 | 1.000000 | 2.59253e-12 | 1.000000 |
| Benzene+2-propynyl | 1.54712e-12 | 1.000000 | 1.54712e-12 | 1.000000 |
| rad60anti          | 2.47698e-14 | 1.000000 | 2.47698e-14 | 1.000000 |
| rad23              | 1.89404e-15 | 1.000000 | 1.89404e-15 | 1.000000 |
| PhCH2CCH+H         | 1.06107e-15 | 1.000000 | 1.06107e-15 | 1.000000 |
| rad31              | 2.25326e-16 | 1.000000 | 2.25326e-16 | 1.000000 |
| rad37              | 1.15262e-16 | 1.000000 | 1.15262e-16 | 1.000000 |
| rad20              | 4.70047e-17 | 1.000000 | 4.70047e-17 | 1.000000 |
| rad21              | 3.45906e-17 | 1.000000 | 3.45906e-17 | 1.000000 |
| rad45              | 1.46566e-17 | 1.000000 | 1.46566e-17 | 1.000000 |
| rad22              | 2.16172e-18 | 1.000000 | 2.16172e-18 | 1.000000 |
| rad36              | 9.12160e-19 | 1.000000 | 9.12160e-19 | 1.000000 |
| rad18              | 2.03127e-19 | 1.000000 | 2.03127e-19 | 1.000000 |
| rad5               | 8.11724e-20 | 1.000000 | 8.11724e-20 | 1.000000 |
| PAH3+H             | 1.77955e-24 | 1.000000 | 1.77955e-24 | 1.000000 |
| rad24              | 1.41712e-24 | 1.000000 | 1.41712e-24 | 1.000000 |
| rad59              | 9.49949e-25 | 1.000000 | 9.49949e-25 | 1.000000 |
| rad50              | 3.46854e-25 | 1.000000 | 3.46854e-25 | 1.000000 |
| rad19syn           | 2.33309e-33 | 1.000000 | 2.33309e-33 | 1.000000 |
| rad52              | 2.75149e-37 | 1.000000 | 2.75149e-37 | 1.000000 |
| rad54              | 2.98400e-38 | 1.000000 | 2.98400e-38 | 1.000000 |
| PAH10+CH3          | 1.97736e-38 | 1.000000 | 1.97736e-38 | 1.000000 |
| rad43              | 4.54176e-39 | 1.000000 | 4.54176e-39 | 1.000000 |
| rad62              | 1.41477e-41 | 1.000000 | 1.41477e-41 | 1.000000 |
| rad51              | 1.56806e-44 | 1.000000 | 1.56806e-44 | 1.000000 |
| rad70              | 1.86229e-47 | 1.000000 | 1.86229e-47 | 1.000000 |
| PhcycC3H3_A+H      | 7.95447e-48 | 1.000000 | 7.95447e-48 | 1.000000 |
| rad55              | 4.27959e-48 | 1.000000 | 4.27959e-48 | 1.000000 |
| rad65              | 1.13086e-49 | 1.000000 | 1.13086e-49 | 1.000000 |
| rad58              | 2.69093e-51 | 1.000000 | 2.69093e-51 | 1.000000 |
| PAH1+H             | 3.90739e-53 | 1.000000 | 3.90739e-53 | 1.000000 |
| rad34              | 2.60076e-55 | 1.000000 | 2.60076e-55 | 1.000000 |



|       |             |          |             |          |
|-------|-------------|----------|-------------|----------|
| rad42 | 1.95184e-59 | 1.000000 | 1.95184e-59 | 1.000000 |
| rad41 | 2.52410e-60 | 1.000000 | 2.52410e-60 | 1.000000 |
| rad47 | 2.32108e-62 | 1.000000 | 2.32108e-62 | 1.000000 |

0.100000000E-03 Pa, 50.0000000 K

| Rate constant      | True (fraction)        | Effective (fraction)   |
|--------------------|------------------------|------------------------|
| Total              | 5.52690e-29 (1.00 )    | 5.52690e-29 (1.00 )    |
| Formation of rad11 | 5.52459e-29 (1.000 )   | 5.52459e-29 (1.000 )   |
| Formation of rad6  | 2.30840e-32 (0.000418) | 2.30840e-32 (0.000418) |
| H-abstraction      | 3.35357e-38 (6.07e-10) | 3.35357e-38 (6.07e-10) |

| species            | PYtrue      | Cumul    | PYeffective | Cumul    |
|--------------------|-------------|----------|-------------|----------|
| Indene+H           | 0.975263    | 0.975263 | 0.975263    | 0.975263 |
| rad6               | 0.0126713   | 0.987934 | 0.0126713   | 0.987934 |
| C2H2+PhCH2         | 0.00786649  | 0.995801 | 0.00786649  | 0.995801 |
| PhCCH+CH3          | 0.00206803  | 0.997869 | 0.00206803  | 0.997869 |
| PhCHCCH2+H         | 0.00130654  | 0.999175 | 0.00130654  | 0.999175 |
| PhCCCH3+H          | 0.000780139 | 0.999955 | 0.000780139 | 0.999955 |
| rad28              | 1.28571e-05 | 0.999968 | 1.28571e-05 | 0.999968 |
| Ph+MeAc            | 1.04514e-05 | 0.999979 | 1.04514e-05 | 0.999979 |
| rad8               | 6.45854e-06 | 0.999985 | 6.45854e-06 | 0.999985 |
| rad2               | 5.96665e-06 | 0.999991 | 5.96666e-06 | 0.999991 |
| rad9               | 3.00566e-06 | 0.999994 | 3.00566e-06 | 0.999994 |
| PAH7+H             | 1.66909e-06 | 0.999996 | 1.66909e-06 | 0.999996 |
| rad26              | 1.41609e-06 | 0.999997 | 1.41609e-06 | 0.999997 |
| rad7               | 9.26834e-07 | 0.999998 | 9.26834e-07 | 0.999998 |
| rad30              | 4.17702e-07 | 0.999999 | 4.17702e-07 | 0.999999 |
| rad1               | 3.78454e-07 | 0.999999 | 3.78454e-07 | 0.999999 |
| rad10              | 3.00025e-07 | 0.999999 | 3.00025e-07 | 0.999999 |
| rad11              | 2.28050e-07 | 1.000000 | 2.28050e-07 | 1.000000 |
| rad12              | 2.03239e-07 | 1.000000 | 2.03239e-07 | 1.000000 |
| rad39              | 1.66312e-07 | 1.000000 | 1.66312e-07 | 1.000000 |
| PAH9+H             | 8.47263e-08 | 1.000000 | 8.47263e-08 | 1.000000 |
| rad15              | 7.48211e-08 | 1.000000 | 7.48211e-08 | 1.000000 |
| Phenyl+Allene      | 5.14158e-08 | 1.000000 | 0.000000    | 1.000000 |
| rad35              | 4.45717e-08 | 1.000000 | 4.45717e-08 | 1.000000 |
| rad3               | 3.73223e-08 | 1.000000 | 3.73223e-08 | 1.000000 |
| rad38              | 2.17857e-08 | 1.000000 | 2.17857e-08 | 1.000000 |
| rad4               | 1.88854e-08 | 1.000000 | 1.88854e-08 | 1.000000 |
| rad13              | 5.09497e-09 | 1.000000 | 5.09497e-09 | 1.000000 |
| Benzene+2-propynyl | 6.06773e-10 | 1.000000 | 6.06773e-10 | 1.000000 |
| rad46              | 1.43439e-10 | 1.000000 | 1.43439e-10 | 1.000000 |
| rad33              | 9.63238e-12 | 1.000000 | 9.63238e-12 | 1.000000 |
| rad14              | 5.41742e-12 | 1.000000 | 5.41742e-12 | 1.000000 |
| rad27              | 3.74520e-12 | 1.000000 | 3.74520e-12 | 1.000000 |
| rad25              | 3.66714e-12 | 1.000000 | 3.66714e-12 | 1.000000 |
| rad60syn           | 3.10107e-12 | 1.000000 | 3.10107e-12 | 1.000000 |
| rad60anti          | 6.57580e-14 | 1.000000 | 6.57580e-14 | 1.000000 |
| PhCH2CCH+H         | 1.95070e-15 | 1.000000 | 1.95070e-15 | 1.000000 |
| rad23              | 5.14718e-16 | 1.000000 | 5.14718e-16 | 1.000000 |
| rad37              | 2.00160e-16 | 1.000000 | 2.00160e-16 | 1.000000 |
| rad31              | 1.10695e-16 | 1.000000 | 1.10695e-16 | 1.000000 |
| rad20              | 2.41444e-17 | 1.000000 | 2.41444e-17 | 1.000000 |
| rad21              | 1.77863e-17 | 1.000000 | 1.77863e-17 | 1.000000 |
| rad45              | 3.89508e-18 | 1.000000 | 3.89508e-18 | 1.000000 |
| rad22              | 7.30669e-19 | 1.000000 | 7.30669e-19 | 1.000000 |
| rad36              | 2.42222e-19 | 1.000000 | 2.42222e-19 | 1.000000 |
| rad5               | 1.38874e-19 | 1.000000 | 1.38874e-19 | 1.000000 |
| rad18              | 1.03349e-19 | 1.000000 | 1.03349e-19 | 1.000000 |
| PAH3+H             | 2.97302e-24 | 1.000000 | 2.97302e-24 | 1.000000 |
| rad59              | 1.58719e-24 | 1.000000 | 1.58719e-24 | 1.000000 |
| rad24              | 6.76025e-25 | 1.000000 | 6.76025e-25 | 1.000000 |
| rad50              | 5.83910e-25 | 1.000000 | 5.83910e-25 | 1.000000 |
| rad19syn           | 4.02129e-33 | 1.000000 | 4.02129e-33 | 1.000000 |
| rad52              | 4.71818e-37 | 1.000000 | 4.71818e-37 | 1.000000 |
| rad54              | 5.32147e-38 | 1.000000 | 5.32147e-38 | 1.000000 |
| PAH10+CH3          | 3.59206e-38 | 1.000000 | 3.59206e-38 | 1.000000 |
| rad43              | 8.25508e-39 | 1.000000 | 8.25508e-39 | 1.000000 |
| rad62              | 2.60983e-41 | 1.000000 | 2.60983e-41 | 1.000000 |
| rad51              | 2.85879e-44 | 1.000000 | 2.85879e-44 | 1.000000 |
| rad70              | 3.60110e-47 | 1.000000 | 3.60110e-47 | 1.000000 |
| PhcycC3H3_A+H      | 1.54703e-47 | 1.000000 | 1.54703e-47 | 1.000000 |
| rad55              | 8.31820e-48 | 1.000000 | 8.31820e-48 | 1.000000 |
| rad65              | 2.14696e-49 | 1.000000 | 2.14696e-49 | 1.000000 |
| rad58              | 5.25967e-51 | 1.000000 | 5.25967e-51 | 1.000000 |
| PAH1+H             | 8.02211e-53 | 1.000000 | 8.02211e-53 | 1.000000 |
| rad34              | 5.41750e-55 | 1.000000 | 5.41750e-55 | 1.000000 |

|       |             |         |             |         |
|-------|-------------|---------|-------------|---------|
| rad42 | 4.33233e-59 | 1.00000 | 4.33233e-59 | 1.00000 |
| rad41 | 6.04574e-60 | 1.00000 | 6.04574e-60 | 1.00000 |
| rad47 | 3.57324e-62 | 1.00000 | 3.57324e-62 | 1.00000 |

0.100000000E-03 Pa, 60.0000000 K

| =====              |                 |            |                      |            |
|--------------------|-----------------|------------|----------------------|------------|
| Rate constant      | True (fraction) |            | Effective (fraction) |            |
| -----              |                 |            |                      |            |
| Total              | 1.83429e-26     | (1.00 )    | 1.83429e-26          | (1.00 )    |
| Formation of rad11 | 1.83139e-26     | (0.998 )   | 1.83139e-26          | (0.998 )   |
| Formation of rad6  | 2.90471e-29     | (0.00158 ) | 2.90471e-29          | (0.00158 ) |
| H-abstraction      | 5.71259e-34     | (3.11e-08) | 5.71259e-34          | (3.11e-08) |
| -----              |                 |            |                      |            |
| species            | PYtrue          | Cumul      | PYeffective          | Cumul      |
| Indene+H           | 0.980353        | 0.980353   | 0.980353             | 0.980353   |
| C2H2+PhCH2         | 0.00820035      | 0.988553   | 0.00820035           | 0.988553   |
| rad6               | 0.00695857      | 0.995512   | 0.00695857           | 0.995512   |
| PhCCH+CH3          | 0.00222202      | 0.997734   | 0.00222202           | 0.997734   |
| PhCHCCH2+H         | 0.00139205      | 0.999126   | 0.00139205           | 0.999126   |
| PhCCCH3+H          | 0.000836127     | 0.999962   | 0.000836127          | 0.999962   |
| Ph+MeAc            | 1.25208e-05     | 0.999975   | 1.25208e-05          | 0.999975   |
| rad28              | 7.34195e-06     | 0.999982   | 7.34195e-06          | 0.999982   |
| rad8               | 7.04141e-06     | 0.999989   | 7.04141e-06          | 0.999989   |
| rad9               | 3.35179e-06     | 0.999992   | 3.35179e-06          | 0.999992   |
| rad2               | 3.21549e-06     | 0.999996   | 3.21549e-06          | 0.999996   |
| PAH7+H             | 1.89226e-06     | 0.999997   | 1.89226e-06          | 0.999997   |
| rad26              | 7.89271e-07     | 0.999998   | 7.89271e-07          | 0.999998   |
| rad7               | 5.08159e-07     | 0.999999   | 5.08159e-07          | 0.999999   |
| rad30              | 4.41080e-07     | 0.999999   | 4.41080e-07          | 0.999999   |
| rad12              | 2.29599e-07     | 0.999999   | 2.29599e-07          | 0.999999   |
| rad1               | 2.04394e-07     | 1.000000   | 2.04394e-07          | 1.000000   |
| rad39              | 1.97284e-07     | 1.000000   | 1.97284e-07          | 1.000000   |
| rad10              | 1.61768e-07     | 1.000000   | 1.61768e-07          | 1.000000   |
| rad11              | 1.24971e-07     | 1.000000   | 1.24971e-07          | 1.000000   |
| PAH9+H             | 8.99134e-08     | 1.000000   | 8.99134e-08          | 1.000000   |
| Phenyl+Allene      | 8.42993e-08     | 1.000000   | 0.000000             | 1.000000   |
| rad15              | 7.97703e-08     | 1.000000   | 7.97703e-08          | 1.000000   |
| rad35              | 4.70563e-08     | 1.000000   | 4.70563e-08          | 1.000000   |
| Benzene+2-propynyl | 3.11432e-08     | 1.000000   | 3.11432e-08          | 1.000000   |
| rad38              | 2.32259e-08     | 1.000000   | 2.32259e-08          | 1.000000   |
| rad3               | 2.01257e-08     | 1.000000   | 2.01257e-08          | 1.000000   |
| rad4               | 1.01894e-08     | 1.000000   | 1.01894e-08          | 1.000000   |
| rad13              | 2.80271e-09     | 1.000000   | 2.80271e-09          | 1.000000   |
| rad46              | 1.57976e-10     | 1.000000   | 1.57976e-10          | 1.000000   |
| rad33              | 5.30238e-12     | 1.000000   | 5.30238e-12          | 1.000000   |
| rad60syn           | 3.78654e-12     | 1.000000   | 3.78654e-12          | 1.000000   |
| rad14              | 3.05037e-12     | 1.000000   | 3.05037e-12          | 1.000000   |
| rad25              | 2.05416e-12     | 1.000000   | 2.05416e-12          | 1.000000   |
| rad27              | 2.05397e-12     | 1.000000   | 2.05397e-12          | 1.000000   |
| rad60anti          | 1.65298e-13     | 1.000000   | 1.65298e-13          | 1.000000   |
| PhCH2CCH+H         | 1.37802e-14     | 1.000000   | 1.37802e-14          | 1.000000   |
| rad37              | 1.22457e-15     | 1.000000   | 1.22457e-15          | 1.000000   |
| rad23              | 1.82759e-16     | 1.000000   | 1.82759e-16          | 1.000000   |
| rad31              | 6.05418e-17     | 1.000000   | 6.05418e-17          | 1.000000   |
| rad20              | 1.37672e-17     | 1.000000   | 1.37672e-17          | 1.000000   |
| rad21              | 1.01545e-17     | 1.000000   | 1.01545e-17          | 1.000000   |
| rad45              | 1.36083e-18     | 1.000000   | 1.36083e-18          | 1.000000   |
| rad5               | 7.89184e-19     | 1.000000   | 7.89184e-19          | 1.000000   |
| rad22              | 3.09055e-19     | 1.000000   | 3.09055e-19          | 1.000000   |
| rad36              | 8.45556e-20     | 1.000000   | 8.45556e-20          | 1.000000   |
| rad18              | 5.86683e-20     | 1.000000   | 5.86683e-20          | 1.000000   |
| PAH3+H             | 1.39699e-23     | 1.000000   | 1.39699e-23          | 1.000000   |
| rad59              | 7.46948e-24     | 1.000000   | 7.46948e-24          | 1.000000   |
| rad50              | 2.99049e-24     | 1.000000   | 2.99049e-24          | 1.000000   |
| rad24              | 3.82842e-25     | 1.000000   | 3.82842e-25          | 1.000000   |
| rad19syn           | 1.78014e-32     | 1.000000   | 1.78014e-32          | 1.000000   |
| rad52              | 2.07254e-36     | 1.000000   | 2.07254e-36          | 1.000000   |
| rad54              | 2.47277e-37     | 1.000000   | 2.47277e-37          | 1.000000   |
| PAH10+CH3          | 1.73342e-37     | 1.000000   | 1.73342e-37          | 1.000000   |
| rad43              | 3.98653e-38     | 1.000000   | 3.98653e-38          | 1.000000   |
| rad62              | 1.28194e-40     | 1.000000   | 1.28194e-40          | 1.000000   |
| rad51              | 1.36858e-43     | 1.000000   | 1.36858e-43          | 1.000000   |
| rad70              | 1.85930e-46     | 1.000000   | 1.85930e-46          | 1.000000   |
| PhcycC3H3_A+H      | 8.04614e-47     | 1.000000   | 8.04614e-47          | 1.000000   |
| rad55              | 4.32290e-47     | 1.000000   | 4.32290e-47          | 1.000000   |
| rad65              | 1.08334e-48     | 1.000000   | 1.08334e-48          | 1.000000   |
| rad58              | 2.75284e-50     | 1.000000   | 2.75284e-50          | 1.000000   |
| PAH1+H             | 4.47275e-52     | 1.000000   | 4.47275e-52          | 1.000000   |
| rad34              | 3.07135e-54     | 1.000000   | 3.07135e-54          | 1.000000   |

|       |             |         |             |         |
|-------|-------------|---------|-------------|---------|
| rad42 | 2.89075e-58 | 1.00000 | 2.89075e-58 | 1.00000 |
| rad41 | 5.14282e-59 | 1.00000 | 5.14282e-59 | 1.00000 |
| rad47 | 1.58408e-61 | 1.00000 | 1.58408e-61 | 1.00000 |

0.100000000E-03 Pa, 70.0000000 K

| Rate constant      | True (fraction) |            | Effective (fraction) |            |
|--------------------|-----------------|------------|----------------------|------------|
| Total              | 1.17336e-24     | (1.00 )    | 1.17336e-24          | (1.00 )    |
| Formation of rad11 | 1.16857e-24     | (0.996 )   | 1.16857e-24          | (0.996 )   |
| Formation of rad6  | 4.79505e-27     | (0.00409 ) | 4.79505e-27          | (0.00409 ) |
| H-abstraction      | 5.89821e-31     | (5.03e-07) | 5.89821e-31          | (5.03e-07) |

  

| species            | PYtrue      | Cumul    | PYeffective | Cumul    |
|--------------------|-------------|----------|-------------|----------|
| Indene+H           | 0.982609    | 0.982609 | 0.982609    | 0.982609 |
| C2H2+PhCH2         | 0.00851552  | 0.991124 | 0.00851552  | 0.991124 |
| rad6               | 0.00409213  | 0.995216 | 0.00409213  | 0.995216 |
| PhCCH+CH3          | 0.00237731  | 0.997593 | 0.00237731  | 0.997593 |
| PhCHCCH2+H         | 0.00147645  | 0.999070 | 0.00147645  | 0.999070 |
| PhCCCH3+H          | 0.000892013 | 0.999962 | 0.000892013 | 0.999962 |
| Ph+MeAc            | 1.50080e-05 | 0.999977 | 1.50080e-05 | 0.999977 |
| rad8               | 7.64638e-06 | 0.999985 | 7.64638e-06 | 0.999985 |
| rad28              | 4.46570e-06 | 0.999989 | 4.46570e-06 | 0.999989 |
| rad9               | 3.73166e-06 | 0.999993 | 3.73166e-06 | 0.999993 |
| PAH7+H             | 2.13584e-06 | 0.999995 | 2.13584e-06 | 0.999995 |
| rad2               | 1.86362e-06 | 0.999997 | 1.86362e-06 | 0.999997 |
| Benzene+2-propynyl | 5.02676e-07 | 0.999997 | 5.02676e-07 | 0.999997 |
| rad26              | 4.70934e-07 | 0.999998 | 4.70934e-07 | 0.999998 |
| rad30              | 4.64115e-07 | 0.999998 | 4.64116e-07 | 0.999998 |
| rad7               | 2.98650e-07 | 0.999999 | 2.98650e-07 | 0.999999 |
| rad12              | 2.58287e-07 | 0.999999 | 2.58288e-07 | 0.999999 |
| rad39              | 2.33451e-07 | 0.999999 | 2.33451e-07 | 0.999999 |
| Phenyl+Allene      | 1.34021e-07 | 0.999999 | 0.00000     | 0.999999 |
| rad1               | 1.18757e-07 | 0.999999 | 1.18757e-07 | 0.999999 |
| PAH9+H             | 9.51250e-08 | 0.999999 | 9.51250e-08 | 0.999999 |
| rad10              | 9.38448e-08 | 0.999999 | 9.38448e-08 | 0.999999 |
| rad15              | 8.47780e-08 | 1.000000 | 8.47780e-08 | 0.999999 |
| rad11              | 7.34236e-08 | 1.000000 | 7.34236e-08 | 0.999999 |
| rad35              | 4.95149e-08 | 1.000000 | 4.95149e-08 | 1.000000 |
| rad38              | 2.46904e-08 | 1.000000 | 2.46904e-08 | 1.000000 |
| rad3               | 1.16742e-08 | 1.000000 | 1.16742e-08 | 1.000000 |
| rad4               | 5.91424e-09 | 1.000000 | 5.91424e-09 | 1.000000 |
| rad13              | 1.65140e-09 | 1.000000 | 1.65140e-09 | 1.000000 |
| rad46              | 1.73903e-10 | 1.000000 | 1.73903e-10 | 1.000000 |
| rad60syn           | 4.69485e-12 | 1.000000 | 4.69485e-12 | 1.000000 |
| rad33              | 3.12671e-12 | 1.000000 | 3.12671e-12 | 1.000000 |
| rad14              | 1.83962e-12 | 1.000000 | 1.83962e-12 | 1.000000 |
| rad25              | 1.23220e-12 | 1.000000 | 1.23220e-12 | 1.000000 |
| rad27              | 1.20926e-12 | 1.000000 | 1.20926e-12 | 1.000000 |
| rad60anti          | 3.46015e-13 | 1.000000 | 3.46015e-13 | 1.000000 |
| PhCH2CCH+H         | 1.86141e-13 | 1.000000 | 1.86141e-13 | 1.000000 |
| rad37              | 2.34873e-14 | 1.000000 | 2.34873e-14 | 1.000000 |
| rad23              | 7.71270e-17 | 1.000000 | 7.71270e-17 | 1.000000 |
| rad31              | 3.57022e-17 | 1.000000 | 3.57022e-17 | 1.000000 |
| rad5               | 1.85796e-17 | 1.000000 | 1.85797e-17 | 1.000000 |
| rad20              | 8.44970e-18 | 1.000000 | 8.44970e-18 | 1.000000 |
| rad21              | 6.24132e-18 | 1.000000 | 6.24132e-18 | 1.000000 |
| rad45              | 5.67202e-19 | 1.000000 | 5.67202e-19 | 1.000000 |
| rad22              | 1.50805e-19 | 1.000000 | 1.50805e-19 | 1.000000 |
| rad18              | 3.59384e-20 | 1.000000 | 3.59384e-20 | 1.000000 |
| rad36              | 3.52156e-20 | 1.000000 | 3.52156e-20 | 1.000000 |
| PAH3+H             | 4.70408e-22 | 1.000000 | 4.70408e-22 | 1.000000 |
| rad59              | 2.51048e-22 | 1.000000 | 2.51048e-22 | 1.000000 |
| rad50              | 8.76831e-23 | 1.000000 | 8.76831e-23 | 1.000000 |
| rad24              | 2.40579e-25 | 1.000000 | 2.40579e-25 | 1.000000 |
| rad19syn           | 2.68410e-31 | 1.000000 | 2.68410e-31 | 1.000000 |
| rad52              | 3.09631e-35 | 1.000000 | 3.09631e-35 | 1.000000 |
| rad54              | 3.94924e-36 | 1.000000 | 3.94924e-36 | 1.000000 |
| PAH10+CH3          | 2.86840e-36 | 1.000000 | 2.86840e-36 | 1.000000 |
| rad43              | 6.60023e-37 | 1.000000 | 6.60023e-37 | 1.000000 |
| rad62              | 2.18335e-39 | 1.000000 | 2.18336e-39 | 1.000000 |
| rad51              | 2.26407e-42 | 1.000000 | 2.26407e-42 | 1.000000 |
| rad70              | 3.35669e-45 | 1.000000 | 3.35669e-45 | 1.000000 |
| PhcycC3H3_A+H      | 1.46505e-45 | 1.000000 | 1.46505e-45 | 1.000000 |
| rad55              | 7.86365e-46 | 1.000000 | 7.86365e-46 | 1.000000 |
| rad65              | 1.90576e-47 | 1.000000 | 1.90577e-47 | 1.000000 |
| rad58              | 5.04930e-49 | 1.000000 | 5.04930e-49 | 1.000000 |
| PAH1+H             | 8.86362e-51 | 1.000000 | 8.86362e-51 | 1.000000 |
| rad34              | 6.19416e-53 | 1.000000 | 6.19416e-53 | 1.000000 |

|       |             |          |             |          |
|-------|-------------|----------|-------------|----------|
| rad42 | 8.24101e-57 | 1.000000 | 8.24101e-57 | 1.000000 |
| rad41 | 2.12583e-57 | 1.000000 | 2.12583e-57 | 1.000000 |
| rad47 | 2.58330e-60 | 1.000000 | 2.58330e-60 | 1.000000 |

0.100000000E-03 Pa, 80.0000000 K

| Rate constant      | True (fraction)        | Effective (fraction)   |
|--------------------|------------------------|------------------------|
| Total              | 2.68112e-23 (1.00 )    | 2.68112e-23 (1.00 )    |
| Formation of rad11 | 2.65890e-23 (0.992 )   | 2.65889e-23 (0.992 )   |
| Formation of rad6  | 2.22189e-25 (0.00829 ) | 2.22189e-25 (0.00829 ) |
| H-abstraction      | 1.05871e-28 (3.95e-06) | 1.05871e-28 (3.95e-06) |

| species            | PYtrue      | Cumul    | PYeffective | Cumul    |
|--------------------|-------------|----------|-------------|----------|
| Indene+H           | 0.983539    | 0.983539 | 0.983539    | 0.983539 |
| C2H2+PhCH2         | 0.00883154  | 0.992371 | 0.00883154  | 0.992371 |
| PhCCH+CH3          | 0.00254100  | 0.994912 | 0.00254100  | 0.994912 |
| rad6               | 0.00253148  | 0.997443 | 0.00253148  | 0.997443 |
| PhCHCCH2+H         | 0.00156390  | 0.999007 | 0.00156390  | 0.999007 |
| PhCCCH3+H          | 0.000950375 | 0.999957 | 0.000950375 | 0.999957 |
| Ph+MeAc            | 1.80439e-05 | 0.999975 | 1.80439e-05 | 0.999975 |
| rad8               | 8.29826e-06 | 0.999984 | 8.29826e-06 | 0.999984 |
| rad9               | 4.16028e-06 | 0.999988 | 4.16028e-06 | 0.999988 |
| Benzene+2-propynyl | 3.94877e-06 | 0.999992 | 3.94877e-06 | 0.999992 |
| rad28              | 2.84622e-06 | 0.999995 | 2.84623e-06 | 0.999995 |
| PAH7+H             | 2.41055e-06 | 0.999997 | 2.41055e-06 | 0.999997 |
| rad2               | 1.13950e-06 | 0.999998 | 1.13950e-06 | 0.999998 |
| rad30              | 4.87987e-07 | 0.999999 | 4.87987e-07 | 0.999999 |
| rad26              | 2.95455e-07 | 0.999999 | 2.95455e-07 | 0.999999 |
| rad12              | 2.90504e-07 | 0.999999 | 2.90504e-07 | 0.999999 |
| rad39              | 2.76610e-07 | 1.000000 | 2.76610e-07 | 1.000000 |
| Phenyl+Allene      | 2.07204e-07 | 1.000000 | 0.000000    | 1.000000 |
| rad7               | 1.84750e-07 | 1.000000 | 1.84750e-07 | 1.000000 |
| PAH9+H             | 1.00620e-07 | 1.000000 | 1.00620e-07 | 1.000000 |
| rad15              | 9.00779e-08 | 1.000000 | 9.00779e-08 | 1.000000 |
| rad1               | 7.28157e-08 | 1.000000 | 7.28157e-08 | 1.000000 |
| rad10              | 5.74489e-08 | 1.000000 | 5.74489e-08 | 1.000000 |
| rad35              | 5.20749e-08 | 1.000000 | 5.20749e-08 | 1.000000 |
| rad11              | 4.54132e-08 | 1.000000 | 4.54132e-08 | 1.000000 |
| rad38              | 2.62493e-08 | 1.000000 | 2.62493e-08 | 1.000000 |
| rad3               | 7.14460e-09 | 1.000000 | 7.14460e-09 | 1.000000 |
| rad4               | 3.62213e-09 | 1.000000 | 3.62213e-09 | 1.000000 |
| rad13              | 1.02378e-09 | 1.000000 | 1.02378e-09 | 1.000000 |
| rad46              | 1.91969e-10 | 1.000000 | 1.91969e-10 | 1.000000 |
| rad60syn           | 5.88176e-12 | 1.000000 | 5.88176e-12 | 1.000000 |
| rad33              | 1.94007e-12 | 1.000000 | 1.94007e-12 | 1.000000 |
| PhCH2CCH+H         | 1.70747e-12 | 1.000000 | 1.70747e-12 | 1.000000 |
| rad14              | 1.16719e-12 | 1.000000 | 1.16719e-12 | 1.000000 |
| rad25              | 7.77594e-13 | 1.000000 | 7.77594e-13 | 1.000000 |
| rad27              | 7.50118e-13 | 1.000000 | 7.50118e-13 | 1.000000 |
| rad60anti          | 6.27511e-13 | 1.000000 | 6.27512e-13 | 1.000000 |
| rad37              | 3.11086e-13 | 1.000000 | 3.11086e-13 | 1.000000 |
| rad5               | 3.36965e-16 | 1.000000 | 3.36965e-16 | 1.000000 |
| rad23              | 3.67406e-17 | 1.000000 | 3.67406e-17 | 1.000000 |
| rad31              | 2.22667e-17 | 1.000000 | 2.22667e-17 | 1.000000 |
| rad20              | 5.47745e-18 | 1.000000 | 5.47745e-18 | 1.000000 |
| rad21              | 4.05228e-18 | 1.000000 | 4.05228e-18 | 1.000000 |
| rad45              | 2.67529e-19 | 1.000000 | 2.67529e-19 | 1.000000 |
| rad22              | 8.12606e-20 | 1.000000 | 8.12607e-20 | 1.000000 |
| rad18              | 2.32829e-20 | 1.000000 | 2.32829e-20 | 1.000000 |
| PAH3+H             | 1.82050e-20 | 1.000000 | 1.82050e-20 | 1.000000 |
| rad36              | 1.65985e-20 | 1.000000 | 1.65985e-20 | 1.000000 |
| rad59              | 9.48788e-21 | 1.000000 | 9.48788e-21 | 1.000000 |
| rad50              | 2.31957e-21 | 1.000000 | 2.31957e-21 | 1.000000 |
| rad24              | 1.62381e-25 | 1.000000 | 1.62381e-25 | 1.000000 |
| rad19syn           | 3.67585e-28 | 1.000000 | 3.67585e-28 | 1.000000 |
| rad52              | 3.88325e-32 | 1.000000 | 3.88325e-32 | 1.000000 |
| rad54              | 3.67583e-34 | 1.000000 | 3.67583e-34 | 1.000000 |
| PAH10+CH3          | 2.56761e-34 | 1.000000 | 2.56761e-34 | 1.000000 |
| rad43              | 5.90601e-35 | 1.000000 | 5.90601e-35 | 1.000000 |
| rad62              | 2.06542e-37 | 1.000000 | 2.06543e-37 | 1.000000 |
| rad51              | 2.18771e-40 | 1.000000 | 2.18771e-40 | 1.000000 |
| rad70              | 3.55677e-43 | 1.000000 | 3.55677e-43 | 1.000000 |
| PhcycC3H3_A+H      | 1.56634e-43 | 1.000000 | 1.56634e-43 | 1.000000 |
| rad55              | 8.39849e-44 | 1.000000 | 8.39849e-44 | 1.000000 |
| rad65              | 1.96525e-45 | 1.000000 | 1.96525e-45 | 1.000000 |
| rad58              | 5.43989e-47 | 1.000000 | 5.43989e-47 | 1.000000 |
| PAH1+H             | 1.03877e-48 | 1.000000 | 1.03877e-48 | 1.000000 |
| rad34              | 7.37306e-51 | 1.000000 | 7.37306e-51 | 1.000000 |

|       |             |         |             |         |
|-------|-------------|---------|-------------|---------|
| rad42 | 1.19301e-54 | 1.00000 | 1.19301e-54 | 1.00000 |
| rad41 | 3.51802e-55 | 1.00000 | 3.51802e-55 | 1.00000 |
| rad47 | 2.55018e-58 | 1.00000 | 2.55019e-58 | 1.00000 |

0.100000000E-03 Pa, 90.0000000 K

| Rate constant      | True (fraction)        | Effective (fraction)   |
|--------------------|------------------------|------------------------|
| Total              | 3.08379e-22 (1.00 )    | 3.08379e-22 (1.00 )    |
| Formation of rad11 | 3.03962e-22 (0.986 )   | 3.03962e-22 (0.986 )   |
| Formation of rad6  | 4.41076e-24 (0.0143 )  | 4.41076e-24 (0.0143 )  |
| H-abstraction      | 5.92916e-27 (1.92e-05) | 5.92916e-27 (1.92e-05) |

| species            | PYtrue      | Cumul    | PYeffective | Cumul    |
|--------------------|-------------|----------|-------------|----------|
| Indene+H           | 0.983762    | 0.983762 | 0.983762    | 0.983762 |
| C2H2+PhCH2         | 0.00915992  | 0.992922 | 0.00915992  | 0.992922 |
| PhCCH+CH3          | 0.00271809  | 0.995640 | 0.00271809  | 0.995640 |
| PhCHCCH2+H         | 0.00165715  | 0.997297 | 0.00165715  | 0.997297 |
| rad6               | 0.00162780  | 0.998925 | 0.00162780  | 0.998925 |
| PhCCCH3+H          | 0.00101296  | 0.999938 | 0.00101296  | 0.999938 |
| Ph+MeAc            | 2.17808e-05 | 0.999960 | 2.17808e-05 | 0.999960 |
| Benzene+2-propynyl | 1.92269e-05 | 0.999979 | 1.92269e-05 | 0.999979 |
| rad8               | 9.01627e-06 | 0.999988 | 9.01627e-06 | 0.999988 |
| rad9               | 4.65202e-06 | 0.999993 | 4.65203e-06 | 0.999993 |
| PAH7+H             | 2.72667e-06 | 0.999995 | 2.72667e-06 | 0.999995 |
| rad28              | 1.87993e-06 | 0.999997 | 1.87993e-06 | 0.999997 |
| rad2               | 7.25676e-07 | 0.999998 | 7.25677e-07 | 0.999998 |
| rad30              | 5.13483e-07 | 0.999999 | 5.13483e-07 | 0.999999 |
| rad39              | 3.28762e-07 | 0.999999 | 3.28762e-07 | 0.999999 |
| rad12              | 3.27339e-07 | 0.999999 | 3.27339e-07 | 0.999999 |
| Phenyl+Allene      | 3.12822e-07 | 0.999999 | 0.00000     | 0.999999 |
| rad26              | 1.92580e-07 | 1.000000 | 1.92580e-07 | 0.999999 |
| rad7               | 1.18848e-07 | 1.000000 | 1.18848e-07 | 0.999999 |
| PAH9+H             | 1.06583e-07 | 1.000000 | 1.06583e-07 | 1.000000 |
| rad15              | 9.58406e-08 | 1.000000 | 9.58406e-08 | 1.000000 |
| rad35              | 5.48231e-08 | 1.000000 | 5.48231e-08 | 1.000000 |
| rad1               | 4.65147e-08 | 1.000000 | 4.65147e-08 | 1.000000 |
| rad10              | 3.66375e-08 | 1.000000 | 3.66375e-08 | 1.000000 |
| rad11              | 2.92113e-08 | 1.000000 | 2.92113e-08 | 1.000000 |
| rad38              | 2.79555e-08 | 1.000000 | 2.79555e-08 | 1.000000 |
| rad3               | 4.55437e-09 | 1.000000 | 4.55437e-09 | 1.000000 |
| rad4               | 2.31080e-09 | 1.000000 | 2.31080e-09 | 1.000000 |
| rad13              | 6.59823e-10 | 1.000000 | 6.59823e-10 | 1.000000 |
| rad46              | 2.12910e-10 | 1.000000 | 2.12910e-10 | 1.000000 |
| PhCH2CCH+H         | 1.03201e-11 | 1.000000 | 1.03201e-11 | 1.000000 |
| rad60syn           | 7.43088e-12 | 1.000000 | 7.43088e-12 | 1.000000 |
| rad37              | 2.40286e-12 | 1.000000 | 2.40286e-12 | 1.000000 |
| rad33              | 1.25157e-12 | 1.000000 | 1.25157e-12 | 1.000000 |
| rad60anti          | 1.03317e-12 | 1.000000 | 1.03317e-12 | 1.000000 |
| rad14              | 7.69812e-13 | 1.000000 | 7.69812e-13 | 1.000000 |
| rad25              | 5.10135e-13 | 1.000000 | 5.10135e-13 | 1.000000 |
| rad27              | 4.84204e-13 | 1.000000 | 4.84204e-13 | 1.000000 |
| rad5               | 3.49024e-15 | 1.000000 | 3.49024e-15 | 1.000000 |
| rad23              | 1.91448e-17 | 1.000000 | 1.91448e-17 | 1.000000 |
| rad31              | 1.45015e-17 | 1.000000 | 1.45015e-17 | 1.000000 |
| rad20              | 3.70303e-18 | 1.000000 | 3.70303e-18 | 1.000000 |
| rad21              | 2.74426e-18 | 1.000000 | 2.74426e-18 | 1.000000 |
| PAH3+H             | 3.50576e-19 | 1.000000 | 3.50576e-19 | 1.000000 |
| rad59              | 1.76480e-19 | 1.000000 | 1.76480e-19 | 1.000000 |
| rad45              | 1.38278e-19 | 1.000000 | 1.38278e-19 | 1.000000 |
| rad22              | 4.70886e-20 | 1.000000 | 4.70886e-20 | 1.000000 |
| rad50              | 3.26744e-20 | 1.000000 | 3.26744e-20 | 1.000000 |
| rad18              | 1.57426e-20 | 1.000000 | 1.57426e-20 | 1.000000 |
| rad36              | 8.57462e-21 | 1.000000 | 8.57462e-21 | 1.000000 |
| rad19syn           | 1.47273e-25 | 1.000000 | 1.47273e-25 | 1.000000 |
| rad24              | 1.15543e-25 | 1.000000 | 1.15543e-25 | 1.000000 |
| rad52              | 1.24091e-29 | 1.000000 | 1.24091e-29 | 1.000000 |
| rad54              | 6.93872e-30 | 1.000000 | 6.93872e-30 | 1.000000 |
| PAH10+CH3          | 3.98935e-30 | 1.000000 | 3.98935e-30 | 1.000000 |
| rad43              | 9.99725e-31 | 1.000000 | 9.99726e-31 | 1.000000 |
| rad62              | 7.53845e-35 | 1.000000 | 7.53846e-35 | 1.000000 |
| rad51              | 8.22400e-38 | 1.000000 | 8.22400e-38 | 1.000000 |
| rad70              | 1.47089e-40 | 1.000000 | 1.47089e-40 | 1.000000 |
| PhcycC3H3_A+H      | 6.53631e-41 | 1.000000 | 6.53631e-41 | 1.000000 |
| rad55              | 3.50087e-41 | 1.000000 | 3.50087e-41 | 1.000000 |
| rad65              | 7.89627e-43 | 1.000000 | 7.89627e-43 | 1.000000 |
| rad58              | 2.28749e-44 | 1.000000 | 2.28750e-44 | 1.000000 |
| PAH1+H             | 4.73915e-46 | 1.000000 | 4.73915e-46 | 1.000000 |
| rad34              | 3.41565e-48 | 1.000000 | 3.41565e-48 | 1.000000 |

|       |             |         |             |          |
|-------|-------------|---------|-------------|----------|
| rad42 | 5.34942e-52 | 1.00000 | 5.34942e-52 | 1.000000 |
| rad41 | 1.51600e-52 | 1.00000 | 1.51600e-52 | 1.000000 |
| rad47 | 9.98914e-56 | 1.00000 | 9.98914e-56 | 1.000000 |

0.100000000E-03 Pa, 100.000000 K

| Rate constant      | True (fraction)        | Effective (fraction)   |
|--------------------|------------------------|------------------------|
| Total              | 2.19347e-21 (1.00 )    | 2.19347e-21 (1.00 )    |
| Formation of rad11 | 2.14498e-21 (0.978 )   | 2.14497e-21 (0.978 )   |
| Formation of rad6  | 4.83503e-23 (0.0220 )  | 4.83503e-23 (0.0220 )  |
| H-abstraction      | 1.47101e-25 (6.71e-05) | 1.47101e-25 (6.71e-05) |

| species            | PYtrue      | Cumul    | PYeffective | Cumul    |
|--------------------|-------------|----------|-------------|----------|
| Indene+H           | 0.983546    | 0.983546 | 0.983546    | 0.983546 |
| C2H2+PhCH2         | 0.00950814  | 0.993054 | 0.00950815  | 0.993054 |
| PhCCH+CH3          | 0.00291236  | 0.995967 | 0.00291236  | 0.995967 |
| PhCHCCH2+H         | 0.00175813  | 0.997725 | 0.00175813  | 0.997725 |
| PhCCCH3+H          | 0.00108104  | 0.998806 | 0.00108104  | 0.998806 |
| rad6               | 0.00107886  | 0.999885 | 0.00107886  | 0.999885 |
| Benzene+2-propynyl | 6.70630e-05 | 0.999952 | 6.70630e-05 | 0.999952 |
| Ph+MeAc            | 2.63885e-05 | 0.999978 | 2.63885e-05 | 0.999978 |
| rad8               | 9.81626e-06 | 0.999988 | 9.81626e-06 | 0.999988 |
| rad9               | 5.22109e-06 | 0.999993 | 5.22110e-06 | 0.999993 |
| PAH7+H             | 3.09449e-06 | 0.999996 | 3.09449e-06 | 0.999996 |
| rad28              | 1.27675e-06 | 0.999997 | 1.27675e-06 | 0.999997 |
| rad30              | 5.41185e-07 | 0.999998 | 5.41186e-07 | 0.999998 |
| rad2               | 4.77086e-07 | 0.999998 | 4.77086e-07 | 0.999998 |
| Phenyl+Allene      | 4.62501e-07 | 0.999999 | 0.00000     | 0.999998 |
| rad39              | 3.92111e-07 | 0.999999 | 3.92111e-07 | 0.999999 |
| rad12              | 3.69802e-07 | 1.000000 | 3.69802e-07 | 0.999999 |
| rad26              | 1.29320e-07 | 1.000000 | 1.29320e-07 | 0.999999 |
| PAH9+H             | 1.13162e-07 | 1.000000 | 1.13163e-07 | 0.999999 |
| rad15              | 1.02203e-07 | 1.000000 | 1.02203e-07 | 1.000000 |
| rad7               | 7.88244e-08 | 1.000000 | 7.88244e-08 | 1.000000 |
| rad35              | 5.78253e-08 | 1.000000 | 5.78254e-08 | 1.000000 |
| rad1               | 3.06835e-08 | 1.000000 | 3.06835e-08 | 1.000000 |
| rad38              | 2.98527e-08 | 1.000000 | 2.98527e-08 | 1.000000 |
| rad10              | 2.41231e-08 | 1.000000 | 2.41231e-08 | 1.000000 |
| rad11              | 1.93741e-08 | 1.000000 | 1.93741e-08 | 1.000000 |
| rad3               | 2.99733e-09 | 1.000000 | 2.99733e-09 | 1.000000 |
| rad4               | 1.52213e-09 | 1.000000 | 1.52213e-09 | 1.000000 |
| rad13              | 4.38383e-10 | 1.000000 | 4.38383e-10 | 1.000000 |
| rad46              | 2.37485e-10 | 1.000000 | 2.37485e-10 | 1.000000 |
| PhCH2CCH+H         | 4.54898e-11 | 1.000000 | 4.54898e-11 | 1.000000 |
| rad37              | 1.22767e-11 | 1.000000 | 1.22767e-11 | 1.000000 |
| rad60syn           | 9.45473e-12 | 1.000000 | 9.45473e-12 | 1.000000 |
| rad60anti          | 1.59524e-12 | 1.000000 | 1.59524e-12 | 1.000000 |
| rad33              | 8.32378e-13 | 1.000000 | 8.32378e-13 | 1.000000 |
| rad14              | 5.23375e-13 | 1.000000 | 5.23375e-13 | 1.000000 |
| rad25              | 3.45017e-13 | 1.000000 | 3.45017e-13 | 1.000000 |
| rad27              | 3.22428e-13 | 1.000000 | 3.22428e-13 | 1.000000 |
| rad5               | 2.33641e-14 | 1.000000 | 2.33641e-14 | 1.000000 |
| rad23              | 1.06912e-17 | 1.000000 | 1.06912e-17 | 1.000000 |
| rad31              | 9.77547e-18 | 1.000000 | 9.77548e-18 | 1.000000 |
| PAH3+H             | 3.82932e-18 | 1.000000 | 3.82932e-18 | 1.000000 |
| rad20              | 2.58774e-18 | 1.000000 | 2.58774e-18 | 1.000000 |
| rad21              | 1.92127e-18 | 1.000000 | 1.92128e-18 | 1.000000 |
| rad59              | 1.85146e-18 | 1.000000 | 1.85146e-18 | 1.000000 |
| rad50              | 2.79794e-19 | 1.000000 | 2.79794e-19 | 1.000000 |
| rad45              | 7.67046e-20 | 1.000000 | 7.67046e-20 | 1.000000 |
| rad22              | 2.88395e-20 | 1.000000 | 2.88395e-20 | 1.000000 |
| rad18              | 1.10067e-20 | 1.000000 | 1.10067e-20 | 1.000000 |
| rad36              | 4.75452e-21 | 1.000000 | 4.75453e-21 | 1.000000 |
| rad19syn           | 1.69555e-23 | 1.000000 | 1.69555e-23 | 1.000000 |
| rad24              | 8.56495e-26 | 1.000000 | 8.56496e-26 | 1.000000 |
| rad54              | 3.44938e-27 | 1.000000 | 3.44938e-27 | 1.000000 |
| PAH10+CH3          | 2.22984e-27 | 1.000000 | 2.22984e-27 | 1.000000 |
| rad52              | 1.20299e-27 | 1.000000 | 1.20299e-27 | 1.000000 |
| rad43              | 5.30877e-28 | 1.000000 | 5.30877e-28 | 1.000000 |
| rad62              | 6.93886e-30 | 1.000000 | 6.93886e-30 | 1.000000 |
| rad51              | 7.66184e-33 | 1.000000 | 7.66185e-33 | 1.000000 |
| rad70              | 1.31309e-37 | 1.000000 | 1.31309e-37 | 1.000000 |
| PhcycC3H3_A+H      | 5.88999e-38 | 1.000000 | 5.88999e-38 | 1.000000 |
| rad55              | 3.15103e-38 | 1.000000 | 3.15104e-38 | 1.000000 |
| rad65              | 6.83517e-40 | 1.000000 | 6.83517e-40 | 1.000000 |
| rad58              | 2.07758e-41 | 1.000000 | 2.07758e-41 | 1.000000 |
| PAH1+H             | 4.67485e-43 | 1.000000 | 4.67485e-43 | 1.000000 |
| rad34              | 3.42191e-45 | 1.000000 | 3.42191e-45 | 1.000000 |

|       |             |         |             |          |
|-------|-------------|---------|-------------|----------|
| rad42 | 4.78161e-49 | 1.00000 | 4.78161e-49 | 1.000000 |
| rad41 | 1.18267e-49 | 1.00000 | 1.18267e-49 | 1.000000 |
| rad47 | 8.55596e-53 | 1.00000 | 8.55597e-53 | 1.000000 |

0.100000000E-03 Pa, 110.000000 K

| Rate constant      | True (fraction)        | Effective (fraction)   |
|--------------------|------------------------|------------------------|
| Total              | 1.09987e-20 (1.00 )    | 1.09987e-20 (1.00 )    |
| Formation of rad11 | 1.06527e-20 (0.969 )   | 1.06526e-20 (0.969 )   |
| Formation of rad6  | 3.44008e-22 (0.0313 )  | 3.44007e-22 (0.0313 )  |
| H-abstraction      | 2.02040e-24 (0.000184) | 2.02040e-24 (0.000184) |

| species            | PYtrue      | Cumul    | PYeffective | Cumul    |
|--------------------|-------------|----------|-------------|----------|
| Indene+H           | 0.982996    | 0.982996 | 0.982996    | 0.982996 |
| C2H2+PhCH2         | 0.00988122  | 0.992878 | 0.00988123  | 0.992878 |
| PhCCH+CH3          | 0.00312676  | 0.996004 | 0.00312676  | 0.996004 |
| PhCHCCH2+H         | 0.00186824  | 0.997873 | 0.00186824  | 0.997873 |
| PhCCCH3+H          | 0.00115553  | 0.999028 | 0.00115553  | 0.999028 |
| rad6               | 0.000732495 | 0.999761 | 0.000732495 | 0.999761 |
| Benzene+2-propynyl | 0.000183695 | 0.999944 | 0.000183695 | 0.999944 |
| Ph+MeAc            | 3.20544e-05 | 0.999976 | 3.20545e-05 | 0.999976 |
| rad8               | 1.07115e-05 | 0.999987 | 1.07115e-05 | 0.999987 |
| rad9               | 5.88172e-06 | 0.999993 | 5.88172e-06 | 0.999993 |
| PAH7+H             | 3.52454e-06 | 0.999997 | 3.52454e-06 | 0.999997 |
| rad28              | 8.86510e-07 | 0.999997 | 8.86510e-07 | 0.999997 |
| Phenyl+Allene      | 6.71015e-07 | 0.999998 | 0.000000    | 0.999997 |
| rad30              | 5.71543e-07 | 0.999999 | 5.71544e-07 | 0.999998 |
| rad39              | 4.69069e-07 | 0.999999 | 4.69069e-07 | 0.999998 |
| rad12              | 4.18846e-07 | 1.000000 | 4.18847e-07 | 0.999999 |
| rad2               | 3.21696e-07 | 1.000000 | 3.21696e-07 | 0.999999 |
| PAH9+H             | 1.20487e-07 | 1.000000 | 1.20487e-07 | 0.999999 |
| rad15              | 1.09280e-07 | 1.000000 | 1.09280e-07 | 0.999999 |
| rad26              | 8.89208e-08 | 1.000000 | 8.89209e-08 | 0.999999 |
| rad35              | 6.11345e-08 | 1.000000 | 6.11346e-08 | 1.000000 |
| rad7               | 5.35681e-08 | 1.000000 | 5.35682e-08 | 1.000000 |
| rad38              | 3.19798e-08 | 1.000000 | 3.19798e-08 | 1.000000 |
| rad1               | 2.07657e-08 | 1.000000 | 2.07658e-08 | 1.000000 |
| rad10              | 1.62927e-08 | 1.000000 | 1.62927e-08 | 1.000000 |
| rad11              | 1.31672e-08 | 1.000000 | 1.31672e-08 | 1.000000 |
| rad3               | 2.02310e-09 | 1.000000 | 2.02310e-09 | 1.000000 |
| rad4               | 1.02838e-09 | 1.000000 | 1.02838e-09 | 1.000000 |
| rad13              | 2.98410e-10 | 1.000000 | 2.98410e-10 | 1.000000 |
| rad46              | 2.66502e-10 | 1.000000 | 2.66502e-10 | 1.000000 |
| PhCH2CCH+H         | 1.58626e-10 | 1.000000 | 1.58626e-10 | 1.000000 |
| rad37              | 4.62122e-11 | 1.000000 | 4.62122e-11 | 1.000000 |
| rad60syn           | 1.20943e-11 | 1.000000 | 1.20943e-11 | 1.000000 |
| rad60anti          | 2.35808e-12 | 1.000000 | 2.35808e-12 | 1.000000 |
| rad33              | 5.67221e-13 | 1.000000 | 5.67222e-13 | 1.000000 |
| rad14              | 3.64570e-13 | 1.000000 | 3.64571e-13 | 1.000000 |
| rad25              | 2.39102e-13 | 1.000000 | 2.39103e-13 | 1.000000 |
| rad27              | 2.20097e-13 | 1.000000 | 2.20097e-13 | 1.000000 |
| rad5               | 1.13164e-13 | 1.000000 | 1.13164e-13 | 1.000000 |
| PAH3+H             | 2.74860e-17 | 1.000000 | 2.74860e-17 | 1.000000 |
| rad59              | 1.27314e-17 | 1.000000 | 1.27314e-17 | 1.000000 |
| rad31              | 6.77847e-18 | 1.000000 | 6.77847e-18 | 1.000000 |
| rad23              | 6.30964e-18 | 1.000000 | 6.30965e-18 | 1.000000 |
| rad20              | 1.85732e-18 | 1.000000 | 1.85732e-18 | 1.000000 |
| rad50              | 1.66104e-18 | 1.000000 | 1.66105e-18 | 1.000000 |
| rad21              | 1.38170e-18 | 1.000000 | 1.38170e-18 | 1.000000 |
| rad45              | 4.50141e-20 | 1.000000 | 4.50141e-20 | 1.000000 |
| rad22              | 1.84463e-20 | 1.000000 | 1.84463e-20 | 1.000000 |
| rad18              | 7.90490e-21 | 1.000000 | 7.90490e-21 | 1.000000 |
| rad36              | 2.78955e-21 | 1.000000 | 2.78955e-21 | 1.000000 |
| rad19syn           | 8.11654e-22 | 1.000000 | 8.11654e-22 | 1.000000 |
| rad54              | 3.80849e-25 | 1.000000 | 3.80849e-25 | 1.000000 |
| PAH10+CH3          | 2.48881e-25 | 1.000000 | 2.48881e-25 | 1.000000 |
| rad24              | 6.56163e-26 | 1.000000 | 6.56163e-26 | 1.000000 |
| rad43              | 5.95445e-26 | 1.000000 | 5.95446e-26 | 1.000000 |
| rad52              | 5.03750e-26 | 1.000000 | 5.03751e-26 | 1.000000 |
| rad62              | 1.37906e-27 | 1.000000 | 1.37906e-27 | 1.000000 |
| rad51              | 1.43663e-30 | 1.000000 | 1.43663e-30 | 1.000000 |
| rad65              | 1.70926e-34 | 1.000000 | 1.70926e-34 | 1.000000 |
| rad70              | 1.18288e-34 | 1.000000 | 1.18288e-34 | 1.000000 |
| PhcycC3H3_A+H      | 5.35799e-35 | 1.000000 | 5.35800e-35 | 1.000000 |
| rad55              | 2.86280e-35 | 1.000000 | 2.86280e-35 | 1.000000 |
| rad58              | 1.90538e-38 | 1.000000 | 1.90538e-38 | 1.000000 |
| PAH1+H             | 4.66999e-40 | 1.000000 | 4.66999e-40 | 1.000000 |
| rad34              | 3.47637e-42 | 1.000000 | 3.47637e-42 | 1.000000 |

|       |             |         |             |          |
|-------|-------------|---------|-------------|----------|
| rad42 | 4.50758e-46 | 1.00000 | 4.50758e-46 | 1.000000 |
| rad41 | 9.61678e-47 | 1.00000 | 9.61678e-47 | 1.000000 |
| rad47 | 7.48980e-50 | 1.00000 | 7.48981e-50 | 1.000000 |

0.100000000E-03 Pa, 120.000000 K

| =====              |                 |            |                      |            |
|--------------------|-----------------|------------|----------------------|------------|
| Rate constant      | True (fraction) |            | Effective (fraction) |            |
| -----              |                 |            |                      |            |
| Total              | 4.24245e-20     | (1.00 )    | 4.24245e-20          | (1.00 )    |
| Formation of rad11 | 4.06372e-20     | (0.958 )   | 4.06372e-20          | (0.958 )   |
| Formation of rad6  | 1.76944e-21     | (0.0417 )  | 1.76944e-21          | (0.0417 )  |
| H-abstraction      | 1.78210e-23     | (0.000420) | 1.78210e-23          | (0.000420) |
| -----              |                 |            |                      |            |
| species            | PYtrue          | Cumul      | PYeffective          | Cumul      |
| -----              |                 |            |                      |            |
| Indene+H           | 0.982135        | 0.982135   | 0.982136             | 0.982136   |
| C2H2+PhCH2         | 0.0102826       | 0.992418   | 0.0102826            | 0.992419   |
| PhCCH+CH3          | 0.00336360      | 0.995781   | 0.00336361           | 0.995782   |
| PhCHCCH2+H         | 0.00198847      | 0.997770   | 0.00198847           | 0.997771   |
| PhCCCH3+H          | 0.00123709      | 0.999007   | 0.00123709           | 0.999008   |
| rad6               | 0.000507159     | 0.999514   | 0.000507160          | 0.999515   |
| Benzene+2-propynyl | 0.000420064     | 0.999934   | 0.000420064          | 0.999935   |
| Ph+MeAc            | 3.89848e-05     | 0.999973   | 3.89849e-05          | 0.999974   |
| rad8               | 1.17134e-05     | 0.999985   | 1.17135e-05          | 0.999986   |
| rad9               | 6.64849e-06     | 0.999992   | 6.64850e-06          | 0.999993   |
| PAH7+H             | 4.02787e-06     | 0.999996   | 4.02787e-06          | 0.999997   |
| Phenyl+Allene      | 9.57034e-07     | 0.999997   | 0.00000              | 0.999997   |
| rad28              | 6.26656e-07     | 0.999997   | 6.26657e-07          | 0.999997   |
| rad30              | 6.04927e-07     | 0.999998   | 6.04928e-07          | 0.999998   |
| rad39              | 5.62314e-07     | 0.999998   | 5.62314e-07          | 0.999998   |
| rad12              | 4.75393e-07     | 0.999999   | 4.75394e-07          | 0.999999   |
| rad2               | 2.21424e-07     | 0.999999   | 2.21424e-07          | 0.999999   |
| PAH9+H             | 1.28668e-07     | 0.999999   | 1.28669e-07          | 0.999999   |
| rad15              | 1.17177e-07     | 0.999999   | 1.17177e-07          | 0.999999   |
| rad35              | 6.47959e-08     | 0.999999   | 6.47960e-08          | 0.999999   |
| rad26              | 6.23250e-08     | 0.999999   | 6.23250e-08          | 0.999999   |
| rad7               | 3.71303e-08     | 0.999999   | 3.71303e-08          | 1.000000   |
| rad38              | 3.43732e-08     | 0.999999   | 3.43732e-08          | 1.000000   |
| rad1               | 1.43503e-08     | 1.000000   | 1.43503e-08          | 1.000000   |
| rad10              | 1.12336e-08     | 1.000000   | 1.12336e-08          | 1.000000   |
| rad11              | 9.12774e-09     | 1.000000   | 9.12775e-09          | 1.000000   |
| rad3               | 1.39392e-09     | 1.000000   | 1.39392e-09          | 1.000000   |
| rad4               | 7.09316e-10     | 1.000000   | 7.09316e-10          | 1.000000   |
| PhCH2CCH+H         | 4.63487e-10     | 1.000000   | 4.63487e-10          | 1.000000   |
| rad46              | 3.00858e-10     | 1.000000   | 3.00859e-10          | 1.000000   |
| rad13              | 2.07170e-10     | 1.000000   | 2.07170e-10          | 1.000000   |
| rad37              | 1.38346e-10     | 1.000000   | 1.38346e-10          | 1.000000   |
| rad60syn           | 1.55224e-11     | 1.000000   | 1.55224e-11          | 1.000000   |
| rad60anti          | 3.38081e-12     | 1.000000   | 3.38082e-12          | 1.000000   |
| rad5               | 4.29677e-13     | 1.000000   | 4.29678e-13          | 1.000000   |
| rad33              | 3.94246e-13     | 1.000000   | 3.94247e-13          | 1.000000   |
| rad14              | 2.59021e-13     | 1.000000   | 2.59021e-13          | 1.000000   |
| rad25              | 1.69031e-13     | 1.000000   | 1.69031e-13          | 1.000000   |
| rad27              | 1.53303e-13     | 1.000000   | 1.53303e-13          | 1.000000   |
| PAH3+H             | 1.44062e-16     | 1.000000   | 1.44062e-16          | 1.000000   |
| rad59              | 6.38930e-17     | 1.000000   | 6.38930e-17          | 1.000000   |
| rad50              | 7.50783e-18     | 1.000000   | 7.50783e-18          | 1.000000   |
| rad31              | 4.81363e-18     | 1.000000   | 4.81363e-18          | 1.000000   |
| rad23              | 3.89723e-18     | 1.000000   | 3.89723e-18          | 1.000000   |
| rad20              | 1.36270e-18     | 1.000000   | 1.36270e-18          | 1.000000   |
| rad21              | 1.01587e-18     | 1.000000   | 1.01587e-18          | 1.000000   |
| rad45              | 2.76712e-20     | 1.000000   | 2.76712e-20          | 1.000000   |
| rad19syn           | 2.03293e-20     | 1.000000   | 2.03293e-20          | 1.000000   |
| rad22              | 1.22172e-20     | 1.000000   | 1.22172e-20          | 1.000000   |
| rad18              | 5.80321e-21     | 1.000000   | 5.80321e-21          | 1.000000   |
| rad36              | 1.71471e-21     | 1.000000   | 1.71471e-21          | 1.000000   |
| rad54              | 1.78785e-23     | 1.000000   | 1.78785e-23          | 1.000000   |
| PAH10+CH3          | 1.18057e-23     | 1.000000   | 1.18057e-23          | 1.000000   |
| rad43              | 2.83943e-24     | 1.000000   | 2.83944e-24          | 1.000000   |
| rad52              | 1.13145e-24     | 1.000000   | 1.13145e-24          | 1.000000   |
| rad62              | 1.01714e-25     | 1.000000   | 1.01714e-25          | 1.000000   |
| rad24              | 5.16615e-26     | 1.000000   | 5.16616e-26          | 1.000000   |
| rad51              | 1.05124e-28     | 1.000000   | 1.05124e-28          | 1.000000   |
| rad70              | 3.03455e-29     | 1.000000   | 3.03455e-29          | 1.000000   |
| PhcycC3H3_A+H      | 1.82717e-29     | 1.000000   | 1.82717e-29          | 1.000000   |
| rad55              | 1.01618e-29     | 1.000000   | 1.01618e-29          | 1.000000   |
| rad65              | 3.61466e-32     | 1.000000   | 3.61467e-32          | 1.000000   |
| rad58              | 8.74438e-33     | 1.000000   | 8.74439e-33          | 1.000000   |
| PAH1+H             | 5.49633e-37     | 1.000000   | 5.49633e-37          | 1.000000   |
| rad34              | 4.16141e-39     | 1.000000   | 4.16141e-39          | 1.000000   |



|       |             |          |             |          |
|-------|-------------|----------|-------------|----------|
| rad42 | 5.05459e-43 | 1.000000 | 5.05460e-43 | 1.000000 |
| rad41 | 8.83410e-44 | 1.000000 | 8.83411e-44 | 1.000000 |
| rad47 | 7.77946e-47 | 1.000000 | 7.77946e-47 | 1.000000 |

0.100000000E-03 Pa, 130.000000 K

| =====              |                 |            |                      |            |
|--------------------|-----------------|------------|----------------------|------------|
| Rate constant      | True (fraction) |            | Effective (fraction) |            |
| -----              |                 |            |                      |            |
| Total              | 1.33719e-19     | (1.00 )    | 1.33719e-19          | (1.00 )    |
| Formation of rad11 | 1.26517e-19     | (0.946 )   | 1.26517e-19          | (0.946 )   |
| Formation of rad6  | 7.08974e-21     | (0.0530 )  | 7.08973e-21          | (0.0530 )  |
| H-abstraction      | 1.11864e-22     | (0.000837) | 1.11864e-22          | (0.000837) |
| -----              |                 |            |                      |            |
| species            | PYtrue          | Cumul      | PYeffective          | Cumul      |
| -----              |                 |            |                      |            |
| Indene+H           | 0.980945        | 0.980945   | 0.980946             | 0.980946   |
| C2H2+PhCH2         | 0.0107147       | 0.991659   | 0.0107147            | 0.991660   |
| PhCCH+CH3          | 0.00362484      | 0.995284   | 0.00362484           | 0.995285   |
| PhCHCCH2+H         | 0.00211961      | 0.997404   | 0.00211962           | 0.997405   |
| PhCCCH3+H          | 0.00132624      | 0.998730   | 0.00132624           | 0.998731   |
| Benzene+2-propynyl | 0.000836559     | 0.999567   | 0.000836560          | 0.999568   |
| rad6               | 0.000356847     | 0.999924   | 0.000356848          | 0.999925   |
| Ph+MeAc            | 4.74093e-05     | 0.999971   | 4.74094e-05          | 0.999972   |
| rad8               | 1.28322e-05     | 0.999984   | 1.28322e-05          | 0.999985   |
| rad9               | 7.53680e-06     | 0.999991   | 7.53681e-06          | 0.999992   |
| PAH7+H             | 4.61642e-06     | 0.999996   | 4.61643e-06          | 0.999997   |
| Phenyl+Allene      | 1.34413e-06     | 0.999997   | 0.00000              | 0.999997   |
| rad39              | 6.74867e-07     | 0.999998   | 6.74868e-07          | 0.999998   |
| rad30              | 6.41660e-07     | 0.999999   | 6.41661e-07          | 0.999998   |
| rad12              | 5.40365e-07     | 0.999999   | 5.40366e-07          | 0.999999   |
| rad28              | 4.49519e-07     | 1.000000   | 4.49520e-07          | 0.999999   |
| rad2               | 1.55019e-07     | 1.000000   | 1.55019e-07          | 0.999999   |
| PAH9+H             | 1.37819e-07     | 1.000000   | 1.37819e-07          | 1.000000   |
| rad15              | 1.25992e-07     | 1.000000   | 1.25993e-07          | 1.000000   |
| rad35              | 6.88514e-08     | 1.000000   | 6.88515e-08          | 1.000000   |
| rad26              | 4.43771e-08     | 1.000000   | 4.43772e-08          | 1.000000   |
| rad38              | 3.70692e-08     | 1.000000   | 3.70693e-08          | 1.000000   |
| rad7               | 2.61586e-08     | 1.000000   | 2.61586e-08          | 1.000000   |
| rad1               | 1.00904e-08     | 1.000000   | 1.00905e-08          | 1.000000   |
| rad10              | 7.87849e-09     | 1.000000   | 7.87850e-09          | 1.000000   |
| rad11              | 6.43157e-09     | 1.000000   | 6.43158e-09          | 1.000000   |
| PhCH2CCH+H         | 1.18183e-09     | 1.000000   | 1.18183e-09          | 1.000000   |
| rad3               | 9.76840e-10     | 1.000000   | 9.76841e-10          | 1.000000   |
| rad4               | 4.97658e-10     | 1.000000   | 4.97659e-10          | 1.000000   |
| rad37              | 3.47650e-10     | 1.000000   | 3.47650e-10          | 1.000000   |
| rad46              | 3.41578e-10     | 1.000000   | 3.41578e-10          | 1.000000   |
| rad13              | 1.46182e-10     | 1.000000   | 1.46182e-10          | 1.000000   |
| rad60syn           | 1.99509e-11     | 1.000000   | 1.99510e-11          | 1.000000   |
| rad60anti          | 4.74059e-12     | 1.000000   | 4.74060e-12          | 1.000000   |
| rad5               | 1.35304e-12     | 1.000000   | 1.35304e-12          | 1.000000   |
| rad33              | 2.78527e-13     | 1.000000   | 2.78527e-13          | 1.000000   |
| rad14              | 1.87068e-13     | 1.000000   | 1.87068e-13          | 1.000000   |
| rad25              | 1.21482e-13     | 1.000000   | 1.21483e-13          | 1.000000   |
| rad27              | 1.08572e-13     | 1.000000   | 1.08572e-13          | 1.000000   |
| PAH3+H             | 5.93947e-16     | 1.000000   | 5.93947e-16          | 1.000000   |
| rad59              | 2.52397e-16     | 1.000000   | 2.52397e-16          | 1.000000   |
| rad50              | 2.75929e-17     | 1.000000   | 2.75930e-17          | 1.000000   |
| rad31              | 3.48989e-18     | 1.000000   | 3.48990e-18          | 1.000000   |
| rad23              | 2.50206e-18     | 1.000000   | 2.50206e-18          | 1.000000   |
| rad20              | 1.01839e-18     | 1.000000   | 1.01839e-18          | 1.000000   |
| rad21              | 7.60892e-19     | 1.000000   | 7.60893e-19          | 1.000000   |
| rad19syn           | 3.10579e-19     | 1.000000   | 3.10580e-19          | 1.000000   |
| rad45              | 1.76943e-20     | 1.000000   | 1.76944e-20          | 1.000000   |
| rad22              | 8.32623e-21     | 1.000000   | 8.32624e-21          | 1.000000   |
| rad18              | 4.33884e-21     | 1.000000   | 4.33885e-21          | 1.000000   |
| rad36              | 1.09663e-21     | 1.000000   | 1.09664e-21          | 1.000000   |
| rad54              | 4.58760e-22     | 1.000000   | 4.58760e-22          | 1.000000   |
| PAH10+CH3          | 3.05535e-22     | 1.000000   | 3.05535e-22          | 1.000000   |
| rad43              | 7.38062e-23     | 1.000000   | 7.38063e-23          | 1.000000   |
| rad52              | 1.58013e-23     | 1.000000   | 1.58013e-23          | 1.000000   |
| rad62              | 3.62096e-24     | 1.000000   | 3.62096e-24          | 1.000000   |
| rad24              | 4.16329e-26     | 1.000000   | 4.16330e-26          | 1.000000   |
| rad51              | 3.73195e-27     | 1.000000   | 3.73196e-27          | 1.000000   |
| rad70              | 2.72452e-27     | 1.000000   | 2.72452e-27          | 1.000000   |
| PhcycC3H3_A+H      | 2.14582e-27     | 1.000000   | 2.14582e-27          | 1.000000   |
| rad55              | 9.73851e-28     | 1.000000   | 9.73852e-28          | 1.000000   |
| rad65              | 2.45235e-30     | 1.000000   | 2.45236e-30          | 1.000000   |
| rad58              | 1.13090e-30     | 1.000000   | 1.13091e-30          | 1.000000   |
| PAH1+H             | 4.50871e-34     | 1.000000   | 4.50871e-34          | 1.000000   |
| rad34              | 3.47497e-36     | 1.000000   | 3.47498e-36          | 1.000000   |

|       |             |         |             |          |
|-------|-------------|---------|-------------|----------|
| rad42 | 4.19822e-40 | 1.00000 | 4.19823e-40 | 1.000000 |
| rad41 | 6.42132e-41 | 1.00000 | 6.42133e-41 | 1.000000 |
| rad47 | 3.58491e-41 | 1.00000 | 3.58492e-41 | 1.000000 |

0.100000000E-03 Pa, 140.000000 K

| Rate constant      | True (fraction)        | Effective (fraction)   |
|--------------------|------------------------|------------------------|
| Total              | 3.59582e-19 (1.00 )    | 3.59581e-19 (1.00 )    |
| Formation of rad11 | 3.35703e-19 (0.934 )   | 3.35702e-19 (0.934 )   |
| Formation of rad6  | 2.33415e-20 (0.0649 )  | 2.33414e-20 (0.0649 )  |
| H-abstraction      | 5.37685e-22 (0.00150 ) | 5.37685e-22 (0.00150 ) |

| species            | PYtrue      | Cumul    | PYeffective | Cumul    |
|--------------------|-------------|----------|-------------|----------|
| Indene+H           | 0.979382    | 0.979382 | 0.979384    | 0.979384 |
| C2H2+PhCH2         | 0.0111796   | 0.990562 | 0.0111796   | 0.990564 |
| PhCCH+CH3          | 0.00391217  | 0.994474 | 0.00391218  | 0.994476 |
| PhCHCCH2+H         | 0.00226225  | 0.996736 | 0.00226226  | 0.996738 |
| Benzene+2-propynyl | 0.00149531  | 0.998232 | 0.00149531  | 0.998234 |
| PhCCCH3+H          | 0.00142337  | 0.999655 | 0.00142337  | 0.999657 |
| rad6               | 0.000254484 | 0.999909 | 0.000254484 | 0.999911 |
| Ph+MeAc            | 5.75849e-05 | 0.999967 | 5.75850e-05 | 0.999969 |
| rad8               | 1.40771e-05 | 0.999981 | 1.40772e-05 | 0.999983 |
| rad9               | 8.56337e-06 | 0.999990 | 8.56339e-06 | 0.999992 |
| PAH7+H             | 5.30350e-06 | 0.999995 | 5.30351e-06 | 0.999997 |
| Phenyl+Allene      | 1.86209e-06 | 0.999997 | 0.00000     | 0.999997 |
| rad39              | 8.10197e-07 | 0.999998 | 8.10198e-07 | 0.999998 |
| rad30              | 6.82052e-07 | 0.999998 | 6.82054e-07 | 0.999999 |
| rad12              | 6.14708e-07 | 0.999999 | 6.14709e-07 | 0.999999 |
| rad28              | 3.26408e-07 | 0.999999 | 3.26409e-07 | 0.999999 |
| PAH9+H             | 1.48054e-07 | 0.999999 | 1.48054e-07 | 1.000000 |
| rad15              | 1.35827e-07 | 1.000000 | 1.35827e-07 | 1.000000 |
| rad2               | 1.10074e-07 | 1.000000 | 1.10074e-07 | 1.000000 |
| rad35              | 7.33430e-08 | 1.000000 | 7.33431e-08 | 1.000000 |
| rad38              | 4.01067e-08 | 1.000000 | 4.01068e-08 | 1.000000 |
| rad26              | 3.20149e-08 | 1.000000 | 3.20150e-08 | 1.000000 |
| rad7               | 1.86808e-08 | 1.000000 | 1.86808e-08 | 1.000000 |
| rad1               | 7.19877e-09 | 1.000000 | 7.19879e-09 | 1.000000 |
| rad10              | 5.60473e-09 | 1.000000 | 5.60474e-09 | 1.000000 |
| rad11              | 4.59390e-09 | 1.000000 | 4.59391e-09 | 1.000000 |
| PhCH2CCH+H         | 2.70784e-09 | 1.000000 | 2.70784e-09 | 1.000000 |
| rad37              | 7.62331e-10 | 1.000000 | 7.62333e-10 | 1.000000 |
| rad3               | 6.94325e-10 | 1.000000 | 6.94326e-10 | 1.000000 |
| rad46              | 3.89869e-10 | 1.000000 | 3.89870e-10 | 1.000000 |
| rad4               | 3.54182e-10 | 1.000000 | 3.54183e-10 | 1.000000 |
| rad13              | 1.04556e-10 | 1.000000 | 1.04556e-10 | 1.000000 |
| rad60syn           | 2.56423e-11 | 1.000000 | 2.56424e-11 | 1.000000 |
| rad60anti          | 6.53680e-12 | 1.000000 | 6.53681e-12 | 1.000000 |
| rad5               | 3.67883e-12 | 1.000000 | 3.67883e-12 | 1.000000 |
| rad33              | 1.99475e-13 | 1.000000 | 1.99475e-13 | 1.000000 |
| rad14              | 1.36975e-13 | 1.000000 | 1.36975e-13 | 1.000000 |
| rad25              | 8.85313e-14 | 1.000000 | 8.85315e-14 | 1.000000 |
| rad27              | 7.79731e-14 | 1.000000 | 7.79732e-14 | 1.000000 |
| PAH3+H             | 2.03193e-15 | 1.000000 | 2.03193e-15 | 1.000000 |
| rad59              | 8.28458e-16 | 1.000000 | 8.28460e-16 | 1.000000 |
| rad50              | 8.64220e-17 | 1.000000 | 8.64222e-17 | 1.000000 |
| rad19syn           | 3.22327e-18 | 1.000000 | 3.22328e-18 | 1.000000 |
| rad31              | 2.57772e-18 | 1.000000 | 2.57773e-18 | 1.000000 |
| rad23              | 1.66169e-18 | 1.000000 | 1.66169e-18 | 1.000000 |
| rad20              | 7.73122e-19 | 1.000000 | 7.73124e-19 | 1.000000 |
| rad21              | 5.79009e-19 | 1.000000 | 5.79010e-19 | 1.000000 |
| rad45              | 1.17123e-20 | 1.000000 | 1.17123e-20 | 1.000000 |
| rad54              | 7.39882e-21 | 1.000000 | 7.39883e-21 | 1.000000 |
| rad22              | 5.81141e-21 | 1.000000 | 5.81142e-21 | 1.000000 |
| PAH10+CH3          | 4.96428e-21 | 1.000000 | 4.96429e-21 | 1.000000 |
| rad18              | 3.29448e-21 | 1.000000 | 3.29449e-21 | 1.000000 |
| rad43              | 1.20364e-21 | 1.000000 | 1.20364e-21 | 1.000000 |
| rad36              | 7.26153e-22 | 1.000000 | 7.26154e-22 | 1.000000 |
| rad52              | 1.52336e-22 | 1.000000 | 1.52337e-22 | 1.000000 |
| rad62              | 7.68620e-23 | 1.000000 | 7.68621e-23 | 1.000000 |
| rad70              | 1.16313e-25 | 1.000000 | 1.16313e-25 | 1.000000 |
| PhcycC3H3_A+H      | 1.06457e-25 | 1.000000 | 1.06458e-25 | 1.000000 |
| rad51              | 7.94296e-26 | 1.000000 | 7.94297e-26 | 1.000000 |
| rad55              | 4.37246e-26 | 1.000000 | 4.37247e-26 | 1.000000 |
| rad24              | 3.42400e-26 | 1.000000 | 3.42401e-26 | 1.000000 |
| PAH1+H             | 1.72844e-28 | 1.000000 | 1.72844e-28 | 1.000000 |
| rad65              | 8.25936e-29 | 1.000000 | 8.25938e-29 | 1.000000 |
| rad58              | 6.05397e-29 | 1.000000 | 6.05399e-29 | 1.000000 |
| rad34              | 4.12761e-30 | 1.000000 | 4.12761e-30 | 1.000000 |

|       |             |          |             |         |
|-------|-------------|----------|-------------|---------|
| rad42 | 1.07619e-36 | 1.000000 | 1.07619e-36 | 1.00000 |
| rad41 | 1.50169e-37 | 1.000000 | 1.50169e-37 | 1.00000 |
| rad47 | 2.48317e-39 | 1.000000 | 2.48318e-39 | 1.00000 |

0.100000000E-03 Pa, 150.000000 K

| Rate constant      | True (fraction)        | Effective (fraction)   |
|--------------------|------------------------|------------------------|
| Total              | 8.51464e-19 (1.00 )    | 8.51462e-19 (1.00 )    |
| Formation of rad11 | 7.83711e-19 (0.920 )   | 7.83709e-19 (0.920 )   |
| Formation of rad6  | 6.56651e-20 (0.0771 )  | 6.56650e-20 (0.0771 )  |
| H-abstraction      | 2.08816e-21 (0.00245 ) | 2.08816e-21 (0.00245 ) |

| species            | PYtrue      | Cumul    | PYeffective | Cumul    |
|--------------------|-------------|----------|-------------|----------|
| Indene+H           | 0.977405    | 0.977405 | 0.977408    | 0.977408 |
| C2H2+PhCH2         | 0.0116790   | 0.989084 | 0.0116790   | 0.989087 |
| PhCCH+CH3          | 0.00422724  | 0.993311 | 0.00422725  | 0.993314 |
| Benzene+2-propynyl | 0.00245244  | 0.995764 | 0.00245245  | 0.995767 |
| PhCHCCH2+H         | 0.00241694  | 0.998181 | 0.00241695  | 0.998184 |
| PhCCCH3+H          | 0.00152880  | 0.999709 | 0.00152881  | 0.999713 |
| rad6               | 0.000183554 | 0.999893 | 0.000183555 | 0.999896 |
| Ph+MeAc            | 6.97996e-05 | 0.999963 | 6.97998e-05 | 0.999966 |
| rad8               | 1.54577e-05 | 0.999978 | 1.54577e-05 | 0.999981 |
| rad9               | 9.74671e-06 | 0.999988 | 9.74674e-06 | 0.999991 |
| PAH7+H             | 6.10410e-06 | 0.999994 | 6.10411e-06 | 0.999997 |
| Phenyl+Allene      | 2.54835e-06 | 0.999997 | 0.00000     | 0.999997 |
| rad39              | 9.72315e-07 | 0.999998 | 9.72317e-07 | 0.999998 |
| rad30              | 7.26425e-07 | 0.999998 | 7.26427e-07 | 0.999999 |
| rad12              | 6.99412e-07 | 0.999999 | 6.99414e-07 | 1.000000 |
| rad28              | 2.39453e-07 | 0.999999 | 2.39454e-07 | 1.000000 |
| PAH9+H             | 1.59502e-07 | 0.999999 | 1.59502e-07 | 1.000000 |
| rad15              | 1.46789e-07 | 1.000000 | 1.46790e-07 | 1.00000  |
| rad2               | 7.90987e-08 | 1.000000 | 7.90989e-08 | 1.00000  |
| rad35              | 7.83156e-08 | 1.000000 | 7.83158e-08 | 1.00000  |
| rad38              | 4.35292e-08 | 1.000000 | 4.35294e-08 | 1.00000  |
| rad26              | 2.33530e-08 | 1.000000 | 2.33531e-08 | 1.00000  |
| rad7               | 1.34943e-08 | 1.000000 | 1.34944e-08 | 1.00000  |
| PhCH2CCH+H         | 5.69604e-09 | 1.000000 | 5.69606e-09 | 1.00000  |
| rad1               | 5.19967e-09 | 1.000000 | 5.19968e-09 | 1.00000  |
| rad10              | 4.03542e-09 | 1.000000 | 4.03543e-09 | 1.00000  |
| rad11              | 3.31924e-09 | 1.000000 | 3.31925e-09 | 1.00000  |
| rad37              | 1.50096e-09 | 1.000000 | 1.50096e-09 | 1.00000  |
| rad3               | 4.99420e-10 | 1.000000 | 4.99421e-10 | 1.00000  |
| rad46              | 4.47181e-10 | 1.000000 | 4.47182e-10 | 1.00000  |
| rad4               | 2.55116e-10 | 1.000000 | 2.55117e-10 | 1.00000  |
| rad13              | 7.56465e-11 | 1.000000 | 7.56467e-11 | 1.00000  |
| rad60syn           | 3.29231e-11 | 1.000000 | 3.29231e-11 | 1.00000  |
| rad60anti          | 8.89654e-12 | 1.000000 | 8.89656e-12 | 1.00000  |
| rad5               | 8.89505e-12 | 1.000000 | 8.89507e-12 | 1.00000  |
| rad33              | 1.44518e-13 | 1.000000 | 1.44519e-13 | 1.00000  |
| rad14              | 1.01479e-13 | 1.000000 | 1.01479e-13 | 1.00000  |
| rad25              | 6.52876e-14 | 1.000000 | 6.52878e-14 | 1.00000  |
| rad27              | 5.66648e-14 | 1.000000 | 5.66650e-14 | 1.00000  |
| PAH3+H             | 5.99895e-15 | 1.000000 | 5.99896e-15 | 1.00000  |
| rad59              | 2.35075e-15 | 1.000000 | 2.35076e-15 | 1.00000  |
| rad50              | 2.38697e-16 | 1.000000 | 2.38697e-16 | 1.00000  |
| rad19syn           | 2.45836e-17 | 1.000000 | 2.45836e-17 | 1.00000  |
| rad31              | 1.93734e-18 | 1.000000 | 1.93734e-18 | 1.00000  |
| rad23              | 1.13800e-18 | 1.000000 | 1.13800e-18 | 1.00000  |
| rad20              | 5.94951e-19 | 1.000000 | 5.94953e-19 | 1.00000  |
| rad21              | 4.46691e-19 | 1.000000 | 4.46692e-19 | 1.00000  |
| rad54              | 8.24673e-20 | 1.000000 | 8.24675e-20 | 1.00000  |
| PAH10+CH3          | 5.56845e-20 | 1.000000 | 5.56846e-20 | 1.00000  |
| rad43              | 1.35389e-20 | 1.000000 | 1.35389e-20 | 1.00000  |
| rad45              | 7.99884e-21 | 1.000000 | 7.99886e-21 | 1.00000  |
| rad22              | 4.13892e-21 | 1.000000 | 4.13893e-21 | 1.00000  |
| rad18              | 2.53484e-21 | 1.000000 | 2.53484e-21 | 1.00000  |
| rad52              | 1.09442e-21 | 1.000000 | 1.09442e-21 | 1.00000  |
| rad62              | 1.08491e-21 | 1.000000 | 1.08491e-21 | 1.00000  |
| rad36              | 4.96221e-22 | 1.000000 | 4.96222e-22 | 1.00000  |
| rad70              | 2.82677e-24 | 1.000000 | 2.82677e-24 | 1.00000  |
| PhcycC3H3_A+H      | 2.82621e-24 | 1.000000 | 2.82622e-24 | 1.00000  |
| rad51              | 1.13091e-24 | 1.000000 | 1.13092e-24 | 1.00000  |
| rad55              | 1.09805e-24 | 1.000000 | 1.09805e-24 | 1.00000  |
| rad24              | 2.86749e-26 | 1.000000 | 2.86749e-26 | 1.00000  |
| PAH1+H             | 8.47385e-27 | 1.000000 | 8.47387e-27 | 1.00000  |
| rad65              | 1.71186e-27 | 1.000000 | 1.71186e-27 | 1.00000  |
| rad58              | 1.68957e-27 | 1.000000 | 1.68958e-27 | 1.00000  |
| rad34              | 2.52692e-28 | 1.000000 | 2.52693e-28 | 1.00000  |

|       |             |          |             |         |
|-------|-------------|----------|-------------|---------|
| rad42 | 7.85375e-31 | 1.000000 | 7.85377e-31 | 1.00000 |
| rad41 | 1.60805e-31 | 1.000000 | 1.60806e-31 | 1.00000 |
| rad47 | 7.59304e-38 | 1.000000 | 7.59306e-38 | 1.00000 |

0.100000000E-03 Pa, 160.000000 K

| Rate constant      | True (fraction)        | Effective (fraction)   |
|--------------------|------------------------|------------------------|
| Total              | 1.81800e-18 (1.00 )    | 1.81800e-18 (1.00 )    |
| Formation of rad11 | 1.64862e-18 (0.907 )   | 1.64862e-18 (0.907 )   |
| Formation of rad6  | 1.62558e-19 (0.0894 )  | 1.62558e-19 (0.0894 )  |
| H-abstraction      | 6.82130e-21 (0.00375 ) | 6.82130e-21 (0.00375 ) |

| species            | PYtrue      | Cumul    | PYeffective | Cumul    |
|--------------------|-------------|----------|-------------|----------|
| Indene+H           | 0.974974    | 0.974974 | 0.974978    | 0.974978 |
| C2H2+PhCH2         | 0.0122147   | 0.987189 | 0.0122147   | 0.987193 |
| PhCCH+CH3          | 0.00457164  | 0.991760 | 0.00457166  | 0.991764 |
| Benzene+2-propynyl | 0.00375209  | 0.995512 | 0.00375210  | 0.995516 |
| PhCHCCH2+H         | 0.00258416  | 0.998097 | 0.00258417  | 0.998101 |
| PhCCCH3+H          | 0.00164283  | 0.999739 | 0.00164284  | 0.999743 |
| rad6               | 0.000133680 | 0.999873 | 0.000133680 | 0.999877 |
| Ph+MeAc            | 8.43759e-05 | 0.999958 | 8.43762e-05 | 0.999962 |
| rad8               | 1.69827e-05 | 0.999974 | 1.69828e-05 | 0.999979 |
| rad9               | 1.11076e-05 | 0.999986 | 1.11076e-05 | 0.999990 |
| PAH7+H             | 7.03538e-06 | 0.999993 | 7.03540e-06 | 0.999997 |
| Phenyl+Allene      | 3.44992e-06 | 0.999996 | 0.00000     | 0.999997 |
| rad39              | 1.16588e-06 | 0.999997 | 1.16588e-06 | 0.999998 |
| rad12              | 7.95514e-07 | 0.999998 | 7.95517e-07 | 0.999999 |
| rad30              | 7.75127e-07 | 0.999999 | 7.75129e-07 | 0.999999 |
| rad28              | 1.77195e-07 | 0.999999 | 1.77196e-07 | 1.000000 |
| PAH9+H             | 1.72305e-07 | 0.999999 | 1.72306e-07 | 1.000000 |
| rad15              | 1.59002e-07 | 0.999999 | 1.59002e-07 | 1.000000 |
| rad35              | 8.38196e-08 | 0.999999 | 8.38199e-08 | 1.000000 |
| rad2               | 5.74270e-08 | 0.999999 | 5.74272e-08 | 1.000000 |
| rad38              | 4.73860e-08 | 1.000000 | 4.73861e-08 | 1.000000 |
| rad26              | 1.71956e-08 | 1.000000 | 1.71957e-08 | 1.000000 |
| PhCH2CCH+H         | 1.11785e-08 | 1.000000 | 1.11785e-08 | 1.000000 |
| rad7               | 9.84353e-09 | 1.000000 | 9.84357e-09 | 1.000000 |
| rad1               | 3.79618e-09 | 1.000000 | 3.79619e-09 | 1.000000 |
| rad10              | 2.93574e-09 | 1.000000 | 2.93575e-09 | 1.000000 |
| rad37              | 2.71096e-09 | 1.000000 | 2.71097e-09 | 1.000000 |
| rad11              | 2.42187e-09 | 1.000000 | 2.42188e-09 | 1.000000 |
| rad46              | 5.15257e-10 | 1.000000 | 5.15259e-10 | 1.000000 |
| rad3               | 3.62971e-10 | 1.000000 | 3.62973e-10 | 1.000000 |
| rad4               | 1.85699e-10 | 1.000000 | 1.85700e-10 | 1.000000 |
| rad13              | 5.52685e-11 | 1.000000 | 5.52687e-11 | 1.000000 |
| rad60syn           | 4.22006e-11 | 1.000000 | 4.22007e-11 | 1.000000 |
| rad5               | 1.95519e-11 | 1.000000 | 1.95519e-11 | 1.000000 |
| rad60anti          | 1.19816e-11 | 1.000000 | 1.19816e-11 | 1.000000 |
| rad33              | 1.05741e-13 | 1.000000 | 1.05741e-13 | 1.000000 |
| rad14              | 7.59441e-14 | 1.000000 | 7.59444e-14 | 1.000000 |
| rad25              | 4.86425e-14 | 1.000000 | 4.86427e-14 | 1.000000 |
| rad27              | 4.16004e-14 | 1.000000 | 4.16005e-14 | 1.000000 |
| PAH3+H             | 1.57400e-14 | 1.000000 | 1.57400e-14 | 1.000000 |
| rad59              | 5.93886e-15 | 1.000000 | 5.93888e-15 | 1.000000 |
| rad50              | 5.96322e-16 | 1.000000 | 5.96324e-16 | 1.000000 |
| rad19syn           | 1.46137e-16 | 1.000000 | 1.46137e-16 | 1.000000 |
| rad31              | 1.48098e-18 | 1.000000 | 1.48099e-18 | 1.000000 |
| rad23              | 8.02218e-19 | 1.000000 | 8.02221e-19 | 1.000000 |
| rad54              | 6.81824e-19 | 1.000000 | 6.81827e-19 | 1.000000 |
| rad20              | 4.63326e-19 | 1.000000 | 4.63327e-19 | 1.000000 |
| PAH10+CH3          | 4.62822e-19 | 1.000000 | 4.62823e-19 | 1.000000 |
| rad21              | 3.48789e-19 | 1.000000 | 3.48790e-19 | 1.000000 |
| rad43              | 1.12716e-19 | 1.000000 | 1.12716e-19 | 1.000000 |
| rad62              | 1.10110e-20 | 1.000000 | 1.10110e-20 | 1.000000 |
| rad52              | 6.20423e-21 | 1.000000 | 6.20426e-21 | 1.000000 |
| rad45              | 5.62629e-21 | 1.000000 | 5.62631e-21 | 1.000000 |
| rad22              | 2.99937e-21 | 1.000000 | 2.99938e-21 | 1.000000 |
| rad18              | 1.97289e-21 | 1.000000 | 1.97290e-21 | 1.000000 |
| rad36              | 3.49335e-22 | 1.000000 | 3.49336e-22 | 1.000000 |
| PhcycC3H3_A+H      | 4.94769e-23 | 1.000000 | 4.94770e-23 | 1.000000 |
| rad70              | 4.57950e-23 | 1.000000 | 4.57952e-23 | 1.000000 |
| rad55              | 1.82840e-23 | 1.000000 | 1.82840e-23 | 1.000000 |
| rad51              | 1.16532e-23 | 1.000000 | 1.16532e-23 | 1.000000 |
| PAH1+H             | 2.26710e-25 | 1.000000 | 2.26711e-25 | 1.000000 |
| rad58              | 3.08076e-26 | 1.000000 | 3.08077e-26 | 1.000000 |
| rad24              | 2.44134e-26 | 1.000000 | 2.44135e-26 | 1.000000 |
| rad65              | 2.43498e-26 | 1.000000 | 2.43499e-26 | 1.000000 |
| rad34              | 7.87196e-27 | 1.000000 | 7.87198e-27 | 1.000000 |

|       |             |          |             |         |
|-------|-------------|----------|-------------|---------|
| rad42 | 4.07640e-29 | 1.000000 | 4.07642e-29 | 1.00000 |
| rad41 | 9.77795e-30 | 1.000000 | 9.77799e-30 | 1.00000 |
| rad47 | 1.41703e-36 | 1.000000 | 1.41703e-36 | 1.00000 |

0.100000000E-03 Pa, 170.000000 K

| Rate constant      | True (fraction)        | Effective (fraction)   |
|--------------------|------------------------|------------------------|
| Total              | 3.56414e-18 (1.00 )    | 3.56412e-18 (1.00 )    |
| Formation of rad11 | 3.18264e-18 (0.893 )   | 3.18262e-18 (0.893 )   |
| Formation of rad6  | 3.62173e-19 (0.102 )   | 3.62171e-19 (0.102 )   |
| H-abstraction      | 1.93278e-20 (0.00542 ) | 1.93278e-20 (0.00542 ) |

| species            | PYtrue      | Cumul    | PYeffective | Cumul    |
|--------------------|-------------|----------|-------------|----------|
| Indene+H           | 0.972063    | 0.972063 | 0.972068    | 0.972068 |
| C2H2+PhCH2         | 0.0127889   | 0.984852 | 0.0127889   | 0.984857 |
| Benzene+2-propynyl | 0.00542285  | 0.990275 | 0.00542288  | 0.990280 |
| PhCCH+CH3          | 0.00494703  | 0.995222 | 0.00494705  | 0.995227 |
| PhCHCCH2+H         | 0.00276441  | 0.997986 | 0.00276442  | 0.997991 |
| PhCCCH3+H          | 0.00176572  | 0.999752 | 0.00176572  | 0.999757 |
| Ph+MeAc            | 0.000101673 | 0.999853 | 0.000101673 | 0.999858 |
| rad6               | 9.81681e-05 | 0.999952 | 9.81686e-05 | 0.999957 |
| rad8               | 1.86615e-05 | 0.999970 | 1.86616e-05 | 0.999975 |
| rad9               | 1.26690e-05 | 0.999983 | 1.26691e-05 | 0.999988 |
| PAH7+H             | 8.11698e-06 | 0.999991 | 8.11702e-06 | 0.999996 |
| Phenyl+Allene      | 4.62531e-06 | 0.999996 | 0.00000     | 0.999996 |
| rad39              | 1.39628e-06 | 0.999997 | 1.39629e-06 | 0.999997 |
| rad12              | 9.04106e-07 | 0.999998 | 9.04110e-07 | 0.999998 |
| rad30              | 8.28543e-07 | 0.999999 | 8.28547e-07 | 0.999999 |
| PAH9+H             | 1.86631e-07 | 0.999999 | 1.86632e-07 | 0.999999 |
| rad15              | 1.72599e-07 | 0.999999 | 1.72600e-07 | 1.000000 |
| rad28              | 1.32100e-07 | 0.999999 | 1.32100e-07 | 1.000000 |
| rad35              | 8.99121e-08 | 0.999999 | 8.99125e-08 | 1.000000 |
| rad38              | 5.17343e-08 | 0.999999 | 5.17345e-08 | 1.000000 |
| rad2               | 4.20638e-08 | 1.000000 | 4.20639e-08 | 1.000000 |
| PhCH2CCH+H         | 2.07187e-08 | 1.000000 | 2.07188e-08 | 1.000000 |
| rad26              | 1.27644e-08 | 1.000000 | 1.27645e-08 | 1.000000 |
| rad7               | 7.24097e-09 | 1.000000 | 7.24101e-09 | 1.000000 |
| rad37              | 4.56586e-09 | 1.000000 | 4.56587e-09 | 1.000000 |
| rad1               | 2.79753e-09 | 1.000000 | 2.79754e-09 | 1.000000 |
| rad10              | 2.15485e-09 | 1.000000 | 2.15486e-09 | 1.000000 |
| rad11              | 1.78207e-09 | 1.000000 | 1.78208e-09 | 1.000000 |
| rad46              | 5.96218e-10 | 1.000000 | 5.96221e-10 | 1.000000 |
| rad3               | 2.66112e-10 | 1.000000 | 2.66113e-10 | 1.000000 |
| rad4               | 1.36373e-10 | 1.000000 | 1.36374e-10 | 1.000000 |
| rad60syn           | 5.39835e-11 | 1.000000 | 5.39837e-11 | 1.000000 |
| rad13              | 4.07219e-11 | 1.000000 | 4.07221e-11 | 1.000000 |
| rad5               | 3.97284e-11 | 1.000000 | 3.97286e-11 | 1.000000 |
| rad60anti          | 1.59968e-11 | 1.000000 | 1.59969e-11 | 1.000000 |
| rad33              | 7.80292e-14 | 1.000000 | 7.80295e-14 | 1.000000 |
| rad14              | 5.73381e-14 | 1.000000 | 5.73384e-14 | 1.000000 |
| PAH3+H             | 3.75310e-14 | 1.000000 | 3.75312e-14 | 1.000000 |
| rad25              | 3.65672e-14 | 1.000000 | 3.65673e-14 | 1.000000 |
| rad27              | 3.08114e-14 | 1.000000 | 3.08116e-14 | 1.000000 |
| rad59              | 1.36604e-14 | 1.000000 | 1.36605e-14 | 1.000000 |
| rad50              | 1.37349e-15 | 1.000000 | 1.37350e-15 | 1.000000 |
| rad19syn           | 7.08152e-16 | 1.000000 | 7.08155e-16 | 1.000000 |
| rad54              | 4.41302e-18 | 1.000000 | 4.41304e-18 | 1.000000 |
| PAH10+CH3          | 3.00789e-18 | 1.000000 | 3.00790e-18 | 1.000000 |
| rad31              | 1.15205e-18 | 1.000000 | 1.15206e-18 | 1.000000 |
| rad43              | 7.32856e-19 | 1.000000 | 7.32859e-19 | 1.000000 |
| rad23              | 5.81761e-19 | 1.000000 | 5.81764e-19 | 1.000000 |
| rad20              | 3.64656e-19 | 1.000000 | 3.64658e-19 | 1.000000 |
| rad21              | 2.75283e-19 | 1.000000 | 2.75284e-19 | 1.000000 |
| rad62              | 8.52360e-20 | 1.000000 | 8.52364e-20 | 1.000000 |
| rad52              | 2.89924e-20 | 1.000000 | 2.89926e-20 | 1.000000 |
| rad45              | 4.07311e-21 | 1.000000 | 4.07313e-21 | 1.000000 |
| rad22              | 2.20665e-21 | 1.000000 | 2.20666e-21 | 1.000000 |
| rad18              | 1.55110e-21 | 1.000000 | 1.55110e-21 | 1.000000 |
| PhcycC3H3_A+H      | 6.18422e-22 | 1.000000 | 6.18425e-22 | 1.000000 |
| rad70              | 5.33303e-22 | 1.000000 | 5.33306e-22 | 1.000000 |
| rad36              | 2.53187e-22 | 1.000000 | 2.53189e-22 | 1.000000 |
| rad55              | 2.18108e-22 | 1.000000 | 2.18109e-22 | 1.000000 |
| rad51              | 9.21778e-23 | 1.000000 | 9.21782e-23 | 1.000000 |
| PAH1+H             | 3.94371e-24 | 1.000000 | 3.94373e-24 | 1.000000 |
| rad58              | 3.99221e-25 | 1.000000 | 3.99223e-25 | 1.000000 |
| rad65              | 2.54647e-25 | 1.000000 | 2.54648e-25 | 1.000000 |
| rad34              | 1.50302e-25 | 1.000000 | 1.50303e-25 | 1.000000 |
| rad24              | 2.11050e-26 | 1.000000 | 2.11051e-26 | 1.000000 |

|       |             |          |             |          |
|-------|-------------|----------|-------------|----------|
| rad42 | 1.01737e-27 | 1.000000 | 1.01737e-27 | 1.000000 |
| rad41 | 2.58546e-28 | 1.000000 | 2.58547e-28 | 1.000000 |
| rad47 | 1.82736e-35 | 1.000000 | 1.82737e-35 | 1.000000 |

0.100000000E-03 Pa, 180.000000 K

| Rate constant      | True (fraction)        | Effective (fraction)   |
|--------------------|------------------------|------------------------|
| Total              | 6.50681e-18 (1.00 )    | 6.50677e-18 (1.00 )    |
| Formation of rad11 | 5.71915e-18 (0.879 )   | 5.71911e-18 (0.879 )   |
| Formation of rad6  | 7.39013e-19 (0.114 )   | 7.39008e-19 (0.114 )   |
| H-abstraction      | 4.86496e-20 (0.00748 ) | 4.86496e-20 (0.00748 ) |

| species            | PYtrue      | Cumul    | PYeffective | Cumul    |
|--------------------|-------------|----------|-------------|----------|
| Indene+H           | 0.968659    | 0.968659 | 0.968665    | 0.968665 |
| C2H2+PhCH2         | 0.0134037   | 0.982063 | 0.0134037   | 0.982069 |
| Benzene+2-propynyl | 0.00747672  | 0.989539 | 0.00747676  | 0.989545 |
| PhCCH+CH3          | 0.00535503  | 0.994895 | 0.00535506  | 0.994901 |
| PhCHCCH2+H         | 0.00295816  | 0.997853 | 0.00295818  | 0.997859 |
| PhCCCH3+H          | 0.00189768  | 0.999750 | 0.00189770  | 0.999756 |
| Ph+MeAc            | 0.000122082 | 0.999872 | 0.000122083 | 0.999878 |
| rad6               | 7.26102e-05 | 0.999945 | 7.26106e-05 | 0.999951 |
| rad8               | 2.05033e-05 | 0.999966 | 2.05034e-05 | 0.999972 |
| rad9               | 1.44572e-05 | 0.999980 | 1.44573e-05 | 0.999986 |
| PAH7+H             | 9.37136e-06 | 0.999989 | 9.37141e-06 | 0.999995 |
| Phenyl+Allene      | 6.14707e-06 | 0.999996 | 0.00000     | 0.999995 |
| rad39              | 1.66976e-06 | 0.999997 | 1.66977e-06 | 0.999997 |
| rad12              | 1.02632e-06 | 0.999998 | 1.02633e-06 | 0.999998 |
| rad30              | 8.87108e-07 | 0.999999 | 8.87114e-07 | 0.999999 |
| PAH9+H             | 2.02670e-07 | 0.999999 | 2.02671e-07 | 0.999999 |
| rad15              | 1.87735e-07 | 1.000000 | 1.87736e-07 | 0.999999 |
| rad28              | 9.91117e-08 | 1.000000 | 9.91124e-08 | 0.999999 |
| rad35              | 9.66582e-08 | 1.000000 | 9.66588e-08 | 1.000000 |
| rad38              | 5.66403e-08 | 1.000000 | 5.66407e-08 | 1.000000 |
| PhCH2CCH+H         | 3.66110e-08 | 1.000000 | 3.66112e-08 | 1.000000 |
| rad2               | 3.10500e-08 | 1.000000 | 3.10502e-08 | 1.000000 |
| rad26              | 9.54162e-09 | 1.000000 | 9.54168e-09 | 1.000000 |
| rad37              | 7.26250e-09 | 1.000000 | 7.26255e-09 | 1.000000 |
| rad7               | 5.36541e-09 | 1.000000 | 5.36545e-09 | 1.000000 |
| rad1               | 2.07870e-09 | 1.000000 | 2.07871e-09 | 1.000000 |
| rad10              | 1.59406e-09 | 1.000000 | 1.59407e-09 | 1.000000 |
| rad11              | 1.32091e-09 | 1.000000 | 1.32092e-09 | 1.000000 |
| rad46              | 6.92624e-10 | 1.000000 | 6.92628e-10 | 1.000000 |
| rad3               | 1.96621e-10 | 1.000000 | 1.96623e-10 | 1.000000 |
| rad4               | 1.00947e-10 | 1.000000 | 1.00948e-10 | 1.000000 |
| rad5               | 7.55982e-11 | 1.000000 | 7.55986e-11 | 1.000000 |
| rad60syn           | 6.89043e-11 | 1.000000 | 6.89047e-11 | 1.000000 |
| rad13              | 3.02241e-11 | 1.000000 | 3.02243e-11 | 1.000000 |
| rad60anti          | 2.12007e-11 | 1.000000 | 2.12008e-11 | 1.000000 |
| PAH3+H             | 8.27374e-14 | 1.000000 | 8.27379e-14 | 1.000000 |
| rad33              | 5.80080e-14 | 1.000000 | 5.80083e-14 | 1.000000 |
| rad14              | 4.36279e-14 | 1.000000 | 4.36282e-14 | 1.000000 |
| rad59              | 2.91033e-14 | 1.000000 | 2.91034e-14 | 1.000000 |
| rad25              | 2.77081e-14 | 1.000000 | 2.77083e-14 | 1.000000 |
| rad27              | 2.29978e-14 | 1.000000 | 2.29980e-14 | 1.000000 |
| rad50              | 2.95950e-15 | 1.000000 | 2.95952e-15 | 1.000000 |
| rad19syn           | 2.89650e-15 | 1.000000 | 2.89652e-15 | 1.000000 |
| rad54              | 2.33149e-17 | 1.000000 | 2.33150e-17 | 1.000000 |
| PAH10+CH3          | 1.59363e-17 | 1.000000 | 1.59364e-17 | 1.000000 |
| rad43              | 3.87936e-18 | 1.000000 | 3.87938e-18 | 1.000000 |
| rad31              | 9.13364e-19 | 1.000000 | 9.13370e-19 | 1.000000 |
| rad62              | 5.26815e-19 | 1.000000 | 5.26818e-19 | 1.000000 |
| rad23              | 4.34281e-19 | 1.000000 | 4.34284e-19 | 1.000000 |
| rad20              | 2.89739e-19 | 1.000000 | 2.89741e-19 | 1.000000 |
| rad21              | 2.19378e-19 | 1.000000 | 2.19379e-19 | 1.000000 |
| rad52              | 1.15527e-19 | 1.000000 | 1.15528e-19 | 1.000000 |
| PhcycC3H3_A+H      | 5.85484e-21 | 1.000000 | 5.85487e-21 | 1.000000 |
| rad70              | 4.72682e-21 | 1.000000 | 4.72685e-21 | 1.000000 |
| rad45              | 3.03709e-21 | 1.000000 | 3.03711e-21 | 1.000000 |
| rad55              | 1.97570e-21 | 1.000000 | 1.97571e-21 | 1.000000 |
| rad22              | 1.64521e-21 | 1.000000 | 1.64522e-21 | 1.000000 |
| rad18              | 1.23045e-21 | 1.000000 | 1.23045e-21 | 1.000000 |
| rad51              | 5.85876e-22 | 1.000000 | 5.85880e-22 | 1.000000 |
| rad36              | 1.89061e-22 | 1.000000 | 1.89062e-22 | 1.000000 |
| PAH1+H             | 4.95131e-23 | 1.000000 | 4.95134e-23 | 1.000000 |
| rad58              | 3.90745e-24 | 1.000000 | 3.90748e-24 | 1.000000 |
| rad65              | 2.06496e-24 | 1.000000 | 2.06498e-24 | 1.000000 |
| rad34              | 2.04031e-24 | 1.000000 | 2.04032e-24 | 1.000000 |
| rad24              | 1.85098e-26 | 1.000000 | 1.85099e-26 | 1.000000 |

|       |             |          |             |          |
|-------|-------------|----------|-------------|----------|
| rad42 | 1.68924e-26 | 1.000000 | 1.68925e-26 | 1.000000 |
| rad41 | 4.43532e-27 | 1.000000 | 4.43535e-27 | 1.000000 |
| rad47 | 1.73364e-34 | 1.000000 | 1.73365e-34 | 1.000000 |

0.100000000E-03 Pa, 190.000000 K

| =====              |                 |            |                      |            |
|--------------------|-----------------|------------|----------------------|------------|
| Rate constant      | True (fraction) |            | Effective (fraction) |            |
| -----              |                 |            |                      |            |
| Total              | 1.11858e-17     | (1.00 )    | 1.11857e-17          | (1.00 )    |
| Formation of rad11 | 9.67466e-18     | (0.865 )   | 9.67458e-18          | (0.865 )   |
| Formation of rad6  | 1.40029e-18     | (0.125 )   | 1.40028e-18          | (0.125 )   |
| H-abstraction      | 1.10851e-19     | (0.00991 ) | 1.10851e-19          | (0.00991 ) |
| -----              |                 |            |                      |            |
| species            | PYtrue          | Cumul      | PYeffective          | Cumul      |
| Indene+H           | 0.964764        | 0.964764   | 0.964771             | 0.964771   |
| C2H2+PhCH2         | 0.0140618       | 0.978825   | 0.0140619            | 0.978833   |
| Benzene+2-propynyl | 0.00990995      | 0.988735   | 0.00991003           | 0.988743   |
| PhCCH+CH3          | 0.00579733      | 0.994533   | 0.00579738           | 0.994541   |
| PhCHCCH2+H         | 0.00316589      | 0.997698   | 0.00316592           | 0.997707   |
| PhCCCH3+H          | 0.00203894      | 0.999737   | 0.00203896           | 0.999746   |
| Ph+MeAc            | 0.000146036     | 0.999883   | 0.000146037          | 0.999892   |
| rad6               | 5.40437e-05     | 0.999937   | 5.40441e-05          | 0.999946   |
| rad8               | 2.25170e-05     | 0.999960   | 2.25172e-05          | 0.999968   |
| rad9               | 1.65011e-05     | 0.999977   | 1.65012e-05          | 0.999985   |
| PAH7+H             | 1.08241e-05     | 0.999987   | 1.08242e-05          | 0.999995   |
| Phenyl+Allene      | 8.10445e-06     | 0.999995   | 0.00000              | 0.999995   |
| rad39              | 1.99350e-06     | 0.999997   | 1.99351e-06          | 0.999997   |
| rad12              | 1.16332e-06     | 0.999999   | 1.16333e-06          | 0.999999   |
| rad30              | 9.51305e-07     | 1.000000   | 9.51313e-07          | 1.000000   |
| PAH9+H             | 2.20642e-07     | 1.000000   | 2.20644e-07          | 1.000000   |
| rad15              | 2.04580e-07     | 1.000000   | 2.04582e-07          | 1.000000   |
| rad35              | 1.04133e-07     | 1.000000   | 1.04134e-07          | 1.000000   |
| rad28              | 7.47741e-08     | 1.000000   | 7.47748e-08          | 1.000000   |
| rad38              | 6.21807e-08     | 1.000000   | 6.21812e-08          | 1.000000   |
| PhCH2CCH+H         | 6.21339e-08     | 1.000000   | 6.21345e-08          | 1.000000   |
| rad2               | 2.30764e-08     | 1.000000   | 2.30766e-08          | 1.000000   |
| rad37              | 1.10193e-08     | 1.000000   | 1.10194e-08          | 1.000000   |
| rad26              | 7.17623e-09     | 1.000000   | 7.17629e-09          | 1.000000   |
| rad7               | 4.00100e-09     | 1.000000   | 4.00103e-09          | 1.000000   |
| rad1               | 1.55600e-09     | 1.000000   | 1.55601e-09          | 1.000000   |
| rad10              | 1.18741e-09     | 1.000000   | 1.18740e-09          | 1.000000   |
| rad11              | 9.85349e-10     | 1.000000   | 9.85357e-10          | 1.000000   |
| rad46              | 8.07569e-10     | 1.000000   | 8.07576e-10          | 1.000000   |
| rad3               | 1.46273e-10     | 1.000000   | 1.46274e-10          | 1.000000   |
| rad5               | 1.36090e-10     | 1.000000   | 1.36091e-10          | 1.000000   |
| rad60syn           | 8.77470e-11     | 1.000000   | 8.77477e-11          | 1.000000   |
| rad4               | 7.52478e-11     | 1.000000   | 7.52485e-11          | 1.000000   |
| rad60anti          | 2.79176e-11     | 1.000000   | 2.79179e-11          | 1.000000   |
| rad13              | 2.25767e-11     | 1.000000   | 2.25768e-11          | 1.000000   |
| PAH3+H             | 1.70903e-13     | 1.000000   | 1.70904e-13          | 1.000000   |
| rad59              | 5.81986e-14     | 1.000000   | 5.81991e-14          | 1.000000   |
| rad33              | 4.34049e-14     | 1.000000   | 4.34051e-14          | 1.000000   |
| rad14              | 3.34265e-14     | 1.000000   | 3.34267e-14          | 1.000000   |
| rad25              | 2.11443e-14     | 1.000000   | 2.11445e-14          | 1.000000   |
| rad27              | 1.72837e-14     | 1.000000   | 1.72839e-14          | 1.000000   |
| rad19syn           | 1.02782e-14     | 1.000000   | 1.02783e-14          | 1.000000   |
| rad50              | 6.03324e-15     | 1.000000   | 6.03329e-15          | 1.000000   |
| rad54              | 1.03910e-16     | 1.000000   | 1.03911e-16          | 1.000000   |
| PAH10+CH3          | 7.11249e-17     | 1.000000   | 7.11255e-17          | 1.000000   |
| rad43              | 1.72757e-17     | 1.000000   | 1.72758e-17          | 1.000000   |
| rad62              | 2.69504e-18     | 1.000000   | 2.69505e-18          | 1.000000   |
| rad31              | 7.40163e-19     | 1.000000   | 7.40168e-19          | 1.000000   |
| rad52              | 4.03131e-19     | 1.000000   | 4.03135e-19          | 1.000000   |
| rad23              | 3.34330e-19     | 1.000000   | 3.34332e-19          | 1.000000   |
| rad20              | 2.32212e-19     | 1.000000   | 2.32214e-19          | 1.000000   |
| rad21              | 1.76374e-19     | 1.000000   | 1.76376e-19          | 1.000000   |
| PhcycC3H3_A+H      | 4.38800e-20     | 1.000000   | 4.38804e-20          | 1.000000   |
| rad70              | 3.33124e-20     | 1.000000   | 3.33127e-20          | 1.000000   |
| rad55              | 1.42051e-20     | 1.000000   | 1.42052e-20          | 1.000000   |
| rad51              | 3.10101e-21     | 1.000000   | 3.10104e-21          | 1.000000   |
| rad45              | 2.33655e-21     | 1.000000   | 2.33657e-21          | 1.000000   |
| rad22              | 1.24132e-21     | 1.000000   | 1.24133e-21          | 1.000000   |
| rad18              | 9.83945e-22     | 1.000000   | 9.83953e-22          | 1.000000   |
| PAH1+H             | 4.73237e-22     | 1.000000   | 4.73241e-22          | 1.000000   |
| rad36              | 1.45712e-22     | 1.000000   | 1.45714e-22          | 1.000000   |
| rad58              | 3.02015e-23     | 1.000000   | 3.02017e-23          | 1.000000   |
| rad34              | 2.08624e-23     | 1.000000   | 2.08626e-23          | 1.000000   |
| rad65              | 1.35298e-23     | 1.000000   | 1.35299e-23          | 1.000000   |
| rad42              | 2.03911e-25     | 1.000000   | 2.03913e-25          | 1.000000   |

|       |             |         |             |         |
|-------|-------------|---------|-------------|---------|
| rad41 | 5.49073e-26 | 1.00000 | 5.49078e-26 | 1.00000 |
| rad24 | 1.64595e-26 | 1.00000 | 1.64597e-26 | 1.00000 |
| rad47 | 1.27096e-33 | 1.00000 | 1.27097e-33 | 1.00000 |

0.100000000E-03 Pa, 200.000000 K

| Rate constant      | True (fraction)       | Effective (fraction)  |
|--------------------|-----------------------|-----------------------|
| Total              | 1.82690e-17 (1.00 )   | 1.82688e-17 (1.00 )   |
| Formation of rad11 | 1.55456e-17 (0.851 )  | 1.55454e-17 (0.851 )  |
| Formation of rad6  | 2.49126e-18 (0.136 )  | 2.49124e-18 (0.136 )  |
| H-abstraction      | 2.32112e-19 (0.0127 ) | 2.32112e-19 (0.0127 ) |

| species            | PYtrue      | Cumul    | PYeffective | Cumul    |
|--------------------|-------------|----------|-------------|----------|
| Indene+H           | 0.960389    | 0.960389 | 0.960399    | 0.960399 |
| C2H2+PhCH2         | 0.0147660   | 0.975155 | 0.0147662   | 0.975165 |
| Benzene+2-propynyl | 0.0127053   | 0.987860 | 0.0127054   | 0.987870 |
| PhCCH+CH3          | 0.00627559  | 0.994136 | 0.00627565  | 0.994146 |
| PhCHCCH2+H         | 0.00338806  | 0.997524 | 0.00338810  | 0.997534 |
| PhCCCH3+H          | 0.00218963  | 0.999714 | 0.00218965  | 0.999724 |
| Ph+MeAc            | 0.000173994 | 0.999888 | 0.000173996 | 0.999898 |
| rad6               | 4.04462e-05 | 0.999928 | 4.04467e-05 | 0.999938 |
| rad8               | 2.47111e-05 | 0.999953 | 2.47114e-05 | 0.999963 |
| rad9               | 1.88328e-05 | 0.999971 | 1.88330e-05 | 0.999982 |
| PAH7+H             | 1.25043e-05 | 0.999984 | 1.25044e-05 | 0.999994 |
| Phenyl+Allene      | 1.06065e-05 | 0.999995 | 0.00000     | 0.999994 |
| rad39              | 2.37567e-06 | 0.999997 | 2.37570e-06 | 0.999997 |
| rad12              | 1.31627e-06 | 0.999998 | 1.31629e-06 | 0.999998 |
| rad30              | 1.02166e-06 | 0.999999 | 1.02168e-06 | 0.999999 |
| PAH9+H             | 2.40798e-07 | 1.000000 | 2.40800e-07 | 0.999999 |
| rad15              | 2.23328e-07 | 1.000000 | 2.23330e-07 | 0.999999 |
| rad35              | 1.12419e-07 | 1.000000 | 1.12420e-07 | 0.999999 |
| PhCH2CCH+H         | 1.01870e-07 | 1.000000 | 1.01871e-07 | 1.000000 |
| rad38              | 6.84433e-08 | 1.000000 | 6.84441e-08 | 1.000000 |
| rad28              | 5.66855e-08 | 1.000000 | 5.66862e-08 | 1.000000 |
| rad2               | 1.72547e-08 | 1.000000 | 1.72548e-08 | 1.000000 |
| rad37              | 1.60757e-08 | 1.000000 | 1.60758e-08 | 1.000000 |
| rad26              | 5.42633e-09 | 1.000000 | 5.42639e-09 | 1.000000 |
| rad7               | 3.00025e-09 | 1.000000 | 3.00029e-09 | 1.000000 |
| rad1               | 1.17252e-09 | 1.000000 | 1.17253e-09 | 1.000000 |
| rad46              | 9.44779e-10 | 1.000000 | 9.44789e-10 | 1.000000 |
| rad10              | 8.89917e-10 | 1.000000 | 8.89927e-10 | 1.000000 |
| rad11              | 7.39172e-10 | 1.000000 | 7.39180e-10 | 1.000000 |
| rad5               | 2.33639e-10 | 1.000000 | 2.33642e-10 | 1.000000 |
| rad60syn           | 1.11477e-10 | 1.000000 | 1.11478e-10 | 1.000000 |
| rad3               | 1.09475e-10 | 1.000000 | 1.09476e-10 | 1.000000 |
| rad4               | 5.64412e-11 | 1.000000 | 5.64418e-11 | 1.000000 |
| rad60anti          | 3.65523e-11 | 1.000000 | 3.65527e-11 | 1.000000 |
| rad13              | 1.69596e-11 | 1.000000 | 1.69597e-11 | 1.000000 |
| PAH3+H             | 3.34270e-13 | 1.000000 | 3.34273e-13 | 1.000000 |
| rad59              | 1.10384e-13 | 1.000000 | 1.10384e-13 | 1.000000 |
| rad33              | 3.26646e-14 | 1.000000 | 3.26650e-14 | 1.000000 |
| rad19syn           | 3.23427e-14 | 1.000000 | 3.23431e-14 | 1.000000 |
| rad14              | 2.57704e-14 | 1.000000 | 2.57707e-14 | 1.000000 |
| rad25              | 1.62388e-14 | 1.000000 | 1.62390e-14 | 1.000000 |
| rad27              | 1.30694e-14 | 1.000000 | 1.30696e-14 | 1.000000 |
| rad50              | 1.17392e-14 | 1.000000 | 1.17393e-14 | 1.000000 |
| rad54              | 4.01064e-16 | 1.000000 | 4.01068e-16 | 1.000000 |
| PAH10+CH3          | 2.74479e-16 | 1.000000 | 2.74482e-16 | 1.000000 |
| rad43              | 6.64337e-17 | 1.000000 | 6.64344e-17 | 1.000000 |
| rad62              | 1.17435e-17 | 1.000000 | 1.17437e-17 | 1.000000 |
| rad52              | 1.25829e-18 | 1.000000 | 1.25830e-18 | 1.000000 |
| rad31              | 6.15903e-19 | 1.000000 | 6.15910e-19 | 1.000000 |
| PhcycC3H3_A+H      | 2.69594e-19 | 1.000000 | 2.69597e-19 | 1.000000 |
| rad23              | 2.66274e-19 | 1.000000 | 2.66277e-19 | 1.000000 |
| rad70              | 1.93268e-19 | 1.000000 | 1.93270e-19 | 1.000000 |
| rad20              | 1.87590e-19 | 1.000000 | 1.87592e-19 | 1.000000 |
| rad21              | 1.42957e-19 | 1.000000 | 1.42959e-19 | 1.000000 |
| rad55              | 8.39568e-20 | 1.000000 | 8.39577e-20 | 1.000000 |
| rad51              | 1.40611e-20 | 1.000000 | 1.40612e-20 | 1.000000 |
| PAH1+H             | 3.58691e-21 | 1.000000 | 3.58695e-21 | 1.000000 |
| rad45              | 1.86092e-21 | 1.000000 | 1.86094e-21 | 1.000000 |
| rad22              | 9.46795e-22 | 1.000000 | 9.46805e-22 | 1.000000 |
| rad18              | 7.92559e-22 | 1.000000 | 7.92567e-22 | 1.000000 |
| rad58              | 1.90924e-22 | 1.000000 | 1.90926e-22 | 1.000000 |
| rad34              | 1.67709e-22 | 1.000000 | 1.67711e-22 | 1.000000 |
| rad36              | 1.16301e-22 | 1.000000 | 1.16302e-22 | 1.000000 |
| rad65              | 7.39943e-23 | 1.000000 | 7.39951e-23 | 1.000000 |
| rad42              | 1.88842e-24 | 1.000000 | 1.88844e-24 | 1.000000 |



|       |             |         |             |          |
|-------|-------------|---------|-------------|----------|
| rad41 | 5.19531e-25 | 1.00000 | 5.19537e-25 | 1.000000 |
| rad24 | 1.48348e-26 | 1.00000 | 1.48349e-26 | 1.000000 |
| rad47 | 7.48906e-33 | 1.00000 | 7.48913e-33 | 1.000000 |

0.100000000E-03 Pa, 210.000000 K

| Rate constant      | True (fraction)       | Effective (fraction)  |
|--------------------|-----------------------|-----------------------|
| Total              | 2.85520e-17 (1.00 )   | 2.85517e-17 (1.00 )   |
| Formation of rad11 | 2.39009e-17 (0.837 )  | 2.39006e-17 (0.837 )  |
| Formation of rad6  | 4.19900e-18 (0.147 )  | 4.19894e-18 (0.147 )  |
| H-abstraction      | 4.52111e-19 (0.0158 ) | 4.52111e-19 (0.0158 ) |

| species            | PYtrue      | Cumul    | PYeffective | Cumul    |
|--------------------|-------------|----------|-------------|----------|
| Indene+H           | 0.955560    | 0.955560 | 0.955573    | 0.955573 |
| Benzene+2-propynyl | 0.0158346   | 0.971394 | 0.0158348   | 0.971408 |
| C2H2+PhCH2         | 0.00155194  | 0.986914 | 0.00155196  | 0.986928 |
| PhCCH+CH3          | 0.00679139  | 0.993705 | 0.00679148  | 0.993719 |
| PhCHCCH2+H         | 0.00362508  | 0.997330 | 0.00362513  | 0.997344 |
| PhCCCH3+H          | 0.00234985  | 0.999680 | 0.00234988  | 0.999694 |
| Ph+MeAc            | 0.000206446 | 0.999886 | 0.000206449 | 0.999901 |
| rad6               | 3.04172e-05 | 0.999917 | 3.04177e-05 | 0.999931 |
| rad8               | 2.70937e-05 | 0.999944 | 2.70941e-05 | 0.999958 |
| rad9               | 2.14879e-05 | 0.999965 | 2.14883e-05 | 0.999980 |
| PAH7+H             | 1.44446e-05 | 0.999980 | 1.44448e-05 | 0.999994 |
| Phenyl+Allene      | 1.37855e-05 | 0.999994 | 0.00000     | 0.999994 |
| rad39              | 2.82560e-06 | 0.999996 | 2.82564e-06 | 0.999997 |
| rad12              | 1.48635e-06 | 0.999998 | 1.48636e-06 | 0.999998 |
| rad30              | 1.09878e-06 | 0.999999 | 1.09879e-06 | 0.999999 |
| PAH9+H             | 2.63424e-07 | 0.999999 | 2.63428e-07 | 1.000000 |
| rad15              | 2.44190e-07 | 1.000000 | 2.44193e-07 | 1.000000 |
| PhCH2CCH+H         | 1.62103e-07 | 1.000000 | 1.62106e-07 | 1.000000 |
| rad35              | 1.21613e-07 | 1.000000 | 1.21615e-07 | 1.000000 |
| rad38              | 7.55293e-08 | 1.000000 | 7.55303e-08 | 1.000000 |
| rad28              | 4.31551e-08 | 1.000000 | 4.31556e-08 | 1.000000 |
| rad37              | 2.26924e-08 | 1.000000 | 2.26927e-08 | 1.000000 |
| rad2               | 1.29723e-08 | 1.000000 | 1.29725e-08 | 1.000000 |
| rad26              | 4.12278e-09 | 1.000000 | 4.12284e-09 | 1.000000 |
| rad7               | 2.26096e-09 | 1.000000 | 2.26099e-09 | 1.000000 |
| rad46              | 1.10872e-09 | 1.000000 | 1.10874e-09 | 1.000000 |
| rad1               | 8.88977e-10 | 1.000000 | 8.88990e-10 | 1.000000 |
| rad10              | 6.70682e-10 | 1.000000 | 6.70692e-10 | 1.000000 |
| rad11              | 5.57259e-10 | 1.000000 | 5.57267e-10 | 1.000000 |
| rad5               | 3.85019e-10 | 1.000000 | 3.85024e-10 | 1.000000 |
| rad60syn           | 1.41280e-10 | 1.000000 | 1.41282e-10 | 1.000000 |
| rad3               | 8.23784e-11 | 1.000000 | 8.23795e-11 | 1.000000 |
| rad60anti          | 4.76072e-11 | 1.000000 | 4.76079e-11 | 1.000000 |
| rad4               | 4.25723e-11 | 1.000000 | 4.25729e-11 | 1.000000 |
| rad13              | 1.28038e-11 | 1.000000 | 1.28040e-11 | 1.000000 |
| PAH3+H             | 6.24240e-13 | 1.000000 | 6.24249e-13 | 1.000000 |
| rad59              | 2.00210e-13 | 1.000000 | 2.00213e-13 | 1.000000 |
| rad19syn           | 9.18598e-14 | 1.000000 | 9.18611e-14 | 1.000000 |
| rad33              | 2.47079e-14 | 1.000000 | 2.47082e-14 | 1.000000 |
| rad50              | 2.19524e-14 | 1.000000 | 2.19528e-14 | 1.000000 |
| rad14              | 1.99807e-14 | 1.000000 | 1.99809e-14 | 1.000000 |
| rad25              | 1.25445e-14 | 1.000000 | 1.25446e-14 | 1.000000 |
| rad27              | 9.93791e-15 | 1.000000 | 9.93800e-15 | 1.000000 |
| rad54              | 1.36925e-15 | 1.000000 | 1.36927e-15 | 1.000000 |
| PAH10+CH3          | 9.35356e-16 | 1.000000 | 9.35369e-16 | 1.000000 |
| rad43              | 2.25306e-16 | 1.000000 | 2.25309e-16 | 1.000000 |
| rad62              | 4.46068e-17 | 1.000000 | 4.46075e-17 | 1.000000 |
| rad52              | 3.57324e-18 | 1.000000 | 3.57329e-18 | 1.000000 |
| PhcycC3H3_A+H      | 1.39624e-18 | 1.000000 | 1.39625e-18 | 1.000000 |
| rad70              | 9.49093e-19 | 1.000000 | 9.49105e-19 | 1.000000 |
| rad31              | 5.29769e-19 | 1.000000 | 5.29777e-19 | 1.000000 |
| rad55              | 4.19469e-19 | 1.000000 | 4.19475e-19 | 1.000000 |
| rad23              | 2.20400e-19 | 1.000000 | 2.20403e-19 | 1.000000 |
| rad20              | 1.52666e-19 | 1.000000 | 1.52669e-19 | 1.000000 |
| rad21              | 1.16754e-19 | 1.000000 | 1.16755e-19 | 1.000000 |
| rad51              | 5.58674e-20 | 1.000000 | 5.58682e-20 | 1.000000 |
| PAH1+H             | 2.22687e-20 | 1.000000 | 2.22690e-20 | 1.000000 |
| rad45              | 1.54129e-21 | 1.000000 | 1.54132e-21 | 1.000000 |
| rad34              | 1.09594e-21 | 1.000000 | 1.09595e-21 | 1.000000 |
| rad58              | 1.01518e-21 | 1.000000 | 1.01519e-21 | 1.000000 |
| rad22              | 7.29476e-22 | 1.000000 | 7.29487e-22 | 1.000000 |
| rad18              | 6.42646e-22 | 1.000000 | 6.42656e-22 | 1.000000 |
| rad65              | 3.46640e-22 | 1.000000 | 3.46645e-22 | 1.000000 |
| rad36              | 9.65724e-23 | 1.000000 | 9.65738e-23 | 1.000000 |
| rad42              | 1.39277e-23 | 1.000000 | 1.39279e-23 | 1.000000 |

|       |             |         |             |         |
|-------|-------------|---------|-------------|---------|
| rad41 | 3.90300e-24 | 1.00000 | 3.90306e-24 | 1.00000 |
| rad24 | 1.35501e-26 | 1.00000 | 1.35503e-26 | 1.00000 |
| rad47 | 3.66169e-32 | 1.00000 | 3.66173e-32 | 1.00000 |

0.100000000E-03 Pa, 220.000000 K

| Rate constant      | True (fraction)       | Effective (fraction)  |
|--------------------|-----------------------|-----------------------|
| Total              | 4.29529e-17 (1.00 )   | 4.29521e-17 (1.00 )   |
| Formation of rad11 | 3.53712e-17 (0.823 )  | 3.53705e-17 (0.823 )  |
| Formation of rad6  | 6.75433e-18 (0.157 )  | 6.75421e-18 (0.157 )  |
| H-abstraction      | 8.27372e-19 (0.0193 ) | 8.27372e-19 (0.0193 ) |

| species            | PYtrue      | Cumul    | PYeffective | Cumul    |
|--------------------|-------------|----------|-------------|----------|
| Indene+H           | 0.950306    | 0.950306 | 0.950324    | 0.950324 |
| Benzene+2-propynyl | 0.0192623   | 0.969569 | 0.0192627   | 0.969586 |
| C2H2+PhCH2         | 0.0163253   | 0.985894 | 0.0163255   | 0.985912 |
| PhCCH+CH3          | 0.00734623  | 0.993240 | 0.00734635  | 0.993258 |
| PhCHCCH2+H         | 0.00387733  | 0.997118 | 0.00387739  | 0.997136 |
| PhCCCH3+H          | 0.00251960  | 0.999637 | 0.00251965  | 0.999655 |
| Ph+MeAc            | 0.000243905 | 0.999881 | 0.000243909 | 0.999899 |
| rad8               | 2.96716e-05 | 0.999911 | 2.96722e-05 | 0.999929 |
| rad9               | 2.45051e-05 | 0.999935 | 2.45055e-05 | 0.999953 |
| rad6               | 2.29740e-05 | 0.999958 | 2.29744e-05 | 0.999976 |
| Phenyl+Allene      | 1.78012e-05 | 0.999976 | 0.00000     | 0.999976 |
| PAH7+H             | 1.66818e-05 | 0.999993 | 1.66820e-05 | 0.999993 |
| rad39              | 3.35378e-06 | 0.999996 | 3.35384e-06 | 0.999996 |
| rad12              | 1.67464e-06 | 0.999998 | 1.67467e-06 | 0.999998 |
| rad30              | 1.18327e-06 | 0.999999 | 1.18329e-06 | 0.999999 |
| PAH9+H             | 2.88844e-07 | 0.999999 | 2.88849e-07 | 1.000000 |
| rad15              | 2.67401e-07 | 0.999999 | 2.67406e-07 | 1.000000 |
| PhCH2CCH+H         | 2.51299e-07 | 1.000000 | 2.51304e-07 | 1.000000 |
| rad35              | 1.31821e-07 | 1.000000 | 1.31824e-07 | 1.000000 |
| rad38              | 8.35533e-08 | 1.000000 | 8.35548e-08 | 1.000000 |
| rad28              | 3.29772e-08 | 1.000000 | 3.29778e-08 | 1.000000 |
| rad37              | 3.11528e-08 | 1.000000 | 3.11534e-08 | 1.000000 |
| rad2               | 9.80172e-09 | 1.000000 | 9.80189e-09 | 1.000000 |
| rad26              | 3.14579e-09 | 1.000000 | 3.14585e-09 | 1.000000 |
| rad7               | 1.71135e-09 | 1.000000 | 1.71138e-09 | 1.000000 |
| rad46              | 1.30476e-09 | 1.000000 | 1.30478e-09 | 1.000000 |
| rad1               | 6.77866e-10 | 1.000000 | 6.77878e-10 | 1.000000 |
| rad5               | 6.12226e-10 | 1.000000 | 6.12237e-10 | 1.000000 |
| rad10              | 5.08053e-10 | 1.000000 | 5.08062e-10 | 1.000000 |
| rad11              | 4.21980e-10 | 1.000000 | 4.21988e-10 | 1.000000 |
| rad60syn           | 1.78595e-10 | 1.000000 | 1.78599e-10 | 1.000000 |
| rad3               | 6.22985e-11 | 1.000000 | 6.22997e-11 | 1.000000 |
| rad60anti          | 6.17019e-11 | 1.000000 | 6.17031e-11 | 1.000000 |
| rad4               | 3.22789e-11 | 1.000000 | 3.22795e-11 | 1.000000 |
| rad13              | 9.70965e-12 | 1.000000 | 9.70982e-12 | 1.000000 |
| PAH3+H             | 1.12043e-12 | 1.000000 | 1.12045e-12 | 1.000000 |
| rad59              | 3.49538e-13 | 1.000000 | 3.49545e-13 | 1.000000 |
| rad19syn           | 2.38904e-13 | 1.000000 | 2.38908e-13 | 1.000000 |
| rad50              | 3.96702e-14 | 1.000000 | 3.96708e-14 | 1.000000 |
| rad33              | 1.87749e-14 | 1.000000 | 1.87753e-14 | 1.000000 |
| rad14              | 1.55726e-14 | 1.000000 | 1.55729e-14 | 1.000000 |
| rad25              | 9.74287e-15 | 1.000000 | 9.74305e-15 | 1.000000 |
| rad27              | 7.59545e-15 | 1.000000 | 7.59559e-15 | 1.000000 |
| rad54              | 4.20658e-15 | 1.000000 | 4.20666e-15 | 1.000000 |
| PAH10+CH3          | 2.86318e-15 | 1.000000 | 2.86322e-15 | 1.000000 |
| rad43              | 6.85556e-16 | 1.000000 | 6.85569e-16 | 1.000000 |
| rad62              | 1.50499e-16 | 1.000000 | 1.50502e-16 | 1.000000 |
| rad52              | 9.35960e-18 | 1.000000 | 9.35976e-18 | 1.000000 |
| PhcycC3H3_A+H      | 6.23402e-18 | 1.000000 | 6.23414e-18 | 1.000000 |
| rad70              | 4.03455e-18 | 1.000000 | 4.03463e-18 | 1.000000 |
| rad55              | 1.81196e-18 | 1.000000 | 1.81199e-18 | 1.000000 |
| rad31              | 4.75145e-19 | 1.000000 | 4.75154e-19 | 1.000000 |
| rad51              | 1.98053e-19 | 1.000000 | 1.98057e-19 | 1.000000 |
| rad23              | 1.90735e-19 | 1.000000 | 1.90738e-19 | 1.000000 |
| rad20              | 1.25110e-19 | 1.000000 | 1.25112e-19 | 1.000000 |
| PAH1+H             | 1.16245e-19 | 1.000000 | 1.16247e-19 | 1.000000 |
| rad21              | 9.60377e-20 | 1.000000 | 9.60394e-20 | 1.000000 |
| rad34              | 5.98155e-21 | 1.000000 | 5.98165e-21 | 1.000000 |
| rad58              | 4.64357e-21 | 1.000000 | 4.64364e-21 | 1.000000 |
| rad65              | 1.42012e-21 | 1.000000 | 1.42014e-21 | 1.000000 |
| rad45              | 1.33591e-21 | 1.000000 | 1.33593e-21 | 1.000000 |
| rad22              | 5.67509e-22 | 1.000000 | 5.67518e-22 | 1.000000 |
| rad18              | 5.24287e-22 | 1.000000 | 5.24296e-22 | 1.000000 |
| rad42              | 8.43080e-23 | 1.000000 | 8.43095e-23 | 1.000000 |
| rad36              | 8.39547e-23 | 1.000000 | 8.39561e-23 | 1.000000 |

|       |             |          |             |         |
|-------|-------------|----------|-------------|---------|
| rad41 | 2.40038e-23 | 1.000000 | 2.40042e-23 | 1.00000 |
| rad24 | 1.25439e-26 | 1.000000 | 1.25442e-26 | 1.00000 |
| rad47 | 1.52480e-31 | 1.000000 | 1.52483e-31 | 1.00000 |

0.100000000E-03 Pa, 230.000000 K

| Rate constant      | True (fraction)       | Effective (fraction)  |
|--------------------|-----------------------|-----------------------|
| Total              | 6.25016e-17 (1.00 )   | 6.25002e-17 (1.00 )   |
| Formation of rad11 | 5.06355e-17 (0.810 )  | 5.06343e-17 (0.810 )  |
| Formation of rad6  | 1.04318e-17 (0.167 )  | 1.04316e-17 (0.167 )  |
| H-abstraction      | 1.43428e-18 (0.0229 ) | 1.43428e-18 (0.0229 ) |

| species            | PYtrue      | Cumul    | PYeffective | Cumul    |
|--------------------|-------------|----------|-------------|----------|
| Indene+H           | 0.944665    | 0.944665 | 0.944686    | 0.944686 |
| Benzene+2-propynyl | 0.0229478   | 0.967613 | 0.0229483   | 0.967634 |
| C2H2+PhCH2         | 0.0171870   | 0.984800 | 0.0171874   | 0.984822 |
| PhCCH+CH3          | 0.00794143  | 0.992741 | 0.00794161  | 0.992763 |
| PhCHCCH2+H         | 0.00414509  | 0.996886 | 0.00414518  | 0.996908 |
| PhCCCH3+H          | 0.00269883  | 0.999585 | 0.00269889  | 0.999607 |
| Ph+MeAc            | 0.000286898 | 0.999872 | 0.000286904 | 0.999894 |
| rad8               | 3.24509e-05 | 0.999904 | 3.24517e-05 | 0.999927 |
| rad9               | 2.79267e-05 | 0.999932 | 2.79274e-05 | 0.999955 |
| Phenyl+Allene      | 2.28443e-05 | 0.999955 | 0.00000     | 0.999955 |
| PAH7+H             | 1.92569e-05 | 0.999974 | 1.92574e-05 | 0.999974 |
| rad6               | 1.74192e-05 | 0.999992 | 1.74197e-05 | 0.999991 |
| rad39              | 3.97202e-06 | 0.999996 | 3.97212e-06 | 0.999995 |
| rad12              | 1.88222e-06 | 0.999998 | 1.88226e-06 | 0.999997 |
| rad30              | 1.27582e-06 | 0.999999 | 1.27585e-06 | 0.999998 |
| PhCH2CCH+H         | 3.80695e-07 | 0.999999 | 3.80703e-07 | 0.999999 |
| PAH9+H             | 3.17423e-07 | 1.000000 | 3.17429e-07 | 0.999999 |
| rad15              | 2.93216e-07 | 1.000000 | 2.93223e-07 | 0.999999 |
| rad35              | 1.43161e-07 | 1.000000 | 1.43163e-07 | 1.000000 |
| rad38              | 9.26459e-08 | 1.000000 | 9.26480e-08 | 1.000000 |
| rad37              | 4.17641e-08 | 1.000000 | 4.17651e-08 | 1.000000 |
| rad28              | 2.52835e-08 | 1.000000 | 2.52840e-08 | 1.000000 |
| rad2               | 7.44124e-09 | 1.000000 | 7.44141e-09 | 1.000000 |
| rad26              | 2.40965e-09 | 1.000000 | 2.40970e-09 | 1.000000 |
| rad46              | 1.53926e-09 | 1.000000 | 1.53929e-09 | 1.000000 |
| rad7               | 1.30046e-09 | 1.000000 | 1.30049e-09 | 1.000000 |
| rad5               | 9.43418e-10 | 1.000000 | 9.43439e-10 | 1.000000 |
| rad1               | 5.19732e-10 | 1.000000 | 5.19744e-10 | 1.000000 |
| rad10              | 3.86706e-10 | 1.000000 | 3.86714e-10 | 1.000000 |
| rad11              | 3.20814e-10 | 1.000000 | 3.20822e-10 | 1.000000 |
| rad60syn           | 2.25172e-10 | 1.000000 | 2.25177e-10 | 1.000000 |
| rad60anti          | 7.95959e-11 | 1.000000 | 7.95978e-11 | 1.000000 |
| rad3               | 4.73326e-11 | 1.000000 | 4.73338e-11 | 1.000000 |
| rad4               | 2.45940e-11 | 1.000000 | 2.45945e-11 | 1.000000 |
| rad13              | 7.39288e-12 | 1.000000 | 7.39306e-12 | 1.000000 |
| PAH3+H             | 1.94316e-12 | 1.000000 | 1.94321e-12 | 1.000000 |
| rad59              | 5.90465e-13 | 1.000000 | 5.90478e-13 | 1.000000 |
| rad19syn           | 5.75707e-13 | 1.000000 | 5.75719e-13 | 1.000000 |
| rad50              | 6.95795e-14 | 1.000000 | 6.95810e-14 | 1.000000 |
| rad33              | 1.43259e-14 | 1.000000 | 1.43262e-14 | 1.000000 |
| rad14              | 1.21962e-14 | 1.000000 | 1.21964e-14 | 1.000000 |
| rad54              | 1.17935e-14 | 1.000000 | 1.17937e-14 | 1.000000 |
| PAH10+CH3          | 7.98359e-15 | 1.000000 | 7.98378e-15 | 1.000000 |
| rad25              | 7.60517e-15 | 1.000000 | 7.60534e-15 | 1.000000 |
| rad27              | 5.83286e-15 | 1.000000 | 5.83300e-15 | 1.000000 |
| rad43              | 1.89811e-15 | 1.000000 | 1.89816e-15 | 1.000000 |
| rad62              | 4.58013e-16 | 1.000000 | 4.58023e-16 | 1.000000 |
| PhcycC3H3_A+H      | 2.44380e-17 | 1.000000 | 2.44385e-17 | 1.000000 |
| rad52              | 2.28660e-17 | 1.000000 | 2.28666e-17 | 1.000000 |
| rad70              | 1.51196e-17 | 1.000000 | 1.51199e-17 | 1.000000 |
| rad55              | 6.89167e-18 | 1.000000 | 6.89183e-18 | 1.000000 |
| rad51              | 6.35610e-19 | 1.000000 | 6.35624e-19 | 1.000000 |
| PAH1+H             | 5.21305e-19 | 1.000000 | 5.21317e-19 | 1.000000 |
| rad31              | 4.48816e-19 | 1.000000 | 4.48826e-19 | 1.000000 |
| rad23              | 1.73878e-19 | 1.000000 | 1.73882e-19 | 1.000000 |
| rad20              | 1.03206e-19 | 1.000000 | 1.03208e-19 | 1.000000 |
| rad21              | 7.95382e-20 | 1.000000 | 7.95400e-20 | 1.000000 |
| rad34              | 2.78833e-20 | 1.000000 | 2.78839e-20 | 1.000000 |
| rad58              | 1.86098e-20 | 1.000000 | 1.86102e-20 | 1.000000 |
| rad65              | 5.17324e-21 | 1.000000 | 5.17335e-21 | 1.000000 |
| rad45              | 1.22100e-21 | 1.000000 | 1.22103e-21 | 1.000000 |
| rad22              | 4.45821e-22 | 1.000000 | 4.45832e-22 | 1.000000 |
| rad18              | 4.30167e-22 | 1.000000 | 4.30176e-22 | 1.000000 |
| rad42              | 4.29453e-22 | 1.000000 | 4.29462e-22 | 1.000000 |
| rad41              | 1.23961e-22 | 1.000000 | 1.23963e-22 | 1.000000 |

|       |             |         |             |          |
|-------|-------------|---------|-------------|----------|
| rad36 | 7.69998e-23 | 1.00000 | 7.70015e-23 | 1.000000 |
| rad24 | 1.17730e-26 | 1.00000 | 1.17732e-26 | 1.000000 |
| rad47 | 5.52562e-31 | 1.00000 | 5.52574e-31 | 1.000000 |

0.100000000E-03 Pa, 240.000000 K

| Rate constant      | True (fraction)       | Effective (fraction)  |
|--------------------|-----------------------|-----------------------|
| Total              | 8.83273e-17 (1.00 )   | 8.83247e-17 (1.00 )   |
| Formation of rad11 | 7.04077e-17 (0.797 )  | 7.04056e-17 (0.797 )  |
| Formation of rad6  | 1.55481e-17 (0.176 )  | 1.55477e-17 (0.176 )  |
| H-abstraction      | 2.37143e-18 (0.0268 ) | 2.37143e-18 (0.0268 ) |

| species            | PYtrue      | Cumul    | PYeffective | Cumul    |
|--------------------|-------------|----------|-------------|----------|
| Indene+H           | 0.938672    | 0.938672 | 0.938699    | 0.938699 |
| Benzene+2-propynyl | 0.0268483   | 0.965520 | 0.0268490   | 0.965549 |
| C2H2+PhCH2         | 0.0181081   | 0.983628 | 0.0181087   | 0.983657 |
| PhCCH+CH3          | 0.00857818  | 0.992207 | 0.00857842  | 0.992236 |
| PhCHCCH2+H         | 0.00442858  | 0.996635 | 0.00442871  | 0.996664 |
| PhCCCH3+H          | 0.00288735  | 0.999522 | 0.00288744  | 0.999552 |
| Ph+MeAc            | 0.000335960 | 0.999858 | 0.000335970 | 0.999888 |
| rad8               | 3.54359e-05 | 0.999894 | 3.54369e-05 | 0.999923 |
| rad9               | 3.17986e-05 | 0.999926 | 3.17996e-05 | 0.999955 |
| Phenyl+Allene      | 2.91422e-05 | 0.999955 | 0.00000     | 0.999955 |
| PAH7+H             | 2.22156e-05 | 0.999977 | 2.22163e-05 | 0.999977 |
| rad6               | 1.32535e-05 | 0.999990 | 1.32539e-05 | 0.999990 |
| rad39              | 4.69349e-06 | 0.999995 | 4.69363e-06 | 0.999995 |
| rad12              | 2.11004e-06 | 0.999997 | 2.11010e-06 | 0.999997 |
| rad30              | 1.37718e-06 | 0.999998 | 1.37722e-06 | 0.999999 |
| PhCH2CCH+H         | 5.64989e-07 | 0.999999 | 5.65005e-07 | 0.999999 |
| PAH9+H             | 3.49569e-07 | 0.999999 | 3.49578e-07 | 1.000000 |
| rad15              | 3.21915e-07 | 1.000000 | 3.21923e-07 | 1.000000 |
| rad35              | 1.55761e-07 | 1.000000 | 1.55765e-07 | 1.000000 |
| rad38              | 1.02955e-07 | 1.000000 | 1.02957e-07 | 1.000000 |
| rad37              | 5.48577e-08 | 1.000000 | 5.48593e-08 | 1.000000 |
| rad28              | 1.94423e-08 | 1.000000 | 1.94429e-08 | 1.000000 |
| rad2               | 5.67428e-09 | 1.000000 | 5.67444e-09 | 1.000000 |
| rad26              | 1.85232e-09 | 1.000000 | 1.85237e-09 | 1.000000 |
| rad46              | 1.81978e-09 | 1.000000 | 1.81983e-09 | 1.000000 |
| rad5               | 1.41384e-09 | 1.000000 | 1.41388e-09 | 1.000000 |
| rad7               | 9.91758e-10 | 1.000000 | 9.91787e-10 | 1.000000 |
| rad1               | 4.00577e-10 | 1.000000 | 4.00588e-10 | 1.000000 |
| rad10              | 2.95683e-10 | 1.000000 | 2.95692e-10 | 1.000000 |
| rad60syn           | 2.83111e-10 | 1.000000 | 2.83120e-10 | 1.000000 |
| rad11              | 2.44781e-10 | 1.000000 | 2.44787e-10 | 1.000000 |
| rad60anti          | 1.02214e-10 | 1.000000 | 1.02217e-10 | 1.000000 |
| rad3               | 3.61219e-11 | 1.000000 | 3.61230e-11 | 1.000000 |
| rad4               | 1.88265e-11 | 1.000000 | 1.88271e-11 | 1.000000 |
| rad13              | 5.64948e-12 | 1.000000 | 5.64964e-12 | 1.000000 |
| PAH3+H             | 3.27019e-12 | 1.000000 | 3.27029e-12 | 1.000000 |
| rad19syn           | 1.29805e-12 | 1.000000 | 1.29809e-12 | 1.000000 |
| rad59              | 9.69184e-13 | 1.000000 | 9.69213e-13 | 1.000000 |
| rad50              | 1.18867e-13 | 1.000000 | 1.18870e-13 | 1.000000 |
| rad54              | 3.05219e-14 | 1.000000 | 3.05228e-14 | 1.000000 |
| PAH10+CH3          | 2.05132e-14 | 1.000000 | 2.05138e-14 | 1.000000 |
| rad33              | 1.09724e-14 | 1.000000 | 1.09728e-14 | 1.000000 |
| rad14              | 9.59546e-15 | 1.000000 | 9.59575e-15 | 1.000000 |
| rad25              | 5.96480e-15 | 1.000000 | 5.96497e-15 | 1.000000 |
| rad43              | 4.83804e-15 | 1.000000 | 4.83818e-15 | 1.000000 |
| rad27              | 4.49956e-15 | 1.000000 | 4.49968e-15 | 1.000000 |
| rad62              | 1.27328e-15 | 1.000000 | 1.27332e-15 | 1.000000 |
| PhcycC3H3_A+H      | 8.53793e-17 | 1.000000 | 8.53818e-17 | 1.000000 |
| rad52              | 5.25738e-17 | 1.000000 | 5.25754e-17 | 1.000000 |
| rad70              | 5.07017e-17 | 1.000000 | 5.07031e-17 | 1.000000 |
| rad55              | 2.34265e-17 | 1.000000 | 2.34271e-17 | 1.000000 |
| PAH1+H             | 2.04458e-18 | 1.000000 | 2.04464e-18 | 1.000000 |
| rad51              | 1.86827e-18 | 1.000000 | 1.86831e-18 | 1.000000 |
| rad31              | 4.50730e-19 | 1.000000 | 4.50742e-19 | 1.000000 |
| rad23              | 1.68497e-19 | 1.000000 | 1.68502e-19 | 1.000000 |
| rad34              | 1.13100e-19 | 1.000000 | 1.13103e-19 | 1.000000 |
| rad20              | 8.56773e-20 | 1.000000 | 8.56799e-20 | 1.000000 |
| rad58              | 6.63356e-20 | 1.000000 | 6.63375e-20 | 1.000000 |
| rad21              | 6.63081e-20 | 1.000000 | 6.63100e-20 | 1.000000 |
| rad65              | 1.69842e-20 | 1.000000 | 1.69847e-20 | 1.000000 |
| rad42              | 1.87976e-21 | 1.000000 | 1.87981e-21 | 1.000000 |
| rad45              | 1.18789e-21 | 1.000000 | 1.18792e-21 | 1.000000 |
| rad41              | 5.49085e-22 | 1.000000 | 5.49101e-22 | 1.000000 |
| rad18              | 3.54834e-22 | 1.000000 | 3.54845e-22 | 1.000000 |
| rad22              | 3.53916e-22 | 1.000000 | 3.53926e-22 | 1.000000 |

|       |             |         |             |         |
|-------|-------------|---------|-------------|---------|
| rad36 | 7.52088e-23 | 1.00000 | 7.52109e-23 | 1.00000 |
| rad24 | 1.12076e-26 | 1.00000 | 1.12079e-26 | 1.00000 |
| rad47 | 1.77412e-30 | 1.00000 | 1.77418e-30 | 1.00000 |

0.100000000E-03 Pa, 250.000000 K

| Rate constant      | True (fraction)       | Effective (fraction)  |
|--------------------|-----------------------|-----------------------|
| Total              | 1.21641e-16 (1.00 )   | 1.21637e-16 (1.00 )   |
| Formation of rad11 | 9.54219e-17 (0.784 )  | 9.54182e-17 (0.784 )  |
| Formation of rad6  | 2.24583e-17 (0.185 )  | 2.24574e-17 (0.185 )  |
| H-abstraction      | 3.76121e-18 (0.0309 ) | 3.76121e-18 (0.0309 ) |

| species            | PYtrue      | Cumul    | PYeffective | Cumul    |
|--------------------|-------------|----------|-------------|----------|
| Indene+H           | 0.932367    | 0.932367 | 0.932401    | 0.932401 |
| Benzene+2-propynyl | 0.0309205   | 0.963287 | 0.0309216   | 0.963322 |
| C2H2+PhCH2         | 0.0190922   | 0.982380 | 0.0190929   | 0.982415 |
| PhCCH+CH3          | 0.00925737  | 0.991637 | 0.00925772  | 0.991673 |
| PhCHCCH2+H         | 0.00472793  | 0.996365 | 0.00472810  | 0.996401 |
| PhCCCH3+H          | 0.00308489  | 0.999450 | 0.00308500  | 0.999486 |
| Ph+MeAc            | 0.000391628 | 0.999841 | 0.000391642 | 0.999878 |
| rad8               | 3.86291e-05 | 0.999880 | 3.86305e-05 | 0.999916 |
| Phenyl+Allene      | 3.69633e-05 | 0.999917 | 0.000000    | 0.999916 |
| rad9               | 3.61702e-05 | 0.999953 | 3.61715e-05 | 0.999952 |
| PAH7+H             | 2.56080e-05 | 0.999979 | 2.56090e-05 | 0.999978 |
| rad6               | 1.01160e-05 | 0.999989 | 1.01164e-05 | 0.999988 |
| rad39              | 5.53279e-06 | 0.999994 | 5.53299e-06 | 0.999994 |
| rad12              | 2.35892e-06 | 0.999997 | 2.35901e-06 | 0.999996 |
| rad30              | 1.48809e-06 | 0.999998 | 1.48815e-06 | 0.999998 |
| PhCH2CCH+H         | 8.23157e-07 | 0.999999 | 8.23188e-07 | 0.999998 |
| PAH9+H             | 3.85738e-07 | 1.000000 | 3.85752e-07 | 0.999999 |
| rad15              | 3.53794e-07 | 1.000000 | 3.53808e-07 | 0.999999 |
| rad35              | 1.69766e-07 | 1.000000 | 1.69773e-07 | 0.999999 |
| rad38              | 1.14644e-07 | 1.000000 | 1.14649e-07 | 0.999999 |
| rad37              | 7.07896e-08 | 1.000000 | 7.07922e-08 | 0.999999 |
| rad28              | 1.49907e-08 | 1.000000 | 1.49913e-08 | 1.000000 |
| rad2               | 4.34609e-09 | 1.000000 | 4.34625e-09 | 1.000000 |
| rad46              | 2.15530e-09 | 1.000000 | 2.15538e-09 | 1.000000 |
| rad5               | 2.06675e-09 | 1.000000 | 2.06682e-09 | 1.000000 |
| rad26              | 1.42859e-09 | 1.000000 | 1.42863e-09 | 1.000000 |
| rad7               | 7.58791e-10 | 1.000000 | 7.58819e-10 | 1.000000 |
| rad60syn           | 3.54927e-10 | 1.000000 | 3.54940e-10 | 1.000000 |
| rad1               | 3.10370e-10 | 1.000000 | 3.10382e-10 | 1.000000 |
| rad10              | 2.27107e-10 | 1.000000 | 2.27115e-10 | 1.000000 |
| rad11              | 1.87379e-10 | 1.000000 | 1.87387e-10 | 1.000000 |
| rad60anti          | 1.30676e-10 | 1.000000 | 1.30680e-10 | 1.000000 |
| rad3               | 2.76844e-11 | 1.000000 | 2.76854e-11 | 1.000000 |
| rad4               | 1.44770e-11 | 1.000000 | 1.44775e-11 | 1.000000 |
| PAH3+H             | 5.35901e-12 | 1.000000 | 5.35921e-12 | 1.000000 |
| rad13              | 4.33161e-12 | 1.000000 | 4.33177e-12 | 1.000000 |
| rad19syn           | 2.76052e-12 | 1.000000 | 2.76062e-12 | 1.000000 |
| rad59              | 1.55095e-12 | 1.000000 | 1.55101e-12 | 1.000000 |
| rad50              | 1.98345e-13 | 1.000000 | 1.98353e-13 | 1.000000 |
| rad54              | 7.36085e-14 | 1.000000 | 7.36112e-14 | 1.000000 |
| PAH10+CH3          | 4.90329e-14 | 1.000000 | 4.90347e-14 | 1.000000 |
| rad43              | 1.14628e-14 | 1.000000 | 1.14631e-14 | 1.000000 |
| rad33              | 8.43313e-15 | 1.000000 | 8.43344e-15 | 1.000000 |
| rad14              | 7.58226e-15 | 1.000000 | 7.58254e-15 | 1.000000 |
| rad25              | 4.69955e-15 | 1.000000 | 4.69972e-15 | 1.000000 |
| rad27              | 3.48616e-15 | 1.000000 | 3.48629e-15 | 1.000000 |
| rad62              | 3.26751e-15 | 1.000000 | 3.26763e-15 | 1.000000 |
| PhcycC3H3_A+H      | 2.69168e-16 | 1.000000 | 2.69178e-16 | 1.000000 |
| rad70              | 1.54026e-16 | 1.000000 | 1.54032e-16 | 1.000000 |
| rad52              | 1.14586e-16 | 1.000000 | 1.14591e-16 | 1.000000 |
| rad55              | 7.20516e-17 | 1.000000 | 7.20544e-17 | 1.000000 |
| PAH1+H             | 7.11909e-18 | 1.000000 | 7.11935e-18 | 1.000000 |
| rad51              | 5.07675e-18 | 1.000000 | 5.07693e-18 | 1.000000 |
| rad31              | 4.84237e-19 | 1.000000 | 4.84255e-19 | 1.000000 |
| rad34              | 4.05496e-19 | 1.000000 | 4.05511e-19 | 1.000000 |
| rad58              | 2.12962e-19 | 1.000000 | 2.12970e-19 | 1.000000 |
| rad23              | 1.75425e-19 | 1.000000 | 1.75431e-19 | 1.000000 |
| rad20              | 7.15646e-20 | 1.000000 | 7.15672e-20 | 1.000000 |
| rad21              | 5.56342e-20 | 1.000000 | 5.56362e-20 | 1.000000 |
| rad65              | 5.08098e-20 | 1.000000 | 5.08117e-20 | 1.000000 |
| rad42              | 7.19599e-21 | 1.000000 | 7.19625e-21 | 1.000000 |
| rad41              | 2.12391e-21 | 1.000000 | 2.12399e-21 | 1.000000 |
| rad45              | 1.24392e-21 | 1.000000 | 1.24397e-21 | 1.000000 |
| rad18              | 2.94180e-22 | 1.000000 | 2.94191e-22 | 1.000000 |
| rad22              | 2.84481e-22 | 1.000000 | 2.84491e-22 | 1.000000 |

|       |             |         |             |          |
|-------|-------------|---------|-------------|----------|
| rad36 | 7.91119e-23 | 1.00000 | 7.91148e-23 | 1.000000 |
| rad24 | 1.08300e-26 | 1.00000 | 1.08304e-26 | 1.000000 |
| rad47 | 5.12366e-30 | 1.00000 | 5.12385e-30 | 1.000000 |

0.100000000E-03 Pa, 260.000000 K

| =====              |                 |           |                      |           |
|--------------------|-----------------|-----------|----------------------|-----------|
| Rate constant      | True (fraction) |           | Effective (fraction) |           |
| -----              |                 |           |                      |           |
| Total              | 1.63720e-16     | (1.00 )   | 1.63713e-16          | (1.00 )   |
| Formation of rad11 | 1.26419e-16     | (0.772 )  | 1.26413e-16          | (0.772 )  |
| Formation of rad6  | 3.15515e-17     | (0.193 )  | 3.15499e-17          | (0.193 )  |
| H-abstraction      | 5.75028e-18     | (0.0351 ) | 5.75028e-18          | (0.0351 ) |
| -----              |                 |           |                      |           |
| species            | PYtrue          | Cumul     | PYeffective          | Cumul     |
| -----              |                 |           |                      |           |
| Indene+H           | 0.925786        | 0.925786  | 0.925829             | 0.925829  |
| Benzene+2-propynyl | 0.0351226       | 0.960909  | 0.0351242            | 0.960953  |
| C2H2+PhCH2         | 0.0201428       | 0.981052  | 0.0201437            | 0.981097  |
| PhCCH+CH3          | 0.00997973      | 0.991031  | 0.00998019           | 0.991077  |
| PhCHCCH2+H         | 0.00504314      | 0.996075  | 0.00504338           | 0.996121  |
| PhCCCH3+H          | 0.00329104      | 0.999366  | 0.00329120           | 0.999412  |
| Ph+MeAc            | 0.000454426     | 0.999820  | 0.000454447          | 0.999866  |
| Phenyl+Allene      | 4.66229e-05     | 0.999867  | 0.000000             | 0.999866  |
| rad8               | 4.20314e-05     | 0.999909  | 4.20334e-05          | 0.999908  |
| rad9               | 4.10946e-05     | 0.999950  | 4.10965e-05          | 0.999949  |
| PAH7+H             | 2.94895e-05     | 0.999979  | 2.94909e-05          | 0.999979  |
| rad6               | 7.74358e-06     | 0.999987  | 7.74393e-06          | 0.999987  |
| rad39              | 6.50602e-06     | 0.999994  | 6.50632e-06          | 0.999993  |
| rad12              | 2.62955e-06     | 0.999996  | 2.62967e-06          | 0.999996  |
| rad30              | 1.60938e-06     | 0.999998  | 1.60946e-06          | 0.999997  |
| PhCH2CCH+H         | 1.17940e-06     | 0.999999  | 1.17944e-06          | 0.999999  |
| PAH9+H             | 4.26439e-07     | 0.999999  | 4.26459e-07          | 0.999999  |
| rad15              | 3.89178e-07     | 1.000000  | 3.89196e-07          | 0.999999  |
| rad35              | 1.85334e-07     | 1.000000  | 1.85343e-07          | 1.000000  |
| rad38              | 1.27902e-07     | 1.000000  | 1.27908e-07          | 1.000000  |
| rad37              | 8.99386e-08     | 1.000000  | 8.99428e-08          | 1.000000  |
| rad28              | 1.15864e-08     | 1.000000  | 1.15870e-08          | 1.000000  |
| rad2               | 3.34368e-09     | 1.000000  | 3.34383e-09          | 1.000000  |
| rad5               | 2.95422e-09     | 1.000000  | 2.95436e-09          | 1.000000  |
| rad46              | 2.55638e-09     | 1.000000  | 2.55650e-09          | 1.000000  |
| rad26              | 1.10519e-09     | 1.000000  | 1.10525e-09          | 1.000000  |
| rad7               | 5.82283e-10     | 1.000000  | 5.82310e-10          | 1.000000  |
| rad60syn           | 4.43610e-10     | 1.000000  | 4.43631e-10          | 1.000000  |
| rad1               | 2.41769e-10     | 1.000000  | 2.41781e-10          | 1.000000  |
| rad10              | 1.75232e-10     | 1.000000  | 1.75240e-10          | 1.000000  |
| rad60anti          | 1.66325e-10     | 1.000000  | 1.66333e-10          | 1.000000  |
| rad11              | 1.43872e-10     | 1.000000  | 1.43878e-10          | 1.000000  |
| rad3               | 2.13062e-11     | 1.000000  | 2.13072e-11          | 1.000000  |
| rad4               | 1.11818e-11     | 1.000000  | 1.11823e-11          | 1.000000  |
| PAH3+H             | 8.57555e-12     | 1.000000  | 8.57594e-12          | 1.000000  |
| rad19syn           | 5.57424e-12     | 1.000000  | 5.57450e-12          | 1.000000  |
| rad13              | 3.33139e-12     | 1.000000  | 3.33154e-12          | 1.000000  |
| rad59              | 2.42640e-12     | 1.000000  | 2.42651e-12          | 1.000000  |
| rad50              | 3.24002e-13     | 1.000000  | 3.24017e-13          | 1.000000  |
| rad54              | 1.66701e-13     | 1.000000  | 1.66708e-13          | 1.000000  |
| PAH10+CH3          | 1.09898e-13     | 1.000000  | 1.09903e-13          | 1.000000  |
| rad43              | 2.54495e-14     | 1.000000  | 2.54507e-14          | 1.000000  |
| rad62              | 7.80745e-15     | 1.000000  | 7.80781e-15          | 1.000000  |
| rad33              | 6.50240e-15     | 1.000000  | 6.50269e-15          | 1.000000  |
| rad14              | 6.01665e-15     | 1.000000  | 6.01693e-15          | 1.000000  |
| rad25              | 3.71898e-15     | 1.000000  | 3.71915e-15          | 1.000000  |
| rad27              | 2.71258e-15     | 1.000000  | 2.71271e-15          | 1.000000  |
| PhcycC3H3_A+H      | 7.73763e-16     | 1.000000  | 7.73800e-16          | 1.000000  |
| rad70              | 4.28268e-16     | 1.000000  | 4.28287e-16          | 1.000000  |
| rad52              | 2.38111e-16     | 1.000000  | 2.38122e-16          | 1.000000  |
| rad55              | 2.02583e-16     | 1.000000  | 2.02592e-16          | 1.000000  |
| PAH1+H             | 2.22885e-17     | 1.000000  | 2.22895e-17          | 1.000000  |
| rad51              | 1.28503e-17     | 1.000000  | 1.28509e-17          | 1.000000  |
| rad34              | 1.30230e-18     | 1.000000  | 1.30236e-18          | 1.000000  |
| rad58              | 6.22293e-19     | 1.000000  | 6.22322e-19          | 1.000000  |
| rad31              | 5.56887e-19     | 1.000000  | 5.56913e-19          | 1.000000  |
| rad23              | 1.98584e-19     | 1.000000  | 1.98594e-19          | 1.000000  |
| rad65              | 1.39772e-19     | 1.000000  | 1.39779e-19          | 1.000000  |
| rad20              | 6.01377e-20     | 1.000000  | 6.01405e-20          | 1.000000  |
| rad21              | 4.69741e-20     | 1.000000  | 4.69763e-20          | 1.000000  |
| rad42              | 2.44566e-20     | 1.000000  | 2.44578e-20          | 1.000000  |
| rad41              | 7.28434e-21     | 1.000000  | 7.28468e-21          | 1.000000  |
| rad45              | 1.41982e-21     | 1.000000  | 1.41988e-21          | 1.000000  |
| rad18              | 2.45077e-22     | 1.000000  | 2.45088e-22          | 1.000000  |
| rad22              | 2.32549e-22     | 1.000000  | 2.32560e-22          | 1.000000  |

|       |             |         |             |          |
|-------|-------------|---------|-------------|----------|
| rad36 | 9.07566e-23 | 1.00000 | 9.07608e-23 | 1.000000 |
| rad24 | 1.06333e-26 | 1.00000 | 1.06338e-26 | 1.000000 |
| rad47 | 1.34807e-29 | 1.00000 | 1.34813e-29 | 1.000000 |

0.100000000E-03 Pa, 270.000000 K

| =====              |                 |           |                      |           |
|--------------------|-----------------|-----------|----------------------|-----------|
| Rate constant      | True (fraction) |           | Effective (fraction) |           |
| -----              |                 |           |                      |           |
| Total              | 2.15887e-16     | (1.00 )   | 2.15874e-16          | (1.00 )   |
| Formation of rad11 | 1.64133e-16     | (0.760 )  | 1.64123e-16          | (0.760 )  |
| Formation of rad6  | 4.32452e-17     | (0.200 )  | 4.32425e-17          | (0.200 )  |
| H-abstraction      | 8.50919e-18     | (0.0394 ) | 8.50919e-18          | (0.0394 ) |
| -----              |                 |           |                      |           |
| species            | PYtrue          | Cumul     | PYeffective          | Cumul     |
| Indene+H           | 0.918966        | 0.918966  | 0.919019             | 0.919019  |
| Benzene+2-propynyl | 0.0394150       | 0.958381  | 0.0394173            | 0.958437  |
| C2H2+PhCH2         | 0.0212634       | 0.979644  | 0.0212647            | 0.979701  |
| PhCCH+CH3          | 0.0107456       | 0.990390  | 0.0107462            | 0.990447  |
| PhCHCCH2+H         | 0.00537415      | 0.995764  | 0.00537446           | 0.995822  |
| PhCCCH3+H          | 0.00350530      | 0.999269  | 0.00350550           | 0.999327  |
| Ph+MeAc            | 0.000524857     | 0.999794  | 0.000524888          | 0.999852  |
| Phenyl+Allene      | 5.84883e-05     | 0.999853  | 0.000000             | 0.999852  |
| rad9               | 4.66282e-05     | 0.999899  | 4.66310e-05          | 0.999899  |
| rad8               | 4.56415e-05     | 0.999945  | 4.56442e-05          | 0.999945  |
| PAH7+H             | 3.39208e-05     | 0.999979  | 3.39228e-05          | 0.999979  |
| rad39              | 7.63085e-06     | 0.999986  | 7.63129e-06          | 0.999986  |
| rad6               | 5.94336e-06     | 0.999992  | 5.94371e-06          | 0.999992  |
| rad12              | 2.92243e-06     | 0.999995  | 2.92259e-06          | 0.999995  |
| rad30              | 1.74190e-06     | 0.999997  | 1.74200e-06          | 0.999997  |
| PhCH2CCH+H         | 1.66417e-06     | 0.999999  | 1.66427e-06          | 0.999998  |
| PAH9+H             | 4.72233e-07     | 0.999999  | 4.72261e-07          | 0.999999  |
| rad15              | 4.28410e-07     | 1.000000  | 4.28435e-07          | 0.999999  |
| rad35              | 2.02633e-07     | 1.000000  | 2.02645e-07          | 1.000000  |
| rad38              | 1.42935e-07     | 1.000000  | 1.42943e-07          | 1.000000  |
| rad37              | 1.12704e-07     | 1.000000  | 1.12711e-07          | 1.000000  |
| rad28              | 8.97512e-09     | 1.000000  | 8.97565e-09          | 1.000000  |
| rad5               | 4.13790e-09     | 1.000000  | 4.13815e-09          | 1.000000  |
| rad46              | 3.03540e-09     | 1.000000  | 3.03558e-09          | 1.000000  |
| rad2               | 2.58441e-09     | 1.000000  | 2.58455e-09          | 1.000000  |
| rad26              | 8.57542e-10     | 1.000000  | 8.57593e-10          | 1.000000  |
| rad60syn           | 5.52685e-10     | 1.000000  | 5.52717e-10          | 1.000000  |
| rad7               | 4.48069e-10     | 1.000000  | 4.48095e-10          | 1.000000  |
| rad60anti          | 2.10767e-10     | 1.000000  | 2.10779e-10          | 1.000000  |
| rad1               | 1.89380e-10     | 1.000000  | 1.89391e-10          | 1.000000  |
| rad10              | 1.35859e-10     | 1.000000  | 1.35867e-10          | 1.000000  |
| rad11              | 1.10775e-10     | 1.000000  | 1.10781e-10          | 1.000000  |
| rad3               | 1.64737e-11     | 1.000000  | 1.64747e-11          | 1.000000  |
| PAH3+H             | 1.34303e-11     | 1.000000  | 1.34312e-11          | 1.000000  |
| rad19syn           | 1.07462e-11     | 1.000000  | 1.07468e-11          | 1.000000  |
| rad4               | 8.67924e-12     | 1.000000  | 8.67975e-12          | 1.000000  |
| rad59              | 3.71919e-12     | 1.000000  | 3.71941e-12          | 1.000000  |
| rad13              | 2.56947e-12     | 1.000000  | 2.56962e-12          | 1.000000  |
| rad50              | 5.19035e-13     | 1.000000  | 5.19064e-13          | 1.000000  |
| rad54              | 3.56767e-13     | 1.000000  | 3.56788e-13          | 1.000000  |
| PAH10+CH3          | 2.32479e-13     | 1.000000  | 2.32493e-13          | 1.000000  |
| rad43              | 5.33052e-14     | 1.000000  | 5.33083e-14          | 1.000000  |
| rad62              | 1.74956e-14     | 1.000000  | 1.74966e-14          | 1.000000  |
| rad33              | 5.02883e-15     | 1.000000  | 5.02912e-15          | 1.000000  |
| rad14              | 4.79390e-15     | 1.000000  | 4.79419e-15          | 1.000000  |
| rad25              | 2.95566e-15     | 1.000000  | 2.95584e-15          | 1.000000  |
| rad27              | 2.11975e-15     | 1.000000  | 2.11988e-15          | 1.000000  |
| PhcycC3H3_A+H      | 2.04626e-15     | 1.000000  | 2.04638e-15          | 1.000000  |
| rad70              | 1.09937e-15     | 1.000000  | 1.09943e-15          | 1.000000  |
| rad55              | 5.25237e-16     | 1.000000  | 5.25269e-16          | 1.000000  |
| rad52              | 4.73891e-16     | 1.000000  | 4.73919e-16          | 1.000000  |
| PAH1+H             | 6.34319e-17     | 1.000000  | 6.34356e-17          | 1.000000  |
| rad51              | 3.04859e-17     | 1.000000  | 3.04877e-17          | 1.000000  |
| rad34              | 3.78968e-18     | 1.000000  | 3.78990e-18          | 1.000000  |
| rad58              | 1.67007e-18     | 1.000000  | 1.67017e-18          | 1.000000  |
| rad31              | 6.81909e-19     | 1.000000  | 6.81948e-19          | 1.000000  |
| rad65              | 3.56276e-19     | 1.000000  | 3.56297e-19          | 1.000000  |
| rad23              | 2.47433e-19     | 1.000000  | 2.47447e-19          | 1.000000  |
| rad42              | 7.47467e-20     | 1.000000  | 7.47510e-20          | 1.000000  |
| rad20              | 5.08378e-20     | 1.000000  | 5.08408e-20          | 1.000000  |
| rad21              | 3.99119e-20     | 1.000000  | 3.99142e-20          | 1.000000  |
| rad41              | 2.24420e-20     | 1.000000  | 2.24432e-20          | 1.000000  |
| rad45              | 1.78962e-21     | 1.000000  | 1.78972e-21          | 1.000000  |
| rad18              | 2.05124e-22     | 1.000000  | 2.05136e-22          | 1.000000  |
| rad22              | 1.95094e-22     | 1.000000  | 1.95105e-22          | 1.000000  |

|       |             |          |             |          |
|-------|-------------|----------|-------------|----------|
| rad36 | 1.15043e-22 | 1.000000 | 1.15050e-22 | 1.000000 |
| rad24 | 1.06218e-26 | 1.000000 | 1.06223e-26 | 1.000000 |
| rad47 | 3.26663e-29 | 1.000000 | 3.26683e-29 | 1.000000 |

0.100000000E-03 Pa, 280.000000 K

| =====              |                 |           |                      |           |
|--------------------|-----------------|-----------|----------------------|-----------|
| Rate constant      | True (fraction) |           | Effective (fraction) |           |
| -----              |                 |           |                      |           |
| Total              | 2.79491e-16     | (1.00 )   | 2.79471e-16          | (1.00 )   |
| Formation of rad11 | 2.09281e-16     | (0.749 )  | 2.09265e-16          | (0.749 )  |
| Formation of rad6  | 5.79792e-17     | (0.207 )  | 5.79748e-17          | (0.207 )  |
| H-abstraction      | 1.22310e-17     | (0.0438 ) | 1.22310e-17          | (0.0438 ) |
| -----              |                 |           |                      |           |
| species            | PYtrue          | Cumul     | PYeffective          | Cumul     |
| Indene+H           | 0.911938        | 0.911938  | 0.912005             | 0.912005  |
| Benzene+2-propynyl | 0.0437616       | 0.955699  | 0.0437648            | 0.955769  |
| C2H2+PhCH2         | 0.0224576       | 0.978157  | 0.0224592            | 0.978229  |
| PhCCH+CH3          | 0.0115551       | 0.989712  | 0.0115559            | 0.989784  |
| PhCHCCH2+H         | 0.00572076      | 0.995433  | 0.00572117           | 0.995506  |
| PhCCCH3+H          | 0.00372703      | 0.999160  | 0.00372730           | 0.999233  |
| Ph+MeAc            | 0.000603395     | 0.999763  | 0.000603439          | 0.999836  |
| Phenyl+Allene      | 7.29848e-05     | 0.999836  | 0.000000             | 0.999836  |
| rad9               | 5.28314e-05     | 0.999889  | 5.28352e-05          | 0.999889  |
| rad8               | 4.94559e-05     | 0.999939  | 4.94595e-05          | 0.999939  |
| PAH7+H             | 3.89673e-05     | 0.999978  | 3.89701e-05          | 0.999978  |
| rad39              | 8.92649e-06     | 0.999986  | 8.92713e-06          | 0.999987  |
| rad6               | 4.57301e-06     | 0.999991  | 4.57334e-06          | 0.999991  |
| rad12              | 3.23784e-06     | 0.999994  | 3.23808e-06          | 0.999994  |
| PhCH2CCH+H         | 2.31536e-06     | 0.999997  | 2.31552e-06          | 0.999997  |
| rad30              | 1.88651e-06     | 0.999998  | 1.88664e-06          | 0.999999  |
| PAH9+H             | 5.23739e-07     | 0.999999  | 5.23778e-07          | 0.999999  |
| rad15              | 4.71854e-07     | 0.999999  | 4.71889e-07          | 1.000000  |
| rad35              | 2.21851e-07     | 1.000000  | 2.21867e-07          | 1.000000  |
| rad38              | 1.59974e-07     | 1.000000  | 1.59986e-07          | 1.000000  |
| rad37              | 1.39501e-07     | 1.000000  | 1.39511e-07          | 1.000000  |
| rad28              | 6.96660e-09     | 1.000000  | 6.96710e-09          | 1.000000  |
| rad5               | 5.68950e-09     | 1.000000  | 5.68992e-09          | 1.000000  |
| rad46              | 3.60684e-09     | 1.000000  | 3.60710e-09          | 1.000000  |
| rad2               | 2.00818e-09     | 1.000000  | 2.00832e-09          | 1.000000  |
| rad60syn           | 6.86288e-10     | 1.000000  | 6.86338e-10          | 1.000000  |
| rad26              | 6.67303e-10     | 1.000000  | 6.67352e-10          | 1.000000  |
| rad7               | 3.45680e-10     | 1.000000  | 3.45705e-10          | 1.000000  |
| rad60anti          | 2.65900e-10     | 1.000000  | 2.65920e-10          | 1.000000  |
| rad1               | 1.49278e-10     | 1.000000  | 1.49289e-10          | 1.000000  |
| rad10              | 1.05893e-10     | 1.000000  | 1.05901e-10          | 1.000000  |
| rad11              | 8.55143e-11     | 1.000000  | 8.55205e-11          | 1.000000  |
| PAH3+H             | 2.06226e-11     | 1.000000  | 2.06241e-11          | 1.000000  |
| rad19syn           | 1.98674e-11     | 1.000000  | 1.98688e-11          | 1.000000  |
| rad3               | 1.27993e-11     | 1.000000  | 1.28002e-11          | 1.000000  |
| rad4               | 6.77155e-12     | 1.000000  | 6.77204e-12          | 1.000000  |
| rad59              | 5.59534e-12     | 1.000000  | 5.59575e-12          | 1.000000  |
| rad13              | 1.98713e-12     | 1.000000  | 1.98728e-12          | 1.000000  |
| rad50              | 8.16481e-13     | 1.000000  | 8.16541e-13          | 1.000000  |
| rad54              | 7.25295e-13     | 1.000000  | 7.25348e-13          | 1.000000  |
| PAH10+CH3          | 4.66706e-13     | 1.000000  | 4.66740e-13          | 1.000000  |
| rad43              | 1.05927e-13     | 1.000000  | 1.05935e-13          | 1.000000  |
| rad62              | 3.69907e-14     | 1.000000  | 3.69935e-14          | 1.000000  |
| PhcycC3H3_A+H      | 5.01646e-15     | 1.000000  | 5.01682e-15          | 1.000000  |
| rad33              | 3.90030e-15     | 1.000000  | 3.90058e-15          | 1.000000  |
| rad14              | 3.83516e-15     | 1.000000  | 3.83543e-15          | 1.000000  |
| rad70              | 2.62474e-15     | 1.000000  | 2.62493e-15          | 1.000000  |
| rad25              | 2.35898e-15     | 1.000000  | 2.35916e-15          | 1.000000  |
| rad27              | 1.66383e-15     | 1.000000  | 1.66394e-15          | 1.000000  |
| rad55              | 1.26514e-15     | 1.000000  | 1.26523e-15          | 1.000000  |
| rad52              | 9.06489e-16     | 1.000000  | 9.06555e-16          | 1.000000  |
| PAH1+H             | 1.65652e-16     | 1.000000  | 1.65664e-16          | 1.000000  |
| rad51              | 6.81356e-17     | 1.000000  | 6.81406e-17          | 1.000000  |
| rad34              | 1.00916e-17     | 1.000000  | 1.00923e-17          | 1.000000  |
| rad58              | 4.14865e-18     | 1.000000  | 4.14895e-18          | 1.000000  |
| rad31              | 8.80669e-19     | 1.000000  | 8.80734e-19          | 1.000000  |
| rad65              | 8.46997e-19     | 1.000000  | 8.47059e-19          | 1.000000  |
| rad23              | 3.42677e-19     | 1.000000  | 3.42701e-19          | 1.000000  |
| rad42              | 2.07721e-19     | 1.000000  | 2.07735e-19          | 1.000000  |
| rad41              | 6.28084e-20     | 1.000000  | 6.28130e-20          | 1.000000  |
| rad20              | 4.32333e-20     | 1.000000  | 4.32364e-20          | 1.000000  |
| rad21              | 3.41260e-20     | 1.000000  | 3.41285e-20          | 1.000000  |
| rad45              | 2.51822e-21     | 1.000000  | 2.51840e-21          | 1.000000  |
| rad18              | 1.72465e-22     | 1.000000  | 1.72478e-22          | 1.000000  |
| rad22              | 1.71087e-22     | 1.000000  | 1.71100e-22          | 1.000000  |



|       |             |         |             |         |
|-------|-------------|---------|-------------|---------|
| rad36 | 1.62897e-22 | 1.00000 | 1.62909e-22 | 1.00000 |
| rad24 | 1.08127e-26 | 1.00000 | 1.08134e-26 | 1.00000 |
| rad47 | 7.35837e-29 | 1.00000 | 7.35891e-29 | 1.00000 |

0.100000000E-03 Pa, 290.000000 K

| =====              |                 |           |                      |           |
|--------------------|-----------------|-----------|----------------------|-----------|
| Rate constant      | True (fraction) |           | Effective (fraction) |           |
| -----              |                 |           |                      |           |
| Total              | 3.55893e-16     | (1.00 )   | 3.55861e-16          | (1.00 )   |
| Formation of rad11 | 2.62555e-16     | (0.738 )  | 2.62530e-16          | (0.738 )  |
| Formation of rad6  | 7.62093e-17     | (0.214 )  | 7.62021e-17          | (0.214 )  |
| H-abstraction      | 1.71289e-17     | (0.0481 ) | 1.71289e-17          | (0.0481 ) |
| -----              |                 |           |                      |           |
| species            | PYtrue          | Cumul     | PYeffective          | Cumul     |
| Indene+H           | 0.904732        | 0.904732  | 0.904815             | 0.904815  |
| Benzene+2-propynyl | 0.0481294       | 0.952861  | 0.0481337            | 0.952948  |
| C2H2+PhCH2         | 0.0237286       | 0.976590  | 0.0237307            | 0.976679  |
| PhCCH+CH3          | 0.0124079       | 0.988998  | 0.0124090            | 0.989088  |
| PhCHCCH2+H         | 0.00608268      | 0.995081  | 0.00608323           | 0.995171  |
| PhCCCH3+H          | 0.00395548      | 0.999036  | 0.00395583           | 0.999127  |
| Ph+MeAc            | 0.000690470     | 0.999727  | 0.000690532          | 0.999818  |
| Phenyl+Allene      | 9.06004e-05     | 0.999817  | 0.00000              | 0.999818  |
| rad9               | 5.97675e-05     | 0.999877  | 5.97728e-05          | 0.999877  |
| rad8               | 5.34689e-05     | 0.999930  | 5.34737e-05          | 0.999931  |
| PAH7+H             | 4.47001e-05     | 0.999975  | 4.47042e-05          | 0.999976  |
| rad39              | 1.04138e-05     | 0.999986  | 1.04147e-05          | 0.999986  |
| rad12              | 3.57590e-06     | 0.999989  | 3.57623e-06          | 0.999990  |
| rad6               | 3.52684e-06     | 0.999993  | 3.52716e-06          | 0.999993  |
| PhCH2CCH+H         | 3.17946e-06     | 0.999996  | 3.17975e-06          | 0.999996  |
| rad30              | 2.04412e-06     | 0.999998  | 2.04430e-06          | 0.999998  |
| PAH9+H             | 5.81638e-07     | 0.999998  | 5.81690e-07          | 0.999999  |
| rad15              | 5.19895e-07     | 0.999999  | 5.19942e-07          | 0.999999  |
| rad35              | 2.43185e-07     | 0.999999  | 2.43208e-07          | 1.000000  |
| rad38              | 1.79274e-07     | 0.999999  | 1.79291e-07          | 1.000000  |
| rad37              | 1.70755e-07     | 1.000000  | 1.70771e-07          | 1.000000  |
| rad5               | 7.69105e-09     | 1.000000  | 7.69175e-09          | 1.000000  |
| rad28              | 5.41787e-09     | 1.000000  | 5.41836e-09          | 1.000000  |
| rad46              | 4.28749e-09     | 1.000000  | 4.28787e-09          | 1.000000  |
| rad2               | 1.56965e-09     | 1.000000  | 1.56979e-09          | 1.000000  |
| rad60syn           | 8.49217e-10     | 1.000000  | 8.49294e-10          | 1.000000  |
| rad26              | 5.20754e-10     | 1.000000  | 5.20801e-10          | 1.000000  |
| rad60anti          | 3.33954e-10     | 1.000000  | 3.33984e-10          | 1.000000  |
| rad7               | 2.67338e-10     | 1.000000  | 2.67361e-10          | 1.000000  |
| rad1               | 1.18482e-10     | 1.000000  | 1.18493e-10          | 1.000000  |
| rad10              | 8.30421e-11     | 1.000000  | 8.30497e-11          | 1.000000  |
| rad11              | 6.61771e-11     | 1.000000  | 6.61831e-11          | 1.000000  |
| rad19syn           | 3.53542e-11     | 1.000000  | 3.53574e-11          | 1.000000  |
| PAH3+H             | 3.10913e-11     | 1.000000  | 3.10942e-11          | 1.000000  |
| rad3               | 9.99959e-12     | 1.000000  | 1.00005e-11          | 1.000000  |
| rad59              | 8.27356e-12     | 1.000000  | 8.27432e-12          | 1.000000  |
| rad4               | 5.31415e-12     | 1.000000  | 5.31463e-12          | 1.000000  |
| rad13              | 1.54069e-12     | 1.000000  | 1.54083e-12          | 1.000000  |
| rad54              | 1.40664e-12     | 1.000000  | 1.40676e-12          | 1.000000  |
| rad50              | 1.26243e-12     | 1.000000  | 1.26255e-12          | 1.000000  |
| PAH10+CH3          | 8.93205e-13     | 1.000000  | 8.93286e-13          | 1.000000  |
| rad43              | 2.00656e-13     | 1.000000  | 2.00674e-13          | 1.000000  |
| rad62              | 7.41656e-14     | 1.000000  | 7.41723e-14          | 1.000000  |
| PhcycC3H3_A+H      | 1.14766e-14     | 1.000000  | 1.14776e-14          | 1.000000  |
| rad70              | 5.86558e-15     | 1.000000  | 5.86610e-15          | 1.000000  |
| rad14              | 3.08058e-15     | 1.000000  | 3.08085e-15          | 1.000000  |
| rad33              | 3.03328e-15     | 1.000000  | 3.03356e-15          | 1.000000  |
| rad55              | 2.84937e-15     | 1.000000  | 2.84963e-15          | 1.000000  |
| rad25              | 1.89072e-15     | 1.000000  | 1.89089e-15          | 1.000000  |
| rad52              | 1.67115e-15     | 1.000000  | 1.67131e-15          | 1.000000  |
| rad27              | 1.31205e-15     | 1.000000  | 1.31218e-15          | 1.000000  |
| PAH1+H             | 4.00225e-16     | 1.000000  | 4.00262e-16          | 1.000000  |
| rad51              | 1.44089e-16     | 1.000000  | 1.44102e-16          | 1.000000  |
| rad34              | 2.48036e-17     | 1.000000  | 2.48058e-17          | 1.000000  |
| rad58              | 9.60437e-18     | 1.000000  | 9.60519e-18          | 1.000000  |
| rad65              | 1.88874e-18     | 1.000000  | 1.88891e-18          | 1.000000  |
| rad31              | 1.18646e-18     | 1.000000  | 1.18657e-18          | 1.000000  |
| rad42              | 5.29925e-19     | 1.000000  | 5.29973e-19          | 1.000000  |
| rad23              | 5.29384e-19     | 1.000000  | 5.29432e-19          | 1.000000  |
| rad41              | 1.61242e-19     | 1.000000  | 1.61257e-19          | 1.000000  |
| rad20              | 3.69884e-20     | 1.000000  | 3.69917e-20          | 1.000000  |
| rad21              | 2.93664e-20     | 1.000000  | 2.93691e-20          | 1.000000  |
| rad45              | 3.97529e-21     | 1.000000  | 3.97565e-21          | 1.000000  |
| rad36              | 2.58930e-22     | 1.000000  | 2.58953e-22          | 1.000000  |
| rad22              | 1.62260e-22     | 1.000000  | 1.62274e-22          | 1.000000  |

|       |             |          |             |         |
|-------|-------------|----------|-------------|---------|
| rad18 | 1.45652e-22 | 1.000000 | 1.45665e-22 | 1.00000 |
| rad24 | 1.12415e-26 | 1.000000 | 1.12425e-26 | 1.00000 |
| rad47 | 1.55319e-28 | 1.000000 | 1.55332e-28 | 1.00000 |

0.100000000E-03 Pa, 300.000000 K

| Rate constant      | True (fraction)       | Effective (fraction)  |
|--------------------|-----------------------|-----------------------|
| Total              | 6.34395e-16 (1.00 )   | 6.34337e-16 (1.00 )   |
| Formation of rad11 | 4.51153e-16 (0.711 )  | 4.51110e-16 (0.711 )  |
| Formation of rad6  | 1.51589e-16 (0.239 )  | 1.51574e-16 (0.239 )  |
| H-abstraction      | 3.16530e-17 (0.0499 ) | 3.16530e-17 (0.0499 ) |

| species            | PYtrue      | Cumul    | PYeffective | Cumul    |
|--------------------|-------------|----------|-------------|----------|
| Indene+H           | 0.891278    | 0.891278 | 0.891360    | 0.891360 |
| Benzene+2-propynyl | 0.0498949   | 0.941173 | 0.0498994   | 0.941259 |
| C2H2+PhCH2         | 0.0318806   | 0.973054 | 0.0318835   | 0.973143 |
| PhCCH+CH3          | 0.0148875   | 0.987941 | 0.0148888   | 0.988031 |
| PhCHCCH2+H         | 0.00656922  | 0.994511 | 0.00656981  | 0.994601 |
| PhCCCH3+H          | 0.00446314  | 0.998974 | 0.00446354  | 0.999065 |
| Ph+MeAc            | 0.000839387 | 0.999813 | 0.000839463 | 0.999904 |
| Phenyl+Allene      | 9.13159e-05 | 0.999904 | 0.00000     | 0.999904 |
| PAH7+H             | 6.59856e-05 | 0.999970 | 6.59915e-05 | 0.999970 |
| rad39              | 1.31351e-05 | 0.999984 | 1.31363e-05 | 0.999983 |
| rad6               | 6.91984e-06 | 0.999990 | 6.92048e-06 | 0.999990 |
| PhCH2CCH+H         | 5.22082e-06 | 0.999996 | 5.22130e-06 | 0.999995 |
| rad30              | 2.21009e-06 | 0.999998 | 2.21029e-06 | 0.999998 |
| PAH9+H             | 7.99359e-07 | 0.999999 | 7.99432e-07 | 0.999998 |
| rad19anti          | 7.03913e-07 | 0.999999 | 7.03977e-07 | 0.999999 |
| rad35              | 2.86865e-07 | 1.000000 | 2.86891e-07 | 0.999999 |
| rad37              | 2.27449e-07 | 1.000000 | 2.27470e-07 | 1.000000 |
| rad38              | 2.12794e-07 | 1.000000 | 2.12813e-07 | 1.000000 |
| rad28              | 9.86561e-09 | 1.000000 | 9.86651e-09 | 1.000000 |
| rad46              | 5.68384e-09 | 1.000000 | 5.68436e-09 | 1.000000 |
| rad2               | 3.57070e-09 | 1.000000 | 3.57103e-09 | 1.000000 |
| rad26              | 1.14258e-09 | 1.000000 | 1.14268e-09 | 1.000000 |
| rad60syn           | 1.08160e-09 | 1.000000 | 1.08170e-09 | 1.000000 |
| rad7               | 6.13898e-10 | 1.000000 | 6.13955e-10 | 1.000000 |
| rad60anti          | 4.39076e-10 | 1.000000 | 4.39116e-10 | 1.000000 |
| rad1               | 2.69067e-10 | 1.000000 | 2.69091e-10 | 1.000000 |
| rad10              | 2.19047e-10 | 1.000000 | 2.19067e-10 | 1.000000 |
| rad11              | 1.47485e-10 | 1.000000 | 1.47498e-10 | 1.000000 |
| rad19syn           | 6.92409e-11 | 1.000000 | 6.92472e-11 | 1.000000 |
| PAH3+H             | 6.10421e-11 | 1.000000 | 6.10477e-11 | 1.000000 |
| rad3               | 2.51157e-11 | 1.000000 | 2.51181e-11 | 1.000000 |
| rad59              | 1.31856e-11 | 1.000000 | 1.31868e-11 | 1.000000 |
| rad4               | 1.24902e-11 | 1.000000 | 1.24913e-11 | 1.000000 |
| rad13              | 3.54041e-12 | 1.000000 | 3.54073e-12 | 1.000000 |
| rad54              | 3.21917e-12 | 1.000000 | 3.21945e-12 | 1.000000 |
| rad50              | 2.22692e-12 | 1.000000 | 2.22712e-12 | 1.000000 |
| PAH10+CH3          | 2.02607e-12 | 1.000000 | 2.02626e-12 | 1.000000 |
| rad67              | 7.75564e-13 | 1.000000 | 7.75636e-13 | 1.000000 |
| rad43              | 4.01368e-13 | 1.000000 | 4.01405e-13 | 1.000000 |
| rad62              | 1.66596e-13 | 1.000000 | 1.66612e-13 | 1.000000 |
| PhcycC3H3_A+H      | 4.89157e-14 | 1.000000 | 4.89201e-14 | 1.000000 |
| rad70              | 1.94649e-14 | 1.000000 | 1.94667e-14 | 1.000000 |
| rad25              | 1.11143e-14 | 1.000000 | 1.11154e-14 | 1.000000 |
| rad14              | 1.10337e-14 | 1.000000 | 1.10347e-14 | 1.000000 |
| rad33              | 8.55552e-15 | 1.000000 | 8.55630e-15 | 1.000000 |
| rad55              | 8.48798e-15 | 1.000000 | 8.48876e-15 | 1.000000 |
| rad27              | 5.11584e-15 | 1.000000 | 5.11631e-15 | 1.000000 |
| rad52              | 3.84264e-15 | 1.000000 | 3.84300e-15 | 1.000000 |
| rad23              | 3.39457e-15 | 1.000000 | 3.39488e-15 | 1.000000 |
| PAH1+H             | 2.34452e-15 | 1.000000 | 2.34472e-15 | 1.000000 |
| rad51              | 4.07432e-16 | 1.000000 | 4.07469e-16 | 1.000000 |
| rad34              | 1.57788e-16 | 1.000000 | 1.57802e-16 | 1.000000 |
| rad45              | 5.22912e-17 | 1.000000 | 5.22960e-17 | 1.000000 |
| rad31              | 3.04126e-17 | 1.000000 | 3.04153e-17 | 1.000000 |
| rad58              | 2.99521e-17 | 1.000000 | 2.99548e-17 | 1.000000 |
| rad65              | 6.35821e-18 | 1.000000 | 6.35879e-18 | 1.000000 |
| rad42              | 4.93415e-18 | 1.000000 | 4.93460e-18 | 1.000000 |
| rad21              | 3.81736e-18 | 1.000000 | 3.81771e-18 | 1.000000 |
| rad20              | 3.40079e-18 | 1.000000 | 3.40109e-18 | 1.000000 |
| rad36              | 1.78225e-18 | 1.000000 | 1.78242e-18 | 1.000000 |
| rad41              | 1.53091e-18 | 1.000000 | 1.53105e-18 | 1.000000 |
| rad22              | 6.65737e-19 | 1.000000 | 6.65798e-19 | 1.000000 |
| rad9               | 6.28912e-19 | 1.000000 | 6.28969e-19 | 1.000000 |
| rad53              | 1.09685e-19 | 1.000000 | 1.09695e-19 | 1.000000 |
| rad18              | 6.84110e-20 | 1.000000 | 6.84172e-20 | 1.000000 |

|           |             |         |             |          |
|-----------|-------------|---------|-------------|----------|
| rad64     | 2.63858e-20 | 1.00000 | 2.63881e-20 | 1.000000 |
| rad5      | 2.47774e-21 | 1.00000 | 2.47797e-21 | 1.000000 |
| rad15     | 3.74284e-22 | 1.00000 | 3.74319e-22 | 1.000000 |
| rad56     | 3.10999e-22 | 1.00000 | 3.11027e-22 | 1.000000 |
| rad24     | 6.37530e-23 | 1.00000 | 6.37588e-23 | 1.000000 |
| rad61     | 3.56445e-23 | 1.00000 | 3.56479e-23 | 1.000000 |
| rad68syn  | 3.28827e-23 | 1.00000 | 3.28857e-23 | 1.000000 |
| rad68anti | 2.37016e-23 | 1.00000 | 2.37038e-23 | 1.000000 |
| rad40syn  | 5.33132e-26 | 1.00000 | 5.33180e-26 | 1.000000 |
| rad12     | 2.38423e-26 | 1.00000 | 2.38445e-26 | 1.000000 |
| rad40anti | 1.32366e-26 | 1.00000 | 1.32378e-26 | 1.000000 |
| PAH8+H    | 1.18612e-26 | 1.00000 | 1.18623e-26 | 1.000000 |
| rad73     | 1.00636e-26 | 1.00000 | 1.00646e-26 | 1.000000 |
| rad47     | 2.86323e-28 | 1.00000 | 2.86349e-28 | 1.000000 |
| rad71     | 9.35690e-29 | 1.00000 | 9.35776e-29 | 1.000000 |
| rad72     | 1.61598e-37 | 1.00000 | 1.61612e-37 | 1.000000 |
| rad8      | 1.56830e-39 | 1.00000 | 1.56845e-39 | 1.000000 |

0.100000000E-03 Pa, 400.000000 K

| Rate constant      | True (fraction)       | Effective (fraction)  |
|--------------------|-----------------------|-----------------------|
| Total              | 5.11288e-15 (1.00 )   | 5.10968e-15 (1.00 )   |
| Formation of rad11 | 3.08094e-15 (0.603 )  | 3.07881e-15 (0.603 )  |
| Formation of rad6  | 1.54092e-15 (0.301 )  | 1.53985e-15 (0.301 )  |
| H-abstraction      | 4.91025e-16 (0.0960 ) | 4.91025e-16 (0.0961 ) |

| species            | PYtrue      | Cumul    | PYeffective | Cumul    |
|--------------------|-------------|----------|-------------|----------|
| Indene+H           | 0.804509    | 0.804509 | 0.805013    | 0.805013 |
| Benzene+2-propynyl | 0.0960368   | 0.900546 | 0.0960969   | 0.901110 |
| C2H2+PhCH2         | 0.0525303   | 0.953076 | 0.0525632   | 0.953674 |
| PhCCH+CH3          | 0.0262461   | 0.979322 | 0.0262625   | 0.979936 |
| PhCHCCH2+H         | 0.0106675   | 0.989990 | 0.0106742   | 0.990610 |
| PhCCH3+H           | 0.00675871  | 0.996749 | 0.00676293  | 0.997373 |
| Ph+MeAc            | 0.00228459  | 0.999033 | 0.00228603  | 0.999659 |
| Phenyl+Allene      | 0.000625696 | 0.999659 | 0.000000    | 0.999659 |
| PAH7+H             | 0.000215625 | 0.999874 | 0.000215761 | 0.999875 |
| PhCH2CCH+H         | 6.37888e-05 | 0.999938 | 6.38288e-05 | 0.999939 |
| rad39              | 4.88299e-05 | 0.999987 | 4.88605e-05 | 0.999988 |
| rad30              | 4.71273e-06 | 0.999992 | 4.71568e-06 | 0.999992 |
| rad19anti          | 2.55241e-06 | 0.999994 | 2.55401e-06 | 0.999995 |
| PAH9+H             | 2.27132e-06 | 0.999997 | 2.27274e-06 | 0.999997 |
| rad37              | 9.72077e-07 | 0.999998 | 9.72681e-07 | 0.999998 |
| rad6               | 8.06752e-07 | 0.999998 | 8.07258e-07 | 0.999999 |
| rad35              | 7.27459e-07 | 0.999999 | 7.27915e-07 | 1.000000 |
| rad38              | 6.64137e-07 | 1.000000 | 6.64553e-07 | 1.000000 |
| rad46              | 2.95893e-08 | 1.000000 | 2.96079e-08 | 1.000000 |
| rad60syn           | 6.77066e-09 | 1.000000 | 6.77489e-09 | 1.000000 |
| rad19syn           | 4.62787e-09 | 1.000000 | 4.63077e-09 | 1.000000 |
| rad60anti          | 3.07453e-09 | 1.000000 | 3.07646e-09 | 1.000000 |
| rad2               | 1.71655e-09 | 1.000000 | 1.71763e-09 | 1.000000 |
| PAH3+H             | 1.45797e-09 | 1.000000 | 1.45888e-09 | 1.000000 |
| rad28              | 1.21356e-09 | 1.000000 | 1.21432e-09 | 1.000000 |
| rad54              | 4.18668e-10 | 1.000000 | 4.18930e-10 | 1.000000 |
| rad59              | 2.84704e-10 | 1.000000 | 2.84882e-10 | 1.000000 |
| PAH10+CH3          | 1.98075e-10 | 1.000000 | 1.98199e-10 | 1.000000 |
| rad1               | 1.59751e-10 | 1.000000 | 1.59851e-10 | 1.000000 |
| rad26              | 1.59686e-10 | 1.000000 | 1.59786e-10 | 1.000000 |
| rad10              | 1.06323e-10 | 1.000000 | 1.06390e-10 | 1.000000 |
| rad50              | 7.81193e-11 | 1.000000 | 7.81682e-11 | 1.000000 |
| rad7               | 7.55141e-11 | 1.000000 | 7.55614e-11 | 1.000000 |
| rad43              | 3.26733e-11 | 1.000000 | 3.26937e-11 | 1.000000 |
| rad67              | 2.48948e-11 | 1.000000 | 2.49104e-11 | 1.000000 |
| PhcycC3H3_A+H      | 2.37988e-11 | 1.000000 | 2.38137e-11 | 1.000000 |
| rad62              | 2.26679e-11 | 1.000000 | 2.26821e-11 | 1.000000 |
| rad11              | 1.85970e-11 | 1.000000 | 1.86086e-11 | 1.000000 |
| rad3               | 1.85895e-11 | 1.000000 | 1.86011e-11 | 1.000000 |
| rad4               | 9.79074e-12 | 1.000000 | 9.79686e-12 | 1.000000 |
| rad70              | 7.63980e-12 | 1.000000 | 7.64459e-12 | 1.000000 |
| rad55              | 3.50823e-12 | 1.000000 | 3.51043e-12 | 1.000000 |
| PAH1+H             | 2.19400e-12 | 1.000000 | 2.19537e-12 | 1.000000 |
| rad23              | 1.98097e-12 | 1.000000 | 1.98221e-12 | 1.000000 |
| rad13              | 4.60851e-13 | 1.000000 | 4.61140e-13 | 1.000000 |
| rad52              | 4.56317e-13 | 1.000000 | 4.56602e-13 | 1.000000 |
| rad34              | 1.75089e-13 | 1.000000 | 1.75198e-13 | 1.000000 |
| rad51              | 1.36999e-13 | 1.000000 | 1.37084e-13 | 1.000000 |
| rad45              | 1.29067e-13 | 1.000000 | 1.29148e-13 | 1.000000 |
| rad58              | 1.74185e-14 | 1.000000 | 1.74293e-14 | 1.000000 |
| rad42              | 7.28198e-15 | 1.000000 | 7.28653e-15 | 1.000000 |

|           |             |          |             |         |
|-----------|-------------|----------|-------------|---------|
| rad36     | 4.97048e-15 | 1.000000 | 4.97359e-15 | 1.00000 |
| rad65     | 3.20501e-15 | 1.000000 | 3.20701e-15 | 1.00000 |
| rad25     | 2.91221e-15 | 1.000000 | 2.91404e-15 | 1.00000 |
| rad14     | 2.61577e-15 | 1.000000 | 2.61741e-15 | 1.00000 |
| rad41     | 2.20571e-15 | 1.000000 | 2.20709e-15 | 1.00000 |
| rad27     | 1.27140e-15 | 1.000000 | 1.27220e-15 | 1.00000 |
| rad33     | 1.26628e-15 | 1.000000 | 1.26707e-15 | 1.00000 |
| rad53     | 9.04225e-16 | 1.000000 | 9.04789e-16 | 1.00000 |
| rad31     | 4.52496e-16 | 1.000000 | 4.52780e-16 | 1.00000 |
| rad64     | 3.15112e-16 | 1.000000 | 3.15309e-16 | 1.00000 |
| rad22     | 1.22316e-16 | 1.000000 | 1.22392e-16 | 1.00000 |
| rad56     | 1.60194e-17 | 1.000000 | 1.60295e-17 | 1.00000 |
| rad9      | 4.65221e-18 | 1.000000 | 4.65512e-18 | 1.00000 |
| rad21     | 4.26386e-18 | 1.000000 | 4.26652e-18 | 1.00000 |
| rad20     | 3.00401e-18 | 1.000000 | 3.00588e-18 | 1.00000 |
| rad68syn  | 1.85189e-18 | 1.000000 | 1.85305e-18 | 1.00000 |
| rad68anti | 1.33289e-18 | 1.000000 | 1.33374e-18 | 1.00000 |
| rad61     | 9.28198e-19 | 1.000000 | 9.28779e-19 | 1.00000 |
| rad18     | 2.90379e-20 | 1.000000 | 2.90561e-20 | 1.00000 |
| rad40syn  | 1.44557e-20 | 1.000000 | 1.44647e-20 | 1.00000 |
| PAH8+H    | 8.91044e-21 | 1.000000 | 8.91602e-21 | 1.00000 |
| rad40anti | 3.67580e-21 | 1.000000 | 3.67811e-21 | 1.00000 |
| rad15     | 2.93657e-21 | 1.000000 | 2.93841e-21 | 1.00000 |
| rad5      | 2.73789e-21 | 1.000000 | 2.73959e-21 | 1.00000 |
| rad73     | 2.39426e-21 | 1.000000 | 2.39575e-21 | 1.00000 |
| rad24     | 1.18274e-21 | 1.000000 | 1.18348e-21 | 1.00000 |
| rad71     | 9.62034e-23 | 1.000000 | 9.62639e-23 | 1.00000 |
| rad12     | 1.84970e-24 | 1.000000 | 1.85086e-24 | 1.00000 |
| rad47     | 7.50668e-26 | 1.000000 | 7.51138e-26 | 1.00000 |
| rad72     | 1.64420e-27 | 1.000000 | 1.64523e-27 | 1.00000 |
| rad8      | 4.43269e-37 | 1.000000 | 4.43547e-37 | 1.00000 |

0.100000000E-03 Pa, 500.000000 K

| Rate constant      | True (fraction)      | Effective (fraction) |
|--------------------|----------------------|----------------------|
| Total              | 2.11551e-14 (1.00 )  | 2.10968e-14 (1.00 )  |
| Formation of rad11 | 1.10850e-14 (0.524 ) | 1.10494e-14 (0.524 ) |
| Formation of rad6  | 7.08033e-15 (0.335 ) | 7.05760e-15 (0.335 ) |
| H-abstraction      | 2.98976e-15 (0.141 ) | 2.98976e-15 (0.142 ) |

| species            | PYtrue      | Cumul    | PYeffective | Cumul    |
|--------------------|-------------|----------|-------------|----------|
| Indene+H           | 0.706771    | 0.706771 | 0.708724    | 0.708724 |
| Benzene+2-propynyl | 0.141326    | 0.848096 | 0.141717    | 0.850441 |
| C2H2+PhCH2         | 0.0810996   | 0.929196 | 0.0813238   | 0.931764 |
| PhCCH+CH3          | 0.0389471   | 0.968143 | 0.0390548   | 0.970819 |
| PhCHCCH2+H         | 0.0153911   | 0.983534 | 0.0154337   | 0.986253 |
| PhCCCH3+H          | 0.00823866  | 0.991773 | 0.00826144  | 0.994514 |
| Ph+MeAc            | 0.00432815  | 0.996101 | 0.00434012  | 0.998855 |
| Phenyl+Allene      | 0.00275750  | 0.998858 | 0.000000    | 0.998855 |
| PAH7+H             | 0.000574770 | 0.999433 | 0.000576359 | 0.999431 |
| PhCH2CCH+H         | 0.000399540 | 0.999833 | 0.000400646 | 0.999832 |
| rad39              | 0.000137919 | 0.999971 | 0.000138300 | 0.999970 |
| rad30              | 9.14583e-06 | 0.999980 | 9.17110e-06 | 0.999979 |
| rad19anti          | 7.87848e-06 | 0.999988 | 7.90027e-06 | 0.999987 |
| PAH9+H             | 6.12713e-06 | 0.999994 | 6.14407e-06 | 0.999993 |
| rad37              | 2.41819e-06 | 0.999996 | 2.42487e-06 | 0.999995 |
| rad38              | 1.93433e-06 | 0.999998 | 1.93968e-06 | 0.999997 |
| rad35              | 1.76556e-06 | 1.000000 | 1.77044e-06 | 0.999999 |
| rad46              | 1.27869e-07 | 1.000000 | 1.28222e-07 | 0.999999 |
| rad6               | 1.15781e-07 | 1.000000 | 1.16101e-07 | 0.999999 |
| rad19syn           | 7.63982e-08 | 1.000000 | 7.66095e-08 | 0.999999 |
| rad60syn           | 2.91340e-08 | 1.000000 | 2.92145e-08 | 1.000000 |
| PAH3+H             | 1.45907e-08 | 1.000000 | 1.46311e-08 | 1.000000 |
| rad60anti          | 1.41792e-08 | 1.000000 | 1.42184e-08 | 1.000000 |
| rad54              | 1.02843e-08 | 1.000000 | 1.03128e-08 | 1.000000 |
| PAH10+CH3          | 3.35595e-09 | 1.000000 | 3.36523e-09 | 1.000000 |
| rad2               | 3.06906e-09 | 1.000000 | 3.07754e-09 | 1.000000 |
| rad59              | 2.61932e-09 | 1.000000 | 2.62656e-09 | 1.000000 |
| PhcycC3H3_A+H      | 1.25838e-09 | 1.000000 | 1.26186e-09 | 1.000000 |
| rad50              | 1.15865e-09 | 1.000000 | 1.16186e-09 | 1.000000 |
| rad62              | 4.84009e-10 | 1.000000 | 4.85347e-10 | 1.000000 |
| rad43              | 4.60420e-10 | 1.000000 | 4.61694e-10 | 1.000000 |
| rad67              | 3.97898e-10 | 1.000000 | 3.98997e-10 | 1.000000 |
| rad1               | 3.67780e-10 | 1.000000 | 3.68797e-10 | 1.000000 |
| rad70              | 3.42517e-10 | 1.000000 | 3.43464e-10 | 1.000000 |
| rad28              | 1.65132e-10 | 1.000000 | 1.65588e-10 | 1.000000 |
| PAH1+H             | 1.64298e-10 | 1.000000 | 1.64753e-10 | 1.000000 |
| rad55              | 1.59822e-10 | 1.000000 | 1.60263e-10 | 1.000000 |

|           |             |         |             |          |
|-----------|-------------|---------|-------------|----------|
| rad10     | 1.55583e-10 | 1.00000 | 1.56014e-10 | 1.000000 |
| rad23     | 1.26271e-10 | 1.00000 | 1.26621e-10 | 1.000000 |
| rad3      | 5.85971e-11 | 1.00000 | 5.87592e-11 | 1.000000 |
| rad4      | 3.32346e-11 | 1.00000 | 3.33265e-11 | 1.000000 |
| rad26     | 3.21281e-11 | 1.00000 | 3.22169e-11 | 1.000000 |
| rad45     | 1.85897e-11 | 1.00000 | 1.86411e-11 | 1.000000 |
| rad34     | 1.41616e-11 | 1.00000 | 1.42007e-11 | 1.000000 |
| rad52     | 1.34824e-11 | 1.00000 | 1.35197e-11 | 1.000000 |
| rad7      | 1.16641e-11 | 1.00000 | 1.16963e-11 | 1.000000 |
| rad51     | 7.24877e-12 | 1.00000 | 7.26881e-12 | 1.000000 |
| rad11     | 2.99101e-12 | 1.00000 | 2.99928e-12 | 1.000000 |
| rad58     | 1.01105e-12 | 1.00000 | 1.01385e-12 | 1.000000 |
| rad36     | 9.95727e-13 | 1.00000 | 9.98484e-13 | 1.000000 |
| rad42     | 6.16330e-13 | 1.00000 | 6.18034e-13 | 1.000000 |
| rad53     | 2.35884e-13 | 1.00000 | 2.36536e-13 | 1.000000 |
| rad65     | 2.01753e-13 | 1.00000 | 2.02311e-13 | 1.000000 |
| rad41     | 1.64835e-13 | 1.00000 | 1.65291e-13 | 1.000000 |
| rad64     | 9.67571e-14 | 1.00000 | 9.70247e-14 | 1.000000 |
| rad13     | 7.89347e-14 | 1.00000 | 7.91530e-14 | 1.000000 |
| rad56     | 1.22103e-14 | 1.00000 | 1.22441e-14 | 1.000000 |
| rad22     | 4.25971e-15 | 1.00000 | 4.27149e-15 | 1.000000 |
| rad31     | 2.28644e-15 | 1.00000 | 2.29277e-15 | 1.000000 |
| rad68syn  | 1.45356e-15 | 1.00000 | 1.45758e-15 | 1.000000 |
| rad25     | 1.14800e-15 | 1.00000 | 1.15118e-15 | 1.000000 |
| rad68anti | 1.02676e-15 | 1.00000 | 1.02960e-15 | 1.000000 |
| rad14     | 9.03600e-16 | 1.00000 | 9.06098e-16 | 1.000000 |
| rad27     | 6.04432e-16 | 1.00000 | 6.06103e-16 | 1.000000 |
| rad61     | 4.14294e-16 | 1.00000 | 4.15439e-16 | 1.000000 |
| rad33     | 3.62021e-16 | 1.00000 | 3.63022e-16 | 1.000000 |
| rad9      | 1.08334e-16 | 1.00000 | 1.08633e-16 | 1.000000 |
| PAH8+H    | 3.34059e-17 | 1.00000 | 3.34983e-17 | 1.000000 |
| rad40syn  | 2.92189e-17 | 1.00000 | 2.92997e-17 | 1.000000 |
| rad21     | 1.86398e-17 | 1.00000 | 1.86914e-17 | 1.000000 |
| rad20     | 9.85217e-18 | 1.00000 | 9.87944e-18 | 1.000000 |
| rad40anti | 8.33336e-18 | 1.00000 | 8.35639e-18 | 1.000000 |
| rad73     | 6.63729e-18 | 1.00000 | 6.65565e-18 | 1.000000 |
| rad71     | 1.63848e-18 | 1.00000 | 1.64301e-18 | 1.000000 |
| rad15     | 7.36366e-20 | 1.00000 | 7.38402e-20 | 1.000000 |
| rad24     | 7.32896e-20 | 1.00000 | 7.34922e-20 | 1.000000 |
| rad18     | 2.49547e-20 | 1.00000 | 2.50237e-20 | 1.000000 |
| rad72     | 1.31429e-20 | 1.00000 | 1.31793e-20 | 1.000000 |
| rad5      | 1.98587e-21 | 1.00000 | 1.99136e-21 | 1.000000 |
| rad12     | 6.99679e-22 | 1.00000 | 7.01613e-22 | 1.000000 |
| rad47     | 4.86082e-24 | 1.00000 | 4.87426e-24 | 1.000000 |
| rad8      | 8.31930e-34 | 1.00000 | 8.34230e-34 | 1.000000 |

0.100000000E-03 Pa, 600.000000 K

=====

| Rate constant      | True (fraction)      | Effective (fraction) |
|--------------------|----------------------|----------------------|
| Total              | 6.08120e-14 (1.00 )  | 6.02869e-14 (1.00 )  |
| Formation of rad11 | 2.83304e-14 (0.466 ) | 2.80313e-14 (0.465 ) |
| Formation of rad6  | 2.13840e-14 (0.352 ) | 2.11582e-14 (0.351 ) |
| H-abstraction      | 1.10975e-14 (0.182 ) | 1.10975e-14 (0.184 ) |

| species            | PYtrue      | Cumul    | PYeffective | Cumul    |
|--------------------|-------------|----------|-------------|----------|
| Indene+H           | 0.606936    | 0.606936 | 0.612222    | 0.612222 |
| Benzene+2-propynyl | 0.182488    | 0.789425 | 0.184077    | 0.796299 |
| C2H2+PhCH2         | 0.112835    | 0.902259 | 0.113817    | 0.910116 |
| PhCCH+CH3          | 0.0502919   | 0.952551 | 0.0507299   | 0.960846 |
| PhCHCCH2+H         | 0.0208954   | 0.973446 | 0.0210773   | 0.981924 |
| Phenyl+Allene      | 0.00863333  | 0.982080 | 0.000000    | 0.981924 |
| PhCCCH3+H          | 0.00840917  | 0.990489 | 0.00848241  | 0.990406 |
| Ph+MeAc            | 0.00630888  | 0.996798 | 0.00636381  | 0.996770 |
| PhCH2CCH+H         | 0.00158536  | 0.998383 | 0.00159916  | 0.998369 |
| PAH7+H             | 0.00124704  | 0.999630 | 0.00125790  | 0.999627 |
| rad39              | 0.000304552 | 0.999935 | 0.000307204 | 0.999934 |
| rad19anti          | 2.07282e-05 | 0.999955 | 2.09087e-05 | 0.999955 |
| rad30              | 1.54420e-05 | 0.999971 | 1.55765e-05 | 0.999971 |
| PAH9+H             | 1.45718e-05 | 0.999985 | 1.46987e-05 | 0.999985 |
| rad38              | 4.88297e-06 | 0.999990 | 4.92550e-06 | 0.999990 |
| rad37              | 4.23976e-06 | 0.999995 | 4.27668e-06 | 0.999994 |
| rad35              | 3.83134e-06 | 0.999998 | 3.86471e-06 | 0.999998 |
| rad19syn           | 5.75842e-07 | 0.999999 | 5.80857e-07 | 0.999999 |
| rad46              | 4.35560e-07 | 0.999999 | 4.39353e-07 | 0.999999 |
| rad54              | 1.01017e-07 | 1.000000 | 1.01897e-07 | 0.999999 |
| rad60syn           | 8.96246e-08 | 1.000000 | 9.04050e-08 | 1.000000 |
| PAH3+H             | 8.11820e-08 | 1.000000 | 8.18892e-08 | 1.000000 |
| rad60anti          | 4.57653e-08 | 1.000000 | 4.61638e-08 | 1.000000 |

|               |             |          |             |          |
|---------------|-------------|----------|-------------|----------|
| rad6          | 2.42161e-08 | 1.000000 | 2.44270e-08 | 1.000000 |
| PAH10+CH3     | 2.25835e-08 | 1.000000 | 2.27801e-08 | 1.000000 |
| PhcycC3H3_A+H | 2.05528e-08 | 1.000000 | 2.07318e-08 | 1.000000 |
| rad59         | 1.35486e-08 | 1.000000 | 1.36666e-08 | 1.000000 |
| rad50         | 9.40359e-09 | 1.000000 | 9.48551e-09 | 1.000000 |
| rad70         | 4.88193e-09 | 1.000000 | 4.92445e-09 | 1.000000 |
| rad62         | 3.91161e-09 | 1.000000 | 3.94568e-09 | 1.000000 |
| rad2          | 3.73207e-09 | 1.000000 | 3.76458e-09 | 1.000000 |
| rad67         | 3.65819e-09 | 1.000000 | 3.69005e-09 | 1.000000 |
| PAH1+H        | 3.25972e-09 | 1.000000 | 3.28811e-09 | 1.000000 |
| rad43         | 2.57507e-09 | 1.000000 | 2.59750e-09 | 1.000000 |
| rad55         | 2.29328e-09 | 1.000000 | 2.31325e-09 | 1.000000 |
| rad23         | 6.80652e-10 | 1.000000 | 6.86579e-10 | 1.000000 |
| rad1          | 5.80795e-10 | 1.000000 | 5.85853e-10 | 1.000000 |
| rad34         | 2.96007e-10 | 1.000000 | 2.98585e-10 | 1.000000 |
| rad52         | 1.71040e-10 | 1.000000 | 1.72529e-10 | 1.000000 |
| rad51         | 1.34246e-10 | 1.000000 | 1.35415e-10 | 1.000000 |
| rad10         | 1.24293e-10 | 1.000000 | 1.25375e-10 | 1.000000 |
| rad45         | 1.10532e-10 | 1.000000 | 1.11495e-10 | 1.000000 |
| rad3          | 8.64854e-11 | 1.000000 | 8.72384e-11 | 1.000000 |
| rad4          | 5.51975e-11 | 1.000000 | 5.56782e-11 | 1.000000 |
| rad28         | 2.62546e-11 | 1.000000 | 2.64833e-11 | 1.000000 |
| rad58         | 1.71339e-11 | 1.000000 | 1.72831e-11 | 1.000000 |
| rad42         | 1.22226e-11 | 1.000000 | 1.23291e-11 | 1.000000 |
| rad53         | 1.06169e-11 | 1.000000 | 1.07093e-11 | 1.000000 |
| rad36         | 1.01771e-11 | 1.000000 | 1.02657e-11 | 1.000000 |
| rad26         | 9.47161e-12 | 1.000000 | 9.55404e-12 | 1.000000 |
| rad64         | 4.60115e-12 | 1.000000 | 4.64122e-12 | 1.000000 |
| rad65         | 4.04882e-12 | 1.000000 | 4.08408e-12 | 1.000000 |
| rad41         | 2.76419e-12 | 1.000000 | 2.78826e-12 | 1.000000 |
| rad7          | 2.70220e-12 | 1.000000 | 2.72573e-12 | 1.000000 |
| rad56         | 1.10536e-12 | 1.000000 | 1.11498e-12 | 1.000000 |
| rad11         | 7.41956e-13 | 1.000000 | 7.48417e-13 | 1.000000 |
| rad68syn      | 1.32112e-13 | 1.000000 | 1.33262e-13 | 1.000000 |
| rad68anti     | 9.18139e-14 | 1.000000 | 9.26137e-14 | 1.000000 |
| rad61         | 2.46432e-14 | 1.000000 | 2.48578e-14 | 1.000000 |
| rad13         | 2.26334e-14 | 1.000000 | 2.28305e-14 | 1.000000 |
| rad22         | 1.95910e-14 | 1.000000 | 1.97616e-14 | 1.000000 |
| PAH8+H        | 8.71255e-15 | 1.000000 | 8.78846e-15 | 1.000000 |
| rad40syn      | 4.98896e-15 | 1.000000 | 5.03241e-15 | 1.000000 |
| rad9          | 4.64881e-15 | 1.000000 | 4.68929e-15 | 1.000000 |
| rad73         | 4.15558e-15 | 1.000000 | 4.19176e-15 | 1.000000 |
| rad71         | 4.14073e-15 | 1.000000 | 4.17679e-15 | 1.000000 |
| rad31         | 3.07581e-15 | 1.000000 | 3.10259e-15 | 1.000000 |
| rad40anti     | 1.60830e-15 | 1.000000 | 1.62230e-15 | 1.000000 |
| rad25         | 7.55958e-16 | 1.000000 | 7.62542e-16 | 1.000000 |
| rad33         | 6.17314e-16 | 1.000000 | 6.22689e-16 | 1.000000 |
| rad14         | 4.78603e-16 | 1.000000 | 4.82771e-16 | 1.000000 |
| rad27         | 4.21441e-16 | 1.000000 | 4.25111e-16 | 1.000000 |
| rad21         | 2.20891e-16 | 1.000000 | 2.22815e-16 | 1.000000 |
| rad72         | 1.12871e-16 | 1.000000 | 1.13854e-16 | 1.000000 |
| rad20         | 9.24769e-17 | 1.000000 | 9.32820e-17 | 1.000000 |
| rad24         | 7.33358e-18 | 1.000000 | 7.39744e-18 | 1.000000 |
| rad15         | 3.07698e-18 | 1.000000 | 3.10378e-18 | 1.000000 |
| rad12         | 3.31270e-19 | 1.000000 | 3.34155e-19 | 1.000000 |
| rad18         | 5.06973e-20 | 1.000000 | 5.11388e-20 | 1.000000 |
| rad5          | 1.32832e-21 | 1.000000 | 1.33988e-21 | 1.000000 |
| rad47         | 1.06856e-22 | 1.000000 | 1.07787e-22 | 1.000000 |
| rad8          | 7.33203e-30 | 1.000000 | 7.39588e-30 | 1.000000 |

0.100000000E-03 Pa, 700.000000 K

=====

| Rate constant      | True (fraction)      | Effective (fraction) |
|--------------------|----------------------|----------------------|
| Total              | 1.39564e-13 (1.00 )  | 1.36669e-13 (1.00 )  |
| Formation of rad11 | 5.88273e-14 (0.422 ) | 5.72650e-14 (0.419 ) |
| Formation of rad6  | 5.01684e-14 (0.359 ) | 4.88360e-14 (0.357 ) |
| H-abstraction      | 3.05678e-14 (0.219 ) | 3.05678e-14 (0.224 ) |

| species            | PYtrue     | Cumul    | PYeffective | Cumul    |
|--------------------|------------|----------|-------------|----------|
| Indene+H           | 0.510454   | 0.510454 | 0.521266    | 0.521266 |
| Benzene+2-propynyl | 0.219024   | 0.729479 | 0.223663    | 0.744929 |
| C2H2+PhCH2         | 0.140690   | 0.870168 | 0.143669    | 0.888598 |
| PhCCH+CH3          | 0.0586090  | 0.928777 | 0.0598504   | 0.948448 |
| PhCHCCH2+H         | 0.0277621  | 0.956539 | 0.0283502   | 0.976799 |
| Phenyl+Allene      | 0.0207414  | 0.977281 | 0.000000    | 0.976799 |
| Ph+MeAc            | 0.00771338 | 0.984994 | 0.00787671  | 0.984675 |
| PhCCH3+H           | 5.00756058 | 0.992555 | 0.00772071  | 0.992396 |
| PhCH2CCH+H         | 0.00451179 | 0.997067 | 0.00460736  | 0.997003 |

|               |             |          |             |          |
|---------------|-------------|----------|-------------|----------|
| PAH7+H        | 0.00225727  | 0.999324 | 0.00230508  | 0.999308 |
| rad39         | 0.000548287 | 0.999872 | 0.000559900 | 0.999868 |
| rad19anti     | 4.66036e-05 | 0.999919 | 4.75908e-05 | 0.999916 |
| PAH9+H        | 2.99985e-05 | 0.999949 | 3.06339e-05 | 0.999947 |
| rad30         | 2.26761e-05 | 0.999971 | 2.31564e-05 | 0.999970 |
| rad38         | 1.05315e-05 | 0.999982 | 1.07545e-05 | 0.999980 |
| rad35         | 7.29844e-06 | 0.999989 | 7.45303e-06 | 0.999988 |
| rad37         | 5.93520e-06 | 0.999995 | 6.06092e-06 | 0.999994 |
| rad19syn      | 2.61379e-06 | 0.999998 | 2.66916e-06 | 0.999997 |
| rad46         | 1.18433e-06 | 0.999999 | 1.20941e-06 | 0.999998 |
| rad54         | 5.53865e-07 | 0.999999 | 5.65596e-07 | 0.999998 |
| PAH3+H        | 2.96686e-07 | 1.000000 | 3.02969e-07 | 0.999999 |
| rad60syn      | 2.09903e-07 | 1.000000 | 2.14349e-07 | 0.999999 |
| PhcycC3H3_A+H | 1.62838e-07 | 1.000000 | 1.66287e-07 | 0.999999 |
| rad60anti     | 1.11059e-07 | 1.000000 | 1.13411e-07 | 0.999999 |
| PAH10+CH3     | 8.88430e-08 | 1.000000 | 9.07250e-08 | 0.999999 |
| rad50         | 4.89498e-08 | 1.000000 | 4.99865e-08 | 0.999999 |
| rad59         | 4.64276e-08 | 1.000000 | 4.74110e-08 | 0.999999 |
| rad70         | 3.43279e-08 | 1.000000 | 3.50550e-08 | 0.999999 |
| PAH1+H        | 2.87929e-08 | 1.000000 | 2.94027e-08 | 0.999999 |
| rad67         | 2.16414e-08 | 1.000000 | 2.20998e-08 | 0.999999 |
| rad62         | 1.75396e-08 | 1.000000 | 1.79112e-08 | 0.999999 |
| rad55         | 1.62462e-08 | 1.000000 | 1.65903e-08 | 1.000000 |
| rad43         | 8.26647e-09 | 1.000000 | 8.44157e-09 | 1.000000 |
| rad6          | 5.86354e-09 | 1.000000 | 5.98774e-09 | 1.000000 |
| rad34         | 2.73085e-09 | 1.000000 | 2.78869e-09 | 1.000000 |
| rad2          | 1.91612e-09 | 1.000000 | 1.95670e-09 | 1.000000 |
| rad51         | 1.25279e-09 | 1.000000 | 1.27933e-09 | 1.000000 |
| rad52         | 1.21940e-09 | 1.000000 | 1.24523e-09 | 1.000000 |
| rad23         | 7.88629e-10 | 1.000000 | 8.05333e-10 | 1.000000 |
| rad1          | 3.63372e-10 | 1.000000 | 3.71069e-10 | 1.000000 |
| rad53         | 1.69563e-10 | 1.000000 | 1.73155e-10 | 1.000000 |
| rad45         | 1.42131e-10 | 1.000000 | 1.45141e-10 | 1.000000 |
| rad58         | 1.35855e-10 | 1.000000 | 1.38733e-10 | 1.000000 |
| rad42         | 1.03500e-10 | 1.000000 | 1.05692e-10 | 1.000000 |
| rad64         | 7.31442e-11 | 1.000000 | 7.46934e-11 | 1.000000 |
| rad10         | 5.10889e-11 | 1.000000 | 5.21711e-11 | 1.000000 |
| rad3          | 4.51331e-11 | 1.000000 | 4.60890e-11 | 1.000000 |
| rad65         | 3.92083e-11 | 1.000000 | 4.00388e-11 | 1.000000 |
| rad4          | 3.13553e-11 | 1.000000 | 3.20195e-11 | 1.000000 |
| rad56         | 2.88485e-11 | 1.000000 | 2.94596e-11 | 1.000000 |
| rad41         | 1.94875e-11 | 1.000000 | 1.99002e-11 | 1.000000 |
| rad36         | 1.43960e-11 | 1.000000 | 1.47010e-11 | 1.000000 |
| rad28         | 5.04236e-12 | 1.000000 | 5.14916e-12 | 1.000000 |
| rad68syn      | 3.41627e-12 | 1.000000 | 3.48863e-12 | 1.000000 |
| rad26         | 2.68934e-12 | 1.000000 | 2.74631e-12 | 1.000000 |
| rad68anti     | 2.34499e-12 | 1.000000 | 2.39466e-12 | 1.000000 |
| rad7          | 7.58470e-13 | 1.000000 | 7.74535e-13 | 1.000000 |
| PAH8+H        | 4.78242e-13 | 1.000000 | 4.88372e-13 | 1.000000 |
| rad61         | 4.70942e-13 | 1.000000 | 4.80916e-13 | 1.000000 |
| rad11         | 2.42664e-13 | 1.000000 | 2.47804e-13 | 1.000000 |
| rad40syn      | 2.02313e-13 | 1.000000 | 2.06599e-13 | 1.000000 |
| rad9          | 1.78947e-13 | 1.000000 | 1.82737e-13 | 1.000000 |
| rad73         | 1.13612e-13 | 1.000000 | 1.16018e-13 | 1.000000 |
| rad71         | 9.91988e-14 | 1.000000 | 1.01300e-13 | 1.000000 |
| rad40anti     | 7.24115e-14 | 1.000000 | 7.39452e-14 | 1.000000 |
| rad22         | 2.31872e-14 | 1.000000 | 2.36783e-14 | 1.000000 |
| rad13         | 1.38610e-14 | 1.000000 | 1.41546e-14 | 1.000000 |
| rad21         | 4.00826e-15 | 1.000000 | 4.09316e-15 | 1.000000 |
| rad33         | 3.86561e-15 | 1.000000 | 3.94749e-15 | 1.000000 |
| rad72         | 2.80961e-15 | 1.000000 | 2.86911e-15 | 1.000000 |
| rad31         | 1.78375e-15 | 1.000000 | 1.82153e-15 | 1.000000 |
| rad20         | 1.49298e-15 | 1.000000 | 1.52460e-15 | 1.000000 |
| rad25         | 8.96513e-16 | 1.000000 | 9.15503e-16 | 1.000000 |
| rad27         | 4.22772e-16 | 1.000000 | 4.31726e-16 | 1.000000 |
| rad14         | 4.08044e-16 | 1.000000 | 4.16687e-16 | 1.000000 |
| rad24         | 3.96850e-16 | 1.000000 | 4.05255e-16 | 1.000000 |
| rad15         | 8.20587e-17 | 1.000000 | 8.37970e-17 | 1.000000 |
| rad12         | 4.79332e-17 | 1.000000 | 4.89485e-17 | 1.000000 |
| rad18         | 2.34700e-19 | 1.000000 | 2.39671e-19 | 1.000000 |
| rad5          | 9.92362e-22 | 1.000000 | 1.01338e-21 | 1.000000 |
| rad47         | 9.05120e-22 | 1.000000 | 9.24291e-22 | 1.000000 |
| rad8          | 9.25581e-26 | 1.000000 | 9.45190e-26 | 1.000000 |

0.100000000E-03 Pa, 800.000000 K

=====

| Rate constant      | True (fraction)      | Effective (fraction) |
|--------------------|----------------------|----------------------|
| Total              | 2.75392e-13 (1.00 )  | 2.64229e-13 (1.00 )  |
| Formation of rad11 | 1.06471e-13 (0.387 ) | 1.00706e-13 (0.381 ) |

|                   |             |         |             |         |
|-------------------|-------------|---------|-------------|---------|
| Formation of rad6 | 9.97133e-14 | (0.362) | 9.43145e-14 | (0.357) |
| H-abstraction     | 6.92082e-14 | (0.251) | 6.92082e-14 | (0.262) |

| species            | PYtrue      | Cumul    | PYeffective | Cumul    |
|--------------------|-------------|----------|-------------|----------|
| Indene+H           | 0.420963    | 0.420963 | 0.438749    | 0.438749 |
| Benzene+2-propynyl | 0.251308    | 0.672270 | 0.261925    | 0.700674 |
| C2H2+PhCH2         | 0.158756    | 0.831027 | 0.165464    | 0.866138 |
| PhCCH+CH3          | 0.0631451   | 0.894172 | 0.0658129   | 0.931950 |
| Phenyl+Allene      | 0.0405363   | 0.934708 | 0.00000     | 0.931950 |
| PhCHCCH2+H         | 0.0360792   | 0.970787 | 0.0376035   | 0.969554 |
| PhCH2CCH+H         | 0.00999819  | 0.980786 | 0.0104207   | 0.979975 |
| Ph+MeAc            | 0.00840385  | 0.989189 | 0.00875888  | 0.988734 |
| PhCCCH3+H          | 0.00623442  | 0.995424 | 0.00649782  | 0.995231 |
| PAH7+H             | 0.00351019  | 0.998934 | 0.00365849  | 0.998890 |
| rad39              | 0.000836589 | 0.999771 | 0.000871939 | 0.999762 |
| rad19anti          | 9.01935e-05 | 0.999861 | 9.40042e-05 | 0.999856 |
| PAH9+H             | 5.38601e-05 | 0.999915 | 5.61357e-05 | 0.999912 |
| rad30              | 2.94555e-05 | 0.999944 | 3.07000e-05 | 0.999943 |
| rad38              | 1.96292e-05 | 0.999964 | 2.04585e-05 | 0.999963 |
| rad35              | 1.22732e-05 | 0.999976 | 1.27916e-05 | 0.999976 |
| rad19syn           | 8.33347e-06 | 0.999984 | 8.68552e-06 | 0.999985 |
| rad37              | 7.26188e-06 | 0.999992 | 7.56866e-06 | 0.999992 |
| rad46              | 2.65267e-06 | 0.999994 | 2.76474e-06 | 0.999995 |
| rad54              | 2.03471e-06 | 0.999996 | 2.12067e-06 | 0.999997 |
| PAH3+H             | 7.96489e-07 | 0.999997 | 8.30142e-07 | 0.999998 |
| PhcycC3H3_A+H      | 7.94325e-07 | 0.999998 | 8.27884e-07 | 0.999999 |
| rad60syn           | 3.96788e-07 | 0.999998 | 4.13551e-07 | 0.999999 |
| PAH10+CH3          | 2.53201e-07 | 0.999999 | 2.63898e-07 | 0.999999 |
| rad60anti          | 2.15810e-07 | 0.999999 | 2.24928e-07 | 1.000000 |
| rad50              | 1.82328e-07 | 0.999999 | 1.90031e-07 | 1.000000 |
| rad70              | 1.50040e-07 | 0.999999 | 1.56379e-07 | 1.000000 |
| PAH1+H             | 1.48682e-07 | 0.999999 | 1.54964e-07 | 1.000000 |
| rad59              | 1.17661e-07 | 0.999999 | 1.22632e-07 | 1.000000 |
| rad67              | 9.03380e-08 | 1.000000 | 9.41547e-08 | 1.000000 |
| rad55              | 7.18814e-08 | 1.000000 | 7.49183e-08 | 1.000000 |
| rad62              | 5.32905e-08 | 1.000000 | 5.55420e-08 | 1.000000 |
| rad43              | 1.85218e-08 | 1.000000 | 1.93043e-08 | 1.000000 |
| rad34              | 1.46559e-08 | 1.000000 | 1.52750e-08 | 1.000000 |
| rad51              | 7.23041e-09 | 1.000000 | 7.53589e-09 | 1.000000 |
| rad52              | 5.74147e-09 | 1.000000 | 5.98404e-09 | 1.000000 |
| rad53              | 1.38657e-09 | 1.000000 | 1.44515e-09 | 1.000000 |
| rad6               | 1.35803e-09 | 1.000000 | 1.41540e-09 | 1.000000 |
| rad58              | 6.48425e-10 | 1.000000 | 6.75820e-10 | 1.000000 |
| rad2               | 5.84525e-10 | 1.000000 | 6.09221e-10 | 1.000000 |
| rad64              | 5.75079e-10 | 1.000000 | 5.99375e-10 | 1.000000 |
| rad42              | 5.07613e-10 | 1.000000 | 5.29059e-10 | 1.000000 |
| rad23              | 4.40523e-10 | 1.000000 | 4.59134e-10 | 1.000000 |
| rad56              | 3.39879e-10 | 1.000000 | 3.54238e-10 | 1.000000 |
| rad65              | 2.29776e-10 | 1.000000 | 2.39484e-10 | 1.000000 |
| rad1               | 1.11891e-10 | 1.000000 | 1.16619e-10 | 1.000000 |
| rad45              | 1.01088e-10 | 1.000000 | 1.05359e-10 | 1.000000 |
| rad41              | 7.94325e-11 | 1.000000 | 8.27884e-11 | 1.000000 |
| rad68syn           | 3.95128e-11 | 1.000000 | 4.11821e-11 | 1.000000 |
| rad68anti          | 2.68642e-11 | 1.000000 | 2.79992e-11 | 1.000000 |
| rad3               | 1.45180e-11 | 1.000000 | 1.51314e-11 | 1.000000 |
| rad10              | 1.41360e-11 | 1.000000 | 1.47332e-11 | 1.000000 |
| rad4               | 1.03098e-11 | 1.000000 | 1.07453e-11 | 1.000000 |
| PAH8+H             | 9.76572e-12 | 1.000000 | 1.01783e-11 | 1.000000 |
| rad36              | 9.61403e-12 | 1.000000 | 1.00202e-11 | 1.000000 |
| rad61              | 4.46643e-12 | 1.000000 | 4.65513e-12 | 1.000000 |
| rad40syn           | 3.28135e-12 | 1.000000 | 3.41998e-12 | 1.000000 |
| rad9               | 2.92325e-12 | 1.000000 | 3.04676e-12 | 1.000000 |
| rad40anti          | 1.27736e-12 | 1.000000 | 1.33132e-12 | 1.000000 |
| rad28              | 1.25439e-12 | 1.000000 | 1.30738e-12 | 1.000000 |
| rad73              | 1.15655e-12 | 1.000000 | 1.20542e-12 | 1.000000 |
| rad26              | 6.53903e-13 | 1.000000 | 6.81530e-13 | 1.000000 |
| rad71              | 5.71333e-13 | 1.000000 | 5.95471e-13 | 1.000000 |
| rad7               | 2.24135e-13 | 1.000000 | 2.33604e-13 | 1.000000 |
| rad11              | 1.37190e-13 | 1.000000 | 1.42986e-13 | 1.000000 |
| rad13              | 6.06853e-14 | 1.000000 | 6.32492e-14 | 1.000000 |
| rad21              | 5.89482e-14 | 1.000000 | 6.14388e-14 | 1.000000 |
| rad33              | 2.86573e-14 | 1.000000 | 2.98680e-14 | 1.000000 |
| rad20              | 2.26406e-14 | 1.000000 | 2.35971e-14 | 1.000000 |
| rad22              | 1.41447e-14 | 1.000000 | 1.47423e-14 | 1.000000 |
| rad72              | 8.47437e-15 | 1.000000 | 8.83239e-15 | 1.000000 |
| rad24              | 5.58311e-15 | 1.000000 | 5.81899e-15 | 1.000000 |
| rad25              | 1.92326e-15 | 1.000000 | 2.00452e-15 | 1.000000 |
| rad12              | 1.15828e-15 | 1.000000 | 1.20722e-15 | 1.000000 |
| rad31              | 8.40549e-16 | 1.000000 | 8.76058e-16 | 1.000000 |



|       |             |          |             |         |
|-------|-------------|----------|-------------|---------|
| rad15 | 8.29207e-16 | 1.000000 | 8.64241e-16 | 1.00000 |
| rad27 | 7.21024e-16 | 1.000000 | 7.51486e-16 | 1.00000 |
| rad14 | 5.79706e-16 | 1.000000 | 6.04198e-16 | 1.00000 |
| rad18 | 2.31019e-18 | 1.000000 | 2.40779e-18 | 1.00000 |
| rad47 | 5.03123e-21 | 1.000000 | 5.24379e-21 | 1.00000 |
| rad5  | 9.88573e-22 | 1.000000 | 1.03035e-21 | 1.00000 |
| rad8  | 3.33313e-22 | 1.000000 | 3.47395e-22 | 1.00000 |

0.100000000E-03 Pa, 900.000000 K

| Rate constant      | True (fraction)      | Effective (fraction) |
|--------------------|----------------------|----------------------|
| Total              | 4.88072e-13 (1.00 )  | 4.55158e-13 (1.00 )  |
| Formation of rad11 | 1.74945e-13 (0.358 ) | 1.58562e-13 (0.348 ) |
| Formation of rad6  | 1.76509e-13 (0.362 ) | 1.59978e-13 (0.351 ) |
| H-abstraction      | 1.36618e-13 (0.280 ) | 1.36618e-13 (0.300 ) |

| species            | PYtrue      | Cumul    | PYeffective | Cumul    |
|--------------------|-------------|----------|-------------|----------|
| Indene+H           | 0.341014    | 0.341014 | 0.365674    | 0.365674 |
| Benzene+2-propynyl | 0.279914    | 0.620928 | 0.300155    | 0.665829 |
| C2H2+PhCH2         | 0.164625    | 0.785553 | 0.176529    | 0.842358 |
| Phenyl+Allene      | 0.0674364   | 0.852989 | 0.000000    | 0.842358 |
| PhCCH+CH3          | 0.0639259   | 0.916915 | 0.0685485   | 0.910906 |
| PhCHCCH2+H         | 0.0451268   | 0.962042 | 0.0483901   | 0.959296 |
| PhCH2CCH+H         | 0.0182967   | 0.980338 | 0.0196198   | 0.978916 |
| Ph+MeAc            | 0.00849313  | 0.988832 | 0.00910729  | 0.988024 |
| PhCCCH3+H          | 0.00485364  | 0.993685 | 0.00520462  | 0.993228 |
| PAH7+H             | 0.00482415  | 0.998509 | 0.00517299  | 0.998401 |
| rad39              | 0.00111872  | 0.999628 | 0.00119961  | 0.999601 |
| rad19anti          | 0.000152570 | 0.999781 | 0.000163603 | 0.999764 |
| PAH9+H             | 8.58055e-05 | 0.999866 | 9.20100e-05 | 0.999856 |
| rad30              | 3.45816e-05 | 0.999901 | 3.70823e-05 | 0.999893 |
| rad38              | 3.22627e-05 | 0.999933 | 3.45957e-05 | 0.999928 |
| rad19syn           | 2.05726e-05 | 0.999954 | 2.20602e-05 | 0.999950 |
| rad35              | 1.85019e-05 | 0.999972 | 1.98398e-05 | 0.999970 |
| rad37              | 8.30353e-06 | 0.999981 | 8.90399e-06 | 0.999979 |
| rad54              | 5.61022e-06 | 0.999986 | 6.01591e-06 | 0.999985 |
| rad46              | 5.06240e-06 | 0.999991 | 5.42848e-06 | 0.999990 |
| PhcycC3H3_A+H      | 2.75303e-06 | 0.999994 | 2.95211e-06 | 0.999993 |
| PAH3+H             | 1.70031e-06 | 0.999996 | 1.82327e-06 | 0.999995 |
| rad60syn           | 6.35566e-07 | 0.999996 | 6.81526e-07 | 0.999996 |
| PAH10+CH3          | 5.91899e-07 | 0.999997 | 6.34701e-07 | 0.999996 |
| PAH1+H             | 5.27743e-07 | 0.999998 | 5.65906e-07 | 0.999997 |
| rad50              | 5.26076e-07 | 0.999998 | 5.64118e-07 | 0.999998 |
| rad70              | 4.68169e-07 | 0.999999 | 5.02024e-07 | 0.999998 |
| rad60anti          | 3.53464e-07 | 0.999999 | 3.79023e-07 | 0.999998 |
| rad67              | 2.86639e-07 | 0.999999 | 3.07366e-07 | 0.999999 |
| rad59              | 2.38375e-07 | 0.999999 | 2.55613e-07 | 0.999999 |
| rad55              | 2.28529e-07 | 1.000000 | 2.45055e-07 | 0.999999 |
| rad62              | 1.23575e-07 | 1.000000 | 1.32511e-07 | 0.999999 |
| rad34              | 5.38118e-08 | 1.000000 | 5.77031e-08 | 0.999999 |
| rad43              | 3.25339e-08 | 1.000000 | 3.48865e-08 | 0.999999 |
| rad51              | 2.94692e-08 | 1.000000 | 3.16002e-08 | 0.999999 |
| rad52              | 1.98879e-08 | 1.000000 | 2.13261e-08 | 1.000000 |
| rad53              | 7.16536e-09 | 1.000000 | 7.68353e-09 | 1.000000 |
| rad64              | 2.79837e-09 | 1.000000 | 3.00073e-09 | 1.000000 |
| rad56              | 2.33179e-09 | 1.000000 | 2.50041e-09 | 1.000000 |
| rad58              | 2.16896e-09 | 1.000000 | 2.32581e-09 | 1.000000 |
| rad42              | 1.71810e-09 | 1.000000 | 1.84235e-09 | 1.000000 |
| rad65              | 9.39417e-10 | 1.000000 | 1.00735e-09 | 1.000000 |
| rad6               | 3.23566e-10 | 1.000000 | 3.46965e-10 | 1.000000 |
| rad68syn           | 2.64057e-10 | 1.000000 | 2.83152e-10 | 1.000000 |
| rad41              | 2.24681e-10 | 1.000000 | 2.40928e-10 | 1.000000 |
| rad23              | 2.02657e-10 | 1.000000 | 2.17312e-10 | 1.000000 |
| rad68anti          | 1.78167e-10 | 1.000000 | 1.91051e-10 | 1.000000 |
| rad2               | 1.36515e-10 | 1.000000 | 1.46387e-10 | 1.000000 |
| PAH8+H             | 1.02542e-10 | 1.000000 | 1.09957e-10 | 1.000000 |
| rad45              | 5.59283e-11 | 1.000000 | 5.99726e-11 | 1.000000 |
| rad40syn           | 2.86499e-11 | 1.000000 | 3.07216e-11 | 1.000000 |
| rad1               | 2.72782e-11 | 1.000000 | 2.92508e-11 | 1.000000 |
| rad61              | 2.66442e-11 | 1.000000 | 2.85709e-11 | 1.000000 |
| rad40anti          | 1.19790e-11 | 1.000000 | 1.28452e-11 | 1.000000 |
| rad9               | 1.16426e-11 | 1.000000 | 1.24846e-11 | 1.000000 |
| rad73              | 1.05368e-11 | 1.000000 | 1.12988e-11 | 1.000000 |
| rad36              | 5.31952e-12 | 1.000000 | 5.70419e-12 | 1.000000 |
| rad71              | 4.68121e-12 | 1.000000 | 5.01972e-12 | 1.000000 |
| rad3               | 4.22768e-12 | 1.000000 | 4.53340e-12 | 1.000000 |
| rad10              | 3.26301e-12 | 1.000000 | 3.49897e-12 | 1.000000 |
| rad4               | 3.13245e-12 | 1.000000 | 3.35897e-12 | 1.000000 |

|       |             |          |             |          |
|-------|-------------|----------|-------------|----------|
| rad13 | 4.93144e-13 | 1.000000 | 5.28805e-13 | 1.000000 |
| rad21 | 3.80413e-13 | 1.000000 | 4.07921e-13 | 1.000000 |
| rad28 | 3.78472e-13 | 1.000000 | 4.05841e-13 | 1.000000 |
| rad11 | 3.27065e-13 | 1.000000 | 3.50717e-13 | 1.000000 |
| rad20 | 1.65010e-13 | 1.000000 | 1.76942e-13 | 1.000000 |
| rad26 | 1.52621e-13 | 1.000000 | 1.63657e-13 | 1.000000 |
| rad33 | 1.26670e-13 | 1.000000 | 1.35831e-13 | 1.000000 |
| rad7  | 1.07708e-13 | 1.000000 | 1.15496e-13 | 1.000000 |
| rad24 | 1.88184e-14 | 1.000000 | 2.01793e-14 | 1.000000 |
| rad72 | 1.67745e-14 | 1.000000 | 1.79875e-14 | 1.000000 |
| rad22 | 7.13307e-15 | 1.000000 | 7.64888e-15 | 1.000000 |
| rad25 | 5.51945e-15 | 1.000000 | 5.91857e-15 | 1.000000 |
| rad12 | 5.35730e-15 | 1.000000 | 5.74470e-15 | 1.000000 |
| rad15 | 2.56403e-15 | 1.000000 | 2.74945e-15 | 1.000000 |
| rad27 | 1.33058e-15 | 1.000000 | 1.42680e-15 | 1.000000 |
| rad14 | 1.05355e-15 | 1.000000 | 1.12973e-15 | 1.000000 |
| rad31 | 4.19946e-16 | 1.000000 | 4.50314e-16 | 1.000000 |
| rad18 | 3.28873e-17 | 1.000000 | 3.52655e-17 | 1.000000 |
| rad8  | 1.12161e-19 | 1.000000 | 1.20272e-19 | 1.000000 |
| rad47 | 2.05660e-20 | 1.000000 | 2.20532e-20 | 1.000000 |
| rad5  | 1.29578e-21 | 1.000000 | 1.38949e-21 | 1.000000 |

0.100000000E-03 Pa, 1000.00000 K

| Rate constant      | True (fraction) |          | Effective (fraction) |          |
|--------------------|-----------------|----------|----------------------|----------|
| Total              | 7.98668e-13     | (1.00 )  | 7.19594e-13          | (1.00 )  |
| Formation of rad11 | 2.67704e-13     | (0.335 ) | 2.29546e-13          | (0.319 ) |
| Formation of rad6  | 2.87049e-13     | (0.359 ) | 2.46133e-13          | (0.342 ) |
| H-abstraction      | 2.43915e-13     | (0.305 ) | 2.43915e-13          | (0.339 ) |

  

| species            | PYtrue      | Cumul    | PYeffective | Cumul    |
|--------------------|-------------|----------|-------------|----------|
| Benzene+2-propynyl | 0.305402    | 0.305402 | 0.338962    | 0.338962 |
| Indene+H           | 0.272124    | 0.577526 | 0.302027    | 0.640989 |
| C2H2+PhCH2         | 0.159453    | 0.736979 | 0.176975    | 0.817964 |
| Phenyl+Allene      | 0.0990073   | 0.835987 | 0.000000    | 0.817964 |
| PhCCH+CH3          | 0.0616205   | 0.897607 | 0.0683917   | 0.886356 |
| PhCHCCH2+H         | 0.0537595   | 0.951367 | 0.0596670   | 0.946023 |
| PhCH2CCH+H         | 0.0288969   | 0.980264 | 0.0320723   | 0.978095 |
| Ph+MeAc            | 0.00817632  | 0.988440 | 0.00907480  | 0.987170 |
| PAH7+H             | 0.00601184  | 0.994452 | 0.00667246  | 0.993842 |
| PhCCCH3+H          | 0.00364277  | 0.998095 | 0.00404307  | 0.997885 |
| rad39              | 0.00134896  | 0.999444 | 0.00149719  | 0.999382 |
| rad19anti          | 0.000230025 | 0.999674 | 0.000255302 | 0.999638 |
| PAH9+H             | 0.000123695 | 0.999797 | 0.000137288 | 0.999775 |
| rad38              | 4.77793e-05 | 0.999845 | 5.30296e-05 | 0.999828 |
| rad19syn           | 4.20371e-05 | 0.999887 | 4.66565e-05 | 0.999875 |
| rad30              | 3.74826e-05 | 0.999925 | 4.16015e-05 | 0.999916 |
| rad35              | 2.54628e-05 | 0.999950 | 2.82608e-05 | 0.999945 |
| rad54              | 1.25292e-05 | 0.999963 | 1.39061e-05 | 0.999959 |
| rad37              | 9.28205e-06 | 0.999972 | 1.03021e-05 | 0.999969 |
| rad46              | 8.48861e-06 | 0.999980 | 9.42145e-06 | 0.999978 |
| PhcycC3H3_A+H      | 7.44283e-06 | 0.999988 | 8.26073e-06 | 0.999987 |
| PAH3+H             | 3.05843e-06 | 0.999991 | 3.39451e-06 | 0.999990 |
| PAH1+H             | 1.42911e-06 | 0.999992 | 1.58616e-06 | 0.999992 |
| rad50              | 1.24671e-06 | 0.999993 | 1.38370e-06 | 0.999993 |
| PAH10+CH3          | 1.21323e-06 | 0.999995 | 1.34654e-06 | 0.999994 |
| rad70              | 1.14131e-06 | 0.999996 | 1.26673e-06 | 0.999995 |
| rad60syn           | 8.97094e-07 | 0.999997 | 9.95669e-07 | 0.999996 |
| rad67              | 7.32850e-07 | 0.999997 | 8.13381e-07 | 0.999997 |
| rad55              | 5.71763e-07 | 0.999998 | 6.34592e-07 | 0.999998 |
| rad60anti          | 5.08253e-07 | 0.999999 | 5.64103e-07 | 0.999999 |
| rad59              | 4.08645e-07 | 0.999999 | 4.53550e-07 | 0.999999 |
| rad62              | 2.36337e-07 | 0.999999 | 2.62307e-07 | 0.999999 |
| rad34              | 1.49947e-07 | 0.999999 | 1.66424e-07 | 0.999999 |
| rad51              | 9.25871e-08 | 0.999999 | 1.02762e-07 | 0.999999 |
| rad52              | 5.46161e-08 | 0.999999 | 6.06177e-08 | 1.000000 |
| rad43              | 4.82844e-08 | 1.000000 | 5.35902e-08 | 1.000000 |
| rad53              | 2.66802e-08 | 1.000000 | 2.96121e-08 | 1.000000 |
| rad56              | 1.08965e-08 | 1.000000 | 1.20939e-08 | 1.000000 |
| rad64              | 9.68714e-09 | 1.000000 | 1.07517e-08 | 1.000000 |
| rad58              | 5.61422e-09 | 1.000000 | 6.23115e-09 | 1.000000 |
| rad42              | 4.47913e-09 | 1.000000 | 4.97133e-09 | 1.000000 |
| rad65              | 2.93950e-09 | 1.000000 | 3.26252e-09 | 1.000000 |
| rad68syn           | 1.19347e-09 | 1.000000 | 1.32462e-09 | 1.000000 |
| rad68anti          | 8.00253e-10 | 1.000000 | 8.88191e-10 | 1.000000 |
| PAH8+H             | 6.70059e-10 | 1.000000 | 7.43688e-10 | 1.000000 |
| rad41              | 4.94036e-10 | 1.000000 | 5.48324e-10 | 1.000000 |
| rad40syn           | 1.60979e-10 | 1.000000 | 1.78668e-10 | 1.000000 |

|           |             |          |             |          |
|-----------|-------------|----------|-------------|----------|
| rad6      | 1.18279e-10 | 1.000000 | 1.31276e-10 | 1.000000 |
| rad61     | 1.14010e-10 | 1.000000 | 1.26539e-10 | 1.000000 |
| rad23     | 9.74598e-11 | 1.000000 | 1.08169e-10 | 1.000000 |
| rad40anti | 7.14866e-11 | 1.000000 | 7.93425e-11 | 1.000000 |
| rad73     | 7.00113e-11 | 1.000000 | 7.77044e-11 | 1.000000 |
| rad71     | 3.69105e-11 | 1.000000 | 4.09665e-11 | 1.000000 |
| rad2      | 3.28429e-11 | 1.000000 | 3.64518e-11 | 1.000000 |
| rad45     | 3.02093e-11 | 1.000000 | 3.35289e-11 | 1.000000 |
| rad9      | 1.56391e-11 | 1.000000 | 1.73576e-11 | 1.000000 |
| rad1      | 7.18326e-12 | 1.000000 | 7.97259e-12 | 1.000000 |
| rad36     | 2.88645e-12 | 1.000000 | 3.20364e-12 | 1.000000 |
| rad13     | 2.41405e-12 | 1.000000 | 2.67931e-12 | 1.000000 |
| rad11     | 1.52592e-12 | 1.000000 | 1.69360e-12 | 1.000000 |
| rad3      | 1.39877e-12 | 1.000000 | 1.55247e-12 | 1.000000 |
| rad4      | 1.07342e-12 | 1.000000 | 1.19138e-12 | 1.000000 |
| rad21     | 9.56170e-13 | 1.000000 | 1.06124e-12 | 1.000000 |
| rad10     | 9.04089e-13 | 1.000000 | 1.00344e-12 | 1.000000 |
| rad20     | 4.65015e-13 | 1.000000 | 5.16114e-13 | 1.000000 |
| rad33     | 2.70083e-13 | 1.000000 | 2.99761e-13 | 1.000000 |
| rad7      | 2.63115e-13 | 1.000000 | 2.92028e-13 | 1.000000 |
| rad28     | 1.61261e-13 | 1.000000 | 1.78982e-13 | 1.000000 |
| rad72     | 1.28636e-13 | 1.000000 | 1.42772e-13 | 1.000000 |
| rad26     | 5.11440e-14 | 1.000000 | 5.67641e-14 | 1.000000 |
| rad24     | 2.48801e-14 | 1.000000 | 2.76141e-14 | 1.000000 |
| rad25     | 1.49322e-14 | 1.000000 | 1.65730e-14 | 1.000000 |
| rad12     | 9.30074e-15 | 1.000000 | 1.03228e-14 | 1.000000 |
| rad22     | 3.84630e-15 | 1.000000 | 4.26895e-15 | 1.000000 |
| rad15     | 3.32508e-15 | 1.000000 | 3.69046e-15 | 1.000000 |
| rad14     | 1.89450e-15 | 1.000000 | 2.10268e-15 | 1.000000 |
| rad27     | 1.86043e-15 | 1.000000 | 2.06487e-15 | 1.000000 |
| rad18     | 4.54917e-16 | 1.000000 | 5.04906e-16 | 1.000000 |
| rad31     | 2.32684e-16 | 1.000000 | 2.58253e-16 | 1.000000 |
| rad8      | 3.75825e-18 | 1.000000 | 4.17124e-18 | 1.000000 |
| rad47     | 6.62590e-20 | 1.000000 | 7.35399e-20 | 1.000000 |
| rad5      | 2.47603e-21 | 1.000000 | 2.74812e-21 | 1.000000 |

0.100000000E-03 Pa, 1100.00000 K

| =====              |                 |          |                      |          |
|--------------------|-----------------|----------|----------------------|----------|
| Rate constant      | True (fraction) |          | Effective (fraction) |          |
| -----              |                 |          |                      |          |
| Total              | 1.22919e-12     | (1.00 )  | 1.06688e-12          | (1.00 )  |
| Formation of rad11 | 3.87976e-13     | (0.316 ) | 3.11712e-13          | (0.292 ) |
| Formation of rad6  | 4.37724e-13     | (0.356 ) | 3.51681e-13          | (0.330 ) |
| H-abstraction      | 4.03491e-13     | (0.328 ) | 4.03491e-13          | (0.378 ) |
| -----              |                 |          |                      |          |
| species            | PYtrue          | Cumul    | PYeffective          | Cumul    |
| -----              |                 |          |                      |          |
| Benzene+2-propynyl | 0.328257        | 0.328257 | 0.378196             | 0.378196 |
| Indene+H           | 0.214714        | 0.542971 | 0.247379             | 0.625574 |
| C2H2+PhCH2         | 0.146502        | 0.689473 | 0.168789             | 0.794364 |
| Phenyl+Allene      | 0.132044        | 0.821517 | 0.000000             | 0.794364 |
| PhCHCCH2+H         | 0.0609574       | 0.882474 | 0.0702309            | 0.864595 |
| PhCCH+CH3          | 0.0572446       | 0.939719 | 0.0659535            | 0.930548 |
| PhCH2CCH+H         | 0.0407440       | 0.980463 | 0.0469425            | 0.977491 |
| Ph+MeAc            | 0.00763489      | 0.988098 | 0.00879642           | 0.986287 |
| PAH7+H             | 0.00694716      | 0.995045 | 0.00800405           | 0.994291 |
| PhCCCH3+H          | 0.00267733      | 0.997722 | 0.00308464           | 0.997376 |
| rad39              | 0.00150224      | 0.999224 | 0.00173078           | 0.999107 |
| rad19anti          | 0.000315220     | 0.999539 | 0.000363175          | 0.999470 |
| PAH9+H             | 0.000164386     | 0.999704 | 0.000189394          | 0.999659 |
| rad19syn           | 7.45655e-05     | 0.999778 | 8.59091e-05          | 0.999745 |
| rad38              | 6.50359e-05     | 0.999843 | 7.49299e-05          | 0.999820 |
| rad30              | 3.82332e-05     | 0.999882 | 4.40497e-05          | 0.999864 |
| rad35              | 3.25605e-05     | 0.999914 | 3.75140e-05          | 0.999902 |
| rad54              | 2.39077e-05     | 0.999938 | 2.75448e-05          | 0.999929 |
| PhcycC3H3_A+H      | 1.67306e-05     | 0.999955 | 1.92759e-05          | 0.999948 |
| rad46              | 1.28371e-05     | 0.999968 | 1.47901e-05          | 0.999963 |
| rad37              | 1.03715e-05     | 0.999978 | 1.19494e-05          | 0.999975 |
| PAH3+H             | 4.83975e-06     | 0.999983 | 5.57602e-06          | 0.999981 |
| PAH1+H             | 3.16887e-06     | 0.999986 | 3.65096e-06          | 0.999984 |
| rad50              | 2.53500e-06     | 0.999989 | 2.92066e-06          | 0.999987 |
| rad70              | 2.31279e-06     | 0.999991 | 2.66464e-06          | 0.999990 |
| PAH10+CH3          | 2.25114e-06     | 0.999993 | 2.59361e-06          | 0.999993 |
| rad67              | 1.57912e-06     | 0.999995 | 1.81935e-06          | 0.999994 |
| rad55              | 1.19782e-06     | 0.999996 | 1.38006e-06          | 0.999996 |
| rad60syn           | 1.15117e-06     | 0.999997 | 1.32630e-06          | 0.999997 |
| rad60anti          | 6.62627e-07     | 0.999998 | 7.63433e-07          | 0.999998 |
| rad59              | 6.18406e-07     | 0.999998 | 7.12482e-07          | 0.999999 |
| rad62              | 3.93252e-07     | 0.999999 | 4.53078e-07          | 0.999999 |
| rad34              | 3.40145e-07     | 0.999999 | 3.91892e-07          | 0.999999 |

|           |             |          |             |          |
|-----------|-------------|----------|-------------|----------|
| rad51     | 2.38372e-07 | 0.999999 | 2.74636e-07 | 1.000000 |
| rad52     | 1.25451e-07 | 1.000000 | 1.44537e-07 | 1.000000 |
| rad53     | 7.80404e-08 | 1.000000 | 8.99129e-08 | 1.000000 |
| rad43     | 6.37337e-08 | 1.000000 | 7.34295e-08 | 1.000000 |
| rad56     | 3.84098e-08 | 1.000000 | 4.42533e-08 | 1.000000 |
| rad64     | 2.61428e-08 | 1.000000 | 3.01199e-08 | 1.000000 |
| rad58     | 1.20347e-08 | 1.000000 | 1.38656e-08 | 1.000000 |
| rad42     | 9.67464e-09 | 1.000000 | 1.11465e-08 | 1.000000 |
| rad65     | 7.50471e-09 | 1.000000 | 8.64644e-09 | 1.000000 |
| rad68syn  | 4.04354e-09 | 1.000000 | 4.65870e-09 | 1.000000 |
| PAH8+H    | 3.08736e-09 | 1.000000 | 3.55705e-09 | 1.000000 |
| rad68anti | 2.69715e-09 | 1.000000 | 3.10748e-09 | 1.000000 |
| rad41     | 9.10258e-10 | 1.000000 | 1.04874e-09 | 1.000000 |
| rad40syn  | 6.53836e-10 | 1.000000 | 7.53304e-10 | 1.000000 |
| rad61     | 3.79381e-10 | 1.000000 | 4.37097e-10 | 1.000000 |
| rad73     | 3.37960e-10 | 1.000000 | 3.89375e-10 | 1.000000 |
| rad40anti | 3.05537e-10 | 1.000000 | 3.52020e-10 | 1.000000 |
| rad71     | 2.11244e-10 | 1.000000 | 2.43380e-10 | 1.000000 |
| rad6      | 7.39488e-11 | 1.000000 | 8.51984e-11 | 1.000000 |
| rad23     | 4.87787e-11 | 1.000000 | 5.61996e-11 | 1.000000 |
| rad45     | 1.63174e-11 | 1.000000 | 1.87998e-11 | 1.000000 |
| rad9      | 1.31506e-11 | 1.000000 | 1.51513e-11 | 1.000000 |
| rad2      | 8.85881e-12 | 1.000000 | 1.02065e-11 | 1.000000 |
| rad11     | 6.07238e-12 | 1.000000 | 6.99617e-12 | 1.000000 |
| rad13     | 5.55450e-12 | 1.000000 | 6.39955e-12 | 1.000000 |
| rad1      | 2.05915e-12 | 1.000000 | 2.37241e-12 | 1.000000 |
| rad36     | 1.56728e-12 | 1.000000 | 1.80571e-12 | 1.000000 |
| rad7      | 1.28107e-12 | 1.000000 | 1.47596e-12 | 1.000000 |
| rad21     | 1.12704e-12 | 1.000000 | 1.29849e-12 | 1.000000 |
| rad72     | 1.12068e-12 | 1.000000 | 1.29116e-12 | 1.000000 |
| rad20     | 5.72536e-13 | 1.000000 | 6.59635e-13 | 1.000000 |
| rad3      | 5.17351e-13 | 1.000000 | 5.96057e-13 | 1.000000 |
| rad4      | 4.04925e-13 | 1.000000 | 4.66526e-13 | 1.000000 |
| rad10     | 3.90999e-13 | 1.000000 | 4.50483e-13 | 1.000000 |
| rad33     | 2.98579e-13 | 1.000000 | 3.44003e-13 | 1.000000 |
| rad28     | 1.00562e-13 | 1.000000 | 1.15861e-13 | 1.000000 |
| rad25     | 2.72799e-14 | 1.000000 | 3.14301e-14 | 1.000000 |
| rad26     | 2.71502e-14 | 1.000000 | 3.12807e-14 | 1.000000 |
| rad24     | 2.16988e-14 | 1.000000 | 2.49998e-14 | 1.000000 |
| rad12     | 1.06575e-14 | 1.000000 | 1.22788e-14 | 1.000000 |
| rad18     | 3.95984e-15 | 1.000000 | 4.56226e-15 | 1.000000 |
| rad15     | 3.00221e-15 | 1.000000 | 3.45895e-15 | 1.000000 |
| rad14     | 2.59107e-15 | 1.000000 | 2.98526e-15 | 1.000000 |
| rad22     | 2.16489e-15 | 1.000000 | 2.49424e-15 | 1.000000 |
| rad27     | 1.66825e-15 | 1.000000 | 1.92204e-15 | 1.000000 |
| rad31     | 1.37107e-16 | 1.000000 | 1.57966e-16 | 1.000000 |
| rad8      | 2.31129e-17 | 1.000000 | 2.66290e-17 | 1.000000 |
| rad47     | 1.74355e-19 | 1.000000 | 2.00880e-19 | 1.000000 |
| rad5      | 6.78406e-21 | 1.000000 | 7.81608e-21 | 1.000000 |

0.100000000E-03 Pa, 1200.00000 K

=====

| Rate constant      | True (fraction)      | Effective (fraction) |
|--------------------|----------------------|----------------------|
| Total              | 1.80237e-12 (1.00 )  | 1.50733e-12 (1.00 )  |
| Formation of rad11 | 5.38789e-13 (0.299 ) | 4.03336e-13 (0.268 ) |
| Formation of rad6  | 6.34764e-13 (0.352 ) | 4.75183e-13 (0.315 ) |
| H-abstraction      | 6.28816e-13 (0.349 ) | 6.28816e-13 (0.417 ) |

| species            | PYtrue      | Cumul    | PYeffective | Cumul    |
|--------------------|-------------|----------|-------------|----------|
| Benzene+2-propynyl | 0.348883    | 0.348883 | 0.417171    | 0.417171 |
| Indene+H           | 0.168224    | 0.517107 | 0.201151    | 0.618322 |
| Phenyl+Allene      | 0.163693    | 0.680800 | 0.000000    | 0.618322 |
| C2H2+PhCH2         | 0.129445    | 0.810245 | 0.154782    | 0.773104 |
| PhCHCCH2+H         | 0.0661470   | 0.876392 | 0.0790946   | 0.852199 |
| PhCH2CCH+H         | 0.0526489   | 0.929041 | 0.0629537   | 0.915152 |
| PhCCH+CH3          | 0.0518208   | 0.980862 | 0.0619641   | 0.977116 |
| PAH7+H             | 0.00758545  | 0.988447 | 0.00907010  | 0.986186 |
| Ph+MeAc            | 0.00700420  | 0.995451 | 0.00837514  | 0.994562 |
| PhCCCH3+H          | 0.00195097  | 0.997402 | 0.00233284  | 0.996894 |
| rad39              | 0.00157581  | 0.998978 | 0.00188425  | 0.998779 |
| rad19anti          | 0.000399579 | 0.999378 | 0.000477791 | 0.999257 |
| PAH9+H             | 0.000204702 | 0.999582 | 0.000244769 | 0.999501 |
| rad19syn           | 0.000118863 | 0.999701 | 0.000142129 | 0.999643 |
| rad38              | 8.27680e-05 | 0.999784 | 9.89685e-05 | 0.999742 |
| rad54              | 4.05005e-05 | 0.999824 | 4.84277e-05 | 0.999791 |
| rad35              | 3.92969e-05 | 0.999864 | 4.69886e-05 | 0.999838 |
| rad30              | 3.73116e-05 | 0.999901 | 4.46148e-05 | 0.999882 |
| PhcycC3H3_A+H      | 3.27086e-05 | 0.999934 | 3.91108e-05 | 0.999922 |

|           |             |          |             |          |
|-----------|-------------|----------|-------------|----------|
| rad46     | 1.78869e-05 | 0.999952 | 2.13880e-05 | 0.999943 |
| rad37     | 1.16239e-05 | 0.999963 | 1.38991e-05 | 0.999957 |
| PAH3+H    | 6.95966e-06 | 0.999970 | 8.32193e-06 | 0.999965 |
| PAH1+H    | 6.04571e-06 | 0.999976 | 7.22906e-06 | 0.999972 |
| rad50     | 4.57121e-06 | 0.999981 | 5.46594e-06 | 0.999978 |
| rad70     | 4.07150e-06 | 0.999985 | 4.86843e-06 | 0.999983 |
| PAH10+CH3 | 3.83957e-06 | 0.999989 | 4.59109e-06 | 0.999987 |
| rad67     | 2.96796e-06 | 0.999992 | 3.54889e-06 | 0.999991 |
| rad55     | 2.19501e-06 | 0.999994 | 2.62464e-06 | 0.999993 |
| rad60syn  | 1.37645e-06 | 0.999995 | 1.64587e-06 | 0.999995 |
| rad59     | 8.52866e-07 | 0.999996 | 1.01981e-06 | 0.999996 |
| rad60anti | 8.03342e-07 | 0.999997 | 9.60578e-07 | 0.999997 |
| rad34     | 6.59901e-07 | 0.999998 | 7.89063e-07 | 0.999998 |
| rad62     | 5.91358e-07 | 0.999998 | 7.07106e-07 | 0.999999 |
| rad51     | 5.25707e-07 | 0.999999 | 6.28605e-07 | 0.999999 |
| rad52     | 2.50704e-07 | 0.999999 | 2.99775e-07 | 0.999999 |
| rad53     | 1.90238e-07 | 0.999999 | 2.27474e-07 | 1.000000 |
| rad56     | 1.09448e-07 | 0.999999 | 1.30871e-07 | 1.000000 |
| rad43     | 7.76164e-08 | 0.999999 | 9.28086e-08 | 1.000000 |
| rad64     | 5.85550e-08 | 0.999999 | 7.00159e-08 | 1.000000 |
| rad58     | 2.24147e-08 | 0.999999 | 2.68020e-08 | 1.000000 |
| rad42     | 1.82035e-08 | 0.999999 | 2.17665e-08 | 1.000000 |
| rad65     | 1.63703e-08 | 0.999999 | 1.95745e-08 | 1.000000 |
| rad68syn  | 1.10175e-08 | 0.999999 | 1.31740e-08 | 1.000000 |
| PAH8+H    | 1.09227e-08 | 0.999999 | 1.30606e-08 | 1.000000 |
| rad68anti | 7.31621e-09 | 0.999999 | 8.74827e-09 | 1.000000 |
| rad40syn  | 2.07794e-09 | 0.999999 | 2.48466e-09 | 1.000000 |
| rad41     | 1.48024e-09 | 0.999999 | 1.76998e-09 | 1.000000 |
| rad73     | 1.26655e-09 | 0.999999 | 1.51446e-09 | 1.000000 |
| rad61     | 1.03672e-09 | 0.999999 | 1.23964e-09 | 1.000000 |
| rad40anti | 1.01429e-09 | 0.999999 | 1.21282e-09 | 1.000000 |
| rad71     | 9.17587e-10 | 0.999999 | 1.09719e-09 | 1.000000 |
| rad6      | 6.68508e-11 | 0.999999 | 7.99356e-11 | 1.000000 |
| rad23     | 2.51796e-11 | 0.999999 | 3.01081e-11 | 1.000000 |
| rad11     | 1.50650e-11 | 0.999999 | 1.80137e-11 | 1.000000 |
| rad9      | 9.58464e-12 | 0.999999 | 1.14606e-11 | 1.000000 |
| rad45     | 8.86841e-12 | 0.999999 | 1.06043e-11 | 1.000000 |
| rad72     | 7.09099e-12 | 0.999999 | 8.47894e-12 | 1.000000 |
| rad13     | 6.46715e-12 | 0.999999 | 7.73298e-12 | 1.000000 |
| rad7      | 4.88651e-12 | 0.999999 | 5.84298e-12 | 1.000000 |
| rad2      | 2.61810e-12 | 0.999999 | 3.13056e-12 | 1.000000 |
| rad21     | 8.79041e-13 | 0.999999 | 1.05110e-12 | 1.000000 |
| rad36     | 8.57938e-13 | 0.999999 | 1.02587e-12 | 1.000000 |
| rad1      | 6.30465e-13 | 0.999999 | 7.53866e-13 | 1.000000 |
| rad20     | 4.28304e-13 | 0.999999 | 5.12137e-13 | 1.000000 |
| rad10     | 3.02838e-13 | 0.999999 | 3.62114e-13 | 1.000000 |
| rad33     | 2.25861e-13 | 0.999999 | 2.70070e-13 | 1.000000 |
| rad3      | 2.06913e-13 | 0.999999 | 2.47412e-13 | 1.000000 |
| rad4      | 1.63852e-13 | 0.999999 | 1.95923e-13 | 1.000000 |
| rad28     | 9.10691e-14 | 0.999999 | 1.08895e-13 | 1.000000 |
| rad25     | 3.12054e-14 | 0.999999 | 3.73133e-14 | 1.000000 |
| rad26     | 2.11485e-14 | 0.999999 | 2.52879e-14 | 1.000000 |
| rad24     | 1.65803e-14 | 0.999999 | 1.98256e-14 | 1.000000 |
| rad18     | 1.63240e-14 | 0.999999 | 1.95191e-14 | 1.000000 |
| rad12     | 1.03519e-14 | 0.999999 | 1.23781e-14 | 1.000000 |
| rad15     | 2.95634e-15 | 0.999999 | 3.53500e-15 | 1.000000 |
| rad14     | 2.44021e-15 | 0.999999 | 2.91784e-15 | 1.000000 |
| rad22     | 1.25649e-15 | 0.999999 | 1.50243e-15 | 1.000000 |
| rad27     | 1.00951e-15 | 0.999999 | 1.20710e-15 | 1.000000 |
| rad31     | 8.42038e-17 | 0.999999 | 1.00685e-16 | 1.000000 |
| rad8      | 5.36818e-17 | 0.999999 | 6.41893e-17 | 1.000000 |
| rad47     | 3.89981e-19 | 0.999999 | 4.66313e-19 | 1.000000 |
| rad5      | 2.42654e-20 | 0.999999 | 2.90149e-20 | 1.000000 |

0.100000000E-03 Pa, 1300.00000 K

| =====              |                 |          |                      |          |
|--------------------|-----------------|----------|----------------------|----------|
| Rate constant      | True (fraction) |          | Effective (fraction) |          |
| -----              |                 |          |                      |          |
| Total              | 2.54148e-12     | (1.00 )  | 2.05338e-12          | (1.00 )  |
| Formation of rad11 | 7.22991e-13     | (0.284 ) | 5.03422e-13          | (0.245 ) |
| Formation of rad6  | 8.84215e-13     | (0.348 ) | 6.15682e-13          | (0.300 ) |
| H-abstraction      | 9.34273e-13     | (0.368 ) | 9.34273e-13          | (0.455 ) |
| -----              |                 |          |                      |          |
| species            | PYtrue          | Cumul    | PYeffective          | Cumul    |
| -----              |                 |          |                      |          |
| Benzene+2-propynyl | 0.367610        | 0.367610 | 0.454993             | 0.454993 |
| Phenyl+Allene      | 0.192054        | 0.559664 | 0.000000             | 0.454993 |
| Indene+H           | 0.131421        | 0.691086 | 0.162661             | 0.617654 |
| C2H2+PhCH2         | 0.111295        | 0.802381 | 0.137750             | 0.755405 |
| PhCHCCH2+H         | 0.0692296       | 0.871610 | 0.0856859            | 0.841091 |

|               |             |          |             |          |
|---------------|-------------|----------|-------------|----------|
| PhCH2CCH+H    | 0.0636260   | 0.935236 | 0.0787507   | 0.919842 |
| PhCCH+CH3     | 0.0461559   | 0.981392 | 0.0571276   | 0.976969 |
| PAH7+H        | 0.00794566  | 0.989338 | 0.00983443  | 0.986804 |
| Ph+MeAc       | 0.00637082  | 0.995709 | 0.00788521  | 0.994689 |
| rad39         | 0.00158196  | 0.997291 | 0.00195800  | 0.996647 |
| PhCCCH3+H     | 0.00142376  | 0.998714 | 0.00176219  | 0.998409 |
| rad19anti     | 0.000475489 | 0.999190 | 0.000588514 | 0.998997 |
| PAH9+H        | 0.000242131 | 0.999432 | 0.000299688 | 0.999297 |
| rad19syn      | 0.000174660 | 0.999607 | 0.000216178 | 0.999513 |
| rad38         | 9.98860e-05 | 0.999707 | 0.000123629 | 0.999637 |
| rad54         | 6.26274e-05 | 0.999769 | 7.75141e-05 | 0.999714 |
| PhcycC3H3_A+H | 5.74351e-05 | 0.999827 | 7.10879e-05 | 0.999786 |
| rad35         | 4.53516e-05 | 0.999872 | 5.61319e-05 | 0.999842 |
| rad30         | 3.53185e-05 | 0.999907 | 4.37139e-05 | 0.999885 |
| rad46         | 2.33611e-05 | 0.999931 | 2.89142e-05 | 0.999914 |
| rad37         | 1.29873e-05 | 0.999944 | 1.60744e-05 | 0.999930 |
| PAH1+H        | 1.02825e-05 | 0.999954 | 1.27267e-05 | 0.999943 |
| PAH3+H        | 9.32004e-06 | 0.999963 | 1.15354e-05 | 0.999955 |
| rad50         | 7.49585e-06 | 0.999971 | 9.27765e-06 | 0.999964 |
| rad70         | 6.43021e-06 | 0.999977 | 7.95868e-06 | 0.999972 |
| PAH10+CH3     | 6.07786e-06 | 0.999983 | 7.52262e-06 | 0.999979 |
| rad67         | 4.99567e-06 | 0.999988 | 6.18315e-06 | 0.999986 |
| rad55         | 3.63003e-06 | 0.999992 | 4.49291e-06 | 0.999990 |
| rad60syn      | 1.56340e-06 | 0.999993 | 1.93503e-06 | 0.999992 |
| rad34         | 1.13462e-06 | 0.999995 | 1.40432e-06 | 0.999993 |
| rad59         | 1.09806e-06 | 0.999996 | 1.35907e-06 | 0.999995 |
| rad51         | 1.02620e-06 | 0.999997 | 1.27014e-06 | 0.999996 |
| rad60anti     | 9.23688e-07 | 0.999998 | 1.14325e-06 | 0.999997 |
| rad62         | 8.25901e-07 | 0.999998 | 1.02222e-06 | 0.999998 |
| rad52         | 4.48900e-07 | 0.999999 | 5.55607e-07 | 0.999999 |
| rad53         | 4.02868e-07 | 0.999999 | 4.98632e-07 | 0.999999 |
| rad56         | 2.64598e-07 | 1.000000 | 3.27496e-07 | 1.000000 |
| rad64         | 1.13755e-07 | 1.000000 | 1.40795e-07 | 1.000000 |
| rad43         | 8.95932e-08 | 1.000000 | 1.10890e-07 | 1.000000 |
| rad58         | 3.75497e-08 | 1.000000 | 4.64755e-08 | 1.000000 |
| rad65         | 3.15601e-08 | 1.000000 | 3.90621e-08 | 1.000000 |
| PAH8+H        | 3.15023e-08 | 1.000000 | 3.89905e-08 | 1.000000 |
| rad42         | 3.09037e-08 | 1.000000 | 3.82497e-08 | 1.000000 |
| rad68syn      | 2.53721e-08 | 1.000000 | 3.14033e-08 | 1.000000 |
| rad68anti     | 1.67834e-08 | 1.000000 | 2.07729e-08 | 1.000000 |
| rad40syn      | 5.46373e-09 | 1.000000 | 6.76250e-09 | 1.000000 |
| rad73         | 3.88974e-09 | 1.000000 | 4.81436e-09 | 1.000000 |
| rad71         | 3.20244e-09 | 1.000000 | 3.96367e-09 | 1.000000 |
| rad40anti     | 2.76933e-09 | 1.000000 | 3.42762e-09 | 1.000000 |
| rad61         | 2.41929e-09 | 1.000000 | 2.99437e-09 | 1.000000 |
| rad41         | 2.20456e-09 | 1.000000 | 2.72860e-09 | 1.000000 |
| rad6          | 7.43608e-11 | 1.000000 | 9.20369e-11 | 1.000000 |
| rad72         | 3.39631e-11 | 1.000000 | 4.20364e-11 | 1.000000 |
| rad11         | 2.13380e-11 | 1.000000 | 2.64103e-11 | 1.000000 |
| rad23         | 1.33975e-11 | 1.000000 | 1.65822e-11 | 1.000000 |
| rad7          | 1.10318e-11 | 1.000000 | 1.36542e-11 | 1.000000 |
| rad9          | 6.54815e-12 | 1.000000 | 8.10468e-12 | 1.000000 |
| rad13         | 4.91983e-12 | 1.000000 | 6.08930e-12 | 1.000000 |
| rad45         | 4.87371e-12 | 1.000000 | 6.03224e-12 | 1.000000 |
| rad2          | 8.29923e-13 | 1.000000 | 1.02720e-12 | 1.000000 |
| rad21         | 5.91330e-13 | 1.000000 | 7.31895e-13 | 1.000000 |
| rad36         | 4.75578e-13 | 1.000000 | 5.88623e-13 | 1.000000 |
| rad20         | 2.63325e-13 | 1.000000 | 3.25918e-13 | 1.000000 |
| rad10         | 2.60076e-13 | 1.000000 | 3.21898e-13 | 1.000000 |
| rad1          | 2.04555e-13 | 1.000000 | 2.53179e-13 | 1.000000 |
| rad33         | 1.50408e-13 | 1.000000 | 1.86161e-13 | 1.000000 |
| rad28         | 1.13910e-13 | 1.000000 | 1.40987e-13 | 1.000000 |
| rad3          | 8.79705e-14 | 1.000000 | 1.08882e-13 | 1.000000 |
| rad4          | 7.02351e-14 | 1.000000 | 8.69307e-14 | 1.000000 |
| rad18         | 3.07383e-14 | 1.000000 | 3.80451e-14 | 1.000000 |
| rad25         | 2.61840e-14 | 1.000000 | 3.24081e-14 | 1.000000 |
| rad26         | 2.07361e-14 | 1.000000 | 2.56652e-14 | 1.000000 |
| rad24         | 1.21061e-14 | 1.000000 | 1.49838e-14 | 1.000000 |
| rad12         | 9.25054e-15 | 1.000000 | 1.14494e-14 | 1.000000 |
| rad15         | 6.92815e-15 | 1.000000 | 8.57497e-15 | 1.000000 |
| rad14         | 1.73628e-15 | 1.000000 | 2.14901e-15 | 1.000000 |
| rad22         | 9.97570e-16 | 1.000000 | 1.23470e-15 | 1.000000 |
| rad27         | 4.96158e-16 | 1.000000 | 6.14097e-16 | 1.000000 |
| rad8          | 7.86598e-17 | 1.000000 | 9.73573e-17 | 1.000000 |
| rad31         | 5.35121e-17 | 1.000000 | 6.62325e-17 | 1.000000 |
| rad47         | 7.66887e-19 | 1.000000 | 9.49183e-19 | 1.000000 |
| rad5          | 9.67443e-20 | 1.000000 | 1.19741e-19 | 1.000000 |

0.100000000E-03 Pa, 1400.00000 K

=====

| Rate constant      | True (fraction)      | Effective (fraction) |
|--------------------|----------------------|----------------------|
| Total              | 3.47024e-12 (1.00 )  | 2.71984e-12 (1.00 )  |
| Formation of rad11 | 9.43269e-13 (0.272 ) | 6.11768e-13 (0.225 ) |
| Formation of rad6  | 1.19194e-12 (0.343 ) | 7.73043e-13 (0.284 ) |
| H-abstraction      | 1.33503e-12 (0.385 ) | 1.33503e-12 (0.491 ) |

| species            | PYtrue      | Cumul    | PYeffective | Cumul    |
|--------------------|-------------|----------|-------------|----------|
| Benzene+2-propynyl | 0.384709    | 0.384709 | 0.490849    | 0.490849 |
| Phenyl+Allene      | 0.216237    | 0.600946 | 0.00000     | 0.490849 |
| Indene+H           | 0.102753    | 0.703699 | 0.131102    | 0.621951 |
| C2H2+PhCH2         | 0.0940337   | 0.797733 | 0.119977    | 0.741928 |
| PhCH2CCH+H         | 0.0730480   | 0.870781 | 0.0932017   | 0.835129 |
| PhCHCCH2+H         | 0.0704361   | 0.941217 | 0.0898693   | 0.924998 |
| PhCCH+CH3          | 0.0407709   | 0.981988 | 0.0520195   | 0.977018 |
| PAH7+H             | 0.00808062  | 0.990068 | 0.0103100   | 0.987328 |
| Ph+MeAc            | 0.00578254  | 0.995851 | 0.00737791  | 0.994706 |
| rad39              | 0.00153900  | 0.997390 | 0.00196361  | 0.996669 |
| PhCCCH3+H          | 0.00104907  | 0.998439 | 0.00133851  | 0.998008 |
| rad19anti          | 0.000537563 | 0.998977 | 0.000685873 | 0.998694 |
| PAH9+H             | 0.000275092 | 0.999252 | 0.000350989 | 0.999045 |
| rad19syn           | 0.000241019 | 0.999493 | 0.000307515 | 0.999352 |
| rad38              | 0.000115616 | 0.999608 | 0.000147513 | 0.999500 |
| PhcycC3H3_A+H      | 9.27188e-05 | 0.999701 | 0.000118299 | 0.999618 |
| rad54              | 9.02066e-05 | 0.999791 | 0.000115094 | 0.999733 |
| rad35              | 5.05796e-05 | 0.999842 | 6.45344e-05 | 0.999798 |
| rad30              | 3.27889e-05 | 0.999875 | 4.18352e-05 | 0.999840 |
| rad46              | 2.89889e-05 | 0.999904 | 3.69868e-05 | 0.999877 |
| PAH1+H             | 1.59963e-05 | 0.999920 | 2.04096e-05 | 0.999897 |
| rad37              | 1.43563e-05 | 0.999934 | 1.83172e-05 | 0.999915 |
| PAH3+H             | 1.18378e-05 | 0.999946 | 1.51038e-05 | 0.999930 |
| rad50              | 1.13924e-05 | 0.999957 | 1.45355e-05 | 0.999945 |
| rad70              | 9.33021e-06 | 0.999967 | 1.19044e-05 | 0.999957 |
| PAH10+CH3          | 9.00294e-06 | 0.999976 | 1.14868e-05 | 0.999968 |
| rad67              | 7.68554e-06 | 0.999983 | 9.80595e-06 | 0.999978 |
| rad55              | 5.54137e-06 | 0.999989 | 7.07023e-06 | 0.999985 |
| rad51              | 1.81654e-06 | 0.999991 | 2.31772e-06 | 0.999988 |
| rad34              | 1.77488e-06 | 0.999992 | 2.26456e-06 | 0.999990 |
| rad60syn           | 1.71203e-06 | 0.999994 | 2.18438e-06 | 0.999992 |
| rad59              | 1.34390e-06 | 0.999995 | 1.71468e-06 | 0.999994 |
| rad62              | 1.09238e-06 | 0.999997 | 1.39377e-06 | 0.999995 |
| rad60anti          | 1.02264e-06 | 0.999998 | 1.30479e-06 | 0.999996 |
| rad53              | 7.63459e-07 | 0.999998 | 9.74098e-07 | 0.999997 |
| rad52              | 7.36190e-07 | 0.999999 | 9.39297e-07 | 0.999998 |
| rad56              | 5.61676e-07 | 1.000000 | 7.16641e-07 | 0.999999 |
| rad64              | 1.97836e-07 | 1.000000 | 2.52418e-07 | 0.999999 |
| rad43              | 1.00004e-07 | 1.000000 | 1.27595e-07 | 0.999999 |
| PAH8+H             | 7.73009e-08 | 1.000000 | 9.86282e-08 | 1.000000 |
| rad58              | 5.80225e-08 | 1.000000 | 7.40306e-08 | 1.000000 |
| rad65              | 5.51354e-08 | 1.000000 | 7.03469e-08 | 1.000000 |
| rad68syn           | 5.11875e-08 | 1.000000 | 6.53098e-08 | 1.000000 |
| rad42              | 4.85214e-08 | 1.000000 | 6.19082e-08 | 1.000000 |
| rad68anti          | 3.37456e-08 | 1.000000 | 4.30559e-08 | 1.000000 |
| rad40syn           | 1.23711e-08 | 1.000000 | 1.57842e-08 | 1.000000 |
| rad73              | 1.01769e-08 | 1.000000 | 1.29847e-08 | 1.000000 |
| rad71              | 9.36215e-09 | 1.000000 | 1.19451e-08 | 1.000000 |
| rad40anti          | 6.47926e-09 | 1.000000 | 8.26688e-09 | 1.000000 |
| rad61              | 4.96370e-09 | 1.000000 | 6.33318e-09 | 1.000000 |
| rad41              | 3.08784e-09 | 1.000000 | 3.93976e-09 | 1.000000 |
| rad72              | 1.29425e-10 | 1.000000 | 1.65134e-10 | 1.000000 |
| rad6               | 9.92046e-11 | 1.000000 | 1.26575e-10 | 1.000000 |
| rad11              | 1.92751e-11 | 1.000000 | 2.45930e-11 | 1.000000 |
| rad7               | 1.43667e-11 | 1.000000 | 1.83305e-11 | 1.000000 |
| rad23              | 7.34418e-12 | 1.000000 | 9.37042e-12 | 1.000000 |
| rad9               | 4.31722e-12 | 1.000000 | 5.50830e-12 | 1.000000 |
| rad13              | 3.13852e-12 | 1.000000 | 4.00443e-12 | 1.000000 |
| rad45              | 2.71837e-12 | 1.000000 | 3.46836e-12 | 1.000000 |
| rad21              | 3.81060e-13 | 1.000000 | 4.86193e-13 | 1.000000 |
| rad2               | 2.79751e-13 | 1.000000 | 3.56933e-13 | 1.000000 |
| rad36              | 2.67751e-13 | 1.000000 | 3.41623e-13 | 1.000000 |
| rad28              | 1.78679e-13 | 1.000000 | 2.27976e-13 | 1.000000 |
| rad10              | 1.72805e-13 | 1.000000 | 2.20481e-13 | 1.000000 |
| rad20              | 1.53041e-13 | 1.000000 | 1.95264e-13 | 1.000000 |
| rad33              | 9.75778e-14 | 1.000000 | 1.24499e-13 | 1.000000 |
| rad1               | 7.01967e-14 | 1.000000 | 8.95638e-14 | 1.000000 |
| rad3               | 3.94571e-14 | 1.000000 | 5.03432e-14 | 1.000000 |
| rad18              | 3.17480e-14 | 1.000000 | 4.05071e-14 | 1.000000 |
| rad4               | 3.17040e-14 | 1.000000 | 4.04510e-14 | 1.000000 |
| rad26              | 2.19340e-14 | 1.000000 | 2.79855e-14 | 1.000000 |

|       |             |         |             |          |
|-------|-------------|---------|-------------|----------|
| rad25 | 1.93942e-14 | 1.00000 | 2.47450e-14 | 1.000000 |
| rad15 | 1.86343e-14 | 1.00000 | 2.37754e-14 | 1.000000 |
| rad24 | 8.67708e-15 | 1.00000 | 1.10711e-14 | 1.000000 |
| rad12 | 7.86877e-15 | 1.00000 | 1.00397e-14 | 1.000000 |
| rad22 | 2.91036e-15 | 1.00000 | 3.71331e-15 | 1.000000 |
| rad14 | 1.10832e-15 | 1.00000 | 1.41410e-15 | 1.000000 |
| rad27 | 2.35650e-16 | 1.00000 | 3.00664e-16 | 1.000000 |
| rad8  | 9.26462e-17 | 1.00000 | 1.18207e-16 | 1.000000 |
| rad31 | 3.51109e-17 | 1.00000 | 4.47979e-17 | 1.000000 |
| rad47 | 1.36054e-18 | 1.00000 | 1.73591e-18 | 1.000000 |
| rad5  | 3.59152e-19 | 1.00000 | 4.58240e-19 | 1.000000 |

0.100000000E-03 Pa, 1500.00000 K

| Rate constant      | True (fraction)      | Effective (fraction) |
|--------------------|----------------------|----------------------|
| Total              | 4.61271e-12 (1.00 )  | 3.52361e-12 (1.00 )  |
| Formation of rad11 | 1.20217e-12 (0.261 ) | 7.28782e-13 (0.207 ) |
| Formation of rad6  | 1.56360e-12 (0.339 ) | 9.47887e-13 (0.269 ) |
| H-abstraction      | 1.84694e-12 (0.400 ) | 1.84694e-12 (0.524 ) |

| species            | PYtrue      | Cumul    | PYeffective | Cumul    |
|--------------------|-------------|----------|-------------|----------|
| Benzene+2-propynyl | 0.400402    | 0.400402 | 0.524162    | 0.524162 |
| Phenyl+Allene      | 0.236109    | 0.636511 | 0.000000    | 0.524162 |
| Indene+H           | 0.0806435   | 0.717155 | 0.105570    | 0.629731 |
| PhCH2CCH+H         | 0.0806387   | 0.797793 | 0.105563    | 0.735294 |
| C2H2+PhCH2         | 0.0787062   | 0.876500 | 0.103033    | 0.838328 |
| PhCHCCH2+H         | 0.0701571   | 0.946657 | 0.0918421   | 0.930170 |
| PhCCH+CH3          | 0.0359368   | 0.982594 | 0.0470444   | 0.977214 |
| PAH7+H             | 0.00805110  | 0.990645 | 0.0105396   | 0.987754 |
| Ph+MeAc            | 0.00526035  | 0.995905 | 0.00688624  | 0.994640 |
| rad39              | 0.00146497  | 0.997370 | 0.00191777  | 0.996558 |
| PhCCCH3+H          | 0.000785539 | 0.998156 | 0.00102834  | 0.997586 |
| rad19anti          | 0.000582991 | 0.998739 | 0.000763188 | 0.998349 |
| rad19syn           | 0.000316567 | 0.999055 | 0.000414413 | 0.998764 |
| PAH9+H             | 0.000302845 | 0.999358 | 0.000396450 | 0.999160 |
| PhcycC3H3_A+H      | 0.000139913 | 0.999498 | 0.000183158 | 0.999343 |
| rad38              | 0.000129499 | 0.999627 | 0.000169526 | 0.999513 |
| rad54              | 0.000122808 | 0.999750 | 0.000160767 | 0.999674 |
| rad35              | 5.49599e-05 | 0.999805 | 7.19472e-05 | 0.999746 |
| rad46              | 3.45380e-05 | 0.999840 | 4.52132e-05 | 0.999791 |
| rad30              | 3.01156e-05 | 0.999870 | 3.94239e-05 | 0.999830 |
| PAH1+H             | 2.31901e-05 | 0.999893 | 3.03579e-05 | 0.999861 |
| rad50              | 1.62766e-05 | 0.999909 | 2.13074e-05 | 0.999882 |
| rad37              | 1.56192e-05 | 0.999925 | 2.04470e-05 | 0.999902 |
| PAH3+H             | 1.44553e-05 | 0.999939 | 1.89232e-05 | 0.999921 |
| rad70              | 1.26613e-05 | 0.999952 | 1.65747e-05 | 0.999938 |
| PAH10+CH3          | 1.25752e-05 | 0.999965 | 1.64620e-05 | 0.999954 |
| rad67              | 1.09793e-05 | 0.999976 | 1.43728e-05 | 0.999969 |
| rad55              | 7.93592e-06 | 0.999983 | 1.03888e-05 | 0.999979 |
| rad51              | 2.96749e-06 | 0.999986 | 3.88470e-06 | 0.999983 |
| rad34              | 2.57549e-06 | 0.999989 | 3.37153e-06 | 0.999986 |
| rad60syn           | 1.82792e-06 | 0.999991 | 2.39290e-06 | 0.999989 |
| rad59              | 1.58467e-06 | 0.999992 | 2.07447e-06 | 0.999991 |
| rad62              | 1.38706e-06 | 0.999994 | 1.81579e-06 | 0.999993 |
| rad53              | 1.32204e-06 | 0.999995 | 1.73067e-06 | 0.999994 |
| rad52              | 1.12378e-06 | 0.999996 | 1.47114e-06 | 0.999996 |
| rad60anti          | 1.10268e-06 | 0.999997 | 1.44350e-06 | 0.999997 |
| rad56              | 1.07222e-06 | 0.999998 | 1.40364e-06 | 0.999999 |
| rad64              | 3.15087e-07 | 0.999999 | 4.12476e-07 | 0.999999 |
| PAH8+H             | 1.66252e-07 | 0.999999 | 2.17639e-07 | 0.999999 |
| rad43              | 1.09523e-07 | 0.999999 | 1.43375e-07 | 0.999999 |
| rad68syn           | 9.28291e-08 | 0.999999 | 1.21521e-07 | 0.999999 |
| rad65              | 8.88724e-08 | 0.999999 | 1.16342e-07 | 1.000000 |
| rad58              | 8.42069e-08 | 0.999999 | 1.10234e-07 | 1.000000 |
| rad42              | 7.16663e-08 | 0.999999 | 9.38173e-08 | 1.000000 |
| rad68anti          | 6.10163e-08 | 0.999999 | 7.98757e-08 | 1.000000 |
| rad40syn           | 2.48114e-08 | 0.999999 | 3.24802e-08 | 1.000000 |
| rad71              | 2.35639e-08 | 0.999999 | 3.08473e-08 | 1.000000 |
| rad73              | 2.32861e-08 | 0.999999 | 3.04835e-08 | 1.000000 |
| rad40anti          | 1.33700e-08 | 0.999999 | 1.75025e-08 | 1.000000 |
| rad61              | 9.14968e-09 | 0.999999 | 1.19777e-08 | 1.000000 |
| rad41              | 4.14357e-09 | 0.999999 | 5.42427e-09 | 1.000000 |
| rad72              | 4.05223e-10 | 0.999999 | 5.30474e-10 | 1.000000 |
| rad6               | 1.49588e-10 | 0.999999 | 1.95824e-10 | 1.000000 |
| rad11              | 1.35885e-11 | 0.999999 | 1.77886e-11 | 1.000000 |
| rad7               | 1.25339e-11 | 0.999999 | 1.64080e-11 | 1.000000 |
| rad23              | 4.13429e-12 | 0.999999 | 5.41214e-12 | 1.000000 |
| rad9               | 2.79621e-12 | 0.999999 | 3.66048e-12 | 1.000000 |



|       |             |          |             |         |
|-------|-------------|----------|-------------|---------|
| rad13 | 1.89913e-12 | 0.999999 | 2.48613e-12 | 1.00000 |
| rad45 | 1.54295e-12 | 0.999999 | 2.01986e-12 | 1.00000 |
| rad28 | 3.01881e-13 | 0.999999 | 3.95188e-13 | 1.00000 |
| rad21 | 2.42952e-13 | 0.999999 | 3.18045e-13 | 1.00000 |
| rad36 | 1.53430e-13 | 0.999999 | 2.00854e-13 | 1.00000 |
| rad2  | 1.00174e-13 | 0.999999 | 1.31137e-13 | 1.00000 |
| rad10 | 9.09038e-14 | 0.999999 | 1.19001e-13 | 1.00000 |
| rad20 | 8.79178e-14 | 0.999999 | 1.15092e-13 | 1.00000 |
| rad33 | 6.33589e-14 | 0.999999 | 8.29429e-14 | 1.00000 |
| rad15 | 3.02164e-14 | 0.999999 | 3.95560e-14 | 1.00000 |
| rad1  | 2.55059e-14 | 0.999999 | 3.33895e-14 | 1.00000 |
| rad18 | 2.34707e-14 | 0.999999 | 3.07253e-14 | 1.00000 |
| rad26 | 2.22310e-14 | 0.999999 | 2.91024e-14 | 1.00000 |
| rad3  | 1.86036e-14 | 0.999999 | 2.43537e-14 | 1.00000 |
| rad4  | 1.50234e-14 | 0.999999 | 1.96669e-14 | 1.00000 |
| rad25 | 1.37831e-14 | 0.999999 | 1.80433e-14 | 1.00000 |
| rad22 | 1.33719e-14 | 0.999999 | 1.75050e-14 | 1.00000 |
| rad12 | 6.49250e-15 | 0.999999 | 8.49924e-15 | 1.00000 |
| rad24 | 6.18581e-15 | 0.999999 | 8.09777e-15 | 1.00000 |
| rad14 | 6.98945e-16 | 0.999999 | 9.14985e-16 | 1.00000 |
| rad27 | 1.15749e-16 | 0.999999 | 1.51525e-16 | 1.00000 |
| rad8  | 9.76883e-17 | 0.999999 | 1.27883e-16 | 1.00000 |
| rad31 | 2.37694e-17 | 0.999999 | 3.11163e-17 | 1.00000 |
| rad47 | 2.21852e-18 | 0.999999 | 2.90423e-18 | 1.00000 |
| rad5  | 1.06412e-18 | 0.999999 | 1.39303e-18 | 1.00000 |

0.100000000E-03 Pa, 1750.00000 K

| Rate constant      | True (fraction) |          | Effective (fraction) |          |
|--------------------|-----------------|----------|----------------------|----------|
| Total              | 8.61869e-12     | (1.00 )  | 6.27400e-12          | (1.00 )  |
| Formation of rad11 | 2.04015e-12     | (0.237 ) | 1.05237e-12          | (0.168 ) |
| Formation of rad6  | 2.80256e-12     | (0.325 ) | 1.44565e-12          | (0.230 ) |
| H-abstraction      | 3.77597e-12     | (0.438 ) | 3.77597e-12          | (0.602 ) |

  

| species            | PYtrue      | Cumul    | PYeffective | Cumul    |
|--------------------|-------------|----------|-------------|----------|
| Benzene+2-propynyl | 0.438115    | 0.438115 | 0.601845    | 0.601845 |
| Phenyl+Allene      | 0.272047    | 0.710162 | 0.00000     | 0.601845 |
| PhCH2CCH+H         | 0.0933387   | 0.803501 | 0.128221    | 0.730066 |
| PhCHCCH2+H         | 0.0656327   | 0.869134 | 0.0901606   | 0.820227 |
| C2H2+PhCH2         | 0.0475978   | 0.916731 | 0.0653858   | 0.885612 |
| Indene+H           | 0.0395372   | 0.956269 | 0.0543127   | 0.939925 |
| PhCCH+CH3          | 0.0276514   | 0.983920 | 0.0379853   | 0.977910 |
| PAH7+H             | 0.00712605  | 0.991046 | 0.00978916  | 0.987700 |
| Ph+MeAc            | 0.00488545  | 0.995931 | 0.00671122  | 0.994411 |
| rad39              | 0.00123375  | 0.997165 | 0.00169483  | 0.996106 |
| rad19anti          | 0.000564116 | 0.997729 | 0.000774933 | 0.996881 |
| rad19syn           | 0.000506158 | 0.998235 | 0.000695318 | 0.997576 |
| PhCCCH3+H          | 0.000461483 | 0.998697 | 0.000633946 | 0.998210 |
| PhcycC3H3_A+H      | 0.000354596 | 0.999052 | 0.000487115 | 0.998697 |
| PAH9+H             | 0.000266731 | 0.999318 | 0.000366412 | 0.999063 |
| rad54              | 0.000215004 | 0.999533 | 0.000295354 | 0.999359 |
| rad38              | 0.000142764 | 0.999676 | 0.000196118 | 0.999555 |
| rad35              | 4.88397e-05 | 0.999725 | 6.70919e-05 | 0.999622 |
| PAH1+H             | 4.24056e-05 | 0.999767 | 5.82532e-05 | 0.999680 |
| rad46              | 3.79670e-05 | 0.999805 | 5.21559e-05 | 0.999732 |
| rad50              | 2.38701e-05 | 0.999829 | 3.27908e-05 | 0.999765 |
| rad30              | 2.30179e-05 | 0.999852 | 3.16201e-05 | 0.999797 |
| PAH10+CH3          | 2.22275e-05 | 0.999874 | 3.05343e-05 | 0.999827 |
| rad70              | 2.20506e-05 | 0.999896 | 3.02913e-05 | 0.999858 |
| PAH3+H             | 2.08052e-05 | 0.999917 | 2.85805e-05 | 0.999886 |
| rad55              | 1.72026e-05 | 0.999934 | 2.36314e-05 | 0.999910 |
| rad67              | 1.69163e-05 | 0.999951 | 2.32382e-05 | 0.999933 |
| rad37              | 1.61425e-05 | 0.999968 | 2.21752e-05 | 0.999955 |
| rad51              | 6.11253e-06 | 0.999974 | 8.39689e-06 | 0.999964 |
| rad34              | 5.25680e-06 | 0.999979 | 7.22134e-06 | 0.999971 |
| rad53              | 4.39527e-06 | 0.999983 | 6.03786e-06 | 0.999977 |
| rad56              | 3.99314e-06 | 0.999987 | 5.48546e-06 | 0.999982 |
| rad62              | 2.35598e-06 | 0.999990 | 3.23645e-06 | 0.999986 |
| rad59              | 2.06481e-06 | 0.999992 | 2.83647e-06 | 0.999988 |
| rad52              | 2.03181e-06 | 0.999994 | 2.79113e-06 | 0.999991 |
| rad60syn           | 1.94292e-06 | 0.999996 | 2.66902e-06 | 0.999994 |
| rad60anti          | 1.30713e-06 | 0.999997 | 1.79563e-06 | 0.999996 |
| rad64              | 7.88600e-07 | 0.999998 | 1.08332e-06 | 0.999997 |
| PAH8+H             | 5.90480e-07 | 0.999998 | 8.11153e-07 | 0.999998 |
| rad68syn           | 2.81742e-07 | 0.999999 | 3.87034e-07 | 0.999998 |
| rad68anti          | 1.82569e-07 | 0.999999 | 2.50799e-07 | 0.999998 |
| rad65              | 1.74383e-07 | 0.999999 | 2.39552e-07 | 0.999998 |
| rad42              | 1.70585e-07 | 0.999999 | 2.34336e-07 | 0.999999 |

|           |             |          |             |          |
|-----------|-------------|----------|-------------|----------|
| rad58     | 1.57351e-07 | 0.999999 | 2.16156e-07 | 0.999999 |
| rad43     | 1.31435e-07 | 0.999999 | 1.80554e-07 | 0.999999 |
| rad71     | 1.24698e-07 | 1.000000 | 1.71300e-07 | 0.999999 |
| rad73     | 9.95919e-08 | 1.000000 | 1.36811e-07 | 0.999999 |
| rad40syn  | 8.39457e-08 | 1.000000 | 1.15318e-07 | 1.000000 |
| rad40anti | 5.01024e-08 | 1.000000 | 6.88266e-08 | 1.000000 |
| rad61     | 2.64237e-08 | 1.000000 | 3.62987e-08 | 1.000000 |
| rad41     | 7.91859e-09 | 1.000000 | 1.08779e-08 | 1.000000 |
| rad72     | 3.69540e-09 | 1.000000 | 5.07644e-09 | 1.000000 |
| rad6      | 2.93033e-10 | 1.000000 | 4.02547e-10 | 1.000000 |
| rad7      | 2.29510e-12 | 1.000000 | 3.15281e-12 | 1.000000 |
| rad11     | 1.74096e-12 | 1.000000 | 2.39158e-12 | 1.000000 |
| rad28     | 6.52214e-13 | 1.000000 | 8.95956e-13 | 1.000000 |
| rad23     | 6.29812e-13 | 1.000000 | 8.65179e-13 | 1.000000 |
| rad9      | 2.23074e-13 | 1.000000 | 3.06440e-13 | 1.000000 |
| rad13     | 1.60845e-13 | 1.000000 | 2.20956e-13 | 1.000000 |
| rad45     | 1.32513e-13 | 1.000000 | 1.82035e-13 | 1.000000 |
| rad22     | 8.46491e-14 | 1.000000 | 1.16284e-13 | 1.000000 |
| rad36     | 2.29393e-14 | 1.000000 | 3.15121e-14 | 1.000000 |
| rad21     | 1.98012e-14 | 1.000000 | 2.72012e-14 | 1.000000 |
| rad26     | 1.35067e-14 | 1.000000 | 1.85543e-14 | 1.000000 |
| rad15     | 1.11897e-14 | 1.000000 | 1.53715e-14 | 1.000000 |
| rad10     | 7.85578e-15 | 1.000000 | 1.07916e-14 | 1.000000 |
| rad20     | 6.44623e-15 | 1.000000 | 8.85532e-15 | 1.000000 |
| rad33     | 5.54006e-15 | 1.000000 | 7.61049e-15 | 1.000000 |
| rad18     | 2.99786e-15 | 1.000000 | 4.11820e-15 | 1.000000 |
| rad2      | 2.77603e-15 | 1.000000 | 3.81348e-15 | 1.000000 |
| rad25     | 1.43077e-15 | 1.000000 | 1.96547e-15 | 1.000000 |
| rad12     | 7.47122e-16 | 1.000000 | 1.02634e-15 | 1.000000 |
| rad1      | 7.45088e-16 | 1.000000 | 1.02354e-15 | 1.000000 |
| rad3      | 6.46252e-16 | 1.000000 | 8.87770e-16 | 1.000000 |
| rad24     | 6.07027e-16 | 1.000000 | 8.33884e-16 | 1.000000 |
| rad4      | 4.14093e-16 | 1.000000 | 5.68844e-16 | 1.000000 |
| rad14     | 7.58534e-17 | 1.000000 | 1.04201e-16 | 1.000000 |
| rad8      | 2.76592e-17 | 1.000000 | 3.79959e-17 | 1.000000 |
| rad27     | 6.88478e-18 | 1.000000 | 9.45777e-18 | 1.000000 |
| rad5      | 5.56033e-18 | 1.000000 | 7.63832e-18 | 1.000000 |
| rad47     | 1.43456e-18 | 1.000000 | 1.97067e-18 | 1.000000 |

0.100000000E-03 Pa, 2000.00000 K

| Rate constant      | True (fraction)      | Effective (fraction) |
|--------------------|----------------------|----------------------|
| Total              | 1.44111e-11 (1.00 )  | 1.02930e-11 (1.00 )  |
| Formation of rad11 | 3.16882e-12 (0.220 ) | 1.47449e-12 (0.143 ) |
| Formation of rad6  | 4.53302e-12 (0.315 ) | 2.10927e-12 (0.205 ) |
| H-abstraction      | 6.70922e-12 (0.466 ) | 6.70922e-12 (0.652 ) |

| species            | PYtrue      | Cumul    | PYeffective | Cumul    |
|--------------------|-------------|----------|-------------|----------|
| Benzene+2-propynyl | 0.465560    | 0.465560 | 0.651825    | 0.651825 |
| Phenyl+Allene      | 0.285759    | 0.751319 | 0.000000    | 0.651825 |
| PhCH2CCH+H         | 0.0971788   | 0.848498 | 0.136059    | 0.787884 |
| PhCHCCH2+H         | 0.0592993   | 0.907797 | 0.0830241   | 0.870908 |
| C2H2+PhCH2         | 0.0319942   | 0.939791 | 0.0447948   | 0.915703 |
| Indene+H           | 0.0233046   | 0.963096 | 0.0326284   | 0.948331 |
| PhCCH+CH3          | 0.0216466   | 0.984742 | 0.0303071   | 0.978638 |
| PAH7+H             | 0.00659328  | 0.991336 | 0.00923114  | 0.987869 |
| Ph+MeAc            | 0.00420938  | 0.995545 | 0.00589349  | 0.993763 |
| rad39              | 0.00101472  | 0.996560 | 0.00142069  | 0.995183 |
| rad19syn           | 0.000746783 | 0.997306 | 0.00104557  | 0.996229 |
| PhcycC3H3_A+H      | 0.000656335 | 0.997963 | 0.000918925 | 0.997148 |
| rad19anti          | 0.000529228 | 0.998492 | 0.000740966 | 0.997889 |
| rad54              | 0.000330237 | 0.998822 | 0.000462359 | 0.998351 |
| PhCCCH3+H          | 0.000291962 | 0.999114 | 0.000408772 | 0.998760 |
| PAH9+H             | 0.000279546 | 0.999394 | 0.000391387 | 0.999151 |
| rad38              | 0.000156414 | 0.999550 | 0.000218994 | 0.999370 |
| PAH1+H             | 6.96990e-05 | 0.999620 | 9.75848e-05 | 0.999468 |
| rad35              | 5.18637e-05 | 0.999672 | 7.26137e-05 | 0.999541 |
| rad46              | 4.57412e-05 | 0.999717 | 6.40416e-05 | 0.999605 |
| rad50              | 3.87497e-05 | 0.999756 | 5.42530e-05 | 0.999659 |
| PAH10+CH3          | 3.34470e-05 | 0.999790 | 4.68285e-05 | 0.999706 |
| rad70              | 3.20125e-05 | 0.999822 | 4.48203e-05 | 0.999751 |
| rad55              | 2.86889e-05 | 0.999850 | 4.01669e-05 | 0.999791 |
| PAH3+H             | 2.79049e-05 | 0.999878 | 3.90694e-05 | 0.999830 |
| rad67              | 2.51584e-05 | 0.999903 | 3.52238e-05 | 0.999865 |
| rad30              | 1.88901e-05 | 0.999922 | 2.64479e-05 | 0.999891 |
| rad37              | 1.66057e-05 | 0.999939 | 2.32494e-05 | 0.999915 |
| rad51              | 1.22963e-05 | 0.999951 | 1.72160e-05 | 0.999932 |
| rad56              | 1.03249e-05 | 0.999961 | 1.44559e-05 | 0.999946 |

|           |             |          |             |          |
|-----------|-------------|----------|-------------|----------|
| rad53     | 9.90974e-06 | 0.999971 | 1.38745e-05 | 0.999960 |
| rad34     | 8.56178e-06 | 0.999980 | 1.19873e-05 | 0.999972 |
| rad52     | 3.64112e-06 | 0.999984 | 5.09788e-06 | 0.999977 |
| rad62     | 3.41505e-06 | 0.999987 | 4.78139e-06 | 0.999982 |
| rad59     | 2.58714e-06 | 0.999990 | 3.62224e-06 | 0.999986 |
| rad60syn  | 2.06844e-06 | 0.999992 | 2.89599e-06 | 0.999989 |
| PAH8+H    | 1.81455e-06 | 0.999993 | 2.54053e-06 | 0.999991 |
| rad64     | 1.47576e-06 | 0.999995 | 2.06619e-06 | 0.999993 |
| rad60anti | 1.42207e-06 | 0.999996 | 1.99102e-06 | 0.999995 |
| rad68syn  | 6.53892e-07 | 0.999997 | 9.15510e-07 | 0.999996 |
| rad71     | 4.98025e-07 | 0.999998 | 6.97280e-07 | 0.999997 |
| rad68anti | 4.21792e-07 | 0.999998 | 5.90544e-07 | 0.999997 |
| rad73     | 3.38736e-07 | 0.999998 | 4.74260e-07 | 0.999998 |
| rad65     | 3.37785e-07 | 0.999999 | 4.72930e-07 | 0.999998 |
| rad42     | 3.12138e-07 | 0.999999 | 4.37019e-07 | 0.999999 |
| rad58     | 2.75720e-07 | 0.999999 | 3.86032e-07 | 0.999999 |
| rad40syn  | 2.27523e-07 | 0.999999 | 3.18551e-07 | 1.000000 |
| rad43     | 1.62531e-07 | 1.000000 | 2.27558e-07 | 1.000000 |
| rad40anti | 1.42660e-07 | 1.000000 | 1.99737e-07 | 1.000000 |
| rad61     | 5.98888e-08 | 1.000000 | 8.38493e-08 | 1.000000 |
| rad72     | 2.09309e-08 | 1.000000 | 2.93050e-08 | 1.000000 |
| rad41     | 1.34670e-08 | 1.000000 | 1.88550e-08 | 1.000000 |
| rad6      | 6.06065e-11 | 1.000000 | 8.48548e-11 | 1.000000 |
| rad7      | 5.25153e-13 | 1.000000 | 7.35259e-13 | 1.000000 |
| rad11     | 4.12511e-13 | 1.000000 | 5.77550e-13 | 1.000000 |
| rad23     | 3.31906e-13 | 1.000000 | 4.64696e-13 | 1.000000 |
| rad28     | 2.03742e-13 | 1.000000 | 2.85257e-13 | 1.000000 |
| rad9      | 7.58878e-14 | 1.000000 | 1.06249e-13 | 1.000000 |
| rad13     | 4.89606e-14 | 1.000000 | 6.85491e-14 | 1.000000 |
| rad45     | 4.02919e-14 | 1.000000 | 5.64121e-14 | 1.000000 |
| rad22     | 2.65566e-14 | 1.000000 | 3.71816e-14 | 1.000000 |
| rad21     | 7.16422e-15 | 1.000000 | 1.00305e-14 | 1.000000 |
| rad36     | 7.13621e-15 | 1.000000 | 9.99134e-15 | 1.000000 |
| rad15     | 3.98371e-15 | 1.000000 | 5.57756e-15 | 1.000000 |
| rad26     | 3.13200e-15 | 1.000000 | 4.38506e-15 | 1.000000 |
| rad33     | 2.26331e-15 | 1.000000 | 3.16884e-15 | 1.000000 |
| rad20     | 1.89432e-15 | 1.000000 | 2.65220e-15 | 1.000000 |
| rad10     | 1.15606e-15 | 1.000000 | 1.61858e-15 | 1.000000 |
| rad18     | 6.66201e-16 | 1.000000 | 9.32737e-16 | 1.000000 |
| rad25     | 5.79819e-16 | 1.000000 | 8.11799e-16 | 1.000000 |
| rad12     | 4.14756e-16 | 1.000000 | 5.80694e-16 | 1.000000 |
| rad2      | 3.68416e-16 | 1.000000 | 5.15815e-16 | 1.000000 |
| rad24     | 2.85159e-16 | 1.000000 | 3.99249e-16 | 1.000000 |
| rad3      | 1.63766e-16 | 1.000000 | 2.29286e-16 | 1.000000 |
| rad4      | 1.04159e-16 | 1.000000 | 1.45831e-16 | 1.000000 |
| rad1      | 1.02117e-16 | 1.000000 | 1.42973e-16 | 1.000000 |
| rad14     | 2.92676e-17 | 1.000000 | 4.09771e-17 | 1.000000 |
| rad8      | 2.34712e-17 | 1.000000 | 3.28617e-17 | 1.000000 |
| rad5      | 3.75871e-18 | 1.000000 | 5.26253e-18 | 1.000000 |
| rad47     | 2.86742e-18 | 1.000000 | 4.01464e-18 | 1.000000 |
| rad27     | 1.89910e-18 | 1.000000 | 2.65891e-18 | 1.000000 |

0.100000000E-03 Pa, 2250.00000 K

=====

| Rate constant      | True (fraction)      | Effective (fraction) |
|--------------------|----------------------|----------------------|
| Total              | 2.23655e-11 (1.00 )  | 1.58437e-11 (1.00 )  |
| Formation of rad11 | 4.62280e-12 (0.207 ) | 1.98925e-12 (0.126 ) |
| Formation of rad6  | 6.82518e-12 (0.305 ) | 2.93696e-12 (0.185 ) |
| H-abstraction      | 1.09175e-11 (0.488 ) | 1.09175e-11 (0.689 ) |

| species            | PYtrue      | Cumul    | PYeffective | Cumul    |
|--------------------|-------------|----------|-------------|----------|
| Benzene+2-propynyl | 0.488140    | 0.488140 | 0.689074    | 0.689074 |
| Phenyl+Allene      | 0.291600    | 0.779740 | 0.000000    | 0.689074 |
| PhCH2CCH+H         | 0.0967415   | 0.876482 | 0.136563    | 0.825637 |
| PhCHCCH2+H         | 0.0532744   | 0.929756 | 0.0752040   | 0.900841 |
| C2H2+PhCH2         | 0.0232642   | 0.953020 | 0.0328403   | 0.933682 |
| PhCCH+CH3          | 0.0176492   | 0.970669 | 0.0249142   | 0.958596 |
| Indene+H           | 0.0145378   | 0.985207 | 0.0205221   | 0.979118 |
| PAH7+H             | 0.00604332  | 0.991251 | 0.00853097  | 0.987649 |
| Ph+MeAc            | 0.00373478  | 0.994985 | 0.00527212  | 0.992921 |
| PhcycC3H3_A+H      | 0.00104439  | 0.996030 | 0.00147430  | 0.994395 |
| rad19syn           | 0.000992650 | 0.997022 | 0.00140125  | 0.995797 |
| rad39              | 0.000833753 | 0.997856 | 0.00117695  | 0.996974 |
| rad19anti          | 0.000463520 | 0.998320 | 0.000654319 | 0.997628 |
| rad54              | 0.000448432 | 0.998768 | 0.000633020 | 0.998261 |
| PAH9+H             | 0.000276004 | 0.999044 | 0.000389615 | 0.998651 |
| PhCCCH3+H          | 0.000209665 | 0.999254 | 0.000295970 | 0.998946 |
| rad38              | 0.000160719 | 0.999414 | 0.000226876 | 0.999173 |

|           |             |          |             |          |
|-----------|-------------|----------|-------------|----------|
| PAH1+H    | 9.95931e-05 | 0.999514 | 0.000140589 | 0.999314 |
| rad50     | 5.46328e-05 | 0.999569 | 7.71214e-05 | 0.999391 |
| rad35     | 5.24979e-05 | 0.999621 | 7.41079e-05 | 0.999465 |
| rad46     | 5.06983e-05 | 0.999672 | 7.15674e-05 | 0.999537 |
| PAH10+CH3 | 4.32190e-05 | 0.999715 | 6.10093e-05 | 0.999598 |
| rad55     | 4.15447e-05 | 0.999757 | 5.86459e-05 | 0.999656 |
| rad70     | 4.13232e-05 | 0.999798 | 5.83331e-05 | 0.999715 |
| PAH3+H    | 3.54273e-05 | 0.999833 | 5.00103e-05 | 0.999765 |
| rad67     | 3.21710e-05 | 0.999866 | 4.54135e-05 | 0.999810 |
| rad56     | 2.10958e-05 | 0.999887 | 2.97795e-05 | 0.999840 |
| rad51     | 2.05290e-05 | 0.999907 | 2.89794e-05 | 0.999869 |
| rad53     | 1.82253e-05 | 0.999925 | 2.57273e-05 | 0.999895 |
| rad30     | 1.61770e-05 | 0.999942 | 2.28359e-05 | 0.999917 |
| rad37     | 1.58091e-05 | 0.999957 | 2.23166e-05 | 0.999940 |
| rad34     | 1.21378e-05 | 0.999970 | 1.71341e-05 | 0.999957 |
| rad52     | 5.53699e-06 | 0.999975 | 7.81618e-06 | 0.999965 |
| rad62     | 4.54170e-06 | 0.999980 | 6.41120e-06 | 0.999971 |
| PAH8+H    | 4.26413e-06 | 0.999984 | 6.01937e-06 | 0.999977 |
| rad59     | 3.10133e-06 | 0.999987 | 4.37793e-06 | 0.999982 |
| rad64     | 2.31389e-06 | 0.999989 | 3.26637e-06 | 0.999985 |
| rad60syn  | 2.18352e-06 | 0.999991 | 3.08232e-06 | 0.999988 |
| rad60anti | 1.52762e-06 | 0.999993 | 2.15643e-06 | 0.999990 |
| rad71     | 1.42621e-06 | 0.999994 | 2.01328e-06 | 0.999992 |
| rad68syn  | 1.22834e-06 | 0.999996 | 1.73396e-06 | 0.999994 |
| rad73     | 8.52958e-07 | 0.999996 | 1.20406e-06 | 0.999995 |
| rad68anti | 7.89692e-07 | 0.999997 | 1.11475e-06 | 0.999996 |
| rad65     | 5.43585e-07 | 0.999998 | 7.67340e-07 | 0.999997 |
| rad42     | 4.97942e-07 | 0.999998 | 7.02910e-07 | 0.999998 |
| rad40syn  | 4.83630e-07 | 0.999999 | 6.82706e-07 | 0.999998 |
| rad58     | 4.30302e-07 | 0.999999 | 6.07428e-07 | 0.999999 |
| rad40anti | 3.15359e-07 | 1.000000 | 4.45171e-07 | 0.999999 |
| rad43     | 2.01350e-07 | 1.000000 | 2.84232e-07 | 1.000000 |
| rad61     | 1.06762e-07 | 1.000000 | 1.50709e-07 | 1.000000 |
| rad72     | 7.85254e-08 | 1.000000 | 1.10849e-07 | 1.000000 |
| rad41     | 2.11925e-08 | 1.000000 | 2.99160e-08 | 1.000000 |
| rad6      | 1.20554e-11 | 1.000000 | 1.70178e-11 | 1.000000 |
| rad7      | 1.68574e-13 | 1.000000 | 2.37965e-13 | 1.000000 |
| rad11     | 1.28927e-13 | 1.000000 | 1.81997e-13 | 1.000000 |
| rad23     | 8.94818e-14 | 1.000000 | 1.26316e-13 | 1.000000 |
| rad28     | 4.35688e-14 | 1.000000 | 6.15030e-14 | 1.000000 |
| rad9      | 2.75820e-14 | 1.000000 | 3.89357e-14 | 1.000000 |
| rad13     | 1.82811e-14 | 1.000000 | 2.58062e-14 | 1.000000 |
| rad45     | 1.39800e-14 | 1.000000 | 1.97346e-14 | 1.000000 |
| rad22     | 6.74810e-15 | 1.000000 | 9.52581e-15 | 1.000000 |
| rad21     | 2.97971e-15 | 1.000000 | 4.20624e-15 | 1.000000 |
| rad36     | 2.52542e-15 | 1.000000 | 3.56495e-15 | 1.000000 |
| rad15     | 1.60419e-15 | 1.000000 | 2.26452e-15 | 1.000000 |
| rad33     | 1.06526e-15 | 1.000000 | 1.50376e-15 | 1.000000 |
| rad26     | 8.51678e-16 | 1.000000 | 1.20225e-15 | 1.000000 |
| rad20     | 6.76725e-16 | 1.000000 | 9.55283e-16 | 1.000000 |
| rad10     | 3.06505e-16 | 1.000000 | 4.32672e-16 | 1.000000 |
| rad25     | 2.68292e-16 | 1.000000 | 3.78730e-16 | 1.000000 |
| rad12     | 2.31790e-16 | 1.000000 | 3.27203e-16 | 1.000000 |
| rad18     | 2.02950e-16 | 1.000000 | 2.86491e-16 | 1.000000 |
| rad24     | 1.45642e-16 | 1.000000 | 2.05592e-16 | 1.000000 |
| rad2      | 7.02712e-17 | 1.000000 | 9.91966e-17 | 1.000000 |
| rad3      | 5.33471e-17 | 1.000000 | 7.53066e-17 | 1.000000 |
| rad4      | 3.33291e-17 | 1.000000 | 4.70484e-17 | 1.000000 |
| rad8      | 2.01388e-17 | 1.000000 | 2.84285e-17 | 1.000000 |
| rad1      | 1.96878e-17 | 1.000000 | 2.77920e-17 | 1.000000 |
| rad14     | 1.40657e-17 | 1.000000 | 1.98556e-17 | 1.000000 |
| rad47     | 4.71862e-18 | 1.000000 | 6.66093e-18 | 1.000000 |
| rad5      | 2.19923e-18 | 1.000000 | 3.10451e-18 | 1.000000 |
| rad27     | 7.37426e-19 | 1.000000 | 1.04097e-18 | 1.000000 |

0.100000000E-03 Pa, 2500.00000 K

| Rate constant      | True (fraction)      | Effective (fraction) |
|--------------------|----------------------|----------------------|
| Total              | 3.28090e-11 (1.00 )  | 2.31980e-11 (1.00 )  |
| Formation of rad11 | 6.43164e-12 (0.196 ) | 2.60906e-12 (0.112 ) |
| Formation of rad6  | 9.73932e-12 (0.297 ) | 3.95085e-12 (0.170 ) |
| H-abstraction      | 1.66381e-11 (0.507 ) | 1.66381e-11 (0.717 ) |

  

| species            | PYtrue    | Cumul    | PYeffective | Cumul    |
|--------------------|-----------|----------|-------------|----------|
| Benzene+2-propynyl | 0.507119  | 0.507119 | 0.717221    | 0.717221 |
| Phenyl+Allene      | 0.292939  | 0.800058 | 0.00000     | 0.717221 |
| PhCH2CCH+H         | 0.0943957 | 0.894453 | 0.133505    | 0.850725 |
| PhCHCCH2+H         | 0.0481939 | 0.942647 | 0.0681609   | 0.918886 |

|               |             |          |             |          |
|---------------|-------------|----------|-------------|----------|
| C2H2+PhCH2    | 0.0183497   | 0.960997 | 0.0259521   | 0.944838 |
| PhCCH+CH3     | 0.0148752   | 0.975872 | 0.0210381   | 0.965876 |
| Indene+H      | 0.00953292  | 0.985405 | 0.0134824   | 0.979359 |
| PAH7+H        | 0.00553047  | 0.990936 | 0.00782174  | 0.987180 |
| Ph+MeAc       | 0.00339482  | 0.994330 | 0.00480131  | 0.991982 |
| PhcycC3H3_A+H | 0.00149309  | 0.995824 | 0.00211168  | 0.994093 |
| rad19syn      | 0.00122618  | 0.997050 | 0.00173419  | 0.995828 |
| rad39         | 0.000692493 | 0.997742 | 0.000979395 | 0.996807 |
| rad54         | 0.000558297 | 0.998301 | 0.000789599 | 0.997597 |
| rad19anti     | 0.000392540 | 0.998693 | 0.000555170 | 0.998152 |
| PAH9+H        | 0.000261381 | 0.998954 | 0.000369672 | 0.998522 |
| PhCCCH3+H     | 0.000164587 | 0.999119 | 0.000232776 | 0.998754 |
| rad38         | 0.000157797 | 0.999277 | 0.000223174 | 0.998977 |
| PAH1+H        | 0.000129617 | 0.999406 | 0.000183319 | 0.999161 |
| rad50         | 6.95411e-05 | 0.999476 | 9.83527e-05 | 0.999259 |
| rad55         | 5.44673e-05 | 0.999530 | 7.70336e-05 | 0.999336 |
| rad46         | 5.29591e-05 | 0.999583 | 7.49001e-05 | 0.999411 |
| rad35         | 5.14100e-05 | 0.999635 | 7.27094e-05 | 0.999484 |
| PAH10+CH3     | 5.04331e-05 | 0.999685 | 7.13277e-05 | 0.999555 |
| rad70         | 4.95223e-05 | 0.999735 | 7.00399e-05 | 0.999625 |
| PAH3+H        | 4.31617e-05 | 0.999778 | 6.10439e-05 | 0.999686 |
| rad67         | 3.73882e-05 | 0.999815 | 5.28783e-05 | 0.999739 |
| rad56         | 3.65112e-05 | 0.999852 | 5.16378e-05 | 0.999791 |
| rad51         | 2.99347e-05 | 0.999882 | 4.23369e-05 | 0.999833 |
| rad53         | 2.90213e-05 | 0.999911 | 4.10449e-05 | 0.999874 |
| rad34         | 1.57208e-05 | 0.999926 | 2.22340e-05 | 0.999896 |
| rad30         | 1.43454e-05 | 0.999941 | 2.02888e-05 | 0.999917 |
| rad37         | 1.43019e-05 | 0.999955 | 2.02272e-05 | 0.999937 |
| PAH8+H        | 8.32886e-06 | 0.999963 | 1.17795e-05 | 0.999949 |
| rad52         | 7.47627e-06 | 0.999971 | 1.05737e-05 | 0.999959 |
| rad62         | 5.70269e-06 | 0.999977 | 8.06532e-06 | 0.999967 |
| rad59         | 3.60017e-06 | 0.999980 | 5.09173e-06 | 0.999972 |
| rad64         | 3.22135e-06 | 0.999983 | 4.55597e-06 | 0.999977 |
| rad71         | 3.21465e-06 | 0.999987 | 4.54650e-06 | 0.999981 |
| rad60syn      | 2.29248e-06 | 0.999989 | 3.24226e-06 | 0.999985 |
| rad68syn      | 1.99920e-06 | 0.999991 | 2.82747e-06 | 0.999988 |
| rad73         | 1.73023e-06 | 0.999993 | 2.44707e-06 | 0.999990 |
| rad60anti     | 1.62672e-06 | 0.999994 | 2.30068e-06 | 0.999992 |
| rad68anti     | 1.28205e-06 | 0.999996 | 1.81322e-06 | 0.999994 |
| rad40syn      | 8.70429e-07 | 0.999996 | 1.23105e-06 | 0.999995 |
| rad65         | 7.65686e-07 | 0.999997 | 1.08291e-06 | 0.999996 |
| rad42         | 7.25369e-07 | 0.999998 | 1.02590e-06 | 0.999997 |
| rad58         | 6.16762e-07 | 0.999999 | 8.72293e-07 | 0.999998 |
| rad40anti     | 5.85898e-07 | 0.999999 | 8.28640e-07 | 0.999999 |
| rad43         | 2.45120e-07 | 0.999999 | 3.46673e-07 | 0.999999 |
| rad72         | 2.19453e-07 | 1.000000 | 3.10373e-07 | 1.000000 |
| rad61         | 1.61750e-07 | 1.000000 | 2.28765e-07 | 1.000000 |
| rad41         | 3.09947e-08 | 1.000000 | 4.38359e-08 | 1.000000 |
| rad6          | 3.28941e-12 | 1.000000 | 4.65223e-12 | 1.000000 |
| rad7          | 6.60289e-14 | 1.000000 | 9.33851e-14 | 1.000000 |
| rad11         | 4.80269e-14 | 1.000000 | 6.79245e-14 | 1.000000 |
| rad23         | 2.59012e-14 | 1.000000 | 3.66321e-14 | 1.000000 |
| rad28         | 1.18080e-14 | 1.000000 | 1.67000e-14 | 1.000000 |
| rad9          | 1.07592e-14 | 1.000000 | 1.52168e-14 | 1.000000 |
| rad13         | 7.91331e-15 | 1.000000 | 1.11918e-14 | 1.000000 |
| rad45         | 5.45028e-15 | 1.000000 | 7.70834e-15 | 1.000000 |
| rad22         | 2.12638e-15 | 1.000000 | 3.00736e-15 | 1.000000 |
| rad21         | 1.39345e-15 | 1.000000 | 1.97077e-15 | 1.000000 |
| rad36         | 1.00132e-15 | 1.000000 | 1.41618e-15 | 1.000000 |
| rad15         | 6.95209e-16 | 1.000000 | 9.83241e-16 | 1.000000 |
| rad33         | 5.56576e-16 | 1.000000 | 7.87170e-16 | 1.000000 |
| rad26         | 3.01752e-16 | 1.000000 | 4.26771e-16 | 1.000000 |
| rad20         | 2.88827e-16 | 1.000000 | 4.08489e-16 | 1.000000 |
| rad25         | 1.37165e-16 | 1.000000 | 1.93993e-16 | 1.000000 |
| rad12         | 1.32606e-16 | 1.000000 | 1.87546e-16 | 1.000000 |
| rad10         | 1.11288e-16 | 1.000000 | 1.57395e-16 | 1.000000 |
| rad24         | 7.99114e-17 | 1.000000 | 1.13019e-16 | 1.000000 |
| rad18         | 7.64144e-17 | 1.000000 | 1.08073e-16 | 1.000000 |
| rad3          | 2.12543e-17 | 1.000000 | 3.00600e-17 | 1.000000 |
| rad2          | 1.89252e-17 | 1.000000 | 2.67661e-17 | 1.000000 |
| rad8          | 1.74700e-17 | 1.000000 | 2.47079e-17 | 1.000000 |
| rad4          | 1.29923e-17 | 1.000000 | 1.83751e-17 | 1.000000 |
| rad14         | 7.76880e-18 | 1.000000 | 1.09875e-17 | 1.000000 |
| rad47         | 6.74962e-18 | 1.000000 | 9.54604e-18 | 1.000000 |
| rad1          | 5.18033e-18 | 1.000000 | 7.32659e-18 | 1.000000 |
| rad5          | 1.44986e-18 | 1.000000 | 2.05054e-18 | 1.000000 |
| rad27         | 3.67279e-19 | 1.000000 | 5.19443e-19 | 1.000000 |

0.100000000E-03 Pa, 2750.00000 K

=====

| Rate constant      | True (fraction)      | Effective (fraction) |
|--------------------|----------------------|----------------------|
| Total              | 4.60596e-11 (1.00 )  | 3.26255e-11 (1.00 )  |
| Formation of rad11 | 8.62280e-12 (0.187 ) | 3.34633e-12 (0.103 ) |
| Formation of rad6  | 1.33313e-11 (0.289 ) | 5.17360e-12 (0.159 ) |
| H-abstraction      | 2.41055e-11 (0.523 ) | 2.41055e-11 (0.739 ) |

| species            | PYtrue      | Cumul    | PYeffective | Cumul    |
|--------------------|-------------|----------|-------------|----------|
| Benzene+2-propynyl | 0.523355    | 0.523355 | 0.738856    | 0.738856 |
| Phenyl+Allene      | 0.291669    | 0.815024 | 0.00000     | 0.738856 |
| PhCH2CCH+H         | 0.0913925   | 0.906416 | 0.129025    | 0.867881 |
| PhCHCCH2+H         | 0.0440897   | 0.950506 | 0.0622446   | 0.930126 |
| C2H2+PhCH2         | 0.0155259   | 0.966032 | 0.0219190   | 0.952045 |
| PhCCH+CH3          | 0.0128664   | 0.978898 | 0.0181644   | 0.970209 |
| Indene+H           | 0.00652675  | 0.985425 | 0.00921427  | 0.979424 |
| PAH7+H             | 0.00506746  | 0.990493 | 0.00715408  | 0.986578 |
| Ph+MeAc            | 0.00315047  | 0.993643 | 0.00444775  | 0.991026 |
| PhcycC3H3_A+H      | 0.00197300  | 0.995616 | 0.00278544  | 0.993811 |
| rad19syn           | 0.00143568  | 0.997052 | 0.00202686  | 0.995838 |
| rad54              | 0.000652594 | 0.997704 | 0.000921315 | 0.996759 |
| rad39              | 0.000584043 | 0.998288 | 0.000824532 | 0.997584 |
| rad19anti          | 0.000328573 | 0.998617 | 0.000463869 | 0.998048 |
| PAH9+H             | 0.000240059 | 0.998857 | 0.000338907 | 0.998386 |
| PAH1+H             | 0.000158291 | 0.999015 | 0.000223471 | 0.998610 |
| rad38              | 0.000149711 | 0.999165 | 0.000211358 | 0.998821 |
| PhCCCH3+H          | 0.000136861 | 0.999302 | 0.000193216 | 0.999015 |
| rad50              | 8.19601e-05 | 0.999384 | 0.000115709 | 0.999130 |
| rad55              | 6.64334e-05 | 0.999450 | 9.37887e-05 | 0.999224 |
| rad70              | 5.64830e-05 | 0.999507 | 7.97407e-05 | 0.999304 |
| rad56              | 5.59920e-05 | 0.999563 | 7.90477e-05 | 0.999383 |
| PAH10+CH3          | 5.49972e-05 | 0.999618 | 7.76435e-05 | 0.999460 |
| rad46              | 5.29186e-05 | 0.999671 | 7.47090e-05 | 0.999535 |
| PAH3+H             | 5.07704e-05 | 0.999721 | 7.16761e-05 | 0.999607 |
| rad35              | 4.92117e-05 | 0.999771 | 6.94754e-05 | 0.999676 |
| rad53              | 4.15958e-05 | 0.999812 | 5.87239e-05 | 0.999735 |
| rad67              | 4.08893e-05 | 0.999853 | 5.77263e-05 | 0.999793 |
| rad51              | 3.94231e-05 | 0.999893 | 5.56562e-05 | 0.999848 |
| rad34              | 1.91382e-05 | 0.999912 | 2.70187e-05 | 0.999875 |
| PAH8+H             | 1.42400e-05 | 0.999926 | 2.01036e-05 | 0.999896 |
| rad30              | 1.30159e-05 | 0.999939 | 1.83754e-05 | 0.999914 |
| rad37              | 1.25497e-05 | 0.999951 | 1.77173e-05 | 0.999932 |
| rad52              | 9.23200e-06 | 0.999961 | 1.30335e-05 | 0.999945 |
| rad62              | 6.96508e-06 | 0.999968 | 9.83308e-06 | 0.999954 |
| rad71              | 6.06264e-06 | 0.999974 | 8.55906e-06 | 0.999963 |
| rad64              | 4.12924e-06 | 0.999978 | 5.82954e-06 | 0.999969 |
| rad59              | 4.06487e-06 | 0.999982 | 5.73866e-06 | 0.999975 |
| rad73              | 2.98825e-06 | 0.999985 | 4.21872e-06 | 0.999979 |
| rad68syn           | 2.93858e-06 | 0.999988 | 4.14861e-06 | 0.999983 |
| rad60syn           | 2.38752e-06 | 0.999990 | 3.37063e-06 | 0.999986 |
| rad68anti          | 1.88086e-06 | 0.999992 | 2.65533e-06 | 0.999989 |
| rad60anti          | 1.71401e-06 | 0.999994 | 2.41979e-06 | 0.999991 |
| rad40syn           | 1.39059e-06 | 0.999995 | 1.96319e-06 | 0.999993 |
| rad42              | 1.00618e-06 | 0.999996 | 1.42050e-06 | 0.999995 |
| rad65              | 9.77109e-07 | 0.999997 | 1.37945e-06 | 0.999996 |
| rad40anti          | 9.60893e-07 | 0.999998 | 1.35656e-06 | 0.999998 |
| rad58              | 8.26832e-07 | 0.999999 | 1.16730e-06 | 0.999999 |
| rad72              | 4.93194e-07 | 1.000000 | 6.96274e-07 | 0.999999 |
| rad43              | 2.90363e-07 | 1.000000 | 4.09925e-07 | 1.000000 |
| rad61              | 2.19014e-07 | 1.000000 | 3.09197e-07 | 1.000000 |
| rad41              | 4.25216e-08 | 1.000000 | 6.00307e-08 | 1.000000 |
| rad6               | 1.11933e-12 | 1.000000 | 1.58025e-12 | 1.000000 |
| rad7               | 2.96692e-14 | 1.000000 | 4.18861e-14 | 1.000000 |
| rad11              | 2.05434e-14 | 1.000000 | 2.90026e-14 | 1.000000 |
| rad23              | 8.85688e-15 | 1.000000 | 1.25039e-14 | 1.000000 |
| rad9               | 4.51526e-15 | 1.000000 | 6.37452e-15 | 1.000000 |
| rad28              | 4.01956e-15 | 1.000000 | 5.67470e-15 | 1.000000 |
| rad13              | 3.84825e-15 | 1.000000 | 5.43286e-15 | 1.000000 |
| rad45              | 2.34610e-15 | 1.000000 | 3.31214e-15 | 1.000000 |
| rad22              | 7.93381e-16 | 1.000000 | 1.12007e-15 | 1.000000 |
| rad21              | 7.20273e-16 | 1.000000 | 1.01686e-15 | 1.000000 |
| rad36              | 4.37169e-16 | 1.000000 | 6.17182e-16 | 1.000000 |
| rad15              | 3.20778e-16 | 1.000000 | 4.52865e-16 | 1.000000 |
| rad33              | 3.15102e-16 | 1.000000 | 4.44850e-16 | 1.000000 |
| rad20              | 1.44342e-16 | 1.000000 | 2.03778e-16 | 1.000000 |
| rad26              | 1.23531e-16 | 1.000000 | 1.74397e-16 | 1.000000 |
| rad12              | 7.84782e-17 | 1.000000 | 1.10793e-16 | 1.000000 |
| rad25              | 7.63295e-17 | 1.000000 | 1.07760e-16 | 1.000000 |
| rad10              | 4.80354e-17 | 1.000000 | 6.78153e-17 | 1.000000 |
| rad24              | 4.65717e-17 | 1.000000 | 6.57484e-17 | 1.000000 |

|       |             |         |             |         |
|-------|-------------|---------|-------------|---------|
| rad18 | 3.38454e-17 | 1.00000 | 4.77820e-17 | 1.00000 |
| rad8  | 1.52996e-17 | 1.00000 | 2.15996e-17 | 1.00000 |
| rad3  | 9.87714e-18 | 1.00000 | 1.39443e-17 | 1.00000 |
| rad47 | 8.69678e-18 | 1.00000 | 1.22779e-17 | 1.00000 |
| rad2  | 6.70997e-18 | 1.00000 | 9.47296e-18 | 1.00000 |
| rad4  | 5.93137e-18 | 1.00000 | 8.37373e-18 | 1.00000 |
| rad14 | 4.74805e-18 | 1.00000 | 6.70317e-18 | 1.00000 |
| rad1  | 1.74685e-18 | 1.00000 | 2.46616e-18 | 1.00000 |
| rad5  | 1.01653e-18 | 1.00000 | 1.43511e-18 | 1.00000 |
| rad27 | 2.15736e-19 | 1.00000 | 3.04569e-19 | 1.00000 |

0.100000000E-03 Pa, 3000.00000 K

| Rate constant      | True (fraction)      | Effective (fraction)  |
|--------------------|----------------------|-----------------------|
| Total              | 6.24269e-11 (1.00 )  | 4.43911e-11 (1.00 )   |
| Formation of rad11 | 1.12221e-11 (0.180 ) | 4.21269e-12 (0.0949 ) |
| Formation of rad6  | 1.76534e-11 (0.283 ) | 6.62699e-12 (0.149 )  |
| H-abstraction      | 3.35514e-11 (0.537 ) | 3.35514e-11 (0.756 )  |

| species            | PYtrue      | Cumul    | PYeffective | Cumul    |
|--------------------|-------------|----------|-------------|----------|
| Benzene+2-propynyl | 0.537451    | 0.537451 | 0.755814    | 0.755814 |
| Phenyl+Allene      | 0.288911    | 0.826362 | 0.00000     | 0.755814 |
| PhCH2CCH+H         | 0.0883066   | 0.914669 | 0.124185    | 0.879999 |
| PhCHCCH2+H         | 0.0408111   | 0.955480 | 0.0573925   | 0.937392 |
| C2H2+PhCH2         | 0.0138651   | 0.969345 | 0.0194984   | 0.956890 |
| PhCCH+CH3          | 0.0113582   | 0.980703 | 0.0159730   | 0.972863 |
| PAH7+H             | 0.00465329  | 0.985356 | 0.00654386  | 0.979407 |
| Indene+H           | 0.00463895  | 0.989995 | 0.00652370  | 0.985931 |
| Ph+MeAc            | 0.00297587  | 0.992971 | 0.00418496  | 0.990116 |
| PhcycC3H3_A+H      | 0.00245642  | 0.995427 | 0.00345445  | 0.993570 |
| rad19syn           | 0.00161454  | 0.997042 | 0.00227052  | 0.995841 |
| rad54              | 0.000727890 | 0.997770 | 0.00102362  | 0.996864 |
| rad39              | 0.000500510 | 0.998270 | 0.000703861 | 0.997568 |
| rad19anti          | 0.000275358 | 0.998546 | 0.000387232 | 0.997955 |
| PAH9+H             | 0.000215435 | 0.998761 | 0.000302964 | 0.998258 |
| PAH1+H             | 0.000185098 | 0.998946 | 0.000260302 | 0.998519 |
| rad38              | 0.000138297 | 0.999085 | 0.000194486 | 0.998713 |
| PhCCCH3+H          | 0.000118094 | 0.999203 | 0.000166074 | 0.998879 |
| rad50              | 9.10199e-05 | 0.999294 | 0.000128001 | 0.999007 |
| rad56              | 7.84307e-05 | 0.999372 | 0.000110297 | 0.999117 |
| rad55              | 7.67854e-05 | 0.999449 | 0.000107983 | 0.999225 |
| rad70              | 6.22156e-05 | 0.999511 | 8.74935e-05 | 0.999313 |
| PAH3+H             | 5.79162e-05 | 0.999569 | 8.14472e-05 | 0.999394 |
| PAH10+CH3          | 5.73435e-05 | 0.999626 | 8.06419e-05 | 0.999475 |
| rad53              | 5.50942e-05 | 0.999682 | 7.74787e-05 | 0.999552 |
| rad46              | 5.10964e-05 | 0.999733 | 7.18563e-05 | 0.999624 |
| rad51              | 4.79927e-05 | 0.999781 | 6.74918e-05 | 0.999692 |
| rad35              | 4.64038e-05 | 0.999827 | 6.52572e-05 | 0.999757 |
| rad67              | 4.30004e-05 | 0.999870 | 6.04712e-05 | 0.999818 |
| rad34              | 2.22803e-05 | 0.999892 | 3.13327e-05 | 0.999849 |
| PAH8+H             | 2.20424e-05 | 0.999914 | 3.09982e-05 | 0.999880 |
| rad30              | 1.19659e-05 | 0.999926 | 1.68276e-05 | 0.999897 |
| rad37              | 1.08360e-05 | 0.999937 | 1.52386e-05 | 0.999912 |
| rad52              | 1.06405e-05 | 0.999948 | 1.49636e-05 | 0.999927 |
| rad71              | 9.97847e-06 | 0.999958 | 1.40327e-05 | 0.999941 |
| rad62              | 8.52399e-06 | 0.999966 | 1.19872e-05 | 0.999953 |
| rad64              | 4.99011e-06 | 0.999971 | 7.01754e-06 | 0.999960 |
| rad73              | 4.56449e-06 | 0.999976 | 6.41901e-06 | 0.999966 |
| rad59              | 4.47702e-06 | 0.999980 | 6.29599e-06 | 0.999973 |
| rad68syn           | 4.00554e-06 | 0.999984 | 5.63295e-06 | 0.999978 |
| rad68anti          | 2.55993e-06 | 0.999987 | 3.60001e-06 | 0.999982 |
| rad60syn           | 2.46101e-06 | 0.999989 | 3.46090e-06 | 0.999985 |
| rad40syn           | 2.03324e-06 | 0.999991 | 2.85932e-06 | 0.999988 |
| rad60anti          | 1.78407e-06 | 0.999993 | 2.50894e-06 | 0.999991 |
| rad40anti          | 1.43624e-06 | 0.999995 | 2.01978e-06 | 0.999993 |
| rad42              | 1.37800e-06 | 0.999996 | 1.93787e-06 | 0.999995 |
| rad65              | 1.15674e-06 | 0.999997 | 1.62672e-06 | 0.999996 |
| rad58              | 1.05023e-06 | 0.999998 | 1.47693e-06 | 0.999998 |
| rad72              | 9.39261e-07 | 0.999999 | 1.32087e-06 | 0.999999 |
| rad43              | 3.36095e-07 | 0.999999 | 4.72649e-07 | 1.000000 |
| rad61              | 2.73990e-07 | 1.000000 | 3.85311e-07 | 1.000000 |
| rad41              | 5.56844e-08 | 1.000000 | 7.83087e-08 | 1.000000 |
| rad6               | 4.44311e-13 | 1.000000 | 6.24830e-13 | 1.000000 |
| rad7               | 1.48091e-14 | 1.000000 | 2.08258e-14 | 1.000000 |
| rad11              | 9.86357e-15 | 1.000000 | 1.38711e-14 | 1.000000 |
| rad23              | 3.41368e-15 | 1.000000 | 4.80065e-15 | 1.000000 |
| rad13              | 2.05538e-15 | 1.000000 | 2.89048e-15 | 1.000000 |
| rad9               | 2.03861e-15 | 1.000000 | 2.86689e-15 | 1.000000 |

|       |             |          |             |         |
|-------|-------------|----------|-------------|---------|
| rad28 | 1.59337e-15 | 1.000000 | 2.24075e-15 | 1.00000 |
| rad45 | 1.09652e-15 | 1.000000 | 1.54203e-15 | 1.00000 |
| rad21 | 4.05034e-16 | 1.000000 | 5.69598e-16 | 1.00000 |
| rad22 | 3.36218e-16 | 1.000000 | 4.72822e-16 | 1.00000 |
| rad36 | 2.06713e-16 | 1.000000 | 2.90698e-16 | 1.00000 |
| rad33 | 1.89985e-16 | 1.000000 | 2.67174e-16 | 1.00000 |
| rad15 | 1.57426e-16 | 1.000000 | 2.21387e-16 | 1.00000 |
| rad20 | 8.22772e-17 | 1.000000 | 1.15706e-16 | 1.00000 |
| rad26 | 5.54952e-17 | 1.000000 | 7.80425e-17 | 1.00000 |
| rad12 | 4.82938e-17 | 1.000000 | 6.79149e-17 | 1.00000 |
| rad25 | 4.56474e-17 | 1.000000 | 6.41938e-17 | 1.00000 |
| rad24 | 2.85392e-17 | 1.000000 | 4.01344e-17 | 1.00000 |
| rad10 | 2.31250e-17 | 1.000000 | 3.25204e-17 | 1.00000 |
| rad18 | 1.70016e-17 | 1.000000 | 2.39092e-17 | 1.00000 |
| rad8  | 1.34844e-17 | 1.000000 | 1.89630e-17 | 1.00000 |
| rad47 | 1.03449e-17 | 1.000000 | 1.45480e-17 | 1.00000 |
| rad3  | 5.15492e-18 | 1.000000 | 7.24934e-18 | 1.00000 |
| rad14 | 3.16322e-18 | 1.000000 | 4.44841e-18 | 1.00000 |
| rad4  | 3.07145e-18 | 1.000000 | 4.31936e-18 | 1.00000 |
| rad2  | 2.90417e-18 | 1.000000 | 4.08413e-18 | 1.00000 |
| rad5  | 7.39278e-19 | 1.000000 | 1.03964e-18 | 1.00000 |
| rad1  | 7.11589e-19 | 1.000000 | 1.00070e-18 | 1.00000 |
| rad27 | 1.40640e-19 | 1.000000 | 1.97781e-19 | 1.00000 |

0.100000000E-03 Pa, 3250.00000 K

| Rate constant      | True (fraction)      | Effective (fraction)  |
|--------------------|----------------------|-----------------------|
| Total              | 8.22129e-11 (1.00 )  | 5.87536e-11 (1.00 )   |
| Formation of rad11 | 1.42538e-11 (0.173 ) | 5.21849e-12 (0.0888 ) |
| Formation of rad6  | 2.27549e-11 (0.277 ) | 8.33083e-12 (0.142 )  |
| H-abstraction      | 4.52043e-11 (0.550 ) | 4.52043e-11 (0.769 )  |

| species            | PYtrue      | Cumul    | PYeffective | Cumul    |
|--------------------|-------------|----------|-------------|----------|
| Benzene+2-propynyl | 0.549844    | 0.549844 | 0.769388    | 0.769388 |
| Phenyl+Allene      | 0.285349    | 0.835192 | 0.000000    | 0.769388 |
| PhCH2CCH+H         | 0.0853725   | 0.920565 | 0.119460    | 0.888848 |
| PhCHCCH2+H         | 0.0381839   | 0.958749 | 0.0534299   | 0.942278 |
| C2H2+PhCH2         | 0.0128678   | 0.971617 | 0.0180057   | 0.960283 |
| PhCCH+CH3          | 0.0101926   | 0.981809 | 0.0142623   | 0.974546 |
| PAH7+H             | 0.00428274  | 0.986092 | 0.00599276  | 0.980539 |
| Indene+H           | 0.00340695  | 0.989499 | 0.00476729  | 0.985306 |
| PhcycC3H3_A+H      | 0.00292038  | 0.992419 | 0.00408643  | 0.989392 |
| Ph+MeAc            | 0.00285191  | 0.995271 | 0.00399061  | 0.993383 |
| rad19syn           | 0.00176005  | 0.997031 | 0.00246280  | 0.995846 |
| rad54              | 0.000783510 | 0.997815 | 0.00109635  | 0.996942 |
| rad39              | 0.000435199 | 0.998250 | 0.000608967 | 0.997551 |
| rad19anti          | 0.000232598 | 0.998483 | 0.000325470 | 0.997876 |
| PAH1+H             | 0.000210285 | 0.998693 | 0.000294248 | 0.998171 |
| PAH9+H             | 0.000189946 | 0.998883 | 0.000265788 | 0.998436 |
| rad38              | 0.000125074 | 0.999008 | 0.000175014 | 0.998611 |
| PhCCCH3+H          | 0.000104499 | 0.999112 | 0.000146224 | 0.998758 |
| rad56              | 0.000102496 | 0.999215 | 0.000143420 | 0.998901 |
| rad50              | 9.64743e-05 | 0.999311 | 0.000134995 | 0.999036 |
| rad55              | 8.51952e-05 | 0.999397 | 0.000119212 | 0.999155 |
| rad53              | 6.86880e-05 | 0.999465 | 9.61137e-05 | 0.999251 |
| rad70              | 6.67834e-05 | 0.999532 | 9.34486e-05 | 0.999345 |
| PAH3+H             | 6.43467e-05 | 0.999596 | 9.00394e-05 | 0.999435 |
| PAH10+CH3          | 5.80427e-05 | 0.999654 | 8.12183e-05 | 0.999516 |
| rad51              | 5.49240e-05 | 0.999709 | 7.68541e-05 | 0.999593 |
| rad46              | 4.80263e-05 | 0.999757 | 6.72021e-05 | 0.999660 |
| rad67              | 4.40669e-05 | 0.999802 | 6.16619e-05 | 0.999722 |
| rad35              | 4.33473e-05 | 0.999845 | 6.06552e-05 | 0.999783 |
| PAH8+H             | 3.16111e-05 | 0.999876 | 4.42329e-05 | 0.999827 |
| rad34              | 2.50786e-05 | 0.999902 | 3.50921e-05 | 0.999862 |
| rad71              | 1.47743e-05 | 0.999916 | 2.06734e-05 | 0.999883 |
| rad52              | 1.16170e-05 | 0.999928 | 1.62555e-05 | 0.999899 |
| rad30              | 1.10774e-05 | 0.999939 | 1.55003e-05 | 0.999914 |
| rad62              | 1.06705e-05 | 0.999950 | 1.49310e-05 | 0.999929 |
| rad37              | 9.29424e-06 | 0.999959 | 1.30053e-05 | 0.999942 |
| rad73              | 6.33743e-06 | 0.999965 | 8.86788e-06 | 0.999951 |
| rad64              | 5.77649e-06 | 0.999971 | 8.08292e-06 | 0.999959 |
| rad68syn           | 5.15348e-06 | 0.999976 | 7.21118e-06 | 0.999966 |
| rad59              | 4.82486e-06 | 0.999981 | 6.75136e-06 | 0.999973 |
| rad68anti          | 3.28964e-06 | 0.999984 | 4.60314e-06 | 0.999978 |
| rad40syn           | 2.77792e-06 | 0.999987 | 3.88709e-06 | 0.999982 |
| rad60syn           | 2.50929e-06 | 0.999990 | 3.51119e-06 | 0.999985 |
| rad40anti          | 1.99952e-06 | 0.999992 | 2.79788e-06 | 0.999988 |
| rad42              | 1.90464e-06 | 0.999994 | 2.66512e-06 | 0.999991 |



|           |             |          |             |          |
|-----------|-------------|----------|-------------|----------|
| rad60anti | 1.83422e-06 | 0.999995 | 2.56658e-06 | 0.999993 |
| rad72     | 1.57365e-06 | 0.999997 | 2.20197e-06 | 0.999995 |
| rad65     | 1.29208e-06 | 0.999998 | 1.80798e-06 | 0.999997 |
| rad58     | 1.27682e-06 | 1.000000 | 1.78663e-06 | 0.999999 |
| rad43     | 3.85029e-07 | 1.000000 | 5.38764e-07 | 1.000000 |
| rad61     | 3.23853e-07 | 1.000000 | 4.53160e-07 | 1.000000 |
| rad41     | 7.10639e-08 | 1.000000 | 9.94383e-08 | 1.000000 |
| rad6      | 1.98841e-13 | 1.000000 | 2.78234e-13 | 1.000000 |
| rad7      | 8.03394e-15 | 1.000000 | 1.12417e-14 | 1.000000 |
| rad11     | 5.21699e-15 | 1.000000 | 7.30001e-15 | 1.000000 |
| rad23     | 1.44258e-15 | 1.000000 | 2.01858e-15 | 1.000000 |
| rad13     | 1.18526e-15 | 1.000000 | 1.65851e-15 | 1.000000 |
| rad9      | 9.88097e-16 | 1.000000 | 1.38263e-15 | 1.000000 |
| rad28     | 7.08258e-16 | 1.000000 | 9.91052e-16 | 1.000000 |
| rad45     | 5.48484e-16 | 1.000000 | 7.67481e-16 | 1.000000 |
| rad21     | 2.44315e-16 | 1.000000 | 3.41865e-16 | 1.000000 |
| rad22     | 1.58159e-16 | 1.000000 | 2.21308e-16 | 1.000000 |
| rad33     | 1.20474e-16 | 1.000000 | 1.68578e-16 | 1.000000 |
| rad36     | 1.04364e-16 | 1.000000 | 1.46035e-16 | 1.000000 |
| rad15     | 8.20468e-17 | 1.000000 | 1.14807e-16 | 1.000000 |
| rad20     | 5.20430e-17 | 1.000000 | 7.28226e-17 | 1.000000 |
| rad12     | 3.09374e-17 | 1.000000 | 4.32901e-17 | 1.000000 |
| rad25     | 2.89947e-17 | 1.000000 | 4.05717e-17 | 1.000000 |
| rad26     | 2.68559e-17 | 1.000000 | 3.75790e-17 | 1.000000 |
| rad24     | 1.82403e-17 | 1.000000 | 2.55233e-17 | 1.000000 |
| rad10     | 1.20434e-17 | 1.000000 | 1.68521e-17 | 1.000000 |
| rad8      | 1.19193e-17 | 1.000000 | 1.66784e-17 | 1.000000 |
| rad47     | 1.15640e-17 | 1.000000 | 1.61813e-17 | 1.000000 |
| rad18     | 9.40390e-18 | 1.000000 | 1.31587e-17 | 1.000000 |
| rad3      | 2.93957e-18 | 1.000000 | 4.11327e-18 | 1.000000 |
| rad14     | 2.29549e-18 | 1.000000 | 3.21204e-18 | 1.000000 |
| rad4      | 1.75941e-18 | 1.000000 | 2.46190e-18 | 1.000000 |
| rad2      | 1.44424e-18 | 1.000000 | 2.02090e-18 | 1.000000 |
| rad5      | 5.55362e-19 | 1.000000 | 7.77109e-19 | 1.000000 |
| rad1      | 3.34922e-19 | 1.000000 | 4.68648e-19 | 1.000000 |
| rad27     | 9.84685e-20 | 1.000000 | 1.37785e-19 | 1.000000 |

0.100000000E-03 Pa, 3500.00000 K

=====

| Rate constant      | True (fraction)      | Effective (fraction)  |
|--------------------|----------------------|-----------------------|
| Total              | 1.05713e-10 (1.00 )  | 7.59650e-11 (1.00 )   |
| Formation of rad11 | 1.77412e-11 (0.168 ) | 6.37264e-12 (0.0839 ) |
| Formation of rad6  | 2.86822e-11 (0.271 ) | 1.03027e-11 (0.136 )  |
| H-abstraction      | 5.92897e-11 (0.561 ) | 5.92897e-11 (0.780 )  |

| species            | PYtrue      | Cumul    | PYeffective | Cumul    |
|--------------------|-------------|----------|-------------|----------|
| Benzene+2-propynyl | 0.560855    | 0.560855 | 0.780487    | 0.780487 |
| Phenyl+Allene      | 0.281404    | 0.842259 | 0.000000    | 0.780487 |
| PhCH2CCH+H         | 0.0826656   | 0.924925 | 0.115037    | 0.895524 |
| PhCHCCH2+H         | 0.0360585   | 0.960983 | 0.0501791   | 0.945703 |
| C2H2+PhCH2         | 0.0122593   | 0.973242 | 0.0170600   | 0.962764 |
| PhCCH+CH3          | 0.00927084  | 0.982513 | 0.0129013   | 0.975665 |
| PAH7+H             | 0.00395025  | 0.986463 | 0.00549717  | 0.981162 |
| PhcycC3H3_A+H      | 0.00334801  | 0.989811 | 0.00465910  | 0.985821 |
| Ph+MeAc            | 0.00276398  | 0.992575 | 0.00384635  | 0.989667 |
| Indene+H           | 0.00257590  | 0.995151 | 0.00358462  | 0.993252 |
| rad19syn           | 0.00187235  | 0.997024 | 0.00260557  | 0.995858 |
| rad54              | 0.000820548 | 0.997844 | 0.00114187  | 0.996999 |
| rad39              | 0.000383055 | 0.998227 | 0.000533059 | 0.997533 |
| PAH1+H             | 0.000234590 | 0.998462 | 0.000326455 | 0.997859 |
| rad19anti          | 0.000198628 | 0.998661 | 0.000276411 | 0.998135 |
| PAH9+H             | 0.000165224 | 0.998826 | 0.000229927 | 0.998365 |
| rad56              | 0.000126873 | 0.998953 | 0.000176556 | 0.998542 |
| rad38              | 0.000111229 | 0.999064 | 0.000154787 | 0.998697 |
| rad50              | 9.85613e-05 | 0.999162 | 0.000137158 | 0.998834 |
| PhCCCH3+H          | 9.42424e-05 | 0.999257 | 0.000131148 | 0.998965 |
| rad55              | 9.15803e-05 | 0.999348 | 0.000127443 | 0.999092 |
| rad53              | 8.16793e-05 | 0.999430 | 0.000113665 | 0.999206 |
| rad70              | 7.02694e-05 | 0.999500 | 9.77871e-05 | 0.999304 |
| PAH3+H             | 6.99220e-05 | 0.999570 | 9.73035e-05 | 0.999401 |
| rad51              | 5.98507e-05 | 0.999630 | 8.32882e-05 | 0.999484 |
| PAH10+CH3          | 5.76128e-05 | 0.999688 | 8.01742e-05 | 0.999565 |
| rad67              | 4.43734e-05 | 0.999732 | 6.17501e-05 | 0.999626 |
| rad46              | 4.41956e-05 | 0.999776 | 6.15029e-05 | 0.999688 |
| PAH8+H             | 4.26935e-05 | 0.999819 | 5.94123e-05 | 0.999747 |
| rad35              | 4.02805e-05 | 0.999859 | 5.60544e-05 | 0.999803 |
| rad34              | 2.74951e-05 | 0.999887 | 3.82622e-05 | 0.999842 |
| rad71              | 2.01281e-05 | 0.999907 | 2.80103e-05 | 0.999870 |

|           |             |          |             |          |
|-----------|-------------|----------|-------------|----------|
| rad62     | 1.37116e-05 | 0.999920 | 1.90811e-05 | 0.999889 |
| rad52     | 1.21501e-05 | 0.999933 | 1.69080e-05 | 0.999906 |
| rad30     | 1.02915e-05 | 0.999943 | 1.43216e-05 | 0.999920 |
| rad73     | 8.16310e-06 | 0.999951 | 1.13598e-05 | 0.999931 |
| rad37     | 7.96636e-06 | 0.999959 | 1.10860e-05 | 0.999942 |
| rad64     | 6.47621e-06 | 0.999966 | 9.01228e-06 | 0.999951 |
| rad68syn  | 6.33612e-06 | 0.999972 | 8.81737e-06 | 0.999960 |
| rad59     | 5.10458e-06 | 0.999977 | 7.10355e-06 | 0.999967 |
| rad68anti | 4.04059e-06 | 0.999981 | 5.62289e-06 | 0.999973 |
| rad40syn  | 3.59895e-06 | 0.999985 | 5.00830e-06 | 0.999978 |
| rad42     | 2.66321e-06 | 0.999987 | 3.70612e-06 | 0.999982 |
| rad40anti | 2.63316e-06 | 0.999990 | 3.66431e-06 | 0.999985 |
| rad60syn  | 2.53258e-06 | 0.999992 | 3.52435e-06 | 0.999989 |
| rad72     | 2.38441e-06 | 0.999995 | 3.31814e-06 | 0.999992 |
| rad60anti | 1.86455e-06 | 0.999997 | 2.59471e-06 | 0.999995 |
| rad58     | 1.49815e-06 | 0.999998 | 2.08483e-06 | 0.999997 |
| rad65     | 1.37925e-06 | 1.000000 | 1.91936e-06 | 0.999999 |
| rad43     | 4.42452e-07 | 1.000000 | 6.15716e-07 | 0.999999 |
| rad61     | 3.67258e-07 | 1.000000 | 5.11077e-07 | 1.000000 |
| rad41     | 8.98821e-08 | 1.000000 | 1.25080e-07 | 1.000000 |
| rad6      | 9.81485e-14 | 1.000000 | 1.36584e-13 | 1.000000 |
| rad7      | 4.66113e-15 | 1.000000 | 6.48645e-15 | 1.000000 |
| rad11     | 2.99104e-15 | 1.000000 | 4.16234e-15 | 1.000000 |
| rad13     | 7.28309e-16 | 1.000000 | 1.01352e-15 | 1.000000 |
| rad23     | 6.57541e-16 | 1.000000 | 9.15037e-16 | 1.000000 |
| rad9      | 5.12114e-16 | 1.000000 | 7.12655e-16 | 1.000000 |
| rad28     | 3.45506e-16 | 1.000000 | 4.80808e-16 | 1.000000 |
| rad45     | 2.90191e-16 | 1.000000 | 4.03831e-16 | 1.000000 |
| rad21     | 1.56206e-16 | 1.000000 | 2.17377e-16 | 1.000000 |
| rad22     | 8.12226e-17 | 1.000000 | 1.13029e-16 | 1.000000 |
| rad33     | 7.96109e-17 | 1.000000 | 1.10787e-16 | 1.000000 |
| rad36     | 5.56129e-17 | 1.000000 | 7.73910e-17 | 1.000000 |
| rad15     | 4.52632e-17 | 1.000000 | 6.29881e-17 | 1.000000 |
| rad20     | 3.56498e-17 | 1.000000 | 4.96104e-17 | 1.000000 |
| rad12     | 2.06000e-17 | 1.000000 | 2.86671e-17 | 1.000000 |
| rad25     | 1.93599e-17 | 1.000000 | 2.69413e-17 | 1.000000 |
| rad26     | 1.38680e-17 | 1.000000 | 1.92988e-17 | 1.000000 |
| rad47     | 1.23125e-17 | 1.000000 | 1.71341e-17 | 1.000000 |
| rad24     | 1.20836e-17 | 1.000000 | 1.68155e-17 | 1.000000 |
| rad8      | 1.05361e-17 | 1.000000 | 1.46621e-17 | 1.000000 |
| rad10     | 6.67479e-18 | 1.000000 | 9.28862e-18 | 1.000000 |
| rad18     | 5.60033e-18 | 1.000000 | 7.79343e-18 | 1.000000 |
| rad14     | 1.81848e-18 | 1.000000 | 2.53061e-18 | 1.000000 |
| rad3      | 1.79665e-18 | 1.000000 | 2.50023e-18 | 1.000000 |
| rad4      | 1.09305e-18 | 1.000000 | 1.52108e-18 | 1.000000 |
| rad2      | 7.92007e-19 | 1.000000 | 1.10216e-18 | 1.000000 |
| rad5      | 4.30383e-19 | 1.000000 | 5.98921e-19 | 1.000000 |
| rad1      | 1.76583e-19 | 1.000000 | 2.45732e-19 | 1.000000 |
| rad27     | 7.31080e-20 | 1.000000 | 1.01737e-19 | 1.000000 |

0.100000000E-03 Pa, 3750.00000 K

| Rate constant      | True (fraction)      | Effective (fraction)  |
|--------------------|----------------------|-----------------------|
| Total              | 1.33217e-10 (1.00 )  | 9.62711e-11 (1.00 )   |
| Formation of rad11 | 2.17064e-11 (0.163 ) | 7.68279e-12 (0.0798 ) |
| Formation of rad6  | 3.54800e-11 (0.266 ) | 1.25578e-11 (0.130 )  |
| H-abstraction      | 7.60305e-11 (0.571 ) | 7.60305e-11 (0.790 )  |

| species            | PYtrue      | Cumul    | PYeffective | Cumul    |
|--------------------|-------------|----------|-------------|----------|
| Benzene+2-propynyl | 0.570727    | 0.570727 | 0.789754    | 0.789754 |
| Phenyl+Allene      | 0.277336    | 0.848063 | 0.00000     | 0.789754 |
| PhCH2CCH+H         | 0.0801946   | 0.928257 | 0.110971    | 0.900725 |
| PhCHCCH2+H         | 0.0343186   | 0.962576 | 0.0474891   | 0.948214 |
| C2H2+PhCH2         | 0.0118838   | 0.974460 | 0.0164445   | 0.964658 |
| PhCCH+CH3          | 0.00852836  | 0.982988 | 0.0118013   | 0.976459 |
| PhcycC3H3_A+H      | 0.00372851  | 0.986717 | 0.00515939  | 0.981619 |
| PAH7+H             | 0.00365085  | 0.990368 | 0.00505194  | 0.986671 |
| Ph+MeAc            | 0.00270113  | 0.993069 | 0.00373773  | 0.990408 |
| Indene+H           | 0.00199900  | 0.995068 | 0.00276616  | 0.993175 |
| rad19syn           | 0.00195356  | 0.997021 | 0.00270328  | 0.995878 |
| rad54              | 0.000841040 | 0.997862 | 0.00116381  | 0.997042 |
| rad39              | 0.000340475 | 0.998203 | 0.000471138 | 0.997513 |
| PAH1+H             | 0.000258935 | 0.998462 | 0.000358305 | 0.997871 |
| rad19anti          | 0.000171610 | 0.998633 | 0.000237469 | 0.998109 |
| rad56              | 0.000150421 | 0.998784 | 0.000208148 | 0.998317 |
| PAH9+H             | 0.000142296 | 0.998926 | 0.000196904 | 0.998514 |
| rad50              | 9.78214e-05 | 0.999024 | 0.000135362 | 0.998649 |
| rad38              | 9.76287e-05 | 0.999121 | 0.000135095 | 0.998784 |

|           |             |          |             |          |
|-----------|-------------|----------|-------------|----------|
| rad55     | 9.60227e-05 | 0.999217 | 0.000132873 | 0.998917 |
| rad53     | 9.35446e-05 | 0.999311 | 0.000129444 | 0.999046 |
| PhCCCH3+H | 8.63448e-05 | 0.999397 | 0.000119481 | 0.999166 |
| PAH3+H    | 7.46029e-05 | 0.999472 | 0.000103233 | 0.999269 |
| rad70     | 7.27716e-05 | 0.999545 | 0.000100699 | 0.999370 |
| rad51     | 6.27266e-05 | 0.999607 | 8.67994e-05 | 0.999457 |
| PAH10+CH3 | 5.64592e-05 | 0.999664 | 7.81267e-05 | 0.999535 |
| PAH8+H    | 5.49581e-05 | 0.999719 | 7.60493e-05 | 0.999611 |
| rad67     | 4.41361e-05 | 0.999763 | 6.10741e-05 | 0.999672 |
| rad46     | 4.00102e-05 | 0.999803 | 5.53649e-05 | 0.999727 |
| rad35     | 3.73501e-05 | 0.999840 | 5.16839e-05 | 0.999779 |
| rad34     | 2.95155e-05 | 0.999870 | 4.08426e-05 | 0.999820 |
| rad71     | 2.56704e-05 | 0.999896 | 3.55219e-05 | 0.999855 |
| rad62     | 1.78765e-05 | 0.999913 | 2.47369e-05 | 0.999880 |
| rad52     | 1.22817e-05 | 0.999926 | 1.69950e-05 | 0.999897 |
| rad73     | 9.90830e-06 | 0.999936 | 1.37108e-05 | 0.999911 |
| rad30     | 9.58077e-06 | 0.999945 | 1.32576e-05 | 0.999924 |
| rad68syn  | 7.51159e-06 | 0.999953 | 1.03943e-05 | 0.999934 |
| rad64     | 7.08717e-06 | 0.999960 | 9.80700e-06 | 0.999944 |
| rad37     | 6.84827e-06 | 0.999967 | 9.47639e-06 | 0.999954 |
| rad59     | 5.31873e-06 | 0.999972 | 7.35989e-06 | 0.999961 |
| rad68anti | 4.78626e-06 | 0.999977 | 6.62308e-06 | 0.999968 |
| rad40syn  | 4.46912e-06 | 0.999981 | 6.18422e-06 | 0.999974 |
| rad42     | 3.72271e-06 | 0.999985 | 5.15138e-06 | 0.999979 |
| rad72     | 3.33614e-06 | 0.999988 | 4.61643e-06 | 0.999984 |
| rad40anti | 3.31727e-06 | 0.999992 | 4.59032e-06 | 0.999988 |
| rad60syn  | 2.53369e-06 | 0.999994 | 3.50604e-06 | 0.999992 |
| rad60anti | 1.87710e-06 | 0.999996 | 2.59748e-06 | 0.999994 |
| rad58     | 1.70809e-06 | 0.999998 | 2.36361e-06 | 0.999997 |
| rad65     | 1.42131e-06 | 0.999999 | 1.96676e-06 | 0.999999 |
| rad43     | 5.13732e-07 | 1.000000 | 7.10883e-07 | 0.999999 |
| rad61     | 4.03889e-07 | 1.000000 | 5.58888e-07 | 1.000000 |
| rad41     | 1.13553e-07 | 1.000000 | 1.57130e-07 | 1.000000 |
| rad6      | 5.25662e-14 | 1.000000 | 7.27394e-14 | 1.000000 |
| rad7      | 2.85692e-15 | 1.000000 | 3.95332e-15 | 1.000000 |
| rad11     | 1.83384e-15 | 1.000000 | 2.53761e-15 | 1.000000 |
| rad13     | 4.71990e-16 | 1.000000 | 6.53121e-16 | 1.000000 |
| rad23     | 3.19446e-16 | 1.000000 | 4.42040e-16 | 1.000000 |
| rad9      | 2.82337e-16 | 1.000000 | 3.90689e-16 | 1.000000 |
| rad28     | 1.82177e-16 | 1.000000 | 2.52091e-16 | 1.000000 |
| rad45     | 1.60906e-16 | 1.000000 | 2.22657e-16 | 1.000000 |
| rad21     | 1.04834e-16 | 1.000000 | 1.45067e-16 | 1.000000 |
| rad33     | 5.44417e-17 | 1.000000 | 7.53345e-17 | 1.000000 |
| rad22     | 4.49260e-17 | 1.000000 | 6.21670e-17 | 1.000000 |
| rad36     | 3.09953e-17 | 1.000000 | 4.28904e-17 | 1.000000 |
| rad15     | 2.63118e-17 | 1.000000 | 3.64095e-17 | 1.000000 |
| rad20     | 2.59386e-17 | 1.000000 | 3.58930e-17 | 1.000000 |
| rad12     | 1.42144e-17 | 1.000000 | 1.96695e-17 | 1.000000 |
| rad25     | 1.34705e-17 | 1.000000 | 1.86401e-17 | 1.000000 |
| rad47     | 1.26179e-17 | 1.000000 | 1.74602e-17 | 1.000000 |
| rad8      | 9.29496e-18 | 1.000000 | 1.28621e-17 | 1.000000 |
| rad24     | 8.25899e-18 | 1.000000 | 1.14285e-17 | 1.000000 |
| rad26     | 7.58881e-18 | 1.000000 | 1.05012e-17 | 1.000000 |
| rad10     | 3.89749e-18 | 1.000000 | 5.39323e-18 | 1.000000 |
| rad18     | 3.53333e-18 | 1.000000 | 4.88931e-18 | 1.000000 |
| rad14     | 1.56337e-18 | 1.000000 | 2.16335e-18 | 1.000000 |
| rad3      | 1.16127e-18 | 1.000000 | 1.60692e-18 | 1.000000 |
| rad4      | 7.24999e-19 | 1.000000 | 1.00323e-18 | 1.000000 |
| rad2      | 4.66856e-19 | 1.000000 | 6.46018e-19 | 1.000000 |
| rad5      | 3.43289e-19 | 1.000000 | 4.75032e-19 | 1.000000 |
| rad1      | 1.02013e-19 | 1.000000 | 1.41163e-19 | 1.000000 |
| rad27     | 5.73766e-20 | 1.000000 | 7.93956e-20 | 1.000000 |

0.100000000E-03 Pa, 4000.00000 K

=====

| Rate constant      | True (fraction)      | Effective (fraction)  |
|--------------------|----------------------|-----------------------|
| Total              | 1.65008e-10 (1.00 )  | 1.19912e-10 (1.00 )   |
| Formation of rad11 | 2.61707e-11 (0.159 ) | 9.15556e-12 (0.0764 ) |
| Formation of rad6  | 4.31906e-11 (0.262 ) | 1.51098e-11 (0.126 )  |
| H-abstraction      | 9.56470e-11 (0.580 ) | 9.56470e-11 (0.798 )  |

| species            | PYtrue     | Cumul    | PYeffective | Cumul    |
|--------------------|------------|----------|-------------|----------|
| Benzene+2-propynyl | 0.579650   | 0.579650 | 0.797641    | 0.797641 |
| Phenyl+Allene      | 0.273295   | 0.852945 | 0.000000    | 0.797641 |
| PhCH2CCH+H         | 0.0779435  | 0.930888 | 0.107256    | 0.904897 |
| PhCHCCH2+H         | 0.0328766  | 0.963765 | 0.0452408   | 0.950138 |
| C2H2+PhCH2         | 0.0116508  | 0.975415 | 0.0160323   | 0.966170 |
| PhCCH+CH3          | 0.00792125 | 0.983337 | 0.0109003   | 0.977070 |

|               |             |          |             |          |
|---------------|-------------|----------|-------------|----------|
| PhcycC3H3_A+H | 0.00405636  | 0.987393 | 0.00558187  | 0.982652 |
| PAH7+H        | 0.00338058  | 0.990774 | 0.00465193  | 0.987304 |
| Ph+MeAc       | 0.00265534  | 0.993429 | 0.00365394  | 0.990958 |
| rad19syn      | 0.00200699  | 0.995436 | 0.00276178  | 0.993720 |
| Indene+H      | 0.00158840  | 0.997024 | 0.00218576  | 0.995906 |
| rad54         | 0.000847468 | 0.997872 | 0.00116618  | 0.997072 |
| rad39         | 0.000304994 | 0.998177 | 0.000419695 | 0.997491 |
| PAH1+H        | 0.000284127 | 0.998461 | 0.000390980 | 0.997882 |
| rad56         | 0.000172242 | 0.998633 | 0.000237017 | 0.998119 |
| rad19anti     | 0.000149971 | 0.998783 | 0.000206372 | 0.998326 |
| PAH9+H        | 0.000121736 | 0.998905 | 0.000167518 | 0.998493 |
| rad53         | 0.000103935 | 0.999009 | 0.000143023 | 0.998636 |
| rad55         | 9.87033e-05 | 0.999108 | 0.000135823 | 0.998772 |
| rad50         | 9.49261e-05 | 0.999203 | 0.000130625 | 0.998903 |
| rad38         | 8.48536e-05 | 0.999287 | 0.000116765 | 0.999020 |
| PhCCCH3+H     | 8.02193e-05 | 0.999368 | 0.000110388 | 0.999130 |
| PAH3+H        | 7.84218e-05 | 0.999446 | 0.000107914 | 0.999238 |
| rad70         | 7.43978e-05 | 0.999520 | 0.000102377 | 0.999340 |
| PAH8+H        | 6.80299e-05 | 0.999588 | 9.36140e-05 | 0.999434 |
| rad51         | 6.37407e-05 | 0.999652 | 8.77122e-05 | 0.999522 |
| PAH10+CH3     | 5.48776e-05 | 0.999707 | 7.55158e-05 | 0.999597 |
| rad67         | 4.35168e-05 | 0.999751 | 5.98821e-05 | 0.999657 |
| rad46         | 3.57792e-05 | 0.999786 | 4.92350e-05 | 0.999706 |
| rad35         | 3.46400e-05 | 0.999821 | 4.76673e-05 | 0.999754 |
| rad34         | 3.11445e-05 | 0.999852 | 4.28572e-05 | 0.999797 |
| rad71         | 3.10563e-05 | 0.999883 | 4.27358e-05 | 0.999839 |
| rad62         | 2.32398e-05 | 0.999906 | 3.19798e-05 | 0.999871 |
| rad52         | 1.20851e-05 | 0.999919 | 1.66300e-05 | 0.999888 |
| rad73         | 1.14710e-05 | 0.999930 | 1.57849e-05 | 0.999904 |
| rad30         | 8.93299e-06 | 0.999939 | 1.22925e-05 | 0.999916 |
| rad68syn      | 8.64434e-06 | 0.999948 | 1.18952e-05 | 0.999928 |
| rad64         | 7.61305e-06 | 0.999955 | 1.04761e-05 | 0.999939 |
| rad37         | 5.91727e-06 | 0.999961 | 8.14263e-06 | 0.999947 |
| rad68anti     | 5.50424e-06 | 0.999967 | 7.57424e-06 | 0.999954 |
| rad59         | 5.47385e-06 | 0.999972 | 7.53243e-06 | 0.999962 |
| rad40syn      | 5.36170e-06 | 0.999977 | 7.37810e-06 | 0.999969 |
| rad42         | 5.12142e-06 | 0.999983 | 7.04750e-06 | 0.999976 |
| rad72         | 4.37871e-06 | 0.999987 | 6.02543e-06 | 0.999982 |
| rad40anti     | 4.03125e-06 | 0.999991 | 5.54731e-06 | 0.999988 |
| rad60syn      | 2.51669e-06 | 0.999993 | 3.46315e-06 | 0.999991 |
| rad58         | 1.90267e-06 | 0.999995 | 2.61822e-06 | 0.999994 |
| rad60anti     | 1.87487e-06 | 0.999997 | 2.57996e-06 | 0.999996 |
| rad65         | 1.42564e-06 | 0.999999 | 1.96179e-06 | 0.999998 |
| rad43         | 6.01849e-07 | 0.999999 | 8.28191e-07 | 0.999999 |
| rad61         | 4.34037e-07 | 1.000000 | 5.97267e-07 | 1.000000 |
| rad41         | 1.43043e-07 | 1.000000 | 1.96838e-07 | 1.000000 |
| rad6          | 3.01578e-14 | 1.000000 | 4.14994e-14 | 1.000000 |
| rad7          | 1.83275e-15 | 1.000000 | 2.52200e-15 | 1.000000 |
| rad11         | 1.18914e-15 | 1.000000 | 1.63634e-15 | 1.000000 |
| rad13         | 3.19990e-16 | 1.000000 | 4.40331e-16 | 1.000000 |
| rad9          | 1.64627e-16 | 1.000000 | 2.26539e-16 | 1.000000 |
| rad23         | 1.63884e-16 | 1.000000 | 2.25517e-16 | 1.000000 |
| rad28         | 1.02608e-16 | 1.000000 | 1.41196e-16 | 1.000000 |
| rad45         | 9.28487e-17 | 1.000000 | 1.27767e-16 | 1.000000 |
| rad21         | 7.32814e-17 | 1.000000 | 1.00841e-16 | 1.000000 |
| rad33         | 3.83235e-17 | 1.000000 | 5.27360e-17 | 1.000000 |
| rad22         | 2.64691e-17 | 1.000000 | 3.64234e-17 | 1.000000 |
| rad20         | 1.97582e-17 | 1.000000 | 2.71888e-17 | 1.000000 |
| rad36         | 1.79434e-17 | 1.000000 | 2.46915e-17 | 1.000000 |
| rad15         | 1.60364e-17 | 1.000000 | 2.20673e-17 | 1.000000 |
| rad47         | 1.25502e-17 | 1.000000 | 1.72700e-17 | 1.000000 |
| rad12         | 1.01281e-17 | 1.000000 | 1.39370e-17 | 1.000000 |
| rad25         | 9.69849e-18 | 1.000000 | 1.33459e-17 | 1.000000 |
| rad8          | 8.17489e-18 | 1.000000 | 1.12493e-17 | 1.000000 |
| rad24         | 5.80458e-18 | 1.000000 | 7.98754e-18 | 1.000000 |
| rad26         | 4.37484e-18 | 1.000000 | 6.02010e-18 | 1.000000 |
| rad10         | 2.38168e-18 | 1.000000 | 3.27737e-18 | 1.000000 |
| rad18         | 2.33495e-18 | 1.000000 | 3.21308e-18 | 1.000000 |
| rad14         | 1.43353e-18 | 1.000000 | 1.97264e-18 | 1.000000 |
| rad3          | 7.86219e-19 | 1.000000 | 1.08190e-18 | 1.000000 |
| rad4          | 5.07077e-19 | 1.000000 | 6.97779e-19 | 1.000000 |
| rad2          | 2.91268e-19 | 1.000000 | 4.00807e-19 | 1.000000 |
| rad5          | 2.80917e-19 | 1.000000 | 3.86563e-19 | 1.000000 |
| rad1          | 6.34973e-20 | 1.000000 | 8.73769e-20 | 1.000000 |
| rad27         | 4.74794e-20 | 1.000000 | 6.53351e-20 | 1.000000 |

0.100000000E-04 Pa, 20.0000000 K

=====

Rate constant | True (fraction) | Effective (fraction)

-----

|                    |                        |                        |
|--------------------|------------------------|------------------------|
| Total              | 1.56740e-51 (1.00 )    | 1.56740e-51 (1.00 )    |
| Formation of rad11 | 1.56740e-51 (1.000 )   | 1.56740e-51 (1.000 )   |
| Formation of rad6  | 3.73945e-60 (2.39e-09) | 3.73945e-60 (2.39e-09) |
| H-abstraction      | 1.53631e-76 (9.80e-26) | 1.53631e-76 (9.80e-26) |

| species            | PYtrue      | Cumul    | PYeffective | Cumul    |
|--------------------|-------------|----------|-------------|----------|
| Indene+H           | 0.986742    | 0.986742 | 0.986742    | 0.986742 |
| C2H2+PhCH2         | 0.00795701  | 0.994699 | 0.00795701  | 0.994699 |
| PhCCH+CH3          | 0.00207345  | 0.996772 | 0.00207345  | 0.996772 |
| PhCHCCH2+H         | 0.00131764  | 0.998090 | 0.00131764  | 0.998090 |
| rad6               | 0.00110197  | 0.999192 | 0.00110197  | 0.999192 |
| PhCCCH3+H          | 0.000784566 | 0.999977 | 0.000784566 | 0.999977 |
| Ph+MeAc            | 9.12304e-06 | 0.999986 | 9.12304e-06 | 0.999986 |
| rad8               | 6.41516e-06 | 0.999992 | 6.41516e-06 | 0.999992 |
| rad9               | 2.89000e-06 | 0.999995 | 2.89000e-06 | 0.999995 |
| PAH7+H             | 1.61855e-06 | 0.999997 | 1.61855e-06 | 0.999997 |
| rad28              | 1.38063e-06 | 0.999998 | 1.38063e-06 | 0.999998 |
| rad2               | 4.75896e-07 | 0.999999 | 4.75896e-07 | 0.999999 |
| rad30              | 4.19797e-07 | 0.999999 | 4.19797e-07 | 0.999999 |
| rad12              | 1.94560e-07 | 0.999999 | 1.94560e-07 | 0.999999 |
| rad39              | 1.53078e-07 | 0.999999 | 1.53078e-07 | 0.999999 |
| rad26              | 1.36166e-07 | 0.999999 | 1.36166e-07 | 0.999999 |
| PAH9+H             | 8.47907e-08 | 1.000000 | 8.47907e-08 | 1.000000 |
| rad7               | 7.98104e-08 | 1.000000 | 7.98104e-08 | 1.000000 |
| rad15              | 7.47342e-08 | 1.000000 | 7.47342e-08 | 1.000000 |
| rad35              | 4.47621e-08 | 1.000000 | 4.47621e-08 | 1.000000 |
| rad1               | 3.00777e-08 | 1.000000 | 3.00777e-08 | 1.000000 |
| rad10              | 2.39488e-08 | 1.000000 | 2.39488e-08 | 1.000000 |
| rad38              | 2.17325e-08 | 1.000000 | 2.17325e-08 | 1.000000 |
| rad11              | 1.95699e-08 | 1.000000 | 1.95699e-08 | 1.000000 |
| Phenyl+Allene      | 1.61488e-08 | 1.000000 | 0.000000    | 1.000000 |
| rad3               | 2.98835e-09 | 1.000000 | 2.98835e-09 | 1.000000 |
| rad4               | 1.51077e-09 | 1.000000 | 1.51077e-09 | 1.000000 |
| rad13              | 4.41799e-10 | 1.000000 | 4.41799e-10 | 1.000000 |
| rad46              | 1.39021e-10 | 1.000000 | 1.39021e-10 | 1.000000 |
| rad60syn           | 3.08783e-12 | 1.000000 | 3.08783e-12 | 1.000000 |
| rad33              | 8.34375e-13 | 1.000000 | 8.34375e-13 | 1.000000 |
| rad14              | 5.54133e-13 | 1.000000 | 5.54133e-13 | 1.000000 |
| rad25              | 3.60177e-13 | 1.000000 | 3.60177e-13 | 1.000000 |
| rad27              | 3.25009e-13 | 1.000000 | 3.25009e-13 | 1.000000 |
| rad60anti          | 3.95140e-15 | 1.000000 | 3.95140e-15 | 1.000000 |
| PhCH2CCH+H         | 9.98689e-17 | 1.000000 | 9.98689e-17 | 1.000000 |
| rad37              | 9.52029e-18 | 1.000000 | 9.52029e-18 | 1.000000 |
| rad31              | 8.73324e-18 | 1.000000 | 8.73324e-18 | 1.000000 |
| rad23              | 5.29486e-18 | 1.000000 | 5.29486e-18 | 1.000000 |
| rad20              | 1.97196e-18 | 1.000000 | 1.97196e-18 | 1.000000 |
| rad21              | 1.45000e-18 | 1.000000 | 1.45000e-18 | 1.000000 |
| rad45              | 3.72023e-20 | 1.000000 | 3.72023e-20 | 1.000000 |
| rad22              | 1.71457e-20 | 1.000000 | 1.71457e-20 | 1.000000 |
| rad18              | 8.19620e-21 | 1.000000 | 8.19620e-21 | 1.000000 |
| rad5               | 6.26929e-21 | 1.000000 | 6.26929e-21 | 1.000000 |
| rad36              | 2.31741e-21 | 1.000000 | 2.31741e-21 | 1.000000 |
| PAH3+H             | 1.17711e-25 | 1.000000 | 1.17711e-25 | 1.000000 |
| Benzene+2-propynyl | 9.80165e-26 | 1.000000 | 9.80165e-26 | 1.000000 |
| rad59              | 6.29847e-26 | 1.000000 | 6.29847e-26 | 1.000000 |
| rad24              | 4.54449e-26 | 1.000000 | 4.54449e-26 | 1.000000 |
| rad50              | 2.47223e-26 | 1.000000 | 2.47223e-26 | 1.000000 |
| rad19syn           | 1.04166e-34 | 1.000000 | 1.04166e-34 | 1.000000 |
| rad52              | 1.24896e-38 | 1.000000 | 1.24896e-38 | 1.000000 |
| rad54              | 1.22304e-39 | 1.000000 | 1.22304e-39 | 1.000000 |
| PAH10+CH3          | 7.99445e-40 | 1.000000 | 7.99445e-40 | 1.000000 |
| rad43              | 1.84063e-40 | 1.000000 | 1.84063e-40 | 1.000000 |
| rad62              | 5.51967e-43 | 1.000000 | 5.51967e-43 | 1.000000 |
| rad51              | 6.15944e-46 | 1.000000 | 6.15944e-46 | 1.000000 |
| rad70              | 6.67823e-49 | 1.000000 | 6.67823e-49 | 1.000000 |
| PhcycC3H3_A+H      | 2.83000e-49 | 1.000000 | 2.83000e-49 | 1.000000 |
| rad55              | 1.52375e-49 | 1.000000 | 1.52375e-49 | 1.000000 |
| rad65              | 4.16193e-51 | 1.000000 | 4.16193e-51 | 1.000000 |
| rad58              | 9.50853e-53 | 1.000000 | 9.50853e-53 | 1.000000 |
| PAH1+H             | 1.28627e-54 | 1.000000 | 1.28627e-54 | 1.000000 |
| rad34              | 8.47798e-57 | 1.000000 | 8.47798e-57 | 1.000000 |
| rad42              | 6.05785e-61 | 1.000000 | 6.05785e-61 | 1.000000 |
| rad41              | 7.60802e-62 | 1.000000 | 7.60802e-62 | 1.000000 |
| rad47              | 2.33782e-64 | 1.000000 | 2.33782e-64 | 1.000000 |

0.100000000E-04 Pa, 30.0000000 K

=====

|               |                 |                      |
|---------------|-----------------|----------------------|
| Rate constant | True (fraction) | Effective (fraction) |
|---------------|-----------------|----------------------|

-----

|                    |                        |                        |
|--------------------|------------------------|------------------------|
| Total              | 5.03204e-39 (1.00 )    | 5.03204e-39 (1.00 )    |
| Formation of rad11 | 5.03203e-39 (1.000 )   | 5.03203e-39 (1.000 )   |
| Formation of rad6  | 9.92181e-45 (1.97e-06) | 9.92181e-45 (1.97e-06) |
| H-abstraction      | 3.33191e-55 (6.62e-17) | 3.33191e-55 (6.62e-17) |

| species            | PYtrue      | Cumul    | PYeffective | Cumul    |
|--------------------|-------------|----------|-------------|----------|
| Indene+H           | 0.987365    | 0.987365 | 0.987365    | 0.987365 |
| C2H2+PhCH2         | 0.00814272  | 0.995508 | 0.00814272  | 0.995508 |
| PhCCH+CH3          | 0.00215923  | 0.997667 | 0.00215923  | 0.997667 |
| PhCHCCH2+H         | 0.00136610  | 0.999033 | 0.00136610  | 0.999033 |
| PhCCCH3+H          | 0.000816179 | 0.999849 | 0.000816179 | 0.999849 |
| rad6               | 0.000127518 | 0.999977 | 0.000127518 | 0.999977 |
| Ph+MeAc            | 9.97593e-06 | 0.999987 | 9.97593e-06 | 0.999987 |
| rad8               | 6.73164e-06 | 0.999993 | 6.73164e-06 | 0.999993 |
| rad9               | 3.05982e-06 | 0.999997 | 3.05982e-06 | 0.999997 |
| PAH7+H             | 1.73308e-06 | 0.999998 | 1.73308e-06 | 0.999998 |
| rad30              | 4.32622e-07 | 0.999999 | 4.32622e-07 | 0.999999 |
| rad12              | 2.08147e-07 | 0.999999 | 2.08147e-07 | 0.999999 |
| rad28              | 1.98804e-07 | 0.999999 | 1.98804e-07 | 0.999999 |
| rad39              | 1.67124e-07 | 0.999999 | 1.67124e-07 | 0.999999 |
| PAH9+H             | 8.75826e-08 | 0.999999 | 8.75826e-08 | 0.999999 |
| rad15              | 7.74011e-08 | 0.999999 | 7.74011e-08 | 0.999999 |
| rad2               | 5.21188e-08 | 0.999999 | 5.21188e-08 | 0.999999 |
| rad35              | 4.61137e-08 | 1.000000 | 4.61137e-08 | 1.000000 |
| rad38              | 2.25005e-08 | 1.000000 | 2.25005e-08 | 1.000000 |
| Phenyl+Allene      | 2.14368e-08 | 1.000000 | 0.000000    | 1.000000 |
| rad26              | 1.81752e-08 | 1.000000 | 1.81752e-08 | 1.000000 |
| rad7               | 9.21579e-09 | 1.000000 | 9.21579e-09 | 1.000000 |
| rad1               | 3.29595e-09 | 1.000000 | 3.29595e-09 | 1.000000 |
| rad10              | 2.63468e-09 | 1.000000 | 2.63468e-09 | 1.000000 |
| rad11              | 2.25630e-09 | 1.000000 | 2.25630e-09 | 1.000000 |
| rad3               | 3.29601e-10 | 1.000000 | 3.29601e-10 | 1.000000 |
| rad4               | 1.66655e-10 | 1.000000 | 1.66655e-10 | 1.000000 |
| rad46              | 1.46102e-10 | 1.000000 | 1.46102e-10 | 1.000000 |
| rad13              | 5.11472e-11 | 1.000000 | 5.11472e-11 | 1.000000 |
| rad60syn           | 3.29524e-12 | 1.000000 | 3.29524e-12 | 1.000000 |
| rad33              | 9.66156e-14 | 1.000000 | 9.66156e-14 | 1.000000 |
| rad14              | 8.48599e-14 | 1.000000 | 8.48599e-14 | 1.000000 |
| rad25              | 5.17960e-14 | 1.000000 | 5.17960e-14 | 1.000000 |
| rad27              | 3.92575e-14 | 1.000000 | 3.92575e-14 | 1.000000 |
| rad60anti          | 3.18244e-15 | 1.000000 | 3.18244e-15 | 1.000000 |
| Benzene+2-propynyl | 6.62139e-17 | 1.000000 | 6.62139e-17 | 1.000000 |
| PhCH2CCH+H         | 5.64314e-17 | 1.000000 | 5.64314e-17 | 1.000000 |
| rad37              | 5.26209e-18 | 1.000000 | 5.26209e-18 | 1.000000 |
| rad31              | 9.71927e-19 | 1.000000 | 9.71927e-19 | 1.000000 |
| rad20              | 2.31100e-19 | 1.000000 | 2.31100e-19 | 1.000000 |
| rad21              | 1.70006e-19 | 1.000000 | 1.70006e-19 | 1.000000 |
| rad23              | 1.53553e-19 | 1.000000 | 1.53553e-19 | 1.000000 |
| rad5               | 3.43087e-21 | 1.000000 | 3.43087e-21 | 1.000000 |
| rad45              | 1.03266e-21 | 1.000000 | 1.03266e-21 | 1.000000 |
| rad18              | 9.53541e-22 | 1.000000 | 9.53541e-22 | 1.000000 |
| rad22              | 9.51212e-22 | 1.000000 | 9.51212e-22 | 1.000000 |
| rad36              | 6.43067e-23 | 1.000000 | 6.43067e-23 | 1.000000 |
| PAH3+H             | 6.29738e-26 | 1.000000 | 6.29738e-26 | 1.000000 |
| rad59              | 3.37035e-26 | 1.000000 | 3.37035e-26 | 1.000000 |
| rad50              | 1.33544e-26 | 1.000000 | 1.33544e-26 | 1.000000 |
| rad24              | 5.35742e-27 | 1.000000 | 5.35742e-27 | 1.000000 |
| rad19syn           | 5.46631e-35 | 1.000000 | 5.46631e-35 | 1.000000 |
| rad52              | 6.54812e-39 | 1.000000 | 6.54812e-39 | 1.000000 |
| rad54              | 6.46829e-40 | 1.000000 | 6.46829e-40 | 1.000000 |
| PAH10+CH3          | 4.23762e-40 | 1.000000 | 4.23762e-40 | 1.000000 |
| rad43              | 9.76500e-41 | 1.000000 | 9.76500e-41 | 1.000000 |
| rad62              | 2.94223e-43 | 1.000000 | 2.94223e-43 | 1.000000 |
| rad51              | 3.27702e-46 | 1.000000 | 3.27702e-46 | 1.000000 |
| rad70              | 3.61699e-49 | 1.000000 | 3.61699e-49 | 1.000000 |
| PhcycC3H3_A+H      | 1.53553e-49 | 1.000000 | 1.53553e-49 | 1.000000 |
| rad55              | 8.26624e-50 | 1.000000 | 8.26624e-50 | 1.000000 |
| rad65              | 2.24107e-51 | 1.000000 | 2.24107e-51 | 1.000000 |
| rad58              | 5.16740e-53 | 1.000000 | 5.16740e-53 | 1.000000 |
| PAH1+H             | 7.08951e-55 | 1.000000 | 7.08951e-55 | 1.000000 |
| rad34              | 4.70292e-57 | 1.000000 | 4.70292e-57 | 1.000000 |
| rad42              | 3.40523e-61 | 1.000000 | 3.40523e-61 | 1.000000 |
| rad41              | 4.30750e-62 | 1.000000 | 4.30750e-62 | 1.000000 |
| rad47              | 6.38479e-65 | 1.000000 | 6.38479e-65 | 1.000000 |

0.100000000E-04 Pa, 40.000000 K

=====

|               |                 |                      |
|---------------|-----------------|----------------------|
| Rate constant | True (fraction) | Effective (fraction) |
|---------------|-----------------|----------------------|

-----

|                    |                        |                        |
|--------------------|------------------------|------------------------|
| Total              | 9.35697e-33 (1.00 )    | 9.35697e-33 (1.00 )    |
| Formation of rad11 | 9.35644e-33 (1.000 )   | 9.35644e-33 (1.000 )   |
| Formation of rad6  | 5.26139e-37 (5.62e-05) | 5.26138e-37 (5.62e-05) |
| H-abstraction      | 1.44763e-44 (1.55e-12) | 1.44763e-44 (1.55e-12) |

| species            | PYtrue      | Cumul    | PYeffective | Cumul    |
|--------------------|-------------|----------|-------------|----------|
| Indene+H           | 0.987155    | 0.987155 | 0.987155    | 0.987155 |
| C2H2+PhCH2         | 0.00829697  | 0.995452 | 0.00829697  | 0.995452 |
| PhCCH+CH3          | 0.00223627  | 0.997688 | 0.00223627  | 0.997688 |
| PhCHCCH2+H         | 0.00140808  | 0.999096 | 0.00140808  | 0.999096 |
| PhCCCH3+H          | 0.000844056 | 0.999940 | 0.000844056 | 0.999940 |
| rad6               | 3.54903e-05 | 0.999976 | 3.54903e-05 | 0.999976 |
| Ph+MeAc            | 1.10541e-05 | 0.999987 | 1.10541e-05 | 0.999987 |
| rad8               | 7.02785e-06 | 0.999994 | 7.02785e-06 | 0.999994 |
| rad9               | 3.23843e-06 | 0.999997 | 3.23843e-06 | 0.999997 |
| PAH7+H             | 1.84964e-06 | 0.999999 | 1.84964e-06 | 0.999999 |
| rad30              | 4.43970e-07 | 0.999999 | 4.43970e-07 | 0.999999 |
| rad12              | 2.22477e-07 | 1.000000 | 2.22477e-07 | 1.000000 |
| rad39              | 1.83037e-07 | 1.000000 | 1.83037e-07 | 1.000000 |
| PAH9+H             | 9.01320e-08 | 1.000000 | 9.01320e-08 | 1.000000 |
| rad15              | 7.98558e-08 | 1.000000 | 7.98558e-08 | 1.000000 |
| rad28              | 6.42077e-08 | 1.000000 | 6.42077e-08 | 1.000000 |
| rad35              | 4.73183e-08 | 1.000000 | 4.73183e-08 | 1.000000 |
| Phenyl+Allene      | 3.46391e-08 | 1.000000 | 0.000000    | 1.000000 |
| rad38              | 2.32151e-08 | 1.000000 | 2.32151e-08 | 1.000000 |
| rad2               | 1.41130e-08 | 1.000000 | 1.41130e-08 | 1.000000 |
| rad26              | 5.66589e-09 | 1.000000 | 5.66589e-09 | 1.000000 |
| rad7               | 2.56468e-09 | 1.000000 | 2.56468e-09 | 1.000000 |
| rad1               | 8.93591e-10 | 1.000000 | 8.93591e-10 | 1.000000 |
| rad10              | 7.15612e-10 | 1.000000 | 7.15612e-10 | 1.000000 |
| rad11              | 6.27593e-10 | 1.000000 | 6.27593e-10 | 1.000000 |
| rad46              | 1.53490e-10 | 1.000000 | 1.53490e-10 | 1.000000 |
| rad3               | 8.96656e-11 | 1.000000 | 8.96656e-11 | 1.000000 |
| rad4               | 4.53514e-11 | 1.000000 | 4.53514e-11 | 1.000000 |
| rad13              | 1.42490e-11 | 1.000000 | 1.42490e-11 | 1.000000 |
| rad60syn           | 3.46790e-12 | 1.000000 | 3.46790e-12 | 1.000000 |
| Benzene+2-propynyl | 1.54712e-12 | 1.000000 | 1.54712e-12 | 1.000000 |
| rad14              | 3.05854e-14 | 1.000000 | 3.05854e-14 | 1.000000 |
| rad33              | 2.69265e-14 | 1.000000 | 2.69265e-14 | 1.000000 |
| rad25              | 1.78034e-14 | 1.000000 | 1.78034e-14 | 1.000000 |
| rad60anti          | 1.27971e-14 | 1.000000 | 1.27971e-14 | 1.000000 |
| rad27              | 1.15143e-14 | 1.000000 | 1.15143e-14 | 1.000000 |
| PhCH2CCH+H         | 6.60108e-17 | 1.000000 | 6.60108e-17 | 1.000000 |
| rad37              | 6.15864e-18 | 1.000000 | 6.15864e-18 | 1.000000 |
| rad31              | 2.68669e-19 | 1.000000 | 2.68669e-19 | 1.000000 |
| rad20              | 6.59341e-20 | 1.000000 | 6.59341e-20 | 1.000000 |
| rad21              | 4.85430e-20 | 1.000000 | 4.85430e-20 | 1.000000 |
| rad23              | 2.11225e-20 | 1.000000 | 2.11225e-20 | 1.000000 |
| rad5               | 4.02442e-21 | 1.000000 | 4.02442e-21 | 1.000000 |
| rad18              | 2.71707e-22 | 1.000000 | 2.71707e-22 | 1.000000 |
| rad22              | 1.89016e-22 | 1.000000 | 1.89016e-22 | 1.000000 |
| rad45              | 1.39301e-22 | 1.000000 | 1.39301e-22 | 1.000000 |
| rad36              | 8.66945e-24 | 1.000000 | 8.66945e-24 | 1.000000 |
| PAH3+H             | 7.43167e-26 | 1.000000 | 7.43167e-26 | 1.000000 |
| rad59              | 3.97656e-26 | 1.000000 | 3.97656e-26 | 1.000000 |
| rad50              | 1.56850e-26 | 1.000000 | 1.56850e-26 | 1.000000 |
| rad24              | 1.59219e-27 | 1.000000 | 1.59219e-27 | 1.000000 |
| rad19syn           | 6.88746e-35 | 1.000000 | 6.88746e-35 | 1.000000 |
| rad52              | 8.20904e-39 | 1.000000 | 8.20904e-39 | 1.000000 |
| rad54              | 8.40130e-40 | 1.000000 | 8.40130e-40 | 1.000000 |
| PAH10+CH3          | 5.56238e-40 | 1.000000 | 5.56238e-40 | 1.000000 |
| rad43              | 1.28192e-40 | 1.000000 | 1.28192e-40 | 1.000000 |
| rad62              | 3.91552e-43 | 1.000000 | 3.91552e-43 | 1.000000 |
| rad51              | 4.33374e-46 | 1.000000 | 4.33374e-46 | 1.000000 |
| rad70              | 5.00598e-49 | 1.000000 | 5.00598e-49 | 1.000000 |
| PhcycC3H3_A+H      | 2.13440e-49 | 1.000000 | 2.13440e-49 | 1.000000 |
| rad55              | 1.14851e-49 | 1.000000 | 1.14851e-49 | 1.000000 |
| rad65              | 3.05873e-51 | 1.000000 | 3.05873e-51 | 1.000000 |
| rad58              | 7.20966e-53 | 1.000000 | 7.20966e-53 | 1.000000 |
| PAH1+H             | 1.02622e-54 | 1.000000 | 1.02622e-54 | 1.000000 |
| rad34              | 6.87642e-57 | 1.000000 | 6.87642e-57 | 1.000000 |
| rad42              | 5.15108e-61 | 1.000000 | 5.15108e-61 | 1.000000 |
| rad41              | 6.69709e-62 | 1.000000 | 6.69709e-62 | 1.000000 |
| rad47              | 6.17034e-65 | 1.000000 | 6.17034e-65 | 1.000000 |

0.100000000E-04 Pa, 50.0000000 K

=====

|               |                 |                      |
|---------------|-----------------|----------------------|
| Rate constant | True (fraction) | Effective (fraction) |
|---------------|-----------------|----------------------|

-----

|                    |                        |                        |
|--------------------|------------------------|------------------------|
| Total              | 5.52690e-29 (1.00 )    | 5.52690e-29 (1.00 )    |
| Formation of rad11 | 5.52459e-29 (1.000 )   | 5.52459e-29 (1.000 )   |
| Formation of rad6  | 2.30840e-32 (0.000418) | 2.30840e-32 (0.000418) |
| H-abstraction      | 3.35357e-38 (6.07e-10) | 3.35357e-38 (6.07e-10) |

| species            | PYtrue      | Cumul    | PYeffective | Cumul    |
|--------------------|-------------|----------|-------------|----------|
| Indene+H           | 0.986820    | 0.986820 | 0.986820    | 0.986820 |
| C2H2+PhCH2         | 0.00847611  | 0.995296 | 0.00847611  | 0.995296 |
| PhCCH+CH3          | 0.00232845  | 0.997625 | 0.00232845  | 0.997625 |
| PhCHCCH2+H         | 0.00145757  | 0.999082 | 0.00145757  | 0.999082 |
| PhCCCH3+H          | 0.000877139 | 0.999959 | 0.000877139 | 0.999959 |
| rad6               | 1.40714e-05 | 0.999973 | 1.40714e-05 | 0.999973 |
| Ph+MeAc            | 1.25305e-05 | 0.999986 | 1.25305e-05 | 0.999986 |
| rad8               | 7.38983e-06 | 0.999993 | 7.38984e-06 | 0.999993 |
| rad9               | 3.46746e-06 | 0.999997 | 3.46746e-06 | 0.999997 |
| PAH7+H             | 1.99681e-06 | 0.999999 | 1.99681e-06 | 0.999999 |
| rad30              | 4.57476e-07 | 0.999999 | 4.57476e-07 | 0.999999 |
| rad12              | 2.40340e-07 | 0.999999 | 2.40340e-07 | 0.999999 |
| rad39              | 2.04398e-07 | 1.000000 | 2.04398e-07 | 1.000000 |
| PAH9+H             | 9.32068e-08 | 1.000000 | 9.32068e-08 | 1.000000 |
| rad15              | 8.28253e-08 | 1.000000 | 8.28253e-08 | 1.000000 |
| Phenyl+Allene      | 5.77998e-08 | 1.000000 | 0.000000    | 1.000000 |
| rad35              | 4.87576e-08 | 1.000000 | 4.87576e-08 | 1.000000 |
| rad28              | 2.85351e-08 | 1.000000 | 2.85351e-08 | 1.000000 |
| rad38              | 2.40835e-08 | 1.000000 | 2.40835e-08 | 1.000000 |
| rad2               | 5.49827e-09 | 1.000000 | 5.49827e-09 | 1.000000 |
| rad26              | 2.46966e-09 | 1.000000 | 2.46966e-09 | 1.000000 |
| rad7               | 1.01743e-09 | 1.000000 | 1.01743e-09 | 1.000000 |
| Benzene+2-propynyl | 6.06773e-10 | 1.000000 | 6.06773e-10 | 1.000000 |
| rad1               | 3.48745e-10 | 1.000000 | 3.48745e-10 | 1.000000 |
| rad10              | 2.79501e-10 | 1.000000 | 2.79501e-10 | 1.000000 |
| rad11              | 2.48929e-10 | 1.000000 | 2.48929e-10 | 1.000000 |
| rad46              | 1.62953e-10 | 1.000000 | 1.62953e-10 | 1.000000 |
| rad3               | 3.50595e-11 | 1.000000 | 3.50595e-11 | 1.000000 |
| rad4               | 1.77404e-11 | 1.000000 | 1.77404e-11 | 1.000000 |
| rad13              | 5.65745e-12 | 1.000000 | 5.65745e-12 | 1.000000 |
| rad60syn           | 3.82755e-12 | 1.000000 | 3.82755e-12 | 1.000000 |
| rad60anti          | 5.78618e-14 | 1.000000 | 5.78618e-14 | 1.000000 |
| rad14              | 1.53457e-14 | 1.000000 | 1.53457e-14 | 1.000000 |
| rad33              | 1.06969e-14 | 1.000000 | 1.06969e-14 | 1.000000 |
| rad25              | 8.62850e-15 | 1.000000 | 8.62850e-15 | 1.000000 |
| rad27              | 4.83023e-15 | 1.000000 | 4.83023e-15 | 1.000000 |
| PhCH2CCH+H         | 2.68319e-16 | 1.000000 | 2.68319e-16 | 1.000000 |
| rad37              | 1.66520e-17 | 1.000000 | 1.66520e-17 | 1.000000 |
| rad31              | 1.07583e-19 | 1.000000 | 1.07583e-19 | 1.000000 |
| rad20              | 2.70631e-20 | 1.000000 | 2.70631e-20 | 1.000000 |
| rad21              | 1.99475e-20 | 1.000000 | 1.99475e-20 | 1.000000 |
| rad5               | 9.96640e-21 | 1.000000 | 9.96640e-21 | 1.000000 |
| rad23              | 5.35273e-21 | 1.000000 | 5.35273e-21 | 1.000000 |
| rad18              | 1.11572e-22 | 1.000000 | 1.11572e-22 | 1.000000 |
| rad22              | 6.18098e-23 | 1.000000 | 6.18098e-23 | 1.000000 |
| rad45              | 3.49082e-23 | 1.000000 | 3.49082e-23 | 1.000000 |
| rad36              | 2.17082e-24 | 1.000000 | 2.17082e-24 | 1.000000 |
| PAH3+H             | 1.70871e-25 | 1.000000 | 1.70871e-25 | 1.000000 |
| rad59              | 9.13949e-26 | 1.000000 | 9.13949e-26 | 1.000000 |
| rad50              | 3.65207e-26 | 1.000000 | 3.65207e-26 | 1.000000 |
| rad24              | 6.94271e-28 | 1.000000 | 6.94271e-28 | 1.000000 |
| rad19syn           | 1.75128e-34 | 1.000000 | 1.75128e-34 | 1.000000 |
| rad52              | 2.07157e-38 | 1.000000 | 2.07157e-38 | 1.000000 |
| rad54              | 2.23492e-39 | 1.000000 | 2.23492e-39 | 1.000000 |
| PAH10+CH3          | 1.51830e-39 | 1.000000 | 1.51830e-39 | 1.000000 |
| rad43              | 3.49844e-40 | 1.000000 | 3.49844e-40 | 1.000000 |
| rad62              | 1.08637e-42 | 1.000000 | 1.08637e-42 | 1.000000 |
| rad51              | 1.18376e-45 | 1.000000 | 1.18376e-45 | 1.000000 |
| rad70              | 1.45989e-48 | 1.000000 | 1.45989e-48 | 1.000000 |
| PhcycC3H3_A+H      | 6.26318e-49 | 1.000000 | 6.26318e-49 | 1.000000 |
| rad55              | 3.36805e-49 | 1.000000 | 3.36805e-49 | 1.000000 |
| rad65              | 8.74492e-51 | 1.000000 | 8.74492e-51 | 1.000000 |
| rad58              | 2.12696e-52 | 1.000000 | 2.12696e-52 | 1.000000 |
| PAH1+H             | 3.19497e-54 | 1.000000 | 3.19497e-54 | 1.000000 |
| rad34              | 2.16890e-56 | 1.000000 | 2.16890e-56 | 1.000000 |
| rad42              | 1.75054e-60 | 1.000000 | 1.75054e-60 | 1.000000 |
| rad41              | 2.51046e-61 | 1.000000 | 2.51046e-61 | 1.000000 |
| rad47              | 1.43639e-64 | 1.000000 | 1.43639e-64 | 1.000000 |

0.100000000E-04 Pa, 60.000000 K

=====

|               |                 |                      |
|---------------|-----------------|----------------------|
| Rate constant | True (fraction) | Effective (fraction) |
|---------------|-----------------|----------------------|

-----



|                    |                        |                        |
|--------------------|------------------------|------------------------|
| Total              | 1.83429e-26 (1.00 )    | 1.83429e-26 (1.00 )    |
| Formation of rad11 | 1.83139e-26 (0.998 )   | 1.83139e-26 (0.998 )   |
| Formation of rad6  | 2.90471e-29 (0.00158 ) | 2.90471e-29 (0.00158 ) |
| H-abstraction      | 5.71259e-34 (3.11e-08) | 5.71259e-34 (3.11e-08) |

| species            | PYtrue      | Cumul    | PYeffective | Cumul    |
|--------------------|-------------|----------|-------------|----------|
| Indene+H           | 0.986416    | 0.986416 | 0.986416    | 0.986416 |
| C2H2+PhCH2         | 0.00868087  | 0.995097 | 0.00868087  | 0.995097 |
| PhCCH+CH3          | 0.00243618  | 0.997533 | 0.00243618  | 0.997533 |
| PhCHCCH2+H         | 0.00151486  | 0.999048 | 0.00151486  | 0.999048 |
| PhCCCH3+H          | 0.000915574 | 0.999963 | 0.000915574 | 0.999963 |
| Ph+MeAc            | 1.44295e-05 | 0.999978 | 1.44295e-05 | 0.999978 |
| rad8               | 7.81948e-06 | 0.999986 | 7.81948e-06 | 0.999986 |
| rad6               | 6.75204e-06 | 0.999992 | 6.75204e-06 | 0.999992 |
| rad9               | 3.74799e-06 | 0.999996 | 3.74799e-06 | 0.999996 |
| PAH7+H             | 2.17576e-06 | 0.999998 | 2.17576e-06 | 0.999998 |
| rad30              | 4.73158e-07 | 0.999999 | 4.73158e-07 | 0.999999 |
| rad12              | 2.61711e-07 | 0.999999 | 2.61711e-07 | 0.999999 |
| rad39              | 2.31594e-07 | 0.999999 | 2.31594e-07 | 0.999999 |
| PAH9+H             | 9.68126e-08 | 0.999999 | 9.68126e-08 | 0.999999 |
| Phenyl+Allene      | 9.36940e-08 | 1.000000 | 0.000000    | 0.999999 |
| rad15              | 8.63148e-08 | 1.000000 | 8.63149e-08 | 1.000000 |
| rad35              | 5.04348e-08 | 1.000000 | 5.04348e-08 | 1.000000 |
| Benzene+2-propynyl | 3.11432e-08 | 1.000000 | 3.11432e-08 | 1.000000 |
| rad38              | 2.51072e-08 | 1.000000 | 2.51072e-08 | 1.000000 |
| rad28              | 1.50243e-08 | 1.000000 | 1.50243e-08 | 1.000000 |
| rad2               | 2.60622e-09 | 1.000000 | 2.60622e-09 | 1.000000 |
| rad26              | 1.28601e-09 | 1.000000 | 1.28601e-09 | 1.000000 |
| rad7               | 4.88640e-10 | 1.000000 | 4.88640e-10 | 1.000000 |
| rad46              | 1.74570e-10 | 1.000000 | 1.74570e-10 | 1.000000 |
| rad1               | 1.65665e-10 | 1.000000 | 1.65665e-10 | 1.000000 |
| rad10              | 1.32771e-10 | 1.000000 | 1.32771e-10 | 1.000000 |
| rad11              | 1.19553e-10 | 1.000000 | 1.19553e-10 | 1.000000 |
| rad3               | 1.66634e-11 | 1.000000 | 1.66634e-11 | 1.000000 |
| rad4               | 8.43646e-12 | 1.000000 | 8.43646e-12 | 1.000000 |
| rad60syn           | 4.43316e-12 | 1.000000 | 4.43316e-12 | 1.000000 |
| rad13              | 2.71933e-12 | 1.000000 | 2.71933e-12 | 1.000000 |
| rad60anti          | 1.68285e-13 | 1.000000 | 1.68285e-13 | 1.000000 |
| rad14              | 9.12411e-15 | 1.000000 | 9.12412e-15 | 1.000000 |
| PhCH2CCH+H         | 8.79296e-15 | 1.000000 | 8.79296e-15 | 1.000000 |
| rad33              | 5.14515e-15 | 1.000000 | 5.14515e-15 | 1.000000 |
| rad25              | 5.00361e-15 | 1.000000 | 5.00361e-15 | 1.000000 |
| rad27              | 2.45879e-15 | 1.000000 | 2.45879e-15 | 1.000000 |
| rad37              | 5.92671e-16 | 1.000000 | 5.92671e-16 | 1.000000 |
| rad5               | 3.22139e-19 | 1.000000 | 3.22139e-19 | 1.000000 |
| rad31              | 5.28371e-20 | 1.000000 | 5.28371e-20 | 1.000000 |
| rad20              | 1.35436e-20 | 1.000000 | 1.35436e-20 | 1.000000 |
| rad21              | 9.99674e-21 | 1.000000 | 9.99674e-21 | 1.000000 |
| rad23              | 1.87912e-21 | 1.000000 | 1.87912e-21 | 1.000000 |
| rad18              | 5.58916e-23 | 1.000000 | 5.58917e-23 | 1.000000 |
| rad22              | 2.63299e-23 | 1.000000 | 2.63299e-23 | 1.000000 |
| rad45              | 1.21655e-23 | 1.000000 | 1.21655e-23 | 1.000000 |
| PAH3+H             | 3.09963e-24 | 1.000000 | 3.09963e-24 | 1.000000 |
| rad59              | 1.67015e-24 | 1.000000 | 1.67015e-24 | 1.000000 |
| rad50              | 9.21838e-25 | 1.000000 | 9.21838e-25 | 1.000000 |
| rad36              | 7.55907e-25 | 1.000000 | 7.55907e-25 | 1.000000 |
| rad24              | 3.74911e-28 | 1.000000 | 3.74911e-28 | 1.000000 |
| rad19syn           | 1.11381e-33 | 1.000000 | 1.11381e-33 | 1.000000 |
| rad52              | 1.30548e-37 | 1.000000 | 1.30548e-37 | 1.000000 |
| rad54              | 1.50222e-38 | 1.000000 | 1.50222e-38 | 1.000000 |
| PAH10+CH3          | 1.06739e-38 | 1.000000 | 1.06739e-38 | 1.000000 |
| rad43              | 2.45884e-39 | 1.000000 | 2.45884e-39 | 1.000000 |
| rad62              | 7.77542e-42 | 1.000000 | 7.77542e-42 | 1.000000 |
| rad51              | 8.22026e-45 | 1.000000 | 8.22026e-45 | 1.000000 |
| rad70              | 1.09790e-47 | 1.000000 | 1.09790e-47 | 1.000000 |
| PhcycC3H3_A+H      | 4.74604e-48 | 1.000000 | 4.74604e-48 | 1.000000 |
| rad55              | 2.55013e-48 | 1.000000 | 2.55013e-48 | 1.000000 |
| rad65              | 6.42159e-50 | 1.000000 | 6.42159e-50 | 1.000000 |
| rad58              | 1.62232e-51 | 1.000000 | 1.62232e-51 | 1.000000 |
| PAH1+H             | 2.60754e-53 | 1.000000 | 2.60754e-53 | 1.000000 |
| rad34              | 1.79617e-55 | 1.000000 | 1.79617e-55 | 1.000000 |
| rad42              | 1.75362e-59 | 1.000000 | 1.75362e-59 | 1.000000 |
| rad41              | 3.31403e-60 | 1.000000 | 3.31403e-60 | 1.000000 |
| rad47              | 9.29337e-64 | 1.000000 | 9.29337e-64 | 1.000000 |

0.100000000E-04 Pa, 70.000000 K

=====

| Rate constant | True (fraction) | Effective (fraction) |
|---------------|-----------------|----------------------|
|---------------|-----------------|----------------------|

-----

|                    |                        |                        |
|--------------------|------------------------|------------------------|
| Total              | 1.17336e-24 (1.00 )    | 1.17336e-24 (1.00 )    |
| Formation of rad11 | 1.16857e-24 (0.996 )   | 1.16857e-24 (0.996 )   |
| Formation of rad6  | 4.79505e-27 (0.00409 ) | 4.79505e-27 (0.00409 ) |
| H-abstraction      | 5.89821e-31 (5.03e-07) | 5.89821e-31 (5.03e-07) |

| species            | PYtrue      | Cumul    | PYeffective | Cumul    |
|--------------------|-------------|----------|-------------|----------|
| Indene+H           | 0.985955    | 0.985955 | 0.985955    | 0.985955 |
| C2H2+PhCH2         | 0.00891001  | 0.994865 | 0.00891002  | 0.994865 |
| PhCCH+CH3          | 0.00255944  | 0.997424 | 0.00255944  | 0.997424 |
| PhCHCCH2+H         | 0.00157985  | 0.999004 | 0.00157985  | 0.999004 |
| PhCCCH3+H          | 0.000959303 | 0.999963 | 0.000959303 | 0.999963 |
| Ph+MeAc            | 1.68115e-05 | 0.999980 | 1.68115e-05 | 0.999980 |
| rad8               | 8.31751e-06 | 0.999988 | 8.31751e-06 | 0.999988 |
| rad9               | 4.08239e-06 | 0.999992 | 4.08239e-06 | 0.999992 |
| rad6               | 3.65108e-06 | 0.999996 | 3.65108e-06 | 0.999996 |
| PAH7+H             | 2.38867e-06 | 0.999998 | 2.38867e-06 | 0.999998 |
| Benzene+2-propynyl | 5.02676e-07 | 0.999999 | 5.02676e-07 | 0.999999 |
| rad30              | 4.90966e-07 | 0.999999 | 4.90966e-07 | 0.999999 |
| rad12              | 2.86875e-07 | 1.000000 | 2.86875e-07 | 1.000000 |
| rad39              | 2.65289e-07 | 1.000000 | 2.65289e-07 | 1.000000 |
| Phenyl+Allene      | 1.46770e-07 | 1.000000 | 0.000000    | 1.000000 |
| PAH9+H             | 1.00948e-07 | 1.000000 | 1.00948e-07 | 1.000000 |
| rad15              | 9.03228e-08 | 1.000000 | 9.03228e-08 | 1.000000 |
| rad35              | 5.23464e-08 | 1.000000 | 5.23464e-08 | 1.000000 |
| rad38              | 2.62872e-08 | 1.000000 | 2.62872e-08 | 1.000000 |
| rad28              | 8.78562e-09 | 1.000000 | 8.78562e-09 | 1.000000 |
| rad2               | 1.39658e-09 | 1.000000 | 1.39658e-09 | 1.000000 |
| rad26              | 7.47439e-10 | 1.000000 | 7.47439e-10 | 1.000000 |
| rad7               | 2.64519e-10 | 1.000000 | 2.64519e-10 | 1.000000 |
| rad46              | 1.88501e-10 | 1.000000 | 1.88501e-10 | 1.000000 |
| rad1               | 8.89956e-11 | 1.000000 | 8.89956e-11 | 1.000000 |
| rad10              | 7.12921e-11 | 1.000000 | 7.12921e-11 | 1.000000 |
| rad11              | 6.47242e-11 | 1.000000 | 6.47242e-11 | 1.000000 |
| rad3               | 8.94827e-12 | 1.000000 | 8.94828e-12 | 1.000000 |
| rad60syn           | 5.30127e-12 | 1.000000 | 5.30127e-12 | 1.000000 |
| rad4               | 4.53328e-12 | 1.000000 | 4.53328e-12 | 1.000000 |
| rad13              | 1.47332e-12 | 1.000000 | 1.47332e-12 | 1.000000 |
| rad60anti          | 3.65430e-13 | 1.000000 | 3.65430e-13 | 1.000000 |
| PhCH2CCH+H         | 1.70605e-13 | 1.000000 | 1.70605e-13 | 1.000000 |
| rad37              | 2.06409e-14 | 1.000000 | 2.06409e-14 | 1.000000 |
| rad14              | 6.00233e-15 | 1.000000 | 6.00233e-15 | 1.000000 |
| rad25              | 3.23338e-15 | 1.000000 | 3.23338e-15 | 1.000000 |
| rad33              | 2.78982e-15 | 1.000000 | 2.78982e-15 | 1.000000 |
| rad27              | 1.41344e-15 | 1.000000 | 1.41344e-15 | 1.000000 |
| rad5               | 1.59955e-17 | 1.000000 | 1.59955e-17 | 1.000000 |
| rad31              | 2.96347e-20 | 1.000000 | 2.96347e-20 | 1.000000 |
| rad20              | 7.68236e-21 | 1.000000 | 7.68236e-21 | 1.000000 |
| rad21              | 5.67979e-21 | 1.000000 | 5.67979e-21 | 1.000000 |
| rad23              | 8.08107e-22 | 1.000000 | 8.08107e-22 | 1.000000 |
| PAH3+H             | 3.81403e-22 | 1.000000 | 3.81403e-22 | 1.000000 |
| rad59              | 2.03854e-22 | 1.000000 | 2.03854e-22 | 1.000000 |
| rad50              | 7.34873e-23 | 1.000000 | 7.34873e-23 | 1.000000 |
| rad18              | 3.17367e-23 | 1.000000 | 3.17367e-23 | 1.000000 |
| rad22              | 1.32095e-23 | 1.000000 | 1.32095e-23 | 1.000000 |
| rad45              | 5.20544e-24 | 1.000000 | 5.20544e-24 | 1.000000 |
| rad36              | 3.23188e-25 | 1.000000 | 3.23188e-25 | 1.000000 |
| rad24              | 2.32633e-28 | 1.000000 | 2.32633e-28 | 1.000000 |
| rad19syn           | 2.22758e-32 | 1.000000 | 2.22758e-32 | 1.000000 |
| rad52              | 2.58453e-36 | 1.000000 | 2.58453e-36 | 1.000000 |
| rad54              | 3.19672e-37 | 1.000000 | 3.19673e-37 | 1.000000 |
| PAH10+CH3          | 2.34293e-37 | 1.000000 | 2.34293e-37 | 1.000000 |
| rad43              | 5.39489e-38 | 1.000000 | 5.39489e-38 | 1.000000 |
| rad62              | 1.76329e-40 | 1.000000 | 1.76329e-40 | 1.000000 |
| rad51              | 1.81539e-43 | 1.000000 | 1.81540e-43 | 1.000000 |
| rad70              | 2.65324e-46 | 1.000000 | 2.65324e-46 | 1.000000 |
| PhcycC3H3_A+H      | 1.15701e-46 | 1.000000 | 1.15701e-46 | 1.000000 |
| rad55              | 6.21075e-47 | 1.000000 | 6.21075e-47 | 1.000000 |
| rad65              | 1.51140e-48 | 1.000000 | 1.51140e-48 | 1.000000 |
| rad58              | 3.98479e-50 | 1.000000 | 3.98479e-50 | 1.000000 |
| PAH1+H             | 6.94696e-52 | 1.000000 | 6.94696e-52 | 1.000000 |
| rad34              | 4.86021e-54 | 1.000000 | 4.86021e-54 | 1.000000 |
| rad42              | 6.77383e-58 | 1.000000 | 6.77383e-58 | 1.000000 |
| rad41              | 1.81881e-58 | 1.000000 | 1.81881e-58 | 1.000000 |
| rad47              | 2.03210e-62 | 1.000000 | 2.03210e-62 | 1.000000 |

0.100000000E-04 Pa, 80.000000 K

=====

| Rate constant | True (fraction) | Effective (fraction) |
|---------------|-----------------|----------------------|
|---------------|-----------------|----------------------|

-----

|                    |                        |                        |
|--------------------|------------------------|------------------------|
| Total              | 2.68112e-23 (1.00 )    | 2.68112e-23 (1.00 )    |
| Formation of rad11 | 2.65890e-23 (0.992 )   | 2.65889e-23 (0.992 )   |
| Formation of rad6  | 2.22189e-25 (0.00829 ) | 2.22189e-25 (0.00829 ) |
| H-abstraction      | 1.05871e-28 (3.95e-06) | 1.05871e-28 (3.95e-06) |

| species            | PYtrue      | Cumul    | PYeffective | Cumul    |
|--------------------|-------------|----------|-------------|----------|
| Indene+H           | 0.985431    | 0.985431 | 0.985431    | 0.985431 |
| C2H2+PhCH2         | 0.00916453  | 0.994596 | 0.00916453  | 0.994596 |
| PhCCH+CH3          | 0.00269951  | 0.997295 | 0.00269952  | 0.997295 |
| PhCHCCH2+H         | 0.00165307  | 0.998948 | 0.00165307  | 0.998948 |
| PhCCCH3+H          | 0.00100870  | 0.999957 | 0.00100870  | 0.999957 |
| Ph+MeAc            | 1.97820e-05 | 0.999977 | 1.97820e-05 | 0.999977 |
| rad8               | 8.89011e-06 | 0.999986 | 8.89012e-06 | 0.999986 |
| rad9               | 4.47766e-06 | 0.999990 | 4.47766e-06 | 0.999990 |
| Benzene+2-propynyl | 3.94877e-06 | 0.999994 | 3.94877e-06 | 0.999994 |
| PAH7+H             | 2.64082e-06 | 0.999997 | 2.64082e-06 | 0.999997 |
| rad6               | 2.14189e-06 | 0.999999 | 2.14190e-06 | 0.999999 |
| rad30              | 5.11046e-07 | 0.999999 | 5.11046e-07 | 0.999999 |
| rad12              | 3.16466e-07 | 1.000000 | 3.16466e-07 | 1.000000 |
| rad39              | 3.06756e-07 | 1.000000 | 3.06756e-07 | 1.000000 |
| Phenyl+Allene      | 2.23623e-07 | 1.000000 | 0.000000    | 1.000000 |
| PAH9+H             | 1.05662e-07 | 1.000000 | 1.05662e-07 | 1.000000 |
| rad15              | 9.48933e-08 | 1.000000 | 9.48933e-08 | 1.000000 |
| rad35              | 5.45105e-08 | 1.000000 | 5.45106e-08 | 1.000000 |
| rad38              | 2.76391e-08 | 1.000000 | 2.76391e-08 | 1.000000 |
| rad28              | 5.51460e-09 | 1.000000 | 5.51461e-09 | 1.000000 |
| rad2               | 8.13456e-10 | 1.000000 | 8.13456e-10 | 1.000000 |
| rad26              | 4.67810e-10 | 1.000000 | 4.67810e-10 | 1.000000 |
| rad46              | 2.05128e-10 | 1.000000 | 2.05128e-10 | 1.000000 |
| rad7               | 1.55375e-10 | 1.000000 | 1.55375e-10 | 1.000000 |
| rad1               | 5.19812e-11 | 1.000000 | 5.19813e-11 | 1.000000 |
| rad10              | 4.16092e-11 | 1.000000 | 4.16092e-11 | 1.000000 |
| rad11              | 3.80239e-11 | 1.000000 | 3.80240e-11 | 1.000000 |
| rad60syn           | 6.47040e-12 | 1.000000 | 6.47041e-12 | 1.000000 |
| rad3               | 5.22287e-12 | 1.000000 | 5.22287e-12 | 1.000000 |
| rad4               | 2.64786e-12 | 1.000000 | 2.64786e-12 | 1.000000 |
| PhCH2CCH+H         | 1.68210e-12 | 1.000000 | 1.68210e-12 | 1.000000 |
| rad13              | 8.66174e-13 | 1.000000 | 8.66174e-13 | 1.000000 |
| rad60anti          | 6.66443e-13 | 1.000000 | 6.66443e-13 | 1.000000 |
| rad37              | 3.03009e-13 | 1.000000 | 3.03009e-13 | 1.000000 |
| rad14              | 4.21697e-15 | 1.000000 | 4.21697e-15 | 1.000000 |
| rad25              | 2.24327e-15 | 1.000000 | 2.24327e-15 | 1.000000 |
| rad33              | 1.64158e-15 | 1.000000 | 1.64158e-15 | 1.000000 |
| rad27              | 8.83084e-16 | 1.000000 | 8.83084e-16 | 1.000000 |
| rad5               | 3.26437e-16 | 1.000000 | 3.26437e-16 | 1.000000 |
| rad31              | 1.83027e-20 | 1.000000 | 1.83027e-20 | 1.000000 |
| PAH3+H             | 1.75019e-20 | 1.000000 | 1.75019e-20 | 1.000000 |
| rad59              | 9.12283e-21 | 1.000000 | 9.12284e-21 | 1.000000 |
| rad20              | 4.75040e-21 | 1.000000 | 4.75040e-21 | 1.000000 |
| rad21              | 3.51864e-21 | 1.000000 | 3.51864e-21 | 1.000000 |
| rad50              | 2.23807e-21 | 1.000000 | 2.23807e-21 | 1.000000 |
| rad23              | 3.99218e-22 | 1.000000 | 3.99218e-22 | 1.000000 |
| rad18              | 1.96392e-23 | 1.000000 | 1.96392e-23 | 1.000000 |
| rad22              | 7.40244e-24 | 1.000000 | 7.40244e-24 | 1.000000 |
| rad45              | 2.56279e-24 | 1.000000 | 2.56279e-24 | 1.000000 |
| rad36              | 1.59005e-25 | 1.000000 | 1.59005e-25 | 1.000000 |
| rad19syn           | 3.52242e-28 | 1.000000 | 3.52242e-28 | 1.000000 |
| rad24              | 1.59373e-28 | 1.000000 | 1.59373e-28 | 1.000000 |
| rad52              | 3.72407e-32 | 1.000000 | 3.72407e-32 | 1.000000 |
| rad54              | 3.50878e-35 | 1.000000 | 3.50878e-35 | 1.000000 |
| PAH10+CH3          | 2.45197e-35 | 1.000000 | 2.45197e-35 | 1.000000 |
| rad43              | 5.64075e-36 | 1.000000 | 5.64075e-36 | 1.000000 |
| rad62              | 1.95654e-38 | 1.000000 | 1.95654e-38 | 1.000000 |
| rad51              | 2.07103e-41 | 1.000000 | 2.07103e-41 | 1.000000 |
| rad70              | 3.32438e-44 | 1.000000 | 3.32438e-44 | 1.000000 |
| PhcycC3H3_A+H      | 1.46282e-44 | 1.000000 | 1.46282e-44 | 1.000000 |
| rad55              | 7.84408e-45 | 1.000000 | 7.84409e-45 | 1.000000 |
| rad65              | 1.84241e-46 | 1.000000 | 1.84241e-46 | 1.000000 |
| rad58              | 5.07708e-48 | 1.000000 | 5.07708e-48 | 1.000000 |
| PAH1+H             | 9.64353e-50 | 1.000000 | 9.64353e-50 | 1.000000 |
| rad34              | 6.84347e-52 | 1.000000 | 6.84347e-52 | 1.000000 |
| rad42              | 1.12538e-55 | 1.000000 | 1.12538e-55 | 1.000000 |
| rad41              | 3.35864e-56 | 1.000000 | 3.35864e-56 | 1.000000 |
| rad47              | 2.37302e-60 | 1.000000 | 2.37302e-60 | 1.000000 |

0.100000000E-04 Pa, 90.0000000 K

=====

| Rate constant | True (fraction) | Effective (fraction) |
|---------------|-----------------|----------------------|
|---------------|-----------------|----------------------|

-----

|                    |                        |                        |
|--------------------|------------------------|------------------------|
| Total              | 3.08379e-22 (1.00 )    | 3.08379e-22 (1.00 )    |
| Formation of rad11 | 3.03962e-22 (0.986 )   | 3.03962e-22 (0.986 )   |
| Formation of rad6  | 4.41076e-24 (0.0143 )  | 4.41076e-24 (0.0143 )  |
| H-abstraction      | 5.92916e-27 (1.92e-05) | 5.92916e-27 (1.92e-05) |

| species            | PYtrue      | Cumul    | PYeffective | Cumul    |
|--------------------|-------------|----------|-------------|----------|
| Indene+H           | 0.984832    | 0.984832 | 0.984832    | 0.984832 |
| C2H2+PhCH2         | 0.00944662  | 0.994279 | 0.00944662  | 0.994279 |
| PhCCH+CH3          | 0.00285838  | 0.997137 | 0.00285838  | 0.997137 |
| PhCHCCH2+H         | 0.00173537  | 0.998872 | 0.00173537  | 0.998872 |
| PhCCCH3+H          | 0.00106436  | 0.999937 | 0.00106436  | 0.999937 |
| Ph+MeAc            | 2.34796e-05 | 0.999960 | 2.34796e-05 | 0.999960 |
| Benzene+2-propynyl | 1.92269e-05 | 0.999979 | 1.92269e-05 | 0.999979 |
| rad8               | 9.54664e-06 | 0.999989 | 9.54665e-06 | 0.999989 |
| rad9               | 4.94387e-06 | 0.999994 | 4.94387e-06 | 0.999994 |
| PAH7+H             | 2.93960e-06 | 0.999997 | 2.93960e-06 | 0.999997 |
| rad6               | 1.33241e-06 | 0.999998 | 1.33241e-06 | 0.999998 |
| rad30              | 5.33654e-07 | 0.999999 | 5.33655e-07 | 0.999999 |
| rad39              | 3.57720e-07 | 0.999999 | 3.57720e-07 | 0.999999 |
| rad12              | 3.51265e-07 | 0.999999 | 3.51265e-07 | 0.999999 |
| Phenyl+Allene      | 3.33232e-07 | 1.000000 | 0.000000    | 0.999999 |
| PAH9+H             | 1.11030e-07 | 1.000000 | 1.11030e-07 | 1.000000 |
| rad15              | 1.00098e-07 | 1.000000 | 1.00098e-07 | 1.000000 |
| rad35              | 5.69580e-08 | 1.000000 | 5.69580e-08 | 1.000000 |
| rad38              | 2.91874e-08 | 1.000000 | 2.91874e-08 | 1.000000 |
| rad28              | 3.64059e-09 | 1.000000 | 3.64059e-09 | 1.000000 |
| rad2               | 5.03393e-10 | 1.000000 | 5.03393e-10 | 1.000000 |
| rad26              | 3.08635e-10 | 1.000000 | 3.08635e-10 | 1.000000 |
| rad46              | 2.24991e-10 | 1.000000 | 2.24992e-10 | 1.000000 |
| rad7               | 9.67883e-11 | 1.000000 | 9.67883e-11 | 1.000000 |
| rad1               | 3.22668e-11 | 1.000000 | 3.22668e-11 | 1.000000 |
| rad10              | 2.57974e-11 | 1.000000 | 2.57974e-11 | 1.000000 |
| rad11              | 2.36910e-11 | 1.000000 | 2.36910e-11 | 1.000000 |
| PhCH2CCH+H         | 1.03714e-11 | 1.000000 | 1.03714e-11 | 1.000000 |
| rad60syn           | 8.01574e-12 | 1.000000 | 8.01574e-12 | 1.000000 |
| rad3               | 3.23835e-12 | 1.000000 | 3.23835e-12 | 1.000000 |
| rad37              | 2.40352e-12 | 1.000000 | 2.40352e-12 | 1.000000 |
| rad4               | 1.64307e-12 | 1.000000 | 1.64307e-12 | 1.000000 |
| rad60anti          | 1.09277e-12 | 1.000000 | 1.09277e-12 | 1.000000 |
| rad13              | 5.40067e-13 | 1.000000 | 5.40067e-13 | 1.000000 |
| rad5               | 3.47734e-15 | 1.000000 | 3.47734e-15 | 1.000000 |
| rad14              | 3.09953e-15 | 1.000000 | 3.09953e-15 | 1.000000 |
| rad25              | 1.63476e-15 | 1.000000 | 1.63476e-15 | 1.000000 |
| rad33              | 1.02452e-15 | 1.000000 | 1.02452e-15 | 1.000000 |
| rad27              | 5.85976e-16 | 1.000000 | 5.85976e-16 | 1.000000 |
| PAH3+H             | 3.47839e-19 | 1.000000 | 3.47839e-19 | 1.000000 |
| rad59              | 1.75123e-19 | 1.000000 | 1.75123e-19 | 1.000000 |
| rad50              | 3.24762e-20 | 1.000000 | 3.24762e-20 | 1.000000 |
| rad31              | 1.22040e-20 | 1.000000 | 1.22040e-20 | 1.000000 |
| rad20              | 3.12801e-21 | 1.000000 | 3.12801e-21 | 1.000000 |
| rad21              | 2.32172e-21 | 1.000000 | 2.32172e-21 | 1.000000 |
| rad23              | 2.18196e-22 | 1.000000 | 2.18196e-22 | 1.000000 |
| rad18              | 1.29348e-23 | 1.000000 | 1.29348e-23 | 1.000000 |
| rad22              | 4.49037e-24 | 1.000000 | 4.49037e-24 | 1.000000 |
| rad45              | 1.39707e-24 | 1.000000 | 1.39707e-24 | 1.000000 |
| rad19syn           | 1.46214e-25 | 1.000000 | 1.46214e-25 | 1.000000 |
| rad36              | 8.66318e-26 | 1.000000 | 8.66319e-26 | 1.000000 |
| rad24              | 1.17702e-28 | 1.000000 | 1.17702e-28 | 1.000000 |
| rad52              | 1.23177e-29 | 1.000000 | 1.23177e-29 | 1.000000 |
| rad54              | 6.86240e-30 | 1.000000 | 6.86241e-30 | 1.000000 |
| PAH10+CH3          | 3.93543e-30 | 1.000000 | 3.93544e-30 | 1.000000 |
| rad43              | 9.87666e-31 | 1.000000 | 9.87667e-31 | 1.000000 |
| rad62              | 7.46453e-36 | 1.000000 | 7.46453e-36 | 1.000000 |
| rad51              | 8.14502e-39 | 1.000000 | 8.14503e-39 | 1.000000 |
| rad70              | 1.44025e-41 | 1.000000 | 1.44025e-41 | 1.000000 |
| PhcycC3H3_A+H      | 6.39552e-42 | 1.000000 | 6.39553e-42 | 1.000000 |
| rad55              | 3.42571e-42 | 1.000000 | 3.42571e-42 | 1.000000 |
| rad65              | 7.75274e-44 | 1.000000 | 7.75275e-44 | 1.000000 |
| rad58              | 2.23690e-45 | 1.000000 | 2.23691e-45 | 1.000000 |
| PAH1+H             | 4.61286e-47 | 1.000000 | 4.61286e-47 | 1.000000 |
| rad34              | 3.32293e-49 | 1.000000 | 3.32293e-49 | 1.000000 |
| rad42              | 5.23592e-53 | 1.000000 | 5.23592e-53 | 1.000000 |
| rad41              | 1.49281e-53 | 1.000000 | 1.49281e-53 | 1.000000 |
| rad47              | 9.74113e-58 | 1.000000 | 9.74113e-58 | 1.000000 |

0.100000000E-04 Pa, 100.000000 K

=====

| Rate constant | True (fraction) | Effective (fraction) |
|---------------|-----------------|----------------------|
|---------------|-----------------|----------------------|

-----

|                    |                        |                        |
|--------------------|------------------------|------------------------|
| Total              | 2.19347e-21 (1.00 )    | 2.19347e-21 (1.00 )    |
| Formation of rad11 | 2.14498e-21 (0.978 )   | 2.14497e-21 (0.978 )   |
| Formation of rad6  | 4.83503e-23 (0.0220 )  | 4.83503e-23 (0.0220 )  |
| H-abstraction      | 1.47101e-25 (6.71e-05) | 1.47101e-25 (6.71e-05) |

| species            | PYtrue      | Cumul    | PYeffective | Cumul    |
|--------------------|-------------|----------|-------------|----------|
| Indene+H           | 0.984132    | 0.984132 | 0.984132    | 0.984132 |
| C2H2+PhCH2         | 0.00975858  | 0.993891 | 0.00975859  | 0.993891 |
| PhCCH+CH3          | 0.00303806  | 0.996929 | 0.00303806  | 0.996929 |
| PhCHCCH2+H         | 0.00182762  | 0.998756 | 0.00182762  | 0.998756 |
| PhCCCH3+H          | 0.00112689  | 0.999883 | 0.00112689  | 0.999883 |
| Benzene+2-propynyl | 6.70630e-05 | 0.999950 | 6.70630e-05 | 0.999950 |
| Ph+MeAc            | 2.80661e-05 | 0.999978 | 2.80661e-05 | 0.999978 |
| rad8               | 1.02972e-05 | 0.999989 | 1.02972e-05 | 0.999989 |
| rad9               | 5.49271e-06 | 0.999994 | 5.49272e-06 | 0.999994 |
| PAH7+H             | 3.29365e-06 | 0.999997 | 3.29366e-06 | 0.999997 |
| rad6               | 8.65966e-07 | 0.999998 | 8.65967e-07 | 0.999998 |
| rad30              | 5.59074e-07 | 0.999999 | 5.59074e-07 | 0.999999 |
| Phenyl+Allene      | 4.87229e-07 | 0.999999 | 0.00000     | 0.999999 |
| rad39              | 4.20224e-07 | 1.000000 | 4.20224e-07 | 0.999999 |
| rad12              | 3.92096e-07 | 1.000000 | 3.92097e-07 | 1.000000 |
| PAH9+H             | 1.17140e-07 | 1.000000 | 1.17140e-07 | 1.000000 |
| rad15              | 1.06018e-07 | 1.000000 | 1.06018e-07 | 1.000000 |
| rad35              | 5.97229e-08 | 1.000000 | 5.97230e-08 | 1.000000 |
| rad38              | 3.09600e-08 | 1.000000 | 3.09600e-08 | 1.000000 |
| rad28              | 2.49479e-09 | 1.000000 | 2.49479e-09 | 1.000000 |
| rad2               | 3.25819e-10 | 1.000000 | 3.25819e-10 | 1.000000 |
| rad46              | 2.48735e-10 | 1.000000 | 2.48735e-10 | 1.000000 |
| rad26              | 2.11702e-10 | 1.000000 | 2.11702e-10 | 1.000000 |
| rad7               | 6.29980e-11 | 1.000000 | 6.29981e-11 | 1.000000 |
| PhCH2CCH+H         | 4.59984e-11 | 1.000000 | 4.59984e-11 | 1.000000 |
| rad1               | 2.09548e-11 | 1.000000 | 2.09549e-11 | 1.000000 |
| rad10              | 1.67298e-11 | 1.000000 | 1.67298e-11 | 1.000000 |
| rad11              | 1.54237e-11 | 1.000000 | 1.54237e-11 | 1.000000 |
| rad37              | 1.23880e-11 | 1.000000 | 1.23880e-11 | 1.000000 |
| rad60syn           | 1.00457e-11 | 1.000000 | 1.00457e-11 | 1.000000 |
| rad3               | 2.09925e-12 | 1.000000 | 2.09925e-12 | 1.000000 |
| rad60anti          | 1.67562e-12 | 1.000000 | 1.67562e-12 | 1.000000 |
| rad4               | 1.06606e-12 | 1.000000 | 1.06606e-12 | 1.000000 |
| rad13              | 3.51861e-13 | 1.000000 | 3.51862e-13 | 1.000000 |
| rad5               | 2.34843e-14 | 1.000000 | 2.34843e-14 | 1.000000 |
| rad14              | 2.35289e-15 | 1.000000 | 2.35289e-15 | 1.000000 |
| rad25              | 1.23412e-15 | 1.000000 | 1.23413e-15 | 1.000000 |
| rad33              | 6.68177e-16 | 1.000000 | 6.68177e-16 | 1.000000 |
| rad27              | 4.06824e-16 | 1.000000 | 4.06824e-16 | 1.000000 |
| PAH3+H             | 3.83441e-18 | 1.000000 | 3.83442e-18 | 1.000000 |
| rad59              | 1.85429e-18 | 1.000000 | 1.85429e-18 | 1.000000 |
| rad50              | 2.80604e-19 | 1.000000 | 2.80605e-19 | 1.000000 |
| rad31              | 8.69040e-21 | 1.000000 | 8.69041e-21 | 1.000000 |
| rad20              | 2.16040e-21 | 1.000000 | 2.16040e-21 | 1.000000 |
| rad21              | 1.60718e-21 | 1.000000 | 1.60718e-21 | 1.000000 |
| rad23              | 1.28875e-22 | 1.000000 | 1.28875e-22 | 1.000000 |
| rad19syn           | 1.69286e-23 | 1.000000 | 1.69286e-23 | 1.000000 |
| rad18              | 8.92887e-24 | 1.000000 | 8.92887e-24 | 1.000000 |
| rad22              | 2.88986e-24 | 1.000000 | 2.88986e-24 | 1.000000 |
| rad45              | 8.23735e-25 | 1.000000 | 8.23736e-25 | 1.000000 |
| rad36              | 5.10592e-26 | 1.000000 | 5.10592e-26 | 1.000000 |
| rad54              | 3.44378e-27 | 1.000000 | 3.44378e-27 | 1.000000 |
| PAH10+CH3          | 2.22595e-27 | 1.000000 | 2.22595e-27 | 1.000000 |
| rad52              | 1.20106e-27 | 1.000000 | 1.20106e-27 | 1.000000 |
| rad43              | 5.29979e-28 | 1.000000 | 5.29979e-28 | 1.000000 |
| rad24              | 9.22778e-29 | 1.000000 | 9.22779e-29 | 1.000000 |
| rad62              | 6.92694e-30 | 1.000000 | 6.92695e-30 | 1.000000 |
| rad51              | 7.65010e-33 | 1.000000 | 7.65011e-33 | 1.000000 |
| rad70              | 1.30516e-38 | 1.000000 | 1.30516e-38 | 1.000000 |
| PhcycC3H3_A+H      | 5.85057e-39 | 1.000000 | 5.85057e-39 | 1.000000 |
| rad55              | 3.13016e-39 | 1.000000 | 3.13016e-39 | 1.000000 |
| rad65              | 6.81045e-41 | 1.000000 | 6.81045e-41 | 1.000000 |
| rad58              | 2.06258e-42 | 1.000000 | 2.06258e-42 | 1.000000 |
| PAH1+H             | 4.62187e-44 | 1.000000 | 4.62187e-44 | 1.000000 |
| rad34              | 3.38107e-46 | 1.000000 | 3.38107e-46 | 1.000000 |
| rad42              | 4.73206e-50 | 1.000000 | 4.73206e-50 | 1.000000 |
| rad41              | 1.17435e-50 | 1.000000 | 1.17435e-50 | 1.000000 |
| rad47              | 8.47223e-55 | 1.000000 | 8.47223e-55 | 1.000000 |

0.100000000E-04 Pa, 110.000000 K

=====

|               |                 |                      |
|---------------|-----------------|----------------------|
| Rate constant | True (fraction) | Effective (fraction) |
|---------------|-----------------|----------------------|

-----

|                    |                        |                        |
|--------------------|------------------------|------------------------|
| Total              | 1.09987e-20 (1.00 )    | 1.09987e-20 (1.00 )    |
| Formation of rad11 | 1.06527e-20 (0.969 )   | 1.06526e-20 (0.969 )   |
| Formation of rad6  | 3.44008e-22 (0.0313 )  | 3.44007e-22 (0.0313 )  |
| H-abstraction      | 2.02040e-24 (0.000184) | 2.02040e-24 (0.000184) |

| species            | PYtrue      | Cumul    | PYeffective | Cumul    |
|--------------------|-------------|----------|-------------|----------|
| Indene+H           | 0.983288    | 0.983288 | 0.983289    | 0.983289 |
| C2H2+PhCH2         | 0.0101023   | 0.993391 | 0.0101023   | 0.993392 |
| PhCCH+CH3          | 0.00324043  | 0.996631 | 0.00324043  | 0.996632 |
| PhCHCCH2+H         | 0.00193055  | 0.998562 | 0.00193055  | 0.998563 |
| PhCCCH3+H          | 0.00119680  | 0.999758 | 0.00119680  | 0.999759 |
| Benzene+2-propynyl | 0.000183695 | 0.999942 | 0.000183695 | 0.999943 |
| Ph+MeAc            | 3.37229e-05 | 0.999976 | 3.37230e-05 | 0.999977 |
| rad8               | 1.11515e-05 | 0.999987 | 1.11515e-05 | 0.999988 |
| rad9               | 6.13685e-06 | 0.999993 | 6.13685e-06 | 0.999994 |
| PAH7+H             | 3.71246e-06 | 0.999997 | 3.71246e-06 | 0.999998 |
| Phenyl+Allene      | 7.00384e-07 | 0.999998 | 0.00000     | 0.999998 |
| rad30              | 5.87573e-07 | 0.999998 | 5.87573e-07 | 0.999998 |
| rad6               | 5.82084e-07 | 0.999999 | 5.82085e-07 | 0.999999 |
| rad39              | 4.96574e-07 | 0.999999 | 4.96574e-07 | 1.000000 |
| rad12              | 4.39791e-07 | 1.000000 | 4.39792e-07 | 1.000000 |
| PAH9+H             | 1.24082e-07 | 1.000000 | 1.24082e-07 | 1.000000 |
| rad15              | 1.12734e-07 | 1.000000 | 1.12734e-07 | 1.000000 |
| rad35              | 6.28393e-08 | 1.000000 | 6.28394e-08 | 1.000000 |
| rad38              | 3.29857e-08 | 1.000000 | 3.29857e-08 | 1.000000 |
| rad28              | 1.75883e-09 | 1.000000 | 1.75884e-09 | 1.000000 |
| rad46              | 2.77099e-10 | 1.000000 | 2.77099e-10 | 1.000000 |
| rad2               | 2.18401e-10 | 1.000000 | 2.18401e-10 | 1.000000 |
| PhCH2CCH+H         | 1.60638e-10 | 1.000000 | 1.60638e-10 | 1.000000 |
| rad26              | 1.49575e-10 | 1.000000 | 1.49575e-10 | 1.000000 |
| rad37              | 4.67687e-11 | 1.000000 | 4.67687e-11 | 1.000000 |
| rad7               | 4.24122e-11 | 1.000000 | 4.24122e-11 | 1.000000 |
| rad1               | 1.40979e-11 | 1.000000 | 1.40979e-11 | 1.000000 |
| rad60syn           | 1.26991e-11 | 1.000000 | 1.26992e-11 | 1.000000 |
| rad10              | 1.12343e-11 | 1.000000 | 1.12343e-11 | 1.000000 |
| rad11              | 1.03864e-11 | 1.000000 | 1.03864e-11 | 1.000000 |
| rad60anti          | 2.45889e-12 | 1.000000 | 2.45889e-12 | 1.000000 |
| rad3               | 1.40849e-12 | 1.000000 | 1.40849e-12 | 1.000000 |
| rad4               | 7.15962e-13 | 1.000000 | 7.15962e-13 | 1.000000 |
| rad13              | 2.37125e-13 | 1.000000 | 2.37125e-13 | 1.000000 |
| rad5               | 1.14079e-13 | 1.000000 | 1.14079e-13 | 1.000000 |
| rad14              | 1.82904e-15 | 1.000000 | 1.82905e-15 | 1.000000 |
| rad25              | 9.56345e-16 | 1.000000 | 9.56346e-16 | 1.000000 |
| rad33              | 4.50791e-16 | 1.000000 | 4.50791e-16 | 1.000000 |
| rad27              | 2.92511e-16 | 1.000000 | 2.92511e-16 | 1.000000 |
| PAH3+H             | 2.76092e-17 | 1.000000 | 2.76092e-17 | 1.000000 |
| rad59              | 1.27918e-17 | 1.000000 | 1.27918e-17 | 1.000000 |
| rad50              | 1.67086e-18 | 1.000000 | 1.67086e-18 | 1.000000 |
| rad31              | 6.57527e-21 | 1.000000 | 6.57527e-21 | 1.000000 |
| rad20              | 1.54909e-21 | 1.000000 | 1.54909e-21 | 1.000000 |
| rad21              | 1.15530e-21 | 1.000000 | 1.15530e-21 | 1.000000 |
| rad19syn           | 8.11779e-22 | 1.000000 | 8.11780e-22 | 1.000000 |
| rad23              | 8.10322e-23 | 1.000000 | 8.10322e-23 | 1.000000 |
| rad18              | 6.39298e-24 | 1.000000 | 6.39299e-24 | 1.000000 |
| rad22              | 1.94652e-24 | 1.000000 | 1.94652e-24 | 1.000000 |
| rad45              | 5.17512e-25 | 1.000000 | 5.17513e-25 | 1.000000 |
| rad54              | 3.80822e-25 | 1.000000 | 3.80822e-25 | 1.000000 |
| PAH10+CH3          | 2.48854e-25 | 1.000000 | 2.48854e-25 | 1.000000 |
| rad43              | 5.95385e-26 | 1.000000 | 5.95385e-26 | 1.000000 |
| rad52              | 5.03863e-26 | 1.000000 | 5.03863e-26 | 1.000000 |
| rad36              | 3.20705e-26 | 1.000000 | 3.20705e-26 | 1.000000 |
| rad62              | 1.37874e-27 | 1.000000 | 1.37874e-27 | 1.000000 |
| rad24              | 7.60046e-29 | 1.000000 | 7.60046e-29 | 1.000000 |
| rad51              | 1.43633e-30 | 1.000000 | 1.43633e-30 | 1.000000 |
| rad65              | 1.70808e-34 | 1.000000 | 1.70809e-34 | 1.000000 |
| rad70              | 1.18255e-35 | 1.000000 | 1.18255e-35 | 1.000000 |
| PhcycC3H3_A+H      | 5.35327e-36 | 1.000000 | 5.35327e-36 | 1.000000 |
| rad55              | 2.86047e-36 | 1.000000 | 2.86047e-36 | 1.000000 |
| rad58              | 1.90278e-39 | 1.000000 | 1.90278e-39 | 1.000000 |
| PAH1+H             | 4.64617e-41 | 1.000000 | 4.64617e-41 | 1.000000 |
| rad34              | 3.45651e-43 | 1.000000 | 3.45652e-43 | 1.000000 |
| rad42              | 4.48092e-47 | 1.000000 | 4.48093e-47 | 1.000000 |
| rad41              | 9.57614e-48 | 1.000000 | 9.57615e-48 | 1.000000 |
| rad47              | 7.46176e-52 | 1.000000 | 7.46177e-52 | 1.000000 |

0.100000000E-04 Pa, 120.000000 K

=====

|               |                 |                      |
|---------------|-----------------|----------------------|
| Rate constant | True (fraction) | Effective (fraction) |
|---------------|-----------------|----------------------|

-----

|                    |             |            |             |            |
|--------------------|-------------|------------|-------------|------------|
| Total              | 4.24245e-20 | (1.00 )    | 4.24245e-20 | (1.00 )    |
| Formation of rad11 | 4.06372e-20 | (0.958 )   | 4.06372e-20 | (0.958 )   |
| Formation of rad6  | 1.76944e-21 | (0.0417 )  | 1.76944e-21 | (0.0417 )  |
| H-abstraction      | 1.78210e-23 | (0.000420) | 1.78210e-23 | (0.000420) |

| species            | PYtrue      | Cumul    | PYeffective | Cumul    |
|--------------------|-------------|----------|-------------|----------|
| Indene+H           | 0.982247    | 0.982247 | 0.982248    | 0.982248 |
| C2H2+PhCH2         | 0.0104795   | 0.992727 | 0.0104795   | 0.992728 |
| PhCCH+CH3          | 0.00346713  | 0.996194 | 0.00346713  | 0.996195 |
| PhCHCCH2+H         | 0.00204475  | 0.998239 | 0.00204475  | 0.998240 |
| PhCCCH3+H          | 0.00127450  | 0.999513 | 0.00127450  | 0.999514 |
| Benzene+2-propynyl | 0.000420064 | 0.999933 | 0.000420064 | 0.999934 |
| Ph+MeAc            | 4.06525e-05 | 0.999974 | 4.06526e-05 | 0.999975 |
| rad8               | 1.21186e-05 | 0.999986 | 1.21186e-05 | 0.999987 |
| rad9               | 6.88980e-06 | 0.999993 | 6.88981e-06 | 0.999994 |
| PAH7+H             | 4.20637e-06 | 0.999997 | 4.20638e-06 | 0.999998 |
| Phenyl+Allene      | 9.91349e-07 | 0.999998 | 0.00000     | 0.999998 |
| rad30              | 6.19407e-07 | 0.999999 | 6.19408e-07 | 0.999999 |
| rad39              | 5.89375e-07 | 0.999999 | 5.89376e-07 | 0.999999 |
| rad12              | 4.95192e-07 | 1.000000 | 4.95192e-07 | 1.000000 |
| rad6               | 4.01774e-07 | 1.000000 | 4.01774e-07 | 1.000000 |
| PAH9+H             | 1.31946e-07 | 1.000000 | 1.31946e-07 | 1.000000 |
| rad15              | 1.20329e-07 | 1.000000 | 1.20329e-07 | 1.000000 |
| rad35              | 6.63402e-08 | 1.000000 | 6.63403e-08 | 1.000000 |
| rad38              | 3.52947e-08 | 1.000000 | 3.52947e-08 | 1.000000 |
| rad28              | 1.26770e-09 | 1.000000 | 1.26770e-09 | 1.000000 |
| PhCH2CCH+H         | 4.69228e-10 | 1.000000 | 4.69228e-10 | 1.000000 |
| rad46              | 3.10929e-10 | 1.000000 | 3.10929e-10 | 1.000000 |
| rad2               | 1.50375e-10 | 1.000000 | 1.50375e-10 | 1.000000 |
| rad37              | 1.40104e-10 | 1.000000 | 1.40104e-10 | 1.000000 |
| rad26              | 1.08144e-10 | 1.000000 | 1.08144e-10 | 1.000000 |
| rad7               | 2.93224e-11 | 1.000000 | 2.93225e-11 | 1.000000 |
| rad60syn           | 1.61473e-11 | 1.000000 | 1.61473e-11 | 1.000000 |
| rad1               | 9.74565e-12 | 1.000000 | 9.74566e-12 | 1.000000 |
| rad10              | 7.75217e-12 | 1.000000 | 7.75218e-12 | 1.000000 |
| rad11              | 7.18289e-12 | 1.000000 | 7.18290e-12 | 1.000000 |
| rad60anti          | 3.50167e-12 | 1.000000 | 3.50167e-12 | 1.000000 |
| rad3               | 9.71513e-13 | 1.000000 | 9.71514e-13 | 1.000000 |
| rad4               | 4.94366e-13 | 1.000000 | 4.94366e-13 | 1.000000 |
| rad5               | 4.33451e-13 | 1.000000 | 4.33451e-13 | 1.000000 |
| rad13              | 1.64116e-13 | 1.000000 | 1.64116e-13 | 1.000000 |
| rad14              | 1.44759e-15 | 1.000000 | 1.44760e-15 | 1.000000 |
| rad25              | 7.55944e-16 | 1.000000 | 7.55945e-16 | 1.000000 |
| rad33              | 3.12361e-16 | 1.000000 | 3.12361e-16 | 1.000000 |
| rad27              | 2.16244e-16 | 1.000000 | 2.16244e-16 | 1.000000 |
| PAH3+H             | 1.44853e-16 | 1.000000 | 1.44853e-16 | 1.000000 |
| rad59              | 6.42635e-17 | 1.000000 | 6.42636e-17 | 1.000000 |
| rad50              | 7.55826e-18 | 1.000000 | 7.55826e-18 | 1.000000 |
| rad19syn           | 2.03460e-20 | 1.000000 | 2.03460e-20 | 1.000000 |
| rad31              | 5.27583e-21 | 1.000000 | 5.27584e-21 | 1.000000 |
| rad20              | 1.14495e-21 | 1.000000 | 1.14495e-21 | 1.000000 |
| rad21              | 8.56242e-22 | 1.000000 | 8.56243e-22 | 1.000000 |
| rad23              | 5.37315e-23 | 1.000000 | 5.37315e-23 | 1.000000 |
| rad54              | 1.78860e-23 | 1.000000 | 1.78860e-23 | 1.000000 |
| PAH10+CH3          | 1.18105e-23 | 1.000000 | 1.18106e-23 | 1.000000 |
| rad18              | 4.71282e-24 | 1.000000 | 4.71282e-24 | 1.000000 |
| rad43              | 2.84057e-24 | 1.000000 | 2.84057e-24 | 1.000000 |
| rad22              | 1.35922e-24 | 1.000000 | 1.35922e-24 | 1.000000 |
| rad52              | 1.13250e-24 | 1.000000 | 1.13250e-24 | 1.000000 |
| rad45              | 3.42967e-25 | 1.000000 | 3.42967e-25 | 1.000000 |
| rad62              | 1.01741e-25 | 1.000000 | 1.01741e-25 | 1.000000 |
| rad36              | 2.12528e-26 | 1.000000 | 2.12528e-26 | 1.000000 |
| rad51              | 1.05153e-28 | 1.000000 | 1.05153e-28 | 1.000000 |
| rad24              | 6.52867e-29 | 1.000000 | 6.52868e-29 | 1.000000 |
| rad70              | 3.03476e-29 | 1.000000 | 3.03476e-29 | 1.000000 |
| PhcycC3H3_A+H      | 1.82704e-29 | 1.000000 | 1.82704e-29 | 1.000000 |
| rad55              | 1.01624e-29 | 1.000000 | 1.01624e-29 | 1.000000 |
| rad65              | 3.61492e-32 | 1.000000 | 3.61492e-32 | 1.000000 |
| rad58              | 8.74397e-33 | 1.000000 | 8.74398e-33 | 1.000000 |
| PAH1+H             | 5.48810e-38 | 1.000000 | 5.48811e-38 | 1.000000 |
| rad34              | 4.15271e-40 | 1.000000 | 4.15272e-40 | 1.000000 |
| rad42              | 5.03895e-44 | 1.000000 | 5.03896e-44 | 1.000000 |
| rad41              | 8.81107e-45 | 1.000000 | 8.81107e-45 | 1.000000 |
| rad47              | 7.77730e-49 | 1.000000 | 7.77731e-49 | 1.000000 |

0.100000000E-04 Pa, 130.000000 K

=====

|               |                 |                      |
|---------------|-----------------|----------------------|
| Rate constant | True (fraction) | Effective (fraction) |
|---------------|-----------------|----------------------|

-----

|                    |                        |                        |
|--------------------|------------------------|------------------------|
| Total              | 1.33719e-19 (1.00 )    | 1.33719e-19 (1.00 )    |
| Formation of rad11 | 1.26517e-19 (0.946 )   | 1.26517e-19 (0.946 )   |
| Formation of rad6  | 7.08974e-21 (0.0530 )  | 7.08973e-21 (0.0530 )  |
| H-abstraction      | 1.11864e-22 (0.000837) | 1.11864e-22 (0.000837) |

| species            | PYtrue      | Cumul    | PYeffective | Cumul    |
|--------------------|-------------|----------|-------------|----------|
| Indene+H           | 0.980943    | 0.980943 | 0.980945    | 0.980945 |
| C2H2+PhCH2         | 0.0108911   | 0.991834 | 0.0108912   | 0.991836 |
| PhCCH+CH3          | 0.00371963  | 0.995553 | 0.00371964  | 0.995556 |
| PhCHCCH2+H         | 0.00217071  | 0.997724 | 0.00217071  | 0.997726 |
| PhCCCH3+H          | 0.00136032  | 0.999084 | 0.00136033  | 0.999087 |
| Benzene+2-propynyl | 0.000836559 | 0.999921 | 0.000836560 | 0.999923 |
| Ph+MeAc            | 4.90813e-05 | 0.999970 | 4.90813e-05 | 0.999972 |
| rad8               | 1.32072e-05 | 0.999983 | 1.32072e-05 | 0.999985 |
| rad9               | 7.76628e-06 | 0.999991 | 7.76629e-06 | 0.999993 |
| PAH7+H             | 4.78689e-06 | 0.999996 | 4.78690e-06 | 0.999998 |
| Phenyl+Allene      | 1.38368e-06 | 0.999997 | 0.00000     | 0.999998 |
| rad39              | 7.01599e-07 | 0.999998 | 7.01600e-07 | 0.999999 |
| rad30              | 6.54821e-07 | 0.999999 | 6.54822e-07 | 0.999999 |
| rad12              | 5.59162e-07 | 0.999999 | 5.59163e-07 | 1.000000 |
| rad6               | 2.83283e-07 | 0.999999 | 2.83283e-07 | 1.000000 |
| PAH9+H             | 1.40826e-07 | 1.000000 | 1.40826e-07 | 1.000000 |
| rad15              | 1.28887e-07 | 1.000000 | 1.28887e-07 | 1.000000 |
| rad35              | 7.02595e-08 | 1.000000 | 7.02596e-08 | 1.000000 |
| rad38              | 3.79190e-08 | 1.000000 | 3.79190e-08 | 1.000000 |
| PhCH2CCH+H         | 1.19528e-09 | 1.000000 | 1.19528e-09 | 1.000000 |
| rad28              | 9.29877e-10 | 1.000000 | 9.29878e-10 | 1.000000 |
| rad37              | 3.51953e-10 | 1.000000 | 3.51954e-10 | 1.000000 |
| rad46              | 3.51220e-10 | 1.000000 | 3.51221e-10 | 1.000000 |
| rad2               | 1.05967e-10 | 1.000000 | 1.05967e-10 | 1.000000 |
| rad26              | 7.96336e-11 | 1.000000 | 7.96337e-11 | 1.000000 |
| rad7               | 2.07101e-11 | 1.000000 | 2.07101e-11 | 1.000000 |
| rad60syn           | 2.06012e-11 | 1.000000 | 2.06013e-11 | 1.000000 |
| rad1               | 6.89755e-12 | 1.000000 | 6.89756e-12 | 1.000000 |
| rad10              | 5.47178e-12 | 1.000000 | 5.47179e-12 | 1.000000 |
| rad11              | 5.07476e-12 | 1.000000 | 5.07477e-12 | 1.000000 |
| rad60anti          | 4.88119e-12 | 1.000000 | 4.88119e-12 | 1.000000 |
| rad5               | 1.36460e-12 | 1.000000 | 1.36460e-12 | 1.000000 |
| rad3               | 6.85219e-13 | 1.000000 | 6.85220e-13 | 1.000000 |
| rad4               | 3.49090e-13 | 1.000000 | 3.49091e-13 | 1.000000 |
| rad13              | 1.16043e-13 | 1.000000 | 1.16043e-13 | 1.000000 |
| rad14              | 1.16171e-15 | 1.000000 | 1.16171e-15 | 1.000000 |
| rad25              | 6.06814e-16 | 1.000000 | 6.06814e-16 | 1.000000 |
| PAH3+H             | 5.97268e-16 | 1.000000 | 5.97269e-16 | 1.000000 |
| rad59              | 2.53891e-16 | 1.000000 | 2.53892e-16 | 1.000000 |
| rad33              | 2.21138e-16 | 1.000000 | 2.21139e-16 | 1.000000 |
| rad27              | 1.63503e-16 | 1.000000 | 1.63503e-16 | 1.000000 |
| rad50              | 2.77753e-17 | 1.000000 | 2.77754e-17 | 1.000000 |
| rad19syn           | 3.10916e-19 | 1.000000 | 3.10917e-19 | 1.000000 |
| rad31              | 4.48930e-21 | 1.000000 | 4.48931e-21 | 1.000000 |
| rad20              | 8.67829e-22 | 1.000000 | 8.67831e-22 | 1.000000 |
| rad21              | 6.50959e-22 | 1.000000 | 6.50960e-22 | 1.000000 |
| rad54              | 4.59039e-22 | 1.000000 | 4.59040e-22 | 1.000000 |
| PAH10+CH3          | 3.05724e-22 | 1.000000 | 3.05724e-22 | 1.000000 |
| rad43              | 7.38503e-23 | 1.000000 | 7.38504e-23 | 1.000000 |
| rad23              | 3.73826e-23 | 1.000000 | 3.73826e-23 | 1.000000 |
| rad52              | 1.58200e-23 | 1.000000 | 1.58201e-23 | 1.000000 |
| rad62              | 3.62252e-24 | 1.000000 | 3.62253e-24 | 1.000000 |
| rad18              | 3.55803e-24 | 1.000000 | 3.55804e-24 | 1.000000 |
| rad22              | 9.77170e-25 | 1.000000 | 9.77171e-25 | 1.000000 |
| rad45              | 2.38598e-25 | 1.000000 | 2.38599e-25 | 1.000000 |
| rad36              | 1.47876e-26 | 1.000000 | 1.47876e-26 | 1.000000 |
| rad51              | 3.73355e-27 | 1.000000 | 3.73355e-27 | 1.000000 |
| rad70              | 2.72506e-27 | 1.000000 | 2.72507e-27 | 1.000000 |
| PhcycC3H3_A+H      | 2.14617e-27 | 1.000000 | 2.14617e-27 | 1.000000 |
| rad55              | 9.74034e-28 | 1.000000 | 9.74036e-28 | 1.000000 |
| rad24              | 5.81729e-29 | 1.000000 | 5.81730e-29 | 1.000000 |
| rad65              | 2.45298e-30 | 1.000000 | 2.45299e-30 | 1.000000 |
| rad58              | 1.13109e-30 | 1.000000 | 1.13109e-30 | 1.000000 |
| PAH1+H             | 4.51043e-35 | 1.000000 | 4.51044e-35 | 1.000000 |
| rad34              | 3.47436e-37 | 1.000000 | 3.47437e-37 | 1.000000 |
| rad42              | 4.19266e-41 | 1.000000 | 4.19266e-41 | 1.000000 |
| rad41              | 6.41276e-42 | 1.000000 | 6.41277e-42 | 1.000000 |
| rad47              | 3.58529e-42 | 1.000000 | 3.58530e-42 | 1.000000 |

0.100000000E-04 Pa, 140.00000 K

=====

| Rate constant | True (fraction) | Effective (fraction) |
|---------------|-----------------|----------------------|
|---------------|-----------------|----------------------|

-----



|                    |             |            |             |            |
|--------------------|-------------|------------|-------------|------------|
| Total              | 3.59582e-19 | (1.00 )    | 3.59581e-19 | (1.00 )    |
| Formation of rad11 | 3.35703e-19 | (0.934 )   | 3.35702e-19 | (0.934 )   |
| Formation of rad6  | 2.33415e-20 | (0.0649 )  | 2.33414e-20 | (0.0649 )  |
| H-abstraction      | 5.37685e-22 | (0.00150 ) | 5.37685e-22 | (0.00150 ) |

| species            | PYtrue      | Cumul    | PYeffective | Cumul    |
|--------------------|-------------|----------|-------------|----------|
| Indene+H           | 0.979311    | 0.979311 | 0.979312    | 0.979312 |
| C2H2+PhCH2         | 0.0113384   | 0.990650 | 0.0113384   | 0.990651 |
| PhCCH+CH3          | 0.00399931  | 0.994649 | 0.00399932  | 0.994650 |
| PhCHCCH2+H         | 0.00230884  | 0.996958 | 0.00230885  | 0.996959 |
| Benzene+2-propynyl | 0.00149531  | 0.998453 | 0.00149531  | 0.998454 |
| PhCCCH3+H          | 0.00145454  | 0.999908 | 0.00145454  | 0.999909 |
| Ph+MeAc            | 5.92636e-05 | 0.999967 | 5.92637e-05 | 0.999968 |
| rad8               | 1.44256e-05 | 0.999982 | 1.44257e-05 | 0.999983 |
| rad9               | 8.78246e-06 | 0.999990 | 8.78248e-06 | 0.999991 |
| PAH7+H             | 5.46694e-06 | 0.999996 | 5.46695e-06 | 0.999997 |
| Phenyl+Allene      | 1.90710e-06 | 0.999998 | 0.00000     | 0.999997 |
| rad39              | 8.36671e-07 | 0.999999 | 8.36673e-07 | 0.999998 |
| rad30              | 6.94074e-07 | 0.999999 | 6.94075e-07 | 0.999998 |
| rad12              | 6.32611e-07 | 1.000000 | 6.32612e-07 | 0.999999 |
| rad6               | 2.03238e-07 | 1.000000 | 2.03238e-07 | 0.999999 |
| PAH9+H             | 1.50828e-07 | 1.000000 | 1.50828e-07 | 0.999999 |
| rad15              | 1.38498e-07 | 1.000000 | 1.38498e-07 | 0.999999 |
| rad35              | 7.46334e-08 | 1.000000 | 7.46335e-08 | 1.000000 |
| rad38              | 4.08946e-08 | 1.000000 | 4.08947e-08 | 1.000000 |
| PhCH2CCH+H         | 2.73530e-09 | 1.000000 | 2.73530e-09 | 1.000000 |
| rad37              | 7.71177e-10 | 1.000000 | 7.71178e-10 | 1.000000 |
| rad28              | 6.91811e-10 | 1.000000 | 6.91813e-10 | 1.000000 |
| rad46              | 3.99156e-10 | 1.000000 | 3.99156e-10 | 1.000000 |
| rad2               | 7.60035e-11 | 1.000000 | 7.60037e-11 | 1.000000 |
| rad26              | 5.95138e-11 | 1.000000 | 5.95139e-11 | 1.000000 |
| rad60syn           | 2.63219e-11 | 1.000000 | 2.63220e-11 | 1.000000 |
| rad7               | 1.48846e-11 | 1.000000 | 1.48846e-11 | 1.000000 |
| rad60anti          | 6.69698e-12 | 1.000000 | 6.69699e-12 | 1.000000 |
| rad1               | 4.97060e-12 | 1.000000 | 4.97061e-12 | 1.000000 |
| rad10              | 3.93324e-12 | 1.000000 | 3.93324e-12 | 1.000000 |
| rad5               | 3.70796e-12 | 1.000000 | 3.70797e-12 | 1.000000 |
| rad11              | 3.64852e-12 | 1.000000 | 3.64853e-12 | 1.000000 |
| rad3               | 4.91885e-13 | 1.000000 | 4.91886e-13 | 1.000000 |
| rad4               | 2.50915e-13 | 1.000000 | 2.50916e-13 | 1.000000 |
| rad13              | 8.34991e-14 | 1.000000 | 8.34993e-14 | 1.000000 |
| PAH3+H             | 2.04271e-15 | 1.000000 | 2.04271e-15 | 1.000000 |
| rad14              | 9.42522e-16 | 1.000000 | 9.42524e-16 | 1.000000 |
| rad59              | 8.33132e-16 | 1.000000 | 8.33134e-16 | 1.000000 |
| rad25              | 4.93081e-16 | 1.000000 | 4.93082e-16 | 1.000000 |
| rad33              | 1.59332e-16 | 1.000000 | 1.59332e-16 | 1.000000 |
| rad27              | 1.25943e-16 | 1.000000 | 1.25943e-16 | 1.000000 |
| rad50              | 8.69512e-17 | 1.000000 | 8.69513e-17 | 1.000000 |
| rad19syn           | 3.22701e-18 | 1.000000 | 3.22702e-18 | 1.000000 |
| rad54              | 7.40382e-21 | 1.000000 | 7.40384e-21 | 1.000000 |
| PAH10+CH3          | 4.96770e-21 | 1.000000 | 4.96771e-21 | 1.000000 |
| rad31              | 4.05111e-21 | 1.000000 | 4.05112e-21 | 1.000000 |
| rad43              | 1.20445e-21 | 1.000000 | 1.20445e-21 | 1.000000 |
| rad20              | 6.72047e-22 | 1.000000 | 6.72048e-22 | 1.000000 |
| rad21              | 5.05771e-22 | 1.000000 | 5.05772e-22 | 1.000000 |
| rad52              | 1.52527e-22 | 1.000000 | 1.52528e-22 | 1.000000 |
| rad62              | 7.68997e-23 | 1.000000 | 7.68999e-23 | 1.000000 |
| rad23              | 2.72513e-23 | 1.000000 | 2.72514e-23 | 1.000000 |
| rad18              | 2.74012e-24 | 1.000000 | 2.74013e-24 | 1.000000 |
| rad22              | 7.19570e-25 | 1.000000 | 7.19571e-25 | 1.000000 |
| rad45              | 1.74119e-25 | 1.000000 | 1.74120e-25 | 1.000000 |
| rad70              | 1.16342e-25 | 1.000000 | 1.16342e-25 | 1.000000 |
| PhcycC3H3_A+H      | 1.06482e-25 | 1.000000 | 1.06482e-25 | 1.000000 |
| rad51              | 7.94680e-26 | 1.000000 | 7.94681e-26 | 1.000000 |
| rad55              | 4.37351e-26 | 1.000000 | 4.37352e-26 | 1.000000 |
| rad36              | 1.07953e-26 | 1.000000 | 1.07953e-26 | 1.000000 |
| PAH1+H             | 1.72866e-28 | 1.000000 | 1.72867e-28 | 1.000000 |
| rad65              | 8.26184e-29 | 1.000000 | 8.26186e-29 | 1.000000 |
| rad58              | 6.05527e-29 | 1.000000 | 6.05528e-29 | 1.000000 |
| rad24              | 5.35503e-29 | 1.000000 | 5.35504e-29 | 1.000000 |
| rad34              | 4.12805e-30 | 1.000000 | 4.12806e-30 | 1.000000 |
| rad42              | 1.07644e-37 | 1.000000 | 1.07645e-37 | 1.000000 |
| rad41              | 1.50181e-38 | 1.000000 | 1.50182e-38 | 1.000000 |
| rad47              | 2.48359e-40 | 1.000000 | 2.48360e-40 | 1.000000 |

0.100000000E-04 Pa, 150.00000 K

=====

| Rate constant | True (fraction) | Effective (fraction) |
|---------------|-----------------|----------------------|
|---------------|-----------------|----------------------|

-----

|                    |                        |                        |
|--------------------|------------------------|------------------------|
| Total              | 8.51464e-19 (1.00 )    | 8.51462e-19 (1.00 )    |
| Formation of rad11 | 7.83711e-19 (0.920 )   | 7.83709e-19 (0.920 )   |
| Formation of rad6  | 6.56651e-20 (0.0771 )  | 6.56649e-20 (0.0771 )  |
| H-abstraction      | 2.08816e-21 (0.00245 ) | 2.08816e-21 (0.00245 ) |

| species            | PYtrue      | Cumul    | PYeffective | Cumul    |
|--------------------|-------------|----------|-------------|----------|
| Indene+H           | 0.977291    | 0.977291 | 0.977294    | 0.977294 |
| C2H2+PhCH2         | 0.0118224   | 0.989114 | 0.0118225   | 0.989117 |
| PhCCH+CH3          | 0.00430758  | 0.993421 | 0.00430759  | 0.993424 |
| PhCHCCH2+H         | 0.00245954  | 0.995881 | 0.00245955  | 0.995884 |
| Benzene+2-propynyl | 0.00245244  | 0.998333 | 0.00245245  | 0.998336 |
| PhCCCH3+H          | 0.00155738  | 0.999891 | 0.00155739  | 0.999894 |
| Ph+MeAc            | 7.14861e-05 | 0.999962 | 7.14863e-05 | 0.999965 |
| rad8               | 1.57822e-05 | 0.999978 | 1.57823e-05 | 0.999981 |
| rad9               | 9.95649e-06 | 0.999988 | 9.95652e-06 | 0.999991 |
| PAH7+H             | 6.26130e-06 | 0.999994 | 6.26131e-06 | 0.999997 |
| Phenyl+Allene      | 2.59905e-06 | 0.999997 | 0.00000     | 0.999997 |
| rad39              | 9.98575e-07 | 0.999998 | 9.98575e-07 | 0.999998 |
| rad30              | 7.37446e-07 | 0.999999 | 7.37448e-07 | 0.999999 |
| rad12              | 7.16496e-07 | 0.999999 | 7.16498e-07 | 1.000000 |
| PAH9+H             | 1.62071e-07 | 0.999999 | 1.62071e-07 | 1.000000 |
| rad15              | 1.49264e-07 | 1.000000 | 1.49264e-07 | 1.000000 |
| rad6               | 1.47922e-07 | 1.000000 | 1.47923e-07 | 1.000000 |
| rad35              | 7.95031e-08 | 1.000000 | 7.95033e-08 | 1.000000 |
| rad38              | 4.42627e-08 | 1.000000 | 4.42628e-08 | 1.000000 |
| PhCH2CCH+H         | 5.74659e-09 | 1.000000 | 5.74661e-09 | 1.000000 |
| rad37              | 1.51693e-09 | 1.000000 | 1.51693e-09 | 1.000000 |
| rad28              | 5.20694e-10 | 1.000000 | 5.20695e-10 | 1.000000 |
| rad46              | 4.56167e-10 | 1.000000 | 4.56168e-10 | 1.000000 |
| rad2               | 5.53518e-11 | 1.000000 | 5.53520e-11 | 1.000000 |
| rad26              | 4.50202e-11 | 1.000000 | 4.50203e-11 | 1.000000 |
| rad60syn           | 3.36352e-11 | 1.000000 | 3.36353e-11 | 1.000000 |
| rad7               | 1.08535e-11 | 1.000000 | 1.08536e-11 | 1.000000 |
| rad60anti          | 9.07628e-12 | 1.000000 | 9.07630e-12 | 1.000000 |
| rad5               | 8.95864e-12 | 1.000000 | 8.95867e-12 | 1.000000 |
| rad1               | 3.63863e-12 | 1.000000 | 3.63864e-12 | 1.000000 |
| rad10              | 2.87072e-12 | 1.000000 | 2.87072e-12 | 1.000000 |
| rad11              | 2.66136e-12 | 1.000000 | 2.66137e-12 | 1.000000 |
| rad3               | 3.58714e-13 | 1.000000 | 3.58715e-13 | 1.000000 |
| rad4               | 1.83240e-13 | 1.000000 | 1.83241e-13 | 1.000000 |
| rad13              | 6.09604e-14 | 1.000000 | 6.09605e-14 | 1.000000 |
| PAH3+H             | 6.02808e-15 | 1.000000 | 6.02810e-15 | 1.000000 |
| rad59              | 2.36293e-15 | 1.000000 | 2.36293e-15 | 1.000000 |
| rad14              | 7.71426e-16 | 1.000000 | 7.71428e-16 | 1.000000 |
| rad25              | 4.04622e-16 | 1.000000 | 4.04623e-16 | 1.000000 |
| rad50              | 2.40006e-16 | 1.000000 | 2.40007e-16 | 1.000000 |
| rad33              | 1.16488e-16 | 1.000000 | 1.16488e-16 | 1.000000 |
| rad27              | 9.85364e-17 | 1.000000 | 9.85366e-17 | 1.000000 |
| rad19syn           | 2.46117e-17 | 1.000000 | 2.46118e-17 | 1.000000 |
| rad54              | 8.25236e-20 | 1.000000 | 8.25238e-20 | 1.000000 |
| PAH10+CH3          | 5.57234e-20 | 1.000000 | 5.57235e-20 | 1.000000 |
| rad43              | 1.35481e-20 | 1.000000 | 1.35481e-20 | 1.000000 |
| rad31              | 3.87332e-21 | 1.000000 | 3.87333e-21 | 1.000000 |
| rad52              | 1.09576e-21 | 1.000000 | 1.09576e-21 | 1.000000 |
| rad62              | 1.08546e-21 | 1.000000 | 1.08546e-21 | 1.000000 |
| rad20              | 5.30254e-22 | 1.000000 | 5.30255e-22 | 1.000000 |
| rad21              | 4.00512e-22 | 1.000000 | 4.00513e-22 | 1.000000 |
| rad23              | 2.08664e-23 | 1.000000 | 2.08664e-23 | 1.000000 |
| rad70              | 2.82749e-24 | 1.000000 | 2.82750e-24 | 1.000000 |
| PhcycC3H3_A+H      | 2.82689e-24 | 1.000000 | 2.82689e-24 | 1.000000 |
| rad18              | 2.14612e-24 | 1.000000 | 2.14612e-24 | 1.000000 |
| rad51              | 1.13147e-24 | 1.000000 | 1.13147e-24 | 1.000000 |
| rad55              | 1.09833e-24 | 1.000000 | 1.09833e-24 | 1.000000 |
| rad22              | 5.40641e-25 | 1.000000 | 5.40642e-25 | 1.000000 |
| rad45              | 1.33528e-25 | 1.000000 | 1.33528e-25 | 1.000000 |
| PAH1+H             | 8.47514e-27 | 1.000000 | 8.47516e-27 | 1.000000 |
| rad36              | 8.28361e-27 | 1.000000 | 8.28363e-27 | 1.000000 |
| rad65              | 1.71239e-27 | 1.000000 | 1.71239e-27 | 1.000000 |
| rad58              | 1.68995e-27 | 1.000000 | 1.68996e-27 | 1.000000 |
| rad34              | 2.52723e-28 | 1.000000 | 2.52724e-28 | 1.000000 |
| rad24              | 5.07651e-29 | 1.000000 | 5.07652e-29 | 1.000000 |
| rad42              | 7.85444e-31 | 1.000000 | 7.85446e-31 | 1.000000 |
| rad41              | 1.60817e-31 | 1.000000 | 1.60817e-31 | 1.000000 |
| rad47              | 7.59450e-39 | 1.000000 | 7.59452e-39 | 1.000000 |

0.100000000E-04 Pa, 160.00000 K

=====

| Rate constant | True (fraction) | Effective (fraction) |
|---------------|-----------------|----------------------|
|---------------|-----------------|----------------------|

-----

|                    |                        |                        |
|--------------------|------------------------|------------------------|
| Total              | 1.81800e-18 (1.00 )    | 1.81800e-18 (1.00 )    |
| Formation of rad11 | 1.64862e-18 (0.907 )   | 1.64862e-18 (0.907 )   |
| Formation of rad6  | 1.62558e-19 (0.0894 )  | 1.62558e-19 (0.0894 )  |
| H-abstraction      | 6.82130e-21 (0.00375 ) | 6.82130e-21 (0.00375 ) |

| species            | PYtrue      | Cumul    | PYeffective | Cumul    |
|--------------------|-------------|----------|-------------|----------|
| Indene+H           | 0.974837    | 0.974837 | 0.974840    | 0.974840 |
| C2H2+PhCH2         | 0.0123447   | 0.987181 | 0.0123448   | 0.987184 |
| PhCCH+CH3          | 0.00464586  | 0.991827 | 0.00464588  | 0.991830 |
| Benzene+2-propynyl | 0.00375209  | 0.995579 | 0.00375210  | 0.995582 |
| PhCHCCH2+H         | 0.00262320  | 0.998202 | 0.00262321  | 0.998206 |
| PhCCCH3+H          | 0.00166909  | 0.999872 | 0.00166909  | 0.999875 |
| Ph+MeAc            | 8.60691e-05 | 0.999958 | 8.60694e-05 | 0.999961 |
| rad8               | 1.72856e-05 | 0.999975 | 1.72857e-05 | 0.999978 |
| rad9               | 1.13088e-05 | 0.999986 | 1.13088e-05 | 0.999989 |
| PAH7+H             | 7.18690e-06 | 0.999993 | 7.18692e-06 | 0.999996 |
| Phenyl+Allene      | 3.50646e-06 | 0.999997 | 0.00000     | 0.999996 |
| rad39              | 1.19194e-06 | 0.999998 | 1.19195e-06 | 0.999998 |
| rad12              | 8.11837e-07 | 0.999999 | 8.11840e-07 | 0.999998 |
| rad30              | 7.85261e-07 | 1.000000 | 7.85264e-07 | 0.999999 |
| PAH9+H             | 1.74693e-07 | 1.000000 | 1.74693e-07 | 0.999999 |
| rad15              | 1.61301e-07 | 1.000000 | 1.61302e-07 | 1.000000 |
| rad6               | 1.08969e-07 | 1.000000 | 1.08970e-07 | 1.000000 |
| rad35              | 8.49159e-08 | 1.000000 | 8.49162e-08 | 1.000000 |
| rad38              | 4.80712e-08 | 1.000000 | 4.80714e-08 | 1.000000 |
| PhCH2CCH+H         | 1.12644e-08 | 1.000000 | 1.12644e-08 | 1.000000 |
| rad37              | 2.73705e-09 | 1.000000 | 2.73706e-09 | 1.000000 |
| rad46              | 5.23989e-10 | 1.000000 | 5.23991e-10 | 1.000000 |
| rad28              | 3.95678e-10 | 1.000000 | 3.95680e-10 | 1.000000 |
| rad60syn           | 4.29477e-11 | 1.000000 | 4.29478e-11 | 1.000000 |
| rad2               | 4.08611e-11 | 1.000000 | 4.08612e-11 | 1.000000 |
| rad26              | 3.44013e-11 | 1.000000 | 3.44014e-11 | 1.000000 |
| rad5               | 1.96761e-11 | 1.000000 | 1.96762e-11 | 1.000000 |
| rad60anti          | 1.21809e-11 | 1.000000 | 1.21809e-11 | 1.000000 |
| rad7               | 8.01071e-12 | 1.000000 | 8.01073e-12 | 1.000000 |
| rad1               | 2.70110e-12 | 1.000000 | 2.70111e-12 | 1.000000 |
| rad10              | 2.12375e-12 | 1.000000 | 2.12375e-12 | 1.000000 |
| rad11              | 1.96501e-12 | 1.000000 | 1.96502e-12 | 1.000000 |
| rad3               | 2.65166e-13 | 1.000000 | 2.65167e-13 | 1.000000 |
| rad4               | 1.35661e-13 | 1.000000 | 1.35662e-13 | 1.000000 |
| rad13              | 4.50511e-14 | 1.000000 | 4.50512e-14 | 1.000000 |
| PAH3+H             | 1.58084e-14 | 1.000000 | 1.58085e-14 | 1.000000 |
| rad59              | 5.96648e-15 | 1.000000 | 5.96651e-15 | 1.000000 |
| rad14              | 6.35915e-16 | 1.000000 | 6.35917e-16 | 1.000000 |
| rad50              | 5.99192e-16 | 1.000000 | 5.99194e-16 | 1.000000 |
| rad25              | 3.34716e-16 | 1.000000 | 3.34718e-16 | 1.000000 |
| rad19syn           | 1.46296e-16 | 1.000000 | 1.46296e-16 | 1.000000 |
| rad33              | 8.62148e-17 | 1.000000 | 8.62151e-17 | 1.000000 |
| rad27              | 7.81229e-17 | 1.000000 | 7.81231e-17 | 1.000000 |
| rad54              | 6.82273e-19 | 1.000000 | 6.82276e-19 | 1.000000 |
| PAH10+CH3          | 4.63135e-19 | 1.000000 | 4.63136e-19 | 1.000000 |
| rad43              | 1.12790e-19 | 1.000000 | 1.12790e-19 | 1.000000 |
| rad62              | 1.10164e-20 | 1.000000 | 1.10164e-20 | 1.000000 |
| rad52              | 6.21139e-21 | 1.000000 | 6.21141e-21 | 1.000000 |
| rad31              | 3.91418e-21 | 1.000000 | 3.91419e-21 | 1.000000 |
| rad20              | 4.25409e-22 | 1.000000 | 4.25410e-22 | 1.000000 |
| rad21              | 3.22606e-22 | 1.000000 | 3.22607e-22 | 1.000000 |
| PhcycC3H3_A+H      | 4.94884e-23 | 1.000000 | 4.94886e-23 | 1.000000 |
| rad70              | 4.58066e-23 | 1.000000 | 4.58068e-23 | 1.000000 |
| rad55              | 1.82886e-23 | 1.000000 | 1.82886e-23 | 1.000000 |
| rad23              | 1.68927e-23 | 1.000000 | 1.68928e-23 | 1.000000 |
| rad51              | 1.16587e-23 | 1.000000 | 1.16587e-23 | 1.000000 |
| rad18              | 1.70554e-24 | 1.000000 | 1.70555e-24 | 1.000000 |
| rad22              | 4.13212e-25 | 1.000000 | 4.13214e-25 | 1.000000 |
| PAH1+H             | 2.26745e-25 | 1.000000 | 2.26746e-25 | 1.000000 |
| rad45              | 1.08376e-25 | 1.000000 | 1.08376e-25 | 1.000000 |
| rad58              | 3.08142e-26 | 1.000000 | 3.08143e-26 | 1.000000 |
| rad65              | 2.43572e-26 | 1.000000 | 2.43573e-26 | 1.000000 |
| rad34              | 7.87295e-27 | 1.000000 | 7.87298e-27 | 1.000000 |
| rad36              | 6.72905e-27 | 1.000000 | 6.72907e-27 | 1.000000 |
| rad24              | 4.94331e-29 | 1.000000 | 4.94332e-29 | 1.000000 |
| rad42              | 4.07679e-29 | 1.000000 | 4.07680e-29 | 1.000000 |
| rad41              | 9.77881e-30 | 1.000000 | 9.77885e-30 | 1.000000 |
| rad47              | 1.41730e-37 | 1.000000 | 1.41731e-37 | 1.000000 |

0.100000000E-04 Pa, 170.00000 K

=====

|               |                 |                      |
|---------------|-----------------|----------------------|
| Rate constant | True (fraction) | Effective (fraction) |
|---------------|-----------------|----------------------|

-----

|                    |             |            |             |            |
|--------------------|-------------|------------|-------------|------------|
| Total              | 3.56414e-18 | (1.00 )    | 3.56412e-18 | (1.00 )    |
| Formation of rad11 | 3.18264e-18 | (0.893 )   | 3.18262e-18 | (0.893 )   |
| Formation of rad6  | 3.62173e-19 | (0.102 )   | 3.62171e-19 | (0.102 )   |
| H-abstraction      | 1.93278e-20 | (0.00542 ) | 1.93278e-20 | (0.00542 ) |

| species            | PYtrue      | Cumul    | PYeffective | Cumul    |
|--------------------|-------------|----------|-------------|----------|
| Indene+H           | 0.971913    | 0.971913 | 0.971917    | 0.971917 |
| C2H2+PhCH2         | 0.0129069   | 0.984820 | 0.0129070   | 0.984824 |
| Benzene+2-propynyl | 0.00542285  | 0.990243 | 0.00542288  | 0.990247 |
| PhCCH+CH3          | 0.00501568  | 0.995258 | 0.00501571  | 0.995262 |
| PhCHCCH2+H         | 0.00280023  | 0.998058 | 0.00280024  | 0.998063 |
| PhCCCH3+H          | 0.00178986  | 0.999848 | 0.00178987  | 0.999852 |
| Ph+MeAc            | 0.000103370 | 0.999952 | 0.000103370 | 0.999956 |
| rad8               | 1.89445e-05 | 0.999971 | 1.89446e-05 | 0.999975 |
| rad9               | 1.28624e-05 | 0.999983 | 1.28625e-05 | 0.999988 |
| PAH7+H             | 8.26327e-06 | 0.999992 | 8.26330e-06 | 0.999996 |
| Phenyl+Allene      | 4.68784e-06 | 0.999996 | 0.00000     | 0.999996 |
| rad39              | 1.42217e-06 | 0.999998 | 1.42217e-06 | 0.999997 |
| rad12              | 9.19709e-07 | 0.999999 | 9.19713e-07 | 0.999998 |
| rad30              | 8.37884e-07 | 1.000000 | 8.37887e-07 | 0.999999 |
| PAH9+H             | 1.88856e-07 | 1.000000 | 1.88857e-07 | 0.999999 |
| rad15              | 1.74740e-07 | 1.000000 | 1.74741e-07 | 0.999999 |
| rad35              | 9.09266e-08 | 1.000000 | 9.09270e-08 | 0.999999 |
| rad6               | 8.10978e-08 | 1.000000 | 8.10982e-08 | 1.000000 |
| rad38              | 5.23761e-08 | 1.000000 | 5.23764e-08 | 1.000000 |
| PhCH2CCH+H         | 2.08554e-08 | 1.000000 | 2.08555e-08 | 1.000000 |
| rad37              | 4.60521e-09 | 1.000000 | 4.60523e-09 | 1.000000 |
| rad46              | 6.04728e-10 | 1.000000 | 6.04731e-10 | 1.000000 |
| rad28              | 3.03098e-10 | 1.000000 | 3.03100e-10 | 1.000000 |
| rad60syn           | 5.47674e-11 | 1.000000 | 5.47677e-11 | 1.000000 |
| rad5               | 3.99506e-11 | 1.000000 | 3.99508e-11 | 1.000000 |
| rad2               | 3.05061e-11 | 1.000000 | 3.05062e-11 | 1.000000 |
| rad26              | 2.65108e-11 | 1.000000 | 2.65109e-11 | 1.000000 |
| rad60anti          | 1.62159e-11 | 1.000000 | 1.62160e-11 | 1.000000 |
| rad7               | 5.97360e-12 | 1.000000 | 5.97363e-12 | 1.000000 |
| rad1               | 2.02886e-12 | 1.000000 | 2.02887e-12 | 1.000000 |
| rad10              | 1.58923e-12 | 1.000000 | 1.58924e-12 | 1.000000 |
| rad11              | 1.46589e-12 | 1.000000 | 1.46590e-12 | 1.000000 |
| rad3               | 1.98078e-13 | 1.000000 | 1.98079e-13 | 1.000000 |
| rad4               | 1.01509e-13 | 1.000000 | 1.01509e-13 | 1.000000 |
| PAH3+H             | 3.76748e-14 | 1.000000 | 3.76750e-14 | 1.000000 |
| rad13              | 3.36400e-14 | 1.000000 | 3.36401e-14 | 1.000000 |
| rad59              | 1.37166e-14 | 1.000000 | 1.37167e-14 | 1.000000 |
| rad50              | 1.37921e-15 | 1.000000 | 1.37922e-15 | 1.000000 |
| rad19syn           | 7.08869e-16 | 1.000000 | 7.08872e-16 | 1.000000 |
| rad14              | 5.27311e-16 | 1.000000 | 5.27313e-16 | 1.000000 |
| rad25              | 2.78749e-16 | 1.000000 | 2.78751e-16 | 1.000000 |
| rad33              | 6.44787e-17 | 1.000000 | 6.44790e-17 | 1.000000 |
| rad27              | 6.26512e-17 | 1.000000 | 6.26515e-17 | 1.000000 |
| rad54              | 4.41575e-18 | 1.000000 | 4.41577e-18 | 1.000000 |
| PAH10+CH3          | 3.00980e-18 | 1.000000 | 3.00981e-18 | 1.000000 |
| rad43              | 7.33309e-19 | 1.000000 | 7.33312e-19 | 1.000000 |
| rad62              | 8.52755e-20 | 1.000000 | 8.52759e-20 | 1.000000 |
| rad52              | 2.90232e-20 | 1.000000 | 2.90233e-20 | 1.000000 |
| rad31              | 4.16354e-21 | 1.000000 | 4.16356e-21 | 1.000000 |
| PhcycC3H3_A+H      | 6.18560e-22 | 1.000000 | 6.18563e-22 | 1.000000 |
| rad70              | 5.33433e-22 | 1.000000 | 5.33434e-22 | 1.000000 |
| rad20              | 3.46510e-22 | 1.000000 | 3.46511e-22 | 1.000000 |
| rad21              | 2.63932e-22 | 1.000000 | 2.63933e-22 | 1.000000 |
| rad55              | 2.18160e-22 | 1.000000 | 2.18160e-22 | 1.000000 |
| rad51              | 9.22183e-23 | 1.000000 | 9.22187e-23 | 1.000000 |
| rad23              | 1.46175e-23 | 1.000000 | 1.46176e-23 | 1.000000 |
| PAH1+H             | 3.94430e-24 | 1.000000 | 3.94431e-24 | 1.000000 |
| rad18              | 1.37279e-24 | 1.000000 | 1.37280e-24 | 1.000000 |
| rad58              | 3.99304e-25 | 1.000000 | 3.99306e-25 | 1.000000 |
| rad22              | 3.20516e-25 | 1.000000 | 3.20518e-25 | 1.000000 |
| rad65              | 2.54719e-25 | 1.000000 | 2.54721e-25 | 1.000000 |
| rad34              | 1.50321e-25 | 1.000000 | 1.50322e-25 | 1.000000 |
| rad45              | 9.42210e-26 | 1.000000 | 9.42214e-26 | 1.000000 |
| rad36              | 5.85683e-27 | 1.000000 | 5.85686e-27 | 1.000000 |
| rad42              | 1.01746e-27 | 1.000000 | 1.01747e-27 | 1.000000 |
| rad41              | 2.58569e-28 | 1.000000 | 2.58571e-28 | 1.000000 |
| rad24              | 4.93405e-29 | 1.000000 | 4.93408e-29 | 1.000000 |
| rad47              | 1.82770e-36 | 1.000000 | 1.82771e-36 | 1.000000 |

0.100000000E-04 Pa, 180.00000 K

=====

| Rate constant | True (fraction) | Effective (fraction) |
|---------------|-----------------|----------------------|
|---------------|-----------------|----------------------|

-----

|                    |                        |                        |
|--------------------|------------------------|------------------------|
| Total              | 6.50681e-18 (1.00 )    | 6.50677e-18 (1.00 )    |
| Formation of rad11 | 5.71915e-18 (0.879 )   | 5.71911e-18 (0.879 )   |
| Formation of rad6  | 7.39013e-19 (0.114 )   | 7.39008e-19 (0.114 )   |
| H-abstraction      | 4.86496e-20 (0.00748 ) | 4.86496e-20 (0.00748 ) |

| species            | PYtrue      | Cumul    | PYeffective | Cumul    |
|--------------------|-------------|----------|-------------|----------|
| Indene+H           | 0.968503    | 0.968503 | 0.968509    | 0.968509 |
| C2H2+PhCH2         | 0.0135111   | 0.982014 | 0.0135112   | 0.982020 |
| Benzene+2-propynyl | 0.00747672  | 0.989491 | 0.00747676  | 0.989497 |
| PhCCH+CH3          | 0.00541860  | 0.994910 | 0.00541863  | 0.994916 |
| PhCHCCH2+H         | 0.00299106  | 0.997901 | 0.00299108  | 0.997907 |
| PhCCCH3+H          | 0.00191991  | 0.999821 | 0.00191992  | 0.999827 |
| Ph+MeAc            | 0.000123783 | 0.999944 | 0.000123783 | 0.999951 |
| rad8               | 2.07679e-05 | 0.999965 | 2.07680e-05 | 0.999971 |
| rad9               | 1.46432e-05 | 0.999980 | 1.46433e-05 | 0.999986 |
| PAH7+H             | 9.51273e-06 | 0.999989 | 9.51279e-06 | 0.999995 |
| Phenyl+Allene      | 6.21569e-06 | 0.999996 | 0.00000     | 0.999995 |
| rad39              | 1.69545e-06 | 0.999997 | 1.69546e-06 | 0.999997 |
| rad12              | 1.04124e-06 | 0.999998 | 1.04124e-06 | 0.999998 |
| rad30              | 8.95731e-07 | 0.999999 | 8.95737e-07 | 0.999999 |
| PAH9+H             | 2.04748e-07 | 0.999999 | 2.04750e-07 | 0.999999 |
| rad15              | 1.89732e-07 | 1.000000 | 1.89733e-07 | 0.999999 |
| rad35              | 9.75991e-08 | 1.000000 | 9.75997e-08 | 1.000000 |
| rad6               | 6.08851e-08 | 1.000000 | 6.08855e-08 | 1.000000 |
| rad38              | 5.72429e-08 | 1.000000 | 5.72433e-08 | 1.000000 |
| PhCH2CCH+H         | 3.68171e-08 | 1.000000 | 3.68173e-08 | 1.000000 |
| rad37              | 7.31815e-09 | 1.000000 | 7.31820e-09 | 1.000000 |
| rad46              | 7.00939e-10 | 1.000000 | 7.00943e-10 | 1.000000 |
| rad28              | 2.33756e-10 | 1.000000 | 2.33757e-10 | 1.000000 |
| rad5               | 7.59677e-11 | 1.000000 | 7.59681e-11 | 1.000000 |
| rad60syn           | 6.97264e-11 | 1.000000 | 6.97268e-11 | 1.000000 |
| rad2               | 2.30335e-11 | 1.000000 | 2.30337e-11 | 1.000000 |
| rad60anti          | 2.14396e-11 | 1.000000 | 2.14398e-11 | 1.000000 |
| rad26              | 2.05776e-11 | 1.000000 | 2.05777e-11 | 1.000000 |
| rad7               | 4.49393e-12 | 1.000000 | 4.49396e-12 | 1.000000 |
| rad1               | 1.54201e-12 | 1.000000 | 1.54202e-12 | 1.000000 |
| rad10              | 1.20221e-12 | 1.000000 | 1.20222e-12 | 1.000000 |
| rad11              | 1.10325e-12 | 1.000000 | 1.10325e-12 | 1.000000 |
| rad3               | 1.49665e-13 | 1.000000 | 1.49666e-13 | 1.000000 |
| PAH3+H             | 8.30139e-14 | 1.000000 | 8.30143e-14 | 1.000000 |
| rad4               | 7.68386e-14 | 1.000000 | 7.68391e-14 | 1.000000 |
| rad59              | 2.92080e-14 | 1.000000 | 2.92082e-14 | 1.000000 |
| rad13              | 2.53430e-14 | 1.000000 | 2.53432e-14 | 1.000000 |
| rad50              | 2.97006e-15 | 1.000000 | 2.97008e-15 | 1.000000 |
| rad19syn           | 2.89919e-15 | 1.000000 | 2.89920e-15 | 1.000000 |
| rad14              | 4.39423e-16 | 1.000000 | 4.39426e-16 | 1.000000 |
| rad25              | 2.33456e-16 | 1.000000 | 2.33457e-16 | 1.000000 |
| rad27              | 5.07484e-17 | 1.000000 | 5.07487e-17 | 1.000000 |
| rad33              | 4.86571e-17 | 1.000000 | 4.86574e-17 | 1.000000 |
| rad54              | 2.33282e-17 | 1.000000 | 2.33283e-17 | 1.000000 |
| PAH10+CH3          | 1.59456e-17 | 1.000000 | 1.59457e-17 | 1.000000 |
| rad43              | 3.88157e-18 | 1.000000 | 3.88160e-18 | 1.000000 |
| rad62              | 5.27043e-19 | 1.000000 | 5.27046e-19 | 1.000000 |
| rad52              | 1.15637e-19 | 1.000000 | 1.15638e-19 | 1.000000 |
| PhcycC3H3_A+H      | 5.85607e-21 | 1.000000 | 5.85610e-21 | 1.000000 |
| rad70              | 4.72790e-21 | 1.000000 | 4.72792e-21 | 1.000000 |
| rad31              | 4.63826e-21 | 1.000000 | 4.63829e-21 | 1.000000 |
| rad55              | 1.97613e-21 | 1.000000 | 1.97615e-21 | 1.000000 |
| rad51              | 5.86112e-22 | 1.000000 | 5.86115e-22 | 1.000000 |
| rad20              | 2.86248e-22 | 1.000000 | 2.86249e-22 | 1.000000 |
| rad21              | 2.19091e-22 | 1.000000 | 2.19093e-22 | 1.000000 |
| PAH1+H             | 4.95203e-23 | 1.000000 | 4.95206e-23 | 1.000000 |
| rad23              | 1.37163e-23 | 1.000000 | 1.37164e-23 | 1.000000 |
| rad58              | 3.90821e-24 | 1.000000 | 3.90824e-24 | 1.000000 |
| rad65              | 2.06551e-24 | 1.000000 | 2.06553e-24 | 1.000000 |
| rad34              | 2.04055e-24 | 1.000000 | 2.04056e-24 | 1.000000 |
| rad18              | 1.11757e-24 | 1.000000 | 1.11758e-24 | 1.000000 |
| rad22              | 2.51858e-25 | 1.000000 | 2.51859e-25 | 1.000000 |
| rad45              | 8.89492e-26 | 1.000000 | 8.89498e-26 | 1.000000 |
| rad42              | 1.68940e-26 | 1.000000 | 1.68941e-26 | 1.000000 |
| rad36              | 5.53715e-27 | 1.000000 | 5.53718e-27 | 1.000000 |
| rad41              | 4.43571e-27 | 1.000000 | 4.43574e-27 | 1.000000 |
| rad24              | 5.03918e-29 | 1.000000 | 5.03921e-29 | 1.000000 |
| rad47              | 1.73397e-35 | 1.000000 | 1.73398e-35 | 1.000000 |

0.100000000E-04 Pa, 190.00000 K

=====

| Rate constant | True (fraction) | Effective (fraction) |
|---------------|-----------------|----------------------|
|---------------|-----------------|----------------------|

-----

|                    |                        |                        |
|--------------------|------------------------|------------------------|
| Total              | 1.11858e-17 (1.00 )    | 1.11857e-17 (1.00 )    |
| Formation of rad11 | 9.67466e-18 (0.865 )   | 9.67458e-18 (0.865 )   |
| Formation of rad6  | 1.40029e-18 (0.125 )   | 1.40028e-18 (0.125 )   |
| H-abstraction      | 1.10851e-19 (0.00991 ) | 1.10851e-19 (0.00991 ) |

| species            | PYtrue      | Cumul    | PYeffective | Cumul    |
|--------------------|-------------|----------|-------------|----------|
| Indene+H           | 0.964607    | 0.964607 | 0.964615    | 0.964615 |
| C2H2+PhCH2         | 0.0141597   | 0.978767 | 0.0141598   | 0.978775 |
| Benzene+2-propynyl | 0.00990995  | 0.988677 | 0.00991003  | 0.988685 |
| PhCCH+CH3          | 0.00585620  | 0.994533 | 0.00585625  | 0.994541 |
| PhCHCCH2+H         | 0.00319612  | 0.997729 | 0.00319614  | 0.997737 |
| PhCCCH3+H          | 0.00205940  | 0.999788 | 0.00205941  | 0.999797 |
| Ph+MeAc            | 0.000147733 | 0.999936 | 0.000147734 | 0.999944 |
| rad8               | 2.27642e-05 | 0.999959 | 2.27643e-05 | 0.999967 |
| rad9               | 1.66799e-05 | 0.999976 | 1.66800e-05 | 0.999984 |
| PAH7+H             | 1.09608e-05 | 0.999987 | 1.09609e-05 | 0.999995 |
| Phenyl+Allene      | 8.17919e-06 | 0.999995 | 0.00000     | 0.999995 |
| rad39              | 2.01897e-06 | 0.999997 | 2.01898e-06 | 0.999997 |
| rad12              | 1.17756e-06 | 0.999998 | 1.17757e-06 | 0.999998 |
| rad30              | 9.59275e-07 | 0.999999 | 9.59283e-07 | 0.999999 |
| PAH9+H             | 2.22585e-07 | 0.999999 | 2.22587e-07 | 0.999999 |
| rad15              | 2.06446e-07 | 0.999999 | 2.06448e-07 | 0.999999 |
| rad35              | 1.05006e-07 | 0.999999 | 1.05007e-07 | 0.999999 |
| rad38              | 6.27474e-08 | 1.000000 | 6.27479e-08 | 0.999999 |
| PhCH2CCH+H         | 6.24312e-08 | 1.000000 | 6.24318e-08 | 1.000000 |
| rad6               | 4.60564e-08 | 1.000000 | 4.60568e-08 | 1.000000 |
| rad37              | 1.10940e-08 | 1.000000 | 1.10941e-08 | 1.000000 |
| rad46              | 8.15710e-10 | 1.000000 | 8.15717e-10 | 1.000000 |
| rad28              | 1.81317e-10 | 1.000000 | 1.81318e-10 | 1.000000 |
| rad5               | 1.36668e-10 | 1.000000 | 1.36670e-10 | 1.000000 |
| rad60syn           | 8.86079e-11 | 1.000000 | 8.86087e-11 | 1.000000 |
| rad60anti          | 2.81765e-11 | 1.000000 | 2.81768e-11 | 1.000000 |
| rad2               | 1.75530e-11 | 1.000000 | 1.75531e-11 | 1.000000 |
| rad26              | 1.60712e-11 | 1.000000 | 1.60713e-11 | 1.000000 |
| rad7               | 3.40661e-12 | 1.000000 | 3.40664e-12 | 1.000000 |
| rad1               | 1.18356e-12 | 1.000000 | 1.18357e-12 | 1.000000 |
| rad10              | 9.18134e-13 | 1.000000 | 9.18141e-13 | 1.000000 |
| rad11              | 8.36676e-13 | 1.000000 | 8.36682e-13 | 1.000000 |
| PAH3+H             | 1.71397e-13 | 1.000000 | 1.71398e-13 | 1.000000 |
| rad3               | 1.14136e-13 | 1.000000 | 1.14136e-13 | 1.000000 |
| rad4               | 5.87151e-14 | 1.000000 | 5.87156e-14 | 1.000000 |
| rad59              | 5.83802e-14 | 1.000000 | 5.83807e-14 | 1.000000 |
| rad13              | 1.92396e-14 | 1.000000 | 1.92398e-14 | 1.000000 |
| rad19syn           | 1.02868e-14 | 1.000000 | 1.02869e-14 | 1.000000 |
| rad50              | 6.05154e-15 | 1.000000 | 6.05159e-15 | 1.000000 |
| rad14              | 3.67728e-16 | 1.000000 | 3.67731e-16 | 1.000000 |
| rad25              | 1.96471e-16 | 1.000000 | 1.96473e-16 | 1.000000 |
| rad54              | 1.03964e-16 | 1.000000 | 1.03965e-16 | 1.000000 |
| PAH10+CH3          | 7.11632e-17 | 1.000000 | 7.11638e-17 | 1.000000 |
| rad27              | 4.14720e-17 | 1.000000 | 4.14724e-17 | 1.000000 |
| rad33              | 3.70046e-17 | 1.000000 | 3.70049e-17 | 1.000000 |
| rad43              | 1.72847e-17 | 1.000000 | 1.72849e-17 | 1.000000 |
| rad62              | 2.69610e-18 | 1.000000 | 2.69612e-18 | 1.000000 |
| rad52              | 4.03476e-19 | 1.000000 | 4.03479e-19 | 1.000000 |
| PhcycC3H3_A+H      | 4.38885e-20 | 1.000000 | 4.38889e-20 | 1.000000 |
| rad70              | 3.33194e-20 | 1.000000 | 3.33197e-20 | 1.000000 |
| rad55              | 1.42081e-20 | 1.000000 | 1.42082e-20 | 1.000000 |
| rad31              | 5.38230e-21 | 1.000000 | 5.38234e-21 | 1.000000 |
| rad51              | 3.10215e-21 | 1.000000 | 3.10217e-21 | 1.000000 |
| PAH1+H             | 4.73302e-22 | 1.000000 | 4.73306e-22 | 1.000000 |
| rad20              | 2.39639e-22 | 1.000000 | 2.39641e-22 | 1.000000 |
| rad21              | 1.84403e-22 | 1.000000 | 1.84404e-22 | 1.000000 |
| rad58              | 3.02069e-23 | 1.000000 | 3.02071e-23 | 1.000000 |
| rad34              | 2.08647e-23 | 1.000000 | 2.08649e-23 | 1.000000 |
| rad23              | 1.41715e-23 | 1.000000 | 1.41716e-23 | 1.000000 |
| rad65              | 1.35330e-23 | 1.000000 | 1.35331e-23 | 1.000000 |
| rad18              | 9.19137e-25 | 1.000000 | 9.19145e-25 | 1.000000 |
| rad42              | 2.03930e-25 | 1.000000 | 2.03931e-25 | 1.000000 |
| rad22              | 2.00213e-25 | 1.000000 | 2.00214e-25 | 1.000000 |
| rad45              | 9.26636e-26 | 1.000000 | 9.26644e-26 | 1.000000 |
| rad41              | 5.49121e-26 | 1.000000 | 5.49125e-26 | 1.000000 |
| rad36              | 5.77869e-27 | 1.000000 | 5.77874e-27 | 1.000000 |
| rad24              | 5.25831e-29 | 1.000000 | 5.25835e-29 | 1.000000 |
| rad47              | 1.27119e-34 | 1.000000 | 1.27120e-34 | 1.000000 |

0.100000000E-04 Pa, 200.00000 K

=====

| Rate constant | True (fraction) | Effective (fraction) |
|---------------|-----------------|----------------------|
|---------------|-----------------|----------------------|

-----

|                    |                       |                       |
|--------------------|-----------------------|-----------------------|
| Total              | 1.82690e-17 (1.00 )   | 1.82688e-17 (1.00 )   |
| Formation of rad11 | 1.55456e-17 (0.851 )  | 1.55454e-17 (0.851 )  |
| Formation of rad6  | 2.49126e-18 (0.136 )  | 2.49124e-18 (0.136 )  |
| H-abstraction      | 2.32112e-19 (0.0127 ) | 2.32112e-19 (0.0127 ) |

| species            | PYtrue      | Cumul    | PYeffective | Cumul    |
|--------------------|-------------|----------|-------------|----------|
| Indene+H           | 0.960237    | 0.960237 | 0.960247    | 0.960247 |
| C2H2+PhCH2         | 0.0148551   | 0.975092 | 0.0148553   | 0.975102 |
| Benzene+2-propynyl | 0.0127053   | 0.987797 | 0.0127054   | 0.987807 |
| PhCCH+CH3          | 0.00633011  | 0.994127 | 0.00633018  | 0.994138 |
| PhCHCCH2+H         | 0.00341582  | 0.997543 | 0.00341586  | 0.997553 |
| PhCCCH3+H          | 0.00220845  | 0.999752 | 0.00220847  | 0.999762 |
| Ph+MeAc            | 0.000175685 | 0.999927 | 0.000175687 | 0.999938 |
| rad8               | 2.49420e-05 | 0.999952 | 2.49423e-05 | 0.999963 |
| rad9               | 1.90048e-05 | 0.999971 | 1.90050e-05 | 0.999982 |
| PAH7+H             | 1.26365e-05 | 0.999984 | 1.26366e-05 | 0.999994 |
| Phenyl+Allene      | 1.06874e-05 | 0.999995 | 0.00000     | 0.999994 |
| rad39              | 2.40090e-06 | 0.999997 | 2.40093e-06 | 0.999997 |
| rad12              | 1.32987e-06 | 0.999998 | 1.32989e-06 | 0.999998 |
| rad30              | 1.02904e-06 | 0.999999 | 1.02905e-06 | 0.999999 |
| PAH9+H             | 2.42618e-07 | 1.000000 | 2.42621e-07 | 0.999999 |
| rad15              | 2.25073e-07 | 1.000000 | 2.25075e-07 | 0.999999 |
| rad35              | 1.13232e-07 | 1.000000 | 1.13233e-07 | 1.000000 |
| PhCH2CCH+H         | 1.02284e-07 | 1.000000 | 1.02285e-07 | 1.000000 |
| rad38              | 6.89771e-08 | 1.000000 | 6.89778e-08 | 1.000000 |
| rad6               | 3.50689e-08 | 1.000000 | 3.50693e-08 | 1.000000 |
| rad37              | 1.61713e-08 | 1.000000 | 1.61715e-08 | 1.000000 |
| rad46              | 9.52764e-10 | 1.000000 | 9.52775e-10 | 1.000000 |
| rad5               | 2.34500e-10 | 1.000000 | 2.34502e-10 | 1.000000 |
| rad28              | 1.41335e-10 | 1.000000 | 1.41337e-10 | 1.000000 |
| rad60syn           | 1.12378e-10 | 1.000000 | 1.12379e-10 | 1.000000 |
| rad60anti          | 3.68313e-11 | 1.000000 | 3.68317e-11 | 1.000000 |
| rad2               | 1.35040e-11 | 1.000000 | 1.35041e-11 | 1.000000 |
| rad26              | 1.26193e-11 | 1.000000 | 1.26194e-11 | 1.000000 |
| rad7               | 2.59957e-12 | 1.000000 | 2.59960e-12 | 1.000000 |
| rad1               | 9.17647e-13 | 1.000000 | 9.17657e-13 | 1.000000 |
| rad10              | 7.07918e-13 | 1.000000 | 7.07926e-13 | 1.000000 |
| rad11              | 6.38754e-13 | 1.000000 | 6.38761e-13 | 1.000000 |
| PAH3+H             | 3.35100e-13 | 1.000000 | 3.35104e-13 | 1.000000 |
| rad59              | 1.10680e-13 | 1.000000 | 1.10682e-13 | 1.000000 |
| rad3               | 8.78267e-14 | 1.000000 | 8.78277e-14 | 1.000000 |
| rad4               | 4.52799e-14 | 1.000000 | 4.52804e-14 | 1.000000 |
| rad19syn           | 3.23672e-14 | 1.000000 | 3.23675e-14 | 1.000000 |
| rad13              | 1.47045e-14 | 1.000000 | 1.47046e-14 | 1.000000 |
| rad50              | 1.17692e-14 | 1.000000 | 1.17694e-14 | 1.000000 |
| rad54              | 4.01253e-16 | 1.000000 | 4.01258e-16 | 1.000000 |
| rad14              | 3.08850e-16 | 1.000000 | 3.08854e-16 | 1.000000 |
| PAH10+CH3          | 2.74613e-16 | 1.000000 | 2.74616e-16 | 1.000000 |
| rad25              | 1.66044e-16 | 1.000000 | 1.66046e-16 | 1.000000 |
| rad43              | 6.64655e-17 | 1.000000 | 6.64663e-17 | 1.000000 |
| rad27              | 3.41607e-17 | 1.000000 | 3.41611e-17 | 1.000000 |
| rad33              | 2.83352e-17 | 1.000000 | 2.83355e-17 | 1.000000 |
| rad62              | 1.17478e-17 | 1.000000 | 1.17479e-17 | 1.000000 |
| rad52              | 1.25924e-18 | 1.000000 | 1.25925e-18 | 1.000000 |
| PhcycC3H3_A+H      | 2.69642e-19 | 1.000000 | 2.69645e-19 | 1.000000 |
| rad70              | 1.93305e-19 | 1.000000 | 1.93307e-19 | 1.000000 |
| rad55              | 8.39730e-20 | 1.000000 | 8.39738e-20 | 1.000000 |
| rad51              | 1.40657e-20 | 1.000000 | 1.40658e-20 | 1.000000 |
| rad31              | 6.47292e-21 | 1.000000 | 6.47299e-21 | 1.000000 |
| PAH1+H             | 3.58737e-21 | 1.000000 | 3.58740e-21 | 1.000000 |
| rad20              | 2.03216e-22 | 1.000000 | 2.03218e-22 | 1.000000 |
| rad58              | 1.90955e-22 | 1.000000 | 1.90957e-22 | 1.000000 |
| rad34              | 1.67726e-22 | 1.000000 | 1.67728e-22 | 1.000000 |
| rad21              | 1.57302e-22 | 1.000000 | 1.57304e-22 | 1.000000 |
| rad65              | 7.40106e-23 | 1.000000 | 7.40115e-23 | 1.000000 |
| rad23              | 1.63085e-23 | 1.000000 | 1.63087e-23 | 1.000000 |
| rad42              | 1.88858e-24 | 1.000000 | 1.88860e-24 | 1.000000 |
| rad18              | 7.63021e-25 | 1.000000 | 7.63029e-25 | 1.000000 |
| rad41              | 5.19575e-25 | 1.000000 | 5.19581e-25 | 1.000000 |
| rad22              | 1.60865e-25 | 1.000000 | 1.60867e-25 | 1.000000 |
| rad45              | 1.07834e-25 | 1.000000 | 1.07835e-25 | 1.000000 |
| rad36              | 6.73925e-27 | 1.000000 | 6.73932e-27 | 1.000000 |
| rad24              | 5.59922e-29 | 1.000000 | 5.59927e-29 | 1.000000 |
| rad47              | 7.49033e-34 | 1.000000 | 7.49041e-34 | 1.000000 |

0.100000000E-04 Pa, 210.00000 K

=====

|               |                 |                      |
|---------------|-----------------|----------------------|
| Rate constant | True (fraction) | Effective (fraction) |
|---------------|-----------------|----------------------|

-----

|                    |                       |                       |
|--------------------|-----------------------|-----------------------|
| Total              | 2.85520e-17 (1.00 )   | 2.85516e-17 (1.00 )   |
| Formation of rad11 | 2.39009e-17 (0.837 )  | 2.39006e-17 (0.837 )  |
| Formation of rad6  | 4.19900e-18 (0.147 )  | 4.19894e-18 (0.147 )  |
| H-abstraction      | 4.52111e-19 (0.0158 ) | 4.52111e-19 (0.0158 ) |

| species            | PYtrue      | Cumul    | PYeffective | Cumul    |
|--------------------|-------------|----------|-------------|----------|
| Indene+H           | 0.955413    | 0.955413 | 0.955427    | 0.955427 |
| Benzene+2-propynyl | 0.0158346   | 0.971248 | 0.0158348   | 0.971261 |
| C2H2+PhCH2         | 0.0156007   | 0.986848 | 0.0156009   | 0.986862 |
| PhCCH+CH3          | 0.00684187  | 0.993690 | 0.00684196  | 0.993704 |
| PhCHCCH2+H         | 0.00365058  | 0.997341 | 0.00365063  | 0.997355 |
| PhCCCH3+H          | 0.00236714  | 0.999708 | 0.00236718  | 0.999722 |
| Ph+MeAc            | 0.000208126 | 0.999916 | 0.000208129 | 0.999930 |
| rad8               | 2.73092e-05 | 0.999943 | 2.73096e-05 | 0.999957 |
| rad9               | 2.16532e-05 | 0.999965 | 2.16535e-05 | 0.999979 |
| PAH7+H             | 1.45724e-05 | 0.999980 | 1.45726e-05 | 0.999994 |
| Phenyl+Allene      | 1.38725e-05 | 0.999993 | 0.00000     | 0.999994 |
| rad39              | 2.85056e-06 | 0.999996 | 2.85060e-06 | 0.999997 |
| rad12              | 1.49930e-06 | 0.999998 | 1.49932e-06 | 0.999998 |
| rad30              | 1.10560e-06 | 0.999999 | 1.10562e-06 | 0.999999 |
| PAH9+H             | 2.65131e-07 | 0.999999 | 2.65134e-07 | 0.999999 |
| rad15              | 2.45823e-07 | 0.999999 | 2.45826e-07 | 1.000000 |
| PhCH2CCH+H         | 1.62659e-07 | 1.000000 | 1.62661e-07 | 1.000000 |
| rad35              | 1.22370e-07 | 1.000000 | 1.22371e-07 | 1.000000 |
| rad38              | 7.60325e-08 | 1.000000 | 7.60335e-08 | 1.000000 |
| rad6               | 2.68571e-08 | 1.000000 | 2.68574e-08 | 1.000000 |
| rad37              | 2.28105e-08 | 1.000000 | 2.28109e-08 | 1.000000 |
| rad46              | 1.11657e-09 | 1.000000 | 1.11658e-09 | 1.000000 |
| rad5               | 3.86244e-10 | 1.000000 | 3.86249e-10 | 1.000000 |
| rad60syn           | 1.42219e-10 | 1.000000 | 1.42221e-10 | 1.000000 |
| rad28              | 1.10639e-10 | 1.000000 | 1.10641e-10 | 1.000000 |
| rad60anti          | 4.79063e-11 | 1.000000 | 4.79070e-11 | 1.000000 |
| rad2               | 1.04761e-11 | 1.000000 | 1.04763e-11 | 1.000000 |
| rad26              | 9.95562e-12 | 1.000000 | 9.95581e-12 | 1.000000 |
| rad7               | 1.99533e-12 | 1.000000 | 1.99536e-12 | 1.000000 |
| rad1               | 7.17924e-13 | 1.000000 | 7.17934e-13 | 1.000000 |
| PAH3+H             | 6.25565e-13 | 1.000000 | 6.25574e-13 | 1.000000 |
| rad10              | 5.50848e-13 | 1.000000 | 5.50856e-13 | 1.000000 |
| rad11              | 4.90519e-13 | 1.000000 | 4.90526e-13 | 1.000000 |
| rad59              | 2.00671e-13 | 1.000000 | 2.00674e-13 | 1.000000 |
| rad19syn           | 9.19219e-14 | 1.000000 | 9.19232e-14 | 1.000000 |
| rad3               | 6.82600e-14 | 1.000000 | 6.82610e-14 | 1.000000 |
| rad4               | 3.52761e-14 | 1.000000 | 3.52766e-14 | 1.000000 |
| rad50              | 2.19997e-14 | 1.000000 | 2.20000e-14 | 1.000000 |
| rad13              | 1.13049e-14 | 1.000000 | 1.13051e-14 | 1.000000 |
| rad54              | 1.36984e-15 | 1.000000 | 1.36986e-15 | 1.000000 |
| PAH10+CH3          | 9.35770e-16 | 1.000000 | 9.35783e-16 | 1.000000 |
| rad14              | 2.60227e-16 | 1.000000 | 2.60230e-16 | 1.000000 |
| rad43              | 2.25403e-16 | 1.000000 | 2.25407e-16 | 1.000000 |
| rad25              | 1.40852e-16 | 1.000000 | 1.40854e-16 | 1.000000 |
| rad62              | 4.46216e-17 | 1.000000 | 4.46221e-17 | 1.000000 |
| rad27              | 2.83410e-17 | 1.000000 | 2.83414e-17 | 1.000000 |
| rad33              | 2.18281e-17 | 1.000000 | 2.18284e-17 | 1.000000 |
| rad52              | 3.57561e-18 | 1.000000 | 3.57567e-18 | 1.000000 |
| PhcycC3H3_A+H      | 1.39646e-18 | 1.000000 | 1.39648e-18 | 1.000000 |
| rad70              | 9.49261e-19 | 1.000000 | 9.49274e-19 | 1.000000 |
| rad55              | 4.19543e-19 | 1.000000 | 4.19549e-19 | 1.000000 |
| rad51              | 5.58837e-20 | 1.000000 | 5.58844e-20 | 1.000000 |
| PAH1+H             | 2.22714e-20 | 1.000000 | 2.22717e-20 | 1.000000 |
| rad31              | 8.03198e-21 | 1.000000 | 8.03209e-21 | 1.000000 |
| rad34              | 1.09604e-21 | 1.000000 | 1.09605e-21 | 1.000000 |
| rad58              | 1.01532e-21 | 1.000000 | 1.01534e-21 | 1.000000 |
| rad65              | 3.46709e-22 | 1.000000 | 3.46714e-22 | 1.000000 |
| rad20              | 1.74510e-22 | 1.000000 | 1.74512e-22 | 1.000000 |
| rad21              | 1.35966e-22 | 1.000000 | 1.35968e-22 | 1.000000 |
| rad23              | 2.09810e-23 | 1.000000 | 2.09813e-23 | 1.000000 |
| rad42              | 1.39289e-23 | 1.000000 | 1.39291e-23 | 1.000000 |
| rad41              | 3.90332e-24 | 1.000000 | 3.90337e-24 | 1.000000 |
| rad18              | 6.38909e-25 | 1.000000 | 6.38918e-25 | 1.000000 |
| rad45              | 1.40695e-25 | 1.000000 | 1.40697e-25 | 1.000000 |
| rad22              | 1.30591e-25 | 1.000000 | 1.30593e-25 | 1.000000 |
| rad36              | 8.81549e-27 | 1.000000 | 8.81561e-27 | 1.000000 |
| rad24              | 6.07798e-29 | 1.000000 | 6.07807e-29 | 1.000000 |
| rad47              | 3.66228e-33 | 1.000000 | 3.66232e-33 | 1.000000 |

0.100000000E-04 Pa, 220.00000 K

=====

| Rate constant | True (fraction) | Effective (fraction) |
|---------------|-----------------|----------------------|
|---------------|-----------------|----------------------|

-----



|                    |             |          |             |          |
|--------------------|-------------|----------|-------------|----------|
| Total              | 4.29529e-17 | (1.00)   | 4.29521e-17 | (1.00)   |
| Formation of rad11 | 3.53712e-17 | (0.823)  | 3.53705e-17 | (0.823)  |
| Formation of rad6  | 6.75433e-18 | (0.157)  | 6.75421e-18 | (0.157)  |
| H-abstraction      | 8.27372e-19 | (0.0193) | 8.27372e-19 | (0.0193) |

| species            | PYtrue      | Cumul    | PYeffective | Cumul    |
|--------------------|-------------|----------|-------------|----------|
| Indene+H           | 0.950167    | 0.950167 | 0.950184    | 0.950184 |
| Benzene+2-propynyl | 0.0192623   | 0.969429 | 0.0192627   | 0.969447 |
| C2H2+PhCH2         | 0.0163994   | 0.985829 | 0.0163997   | 0.985847 |
| PhCCH+CH3          | 0.00739292  | 0.993222 | 0.00739305  | 0.993240 |
| PhCHCCH2+H         | 0.00390074  | 0.997122 | 0.00390080  | 0.997141 |
| PhCCCH3+H          | 0.00253550  | 0.999658 | 0.00253554  | 0.999676 |
| Ph+MeAc            | 0.000245569 | 0.999904 | 0.000245573 | 0.999922 |
| rad8               | 2.98727e-05 | 0.999933 | 2.98733e-05 | 0.999952 |
| rad9               | 2.46639e-05 | 0.999958 | 2.46643e-05 | 0.999976 |
| Phenyl+Allene      | 1.78940e-05 | 0.999976 | 0.00000     | 0.999976 |
| PAH7+H             | 1.68054e-05 | 0.999993 | 1.68057e-05 | 0.999993 |
| rad39              | 3.37845e-06 | 0.999996 | 3.37850e-06 | 0.999996 |
| rad12              | 1.68697e-06 | 0.999998 | 1.68700e-06 | 0.999998 |
| rad30              | 1.18960e-06 | 0.999999 | 1.18961e-06 | 0.999999 |
| PAH9+H             | 2.90445e-07 | 0.999999 | 2.90451e-07 | 1.000000 |
| rad15              | 2.68929e-07 | 1.000000 | 2.68934e-07 | 1.000000 |
| PhCH2CCH+H         | 2.52026e-07 | 1.000000 | 2.52031e-07 | 1.000000 |
| rad35              | 1.32525e-07 | 1.000000 | 1.32528e-07 | 1.000000 |
| rad38              | 8.40281e-08 | 1.000000 | 8.40297e-08 | 1.000000 |
| rad37              | 3.12942e-08 | 1.000000 | 3.12947e-08 | 1.000000 |
| rad6               | 2.06735e-08 | 1.000000 | 2.06738e-08 | 1.000000 |
| rad46              | 1.31247e-09 | 1.000000 | 1.31249e-09 | 1.000000 |
| rad5               | 6.13906e-10 | 1.000000 | 6.13916e-10 | 1.000000 |
| rad60syn           | 1.79574e-10 | 1.000000 | 1.79577e-10 | 1.000000 |
| rad28              | 8.69295e-11 | 1.000000 | 8.69310e-11 | 1.000000 |
| rad60anti          | 6.20211e-11 | 1.000000 | 6.20222e-11 | 1.000000 |
| rad2               | 8.21942e-12 | 1.000000 | 8.21956e-12 | 1.000000 |
| rad26              | 7.88731e-12 | 1.000000 | 7.88745e-12 | 1.000000 |
| rad7               | 1.53949e-12 | 1.000000 | 1.53952e-12 | 1.000000 |
| PAH3+H             | 1.12246e-12 | 1.000000 | 1.12248e-12 | 1.000000 |
| rad1               | 5.68437e-13 | 1.000000 | 5.68447e-13 | 1.000000 |
| rad10              | 4.33047e-13 | 1.000000 | 4.33054e-13 | 1.000000 |
| rad11              | 3.78649e-13 | 1.000000 | 3.78656e-13 | 1.000000 |
| rad59              | 3.50224e-13 | 1.000000 | 3.50230e-13 | 1.000000 |
| rad19syn           | 2.39048e-13 | 1.000000 | 2.39052e-13 | 1.000000 |
| rad3               | 5.35544e-14 | 1.000000 | 5.35552e-14 | 1.000000 |
| rad50              | 3.97417e-14 | 1.000000 | 3.97424e-14 | 1.000000 |
| rad4               | 2.77483e-14 | 1.000000 | 2.77488e-14 | 1.000000 |
| rad13              | 8.73724e-15 | 1.000000 | 8.73739e-15 | 1.000000 |
| rad54              | 4.20819e-15 | 1.000000 | 4.20827e-15 | 1.000000 |
| PAH10+CH3          | 2.86431e-15 | 1.000000 | 2.86436e-15 | 1.000000 |
| rad43              | 6.85825e-16 | 1.000000 | 6.85836e-16 | 1.000000 |
| rad14              | 2.19880e-16 | 1.000000 | 2.19884e-16 | 1.000000 |
| rad62              | 1.50544e-16 | 1.000000 | 1.50547e-16 | 1.000000 |
| rad25              | 1.19881e-16 | 1.000000 | 1.19883e-16 | 1.000000 |
| rad27              | 2.36682e-17 | 1.000000 | 2.36686e-17 | 1.000000 |
| rad33              | 1.69063e-17 | 1.000000 | 1.69066e-17 | 1.000000 |
| rad52              | 9.36503e-18 | 1.000000 | 9.36520e-18 | 1.000000 |
| PhcycC3H3_A+H      | 6.23495e-18 | 1.000000 | 6.23507e-18 | 1.000000 |
| rad70              | 4.03521e-18 | 1.000000 | 4.03527e-18 | 1.000000 |
| rad55              | 1.81226e-18 | 1.000000 | 1.81228e-18 | 1.000000 |
| rad51              | 1.98104e-19 | 1.000000 | 1.98108e-19 | 1.000000 |
| PAH1+H             | 1.16258e-19 | 1.000000 | 1.16260e-19 | 1.000000 |
| rad31              | 1.02454e-20 | 1.000000 | 1.02455e-20 | 1.000000 |
| rad34              | 5.98210e-21 | 1.000000 | 5.98220e-21 | 1.000000 |
| rad58              | 4.64420e-21 | 1.000000 | 4.64428e-21 | 1.000000 |
| rad65              | 1.42036e-21 | 1.000000 | 1.42039e-21 | 1.000000 |
| rad20              | 1.51744e-22 | 1.000000 | 1.51747e-22 | 1.000000 |
| rad21              | 1.19083e-22 | 1.000000 | 1.19085e-22 | 1.000000 |
| rad42              | 8.43146e-23 | 1.000000 | 8.43160e-23 | 1.000000 |
| rad23              | 3.00251e-23 | 1.000000 | 3.00257e-23 | 1.000000 |
| rad41              | 2.40056e-23 | 1.000000 | 2.40061e-23 | 1.000000 |
| rad18              | 5.39327e-25 | 1.000000 | 5.39337e-25 | 1.000000 |
| rad45              | 2.04710e-25 | 1.000000 | 2.04714e-25 | 1.000000 |
| rad22              | 1.07172e-25 | 1.000000 | 1.07174e-25 | 1.000000 |
| rad36              | 1.28649e-26 | 1.000000 | 1.28652e-26 | 1.000000 |
| rad24              | 6.72020e-29 | 1.000000 | 6.72032e-29 | 1.000000 |
| rad47              | 1.52504e-32 | 1.000000 | 1.52506e-32 | 1.000000 |

0.100000000E-04 Pa, 230.000000 K

=====

| Rate constant | True (fraction) | Effective (fraction) |
|---------------|-----------------|----------------------|
|---------------|-----------------|----------------------|

-----

|                    |             |          |             |          |
|--------------------|-------------|----------|-------------|----------|
| Total              | 6.25016e-17 | (1.00)   | 6.25002e-17 | (1.00)   |
| Formation of rad11 | 5.06355e-17 | (0.810)  | 5.06343e-17 | (0.810)  |
| Formation of rad6  | 1.04318e-17 | (0.167)  | 1.04316e-17 | (0.167)  |
| H-abstraction      | 1.43428e-18 | (0.0229) | 1.43428e-18 | (0.0229) |

| species            | PYtrue      | Cumul    | PYeffective | Cumul    |
|--------------------|-------------|----------|-------------|----------|
| Indene+H           | 0.944533    | 0.944533 | 0.944555    | 0.944555 |
| Benzene+2-propynyl | 0.0229478   | 0.967481 | 0.0229483   | 0.967503 |
| C2H2+PhCH2         | 0.0172546   | 0.984735 | 0.0172550   | 0.984758 |
| PhCCH+CH3          | 0.00798461  | 0.992720 | 0.00798479  | 0.992743 |
| PhCHCCH2+H         | 0.00416655  | 0.996887 | 0.00416665  | 0.996910 |
| PhCCCH3+H          | 0.00271342  | 0.999600 | 0.00271348  | 0.999623 |
| Ph+MeAc            | 0.000288540 | 0.999889 | 0.000288547 | 0.999912 |
| rad8               | 3.26382e-05 | 0.999921 | 3.26390e-05 | 0.999944 |
| rad9               | 2.80791e-05 | 0.999949 | 2.80797e-05 | 0.999972 |
| Phenyl+Allene      | 2.29430e-05 | 0.999972 | 0.000000    | 0.999972 |
| PAH7+H             | 1.93764e-05 | 0.999992 | 1.93768e-05 | 0.999992 |
| rad39              | 3.99635e-06 | 0.999996 | 3.99643e-06 | 0.999996 |
| rad12              | 1.89394e-06 | 0.999997 | 1.89398e-06 | 0.999998 |
| rad30              | 1.28169e-06 | 0.999999 | 1.28172e-06 | 0.999999 |
| PhCH2CCH+H         | 3.81622e-07 | 0.999999 | 3.81631e-07 | 0.999999 |
| PAH9+H             | 3.18926e-07 | 0.999999 | 3.18934e-07 | 1.000000 |
| rad15              | 2.94648e-07 | 1.000000 | 2.94654e-07 | 1.000000 |
| rad35              | 1.43816e-07 | 1.000000 | 1.43820e-07 | 1.000000 |
| rad38              | 9.30943e-08 | 1.000000 | 9.30964e-08 | 1.000000 |
| rad37              | 4.19286e-08 | 1.000000 | 4.19296e-08 | 1.000000 |
| rad6               | 1.59865e-08 | 1.000000 | 1.59869e-08 | 1.000000 |
| rad46              | 1.54684e-09 | 1.000000 | 1.54688e-09 | 1.000000 |
| rad5               | 9.45645e-10 | 1.000000 | 9.45666e-10 | 1.000000 |
| rad60syn           | 2.26189e-10 | 1.000000 | 2.26193e-10 | 1.000000 |
| rad60anti          | 7.99350e-11 | 1.000000 | 7.99368e-11 | 1.000000 |
| rad28              | 6.85216e-11 | 1.000000 | 6.85232e-11 | 1.000000 |
| rad2               | 6.51888e-12 | 1.000000 | 6.51904e-12 | 1.000000 |
| rad26              | 6.27250e-12 | 1.000000 | 6.27264e-12 | 1.000000 |
| PAH3+H             | 1.94614e-12 | 1.000000 | 1.94618e-12 | 1.000000 |
| rad7               | 1.19332e-12 | 1.000000 | 1.19335e-12 | 1.000000 |
| rad59              | 5.91450e-13 | 1.000000 | 5.91463e-13 | 1.000000 |
| rad19syn           | 5.76013e-13 | 1.000000 | 5.76027e-13 | 1.000000 |
| rad1               | 4.55310e-13 | 1.000000 | 4.55321e-13 | 1.000000 |
| rad10              | 3.44315e-13 | 1.000000 | 3.44323e-13 | 1.000000 |
| rad11              | 2.93662e-13 | 1.000000 | 2.93669e-13 | 1.000000 |
| rad50              | 6.96843e-14 | 1.000000 | 6.96860e-14 | 1.000000 |
| rad3               | 4.25369e-14 | 1.000000 | 4.25380e-14 | 1.000000 |
| rad4               | 2.21021e-14 | 1.000000 | 2.21027e-14 | 1.000000 |
| rad54              | 1.17975e-14 | 1.000000 | 1.17978e-14 | 1.000000 |
| PAH10+CH3          | 7.98644e-15 | 1.000000 | 7.98663e-15 | 1.000000 |
| rad13              | 6.78474e-15 | 1.000000 | 6.78489e-15 | 1.000000 |
| rad43              | 1.89878e-15 | 1.000000 | 1.89882e-15 | 1.000000 |
| rad62              | 4.58136e-16 | 1.000000 | 4.58146e-16 | 1.000000 |
| rad14              | 1.86268e-16 | 1.000000 | 1.86272e-16 | 1.000000 |
| rad25              | 1.02345e-16 | 1.000000 | 1.02347e-16 | 1.000000 |
| PhcycC3H3_A+H      | 2.44414e-17 | 1.000000 | 2.44419e-17 | 1.000000 |
| rad52              | 2.28776e-17 | 1.000000 | 2.28782e-17 | 1.000000 |
| rad27              | 1.98874e-17 | 1.000000 | 1.98879e-17 | 1.000000 |
| rad70              | 1.51218e-17 | 1.000000 | 1.51221e-17 | 1.000000 |
| rad33              | 1.31582e-17 | 1.000000 | 1.31584e-17 | 1.000000 |
| rad55              | 6.89268e-18 | 1.000000 | 6.89285e-18 | 1.000000 |
| rad51              | 6.35754e-19 | 1.000000 | 6.35768e-19 | 1.000000 |
| PAH1+H             | 5.21359e-19 | 1.000000 | 5.21370e-19 | 1.000000 |
| rad34              | 2.78857e-20 | 1.000000 | 2.78863e-20 | 1.000000 |
| rad58              | 1.86121e-20 | 1.000000 | 1.86125e-20 | 1.000000 |
| rad31              | 1.33932e-20 | 1.000000 | 1.33935e-20 | 1.000000 |
| rad65              | 5.17407e-21 | 1.000000 | 5.17418e-21 | 1.000000 |
| rad42              | 4.29485e-22 | 1.000000 | 4.29494e-22 | 1.000000 |
| rad20              | 1.33614e-22 | 1.000000 | 1.33618e-22 | 1.000000 |
| rad41              | 1.23969e-22 | 1.000000 | 1.23972e-22 | 1.000000 |
| rad21              | 1.05691e-22 | 1.000000 | 1.05694e-22 | 1.000000 |
| rad23              | 4.72921e-23 | 1.000000 | 4.72932e-23 | 1.000000 |
| rad18              | 4.58770e-25 | 1.000000 | 4.58780e-25 | 1.000000 |
| rad45              | 3.29222e-25 | 1.000000 | 3.29229e-25 | 1.000000 |
| rad22              | 8.91155e-26 | 1.000000 | 8.91176e-26 | 1.000000 |
| rad36              | 2.07616e-26 | 1.000000 | 2.07621e-26 | 1.000000 |
| rad24              | 7.56323e-29 | 1.000000 | 7.56341e-29 | 1.000000 |
| rad47              | 5.52641e-32 | 1.000000 | 5.52654e-32 | 1.000000 |

0.100000000E-04 Pa, 240.000000 K

=====

|               |                 |                      |
|---------------|-----------------|----------------------|
| Rate constant | True (fraction) | Effective (fraction) |
|---------------|-----------------|----------------------|

-----

|                    |                       |                       |
|--------------------|-----------------------|-----------------------|
| Total              | 8.83273e-17 (1.00 )   | 8.83247e-17 (1.00 )   |
| Formation of rad11 | 7.04077e-17 (0.797 )  | 7.04056e-17 (0.797 )  |
| Formation of rad6  | 1.55481e-17 (0.176 )  | 1.55476e-17 (0.176 )  |
| H-abstraction      | 2.37143e-18 (0.0268 ) | 2.37143e-18 (0.0268 ) |

| species            | PYtrue      | Cumul    | PYeffective | Cumul    |
|--------------------|-------------|----------|-------------|----------|
| Indene+H           | 0.938548    | 0.938548 | 0.938576    | 0.938576 |
| Benzene+2-propynyl | 0.0268483   | 0.965397 | 0.0268490   | 0.965425 |
| C2H2+PhCH2         | 0.0181698   | 0.983566 | 0.0181703   | 0.983595 |
| PhCCH+CH3          | 0.00861805  | 0.992185 | 0.00861829  | 0.992213 |
| PhCHCCH2+H         | 0.00444825  | 0.996633 | 0.00444838  | 0.996662 |
| PhCCCH3+H          | 0.00290072  | 0.999534 | 0.00290081  | 0.999563 |
| Ph+MeAc            | 0.000337577 | 0.999871 | 0.000337587 | 0.999900 |
| rad8               | 3.56101e-05 | 0.999907 | 3.56111e-05 | 0.999936 |
| rad9               | 3.19447e-05 | 0.999939 | 3.19456e-05 | 0.999968 |
| Phenyl+Allene      | 2.92466e-05 | 0.999968 | 0.00000     | 0.999968 |
| PAH7+H             | 2.23309e-05 | 0.999990 | 2.23316e-05 | 0.999990 |
| rad39              | 4.71744e-06 | 0.999995 | 4.71757e-06 | 0.999995 |
| rad12              | 2.12114e-06 | 0.999997 | 2.12121e-06 | 0.999997 |
| rad30              | 1.38261e-06 | 0.999998 | 1.38264e-06 | 0.999998 |
| PhCH2CCH+H         | 5.66147e-07 | 0.999999 | 5.66163e-07 | 0.999999 |
| PAH9+H             | 3.50982e-07 | 0.999999 | 3.50992e-07 | 0.999999 |
| rad15              | 3.23254e-07 | 1.000000 | 3.23263e-07 | 1.000000 |
| rad35              | 1.56373e-07 | 1.000000 | 1.56378e-07 | 1.000000 |
| rad38              | 1.03378e-07 | 1.000000 | 1.03381e-07 | 1.000000 |
| rad37              | 5.50448e-08 | 1.000000 | 5.50464e-08 | 1.000000 |
| rad6               | 1.24134e-08 | 1.000000 | 1.24137e-08 | 1.000000 |
| rad46              | 1.82726e-09 | 1.000000 | 1.82731e-09 | 1.000000 |
| rad5               | 1.41671e-09 | 1.000000 | 1.41675e-09 | 1.000000 |
| rad60syn           | 2.84165e-10 | 1.000000 | 2.84173e-10 | 1.000000 |
| rad60anti          | 1.02573e-10 | 1.000000 | 1.02576e-10 | 1.000000 |
| rad28              | 5.41658e-11 | 1.000000 | 5.41674e-11 | 1.000000 |
| rad2               | 5.23401e-12 | 1.000000 | 5.23416e-12 | 1.000000 |
| rad26              | 5.00582e-12 | 1.000000 | 5.00597e-12 | 1.000000 |
| PAH3+H             | 3.27442e-12 | 1.000000 | 3.27453e-12 | 1.000000 |
| rad19syn           | 1.29866e-12 | 1.000000 | 1.29870e-12 | 1.000000 |
| rad59              | 9.70552e-13 | 1.000000 | 9.70581e-13 | 1.000000 |
| rad7               | 9.28895e-13 | 1.000000 | 9.28922e-13 | 1.000000 |
| rad1               | 3.69495e-13 | 1.000000 | 3.69506e-13 | 1.000000 |
| rad10              | 2.77246e-13 | 1.000000 | 2.77255e-13 | 1.000000 |
| rad11              | 2.28715e-13 | 1.000000 | 2.28722e-13 | 1.000000 |
| rad50              | 1.19015e-13 | 1.000000 | 1.19019e-13 | 1.000000 |
| rad3               | 3.41884e-14 | 1.000000 | 3.41894e-14 | 1.000000 |
| rad54              | 3.05312e-14 | 1.000000 | 3.05320e-14 | 1.000000 |
| PAH10+CH3          | 2.05197e-14 | 1.000000 | 2.05203e-14 | 1.000000 |
| rad4               | 1.78188e-14 | 1.000000 | 1.78193e-14 | 1.000000 |
| rad13              | 5.29126e-15 | 1.000000 | 5.29141e-15 | 1.000000 |
| rad43              | 4.83957e-15 | 1.000000 | 4.83970e-15 | 1.000000 |
| rad62              | 1.27359e-15 | 1.000000 | 1.27363e-15 | 1.000000 |
| rad14              | 1.58168e-16 | 1.000000 | 1.58172e-16 | 1.000000 |
| rad25              | 8.76213e-17 | 1.000000 | 8.76239e-17 | 1.000000 |
| PhcycC3H3_A+H      | 8.53899e-17 | 1.000000 | 8.53924e-17 | 1.000000 |
| rad52              | 5.25968e-17 | 1.000000 | 5.25983e-17 | 1.000000 |
| rad70              | 5.07084e-17 | 1.000000 | 5.07099e-17 | 1.000000 |
| rad55              | 2.34296e-17 | 1.000000 | 2.34303e-17 | 1.000000 |
| rad27              | 1.68073e-17 | 1.000000 | 1.68078e-17 | 1.000000 |
| rad33              | 1.02867e-17 | 1.000000 | 1.02870e-17 | 1.000000 |
| PAH1+H             | 2.04478e-18 | 1.000000 | 2.04483e-18 | 1.000000 |
| rad51              | 1.86864e-18 | 1.000000 | 1.86869e-18 | 1.000000 |
| rad34              | 1.13109e-19 | 1.000000 | 1.13112e-19 | 1.000000 |
| rad58              | 6.63431e-20 | 1.000000 | 6.63451e-20 | 1.000000 |
| rad31              | 1.78978e-20 | 1.000000 | 1.78984e-20 | 1.000000 |
| rad65              | 1.69867e-20 | 1.000000 | 1.69871e-20 | 1.000000 |
| rad42              | 1.87990e-21 | 1.000000 | 1.87994e-21 | 1.000000 |
| rad41              | 5.49124e-22 | 1.000000 | 5.49140e-22 | 1.000000 |
| rad20              | 1.19159e-22 | 1.000000 | 1.19161e-22 | 1.000000 |
| rad21              | 9.50805e-23 | 1.000000 | 9.50834e-23 | 1.000000 |
| rad23              | 8.09951e-23 | 1.000000 | 8.09975e-23 | 1.000000 |
| rad45              | 5.78860e-25 | 1.000000 | 5.78876e-25 | 1.000000 |
| rad18              | 3.93126e-25 | 1.000000 | 3.93138e-25 | 1.000000 |
| rad22              | 7.55219e-26 | 1.000000 | 7.55241e-26 | 1.000000 |
| rad36              | 3.66495e-26 | 1.000000 | 3.66505e-26 | 1.000000 |
| rad24              | 8.66000e-29 | 1.000000 | 8.66025e-29 | 1.000000 |
| rad47              | 1.77437e-31 | 1.000000 | 1.77442e-31 | 1.000000 |

0.100000000E-04 Pa, 250.00000 K

=====

|               |                 |                      |
|---------------|-----------------|----------------------|
| Rate constant | True (fraction) | Effective (fraction) |
|---------------|-----------------|----------------------|

-----

|                    |                       |                       |
|--------------------|-----------------------|-----------------------|
| Total              | 1.21641e-16 (1.00 )   | 1.21637e-16 (1.00 )   |
| Formation of rad11 | 9.54219e-17 (0.784 )  | 9.54182e-17 (0.784 )  |
| Formation of rad6  | 2.24583e-17 (0.185 )  | 2.24574e-17 (0.185 )  |
| H-abstraction      | 3.76121e-18 (0.0309 ) | 3.76121e-18 (0.0309 ) |

| species            | PYtrue      | Cumul    | PYeffective | Cumul    |
|--------------------|-------------|----------|-------------|----------|
| Indene+H           | 0.932252    | 0.932252 | 0.932286    | 0.932286 |
| Benzene+2-propynyl | 0.0309205   | 0.963172 | 0.0309216   | 0.963208 |
| C2H2+PhCH2         | 0.0191484   | 0.982321 | 0.0191491   | 0.982357 |
| PhCCH+CH3          | 0.00929415  | 0.991615 | 0.00929450  | 0.991652 |
| PhCHCCH2+H         | 0.00474593  | 0.996361 | 0.00474610  | 0.996398 |
| PhCCCH3+H          | 0.00309713  | 0.999458 | 0.00309724  | 0.999495 |
| Ph+MeAc            | 0.000393214 | 0.999851 | 0.000393229 | 0.999888 |
| rad8               | 3.87909e-05 | 0.999890 | 3.87923e-05 | 0.999927 |
| Phenyl+Allene      | 3.70732e-05 | 0.999927 | 0.00000     | 0.999927 |
| rad9               | 3.63102e-05 | 0.999963 | 3.63115e-05 | 0.999963 |
| PAH7+H             | 2.57193e-05 | 0.999989 | 2.57202e-05 | 0.999989 |
| rad39              | 5.55632e-06 | 0.999994 | 5.55653e-06 | 0.999995 |
| rad12              | 2.36943e-06 | 0.999997 | 2.36951e-06 | 0.999997 |
| rad30              | 1.49312e-06 | 0.999998 | 1.49318e-06 | 0.999998 |
| PhCH2CCH+H         | 8.24576e-07 | 0.999999 | 8.24606e-07 | 0.999999 |
| PAH9+H             | 3.87066e-07 | 0.999999 | 3.87081e-07 | 1.000000 |
| rad15              | 3.55048e-07 | 1.000000 | 3.55062e-07 | 1.000000 |
| rad35              | 1.70337e-07 | 1.000000 | 1.70344e-07 | 1.00000  |
| rad38              | 1.15045e-07 | 1.00000  | 1.15049e-07 | 1.00000  |
| rad37              | 7.09980e-08 | 1.00000  | 7.10006e-08 | 1.00000  |
| rad6               | 9.67541e-09 | 1.00000  | 9.67576e-09 | 1.00000  |
| rad46              | 2.16267e-09 | 1.00000  | 2.16274e-09 | 1.00000  |
| rad5               | 2.07035e-09 | 1.00000  | 2.07043e-09 | 1.00000  |
| rad60syn           | 3.56018e-10 | 1.00000  | 3.56031e-10 | 1.00000  |
| rad60anti          | 1.31053e-10 | 1.00000  | 1.31058e-10 | 1.00000  |
| rad28              | 4.29263e-11 | 1.00000  | 4.29279e-11 | 1.00000  |
| PAH3+H             | 5.36486e-12 | 1.00000  | 5.36506e-12 | 1.00000  |
| rad2               | 4.27356e-12 | 1.00000  | 4.27372e-12 | 1.00000  |
| rad26              | 4.00813e-12 | 1.00000  | 4.00828e-12 | 1.00000  |
| rad19syn           | 2.76166e-12 | 1.00000  | 2.76177e-12 | 1.00000  |
| rad59              | 1.55280e-12 | 1.00000  | 1.55286e-12 | 1.00000  |
| rad7               | 7.25859e-13 | 1.00000  | 7.25885e-13 | 1.00000  |
| rad1               | 3.05191e-13 | 1.00000  | 3.05203e-13 | 1.00000  |
| rad10              | 2.26887e-13 | 1.00000  | 2.26895e-13 | 1.00000  |
| rad50              | 1.98553e-13 | 1.00000  | 1.98560e-13 | 1.00000  |
| rad11              | 1.78826e-13 | 1.00000  | 1.78833e-13 | 1.00000  |
| rad54              | 7.36282e-14 | 1.00000  | 7.36311e-14 | 1.00000  |
| PAH10+CH3          | 4.90469e-14 | 1.00000  | 4.90486e-14 | 1.00000  |
| rad3               | 2.79353e-14 | 1.00000  | 2.79363e-14 | 1.00000  |
| rad4               | 1.46082e-14 | 1.00000  | 1.46088e-14 | 1.00000  |
| rad43              | 1.14660e-14 | 1.00000  | 1.14664e-14 | 1.00000  |
| rad13              | 4.14289e-15 | 1.00000  | 4.14304e-15 | 1.00000  |
| rad62              | 3.26822e-15 | 1.00000  | 3.26834e-15 | 1.00000  |
| PhcycC3H3_A+H      | 2.69199e-16 | 1.00000  | 2.69209e-16 | 1.00000  |
| rad70              | 1.54045e-16 | 1.00000  | 1.54051e-16 | 1.00000  |
| rad14              | 1.34606e-16 | 1.00000  | 1.34612e-16 | 1.00000  |
| rad52              | 1.14630e-16 | 1.00000  | 1.14633e-16 | 1.00000  |
| rad25              | 7.52164e-17 | 1.00000  | 7.52192e-17 | 1.00000  |
| rad55              | 7.20605e-17 | 1.00000  | 7.20632e-17 | 1.00000  |
| rad27              | 1.42829e-17 | 1.00000  | 1.42834e-17 | 1.00000  |
| rad33              | 8.07515e-18 | 1.00000  | 8.07545e-18 | 1.00000  |
| PAH1+H             | 7.11973e-18 | 1.00000  | 7.12000e-18 | 1.00000  |
| rad51              | 5.07765e-18 | 1.00000  | 5.07784e-18 | 1.00000  |
| rad34              | 4.05527e-19 | 1.00000  | 4.05542e-19 | 1.00000  |
| rad58              | 2.12984e-19 | 1.00000  | 2.12993e-19 | 1.00000  |
| rad65              | 5.08164e-20 | 1.00000  | 5.08183e-20 | 1.00000  |
| rad31              | 2.43960e-20 | 1.00000  | 2.43969e-20 | 1.00000  |
| rad42              | 7.19648e-21 | 1.00000  | 7.19675e-21 | 1.00000  |
| rad41              | 2.12406e-21 | 1.00000  | 2.12413e-21 | 1.00000  |
| rad23              | 1.49166e-22 | 1.00000  | 1.49171e-22 | 1.00000  |
| rad20              | 1.07656e-22 | 1.00000  | 1.07661e-22 | 1.00000  |
| rad21              | 8.67263e-23 | 1.00000  | 8.67295e-23 | 1.00000  |
| rad45              | 1.10085e-24 | 1.00000  | 1.10090e-24 | 1.00000  |
| rad18              | 3.39289e-25 | 1.00000  | 3.39302e-25 | 1.00000  |
| rad36              | 7.00131e-26 | 1.00000  | 7.00157e-26 | 1.00000  |
| rad22              | 6.61083e-26 | 1.00000  | 6.61107e-26 | 1.00000  |
| rad24              | 1.00845e-28 | 1.00000  | 1.00849e-28 | 1.00000  |
| rad47              | 5.12431e-31 | 1.00000  | 5.12450e-31 | 1.00000  |

0.100000000E-04 Pa, 260.00000 K

=====

| Rate constant | True (fraction) | Effective (fraction) |
|---------------|-----------------|----------------------|
|---------------|-----------------|----------------------|

-----

|                    |             |          |             |          |
|--------------------|-------------|----------|-------------|----------|
| Total              | 1.63720e-16 | (1.00)   | 1.63713e-16 | (1.00)   |
| Formation of rad11 | 1.26419e-16 | (0.772)  | 1.26412e-16 | (0.772)  |
| Formation of rad6  | 3.15515e-17 | (0.193)  | 3.15499e-17 | (0.193)  |
| H-abstraction      | 5.75028e-18 | (0.0351) | 5.75028e-18 | (0.0351) |

| species            | PYtrue      | Cumul    | PYeffective | Cumul    |
|--------------------|-------------|----------|-------------|----------|
| Indene+H           | 0.925679    | 0.925679 | 0.925722    | 0.925722 |
| Benzene+2-propynyl | 0.0351226   | 0.960802 | 0.0351242   | 0.960846 |
| C2H2+PhCH2         | 0.0201940   | 0.980996 | 0.0201949   | 0.981041 |
| PhCCH+CH3          | 0.0100136   | 0.991009 | 0.0100141   | 0.991055 |
| PhCHCCH2+H         | 0.00505961  | 0.996069 | 0.00505984  | 0.996115 |
| PhCCCH3+H          | 0.00330223  | 0.999371 | 0.00330238  | 0.999418 |
| Ph+MeAc            | 0.000455976 | 0.999827 | 0.000455997 | 0.999874 |
| Phenyl+Allene      | 4.67380e-05 | 0.999874 | 0.000000    | 0.999874 |
| rad8               | 4.21815e-05 | 0.999916 | 4.21834e-05 | 0.999916 |
| rad9               | 4.12283e-05 | 0.999957 | 4.12303e-05 | 0.999957 |
| PAH7+H             | 2.95968e-05 | 0.999987 | 2.95982e-05 | 0.999987 |
| rad39              | 6.52910e-06 | 0.999994 | 6.52940e-06 | 0.999993 |
| rad12              | 2.63947e-06 | 0.999996 | 2.63959e-06 | 0.999996 |
| rad30              | 1.61403e-06 | 0.999998 | 1.61411e-06 | 0.999997 |
| PhCH2CCH+H         | 1.18111e-06 | 0.999999 | 1.18116e-06 | 0.999999 |
| PAH9+H             | 4.27688e-07 | 0.999999 | 4.27707e-07 | 0.999999 |
| rad15              | 3.90352e-07 | 1.000000 | 3.90370e-07 | 0.999999 |
| rad35              | 1.85866e-07 | 1.000000 | 1.85875e-07 | 1.000000 |
| rad38              | 1.28280e-07 | 1.000000 | 1.28287e-07 | 1.000000 |
| rad37              | 9.01666e-08 | 1.000000 | 9.01709e-08 | 1.000000 |
| rad6               | 7.56787e-09 | 1.000000 | 7.56823e-09 | 1.000000 |
| rad5               | 2.95864e-09 | 1.000000 | 2.95878e-09 | 1.000000 |
| rad46              | 2.56363e-09 | 1.000000 | 2.56375e-09 | 1.000000 |
| rad60syn           | 4.44734e-10 | 1.000000 | 4.44755e-10 | 1.000000 |
| rad60anti          | 1.66722e-10 | 1.000000 | 1.66730e-10 | 1.000000 |
| rad28              | 3.40966e-11 | 1.000000 | 3.40982e-11 | 1.000000 |
| PAH3+H             | 8.58343e-12 | 1.000000 | 8.58383e-12 | 1.000000 |
| rad19syn           | 5.57628e-12 | 1.000000 | 5.57654e-12 | 1.000000 |
| rad2               | 3.55649e-12 | 1.000000 | 3.55666e-12 | 1.000000 |
| rad26              | 3.21952e-12 | 1.000000 | 3.21967e-12 | 1.000000 |
| rad59              | 2.42884e-12 | 1.000000 | 2.42895e-12 | 1.000000 |
| rad7               | 5.69244e-13 | 1.000000 | 5.69271e-13 | 1.000000 |
| rad50              | 3.24283e-13 | 1.000000 | 3.24298e-13 | 1.000000 |
| rad1               | 2.57157e-13 | 1.000000 | 2.57169e-13 | 1.000000 |
| rad10              | 1.89305e-13 | 1.000000 | 1.89314e-13 | 1.000000 |
| rad54              | 1.66740e-13 | 1.000000 | 1.66749e-13 | 1.000000 |
| rad11              | 1.40327e-13 | 1.000000 | 1.40333e-13 | 1.000000 |
| PAH10+CH3          | 1.09926e-13 | 1.000000 | 1.09931e-13 | 1.000000 |
| rad43              | 2.54560e-14 | 1.000000 | 2.54572e-14 | 1.000000 |
| rad3               | 2.32887e-14 | 1.000000 | 2.32897e-14 | 1.000000 |
| rad4               | 1.22222e-14 | 1.000000 | 1.22228e-14 | 1.000000 |
| rad62              | 7.80898e-15 | 1.000000 | 7.80934e-15 | 1.000000 |
| rad13              | 3.25576e-15 | 1.000000 | 3.25591e-15 | 1.000000 |
| PhcycC3H3_A+H      | 7.73844e-16 | 1.000000 | 7.73881e-16 | 1.000000 |
| rad70              | 4.28315e-16 | 1.000000 | 4.28335e-16 | 1.000000 |
| rad52              | 2.38188e-16 | 1.000000 | 2.38199e-16 | 1.000000 |
| rad55              | 2.02605e-16 | 1.000000 | 2.02614e-16 | 1.000000 |
| rad14              | 1.14798e-16 | 1.000000 | 1.14804e-16 | 1.000000 |
| rad25              | 6.47331e-17 | 1.000000 | 6.47361e-17 | 1.000000 |
| PAH1+H             | 2.22904e-17 | 1.000000 | 2.22914e-17 | 1.000000 |
| rad51              | 1.28523e-17 | 1.000000 | 1.28529e-17 | 1.000000 |
| rad27              | 1.22026e-17 | 1.000000 | 1.22032e-17 | 1.000000 |
| rad33              | 6.36370e-18 | 1.000000 | 6.36400e-18 | 1.000000 |
| rad34              | 1.30239e-18 | 1.000000 | 1.30245e-18 | 1.000000 |
| rad58              | 6.22352e-19 | 1.000000 | 6.22381e-19 | 1.000000 |
| rad65              | 1.39789e-19 | 1.000000 | 1.39795e-19 | 1.000000 |
| rad31              | 3.38517e-20 | 1.000000 | 3.38532e-20 | 1.000000 |
| rad42              | 2.44582e-20 | 1.000000 | 2.44593e-20 | 1.000000 |
| rad41              | 7.28482e-21 | 1.000000 | 7.28516e-21 | 1.000000 |
| rad23              | 2.92648e-22 | 1.000000 | 2.92661e-22 | 1.000000 |
| rad20              | 9.85690e-23 | 1.000000 | 9.85736e-23 | 1.000000 |
| rad21              | 8.02366e-23 | 1.000000 | 8.02403e-23 | 1.000000 |
| rad45              | 2.24681e-24 | 1.000000 | 2.24692e-24 | 1.000000 |
| rad18              | 2.94885e-25 | 1.000000 | 2.94899e-25 | 1.000000 |
| rad36              | 1.43620e-25 | 1.000000 | 1.43627e-25 | 1.000000 |
| rad22              | 6.14644e-26 | 1.000000 | 6.14673e-26 | 1.000000 |
| rad24              | 1.19406e-28 | 1.000000 | 1.19411e-28 | 1.000000 |
| rad47              | 1.34823e-30 | 1.000000 | 1.34829e-30 | 1.000000 |

0.100000000E-04 Pa, 270.00000 K

=====

| Rate constant | True (fraction) | Effective (fraction) |
|---------------|-----------------|----------------------|
|---------------|-----------------|----------------------|

-----

|                    |             |           |             |           |
|--------------------|-------------|-----------|-------------|-----------|
| Total              | 2.15887e-16 | (1.00 )   | 2.15874e-16 | (1.00 )   |
| Formation of rad11 | 1.64133e-16 | (0.760 )  | 1.64123e-16 | (0.760 )  |
| Formation of rad6  | 4.32452e-17 | (0.200 )  | 4.32425e-17 | (0.200 )  |
| H-abstraction      | 8.50919e-18 | (0.0394 ) | 8.50919e-18 | (0.0394 ) |

| species            | PYtrue      | Cumul    | PYeffective | Cumul    |
|--------------------|-------------|----------|-------------|----------|
| Indene+H           | 0.918867    | 0.918867 | 0.918920    | 0.918920 |
| Benzene+2-propynyl | 0.0394150   | 0.958282 | 0.0394174   | 0.958338 |
| C2H2+PhCH2         | 0.0213101   | 0.979592 | 0.0213113   | 0.979649 |
| PhCCH+CH3          | 0.0107767   | 0.990369 | 0.0107774   | 0.990426 |
| PhCHCCH2+H         | 0.00538918  | 0.995758 | 0.00538949  | 0.995816 |
| PhCCCH3+H          | 0.00351550  | 0.999273 | 0.00351571  | 0.999331 |
| Ph+MeAc            | 0.000526367 | 0.999800 | 0.000526398 | 0.999858 |
| Phenyl+Allene      | 5.86083e-05 | 0.999858 | 0.000000    | 0.999858 |
| rad9               | 4.67561e-05 | 0.999905 | 4.67588e-05 | 0.999905 |
| rad8               | 4.57804e-05 | 0.999951 | 4.57831e-05 | 0.999950 |
| PAH7+H             | 3.40240e-05 | 0.999985 | 3.40260e-05 | 0.999984 |
| rad39              | 7.65343e-06 | 0.999992 | 7.65388e-06 | 0.999992 |
| rad12              | 2.93176e-06 | 0.999995 | 2.93194e-06 | 0.999995 |
| rad30              | 1.74620e-06 | 0.999997 | 1.74630e-06 | 0.999997 |
| PhCH2CCH+H         | 1.66619e-06 | 0.999999 | 1.66629e-06 | 0.999998 |
| PAH9+H             | 4.73407e-07 | 0.999999 | 4.73435e-07 | 0.999999 |
| rad15              | 4.29508e-07 | 1.000000 | 4.29533e-07 | 0.999999 |
| rad35              | 2.03130e-07 | 1.000000 | 2.03141e-07 | 1.000000 |
| rad38              | 1.43292e-07 | 1.000000 | 1.43302e-07 | 1.000000 |
| rad37              | 1.12949e-07 | 1.000000 | 1.12956e-07 | 1.000000 |
| rad6               | 5.93909e-09 | 1.000000 | 5.93944e-09 | 1.000000 |
| rad5               | 4.14321e-09 | 1.000000 | 4.14346e-09 | 1.000000 |
| rad46              | 3.04255e-09 | 1.000000 | 3.04272e-09 | 1.000000 |
| rad60syn           | 5.53842e-10 | 1.000000 | 5.53875e-10 | 1.000000 |
| rad60anti          | 2.11182e-10 | 1.000000 | 2.11195e-10 | 1.000000 |
| rad28              | 2.71391e-11 | 1.000000 | 2.71407e-11 | 1.000000 |
| PAH3+H             | 1.34407e-11 | 1.000000 | 1.34415e-11 | 1.000000 |
| rad19syn           | 1.07496e-11 | 1.000000 | 1.07503e-11 | 1.000000 |
| rad59              | 3.72234e-12 | 1.000000 | 3.72257e-12 | 1.000000 |
| rad2               | 3.03496e-12 | 1.000000 | 3.03513e-12 | 1.000000 |
| rad26              | 2.59419e-12 | 1.000000 | 2.59435e-12 | 1.000000 |
| rad50              | 5.19408e-13 | 1.000000 | 5.19439e-13 | 1.000000 |
| rad7               | 4.47943e-13 | 1.000000 | 4.47970e-13 | 1.000000 |
| rad54              | 3.56843e-13 | 1.000000 | 3.56863e-13 | 1.000000 |
| PAH10+CH3          | 2.32532e-13 | 1.000000 | 2.32546e-13 | 1.000000 |
| rad1               | 2.22397e-13 | 1.000000 | 2.22409e-13 | 1.000000 |
| rad10              | 1.61854e-13 | 1.000000 | 1.61863e-13 | 1.000000 |
| rad11              | 1.10494e-13 | 1.000000 | 1.10501e-13 | 1.000000 |
| rad43              | 5.33173e-14 | 1.000000 | 5.33204e-14 | 1.000000 |
| rad3               | 1.98940e-14 | 1.000000 | 1.98952e-14 | 1.000000 |
| rad62              | 1.74987e-14 | 1.000000 | 1.74997e-14 | 1.000000 |
| rad4               | 1.04812e-14 | 1.000000 | 1.04819e-14 | 1.000000 |
| rad13              | 2.56759e-15 | 1.000000 | 2.56773e-15 | 1.000000 |
| PhcycC3H3_A+H      | 2.04645e-15 | 1.000000 | 2.04657e-15 | 1.000000 |
| rad70              | 1.09948e-15 | 1.000000 | 1.09954e-15 | 1.000000 |
| rad55              | 5.25291e-16 | 1.000000 | 5.25322e-16 | 1.000000 |
| rad52              | 4.74024e-16 | 1.000000 | 4.74051e-16 | 1.000000 |
| rad14              | 9.81084e-17 | 1.000000 | 9.81139e-17 | 1.000000 |
| PAH1+H             | 6.34370e-17 | 1.000000 | 6.34407e-17 | 1.000000 |
| rad25              | 5.58499e-17 | 1.000000 | 5.58532e-17 | 1.000000 |
| rad51              | 3.04902e-17 | 1.000000 | 3.04920e-17 | 1.000000 |
| rad27              | 1.04802e-17 | 1.000000 | 1.04808e-17 | 1.000000 |
| rad33              | 5.03368e-18 | 1.000000 | 5.03397e-18 | 1.000000 |
| rad34              | 3.78993e-18 | 1.000000 | 3.79016e-18 | 1.000000 |
| rad58              | 1.67022e-18 | 1.000000 | 1.67032e-18 | 1.000000 |
| rad65              | 3.56314e-19 | 1.000000 | 3.56335e-19 | 1.000000 |
| rad42              | 7.47515e-20 | 1.000000 | 7.47558e-20 | 1.000000 |
| rad31              | 4.77262e-20 | 1.000000 | 4.77290e-20 | 1.000000 |
| rad41              | 2.24434e-20 | 1.000000 | 2.24447e-20 | 1.000000 |
| rad23              | 6.06832e-22 | 1.000000 | 6.06867e-22 | 1.000000 |
| rad20              | 9.14933e-23 | 1.000000 | 9.14987e-23 | 1.000000 |
| rad21              | 7.53227e-23 | 1.000000 | 7.53272e-23 | 1.000000 |
| rad45              | 4.88846e-24 | 1.000000 | 4.88875e-24 | 1.000000 |
| rad36              | 3.14249e-25 | 1.000000 | 3.14267e-25 | 1.000000 |
| rad18              | 2.58079e-25 | 1.000000 | 2.58095e-25 | 1.000000 |
| rad22              | 6.37681e-26 | 1.000000 | 6.37718e-26 | 1.000000 |
| rad24              | 1.43743e-28 | 1.000000 | 1.43751e-28 | 1.000000 |
| rad47              | 3.26700e-30 | 1.000000 | 3.26718e-30 | 1.000000 |

0.100000000E-04 Pa, 280.00000 K

=====

| Rate constant | True (fraction) | Effective (fraction) |
|---------------|-----------------|----------------------|
|---------------|-----------------|----------------------|

-----

|                    |             |           |             |           |
|--------------------|-------------|-----------|-------------|-----------|
| Total              | 2.79491e-16 | (1.00 )   | 2.79471e-16 | (1.00 )   |
| Formation of rad11 | 2.09281e-16 | (0.749 )  | 2.09265e-16 | (0.749 )  |
| Formation of rad6  | 5.79792e-17 | (0.207 )  | 5.79748e-17 | (0.207 )  |
| H-abstraction      | 1.22310e-17 | (0.0438 ) | 1.22310e-17 | (0.0438 ) |

| species            | PYtrue      | Cumul    | PYeffective | Cumul    |
|--------------------|-------------|----------|-------------|----------|
| Indene+H           | 0.911846    | 0.911846 | 0.911913    | 0.911913 |
| Benzene+2-propynyl | 0.0437616   | 0.955608 | 0.0437648   | 0.955678 |
| C2H2+PhCH2         | 0.0225001   | 0.978108 | 0.0225017   | 0.978179 |
| PhCCH+CH3          | 0.0115837   | 0.989691 | 0.0115845   | 0.989764 |
| PhCHCCH2+H         | 0.00573446  | 0.995426 | 0.00573488  | 0.995499 |
| PhCCCH3+H          | 0.00373632  | 0.999162 | 0.00373659  | 0.999235 |
| Ph+MeAc            | 0.000604861 | 0.999767 | 0.000604905 | 0.999840 |
| Phenyl+Allene      | 7.31093e-05 | 0.999840 | 0.000000    | 0.999840 |
| rad9               | 5.29532e-05 | 0.999893 | 5.29572e-05 | 0.999893 |
| rad8               | 4.95842e-05 | 0.999943 | 4.95879e-05 | 0.999943 |
| PAH7+H             | 3.90666e-05 | 0.999982 | 3.90695e-05 | 0.999982 |
| rad39              | 8.94856e-06 | 0.999991 | 8.94920e-06 | 0.999991 |
| rad12              | 3.24663e-06 | 0.999994 | 3.24687e-06 | 0.999994 |
| PhCH2CCH+H         | 2.31773e-06 | 0.999996 | 2.31790e-06 | 0.999996 |
| rad30              | 1.89048e-06 | 0.999998 | 1.89062e-06 | 0.999998 |
| PAH9+H             | 5.24843e-07 | 0.999999 | 5.24881e-07 | 0.999999 |
| rad15              | 4.72881e-07 | 0.999999 | 4.72916e-07 | 0.999999 |
| rad35              | 2.22313e-07 | 0.999999 | 2.22329e-07 | 0.999999 |
| rad38              | 1.60312e-07 | 1.000000 | 1.60324e-07 | 1.000000 |
| rad37              | 1.39762e-07 | 1.000000 | 1.39772e-07 | 1.000000 |
| rad5               | 5.69578e-09 | 1.000000 | 5.69619e-09 | 1.000000 |
| rad6               | 4.67581e-09 | 1.000000 | 4.67614e-09 | 1.000000 |
| rad46              | 3.61388e-09 | 1.000000 | 3.61415e-09 | 1.000000 |
| rad60syn           | 6.87474e-10 | 1.000000 | 6.87525e-10 | 1.000000 |
| rad60anti          | 2.66333e-10 | 1.000000 | 2.66353e-10 | 1.000000 |
| rad28              | 2.16422e-11 | 1.000000 | 2.16437e-11 | 1.000000 |
| PAH3+H             | 2.06360e-11 | 1.000000 | 2.06376e-11 | 1.000000 |
| rad19syn           | 1.98729e-11 | 1.000000 | 1.98744e-11 | 1.000000 |
| rad59              | 5.59933e-12 | 1.000000 | 5.59974e-12 | 1.000000 |
| rad2               | 2.66914e-12 | 1.000000 | 2.66933e-12 | 1.000000 |
| rad26              | 2.09702e-12 | 1.000000 | 2.09717e-12 | 1.000000 |
| rad50              | 8.16970e-13 | 1.000000 | 8.17030e-13 | 1.000000 |
| rad54              | 7.25431e-13 | 1.000000 | 7.25484e-13 | 1.000000 |
| PAH10+CH3          | 4.66800e-13 | 1.000000 | 4.66834e-13 | 1.000000 |
| rad7               | 3.53651e-13 | 1.000000 | 3.53677e-13 | 1.000000 |
| rad1               | 1.98411e-13 | 1.000000 | 1.98426e-13 | 1.000000 |
| rad10              | 1.42613e-13 | 1.000000 | 1.42624e-13 | 1.000000 |
| rad43              | 1.05948e-13 | 1.000000 | 1.05957e-13 | 1.000000 |
| rad11              | 8.72936e-14 | 1.000000 | 8.73000e-14 | 1.000000 |
| rad62              | 3.69966e-14 | 1.000000 | 3.69993e-14 | 1.000000 |
| rad3               | 1.75336e-14 | 1.000000 | 1.75349e-14 | 1.000000 |
| rad4               | 9.27633e-15 | 1.000000 | 9.27700e-15 | 1.000000 |
| PhcycC3H3_A+H      | 5.01690e-15 | 1.000000 | 5.01727e-15 | 1.000000 |
| rad70              | 2.62498e-15 | 1.000000 | 2.62517e-15 | 1.000000 |
| rad13              | 2.03178e-15 | 1.000000 | 2.03192e-15 | 1.000000 |
| rad55              | 1.26526e-15 | 1.000000 | 1.26535e-15 | 1.000000 |
| rad52              | 9.06707e-16 | 1.000000 | 9.06774e-16 | 1.000000 |
| PAH1+H             | 1.65664e-16 | 1.000000 | 1.65676e-16 | 1.000000 |
| rad14              | 8.40158e-17 | 1.000000 | 8.40220e-17 | 1.000000 |
| rad51              | 6.81440e-17 | 1.000000 | 6.81491e-17 | 1.000000 |
| rad25              | 4.83042e-17 | 1.000000 | 4.83078e-17 | 1.000000 |
| rad34              | 1.00922e-17 | 1.000000 | 1.00930e-17 | 1.000000 |
| rad27              | 9.04792e-18 | 1.000000 | 9.04858e-18 | 1.000000 |
| rad58              | 4.14898e-18 | 1.000000 | 4.14929e-18 | 1.000000 |
| rad33              | 3.99613e-18 | 1.000000 | 3.99642e-18 | 1.000000 |
| rad65              | 8.47078e-19 | 1.000000 | 8.47140e-19 | 1.000000 |
| rad42              | 2.07733e-19 | 1.000000 | 2.07749e-19 | 1.000000 |
| rad31              | 6.82380e-20 | 1.000000 | 6.82430e-20 | 1.000000 |
| rad41              | 6.28123e-20 | 1.000000 | 6.28169e-20 | 1.000000 |
| rad23              | 1.32073e-21 | 1.000000 | 1.32082e-21 | 1.000000 |
| rad20              | 8.61280e-23 | 1.000000 | 8.61343e-23 | 1.000000 |
| rad21              | 7.17759e-23 | 1.000000 | 7.17811e-23 | 1.000000 |
| rad45              | 1.12907e-23 | 1.000000 | 1.12915e-23 | 1.000000 |
| rad36              | 7.30366e-25 | 1.000000 | 7.30419e-25 | 1.000000 |
| rad18              | 2.27446e-25 | 1.000000 | 2.27463e-25 | 1.000000 |
| rad22              | 7.85071e-26 | 1.000000 | 7.85128e-26 | 1.000000 |
| rad24              | 1.75934e-28 | 1.000000 | 1.75946e-28 | 1.000000 |
| rad47              | 7.35913e-30 | 1.000000 | 7.35967e-30 | 1.000000 |

0.100000000E-04 Pa, 290.00000 K

=====

|               |                 |                      |
|---------------|-----------------|----------------------|
| Rate constant | True (fraction) | Effective (fraction) |
|---------------|-----------------|----------------------|

-----

|                    |                       |                       |
|--------------------|-----------------------|-----------------------|
| Total              | 3.55893e-16 (1.00 )   | 3.55861e-16 (1.00 )   |
| Formation of rad11 | 2.62555e-16 (0.738 )  | 2.62530e-16 (0.738 )  |
| Formation of rad6  | 7.62093e-17 (0.214 )  | 7.62020e-17 (0.214 )  |
| H-abstraction      | 1.71289e-17 (0.0481 ) | 1.71289e-17 (0.0481 ) |

| species            | PYtrue      | Cumul    | PYeffective | Cumul    |
|--------------------|-------------|----------|-------------|----------|
| Indene+H           | 0.904648    | 0.904648 | 0.904731    | 0.904731 |
| Benzene+2-propynyl | 0.0481294   | 0.952778 | 0.0481337   | 0.952865 |
| C2H2+PhCH2         | 0.0237673   | 0.976545 | 0.0237694   | 0.976634 |
| PhCCH+CH3          | 0.0124342   | 0.988979 | 0.0124353   | 0.989069 |
| PhCHCCH2+H         | 0.00609516  | 0.995074 | 0.00609571  | 0.995165 |
| PhCCCH3+H          | 0.00396392  | 0.999038 | 0.00396429  | 0.999129 |
| Ph+MeAc            | 0.000691888 | 0.999730 | 0.000691951 | 0.999821 |
| Phenyl+Allene      | 9.07290e-05 | 0.999821 | 0.00000     | 0.999821 |
| rad9               | 5.98835e-05 | 0.999881 | 5.98890e-05 | 0.999881 |
| rad8               | 5.35872e-05 | 0.999934 | 5.35921e-05 | 0.999935 |
| PAH7+H             | 4.47955e-05 | 0.999979 | 4.47996e-05 | 0.999979 |
| rad39              | 1.04353e-05 | 0.999990 | 1.04362e-05 | 0.999990 |
| rad12              | 3.58414e-06 | 0.999993 | 3.58446e-06 | 0.999993 |
| PhCH2CCH+H         | 3.18219e-06 | 0.999996 | 3.18248e-06 | 0.999997 |
| rad30              | 2.04781e-06 | 0.999998 | 2.04799e-06 | 0.999999 |
| PAH9+H             | 5.82675e-07 | 0.999999 | 5.82728e-07 | 0.999999 |
| rad15              | 5.20855e-07 | 0.999999 | 5.20902e-07 | 1.000000 |
| rad35              | 2.43617e-07 | 1.000000 | 2.43639e-07 | 1.000000 |
| rad38              | 1.79594e-07 | 1.000000 | 1.79611e-07 | 1.000000 |
| rad37              | 1.71029e-07 | 1.000000 | 1.71045e-07 | 1.000000 |
| rad5               | 7.69832e-09 | 1.000000 | 7.69902e-09 | 1.000000 |
| rad46              | 4.29443e-09 | 1.000000 | 4.29482e-09 | 1.000000 |
| rad6               | 3.69290e-09 | 1.000000 | 3.69323e-09 | 1.000000 |
| rad60syn           | 8.50433e-10 | 1.000000 | 8.50510e-10 | 1.000000 |
| rad60anti          | 3.34404e-10 | 1.000000 | 3.34434e-10 | 1.000000 |
| rad19syn           | 3.53629e-11 | 1.000000 | 3.53661e-11 | 1.000000 |
| PAH3+H             | 3.11084e-11 | 1.000000 | 3.11113e-11 | 1.000000 |
| rad28              | 1.72890e-11 | 1.000000 | 1.72906e-11 | 1.000000 |
| rad59              | 8.27853e-12 | 1.000000 | 8.27929e-12 | 1.000000 |
| rad2               | 2.43092e-12 | 1.000000 | 2.43113e-12 | 1.000000 |
| rad26              | 1.70078e-12 | 1.000000 | 1.70094e-12 | 1.000000 |
| rad54              | 1.40687e-12 | 1.000000 | 1.40700e-12 | 1.000000 |
| rad50              | 1.26306e-12 | 1.000000 | 1.26317e-12 | 1.000000 |
| PAH10+CH3          | 8.93365e-13 | 1.000000 | 8.93446e-13 | 1.000000 |
| rad7               | 2.80118e-13 | 1.000000 | 2.80144e-13 | 1.000000 |
| rad43              | 2.00693e-13 | 1.000000 | 2.00711e-13 | 1.000000 |
| rad1               | 1.83493e-13 | 1.000000 | 1.83510e-13 | 1.000000 |
| rad10              | 1.30161e-13 | 1.000000 | 1.30172e-13 | 1.000000 |
| rad62              | 7.41760e-14 | 1.000000 | 7.41827e-14 | 1.000000 |
| rad11              | 6.91913e-14 | 1.000000 | 6.91975e-14 | 1.000000 |
| rad3               | 1.60131e-14 | 1.000000 | 1.60146e-14 | 1.000000 |
| PhcycC3H3_A+H      | 1.14775e-14 | 1.000000 | 1.14786e-14 | 1.000000 |
| rad4               | 8.50997e-15 | 1.000000 | 8.51074e-15 | 1.000000 |
| rad70              | 5.86607e-15 | 1.000000 | 5.86661e-15 | 1.000000 |
| rad55              | 2.84962e-15 | 1.000000 | 2.84988e-15 | 1.000000 |
| rad52              | 1.67149e-15 | 1.000000 | 1.67165e-15 | 1.000000 |
| rad13              | 1.61321e-15 | 1.000000 | 1.61337e-15 | 1.000000 |
| PAH1+H             | 4.00254e-16 | 1.000000 | 4.00290e-16 | 1.000000 |
| rad51              | 1.44106e-16 | 1.000000 | 1.44118e-16 | 1.000000 |
| rad14              | 7.20947e-17 | 1.000000 | 7.21012e-17 | 1.000000 |
| rad25              | 4.18806e-17 | 1.000000 | 4.18844e-17 | 1.000000 |
| rad34              | 2.48051e-17 | 1.000000 | 2.48073e-17 | 1.000000 |
| rad58              | 9.60504e-18 | 1.000000 | 9.60595e-18 | 1.000000 |
| rad27              | 7.85252e-18 | 1.000000 | 7.85324e-18 | 1.000000 |
| rad33              | 3.18401e-18 | 1.000000 | 3.18430e-18 | 1.000000 |
| rad65              | 1.88891e-18 | 1.000000 | 1.88908e-18 | 1.000000 |
| rad42              | 5.29957e-19 | 1.000000 | 5.30005e-19 | 1.000000 |
| rad41              | 1.61252e-19 | 1.000000 | 1.61267e-19 | 1.000000 |
| rad31              | 9.87518e-20 | 1.000000 | 9.87609e-20 | 1.000000 |
| rad23              | 2.99765e-21 | 1.000000 | 2.99792e-21 | 1.000000 |
| rad20              | 8.22553e-23 | 1.000000 | 8.22628e-23 | 1.000000 |
| rad21              | 6.94520e-23 | 1.000000 | 6.94583e-23 | 1.000000 |
| rad45              | 2.74855e-23 | 1.000000 | 2.74880e-23 | 1.000000 |
| rad36              | 1.79026e-24 | 1.000000 | 1.79042e-24 | 1.000000 |
| rad18              | 2.01865e-25 | 1.000000 | 2.01883e-25 | 1.000000 |
| rad22              | 1.18510e-25 | 1.000000 | 1.18521e-25 | 1.000000 |
| rad24              | 2.18971e-28 | 1.000000 | 2.18991e-28 | 1.000000 |
| rad47              | 1.55333e-29 | 1.000000 | 1.55347e-29 | 1.000000 |

0.100000000E-04 Pa, 300.000000 K

=====

| Rate constant | True (fraction) | Effective (fraction) |
|---------------|-----------------|----------------------|
|---------------|-----------------|----------------------|

-----



|                    |             |           |             |           |
|--------------------|-------------|-----------|-------------|-----------|
| Total              | 6.34395e-16 | (1.00 )   | 6.34337e-16 | (1.00 )   |
| Formation of rad11 | 4.51153e-16 | (0.711 )  | 4.51110e-16 | (0.711 )  |
| Formation of rad6  | 1.51589e-16 | (0.239 )  | 1.51574e-16 | (0.239 )  |
| H-abstraction      | 3.16530e-17 | (0.0499 ) | 3.16530e-17 | (0.0499 ) |

| species            | PYtrue      | Cumul    | PYeffective | Cumul    |
|--------------------|-------------|----------|-------------|----------|
| Indene+H           | 0.891226    | 0.891226 | 0.891307    | 0.891307 |
| Benzene+2-propynyl | 0.0498949   | 0.941121 | 0.0498994   | 0.941207 |
| C2H2+PhCH2         | 0.0319092   | 0.973030 | 0.0319121   | 0.973119 |
| PhCCH+CH3          | 0.0149043   | 0.987935 | 0.0149057   | 0.988025 |
| PhCHCCH2+H         | 0.00657666  | 0.994511 | 0.00657725  | 0.994602 |
| PhCCCH3+H          | 0.00446845  | 0.998980 | 0.00446886  | 0.999071 |
| Ph+MeAc            | 0.000840126 | 0.999820 | 0.000840202 | 0.999911 |
| Phenyl+Allene      | 9.13471e-05 | 0.999911 | 0.000000    | 0.999911 |
| PAH7+H             | 6.60473e-05 | 0.999977 | 6.60534e-05 | 0.999977 |
| rad39              | 1.31460e-05 | 0.999990 | 1.31473e-05 | 0.999990 |
| PhCH2CCH+H         | 5.22124e-06 | 0.999996 | 5.22171e-06 | 0.999995 |
| rad30              | 2.21213e-06 | 0.999998 | 2.21234e-06 | 0.999997 |
| PAH9+H             | 8.00033e-07 | 0.999999 | 8.00106e-07 | 0.999998 |
| rad19anti          | 7.04464e-07 | 0.999999 | 7.04528e-07 | 0.999999 |
| rad35              | 2.87115e-07 | 1.000000 | 2.87141e-07 | 0.999999 |
| rad37              | 2.27544e-07 | 1.000000 | 2.27565e-07 | 1.000000 |
| rad38              | 2.12968e-07 | 1.000000 | 2.12987e-07 | 1.000000 |
| rad6               | 3.17624e-08 | 1.000000 | 3.17653e-08 | 1.000000 |
| rad46              | 5.68721e-09 | 1.000000 | 5.68773e-09 | 1.000000 |
| rad60syn           | 1.08207e-09 | 1.000000 | 1.08216e-09 | 1.000000 |
| rad60anti          | 4.39236e-10 | 1.000000 | 4.39275e-10 | 1.000000 |
| rad28              | 1.09766e-10 | 1.000000 | 1.09776e-10 | 1.000000 |
| rad19syn           | 6.92347e-11 | 1.000000 | 6.92411e-11 | 1.000000 |
| PAH3+H             | 6.10402e-11 | 1.000000 | 6.10458e-11 | 1.000000 |
| rad2               | 3.00445e-11 | 1.000000 | 3.00473e-11 | 1.000000 |
| rad26              | 1.48169e-11 | 1.000000 | 1.48182e-11 | 1.000000 |
| rad59              | 1.31853e-11 | 1.000000 | 1.31864e-11 | 1.000000 |
| rad54              | 3.21890e-12 | 1.000000 | 3.21920e-12 | 1.000000 |
| rad7               | 2.82334e-12 | 1.000000 | 2.82359e-12 | 1.000000 |
| rad1               | 2.26398e-12 | 1.000000 | 2.26418e-12 | 1.000000 |
| rad50              | 2.22682e-12 | 1.000000 | 2.22703e-12 | 1.000000 |
| PAH10+CH3          | 2.02587e-12 | 1.000000 | 2.02606e-12 | 1.000000 |
| rad10              | 1.86962e-12 | 1.000000 | 1.86979e-12 | 1.000000 |
| rad67              | 7.75555e-13 | 1.000000 | 7.75625e-13 | 1.000000 |
| rad11              | 6.77129e-13 | 1.000000 | 6.77191e-13 | 1.000000 |
| rad43              | 4.01328e-13 | 1.000000 | 4.01365e-13 | 1.000000 |
| rad3               | 2.90060e-13 | 1.000000 | 2.90087e-13 | 1.000000 |
| rad62              | 1.66583e-13 | 1.000000 | 1.66598e-13 | 1.000000 |
| rad4               | 1.44248e-13 | 1.000000 | 1.44261e-13 | 1.000000 |
| PhcycC3H3_A+H      | 4.89131e-14 | 1.000000 | 4.89175e-14 | 1.000000 |
| rad70              | 1.94639e-14 | 1.000000 | 1.94657e-14 | 1.000000 |
| rad13              | 1.62567e-14 | 1.000000 | 1.62581e-14 | 1.000000 |
| rad55              | 8.48752e-15 | 1.000000 | 8.48829e-15 | 1.000000 |
| rad52              | 3.84234e-15 | 1.000000 | 3.84269e-15 | 1.000000 |
| PAH1+H             | 2.34441e-15 | 1.000000 | 2.34463e-15 | 1.000000 |
| rad25              | 6.92452e-16 | 1.000000 | 6.92515e-16 | 1.000000 |
| rad14              | 6.11467e-16 | 1.000000 | 6.11523e-16 | 1.000000 |
| rad51              | 4.07407e-16 | 1.000000 | 4.07444e-16 | 1.000000 |
| rad27              | 1.69466e-16 | 1.000000 | 1.69482e-16 | 1.000000 |
| rad34              | 1.57782e-16 | 1.000000 | 1.57797e-16 | 1.000000 |
| rad23              | 9.04094e-17 | 1.000000 | 9.04177e-17 | 1.000000 |
| rad33              | 4.30611e-17 | 1.000000 | 4.30651e-17 | 1.000000 |
| rad58              | 2.99506e-17 | 1.000000 | 2.99534e-17 | 1.000000 |
| rad65              | 6.35787e-18 | 1.000000 | 6.35844e-18 | 1.000000 |
| rad42              | 4.93397e-18 | 1.000000 | 4.93442e-18 | 1.000000 |
| rad31              | 2.88995e-18 | 1.000000 | 2.89022e-18 | 1.000000 |
| rad45              | 2.51656e-18 | 1.000000 | 2.51679e-18 | 1.000000 |
| rad41              | 1.53085e-18 | 1.000000 | 1.53099e-18 | 1.000000 |
| rad21              | 1.24004e-19 | 1.000000 | 1.24016e-19 | 1.000000 |
| rad53              | 1.09682e-19 | 1.000000 | 1.09693e-19 | 1.000000 |
| rad20              | 9.69297e-20 | 1.000000 | 9.69378e-20 | 1.000000 |
| rad36              | 8.57732e-20 | 1.000000 | 8.57811e-20 | 1.000000 |
| rad64              | 2.63853e-20 | 1.000000 | 2.63877e-20 | 1.000000 |
| rad9               | 7.50853e-21 | 1.000000 | 7.50922e-21 | 1.000000 |
| rad22              | 4.37095e-21 | 1.000000 | 4.37135e-21 | 1.000000 |
| rad18              | 1.09525e-21 | 1.000000 | 1.09535e-21 | 1.000000 |
| rad56              | 3.10995e-22 | 1.000000 | 3.11024e-22 | 1.000000 |
| rad5               | 8.15926e-23 | 1.000000 | 8.16001e-23 | 1.000000 |
| rad61              | 3.56437e-23 | 1.000000 | 3.56469e-23 | 1.000000 |
| rad68syn           | 3.28824e-23 | 1.000000 | 3.28855e-23 | 1.000000 |
| rad68anti          | 2.37014e-23 | 1.000000 | 2.37036e-23 | 1.000000 |
| rad24              | 4.99058e-24 | 1.000000 | 4.99103e-24 | 1.000000 |
| rad15              | 4.46180e-24 | 1.000000 | 4.46220e-24 | 1.000000 |

|           |             |          |             |          |
|-----------|-------------|----------|-------------|----------|
| rad40syn  | 5.33123e-26 | 1.000000 | 5.33172e-26 | 1.000000 |
| rad40anti | 1.32362e-26 | 1.000000 | 1.32374e-26 | 1.000000 |
| PAH8+H    | 1.18607e-26 | 1.000000 | 1.18618e-26 | 1.000000 |
| rad73     | 1.00621e-26 | 1.000000 | 1.00630e-26 | 1.000000 |
| rad12     | 1.79235e-27 | 1.000000 | 1.79252e-27 | 1.000000 |
| rad71     | 9.35101e-29 | 1.000000 | 9.35187e-29 | 1.000000 |
| rad47     | 2.86304e-29 | 1.000000 | 2.86330e-29 | 1.000000 |
| rad72     | 1.61633e-38 | 1.000000 | 1.61648e-38 | 1.000000 |
| rad8      | 1.55278e-40 | 1.000000 | 1.55291e-40 | 1.000000 |

0.100000000E-04 Pa, 400.000000 K

| Rate constant      | True (fraction)       | Effective (fraction)  |
|--------------------|-----------------------|-----------------------|
| Total              | 5.11288e-15 (1.00 )   | 5.10968e-15 (1.00 )   |
| Formation of rad11 | 3.08094e-15 (0.603 )  | 3.07881e-15 (0.603 )  |
| Formation of rad6  | 1.54092e-15 (0.301 )  | 1.53985e-15 (0.301 )  |
| H-abstraction      | 4.91025e-16 (0.0960 ) | 4.91025e-16 (0.0961 ) |

| species            | PYtrue      | Cumul    | PYeffective | Cumul    |
|--------------------|-------------|----------|-------------|----------|
| Indene+H           | 0.804487    | 0.804487 | 0.804992    | 0.804992 |
| Benzene+2-propynyl | 0.0960368   | 0.900524 | 0.0960969   | 0.901089 |
| C2H2+PhCH2         | 0.0525410   | 0.953065 | 0.0525739   | 0.953662 |
| PhCCH+CH3          | 0.0262528   | 0.979318 | 0.0262692   | 0.979932 |
| PhCHCCH2+H         | 0.0106702   | 0.989988 | 0.0106769   | 0.990609 |
| PhCCCH3+H          | 0.00676059  | 0.996749 | 0.00676483  | 0.997373 |
| Ph+MeAc            | 0.00228507  | 0.999034 | 0.00228650  | 0.999660 |
| Phenyl+Allene      | 0.000625749 | 0.999660 | 0.000000    | 0.999660 |
| PAH7+H             | 0.000215665 | 0.999875 | 0.000215800 | 0.999876 |
| PhCH2CCH+H         | 6.37918e-05 | 0.999939 | 6.38316e-05 | 0.999940 |
| rad39              | 4.88381e-05 | 0.999988 | 4.88686e-05 | 0.999988 |
| rad30              | 4.71364e-06 | 0.999993 | 4.71659e-06 | 0.999993 |
| rad19anti          | 2.55279e-06 | 0.999995 | 2.55439e-06 | 0.999996 |
| PAH9+H             | 2.27168e-06 | 0.999997 | 2.27311e-06 | 0.999998 |
| rad37              | 9.72212e-07 | 0.999998 | 9.72826e-07 | 0.999999 |
| rad35              | 7.27584e-07 | 0.999999 | 7.28039e-07 | 1.000000 |
| rad38              | 6.64238e-07 | 1.000000 | 6.64654e-07 | 1.000000 |
| rad46              | 2.95923e-08 | 1.000000 | 2.96109e-08 | 1.000000 |
| rad60syn           | 6.77125e-09 | 1.000000 | 6.77549e-09 | 1.000000 |
| rad6               | 4.76235e-09 | 1.000000 | 4.76532e-09 | 1.000000 |
| rad19syn           | 4.62789e-09 | 1.000000 | 4.63079e-09 | 1.000000 |
| rad60anti          | 3.07478e-09 | 1.000000 | 3.07671e-09 | 1.000000 |
| PAH3+H             | 1.45799e-09 | 1.000000 | 1.45891e-09 | 1.000000 |
| rad54              | 4.18669e-10 | 1.000000 | 4.18931e-10 | 1.000000 |
| rad59              | 2.84710e-10 | 1.000000 | 2.84889e-10 | 1.000000 |
| PAH10+CH3          | 1.98074e-10 | 1.000000 | 1.98198e-10 | 1.000000 |
| rad50              | 7.81203e-11 | 1.000000 | 7.81692e-11 | 1.000000 |
| rad2               | 6.91884e-11 | 1.000000 | 6.92317e-11 | 1.000000 |
| rad43              | 3.26732e-11 | 1.000000 | 3.26936e-11 | 1.000000 |
| rad67              | 2.48951e-11 | 1.000000 | 2.49108e-11 | 1.000000 |
| PhcycC3H3_A+H      | 2.37988e-11 | 1.000000 | 2.38137e-11 | 1.000000 |
| rad62              | 2.26679e-11 | 1.000000 | 2.26821e-11 | 1.000000 |
| rad28              | 1.66664e-11 | 1.000000 | 1.66768e-11 | 1.000000 |
| rad70              | 7.63979e-12 | 1.000000 | 7.64458e-12 | 1.000000 |
| rad1               | 6.43913e-12 | 1.000000 | 6.44316e-12 | 1.000000 |
| rad10              | 4.18615e-12 | 1.000000 | 4.18878e-12 | 1.000000 |
| rad55              | 3.50822e-12 | 1.000000 | 3.51042e-12 | 1.000000 |
| rad26              | 2.61440e-12 | 1.000000 | 2.61603e-12 | 1.000000 |
| PAH1+H             | 2.19400e-12 | 1.000000 | 2.19537e-12 | 1.000000 |
| rad3               | 1.12547e-12 | 1.000000 | 1.12617e-12 | 1.000000 |
| rad4               | 5.92801e-13 | 1.000000 | 5.93172e-13 | 1.000000 |
| rad52              | 4.56316e-13 | 1.000000 | 4.56602e-13 | 1.000000 |
| rad7               | 4.46724e-13 | 1.000000 | 4.47004e-13 | 1.000000 |
| rad34              | 1.75088e-13 | 1.000000 | 1.75198e-13 | 1.000000 |
| rad51              | 1.36997e-13 | 1.000000 | 1.37083e-13 | 1.000000 |
| rad11              | 1.10517e-13 | 1.000000 | 1.10585e-13 | 1.000000 |
| rad23              | 1.06268e-13 | 1.000000 | 1.06335e-13 | 1.000000 |
| rad58              | 1.74185e-14 | 1.000000 | 1.74293e-14 | 1.000000 |
| rad45              | 1.05177e-14 | 1.000000 | 1.05243e-14 | 1.000000 |
| rad42              | 7.28195e-15 | 1.000000 | 7.28651e-15 | 1.000000 |
| rad65              | 3.20498e-15 | 1.000000 | 3.20698e-15 | 1.000000 |
| rad13              | 2.72774e-15 | 1.000000 | 2.72944e-15 | 1.000000 |
| rad41              | 2.20567e-15 | 1.000000 | 2.20705e-15 | 1.000000 |
| rad53              | 9.04225e-16 | 1.000000 | 9.04789e-16 | 1.000000 |
| rad36              | 4.05533e-16 | 1.000000 | 4.05787e-16 | 1.000000 |
| rad64              | 3.15111e-16 | 1.000000 | 3.15309e-16 | 1.000000 |
| rad25              | 2.32355e-16 | 1.000000 | 2.32500e-16 | 1.000000 |
| rad14              | 1.88185e-16 | 1.000000 | 1.88303e-16 | 1.000000 |
| rad27              | 6.46682e-17 | 1.000000 | 6.47087e-17 | 1.000000 |

|           |             |          |             |         |
|-----------|-------------|----------|-------------|---------|
| rad31     | 4.49851e-17 | 1.000000 | 4.50133e-17 | 1.00000 |
| rad56     | 1.60193e-17 | 1.000000 | 1.60294e-17 | 1.00000 |
| rad33     | 1.20337e-17 | 1.000000 | 1.20413e-17 | 1.00000 |
| rad68syn  | 1.85188e-18 | 1.000000 | 1.85304e-18 | 1.00000 |
| rad68anti | 1.33289e-18 | 1.000000 | 1.33373e-18 | 1.00000 |
| rad22     | 1.24148e-18 | 1.000000 | 1.24225e-18 | 1.00000 |
| rad61     | 9.28162e-19 | 1.000000 | 9.28742e-19 | 1.00000 |
| rad21     | 2.98644e-19 | 1.000000 | 2.98830e-19 | 1.00000 |
| rad20     | 1.92626e-19 | 1.000000 | 1.92746e-19 | 1.00000 |
| rad9      | 8.82914e-20 | 1.000000 | 8.83466e-20 | 1.00000 |
| rad40syn  | 1.44547e-20 | 1.000000 | 1.44638e-20 | 1.00000 |
| PAH8+H    | 8.90806e-21 | 1.000000 | 8.91363e-21 | 1.00000 |
| rad40anti | 3.67532e-21 | 1.000000 | 3.67761e-21 | 1.00000 |
| rad73     | 2.38404e-21 | 1.000000 | 2.38554e-21 | 1.00000 |
| rad18     | 9.49631e-22 | 1.000000 | 9.50228e-22 | 1.00000 |
| rad24     | 1.03728e-22 | 1.000000 | 1.03793e-22 | 1.00000 |
| rad5      | 1.00557e-22 | 1.000000 | 1.00620e-22 | 1.00000 |
| rad71     | 9.37048e-23 | 1.000000 | 9.37637e-23 | 1.00000 |
| rad15     | 5.54674e-23 | 1.000000 | 5.55021e-23 | 1.00000 |
| rad12     | 1.78142e-25 | 1.000000 | 1.78253e-25 | 1.00000 |
| rad47     | 7.50666e-27 | 1.000000 | 7.51136e-27 | 1.00000 |
| rad72     | 2.44375e-28 | 1.000000 | 2.44528e-28 | 1.00000 |
| rad8      | 4.41170e-38 | 1.000000 | 4.41446e-38 | 1.00000 |

0.100000000E-04 Pa, 500.000000 K

| Rate constant      | True (fraction) |          | Effective (fraction) |          |
|--------------------|-----------------|----------|----------------------|----------|
| Total              | 2.11551e-14     | (1.00 )  | 2.10968e-14          | (1.00 )  |
| Formation of rad11 | 1.10850e-14     | (0.524 ) | 1.10494e-14          | (0.524 ) |
| Formation of rad6  | 7.08033e-15     | (0.335 ) | 7.05760e-15          | (0.335 ) |
| H-abstraction      | 2.98976e-15     | (0.141 ) | 2.98976e-15          | (0.142 ) |

  

| species            | PYtrue      | Cumul    | PYeffective | Cumul    |
|--------------------|-------------|----------|-------------|----------|
| Indene+H           | 0.706763    | 0.706763 | 0.708717    | 0.708717 |
| Benzene+2-propynyl | 0.141326    | 0.848088 | 0.141717    | 0.850434 |
| C2H2+PhCH2         | 0.0811033   | 0.929192 | 0.0813276   | 0.931761 |
| PhCCH+CH3          | 0.0389494   | 0.968141 | 0.0390570   | 0.970818 |
| PhCHCCH2+H         | 0.0153920   | 0.983533 | 0.0154345   | 0.986253 |
| PhCCCH3+H          | 0.00823922  | 0.991772 | 0.00826200  | 0.994515 |
| Ph+MeAc            | 0.00432836  | 0.996101 | 0.00434033  | 0.998855 |
| Phenyl+Allene      | 0.00275755  | 0.998858 | 0.00000     | 0.998855 |
| PAH7+H             | 0.000574791 | 0.999433 | 0.000576380 | 0.999432 |
| PhCH2CCH+H         | 0.000399545 | 0.999833 | 0.000400650 | 0.999832 |
| rad39              | 0.000137924 | 0.999971 | 0.000138306 | 0.999971 |
| rad30              | 9.14617e-06 | 0.999980 | 9.17153e-06 | 0.999980 |
| rad19anti          | 7.87871e-06 | 0.999988 | 7.90049e-06 | 0.999988 |
| PAH9+H             | 6.12732e-06 | 0.999994 | 6.14426e-06 | 0.999994 |
| rad37              | 2.41828e-06 | 0.999996 | 2.42497e-06 | 0.999996 |
| rad38              | 1.93438e-06 | 0.999998 | 1.93973e-06 | 0.999998 |
| rad35              | 1.76561e-06 | 1.000000 | 1.77050e-06 | 1.000000 |
| rad46              | 1.27870e-07 | 1.000000 | 1.28224e-07 | 1.000000 |
| rad19syn           | 7.63986e-08 | 1.000000 | 7.66098e-08 | 1.000000 |
| rad60syn           | 2.91345e-08 | 1.000000 | 2.92150e-08 | 1.000000 |
| PAH3+H             | 1.45909e-08 | 1.000000 | 1.46312e-08 | 1.000000 |
| rad60anti          | 1.41795e-08 | 1.000000 | 1.42187e-08 | 1.000000 |
| rad54              | 1.02843e-08 | 1.000000 | 1.03128e-08 | 1.000000 |
| PAH10+CH3          | 3.35592e-09 | 1.000000 | 3.36520e-09 | 1.000000 |
| rad59              | 2.61933e-09 | 1.000000 | 2.62658e-09 | 1.000000 |
| rad6               | 1.28758e-09 | 1.000000 | 1.29114e-09 | 1.000000 |
| PhcycC3H3_A+H      | 1.25838e-09 | 1.000000 | 1.26187e-09 | 1.000000 |
| rad50              | 1.15864e-09 | 1.000000 | 1.16185e-09 | 1.000000 |
| rad62              | 4.84009e-10 | 1.000000 | 4.85347e-10 | 1.000000 |
| rad43              | 4.60419e-10 | 1.000000 | 4.61691e-10 | 1.000000 |
| rad67              | 3.97898e-10 | 1.000000 | 3.98999e-10 | 1.000000 |
| rad70              | 3.42517e-10 | 1.000000 | 3.43464e-10 | 1.000000 |
| rad2               | 2.13651e-10 | 1.000000 | 2.14241e-10 | 1.000000 |
| PAH1+H             | 1.64298e-10 | 1.000000 | 1.64753e-10 | 1.000000 |
| rad55              | 1.59822e-10 | 1.000000 | 1.60264e-10 | 1.000000 |
| rad1               | 2.56549e-11 | 1.000000 | 2.57258e-11 | 1.000000 |
| rad34              | 1.41616e-11 | 1.000000 | 1.42007e-11 | 1.000000 |
| rad52              | 1.34820e-11 | 1.000000 | 1.35193e-11 | 1.000000 |
| rad10              | 1.03451e-11 | 1.000000 | 1.03736e-11 | 1.000000 |
| rad23              | 8.99118e-12 | 1.000000 | 9.01610e-12 | 1.000000 |
| rad51              | 7.24804e-12 | 1.000000 | 7.26808e-12 | 1.000000 |
| rad3               | 5.09512e-12 | 1.000000 | 5.10922e-12 | 1.000000 |
| rad4               | 2.89370e-12 | 1.000000 | 2.90169e-12 | 1.000000 |
| rad28              | 2.78295e-12 | 1.000000 | 2.79065e-12 | 1.000000 |
| rad45              | 1.70947e-12 | 1.000000 | 1.71420e-12 | 1.000000 |

|           |             |         |             |         |
|-----------|-------------|---------|-------------|---------|
| rad58     | 1.01105e-12 | 1.00000 | 1.01385e-12 | 1.00000 |
| rad42     | 6.16327e-13 | 1.00000 | 6.18032e-13 | 1.00000 |
| rad26     | 6.07801e-13 | 1.00000 | 6.09483e-13 | 1.00000 |
| rad53     | 2.35883e-13 | 1.00000 | 2.36536e-13 | 1.00000 |
| rad65     | 2.01732e-13 | 1.00000 | 2.02290e-13 | 1.00000 |
| rad41     | 1.64829e-13 | 1.00000 | 1.65284e-13 | 1.00000 |
| rad7      | 1.30001e-13 | 1.00000 | 1.30360e-13 | 1.00000 |
| rad64     | 9.67571e-14 | 1.00000 | 9.70247e-14 | 1.00000 |
| rad36     | 9.28004e-14 | 1.00000 | 9.30568e-14 | 1.00000 |
| rad11     | 3.38225e-14 | 1.00000 | 3.39160e-14 | 1.00000 |
| rad56     | 1.22100e-14 | 1.00000 | 1.22438e-14 | 1.00000 |
| rad68syn  | 1.45353e-15 | 1.00000 | 1.45755e-15 | 1.00000 |
| rad68anti | 1.02673e-15 | 1.00000 | 1.02957e-15 | 1.00000 |
| rad13     | 8.92102e-16 | 1.00000 | 8.94563e-16 | 1.00000 |
| rad61     | 4.14139e-16 | 1.00000 | 4.15285e-16 | 1.00000 |
| rad31     | 2.28446e-16 | 1.00000 | 2.29078e-16 | 1.00000 |
| rad25     | 1.04823e-16 | 1.00000 | 1.05113e-16 | 1.00000 |
| rad14     | 7.48578e-17 | 1.00000 | 7.50648e-17 | 1.00000 |
| rad22     | 4.56712e-17 | 1.00000 | 4.57975e-17 | 1.00000 |
| rad27     | 3.52909e-17 | 1.00000 | 3.53885e-17 | 1.00000 |
| PAH8+H    | 3.33552e-17 | 1.00000 | 3.34475e-17 | 1.00000 |
| rad40syn  | 2.92070e-17 | 1.00000 | 2.92878e-17 | 1.00000 |
| rad33     | 1.40338e-17 | 1.00000 | 1.40726e-17 | 1.00000 |
| rad40anti | 8.32521e-18 | 1.00000 | 8.34823e-18 | 1.00000 |
| rad73     | 5.30677e-18 | 1.00000 | 5.32145e-18 | 1.00000 |
| rad9      | 3.31923e-18 | 1.00000 | 3.32841e-18 | 1.00000 |
| rad21     | 1.73198e-18 | 1.00000 | 1.73677e-18 | 1.00000 |
| rad20     | 8.90780e-19 | 1.00000 | 8.93241e-19 | 1.00000 |
| rad71     | 5.89556e-19 | 1.00000 | 5.91187e-19 | 1.00000 |
| rad24     | 6.96186e-21 | 1.00000 | 6.98111e-21 | 1.00000 |
| rad15     | 2.23546e-21 | 1.00000 | 2.24164e-21 | 1.00000 |
| rad18     | 1.44508e-21 | 1.00000 | 1.44907e-21 | 1.00000 |
| rad72     | 1.32142e-21 | 1.00000 | 1.32508e-21 | 1.00000 |
| rad5      | 8.09808e-23 | 1.00000 | 8.12048e-23 | 1.00000 |
| rad12     | 6.96447e-23 | 1.00000 | 6.98372e-23 | 1.00000 |
| rad47     | 4.86077e-25 | 1.00000 | 4.87422e-25 | 1.00000 |
| rad8      | 8.30419e-35 | 1.00000 | 8.32715e-35 | 1.00000 |

0.100000000E-04 Pa, 600.000000 K

| Rate constant      | True (fraction)      | Effective (fraction) |
|--------------------|----------------------|----------------------|
| Total              | 6.08120e-14 (1.00 )  | 6.02869e-14 (1.00 )  |
| Formation of rad11 | 2.83304e-14 (0.466 ) | 2.80313e-14 (0.465 ) |
| Formation of rad6  | 2.13840e-14 (0.352 ) | 2.11582e-14 (0.351 ) |
| H-abstraction      | 1.10975e-14 (0.182 ) | 1.10975e-14 (0.184 ) |

| species            | PYtrue      | Cumul    | PYeffective | Cumul    |
|--------------------|-------------|----------|-------------|----------|
| Indene+H           | 0.606934    | 0.606934 | 0.612219    | 0.612219 |
| Benzene+2-propynyl | 0.182488    | 0.789422 | 0.184077    | 0.796297 |
| C2H2+PhCH2         | 0.112836    | 0.902258 | 0.113819    | 0.910116 |
| PhCCH+CH3          | 0.0502927   | 0.952551 | 0.0507306   | 0.960846 |
| PhCHCCH2+H         | 0.0208956   | 0.973447 | 0.0210776   | 0.981924 |
| Phenyl+Allene      | 0.00863333  | 0.982080 | 0.000000    | 0.981924 |
| PhCCCH3+H          | 0.00840933  | 0.990489 | 0.00848258  | 0.990406 |
| Ph+MeAc            | 0.00630895  | 0.996798 | 0.00636389  | 0.996770 |
| PhCH2CCH+H         | 0.00158536  | 0.998384 | 0.00159917  | 0.998369 |
| PAH7+H             | 0.00124706  | 0.999631 | 0.00125792  | 0.999627 |
| rad39              | 0.000304554 | 0.999935 | 0.000307206 | 0.999934 |
| rad19anti          | 2.07283e-05 | 0.999956 | 2.09088e-05 | 0.999955 |
| rad30              | 1.54421e-05 | 0.999971 | 1.55766e-05 | 0.999971 |
| PAH9+H             | 1.45719e-05 | 0.999986 | 1.46988e-05 | 0.999986 |
| rad38              | 4.88300e-06 | 0.999991 | 4.92552e-06 | 0.999991 |
| rad37              | 4.23980e-06 | 0.999995 | 4.27672e-06 | 0.999995 |
| rad35              | 3.83137e-06 | 0.999999 | 3.86473e-06 | 0.999999 |
| rad19syn           | 5.75843e-07 | 0.999999 | 5.80858e-07 | 0.999999 |
| rad46              | 4.35560e-07 | 1.000000 | 4.39353e-07 | 1.000000 |
| rad54              | 1.01017e-07 | 1.000000 | 1.01897e-07 | 1.000000 |
| rad60syn           | 8.96254e-08 | 1.000000 | 9.04058e-08 | 1.000000 |
| PAH3+H             | 8.11821e-08 | 1.000000 | 8.18892e-08 | 1.000000 |
| rad60anti          | 4.57655e-08 | 1.000000 | 4.61640e-08 | 1.000000 |
| PAH10+CH3          | 2.25831e-08 | 1.000000 | 2.27798e-08 | 1.000000 |
| PhcycC3H3_A+H      | 2.05528e-08 | 1.000000 | 2.07318e-08 | 1.000000 |
| rad59              | 1.35486e-08 | 1.000000 | 1.36666e-08 | 1.000000 |
| rad50              | 9.40277e-09 | 1.000000 | 9.48461e-09 | 1.000000 |
| rad70              | 4.88193e-09 | 1.000000 | 4.92445e-09 | 1.000000 |
| rad62              | 3.91161e-09 | 1.000000 | 3.94568e-09 | 1.000000 |
| rad67              | 3.65819e-09 | 1.000000 | 3.69004e-09 | 1.000000 |
| PAH1+H             | 3.25971e-09 | 1.000000 | 3.28810e-09 | 1.000000 |

|           |             |         |             |         |
|-----------|-------------|---------|-------------|---------|
| rad43     | 2.57504e-09 | 1.00000 | 2.59746e-09 | 1.00000 |
| rad55     | 2.29328e-09 | 1.00000 | 2.31325e-09 | 1.00000 |
| rad6      | 6.07623e-10 | 1.00000 | 6.12914e-10 | 1.00000 |
| rad2      | 3.13252e-10 | 1.00000 | 3.15980e-10 | 1.00000 |
| rad34     | 2.96007e-10 | 1.00000 | 2.98585e-10 | 1.00000 |
| rad52     | 1.70978e-10 | 1.00000 | 1.72467e-10 | 1.00000 |
| rad51     | 1.34066e-10 | 1.00000 | 1.35233e-10 | 1.00000 |
| rad23     | 5.20314e-11 | 1.00000 | 5.24845e-11 | 1.00000 |
| rad1      | 4.95728e-11 | 1.00000 | 5.00045e-11 | 1.00000 |
| rad58     | 1.71337e-11 | 1.00000 | 1.72830e-11 | 1.00000 |
| rad42     | 1.22225e-11 | 1.00000 | 1.23290e-11 | 1.00000 |
| rad53     | 1.06169e-11 | 1.00000 | 1.07093e-11 | 1.00000 |
| rad45     | 1.05311e-11 | 1.00000 | 1.06228e-11 | 1.00000 |
| rad10     | 9.91527e-12 | 1.00000 | 1.00016e-11 | 1.00000 |
| rad3      | 8.20169e-12 | 1.00000 | 8.27313e-12 | 1.00000 |
| rad4      | 5.25605e-12 | 1.00000 | 5.30182e-12 | 1.00000 |
| rad64     | 4.60105e-12 | 1.00000 | 4.64112e-12 | 1.00000 |
| rad65     | 4.04388e-12 | 1.00000 | 4.07910e-12 | 1.00000 |
| rad41     | 2.76379e-12 | 1.00000 | 2.78785e-12 | 1.00000 |
| rad56     | 1.10532e-12 | 1.00000 | 1.11494e-12 | 1.00000 |
| rad36     | 9.92631e-13 | 1.00000 | 1.00128e-12 | 1.00000 |
| rad28     | 5.41212e-13 | 1.00000 | 5.45925e-13 | 1.00000 |
| rad26     | 1.87244e-13 | 1.00000 | 1.88874e-13 | 1.00000 |
| rad68syn  | 1.32097e-13 | 1.00000 | 1.33247e-13 | 1.00000 |
| rad68anti | 9.18041e-14 | 1.00000 | 9.26039e-14 | 1.00000 |
| rad7      | 6.79239e-14 | 1.00000 | 6.85154e-14 | 1.00000 |
| rad61     | 2.45836e-14 | 1.00000 | 2.47977e-14 | 1.00000 |
| rad11     | 1.91214e-14 | 1.00000 | 1.92878e-14 | 1.00000 |
| PAH8+H    | 8.65009e-15 | 1.00000 | 8.72548e-15 | 1.00000 |
| rad40syn  | 4.97827e-15 | 1.00000 | 5.02163e-15 | 1.00000 |
| rad40anti | 1.59993e-15 | 1.00000 | 1.61386e-15 | 1.00000 |
| rad73     | 1.33747e-15 | 1.00000 | 1.34911e-15 | 1.00000 |
| rad13     | 6.17068e-16 | 1.00000 | 6.22441e-16 | 1.00000 |
| rad71     | 5.63081e-16 | 1.00000 | 5.67985e-16 | 1.00000 |
| rad31     | 3.07525e-16 | 1.00000 | 3.10203e-16 | 1.00000 |
| rad9      | 2.21744e-16 | 1.00000 | 2.23675e-16 | 1.00000 |
| rad22     | 2.13355e-16 | 1.00000 | 2.15213e-16 | 1.00000 |
| rad25     | 7.33911e-17 | 1.00000 | 7.40302e-17 | 1.00000 |
| rad33     | 5.43037e-17 | 1.00000 | 5.47766e-17 | 1.00000 |
| rad14     | 4.32290e-17 | 1.00000 | 4.36055e-17 | 1.00000 |
| rad27     | 2.90742e-17 | 1.00000 | 2.93274e-17 | 1.00000 |
| rad21     | 2.17983e-17 | 1.00000 | 2.19881e-17 | 1.00000 |
| rad72     | 1.12999e-17 | 1.00000 | 1.13984e-17 | 1.00000 |
| rad20     | 9.07160e-18 | 1.00000 | 9.15057e-18 | 1.00000 |
| rad24     | 7.30914e-19 | 1.00000 | 7.37280e-19 | 1.00000 |
| rad15     | 1.44238e-19 | 1.00000 | 1.45494e-19 | 1.00000 |
| rad12     | 3.31015e-20 | 1.00000 | 3.33898e-20 | 1.00000 |
| rad18     | 4.05182e-21 | 1.00000 | 4.08710e-21 | 1.00000 |
| rad5      | 6.01200e-23 | 1.00000 | 6.06435e-23 | 1.00000 |
| rad47     | 1.06840e-23 | 1.00000 | 1.07770e-23 | 1.00000 |
| rad8      | 7.32830e-31 | 1.00000 | 7.39212e-31 | 1.00000 |

0.100000000E-04 Pa, 700.000000 K

=====

| Rate constant      | True (fraction)      | Effective (fraction) |
|--------------------|----------------------|----------------------|
| Total              | 1.39564e-13 (1.00 )  | 1.36669e-13 (1.00 )  |
| Formation of rad11 | 5.88273e-14 (0.422 ) | 5.72650e-14 (0.419 ) |
| Formation of rad6  | 5.01684e-14 (0.359 ) | 4.88360e-14 (0.357 ) |
| H-abstraction      | 3.05678e-14 (0.219 ) | 3.05678e-14 (0.224 ) |

| species            | PYtrue      | Cumul    | PYeffective | Cumul    |
|--------------------|-------------|----------|-------------|----------|
| Indene+H           | 0.510454    | 0.510454 | 0.521265    | 0.521265 |
| Benzene+2-propynyl | 0.219024    | 0.729478 | 0.223663    | 0.744928 |
| C2H2+PhCH2         | 0.140690    | 0.870167 | 0.143670    | 0.888598 |
| PhCCH+CH3          | 0.0586092   | 0.928777 | 0.0598506   | 0.948449 |
| PhCHCCH2+H         | 0.0277622   | 0.956539 | 0.0283503   | 0.976799 |
| Phenyl+Allene      | 0.0207415   | 0.977280 | 0.000000    | 0.976799 |
| Ph+MeAc            | 0.00771340  | 0.984994 | 0.00787679  | 0.984676 |
| PhCCCH3+H          | 0.00756061  | 0.992554 | 0.00772075  | 0.992396 |
| PhCH2CCH+H         | 0.00451180  | 0.997066 | 0.00460736  | 0.997004 |
| PAH7+H             | 0.00225727  | 0.999323 | 0.00230508  | 0.999309 |
| rad39              | 0.000548288 | 0.999872 | 0.000559902 | 0.999869 |
| rad19anti          | 4.66037e-05 | 0.999918 | 4.75908e-05 | 0.999916 |
| PAH9+H             | 2.99985e-05 | 0.999948 | 3.06339e-05 | 0.999947 |
| rad30              | 2.26762e-05 | 0.999971 | 2.31565e-05 | 0.999970 |
| rad38              | 1.05314e-05 | 0.999981 | 1.07545e-05 | 0.999981 |
| rad35              | 7.29844e-06 | 0.999989 | 7.45303e-06 | 0.999988 |
| rad37              | 5.93522e-06 | 0.999995 | 6.06093e-06 | 0.999994 |

|               |             |          |             |          |
|---------------|-------------|----------|-------------|----------|
| rad19syn      | 2.61380e-06 | 0.999997 | 2.66916e-06 | 0.999997 |
| rad46         | 1.18432e-06 | 0.999999 | 1.20940e-06 | 0.999998 |
| rad54         | 5.53865e-07 | 0.999999 | 5.65596e-07 | 0.999999 |
| PAH3+H        | 2.96686e-07 | 0.999999 | 3.02969e-07 | 0.999999 |
| rad60syn      | 2.09904e-07 | 1.000000 | 2.14349e-07 | 0.999999 |
| PhcycC3H3_A+H | 1.62838e-07 | 1.000000 | 1.66287e-07 | 1.000000 |
| rad60anti     | 1.11059e-07 | 1.000000 | 1.13411e-07 | 1.000000 |
| PAH10+CH3     | 8.88415e-08 | 1.000000 | 9.07227e-08 | 1.000000 |
| rad50         | 4.89409e-08 | 1.000000 | 4.99774e-08 | 1.000000 |
| rad59         | 4.64276e-08 | 1.000000 | 4.74110e-08 | 1.000000 |
| rad70         | 3.43279e-08 | 1.000000 | 3.50550e-08 | 1.000000 |
| PAH1+H        | 2.87927e-08 | 1.000000 | 2.94026e-08 | 1.000000 |
| rad67         | 2.16413e-08 | 1.000000 | 2.20997e-08 | 1.000000 |
| rad62         | 1.75396e-08 | 1.000000 | 1.79112e-08 | 1.000000 |
| rad55         | 1.62462e-08 | 1.000000 | 1.65903e-08 | 1.000000 |
| rad43         | 8.26639e-09 | 1.000000 | 8.44142e-09 | 1.000000 |
| rad34         | 2.73084e-09 | 1.000000 | 2.78869e-09 | 1.000000 |
| rad51         | 1.25030e-09 | 1.000000 | 1.27679e-09 | 1.000000 |
| rad52         | 1.21865e-09 | 1.000000 | 1.24446e-09 | 1.000000 |
| rad6          | 2.11297e-10 | 1.000000 | 2.15772e-10 | 1.000000 |
| rad2          | 1.73985e-10 | 1.000000 | 1.77670e-10 | 1.000000 |
| rad53         | 1.69563e-10 | 1.000000 | 1.73154e-10 | 1.000000 |
| rad58         | 1.35852e-10 | 1.000000 | 1.38730e-10 | 1.000000 |
| rad42         | 1.03499e-10 | 1.000000 | 1.05691e-10 | 1.000000 |
| rad64         | 7.31425e-11 | 1.000000 | 7.46917e-11 | 1.000000 |
| rad23         | 6.15850e-11 | 1.000000 | 6.28895e-11 | 1.000000 |
| rad65         | 3.91420e-11 | 1.000000 | 3.99711e-11 | 1.000000 |
| rad1          | 3.38689e-11 | 1.000000 | 3.45863e-11 | 1.000000 |
| rad56         | 2.88482e-11 | 1.000000 | 2.94593e-11 | 1.000000 |
| rad41         | 1.94819e-11 | 1.000000 | 1.98946e-11 | 1.000000 |
| rad45         | 1.38711e-11 | 1.000000 | 1.41649e-11 | 1.000000 |
| rad3          | 4.41320e-12 | 1.000000 | 4.50668e-12 | 1.000000 |
| rad10         | 4.40662e-12 | 1.000000 | 4.49997e-12 | 1.000000 |
| rad68syn      | 3.41600e-12 | 1.000000 | 3.48835e-12 | 1.000000 |
| rad4          | 3.07670e-12 | 1.000000 | 3.14187e-12 | 1.000000 |
| rad68anti     | 2.34482e-12 | 1.000000 | 2.39448e-12 | 1.000000 |
| rad36         | 1.42455e-12 | 1.000000 | 1.45472e-12 | 1.000000 |
| PAH8+H        | 4.75762e-13 | 1.000000 | 4.85839e-13 | 1.000000 |
| rad61         | 4.69504e-13 | 1.000000 | 4.79448e-13 | 1.000000 |
| rad40syn      | 2.01862e-13 | 1.000000 | 2.06138e-13 | 1.000000 |
| rad28         | 1.26073e-13 | 1.000000 | 1.28744e-13 | 1.000000 |
| rad40anti     | 7.20089e-14 | 1.000000 | 7.35341e-14 | 1.000000 |
| rad26         | 5.62766e-14 | 1.000000 | 5.74685e-14 | 1.000000 |
| rad73         | 5.62684e-14 | 1.000000 | 5.74602e-14 | 1.000000 |
| rad7          | 2.74190e-14 | 1.000000 | 2.79997e-14 | 1.000000 |
| rad71         | 2.08536e-14 | 1.000000 | 2.12953e-14 | 1.000000 |
| rad9          | 1.20116e-14 | 1.000000 | 1.22660e-14 | 1.000000 |
| rad11         | 9.71440e-15 | 1.000000 | 9.92018e-15 | 1.000000 |
| rad13         | 8.31200e-16 | 1.000000 | 8.48808e-16 | 1.000000 |
| rad21         | 3.99967e-16 | 1.000000 | 4.08438e-16 | 1.000000 |
| rad33         | 3.82206e-16 | 1.000000 | 3.90302e-16 | 1.000000 |
| rad72         | 2.84577e-16 | 1.000000 | 2.90604e-16 | 1.000000 |
| rad22         | 2.57784e-16 | 1.000000 | 2.63245e-16 | 1.000000 |
| rad31         | 1.78366e-16 | 1.000000 | 1.82144e-16 | 1.000000 |
| rad20         | 1.48809e-16 | 1.000000 | 1.51961e-16 | 1.000000 |
| rad25         | 8.90062e-17 | 1.000000 | 9.08919e-17 | 1.000000 |
| rad24         | 3.96770e-17 | 1.000000 | 4.05174e-17 | 1.000000 |
| rad14         | 3.93746e-17 | 1.000000 | 4.02086e-17 | 1.000000 |
| rad27         | 3.74821e-17 | 1.000000 | 3.82760e-17 | 1.000000 |
| rad15         | 5.33071e-18 | 1.000000 | 5.44363e-18 | 1.000000 |
| rad12         | 4.79239e-18 | 1.000000 | 4.89390e-18 | 1.000000 |
| rad18         | 2.17903e-20 | 1.000000 | 2.22518e-20 | 1.000000 |
| rad47         | 9.04042e-23 | 1.000000 | 9.23188e-23 | 1.000000 |
| rad5          | 4.99311e-23 | 1.000000 | 5.09887e-23 | 1.000000 |
| rad8          | 9.25495e-27 | 1.000000 | 9.45097e-27 | 1.000000 |

0.100000000E-04 Pa, 800.000000 K

| Rate constant      | True (fraction) |          | Effective (fraction) |          |
|--------------------|-----------------|----------|----------------------|----------|
| Total              | 2.75392e-13     | (1.00 )  | 2.64229e-13          | (1.00 )  |
| Formation of rad11 | 1.06471e-13     | (0.387 ) | 1.00706e-13          | (0.381 ) |
| Formation of rad6  | 9.97133e-14     | (0.362 ) | 9.43145e-14          | (0.357 ) |
| H-abstraction      | 6.92082e-14     | (0.251 ) | 6.92082e-14          | (0.262 ) |
| species            | PYtrue          | Cumul    | PYeffective          | Cumul    |
| Indene+H           | 0.420963        | 0.420963 | 0.438748             | 0.438748 |
| Benzene+2-propynyl | 0.251308        | 0.672270 | 0.261925             | 0.700673 |
| C2H2+PhCH2         | 0.158756        | 0.831027 | 0.165464             | 0.866137 |

|               |             |          |             |          |
|---------------|-------------|----------|-------------|----------|
| PhCCH+CH3     | 0.0631451   | 0.894172 | 0.0658130   | 0.931950 |
| Phenyl+Allene | 0.0405363   | 0.934708 | 0.00000     | 0.931950 |
| PhCHCCH2+H    | 0.0360793   | 0.970788 | 0.0376036   | 0.969553 |
| PhCH2CCH+H    | 0.00999819  | 0.980786 | 0.0104207   | 0.979974 |
| Ph+MeAc       | 0.00840385  | 0.989190 | 0.00875888  | 0.988733 |
| PhCCCH3+H     | 0.00623443  | 0.995424 | 0.00649783  | 0.995231 |
| PAH7+H        | 0.00351019  | 0.998934 | 0.00365850  | 0.998889 |
| rad39         | 0.000836596 | 0.999771 | 0.000871939 | 0.999761 |
| rad19anti     | 9.01935e-05 | 0.999861 | 9.40042e-05 | 0.999855 |
| PAH9+H        | 5.38600e-05 | 0.999915 | 5.61355e-05 | 0.999911 |
| rad30         | 2.94556e-05 | 0.999944 | 3.07000e-05 | 0.999942 |
| rad38         | 1.96291e-05 | 0.999964 | 2.04585e-05 | 0.999962 |
| rad35         | 1.22732e-05 | 0.999976 | 1.27916e-05 | 0.999975 |
| rad19syn      | 8.33347e-06 | 0.999985 | 8.68552e-06 | 0.999984 |
| rad37         | 7.26188e-06 | 0.999992 | 7.56866e-06 | 0.999992 |
| rad46         | 2.65265e-06 | 0.999994 | 2.76472e-06 | 0.999994 |
| rad54         | 2.03471e-06 | 0.999996 | 2.12067e-06 | 0.999996 |
| PAH3+H        | 7.96489e-07 | 0.999997 | 8.30142e-07 | 0.999997 |
| PhcycC3H3_A+H | 7.94325e-07 | 0.999998 | 8.27884e-07 | 0.999998 |
| rad60syn      | 3.96788e-07 | 0.999998 | 4.13552e-07 | 0.999998 |
| PAH10+CH3     | 2.53197e-07 | 0.999999 | 2.63895e-07 | 0.999999 |
| rad60anti     | 2.15811e-07 | 0.999999 | 2.24928e-07 | 0.999999 |
| rad50         | 1.82307e-07 | 0.999999 | 1.90010e-07 | 0.999999 |
| rad70         | 1.50040e-07 | 0.999999 | 1.56379e-07 | 0.999999 |
| PAH1+H        | 1.48682e-07 | 0.999999 | 1.54963e-07 | 0.999999 |
| rad59         | 1.17661e-07 | 1.000000 | 1.22632e-07 | 1.000000 |
| rad67         | 9.03380e-08 | 1.000000 | 9.41547e-08 | 1.000000 |
| rad55         | 7.18814e-08 | 1.000000 | 7.49183e-08 | 1.000000 |
| rad62         | 5.32905e-08 | 1.000000 | 5.55419e-08 | 1.000000 |
| rad43         | 1.85216e-08 | 1.000000 | 1.93041e-08 | 1.000000 |
| rad34         | 1.46559e-08 | 1.000000 | 1.52750e-08 | 1.000000 |
| rad51         | 7.22433e-09 | 1.000000 | 7.52954e-09 | 1.000000 |
| rad52         | 5.73969e-09 | 1.000000 | 5.98218e-09 | 1.000000 |
| rad53         | 1.38657e-09 | 1.000000 | 1.44515e-09 | 1.000000 |
| rad58         | 6.48418e-10 | 1.000000 | 6.75812e-10 | 1.000000 |
| rad64         | 5.75074e-10 | 1.000000 | 5.99371e-10 | 1.000000 |
| rad42         | 5.07610e-10 | 1.000000 | 5.29056e-10 | 1.000000 |
| rad56         | 3.39878e-10 | 1.000000 | 3.54238e-10 | 1.000000 |
| rad65         | 2.29616e-10 | 1.000000 | 2.39317e-10 | 1.000000 |
| rad41         | 7.94183e-11 | 1.000000 | 8.27736e-11 | 1.000000 |
| rad2          | 5.56152e-11 | 1.000000 | 5.79649e-11 | 1.000000 |
| rad6          | 5.14108e-11 | 1.000000 | 5.35828e-11 | 1.000000 |
| rad68syn      | 3.95120e-11 | 1.000000 | 4.11813e-11 | 1.000000 |
| rad23         | 3.47988e-11 | 1.000000 | 3.62691e-11 | 1.000000 |
| rad68anti     | 2.68638e-11 | 1.000000 | 2.79987e-11 | 1.000000 |
| rad1          | 1.08371e-11 | 1.000000 | 1.12950e-11 | 1.000000 |
| rad45         | 1.00025e-11 | 1.000000 | 1.04250e-11 | 1.000000 |
| PAH8+H        | 9.75666e-12 | 1.000000 | 1.01688e-11 | 1.000000 |
| rad61         | 4.46226e-12 | 1.000000 | 4.65078e-12 | 1.000000 |
| rad40syn      | 3.27971e-12 | 1.000000 | 3.41828e-12 | 1.000000 |
| rad3          | 1.43817e-12 | 1.000000 | 1.49893e-12 | 1.000000 |
| rad40anti     | 1.27586e-12 | 1.000000 | 1.32976e-12 | 1.000000 |
| rad10         | 1.24378e-12 | 1.000000 | 1.29633e-12 | 1.000000 |
| rad4          | 1.02314e-12 | 1.000000 | 1.06636e-12 | 1.000000 |
| rad73         | 9.99437e-13 | 1.000000 | 1.04166e-12 | 1.000000 |
| rad36         | 9.56672e-13 | 1.000000 | 9.97095e-13 | 1.000000 |
| rad71         | 3.51814e-13 | 1.000000 | 3.66679e-13 | 1.000000 |
| rad9          | 2.40190e-13 | 1.000000 | 2.50338e-13 | 1.000000 |
| rad28         | 3.75898e-14 | 1.000000 | 3.91779e-14 | 1.000000 |
| rad26         | 1.56738e-14 | 1.000000 | 1.63360e-14 | 1.000000 |
| rad11         | 8.91775e-15 | 1.000000 | 9.29450e-15 | 1.000000 |
| rad7          | 8.86953e-15 | 1.000000 | 9.24424e-15 | 1.000000 |
| rad21         | 5.89287e-15 | 1.000000 | 6.14184e-15 | 1.000000 |
| rad13         | 5.79191e-15 | 1.000000 | 6.03661e-15 | 1.000000 |
| rad33         | 2.86233e-15 | 1.000000 | 2.98326e-15 | 1.000000 |
| rad20         | 2.26283e-15 | 1.000000 | 2.35843e-15 | 1.000000 |
| rad72         | 1.12108e-15 | 1.000000 | 1.16845e-15 | 1.000000 |
| rad24         | 5.58299e-16 | 1.000000 | 5.81887e-16 | 1.000000 |
| rad25         | 1.92071e-16 | 1.000000 | 2.00186e-16 | 1.000000 |
| rad22         | 1.62767e-16 | 1.000000 | 1.69644e-16 | 1.000000 |
| rad12         | 1.15820e-16 | 1.000000 | 1.20714e-16 | 1.000000 |
| rad31         | 8.40534e-17 | 1.000000 | 8.76043e-17 | 1.000000 |
| rad27         | 7.07529e-17 | 1.000000 | 7.37421e-17 | 1.000000 |
| rad15         | 6.42652e-17 | 1.000000 | 6.69804e-17 | 1.000000 |
| rad14         | 5.75336e-17 | 1.000000 | 5.99643e-17 | 1.000000 |
| rad18         | 2.26259e-19 | 1.000000 | 2.35819e-19 | 1.000000 |
| rad47         | 5.02558e-22 | 1.000000 | 5.23791e-22 | 1.000000 |
| rad5          | 5.51523e-23 | 1.000000 | 5.74824e-23 | 1.000000 |
| rad8          | 3.33308e-23 | 1.000000 | 3.47390e-23 | 1.000000 |

0.100000000E-04 Pa, 900.000000 K

| =====              |                 |          |                      |          |
|--------------------|-----------------|----------|----------------------|----------|
| Rate constant      | True (fraction) |          | Effective (fraction) |          |
| -----              |                 |          |                      |          |
| Total              | 4.88072e-13     | (1.00 )  | 4.55158e-13          | (1.00 )  |
| Formation of rad11 | 1.74945e-13     | (0.358 ) | 1.58562e-13          | (0.348 ) |
| Formation of rad6  | 1.76509e-13     | (0.362 ) | 1.59978e-13          | (0.351 ) |
| H-abstraction      | 1.36618e-13     | (0.280 ) | 1.36618e-13          | (0.300 ) |
| -----              |                 |          |                      |          |
| species            | PYtrue          | Cumul    | PYeffective          | Cumul    |
| -----              |                 |          |                      |          |
| Indene+H           | 0.341014        | 0.341014 | 0.365674             | 0.365674 |
| Benzene+2-propynyl | 0.279914        | 0.620928 | 0.300155             | 0.665829 |
| C2H2+PhCH2         | 0.164625        | 0.785553 | 0.176529             | 0.842358 |
| Phenyl+Allene      | 0.0674364       | 0.852989 | 0.000000             | 0.842358 |
| PhCCH+CH3          | 0.0639259       | 0.916915 | 0.0685485            | 0.910906 |
| PhCHCCH2+H         | 0.0451268       | 0.962042 | 0.0483901            | 0.959296 |
| PhCH2CCH+H         | 0.0182967       | 0.980338 | 0.0196198            | 0.978916 |
| Ph+MeAc            | 0.00849313      | 0.988832 | 0.00910729           | 0.988024 |
| PhCCCH3+H          | 0.00485364      | 0.993685 | 0.00520463           | 0.993228 |
| PAH7+H             | 0.00482415      | 0.998509 | 0.00517299           | 0.998401 |
| rad39              | 0.00111872      | 0.999628 | 0.00119961           | 0.999601 |
| rad19anti          | 0.000152570     | 0.999781 | 0.000163603          | 0.999764 |
| PAH9+H             | 8.58055e-05     | 0.999866 | 9.20100e-05          | 0.999856 |
| rad30              | 3.45816e-05     | 0.999901 | 3.70824e-05          | 0.999893 |
| rad38              | 3.22626e-05     | 0.999933 | 3.45956e-05          | 0.999928 |
| rad19syn           | 2.05726e-05     | 0.999954 | 2.20602e-05          | 0.999950 |
| rad35              | 1.85019e-05     | 0.999972 | 1.98398e-05          | 0.999970 |
| rad37              | 8.30353e-06     | 0.999981 | 8.90399e-06          | 0.999979 |
| rad54              | 5.61022e-06     | 0.999986 | 6.01591e-06          | 0.999985 |
| rad46              | 5.06239e-06     | 0.999991 | 5.42846e-06          | 0.999990 |
| PhcycC3H3_A+H      | 2.75303e-06     | 0.999994 | 2.95211e-06          | 0.999993 |
| PAH3+H             | 1.70031e-06     | 0.999996 | 1.82327e-06          | 0.999995 |
| rad60syn           | 6.35566e-07     | 0.999996 | 6.81526e-07          | 0.999996 |
| PAH10+CH3          | 5.91897e-07     | 0.999997 | 6.34698e-07          | 0.999996 |
| PAH1+H             | 5.27743e-07     | 0.999998 | 5.65906e-07          | 0.999997 |
| rad50              | 5.26058e-07     | 0.999998 | 5.64099e-07          | 0.999998 |
| rad70              | 4.68169e-07     | 0.999999 | 5.02024e-07          | 0.999998 |
| rad60anti          | 3.53464e-07     | 0.999999 | 3.79023e-07          | 0.999998 |
| rad67              | 2.86638e-07     | 0.999999 | 3.07366e-07          | 0.999999 |
| rad59              | 2.38374e-07     | 0.999999 | 2.55613e-07          | 0.999999 |
| rad55              | 2.28529e-07     | 1.000000 | 2.45055e-07          | 0.999999 |
| rad62              | 1.23575e-07     | 1.000000 | 1.32511e-07          | 0.999999 |
| rad34              | 5.38118e-08     | 1.000000 | 5.77031e-08          | 0.999999 |
| rad43              | 3.25336e-08     | 1.000000 | 3.48863e-08          | 0.999999 |
| rad51              | 2.94634e-08     | 1.000000 | 3.15940e-08          | 0.999999 |
| rad52              | 1.98863e-08     | 1.000000 | 2.13243e-08          | 1.000000 |
| rad53              | 7.16536e-09     | 1.000000 | 7.68353e-09          | 1.000000 |
| rad64              | 2.79837e-09     | 1.000000 | 3.00073e-09          | 1.000000 |
| rad56              | 2.33179e-09     | 1.000000 | 2.50041e-09          | 1.000000 |
| rad58              | 2.16896e-09     | 1.000000 | 2.32580e-09          | 1.000000 |
| rad42              | 1.71810e-09     | 1.000000 | 1.84235e-09          | 1.000000 |
| rad65              | 9.39266e-10     | 1.000000 | 1.00719e-09          | 1.000000 |
| rad68syn           | 2.64056e-10     | 1.000000 | 2.83151e-10          | 1.000000 |
| rad41              | 2.24668e-10     | 1.000000 | 2.40914e-10          | 1.000000 |
| rad68anti          | 1.78166e-10     | 1.000000 | 1.91050e-10          | 1.000000 |
| PAH8+H             | 1.02532e-10     | 1.000000 | 1.09947e-10          | 1.000000 |
| rad40syn           | 2.86481e-11     | 1.000000 | 3.07198e-11          | 1.000000 |
| rad61              | 2.66402e-11     | 1.000000 | 2.85667e-11          | 1.000000 |
| rad23              | 1.60743e-11     | 1.000000 | 1.72366e-11          | 1.000000 |
| rad2               | 1.33132e-11     | 1.000000 | 1.42759e-11          | 1.000000 |
| rad40anti          | 1.19775e-11     | 1.000000 | 1.28436e-11          | 1.000000 |
| rad6               | 1.15557e-11     | 1.000000 | 1.23914e-11          | 1.000000 |
| rad73              | 1.03813e-11     | 1.000000 | 1.11320e-11          | 1.000000 |
| rad45              | 5.56226e-12     | 1.000000 | 5.96448e-12          | 1.000000 |
| rad71              | 4.46171e-12     | 1.000000 | 4.78436e-12          | 1.000000 |
| rad1               | 2.68520e-12     | 1.000000 | 2.87938e-12          | 1.000000 |
| rad9               | 1.05962e-12     | 1.000000 | 1.13625e-12          | 1.000000 |
| rad36              | 5.30374e-13     | 1.000000 | 5.68727e-13          | 1.000000 |
| rad3               | 4.20957e-13     | 1.000000 | 4.51397e-13          | 1.000000 |
| rad4               | 3.12157e-13     | 1.000000 | 3.34730e-13          | 1.000000 |
| rad10              | 2.81421e-13     | 1.000000 | 3.01771e-13          | 1.000000 |
| rad13              | 4.91281e-14     | 1.000000 | 5.26807e-14          | 1.000000 |
| rad21              | 3.80392e-14     | 1.000000 | 4.07899e-14          | 1.000000 |
| rad11              | 3.04432e-14     | 1.000000 | 3.26447e-14          | 1.000000 |
| rad20              | 1.64993e-14     | 1.000000 | 1.76924e-14          | 1.000000 |
| rad28              | 1.38843e-14     | 1.000000 | 1.48884e-14          | 1.000000 |
| rad33              | 1.26650e-14     | 1.000000 | 1.35808e-14          | 1.000000 |
| rad72              | 9.28832e-15     | 1.000000 | 9.95998e-15          | 1.000000 |
| rad7               | 6.12287e-15     | 1.000000 | 6.56564e-15          | 1.000000 |



|       |             |          |             |          |
|-------|-------------|----------|-------------|----------|
| rad26 | 4.74492e-15 | 1.000000 | 5.08804e-15 | 1.000000 |
| rad24 | 1.88184e-15 | 1.000000 | 2.01792e-15 | 1.000000 |
| rad25 | 5.51838e-16 | 1.000000 | 5.91743e-16 | 1.000000 |
| rad12 | 5.35715e-16 | 1.000000 | 5.74454e-16 | 1.000000 |
| rad15 | 2.10751e-16 | 1.000000 | 2.25990e-16 | 1.000000 |
| rad27 | 1.32729e-16 | 1.000000 | 1.42327e-16 | 1.000000 |
| rad14 | 1.05219e-16 | 1.000000 | 1.12828e-16 | 1.000000 |
| rad22 | 8.45093e-17 | 1.000000 | 9.06201e-17 | 1.000000 |
| rad31 | 4.19944e-17 | 1.000000 | 4.50312e-17 | 1.000000 |
| rad18 | 3.27056e-18 | 1.000000 | 3.50706e-18 | 1.000000 |
| rad8  | 1.12161e-20 | 1.000000 | 1.20272e-20 | 1.000000 |
| rad47 | 2.05595e-21 | 1.000000 | 2.20462e-21 | 1.000000 |
| rad5  | 8.06338e-23 | 1.000000 | 8.64644e-23 | 1.000000 |

0.100000000E-04 Pa, 1000.00000 K

| Rate constant      | True (fraction) |          | Effective (fraction) |          |
|--------------------|-----------------|----------|----------------------|----------|
| Total              | 7.98668e-13     | (1.00 )  | 7.19594e-13          | (1.00 )  |
| Formation of rad11 | 2.67704e-13     | (0.335 ) | 2.29546e-13          | (0.319 ) |
| Formation of rad6  | 2.87049e-13     | (0.359 ) | 2.46133e-13          | (0.342 ) |
| H-abstraction      | 2.43915e-13     | (0.305 ) | 2.43915e-13          | (0.339 ) |

  

| species            | PYtrue      | Cumul    | PYeffective | Cumul    |
|--------------------|-------------|----------|-------------|----------|
| Benzene+2-propynyl | 0.305402    | 0.305402 | 0.338962    | 0.338962 |
| Indene+H           | 0.272124    | 0.577526 | 0.302027    | 0.640989 |
| C2H2+PhCH2         | 0.159453    | 0.736979 | 0.176975    | 0.817964 |
| Phenyl+Allene      | 0.0990073   | 0.835987 | 0.000000    | 0.817964 |
| PhCCH+CH3          | 0.0616205   | 0.897607 | 0.0683917   | 0.886356 |
| PhCHCCH2+H         | 0.0537596   | 0.951367 | 0.0596670   | 0.946023 |
| PhCH2CCH+H         | 0.0288969   | 0.980264 | 0.0320723   | 0.978095 |
| Ph+MeAc            | 0.00817632  | 0.988440 | 0.00907480  | 0.987170 |
| PAH7+H             | 0.00601184  | 0.994452 | 0.00667246  | 0.993842 |
| PhCCCH3+H          | 0.00364277  | 0.998095 | 0.00404307  | 0.997885 |
| rad39              | 0.00134896  | 0.999444 | 0.00149719  | 0.999382 |
| rad19anti          | 0.000230025 | 0.999674 | 0.000255302 | 0.999638 |
| PAH9+H             | 0.000123695 | 0.999797 | 0.000137287 | 0.999775 |
| rad38              | 4.77792e-05 | 0.999845 | 5.30296e-05 | 0.999828 |
| rad19syn           | 4.20371e-05 | 0.999887 | 4.66565e-05 | 0.999875 |
| rad30              | 3.74826e-05 | 0.999925 | 4.16015e-05 | 0.999916 |
| rad35              | 2.54628e-05 | 0.999950 | 2.82608e-05 | 0.999945 |
| rad54              | 1.25292e-05 | 0.999963 | 1.39061e-05 | 0.999959 |
| rad37              | 9.28205e-06 | 0.999972 | 1.03021e-05 | 0.999969 |
| rad46              | 8.48861e-06 | 0.999980 | 9.42145e-06 | 0.999978 |
| PhcycC3H3_A+H      | 7.44283e-06 | 0.999988 | 8.26073e-06 | 0.999987 |
| PAH3+H             | 3.05843e-06 | 0.999991 | 3.39451e-06 | 0.999990 |
| PAH1+H             | 1.42911e-06 | 0.999992 | 1.58616e-06 | 0.999991 |
| rad50              | 1.24669e-06 | 0.999994 | 1.38369e-06 | 0.999993 |
| PAH10+CH3          | 1.21323e-06 | 0.999995 | 1.34654e-06 | 0.999994 |
| rad70              | 1.14131e-06 | 0.999996 | 1.26673e-06 | 0.999995 |
| rad60syn           | 8.97094e-07 | 0.999997 | 9.95669e-07 | 0.999996 |
| rad67              | 7.32850e-07 | 0.999998 | 8.13375e-07 | 0.999997 |
| rad55              | 5.71763e-07 | 0.999998 | 6.34592e-07 | 0.999998 |
| rad60anti          | 5.08253e-07 | 0.999999 | 5.64103e-07 | 0.999999 |
| rad59              | 4.08645e-07 | 0.999999 | 4.53550e-07 | 0.999999 |
| rad62              | 2.36337e-07 | 0.999999 | 2.62307e-07 | 0.999999 |
| rad34              | 1.49947e-07 | 0.999999 | 1.66424e-07 | 0.999999 |
| rad51              | 9.25837e-08 | 0.999999 | 1.02757e-07 | 0.999999 |
| rad52              | 5.46151e-08 | 1.000000 | 6.06166e-08 | 1.000000 |
| rad43              | 4.82842e-08 | 1.000000 | 5.35901e-08 | 1.000000 |
| rad53              | 2.66802e-08 | 1.000000 | 2.96121e-08 | 1.000000 |
| rad56              | 1.08965e-08 | 1.000000 | 1.20939e-08 | 1.000000 |
| rad64              | 9.68714e-09 | 1.000000 | 1.07517e-08 | 1.000000 |
| rad58              | 5.61421e-09 | 1.000000 | 6.23115e-09 | 1.000000 |
| rad42              | 4.47913e-09 | 1.000000 | 4.97133e-09 | 1.000000 |
| rad65              | 2.93940e-09 | 1.000000 | 3.26240e-09 | 1.000000 |
| rad68syn           | 1.19347e-09 | 1.000000 | 1.32462e-09 | 1.000000 |
| rad68anti          | 8.00253e-10 | 1.000000 | 8.88191e-10 | 1.000000 |
| PAH8+H             | 6.70054e-10 | 1.000000 | 7.43681e-10 | 1.000000 |
| rad41              | 4.94030e-10 | 1.000000 | 5.48317e-10 | 1.000000 |
| rad40syn           | 1.60977e-10 | 1.000000 | 1.78667e-10 | 1.000000 |
| rad61              | 1.14008e-10 | 1.000000 | 1.26536e-10 | 1.000000 |
| rad40anti          | 7.14860e-11 | 1.000000 | 7.93411e-11 | 1.000000 |
| rad73              | 6.99085e-11 | 1.000000 | 7.75907e-11 | 1.000000 |
| rad71              | 3.67649e-11 | 1.000000 | 4.08049e-11 | 1.000000 |
| rad23              | 7.73796e-12 | 1.000000 | 8.58821e-12 | 1.000000 |
| rad6               | 4.43366e-12 | 1.000000 | 4.92087e-12 | 1.000000 |
| rad2               | 3.23404e-12 | 1.000000 | 3.58942e-12 | 1.000000 |
| rad45              | 3.00958e-12 | 1.000000 | 3.34029e-12 | 1.000000 |

|       |             |          |             |          |
|-------|-------------|----------|-------------|----------|
| rad9  | 1.49473e-12 | 1.000000 | 1.65899e-12 | 1.000000 |
| rad1  | 7.11095e-13 | 1.000000 | 7.89234e-13 | 1.000000 |
| rad36 | 2.87991e-13 | 1.000000 | 3.19638e-13 | 1.000000 |
| rad13 | 2.41265e-13 | 1.000000 | 2.67777e-13 | 1.000000 |
| rad11 | 1.50329e-13 | 1.000000 | 1.66848e-13 | 1.000000 |
| rad3  | 1.39517e-13 | 1.000000 | 1.54848e-13 | 1.000000 |
| rad72 | 1.23637e-13 | 1.000000 | 1.37223e-13 | 1.000000 |
| rad4  | 1.07114e-13 | 1.000000 | 1.18884e-13 | 1.000000 |
| rad21 | 9.56156e-14 | 1.000000 | 1.06122e-13 | 1.000000 |
| rad10 | 7.53507e-14 | 1.000000 | 8.36313e-14 | 1.000000 |
| rad20 | 4.65002e-14 | 1.000000 | 5.16100e-14 | 1.000000 |
| rad33 | 2.70074e-14 | 1.000000 | 2.99752e-14 | 1.000000 |
| rad7  | 2.35649e-14 | 1.000000 | 2.61544e-14 | 1.000000 |
| rad28 | 7.23993e-15 | 1.000000 | 8.03545e-15 | 1.000000 |
| rad24 | 2.48801e-15 | 1.000000 | 2.76141e-15 | 1.000000 |
| rad26 | 2.20825e-15 | 1.000000 | 2.45091e-15 | 1.000000 |
| rad25 | 1.49317e-15 | 1.000000 | 1.65726e-15 | 1.000000 |
| rad12 | 9.30067e-16 | 1.000000 | 1.03227e-15 | 1.000000 |
| rad15 | 2.69540e-16 | 1.000000 | 2.99159e-16 | 1.000000 |
| rad14 | 1.89400e-16 | 1.000000 | 2.10212e-16 | 1.000000 |
| rad27 | 1.85952e-16 | 1.000000 | 2.06386e-16 | 1.000000 |
| rad22 | 4.74220e-17 | 1.000000 | 5.26331e-17 | 1.000000 |
| rad18 | 4.54294e-17 | 1.000000 | 5.04216e-17 | 1.000000 |
| rad31 | 2.32683e-17 | 1.000000 | 2.58252e-17 | 1.000000 |
| rad8  | 3.75825e-19 | 1.000000 | 4.17124e-19 | 1.000000 |
| rad47 | 6.62547e-21 | 1.000000 | 7.35352e-21 | 1.000000 |
| rad5  | 1.71218e-22 | 1.000000 | 1.90033e-22 | 1.000000 |

0.100000000E-04 Pa, 1100.00000 K

| Rate constant      | True (fraction) |          | Effective (fraction) |          |
|--------------------|-----------------|----------|----------------------|----------|
| Total              | 1.22919e-12     | (1.00 )  | 1.06688e-12          | (1.00 )  |
| Formation of rad11 | 3.87976e-13     | (0.316 ) | 3.11712e-13          | (0.292 ) |
| Formation of rad6  | 4.37724e-13     | (0.356 ) | 3.51681e-13          | (0.330 ) |
| H-abstraction      | 4.03491e-13     | (0.328 ) | 4.03491e-13          | (0.378 ) |

  

| species            | PYtrue      | Cumul    | PYeffective | Cumul    |
|--------------------|-------------|----------|-------------|----------|
| Benzene+2-propynyl | 0.328257    | 0.328257 | 0.378196    | 0.378196 |
| Indene+H           | 0.214714    | 0.542971 | 0.247379    | 0.625574 |
| C2H2+PhCH2         | 0.146502    | 0.689473 | 0.168789    | 0.794364 |
| Phenyl+Allene      | 0.132044    | 0.821517 | 0.000000    | 0.794364 |
| PhCHCCH2+H         | 0.0609574   | 0.882474 | 0.0702309   | 0.864595 |
| PhCCH+CH3          | 0.0572446   | 0.939719 | 0.0659535   | 0.930548 |
| PhCH2CCH+H         | 0.0407440   | 0.980463 | 0.0469425   | 0.977491 |
| Ph+MeAc            | 0.00763489  | 0.988098 | 0.00879642  | 0.986287 |
| PAH7+H             | 0.00694716  | 0.995045 | 0.00800405  | 0.994291 |
| PhCCCH3+H          | 0.00267733  | 0.997722 | 0.00308464  | 0.997376 |
| rad39              | 0.00150224  | 0.999224 | 0.00173078  | 0.999107 |
| rad19anti          | 0.000315220 | 0.999539 | 0.000363175 | 0.999470 |
| PAH9+H             | 0.000164386 | 0.999704 | 0.000189394 | 0.999659 |
| rad19syn           | 7.45655e-05 | 0.999778 | 8.59091e-05 | 0.999745 |
| rad38              | 6.50359e-05 | 0.999843 | 7.49299e-05 | 0.999820 |
| rad30              | 3.82332e-05 | 0.999882 | 4.40497e-05 | 0.999864 |
| rad35              | 3.25605e-05 | 0.999914 | 3.75140e-05 | 0.999902 |
| rad54              | 2.39077e-05 | 0.999938 | 2.75448e-05 | 0.999929 |
| PhcycC3H3_A+H      | 1.67306e-05 | 0.999955 | 1.92759e-05 | 0.999948 |
| rad46              | 1.28371e-05 | 0.999968 | 1.47901e-05 | 0.999963 |
| rad37              | 1.03715e-05 | 0.999978 | 1.19494e-05 | 0.999975 |
| PAH3+H             | 4.83975e-06 | 0.999983 | 5.57602e-06 | 0.999981 |
| PAH1+H             | 3.16887e-06 | 0.999986 | 3.65096e-06 | 0.999984 |
| rad50              | 2.53500e-06 | 0.999989 | 2.92065e-06 | 0.999987 |
| rad70              | 2.31279e-06 | 0.999991 | 2.66464e-06 | 0.999990 |
| PAH10+CH3          | 2.25114e-06 | 0.999993 | 2.59361e-06 | 0.999993 |
| rad67              | 1.57911e-06 | 0.999995 | 1.81935e-06 | 0.999994 |
| rad55              | 1.19782e-06 | 0.999996 | 1.38006e-06 | 0.999996 |
| rad60syn           | 1.15117e-06 | 0.999997 | 1.32630e-06 | 0.999997 |
| rad60anti          | 6.62627e-07 | 0.999998 | 7.63433e-07 | 0.999998 |
| rad59              | 6.18406e-07 | 0.999998 | 7.12482e-07 | 0.999999 |
| rad62              | 3.93252e-07 | 0.999999 | 4.53078e-07 | 0.999999 |
| rad34              | 3.40145e-07 | 0.999999 | 3.91892e-07 | 0.999999 |
| rad51              | 2.38369e-07 | 0.999999 | 2.74634e-07 | 1.000000 |
| rad52              | 1.25451e-07 | 1.000000 | 1.44536e-07 | 1.000000 |
| rad53              | 7.80404e-08 | 1.000000 | 8.99129e-08 | 1.000000 |
| rad43              | 6.37337e-08 | 1.000000 | 7.34295e-08 | 1.000000 |
| rad56              | 3.84098e-08 | 1.000000 | 4.42533e-08 | 1.000000 |
| rad64              | 2.61428e-08 | 1.000000 | 3.01199e-08 | 1.000000 |
| rad58              | 1.20347e-08 | 1.000000 | 1.38656e-08 | 1.000000 |
| rad42              | 9.67464e-09 | 1.000000 | 1.11465e-08 | 1.000000 |

|           |             |          |             |         |
|-----------|-------------|----------|-------------|---------|
| rad65     | 7.50471e-09 | 1.000000 | 8.64638e-09 | 1.00000 |
| rad68syn  | 4.04354e-09 | 1.000000 | 4.65870e-09 | 1.00000 |
| PAH8+H    | 3.08736e-09 | 1.000000 | 3.55705e-09 | 1.00000 |
| rad68anti | 2.69715e-09 | 1.000000 | 3.10748e-09 | 1.00000 |
| rad41     | 9.10252e-10 | 1.000000 | 1.04874e-09 | 1.00000 |
| rad40syn  | 6.53835e-10 | 1.000000 | 7.53304e-10 | 1.00000 |
| rad61     | 3.79380e-10 | 1.000000 | 4.37096e-10 | 1.00000 |
| rad73     | 3.37901e-10 | 1.000000 | 3.89306e-10 | 1.00000 |
| rad40anti | 3.05537e-10 | 1.000000 | 3.52020e-10 | 1.00000 |
| rad71     | 2.11159e-10 | 1.000000 | 2.43283e-10 | 1.00000 |
| rad23     | 3.87097e-12 | 1.000000 | 4.45987e-12 | 1.00000 |
| rad6      | 3.38782e-12 | 1.000000 | 3.90322e-12 | 1.00000 |
| rad45     | 1.62676e-12 | 1.000000 | 1.87424e-12 | 1.00000 |
| rad9      | 1.28336e-12 | 1.000000 | 1.47860e-12 | 1.00000 |
| rad72     | 1.11777e-12 | 1.000000 | 1.28782e-12 | 1.00000 |
| rad2      | 8.75153e-13 | 1.000000 | 1.00829e-12 | 1.00000 |
| rad11     | 6.03767e-13 | 1.000000 | 6.95619e-13 | 1.00000 |
| rad13     | 5.55361e-13 | 1.000000 | 6.39849e-13 | 1.00000 |
| rad1      | 2.04204e-13 | 1.000000 | 2.35270e-13 | 1.00000 |
| rad36     | 1.56426e-13 | 1.000000 | 1.80223e-13 | 1.00000 |
| rad7      | 1.25189e-13 | 1.000000 | 1.44234e-13 | 1.00000 |
| rad21     | 1.12703e-13 | 1.000000 | 1.29848e-13 | 1.00000 |
| rad20     | 5.72530e-14 | 1.000000 | 6.59629e-14 | 1.00000 |
| rad3      | 5.16351e-14 | 1.000000 | 5.94904e-14 | 1.00000 |
| rad4      | 4.04270e-14 | 1.000000 | 4.65772e-14 | 1.00000 |
| rad10     | 3.31289e-14 | 1.000000 | 3.81689e-14 | 1.00000 |
| rad33     | 2.98576e-14 | 1.000000 | 3.43999e-14 | 1.00000 |
| rad28     | 5.45463e-15 | 1.000000 | 6.28445e-15 | 1.00000 |
| rad25     | 2.72797e-15 | 1.000000 | 3.14298e-15 | 1.00000 |
| rad24     | 2.16988e-15 | 1.000000 | 2.49998e-15 | 1.00000 |
| rad26     | 1.56321e-15 | 1.000000 | 1.80103e-15 | 1.00000 |
| rad12     | 1.06574e-15 | 1.000000 | 1.22787e-15 | 1.00000 |
| rad18     | 3.95828e-16 | 1.000000 | 4.56046e-16 | 1.00000 |
| rad14     | 2.59086e-16 | 1.000000 | 2.98502e-16 | 1.00000 |
| rad15     | 2.32139e-16 | 1.000000 | 2.67454e-16 | 1.00000 |
| rad27     | 1.66798e-16 | 1.000000 | 1.92173e-16 | 1.00000 |
| rad22     | 2.81738e-17 | 1.000000 | 3.24600e-17 | 1.00000 |
| rad31     | 1.37107e-17 | 1.000000 | 1.57966e-17 | 1.00000 |
| rad8      | 2.31129e-18 | 1.000000 | 2.66290e-18 | 1.00000 |
| rad47     | 1.74353e-20 | 1.000000 | 2.00877e-20 | 1.00000 |
| rad5      | 5.16482e-22 | 1.000000 | 5.95055e-22 | 1.00000 |

0.100000000E-04 Pa, 1200.00000 K

=====

| Rate constant      | True (fraction)      | Effective (fraction) |
|--------------------|----------------------|----------------------|
| Total              | 1.80237e-12 (1.00 )  | 1.50733e-12 (1.00 )  |
| Formation of rad11 | 5.38789e-13 (0.299 ) | 4.03336e-13 (0.268 ) |
| Formation of rad6  | 6.34764e-13 (0.352 ) | 4.75183e-13 (0.315 ) |
| H-abstraction      | 6.28816e-13 (0.349 ) | 6.28816e-13 (0.417 ) |

| species            | PYtrue      | Cumul    | PYeffective | Cumul    |
|--------------------|-------------|----------|-------------|----------|
| Benzene+2-propynyl | 0.348883    | 0.348883 | 0.417171    | 0.417171 |
| Indene+H           | 0.168224    | 0.517107 | 0.201151    | 0.618322 |
| Phenyl+Allene      | 0.163693    | 0.680800 | 0.000000    | 0.618322 |
| C2H2+PhCH2         | 0.129445    | 0.810245 | 0.154782    | 0.773104 |
| PhCHCCH2+H         | 0.0661470   | 0.876392 | 0.0790946   | 0.852199 |
| PhCH2CCH+H         | 0.0526489   | 0.929041 | 0.0629537   | 0.915152 |
| PhCCH+CH3          | 0.0518208   | 0.980862 | 0.0619641   | 0.977116 |
| PAH7+H             | 0.00758545  | 0.988447 | 0.00907010  | 0.986186 |
| Ph+MeAc            | 0.00700420  | 0.995451 | 0.00837514  | 0.994562 |
| PhCCCH3+H          | 0.00195097  | 0.997402 | 0.00233284  | 0.996894 |
| rad39              | 0.00157581  | 0.998978 | 0.00188425  | 0.998779 |
| rad19anti          | 0.000399579 | 0.999378 | 0.000477791 | 0.999257 |
| PAH9+H             | 0.000204702 | 0.999582 | 0.000244769 | 0.999501 |
| rad19syn           | 0.000118863 | 0.999701 | 0.000142129 | 0.999643 |
| rad38              | 8.27680e-05 | 0.999784 | 9.89685e-05 | 0.999742 |
| rad54              | 4.05005e-05 | 0.999824 | 4.84277e-05 | 0.999791 |
| rad35              | 3.92969e-05 | 0.999864 | 4.69886e-05 | 0.999838 |
| rad30              | 3.73116e-05 | 0.999901 | 4.46148e-05 | 0.999882 |
| PhcycC3H3_A+H      | 3.27086e-05 | 0.999934 | 3.91108e-05 | 0.999922 |
| rad46              | 1.78869e-05 | 0.999952 | 2.13880e-05 | 0.999943 |
| rad37              | 1.16239e-05 | 0.999963 | 1.38991e-05 | 0.999957 |
| PAH3+H             | 6.95966e-06 | 0.999970 | 8.32193e-06 | 0.999965 |
| PAH1+H             | 6.04571e-06 | 0.999976 | 7.22906e-06 | 0.999972 |
| rad50              | 4.57121e-06 | 0.999981 | 5.46594e-06 | 0.999978 |
| rad70              | 4.07150e-06 | 0.999985 | 4.86843e-06 | 0.999983 |
| PAH10+CH3          | 3.83957e-06 | 0.999989 | 4.59109e-06 | 0.999987 |
| rad67              | 2.96796e-06 | 0.999992 | 3.54889e-06 | 0.999991 |

|           |             |          |             |          |
|-----------|-------------|----------|-------------|----------|
| rad55     | 2.19501e-06 | 0.999994 | 2.62464e-06 | 0.999993 |
| rad60syn  | 1.37645e-06 | 0.999995 | 1.64587e-06 | 0.999995 |
| rad59     | 8.52866e-07 | 0.999996 | 1.01981e-06 | 0.999996 |
| rad60anti | 8.03342e-07 | 0.999997 | 9.60578e-07 | 0.999997 |
| rad34     | 6.59901e-07 | 0.999998 | 7.89063e-07 | 0.999998 |
| rad62     | 5.91358e-07 | 0.999998 | 7.07106e-07 | 0.999999 |
| rad51     | 5.25705e-07 | 0.999999 | 6.28605e-07 | 0.999999 |
| rad52     | 2.50703e-07 | 0.999999 | 2.99775e-07 | 0.999999 |
| rad53     | 1.90238e-07 | 0.999999 | 2.27474e-07 | 1.000000 |
| rad56     | 1.09448e-07 | 0.999999 | 1.30871e-07 | 1.000000 |
| rad43     | 7.76164e-08 | 0.999999 | 9.28086e-08 | 1.000000 |
| rad64     | 5.85550e-08 | 0.999999 | 7.00159e-08 | 1.000000 |
| rad58     | 2.24147e-08 | 0.999999 | 2.68020e-08 | 1.000000 |
| rad42     | 1.82035e-08 | 0.999999 | 2.17665e-08 | 1.000000 |
| rad65     | 1.63703e-08 | 0.999999 | 1.95744e-08 | 1.000000 |
| rad68syn  | 1.10175e-08 | 0.999999 | 1.31740e-08 | 1.000000 |
| PAH8+H    | 1.09227e-08 | 0.999999 | 1.30606e-08 | 1.000000 |
| rad68anti | 7.31621e-09 | 0.999999 | 8.74827e-09 | 1.000000 |
| rad40syn  | 2.07794e-09 | 0.999999 | 2.48466e-09 | 1.000000 |
| rad41     | 1.48024e-09 | 0.999999 | 1.76997e-09 | 1.000000 |
| rad73     | 1.26652e-09 | 0.999999 | 1.51442e-09 | 1.000000 |
| rad61     | 1.03672e-09 | 0.999999 | 1.23964e-09 | 1.000000 |
| rad40anti | 1.01429e-09 | 0.999999 | 1.21282e-09 | 1.000000 |
| rad71     | 9.17535e-10 | 0.999999 | 1.09713e-09 | 1.000000 |
| rad72     | 7.08936e-12 | 0.999999 | 8.47702e-12 | 1.000000 |
| rad6      | 3.66804e-12 | 0.999999 | 4.38600e-12 | 1.000000 |
| rad23     | 1.99376e-12 | 0.999999 | 2.38400e-12 | 1.000000 |
| rad11     | 1.50204e-12 | 0.999999 | 1.79604e-12 | 1.000000 |
| rad9      | 9.42707e-13 | 0.999999 | 1.12723e-12 | 1.000000 |
| rad45     | 8.84484e-13 | 0.999999 | 1.05761e-12 | 1.000000 |
| rad13     | 6.46665e-13 | 0.999999 | 7.73239e-13 | 1.000000 |
| rad7      | 4.84716e-13 | 0.999999 | 5.79590e-13 | 1.000000 |
| rad2      | 2.58798e-13 | 0.999999 | 3.09454e-13 | 1.000000 |
| rad21     | 8.79041e-14 | 0.999999 | 1.05110e-13 | 1.000000 |
| rad36     | 8.56473e-14 | 0.999999 | 1.02412e-13 | 1.000000 |
| rad1      | 6.25376e-14 | 0.999999 | 7.47781e-14 | 1.000000 |
| rad20     | 4.28302e-14 | 0.999999 | 5.12134e-14 | 1.000000 |
| rad10     | 2.77402e-14 | 0.999999 | 3.31699e-14 | 1.000000 |
| rad33     | 2.25860e-14 | 0.999999 | 2.70068e-14 | 1.000000 |
| rad3      | 2.06569e-14 | 0.999999 | 2.47001e-14 | 1.000000 |
| rad4      | 1.63623e-14 | 0.999999 | 1.95649e-14 | 1.000000 |
| rad28     | 5.85419e-15 | 0.999999 | 7.00007e-15 | 1.000000 |
| rad25     | 3.12053e-15 | 0.999999 | 3.73132e-15 | 1.000000 |
| rad24     | 1.65803e-15 | 0.999999 | 1.98256e-15 | 1.000000 |
| rad18     | 1.63214e-15 | 0.999999 | 1.95160e-15 | 1.000000 |
| rad26     | 1.48401e-15 | 0.999999 | 1.77447e-15 | 1.000000 |
| rad12     | 1.03519e-15 | 0.999999 | 1.23781e-15 | 1.000000 |
| rad14     | 2.44013e-16 | 0.999999 | 2.91774e-16 | 1.000000 |
| rad15     | 2.33128e-16 | 0.999999 | 2.78758e-16 | 1.000000 |
| rad27     | 1.00943e-16 | 0.999999 | 1.20700e-16 | 1.000000 |
| rad22     | 1.91920e-17 | 0.999999 | 2.29485e-17 | 1.000000 |
| rad31     | 8.42038e-18 | 0.999999 | 1.00685e-17 | 1.000000 |
| rad8      | 5.36818e-18 | 0.999999 | 6.41893e-18 | 1.000000 |
| rad47     | 3.89980e-20 | 0.999999 | 4.66312e-20 | 1.000000 |
| rad5      | 2.00400e-21 | 0.999999 | 2.39625e-21 | 1.000000 |

0.100000000E-04 Pa, 1300.00000 K

=====

| Rate constant      | True (fraction)      | Effective (fraction) |
|--------------------|----------------------|----------------------|
| Total              | 2.54148e-12 (1.00 )  | 2.05338e-12 (1.00 )  |
| Formation of rad11 | 7.22991e-13 (0.284 ) | 5.03422e-13 (0.245 ) |
| Formation of rad6  | 8.84215e-13 (0.348 ) | 6.15682e-13 (0.300 ) |
| H-abstraction      | 9.34273e-13 (0.368 ) | 9.34273e-13 (0.455 ) |

| species            | PYtrue      | Cumul    | PYeffective | Cumul    |
|--------------------|-------------|----------|-------------|----------|
| Benzene+2-propynyl | 0.367610    | 0.367610 | 0.454993    | 0.454993 |
| Phenyl+Allene      | 0.192054    | 0.559664 | 0.000000    | 0.454993 |
| Indene+H           | 0.131421    | 0.691086 | 0.162661    | 0.617654 |
| C2H2+PhCH2         | 0.111295    | 0.802381 | 0.137750    | 0.755405 |
| PhCHCCH2+H         | 0.0692296   | 0.871610 | 0.0856859   | 0.841091 |
| PhCH2CCH+H         | 0.0636260   | 0.935236 | 0.0787507   | 0.919842 |
| PhCCH+CH3          | 0.0461559   | 0.981392 | 0.0571276   | 0.976969 |
| PAH7+H             | 0.00794566  | 0.989338 | 0.00983443  | 0.986804 |
| Ph+MeAc            | 0.00637082  | 0.995709 | 0.00788521  | 0.994689 |
| rad39              | 0.00158196  | 0.997291 | 0.00195800  | 0.996647 |
| PhCCCH3+H          | 0.00142376  | 0.998714 | 0.00176219  | 0.998409 |
| rad19anti          | 0.000475489 | 0.999190 | 0.000588514 | 0.998997 |
| PAH9+H             | 0.000242131 | 0.999432 | 0.000299688 | 0.999297 |

|               |             |          |             |          |
|---------------|-------------|----------|-------------|----------|
| rad19syn      | 0.000174660 | 0.999607 | 0.000216178 | 0.999513 |
| rad38         | 9.98860e-05 | 0.999707 | 0.000123629 | 0.999637 |
| rad54         | 6.26274e-05 | 0.999769 | 7.75141e-05 | 0.999714 |
| PhcycC3H3_A+H | 5.74351e-05 | 0.999827 | 7.10879e-05 | 0.999786 |
| rad35         | 4.53516e-05 | 0.999872 | 5.61319e-05 | 0.999842 |
| rad30         | 3.53185e-05 | 0.999907 | 4.37139e-05 | 0.999885 |
| rad46         | 2.33611e-05 | 0.999931 | 2.89142e-05 | 0.999914 |
| rad37         | 1.29873e-05 | 0.999944 | 1.60744e-05 | 0.999930 |
| PAH1+H        | 1.02825e-05 | 0.999954 | 1.27267e-05 | 0.999943 |
| PAH3+H        | 9.32004e-06 | 0.999963 | 1.15354e-05 | 0.999955 |
| rad50         | 7.49585e-06 | 0.999971 | 9.27759e-06 | 0.999964 |
| rad70         | 6.43021e-06 | 0.999977 | 7.95868e-06 | 0.999972 |
| PAH10+CH3     | 6.07786e-06 | 0.999983 | 7.52262e-06 | 0.999979 |
| rad67         | 4.99567e-06 | 0.999988 | 6.18315e-06 | 0.999986 |
| rad55         | 3.63003e-06 | 0.999992 | 4.49291e-06 | 0.999990 |
| rad60syn      | 1.56340e-06 | 0.999993 | 1.93503e-06 | 0.999992 |
| rad34         | 1.13462e-06 | 0.999995 | 1.40432e-06 | 0.999993 |
| rad59         | 1.09806e-06 | 0.999996 | 1.35907e-06 | 0.999995 |
| rad51         | 1.02620e-06 | 0.999997 | 1.27014e-06 | 0.999996 |
| rad60anti     | 9.23688e-07 | 0.999998 | 1.14325e-06 | 0.999997 |
| rad62         | 8.25901e-07 | 0.999998 | 1.02222e-06 | 0.999998 |
| rad52         | 4.48900e-07 | 0.999999 | 5.55607e-07 | 0.999999 |
| rad53         | 4.02868e-07 | 0.999999 | 4.98632e-07 | 0.999999 |
| rad56         | 2.64598e-07 | 1.000000 | 3.27496e-07 | 1.000000 |
| rad64         | 1.13755e-07 | 1.000000 | 1.40795e-07 | 1.000000 |
| rad43         | 8.95932e-08 | 1.000000 | 1.10890e-07 | 1.000000 |
| rad58         | 3.75497e-08 | 1.000000 | 4.64755e-08 | 1.000000 |
| rad65         | 3.15601e-08 | 1.000000 | 3.90621e-08 | 1.000000 |
| PAH8+H        | 3.15023e-08 | 1.000000 | 3.89905e-08 | 1.000000 |
| rad42         | 3.09037e-08 | 1.000000 | 3.82497e-08 | 1.000000 |
| rad68syn      | 2.53721e-08 | 1.000000 | 3.14033e-08 | 1.000000 |
| rad68anti     | 1.67834e-08 | 1.000000 | 2.07729e-08 | 1.000000 |
| rad40syn      | 5.46373e-09 | 1.000000 | 6.76250e-09 | 1.000000 |
| rad73         | 3.88973e-09 | 1.000000 | 4.81434e-09 | 1.000000 |
| rad71         | 3.20241e-09 | 1.000000 | 3.96365e-09 | 1.000000 |
| rad40anti     | 2.76933e-09 | 1.000000 | 3.42762e-09 | 1.000000 |
| rad61         | 2.41929e-09 | 1.000000 | 2.99437e-09 | 1.000000 |
| rad41         | 2.20456e-09 | 1.000000 | 2.72860e-09 | 1.000000 |
| rad72         | 3.39623e-11 | 1.000000 | 4.20353e-11 | 1.000000 |
| rad6          | 4.67641e-12 | 1.000000 | 5.78802e-12 | 1.000000 |
| rad11         | 2.13012e-12 | 1.000000 | 2.63646e-12 | 1.000000 |
| rad7          | 1.09878e-12 | 1.000000 | 1.35997e-12 | 1.000000 |
| rad23         | 1.05610e-12 | 1.000000 | 1.30714e-12 | 1.000000 |
| rad9          | 6.46005e-13 | 1.000000 | 7.99568e-13 | 1.000000 |
| rad13         | 4.91956e-13 | 1.000000 | 6.08898e-13 | 1.000000 |
| rad45         | 4.86202e-13 | 1.000000 | 6.01774e-13 | 1.000000 |
| rad2          | 8.19552e-14 | 1.000000 | 1.01436e-13 | 1.000000 |
| rad21         | 5.91330e-14 | 1.000000 | 7.31895e-14 | 1.000000 |
| rad36         | 4.74848e-14 | 1.000000 | 5.87724e-14 | 1.000000 |
| rad20         | 2.63323e-14 | 1.000000 | 3.25917e-14 | 1.000000 |
| rad10         | 2.49214e-14 | 1.000000 | 3.08453e-14 | 1.000000 |
| rad1          | 2.02747e-14 | 1.000000 | 2.50941e-14 | 1.000000 |
| rad33         | 1.50408e-14 | 1.000000 | 1.86161e-14 | 1.000000 |
| rad3          | 8.78339e-15 | 1.000000 | 1.08713e-14 | 1.000000 |
| rad28         | 8.46024e-15 | 1.000000 | 1.04713e-14 | 1.000000 |
| rad4          | 7.01441e-15 | 1.000000 | 8.68174e-15 | 1.000000 |
| rad18         | 3.07357e-15 | 1.000000 | 3.80417e-15 | 1.000000 |
| rad25         | 2.61840e-15 | 1.000000 | 3.24081e-15 | 1.000000 |
| rad26         | 1.64322e-15 | 1.000000 | 2.03382e-15 | 1.000000 |
| rad24         | 1.21061e-15 | 1.000000 | 1.49838e-15 | 1.000000 |
| rad12         | 9.25054e-16 | 1.000000 | 1.14494e-15 | 1.000000 |
| rad15         | 6.45626e-16 | 1.000000 | 7.99094e-16 | 1.000000 |
| rad14         | 1.73625e-16 | 1.000000 | 2.14897e-16 | 1.000000 |
| rad27         | 4.96127e-17 | 1.000000 | 6.14059e-17 | 1.000000 |
| rad22         | 3.81291e-17 | 1.000000 | 4.71927e-17 | 1.000000 |
| rad8          | 7.86598e-18 | 1.000000 | 9.73573e-18 | 1.000000 |
| rad31         | 5.35121e-18 | 1.000000 | 6.62325e-18 | 1.000000 |
| rad47         | 7.66887e-20 | 1.000000 | 9.49183e-20 | 1.000000 |
| rad5          | 8.51248e-21 | 1.000000 | 1.05359e-20 | 1.000000 |

0.100000000E-04 Pa, 1400.00000 K

=====

| Rate constant      | True (fraction)      | Effective (fraction) |
|--------------------|----------------------|----------------------|
| Total              | 3.47024e-12 (1.00 )  | 2.71984e-12 (1.00 )  |
| Formation of rad11 | 9.43269e-13 (0.272 ) | 6.11768e-13 (0.225 ) |
| Formation of rad6  | 1.19194e-12 (0.343 ) | 7.73043e-13 (0.284 ) |
| H-abstraction      | 1.33503e-12 (0.385 ) | 1.33503e-12 (0.491 ) |
| species            | PYtrue Cumul         | PYeffective Cumul    |

|                    |             |          |             |          |
|--------------------|-------------|----------|-------------|----------|
| Benzene+2-propynyl | 0.384709    | 0.384709 | 0.490849    | 0.490849 |
| Phenyl+Allene      | 0.216237    | 0.600946 | 0.00000     | 0.490849 |
| Indene+H           | 0.102753    | 0.703699 | 0.131102    | 0.621951 |
| C2H2+PhCH2         | 0.0940337   | 0.797733 | 0.119977    | 0.741928 |
| PhCH2CCH+H         | 0.0730480   | 0.870781 | 0.0932017   | 0.835129 |
| PhCHCCH2+H         | 0.0704361   | 0.941217 | 0.0898693   | 0.924998 |
| PhCCH+CH3          | 0.0407709   | 0.981988 | 0.0520195   | 0.977018 |
| PAH7+H             | 0.00808062  | 0.990068 | 0.0103100   | 0.987328 |
| Ph+MeAc            | 0.00578254  | 0.995851 | 0.00737791  | 0.994706 |
| rad39              | 0.00153900  | 0.997390 | 0.00196361  | 0.996669 |
| PhCCCH3+H          | 0.00104907  | 0.998439 | 0.00133851  | 0.998008 |
| rad19anti          | 0.000537563 | 0.998977 | 0.000685873 | 0.998694 |
| PAH9+H             | 0.000275092 | 0.999252 | 0.000350989 | 0.999045 |
| rad19syn           | 0.000241019 | 0.999493 | 0.000307515 | 0.999352 |
| rad38              | 0.000115616 | 0.999608 | 0.000147513 | 0.999500 |
| PhcycC3H3_A+H      | 9.27188e-05 | 0.999701 | 0.000118299 | 0.999618 |
| rad54              | 9.20266e-05 | 0.999791 | 0.000115094 | 0.999733 |
| rad35              | 5.05796e-05 | 0.999842 | 6.45344e-05 | 0.999798 |
| rad30              | 3.27889e-05 | 0.999875 | 4.18352e-05 | 0.999840 |
| rad46              | 2.89889e-05 | 0.999904 | 3.69868e-05 | 0.999877 |
| PAH1+H             | 1.59963e-05 | 0.999920 | 2.04096e-05 | 0.999897 |
| rad37              | 1.43563e-05 | 0.999934 | 1.83172e-05 | 0.999915 |
| PAH3+H             | 1.18378e-05 | 0.999946 | 1.51038e-05 | 0.999930 |
| rad50              | 1.13924e-05 | 0.999957 | 1.45355e-05 | 0.999945 |
| rad70              | 9.33021e-06 | 0.999967 | 1.19044e-05 | 0.999957 |
| PAH10+CH3          | 9.00294e-06 | 0.999976 | 1.14868e-05 | 0.999968 |
| rad67              | 7.68554e-06 | 0.999983 | 9.80595e-06 | 0.999978 |
| rad55              | 5.54137e-06 | 0.999989 | 7.07023e-06 | 0.999985 |
| rad51              | 1.81654e-06 | 0.999991 | 2.31772e-06 | 0.999988 |
| rad34              | 1.77488e-06 | 0.999992 | 2.26456e-06 | 0.999990 |
| rad60syn           | 1.71203e-06 | 0.999994 | 2.18438e-06 | 0.999992 |
| rad59              | 1.34390e-06 | 0.999995 | 1.71468e-06 | 0.999994 |
| rad62              | 1.09238e-06 | 0.999997 | 1.39377e-06 | 0.999995 |
| rad60anti          | 1.02264e-06 | 0.999998 | 1.30479e-06 | 0.999996 |
| rad53              | 7.63459e-07 | 0.999998 | 9.74098e-07 | 0.999997 |
| rad52              | 7.36190e-07 | 0.999999 | 9.39297e-07 | 0.999998 |
| rad56              | 5.61676e-07 | 1.000000 | 7.16641e-07 | 0.999999 |
| rad64              | 1.97836e-07 | 1.000000 | 2.52418e-07 | 0.999999 |
| rad43              | 1.00004e-07 | 1.000000 | 1.27595e-07 | 0.999999 |
| PAH8+H             | 7.73009e-08 | 1.000000 | 9.86282e-08 | 1.000000 |
| rad58              | 5.80225e-08 | 1.000000 | 7.40306e-08 | 1.000000 |
| rad65              | 5.51354e-08 | 1.000000 | 7.03469e-08 | 1.000000 |
| rad68syn           | 5.11875e-08 | 1.000000 | 6.53098e-08 | 1.000000 |
| rad42              | 4.85214e-08 | 1.000000 | 6.19082e-08 | 1.000000 |
| rad68anti          | 3.37456e-08 | 1.000000 | 4.30559e-08 | 1.000000 |
| rad40syn           | 1.23711e-08 | 1.000000 | 1.57842e-08 | 1.000000 |
| rad73              | 1.01769e-08 | 1.000000 | 1.29847e-08 | 1.000000 |
| rad71              | 9.36208e-09 | 1.000000 | 1.19451e-08 | 1.000000 |
| rad40anti          | 6.47926e-09 | 1.000000 | 8.26688e-09 | 1.000000 |
| rad61              | 4.96370e-09 | 1.000000 | 6.33318e-09 | 1.000000 |
| rad41              | 3.08784e-09 | 1.000000 | 3.93976e-09 | 1.000000 |
| rad72              | 1.29425e-10 | 1.000000 | 1.65133e-10 | 1.000000 |
| rad6               | 7.10858e-12 | 1.000000 | 9.06977e-12 | 1.000000 |
| rad11              | 1.92545e-12 | 1.000000 | 2.45668e-12 | 1.000000 |
| rad7               | 1.43324e-12 | 1.000000 | 1.82867e-12 | 1.000000 |
| rad23              | 5.75215e-13 | 1.000000 | 7.33916e-13 | 1.000000 |
| rad9               | 4.26457e-13 | 1.000000 | 5.44115e-13 | 1.000000 |
| rad13              | 3.13837e-13 | 1.000000 | 4.00424e-13 | 1.000000 |
| rad45              | 2.71238e-13 | 1.000000 | 3.46071e-13 | 1.000000 |
| rad21              | 3.81060e-14 | 1.000000 | 4.86193e-14 | 1.000000 |
| rad2               | 2.75493e-14 | 1.000000 | 3.51500e-14 | 1.000000 |
| rad36              | 2.67375e-14 | 1.000000 | 3.41143e-14 | 1.000000 |
| rad10              | 1.68325e-14 | 1.000000 | 2.14765e-14 | 1.000000 |
| rad20              | 1.53040e-14 | 1.000000 | 1.95263e-14 | 1.000000 |
| rad28              | 1.48042e-14 | 1.000000 | 1.88886e-14 | 1.000000 |
| rad33              | 9.75778e-15 | 1.000000 | 1.24499e-14 | 1.000000 |
| rad1               | 6.94374e-15 | 1.000000 | 8.85954e-15 | 1.000000 |
| rad3               | 3.93970e-15 | 1.000000 | 5.02664e-15 | 1.000000 |
| rad18              | 3.17462e-15 | 1.000000 | 4.05049e-15 | 1.000000 |
| rad4               | 3.16634e-15 | 1.000000 | 4.03992e-15 | 1.000000 |
| rad25              | 1.93942e-15 | 1.000000 | 2.47449e-15 | 1.000000 |
| rad26              | 1.86994e-15 | 1.000000 | 2.38585e-15 | 1.000000 |
| rad15              | 1.83391e-15 | 1.000000 | 2.33988e-15 | 1.000000 |
| rad24              | 8.67708e-16 | 1.000000 | 1.10711e-15 | 1.000000 |
| rad12              | 7.86877e-16 | 1.000000 | 1.00397e-15 | 1.000000 |
| rad22              | 2.47231e-16 | 1.000000 | 3.15441e-16 | 1.000000 |
| rad14              | 1.10830e-16 | 1.000000 | 1.41408e-16 | 1.000000 |
| rad27              | 2.35636e-17 | 1.000000 | 3.00647e-17 | 1.000000 |
| rad8               | 9.26462e-18 | 1.000000 | 1.18207e-17 | 1.000000 |

|       |             |         |             |          |
|-------|-------------|---------|-------------|----------|
| rad31 | 3.51109e-18 | 1.00000 | 4.47979e-18 | 1.000000 |
| rad47 | 1.36054e-19 | 1.00000 | 1.73591e-19 | 1.000000 |
| rad5  | 3.30716e-20 | 1.00000 | 4.21959e-20 | 1.000000 |

0.100000000E-04 Pa, 1500.00000 K

| Rate constant      | True (fraction)      | Effective (fraction) |
|--------------------|----------------------|----------------------|
| Total              | 4.61271e-12 (1.00 )  | 3.52361e-12 (1.00 )  |
| Formation of rad11 | 1.20217e-12 (0.261 ) | 7.28782e-13 (0.207 ) |
| Formation of rad6  | 1.56360e-12 (0.339 ) | 9.47887e-13 (0.269 ) |
| H-abstraction      | 1.84694e-12 (0.400 ) | 1.84694e-12 (0.524 ) |

| species            | PYtrue      | Cumul    | PYeffective | Cumul    |
|--------------------|-------------|----------|-------------|----------|
| Benzene+2-propynyl | 0.400402    | 0.400402 | 0.524162    | 0.524162 |
| Phenyl+Allene      | 0.236109    | 0.636511 | 0.000000    | 0.524162 |
| Indene+H           | 0.0806435   | 0.717155 | 0.105570    | 0.629731 |
| PhCH2CCH+H         | 0.0806387   | 0.797793 | 0.105563    | 0.735294 |
| C2H2+PhCH2         | 0.0787062   | 0.876500 | 0.103033    | 0.838328 |
| PhCHCCH2+H         | 0.0701571   | 0.946657 | 0.0918421   | 0.930170 |
| PhCCH+CH3          | 0.0359368   | 0.982594 | 0.0470444   | 0.977214 |
| PAH7+H             | 0.00805110  | 0.990645 | 0.0105396   | 0.987754 |
| Ph+MeAc            | 0.00526035  | 0.995905 | 0.00688624  | 0.994640 |
| rad39              | 0.00146497  | 0.997370 | 0.00191777  | 0.996558 |
| PhCCCH3+H          | 0.000785539 | 0.998156 | 0.00102834  | 0.997586 |
| rad19anti          | 0.000582991 | 0.998739 | 0.000763188 | 0.998349 |
| rad19syn           | 0.000316567 | 0.999055 | 0.000414413 | 0.998764 |
| PAH9+H             | 0.000302845 | 0.999358 | 0.000396450 | 0.999160 |
| PhcycC3H3_A+H      | 0.000139913 | 0.999498 | 0.000183158 | 0.999343 |
| rad38              | 0.000129499 | 0.999627 | 0.000169526 | 0.999513 |
| rad54              | 0.000122808 | 0.999750 | 0.000160767 | 0.999674 |
| rad35              | 5.49599e-05 | 0.999805 | 7.19472e-05 | 0.999746 |
| rad46              | 3.45380e-05 | 0.999840 | 4.52132e-05 | 0.999791 |
| rad30              | 3.01156e-05 | 0.999870 | 3.94239e-05 | 0.999830 |
| PAH1+H             | 2.31901e-05 | 0.999893 | 3.03579e-05 | 0.999861 |
| rad50              | 1.62766e-05 | 0.999909 | 2.13074e-05 | 0.999882 |
| rad37              | 1.56192e-05 | 0.999925 | 2.04470e-05 | 0.999902 |
| PAH3+H             | 1.44553e-05 | 0.999939 | 1.89232e-05 | 0.999921 |
| rad70              | 1.26613e-05 | 0.999952 | 1.65747e-05 | 0.999938 |
| PAH10+CH3          | 1.25752e-05 | 0.999965 | 1.64620e-05 | 0.999954 |
| rad67              | 1.09793e-05 | 0.999976 | 1.43728e-05 | 0.999969 |
| rad55              | 7.93592e-06 | 0.999983 | 1.03888e-05 | 0.999979 |
| rad51              | 2.96749e-06 | 0.999986 | 3.88470e-06 | 0.999983 |
| rad34              | 2.57549e-06 | 0.999989 | 3.37153e-06 | 0.999986 |
| rad60syn           | 1.82792e-06 | 0.999991 | 2.39290e-06 | 0.999989 |
| rad59              | 1.58467e-06 | 0.999992 | 2.07447e-06 | 0.999991 |
| rad62              | 1.38706e-06 | 0.999994 | 1.81579e-06 | 0.999993 |
| rad53              | 1.32204e-06 | 0.999995 | 1.73067e-06 | 0.999994 |
| rad52              | 1.12378e-06 | 0.999996 | 1.47114e-06 | 0.999996 |
| rad60anti          | 1.10268e-06 | 0.999997 | 1.44350e-06 | 0.999997 |
| rad56              | 1.07222e-06 | 0.999998 | 1.40364e-06 | 0.999999 |
| rad64              | 3.15087e-07 | 0.999999 | 4.12476e-07 | 0.999999 |
| PAH8+H             | 1.66252e-07 | 0.999999 | 2.17639e-07 | 0.999999 |
| rad43              | 1.09523e-07 | 0.999999 | 1.43375e-07 | 0.999999 |
| rad68syn           | 9.28291e-08 | 0.999999 | 1.21521e-07 | 0.999999 |
| rad65              | 8.88724e-08 | 0.999999 | 1.16342e-07 | 1.000000 |
| rad58              | 8.42069e-08 | 0.999999 | 1.10234e-07 | 1.000000 |
| rad42              | 7.16663e-08 | 0.999999 | 9.38173e-08 | 1.000000 |
| rad68anti          | 6.10163e-08 | 0.999999 | 7.98757e-08 | 1.000000 |
| rad40syn           | 2.48114e-08 | 0.999999 | 3.24802e-08 | 1.000000 |
| rad71              | 2.35639e-08 | 0.999999 | 3.08472e-08 | 1.000000 |
| rad73              | 2.32861e-08 | 0.999999 | 3.04835e-08 | 1.000000 |
| rad40anti          | 1.33700e-08 | 0.999999 | 1.75025e-08 | 1.000000 |
| rad61              | 9.14968e-09 | 0.999999 | 1.19777e-08 | 1.000000 |
| rad41              | 4.14357e-09 | 0.999999 | 5.42427e-09 | 1.000000 |
| rad72              | 4.05222e-10 | 0.999999 | 5.30469e-10 | 1.000000 |
| rad6               | 1.20664e-11 | 0.999999 | 1.57960e-11 | 1.000000 |
| rad11              | 1.35789e-12 | 0.999999 | 1.77759e-12 | 1.000000 |
| rad7               | 1.25137e-12 | 0.999999 | 1.63815e-12 | 1.000000 |
| rad23              | 3.21525e-13 | 0.999999 | 4.20904e-13 | 1.000000 |
| rad9               | 2.76368e-13 | 0.999999 | 3.61790e-13 | 1.000000 |
| rad13              | 1.89903e-13 | 0.999999 | 2.48600e-13 | 1.000000 |
| rad45              | 1.53977e-13 | 0.999999 | 2.01569e-13 | 1.000000 |
| rad28              | 2.69020e-14 | 0.999999 | 3.52171e-14 | 1.000000 |
| rad21              | 2.42952e-14 | 0.999999 | 3.18045e-14 | 1.000000 |
| rad36              | 1.53231e-14 | 0.999999 | 2.00593e-14 | 1.000000 |
| rad2               | 9.81026e-15 | 0.999999 | 1.28425e-14 | 1.000000 |
| rad10              | 8.90409e-15 | 0.999999 | 1.16562e-14 | 1.000000 |
| rad20              | 8.79172e-15 | 0.999999 | 1.15092e-14 | 1.000000 |

|       |             |          |             |         |
|-------|-------------|----------|-------------|---------|
| rad33 | 6.33589e-15 | 0.999999 | 8.29424e-15 | 1.00000 |
| rad15 | 3.00571e-15 | 0.999999 | 3.93473e-15 | 1.00000 |
| rad1  | 2.51297e-15 | 0.999999 | 3.28970e-15 | 1.00000 |
| rad18 | 2.34698e-15 | 0.999999 | 3.07241e-15 | 1.00000 |
| rad26 | 1.98205e-15 | 0.999999 | 2.59468e-15 | 1.00000 |
| rad3  | 1.85737e-15 | 0.999999 | 2.43146e-15 | 1.00000 |
| rad4  | 1.50031e-15 | 0.999999 | 1.96404e-15 | 1.00000 |
| rad25 | 1.37831e-15 | 0.999999 | 1.80433e-15 | 1.00000 |
| rad22 | 1.28402e-15 | 0.999999 | 1.68090e-15 | 1.00000 |
| rad12 | 6.49250e-16 | 0.999999 | 8.49924e-16 | 1.00000 |
| rad24 | 6.18581e-16 | 0.999999 | 8.09777e-16 | 1.00000 |
| rad14 | 6.98939e-17 | 0.999999 | 9.14971e-17 | 1.00000 |
| rad27 | 1.15741e-17 | 0.999999 | 1.51515e-17 | 1.00000 |
| rad8  | 9.76883e-18 | 0.999999 | 1.27883e-17 | 1.00000 |
| rad31 | 2.37694e-18 | 0.999999 | 3.11163e-18 | 1.00000 |
| rad47 | 2.21852e-19 | 0.999999 | 2.90423e-19 | 1.00000 |
| rad5  | 1.00991e-19 | 0.999999 | 1.32206e-19 | 1.00000 |

0.100000000E-04 Pa, 1750.00000 K

| Rate constant      | True (fraction)      | Effective (fraction) |
|--------------------|----------------------|----------------------|
| Total              | 8.61869e-12 (1.00 )  | 6.27400e-12 (1.00 )  |
| Formation of rad11 | 2.04015e-12 (0.237 ) | 1.05237e-12 (0.168 ) |
| Formation of rad6  | 2.80256e-12 (0.325 ) | 1.44565e-12 (0.230 ) |
| H-abstraction      | 3.77597e-12 (0.438 ) | 3.77597e-12 (0.602 ) |

| species            | PYtrue      | Cumul    | PYeffective | Cumul    |
|--------------------|-------------|----------|-------------|----------|
| Benzene+2-propynyl | 0.438115    | 0.438115 | 0.601845    | 0.601845 |
| Phenyl+Allene      | 0.272047    | 0.710162 | 0.00000     | 0.601845 |
| PhCH2CCH+H         | 0.0933387   | 0.803501 | 0.128221    | 0.730066 |
| PhCHCCH2+H         | 0.0656327   | 0.869134 | 0.0901606   | 0.820227 |
| C2H2+PhCH2         | 0.0475978   | 0.916731 | 0.0653858   | 0.885612 |
| Indene+H           | 0.0395372   | 0.956269 | 0.0543127   | 0.939925 |
| PhCCH+CH3          | 0.0276514   | 0.983920 | 0.0379853   | 0.977910 |
| PAH7+H             | 0.00712605  | 0.991046 | 0.00978916  | 0.987700 |
| Ph+MeAc            | 0.00488545  | 0.995931 | 0.00671122  | 0.994411 |
| rad39              | 0.00123375  | 0.997165 | 0.00169483  | 0.996106 |
| rad19anti          | 0.000564116 | 0.997729 | 0.000774933 | 0.996881 |
| rad19syn           | 0.000506158 | 0.998235 | 0.000695318 | 0.997576 |
| PhCCCH3+H          | 0.000461483 | 0.998697 | 0.000633946 | 0.998210 |
| PhcycC3H3_A+H      | 0.000354596 | 0.999052 | 0.000487115 | 0.998697 |
| PAH9+H             | 0.000266731 | 0.999318 | 0.000366412 | 0.999063 |
| rad54              | 0.000215004 | 0.999533 | 0.000295354 | 0.999359 |
| rad38              | 0.000142764 | 0.999676 | 0.000196118 | 0.999555 |
| rad35              | 4.88397e-05 | 0.999725 | 6.70919e-05 | 0.999622 |
| PAH1+H             | 4.24056e-05 | 0.999767 | 5.82532e-05 | 0.999680 |
| rad46              | 3.79670e-05 | 0.999805 | 5.21559e-05 | 0.999732 |
| rad50              | 2.38701e-05 | 0.999829 | 3.27908e-05 | 0.999765 |
| rad30              | 2.30179e-05 | 0.999852 | 3.16201e-05 | 0.999797 |
| PAH10+CH3          | 2.22275e-05 | 0.999874 | 3.05343e-05 | 0.999827 |
| rad70              | 2.20506e-05 | 0.999896 | 3.02913e-05 | 0.999858 |
| PAH3+H             | 2.08052e-05 | 0.999917 | 2.85805e-05 | 0.999886 |
| rad55              | 1.72026e-05 | 0.999934 | 2.36314e-05 | 0.999910 |
| rad67              | 1.69163e-05 | 0.999951 | 2.32382e-05 | 0.999933 |
| rad37              | 1.61425e-05 | 0.999968 | 2.21752e-05 | 0.999955 |
| rad51              | 6.11253e-06 | 0.999974 | 8.39689e-06 | 0.999964 |
| rad34              | 5.25680e-06 | 0.999979 | 7.22134e-06 | 0.999971 |
| rad53              | 4.39527e-06 | 0.999983 | 6.03786e-06 | 0.999977 |
| rad56              | 3.99314e-06 | 0.999987 | 5.48546e-06 | 0.999982 |
| rad62              | 2.35598e-06 | 0.999990 | 3.23645e-06 | 0.999986 |
| rad59              | 2.06481e-06 | 0.999992 | 2.83647e-06 | 0.999988 |
| rad52              | 2.03181e-06 | 0.999994 | 2.79112e-06 | 0.999991 |
| rad60syn           | 1.94292e-06 | 0.999996 | 2.66902e-06 | 0.999994 |
| rad60anti          | 1.30713e-06 | 0.999997 | 1.79563e-06 | 0.999996 |
| rad64              | 7.88600e-07 | 0.999998 | 1.08332e-06 | 0.999997 |
| PAH8+H             | 5.90480e-07 | 0.999998 | 8.11153e-07 | 0.999998 |
| rad68syn           | 2.81742e-07 | 0.999999 | 3.87034e-07 | 0.999998 |
| rad68anti          | 1.82569e-07 | 0.999999 | 2.50799e-07 | 0.999998 |
| rad65              | 1.74382e-07 | 0.999999 | 2.39552e-07 | 0.999998 |
| rad42              | 1.70585e-07 | 0.999999 | 2.34336e-07 | 0.999999 |
| rad58              | 1.57351e-07 | 0.999999 | 2.16156e-07 | 0.999999 |
| rad43              | 1.31435e-07 | 0.999999 | 1.80554e-07 | 0.999999 |
| rad71              | 1.24696e-07 | 1.000000 | 1.71297e-07 | 0.999999 |
| rad73              | 9.95914e-08 | 1.000000 | 1.36810e-07 | 0.999999 |
| rad40syn           | 8.39457e-08 | 1.000000 | 1.15318e-07 | 1.000000 |
| rad40anti          | 5.01024e-08 | 1.000000 | 6.88266e-08 | 1.000000 |
| rad61              | 2.64237e-08 | 1.000000 | 3.62987e-08 | 1.000000 |
| rad41              | 7.91859e-09 | 1.000000 | 1.08779e-08 | 1.000000 |



|       |             |          |             |          |
|-------|-------------|----------|-------------|----------|
| rad72 | 3.69503e-09 | 1.000000 | 5.07592e-09 | 1.000000 |
| rad6  | 2.81407e-11 | 1.000000 | 3.86574e-11 | 1.000000 |
| rad7  | 2.29398e-13 | 1.000000 | 3.15127e-13 | 1.000000 |
| rad11 | 1.74073e-13 | 1.000000 | 2.39127e-13 | 1.000000 |
| rad28 | 6.35419e-14 | 1.000000 | 8.72891e-14 | 1.000000 |
| rad23 | 5.52346e-14 | 1.000000 | 7.58768e-14 | 1.000000 |
| rad9  | 2.22200e-14 | 1.000000 | 3.05240e-14 | 1.000000 |
| rad13 | 1.60837e-14 | 1.000000 | 2.20945e-14 | 1.000000 |
| rad45 | 1.32482e-14 | 1.000000 | 1.81994e-14 | 1.000000 |
| rad22 | 8.41373e-15 | 1.000000 | 1.15581e-14 | 1.000000 |
| rad36 | 2.29360e-15 | 1.000000 | 3.15076e-15 | 1.000000 |
| rad21 | 1.98012e-15 | 1.000000 | 2.72012e-15 | 1.000000 |
| rad26 | 1.30654e-15 | 1.000000 | 1.79481e-15 | 1.000000 |
| rad15 | 1.11859e-15 | 1.000000 | 1.53663e-15 | 1.000000 |
| rad10 | 7.74199e-16 | 1.000000 | 1.06353e-15 | 1.000000 |
| rad20 | 6.44623e-16 | 1.000000 | 8.85528e-16 | 1.000000 |
| rad33 | 5.54005e-16 | 1.000000 | 7.61045e-16 | 1.000000 |
| rad18 | 2.99782e-16 | 1.000000 | 4.11816e-16 | 1.000000 |
| rad2  | 2.66656e-16 | 1.000000 | 3.66309e-16 | 1.000000 |
| rad25 | 1.43077e-16 | 1.000000 | 1.96547e-16 | 1.000000 |
| rad12 | 7.47122e-17 | 1.000000 | 1.02634e-16 | 1.000000 |
| rad1  | 7.24248e-17 | 1.000000 | 9.94909e-17 | 1.000000 |
| rad3  | 6.45747e-17 | 1.000000 | 8.87077e-17 | 1.000000 |
| rad24 | 6.07027e-17 | 1.000000 | 8.33884e-17 | 1.000000 |
| rad4  | 4.13810e-17 | 1.000000 | 5.68458e-17 | 1.000000 |
| rad14 | 7.58528e-18 | 1.000000 | 1.04200e-17 | 1.000000 |
| rad8  | 2.76592e-18 | 1.000000 | 3.79959e-18 | 1.000000 |
| rad27 | 6.88433e-19 | 1.000000 | 9.45709e-19 | 1.000000 |
| rad5  | 5.46366e-19 | 1.000000 | 7.50554e-19 | 1.000000 |
| rad47 | 1.43456e-19 | 1.000000 | 1.97067e-19 | 1.000000 |

0.100000000E-04 Pa, 2000.00000 K

| Rate constant      | True (fraction)      | Effective (fraction) |
|--------------------|----------------------|----------------------|
| Total              | 1.44111e-11 (1.00 )  | 1.02930e-11 (1.00 )  |
| Formation of rad11 | 3.16882e-12 (0.220 ) | 1.47449e-12 (0.143 ) |
| Formation of rad6  | 4.53302e-12 (0.315 ) | 2.10927e-12 (0.205 ) |
| H-abstraction      | 6.70922e-12 (0.466 ) | 6.70922e-12 (0.652 ) |

| species            | PYtrue      | Cumul    | PYeffective | Cumul    |
|--------------------|-------------|----------|-------------|----------|
| Benzene+2-propynyl | 0.465560    | 0.465560 | 0.651825    | 0.651825 |
| Phenyl+Allene      | 0.285759    | 0.751319 | 0.000000    | 0.651825 |
| PhCH2CCH+H         | 0.0971788   | 0.848498 | 0.136059    | 0.787884 |
| PhCHCCH2+H         | 0.0592993   | 0.907797 | 0.0830241   | 0.870908 |
| C2H2+PhCH2         | 0.0319942   | 0.939791 | 0.0447948   | 0.915703 |
| Indene+H           | 0.0233046   | 0.963096 | 0.0326284   | 0.948331 |
| PhCCH+CH3          | 0.0216466   | 0.984742 | 0.0303071   | 0.978638 |
| PAH7+H             | 0.00659328  | 0.991336 | 0.00923114  | 0.987869 |
| Ph+MeAc            | 0.00420938  | 0.995545 | 0.00589349  | 0.993763 |
| rad39              | 0.00101472  | 0.996560 | 0.00142069  | 0.995183 |
| rad19syn           | 0.000746783 | 0.997306 | 0.00104557  | 0.996229 |
| PhcycC3H3_A+H      | 0.000656335 | 0.997963 | 0.000918925 | 0.997148 |
| rad19anti          | 0.000529228 | 0.998492 | 0.000740966 | 0.997889 |
| rad54              | 0.000330237 | 0.998822 | 0.000462359 | 0.998351 |
| PhCCCH3+H          | 0.000291962 | 0.999114 | 0.000408772 | 0.998760 |
| PAH9+H             | 0.000279546 | 0.999394 | 0.000391387 | 0.999151 |
| rad38              | 0.000156414 | 0.999550 | 0.000218994 | 0.999370 |
| PAH1+H             | 6.96990e-05 | 0.999620 | 9.75848e-05 | 0.999468 |
| rad35              | 5.18637e-05 | 0.999672 | 7.26137e-05 | 0.999541 |
| rad46              | 4.57412e-05 | 0.999717 | 6.40416e-05 | 0.999605 |
| rad50              | 3.87497e-05 | 0.999756 | 5.42530e-05 | 0.999659 |
| PAH10+CH3          | 3.34470e-05 | 0.999790 | 4.68285e-05 | 0.999706 |
| rad70              | 3.20125e-05 | 0.999822 | 4.48203e-05 | 0.999751 |
| rad55              | 2.86889e-05 | 0.999850 | 4.01669e-05 | 0.999791 |
| PAH3+H             | 2.79049e-05 | 0.999878 | 3.90694e-05 | 0.999830 |
| rad67              | 2.51584e-05 | 0.999903 | 3.52238e-05 | 0.999865 |
| rad30              | 1.88901e-05 | 0.999922 | 2.64479e-05 | 0.999891 |
| rad37              | 1.66057e-05 | 0.999939 | 2.32494e-05 | 0.999915 |
| rad51              | 1.22963e-05 | 0.999951 | 1.72160e-05 | 0.999932 |
| rad56              | 1.03249e-05 | 0.999961 | 1.44559e-05 | 0.999946 |
| rad53              | 9.90974e-06 | 0.999971 | 1.38745e-05 | 0.999960 |
| rad34              | 8.56178e-06 | 0.999980 | 1.19873e-05 | 0.999972 |
| rad52              | 3.64112e-06 | 0.999984 | 5.09788e-06 | 0.999977 |
| rad62              | 3.41505e-06 | 0.999987 | 4.78139e-06 | 0.999982 |
| rad59              | 2.58714e-06 | 0.999990 | 3.62224e-06 | 0.999986 |
| rad60syn           | 2.06844e-06 | 0.999992 | 2.89599e-06 | 0.999989 |
| PAH8+H             | 1.81455e-06 | 0.999993 | 2.54053e-06 | 0.999991 |
| rad64              | 1.47576e-06 | 0.999995 | 2.06619e-06 | 0.999993 |

|           |             |          |             |          |
|-----------|-------------|----------|-------------|----------|
| rad60anti | 1.42207e-06 | 0.999996 | 1.99102e-06 | 0.999995 |
| rad68syn  | 6.53892e-07 | 0.999997 | 9.15510e-07 | 0.999996 |
| rad71     | 4.98025e-07 | 0.999998 | 6.97277e-07 | 0.999997 |
| rad68anti | 4.21792e-07 | 0.999998 | 5.90544e-07 | 0.999997 |
| rad73     | 3.38736e-07 | 0.999998 | 4.74260e-07 | 0.999998 |
| rad65     | 3.37785e-07 | 0.999999 | 4.72930e-07 | 0.999998 |
| rad42     | 3.12138e-07 | 0.999999 | 4.37019e-07 | 0.999999 |
| rad58     | 2.75720e-07 | 0.999999 | 3.86032e-07 | 0.999999 |
| rad40syn  | 2.27523e-07 | 0.999999 | 3.18551e-07 | 1.000000 |
| rad43     | 1.62531e-07 | 1.000000 | 2.27558e-07 | 1.000000 |
| rad40anti | 1.42660e-07 | 1.000000 | 1.99737e-07 | 1.000000 |
| rad61     | 5.98888e-08 | 1.000000 | 8.38493e-08 | 1.000000 |
| rad72     | 2.09307e-08 | 1.000000 | 2.93048e-08 | 1.000000 |
| rad41     | 1.34670e-08 | 1.000000 | 1.88550e-08 | 1.000000 |
| rad6      | 5.97509e-12 | 1.000000 | 8.36564e-12 | 1.000000 |
| rad7      | 5.25061e-14 | 1.000000 | 7.35130e-14 | 1.000000 |
| rad11     | 4.12488e-14 | 1.000000 | 5.77518e-14 | 1.000000 |
| rad23     | 3.16747e-14 | 1.000000 | 4.43474e-14 | 1.000000 |
| rad28     | 2.01848e-14 | 1.000000 | 2.82605e-14 | 1.000000 |
| rad9      | 7.55960e-15 | 1.000000 | 1.05841e-14 | 1.000000 |
| rad13     | 4.89597e-15 | 1.000000 | 6.85477e-15 | 1.000000 |
| rad45     | 4.02832e-15 | 1.000000 | 5.64002e-15 | 1.000000 |
| rad22     | 2.65016e-15 | 1.000000 | 3.71047e-15 | 1.000000 |
| rad21     | 7.16422e-16 | 1.000000 | 1.00305e-15 | 1.000000 |
| rad36     | 7.13531e-16 | 1.000000 | 9.99005e-16 | 1.000000 |
| rad15     | 3.98290e-16 | 1.000000 | 5.57641e-16 | 1.000000 |
| rad26     | 3.10315e-16 | 1.000000 | 4.34467e-16 | 1.000000 |
| rad33     | 2.26331e-16 | 1.000000 | 3.16884e-16 | 1.000000 |
| rad20     | 1.89431e-16 | 1.000000 | 2.65220e-16 | 1.000000 |
| rad10     | 1.14690e-16 | 1.000000 | 1.60577e-16 | 1.000000 |
| rad18     | 6.66195e-17 | 1.000000 | 9.32730e-17 | 1.000000 |
| rad25     | 5.79819e-17 | 1.000000 | 8.11799e-17 | 1.000000 |
| rad12     | 4.14756e-17 | 1.000000 | 5.80694e-17 | 1.000000 |
| rad2      | 3.53866e-17 | 1.000000 | 4.95443e-17 | 1.000000 |
| rad24     | 2.85159e-17 | 1.000000 | 3.99249e-17 | 1.000000 |
| rad3      | 1.63699e-17 | 1.000000 | 2.29193e-17 | 1.000000 |
| rad4      | 1.04122e-17 | 1.000000 | 1.45779e-17 | 1.000000 |
| rad1      | 9.93507e-18 | 1.000000 | 1.39100e-17 | 1.000000 |
| rad14     | 2.92675e-18 | 1.000000 | 4.09771e-18 | 1.000000 |
| rad8      | 2.34712e-18 | 1.000000 | 3.28617e-18 | 1.000000 |
| rad5      | 3.73471e-19 | 1.000000 | 5.22893e-19 | 1.000000 |
| rad47     | 2.86742e-19 | 1.000000 | 4.01464e-19 | 1.000000 |
| rad27     | 1.89905e-19 | 1.000000 | 2.65883e-19 | 1.000000 |

0.100000000E-04 Pa, 2250.00000 K

| Rate constant      | True (fraction)      | Effective (fraction) |
|--------------------|----------------------|----------------------|
| Total              | 2.23655e-11 (1.00 )  | 1.58437e-11 (1.00 )  |
| Formation of rad11 | 4.62280e-12 (0.207 ) | 1.98925e-12 (0.126 ) |
| Formation of rad6  | 6.82518e-12 (0.305 ) | 2.93696e-12 (0.185 ) |
| H-abstraction      | 1.09175e-11 (0.488 ) | 1.09175e-11 (0.689 ) |

| species            | PYtrue      | Cumul    | PYeffective | Cumul    |
|--------------------|-------------|----------|-------------|----------|
| Benzene+2-propynyl | 0.488140    | 0.488140 | 0.689074    | 0.689074 |
| Phenyl+Allene      | 0.291600    | 0.779740 | 0.000000    | 0.689074 |
| PhCH2CCH+H         | 0.0967415   | 0.876482 | 0.136563    | 0.825637 |
| PhCHCCH2+H         | 0.0532744   | 0.929756 | 0.0752040   | 0.900841 |
| C2H2+PhCH2         | 0.0232642   | 0.953020 | 0.0328403   | 0.933682 |
| PhCCH+CH3          | 0.0176492   | 0.970669 | 0.0249142   | 0.958596 |
| Indene+H           | 0.0145378   | 0.985207 | 0.0205221   | 0.979118 |
| PAH7+H             | 0.00604332  | 0.991251 | 0.00853097  | 0.987649 |
| Ph+MeAc            | 0.00373478  | 0.994985 | 0.00527212  | 0.992921 |
| PhcycC3H3_A+H      | 0.00104439  | 0.996030 | 0.00147430  | 0.994395 |
| rad19syn           | 0.000992650 | 0.997022 | 0.00140125  | 0.995797 |
| rad39              | 0.000833753 | 0.997856 | 0.00117695  | 0.996694 |
| rad19anti          | 0.000463520 | 0.998320 | 0.000654319 | 0.997628 |
| rad54              | 0.000448432 | 0.998768 | 0.000633020 | 0.998261 |
| PAH9+H             | 0.000276004 | 0.999044 | 0.000389615 | 0.998651 |
| PhCCCH3+H          | 0.000209665 | 0.999254 | 0.000295970 | 0.998946 |
| rad38              | 0.000160719 | 0.999414 | 0.000226876 | 0.999173 |
| PAH1+H             | 9.95931e-05 | 0.999514 | 0.000140589 | 0.999314 |
| rad50              | 5.46328e-05 | 0.999569 | 7.71214e-05 | 0.999391 |
| rad35              | 5.24979e-05 | 0.999621 | 7.41079e-05 | 0.999465 |
| rad46              | 5.06983e-05 | 0.999672 | 7.15674e-05 | 0.999537 |
| PAH10+CH3          | 4.32190e-05 | 0.999715 | 6.10093e-05 | 0.999598 |
| rad55              | 4.15447e-05 | 0.999757 | 5.86459e-05 | 0.999656 |
| rad70              | 4.13232e-05 | 0.999798 | 5.83331e-05 | 0.999715 |
| PAH3+H             | 3.54273e-05 | 0.999833 | 5.00103e-05 | 0.999765 |

|           |             |          |             |          |
|-----------|-------------|----------|-------------|----------|
| rad67     | 3.21710e-05 | 0.999866 | 4.54135e-05 | 0.999810 |
| rad56     | 2.10958e-05 | 0.999887 | 2.97795e-05 | 0.999840 |
| rad51     | 2.05290e-05 | 0.999907 | 2.89794e-05 | 0.999869 |
| rad53     | 1.82253e-05 | 0.999925 | 2.57273e-05 | 0.999895 |
| rad30     | 1.61770e-05 | 0.999942 | 2.28359e-05 | 0.999917 |
| rad37     | 1.58091e-05 | 0.999957 | 2.23166e-05 | 0.999940 |
| rad34     | 1.21378e-05 | 0.999970 | 1.71341e-05 | 0.999957 |
| rad52     | 5.53699e-06 | 0.999975 | 7.81618e-06 | 0.999965 |
| rad62     | 4.54170e-06 | 0.999980 | 6.41120e-06 | 0.999971 |
| PAH8+H    | 4.26413e-06 | 0.999984 | 6.01937e-06 | 0.999977 |
| rad59     | 3.10133e-06 | 0.999987 | 4.37793e-06 | 0.999982 |
| rad64     | 2.31389e-06 | 0.999989 | 3.26637e-06 | 0.999985 |
| rad60syn  | 2.18352e-06 | 0.999991 | 3.08232e-06 | 0.999988 |
| rad60anti | 1.52762e-06 | 0.999993 | 2.15643e-06 | 0.999990 |
| rad71     | 1.42621e-06 | 0.999994 | 2.01328e-06 | 0.999992 |
| rad68syn  | 1.22834e-06 | 0.999996 | 1.73396e-06 | 0.999994 |
| rad73     | 8.52958e-07 | 0.999996 | 1.20406e-06 | 0.999995 |
| rad68anti | 7.89692e-07 | 0.999997 | 1.11475e-06 | 0.999996 |
| rad65     | 5.43585e-07 | 0.999998 | 7.67340e-07 | 0.999997 |
| rad42     | 4.97942e-07 | 0.999998 | 7.02910e-07 | 0.999998 |
| rad40syn  | 4.83630e-07 | 0.999999 | 6.82706e-07 | 0.999998 |
| rad58     | 4.30302e-07 | 0.999999 | 6.07428e-07 | 0.999999 |
| rad40anti | 3.15359e-07 | 1.000000 | 4.45171e-07 | 0.999999 |
| rad43     | 2.01350e-07 | 1.000000 | 2.84232e-07 | 1.000000 |
| rad61     | 1.06762e-07 | 1.000000 | 1.50709e-07 | 1.000000 |
| rad72     | 7.85254e-08 | 1.000000 | 1.10849e-07 | 1.000000 |
| rad41     | 2.11925e-08 | 1.000000 | 2.99160e-08 | 1.000000 |
| rad6      | 1.19683e-12 | 1.000000 | 1.68948e-12 | 1.000000 |
| rad7      | 1.68560e-14 | 1.000000 | 2.37944e-14 | 1.000000 |
| rad11     | 1.28923e-14 | 1.000000 | 1.81991e-14 | 1.000000 |
| rad23     | 8.71457e-15 | 1.000000 | 1.23018e-14 | 1.000000 |
| rad28     | 4.33962e-15 | 1.000000 | 6.12596e-15 | 1.000000 |
| rad9      | 2.74768e-15 | 1.000000 | 3.87871e-15 | 1.000000 |
| rad13     | 1.82810e-15 | 1.000000 | 2.58059e-15 | 1.000000 |
| rad45     | 1.39773e-15 | 1.000000 | 1.97308e-15 | 1.000000 |
| rad22     | 6.74125e-16 | 1.000000 | 9.51614e-16 | 1.000000 |
| rad21     | 2.97971e-16 | 1.000000 | 4.20624e-16 | 1.000000 |
| rad36     | 2.52513e-16 | 1.000000 | 3.56455e-16 | 1.000000 |
| rad15     | 1.60392e-16 | 1.000000 | 2.26415e-16 | 1.000000 |
| rad33     | 1.06526e-16 | 1.000000 | 1.50376e-16 | 1.000000 |
| rad26     | 8.48515e-17 | 1.000000 | 1.19779e-16 | 1.000000 |
| rad20     | 6.76725e-17 | 1.000000 | 9.55283e-17 | 1.000000 |
| rad10     | 3.05075e-17 | 1.000000 | 4.30654e-17 | 1.000000 |
| rad25     | 2.68292e-17 | 1.000000 | 3.78730e-17 | 1.000000 |
| rad12     | 2.31790e-17 | 1.000000 | 3.27203e-17 | 1.000000 |
| rad18     | 2.02950e-17 | 1.000000 | 2.86490e-17 | 1.000000 |
| rad24     | 1.45642e-17 | 1.000000 | 2.05592e-17 | 1.000000 |
| rad2      | 6.76167e-18 | 1.000000 | 9.54499e-18 | 1.000000 |
| rad3      | 5.33353e-18 | 1.000000 | 7.52898e-18 | 1.000000 |
| rad4      | 3.33225e-18 | 1.000000 | 4.70390e-18 | 1.000000 |
| rad8      | 2.01388e-18 | 1.000000 | 2.84285e-18 | 1.000000 |
| rad1      | 1.91857e-18 | 1.000000 | 2.70831e-18 | 1.000000 |
| rad14     | 1.40657e-18 | 1.000000 | 1.98555e-18 | 1.000000 |
| rad47     | 4.71862e-19 | 1.000000 | 6.66093e-19 | 1.000000 |
| rad5      | 2.19237e-19 | 1.000000 | 3.09482e-19 | 1.000000 |
| rad27     | 7.37416e-20 | 1.000000 | 1.04096e-19 | 1.000000 |

0.100000000E-04 Pa, 2500.00000 K

| Rate constant      | True (fraction)      | Effective (fraction) |
|--------------------|----------------------|----------------------|
| Total              | 3.28090e-11 (1.00 )  | 2.31980e-11 (1.00 )  |
| Formation of rad11 | 6.43164e-12 (0.196 ) | 2.60906e-12 (0.112 ) |
| Formation of rad6  | 9.73932e-12 (0.297 ) | 3.95085e-12 (0.170 ) |
| H-abstraction      | 1.66381e-11 (0.507 ) | 1.66381e-11 (0.717 ) |

  

| species            | PYtrue      | Cumul    | PYeffective | Cumul    |
|--------------------|-------------|----------|-------------|----------|
| Benzene+2-propynyl | 0.507119    | 0.507119 | 0.717221    | 0.717221 |
| Phenyl+Allene      | 0.292939    | 0.800058 | 0.000000    | 0.717221 |
| PhCH2CCH+H         | 0.0943957   | 0.894453 | 0.133505    | 0.850725 |
| PhCHCCH2+H         | 0.0481939   | 0.942647 | 0.0681609   | 0.918886 |
| C2H2+PhCH2         | 0.0183497   | 0.960997 | 0.0259521   | 0.944838 |
| PhCCH+CH3          | 0.0148752   | 0.975872 | 0.0210381   | 0.965876 |
| Indene+H           | 0.00953292  | 0.985405 | 0.0134824   | 0.979359 |
| PAH7+H             | 0.00553047  | 0.990936 | 0.00782174  | 0.987180 |
| Ph+MeAc            | 0.00339482  | 0.994330 | 0.00480131  | 0.991982 |
| PhcycC3H3_A+H      | 0.00149309  | 0.995824 | 0.00211168  | 0.994093 |
| rad19syn           | 0.00122618  | 0.997050 | 0.00173419  | 0.995828 |
| rad39              | 0.000692493 | 0.997742 | 0.000979395 | 0.996807 |

|           |             |          |             |          |
|-----------|-------------|----------|-------------|----------|
| rad54     | 0.000558297 | 0.998301 | 0.000789599 | 0.997597 |
| rad19anti | 0.000392540 | 0.998693 | 0.000555170 | 0.998152 |
| PAH9+H    | 0.000261381 | 0.998954 | 0.000369672 | 0.998522 |
| PhCCCH3+H | 0.000164587 | 0.999119 | 0.000232776 | 0.998754 |
| rad38     | 0.000157797 | 0.999277 | 0.000223174 | 0.998977 |
| PAH1+H    | 0.000129617 | 0.999406 | 0.000183319 | 0.999161 |
| rad50     | 6.95411e-05 | 0.999476 | 9.83527e-05 | 0.999259 |
| rad55     | 5.44673e-05 | 0.999530 | 7.70336e-05 | 0.999336 |
| rad46     | 5.29591e-05 | 0.999583 | 7.49001e-05 | 0.999411 |
| rad35     | 5.14100e-05 | 0.999635 | 7.27094e-05 | 0.999484 |
| PAH10+CH3 | 5.04331e-05 | 0.999685 | 7.13277e-05 | 0.999555 |
| rad70     | 4.95223e-05 | 0.999735 | 7.00399e-05 | 0.999625 |
| PAH3+H    | 4.31617e-05 | 0.999778 | 6.10439e-05 | 0.999686 |
| rad67     | 3.73882e-05 | 0.999815 | 5.28783e-05 | 0.999739 |
| rad56     | 3.65112e-05 | 0.999852 | 5.16378e-05 | 0.999791 |
| rad51     | 2.99347e-05 | 0.999882 | 4.23369e-05 | 0.999833 |
| rad53     | 2.90213e-05 | 0.999911 | 4.10449e-05 | 0.999874 |
| rad34     | 1.57208e-05 | 0.999926 | 2.22340e-05 | 0.999896 |
| rad30     | 1.43454e-05 | 0.999941 | 2.02888e-05 | 0.999917 |
| rad37     | 1.43019e-05 | 0.999955 | 2.02272e-05 | 0.999937 |
| PAH8+H    | 8.32886e-06 | 0.999963 | 1.17795e-05 | 0.999949 |
| rad52     | 7.47627e-06 | 0.999971 | 1.05737e-05 | 0.999959 |
| rad62     | 5.70269e-06 | 0.999977 | 8.06532e-06 | 0.999967 |
| rad59     | 3.60017e-06 | 0.999980 | 5.09173e-06 | 0.999972 |
| rad64     | 3.22135e-06 | 0.999983 | 4.55597e-06 | 0.999977 |
| rad71     | 3.21465e-06 | 0.999987 | 4.54650e-06 | 0.999981 |
| rad60syn  | 2.29248e-06 | 0.999989 | 3.24226e-06 | 0.999985 |
| rad68syn  | 1.99920e-06 | 0.999991 | 2.82747e-06 | 0.999988 |
| rad73     | 1.73023e-06 | 0.999993 | 2.44707e-06 | 0.999990 |
| rad60anti | 1.62672e-06 | 0.999994 | 2.30068e-06 | 0.999992 |
| rad68anti | 1.28205e-06 | 0.999996 | 1.81322e-06 | 0.999994 |
| rad40syn  | 8.70429e-07 | 0.999996 | 1.23105e-06 | 0.999995 |
| rad65     | 7.65686e-07 | 0.999997 | 1.08291e-06 | 0.999996 |
| rad42     | 7.25369e-07 | 0.999998 | 1.02590e-06 | 0.999997 |
| rad58     | 6.16762e-07 | 0.999999 | 8.72293e-07 | 0.999998 |
| rad40anti | 5.85898e-07 | 0.999999 | 8.28640e-07 | 0.999999 |
| rad43     | 2.45120e-07 | 0.999999 | 3.46673e-07 | 0.999999 |
| rad72     | 2.19453e-07 | 1.000000 | 3.10373e-07 | 1.000000 |
| rad61     | 1.61750e-07 | 1.000000 | 2.28765e-07 | 1.000000 |
| rad41     | 3.09947e-08 | 1.000000 | 4.38359e-08 | 1.000000 |
| rad6      | 3.27072e-13 | 1.000000 | 4.62579e-13 | 1.000000 |
| rad7      | 6.60249e-15 | 1.000000 | 9.33797e-15 | 1.000000 |
| rad11     | 4.80257e-15 | 1.000000 | 6.79231e-15 | 1.000000 |
| rad23     | 2.53266e-15 | 1.000000 | 3.58194e-15 | 1.000000 |
| rad28     | 1.17771e-15 | 1.000000 | 1.66563e-15 | 1.000000 |
| rad9      | 1.07182e-15 | 1.000000 | 1.51589e-15 | 1.000000 |
| rad13     | 7.91326e-16 | 1.000000 | 1.11917e-15 | 1.000000 |
| rad45     | 5.44930e-16 | 1.000000 | 7.70698e-16 | 1.000000 |
| rad22     | 2.12475e-16 | 1.000000 | 3.00504e-16 | 1.000000 |
| rad21     | 1.39345e-16 | 1.000000 | 1.97077e-16 | 1.000000 |
| rad36     | 1.00122e-16 | 1.000000 | 1.41603e-16 | 1.000000 |
| rad15     | 6.95111e-17 | 1.000000 | 9.83100e-17 | 1.000000 |
| rad33     | 5.56576e-17 | 1.000000 | 7.87170e-17 | 1.000000 |
| rad26     | 3.01016e-17 | 1.000000 | 4.25730e-17 | 1.000000 |
| rad20     | 2.88827e-17 | 1.000000 | 4.08489e-17 | 1.000000 |
| rad25     | 1.37165e-17 | 1.000000 | 1.93993e-17 | 1.000000 |
| rad12     | 1.32606e-17 | 1.000000 | 1.87546e-17 | 1.000000 |
| rad10     | 1.10911e-17 | 1.000000 | 1.56862e-17 | 1.000000 |
| rad24     | 7.99114e-18 | 1.000000 | 1.13019e-17 | 1.000000 |
| rad18     | 7.64139e-18 | 1.000000 | 1.08073e-17 | 1.000000 |
| rad3      | 2.12510e-18 | 1.000000 | 3.00555e-18 | 1.000000 |
| rad2      | 1.81916e-18 | 1.000000 | 2.57285e-18 | 1.000000 |
| rad8      | 1.74700e-18 | 1.000000 | 2.47079e-18 | 1.000000 |
| rad4      | 1.29904e-18 | 1.000000 | 1.83725e-18 | 1.000000 |
| rad14     | 7.76880e-19 | 1.000000 | 1.09875e-18 | 1.000000 |
| rad47     | 6.74962e-19 | 1.000000 | 9.54604e-19 | 1.000000 |
| rad1      | 5.04218e-19 | 1.000000 | 7.13122e-19 | 1.000000 |
| rad5      | 1.44646e-19 | 1.000000 | 2.04573e-19 | 1.000000 |
| rad27     | 3.67277e-20 | 1.000000 | 5.19440e-20 | 1.000000 |

0.100000000E-04 Pa, 2750.00000 K

| Rate constant      | True (fraction)      | Effective (fraction) |
|--------------------|----------------------|----------------------|
| Total              | 4.60596e-11 (1.00 )  | 3.26255e-11 (1.00 )  |
| Formation of rad11 | 8.62280e-12 (0.187 ) | 3.34633e-12 (0.103 ) |
| Formation of rad6  | 1.33313e-11 (0.289 ) | 5.17360e-12 (0.159 ) |
| H-abstraction      | 2.41055e-11 (0.523 ) | 2.41055e-11 (0.739 ) |
| species            | PYtrue Cumul         | PYeffective Cumul    |

|                    |             |          |             |          |
|--------------------|-------------|----------|-------------|----------|
| Benzene+2-propynyl | 0.523355    | 0.523355 | 0.738856    | 0.738856 |
| Phenyl+Allene      | 0.291669    | 0.815024 | 0.00000     | 0.738856 |
| PhCH2CCH+H         | 0.0913925   | 0.906416 | 0.129025    | 0.867881 |
| PhCHCCH2+H         | 0.0440897   | 0.950506 | 0.0622446   | 0.930126 |
| C2H2+PhCH2         | 0.0155259   | 0.966032 | 0.0219190   | 0.952045 |
| PhCCH+CH3          | 0.0128664   | 0.978898 | 0.0181644   | 0.970209 |
| Indene+H           | 0.00652675  | 0.985425 | 0.00921427  | 0.979424 |
| PAH7+H             | 0.00506746  | 0.990493 | 0.00715408  | 0.986578 |
| Ph+MeAc            | 0.00315047  | 0.993643 | 0.00444775  | 0.991026 |
| PhcycC3H3_A+H      | 0.00197300  | 0.995616 | 0.00278544  | 0.993811 |
| rad19syn           | 0.00143568  | 0.997052 | 0.00202686  | 0.995838 |
| rad54              | 0.000652594 | 0.997704 | 0.000921315 | 0.996759 |
| rad39              | 0.000584043 | 0.998288 | 0.000824532 | 0.997584 |
| rad19anti          | 0.000328573 | 0.998617 | 0.000463869 | 0.998048 |
| PAH9+H             | 0.000240059 | 0.998857 | 0.000338907 | 0.998386 |
| PAH1+H             | 0.000158291 | 0.999015 | 0.000223471 | 0.998610 |
| rad38              | 0.000149711 | 0.999165 | 0.000211358 | 0.998821 |
| PhCCCH3+H          | 0.000136861 | 0.999302 | 0.000193216 | 0.999015 |
| rad50              | 8.19601e-05 | 0.999384 | 0.000115709 | 0.999130 |
| rad55              | 6.64334e-05 | 0.999450 | 9.37887e-05 | 0.999224 |
| rad70              | 5.64830e-05 | 0.999507 | 7.97407e-05 | 0.999304 |
| rad56              | 5.59920e-05 | 0.999563 | 7.90477e-05 | 0.999383 |
| PAH10+CH3          | 5.49972e-05 | 0.999618 | 7.76435e-05 | 0.999460 |
| rad46              | 5.29186e-05 | 0.999671 | 7.47090e-05 | 0.999535 |
| PAH3+H             | 5.07704e-05 | 0.999721 | 7.16761e-05 | 0.999607 |
| rad35              | 4.92117e-05 | 0.999771 | 6.94754e-05 | 0.999676 |
| rad53              | 4.15958e-05 | 0.999812 | 5.87239e-05 | 0.999735 |
| rad67              | 4.08893e-05 | 0.999853 | 5.77263e-05 | 0.999793 |
| rad51              | 3.94231e-05 | 0.999893 | 5.56562e-05 | 0.999848 |
| rad34              | 1.91382e-05 | 0.999912 | 2.70187e-05 | 0.999875 |
| PAH8+H             | 1.42400e-05 | 0.999926 | 2.01036e-05 | 0.999896 |
| rad30              | 1.30159e-05 | 0.999939 | 1.83754e-05 | 0.999914 |
| rad37              | 1.25497e-05 | 0.999951 | 1.77173e-05 | 0.999932 |
| rad52              | 9.23200e-06 | 0.999961 | 1.30335e-05 | 0.999945 |
| rad62              | 6.96508e-06 | 0.999968 | 9.83308e-06 | 0.999954 |
| rad71              | 6.06264e-06 | 0.999974 | 8.55906e-06 | 0.999963 |
| rad64              | 4.12924e-06 | 0.999978 | 5.82954e-06 | 0.999969 |
| rad59              | 4.06487e-06 | 0.999982 | 5.73866e-06 | 0.999975 |
| rad73              | 2.98825e-06 | 0.999985 | 4.21872e-06 | 0.999979 |
| rad68syn           | 2.93858e-06 | 0.999988 | 4.14861e-06 | 0.999983 |
| rad60syn           | 2.38752e-06 | 0.999990 | 3.37063e-06 | 0.999986 |
| rad68anti          | 1.88086e-06 | 0.999992 | 2.65533e-06 | 0.999989 |
| rad60anti          | 1.71401e-06 | 0.999994 | 2.41979e-06 | 0.999991 |
| rad40syn           | 1.39059e-06 | 0.999995 | 1.96319e-06 | 0.999993 |
| rad42              | 1.00618e-06 | 0.999996 | 1.42050e-06 | 0.999995 |
| rad65              | 9.77109e-07 | 0.999997 | 1.37945e-06 | 0.999996 |
| rad40anti          | 9.60893e-07 | 0.999998 | 1.35656e-06 | 0.999998 |
| rad58              | 8.26832e-07 | 0.999999 | 1.16730e-06 | 0.999999 |
| rad72              | 4.93194e-07 | 1.000000 | 6.96274e-07 | 0.999999 |
| rad43              | 2.90363e-07 | 1.000000 | 4.09925e-07 | 1.000000 |
| rad61              | 2.19014e-07 | 1.000000 | 3.09197e-07 | 1.000000 |
| rad41              | 4.25216e-08 | 1.000000 | 6.00307e-08 | 1.000000 |
| rad6               | 1.11338e-13 | 1.000000 | 1.57183e-13 | 1.000000 |
| rad7               | 2.96678e-15 | 1.000000 | 4.18840e-15 | 1.000000 |
| rad11              | 2.05429e-15 | 1.000000 | 2.90018e-15 | 1.000000 |
| rad23              | 8.65021e-16 | 1.000000 | 1.22121e-15 | 1.000000 |
| rad9               | 4.49806e-16 | 1.000000 | 6.35023e-16 | 1.000000 |
| rad28              | 4.01058e-16 | 1.000000 | 5.66204e-16 | 1.000000 |
| rad13              | 3.84824e-16 | 1.000000 | 5.43283e-16 | 1.000000 |
| rad45              | 2.34569e-16 | 1.000000 | 3.31159e-16 | 1.000000 |
| rad22              | 7.92842e-17 | 1.000000 | 1.11931e-16 | 1.000000 |
| rad21              | 7.20273e-17 | 1.000000 | 1.01686e-16 | 1.000000 |
| rad36              | 4.37126e-17 | 1.000000 | 6.17122e-17 | 1.000000 |
| rad15              | 3.20737e-17 | 1.000000 | 4.52807e-17 | 1.000000 |
| rad33              | 3.15102e-17 | 1.000000 | 4.44850e-17 | 1.000000 |
| rad20              | 1.44342e-17 | 1.000000 | 2.03778e-17 | 1.000000 |
| rad26              | 1.23284e-17 | 1.000000 | 1.74049e-17 | 1.000000 |
| rad12              | 7.84782e-18 | 1.000000 | 1.10793e-17 | 1.000000 |
| rad25              | 7.63295e-18 | 1.000000 | 1.07760e-17 | 1.000000 |
| rad10              | 4.79043e-18 | 1.000000 | 6.76302e-18 | 1.000000 |
| rad24              | 4.65717e-18 | 1.000000 | 6.57484e-18 | 1.000000 |
| rad18              | 3.38453e-18 | 1.000000 | 4.77817e-18 | 1.000000 |
| rad8               | 1.52996e-18 | 1.000000 | 2.15996e-18 | 1.000000 |
| rad3               | 9.87600e-19 | 1.000000 | 1.39426e-18 | 1.000000 |
| rad47              | 8.69678e-19 | 1.000000 | 1.22779e-18 | 1.000000 |
| rad2               | 6.44939e-19 | 1.000000 | 9.10503e-19 | 1.000000 |
| rad4               | 5.93071e-19 | 1.000000 | 8.37281e-19 | 1.000000 |
| rad14              | 4.74805e-19 | 1.000000 | 6.70314e-19 | 1.000000 |
| rad1               | 1.69799e-19 | 1.000000 | 2.39717e-19 | 1.000000 |

|       |             |         |             |         |
|-------|-------------|---------|-------------|---------|
| rad5  | 1.01438e-19 | 1.00000 | 1.43206e-19 | 1.00000 |
| rad27 | 2.15735e-20 | 1.00000 | 3.04569e-20 | 1.00000 |

0.100000000E-04 Pa, 3000.00000 K

| =====              |                 |          |                      |           |
|--------------------|-----------------|----------|----------------------|-----------|
| Rate constant      | True (fraction) |          | Effective (fraction) |           |
| -----              |                 |          |                      |           |
| Total              | 6.24269e-11     | (1.00 )  | 4.43911e-11          | (1.00 )   |
| Formation of rad11 | 1.12221e-11     | (0.180 ) | 4.21269e-12          | (0.0949 ) |
| Formation of rad6  | 1.76534e-11     | (0.283 ) | 6.62699e-12          | (0.149 )  |
| H-abstraction      | 3.35514e-11     | (0.537 ) | 3.35514e-11          | (0.756 )  |
| -----              |                 |          |                      |           |
| species            | PYtrue          | Cumul    | PYeffective          | Cumul     |
| -----              |                 |          |                      |           |
| Benzene+2-propynyl | 0.537451        | 0.537451 | 0.755814             | 0.755814  |
| Phenyl+Allene      | 0.288911        | 0.826362 | 0.00000              | 0.755814  |
| PhCH2CCH+H         | 0.0883066       | 0.914669 | 0.124185             | 0.879999  |
| PhCHCCH2+H         | 0.0408111       | 0.955480 | 0.0573925            | 0.937392  |
| C2H2+PhCH2         | 0.0138651       | 0.969345 | 0.0194984            | 0.956890  |
| PhCCH+CH3          | 0.0113582       | 0.980703 | 0.0159730            | 0.972863  |
| PAH7+H             | 0.00465329      | 0.985356 | 0.00654386           | 0.979407  |
| Indene+H           | 0.00463895      | 0.989995 | 0.00652370           | 0.985931  |
| Ph+MeAc            | 0.00297587      | 0.992971 | 0.00418496           | 0.990116  |
| PhcycC3H3_A+H      | 0.00245642      | 0.995427 | 0.00345445           | 0.993570  |
| rad19syn           | 0.00161454      | 0.997042 | 0.00227052           | 0.995841  |
| rad54              | 0.000727890     | 0.997770 | 0.00102362           | 0.996864  |
| rad39              | 0.000500510     | 0.998270 | 0.000703861          | 0.997568  |
| rad19anti          | 0.000275358     | 0.998546 | 0.000387232          | 0.997955  |
| PAH9+H             | 0.000215435     | 0.998761 | 0.000302964          | 0.998258  |
| PAH1+H             | 0.000185098     | 0.998946 | 0.000260302          | 0.998519  |
| rad38              | 0.000138297     | 0.999085 | 0.000194486          | 0.998713  |
| PhCCCH3+H          | 0.000118094     | 0.999203 | 0.000166074          | 0.998879  |
| rad50              | 9.10199e-05     | 0.999294 | 0.000128001          | 0.999007  |
| rad56              | 7.84307e-05     | 0.999372 | 0.000110297          | 0.999117  |
| rad55              | 7.67854e-05     | 0.999449 | 0.000107983          | 0.999225  |
| rad70              | 6.22156e-05     | 0.999511 | 8.74935e-05          | 0.999313  |
| PAH3+H             | 5.79162e-05     | 0.999569 | 8.14472e-05          | 0.999394  |
| PAH10+CH3          | 5.73435e-05     | 0.999626 | 8.06419e-05          | 0.999475  |
| rad53              | 5.50942e-05     | 0.999682 | 7.74787e-05          | 0.999552  |
| rad46              | 5.10964e-05     | 0.999733 | 7.18563e-05          | 0.999624  |
| rad51              | 4.79927e-05     | 0.999781 | 6.74918e-05          | 0.999692  |
| rad35              | 4.64038e-05     | 0.999827 | 6.52572e-05          | 0.999757  |
| rad67              | 4.30004e-05     | 0.999870 | 6.04712e-05          | 0.999818  |
| rad34              | 2.22803e-05     | 0.999892 | 3.13327e-05          | 0.999849  |
| PAH8+H             | 2.20424e-05     | 0.999914 | 3.09982e-05          | 0.999880  |
| rad30              | 1.19659e-05     | 0.999926 | 1.68276e-05          | 0.999897  |
| rad37              | 1.08360e-05     | 0.999937 | 1.52386e-05          | 0.999912  |
| rad52              | 1.06405e-05     | 0.999948 | 1.49636e-05          | 0.999927  |
| rad71              | 9.97847e-06     | 0.999958 | 1.40327e-05          | 0.999941  |
| rad62              | 8.52399e-06     | 0.999966 | 1.19872e-05          | 0.999953  |
| rad64              | 4.99011e-06     | 0.999971 | 7.01754e-06          | 0.999960  |
| rad73              | 4.56449e-06     | 0.999976 | 6.41901e-06          | 0.999966  |
| rad59              | 4.47702e-06     | 0.999980 | 6.29599e-06          | 0.999973  |
| rad68syn           | 4.00554e-06     | 0.999984 | 5.63295e-06          | 0.999978  |
| rad68anti          | 2.55993e-06     | 0.999987 | 3.60001e-06          | 0.999982  |
| rad60syn           | 2.46101e-06     | 0.999989 | 3.46090e-06          | 0.999985  |
| rad40syn           | 2.03324e-06     | 0.999991 | 2.85932e-06          | 0.999988  |
| rad60anti          | 1.78407e-06     | 0.999993 | 2.50894e-06          | 0.999991  |
| rad40anti          | 1.43624e-06     | 0.999995 | 2.01978e-06          | 0.999993  |
| rad42              | 1.37800e-06     | 0.999996 | 1.93787e-06          | 0.999995  |
| rad65              | 1.15674e-06     | 0.999997 | 1.62672e-06          | 0.999996  |
| rad58              | 1.05023e-06     | 0.999998 | 1.47693e-06          | 0.999998  |
| rad72              | 9.39261e-07     | 0.999999 | 1.32087e-06          | 0.999999  |
| rad43              | 3.36095e-07     | 0.999999 | 4.72649e-07          | 1.000000  |
| rad61              | 2.73990e-07     | 1.000000 | 3.85311e-07          | 1.000000  |
| rad41              | 5.56844e-08     | 1.000000 | 7.83087e-08          | 1.000000  |
| rad6               | 4.41968e-14     | 1.000000 | 6.21536e-14          | 1.000000  |
| rad7               | 1.48085e-15     | 1.000000 | 2.08251e-15          | 1.000000  |
| rad11              | 9.86343e-16     | 1.000000 | 1.38709e-15          | 1.000000  |
| rad23              | 3.32399e-16     | 1.000000 | 4.67450e-16          | 1.000000  |
| rad13              | 2.05537e-16     | 1.000000 | 2.89045e-16          | 1.000000  |
| rad9               | 2.03082e-16     | 1.000000 | 2.85593e-16          | 1.000000  |
| rad28              | 1.59005e-16     | 1.000000 | 2.23608e-16          | 1.000000  |
| rad45              | 1.09635e-16     | 1.000000 | 1.54178e-16          | 1.000000  |
| rad21              | 4.05034e-17     | 1.000000 | 5.69598e-17          | 1.000000  |
| rad22              | 3.36005e-17     | 1.000000 | 4.72522e-17          | 1.000000  |
| rad36              | 2.06694e-17     | 1.000000 | 2.90674e-17          | 1.000000  |
| rad33              | 1.89985e-17     | 1.000000 | 2.67174e-17          | 1.000000  |
| rad15              | 1.57407e-17     | 1.000000 | 2.21360e-17          | 1.000000  |
| rad20              | 8.22772e-18     | 1.000000 | 1.15706e-17          | 1.000000  |

|       |             |          |             |         |
|-------|-------------|----------|-------------|---------|
| rad26 | 5.53962e-18 | 1.000000 | 7.79034e-18 | 1.00000 |
| rad12 | 4.82938e-18 | 1.000000 | 6.79149e-18 | 1.00000 |
| rad25 | 4.56474e-18 | 1.000000 | 6.41938e-18 | 1.00000 |
| rad24 | 2.85392e-18 | 1.000000 | 4.01344e-18 | 1.00000 |
| rad10 | 2.30708e-18 | 1.000000 | 3.24442e-18 | 1.00000 |
| rad18 | 1.70015e-18 | 1.000000 | 2.39092e-18 | 1.00000 |
| rad8  | 1.34844e-18 | 1.000000 | 1.89630e-18 | 1.00000 |
| rad47 | 1.03449e-18 | 1.000000 | 1.45480e-18 | 1.00000 |
| rad3  | 5.15441e-19 | 1.000000 | 7.24861e-19 | 1.00000 |
| rad14 | 3.16322e-19 | 1.000000 | 4.44841e-19 | 1.00000 |
| rad4  | 3.07117e-19 | 1.000000 | 4.31897e-19 | 1.00000 |
| rad2  | 2.79473e-19 | 1.000000 | 3.93022e-19 | 1.00000 |
| rad5  | 7.37774e-20 | 1.000000 | 1.03753e-19 | 1.00000 |
| rad1  | 6.91149e-20 | 1.000000 | 9.71962e-20 | 1.00000 |
| rad27 | 1.40640e-20 | 1.000000 | 1.97781e-20 | 1.00000 |

0.100000000E-04 Pa, 3250.00000 K

| Rate constant      | True (fraction)      | Effective (fraction)  |
|--------------------|----------------------|-----------------------|
| Total              | 8.22129e-11 (1.00 )  | 5.87536e-11 (1.00 )   |
| Formation of rad11 | 1.42538e-11 (0.173 ) | 5.21849e-12 (0.0888 ) |
| Formation of rad6  | 2.27549e-11 (0.277 ) | 8.33083e-12 (0.142 )  |
| H-abstraction      | 4.52043e-11 (0.550 ) | 4.52043e-11 (0.769 )  |

| species            | PYtrue      | Cumul    | PYeffective | Cumul    |
|--------------------|-------------|----------|-------------|----------|
| Benzene+2-propynyl | 0.549844    | 0.549844 | 0.769388    | 0.769388 |
| Phenyl+Allene      | 0.285349    | 0.835192 | 0.000000    | 0.769388 |
| PhCH2CCH+H         | 0.0853725   | 0.920565 | 0.119460    | 0.888848 |
| PhCHCCH2+H         | 0.0381839   | 0.958749 | 0.0534299   | 0.942278 |
| C2H2+PhCH2         | 0.0128678   | 0.971617 | 0.0180057   | 0.960283 |
| PhCCH+CH3          | 0.0101926   | 0.981809 | 0.0142623   | 0.974546 |
| PAH7+H             | 0.00428274  | 0.986092 | 0.00599276  | 0.980539 |
| Indene+H           | 0.00340695  | 0.989499 | 0.00476729  | 0.985306 |
| PhcycC3H3_A+H      | 0.00292038  | 0.992419 | 0.00408643  | 0.989392 |
| Ph+MeAc            | 0.00285191  | 0.995271 | 0.00399061  | 0.993383 |
| rad19syn           | 0.00176005  | 0.997031 | 0.00246280  | 0.995846 |
| rad54              | 0.000783510 | 0.997815 | 0.00109635  | 0.996942 |
| rad39              | 0.000435199 | 0.998250 | 0.000608967 | 0.997551 |
| rad19anti          | 0.000232598 | 0.998483 | 0.000325470 | 0.997876 |
| PAH1+H             | 0.000210285 | 0.998693 | 0.000294248 | 0.998171 |
| PAH9+H             | 0.000189946 | 0.998883 | 0.000265788 | 0.998436 |
| rad38              | 0.000125074 | 0.999008 | 0.000175014 | 0.998611 |
| PhCCCH3+H          | 0.000104499 | 0.999112 | 0.000146224 | 0.998758 |
| rad56              | 0.000102496 | 0.999215 | 0.000143420 | 0.998901 |
| rad50              | 9.64743e-05 | 0.999311 | 0.000134995 | 0.999036 |
| rad55              | 8.51952e-05 | 0.999397 | 0.000119212 | 0.999155 |
| rad53              | 6.86880e-05 | 0.999465 | 9.61137e-05 | 0.999251 |
| rad70              | 6.67834e-05 | 0.999532 | 9.34486e-05 | 0.999345 |
| PAH3+H             | 6.43467e-05 | 0.999596 | 9.00394e-05 | 0.999435 |
| PAH10+CH3          | 5.80427e-05 | 0.999654 | 8.12183e-05 | 0.999516 |
| rad51              | 5.49240e-05 | 0.999709 | 7.68541e-05 | 0.999593 |
| rad46              | 4.80263e-05 | 0.999757 | 6.72021e-05 | 0.999660 |
| rad67              | 4.40669e-05 | 0.999802 | 6.16619e-05 | 0.999722 |
| rad35              | 4.33473e-05 | 0.999845 | 6.06552e-05 | 0.999783 |
| PAH8+H             | 3.16111e-05 | 0.999876 | 4.42329e-05 | 0.999827 |
| rad34              | 2.50786e-05 | 0.999902 | 3.50921e-05 | 0.999862 |
| rad71              | 1.47743e-05 | 0.999916 | 2.06734e-05 | 0.999883 |
| rad52              | 1.16170e-05 | 0.999928 | 1.62555e-05 | 0.999899 |
| rad30              | 1.10774e-05 | 0.999939 | 1.55003e-05 | 0.999914 |
| rad62              | 1.06705e-05 | 0.999950 | 1.49310e-05 | 0.999929 |
| rad37              | 9.29424e-06 | 0.999959 | 1.30053e-05 | 0.999942 |
| rad73              | 6.33743e-06 | 0.999965 | 8.86788e-06 | 0.999951 |
| rad64              | 5.77649e-06 | 0.999971 | 8.08292e-06 | 0.999959 |
| rad68syn           | 5.15348e-06 | 0.999976 | 7.21118e-06 | 0.999966 |
| rad59              | 4.82486e-06 | 0.999981 | 6.75136e-06 | 0.999973 |
| rad68anti          | 3.28964e-06 | 0.999984 | 4.60314e-06 | 0.999978 |
| rad40syn           | 2.77792e-06 | 0.999987 | 3.88709e-06 | 0.999982 |
| rad60syn           | 2.50929e-06 | 0.999990 | 3.51119e-06 | 0.999985 |
| rad40anti          | 1.99952e-06 | 0.999992 | 2.79788e-06 | 0.999988 |
| rad42              | 1.90464e-06 | 0.999994 | 2.66512e-06 | 0.999991 |
| rad60anti          | 1.83422e-06 | 0.999995 | 2.56658e-06 | 0.999993 |
| rad72              | 1.57365e-06 | 0.999997 | 2.20197e-06 | 0.999995 |
| rad65              | 1.29208e-06 | 0.999998 | 1.80798e-06 | 0.999997 |
| rad58              | 1.27682e-06 | 1.000000 | 1.78663e-06 | 0.999999 |
| rad43              | 3.85029e-07 | 1.000000 | 5.38764e-07 | 1.000000 |
| rad61              | 3.23853e-07 | 1.000000 | 4.53160e-07 | 1.000000 |
| rad41              | 7.10639e-08 | 1.000000 | 9.94383e-08 | 1.000000 |
| rad6               | 1.97784e-14 | 1.000000 | 2.76756e-14 | 1.000000 |

|       |             |         |             |         |
|-------|-------------|---------|-------------|---------|
| rad7  | 8.03367e-16 | 1.00000 | 1.12414e-15 | 1.00000 |
| rad11 | 5.21690e-16 | 1.00000 | 7.29990e-16 | 1.00000 |
| rad23 | 1.39938e-16 | 1.00000 | 1.95812e-16 | 1.00000 |
| rad13 | 1.18526e-16 | 1.00000 | 1.65850e-16 | 1.00000 |
| rad9  | 9.84298e-17 | 1.00000 | 1.37731e-16 | 1.00000 |
| rad28 | 7.06840e-17 | 1.00000 | 9.89065e-17 | 1.00000 |
| rad45 | 5.48398e-17 | 1.00000 | 7.67365e-17 | 1.00000 |
| rad21 | 2.44315e-17 | 1.00000 | 3.41865e-17 | 1.00000 |
| rad22 | 1.58063e-17 | 1.00000 | 2.21175e-17 | 1.00000 |
| rad33 | 1.20474e-17 | 1.00000 | 1.68578e-17 | 1.00000 |
| rad36 | 1.04355e-17 | 1.00000 | 1.46022e-17 | 1.00000 |
| rad15 | 8.20378e-18 | 1.00000 | 1.14794e-17 | 1.00000 |
| rad20 | 5.20430e-18 | 1.00000 | 7.28226e-18 | 1.00000 |
| rad12 | 3.09374e-18 | 1.00000 | 4.32901e-18 | 1.00000 |
| rad25 | 2.89947e-18 | 1.00000 | 4.05717e-18 | 1.00000 |
| rad26 | 2.68112e-18 | 1.00000 | 3.75165e-18 | 1.00000 |
| rad24 | 1.82403e-18 | 1.00000 | 2.55233e-18 | 1.00000 |
| rad10 | 1.20179e-18 | 1.00000 | 1.68164e-18 | 1.00000 |
| rad8  | 1.19193e-18 | 1.00000 | 1.66784e-18 | 1.00000 |
| rad47 | 1.15640e-18 | 1.00000 | 1.61813e-18 | 1.00000 |
| rad18 | 9.40390e-19 | 1.00000 | 1.31587e-18 | 1.00000 |
| rad3  | 2.93935e-19 | 1.00000 | 4.11297e-19 | 1.00000 |
| rad14 | 2.29549e-19 | 1.00000 | 3.21204e-19 | 1.00000 |
| rad4  | 1.75929e-19 | 1.00000 | 2.46174e-19 | 1.00000 |
| rad2  | 1.39212e-19 | 1.00000 | 1.94797e-19 | 1.00000 |
| rad5  | 5.54264e-20 | 1.00000 | 7.75570e-20 | 1.00000 |
| rad1  | 3.25225e-20 | 1.00000 | 4.55081e-20 | 1.00000 |
| rad27 | 9.84685e-21 | 1.00000 | 1.37785e-20 | 1.00000 |

0.100000000E-04 Pa, 3500.00000 K

| Rate constant      | True (fraction) |          | Effective (fraction) |           |
|--------------------|-----------------|----------|----------------------|-----------|
| Total              | 1.05713e-10     | (1.00 )  | 7.59650e-11          | (1.00 )   |
| Formation of rad11 | 1.77412e-11     | (0.168 ) | 6.37264e-12          | (0.0839 ) |
| Formation of rad6  | 2.86822e-11     | (0.271 ) | 1.03027e-11          | (0.136 )  |
| H-abstraction      | 5.92897e-11     | (0.561 ) | 5.92897e-11          | (0.780 )  |

  

| species            | PYtrue      | Cumul    | PYeffective | Cumul    |
|--------------------|-------------|----------|-------------|----------|
| Benzene+2-propynyl | 0.560855    | 0.560855 | 0.780487    | 0.780487 |
| Phenyl+Allene      | 0.281404    | 0.842259 | 0.00000     | 0.780487 |
| PhCH2CCH+H         | 0.0826656   | 0.924925 | 0.115037    | 0.895524 |
| PhCHCCH2+H         | 0.0360585   | 0.960983 | 0.0501791   | 0.945703 |
| C2H2+PhCH2         | 0.0122593   | 0.973242 | 0.0170600   | 0.962764 |
| PhCCH+CH3          | 0.00927084  | 0.982513 | 0.0129013   | 0.975665 |
| PAH7+H             | 0.00395025  | 0.986463 | 0.00549717  | 0.981162 |
| PhcycC3H3_A+H      | 0.00334801  | 0.989811 | 0.00465910  | 0.985821 |
| Ph+MeAc            | 0.00276398  | 0.992575 | 0.00384635  | 0.989667 |
| Indene+H           | 0.00257590  | 0.995151 | 0.00358462  | 0.993252 |
| rad19syn           | 0.00187235  | 0.997024 | 0.00260557  | 0.995858 |
| rad54              | 0.000820548 | 0.997844 | 0.00114187  | 0.996999 |
| rad39              | 0.000383055 | 0.998227 | 0.000533059 | 0.997533 |
| PAH1+H             | 0.000234590 | 0.998462 | 0.000326455 | 0.997859 |
| rad19anti          | 0.000198628 | 0.998661 | 0.000276411 | 0.998135 |
| PAH9+H             | 0.000165224 | 0.998826 | 0.000229927 | 0.998365 |
| rad56              | 0.000126873 | 0.998953 | 0.000176556 | 0.998542 |
| rad38              | 0.000111229 | 0.999064 | 0.000154787 | 0.998697 |
| rad50              | 9.85613e-05 | 0.999162 | 0.000137158 | 0.998834 |
| PhCCCH3+H          | 9.42424e-05 | 0.999257 | 0.000131148 | 0.998965 |
| rad55              | 9.15803e-05 | 0.999348 | 0.000127443 | 0.999092 |
| rad53              | 8.16793e-05 | 0.999430 | 0.000113665 | 0.999206 |
| rad70              | 7.02694e-05 | 0.999500 | 9.77871e-05 | 0.999304 |
| PAH3+H             | 6.99220e-05 | 0.999570 | 9.73035e-05 | 0.999401 |
| rad51              | 5.98507e-05 | 0.999630 | 8.32882e-05 | 0.999484 |
| PAH10+CH3          | 5.76128e-05 | 0.999688 | 8.01742e-05 | 0.999565 |
| rad67              | 4.43734e-05 | 0.999732 | 6.17501e-05 | 0.999626 |
| rad46              | 4.41956e-05 | 0.999776 | 6.15029e-05 | 0.999688 |
| PAH8+H             | 4.26935e-05 | 0.999819 | 5.94123e-05 | 0.999747 |
| rad35              | 4.02805e-05 | 0.999859 | 5.60544e-05 | 0.999803 |
| rad34              | 2.74951e-05 | 0.999887 | 3.82622e-05 | 0.999842 |
| rad71              | 2.01281e-05 | 0.999907 | 2.80103e-05 | 0.999870 |
| rad62              | 1.37116e-05 | 0.999920 | 1.90811e-05 | 0.999889 |
| rad52              | 1.21501e-05 | 0.999933 | 1.69080e-05 | 0.999906 |
| rad30              | 1.02915e-05 | 0.999943 | 1.43216e-05 | 0.999920 |
| rad73              | 8.16310e-06 | 0.999951 | 1.13598e-05 | 0.999931 |
| rad37              | 7.96636e-06 | 0.999959 | 1.10860e-05 | 0.999942 |
| rad64              | 6.47621e-06 | 0.999966 | 9.01228e-06 | 0.999951 |
| rad68syn           | 6.33612e-06 | 0.999972 | 8.81737e-06 | 0.999960 |
| rad59              | 5.10458e-06 | 0.999977 | 7.10355e-06 | 0.999967 |



|           |             |          |             |          |
|-----------|-------------|----------|-------------|----------|
| rad68anti | 4.04059e-06 | 0.999981 | 5.62289e-06 | 0.999973 |
| rad40syn  | 3.59895e-06 | 0.999985 | 5.00830e-06 | 0.999978 |
| rad42     | 2.66321e-06 | 0.999987 | 3.70612e-06 | 0.999982 |
| rad40anti | 2.63316e-06 | 0.999990 | 3.66431e-06 | 0.999985 |
| rad60syn  | 2.53258e-06 | 0.999992 | 3.52435e-06 | 0.999989 |
| rad72     | 2.38441e-06 | 0.999995 | 3.31814e-06 | 0.999992 |
| rad60anti | 1.86455e-06 | 0.999997 | 2.59471e-06 | 0.999995 |
| rad58     | 1.49815e-06 | 0.999998 | 2.08483e-06 | 0.999997 |
| rad65     | 1.37925e-06 | 1.000000 | 1.91936e-06 | 0.999999 |
| rad43     | 4.42452e-07 | 1.000000 | 6.15716e-07 | 0.999999 |
| rad61     | 3.67258e-07 | 1.000000 | 5.11077e-07 | 1.000000 |
| rad41     | 8.98821e-08 | 1.000000 | 1.25080e-07 | 1.000000 |
| rad6      | 9.76203e-15 | 1.000000 | 1.35848e-14 | 1.000000 |
| rad7      | 4.66100e-16 | 1.000000 | 6.48628e-16 | 1.000000 |
| rad11     | 2.99100e-16 | 1.000000 | 4.16227e-16 | 1.000000 |
| rad13     | 7.28305e-17 | 1.000000 | 1.01351e-16 | 1.000000 |
| rad23     | 6.35219e-17 | 1.000000 | 8.83974e-17 | 1.000000 |
| rad9      | 5.10120e-17 | 1.000000 | 7.09885e-17 | 1.000000 |
| rad28     | 3.44832e-17 | 1.000000 | 4.79868e-17 | 1.000000 |
| rad45     | 2.90149e-17 | 1.000000 | 4.03772e-17 | 1.000000 |
| rad21     | 1.56206e-17 | 1.000000 | 2.17377e-17 | 1.000000 |
| rad22     | 8.11756e-18 | 1.000000 | 1.12964e-17 | 1.000000 |
| rad33     | 7.96109e-18 | 1.000000 | 1.10787e-17 | 1.000000 |
| rad36     | 5.56085e-18 | 1.000000 | 7.73847e-18 | 1.000000 |
| rad15     | 4.52583e-18 | 1.000000 | 6.29815e-18 | 1.000000 |
| rad20     | 3.56498e-18 | 1.000000 | 4.96104e-18 | 1.000000 |
| rad12     | 2.06000e-18 | 1.000000 | 2.86671e-18 | 1.000000 |
| rad25     | 1.93599e-18 | 1.000000 | 2.69413e-18 | 1.000000 |
| rad26     | 1.38460e-18 | 1.000000 | 1.92682e-18 | 1.000000 |
| rad47     | 1.23125e-18 | 1.000000 | 1.71341e-18 | 1.000000 |
| rad24     | 1.20836e-18 | 1.000000 | 1.68155e-18 | 1.000000 |
| rad8      | 1.05361e-18 | 1.000000 | 1.46621e-18 | 1.000000 |
| rad10     | 6.66148e-19 | 1.000000 | 9.27012e-19 | 1.000000 |
| rad18     | 5.60033e-19 | 1.000000 | 7.79343e-19 | 1.000000 |
| rad14     | 1.81848e-19 | 1.000000 | 2.53061e-19 | 1.000000 |
| rad3      | 1.79655e-19 | 1.000000 | 2.50008e-19 | 1.000000 |
| rad4      | 1.09298e-19 | 1.000000 | 1.52100e-19 | 1.000000 |
| rad2      | 7.64543e-20 | 1.000000 | 1.06394e-19 | 1.000000 |
| rad5      | 4.29550e-20 | 1.000000 | 5.97762e-20 | 1.000000 |
| rad1      | 1.71491e-20 | 1.000000 | 2.38646e-20 | 1.000000 |
| rad27     | 7.31080e-21 | 1.000000 | 1.01737e-20 | 1.000000 |

0.100000000E-04 Pa, 3750.00000 K

| Rate constant      | True (fraction) |          | Effective (fraction) |           |
|--------------------|-----------------|----------|----------------------|-----------|
| Total              | 1.33217e-10     | (1.00 )  | 9.62711e-11          | (1.00 )   |
| Formation of rad11 | 2.17064e-11     | (0.163 ) | 7.68279e-12          | (0.0798 ) |
| Formation of rad6  | 3.54800e-11     | (0.266 ) | 1.25578e-11          | (0.130 )  |
| H-abstraction      | 7.60305e-11     | (0.571 ) | 7.60305e-11          | (0.790 )  |

  

| species            | PYtrue      | Cumul    | PYeffective | Cumul    |
|--------------------|-------------|----------|-------------|----------|
| Benzene+2-propynyl | 0.570727    | 0.570727 | 0.789754    | 0.789754 |
| Phenyl+Allene      | 0.277336    | 0.848063 | 0.000000    | 0.789754 |
| PhCH2CCH+H         | 0.0801946   | 0.928257 | 0.110971    | 0.900725 |
| PhCHCCH2+H         | 0.0343186   | 0.962576 | 0.0474891   | 0.948214 |
| C2H2+PhCH2         | 0.0118838   | 0.974460 | 0.0164445   | 0.964658 |
| PhCCH+CH3          | 0.00852836  | 0.982988 | 0.0118013   | 0.976459 |
| PhcycC3H3_A+H      | 0.00372851  | 0.986717 | 0.00515939  | 0.981619 |
| PAH7+H             | 0.00365085  | 0.990368 | 0.00505194  | 0.986671 |
| Ph+MeAc            | 0.00270113  | 0.993069 | 0.00373773  | 0.990408 |
| Indene+H           | 0.00199900  | 0.995068 | 0.00276616  | 0.993175 |
| rad19syn           | 0.00195356  | 0.997021 | 0.00270328  | 0.995878 |
| rad54              | 0.000841040 | 0.997862 | 0.00116381  | 0.997042 |
| rad39              | 0.000340475 | 0.998203 | 0.000471138 | 0.997513 |
| PAH1+H             | 0.000258935 | 0.998462 | 0.000358305 | 0.997871 |
| rad19anti          | 0.000171610 | 0.998633 | 0.000237469 | 0.998109 |
| rad56              | 0.000150421 | 0.998784 | 0.000208148 | 0.998317 |
| PAH9+H             | 0.000142296 | 0.998926 | 0.000196904 | 0.998514 |
| rad50              | 9.78214e-05 | 0.999024 | 0.000135362 | 0.998649 |
| rad38              | 9.76287e-05 | 0.999121 | 0.000135095 | 0.998784 |
| rad55              | 9.60227e-05 | 0.999217 | 0.000132873 | 0.998917 |
| rad53              | 9.35446e-05 | 0.999311 | 0.000129444 | 0.999046 |
| PhCCCH3+H          | 8.63448e-05 | 0.999397 | 0.000119481 | 0.999166 |
| PAH3+H             | 7.46029e-05 | 0.999472 | 0.000103233 | 0.999269 |
| rad70              | 7.27716e-05 | 0.999545 | 0.000100699 | 0.999370 |
| rad51              | 6.27266e-05 | 0.999607 | 8.67994e-05 | 0.999457 |
| PAH10+CH3          | 5.64592e-05 | 0.999664 | 7.81267e-05 | 0.999535 |
| PAH8+H             | 5.49581e-05 | 0.999719 | 7.60493e-05 | 0.999611 |

|           |             |          |             |          |
|-----------|-------------|----------|-------------|----------|
| rad67     | 4.41361e-05 | 0.999763 | 6.10741e-05 | 0.999672 |
| rad46     | 4.00102e-05 | 0.999803 | 5.53649e-05 | 0.999727 |
| rad35     | 3.73501e-05 | 0.999840 | 5.16839e-05 | 0.999779 |
| rad34     | 2.95155e-05 | 0.999870 | 4.08426e-05 | 0.999820 |
| rad71     | 2.56704e-05 | 0.999896 | 3.55219e-05 | 0.999855 |
| rad62     | 1.78765e-05 | 0.999913 | 2.47369e-05 | 0.999880 |
| rad52     | 1.22817e-05 | 0.999926 | 1.69950e-05 | 0.999897 |
| rad73     | 9.90830e-06 | 0.999936 | 1.37108e-05 | 0.999911 |
| rad30     | 9.58077e-06 | 0.999945 | 1.32576e-05 | 0.999924 |
| rad68syn  | 7.51159e-06 | 0.999953 | 1.03943e-05 | 0.999934 |
| rad64     | 7.08717e-06 | 0.999960 | 9.80700e-06 | 0.999944 |
| rad37     | 6.84827e-06 | 0.999967 | 9.47639e-06 | 0.999954 |
| rad59     | 5.31873e-06 | 0.999972 | 7.35989e-06 | 0.999961 |
| rad68anti | 4.78626e-06 | 0.999977 | 6.62308e-06 | 0.999968 |
| rad40syn  | 4.46912e-06 | 0.999981 | 6.18422e-06 | 0.999974 |
| rad42     | 3.72271e-06 | 0.999985 | 5.15138e-06 | 0.999979 |
| rad72     | 3.33614e-06 | 0.999988 | 4.61643e-06 | 0.999984 |
| rad40anti | 3.31727e-06 | 0.999992 | 4.59032e-06 | 0.999988 |
| rad60syn  | 2.53369e-06 | 0.999994 | 3.50604e-06 | 0.999992 |
| rad60anti | 1.87710e-06 | 0.999996 | 2.59748e-06 | 0.999994 |
| rad58     | 1.70809e-06 | 0.999998 | 2.36361e-06 | 0.999997 |
| rad65     | 1.42131e-06 | 0.999999 | 1.96676e-06 | 0.999999 |
| rad43     | 5.13732e-07 | 1.000000 | 7.10883e-07 | 0.999999 |
| rad61     | 4.03889e-07 | 1.000000 | 5.58888e-07 | 1.000000 |
| rad41     | 1.13553e-07 | 1.000000 | 1.57130e-07 | 1.000000 |
| rad6      | 5.22786e-15 | 1.000000 | 7.23414e-15 | 1.000000 |
| rad7      | 2.85684e-16 | 1.000000 | 3.95321e-16 | 1.000000 |
| rad11     | 1.83382e-16 | 1.000000 | 2.53758e-16 | 1.000000 |
| rad13     | 4.71985e-17 | 1.000000 | 6.53121e-17 | 1.000000 |
| rad23     | 3.07286e-17 | 1.000000 | 4.25212e-17 | 1.000000 |
| rad9      | 2.81224e-17 | 1.000000 | 3.89148e-17 | 1.000000 |
| rad28     | 1.81830e-17 | 1.000000 | 2.51610e-17 | 1.000000 |
| rad45     | 1.60882e-17 | 1.000000 | 2.22623e-17 | 1.000000 |
| rad21     | 1.04834e-17 | 1.000000 | 1.45067e-17 | 1.000000 |
| rad33     | 5.44417e-18 | 1.000000 | 7.53345e-18 | 1.000000 |
| rad22     | 4.49011e-18 | 1.000000 | 6.21323e-18 | 1.000000 |
| rad36     | 3.09929e-18 | 1.000000 | 4.28868e-18 | 1.000000 |
| rad15     | 2.63092e-18 | 1.000000 | 3.64060e-18 | 1.000000 |
| rad20     | 2.59386e-18 | 1.000000 | 3.58930e-18 | 1.000000 |
| rad12     | 1.42144e-18 | 1.000000 | 1.96695e-18 | 1.000000 |
| rad25     | 1.34705e-18 | 1.000000 | 1.86401e-18 | 1.000000 |
| rad47     | 1.26179e-18 | 1.000000 | 1.74602e-18 | 1.000000 |
| rad8      | 9.29496e-19 | 1.000000 | 1.28621e-18 | 1.000000 |
| rad24     | 8.25899e-19 | 1.000000 | 1.14285e-18 | 1.000000 |
| rad26     | 7.57718e-19 | 1.000000 | 1.04851e-18 | 1.000000 |
| rad10     | 3.88996e-19 | 1.000000 | 5.38280e-19 | 1.000000 |
| rad18     | 3.53333e-19 | 1.000000 | 4.88931e-19 | 1.000000 |
| rad14     | 1.56337e-19 | 1.000000 | 2.16335e-19 | 1.000000 |
| rad3      | 1.16120e-19 | 1.000000 | 1.60683e-19 | 1.000000 |
| rad4      | 7.24960e-20 | 1.000000 | 1.00318e-19 | 1.000000 |
| rad2      | 4.51127e-20 | 1.000000 | 6.24252e-20 | 1.000000 |
| rad5      | 3.42636e-20 | 1.000000 | 4.74130e-20 | 1.000000 |
| rad1      | 9.91071e-21 | 1.000000 | 1.37141e-20 | 1.000000 |
| rad27     | 5.73762e-21 | 1.000000 | 7.93956e-21 | 1.000000 |

0.100000000E-04 Pa, 4000.00000 K

| Rate constant      | True (fraction)      | Effective (fraction)  |
|--------------------|----------------------|-----------------------|
| Total              | 1.65008e-10 (1.00 )  | 1.19912e-10 (1.00 )   |
| Formation of rad11 | 2.61707e-11 (0.159 ) | 9.15556e-12 (0.0764 ) |
| Formation of rad6  | 4.31906e-11 (0.262 ) | 1.51098e-11 (0.126 )  |
| H-abstraction      | 9.56470e-11 (0.580 ) | 9.56470e-11 (0.798 )  |

| species            | PYtrue      | Cumul    | PYeffective | Cumul    |
|--------------------|-------------|----------|-------------|----------|
| Benzene+2-propynyl | 0.579650    | 0.579650 | 0.797641    | 0.797641 |
| Phenyl+Allene      | 0.273295    | 0.852945 | 0.000000    | 0.797641 |
| PhCH2CCH+H         | 0.0779435   | 0.930888 | 0.107256    | 0.904897 |
| PhCHCCH2+H         | 0.0328766   | 0.963765 | 0.0452408   | 0.950138 |
| C2H2+PhCH2         | 0.0116508   | 0.975415 | 0.0160323   | 0.966170 |
| PhCCH+CH3          | 0.00792125  | 0.983337 | 0.0109003   | 0.977070 |
| PhcycC3H3_A+H      | 0.00405636  | 0.987393 | 0.00558187  | 0.982652 |
| PAH7+H             | 0.00338058  | 0.990774 | 0.00465193  | 0.987304 |
| Ph+MeAc            | 0.00265534  | 0.993429 | 0.00365394  | 0.990958 |
| rad19syn           | 0.00200699  | 0.995436 | 0.00276178  | 0.993720 |
| Indene+H           | 0.00158840  | 0.997024 | 0.00218576  | 0.995906 |
| rad54              | 0.000847468 | 0.997872 | 0.00116618  | 0.997072 |
| rad39              | 0.000304994 | 0.998177 | 0.000419695 | 0.997491 |
| PAH1+H             | 0.000284127 | 0.998461 | 0.000390980 | 0.997882 |

|           |             |          |             |          |
|-----------|-------------|----------|-------------|----------|
| rad56     | 0.000172242 | 0.998633 | 0.000237017 | 0.998119 |
| rad19anti | 0.000149971 | 0.998783 | 0.000206372 | 0.998326 |
| PAH9+H    | 0.000121736 | 0.998905 | 0.000167518 | 0.998493 |
| rad53     | 0.000103935 | 0.999009 | 0.000143023 | 0.998636 |
| rad55     | 9.87033e-05 | 0.999108 | 0.000135823 | 0.998772 |
| rad50     | 9.49261e-05 | 0.999203 | 0.000130625 | 0.998903 |
| rad38     | 8.48536e-05 | 0.999287 | 0.000116765 | 0.999020 |
| PhCCCH3+H | 8.02193e-05 | 0.999368 | 0.000110388 | 0.999130 |
| PAH3+H    | 7.84218e-05 | 0.999446 | 0.000107914 | 0.999238 |
| rad70     | 7.43978e-05 | 0.999520 | 0.000102377 | 0.999340 |
| PAH8+H    | 6.80299e-05 | 0.999588 | 9.36140e-05 | 0.999434 |
| rad51     | 6.37407e-05 | 0.999652 | 8.77122e-05 | 0.999522 |
| PAH10+CH3 | 5.48776e-05 | 0.999707 | 7.55158e-05 | 0.999597 |
| rad67     | 4.35168e-05 | 0.999751 | 5.98821e-05 | 0.999657 |
| rad46     | 3.57792e-05 | 0.999786 | 4.92350e-05 | 0.999706 |
| rad35     | 3.46400e-05 | 0.999821 | 4.76673e-05 | 0.999754 |
| rad34     | 3.11445e-05 | 0.999852 | 4.28572e-05 | 0.999797 |
| rad71     | 3.10563e-05 | 0.999883 | 4.27358e-05 | 0.999839 |
| rad62     | 2.32398e-05 | 0.999906 | 3.19798e-05 | 0.999871 |
| rad52     | 1.20851e-05 | 0.999919 | 1.66300e-05 | 0.999888 |
| rad73     | 1.14710e-05 | 0.999930 | 1.57849e-05 | 0.999904 |
| rad30     | 8.93299e-06 | 0.999939 | 1.22925e-05 | 0.999916 |
| rad68syn  | 8.64434e-06 | 0.999948 | 1.18952e-05 | 0.999928 |
| rad64     | 7.61305e-06 | 0.999955 | 1.04761e-05 | 0.999939 |
| rad37     | 5.91727e-06 | 0.999961 | 8.14263e-06 | 0.999947 |
| rad68anti | 5.50424e-06 | 0.999967 | 7.57424e-06 | 0.999954 |
| rad59     | 5.47385e-06 | 0.999972 | 7.53243e-06 | 0.999962 |
| rad40syn  | 5.36170e-06 | 0.999977 | 7.37810e-06 | 0.999969 |
| rad42     | 5.12142e-06 | 0.999983 | 7.04750e-06 | 0.999976 |
| rad72     | 4.37871e-06 | 0.999987 | 6.02543e-06 | 0.999982 |
| rad40anti | 4.03125e-06 | 0.999991 | 5.54731e-06 | 0.999988 |
| rad60syn  | 2.51669e-06 | 0.999993 | 3.46315e-06 | 0.999991 |
| rad58     | 1.90267e-06 | 0.999995 | 2.61822e-06 | 0.999994 |
| rad60anti | 1.87487e-06 | 0.999997 | 2.57996e-06 | 0.999996 |
| rad65     | 1.42564e-06 | 0.999999 | 1.96179e-06 | 0.999998 |
| rad43     | 6.01849e-07 | 0.999999 | 8.28191e-07 | 0.999999 |
| rad61     | 4.34037e-07 | 1.000000 | 5.97267e-07 | 1.000000 |
| rad41     | 1.43043e-07 | 1.000000 | 1.96838e-07 | 1.000000 |
| rad6      | 2.99901e-15 | 1.000000 | 4.12687e-15 | 1.000000 |
| rad7      | 1.83271e-16 | 1.000000 | 2.52194e-16 | 1.000000 |
| rad11     | 1.18912e-16 | 1.000000 | 1.63632e-16 | 1.000000 |
| rad13     | 3.19990e-17 | 1.000000 | 4.40329e-17 | 1.000000 |
| rad9      | 1.63967e-17 | 1.000000 | 2.25630e-17 | 1.000000 |
| rad23     | 1.56966e-17 | 1.000000 | 2.15998e-17 | 1.000000 |
| rad28     | 1.02416e-17 | 1.000000 | 1.40933e-17 | 1.000000 |
| rad45     | 9.28361e-18 | 1.000000 | 1.27749e-17 | 1.000000 |
| rad21     | 7.32814e-18 | 1.000000 | 1.00841e-17 | 1.000000 |
| rad33     | 3.83235e-18 | 1.000000 | 5.27360e-18 | 1.000000 |
| rad22     | 2.64549e-18 | 1.000000 | 3.64038e-18 | 1.000000 |
| rad20     | 1.97582e-18 | 1.000000 | 2.71888e-18 | 1.000000 |
| rad36     | 1.79420e-18 | 1.000000 | 2.46896e-18 | 1.000000 |
| rad15     | 1.60349e-18 | 1.000000 | 2.20652e-18 | 1.000000 |
| rad47     | 1.25502e-18 | 1.000000 | 1.72700e-18 | 1.000000 |
| rad12     | 1.01281e-18 | 1.000000 | 1.39370e-18 | 1.000000 |
| rad25     | 9.69849e-19 | 1.000000 | 1.33459e-18 | 1.000000 |
| rad8      | 8.17489e-19 | 1.000000 | 1.12493e-18 | 1.000000 |
| rad24     | 5.80458e-19 | 1.000000 | 7.98754e-19 | 1.000000 |
| rad26     | 4.36824e-19 | 1.000000 | 6.01106e-19 | 1.000000 |
| rad10     | 2.37711e-19 | 1.000000 | 3.27107e-19 | 1.000000 |
| rad18     | 2.33495e-19 | 1.000000 | 3.21308e-19 | 1.000000 |
| rad14     | 1.43353e-19 | 1.000000 | 1.97264e-19 | 1.000000 |
| rad3      | 7.86177e-20 | 1.000000 | 1.08184e-19 | 1.000000 |
| rad4      | 5.07056e-20 | 1.000000 | 6.97746e-20 | 1.000000 |
| rad2      | 2.81629e-20 | 1.000000 | 3.87544e-20 | 1.000000 |
| rad5      | 2.80392e-20 | 1.000000 | 3.85840e-20 | 1.000000 |
| rad1      | 6.17217e-21 | 1.000000 | 8.49336e-21 | 1.000000 |
| rad27     | 4.74794e-21 | 1.000000 | 6.53351e-21 | 1.000000 |

0.100000000E-05 Pa, 20.0000000 K

=====

| Rate constant      | True (fraction)        | Effective (fraction)   |             |          |
|--------------------|------------------------|------------------------|-------------|----------|
| Total              | 1.56740e-51 (1.00 )    | 1.56740e-51 (1.00 )    |             |          |
| Formation of rad11 | 1.56740e-51 (1.000 )   | 1.56740e-51 (1.000 )   |             |          |
| Formation of rad6  | 3.73945e-60 (2.39e-09) | 3.73945e-60 (2.39e-09) |             |          |
| H-abstraction      | 1.53631e-76 (9.80e-26) | 1.53631e-76 (9.80e-26) |             |          |
| species            | PYtrue                 | Cumul                  | PYeffective | Cumul    |
| Indene+H           | 0.987411               | 0.987411               | 0.987411    | 0.987411 |

|                    |             |          |             |          |
|--------------------|-------------|----------|-------------|----------|
| C2H2+PhCH2         | 0.00818747  | 0.995598 | 0.00818747  | 0.995598 |
| PhCCH+CH3          | 0.00217762  | 0.997776 | 0.00217762  | 0.997776 |
| PhCHCCH2+H         | 0.00137751  | 0.999154 | 0.00137751  | 0.999154 |
| PhCCCH3+H          | 0.000823354 | 0.999977 | 0.000823354 | 0.999977 |
| Ph+MeAc            | 9.91712e-06 | 0.999987 | 9.91712e-06 | 0.999987 |
| rad8               | 6.79362e-06 | 0.999994 | 6.79362e-06 | 0.999994 |
| rad9               | 3.07751e-06 | 0.999997 | 3.07751e-06 | 0.999997 |
| PAH7+H             | 1.74817e-06 | 0.999998 | 1.74817e-06 | 0.999998 |
| rad6               | 8.94521e-07 | 0.999999 | 8.94521e-07 | 0.999999 |
| rad30              | 4.35305e-07 | 1.000000 | 4.35305e-07 | 1.000000 |
| rad12              | 2.09205e-07 | 1.000000 | 2.09205e-07 | 1.000000 |
| rad39              | 1.68105e-07 | 1.000000 | 1.68105e-07 | 1.000000 |
| PAH9+H             | 8.81109e-08 | 1.000000 | 8.81109e-08 | 1.000000 |
| rad15              | 7.78995e-08 | 1.000000 | 7.78995e-08 | 1.000000 |
| rad35              | 4.63895e-08 | 1.000000 | 4.63895e-08 | 1.000000 |
| rad38              | 2.26371e-08 | 1.000000 | 2.26371e-08 | 1.000000 |
| Phenyl+Allene      | 1.59521e-08 | 1.000000 | 0.000000    | 1.000000 |
| rad28              | 2.94875e-09 | 1.000000 | 2.94875e-09 | 1.000000 |
| rad2               | 3.30175e-10 | 1.000000 | 3.30175e-10 | 1.000000 |
| rad26              | 2.47852e-10 | 1.000000 | 2.47852e-10 | 1.000000 |
| rad46              | 1.46832e-10 | 1.000000 | 1.46832e-10 | 1.000000 |
| rad7               | 6.45241e-11 | 1.000000 | 6.45241e-11 | 1.000000 |
| rad1               | 2.08678e-11 | 1.000000 | 2.08678e-11 | 1.000000 |
| rad10              | 1.68372e-11 | 1.000000 | 1.68372e-11 | 1.000000 |
| rad11              | 1.57699e-11 | 1.000000 | 1.57699e-11 | 1.000000 |
| rad60syn           | 3.49350e-12 | 1.000000 | 3.49350e-12 | 1.000000 |
| rad3               | 2.13030e-12 | 1.000000 | 2.13030e-12 | 1.000000 |
| rad4               | 1.07698e-12 | 1.000000 | 1.07698e-12 | 1.000000 |
| rad13              | 3.58617e-13 | 1.000000 | 3.58617e-13 | 1.000000 |
| rad14              | 3.06753e-15 | 1.000000 | 3.06753e-15 | 1.000000 |
| rad25              | 1.55582e-15 | 1.000000 | 1.55582e-15 | 1.000000 |
| rad33              | 6.77352e-16 | 1.000000 | 6.77352e-16 | 1.000000 |
| rad27              | 4.53068e-16 | 1.000000 | 4.53068e-16 | 1.000000 |
| rad60anti          | 4.48621e-16 | 1.000000 | 4.48621e-16 | 1.000000 |
| PhCH2CCH+H         | 7.79467e-18 | 1.000000 | 7.79467e-18 | 1.000000 |
| rad37              | 7.05170e-19 | 1.000000 | 7.05170e-19 | 1.000000 |
| rad31              | 7.15574e-21 | 1.000000 | 7.15574e-21 | 1.000000 |
| rad20              | 1.66776e-21 | 1.000000 | 1.66776e-21 | 1.000000 |
| rad21              | 1.22843e-21 | 1.000000 | 1.22843e-21 | 1.000000 |
| rad5               | 4.53435e-22 | 1.000000 | 4.53435e-22 | 1.000000 |
| rad23              | 6.79388e-23 | 1.000000 | 6.79388e-23 | 1.000000 |
| rad18              | 6.77695e-24 | 1.000000 | 6.77695e-24 | 1.000000 |
| rad22              | 1.93838e-24 | 1.000000 | 1.93838e-24 | 1.000000 |
| rad45              | 4.30524e-25 | 1.000000 | 4.30524e-25 | 1.000000 |
| Benzene+2-propynyl | 9.80165e-26 | 1.000000 | 9.80165e-26 | 1.000000 |
| rad36              | 2.68183e-26 | 1.000000 | 2.68183e-26 | 1.000000 |
| PAH3+H             | 8.05518e-27 | 1.000000 | 8.05518e-27 | 1.000000 |
| rad59              | 4.31309e-27 | 1.000000 | 4.31309e-27 | 1.000000 |
| rad50              | 1.73579e-27 | 1.000000 | 1.73579e-27 | 1.000000 |
| rad24              | 4.88360e-29 | 1.000000 | 4.88360e-29 | 1.000000 |
| rad19syn           | 6.39889e-36 | 1.000000 | 6.39889e-36 | 1.000000 |
| rad52              | 7.69654e-40 | 1.000000 | 7.69654e-40 | 1.000000 |
| rad54              | 7.40665e-41 | 1.000000 | 7.40665e-41 | 1.000000 |
| PAH10+CH3          | 4.82760e-41 | 1.000000 | 4.82760e-41 | 1.000000 |
| rad43              | 1.11376e-41 | 1.000000 | 1.11376e-41 | 1.000000 |
| rad62              | 3.32288e-44 | 1.000000 | 3.32288e-44 | 1.000000 |
| rad51              | 3.70929e-47 | 1.000000 | 3.70929e-47 | 1.000000 |
| rad70              | 3.98869e-50 | 1.000000 | 3.98869e-50 | 1.000000 |
| PhcycC3H3_A+H      | 1.68937e-50 | 1.000000 | 1.68937e-50 | 1.000000 |
| rad55              | 9.09647e-51 | 1.000000 | 9.09647e-51 | 1.000000 |
| rad65              | 2.49025e-52 | 1.000000 | 2.49025e-52 | 1.000000 |
| rad58              | 5.67358e-54 | 1.000000 | 5.67358e-54 | 1.000000 |
| PAH1+H             | 7.61510e-56 | 1.000000 | 7.61510e-56 | 1.000000 |
| rad34              | 5.03880e-58 | 1.000000 | 5.03880e-58 | 1.000000 |
| rad42              | 3.59501e-62 | 1.000000 | 3.59501e-62 | 1.000000 |
| rad41              | 4.51167e-63 | 1.000000 | 4.51167e-63 | 1.000000 |
| rad47              | 1.39164e-66 | 1.000000 | 1.39164e-66 | 1.000000 |

0.100000000E-05 Pa, 30.0000000 K

| Rate constant      | True (fraction)        | Effective (fraction)   |             |          |
|--------------------|------------------------|------------------------|-------------|----------|
| Total              | 5.03204e-39 (1.00 )    | 5.03204e-39 (1.00 )    |             |          |
| Formation of rad11 | 5.03203e-39 (1.000 )   | 5.03203e-39 (1.000 )   |             |          |
| Formation of rad6  | 9.92181e-45 (1.97e-06) | 9.92181e-45 (1.97e-06) |             |          |
| H-abstraction      | 3.33191e-55 (6.62e-17) | 3.33191e-55 (6.62e-17) |             |          |
| species            | PYtrue                 | Cumul                  | PYeffective | Cumul    |
| Indene+H           | 0.987280               | 0.987280               | 0.987280    | 0.987280 |

|                    |             |          |             |          |
|--------------------|-------------|----------|-------------|----------|
| C2H2+PhCH2         | 0.00825408  | 0.995534 | 0.00825408  | 0.995534 |
| PhCCH+CH3          | 0.00221129  | 0.997745 | 0.00221129  | 0.997745 |
| PhCHCCH2+H         | 0.00139577  | 0.999141 | 0.00139577  | 0.999141 |
| PhCCCH3+H          | 0.000835514 | 0.999977 | 0.000835514 | 0.999977 |
| Ph+MeAc            | 1.04014e-05 | 0.999987 | 1.04014e-05 | 0.999987 |
| rad8               | 6.92315e-06 | 0.999994 | 6.92315e-06 | 0.999994 |
| rad9               | 3.15630e-06 | 0.999997 | 3.15630e-06 | 0.999997 |
| PAH7+H             | 1.79997e-06 | 0.999999 | 1.79997e-06 | 0.999999 |
| rad30              | 4.40252e-07 | 0.999999 | 4.40252e-07 | 0.999999 |
| rad12              | 2.15752e-07 | 1.000000 | 2.15752e-07 | 1.000000 |
| rad39              | 1.75060e-07 | 1.000000 | 1.75060e-07 | 1.000000 |
| rad6               | 1.09243e-07 | 1.000000 | 1.09243e-07 | 1.000000 |
| PAH9+H             | 8.92267e-08 | 1.000000 | 8.92267e-08 | 1.000000 |
| rad15              | 7.89749e-08 | 1.000000 | 7.89749e-08 | 1.000000 |
| rad35              | 4.69148e-08 | 1.000000 | 4.69148e-08 | 1.000000 |
| rad38              | 2.29505e-08 | 1.000000 | 2.29505e-08 | 1.000000 |
| Phenyl+Allene      | 2.15063e-08 | 1.000000 | 0.000000    | 1.000000 |
| rad28              | 5.53758e-10 | 1.000000 | 5.53758e-10 | 1.000000 |
| rad46              | 1.50087e-10 | 1.000000 | 1.50087e-10 | 1.000000 |
| rad26              | 4.81141e-11 | 1.000000 | 4.81141e-11 | 1.000000 |
| rad2               | 3.90749e-11 | 1.000000 | 3.90749e-11 | 1.000000 |
| rad7               | 7.88098e-12 | 1.000000 | 7.88098e-12 | 1.000000 |
| rad60syn           | 3.50523e-12 | 1.000000 | 3.50523e-12 | 1.000000 |
| rad1               | 2.47107e-12 | 1.000000 | 2.47107e-12 | 1.000000 |
| rad10              | 1.99631e-12 | 1.000000 | 1.99631e-12 | 1.000000 |
| rad11              | 1.92578e-12 | 1.000000 | 1.92578e-12 | 1.000000 |
| rad3               | 2.54200e-13 | 1.000000 | 2.54200e-13 | 1.000000 |
| rad4               | 1.28530e-13 | 1.000000 | 1.28530e-13 | 1.000000 |
| rad13              | 4.38164e-14 | 1.000000 | 4.38164e-14 | 1.000000 |
| rad14              | 1.11731e-15 | 1.000000 | 1.11731e-15 | 1.000000 |
| rad60anti          | 8.52397e-16 | 1.000000 | 8.52397e-16 | 1.000000 |
| rad25              | 5.48732e-16 | 1.000000 | 5.48732e-16 | 1.000000 |
| rad27              | 1.02048e-16 | 1.000000 | 1.02048e-16 | 1.000000 |
| rad33              | 8.27860e-17 | 1.000000 | 8.27860e-17 | 1.000000 |
| Benzene+2-propynyl | 6.62139e-17 | 1.000000 | 6.62139e-17 | 1.000000 |
| PhCH2CCH+H         | 4.97327e-18 | 1.000000 | 4.97327e-18 | 1.000000 |
| rad37              | 4.51450e-19 | 1.000000 | 4.51451e-19 | 1.000000 |
| rad31              | 1.16578e-21 | 1.000000 | 1.16578e-21 | 1.000000 |
| rad5               | 2.90811e-22 | 1.000000 | 2.90811e-22 | 1.000000 |
| rad20              | 2.24381e-22 | 1.000000 | 2.24381e-22 | 1.000000 |
| rad21              | 1.65930e-22 | 1.000000 | 1.65930e-22 | 1.000000 |
| rad23              | 3.20582e-24 | 1.000000 | 3.20582e-24 | 1.000000 |
| rad18              | 8.93113e-25 | 1.000000 | 8.93113e-25 | 1.000000 |
| rad22              | 1.76907e-25 | 1.000000 | 1.76907e-25 | 1.000000 |
| rad45              | 2.01087e-26 | 1.000000 | 2.01087e-26 | 1.000000 |
| PAH3+H             | 5.18958e-27 | 1.000000 | 5.18958e-27 | 1.000000 |
| rad59              | 2.77840e-27 | 1.000000 | 2.77840e-27 | 1.000000 |
| rad36              | 1.25223e-27 | 1.000000 | 1.25223e-27 | 1.000000 |
| rad50              | 1.11493e-27 | 1.000000 | 1.11493e-27 | 1.000000 |
| rad24              | 1.03637e-29 | 1.000000 | 1.03637e-29 | 1.000000 |
| rad19syn           | 4.26682e-36 | 1.000000 | 4.26682e-36 | 1.000000 |
| rad52              | 5.11927e-40 | 1.000000 | 5.11927e-40 | 1.000000 |
| rad54              | 5.01310e-41 | 1.000000 | 5.01310e-41 | 1.000000 |
| PAH10+CH3          | 3.27966e-41 | 1.000000 | 3.27966e-41 | 1.000000 |
| rad43              | 7.56626e-42 | 1.000000 | 7.56626e-42 | 1.000000 |
| rad62              | 2.27374e-44 | 1.000000 | 2.27374e-44 | 1.000000 |
| rad51              | 2.53268e-47 | 1.000000 | 2.53268e-47 | 1.000000 |
| rad70              | 2.78399e-50 | 1.000000 | 2.78399e-50 | 1.000000 |
| PhcycC3H3_A+H      | 1.18158e-50 | 1.000000 | 1.18158e-50 | 1.000000 |
| rad55              | 6.36097e-51 | 1.000000 | 6.36097e-51 | 1.000000 |
| rad65              | 1.72647e-52 | 1.000000 | 1.72647e-52 | 1.000000 |
| rad58              | 3.97540e-54 | 1.000000 | 3.97540e-54 | 1.000000 |
| PAH1+H             | 5.43141e-56 | 1.000000 | 5.43141e-56 | 1.000000 |
| rad34              | 3.61097e-58 | 1.000000 | 3.61097e-58 | 1.000000 |
| rad42              | 2.61279e-62 | 1.000000 | 2.61279e-62 | 1.000000 |
| rad41              | 3.30444e-63 | 1.000000 | 3.30444e-63 | 1.000000 |
| rad47              | 4.90612e-67 | 1.000000 | 4.90612e-67 | 1.000000 |

0.100000000E-05 Pa, 40.0000000 K

=====

| Rate constant      | True (fraction)        | Effective (fraction)   |             |          |
|--------------------|------------------------|------------------------|-------------|----------|
| Total              | 9.35697e-33 (1.00 )    | 9.35697e-33 (1.00 )    |             |          |
| Formation of rad11 | 9.35644e-33 (1.000 )   | 9.35644e-33 (1.000 )   |             |          |
| Formation of rad6  | 5.26139e-37 (5.62e-05) | 5.26138e-37 (5.62e-05) |             |          |
| H-abstraction      | 1.44763e-44 (1.55e-12) | 1.44763e-44 (1.55e-12) |             |          |
| species            | PYtrue                 | Cumul                  | PYeffective | Cumul    |
| Indene+H           | 0.987047               | 0.987047               | 0.987047    | 0.987047 |

|                    |             |          |             |          |
|--------------------|-------------|----------|-------------|----------|
| C2H2+PhCH2         | 0.00837103  | 0.995418 | 0.00837103  | 0.995418 |
| PhCCH+CH3          | 0.00227151  | 0.997690 | 0.00227151  | 0.997690 |
| PhCHCCH2+H         | 0.00142805  | 0.999118 | 0.00142805  | 0.999118 |
| PhCCCH3+H          | 0.000857113 | 0.999975 | 0.000857113 | 0.999975 |
| Ph+MeAc            | 1.13615e-05 | 0.999986 | 1.13615e-05 | 0.999986 |
| rad8               | 7.15833e-06 | 0.999993 | 7.15833e-06 | 0.999993 |
| rad9               | 3.30508e-06 | 0.999997 | 3.30508e-06 | 0.999997 |
| PAH7+H             | 1.89629e-06 | 0.999998 | 1.89629e-06 | 0.999998 |
| rad30              | 4.49093e-07 | 0.999999 | 4.49093e-07 | 0.999999 |
| rad12              | 2.27810e-07 | 0.999999 | 2.27810e-07 | 0.999999 |
| rad39              | 1.88672e-07 | 0.999999 | 1.88672e-07 | 0.999999 |
| PAH9+H             | 9.12409e-08 | 0.999999 | 9.12409e-08 | 0.999999 |
| rad15              | 8.09189e-08 | 0.999999 | 8.09189e-08 | 0.999999 |
| rad35              | 4.78565e-08 | 1.000000 | 4.78566e-08 | 1.000000 |
| Phenyl+Allene      | 3.50244e-08 | 1.000000 | 0.000000    | 1.000000 |
| rad6               | 3.36460e-08 | 1.000000 | 3.36460e-08 | 1.000000 |
| rad38              | 2.35195e-08 | 1.000000 | 2.35195e-08 | 1.000000 |
| rad28              | 2.21825e-10 | 1.000000 | 2.21825e-10 | 1.000000 |
| rad46              | 1.56233e-10 | 1.000000 | 1.56233e-10 | 1.000000 |
| rad26              | 2.00525e-11 | 1.000000 | 2.00525e-11 | 1.000000 |
| rad2               | 1.18837e-11 | 1.000000 | 1.18837e-11 | 1.000000 |
| rad60syn           | 3.60306e-12 | 1.000000 | 3.60306e-12 | 1.000000 |
| rad7               | 2.42868e-12 | 1.000000 | 2.42868e-12 | 1.000000 |
| Benzene+2-propynyl | 1.54712e-12 | 1.000000 | 1.54712e-12 | 1.000000 |
| rad1               | 7.52440e-13 | 1.000000 | 7.52440e-13 | 1.000000 |
| rad10              | 6.07828e-13 | 1.000000 | 6.07828e-13 | 1.000000 |
| rad11              | 5.93493e-13 | 1.000000 | 5.93493e-13 | 1.000000 |
| rad3               | 7.76810e-14 | 1.000000 | 7.76810e-14 | 1.000000 |
| rad4               | 3.92898e-14 | 1.000000 | 3.92898e-14 | 1.000000 |
| rad13              | 1.35083e-14 | 1.000000 | 1.35083e-14 | 1.000000 |
| rad60anti          | 1.06843e-14 | 1.000000 | 1.06843e-14 | 1.000000 |
| rad14              | 6.57476e-16 | 1.000000 | 6.57476e-16 | 1.000000 |
| rad25              | 3.21117e-16 | 1.000000 | 3.21117e-16 | 1.000000 |
| rad27              | 5.03169e-17 | 1.000000 | 5.03169e-17 | 1.000000 |
| rad33              | 2.55365e-17 | 1.000000 | 2.55365e-17 | 1.000000 |
| PhCH2CCH+H         | 6.36045e-18 | 1.000000 | 6.36045e-18 | 1.000000 |
| rad37              | 5.62687e-19 | 1.000000 | 5.62687e-19 | 1.000000 |
| rad31              | 5.07740e-22 | 1.000000 | 5.07740e-22 | 1.000000 |
| rad5               | 3.64134e-22 | 1.000000 | 3.64134e-22 | 1.000000 |
| rad20              | 7.87934e-23 | 1.000000 | 7.87934e-23 | 1.000000 |
| rad21              | 5.85660e-23 | 1.000000 | 5.85660e-23 | 1.000000 |
| rad23              | 6.51496e-25 | 1.000000 | 6.51496e-25 | 1.000000 |
| rad18              | 3.05709e-25 | 1.000000 | 3.05709e-25 | 1.000000 |
| rad22              | 5.09945e-26 | 1.000000 | 5.09945e-26 | 1.000000 |
| PAH3+H             | 6.59241e-27 | 1.000000 | 6.59241e-27 | 1.000000 |
| rad45              | 4.07350e-27 | 1.000000 | 4.07350e-27 | 1.000000 |
| rad59              | 3.52832e-27 | 1.000000 | 3.52832e-27 | 1.000000 |
| rad50              | 1.40381e-27 | 1.000000 | 1.40381e-27 | 1.000000 |
| rad36              | 2.53515e-28 | 1.000000 | 2.53515e-28 | 1.000000 |
| rad24              | 5.38822e-30 | 1.000000 | 5.38822e-30 | 1.000000 |
| rad19syn           | 5.88872e-36 | 1.000000 | 5.88872e-36 | 1.000000 |
| rad52              | 7.02614e-40 | 1.000000 | 7.02615e-40 | 1.000000 |
| rad54              | 7.14847e-41 | 1.000000 | 7.14847e-41 | 1.000000 |
| PAH10+CH3          | 4.73118e-41 | 1.000000 | 4.73118e-41 | 1.000000 |
| rad43              | 1.09117e-41 | 1.000000 | 1.09117e-41 | 1.000000 |
| rad62              | 3.32608e-44 | 1.000000 | 3.32608e-44 | 1.000000 |
| rad51              | 3.68049e-47 | 1.000000 | 3.68049e-47 | 1.000000 |
| rad70              | 4.23961e-50 | 1.000000 | 4.23961e-50 | 1.000000 |
| PhcycC3H3_A+H      | 1.80732e-50 | 1.000000 | 1.80732e-50 | 1.000000 |
| rad55              | 9.72526e-51 | 1.000000 | 9.72526e-51 | 1.000000 |
| rad65              | 2.59202e-52 | 1.000000 | 2.59202e-52 | 1.000000 |
| rad58              | 6.10391e-54 | 1.000000 | 6.10391e-54 | 1.000000 |
| PAH1+H             | 8.66425e-56 | 1.000000 | 8.66425e-56 | 1.000000 |
| rad34              | 5.81404e-58 | 1.000000 | 5.81404e-58 | 1.000000 |
| rad42              | 4.35492e-62 | 1.000000 | 4.35492e-62 | 1.000000 |
| rad41              | 5.66657e-63 | 1.000000 | 5.66657e-63 | 1.000000 |
| rad47              | 5.21975e-67 | 1.000000 | 5.21975e-67 | 1.000000 |

0.100000000E-05 Pa, 50.0000000 K

=====

| Rate constant      | True (fraction)        | Effective (fraction)   |             |          |
|--------------------|------------------------|------------------------|-------------|----------|
| Total              | 5.52690e-29 (1.00 )    | 5.52690e-29 (1.00 )    |             |          |
| Formation of rad11 | 5.52459e-29 (1.000 )   | 5.52459e-29 (1.000 )   |             |          |
| Formation of rad6  | 2.30840e-32 (0.000418) | 2.30840e-32 (0.000418) |             |          |
| H-abstraction      | 3.35357e-38 (6.07e-10) | 3.35357e-38 (6.07e-10) |             |          |
| species            | PYtrue                 | Cumul                  | PYeffective | Cumul    |
| Indene+H           | 0.986726               | 0.986726               | 0.986726    | 0.986726 |

|                    |             |          |             |          |
|--------------------|-------------|----------|-------------|----------|
| C2H2+PhCH2         | 0.00853167  | 0.995258 | 0.00853167  | 0.995258 |
| PhCCH+CH3          | 0.00235532  | 0.997613 | 0.00235532  | 0.997613 |
| PhCHCCH2+H         | 0.00147272  | 0.999086 | 0.00147272  | 0.999086 |
| PhCCCH3+H          | 0.000887069 | 0.999973 | 0.000887069 | 0.999973 |
| Ph+MeAc            | 1.27828e-05 | 0.999986 | 1.27828e-05 | 0.999986 |
| rad8               | 7.48998e-06 | 0.999993 | 7.48998e-06 | 0.999993 |
| rad9               | 3.51944e-06 | 0.999997 | 3.51944e-06 | 0.999997 |
| PAH7+H             | 2.03359e-06 | 0.999999 | 2.03359e-06 | 0.999999 |
| rad30              | 4.61353e-07 | 0.999999 | 4.61353e-07 | 0.999999 |
| rad12              | 2.44553e-07 | 0.999999 | 2.44553e-07 | 0.999999 |
| rad39              | 2.08944e-07 | 1.000000 | 2.08944e-07 | 1.000000 |
| PAH9+H             | 9.40503e-08 | 1.000000 | 9.40503e-08 | 1.000000 |
| rad15              | 8.36346e-08 | 1.000000 | 8.36346e-08 | 1.000000 |
| Phenyl+Allene      | 5.85234e-08 | 1.000000 | 0.000000    | 1.000000 |
| rad35              | 4.91655e-08 | 1.000000 | 4.91655e-08 | 1.000000 |
| rad38              | 2.43157e-08 | 1.000000 | 2.43157e-08 | 1.000000 |
| rad6               | 1.46125e-08 | 1.000000 | 1.46125e-08 | 1.000000 |
| Benzene+2-propynyl | 6.06773e-10 | 1.000000 | 6.06773e-10 | 1.000000 |
| rad46              | 1.65088e-10 | 1.000000 | 1.65088e-10 | 1.000000 |
| rad28              | 1.16336e-10 | 1.000000 | 1.16336e-10 | 1.000000 |
| rad26              | 1.09037e-11 | 1.000000 | 1.09037e-11 | 1.000000 |
| rad2               | 5.13177e-12 | 1.000000 | 5.13177e-12 | 1.000000 |
| rad60syn           | 3.92699e-12 | 1.000000 | 3.92699e-12 | 1.000000 |
| rad7               | 1.05570e-12 | 1.000000 | 1.05570e-12 | 1.000000 |
| rad1               | 3.25498e-13 | 1.000000 | 3.25498e-13 | 1.000000 |
| rad10              | 2.62726e-13 | 1.000000 | 2.62726e-13 | 1.000000 |
| rad11              | 2.58016e-13 | 1.000000 | 2.58016e-13 | 1.000000 |
| rad60anti          | 5.63735e-14 | 1.000000 | 5.63735e-14 | 1.000000 |
| rad3               | 3.36409e-14 | 1.000000 | 3.36409e-14 | 1.000000 |
| rad4               | 1.70226e-14 | 1.000000 | 1.70226e-14 | 1.000000 |
| rad13              | 5.87492e-15 | 1.000000 | 5.87492e-15 | 1.000000 |
| rad14              | 4.49428e-16 | 1.000000 | 4.49428e-16 | 1.000000 |
| rad25              | 2.19606e-16 | 1.000000 | 2.19606e-16 | 1.000000 |
| PhCH2CCH+H         | 1.41165e-16 | 1.000000 | 1.41165e-16 | 1.000000 |
| rad27              | 3.16347e-17 | 1.000000 | 3.16347e-17 | 1.000000 |
| rad33              | 1.11145e-17 | 1.000000 | 1.11145e-17 | 1.000000 |
| rad37              | 4.33094e-18 | 1.000000 | 4.33094e-18 | 1.000000 |
| rad5               | 1.83039e-21 | 1.000000 | 1.83039e-21 | 1.000000 |
| rad31              | 3.15600e-22 | 1.000000 | 3.15600e-22 | 1.000000 |
| rad20              | 3.99071e-23 | 1.000000 | 3.99071e-23 | 1.000000 |
| rad21              | 2.98309e-23 | 1.000000 | 2.98309e-23 | 1.000000 |
| rad23              | 2.29631e-25 | 1.000000 | 2.29631e-25 | 1.000000 |
| rad18              | 1.50465e-25 | 1.000000 | 1.50465e-25 | 1.000000 |
| rad22              | 2.24570e-26 | 1.000000 | 2.24570e-26 | 1.000000 |
| PAH3+H             | 1.73984e-26 | 1.000000 | 1.73984e-26 | 1.000000 |
| rad59              | 9.31008e-27 | 1.000000 | 9.31008e-27 | 1.000000 |
| rad50              | 4.51411e-27 | 1.000000 | 4.51411e-27 | 1.000000 |
| rad45              | 1.43429e-27 | 1.000000 | 1.43429e-27 | 1.000000 |
| rad36              | 8.91933e-29 | 1.000000 | 8.91933e-29 | 1.000000 |
| rad24              | 3.75087e-30 | 1.000000 | 3.75087e-30 | 1.000000 |
| rad19syn           | 1.58940e-35 | 1.000000 | 1.58940e-35 | 1.000000 |
| rad52              | 1.88164e-39 | 1.000000 | 1.88164e-39 | 1.000000 |
| rad54              | 2.02090e-40 | 1.000000 | 2.02090e-40 | 1.000000 |
| PAH10+CH3          | 1.37409e-40 | 1.000000 | 1.37409e-40 | 1.000000 |
| rad43              | 3.16756e-41 | 1.000000 | 3.16756e-41 | 1.000000 |
| rad62              | 9.81682e-44 | 1.000000 | 9.81682e-44 | 1.000000 |
| rad51              | 1.06886e-46 | 1.000000 | 1.06886e-46 | 1.000000 |
| rad70              | 1.31540e-49 | 1.000000 | 1.31540e-49 | 1.000000 |
| PhcycC3H3_A+H      | 5.64252e-50 | 1.000000 | 5.64252e-50 | 1.000000 |
| rad55              | 3.03432e-50 | 1.000000 | 3.03432e-50 | 1.000000 |
| rad65              | 7.88302e-52 | 1.000000 | 7.88302e-52 | 1.000000 |
| rad58              | 1.91597e-53 | 1.000000 | 1.91597e-53 | 1.000000 |
| PAH1+H             | 2.87262e-55 | 1.000000 | 2.87262e-55 | 1.000000 |
| rad34              | 1.95178e-57 | 1.000000 | 1.95178e-57 | 1.000000 |
| rad42              | 1.57762e-61 | 1.000000 | 1.57762e-61 | 1.000000 |
| rad41              | 2.27122e-62 | 1.000000 | 2.27122e-62 | 1.000000 |
| rad47              | 1.29311e-66 | 1.000000 | 1.29311e-66 | 1.000000 |

0.100000000E-05 Pa, 60.0000000 K

=====

| Rate constant      | True (fraction) |            | Effective (fraction) |            |
|--------------------|-----------------|------------|----------------------|------------|
| Total              | 1.83429e-26     | (1.00 )    | 1.83429e-26          | (1.00 )    |
| Formation of rad11 | 1.83139e-26     | (0.998 )   | 1.83139e-26          | (0.998 )   |
| Formation of rad6  | 2.90471e-29     | (0.00158 ) | 2.90471e-29          | (0.00158 ) |
| H-abstraction      | 5.71259e-34     | (3.11e-08) | 5.71259e-34          | (3.11e-08) |
| species            | PYtrue          | Cumul      | PYeffective          | Cumul      |
| Indene+H           | 0.986336        | 0.986336   | 0.986336             | 0.986336   |

|                    |             |          |             |          |
|--------------------|-------------|----------|-------------|----------|
| C2H2+PhCH2         | 0.00872527  | 0.995061 | 0.00872527  | 0.995061 |
| PhCCH+CH3          | 0.00245800  | 0.997519 | 0.00245800  | 0.997519 |
| PhCHCCH2+H         | 0.00152709  | 0.999046 | 0.00152709  | 0.999046 |
| PhCCCH3+H          | 0.000923616 | 0.999970 | 0.000923616 | 0.999970 |
| Ph+MeAc            | 1.46513e-05 | 0.999985 | 1.46513e-05 | 0.999985 |
| rad8               | 7.90141e-06 | 0.999992 | 7.90141e-06 | 0.999992 |
| rad9               | 3.79129e-06 | 0.999996 | 3.79129e-06 | 0.999996 |
| PAH7+H             | 2.20671e-06 | 0.999998 | 2.20672e-06 | 0.999998 |
| rad30              | 4.76285e-07 | 0.999999 | 4.76285e-07 | 0.999999 |
| rad12              | 2.65249e-07 | 0.999999 | 2.65249e-07 | 0.999999 |
| rad39              | 2.35527e-07 | 0.999999 | 2.35527e-07 | 0.999999 |
| PAH9+H             | 9.74964e-08 | 1.000000 | 9.74964e-08 | 1.000000 |
| Phenyl+Allene      | 9.47686e-08 | 1.000000 | 0.000000    | 1.000000 |
| rad15              | 8.69716e-08 | 1.000000 | 8.69716e-08 | 1.000000 |
| rad35              | 5.07642e-08 | 1.000000 | 5.07642e-08 | 1.000000 |
| Benzene+2-propynyl | 3.11432e-08 | 1.000000 | 3.11432e-08 | 1.000000 |
| rad38              | 2.52960e-08 | 1.000000 | 2.52960e-08 | 1.000000 |
| rad6               | 7.58893e-09 | 1.000000 | 7.58893e-09 | 1.000000 |
| rad46              | 1.76344e-10 | 1.000000 | 1.76344e-10 | 1.000000 |
| rad28              | 6.99357e-11 | 1.000000 | 6.99357e-11 | 1.000000 |
| rad26              | 6.77035e-12 | 1.000000 | 6.77035e-12 | 1.000000 |
| rad60syn           | 4.51472e-12 | 1.000000 | 4.51472e-12 | 1.000000 |
| rad2               | 2.66002e-12 | 1.000000 | 2.66002e-12 | 1.000000 |
| rad7               | 5.48870e-13 | 1.000000 | 5.48870e-13 | 1.000000 |
| rad1               | 1.69085e-13 | 1.000000 | 1.69085e-13 | 1.000000 |
| rad60anti          | 1.68188e-13 | 1.000000 | 1.68188e-13 | 1.000000 |
| rad10              | 1.36406e-13 | 1.000000 | 1.36406e-13 | 1.000000 |
| rad11              | 1.34171e-13 | 1.000000 | 1.34171e-13 | 1.000000 |
| rad3               | 1.75291e-14 | 1.000000 | 1.75291e-14 | 1.000000 |
| rad4               | 8.87478e-15 | 1.000000 | 8.87478e-15 | 1.000000 |
| PhCH2CCH+H         | 8.33152e-15 | 1.000000 | 8.33152e-15 | 1.000000 |
| rad13              | 3.05636e-15 | 1.000000 | 3.05636e-15 | 1.000000 |
| rad37              | 5.37825e-16 | 1.000000 | 5.37825e-16 | 1.000000 |
| rad14              | 3.30335e-16 | 1.000000 | 3.30335e-16 | 1.000000 |
| rad25              | 1.61874e-16 | 1.000000 | 1.61874e-16 | 1.000000 |
| rad27              | 2.22373e-17 | 1.000000 | 2.22374e-17 | 1.000000 |
| rad33              | 5.78754e-18 | 1.000000 | 5.78754e-18 | 1.000000 |
| rad5               | 2.83184e-19 | 1.000000 | 2.83184e-19 | 1.000000 |
| rad31              | 2.34893e-22 | 1.000000 | 2.34893e-22 | 1.000000 |
| rad20              | 2.45297e-23 | 1.000000 | 2.45297e-23 | 1.000000 |
| rad21              | 1.84446e-23 | 1.000000 | 1.84446e-23 | 1.000000 |
| PAH3+H             | 2.27722e-24 | 1.000000 | 2.27723e-24 | 1.000000 |
| rad59              | 1.23069e-24 | 1.000000 | 1.23069e-24 | 1.000000 |
| rad50              | 7.57813e-25 | 1.000000 | 7.57813e-25 | 1.000000 |
| rad23              | 1.08155e-25 | 1.000000 | 1.08155e-25 | 1.000000 |
| rad18              | 8.96839e-26 | 1.000000 | 8.96839e-26 | 1.000000 |
| rad22              | 1.23077e-26 | 1.000000 | 1.23077e-26 | 1.000000 |
| rad45              | 6.75858e-28 | 1.000000 | 6.75858e-28 | 1.000000 |
| rad36              | 4.19945e-29 | 1.000000 | 4.19945e-29 | 1.000000 |
| rad24              | 2.99857e-30 | 1.000000 | 2.99857e-30 | 1.000000 |
| rad19syn           | 1.05929e-34 | 1.000000 | 1.05929e-34 | 1.000000 |
| rad52              | 1.24242e-38 | 1.000000 | 1.24242e-38 | 1.000000 |
| rad54              | 1.42443e-39 | 1.000000 | 1.42443e-39 | 1.000000 |
| PAH10+CH3          | 1.01378e-39 | 1.000000 | 1.01378e-39 | 1.000000 |
| rad43              | 2.33587e-40 | 1.000000 | 2.33587e-40 | 1.000000 |
| rad62              | 7.37327e-43 | 1.000000 | 7.37327e-43 | 1.000000 |
| rad51              | 7.78569e-46 | 1.000000 | 7.78570e-46 | 1.000000 |
| rad70              | 1.03809e-48 | 1.000000 | 1.03809e-48 | 1.000000 |
| PhcycC3H3_A+H      | 4.48701e-49 | 1.000000 | 4.48701e-49 | 1.000000 |
| rad55              | 2.41097e-49 | 1.000000 | 2.41097e-49 | 1.000000 |
| rad65              | 6.07407e-51 | 1.000000 | 6.07407e-51 | 1.000000 |
| rad58              | 1.53364e-52 | 1.000000 | 1.53364e-52 | 1.000000 |
| PAH1+H             | 2.46210e-54 | 1.000000 | 2.46210e-54 | 1.000000 |
| rad34              | 1.69671e-56 | 1.000000 | 1.69671e-56 | 1.000000 |
| rad42              | 1.66403e-60 | 1.000000 | 1.66403e-60 | 1.000000 |
| rad41              | 3.16674e-61 | 1.000000 | 3.16674e-61 | 1.000000 |
| rad47              | 8.78142e-66 | 1.000000 | 8.78142e-66 | 1.000000 |

0.100000000E-05 Pa, 70.0000000 K

| Rate constant      | True (fraction) |            | Effective (fraction) |            |
|--------------------|-----------------|------------|----------------------|------------|
| Total              | 1.17336e-24     | (1.00 )    | 1.17336e-24          | (1.00 )    |
| Formation of rad11 | 1.16857e-24     | (0.996 )   | 1.16857e-24          | (0.996 )   |
| Formation of rad6  | 4.79505e-27     | (0.00409 ) | 4.79505e-27          | (0.00409 ) |
| H-abstraction      | 5.89821e-31     | (5.03e-07) | 5.89821e-31          | (5.03e-07) |
| species            | PYtrue          | Cumul      | PYeffective          | Cumul      |
| Indene+H           | 0.985886        | 0.985886   | 0.985886             | 0.985886   |



|                    |             |          |             |          |
|--------------------|-------------|----------|-------------|----------|
| C2H2+PhCH2         | 0.00894689  | 0.994832 | 0.00894689  | 0.994832 |
| PhCCH+CH3          | 0.00257786  | 0.997410 | 0.00257786  | 0.997410 |
| PhCHCCH2+H         | 0.00159011  | 0.999000 | 0.00159011  | 0.999000 |
| PhCCCH3+H          | 0.000966070 | 0.999966 | 0.000966070 | 0.999966 |
| Ph+MeAc            | 1.70147e-05 | 0.999983 | 1.70147e-05 | 0.999983 |
| rad8               | 8.38725e-06 | 0.999992 | 8.38725e-06 | 0.999992 |
| rad9               | 4.11998e-06 | 0.999996 | 4.11998e-06 | 0.999996 |
| PAH7+H             | 2.41578e-06 | 0.999998 | 2.41578e-06 | 0.999998 |
| Benzene+2-propynyl | 5.02676e-07 | 0.999999 | 5.02676e-07 | 0.999999 |
| rad30              | 4.93588e-07 | 0.999999 | 4.93588e-07 | 0.999999 |
| rad12              | 2.89961e-07 | 1.000000 | 2.89961e-07 | 1.000000 |
| rad39              | 2.68838e-07 | 1.000000 | 2.68838e-07 | 1.000000 |
| Phenyl+Allene      | 1.48209e-07 | 1.000000 | 0.000000    | 1.000000 |
| PAH9+H             | 1.01525e-07 | 1.000000 | 1.01525e-07 | 1.000000 |
| rad15              | 9.08772e-08 | 1.000000 | 9.08772e-08 | 1.000000 |
| rad35              | 5.26231e-08 | 1.000000 | 5.26231e-08 | 1.000000 |
| rad38              | 2.64470e-08 | 1.000000 | 2.64470e-08 | 1.000000 |
| rad6               | 4.39863e-09 | 1.000000 | 4.39863e-09 | 1.000000 |
| rad46              | 1.90039e-10 | 1.000000 | 1.90039e-10 | 1.000000 |
| rad28              | 4.56493e-11 | 1.000000 | 4.56493e-11 | 1.000000 |
| rad60syn           | 5.37357e-12 | 1.000000 | 5.37357e-12 | 1.000000 |
| rad26              | 4.54991e-12 | 1.000000 | 4.54991e-12 | 1.000000 |
| rad2               | 1.54339e-12 | 1.000000 | 1.54339e-12 | 1.000000 |
| rad60anti          | 3.67294e-13 | 1.000000 | 3.67294e-13 | 1.000000 |
| rad7               | 3.18525e-13 | 1.000000 | 3.18525e-13 | 1.000000 |
| PhCH2CCH+H         | 1.69025e-13 | 1.000000 | 1.69025e-13 | 1.000000 |
| rad1               | 9.83505e-14 | 1.000000 | 9.83505e-14 | 1.000000 |
| rad10              | 7.92281e-14 | 1.000000 | 7.92281e-14 | 1.000000 |
| rad11              | 7.78812e-14 | 1.000000 | 7.78812e-14 | 1.000000 |
| rad37              | 2.03612e-14 | 1.000000 | 2.03612e-14 | 1.000000 |
| rad3               | 1.01851e-14 | 1.000000 | 1.01851e-14 | 1.000000 |
| rad4               | 5.15987e-15 | 1.000000 | 5.15987e-15 | 1.000000 |
| rad13              | 1.77497e-15 | 1.000000 | 1.77497e-15 | 1.000000 |
| rad14              | 2.53528e-16 | 1.000000 | 2.53528e-16 | 1.000000 |
| rad25              | 1.24747e-16 | 1.000000 | 1.24747e-16 | 1.000000 |
| rad27              | 1.66500e-17 | 1.000000 | 1.66500e-17 | 1.000000 |
| rad5               | 1.57470e-17 | 1.000000 | 1.57470e-17 | 1.000000 |
| rad33              | 3.36469e-18 | 1.000000 | 3.36469e-18 | 1.000000 |
| PAH3+H             | 3.73225e-22 | 1.000000 | 3.73225e-22 | 1.000000 |
| rad59              | 1.99513e-22 | 1.000000 | 1.99513e-22 | 1.000000 |
| rad31              | 1.94990e-22 | 1.000000 | 1.94990e-22 | 1.000000 |
| rad50              | 7.21547e-23 | 1.000000 | 7.21547e-23 | 1.000000 |
| rad20              | 1.69917e-23 | 1.000000 | 1.69917e-23 | 1.000000 |
| rad21              | 1.28530e-23 | 1.000000 | 1.28530e-23 | 1.000000 |
| rad23              | 6.10412e-26 | 1.000000 | 6.10412e-26 | 1.000000 |
| rad18              | 6.01438e-26 | 1.000000 | 6.01438e-26 | 1.000000 |
| rad22              | 7.70294e-27 | 1.000000 | 7.70294e-27 | 1.000000 |
| rad45              | 3.82227e-28 | 1.000000 | 3.82227e-28 | 1.000000 |
| rad36              | 2.37311e-29 | 1.000000 | 2.37311e-29 | 1.000000 |
| rad24              | 2.59799e-30 | 1.000000 | 2.59799e-30 | 1.000000 |
| rad19syn           | 2.18606e-33 | 1.000000 | 2.18606e-33 | 1.000000 |
| rad52              | 2.53784e-37 | 1.000000 | 2.53784e-37 | 1.000000 |
| rad54              | 3.12925e-38 | 1.000000 | 3.12925e-38 | 1.000000 |
| PAH10+CH3          | 2.29567e-38 | 1.000000 | 2.29567e-38 | 1.000000 |
| rad43              | 5.28646e-39 | 1.000000 | 5.28646e-39 | 1.000000 |
| rad62              | 1.72575e-41 | 1.000000 | 1.72575e-41 | 1.000000 |
| rad51              | 1.77538e-44 | 1.000000 | 1.77538e-44 | 1.000000 |
| rad70              | 2.59104e-47 | 1.000000 | 2.59104e-47 | 1.000000 |
| PhcycC3H3_A+H      | 1.12979e-47 | 1.000000 | 1.12979e-47 | 1.000000 |
| rad55              | 6.06469e-48 | 1.000000 | 6.06469e-48 | 1.000000 |
| rad65              | 1.47646e-49 | 1.000000 | 1.47646e-49 | 1.000000 |
| rad58              | 3.89076e-51 | 1.000000 | 3.89076e-51 | 1.000000 |
| PAH1+H             | 6.77831e-53 | 1.000000 | 6.77831e-53 | 1.000000 |
| rad34              | 4.74284e-55 | 1.000000 | 4.74284e-55 | 1.000000 |
| rad42              | 6.64275e-59 | 1.000000 | 6.64275e-59 | 1.000000 |
| rad41              | 1.79080e-59 | 1.000000 | 1.79080e-59 | 1.000000 |
| rad47              | 1.98352e-64 | 1.000000 | 1.98352e-64 | 1.000000 |

0.100000000E-05 Pa, 80.0000000 K

| Rate constant      | True (fraction) |            | Effective (fraction) |            |
|--------------------|-----------------|------------|----------------------|------------|
| Total              | 2.68112e-23     | (1.00 )    | 2.68112e-23          | (1.00 )    |
| Formation of rad11 | 2.65890e-23     | (0.992 )   | 2.65889e-23          | (0.992 )   |
| Formation of rad6  | 2.22189e-25     | (0.00829 ) | 2.22189e-25          | (0.00829 ) |
| H-abstraction      | 1.05871e-28     | (3.95e-06) | 1.05871e-28          | (3.95e-06) |
| species            | PYtrue          | Cumul      | PYeffective          | Cumul      |
| Indene+H           | 0.985370        | 0.985370   | 0.985371             | 0.985371   |

|                    |             |          |             |          |
|--------------------|-------------|----------|-------------|----------|
| C2H2+PhCH2         | 0.00919595  | 0.994566 | 0.00919596  | 0.994567 |
| PhCCH+CH3          | 0.00271548  | 0.997282 | 0.00271548  | 0.997283 |
| PhCHCCH2+H         | 0.00166190  | 0.998943 | 0.00166190  | 0.998944 |
| PhCCCH3+H          | 0.00101455  | 0.999958 | 0.00101455  | 0.999959 |
| Ph+MeAc            | 1.99735e-05 | 0.999978 | 1.99735e-05 | 0.999979 |
| rad8               | 8.95106e-06 | 0.999987 | 8.95106e-06 | 0.999988 |
| rad9               | 4.51120e-06 | 0.999991 | 4.51120e-06 | 0.999992 |
| Benzene+2-propynyl | 3.94877e-06 | 0.999995 | 3.94877e-06 | 0.999996 |
| PAH7+H             | 2.66518e-06 | 0.999998 | 2.66518e-06 | 0.999999 |
| rad30              | 5.13302e-07 | 0.999999 | 5.13302e-07 | 1.000000 |
| rad12              | 3.19226e-07 | 0.999999 | 3.19226e-07 | 1.000000 |
| rad39              | 3.10047e-07 | 0.999999 | 3.10047e-07 | 1.000000 |
| Phenyl+Allene      | 2.25443e-07 | 0.999999 | 0.000000    | 1.000000 |
| PAH9+H             | 1.06161e-07 | 1.000000 | 1.06161e-07 | 1.000000 |
| rad15              | 9.53738e-08 | 1.000000 | 9.53739e-08 | 1.000000 |
| rad35              | 5.47491e-08 | 1.000000 | 5.47491e-08 | 1.000000 |
| rad38              | 2.77780e-08 | 1.000000 | 2.77780e-08 | 1.000000 |
| rad6               | 2.74504e-09 | 1.000000 | 2.74505e-09 | 1.000000 |
| rad46              | 2.06501e-10 | 1.000000 | 2.06501e-10 | 1.000000 |
| rad28              | 3.14694e-11 | 1.000000 | 3.14694e-11 | 1.000000 |
| rad60syn           | 6.53784e-12 | 1.000000 | 6.53784e-12 | 1.000000 |
| rad26              | 3.22085e-12 | 1.000000 | 3.22085e-12 | 1.000000 |
| PhCH2CCH+H         | 1.67934e-12 | 1.000000 | 1.67934e-12 | 1.000000 |
| rad2               | 9.65962e-13 | 1.000000 | 9.65962e-13 | 1.000000 |
| rad60anti          | 6.70526e-13 | 1.000000 | 6.70526e-13 | 1.000000 |
| rad37              | 3.02172e-13 | 1.000000 | 3.02172e-13 | 1.000000 |
| rad7               | 1.99051e-13 | 1.000000 | 1.99051e-13 | 1.000000 |
| rad1               | 6.17267e-14 | 1.000000 | 6.17267e-14 | 1.000000 |
| rad10              | 4.96733e-14 | 1.000000 | 4.96734e-14 | 1.000000 |
| rad11              | 4.86818e-14 | 1.000000 | 4.86819e-14 | 1.000000 |
| rad3               | 6.40367e-15 | 1.000000 | 6.40367e-15 | 1.000000 |
| rad4               | 3.24650e-15 | 1.000000 | 3.24650e-15 | 1.000000 |
| rad13              | 1.11008e-15 | 1.000000 | 1.11008e-15 | 1.000000 |
| rad5               | 3.25370e-16 | 1.000000 | 3.25370e-16 | 1.000000 |
| rad14              | 2.00218e-16 | 1.000000 | 2.00218e-16 | 1.000000 |
| rad25              | 9.89974e-17 | 1.000000 | 9.89974e-17 | 1.000000 |
| rad27              | 1.29764e-17 | 1.000000 | 1.29764e-17 | 1.000000 |
| rad33              | 2.10686e-18 | 1.000000 | 2.10686e-18 | 1.000000 |
| PAH3+H             | 1.74327e-20 | 1.000000 | 1.74327e-20 | 1.000000 |
| rad59              | 9.08687e-21 | 1.000000 | 9.08687e-21 | 1.000000 |
| rad50              | 2.22994e-21 | 1.000000 | 2.22994e-21 | 1.000000 |
| rad31              | 1.74289e-22 | 1.000000 | 1.74289e-22 | 1.000000 |
| rad20              | 1.27556e-23 | 1.000000 | 1.27556e-23 | 1.000000 |
| rad21              | 9.70634e-24 | 1.000000 | 9.70634e-24 | 1.000000 |
| rad18              | 4.36533e-26 | 1.000000 | 4.36533e-26 | 1.000000 |
| rad23              | 3.90935e-26 | 1.000000 | 3.90935e-26 | 1.000000 |
| rad22              | 5.26573e-27 | 1.000000 | 5.26574e-27 | 1.000000 |
| rad19syn           | 3.50774e-28 | 1.000000 | 3.50774e-28 | 1.000000 |
| rad45              | 2.45851e-28 | 1.000000 | 2.45851e-28 | 1.000000 |
| rad36              | 1.52535e-29 | 1.000000 | 1.52535e-29 | 1.000000 |
| rad24              | 2.37294e-30 | 1.000000 | 2.37294e-30 | 1.000000 |
| rad52              | 3.70884e-32 | 1.000000 | 3.70884e-32 | 1.000000 |
| rad54              | 3.49267e-36 | 1.000000 | 3.49267e-36 | 1.000000 |
| PAH10+CH3          | 2.44080e-36 | 1.000000 | 2.44080e-36 | 1.000000 |
| rad43              | 5.61514e-37 | 1.000000 | 5.61514e-37 | 1.000000 |
| rad62              | 1.94606e-39 | 1.000000 | 1.94606e-39 | 1.000000 |
| rad51              | 2.05980e-42 | 1.000000 | 2.05980e-42 | 1.000000 |
| rad70              | 3.30212e-45 | 1.000000 | 3.30212e-45 | 1.000000 |
| PhcycC3H3_A+H      | 1.45291e-45 | 1.000000 | 1.45291e-45 | 1.000000 |
| rad55              | 7.79100e-46 | 1.000000 | 7.79100e-46 | 1.000000 |
| rad65              | 1.83063e-47 | 1.000000 | 1.83063e-47 | 1.000000 |
| rad58              | 5.04235e-49 | 1.000000 | 5.04235e-49 | 1.000000 |
| PAH1+H             | 9.57247e-51 | 1.000000 | 9.57247e-51 | 1.000000 |
| rad34              | 6.79291e-53 | 1.000000 | 6.79291e-53 | 1.000000 |
| rad42              | 1.11888e-56 | 1.000000 | 1.11888e-56 | 1.000000 |
| rad41              | 3.34320e-57 | 1.000000 | 3.34320e-57 | 1.000000 |
| rad47              | 2.35609e-62 | 1.000000 | 2.35609e-62 | 1.000000 |

0.100000000E-05 Pa, 90.0000000 K

| Rate constant      | True (fraction) |            | Effective (fraction) |            |
|--------------------|-----------------|------------|----------------------|------------|
| Total              | 3.08379e-22     | (1.00 )    | 3.08379e-22          | (1.00 )    |
| Formation of rad11 | 3.03962e-22     | (0.986 )   | 3.03962e-22          | (0.986 )   |
| Formation of rad6  | 4.41076e-24     | (0.0143 )  | 4.41076e-24          | (0.0143 )  |
| H-abstraction      | 5.92916e-27     | (1.92e-05) | 5.92916e-27          | (1.92e-05) |
| species            | PYtrue          | Cumul      | PYeffective          | Cumul      |
| Indene+H           | 0.984779        | 0.984779   | 0.984779             | 0.984779   |

|                    |             |          |             |          |
|--------------------|-------------|----------|-------------|----------|
| C2H2+PhCH2         | 0.00947389  | 0.994253 | 0.00947389  | 0.994253 |
| PhCCH+CH3          | 0.00287245  | 0.997125 | 0.00287246  | 0.997125 |
| PhCHCCH2+H         | 0.00174312  | 0.998869 | 0.00174312  | 0.998869 |
| PhCCCH3+H          | 0.00106950  | 0.999938 | 0.00106950  | 0.999938 |
| Ph+MeAc            | 2.36635e-05 | 0.999962 | 2.36635e-05 | 0.999962 |
| Benzene+2-propynyl | 1.92269e-05 | 0.999981 | 1.92269e-05 | 0.999981 |
| rad8               | 9.60090e-06 | 0.999991 | 9.60090e-06 | 0.999991 |
| rad9               | 4.97439e-06 | 0.999995 | 4.97440e-06 | 0.999995 |
| PAH7+H             | 2.96190e-06 | 0.999998 | 2.96190e-06 | 0.999998 |
| rad30              | 5.35632e-07 | 0.999999 | 5.35632e-07 | 0.999999 |
| rad39              | 3.60832e-07 | 0.999999 | 3.60832e-07 | 0.999999 |
| rad12              | 3.53779e-07 | 1.000000 | 3.53779e-07 | 1.000000 |
| Phenyl+Allene      | 3.35457e-07 | 1.000000 | 0.000000    | 1.000000 |
| PAH9+H             | 1.11470e-07 | 1.000000 | 1.11470e-07 | 1.000000 |
| rad15              | 1.00523e-07 | 1.000000 | 1.00523e-07 | 1.000000 |
| rad35              | 5.71675e-08 | 1.000000 | 5.71676e-08 | 1.000000 |
| rad38              | 2.93104e-08 | 1.000000 | 2.93104e-08 | 1.000000 |
| rad6               | 1.80571e-09 | 1.000000 | 1.80571e-09 | 1.000000 |
| rad46              | 2.26242e-10 | 1.000000 | 2.26242e-10 | 1.000000 |
| rad28              | 2.25421e-11 | 1.000000 | 2.25421e-11 | 1.000000 |
| PhCH2CCH+H         | 1.03761e-11 | 1.000000 | 1.03761e-11 | 1.000000 |
| rad60syn           | 8.08081e-12 | 1.000000 | 8.08081e-12 | 1.000000 |
| rad37              | 2.40347e-12 | 1.000000 | 2.40348e-12 | 1.000000 |
| rad26              | 2.36399e-12 | 1.000000 | 2.36399e-12 | 1.000000 |
| rad60anti          | 1.09912e-12 | 1.000000 | 1.09912e-12 | 1.000000 |
| rad2               | 6.39101e-13 | 1.000000 | 6.39102e-13 | 1.000000 |
| rad7               | 1.31126e-13 | 1.000000 | 1.31126e-13 | 1.000000 |
| rad1               | 4.09654e-14 | 1.000000 | 4.09654e-14 | 1.000000 |
| rad10              | 3.29037e-14 | 1.000000 | 3.29037e-14 | 1.000000 |
| rad11              | 3.20789e-14 | 1.000000 | 3.20789e-14 | 1.000000 |
| rad3               | 4.25356e-15 | 1.000000 | 4.25356e-15 | 1.000000 |
| rad5               | 3.47593e-15 | 1.000000 | 3.47593e-15 | 1.000000 |
| rad4               | 2.15817e-15 | 1.000000 | 2.15817e-15 | 1.000000 |
| rad13              | 7.31901e-16 | 1.000000 | 7.31901e-16 | 1.000000 |
| rad14              | 1.61299e-16 | 1.000000 | 1.61299e-16 | 1.000000 |
| rad25              | 8.01866e-17 | 1.000000 | 8.01866e-17 | 1.000000 |
| rad27              | 1.03930e-17 | 1.000000 | 1.03930e-17 | 1.000000 |
| rad33              | 1.39098e-18 | 1.000000 | 1.39098e-18 | 1.000000 |
| PAH3+H             | 3.47561e-19 | 1.000000 | 3.47561e-19 | 1.000000 |
| rad59              | 1.74985e-19 | 1.000000 | 1.74985e-19 | 1.000000 |
| rad50              | 3.24557e-20 | 1.000000 | 3.24557e-20 | 1.000000 |
| rad31              | 1.64444e-22 | 1.000000 | 1.64444e-22 | 1.000000 |
| rad20              | 1.01384e-23 | 1.000000 | 1.01384e-23 | 1.000000 |
| rad21              | 7.76062e-24 | 1.000000 | 7.76062e-24 | 1.000000 |
| rad19syn           | 1.46109e-25 | 1.000000 | 1.46109e-25 | 1.000000 |
| rad18              | 3.35079e-26 | 1.000000 | 3.35079e-26 | 1.000000 |
| rad23              | 2.75910e-26 | 1.000000 | 2.75910e-26 | 1.000000 |
| rad22              | 3.83010e-27 | 1.000000 | 3.83010e-27 | 1.000000 |
| rad45              | 1.74384e-28 | 1.000000 | 1.74384e-28 | 1.000000 |
| rad52              | 1.23086e-29 | 1.000000 | 1.23086e-29 | 1.000000 |
| rad36              | 1.08135e-29 | 1.000000 | 1.08135e-29 | 1.000000 |
| rad54              | 6.85483e-30 | 1.000000 | 6.85484e-30 | 1.000000 |
| PAH10+CH3          | 3.93008e-30 | 1.000000 | 3.93008e-30 | 1.000000 |
| rad24              | 2.25021e-30 | 1.000000 | 2.25021e-30 | 1.000000 |
| rad43              | 9.86470e-31 | 1.000000 | 9.86470e-31 | 1.000000 |
| rad62              | 7.45719e-37 | 1.000000 | 7.45719e-37 | 1.000000 |
| rad51              | 8.13718e-40 | 1.000000 | 8.13719e-40 | 1.000000 |
| rad70              | 1.43722e-42 | 1.000000 | 1.43722e-42 | 1.000000 |
| PhcycC3H3_A+H      | 6.38160e-43 | 1.000000 | 6.38160e-43 | 1.000000 |
| rad55              | 3.41828e-43 | 1.000000 | 3.41828e-43 | 1.000000 |
| rad65              | 7.73853e-45 | 1.000000 | 7.73853e-45 | 1.000000 |
| rad58              | 2.23190e-46 | 1.000000 | 2.23190e-46 | 1.000000 |
| PAH1+H             | 4.60041e-48 | 1.000000 | 4.60041e-48 | 1.000000 |
| rad34              | 3.31378e-50 | 1.000000 | 3.31378e-50 | 1.000000 |
| rad42              | 5.22472e-54 | 1.000000 | 5.22472e-54 | 1.000000 |
| rad41              | 1.49052e-54 | 1.000000 | 1.49052e-54 | 1.000000 |
| rad47              | 9.71665e-60 | 1.000000 | 9.71665e-60 | 1.000000 |

0.100000000E-05 Pa, 100.000000 K

| Rate constant      | True (fraction)        | Effective (fraction)   |             |          |
|--------------------|------------------------|------------------------|-------------|----------|
| Total              | 2.19347e-21 (1.00 )    | 2.19347e-21 (1.00 )    |             |          |
| Formation of rad11 | 2.14498e-21 (0.978 )   | 2.14497e-21 (0.978 )   |             |          |
| Formation of rad6  | 4.83503e-23 (0.0220 )  | 4.83503e-23 (0.0220 )  |             |          |
| H-abstraction      | 1.47101e-25 (6.71e-05) | 1.47101e-25 (6.71e-05) |             |          |
| species            | PYtrue                 | Cumul                  | PYeffective | Cumul    |
| Indene+H           | 0.984084               | 0.984084               | 0.984085    | 0.984085 |

|                    |             |          |             |          |
|--------------------|-------------|----------|-------------|----------|
| C2H2+PhCH2         | 0.00978254  | 0.993867 | 0.00978255  | 0.993868 |
| PhCCH+CH3          | 0.00305066  | 0.996917 | 0.00305066  | 0.996918 |
| PhCHCCH2+H         | 0.00183450  | 0.998752 | 0.00183450  | 0.998753 |
| PhCCCH3+H          | 0.00113146  | 0.999883 | 0.00113146  | 0.999884 |
| Benzene+2-propynyl | 6.70630e-05 | 0.999950 | 6.70630e-05 | 0.999951 |
| Ph+MeAc            | 2.82452e-05 | 0.999978 | 2.82452e-05 | 0.999979 |
| rad8               | 1.03461e-05 | 0.999989 | 1.03461e-05 | 0.999990 |
| rad9               | 5.52090e-06 | 0.999994 | 5.52090e-06 | 0.999995 |
| PAH7+H             | 3.31435e-06 | 0.999998 | 3.31435e-06 | 0.999999 |
| rad30              | 5.60830e-07 | 0.999998 | 5.60830e-07 | 0.999999 |
| Phenyl+Allene      | 4.89886e-07 | 0.999999 | 0.000000    | 0.999999 |
| rad39              | 4.23208e-07 | 0.999999 | 4.23208e-07 | 1.000000 |
| rad12              | 3.94419e-07 | 1.000000 | 3.94419e-07 | 1.000000 |
| PAH9+H             | 1.17534e-07 | 1.000000 | 1.17534e-07 | 1.000000 |
| rad15              | 1.06398e-07 | 1.000000 | 1.06398e-07 | 1.000000 |
| rad35              | 5.99096e-08 | 1.000000 | 5.99096e-08 | 1.000000 |
| rad38              | 3.10705e-08 | 1.000000 | 3.10705e-08 | 1.000000 |
| rad6               | 1.23504e-09 | 1.000000 | 1.23504e-09 | 1.000000 |
| rad46              | 2.49893e-10 | 1.000000 | 2.49894e-10 | 1.000000 |
| PhCH2CCH+H         | 4.60491e-11 | 1.000000 | 4.60491e-11 | 1.000000 |
| rad28              | 1.66048e-11 | 1.000000 | 1.66049e-11 | 1.000000 |
| rad37              | 1.23990e-11 | 1.000000 | 1.23990e-11 | 1.000000 |
| rad60syn           | 1.01100e-11 | 1.000000 | 1.01100e-11 | 1.000000 |
| rad26              | 1.78107e-12 | 1.000000 | 1.78107e-12 | 1.000000 |
| rad60anti          | 1.68416e-12 | 1.000000 | 1.68416e-12 | 1.000000 |
| rad2               | 4.41351e-13 | 1.000000 | 4.41351e-13 | 1.000000 |
| rad7               | 8.98238e-14 | 1.000000 | 8.98239e-14 | 1.000000 |
| rad1               | 2.83852e-14 | 1.000000 | 2.83853e-14 | 1.000000 |
| rad5               | 2.34961e-14 | 1.000000 | 2.34961e-14 | 1.000000 |
| rad10              | 2.27356e-14 | 1.000000 | 2.27356e-14 | 1.000000 |
| rad11              | 2.19813e-14 | 1.000000 | 2.19813e-14 | 1.000000 |
| rad3               | 2.93890e-15 | 1.000000 | 2.93890e-15 | 1.000000 |
| rad4               | 1.49245e-15 | 1.000000 | 1.49246e-15 | 1.000000 |
| rad13              | 5.01820e-16 | 1.000000 | 5.01820e-16 | 1.000000 |
| rad14              | 1.31827e-16 | 1.000000 | 1.31827e-16 | 1.000000 |
| rad25              | 6.59173e-17 | 1.000000 | 6.59174e-17 | 1.000000 |
| rad27              | 8.48696e-18 | 1.000000 | 8.48696e-18 | 1.000000 |
| PAH3+H             | 3.83490e-18 | 1.000000 | 3.83490e-18 | 1.000000 |
| rad59              | 1.85456e-18 | 1.000000 | 1.85457e-18 | 1.000000 |
| rad33              | 9.55140e-19 | 1.000000 | 9.55140e-19 | 1.000000 |
| rad50              | 2.80683e-19 | 1.000000 | 2.80683e-19 | 1.000000 |
| rad31              | 1.61816e-22 | 1.000000 | 1.61816e-22 | 1.000000 |
| rad19syn           | 1.69259e-23 | 1.000000 | 1.69259e-23 | 1.000000 |
| rad20              | 8.40566e-24 | 1.000000 | 8.40567e-24 | 1.000000 |
| rad21              | 6.47225e-24 | 1.000000 | 6.47226e-24 | 1.000000 |
| rad18              | 2.67997e-26 | 1.000000 | 2.67997e-26 | 1.000000 |
| rad23              | 2.11311e-26 | 1.000000 | 2.11311e-26 | 1.000000 |
| rad54              | 3.44322e-27 | 1.000000 | 3.44322e-27 | 1.000000 |
| rad22              | 2.91521e-27 | 1.000000 | 2.91521e-27 | 1.000000 |
| PAH10+CH3          | 2.22556e-27 | 1.000000 | 2.22556e-27 | 1.000000 |
| rad52              | 1.20086e-27 | 1.000000 | 1.20086e-27 | 1.000000 |
| rad43              | 5.29889e-28 | 1.000000 | 5.29890e-28 | 1.000000 |
| rad45              | 1.34525e-28 | 1.000000 | 1.34525e-28 | 1.000000 |
| rad36              | 8.33850e-30 | 1.000000 | 8.33850e-30 | 1.000000 |
| rad62              | 6.92575e-30 | 1.000000 | 6.92576e-30 | 1.000000 |
| rad24              | 2.19501e-30 | 1.000000 | 2.19502e-30 | 1.000000 |
| rad51              | 7.64893e-33 | 1.000000 | 7.64894e-33 | 1.000000 |
| rad70              | 1.30436e-39 | 1.000000 | 1.30436e-39 | 1.000000 |
| PhcycC3H3_A+H      | 5.84663e-40 | 1.000000 | 5.84663e-40 | 1.000000 |
| rad55              | 3.12808e-40 | 1.000000 | 3.12808e-40 | 1.000000 |
| rad65              | 6.80797e-42 | 1.000000 | 6.80798e-42 | 1.000000 |
| rad58              | 2.06108e-43 | 1.000000 | 2.06108e-43 | 1.000000 |
| PAH1+H             | 4.61659e-45 | 1.000000 | 4.61659e-45 | 1.000000 |
| rad34              | 3.37700e-47 | 1.000000 | 3.37700e-47 | 1.000000 |
| rad42              | 4.72713e-51 | 1.000000 | 4.72713e-51 | 1.000000 |
| rad41              | 1.17352e-51 | 1.000000 | 1.17352e-51 | 1.000000 |
| rad47              | 8.46388e-57 | 1.000000 | 8.46389e-57 | 1.000000 |

0.100000000E-05 Pa, 110.000000 K

=====

| Rate constant      | True (fraction) |            | Effective (fraction) |            |
|--------------------|-----------------|------------|----------------------|------------|
| Total              | 1.09987e-20     | (1.00 )    | 1.09987e-20          | (1.00 )    |
| Formation of rad11 | 1.06527e-20     | (0.969 )   | 1.06526e-20          | (0.969 )   |
| Formation of rad6  | 3.44008e-22     | (0.0313 )  | 3.44007e-22          | (0.0313 )  |
| H-abstraction      | 2.02040e-24     | (0.000184) | 2.02040e-24          | (0.000184) |
| species            | PYtrue          | Cumul      | PYeffective          | Cumul      |
| Indene+H           | 0.983245        | 0.983245   | 0.983246             | 0.983246   |

|                    |             |          |             |          |
|--------------------|-------------|----------|-------------|----------|
| C2H2+PhCH2         | 0.0101236   | 0.993369 | 0.0101236   | 0.993370 |
| PhCCH+CH3          | 0.00325181  | 0.996621 | 0.00325181  | 0.996622 |
| PhCHCCH2+H         | 0.00193671  | 0.998558 | 0.00193671  | 0.998559 |
| PhCCCH3+H          | 0.00120092  | 0.999758 | 0.00120092  | 0.999759 |
| Benzene+2-propynyl | 0.000183695 | 0.999942 | 0.000183695 | 0.999943 |
| Ph+MeAc            | 3.38991e-05 | 0.999976 | 3.38991e-05 | 0.999977 |
| rad8               | 1.11961e-05 | 0.999987 | 1.11961e-05 | 0.999988 |
| rad9               | 6.16316e-06 | 0.999993 | 6.16316e-06 | 0.999994 |
| PAH7+H             | 3.73185e-06 | 0.999997 | 3.73186e-06 | 0.999998 |
| Phenyl+Allene      | 7.03502e-07 | 0.999998 | 0.00000     | 0.999998 |
| rad30              | 5.89151e-07 | 0.999998 | 5.89151e-07 | 0.999999 |
| rad39              | 4.99464e-07 | 0.999999 | 4.99464e-07 | 0.999999 |
| rad12              | 4.41958e-07 | 0.999999 | 4.41958e-07 | 1.000000 |
| PAH9+H             | 1.24438e-07 | 0.999999 | 1.24439e-07 | 1.000000 |
| rad15              | 1.13078e-07 | 1.000000 | 1.13078e-07 | 1.000000 |
| rad35              | 6.30073e-08 | 1.000000 | 6.30073e-08 | 1.000000 |
| rad38              | 3.30861e-08 | 1.000000 | 3.30861e-08 | 1.000000 |
| rad6               | 8.70233e-10 | 1.000000 | 8.70233e-10 | 1.000000 |
| rad46              | 2.78185e-10 | 1.000000 | 2.78185e-10 | 1.000000 |
| PhCH2CCH+H         | 1.60841e-10 | 1.000000 | 1.60841e-10 | 1.000000 |
| rad37              | 4.68247e-11 | 1.000000 | 4.68247e-11 | 1.000000 |
| rad60syn           | 1.27639e-11 | 1.000000 | 1.27639e-11 | 1.000000 |
| rad28              | 1.24904e-11 | 1.000000 | 1.24904e-11 | 1.000000 |
| rad60anti          | 2.46954e-12 | 1.000000 | 2.46954e-12 | 1.000000 |
| rad26              | 1.36825e-12 | 1.000000 | 1.36825e-12 | 1.000000 |
| rad2               | 3.14305e-13 | 1.000000 | 3.14305e-13 | 1.000000 |
| rad5               | 1.14171e-13 | 1.000000 | 1.14171e-13 | 1.000000 |
| rad7               | 6.33941e-14 | 1.000000 | 6.33941e-14 | 1.000000 |
| rad1               | 2.02887e-14 | 1.000000 | 2.02887e-14 | 1.000000 |
| rad10              | 1.62216e-14 | 1.000000 | 1.62216e-14 | 1.000000 |
| rad11              | 1.55186e-14 | 1.000000 | 1.55186e-14 | 1.000000 |
| rad3               | 2.11022e-15 | 1.000000 | 2.11022e-15 | 1.000000 |
| rad4               | 1.07266e-15 | 1.000000 | 1.07266e-15 | 1.000000 |
| rad13              | 3.54509e-16 | 1.000000 | 3.54509e-16 | 1.000000 |
| rad14              | 1.08893e-16 | 1.000000 | 1.08893e-16 | 1.000000 |
| rad25              | 5.47855e-17 | 1.000000 | 5.47855e-17 | 1.000000 |
| PAH3+H             | 2.76215e-17 | 1.000000 | 2.76215e-17 | 1.000000 |
| rad59              | 1.27979e-17 | 1.000000 | 1.27979e-17 | 1.000000 |
| rad27              | 7.03019e-18 | 1.000000 | 7.03019e-18 | 1.000000 |
| rad50              | 1.67184e-18 | 1.000000 | 1.67184e-18 | 1.000000 |
| rad33              | 6.75867e-19 | 1.000000 | 6.75867e-19 | 1.000000 |
| rad19syn           | 8.11792e-22 | 1.000000 | 8.11793e-22 | 1.000000 |
| rad31              | 1.64804e-22 | 1.000000 | 1.64805e-22 | 1.000000 |
| rad20              | 7.19728e-24 | 1.000000 | 7.19728e-24 | 1.000000 |
| rad21              | 5.57452e-24 | 1.000000 | 5.57453e-24 | 1.000000 |
| rad54              | 3.80819e-25 | 1.000000 | 3.80819e-25 | 1.000000 |
| PAH10+CH3          | 2.48851e-25 | 1.000000 | 2.48852e-25 | 1.000000 |
| rad43              | 5.95378e-26 | 1.000000 | 5.95379e-26 | 1.000000 |
| rad52              | 5.03874e-26 | 1.000000 | 5.03874e-26 | 1.000000 |
| rad18              | 2.21119e-26 | 1.000000 | 2.21119e-26 | 1.000000 |
| rad23              | 1.74440e-26 | 1.000000 | 1.74440e-26 | 1.000000 |
| rad22              | 2.29608e-27 | 1.000000 | 2.29608e-27 | 1.000000 |
| rad62              | 1.37871e-27 | 1.000000 | 1.37871e-27 | 1.000000 |
| rad45              | 1.12488e-28 | 1.000000 | 1.12488e-28 | 1.000000 |
| rad36              | 6.97094e-30 | 1.000000 | 6.97095e-30 | 1.000000 |
| rad24              | 2.18972e-30 | 1.000000 | 2.18973e-30 | 1.000000 |
| rad51              | 1.43630e-30 | 1.000000 | 1.43630e-30 | 1.000000 |
| rad65              | 1.70797e-34 | 1.000000 | 1.70797e-34 | 1.000000 |
| rad70              | 1.18251e-36 | 1.000000 | 1.18251e-36 | 1.000000 |
| PhcycC3H3_A+H      | 5.35280e-37 | 1.000000 | 5.35280e-37 | 1.000000 |
| rad55              | 2.86024e-37 | 1.000000 | 2.86024e-37 | 1.000000 |
| rad58              | 1.90252e-40 | 1.000000 | 1.90252e-40 | 1.000000 |
| PAH1+H             | 4.64379e-42 | 1.000000 | 4.64379e-42 | 1.000000 |
| rad34              | 3.45454e-44 | 1.000000 | 3.45454e-44 | 1.000000 |
| rad42              | 4.47826e-48 | 1.000000 | 4.47827e-48 | 1.000000 |
| rad41              | 9.57209e-49 | 1.000000 | 9.57209e-49 | 1.000000 |
| rad47              | 7.45896e-54 | 1.000000 | 7.45896e-54 | 1.000000 |

0.100000000E-05 Pa, 120.000000 K

=====

| Rate constant      | True (fraction)        | Effective (fraction)   |             |          |
|--------------------|------------------------|------------------------|-------------|----------|
| Total              | 4.24245e-20 (1.00 )    | 4.24245e-20 (1.00 )    |             |          |
| Formation of rad11 | 4.06372e-20 (0.958 )   | 4.06372e-20 (0.958 )   |             |          |
| Formation of rad6  | 1.76944e-21 (0.0417 )  | 1.76944e-21 (0.0417 )  |             |          |
| H-abstraction      | 1.78210e-23 (0.000420) | 1.78210e-23 (0.000420) |             |          |
| species            | PYtrue                 | Cumul                  | PYeffective | Cumul    |
| Indene+H           | 0.982208               | 0.982208               | 0.982209    | 0.982209 |

|                    |             |          |             |          |
|--------------------|-------------|----------|-------------|----------|
| C2H2+PhCH2         | 0.0104985   | 0.992707 | 0.0104985   | 0.992708 |
| PhCCH+CH3          | 0.00347748  | 0.996184 | 0.00347748  | 0.996185 |
| PhCHCCH2+H         | 0.00205033  | 0.998235 | 0.00205033  | 0.998236 |
| PhCCCH3+H          | 0.00127823  | 0.999513 | 0.00127823  | 0.999514 |
| Benzene+2-propynyl | 0.000420064 | 0.999933 | 0.000420064 | 0.999934 |
| Ph+MeAc            | 4.08270e-05 | 0.999974 | 4.08270e-05 | 0.999975 |
| rad8               | 1.21596e-05 | 0.999986 | 1.21596e-05 | 0.999987 |
| rad9               | 6.91456e-06 | 0.999993 | 6.91457e-06 | 0.999994 |
| PAH7+H             | 4.22471e-06 | 0.999997 | 4.22471e-06 | 0.999998 |
| Phenyl+Allene      | 9.94956e-07 | 0.999998 | 0.00000     | 0.999998 |
| rad30              | 6.20834e-07 | 0.999999 | 6.20834e-07 | 0.999999 |
| rad39              | 5.92196e-07 | 0.999999 | 5.92196e-07 | 0.999999 |
| rad12              | 4.97228e-07 | 1.000000 | 4.97228e-07 | 1.000000 |
| PAH9+H             | 1.32270e-07 | 1.000000 | 1.32270e-07 | 1.000000 |
| rad15              | 1.20643e-07 | 1.000000 | 1.20643e-07 | 1.000000 |
| rad35              | 6.64927e-08 | 1.000000 | 6.64927e-08 | 1.000000 |
| rad38              | 3.53865e-08 | 1.000000 | 3.53866e-08 | 1.000000 |
| rad6               | 6.27623e-10 | 1.000000 | 6.27624e-10 | 1.000000 |
| PhCH2CCH+H         | 4.69809e-10 | 1.000000 | 4.69809e-10 | 1.000000 |
| rad46              | 3.11958e-10 | 1.000000 | 3.11958e-10 | 1.000000 |
| rad37              | 1.40282e-10 | 1.000000 | 1.40282e-10 | 1.000000 |
| rad60syn           | 1.62134e-11 | 1.000000 | 1.62134e-11 | 1.000000 |
| rad28              | 9.54782e-12 | 1.000000 | 9.54783e-12 | 1.000000 |
| rad60anti          | 3.51434e-12 | 1.000000 | 3.51435e-12 | 1.000000 |
| rad26              | 1.06679e-12 | 1.000000 | 1.06679e-12 | 1.000000 |
| rad5               | 4.33831e-13 | 1.000000 | 4.33831e-13 | 1.000000 |
| rad2               | 2.29882e-13 | 1.000000 | 2.29883e-13 | 1.000000 |
| rad7               | 4.57975e-14 | 1.000000 | 4.57976e-14 | 1.000000 |
| rad1               | 1.48985e-14 | 1.000000 | 1.48985e-14 | 1.000000 |
| rad10              | 1.18810e-14 | 1.000000 | 1.18811e-14 | 1.000000 |
| rad11              | 1.12150e-14 | 1.000000 | 1.12150e-14 | 1.000000 |
| rad3               | 1.54905e-15 | 1.000000 | 1.54905e-15 | 1.000000 |
| rad4               | 7.88252e-16 | 1.000000 | 7.88253e-16 | 1.000000 |
| rad13              | 2.56369e-16 | 1.000000 | 2.56369e-16 | 1.000000 |
| PAH3+H             | 1.44932e-16 | 1.000000 | 1.44932e-16 | 1.000000 |
| rad14              | 9.06762e-17 | 1.000000 | 9.06763e-17 | 1.000000 |
| rad59              | 6.43007e-17 | 1.000000 | 6.43007e-17 | 1.000000 |
| rad25              | 4.59156e-17 | 1.000000 | 4.59156e-17 | 1.000000 |
| rad50              | 7.56332e-18 | 1.000000 | 7.56333e-18 | 1.000000 |
| rad27              | 5.88688e-18 | 1.000000 | 5.88689e-18 | 1.000000 |
| rad33              | 4.89654e-19 | 1.000000 | 4.89654e-19 | 1.000000 |
| rad19syn           | 2.03476e-20 | 1.000000 | 2.03477e-20 | 1.000000 |
| rad31              | 1.72871e-22 | 1.000000 | 1.72871e-22 | 1.000000 |
| rad54              | 1.78867e-23 | 1.000000 | 1.78867e-23 | 1.000000 |
| PAH10+CH3          | 1.18110e-23 | 1.000000 | 1.18110e-23 | 1.000000 |
| rad20              | 6.32070e-24 | 1.000000 | 6.32071e-24 | 1.000000 |
| rad21              | 4.92459e-24 | 1.000000 | 4.92459e-24 | 1.000000 |
| rad43              | 2.84068e-24 | 1.000000 | 2.84068e-24 | 1.000000 |
| rad52              | 1.13260e-24 | 1.000000 | 1.13260e-24 | 1.000000 |
| rad62              | 1.01744e-25 | 1.000000 | 1.01744e-25 | 1.000000 |
| rad18              | 1.86902e-26 | 1.000000 | 1.86902e-26 | 1.000000 |
| rad23              | 1.55025e-26 | 1.000000 | 1.55025e-26 | 1.000000 |
| rad22              | 1.85688e-27 | 1.000000 | 1.85688e-27 | 1.000000 |
| rad51              | 1.05156e-28 | 1.000000 | 1.05156e-28 | 1.000000 |
| rad45              | 1.01235e-28 | 1.000000 | 1.01235e-28 | 1.000000 |
| rad70              | 3.03478e-29 | 1.000000 | 3.03479e-29 | 1.000000 |
| PhcycC3H3_A+H      | 1.82703e-29 | 1.000000 | 1.82703e-29 | 1.000000 |
| rad55              | 1.01624e-29 | 1.000000 | 1.01624e-29 | 1.000000 |
| rad36              | 6.27331e-30 | 1.000000 | 6.27331e-30 | 1.000000 |
| rad24              | 2.22537e-30 | 1.000000 | 2.22537e-30 | 1.000000 |
| rad65              | 3.61494e-32 | 1.000000 | 3.61495e-32 | 1.000000 |
| rad58              | 8.74393e-33 | 1.000000 | 8.74393e-33 | 1.000000 |
| PAH1+H             | 5.48728e-39 | 1.000000 | 5.48728e-39 | 1.000000 |
| rad34              | 4.15185e-41 | 1.000000 | 4.15186e-41 | 1.000000 |
| rad42              | 5.03739e-45 | 1.000000 | 5.03739e-45 | 1.000000 |
| rad41              | 8.80876e-46 | 1.000000 | 8.80877e-46 | 1.000000 |
| rad47              | 7.77709e-51 | 1.000000 | 7.77709e-51 | 1.000000 |

0.100000000E-05 Pa, 130.000000 K

=====

| Rate constant      | True (fraction) |            | Effective (fraction) |            |
|--------------------|-----------------|------------|----------------------|------------|
| Total              | 1.33719e-19     | (1.00 )    | 1.33719e-19          | (1.00 )    |
| Formation of rad11 | 1.26517e-19     | (0.946 )   | 1.26517e-19          | (0.946 )   |
| Formation of rad6  | 7.08974e-21     | (0.0530 )  | 7.08973e-21          | (0.0530 )  |
| H-abstraction      | 1.11864e-22     | (0.000837) | 1.11864e-22          | (0.000837) |
| species            | PYtrue          | Cumul      | PYeffective          | Cumul      |
| Indene+H           | 0.980908        | 0.980908   | 0.980909             | 0.980909   |

|                    |             |          |             |          |
|--------------------|-------------|----------|-------------|----------|
| C2H2+PhCH2         | 0.0109083   | 0.991816 | 0.0109083   | 0.991817 |
| PhCCH+CH3          | 0.00372910  | 0.995545 | 0.00372910  | 0.995546 |
| PhCHCCH2+H         | 0.00217578  | 0.997721 | 0.00217578  | 0.997722 |
| PhCCCH3+H          | 0.00136372  | 0.999085 | 0.00136372  | 0.999086 |
| Benzene+2-propynyl | 0.000836559 | 0.999921 | 0.000836560 | 0.999922 |
| Ph+MeAc            | 4.92550e-05 | 0.999970 | 4.92550e-05 | 0.999971 |
| rad8               | 1.32450e-05 | 0.999984 | 1.32451e-05 | 0.999985 |
| rad9               | 7.78972e-06 | 0.999991 | 7.78973e-06 | 0.999992 |
| PAH7+H             | 4.80433e-06 | 0.999996 | 4.80434e-06 | 0.999997 |
| Phenyl+Allene      | 1.38780e-06 | 0.999998 | 0.00000     | 0.999997 |
| rad39              | 7.04366e-07 | 0.999998 | 7.04367e-07 | 0.999998 |
| rad30              | 6.56120e-07 | 0.999999 | 6.56121e-07 | 0.999999 |
| rad12              | 5.61086e-07 | 1.000000 | 5.61087e-07 | 0.999999 |
| PAH9+H             | 1.41125e-07 | 1.000000 | 1.41125e-07 | 0.999999 |
| rad15              | 1.29175e-07 | 1.000000 | 1.29175e-07 | 0.999999 |
| rad35              | 7.03986e-08 | 1.000000 | 7.03987e-08 | 1.000000 |
| rad38              | 3.80037e-08 | 1.000000 | 3.80038e-08 | 1.000000 |
| PhCH2CCH+H         | 1.19664e-09 | 1.000000 | 1.19664e-09 | 1.000000 |
| rad6               | 4.61137e-10 | 1.000000 | 4.61137e-10 | 1.000000 |
| rad37              | 3.52389e-10 | 1.000000 | 3.52389e-10 | 1.000000 |
| rad46              | 3.52201e-10 | 1.000000 | 3.52202e-10 | 1.000000 |
| rad60syn           | 2.06692e-11 | 1.000000 | 2.06692e-11 | 1.000000 |
| rad28              | 7.39084e-12 | 1.000000 | 7.39085e-12 | 1.000000 |
| rad60anti          | 4.89584e-12 | 1.000000 | 4.89585e-12 | 1.000000 |
| rad5               | 1.36576e-12 | 1.000000 | 1.36577e-12 | 1.000000 |
| rad26              | 8.41362e-13 | 1.000000 | 8.41363e-13 | 1.000000 |
| rad2               | 1.71787e-13 | 1.000000 | 1.71787e-13 | 1.000000 |
| rad7               | 3.37078e-14 | 1.000000 | 3.37079e-14 | 1.000000 |
| rad1               | 1.11818e-14 | 1.000000 | 1.11819e-14 | 1.000000 |
| rad10              | 8.90109e-15 | 1.000000 | 8.90110e-15 | 1.000000 |
| rad11              | 8.25752e-15 | 1.000000 | 8.25753e-15 | 1.000000 |
| rad3               | 1.16923e-15 | 1.000000 | 1.16923e-15 | 1.000000 |
| PAH3+H             | 5.97602e-16 | 1.000000 | 5.97603e-16 | 1.000000 |
| rad4               | 5.95670e-16 | 1.000000 | 5.95671e-16 | 1.000000 |
| rad59              | 2.54042e-16 | 1.000000 | 2.54042e-16 | 1.000000 |
| rad13              | 1.88897e-16 | 1.000000 | 1.88898e-16 | 1.000000 |
| rad14              | 7.59785e-17 | 1.000000 | 7.59786e-17 | 1.000000 |
| rad25              | 3.87326e-17 | 1.000000 | 3.87327e-17 | 1.000000 |
| rad50              | 2.77937e-17 | 1.000000 | 2.77938e-17 | 1.000000 |
| rad27              | 4.97123e-18 | 1.000000 | 4.97124e-18 | 1.000000 |
| rad33              | 3.61508e-19 | 1.000000 | 3.61508e-19 | 1.000000 |
| rad19syn           | 3.10950e-19 | 1.000000 | 3.10951e-19 | 1.000000 |
| rad54              | 4.59067e-22 | 1.000000 | 4.59068e-22 | 1.000000 |
| PAH10+CH3          | 3.05742e-22 | 1.000000 | 3.05743e-22 | 1.000000 |
| rad31              | 1.86161e-22 | 1.000000 | 1.86162e-22 | 1.000000 |
| rad43              | 7.38547e-23 | 1.000000 | 7.38548e-23 | 1.000000 |
| rad52              | 1.58219e-23 | 1.000000 | 1.58219e-23 | 1.000000 |
| rad20              | 5.66558e-24 | 1.000000 | 5.66559e-24 | 1.000000 |
| rad21              | 4.44054e-24 | 1.000000 | 4.44055e-24 | 1.000000 |
| rad62              | 3.62268e-24 | 1.000000 | 3.62268e-24 | 1.000000 |
| rad18              | 1.61042e-26 | 1.000000 | 1.61042e-26 | 1.000000 |
| rad23              | 1.48588e-26 | 1.000000 | 1.48588e-26 | 1.000000 |
| rad51              | 3.73371e-27 | 1.000000 | 3.73371e-27 | 1.000000 |
| rad70              | 2.72512e-27 | 1.000000 | 2.72512e-27 | 1.000000 |
| PhcycC3H3_A+H      | 2.14621e-27 | 1.000000 | 2.14621e-27 | 1.000000 |
| rad22              | 1.53336e-27 | 1.000000 | 1.53336e-27 | 1.000000 |
| rad55              | 9.74053e-28 | 1.000000 | 9.74054e-28 | 1.000000 |
| rad45              | 9.91282e-29 | 1.000000 | 9.91284e-29 | 1.000000 |
| rad36              | 6.14365e-30 | 1.000000 | 6.14366e-30 | 1.000000 |
| rad65              | 2.45305e-30 | 1.000000 | 2.45305e-30 | 1.000000 |
| rad24              | 2.29806e-30 | 1.000000 | 2.29806e-30 | 1.000000 |
| rad58              | 1.13110e-30 | 1.000000 | 1.13111e-30 | 1.000000 |
| PAH1+H             | 4.51061e-36 | 1.000000 | 4.51061e-36 | 1.000000 |
| rad34              | 3.47430e-38 | 1.000000 | 3.47430e-38 | 1.000000 |
| rad42              | 4.19210e-42 | 1.000000 | 4.19211e-42 | 1.000000 |
| rad41              | 6.41190e-43 | 1.000000 | 6.41191e-43 | 1.000000 |
| rad47              | 3.58533e-43 | 1.000000 | 3.58533e-43 | 1.000000 |

0.100000000E-05 Pa, 140.000000 K

| Rate constant      | True (fraction) |            | Effective (fraction) |            |
|--------------------|-----------------|------------|----------------------|------------|
| Total              | 3.59582e-19     | (1.00 )    | 3.59581e-19          | (1.00 )    |
| Formation of rad11 | 3.35703e-19     | (0.934 )   | 3.35702e-19          | (0.934 )   |
| Formation of rad6  | 2.33415e-20     | (0.0649 )  | 2.33414e-20          | (0.0649 )  |
| H-abstraction      | 5.37685e-22     | (0.00150 ) | 5.37685e-22          | (0.00150 ) |
| species            | PYtrue          | Cumul      | PYeffective          | Cumul      |
| Indene+H           | 0.979279        | 0.979279   | 0.979280             | 0.979280   |

|                    |             |          |             |          |
|--------------------|-------------|----------|-------------|----------|
| C2H2+PhCH2         | 0.0113539   | 0.990633 | 0.0113539   | 0.990634 |
| PhCCH+CH3          | 0.00400801  | 0.994641 | 0.00400802  | 0.994642 |
| PhCHCCH2+H         | 0.00231347  | 0.996955 | 0.00231347  | 0.996956 |
| Benzene+2-propynyl | 0.00149531  | 0.998450 | 0.00149531  | 0.998451 |
| PhCCCH3+H          | 0.00145764  | 0.999908 | 0.00145765  | 0.999909 |
| Ph+MeAc            | 5.94370e-05 | 0.999967 | 5.94371e-05 | 0.999968 |
| rad8               | 1.44607e-05 | 0.999982 | 1.44607e-05 | 0.999983 |
| rad9               | 8.80476e-06 | 0.999991 | 8.80477e-06 | 0.999992 |
| PAH7+H             | 5.48360e-06 | 0.999996 | 5.48361e-06 | 0.999997 |
| Phenyl+Allene      | 1.91177e-06 | 0.999998 | 0.00000     | 0.999997 |
| rad39              | 8.39397e-07 | 0.999999 | 8.39399e-07 | 0.999998 |
| rad30              | 6.95261e-07 | 0.999999 | 6.95263e-07 | 0.999999 |
| rad12              | 6.34436e-07 | 1.00000  | 6.34437e-07 | 0.999999 |
| PAH9+H             | 1.51104e-07 | 1.00000  | 1.51104e-07 | 0.999999 |
| rad15              | 1.38764e-07 | 1.00000  | 1.38764e-07 | 0.999999 |
| rad35              | 7.47610e-08 | 1.00000  | 7.47612e-08 | 1.000000 |
| rad38              | 4.09731e-08 | 1.00000  | 4.09732e-08 | 1.000000 |
| PhCH2CCH+H         | 2.73808e-09 | 1.00000  | 2.73808e-09 | 1.000000 |
| rad37              | 7.72072e-10 | 1.00000  | 7.72073e-10 | 1.000000 |
| rad46              | 4.00099e-10 | 1.00000  | 4.00100e-10 | 1.000000 |
| rad6               | 3.43963e-10 | 1.00000  | 3.43964e-10 | 1.000000 |
| rad60syn           | 2.63925e-11 | 1.00000  | 2.63925e-11 | 1.000000 |
| rad60anti          | 6.71358e-12 | 1.00000  | 6.71359e-12 | 1.000000 |
| rad28              | 5.77866e-12 | 1.00000  | 5.77867e-12 | 1.000000 |
| rad5               | 3.71089e-12 | 1.00000  | 3.71090e-12 | 1.000000 |
| rad26              | 6.69615e-13 | 1.00000  | 6.69616e-13 | 1.000000 |
| rad2               | 1.31537e-13 | 1.00000  | 1.31537e-13 | 1.000000 |
| rad7               | 2.51884e-14 | 1.00000  | 2.51884e-14 | 1.000000 |
| rad1               | 8.60245e-15 | 1.00000  | 8.60247e-15 | 1.000000 |
| rad10              | 6.81147e-15 | 1.00000  | 6.81148e-15 | 1.000000 |
| rad11              | 6.17289e-15 | 1.00000  | 6.17290e-15 | 1.000000 |
| PAH3+H             | 2.04380e-15 | 1.00000  | 2.04380e-15 | 1.000000 |
| rad3               | 8.98046e-16 | 1.00000  | 8.98048e-16 | 1.000000 |
| rad59              | 8.33603e-16 | 1.00000  | 8.33605e-16 | 1.000000 |
| rad4               | 4.58102e-16 | 1.00000  | 4.58103e-16 | 1.000000 |
| rad13              | 1.41315e-16 | 1.00000  | 1.41316e-16 | 1.000000 |
| rad50              | 8.70044e-17 | 1.00000  | 8.70046e-17 | 1.000000 |
| rad14              | 6.39758e-17 | 1.00000  | 6.39759e-17 | 1.000000 |
| rad25              | 3.28423e-17 | 1.00000  | 3.28424e-17 | 1.000000 |
| rad27              | 4.22628e-18 | 1.00000  | 4.22629e-18 | 1.000000 |
| rad19syn           | 3.22739e-18 | 1.00000  | 3.22739e-18 | 1.000000 |
| rad33              | 2.71045e-19 | 1.00000  | 2.71046e-19 | 1.000000 |
| rad54              | 7.40432e-21 | 1.00000  | 7.40434e-21 | 1.000000 |
| PAH10+CH3          | 4.96805e-21 | 1.00000  | 4.96806e-21 | 1.000000 |
| rad43              | 1.20453e-21 | 1.00000  | 1.20453e-21 | 1.000000 |
| rad31              | 2.05374e-22 | 1.00000  | 2.05375e-22 | 1.000000 |
| rad52              | 1.52546e-22 | 1.00000  | 1.52547e-22 | 1.000000 |
| rad62              | 7.69035e-23 | 1.00000  | 7.69037e-23 | 1.000000 |
| rad20              | 5.16503e-24 | 1.00000  | 5.16504e-24 | 1.000000 |
| rad21              | 4.07276e-24 | 1.00000  | 4.07277e-24 | 1.000000 |
| rad70              | 1.16344e-25 | 1.00000  | 1.16345e-25 | 1.000000 |
| PhcycC3H3_A+H      | 1.06484e-25 | 1.00000  | 1.06484e-25 | 1.000000 |
| rad51              | 7.94718e-26 | 1.00000  | 7.94720e-26 | 1.000000 |
| rad55              | 4.37362e-26 | 1.00000  | 4.37363e-26 | 1.000000 |
| rad23              | 1.53956e-26 | 1.00000  | 1.53957e-26 | 1.000000 |
| rad18              | 1.40936e-26 | 1.00000  | 1.40936e-26 | 1.000000 |
| rad22              | 1.28763e-27 | 1.00000  | 1.28763e-27 | 1.000000 |
| PAH1+H             | 1.72869e-28 | 1.00000  | 1.72869e-28 | 1.000000 |
| rad45              | 1.05164e-28 | 1.00000  | 1.05164e-28 | 1.000000 |
| rad65              | 8.26209e-29 | 1.00000  | 8.26210e-29 | 1.000000 |
| rad58              | 6.05540e-29 | 1.00000  | 6.05541e-29 | 1.000000 |
| rad36              | 6.52005e-30 | 1.00000  | 6.52007e-30 | 1.000000 |
| rad34              | 4.12810e-30 | 1.00000  | 4.12810e-30 | 1.000000 |
| rad24              | 2.40715e-30 | 1.00000  | 2.40716e-30 | 1.000000 |
| rad42              | 1.07647e-38 | 1.00000  | 1.07647e-38 | 1.000000 |
| rad41              | 1.50182e-39 | 1.00000  | 1.50183e-39 | 1.000000 |
| rad47              | 2.48364e-41 | 1.00000  | 2.48364e-41 | 1.000000 |

0.100000000E-05 Pa, 150.000000 K

| Rate constant      | True (fraction) |            | Effective (fraction) |            |
|--------------------|-----------------|------------|----------------------|------------|
| Total              | 8.51464e-19     | (1.00 )    | 8.51462e-19          | (1.00 )    |
| Formation of rad11 | 7.83711e-19     | (0.920 )   | 7.83709e-19          | (0.920 )   |
| Formation of rad6  | 6.56651e-20     | (0.0771 )  | 6.56649e-20          | (0.0771 )  |
| H-abstraction      | 2.08816e-21     | (0.00245 ) | 2.08816e-21          | (0.00245 ) |
| species            | PYtrue          | Cumul      | PYeffective          | Cumul      |
| Indene+H           | 0.977262        | 0.977262   | 0.977264             | 0.977264   |



|                    |             |          |             |          |
|--------------------|-------------|----------|-------------|----------|
| C2H2+PhCH2         | 0.0118365   | 0.989099 | 0.0118365   | 0.989101 |
| PhCCH+CH3          | 0.00431559  | 0.993415 | 0.00431560  | 0.993417 |
| PhCHCCH2+H         | 0.00246377  | 0.995878 | 0.00246377  | 0.995880 |
| Benzene+2-propynyl | 0.00245244  | 0.998331 | 0.00245245  | 0.998333 |
| PhCCCH3+H          | 0.00156022  | 0.999891 | 0.00156023  | 0.999893 |
| Ph+MeAc            | 7.16592e-05 | 0.999963 | 7.16594e-05 | 0.999965 |
| rad8               | 1.58148e-05 | 0.999978 | 1.58149e-05 | 0.999980 |
| rad9               | 9.97777e-06 | 0.999988 | 9.97777e-06 | 0.999990 |
| PAH7+H             | 6.27727e-06 | 0.999995 | 6.27728e-06 | 0.999997 |
| Phenyl+Allene      | 2.60427e-06 | 0.999997 | 0.00000     | 0.999997 |
| rad39              | 1.00127e-06 | 0.999998 | 1.00127e-06 | 0.999998 |
| rad30              | 7.38536e-07 | 0.999999 | 7.38538e-07 | 0.999998 |
| rad12              | 7.18232e-07 | 1.00000  | 7.18234e-07 | 0.999999 |
| PAH9+H             | 1.62326e-07 | 1.00000  | 1.62327e-07 | 0.999999 |
| rad15              | 1.49510e-07 | 1.00000  | 1.49510e-07 | 0.999999 |
| rad35              | 7.96208e-08 | 1.00000  | 7.96210e-08 | 1.00000  |
| rad38              | 4.43358e-08 | 1.00000  | 4.43359e-08 | 1.00000  |
| PhCH2CCH+H         | 5.75171e-09 | 1.00000  | 5.75172e-09 | 1.00000  |
| rad37              | 1.51855e-09 | 1.00000  | 1.51855e-09 | 1.00000  |
| rad46              | 4.57077e-10 | 1.00000  | 4.57078e-10 | 1.00000  |
| rad6               | 2.59773e-10 | 1.00000  | 2.59774e-10 | 1.00000  |
| rad60syn           | 3.37086e-11 | 1.00000  | 3.37086e-11 | 1.00000  |
| rad60anti          | 9.09479e-12 | 1.00000  | 9.09482e-12 | 1.00000  |
| rad5               | 8.96505e-12 | 1.00000  | 8.96507e-12 | 1.00000  |
| rad28              | 4.55467e-12 | 1.00000  | 4.55469e-12 | 1.00000  |
| rad26              | 5.36807e-13 | 1.00000  | 5.36808e-13 | 1.00000  |
| rad2               | 1.01627e-13 | 1.00000  | 1.01627e-13 | 1.00000  |
| rad7               | 1.90588e-14 | 1.00000  | 1.90589e-14 | 1.00000  |
| rad1               | 6.68059e-15 | 1.00000  | 6.68061e-15 | 1.00000  |
| PAH3+H             | 6.03101e-15 | 1.00000  | 6.03103e-15 | 1.00000  |
| rad10              | 5.29335e-15 | 1.00000  | 5.29337e-15 | 1.00000  |
| rad11              | 4.67267e-15 | 1.00000  | 4.67268e-15 | 1.00000  |
| rad59              | 2.36415e-15 | 1.00000  | 2.36416e-15 | 1.00000  |
| rad3               | 7.04891e-16 | 1.00000  | 7.04893e-16 | 1.00000  |
| rad4               | 3.60076e-16 | 1.00000  | 3.60077e-16 | 1.00000  |
| rad50              | 2.40138e-16 | 1.00000  | 2.40139e-16 | 1.00000  |
| rad13              | 1.07056e-16 | 1.00000  | 1.07056e-16 | 1.00000  |
| rad14              | 5.40810e-17 | 1.00000  | 5.40812e-17 | 1.00000  |
| rad25              | 2.79645e-17 | 1.00000  | 2.79645e-17 | 1.00000  |
| rad19syn           | 2.46146e-17 | 1.00000  | 2.46146e-17 | 1.00000  |
| rad27              | 3.61268e-18 | 1.00000  | 3.61269e-18 | 1.00000  |
| rad33              | 2.05837e-19 | 1.00000  | 2.05837e-19 | 1.00000  |
| rad54              | 8.25292e-20 | 1.00000  | 8.25294e-20 | 1.00000  |
| PAH10+CH3          | 5.57273e-20 | 1.00000  | 5.57274e-20 | 1.00000  |
| rad43              | 1.35490e-20 | 1.00000  | 1.35490e-20 | 1.00000  |
| rad52              | 1.09590e-21 | 1.00000  | 1.09590e-21 | 1.00000  |
| rad62              | 1.08551e-21 | 1.00000  | 1.08551e-21 | 1.00000  |
| rad31              | 2.31782e-22 | 1.00000  | 2.31783e-22 | 1.00000  |
| rad20              | 4.77668e-24 | 1.00000  | 4.77669e-24 | 1.00000  |
| rad21              | 3.78981e-24 | 1.00000  | 3.78982e-24 | 1.00000  |
| rad70              | 2.82756e-24 | 1.00000  | 2.82757e-24 | 1.00000  |
| PhcycC3H3_A+H      | 2.82695e-24 | 1.00000  | 2.82696e-24 | 1.00000  |
| rad51              | 1.13152e-24 | 1.00000  | 1.13153e-24 | 1.00000  |
| rad55              | 1.09836e-24 | 1.00000  | 1.09836e-24 | 1.00000  |
| rad23              | 1.72611e-26 | 1.00000  | 1.72611e-26 | 1.00000  |
| rad18              | 1.24936e-26 | 1.00000  | 1.24936e-26 | 1.00000  |
| PAH1+H             | 8.47527e-27 | 1.00000  | 8.47529e-27 | 1.00000  |
| rad65              | 1.71244e-27 | 1.00000  | 1.71245e-27 | 1.00000  |
| rad58              | 1.68999e-27 | 1.00000  | 1.68999e-27 | 1.00000  |
| rad22              | 1.09623e-27 | 1.00000  | 1.09623e-27 | 1.00000  |
| rad34              | 2.52726e-28 | 1.00000  | 2.52727e-28 | 1.00000  |
| rad45              | 1.21361e-28 | 1.00000  | 1.21361e-28 | 1.00000  |
| rad36              | 7.52880e-30 | 1.00000  | 7.52882e-30 | 1.00000  |
| rad24              | 2.55457e-30 | 1.00000  | 2.55457e-30 | 1.00000  |
| rad42              | 7.85451e-31 | 1.00000  | 7.85453e-31 | 1.00000  |
| rad41              | 1.60818e-31 | 1.00000  | 1.60819e-31 | 1.00000  |
| rad47              | 7.59464e-40 | 1.00000  | 7.59466e-40 | 1.00000  |

0.100000000E-05 Pa, 160.000000 K

| Rate constant      | True (fraction) |            | Effective (fraction) |            |
|--------------------|-----------------|------------|----------------------|------------|
| Total              | 1.81800e-18     | (1.00 )    | 1.81799e-18          | (1.00 )    |
| Formation of rad11 | 1.64862e-18     | (0.907 )   | 1.64862e-18          | (0.907 )   |
| Formation of rad6  | 1.62558e-19     | (0.0894 )  | 1.62558e-19          | (0.0894 )  |
| H-abstraction      | 6.82130e-21     | (0.00375 ) | 6.82130e-21          | (0.00375 ) |
| species            | PYtrue          | Cumul      | PYeffective          | Cumul      |
| Indene+H           | 0.974810        | 0.974810   | 0.974813             | 0.974813   |

|                    |             |          |             |          |
|--------------------|-------------|----------|-------------|----------|
| C2H2+PhCH2         | 0.0123575   | 0.987167 | 0.0123576   | 0.987170 |
| PhCCH+CH3          | 0.00465327  | 0.991820 | 0.00465328  | 0.991823 |
| Benzene+2-propynyl | 0.00375209  | 0.995572 | 0.00375210  | 0.995576 |
| PhCHCCH2+H         | 0.00262708  | 0.998200 | 0.00262709  | 0.998203 |
| PhCCCH3+H          | 0.00167170  | 0.999871 | 0.00167170  | 0.999874 |
| Ph+MeAc            | 8.62423e-05 | 0.999957 | 8.62426e-05 | 0.999961 |
| rad8               | 1.73161e-05 | 0.999975 | 1.73161e-05 | 0.999978 |
| rad9               | 1.13292e-05 | 0.999986 | 1.13292e-05 | 0.999989 |
| PAH7+H             | 7.20225e-06 | 0.999993 | 7.20228e-06 | 0.999996 |
| Phenyl+Allene      | 3.51225e-06 | 0.999997 | 0.00000     | 0.999996 |
| rad39              | 1.19461e-06 | 0.999998 | 1.19461e-06 | 0.999998 |
| rad12              | 8.13492e-07 | 0.999999 | 8.13495e-07 | 0.999998 |
| rad30              | 7.86265e-07 | 1.000000 | 7.86267e-07 | 0.999999 |
| PAH9+H             | 1.74930e-07 | 1.000000 | 1.74931e-07 | 0.999999 |
| rad15              | 1.61530e-07 | 1.000000 | 1.61531e-07 | 1.000000 |
| rad35              | 8.50246e-08 | 1.000000 | 8.50249e-08 | 1.000000 |
| rad38              | 4.81395e-08 | 1.000000 | 4.81397e-08 | 1.000000 |
| PhCH2CCH+H         | 1.12730e-08 | 1.000000 | 1.12730e-08 | 1.000000 |
| rad37              | 2.73969e-09 | 1.000000 | 2.73970e-09 | 1.000000 |
| rad46              | 5.24871e-10 | 1.000000 | 5.24873e-10 | 1.000000 |
| rad6               | 1.98240e-10 | 1.000000 | 1.98240e-10 | 1.000000 |
| rad60syn           | 4.30244e-11 | 1.000000 | 4.30245e-11 | 1.000000 |
| rad5               | 1.96886e-11 | 1.000000 | 1.96886e-11 | 1.000000 |
| rad60anti          | 1.22013e-11 | 1.000000 | 1.22013e-11 | 1.000000 |
| rad28              | 3.61358e-12 | 1.000000 | 3.61359e-12 | 1.000000 |
| rad26              | 4.32874e-13 | 1.000000 | 4.32875e-13 | 1.000000 |
| rad2               | 8.10011e-14 | 1.000000 | 8.10014e-14 | 1.000000 |
| PAH3+H             | 1.58152e-14 | 1.000000 | 1.58153e-14 | 1.000000 |
| rad7               | 1.45725e-14 | 1.000000 | 1.45725e-14 | 1.000000 |
| rad59              | 5.96926e-15 | 1.000000 | 5.96928e-15 | 1.000000 |
| rad1               | 5.35453e-15 | 1.000000 | 5.35455e-15 | 1.000000 |
| rad10              | 4.20750e-15 | 1.000000 | 4.20752e-15 | 1.000000 |
| rad11              | 3.57430e-15 | 1.000000 | 3.57431e-15 | 1.000000 |
| rad50              | 5.99481e-16 | 1.000000 | 5.99483e-16 | 1.000000 |
| rad3               | 5.67987e-16 | 1.000000 | 5.67989e-16 | 1.000000 |
| rad4               | 2.90587e-16 | 1.000000 | 2.90588e-16 | 1.000000 |
| rad19syn           | 1.46312e-16 | 1.000000 | 1.46312e-16 | 1.000000 |
| rad13              | 8.19585e-17 | 1.000000 | 8.19588e-17 | 1.000000 |
| rad14              | 4.58630e-17 | 1.000000 | 4.58632e-17 | 1.000000 |
| rad25              | 2.38932e-17 | 1.000000 | 2.38932e-17 | 1.000000 |
| rad27              | 3.10224e-18 | 1.000000 | 3.10225e-18 | 1.000000 |
| rad54              | 6.82318e-19 | 1.000000 | 6.82321e-19 | 1.000000 |
| PAH10+CH3          | 4.63166e-19 | 1.000000 | 4.63168e-19 | 1.000000 |
| rad33              | 1.58011e-19 | 1.000000 | 1.58011e-19 | 1.000000 |
| rad43              | 1.12797e-19 | 1.000000 | 1.12798e-19 | 1.000000 |
| rad62              | 1.10169e-20 | 1.000000 | 1.10170e-20 | 1.000000 |
| rad52              | 6.21209e-21 | 1.000000 | 6.21212e-21 | 1.000000 |
| rad31              | 2.67357e-22 | 1.000000 | 2.67358e-22 | 1.000000 |
| PhcycC3H3_A+H      | 4.94896e-23 | 1.000000 | 4.94897e-23 | 1.000000 |
| rad70              | 4.58078e-23 | 1.000000 | 4.58079e-23 | 1.000000 |
| rad55              | 1.82890e-23 | 1.000000 | 1.82891e-23 | 1.000000 |
| rad51              | 1.16592e-23 | 1.000000 | 1.16593e-23 | 1.000000 |
| rad20              | 4.47269e-24 | 1.000000 | 4.47271e-24 | 1.000000 |
| rad21              | 3.57109e-24 | 1.000000 | 3.57110e-24 | 1.000000 |
| PAH1+H             | 2.26749e-25 | 1.000000 | 2.26750e-25 | 1.000000 |
| rad58              | 3.08149e-26 | 1.000000 | 3.08150e-26 | 1.000000 |
| rad65              | 2.43579e-26 | 1.000000 | 2.43580e-26 | 1.000000 |
| rad23              | 2.09077e-26 | 1.000000 | 2.09078e-26 | 1.000000 |
| rad18              | 1.11956e-26 | 1.000000 | 1.11956e-26 | 1.000000 |
| rad34              | 7.87305e-27 | 1.000000 | 7.87308e-27 | 1.000000 |
| rad22              | 9.43999e-28 | 1.000000 | 9.44003e-28 | 1.000000 |
| rad45              | 1.51967e-28 | 1.000000 | 1.51967e-28 | 1.000000 |
| rad42              | 4.07683e-29 | 1.000000 | 4.07684e-29 | 1.000000 |
| rad41              | 9.77890e-30 | 1.000000 | 9.77893e-30 | 1.000000 |
| rad36              | 9.43558e-30 | 1.000000 | 9.43561e-30 | 1.000000 |
| rad24              | 2.74448e-30 | 1.000000 | 2.74449e-30 | 1.000000 |
| rad47              | 1.41733e-38 | 1.000000 | 1.41734e-38 | 1.000000 |

0.100000000E-05 Pa, 170.000000 K

| Rate constant      | True (fraction) |            | Effective (fraction) |            |
|--------------------|-----------------|------------|----------------------|------------|
| Total              | 3.56414e-18     | (1.00 )    | 3.56412e-18          | (1.00 )    |
| Formation of rad11 | 3.18264e-18     | (0.893 )   | 3.18262e-18          | (0.893 )   |
| Formation of rad6  | 3.62173e-19     | (0.102 )   | 3.62171e-19          | (0.102 )   |
| H-abstraction      | 1.93278e-20     | (0.00542 ) | 1.93278e-20          | (0.00542 ) |
| species            | PYtrue          | Cumul      | PYeffective          | Cumul      |
| Indene+H           | 0.971888        | 0.971888   | 0.971893             | 0.971893   |

|                    |             |          |             |          |
|--------------------|-------------|----------|-------------|----------|
| C2H2+PhCH2         | 0.0129186   | 0.984806 | 0.0129186   | 0.984811 |
| Benzene+2-propynyl | 0.00542285  | 0.990229 | 0.00542288  | 0.990234 |
| PhCCH+CH3          | 0.00502254  | 0.995252 | 0.00502255  | 0.995257 |
| PhCHCCH2+H         | 0.00280378  | 0.998056 | 0.00280379  | 0.998061 |
| PhCCCH3+H          | 0.00179227  | 0.999848 | 0.00179228  | 0.999853 |
| Ph+MeAc            | 0.000103543 | 0.999951 | 0.000103543 | 0.999956 |
| rad8               | 1.89730e-05 | 0.999970 | 1.89731e-05 | 0.999975 |
| rad9               | 1.28820e-05 | 0.999983 | 1.28821e-05 | 0.999988 |
| PAH7+H             | 8.27805e-06 | 0.999992 | 8.27809e-06 | 0.999997 |
| Phenyl+Allene      | 4.69423e-06 | 0.999996 | 0.00000     | 0.999997 |
| rad39              | 1.42480e-06 | 0.999998 | 1.42480e-06 | 0.999998 |
| rad12              | 9.21288e-07 | 0.999999 | 9.21292e-07 | 0.999999 |
| rad30              | 8.38808e-07 | 0.999999 | 8.38812e-07 | 1.000000 |
| PAH9+H             | 1.89077e-07 | 1.000000 | 1.89078e-07 | 1.000000 |
| rad15              | 1.74953e-07 | 1.000000 | 1.74954e-07 | 1.000000 |
| rad35              | 9.10273e-08 | 1.000000 | 9.10278e-08 | 1.000000 |
| rad38              | 5.24402e-08 | 1.000000 | 5.24405e-08 | 1.000000 |
| PhCH2CCH+H         | 2.08691e-08 | 1.000000 | 2.08692e-08 | 1.000000 |
| rad37              | 4.60919e-09 | 1.000000 | 4.60921e-09 | 1.000000 |
| rad46              | 6.05586e-10 | 1.000000 | 6.05589e-10 | 1.000000 |
| rad6               | 1.52616e-10 | 1.000000 | 1.52617e-10 | 1.000000 |
| rad60syn           | 5.48474e-11 | 1.000000 | 5.48477e-11 | 1.000000 |
| rad5               | 3.99730e-11 | 1.000000 | 3.99731e-11 | 1.000000 |
| rad60anti          | 1.62383e-11 | 1.000000 | 1.62384e-11 | 1.000000 |
| rad28              | 2.88244e-12 | 1.000000 | 2.88245e-12 | 1.000000 |
| rad26              | 3.50742e-13 | 1.000000 | 3.50744e-13 | 1.000000 |
| rad2               | 6.47217e-14 | 1.000000 | 6.47220e-14 | 1.000000 |
| PAH3+H             | 3.76892e-14 | 1.000000 | 3.76894e-14 | 1.000000 |
| rad59              | 1.37223e-14 | 1.000000 | 1.37224e-14 | 1.000000 |
| rad7               | 1.12412e-14 | 1.000000 | 1.12412e-14 | 1.000000 |
| rad1               | 4.30443e-15 | 1.000000 | 4.30445e-15 | 1.000000 |
| rad10              | 3.38839e-15 | 1.000000 | 3.38840e-15 | 1.000000 |
| rad11              | 2.75846e-15 | 1.000000 | 2.75847e-15 | 1.000000 |
| rad50              | 1.37979e-15 | 1.000000 | 1.37980e-15 | 1.000000 |
| rad19syn           | 7.08941e-16 | 1.000000 | 7.08945e-16 | 1.000000 |
| rad3               | 4.64349e-16 | 1.000000 | 4.64352e-16 | 1.000000 |
| rad4               | 2.37964e-16 | 1.000000 | 2.37965e-16 | 1.000000 |
| rad13              | 6.33063e-17 | 1.000000 | 6.33066e-17 | 1.000000 |
| rad14              | 3.89966e-17 | 1.000000 | 3.89968e-17 | 1.000000 |
| rad25              | 2.04739e-17 | 1.000000 | 2.04739e-17 | 1.000000 |
| rad54              | 4.41603e-18 | 1.000000 | 4.41605e-18 | 1.000000 |
| PAH10+CH3          | 3.00999e-18 | 1.000000 | 3.01001e-18 | 1.000000 |
| rad27              | 2.67420e-18 | 1.000000 | 2.67422e-18 | 1.000000 |
| rad43              | 7.33353e-19 | 1.000000 | 7.33357e-19 | 1.000000 |
| rad33              | 1.22421e-19 | 1.000000 | 1.22421e-19 | 1.000000 |
| rad62              | 8.52795e-20 | 1.000000 | 8.52799e-20 | 1.000000 |
| rad52              | 2.90262e-20 | 1.000000 | 2.90263e-20 | 1.000000 |
| PhcycC3H3_A+H      | 6.18574e-22 | 1.000000 | 6.18577e-22 | 1.000000 |
| rad70              | 5.33445e-22 | 1.000000 | 5.33447e-22 | 1.000000 |
| rad31              | 3.14991e-22 | 1.000000 | 3.14992e-22 | 1.000000 |
| rad55              | 2.18164e-22 | 1.000000 | 2.18165e-22 | 1.000000 |
| rad51              | 9.22224e-23 | 1.000000 | 9.22228e-23 | 1.000000 |
| rad20              | 4.23427e-24 | 1.000000 | 4.23429e-24 | 1.000000 |
| PAH1+H             | 3.94435e-24 | 1.000000 | 3.94437e-24 | 1.000000 |
| rad21              | 3.40272e-24 | 1.000000 | 3.40274e-24 | 1.000000 |
| rad58              | 3.99313e-25 | 1.000000 | 3.99314e-25 | 1.000000 |
| rad65              | 2.54727e-25 | 1.000000 | 2.54728e-25 | 1.000000 |
| rad34              | 1.50323e-25 | 1.000000 | 1.50323e-25 | 1.000000 |
| rad23              | 2.72570e-26 | 1.000000 | 2.72571e-26 | 1.000000 |
| rad18              | 1.01257e-26 | 1.000000 | 1.01257e-26 | 1.000000 |
| rad42              | 1.01747e-27 | 1.000000 | 1.01748e-27 | 1.000000 |
| rad22              | 8.20793e-28 | 1.000000 | 8.20797e-28 | 1.000000 |
| rad41              | 2.58572e-28 | 1.000000 | 2.58573e-28 | 1.000000 |
| rad45              | 2.05381e-28 | 1.000000 | 2.05382e-28 | 1.000000 |
| rad36              | 1.27666e-29 | 1.000000 | 1.27667e-29 | 1.000000 |
| rad24              | 2.98339e-30 | 1.000000 | 2.98341e-30 | 1.000000 |
| rad47              | 1.82774e-37 | 1.000000 | 1.82775e-37 | 1.000000 |

0.100000000E-05 Pa, 180.000000 K

| Rate constant      | True (fraction) |            | Effective (fraction) |            |
|--------------------|-----------------|------------|----------------------|------------|
| Total              | 6.50681e-18     | (1.00 )    | 6.50677e-18          | (1.00 )    |
| Formation of rad11 | 5.71915e-18     | (0.879 )   | 5.71911e-18          | (0.879 )   |
| Formation of rad6  | 7.39013e-19     | (0.114 )   | 7.39008e-19          | (0.114 )   |
| H-abstraction      | 4.86496e-20     | (0.00748 ) | 4.86496e-20          | (0.00748 ) |
| species            | PYtrue          | Cumul      | PYeffective          | Cumul      |
| Indene+H           | 0.968480        | 0.968480   | 0.968487             | 0.968487   |

|                    |             |          |             |          |
|--------------------|-------------|----------|-------------|----------|
| C2H2+PhCH2         | 0.0135216   | 0.982002 | 0.0135217   | 0.982009 |
| Benzene+2-propynyl | 0.00747672  | 0.989479 | 0.00747676  | 0.989486 |
| PhCCH+CH3          | 0.00542493  | 0.994904 | 0.00542497  | 0.994911 |
| PhCHCCH2+H         | 0.00299432  | 0.997898 | 0.00299434  | 0.997905 |
| PhCCCH3+H          | 0.00192212  | 0.999820 | 0.00192213  | 0.999827 |
| Ph+MeAc            | 0.000123955 | 0.999944 | 0.000123955 | 0.999951 |
| rad8               | 2.07944e-05 | 0.999965 | 2.07945e-05 | 0.999972 |
| rad9               | 1.46620e-05 | 0.999980 | 1.46620e-05 | 0.999987 |
| PAH7+H             | 9.52700e-06 | 0.999989 | 9.52706e-06 | 0.999996 |
| Phenyl+Allene      | 6.22266e-06 | 0.999995 | 0.00000     | 0.999996 |
| rad39              | 1.69806e-06 | 0.999997 | 1.69807e-06 | 0.999998 |
| rad12              | 1.04274e-06 | 0.999998 | 1.04274e-06 | 0.999999 |
| rad30              | 8.96587e-07 | 0.999999 | 8.96592e-07 | 1.000000 |
| PAH9+H             | 2.04955e-07 | 0.999999 | 2.04956e-07 | 1.000000 |
| rad15              | 1.89931e-07 | 0.999999 | 1.89932e-07 | 1.000000 |
| rad35              | 9.76925e-08 | 0.999999 | 9.76931e-08 | 1.000000 |
| rad38              | 5.73030e-08 | 0.999999 | 5.73034e-08 | 1.000000 |
| PhCH2CCH+H         | 3.68378e-08 | 1.000000 | 3.68381e-08 | 1.000000 |
| rad37              | 7.32377e-09 | 1.000000 | 7.32382e-09 | 1.000000 |
| rad46              | 7.01776e-10 | 1.000000 | 7.01781e-10 | 1.000000 |
| rad6               | 1.18377e-10 | 1.000000 | 1.18377e-10 | 1.000000 |
| rad5               | 7.60049e-11 | 1.000000 | 7.60053e-11 | 1.000000 |
| rad60syn           | 6.98100e-11 | 1.000000 | 6.98105e-11 | 1.000000 |
| rad60anti          | 2.14639e-11 | 1.000000 | 2.14641e-11 | 1.000000 |
| rad28              | 2.30953e-12 | 1.000000 | 2.30955e-12 | 1.000000 |
| rad26              | 2.85322e-13 | 1.000000 | 2.85324e-13 | 1.000000 |
| PAH3+H             | 8.30416e-14 | 1.000000 | 8.30421e-14 | 1.000000 |
| rad2               | 5.34436e-14 | 1.000000 | 5.34440e-14 | 1.000000 |
| rad59              | 2.92185e-14 | 1.000000 | 2.92187e-14 | 1.000000 |
| rad7               | 8.73727e-15 | 1.000000 | 8.73733e-15 | 1.000000 |
| rad1               | 3.57788e-15 | 1.000000 | 3.57790e-15 | 1.000000 |
| rad50              | 2.97112e-15 | 1.000000 | 2.97114e-15 | 1.000000 |
| rad19syn           | 2.89946e-15 | 1.000000 | 2.89947e-15 | 1.000000 |
| rad10              | 2.79039e-15 | 1.000000 | 2.79040e-15 | 1.000000 |
| rad11              | 2.14506e-15 | 1.000000 | 2.14507e-15 | 1.000000 |
| rad3               | 3.89847e-16 | 1.000000 | 3.89850e-16 | 1.000000 |
| rad4               | 2.00150e-16 | 1.000000 | 2.00151e-16 | 1.000000 |
| rad13              | 4.92738e-17 | 1.000000 | 4.92741e-17 | 1.000000 |
| rad14              | 3.32320e-17 | 1.000000 | 3.32322e-17 | 1.000000 |
| rad54              | 2.33295e-17 | 1.000000 | 2.33297e-17 | 1.000000 |
| rad25              | 1.75873e-17 | 1.000000 | 1.75874e-17 | 1.000000 |
| PAH10+CH3          | 1.59466e-17 | 1.000000 | 1.59467e-17 | 1.000000 |
| rad43              | 3.88180e-18 | 1.000000 | 3.88182e-18 | 1.000000 |
| rad27              | 2.31294e-18 | 1.000000 | 2.31296e-18 | 1.000000 |
| rad62              | 5.27066e-19 | 1.000000 | 5.27069e-19 | 1.000000 |
| rad52              | 1.15648e-19 | 1.000000 | 1.15649e-19 | 1.000000 |
| rad33              | 9.56072e-20 | 1.000000 | 9.56078e-20 | 1.000000 |
| PhcycC3H3_A+H      | 5.85619e-21 | 1.000000 | 5.85622e-21 | 1.000000 |
| rad70              | 4.72800e-21 | 1.000000 | 4.72803e-21 | 1.000000 |
| rad55              | 1.97618e-21 | 1.000000 | 1.97619e-21 | 1.000000 |
| rad51              | 5.86135e-22 | 1.000000 | 5.86139e-22 | 1.000000 |
| rad31              | 3.78883e-22 | 1.000000 | 3.78886e-22 | 1.000000 |
| PAH1+H             | 4.95210e-23 | 1.000000 | 4.95213e-23 | 1.000000 |
| rad20              | 4.04839e-24 | 1.000000 | 4.04841e-24 | 1.000000 |
| rad58              | 3.90829e-24 | 1.000000 | 3.90832e-24 | 1.000000 |
| rad21              | 3.27518e-24 | 1.000000 | 3.27520e-24 | 1.000000 |
| rad65              | 2.06557e-24 | 1.000000 | 2.06558e-24 | 1.000000 |
| rad34              | 2.04057e-24 | 1.000000 | 2.04059e-24 | 1.000000 |
| rad23              | 3.80589e-26 | 1.000000 | 3.80592e-26 | 1.000000 |
| rad42              | 1.68941e-26 | 1.000000 | 1.68942e-26 | 1.000000 |
| rad18              | 9.23189e-27 | 1.000000 | 9.23194e-27 | 1.000000 |
| rad41              | 4.43575e-27 | 1.000000 | 4.43577e-27 | 1.000000 |
| rad22              | 7.19637e-28 | 1.000000 | 7.19642e-28 | 1.000000 |
| rad45              | 2.98125e-28 | 1.000000 | 2.98127e-28 | 1.000000 |
| rad36              | 1.85585e-29 | 1.000000 | 1.85586e-29 | 1.000000 |
| rad24              | 3.28050e-30 | 1.000000 | 3.28053e-30 | 1.000000 |
| rad47              | 1.73400e-36 | 1.000000 | 1.73401e-36 | 1.000000 |

0.100000000E-05 Pa, 190.000000 K

| Rate constant      | True (fraction) |            | Effective (fraction) |            |
|--------------------|-----------------|------------|----------------------|------------|
| Total              | 1.11858e-17     | (1.00 )    | 1.11857e-17          | (1.00 )    |
| Formation of rad11 | 9.67466e-18     | (0.865 )   | 9.67458e-18          | (0.865 )   |
| Formation of rad6  | 1.40029e-18     | (0.125 )   | 1.40028e-18          | (0.125 )   |
| H-abstraction      | 1.10851e-19     | (0.00991 ) | 1.10851e-19          | (0.00991 ) |
| species            | PYtrue          | Cumul      | PYeffective          | Cumul      |
| Indene+H           | 0.964586        | 0.964586   | 0.964595             | 0.964595   |

|                    |             |          |             |          |
|--------------------|-------------|----------|-------------|----------|
| C2H2+PhCH2         | 0.0141693   | 0.978756 | 0.0141694   | 0.978765 |
| Benzene+2-propynyl | 0.00990995  | 0.988666 | 0.00991003  | 0.988675 |
| PhCCH+CH3          | 0.00586208  | 0.994528 | 0.00586212  | 0.994537 |
| PhCHCCH2+H         | 0.00319912  | 0.997727 | 0.00319914  | 0.997736 |
| PhCCCH3+H          | 0.00206143  | 0.999788 | 0.00206145  | 0.999797 |
| Ph+MeAc            | 0.000147906 | 0.999936 | 0.000147907 | 0.999945 |
| rad8               | 2.27889e-05 | 0.999959 | 2.27891e-05 | 0.999968 |
| rad9               | 1.66980e-05 | 0.999976 | 1.66981e-05 | 0.999985 |
| PAH7+H             | 1.09746e-05 | 0.999987 | 1.09747e-05 | 0.999996 |
| Phenyl+Allene      | 8.18678e-06 | 0.999995 | 0.00000     | 0.999996 |
| rad39              | 2.02155e-06 | 0.999997 | 2.02157e-06 | 0.999998 |
| rad12              | 1.17900e-06 | 0.999998 | 1.17901e-06 | 0.999999 |
| rad30              | 9.60067e-07 | 0.999999 | 9.60074e-07 | 1.000000 |
| PAH9+H             | 2.22779e-07 | 0.999999 | 2.22781e-07 | 1.00000  |
| rad15              | 2.06632e-07 | 0.999999 | 2.06634e-07 | 1.00000  |
| rad35              | 1.05093e-07 | 0.999999 | 1.05094e-07 | 1.00000  |
| rad38              | 6.28040e-08 | 0.999999 | 6.28045e-08 | 1.00000  |
| PhCH2CCH+H         | 6.24612e-08 | 1.000000 | 6.24617e-08 | 1.00000  |
| rad37              | 1.11015e-08 | 1.000000 | 1.11016e-08 | 1.00000  |
| rad46              | 8.16530e-10 | 1.000000 | 8.16537e-10 | 1.00000  |
| rad5               | 1.36726e-10 | 1.000000 | 1.36727e-10 | 1.00000  |
| rad6               | 9.24167e-11 | 1.000000 | 9.24174e-11 | 1.00000  |
| rad60syn           | 8.86953e-11 | 1.000000 | 8.86960e-11 | 1.00000  |
| rad60anti          | 2.82028e-11 | 1.000000 | 2.82030e-11 | 1.00000  |
| rad28              | 1.85741e-12 | 1.000000 | 1.85743e-12 | 1.00000  |
| rad26              | 2.32871e-13 | 1.000000 | 2.32873e-13 | 1.00000  |
| PAH3+H             | 1.71447e-13 | 1.000000 | 1.71448e-13 | 1.00000  |
| rad59              | 5.83985e-14 | 1.000000 | 5.83989e-14 | 1.00000  |
| rad2               | 4.49988e-14 | 1.000000 | 4.49992e-14 | 1.00000  |
| rad19syn           | 1.02877e-14 | 1.000000 | 1.02878e-14 | 1.00000  |
| rad7               | 6.83571e-15 | 1.000000 | 6.83577e-15 | 1.00000  |
| rad50              | 6.05338e-15 | 1.000000 | 6.05343e-15 | 1.00000  |
| rad1               | 3.03417e-15 | 1.000000 | 3.03420e-15 | 1.00000  |
| rad10              | 2.34875e-15 | 1.000000 | 2.34877e-15 | 1.00000  |
| rad11              | 1.67906e-15 | 1.000000 | 1.67908e-15 | 1.00000  |
| rad3               | 3.34066e-16 | 1.000000 | 3.34068e-16 | 1.00000  |
| rad4               | 1.71855e-16 | 1.000000 | 1.71857e-16 | 1.00000  |
| rad54              | 1.03970e-16 | 1.000000 | 1.03970e-16 | 1.00000  |
| PAH10+CH3          | 7.11671e-17 | 1.000000 | 7.11677e-17 | 1.00000  |
| rad13              | 3.86064e-17 | 1.000000 | 3.86067e-17 | 1.00000  |
| rad14              | 2.83735e-17 | 1.000000 | 2.83737e-17 | 1.00000  |
| rad43              | 1.72856e-17 | 1.000000 | 1.72858e-17 | 1.00000  |
| rad25              | 1.51405e-17 | 1.000000 | 1.51407e-17 | 1.00000  |
| rad62              | 2.69621e-18 | 1.000000 | 2.69623e-18 | 1.00000  |
| rad27              | 2.00639e-18 | 1.000000 | 2.00640e-18 | 1.00000  |
| rad52              | 4.03510e-19 | 1.000000 | 4.03513e-19 | 1.00000  |
| rad33              | 7.51939e-20 | 1.000000 | 7.51945e-20 | 1.00000  |
| PhcycC3H3_A+H      | 4.38894e-20 | 1.000000 | 4.38898e-20 | 1.00000  |
| rad70              | 3.33201e-20 | 1.000000 | 3.33204e-20 | 1.00000  |
| rad55              | 1.42084e-20 | 1.000000 | 1.42085e-20 | 1.00000  |
| rad51              | 3.10226e-21 | 1.000000 | 3.10229e-21 | 1.00000  |
| PAH1+H             | 4.73308e-22 | 1.000000 | 4.73312e-22 | 1.00000  |
| rad31              | 4.65107e-22 | 1.000000 | 4.65111e-22 | 1.00000  |
| rad58              | 3.02074e-23 | 1.000000 | 3.02076e-23 | 1.00000  |
| rad34              | 2.08650e-23 | 1.000000 | 2.08652e-23 | 1.00000  |
| rad65              | 1.35334e-23 | 1.000000 | 1.35335e-23 | 1.00000  |
| rad20              | 3.90596e-24 | 1.000000 | 3.90600e-24 | 1.00000  |
| rad21              | 3.18191e-24 | 1.000000 | 3.18194e-24 | 1.00000  |
| rad42              | 2.03931e-25 | 1.000000 | 2.03933e-25 | 1.00000  |
| rad23              | 5.66523e-26 | 1.000000 | 5.66527e-26 | 1.00000  |
| rad41              | 5.49125e-26 | 1.000000 | 5.49130e-26 | 1.00000  |
| rad18              | 8.47689e-27 | 1.000000 | 8.47696e-27 | 1.00000  |
| rad22              | 6.35631e-28 | 1.000000 | 6.35636e-28 | 1.00000  |
| rad45              | 4.61401e-28 | 1.000000 | 4.61405e-28 | 1.00000  |
| rad36              | 2.87739e-29 | 1.000000 | 2.87741e-29 | 1.00000  |
| rad24              | 3.64828e-30 | 1.000000 | 3.64832e-30 | 1.00000  |
| rad47              | 1.27121e-35 | 1.000000 | 1.27122e-35 | 1.00000  |

0.100000000E-05 Pa, 200.00000 K

| Rate constant      | True (fraction) |           | Effective (fraction) |           |
|--------------------|-----------------|-----------|----------------------|-----------|
| Total              | 1.82690e-17     | (1.00 )   | 1.82688e-17          | (1.00 )   |
| Formation of rad11 | 1.55456e-17     | (0.851 )  | 1.55454e-17          | (0.851 )  |
| Formation of rad6  | 2.49126e-18     | (0.136 )  | 2.49124e-18          | (0.136 )  |
| H-abstraction      | 2.32112e-19     | (0.0127 ) | 2.32112e-19          | (0.0127 ) |
| species            | PYtrue          | Cumul     | PYeffective          | Cumul     |
| Indene+H           | 0.960217        | 0.960217  | 0.960228             | 0.960228  |

|                    |             |          |             |          |
|--------------------|-------------|----------|-------------|----------|
| C2H2+PhCH2         | 0.0148639   | 0.975081 | 0.0148641   | 0.975092 |
| Benzene+2-propynyl | 0.0127053   | 0.987786 | 0.0127054   | 0.987797 |
| PhCCH+CH3          | 0.00633555  | 0.994122 | 0.00633562  | 0.994133 |
| PhCHCCH2+H         | 0.00341859  | 0.997541 | 0.00341863  | 0.997552 |
| PhCCCH3+H          | 0.00221032  | 0.999751 | 0.00221035  | 0.999762 |
| Ph+MeAc            | 0.000175856 | 0.999927 | 0.000175858 | 0.999938 |
| rad8               | 2.49651e-05 | 0.999952 | 2.49654e-05 | 0.999963 |
| rad9               | 1.90221e-05 | 0.999971 | 1.90223e-05 | 0.999982 |
| PAH7+H             | 1.26498e-05 | 0.999983 | 1.26499e-05 | 0.999995 |
| Phenyl+Allene      | 1.06956e-05 | 0.999994 | 0.00000     | 0.999995 |
| rad39              | 2.40345e-06 | 0.999996 | 2.40348e-06 | 0.999997 |
| rad12              | 1.33124e-06 | 0.999998 | 1.33125e-06 | 0.999998 |
| rad30              | 1.02977e-06 | 0.999999 | 1.02979e-06 | 0.999999 |
| PAH9+H             | 2.42799e-07 | 0.999999 | 2.42802e-07 | 1.000000 |
| rad15              | 2.25246e-07 | 0.999999 | 2.25249e-07 | 1.000000 |
| rad35              | 1.13313e-07 | 0.999999 | 1.13314e-07 | 1.000000 |
| PhCH2CCH+H         | 1.02325e-07 | 0.999999 | 1.02326e-07 | 1.000000 |
| rad38              | 6.90304e-08 | 1.000000 | 6.90311e-08 | 1.000000 |
| rad37              | 1.61810e-08 | 1.000000 | 1.61812e-08 | 1.000000 |
| rad46              | 9.53568e-10 | 1.000000 | 9.53578e-10 | 1.000000 |
| rad5               | 2.34586e-10 | 1.000000 | 2.34589e-10 | 1.000000 |
| rad60syn           | 1.12469e-10 | 1.000000 | 1.12470e-10 | 1.000000 |
| rad6               | 7.25594e-11 | 1.000000 | 7.25601e-11 | 1.000000 |
| rad60anti          | 3.68596e-11 | 1.000000 | 3.68600e-11 | 1.000000 |
| rad28              | 1.49850e-12 | 1.000000 | 1.49851e-12 | 1.000000 |
| PAH3+H             | 3.35184e-13 | 1.000000 | 3.35187e-13 | 1.000000 |
| rad26              | 1.90591e-13 | 1.000000 | 1.90593e-13 | 1.000000 |
| rad59              | 1.10710e-13 | 1.000000 | 1.10711e-13 | 1.000000 |
| rad2               | 3.85118e-14 | 1.000000 | 3.85122e-14 | 1.000000 |
| rad19syn           | 3.23696e-14 | 1.000000 | 3.23699e-14 | 1.000000 |
| rad50              | 1.17723e-14 | 1.000000 | 1.17724e-14 | 1.000000 |
| rad7               | 5.37874e-15 | 1.000000 | 5.37880e-15 | 1.000000 |
| rad1               | 2.61702e-15 | 1.000000 | 2.61705e-15 | 1.000000 |
| rad10              | 2.01718e-15 | 1.000000 | 2.01721e-15 | 1.000000 |
| rad11              | 1.32189e-15 | 1.000000 | 1.32191e-15 | 1.000000 |
| rad54              | 4.01273e-16 | 1.000000 | 4.01277e-16 | 1.000000 |
| rad3               | 2.94165e-16 | 1.000000 | 2.94168e-16 | 1.000000 |
| PAH10+CH3          | 2.74627e-16 | 1.000000 | 2.74630e-16 | 1.000000 |
| rad4               | 1.51659e-16 | 1.000000 | 1.51661e-16 | 1.000000 |
| rad43              | 6.64687e-17 | 1.000000 | 6.64694e-17 | 1.000000 |
| rad13              | 3.04245e-17 | 1.000000 | 3.04248e-17 | 1.000000 |
| rad14              | 2.42656e-17 | 1.000000 | 2.42659e-17 | 1.000000 |
| rad25              | 1.30592e-17 | 1.000000 | 1.30594e-17 | 1.000000 |
| rad62              | 1.17482e-17 | 1.000000 | 1.17483e-17 | 1.000000 |
| rad27              | 1.74509e-18 | 1.000000 | 1.74511e-18 | 1.000000 |
| rad52              | 1.25933e-18 | 1.000000 | 1.25934e-18 | 1.000000 |
| PhcycC3H3_A+H      | 2.69647e-19 | 1.000000 | 2.69650e-19 | 1.000000 |
| rad70              | 1.93309e-19 | 1.000000 | 1.93311e-19 | 1.000000 |
| rad55              | 8.39746e-20 | 1.000000 | 8.39755e-20 | 1.000000 |
| rad33              | 5.95122e-20 | 1.000000 | 5.95128e-20 | 1.000000 |
| rad51              | 1.40661e-20 | 1.000000 | 1.40663e-20 | 1.000000 |
| PAH1+H             | 3.58741e-21 | 1.000000 | 3.58745e-21 | 1.000000 |
| rad31              | 5.82490e-22 | 1.000000 | 5.82496e-22 | 1.000000 |
| rad58              | 1.90959e-22 | 1.000000 | 1.90961e-22 | 1.000000 |
| rad34              | 1.67728e-22 | 1.000000 | 1.67730e-22 | 1.000000 |
| rad65              | 7.40123e-23 | 1.000000 | 7.40130e-23 | 1.000000 |
| rad20              | 3.80064e-24 | 1.000000 | 3.80068e-24 | 1.000000 |
| rad21              | 3.11844e-24 | 1.000000 | 3.11848e-24 | 1.000000 |
| rad42              | 1.88860e-24 | 1.000000 | 1.88862e-24 | 1.000000 |
| rad41              | 5.19579e-25 | 1.000000 | 5.19585e-25 | 1.000000 |
| rad23              | 8.95746e-26 | 1.000000 | 8.95756e-26 | 1.000000 |
| rad18              | 7.83328e-27 | 1.000000 | 7.83336e-27 | 1.000000 |
| rad45              | 7.61827e-28 | 1.000000 | 7.61835e-28 | 1.000000 |
| rad22              | 5.65295e-28 | 1.000000 | 5.65301e-28 | 1.000000 |
| rad36              | 4.76116e-29 | 1.000000 | 4.76121e-29 | 1.000000 |
| rad24              | 4.10347e-30 | 1.000000 | 4.10352e-30 | 1.000000 |
| rad47              | 7.49046e-35 | 1.000000 | 7.49054e-35 | 1.000000 |

0.100000000E-05 Pa, 210.000000 K

| =====              |                 |           |                      |           |
|--------------------|-----------------|-----------|----------------------|-----------|
| Rate constant      | True (fraction) |           | Effective (fraction) |           |
| -----              |                 |           |                      |           |
| Total              | 2.85520e-17     | (1.00 )   | 2.85516e-17          | (1.00 )   |
| Formation of rad11 | 2.39009e-17     | (0.837 )  | 2.39006e-17          | (0.837 )  |
| Formation of rad6  | 4.19900e-18     | (0.147 )  | 4.19894e-18          | (0.147 )  |
| H-abstraction      | 4.52111e-19     | (0.0158 ) | 4.52111e-19          | (0.0158 ) |
| species            | PYtrue          | Cumul     | PYeffective          | Cumul     |
| -----              |                 |           |                      |           |
| Indene+H           | 0.955395        | 0.955395  | 0.955409             | 0.955409  |

|                    |             |          |             |          |
|--------------------|-------------|----------|-------------|----------|
| Benzene+2-propynyl | 0.0158346   | 0.971230 | 0.0158348   | 0.971244 |
| C2H2+PhCH2         | 0.0156088   | 0.986839 | 0.0156090   | 0.986853 |
| PhCCH+CH3          | 0.00684690  | 0.993686 | 0.00684699  | 0.993700 |
| PhCHCCH2+H         | 0.00365312  | 0.997339 | 0.00365317  | 0.997353 |
| PhCCCH3+H          | 0.00236887  | 0.999708 | 0.00236891  | 0.999722 |
| Ph+MeAc            | 0.000208296 | 0.999916 | 0.000208299 | 0.999930 |
| rad8               | 2.73309e-05 | 0.999943 | 2.73312e-05 | 0.999957 |
| rad9               | 2.16698e-05 | 0.999965 | 2.16701e-05 | 0.999979 |
| PAH7+H             | 1.45853e-05 | 0.999979 | 1.45855e-05 | 0.999994 |
| Phenyl+Allene      | 1.38813e-05 | 0.999993 | 0.00000     | 0.999994 |
| rad39              | 2.85308e-06 | 0.999996 | 2.85311e-06 | 0.999996 |
| rad12              | 1.50060e-06 | 0.999998 | 1.50062e-06 | 0.999998 |
| rad30              | 1.10628e-06 | 0.999999 | 1.10630e-06 | 0.999999 |
| PAH9+H             | 2.65300e-07 | 0.999999 | 2.65304e-07 | 0.999999 |
| rad15              | 2.45985e-07 | 0.999999 | 2.45989e-07 | 1.000000 |
| PhCH2CCH+H         | 1.62715e-07 | 0.999999 | 1.62717e-07 | 1.000000 |
| rad35              | 1.22445e-07 | 1.000000 | 1.22447e-07 | 1.000000 |
| rad38              | 7.60827e-08 | 1.000000 | 7.60837e-08 | 1.000000 |
| rad37              | 2.28224e-08 | 1.000000 | 2.28228e-08 | 1.000000 |
| rad46              | 1.11736e-09 | 1.000000 | 1.11737e-09 | 1.000000 |
| rad5               | 3.86367e-10 | 1.000000 | 3.86372e-10 | 1.000000 |
| rad60syn           | 1.42314e-10 | 1.000000 | 1.42316e-10 | 1.000000 |
| rad6               | 5.72550e-11 | 1.000000 | 5.72559e-11 | 1.000000 |
| rad60anti          | 4.79365e-11 | 1.000000 | 4.79372e-11 | 1.000000 |
| rad28              | 1.21214e-12 | 1.000000 | 1.21216e-12 | 1.000000 |
| PAH3+H             | 6.25698e-13 | 1.000000 | 6.25707e-13 | 1.000000 |
| rad59              | 2.00718e-13 | 1.000000 | 2.00720e-13 | 1.000000 |
| rad26              | 1.56357e-13 | 1.000000 | 1.56359e-13 | 1.000000 |
| rad19syn           | 9.19281e-14 | 1.000000 | 9.19294e-14 | 1.000000 |
| rad2               | 3.41164e-14 | 1.000000 | 3.41168e-14 | 1.000000 |
| rad50              | 2.20045e-14 | 1.000000 | 2.20048e-14 | 1.000000 |
| rad7               | 4.25389e-15 | 1.000000 | 4.25395e-15 | 1.000000 |
| rad1               | 2.33796e-15 | 1.000000 | 2.33799e-15 | 1.000000 |
| rad10              | 1.78529e-15 | 1.000000 | 1.78531e-15 | 1.000000 |
| rad54              | 1.36990e-15 | 1.000000 | 1.36992e-15 | 1.000000 |
| rad11              | 1.04603e-15 | 1.000000 | 1.04604e-15 | 1.000000 |
| PAH10+CH3          | 9.35811e-16 | 1.000000 | 9.35825e-16 | 1.000000 |
| rad3               | 2.67747e-16 | 1.000000 | 2.67751e-16 | 1.000000 |
| rad43              | 2.25413e-16 | 1.000000 | 2.25417e-16 | 1.000000 |
| rad4               | 1.38369e-16 | 1.000000 | 1.38371e-16 | 1.000000 |
| rad62              | 4.46230e-17 | 1.000000 | 4.46236e-17 | 1.000000 |
| rad13              | 2.41006e-17 | 1.000000 | 2.41009e-17 | 1.000000 |
| rad14              | 2.07833e-17 | 1.000000 | 2.07836e-17 | 1.000000 |
| rad25              | 1.12839e-17 | 1.000000 | 1.12841e-17 | 1.000000 |
| rad52              | 3.57586e-18 | 1.000000 | 3.57591e-18 | 1.000000 |
| rad27              | 1.52154e-18 | 1.000000 | 1.52156e-18 | 1.000000 |
| PhcycC3H3_A+H      | 1.39649e-18 | 1.000000 | 1.39651e-18 | 1.000000 |
| rad70              | 9.49278e-19 | 1.000000 | 9.49290e-19 | 1.000000 |
| rad55              | 4.19551e-19 | 1.000000 | 4.19556e-19 | 1.000000 |
| rad51              | 5.58853e-20 | 1.000000 | 5.58861e-20 | 1.000000 |
| rad33              | 4.73716e-20 | 1.000000 | 4.73722e-20 | 1.000000 |
| PAH1+H             | 2.22717e-20 | 1.000000 | 2.22720e-20 | 1.000000 |
| rad34              | 1.09605e-21 | 1.000000 | 1.09606e-21 | 1.000000 |
| rad58              | 1.01534e-21 | 1.000000 | 1.01535e-21 | 1.000000 |
| rad31              | 7.43950e-22 | 1.000000 | 7.43961e-22 | 1.000000 |
| rad65              | 3.46716e-22 | 1.000000 | 3.46720e-22 | 1.000000 |
| rad42              | 1.39290e-23 | 1.000000 | 1.39292e-23 | 1.000000 |
| rad41              | 3.90335e-24 | 1.000000 | 3.90341e-24 | 1.000000 |
| rad20              | 3.72801e-24 | 1.000000 | 3.72807e-24 | 1.000000 |
| rad21              | 3.08180e-24 | 1.000000 | 3.08184e-24 | 1.000000 |
| rad23              | 1.50070e-25 | 1.000000 | 1.50072e-25 | 1.000000 |
| rad18              | 7.28053e-27 | 1.000000 | 7.28064e-27 | 1.000000 |
| rad45              | 1.35221e-27 | 1.000000 | 1.35222e-27 | 1.000000 |
| rad22              | 5.06203e-28 | 1.000000 | 5.06210e-28 | 1.000000 |
| rad36              | 8.47249e-29 | 1.000000 | 8.47261e-29 | 1.000000 |
| rad24              | 4.66838e-30 | 1.000000 | 4.66845e-30 | 1.000000 |
| rad47              | 3.66234e-34 | 1.000000 | 3.66238e-34 | 1.000000 |

0.100000000E-05 Pa, 220.000000 K

| Rate constant      | True (fraction) |           | Effective (fraction) |           |
|--------------------|-----------------|-----------|----------------------|-----------|
| Total              | 4.29529e-17     | (1.00 )   | 4.29521e-17          | (1.00 )   |
| Formation of rad11 | 3.53712e-17     | (0.823 )  | 3.53705e-17          | (0.823 )  |
| Formation of rad6  | 6.75433e-18     | (0.157 )  | 6.75421e-18          | (0.157 )  |
| H-abstraction      | 8.27372e-19     | (0.0193 ) | 8.27372e-19          | (0.0193 ) |
| species            | PYtrue          | Cumul     | PYeffective          | Cumul     |
| Indene+H           | 0.950150        | 0.950150  | 0.950168             | 0.950168  |

|                    |             |          |             |          |
|--------------------|-------------|----------|-------------|----------|
| Benzene+2-propynyl | 0.0192623   | 0.969413 | 0.0192627   | 0.969430 |
| C2H2+PhCH2         | 0.0164068   | 0.985820 | 0.0164070   | 0.985837 |
| PhCCH+CH3          | 0.00739758  | 0.993217 | 0.00739771  | 0.993235 |
| PhCHCCH2+H         | 0.00390306  | 0.997120 | 0.00390313  | 0.997138 |
| PhCCCH3+H          | 0.00253708  | 0.999657 | 0.00253713  | 0.999675 |
| Ph+MeAc            | 0.000245737 | 0.999903 | 0.000245741 | 0.999921 |
| rad8               | 2.98928e-05 | 0.999933 | 2.98934e-05 | 0.999951 |
| rad9               | 2.46798e-05 | 0.999958 | 2.46803e-05 | 0.999976 |
| Phenyl+Allene      | 1.79035e-05 | 0.999975 | 0.00000     | 0.999976 |
| PAH7+H             | 1.68178e-05 | 0.999992 | 1.68182e-05 | 0.999993 |
| rad39              | 3.38093e-06 | 0.999996 | 3.38098e-06 | 0.999996 |
| rad12              | 1.68821e-06 | 0.999997 | 1.68824e-06 | 0.999998 |
| rad30              | 1.19022e-06 | 0.999999 | 1.19024e-06 | 0.999999 |
| PAH9+H             | 2.90605e-07 | 0.999999 | 2.90610e-07 | 0.999999 |
| rad15              | 2.69081e-07 | 0.999999 | 2.69086e-07 | 0.999999 |
| PhCH2CCH+H         | 2.52099e-07 | 0.999999 | 2.52103e-07 | 1.000000 |
| rad35              | 1.32596e-07 | 0.999999 | 1.32598e-07 | 1.000000 |
| rad38              | 8.40756e-08 | 1.000000 | 8.40771e-08 | 1.000000 |
| rad37              | 3.13084e-08 | 1.000000 | 3.13090e-08 | 1.000000 |
| rad46              | 1.31325e-09 | 1.000000 | 1.31327e-09 | 1.000000 |
| rad5               | 6.14074e-10 | 1.000000 | 6.14085e-10 | 1.000000 |
| rad60syn           | 1.79672e-10 | 1.000000 | 1.79676e-10 | 1.000000 |
| rad60anti          | 6.20532e-11 | 1.000000 | 6.20544e-11 | 1.000000 |
| rad6               | 4.53828e-11 | 1.000000 | 4.53835e-11 | 1.000000 |
| PAH3+H             | 1.12266e-12 | 1.000000 | 1.12268e-12 | 1.000000 |
| rad28              | 9.82729e-13 | 1.000000 | 9.82748e-13 | 1.000000 |
| rad59              | 3.50293e-13 | 1.000000 | 3.50300e-13 | 1.000000 |
| rad19syn           | 2.39062e-13 | 1.000000 | 2.39066e-13 | 1.000000 |
| rad26              | 1.28534e-13 | 1.000000 | 1.28536e-13 | 1.000000 |
| rad50              | 3.97489e-14 | 1.000000 | 3.97496e-14 | 1.000000 |
| rad2               | 3.10138e-14 | 1.000000 | 3.10143e-14 | 1.000000 |
| rad54              | 4.20835e-15 | 1.000000 | 4.20842e-15 | 1.000000 |
| rad7               | 3.37969e-15 | 1.000000 | 3.37975e-15 | 1.000000 |
| PAH10+CH3          | 2.86443e-15 | 1.000000 | 2.86448e-15 | 1.000000 |
| rad1               | 2.14485e-15 | 1.000000 | 2.14489e-15 | 1.000000 |
| rad10              | 1.62511e-15 | 1.000000 | 1.62514e-15 | 1.000000 |
| rad11              | 8.31557e-16 | 1.000000 | 8.31572e-16 | 1.000000 |
| rad43              | 6.85851e-16 | 1.000000 | 6.85864e-16 | 1.000000 |
| rad3               | 2.52027e-16 | 1.000000 | 2.52031e-16 | 1.000000 |
| rad62              | 1.50549e-16 | 1.000000 | 1.50551e-16 | 1.000000 |
| rad4               | 1.30583e-16 | 1.000000 | 1.30586e-16 | 1.000000 |
| rad13              | 1.91803e-17 | 1.000000 | 1.91807e-17 | 1.000000 |
| rad14              | 1.78250e-17 | 1.000000 | 1.78254e-17 | 1.000000 |
| rad25              | 9.76605e-18 | 1.000000 | 9.76622e-18 | 1.000000 |
| rad52              | 9.36557e-18 | 1.000000 | 9.36575e-18 | 1.000000 |
| PhcycC3H3_A+H      | 6.23505e-18 | 1.000000 | 6.23517e-18 | 1.000000 |
| rad70              | 4.03526e-18 | 1.000000 | 4.03534e-18 | 1.000000 |
| rad55              | 1.81229e-18 | 1.000000 | 1.81231e-18 | 1.000000 |
| rad27              | 1.32967e-18 | 1.000000 | 1.32970e-18 | 1.000000 |
| rad51              | 1.98109e-19 | 1.000000 | 1.98113e-19 | 1.000000 |
| PAH1+H             | 1.16259e-19 | 1.000000 | 1.16262e-19 | 1.000000 |
| rad33              | 3.79091e-20 | 1.000000 | 3.79098e-20 | 1.000000 |
| rad34              | 5.98215e-21 | 1.000000 | 5.98225e-21 | 1.000000 |
| rad58              | 4.64426e-21 | 1.000000 | 4.64434e-21 | 1.000000 |
| rad65              | 1.42039e-21 | 1.000000 | 1.42042e-21 | 1.000000 |
| rad31              | 9.68536e-22 | 1.000000 | 9.68554e-22 | 1.000000 |
| rad42              | 8.43153e-23 | 1.000000 | 8.43167e-23 | 1.000000 |
| rad41              | 2.40058e-23 | 1.000000 | 2.40063e-23 | 1.000000 |
| rad20              | 3.68516e-24 | 1.000000 | 3.68523e-24 | 1.000000 |
| rad21              | 3.07021e-24 | 1.000000 | 3.07027e-24 | 1.000000 |
| rad23              | 2.66008e-25 | 1.000000 | 2.66013e-25 | 1.000000 |
| rad18              | 6.80306e-27 | 1.000000 | 6.80319e-27 | 1.000000 |
| rad45              | 2.52692e-27 | 1.000000 | 2.52696e-27 | 1.000000 |
| rad22              | 4.56805e-28 | 1.000000 | 4.56813e-28 | 1.000000 |
| rad36              | 1.58803e-28 | 1.000000 | 1.58806e-28 | 1.000000 |
| rad24              | 5.37285e-30 | 1.000000 | 5.37295e-30 | 1.000000 |
| rad47              | 1.52506e-33 | 1.000000 | 1.52509e-33 | 1.000000 |

0.100000000E-05 Pa, 230.000000 K

=====

| Rate constant      | True (fraction)       | Effective (fraction)  |             |          |
|--------------------|-----------------------|-----------------------|-------------|----------|
| Total              | 6.25016e-17 (1.00 )   | 6.25002e-17 (1.00 )   |             |          |
| Formation of rad11 | 5.06355e-17 (0.810 )  | 5.06343e-17 (0.810 )  |             |          |
| Formation of rad6  | 1.04318e-17 (0.167 )  | 1.04316e-17 (0.167 )  |             |          |
| H-abstraction      | 1.43428e-18 (0.0229 ) | 1.43428e-18 (0.0229 ) |             |          |
| species            | PYtrue                | Cumul                 | PYeffective | Cumul    |
| Indene+H           | 0.944518              | 0.944518              | 0.944540    | 0.944540 |



|                    |             |          |             |          |
|--------------------|-------------|----------|-------------|----------|
| Benzene+2-propynyl | 0.0229478   | 0.967466 | 0.0229483   | 0.967489 |
| C2H2+PhCH2         | 0.0172613   | 0.984727 | 0.0172617   | 0.984750 |
| PhCCH+CH3          | 0.00798891  | 0.992716 | 0.00798910  | 0.992739 |
| PhCHCCH2+H         | 0.00416869  | 0.996885 | 0.00416879  | 0.996908 |
| PhCCCH3+H          | 0.00271487  | 0.999600 | 0.00271493  | 0.999623 |
| Ph+MeAc            | 0.000288706 | 0.999889 | 0.000288712 | 0.999912 |
| rad8               | 3.26570e-05 | 0.999921 | 3.26577e-05 | 0.999944 |
| rad9               | 2.80944e-05 | 0.999949 | 2.80950e-05 | 0.999973 |
| Phenyl+Allene      | 2.29530e-05 | 0.999972 | 0.00000     | 0.999973 |
| PAH7+H             | 1.93884e-05 | 0.999992 | 1.93888e-05 | 0.999992 |
| rad39              | 3.99879e-06 | 0.999996 | 3.99889e-06 | 0.999996 |
| rad12              | 1.89511e-06 | 0.999998 | 1.89515e-06 | 0.999998 |
| rad30              | 1.28226e-06 | 0.999999 | 1.28229e-06 | 0.999999 |
| PhCH2CCH+H         | 3.81715e-07 | 0.999999 | 3.81724e-07 | 1.000000 |
| PAH9+H             | 3.19077e-07 | 1.000000 | 3.19084e-07 | 1.000000 |
| rad15              | 2.94790e-07 | 1.000000 | 2.94797e-07 | 1.000000 |
| rad35              | 1.43882e-07 | 1.000000 | 1.43886e-07 | 1.000000 |
| rad38              | 9.31391e-08 | 1.000000 | 9.31413e-08 | 1.000000 |
| rad37              | 4.19451e-08 | 1.000000 | 4.19461e-08 | 1.000000 |
| rad46              | 1.54760e-09 | 1.000000 | 1.54764e-09 | 1.000000 |
| rad5               | 9.45868e-10 | 1.000000 | 9.45890e-10 | 1.000000 |
| rad60syn           | 2.26291e-10 | 1.000000 | 2.26296e-10 | 1.000000 |
| rad60anti          | 7.99692e-11 | 1.000000 | 7.99710e-11 | 1.000000 |
| rad6               | 3.61207e-11 | 1.000000 | 3.61216e-11 | 1.000000 |
| PAH3+H             | 1.94643e-12 | 1.000000 | 1.94648e-12 | 1.000000 |
| rad28              | 7.98286e-13 | 1.000000 | 7.98304e-13 | 1.000000 |
| rad59              | 5.91548e-13 | 1.000000 | 5.91562e-13 | 1.000000 |
| rad19syn           | 5.76045e-13 | 1.000000 | 5.76057e-13 | 1.000000 |
| rad26              | 1.05851e-13 | 1.000000 | 1.05854e-13 | 1.000000 |
| rad50              | 6.96948e-14 | 1.000000 | 6.96964e-14 | 1.000000 |
| rad2               | 2.91895e-14 | 1.000000 | 2.91902e-14 | 1.000000 |
| rad54              | 1.17979e-14 | 1.000000 | 1.17982e-14 | 1.000000 |
| PAH10+CH3          | 7.98673e-15 | 1.000000 | 7.98691e-15 | 1.000000 |
| rad7               | 2.69643e-15 | 1.000000 | 2.69650e-15 | 1.000000 |
| rad1               | 2.03874e-15 | 1.000000 | 2.03878e-15 | 1.000000 |
| rad43              | 1.89884e-15 | 1.000000 | 1.89889e-15 | 1.000000 |
| rad10              | 1.52631e-15 | 1.000000 | 1.52635e-15 | 1.000000 |
| rad11              | 6.63858e-16 | 1.000000 | 6.63873e-16 | 1.000000 |
| rad62              | 4.58149e-16 | 1.000000 | 4.58159e-16 | 1.000000 |
| rad3               | 2.44637e-16 | 1.000000 | 2.44643e-16 | 1.000000 |
| rad4               | 1.27114e-16 | 1.000000 | 1.27116e-16 | 1.000000 |
| PhcycC3H3_A+H      | 2.44416e-17 | 1.000000 | 2.44422e-17 | 1.000000 |
| rad52              | 2.28788e-17 | 1.000000 | 2.28793e-17 | 1.000000 |
| rad13              | 1.53299e-17 | 1.000000 | 1.53303e-17 | 1.000000 |
| rad14              | 1.53073e-17 | 1.000000 | 1.53077e-17 | 1.000000 |
| rad70              | 1.51220e-17 | 1.000000 | 1.51223e-17 | 1.000000 |
| rad25              | 8.46558e-18 | 1.000000 | 8.46578e-18 | 1.000000 |
| rad55              | 6.89279e-18 | 1.000000 | 6.89294e-18 | 1.000000 |
| rad27              | 1.16457e-18 | 1.000000 | 1.16460e-18 | 1.000000 |
| rad51              | 6.35769e-19 | 1.000000 | 6.35783e-19 | 1.000000 |
| PAH1+H             | 5.21364e-19 | 1.000000 | 5.21376e-19 | 1.000000 |
| rad33              | 3.04910e-20 | 1.000000 | 3.04917e-20 | 1.000000 |
| rad34              | 2.78859e-20 | 1.000000 | 2.78865e-20 | 1.000000 |
| rad58              | 1.86124e-20 | 1.000000 | 1.86127e-20 | 1.000000 |
| rad65              | 5.17415e-21 | 1.000000 | 5.17427e-21 | 1.000000 |
| rad31              | 1.28454e-21 | 1.000000 | 1.28457e-21 | 1.000000 |
| rad42              | 4.29488e-22 | 1.000000 | 4.29498e-22 | 1.000000 |
| rad41              | 1.23970e-22 | 1.000000 | 1.23973e-22 | 1.000000 |
| rad20              | 3.67037e-24 | 1.000000 | 3.67045e-24 | 1.000000 |
| rad21              | 3.08287e-24 | 1.000000 | 3.08294e-24 | 1.000000 |
| rad23              | 4.98321e-25 | 1.000000 | 4.98332e-25 | 1.000000 |
| rad18              | 6.38883e-27 | 1.000000 | 6.38898e-27 | 1.000000 |
| rad45              | 5.06665e-27 | 1.000000 | 5.06677e-27 | 1.000000 |
| rad22              | 4.16469e-28 | 1.000000 | 4.16479e-28 | 1.000000 |
| rad36              | 3.19517e-28 | 1.000000 | 3.19523e-28 | 1.000000 |
| rad24              | 6.25708e-30 | 1.000000 | 6.25722e-30 | 1.000000 |
| rad47              | 5.52649e-33 | 1.000000 | 5.52661e-33 | 1.000000 |

0.100000000E-05 Pa, 240.000000 K

| Rate constant      | True (fraction)       | Effective (fraction)  |             |          |
|--------------------|-----------------------|-----------------------|-------------|----------|
| Total              | 8.83273e-17 (1.00 )   | 8.83247e-17 (1.00 )   |             |          |
| Formation of rad11 | 7.04077e-17 (0.797 )  | 7.04056e-17 (0.797 )  |             |          |
| Formation of rad6  | 1.55481e-17 (0.176 )  | 1.55476e-17 (0.176 )  |             |          |
| H-abstraction      | 2.37143e-18 (0.0268 ) | 2.37143e-18 (0.0268 ) |             |          |
| species            | PYtrue                | Cumul                 | PYeffective | Cumul    |
| Indene+H           | 0.938535              | 0.938535              | 0.938562    | 0.938562 |

|                    |             |          |             |          |
|--------------------|-------------|----------|-------------|----------|
| Benzene+2-propynyl | 0.0268483   | 0.965383 | 0.0268490   | 0.965411 |
| C2H2+PhCH2         | 0.0181758   | 0.983559 | 0.0181764   | 0.983588 |
| PhCCH+CH3          | 0.00862202  | 0.992181 | 0.00862227  | 0.992210 |
| PhCHCCH2+H         | 0.00445020  | 0.996631 | 0.00445034  | 0.996660 |
| PhCCCH3+H          | 0.00290206  | 0.999533 | 0.00290214  | 0.999562 |
| Ph+MeAc            | 0.000337739 | 0.999871 | 0.000337750 | 0.999900 |
| rad8               | 3.56275e-05 | 0.999907 | 3.56285e-05 | 0.999936 |
| rad9               | 3.19594e-05 | 0.999938 | 3.19603e-05 | 0.999968 |
| Phenyl+Allene      | 2.92572e-05 | 0.999968 | 0.00000     | 0.999968 |
| PAH7+H             | 2.23425e-05 | 0.999990 | 2.23432e-05 | 0.999990 |
| rad39              | 4.71984e-06 | 0.999995 | 4.71999e-06 | 0.999995 |
| rad12              | 2.12226e-06 | 0.999997 | 2.12232e-06 | 0.999997 |
| rad30              | 1.38314e-06 | 0.999998 | 1.38319e-06 | 0.999998 |
| PhCH2CCH+H         | 5.66262e-07 | 0.999999 | 5.66279e-07 | 0.999999 |
| PAH9+H             | 3.51123e-07 | 0.999999 | 3.51133e-07 | 0.999999 |
| rad15              | 3.23387e-07 | 1.000000 | 3.23397e-07 | 1.000000 |
| rad35              | 1.56434e-07 | 1.000000 | 1.56438e-07 | 1.000000 |
| rad38              | 1.03421e-07 | 1.000000 | 1.03424e-07 | 1.000000 |
| rad37              | 5.50636e-08 | 1.000000 | 5.50652e-08 | 1.000000 |
| rad46              | 1.82801e-09 | 1.000000 | 1.82805e-09 | 1.000000 |
| rad5               | 1.41700e-09 | 1.000000 | 1.41703e-09 | 1.000000 |
| rad60syn           | 2.84271e-10 | 1.000000 | 2.84279e-10 | 1.000000 |
| rad60anti          | 1.02609e-10 | 1.000000 | 1.02612e-10 | 1.000000 |
| rad6               | 2.88602e-11 | 1.000000 | 2.88610e-11 | 1.000000 |
| PAH3+H             | 3.27485e-12 | 1.000000 | 3.27494e-12 | 1.000000 |
| rad19syn           | 1.29872e-12 | 1.000000 | 1.29876e-12 | 1.000000 |
| rad59              | 9.70690e-13 | 1.000000 | 9.70718e-13 | 1.000000 |
| rad28              | 6.49555e-13 | 1.000000 | 6.49574e-13 | 1.000000 |
| rad50              | 1.19031e-13 | 1.000000 | 1.19034e-13 | 1.000000 |
| rad26              | 8.73118e-14 | 1.000000 | 8.73143e-14 | 1.000000 |
| rad54              | 3.05321e-14 | 1.000000 | 3.05330e-14 | 1.000000 |
| rad2               | 2.84446e-14 | 1.000000 | 2.84455e-14 | 1.000000 |
| PAH10+CH3          | 2.05204e-14 | 1.000000 | 2.05209e-14 | 1.000000 |
| rad43              | 4.83972e-15 | 1.000000 | 4.83986e-15 | 1.000000 |
| rad7               | 2.15978e-15 | 1.000000 | 2.15985e-15 | 1.000000 |
| rad1               | 2.00805e-15 | 1.000000 | 2.00812e-15 | 1.000000 |
| rad10              | 1.48922e-15 | 1.000000 | 1.48926e-15 | 1.000000 |
| rad62              | 1.27362e-15 | 1.000000 | 1.27366e-15 | 1.000000 |
| rad11              | 5.32085e-16 | 1.000000 | 5.32101e-16 | 1.000000 |
| rad3               | 2.42848e-16 | 1.000000 | 2.42855e-16 | 1.000000 |
| rad4               | 1.26571e-16 | 1.000000 | 1.26575e-16 | 1.000000 |
| PhcycC3H3_A+H      | 8.53910e-17 | 1.000000 | 8.53935e-17 | 1.000000 |
| rad52              | 5.25991e-17 | 1.000000 | 5.26007e-17 | 1.000000 |
| rad70              | 5.07091e-17 | 1.000000 | 5.07106e-17 | 1.000000 |
| rad55              | 2.34299e-17 | 1.000000 | 2.34307e-17 | 1.000000 |
| rad14              | 1.31614e-17 | 1.000000 | 1.31618e-17 | 1.000000 |
| rad13              | 1.23019e-17 | 1.000000 | 1.23023e-17 | 1.000000 |
| rad25              | 7.34952e-18 | 1.000000 | 7.34974e-18 | 1.000000 |
| PAH1+H             | 2.04480e-18 | 1.000000 | 2.04485e-18 | 1.000000 |
| rad51              | 1.86868e-18 | 1.000000 | 1.86873e-18 | 1.000000 |
| rad27              | 1.02216e-18 | 1.000000 | 1.02219e-18 | 1.000000 |
| rad34              | 1.13110e-19 | 1.000000 | 1.13113e-19 | 1.000000 |
| rad58              | 6.63438e-20 | 1.000000 | 6.63457e-20 | 1.000000 |
| rad33              | 2.46465e-20 | 1.000000 | 2.46472e-20 | 1.000000 |
| rad65              | 1.69869e-20 | 1.000000 | 1.69874e-20 | 1.000000 |
| rad42              | 1.87991e-21 | 1.000000 | 1.87996e-21 | 1.000000 |
| rad31              | 1.73428e-21 | 1.000000 | 1.73433e-21 | 1.000000 |
| rad41              | 5.49128e-22 | 1.000000 | 5.49144e-22 | 1.000000 |
| rad20              | 3.68288e-24 | 1.000000 | 3.68299e-24 | 1.000000 |
| rad21              | 3.11981e-24 | 1.000000 | 3.11990e-24 | 1.000000 |
| rad23              | 9.85326e-25 | 1.000000 | 9.85354e-25 | 1.000000 |
| rad45              | 1.07752e-26 | 1.000000 | 1.07755e-26 | 1.000000 |
| rad18              | 6.02845e-27 | 1.000000 | 6.02862e-27 | 1.000000 |
| rad36              | 6.82213e-28 | 1.000000 | 6.82233e-28 | 1.000000 |
| rad22              | 3.85843e-28 | 1.000000 | 3.85854e-28 | 1.000000 |
| rad24              | 7.37548e-30 | 1.000000 | 7.37570e-30 | 1.000000 |
| rad47              | 1.77440e-32 | 1.000000 | 1.77444e-32 | 1.000000 |

0.100000000E-05 Pa, 250.000000 K

| Rate constant      | True (fraction) |           | Effective (fraction) |           |
|--------------------|-----------------|-----------|----------------------|-----------|
| Total              | 1.21641e-16     | (1.00 )   | 1.21637e-16          | (1.00 )   |
| Formation of rad11 | 9.54219e-17     | (0.784 )  | 9.54182e-17          | (0.784 )  |
| Formation of rad6  | 2.24583e-17     | (0.185 )  | 2.24574e-17          | (0.185 )  |
| H-abstraction      | 3.76121e-18     | (0.0309 ) | 3.76121e-18          | (0.0309 ) |
| species            | PYtrue          | Cumul     | PYeffective          | Cumul     |
| Indene+H           | 0.932239        | 0.932239  | 0.932274             | 0.932274  |

|                    |             |          |             |          |
|--------------------|-------------|----------|-------------|----------|
| Benzene+2-propynyl | 0.0309205   | 0.963159 | 0.0309216   | 0.963195 |
| C2H2+PhCH2         | 0.0191540   | 0.982313 | 0.0191547   | 0.982350 |
| PhCCH+CH3          | 0.00929782  | 0.991611 | 0.00929816  | 0.991648 |
| PhCHCCH2+H         | 0.00474772  | 0.996359 | 0.00474789  | 0.996396 |
| PhCCCH3+H          | 0.00309834  | 0.999457 | 0.00309846  | 0.999495 |
| Ph+MeAc            | 0.000393374 | 0.999851 | 0.000393388 | 0.999888 |
| rad8               | 3.88071e-05 | 0.999889 | 3.88085e-05 | 0.999927 |
| Phenyl+Allene      | 3.70843e-05 | 0.999927 | 0.00000     | 0.999927 |
| rad9               | 3.63241e-05 | 0.999963 | 3.63255e-05 | 0.999963 |
| PAH7+H             | 2.57304e-05 | 0.999989 | 2.57315e-05 | 0.999989 |
| rad39              | 5.55869e-06 | 0.999994 | 5.55890e-06 | 0.999994 |
| rad12              | 2.37048e-06 | 0.999997 | 2.37057e-06 | 0.999997 |
| rad30              | 1.49361e-06 | 0.999998 | 1.49367e-06 | 0.999998 |
| PhCH2CCH+H         | 8.24718e-07 | 0.999999 | 8.24749e-07 | 0.999999 |
| PAH9+H             | 3.87199e-07 | 0.999999 | 3.87213e-07 | 0.999999 |
| rad15              | 3.55173e-07 | 1.000000 | 3.55187e-07 | 1.000000 |
| rad35              | 1.70394e-07 | 1.000000 | 1.70401e-07 | 1.000000 |
| rad38              | 1.15085e-07 | 1.000000 | 1.15089e-07 | 1.000000 |
| rad37              | 7.10189e-08 | 1.000000 | 7.10215e-08 | 1.000000 |
| rad46              | 2.16340e-09 | 1.000000 | 2.16348e-09 | 1.000000 |
| rad5               | 2.07071e-09 | 1.000000 | 2.07078e-09 | 1.000000 |
| rad60syn           | 3.56127e-10 | 1.000000 | 3.56140e-10 | 1.000000 |
| rad60anti          | 1.31091e-10 | 1.000000 | 1.31096e-10 | 1.000000 |
| rad6               | 2.31448e-11 | 1.000000 | 2.31457e-11 | 1.000000 |
| PAH3+H             | 5.36545e-12 | 1.000000 | 5.36565e-12 | 1.000000 |
| rad19syn           | 2.76178e-12 | 1.000000 | 2.76188e-12 | 1.000000 |
| rad59              | 1.55299e-12 | 1.000000 | 1.55305e-12 | 1.000000 |
| rad28              | 5.29317e-13 | 1.000000 | 5.29337e-13 | 1.000000 |
| rad50              | 1.98573e-13 | 1.000000 | 1.98581e-13 | 1.000000 |
| rad54              | 7.36303e-14 | 1.000000 | 7.36330e-14 | 1.000000 |
| rad26              | 7.21260e-14 | 1.000000 | 7.21287e-14 | 1.000000 |
| PAH10+CH3          | 4.90482e-14 | 1.000000 | 4.90500e-14 | 1.000000 |
| rad2               | 2.87951e-14 | 1.000000 | 2.87962e-14 | 1.000000 |
| rad43              | 1.14663e-14 | 1.000000 | 1.14667e-14 | 1.000000 |
| rad62              | 3.26829e-15 | 1.000000 | 3.26841e-15 | 1.000000 |
| rad1               | 2.05637e-15 | 1.000000 | 2.05644e-15 | 1.000000 |
| rad7               | 1.73651e-15 | 1.000000 | 1.73658e-15 | 1.000000 |
| rad10              | 1.50198e-15 | 1.000000 | 1.50203e-15 | 1.000000 |
| rad11              | 4.28104e-16 | 1.000000 | 4.28120e-16 | 1.000000 |
| PhcycC3H3_A+H      | 2.69202e-16 | 1.000000 | 2.69212e-16 | 1.000000 |
| rad3               | 2.51707e-16 | 1.000000 | 2.51715e-16 | 1.000000 |
| rad70              | 1.54047e-16 | 1.000000 | 1.54052e-16 | 1.000000 |
| rad4               | 1.31624e-16 | 1.000000 | 1.31630e-16 | 1.000000 |
| rad52              | 1.14633e-16 | 1.000000 | 1.14638e-16 | 1.000000 |
| rad55              | 7.20613e-17 | 1.000000 | 7.20641e-17 | 1.000000 |
| rad14              | 1.13299e-17 | 1.000000 | 1.13304e-17 | 1.000000 |
| rad13              | 9.91049e-18 | 1.000000 | 9.91086e-18 | 1.000000 |
| PAH1+H             | 7.11980e-18 | 1.000000 | 7.12006e-18 | 1.000000 |
| rad25              | 6.39032e-18 | 1.000000 | 6.39056e-18 | 1.000000 |
| rad51              | 5.07773e-18 | 1.000000 | 5.07792e-18 | 1.000000 |
| rad27              | 8.99081e-19 | 1.000000 | 8.99115e-19 | 1.000000 |
| rad34              | 4.05530e-19 | 1.000000 | 4.05545e-19 | 1.000000 |
| rad58              | 2.12987e-19 | 1.000000 | 2.12995e-19 | 1.000000 |
| rad65              | 5.08171e-20 | 1.000000 | 5.08190e-20 | 1.000000 |
| rad33              | 2.00221e-20 | 1.000000 | 2.00228e-20 | 1.000000 |
| rad42              | 7.19654e-21 | 1.000000 | 7.19680e-21 | 1.000000 |
| rad31              | 2.38143e-21 | 1.000000 | 2.38151e-21 | 1.000000 |
| rad41              | 2.12408e-21 | 1.000000 | 2.12415e-21 | 1.000000 |
| rad20              | 3.72282e-24 | 1.000000 | 3.72296e-24 | 1.000000 |
| rad21              | 3.18187e-24 | 1.000000 | 3.18199e-24 | 1.000000 |
| rad23              | 2.05277e-24 | 1.000000 | 2.05286e-24 | 1.000000 |
| rad45              | 2.44446e-26 | 1.000000 | 2.44456e-26 | 1.000000 |
| rad18              | 5.71453e-27 | 1.000000 | 5.71473e-27 | 1.000000 |
| rad36              | 1.55465e-27 | 1.000000 | 1.55470e-27 | 1.000000 |
| rad22              | 3.67811e-28 | 1.000000 | 3.67824e-28 | 1.000000 |
| rad24              | 8.80253e-30 | 1.000000 | 8.80286e-30 | 1.000000 |
| rad47              | 5.12438e-32 | 1.000000 | 5.12456e-32 | 1.000000 |

0.100000000E-05 Pa, 260.000000 K

| Rate constant      | True (fraction) |           | Effective (fraction) |           |
|--------------------|-----------------|-----------|----------------------|-----------|
| Total              | 1.63720e-16     | (1.00 )   | 1.63713e-16          | (1.00 )   |
| Formation of rad11 | 1.26419e-16     | (0.772 )  | 1.26412e-16          | (0.772 )  |
| Formation of rad6  | 3.15515e-17     | (0.193 )  | 3.15499e-17          | (0.193 )  |
| H-abstraction      | 5.75028e-18     | (0.0351 ) | 5.75028e-18          | (0.0351 ) |
| species            | PYtrue          | Cumul     | PYeffective          | Cumul     |
| Indene+H           | 0.925668        | 0.925668  | 0.925711             | 0.925711  |

|                    |             |          |             |          |
|--------------------|-------------|----------|-------------|----------|
| Benzene+2-propynyl | 0.0351226   | 0.960790 | 0.0351242   | 0.960835 |
| C2H2+PhCH2         | 0.0201991   | 0.980989 | 0.0202001   | 0.981035 |
| PhCCH+CH3          | 0.0100170   | 0.991006 | 0.0100174   | 0.991052 |
| PhCHCCH2+H         | 0.00506124  | 0.996068 | 0.00506148  | 0.996114 |
| PhCCCH3+H          | 0.00330334  | 0.999371 | 0.00330349  | 0.999417 |
| Ph+MeAc            | 0.000456131 | 0.999827 | 0.000456153 | 0.999873 |
| Phenyl+Allene      | 4.67496e-05 | 0.999874 | 0.00000     | 0.999873 |
| rad8               | 4.21965e-05 | 0.999916 | 4.21985e-05 | 0.999916 |
| rad9               | 4.12418e-05 | 0.999957 | 4.12437e-05 | 0.999957 |
| PAH7+H             | 2.96076e-05 | 0.999987 | 2.96090e-05 | 0.999986 |
| rad39              | 6.53142e-06 | 0.999993 | 6.53173e-06 | 0.999993 |
| rad12              | 2.64046e-06 | 0.999996 | 2.64059e-06 | 0.999996 |
| rad30              | 1.61449e-06 | 0.999998 | 1.61457e-06 | 0.999997 |
| PhCH2CCH+H         | 1.18127e-06 | 0.999999 | 1.18133e-06 | 0.999998 |
| PAH9+H             | 4.27812e-07 | 0.999999 | 4.27832e-07 | 0.999999 |
| rad15              | 3.90469e-07 | 1.000000 | 3.90487e-07 | 0.999999 |
| rad35              | 1.85919e-07 | 1.000000 | 1.85928e-07 | 0.999999 |
| rad38              | 1.28318e-07 | 1.000000 | 1.28325e-07 | 1.000000 |
| rad37              | 9.01896e-08 | 1.000000 | 9.01938e-08 | 1.000000 |
| rad5               | 2.95909e-09 | 1.000000 | 2.95923e-09 | 1.000000 |
| rad46              | 2.56435e-09 | 1.000000 | 2.56448e-09 | 1.000000 |
| rad60syn           | 4.44847e-10 | 1.000000 | 4.44868e-10 | 1.000000 |
| rad60anti          | 1.66762e-10 | 1.000000 | 1.66769e-10 | 1.000000 |
| rad6               | 1.86301e-11 | 1.000000 | 1.86310e-11 | 1.000000 |
| PAH3+H             | 8.58423e-12 | 1.000000 | 8.58463e-12 | 1.000000 |
| rad19syn           | 5.57648e-12 | 1.000000 | 5.57674e-12 | 1.000000 |
| rad59              | 2.42908e-12 | 1.000000 | 2.42919e-12 | 1.000000 |
| rad28              | 4.31903e-13 | 1.000000 | 4.31924e-13 | 1.000000 |
| rad50              | 3.24311e-13 | 1.000000 | 3.24326e-13 | 1.000000 |
| rad54              | 1.66744e-13 | 1.000000 | 1.66753e-13 | 1.000000 |
| PAH10+CH3          | 1.09928e-13 | 1.000000 | 1.09933e-13 | 1.000000 |
| rad26              | 5.96650e-14 | 1.000000 | 5.96678e-14 | 1.000000 |
| rad2               | 3.01617e-14 | 1.000000 | 3.01631e-14 | 1.000000 |
| rad43              | 2.54567e-14 | 1.000000 | 2.54578e-14 | 1.000000 |
| rad62              | 7.80912e-15 | 1.000000 | 7.80948e-15 | 1.000000 |
| rad1               | 2.18087e-15 | 1.000000 | 2.18098e-15 | 1.000000 |
| rad10              | 1.57217e-15 | 1.000000 | 1.57225e-15 | 1.000000 |
| rad7               | 1.40148e-15 | 1.000000 | 1.40155e-15 | 1.000000 |
| PhcycC3H3_A+H      | 7.73852e-16 | 1.000000 | 7.73888e-16 | 1.000000 |
| rad70              | 4.28320e-16 | 1.000000 | 4.28340e-16 | 1.000000 |
| rad11              | 3.45763e-16 | 1.000000 | 3.45779e-16 | 1.000000 |
| rad3               | 2.69973e-16 | 1.000000 | 2.69986e-16 | 1.000000 |
| rad52              | 2.38195e-16 | 1.000000 | 2.38207e-16 | 1.000000 |
| rad55              | 2.02608e-16 | 1.000000 | 2.02617e-16 | 1.000000 |
| rad4               | 1.41685e-16 | 1.000000 | 1.41692e-16 | 1.000000 |
| PAH1+H             | 2.22906e-17 | 1.000000 | 2.22916e-17 | 1.000000 |
| rad51              | 1.28526e-17 | 1.000000 | 1.28531e-17 | 1.000000 |
| rad14              | 9.76514e-18 | 1.000000 | 9.76560e-18 | 1.000000 |
| rad13              | 8.01501e-18 | 1.000000 | 8.01538e-18 | 1.000000 |
| rad25              | 5.56486e-18 | 1.000000 | 5.56512e-18 | 1.000000 |
| rad34              | 1.30240e-18 | 1.000000 | 1.30246e-18 | 1.000000 |
| rad27              | 7.92525e-19 | 1.000000 | 7.92562e-19 | 1.000000 |
| rad58              | 6.22358e-19 | 1.000000 | 6.22386e-19 | 1.000000 |
| rad65              | 1.39790e-19 | 1.000000 | 1.39797e-19 | 1.000000 |
| rad42              | 2.44584e-20 | 1.000000 | 2.44595e-20 | 1.000000 |
| rad33              | 1.63501e-20 | 1.000000 | 1.63509e-20 | 1.000000 |
| rad41              | 7.28487e-21 | 1.000000 | 7.28521e-21 | 1.000000 |
| rad31              | 3.32217e-21 | 1.000000 | 3.32232e-21 | 1.000000 |
| rad23              | 4.49415e-24 | 1.000000 | 4.49436e-24 | 1.000000 |
| rad20              | 3.79117e-24 | 1.000000 | 3.79134e-24 | 1.000000 |
| rad21              | 3.27068e-24 | 1.000000 | 3.27083e-24 | 1.000000 |
| rad45              | 5.86261e-26 | 1.000000 | 5.86289e-26 | 1.000000 |
| rad18              | 5.44119e-27 | 1.000000 | 5.44145e-27 | 1.000000 |
| rad36              | 3.74747e-27 | 1.000000 | 3.74765e-27 | 1.000000 |
| rad22              | 3.69793e-28 | 1.000000 | 3.69811e-28 | 1.000000 |
| rad24              | 1.06411e-29 | 1.000000 | 1.06415e-29 | 1.000000 |
| rad47              | 1.34824e-31 | 1.000000 | 1.34831e-31 | 1.000000 |

0.100000000E-05 Pa, 270.000000 K

| Rate constant      | True (fraction) |           | Effective (fraction) |           |
|--------------------|-----------------|-----------|----------------------|-----------|
| Total              | 2.15887e-16     | (1.00 )   | 2.15874e-16          | (1.00 )   |
| Formation of rad11 | 1.64133e-16     | (0.760 )  | 1.64123e-16          | (0.760 )  |
| Formation of rad6  | 4.32452e-17     | (0.200 )  | 4.32425e-17          | (0.200 )  |
| H-abstraction      | 8.50919e-18     | (0.0394 ) | 8.50919e-18          | (0.0394 ) |
| species            | PYtrue          | Cumul     | PYeffective          | Cumul     |
| Indene+H           | 0.918856        | 0.918856  | 0.918910             | 0.918910  |

|                    |             |          |             |          |
|--------------------|-------------|----------|-------------|----------|
| Benzene+2-propynyl | 0.0394150   | 0.958271 | 0.0394174   | 0.958327 |
| C2H2+PhCH2         | 0.0213147   | 0.979586 | 0.0213160   | 0.979643 |
| PhCCH+CH3          | 0.0107799   | 0.990366 | 0.0107805   | 0.990424 |
| PhCHCCH2+H         | 0.00539067  | 0.995756 | 0.00539099  | 0.995815 |
| PhCCCH3+H          | 0.00351652  | 0.999273 | 0.00351672  | 0.999331 |
| Ph+MeAc            | 0.000526519 | 0.999800 | 0.000526549 | 0.999858 |
| Phenyl+Allene      | 5.86203e-05 | 0.999858 | 0.000000    | 0.999858 |
| rad9               | 4.67689e-05 | 0.999905 | 4.67716e-05 | 0.999905 |
| rad8               | 4.57943e-05 | 0.999951 | 4.57969e-05 | 0.999950 |
| PAH7+H             | 3.40344e-05 | 0.999985 | 3.40364e-05 | 0.999984 |
| rad39              | 7.65570e-06 | 0.999992 | 7.65615e-06 | 0.999992 |
| rad12              | 2.93270e-06 | 0.999995 | 2.93288e-06 | 0.999995 |
| rad30              | 1.74662e-06 | 0.999997 | 1.74672e-06 | 0.999997 |
| PhCH2CCH+H         | 1.66639e-06 | 0.999999 | 1.66650e-06 | 0.999998 |
| PAH9+H             | 4.73523e-07 | 0.999999 | 4.73552e-07 | 0.999999 |
| rad15              | 4.29618e-07 | 1.000000 | 4.29643e-07 | 0.999999 |
| rad35              | 2.03179e-07 | 1.000000 | 2.03191e-07 | 1.000000 |
| rad38              | 1.43329e-07 | 1.000000 | 1.43337e-07 | 1.000000 |
| rad37              | 1.12974e-07 | 1.000000 | 1.12981e-07 | 1.000000 |
| rad5               | 4.14375e-09 | 1.000000 | 4.14399e-09 | 1.000000 |
| rad46              | 3.04327e-09 | 1.000000 | 3.04344e-09 | 1.000000 |
| rad60syn           | 5.53958e-10 | 1.000000 | 5.53990e-10 | 1.000000 |
| rad60anti          | 2.11224e-10 | 1.000000 | 2.11236e-10 | 1.000000 |
| rad6               | 1.50540e-11 | 1.000000 | 1.50548e-11 | 1.000000 |
| PAH3+H             | 1.34418e-11 | 1.000000 | 1.34426e-11 | 1.000000 |
| rad19syn           | 1.07499e-11 | 1.000000 | 1.07506e-11 | 1.000000 |
| rad59              | 3.72266e-12 | 1.000000 | 3.72288e-12 | 1.000000 |
| rad50              | 5.19446e-13 | 1.000000 | 5.19476e-13 | 1.000000 |
| rad54              | 3.56850e-13 | 1.000000 | 3.56871e-13 | 1.000000 |
| rad28              | 3.52835e-13 | 1.000000 | 3.52856e-13 | 1.000000 |
| PAH10+CH3          | 2.32536e-13 | 1.000000 | 2.32550e-13 | 1.000000 |
| rad43              | 5.33184e-14 | 1.000000 | 5.33216e-14 | 1.000000 |
| rad26              | 4.94247e-14 | 1.000000 | 4.94275e-14 | 1.000000 |
| rad2               | 3.25178e-14 | 1.000000 | 3.25197e-14 | 1.000000 |
| rad62              | 1.74990e-14 | 1.000000 | 1.75000e-14 | 1.000000 |
| rad1               | 2.38285e-15 | 1.000000 | 2.38298e-15 | 1.000000 |
| PhcycC3H3_A+H      | 2.04647e-15 | 1.000000 | 2.04659e-15 | 1.000000 |
| rad10              | 1.70089e-15 | 1.000000 | 1.70099e-15 | 1.000000 |
| rad7               | 1.13555e-15 | 1.000000 | 1.13562e-15 | 1.000000 |
| rad70              | 1.09950e-15 | 1.000000 | 1.09956e-15 | 1.000000 |
| rad55              | 5.25297e-16 | 1.000000 | 5.25327e-16 | 1.000000 |
| rad52              | 4.74037e-16 | 1.000000 | 4.74065e-16 | 1.000000 |
| rad3               | 2.93854e-16 | 1.000000 | 2.93871e-16 | 1.000000 |
| rad11              | 2.80371e-16 | 1.000000 | 2.80387e-16 | 1.000000 |
| rad4               | 1.54818e-16 | 1.000000 | 1.54828e-16 | 1.000000 |
| PAH1+H             | 6.34375e-17 | 1.000000 | 6.34413e-17 | 1.000000 |
| rad51              | 3.04906e-17 | 1.000000 | 3.04924e-17 | 1.000000 |
| rad14              | 8.42689e-18 | 1.000000 | 8.42738e-18 | 1.000000 |
| rad13              | 6.50830e-18 | 1.000000 | 6.50869e-18 | 1.000000 |
| rad25              | 4.85369e-18 | 1.000000 | 4.85398e-18 | 1.000000 |
| rad34              | 3.78996e-18 | 1.000000 | 3.79018e-18 | 1.000000 |
| rad58              | 1.67023e-18 | 1.000000 | 1.67033e-18 | 1.000000 |
| rad27              | 7.00133e-19 | 1.000000 | 7.00173e-19 | 1.000000 |
| rad65              | 3.56317e-19 | 1.000000 | 3.56339e-19 | 1.000000 |
| rad42              | 7.47520e-20 | 1.000000 | 7.47563e-20 | 1.000000 |
| rad41              | 2.24435e-20 | 1.000000 | 2.24448e-20 | 1.000000 |
| rad33              | 1.34266e-20 | 1.000000 | 1.34273e-20 | 1.000000 |
| rad31              | 4.70236e-21 | 1.000000 | 4.70264e-21 | 1.000000 |
| rad23              | 1.03042e-23 | 1.000000 | 1.03048e-23 | 1.000000 |
| rad20              | 3.88974e-24 | 1.000000 | 3.88996e-24 | 1.000000 |
| rad21              | 3.38875e-24 | 1.000000 | 3.38895e-24 | 1.000000 |
| rad45              | 1.49000e-25 | 1.000000 | 1.49008e-25 | 1.000000 |
| rad36              | 9.57825e-27 | 1.000000 | 9.57881e-27 | 1.000000 |
| rad18              | 5.20379e-27 | 1.000000 | 5.20409e-27 | 1.000000 |
| rad22              | 4.09044e-28 | 1.000000 | 4.09068e-28 | 1.000000 |
| rad24              | 1.30346e-29 | 1.000000 | 1.30354e-29 | 1.000000 |
| rad47              | 3.26704e-31 | 1.000000 | 3.26722e-31 | 1.000000 |

0.100000000E-05 Pa, 280.000000 K

| Rate constant      | True (fraction) |           | Effective (fraction) |           |
|--------------------|-----------------|-----------|----------------------|-----------|
| Total              | 2.79491e-16     | (1.00 )   | 2.79471e-16          | (1.00 )   |
| Formation of rad11 | 2.09281e-16     | (0.749 )  | 2.09265e-16          | (0.749 )  |
| Formation of rad6  | 5.79792e-17     | (0.207 )  | 5.79748e-17          | (0.207 )  |
| H-abstraction      | 1.22310e-17     | (0.0438 ) | 1.22310e-17          | (0.0438 ) |
| species            | PYtrue          | Cumul     | PYeffective          | Cumul     |
| Indene+H           | 0.911836        | 0.911836  | 0.911903             | 0.911903  |

|                    |             |          |             |          |
|--------------------|-------------|----------|-------------|----------|
| Benzene+2-propynyl | 0.0437616   | 0.955598 | 0.0437648   | 0.955668 |
| C2H2+PhCH2         | 0.0225043   | 0.978102 | 0.0225060   | 0.978174 |
| PhCCH+CH3          | 0.0115865   | 0.989689 | 0.0115874   | 0.989761 |
| PhCHCCH2+H         | 0.00573582  | 0.995425 | 0.00573624  | 0.995498 |
| PhCCCH3+H          | 0.00373725  | 0.999162 | 0.00373752  | 0.999235 |
| Ph+MeAc            | 0.000605008 | 0.999767 | 0.000605052 | 0.999840 |
| Phenyl+Allene      | 7.31217e-05 | 0.999840 | 0.000000    | 0.999840 |
| rad9               | 5.29655e-05 | 0.999893 | 5.29693e-05 | 0.999893 |
| rad8               | 4.95970e-05 | 0.999943 | 4.96007e-05 | 0.999943 |
| PAH7+H             | 3.90766e-05 | 0.999982 | 3.90794e-05 | 0.999982 |
| rad39              | 8.95076e-06 | 0.999991 | 8.95142e-06 | 0.999991 |
| rad12              | 3.24751e-06 | 0.999994 | 3.24775e-06 | 0.999994 |
| PhCH2CCH+H         | 2.31797e-06 | 0.999996 | 2.31813e-06 | 0.999996 |
| rad30              | 1.89088e-06 | 0.999998 | 1.89102e-06 | 0.999998 |
| PAH9+H             | 5.24953e-07 | 0.999999 | 5.24991e-07 | 0.999999 |
| rad15              | 4.72984e-07 | 0.999999 | 4.73018e-07 | 0.999999 |
| rad35              | 2.22360e-07 | 0.999999 | 2.22375e-07 | 0.999999 |
| rad38              | 1.60346e-07 | 1.000000 | 1.60358e-07 | 1.000000 |
| rad37              | 1.39788e-07 | 1.000000 | 1.39799e-07 | 1.000000 |
| rad5               | 5.69641e-09 | 1.000000 | 5.69682e-09 | 1.000000 |
| rad46              | 3.61459e-09 | 1.000000 | 3.61486e-09 | 1.000000 |
| rad60syn           | 6.87594e-10 | 1.000000 | 6.87644e-10 | 1.000000 |
| rad60anti          | 2.66376e-10 | 1.000000 | 2.66397e-10 | 1.000000 |
| PAH3+H             | 2.06373e-11 | 1.000000 | 2.06389e-11 | 1.000000 |
| rad19syn           | 1.98735e-11 | 1.000000 | 1.98750e-11 | 1.000000 |
| rad6               | 1.22154e-11 | 1.000000 | 1.22163e-11 | 1.000000 |
| rad59              | 5.59973e-12 | 1.000000 | 5.60014e-12 | 1.000000 |
| rad50              | 8.17020e-13 | 1.000000 | 8.17079e-13 | 1.000000 |
| rad54              | 7.25446e-13 | 1.000000 | 7.25499e-13 | 1.000000 |
| PAH10+CH3          | 4.66809e-13 | 1.000000 | 4.66844e-13 | 1.000000 |
| rad28              | 2.88554e-13 | 1.000000 | 2.88575e-13 | 1.000000 |
| rad43              | 1.05950e-13 | 1.000000 | 1.05959e-13 | 1.000000 |
| rad26              | 4.09989e-14 | 1.000000 | 4.10018e-14 | 1.000000 |
| rad62              | 3.69972e-14 | 1.000000 | 3.69999e-14 | 1.000000 |
| rad2               | 3.64605e-14 | 1.000000 | 3.64632e-14 | 1.000000 |
| PhcycC3H3_A+H      | 5.01694e-15 | 1.000000 | 5.01731e-15 | 1.000000 |
| rad1               | 2.71030e-15 | 1.000000 | 2.71051e-15 | 1.000000 |
| rad70              | 2.62501e-15 | 1.000000 | 2.62520e-15 | 1.000000 |
| rad10              | 1.90033e-15 | 1.000000 | 1.90047e-15 | 1.000000 |
| rad55              | 1.26527e-15 | 1.000000 | 1.26536e-15 | 1.000000 |
| rad7               | 9.24027e-16 | 1.000000 | 9.24094e-16 | 1.000000 |
| rad52              | 9.06729e-16 | 1.000000 | 9.06795e-16 | 1.000000 |
| rad3               | 3.32392e-16 | 1.000000 | 3.32417e-16 | 1.000000 |
| rad11              | 2.28332e-16 | 1.000000 | 2.28349e-16 | 1.000000 |
| rad4               | 1.75855e-16 | 1.000000 | 1.75869e-16 | 1.000000 |
| PAH1+H             | 1.65665e-16 | 1.000000 | 1.65677e-16 | 1.000000 |
| rad51              | 6.81449e-17 | 1.000000 | 6.81498e-17 | 1.000000 |
| rad34              | 1.00923e-17 | 1.000000 | 1.00931e-17 | 1.000000 |
| rad14              | 7.28137e-18 | 1.000000 | 7.28190e-18 | 1.000000 |
| rad13              | 5.30813e-18 | 1.000000 | 5.30851e-18 | 1.000000 |
| rad25              | 4.24033e-18 | 1.000000 | 4.24065e-18 | 1.000000 |
| rad58              | 4.14902e-18 | 1.000000 | 4.14932e-18 | 1.000000 |
| rad65              | 8.47087e-19 | 1.000000 | 8.47149e-19 | 1.000000 |
| rad27              | 6.19912e-19 | 1.000000 | 6.19957e-19 | 1.000000 |
| rad42              | 2.07734e-19 | 1.000000 | 2.07750e-19 | 1.000000 |
| rad41              | 6.28127e-20 | 1.000000 | 6.28173e-20 | 1.000000 |
| rad33              | 1.10945e-20 | 1.000000 | 1.10953e-20 | 1.000000 |
| rad31              | 6.74340e-21 | 1.000000 | 6.74390e-21 | 1.000000 |
| rad23              | 2.46387e-23 | 1.000000 | 2.46406e-23 | 1.000000 |
| rad20              | 4.02126e-24 | 1.000000 | 4.02156e-24 | 1.000000 |
| rad21              | 3.53955e-24 | 1.000000 | 3.53980e-24 | 1.000000 |
| rad45              | 3.96800e-25 | 1.000000 | 3.96829e-25 | 1.000000 |
| rad36              | 2.56681e-26 | 1.000000 | 2.56699e-26 | 1.000000 |
| rad18              | 4.99859e-27 | 1.000000 | 4.99896e-27 | 1.000000 |
| rad22              | 5.24941e-28 | 1.000000 | 5.24980e-28 | 1.000000 |
| rad24              | 1.61857e-29 | 1.000000 | 1.61869e-29 | 1.000000 |
| rad47              | 7.35921e-31 | 1.000000 | 7.35975e-31 | 1.000000 |

0.100000000E-05 Pa, 290.000000 K

| Rate constant      | True (fraction) |           | Effective (fraction) |           |
|--------------------|-----------------|-----------|----------------------|-----------|
| Total              | 3.55893e-16     | (1.00 )   | 3.55861e-16          | (1.00 )   |
| Formation of rad11 | 2.62555e-16     | (0.738 )  | 2.62530e-16          | (0.738 )  |
| Formation of rad6  | 7.62093e-17     | (0.214 )  | 7.62020e-17          | (0.214 )  |
| H-abstraction      | 1.71289e-17     | (0.0481 ) | 1.71289e-17          | (0.0481 ) |
| species            | PYtrue          | Cumul     | PYeffective          | Cumul     |
| Indene+H           | 0.904640        | 0.904640  | 0.904721             | 0.904721  |

|                    |             |          |             |          |
|--------------------|-------------|----------|-------------|----------|
| Benzene+2-propynyl | 0.0481294   | 0.952769 | 0.0481337   | 0.952855 |
| C2H2+PhCH2         | 0.0237711   | 0.976540 | 0.0237732   | 0.976628 |
| PhCCH+CH3          | 0.0124368   | 0.988977 | 0.0124379   | 0.989066 |
| PhCHCCH2+H         | 0.00609640  | 0.995073 | 0.00609695  | 0.995163 |
| PhCCCH3+H          | 0.00396477  | 0.999038 | 0.00396513  | 0.999128 |
| Ph+MeAc            | 0.000692030 | 0.999730 | 0.000692093 | 0.999820 |
| Phenyl+Allene      | 9.07418e-05 | 0.999821 | 0.000000    | 0.999820 |
| rad9               | 5.98951e-05 | 0.999881 | 5.99006e-05 | 0.999880 |
| rad8               | 5.35991e-05 | 0.999934 | 5.36039e-05 | 0.999934 |
| PAH7+H             | 4.48050e-05 | 0.999979 | 4.48091e-05 | 0.999979 |
| rad39              | 1.04374e-05 | 0.999990 | 1.04384e-05 | 0.999989 |
| rad12              | 3.58496e-06 | 0.999993 | 3.58529e-06 | 0.999993 |
| PhCH2CCH+H         | 3.18247e-06 | 0.999996 | 3.18276e-06 | 0.999996 |
| rad30              | 2.04817e-06 | 0.999998 | 2.04836e-06 | 0.999998 |
| PAH9+H             | 5.82779e-07 | 0.999999 | 5.82832e-07 | 0.999999 |
| rad15              | 5.20951e-07 | 1.000000 | 5.20998e-07 | 0.999999 |
| rad35              | 2.43660e-07 | 1.000000 | 2.43682e-07 | 0.999999 |
| rad38              | 1.79627e-07 | 1.000000 | 1.79643e-07 | 0.999999 |
| rad37              | 1.71057e-07 | 1.000000 | 1.71072e-07 | 1.000000 |
| rad5               | 7.69904e-09 | 1.000000 | 7.69974e-09 | 1.000000 |
| rad46              | 4.29513e-09 | 1.000000 | 4.29552e-09 | 1.000000 |
| rad60syn           | 8.50554e-10 | 1.000000 | 8.50631e-10 | 1.000000 |
| rad60anti          | 3.34449e-10 | 1.000000 | 3.34479e-10 | 1.000000 |
| rad19syn           | 3.53638e-11 | 1.000000 | 3.53670e-11 | 1.000000 |
| PAH3+H             | 3.11101e-11 | 1.000000 | 3.11129e-11 | 1.000000 |
| rad6               | 9.95971e-12 | 1.000000 | 9.96061e-12 | 1.000000 |
| rad59              | 8.27903e-12 | 1.000000 | 8.27978e-12 | 1.000000 |
| rad54              | 1.40689e-12 | 1.000000 | 1.40702e-12 | 1.000000 |
| rad50              | 1.26312e-12 | 1.000000 | 1.26323e-12 | 1.000000 |
| PAH10+CH3          | 8.93381e-13 | 1.000000 | 8.93462e-13 | 1.000000 |
| rad28              | 2.36222e-13 | 1.000000 | 2.36244e-13 | 1.000000 |
| rad43              | 2.00696e-13 | 1.000000 | 2.00715e-13 | 1.000000 |
| rad62              | 7.41771e-14 | 1.000000 | 7.41838e-14 | 1.000000 |
| rad2               | 4.17372e-14 | 1.000000 | 4.17410e-14 | 1.000000 |
| rad26              | 3.40591e-14 | 1.000000 | 3.40622e-14 | 1.000000 |
| PhcycC3H3_A+H      | 1.14776e-14 | 1.000000 | 1.14787e-14 | 1.000000 |
| rad70              | 5.86612e-15 | 1.000000 | 5.86666e-15 | 1.000000 |
| rad1               | 3.15045e-15 | 1.000000 | 3.15073e-15 | 1.000000 |
| rad55              | 2.84964e-15 | 1.000000 | 2.84991e-15 | 1.000000 |
| rad10              | 2.17861e-15 | 1.000000 | 2.17880e-15 | 1.000000 |
| rad52              | 1.67153e-15 | 1.000000 | 1.67169e-15 | 1.000000 |
| rad7               | 7.55585e-16 | 1.000000 | 7.55653e-16 | 1.000000 |
| PAH1+H             | 4.00257e-16 | 1.000000 | 4.00293e-16 | 1.000000 |
| rad3               | 3.83065e-16 | 1.000000 | 3.83100e-16 | 1.000000 |
| rad4               | 2.03575e-16 | 1.000000 | 2.03593e-16 | 1.000000 |
| rad11              | 1.86870e-16 | 1.000000 | 1.86888e-16 | 1.000000 |
| rad51              | 1.44107e-16 | 1.000000 | 1.44120e-16 | 1.000000 |
| rad34              | 2.48052e-17 | 1.000000 | 2.48074e-17 | 1.000000 |
| rad58              | 9.60514e-18 | 1.000000 | 9.60604e-18 | 1.000000 |
| rad14              | 6.30002e-18 | 1.000000 | 6.30059e-18 | 1.000000 |
| rad13              | 4.35099e-18 | 1.000000 | 4.35138e-18 | 1.000000 |
| rad25              | 3.71084e-18 | 1.000000 | 3.71117e-18 | 1.000000 |
| rad65              | 1.88893e-18 | 1.000000 | 1.88909e-18 | 1.000000 |
| rad27              | 5.50176e-19 | 1.000000 | 5.50225e-19 | 1.000000 |
| rad42              | 5.29961e-19 | 1.000000 | 5.30009e-19 | 1.000000 |
| rad41              | 1.61253e-19 | 1.000000 | 1.61268e-19 | 1.000000 |
| rad31              | 9.78114e-21 | 1.000000 | 9.78204e-21 | 1.000000 |
| rad33              | 9.23298e-21 | 1.000000 | 9.23382e-21 | 1.000000 |
| rad23              | 6.11484e-23 | 1.000000 | 6.11539e-23 | 1.000000 |
| rad20              | 4.18954e-24 | 1.000000 | 4.18992e-24 | 1.000000 |
| rad21              | 3.72770e-24 | 1.000000 | 3.72803e-24 | 1.000000 |
| rad45              | 1.10375e-24 | 1.000000 | 1.10385e-24 | 1.000000 |
| rad36              | 7.18927e-26 | 1.000000 | 7.18992e-26 | 1.000000 |
| rad18              | 4.82270e-27 | 1.000000 | 4.82313e-27 | 1.000000 |
| rad22              | 8.07718e-28 | 1.000000 | 8.07792e-28 | 1.000000 |
| rad24              | 2.03837e-29 | 1.000000 | 2.03856e-29 | 1.000000 |
| rad47              | 1.55335e-30 | 1.000000 | 1.55349e-30 | 1.000000 |

0.100000000E-05 Pa, 300.000000 K

| Rate constant      | True (fraction) |           | Effective (fraction) |           |
|--------------------|-----------------|-----------|----------------------|-----------|
| Total              | 6.34395e-16     | (1.00 )   | 6.34337e-16          | (1.00 )   |
| Formation of rad11 | 4.51153e-16     | (0.711 )  | 4.51110e-16          | (0.711 )  |
| Formation of rad6  | 1.51589e-16     | (0.239 )  | 1.51574e-16          | (0.239 )  |
| H-abstraction      | 3.16530e-17     | (0.0499 ) | 3.16530e-17          | (0.0499 ) |
| species            | PYtrue          | Cumul     | PYeffective          | Cumul     |
| Indene+H           | 0.891220        | 0.891220  | 0.891302             | 0.891302  |

|                    |             |          |             |          |
|--------------------|-------------|----------|-------------|----------|
| Benzene+2-propynyl | 0.0498949   | 0.941115 | 0.0498994   | 0.941201 |
| C2H2+PhCH2         | 0.0319120   | 0.973027 | 0.0319149   | 0.973116 |
| PhCCH+CH3          | 0.0149060   | 0.987933 | 0.0149074   | 0.988023 |
| PhCHCCH2+H         | 0.00657740  | 0.994511 | 0.00657800  | 0.994601 |
| PhCCCH3+H          | 0.00446897  | 0.998980 | 0.00446939  | 0.999071 |
| Ph+MeAc            | 0.000840200 | 0.999820 | 0.000840277 | 0.999911 |
| Phenyl+Allene      | 9.13501e-05 | 0.999911 | 0.000000    | 0.999911 |
| PAH7+H             | 6.60536e-05 | 0.999977 | 6.60595e-05 | 0.999977 |
| rad39              | 1.31472e-05 | 0.999990 | 1.31483e-05 | 0.999990 |
| PhCH2CCH+H         | 5.22127e-06 | 0.999996 | 5.22175e-06 | 0.999996 |
| rad30              | 2.21234e-06 | 0.999998 | 2.21254e-06 | 0.999998 |
| PAH9+H             | 8.00101e-07 | 0.999999 | 8.00174e-07 | 0.999999 |
| rad19anti          | 7.04519e-07 | 0.999999 | 7.04583e-07 | 0.999999 |
| rad35              | 2.87140e-07 | 1.000000 | 2.87166e-07 | 1.000000 |
| rad37              | 2.27554e-07 | 1.000000 | 2.27575e-07 | 1.000000 |
| rad38              | 2.12985e-07 | 1.000000 | 2.13004e-07 | 1.000000 |
| rad46              | 5.68755e-09 | 1.000000 | 5.68806e-09 | 1.000000 |
| rad60syn           | 1.08211e-09 | 1.000000 | 1.08221e-09 | 1.000000 |
| rad60anti          | 4.39252e-10 | 1.000000 | 4.39291e-10 | 1.000000 |
| rad6               | 2.80383e-10 | 1.000000 | 2.80408e-10 | 1.000000 |
| rad19syn           | 6.92341e-11 | 1.000000 | 6.92404e-11 | 1.000000 |
| PAH3+H             | 6.10400e-11 | 1.000000 | 6.10456e-11 | 1.000000 |
| rad59              | 1.31853e-11 | 1.000000 | 1.31864e-11 | 1.000000 |
| rad28              | 3.25642e-12 | 1.000000 | 3.25672e-12 | 1.000000 |
| rad54              | 3.21888e-12 | 1.000000 | 3.21917e-12 | 1.000000 |
| rad50              | 2.22681e-12 | 1.000000 | 2.22701e-12 | 1.000000 |
| PAH10+CH3          | 2.02585e-12 | 1.000000 | 2.02603e-12 | 1.000000 |
| rad2               | 1.12503e-12 | 1.000000 | 1.12514e-12 | 1.000000 |
| rad67              | 7.75554e-13 | 1.000000 | 7.75624e-13 | 1.000000 |
| rad26              | 6.90862e-13 | 1.000000 | 6.90925e-13 | 1.000000 |
| rad43              | 4.01324e-13 | 1.000000 | 4.01361e-13 | 1.000000 |
| rad62              | 1.66581e-13 | 1.000000 | 1.66596e-13 | 1.000000 |
| rad1               | 8.47760e-14 | 1.000000 | 8.47837e-14 | 1.000000 |
| rad10              | 6.73881e-14 | 1.000000 | 6.73943e-14 | 1.000000 |
| PhcycC3H3_A+H      | 4.89128e-14 | 1.000000 | 4.89173e-14 | 1.000000 |
| rad7               | 2.49461e-14 | 1.000000 | 2.49484e-14 | 1.000000 |
| rad70              | 1.94638e-14 | 1.000000 | 1.94656e-14 | 1.000000 |
| rad3               | 1.66759e-14 | 1.000000 | 1.66774e-14 | 1.000000 |
| rad55              | 8.48747e-15 | 1.000000 | 8.48825e-15 | 1.000000 |
| rad4               | 8.29297e-15 | 1.000000 | 8.29373e-15 | 1.000000 |
| rad11              | 6.12141e-15 | 1.000000 | 6.12197e-15 | 1.000000 |
| rad52              | 3.84231e-15 | 1.000000 | 3.84266e-15 | 1.000000 |
| PAH1+H             | 2.34440e-15 | 1.000000 | 2.34462e-15 | 1.000000 |
| rad51              | 4.07404e-16 | 1.000000 | 4.07441e-16 | 1.000000 |
| rad34              | 1.57781e-16 | 1.000000 | 1.57796e-16 | 1.000000 |
| rad13              | 1.44071e-16 | 1.000000 | 1.44084e-16 | 1.000000 |
| rad25              | 6.62273e-17 | 1.000000 | 6.62333e-17 | 1.000000 |
| rad14              | 5.76130e-17 | 1.000000 | 5.76183e-17 | 1.000000 |
| rad58              | 2.99505e-17 | 1.000000 | 2.99533e-17 | 1.000000 |
| rad27              | 1.49766e-17 | 1.000000 | 1.49781e-17 | 1.000000 |
| rad65              | 6.35784e-18 | 1.000000 | 6.35842e-18 | 1.000000 |
| rad42              | 4.93395e-18 | 1.000000 | 4.93440e-18 | 1.000000 |
| rad23              | 3.82575e-18 | 1.000000 | 3.82610e-18 | 1.000000 |
| rad41              | 1.53085e-18 | 1.000000 | 1.53098e-18 | 1.000000 |
| rad33              | 7.31933e-19 | 1.000000 | 7.31999e-19 | 1.000000 |
| rad31              | 2.87741e-19 | 1.000000 | 2.87767e-19 | 1.000000 |
| rad45              | 2.09864e-19 | 1.000000 | 2.09883e-19 | 1.000000 |
| rad53              | 1.09682e-19 | 1.000000 | 1.09692e-19 | 1.000000 |
| rad64              | 2.63852e-20 | 1.000000 | 2.63876e-20 | 1.000000 |
| rad21              | 1.11232e-20 | 1.000000 | 1.11242e-20 | 1.000000 |
| rad20              | 8.50414e-21 | 1.000000 | 8.50492e-21 | 1.000000 |
| rad36              | 7.15285e-21 | 1.000000 | 7.15351e-21 | 1.000000 |
| rad56              | 3.10995e-22 | 1.000000 | 3.11023e-22 | 1.000000 |
| rad9               | 1.76529e-22 | 1.000000 | 1.76545e-22 | 1.000000 |
| rad22              | 8.39128e-23 | 1.000000 | 8.39205e-23 | 1.000000 |
| rad18              | 8.25845e-23 | 1.000000 | 8.25921e-23 | 1.000000 |
| rad61              | 3.56436e-23 | 1.000000 | 3.56468e-23 | 1.000000 |
| rad68syn           | 3.28824e-23 | 1.000000 | 3.28854e-23 | 1.000000 |
| rad68anti          | 2.37014e-23 | 1.000000 | 2.37036e-23 | 1.000000 |
| rad5               | 4.04154e-24 | 1.000000 | 4.04191e-24 | 1.000000 |
| rad24              | 4.90051e-25 | 1.000000 | 4.90096e-25 | 1.000000 |
| rad15              | 1.04197e-25 | 1.000000 | 1.04206e-25 | 1.000000 |
| rad40syn           | 5.33122e-26 | 1.000000 | 5.33171e-26 | 1.000000 |
| rad40anti          | 1.32361e-26 | 1.000000 | 1.32374e-26 | 1.000000 |
| PAH8+H             | 1.18606e-26 | 1.000000 | 1.18617e-26 | 1.000000 |
| rad73              | 1.00620e-26 | 1.000000 | 1.00629e-26 | 1.000000 |
| rad12              | 1.73154e-28 | 1.000000 | 1.73170e-28 | 1.000000 |
| rad71              | 9.35042e-29 | 1.000000 | 9.35128e-29 | 1.000000 |
| rad47              | 2.86303e-30 | 1.000000 | 2.86328e-30 | 1.000000 |
| rad72              | 1.61637e-39 | 1.000000 | 1.61651e-39 | 1.000000 |



rad8 | 1.55119e-41 1.00000 | 1.55132e-41 1.000000

0.100000000E-05 Pa, 400.000000 K

=====

| Rate constant      | True (fraction)       | Effective (fraction)  |
|--------------------|-----------------------|-----------------------|
| Total              | 5.11288e-15 (1.00 )   | 5.10968e-15 (1.00 )   |
| Formation of rad11 | 3.08094e-15 (0.603 )  | 3.07881e-15 (0.603 )  |
| Formation of rad6  | 1.54092e-15 (0.301 )  | 1.53985e-15 (0.301 )  |
| H-abstraction      | 4.91025e-16 (0.0960 ) | 4.91025e-16 (0.0961 ) |

| species            | PYtrue      | Cumul    | PYeffective | Cumul    |
|--------------------|-------------|----------|-------------|----------|
| Indene+H           | 0.804486    | 0.804486 | 0.804989    | 0.804989 |
| Benzene+2-propynyl | 0.0960368   | 0.900522 | 0.0960969   | 0.901086 |
| C2H2+PhCH2         | 0.0525420   | 0.953065 | 0.0525750   | 0.953661 |
| PhCCH+CH3          | 0.0262534   | 0.979318 | 0.0262699   | 0.979931 |
| PhCHCCH2+H         | 0.0106705   | 0.989988 | 0.0106772   | 0.990608 |
| PhCCCH3+H          | 0.00676078  | 0.996749 | 0.00676501  | 0.997373 |
| Ph+MeAc            | 0.00228511  | 0.999034 | 0.00228654  | 0.999659 |
| Phenyl+Allene      | 0.000625754 | 0.999660 | 0.000000    | 0.999659 |
| PAH7+H             | 0.000215668 | 0.999876 | 0.000215803 | 0.999875 |
| PhCH2CCH+H         | 6.37921e-05 | 0.999940 | 6.38320e-05 | 0.999939 |
| rad39              | 4.88389e-05 | 0.999988 | 4.88695e-05 | 0.999988 |
| rad30              | 4.71373e-06 | 0.999993 | 4.71669e-06 | 0.999993 |
| rad19anti          | 2.55283e-06 | 0.999996 | 2.55443e-06 | 0.999995 |
| PAH9+H             | 2.27172e-06 | 0.999998 | 2.27314e-06 | 0.999998 |
| rad37              | 9.72231e-07 | 0.999999 | 9.72835e-07 | 0.999998 |
| rad35              | 7.27596e-07 | 1.000000 | 7.28051e-07 | 0.999999 |
| rad38              | 6.64248e-07 | 1.000000 | 6.64663e-07 | 1.000000 |
| rad46              | 2.95927e-08 | 1.000000 | 2.96111e-08 | 1.000000 |
| rad60syn           | 6.77132e-09 | 1.000000 | 6.77556e-09 | 1.000000 |
| rad19syn           | 4.62790e-09 | 1.000000 | 4.63079e-09 | 1.000000 |
| rad60anti          | 3.07480e-09 | 1.000000 | 3.07673e-09 | 1.000000 |
| PAH3+H             | 1.45800e-09 | 1.000000 | 1.45891e-09 | 1.000000 |
| rad54              | 4.18669e-10 | 1.000000 | 4.18931e-10 | 1.000000 |
| rad59              | 2.84711e-10 | 1.000000 | 2.84889e-10 | 1.000000 |
| PAH10+CH3          | 1.98074e-10 | 1.000000 | 1.98198e-10 | 1.000000 |
| rad50              | 7.81204e-11 | 1.000000 | 7.81693e-11 | 1.000000 |
| rad6               | 5.57653e-11 | 1.000000 | 5.58002e-11 | 1.000000 |
| rad43              | 3.26732e-11 | 1.000000 | 3.26936e-11 | 1.000000 |
| rad67              | 2.48951e-11 | 1.000000 | 2.49108e-11 | 1.000000 |
| PhcycC3H3_A+H      | 2.37988e-11 | 1.000000 | 2.38137e-11 | 1.000000 |
| rad62              | 2.26679e-11 | 1.000000 | 2.26821e-11 | 1.000000 |
| rad70              | 7.63979e-12 | 1.000000 | 7.64458e-12 | 1.000000 |
| rad2               | 4.95208e-12 | 1.000000 | 4.95519e-12 | 1.000000 |
| rad55              | 3.50822e-12 | 1.000000 | 3.51042e-12 | 1.000000 |
| PAH1+H             | 2.19400e-12 | 1.000000 | 2.19537e-12 | 1.000000 |
| rad28              | 5.71311e-13 | 1.000000 | 5.71669e-13 | 1.000000 |
| rad1               | 4.60882e-13 | 1.000000 | 4.61170e-13 | 1.000000 |
| rad52              | 4.56316e-13 | 1.000000 | 4.56602e-13 | 1.000000 |
| rad10              | 2.86441e-13 | 1.000000 | 2.86620e-13 | 1.000000 |
| rad34              | 1.75088e-13 | 1.000000 | 1.75198e-13 | 1.000000 |
| rad51              | 1.36997e-13 | 1.000000 | 1.37083e-13 | 1.000000 |
| rad26              | 1.32991e-13 | 1.000000 | 1.33074e-13 | 1.000000 |
| rad3               | 1.00670e-13 | 1.000000 | 1.00733e-13 | 1.000000 |
| rad4               | 5.30251e-14 | 1.000000 | 5.30583e-14 | 1.000000 |
| rad58              | 1.74184e-14 | 1.000000 | 1.74293e-14 | 1.000000 |
| rad42              | 7.28195e-15 | 1.000000 | 7.28651e-15 | 1.000000 |
| rad23              | 6.83210e-15 | 1.000000 | 6.83638e-15 | 1.000000 |
| rad7               | 5.24201e-15 | 1.000000 | 5.24530e-15 | 1.000000 |
| rad65              | 3.20497e-15 | 1.000000 | 3.20698e-15 | 1.000000 |
| rad41              | 2.20567e-15 | 1.000000 | 2.20705e-15 | 1.000000 |
| rad11              | 1.37413e-15 | 1.000000 | 1.37500e-15 | 1.000000 |
| rad45              | 1.00291e-15 | 1.000000 | 1.00354e-15 | 1.000000 |
| rad53              | 9.04225e-16 | 1.000000 | 9.04789e-16 | 1.000000 |
| rad64              | 3.15111e-16 | 1.000000 | 3.15309e-16 | 1.000000 |
| rad36              | 3.86828e-17 | 1.000000 | 3.87070e-17 | 1.000000 |
| rad13              | 3.26159e-17 | 1.000000 | 3.26363e-17 | 1.000000 |
| rad25              | 2.27651e-17 | 1.000000 | 2.27794e-17 | 1.000000 |
| rad14              | 1.82251e-17 | 1.000000 | 1.82365e-17 | 1.000000 |
| rad56              | 1.60193e-17 | 1.000000 | 1.60293e-17 | 1.000000 |
| rad27              | 6.00272e-18 | 1.000000 | 6.00648e-18 | 1.000000 |
| rad31              | 4.49592e-18 | 1.000000 | 4.49873e-18 | 1.000000 |
| rad68syn           | 1.85188e-18 | 1.000000 | 1.85304e-18 | 1.000000 |
| rad68anti          | 1.33289e-18 | 1.000000 | 1.33373e-18 | 1.000000 |
| rad61              | 9.28153e-19 | 1.000000 | 9.28733e-19 | 1.000000 |
| rad33              | 5.65102e-19 | 1.000000 | 5.65456e-19 | 1.000000 |
| rad21              | 2.90443e-20 | 1.000000 | 2.90625e-20 | 1.000000 |
| rad20              | 1.85843e-20 | 1.000000 | 1.85959e-20 | 1.000000 |

|           |             |         |             |          |
|-----------|-------------|---------|-------------|----------|
| rad40syn  | 1.44546e-20 | 1.00000 | 1.44636e-20 | 1.000000 |
| rad22     | 1.14618e-20 | 1.00000 | 1.14690e-20 | 1.000000 |
| PAH8+H    | 8.90782e-21 | 1.00000 | 8.91340e-21 | 1.000000 |
| rad40anti | 3.67526e-21 | 1.00000 | 3.67757e-21 | 1.000000 |
| rad9      | 2.87808e-21 | 1.00000 | 2.87988e-21 | 1.000000 |
| rad73     | 2.38302e-21 | 1.00000 | 2.38451e-21 | 1.000000 |
| rad71     | 9.34553e-23 | 1.00000 | 9.35133e-23 | 1.000000 |
| rad18     | 8.34656e-23 | 1.00000 | 8.35178e-23 | 1.000000 |
| rad24     | 1.02282e-23 | 1.00000 | 1.02345e-23 | 1.000000 |
| rad5      | 5.34464e-24 | 1.00000 | 5.34799e-24 | 1.000000 |
| rad15     | 1.78240e-24 | 1.00000 | 1.78351e-24 | 1.000000 |
| rad12     | 1.77140e-26 | 1.00000 | 1.77251e-26 | 1.000000 |
| rad47     | 7.50666e-28 | 1.00000 | 7.51136e-28 | 1.000000 |
| rad72     | 1.04372e-28 | 1.00000 | 1.04437e-28 | 1.000000 |
| rad8      | 4.40959e-39 | 1.00000 | 4.41234e-39 | 1.000000 |

0.100000000E-05 Pa, 500.000000 K

| Rate constant      | True (fraction)      | Effective (fraction) |
|--------------------|----------------------|----------------------|
| Total              | 2.11551e-14 (1.00 )  | 2.10968e-14 (1.00 )  |
| Formation of rad11 | 1.10850e-14 (0.524 ) | 1.10494e-14 (0.524 ) |
| Formation of rad6  | 7.08033e-15 (0.335 ) | 7.05760e-15 (0.335 ) |
| H-abstraction      | 2.98976e-15 (0.141 ) | 2.98976e-15 (0.142 ) |

| species            | PYtrue      | Cumul    | PYeffective | Cumul    |
|--------------------|-------------|----------|-------------|----------|
| Indene+H           | 0.706762    | 0.706762 | 0.708716    | 0.708716 |
| Benzene+2-propynyl | 0.141326    | 0.848088 | 0.141717    | 0.850433 |
| C2H2+PhCH2         | 0.0811037   | 0.929191 | 0.0813279   | 0.931761 |
| PhCCH+CH3          | 0.0389496   | 0.968141 | 0.0390573   | 0.970818 |
| PhCHCCH2+H         | 0.0153921   | 0.983533 | 0.0154346   | 0.986253 |
| PhCCCH3+H          | 0.00823927  | 0.991772 | 0.00826206  | 0.994515 |
| Ph+MeAc            | 0.00432839  | 0.996101 | 0.00434036  | 0.998855 |
| Phenyl+Allene      | 0.00275756  | 0.998858 | 0.000000    | 0.998855 |
| PAH7+H             | 0.000574793 | 0.999433 | 0.000576382 | 0.999432 |
| PhCH2CCH+H         | 0.000399546 | 0.999833 | 0.000400651 | 0.999832 |
| rad39              | 0.000137925 | 0.999971 | 0.000138306 | 0.999971 |
| rad30              | 9.14625e-06 | 0.999980 | 9.17153e-06 | 0.999980 |
| rad19anti          | 7.87872e-06 | 0.999988 | 7.90051e-06 | 0.999988 |
| PAH9+H             | 6.12734e-06 | 0.999994 | 6.14428e-06 | 0.999994 |
| rad37              | 2.41829e-06 | 0.999996 | 2.42498e-06 | 0.999996 |
| rad38              | 1.93439e-06 | 0.999998 | 1.93974e-06 | 0.999998 |
| rad35              | 1.76562e-06 | 1.000000 | 1.77051e-06 | 1.000000 |
| rad46              | 1.27870e-07 | 1.000000 | 1.28224e-07 | 1.000000 |
| rad19syn           | 7.63986e-08 | 1.000000 | 7.66098e-08 | 1.000000 |
| rad60syn           | 2.91346e-08 | 1.000000 | 2.92151e-08 | 1.000000 |
| PAH3+H             | 1.45909e-08 | 1.000000 | 1.46312e-08 | 1.000000 |
| rad60anti          | 1.41795e-08 | 1.000000 | 1.42187e-08 | 1.000000 |
| rad54              | 1.02843e-08 | 1.000000 | 1.03128e-08 | 1.000000 |
| PAH10+CH3          | 3.35592e-09 | 1.000000 | 3.36520e-09 | 1.000000 |
| rad59              | 2.61933e-09 | 1.000000 | 2.62658e-09 | 1.000000 |
| PhcycC3H3_A+H      | 1.25838e-09 | 1.000000 | 1.26187e-09 | 1.000000 |
| rad50              | 1.15864e-09 | 1.000000 | 1.16185e-09 | 1.000000 |
| rad62              | 4.84009e-10 | 1.000000 | 4.85347e-10 | 1.000000 |
| rad43              | 4.60419e-10 | 1.000000 | 4.61691e-10 | 1.000000 |
| rad67              | 3.97898e-10 | 1.000000 | 3.98999e-10 | 1.000000 |
| rad70              | 3.42517e-10 | 1.000000 | 3.43464e-10 | 1.000000 |
| PAH1+H             | 1.64298e-10 | 1.000000 | 1.64753e-10 | 1.000000 |
| rad55              | 1.59822e-10 | 1.000000 | 1.60264e-10 | 1.000000 |
| rad6               | 2.91728e-11 | 1.000000 | 2.92535e-11 | 1.000000 |
| rad2               | 1.82752e-11 | 1.000000 | 1.83256e-11 | 1.000000 |
| rad34              | 1.41616e-11 | 1.000000 | 1.42007e-11 | 1.000000 |
| rad52              | 1.34820e-11 | 1.000000 | 1.35193e-11 | 1.000000 |
| rad51              | 7.24797e-12 | 1.000000 | 7.26801e-12 | 1.000000 |
| rad1               | 2.19730e-12 | 1.000000 | 2.20338e-12 | 1.000000 |
| rad58              | 1.01105e-12 | 1.000000 | 1.01385e-12 | 1.000000 |
| rad10              | 8.38090e-13 | 1.000000 | 8.40407e-13 | 1.000000 |
| rad23              | 6.78708e-13 | 1.000000 | 6.80584e-13 | 1.000000 |
| rad42              | 6.16327e-13 | 1.000000 | 6.18031e-13 | 1.000000 |
| rad3               | 4.91044e-13 | 1.000000 | 4.92402e-13 | 1.000000 |
| rad4               | 2.78995e-13 | 1.000000 | 2.79767e-13 | 1.000000 |
| rad53              | 2.35883e-13 | 1.000000 | 2.36535e-13 | 1.000000 |
| rad65              | 2.01730e-13 | 1.000000 | 2.02288e-13 | 1.000000 |
| rad45              | 1.67672e-13 | 1.000000 | 1.68136e-13 | 1.000000 |
| rad41              | 1.64828e-13 | 1.000000 | 1.65284e-13 | 1.000000 |
| rad28              | 1.07448e-13 | 1.000000 | 1.07745e-13 | 1.000000 |
| rad64              | 9.67571e-14 | 1.000000 | 9.70247e-14 | 1.000000 |
| rad26              | 2.82082e-14 | 1.000000 | 2.82863e-14 | 1.000000 |
| rad56              | 1.22099e-14 | 1.000000 | 1.22437e-14 | 1.000000 |

|           |             |         |             |         |
|-----------|-------------|---------|-------------|---------|
| rad36     | 9.13226e-15 | 1.00000 | 9.15746e-15 | 1.00000 |
| rad7      | 2.95200e-15 | 1.00000 | 2.96017e-15 | 1.00000 |
| rad68syn  | 1.45353e-15 | 1.00000 | 1.45755e-15 | 1.00000 |
| rad68anti | 1.02673e-15 | 1.00000 | 1.02957e-15 | 1.00000 |
| rad11     | 8.19784e-16 | 1.00000 | 8.22050e-16 | 1.00000 |
| rad61     | 4.14124e-16 | 1.00000 | 4.15269e-16 | 1.00000 |
| PAH8+H    | 3.33501e-17 | 1.00000 | 3.34424e-17 | 1.00000 |
| rad40syn  | 2.92058e-17 | 1.00000 | 2.92866e-17 | 1.00000 |
| rad31     | 2.28425e-17 | 1.00000 | 2.29057e-17 | 1.00000 |
| rad13     | 2.14815e-17 | 1.00000 | 2.15409e-17 | 1.00000 |
| rad25     | 1.03951e-17 | 1.00000 | 1.04239e-17 | 1.00000 |
| rad40anti | 8.32440e-18 | 1.00000 | 8.34742e-18 | 1.00000 |
| rad14     | 7.34720e-18 | 1.00000 | 7.36752e-18 | 1.00000 |
| rad73     | 5.17372e-18 | 1.00000 | 5.18803e-18 | 1.00000 |
| rad27     | 3.30353e-18 | 1.00000 | 3.31267e-18 | 1.00000 |
| rad33     | 1.19229e-18 | 1.00000 | 1.19558e-18 | 1.00000 |
| rad71     | 4.84663e-19 | 1.00000 | 4.86004e-19 | 1.00000 |
| rad22     | 4.14305e-19 | 1.00000 | 4.15450e-19 | 1.00000 |
| rad21     | 1.72017e-19 | 1.00000 | 1.72492e-19 | 1.00000 |
| rad9      | 1.50115e-19 | 1.00000 | 1.50530e-19 | 1.00000 |
| rad20     | 8.82348e-20 | 1.00000 | 8.84787e-20 | 1.00000 |
| rad24     | 6.92381e-22 | 1.00000 | 6.94295e-22 | 1.00000 |
| rad72     | 1.39273e-22 | 1.00000 | 1.39657e-22 | 1.00000 |
| rad18     | 1.35102e-22 | 1.00000 | 1.35476e-22 | 1.00000 |
| rad15     | 9.89425e-23 | 1.00000 | 9.92167e-23 | 1.00000 |
| rad12     | 6.95832e-24 | 1.00000 | 6.97756e-24 | 1.00000 |
| rad5      | 4.60024e-24 | 1.00000 | 4.61296e-24 | 1.00000 |
| rad47     | 4.86077e-26 | 1.00000 | 4.87421e-26 | 1.00000 |
| rad8      | 8.30267e-36 | 1.00000 | 8.32562e-36 | 1.00000 |

0.100000000E-05 Pa, 600.000000 K

| Rate constant      | True (fraction) |          | Effective (fraction) |          |
|--------------------|-----------------|----------|----------------------|----------|
| Total              | 6.08120e-14     | (1.00 )  | 6.02869e-14          | (1.00 )  |
| Formation of rad11 | 2.83304e-14     | (0.466 ) | 2.80313e-14          | (0.465 ) |
| Formation of rad6  | 2.13840e-14     | (0.352 ) | 2.11582e-14          | (0.351 ) |
| H-abstraction      | 1.10975e-14     | (0.182 ) | 1.10975e-14          | (0.184 ) |

  

| species            | PYtrue      | Cumul    | PYeffective | Cumul    |
|--------------------|-------------|----------|-------------|----------|
| Indene+H           | 0.606934    | 0.606934 | 0.612219    | 0.612219 |
| Benzene+2-propynyl | 0.182488    | 0.789422 | 0.184077    | 0.796297 |
| C2H2+PhCH2         | 0.112836    | 0.902258 | 0.113819    | 0.910116 |
| PhCCH+CH3          | 0.0502927   | 0.952551 | 0.0507307   | 0.960846 |
| PhCHCCH2+H         | 0.0208956   | 0.973447 | 0.0210776   | 0.981924 |
| Phenyl+Allene      | 0.00863333  | 0.982080 | 0.000000    | 0.981924 |
| PhCCCH3+H          | 0.00840933  | 0.990489 | 0.00848258  | 0.990406 |
| Ph+MeAc            | 0.00630896  | 0.996798 | 0.00636390  | 0.996770 |
| PhCH2CCH+H         | 0.00158536  | 0.998384 | 0.00159917  | 0.998369 |
| PAH7+H             | 0.00124706  | 0.999631 | 0.00125792  | 0.999627 |
| rad39              | 0.000304554 | 0.999935 | 0.000307206 | 0.999935 |
| rad19anti          | 2.07283e-05 | 0.999956 | 2.09088e-05 | 0.999955 |
| rad30              | 1.54421e-05 | 0.999971 | 1.55766e-05 | 0.999971 |
| PAH9+H             | 1.45719e-05 | 0.999986 | 1.46988e-05 | 0.999986 |
| rad38              | 4.88300e-06 | 0.999991 | 4.92552e-06 | 0.999991 |
| rad37              | 4.23980e-06 | 0.999995 | 4.27673e-06 | 0.999995 |
| rad35              | 3.83137e-06 | 0.999999 | 3.86474e-06 | 0.999999 |
| rad19syn           | 5.75843e-07 | 1.000000 | 5.80858e-07 | 0.999999 |
| rad46              | 4.35560e-07 | 1.000000 | 4.39353e-07 | 1.000000 |
| rad54              | 1.01017e-07 | 1.000000 | 1.01897e-07 | 1.000000 |
| rad60syn           | 8.96254e-08 | 1.000000 | 9.04058e-08 | 1.000000 |
| PAH3+H             | 8.11822e-08 | 1.000000 | 8.18892e-08 | 1.000000 |
| rad60anti          | 4.57655e-08 | 1.000000 | 4.61641e-08 | 1.000000 |
| PAH10+CH3          | 2.25831e-08 | 1.000000 | 2.27797e-08 | 1.000000 |
| PhcycC3H3_A+H      | 2.05528e-08 | 1.000000 | 2.07318e-08 | 1.000000 |
| rad59              | 1.35486e-08 | 1.000000 | 1.36666e-08 | 1.000000 |
| rad50              | 9.40269e-09 | 1.000000 | 9.48453e-09 | 1.000000 |
| rad70              | 4.88193e-09 | 1.000000 | 4.92445e-09 | 1.000000 |
| rad62              | 3.91161e-09 | 1.000000 | 3.94568e-09 | 1.000000 |
| rad67              | 3.65819e-09 | 1.000000 | 3.69004e-09 | 1.000000 |
| PAH1+H             | 3.25971e-09 | 1.000000 | 3.28810e-09 | 1.000000 |
| rad43              | 2.57504e-09 | 1.000000 | 2.59746e-09 | 1.000000 |
| rad55              | 2.29328e-09 | 1.000000 | 2.31325e-09 | 1.000000 |
| rad34              | 2.96007e-10 | 1.000000 | 2.98585e-10 | 1.000000 |
| rad52              | 1.70972e-10 | 1.000000 | 1.72462e-10 | 1.000000 |
| rad51              | 1.34048e-10 | 1.000000 | 1.35215e-10 | 1.000000 |
| rad2               | 2.90415e-11 | 1.000000 | 2.92943e-11 | 1.000000 |
| rad6               | 2.00601e-11 | 1.000000 | 2.02348e-11 | 1.000000 |
| rad58              | 1.71337e-11 | 1.000000 | 1.72829e-11 | 1.000000 |

|           |             |         |             |         |
|-----------|-------------|---------|-------------|---------|
| rad42     | 1.22225e-11 | 1.00000 | 1.23290e-11 | 1.00000 |
| rad53     | 1.06169e-11 | 1.00000 | 1.07093e-11 | 1.00000 |
| rad1      | 4.63559e-12 | 1.00000 | 4.67597e-12 | 1.00000 |
| rad64     | 4.60105e-12 | 1.00000 | 4.64111e-12 | 1.00000 |
| rad65     | 4.04339e-12 | 1.00000 | 4.07860e-12 | 1.00000 |
| rad23     | 4.04215e-12 | 1.00000 | 4.07734e-12 | 1.00000 |
| rad41     | 2.76375e-12 | 1.00000 | 2.78781e-12 | 1.00000 |
| rad56     | 1.10531e-12 | 1.00000 | 1.11493e-12 | 1.00000 |
| rad45     | 1.04117e-12 | 1.00000 | 1.05024e-12 | 1.00000 |
| rad10     | 8.69342e-13 | 1.00000 | 8.76913e-13 | 1.00000 |
| rad3      | 8.08648e-13 | 1.00000 | 8.15691e-13 | 1.00000 |
| rad4      | 5.18826e-13 | 1.00000 | 5.23345e-13 | 1.00000 |
| rad68syn  | 1.32095e-13 | 1.00000 | 1.33246e-13 | 1.00000 |
| rad36     | 9.86851e-14 | 1.00000 | 9.95442e-14 | 1.00000 |
| rad68anti | 9.18033e-14 | 1.00000 | 9.26031e-14 | 1.00000 |
| rad61     | 2.45777e-14 | 1.00000 | 2.47917e-14 | 1.00000 |
| rad28     | 2.30122e-14 | 1.00000 | 2.32126e-14 | 1.00000 |
| PAH8+H    | 8.64388e-15 | 1.00000 | 8.71919e-15 | 1.00000 |
| rad26     | 7.04480e-15 | 1.00000 | 7.10615e-15 | 1.00000 |
| rad40syn  | 4.97721e-15 | 1.00000 | 5.02055e-15 | 1.00000 |
| rad7      | 2.24837e-15 | 1.00000 | 2.26795e-15 | 1.00000 |
| rad40anti | 1.59909e-15 | 1.00000 | 1.61302e-15 | 1.00000 |
| rad73     | 1.05573e-15 | 1.00000 | 1.06493e-15 | 1.00000 |
| rad11     | 6.86311e-16 | 1.00000 | 6.92287e-16 | 1.00000 |
| rad71     | 2.05406e-16 | 1.00000 | 2.07195e-16 | 1.00000 |
| rad31     | 3.07519e-17 | 1.00000 | 3.10197e-17 | 1.00000 |
| rad13     | 2.49898e-17 | 1.00000 | 2.52074e-17 | 1.00000 |
| rad9      | 1.35172e-17 | 1.00000 | 1.36350e-17 | 1.00000 |
| rad25     | 7.31849e-18 | 1.00000 | 7.38221e-18 | 1.00000 |
| rad33     | 5.28971e-18 | 1.00000 | 5.33577e-18 | 1.00000 |
| rad14     | 4.27961e-18 | 1.00000 | 4.31688e-18 | 1.00000 |
| rad27     | 2.78238e-18 | 1.00000 | 2.80661e-18 | 1.00000 |
| rad21     | 2.17654e-18 | 1.00000 | 2.19549e-18 | 1.00000 |
| rad22     | 1.91101e-18 | 1.00000 | 1.92765e-18 | 1.00000 |
| rad72     | 1.14542e-18 | 1.00000 | 1.15540e-18 | 1.00000 |
| rad20     | 9.05084e-19 | 1.00000 | 9.12960e-19 | 1.00000 |
| rad24     | 7.30669e-20 | 1.00000 | 7.37032e-20 | 1.00000 |
| rad15     | 8.50580e-21 | 1.00000 | 8.57983e-21 | 1.00000 |
| rad12     | 3.30957e-21 | 1.00000 | 3.33839e-21 | 1.00000 |
| rad18     | 3.89380e-22 | 1.00000 | 3.92771e-22 | 1.00000 |
| rad5      | 3.64796e-24 | 1.00000 | 3.67972e-24 | 1.00000 |
| rad47     | 1.06838e-24 | 1.00000 | 1.07769e-24 | 1.00000 |
| rad8      | 7.32793e-32 | 1.00000 | 7.39174e-32 | 1.00000 |

0.100000000E-05 Pa, 700.000000 K

| Rate constant      | True (fraction)      | Effective (fraction) |
|--------------------|----------------------|----------------------|
| Total              | 1.39564e-13 (1.00 )  | 1.36669e-13 (1.00 )  |
| Formation of rad11 | 5.88273e-14 (0.422 ) | 5.72650e-14 (0.419 ) |
| Formation of rad6  | 5.01684e-14 (0.359 ) | 4.88360e-14 (0.357 ) |
| H-abstraction      | 3.05678e-14 (0.219 ) | 3.05678e-14 (0.224 ) |

| species            | PYtrue      | Cumul    | PYeffective | Cumul    |
|--------------------|-------------|----------|-------------|----------|
| Indene+H           | 0.510454    | 0.510454 | 0.521265    | 0.521265 |
| Benzene+2-propynyl | 0.219024    | 0.729478 | 0.223663    | 0.744928 |
| C2H2+PhCH2         | 0.140690    | 0.870167 | 0.143670    | 0.888598 |
| PhCCH+CH3          | 0.0586092   | 0.928777 | 0.0598506   | 0.948449 |
| PhCHCCH2+H         | 0.0277623   | 0.956539 | 0.0283503   | 0.976799 |
| Phenyl+Allene      | 0.0207415   | 0.977280 | 0.000000    | 0.976799 |
| Ph+MeAc            | 0.00771340  | 0.984994 | 0.00787679  | 0.984676 |
| PhCCCH3+H          | 0.00756061  | 0.992554 | 0.00772075  | 0.992396 |
| PhCH2CCH+H         | 0.00451180  | 0.997066 | 0.00460736  | 0.997004 |
| PAH7+H             | 0.00225727  | 0.999323 | 0.00230508  | 0.999309 |
| rad39              | 0.000548289 | 0.999872 | 0.000559902 | 0.999869 |
| rad19anti          | 4.66037e-05 | 0.999918 | 4.75908e-05 | 0.999916 |
| PAH9+H             | 2.99985e-05 | 0.999948 | 3.06339e-05 | 0.999947 |
| rad30              | 2.26762e-05 | 0.999971 | 2.31565e-05 | 0.999970 |
| rad38              | 1.05314e-05 | 0.999982 | 1.07544e-05 | 0.999981 |
| rad35              | 7.29844e-06 | 0.999989 | 7.45303e-06 | 0.999988 |
| rad37              | 5.93522e-06 | 0.999995 | 6.06093e-06 | 0.999994 |
| rad19syn           | 2.61380e-06 | 0.999997 | 2.66916e-06 | 0.999997 |
| rad46              | 1.18432e-06 | 0.999999 | 1.20940e-06 | 0.999998 |
| rad54              | 5.53865e-07 | 0.999999 | 5.65596e-07 | 0.999999 |
| PAH3+H             | 2.96686e-07 | 0.999999 | 3.02969e-07 | 0.999999 |
| rad60syn           | 2.09904e-07 | 1.000000 | 2.14349e-07 | 0.999999 |
| PhcycC3H3_A+H      | 1.62838e-07 | 1.000000 | 1.66287e-07 | 1.000000 |
| rad60anti          | 1.11059e-07 | 1.000000 | 1.13411e-07 | 1.000000 |
| PAH10+CH3          | 8.88415e-08 | 1.000000 | 9.07227e-08 | 1.000000 |

|           |             |         |             |          |
|-----------|-------------|---------|-------------|----------|
| rad50     | 4.89399e-08 | 1.00000 | 4.99765e-08 | 1.000000 |
| rad59     | 4.64276e-08 | 1.00000 | 4.74110e-08 | 1.000000 |
| rad70     | 3.43279e-08 | 1.00000 | 3.50550e-08 | 1.000000 |
| PAH1+H    | 2.87927e-08 | 1.00000 | 2.94026e-08 | 1.000000 |
| rad67     | 2.16413e-08 | 1.00000 | 2.20997e-08 | 1.000000 |
| rad62     | 1.75396e-08 | 1.00000 | 1.79112e-08 | 1.000000 |
| rad55     | 1.62462e-08 | 1.00000 | 1.65903e-08 | 1.000000 |
| rad43     | 8.26632e-09 | 1.00000 | 8.44142e-09 | 1.000000 |
| rad34     | 2.73084e-09 | 1.00000 | 2.78868e-09 | 1.000000 |
| rad51     | 1.25005e-09 | 1.00000 | 1.27653e-09 | 1.000000 |
| rad52     | 1.21857e-09 | 1.00000 | 1.24438e-09 | 1.000000 |
| rad53     | 1.69563e-10 | 1.00000 | 1.73154e-10 | 1.000000 |
| rad58     | 1.35852e-10 | 1.00000 | 1.38730e-10 | 1.000000 |
| rad42     | 1.03499e-10 | 1.00000 | 1.05691e-10 | 1.000000 |
| rad64     | 7.31424e-11 | 1.00000 | 7.46916e-11 | 1.000000 |
| rad65     | 3.91354e-11 | 1.00000 | 3.99643e-11 | 1.000000 |
| rad56     | 2.88481e-11 | 1.00000 | 2.94592e-11 | 1.000000 |
| rad41     | 1.94814e-11 | 1.00000 | 1.98940e-11 | 1.000000 |
| rad2      | 1.66906e-11 | 1.00000 | 1.70442e-11 | 1.000000 |
| rad6      | 7.57345e-12 | 1.00000 | 7.73387e-12 | 1.000000 |
| rad23     | 4.81350e-12 | 1.00000 | 4.91546e-12 | 1.000000 |
| rad68syn  | 3.41597e-12 | 1.00000 | 3.48832e-12 | 1.000000 |
| rad1      | 3.28945e-12 | 1.00000 | 3.35912e-12 | 1.000000 |
| rad68anti | 2.34479e-12 | 1.00000 | 2.39446e-12 | 1.000000 |
| rad45     | 1.37911e-12 | 1.00000 | 1.40832e-12 | 1.000000 |
| PAH8+H    | 4.75517e-13 | 1.00000 | 4.85588e-13 | 1.000000 |
| rad61     | 4.69362e-13 | 1.00000 | 4.79303e-13 | 1.000000 |
| rad3      | 4.38701e-13 | 1.00000 | 4.47993e-13 | 1.000000 |
| rad10     | 3.99753e-13 | 1.00000 | 4.08220e-13 | 1.000000 |
| rad4      | 3.06139e-13 | 1.00000 | 3.12623e-13 | 1.000000 |
| rad40syn  | 2.01817e-13 | 1.00000 | 2.06092e-13 | 1.000000 |
| rad36     | 1.42098e-13 | 1.00000 | 1.45107e-13 | 1.000000 |
| rad40anti | 7.19692e-14 | 1.00000 | 7.34935e-14 | 1.000000 |
| rad73     | 5.05433e-14 | 1.00000 | 5.16139e-14 | 1.000000 |
| rad71     | 1.30318e-14 | 1.00000 | 1.33079e-14 | 1.000000 |
| rad28     | 5.88437e-15 | 1.00000 | 6.00901e-15 | 1.000000 |
| rad26     | 2.00084e-15 | 1.00000 | 2.04322e-15 | 1.000000 |
| rad7      | 9.94932e-16 | 1.00000 | 1.01601e-15 | 1.000000 |
| rad9      | 9.20872e-16 | 1.00000 | 9.40377e-16 | 1.000000 |
| rad11     | 4.60273e-16 | 1.00000 | 4.70022e-16 | 1.000000 |
| rad13     | 6.38761e-17 | 1.00000 | 6.52290e-17 | 1.000000 |
| rad21     | 3.99870e-17 | 1.00000 | 4.08339e-17 | 1.000000 |
| rad33     | 3.81272e-17 | 1.00000 | 3.89348e-17 | 1.000000 |
| rad72     | 3.24865e-17 | 1.00000 | 3.31746e-17 | 1.000000 |
| rad31     | 1.78365e-17 | 1.00000 | 1.82143e-17 | 1.000000 |
| rad20     | 1.48752e-17 | 1.00000 | 1.51903e-17 | 1.000000 |
| rad25     | 8.89438e-18 | 1.00000 | 9.08275e-18 | 1.000000 |
| rad24     | 3.96761e-18 | 1.00000 | 4.05165e-18 | 1.000000 |
| rad14     | 3.92371e-18 | 1.00000 | 4.00682e-18 | 1.000000 |
| rad27     | 3.70018e-18 | 1.00000 | 3.77855e-18 | 1.000000 |
| rad22     | 2.29836e-18 | 1.00000 | 2.34704e-18 | 1.000000 |
| rad12     | 4.79215e-19 | 1.00000 | 4.89366e-19 | 1.000000 |
| rad15     | 3.87890e-19 | 1.00000 | 3.96106e-19 | 1.000000 |
| rad18     | 2.14757e-21 | 1.00000 | 2.19306e-21 | 1.000000 |
| rad47     | 9.03933e-24 | 1.00000 | 9.23080e-24 | 1.000000 |
| rad5      | 3.23878e-24 | 1.00000 | 3.30737e-24 | 1.000000 |
| rad8      | 9.25480e-28 | 1.00000 | 9.45081e-28 | 1.000000 |

0.100000000E-05 Pa, 800.000000 K

=====

| Rate constant      | True (fraction)      | Effective (fraction) |
|--------------------|----------------------|----------------------|
| Total              | 2.75392e-13 (1.00 )  | 2.64229e-13 (1.00 )  |
| Formation of rad11 | 1.06471e-13 (0.387 ) | 1.00706e-13 (0.381 ) |
| Formation of rad6  | 9.97133e-14 (0.362 ) | 9.43145e-14 (0.357 ) |
| H-abstraction      | 6.92082e-14 (0.251 ) | 6.92082e-14 (0.262 ) |

| species            | PYtrue      | Cumul    | PYeffective | Cumul    |
|--------------------|-------------|----------|-------------|----------|
| Indene+H           | 0.420963    | 0.420963 | 0.438748    | 0.438748 |
| Benzene+2-propynyl | 0.251308    | 0.672270 | 0.261925    | 0.700673 |
| C2H2+PhCH2         | 0.158756    | 0.831027 | 0.165464    | 0.866137 |
| PhCCH+CH3          | 0.0631452   | 0.894172 | 0.0658130   | 0.931950 |
| Phenyl+Allene      | 0.0405363   | 0.934708 | 0.00000     | 0.931950 |
| PhCHCCH2+H         | 0.0360793   | 0.970788 | 0.0376036   | 0.969553 |
| PhCH2CCH+H         | 0.00999819  | 0.980786 | 0.0104207   | 0.979974 |
| Ph+MeAc            | 0.00840385  | 0.989190 | 0.00875888  | 0.988733 |
| PhCCCH3+H          | 0.00623443  | 0.995424 | 0.00649783  | 0.995231 |
| PAH7+H             | 0.00351019  | 0.998934 | 0.00365850  | 0.998889 |
| rad39              | 0.000836596 | 0.999771 | 0.000871939 | 0.999761 |

|               |             |          |             |          |
|---------------|-------------|----------|-------------|----------|
| rad19anti     | 9.01935e-05 | 0.999861 | 9.40042e-05 | 0.999855 |
| PAH9+H        | 5.38600e-05 | 0.999915 | 5.61355e-05 | 0.999911 |
| rad30         | 2.94556e-05 | 0.999944 | 3.07000e-05 | 0.999942 |
| rad38         | 1.96291e-05 | 0.999964 | 2.04585e-05 | 0.999962 |
| rad35         | 1.22732e-05 | 0.999976 | 1.27916e-05 | 0.999975 |
| rad19syn      | 8.33347e-06 | 0.999985 | 8.68552e-06 | 0.999984 |
| rad37         | 7.26188e-06 | 0.999992 | 7.56866e-06 | 0.999992 |
| rad46         | 2.65265e-06 | 0.999995 | 2.76472e-06 | 0.999994 |
| rad54         | 2.03471e-06 | 0.999997 | 2.12067e-06 | 0.999996 |
| PAH3+H        | 7.96489e-07 | 0.999997 | 8.30142e-07 | 0.999997 |
| PhcycC3H3_A+H | 7.94325e-07 | 0.999998 | 8.27884e-07 | 0.999998 |
| rad60syn      | 3.96788e-07 | 0.999999 | 4.13552e-07 | 0.999998 |
| PAH10+CH3     | 2.53197e-07 | 0.999999 | 2.63894e-07 | 0.999999 |
| rad60anti     | 2.15811e-07 | 0.999999 | 2.24928e-07 | 0.999999 |
| rad50         | 1.82305e-07 | 0.999999 | 1.90008e-07 | 0.999999 |
| rad70         | 1.50040e-07 | 0.999999 | 1.56379e-07 | 0.999999 |
| PAH1+H        | 1.48682e-07 | 0.999999 | 1.54963e-07 | 0.999999 |
| rad59         | 1.17661e-07 | 1.000000 | 1.22632e-07 | 1.000000 |
| rad67         | 9.03380e-08 | 1.000000 | 9.41547e-08 | 1.000000 |
| rad55         | 7.18814e-08 | 1.000000 | 7.49183e-08 | 1.000000 |
| rad62         | 5.32905e-08 | 1.000000 | 5.55419e-08 | 1.000000 |
| rad43         | 1.85215e-08 | 1.000000 | 1.93041e-08 | 1.000000 |
| rad34         | 1.46559e-08 | 1.000000 | 1.52750e-08 | 1.000000 |
| rad51         | 7.22372e-09 | 1.000000 | 7.52888e-09 | 1.000000 |
| rad52         | 5.73951e-09 | 1.000000 | 5.98200e-09 | 1.000000 |
| rad53         | 1.38657e-09 | 1.000000 | 1.44515e-09 | 1.000000 |
| rad58         | 6.48417e-10 | 1.000000 | 6.75812e-10 | 1.000000 |
| rad64         | 5.75074e-10 | 1.000000 | 5.99371e-10 | 1.000000 |
| rad42         | 5.07610e-10 | 1.000000 | 5.29056e-10 | 1.000000 |
| rad56         | 3.39878e-10 | 1.000000 | 3.54238e-10 | 1.000000 |
| rad65         | 2.29600e-10 | 1.000000 | 2.39300e-10 | 1.000000 |
| rad41         | 7.94168e-11 | 1.000000 | 8.27721e-11 | 1.000000 |
| rad68syn      | 3.95119e-11 | 1.000000 | 4.11813e-11 | 1.000000 |
| rad68anti     | 2.68637e-11 | 1.000000 | 2.79986e-11 | 1.000000 |
| PAH8+H        | 9.75576e-12 | 1.000000 | 1.01679e-11 | 1.000000 |
| rad2          | 5.44429e-12 | 1.000000 | 5.67430e-12 | 1.000000 |
| rad61         | 4.46185e-12 | 1.000000 | 4.65035e-12 | 1.000000 |
| rad40syn      | 3.27955e-12 | 1.000000 | 3.41811e-12 | 1.000000 |
| rad23         | 2.72797e-12 | 1.000000 | 2.84322e-12 | 1.000000 |
| rad6          | 1.86785e-12 | 1.000000 | 1.94676e-12 | 1.000000 |
| rad40anti     | 1.27571e-12 | 1.000000 | 1.32960e-12 | 1.000000 |
| rad1          | 1.06954e-12 | 1.000000 | 1.11472e-12 | 1.000000 |
| rad45         | 9.97685e-13 | 1.000000 | 1.03984e-12 | 1.000000 |
| rad73         | 9.83767e-13 | 1.000000 | 1.02533e-12 | 1.000000 |
| rad71         | 3.29921e-13 | 1.000000 | 3.43859e-13 | 1.000000 |
| rad3          | 1.43458e-13 | 1.000000 | 1.49518e-13 | 1.000000 |
| rad10         | 1.13422e-13 | 1.000000 | 1.18213e-13 | 1.000000 |
| rad4          | 1.02109e-13 | 1.000000 | 1.06423e-13 | 1.000000 |
| rad36         | 9.55526e-14 | 1.000000 | 9.95899e-14 | 1.000000 |
| rad9          | 2.10724e-14 | 1.000000 | 2.19627e-14 | 1.000000 |
| rad28         | 1.95791e-15 | 1.000000 | 2.04062e-15 | 1.000000 |
| rad11         | 7.21861e-16 | 1.000000 | 7.52357e-16 | 1.000000 |
| rad26         | 6.73231e-16 | 1.000000 | 7.01674e-16 | 1.000000 |
| rad21         | 5.89266e-16 | 1.000000 | 6.14162e-16 | 1.000000 |
| rad13         | 5.70170e-16 | 1.000000 | 5.94259e-16 | 1.000000 |
| rad72         | 3.87704e-16 | 1.000000 | 4.04085e-16 | 1.000000 |
| rad7          | 3.68021e-16 | 1.000000 | 3.83569e-16 | 1.000000 |
| rad33         | 2.86179e-16 | 1.000000 | 2.98269e-16 | 1.000000 |
| rad20         | 2.26270e-16 | 1.000000 | 2.35829e-16 | 1.000000 |
| rad24         | 5.58298e-17 | 1.000000 | 5.81886e-17 | 1.000000 |
| rad25         | 1.92046e-17 | 1.000000 | 2.00159e-17 | 1.000000 |
| rad12         | 1.15817e-17 | 1.000000 | 1.20711e-17 | 1.000000 |
| rad31         | 8.40534e-18 | 1.000000 | 8.76043e-18 | 1.000000 |
| rad27         | 7.06140e-18 | 1.000000 | 7.35973e-18 | 1.000000 |
| rad14         | 5.74905e-18 | 1.000000 | 5.99194e-18 | 1.000000 |
| rad15         | 5.20337e-18 | 1.000000 | 5.42321e-18 | 1.000000 |
| rad22         | 1.44209e-18 | 1.000000 | 1.50302e-18 | 1.000000 |
| rad18         | 2.25538e-20 | 1.000000 | 2.35067e-20 | 1.000000 |
| rad47         | 5.02502e-23 | 1.000000 | 5.23732e-23 | 1.000000 |
| rad5          | 3.81908e-24 | 1.000000 | 3.98043e-24 | 1.000000 |
| rad8          | 3.33307e-24 | 1.000000 | 3.47390e-24 | 1.000000 |

0.100000000E-05 Pa, 900.000000 K

=====

| Rate constant      | True (fraction)      | Effective (fraction) |
|--------------------|----------------------|----------------------|
| Total              | 4.88072e-13 (1.00 )  | 4.55158e-13 (1.00 )  |
| Formation of rad11 | 1.74945e-13 (0.358 ) | 1.58562e-13 (0.348 ) |
| Formation of rad6  | 1.76509e-13 (0.362 ) | 1.59978e-13 (0.351 ) |
| H-abstraction      | 1.36618e-13 (0.280 ) | 1.36618e-13 (0.300 ) |

| species            | PYtrue      | Cumul    | PYeffective | Cumul    |
|--------------------|-------------|----------|-------------|----------|
| Indene+H           | 0.341014    | 0.341014 | 0.365674    | 0.365674 |
| Benzene+2-propynyl | 0.279914    | 0.620928 | 0.300155    | 0.665829 |
| C2H2+PhCH2         | 0.164625    | 0.785553 | 0.176529    | 0.842358 |
| Phenyl+Allene      | 0.0674364   | 0.852989 | 0.000000    | 0.842358 |
| PhCCH+CH3          | 0.0639259   | 0.916915 | 0.0685486   | 0.910906 |
| PhCHCCH2+H         | 0.0451268   | 0.962042 | 0.0483901   | 0.959297 |
| PhCH2CCH+H         | 0.0182967   | 0.980338 | 0.0196198   | 0.978916 |
| Ph+MeAc            | 0.00849313  | 0.988832 | 0.00910729  | 0.988024 |
| PhCCCH3+H          | 0.00485364  | 0.993685 | 0.00520463  | 0.993228 |
| PAH7+H             | 0.00482415  | 0.998509 | 0.00517299  | 0.998401 |
| rad39              | 0.00111872  | 0.999628 | 0.00119961  | 0.999601 |
| rad19anti          | 0.000152570 | 0.999781 | 0.000163603 | 0.999764 |
| PAH9+H             | 8.58055e-05 | 0.999866 | 9.20100e-05 | 0.999856 |
| rad30              | 3.45816e-05 | 0.999901 | 3.70824e-05 | 0.999894 |
| rad38              | 3.22626e-05 | 0.999933 | 3.45956e-05 | 0.999928 |
| rad19syn           | 2.05726e-05 | 0.999954 | 2.20602e-05 | 0.999950 |
| rad35              | 1.85019e-05 | 0.999972 | 1.98398e-05 | 0.999970 |
| rad37              | 8.30353e-06 | 0.999981 | 8.90399e-06 | 0.999979 |
| rad54              | 5.61022e-06 | 0.999986 | 6.01591e-06 | 0.999985 |
| rad46              | 5.06238e-06 | 0.999991 | 5.42846e-06 | 0.999990 |
| PhcycC3H3_A+H      | 2.75303e-06 | 0.999994 | 2.95211e-06 | 0.999993 |
| PAH3+H             | 1.70031e-06 | 0.999996 | 1.82327e-06 | 0.999995 |
| rad60syn           | 6.35566e-07 | 0.999996 | 6.81526e-07 | 0.999996 |
| PAH10+CH3          | 5.91896e-07 | 0.999997 | 6.34698e-07 | 0.999996 |
| PAH1+H             | 5.27743e-07 | 0.999998 | 5.65906e-07 | 0.999997 |
| rad50              | 5.26056e-07 | 0.999998 | 5.64097e-07 | 0.999998 |
| rad70              | 4.68169e-07 | 0.999999 | 5.02024e-07 | 0.999998 |
| rad60anti          | 3.53464e-07 | 0.999999 | 3.79023e-07 | 0.999999 |
| rad67              | 2.86638e-07 | 0.999999 | 3.07366e-07 | 0.999999 |
| rad59              | 2.38374e-07 | 0.999999 | 2.55613e-07 | 0.999999 |
| rad55              | 2.28529e-07 | 1.000000 | 2.45055e-07 | 0.999999 |
| rad62              | 1.23575e-07 | 1.000000 | 1.32511e-07 | 0.999999 |
| rad34              | 5.38118e-08 | 1.000000 | 5.77031e-08 | 0.999999 |
| rad43              | 3.25336e-08 | 1.000000 | 3.48862e-08 | 1.000000 |
| rad51              | 2.94628e-08 | 1.000000 | 3.15934e-08 | 1.000000 |
| rad52              | 1.98861e-08 | 1.000000 | 2.13241e-08 | 1.000000 |
| rad53              | 7.16536e-09 | 1.000000 | 7.68353e-09 | 1.000000 |
| rad64              | 2.79837e-09 | 1.000000 | 3.00073e-09 | 1.000000 |
| rad56              | 2.33179e-09 | 1.000000 | 2.50041e-09 | 1.000000 |
| rad58              | 2.16896e-09 | 1.000000 | 2.32580e-09 | 1.000000 |
| rad42              | 1.71810e-09 | 1.000000 | 1.84235e-09 | 1.000000 |
| rad65              | 9.39252e-10 | 1.000000 | 1.00717e-09 | 1.000000 |
| rad68syn           | 2.64056e-10 | 1.000000 | 2.83151e-10 | 1.000000 |
| rad41              | 2.24666e-10 | 1.000000 | 2.40913e-10 | 1.000000 |
| rad68anti          | 1.78166e-10 | 1.000000 | 1.91050e-10 | 1.000000 |
| PAH8+H             | 1.02532e-10 | 1.000000 | 1.09946e-10 | 1.000000 |
| rad40syn           | 2.86480e-11 | 1.000000 | 3.07196e-11 | 1.000000 |
| rad61              | 2.66398e-11 | 1.000000 | 2.85663e-11 | 1.000000 |
| rad40anti          | 1.19773e-11 | 1.000000 | 1.28434e-11 | 1.000000 |
| rad73              | 1.03658e-11 | 1.000000 | 1.11154e-11 | 1.000000 |
| rad71              | 4.43983e-12 | 1.000000 | 4.76088e-12 | 1.000000 |
| rad2               | 1.31761e-12 | 1.000000 | 1.41289e-12 | 1.000000 |
| rad23              | 1.26332e-12 | 1.000000 | 1.35467e-12 | 1.000000 |
| rad45              | 5.55510e-13 | 1.000000 | 5.95681e-13 | 1.000000 |
| rad6               | 4.26029e-13 | 1.000000 | 4.56836e-13 | 1.000000 |
| rad1               | 2.66837e-13 | 1.000000 | 2.86134e-13 | 1.000000 |
| rad9               | 9.95411e-14 | 1.000000 | 1.06739e-13 | 1.000000 |
| rad36              | 5.30000e-14 | 1.000000 | 5.68327e-14 | 1.000000 |
| rad3               | 4.20525e-14 | 1.000000 | 4.50934e-14 | 1.000000 |
| rad4               | 3.11899e-14 | 1.000000 | 3.34454e-14 | 1.000000 |
| rad10              | 2.54340e-14 | 1.000000 | 2.72732e-14 | 1.000000 |
| rad72              | 8.54188e-15 | 1.000000 | 9.15957e-15 | 1.000000 |
| rad13              | 4.90843e-15 | 1.000000 | 5.26337e-15 | 1.000000 |
| rad21              | 3.80390e-15 | 1.000000 | 4.07897e-15 | 1.000000 |
| rad11              | 2.98422e-15 | 1.000000 | 3.20002e-15 | 1.000000 |
| rad20              | 1.64992e-15 | 1.000000 | 1.76923e-15 | 1.000000 |
| rad33              | 1.26647e-15 | 1.000000 | 1.35806e-15 | 1.000000 |
| rad28              | 8.21489e-16 | 1.000000 | 8.80895e-16 | 1.000000 |
| rad7               | 4.56875e-16 | 1.000000 | 4.89913e-16 | 1.000000 |
| rad26              | 2.81621e-16 | 1.000000 | 3.01986e-16 | 1.000000 |
| rad24              | 1.88184e-16 | 1.000000 | 2.01792e-16 | 1.000000 |
| rad25              | 5.51827e-17 | 1.000000 | 5.91732e-17 | 1.000000 |
| rad12              | 5.35711e-17 | 1.000000 | 5.74449e-17 | 1.000000 |
| rad15              | 1.75402e-17 | 1.000000 | 1.88085e-17 | 1.000000 |
| rad27              | 1.32695e-17 | 1.000000 | 1.42290e-17 | 1.000000 |
| rad14              | 1.05205e-17 | 1.000000 | 1.12813e-17 | 1.000000 |
| rad31              | 4.19944e-18 | 1.000000 | 4.50311e-18 | 1.000000 |

|       |             |          |             |          |
|-------|-------------|----------|-------------|----------|
| rad22 | 7.46650e-19 | 1.000000 | 8.00644e-19 | 1.000000 |
| rad18 | 3.26840e-19 | 1.000000 | 3.50475e-19 | 1.000000 |
| rad8  | 1.12161e-21 | 1.000000 | 1.20272e-21 | 1.000000 |
| rad47 | 2.05589e-22 | 1.000000 | 2.20455e-22 | 1.000000 |
| rad5  | 5.97731e-24 | 1.000000 | 6.40954e-24 | 1.000000 |

0.100000000E-05 Pa, 1000.00000 K

| Rate constant      | True (fraction) |          | Effective (fraction) |          |
|--------------------|-----------------|----------|----------------------|----------|
| Total              | 7.98668e-13     | (1.00 )  | 7.19594e-13          | (1.00 )  |
| Formation of rad11 | 2.67704e-13     | (0.335 ) | 2.29546e-13          | (0.319 ) |
| Formation of rad6  | 2.87049e-13     | (0.359 ) | 2.46133e-13          | (0.342 ) |
| H-abstraction      | 2.43915e-13     | (0.305 ) | 2.43915e-13          | (0.339 ) |

  

| species            | PYtrue      | Cumul    | PYeffective | Cumul    |
|--------------------|-------------|----------|-------------|----------|
| Benzene+2-propynyl | 0.305402    | 0.305402 | 0.338962    | 0.338962 |
| Indene+H           | 0.272124    | 0.577526 | 0.302027    | 0.640989 |
| C2H2+PhCH2         | 0.159453    | 0.736979 | 0.176975    | 0.817964 |
| Phenyl+Allene      | 0.0990073   | 0.835987 | 0.000000    | 0.817964 |
| PhCCH+CH3          | 0.0616205   | 0.897607 | 0.0683917   | 0.886356 |
| PhCHCCH2+H         | 0.0537596   | 0.951367 | 0.0596670   | 0.946023 |
| PhCH2CCH+H         | 0.0288969   | 0.980264 | 0.0320723   | 0.978095 |
| Ph+MeAc            | 0.00817632  | 0.988440 | 0.00907480  | 0.987170 |
| PAH7+H             | 0.00601184  | 0.994452 | 0.00667246  | 0.993842 |
| PhCCCH3+H          | 0.00364277  | 0.998095 | 0.00404307  | 0.997885 |
| rad39              | 0.00134896  | 0.999444 | 0.00149719  | 0.999382 |
| rad19anti          | 0.000230025 | 0.999674 | 0.000255302 | 0.999638 |
| PAH9+H             | 0.000123695 | 0.999797 | 0.000137287 | 0.999775 |
| rad38              | 4.77792e-05 | 0.999845 | 5.30296e-05 | 0.999828 |
| rad19syn           | 4.20371e-05 | 0.999887 | 4.66565e-05 | 0.999875 |
| rad30              | 3.74826e-05 | 0.999925 | 4.16015e-05 | 0.999916 |
| rad35              | 2.54628e-05 | 0.999950 | 2.82608e-05 | 0.999945 |
| rad54              | 1.25292e-05 | 0.999963 | 1.39061e-05 | 0.999959 |
| rad37              | 9.28205e-06 | 0.999972 | 1.03021e-05 | 0.999969 |
| rad46              | 8.48861e-06 | 0.999980 | 9.42145e-06 | 0.999978 |
| PhcycC3H3_A+H      | 7.44283e-06 | 0.999988 | 8.26073e-06 | 0.999987 |
| PAH3+H             | 3.05843e-06 | 0.999991 | 3.39451e-06 | 0.999990 |
| PAH1+H             | 1.42911e-06 | 0.999992 | 1.58616e-06 | 0.999991 |
| rad50              | 1.24669e-06 | 0.999994 | 1.38369e-06 | 0.999993 |
| PAH10+CH3          | 1.21323e-06 | 0.999995 | 1.34654e-06 | 0.999994 |
| rad70              | 1.14131e-06 | 0.999996 | 1.26673e-06 | 0.999995 |
| rad60syn           | 8.97094e-07 | 0.999997 | 9.95669e-07 | 0.999996 |
| rad67              | 7.32850e-07 | 0.999998 | 8.13375e-07 | 0.999997 |
| rad55              | 5.71763e-07 | 0.999998 | 6.34592e-07 | 0.999998 |
| rad60anti          | 5.08253e-07 | 0.999999 | 5.64103e-07 | 0.999999 |
| rad59              | 4.08645e-07 | 0.999999 | 4.53550e-07 | 0.999999 |
| rad62              | 2.36337e-07 | 0.999999 | 2.62307e-07 | 0.999999 |
| rad34              | 1.49947e-07 | 0.999999 | 1.66424e-07 | 0.999999 |
| rad51              | 9.25830e-08 | 0.999999 | 1.02757e-07 | 0.999999 |
| rad52              | 5.46150e-08 | 1.000000 | 6.06164e-08 | 1.000000 |
| rad43              | 4.82842e-08 | 1.000000 | 5.35901e-08 | 1.000000 |
| rad53              | 2.66802e-08 | 1.000000 | 2.96121e-08 | 1.000000 |
| rad56              | 1.08965e-08 | 1.000000 | 1.20939e-08 | 1.000000 |
| rad64              | 9.68714e-09 | 1.000000 | 1.07517e-08 | 1.000000 |
| rad58              | 5.61421e-09 | 1.000000 | 6.23115e-09 | 1.000000 |
| rad42              | 4.47913e-09 | 1.000000 | 4.97133e-09 | 1.000000 |
| rad65              | 2.93939e-09 | 1.000000 | 3.26240e-09 | 1.000000 |
| rad68syn           | 1.19347e-09 | 1.000000 | 1.32462e-09 | 1.000000 |
| rad68anti          | 8.00253e-10 | 1.000000 | 8.88191e-10 | 1.000000 |
| PAH8+H             | 6.70053e-10 | 1.000000 | 7.43681e-10 | 1.000000 |
| rad41              | 4.94029e-10 | 1.000000 | 5.48317e-10 | 1.000000 |
| rad40syn           | 1.60977e-10 | 1.000000 | 1.78667e-10 | 1.000000 |
| rad61              | 1.14008e-10 | 1.000000 | 1.26536e-10 | 1.000000 |
| rad40anti          | 7.14860e-11 | 1.000000 | 7.93411e-11 | 1.000000 |
| rad73              | 6.98981e-11 | 1.000000 | 7.75795e-11 | 1.000000 |
| rad71              | 3.67504e-11 | 1.000000 | 4.07888e-11 | 1.000000 |
| rad23              | 6.08765e-13 | 1.000000 | 6.75661e-13 | 1.000000 |
| rad2               | 3.21422e-13 | 1.000000 | 3.56742e-13 | 1.000000 |
| rad45              | 3.00707e-13 | 1.000000 | 3.33750e-13 | 1.000000 |
| rad6               | 1.93210e-13 | 1.000000 | 2.14442e-13 | 1.000000 |
| rad9               | 1.45074e-13 | 1.000000 | 1.61016e-13 | 1.000000 |
| rad72              | 1.23138e-13 | 1.000000 | 1.36670e-13 | 1.000000 |
| rad1               | 7.08302e-14 | 1.000000 | 7.86140e-14 | 1.000000 |
| rad36              | 2.87845e-14 | 1.000000 | 3.19475e-14 | 1.000000 |
| rad13              | 2.41239e-14 | 1.000000 | 2.67748e-14 | 1.000000 |
| rad11              | 1.49921e-14 | 1.000000 | 1.66395e-14 | 1.000000 |
| rad3               | 1.39433e-14 | 1.000000 | 1.54755e-14 | 1.000000 |
| rad4               | 1.07060e-14 | 1.000000 | 1.18826e-14 | 1.000000 |



|       |             |          |             |          |
|-------|-------------|----------|-------------|----------|
| rad21 | 9.56156e-15 | 1.000000 | 1.06122e-14 | 1.000000 |
| rad10 | 6.72908e-15 | 1.000000 | 7.46854e-15 | 1.000000 |
| rad20 | 4.65001e-15 | 1.000000 | 5.16098e-15 | 1.000000 |
| rad33 | 2.70073e-15 | 1.000000 | 2.99751e-15 | 1.000000 |
| rad7  | 2.27752e-15 | 1.000000 | 2.52779e-15 | 1.000000 |
| rad28 | 4.80689e-16 | 1.000000 | 5.33510e-16 | 1.000000 |
| rad24 | 2.48801e-16 | 1.000000 | 2.76141e-16 | 1.000000 |
| rad26 | 1.66342e-16 | 1.000000 | 1.84620e-16 | 1.000000 |
| rad25 | 1.49317e-16 | 1.000000 | 1.65725e-16 | 1.000000 |
| rad12 | 9.30067e-17 | 1.000000 | 1.03226e-16 | 1.000000 |
| rad15 | 2.20054e-17 | 1.000000 | 2.44235e-17 | 1.000000 |
| rad14 | 1.89394e-17 | 1.000000 | 2.10206e-17 | 1.000000 |
| rad27 | 1.85943e-17 | 1.000000 | 2.06376e-17 | 1.000000 |
| rad18 | 4.54226e-18 | 1.000000 | 5.04140e-18 | 1.000000 |
| rad31 | 2.32683e-18 | 1.000000 | 2.58252e-18 | 1.000000 |
| rad22 | 4.22707e-19 | 1.000000 | 4.69157e-19 | 1.000000 |
| rad8  | 3.75825e-20 | 1.000000 | 4.17124e-20 | 1.000000 |
| rad47 | 6.62542e-22 | 1.000000 | 7.35346e-22 | 1.000000 |
| rad5  | 1.35520e-23 | 1.000000 | 1.50411e-23 | 1.000000 |

0.100000000E-05 Pa, 1100.00000 K

| Rate constant      | True (fraction)      | Effective (fraction) |
|--------------------|----------------------|----------------------|
| Total              | 1.22919e-12 (1.00 )  | 1.06688e-12 (1.00 )  |
| Formation of rad11 | 3.87976e-13 (0.316 ) | 3.11712e-13 (0.292 ) |
| Formation of rad6  | 4.37724e-13 (0.356 ) | 3.51681e-13 (0.330 ) |
| H-abstraction      | 4.03491e-13 (0.328 ) | 4.03491e-13 (0.378 ) |

| species            | PYtrue      | Cumul    | PYeffective | Cumul    |
|--------------------|-------------|----------|-------------|----------|
| Benzene+2-propynyl | 0.328257    | 0.328257 | 0.378196    | 0.378196 |
| Indene+H           | 0.214714    | 0.542971 | 0.247379    | 0.625574 |
| C2H2+PhCH2         | 0.146502    | 0.689473 | 0.168789    | 0.794364 |
| Phenyl+Allene      | 0.132044    | 0.821517 | 0.000000    | 0.794364 |
| PhCHCCH2+H         | 0.0609574   | 0.882474 | 0.0702309   | 0.864595 |
| PhCCH+CH3          | 0.0572446   | 0.939719 | 0.0659535   | 0.930548 |
| PhCH2CCH+H         | 0.0407440   | 0.980463 | 0.0469425   | 0.977491 |
| Ph+MeAc            | 0.00763489  | 0.988098 | 0.00879642  | 0.986287 |
| PAH7+H             | 0.00694716  | 0.995045 | 0.00800405  | 0.994291 |
| PhCCCH3+H          | 0.00267733  | 0.997722 | 0.00308464  | 0.997376 |
| rad39              | 0.00150224  | 0.999224 | 0.00173078  | 0.999107 |
| rad19anti          | 0.000315220 | 0.999539 | 0.000363175 | 0.999470 |
| PAH9+H             | 0.000164386 | 0.999704 | 0.000189394 | 0.999659 |
| rad19syn           | 7.45655e-05 | 0.999778 | 8.59091e-05 | 0.999745 |
| rad38              | 6.50359e-05 | 0.999843 | 7.49299e-05 | 0.999820 |
| rad30              | 3.82332e-05 | 0.999882 | 4.40497e-05 | 0.999864 |
| rad35              | 3.25605e-05 | 0.999914 | 3.75140e-05 | 0.999902 |
| rad54              | 2.39077e-05 | 0.999938 | 2.75448e-05 | 0.999929 |
| PhcycC3H3_A+H      | 1.67306e-05 | 0.999955 | 1.92759e-05 | 0.999948 |
| rad46              | 1.28371e-05 | 0.999968 | 1.47901e-05 | 0.999963 |
| rad37              | 1.03715e-05 | 0.999978 | 1.19494e-05 | 0.999975 |
| PAH3+H             | 4.83975e-06 | 0.999983 | 5.57602e-06 | 0.999981 |
| PAH1+H             | 3.16887e-06 | 0.999986 | 3.65096e-06 | 0.999984 |
| rad50              | 2.53500e-06 | 0.999989 | 2.92065e-06 | 0.999987 |
| rad70              | 2.31279e-06 | 0.999991 | 2.66464e-06 | 0.999990 |
| PAH10+CH3          | 2.25114e-06 | 0.999993 | 2.59361e-06 | 0.999993 |
| rad67              | 1.57911e-06 | 0.999995 | 1.81935e-06 | 0.999994 |
| rad55              | 1.19782e-06 | 0.999996 | 1.38006e-06 | 0.999996 |
| rad60syn           | 1.15117e-06 | 0.999997 | 1.32630e-06 | 0.999997 |
| rad60anti          | 6.62627e-07 | 0.999998 | 7.63433e-07 | 0.999998 |
| rad59              | 6.18406e-07 | 0.999998 | 7.12482e-07 | 0.999999 |
| rad62              | 3.93252e-07 | 0.999999 | 4.53078e-07 | 0.999999 |
| rad34              | 3.40145e-07 | 0.999999 | 3.91892e-07 | 0.999999 |
| rad51              | 2.38369e-07 | 0.999999 | 2.74633e-07 | 1.000000 |
| rad52              | 1.25451e-07 | 1.000000 | 1.44535e-07 | 1.000000 |
| rad53              | 7.80404e-08 | 1.000000 | 8.99129e-08 | 1.000000 |
| rad43              | 6.37336e-08 | 1.000000 | 7.34295e-08 | 1.000000 |
| rad56              | 3.84098e-08 | 1.000000 | 4.42533e-08 | 1.000000 |
| rad64              | 2.61428e-08 | 1.000000 | 3.01199e-08 | 1.000000 |
| rad58              | 1.20347e-08 | 1.000000 | 1.38656e-08 | 1.000000 |
| rad42              | 9.67464e-09 | 1.000000 | 1.11465e-08 | 1.000000 |
| rad65              | 7.50471e-09 | 1.000000 | 8.64638e-09 | 1.000000 |
| rad68syn           | 4.04354e-09 | 1.000000 | 4.65870e-09 | 1.000000 |
| PAH8+H             | 3.08736e-09 | 1.000000 | 3.55705e-09 | 1.000000 |
| rad68anti          | 2.69715e-09 | 1.000000 | 3.10748e-09 | 1.000000 |
| rad41              | 9.10252e-10 | 1.000000 | 1.04874e-09 | 1.000000 |
| rad40syn           | 6.53835e-10 | 1.000000 | 7.53304e-10 | 1.000000 |
| rad61              | 3.79380e-10 | 1.000000 | 4.37096e-10 | 1.000000 |
| rad73              | 3.37895e-10 | 1.000000 | 3.89300e-10 | 1.000000 |

|           |             |          |             |         |
|-----------|-------------|----------|-------------|---------|
| rad40anti | 3.05537e-10 | 1.000000 | 3.52019e-10 | 1.00000 |
| rad71     | 2.11151e-10 | 1.000000 | 2.43273e-10 | 1.00000 |
| rad72     | 1.11748e-12 | 1.000000 | 1.28748e-12 | 1.00000 |
| rad23     | 3.04473e-13 | 1.000000 | 3.50793e-13 | 1.00000 |
| rad6      | 1.85047e-13 | 1.000000 | 2.13199e-13 | 1.00000 |
| rad45     | 1.62568e-13 | 1.000000 | 1.87300e-13 | 1.00000 |
| rad9      | 1.26299e-13 | 1.000000 | 1.45513e-13 | 1.00000 |
| rad2      | 8.71002e-14 | 1.000000 | 1.00351e-13 | 1.00000 |
| rad11     | 6.03269e-14 | 1.000000 | 6.95047e-14 | 1.00000 |
| rad13     | 5.55343e-14 | 1.000000 | 6.39830e-14 | 1.00000 |
| rad1      | 2.03556e-14 | 1.000000 | 2.34523e-14 | 1.00000 |
| rad36     | 1.56360e-14 | 1.000000 | 1.80147e-14 | 1.00000 |
| rad7      | 1.24448e-14 | 1.000000 | 1.43381e-14 | 1.00000 |
| rad21     | 1.12703e-14 | 1.000000 | 1.29848e-14 | 1.00000 |
| rad20     | 5.72530e-15 | 1.000000 | 6.59629e-15 | 1.00000 |
| rad3      | 5.16160e-15 | 1.000000 | 5.94684e-15 | 1.00000 |
| rad4      | 4.04143e-15 | 1.000000 | 4.65627e-15 | 1.00000 |
| rad10     | 3.03521e-15 | 1.000000 | 3.49696e-15 | 1.00000 |
| rad33     | 2.98576e-15 | 1.000000 | 3.43998e-15 | 1.00000 |
| rad28     | 4.00307e-16 | 1.000000 | 4.61207e-16 | 1.00000 |
| rad25     | 2.72797e-16 | 1.000000 | 3.14298e-16 | 1.00000 |
| rad24     | 2.16988e-16 | 1.000000 | 2.49998e-16 | 1.00000 |
| rad26     | 1.33842e-16 | 1.000000 | 1.54204e-16 | 1.00000 |
| rad12     | 1.06574e-16 | 1.000000 | 1.22787e-16 | 1.00000 |
| rad18     | 3.95812e-17 | 1.000000 | 4.56027e-17 | 1.00000 |
| rad14     | 2.59084e-17 | 1.000000 | 2.98500e-17 | 1.00000 |
| rad15     | 1.82879e-17 | 1.000000 | 2.10700e-17 | 1.00000 |
| rad27     | 1.66794e-17 | 1.000000 | 1.92169e-17 | 1.00000 |
| rad31     | 1.37107e-18 | 1.000000 | 1.57966e-18 | 1.00000 |
| rad22     | 2.72575e-19 | 1.000000 | 3.14042e-19 | 1.00000 |
| rad8      | 2.31129e-19 | 1.000000 | 2.66290e-19 | 1.00000 |
| rad47     | 1.74352e-21 | 1.000000 | 2.00877e-21 | 1.00000 |
| rad5      | 4.33928e-23 | 1.000000 | 4.99943e-23 | 1.00000 |

0.100000000E-05 Pa, 1200.00000 K

| Rate constant      | True (fraction)      | Effective (fraction) |
|--------------------|----------------------|----------------------|
| Total              | 1.80237e-12 (1.00 )  | 1.50733e-12 (1.00 )  |
| Formation of rad11 | 5.38789e-13 (0.299 ) | 4.03336e-13 (0.268 ) |
| Formation of rad6  | 6.34764e-13 (0.352 ) | 4.75183e-13 (0.315 ) |
| H-abstraction      | 6.28816e-13 (0.349 ) | 6.28816e-13 (0.417 ) |

| species            | PYtrue      | Cumul    | PYeffective | Cumul    |
|--------------------|-------------|----------|-------------|----------|
| Benzene+2-propynyl | 0.348883    | 0.348883 | 0.417171    | 0.417171 |
| Indene+H           | 0.168224    | 0.517107 | 0.201151    | 0.618322 |
| Phenyl+Allene      | 0.163693    | 0.680800 | 0.000000    | 0.618322 |
| C2H2+PhCH2         | 0.129445    | 0.810245 | 0.154782    | 0.773104 |
| PhCHCCH2+H         | 0.0661470   | 0.876392 | 0.0790946   | 0.852199 |
| PhCH2CCH+H         | 0.0526489   | 0.929041 | 0.0629537   | 0.915152 |
| PhCCH+CH3          | 0.0518208   | 0.980862 | 0.0619641   | 0.977116 |
| PAH7+H             | 0.00758545  | 0.988447 | 0.00907010  | 0.986186 |
| Ph+MeAc            | 0.00700420  | 0.995451 | 0.00837514  | 0.994562 |
| PhCCCH3+H          | 0.00195097  | 0.997402 | 0.00233284  | 0.996894 |
| rad39              | 0.00157581  | 0.998978 | 0.00188425  | 0.998779 |
| rad19anti          | 0.000399579 | 0.999378 | 0.000477791 | 0.999257 |
| PAH9+H             | 0.000204702 | 0.999582 | 0.000244769 | 0.999501 |
| rad19syn           | 0.000118863 | 0.999701 | 0.000142129 | 0.999643 |
| rad38              | 8.27680e-05 | 0.999784 | 9.89685e-05 | 0.999742 |
| rad54              | 4.05005e-05 | 0.999824 | 4.84277e-05 | 0.999791 |
| rad35              | 3.92969e-05 | 0.999864 | 4.69886e-05 | 0.999838 |
| rad30              | 3.73116e-05 | 0.999901 | 4.46148e-05 | 0.999882 |
| PhcycC3H3_A+H      | 3.27086e-05 | 0.999934 | 3.91108e-05 | 0.999922 |
| rad46              | 1.78869e-05 | 0.999952 | 2.13880e-05 | 0.999943 |
| rad37              | 1.16239e-05 | 0.999963 | 1.38991e-05 | 0.999957 |
| PAH3+H             | 6.95966e-06 | 0.999970 | 8.32193e-06 | 0.999965 |
| PAH1+H             | 6.04571e-06 | 0.999976 | 7.22906e-06 | 0.999972 |
| rad50              | 4.57121e-06 | 0.999981 | 5.46594e-06 | 0.999978 |
| rad70              | 4.07150e-06 | 0.999985 | 4.86843e-06 | 0.999983 |
| PAH10+CH3          | 3.83957e-06 | 0.999989 | 4.59109e-06 | 0.999987 |
| rad67              | 2.96796e-06 | 0.999992 | 3.54889e-06 | 0.999991 |
| rad55              | 2.19501e-06 | 0.999994 | 2.62464e-06 | 0.999993 |
| rad60syn           | 1.37645e-06 | 0.999995 | 1.64587e-06 | 0.999995 |
| rad59              | 8.52866e-07 | 0.999996 | 1.01981e-06 | 0.999996 |
| rad60anti          | 8.03342e-07 | 0.999997 | 9.60578e-07 | 0.999997 |
| rad34              | 6.59901e-07 | 0.999998 | 7.89063e-07 | 0.999998 |
| rad62              | 5.91358e-07 | 0.999998 | 7.07106e-07 | 0.999999 |
| rad51              | 5.25705e-07 | 0.999999 | 6.28605e-07 | 0.999999 |
| rad52              | 2.50703e-07 | 0.999999 | 2.99775e-07 | 0.999999 |

|           |             |          |             |          |
|-----------|-------------|----------|-------------|----------|
| rad53     | 1.90238e-07 | 0.999999 | 2.27474e-07 | 1.000000 |
| rad56     | 1.09448e-07 | 0.999999 | 1.30871e-07 | 1.000000 |
| rad43     | 7.76164e-08 | 0.999999 | 9.28086e-08 | 1.000000 |
| rad64     | 5.85550e-08 | 0.999999 | 7.00159e-08 | 1.000000 |
| rad58     | 2.24147e-08 | 0.999999 | 2.68020e-08 | 1.000000 |
| rad42     | 1.82035e-08 | 0.999999 | 2.17665e-08 | 1.000000 |
| rad65     | 1.63703e-08 | 0.999999 | 1.95744e-08 | 1.000000 |
| rad68syn  | 1.10175e-08 | 0.999999 | 1.31740e-08 | 1.000000 |
| PAH8+H    | 1.09227e-08 | 0.999999 | 1.30606e-08 | 1.000000 |
| rad68anti | 7.31621e-09 | 0.999999 | 8.74827e-09 | 1.000000 |
| rad40syn  | 2.07794e-09 | 0.999999 | 2.48466e-09 | 1.000000 |
| rad41     | 1.48024e-09 | 0.999999 | 1.76997e-09 | 1.000000 |
| rad73     | 1.26651e-09 | 0.999999 | 1.51441e-09 | 1.000000 |
| rad61     | 1.03672e-09 | 0.999999 | 1.23964e-09 | 1.000000 |
| rad40anti | 1.01429e-09 | 0.999999 | 1.21282e-09 | 1.000000 |
| rad71     | 9.17535e-10 | 0.999999 | 1.09712e-09 | 1.000000 |
| rad72     | 7.08923e-12 | 0.999999 | 8.47678e-12 | 1.000000 |
| rad6      | 2.29683e-13 | 0.999999 | 2.74640e-13 | 1.000000 |
| rad23     | 1.56601e-13 | 0.999999 | 1.87254e-13 | 1.000000 |
| rad11     | 1.50145e-13 | 0.999999 | 1.79534e-13 | 1.000000 |
| rad9      | 9.32588e-14 | 0.999999 | 1.11513e-13 | 1.000000 |
| rad45     | 8.83983e-14 | 0.999999 | 1.05701e-13 | 1.000000 |
| rad13     | 6.46654e-14 | 0.999999 | 7.73222e-14 | 1.000000 |
| rad7      | 4.83836e-14 | 0.999999 | 5.78538e-14 | 1.000000 |
| rad2      | 2.57672e-14 | 0.999999 | 3.08107e-14 | 1.000000 |
| rad21     | 8.79041e-15 | 0.999999 | 1.05110e-14 | 1.000000 |
| rad36     | 8.56160e-15 | 0.999999 | 1.02374e-14 | 1.000000 |
| rad1      | 6.23512e-15 | 0.999999 | 7.45555e-15 | 1.000000 |
| rad20     | 4.28302e-15 | 0.999999 | 5.12134e-15 | 1.000000 |
| rad10     | 2.67179e-15 | 0.999999 | 3.19475e-15 | 1.000000 |
| rad33     | 2.25859e-15 | 0.999999 | 2.70068e-15 | 1.000000 |
| rad3      | 2.06519e-15 | 0.999999 | 2.46941e-15 | 1.000000 |
| rad4      | 1.63589e-15 | 0.999999 | 1.95609e-15 | 1.000000 |
| rad28     | 4.68392e-16 | 0.999999 | 5.60071e-16 | 1.000000 |
| rad25     | 3.12053e-16 | 0.999999 | 3.73132e-16 | 1.000000 |
| rad24     | 1.65803e-16 | 0.999999 | 1.98256e-16 | 1.000000 |
| rad18     | 1.63210e-16 | 0.999999 | 1.95156e-16 | 1.000000 |
| rad26     | 1.35419e-16 | 0.999999 | 1.61926e-16 | 1.000000 |
| rad12     | 1.03518e-16 | 0.999999 | 1.23781e-16 | 1.000000 |
| rad14     | 2.44012e-17 | 0.999999 | 2.91773e-17 | 1.000000 |
| rad15     | 1.91893e-17 | 0.999999 | 2.29453e-17 | 1.000000 |
| rad27     | 1.00941e-17 | 0.999999 | 1.20699e-17 | 1.000000 |
| rad31     | 8.42038e-19 | 0.999999 | 1.00685e-18 | 1.000000 |
| rad8      | 5.36818e-19 | 0.999999 | 6.41893e-19 | 1.000000 |
| rad22     | 3.98603e-19 | 0.999999 | 4.76623e-19 | 1.000000 |
| rad47     | 3.89980e-21 | 0.999999 | 4.66312e-21 | 1.000000 |
| rad5      | 1.77111e-22 | 0.999999 | 2.11777e-22 | 1.000000 |

0.100000000E-05 Pa, 1300.00000 K

| =====              |                 |          |                      |          |
|--------------------|-----------------|----------|----------------------|----------|
| Rate constant      | True (fraction) |          | Effective (fraction) |          |
| -----              |                 |          |                      |          |
| Total              | 2.54148e-12     | (1.00 )  | 2.05338e-12          | (1.00 )  |
| Formation of rad11 | 7.22991e-13     | (0.284 ) | 5.03422e-13          | (0.245 ) |
| Formation of rad6  | 8.84215e-13     | (0.348 ) | 6.15682e-13          | (0.300 ) |
| H-abstraction      | 9.34273e-13     | (0.368 ) | 9.34273e-13          | (0.455 ) |
| -----              |                 |          |                      |          |
| species            | PYtrue          | Cumul    | PYeffective          | Cumul    |
| -----              |                 |          |                      |          |
| Benzene+2-propynyl | 0.367610        | 0.367610 | 0.454993             | 0.454993 |
| Phenyl+Allene      | 0.192054        | 0.559664 | 0.000000             | 0.454993 |
| Indene+H           | 0.131421        | 0.691086 | 0.162661             | 0.617654 |
| C2H2+PhCH2         | 0.111295        | 0.802381 | 0.137750             | 0.755405 |
| PhCHCCH2+H         | 0.0692296       | 0.871610 | 0.0856859            | 0.841091 |
| PhCH2CCH+H         | 0.0636260       | 0.935236 | 0.0787507            | 0.919842 |
| PhCCH+CH3          | 0.0461559       | 0.981392 | 0.0571276            | 0.976969 |
| PAH7+H             | 0.00794566      | 0.989338 | 0.00983443           | 0.986804 |
| Ph+MeAc            | 0.00637082      | 0.995709 | 0.00788521           | 0.994689 |
| rad39              | 0.00158196      | 0.997291 | 0.00195800           | 0.996647 |
| PhCCCH3+H          | 0.00142376      | 0.998714 | 0.00176219           | 0.998409 |
| rad19anti          | 0.000475489     | 0.999190 | 0.000588514          | 0.998997 |
| PAH9+H             | 0.000242131     | 0.999432 | 0.000299688          | 0.999297 |
| rad19syn           | 0.000174660     | 0.999607 | 0.000216178          | 0.999513 |
| rad38              | 9.98860e-05     | 0.999707 | 0.000123629          | 0.999637 |
| rad54              | 6.26274e-05     | 0.999769 | 7.75141e-05          | 0.999714 |
| PhcycC3H3_A+H      | 5.74351e-05     | 0.999827 | 7.10879e-05          | 0.999786 |
| rad35              | 4.53516e-05     | 0.999872 | 5.61319e-05          | 0.999842 |
| rad30              | 3.53185e-05     | 0.999907 | 4.37139e-05          | 0.999885 |
| rad46              | 2.33611e-05     | 0.999931 | 2.89142e-05          | 0.999914 |
| rad37              | 1.29873e-05     | 0.999944 | 1.60744e-05          | 0.999930 |

|           |             |          |             |          |
|-----------|-------------|----------|-------------|----------|
| PAH1+H    | 1.02825e-05 | 0.999954 | 1.27267e-05 | 0.999943 |
| PAH3+H    | 9.32004e-06 | 0.999963 | 1.15354e-05 | 0.999955 |
| rad50     | 7.49585e-06 | 0.999971 | 9.27759e-06 | 0.999964 |
| rad70     | 6.43021e-06 | 0.999977 | 7.95868e-06 | 0.999972 |
| PAH10+CH3 | 6.07786e-06 | 0.999983 | 7.52262e-06 | 0.999979 |
| rad67     | 4.99567e-06 | 0.999988 | 6.18315e-06 | 0.999986 |
| rad55     | 3.63003e-06 | 0.999992 | 4.49291e-06 | 0.999990 |
| rad60syn  | 1.56340e-06 | 0.999993 | 1.93503e-06 | 0.999992 |
| rad34     | 1.13462e-06 | 0.999995 | 1.40432e-06 | 0.999993 |
| rad59     | 1.09806e-06 | 0.999996 | 1.35907e-06 | 0.999995 |
| rad51     | 1.02620e-06 | 0.999997 | 1.27014e-06 | 0.999996 |
| rad60anti | 9.23688e-07 | 0.999998 | 1.14325e-06 | 0.999997 |
| rad62     | 8.25901e-07 | 0.999998 | 1.02222e-06 | 0.999998 |
| rad52     | 4.48900e-07 | 0.999999 | 5.55607e-07 | 0.999999 |
| rad53     | 4.02868e-07 | 0.999999 | 4.98632e-07 | 0.999999 |
| rad56     | 2.64598e-07 | 1.000000 | 3.27496e-07 | 1.000000 |
| rad64     | 1.13755e-07 | 1.000000 | 1.40795e-07 | 1.000000 |
| rad43     | 8.95932e-08 | 1.000000 | 1.10890e-07 | 1.000000 |
| rad58     | 3.75497e-08 | 1.000000 | 4.64755e-08 | 1.000000 |
| rad65     | 3.15601e-08 | 1.000000 | 3.90621e-08 | 1.000000 |
| PAH8+H    | 3.15023e-08 | 1.000000 | 3.89905e-08 | 1.000000 |
| rad42     | 3.09037e-08 | 1.000000 | 3.82497e-08 | 1.000000 |
| rad68syn  | 2.53721e-08 | 1.000000 | 3.14033e-08 | 1.000000 |
| rad68anti | 1.67834e-08 | 1.000000 | 2.07729e-08 | 1.000000 |
| rad40syn  | 5.46373e-09 | 1.000000 | 6.76250e-09 | 1.000000 |
| rad73     | 3.88972e-09 | 1.000000 | 4.81434e-09 | 1.000000 |
| rad71     | 3.20241e-09 | 1.000000 | 3.96364e-09 | 1.000000 |
| rad40anti | 2.76933e-09 | 1.000000 | 3.42762e-09 | 1.000000 |
| rad61     | 2.41929e-09 | 1.000000 | 2.99437e-09 | 1.000000 |
| rad41     | 2.20456e-09 | 1.000000 | 2.72860e-09 | 1.000000 |
| rad72     | 3.39622e-11 | 1.000000 | 4.20352e-11 | 1.000000 |
| rad6      | 3.24379e-13 | 1.000000 | 4.01487e-13 | 1.000000 |
| rad11     | 2.12964e-13 | 1.000000 | 2.63586e-13 | 1.000000 |
| rad7      | 1.09787e-13 | 1.000000 | 1.35884e-13 | 1.000000 |
| rad23     | 8.27495e-14 | 1.000000 | 1.02420e-13 | 1.000000 |
| rad9      | 6.40371e-14 | 1.000000 | 7.92592e-14 | 1.000000 |
| rad13     | 4.91949e-14 | 1.000000 | 6.08887e-14 | 1.000000 |
| rad45     | 4.85974e-14 | 1.000000 | 6.01491e-14 | 1.000000 |
| rad2      | 8.15669e-15 | 1.000000 | 1.00956e-14 | 1.000000 |
| rad21     | 5.91330e-15 | 1.000000 | 7.31895e-15 | 1.000000 |
| rad36     | 4.74702e-15 | 1.000000 | 5.87544e-15 | 1.000000 |
| rad20     | 2.63323e-15 | 1.000000 | 3.25917e-15 | 1.000000 |
| rad10     | 2.45329e-15 | 1.000000 | 3.03646e-15 | 1.000000 |
| rad1      | 2.02087e-15 | 1.000000 | 2.50124e-15 | 1.000000 |
| rad33     | 1.50408e-15 | 1.000000 | 1.86161e-15 | 1.000000 |
| rad3      | 8.78061e-16 | 1.000000 | 1.08678e-15 | 1.000000 |
| rad28     | 7.27021e-16 | 1.000000 | 8.99833e-16 | 1.000000 |
| rad4      | 7.01257e-16 | 1.000000 | 8.67945e-16 | 1.000000 |
| rad18     | 3.07354e-16 | 1.000000 | 3.80414e-16 | 1.000000 |
| rad25     | 2.61840e-16 | 1.000000 | 3.24081e-16 | 1.000000 |
| rad26     | 1.55020e-16 | 1.000000 | 1.91869e-16 | 1.000000 |
| rad24     | 1.21061e-16 | 1.000000 | 1.49838e-16 | 1.000000 |
| rad12     | 9.25054e-17 | 1.000000 | 1.14494e-16 | 1.000000 |
| rad15     | 6.16589e-17 | 1.000000 | 7.63156e-17 | 1.000000 |
| rad14     | 1.73625e-17 | 1.000000 | 2.14896e-17 | 1.000000 |
| rad27     | 4.96123e-18 | 1.000000 | 6.14053e-18 | 1.000000 |
| rad22     | 2.88778e-18 | 1.000000 | 3.57422e-18 | 1.000000 |
| rad8      | 7.86598e-19 | 1.000000 | 9.73573e-19 | 1.000000 |
| rad31     | 5.35121e-19 | 1.000000 | 6.62325e-19 | 1.000000 |
| rad47     | 7.66887e-21 | 1.000000 | 9.49183e-21 | 1.000000 |
| rad5      | 7.82842e-22 | 1.000000 | 9.68924e-22 | 1.000000 |

0.100000000E-05 Pa, 1400.00000 K

=====

| Rate constant      | True (fraction)      | Effective (fraction) |
|--------------------|----------------------|----------------------|
| Total              | 3.47024e-12 (1.00 )  | 2.71984e-12 (1.00 )  |
| Formation of rad11 | 9.43269e-13 (0.272 ) | 6.11768e-13 (0.225 ) |
| Formation of rad6  | 1.19194e-12 (0.343 ) | 7.73043e-13 (0.284 ) |
| H-abstraction      | 1.33503e-12 (0.385 ) | 1.33503e-12 (0.491 ) |

  

| species            | PYtrue    | Cumul    | PYeffective | Cumul    |
|--------------------|-----------|----------|-------------|----------|
| Benzene+2-propynyl | 0.384709  | 0.384709 | 0.490849    | 0.490849 |
| Phenyl+Allene      | 0.216237  | 0.600946 | 0.000000    | 0.490849 |
| Indene+H           | 0.102753  | 0.703699 | 0.131102    | 0.621951 |
| C2H2+PhCH2         | 0.0940337 | 0.797733 | 0.119977    | 0.741928 |
| PhCH2CCH+H         | 0.0730480 | 0.870781 | 0.0932017   | 0.835129 |
| PhCHCCH2+H         | 0.0704361 | 0.941217 | 0.0898693   | 0.924998 |
| PhCCH+CH3          | 0.0407709 | 0.981988 | 0.0520195   | 0.977018 |

|               |             |          |             |          |
|---------------|-------------|----------|-------------|----------|
| PAH7+H        | 0.00808062  | 0.990068 | 0.0103100   | 0.987328 |
| Ph+MeAc       | 0.00578254  | 0.995851 | 0.00737791  | 0.994706 |
| rad39         | 0.00153900  | 0.997390 | 0.00196361  | 0.996669 |
| PhCCCH3+H     | 0.00104907  | 0.998439 | 0.00133851  | 0.998008 |
| rad19anti     | 0.000537563 | 0.998977 | 0.000685873 | 0.998694 |
| PAH9+H        | 0.000275092 | 0.999252 | 0.000350989 | 0.999045 |
| rad19syn      | 0.000241019 | 0.999493 | 0.000307515 | 0.999352 |
| rad38         | 0.000115616 | 0.999608 | 0.000147513 | 0.999500 |
| PhcycC3H3_A+H | 9.27188e-05 | 0.999701 | 0.000118299 | 0.999618 |
| rad54         | 9.02066e-05 | 0.999791 | 0.000115094 | 0.999733 |
| rad35         | 5.05796e-05 | 0.999842 | 6.45344e-05 | 0.999798 |
| rad30         | 3.27889e-05 | 0.999875 | 4.18352e-05 | 0.999840 |
| rad46         | 2.89889e-05 | 0.999904 | 3.69868e-05 | 0.999877 |
| PAH1+H        | 1.59963e-05 | 0.999920 | 2.04096e-05 | 0.999897 |
| rad37         | 1.43563e-05 | 0.999934 | 1.83172e-05 | 0.999915 |
| PAH3+H        | 1.18378e-05 | 0.999946 | 1.51038e-05 | 0.999930 |
| rad50         | 1.13924e-05 | 0.999957 | 1.45355e-05 | 0.999945 |
| rad70         | 9.33021e-06 | 0.999967 | 1.19044e-05 | 0.999957 |
| PAH10+CH3     | 9.00294e-06 | 0.999976 | 1.14868e-05 | 0.999968 |
| rad67         | 7.68554e-06 | 0.999983 | 9.80595e-06 | 0.999978 |
| rad55         | 5.54137e-06 | 0.999989 | 7.07023e-06 | 0.999985 |
| rad51         | 1.81654e-06 | 0.999991 | 2.31772e-06 | 0.999988 |
| rad34         | 1.77488e-06 | 0.999992 | 2.26456e-06 | 0.999990 |
| rad60syn      | 1.71203e-06 | 0.999994 | 2.18438e-06 | 0.999992 |
| rad59         | 1.34390e-06 | 0.999995 | 1.71468e-06 | 0.999994 |
| rad62         | 1.09238e-06 | 0.999997 | 1.39377e-06 | 0.999995 |
| rad60anti     | 1.02264e-06 | 0.999998 | 1.30479e-06 | 0.999996 |
| rad53         | 7.63459e-07 | 0.999998 | 9.74098e-07 | 0.999997 |
| rad52         | 7.36190e-07 | 0.999999 | 9.39297e-07 | 0.999998 |
| rad56         | 5.61676e-07 | 1.000000 | 7.16641e-07 | 0.999999 |
| rad64         | 1.97836e-07 | 1.000000 | 2.52418e-07 | 0.999999 |
| rad43         | 1.00004e-07 | 1.000000 | 1.27595e-07 | 0.999999 |
| PAH8+H        | 7.73009e-08 | 1.000000 | 9.86282e-08 | 1.000000 |
| rad58         | 5.80225e-08 | 1.000000 | 7.40306e-08 | 1.000000 |
| rad65         | 5.51354e-08 | 1.000000 | 7.03469e-08 | 1.000000 |
| rad68syn      | 5.11875e-08 | 1.000000 | 6.53098e-08 | 1.000000 |
| rad42         | 4.85214e-08 | 1.000000 | 6.19082e-08 | 1.000000 |
| rad68anti     | 3.37456e-08 | 1.000000 | 4.30559e-08 | 1.000000 |
| rad40syn      | 1.23711e-08 | 1.000000 | 1.57842e-08 | 1.000000 |
| rad73         | 1.01769e-08 | 1.000000 | 1.29847e-08 | 1.000000 |
| rad71         | 9.36208e-09 | 1.000000 | 1.19451e-08 | 1.000000 |
| rad40anti     | 6.47926e-09 | 1.000000 | 8.26688e-09 | 1.000000 |
| rad61         | 4.96370e-09 | 1.000000 | 6.33318e-09 | 1.000000 |
| rad41         | 3.08784e-09 | 1.000000 | 3.93976e-09 | 1.000000 |
| rad72         | 1.29425e-10 | 1.000000 | 1.65133e-10 | 1.000000 |
| rad6          | 5.49171e-13 | 1.000000 | 7.00684e-13 | 1.000000 |
| rad11         | 1.92517e-13 | 1.000000 | 2.45631e-13 | 1.000000 |
| rad7          | 1.43249e-13 | 1.000000 | 1.82771e-13 | 1.000000 |
| rad23         | 4.49273e-14 | 1.000000 | 5.73228e-14 | 1.000000 |
| rad9          | 4.23101e-14 | 1.000000 | 5.39833e-14 | 1.000000 |
| rad13         | 3.13833e-14 | 1.000000 | 4.00418e-14 | 1.000000 |
| rad45         | 2.71120e-14 | 1.000000 | 3.45921e-14 | 1.000000 |
| rad21         | 3.81060e-15 | 1.000000 | 4.86193e-15 | 1.000000 |
| rad2          | 2.73894e-15 | 1.000000 | 3.49461e-15 | 1.000000 |
| rad36         | 2.67302e-15 | 1.000000 | 3.41050e-15 | 1.000000 |
| rad10         | 1.66792e-15 | 1.000000 | 2.12809e-15 | 1.000000 |
| rad20         | 1.53040e-15 | 1.000000 | 1.95263e-15 | 1.000000 |
| rad28         | 1.34201e-15 | 1.000000 | 1.71226e-15 | 1.000000 |
| rad33         | 9.75778e-16 | 1.000000 | 1.24499e-15 | 1.000000 |
| rad1          | 6.91599e-16 | 1.000000 | 8.82410e-16 | 1.000000 |
| rad3          | 3.93815e-16 | 1.000000 | 5.02467e-16 | 1.000000 |
| rad18         | 3.17460e-16 | 1.000000 | 4.05046e-16 | 1.000000 |
| rad4          | 3.16531e-16 | 1.000000 | 4.03861e-16 | 1.000000 |
| rad25         | 1.93942e-16 | 1.000000 | 2.47449e-16 | 1.000000 |
| rad15         | 1.81660e-16 | 1.000000 | 2.31779e-16 | 1.000000 |
| rad26         | 1.79744e-16 | 1.000000 | 2.29335e-16 | 1.000000 |
| rad24         | 8.67708e-17 | 1.000000 | 1.10711e-16 | 1.000000 |
| rad12         | 7.86877e-17 | 1.000000 | 1.00397e-16 | 1.000000 |
| rad22         | 2.40405e-17 | 1.000000 | 3.06732e-17 | 1.000000 |
| rad14         | 1.10830e-17 | 1.000000 | 1.41408e-17 | 1.000000 |
| rad27         | 2.35634e-18 | 1.000000 | 3.00645e-18 | 1.000000 |
| rad8          | 9.26462e-19 | 1.000000 | 1.18207e-18 | 1.000000 |
| rad31         | 3.51109e-19 | 1.000000 | 4.47978e-19 | 1.000000 |
| rad47         | 1.36054e-20 | 1.000000 | 1.73591e-20 | 1.000000 |
| rad5          | 3.13072e-21 | 1.000000 | 3.99447e-21 | 1.000000 |

0.100000000E-05 Pa, 1500.00000 K

=====

| Rate constant | True (fraction) | Effective (fraction) |
|---------------|-----------------|----------------------|
| -----         | -----           | -----                |

|                    |                      |                      |
|--------------------|----------------------|----------------------|
| Total              | 4.61271e-12 (1.00 )  | 3.52361e-12 (1.00 )  |
| Formation of rad11 | 1.20217e-12 (0.261 ) | 7.28782e-13 (0.207 ) |
| Formation of rad6  | 1.56360e-12 (0.339 ) | 9.47887e-13 (0.269 ) |
| H-abstraction      | 1.84694e-12 (0.400 ) | 1.84694e-12 (0.524 ) |

| species            | PYtrue      | Cumul    | PYeffective | Cumul    |
|--------------------|-------------|----------|-------------|----------|
| Benzene+2-propynyl | 0.400402    | 0.400402 | 0.524162    | 0.524162 |
| Phenyl+Allene      | 0.236109    | 0.636511 | 0.000000    | 0.524162 |
| Indene+H           | 0.0806435   | 0.717155 | 0.105570    | 0.629731 |
| PhCH2CCH+H         | 0.0806387   | 0.797793 | 0.105563    | 0.735294 |
| C2H2+PhCH2         | 0.0787062   | 0.876500 | 0.103033    | 0.838328 |
| PhCHCCH2+H         | 0.0701571   | 0.946657 | 0.0918421   | 0.930170 |
| PhCCH+CH3          | 0.0359368   | 0.982594 | 0.0470444   | 0.977214 |
| PAH7+H             | 0.00805110  | 0.990645 | 0.0105396   | 0.987754 |
| Ph+MeAc            | 0.00526035  | 0.995905 | 0.00688624  | 0.994640 |
| rad39              | 0.00146497  | 0.997370 | 0.00191777  | 0.996558 |
| PhCCCH3+H          | 0.000785539 | 0.998156 | 0.00102834  | 0.997586 |
| rad19anti          | 0.000582991 | 0.998739 | 0.000763188 | 0.998349 |
| rad19syn           | 0.000316567 | 0.999055 | 0.000414413 | 0.998764 |
| PAH9+H             | 0.000302845 | 0.999358 | 0.000396450 | 0.999160 |
| PhcycC3H3_A+H      | 0.000139913 | 0.999498 | 0.000183158 | 0.999343 |
| rad38              | 0.000129499 | 0.999627 | 0.000169526 | 0.999513 |
| rad54              | 0.000122808 | 0.999750 | 0.000160767 | 0.999674 |
| rad35              | 5.49599e-05 | 0.999805 | 7.19472e-05 | 0.999746 |
| rad46              | 3.45380e-05 | 0.999840 | 4.52132e-05 | 0.999791 |
| rad30              | 3.01156e-05 | 0.999870 | 3.94239e-05 | 0.999830 |
| PAH1+H             | 2.31901e-05 | 0.999893 | 3.03579e-05 | 0.999861 |
| rad50              | 1.62766e-05 | 0.999909 | 2.13074e-05 | 0.999882 |
| rad37              | 1.56192e-05 | 0.999925 | 2.04470e-05 | 0.999902 |
| PAH3+H             | 1.44553e-05 | 0.999939 | 1.89232e-05 | 0.999921 |
| rad70              | 1.26613e-05 | 0.999952 | 1.65747e-05 | 0.999938 |
| PAH10+CH3          | 1.25752e-05 | 0.999965 | 1.64620e-05 | 0.999954 |
| rad67              | 1.09793e-05 | 0.999976 | 1.43728e-05 | 0.999969 |
| rad55              | 7.93592e-06 | 0.999983 | 1.03888e-05 | 0.999979 |
| rad51              | 2.96749e-06 | 0.999986 | 3.88470e-06 | 0.999983 |
| rad34              | 2.57549e-06 | 0.999989 | 3.37153e-06 | 0.999986 |
| rad60syn           | 1.82792e-06 | 0.999991 | 2.39290e-06 | 0.999989 |
| rad59              | 1.58467e-06 | 0.999992 | 2.07447e-06 | 0.999991 |
| rad62              | 1.38706e-06 | 0.999994 | 1.81579e-06 | 0.999993 |
| rad53              | 1.32204e-06 | 0.999995 | 1.73067e-06 | 0.999994 |
| rad52              | 1.12378e-06 | 0.999996 | 1.47114e-06 | 0.999996 |
| rad60anti          | 1.10268e-06 | 0.999997 | 1.44350e-06 | 0.999997 |
| rad56              | 1.07222e-06 | 0.999998 | 1.40364e-06 | 0.999999 |
| rad64              | 3.15087e-07 | 0.999999 | 4.12476e-07 | 0.999999 |
| PAH8+H             | 1.66252e-07 | 0.999999 | 2.17639e-07 | 0.999999 |
| rad43              | 1.09523e-07 | 0.999999 | 1.43375e-07 | 0.999999 |
| rad68syn           | 9.28291e-08 | 0.999999 | 1.21521e-07 | 0.999999 |
| rad65              | 8.88724e-08 | 0.999999 | 1.16342e-07 | 1.000000 |
| rad58              | 8.42069e-08 | 0.999999 | 1.10234e-07 | 1.000000 |
| rad42              | 7.16663e-08 | 0.999999 | 9.38173e-08 | 1.000000 |
| rad68anti          | 6.10163e-08 | 0.999999 | 7.98757e-08 | 1.000000 |
| rad40syn           | 2.48114e-08 | 0.999999 | 3.24802e-08 | 1.000000 |
| rad71              | 2.35639e-08 | 0.999999 | 3.08472e-08 | 1.000000 |
| rad73              | 2.32861e-08 | 0.999999 | 3.04835e-08 | 1.000000 |
| rad40anti          | 1.33700e-08 | 0.999999 | 1.75025e-08 | 1.000000 |
| rad61              | 9.14968e-09 | 0.999999 | 1.19777e-08 | 1.000000 |
| rad41              | 4.14357e-09 | 0.999999 | 5.42427e-09 | 1.000000 |
| rad72              | 4.05222e-10 | 0.999999 | 5.30469e-10 | 1.000000 |
| rad6               | 1.02582e-12 | 0.999999 | 1.34289e-12 | 1.000000 |
| rad11              | 1.35774e-13 | 0.999999 | 1.77739e-13 | 1.000000 |
| rad7               | 1.25086e-13 | 0.999999 | 1.63749e-13 | 1.000000 |
| rad9               | 2.74303e-14 | 0.999999 | 3.59086e-14 | 1.000000 |
| rad23              | 2.50449e-14 | 0.999999 | 3.27860e-14 | 1.000000 |
| rad13              | 1.89900e-14 | 0.999999 | 2.48597e-14 | 1.000000 |
| rad45              | 1.53922e-14 | 0.999999 | 2.01497e-14 | 1.000000 |
| rad28              | 2.52835e-15 | 0.999999 | 3.30983e-15 | 1.000000 |
| rad21              | 2.42952e-15 | 0.999999 | 3.18045e-15 | 1.000000 |
| rad36              | 1.53196e-15 | 0.999999 | 2.00547e-15 | 1.000000 |
| rad2               | 9.72667e-16 | 0.999999 | 1.27331e-15 | 1.000000 |
| rad10              | 8.83717e-16 | 0.999999 | 1.15686e-15 | 1.000000 |
| rad20              | 8.79172e-16 | 0.999999 | 1.15092e-15 | 1.000000 |
| rad33              | 6.33589e-16 | 0.999999 | 8.29424e-16 | 1.000000 |
| rad15              | 2.99667e-16 | 0.999999 | 3.92291e-16 | 1.000000 |
| rad1               | 2.49824e-16 | 0.999999 | 3.27041e-16 | 1.000000 |
| rad18              | 2.34698e-16 | 0.999999 | 3.07239e-16 | 1.000000 |
| rad26              | 1.92659e-16 | 0.999999 | 2.52208e-16 | 1.000000 |
| rad3               | 1.85662e-16 | 0.999999 | 2.43047e-16 | 1.000000 |
| rad4               | 1.49982e-16 | 0.999999 | 1.96339e-16 | 1.000000 |
| rad25              | 1.37831e-16 | 0.999999 | 1.80433e-16 | 1.000000 |

|       |             |          |             |         |
|-------|-------------|----------|-------------|---------|
| rad22 | 1.27564e-16 | 0.999999 | 1.66993e-16 | 1.00000 |
| rad12 | 6.49250e-17 | 0.999999 | 8.49924e-17 | 1.00000 |
| rad24 | 6.18581e-17 | 0.999999 | 8.09777e-17 | 1.00000 |
| rad14 | 6.98939e-18 | 0.999999 | 9.14971e-18 | 1.00000 |
| rad27 | 1.15740e-18 | 0.999999 | 1.51513e-18 | 1.00000 |
| rad8  | 9.76883e-19 | 0.999999 | 1.27883e-18 | 1.00000 |
| rad31 | 2.37694e-19 | 0.999999 | 3.11163e-19 | 1.00000 |
| rad47 | 2.21852e-20 | 0.999999 | 2.90423e-20 | 1.00000 |
| rad5  | 9.74922e-21 | 0.999999 | 1.27626e-20 | 1.00000 |

0.100000000E-05 Pa, 1750.00000 K

| Rate constant      | True (fraction)      | Effective (fraction) |
|--------------------|----------------------|----------------------|
| Total              | 8.61869e-12 (1.00 )  | 6.27400e-12 (1.00 )  |
| Formation of rad11 | 2.04015e-12 (0.237 ) | 1.05237e-12 (0.168 ) |
| Formation of rad6  | 2.80256e-12 (0.325 ) | 1.44565e-12 (0.230 ) |
| H-abstraction      | 3.77597e-12 (0.438 ) | 3.77597e-12 (0.602 ) |

| species            | PYtrue      | Cumul    | PYeffective | Cumul    |
|--------------------|-------------|----------|-------------|----------|
| Benzene+2-propynyl | 0.438115    | 0.438115 | 0.601845    | 0.601845 |
| Phenyl+Allene      | 0.272047    | 0.710162 | 0.00000     | 0.601845 |
| PhCH2CCH+H         | 0.0933387   | 0.803501 | 0.128221    | 0.730066 |
| PhCHCCH2+H         | 0.0656327   | 0.869134 | 0.0901606   | 0.820227 |
| C2H2+PhCH2         | 0.0475978   | 0.916731 | 0.0653858   | 0.885612 |
| Indene+H           | 0.0395372   | 0.956269 | 0.0543127   | 0.939925 |
| PhCCH+CH3          | 0.0276514   | 0.983920 | 0.0379853   | 0.977910 |
| PAH7+H             | 0.00712605  | 0.991046 | 0.00978916  | 0.987700 |
| Ph+MeAc            | 0.00488545  | 0.995931 | 0.00671122  | 0.994411 |
| rad39              | 0.00123375  | 0.997165 | 0.00169483  | 0.996106 |
| rad19anti          | 0.000564116 | 0.997729 | 0.000774933 | 0.996881 |
| rad19syn           | 0.000506158 | 0.998235 | 0.000695318 | 0.997576 |
| PhCCH3+H           | 0.000461483 | 0.998697 | 0.000633946 | 0.998210 |
| PhcycC3H3_A+H      | 0.000354596 | 0.999052 | 0.000487115 | 0.998697 |
| PAH9+H             | 0.000266731 | 0.999318 | 0.000366412 | 0.999063 |
| rad54              | 0.000215004 | 0.999533 | 0.000295354 | 0.999359 |
| rad38              | 0.000142764 | 0.999676 | 0.000196118 | 0.999555 |
| rad35              | 4.88397e-05 | 0.999725 | 6.70919e-05 | 0.999622 |
| PAH1+H             | 4.24056e-05 | 0.999767 | 5.82532e-05 | 0.999680 |
| rad46              | 3.79670e-05 | 0.999805 | 5.21559e-05 | 0.999732 |
| rad50              | 2.38701e-05 | 0.999829 | 3.27908e-05 | 0.999765 |
| rad30              | 2.30179e-05 | 0.999852 | 3.16201e-05 | 0.999797 |
| PAH10+CH3          | 2.22275e-05 | 0.999874 | 3.05343e-05 | 0.999827 |
| rad70              | 2.20506e-05 | 0.999896 | 3.02913e-05 | 0.999858 |
| PAH3+H             | 2.08052e-05 | 0.999917 | 2.85805e-05 | 0.999886 |
| rad55              | 1.72026e-05 | 0.999934 | 2.36314e-05 | 0.999910 |
| rad67              | 1.69163e-05 | 0.999951 | 2.32382e-05 | 0.999933 |
| rad37              | 1.61425e-05 | 0.999968 | 2.21752e-05 | 0.999955 |
| rad51              | 6.11253e-06 | 0.999974 | 8.39689e-06 | 0.999964 |
| rad34              | 5.25680e-06 | 0.999979 | 7.22134e-06 | 0.999971 |
| rad53              | 4.39527e-06 | 0.999983 | 6.03786e-06 | 0.999977 |
| rad56              | 3.99314e-06 | 0.999987 | 5.48546e-06 | 0.999982 |
| rad62              | 2.35598e-06 | 0.999990 | 3.23645e-06 | 0.999986 |
| rad59              | 2.06481e-06 | 0.999992 | 2.83647e-06 | 0.999988 |
| rad52              | 2.03181e-06 | 0.999994 | 2.79112e-06 | 0.999991 |
| rad60syn           | 1.94292e-06 | 0.999996 | 2.66902e-06 | 0.999994 |
| rad60anti          | 1.30713e-06 | 0.999997 | 1.79563e-06 | 0.999996 |
| rad64              | 7.88600e-07 | 0.999998 | 1.08332e-06 | 0.999997 |
| PAH8+H             | 5.90480e-07 | 0.999998 | 8.11153e-07 | 0.999998 |
| rad68syn           | 2.81742e-07 | 0.999999 | 3.87034e-07 | 0.999998 |
| rad68anti          | 1.82569e-07 | 0.999999 | 2.50799e-07 | 0.999998 |
| rad65              | 1.74382e-07 | 0.999999 | 2.39552e-07 | 0.999998 |
| rad42              | 1.70585e-07 | 0.999999 | 2.34336e-07 | 0.999999 |
| rad58              | 1.57351e-07 | 0.999999 | 2.16156e-07 | 0.999999 |
| rad43              | 1.31435e-07 | 0.999999 | 1.80554e-07 | 0.999999 |
| rad71              | 1.24696e-07 | 1.000000 | 1.71297e-07 | 0.999999 |
| rad73              | 9.95914e-08 | 1.000000 | 1.36810e-07 | 0.999999 |
| rad40syn           | 8.39457e-08 | 1.000000 | 1.15318e-07 | 1.000000 |
| rad40anti          | 5.01024e-08 | 1.000000 | 6.88266e-08 | 1.000000 |
| rad61              | 2.64237e-08 | 1.000000 | 3.62987e-08 | 1.000000 |
| rad41              | 7.91859e-09 | 1.000000 | 1.08779e-08 | 1.000000 |
| rad72              | 3.69500e-09 | 1.000000 | 5.07588e-09 | 1.000000 |
| rad6               | 2.73080e-12 | 1.000000 | 3.75135e-12 | 1.000000 |
| rad7               | 2.29341e-14 | 1.000000 | 3.15050e-14 | 1.000000 |
| rad11              | 1.74064e-14 | 1.000000 | 2.39114e-14 | 1.000000 |
| rad28              | 6.31981e-15 | 1.000000 | 8.68161e-15 | 1.000000 |
| rad23              | 4.89980e-15 | 1.000000 | 6.73093e-15 | 1.000000 |
| rad9               | 2.21653e-15 | 1.000000 | 3.04488e-15 | 1.000000 |
| rad13              | 1.60834e-15 | 1.000000 | 2.20940e-15 | 1.000000 |

|       |             |          |             |          |
|-------|-------------|----------|-------------|----------|
| rad45 | 1.32473e-15 | 1.000000 | 1.81981e-15 | 1.000000 |
| rad22 | 8.40732e-16 | 1.000000 | 1.15493e-15 | 1.000000 |
| rad36 | 2.29350e-16 | 1.000000 | 3.15062e-16 | 1.000000 |
| rad21 | 1.98012e-16 | 1.000000 | 2.72012e-16 | 1.000000 |
| rad26 | 1.29918e-16 | 1.000000 | 1.78470e-16 | 1.000000 |
| rad15 | 1.11839e-16 | 1.000000 | 1.53634e-16 | 1.000000 |
| rad10 | 7.68462e-17 | 1.000000 | 1.05565e-16 | 1.000000 |
| rad20 | 6.44623e-17 | 1.000000 | 8.85528e-17 | 1.000000 |
| rad33 | 5.54005e-17 | 1.000000 | 7.61045e-17 | 1.000000 |
| rad18 | 2.99781e-17 | 1.000000 | 4.11816e-17 | 1.000000 |
| rad2  | 2.60287e-17 | 1.000000 | 3.57561e-17 | 1.000000 |
| rad25 | 1.43077e-17 | 1.000000 | 1.96547e-17 | 1.000000 |
| rad12 | 7.47122e-18 | 1.000000 | 1.02634e-17 | 1.000000 |
| rad1  | 7.12718e-18 | 1.000000 | 9.79075e-18 | 1.000000 |
| rad3  | 6.45556e-18 | 1.000000 | 8.86814e-18 | 1.000000 |
| rad24 | 6.07027e-18 | 1.000000 | 8.33884e-18 | 1.000000 |
| rad4  | 4.13705e-18 | 1.000000 | 5.68314e-18 | 1.000000 |
| rad14 | 7.58528e-19 | 1.000000 | 1.04200e-18 | 1.000000 |
| rad8  | 2.76592e-19 | 1.000000 | 3.79959e-19 | 1.000000 |
| rad27 | 6.88422e-20 | 1.000000 | 9.45698e-20 | 1.000000 |
| rad5  | 5.43716e-20 | 1.000000 | 7.46911e-20 | 1.000000 |
| rad47 | 1.43456e-20 | 1.000000 | 1.97067e-20 | 1.000000 |

0.100000000E-05 Pa, 2000.00000 K

| Rate constant      | True (fraction)      | Effective (fraction) |
|--------------------|----------------------|----------------------|
| Total              | 1.44111e-11 (1.00 )  | 1.02930e-11 (1.00 )  |
| Formation of rad11 | 3.16882e-12 (0.220 ) | 1.47449e-12 (0.143 ) |
| Formation of rad6  | 4.53302e-12 (0.315 ) | 2.10927e-12 (0.205 ) |
| H-abstraction      | 6.70922e-12 (0.466 ) | 6.70922e-12 (0.652 ) |

| species            | PYtrue      | Cumul    | PYeffective | Cumul    |
|--------------------|-------------|----------|-------------|----------|
| Benzene+2-propynyl | 0.465560    | 0.465560 | 0.651825    | 0.651825 |
| Phenyl+Allene      | 0.285759    | 0.751319 | 0.000000    | 0.651825 |
| PhCH2CCH+H         | 0.0971788   | 0.848498 | 0.136059    | 0.787884 |
| PhCHCCH2+H         | 0.0592993   | 0.907797 | 0.0830241   | 0.870908 |
| C2H2+PhCH2         | 0.0319942   | 0.939791 | 0.0447948   | 0.915703 |
| Indene+H           | 0.0233046   | 0.963096 | 0.0326284   | 0.948331 |
| PhCCH+CH3          | 0.0216466   | 0.984742 | 0.0303071   | 0.978638 |
| PAH7+H             | 0.00659328  | 0.991336 | 0.00923114  | 0.987869 |
| Ph+MeAc            | 0.00420938  | 0.995545 | 0.00589349  | 0.993763 |
| rad39              | 0.00101472  | 0.996560 | 0.00142069  | 0.995183 |
| rad19syn           | 0.000746783 | 0.997306 | 0.00104557  | 0.996229 |
| PhcycC3H3_A+H      | 0.000656335 | 0.997963 | 0.000918925 | 0.997148 |
| rad19anti          | 0.000529228 | 0.998492 | 0.000740966 | 0.997889 |
| rad54              | 0.000330237 | 0.998822 | 0.000462359 | 0.998351 |
| PhCCCH3+H          | 0.000291962 | 0.999114 | 0.000408772 | 0.998760 |
| PAH9+H             | 0.000279546 | 0.999394 | 0.000391387 | 0.999151 |
| rad38              | 0.000156414 | 0.999550 | 0.000218994 | 0.999370 |
| PAH1+H             | 6.96990e-05 | 0.999620 | 9.75848e-05 | 0.999468 |
| rad35              | 5.18637e-05 | 0.999672 | 7.26137e-05 | 0.999541 |
| rad46              | 4.57412e-05 | 0.999717 | 6.40416e-05 | 0.999605 |
| rad50              | 3.87497e-05 | 0.999756 | 5.42530e-05 | 0.999659 |
| PAH10+CH3          | 3.34470e-05 | 0.999790 | 4.68285e-05 | 0.999706 |
| rad70              | 3.20125e-05 | 0.999822 | 4.48203e-05 | 0.999751 |
| rad55              | 2.86889e-05 | 0.999850 | 4.01669e-05 | 0.999791 |
| PAH3+H             | 2.79049e-05 | 0.999878 | 3.90694e-05 | 0.999830 |
| rad67              | 2.51584e-05 | 0.999903 | 3.52238e-05 | 0.999865 |
| rad30              | 1.88901e-05 | 0.999922 | 2.64479e-05 | 0.999891 |
| rad37              | 1.66057e-05 | 0.999939 | 2.32494e-05 | 0.999915 |
| rad51              | 1.22963e-05 | 0.999951 | 1.72160e-05 | 0.999932 |
| rad56              | 1.03249e-05 | 0.999961 | 1.44559e-05 | 0.999946 |
| rad53              | 9.90974e-06 | 0.999971 | 1.38745e-05 | 0.999960 |
| rad34              | 8.56178e-06 | 0.999980 | 1.19873e-05 | 0.999972 |
| rad52              | 3.64112e-06 | 0.999984 | 5.09788e-06 | 0.999977 |
| rad62              | 3.41505e-06 | 0.999987 | 4.78139e-06 | 0.999982 |
| rad59              | 2.58714e-06 | 0.999990 | 3.62224e-06 | 0.999986 |
| rad60syn           | 2.06844e-06 | 0.999992 | 2.89599e-06 | 0.999989 |
| PAH8+H             | 1.81455e-06 | 0.999993 | 2.54053e-06 | 0.999991 |
| rad64              | 1.47576e-06 | 0.999995 | 2.06619e-06 | 0.999993 |
| rad60anti          | 1.42207e-06 | 0.999996 | 1.99102e-06 | 0.999995 |
| rad68syn           | 6.53892e-07 | 0.999997 | 9.15510e-07 | 0.999996 |
| rad71              | 4.98025e-07 | 0.999998 | 6.97277e-07 | 0.999997 |
| rad68anti          | 4.21792e-07 | 0.999998 | 5.90544e-07 | 0.999997 |
| rad73              | 3.38736e-07 | 0.999998 | 4.74260e-07 | 0.999998 |
| rad65              | 3.37785e-07 | 0.999999 | 4.72930e-07 | 0.999998 |
| rad42              | 3.12138e-07 | 0.999999 | 4.37019e-07 | 0.999999 |
| rad58              | 2.75720e-07 | 0.999999 | 3.86032e-07 | 0.999999 |



|           |             |          |             |          |
|-----------|-------------|----------|-------------|----------|
| rad40syn  | 2.27523e-07 | 0.999999 | 3.18551e-07 | 1.000000 |
| rad43     | 1.62531e-07 | 1.000000 | 2.27558e-07 | 1.000000 |
| rad40anti | 1.42660e-07 | 1.000000 | 1.99737e-07 | 1.000000 |
| rad61     | 5.98888e-08 | 1.000000 | 8.38493e-08 | 1.000000 |
| rad72     | 2.09307e-08 | 1.000000 | 2.93048e-08 | 1.000000 |
| rad41     | 1.34670e-08 | 1.000000 | 1.88550e-08 | 1.000000 |
| rad6      | 5.91208e-13 | 1.000000 | 8.27745e-13 | 1.000000 |
| rad7      | 5.25013e-15 | 1.000000 | 7.35064e-15 | 1.000000 |
| rad11     | 4.12478e-15 | 1.000000 | 5.77504e-15 | 1.000000 |
| rad23     | 3.04466e-15 | 1.000000 | 4.26278e-15 | 1.000000 |
| rad28     | 2.01472e-15 | 1.000000 | 2.82078e-15 | 1.000000 |
| rad9      | 7.54180e-16 | 1.000000 | 1.05592e-15 | 1.000000 |
| rad13     | 4.89592e-16 | 1.000000 | 6.85474e-16 | 1.000000 |
| rad45     | 4.02815e-16 | 1.000000 | 5.63974e-16 | 1.000000 |
| rad22     | 2.64949e-16 | 1.000000 | 3.70953e-16 | 1.000000 |
| rad21     | 7.16422e-17 | 1.000000 | 1.00305e-16 | 1.000000 |
| rad36     | 7.13509e-17 | 1.000000 | 9.98974e-17 | 1.000000 |
| rad15     | 3.98246e-17 | 1.000000 | 5.57578e-17 | 1.000000 |
| rad26     | 3.09848e-17 | 1.000000 | 4.33812e-17 | 1.000000 |
| rad33     | 2.26331e-17 | 1.000000 | 3.16884e-17 | 1.000000 |
| rad20     | 1.89431e-17 | 1.000000 | 2.65220e-17 | 1.000000 |
| rad10     | 1.14211e-17 | 1.000000 | 1.59906e-17 | 1.000000 |
| rad18     | 6.66195e-18 | 1.000000 | 9.32730e-18 | 1.000000 |
| rad25     | 5.79819e-18 | 1.000000 | 8.11799e-18 | 1.000000 |
| rad12     | 4.14756e-18 | 1.000000 | 5.80694e-18 | 1.000000 |
| rad2      | 3.44956e-18 | 1.000000 | 4.82968e-18 | 1.000000 |
| rad24     | 2.85159e-18 | 1.000000 | 3.99249e-18 | 1.000000 |
| rad3      | 1.63673e-18 | 1.000000 | 2.29157e-18 | 1.000000 |
| rad4      | 1.04107e-18 | 1.000000 | 1.45759e-18 | 1.000000 |
| rad1      | 9.77378e-19 | 1.000000 | 1.36842e-18 | 1.000000 |
| rad14     | 2.92675e-19 | 1.000000 | 4.09771e-19 | 1.000000 |
| rad8      | 2.34712e-19 | 1.000000 | 3.28617e-19 | 1.000000 |
| rad5      | 3.72840e-20 | 1.000000 | 5.22009e-20 | 1.000000 |
| rad47     | 2.86742e-20 | 1.000000 | 4.01464e-20 | 1.000000 |
| rad27     | 1.89904e-20 | 1.000000 | 2.65882e-20 | 1.000000 |

0.100000000E-05 Pa, 2250.00000 K

| Rate constant      | True (fraction) |          | Effective (fraction) |          |
|--------------------|-----------------|----------|----------------------|----------|
| Total              | 2.23655e-11     | (1.00 )  | 1.58437e-11          | (1.00 )  |
| Formation of rad11 | 4.62280e-12     | (0.207 ) | 1.98925e-12          | (0.126 ) |
| Formation of rad6  | 6.82518e-12     | (0.305 ) | 2.93696e-12          | (0.185 ) |
| H-abstraction      | 1.09175e-11     | (0.488 ) | 1.09175e-11          | (0.689 ) |

  

| species            | PYtrue      | Cumul    | PYeffective | Cumul    |
|--------------------|-------------|----------|-------------|----------|
| Benzene+2-propynyl | 0.488140    | 0.488140 | 0.689074    | 0.689074 |
| Phenyl+Allene      | 0.291600    | 0.779740 | 0.000000    | 0.689074 |
| PhCH2CCH+H         | 0.0967415   | 0.876482 | 0.136563    | 0.825637 |
| PhCHCCH2+H         | 0.0532744   | 0.929756 | 0.0752040   | 0.900841 |
| C2H2+PhCH2         | 0.0232642   | 0.953020 | 0.0328403   | 0.933682 |
| PhCCH+CH3          | 0.0176492   | 0.970669 | 0.0249142   | 0.958596 |
| Indene+H           | 0.0145378   | 0.985207 | 0.0205221   | 0.979118 |
| PAH7+H             | 0.00604332  | 0.991251 | 0.00853097  | 0.987649 |
| Ph+MeAc            | 0.00373478  | 0.994985 | 0.00527212  | 0.992921 |
| PhcycC3H3_A+H      | 0.00104439  | 0.996030 | 0.00147430  | 0.994395 |
| rad19syn           | 0.000992650 | 0.997022 | 0.00140125  | 0.995797 |
| rad39              | 0.000833753 | 0.997856 | 0.00117695  | 0.996974 |
| rad19anti          | 0.000463520 | 0.998320 | 0.000654319 | 0.997628 |
| rad54              | 0.000448432 | 0.998768 | 0.000633020 | 0.998261 |
| PAH9+H             | 0.000276004 | 0.999044 | 0.000389615 | 0.998651 |
| PhCCCH3+H          | 0.000209665 | 0.999254 | 0.000295970 | 0.998946 |
| rad38              | 0.000160719 | 0.999414 | 0.000226876 | 0.999173 |
| PAH1+H             | 9.95931e-05 | 0.999514 | 0.000140589 | 0.999314 |
| rad50              | 5.46328e-05 | 0.999569 | 7.71214e-05 | 0.999391 |
| rad35              | 5.24979e-05 | 0.999621 | 7.41079e-05 | 0.999465 |
| rad46              | 5.06983e-05 | 0.999672 | 7.15674e-05 | 0.999537 |
| PAH10+CH3          | 4.32190e-05 | 0.999715 | 6.10093e-05 | 0.999598 |
| rad55              | 4.15447e-05 | 0.999757 | 5.86459e-05 | 0.999656 |
| rad70              | 4.13232e-05 | 0.999798 | 5.83331e-05 | 0.999715 |
| PAH3+H             | 3.54273e-05 | 0.999833 | 5.00103e-05 | 0.999765 |
| rad67              | 3.21710e-05 | 0.999866 | 4.54135e-05 | 0.999810 |
| rad56              | 2.10958e-05 | 0.999887 | 2.97795e-05 | 0.999840 |
| rad51              | 2.05290e-05 | 0.999907 | 2.89794e-05 | 0.999869 |
| rad53              | 1.82253e-05 | 0.999925 | 2.57273e-05 | 0.999895 |
| rad30              | 1.61770e-05 | 0.999942 | 2.28359e-05 | 0.999917 |
| rad37              | 1.58091e-05 | 0.999957 | 2.23166e-05 | 0.999940 |
| rad34              | 1.21378e-05 | 0.999970 | 1.71341e-05 | 0.999957 |
| rad52              | 5.53699e-06 | 0.999975 | 7.81618e-06 | 0.999965 |

|           |             |          |             |          |
|-----------|-------------|----------|-------------|----------|
| rad62     | 4.54170e-06 | 0.999980 | 6.41120e-06 | 0.999971 |
| PAH8+H    | 4.26413e-06 | 0.999984 | 6.01937e-06 | 0.999977 |
| rad59     | 3.10133e-06 | 0.999987 | 4.37793e-06 | 0.999982 |
| rad64     | 2.31389e-06 | 0.999989 | 3.26637e-06 | 0.999985 |
| rad60syn  | 2.18352e-06 | 0.999991 | 3.08232e-06 | 0.999988 |
| rad60anti | 1.52762e-06 | 0.999993 | 2.15643e-06 | 0.999990 |
| rad71     | 1.42621e-06 | 0.999994 | 2.01328e-06 | 0.999992 |
| rad68syn  | 1.22834e-06 | 0.999996 | 1.73396e-06 | 0.999994 |
| rad73     | 8.52958e-07 | 0.999996 | 1.20406e-06 | 0.999995 |
| rad68anti | 7.89692e-07 | 0.999997 | 1.11475e-06 | 0.999996 |
| rad65     | 5.43585e-07 | 0.999998 | 7.67340e-07 | 0.999997 |
| rad42     | 4.97942e-07 | 0.999998 | 7.02910e-07 | 0.999998 |
| rad40syn  | 4.83630e-07 | 0.999999 | 6.82706e-07 | 0.999998 |
| rad58     | 4.30302e-07 | 0.999999 | 6.07428e-07 | 0.999999 |
| rad40anti | 3.15359e-07 | 1.000000 | 4.45171e-07 | 0.999999 |
| rad43     | 2.01350e-07 | 1.000000 | 2.84232e-07 | 1.000000 |
| rad61     | 1.06762e-07 | 1.000000 | 1.50709e-07 | 1.000000 |
| rad72     | 7.85254e-08 | 1.000000 | 1.10849e-07 | 1.000000 |
| rad41     | 2.11925e-08 | 1.000000 | 2.99160e-08 | 1.000000 |
| rad6      | 1.19040e-13 | 1.000000 | 1.68040e-13 | 1.000000 |
| rad7      | 1.68552e-15 | 1.000000 | 2.37934e-15 | 1.000000 |
| rad11     | 1.28921e-15 | 1.000000 | 1.81989e-15 | 1.000000 |
| rad23     | 8.52364e-16 | 1.000000 | 1.20322e-15 | 1.000000 |
| rad28     | 4.33631e-16 | 1.000000 | 6.12126e-16 | 1.000000 |
| rad9      | 2.74141e-16 | 1.000000 | 3.86985e-16 | 1.000000 |
| rad13     | 1.82809e-16 | 1.000000 | 2.58059e-16 | 1.000000 |
| rad45     | 1.39758e-16 | 1.000000 | 1.97287e-16 | 1.000000 |
| rad22     | 6.74038e-17 | 1.000000 | 9.51495e-17 | 1.000000 |
| rad21     | 2.97971e-17 | 1.000000 | 4.20624e-17 | 1.000000 |
| rad36     | 2.52499e-17 | 1.000000 | 3.56436e-17 | 1.000000 |
| rad15     | 1.60379e-17 | 1.000000 | 2.26396e-17 | 1.000000 |
| rad33     | 1.06526e-17 | 1.000000 | 1.50376e-17 | 1.000000 |
| rad26     | 8.48024e-18 | 1.000000 | 1.19710e-17 | 1.000000 |
| rad20     | 6.76720e-18 | 1.000000 | 9.55283e-18 | 1.000000 |
| rad10     | 3.04337e-18 | 1.000000 | 4.29613e-18 | 1.000000 |
| rad25     | 2.68292e-18 | 1.000000 | 3.78730e-18 | 1.000000 |
| rad12     | 2.31790e-18 | 1.000000 | 3.27203e-18 | 1.000000 |
| rad18     | 2.02949e-18 | 1.000000 | 2.86490e-18 | 1.000000 |
| rad24     | 1.45642e-18 | 1.000000 | 2.05592e-18 | 1.000000 |
| rad2      | 6.60233e-19 | 1.000000 | 9.32007e-19 | 1.000000 |
| rad3      | 5.33291e-19 | 1.000000 | 7.52811e-19 | 1.000000 |
| rad4      | 3.33190e-19 | 1.000000 | 4.70341e-19 | 1.000000 |
| rad8      | 2.01388e-19 | 1.000000 | 2.84285e-19 | 1.000000 |
| rad1      | 1.88978e-19 | 1.000000 | 2.66767e-19 | 1.000000 |
| rad14     | 1.40657e-19 | 1.000000 | 1.98555e-19 | 1.000000 |
| rad47     | 4.71862e-20 | 1.000000 | 6.66093e-20 | 1.000000 |
| rad5      | 2.19065e-20 | 1.000000 | 3.09238e-20 | 1.000000 |
| rad27     | 7.37416e-21 | 1.000000 | 1.04096e-20 | 1.000000 |

0.100000000E-05 Pa, 2500.00000 K

| Rate constant      | True (fraction)      | Effective (fraction) |
|--------------------|----------------------|----------------------|
| Total              | 3.28090e-11 (1.00 )  | 2.31980e-11 (1.00 )  |
| Formation of rad11 | 6.43164e-12 (0.196 ) | 2.60906e-12 (0.112 ) |
| Formation of rad6  | 9.73932e-12 (0.297 ) | 3.95085e-12 (0.170 ) |
| H-abstraction      | 1.66381e-11 (0.507 ) | 1.66381e-11 (0.717 ) |

  

| species            | PYtrue      | Cumul    | PYeffective | Cumul    |
|--------------------|-------------|----------|-------------|----------|
| Benzene+2-propynyl | 0.507119    | 0.507119 | 0.717221    | 0.717221 |
| Phenyl+Allene      | 0.292939    | 0.800058 | 0.000000    | 0.717221 |
| PhCH2CCH+H         | 0.0943957   | 0.894453 | 0.133505    | 0.850725 |
| PhCHCCH2+H         | 0.0481939   | 0.942647 | 0.0681609   | 0.918886 |
| C2H2+PhCH2         | 0.0183497   | 0.960997 | 0.0259521   | 0.944838 |
| PhCCH+CH3          | 0.0148752   | 0.975872 | 0.0210381   | 0.965876 |
| Indene+H           | 0.00953292  | 0.985405 | 0.0134824   | 0.979359 |
| PAH7+H             | 0.00553047  | 0.990936 | 0.00782174  | 0.987180 |
| Ph+MeAc            | 0.00339482  | 0.994330 | 0.00480131  | 0.991982 |
| PhcycC3H3_A+H      | 0.00149309  | 0.995824 | 0.00211168  | 0.994093 |
| rad19syn           | 0.00122618  | 0.997050 | 0.00173419  | 0.995828 |
| rad39              | 0.000692493 | 0.997742 | 0.000979395 | 0.996807 |
| rad54              | 0.000558297 | 0.998301 | 0.000789599 | 0.997597 |
| rad19anti          | 0.000392540 | 0.998693 | 0.000555170 | 0.998152 |
| PAH9+H             | 0.000261381 | 0.998954 | 0.000369672 | 0.998522 |
| PhCCCH3+H          | 0.000164587 | 0.999119 | 0.000232776 | 0.998754 |
| rad38              | 0.000157797 | 0.999277 | 0.000223174 | 0.998977 |
| PAH1+H             | 0.000129617 | 0.999406 | 0.000183319 | 0.999161 |
| rad50              | 6.95411e-05 | 0.999476 | 9.83527e-05 | 0.999259 |
| rad55              | 5.44673e-05 | 0.999530 | 7.70336e-05 | 0.999336 |

|           |             |          |             |          |
|-----------|-------------|----------|-------------|----------|
| rad46     | 5.29591e-05 | 0.999583 | 7.49001e-05 | 0.999411 |
| rad35     | 5.14100e-05 | 0.999635 | 7.27094e-05 | 0.999484 |
| PAH10+CH3 | 5.04331e-05 | 0.999685 | 7.13277e-05 | 0.999555 |
| rad70     | 4.95223e-05 | 0.999735 | 7.00399e-05 | 0.999625 |
| PAH3+H    | 4.31617e-05 | 0.999778 | 6.10439e-05 | 0.999686 |
| rad67     | 3.73882e-05 | 0.999815 | 5.28783e-05 | 0.999739 |
| rad56     | 3.65112e-05 | 0.999852 | 5.16378e-05 | 0.999791 |
| rad51     | 2.99347e-05 | 0.999882 | 4.23369e-05 | 0.999833 |
| rad53     | 2.90213e-05 | 0.999911 | 4.10449e-05 | 0.999874 |
| rad34     | 1.57208e-05 | 0.999926 | 2.22340e-05 | 0.999896 |
| rad30     | 1.43454e-05 | 0.999941 | 2.02888e-05 | 0.999917 |
| rad37     | 1.43019e-05 | 0.999955 | 2.02272e-05 | 0.999937 |
| PAH8+H    | 8.32886e-06 | 0.999963 | 1.17795e-05 | 0.999949 |
| rad52     | 7.47627e-06 | 0.999971 | 1.05737e-05 | 0.999959 |
| rad62     | 5.70269e-06 | 0.999977 | 8.06532e-06 | 0.999967 |
| rad59     | 3.60017e-06 | 0.999980 | 5.09173e-06 | 0.999972 |
| rad64     | 3.22135e-06 | 0.999983 | 4.55597e-06 | 0.999977 |
| rad71     | 3.21465e-06 | 0.999987 | 4.54650e-06 | 0.999981 |
| rad60syn  | 2.29248e-06 | 0.999989 | 3.24226e-06 | 0.999985 |
| rad68syn  | 1.99920e-06 | 0.999991 | 2.82747e-06 | 0.999988 |
| rad73     | 1.73023e-06 | 0.999993 | 2.44707e-06 | 0.999990 |
| rad60anti | 1.62672e-06 | 0.999994 | 2.30068e-06 | 0.999992 |
| rad68anti | 1.28205e-06 | 0.999996 | 1.81322e-06 | 0.999994 |
| rad40syn  | 8.70429e-07 | 0.999996 | 1.23105e-06 | 0.999995 |
| rad65     | 7.65686e-07 | 0.999997 | 1.08291e-06 | 0.999996 |
| rad42     | 7.25369e-07 | 0.999998 | 1.02590e-06 | 0.999997 |
| rad58     | 6.16762e-07 | 0.999999 | 8.72293e-07 | 0.999998 |
| rad40anti | 5.85898e-07 | 0.999999 | 8.28640e-07 | 0.999999 |
| rad43     | 2.45120e-07 | 0.999999 | 3.46673e-07 | 0.999999 |
| rad72     | 2.19453e-07 | 1.000000 | 3.10373e-07 | 1.000000 |
| rad61     | 1.61750e-07 | 1.000000 | 2.28765e-07 | 1.000000 |
| rad41     | 3.09947e-08 | 1.000000 | 4.38359e-08 | 1.000000 |
| rad6      | 3.25694e-14 | 1.000000 | 4.60631e-14 | 1.000000 |
| rad7      | 6.60234e-16 | 1.000000 | 9.33769e-16 | 1.000000 |
| rad11     | 4.80253e-16 | 1.000000 | 6.79225e-16 | 1.000000 |
| rad23     | 2.48545e-16 | 1.000000 | 3.51520e-16 | 1.000000 |
| rad28     | 1.17713e-16 | 1.000000 | 1.66482e-16 | 1.000000 |
| rad9      | 1.06944e-16 | 1.000000 | 1.51252e-16 | 1.000000 |
| rad13     | 7.91321e-17 | 1.000000 | 1.11917e-16 | 1.000000 |
| rad45     | 5.44866e-17 | 1.000000 | 7.70608e-17 | 1.000000 |
| rad22     | 2.12456e-17 | 1.000000 | 3.00479e-17 | 1.000000 |
| rad21     | 1.39345e-17 | 1.000000 | 1.97077e-17 | 1.000000 |
| rad36     | 1.00116e-17 | 1.000000 | 1.41594e-17 | 1.000000 |
| rad15     | 6.95061e-18 | 1.000000 | 9.83029e-18 | 1.000000 |
| rad33     | 5.56576e-18 | 1.000000 | 7.87170e-18 | 1.000000 |
| rad26     | 3.00907e-18 | 1.000000 | 4.25575e-18 | 1.000000 |
| rad20     | 2.88827e-18 | 1.000000 | 4.08489e-18 | 1.000000 |
| rad25     | 1.37165e-18 | 1.000000 | 1.93993e-18 | 1.000000 |
| rad12     | 1.32606e-18 | 1.000000 | 1.87546e-18 | 1.000000 |
| rad10     | 1.10722e-18 | 1.000000 | 1.56594e-18 | 1.000000 |
| rad24     | 7.99114e-19 | 1.000000 | 1.13019e-18 | 1.000000 |
| rad18     | 7.64139e-19 | 1.000000 | 1.08073e-18 | 1.000000 |
| rad3      | 2.12498e-19 | 1.000000 | 3.00538e-19 | 1.000000 |
| rad2      | 1.77671e-19 | 1.000000 | 2.51281e-19 | 1.000000 |
| rad8      | 1.74700e-19 | 1.000000 | 2.47079e-19 | 1.000000 |
| rad4      | 1.29898e-19 | 1.000000 | 1.83716e-19 | 1.000000 |
| rad14     | 7.76880e-20 | 1.000000 | 1.09875e-19 | 1.000000 |
| rad47     | 6.74962e-20 | 1.000000 | 9.54604e-20 | 1.000000 |
| rad1      | 4.96553e-20 | 1.000000 | 7.02274e-20 | 1.000000 |
| rad5      | 1.44564e-20 | 1.000000 | 2.04457e-20 | 1.000000 |
| rad27     | 3.67276e-21 | 1.000000 | 5.19440e-21 | 1.000000 |

0.100000000E-05 Pa, 2750.00000 K

=====

| Rate constant      | True (fraction)      | Effective (fraction) |
|--------------------|----------------------|----------------------|
| Total              | 4.60596e-11 (1.00 )  | 3.26255e-11 (1.00 )  |
| Formation of rad11 | 8.62280e-12 (0.187 ) | 3.34633e-12 (0.103 ) |
| Formation of rad6  | 1.33313e-11 (0.289 ) | 5.17360e-12 (0.159 ) |
| H-abstraction      | 2.41055e-11 (0.523 ) | 2.41055e-11 (0.739 ) |

  

| species            | PYtrue     | Cumul    | PYeffective | Cumul    |
|--------------------|------------|----------|-------------|----------|
| Benzene+2-propynyl | 0.523355   | 0.523355 | 0.738856    | 0.738856 |
| Phenyl+Allene      | 0.291669   | 0.815024 | 0.000000    | 0.738856 |
| PhCH2CCH+H         | 0.0913925  | 0.906416 | 0.129025    | 0.867881 |
| PhCHCCH2+H         | 0.0440897  | 0.950506 | 0.0622446   | 0.930126 |
| C2H2+PhCH2         | 0.0155259  | 0.966032 | 0.0219190   | 0.952045 |
| PhCCH+CH3          | 0.0128664  | 0.978898 | 0.0181644   | 0.970209 |
| Indene+H           | 0.00652675 | 0.985425 | 0.00921427  | 0.979424 |

|               |             |          |             |          |
|---------------|-------------|----------|-------------|----------|
| PAH7+H        | 0.00506746  | 0.990493 | 0.00715408  | 0.986578 |
| Ph+MeAc       | 0.00315047  | 0.993643 | 0.00444775  | 0.991026 |
| PhcycC3H3_A+H | 0.00197300  | 0.995616 | 0.00278544  | 0.993811 |
| rad19syn      | 0.00143568  | 0.997052 | 0.00202686  | 0.995838 |
| rad54         | 0.000652594 | 0.997704 | 0.000921315 | 0.996759 |
| rad39         | 0.000584043 | 0.998288 | 0.000824532 | 0.997584 |
| rad19anti     | 0.000328573 | 0.998617 | 0.000463869 | 0.998048 |
| PAH9+H        | 0.000240059 | 0.998857 | 0.000338907 | 0.998386 |
| PAH1+H        | 0.000158291 | 0.999015 | 0.000223471 | 0.998610 |
| rad38         | 0.000149711 | 0.999165 | 0.000211358 | 0.998821 |
| PhCCCH3+H     | 0.000136861 | 0.999302 | 0.000193216 | 0.999015 |
| rad50         | 8.19601e-05 | 0.999384 | 0.000115709 | 0.999130 |
| rad55         | 6.64334e-05 | 0.999450 | 9.37887e-05 | 0.999224 |
| rad70         | 5.64830e-05 | 0.999507 | 7.97407e-05 | 0.999304 |
| rad56         | 5.59920e-05 | 0.999563 | 7.90477e-05 | 0.999383 |
| PAH10+CH3     | 5.49972e-05 | 0.999618 | 7.76435e-05 | 0.999460 |
| rad46         | 5.29186e-05 | 0.999671 | 7.47090e-05 | 0.999535 |
| PAH3+H        | 5.07704e-05 | 0.999721 | 7.16761e-05 | 0.999607 |
| rad35         | 4.92117e-05 | 0.999771 | 6.94754e-05 | 0.999676 |
| rad53         | 4.15958e-05 | 0.999812 | 5.87239e-05 | 0.999735 |
| rad67         | 4.08893e-05 | 0.999853 | 5.77263e-05 | 0.999793 |
| rad51         | 3.94231e-05 | 0.999893 | 5.56562e-05 | 0.999848 |
| rad34         | 1.91382e-05 | 0.999912 | 2.70187e-05 | 0.999875 |
| PAH8+H        | 1.42400e-05 | 0.999926 | 2.01036e-05 | 0.999896 |
| rad30         | 1.30159e-05 | 0.999939 | 1.83754e-05 | 0.999914 |
| rad37         | 1.25497e-05 | 0.999951 | 1.77173e-05 | 0.999932 |
| rad52         | 9.23200e-06 | 0.999961 | 1.30335e-05 | 0.999945 |
| rad62         | 6.96508e-06 | 0.999968 | 9.83308e-06 | 0.999954 |
| rad71         | 6.06264e-06 | 0.999974 | 8.55906e-06 | 0.999963 |
| rad64         | 4.12924e-06 | 0.999978 | 5.82954e-06 | 0.999969 |
| rad59         | 4.06487e-06 | 0.999982 | 5.73866e-06 | 0.999975 |
| rad73         | 2.98825e-06 | 0.999985 | 4.21872e-06 | 0.999979 |
| rad68syn      | 2.93858e-06 | 0.999988 | 4.14861e-06 | 0.999983 |
| rad60syn      | 2.38752e-06 | 0.999990 | 3.37063e-06 | 0.999986 |
| rad68anti     | 1.88086e-06 | 0.999992 | 2.65533e-06 | 0.999989 |
| rad60anti     | 1.71401e-06 | 0.999994 | 2.41979e-06 | 0.999991 |
| rad40syn      | 1.39059e-06 | 0.999995 | 1.96319e-06 | 0.999993 |
| rad42         | 1.00618e-06 | 0.999996 | 1.42050e-06 | 0.999995 |
| rad65         | 9.77109e-07 | 0.999997 | 1.37945e-06 | 0.999996 |
| rad40anti     | 9.60893e-07 | 0.999998 | 1.35656e-06 | 0.999998 |
| rad58         | 8.26832e-07 | 0.999999 | 1.16730e-06 | 0.999999 |
| rad72         | 4.93194e-07 | 1.000000 | 6.96274e-07 | 0.999999 |
| rad43         | 2.90363e-07 | 1.000000 | 4.09925e-07 | 1.000000 |
| rad61         | 2.19014e-07 | 1.000000 | 3.09197e-07 | 1.000000 |
| rad41         | 4.25216e-08 | 1.000000 | 6.00307e-08 | 1.000000 |
| rad6          | 1.10899e-14 | 1.000000 | 1.56563e-14 | 1.000000 |
| rad7          | 2.96672e-16 | 1.000000 | 4.18833e-16 | 1.000000 |
| rad11         | 2.05428e-16 | 1.000000 | 2.90018e-16 | 1.000000 |
| rad23         | 8.47981e-17 | 1.000000 | 1.19715e-16 | 1.000000 |
| rad9          | 4.48827e-17 | 1.000000 | 6.33642e-17 | 1.000000 |
| rad28         | 4.00896e-17 | 1.000000 | 5.65974e-17 | 1.000000 |
| rad13         | 3.84823e-17 | 1.000000 | 5.43283e-17 | 1.000000 |
| rad45         | 2.34574e-17 | 1.000000 | 3.31164e-17 | 1.000000 |
| rad22         | 7.92776e-18 | 1.000000 | 1.11922e-17 | 1.000000 |
| rad21         | 7.20273e-18 | 1.000000 | 1.01686e-17 | 1.000000 |
| rad36         | 4.37127e-18 | 1.000000 | 6.17122e-18 | 1.000000 |
| rad15         | 3.20717e-18 | 1.000000 | 4.52779e-18 | 1.000000 |
| rad33         | 3.15102e-18 | 1.000000 | 4.44850e-18 | 1.000000 |
| rad20         | 1.44342e-18 | 1.000000 | 2.03778e-18 | 1.000000 |
| rad26         | 1.23248e-18 | 1.000000 | 1.73998e-18 | 1.000000 |
| rad12         | 7.84782e-19 | 1.000000 | 1.10793e-18 | 1.000000 |
| rad25         | 7.63295e-19 | 1.000000 | 1.07760e-18 | 1.000000 |
| rad10         | 4.78404e-19 | 1.000000 | 6.75396e-19 | 1.000000 |
| rad24         | 4.65717e-19 | 1.000000 | 6.57484e-19 | 1.000000 |
| rad18         | 3.38453e-19 | 1.000000 | 4.77817e-19 | 1.000000 |
| rad8          | 1.52996e-19 | 1.000000 | 2.15996e-19 | 1.000000 |
| rad3          | 9.87576e-20 | 1.000000 | 1.39423e-19 | 1.000000 |
| rad47         | 8.69678e-20 | 1.000000 | 1.22779e-19 | 1.000000 |
| rad2          | 6.30378e-20 | 1.000000 | 8.89949e-20 | 1.000000 |
| rad4          | 5.93061e-20 | 1.000000 | 8.37266e-20 | 1.000000 |
| rad14         | 4.74805e-20 | 1.000000 | 6.70314e-20 | 1.000000 |
| rad1          | 1.67172e-20 | 1.000000 | 2.36009e-20 | 1.000000 |
| rad5          | 1.01387e-20 | 1.000000 | 1.43136e-20 | 1.000000 |
| rad27         | 2.15735e-21 | 1.000000 | 3.04569e-21 | 1.000000 |

0.100000000E-05 Pa, 3000.00000 K

| Rate constant | True (fraction)     | Effective (fraction) |
|---------------|---------------------|----------------------|
| Total         | 6.24269e-11 (1.00 ) | 4.43911e-11 (1.00 )  |

|                    |                      |                       |
|--------------------|----------------------|-----------------------|
| Formation of rad11 | 1.12221e-11 (0.180 ) | 4.21269e-12 (0.0949 ) |
| Formation of rad6  | 1.76534e-11 (0.283 ) | 6.62699e-12 (0.149 )  |
| H-abstraction      | 3.35514e-11 (0.537 ) | 3.35514e-11 (0.756 )  |

| species            | PYtrue      | Cumul    | PYeffective | Cumul    |
|--------------------|-------------|----------|-------------|----------|
| Benzene+2-propynyl | 0.537451    | 0.537451 | 0.755814    | 0.755814 |
| Phenyl+Allene      | 0.288911    | 0.826362 | 0.00000     | 0.755814 |
| PhCH2CCH+H         | 0.0883066   | 0.914669 | 0.124185    | 0.879999 |
| PhCHCCH2+H         | 0.0408111   | 0.955480 | 0.0573925   | 0.937392 |
| C2H2+PhCH2         | 0.0138651   | 0.969345 | 0.0194984   | 0.956890 |
| PhCCH+CH3          | 0.0113582   | 0.980703 | 0.0159730   | 0.972863 |
| PAH7+H             | 0.00465329  | 0.985356 | 0.00654386  | 0.979407 |
| Indene+H           | 0.00463895  | 0.989995 | 0.00652370  | 0.985931 |
| Ph+MeAc            | 0.00297587  | 0.992971 | 0.00418496  | 0.990116 |
| PhcycC3H3_A+H      | 0.00245642  | 0.995427 | 0.00345445  | 0.993570 |
| rad19syn           | 0.00161454  | 0.997042 | 0.00227052  | 0.995841 |
| rad54              | 0.000727890 | 0.997770 | 0.00102362  | 0.996864 |
| rad39              | 0.000500510 | 0.998270 | 0.000703861 | 0.997568 |
| rad19anti          | 0.000275358 | 0.998546 | 0.000387232 | 0.997955 |
| PAH9+H             | 0.000215435 | 0.998761 | 0.000302964 | 0.998258 |
| PAH1+H             | 0.000185098 | 0.998946 | 0.000260302 | 0.998519 |
| rad38              | 0.000138297 | 0.999085 | 0.000194486 | 0.998713 |
| PhCCCH3+H          | 0.000118094 | 0.999203 | 0.000166074 | 0.998879 |
| rad50              | 9.10199e-05 | 0.999294 | 0.000128001 | 0.999007 |
| rad56              | 7.84307e-05 | 0.999372 | 0.000110297 | 0.999117 |
| rad55              | 7.67854e-05 | 0.999449 | 0.000107983 | 0.999225 |
| rad70              | 6.22156e-05 | 0.999511 | 8.74935e-05 | 0.999313 |
| PAH3+H             | 5.79162e-05 | 0.999569 | 8.14472e-05 | 0.999394 |
| PAH10+CH3          | 5.73435e-05 | 0.999626 | 8.06419e-05 | 0.999475 |
| rad53              | 5.50942e-05 | 0.999682 | 7.74787e-05 | 0.999552 |
| rad46              | 5.10964e-05 | 0.999733 | 7.18563e-05 | 0.999624 |
| rad51              | 4.79927e-05 | 0.999781 | 6.74918e-05 | 0.999692 |
| rad35              | 4.64038e-05 | 0.999827 | 6.52572e-05 | 0.999757 |
| rad67              | 4.30004e-05 | 0.999870 | 6.04712e-05 | 0.999818 |
| rad34              | 2.22803e-05 | 0.999892 | 3.13327e-05 | 0.999849 |
| PAH8+H             | 2.20424e-05 | 0.999914 | 3.09982e-05 | 0.999880 |
| rad30              | 1.19659e-05 | 0.999926 | 1.68276e-05 | 0.999897 |
| rad37              | 1.08360e-05 | 0.999937 | 1.52386e-05 | 0.999912 |
| rad52              | 1.06405e-05 | 0.999948 | 1.49636e-05 | 0.999927 |
| rad71              | 9.97847e-06 | 0.999958 | 1.40327e-05 | 0.999941 |
| rad62              | 8.52399e-06 | 0.999966 | 1.19872e-05 | 0.999953 |
| rad64              | 4.99011e-06 | 0.999971 | 7.01754e-06 | 0.999960 |
| rad73              | 4.56449e-06 | 0.999976 | 6.41901e-06 | 0.999966 |
| rad59              | 4.47702e-06 | 0.999980 | 6.29599e-06 | 0.999973 |
| rad68syn           | 4.00554e-06 | 0.999984 | 5.63295e-06 | 0.999978 |
| rad68anti          | 2.55993e-06 | 0.999987 | 3.60001e-06 | 0.999982 |
| rad60syn           | 2.46101e-06 | 0.999989 | 3.46090e-06 | 0.999985 |
| rad40syn           | 2.03324e-06 | 0.999991 | 2.85932e-06 | 0.999988 |
| rad60anti          | 1.78407e-06 | 0.999993 | 2.50894e-06 | 0.999991 |
| rad40anti          | 1.43624e-06 | 0.999995 | 2.01978e-06 | 0.999993 |
| rad42              | 1.37800e-06 | 0.999996 | 1.93787e-06 | 0.999995 |
| rad65              | 1.15674e-06 | 0.999997 | 1.62672e-06 | 0.999996 |
| rad58              | 1.05023e-06 | 0.999998 | 1.47693e-06 | 0.999998 |
| rad72              | 9.39261e-07 | 0.999999 | 1.32087e-06 | 0.999999 |
| rad43              | 3.36095e-07 | 0.999999 | 4.72649e-07 | 1.000000 |
| rad61              | 2.73990e-07 | 1.000000 | 3.85311e-07 | 1.000000 |
| rad41              | 5.56844e-08 | 1.000000 | 7.83087e-08 | 1.000000 |
| rad6               | 4.40244e-15 | 1.000000 | 6.19114e-15 | 1.000000 |
| rad7               | 1.48082e-16 | 1.000000 | 2.08247e-16 | 1.000000 |
| rad11              | 9.86334e-17 | 1.000000 | 1.38708e-16 | 1.000000 |
| rad23              | 3.24975e-17 | 1.000000 | 4.57009e-17 | 1.000000 |
| rad13              | 2.05537e-17 | 1.000000 | 2.89045e-17 | 1.000000 |
| rad9               | 2.02648e-17 | 1.000000 | 2.84982e-17 | 1.000000 |
| rad28              | 1.58947e-17 | 1.000000 | 2.23525e-17 | 1.000000 |
| rad45              | 1.09628e-17 | 1.000000 | 1.54169e-17 | 1.000000 |
| rad21              | 4.05034e-18 | 1.000000 | 5.69598e-18 | 1.000000 |
| rad22              | 3.35980e-18 | 1.000000 | 4.72485e-18 | 1.000000 |
| rad36              | 2.06687e-18 | 1.000000 | 2.90664e-18 | 1.000000 |
| rad33              | 1.89985e-18 | 1.000000 | 2.67174e-18 | 1.000000 |
| rad15              | 1.57398e-18 | 1.000000 | 2.21348e-18 | 1.000000 |
| rad20              | 8.22772e-19 | 1.000000 | 1.15706e-18 | 1.000000 |
| rad26              | 5.53823e-19 | 1.000000 | 7.78836e-19 | 1.000000 |
| rad12              | 4.82938e-19 | 1.000000 | 6.79149e-19 | 1.000000 |
| rad25              | 4.56474e-19 | 1.000000 | 6.41938e-19 | 1.000000 |
| rad24              | 2.85392e-19 | 1.000000 | 4.01344e-19 | 1.000000 |
| rad10              | 2.30451e-19 | 1.000000 | 3.24081e-19 | 1.000000 |
| rad18              | 1.70015e-19 | 1.000000 | 2.39092e-19 | 1.000000 |
| rad8               | 1.34844e-19 | 1.000000 | 1.89630e-19 | 1.000000 |
| rad47              | 1.03449e-19 | 1.000000 | 1.45480e-19 | 1.000000 |

|       |             |          |             |         |
|-------|-------------|----------|-------------|---------|
| rad3  | 5.15423e-20 | 1.000000 | 7.24837e-20 | 1.00000 |
| rad14 | 3.16322e-20 | 1.000000 | 4.44841e-20 | 1.00000 |
| rad4  | 3.07106e-20 | 1.000000 | 4.31882e-20 | 1.00000 |
| rad2  | 2.73581e-20 | 1.000000 | 3.84734e-20 | 1.00000 |
| rad5  | 7.37437e-21 | 1.000000 | 1.03706e-20 | 1.00000 |
| rad1  | 6.80548e-21 | 1.000000 | 9.57048e-21 | 1.00000 |
| rad27 | 1.40640e-21 | 1.000000 | 1.97781e-21 | 1.00000 |

0.100000000E-05 Pa, 3250.00000 K

| Rate constant      | True (fraction) |          | Effective (fraction) |           |
|--------------------|-----------------|----------|----------------------|-----------|
| Total              | 8.22129e-11     | (1.00 )  | 5.87536e-11          | (1.00 )   |
| Formation of rad11 | 1.42538e-11     | (0.173 ) | 5.21849e-12          | (0.0888 ) |
| Formation of rad6  | 2.27549e-11     | (0.277 ) | 8.33083e-12          | (0.142 )  |
| H-abstraction      | 4.52043e-11     | (0.550 ) | 4.52043e-11          | (0.769 )  |

  

| species            | PYtrue      | Cumul    | PYeffective | Cumul    |
|--------------------|-------------|----------|-------------|----------|
| Benzene+2-propynyl | 0.549844    | 0.549844 | 0.769388    | 0.769388 |
| Phenyl+Allene      | 0.285349    | 0.835192 | 0.00000     | 0.769388 |
| PhCH2CCH+H         | 0.0853725   | 0.920565 | 0.119460    | 0.888848 |
| PhCHCCH2+H         | 0.0381839   | 0.958749 | 0.0534299   | 0.942278 |
| C2H2+PhCH2         | 0.0128678   | 0.971617 | 0.0180057   | 0.960283 |
| PhCCH+CH3          | 0.0101926   | 0.981809 | 0.0142623   | 0.974546 |
| PAH7+H             | 0.00428274  | 0.986092 | 0.00599276  | 0.980539 |
| Indene+H           | 0.00340695  | 0.989499 | 0.00476729  | 0.985306 |
| PhcycC3H3_A+H      | 0.00292038  | 0.992419 | 0.00408643  | 0.989392 |
| Ph+MeAc            | 0.00285191  | 0.995271 | 0.00399061  | 0.993383 |
| rad19syn           | 0.00176005  | 0.997031 | 0.00246280  | 0.995846 |
| rad54              | 0.000783510 | 0.997815 | 0.00109635  | 0.996942 |
| rad39              | 0.000435199 | 0.998250 | 0.000608967 | 0.997551 |
| rad19anti          | 0.000232598 | 0.998483 | 0.000325470 | 0.997876 |
| PAH1+H             | 0.000210285 | 0.998693 | 0.000294248 | 0.998171 |
| PAH9+H             | 0.000189946 | 0.998883 | 0.000265788 | 0.998436 |
| rad38              | 0.000125074 | 0.999008 | 0.000175014 | 0.998611 |
| PhCCCH3+H          | 0.000104499 | 0.999112 | 0.000146224 | 0.998758 |
| rad56              | 0.000102496 | 0.999215 | 0.000143420 | 0.998901 |
| rad50              | 9.64743e-05 | 0.999311 | 0.000134995 | 0.999036 |
| rad55              | 8.51952e-05 | 0.999397 | 0.000119212 | 0.999155 |
| rad53              | 6.86880e-05 | 0.999465 | 9.61137e-05 | 0.999251 |
| rad70              | 6.67834e-05 | 0.999532 | 9.34486e-05 | 0.999345 |
| PAH3+H             | 6.43467e-05 | 0.999596 | 9.00394e-05 | 0.999435 |
| PAH10+CH3          | 5.80427e-05 | 0.999654 | 8.12183e-05 | 0.999516 |
| rad51              | 5.49240e-05 | 0.999709 | 7.68541e-05 | 0.999593 |
| rad46              | 4.80263e-05 | 0.999757 | 6.72021e-05 | 0.999660 |
| rad67              | 4.40669e-05 | 0.999802 | 6.16619e-05 | 0.999722 |
| rad35              | 4.33473e-05 | 0.999845 | 6.06552e-05 | 0.999783 |
| PAH8+H             | 3.16111e-05 | 0.999876 | 4.42329e-05 | 0.999827 |
| rad34              | 2.50786e-05 | 0.999902 | 3.50921e-05 | 0.999862 |
| rad71              | 1.47743e-05 | 0.999916 | 2.06734e-05 | 0.999883 |
| rad52              | 1.16170e-05 | 0.999928 | 1.62555e-05 | 0.999899 |
| rad30              | 1.10774e-05 | 0.999939 | 1.55003e-05 | 0.999914 |
| rad62              | 1.06705e-05 | 0.999950 | 1.49310e-05 | 0.999929 |
| rad37              | 9.29424e-06 | 0.999959 | 1.30053e-05 | 0.999942 |
| rad73              | 6.33743e-06 | 0.999965 | 8.86788e-06 | 0.999951 |
| rad64              | 5.77649e-06 | 0.999971 | 8.08292e-06 | 0.999959 |
| rad68syn           | 5.15348e-06 | 0.999976 | 7.21118e-06 | 0.999966 |
| rad59              | 4.82486e-06 | 0.999981 | 6.75136e-06 | 0.999973 |
| rad68anti          | 3.28964e-06 | 0.999984 | 4.60314e-06 | 0.999978 |
| rad40syn           | 2.77792e-06 | 0.999987 | 3.88709e-06 | 0.999982 |
| rad60syn           | 2.50929e-06 | 0.999990 | 3.51119e-06 | 0.999985 |
| rad40anti          | 1.99952e-06 | 0.999992 | 2.79788e-06 | 0.999988 |
| rad42              | 1.90464e-06 | 0.999994 | 2.66512e-06 | 0.999991 |
| rad60anti          | 1.83422e-06 | 0.999995 | 2.56658e-06 | 0.999993 |
| rad72              | 1.57365e-06 | 0.999997 | 2.20197e-06 | 0.999995 |
| rad65              | 1.29208e-06 | 0.999998 | 1.80798e-06 | 0.999997 |
| rad58              | 1.27682e-06 | 1.000000 | 1.78663e-06 | 0.999999 |
| rad43              | 3.85029e-07 | 1.000000 | 5.38764e-07 | 1.000000 |
| rad61              | 3.23853e-07 | 1.000000 | 4.53160e-07 | 1.000000 |
| rad41              | 7.10639e-08 | 1.000000 | 9.94383e-08 | 1.000000 |
| rad6               | 1.97009e-15 | 1.000000 | 2.75670e-15 | 1.000000 |
| rad7               | 8.03358e-17 | 1.000000 | 1.12412e-16 | 1.000000 |
| rad11              | 5.21686e-17 | 1.000000 | 7.29988e-17 | 1.000000 |
| rad23              | 1.36352e-17 | 1.000000 | 1.90795e-17 | 1.000000 |
| rad13              | 1.18525e-17 | 1.000000 | 1.65850e-17 | 1.000000 |
| rad9               | 9.82223e-18 | 1.000000 | 1.37440e-17 | 1.000000 |
| rad28              | 7.06592e-18 | 1.000000 | 9.88721e-18 | 1.000000 |
| rad45              | 5.48385e-18 | 1.000000 | 7.67347e-18 | 1.000000 |
| rad21              | 2.44315e-18 | 1.000000 | 3.41865e-18 | 1.000000 |

|       |             |         |             |         |
|-------|-------------|---------|-------------|---------|
| rad22 | 1.58052e-18 | 1.00000 | 2.21159e-18 | 1.00000 |
| rad33 | 1.20474e-18 | 1.00000 | 1.68578e-18 | 1.00000 |
| rad36 | 1.04353e-18 | 1.00000 | 1.46020e-18 | 1.00000 |
| rad15 | 8.20337e-19 | 1.00000 | 1.14788e-18 | 1.00000 |
| rad20 | 5.20430e-19 | 1.00000 | 7.28226e-19 | 1.00000 |
| rad12 | 3.09374e-19 | 1.00000 | 4.32901e-19 | 1.00000 |
| rad25 | 2.89947e-19 | 1.00000 | 4.05717e-19 | 1.00000 |
| rad26 | 2.68050e-19 | 1.00000 | 3.75077e-19 | 1.00000 |
| rad24 | 1.82403e-19 | 1.00000 | 2.55233e-19 | 1.00000 |
| rad10 | 1.20062e-19 | 1.00000 | 1.68001e-19 | 1.00000 |
| rad8  | 1.19193e-19 | 1.00000 | 1.66784e-19 | 1.00000 |
| rad47 | 1.15640e-19 | 1.00000 | 1.61813e-19 | 1.00000 |
| rad18 | 9.40390e-20 | 1.00000 | 1.31587e-19 | 1.00000 |
| rad3  | 2.93950e-20 | 1.00000 | 4.11318e-20 | 1.00000 |
| rad14 | 2.29549e-20 | 1.00000 | 3.21204e-20 | 1.00000 |
| rad4  | 1.75935e-20 | 1.00000 | 2.46183e-20 | 1.00000 |
| rad2  | 1.36533e-20 | 1.00000 | 1.91048e-20 | 1.00000 |
| rad5  | 5.54025e-21 | 1.00000 | 7.75236e-21 | 1.00000 |
| rad1  | 3.20404e-21 | 1.00000 | 4.48334e-21 | 1.00000 |
| rad27 | 9.84680e-22 | 1.00000 | 1.37785e-21 | 1.00000 |

0.100000000E-05 Pa, 3500.00000 K

| Rate constant      | True (fraction) |          | Effective (fraction) |           |
|--------------------|-----------------|----------|----------------------|-----------|
| Total              | 1.05713e-10     | (1.00 )  | 7.59650e-11          | (1.00 )   |
| Formation of rad11 | 1.77412e-11     | (0.168 ) | 6.37264e-12          | (0.0839 ) |
| Formation of rad6  | 2.86822e-11     | (0.271 ) | 1.03027e-11          | (0.136 )  |
| H-abstraction      | 5.92897e-11     | (0.561 ) | 5.92897e-11          | (0.780 )  |

  

| species            | PYtrue      | Cumul    | PYeffective | Cumul    |
|--------------------|-------------|----------|-------------|----------|
| Benzene+2-propynyl | 0.560855    | 0.560855 | 0.780487    | 0.780487 |
| Phenyl+Allene      | 0.281404    | 0.842259 | 0.00000     | 0.780487 |
| PhCH2CCH+H         | 0.0826656   | 0.924925 | 0.115037    | 0.895524 |
| PhCHCCH2+H         | 0.0360585   | 0.960983 | 0.0501791   | 0.945703 |
| C2H2+PhCH2         | 0.0122593   | 0.973242 | 0.0170600   | 0.962764 |
| PhCCH+CH3          | 0.00927084  | 0.982513 | 0.0129013   | 0.975665 |
| PAH7+H             | 0.00395025  | 0.986463 | 0.00549717  | 0.981162 |
| PhcycC3H3_A+H      | 0.00334801  | 0.989811 | 0.00465910  | 0.985821 |
| Ph+MeAc            | 0.00276398  | 0.992575 | 0.00384635  | 0.989667 |
| Indene+H           | 0.00257590  | 0.995151 | 0.00358462  | 0.993252 |
| rad19syn           | 0.00187235  | 0.997024 | 0.00260557  | 0.995858 |
| rad54              | 0.000820548 | 0.997844 | 0.00114187  | 0.996999 |
| rad39              | 0.000383055 | 0.998227 | 0.000533059 | 0.997533 |
| PAH1+H             | 0.000234590 | 0.998462 | 0.000326455 | 0.997859 |
| PAH19anti          | 0.000198628 | 0.998661 | 0.000276411 | 0.998135 |
| PAH9+H             | 0.000165224 | 0.998826 | 0.000229927 | 0.998365 |
| rad56              | 0.000126873 | 0.998953 | 0.000176556 | 0.998542 |
| rad38              | 0.000111229 | 0.999064 | 0.000154787 | 0.998697 |
| rad50              | 9.85613e-05 | 0.999162 | 0.000137158 | 0.998834 |
| PhCCCH3+H          | 9.42424e-05 | 0.999257 | 0.000131148 | 0.998965 |
| rad55              | 9.15803e-05 | 0.999348 | 0.000127443 | 0.999092 |
| rad53              | 8.16793e-05 | 0.999430 | 0.000113665 | 0.999206 |
| rad70              | 7.02694e-05 | 0.999500 | 9.77871e-05 | 0.999304 |
| PAH3+H             | 6.99220e-05 | 0.999570 | 9.73035e-05 | 0.999401 |
| rad51              | 5.98507e-05 | 0.999630 | 8.32882e-05 | 0.999484 |
| PAH10+CH3          | 5.76128e-05 | 0.999688 | 8.01742e-05 | 0.999565 |
| rad67              | 4.43734e-05 | 0.999732 | 6.17501e-05 | 0.999626 |
| rad46              | 4.41956e-05 | 0.999776 | 6.15029e-05 | 0.999688 |
| PAH8+H             | 4.26935e-05 | 0.999819 | 5.94123e-05 | 0.999747 |
| rad35              | 4.02805e-05 | 0.999859 | 5.60544e-05 | 0.999803 |
| rad34              | 2.74951e-05 | 0.999887 | 3.82622e-05 | 0.999842 |
| rad71              | 2.01281e-05 | 0.999907 | 2.80103e-05 | 0.999870 |
| rad62              | 1.37116e-05 | 0.999920 | 1.90811e-05 | 0.999889 |
| rad52              | 1.21501e-05 | 0.999933 | 1.69080e-05 | 0.999906 |
| rad30              | 1.02915e-05 | 0.999943 | 1.43216e-05 | 0.999920 |
| rad73              | 8.16310e-06 | 0.999951 | 1.13598e-05 | 0.999931 |
| rad37              | 7.96636e-06 | 0.999959 | 1.10860e-05 | 0.999942 |
| rad64              | 6.47621e-06 | 0.999966 | 9.01228e-06 | 0.999951 |
| rad68syn           | 6.33612e-06 | 0.999972 | 8.81737e-06 | 0.999960 |
| rad59              | 5.10458e-06 | 0.999977 | 7.10355e-06 | 0.999967 |
| rad68anti          | 4.04059e-06 | 0.999981 | 5.62289e-06 | 0.999973 |
| rad40syn           | 3.59895e-06 | 0.999985 | 5.00830e-06 | 0.999978 |
| rad42              | 2.66321e-06 | 0.999987 | 3.70612e-06 | 0.999982 |
| rad40anti          | 2.63316e-06 | 0.999990 | 3.66431e-06 | 0.999985 |
| rad60syn           | 2.53258e-06 | 0.999992 | 3.52435e-06 | 0.999989 |
| rad72              | 2.38441e-06 | 0.999995 | 3.31814e-06 | 0.999992 |
| rad60anti          | 1.86455e-06 | 0.999997 | 2.59471e-06 | 0.999995 |
| rad58              | 1.49815e-06 | 0.999998 | 2.08483e-06 | 0.999997 |

|       |             |          |             |          |
|-------|-------------|----------|-------------|----------|
| rad65 | 1.37925e-06 | 1.000000 | 1.91936e-06 | 0.999999 |
| rad43 | 4.42452e-07 | 1.000000 | 6.15716e-07 | 0.999999 |
| rad61 | 3.67258e-07 | 1.000000 | 5.11077e-07 | 1.000000 |
| rad41 | 8.98821e-08 | 1.000000 | 1.25080e-07 | 1.000000 |
| rad6  | 9.72329e-16 | 1.000000 | 1.35309e-15 | 1.000000 |
| rad7  | 4.66096e-17 | 1.000000 | 6.48621e-17 | 1.000000 |
| rad11 | 2.99098e-17 | 1.000000 | 4.16225e-17 | 1.000000 |
| rad13 | 7.28305e-18 | 1.000000 | 1.01351e-17 | 1.000000 |
| rad23 | 6.16661e-18 | 1.000000 | 8.58146e-18 | 1.000000 |
| rad9  | 5.09053e-18 | 1.000000 | 7.08401e-18 | 1.000000 |
| rad28 | 3.44718e-18 | 1.000000 | 4.79710e-18 | 1.000000 |
| rad45 | 2.90125e-18 | 1.000000 | 4.03739e-18 | 1.000000 |
| rad21 | 1.56206e-18 | 1.000000 | 2.17377e-18 | 1.000000 |
| rad22 | 8.11699e-19 | 1.000000 | 1.12956e-18 | 1.000000 |
| rad33 | 7.96109e-19 | 1.000000 | 1.10787e-18 | 1.000000 |
| rad36 | 5.56059e-19 | 1.000000 | 7.73816e-19 | 1.000000 |
| rad15 | 4.52561e-19 | 1.000000 | 6.29785e-19 | 1.000000 |
| rad20 | 3.56498e-19 | 1.000000 | 4.96104e-19 | 1.000000 |
| rad12 | 2.06000e-19 | 1.000000 | 2.86671e-19 | 1.000000 |
| rad25 | 1.93599e-19 | 1.000000 | 2.69413e-19 | 1.000000 |
| rad26 | 1.38430e-19 | 1.000000 | 1.92640e-19 | 1.000000 |
| rad47 | 1.23125e-19 | 1.000000 | 1.71341e-19 | 1.000000 |
| rad24 | 1.20836e-19 | 1.000000 | 1.68155e-19 | 1.000000 |
| rad8  | 1.05361e-19 | 1.000000 | 1.46621e-19 | 1.000000 |
| rad10 | 6.65556e-20 | 1.000000 | 9.26191e-20 | 1.000000 |
| rad18 | 5.60033e-20 | 1.000000 | 7.79343e-20 | 1.000000 |
| rad14 | 1.81848e-20 | 1.000000 | 2.53061e-20 | 1.000000 |
| rad3  | 1.79646e-20 | 1.000000 | 2.49997e-20 | 1.000000 |
| rad4  | 1.09294e-20 | 1.000000 | 1.52094e-20 | 1.000000 |
| rad2  | 7.50903e-21 | 1.000000 | 1.04496e-20 | 1.000000 |
| rad5  | 4.29372e-21 | 1.000000 | 5.97514e-21 | 1.000000 |
| rad1  | 1.69041e-21 | 1.000000 | 2.35239e-21 | 1.000000 |
| rad27 | 7.31080e-22 | 1.000000 | 1.01737e-21 | 1.000000 |

0.100000000E-05 Pa, 3750.00000 K

| =====              |                 |          |                      |           |
|--------------------|-----------------|----------|----------------------|-----------|
| Rate constant      | True (fraction) |          | Effective (fraction) |           |
| -----              |                 |          |                      |           |
| Total              | 1.33217e-10     | (1.00 )  | 9.62711e-11          | (1.00 )   |
| Formation of rad11 | 2.17064e-11     | (0.163 ) | 7.68279e-12          | (0.0798 ) |
| Formation of rad6  | 3.54800e-11     | (0.266 ) | 1.25578e-11          | (0.130 )  |
| H-abstraction      | 7.60305e-11     | (0.571 ) | 7.60305e-11          | (0.790 )  |
| -----              |                 |          |                      |           |
| species            | PYtrue          | Cumul    | PYeffective          | Cumul     |
| -----              |                 |          |                      |           |
| Benzene+2-propynyl | 0.570727        | 0.570727 | 0.789754             | 0.789754  |
| Phenyl+Allene      | 0.277336        | 0.848063 | 0.000000             | 0.789754  |
| PhCH2CCH+H         | 0.0801946       | 0.928257 | 0.110971             | 0.900725  |
| PhCHCCH2+H         | 0.0343186       | 0.962576 | 0.0474891            | 0.948214  |
| C2H2+PhCH2         | 0.0118838       | 0.974460 | 0.0164445            | 0.964658  |
| PhCCH+CH3          | 0.00852836      | 0.982988 | 0.0118013            | 0.976459  |
| PhcycC3H3_A+H      | 0.00372851      | 0.986717 | 0.00515939           | 0.981619  |
| PAH7+H             | 0.00365085      | 0.990368 | 0.00505194           | 0.986671  |
| Ph+MeAc            | 0.00270113      | 0.993069 | 0.00373773           | 0.990408  |
| Indene+H           | 0.00199900      | 0.995068 | 0.00276616           | 0.993175  |
| rad19syn           | 0.00195356      | 0.997021 | 0.00270328           | 0.995878  |
| rad54              | 0.000841040     | 0.997862 | 0.00116381           | 0.997042  |
| rad39              | 0.000340475     | 0.998203 | 0.000471138          | 0.997513  |
| PAH1+H             | 0.000258935     | 0.998462 | 0.000358305          | 0.997871  |
| rad19anti          | 0.000171610     | 0.998633 | 0.000237469          | 0.998109  |
| rad56              | 0.000150421     | 0.998784 | 0.000208148          | 0.998317  |
| PAH9+H             | 0.000142296     | 0.998926 | 0.000196904          | 0.998514  |
| rad50              | 9.78214e-05     | 0.999024 | 0.000135362          | 0.998649  |
| rad38              | 9.76287e-05     | 0.999121 | 0.000135095          | 0.998784  |
| rad55              | 9.60227e-05     | 0.999217 | 0.000132873          | 0.998917  |
| rad53              | 9.35446e-05     | 0.999311 | 0.000129444          | 0.999046  |
| PhCCCH3+H          | 8.63448e-05     | 0.999397 | 0.000119481          | 0.999166  |
| PAH3+H             | 7.46029e-05     | 0.999472 | 0.000103233          | 0.999269  |
| rad70              | 7.27716e-05     | 0.999545 | 0.000100699          | 0.999370  |
| rad51              | 6.27266e-05     | 0.999607 | 8.67994e-05          | 0.999457  |
| PAH10+CH3          | 5.64592e-05     | 0.999664 | 7.81267e-05          | 0.999535  |
| PAH8+H             | 5.49581e-05     | 0.999719 | 7.60493e-05          | 0.999611  |
| rad67              | 4.41361e-05     | 0.999763 | 6.10741e-05          | 0.999672  |
| rad46              | 4.00102e-05     | 0.999803 | 5.53649e-05          | 0.999727  |
| rad35              | 3.73501e-05     | 0.999840 | 5.16839e-05          | 0.999779  |
| rad34              | 2.95155e-05     | 0.999870 | 4.08426e-05          | 0.999820  |
| rad71              | 2.56704e-05     | 0.999896 | 3.55219e-05          | 0.999855  |
| rad62              | 1.78765e-05     | 0.999913 | 2.47369e-05          | 0.999880  |
| rad52              | 1.22817e-05     | 0.999926 | 1.69950e-05          | 0.999897  |
| rad73              | 9.90830e-06     | 0.999936 | 1.37108e-05          | 0.999911  |



|           |             |          |             |          |
|-----------|-------------|----------|-------------|----------|
| rad30     | 9.58077e-06 | 0.999945 | 1.32576e-05 | 0.999924 |
| rad68syn  | 7.51159e-06 | 0.999953 | 1.03943e-05 | 0.999934 |
| rad64     | 7.08717e-06 | 0.999960 | 9.80700e-06 | 0.999944 |
| rad37     | 6.84827e-06 | 0.999967 | 9.47639e-06 | 0.999954 |
| rad59     | 5.31873e-06 | 0.999972 | 7.35989e-06 | 0.999961 |
| rad68anti | 4.78626e-06 | 0.999977 | 6.62308e-06 | 0.999968 |
| rad40syn  | 4.46912e-06 | 0.999981 | 6.18422e-06 | 0.999974 |
| rad42     | 3.72271e-06 | 0.999985 | 5.15138e-06 | 0.999979 |
| rad72     | 3.33614e-06 | 0.999988 | 4.61643e-06 | 0.999984 |
| rad40anti | 3.31727e-06 | 0.999992 | 4.59032e-06 | 0.999988 |
| rad60syn  | 2.53369e-06 | 0.999994 | 3.50604e-06 | 0.999992 |
| rad60anti | 1.87710e-06 | 0.999996 | 2.59748e-06 | 0.999994 |
| rad58     | 1.70809e-06 | 0.999998 | 2.36361e-06 | 0.999997 |
| rad65     | 1.42131e-06 | 0.999999 | 1.96676e-06 | 0.999999 |
| rad43     | 5.13732e-07 | 1.000000 | 7.10883e-07 | 0.999999 |
| rad61     | 4.03889e-07 | 1.000000 | 5.58888e-07 | 1.000000 |
| rad41     | 1.13553e-07 | 1.000000 | 1.57130e-07 | 1.000000 |
| rad6      | 5.20682e-16 | 1.000000 | 7.20504e-16 | 1.000000 |
| rad7      | 2.85681e-17 | 1.000000 | 3.95317e-17 | 1.000000 |
| rad11     | 1.83381e-17 | 1.000000 | 2.53756e-17 | 1.000000 |
| rad13     | 4.71985e-18 | 1.000000 | 6.53121e-18 | 1.000000 |
| rad23     | 2.97165e-18 | 1.000000 | 4.11207e-18 | 1.000000 |
| rad9      | 2.80639e-18 | 1.000000 | 3.88339e-18 | 1.000000 |
| rad28     | 1.81772e-18 | 1.000000 | 2.51530e-18 | 1.000000 |
| rad45     | 1.60878e-18 | 1.000000 | 2.22617e-18 | 1.000000 |
| rad21     | 1.04834e-18 | 1.000000 | 1.45067e-18 | 1.000000 |
| rad33     | 5.44417e-19 | 1.000000 | 7.53345e-19 | 1.000000 |
| rad22     | 4.48981e-19 | 1.000000 | 6.21285e-19 | 1.000000 |
| rad36     | 3.09923e-19 | 1.000000 | 4.28860e-19 | 1.000000 |
| rad15     | 2.63080e-19 | 1.000000 | 3.64043e-19 | 1.000000 |
| rad20     | 2.59386e-19 | 1.000000 | 3.58930e-19 | 1.000000 |
| rad12     | 1.42144e-19 | 1.000000 | 1.96695e-19 | 1.000000 |
| rad25     | 1.34705e-19 | 1.000000 | 1.86401e-19 | 1.000000 |
| rad47     | 1.26179e-19 | 1.000000 | 1.74602e-19 | 1.000000 |
| rad8      | 9.29496e-20 | 1.000000 | 1.28621e-19 | 1.000000 |
| rad24     | 8.25899e-20 | 1.000000 | 1.14285e-19 | 1.000000 |
| rad26     | 7.57563e-20 | 1.000000 | 1.04829e-19 | 1.000000 |
| rad10     | 3.88674e-20 | 1.000000 | 5.37834e-20 | 1.000000 |
| rad18     | 3.53332e-20 | 1.000000 | 4.88931e-20 | 1.000000 |
| rad14     | 1.56337e-20 | 1.000000 | 2.16335e-20 | 1.000000 |
| rad3      | 1.16122e-20 | 1.000000 | 1.60685e-20 | 1.000000 |
| rad4      | 7.24969e-21 | 1.000000 | 1.00319e-20 | 1.000000 |
| rad2      | 4.43692e-21 | 1.000000 | 6.13964e-21 | 1.000000 |
| rad5      | 3.42500e-21 | 1.000000 | 4.73941e-21 | 1.000000 |
| rad1      | 9.77716e-22 | 1.000000 | 1.35293e-21 | 1.000000 |
| rad27     | 5.73762e-22 | 1.000000 | 7.93956e-22 | 1.000000 |

0.100000000E-05 Pa, 4000.00000 K

| =====              |                 |          |                      |           |
|--------------------|-----------------|----------|----------------------|-----------|
| Rate constant      | True (fraction) |          | Effective (fraction) |           |
| -----              |                 |          |                      |           |
| Total              | 1.65008e-10     | (1.00 )  | 1.19912e-10          | (1.00 )   |
| Formation of rad11 | 2.61707e-11     | (0.159 ) | 9.15556e-12          | (0.0764 ) |
| Formation of rad6  | 4.31906e-11     | (0.262 ) | 1.51098e-11          | (0.126 )  |
| H-abstraction      | 9.56470e-11     | (0.580 ) | 9.56470e-11          | (0.798 )  |
| -----              |                 |          |                      |           |
| species            | PYtrue          | Cumul    | PYeffective          | Cumul     |
| -----              |                 |          |                      |           |
| Benzene+2-propynyl | 0.579650        | 0.579650 | 0.797641             | 0.797641  |
| Phenyl+Allene      | 0.273295        | 0.852945 | 0.000000             | 0.797641  |
| PhCH2CCH+H         | 0.0779435       | 0.930888 | 0.107256             | 0.904897  |
| PhCHCCH2+H         | 0.0328766       | 0.963765 | 0.0452408            | 0.950138  |
| C2H2+PhCH2         | 0.0116508       | 0.975415 | 0.0160323            | 0.966170  |
| PhCCH+CH3          | 0.00792125      | 0.983337 | 0.0109003            | 0.977070  |
| PhcycC3H3_A+H      | 0.00405636      | 0.987393 | 0.00558187           | 0.982652  |
| PAH7+H             | 0.00338058      | 0.990774 | 0.00465193           | 0.987304  |
| Ph+MeAc            | 0.00265534      | 0.993429 | 0.00365394           | 0.990958  |
| rad19syn           | 0.00200699      | 0.995436 | 0.00276178           | 0.993720  |
| Indene+H           | 0.00158840      | 0.997024 | 0.00218576           | 0.995906  |
| rad54              | 0.000847468     | 0.997872 | 0.00116618           | 0.997072  |
| rad39              | 0.000304994     | 0.998177 | 0.000419695          | 0.997491  |
| PAH1+H             | 0.000284127     | 0.998461 | 0.000390980          | 0.997882  |
| rad56              | 0.000172242     | 0.998633 | 0.000237017          | 0.998119  |
| rad19anti          | 0.000149971     | 0.998783 | 0.000206372          | 0.998326  |
| PAH9+H             | 0.000121736     | 0.998905 | 0.000167518          | 0.998493  |
| rad53              | 0.000103935     | 0.999009 | 0.000143023          | 0.998636  |
| rad55              | 9.87033e-05     | 0.999108 | 0.000135823          | 0.998772  |
| rad50              | 9.49261e-05     | 0.999203 | 0.000130625          | 0.998903  |
| rad38              | 8.48536e-05     | 0.999287 | 0.000116765          | 0.999020  |
| PhCCCH3+H          | 8.02193e-05     | 0.999368 | 0.000110388          | 0.999130  |

|           |             |          |             |          |
|-----------|-------------|----------|-------------|----------|
| PAH3+H    | 7.84218e-05 | 0.999446 | 0.000107914 | 0.999238 |
| rad70     | 7.43978e-05 | 0.999520 | 0.000102377 | 0.999340 |
| PAH8+H    | 6.80299e-05 | 0.999588 | 9.36140e-05 | 0.999434 |
| rad51     | 6.37407e-05 | 0.999652 | 8.77122e-05 | 0.999522 |
| PAH10+CH3 | 5.48776e-05 | 0.999707 | 7.55158e-05 | 0.999597 |
| rad67     | 4.35168e-05 | 0.999751 | 5.98821e-05 | 0.999657 |
| rad46     | 3.57792e-05 | 0.999786 | 4.92350e-05 | 0.999706 |
| rad35     | 3.46400e-05 | 0.999821 | 4.76673e-05 | 0.999754 |
| rad34     | 3.11445e-05 | 0.999852 | 4.28572e-05 | 0.999797 |
| rad71     | 3.10563e-05 | 0.999883 | 4.27358e-05 | 0.999839 |
| rad62     | 2.32398e-05 | 0.999906 | 3.19798e-05 | 0.999871 |
| rad52     | 1.20851e-05 | 0.999919 | 1.66300e-05 | 0.999888 |
| rad73     | 1.14710e-05 | 0.999930 | 1.57849e-05 | 0.999904 |
| rad30     | 8.93299e-06 | 0.999939 | 1.22925e-05 | 0.999916 |
| rad68syn  | 8.64434e-06 | 0.999948 | 1.18952e-05 | 0.999928 |
| rad64     | 7.61305e-06 | 0.999955 | 1.04761e-05 | 0.999939 |
| rad37     | 5.91727e-06 | 0.999961 | 8.14263e-06 | 0.999947 |
| rad68anti | 5.50424e-06 | 0.999967 | 7.57424e-06 | 0.999954 |
| rad59     | 5.47385e-06 | 0.999972 | 7.53243e-06 | 0.999962 |
| rad40syn  | 5.36170e-06 | 0.999977 | 7.37810e-06 | 0.999969 |
| rad42     | 5.12142e-06 | 0.999983 | 7.04750e-06 | 0.999976 |
| rad72     | 4.37871e-06 | 0.999987 | 6.02543e-06 | 0.999982 |
| rad40anti | 4.03125e-06 | 0.999991 | 5.54731e-06 | 0.999988 |
| rad60syn  | 2.51669e-06 | 0.999993 | 3.46315e-06 | 0.999991 |
| rad58     | 1.90267e-06 | 0.999995 | 2.61822e-06 | 0.999994 |
| rad60anti | 1.87487e-06 | 0.999997 | 2.57996e-06 | 0.999996 |
| rad65     | 1.42564e-06 | 0.999999 | 1.96179e-06 | 0.999998 |
| rad43     | 6.01849e-07 | 0.999999 | 8.28191e-07 | 0.999999 |
| rad61     | 4.34037e-07 | 1.000000 | 5.97267e-07 | 1.000000 |
| rad41     | 1.43043e-07 | 1.000000 | 1.96838e-07 | 1.000000 |
| rad6      | 2.98677e-16 | 1.000000 | 4.11002e-16 | 1.000000 |
| rad7      | 1.83269e-17 | 1.000000 | 2.52192e-17 | 1.000000 |
| rad11     | 1.18912e-17 | 1.000000 | 1.63632e-17 | 1.000000 |
| rad13     | 3.19990e-18 | 1.000000 | 4.40329e-18 | 1.000000 |
| rad9      | 1.63626e-18 | 1.000000 | 2.25163e-18 | 1.000000 |
| rad23     | 1.51208e-18 | 1.000000 | 2.08074e-18 | 1.000000 |
| rad28     | 1.02385e-18 | 1.000000 | 1.40890e-18 | 1.000000 |
| rad45     | 9.28352e-19 | 1.000000 | 1.27749e-18 | 1.000000 |
| rad21     | 7.32814e-19 | 1.000000 | 1.00841e-18 | 1.000000 |
| rad33     | 3.83235e-19 | 1.000000 | 5.27360e-19 | 1.000000 |
| rad22     | 2.64532e-19 | 1.000000 | 3.64016e-19 | 1.000000 |
| rad20     | 1.97582e-19 | 1.000000 | 2.71888e-19 | 1.000000 |
| rad36     | 1.79419e-19 | 1.000000 | 2.46894e-19 | 1.000000 |
| rad15     | 1.60341e-19 | 1.000000 | 2.20642e-19 | 1.000000 |
| rad47     | 1.25502e-19 | 1.000000 | 1.72700e-19 | 1.000000 |
| rad12     | 1.01281e-19 | 1.000000 | 1.39370e-19 | 1.000000 |
| rad25     | 9.69849e-20 | 1.000000 | 1.33459e-19 | 1.000000 |
| rad8      | 8.17489e-20 | 1.000000 | 1.12493e-19 | 1.000000 |
| rad24     | 5.80458e-20 | 1.000000 | 7.98754e-20 | 1.000000 |
| rad26     | 4.36740e-20 | 1.000000 | 6.00984e-20 | 1.000000 |
| rad10     | 2.37521e-20 | 1.000000 | 3.26846e-20 | 1.000000 |
| rad18     | 2.33495e-20 | 1.000000 | 3.21308e-20 | 1.000000 |
| rad14     | 1.43353e-20 | 1.000000 | 1.97264e-20 | 1.000000 |
| rad3      | 7.86194e-21 | 1.000000 | 1.08186e-20 | 1.000000 |
| rad4      | 5.07065e-21 | 1.000000 | 6.97759e-21 | 1.000000 |
| rad5      | 2.80285e-21 | 1.000000 | 3.85694e-21 | 1.000000 |
| rad2      | 2.77243e-21 | 1.000000 | 3.81508e-21 | 1.000000 |
| rad1      | 6.09340e-22 | 1.000000 | 8.38495e-22 | 1.000000 |
| rad27     | 4.74794e-22 | 1.000000 | 6.53351e-22 | 1.000000 |

0.100000000E-06 Pa, 20.0000000 K

=====

| Rate constant      | True (fraction)        | Effective (fraction)   |
|--------------------|------------------------|------------------------|
| Total              | 1.56740e-51 (1.00 )    | 1.56740e-51 (1.00 )    |
| Formation of rad11 | 1.56740e-51 (1.000 )   | 1.56740e-51 (1.000 )   |
| Formation of rad6  | 3.73945e-60 (2.39e-09) | 3.73945e-60 (2.39e-09) |
| H-abstraction      | 1.53631e-76 (9.80e-26) | 1.53631e-76 (9.80e-26) |

| species    | PYtrue      | Cumul    | PYeffective | Cumul    |
|------------|-------------|----------|-------------|----------|
| Indene+H   | 0.987369    | 0.987369 | 0.987369    | 0.987369 |
| C2H2+PhCH2 | 0.00820954  | 0.995579 | 0.00820954  | 0.995579 |
| PhCCH+CH3  | 0.00218811  | 0.997767 | 0.00218811  | 0.997767 |
| PhCHCCH2+H | 0.00138347  | 0.999150 | 0.00138347  | 0.999150 |
| PhCCCH3+H  | 0.000827245 | 0.999977 | 0.000827245 | 0.999977 |
| Ph+MeAc    | 1.00039e-05 | 0.999987 | 1.00039e-05 | 0.999987 |
| rad8       | 6.83249e-06 | 0.999994 | 6.83249e-06 | 0.999994 |
| rad9       | 3.09720e-06 | 0.999997 | 3.09720e-06 | 0.999997 |
| PAH7+H     | 1.76170e-06 | 0.999999 | 1.76170e-06 | 0.999999 |

|                    |             |          |             |          |
|--------------------|-------------|----------|-------------|----------|
| rad30              | 4.36830e-07 | 0.999999 | 4.36830e-07 | 0.999999 |
| rad12              | 2.10741e-07 | 1.000000 | 2.10741e-07 | 1.000000 |
| rad39              | 1.69731e-07 | 1.000000 | 1.69731e-07 | 1.000000 |
| PAH9+H             | 8.84404e-08 | 1.000000 | 8.84404e-08 | 1.000000 |
| rad15              | 7.82157e-08 | 1.000000 | 7.82157e-08 | 1.000000 |
| rad35              | 4.65496e-08 | 1.000000 | 4.65496e-08 | 1.000000 |
| rad38              | 2.27274e-08 | 1.000000 | 2.27274e-08 | 1.000000 |
| Phenyl+Allene      | 1.59134e-08 | 1.000000 | 0.000000    | 1.000000 |
| rad6               | 1.34923e-09 | 1.000000 | 1.34923e-09 | 1.000000 |
| rad46              | 1.47640e-10 | 1.000000 | 1.47640e-10 | 1.000000 |
| rad28              | 2.21636e-11 | 1.000000 | 2.21636e-11 | 1.000000 |
| rad60syn           | 3.54196e-12 | 1.000000 | 3.54196e-12 | 1.000000 |
| rad26              | 2.45060e-12 | 1.000000 | 2.45060e-12 | 1.000000 |
| rad2               | 4.67802e-13 | 1.000000 | 4.67802e-13 | 1.000000 |
| rad7               | 9.72936e-14 | 1.000000 | 9.72936e-14 | 1.000000 |
| rad1               | 2.95662e-14 | 1.000000 | 2.95662e-14 | 1.000000 |
| rad10              | 2.39345e-14 | 1.000000 | 2.39345e-14 | 1.000000 |
| rad11              | 2.37711e-14 | 1.000000 | 2.37711e-14 | 1.000000 |
| rad3               | 3.10628e-15 | 1.000000 | 3.10628e-15 | 1.000000 |
| rad4               | 1.57038e-15 | 1.000000 | 1.57038e-15 | 1.000000 |
| rad13              | 5.40911e-16 | 1.000000 | 5.40911e-16 | 1.000000 |
| rad14              | 1.84853e-16 | 1.000000 | 1.84853e-16 | 1.000000 |
| rad25              | 8.93122e-17 | 1.000000 | 8.93122e-17 | 1.000000 |
| rad60anti          | 4.67472e-17 | 1.000000 | 4.67472e-17 | 1.000000 |
| rad27              | 1.09692e-17 | 1.000000 | 1.09692e-17 | 1.000000 |
| rad33              | 1.02379e-18 | 1.000000 | 1.02379e-18 | 1.000000 |
| PhCH2CCH+H         | 7.57199e-19 | 1.000000 | 7.57199e-19 | 1.000000 |
| rad37              | 6.81196e-20 | 1.000000 | 6.81196e-20 | 1.000000 |
| rad31              | 8.48150e-23 | 1.000000 | 8.48150e-23 | 1.000000 |
| rad5               | 4.36950e-23 | 1.000000 | 4.36950e-23 | 1.000000 |
| rad20              | 6.79069e-24 | 1.000000 | 6.79069e-24 | 1.000000 |
| rad21              | 5.14703e-24 | 1.000000 | 5.14703e-24 | 1.000000 |
| Benzene+2-propynyl | 9.80165e-26 | 1.000000 | 9.80165e-26 | 1.000000 |
| rad18              | 2.29424e-26 | 1.000000 | 2.29424e-26 | 1.000000 |
| rad23              | 1.18607e-26 | 1.000000 | 1.18607e-26 | 1.000000 |
| rad22              | 2.47288e-27 | 1.000000 | 2.47288e-27 | 1.000000 |
| PAH3+H             | 7.71799e-28 | 1.000000 | 7.71799e-28 | 1.000000 |
| rad59              | 4.13282e-28 | 1.000000 | 4.13282e-28 | 1.000000 |
| rad50              | 1.66754e-28 | 1.000000 | 1.66754e-28 | 1.000000 |
| rad45              | 7.38420e-29 | 1.000000 | 7.38420e-29 | 1.000000 |
| rad36              | 4.59978e-30 | 1.000000 | 4.59978e-30 | 1.000000 |
| rad24              | 1.11604e-30 | 1.000000 | 1.11604e-30 | 1.000000 |
| rad19syn           | 6.06399e-37 | 1.000000 | 6.06399e-37 | 1.000000 |
| rad52              | 7.29603e-41 | 1.000000 | 7.29603e-41 | 1.000000 |
| rad54              | 7.00896e-42 | 1.000000 | 7.00896e-42 | 1.000000 |
| PAH10+CH3          | 4.56660e-42 | 1.000000 | 4.56660e-42 | 1.000000 |
| rad43              | 1.05385e-42 | 1.000000 | 1.05385e-42 | 1.000000 |
| rad62              | 3.14254e-45 | 1.000000 | 3.14254e-45 | 1.000000 |
| rad51              | 3.50814e-48 | 1.000000 | 3.50814e-48 | 1.000000 |
| rad70              | 3.76929e-51 | 1.000000 | 3.76929e-51 | 1.000000 |
| PhcycC3H3_A+H      | 1.59636e-51 | 1.000000 | 1.59636e-51 | 1.000000 |
| rad55              | 8.59569e-52 | 1.000000 | 8.59569e-52 | 1.000000 |
| rad65              | 2.35368e-53 | 1.000000 | 2.35368e-53 | 1.000000 |
| rad58              | 5.36097e-55 | 1.000000 | 5.36097e-55 | 1.000000 |
| PAH1+H             | 7.18888e-57 | 1.000000 | 7.18888e-57 | 1.000000 |
| rad34              | 4.75929e-59 | 1.000000 | 4.75929e-59 | 1.000000 |
| rad42              | 3.39505e-63 | 1.000000 | 3.39505e-63 | 1.000000 |
| rad41              | 4.26030e-64 | 1.000000 | 4.26030e-64 | 1.000000 |
| rad47              | 1.31464e-68 | 1.000000 | 1.31464e-68 | 1.000000 |

0.100000000E-06 Pa, 30.0000000 K

=====

| Rate constant      | True (fraction)        | Effective (fraction)   |
|--------------------|------------------------|------------------------|
| Total              | 5.03204e-39 (1.00 )    | 5.03204e-39 (1.00 )    |
| Formation of rad11 | 5.03203e-39 (1.000 )   | 5.03203e-39 (1.000 )   |
| Formation of rad6  | 9.92181e-45 (1.97e-06) | 9.92181e-45 (1.97e-06) |
| H-abstraction      | 3.33191e-55 (6.62e-17) | 3.33191e-55 (6.62e-17) |

| species    | PYtrue      | Cumul    | PYeffective | Cumul    |
|------------|-------------|----------|-------------|----------|
| Indene+H   | 0.987259    | 0.987259 | 0.987259    | 0.987259 |
| C2H2+PhCH2 | 0.00826499  | 0.995524 | 0.00826499  | 0.995524 |
| PhCCH+CH3  | 0.00221651  | 0.997740 | 0.00221651  | 0.997740 |
| PhCHCCH2+H | 0.00139872  | 0.999139 | 0.00139872  | 0.999139 |
| PhCCCH3+H  | 0.000837447 | 0.999977 | 0.000837447 | 0.999977 |
| Ph+MeAc    | 1.04458e-05 | 0.999987 | 1.04458e-05 | 0.999987 |
| rad8       | 6.94253e-06 | 0.999994 | 6.94253e-06 | 0.999994 |
| rad9       | 3.16617e-06 | 0.999997 | 3.16617e-06 | 0.999997 |
| PAH7+H     | 1.80679e-06 | 0.999999 | 1.80679e-06 | 0.999999 |

|                    |             |          |             |          |
|--------------------|-------------|----------|-------------|----------|
| rad30              | 4.41009e-07 | 0.999999 | 4.41009e-07 | 0.999999 |
| rad12              | 2.16531e-07 | 1.000000 | 2.16531e-07 | 1.000000 |
| rad39              | 1.75885e-07 | 1.000000 | 1.75885e-07 | 1.000000 |
| PAH9+H             | 8.93904e-08 | 1.000000 | 8.93904e-08 | 1.000000 |
| rad15              | 7.91321e-08 | 1.000000 | 7.91321e-08 | 1.000000 |
| rad35              | 4.69942e-08 | 1.000000 | 4.69942e-08 | 1.000000 |
| rad38              | 2.29955e-08 | 1.000000 | 2.29955e-08 | 1.000000 |
| Phenyl+Allene      | 2.15093e-08 | 1.000000 | 0.000000    | 1.000000 |
| rad6               | 2.24643e-10 | 1.000000 | 2.24643e-10 | 1.000000 |
| rad46              | 1.50492e-10 | 1.000000 | 1.50492e-10 | 1.000000 |
| rad28              | 6.48970e-12 | 1.000000 | 6.48970e-12 | 1.000000 |
| rad60syn           | 3.52821e-12 | 1.000000 | 3.52821e-12 | 1.000000 |
| rad26              | 8.41218e-13 | 1.000000 | 8.41218e-13 | 1.000000 |
| rad2               | 7.92285e-14 | 1.000000 | 7.92285e-14 | 1.000000 |
| rad7               | 1.62037e-14 | 1.000000 | 1.62037e-14 | 1.000000 |
| rad1               | 5.01035e-15 | 1.000000 | 5.01035e-15 | 1.000000 |
| rad10              | 4.06191e-15 | 1.000000 | 4.06191e-15 | 1.000000 |
| rad11              | 3.95988e-15 | 1.000000 | 3.95988e-15 | 1.000000 |
| rad60anti          | 6.00906e-16 | 1.000000 | 6.00906e-16 | 1.000000 |
| rad3               | 5.38954e-16 | 1.000000 | 5.38954e-16 | 1.000000 |
| rad4               | 2.72509e-16 | 1.000000 | 2.72509e-16 | 1.000000 |
| rad13              | 9.01021e-17 | 1.000000 | 9.01021e-17 | 1.000000 |
| rad14              | 8.74661e-17 | 1.000000 | 8.74661e-17 | 1.000000 |
| Benzene+2-propynyl | 6.62139e-17 | 1.000000 | 6.62139e-17 | 1.000000 |
| rad25              | 4.22841e-17 | 1.000000 | 4.22841e-17 | 1.000000 |
| rad27              | 4.97462e-18 | 1.000000 | 4.97462e-18 | 1.000000 |
| PhCH2CCH+H         | 4.90579e-19 | 1.000000 | 4.90579e-19 | 1.000000 |
| rad33              | 1.71195e-19 | 1.000000 | 1.71195e-19 | 1.000000 |
| rad37              | 4.44082e-20 | 1.000000 | 4.44082e-20 | 1.000000 |
| rad31              | 3.89595e-23 | 1.000000 | 3.89595e-23 | 1.000000 |
| rad5               | 2.85714e-23 | 1.000000 | 2.85714e-23 | 1.000000 |
| rad20              | 2.50588e-24 | 1.000000 | 2.50588e-24 | 1.000000 |
| rad21              | 1.91845e-24 | 1.000000 | 1.91845e-24 | 1.000000 |
| rad18              | 7.85689e-27 | 1.000000 | 7.85689e-27 | 1.000000 |
| rad23              | 2.04980e-27 | 1.000000 | 2.04980e-27 | 1.000000 |
| rad22              | 7.08089e-28 | 1.000000 | 7.08089e-28 | 1.000000 |
| PAH3+H             | 5.08404e-28 | 1.000000 | 5.08404e-28 | 1.000000 |
| rad59              | 2.72198e-28 | 1.000000 | 2.72198e-28 | 1.000000 |
| rad50              | 1.09370e-28 | 1.000000 | 1.09370e-28 | 1.000000 |
| rad45              | 1.29239e-29 | 1.000000 | 1.29239e-29 | 1.000000 |
| rad36              | 8.04810e-31 | 1.000000 | 8.04810e-31 | 1.000000 |
| rad24              | 5.37118e-31 | 1.000000 | 5.37118e-31 | 1.000000 |
| rad19syn           | 4.15722e-37 | 1.000000 | 4.15722e-37 | 1.000000 |
| rad52              | 4.98856e-41 | 1.000000 | 4.98856e-41 | 1.000000 |
| rad54              | 4.88084e-42 | 1.000000 | 4.88084e-42 | 1.000000 |
| PAH10+CH3          | 3.19261e-42 | 1.000000 | 3.19261e-42 | 1.000000 |
| rad43              | 7.36643e-43 | 1.000000 | 7.36643e-43 | 1.000000 |
| rad62              | 2.21311e-45 | 1.000000 | 2.21311e-45 | 1.000000 |
| rad51              | 2.46516e-48 | 1.000000 | 2.46516e-48 | 1.000000 |
| rad70              | 2.70867e-51 | 1.000000 | 2.70867e-51 | 1.000000 |
| PhcycC3H3_A+H      | 1.14959e-51 | 1.000000 | 1.14959e-51 | 1.000000 |
| rad55              | 6.18873e-52 | 1.000000 | 6.18873e-52 | 1.000000 |
| rad65              | 1.67991e-53 | 1.000000 | 1.67991e-53 | 1.000000 |
| rad58              | 3.86765e-55 | 1.000000 | 3.86765e-55 | 1.000000 |
| PAH1+H             | 5.28180e-57 | 1.000000 | 5.28180e-57 | 1.000000 |
| rad34              | 3.51242e-59 | 1.000000 | 3.51242e-59 | 1.000000 |
| rad42              | 2.54130e-63 | 1.000000 | 2.54130e-63 | 1.000000 |
| rad41              | 3.21394e-64 | 1.000000 | 3.21394e-64 | 1.000000 |
| rad47              | 4.77258e-69 | 1.000000 | 4.77258e-69 | 1.000000 |

0.100000000E-06 Pa, 40.0000000 K

=====

| Rate constant      | True (fraction)        | Effective (fraction)   |
|--------------------|------------------------|------------------------|
| Total              | 9.35697e-33 (1.00 )    | 9.35697e-33 (1.00 )    |
| Formation of rad11 | 9.35644e-33 (1.000 )   | 9.35644e-33 (1.000 )   |
| Formation of rad6  | 5.26139e-37 (5.62e-05) | 5.26138e-37 (5.62e-05) |
| H-abstraction      | 1.44763e-44 (1.55e-12) | 1.44763e-44 (1.55e-12) |

| species    | PYtrue      | Cumul    | PYeffective | Cumul    |
|------------|-------------|----------|-------------|----------|
| Indene+H   | 0.987033    | 0.987033 | 0.987033    | 0.987033 |
| C2H2+PhCH2 | 0.00837833  | 0.995411 | 0.00837833  | 0.995411 |
| PhCCH+CH3  | 0.00227504  | 0.997686 | 0.00227504  | 0.997686 |
| PhCHCCH2+H | 0.00143004  | 0.999116 | 0.00143004  | 0.999116 |
| PhCCCH3+H  | 0.000858419 | 0.999975 | 0.000858419 | 0.999975 |
| Ph+MeAc    | 1.13931e-05 | 0.999986 | 1.13931e-05 | 0.999986 |
| rad8       | 7.17148e-06 | 0.999993 | 7.17148e-06 | 0.999993 |
| rad9       | 3.31184e-06 | 0.999997 | 3.31184e-06 | 0.999997 |
| PAH7+H     | 1.90101e-06 | 0.999999 | 1.90101e-06 | 0.999999 |

|                    |             |          |             |          |
|--------------------|-------------|----------|-------------|----------|
| rad30              | 4.49603e-07 | 0.999999 | 4.49603e-07 | 0.999999 |
| rad12              | 2.28351e-07 | 0.999999 | 2.28351e-07 | 0.999999 |
| rad39              | 1.89249e-07 | 0.999999 | 1.89249e-07 | 0.999999 |
| PAH9+H             | 9.13514e-08 | 1.000000 | 9.13514e-08 | 1.000000 |
| rad15              | 8.10250e-08 | 1.000000 | 8.10250e-08 | 1.000000 |
| rad35              | 4.79101e-08 | 1.000000 | 4.79101e-08 | 1.000000 |
| Phenyl+Allene      | 3.50625e-08 | 1.000000 | 0.000000    | 1.000000 |
| rad38              | 2.35499e-08 | 1.000000 | 2.35499e-08 | 1.000000 |
| rad46              | 1.56511e-10 | 1.000000 | 1.56511e-10 | 1.000000 |
| rad6               | 8.26008e-11 | 1.000000 | 8.26008e-11 | 1.000000 |
| rad60syn           | 3.61737e-12 | 1.000000 | 3.61737e-12 | 1.000000 |
| rad28              | 3.29554e-12 | 1.000000 | 3.29554e-12 | 1.000000 |
| Benzene+2-propynyl | 1.54712e-12 | 1.000000 | 1.54712e-12 | 1.000000 |
| rad26              | 4.69688e-13 | 1.000000 | 4.69688e-13 | 1.000000 |
| rad2               | 3.00938e-14 | 1.000000 | 3.00938e-14 | 1.000000 |
| rad60anti          | 1.04594e-14 | 1.000000 | 1.04594e-14 | 1.000000 |
| rad7               | 5.96185e-15 | 1.000000 | 5.96185e-15 | 1.000000 |
| rad1               | 1.90544e-15 | 1.000000 | 1.90544e-15 | 1.000000 |
| rad10              | 1.54271e-15 | 1.000000 | 1.54271e-15 | 1.000000 |
| rad11              | 1.45746e-15 | 1.000000 | 1.45746e-15 | 1.000000 |
| rad3               | 2.08202e-16 | 1.000000 | 2.08202e-16 | 1.000000 |
| rad4               | 1.05305e-16 | 1.000000 | 1.05305e-16 | 1.000000 |
| rad14              | 5.59245e-17 | 1.000000 | 5.59245e-17 | 1.000000 |
| rad13              | 3.31630e-17 | 1.000000 | 3.31630e-17 | 1.000000 |
| rad25              | 2.71057e-17 | 1.000000 | 2.71057e-17 | 1.000000 |
| rad27              | 3.15523e-18 | 1.000000 | 3.15523e-18 | 1.000000 |
| PhCH2CCH+H         | 8.60132e-19 | 1.000000 | 8.60132e-19 | 1.000000 |
| rad33              | 6.33069e-20 | 1.000000 | 6.33069e-20 | 1.000000 |
| rad37              | 5.67935e-20 | 1.000000 | 5.67935e-20 | 1.000000 |
| rad5               | 3.62080e-23 | 1.000000 | 3.62080e-23 | 1.000000 |
| rad31              | 2.62756e-23 | 1.000000 | 2.62756e-23 | 1.000000 |
| rad20              | 1.54901e-24 | 1.000000 | 1.54901e-24 | 1.000000 |
| rad21              | 1.19116e-24 | 1.000000 | 1.19116e-24 | 1.000000 |
| rad18              | 4.69896e-27 | 1.000000 | 4.69896e-27 | 1.000000 |
| rad23              | 8.70906e-28 | 1.000000 | 8.70906e-28 | 1.000000 |
| PAH3+H             | 6.51116e-28 | 1.000000 | 6.51116e-28 | 1.000000 |
| rad22              | 3.94314e-28 | 1.000000 | 3.94314e-28 | 1.000000 |
| rad59              | 3.48492e-28 | 1.000000 | 3.48492e-28 | 1.000000 |
| rad50              | 1.38835e-28 | 1.000000 | 1.38835e-28 | 1.000000 |
| rad45              | 5.53279e-30 | 1.000000 | 5.53279e-30 | 1.000000 |
| rad24              | 3.69324e-31 | 1.000000 | 3.69324e-31 | 1.000000 |
| rad36              | 3.44335e-31 | 1.000000 | 3.44335e-31 | 1.000000 |
| rad19syn           | 5.79439e-37 | 1.000000 | 5.79439e-37 | 1.000000 |
| rad52              | 6.91433e-41 | 1.000000 | 6.91433e-41 | 1.000000 |
| rad54              | 7.03056e-42 | 1.000000 | 7.03056e-42 | 1.000000 |
| PAH10+CH3          | 4.65295e-42 | 1.000000 | 4.65295e-42 | 1.000000 |
| rad43              | 1.07322e-42 | 1.000000 | 1.07322e-42 | 1.000000 |
| rad62              | 3.27067e-45 | 1.000000 | 3.27067e-45 | 1.000000 |
| rad51              | 3.61910e-48 | 1.000000 | 3.61910e-48 | 1.000000 |
| rad70              | 4.16773e-51 | 1.000000 | 4.16773e-51 | 1.000000 |
| PhcycC3H3_A+H      | 1.77664e-51 | 1.000000 | 1.77664e-51 | 1.000000 |
| rad55              | 9.56022e-52 | 1.000000 | 9.56022e-52 | 1.000000 |
| rad65              | 2.54822e-53 | 1.000000 | 2.54822e-53 | 1.000000 |
| rad58              | 6.00022e-55 | 1.000000 | 6.00023e-55 | 1.000000 |
| PAH1+H             | 8.51459e-57 | 1.000000 | 8.51459e-57 | 1.000000 |
| rad34              | 5.71452e-59 | 1.000000 | 5.71452e-59 | 1.000000 |
| rad42              | 4.28035e-63 | 1.000000 | 4.28035e-63 | 1.000000 |
| rad41              | 5.57001e-64 | 1.000000 | 5.57001e-64 | 1.000000 |
| rad47              | 5.13067e-69 | 1.000000 | 5.13067e-69 | 1.000000 |

0.100000000E-06 Pa, 50.0000000 K

=====

| Rate constant      | True (fraction)        | Effective (fraction)   |
|--------------------|------------------------|------------------------|
| Total              | 5.52690e-29 (1.00 )    | 5.52690e-29 (1.00 )    |
| Formation of rad11 | 5.52459e-29 (1.000 )   | 5.52459e-29 (1.000 )   |
| Formation of rad6  | 2.30840e-32 (0.000418) | 2.30840e-32 (0.000418) |
| H-abstraction      | 3.35357e-38 (6.07e-10) | 3.35357e-38 (6.07e-10) |

| species    | PYtrue      | Cumul    | PYeffective | Cumul    |
|------------|-------------|----------|-------------|----------|
| Indene+H   | 0.986715    | 0.986715 | 0.986715    | 0.986715 |
| C2H2+PhCH2 | 0.00853717  | 0.995252 | 0.00853717  | 0.995252 |
| PhCCH+CH3  | 0.00235801  | 0.997610 | 0.00235801  | 0.997610 |
| PhCHCCH2+H | 0.00147423  | 0.999084 | 0.00147423  | 0.999084 |
| PhCCCH3+H  | 0.000888061 | 0.999972 | 0.000888061 | 0.999972 |
| Ph+MeAc    | 1.28086e-05 | 0.999985 | 1.28086e-05 | 0.999985 |
| rad8       | 7.50004e-06 | 0.999993 | 7.50004e-06 | 0.999993 |
| rad9       | 3.52469e-06 | 0.999996 | 3.52469e-06 | 0.999996 |
| PAH7+H     | 2.03731e-06 | 0.999998 | 2.03731e-06 | 0.999998 |

|                    |             |          |             |          |
|--------------------|-------------|----------|-------------|----------|
| rad30              | 4.61739e-07 | 0.999999 | 4.61739e-07 | 0.999999 |
| rad12              | 2.44979e-07 | 0.999999 | 2.44979e-07 | 0.999999 |
| rad39              | 2.09407e-07 | 0.999999 | 2.09407e-07 | 0.999999 |
| PAH9+H             | 9.41345e-08 | 0.999999 | 9.41345e-08 | 0.999999 |
| rad15              | 8.37155e-08 | 0.999999 | 8.37155e-08 | 0.999999 |
| Phenyl+Allene      | 5.85966e-08 | 0.999999 | 0.00000     | 0.999999 |
| rad35              | 4.92061e-08 | 1.000000 | 4.92061e-08 | 0.999999 |
| rad38              | 2.43389e-08 | 1.000000 | 2.43389e-08 | 1.000000 |
| Benzene+2-propynyl | 6.06773e-10 | 1.000000 | 6.06773e-10 | 1.000000 |
| rad46              | 1.65303e-10 | 1.000000 | 1.65303e-10 | 1.000000 |
| rad6               | 4.06045e-11 | 1.000000 | 4.06045e-11 | 1.000000 |
| rad60syn           | 3.93733e-12 | 1.000000 | 3.93733e-12 | 1.000000 |
| rad28              | 2.02591e-12 | 1.000000 | 2.02591e-12 | 1.000000 |
| rad26              | 3.08296e-13 | 1.000000 | 3.08296e-13 | 1.000000 |
| rad60anti          | 5.62146e-14 | 1.000000 | 5.62146e-14 | 1.000000 |
| rad2               | 1.52049e-14 | 1.000000 | 1.52049e-14 | 1.000000 |
| rad7               | 2.93335e-15 | 1.000000 | 2.93335e-15 | 1.000000 |
| rad1               | 9.64421e-16 | 1.000000 | 9.64421e-16 | 1.000000 |
| rad10              | 7.85045e-16 | 1.000000 | 7.85045e-16 | 1.000000 |
| rad11              | 7.17403e-16 | 1.000000 | 7.17403e-16 | 1.000000 |
| PhCH2CCH+H         | 1.28931e-16 | 1.000000 | 1.28931e-16 | 1.000000 |
| rad3               | 1.09809e-16 | 1.000000 | 1.09809e-16 | 1.000000 |
| rad4               | 5.55642e-17 | 1.000000 | 5.55642e-17 | 1.000000 |
| rad14              | 3.98212e-17 | 1.000000 | 3.98212e-17 | 1.000000 |
| rad25              | 1.93742e-17 | 1.000000 | 1.93742e-17 | 1.000000 |
| rad13              | 1.63251e-17 | 1.000000 | 1.63251e-17 | 1.000000 |
| rad37              | 3.16175e-18 | 1.000000 | 3.16175e-18 | 1.000000 |
| rad27              | 2.24946e-18 | 1.000000 | 2.24946e-18 | 1.000000 |
| rad33              | 3.13339e-20 | 1.000000 | 3.13339e-20 | 1.000000 |
| rad5               | 1.06367e-21 | 1.000000 | 1.06367e-21 | 1.000000 |
| rad31              | 2.05604e-23 | 1.000000 | 2.05604e-23 | 1.000000 |
| rad20              | 1.13122e-24 | 1.000000 | 1.13122e-24 | 1.000000 |
| rad21              | 8.72843e-25 | 1.000000 | 8.72843e-25 | 1.000000 |
| rad18              | 3.34997e-27 | 1.000000 | 3.34997e-27 | 1.000000 |
| PAH3+H             | 3.16646e-27 | 1.000000 | 3.16646e-27 | 1.000000 |
| rad59              | 1.69664e-27 | 1.000000 | 1.69664e-27 | 1.000000 |
| rad50              | 1.52411e-27 | 1.000000 | 1.52411e-27 | 1.000000 |
| rad23              | 5.02612e-28 | 1.000000 | 5.02612e-28 | 1.000000 |
| rad22              | 2.69542e-28 | 1.000000 | 2.69542e-28 | 1.000000 |
| rad45              | 3.26849e-30 | 1.000000 | 3.26849e-30 | 1.000000 |
| rad24              | 2.92740e-31 | 1.000000 | 2.92740e-31 | 1.000000 |
| rad36              | 2.03256e-31 | 1.000000 | 2.03256e-31 | 1.000000 |
| rad19syn           | 1.57380e-36 | 1.000000 | 1.57380e-36 | 1.000000 |
| rad52              | 1.86332e-40 | 1.000000 | 1.86332e-40 | 1.000000 |
| rad54              | 2.00032e-41 | 1.000000 | 2.00032e-41 | 1.000000 |
| PAH10+CH3          | 1.36023e-41 | 1.000000 | 1.36023e-41 | 1.000000 |
| rad43              | 3.13575e-42 | 1.000000 | 3.13575e-42 | 1.000000 |
| rad62              | 9.71628e-45 | 1.000000 | 9.71628e-45 | 1.000000 |
| rad51              | 1.05783e-47 | 1.000000 | 1.05783e-47 | 1.000000 |
| rad70              | 1.30155e-50 | 1.000000 | 1.30155e-50 | 1.000000 |
| PhcycC3H3_A+H      | 5.58302e-51 | 1.000000 | 5.58302e-51 | 1.000000 |
| rad55              | 3.00233e-51 | 1.000000 | 3.00233e-51 | 1.000000 |
| rad65              | 7.80036e-53 | 1.000000 | 7.80036e-53 | 1.000000 |
| rad58              | 1.89574e-54 | 1.000000 | 1.89574e-54 | 1.000000 |
| PAH1+H             | 2.84174e-56 | 1.000000 | 2.84174e-56 | 1.000000 |
| rad34              | 1.93099e-58 | 1.000000 | 1.93099e-58 | 1.000000 |
| rad42              | 1.56105e-62 | 1.000000 | 1.56105e-62 | 1.000000 |
| rad41              | 2.24827e-63 | 1.000000 | 2.24827e-63 | 1.000000 |
| rad47              | 1.27938e-68 | 1.000000 | 1.27938e-68 | 1.000000 |

0.100000000E-06 Pa, 60.0000000 K

=====

| Rate constant      | True (fraction)        | Effective (fraction)   |
|--------------------|------------------------|------------------------|
| Total              | 1.83429e-26 (1.00 )    | 1.83429e-26 (1.00 )    |
| Formation of rad11 | 1.83139e-26 (0.998 )   | 1.83139e-26 (0.998 )   |
| Formation of rad6  | 2.90471e-29 (0.00158 ) | 2.90471e-29 (0.00158 ) |
| H-abstraction      | 5.71259e-34 (3.11e-08) | 5.71259e-34 (3.11e-08) |

| species    | PYtrue      | Cumul    | PYeffective | Cumul    |
|------------|-------------|----------|-------------|----------|
| Indene+H   | 0.986327    | 0.986327 | 0.986328    | 0.986328 |
| C2H2+PhCH2 | 0.00872967  | 0.995057 | 0.00872967  | 0.995058 |
| PhCCH+CH3  | 0.00246019  | 0.997517 | 0.00246019  | 0.997518 |
| PhCHCCH2+H | 0.00152831  | 0.999045 | 0.00152831  | 0.999046 |
| PhCCCH3+H  | 0.000924419 | 0.999970 | 0.000924419 | 0.999971 |
| Ph+MeAc    | 1.46738e-05 | 0.999984 | 1.46738e-05 | 0.999985 |
| rad8       | 7.90964e-06 | 0.999992 | 7.90964e-06 | 0.999993 |
| rad9       | 3.79565e-06 | 0.999996 | 3.79565e-06 | 0.999997 |
| PAH7+H     | 2.20983e-06 | 0.999998 | 2.20983e-06 | 0.999999 |

|                    |             |          |             |          |
|--------------------|-------------|----------|-------------|----------|
| rad30              | 4.76596e-07 | 0.999999 | 4.76596e-07 | 1.000000 |
| rad12              | 2.65606e-07 | 0.999999 | 2.65606e-07 | 1.000000 |
| rad39              | 2.35925e-07 | 0.999999 | 2.35925e-07 | 1.000000 |
| PAH9+H             | 9.75647e-08 | 0.999999 | 9.75647e-08 | 1.000000 |
| Phenyl+Allene      | 9.48777e-08 | 0.999999 | 0.000000    | 1.000000 |
| rad15              | 8.70373e-08 | 0.999999 | 8.70373e-08 | 1.000000 |
| rad35              | 5.07971e-08 | 0.999999 | 5.07971e-08 | 1.000000 |
| Benzene+2-propynyl | 3.11432e-08 | 0.999999 | 3.11432e-08 | 1.000000 |
| rad38              | 2.53149e-08 | 1.000000 | 2.53149e-08 | 1.000000 |
| rad46              | 1.76523e-10 | 1.000000 | 1.76523e-10 | 1.000000 |
| rad6               | 2.31998e-11 | 1.000000 | 2.31998e-11 | 1.000000 |
| rad60syn           | 4.52310e-12 | 1.000000 | 4.52310e-12 | 1.000000 |
| rad28              | 1.37074e-12 | 1.000000 | 1.37074e-12 | 1.000000 |
| rad26              | 2.19080e-13 | 1.000000 | 2.19080e-13 | 1.000000 |
| rad60anti          | 1.68173e-13 | 1.000000 | 1.68173e-13 | 1.000000 |
| rad2               | 9.19912e-15 | 1.000000 | 9.19912e-15 | 1.000000 |
| PhCH2CCH+H         | 8.28584e-15 | 1.000000 | 8.28584e-15 | 1.000000 |
| rad7               | 1.67785e-15 | 1.000000 | 1.67785e-15 | 1.000000 |
| rad1               | 5.84745e-16 | 1.000000 | 5.84745e-16 | 1.000000 |
| rad37              | 5.32433e-16 | 1.000000 | 5.32433e-16 | 1.000000 |
| rad10              | 4.69539e-16 | 1.000000 | 4.69539e-16 | 1.000000 |
| rad11              | 4.10545e-16 | 1.000000 | 4.10545e-16 | 1.000000 |
| rad3               | 6.65654e-17 | 1.000000 | 6.65654e-17 | 1.000000 |
| rad4               | 3.37012e-17 | 1.000000 | 3.37012e-17 | 1.000000 |
| rad14              | 2.99931e-17 | 1.000000 | 2.99931e-17 | 1.000000 |
| rad25              | 1.46599e-17 | 1.000000 | 1.46599e-17 | 1.000000 |
| rad13              | 9.34357e-18 | 1.000000 | 9.34357e-18 | 1.000000 |
| rad27              | 1.70383e-18 | 1.000000 | 1.70383e-18 | 1.000000 |
| rad5               | 2.79369e-19 | 1.000000 | 2.79369e-19 | 1.000000 |
| rad33              | 1.80449e-20 | 1.000000 | 1.80449e-20 | 1.000000 |
| rad31              | 1.75397e-23 | 1.000000 | 1.75397e-23 | 1.000000 |
| PAH3+H             | 2.19751e-24 | 1.000000 | 2.19751e-24 | 1.000000 |
| rad59              | 1.18809e-24 | 1.000000 | 1.18809e-24 | 1.000000 |
| rad20              | 8.98546e-25 | 1.000000 | 8.98546e-25 | 1.000000 |
| rad50              | 7.41836e-25 | 1.000000 | 7.41836e-25 | 1.000000 |
| rad21              | 6.95551e-25 | 1.000000 | 6.95551e-25 | 1.000000 |
| rad18              | 2.60281e-27 | 1.000000 | 2.60281e-27 | 1.000000 |
| rad23              | 3.39830e-28 | 1.000000 | 3.39830e-28 | 1.000000 |
| rad22              | 2.03033e-28 | 1.000000 | 2.03033e-28 | 1.000000 |
| rad45              | 2.25461e-30 | 1.000000 | 2.25461e-30 | 1.000000 |
| rad24              | 2.51460e-31 | 1.000000 | 2.51460e-31 | 1.000000 |
| rad36              | 1.40090e-31 | 1.000000 | 1.40090e-31 | 1.000000 |
| rad19syn           | 1.05395e-35 | 1.000000 | 1.05395e-35 | 1.000000 |
| rad52              | 1.23624e-39 | 1.000000 | 1.23624e-39 | 1.000000 |
| rad54              | 1.41683e-40 | 1.000000 | 1.41683e-40 | 1.000000 |
| PAH10+CH3          | 1.00854e-40 | 1.000000 | 1.00854e-40 | 1.000000 |
| rad43              | 2.32384e-41 | 1.000000 | 2.32384e-41 | 1.000000 |
| rad62              | 7.33399e-44 | 1.000000 | 7.33399e-44 | 1.000000 |
| rad51              | 7.74326e-47 | 1.000000 | 7.74326e-47 | 1.000000 |
| rad70              | 1.03225e-49 | 1.000000 | 1.03225e-49 | 1.000000 |
| PhcycC3H3_A+H      | 4.46175e-50 | 1.000000 | 4.46175e-50 | 1.000000 |
| rad55              | 2.39740e-50 | 1.000000 | 2.39740e-50 | 1.000000 |
| rad65              | 6.04016e-52 | 1.000000 | 6.04016e-52 | 1.000000 |
| rad58              | 1.52499e-53 | 1.000000 | 1.52499e-53 | 1.000000 |
| PAH1+H             | 2.44792e-55 | 1.000000 | 2.44792e-55 | 1.000000 |
| rad34              | 1.68701e-57 | 1.000000 | 1.68701e-57 | 1.000000 |
| rad42              | 1.65528e-61 | 1.000000 | 1.65528e-61 | 1.000000 |
| rad41              | 3.15233e-62 | 1.000000 | 3.15233e-62 | 1.000000 |
| rad47              | 8.73151e-68 | 1.000000 | 8.73151e-68 | 1.000000 |

0.100000000E-06 Pa, 70.0000000 K

=====

| Rate constant      | True (fraction)        | Effective (fraction)   |
|--------------------|------------------------|------------------------|
| Total              | 1.17336e-24 (1.00 )    | 1.17336e-24 (1.00 )    |
| Formation of rad11 | 1.16857e-24 (0.996 )   | 1.16857e-24 (0.996 )   |
| Formation of rad6  | 4.79505e-27 (0.00409 ) | 4.79505e-27 (0.00409 ) |
| H-abstraction      | 5.89821e-31 (5.03e-07) | 5.89821e-31 (5.03e-07) |

| species    | PYtrue      | Cumul    | PYeffective | Cumul    |
|------------|-------------|----------|-------------|----------|
| Indene+H   | 0.985878    | 0.985878 | 0.985879    | 0.985879 |
| C2H2+PhCH2 | 0.00895056  | 0.994828 | 0.00895056  | 0.994829 |
| PhCCH+CH3  | 0.00257971  | 0.997408 | 0.00257971  | 0.997409 |
| PhCHCCH2+H | 0.00159114  | 0.998999 | 0.00159114  | 0.999000 |
| PhCCCH3+H  | 0.000966747 | 0.999966 | 0.000966747 | 0.999967 |
| Ph+MeAc    | 1.70353e-05 | 0.999983 | 1.70353e-05 | 0.999984 |
| rad8       | 8.39424e-06 | 0.999991 | 8.39424e-06 | 0.999992 |
| rad9       | 4.12376e-06 | 0.999995 | 4.12376e-06 | 0.999996 |
| PAH7+H     | 2.41850e-06 | 0.999998 | 2.41850e-06 | 0.999999 |

|                    |             |          |             |          |
|--------------------|-------------|----------|-------------|----------|
| Benzene+2-propynyl | 5.02676e-07 | 0.999998 | 5.02676e-07 | 0.999999 |
| rad30              | 4.93849e-07 | 0.999999 | 4.93849e-07 | 1.000000 |
| rad12              | 2.90272e-07 | 0.999999 | 2.90272e-07 | 1.000000 |
| rad39              | 2.69197e-07 | 0.999999 | 2.69197e-07 | 1.000000 |
| Phenyl+Allene      | 1.48355e-07 | 0.999999 | 0.000000    | 1.000000 |
| PAH9+H             | 1.01582e-07 | 0.999999 | 1.01582e-07 | 1.000000 |
| rad15              | 9.09326e-08 | 1.000000 | 9.09326e-08 | 1.000000 |
| rad35              | 5.26506e-08 | 1.000000 | 5.26507e-08 | 1.000000 |
| rad38              | 2.64629e-08 | 1.000000 | 2.64629e-08 | 1.000000 |
| rad46              | 1.90194e-10 | 1.000000 | 1.90194e-10 | 1.000000 |
| rad6               | 1.45360e-11 | 1.000000 | 1.45360e-11 | 1.000000 |
| rad60syn           | 5.38094e-12 | 1.000000 | 5.38094e-12 | 1.000000 |
| rad28              | 9.82527e-13 | 1.000000 | 9.82527e-13 | 1.000000 |
| rad60anti          | 3.67479e-13 | 1.000000 | 3.67479e-13 | 1.000000 |
| PhCH2CCH+H         | 1.68867e-13 | 1.000000 | 1.68867e-13 | 1.000000 |
| rad26              | 1.63216e-13 | 1.000000 | 1.63216e-13 | 1.000000 |
| rad37              | 2.03333e-14 | 1.000000 | 2.03333e-14 | 1.000000 |
| rad2               | 5.93747e-15 | 1.000000 | 5.93747e-15 | 1.000000 |
| rad7               | 1.05259e-15 | 1.000000 | 1.05259e-15 | 1.000000 |
| rad1               | 3.78358e-16 | 1.000000 | 3.78358e-16 | 1.000000 |
| rad10              | 3.08276e-16 | 1.000000 | 3.08276e-16 | 1.000000 |
| rad11              | 2.57689e-16 | 1.000000 | 2.57689e-16 | 1.000000 |
| rad3               | 4.48439e-17 | 1.000000 | 4.48439e-17 | 1.000000 |
| rad14              | 2.33989e-17 | 1.000000 | 2.33989e-17 | 1.000000 |
| rad4               | 2.27184e-17 | 1.000000 | 2.27184e-17 | 1.000000 |
| rad5               | 1.57223e-17 | 1.000000 | 1.57223e-17 | 1.000000 |
| rad25              | 1.14961e-17 | 1.000000 | 1.14961e-17 | 1.000000 |
| rad13              | 5.86576e-18 | 1.000000 | 5.86576e-18 | 1.000000 |
| rad27              | 1.34022e-18 | 1.000000 | 1.34022e-18 | 1.000000 |
| rad33              | 1.14074e-20 | 1.000000 | 1.14074e-20 | 1.000000 |
| PAH3+H             | 3.72414e-22 | 1.000000 | 3.72414e-22 | 1.000000 |
| rad59              | 1.99083e-22 | 1.000000 | 1.99083e-22 | 1.000000 |
| rad50              | 7.20224e-23 | 1.000000 | 7.20224e-23 | 1.000000 |
| rad31              | 1.58825e-23 | 1.000000 | 1.58825e-23 | 1.000000 |
| rad20              | 7.51633e-25 | 1.000000 | 7.51634e-25 | 1.000000 |
| rad21              | 5.83739e-25 | 1.000000 | 5.83739e-25 | 1.000000 |
| rad18              | 2.12954e-27 | 1.000000 | 2.12954e-27 | 1.000000 |
| rad23              | 2.54443e-28 | 1.000000 | 2.54443e-28 | 1.000000 |
| rad22              | 1.61836e-28 | 1.000000 | 1.61836e-28 | 1.000000 |
| rad45              | 1.71177e-30 | 1.000000 | 1.71177e-30 | 1.000000 |
| rad24              | 2.27761e-31 | 1.000000 | 2.27761e-31 | 1.000000 |
| rad36              | 1.06278e-31 | 1.000000 | 1.06278e-31 | 1.000000 |
| rad19syn           | 2.18195e-34 | 1.000000 | 2.18195e-34 | 1.000000 |
| rad52              | 2.53321e-38 | 1.000000 | 2.53321e-38 | 1.000000 |
| rad54              | 3.12257e-39 | 1.000000 | 3.12257e-39 | 1.000000 |
| PAH10+CH3          | 2.29099e-39 | 1.000000 | 2.29099e-39 | 1.000000 |
| rad43              | 5.27573e-40 | 1.000000 | 5.27573e-40 | 1.000000 |
| rad62              | 1.72204e-42 | 1.000000 | 1.72204e-42 | 1.000000 |
| rad51              | 1.77143e-45 | 1.000000 | 1.77143e-45 | 1.000000 |
| rad70              | 2.58490e-48 | 1.000000 | 2.58490e-48 | 1.000000 |
| PhcycC3H3_A+H      | 1.12710e-48 | 1.000000 | 1.12711e-48 | 1.000000 |
| rad55              | 6.05027e-49 | 1.000000 | 6.05027e-49 | 1.000000 |
| rad65              | 1.47301e-50 | 1.000000 | 1.47301e-50 | 1.000000 |
| rad58              | 3.88148e-52 | 1.000000 | 3.88148e-52 | 1.000000 |
| PAH1+H             | 6.76166e-54 | 1.000000 | 6.76166e-54 | 1.000000 |
| rad34              | 4.73125e-56 | 1.000000 | 4.73125e-56 | 1.000000 |
| rad42              | 6.62979e-60 | 1.000000 | 6.62979e-60 | 1.000000 |
| rad41              | 1.78802e-60 | 1.000000 | 1.78802e-60 | 1.000000 |
| rad47              | 1.97872e-66 | 1.000000 | 1.97872e-66 | 1.000000 |

0.100000000E-06 Pa, 80.0000000 K

=====

| Rate constant      | True (fraction)        | Effective (fraction)   |
|--------------------|------------------------|------------------------|
| Total              | 2.68112e-23 (1.00 )    | 2.68112e-23 (1.00 )    |
| Formation of rad11 | 2.65890e-23 (0.992 )   | 2.65889e-23 (0.992 )   |
| Formation of rad6  | 2.22189e-25 (0.00829 ) | 2.22189e-25 (0.00829 ) |
| H-abstraction      | 1.05871e-28 (3.95e-06) | 1.05871e-28 (3.95e-06) |

| species            | PYtrue      | Cumul    | PYeffective | Cumul    |
|--------------------|-------------|----------|-------------|----------|
| Indene+H           | 0.985364    | 0.985364 | 0.985364    | 0.985364 |
| C2H2+PhCH2         | 0.00919908  | 0.994563 | 0.00919908  | 0.994563 |
| PhCCH+CH3          | 0.00271707  | 0.997280 | 0.00271708  | 0.997280 |
| PhCHCCH2+H         | 0.00166278  | 0.998943 | 0.00166278  | 0.998943 |
| PhCCCH3+H          | 0.00101513  | 0.999958 | 0.00101513  | 0.999958 |
| Ph+MeAc            | 1.99928e-05 | 0.999978 | 1.99928e-05 | 0.999978 |
| rad8               | 8.95716e-06 | 0.999987 | 8.95717e-06 | 0.999987 |
| rad9               | 4.51458e-06 | 0.999992 | 4.51458e-06 | 0.999992 |
| Benzene+2-propynyl | 3.94877e-06 | 0.999996 | 3.94877e-06 | 0.999996 |



|               |             |          |             |          |
|---------------|-------------|----------|-------------|----------|
| PAH7+H        | 2.66763e-06 | 0.999998 | 2.66763e-06 | 0.999998 |
| rad30         | 5.13527e-07 | 0.999999 | 5.13527e-07 | 0.999999 |
| rad12         | 3.19504e-07 | 0.999999 | 3.19504e-07 | 0.999999 |
| rad39         | 3.10379e-07 | 0.999999 | 3.10379e-07 | 0.999999 |
| Phenyl+Allene | 2.25627e-07 | 1.000000 | 0.000000    | 0.999999 |
| PAH9+H        | 1.06211e-07 | 1.000000 | 1.06211e-07 | 1.000000 |
| rad15         | 9.54219e-08 | 1.000000 | 9.54219e-08 | 1.000000 |
| rad35         | 5.47729e-08 | 1.000000 | 5.47729e-08 | 1.000000 |
| rad38         | 2.77919e-08 | 1.000000 | 2.77919e-08 | 1.000000 |
| rad46         | 2.06638e-10 | 1.000000 | 2.06638e-10 | 1.000000 |
| rad6          | 9.69046e-12 | 1.000000 | 9.69047e-12 | 1.000000 |
| rad60syn      | 6.54469e-12 | 1.000000 | 6.54469e-12 | 1.000000 |
| PhCH2CCH+H    | 1.67906e-12 | 1.000000 | 1.67906e-12 | 1.000000 |
| rad28         | 7.31655e-13 | 1.000000 | 7.31655e-13 | 1.000000 |
| rad60anti     | 6.70936e-13 | 1.000000 | 6.70936e-13 | 1.000000 |
| rad37         | 3.02088e-13 | 1.000000 | 3.02088e-13 | 1.000000 |
| rad26         | 1.25434e-13 | 1.000000 | 1.25434e-13 | 1.000000 |
| rad2          | 4.30660e-15 | 1.000000 | 4.30660e-15 | 1.000000 |
| rad7          | 7.02667e-16 | 1.000000 | 7.02667e-16 | 1.000000 |
| rad5          | 3.25263e-16 | 1.000000 | 3.25263e-16 | 1.000000 |
| rad1          | 2.75200e-16 | 1.000000 | 2.75200e-16 | 1.000000 |
| rad10         | 2.19083e-16 | 1.000000 | 2.19083e-16 | 1.000000 |
| rad11         | 1.72123e-16 | 1.000000 | 1.72123e-16 | 1.000000 |
| rad3          | 3.29957e-17 | 1.000000 | 3.29957e-17 | 1.000000 |
| rad14         | 1.86973e-17 | 1.000000 | 1.86973e-17 | 1.000000 |
| rad4          | 1.67279e-17 | 1.000000 | 1.67279e-17 | 1.000000 |
| rad25         | 9.23752e-18 | 1.000000 | 9.23753e-18 | 1.000000 |
| rad13         | 3.91882e-18 | 1.000000 | 3.91882e-18 | 1.000000 |
| rad27         | 1.08172e-18 | 1.000000 | 1.08172e-18 | 1.000000 |
| PAH3+H        | 1.74258e-20 | 1.000000 | 1.74258e-20 | 1.000000 |
| rad59         | 9.08328e-21 | 1.000000 | 9.08328e-21 | 1.000000 |
| rad33         | 7.68086e-21 | 1.000000 | 7.68086e-21 | 1.000000 |
| rad50         | 2.22913e-21 | 1.000000 | 2.22913e-21 | 1.000000 |
| rad31         | 1.50449e-23 | 1.000000 | 1.50449e-23 | 1.000000 |
| rad20         | 6.51311e-25 | 1.000000 | 6.51311e-25 | 1.000000 |
| rad21         | 5.07559e-25 | 1.000000 | 5.07559e-25 | 1.000000 |
| rad18         | 1.80336e-27 | 1.000000 | 1.80336e-27 | 1.000000 |
| rad19syn      | 3.50628e-28 | 1.000000 | 3.50628e-28 | 1.000000 |
| rad23         | 2.05578e-28 | 1.000000 | 2.05578e-28 | 1.000000 |
| rad22         | 1.33829e-28 | 1.000000 | 1.33829e-28 | 1.000000 |
| rad45         | 1.42429e-30 | 1.000000 | 1.42429e-30 | 1.000000 |
| rad24         | 2.14283e-31 | 1.000000 | 2.14283e-31 | 1.000000 |
| rad36         | 8.83689e-32 | 1.000000 | 8.83690e-32 | 1.000000 |
| rad52         | 3.70732e-32 | 1.000000 | 3.70732e-32 | 1.000000 |
| rad54         | 3.49107e-37 | 1.000000 | 3.49107e-37 | 1.000000 |
| PAH10+CH3     | 2.43969e-37 | 1.000000 | 2.43969e-37 | 1.000000 |
| rad43         | 5.61259e-38 | 1.000000 | 5.61259e-38 | 1.000000 |
| rad62         | 1.94502e-40 | 1.000000 | 1.94502e-40 | 1.000000 |
| rad51         | 2.05868e-43 | 1.000000 | 2.05868e-43 | 1.000000 |
| rad70         | 3.29990e-46 | 1.000000 | 3.29990e-46 | 1.000000 |
| PhcycC3H3_A+H | 1.45193e-46 | 1.000000 | 1.45193e-46 | 1.000000 |
| rad55         | 7.78571e-47 | 1.000000 | 7.78572e-47 | 1.000000 |
| rad65         | 1.82946e-48 | 1.000000 | 1.82946e-48 | 1.000000 |
| rad58         | 5.03889e-50 | 1.000000 | 5.03889e-50 | 1.000000 |
| PAH1+H        | 9.56539e-52 | 1.000000 | 9.56540e-52 | 1.000000 |
| rad34         | 6.78788e-54 | 1.000000 | 6.78788e-54 | 1.000000 |
| rad42         | 1.11824e-57 | 1.000000 | 1.11824e-57 | 1.000000 |
| rad41         | 3.34166e-58 | 1.000000 | 3.34166e-58 | 1.000000 |
| rad47         | 2.35440e-64 | 1.000000 | 2.35440e-64 | 1.000000 |

0.100000000E-06 Pa, 90.0000000 K

=====

| Rate constant      | True (fraction)        | Effective (fraction)   |
|--------------------|------------------------|------------------------|
| Total              | 3.08379e-22 (1.00 )    | 3.08379e-22 (1.00 )    |
| Formation of rad11 | 3.03962e-22 (0.986 )   | 3.03962e-22 (0.986 )   |
| Formation of rad6  | 4.41076e-24 (0.0143 )  | 4.41076e-24 (0.0143 )  |
| H-abstraction      | 5.92916e-27 (1.92e-05) | 5.92916e-27 (1.92e-05) |

| species            | PYtrue      | Cumul    | PYeffective | Cumul    |
|--------------------|-------------|----------|-------------|----------|
| Indene+H           | 0.984773    | 0.984773 | 0.984774    | 0.984774 |
| C2H2+PhCH2         | 0.00947660  | 0.994250 | 0.00947660  | 0.994251 |
| PhCCH+CH3          | 0.00287386  | 0.997124 | 0.00287386  | 0.997125 |
| PhCHCCH2+H         | 0.00174389  | 0.998867 | 0.00174389  | 0.998868 |
| PhCCCH3+H          | 0.00107001  | 0.999937 | 0.00107001  | 0.999938 |
| Ph+MeAc            | 2.36820e-05 | 0.999961 | 2.36821e-05 | 0.999962 |
| Benzene+2-propynyl | 1.92269e-05 | 0.999980 | 1.92269e-05 | 0.999981 |
| rad8               | 9.60633e-06 | 0.999990 | 9.60633e-06 | 0.999991 |
| rad9               | 4.97746e-06 | 0.999995 | 4.97746e-06 | 0.999996 |

|               |             |          |             |          |
|---------------|-------------|----------|-------------|----------|
| PAH7+H        | 2.96414e-06 | 0.999998 | 2.96414e-06 | 0.999999 |
| rad30         | 5.35829e-07 | 0.999998 | 5.35830e-07 | 0.999999 |
| rad39         | 3.61146e-07 | 0.999999 | 3.61146e-07 | 1.000000 |
| rad12         | 3.54032e-07 | 0.999999 | 3.54032e-07 | 1.000000 |
| Phenyl+Allene | 3.35682e-07 | 0.999999 | 0.000000    | 1.000000 |
| PAH9+H        | 1.11514e-07 | 1.000000 | 1.11514e-07 | 1.000000 |
| rad15         | 1.00565e-07 | 1.000000 | 1.00565e-07 | 1.000000 |
| rad35         | 5.71884e-08 | 1.000000 | 5.71885e-08 | 1.000000 |
| rad38         | 2.93227e-08 | 1.000000 | 2.93227e-08 | 1.000000 |
| rad46         | 2.26368e-10 | 1.000000 | 2.26368e-10 | 1.000000 |
| PhCH2CCH+H    | 1.03766e-11 | 1.000000 | 1.03766e-11 | 1.000000 |
| rad60syn      | 8.08739e-12 | 1.000000 | 8.08739e-12 | 1.000000 |
| rad6          | 6.75145e-12 | 1.000000 | 6.75145e-12 | 1.000000 |
| rad37         | 2.40347e-12 | 1.000000 | 2.40347e-12 | 1.000000 |
| rad60anti     | 1.09975e-12 | 1.000000 | 1.09976e-12 | 1.000000 |
| rad28         | 5.59535e-13 | 1.000000 | 5.59536e-13 | 1.000000 |
| rad26         | 9.84961e-14 | 1.000000 | 9.84961e-14 | 1.000000 |
| rad5          | 3.47579e-15 | 1.000000 | 3.47579e-15 | 1.000000 |
| rad2          | 3.17675e-15 | 1.000000 | 3.17675e-15 | 1.000000 |
| rad7          | 4.90272e-16 | 1.000000 | 4.90272e-16 | 1.000000 |
| rad1          | 2.03625e-16 | 1.000000 | 2.03625e-16 | 1.000000 |
| rad10         | 1.62188e-16 | 1.000000 | 1.62188e-16 | 1.000000 |
| rad11         | 1.20171e-16 | 1.000000 | 1.20171e-16 | 1.000000 |
| rad3          | 2.53310e-17 | 1.000000 | 2.53310e-17 | 1.000000 |
| rad14         | 1.51974e-17 | 1.000000 | 1.51974e-17 | 1.000000 |
| rad4          | 1.28525e-17 | 1.000000 | 1.28525e-17 | 1.000000 |
| rad25         | 7.55286e-18 | 1.000000 | 7.55286e-18 | 1.000000 |
| rad13         | 2.73660e-18 | 1.000000 | 2.73660e-18 | 1.000000 |
| rad27         | 8.89283e-19 | 1.000000 | 8.89283e-19 | 1.000000 |
| PAH3+H        | 3.47533e-19 | 1.000000 | 3.47533e-19 | 1.000000 |
| rad59         | 1.74971e-19 | 1.000000 | 1.74971e-19 | 1.000000 |
| rad50         | 3.24536e-20 | 1.000000 | 3.24536e-20 | 1.000000 |
| rad33         | 5.41088e-21 | 1.000000 | 5.41088e-21 | 1.000000 |
| rad31         | 1.47747e-23 | 1.000000 | 1.47747e-23 | 1.000000 |
| rad20         | 5.78970e-25 | 1.000000 | 5.78970e-25 | 1.000000 |
| rad21         | 4.52807e-25 | 1.000000 | 4.52807e-25 | 1.000000 |
| rad19syn      | 1.46099e-25 | 1.000000 | 1.46099e-25 | 1.000000 |
| rad18         | 1.56476e-27 | 1.000000 | 1.56476e-27 | 1.000000 |
| rad23         | 1.77106e-28 | 1.000000 | 1.77106e-28 | 1.000000 |
| rad22         | 1.13516e-28 | 1.000000 | 1.13516e-28 | 1.000000 |
| rad52         | 1.23077e-29 | 1.000000 | 1.23077e-29 | 1.000000 |
| rad54         | 6.85408e-30 | 1.000000 | 6.85408e-30 | 1.000000 |
| PAH10+CH3     | 3.92955e-30 | 1.000000 | 3.92955e-30 | 1.000000 |
| rad45         | 1.27336e-30 | 1.000000 | 1.27336e-30 | 1.000000 |
| rad43         | 9.86350e-31 | 1.000000 | 9.86351e-31 | 1.000000 |
| rad24         | 2.07482e-31 | 1.000000 | 2.07482e-31 | 1.000000 |
| rad36         | 7.89601e-32 | 1.000000 | 7.89602e-32 | 1.000000 |
| rad62         | 7.45646e-38 | 1.000000 | 7.45646e-38 | 1.000000 |
| rad51         | 8.13640e-41 | 1.000000 | 8.13640e-41 | 1.000000 |
| rad70         | 1.43692e-43 | 1.000000 | 1.43692e-43 | 1.000000 |
| PhcycC3H3_A+H | 6.38021e-44 | 1.000000 | 6.38021e-44 | 1.000000 |
| rad55         | 3.41754e-44 | 1.000000 | 3.41754e-44 | 1.000000 |
| rad65         | 7.73711e-46 | 1.000000 | 7.73711e-46 | 1.000000 |
| rad58         | 2.23140e-47 | 1.000000 | 2.23140e-47 | 1.000000 |
| PAH1+H        | 4.59917e-49 | 1.000000 | 4.59917e-49 | 1.000000 |
| rad34         | 3.31287e-51 | 1.000000 | 3.31287e-51 | 1.000000 |
| rad42         | 5.22360e-55 | 1.000000 | 5.22360e-55 | 1.000000 |
| rad41         | 1.49029e-55 | 1.000000 | 1.49029e-55 | 1.000000 |
| rad47         | 9.71420e-62 | 1.000000 | 9.71421e-62 | 1.000000 |

0.100000000E-06 Pa, 100.000000 K

=====

| Rate constant      | True (fraction)        | Effective (fraction)   |
|--------------------|------------------------|------------------------|
| Total              | 2.19347e-21 (1.00 )    | 2.19347e-21 (1.00 )    |
| Formation of rad11 | 2.14498e-21 (0.978 )   | 2.14497e-21 (0.978 )   |
| Formation of rad6  | 4.83503e-23 (0.0220 )  | 4.83503e-23 (0.0220 )  |
| H-abstraction      | 1.47101e-25 (6.71e-05) | 1.47101e-25 (6.71e-05) |

| species            | PYtrue      | Cumul    | PYeffective | Cumul    |
|--------------------|-------------|----------|-------------|----------|
| Indene+H           | 0.984079    | 0.984079 | 0.984080    | 0.984080 |
| C2H2+PhCH2         | 0.00978493  | 0.993864 | 0.00978494  | 0.993865 |
| PhCCH+CH3          | 0.00305192  | 0.996916 | 0.00305192  | 0.996917 |
| PhCHCCH2+H         | 0.00183519  | 0.998751 | 0.00183519  | 0.998752 |
| PhCCCH3+H          | 0.00113192  | 0.999883 | 0.00113192  | 0.999884 |
| Benzene+2-propynyl | 6.70630e-05 | 0.999950 | 6.70630e-05 | 0.999951 |
| Ph+MeAc            | 2.82632e-05 | 0.999978 | 2.82632e-05 | 0.999979 |
| rad8               | 1.03510e-05 | 0.999989 | 1.03510e-05 | 0.999990 |
| rad9               | 5.52373e-06 | 0.999994 | 5.52373e-06 | 0.999995 |

|               |             |          |             |          |
|---------------|-------------|----------|-------------|----------|
| PAH7+H        | 3.31643e-06 | 0.999997 | 3.31643e-06 | 0.999998 |
| rad30         | 5.61005e-07 | 0.999998 | 5.61006e-07 | 0.999999 |
| Phenyl+Allene | 4.90154e-07 | 0.999999 | 0.00000     | 0.999999 |
| rad39         | 4.23508e-07 | 0.999999 | 4.23508e-07 | 0.999999 |
| rad12         | 3.94652e-07 | 0.999999 | 3.94652e-07 | 1.000000 |
| PAH9+H        | 1.17574e-07 | 0.999999 | 1.17574e-07 | 1.000000 |
| rad15         | 1.06436e-07 | 1.000000 | 1.06436e-07 | 1.000000 |
| rad35         | 5.99282e-08 | 1.000000 | 5.99283e-08 | 1.000000 |
| rad38         | 3.10815e-08 | 1.000000 | 3.10816e-08 | 1.000000 |
| rad46         | 2.50010e-10 | 1.000000 | 2.50010e-10 | 1.000000 |
| PhCH2CCH+H    | 4.60542e-11 | 1.000000 | 4.60542e-11 | 1.000000 |
| rad37         | 1.24001e-11 | 1.000000 | 1.24001e-11 | 1.000000 |
| rad60syn      | 1.01165e-11 | 1.000000 | 1.01165e-11 | 1.000000 |
| rad6          | 4.85956e-12 | 1.000000 | 4.85957e-12 | 1.000000 |
| rad60anti     | 1.68502e-12 | 1.000000 | 1.68502e-12 | 1.000000 |
| rad28         | 4.36201e-13 | 1.000000 | 4.36201e-13 | 1.000000 |
| rad26         | 7.85445e-14 | 1.000000 | 7.85446e-14 | 1.000000 |
| rad5          | 2.34973e-14 | 1.000000 | 2.34973e-14 | 1.000000 |
| rad2          | 2.40657e-15 | 1.000000 | 2.40657e-15 | 1.000000 |
| rad7          | 3.53433e-16 | 1.000000 | 3.53433e-16 | 1.000000 |
| rad1          | 1.54777e-16 | 1.000000 | 1.54777e-16 | 1.000000 |
| rad10         | 1.25226e-16 | 1.000000 | 1.25226e-16 | 1.000000 |
| rad11         | 8.66885e-17 | 1.000000 | 8.66885e-17 | 1.000000 |
| rad3          | 2.09020e-17 | 1.000000 | 2.09020e-17 | 1.000000 |
| rad14         | 1.25077e-17 | 1.000000 | 1.25077e-17 | 1.000000 |
| rad4          | 1.06146e-17 | 1.000000 | 1.06146e-17 | 1.000000 |
| rad25         | 6.25462e-18 | 1.000000 | 6.25462e-18 | 1.000000 |
| PAH3+H        | 3.83495e-18 | 1.000000 | 3.83495e-18 | 1.000000 |
| rad13         | 1.97459e-18 | 1.000000 | 1.97459e-18 | 1.000000 |
| rad59         | 1.85459e-18 | 1.000000 | 1.85459e-18 | 1.000000 |
| rad27         | 7.41042e-19 | 1.000000 | 7.41042e-19 | 1.000000 |
| rad50         | 2.80691e-19 | 1.000000 | 2.80691e-19 | 1.000000 |
| rad33         | 3.94273e-21 | 1.000000 | 3.94273e-21 | 1.000000 |
| rad19syn      | 1.69256e-23 | 1.000000 | 1.69256e-23 | 1.000000 |
| rad31         | 1.49549e-23 | 1.000000 | 1.49549e-23 | 1.000000 |
| rad20         | 5.24686e-25 | 1.000000 | 5.24686e-25 | 1.000000 |
| rad21         | 4.11907e-25 | 1.000000 | 4.11908e-25 | 1.000000 |
| rad54         | 3.44316e-27 | 1.000000 | 3.44316e-27 | 1.000000 |
| PAH10+CH3     | 2.22552e-27 | 1.000000 | 2.22552e-27 | 1.000000 |
| rad18         | 1.38225e-27 | 1.000000 | 1.38225e-27 | 1.000000 |
| rad52         | 1.20084e-27 | 1.000000 | 1.20084e-27 | 1.000000 |
| rad43         | 5.29880e-28 | 1.000000 | 5.29881e-28 | 1.000000 |
| rad23         | 1.61973e-28 | 1.000000 | 1.61973e-28 | 1.000000 |
| rad22         | 9.80615e-29 | 1.000000 | 9.80616e-29 | 1.000000 |
| rad62         | 6.92563e-30 | 1.000000 | 6.92564e-30 | 1.000000 |
| rad45         | 1.25685e-30 | 1.000000 | 1.25685e-30 | 1.000000 |
| rad24         | 2.05513e-31 | 1.000000 | 2.05513e-31 | 1.000000 |
| rad36         | 7.79053e-32 | 1.000000 | 7.79053e-32 | 1.000000 |
| rad51         | 7.64881e-33 | 1.000000 | 7.64882e-33 | 1.000000 |
| rad70         | 1.30428e-40 | 1.000000 | 1.30429e-40 | 1.000000 |
| PhcycC3H3_A+H | 5.84624e-41 | 1.000000 | 5.84624e-41 | 1.000000 |
| rad55         | 3.12787e-41 | 1.000000 | 3.12787e-41 | 1.000000 |
| rad65         | 6.80773e-43 | 1.000000 | 6.80773e-43 | 1.000000 |
| rad58         | 2.06093e-44 | 1.000000 | 2.06093e-44 | 1.000000 |
| PAH1+H        | 4.61606e-46 | 1.000000 | 4.61607e-46 | 1.000000 |
| rad34         | 3.37660e-48 | 1.000000 | 3.37660e-48 | 1.000000 |
| rad42         | 4.72664e-52 | 1.000000 | 4.72664e-52 | 1.000000 |
| rad41         | 1.17344e-52 | 1.000000 | 1.17344e-52 | 1.000000 |
| rad47         | 8.46305e-59 | 1.000000 | 8.46305e-59 | 1.000000 |

0.100000000E-06 Pa, 110.000000 K

=====

| Rate constant      | True (fraction)        | Effective (fraction)   |
|--------------------|------------------------|------------------------|
| Total              | 1.09987e-20 (1.00 )    | 1.09987e-20 (1.00 )    |
| Formation of rad11 | 1.06527e-20 (0.969 )   | 1.06526e-20 (0.969 )   |
| Formation of rad6  | 3.44008e-22 (0.0313 )  | 3.44007e-22 (0.0313 )  |
| H-abstraction      | 2.02040e-24 (0.000184) | 2.02040e-24 (0.000184) |

| species            | PYtrue      | Cumul    | PYeffective | Cumul    |
|--------------------|-------------|----------|-------------|----------|
| Indene+H           | 0.983241    | 0.983241 | 0.983242    | 0.983242 |
| C2H2+PhCH2         | 0.0101257   | 0.993367 | 0.0101257   | 0.993368 |
| PhCCH+CH3          | 0.00325294  | 0.996620 | 0.00325294  | 0.996621 |
| PhCHCCH2+H         | 0.00193733  | 0.998557 | 0.00193733  | 0.998558 |
| PhCCCH3+H          | 0.00120133  | 0.999759 | 0.00120133  | 0.999760 |
| Benzene+2-propynyl | 0.000183695 | 0.999942 | 0.000183695 | 0.999943 |
| Ph+MeAc            | 3.39168e-05 | 0.999976 | 3.39169e-05 | 0.999977 |
| rad8               | 1.12005e-05 | 0.999988 | 1.12005e-05 | 0.999989 |
| rad9               | 6.16580e-06 | 0.999994 | 6.16580e-06 | 0.999995 |

|               |             |          |             |          |
|---------------|-------------|----------|-------------|----------|
| PAH7+H        | 3.73380e-06 | 0.999997 | 3.73380e-06 | 0.999998 |
| Phenyl+Allene | 7.03816e-07 | 0.999998 | 0.00000     | 0.999998 |
| rad30         | 5.89308e-07 | 0.999999 | 5.89309e-07 | 0.999999 |
| rad39         | 4.99755e-07 | 0.999999 | 4.99755e-07 | 0.999999 |
| rad12         | 4.42175e-07 | 1.000000 | 4.42176e-07 | 1.000000 |
| PAH9+H        | 1.24474e-07 | 1.000000 | 1.24474e-07 | 1.000000 |
| rad15         | 1.13113e-07 | 1.000000 | 1.13113e-07 | 1.000000 |
| rad35         | 6.30240e-08 | 1.000000 | 6.30241e-08 | 1.000000 |
| rad38         | 3.30961e-08 | 1.000000 | 3.30961e-08 | 1.000000 |
| rad46         | 2.78294e-10 | 1.000000 | 2.78294e-10 | 1.000000 |
| PhCH2CCH+H    | 1.60861e-10 | 1.000000 | 1.60861e-10 | 1.000000 |
| rad37         | 4.68303e-11 | 1.000000 | 4.68303e-11 | 1.000000 |
| rad60syn      | 1.27704e-11 | 1.000000 | 1.27704e-11 | 1.000000 |
| rad6          | 3.58556e-12 | 1.000000 | 3.58557e-12 | 1.000000 |
| rad60anti     | 2.47061e-12 | 1.000000 | 2.47061e-12 | 1.000000 |
| rad28         | 3.44912e-13 | 1.000000 | 3.44912e-13 | 1.000000 |
| rad5          | 1.14180e-13 | 1.000000 | 1.14180e-13 | 1.000000 |
| rad26         | 6.33455e-14 | 1.000000 | 6.33456e-14 | 1.000000 |
| rad2          | 1.95050e-15 | 1.000000 | 1.95050e-15 | 1.000000 |
| rad7          | 2.61198e-16 | 1.000000 | 2.61198e-16 | 1.000000 |
| rad1          | 1.25906e-16 | 1.000000 | 1.25906e-16 | 1.000000 |
| rad10         | 1.00418e-16 | 1.000000 | 1.00419e-16 | 1.000000 |
| rad11         | 6.41116e-17 | 1.000000 | 6.41117e-17 | 1.000000 |
| PAH3+H        | 2.76227e-17 | 1.000000 | 2.76227e-17 | 1.000000 |
| rad3          | 1.67709e-17 | 1.000000 | 1.67709e-17 | 1.000000 |
| rad59         | 1.27985e-17 | 1.000000 | 1.27985e-17 | 1.000000 |
| rad14         | 1.03900e-17 | 1.000000 | 1.03901e-17 | 1.000000 |
| rad4          | 8.52501e-18 | 1.000000 | 8.52502e-18 | 1.000000 |
| rad25         | 5.22923e-18 | 1.000000 | 5.22924e-18 | 1.000000 |
| rad50         | 1.67194e-18 | 1.000000 | 1.67194e-18 | 1.000000 |
| rad13         | 1.46070e-18 | 1.000000 | 1.46070e-18 | 1.000000 |
| rad27         | 6.23846e-19 | 1.000000 | 6.23847e-19 | 1.000000 |
| rad33         | 2.94890e-21 | 1.000000 | 2.94891e-21 | 1.000000 |
| rad19syn      | 8.11793e-22 | 1.000000 | 8.11794e-22 | 1.000000 |
| rad31         | 1.55429e-23 | 1.000000 | 1.55429e-23 | 1.000000 |
| rad20         | 4.82739e-25 | 1.000000 | 4.82739e-25 | 1.000000 |
| rad54         | 3.80819e-25 | 1.000000 | 3.80819e-25 | 1.000000 |
| rad21         | 3.80493e-25 | 1.000000 | 3.80493e-25 | 1.000000 |
| PAH10+CH3     | 2.48851e-25 | 1.000000 | 2.48851e-25 | 1.000000 |
| rad43         | 5.95378e-26 | 1.000000 | 5.95378e-26 | 1.000000 |
| rad52         | 5.03875e-26 | 1.000000 | 5.03875e-26 | 1.000000 |
| rad62         | 1.37871e-27 | 1.000000 | 1.37871e-27 | 1.000000 |
| rad18         | 1.23773e-27 | 1.000000 | 1.23773e-27 | 1.000000 |
| rad23         | 1.57266e-28 | 1.000000 | 1.57266e-28 | 1.000000 |
| rad22         | 8.58673e-29 | 1.000000 | 8.58673e-29 | 1.000000 |
| rad51         | 1.43630e-30 | 1.000000 | 1.43630e-30 | 1.000000 |
| rad45         | 1.27554e-30 | 1.000000 | 1.27555e-30 | 1.000000 |
| rad24         | 2.07408e-31 | 1.000000 | 2.07408e-31 | 1.000000 |
| rad36         | 7.90457e-32 | 1.000000 | 7.90457e-32 | 1.000000 |
| rad65         | 1.70796e-34 | 1.000000 | 1.70796e-34 | 1.000000 |
| rad70         | 1.18251e-37 | 1.000000 | 1.18251e-37 | 1.000000 |
| PhcycC3H3_A+H | 5.35275e-38 | 1.000000 | 5.35275e-38 | 1.000000 |
| rad55         | 2.86021e-38 | 1.000000 | 2.86022e-38 | 1.000000 |
| rad58         | 1.90250e-41 | 1.000000 | 1.90250e-41 | 1.000000 |
| PAH1+H        | 4.64355e-43 | 1.000000 | 4.64355e-43 | 1.000000 |
| rad34         | 3.45434e-45 | 1.000000 | 3.45435e-45 | 1.000000 |
| rad42         | 4.47800e-49 | 1.000000 | 4.47800e-49 | 1.000000 |
| rad41         | 9.57168e-50 | 1.000000 | 9.57169e-50 | 1.000000 |
| rad47         | 7.45868e-56 | 1.000000 | 7.45868e-56 | 1.000000 |

0.100000000E-06 Pa, 120.000000 K

| Rate constant      | True (fraction)        | Effective (fraction)   |
|--------------------|------------------------|------------------------|
| Total              | 4.24245e-20 (1.00 )    | 4.24245e-20 (1.00 )    |
| Formation of rad11 | 4.06372e-20 (0.958 )   | 4.06372e-20 (0.958 )   |
| Formation of rad6  | 1.76944e-21 (0.0417 )  | 1.76944e-21 (0.0417 )  |
| H-abstraction      | 1.78210e-23 (0.000420) | 1.78210e-23 (0.000420) |

| species            | PYtrue      | Cumul    | PYeffective | Cumul    |
|--------------------|-------------|----------|-------------|----------|
| Indene+H           | 0.982204    | 0.982204 | 0.982205    | 0.982205 |
| C2H2+PhCH2         | 0.0105004   | 0.992705 | 0.0105004   | 0.992706 |
| PhCCH+CH3          | 0.00347852  | 0.996183 | 0.00347852  | 0.996184 |
| PhCHCCH2+H         | 0.00205089  | 0.998234 | 0.00205089  | 0.998235 |
| PhCCCH3+H          | 0.00127860  | 0.999513 | 0.00127860  | 0.999514 |
| Benzene+2-propynyl | 0.000420064 | 0.999933 | 0.000420064 | 0.999934 |
| Ph+MeAc            | 4.08445e-05 | 0.999974 | 4.08445e-05 | 0.999975 |
| rad8               | 1.21637e-05 | 0.999986 | 1.21637e-05 | 0.999987 |
| rad9               | 6.91704e-06 | 0.999993 | 6.91705e-06 | 0.999994 |

|               |             |          |             |          |
|---------------|-------------|----------|-------------|----------|
| PAH7+H        | 4.22655e-06 | 0.999997 | 4.22655e-06 | 0.999998 |
| Phenyl+Allene | 9.95319e-07 | 0.999998 | 0.00000     | 0.999998 |
| rad30         | 6.20976e-07 | 0.999998 | 6.20977e-07 | 0.999998 |
| rad39         | 5.92479e-07 | 0.999999 | 5.92480e-07 | 0.999999 |
| rad12         | 4.97432e-07 | 1.000000 | 4.97432e-07 | 1.000000 |
| PAH9+H        | 1.32303e-07 | 1.000000 | 1.32303e-07 | 1.000000 |
| rad15         | 1.20674e-07 | 1.000000 | 1.20674e-07 | 1.000000 |
| rad35         | 6.65079e-08 | 1.000000 | 6.65080e-08 | 1.000000 |
| rad38         | 3.53957e-08 | 1.000000 | 3.53958e-08 | 1.000000 |
| PhCH2CCH+H    | 4.69867e-10 | 1.000000 | 4.69868e-10 | 1.000000 |
| rad46         | 3.12061e-10 | 1.000000 | 3.12061e-10 | 1.000000 |
| rad37         | 1.40299e-10 | 1.000000 | 1.40300e-10 | 1.000000 |
| rad60syn      | 1.62200e-11 | 1.000000 | 1.62200e-11 | 1.000000 |
| rad60anti     | 3.51562e-12 | 1.000000 | 3.51562e-12 | 1.000000 |
| rad6          | 2.69711e-12 | 1.000000 | 2.69712e-12 | 1.000000 |
| rad5          | 4.33869e-13 | 1.000000 | 4.33869e-13 | 1.000000 |
| rad28         | 2.75663e-13 | 1.000000 | 2.75664e-13 | 1.000000 |
| rad26         | 5.15197e-14 | 1.000000 | 5.15198e-14 | 1.000000 |
| rad2          | 1.61368e-15 | 1.000000 | 1.61368e-15 | 1.000000 |
| rad7          | 1.96808e-16 | 1.000000 | 1.96809e-16 | 1.000000 |
| PAH3+H        | 1.44940e-16 | 1.000000 | 1.44940e-16 | 1.000000 |
| rad1          | 1.04582e-16 | 1.000000 | 1.04582e-16 | 1.000000 |
| rad10         | 8.32954e-17 | 1.000000 | 8.32955e-17 | 1.000000 |
| rad59         | 6.43044e-17 | 1.000000 | 6.43045e-17 | 1.000000 |
| rad11         | 4.83444e-17 | 1.000000 | 4.83444e-17 | 1.000000 |
| rad3          | 1.45215e-17 | 1.000000 | 1.45215e-17 | 1.000000 |
| rad14         | 8.69227e-18 | 1.000000 | 8.69228e-18 | 1.000000 |
| rad50         | 7.56383e-18 | 1.000000 | 7.56384e-18 | 1.000000 |
| rad4          | 7.38945e-18 | 1.000000 | 7.38946e-18 | 1.000000 |
| rad25         | 4.40404e-18 | 1.000000 | 4.40405e-18 | 1.000000 |
| rad13         | 1.10174e-18 | 1.000000 | 1.10175e-18 | 1.000000 |
| rad27         | 5.29341e-19 | 1.000000 | 5.29341e-19 | 1.000000 |
| rad19syn      | 2.03478e-20 | 1.000000 | 2.03478e-20 | 1.000000 |
| rad33         | 2.25189e-21 | 1.000000 | 2.25189e-21 | 1.000000 |
| rad54         | 1.78868e-23 | 1.000000 | 1.78868e-23 | 1.000000 |
| rad31         | 1.65458e-23 | 1.000000 | 1.65458e-23 | 1.000000 |
| PAH10+CH3     | 1.18111e-23 | 1.000000 | 1.18111e-23 | 1.000000 |
| rad43         | 2.84069e-24 | 1.000000 | 2.84069e-24 | 1.000000 |
| rad52         | 1.13261e-24 | 1.000000 | 1.13261e-24 | 1.000000 |
| rad20         | 4.49636e-25 | 1.000000 | 4.49637e-25 | 1.000000 |
| rad21         | 3.55896e-25 | 1.000000 | 3.55896e-25 | 1.000000 |
| rad62         | 1.01744e-25 | 1.000000 | 1.01744e-25 | 1.000000 |
| rad18         | 1.12020e-27 | 1.000000 | 1.12020e-27 | 1.000000 |
| rad23         | 1.62508e-28 | 1.000000 | 1.62509e-28 | 1.000000 |
| rad51         | 1.05156e-28 | 1.000000 | 1.05156e-28 | 1.000000 |
| rad22         | 7.59700e-29 | 1.000000 | 7.59701e-29 | 1.000000 |
| rad70         | 3.03478e-29 | 1.000000 | 3.03479e-29 | 1.000000 |
| PhcycC3H3_A+H | 1.82703e-29 | 1.000000 | 1.82703e-29 | 1.000000 |
| rad55         | 1.01624e-29 | 1.000000 | 1.01625e-29 | 1.000000 |
| rad45         | 1.42730e-30 | 1.000000 | 1.42730e-30 | 1.000000 |
| rad24         | 2.12692e-31 | 1.000000 | 2.12692e-31 | 1.000000 |
| rad36         | 8.84460e-32 | 1.000000 | 8.84461e-32 | 1.000000 |
| rad65         | 3.61495e-32 | 1.000000 | 3.61495e-32 | 1.000000 |
| rad58         | 8.74392e-33 | 1.000000 | 8.74393e-33 | 1.000000 |
| PAH1+H        | 5.48720e-40 | 1.000000 | 5.48720e-40 | 1.000000 |
| rad34         | 4.15177e-42 | 1.000000 | 4.15177e-42 | 1.000000 |
| rad42         | 5.03723e-46 | 1.000000 | 5.03724e-46 | 1.000000 |
| rad41         | 8.80853e-47 | 1.000000 | 8.80854e-47 | 1.000000 |
| rad47         | 7.77706e-53 | 1.000000 | 7.77707e-53 | 1.000000 |

0.100000000E-06 Pa, 130.000000 K

=====

| Rate constant      | True (fraction)        | Effective (fraction)   |
|--------------------|------------------------|------------------------|
| Total              | 1.33719e-19 (1.00 )    | 1.33719e-19 (1.00 )    |
| Formation of rad11 | 1.26517e-19 (0.946 )   | 1.26517e-19 (0.946 )   |
| Formation of rad6  | 7.08974e-21 (0.0530 )  | 7.08973e-21 (0.0530 )  |
| H-abstraction      | 1.11864e-22 (0.000837) | 1.11864e-22 (0.000837) |

| species            | PYtrue      | Cumul    | PYeffective | Cumul    |
|--------------------|-------------|----------|-------------|----------|
| Indene+H           | 0.980905    | 0.980905 | 0.980906    | 0.980906 |
| C2H2+PhCH2         | 0.0109100   | 0.991815 | 0.0109100   | 0.991816 |
| PhCCH+CH3          | 0.00373004  | 0.995545 | 0.00373005  | 0.995546 |
| PhCHCCH2+H         | 0.00217629  | 0.997721 | 0.00217629  | 0.997722 |
| PhCCCH3+H          | 0.00136406  | 0.999085 | 0.00136406  | 0.999086 |
| Benzene+2-propynyl | 0.000836559 | 0.999922 | 0.000836560 | 0.999923 |
| Ph+MeAc            | 4.92723e-05 | 0.999971 | 4.92724e-05 | 0.999972 |
| rad8               | 1.32488e-05 | 0.999984 | 1.32489e-05 | 0.999985 |
| rad9               | 7.79207e-06 | 0.999992 | 7.79208e-06 | 0.999993 |

|               |             |          |             |          |
|---------------|-------------|----------|-------------|----------|
| PAH7+H        | 4.80608e-06 | 0.999997 | 4.80608e-06 | 0.999998 |
| Phenyl+Allene | 1.38822e-06 | 0.999998 | 0.00000     | 0.999998 |
| rad39         | 7.04644e-07 | 0.999999 | 7.04645e-07 | 0.999998 |
| rad30         | 6.56250e-07 | 1.000000 | 6.56251e-07 | 0.999999 |
| rad12         | 5.61279e-07 | 1.000000 | 5.61280e-07 | 1.000000 |
| PAH9+H        | 1.41155e-07 | 1.000000 | 1.41155e-07 | 1.000000 |
| rad15         | 1.29204e-07 | 1.000000 | 1.29204e-07 | 1.000000 |
| rad35         | 7.04124e-08 | 1.000000 | 7.04125e-08 | 1.000000 |
| rad38         | 3.80122e-08 | 1.000000 | 3.80123e-08 | 1.000000 |
| PhCH2CCH+H    | 1.19678e-09 | 1.000000 | 1.19678e-09 | 1.000000 |
| rad37         | 3.52432e-10 | 1.000000 | 3.52433e-10 | 1.000000 |
| rad46         | 3.52300e-10 | 1.000000 | 3.52300e-10 | 1.000000 |
| rad60syn      | 2.06760e-11 | 1.000000 | 2.06760e-11 | 1.000000 |
| rad60anti     | 4.89731e-12 | 1.000000 | 4.89732e-12 | 1.000000 |
| rad6          | 2.06018e-12 | 1.000000 | 2.06018e-12 | 1.000000 |
| rad5          | 1.36588e-12 | 1.000000 | 1.36588e-12 | 1.000000 |
| rad28         | 2.22135e-13 | 1.000000 | 2.22135e-13 | 1.000000 |
| rad26         | 4.21702e-14 | 1.000000 | 4.21703e-14 | 1.000000 |
| rad2          | 1.36671e-15 | 1.000000 | 1.36671e-15 | 1.000000 |
| PAH3+H        | 5.97636e-16 | 1.000000 | 5.97637e-16 | 1.000000 |
| rad59         | 2.54057e-16 | 1.000000 | 2.54057e-16 | 1.000000 |
| rad7          | 1.50595e-16 | 1.000000 | 1.50595e-16 | 1.000000 |
| rad1          | 8.89608e-17 | 1.000000 | 8.89609e-17 | 1.000000 |
| rad10         | 7.06814e-17 | 1.000000 | 7.06815e-17 | 1.000000 |
| rad11         | 3.70229e-17 | 1.000000 | 3.70230e-17 | 1.000000 |
| rad50         | 2.77956e-17 | 1.000000 | 2.77956e-17 | 1.000000 |
| rad3          | 1.28120e-17 | 1.000000 | 1.28120e-17 | 1.000000 |
| rad14         | 7.31193e-18 | 1.000000 | 7.31194e-18 | 1.000000 |
| rad4          | 6.52715e-18 | 1.000000 | 6.52716e-18 | 1.000000 |
| rad25         | 3.73034e-18 | 1.000000 | 3.73034e-18 | 1.000000 |
| rad13         | 8.43949e-19 | 1.000000 | 8.43950e-19 | 1.000000 |
| rad27         | 4.51954e-19 | 1.000000 | 4.51954e-19 | 1.000000 |
| rad19syn      | 3.10953e-19 | 1.000000 | 3.10954e-19 | 1.000000 |
| rad33         | 1.74912e-21 | 1.000000 | 1.74912e-21 | 1.000000 |
| rad54         | 4.59070e-22 | 1.000000 | 4.59071e-22 | 1.000000 |
| PAH10+CH3     | 3.05744e-22 | 1.000000 | 3.05745e-22 | 1.000000 |
| rad43         | 7.38551e-23 | 1.000000 | 7.38552e-23 | 1.000000 |
| rad31         | 1.80115e-23 | 1.000000 | 1.80115e-23 | 1.000000 |
| rad52         | 1.58221e-23 | 1.000000 | 1.58221e-23 | 1.000000 |
| rad62         | 3.62270e-24 | 1.000000 | 3.62270e-24 | 1.000000 |
| rad20         | 4.23142e-25 | 1.000000 | 4.23143e-25 | 1.000000 |
| rad21         | 3.36416e-25 | 1.000000 | 3.36416e-25 | 1.000000 |
| rad51         | 3.73372e-27 | 1.000000 | 3.73373e-27 | 1.000000 |
| rad70         | 2.72512e-27 | 1.000000 | 2.72513e-27 | 1.000000 |
| PhcycC3H3_A+H | 2.14621e-27 | 1.000000 | 2.14621e-27 | 1.000000 |
| rad18         | 1.02253e-27 | 1.000000 | 1.02253e-27 | 1.000000 |
| rad55         | 9.74054e-28 | 1.000000 | 9.74056e-28 | 1.000000 |
| rad23         | 1.79153e-28 | 1.000000 | 1.79154e-28 | 1.000000 |
| rad22         | 6.77573e-29 | 1.000000 | 6.77574e-29 | 1.000000 |
| rad65         | 2.45305e-30 | 1.000000 | 2.45306e-30 | 1.000000 |
| rad45         | 1.68470e-30 | 1.000000 | 1.68470e-30 | 1.000000 |
| rad58         | 1.13111e-30 | 1.000000 | 1.13111e-30 | 1.000000 |
| rad24         | 2.21213e-31 | 1.000000 | 2.21214e-31 | 1.000000 |
| rad36         | 1.04413e-31 | 1.000000 | 1.04413e-31 | 1.000000 |
| PAH1+H        | 4.51062e-37 | 1.000000 | 4.51063e-37 | 1.000000 |
| rad34         | 3.47429e-39 | 1.000000 | 3.47430e-39 | 1.000000 |
| rad42         | 4.19204e-43 | 1.000000 | 4.19205e-43 | 1.000000 |
| rad41         | 6.41181e-44 | 1.000000 | 6.41182e-44 | 1.000000 |
| rad47         | 3.58533e-44 | 1.000000 | 3.58534e-44 | 1.000000 |

0.100000000E-06 Pa, 140.000000 K

=====

| Rate constant      | True (fraction)        | Effective (fraction)   |
|--------------------|------------------------|------------------------|
| Total              | 3.59582e-19 (1.00 )    | 3.59581e-19 (1.00 )    |
| Formation of rad11 | 3.35703e-19 (0.934 )   | 3.35702e-19 (0.934 )   |
| Formation of rad6  | 2.33415e-20 (0.0649 )  | 2.33414e-20 (0.0649 )  |
| H-abstraction      | 5.37685e-22 (0.00150 ) | 5.37685e-22 (0.00150 ) |

| species            | PYtrue      | Cumul    | PYeffective | Cumul    |
|--------------------|-------------|----------|-------------|----------|
| Indene+H           | 0.979275    | 0.979275 | 0.979277    | 0.979277 |
| C2H2+PhCH2         | 0.0113554   | 0.990631 | 0.0113554   | 0.990633 |
| PhCCH+CH3          | 0.00400888  | 0.994640 | 0.00400889  | 0.994642 |
| PhCHCCH2+H         | 0.00231392  | 0.996954 | 0.00231393  | 0.996956 |
| Benzene+2-propynyl | 0.00149531  | 0.998449 | 0.00149531  | 0.998451 |
| PhCCCH3+H          | 0.00145795  | 0.999907 | 0.00145796  | 0.999909 |
| Ph+MeAc            | 5.94544e-05 | 0.999966 | 5.94545e-05 | 0.999968 |
| rad8               | 1.44642e-05 | 0.999981 | 1.44642e-05 | 0.999983 |
| rad9               | 8.80699e-06 | 0.999990 | 8.80701e-06 | 0.999992 |

|               |             |          |             |          |
|---------------|-------------|----------|-------------|----------|
| PAH7+H        | 5.48527e-06 | 0.999995 | 5.48528e-06 | 0.999997 |
| Phenyl+Allene | 1.91223e-06 | 0.999997 | 0.00000     | 0.999997 |
| rad39         | 8.39671e-07 | 0.999998 | 8.39673e-07 | 0.999998 |
| rad30         | 6.95380e-07 | 0.999999 | 6.95381e-07 | 0.999999 |
| rad12         | 6.34619e-07 | 0.999999 | 6.34620e-07 | 0.999999 |
| PAH9+H        | 1.51131e-07 | 0.999999 | 1.51132e-07 | 0.999999 |
| rad15         | 1.38790e-07 | 1.000000 | 1.38791e-07 | 1.000000 |
| rad35         | 7.47738e-08 | 1.000000 | 7.47740e-08 | 1.000000 |
| rad38         | 4.09810e-08 | 1.000000 | 4.09810e-08 | 1.000000 |
| PhCH2CCH+H    | 2.73836e-09 | 1.000000 | 2.73836e-09 | 1.000000 |
| rad37         | 7.72161e-10 | 1.000000 | 7.72163e-10 | 1.000000 |
| rad46         | 4.00193e-10 | 1.000000 | 4.00194e-10 | 1.000000 |
| rad60syn      | 2.63995e-11 | 1.000000 | 2.63996e-11 | 1.000000 |
| rad60anti     | 6.71524e-12 | 1.000000 | 6.71525e-12 | 1.000000 |
| rad5          | 3.71118e-12 | 1.000000 | 3.71119e-12 | 1.000000 |
| rad6          | 1.59330e-12 | 1.000000 | 1.59330e-12 | 1.000000 |
| rad28         | 1.80147e-13 | 1.000000 | 1.80148e-13 | 1.000000 |
| rad26         | 3.46870e-14 | 1.000000 | 3.46871e-14 | 1.000000 |
| PAH3+H        | 2.04390e-15 | 1.000000 | 2.04391e-15 | 1.000000 |
| rad2          | 1.20641e-15 | 1.000000 | 1.20641e-15 | 1.000000 |
| rad59         | 8.33650e-16 | 1.000000 | 8.33652e-16 | 1.000000 |
| rad7          | 1.16679e-16 | 1.000000 | 1.16680e-16 | 1.000000 |
| rad50         | 8.70097e-17 | 1.000000 | 8.70099e-17 | 1.000000 |
| rad1          | 7.88989e-17 | 1.000000 | 7.88990e-17 | 1.000000 |
| rad10         | 6.17039e-17 | 1.000000 | 6.17040e-17 | 1.000000 |
| rad11         | 2.87104e-17 | 1.000000 | 2.87104e-17 | 1.000000 |
| rad3          | 1.17351e-17 | 1.000000 | 1.17351e-17 | 1.000000 |
| rad14         | 6.17747e-18 | 1.000000 | 6.17748e-18 | 1.000000 |
| rad4          | 5.98620e-18 | 1.000000 | 5.98621e-18 | 1.000000 |
| rad19syn      | 3.22743e-18 | 1.000000 | 3.22743e-18 | 1.000000 |
| rad25         | 3.17412e-18 | 1.000000 | 3.17413e-18 | 1.000000 |
| rad13         | 6.54633e-19 | 1.000000 | 6.54634e-19 | 1.000000 |
| rad27         | 3.87822e-19 | 1.000000 | 3.87822e-19 | 1.000000 |
| rad54         | 7.40437e-21 | 1.000000 | 7.40439e-21 | 1.000000 |
| PAH10+CH3     | 4.96808e-21 | 1.000000 | 4.96809e-21 | 1.000000 |
| rad33         | 1.37813e-21 | 1.000000 | 1.37813e-21 | 1.000000 |
| rad43         | 1.20454e-21 | 1.000000 | 1.20454e-21 | 1.000000 |
| rad52         | 1.52548e-22 | 1.000000 | 1.52549e-22 | 1.000000 |
| rad62         | 7.69039e-23 | 1.000000 | 7.69041e-23 | 1.000000 |
| rad31         | 2.00296e-23 | 1.000000 | 2.00297e-23 | 1.000000 |
| rad20         | 4.01772e-25 | 1.000000 | 4.01773e-25 | 1.000000 |
| rad21         | 3.20925e-25 | 1.000000 | 3.20926e-25 | 1.000000 |
| rad70         | 1.16345e-25 | 1.000000 | 1.16345e-25 | 1.000000 |
| PhcycC3H3_A+H | 1.06484e-25 | 1.000000 | 1.06485e-25 | 1.000000 |
| rad51         | 7.94722e-26 | 1.000000 | 7.94724e-26 | 1.000000 |
| rad55         | 4.37363e-26 | 1.000000 | 4.37364e-26 | 1.000000 |
| rad18         | 9.40016e-28 | 1.000000 | 9.40018e-28 | 1.000000 |
| rad23         | 2.11110e-28 | 1.000000 | 2.11110e-28 | 1.000000 |
| PAH1+H        | 1.72869e-28 | 1.000000 | 1.72869e-28 | 1.000000 |
| rad65         | 8.26211e-29 | 1.000000 | 8.26213e-29 | 1.000000 |
| rad22         | 6.08219e-29 | 1.000000 | 6.08220e-29 | 1.000000 |
| rad58         | 6.05541e-29 | 1.000000 | 6.05542e-29 | 1.000000 |
| rad34         | 4.12810e-30 | 1.000000 | 4.12811e-30 | 1.000000 |
| rad45         | 2.13165e-30 | 1.000000 | 2.13166e-30 | 1.000000 |
| rad24         | 2.33054e-31 | 1.000000 | 2.33055e-31 | 1.000000 |
| rad36         | 1.32161e-31 | 1.000000 | 1.32161e-31 | 1.000000 |
| rad42         | 1.07647e-39 | 1.000000 | 1.07647e-39 | 1.000000 |
| rad41         | 1.50183e-40 | 1.000000 | 1.50183e-40 | 1.000000 |
| rad47         | 2.48364e-42 | 1.000000 | 2.48364e-42 | 1.000000 |

0.100000000E-06 Pa, 150.000000 K

=====

| Rate constant      | True (fraction)        | Effective (fraction)   |
|--------------------|------------------------|------------------------|
| Total              | 8.51464e-19 (1.00 )    | 8.51462e-19 (1.00 )    |
| Formation of rad11 | 7.83711e-19 (0.920 )   | 7.83709e-19 (0.920 )   |
| Formation of rad6  | 6.56651e-20 (0.0771 )  | 6.56649e-20 (0.0771 )  |
| H-abstraction      | 2.08816e-21 (0.00245 ) | 2.08816e-21 (0.00245 ) |

| species            | PYtrue      | Cumul    | PYeffective | Cumul    |
|--------------------|-------------|----------|-------------|----------|
| Indene+H           | 0.977259    | 0.977259 | 0.977261    | 0.977261 |
| C2H2+PhCH2         | 0.0118379   | 0.989097 | 0.0118379   | 0.989099 |
| PhCCH+CH3          | 0.00431640  | 0.993414 | 0.00431641  | 0.993416 |
| PhCHCCH2+H         | 0.00246419  | 0.995878 | 0.00246419  | 0.995880 |
| Benzene+2-propynyl | 0.00245244  | 0.998330 | 0.00245245  | 0.998332 |
| PhCCCH3+H          | 0.00156051  | 0.999891 | 0.00156051  | 0.999893 |
| Ph+MeAc            | 7.16766e-05 | 0.999963 | 7.16768e-05 | 0.999965 |
| rad8               | 1.58181e-05 | 0.999978 | 1.58182e-05 | 0.999980 |
| rad9               | 9.97996e-06 | 0.999988 | 9.97996e-06 | 0.999990 |

|               |             |          |             |          |
|---------------|-------------|----------|-------------|----------|
| PAH7+H        | 6.27886e-06 | 0.999995 | 6.27888e-06 | 0.999997 |
| Phenyl+Allene | 2.60480e-06 | 0.999997 | 0.00000     | 0.999997 |
| rad39         | 1.00154e-06 | 0.999998 | 1.00154e-06 | 0.999998 |
| rad30         | 7.38645e-07 | 0.999999 | 7.38647e-07 | 0.999998 |
| rad12         | 7.18406e-07 | 1.000000 | 7.18408e-07 | 0.999999 |
| PAH9+H        | 1.62352e-07 | 1.000000 | 1.62352e-07 | 0.999999 |
| rad15         | 1.49535e-07 | 1.000000 | 1.49535e-07 | 0.999999 |
| rad35         | 7.96324e-08 | 1.000000 | 7.96327e-08 | 0.999999 |
| rad38         | 4.43432e-08 | 1.000000 | 4.43433e-08 | 1.000000 |
| PhCH2CCH+H    | 5.75222e-09 | 1.000000 | 5.75224e-09 | 1.000000 |
| rad37         | 1.51871e-09 | 1.000000 | 1.51871e-09 | 1.000000 |
| rad46         | 4.57168e-10 | 1.000000 | 4.57170e-10 | 1.000000 |
| rad60syn      | 3.37159e-11 | 1.000000 | 3.37160e-11 | 1.000000 |
| rad60anti     | 9.09665e-12 | 1.000000 | 9.09668e-12 | 1.000000 |
| rad5          | 8.96569e-12 | 1.000000 | 8.96571e-12 | 1.000000 |
| rad6          | 1.24487e-12 | 1.000000 | 1.24488e-12 | 1.000000 |
| rad28         | 1.46831e-13 | 1.000000 | 1.46832e-13 | 1.000000 |
| rad26         | 2.86403e-14 | 1.000000 | 2.86404e-14 | 1.000000 |
| PAH3+H        | 6.03130e-15 | 1.000000 | 6.03132e-15 | 1.000000 |
| rad59         | 2.36428e-15 | 1.000000 | 2.36428e-15 | 1.000000 |
| rad2          | 1.07101e-15 | 1.000000 | 1.07101e-15 | 1.000000 |
| rad50         | 2.40151e-16 | 1.000000 | 2.40152e-16 | 1.000000 |
| rad7          | 9.13353e-17 | 1.000000 | 9.13355e-17 | 1.000000 |
| rad1          | 7.04042e-17 | 1.000000 | 7.04044e-17 | 1.000000 |
| rad10         | 5.56272e-17 | 1.000000 | 5.56274e-17 | 1.000000 |
| rad19syn      | 2.46149e-17 | 1.000000 | 2.46149e-17 | 1.000000 |
| rad11         | 2.24954e-17 | 1.000000 | 2.24954e-17 | 1.000000 |
| rad3          | 1.11120e-17 | 1.000000 | 1.11120e-17 | 1.000000 |
| rad4          | 5.67627e-18 | 1.000000 | 5.67628e-18 | 1.000000 |
| rad14         | 5.23719e-18 | 1.000000 | 5.23720e-18 | 1.000000 |
| rad25         | 2.71086e-18 | 1.000000 | 2.71087e-18 | 1.000000 |
| rad13         | 5.13054e-19 | 1.000000 | 5.13055e-19 | 1.000000 |
| rad27         | 3.34170e-19 | 1.000000 | 3.34170e-19 | 1.000000 |
| rad54         | 8.25298e-20 | 1.000000 | 8.25300e-20 | 1.000000 |
| PAH10+CH3     | 5.57277e-20 | 1.000000 | 5.57278e-20 | 1.000000 |
| rad43         | 1.35491e-20 | 1.000000 | 1.35491e-20 | 1.000000 |
| rad33         | 1.09927e-21 | 1.000000 | 1.09927e-21 | 1.000000 |
| rad52         | 1.09591e-21 | 1.000000 | 1.09591e-21 | 1.000000 |
| rad62         | 1.08552e-21 | 1.000000 | 1.08552e-21 | 1.000000 |
| rad31         | 2.27398e-23 | 1.000000 | 2.27399e-23 | 1.000000 |
| rad70         | 2.82757e-24 | 1.000000 | 2.82758e-24 | 1.000000 |
| PhcycC3H3_A+H | 2.82696e-24 | 1.000000 | 2.82697e-24 | 1.000000 |
| rad51         | 1.13153e-24 | 1.000000 | 1.13153e-24 | 1.000000 |
| rad55         | 1.09836e-24 | 1.000000 | 1.09836e-24 | 1.000000 |
| rad20         | 3.84514e-25 | 1.000000 | 3.84515e-25 | 1.000000 |
| rad21         | 3.08661e-25 | 1.000000 | 3.08662e-25 | 1.000000 |
| PAH1+H        | 8.47528e-27 | 1.000000 | 8.47531e-27 | 1.000000 |
| rad65         | 1.71245e-27 | 1.000000 | 1.71245e-27 | 1.000000 |
| rad58         | 1.68999e-27 | 1.000000 | 1.69000e-27 | 1.000000 |
| rad18         | 8.69341e-28 | 1.000000 | 8.69343e-28 | 1.000000 |
| rad23         | 2.65806e-28 | 1.000000 | 2.65806e-28 | 1.000000 |
| rad34         | 2.52727e-28 | 1.000000 | 2.52727e-28 | 1.000000 |
| rad22         | 5.48824e-29 | 1.000000 | 5.48826e-29 | 1.000000 |
| rad45         | 2.94761e-30 | 1.000000 | 2.94762e-30 | 1.000000 |
| rad42         | 7.85452e-31 | 1.000000 | 7.85454e-31 | 1.000000 |
| rad24         | 2.48495e-31 | 1.000000 | 2.48496e-31 | 1.000000 |
| rad36         | 1.82861e-31 | 1.000000 | 1.82861e-31 | 1.000000 |
| rad41         | 1.60818e-31 | 1.000000 | 1.60819e-31 | 1.000000 |
| rad47         | 7.59466e-41 | 1.000000 | 7.59468e-41 | 1.000000 |

0.100000000E-06 Pa, 160.000000 K

=====

| Rate constant      | True (fraction)        | Effective (fraction)   |
|--------------------|------------------------|------------------------|
| Total              | 1.81800e-18 (1.00 )    | 1.81799e-18 (1.00 )    |
| Formation of rad11 | 1.64862e-18 (0.907 )   | 1.64862e-18 (0.907 )   |
| Formation of rad6  | 1.62558e-19 (0.0894 )  | 1.62558e-19 (0.0894 )  |
| H-abstraction      | 6.82130e-21 (0.00375 ) | 6.82130e-21 (0.00375 ) |

| species            | PYtrue      | Cumul    | PYeffective | Cumul    |
|--------------------|-------------|----------|-------------|----------|
| Indene+H           | 0.974807    | 0.974807 | 0.974811    | 0.974811 |
| C2H2+PhCH2         | 0.0123588   | 0.987165 | 0.0123588   | 0.987169 |
| PhCCH+CH3          | 0.00465401  | 0.991819 | 0.00465402  | 0.991823 |
| Benzene+2-propynyl | 0.00375209  | 0.995572 | 0.00375210  | 0.995576 |
| PhCHCCH2+H         | 0.00262746  | 0.998199 | 0.00262746  | 0.998203 |
| PhCCCH3+H          | 0.00167196  | 0.999871 | 0.00167197  | 0.999875 |
| Ph+MeAc            | 8.62597e-05 | 0.999957 | 8.62600e-05 | 0.999961 |
| rad8               | 1.73191e-05 | 0.999975 | 1.73192e-05 | 0.999979 |
| rad9               | 1.13312e-05 | 0.999986 | 1.13312e-05 | 0.999990 |



|               |             |          |             |          |
|---------------|-------------|----------|-------------|----------|
| PAH7+H        | 7.20380e-06 | 0.999993 | 7.20382e-06 | 0.999997 |
| Phenyl+Allene | 3.51284e-06 | 0.999997 | 0.00000     | 0.999997 |
| rad39         | 1.19487e-06 | 0.999998 | 1.19488e-06 | 0.999998 |
| rad12         | 8.13658e-07 | 0.999999 | 8.13661e-07 | 0.999999 |
| rad30         | 7.86364e-07 | 0.999999 | 7.86367e-07 | 1.000000 |
| PAH9+H        | 1.74954e-07 | 1.000000 | 1.74955e-07 | 1.000000 |
| rad15         | 1.61553e-07 | 1.000000 | 1.61554e-07 | 1.000000 |
| rad35         | 8.50354e-08 | 1.000000 | 8.50357e-08 | 1.000000 |
| rad38         | 4.81464e-08 | 1.000000 | 4.81466e-08 | 1.000000 |
| PhCH2CCH+H    | 1.12738e-08 | 1.000000 | 1.12739e-08 | 1.000000 |
| rad37         | 2.73995e-09 | 1.000000 | 2.73996e-09 | 1.000000 |
| rad46         | 5.24960e-10 | 1.000000 | 5.24962e-10 | 1.000000 |
| rad60syn      | 4.30320e-11 | 1.000000 | 4.30321e-11 | 1.000000 |
| rad5          | 1.96898e-11 | 1.000000 | 1.96899e-11 | 1.000000 |
| rad60anti     | 1.22034e-11 | 1.000000 | 1.22034e-11 | 1.000000 |
| rad6          | 9.80939e-13 | 1.000000 | 9.80942e-13 | 1.000000 |
| rad28         | 1.20153e-13 | 1.000000 | 1.20154e-13 | 1.000000 |
| rad26         | 2.37180e-14 | 1.000000 | 2.37180e-14 | 1.000000 |
| PAH3+H        | 1.58159e-14 | 1.000000 | 1.58160e-14 | 1.000000 |
| rad59         | 5.96954e-15 | 1.000000 | 5.96956e-15 | 1.000000 |
| rad2          | 1.01326e-15 | 1.000000 | 1.01326e-15 | 1.000000 |
| rad50         | 5.99510e-16 | 1.000000 | 5.99512e-16 | 1.000000 |
| rad19syn      | 1.46313e-16 | 1.000000 | 1.46314e-16 | 1.000000 |
| rad7          | 7.21105e-17 | 1.000000 | 7.21108e-17 | 1.000000 |
| rad1          | 6.69807e-17 | 1.000000 | 6.69810e-17 | 1.000000 |
| rad10         | 5.13198e-17 | 1.000000 | 5.13200e-17 | 1.000000 |
| rad11         | 1.77784e-17 | 1.000000 | 1.77785e-17 | 1.000000 |
| rad3          | 1.02217e-17 | 1.000000 | 1.02217e-17 | 1.000000 |
| rad4          | 5.22949e-18 | 1.000000 | 5.22951e-18 | 1.000000 |
| rad14         | 4.45262e-18 | 1.000000 | 4.45264e-18 | 1.000000 |
| rad25         | 2.32231e-18 | 1.000000 | 2.32232e-18 | 1.000000 |
| rad54         | 6.82323e-19 | 1.000000 | 6.82325e-19 | 1.000000 |
| PAH10+CH3     | 4.63169e-19 | 1.000000 | 4.63171e-19 | 1.000000 |
| rad13         | 4.05577e-19 | 1.000000 | 4.05578e-19 | 1.000000 |
| rad27         | 2.88944e-19 | 1.000000 | 2.88945e-19 | 1.000000 |
| rad43         | 1.12798e-19 | 1.000000 | 1.12798e-19 | 1.000000 |
| rad62         | 1.10170e-20 | 1.000000 | 1.10170e-20 | 1.000000 |
| rad52         | 6.21217e-21 | 1.000000 | 6.21219e-21 | 1.000000 |
| rad33         | 8.86414e-22 | 1.000000 | 8.86417e-22 | 1.000000 |
| PhcycC3H3_A+H | 4.94897e-23 | 1.000000 | 4.94898e-23 | 1.000000 |
| rad70         | 4.58079e-23 | 1.000000 | 4.58080e-23 | 1.000000 |
| rad31         | 2.63465e-23 | 1.000000 | 2.63466e-23 | 1.000000 |
| rad55         | 1.82891e-23 | 1.000000 | 1.82891e-23 | 1.000000 |
| rad51         | 1.16593e-23 | 1.000000 | 1.16593e-23 | 1.000000 |
| rad20         | 3.70657e-25 | 1.000000 | 3.70658e-25 | 1.000000 |
| rad21         | 2.99093e-25 | 1.000000 | 2.99094e-25 | 1.000000 |
| PAH1+H        | 2.26749e-25 | 1.000000 | 2.26750e-25 | 1.000000 |
| rad58         | 3.08150e-26 | 1.000000 | 3.08151e-26 | 1.000000 |
| rad65         | 2.43580e-26 | 1.000000 | 2.43581e-26 | 1.000000 |
| rad34         | 7.87306e-27 | 1.000000 | 7.87309e-27 | 1.000000 |
| rad18         | 8.08151e-28 | 1.000000 | 8.08154e-28 | 1.000000 |
| rad23         | 3.56826e-28 | 1.000000 | 3.56827e-28 | 1.000000 |
| rad22         | 4.97379e-29 | 1.000000 | 4.97380e-29 | 1.000000 |
| rad42         | 4.07683e-29 | 1.000000 | 4.07684e-29 | 1.000000 |
| rad41         | 9.77891e-30 | 1.000000 | 9.77894e-30 | 1.000000 |
| rad45         | 4.24586e-30 | 1.000000 | 4.24587e-30 | 1.000000 |
| rad24         | 2.68013e-31 | 1.000000 | 2.68014e-31 | 1.000000 |
| rad36         | 2.63625e-31 | 1.000000 | 2.63626e-31 | 1.000000 |
| rad47         | 1.41734e-39 | 1.000000 | 1.41734e-39 | 1.000000 |

0.100000000E-06 Pa, 170.000000 K

=====

| Rate constant      | True (fraction)        | Effective (fraction)   |
|--------------------|------------------------|------------------------|
| Total              | 3.56414e-18 (1.00 )    | 3.56412e-18 (1.00 )    |
| Formation of rad11 | 3.18264e-18 (0.893 )   | 3.18262e-18 (0.893 )   |
| Formation of rad6  | 3.62173e-19 (0.102 )   | 3.62171e-19 (0.102 )   |
| H-abstraction      | 1.93278e-20 (0.00542 ) | 1.93278e-20 (0.00542 ) |

| species            | PYtrue      | Cumul    | PYeffective | Cumul    |
|--------------------|-------------|----------|-------------|----------|
| Indene+H           | 0.971886    | 0.971886 | 0.971890    | 0.971890 |
| C2H2+PhCH2         | 0.0129197   | 0.984806 | 0.0129198   | 0.984810 |
| Benzene+2-propynyl | 0.00542285  | 0.990228 | 0.00542288  | 0.990232 |
| PhCCH+CH3          | 0.00502322  | 0.995252 | 0.00502324  | 0.995256 |
| PhCHCCH2+H         | 0.00280414  | 0.998056 | 0.00280415  | 0.998060 |
| PhCCCH3+H          | 0.00179251  | 0.999848 | 0.00179252  | 0.999852 |
| Ph+MeAc            | 0.000103560 | 0.999952 | 0.000103561 | 0.999956 |
| rad8               | 1.89757e-05 | 0.999971 | 1.89758e-05 | 0.999975 |
| rad9               | 1.28840e-05 | 0.999984 | 1.28840e-05 | 0.999988 |

|               |             |          |             |          |
|---------------|-------------|----------|-------------|----------|
| PAH7+H        | 8.27954e-06 | 0.999992 | 8.27958e-06 | 0.999996 |
| Phenyl+Allene | 4.69486e-06 | 0.999997 | 0.00000     | 0.999996 |
| rad39         | 1.42506e-06 | 0.999998 | 1.42507e-06 | 0.999997 |
| rad12         | 9.21445e-07 | 0.999999 | 9.21450e-07 | 0.999998 |
| rad30         | 8.38901e-07 | 1.000000 | 8.38905e-07 | 0.999999 |
| PAH9+H        | 1.89100e-07 | 1.000000 | 1.89101e-07 | 0.999999 |
| rad15         | 1.74975e-07 | 1.000000 | 1.74976e-07 | 1.000000 |
| rad35         | 9.10373e-08 | 1.000000 | 9.10378e-08 | 1.000000 |
| rad38         | 5.24466e-08 | 1.000000 | 5.24468e-08 | 1.000000 |
| PhCH2CCH+H    | 2.08705e-08 | 1.000000 | 2.08706e-08 | 1.000000 |
| rad37         | 4.60959e-09 | 1.000000 | 4.60961e-09 | 1.000000 |
| rad46         | 6.05673e-10 | 1.000000 | 6.05676e-10 | 1.000000 |
| rad60syn      | 5.48555e-11 | 1.000000 | 5.48558e-11 | 1.000000 |
| rad5          | 3.99752e-11 | 1.000000 | 3.99754e-11 | 1.000000 |
| rad60anti     | 1.62405e-11 | 1.000000 | 1.62405e-11 | 1.000000 |
| rad6          | 7.78520e-13 | 1.000000 | 7.78524e-13 | 1.000000 |
| rad28         | 9.86352e-14 | 1.000000 | 9.86357e-14 | 1.000000 |
| PAH3+H        | 3.76907e-14 | 1.000000 | 3.76909e-14 | 1.000000 |
| rad26         | 1.96873e-14 | 1.000000 | 1.96874e-14 | 1.000000 |
| rad59         | 1.37229e-14 | 1.000000 | 1.37229e-14 | 1.000000 |
| rad50         | 1.37985e-15 | 1.000000 | 1.37986e-15 | 1.000000 |
| rad2          | 9.01248e-16 | 1.000000 | 9.01252e-16 | 1.000000 |
| rad19syn      | 7.08948e-16 | 1.000000 | 7.08951e-16 | 1.000000 |
| rad1          | 5.99391e-17 | 1.000000 | 5.99394e-17 | 1.000000 |
| rad7          | 5.73454e-17 | 1.000000 | 5.73457e-17 | 1.000000 |
| rad10         | 4.73840e-17 | 1.000000 | 4.73842e-17 | 1.000000 |
| rad11         | 1.41535e-17 | 1.000000 | 1.41536e-17 | 1.000000 |
| rad3          | 1.02712e-17 | 1.000000 | 1.02712e-17 | 1.000000 |
| rad4          | 5.26362e-18 | 1.000000 | 5.26364e-18 | 1.000000 |
| rad54         | 4.41605e-18 | 1.000000 | 4.41607e-18 | 1.000000 |
| rad14         | 3.79448e-18 | 1.000000 | 3.79449e-18 | 1.000000 |
| PAH10+CH3     | 3.01001e-18 | 1.000000 | 3.01003e-18 | 1.000000 |
| rad25         | 1.99460e-18 | 1.000000 | 1.99461e-18 | 1.000000 |
| rad43         | 7.33358e-19 | 1.000000 | 7.33361e-19 | 1.000000 |
| rad13         | 3.22961e-19 | 1.000000 | 3.22963e-19 | 1.000000 |
| rad27         | 2.50586e-19 | 1.000000 | 2.50587e-19 | 1.000000 |
| rad62         | 8.52798e-20 | 1.000000 | 8.52803e-20 | 1.000000 |
| rad52         | 2.90265e-20 | 1.000000 | 2.90266e-20 | 1.000000 |
| rad33         | 7.21846e-22 | 1.000000 | 7.21850e-22 | 1.000000 |
| PhcycC3H3_A+H | 6.18575e-22 | 1.000000 | 6.18578e-22 | 1.000000 |
| rad70         | 5.33446e-22 | 1.000000 | 5.33448e-22 | 1.000000 |
| rad55         | 2.18165e-22 | 1.000000 | 2.18166e-22 | 1.000000 |
| rad51         | 9.22228e-23 | 1.000000 | 9.22232e-23 | 1.000000 |
| rad31         | 3.11440e-23 | 1.000000 | 3.11441e-23 | 1.000000 |
| PAH1+H        | 3.94436e-24 | 1.000000 | 3.94438e-24 | 1.000000 |
| rad58         | 3.99313e-25 | 1.000000 | 3.99315e-25 | 1.000000 |
| rad20         | 3.59702e-25 | 1.000000 | 3.59704e-25 | 1.000000 |
| rad21         | 2.91853e-25 | 1.000000 | 2.91855e-25 | 1.000000 |
| rad65         | 2.54727e-25 | 1.000000 | 2.54729e-25 | 1.000000 |
| rad34         | 1.50323e-25 | 1.000000 | 1.50324e-25 | 1.000000 |
| rad42         | 1.01747e-27 | 1.000000 | 1.01748e-27 | 1.000000 |
| rad18         | 7.54712e-28 | 1.000000 | 7.54716e-28 | 1.000000 |
| rad23         | 5.09434e-28 | 1.000000 | 5.09437e-28 | 1.000000 |
| rad41         | 2.58572e-28 | 1.000000 | 2.58573e-28 | 1.000000 |
| rad22         | 4.52406e-29 | 1.000000 | 4.52408e-29 | 1.000000 |
| rad45         | 6.47710e-30 | 1.000000 | 6.47713e-30 | 1.000000 |
| rad36         | 4.02621e-31 | 1.000000 | 4.02623e-31 | 1.000000 |
| rad24         | 2.92295e-31 | 1.000000 | 2.92297e-31 | 1.000000 |
| rad47         | 1.82774e-38 | 1.000000 | 1.82775e-38 | 1.000000 |

0.100000000E-06 Pa, 180.000000 K

=====

| Rate constant      | True (fraction)        | Effective (fraction)   |
|--------------------|------------------------|------------------------|
| Total              | 6.50681e-18 (1.00 )    | 6.50677e-18 (1.00 )    |
| Formation of rad11 | 5.71915e-18 (0.879 )   | 5.71911e-18 (0.879 )   |
| Formation of rad6  | 7.39013e-19 (0.114 )   | 7.39008e-19 (0.114 )   |
| H-abstraction      | 4.86496e-20 (0.00748 ) | 4.86496e-20 (0.00748 ) |

| species            | PYtrue      | Cumul    | PYeffective | Cumul    |
|--------------------|-------------|----------|-------------|----------|
| Indene+H           | 0.968478    | 0.968478 | 0.968484    | 0.968484 |
| C2H2+PhCH2         | 0.0135227   | 0.982001 | 0.0135228   | 0.982007 |
| Benzene+2-propynyl | 0.00747672  | 0.989478 | 0.00747676  | 0.989484 |
| PhCCH+CH3          | 0.00542557  | 0.994903 | 0.00542561  | 0.994910 |
| PhCHCCH2+H         | 0.00299465  | 0.997898 | 0.00299467  | 0.997904 |
| PhCCCH3+H          | 0.00192234  | 0.999820 | 0.00192235  | 0.999827 |
| Ph+MeAc            | 0.000123972 | 0.999944 | 0.000123973 | 0.999951 |
| rad8               | 2.07969e-05 | 0.999965 | 2.07971e-05 | 0.999971 |
| rad9               | 1.46638e-05 | 0.999980 | 1.46639e-05 | 0.999986 |

|               |             |          |             |          |
|---------------|-------------|----------|-------------|----------|
| PAH7+H        | 9.52843e-06 | 0.999989 | 9.52849e-06 | 0.999996 |
| Phenyl+Allene | 6.22337e-06 | 0.999996 | 0.00000     | 0.999996 |
| rad39         | 1.69832e-06 | 0.999997 | 1.69833e-06 | 0.999997 |
| rad12         | 1.04289e-06 | 0.999998 | 1.04289e-06 | 0.999998 |
| rad30         | 8.96672e-07 | 0.999999 | 8.96677e-07 | 0.999999 |
| PAH9+H        | 2.04976e-07 | 0.999999 | 2.04977e-07 | 0.999999 |
| rad15         | 1.89951e-07 | 1.000000 | 1.89952e-07 | 1.000000 |
| rad35         | 9.77018e-08 | 1.000000 | 9.77024e-08 | 1.000000 |
| rad38         | 5.73091e-08 | 1.000000 | 5.73094e-08 | 1.000000 |
| PhCH2CCH+H    | 3.68399e-08 | 1.000000 | 3.68402e-08 | 1.000000 |
| rad37         | 7.32434e-09 | 1.000000 | 7.32437e-09 | 1.000000 |
| rad46         | 7.01861e-10 | 1.000000 | 7.01865e-10 | 1.000000 |
| rad5          | 7.60086e-11 | 1.000000 | 7.60090e-11 | 1.000000 |
| rad60syn      | 6.98185e-11 | 1.000000 | 6.98188e-11 | 1.000000 |
| rad60anti     | 2.14664e-11 | 1.000000 | 2.14665e-11 | 1.000000 |
| rad6          | 6.21671e-13 | 1.000000 | 6.21675e-13 | 1.000000 |
| PAH3+H        | 8.30444e-14 | 1.000000 | 8.30449e-14 | 1.000000 |
| rad28         | 8.11763e-14 | 1.000000 | 8.11769e-14 | 1.000000 |
| rad59         | 2.92195e-14 | 1.000000 | 2.92197e-14 | 1.000000 |
| rad26         | 1.63714e-14 | 1.000000 | 1.63715e-14 | 1.000000 |
| rad50         | 2.97123e-15 | 1.000000 | 2.97125e-15 | 1.000000 |
| rad19syn      | 2.89948e-15 | 1.000000 | 2.89950e-15 | 1.000000 |
| rad2          | 9.30539e-16 | 1.000000 | 9.30545e-16 | 1.000000 |
| rad1          | 6.22966e-17 | 1.000000 | 6.22970e-17 | 1.000000 |
| rad10         | 4.65373e-17 | 1.000000 | 4.65376e-17 | 1.000000 |
| rad7          | 4.58869e-17 | 1.000000 | 4.58872e-17 | 1.000000 |
| rad54         | 2.33297e-17 | 1.000000 | 2.33298e-17 | 1.000000 |
| PAH10+CH3     | 1.59467e-17 | 1.000000 | 1.59468e-17 | 1.000000 |
| rad11         | 1.13387e-17 | 1.000000 | 1.13388e-17 | 1.000000 |
| rad3          | 1.03462e-17 | 1.000000 | 1.03463e-17 | 1.000000 |
| rad4          | 5.31179e-18 | 1.000000 | 5.31182e-18 | 1.000000 |
| rad43         | 3.88182e-18 | 1.000000 | 3.88185e-18 | 1.000000 |
| rad14         | 3.24000e-18 | 1.000000 | 3.24002e-18 | 1.000000 |
| rad25         | 1.71694e-18 | 1.000000 | 1.71695e-18 | 1.000000 |
| rad62         | 5.27068e-19 | 1.000000 | 5.27072e-19 | 1.000000 |
| rad13         | 2.58791e-19 | 1.000000 | 2.58792e-19 | 1.000000 |
| rad27         | 2.17889e-19 | 1.000000 | 2.17890e-19 | 1.000000 |
| rad52         | 1.15649e-19 | 1.000000 | 1.15650e-19 | 1.000000 |
| PhcycC3H3_A+H | 5.85620e-21 | 1.000000 | 5.85623e-21 | 1.000000 |
| rad70         | 4.72801e-21 | 1.000000 | 4.72804e-21 | 1.000000 |
| rad55         | 1.97618e-21 | 1.000000 | 1.97620e-21 | 1.000000 |
| rad33         | 5.93234e-22 | 1.000000 | 5.93238e-22 | 1.000000 |
| rad51         | 5.86138e-22 | 1.000000 | 5.86142e-22 | 1.000000 |
| PAH1+H        | 4.95211e-23 | 1.000000 | 4.95214e-23 | 1.000000 |
| rad31         | 3.75554e-23 | 1.000000 | 3.75556e-23 | 1.000000 |
| rad58         | 3.90830e-24 | 1.000000 | 3.90832e-24 | 1.000000 |
| rad65         | 2.06558e-24 | 1.000000 | 2.06559e-24 | 1.000000 |
| rad34         | 2.04058e-24 | 1.000000 | 2.04059e-24 | 1.000000 |
| rad20         | 3.51297e-25 | 1.000000 | 3.51299e-25 | 1.000000 |
| rad21         | 2.86691e-25 | 1.000000 | 2.86693e-25 | 1.000000 |
| rad42         | 1.68941e-26 | 1.000000 | 1.68942e-26 | 1.000000 |
| rad41         | 4.43576e-27 | 1.000000 | 4.43577e-27 | 1.000000 |
| rad23         | 7.70865e-28 | 1.000000 | 7.70870e-28 | 1.000000 |
| rad18         | 7.07721e-28 | 1.000000 | 7.07725e-28 | 1.000000 |
| rad22         | 4.12798e-29 | 1.000000 | 4.12801e-29 | 1.000000 |
| rad45         | 1.05315e-29 | 1.000000 | 1.05315e-29 | 1.000000 |
| rad36         | 6.55590e-31 | 1.000000 | 6.55594e-31 | 1.000000 |
| rad24         | 3.22288e-31 | 1.000000 | 3.22290e-31 | 1.000000 |
| rad47         | 1.73400e-37 | 1.000000 | 1.73401e-37 | 1.000000 |

0.100000000E-06 Pa, 190.000000 K

=====

| Rate constant      | True (fraction)        | Effective (fraction)   |
|--------------------|------------------------|------------------------|
| Total              | 1.11858e-17 (1.00 )    | 1.11857e-17 (1.00 )    |
| Formation of rad11 | 9.67466e-18 (0.865 )   | 9.67458e-18 (0.865 )   |
| Formation of rad6  | 1.40029e-18 (0.125 )   | 1.40028e-18 (0.125 )   |
| H-abstraction      | 1.10851e-19 (0.00991 ) | 1.10851e-19 (0.00991 ) |

| species            | PYtrue      | Cumul    | PYeffective | Cumul    |
|--------------------|-------------|----------|-------------|----------|
| Indene+H           | 0.964584    | 0.964584 | 0.964592    | 0.964592 |
| C2H2+PhCH2         | 0.0141702   | 0.978755 | 0.0141704   | 0.978763 |
| Benzene+2-propynyl | 0.00990995  | 0.988664 | 0.00991003  | 0.988673 |
| PhCCH+CH3          | 0.00586267  | 0.994527 | 0.00586271  | 0.994535 |
| PhCHCCH2+H         | 0.00319942  | 0.997727 | 0.00319945  | 0.997735 |
| PhCCCH3+H          | 0.00206163  | 0.999788 | 0.00206164  | 0.999796 |
| Ph+MeAc            | 0.000147922 | 0.999936 | 0.000147924 | 0.999944 |
| rad8               | 2.27914e-05 | 0.999959 | 2.27916e-05 | 0.999967 |
| rad9               | 1.66997e-05 | 0.999976 | 1.66999e-05 | 0.999984 |

|               |             |          |             |          |
|---------------|-------------|----------|-------------|----------|
| PAH7+H        | 1.09759e-05 | 0.999987 | 1.09760e-05 | 0.999995 |
| Phenyl+Allene | 8.18753e-06 | 0.999995 | 0.00000     | 0.999995 |
| rad39         | 2.02180e-06 | 0.999997 | 2.02182e-06 | 0.999997 |
| rad12         | 1.17915e-06 | 0.999998 | 1.17916e-06 | 0.999998 |
| rad30         | 9.60146e-07 | 0.999999 | 9.60154e-07 | 0.999999 |
| PAH9+H        | 2.22798e-07 | 0.999999 | 2.22800e-07 | 0.999999 |
| rad15         | 2.06651e-07 | 0.999999 | 2.06653e-07 | 0.999999 |
| rad35         | 1.05102e-07 | 0.999999 | 1.05103e-07 | 0.999999 |
| rad38         | 6.28096e-08 | 1.000000 | 6.28101e-08 | 1.000000 |
| PhCH2CCH+H    | 6.24642e-08 | 1.000000 | 6.24647e-08 | 1.000000 |
| rad37         | 1.11022e-08 | 1.000000 | 1.11023e-08 | 1.000000 |
| rad46         | 8.16612e-10 | 1.000000 | 8.16619e-10 | 1.000000 |
| rad5          | 1.36732e-10 | 1.000000 | 1.36733e-10 | 1.000000 |
| rad60syn      | 8.87040e-11 | 1.000000 | 8.87048e-11 | 1.000000 |
| rad60anti     | 2.82054e-11 | 1.000000 | 2.82057e-11 | 1.000000 |
| rad6          | 4.99060e-13 | 1.000000 | 4.99064e-13 | 1.000000 |
| PAH3+H        | 1.71452e-13 | 1.000000 | 1.71453e-13 | 1.000000 |
| rad28         | 6.69440e-14 | 1.000000 | 6.69446e-14 | 1.000000 |
| rad59         | 5.84003e-14 | 1.000000 | 5.84008e-14 | 1.000000 |
| rad26         | 1.36335e-14 | 1.000000 | 1.36336e-14 | 1.000000 |
| rad19syn      | 1.02878e-14 | 1.000000 | 1.02879e-14 | 1.000000 |
| rad50         | 6.05356e-15 | 1.000000 | 6.05362e-15 | 1.000000 |
| rad2          | 8.98587e-16 | 1.000000 | 8.98594e-16 | 1.000000 |
| rad54         | 1.03970e-16 | 1.000000 | 1.03971e-16 | 1.000000 |
| PAH10+CH3     | 7.11675e-17 | 1.000000 | 7.11681e-17 | 1.000000 |
| rad1          | 6.05897e-17 | 1.000000 | 6.05902e-17 | 1.000000 |
| rad10         | 4.59334e-17 | 1.000000 | 4.59338e-17 | 1.000000 |
| rad7          | 3.69156e-17 | 1.000000 | 3.69159e-17 | 1.000000 |
| rad43         | 1.72857e-17 | 1.000000 | 1.72859e-17 | 1.000000 |
| rad3          | 1.03219e-17 | 1.000000 | 1.03219e-17 | 1.000000 |
| rad11         | 9.13331e-18 | 1.000000 | 9.13338e-18 | 1.000000 |
| rad4          | 5.30990e-18 | 1.000000 | 5.30994e-18 | 1.000000 |
| rad14         | 2.77125e-18 | 1.000000 | 2.77128e-18 | 1.000000 |
| rad62         | 2.69622e-18 | 1.000000 | 2.69624e-18 | 1.000000 |
| rad25         | 1.48081e-18 | 1.000000 | 1.48083e-18 | 1.000000 |
| rad52         | 4.03514e-19 | 1.000000 | 4.03517e-19 | 1.000000 |
| rad13         | 2.08501e-19 | 1.000000 | 2.08502e-19 | 1.000000 |
| rad27         | 1.89901e-19 | 1.000000 | 1.89903e-19 | 1.000000 |
| PhcycC3H3_A+H | 4.38895e-20 | 1.000000 | 4.38898e-20 | 1.000000 |
| rad70         | 3.33202e-20 | 1.000000 | 3.33205e-20 | 1.000000 |
| rad55         | 1.42084e-20 | 1.000000 | 1.42085e-20 | 1.000000 |
| rad51         | 3.10227e-21 | 1.000000 | 3.10230e-21 | 1.000000 |
| rad33         | 4.91796e-22 | 1.000000 | 4.91799e-22 | 1.000000 |
| PAH1+H        | 4.73309e-22 | 1.000000 | 4.73313e-22 | 1.000000 |
| rad31         | 4.61897e-23 | 1.000000 | 4.61901e-23 | 1.000000 |
| rad58         | 3.02074e-23 | 1.000000 | 3.02077e-23 | 1.000000 |
| rad34         | 2.08650e-23 | 1.000000 | 2.08652e-23 | 1.000000 |
| rad65         | 1.35334e-23 | 1.000000 | 1.35335e-23 | 1.000000 |
| rad20         | 3.45196e-25 | 1.000000 | 3.45199e-25 | 1.000000 |
| rad21         | 2.83442e-25 | 1.000000 | 2.83445e-25 | 1.000000 |
| rad42         | 2.03932e-25 | 1.000000 | 2.03933e-25 | 1.000000 |
| rad41         | 5.49126e-26 | 1.000000 | 5.49130e-26 | 1.000000 |
| rad23         | 1.23420e-27 | 1.000000 | 1.23421e-27 | 1.000000 |
| rad18         | 6.66174e-28 | 1.000000 | 6.66180e-28 | 1.000000 |
| rad22         | 3.77705e-29 | 1.000000 | 3.77707e-29 | 1.000000 |
| rad45         | 1.83351e-29 | 1.000000 | 1.83353e-29 | 1.000000 |
| rad36         | 1.14342e-30 | 1.000000 | 1.14343e-30 | 1.000000 |
| rad24         | 3.59257e-31 | 1.000000 | 3.59260e-31 | 1.000000 |
| rad47         | 1.27121e-36 | 1.000000 | 1.27122e-36 | 1.000000 |

0.100000000E-06 Pa, 200.000000 K

=====

| Rate constant      | True (fraction)       | Effective (fraction)  |
|--------------------|-----------------------|-----------------------|
| Total              | 1.82690e-17 (1.00 )   | 1.82688e-17 (1.00 )   |
| Formation of rad11 | 1.55456e-17 (0.851 )  | 1.55454e-17 (0.851 )  |
| Formation of rad6  | 2.49126e-18 (0.136 )  | 2.49124e-18 (0.136 )  |
| H-abstraction      | 2.32112e-19 (0.0127 ) | 2.32112e-19 (0.0127 ) |

| species            | PYtrue      | Cumul    | PYeffective | Cumul    |
|--------------------|-------------|----------|-------------|----------|
| Indene+H           | 0.960215    | 0.960215 | 0.960226    | 0.960226 |
| C2H2+PhCH2         | 0.0148648   | 0.975080 | 0.0148650   | 0.975091 |
| Benzene+2-propynyl | 0.0127053   | 0.987785 | 0.0127054   | 0.987796 |
| PhCCH+CH3          | 0.00633609  | 0.994121 | 0.00633616  | 0.994133 |
| PhCHCCH2+H         | 0.00341886  | 0.997540 | 0.00341890  | 0.997551 |
| PhCCCH3+H          | 0.00221050  | 0.999751 | 0.00221053  | 0.999762 |
| Ph+MeAc            | 0.000175874 | 0.999927 | 0.000175876 | 0.999938 |
| rad8               | 2.49675e-05 | 0.999952 | 2.49677e-05 | 0.999963 |
| rad9               | 1.90239e-05 | 0.999971 | 1.90241e-05 | 0.999982 |

|               |             |          |             |          |
|---------------|-------------|----------|-------------|----------|
| PAH7+H        | 1.26511e-05 | 0.999983 | 1.26513e-05 | 0.999994 |
| Phenyl+Allene | 1.06964e-05 | 0.999994 | 0.00000     | 0.999994 |
| rad39         | 2.40371e-06 | 0.999996 | 2.40374e-06 | 0.999997 |
| rad12         | 1.33138e-06 | 0.999998 | 1.33139e-06 | 0.999998 |
| rad30         | 1.02985e-06 | 0.999999 | 1.02986e-06 | 0.999999 |
| PAH9+H        | 2.42818e-07 | 0.999999 | 2.42820e-07 | 0.999999 |
| rad15         | 2.25264e-07 | 0.999999 | 2.25266e-07 | 1.000000 |
| rad35         | 1.13321e-07 | 0.999999 | 1.13322e-07 | 1.000000 |
| PhCH2CCH+H    | 1.02329e-07 | 0.999999 | 1.02330e-07 | 1.000000 |
| rad38         | 6.90357e-08 | 0.999999 | 6.90365e-08 | 1.000000 |
| rad37         | 1.61820e-08 | 0.999999 | 1.61822e-08 | 1.000000 |
| rad46         | 9.53649e-10 | 0.999999 | 9.53658e-10 | 1.000000 |
| rad5          | 2.34595e-10 | 0.999999 | 2.34598e-10 | 1.000000 |
| rad60syn      | 1.12478e-10 | 0.999999 | 1.12480e-10 | 1.000000 |
| rad60anti     | 3.68624e-11 | 0.999999 | 3.68628e-11 | 1.000000 |
| rad6          | 4.02503e-13 | 0.999999 | 4.02508e-13 | 1.000000 |
| PAH3+H        | 3.35192e-13 | 0.999999 | 3.35195e-13 | 1.000000 |
| rad59         | 1.10713e-13 | 0.999999 | 1.10714e-13 | 1.000000 |
| rad28         | 5.52977e-14 | 0.999999 | 5.52983e-14 | 1.000000 |
| rad19syn      | 3.23698e-14 | 0.999999 | 3.23702e-14 | 1.000000 |
| rad50         | 1.17726e-14 | 0.999999 | 1.17727e-14 | 1.000000 |
| rad26         | 1.13664e-14 | 0.999999 | 1.13665e-14 | 1.000000 |
| rad2          | 9.10923e-16 | 0.999999 | 9.10932e-16 | 1.000000 |
| rad54         | 4.01275e-16 | 0.999999 | 4.01279e-16 | 1.000000 |
| PAH10+CH3     | 2.74628e-16 | 0.999999 | 2.74631e-16 | 1.000000 |
| rad43         | 6.64690e-17 | 0.999999 | 6.64697e-17 | 1.000000 |
| rad1          | 6.19010e-17 | 0.999999 | 6.19017e-17 | 1.000000 |
| rad10         | 4.62936e-17 | 0.999999 | 4.62940e-17 | 1.000000 |
| rad7          | 2.98390e-17 | 0.999999 | 2.98393e-17 | 1.000000 |
| rad62         | 1.17482e-17 | 0.999999 | 1.17484e-17 | 1.000000 |
| rad3          | 1.05950e-17 | 0.999999 | 1.05951e-17 | 1.000000 |
| rad11         | 7.39246e-18 | 0.999999 | 7.39254e-18 | 1.000000 |
| rad4          | 5.46234e-18 | 0.999999 | 5.46240e-18 | 1.000000 |
| rad14         | 2.37385e-18 | 0.999999 | 2.37388e-18 | 1.000000 |
| rad25         | 1.27939e-18 | 0.999999 | 1.27941e-18 | 1.000000 |
| rad52         | 1.25934e-18 | 0.999999 | 1.25935e-18 | 1.000000 |
| PhcycC3H3_A+H | 2.69647e-19 | 0.999999 | 2.69650e-19 | 1.000000 |
| rad70         | 1.93309e-19 | 0.999999 | 1.93311e-19 | 1.000000 |
| rad13         | 1.68793e-19 | 0.999999 | 1.68795e-19 | 1.000000 |
| rad27         | 1.65864e-19 | 0.999999 | 1.65865e-19 | 1.000000 |
| rad55         | 8.39747e-20 | 0.999999 | 8.39756e-20 | 1.000000 |
| rad51         | 1.40662e-20 | 0.999999 | 1.40663e-20 | 1.000000 |
| PAH1+H        | 3.58741e-21 | 0.999999 | 3.58745e-21 | 1.000000 |
| rad33         | 4.11172e-22 | 0.999999 | 4.11177e-22 | 1.000000 |
| rad58         | 1.90959e-22 | 0.999999 | 1.90961e-22 | 1.000000 |
| rad34         | 1.67728e-22 | 0.999999 | 1.67730e-22 | 1.000000 |
| rad65         | 7.40125e-23 | 0.999999 | 7.40132e-23 | 1.000000 |
| rad31         | 5.79308e-23 | 0.999999 | 5.79314e-23 | 1.000000 |
| rad42         | 1.88860e-24 | 0.999999 | 1.88862e-24 | 1.000000 |
| rad41         | 5.19580e-25 | 0.999999 | 5.19585e-25 | 1.000000 |
| rad20         | 3.41241e-25 | 0.999999 | 3.41245e-25 | 1.000000 |
| rad21         | 2.82010e-25 | 0.999999 | 2.82013e-25 | 1.000000 |
| rad23         | 2.08742e-27 | 0.999999 | 2.08744e-27 | 1.000000 |
| rad18         | 6.29295e-28 | 0.999999 | 6.29302e-28 | 1.000000 |
| rad22         | 3.46465e-29 | 0.999999 | 3.46469e-29 | 1.000000 |
| rad45         | 3.33749e-29 | 0.999999 | 3.33753e-29 | 1.000000 |
| rad36         | 2.08580e-30 | 0.999999 | 2.08583e-30 | 1.000000 |
| rad24         | 4.04885e-31 | 0.999999 | 4.04890e-31 | 1.000000 |
| rad47         | 7.49047e-36 | 0.999999 | 7.49055e-36 | 1.000000 |

0.100000000E-06 Pa, 210.000000 K

=====

| Rate constant      | True (fraction)       | Effective (fraction)  |
|--------------------|-----------------------|-----------------------|
| Total              | 2.85520e-17 (1.00 )   | 2.85516e-17 (1.00 )   |
| Formation of rad11 | 2.39009e-17 (0.837 )  | 2.39006e-17 (0.837 )  |
| Formation of rad6  | 4.19900e-18 (0.147 )  | 4.19894e-18 (0.147 )  |
| H-abstraction      | 4.52111e-19 (0.0158 ) | 4.52111e-19 (0.0158 ) |

| species            | PYtrue      | Cumul    | PYeffective | Cumul    |
|--------------------|-------------|----------|-------------|----------|
| Indene+H           | 0.955394    | 0.955394 | 0.955407    | 0.955407 |
| Benzene+2-propynyl | 0.0158346   | 0.971229 | 0.0158348   | 0.971242 |
| C2H2+PhCH2         | 0.0156096   | 0.986838 | 0.0156097   | 0.986851 |
| PhCCH+CH3          | 0.00684740  | 0.993686 | 0.00684750  | 0.993699 |
| PhCHCCH2+H         | 0.00365337  | 0.997339 | 0.00365343  | 0.997352 |
| PhCCCH3+H          | 0.00236904  | 0.999708 | 0.00236907  | 0.999721 |
| Ph+MeAc            | 0.000208313 | 0.999917 | 0.000208316 | 0.999930 |
| rad8               | 2.73329e-05 | 0.999944 | 2.73333e-05 | 0.999957 |
| rad9               | 2.16715e-05 | 0.999966 | 2.16718e-05 | 0.999979 |

|               |             |          |             |          |
|---------------|-------------|----------|-------------|----------|
| PAH7+H        | 1.45866e-05 | 0.999980 | 1.45868e-05 | 0.999993 |
| Phenyl+Allene | 1.38821e-05 | 0.999994 | 0.00000     | 0.999993 |
| rad39         | 2.85333e-06 | 0.999997 | 2.85337e-06 | 0.999996 |
| rad12         | 1.50073e-06 | 0.999998 | 1.50075e-06 | 0.999998 |
| rad30         | 1.10635e-06 | 1.000000 | 1.10637e-06 | 0.999999 |
| PAH9+H        | 2.65318e-07 | 1.000000 | 2.65322e-07 | 0.999999 |
| rad15         | 2.46002e-07 | 1.00000  | 2.46005e-07 | 0.999999 |
| PhCH2CCH+H    | 1.62720e-07 | 1.00000  | 1.62723e-07 | 0.999999 |
| rad35         | 1.22453e-07 | 1.00000  | 1.22454e-07 | 1.000000 |
| rad38         | 7.60877e-08 | 1.00000  | 7.60888e-08 | 1.000000 |
| rad37         | 2.28236e-08 | 1.00000  | 2.28240e-08 | 1.000000 |
| rad46         | 1.11744e-09 | 1.00000  | 1.11745e-09 | 1.000000 |
| rad5          | 3.86379e-10 | 1.00000  | 3.86384e-10 | 1.000000 |
| rad60syn      | 1.42323e-10 | 1.00000  | 1.42325e-10 | 1.000000 |
| rad60anti     | 4.79396e-11 | 1.00000  | 4.79403e-11 | 1.000000 |
| PAH3+H        | 6.25712e-13 | 1.00000  | 6.25720e-13 | 1.000000 |
| rad6          | 3.25985e-13 | 1.00000  | 3.25990e-13 | 1.000000 |
| rad59         | 2.00722e-13 | 1.00000  | 2.00724e-13 | 1.000000 |
| rad19syn      | 9.19288e-14 | 1.00000  | 9.19301e-14 | 1.000000 |
| rad28         | 4.57381e-14 | 1.00000  | 4.57387e-14 | 1.000000 |
| rad50         | 2.20050e-14 | 1.00000  | 2.20052e-14 | 1.000000 |
| rad26         | 9.48477e-15 | 1.00000  | 9.48489e-15 | 1.000000 |
| rad54         | 1.36990e-15 | 1.00000  | 1.36992e-15 | 1.000000 |
| PAH10+CH3     | 9.35815e-16 | 1.00000  | 9.35829e-16 | 1.000000 |
| rad2          | 9.33036e-16 | 1.00000  | 9.33050e-16 | 1.000000 |
| rad43         | 2.25414e-16 | 1.00000  | 2.25418e-16 | 1.000000 |
| rad1          | 6.39399e-17 | 1.00000  | 6.39408e-17 | 1.000000 |
| rad10         | 4.78710e-17 | 1.00000  | 4.78717e-17 | 1.000000 |
| rad62         | 4.46231e-17 | 1.00000  | 4.46238e-17 | 1.000000 |
| rad7          | 2.42215e-17 | 1.00000  | 2.42218e-17 | 1.000000 |
| rad3          | 1.13777e-17 | 1.00000  | 1.13779e-17 | 1.000000 |
| rad11         | 6.00946e-18 | 1.00000  | 6.00955e-18 | 1.000000 |
| rad4          | 5.87991e-18 | 1.00000  | 5.87998e-18 | 1.000000 |
| rad52         | 3.57588e-18 | 1.00000  | 3.57592e-18 | 1.000000 |
| rad14         | 2.03615e-18 | 1.00000  | 2.03618e-18 | 1.000000 |
| PhcycC3H3_A+H | 1.39649e-18 | 1.00000  | 1.39651e-18 | 1.000000 |
| rad25         | 1.10714e-18 | 1.00000  | 1.10716e-18 | 1.000000 |
| rad70         | 9.49279e-19 | 1.00000  | 9.49292e-19 | 1.000000 |
| rad55         | 4.19552e-19 | 1.00000  | 4.19557e-19 | 1.000000 |
| rad27         | 1.45158e-19 | 1.00000  | 1.45159e-19 | 1.000000 |
| rad13         | 1.37238e-19 | 1.00000  | 1.37240e-19 | 1.000000 |
| rad51         | 5.58854e-20 | 1.00000  | 5.58862e-20 | 1.000000 |
| PAH1+H        | 2.22717e-20 | 1.00000  | 2.22720e-20 | 1.000000 |
| rad34         | 1.09606e-21 | 1.00000  | 1.09606e-21 | 1.000000 |
| rad58         | 1.01534e-21 | 1.00000  | 1.01536e-21 | 1.000000 |
| rad65         | 3.46717e-22 | 1.00000  | 3.46720e-22 | 1.000000 |
| rad33         | 3.46675e-22 | 1.00000  | 3.46680e-22 | 1.000000 |
| rad31         | 7.40709e-23 | 1.00000  | 7.40720e-23 | 1.000000 |
| rad42         | 1.39290e-23 | 1.00000  | 1.39292e-23 | 1.000000 |
| rad41         | 3.90335e-24 | 1.00000  | 3.90341e-24 | 1.000000 |
| rad20         | 3.39339e-25 | 1.00000  | 3.39344e-25 | 1.000000 |
| rad21         | 2.82356e-25 | 1.00000  | 2.82360e-25 | 1.000000 |
| rad23         | 3.72806e-27 | 1.00000  | 3.72812e-27 | 1.000000 |
| rad18         | 5.96466e-28 | 1.00000  | 5.96475e-28 | 1.000000 |
| rad45         | 6.39278e-29 | 1.00000  | 6.39287e-29 | 1.000000 |
| rad22         | 3.18567e-29 | 1.00000  | 3.18572e-29 | 1.000000 |
| rad36         | 4.00552e-30 | 1.00000  | 4.00558e-30 | 1.000000 |
| rad24         | 4.61409e-31 | 1.00000  | 4.61415e-31 | 1.000000 |
| rad47         | 3.66234e-35 | 1.00000  | 3.66239e-35 | 1.000000 |

0.100000000E-06 Pa, 220.000000 K

=====

| Rate constant      | True (fraction)       | Effective (fraction)  |
|--------------------|-----------------------|-----------------------|
| Total              | 4.29529e-17 (1.00 )   | 4.29521e-17 (1.00 )   |
| Formation of rad11 | 3.53712e-17 (0.823 )  | 3.53705e-17 (0.823 )  |
| Formation of rad6  | 6.75433e-18 (0.157 )  | 6.75421e-18 (0.157 )  |
| H-abstraction      | 8.27372e-19 (0.0193 ) | 8.27372e-19 (0.0193 ) |

| species            | PYtrue      | Cumul    | PYeffective | Cumul    |
|--------------------|-------------|----------|-------------|----------|
| Indene+H           | 0.950149    | 0.950149 | 0.950166    | 0.950166 |
| Benzene+2-propynyl | 0.0192623   | 0.969412 | 0.0192627   | 0.969428 |
| C2H2+PhCH2         | 0.0164074   | 0.985819 | 0.0164077   | 0.985836 |
| PhCCH+CH3          | 0.00739805  | 0.993217 | 0.00739817  | 0.993234 |
| PhCHCCH2+H         | 0.00390330  | 0.997121 | 0.00390336  | 0.997138 |
| PhCCCH3+H          | 0.00253724  | 0.999658 | 0.00253729  | 0.999675 |
| Ph+MeAc            | 0.000245753 | 0.999904 | 0.000245758 | 0.999921 |
| rad8               | 2.98948e-05 | 0.999933 | 2.98954e-05 | 0.999951 |
| rad9               | 2.46814e-05 | 0.999958 | 2.46818e-05 | 0.999975 |

|               |             |          |             |          |
|---------------|-------------|----------|-------------|----------|
| Phenyl+Allene | 1.79044e-05 | 0.999976 | 0.00000     | 0.999975 |
| PAH7+H        | 1.68191e-05 | 0.999993 | 1.68194e-05 | 0.999992 |
| rad39         | 3.38117e-06 | 0.999996 | 3.38124e-06 | 0.999996 |
| rad12         | 1.68833e-06 | 0.999998 | 1.68836e-06 | 0.999997 |
| rad30         | 1.19028e-06 | 0.999999 | 1.19030e-06 | 0.999998 |
| PAH9+H        | 2.90621e-07 | 0.999999 | 2.90627e-07 | 0.999999 |
| rad15         | 2.69097e-07 | 1.000000 | 2.69102e-07 | 0.999999 |
| PhCH2CCH+H    | 2.52106e-07 | 1.000000 | 2.52111e-07 | 0.999999 |
| rad35         | 1.32603e-07 | 1.000000 | 1.32605e-07 | 0.999999 |
| rad38         | 8.40803e-08 | 1.000000 | 8.40818e-08 | 0.999999 |
| rad37         | 3.13098e-08 | 1.000000 | 3.13103e-08 | 0.999999 |
| rad46         | 1.31333e-09 | 1.000000 | 1.31334e-09 | 0.999999 |
| rad5          | 6.14091e-10 | 1.000000 | 6.14101e-10 | 0.999999 |
| rad60syn      | 1.79682e-10 | 1.000000 | 1.79686e-10 | 0.999999 |
| rad60anti     | 6.20565e-11 | 1.000000 | 6.20576e-11 | 0.999999 |
| PAH3+H        | 1.12268e-12 | 1.000000 | 1.12271e-12 | 0.999999 |
| rad59         | 3.50300e-13 | 1.000000 | 3.50307e-13 | 0.999999 |
| rad6          | 2.65026e-13 | 1.000000 | 2.65031e-13 | 0.999999 |
| rad19syn      | 2.39064e-13 | 1.000000 | 2.39067e-13 | 0.999999 |
| rad50         | 3.97496e-14 | 1.000000 | 3.97504e-14 | 0.999999 |
| rad28         | 3.78717e-14 | 1.000000 | 3.78723e-14 | 0.999999 |
| rad26         | 7.92022e-15 | 1.000000 | 7.92037e-15 | 0.999999 |
| rad54         | 4.20837e-15 | 1.000000 | 4.20844e-15 | 0.999999 |
| PAH10+CH3     | 2.86444e-15 | 1.000000 | 2.86449e-15 | 0.999999 |
| rad2          | 9.59398e-16 | 1.000000 | 9.59415e-16 | 0.999999 |
| rad43         | 6.85854e-16 | 1.000000 | 6.85867e-16 | 0.999999 |
| rad62         | 1.50549e-16 | 1.000000 | 1.50552e-16 | 0.999999 |
| rad1          | 6.63497e-17 | 1.000000 | 6.63509e-17 | 0.999999 |
| rad10         | 5.05114e-17 | 1.000000 | 5.05123e-17 | 0.999999 |
| rad7          | 1.97383e-17 | 1.000000 | 1.97386e-17 | 0.999999 |
| rad3          | 1.20481e-17 | 1.000000 | 1.20483e-17 | 0.999999 |
| rad52         | 9.36563e-18 | 1.000000 | 9.36580e-18 | 0.999999 |
| rad4          | 6.24250e-18 | 1.000000 | 6.24261e-18 | 0.999999 |
| PhcycC3H3_A+H | 6.23506e-18 | 1.000000 | 6.23517e-18 | 0.999999 |
| rad11         | 4.90484e-18 | 1.000000 | 4.90492e-18 | 0.999999 |
| rad70         | 4.03527e-18 | 1.000000 | 4.03535e-18 | 0.999999 |
| rad55         | 1.81229e-18 | 1.000000 | 1.81231e-18 | 0.999999 |
| rad14         | 1.74864e-18 | 1.000000 | 1.74867e-18 | 0.999999 |
| rad25         | 9.59525e-19 | 1.000000 | 9.59543e-19 | 0.999999 |
| rad51         | 1.98110e-19 | 1.000000 | 1.98114e-19 | 0.999999 |
| rad27         | 1.27278e-19 | 1.000000 | 1.27281e-19 | 0.999999 |
| PAH1+H        | 1.16260e-19 | 1.000000 | 1.16262e-19 | 0.999999 |
| rad13         | 1.12028e-19 | 1.000000 | 1.12031e-19 | 0.999999 |
| rad34         | 5.98216e-21 | 1.000000 | 5.98226e-21 | 0.999999 |
| rad58         | 4.64426e-21 | 1.000000 | 4.64435e-21 | 0.999999 |
| rad65         | 1.42039e-21 | 1.000000 | 1.42042e-21 | 0.999999 |
| rad33         | 2.94806e-22 | 1.000000 | 2.94812e-22 | 0.999999 |
| rad31         | 9.65147e-23 | 1.000000 | 9.65164e-23 | 0.999999 |
| rad42         | 8.43153e-23 | 1.000000 | 8.43168e-23 | 0.999999 |
| rad41         | 2.40058e-23 | 1.000000 | 2.40063e-23 | 0.999999 |
| rad20         | 3.39459e-25 | 1.000000 | 3.39465e-25 | 0.999999 |
| rad21         | 2.84494e-25 | 1.000000 | 2.84499e-25 | 0.999999 |
| rad23         | 7.02848e-27 | 1.000000 | 7.02860e-27 | 0.999999 |
| rad18         | 5.67197e-28 | 1.000000 | 5.67206e-28 | 0.999999 |
| rad45         | 1.26407e-28 | 1.000000 | 1.26409e-28 | 0.999999 |
| rad22         | 2.93620e-29 | 1.000000 | 2.93626e-29 | 0.999999 |
| rad36         | 7.94394e-30 | 1.000000 | 7.94407e-30 | 0.999999 |
| rad24         | 5.31818e-31 | 1.000000 | 5.31826e-31 | 0.999999 |
| rad47         | 1.52506e-34 | 1.000000 | 1.52509e-34 | 0.999999 |

0.100000000E-06 Pa, 230.000000 K

=====

| Rate constant      | True (fraction)       | Effective (fraction)  |
|--------------------|-----------------------|-----------------------|
| Total              | 6.25016e-17 (1.00 )   | 6.25002e-17 (1.00 )   |
| Formation of rad11 | 5.06355e-17 (0.810 )  | 5.06343e-17 (0.810 )  |
| Formation of rad6  | 1.04318e-17 (0.167 )  | 1.04316e-17 (0.167 )  |
| H-abstraction      | 1.43428e-18 (0.0229 ) | 1.43428e-18 (0.0229 ) |

| species            | PYtrue      | Cumul    | PYeffective | Cumul    |
|--------------------|-------------|----------|-------------|----------|
| Indene+H           | 0.944516    | 0.944516 | 0.944538    | 0.944538 |
| Benzene+2-propynyl | 0.0229478   | 0.967464 | 0.0229483   | 0.967487 |
| C2H2+PhCH2         | 0.0172620   | 0.984726 | 0.0172624   | 0.984749 |
| PhCCH+CH3          | 0.00798934  | 0.992715 | 0.00798953  | 0.992739 |
| PhCHCCH2+H         | 0.00416891  | 0.996884 | 0.00416900  | 0.996908 |
| PhCCCH3+H          | 0.00271501  | 0.999599 | 0.00271508  | 0.999623 |
| Ph+MeAc            | 0.000288722 | 0.999888 | 0.000288729 | 0.999911 |
| rad8               | 3.26588e-05 | 0.999921 | 3.26596e-05 | 0.999944 |
| rad9               | 2.80959e-05 | 0.999949 | 2.80966e-05 | 0.999972 |

|               |             |          |             |          |
|---------------|-------------|----------|-------------|----------|
| Phenyl+Allene | 2.29541e-05 | 0.999972 | 0.00000     | 0.999972 |
| PAH7+H        | 1.93896e-05 | 0.999991 | 1.93901e-05 | 0.999991 |
| rad39         | 3.99904e-06 | 0.999995 | 3.99913e-06 | 0.999995 |
| rad12         | 1.89523e-06 | 0.999997 | 1.89528e-06 | 0.999997 |
| rad30         | 1.28232e-06 | 0.999998 | 1.28235e-06 | 0.999999 |
| PhCH2CCH+H    | 3.81725e-07 | 0.999999 | 3.81733e-07 | 0.999999 |
| PAH9+H        | 3.19092e-07 | 0.999999 | 3.19099e-07 | 0.999999 |
| rad15         | 2.94804e-07 | 0.999999 | 2.94811e-07 | 1.000000 |
| rad35         | 1.43889e-07 | 1.000000 | 1.43891e-07 | 1.000000 |
| rad38         | 9.31436e-08 | 1.000000 | 9.31458e-08 | 1.000000 |
| rad37         | 4.19468e-08 | 1.000000 | 4.19478e-08 | 1.000000 |
| rad46         | 1.54768e-09 | 1.000000 | 1.54772e-09 | 1.000000 |
| rad5          | 9.45890e-10 | 1.000000 | 9.45912e-10 | 1.000000 |
| rad60syn      | 2.26301e-10 | 1.000000 | 2.26306e-10 | 1.000000 |
| rad60anti     | 7.99726e-11 | 1.000000 | 7.99744e-11 | 1.000000 |
| PAH3+H        | 1.94646e-12 | 1.000000 | 1.94651e-12 | 1.000000 |
| rad59         | 5.91558e-13 | 1.000000 | 5.91573e-13 | 1.000000 |
| rad19syn      | 5.76047e-13 | 1.000000 | 5.76061e-13 | 1.000000 |
| rad6          | 2.16245e-13 | 1.000000 | 2.16250e-13 | 1.000000 |
| rad50         | 6.96959e-14 | 1.000000 | 6.96975e-14 | 1.000000 |
| rad28         | 3.13857e-14 | 1.000000 | 3.13864e-14 | 1.000000 |
| rad54         | 1.17979e-14 | 1.000000 | 1.17982e-14 | 1.000000 |
| PAH10+CH3     | 7.98676e-15 | 1.000000 | 7.98694e-15 | 1.000000 |
| rad26         | 6.61754e-15 | 1.000000 | 6.61769e-15 | 1.000000 |
| rad43         | 1.89885e-15 | 1.000000 | 1.89890e-15 | 1.000000 |
| rad2          | 1.07419e-15 | 1.000000 | 1.07421e-15 | 1.000000 |
| rad62         | 4.58150e-16 | 1.000000 | 4.58160e-16 | 1.000000 |
| rad1          | 7.50266e-17 | 1.000000 | 7.50283e-17 | 1.000000 |
| rad10         | 5.50734e-17 | 1.000000 | 5.50747e-17 | 1.000000 |
| PhcycC3H3_A+H | 2.44417e-17 | 1.000000 | 2.44422e-17 | 1.000000 |
| rad52         | 2.28788e-17 | 1.000000 | 2.28794e-17 | 1.000000 |
| rad7          | 1.61442e-17 | 1.000000 | 1.61446e-17 | 1.000000 |
| rad70         | 1.51220e-17 | 1.000000 | 1.51224e-17 | 1.000000 |
| rad3          | 1.33407e-17 | 1.000000 | 1.33410e-17 | 1.000000 |
| rad4          | 6.93180e-18 | 1.000000 | 6.93197e-18 | 1.000000 |
| rad55         | 6.89280e-18 | 1.000000 | 6.89295e-18 | 1.000000 |
| rad11         | 4.01851e-18 | 1.000000 | 4.01860e-18 | 1.000000 |
| rad14         | 1.50347e-18 | 1.000000 | 1.50351e-18 | 1.000000 |
| rad25         | 8.32800e-19 | 1.000000 | 8.32819e-19 | 1.000000 |
| rad51         | 6.35770e-19 | 1.000000 | 6.35785e-19 | 1.000000 |
| PAH1+H        | 5.21365e-19 | 1.000000 | 5.21376e-19 | 1.000000 |
| rad27         | 1.11808e-19 | 1.000000 | 1.11811e-19 | 1.000000 |
| rad13         | 9.17946e-20 | 1.000000 | 9.17967e-20 | 1.000000 |
| rad34         | 2.78859e-20 | 1.000000 | 2.78865e-20 | 1.000000 |
| rad58         | 1.86124e-20 | 1.000000 | 1.86127e-20 | 1.000000 |
| rad65         | 5.17416e-21 | 1.000000 | 5.17428e-21 | 1.000000 |
| rad42         | 4.29489e-22 | 1.000000 | 4.29498e-22 | 1.000000 |
| rad33         | 2.52917e-22 | 1.000000 | 2.52923e-22 | 1.000000 |
| rad31         | 1.28091e-22 | 1.000000 | 1.28093e-22 | 1.000000 |
| rad41         | 1.23970e-22 | 1.000000 | 1.23973e-22 | 1.000000 |
| rad20         | 3.41621e-25 | 1.000000 | 3.41629e-25 | 1.000000 |
| rad21         | 2.88488e-25 | 1.000000 | 2.88495e-25 | 1.000000 |
| rad23         | 1.39901e-26 | 1.000000 | 1.39904e-26 | 1.000000 |
| rad18         | 5.41089e-28 | 1.000000 | 5.41101e-28 | 1.000000 |
| rad45         | 2.83475e-28 | 1.000000 | 2.83482e-28 | 1.000000 |
| rad22         | 2.71354e-29 | 1.000000 | 2.71359e-29 | 1.000000 |
| rad36         | 1.78766e-29 | 1.000000 | 1.78771e-29 | 1.000000 |
| rad24         | 6.20124e-31 | 1.000000 | 6.20139e-31 | 1.000000 |
| rad47         | 5.52650e-34 | 1.000000 | 5.52662e-34 | 1.000000 |

0.100000000E-06 Pa, 240.000000 K

=====

| Rate constant      | True (fraction)       | Effective (fraction)  |
|--------------------|-----------------------|-----------------------|
| Total              | 8.83273e-17 (1.00 )   | 8.83247e-17 (1.00 )   |
| Formation of rad11 | 7.04077e-17 (0.797 )  | 7.04056e-17 (0.797 )  |
| Formation of rad6  | 1.55481e-17 (0.176 )  | 1.55476e-17 (0.176 )  |
| H-abstraction      | 2.37143e-18 (0.0268 ) | 2.37143e-18 (0.0268 ) |

| species            | PYtrue      | Cumul    | PYeffective | Cumul    |
|--------------------|-------------|----------|-------------|----------|
| Indene+H           | 0.938534    | 0.938534 | 0.938561    | 0.938561 |
| Benzene+2-propynyl | 0.0268483   | 0.965382 | 0.0268490   | 0.965410 |
| C2H2+PhCH2         | 0.0181765   | 0.983559 | 0.0181770   | 0.983587 |
| PhCCH+CH3          | 0.00862242  | 0.992181 | 0.00862267  | 0.992210 |
| PhCHCCH2+H         | 0.00445040  | 0.996631 | 0.00445053  | 0.996661 |
| PhCCCH3+H          | 0.00290218  | 0.999534 | 0.00290227  | 0.999563 |
| Ph+MeAc            | 0.000337756 | 0.999871 | 0.000337766 | 0.999901 |
| rad8               | 3.56292e-05 | 0.999907 | 3.56303e-05 | 0.999936 |
| rad9               | 3.19608e-05 | 0.999939 | 3.19618e-05 | 0.999968 |



|               |             |          |             |          |
|---------------|-------------|----------|-------------|----------|
| Phenyl+Allene | 2.92582e-05 | 0.999968 | 0.00000     | 0.999968 |
| PAH7+H        | 2.23437e-05 | 0.999991 | 2.23443e-05 | 0.999990 |
| rad39         | 4.72009e-06 | 0.999995 | 4.72023e-06 | 0.999995 |
| rad12         | 2.12237e-06 | 0.999997 | 2.12243e-06 | 0.999997 |
| rad30         | 1.38320e-06 | 0.999999 | 1.38324e-06 | 0.999999 |
| PhCH2CCH+H    | 5.66274e-07 | 0.999999 | 5.66291e-07 | 0.999999 |
| PAH9+H        | 3.51137e-07 | 1.000000 | 3.51147e-07 | 1.000000 |
| rad15         | 3.23401e-07 | 1.000000 | 3.23410e-07 | 1.000000 |
| rad35         | 1.56440e-07 | 1.000000 | 1.56445e-07 | 1.000000 |
| rad38         | 1.03425e-07 | 1.000000 | 1.03427e-07 | 1.000000 |
| rad37         | 5.50654e-08 | 1.000000 | 5.50670e-08 | 1.000000 |
| rad46         | 1.82808e-09 | 1.000000 | 1.82813e-09 | 1.000000 |
| rad5          | 1.41703e-09 | 1.000000 | 1.41706e-09 | 1.000000 |
| rad60syn      | 2.84281e-10 | 1.000000 | 2.84290e-10 | 1.000000 |
| rad60anti     | 1.02613e-10 | 1.000000 | 1.02616e-10 | 1.000000 |
| PAH3+H        | 3.27489e-12 | 1.000000 | 3.27499e-12 | 1.000000 |
| rad19syn      | 1.29873e-12 | 1.000000 | 1.29877e-12 | 1.000000 |
| rad59         | 9.70704e-13 | 1.000000 | 9.70733e-13 | 1.000000 |
| rad6          | 1.77067e-13 | 1.000000 | 1.77072e-13 | 1.000000 |
| rad50         | 1.19032e-13 | 1.000000 | 1.19036e-13 | 1.000000 |
| rad54         | 3.05322e-14 | 1.000000 | 3.05331e-14 | 1.000000 |
| rad28         | 2.60293e-14 | 1.000000 | 2.60300e-14 | 1.000000 |
| PAH10+CH3     | 2.05205e-14 | 1.000000 | 2.05210e-14 | 1.000000 |
| rad26         | 5.53170e-15 | 1.000000 | 5.53186e-15 | 1.000000 |
| rad43         | 4.83974e-15 | 1.000000 | 4.83988e-15 | 1.000000 |
| rad62         | 1.27363e-15 | 1.000000 | 1.27366e-15 | 1.000000 |
| rad2          | 1.20759e-15 | 1.000000 | 1.20762e-15 | 1.000000 |
| PhcycC3H3_A+H | 8.53910e-17 | 1.000000 | 8.53936e-17 | 1.000000 |
| rad1          | 8.52500e-17 | 1.000000 | 8.52526e-17 | 1.000000 |
| rad10         | 6.12767e-17 | 1.000000 | 6.12785e-17 | 1.000000 |
| rad52         | 5.25993e-17 | 1.000000 | 5.26009e-17 | 1.000000 |
| rad70         | 5.07092e-17 | 1.000000 | 5.07107e-17 | 1.000000 |
| rad55         | 2.34300e-17 | 1.000000 | 2.34307e-17 | 1.000000 |
| rad3          | 1.47854e-17 | 1.000000 | 1.47859e-17 | 1.000000 |
| rad7          | 1.32523e-17 | 1.000000 | 1.32527e-17 | 1.000000 |
| rad4          | 7.70606e-18 | 1.000000 | 7.70628e-18 | 1.000000 |
| rad11         | 3.30467e-18 | 1.000000 | 3.30476e-18 | 1.000000 |
| PAH1+H        | 2.04480e-18 | 1.000000 | 2.04486e-18 | 1.000000 |
| rad51         | 1.86868e-18 | 1.000000 | 1.86873e-18 | 1.000000 |
| rad14         | 1.29413e-18 | 1.000000 | 1.29416e-18 | 1.000000 |
| rad25         | 7.23843e-19 | 1.000000 | 7.23864e-19 | 1.000000 |
| rad34         | 1.13110e-19 | 1.000000 | 1.13113e-19 | 1.000000 |
| rad27         | 9.83983e-20 | 1.000000 | 9.84011e-20 | 1.000000 |
| rad13         | 7.54944e-20 | 1.000000 | 7.54966e-20 | 1.000000 |
| rad58         | 6.63439e-20 | 1.000000 | 6.63458e-20 | 1.000000 |
| rad65         | 1.69869e-20 | 1.000000 | 1.69874e-20 | 1.000000 |
| rad42         | 1.87991e-21 | 1.000000 | 1.87996e-21 | 1.000000 |
| rad41         | 5.49128e-22 | 1.000000 | 5.49144e-22 | 1.000000 |
| rad33         | 2.18985e-22 | 1.000000 | 2.18992e-22 | 1.000000 |
| rad31         | 1.73028e-22 | 1.000000 | 1.73033e-22 | 1.000000 |
| rad20         | 3.45900e-25 | 1.000000 | 3.45909e-25 | 1.000000 |
| rad21         | 2.94451e-25 | 1.000000 | 2.94460e-25 | 1.000000 |
| rad23         | 2.93642e-26 | 1.000000 | 2.93650e-26 | 1.000000 |
| rad45         | 6.36891e-28 | 1.000000 | 6.36909e-28 | 1.000000 |
| rad18         | 5.17821e-28 | 1.000000 | 5.17836e-28 | 1.000000 |
| rad36         | 4.03242e-29 | 1.000000 | 4.03254e-29 | 1.000000 |
| rad22         | 2.51643e-29 | 1.000000 | 2.51651e-29 | 1.000000 |
| rad24         | 7.31766e-31 | 1.000000 | 7.31788e-31 | 1.000000 |
| rad47         | 1.77440e-33 | 1.000000 | 1.77444e-33 | 1.000000 |

0.100000000E-06 Pa, 250.000000 K

| =====              |                 |           |                      |           |
|--------------------|-----------------|-----------|----------------------|-----------|
| Rate constant      | True (fraction) |           | Effective (fraction) |           |
| -----              |                 |           |                      |           |
| Total              | 1.21641e-16     | (1.00 )   | 1.21637e-16          | (1.00 )   |
| Formation of rad11 | 9.54219e-17     | (0.784 )  | 9.54182e-17          | (0.784 )  |
| Formation of rad6  | 2.24583e-17     | (0.185 )  | 2.24574e-17          | (0.185 )  |
| H-abstraction      | 3.76121e-18     | (0.0309 ) | 3.76121e-18          | (0.0309 ) |
| species            | PYtrue          | Cumul     | PYeffective          | Cumul     |
| -----              |                 |           |                      |           |
| Indene+H           | 0.932238        | 0.932238  | 0.932273             | 0.932273  |
| Benzene+2-propynyl | 0.0309205       | 0.963159  | 0.0309216            | 0.963194  |
| C2H2+PhCH2         | 0.0191545       | 0.982313  | 0.0191552            | 0.982350  |
| PhCCH+CH3          | 0.00929819      | 0.991611  | 0.00929853           | 0.991648  |
| PhCHCCH2+H         | 0.00474790      | 0.996359  | 0.00474808           | 0.996396  |
| PhCCCH3+H          | 0.00309847      | 0.999458  | 0.00309858           | 0.999495  |
| Ph+MeAc            | 0.000393389     | 0.999851  | 0.000393404          | 0.999888  |
| rad8               | 3.88087e-05     | 0.999890  | 3.88101e-05          | 0.999927  |
| Phenyl+Allene      | 3.70854e-05     | 0.999927  | 0.00000              | 0.999927  |

|               |             |          |             |          |
|---------------|-------------|----------|-------------|----------|
| rad9          | 3.63256e-05 | 0.999963 | 3.63269e-05 | 0.999963 |
| PAH7+H        | 2.57316e-05 | 0.999989 | 2.57325e-05 | 0.999989 |
| rad39         | 5.55892e-06 | 0.999994 | 5.55913e-06 | 0.999995 |
| rad12         | 2.37059e-06 | 0.999997 | 2.37068e-06 | 0.999997 |
| rad30         | 1.49366e-06 | 0.999998 | 1.49372e-06 | 0.999998 |
| PhCH2CCH+H    | 8.24732e-07 | 0.999999 | 8.24763e-07 | 0.999999 |
| PAH9+H        | 3.87212e-07 | 1.000000 | 3.87226e-07 | 1.000000 |
| rad15         | 3.55186e-07 | 1.000000 | 3.55199e-07 | 1.000000 |
| rad35         | 1.70400e-07 | 1.000000 | 1.70406e-07 | 1.000000 |
| rad38         | 1.15089e-07 | 1.000000 | 1.15094e-07 | 1.000000 |
| rad37         | 7.10210e-08 | 1.000000 | 7.10237e-08 | 1.000000 |
| rad46         | 2.16347e-09 | 1.000000 | 2.16355e-09 | 1.000000 |
| rad5          | 2.07075e-09 | 1.000000 | 2.07082e-09 | 1.000000 |
| rad60syn      | 3.56138e-10 | 1.000000 | 3.56151e-10 | 1.000000 |
| rad60anti     | 1.31095e-10 | 1.000000 | 1.31100e-10 | 1.000000 |
| PAH3+H        | 5.36551e-12 | 1.000000 | 5.36571e-12 | 1.000000 |
| rad19syn      | 2.76179e-12 | 1.000000 | 2.76189e-12 | 1.000000 |
| rad59         | 1.55301e-12 | 1.000000 | 1.55306e-12 | 1.000000 |
| rad50         | 1.98576e-13 | 1.000000 | 1.98583e-13 | 1.000000 |
| rad6          | 1.45512e-13 | 1.000000 | 1.45518e-13 | 1.000000 |
| rad54         | 7.36305e-14 | 1.000000 | 7.36332e-14 | 1.000000 |
| PAH10+CH3     | 4.90483e-14 | 1.000000 | 4.90502e-14 | 1.000000 |
| rad28         | 2.15999e-14 | 1.000000 | 2.16008e-14 | 1.000000 |
| rad43         | 1.14663e-14 | 1.000000 | 1.14667e-14 | 1.000000 |
| rad26         | 4.62585e-15 | 1.000000 | 4.62603e-15 | 1.000000 |
| rad62         | 3.26830e-15 | 1.000000 | 3.26842e-15 | 1.000000 |
| rad2          | 1.34061e-15 | 1.000000 | 1.34067e-15 | 1.000000 |
| PhcycC3H3_A+H | 2.69202e-16 | 1.000000 | 2.69212e-16 | 1.000000 |
| rad70         | 1.54047e-16 | 1.000000 | 1.54052e-16 | 1.000000 |
| rad52         | 1.14634e-16 | 1.000000 | 1.14638e-16 | 1.000000 |
| rad1          | 9.57387e-17 | 1.000000 | 9.57421e-17 | 1.000000 |
| rad55         | 7.20614e-17 | 1.000000 | 7.20642e-17 | 1.000000 |
| rad10         | 6.92903e-17 | 1.000000 | 6.92928e-17 | 1.000000 |
| rad3          | 1.65243e-17 | 1.000000 | 1.65249e-17 | 1.000000 |
| rad7          | 1.09187e-17 | 1.000000 | 1.09191e-17 | 1.000000 |
| rad4          | 8.64107e-18 | 1.000000 | 8.64139e-18 | 1.000000 |
| PAH1+H        | 7.11981e-18 | 1.000000 | 7.12007e-18 | 1.000000 |
| rad51         | 5.07774e-18 | 1.000000 | 5.07793e-18 | 1.000000 |
| rad11         | 2.72807e-18 | 1.000000 | 2.72817e-18 | 1.000000 |
| rad14         | 1.11518e-18 | 1.000000 | 1.11523e-18 | 1.000000 |
| rad25         | 6.30041e-19 | 1.000000 | 6.30065e-19 | 1.000000 |
| rad34         | 4.05530e-19 | 1.000000 | 4.05545e-19 | 1.000000 |
| rad58         | 2.12987e-19 | 1.000000 | 2.12995e-19 | 1.000000 |
| rad27         | 8.67570e-20 | 1.000000 | 8.67602e-20 | 1.000000 |
| rad13         | 6.23250e-20 | 1.000000 | 6.23272e-20 | 1.000000 |
| rad65         | 5.08172e-20 | 1.000000 | 5.08191e-20 | 1.000000 |
| rad42         | 7.19654e-21 | 1.000000 | 7.19680e-21 | 1.000000 |
| rad41         | 2.12408e-21 | 1.000000 | 2.12415e-21 | 1.000000 |
| rad31         | 2.37693e-22 | 1.000000 | 2.37701e-22 | 1.000000 |
| rad33         | 1.91455e-22 | 1.000000 | 1.91462e-22 | 1.000000 |
| rad20         | 3.52422e-25 | 1.000000 | 3.52435e-25 | 1.000000 |
| rad21         | 3.02551e-25 | 1.000000 | 3.02563e-25 | 1.000000 |
| rad23         | 6.48883e-26 | 1.000000 | 6.48907e-26 | 1.000000 |
| rad45         | 1.55141e-27 | 1.000000 | 1.55147e-27 | 1.000000 |
| rad18         | 4.97129e-28 | 1.000000 | 4.97147e-28 | 1.000000 |
| rad36         | 9.86678e-29 | 1.000000 | 9.86716e-29 | 1.000000 |
| rad22         | 2.34602e-29 | 1.000000 | 2.34610e-29 | 1.000000 |
| rad24         | 8.74180e-31 | 1.000000 | 8.74211e-31 | 1.000000 |
| rad47         | 5.12438e-33 | 1.000000 | 5.12457e-33 | 1.000000 |

0.100000000E-06 Pa, 260.000000 K

=====

| Rate constant      | True (fraction)       | Effective (fraction)  |
|--------------------|-----------------------|-----------------------|
| Total              | 1.63720e-16 (1.00 )   | 1.63713e-16 (1.00 )   |
| Formation of rad11 | 1.26419e-16 (0.772 )  | 1.26412e-16 (0.772 )  |
| Formation of rad6  | 3.15515e-17 (0.193 )  | 3.15499e-17 (0.193 )  |
| H-abstraction      | 5.75028e-18 (0.0351 ) | 5.75028e-18 (0.0351 ) |

| species            | PYtrue      | Cumul    | PYeffective | Cumul    |
|--------------------|-------------|----------|-------------|----------|
| Indene+H           | 0.925667    | 0.925667 | 0.925710    | 0.925710 |
| Benzene+2-propynyl | 0.0351226   | 0.960789 | 0.0351242   | 0.960834 |
| C2H2+PhCH2         | 0.0201996   | 0.980989 | 0.0202005   | 0.981034 |
| PhCCH+CH3          | 0.0100173   | 0.991006 | 0.0100178   | 0.991052 |
| PhCHCCH2+H         | 0.00506140  | 0.996068 | 0.00506164  | 0.996114 |
| PhCCCH3+H          | 0.00330345  | 0.999371 | 0.00330361  | 0.999417 |
| Ph+MeAc            | 0.000456147 | 0.999827 | 0.000456168 | 0.999874 |
| Phenyl+Allene      | 4.67507e-05 | 0.999874 | 0.00000     | 0.999874 |
| rad8               | 4.21979e-05 | 0.999916 | 4.21999e-05 | 0.999916 |

|               |             |          |             |          |
|---------------|-------------|----------|-------------|----------|
| rad9          | 4.12431e-05 | 0.999957 | 4.12451e-05 | 0.999957 |
| PAH7+H        | 2.96087e-05 | 0.999987 | 2.96101e-05 | 0.999987 |
| rad39         | 6.53165e-06 | 0.999994 | 6.53196e-06 | 0.999993 |
| rad12         | 2.64056e-06 | 0.999996 | 2.64068e-06 | 0.999996 |
| rad30         | 1.61454e-06 | 0.999998 | 1.61461e-06 | 0.999997 |
| PhCH2CCH+H    | 1.18129e-06 | 0.999999 | 1.18135e-06 | 0.999999 |
| PAH9+H        | 4.27825e-07 | 0.999999 | 4.27844e-07 | 0.999999 |
| rad15         | 3.90481e-07 | 1.000000 | 3.90499e-07 | 0.999999 |
| rad35         | 1.85924e-07 | 1.000000 | 1.85933e-07 | 1.000000 |
| rad38         | 1.28322e-07 | 1.000000 | 1.28328e-07 | 1.000000 |
| rad37         | 9.01918e-08 | 1.000000 | 9.01961e-08 | 1.000000 |
| rad5          | 2.95912e-09 | 1.000000 | 2.95926e-09 | 1.000000 |
| rad46         | 2.56443e-09 | 1.000000 | 2.56455e-09 | 1.000000 |
| rad60syn      | 4.44858e-10 | 1.000000 | 4.44879e-10 | 1.000000 |
| rad60anti     | 1.66766e-10 | 1.000000 | 1.66774e-10 | 1.000000 |
| PAH3+H        | 8.58430e-12 | 1.000000 | 8.58470e-12 | 1.000000 |
| rad19syn      | 5.57650e-12 | 1.000000 | 5.57676e-12 | 1.000000 |
| rad59         | 2.42911e-12 | 1.000000 | 2.42922e-12 | 1.000000 |
| rad50         | 3.24314e-13 | 1.000000 | 3.24329e-13 | 1.000000 |
| rad54         | 1.66745e-13 | 1.000000 | 1.66753e-13 | 1.000000 |
| rad6          | 1.20047e-13 | 1.000000 | 1.20053e-13 | 1.000000 |
| PAH10+CH3     | 1.09928e-13 | 1.000000 | 1.09934e-13 | 1.000000 |
| rad43         | 2.54567e-14 | 1.000000 | 2.54579e-14 | 1.000000 |
| rad28         | 1.79335e-14 | 1.000000 | 1.79343e-14 | 1.000000 |
| rad62         | 7.80914e-15 | 1.000000 | 7.80950e-15 | 1.000000 |
| rad26         | 3.86972e-15 | 1.000000 | 3.86989e-15 | 1.000000 |
| rad2          | 1.57894e-15 | 1.000000 | 1.57902e-15 | 1.000000 |
| PhcycC3H3_A+H | 7.73853e-16 | 1.000000 | 7.73889e-16 | 1.000000 |
| rad70         | 4.28321e-16 | 1.000000 | 4.28340e-16 | 1.000000 |
| rad52         | 2.38196e-16 | 1.000000 | 2.38208e-16 | 1.000000 |
| rad55         | 2.02608e-16 | 1.000000 | 2.02617e-16 | 1.000000 |
| rad1          | 1.14169e-16 | 1.000000 | 1.14175e-16 | 1.000000 |
| rad10         | 7.98237e-17 | 1.000000 | 7.98275e-17 | 1.000000 |
| PAH1+H        | 2.22906e-17 | 1.000000 | 2.22916e-17 | 1.000000 |
| rad3          | 1.90620e-17 | 1.000000 | 1.90630e-17 | 1.000000 |
| rad51         | 1.28526e-17 | 1.000000 | 1.28531e-17 | 1.000000 |
| rad4          | 1.00040e-17 | 1.000000 | 1.00045e-17 | 1.000000 |
| rad7          | 9.03186e-18 | 1.000000 | 9.03228e-18 | 1.000000 |
| rad11         | 2.26135e-18 | 1.000000 | 2.26147e-18 | 1.000000 |
| rad34         | 1.30240e-18 | 1.000000 | 1.30246e-18 | 1.000000 |
| rad14         | 9.62062e-19 | 1.000000 | 9.62107e-19 | 1.000000 |
| rad58         | 6.22358e-19 | 1.000000 | 6.22387e-19 | 1.000000 |
| rad25         | 5.49195e-19 | 1.000000 | 5.49221e-19 | 1.000000 |
| rad65         | 1.39790e-19 | 1.000000 | 1.39797e-19 | 1.000000 |
| rad27         | 7.66365e-20 | 1.000000 | 7.66401e-20 | 1.000000 |
| rad13         | 5.16633e-20 | 1.000000 | 5.16657e-20 | 1.000000 |
| rad42         | 2.44584e-20 | 1.000000 | 2.44595e-20 | 1.000000 |
| rad41         | 7.28487e-21 | 1.000000 | 7.28522e-21 | 1.000000 |
| rad31         | 3.31701e-22 | 1.000000 | 3.31716e-22 | 1.000000 |
| rad33         | 1.69117e-22 | 1.000000 | 1.69125e-22 | 1.000000 |
| rad20         | 3.61375e-25 | 1.000000 | 3.61391e-25 | 1.000000 |
| rad21         | 3.13018e-25 | 1.000000 | 3.13033e-25 | 1.000000 |
| rad23         | 1.50559e-25 | 1.000000 | 1.50566e-25 | 1.000000 |
| rad45         | 4.08658e-27 | 1.000000 | 4.08678e-27 | 1.000000 |
| rad18         | 4.78798e-28 | 1.000000 | 4.78821e-28 | 1.000000 |
| rad36         | 2.61221e-28 | 1.000000 | 2.61233e-28 | 1.000000 |
| rad22         | 2.20785e-29 | 1.000000 | 2.20795e-29 | 1.000000 |
| rad24         | 1.05762e-30 | 1.000000 | 1.05768e-30 | 1.000000 |
| rad47         | 1.34824e-32 | 1.000000 | 1.34831e-32 | 1.000000 |

0.100000000E-06 Pa, 270.000000 K

=====

| Rate constant      | True (fraction)       | Effective (fraction)  |
|--------------------|-----------------------|-----------------------|
| Total              | 2.15887e-16 (1.00 )   | 2.15874e-16 (1.00 )   |
| Formation of rad11 | 1.64133e-16 (0.760 )  | 1.64123e-16 (0.760 )  |
| Formation of rad6  | 4.32452e-17 (0.200 )  | 4.32425e-17 (0.200 )  |
| H-abstraction      | 8.50919e-18 (0.0394 ) | 8.50919e-18 (0.0394 ) |

| species            | PYtrue      | Cumul    | PYeffective | Cumul    |
|--------------------|-------------|----------|-------------|----------|
| Indene+H           | 0.918855    | 0.918855 | 0.918909    | 0.918909 |
| Benzene+2-propynyl | 0.0394150   | 0.958270 | 0.0394174   | 0.958326 |
| C2H2+PhCH2         | 0.0213152   | 0.979585 | 0.0213165   | 0.979643 |
| PhCCH+CH3          | 0.0107802   | 0.990366 | 0.0107808   | 0.990423 |
| PhCHCCH2+H         | 0.00539082  | 0.995756 | 0.00539114  | 0.995815 |
| PhCCCH3+H          | 0.00351662  | 0.999273 | 0.00351683  | 0.999331 |
| Ph+MeAc            | 0.000526534 | 0.999800 | 0.000526565 | 0.999858 |
| Phenyl+Allene      | 5.86215e-05 | 0.999858 | 0.000000    | 0.999858 |
| rad9               | 4.67701e-05 | 0.999905 | 4.67729e-05 | 0.999905 |

|               |             |          |             |          |
|---------------|-------------|----------|-------------|----------|
| rad8          | 4.57957e-05 | 0.999951 | 4.57984e-05 | 0.999950 |
| PAH7+H        | 3.40354e-05 | 0.999985 | 3.40374e-05 | 0.999985 |
| rad39         | 7.65593e-06 | 0.999992 | 7.65638e-06 | 0.999992 |
| rad12         | 2.93280e-06 | 0.999995 | 2.93297e-06 | 0.999995 |
| rad30         | 1.74667e-06 | 0.999997 | 1.74677e-06 | 0.999997 |
| PhCH2CCH+H    | 1.66641e-06 | 0.999999 | 1.66651e-06 | 0.999999 |
| PAH9+H        | 4.73536e-07 | 0.999999 | 4.73563e-07 | 0.999999 |
| rad15         | 4.29628e-07 | 1.000000 | 4.29654e-07 | 0.999999 |
| rad35         | 2.03184e-07 | 1.000000 | 2.03196e-07 | 1.000000 |
| rad38         | 1.43332e-07 | 1.000000 | 1.43341e-07 | 1.000000 |
| rad37         | 1.12976e-07 | 1.000000 | 1.12984e-07 | 1.000000 |
| rad5          | 4.14380e-09 | 1.000000 | 4.14405e-09 | 1.000000 |
| rad46         | 3.04333e-09 | 1.000000 | 3.04351e-09 | 1.000000 |
| rad60syn      | 5.53969e-10 | 1.000000 | 5.54003e-10 | 1.000000 |
| rad60anti     | 2.11228e-10 | 1.000000 | 2.11241e-10 | 1.000000 |
| PAH3+H        | 1.34418e-11 | 1.000000 | 1.34427e-11 | 1.000000 |
| rad19syn      | 1.07500e-11 | 1.000000 | 1.07506e-11 | 1.000000 |
| rad59         | 3.72269e-12 | 1.000000 | 3.72291e-12 | 1.000000 |
| rad50         | 5.19450e-13 | 1.000000 | 5.19480e-13 | 1.000000 |
| rad54         | 3.56851e-13 | 1.000000 | 3.56872e-13 | 1.000000 |
| PAH10+CH3     | 2.32537e-13 | 1.000000 | 2.32551e-13 | 1.000000 |
| rad6          | 9.94782e-14 | 1.000000 | 9.94837e-14 | 1.000000 |
| rad43         | 5.33186e-14 | 1.000000 | 5.33217e-14 | 1.000000 |
| rad62         | 1.74991e-14 | 1.000000 | 1.75001e-14 | 1.000000 |
| rad28         | 1.48961e-14 | 1.000000 | 1.48969e-14 | 1.000000 |
| rad26         | 3.23824e-15 | 1.000000 | 3.23842e-15 | 1.000000 |
| PhcycC3H3_A+H | 2.04647e-15 | 1.000000 | 2.04659e-15 | 1.000000 |
| rad2          | 1.83113e-15 | 1.000000 | 1.83124e-15 | 1.000000 |
| rad70         | 1.09950e-15 | 1.000000 | 1.09956e-15 | 1.000000 |
| rad55         | 5.25298e-16 | 1.000000 | 5.25328e-16 | 1.000000 |
| rad52         | 4.74038e-16 | 1.000000 | 4.74066e-16 | 1.000000 |
| rad1          | 1.34183e-16 | 1.000000 | 1.34191e-16 | 1.000000 |
| rad10         | 9.28236e-17 | 1.000000 | 9.28291e-17 | 1.000000 |
| PAH1+H        | 6.34376e-17 | 1.000000 | 6.34413e-17 | 1.000000 |
| rad51         | 3.04906e-17 | 1.000000 | 3.04924e-17 | 1.000000 |
| rad3          | 2.18695e-17 | 1.000000 | 2.18708e-17 | 1.000000 |
| rad4          | 1.15220e-17 | 1.000000 | 1.15228e-17 | 1.000000 |
| rad7          | 7.50484e-18 | 1.000000 | 7.50528e-18 | 1.000000 |
| rad34         | 3.78996e-18 | 1.000000 | 3.79018e-18 | 1.000000 |
| rad11         | 1.88323e-18 | 1.000000 | 1.88334e-18 | 1.000000 |
| rad58         | 1.67024e-18 | 1.000000 | 1.67033e-18 | 1.000000 |
| rad14         | 8.30935e-19 | 1.000000 | 8.30983e-19 | 1.000000 |
| rad25         | 4.79444e-19 | 1.000000 | 4.79472e-19 | 1.000000 |
| rad65         | 3.56318e-19 | 1.000000 | 3.56339e-19 | 1.000000 |
| rad42         | 7.47520e-20 | 1.000000 | 7.47564e-20 | 1.000000 |
| rad27         | 6.78277e-20 | 1.000000 | 6.78316e-20 | 1.000000 |
| rad13         | 4.30240e-20 | 1.000000 | 4.30265e-20 | 1.000000 |
| rad41         | 2.24435e-20 | 1.000000 | 2.24449e-20 | 1.000000 |
| rad31         | 4.69633e-22 | 1.000000 | 4.69661e-22 | 1.000000 |
| rad33         | 1.51033e-22 | 1.000000 | 1.51041e-22 | 1.000000 |
| rad20         | 3.73008e-25 | 1.000000 | 3.73030e-25 | 1.000000 |
| rad23         | 3.65365e-25 | 1.000000 | 3.65386e-25 | 1.000000 |
| rad21         | 3.26153e-25 | 1.000000 | 3.26173e-25 | 1.000000 |
| rad45         | 1.04091e-26 | 1.000000 | 1.04097e-26 | 1.000000 |
| rad36         | 6.69155e-28 | 1.000000 | 6.69195e-28 | 1.000000 |
| rad18         | 4.62655e-28 | 1.000000 | 4.62683e-28 | 1.000000 |
| rad22         | 2.11698e-29 | 1.000000 | 2.11710e-29 | 1.000000 |
| rad24         | 1.29642e-30 | 1.000000 | 1.29650e-30 | 1.000000 |
| rad47         | 3.26704e-32 | 1.000000 | 3.26723e-32 | 1.000000 |

0.100000000E-06 Pa, 280.000000 K

=====

| Rate constant      | True (fraction)       | Effective (fraction)  |
|--------------------|-----------------------|-----------------------|
| Total              | 2.79491e-16 (1.00 )   | 2.79471e-16 (1.00 )   |
| Formation of rad11 | 2.09281e-16 (0.749 )  | 2.09265e-16 (0.749 )  |
| Formation of rad6  | 5.79792e-17 (0.207 )  | 5.79748e-17 (0.207 )  |
| H-abstraction      | 1.22310e-17 (0.0438 ) | 1.22310e-17 (0.0438 ) |

| species            | PYtrue      | Cumul    | PYeffective | Cumul    |
|--------------------|-------------|----------|-------------|----------|
| Indene+H           | 0.911836    | 0.911836 | 0.911902    | 0.911902 |
| Benzene+2-propynyl | 0.0437616   | 0.955597 | 0.0437648   | 0.955667 |
| C2H2+PhCH2         | 0.0225047   | 0.978102 | 0.0225063   | 0.978173 |
| PhCCH+CH3          | 0.0115868   | 0.989689 | 0.0115877   | 0.989761 |
| PhCHCCH2+H         | 0.00573596  | 0.995425 | 0.00573638  | 0.995497 |
| PhCCCH3+H          | 0.00373733  | 0.999162 | 0.00373761  | 0.999235 |
| Ph+MeAc            | 0.000605023 | 0.999767 | 0.000605066 | 0.999840 |
| Phenyl+Allene      | 7.31230e-05 | 0.999840 | 0.00000     | 0.999840 |
| rad9               | 5.29667e-05 | 0.999893 | 5.29706e-05 | 0.999893 |

|               |             |          |             |          |
|---------------|-------------|----------|-------------|----------|
| rad8          | 4.95984e-05 | 0.999943 | 4.96019e-05 | 0.999943 |
| PAH7+H        | 3.90775e-05 | 0.999982 | 3.90804e-05 | 0.999982 |
| rad39         | 8.95099e-06 | 0.999991 | 8.95164e-06 | 0.999991 |
| rad12         | 3.24760e-06 | 0.999994 | 3.24783e-06 | 0.999994 |
| PhCH2CCH+H    | 2.31799e-06 | 0.999996 | 2.31816e-06 | 0.999996 |
| rad30         | 1.89092e-06 | 0.999998 | 1.89106e-06 | 0.999998 |
| PAH9+H        | 5.24964e-07 | 0.999999 | 5.25003e-07 | 0.999999 |
| rad15         | 4.72994e-07 | 0.999999 | 4.73029e-07 | 0.999999 |
| rad35         | 2.22364e-07 | 0.999999 | 2.22380e-07 | 0.999999 |
| rad38         | 1.60350e-07 | 0.999999 | 1.60362e-07 | 1.000000 |
| rad37         | 1.39791e-07 | 1.000000 | 1.39801e-07 | 1.000000 |
| rad5          | 5.69647e-09 | 1.000000 | 5.69689e-09 | 1.000000 |
| rad46         | 3.61467e-09 | 1.000000 | 3.61492e-09 | 1.000000 |
| rad60syn      | 6.87605e-10 | 1.000000 | 6.87656e-10 | 1.000000 |
| rad60anti     | 2.66381e-10 | 1.000000 | 2.66400e-10 | 1.000000 |
| PAH3+H        | 2.06375e-11 | 1.000000 | 2.06390e-11 | 1.000000 |
| rad19syn      | 1.98736e-11 | 1.000000 | 1.98751e-11 | 1.000000 |
| rad59         | 5.59977e-12 | 1.000000 | 5.60018e-12 | 1.000000 |
| rad50         | 8.17024e-13 | 1.000000 | 8.17084e-13 | 1.000000 |
| rad54         | 7.25446e-13 | 1.000000 | 7.25499e-13 | 1.000000 |
| PAH10+CH3     | 4.66810e-13 | 1.000000 | 4.66845e-13 | 1.000000 |
| rad43         | 1.05951e-13 | 1.000000 | 1.05959e-13 | 1.000000 |
| rad6          | 8.28746e-14 | 1.000000 | 8.28807e-14 | 1.000000 |
| rad62         | 3.69972e-14 | 1.000000 | 3.69999e-14 | 1.000000 |
| rad28         | 1.23780e-14 | 1.000000 | 1.23789e-14 | 1.000000 |
| PhcycC3H3_A+H | 5.01695e-15 | 1.000000 | 5.01732e-15 | 1.000000 |
| rad26         | 2.71070e-15 | 1.000000 | 2.71089e-15 | 1.000000 |
| rad70         | 2.62501e-15 | 1.000000 | 2.62520e-15 | 1.000000 |
| rad2          | 2.14729e-15 | 1.000000 | 2.14745e-15 | 1.000000 |
| rad55         | 1.26527e-15 | 1.000000 | 1.26537e-15 | 1.000000 |
| rad52         | 9.06731e-16 | 1.000000 | 9.06798e-16 | 1.000000 |
| PAH1+H        | 1.65665e-16 | 1.000000 | 1.65678e-16 | 1.000000 |
| rad1          | 1.59619e-16 | 1.000000 | 1.59630e-16 | 1.000000 |
| rad10         | 1.11092e-16 | 1.000000 | 1.11100e-16 | 1.000000 |
| rad51         | 6.81450e-17 | 1.000000 | 6.81499e-17 | 1.000000 |
| rad3          | 2.60563e-17 | 1.000000 | 2.60582e-17 | 1.000000 |
| rad4          | 1.37853e-17 | 1.000000 | 1.37863e-17 | 1.000000 |
| rad34         | 1.00923e-17 | 1.000000 | 1.00931e-17 | 1.000000 |
| rad7          | 6.26996e-18 | 1.000000 | 6.27042e-18 | 1.000000 |
| rad58         | 4.14902e-18 | 1.000000 | 4.14932e-18 | 1.000000 |
| rad11         | 1.57707e-18 | 1.000000 | 1.57719e-18 | 1.000000 |
| rad65         | 8.47088e-19 | 1.000000 | 8.47150e-19 | 1.000000 |
| rad14         | 7.18551e-19 | 1.000000 | 7.18604e-19 | 1.000000 |
| rad25         | 4.19210e-19 | 1.000000 | 4.19240e-19 | 1.000000 |
| rad42         | 2.07735e-19 | 1.000000 | 2.07750e-19 | 1.000000 |
| rad41         | 6.28127e-20 | 1.000000 | 6.28173e-20 | 1.000000 |
| rad27         | 6.01521e-20 | 1.000000 | 6.01565e-20 | 1.000000 |
| rad13         | 3.60291e-20 | 1.000000 | 3.60317e-20 | 1.000000 |
| rad31         | 6.73623e-22 | 1.000000 | 6.73673e-22 | 1.000000 |
| rad33         | 1.36472e-22 | 1.000000 | 1.36482e-22 | 1.000000 |
| rad23         | 9.23541e-25 | 1.000000 | 9.23608e-25 | 1.000000 |
| rad20         | 3.87650e-25 | 1.000000 | 3.87679e-25 | 1.000000 |
| rad21         | 3.42344e-25 | 1.000000 | 3.42369e-25 | 1.000000 |
| rad45         | 2.95590e-26 | 1.000000 | 2.95611e-26 | 1.000000 |
| rad36         | 1.91209e-27 | 1.000000 | 1.91223e-27 | 1.000000 |
| rad18         | 4.48559e-28 | 1.000000 | 4.48592e-28 | 1.000000 |
| rad22         | 2.10956e-29 | 1.000000 | 2.10971e-29 | 1.000000 |
| rad24         | 1.61077e-30 | 1.000000 | 1.61089e-30 | 1.000000 |
| rad47         | 7.35922e-32 | 1.000000 | 7.35976e-32 | 1.000000 |

0.100000000E-06 Pa, 290.000000 K

=====

| Rate constant      | True (fraction)       | Effective (fraction)  |
|--------------------|-----------------------|-----------------------|
| Total              | 3.55893e-16 (1.00 )   | 3.55861e-16 (1.00 )   |
| Formation of rad11 | 2.62555e-16 (0.738 )  | 2.62530e-16 (0.738 )  |
| Formation of rad6  | 7.62093e-17 (0.214 )  | 7.62020e-17 (0.214 )  |
| H-abstraction      | 1.71289e-17 (0.0481 ) | 1.71289e-17 (0.0481 ) |

| species            | PYtrue      | Cumul    | PYeffective | Cumul    |
|--------------------|-------------|----------|-------------|----------|
| Indene+H           | 0.904639    | 0.904639 | 0.904720    | 0.904720 |
| Benzene+2-propynyl | 0.0481294   | 0.952768 | 0.0481337   | 0.952854 |
| C2H2+PhCH2         | 0.0237714   | 0.976540 | 0.0237736   | 0.976628 |
| PhCCH+CH3          | 0.0124370   | 0.988977 | 0.0124382   | 0.989066 |
| PhCHCCH2+H         | 0.00609652  | 0.995073 | 0.00609707  | 0.995163 |
| PhCCCH3+H          | 0.00396486  | 0.999038 | 0.00396521  | 0.999128 |
| Ph+MeAc            | 0.000692044 | 0.999730 | 0.000692108 | 0.999820 |
| Phenyl+Allene      | 9.07432e-05 | 0.999821 | 0.000000    | 0.999820 |
| rad9               | 5.98963e-05 | 0.999881 | 5.99017e-05 | 0.999880 |

|               |             |          |             |          |
|---------------|-------------|----------|-------------|----------|
| rad8          | 5.36002e-05 | 0.999934 | 5.36051e-05 | 0.999934 |
| PAH7+H        | 4.48060e-05 | 0.999979 | 4.48101e-05 | 0.999979 |
| rad39         | 1.04376e-05 | 0.999990 | 1.04385e-05 | 0.999989 |
| rad12         | 3.58504e-06 | 0.999993 | 3.58537e-06 | 0.999993 |
| PhCH2CCH+H    | 3.18249e-06 | 0.999996 | 3.18278e-06 | 0.999996 |
| rad30         | 2.04821e-06 | 0.999998 | 2.04840e-06 | 0.999998 |
| PAH9+H        | 5.82789e-07 | 0.999999 | 5.82842e-07 | 0.999998 |
| rad15         | 5.20961e-07 | 0.999999 | 5.21008e-07 | 0.999999 |
| rad35         | 2.43664e-07 | 1.000000 | 2.43686e-07 | 0.999999 |
| rad38         | 1.79629e-07 | 1.000000 | 1.79646e-07 | 0.999999 |
| rad37         | 1.71060e-07 | 1.000000 | 1.71075e-07 | 1.000000 |
| rad5          | 7.69912e-09 | 1.000000 | 7.69982e-09 | 1.000000 |
| rad46         | 4.29520e-09 | 1.000000 | 4.29559e-09 | 1.000000 |
| rad60syn      | 8.50567e-10 | 1.000000 | 8.50644e-10 | 1.000000 |
| rad60anti     | 3.34453e-10 | 1.000000 | 3.34484e-10 | 1.000000 |
| rad19syn      | 3.53639e-11 | 1.000000 | 3.53671e-11 | 1.000000 |
| PAH3+H        | 3.11103e-11 | 1.000000 | 3.11131e-11 | 1.000000 |
| rad59         | 8.27909e-12 | 1.000000 | 8.27983e-12 | 1.000000 |
| rad54         | 1.40689e-12 | 1.000000 | 1.40702e-12 | 1.000000 |
| rad50         | 1.26312e-12 | 1.000000 | 1.26324e-12 | 1.000000 |
| PAH10+CH3     | 8.93383e-13 | 1.000000 | 8.93464e-13 | 1.000000 |
| rad43         | 2.00697e-13 | 1.000000 | 2.00715e-13 | 1.000000 |
| rad62         | 7.41772e-14 | 1.000000 | 7.41839e-14 | 1.000000 |
| rad6          | 6.95090e-14 | 1.000000 | 6.95153e-14 | 1.000000 |
| PhcycC3H3_A+H | 1.14777e-14 | 1.000000 | 1.14787e-14 | 1.000000 |
| rad28         | 1.02895e-14 | 1.000000 | 1.02905e-14 | 1.000000 |
| rad70         | 5.86613e-15 | 1.000000 | 5.86667e-15 | 1.000000 |
| rad55         | 2.84964e-15 | 1.000000 | 2.84991e-15 | 1.000000 |
| rad2          | 2.71315e-15 | 1.000000 | 2.71339e-15 | 1.000000 |
| rad26         | 2.26987e-15 | 1.000000 | 2.27008e-15 | 1.000000 |
| rad52         | 1.67153e-15 | 1.000000 | 1.67169e-15 | 1.000000 |
| PAH1+H        | 4.00257e-16 | 1.000000 | 4.00293e-16 | 1.000000 |
| rad1          | 2.04794e-16 | 1.000000 | 2.04813e-16 | 1.000000 |
| rad51         | 1.44108e-16 | 1.000000 | 1.44120e-16 | 1.000000 |
| rad10         | 1.36989e-16 | 1.000000 | 1.37002e-16 | 1.000000 |
| rad3          | 3.09597e-17 | 1.000000 | 3.09625e-17 | 1.000000 |
| rad34         | 2.48053e-17 | 1.000000 | 2.48074e-17 | 1.000000 |
| rad4          | 1.64531e-17 | 1.000000 | 1.64546e-17 | 1.000000 |
| rad58         | 9.60514e-18 | 1.000000 | 9.60604e-18 | 1.000000 |
| rad7          | 5.27412e-18 | 1.000000 | 5.27461e-18 | 1.000000 |
| rad65         | 1.88893e-18 | 1.000000 | 1.88910e-18 | 1.000000 |
| rad11         | 1.32985e-18 | 1.000000 | 1.32997e-18 | 1.000000 |
| rad14         | 6.22165e-19 | 1.000000 | 6.22221e-19 | 1.000000 |
| rad42         | 5.29961e-19 | 1.000000 | 5.30009e-19 | 1.000000 |
| rad25         | 3.67150e-19 | 1.000000 | 3.67183e-19 | 1.000000 |
| rad41         | 1.61253e-19 | 1.000000 | 1.61268e-19 | 1.000000 |
| rad27         | 5.34573e-20 | 1.000000 | 5.34621e-20 | 1.000000 |
| rad13         | 3.03818e-20 | 1.000000 | 3.03846e-20 | 1.000000 |
| rad31         | 9.77248e-22 | 1.000000 | 9.77338e-22 | 1.000000 |
| rad33         | 1.24869e-22 | 1.000000 | 1.24880e-22 | 1.000000 |
| rad23         | 2.41942e-24 | 1.000000 | 2.41963e-24 | 1.000000 |
| rad20         | 4.05724e-25 | 1.000000 | 4.05761e-25 | 1.000000 |
| rad21         | 3.62083e-25 | 1.000000 | 3.62117e-25 | 1.000000 |
| rad45         | 8.44372e-26 | 1.000000 | 8.44449e-26 | 1.000000 |
| rad36         | 5.49990e-27 | 1.000000 | 5.50040e-27 | 1.000000 |
| rad18         | 4.36397e-28 | 1.000000 | 4.36436e-28 | 1.000000 |
| rad22         | 2.27014e-29 | 1.000000 | 2.27034e-29 | 1.000000 |
| rad24         | 2.02952e-30 | 1.000000 | 2.02970e-30 | 1.000000 |
| rad47         | 1.55335e-31 | 1.000000 | 1.55349e-31 | 1.000000 |

0.100000000E-06 Pa, 300.000000 K

=====

| Rate constant      | True (fraction)       | Effective (fraction)  |
|--------------------|-----------------------|-----------------------|
| Total              | 6.34395e-16 (1.00 )   | 6.34337e-16 (1.00 )   |
| Formation of rad11 | 4.51153e-16 (0.711 )  | 4.51110e-16 (0.711 )  |
| Formation of rad6  | 1.51589e-16 (0.239 )  | 1.51574e-16 (0.239 )  |
| H-abstraction      | 3.16530e-17 (0.0499 ) | 3.16530e-17 (0.0499 ) |

| species            | PYtrue      | Cumul    | PYeffective | Cumul    |
|--------------------|-------------|----------|-------------|----------|
| Indene+H           | 0.891220    | 0.891220 | 0.891301    | 0.891301 |
| Benzene+2-propynyl | 0.0498949   | 0.941114 | 0.0498994   | 0.941200 |
| C2H2+PhCH2         | 0.0319123   | 0.973027 | 0.0319152   | 0.973115 |
| PhCCH+CH3          | 0.0149061   | 0.987933 | 0.0149076   | 0.988023 |
| PhCHCCH2+H         | 0.00657747  | 0.994510 | 0.00657807  | 0.994601 |
| PhCCCH3+H          | 0.00446903  | 0.998979 | 0.00446943  | 0.999070 |
| Ph+MeAc            | 0.000840207 | 0.999820 | 0.000840284 | 0.999911 |
| Phenyl+Allene      | 9.13505e-05 | 0.999911 | 0.000000    | 0.999911 |
| PAH7+H             | 6.60542e-05 | 0.999977 | 6.60602e-05 | 0.999977 |

|               |             |          |             |          |
|---------------|-------------|----------|-------------|----------|
| rad39         | 1.31473e-05 | 0.999990 | 1.31484e-05 | 0.999990 |
| PhCH2CCH+H    | 5.22128e-06 | 0.999995 | 5.22175e-06 | 0.999995 |
| rad30         | 2.21236e-06 | 0.999998 | 2.21256e-06 | 0.999997 |
| PAH9+H        | 8.00107e-07 | 0.999998 | 8.00180e-07 | 0.999998 |
| rad19anti     | 7.04525e-07 | 0.999999 | 7.04589e-07 | 0.999999 |
| rad35         | 2.87143e-07 | 0.999999 | 2.87169e-07 | 0.999999 |
| rad37         | 2.27555e-07 | 1.000000 | 2.27576e-07 | 0.999999 |
| rad38         | 2.12987e-07 | 1.000000 | 2.13006e-07 | 1.000000 |
| rad46         | 5.68758e-09 | 1.000000 | 5.68810e-09 | 1.000000 |
| rad60syn      | 1.08211e-09 | 1.000000 | 1.08221e-09 | 1.000000 |
| rad60anti     | 4.39254e-10 | 1.000000 | 4.39293e-10 | 1.000000 |
| rad19syn      | 6.92341e-11 | 1.000000 | 6.92404e-11 | 1.000000 |
| PAH3+H        | 6.10400e-11 | 1.000000 | 6.10456e-11 | 1.000000 |
| rad59         | 1.31853e-11 | 1.000000 | 1.31864e-11 | 1.000000 |
| rad6          | 4.75567e-12 | 1.000000 | 4.75611e-12 | 1.000000 |
| rad54         | 3.21887e-12 | 1.000000 | 3.21917e-12 | 1.000000 |
| rad50         | 2.22681e-12 | 1.000000 | 2.22701e-12 | 1.000000 |
| PAH10+CH3     | 2.02585e-12 | 1.000000 | 2.02603e-12 | 1.000000 |
| rad67         | 7.75554e-13 | 1.000000 | 7.75624e-13 | 1.000000 |
| rad43         | 4.01324e-13 | 1.000000 | 4.01360e-13 | 1.000000 |
| rad28         | 1.72141e-13 | 1.000000 | 1.72157e-13 | 1.000000 |
| rad62         | 1.66581e-13 | 1.000000 | 1.66596e-13 | 1.000000 |
| rad2          | 9.34664e-14 | 1.000000 | 9.34749e-14 | 1.000000 |
| rad26         | 6.08567e-14 | 1.000000 | 6.08622e-14 | 1.000000 |
| PhcycC3H3_A+H | 4.89128e-14 | 1.000000 | 4.89173e-14 | 1.000000 |
| rad70         | 1.94638e-14 | 1.000000 | 1.94656e-14 | 1.000000 |
| rad55         | 8.48747e-15 | 1.000000 | 8.48824e-15 | 1.000000 |
| rad1          | 7.04258e-15 | 1.000000 | 7.04322e-15 | 1.000000 |
| rad10         | 5.53293e-15 | 1.000000 | 5.53343e-15 | 1.000000 |
| rad52         | 3.84231e-15 | 1.000000 | 3.84266e-15 | 1.000000 |
| PAH1+H        | 2.34440e-15 | 1.000000 | 2.34461e-15 | 1.000000 |
| rad3          | 1.51152e-15 | 1.000000 | 1.51166e-15 | 1.000000 |
| rad4          | 7.51681e-16 | 1.000000 | 7.51750e-16 | 1.000000 |
| rad7          | 4.24738e-16 | 1.000000 | 4.24777e-16 | 1.000000 |
| rad51         | 4.07404e-16 | 1.000000 | 4.07441e-16 | 1.000000 |
| rad34         | 1.57781e-16 | 1.000000 | 1.57796e-16 | 1.000000 |
| rad11         | 1.17166e-16 | 1.000000 | 1.17177e-16 | 1.000000 |
| rad58         | 2.99505e-17 | 1.000000 | 2.99533e-17 | 1.000000 |
| rad25         | 6.59400e-18 | 1.000000 | 6.59459e-18 | 1.000000 |
| rad65         | 6.35783e-18 | 1.000000 | 6.35842e-18 | 1.000000 |
| rad14         | 5.72766e-18 | 1.000000 | 5.72818e-18 | 1.000000 |
| rad42         | 4.93395e-18 | 1.000000 | 4.93440e-18 | 1.000000 |
| rad13         | 2.49538e-18 | 1.000000 | 2.49562e-18 | 1.000000 |
| rad41         | 1.53085e-18 | 1.000000 | 1.53098e-18 | 1.000000 |
| rad27         | 1.48017e-18 | 1.000000 | 1.48030e-18 | 1.000000 |
| rad23         | 2.49703e-19 | 1.000000 | 2.49725e-19 | 1.000000 |
| rad53         | 1.09682e-19 | 1.000000 | 1.09692e-19 | 1.000000 |
| rad33         | 4.44844e-20 | 1.000000 | 4.44885e-20 | 1.000000 |
| rad31         | 2.87620e-20 | 1.000000 | 2.87646e-20 | 1.000000 |
| rad64         | 2.63852e-20 | 1.000000 | 2.63876e-20 | 1.000000 |
| rad45         | 2.05484e-20 | 1.000000 | 2.05503e-20 | 1.000000 |
| rad21         | 1.10173e-21 | 1.000000 | 1.10183e-21 | 1.000000 |
| rad20         | 8.40618e-22 | 1.000000 | 8.40695e-22 | 1.000000 |
| rad36         | 7.00307e-22 | 1.000000 | 7.00371e-22 | 1.000000 |
| rad56         | 3.10995e-22 | 1.000000 | 3.11023e-22 | 1.000000 |
| rad61         | 3.56436e-23 | 1.000000 | 3.56468e-23 | 1.000000 |
| rad68syn      | 3.28824e-23 | 1.000000 | 3.28854e-23 | 1.000000 |
| rad68anti     | 2.37014e-23 | 1.000000 | 2.37036e-23 | 1.000000 |
| rad18         | 8.04022e-24 | 1.000000 | 8.04095e-24 | 1.000000 |
| rad9          | 7.89803e-24 | 1.000000 | 7.89876e-24 | 1.000000 |
| rad22         | 5.34593e-24 | 1.000000 | 5.34642e-24 | 1.000000 |
| rad5          | 2.65652e-25 | 1.000000 | 2.65677e-25 | 1.000000 |
| rad40syn      | 5.33122e-26 | 1.000000 | 5.33171e-26 | 1.000000 |
| rad24         | 4.89228e-26 | 1.000000 | 4.89273e-26 | 1.000000 |
| rad40anti     | 1.32361e-26 | 1.000000 | 1.32374e-26 | 1.000000 |
| PAH8+H        | 1.18606e-26 | 1.000000 | 1.18617e-26 | 1.000000 |
| rad73         | 1.00619e-26 | 1.000000 | 1.00629e-26 | 1.000000 |
| rad15         | 4.61049e-27 | 1.000000 | 4.61091e-27 | 1.000000 |
| rad71         | 9.35036e-29 | 1.000000 | 9.35121e-29 | 1.000000 |
| rad12         | 1.72163e-29 | 1.000000 | 1.72178e-29 | 1.000000 |
| rad47         | 2.86302e-31 | 1.000000 | 2.86328e-31 | 1.000000 |
| rad72         | 1.61637e-40 | 1.000000 | 1.61652e-40 | 1.000000 |
| rad8          | 1.55103e-42 | 1.000000 | 1.55117e-42 | 1.000000 |

0.100000000E-06 Pa, 400.000000 K

| Rate constant      | True (fraction)      | Effective (fraction) |
|--------------------|----------------------|----------------------|
| Total              | 5.11288e-15 (1.00 )  | 5.10968e-15 (1.00 )  |
| Formation of rad11 | 3.08094e-15 (0.603 ) | 3.07881e-15 (0.603 ) |

|                   |                       |                       |
|-------------------|-----------------------|-----------------------|
| Formation of rad6 | 1.54092e-15 (0.301 )  | 1.53985e-15 (0.301 )  |
| H-abstraction     | 4.91025e-16 (0.0960 ) | 4.91025e-16 (0.0961 ) |

| species            | PYtrue      | Cumul    | PYeffective | Cumul    |
|--------------------|-------------|----------|-------------|----------|
| Indene+H           | 0.804485    | 0.804485 | 0.804989    | 0.804989 |
| Benzene+2-propynyl | 0.0960368   | 0.900522 | 0.0960969   | 0.901086 |
| C2H2+PhCH2         | 0.0525421   | 0.953064 | 0.0525751   | 0.953661 |
| PhCCH+CH3          | 0.0262535   | 0.979317 | 0.0262700   | 0.979931 |
| PhCHCCH2+H         | 0.0106706   | 0.989988 | 0.0106772   | 0.990608 |
| PhCCCH3+H          | 0.00676080  | 0.996749 | 0.00676504  | 0.997373 |
| Ph+MeAc            | 0.00228512  | 0.999034 | 0.00228655  | 0.999660 |
| Phenyl+Allene      | 0.000625754 | 0.999659 | 0.000000    | 0.999660 |
| PAH7+H             | 0.000215668 | 0.999875 | 0.000215804 | 0.999875 |
| PhCH2CCH+H         | 6.37921e-05 | 0.999939 | 6.38320e-05 | 0.999939 |
| rad39              | 4.88390e-05 | 0.999988 | 4.88695e-05 | 0.999988 |
| rad30              | 4.71374e-06 | 0.999992 | 4.71670e-06 | 0.999993 |
| rad19anti          | 2.55284e-06 | 0.999995 | 2.55443e-06 | 0.999995 |
| PAH9+H             | 2.27172e-06 | 0.999997 | 2.27314e-06 | 0.999998 |
| rad37              | 9.72231e-07 | 0.999998 | 9.72835e-07 | 0.999999 |
| rad35              | 7.27597e-07 | 0.999999 | 7.28053e-07 | 0.999999 |
| rad38              | 6.64248e-07 | 1.000000 | 6.64664e-07 | 1.000000 |
| rad46              | 2.95927e-08 | 1.000000 | 2.96112e-08 | 1.000000 |
| rad60syn           | 6.77132e-09 | 1.000000 | 6.77556e-09 | 1.000000 |
| rad19syn           | 4.62790e-09 | 1.000000 | 4.63079e-09 | 1.000000 |
| rad60anti          | 3.07480e-09 | 1.000000 | 3.07673e-09 | 1.000000 |
| PAH3+H             | 1.45800e-09 | 1.000000 | 1.45891e-09 | 1.000000 |
| rad54              | 4.18669e-10 | 1.000000 | 4.18931e-10 | 1.000000 |
| rad59              | 2.84711e-10 | 1.000000 | 2.84889e-10 | 1.000000 |
| PAH10+CH3          | 1.98074e-10 | 1.000000 | 1.98198e-10 | 1.000000 |
| rad50              | 7.81204e-11 | 1.000000 | 7.81693e-11 | 1.000000 |
| rad43              | 3.26732e-11 | 1.000000 | 3.26936e-11 | 1.000000 |
| rad67              | 2.48951e-11 | 1.000000 | 2.49108e-11 | 1.000000 |
| PhcycC3H3_A+H      | 2.37988e-11 | 1.000000 | 2.38137e-11 | 1.000000 |
| rad62              | 2.26679e-11 | 1.000000 | 2.26821e-11 | 1.000000 |
| rad70              | 7.63979e-12 | 1.000000 | 7.64458e-12 | 1.000000 |
| rad55              | 3.50822e-12 | 1.000000 | 3.51042e-12 | 1.000000 |
| PAH1+H             | 2.19400e-12 | 1.000000 | 2.19537e-12 | 1.000000 |
| rad6               | 1.05897e-12 | 1.000000 | 1.05963e-12 | 1.000000 |
| rad2               | 4.74705e-13 | 1.000000 | 4.75003e-13 | 1.000000 |
| rad52              | 4.56316e-13 | 1.000000 | 4.56602e-13 | 1.000000 |
| rad34              | 1.75088e-13 | 1.000000 | 1.75198e-13 | 1.000000 |
| rad51              | 1.36997e-13 | 1.000000 | 1.37083e-13 | 1.000000 |
| rad1               | 4.41864e-14 | 1.000000 | 4.42141e-14 | 1.000000 |
| rad28              | 3.27172e-14 | 1.000000 | 3.27377e-14 | 1.000000 |
| rad10              | 2.68469e-14 | 1.000000 | 2.68637e-14 | 1.000000 |
| rad58              | 1.74184e-14 | 1.000000 | 1.74293e-14 | 1.000000 |
| rad26              | 1.19181e-14 | 1.000000 | 1.19256e-14 | 1.000000 |
| rad3               | 9.84787e-15 | 1.000000 | 9.85399e-15 | 1.000000 |
| rad42              | 7.28195e-15 | 1.000000 | 7.28651e-15 | 1.000000 |
| rad4               | 5.18689e-15 | 1.000000 | 5.19014e-15 | 1.000000 |
| rad65              | 3.20497e-15 | 1.000000 | 3.20698e-15 | 1.000000 |
| rad41              | 2.20567e-15 | 1.000000 | 2.20705e-15 | 1.000000 |
| rad53              | 9.04225e-16 | 1.000000 | 9.04789e-16 | 1.000000 |
| rad23              | 5.52877e-16 | 1.000000 | 5.53222e-16 | 1.000000 |
| rad64              | 3.15111e-16 | 1.000000 | 3.15309e-16 | 1.000000 |
| rad7               | 1.00480e-16 | 1.000000 | 1.00543e-16 | 1.000000 |
| rad45              | 9.89352e-17 | 1.000000 | 9.89973e-17 | 1.000000 |
| rad11              | 3.35717e-17 | 1.000000 | 3.35927e-17 | 1.000000 |
| rad56              | 1.60193e-17 | 1.000000 | 1.60293e-17 | 1.000000 |
| rad36              | 3.81656e-18 | 1.000000 | 3.81895e-18 | 1.000000 |
| rad25              | 2.27195e-18 | 1.000000 | 2.27337e-18 | 1.000000 |
| rad68syn           | 1.85188e-18 | 1.000000 | 1.85304e-18 | 1.000000 |
| rad14              | 1.81674e-18 | 1.000000 | 1.81788e-18 | 1.000000 |
| rad68anti          | 1.33289e-18 | 1.000000 | 1.33373e-18 | 1.000000 |
| rad61              | 9.28153e-19 | 1.000000 | 9.28733e-19 | 1.000000 |
| rad13              | 6.81910e-19 | 1.000000 | 6.82337e-19 | 1.000000 |
| rad27              | 5.95872e-19 | 1.000000 | 5.96244e-19 | 1.000000 |
| rad31              | 4.49566e-19 | 1.000000 | 4.49847e-19 | 1.000000 |
| rad33              | 4.97415e-20 | 1.000000 | 4.97726e-20 | 1.000000 |
| rad40syn           | 1.44546e-20 | 1.000000 | 1.44636e-20 | 1.000000 |
| PAH8+H             | 8.90780e-21 | 1.000000 | 8.91337e-21 | 1.000000 |
| rad40anti          | 3.67526e-21 | 1.000000 | 3.67756e-21 | 1.000000 |
| rad21              | 2.89653e-21 | 1.000000 | 2.89835e-21 | 1.000000 |
| rad73              | 2.38292e-21 | 1.000000 | 2.38442e-21 | 1.000000 |
| rad20              | 1.85189e-21 | 1.000000 | 1.85305e-21 | 1.000000 |
| rad9               | 1.57636e-22 | 1.000000 | 1.57735e-22 | 1.000000 |
| rad22              | 1.15480e-22 | 1.000000 | 1.15552e-22 | 1.000000 |
| rad71              | 9.34300e-23 | 1.000000 | 9.34889e-23 | 1.000000 |
| rad18              | 8.23486e-24 | 1.000000 | 8.24002e-24 | 1.000000 |



|       |             |          |             |         |
|-------|-------------|----------|-------------|---------|
| rad24 | 1.02138e-24 | 1.000000 | 1.02202e-24 | 1.00000 |
| rad5  | 3.74034e-25 | 1.000000 | 3.74267e-25 | 1.00000 |
| rad15 | 9.57659e-26 | 1.000000 | 9.58264e-26 | 1.00000 |
| rad12 | 1.76943e-27 | 1.000000 | 1.77054e-27 | 1.00000 |
| rad72 | 9.03714e-29 | 1.000000 | 9.04283e-29 | 1.00000 |
| rad47 | 7.50666e-29 | 1.000000 | 7.51136e-29 | 1.00000 |
| rad8  | 4.40937e-40 | 1.000000 | 4.41213e-40 | 1.00000 |

0.100000000E-06 Pa, 500.000000 K

| Rate constant      | True (fraction)      | Effective (fraction) |
|--------------------|----------------------|----------------------|
| Total              | 2.11551e-14 (1.00 )  | 2.10968e-14 (1.00 )  |
| Formation of rad11 | 1.10850e-14 (0.524 ) | 1.10494e-14 (0.524 ) |
| Formation of rad6  | 7.08033e-15 (0.335 ) | 7.05760e-15 (0.335 ) |
| H-abstraction      | 2.98976e-15 (0.141 ) | 2.98976e-15 (0.142 ) |

| species            | PYtrue      | Cumul    | PYeffective | Cumul    |
|--------------------|-------------|----------|-------------|----------|
| Indene+H           | 0.706762    | 0.706762 | 0.708716    | 0.708716 |
| Benzene+2-propynyl | 0.141326    | 0.848088 | 0.141717    | 0.850433 |
| C2H2+PhCH2         | 0.0811037   | 0.929191 | 0.0813279   | 0.931761 |
| PhCCH+CH3          | 0.0389496   | 0.968141 | 0.0390573   | 0.970818 |
| PhCHCCH2+H         | 0.0153921   | 0.983533 | 0.0154346   | 0.986253 |
| PhCCCH3+H          | 0.00823928  | 0.991772 | 0.00826206  | 0.994515 |
| Ph+MeAc            | 0.00432839  | 0.996101 | 0.00434036  | 0.998855 |
| Phenyl+Allene      | 0.00275756  | 0.998858 | 0.00000     | 0.998855 |
| PAH7+H             | 0.000574793 | 0.999433 | 0.000576383 | 0.999432 |
| PhCH2CCH+H         | 0.000399546 | 0.999833 | 0.000400651 | 0.999832 |
| rad39              | 0.000137925 | 0.999971 | 0.000138306 | 0.999971 |
| rad30              | 9.14625e-06 | 0.999980 | 9.17153e-06 | 0.999980 |
| rad19anti          | 7.87872e-06 | 0.999988 | 7.90052e-06 | 0.999988 |
| PAH9+H             | 6.12734e-06 | 0.999994 | 6.14428e-06 | 0.999994 |
| rad37              | 2.41829e-06 | 0.999996 | 2.42498e-06 | 0.999996 |
| rad38              | 1.93439e-06 | 0.999998 | 1.93974e-06 | 0.999998 |
| rad35              | 1.76562e-06 | 1.000000 | 1.77051e-06 | 1.000000 |
| rad46              | 1.27870e-07 | 1.000000 | 1.28224e-07 | 1.00000  |
| rad19syn           | 7.63986e-08 | 1.000000 | 7.66098e-08 | 1.00000  |
| rad60syn           | 2.91346e-08 | 1.00000  | 2.92151e-08 | 1.00000  |
| PAH3+H             | 1.45909e-08 | 1.00000  | 1.46312e-08 | 1.00000  |
| rad60anti          | 1.41795e-08 | 1.00000  | 1.42187e-08 | 1.00000  |
| rad54              | 1.02843e-08 | 1.00000  | 1.03128e-08 | 1.00000  |
| PAH10+CH3          | 3.35592e-09 | 1.00000  | 3.36520e-09 | 1.00000  |
| rad59              | 2.61933e-09 | 1.00000  | 2.62658e-09 | 1.00000  |
| PhcycC3H3_A+H      | 1.25838e-09 | 1.00000  | 1.26187e-09 | 1.00000  |
| rad50              | 1.15864e-09 | 1.00000  | 1.16185e-09 | 1.00000  |
| rad62              | 4.84009e-10 | 1.00000  | 4.85347e-10 | 1.00000  |
| rad43              | 4.60419e-10 | 1.00000  | 4.61691e-10 | 1.00000  |
| rad67              | 3.97898e-10 | 1.00000  | 3.98999e-10 | 1.00000  |
| rad70              | 3.42517e-10 | 1.00000  | 3.43464e-10 | 1.00000  |
| PAH1+H             | 1.64298e-10 | 1.00000  | 1.64753e-10 | 1.00000  |
| rad55              | 1.59822e-10 | 1.00000  | 1.60264e-10 | 1.00000  |
| rad34              | 1.41616e-11 | 1.00000  | 1.42007e-11 | 1.00000  |
| rad52              | 1.34820e-11 | 1.00000  | 1.35193e-11 | 1.00000  |
| rad51              | 7.24796e-12 | 1.00000  | 7.26800e-12 | 1.00000  |
| rad2               | 1.74505e-12 | 1.00000  | 1.74987e-12 | 1.00000  |
| rad58              | 1.01105e-12 | 1.00000  | 1.01385e-12 | 1.00000  |
| rad42              | 6.16327e-13 | 1.00000  | 6.18031e-13 | 1.00000  |
| rad6               | 5.24448e-13 | 1.00000  | 5.25899e-13 | 1.00000  |
| rad53              | 2.35883e-13 | 1.00000  | 2.36535e-13 | 1.00000  |
| rad1               | 2.09881e-13 | 1.00000  | 2.10461e-13 | 1.00000  |
| rad65              | 2.01730e-13 | 1.00000  | 2.02287e-13 | 1.00000  |
| rad41              | 1.64828e-13 | 1.00000  | 1.65283e-13 | 1.00000  |
| rad64              | 9.67571e-14 | 1.00000  | 9.70247e-14 | 1.00000  |
| rad10              | 7.88057e-14 | 1.00000  | 7.90235e-14 | 1.00000  |
| rad23              | 5.92532e-14 | 1.00000  | 5.94171e-14 | 1.00000  |
| rad3               | 4.93309e-14 | 1.00000  | 4.94673e-14 | 1.00000  |
| rad4               | 2.80221e-14 | 1.00000  | 2.80996e-14 | 1.00000  |
| rad45              | 1.66703e-14 | 1.00000  | 1.67164e-14 | 1.00000  |
| rad56              | 1.22099e-14 | 1.00000  | 1.22437e-14 | 1.00000  |
| rad28              | 6.58022e-15 | 1.00000  | 6.59841e-15 | 1.00000  |
| rad26              | 2.45668e-15 | 1.00000  | 2.46348e-15 | 1.00000  |
| rad68syn           | 1.45353e-15 | 1.00000  | 1.45755e-15 | 1.00000  |
| rad68anti          | 1.02673e-15 | 1.00000  | 1.02957e-15 | 1.00000  |
| rad36              | 9.08898e-16 | 1.00000  | 9.11411e-16 | 1.00000  |
| rad61              | 4.14122e-16 | 1.00000  | 4.15268e-16 | 1.00000  |
| rad7               | 5.37903e-17 | 1.00000  | 5.39391e-17 | 1.00000  |
| PAH8+H             | 3.33496e-17 | 1.00000  | 3.34419e-17 | 1.00000  |
| rad40syn           | 2.92057e-17 | 1.00000  | 2.92865e-17 | 1.00000  |
| rad11              | 2.07460e-17 | 1.00000  | 2.08034e-17 | 1.00000  |

|           |             |         |             |         |
|-----------|-------------|---------|-------------|---------|
| rad40anti | 8.32431e-18 | 1.00000 | 8.34733e-18 | 1.00000 |
| rad73     | 5.16042e-18 | 1.00000 | 5.17469e-18 | 1.00000 |
| rad31     | 2.28423e-18 | 1.00000 | 2.29055e-18 | 1.00000 |
| rad25     | 1.03866e-18 | 1.00000 | 1.04153e-18 | 1.00000 |
| rad14     | 7.33358e-19 | 1.00000 | 7.35386e-19 | 1.00000 |
| rad13     | 5.24170e-19 | 1.00000 | 5.25619e-19 | 1.00000 |
| rad71     | 4.74174e-19 | 1.00000 | 4.75486e-19 | 1.00000 |
| rad27     | 3.28168e-19 | 1.00000 | 3.29075e-19 | 1.00000 |
| rad33     | 1.14564e-19 | 1.00000 | 1.14881e-19 | 1.00000 |
| rad21     | 1.71870e-20 | 1.00000 | 1.72345e-20 | 1.00000 |
| rad9      | 9.90051e-21 | 1.00000 | 9.92785e-21 | 1.00000 |
| rad20     | 8.81257e-21 | 1.00000 | 8.83689e-21 | 1.00000 |
| rad22     | 4.05347e-21 | 1.00000 | 4.06468e-21 | 1.00000 |
| rad24     | 6.92004e-23 | 1.00000 | 6.93918e-23 | 1.00000 |
| rad72     | 2.10572e-23 | 1.00000 | 2.11154e-23 | 1.00000 |
| rad18     | 1.33618e-23 | 1.00000 | 1.33987e-23 | 1.00000 |
| rad15     | 6.36862e-24 | 1.00000 | 6.38622e-24 | 1.00000 |
| rad12     | 6.95693e-25 | 1.00000 | 6.97617e-25 | 1.00000 |
| rad5      | 3.39708e-25 | 1.00000 | 3.40647e-25 | 1.00000 |
| rad47     | 4.86077e-27 | 1.00000 | 4.87421e-27 | 1.00000 |
| rad8      | 8.30251e-37 | 1.00000 | 8.32547e-37 | 1.00000 |

0.100000000E-06 Pa, 600.000000 K

| Rate constant      | True (fraction)      | Effective (fraction) |
|--------------------|----------------------|----------------------|
| Total              | 6.08120e-14 (1.00 )  | 6.02869e-14 (1.00 )  |
| Formation of rad11 | 2.83304e-14 (0.466 ) | 2.80313e-14 (0.465 ) |
| Formation of rad6  | 2.13840e-14 (0.352 ) | 2.11582e-14 (0.351 ) |
| H-abstraction      | 1.10975e-14 (0.182 ) | 1.10975e-14 (0.184 ) |

| species            | PYtrue      | Cumul    | PYeffective | Cumul    |
|--------------------|-------------|----------|-------------|----------|
| Indene+H           | 0.606934    | 0.606934 | 0.612219    | 0.612219 |
| Benzene+2-propynyl | 0.182488    | 0.789422 | 0.184077    | 0.796297 |
| C2H2+PhCH2         | 0.112836    | 0.902258 | 0.113819    | 0.910116 |
| PhCCH+CH3          | 0.0502927   | 0.952551 | 0.0507307   | 0.960846 |
| PhCHCCH2+H         | 0.0208956   | 0.973447 | 0.0210776   | 0.981924 |
| Phenyl+Allene      | 0.00863333  | 0.982080 | 0.000000    | 0.981924 |
| PhCCCH3+H          | 0.00840933  | 0.990489 | 0.00848258  | 0.990406 |
| Ph+MeAc            | 0.00630896  | 0.996798 | 0.00636390  | 0.996770 |
| PhCH2CCH+H         | 0.00158536  | 0.998384 | 0.00159917  | 0.998369 |
| PAH7+H             | 0.00124706  | 0.999631 | 0.00125792  | 0.999627 |
| rad39              | 0.000304554 | 0.999935 | 0.000307206 | 0.999935 |
| rad19anti          | 2.07283e-05 | 0.999956 | 2.09088e-05 | 0.999955 |
| rad30              | 1.54421e-05 | 0.999971 | 1.55766e-05 | 0.999971 |
| PAH9+H             | 1.45719e-05 | 0.999986 | 1.46988e-05 | 0.999986 |
| rad38              | 4.88300e-06 | 0.999991 | 4.92552e-06 | 0.999991 |
| rad37              | 4.23980e-06 | 0.999995 | 4.27673e-06 | 0.999995 |
| rad35              | 3.83137e-06 | 0.999999 | 3.86474e-06 | 0.999999 |
| rad19syn           | 5.75843e-07 | 1.000000 | 5.80858e-07 | 0.999999 |
| rad46              | 4.35560e-07 | 1.000000 | 4.39353e-07 | 1.000000 |
| rad54              | 1.01017e-07 | 1.000000 | 1.01897e-07 | 1.000000 |
| rad60syn           | 8.96254e-08 | 1.000000 | 9.04058e-08 | 1.000000 |
| PAH3+H             | 8.11822e-08 | 1.000000 | 8.18892e-08 | 1.000000 |
| rad60anti          | 4.57655e-08 | 1.000000 | 4.61641e-08 | 1.000000 |
| PAH10+CH3          | 2.25831e-08 | 1.000000 | 2.27797e-08 | 1.000000 |
| PhcycC3H3_A+H      | 2.05528e-08 | 1.000000 | 2.07318e-08 | 1.000000 |
| rad59              | 1.35486e-08 | 1.000000 | 1.36666e-08 | 1.000000 |
| rad50              | 9.40269e-09 | 1.000000 | 9.48453e-09 | 1.000000 |
| rad70              | 4.88193e-09 | 1.000000 | 4.92445e-09 | 1.000000 |
| rad62              | 3.91161e-09 | 1.000000 | 3.94568e-09 | 1.000000 |
| rad67              | 3.65819e-09 | 1.000000 | 3.69004e-09 | 1.000000 |
| PAH1+H             | 3.25971e-09 | 1.000000 | 3.28810e-09 | 1.000000 |
| rad43              | 2.57504e-09 | 1.000000 | 2.59746e-09 | 1.000000 |
| rad55              | 2.29328e-09 | 1.000000 | 2.31325e-09 | 1.000000 |
| rad34              | 2.96007e-10 | 1.000000 | 2.98585e-10 | 1.000000 |
| rad52              | 1.70972e-10 | 1.000000 | 1.72461e-10 | 1.000000 |
| rad51              | 1.34047e-10 | 1.000000 | 1.35214e-10 | 1.000000 |
| rad58              | 1.71337e-11 | 1.000000 | 1.72829e-11 | 1.000000 |
| rad42              | 1.22225e-11 | 1.000000 | 1.23290e-11 | 1.000000 |
| rad53              | 1.06169e-11 | 1.000000 | 1.07093e-11 | 1.000000 |
| rad64              | 4.60104e-12 | 1.000000 | 4.64111e-12 | 1.000000 |
| rad65              | 4.04334e-12 | 1.000000 | 4.07855e-12 | 1.000000 |
| rad2               | 2.85587e-12 | 1.000000 | 2.88075e-12 | 1.000000 |
| rad41              | 2.76375e-12 | 1.000000 | 2.78781e-12 | 1.000000 |
| rad56              | 1.10531e-12 | 1.000000 | 1.11493e-12 | 1.000000 |
| rad1               | 4.56653e-13 | 1.000000 | 4.60630e-13 | 1.000000 |
| rad23              | 3.58481e-13 | 1.000000 | 3.61603e-13 | 1.000000 |
| rad6               | 3.38107e-13 | 1.000000 | 3.41052e-13 | 1.000000 |

|           |             |         |             |         |
|-----------|-------------|---------|-------------|---------|
| rad68syn  | 1.32095e-13 | 1.00000 | 1.33246e-13 | 1.00000 |
| rad45     | 1.03992e-13 | 1.00000 | 1.04898e-13 | 1.00000 |
| rad68anti | 9.18033e-14 | 1.00000 | 9.26031e-14 | 1.00000 |
| rad10     | 8.42241e-14 | 1.00000 | 8.49579e-14 | 1.00000 |
| rad3      | 8.01073e-14 | 1.00000 | 8.08050e-14 | 1.00000 |
| rad4      | 5.14610e-14 | 1.00000 | 5.19092e-14 | 1.00000 |
| rad61     | 2.45771e-14 | 1.00000 | 2.47911e-14 | 1.00000 |
| rad36     | 9.86140e-15 | 1.00000 | 9.94724e-15 | 1.00000 |
| PAH8+H    | 8.64322e-15 | 1.00000 | 8.71854e-15 | 1.00000 |
| rad40syn  | 4.97710e-15 | 1.00000 | 5.02044e-15 | 1.00000 |
| rad40anti | 1.59901e-15 | 1.00000 | 1.61294e-15 | 1.00000 |
| rad28     | 1.48960e-15 | 1.00000 | 1.50258e-15 | 1.00000 |
| rad73     | 1.02756e-15 | 1.00000 | 1.03651e-15 | 1.00000 |
| rad26     | 5.71565e-16 | 1.00000 | 5.76542e-16 | 1.00000 |
| rad71     | 1.69641e-16 | 1.00000 | 1.71119e-16 | 1.00000 |
| rad7      | 3.87845e-17 | 1.00000 | 3.91222e-17 | 1.00000 |
| rad11     | 1.90300e-17 | 1.00000 | 1.91958e-17 | 1.00000 |
| rad31     | 3.07518e-18 | 1.00000 | 3.10197e-18 | 1.00000 |
| rad9      | 1.04702e-18 | 1.00000 | 1.05614e-18 | 1.00000 |
| rad13     | 1.00802e-18 | 1.00000 | 1.01679e-18 | 1.00000 |
| rad25     | 7.31644e-19 | 1.00000 | 7.38016e-19 | 1.00000 |
| rad33     | 5.24243e-19 | 1.00000 | 5.28809e-19 | 1.00000 |
| rad14     | 4.27537e-19 | 1.00000 | 4.31259e-19 | 1.00000 |
| rad27     | 2.77029e-19 | 1.00000 | 2.79442e-19 | 1.00000 |
| rad21     | 2.17608e-19 | 1.00000 | 2.19503e-19 | 1.00000 |
| rad72     | 1.30033e-19 | 1.00000 | 1.31166e-19 | 1.00000 |
| rad20     | 9.04765e-20 | 1.00000 | 9.12642e-20 | 1.00000 |
| rad22     | 1.85978e-20 | 1.00000 | 1.87599e-20 | 1.00000 |
| rad24     | 7.30645e-21 | 1.00000 | 7.37007e-21 | 1.00000 |
| rad15     | 6.37840e-22 | 1.00000 | 6.43394e-22 | 1.00000 |
| rad12     | 3.30942e-22 | 1.00000 | 3.33824e-22 | 1.00000 |
| rad18     | 3.85732e-23 | 1.00000 | 3.89091e-23 | 1.00000 |
| rad5      | 2.82520e-25 | 1.00000 | 2.84980e-25 | 1.00000 |
| rad47     | 1.06838e-25 | 1.00000 | 1.07769e-25 | 1.00000 |
| rad8      | 7.32789e-33 | 1.00000 | 7.39170e-33 | 1.00000 |

0.100000000E-06 Pa, 700.000000 K

| Rate constant      | True (fraction)      | Effective (fraction) |
|--------------------|----------------------|----------------------|
| Total              | 1.39564e-13 (1.00 )  | 1.36669e-13 (1.00 )  |
| Formation of rad11 | 5.88273e-14 (0.422 ) | 5.72650e-14 (0.419 ) |
| Formation of rad6  | 5.01684e-14 (0.359 ) | 4.88360e-14 (0.357 ) |
| H-abstraction      | 3.05678e-14 (0.219 ) | 3.05678e-14 (0.224 ) |

| species            | PYtrue      | Cumul    | PYeffective | Cumul    |
|--------------------|-------------|----------|-------------|----------|
| Indene+H           | 0.510454    | 0.510454 | 0.521265    | 0.521265 |
| Benzene+2-propynyl | 0.219024    | 0.729478 | 0.223663    | 0.744928 |
| C2H2+PhCH2         | 0.140690    | 0.870167 | 0.143670    | 0.888598 |
| PhCCH+CH3          | 0.0586093   | 0.928777 | 0.0598506   | 0.948449 |
| PhCHCCH2+H         | 0.0277623   | 0.956539 | 0.0283503   | 0.976799 |
| Phenyl+Allene      | 0.0207415   | 0.977280 | 0.000000    | 0.976799 |
| Ph+MeAc            | 0.00771340  | 0.984994 | 0.00787679  | 0.984676 |
| PhCCH3+H           | 0.00756061  | 0.992554 | 0.00772075  | 0.992396 |
| PhCH2CCH+H         | 0.00451180  | 0.997066 | 0.00460736  | 0.997004 |
| PAH7+H             | 0.00225727  | 0.999324 | 0.00230508  | 0.999309 |
| rad39              | 0.000548289 | 0.999872 | 0.000559902 | 0.999869 |
| rad19anti          | 4.66037e-05 | 0.999918 | 4.75908e-05 | 0.999916 |
| PAH9+H             | 2.99985e-05 | 0.999948 | 3.06339e-05 | 0.999947 |
| rad30              | 2.26762e-05 | 0.999971 | 2.31565e-05 | 0.999970 |
| rad38              | 1.05314e-05 | 0.999982 | 1.07544e-05 | 0.999981 |
| rad35              | 7.29844e-06 | 0.999989 | 7.45303e-06 | 0.999988 |
| rad37              | 5.93522e-06 | 0.999995 | 6.06093e-06 | 0.999994 |
| rad19syn           | 2.61380e-06 | 0.999998 | 2.66916e-06 | 0.999997 |
| rad46              | 1.18432e-06 | 0.999999 | 1.20940e-06 | 0.999998 |
| rad54              | 5.53865e-07 | 0.999999 | 5.65596e-07 | 0.999999 |
| PAH3+H             | 2.96686e-07 | 1.000000 | 3.02969e-07 | 0.999999 |
| rad60syn           | 2.09904e-07 | 1.000000 | 2.14349e-07 | 0.999999 |
| PhcycC3H3_A+H      | 1.62838e-07 | 1.000000 | 1.66287e-07 | 1.000000 |
| rad60anti          | 1.11059e-07 | 1.000000 | 1.13411e-07 | 1.000000 |
| PAH10+CH3          | 8.88407e-08 | 1.000000 | 9.07227e-08 | 1.000000 |
| rad50              | 4.89398e-08 | 1.000000 | 4.99764e-08 | 1.000000 |
| rad59              | 4.64276e-08 | 1.000000 | 4.74110e-08 | 1.000000 |
| rad70              | 3.43279e-08 | 1.000000 | 3.50550e-08 | 1.000000 |
| PAH1+H             | 2.87927e-08 | 1.000000 | 2.94026e-08 | 1.000000 |
| rad67              | 2.16413e-08 | 1.000000 | 2.20997e-08 | 1.000000 |
| rad62              | 1.75396e-08 | 1.000000 | 1.79112e-08 | 1.000000 |
| rad55              | 1.62462e-08 | 1.000000 | 1.65903e-08 | 1.000000 |
| rad43              | 8.26632e-09 | 1.000000 | 8.44142e-09 | 1.000000 |

|           |             |         |             |          |
|-----------|-------------|---------|-------------|----------|
| rad34     | 2.73084e-09 | 1.00000 | 2.78868e-09 | 1.000000 |
| rad51     | 1.25003e-09 | 1.00000 | 1.27651e-09 | 1.000000 |
| rad52     | 1.21856e-09 | 1.00000 | 1.24437e-09 | 1.000000 |
| rad53     | 1.69563e-10 | 1.00000 | 1.73154e-10 | 1.000000 |
| rad58     | 1.35852e-10 | 1.00000 | 1.38730e-10 | 1.000000 |
| rad42     | 1.03499e-10 | 1.00000 | 1.05691e-10 | 1.000000 |
| rad64     | 7.31424e-11 | 1.00000 | 7.46916e-11 | 1.000000 |
| rad65     | 3.91348e-11 | 1.00000 | 3.99636e-11 | 1.000000 |
| rad56     | 2.88481e-11 | 1.00000 | 2.94592e-11 | 1.000000 |
| rad41     | 1.94813e-11 | 1.00000 | 1.98939e-11 | 1.000000 |
| rad68syn  | 3.41597e-12 | 1.00000 | 3.48832e-12 | 1.000000 |
| rad68anti | 2.34479e-12 | 1.00000 | 2.39446e-12 | 1.000000 |
| rad2      | 1.65256e-12 | 1.00000 | 1.68756e-12 | 1.000000 |
| PAH8+H    | 4.75492e-13 | 1.00000 | 4.85564e-13 | 1.000000 |
| rad61     | 4.69348e-13 | 1.00000 | 4.79288e-13 | 1.000000 |
| rad23     | 4.28883e-13 | 1.00000 | 4.37967e-13 | 1.000000 |
| rad1      | 3.26775e-13 | 1.00000 | 3.33696e-13 | 1.000000 |
| rad40syn  | 2.01813e-13 | 1.00000 | 2.06088e-13 | 1.000000 |
| rad45     | 1.37822e-13 | 1.00000 | 1.40741e-13 | 1.000000 |
| rad6      | 1.27031e-13 | 1.00000 | 1.29722e-13 | 1.000000 |
| rad40anti | 7.19652e-14 | 1.00000 | 7.34895e-14 | 1.000000 |
| rad73     | 4.99710e-14 | 1.00000 | 5.10295e-14 | 1.000000 |
| rad3      | 4.38601e-14 | 1.00000 | 4.47891e-14 | 1.000000 |
| rad10     | 3.88926e-14 | 1.00000 | 3.97164e-14 | 1.000000 |
| rad4      | 3.06072e-14 | 1.00000 | 3.12555e-14 | 1.000000 |
| rad36     | 1.42049e-14 | 1.00000 | 1.45058e-14 | 1.000000 |
| rad71     | 1.22500e-14 | 1.00000 | 1.25094e-14 | 1.000000 |
| rad28     | 4.02308e-16 | 1.00000 | 4.10830e-16 | 1.000000 |
| rad26     | 1.58339e-16 | 1.00000 | 1.61692e-16 | 1.000000 |
| rad9      | 8.04413e-17 | 1.00000 | 8.21457e-17 | 1.000000 |
| rad11     | 2.29306e-17 | 1.00000 | 2.34163e-17 | 1.000000 |
| rad7      | 1.85159e-17 | 1.00000 | 1.89081e-17 | 1.000000 |
| rad72     | 7.28744e-18 | 1.00000 | 7.44179e-18 | 1.000000 |
| rad13     | 5.52415e-18 | 1.00000 | 5.64115e-18 | 1.000000 |
| rad21     | 3.99858e-18 | 1.00000 | 4.08327e-18 | 1.000000 |
| rad33     | 3.80980e-18 | 1.00000 | 3.89050e-18 | 1.000000 |
| rad31     | 1.78365e-18 | 1.00000 | 1.82143e-18 | 1.000000 |
| rad20     | 1.48744e-18 | 1.00000 | 1.51895e-18 | 1.000000 |
| rad25     | 8.89375e-19 | 1.00000 | 9.08213e-19 | 1.000000 |
| rad24     | 3.96761e-19 | 1.00000 | 4.05165e-19 | 1.000000 |
| rad14     | 3.92236e-19 | 1.00000 | 4.00544e-19 | 1.000000 |
| rad27     | 3.69548e-19 | 1.00000 | 3.77375e-19 | 1.000000 |
| rad12     | 4.79209e-20 | 1.00000 | 4.89359e-20 | 1.000000 |
| rad15     | 3.23882e-20 | 1.00000 | 3.30742e-20 | 1.000000 |
| rad22     | 2.22769e-20 | 1.00000 | 2.27488e-20 | 1.000000 |
| rad18     | 2.14034e-22 | 1.00000 | 2.18567e-22 | 1.000000 |
| rad47     | 9.03917e-25 | 1.00000 | 9.23064e-25 | 1.000000 |
| rad5      | 2.61894e-25 | 1.00000 | 2.67441e-25 | 1.000000 |
| rad8      | 9.25480e-29 | 1.00000 | 9.45081e-29 | 1.000000 |

0.100000000E-06 Pa, 800.000000 K

=====

| Rate constant      | True (fraction)      | Effective (fraction) |
|--------------------|----------------------|----------------------|
| Total              | 2.75392e-13 (1.00 )  | 2.64229e-13 (1.00 )  |
| Formation of rad11 | 1.06471e-13 (0.387 ) | 1.00706e-13 (0.381 ) |
| Formation of rad6  | 9.97133e-14 (0.362 ) | 9.43145e-14 (0.357 ) |
| H-abstraction      | 6.92082e-14 (0.251 ) | 6.92082e-14 (0.262 ) |

| species            | PYtrue      | Cumul    | PYeffective | Cumul    |
|--------------------|-------------|----------|-------------|----------|
| Indene+H           | 0.420963    | 0.420963 | 0.438748    | 0.438748 |
| Benzene+2-propynyl | 0.251308    | 0.672270 | 0.261925    | 0.700673 |
| C2H2+PhCH2         | 0.158756    | 0.831027 | 0.165464    | 0.866137 |
| PhCCH+CH3          | 0.0631452   | 0.894172 | 0.0658130   | 0.931950 |
| Phenyl+Allene      | 0.0405363   | 0.934708 | 0.000000    | 0.931950 |
| PhCHCCH2+H         | 0.0360793   | 0.970788 | 0.0376036   | 0.969553 |
| PhCH2CCH+H         | 0.00999819  | 0.980786 | 0.0104207   | 0.979974 |
| Ph+MeAc            | 0.00840385  | 0.989190 | 0.00875888  | 0.988733 |
| PhCCCH3+H          | 0.00623443  | 0.995424 | 0.00649783  | 0.995231 |
| PAH7+H             | 0.00351019  | 0.998934 | 0.00365850  | 0.998889 |
| rad39              | 0.000836596 | 0.999771 | 0.000871939 | 0.999761 |
| rad19anti          | 9.01935e-05 | 0.999861 | 9.40042e-05 | 0.999855 |
| PAH9+H             | 5.38600e-05 | 0.999915 | 5.61355e-05 | 0.999911 |
| rad30              | 2.94556e-05 | 0.999944 | 3.07000e-05 | 0.999942 |
| rad38              | 1.96291e-05 | 0.999964 | 2.04585e-05 | 0.999962 |
| rad35              | 1.22732e-05 | 0.999976 | 1.27916e-05 | 0.999975 |
| rad19syn           | 8.33347e-06 | 0.999985 | 8.68552e-06 | 0.999984 |
| rad37              | 7.26188e-06 | 0.999992 | 7.56866e-06 | 0.999992 |
| rad46              | 2.65265e-06 | 0.999995 | 2.76472e-06 | 0.999994 |

|               |             |          |             |          |
|---------------|-------------|----------|-------------|----------|
| rad54         | 2.03471e-06 | 0.999997 | 2.12067e-06 | 0.999996 |
| PAH3+H        | 7.96489e-07 | 0.999997 | 8.30142e-07 | 0.999997 |
| PhcycC3H3_A+H | 7.94325e-07 | 0.999998 | 8.27884e-07 | 0.999998 |
| rad60syn      | 3.96788e-07 | 0.999999 | 4.13552e-07 | 0.999998 |
| PAH10+CH3     | 2.53197e-07 | 0.999999 | 2.63894e-07 | 0.999999 |
| rad60anti     | 2.15811e-07 | 0.999999 | 2.24928e-07 | 0.999999 |
| rad50         | 1.82305e-07 | 0.999999 | 1.90008e-07 | 0.999999 |
| rad70         | 1.50040e-07 | 0.999999 | 1.56379e-07 | 0.999999 |
| PAH1+H        | 1.48682e-07 | 0.999999 | 1.54963e-07 | 0.999999 |
| rad59         | 1.17661e-07 | 1.000000 | 1.22632e-07 | 1.000000 |
| rad67         | 9.03380e-08 | 1.000000 | 9.41547e-08 | 1.000000 |
| rad55         | 7.18814e-08 | 1.000000 | 7.49183e-08 | 1.000000 |
| rad62         | 5.32905e-08 | 1.000000 | 5.55419e-08 | 1.000000 |
| rad43         | 1.85215e-08 | 1.000000 | 1.93041e-08 | 1.000000 |
| rad34         | 1.46559e-08 | 1.000000 | 1.52750e-08 | 1.000000 |
| rad51         | 7.22366e-09 | 1.000000 | 7.52888e-09 | 1.000000 |
| rad52         | 5.73950e-09 | 1.000000 | 5.98199e-09 | 1.000000 |
| rad53         | 1.38657e-09 | 1.000000 | 1.44515e-09 | 1.000000 |
| rad58         | 6.48417e-10 | 1.000000 | 6.75812e-10 | 1.000000 |
| rad64         | 5.75074e-10 | 1.000000 | 5.99371e-10 | 1.000000 |
| rad42         | 5.07610e-10 | 1.000000 | 5.29056e-10 | 1.000000 |
| rad56         | 3.39878e-10 | 1.000000 | 3.54238e-10 | 1.000000 |
| rad65         | 2.29598e-10 | 1.000000 | 2.39299e-10 | 1.000000 |
| rad41         | 7.94160e-11 | 1.000000 | 8.27714e-11 | 1.000000 |
| rad68syn      | 3.95119e-11 | 1.000000 | 4.11813e-11 | 1.000000 |
| rad68anti     | 2.68637e-11 | 1.000000 | 2.79986e-11 | 1.000000 |
| PAH8+H        | 9.75569e-12 | 1.000000 | 1.01678e-11 | 1.000000 |
| rad61         | 4.46180e-12 | 1.000000 | 4.65031e-12 | 1.000000 |
| rad40syn      | 3.27953e-12 | 1.000000 | 3.41809e-12 | 1.000000 |
| rad40anti     | 1.27570e-12 | 1.000000 | 1.32959e-12 | 1.000000 |
| rad73         | 9.82194e-13 | 1.000000 | 1.02370e-12 | 1.000000 |
| rad2          | 5.41569e-13 | 1.000000 | 5.64450e-13 | 1.000000 |
| rad71         | 3.27733e-13 | 1.000000 | 3.41579e-13 | 1.000000 |
| rad23         | 2.43387e-13 | 1.000000 | 2.53670e-13 | 1.000000 |
| rad1          | 1.06618e-13 | 1.000000 | 1.11122e-13 | 1.000000 |
| rad45         | 9.97954e-14 | 1.000000 | 1.04012e-13 | 1.000000 |
| rad6          | 3.47208e-14 | 1.000000 | 3.61877e-14 | 1.000000 |
| rad3          | 1.43554e-14 | 1.000000 | 1.49620e-14 | 1.000000 |
| rad10         | 1.10829e-14 | 1.000000 | 1.15512e-14 | 1.000000 |
| rad4          | 1.02150e-14 | 1.000000 | 1.06466e-14 | 1.000000 |
| rad36         | 9.55556e-15 | 1.000000 | 9.95929e-15 | 1.000000 |
| rad9          | 1.97232e-15 | 1.000000 | 2.05565e-15 | 1.000000 |
| rad72         | 3.14415e-16 | 1.000000 | 3.27699e-16 | 1.000000 |
| rad28         | 1.42138e-16 | 1.000000 | 1.48144e-16 | 1.000000 |
| rad11         | 6.48356e-17 | 1.000000 | 6.75747e-17 | 1.000000 |
| rad21         | 5.89264e-17 | 1.000000 | 6.14159e-17 | 1.000000 |
| rad26         | 5.68968e-17 | 1.000000 | 5.93006e-17 | 1.000000 |
| rad13         | 5.66453e-17 | 1.000000 | 5.90385e-17 | 1.000000 |
| rad33         | 2.86167e-17 | 1.000000 | 2.98257e-17 | 1.000000 |
| rad20         | 2.26268e-17 | 1.000000 | 2.35827e-17 | 1.000000 |
| rad7          | 1.29558e-17 | 1.000000 | 1.35032e-17 | 1.000000 |
| rad24         | 5.58298e-18 | 1.000000 | 5.81886e-18 | 1.000000 |
| rad25         | 1.92043e-18 | 1.000000 | 2.00157e-18 | 1.000000 |
| rad12         | 1.15817e-18 | 1.000000 | 1.20711e-18 | 1.000000 |
| rad31         | 8.40534e-19 | 1.000000 | 8.76043e-19 | 1.000000 |
| rad27         | 7.06002e-19 | 1.000000 | 7.35830e-19 | 1.000000 |
| rad14         | 5.74862e-19 | 1.000000 | 5.99150e-19 | 1.000000 |
| rad15         | 4.57128e-19 | 1.000000 | 4.76442e-19 | 1.000000 |
| rad22         | 1.38963e-20 | 1.000000 | 1.44834e-20 | 1.000000 |
| rad18         | 2.25410e-21 | 1.000000 | 2.34933e-21 | 1.000000 |
| rad47         | 5.02496e-24 | 1.000000 | 5.23726e-24 | 1.000000 |
| rad8          | 3.33307e-25 | 1.000000 | 3.47390e-25 | 1.000000 |
| rad5          | 3.20118e-25 | 1.000000 | 3.33643e-25 | 1.000000 |

0.100000000E-06 Pa, 900.000000 K

=====

| Rate constant      | True (fraction)      | Effective (fraction) |
|--------------------|----------------------|----------------------|
| Total              | 4.88072e-13 (1.00 )  | 4.55158e-13 (1.00 )  |
| Formation of rad11 | 1.74945e-13 (0.358 ) | 1.58562e-13 (0.348 ) |
| Formation of rad6  | 1.76509e-13 (0.362 ) | 1.59978e-13 (0.351 ) |
| H-abstraction      | 1.36618e-13 (0.280 ) | 1.36618e-13 (0.300 ) |

| species            | PYtrue    | Cumul    | PYeffective | Cumul    |
|--------------------|-----------|----------|-------------|----------|
| Indene+H           | 0.341014  | 0.341014 | 0.365674    | 0.365674 |
| Benzene+2-propynyl | 0.279914  | 0.620928 | 0.300155    | 0.665829 |
| C2H2+PhCH2         | 0.164625  | 0.785553 | 0.176529    | 0.842358 |
| Phenyl+Allene      | 0.0674364 | 0.852989 | 0.000000    | 0.842358 |
| PhCCH+CH3          | 0.0639259 | 0.916915 | 0.0685486   | 0.910906 |

|               |             |          |             |          |
|---------------|-------------|----------|-------------|----------|
| PhCHCCH2+H    | 0.0451268   | 0.962042 | 0.0483901   | 0.959297 |
| PhCH2CCH+H    | 0.0182967   | 0.980338 | 0.0196198   | 0.978916 |
| Ph+MeAc       | 0.00849313  | 0.988832 | 0.00910729  | 0.988024 |
| PhCCCH3+H     | 0.00485364  | 0.993685 | 0.00520463  | 0.993228 |
| PAH7+H        | 0.00482415  | 0.998509 | 0.00517299  | 0.998401 |
| rad39         | 0.00111872  | 0.999628 | 0.00119961  | 0.999601 |
| rad19anti     | 0.000152570 | 0.999781 | 0.000163603 | 0.999764 |
| PAH9+H        | 8.58055e-05 | 0.999866 | 9.20100e-05 | 0.999856 |
| rad30         | 3.45816e-05 | 0.999901 | 3.70824e-05 | 0.999894 |
| rad38         | 3.22626e-05 | 0.999933 | 3.45956e-05 | 0.999928 |
| rad19syn      | 2.05726e-05 | 0.999954 | 2.20602e-05 | 0.999950 |
| rad35         | 1.85019e-05 | 0.999972 | 1.98398e-05 | 0.999970 |
| rad37         | 8.30353e-06 | 0.999981 | 8.90399e-06 | 0.999979 |
| rad54         | 5.61022e-06 | 0.999986 | 6.01591e-06 | 0.999985 |
| rad46         | 5.06238e-06 | 0.999991 | 5.42846e-06 | 0.999990 |
| PhcycC3H3_A+H | 2.75303e-06 | 0.999994 | 2.95211e-06 | 0.999993 |
| PAH3+H        | 1.70031e-06 | 0.999996 | 1.82327e-06 | 0.999995 |
| rad60syn      | 6.35566e-07 | 0.999996 | 6.81526e-07 | 0.999996 |
| PAH10+CH3     | 5.91896e-07 | 0.999997 | 6.34698e-07 | 0.999996 |
| PAH1+H        | 5.27743e-07 | 0.999998 | 5.65906e-07 | 0.999997 |
| rad50         | 5.26055e-07 | 0.999998 | 5.64096e-07 | 0.999998 |
| rad70         | 4.68169e-07 | 0.999999 | 5.02024e-07 | 0.999998 |
| rad60anti     | 3.53464e-07 | 0.999999 | 3.79023e-07 | 0.999999 |
| rad67         | 2.86638e-07 | 0.999999 | 3.07366e-07 | 0.999999 |
| rad59         | 2.38374e-07 | 0.999999 | 2.55613e-07 | 0.999999 |
| rad55         | 2.28529e-07 | 1.000000 | 2.45055e-07 | 0.999999 |
| rad62         | 1.23575e-07 | 1.000000 | 1.32511e-07 | 0.999999 |
| rad34         | 5.38118e-08 | 1.000000 | 5.77031e-08 | 0.999999 |
| rad43         | 3.25336e-08 | 1.000000 | 3.48862e-08 | 1.000000 |
| rad51         | 2.94628e-08 | 1.000000 | 3.15934e-08 | 1.000000 |
| rad52         | 1.98861e-08 | 1.000000 | 2.13241e-08 | 1.000000 |
| rad53         | 7.16536e-09 | 1.000000 | 7.68353e-09 | 1.000000 |
| rad64         | 2.79837e-09 | 1.000000 | 3.00073e-09 | 1.000000 |
| rad56         | 2.33179e-09 | 1.000000 | 2.50041e-09 | 1.000000 |
| rad58         | 2.16896e-09 | 1.000000 | 2.32580e-09 | 1.000000 |
| rad42         | 1.71810e-09 | 1.000000 | 1.84235e-09 | 1.000000 |
| rad65         | 9.39252e-10 | 1.000000 | 1.00717e-09 | 1.000000 |
| rad68syn      | 2.64056e-10 | 1.000000 | 2.83151e-10 | 1.000000 |
| rad41         | 2.24666e-10 | 1.000000 | 2.40913e-10 | 1.000000 |
| rad68anti     | 1.78166e-10 | 1.000000 | 1.91050e-10 | 1.000000 |
| PAH8+H        | 1.02532e-10 | 1.000000 | 1.09946e-10 | 1.000000 |
| rad40syn      | 2.86480e-11 | 1.000000 | 3.07196e-11 | 1.000000 |
| rad61         | 2.66398e-11 | 1.000000 | 2.85662e-11 | 1.000000 |
| rad40anti     | 1.19773e-11 | 1.000000 | 1.28434e-11 | 1.000000 |
| rad73         | 1.03643e-11 | 1.000000 | 1.11137e-11 | 1.000000 |
| rad71         | 4.43764e-12 | 1.000000 | 4.75854e-12 | 1.000000 |
| rad2          | 1.31560e-13 | 1.000000 | 1.41073e-13 | 1.000000 |
| rad23         | 1.12884e-13 | 1.000000 | 1.21047e-13 | 1.000000 |
| rad45         | 5.55383e-14 | 1.000000 | 5.95544e-14 | 1.000000 |
| rad1          | 2.66569e-14 | 1.000000 | 2.85846e-14 | 1.000000 |
| rad6          | 1.12830e-14 | 1.000000 | 1.20989e-14 | 1.000000 |
| rad9          | 9.64937e-15 | 1.000000 | 1.03471e-14 | 1.000000 |
| rad72         | 8.46735e-15 | 1.000000 | 9.07965e-15 | 1.000000 |
| rad36         | 5.29914e-15 | 1.000000 | 5.68234e-15 | 1.000000 |
| rad3          | 4.20630e-15 | 1.000000 | 4.51047e-15 | 1.000000 |
| rad4          | 3.11950e-15 | 1.000000 | 3.34508e-15 | 1.000000 |
| rad10         | 2.47950e-15 | 1.000000 | 2.65880e-15 | 1.000000 |
| rad13         | 4.90701e-16 | 1.000000 | 5.26185e-16 | 1.000000 |
| rad21         | 3.80389e-16 | 1.000000 | 4.07897e-16 | 1.000000 |
| rad11         | 2.96292e-16 | 1.000000 | 3.17718e-16 | 1.000000 |
| rad20         | 1.64991e-16 | 1.000000 | 1.76922e-16 | 1.000000 |
| rad33         | 1.26647e-16 | 1.000000 | 1.35806e-16 | 1.000000 |
| rad28         | 6.37161e-17 | 1.000000 | 6.83236e-17 | 1.000000 |
| rad7          | 3.92613e-17 | 1.000000 | 4.21004e-17 | 1.000000 |
| rad26         | 2.59060e-17 | 1.000000 | 2.77794e-17 | 1.000000 |
| rad24         | 1.88184e-17 | 1.000000 | 2.01792e-17 | 1.000000 |
| rad25         | 5.51827e-18 | 1.000000 | 5.91731e-18 | 1.000000 |
| rad12         | 5.35710e-18 | 1.000000 | 5.74449e-18 | 1.000000 |
| rad15         | 1.55862e-18 | 1.000000 | 1.67133e-18 | 1.000000 |
| rad27         | 1.32692e-18 | 1.000000 | 1.42287e-18 | 1.000000 |
| rad14         | 1.05204e-18 | 1.000000 | 1.12812e-18 | 1.000000 |
| rad31         | 4.19944e-19 | 1.000000 | 4.50311e-19 | 1.000000 |
| rad18         | 3.26813e-20 | 1.000000 | 3.50445e-20 | 1.000000 |
| rad22         | 7.17184e-21 | 1.000000 | 7.69046e-21 | 1.000000 |
| rad8          | 1.12161e-22 | 1.000000 | 1.20272e-22 | 1.000000 |
| rad47         | 2.05588e-23 | 1.000000 | 2.20455e-23 | 1.000000 |
| rad5          | 5.20011e-25 | 1.000000 | 5.57614e-25 | 1.000000 |

0.100000000E-06 Pa, 1000.00000 K

=====

| Rate constant      | True (fraction)      | Effective (fraction) |
|--------------------|----------------------|----------------------|
| Total              | 7.98668e-13 (1.00 )  | 7.19594e-13 (1.00 )  |
| Formation of rad11 | 2.67704e-13 (0.335 ) | 2.29546e-13 (0.319 ) |
| Formation of rad6  | 2.87049e-13 (0.359 ) | 2.46133e-13 (0.342 ) |
| H-abstraction      | 2.43915e-13 (0.305 ) | 2.43915e-13 (0.339 ) |

| species            | PYtrue      | Cumul    | PYeffective | Cumul    |
|--------------------|-------------|----------|-------------|----------|
| Benzene+2-propynyl | 0.305402    | 0.305402 | 0.338962    | 0.338962 |
| Indene+H           | 0.272124    | 0.577526 | 0.302027    | 0.640989 |
| C2H2+PhCH2         | 0.159453    | 0.736979 | 0.176975    | 0.817964 |
| Phenyl+Allene      | 0.0990073   | 0.835987 | 0.000000    | 0.817964 |
| PhCCH+CH3          | 0.0616205   | 0.897607 | 0.0683917   | 0.886356 |
| PhCHCCH2+H         | 0.0537596   | 0.951367 | 0.0596670   | 0.946023 |
| PhCH2CCH+H         | 0.0288969   | 0.980264 | 0.0320723   | 0.978095 |
| Ph+MeAc            | 0.00817632  | 0.988440 | 0.00907480  | 0.987170 |
| PAH7+H             | 0.00601184  | 0.994452 | 0.00667246  | 0.993842 |
| PhCCCH3+H          | 0.00364277  | 0.998095 | 0.00404307  | 0.997885 |
| rad39              | 0.00134896  | 0.999444 | 0.00149719  | 0.999382 |
| rad19anti          | 0.000230025 | 0.999674 | 0.000255302 | 0.999638 |
| PAH9+H             | 0.000123695 | 0.999797 | 0.000137287 | 0.999775 |
| rad38              | 4.77792e-05 | 0.999845 | 5.30296e-05 | 0.999828 |
| rad19syn           | 4.20371e-05 | 0.999887 | 4.66565e-05 | 0.999875 |
| rad30              | 3.74826e-05 | 0.999925 | 4.16015e-05 | 0.999916 |
| rad35              | 2.54628e-05 | 0.999950 | 2.82608e-05 | 0.999945 |
| rad54              | 1.25292e-05 | 0.999963 | 1.39061e-05 | 0.999959 |
| rad37              | 9.28205e-06 | 0.999972 | 1.03021e-05 | 0.999969 |
| rad46              | 8.48861e-06 | 0.999980 | 9.42145e-06 | 0.999978 |
| PhcycC3H3_A+H      | 7.44283e-06 | 0.999988 | 8.26073e-06 | 0.999987 |
| PAH3+H             | 3.05843e-06 | 0.999991 | 3.39451e-06 | 0.999990 |
| PAH1+H             | 1.42911e-06 | 0.999992 | 1.58616e-06 | 0.999991 |
| rad50              | 1.24669e-06 | 0.999994 | 1.38369e-06 | 0.999993 |
| PAH10+CH3          | 1.21323e-06 | 0.999995 | 1.34654e-06 | 0.999994 |
| rad70              | 1.14131e-06 | 0.999996 | 1.26673e-06 | 0.999995 |
| rad60syn           | 8.97094e-07 | 0.999997 | 9.95669e-07 | 0.999996 |
| rad67              | 7.32850e-07 | 0.999998 | 8.13375e-07 | 0.999997 |
| rad55              | 5.71763e-07 | 0.999998 | 6.34592e-07 | 0.999998 |
| rad60anti          | 5.08253e-07 | 0.999999 | 5.64103e-07 | 0.999999 |
| rad59              | 4.08645e-07 | 0.999999 | 4.53550e-07 | 0.999999 |
| rad62              | 2.36337e-07 | 0.999999 | 2.62307e-07 | 0.999999 |
| rad34              | 1.49947e-07 | 0.999999 | 1.66424e-07 | 0.999999 |
| rad51              | 9.25830e-08 | 0.999999 | 1.02757e-07 | 0.999999 |
| rad52              | 5.46149e-08 | 1.000000 | 6.06164e-08 | 1.000000 |
| rad43              | 4.82842e-08 | 1.000000 | 5.35901e-08 | 1.000000 |
| rad53              | 2.66802e-08 | 1.000000 | 2.96121e-08 | 1.000000 |
| rad56              | 1.08965e-08 | 1.000000 | 1.20939e-08 | 1.000000 |
| rad64              | 9.68714e-09 | 1.000000 | 1.07517e-08 | 1.000000 |
| rad58              | 5.61421e-09 | 1.000000 | 6.23115e-09 | 1.000000 |
| rad42              | 4.47913e-09 | 1.000000 | 4.97133e-09 | 1.000000 |
| rad65              | 2.93939e-09 | 1.000000 | 3.26239e-09 | 1.000000 |
| rad68syn           | 1.19347e-09 | 1.000000 | 1.32462e-09 | 1.000000 |
| rad68anti          | 8.00253e-10 | 1.000000 | 8.88191e-10 | 1.000000 |
| PAH8+H             | 6.70053e-10 | 1.000000 | 7.43681e-10 | 1.000000 |
| rad41              | 4.94029e-10 | 1.000000 | 5.48317e-10 | 1.000000 |
| rad40syn           | 1.60977e-10 | 1.000000 | 1.78667e-10 | 1.000000 |
| rad61              | 1.14008e-10 | 1.000000 | 1.26536e-10 | 1.000000 |
| rad40anti          | 7.14860e-11 | 1.000000 | 7.93411e-11 | 1.000000 |
| rad73              | 6.98974e-11 | 1.000000 | 7.75781e-11 | 1.000000 |
| rad71              | 3.67490e-11 | 1.000000 | 4.07872e-11 | 1.000000 |
| rad72              | 1.23088e-13 | 1.000000 | 1.36614e-13 | 1.000000 |
| rad23              | 5.44413e-14 | 1.000000 | 6.04238e-14 | 1.000000 |
| rad2               | 3.21414e-14 | 1.000000 | 3.56733e-14 | 1.000000 |
| rad45              | 3.00615e-14 | 1.000000 | 3.33649e-14 | 1.000000 |
| rad9               | 1.42971e-14 | 1.000000 | 1.58681e-14 | 1.000000 |
| rad6               | 9.08701e-15 | 1.000000 | 1.00856e-14 | 1.000000 |
| rad1               | 7.08268e-15 | 1.000000 | 7.86094e-15 | 1.000000 |
| rad36              | 2.87798e-15 | 1.000000 | 3.19422e-15 | 1.000000 |
| rad13              | 2.41232e-15 | 1.000000 | 2.67740e-15 | 1.000000 |
| rad11              | 1.49817e-15 | 1.000000 | 1.66280e-15 | 1.000000 |
| rad3               | 1.39365e-15 | 1.000000 | 1.54679e-15 | 1.000000 |
| rad4               | 1.07022e-15 | 1.000000 | 1.18783e-15 | 1.000000 |
| rad21              | 9.56156e-16 | 1.000000 | 1.06122e-15 | 1.000000 |
| rad10              | 6.69033e-16 | 1.000000 | 7.42551e-16 | 1.000000 |
| rad20              | 4.65001e-16 | 1.000000 | 5.16098e-16 | 1.000000 |
| rad33              | 2.70073e-16 | 1.000000 | 2.99751e-16 | 1.000000 |
| rad7               | 2.24873e-16 | 1.000000 | 2.49584e-16 | 1.000000 |
| rad28              | 3.94957e-17 | 1.000000 | 4.38358e-17 | 1.000000 |
| rad24              | 2.48801e-17 | 1.000000 | 2.76141e-17 | 1.000000 |
| rad26              | 1.59958e-17 | 1.000000 | 1.77535e-17 | 1.000000 |

|       |             |          |             |          |
|-------|-------------|----------|-------------|----------|
| rad25 | 1.49317e-17 | 1.000000 | 1.65725e-17 | 1.000000 |
| rad12 | 9.30060e-18 | 1.000000 | 1.03226e-17 | 1.000000 |
| rad15 | 1.93333e-18 | 1.000000 | 2.14578e-18 | 1.000000 |
| rad14 | 1.89393e-18 | 1.000000 | 2.10206e-18 | 1.000000 |
| rad27 | 1.85942e-18 | 1.000000 | 2.06374e-18 | 1.000000 |
| rad18 | 4.54219e-19 | 1.000000 | 5.04132e-19 | 1.000000 |
| rad31 | 2.32683e-19 | 1.000000 | 2.58252e-19 | 1.000000 |
| rad22 | 4.21297e-21 | 1.000000 | 4.67591e-21 | 1.000000 |
| rad8  | 3.75825e-21 | 1.000000 | 4.17124e-21 | 1.000000 |
| rad47 | 6.62542e-23 | 1.000000 | 7.35346e-23 | 1.000000 |
| rad5  | 1.21890e-24 | 1.000000 | 1.35284e-24 | 1.000000 |

0.100000000E-06 Pa, 1100.00000 K

| Rate constant      | True (fraction)      | Effective (fraction) |
|--------------------|----------------------|----------------------|
| Total              | 1.22919e-12 (1.00 )  | 1.06688e-12 (1.00 )  |
| Formation of rad11 | 3.87976e-13 (0.316 ) | 3.11712e-13 (0.292 ) |
| Formation of rad6  | 4.37724e-13 (0.356 ) | 3.51681e-13 (0.330 ) |
| H-abstraction      | 4.03491e-13 (0.328 ) | 4.03491e-13 (0.378 ) |

| species            | PYtrue      | Cumul    | PYeffective | Cumul    |
|--------------------|-------------|----------|-------------|----------|
| Benzene+2-propynyl | 0.328257    | 0.328257 | 0.378196    | 0.378196 |
| Indene+H           | 0.214714    | 0.542971 | 0.247379    | 0.625574 |
| C2H2+PhCH2         | 0.146502    | 0.689473 | 0.168789    | 0.794364 |
| Phenyl+Allene      | 0.132044    | 0.821517 | 0.000000    | 0.794364 |
| PhCHCCH2+H         | 0.0609574   | 0.882474 | 0.0702309   | 0.864595 |
| PhCCH+CH3          | 0.0572446   | 0.939719 | 0.0659535   | 0.930548 |
| PhCH2CCH+H         | 0.0407440   | 0.980463 | 0.0469425   | 0.977491 |
| Ph+MeAc            | 0.00763489  | 0.988098 | 0.00879642  | 0.986287 |
| PAH7+H             | 0.00694716  | 0.995045 | 0.00800405  | 0.994291 |
| PhCCCH3+H          | 0.00267733  | 0.997722 | 0.00308464  | 0.997376 |
| rad39              | 0.00150224  | 0.999224 | 0.00173078  | 0.999107 |
| rad19anti          | 0.000315220 | 0.999539 | 0.000363175 | 0.999470 |
| PAH9+H             | 0.000164386 | 0.999704 | 0.000189394 | 0.999659 |
| rad19syn           | 7.45655e-05 | 0.999778 | 8.59091e-05 | 0.999745 |
| rad38              | 6.50359e-05 | 0.999843 | 7.49299e-05 | 0.999820 |
| rad30              | 3.82332e-05 | 0.999882 | 4.40497e-05 | 0.999864 |
| rad35              | 3.25605e-05 | 0.999914 | 3.75140e-05 | 0.999902 |
| rad54              | 2.39077e-05 | 0.999938 | 2.75448e-05 | 0.999929 |
| PhcycC3H3_A+H      | 1.67306e-05 | 0.999955 | 1.92759e-05 | 0.999948 |
| rad46              | 1.28371e-05 | 0.999968 | 1.47901e-05 | 0.999963 |
| rad37              | 1.03715e-05 | 0.999978 | 1.19494e-05 | 0.999975 |
| PAH3+H             | 4.83975e-06 | 0.999983 | 5.57602e-06 | 0.999981 |
| PAH1+H             | 3.16887e-06 | 0.999986 | 3.65096e-06 | 0.999984 |
| rad50              | 2.53500e-06 | 0.999989 | 2.92065e-06 | 0.999987 |
| rad70              | 2.31279e-06 | 0.999991 | 2.66464e-06 | 0.999990 |
| PAH10+CH3          | 2.25114e-06 | 0.999993 | 2.59361e-06 | 0.999993 |
| rad67              | 1.57911e-06 | 0.999995 | 1.81935e-06 | 0.999994 |
| rad55              | 1.19782e-06 | 0.999996 | 1.38006e-06 | 0.999996 |
| rad60syn           | 1.15117e-06 | 0.999997 | 1.32630e-06 | 0.999997 |
| rad60anti          | 6.62627e-07 | 0.999998 | 7.63433e-07 | 0.999998 |
| rad59              | 6.18406e-07 | 0.999998 | 7.12482e-07 | 0.999999 |
| rad62              | 3.93252e-07 | 0.999999 | 4.53078e-07 | 0.999999 |
| rad34              | 3.40145e-07 | 0.999999 | 3.91892e-07 | 0.999999 |
| rad51              | 2.38369e-07 | 0.999999 | 2.74633e-07 | 1.000000 |
| rad52              | 1.25451e-07 | 1.000000 | 1.44535e-07 | 1.000000 |
| rad53              | 7.80404e-08 | 1.000000 | 8.99129e-08 | 1.000000 |
| rad43              | 6.37336e-08 | 1.000000 | 7.34295e-08 | 1.000000 |
| rad56              | 3.84098e-08 | 1.000000 | 4.42533e-08 | 1.000000 |
| rad64              | 2.61428e-08 | 1.000000 | 3.01199e-08 | 1.000000 |
| rad58              | 1.20347e-08 | 1.000000 | 1.38656e-08 | 1.000000 |
| rad42              | 9.67464e-09 | 1.000000 | 1.11465e-08 | 1.000000 |
| rad65              | 7.50471e-09 | 1.000000 | 8.64638e-09 | 1.000000 |
| rad68syn           | 4.04354e-09 | 1.000000 | 4.65870e-09 | 1.000000 |
| PAH8+H             | 3.08736e-09 | 1.000000 | 3.55704e-09 | 1.000000 |
| rad68anti          | 2.69715e-09 | 1.000000 | 3.10748e-09 | 1.000000 |
| rad41              | 9.10252e-10 | 1.000000 | 1.04874e-09 | 1.000000 |
| rad40syn           | 6.53835e-10 | 1.000000 | 7.53304e-10 | 1.000000 |
| rad61              | 3.79380e-10 | 1.000000 | 4.37096e-10 | 1.000000 |
| rad73              | 3.37894e-10 | 1.000000 | 3.89299e-10 | 1.000000 |
| rad40anti          | 3.05537e-10 | 1.000000 | 3.52019e-10 | 1.000000 |
| rad71              | 2.11150e-10 | 1.000000 | 2.43273e-10 | 1.000000 |
| rad72              | 1.11745e-12 | 1.000000 | 1.28745e-12 | 1.000000 |
| rad23              | 2.72310e-14 | 1.000000 | 3.13737e-14 | 1.000000 |
| rad45              | 1.62566e-14 | 1.000000 | 1.87297e-14 | 1.000000 |
| rad9               | 1.25332e-14 | 1.000000 | 1.44399e-14 | 1.000000 |
| rad6               | 1.17237e-14 | 1.000000 | 1.35072e-14 | 1.000000 |
| rad2               | 8.70841e-15 | 1.000000 | 1.00332e-14 | 1.000000 |



|       |             |          |             |         |
|-------|-------------|----------|-------------|---------|
| rad11 | 6.03172e-15 | 1.000000 | 6.94935e-15 | 1.00000 |
| rad13 | 5.55338e-15 | 1.000000 | 6.39824e-15 | 1.00000 |
| rad1  | 2.03523e-15 | 1.000000 | 2.34485e-15 | 1.00000 |
| rad36 | 1.56360e-15 | 1.000000 | 1.80147e-15 | 1.00000 |
| rad7  | 1.24198e-15 | 1.000000 | 1.43092e-15 | 1.00000 |
| rad21 | 1.12703e-15 | 1.000000 | 1.29848e-15 | 1.00000 |
| rad20 | 5.72530e-16 | 1.000000 | 6.59629e-16 | 1.00000 |
| rad3  | 5.16042e-16 | 1.000000 | 5.94549e-16 | 1.00000 |
| rad4  | 4.04061e-16 | 1.000000 | 4.65531e-16 | 1.00000 |
| rad10 | 3.00433e-16 | 1.000000 | 3.46139e-16 | 1.00000 |
| rad33 | 2.98576e-16 | 1.000000 | 3.43998e-16 | 1.00000 |
| rad28 | 3.45530e-17 | 1.000000 | 3.98096e-17 | 1.00000 |
| rad25 | 2.72797e-17 | 1.000000 | 3.14298e-17 | 1.00000 |
| rad24 | 2.16988e-17 | 1.000000 | 2.49998e-17 | 1.00000 |
| rad26 | 1.31205e-17 | 1.000000 | 1.51166e-17 | 1.00000 |
| rad12 | 1.06574e-17 | 1.000000 | 1.22787e-17 | 1.00000 |
| rad18 | 3.95810e-18 | 1.000000 | 4.56025e-18 | 1.00000 |
| rad14 | 2.59084e-18 | 1.000000 | 2.98500e-18 | 1.00000 |
| rad27 | 1.66794e-18 | 1.000000 | 1.92169e-18 | 1.00000 |
| rad15 | 1.57989e-18 | 1.000000 | 1.82024e-18 | 1.00000 |
| rad31 | 1.37107e-19 | 1.000000 | 1.57966e-19 | 1.00000 |
| rad8  | 2.31129e-20 | 1.000000 | 2.66290e-20 | 1.00000 |
| rad22 | 4.43137e-21 | 1.000000 | 5.10553e-21 | 1.00000 |
| rad47 | 1.74352e-22 | 1.000000 | 2.00877e-22 | 1.00000 |
| rad5  | 4.01643e-24 | 1.000000 | 4.62746e-24 | 1.00000 |

0.100000000E-06 Pa, 1200.00000 K

| Rate constant      | True (fraction) |          | Effective (fraction) |          |
|--------------------|-----------------|----------|----------------------|----------|
| Total              | 1.80237e-12     | (1.00 )  | 1.50733e-12          | (1.00 )  |
| Formation of rad11 | 5.38789e-13     | (0.299 ) | 4.03336e-13          | (0.268 ) |
| Formation of rad6  | 6.34764e-13     | (0.352 ) | 4.75183e-13          | (0.315 ) |
| H-abstraction      | 6.28816e-13     | (0.349 ) | 6.28816e-13          | (0.417 ) |

  

| species            | PYtrue      | Cumul    | PYeffective | Cumul    |
|--------------------|-------------|----------|-------------|----------|
| Benzene+2-propynyl | 0.348883    | 0.348883 | 0.417171    | 0.417171 |
| Indene+H           | 0.168224    | 0.517107 | 0.201151    | 0.618322 |
| Phenyl+Allene      | 0.163693    | 0.680800 | 0.000000    | 0.618322 |
| C2H2+PhCH2         | 0.129445    | 0.810245 | 0.154782    | 0.773104 |
| PhCHCCH2+H         | 0.0661470   | 0.876392 | 0.0790946   | 0.852199 |
| PhCH2CCH+H         | 0.0526489   | 0.929041 | 0.0629537   | 0.915152 |
| PhCCH+CH3          | 0.0518208   | 0.980862 | 0.0619641   | 0.977116 |
| PAH7+H             | 0.00758545  | 0.988447 | 0.00907010  | 0.986186 |
| Ph+MeAc            | 0.00700420  | 0.995451 | 0.00837514  | 0.994562 |
| PhCCH3+H           | 0.00195097  | 0.997402 | 0.00233284  | 0.996894 |
| rad39              | 0.00157581  | 0.998978 | 0.00188425  | 0.998779 |
| rad19anti          | 0.000399579 | 0.999378 | 0.000477791 | 0.999257 |
| PAH9+H             | 0.000204702 | 0.999582 | 0.000244769 | 0.999501 |
| rad19syn           | 0.000118863 | 0.999701 | 0.000142129 | 0.999643 |
| rad38              | 8.27680e-05 | 0.999784 | 9.89685e-05 | 0.999742 |
| rad54              | 4.05005e-05 | 0.999824 | 4.84277e-05 | 0.999791 |
| rad35              | 3.92969e-05 | 0.999864 | 4.69886e-05 | 0.999838 |
| rad30              | 3.73116e-05 | 0.999901 | 4.46148e-05 | 0.999882 |
| PhcycC3H3_A+H      | 3.27086e-05 | 0.999934 | 3.91108e-05 | 0.999922 |
| rad46              | 1.78869e-05 | 0.999952 | 2.13880e-05 | 0.999943 |
| rad37              | 1.16239e-05 | 0.999963 | 1.38991e-05 | 0.999957 |
| PAH3+H             | 6.95966e-06 | 0.999970 | 8.32193e-06 | 0.999965 |
| PAH1+H             | 6.04571e-06 | 0.999976 | 7.22906e-06 | 0.999972 |
| rad50              | 4.57121e-06 | 0.999981 | 5.46594e-06 | 0.999978 |
| rad70              | 4.07150e-06 | 0.999985 | 4.86843e-06 | 0.999983 |
| PAH10+CH3          | 3.83957e-06 | 0.999989 | 4.59109e-06 | 0.999987 |
| rad67              | 2.96796e-06 | 0.999992 | 3.54889e-06 | 0.999991 |
| rad55              | 2.19501e-06 | 0.999994 | 2.62464e-06 | 0.999993 |
| rad60syn           | 1.37645e-06 | 0.999995 | 1.64587e-06 | 0.999995 |
| rad59              | 8.52866e-07 | 0.999996 | 1.01981e-06 | 0.999996 |
| rad60anti          | 8.03342e-07 | 0.999997 | 9.60578e-07 | 0.999997 |
| rad34              | 6.59901e-07 | 0.999998 | 7.89063e-07 | 0.999998 |
| rad62              | 5.91358e-07 | 0.999998 | 7.07106e-07 | 0.999999 |
| rad51              | 5.25705e-07 | 0.999999 | 6.28605e-07 | 0.999999 |
| rad52              | 2.50703e-07 | 0.999999 | 2.99775e-07 | 0.999999 |
| rad53              | 1.90238e-07 | 0.999999 | 2.27474e-07 | 1.000000 |
| rad56              | 1.09448e-07 | 0.999999 | 1.30871e-07 | 1.000000 |
| rad43              | 7.76164e-08 | 0.999999 | 9.28086e-08 | 1.000000 |
| rad64              | 5.85550e-08 | 0.999999 | 7.00159e-08 | 1.000000 |
| rad58              | 2.24147e-08 | 0.999999 | 2.68020e-08 | 1.000000 |
| rad42              | 1.82035e-08 | 0.999999 | 2.17665e-08 | 1.000000 |
| rad65              | 1.63703e-08 | 0.999999 | 1.95744e-08 | 1.000000 |
| rad68syn           | 1.10175e-08 | 0.999999 | 1.31740e-08 | 1.000000 |

|           |             |          |             |         |
|-----------|-------------|----------|-------------|---------|
| PAH8+H    | 1.09227e-08 | 0.999999 | 1.30606e-08 | 1.00000 |
| rad68anti | 7.31621e-09 | 0.999999 | 8.74827e-09 | 1.00000 |
| rad40syn  | 2.07794e-09 | 0.999999 | 2.48466e-09 | 1.00000 |
| rad41     | 1.48024e-09 | 0.999999 | 1.76997e-09 | 1.00000 |
| rad73     | 1.26651e-09 | 0.999999 | 1.51441e-09 | 1.00000 |
| rad61     | 1.03672e-09 | 0.999999 | 1.23964e-09 | 1.00000 |
| rad40anti | 1.01429e-09 | 0.999999 | 1.21282e-09 | 1.00000 |
| rad71     | 9.17535e-10 | 0.999999 | 1.09712e-09 | 1.00000 |
| rad72     | 7.08917e-12 | 0.999999 | 8.47678e-12 | 1.00000 |
| rad6      | 1.62290e-14 | 0.999999 | 1.94055e-14 | 1.00000 |
| rad11     | 1.50135e-14 | 0.999999 | 1.79521e-14 | 1.00000 |
| rad23     | 1.39892e-14 | 0.999999 | 1.67273e-14 | 1.00000 |
| rad9      | 9.27855e-15 | 0.999999 | 1.10947e-14 | 1.00000 |
| rad45     | 8.83878e-15 | 0.999999 | 1.05688e-14 | 1.00000 |
| rad13     | 6.46650e-15 | 0.999999 | 7.73222e-15 | 1.00000 |
| rad7      | 4.83555e-15 | 0.999999 | 5.78203e-15 | 1.00000 |
| rad2      | 2.57521e-15 | 0.999999 | 3.07927e-15 | 1.00000 |
| rad21     | 8.79041e-16 | 0.999999 | 1.05110e-15 | 1.00000 |
| rad36     | 8.56115e-16 | 0.999999 | 1.02368e-15 | 1.00000 |
| rad1      | 6.23278e-16 | 0.999999 | 7.45275e-16 | 1.00000 |
| rad20     | 4.28302e-16 | 0.999999 | 5.12134e-16 | 1.00000 |
| rad10     | 2.66016e-16 | 0.999999 | 3.18084e-16 | 1.00000 |
| rad33     | 2.25859e-16 | 0.999999 | 2.70068e-16 | 1.00000 |
| rad3      | 2.06489e-16 | 0.999999 | 2.46906e-16 | 1.00000 |
| rad4      | 1.63574e-16 | 0.999999 | 1.95591e-16 | 1.00000 |
| rad28     | 4.21412e-17 | 0.999999 | 5.03896e-17 | 1.00000 |
| rad25     | 3.12053e-17 | 0.999999 | 3.73132e-17 | 1.00000 |
| rad24     | 1.65803e-17 | 0.999999 | 1.98256e-17 | 1.00000 |
| rad18     | 1.63210e-17 | 0.999999 | 1.95156e-17 | 1.00000 |
| rad26     | 1.33896e-17 | 0.999999 | 1.60104e-17 | 1.00000 |
| rad12     | 1.03518e-17 | 0.999999 | 1.23781e-17 | 1.00000 |
| rad14     | 2.44012e-18 | 0.999999 | 2.91773e-18 | 1.00000 |
| rad15     | 1.72385e-18 | 0.999999 | 2.06126e-18 | 1.00000 |
| rad27     | 1.00941e-18 | 0.999999 | 1.20699e-18 | 1.00000 |
| rad31     | 8.42038e-20 | 0.999999 | 1.00685e-19 | 1.00000 |
| rad8      | 5.36818e-20 | 0.999999 | 6.41893e-20 | 1.00000 |
| rad22     | 2.58081e-20 | 0.999999 | 3.08596e-20 | 1.00000 |
| rad47     | 3.89980e-22 | 0.999999 | 4.66312e-22 | 1.00000 |
| rad5      | 1.67812e-23 | 0.999999 | 2.00659e-23 | 1.00000 |

0.100000000E-06 Pa, 1300.00000 K

| Rate constant      | True (fraction)      | Effective (fraction) |
|--------------------|----------------------|----------------------|
| Total              | 2.54148e-12 (1.00 )  | 2.05338e-12 (1.00 )  |
| Formation of rad11 | 7.22991e-13 (0.284 ) | 5.03422e-13 (0.245 ) |
| Formation of rad6  | 8.84215e-13 (0.348 ) | 6.15682e-13 (0.300 ) |
| H-abstraction      | 9.34273e-13 (0.368 ) | 9.34273e-13 (0.455 ) |

| species            | PYtrue      | Cumul    | PYeffective | Cumul    |
|--------------------|-------------|----------|-------------|----------|
| Benzene+2-propynyl | 0.367610    | 0.367610 | 0.454993    | 0.454993 |
| Phenyl+Allene      | 0.192054    | 0.559664 | 0.000000    | 0.454993 |
| Indene+H           | 0.131421    | 0.691086 | 0.162661    | 0.617654 |
| C2H2+PhCH2         | 0.111295    | 0.802381 | 0.137750    | 0.755405 |
| PhCHCCH2+H         | 0.0692296   | 0.871610 | 0.0856859   | 0.841091 |
| PhCH2CCH+H         | 0.0636260   | 0.935236 | 0.0787507   | 0.919842 |
| PhCCH+CH3          | 0.0461559   | 0.981392 | 0.0571276   | 0.976969 |
| PAH7+H             | 0.00794566  | 0.989338 | 0.00983443  | 0.986804 |
| Ph+MeAc            | 0.00637082  | 0.995709 | 0.00788521  | 0.994689 |
| rad39              | 0.00158196  | 0.997291 | 0.00195800  | 0.996647 |
| PhCCCH3+H          | 0.00142376  | 0.998714 | 0.00176219  | 0.998409 |
| rad19anti          | 0.000475489 | 0.999190 | 0.000588514 | 0.998997 |
| PAH9+H             | 0.000242131 | 0.999432 | 0.000299688 | 0.999297 |
| rad19syn           | 0.000174660 | 0.999607 | 0.000216178 | 0.999513 |
| rad38              | 9.98860e-05 | 0.999707 | 0.000123629 | 0.999637 |
| rad54              | 6.26274e-05 | 0.999769 | 7.75141e-05 | 0.999714 |
| PhcycC3H3_A+H      | 5.74351e-05 | 0.999827 | 7.10879e-05 | 0.999786 |
| rad35              | 4.53516e-05 | 0.999872 | 5.61319e-05 | 0.999842 |
| rad30              | 3.53185e-05 | 0.999907 | 4.37139e-05 | 0.999885 |
| rad46              | 2.33611e-05 | 0.999931 | 2.89142e-05 | 0.999914 |
| rad37              | 1.29873e-05 | 0.999944 | 1.60744e-05 | 0.999930 |
| PAH1+H             | 1.02825e-05 | 0.999954 | 1.27267e-05 | 0.999943 |
| PAH3+H             | 9.32004e-06 | 0.999963 | 1.15354e-05 | 0.999955 |
| rad50              | 7.49585e-06 | 0.999971 | 9.27759e-06 | 0.999964 |
| rad70              | 6.43021e-06 | 0.999977 | 7.95868e-06 | 0.999972 |
| PAH10+CH3          | 6.07786e-06 | 0.999983 | 7.52262e-06 | 0.999979 |
| rad67              | 4.99567e-06 | 0.999988 | 6.18315e-06 | 0.999986 |
| rad55              | 3.63003e-06 | 0.999992 | 4.49291e-06 | 0.999990 |
| rad60syn           | 1.56340e-06 | 0.999993 | 1.93503e-06 | 0.999992 |

|           |             |          |             |          |
|-----------|-------------|----------|-------------|----------|
| rad34     | 1.13462e-06 | 0.999995 | 1.40432e-06 | 0.999993 |
| rad59     | 1.09806e-06 | 0.999996 | 1.35907e-06 | 0.999995 |
| rad51     | 1.02620e-06 | 0.999997 | 1.27014e-06 | 0.999996 |
| rad60anti | 9.23688e-07 | 0.999998 | 1.14325e-06 | 0.999997 |
| rad62     | 8.25901e-07 | 0.999998 | 1.02222e-06 | 0.999998 |
| rad52     | 4.48900e-07 | 0.999999 | 5.55607e-07 | 0.999999 |
| rad53     | 4.02868e-07 | 0.999999 | 4.98632e-07 | 0.999999 |
| rad56     | 2.64598e-07 | 1.000000 | 3.27496e-07 | 1.000000 |
| rad64     | 1.13755e-07 | 1.000000 | 1.40795e-07 | 1.000000 |
| rad43     | 8.95932e-08 | 1.000000 | 1.10890e-07 | 1.000000 |
| rad58     | 3.75497e-08 | 1.000000 | 4.64755e-08 | 1.000000 |
| rad65     | 3.15601e-08 | 1.000000 | 3.90621e-08 | 1.000000 |
| PAH8+H    | 3.15023e-08 | 1.000000 | 3.89905e-08 | 1.000000 |
| rad42     | 3.09037e-08 | 1.000000 | 3.82497e-08 | 1.000000 |
| rad68syn  | 2.53721e-08 | 1.000000 | 3.14033e-08 | 1.000000 |
| rad68anti | 1.67834e-08 | 1.000000 | 2.07729e-08 | 1.000000 |
| rad40syn  | 5.46373e-09 | 1.000000 | 6.76250e-09 | 1.000000 |
| rad73     | 3.88972e-09 | 1.000000 | 4.81434e-09 | 1.000000 |
| rad71     | 3.20241e-09 | 1.000000 | 3.96364e-09 | 1.000000 |
| rad40anti | 2.76933e-09 | 1.000000 | 3.42762e-09 | 1.000000 |
| rad61     | 2.41929e-09 | 1.000000 | 2.99437e-09 | 1.000000 |
| rad41     | 2.20456e-09 | 1.000000 | 2.72860e-09 | 1.000000 |
| rad72     | 3.39621e-11 | 1.000000 | 4.20352e-11 | 1.000000 |
| rad6      | 2.47949e-14 | 1.000000 | 3.06889e-14 | 1.000000 |
| rad11     | 2.12955e-14 | 1.000000 | 2.63576e-14 | 1.000000 |
| rad7      | 1.09758e-14 | 1.000000 | 1.35848e-14 | 1.000000 |
| rad23     | 7.37797e-15 | 1.000000 | 9.13175e-15 | 1.000000 |
| rad9      | 6.37772e-15 | 1.000000 | 7.89377e-15 | 1.000000 |
| rad13     | 4.91947e-15 | 1.000000 | 6.08887e-15 | 1.000000 |
| rad45     | 4.85853e-15 | 1.000000 | 6.01344e-15 | 1.000000 |
| rad2      | 8.14835e-16 | 1.000000 | 1.00853e-15 | 1.000000 |
| rad21     | 5.91330e-16 | 1.000000 | 7.31895e-16 | 1.000000 |
| rad36     | 4.74625e-16 | 1.000000 | 5.87446e-16 | 1.000000 |
| rad20     | 2.63323e-16 | 1.000000 | 3.25917e-16 | 1.000000 |
| rad10     | 2.44535e-16 | 1.000000 | 3.02662e-16 | 1.000000 |
| rad1      | 2.01945e-16 | 1.000000 | 2.49949e-16 | 1.000000 |
| rad33     | 1.50408e-16 | 1.000000 | 1.86161e-16 | 1.000000 |
| rad3      | 8.78681e-17 | 1.000000 | 1.08755e-16 | 1.000000 |
| rad4      | 7.01643e-17 | 1.000000 | 8.68430e-17 | 1.000000 |
| rad28     | 6.76227e-17 | 1.000000 | 8.36972e-17 | 1.000000 |
| rad18     | 3.07354e-17 | 1.000000 | 3.80413e-17 | 1.000000 |
| rad25     | 2.61840e-17 | 1.000000 | 3.24081e-17 | 1.000000 |
| rad26     | 1.53927e-17 | 1.000000 | 1.90516e-17 | 1.000000 |
| rad24     | 1.21061e-17 | 1.000000 | 1.49838e-17 | 1.000000 |
| rad12     | 9.25054e-18 | 1.000000 | 1.14494e-17 | 1.000000 |
| rad15     | 6.03529e-18 | 1.000000 | 7.46991e-18 | 1.000000 |
| rad14     | 1.73625e-18 | 1.000000 | 2.14896e-18 | 1.000000 |
| rad27     | 4.96123e-19 | 1.000000 | 6.14053e-19 | 1.000000 |
| rad22     | 2.79875e-19 | 1.000000 | 3.46403e-19 | 1.000000 |
| rad8      | 7.86598e-20 | 1.000000 | 9.73573e-20 | 1.000000 |
| rad31     | 5.35121e-20 | 1.000000 | 6.62325e-20 | 1.000000 |
| rad47     | 7.66887e-22 | 1.000000 | 9.49183e-22 | 1.000000 |
| rad5      | 7.55124e-23 | 1.000000 | 9.34621e-23 | 1.000000 |

0.100000000E-06 Pa, 1400.00000 K

| Rate constant      | True (fraction)      | Effective (fraction) |
|--------------------|----------------------|----------------------|
| Total              | 3.47024e-12 (1.00 )  | 2.71984e-12 (1.00 )  |
| Formation of rad11 | 9.43269e-13 (0.272 ) | 6.11768e-13 (0.225 ) |
| Formation of rad6  | 1.19194e-12 (0.343 ) | 7.73043e-13 (0.284 ) |
| H-abstraction      | 1.33503e-12 (0.385 ) | 1.33503e-12 (0.491 ) |

| species            | PYtrue      | Cumul    | PYeffective | Cumul    |
|--------------------|-------------|----------|-------------|----------|
| Benzene+2-propynyl | 0.384709    | 0.384709 | 0.490849    | 0.490849 |
| Phenyl+Allene      | 0.216237    | 0.600946 | 0.000000    | 0.490849 |
| Indene+H           | 0.102753    | 0.703699 | 0.131102    | 0.621951 |
| C2H2+PhCH2         | 0.0940337   | 0.797733 | 0.119977    | 0.741928 |
| PhCH2CCH+H         | 0.0730480   | 0.870781 | 0.0932017   | 0.835129 |
| PhCHCCH2+H         | 0.0704361   | 0.941217 | 0.0898693   | 0.924998 |
| PhCCH+CH3          | 0.0407709   | 0.981988 | 0.0520195   | 0.977018 |
| PAH7+H             | 0.00808062  | 0.990068 | 0.0103100   | 0.987328 |
| Ph+MeAc            | 0.00578254  | 0.995851 | 0.00737791  | 0.994706 |
| rad39              | 0.00153900  | 0.997390 | 0.00196361  | 0.996669 |
| PhCCCH3+H          | 0.00104907  | 0.998439 | 0.00133851  | 0.998008 |
| rad19anti          | 0.000537563 | 0.998977 | 0.000685873 | 0.998694 |
| PAH9+H             | 0.000275092 | 0.999252 | 0.000350989 | 0.999045 |
| rad19syn           | 0.000241019 | 0.999493 | 0.000307515 | 0.999352 |
| rad38              | 0.000115616 | 0.999608 | 0.000147513 | 0.999500 |

|               |             |          |             |          |
|---------------|-------------|----------|-------------|----------|
| PhcycC3H3_A+H | 9.27188e-05 | 0.999701 | 0.000118299 | 0.999618 |
| rad54         | 9.02066e-05 | 0.999791 | 0.000115094 | 0.999733 |
| rad35         | 5.05796e-05 | 0.999842 | 6.45344e-05 | 0.999798 |
| rad30         | 3.27889e-05 | 0.999875 | 4.18352e-05 | 0.999840 |
| rad46         | 2.89889e-05 | 0.999904 | 3.69868e-05 | 0.999877 |
| PAH1+H        | 1.59963e-05 | 0.999920 | 2.04096e-05 | 0.999897 |
| rad37         | 1.43563e-05 | 0.999934 | 1.83172e-05 | 0.999915 |
| PAH3+H        | 1.18378e-05 | 0.999946 | 1.51038e-05 | 0.999930 |
| rad50         | 1.13924e-05 | 0.999957 | 1.45355e-05 | 0.999945 |
| rad70         | 9.33021e-06 | 0.999967 | 1.19044e-05 | 0.999957 |
| PAH10+CH3     | 9.00294e-06 | 0.999976 | 1.14868e-05 | 0.999968 |
| rad67         | 7.68554e-06 | 0.999983 | 9.80595e-06 | 0.999978 |
| rad55         | 5.54137e-06 | 0.999989 | 7.07023e-06 | 0.999985 |
| rad51         | 1.81654e-06 | 0.999991 | 2.31772e-06 | 0.999988 |
| rad34         | 1.77488e-06 | 0.999992 | 2.26456e-06 | 0.999990 |
| rad60syn      | 1.71203e-06 | 0.999994 | 2.18438e-06 | 0.999992 |
| rad59         | 1.34390e-06 | 0.999995 | 1.71468e-06 | 0.999994 |
| rad62         | 1.09238e-06 | 0.999997 | 1.39377e-06 | 0.999995 |
| rad60anti     | 1.02264e-06 | 0.999998 | 1.30479e-06 | 0.999996 |
| rad53         | 7.63459e-07 | 0.999998 | 9.74098e-07 | 0.999997 |
| rad52         | 7.36190e-07 | 0.999999 | 9.39297e-07 | 0.999998 |
| rad56         | 5.61676e-07 | 1.000000 | 7.16641e-07 | 0.999999 |
| rad64         | 1.97836e-07 | 1.000000 | 2.52418e-07 | 0.999999 |
| rad43         | 1.00004e-07 | 1.000000 | 1.27595e-07 | 0.999999 |
| PAH8+H        | 7.73009e-08 | 1.000000 | 9.86282e-08 | 1.000000 |
| rad58         | 5.80225e-08 | 1.000000 | 7.40306e-08 | 1.000000 |
| rad65         | 5.51354e-08 | 1.000000 | 7.03469e-08 | 1.000000 |
| rad68syn      | 5.11875e-08 | 1.000000 | 6.53098e-08 | 1.000000 |
| rad42         | 4.85214e-08 | 1.000000 | 6.19082e-08 | 1.000000 |
| rad68anti     | 3.37456e-08 | 1.000000 | 4.30559e-08 | 1.000000 |
| rad40syn      | 1.23711e-08 | 1.000000 | 1.57842e-08 | 1.000000 |
| rad73         | 1.01769e-08 | 1.000000 | 1.29847e-08 | 1.000000 |
| rad71         | 9.36208e-09 | 1.000000 | 1.19451e-08 | 1.000000 |
| rad40anti     | 6.47926e-09 | 1.000000 | 8.26688e-09 | 1.000000 |
| rad61         | 4.96370e-09 | 1.000000 | 6.33318e-09 | 1.000000 |
| rad41         | 3.08784e-09 | 1.000000 | 3.93976e-09 | 1.000000 |
| rad72         | 1.29425e-10 | 1.000000 | 1.65133e-10 | 1.000000 |
| rad6          | 4.57086e-14 | 1.000000 | 5.83197e-14 | 1.000000 |
| rad11         | 1.92510e-14 | 1.000000 | 2.45624e-14 | 1.000000 |
| rad7          | 1.43224e-14 | 1.000000 | 1.82739e-14 | 1.000000 |
| rad9          | 4.21575e-15 | 1.000000 | 5.37888e-15 | 1.000000 |
| rad23         | 4.00184e-15 | 1.000000 | 5.10592e-15 | 1.000000 |
| rad13         | 3.13831e-15 | 1.000000 | 4.00416e-15 | 1.000000 |
| rad45         | 2.71132e-15 | 1.000000 | 3.45936e-15 | 1.000000 |
| rad21         | 3.81060e-16 | 1.000000 | 4.86193e-16 | 1.000000 |
| rad2          | 2.73686e-16 | 1.000000 | 3.49194e-16 | 1.000000 |
| rad36         | 2.67305e-16 | 1.000000 | 3.41054e-16 | 1.000000 |
| rad10         | 1.66479e-16 | 1.000000 | 2.12409e-16 | 1.000000 |
| rad20         | 1.53040e-16 | 1.000000 | 1.95263e-16 | 1.000000 |
| rad28         | 1.27953e-16 | 1.000000 | 1.63255e-16 | 1.000000 |
| rad33         | 9.75772e-17 | 1.000000 | 1.24499e-16 | 1.000000 |
| rad1          | 6.91187e-17 | 1.000000 | 8.81880e-17 | 1.000000 |
| rad3          | 3.93979e-17 | 1.000000 | 5.02677e-17 | 1.000000 |
| rad18         | 3.17460e-17 | 1.000000 | 4.05046e-17 | 1.000000 |
| rad4          | 3.16632e-17 | 1.000000 | 4.03990e-17 | 1.000000 |
| rad25         | 1.93942e-17 | 1.000000 | 2.47449e-17 | 1.000000 |
| rad15         | 1.80910e-17 | 1.000000 | 2.30823e-17 | 1.000000 |
| rad26         | 1.78890e-17 | 1.000000 | 2.28245e-17 | 1.000000 |
| rad24         | 8.67708e-18 | 1.000000 | 1.10711e-17 | 1.000000 |
| rad12         | 7.86877e-18 | 1.000000 | 1.00397e-17 | 1.000000 |
| rad22         | 2.39710e-18 | 1.000000 | 3.05845e-18 | 1.000000 |
| rad14         | 1.10830e-18 | 1.000000 | 1.41408e-18 | 1.000000 |
| rad27         | 2.35634e-19 | 1.000000 | 3.00644e-19 | 1.000000 |
| rad8          | 9.26462e-20 | 1.000000 | 1.18207e-19 | 1.000000 |
| rad31         | 3.51109e-20 | 1.000000 | 4.47978e-20 | 1.000000 |
| rad47         | 1.36054e-21 | 1.000000 | 1.73591e-21 | 1.000000 |
| rad5          | 3.05872e-22 | 1.000000 | 3.90260e-22 | 1.000000 |

0.100000000E-06 Pa, 1500.00000 K

=====

| Rate constant      | True (fraction)      | Effective (fraction) |             |          |
|--------------------|----------------------|----------------------|-------------|----------|
| Total              | 4.61271e-12 (1.00 )  | 3.52361e-12 (1.00 )  |             |          |
| Formation of rad11 | 1.20217e-12 (0.261 ) | 7.28782e-13 (0.207 ) |             |          |
| Formation of rad6  | 1.56360e-12 (0.339 ) | 9.47887e-13 (0.269 ) |             |          |
| H-abstraction      | 1.84694e-12 (0.400 ) | 1.84694e-12 (0.524 ) |             |          |
| species            | PYtrue               | Cumul                | PYeffective | Cumul    |
| Benzene+2-propynyl | 0.400402             | 0.400402             | 0.524162    | 0.524162 |

|               |             |          |             |          |
|---------------|-------------|----------|-------------|----------|
| Phenyl+Allene | 0.236109    | 0.636511 | 0.00000     | 0.524162 |
| Indene+H      | 0.0806435   | 0.717155 | 0.105570    | 0.629731 |
| PhCH2CCH+H    | 0.0806387   | 0.797793 | 0.105563    | 0.735294 |
| C2H2+PhCH2    | 0.0787062   | 0.876500 | 0.103033    | 0.838328 |
| PhCHCCH2+H    | 0.0701571   | 0.946657 | 0.0918421   | 0.930170 |
| PhCCH+CH3     | 0.0359368   | 0.982594 | 0.0470444   | 0.977214 |
| PAH7+H        | 0.00805110  | 0.990645 | 0.0105396   | 0.987754 |
| Ph+MeAc       | 0.00526035  | 0.995905 | 0.00688624  | 0.994640 |
| rad39         | 0.00146497  | 0.997370 | 0.00191777  | 0.996558 |
| PhCCCH3+H     | 0.000785539 | 0.998156 | 0.00102834  | 0.997586 |
| rad19anti     | 0.000582991 | 0.998739 | 0.000763188 | 0.998349 |
| rad19syn      | 0.000316567 | 0.999055 | 0.000414413 | 0.998764 |
| PAH9+H        | 0.000302845 | 0.999358 | 0.000396450 | 0.999160 |
| PhcycC3H3_A+H | 0.000139913 | 0.999498 | 0.000183158 | 0.999343 |
| rad38         | 0.000129499 | 0.999627 | 0.000169526 | 0.999513 |
| rad54         | 0.000122808 | 0.999750 | 0.000160767 | 0.999674 |
| rad35         | 5.49599e-05 | 0.999805 | 7.19472e-05 | 0.999746 |
| rad46         | 3.45380e-05 | 0.999840 | 4.52132e-05 | 0.999791 |
| rad30         | 3.01156e-05 | 0.999870 | 3.94239e-05 | 0.999830 |
| PAH1+H        | 2.31901e-05 | 0.999893 | 3.03579e-05 | 0.999861 |
| rad50         | 1.62766e-05 | 0.999909 | 2.13074e-05 | 0.999882 |
| rad37         | 1.56192e-05 | 0.999925 | 2.04470e-05 | 0.999902 |
| PAH3+H        | 1.44553e-05 | 0.999939 | 1.89232e-05 | 0.999921 |
| rad70         | 1.26613e-05 | 0.999952 | 1.65747e-05 | 0.999938 |
| PAH10+CH3     | 1.25752e-05 | 0.999965 | 1.64620e-05 | 0.999954 |
| rad67         | 1.09793e-05 | 0.999976 | 1.43728e-05 | 0.999969 |
| rad55         | 7.93592e-06 | 0.999983 | 1.03888e-05 | 0.999979 |
| rad51         | 2.96749e-06 | 0.999986 | 3.88470e-06 | 0.999983 |
| rad34         | 2.57549e-06 | 0.999989 | 3.37153e-06 | 0.999986 |
| rad60syn      | 1.82792e-06 | 0.999991 | 2.39290e-06 | 0.999989 |
| rad59         | 1.58467e-06 | 0.999992 | 2.07447e-06 | 0.999991 |
| rad62         | 1.38706e-06 | 0.999994 | 1.81579e-06 | 0.999993 |
| rad53         | 1.32204e-06 | 0.999995 | 1.73067e-06 | 0.999994 |
| rad52         | 1.12378e-06 | 0.999996 | 1.47114e-06 | 0.999996 |
| rad60anti     | 1.10268e-06 | 0.999997 | 1.44350e-06 | 0.999997 |
| rad56         | 1.07222e-06 | 0.999998 | 1.40364e-06 | 0.999999 |
| rad64         | 3.15087e-07 | 0.999999 | 4.12476e-07 | 0.999999 |
| PAH8+H        | 1.66252e-07 | 0.999999 | 2.17639e-07 | 0.999999 |
| rad43         | 1.09523e-07 | 0.999999 | 1.43375e-07 | 0.999999 |
| rad68syn      | 9.28291e-08 | 0.999999 | 1.21521e-07 | 0.999999 |
| rad65         | 8.88724e-08 | 0.999999 | 1.16342e-07 | 1.000000 |
| rad58         | 8.42069e-08 | 0.999999 | 1.10234e-07 | 1.000000 |
| rad42         | 7.16663e-08 | 0.999999 | 9.38173e-08 | 1.000000 |
| rad68anti     | 6.10163e-08 | 0.999999 | 7.98757e-08 | 1.000000 |
| rad40syn      | 2.48114e-08 | 0.999999 | 3.24802e-08 | 1.000000 |
| rad71         | 2.35639e-08 | 0.999999 | 3.08472e-08 | 1.000000 |
| rad73         | 2.32861e-08 | 0.999999 | 3.04835e-08 | 1.000000 |
| rad40anti     | 1.33700e-08 | 0.999999 | 1.75025e-08 | 1.000000 |
| rad61         | 9.14968e-09 | 0.999999 | 1.19777e-08 | 1.000000 |
| rad41         | 4.14357e-09 | 0.999999 | 5.42427e-09 | 1.000000 |
| rad72         | 4.05222e-10 | 0.999999 | 5.30469e-10 | 1.000000 |
| rad6          | 9.16797e-14 | 0.999999 | 1.20017e-13 | 1.000000 |
| rad11         | 1.35770e-14 | 0.999999 | 1.77735e-14 | 1.000000 |
| rad7          | 1.25067e-14 | 0.999999 | 1.63724e-14 | 1.000000 |
| rad9          | 2.73376e-15 | 0.999999 | 3.57874e-15 | 1.000000 |
| rad23         | 2.22899e-15 | 0.999999 | 2.91794e-15 | 1.000000 |
| rad13         | 1.89899e-15 | 0.999999 | 2.48595e-15 | 1.000000 |
| rad45         | 1.53875e-15 | 0.999999 | 2.01436e-15 | 1.000000 |
| rad28         | 2.45205e-16 | 0.999999 | 3.20995e-16 | 1.000000 |
| rad21         | 2.42952e-16 | 0.999999 | 3.18045e-16 | 1.000000 |
| rad36         | 1.53170e-16 | 0.999999 | 2.00514e-16 | 1.000000 |
| rad2          | 9.70221e-17 | 0.999999 | 1.27010e-16 | 1.000000 |
| rad10         | 8.82008e-17 | 0.999999 | 1.15463e-16 | 1.000000 |
| rad20         | 8.79172e-17 | 0.999999 | 1.15092e-16 | 1.000000 |
| rad33         | 6.33589e-17 | 0.999999 | 8.29424e-17 | 1.000000 |
| rad15         | 2.99287e-17 | 0.999999 | 3.91793e-17 | 1.000000 |
| rad1          | 2.49410e-17 | 0.999999 | 3.26500e-17 | 1.000000 |
| rad18         | 2.34697e-17 | 0.999999 | 3.07239e-17 | 1.000000 |
| rad26         | 1.92002e-17 | 0.999999 | 2.51348e-17 | 1.000000 |
| rad3          | 1.85587e-17 | 0.999999 | 2.42949e-17 | 1.000000 |
| rad4          | 1.49936e-17 | 0.999999 | 1.96279e-17 | 1.000000 |
| rad25         | 1.37831e-17 | 0.999999 | 1.80433e-17 | 1.000000 |
| rad22         | 1.27475e-17 | 0.999999 | 1.66876e-17 | 1.000000 |
| rad12         | 6.49250e-18 | 0.999999 | 8.49924e-18 | 1.000000 |
| rad24         | 6.18581e-18 | 0.999999 | 8.09777e-18 | 1.000000 |
| rad14         | 6.98939e-19 | 0.999999 | 9.14971e-19 | 1.000000 |
| rad27         | 1.15740e-19 | 0.999999 | 1.51513e-19 | 1.000000 |
| rad8          | 9.76883e-20 | 0.999999 | 1.27883e-19 | 1.000000 |
| rad31         | 2.37694e-20 | 0.999999 | 3.11163e-20 | 1.000000 |
| rad47         | 2.21852e-21 | 0.999999 | 2.90423e-21 | 1.000000 |

rad5 | 9.60645e-22 0.999999 | 1.25757e-21 1.00000

0.100000000E-06 Pa, 1750.00000 K

| Rate constant      | True (fraction)      | Effective (fraction) |
|--------------------|----------------------|----------------------|
| Total              | 8.61869e-12 (1.00 )  | 6.27400e-12 (1.00 )  |
| Formation of rad11 | 2.04015e-12 (0.237 ) | 1.05237e-12 (0.168 ) |
| Formation of rad6  | 2.80256e-12 (0.325 ) | 1.44565e-12 (0.230 ) |
| H-abstraction      | 3.77597e-12 (0.438 ) | 3.77597e-12 (0.602 ) |

| species            | PYtrue      | Cumul    | PYeffective | Cumul    |
|--------------------|-------------|----------|-------------|----------|
| Benzene+2-propynyl | 0.438115    | 0.438115 | 0.601845    | 0.601845 |
| Phenyl+Allene      | 0.272047    | 0.710162 | 0.00000     | 0.601845 |
| PhCH2CCH+H         | 0.0933387   | 0.803501 | 0.128221    | 0.730066 |
| PhCHCCH2+H         | 0.0656327   | 0.869134 | 0.0901606   | 0.820227 |
| C2H2+PhCH2         | 0.0475978   | 0.916731 | 0.0653858   | 0.885612 |
| Indene+H           | 0.0395372   | 0.956269 | 0.0543127   | 0.939925 |
| PhCCH+CH3          | 0.0276514   | 0.983920 | 0.0379853   | 0.977910 |
| PAH7+H             | 0.00712605  | 0.991046 | 0.00978916  | 0.987700 |
| Ph+MeAc            | 0.00488545  | 0.995931 | 0.00671122  | 0.994411 |
| rad39              | 0.00123375  | 0.997165 | 0.00169483  | 0.996106 |
| rad19anti          | 0.000564116 | 0.997729 | 0.000774933 | 0.996881 |
| rad19syn           | 0.000506158 | 0.998235 | 0.000695318 | 0.997576 |
| PhCCH3+H           | 0.000461483 | 0.998697 | 0.000633946 | 0.998210 |
| PhcycC3H3_A+H      | 0.000354596 | 0.999052 | 0.000487115 | 0.998697 |
| PAH9+H             | 0.000266731 | 0.999318 | 0.000366412 | 0.999063 |
| rad54              | 0.000215004 | 0.999533 | 0.000295354 | 0.999359 |
| rad38              | 0.000142764 | 0.999676 | 0.000196118 | 0.999555 |
| rad35              | 4.88397e-05 | 0.999725 | 6.70919e-05 | 0.999622 |
| PAH1+H             | 4.24056e-05 | 0.999767 | 5.82532e-05 | 0.999680 |
| rad46              | 3.79670e-05 | 0.999805 | 5.21559e-05 | 0.999732 |
| rad50              | 2.38701e-05 | 0.999829 | 3.27908e-05 | 0.999765 |
| rad30              | 2.30179e-05 | 0.999852 | 3.16201e-05 | 0.999797 |
| PAH10+CH3          | 2.22275e-05 | 0.999874 | 3.05343e-05 | 0.999827 |
| rad70              | 2.20506e-05 | 0.999896 | 3.02913e-05 | 0.999858 |
| PAH3+H             | 2.08052e-05 | 0.999917 | 2.85805e-05 | 0.999886 |
| rad55              | 1.72026e-05 | 0.999934 | 2.36314e-05 | 0.999910 |
| rad67              | 1.69163e-05 | 0.999951 | 2.32382e-05 | 0.999933 |
| rad37              | 1.61425e-05 | 0.999968 | 2.21752e-05 | 0.999955 |
| rad51              | 6.11253e-06 | 0.999974 | 8.39689e-06 | 0.999964 |
| rad34              | 5.25680e-06 | 0.999979 | 7.22134e-06 | 0.999971 |
| rad53              | 4.39527e-06 | 0.999983 | 6.03786e-06 | 0.999977 |
| rad56              | 3.99314e-06 | 0.999987 | 5.48546e-06 | 0.999982 |
| rad62              | 2.35598e-06 | 0.999990 | 3.23645e-06 | 0.999986 |
| rad59              | 2.06481e-06 | 0.999992 | 2.83647e-06 | 0.999988 |
| rad52              | 2.03181e-06 | 0.999994 | 2.79112e-06 | 0.999991 |
| rad60syn           | 1.94292e-06 | 0.999996 | 2.66902e-06 | 0.999994 |
| rad60anti          | 1.30713e-06 | 0.999997 | 1.79563e-06 | 0.999996 |
| rad64              | 7.88600e-07 | 0.999998 | 1.08332e-06 | 0.999997 |
| PAH8+H             | 5.90480e-07 | 0.999998 | 8.11153e-07 | 0.999998 |
| rad68syn           | 2.81742e-07 | 0.999999 | 3.87034e-07 | 0.999998 |
| rad68anti          | 1.82569e-07 | 0.999999 | 2.50799e-07 | 0.999998 |
| rad65              | 1.74382e-07 | 0.999999 | 2.39552e-07 | 0.999998 |
| rad42              | 1.70585e-07 | 0.999999 | 2.34336e-07 | 0.999999 |
| rad58              | 1.57351e-07 | 0.999999 | 2.16156e-07 | 0.999999 |
| rad43              | 1.31435e-07 | 0.999999 | 1.80554e-07 | 0.999999 |
| rad71              | 1.24696e-07 | 1.000000 | 1.71297e-07 | 0.999999 |
| rad73              | 9.95914e-08 | 1.000000 | 1.36810e-07 | 0.999999 |
| rad40syn           | 8.39457e-08 | 1.000000 | 1.15318e-07 | 1.000000 |
| rad40anti          | 5.01024e-08 | 1.000000 | 6.88266e-08 | 1.000000 |
| rad61              | 2.64237e-08 | 1.000000 | 3.62987e-08 | 1.000000 |
| rad41              | 7.91859e-09 | 1.000000 | 1.08779e-08 | 1.000000 |
| rad72              | 3.69499e-09 | 1.000000 | 5.07588e-09 | 1.000000 |
| rad6               | 2.67943e-13 | 1.000000 | 3.68078e-13 | 1.000000 |
| rad7               | 2.29314e-15 | 1.000000 | 3.15012e-15 | 1.000000 |
| rad11              | 1.74060e-15 | 1.000000 | 2.39109e-15 | 1.000000 |
| rad28              | 6.31593e-16 | 1.000000 | 8.67631e-16 | 1.000000 |
| rad23              | 4.58942e-16 | 1.000000 | 6.30454e-16 | 1.000000 |
| rad9               | 2.21533e-16 | 1.000000 | 3.04324e-16 | 1.000000 |
| rad13              | 1.60832e-16 | 1.000000 | 2.20939e-16 | 1.000000 |
| rad45              | 1.32484e-16 | 1.000000 | 1.81995e-16 | 1.000000 |
| rad22              | 8.40665e-17 | 1.000000 | 1.15483e-16 | 1.000000 |
| rad36              | 2.29359e-17 | 1.000000 | 3.15074e-17 | 1.000000 |
| rad21              | 1.98012e-17 | 1.000000 | 2.72012e-17 | 1.000000 |
| rad26              | 1.29840e-17 | 1.000000 | 1.78363e-17 | 1.000000 |
| rad15              | 1.11834e-17 | 1.000000 | 1.53628e-17 | 1.000000 |
| rad10              | 7.66423e-18 | 1.000000 | 1.05285e-17 | 1.000000 |
| rad20              | 6.44623e-18 | 1.000000 | 8.85528e-18 | 1.000000 |

|       |             |          |             |          |
|-------|-------------|----------|-------------|----------|
| rad33 | 5.54005e-18 | 1.000000 | 7.61045e-18 | 1.000000 |
| rad18 | 2.99781e-18 | 1.000000 | 4.11816e-18 | 1.000000 |
| rad2  | 2.58059e-18 | 1.000000 | 3.54500e-18 | 1.000000 |
| rad25 | 1.43077e-18 | 1.000000 | 1.96547e-18 | 1.000000 |
| rad12 | 7.47122e-19 | 1.000000 | 1.02634e-18 | 1.000000 |
| rad1  | 7.08706e-19 | 1.000000 | 9.73564e-19 | 1.000000 |
| rad3  | 6.45544e-19 | 1.000000 | 8.86798e-19 | 1.000000 |
| rad24 | 6.07027e-19 | 1.000000 | 8.33884e-19 | 1.000000 |
| rad4  | 4.13690e-19 | 1.000000 | 5.68290e-19 | 1.000000 |
| rad14 | 7.58528e-20 | 1.000000 | 1.04200e-19 | 1.000000 |
| rad8  | 2.76592e-20 | 1.000000 | 3.79959e-20 | 1.000000 |
| rad27 | 6.88422e-21 | 1.000000 | 9.45698e-21 | 1.000000 |
| rad5  | 5.43402e-21 | 1.000000 | 7.46481e-21 | 1.000000 |
| rad47 | 1.43456e-21 | 1.000000 | 1.97067e-21 | 1.000000 |

0.100000000E-06 Pa, 2000.00000 K

| Rate constant      | True (fraction)      | Effective (fraction) |
|--------------------|----------------------|----------------------|
| Total              | 1.44111e-11 (1.00 )  | 1.02930e-11 (1.00 )  |
| Formation of rad11 | 3.16882e-12 (0.220 ) | 1.47449e-12 (0.143 ) |
| Formation of rad6  | 4.53302e-12 (0.315 ) | 2.10927e-12 (0.205 ) |
| H-abstraction      | 6.70922e-12 (0.466 ) | 6.70922e-12 (0.652 ) |

| species            | PYtrue      | Cumul    | PYeffective | Cumul    |
|--------------------|-------------|----------|-------------|----------|
| Benzene+2-propynyl | 0.465560    | 0.465560 | 0.651825    | 0.651825 |
| Phenyl+Allene      | 0.285759    | 0.751319 | 0.000000    | 0.651825 |
| PhCH2CCH+H         | 0.0971788   | 0.848498 | 0.136059    | 0.787884 |
| PhCHCCH2+H         | 0.0592993   | 0.907797 | 0.0830241   | 0.870908 |
| C2H2+PhCH2         | 0.0319942   | 0.939791 | 0.0447948   | 0.915703 |
| Indene+H           | 0.0233046   | 0.963096 | 0.0326284   | 0.948331 |
| PhCCH+CH3          | 0.0216466   | 0.984742 | 0.0303071   | 0.978638 |
| PAH7+H             | 0.00659328  | 0.991336 | 0.00923114  | 0.987869 |
| Ph+MeAc            | 0.00420938  | 0.995545 | 0.00589349  | 0.993763 |
| rad39              | 0.00101472  | 0.996560 | 0.00142069  | 0.995183 |
| rad19syn           | 0.000746783 | 0.997306 | 0.00104557  | 0.996229 |
| PhcycC3H3_A+H      | 0.000656335 | 0.997963 | 0.000918925 | 0.997148 |
| rad19anti          | 0.000529228 | 0.998492 | 0.000740966 | 0.997889 |
| rad54              | 0.000330237 | 0.998822 | 0.000462359 | 0.998351 |
| PhCCCH3+H          | 0.000291962 | 0.999114 | 0.000408772 | 0.998760 |
| PAH9+H             | 0.000279546 | 0.999394 | 0.000391387 | 0.999151 |
| rad38              | 0.000156414 | 0.999550 | 0.000218994 | 0.999370 |
| PAH1+H             | 6.96990e-05 | 0.999620 | 9.75848e-05 | 0.999468 |
| rad35              | 5.18637e-05 | 0.999672 | 7.26137e-05 | 0.999541 |
| rad46              | 4.57412e-05 | 0.999717 | 6.40416e-05 | 0.999605 |
| rad50              | 3.87497e-05 | 0.999756 | 5.42530e-05 | 0.999659 |
| PAH10+CH3          | 3.34470e-05 | 0.999790 | 4.68285e-05 | 0.999706 |
| rad70              | 3.20125e-05 | 0.999822 | 4.48203e-05 | 0.999751 |
| rad55              | 2.86889e-05 | 0.999850 | 4.01669e-05 | 0.999791 |
| PAH3+H             | 2.79049e-05 | 0.999878 | 3.90694e-05 | 0.999830 |
| rad67              | 2.51584e-05 | 0.999903 | 3.52238e-05 | 0.999865 |
| rad30              | 1.88901e-05 | 0.999922 | 2.64479e-05 | 0.999891 |
| rad37              | 1.66057e-05 | 0.999939 | 2.32494e-05 | 0.999915 |
| rad51              | 1.22963e-05 | 0.999951 | 1.72160e-05 | 0.999932 |
| rad56              | 1.03249e-05 | 0.999961 | 1.44559e-05 | 0.999946 |
| rad53              | 9.90974e-06 | 0.999971 | 1.38745e-05 | 0.999960 |
| rad34              | 8.56178e-06 | 0.999980 | 1.19873e-05 | 0.999972 |
| rad52              | 3.64112e-06 | 0.999984 | 5.09788e-06 | 0.999977 |
| rad62              | 3.41505e-06 | 0.999987 | 4.78139e-06 | 0.999982 |
| rad59              | 2.58714e-06 | 0.999990 | 3.62224e-06 | 0.999986 |
| rad60syn           | 2.06844e-06 | 0.999992 | 2.89599e-06 | 0.999989 |
| PAH8+H             | 1.81455e-06 | 0.999993 | 2.54053e-06 | 0.999991 |
| rad64              | 1.47576e-06 | 0.999995 | 2.06619e-06 | 0.999993 |
| rad60anti          | 1.42207e-06 | 0.999996 | 1.99102e-06 | 0.999995 |
| rad68syn           | 6.53892e-07 | 0.999997 | 9.15510e-07 | 0.999996 |
| rad71              | 4.98025e-07 | 0.999998 | 6.97277e-07 | 0.999997 |
| rad68anti          | 4.21792e-07 | 0.999998 | 5.90544e-07 | 0.999997 |
| rad73              | 3.38736e-07 | 0.999998 | 4.74260e-07 | 0.999998 |
| rad65              | 3.37785e-07 | 0.999999 | 4.72930e-07 | 0.999998 |
| rad42              | 3.12138e-07 | 0.999999 | 4.37019e-07 | 0.999999 |
| rad58              | 2.75720e-07 | 0.999999 | 3.86032e-07 | 0.999999 |
| rad40syn           | 2.27523e-07 | 0.999999 | 3.18551e-07 | 1.000000 |
| rad43              | 1.62531e-07 | 1.000000 | 2.27558e-07 | 1.000000 |
| rad40anti          | 1.42660e-07 | 1.000000 | 1.99737e-07 | 1.000000 |
| rad61              | 5.98888e-08 | 1.000000 | 8.38493e-08 | 1.000000 |
| rad72              | 2.09307e-08 | 1.000000 | 2.93048e-08 | 1.000000 |
| rad41              | 1.34670e-08 | 1.000000 | 1.88550e-08 | 1.000000 |
| rad6               | 5.87248e-14 | 1.000000 | 8.22199e-14 | 1.000000 |
| rad7               | 5.24990e-16 | 1.000000 | 7.35033e-16 | 1.000000 |

|       |             |          |             |         |
|-------|-------------|----------|-------------|---------|
| rad11 | 4.12474e-16 | 1.000000 | 5.77501e-16 | 1.00000 |
| rad23 | 2.98582e-16 | 1.000000 | 4.18040e-16 | 1.00000 |
| rad28 | 2.01430e-16 | 1.000000 | 2.82020e-16 | 1.00000 |
| rad9  | 7.53811e-17 | 1.000000 | 1.05540e-16 | 1.00000 |
| rad13 | 4.89591e-17 | 1.000000 | 6.85470e-17 | 1.00000 |
| rad45 | 4.02924e-17 | 1.000000 | 5.64128e-17 | 1.00000 |
| rad22 | 2.64942e-17 | 1.000000 | 3.70942e-17 | 1.00000 |
| rad21 | 7.16422e-18 | 1.000000 | 1.00305e-17 | 1.00000 |
| rad36 | 7.13595e-18 | 1.000000 | 9.99099e-18 | 1.00000 |
| rad15 | 3.98238e-18 | 1.000000 | 5.57568e-18 | 1.00000 |
| rad26 | 3.09798e-18 | 1.000000 | 4.33746e-18 | 1.00000 |
| rad33 | 2.26331e-18 | 1.000000 | 3.16884e-18 | 1.00000 |
| rad20 | 1.89431e-18 | 1.000000 | 2.65220e-18 | 1.00000 |
| rad10 | 1.14037e-18 | 1.000000 | 1.59662e-18 | 1.00000 |
| rad18 | 6.66195e-19 | 1.000000 | 9.32730e-19 | 1.00000 |
| rad25 | 5.79819e-19 | 1.000000 | 8.11799e-19 | 1.00000 |
| rad12 | 4.14756e-19 | 1.000000 | 5.80694e-19 | 1.00000 |
| rad2  | 3.41553e-19 | 1.000000 | 4.78205e-19 | 1.00000 |
| rad24 | 2.85159e-19 | 1.000000 | 3.99249e-19 | 1.00000 |
| rad3  | 1.63754e-19 | 1.000000 | 2.29271e-19 | 1.00000 |
| rad4  | 1.04151e-19 | 1.000000 | 1.45820e-19 | 1.00000 |
| rad1  | 9.71323e-20 | 1.000000 | 1.35994e-19 | 1.00000 |
| rad14 | 2.92675e-20 | 1.000000 | 4.09771e-20 | 1.00000 |
| rad8  | 2.34712e-20 | 1.000000 | 3.28617e-20 | 1.00000 |
| rad5  | 3.72766e-21 | 1.000000 | 5.21904e-21 | 1.00000 |
| rad47 | 2.86742e-21 | 1.000000 | 4.01464e-21 | 1.00000 |
| rad27 | 1.89904e-21 | 1.000000 | 2.65882e-21 | 1.00000 |

0.100000000E-06 Pa, 2250.00000 K

| Rate constant      | True (fraction)      | Effective (fraction) |
|--------------------|----------------------|----------------------|
| Total              | 2.23655e-11 (1.00 )  | 1.58437e-11 (1.00 )  |
| Formation of rad11 | 4.62280e-12 (0.207 ) | 1.98925e-12 (0.126 ) |
| Formation of rad6  | 6.82518e-12 (0.305 ) | 2.93696e-12 (0.185 ) |
| H-abstraction      | 1.09175e-11 (0.488 ) | 1.09175e-11 (0.689 ) |

| species            | PYtrue      | Cumul    | PYeffective | Cumul    |
|--------------------|-------------|----------|-------------|----------|
| Benzene+2-propynyl | 0.488140    | 0.488140 | 0.689074    | 0.689074 |
| Phenyl+Allene      | 0.291600    | 0.779740 | 0.000000    | 0.689074 |
| PhCH2CCH+H         | 0.0967415   | 0.876482 | 0.136563    | 0.825637 |
| PhCHCCH2+H         | 0.0532744   | 0.929756 | 0.0752040   | 0.900841 |
| C2H2+PhCH2         | 0.0232642   | 0.953020 | 0.0328403   | 0.933682 |
| PhCCH+CH3          | 0.0176492   | 0.970669 | 0.0249142   | 0.958596 |
| Indene+H           | 0.0145378   | 0.985207 | 0.0205221   | 0.979118 |
| PAH7+H             | 0.00604332  | 0.991251 | 0.00853097  | 0.987649 |
| Ph+MeAc            | 0.00373478  | 0.994985 | 0.00527212  | 0.992921 |
| PhcycC3H3_A+H      | 0.00104439  | 0.996030 | 0.00147430  | 0.994395 |
| rad19syn           | 0.000992650 | 0.997022 | 0.00140125  | 0.995797 |
| rad39              | 0.000833753 | 0.997856 | 0.00117695  | 0.996974 |
| rad19anti          | 0.000463520 | 0.998320 | 0.000654319 | 0.997628 |
| rad54              | 0.000448432 | 0.998768 | 0.000633020 | 0.998261 |
| PAH9+H             | 0.000276004 | 0.999044 | 0.000389615 | 0.998651 |
| PhCCCH3+H          | 0.000209665 | 0.999254 | 0.000295970 | 0.998946 |
| rad38              | 0.000160719 | 0.999414 | 0.000226876 | 0.999173 |
| PAH1+H             | 9.95931e-05 | 0.999514 | 0.000140589 | 0.999314 |
| rad50              | 5.46328e-05 | 0.999569 | 7.71214e-05 | 0.999391 |
| rad35              | 5.24979e-05 | 0.999621 | 7.41079e-05 | 0.999465 |
| rad46              | 5.06983e-05 | 0.999672 | 7.15674e-05 | 0.999537 |
| PAH10+CH3          | 4.32190e-05 | 0.999715 | 6.10093e-05 | 0.999598 |
| rad55              | 4.15447e-05 | 0.999757 | 5.86459e-05 | 0.999656 |
| rad70              | 4.13232e-05 | 0.999798 | 5.83331e-05 | 0.999715 |
| PAH3+H             | 3.54273e-05 | 0.999833 | 5.00103e-05 | 0.999765 |
| rad67              | 3.21710e-05 | 0.999866 | 4.54135e-05 | 0.999810 |
| rad56              | 2.10958e-05 | 0.999887 | 2.97795e-05 | 0.999840 |
| rad51              | 2.05290e-05 | 0.999907 | 2.89794e-05 | 0.999869 |
| rad53              | 1.82253e-05 | 0.999925 | 2.57273e-05 | 0.999895 |
| rad30              | 1.61770e-05 | 0.999942 | 2.28359e-05 | 0.999917 |
| rad37              | 1.58091e-05 | 0.999957 | 2.23166e-05 | 0.999940 |
| rad34              | 1.21378e-05 | 0.999970 | 1.71341e-05 | 0.999957 |
| rad52              | 5.53699e-06 | 0.999975 | 7.81618e-06 | 0.999965 |
| rad62              | 4.54170e-06 | 0.999980 | 6.41120e-06 | 0.999971 |
| PAH8+H             | 4.26413e-06 | 0.999984 | 6.01937e-06 | 0.999977 |
| rad59              | 3.10133e-06 | 0.999987 | 4.37793e-06 | 0.999982 |
| rad64              | 2.31389e-06 | 0.999989 | 3.26637e-06 | 0.999985 |
| rad60syn           | 2.18352e-06 | 0.999991 | 3.08232e-06 | 0.999988 |
| rad60anti          | 1.52762e-06 | 0.999993 | 2.15643e-06 | 0.999990 |
| rad71              | 1.42621e-06 | 0.999994 | 2.01328e-06 | 0.999992 |
| rad68syn           | 1.22834e-06 | 0.999996 | 1.73396e-06 | 0.999994 |



|           |             |          |             |          |
|-----------|-------------|----------|-------------|----------|
| rad73     | 8.52958e-07 | 0.999996 | 1.20406e-06 | 0.999995 |
| rad68anti | 7.89692e-07 | 0.999997 | 1.11475e-06 | 0.999996 |
| rad65     | 5.43585e-07 | 0.999998 | 7.67340e-07 | 0.999997 |
| rad42     | 4.97942e-07 | 0.999998 | 7.02910e-07 | 0.999998 |
| rad40syn  | 4.83630e-07 | 0.999999 | 6.82706e-07 | 0.999998 |
| rad58     | 4.30302e-07 | 0.999999 | 6.07428e-07 | 0.999999 |
| rad40anti | 3.15359e-07 | 1.000000 | 4.45171e-07 | 0.999999 |
| rad43     | 2.01350e-07 | 1.000000 | 2.84232e-07 | 1.000000 |
| rad61     | 1.06762e-07 | 1.000000 | 1.50709e-07 | 1.000000 |
| rad72     | 7.85254e-08 | 1.000000 | 1.10849e-07 | 1.000000 |
| rad41     | 2.11925e-08 | 1.000000 | 2.99160e-08 | 1.000000 |
| rad6      | 1.18633e-14 | 1.000000 | 1.67466e-14 | 1.000000 |
| rad7      | 1.68549e-16 | 1.000000 | 2.37929e-16 | 1.000000 |
| rad11     | 1.28921e-16 | 1.000000 | 1.81988e-16 | 1.000000 |
| rad23     | 8.43571e-17 | 1.000000 | 1.19081e-16 | 1.000000 |
| rad28     | 4.33594e-17 | 1.000000 | 6.12076e-17 | 1.000000 |
| rad9      | 2.74015e-17 | 1.000000 | 3.86807e-17 | 1.000000 |
| rad13     | 1.82809e-17 | 1.000000 | 2.58058e-17 | 1.000000 |
| rad45     | 1.39718e-17 | 1.000000 | 1.97230e-17 | 1.000000 |
| rad22     | 6.74032e-18 | 1.000000 | 9.51483e-18 | 1.000000 |
| rad21     | 2.97971e-18 | 1.000000 | 4.20624e-18 | 1.000000 |
| rad36     | 2.52469e-18 | 1.000000 | 3.56393e-18 | 1.000000 |
| rad15     | 1.60376e-18 | 1.000000 | 2.26392e-18 | 1.000000 |
| rad33     | 1.06526e-18 | 1.000000 | 1.50376e-18 | 1.000000 |
| rad26     | 8.47973e-19 | 1.000000 | 1.19702e-18 | 1.000000 |
| rad20     | 6.76720e-19 | 1.000000 | 9.55283e-19 | 1.000000 |
| rad10     | 3.04075e-19 | 1.000000 | 4.29243e-19 | 1.000000 |
| rad25     | 2.68292e-19 | 1.000000 | 3.78730e-19 | 1.000000 |
| rad12     | 2.31790e-19 | 1.000000 | 3.27203e-19 | 1.000000 |
| rad18     | 2.02949e-19 | 1.000000 | 2.86490e-19 | 1.000000 |
| rad24     | 1.45642e-19 | 1.000000 | 2.05592e-19 | 1.000000 |
| rad2      | 6.54203e-20 | 1.000000 | 9.23497e-20 | 1.000000 |
| rad3      | 5.33384e-20 | 1.000000 | 7.52938e-20 | 1.000000 |
| rad4      | 3.33225e-20 | 1.000000 | 4.70390e-20 | 1.000000 |
| rad8      | 2.01388e-20 | 1.000000 | 2.84285e-20 | 1.000000 |
| rad1      | 1.87904e-20 | 1.000000 | 2.65251e-20 | 1.000000 |
| rad14     | 1.40657e-20 | 1.000000 | 1.98555e-20 | 1.000000 |
| rad47     | 4.71862e-21 | 1.000000 | 6.66093e-21 | 1.000000 |
| rad5      | 2.19045e-21 | 1.000000 | 3.09210e-21 | 1.000000 |
| rad27     | 7.37416e-22 | 1.000000 | 1.04096e-21 | 1.000000 |

0.100000000E-06 Pa, 2500.00000 K

| Rate constant      | True (fraction)      | Effective (fraction) |
|--------------------|----------------------|----------------------|
| Total              | 3.28090e-11 (1.00 )  | 2.31980e-11 (1.00 )  |
| Formation of rad11 | 6.43164e-12 (0.196 ) | 2.60906e-12 (0.112 ) |
| Formation of rad6  | 9.73932e-12 (0.297 ) | 3.95085e-12 (0.170 ) |
| H-abstraction      | 1.66381e-11 (0.507 ) | 1.66381e-11 (0.717 ) |

  

| species            | PYtrue      | Cumul    | PYeffective | Cumul    |
|--------------------|-------------|----------|-------------|----------|
| Benzene+2-propynyl | 0.507119    | 0.507119 | 0.717221    | 0.717221 |
| Phenyl+Allene      | 0.292939    | 0.800058 | 0.000000    | 0.717221 |
| PhCH2CCH+H         | 0.0943957   | 0.894453 | 0.133305    | 0.850725 |
| PhCHCCH2+H         | 0.0481939   | 0.942647 | 0.0681609   | 0.918886 |
| C2H2+PhCH2         | 0.0183497   | 0.960997 | 0.0259521   | 0.944838 |
| PhCCH+CH3          | 0.0148752   | 0.975872 | 0.0210381   | 0.965876 |
| Indene+H           | 0.00953292  | 0.985405 | 0.0134824   | 0.979359 |
| PAH7+H             | 0.00553047  | 0.990936 | 0.00782174  | 0.987180 |
| Ph+MeAc            | 0.00339482  | 0.994330 | 0.00480131  | 0.991982 |
| PhcycC3H3_A+H      | 0.00149309  | 0.995824 | 0.00211168  | 0.994093 |
| rad19syn           | 0.00122618  | 0.997050 | 0.00173419  | 0.995828 |
| rad39              | 0.000692493 | 0.997742 | 0.000979395 | 0.996807 |
| rad54              | 0.000558297 | 0.998301 | 0.000789599 | 0.997597 |
| rad19anti          | 0.000392540 | 0.998693 | 0.000555170 | 0.998152 |
| PAH9+H             | 0.000261381 | 0.998954 | 0.000369672 | 0.998522 |
| PhCCCH3+H          | 0.000164587 | 0.999119 | 0.000232776 | 0.998754 |
| rad38              | 0.000157797 | 0.999277 | 0.000223174 | 0.998977 |
| PAH1+H             | 0.000129617 | 0.999406 | 0.000183319 | 0.999161 |
| rad50              | 6.95411e-05 | 0.999476 | 9.83527e-05 | 0.999259 |
| rad55              | 5.44673e-05 | 0.999530 | 7.70336e-05 | 0.999336 |
| rad46              | 5.29591e-05 | 0.999583 | 7.49001e-05 | 0.999411 |
| rad35              | 5.14100e-05 | 0.999635 | 7.27094e-05 | 0.999484 |
| PAH10+CH3          | 5.04331e-05 | 0.999685 | 7.13277e-05 | 0.999555 |
| rad70              | 4.95223e-05 | 0.999735 | 7.00399e-05 | 0.999625 |
| PAH3+H             | 4.31617e-05 | 0.999778 | 6.10439e-05 | 0.999686 |
| rad67              | 3.73882e-05 | 0.999815 | 5.28783e-05 | 0.999739 |
| rad56              | 3.65112e-05 | 0.999852 | 5.16378e-05 | 0.999791 |
| rad51              | 2.99347e-05 | 0.999882 | 4.23369e-05 | 0.999833 |

|           |             |          |             |          |
|-----------|-------------|----------|-------------|----------|
| rad53     | 2.90213e-05 | 0.999911 | 4.10449e-05 | 0.999874 |
| rad34     | 1.57208e-05 | 0.999926 | 2.22340e-05 | 0.999896 |
| rad30     | 1.43454e-05 | 0.999941 | 2.02888e-05 | 0.999917 |
| rad37     | 1.43019e-05 | 0.999955 | 2.02272e-05 | 0.999937 |
| PAH8+H    | 8.32886e-06 | 0.999963 | 1.17795e-05 | 0.999949 |
| rad52     | 7.47627e-06 | 0.999971 | 1.05737e-05 | 0.999959 |
| rad62     | 5.70269e-06 | 0.999977 | 8.06532e-06 | 0.999967 |
| rad59     | 3.60017e-06 | 0.999980 | 5.09173e-06 | 0.999972 |
| rad64     | 3.22135e-06 | 0.999983 | 4.55597e-06 | 0.999977 |
| rad71     | 3.21465e-06 | 0.999987 | 4.54650e-06 | 0.999981 |
| rad60syn  | 2.29248e-06 | 0.999989 | 3.24226e-06 | 0.999985 |
| rad68syn  | 1.99920e-06 | 0.999991 | 2.82747e-06 | 0.999988 |
| rad73     | 1.73023e-06 | 0.999993 | 2.44707e-06 | 0.999990 |
| rad60anti | 1.62672e-06 | 0.999994 | 2.30068e-06 | 0.999992 |
| rad68anti | 1.28205e-06 | 0.999996 | 1.81322e-06 | 0.999994 |
| rad40syn  | 8.70429e-07 | 0.999996 | 1.23105e-06 | 0.999995 |
| rad65     | 7.65686e-07 | 0.999997 | 1.08291e-06 | 0.999996 |
| rad42     | 7.25369e-07 | 0.999998 | 1.02590e-06 | 0.999997 |
| rad58     | 6.16762e-07 | 0.999999 | 8.72293e-07 | 0.999998 |
| rad40anti | 5.85898e-07 | 0.999999 | 8.28640e-07 | 0.999999 |
| rad43     | 2.45120e-07 | 0.999999 | 3.46673e-07 | 0.999999 |
| rad72     | 2.19453e-07 | 1.000000 | 3.10373e-07 | 1.000000 |
| rad61     | 1.61750e-07 | 1.000000 | 2.28765e-07 | 1.000000 |
| rad41     | 3.09947e-08 | 1.000000 | 4.38359e-08 | 1.000000 |
| rad6      | 3.24821e-15 | 1.000000 | 4.59395e-15 | 1.000000 |
| rad7      | 6.60225e-17 | 1.000000 | 9.33758e-17 | 1.000000 |
| rad11     | 4.80251e-17 | 1.000000 | 6.79222e-17 | 1.000000 |
| rad23     | 2.46462e-17 | 1.000000 | 3.48571e-17 | 1.000000 |
| rad28     | 1.17706e-17 | 1.000000 | 1.66473e-17 | 1.000000 |
| rad9      | 1.06898e-17 | 1.000000 | 1.51187e-17 | 1.000000 |
| rad13     | 7.91321e-18 | 1.000000 | 1.11917e-17 | 1.000000 |
| rad45     | 5.44871e-18 | 1.000000 | 7.70611e-18 | 1.000000 |
| rad22     | 2.12454e-18 | 1.000000 | 3.00476e-18 | 1.000000 |
| rad21     | 1.39345e-18 | 1.000000 | 1.97077e-18 | 1.000000 |
| rad36     | 1.00116e-18 | 1.000000 | 1.41594e-18 | 1.000000 |
| rad15     | 6.95052e-19 | 1.000000 | 9.83015e-19 | 1.000000 |
| rad33     | 5.56576e-19 | 1.000000 | 7.87170e-19 | 1.000000 |
| rad26     | 3.00895e-19 | 1.000000 | 4.25558e-19 | 1.000000 |
| rad20     | 2.88827e-19 | 1.000000 | 4.08489e-19 | 1.000000 |
| rad25     | 1.37165e-19 | 1.000000 | 1.93993e-19 | 1.000000 |
| rad12     | 1.32606e-19 | 1.000000 | 1.87546e-19 | 1.000000 |
| rad10     | 1.10657e-19 | 1.000000 | 1.56503e-19 | 1.000000 |
| rad24     | 7.99114e-20 | 1.000000 | 1.13019e-19 | 1.000000 |
| rad18     | 7.64139e-20 | 1.000000 | 1.08073e-19 | 1.000000 |
| rad3      | 2.12385e-20 | 1.000000 | 3.00377e-20 | 1.000000 |
| rad2      | 1.75966e-20 | 1.000000 | 2.48869e-20 | 1.000000 |
| rad8      | 1.74700e-20 | 1.000000 | 2.47079e-20 | 1.000000 |
| rad4      | 1.29840e-20 | 1.000000 | 1.83634e-20 | 1.000000 |
| rad14     | 7.76880e-21 | 1.000000 | 1.09875e-20 | 1.000000 |
| rad47     | 6.74962e-21 | 1.000000 | 9.54604e-21 | 1.000000 |
| rad1      | 4.93596e-21 | 1.000000 | 6.98092e-21 | 1.000000 |
| rad5      | 1.44554e-21 | 1.000000 | 2.04444e-21 | 1.000000 |
| rad27     | 3.67276e-22 | 1.000000 | 5.19440e-22 | 1.000000 |

0.100000000E-06 Pa, 2750.00000 K

| Rate constant      | True (fraction) |          | Effective (fraction) |          |
|--------------------|-----------------|----------|----------------------|----------|
| Total              | 4.60596e-11     | (1.00 )  | 3.26255e-11          | (1.00 )  |
| Formation of rad11 | 8.62280e-12     | (0.187 ) | 3.34633e-12          | (0.103 ) |
| Formation of rad6  | 1.33313e-11     | (0.289 ) | 5.17360e-12          | (0.159 ) |
| H-abstraction      | 2.41055e-11     | (0.523 ) | 2.41055e-11          | (0.739 ) |

  

| species            | PYtrue      | Cumul    | PYeffective | Cumul    |
|--------------------|-------------|----------|-------------|----------|
| Benzene+2-propynyl | 0.523355    | 0.523355 | 0.738856    | 0.738856 |
| Phenyl+Allene      | 0.291669    | 0.815024 | 0.000000    | 0.738856 |
| PhCH2CCH+H         | 0.0913925   | 0.906416 | 0.129025    | 0.867881 |
| PhCHCCH2+H         | 0.0440897   | 0.950506 | 0.0622446   | 0.930126 |
| C2H2+PhCH2         | 0.0155259   | 0.966032 | 0.0219190   | 0.952045 |
| PhCCH+CH3          | 0.0128664   | 0.978898 | 0.0181644   | 0.970209 |
| Indene+H           | 0.00652675  | 0.985425 | 0.00921427  | 0.979424 |
| PAH7+H             | 0.00506746  | 0.990493 | 0.00715408  | 0.986578 |
| Ph+MeAc            | 0.00315047  | 0.993643 | 0.00444775  | 0.991026 |
| PhcycC3H3_A+H      | 0.00197300  | 0.995616 | 0.00278544  | 0.993811 |
| rad19syn           | 0.00143568  | 0.997052 | 0.00202686  | 0.995838 |
| rad54              | 0.000652594 | 0.997704 | 0.000921315 | 0.996759 |
| rad39              | 0.000584043 | 0.998288 | 0.000824532 | 0.997584 |
| rad19anti          | 0.000328573 | 0.998617 | 0.000463869 | 0.998048 |
| PAH9+H             | 0.000240059 | 0.998857 | 0.000338907 | 0.998386 |

|           |             |          |             |          |
|-----------|-------------|----------|-------------|----------|
| PAH1+H    | 0.000158291 | 0.999015 | 0.000223471 | 0.998610 |
| rad38     | 0.000149711 | 0.999165 | 0.000211358 | 0.998821 |
| PhCCCH3+H | 0.000136861 | 0.999302 | 0.000193216 | 0.999015 |
| rad50     | 8.19601e-05 | 0.999384 | 0.000115709 | 0.999130 |
| rad55     | 6.64334e-05 | 0.999450 | 9.37887e-05 | 0.999224 |
| rad70     | 5.64830e-05 | 0.999507 | 7.97407e-05 | 0.999304 |
| rad56     | 5.59920e-05 | 0.999563 | 7.90477e-05 | 0.999383 |
| PAH10+CH3 | 5.49972e-05 | 0.999618 | 7.76435e-05 | 0.999460 |
| rad46     | 5.29186e-05 | 0.999671 | 7.47090e-05 | 0.999535 |
| PAH3+H    | 5.07704e-05 | 0.999721 | 7.16761e-05 | 0.999607 |
| rad35     | 4.92117e-05 | 0.999771 | 6.94754e-05 | 0.999676 |
| rad53     | 4.15958e-05 | 0.999812 | 5.87239e-05 | 0.999735 |
| rad67     | 4.08893e-05 | 0.999853 | 5.77263e-05 | 0.999793 |
| rad51     | 3.94231e-05 | 0.999893 | 5.56562e-05 | 0.999848 |
| rad34     | 1.91382e-05 | 0.999912 | 2.70187e-05 | 0.999875 |
| PAH8+H    | 1.42400e-05 | 0.999926 | 2.01036e-05 | 0.999896 |
| rad30     | 1.30159e-05 | 0.999939 | 1.83754e-05 | 0.999914 |
| rad37     | 1.25497e-05 | 0.999951 | 1.77173e-05 | 0.999932 |
| rad52     | 9.23200e-06 | 0.999961 | 1.30335e-05 | 0.999945 |
| rad62     | 6.96508e-06 | 0.999968 | 9.83308e-06 | 0.999954 |
| rad71     | 6.06264e-06 | 0.999974 | 8.55906e-06 | 0.999963 |
| rad64     | 4.12924e-06 | 0.999978 | 5.82954e-06 | 0.999969 |
| rad59     | 4.06487e-06 | 0.999982 | 5.73866e-06 | 0.999975 |
| rad73     | 2.98825e-06 | 0.999985 | 4.21872e-06 | 0.999979 |
| rad68syn  | 2.93858e-06 | 0.999988 | 4.14861e-06 | 0.999983 |
| rad60syn  | 2.38752e-06 | 0.999990 | 3.37063e-06 | 0.999986 |
| rad68anti | 1.88086e-06 | 0.999992 | 2.65533e-06 | 0.999989 |
| rad60anti | 1.71401e-06 | 0.999994 | 2.41979e-06 | 0.999991 |
| rad40syn  | 1.39059e-06 | 0.999995 | 1.96319e-06 | 0.999993 |
| rad42     | 1.00618e-06 | 0.999996 | 1.42050e-06 | 0.999995 |
| rad65     | 9.77109e-07 | 0.999997 | 1.37945e-06 | 0.999996 |
| rad40anti | 9.60893e-07 | 0.999998 | 1.35656e-06 | 0.999998 |
| rad58     | 8.26832e-07 | 0.999999 | 1.16730e-06 | 0.999999 |
| rad72     | 4.93194e-07 | 1.000000 | 6.96274e-07 | 0.999999 |
| rad43     | 2.90363e-07 | 1.000000 | 4.09925e-07 | 1.000000 |
| rad61     | 2.19014e-07 | 1.000000 | 3.09197e-07 | 1.000000 |
| rad41     | 4.25216e-08 | 1.000000 | 6.00307e-08 | 1.000000 |
| rad6      | 1.10619e-15 | 1.000000 | 1.56169e-15 | 1.000000 |
| rad7      | 2.96669e-17 | 1.000000 | 4.18827e-17 | 1.000000 |
| rad11     | 2.05427e-17 | 1.000000 | 2.90016e-17 | 1.000000 |
| rad23     | 8.40740e-18 | 1.000000 | 1.18693e-17 | 1.000000 |
| rad9      | 4.48643e-18 | 1.000000 | 6.33380e-18 | 1.000000 |
| rad28     | 4.00878e-18 | 1.000000 | 5.65948e-18 | 1.000000 |
| rad13     | 3.84823e-18 | 1.000000 | 5.43281e-18 | 1.000000 |
| rad45     | 2.34591e-18 | 1.000000 | 3.31190e-18 | 1.000000 |
| rad22     | 7.92771e-19 | 1.000000 | 1.11921e-18 | 1.000000 |
| rad21     | 7.20273e-19 | 1.000000 | 1.01686e-18 | 1.000000 |
| rad36     | 4.37131e-19 | 1.000000 | 6.17129e-19 | 1.000000 |
| rad15     | 3.20713e-19 | 1.000000 | 4.52773e-19 | 1.000000 |
| rad33     | 3.15102e-19 | 1.000000 | 4.44850e-19 | 1.000000 |
| rad20     | 1.44342e-19 | 1.000000 | 2.03778e-19 | 1.000000 |
| rad26     | 1.23245e-19 | 1.000000 | 1.73993e-19 | 1.000000 |
| rad12     | 7.84782e-20 | 1.000000 | 1.10793e-19 | 1.000000 |
| rad25     | 7.63295e-20 | 1.000000 | 1.07760e-19 | 1.000000 |
| rad10     | 4.78209e-20 | 1.000000 | 6.75119e-20 | 1.000000 |
| rad24     | 4.65717e-20 | 1.000000 | 6.57484e-20 | 1.000000 |
| rad18     | 3.38453e-20 | 1.000000 | 4.77817e-20 | 1.000000 |
| rad8      | 1.52996e-20 | 1.000000 | 2.15996e-20 | 1.000000 |
| rad3      | 9.88033e-21 | 1.000000 | 1.39488e-20 | 1.000000 |
| rad47     | 8.69678e-21 | 1.000000 | 1.22779e-20 | 1.000000 |
| rad2      | 6.25759e-21 | 1.000000 | 8.83431e-21 | 1.000000 |
| rad4      | 5.93295e-21 | 1.000000 | 8.37595e-21 | 1.000000 |
| rad14     | 4.74805e-21 | 1.000000 | 6.70314e-21 | 1.000000 |
| rad1      | 1.66344e-21 | 1.000000 | 2.34840e-21 | 1.000000 |
| rad5      | 1.01382e-21 | 1.000000 | 1.43128e-21 | 1.000000 |
| rad27     | 2.15735e-22 | 1.000000 | 3.04569e-22 | 1.000000 |

0.100000000E-06 Pa, 3000.00000 K

| Rate constant      | True (fraction)      | Effective (fraction)  |
|--------------------|----------------------|-----------------------|
| Total              | 6.24269e-11 (1.00 )  | 4.43911e-11 (1.00 )   |
| Formation of rad11 | 1.12221e-11 (0.180 ) | 4.21269e-12 (0.0949 ) |
| Formation of rad6  | 1.76534e-11 (0.283 ) | 6.62699e-12 (0.149 )  |
| H-abstraction      | 3.35514e-11 (0.537 ) | 3.35514e-11 (0.756 )  |

  

| species            | PYtrue   | Cumul    | PYeffective | Cumul    |
|--------------------|----------|----------|-------------|----------|
| Benzene+2-propynyl | 0.537451 | 0.537451 | 0.755814    | 0.755814 |
| Phenyl+Allene      | 0.288911 | 0.826362 | 0.000000    | 0.755814 |

|               |             |          |             |          |
|---------------|-------------|----------|-------------|----------|
| PhCH2CCH+H    | 0.0883066   | 0.914669 | 0.124185    | 0.879999 |
| PhCHCCH2+H    | 0.0408111   | 0.955480 | 0.0573925   | 0.937392 |
| C2H2+PhCH2    | 0.0138651   | 0.969345 | 0.0194984   | 0.956890 |
| PhCCH+CH3     | 0.0113582   | 0.980703 | 0.0159730   | 0.972863 |
| PAH7+H        | 0.00465329  | 0.985356 | 0.00654386  | 0.979407 |
| Indene+H      | 0.00463895  | 0.989995 | 0.00652370  | 0.985931 |
| Ph+MeAc       | 0.00297587  | 0.992971 | 0.00418496  | 0.990116 |
| PhcycC3H3_A+H | 0.00245642  | 0.995427 | 0.00345445  | 0.993570 |
| rad19syn      | 0.00161454  | 0.997042 | 0.00227052  | 0.995841 |
| rad54         | 0.000727890 | 0.997770 | 0.00102362  | 0.996864 |
| rad39         | 0.000500510 | 0.998270 | 0.000703861 | 0.997568 |
| rad19anti     | 0.000275358 | 0.998546 | 0.000387232 | 0.997955 |
| PAH9+H        | 0.000215435 | 0.998761 | 0.000302964 | 0.998258 |
| PAH1+H        | 0.000185098 | 0.998946 | 0.000260302 | 0.998519 |
| rad38         | 0.000138297 | 0.999085 | 0.000194486 | 0.998713 |
| PhCCCH3+H     | 0.000118094 | 0.999203 | 0.000166074 | 0.998879 |
| rad50         | 9.10199e-05 | 0.999294 | 0.000128001 | 0.999007 |
| rad56         | 7.84307e-05 | 0.999372 | 0.000110297 | 0.999117 |
| rad55         | 7.67854e-05 | 0.999449 | 0.000107983 | 0.999225 |
| rad70         | 6.22156e-05 | 0.999511 | 8.74935e-05 | 0.999313 |
| PAH3+H        | 5.79162e-05 | 0.999569 | 8.14472e-05 | 0.999394 |
| PAH10+CH3     | 5.73435e-05 | 0.999626 | 8.06419e-05 | 0.999475 |
| rad53         | 5.50942e-05 | 0.999682 | 7.74787e-05 | 0.999552 |
| rad46         | 5.10964e-05 | 0.999733 | 7.18563e-05 | 0.999624 |
| rad51         | 4.79927e-05 | 0.999781 | 6.74918e-05 | 0.999692 |
| rad35         | 4.64038e-05 | 0.999827 | 6.52572e-05 | 0.999757 |
| rad67         | 4.30004e-05 | 0.999870 | 6.04712e-05 | 0.999818 |
| rad34         | 2.22803e-05 | 0.999892 | 3.13327e-05 | 0.999849 |
| PAH8+H        | 2.20424e-05 | 0.999914 | 3.09982e-05 | 0.999880 |
| rad30         | 1.19659e-05 | 0.999926 | 1.68276e-05 | 0.999897 |
| rad37         | 1.08360e-05 | 0.999937 | 1.52386e-05 | 0.999912 |
| rad52         | 1.06405e-05 | 0.999948 | 1.49636e-05 | 0.999927 |
| rad71         | 9.97847e-06 | 0.999958 | 1.40327e-05 | 0.999941 |
| rad62         | 8.52399e-06 | 0.999966 | 1.19872e-05 | 0.999953 |
| rad64         | 4.99011e-06 | 0.999971 | 7.01754e-06 | 0.999960 |
| rad73         | 4.56449e-06 | 0.999976 | 6.41901e-06 | 0.999966 |
| rad59         | 4.47702e-06 | 0.999980 | 6.29599e-06 | 0.999973 |
| rad68syn      | 4.00554e-06 | 0.999984 | 5.63295e-06 | 0.999978 |
| rad68anti     | 2.55993e-06 | 0.999987 | 3.60001e-06 | 0.999982 |
| rad60syn      | 2.46101e-06 | 0.999989 | 3.46090e-06 | 0.999985 |
| rad40syn      | 2.03324e-06 | 0.999991 | 2.85932e-06 | 0.999988 |
| rad60anti     | 1.78407e-06 | 0.999993 | 2.50894e-06 | 0.999991 |
| rad40anti     | 1.43624e-06 | 0.999995 | 2.01978e-06 | 0.999993 |
| rad42         | 1.37800e-06 | 0.999996 | 1.93787e-06 | 0.999995 |
| rad65         | 1.15674e-06 | 0.999997 | 1.62672e-06 | 0.999996 |
| rad58         | 1.05023e-06 | 0.999998 | 1.47693e-06 | 0.999998 |
| rad72         | 9.39261e-07 | 0.999999 | 1.32087e-06 | 0.999999 |
| rad43         | 3.36095e-07 | 0.999999 | 4.72649e-07 | 1.000000 |
| rad61         | 2.73990e-07 | 1.000000 | 3.85311e-07 | 1.000000 |
| rad41         | 5.56844e-08 | 1.000000 | 7.83087e-08 | 1.000000 |
| rad6          | 4.39144e-16 | 1.000000 | 6.17566e-16 | 1.000000 |
| rad7          | 1.48081e-17 | 1.000000 | 2.08245e-17 | 1.000000 |
| rad11         | 9.86334e-18 | 1.000000 | 1.38707e-17 | 1.000000 |
| rad23         | 3.21934e-18 | 1.000000 | 4.52733e-18 | 1.000000 |
| rad13         | 2.05537e-18 | 1.000000 | 2.89045e-18 | 1.000000 |
| rad9          | 2.02568e-18 | 1.000000 | 2.84870e-18 | 1.000000 |
| rad28         | 1.58940e-18 | 1.000000 | 2.23517e-18 | 1.000000 |
| rad45         | 1.09623e-18 | 1.000000 | 1.54162e-18 | 1.000000 |
| rad21         | 4.05034e-19 | 1.000000 | 5.69598e-19 | 1.000000 |
| rad22         | 3.35977e-19 | 1.000000 | 4.72483e-19 | 1.000000 |
| rad36         | 2.06679e-19 | 1.000000 | 2.90652e-19 | 1.000000 |
| rad33         | 1.89985e-19 | 1.000000 | 2.67174e-19 | 1.000000 |
| rad15         | 1.57397e-19 | 1.000000 | 2.21345e-19 | 1.000000 |
| rad20         | 8.22772e-20 | 1.000000 | 1.15706e-19 | 1.000000 |
| rad26         | 5.53805e-20 | 1.000000 | 7.78816e-20 | 1.000000 |
| rad12         | 4.82938e-20 | 1.000000 | 6.79149e-20 | 1.000000 |
| rad25         | 4.56474e-20 | 1.000000 | 6.41938e-20 | 1.000000 |
| rad24         | 2.85392e-20 | 1.000000 | 4.01344e-20 | 1.000000 |
| rad10         | 2.30374e-20 | 1.000000 | 3.23974e-20 | 1.000000 |
| rad18         | 1.70015e-20 | 1.000000 | 2.39092e-20 | 1.000000 |
| rad8          | 1.34844e-20 | 1.000000 | 1.89630e-20 | 1.000000 |
| rad47         | 1.03449e-20 | 1.000000 | 1.45480e-20 | 1.000000 |
| rad3          | 5.15228e-21 | 1.000000 | 7.24563e-21 | 1.000000 |
| rad14         | 3.16322e-21 | 1.000000 | 4.44841e-21 | 1.000000 |
| rad4          | 3.07009e-21 | 1.000000 | 4.31745e-21 | 1.000000 |
| rad2          | 2.71710e-21 | 1.000000 | 3.82105e-21 | 1.000000 |
| rad5          | 7.37400e-22 | 1.000000 | 1.03700e-21 | 1.000000 |
| rad1          | 6.77236e-22 | 1.000000 | 9.52391e-22 | 1.000000 |
| rad27         | 1.40640e-22 | 1.000000 | 1.97781e-22 | 1.000000 |

0.100000000E-06 Pa, 3250.00000 K

| =====              |                 |          |                      |           |
|--------------------|-----------------|----------|----------------------|-----------|
| Rate constant      | True (fraction) |          | Effective (fraction) |           |
| -----              |                 |          |                      |           |
| Total              | 8.22129e-11     | (1.00 )  | 5.87536e-11          | (1.00 )   |
| Formation of rad11 | 1.42538e-11     | (0.173 ) | 5.21849e-12          | (0.0888 ) |
| Formation of rad6  | 2.27549e-11     | (0.277 ) | 8.33083e-12          | (0.142 )  |
| H-abstraction      | 4.52043e-11     | (0.550 ) | 4.52043e-11          | (0.769 )  |
| -----              |                 |          |                      |           |
| species            | PYtrue          | Cumul    | PYeffective          | Cumul     |
| -----              |                 |          |                      |           |
| Benzene+2-propynyl | 0.549844        | 0.549844 | 0.769388             | 0.769388  |
| Phenyl+Allene      | 0.285349        | 0.835192 | 0.000000             | 0.769388  |
| PhCH2CCH+H         | 0.0853725       | 0.920565 | 0.119460             | 0.888848  |
| PhCHCCH2+H         | 0.0381839       | 0.958749 | 0.0534299            | 0.942278  |
| C2H2+PhCH2         | 0.0128678       | 0.971617 | 0.0180057            | 0.960283  |
| PhCCH+CH3          | 0.0101926       | 0.981809 | 0.0142623            | 0.974546  |
| PAH7+H             | 0.00428274      | 0.986092 | 0.00599276           | 0.980539  |
| Indene+H           | 0.00340695      | 0.989499 | 0.00476729           | 0.985306  |
| PhcycC3H3_A+H      | 0.00292038      | 0.992419 | 0.00408643           | 0.989392  |
| Ph+MeAc            | 0.00285191      | 0.995271 | 0.00399061           | 0.993383  |
| rad19syn           | 0.00176005      | 0.997031 | 0.00246280           | 0.995846  |
| rad54              | 0.000783510     | 0.997815 | 0.00109635           | 0.996942  |
| rad39              | 0.000435199     | 0.998250 | 0.000608967          | 0.997551  |
| rad19anti          | 0.000232598     | 0.998483 | 0.000325470          | 0.997876  |
| PAH1+H             | 0.000210285     | 0.998693 | 0.000294248          | 0.998171  |
| PAH9+H             | 0.000189946     | 0.998883 | 0.000265788          | 0.998436  |
| rad38              | 0.000125074     | 0.999008 | 0.000175014          | 0.998611  |
| PhCCCH3+H          | 0.000104499     | 0.999112 | 0.000146224          | 0.998758  |
| rad56              | 0.000102496     | 0.999215 | 0.000143420          | 0.998901  |
| rad50              | 9.64743e-05     | 0.999311 | 0.000134995          | 0.999036  |
| rad55              | 8.51952e-05     | 0.999397 | 0.000119212          | 0.999155  |
| rad53              | 6.86880e-05     | 0.999465 | 9.61137e-05          | 0.999251  |
| rad70              | 6.67834e-05     | 0.999532 | 9.34486e-05          | 0.999345  |
| PAH3+H             | 6.43467e-05     | 0.999596 | 9.00394e-05          | 0.999435  |
| PAH10+CH3          | 5.80427e-05     | 0.999654 | 8.12183e-05          | 0.999516  |
| rad51              | 5.49240e-05     | 0.999709 | 7.68541e-05          | 0.999593  |
| rad46              | 4.80263e-05     | 0.999757 | 6.72021e-05          | 0.999660  |
| rad67              | 4.40669e-05     | 0.999802 | 6.16619e-05          | 0.999722  |
| rad35              | 4.33473e-05     | 0.999845 | 6.06552e-05          | 0.999783  |
| PAH8+H             | 3.16111e-05     | 0.999876 | 4.42329e-05          | 0.999827  |
| rad34              | 2.50786e-05     | 0.999902 | 3.50921e-05          | 0.999862  |
| rad71              | 1.47743e-05     | 0.999916 | 2.06734e-05          | 0.999883  |
| rad52              | 1.16170e-05     | 0.999928 | 1.62555e-05          | 0.999899  |
| rad30              | 1.10774e-05     | 0.999939 | 1.55003e-05          | 0.999914  |
| rad62              | 1.06705e-05     | 0.999950 | 1.49310e-05          | 0.999929  |
| rad37              | 9.29424e-06     | 0.999959 | 1.30053e-05          | 0.999942  |
| rad73              | 6.33743e-06     | 0.999965 | 8.86788e-06          | 0.999951  |
| rad64              | 5.77649e-06     | 0.999971 | 8.08292e-06          | 0.999959  |
| rad68syn           | 5.15348e-06     | 0.999976 | 7.21118e-06          | 0.999966  |
| rad59              | 4.82486e-06     | 0.999981 | 6.75136e-06          | 0.999973  |
| rad68anti          | 3.28964e-06     | 0.999984 | 4.60314e-06          | 0.999978  |
| rad40syn           | 2.77792e-06     | 0.999987 | 3.88709e-06          | 0.999982  |
| rad60syn           | 2.50929e-06     | 0.999990 | 3.51119e-06          | 0.999985  |
| rad40anti          | 1.99952e-06     | 0.999992 | 2.79788e-06          | 0.999988  |
| rad42              | 1.90464e-06     | 0.999994 | 2.66512e-06          | 0.999991  |
| rad60anti          | 1.83422e-06     | 0.999995 | 2.56658e-06          | 0.999993  |
| rad72              | 1.57365e-06     | 0.999997 | 2.20197e-06          | 0.999995  |
| rad65              | 1.29208e-06     | 0.999998 | 1.80798e-06          | 0.999997  |
| rad58              | 1.27682e-06     | 1.000000 | 1.78663e-06          | 0.999999  |
| rad43              | 3.85029e-07     | 1.000000 | 5.38764e-07          | 1.000000  |
| rad61              | 3.23853e-07     | 1.000000 | 4.53160e-07          | 1.000000  |
| rad41              | 7.10639e-08     | 1.000000 | 9.94383e-08          | 1.000000  |
| rad6               | 1.96511e-16     | 1.000000 | 2.74973e-16          | 1.000000  |
| rad7               | 8.03353e-18     | 1.000000 | 1.12411e-17          | 1.000000  |
| rad11              | 5.21686e-18     | 1.000000 | 7.29985e-18          | 1.000000  |
| rad23              | 1.34932e-18     | 1.000000 | 1.88808e-18          | 1.000000  |
| rad13              | 1.18525e-18     | 1.000000 | 1.65850e-18          | 1.000000  |
| rad9               | 9.81849e-19     | 1.000000 | 1.37388e-18          | 1.000000  |
| rad28              | 7.06565e-19     | 1.000000 | 9.88684e-19          | 1.000000  |
| rad45              | 5.48362e-19     | 1.000000 | 7.67312e-19          | 1.000000  |
| rad21              | 2.44315e-19     | 1.000000 | 3.41865e-19          | 1.000000  |
| rad22              | 1.58051e-19     | 1.000000 | 2.21157e-19          | 1.000000  |
| rad33              | 1.20474e-19     | 1.000000 | 1.68578e-19          | 1.000000  |
| rad36              | 1.04350e-19     | 1.000000 | 1.46015e-19          | 1.000000  |
| rad15              | 8.20328e-20     | 1.000000 | 1.14787e-19          | 1.000000  |
| rad20              | 5.20430e-20     | 1.000000 | 7.28226e-20          | 1.000000  |
| rad12              | 3.09374e-20     | 1.000000 | 4.32901e-20          | 1.000000  |
| rad25              | 2.89947e-20     | 1.000000 | 4.05717e-20          | 1.000000  |
| rad26              | 2.68044e-20     | 1.000000 | 3.75068e-20          | 1.000000  |

|       |             |         |             |         |
|-------|-------------|---------|-------------|---------|
| rad24 | 1.82403e-20 | 1.00000 | 2.55233e-20 | 1.00000 |
| rad10 | 1.20029e-20 | 1.00000 | 1.67954e-20 | 1.00000 |
| rad8  | 1.19193e-20 | 1.00000 | 1.66784e-20 | 1.00000 |
| rad47 | 1.15640e-20 | 1.00000 | 1.61813e-20 | 1.00000 |
| rad18 | 9.40390e-21 | 1.00000 | 1.31587e-20 | 1.00000 |
| rad3  | 2.93741e-21 | 1.00000 | 4.11028e-21 | 1.00000 |
| rad14 | 2.29549e-21 | 1.00000 | 3.21202e-21 | 1.00000 |
| rad4  | 1.75826e-21 | 1.00000 | 2.46031e-21 | 1.00000 |
| rad2  | 1.35691e-21 | 1.00000 | 1.89870e-21 | 1.00000 |
| rad5  | 5.53998e-22 | 1.00000 | 7.75197e-22 | 1.00000 |
| rad1  | 3.18923e-22 | 1.00000 | 4.46263e-22 | 1.00000 |
| rad27 | 9.84680e-23 | 1.00000 | 1.37785e-22 | 1.00000 |

0.100000000E-06 Pa, 3500.00000 K

| Rate constant      | True (fraction) |          | Effective (fraction) |           |
|--------------------|-----------------|----------|----------------------|-----------|
| Total              | 1.05713e-10     | (1.00 )  | 7.59650e-11          | (1.00 )   |
| Formation of rad11 | 1.77412e-11     | (0.168 ) | 6.37264e-12          | (0.0839 ) |
| Formation of rad6  | 2.86822e-11     | (0.271 ) | 1.03027e-11          | (0.136 )  |
| H-abstraction      | 5.92897e-11     | (0.561 ) | 5.92897e-11          | (0.780 )  |

  

| species            | PYtrue      | Cumul    | PYeffective | Cumul    |
|--------------------|-------------|----------|-------------|----------|
| Benzene+2-propynyl | 0.560855    | 0.560855 | 0.780487    | 0.780487 |
| Phenyl+Allene      | 0.281404    | 0.842259 | 0.00000     | 0.780487 |
| PhCH2CCH+H         | 0.0826656   | 0.924925 | 0.115037    | 0.895524 |
| PhCHCCH2+H         | 0.0360585   | 0.960983 | 0.0501791   | 0.945703 |
| C2H2+PhCH2         | 0.0122593   | 0.973242 | 0.0170600   | 0.962764 |
| PhCCH+CH3          | 0.00927084  | 0.982513 | 0.0129013   | 0.975665 |
| PAH7+H             | 0.00395025  | 0.986463 | 0.00549717  | 0.981162 |
| PhcycC3H3_A+H      | 0.00334801  | 0.989811 | 0.00465910  | 0.985821 |
| Ph+MeAc            | 0.00276398  | 0.992575 | 0.00384635  | 0.989667 |
| Indene+H           | 0.00257590  | 0.995151 | 0.00358462  | 0.993252 |
| rad19syn           | 0.00187235  | 0.997024 | 0.00260557  | 0.995858 |
| rad54              | 0.000820548 | 0.997844 | 0.00114187  | 0.996999 |
| rad39              | 0.000383055 | 0.998227 | 0.000533059 | 0.997533 |
| PAH1+H             | 0.000234590 | 0.998462 | 0.000326455 | 0.997859 |
| rad19anti          | 0.000198628 | 0.998661 | 0.000276411 | 0.998135 |
| PAH9+H             | 0.000165224 | 0.998826 | 0.000229927 | 0.998365 |
| rad56              | 0.000126873 | 0.998953 | 0.000176556 | 0.998542 |
| rad38              | 0.000111229 | 0.999064 | 0.000154787 | 0.998697 |
| rad50              | 9.85613e-05 | 0.999162 | 0.000137158 | 0.998834 |
| PhCCCH3+H          | 9.42424e-05 | 0.999257 | 0.000131148 | 0.998965 |
| rad55              | 9.15803e-05 | 0.999348 | 0.000127443 | 0.999092 |
| rad53              | 8.16793e-05 | 0.999430 | 0.000113665 | 0.999206 |
| rad70              | 7.02694e-05 | 0.999500 | 9.77871e-05 | 0.999304 |
| PAH3+H             | 6.99220e-05 | 0.999570 | 9.73035e-05 | 0.999401 |
| rad51              | 5.98507e-05 | 0.999630 | 8.32882e-05 | 0.999484 |
| PAH10+CH3          | 5.76128e-05 | 0.999688 | 8.01742e-05 | 0.999565 |
| rad67              | 4.43734e-05 | 0.999732 | 6.17501e-05 | 0.999626 |
| rad46              | 4.41956e-05 | 0.999776 | 6.15029e-05 | 0.999688 |
| PAH8+H             | 4.26935e-05 | 0.999819 | 5.94123e-05 | 0.999747 |
| rad35              | 4.02805e-05 | 0.999859 | 5.60544e-05 | 0.999803 |
| rad34              | 2.74951e-05 | 0.999887 | 3.82622e-05 | 0.999842 |
| rad71              | 2.01281e-05 | 0.999907 | 2.80103e-05 | 0.999870 |
| rad62              | 1.37116e-05 | 0.999920 | 1.90811e-05 | 0.999889 |
| rad52              | 1.21501e-05 | 0.999933 | 1.69080e-05 | 0.999906 |
| rad30              | 1.02915e-05 | 0.999943 | 1.43216e-05 | 0.999920 |
| rad73              | 8.16310e-06 | 0.999951 | 1.13598e-05 | 0.999931 |
| rad37              | 7.96636e-06 | 0.999959 | 1.10860e-05 | 0.999942 |
| rad64              | 6.47621e-06 | 0.999966 | 9.01228e-06 | 0.999951 |
| rad68syn           | 6.33612e-06 | 0.999972 | 8.81737e-06 | 0.999960 |
| rad59              | 5.10458e-06 | 0.999977 | 7.10355e-06 | 0.999967 |
| rad68anti          | 4.04059e-06 | 0.999981 | 5.62289e-06 | 0.999973 |
| rad40syn           | 3.59895e-06 | 0.999985 | 5.00830e-06 | 0.999978 |
| rad42              | 2.66321e-06 | 0.999987 | 3.70612e-06 | 0.999982 |
| rad40anti          | 2.63316e-06 | 0.999990 | 3.66431e-06 | 0.999985 |
| rad60syn           | 2.53258e-06 | 0.999992 | 3.52435e-06 | 0.999989 |
| rad72              | 2.38441e-06 | 0.999995 | 3.31814e-06 | 0.999992 |
| rad60anti          | 1.86455e-06 | 0.999997 | 2.59471e-06 | 0.999995 |
| rad58              | 1.49815e-06 | 0.999998 | 2.08483e-06 | 0.999997 |
| rad65              | 1.37925e-06 | 1.000000 | 1.91936e-06 | 0.999999 |
| rad43              | 4.42452e-07 | 1.000000 | 6.15716e-07 | 0.999999 |
| rad61              | 3.67258e-07 | 1.00000  | 5.11077e-07 | 1.000000 |
| rad41              | 8.98821e-08 | 1.00000  | 1.25080e-07 | 1.00000  |
| rad6               | 9.69826e-17 | 1.00000  | 1.34961e-16 | 1.00000  |
| rad7               | 4.66091e-18 | 1.00000  | 6.48617e-18 | 1.00000  |
| rad11              | 2.99098e-18 | 1.00000  | 4.16225e-18 | 1.00000  |
| rad13              | 7.28305e-19 | 1.00000  | 1.01351e-18 | 1.00000  |

|       |             |         |             |         |
|-------|-------------|---------|-------------|---------|
| rad23 | 6.09551e-19 | 1.00000 | 8.48251e-19 | 1.00000 |
| rad9  | 5.08868e-19 | 1.00000 | 7.08140e-19 | 1.00000 |
| rad28 | 3.44705e-19 | 1.00000 | 4.79693e-19 | 1.00000 |
| rad45 | 2.90328e-19 | 1.00000 | 4.04020e-19 | 1.00000 |
| rad21 | 1.56206e-19 | 1.00000 | 2.17377e-19 | 1.00000 |
| rad22 | 8.11694e-20 | 1.00000 | 1.12955e-19 | 1.00000 |
| rad33 | 7.96109e-20 | 1.00000 | 1.10787e-19 | 1.00000 |
| rad36 | 5.56235e-20 | 1.00000 | 7.74055e-20 | 1.00000 |
| rad15 | 4.52557e-20 | 1.00000 | 6.29778e-20 | 1.00000 |
| rad20 | 3.56498e-20 | 1.00000 | 4.96104e-20 | 1.00000 |
| rad12 | 2.06000e-20 | 1.00000 | 2.86671e-20 | 1.00000 |
| rad25 | 1.93599e-20 | 1.00000 | 2.69413e-20 | 1.00000 |
| rad26 | 1.38427e-20 | 1.00000 | 1.92636e-20 | 1.00000 |
| rad47 | 1.23125e-20 | 1.00000 | 1.71341e-20 | 1.00000 |
| rad24 | 1.20836e-20 | 1.00000 | 1.68155e-20 | 1.00000 |
| rad8  | 1.05361e-20 | 1.00000 | 1.46621e-20 | 1.00000 |
| rad10 | 6.65384e-21 | 1.00000 | 9.25949e-21 | 1.00000 |
| rad18 | 5.60033e-21 | 1.00000 | 7.79343e-21 | 1.00000 |
| rad14 | 1.81848e-21 | 1.00000 | 2.53061e-21 | 1.00000 |
| rad3  | 1.79632e-21 | 1.00000 | 2.49977e-21 | 1.00000 |
| rad4  | 1.09288e-21 | 1.00000 | 1.52086e-21 | 1.00000 |
| rad2  | 7.46793e-22 | 1.00000 | 1.03924e-21 | 1.00000 |
| rad5  | 4.29352e-22 | 1.00000 | 5.97488e-22 | 1.00000 |
| rad1  | 1.68311e-22 | 1.00000 | 2.34222e-22 | 1.00000 |
| rad27 | 7.31080e-23 | 1.00000 | 1.01737e-22 | 1.00000 |

0.100000000E-06 Pa, 3750.00000 K

| Rate constant      | True (fraction) |          | Effective (fraction) |           |
|--------------------|-----------------|----------|----------------------|-----------|
| Total              | 1.33217e-10     | (1.00 )  | 9.62711e-11          | (1.00 )   |
| Formation of rad11 | 2.17064e-11     | (0.163 ) | 7.68279e-12          | (0.0798 ) |
| Formation of rad6  | 3.54800e-11     | (0.266 ) | 1.25578e-11          | (0.130 )  |
| H-abstraction      | 7.60305e-11     | (0.571 ) | 7.60305e-11          | (0.790 )  |

  

| species            | PYtrue      | Cumul    | PYeffective | Cumul    |
|--------------------|-------------|----------|-------------|----------|
| Benzene+2-propynyl | 0.570727    | 0.570727 | 0.789754    | 0.789754 |
| Phenyl+Allene      | 0.277336    | 0.848063 | 0.00000     | 0.789754 |
| PhCH2CCH+H         | 0.0801946   | 0.928257 | 0.110971    | 0.900725 |
| PhCHCCH2+H         | 0.0343186   | 0.962576 | 0.0474891   | 0.948214 |
| C2H2+PhCH2         | 0.0118838   | 0.974460 | 0.0164445   | 0.964658 |
| PhCCH+CH3          | 0.00852836  | 0.982988 | 0.0118013   | 0.976459 |
| PhcycC3H3_A+H      | 0.00372851  | 0.986717 | 0.00515939  | 0.981619 |
| PAH7+H             | 0.00365085  | 0.990368 | 0.00505194  | 0.986671 |
| Ph+MeAc            | 0.00270113  | 0.993069 | 0.00373773  | 0.990408 |
| Indene+H           | 0.00199900  | 0.995068 | 0.00276616  | 0.993175 |
| rad19syn           | 0.00195356  | 0.997021 | 0.00270328  | 0.995878 |
| rad54              | 0.000841040 | 0.997862 | 0.00116381  | 0.997042 |
| rad39              | 0.000340475 | 0.998203 | 0.000471138 | 0.997513 |
| PAH1+H             | 0.000258935 | 0.998462 | 0.000358305 | 0.997871 |
| rad19anti          | 0.000171610 | 0.998633 | 0.000237469 | 0.998109 |
| rad56              | 0.000150421 | 0.998784 | 0.000208148 | 0.998317 |
| PAH9+H             | 0.000142296 | 0.998926 | 0.000196904 | 0.998514 |
| rad50              | 9.78214e-05 | 0.999024 | 0.000135362 | 0.998649 |
| rad38              | 9.76287e-05 | 0.999121 | 0.000135095 | 0.998784 |
| rad55              | 9.60227e-05 | 0.999217 | 0.000132873 | 0.998917 |
| rad53              | 9.35446e-05 | 0.999311 | 0.000129444 | 0.999046 |
| PhCCCH3+H          | 8.63448e-05 | 0.999397 | 0.000119481 | 0.999166 |
| PAH3+H             | 7.46029e-05 | 0.999472 | 0.000103233 | 0.999269 |
| rad70              | 7.27716e-05 | 0.999545 | 0.000100699 | 0.999370 |
| rad51              | 6.27266e-05 | 0.999607 | 8.67994e-05 | 0.999457 |
| PAH10+CH3          | 5.64592e-05 | 0.999664 | 7.81267e-05 | 0.999535 |
| PAH8+H             | 5.49581e-05 | 0.999719 | 7.60493e-05 | 0.999611 |
| rad67              | 4.41361e-05 | 0.999763 | 6.10741e-05 | 0.999672 |
| rad46              | 4.00102e-05 | 0.999803 | 5.53649e-05 | 0.999727 |
| rad35              | 3.73501e-05 | 0.999840 | 5.16839e-05 | 0.999779 |
| rad34              | 2.95155e-05 | 0.999870 | 4.08426e-05 | 0.999820 |
| rad71              | 2.56704e-05 | 0.999896 | 3.55219e-05 | 0.999855 |
| rad62              | 1.78765e-05 | 0.999913 | 2.47369e-05 | 0.999880 |
| rad52              | 1.22817e-05 | 0.999926 | 1.69950e-05 | 0.999897 |
| rad73              | 9.90830e-06 | 0.999936 | 1.37108e-05 | 0.999911 |
| rad30              | 9.58077e-06 | 0.999945 | 1.32576e-05 | 0.999924 |
| rad68syn           | 7.51159e-06 | 0.999953 | 1.03943e-05 | 0.999934 |
| rad64              | 7.08717e-06 | 0.999960 | 9.80700e-06 | 0.999944 |
| rad37              | 6.84827e-06 | 0.999967 | 9.47639e-06 | 0.999954 |
| rad59              | 5.31873e-06 | 0.999972 | 7.35989e-06 | 0.999961 |
| rad68anti          | 4.78626e-06 | 0.999977 | 6.62308e-06 | 0.999968 |
| rad40syn           | 4.46912e-06 | 0.999981 | 6.18422e-06 | 0.999974 |
| rad42              | 3.72271e-06 | 0.999985 | 5.15138e-06 | 0.999979 |

|           |             |          |             |          |
|-----------|-------------|----------|-------------|----------|
| rad72     | 3.33614e-06 | 0.999988 | 4.61643e-06 | 0.999984 |
| rad40anti | 3.31727e-06 | 0.999992 | 4.59032e-06 | 0.999988 |
| rad60syn  | 2.53369e-06 | 0.999994 | 3.50604e-06 | 0.999992 |
| rad60anti | 1.87710e-06 | 0.999996 | 2.59748e-06 | 0.999994 |
| rad58     | 1.70809e-06 | 0.999998 | 2.36361e-06 | 0.999997 |
| rad65     | 1.42131e-06 | 0.999999 | 1.96676e-06 | 0.999999 |
| rad43     | 5.13732e-07 | 1.000000 | 7.10883e-07 | 0.999999 |
| rad61     | 4.03889e-07 | 1.000000 | 5.58888e-07 | 1.000000 |
| rad41     | 1.13553e-07 | 1.000000 | 1.57130e-07 | 1.000000 |
| rad6      | 5.19317e-17 | 1.000000 | 7.18614e-17 | 1.000000 |
| rad7      | 2.85680e-18 | 1.000000 | 3.95315e-18 | 1.000000 |
| rad11     | 1.83381e-18 | 1.000000 | 2.53756e-18 | 1.000000 |
| rad13     | 4.71985e-19 | 1.000000 | 6.53121e-19 | 1.000000 |
| rad23     | 2.93381e-19 | 1.000000 | 4.05972e-19 | 1.000000 |
| rad9      | 2.80538e-19 | 1.000000 | 3.88200e-19 | 1.000000 |
| rad28     | 1.81766e-19 | 1.000000 | 2.51521e-19 | 1.000000 |
| rad45     | 1.60897e-19 | 1.000000 | 2.22644e-19 | 1.000000 |
| rad21     | 1.04834e-19 | 1.000000 | 1.45067e-19 | 1.000000 |
| rad33     | 5.44417e-20 | 1.000000 | 7.53345e-20 | 1.000000 |
| rad22     | 4.48976e-20 | 1.000000 | 6.21281e-20 | 1.000000 |
| rad36     | 3.09945e-20 | 1.000000 | 4.28891e-20 | 1.000000 |
| rad15     | 2.63078e-20 | 1.000000 | 3.64039e-20 | 1.000000 |
| rad20     | 2.59386e-20 | 1.000000 | 3.58930e-20 | 1.000000 |
| rad12     | 1.42144e-20 | 1.000000 | 1.96695e-20 | 1.000000 |
| rad25     | 1.34705e-20 | 1.000000 | 1.86401e-20 | 1.000000 |
| rad47     | 1.26179e-20 | 1.000000 | 1.74602e-20 | 1.000000 |
| rad8      | 9.29496e-21 | 1.000000 | 1.28621e-20 | 1.000000 |
| rad24     | 8.25899e-21 | 1.000000 | 1.14285e-20 | 1.000000 |
| rad26     | 7.57546e-21 | 1.000000 | 1.04827e-20 | 1.000000 |
| rad10     | 3.88583e-21 | 1.000000 | 5.37708e-21 | 1.000000 |
| rad18     | 3.53332e-21 | 1.000000 | 4.88931e-21 | 1.000000 |
| rad14     | 1.56337e-21 | 1.000000 | 2.16335e-21 | 1.000000 |
| rad3      | 1.16060e-21 | 1.000000 | 1.60600e-21 | 1.000000 |
| rad4      | 7.24655e-22 | 1.000000 | 1.00276e-21 | 1.000000 |
| rad2      | 4.41537e-22 | 1.000000 | 6.10985e-22 | 1.000000 |
| rad5      | 3.42485e-22 | 1.000000 | 4.73920e-22 | 1.000000 |
| rad1      | 9.73865e-23 | 1.000000 | 1.34760e-22 | 1.000000 |
| rad27     | 5.73762e-23 | 1.000000 | 7.93956e-23 | 1.000000 |

0.100000000E-06 Pa, 4000.00000 K

=====

| Rate constant      | True (fraction)      | Effective (fraction)  |
|--------------------|----------------------|-----------------------|
| Total              | 1.65008e-10 (1.00 )  | 1.19912e-10 (1.00 )   |
| Formation of rad11 | 2.61707e-11 (0.159 ) | 9.15556e-12 (0.0764 ) |
| Formation of rad6  | 4.31906e-11 (0.262 ) | 1.51098e-11 (0.126 )  |
| H-abstraction      | 9.56470e-11 (0.580 ) | 9.56470e-11 (0.798 )  |

| species            | PYtrue      | Cumul    | PYeffective | Cumul    |
|--------------------|-------------|----------|-------------|----------|
| Benzene+2-propynyl | 0.579650    | 0.579650 | 0.797641    | 0.797641 |
| Phenyl+Allene      | 0.273295    | 0.852945 | 0.000000    | 0.797641 |
| PhCH2CCH+H         | 0.0779435   | 0.930888 | 0.107256    | 0.904897 |
| PhCHCCH2+H         | 0.0328766   | 0.963765 | 0.0452408   | 0.950138 |
| C2H2+PhCH2         | 0.0116508   | 0.975415 | 0.0160323   | 0.966170 |
| PhCCH+CH3          | 0.00792125  | 0.983337 | 0.0109003   | 0.977070 |
| PhcycC3H3_A+H      | 0.00405636  | 0.987393 | 0.00558187  | 0.982652 |
| PAH7+H             | 0.00338058  | 0.990774 | 0.00465193  | 0.987304 |
| Ph+MeAc            | 0.00265534  | 0.993429 | 0.00365394  | 0.990958 |
| rad19syn           | 0.00200699  | 0.995436 | 0.00276178  | 0.993720 |
| Indene+H           | 0.00158840  | 0.997024 | 0.00218576  | 0.995906 |
| rad54              | 0.000847468 | 0.997872 | 0.00116618  | 0.997072 |
| rad39              | 0.000304994 | 0.998177 | 0.000419695 | 0.997491 |
| PAH1+H             | 0.000284127 | 0.998461 | 0.000390980 | 0.997882 |
| rad56              | 0.000172242 | 0.998633 | 0.000237017 | 0.998119 |
| rad19anti          | 0.000149971 | 0.998783 | 0.000206372 | 0.998326 |
| PAH9+H             | 0.000121736 | 0.998905 | 0.000167518 | 0.998493 |
| rad53              | 0.000103935 | 0.999009 | 0.000143023 | 0.998636 |
| rad55              | 9.87033e-05 | 0.999108 | 0.000135823 | 0.998772 |
| rad50              | 9.49261e-05 | 0.999203 | 0.000130625 | 0.998903 |
| rad38              | 8.48536e-05 | 0.999287 | 0.000116765 | 0.999020 |
| PhCCCH3+H          | 8.02193e-05 | 0.999368 | 0.000110388 | 0.999130 |
| PAH3+H             | 7.84218e-05 | 0.999446 | 0.000107914 | 0.999238 |
| rad70              | 7.43978e-05 | 0.999520 | 0.000102377 | 0.999340 |
| PAH8+H             | 6.80299e-05 | 0.999588 | 9.36140e-05 | 0.999434 |
| rad51              | 6.37407e-05 | 0.999652 | 8.77122e-05 | 0.999522 |
| PAH10+CH3          | 5.48776e-05 | 0.999707 | 7.55158e-05 | 0.999597 |
| rad67              | 4.35168e-05 | 0.999751 | 5.98821e-05 | 0.999657 |
| rad46              | 3.57792e-05 | 0.999786 | 4.92350e-05 | 0.999706 |
| rad35              | 3.46400e-05 | 0.999821 | 4.76673e-05 | 0.999754 |



|           |             |          |             |          |
|-----------|-------------|----------|-------------|----------|
| rad34     | 3.11445e-05 | 0.999852 | 4.28572e-05 | 0.999797 |
| rad71     | 3.10563e-05 | 0.999883 | 4.27358e-05 | 0.999839 |
| rad62     | 2.32398e-05 | 0.999906 | 3.19798e-05 | 0.999871 |
| rad52     | 1.20851e-05 | 0.999919 | 1.66300e-05 | 0.999888 |
| rad73     | 1.14710e-05 | 0.999930 | 1.57849e-05 | 0.999904 |
| rad30     | 8.93299e-06 | 0.999939 | 1.22925e-05 | 0.999916 |
| rad68syn  | 8.64434e-06 | 0.999948 | 1.18952e-05 | 0.999928 |
| rad64     | 7.61305e-06 | 0.999955 | 1.04761e-05 | 0.999939 |
| rad37     | 5.91727e-06 | 0.999961 | 8.14263e-06 | 0.999947 |
| rad68anti | 5.50424e-06 | 0.999967 | 7.57424e-06 | 0.999954 |
| rad59     | 5.47385e-06 | 0.999972 | 7.53243e-06 | 0.999962 |
| rad40syn  | 5.36170e-06 | 0.999977 | 7.37810e-06 | 0.999969 |
| rad42     | 5.12142e-06 | 0.999983 | 7.04750e-06 | 0.999976 |
| rad72     | 4.37871e-06 | 0.999987 | 6.02543e-06 | 0.999982 |
| rad40anti | 4.03125e-06 | 0.999991 | 5.54731e-06 | 0.999988 |
| rad60syn  | 2.51669e-06 | 0.999993 | 3.46315e-06 | 0.999991 |
| rad58     | 1.90267e-06 | 0.999995 | 2.61822e-06 | 0.999994 |
| rad60anti | 1.87487e-06 | 0.999997 | 2.57996e-06 | 0.999996 |
| rad65     | 1.42564e-06 | 0.999999 | 1.96179e-06 | 0.999998 |
| rad43     | 6.01849e-07 | 0.999999 | 8.28191e-07 | 0.999999 |
| rad61     | 4.34037e-07 | 1.000000 | 5.97267e-07 | 1.000000 |
| rad41     | 1.43043e-07 | 1.000000 | 1.96838e-07 | 1.000000 |
| rad6      | 2.97878e-17 | 1.000000 | 4.09903e-17 | 1.000000 |
| rad7      | 1.83268e-18 | 1.000000 | 2.52190e-18 | 1.000000 |
| rad11     | 1.18912e-18 | 1.000000 | 1.63631e-18 | 1.000000 |
| rad13     | 3.19990e-19 | 1.000000 | 4.40329e-19 | 1.000000 |
| rad9      | 1.63568e-19 | 1.000000 | 2.25082e-19 | 1.000000 |
| rad23     | 1.49110e-19 | 1.000000 | 2.05186e-19 | 1.000000 |
| rad28     | 1.02382e-19 | 1.000000 | 1.40885e-19 | 1.000000 |
| rad45     | 9.28209e-20 | 1.000000 | 1.27728e-19 | 1.000000 |
| rad21     | 7.32814e-20 | 1.000000 | 1.00841e-19 | 1.000000 |
| rad33     | 3.83235e-20 | 1.000000 | 5.27360e-20 | 1.000000 |
| rad22     | 2.64531e-20 | 1.000000 | 3.64014e-20 | 1.000000 |
| rad20     | 1.97582e-20 | 1.000000 | 2.71888e-20 | 1.000000 |
| rad36     | 1.79408e-20 | 1.000000 | 2.46878e-20 | 1.000000 |
| rad15     | 1.60341e-20 | 1.000000 | 2.20640e-20 | 1.000000 |
| rad47     | 1.25502e-20 | 1.000000 | 1.72700e-20 | 1.000000 |
| rad12     | 1.01281e-20 | 1.000000 | 1.39370e-20 | 1.000000 |
| rad25     | 9.69849e-21 | 1.000000 | 1.33459e-20 | 1.000000 |
| rad8      | 8.17489e-21 | 1.000000 | 1.12493e-20 | 1.000000 |
| rad24     | 5.80458e-21 | 1.000000 | 7.98754e-21 | 1.000000 |
| rad26     | 4.36727e-21 | 1.000000 | 6.00972e-21 | 1.000000 |
| rad10     | 2.37472e-21 | 1.000000 | 3.26780e-21 | 1.000000 |
| rad18     | 2.33495e-21 | 1.000000 | 3.21308e-21 | 1.000000 |
| rad14     | 1.43353e-21 | 1.000000 | 1.97264e-21 | 1.000000 |
| rad3      | 7.86064e-22 | 1.000000 | 1.08168e-21 | 1.000000 |
| rad4      | 5.06972e-22 | 1.000000 | 6.97631e-22 | 1.000000 |
| rad5      | 2.80274e-22 | 1.000000 | 3.85678e-22 | 1.000000 |
| rad2      | 2.76083e-22 | 1.000000 | 3.79911e-22 | 1.000000 |
| rad1      | 6.07280e-23 | 1.000000 | 8.35662e-23 | 1.000000 |
| rad27     | 4.74794e-23 | 1.000000 | 6.53351e-23 | 1.000000 |

0.100000000E-07 Pa, 20.0000000 K

=====

| Rate constant      | True (fraction)        | Effective (fraction)   |
|--------------------|------------------------|------------------------|
| Total              | 1.56740e-51 (1.00 )    | 1.56740e-51 (1.00 )    |
| Formation of rad11 | 1.56740e-51 (1.000 )   | 1.56740e-51 (1.000 )   |
| Formation of rad6  | 3.73945e-60 (2.39e-09) | 3.73945e-60 (2.39e-09) |
| H-abstraction      | 1.53631e-76 (9.80e-26) | 1.53631e-76 (9.80e-26) |

| species       | PYtrue      | Cumul    | PYeffective | Cumul    |
|---------------|-------------|----------|-------------|----------|
| Indene+H      | 0.987365    | 0.987365 | 0.987365    | 0.987365 |
| C2H2+PhCH2    | 0.00821174  | 0.995577 | 0.00821174  | 0.995577 |
| PhCCH+CH3     | 0.00218916  | 0.997766 | 0.00218916  | 0.997766 |
| PhCHCCH2+H    | 0.00138406  | 0.999150 | 0.00138406  | 0.999150 |
| PhCCCH3+H     | 0.000827634 | 0.999978 | 0.000827634 | 0.999978 |
| Ph+MeAc       | 1.00126e-05 | 0.999988 | 1.00126e-05 | 0.999988 |
| rad8          | 6.83639e-06 | 0.999994 | 6.83639e-06 | 0.999994 |
| rad9          | 3.09918e-06 | 0.999998 | 3.09918e-06 | 0.999998 |
| PAH7+H        | 1.76306e-06 | 0.999999 | 1.76306e-06 | 0.999999 |
| rad30         | 4.36983e-07 | 1.000000 | 4.36983e-07 | 1.000000 |
| rad12         | 2.10895e-07 | 1.000000 | 2.10895e-07 | 1.000000 |
| rad39         | 1.69895e-07 | 1.000000 | 1.69895e-07 | 1.000000 |
| PAH9+H        | 8.84733e-08 | 1.000000 | 8.84733e-08 | 1.000000 |
| rad15         | 7.82473e-08 | 1.000000 | 7.82473e-08 | 1.000000 |
| rad35         | 4.65656e-08 | 1.000000 | 4.65656e-08 | 1.000000 |
| rad38         | 2.27364e-08 | 1.000000 | 2.27364e-08 | 1.000000 |
| Phenyl+Allene | 1.59093e-08 | 1.000000 | 0.000000    | 1.000000 |

|                    |             |         |             |         |
|--------------------|-------------|---------|-------------|---------|
| rad46              | 1.47721e-10 | 1.00000 | 1.47721e-10 | 1.00000 |
| rad6               | 5.63049e-12 | 1.00000 | 5.63049e-12 | 1.00000 |
| rad60syn           | 3.54690e-12 | 1.00000 | 3.54690e-12 | 1.00000 |
| rad28              | 6.42199e-13 | 1.00000 | 6.42199e-13 | 1.00000 |
| rad26              | 1.19554e-13 | 1.00000 | 1.19554e-13 | 1.00000 |
| rad2               | 2.48920e-15 | 1.00000 | 2.48920e-15 | 1.00000 |
| rad7               | 4.06011e-16 | 1.00000 | 4.06011e-16 | 1.00000 |
| rad1               | 1.57324e-16 | 1.00000 | 1.57324e-16 | 1.00000 |
| rad10              | 1.27013e-16 | 1.00000 | 1.27013e-16 | 1.00000 |
| rad11              | 9.94220e-17 | 1.00000 | 9.94220e-17 | 1.00000 |
| rad3               | 2.00181e-17 | 1.00000 | 2.00181e-17 | 1.00000 |
| rad14              | 1.76366e-17 | 1.00000 | 1.76366e-17 | 1.00000 |
| rad4               | 1.01202e-17 | 1.00000 | 1.01202e-17 | 1.00000 |
| rad25              | 8.51228e-18 | 1.00000 | 8.51228e-18 | 1.00000 |
| rad60anti          | 6.00859e-18 | 1.00000 | 6.00859e-18 | 1.00000 |
| rad13              | 2.25732e-18 | 1.00000 | 2.25732e-18 | 1.00000 |
| rad27              | 9.69509e-19 | 1.00000 | 9.69509e-19 | 1.00000 |
| PhCH2CCH+H         | 7.54970e-20 | 1.00000 | 7.54970e-20 | 1.00000 |
| rad37              | 6.78808e-21 | 1.00000 | 6.78808e-21 | 1.00000 |
| rad33              | 4.44981e-21 | 1.00000 | 4.44981e-21 | 1.00000 |
| rad31              | 7.42004e-24 | 1.00000 | 7.42004e-24 | 1.00000 |
| rad5               | 4.35312e-24 | 1.00000 | 4.35312e-24 | 1.00000 |
| rad20              | 4.22190e-25 | 1.00000 | 4.22190e-25 | 1.00000 |
| rad21              | 3.25282e-25 | 1.00000 | 3.25282e-25 | 1.00000 |
| Benzene+2-propynyl | 9.80165e-26 | 1.00000 | 9.80165e-26 | 1.00000 |
| rad18              | 1.25298e-27 | 1.00000 | 1.25298e-27 | 1.00000 |
| rad22              | 9.63424e-29 | 1.00000 | 9.63424e-29 | 1.00000 |
| rad23              | 9.24580e-29 | 1.00000 | 9.24580e-29 | 1.00000 |
| PAH3+H             | 7.68463e-29 | 1.00000 | 7.68463e-29 | 1.00000 |
| rad59              | 4.11498e-29 | 1.00000 | 4.11498e-29 | 1.00000 |
| rad50              | 1.66078e-29 | 1.00000 | 1.66078e-29 | 1.00000 |
| rad45              | 6.05569e-31 | 1.00000 | 6.05569e-31 | 1.00000 |
| rad24              | 1.03876e-31 | 1.00000 | 1.03876e-31 | 1.00000 |
| rad36              | 3.77222e-32 | 1.00000 | 3.77222e-32 | 1.00000 |
| rad19syn           | 6.03114e-38 | 1.00000 | 6.03114e-38 | 1.00000 |
| rad52              | 7.25673e-42 | 1.00000 | 7.25673e-42 | 1.00000 |
| rad54              | 6.96998e-43 | 1.00000 | 6.96998e-43 | 1.00000 |
| PAH10+CH3          | 4.54102e-43 | 1.00000 | 4.54102e-43 | 1.00000 |
| rad43              | 1.04797e-43 | 1.00000 | 1.04797e-43 | 1.00000 |
| rad62              | 3.12487e-46 | 1.00000 | 3.12487e-46 | 1.00000 |
| rad51              | 3.48843e-49 | 1.00000 | 3.48843e-49 | 1.00000 |
| rad70              | 3.74780e-52 | 1.00000 | 3.74780e-52 | 1.00000 |
| PhcycC3H3_A+H      | 1.58726e-52 | 1.00000 | 1.58726e-52 | 1.00000 |
| rad55              | 8.54666e-53 | 1.00000 | 8.54666e-53 | 1.00000 |
| rad65              | 2.34031e-54 | 1.00000 | 2.34031e-54 | 1.00000 |
| rad58              | 5.33036e-56 | 1.00000 | 5.33036e-56 | 1.00000 |
| PAH1+H             | 7.14717e-58 | 1.00000 | 7.14717e-58 | 1.00000 |
| rad34              | 4.73193e-60 | 1.00000 | 4.73193e-60 | 1.00000 |
| rad42              | 3.37548e-64 | 1.00000 | 3.37548e-64 | 1.00000 |
| rad41              | 4.23570e-65 | 1.00000 | 4.23570e-65 | 1.00000 |
| rad47              | 1.30710e-70 | 1.00000 | 1.30710e-70 | 1.00000 |

0.100000000E-07 Pa, 30.0000000 K

=====

| Rate constant      | True (fraction)        | Effective (fraction)   |
|--------------------|------------------------|------------------------|
| Total              | 5.03204e-39 (1.00 )    | 5.03204e-39 (1.00 )    |
| Formation of rad11 | 5.03203e-39 (1.000 )   | 5.03203e-39 (1.000 )   |
| Formation of rad6  | 9.92181e-45 (1.97e-06) | 9.92181e-45 (1.97e-06) |
| H-abstraction      | 3.33191e-55 (6.62e-17) | 3.33191e-55 (6.62e-17) |

| species       | PYtrue      | Cumul    | PYeffective | Cumul    |
|---------------|-------------|----------|-------------|----------|
| Indene+H      | 0.987257    | 0.987257 | 0.987257    | 0.987257 |
| C2H2+PhCH2    | 0.00826608  | 0.995523 | 0.00826608  | 0.995523 |
| PhCCH+CH3     | 0.00221703  | 0.997740 | 0.00221703  | 0.997740 |
| PhCHCCH2+H    | 0.00139902  | 0.999139 | 0.00139902  | 0.999139 |
| PhCCCH3+H     | 0.000837641 | 0.999977 | 0.000837641 | 0.999977 |
| Ph+MeAc       | 1.04503e-05 | 0.999987 | 1.04503e-05 | 0.999987 |
| rad8          | 6.94447e-06 | 0.999994 | 6.94447e-06 | 0.999994 |
| rad9          | 3.16716e-06 | 0.999997 | 3.16716e-06 | 0.999997 |
| PAH7+H        | 1.80747e-06 | 0.999999 | 1.80747e-06 | 0.999999 |
| rad30         | 4.41084e-07 | 1.000000 | 4.41084e-07 | 1.000000 |
| rad12         | 2.16608e-07 | 1.000000 | 2.16609e-07 | 1.000000 |
| rad39         | 1.75968e-07 | 1.000000 | 1.75968e-07 | 1.000000 |
| PAH9+H        | 8.94068e-08 | 1.000000 | 8.94068e-08 | 1.000000 |
| rad15         | 7.91478e-08 | 1.000000 | 7.91478e-08 | 1.000000 |
| rad35         | 4.70022e-08 | 1.000000 | 4.70022e-08 | 1.000000 |
| rad38         | 2.30000e-08 | 1.000000 | 2.30000e-08 | 1.000000 |
| Phenyl+Allene | 2.15096e-08 | 1.000000 | 0.000000    | 1.000000 |

|                    |             |         |             |         |
|--------------------|-------------|---------|-------------|---------|
| rad46              | 1.50532e-10 | 1.00000 | 1.50532e-10 | 1.00000 |
| rad60syn           | 3.53053e-12 | 1.00000 | 3.53053e-12 | 1.00000 |
| rad6               | 1.26179e-12 | 1.00000 | 1.26179e-12 | 1.00000 |
| rad28              | 2.62326e-13 | 1.00000 | 2.62326e-13 | 1.00000 |
| rad26              | 5.45504e-14 | 1.00000 | 5.45504e-14 | 1.00000 |
| rad2               | 6.62498e-16 | 1.00000 | 6.62498e-16 | 1.00000 |
| rad60anti          | 5.75563e-16 | 1.00000 | 5.75563e-16 | 1.00000 |
| rad7               | 9.10159e-17 | 1.00000 | 9.10159e-17 | 1.00000 |
| Benzene+2-propynyl | 6.62139e-17 | 1.00000 | 6.62139e-17 | 1.00000 |
| rad1               | 4.18957e-17 | 1.00000 | 4.18957e-17 | 1.00000 |
| rad10              | 3.52817e-17 | 1.00000 | 3.52817e-17 | 1.00000 |
| rad11              | 2.23504e-17 | 1.00000 | 2.23504e-17 | 1.00000 |
| rad14              | 8.54693e-18 | 1.00000 | 8.54693e-18 | 1.00000 |
| rad3               | 5.95560e-18 | 1.00000 | 5.95560e-18 | 1.00000 |
| rad25              | 4.13052e-18 | 1.00000 | 4.13052e-18 | 1.00000 |
| rad4               | 3.01131e-18 | 1.00000 | 3.01131e-18 | 1.00000 |
| rad13              | 5.06111e-19 | 1.00000 | 5.06111e-19 | 1.00000 |
| rad27              | 4.69287e-19 | 1.00000 | 4.69287e-19 | 1.00000 |
| PhCH2CCH+H         | 4.89976e-20 | 1.00000 | 4.89976e-20 | 1.00000 |
| rad37              | 4.43347e-21 | 1.00000 | 4.43347e-21 | 1.00000 |
| rad33              | 1.04680e-21 | 1.00000 | 1.04680e-21 | 1.00000 |
| rad31              | 3.70281e-24 | 1.00000 | 3.70281e-24 | 1.00000 |
| rad5               | 2.85206e-24 | 1.00000 | 2.85206e-24 | 1.00000 |
| rad20              | 2.05769e-25 | 1.00000 | 2.05769e-25 | 1.00000 |
| rad21              | 1.58744e-25 | 1.00000 | 1.58744e-25 | 1.00000 |
| rad18              | 6.04652e-28 | 1.00000 | 6.04652e-28 | 1.00000 |
| PAH3+H             | 5.07354e-29 | 1.00000 | 5.07354e-29 | 1.00000 |
| rad22              | 4.54782e-29 | 1.00000 | 4.54782e-29 | 1.00000 |
| rad23              | 3.07155e-29 | 1.00000 | 3.07155e-29 | 1.00000 |
| rad59              | 2.71637e-29 | 1.00000 | 2.71637e-29 | 1.00000 |
| rad50              | 1.09158e-29 | 1.00000 | 1.09158e-29 | 1.00000 |
| rad45              | 1.99876e-31 | 1.00000 | 1.99876e-31 | 1.00000 |
| rad24              | 5.21966e-32 | 1.00000 | 5.21966e-32 | 1.00000 |
| rad36              | 1.24469e-32 | 1.00000 | 1.24469e-32 | 1.00000 |
| rad19syn           | 4.14636e-38 | 1.00000 | 4.14636e-38 | 1.00000 |
| rad52              | 4.97561e-42 | 1.00000 | 4.97561e-42 | 1.00000 |
| rad54              | 4.86774e-43 | 1.00000 | 4.86774e-43 | 1.00000 |
| PAH10+CH3          | 3.18399e-43 | 1.00000 | 3.18399e-43 | 1.00000 |
| rad43              | 7.34664e-44 | 1.00000 | 7.34664e-44 | 1.00000 |
| rad62              | 2.20710e-46 | 1.00000 | 2.20710e-46 | 1.00000 |
| rad51              | 2.45848e-49 | 1.00000 | 2.45848e-49 | 1.00000 |
| rad70              | 2.70122e-52 | 1.00000 | 2.70122e-52 | 1.00000 |
| PhcycC3H3_A+H      | 1.14642e-52 | 1.00000 | 1.14642e-52 | 1.00000 |
| rad55              | 6.17168e-53 | 1.00000 | 6.17168e-53 | 1.00000 |
| rad65              | 1.67530e-54 | 1.00000 | 1.67530e-54 | 1.00000 |
| rad58              | 3.85699e-56 | 1.00000 | 3.85699e-56 | 1.00000 |
| PAH1+H             | 5.26700e-58 | 1.00000 | 5.26700e-58 | 1.00000 |
| rad34              | 3.50266e-60 | 1.00000 | 3.50266e-60 | 1.00000 |
| rad42              | 2.53422e-64 | 1.00000 | 2.53423e-64 | 1.00000 |
| rad41              | 3.20499e-65 | 1.00000 | 3.20499e-65 | 1.00000 |
| rad47              | 4.75936e-71 | 1.00000 | 4.75936e-71 | 1.00000 |

0.100000000E-07 Pa, 40.0000000 K

=====

| Rate constant      | True (fraction)        | Effective (fraction)   |
|--------------------|------------------------|------------------------|
| Total              | 9.35697e-33 (1.00 )    | 9.35697e-33 (1.00 )    |
| Formation of rad11 | 9.35644e-33 (1.000 )   | 9.35644e-33 (1.000 )   |
| Formation of rad6  | 5.26139e-37 (5.62e-05) | 5.26138e-37 (5.62e-05) |
| H-abstraction      | 1.44763e-44 (1.55e-12) | 1.44763e-44 (1.55e-12) |

| species       | PYtrue      | Cumul    | PYeffective | Cumul    |
|---------------|-------------|----------|-------------|----------|
| Indene+H      | 0.987032    | 0.987032 | 0.987032    | 0.987032 |
| C2H2+PhCH2    | 0.00837906  | 0.995411 | 0.00837906  | 0.995411 |
| PhCCH+CH3     | 0.00227539  | 0.997686 | 0.00227539  | 0.997686 |
| PhCHCCH2+H    | 0.00143024  | 0.999117 | 0.00143024  | 0.999117 |
| PhCCCH3+H     | 0.000858549 | 0.999975 | 0.000858549 | 0.999975 |
| Ph+MeAc       | 1.13963e-05 | 0.999987 | 1.13963e-05 | 0.999987 |
| rad8          | 7.17279e-06 | 0.999994 | 7.17279e-06 | 0.999994 |
| rad9          | 3.31252e-06 | 0.999997 | 3.31252e-06 | 0.999997 |
| PAH7+H        | 1.90148e-06 | 0.999999 | 1.90148e-06 | 0.999999 |
| rad30         | 4.49653e-07 | 0.999999 | 4.49653e-07 | 0.999999 |
| rad12         | 2.28406e-07 | 1.000000 | 2.28406e-07 | 1.000000 |
| rad39         | 1.89307e-07 | 1.000000 | 1.89307e-07 | 1.000000 |
| PAH9+H        | 9.13625e-08 | 1.000000 | 9.13625e-08 | 1.000000 |
| rad15         | 8.10356e-08 | 1.000000 | 8.10356e-08 | 1.000000 |
| rad35         | 4.79154e-08 | 1.000000 | 4.79154e-08 | 1.000000 |
| Phenyl+Allene | 3.50663e-08 | 1.000000 | 0.000000    | 1.000000 |
| rad38         | 2.35529e-08 | 1.000000 | 2.35529e-08 | 1.000000 |

|                    |             |         |             |         |
|--------------------|-------------|---------|-------------|---------|
| rad46              | 1.56538e-10 | 1.00000 | 1.56538e-10 | 1.00000 |
| rad60syn           | 3.61881e-12 | 1.00000 | 3.61881e-12 | 1.00000 |
| Benzene+2-propynyl | 1.54712e-12 | 1.00000 | 1.54712e-12 | 1.00000 |
| rad6               | 5.46608e-13 | 1.00000 | 5.46608e-13 | 1.00000 |
| rad28              | 1.57185e-13 | 1.00000 | 1.57185e-13 | 1.00000 |
| rad26              | 3.42090e-14 | 1.00000 | 3.42090e-14 | 1.00000 |
| rad60anti          | 1.04368e-14 | 1.00000 | 1.04368e-14 | 1.00000 |
| rad2               | 3.56721e-16 | 1.00000 | 3.56721e-16 | 1.00000 |
| rad7               | 3.94538e-17 | 1.00000 | 3.94539e-17 | 1.00000 |
| rad1               | 2.25865e-17 | 1.00000 | 2.25865e-17 | 1.00000 |
| rad10              | 1.85484e-17 | 1.00000 | 1.85484e-17 | 1.00000 |
| rad11              | 9.71483e-18 | 1.00000 | 9.71483e-18 | 1.00000 |
| rad14              | 5.50666e-18 | 1.00000 | 5.50666e-18 | 1.00000 |
| rad3               | 3.35562e-18 | 1.00000 | 3.35562e-18 | 1.00000 |
| rad25              | 2.66859e-18 | 1.00000 | 2.66859e-18 | 1.00000 |
| rad4               | 1.69722e-18 | 1.00000 | 1.69722e-18 | 1.00000 |
| PhCH2CCH+H         | 3.14793e-19 | 1.00000 | 3.14793e-19 | 1.00000 |
| rad27              | 3.03644e-19 | 1.00000 | 3.03644e-19 | 1.00000 |
| rad13              | 2.19468e-19 | 1.00000 | 2.19468e-19 | 1.00000 |
| rad37              | 6.73781e-21 | 1.00000 | 6.73781e-21 | 1.00000 |
| rad33              | 4.74683e-22 | 1.00000 | 4.74683e-22 | 1.00000 |
| rad5               | 3.79126e-24 | 1.00000 | 3.79126e-24 | 1.00000 |
| rad31              | 2.55168e-24 | 1.00000 | 2.55168e-24 | 1.00000 |
| rad20              | 1.37684e-25 | 1.00000 | 1.37684e-25 | 1.00000 |
| rad21              | 1.06382e-25 | 1.00000 | 1.06382e-25 | 1.00000 |
| rad18              | 4.00445e-28 | 1.00000 | 4.00445e-28 | 1.00000 |
| PAH3+H             | 6.50572e-29 | 1.00000 | 6.50572e-29 | 1.00000 |
| rad59              | 3.48200e-29 | 1.00000 | 3.48200e-29 | 1.00000 |
| rad22              | 2.97487e-29 | 1.00000 | 2.97487e-29 | 1.00000 |
| rad23              | 1.74724e-29 | 1.00000 | 1.74724e-29 | 1.00000 |
| rad50              | 1.39327e-29 | 1.00000 | 1.39327e-29 | 1.00000 |
| rad45              | 1.19353e-31 | 1.00000 | 1.19353e-31 | 1.00000 |
| rad24              | 3.62988e-32 | 1.00000 | 3.62988e-32 | 1.00000 |
| rad36              | 7.42801e-33 | 1.00000 | 7.42801e-33 | 1.00000 |
| rad19syn           | 5.78502e-38 | 1.00000 | 5.78502e-38 | 1.00000 |
| rad52              | 6.90322e-42 | 1.00000 | 6.90322e-42 | 1.00000 |
| rad54              | 7.01884e-43 | 1.00000 | 7.01884e-43 | 1.00000 |
| PAH10+CH3          | 4.64518e-43 | 1.00000 | 4.64518e-43 | 1.00000 |
| rad43              | 1.07143e-43 | 1.00000 | 1.07143e-43 | 1.00000 |
| rad62              | 3.26517e-46 | 1.00000 | 3.26517e-46 | 1.00000 |
| rad51              | 3.61299e-49 | 1.00000 | 3.61299e-49 | 1.00000 |
| rad70              | 4.16059e-52 | 1.00000 | 4.16059e-52 | 1.00000 |
| PhcycC3H3_A+H      | 1.77360e-52 | 1.00000 | 1.77360e-52 | 1.00000 |
| rad55              | 9.54382e-53 | 1.00000 | 9.54382e-53 | 1.00000 |
| rad65              | 2.54387e-54 | 1.00000 | 2.54387e-54 | 1.00000 |
| rad58              | 5.98992e-56 | 1.00000 | 5.98992e-56 | 1.00000 |
| PAH1+H             | 8.49972e-58 | 1.00000 | 8.49972e-58 | 1.00000 |
| rad34              | 5.70464e-60 | 1.00000 | 5.70464e-60 | 1.00000 |
| rad42              | 4.27294e-64 | 1.00000 | 4.27294e-64 | 1.00000 |
| rad41              | 5.56042e-65 | 1.00000 | 5.56042e-65 | 1.00000 |
| rad47              | 5.12182e-71 | 1.00000 | 5.12182e-71 | 1.00000 |

0.100000000E-07 Pa, 50.0000000 K

=====

| Rate constant      | True (fraction)        | Effective (fraction)   |
|--------------------|------------------------|------------------------|
| Total              | 5.52690e-29 (1.00 )    | 5.52690e-29 (1.00 )    |
| Formation of rad11 | 5.52459e-29 (1.000 )   | 5.52459e-29 (1.000 )   |
| Formation of rad6  | 2.30840e-32 (0.000418) | 2.30840e-32 (0.000418) |
| H-abstraction      | 3.35357e-38 (6.07e-10) | 3.35357e-38 (6.07e-10) |

| species       | PYtrue      | Cumul    | PYeffective | Cumul    |
|---------------|-------------|----------|-------------|----------|
| Indene+H      | 0.986714    | 0.986714 | 0.986714    | 0.986714 |
| C2H2+PhCH2    | 0.00853772  | 0.995252 | 0.00853772  | 0.995252 |
| PhCCH+CH3     | 0.00235828  | 0.997610 | 0.00235828  | 0.997610 |
| PhCHCCH2+H    | 0.00147438  | 0.999084 | 0.00147438  | 0.999084 |
| PhCCCH3+H     | 0.000888161 | 0.999973 | 0.000888161 | 0.999973 |
| Ph+MeAc       | 1.28111e-05 | 0.999985 | 1.28111e-05 | 0.999985 |
| rad8          | 7.50105e-06 | 0.999993 | 7.50105e-06 | 0.999993 |
| rad9          | 3.52522e-06 | 0.999996 | 3.52522e-06 | 0.999996 |
| PAH7+H        | 2.03768e-06 | 0.999998 | 2.03768e-06 | 0.999998 |
| rad30         | 4.61778e-07 | 0.999999 | 4.61778e-07 | 0.999999 |
| rad12         | 2.45022e-07 | 0.999999 | 2.45022e-07 | 0.999999 |
| rad39         | 2.09454e-07 | 0.999999 | 2.09454e-07 | 0.999999 |
| PAH9+H        | 9.41429e-08 | 0.999999 | 9.41429e-08 | 0.999999 |
| rad15         | 8.37236e-08 | 1.000000 | 8.37236e-08 | 1.000000 |
| Phenyl+Allene | 5.86040e-08 | 1.000000 | 0.000000    | 1.000000 |
| rad35         | 4.92102e-08 | 1.000000 | 4.92102e-08 | 1.000000 |
| rad38         | 2.43412e-08 | 1.000000 | 2.43412e-08 | 1.000000 |

|                    |             |          |             |          |
|--------------------|-------------|----------|-------------|----------|
| Benzene+2-propynyl | 6.06773e-10 | 1.000000 | 6.06773e-10 | 1.000000 |
| rad46              | 1.65324e-10 | 1.000000 | 1.65324e-10 | 1.000000 |
| rad60syn           | 3.93837e-12 | 1.000000 | 3.93837e-12 | 1.000000 |
| rad6               | 3.00920e-13 | 1.000000 | 3.00920e-13 | 1.000000 |
| rad28              | 1.07261e-13 | 1.000000 | 1.07261e-13 | 1.000000 |
| rad60anti          | 5.61986e-14 | 1.000000 | 5.61986e-14 | 1.000000 |
| rad26              | 2.39461e-14 | 1.000000 | 2.39461e-14 | 1.000000 |
| rad2               | 2.21406e-16 | 1.000000 | 2.21406e-16 | 1.000000 |
| PhCH2CCH+H         | 1.27712e-16 | 1.000000 | 1.27712e-16 | 1.000000 |
| rad7               | 2.17402e-17 | 1.000000 | 2.17402e-17 | 1.000000 |
| rad1               | 1.40433e-17 | 1.000000 | 1.40433e-17 | 1.000000 |
| rad10              | 1.19944e-17 | 1.000000 | 1.19944e-17 | 1.000000 |
| rad11              | 5.36749e-18 | 1.000000 | 5.36749e-18 | 1.000000 |
| rad14              | 3.93599e-18 | 1.000000 | 3.93599e-18 | 1.000000 |
| rad37              | 3.04547e-18 | 1.000000 | 3.04547e-18 | 1.000000 |
| rad3               | 2.20493e-18 | 1.000000 | 2.20493e-18 | 1.000000 |
| rad25              | 1.91485e-18 | 1.000000 | 1.91485e-18 | 1.000000 |
| rad4               | 1.11571e-18 | 1.000000 | 1.11571e-18 | 1.000000 |
| rad27              | 2.18604e-19 | 1.000000 | 2.18604e-19 | 1.000000 |
| rad13              | 1.20994e-19 | 1.000000 | 1.20994e-19 | 1.000000 |
| rad5               | 9.87464e-22 | 1.000000 | 9.87464e-22 | 1.000000 |
| rad33              | 2.73298e-22 | 1.000000 | 2.73298e-22 | 1.000000 |
| rad31              | 2.01638e-24 | 1.000000 | 2.01638e-24 | 1.000000 |
| rad20              | 1.04256e-25 | 1.000000 | 1.04256e-25 | 1.000000 |
| rad21              | 8.07167e-26 | 1.000000 | 8.07167e-26 | 1.000000 |
| PAH3+H             | 1.75424e-27 | 1.000000 | 1.75424e-27 | 1.000000 |
| rad50              | 1.22719e-27 | 1.000000 | 1.22719e-27 | 1.000000 |
| rad59              | 9.41147e-28 | 1.000000 | 9.41147e-28 | 1.000000 |
| rad18              | 2.99252e-28 | 1.000000 | 2.99252e-28 | 1.000000 |
| rad22              | 2.19611e-29 | 1.000000 | 2.19611e-29 | 1.000000 |
| rad23              | 1.21095e-29 | 1.000000 | 1.21095e-29 | 1.000000 |
| rad45              | 8.09026e-32 | 1.000000 | 8.09026e-32 | 1.000000 |
| rad24              | 2.89207e-32 | 1.000000 | 2.89207e-32 | 1.000000 |
| rad36              | 5.03106e-33 | 1.000000 | 5.03106e-33 | 1.000000 |
| rad19syn           | 1.57225e-37 | 1.000000 | 1.57225e-37 | 1.000000 |
| rad52              | 1.86150e-41 | 1.000000 | 1.86150e-41 | 1.000000 |
| rad54              | 1.99827e-42 | 1.000000 | 1.99827e-42 | 1.000000 |
| PAH10+CH3          | 1.35884e-42 | 1.000000 | 1.35884e-42 | 1.000000 |
| rad43              | 3.13258e-43 | 1.000000 | 3.13258e-43 | 1.000000 |
| rad62              | 9.70626e-46 | 1.000000 | 9.70626e-46 | 1.000000 |
| rad51              | 1.05673e-48 | 1.000000 | 1.05673e-48 | 1.000000 |
| rad70              | 1.30017e-51 | 1.000000 | 1.30017e-51 | 1.000000 |
| PhcycC3H3_A+H      | 5.57709e-52 | 1.000000 | 5.57709e-52 | 1.000000 |
| rad55              | 2.99914e-52 | 1.000000 | 2.99914e-52 | 1.000000 |
| rad65              | 7.79212e-54 | 1.000000 | 7.79212e-54 | 1.000000 |
| rad58              | 1.89373e-55 | 1.000000 | 1.89373e-55 | 1.000000 |
| PAH1+H             | 2.83867e-57 | 1.000000 | 2.83867e-57 | 1.000000 |
| rad34              | 1.92891e-59 | 1.000000 | 1.92891e-59 | 1.000000 |
| rad42              | 1.55940e-63 | 1.000000 | 1.55940e-63 | 1.000000 |
| rad41              | 2.24598e-64 | 1.000000 | 2.24598e-64 | 1.000000 |
| rad47              | 1.27801e-70 | 1.000000 | 1.27801e-70 | 1.000000 |

0.100000000E-07 Pa, 60.0000000 K

=====

| Rate constant      | True (fraction)        | Effective (fraction)   |
|--------------------|------------------------|------------------------|
| Total              | 1.83429e-26 (1.00 )    | 1.83429e-26 (1.00 )    |
| Formation of rad11 | 1.83139e-26 (0.998 )   | 1.83139e-26 (0.998 )   |
| Formation of rad6  | 2.90471e-29 (0.00158 ) | 2.90471e-29 (0.00158 ) |
| H-abstraction      | 5.71259e-34 (3.11e-08) | 5.71259e-34 (3.11e-08) |

| species            | PYtrue      | Cumul    | PYeffective | Cumul    |
|--------------------|-------------|----------|-------------|----------|
| Indene+H           | 0.986327    | 0.986327 | 0.986327    | 0.986327 |
| C2H2+PhCH2         | 0.00873011  | 0.995057 | 0.00873011  | 0.995057 |
| PhCCH+CH3          | 0.00246041  | 0.997517 | 0.00246041  | 0.997517 |
| PhCHCCH2+H         | 0.00152844  | 0.999046 | 0.00152844  | 0.999046 |
| PhCCCH3+H          | 0.000924500 | 0.999970 | 0.000924500 | 0.999970 |
| Ph+MeAc            | 1.46761e-05 | 0.999985 | 1.46761e-05 | 0.999985 |
| rad8               | 7.91046e-06 | 0.999993 | 7.91046e-06 | 0.999993 |
| rad9               | 3.79609e-06 | 0.999997 | 3.79609e-06 | 0.999997 |
| PAH7+H             | 2.21015e-06 | 0.999999 | 2.21015e-06 | 0.999999 |
| rad30              | 4.76627e-07 | 0.999999 | 4.76627e-07 | 0.999999 |
| rad12              | 2.65642e-07 | 1.000000 | 2.65642e-07 | 1.000000 |
| rad39              | 2.35965e-07 | 1.000000 | 2.35965e-07 | 1.000000 |
| PAH9+H             | 9.75715e-08 | 1.000000 | 9.75715e-08 | 1.000000 |
| Phenyl+Allene      | 9.48886e-08 | 1.000000 | 0.000000    | 1.000000 |
| rad15              | 8.70438e-08 | 1.000000 | 8.70438e-08 | 1.000000 |
| rad35              | 5.08003e-08 | 1.000000 | 5.08003e-08 | 1.000000 |
| Benzene+2-propynyl | 3.11432e-08 | 1.000000 | 3.11432e-08 | 1.000000 |

|               |             |         |             |         |
|---------------|-------------|---------|-------------|---------|
| rad38         | 2.53168e-08 | 1.00000 | 2.53168e-08 | 1.00000 |
| rad46         | 1.76540e-10 | 1.00000 | 1.76540e-10 | 1.00000 |
| rad60syn      | 4.52394e-12 | 1.00000 | 4.52394e-12 | 1.00000 |
| rad6          | 1.87497e-13 | 1.00000 | 1.87497e-13 | 1.00000 |
| rad60anti     | 1.68171e-13 | 1.00000 | 1.68171e-13 | 1.00000 |
| rad28         | 7.81191e-14 | 1.00000 | 7.81191e-14 | 1.00000 |
| rad26         | 1.77329e-14 | 1.00000 | 1.77329e-14 | 1.00000 |
| PhCH2CCH+H    | 8.28128e-15 | 1.00000 | 8.28128e-15 | 1.00000 |
| rad37         | 5.31894e-16 | 1.00000 | 5.31894e-16 | 1.00000 |
| rad2          | 1.87145e-16 | 1.00000 | 1.87145e-16 | 1.00000 |
| rad7          | 1.35611e-17 | 1.00000 | 1.35611e-17 | 1.00000 |
| rad1          | 1.18959e-17 | 1.00000 | 1.18959e-17 | 1.00000 |
| rad10         | 8.90215e-18 | 1.00000 | 8.90215e-18 | 1.00000 |
| rad11         | 3.35713e-18 | 1.00000 | 3.35713e-18 | 1.00000 |
| rad14         | 2.97141e-18 | 1.00000 | 2.97141e-18 | 1.00000 |
| rad3          | 1.95099e-18 | 1.00000 | 1.95099e-18 | 1.00000 |
| rad25         | 1.45233e-18 | 1.00000 | 1.45234e-18 | 1.00000 |
| rad4          | 9.87761e-19 | 1.00000 | 9.87762e-19 | 1.00000 |
| rad5          | 2.78989e-19 | 1.00000 | 2.78989e-19 | 1.00000 |
| rad27         | 1.66553e-19 | 1.00000 | 1.66553e-19 | 1.00000 |
| rad13         | 7.55206e-20 | 1.00000 | 7.55206e-20 | 1.00000 |
| rad33         | 1.78150e-22 | 1.00000 | 1.78150e-22 | 1.00000 |
| PAH3+H        | 2.18957e-24 | 1.00000 | 2.18957e-24 | 1.00000 |
| rad31         | 1.72983e-24 | 1.00000 | 1.72983e-24 | 1.00000 |
| rad59         | 1.18384e-24 | 1.00000 | 1.18384e-24 | 1.00000 |
| rad50         | 7.40243e-25 | 1.00000 | 7.40243e-25 | 1.00000 |
| rad20         | 8.45316e-26 | 1.00000 | 8.45316e-26 | 1.00000 |
| rad21         | 6.56050e-26 | 1.00000 | 6.56050e-26 | 1.00000 |
| rad18         | 2.38824e-28 | 1.00000 | 2.38824e-28 | 1.00000 |
| rad22         | 1.72963e-29 | 1.00000 | 1.72963e-29 | 1.00000 |
| rad23         | 9.35348e-30 | 1.00000 | 9.35348e-30 | 1.00000 |
| rad45         | 7.31126e-32 | 1.00000 | 7.31126e-32 | 1.00000 |
| rad24         | 2.49163e-32 | 1.00000 | 2.49163e-32 | 1.00000 |
| rad36         | 4.54286e-33 | 1.00000 | 4.54286e-33 | 1.00000 |
| rad19syn      | 1.05342e-36 | 1.00000 | 1.05342e-36 | 1.00000 |
| rad52         | 1.23562e-40 | 1.00000 | 1.23562e-40 | 1.00000 |
| rad54         | 1.41607e-41 | 1.00000 | 1.41607e-41 | 1.00000 |
| PAH10+CH3     | 1.00802e-41 | 1.00000 | 1.00802e-41 | 1.00000 |
| rad43         | 2.32264e-42 | 1.00000 | 2.32264e-42 | 1.00000 |
| rad62         | 7.33007e-45 | 1.00000 | 7.33007e-45 | 1.00000 |
| rad51         | 7.73903e-48 | 1.00000 | 7.73903e-48 | 1.00000 |
| rad70         | 1.03167e-50 | 1.00000 | 1.03167e-50 | 1.00000 |
| PhcycC3H3_A+H | 4.45923e-51 | 1.00000 | 4.45923e-51 | 1.00000 |
| rad55         | 2.39605e-51 | 1.00000 | 2.39605e-51 | 1.00000 |
| rad65         | 6.03678e-53 | 1.00000 | 6.03678e-53 | 1.00000 |
| rad58         | 1.52413e-54 | 1.00000 | 1.52413e-54 | 1.00000 |
| PAH1+H        | 2.44651e-56 | 1.00000 | 2.44651e-56 | 1.00000 |
| rad34         | 1.68604e-58 | 1.00000 | 1.68604e-58 | 1.00000 |
| rad42         | 1.65441e-62 | 1.00000 | 1.65441e-62 | 1.00000 |
| rad41         | 3.15089e-63 | 1.00000 | 3.15089e-63 | 1.00000 |
| rad47         | 8.72653e-70 | 1.00000 | 8.72653e-70 | 1.00000 |

0.100000000E-07 Pa, 70.0000000 K

=====

| Rate constant      | True (fraction)        | Effective (fraction)   |
|--------------------|------------------------|------------------------|
| Total              | 1.17336e-24 (1.00 )    | 1.17336e-24 (1.00 )    |
| Formation of rad11 | 1.16857e-24 (0.996 )   | 1.16857e-24 (0.996 )   |
| Formation of rad6  | 4.79505e-27 (0.00409 ) | 4.79505e-27 (0.00409 ) |
| H-abstraction      | 5.89821e-31 (5.03e-07) | 5.89821e-31 (5.03e-07) |

| species            | PYtrue      | Cumul    | PYeffective | Cumul    |
|--------------------|-------------|----------|-------------|----------|
| Indene+H           | 0.985878    | 0.985878 | 0.985878    | 0.985878 |
| C2H2+PhCH2         | 0.00895092  | 0.994828 | 0.00895092  | 0.994828 |
| PhCCH+CH3          | 0.00257989  | 0.997408 | 0.00257989  | 0.997408 |
| PhCHCCH2+H         | 0.00159124  | 0.999000 | 0.00159124  | 0.999000 |
| PhCCCH3+H          | 0.000966814 | 0.999966 | 0.000966814 | 0.999966 |
| Ph+MeAc            | 1.70374e-05 | 0.999983 | 1.70374e-05 | 0.999983 |
| rad8               | 8.39494e-06 | 0.999992 | 8.39494e-06 | 0.999992 |
| rad9               | 4.12414e-06 | 0.999996 | 4.12414e-06 | 0.999996 |
| PAH7+H             | 2.41878e-06 | 0.999998 | 2.41878e-06 | 0.999998 |
| Benzene+2-propynyl | 5.02676e-07 | 0.999999 | 5.02676e-07 | 0.999999 |
| rad30              | 4.93875e-07 | 0.999999 | 4.93875e-07 | 0.999999 |
| rad12              | 2.90303e-07 | 1.000000 | 2.90303e-07 | 1.000000 |
| rad39              | 2.69233e-07 | 1.000000 | 2.69233e-07 | 1.000000 |
| Phenyl+Allene      | 1.48369e-07 | 1.000000 | 0.000000    | 1.000000 |
| PAH9+H             | 1.01588e-07 | 1.000000 | 1.01588e-07 | 1.000000 |
| rad15              | 9.09381e-08 | 1.000000 | 9.09381e-08 | 1.000000 |
| rad35              | 5.26534e-08 | 1.000000 | 5.26534e-08 | 1.000000 |

|               |             |         |             |         |
|---------------|-------------|---------|-------------|---------|
| rad38         | 2.64645e-08 | 1.00000 | 2.64645e-08 | 1.00000 |
| rad46         | 1.90209e-10 | 1.00000 | 1.90209e-10 | 1.00000 |
| rad60syn      | 5.38168e-12 | 1.00000 | 5.38168e-12 | 1.00000 |
| rad60anti     | 3.67497e-13 | 1.00000 | 3.67497e-13 | 1.00000 |
| PhCH2CCH+H    | 1.68851e-13 | 1.00000 | 1.68851e-13 | 1.00000 |
| rad6          | 1.26037e-13 | 1.00000 | 1.26037e-13 | 1.00000 |
| rad28         | 5.91910e-14 | 1.00000 | 5.91910e-14 | 1.00000 |
| rad37         | 2.03305e-14 | 1.00000 | 2.03305e-14 | 1.00000 |
| rad26         | 1.35979e-14 | 1.00000 | 1.35979e-14 | 1.00000 |
| rad2          | 1.44327e-16 | 1.00000 | 1.44327e-16 | 1.00000 |
| rad5          | 1.57198e-17 | 1.00000 | 1.57198e-17 | 1.00000 |
| rad1          | 9.19712e-18 | 1.00000 | 9.19712e-18 | 1.00000 |
| rad7          | 9.12743e-18 | 1.00000 | 9.12743e-18 | 1.00000 |
| rad10         | 6.84382e-18 | 1.00000 | 6.84382e-18 | 1.00000 |
| rad14         | 2.32172e-18 | 1.00000 | 2.32172e-18 | 1.00000 |
| rad11         | 2.26574e-18 | 1.00000 | 2.26574e-18 | 1.00000 |
| rad3          | 1.63307e-18 | 1.00000 | 1.63307e-18 | 1.00000 |
| rad25         | 1.14071e-18 | 1.00000 | 1.14071e-18 | 1.00000 |
| rad4          | 8.27326e-19 | 1.00000 | 8.27326e-19 | 1.00000 |
| rad27         | 1.31527e-19 | 1.00000 | 1.31527e-19 | 1.00000 |
| rad13         | 5.08662e-20 | 1.00000 | 5.08662e-20 | 1.00000 |
| PAH3+H        | 3.72333e-22 | 1.00000 | 3.72334e-22 | 1.00000 |
| rad59         | 1.99040e-22 | 1.00000 | 1.99040e-22 | 1.00000 |
| rad33         | 1.25421e-22 | 1.00000 | 1.25421e-22 | 1.00000 |
| rad50         | 7.20092e-23 | 1.00000 | 7.20092e-23 | 1.00000 |
| rad31         | 1.57209e-24 | 1.00000 | 1.57209e-24 | 1.00000 |
| rad20         | 7.16486e-26 | 1.00000 | 7.16486e-26 | 1.00000 |
| rad21         | 5.57607e-26 | 1.00000 | 5.57608e-26 | 1.00000 |
| rad18         | 1.98789e-28 | 1.00000 | 1.98789e-28 | 1.00000 |
| rad22         | 1.41917e-29 | 1.00000 | 1.41917e-29 | 1.00000 |
| rad23         | 7.76843e-30 | 1.00000 | 7.76843e-30 | 1.00000 |
| rad45         | 6.81861e-32 | 1.00000 | 6.81861e-32 | 1.00000 |
| rad24         | 2.26116e-32 | 1.00000 | 2.26116e-32 | 1.00000 |
| rad36         | 4.23347e-33 | 1.00000 | 4.23347e-33 | 1.00000 |
| rad19syn      | 2.18154e-35 | 1.00000 | 2.18154e-35 | 1.00000 |
| rad52         | 2.53275e-39 | 1.00000 | 2.53275e-39 | 1.00000 |
| rad54         | 3.12191e-40 | 1.00000 | 3.12191e-40 | 1.00000 |
| PAH10+CH3     | 2.29052e-40 | 1.00000 | 2.29052e-40 | 1.00000 |
| rad43         | 5.27466e-41 | 1.00000 | 5.27466e-41 | 1.00000 |
| rad62         | 1.72167e-43 | 1.00000 | 1.72167e-43 | 1.00000 |
| rad51         | 1.77103e-46 | 1.00000 | 1.77103e-46 | 1.00000 |
| rad70         | 2.58429e-49 | 1.00000 | 2.58429e-49 | 1.00000 |
| PhcycC3H3_A+H | 1.12684e-49 | 1.00000 | 1.12684e-49 | 1.00000 |
| rad55         | 6.04882e-50 | 1.00000 | 6.04883e-50 | 1.00000 |
| rad65         | 1.47266e-51 | 1.00000 | 1.47266e-51 | 1.00000 |
| rad58         | 3.88055e-53 | 1.00000 | 3.88055e-53 | 1.00000 |
| PAH1+H        | 6.76000e-55 | 1.00000 | 6.76000e-55 | 1.00000 |
| rad34         | 4.73009e-57 | 1.00000 | 4.73009e-57 | 1.00000 |
| rad42         | 6.62850e-61 | 1.00000 | 6.62850e-61 | 1.00000 |
| rad41         | 1.78775e-61 | 1.00000 | 1.78775e-61 | 1.00000 |
| rad47         | 1.97824e-68 | 1.00000 | 1.97824e-68 | 1.00000 |

0.100000000E-07 Pa, 80.0000000 K

=====

| Rate constant      | True (fraction)        | Effective (fraction)   |
|--------------------|------------------------|------------------------|
| Total              | 2.68112e-23 (1.00 )    | 2.68112e-23 (1.00 )    |
| Formation of rad11 | 2.65890e-23 (0.992 )   | 2.65889e-23 (0.992 )   |
| Formation of rad6  | 2.22189e-25 (0.00829 ) | 2.22189e-25 (0.00829 ) |
| H-abstraction      | 1.05871e-28 (3.95e-06) | 1.05871e-28 (3.95e-06) |

| species            | PYtrue      | Cumul    | PYeffective | Cumul    |
|--------------------|-------------|----------|-------------|----------|
| Indene+H           | 0.985363    | 0.985363 | 0.985364    | 0.985364 |
| C2H2+PhCH2         | 0.00919939  | 0.994563 | 0.00919939  | 0.994564 |
| PhCCH+CH3          | 0.00271723  | 0.997280 | 0.00271724  | 0.997281 |
| PhCHCCH2+H         | 0.00166287  | 0.998943 | 0.00166287  | 0.998944 |
| PhCCCH3+H          | 0.00101519  | 0.999958 | 0.00101519  | 0.999959 |
| Ph+MeAc            | 1.99948e-05 | 0.999978 | 1.99948e-05 | 0.999979 |
| rad8               | 8.95777e-06 | 0.999987 | 8.95778e-06 | 0.999988 |
| rad9               | 4.51491e-06 | 0.999991 | 4.51491e-06 | 0.999992 |
| Benzene+2-propynyl | 3.94877e-06 | 0.999995 | 3.94877e-06 | 0.999996 |
| PAH7+H             | 2.66788e-06 | 0.999998 | 2.66788e-06 | 0.999999 |
| rad30              | 5.13549e-07 | 0.999998 | 5.13549e-07 | 0.999999 |
| rad12              | 3.19532e-07 | 0.999999 | 3.19532e-07 | 1.000000 |
| rad39              | 3.10413e-07 | 0.999999 | 3.10413e-07 | 1.000000 |
| Phenyl+Allene      | 2.25646e-07 | 0.999999 | 0.000000    | 1.000000 |
| PAH9+H             | 1.06216e-07 | 0.999999 | 1.06216e-07 | 1.000000 |
| rad15              | 9.54267e-08 | 0.999999 | 9.54267e-08 | 1.000000 |
| rad35              | 5.47753e-08 | 1.000000 | 5.47753e-08 | 1.000000 |

|               |             |          |             |         |
|---------------|-------------|----------|-------------|---------|
| rad38         | 2.77932e-08 | 1.000000 | 2.77933e-08 | 1.00000 |
| rad46         | 2.06652e-10 | 1.000000 | 2.06652e-10 | 1.00000 |
| rad60syn      | 6.54537e-12 | 1.000000 | 6.54537e-12 | 1.00000 |
| PhCH2CCH+H    | 1.67904e-12 | 1.000000 | 1.67904e-12 | 1.00000 |
| rad60anti     | 6.70977e-13 | 1.000000 | 6.70977e-13 | 1.00000 |
| rad37         | 3.02079e-13 | 1.000000 | 3.02079e-13 | 1.00000 |
| rad6          | 8.91568e-14 | 1.000000 | 8.91568e-14 | 1.00000 |
| rad28         | 4.60490e-14 | 1.000000 | 4.60490e-14 | 1.00000 |
| rad26         | 1.06765e-14 | 1.000000 | 1.06765e-14 | 1.00000 |
| rad5          | 3.25253e-16 | 1.000000 | 3.25253e-16 | 1.00000 |
| rad2          | 1.09965e-16 | 1.000000 | 1.09965e-16 | 1.00000 |
| rad1          | 7.02691e-18 | 1.000000 | 7.02691e-18 | 1.00000 |
| rad7          | 6.46554e-18 | 1.000000 | 6.46554e-18 | 1.00000 |
| rad10         | 5.83831e-18 | 1.000000 | 5.83832e-18 | 1.00000 |
| rad14         | 1.85730e-18 | 1.000000 | 1.85730e-18 | 1.00000 |
| rad11         | 1.60948e-18 | 1.000000 | 1.60948e-18 | 1.00000 |
| rad3          | 1.11936e-18 | 1.000000 | 1.11936e-18 | 1.00000 |
| rad25         | 9.17657e-19 | 1.000000 | 9.17657e-19 | 1.00000 |
| rad4          | 5.67482e-19 | 1.000000 | 5.67482e-19 | 1.00000 |
| rad27         | 1.06459e-19 | 1.000000 | 1.06459e-19 | 1.00000 |
| rad13         | 3.60603e-20 | 1.000000 | 3.60603e-20 | 1.00000 |
| PAH3+H        | 1.74251e-20 | 1.000000 | 1.74251e-20 | 1.00000 |
| rad59         | 9.08292e-21 | 1.000000 | 9.08293e-21 | 1.00000 |
| rad50         | 2.22905e-21 | 1.000000 | 2.22905e-21 | 1.00000 |
| rad33         | 9.30709e-23 | 1.000000 | 9.30709e-23 | 1.00000 |
| rad31         | 1.49288e-24 | 1.000000 | 1.49288e-24 | 1.00000 |
| rad20         | 6.26557e-26 | 1.000000 | 6.26557e-26 | 1.00000 |
| rad21         | 4.89115e-26 | 1.000000 | 4.89116e-26 | 1.00000 |
| rad19syn      | 3.50614e-28 | 1.000000 | 3.50614e-28 | 1.00000 |
| rad18         | 1.70364e-28 | 1.000000 | 1.70364e-28 | 1.00000 |
| rad22         | 1.19761e-29 | 1.000000 | 1.19761e-29 | 1.00000 |
| rad23         | 6.83868e-30 | 1.000000 | 6.83868e-30 | 1.00000 |
| rad45         | 5.12397e-32 | 1.000000 | 5.12397e-32 | 1.00000 |
| rad52         | 3.70717e-32 | 1.000000 | 3.70717e-32 | 1.00000 |
| rad24         | 2.13023e-32 | 1.000000 | 2.13023e-32 | 1.00000 |
| rad36         | 3.17911e-33 | 1.000000 | 3.17911e-33 | 1.00000 |
| rad54         | 3.49091e-38 | 1.000000 | 3.49091e-38 | 1.00000 |
| PAH10+CH3     | 2.43958e-38 | 1.000000 | 2.43958e-38 | 1.00000 |
| rad43         | 5.61233e-39 | 1.000000 | 5.61233e-39 | 1.00000 |
| rad62         | 1.94491e-41 | 1.000000 | 1.94491e-41 | 1.00000 |
| rad51         | 2.05857e-44 | 1.000000 | 2.05857e-44 | 1.00000 |
| rad70         | 3.29968e-47 | 1.000000 | 3.29968e-47 | 1.00000 |
| PhcycC3H3_A+H | 1.45183e-47 | 1.000000 | 1.45183e-47 | 1.00000 |
| rad55         | 7.78519e-48 | 1.000000 | 7.78519e-48 | 1.00000 |
| rad65         | 1.82934e-49 | 1.000000 | 1.82934e-49 | 1.00000 |
| rad58         | 5.03855e-51 | 1.000000 | 5.03855e-51 | 1.00000 |
| PAH1+H        | 9.56469e-53 | 1.000000 | 9.56469e-53 | 1.00000 |
| rad34         | 6.78737e-55 | 1.000000 | 6.78738e-55 | 1.00000 |
| rad42         | 1.11817e-58 | 1.000000 | 1.11817e-58 | 1.00000 |
| rad41         | 3.34151e-59 | 1.000000 | 3.34151e-59 | 1.00000 |
| rad47         | 2.35424e-66 | 1.000000 | 2.35424e-66 | 1.00000 |

0.100000000E-07 Pa, 90.0000000 K

=====

| Rate constant      | True (fraction)        | Effective (fraction)   |
|--------------------|------------------------|------------------------|
| Total              | 3.08379e-22 (1.00 )    | 3.08379e-22 (1.00 )    |
| Formation of rad11 | 3.03962e-22 (0.986 )   | 3.03962e-22 (0.986 )   |
| Formation of rad6  | 4.41076e-24 (0.0143 )  | 4.41076e-24 (0.0143 )  |
| H-abstraction      | 5.92916e-27 (1.92e-05) | 5.92916e-27 (1.92e-05) |

| species            | PYtrue      | Cumul    | PYeffective | Cumul    |
|--------------------|-------------|----------|-------------|----------|
| Indene+H           | 0.984773    | 0.984773 | 0.984773    | 0.984773 |
| C2H2+PhCH2         | 0.00947687  | 0.994250 | 0.00947687  | 0.994250 |
| PhCCH+CH3          | 0.00287400  | 0.997124 | 0.00287400  | 0.997124 |
| PhCHCCH2+H         | 0.00174397  | 0.998868 | 0.00174397  | 0.998868 |
| PhCCCH3+H          | 0.00107007  | 0.999938 | 0.00107007  | 0.999938 |
| Ph+MeAc            | 2.36839e-05 | 0.999962 | 2.36839e-05 | 0.999962 |
| Benzene+2-propynyl | 1.92269e-05 | 0.999981 | 1.92269e-05 | 0.999981 |
| rad8               | 9.60688e-06 | 0.999990 | 9.60688e-06 | 0.999990 |
| rad9               | 4.97777e-06 | 0.999995 | 4.97777e-06 | 0.999995 |
| PAH7+H             | 2.96437e-06 | 0.999998 | 2.96437e-06 | 0.999998 |
| rad30              | 5.35849e-07 | 0.999999 | 5.35849e-07 | 0.999999 |
| rad39              | 3.61177e-07 | 0.999999 | 3.61177e-07 | 0.999999 |
| rad12              | 3.54057e-07 | 1.000000 | 3.54057e-07 | 1.000000 |
| Phenyl+Allene      | 3.35704e-07 | 1.000000 | 0.000000    | 1.000000 |
| PAH9+H             | 1.11519e-07 | 1.000000 | 1.11519e-07 | 1.000000 |
| rad15              | 1.00569e-07 | 1.000000 | 1.00569e-07 | 1.000000 |
| rad35              | 5.71905e-08 | 1.000000 | 5.71906e-08 | 1.000000 |



|               |             |         |             |          |
|---------------|-------------|---------|-------------|----------|
| rad38         | 2.93239e-08 | 1.00000 | 2.93239e-08 | 1.000000 |
| rad46         | 2.26380e-10 | 1.00000 | 2.26381e-10 | 1.000000 |
| PhCH2CCH+H    | 1.03766e-11 | 1.00000 | 1.03766e-11 | 1.000000 |
| rad60syn      | 8.08805e-12 | 1.00000 | 8.08805e-12 | 1.000000 |
| rad37         | 2.40347e-12 | 1.00000 | 2.40347e-12 | 1.000000 |
| rad60anti     | 1.09982e-12 | 1.00000 | 1.09982e-12 | 1.000000 |
| rad6          | 6.53921e-14 | 1.00000 | 6.53922e-14 | 1.000000 |
| rad28         | 3.64928e-14 | 1.00000 | 3.64928e-14 | 1.000000 |
| rad26         | 8.52377e-15 | 1.00000 | 8.52377e-15 | 1.000000 |
| rad5          | 3.47577e-15 | 1.00000 | 3.47578e-15 | 1.000000 |
| rad2          | 9.18346e-17 | 1.00000 | 9.18346e-17 | 1.000000 |
| rad1          | 5.88644e-18 | 1.00000 | 5.88644e-18 | 1.000000 |
| rad10         | 4.97973e-18 | 1.00000 | 4.97973e-18 | 1.000000 |
| rad7          | 4.74918e-18 | 1.00000 | 4.74918e-18 | 1.000000 |
| rad14         | 1.51093e-18 | 1.00000 | 1.51093e-18 | 1.000000 |
| rad11         | 1.18566e-18 | 1.00000 | 1.18566e-18 | 1.000000 |
| rad3          | 1.01927e-18 | 1.00000 | 1.01927e-18 | 1.000000 |
| rad25         | 7.50959e-19 | 1.00000 | 7.50959e-19 | 1.000000 |
| rad4          | 5.17152e-19 | 1.00000 | 5.17152e-19 | 1.000000 |
| PAH3+H        | 3.47530e-19 | 1.00000 | 3.47530e-19 | 1.000000 |
| rad59         | 1.74970e-19 | 1.00000 | 1.74970e-19 | 1.000000 |
| rad27         | 8.77083e-20 | 1.00000 | 8.77083e-20 | 1.000000 |
| rad50         | 3.24534e-20 | 1.00000 | 3.24534e-20 | 1.000000 |
| rad13         | 2.65103e-20 | 1.00000 | 2.65103e-20 | 1.000000 |
| rad33         | 7.17557e-23 | 1.00000 | 7.17557e-23 | 1.000000 |
| rad31         | 1.46870e-24 | 1.00000 | 1.46870e-24 | 1.000000 |
| rad19syn      | 1.46098e-25 | 1.00000 | 1.46098e-25 | 1.000000 |
| rad20         | 5.60705e-26 | 1.00000 | 5.60705e-26 | 1.000000 |
| rad21         | 4.39170e-26 | 1.00000 | 4.39171e-26 | 1.000000 |
| rad18         | 1.49125e-28 | 1.00000 | 1.49125e-28 | 1.000000 |
| rad52         | 1.23076e-29 | 1.00000 | 1.23076e-29 | 1.000000 |
| rad22         | 1.03114e-29 | 1.00000 | 1.03114e-29 | 1.000000 |
| rad54         | 6.85400e-30 | 1.00000 | 6.85400e-30 | 1.000000 |
| rad23         | 6.34312e-30 | 1.00000 | 6.34313e-30 | 1.000000 |
| PAH10+CH3     | 3.92949e-30 | 1.00000 | 3.92950e-30 | 1.000000 |
| rad43         | 9.86339e-31 | 1.00000 | 9.86339e-31 | 1.000000 |
| rad45         | 5.16880e-32 | 1.00000 | 5.16880e-32 | 1.000000 |
| rad24         | 2.06467e-32 | 1.00000 | 2.06467e-32 | 1.000000 |
| rad36         | 3.20512e-33 | 1.00000 | 3.20512e-33 | 1.000000 |
| rad62         | 7.45638e-39 | 1.00000 | 7.45639e-39 | 1.000000 |
| rad51         | 8.13632e-42 | 1.00000 | 8.13632e-42 | 1.000000 |
| rad70         | 1.43688e-44 | 1.00000 | 1.43689e-44 | 1.000000 |
| PhcycC3H3_A+H | 6.38007e-45 | 1.00000 | 6.38007e-45 | 1.000000 |
| rad55         | 3.41746e-45 | 1.00000 | 3.41747e-45 | 1.000000 |
| rad65         | 7.73697e-47 | 1.00000 | 7.73697e-47 | 1.000000 |
| rad58         | 2.23135e-48 | 1.00000 | 2.23135e-48 | 1.000000 |
| PAH1+H        | 4.59904e-50 | 1.00000 | 4.59904e-50 | 1.000000 |
| rad34         | 3.31278e-52 | 1.00000 | 3.31278e-52 | 1.000000 |
| rad42         | 5.22349e-56 | 1.00000 | 5.22349e-56 | 1.000000 |
| rad41         | 1.49027e-56 | 1.00000 | 1.49027e-56 | 1.000000 |
| rad47         | 9.71396e-64 | 1.00000 | 9.71396e-64 | 1.000000 |

0.100000000E-07 Pa, 100.000000 K

=====

| Rate constant      | True (fraction)        | Effective (fraction)   |
|--------------------|------------------------|------------------------|
| Total              | 2.19347e-21 (1.00 )    | 2.19347e-21 (1.00 )    |
| Formation of rad11 | 2.14498e-21 (0.978 )   | 2.14497e-21 (0.978 )   |
| Formation of rad6  | 4.83503e-23 (0.0220 )  | 4.83503e-23 (0.0220 )  |
| H-abstraction      | 1.47101e-25 (6.71e-05) | 1.47101e-25 (6.71e-05) |

| species            | PYtrue      | Cumul    | PYeffective | Cumul    |
|--------------------|-------------|----------|-------------|----------|
| Indene+H           | 0.984079    | 0.984079 | 0.984079    | 0.984079 |
| C2H2+PhCH2         | 0.00978517  | 0.993864 | 0.00978517  | 0.993864 |
| PhCCH+CH3          | 0.00305204  | 0.996916 | 0.00305205  | 0.996916 |
| PhCHCCH2+H         | 0.00183526  | 0.998751 | 0.00183526  | 0.998751 |
| PhCCCH3+H          | 0.00113197  | 0.999883 | 0.00113197  | 0.999883 |
| Benzene+2-propynyl | 6.70630e-05 | 0.999951 | 6.70630e-05 | 0.999951 |
| Ph+MeAc            | 2.82650e-05 | 0.999979 | 2.82650e-05 | 0.999979 |
| rad8               | 1.03515e-05 | 0.999989 | 1.03515e-05 | 0.999989 |
| rad9               | 5.52401e-06 | 0.999995 | 5.52401e-06 | 0.999995 |
| PAH7+H             | 3.31663e-06 | 0.999998 | 3.31664e-06 | 0.999998 |
| rad30              | 5.61023e-07 | 0.999999 | 5.61023e-07 | 0.999999 |
| Phenyl+Allene      | 4.90181e-07 | 0.999999 | 0.00000     | 0.999999 |
| rad39              | 4.23538e-07 | 0.999999 | 4.23538e-07 | 0.999999 |
| rad12              | 3.94675e-07 | 1.000000 | 3.94676e-07 | 0.999999 |
| PAH9+H             | 1.17578e-07 | 1.000000 | 1.17578e-07 | 0.999999 |
| rad15              | 1.06440e-07 | 1.00000  | 1.06440e-07 | 1.000000 |
| rad35              | 5.99301e-08 | 1.00000  | 5.99301e-08 | 1.000000 |

|               |             |         |             |          |
|---------------|-------------|---------|-------------|----------|
| rad38         | 3.10826e-08 | 1.00000 | 3.10827e-08 | 1.000000 |
| rad46         | 2.50021e-10 | 1.00000 | 2.50021e-10 | 1.000000 |
| PhCH2CCH+H    | 4.60547e-11 | 1.00000 | 4.60547e-11 | 1.000000 |
| rad37         | 1.24003e-11 | 1.00000 | 1.24003e-11 | 1.000000 |
| rad60syn      | 1.01171e-11 | 1.00000 | 1.01172e-11 | 1.000000 |
| rad60anti     | 1.68510e-12 | 1.00000 | 1.68510e-12 | 1.000000 |
| rad6          | 4.92558e-14 | 1.00000 | 4.92558e-14 | 1.000000 |
| rad28         | 2.93064e-14 | 1.00000 | 2.93064e-14 | 1.000000 |
| rad5          | 2.34974e-14 | 1.00000 | 2.34974e-14 | 1.000000 |
| rad26         | 6.88783e-15 | 1.00000 | 6.88783e-15 | 1.000000 |
| rad2          | 1.01120e-16 | 1.00000 | 1.01120e-16 | 1.000000 |
| rad1          | 6.50347e-18 | 1.00000 | 6.50347e-18 | 1.000000 |
| rad10         | 4.43894e-18 | 1.00000 | 4.43894e-18 | 1.000000 |
| PAH3+H        | 3.83495e-18 | 1.00000 | 3.83495e-18 | 1.000000 |
| rad7          | 3.58284e-18 | 1.00000 | 3.58285e-18 | 1.000000 |
| rad59         | 1.85459e-18 | 1.00000 | 1.85460e-18 | 1.000000 |
| rad14         | 1.24435e-18 | 1.00000 | 1.24435e-18 | 1.000000 |
| rad3          | 1.19333e-18 | 1.00000 | 1.19333e-18 | 1.000000 |
| rad11         | 8.97185e-19 | 1.00000 | 8.97186e-19 | 1.000000 |
| rad25         | 6.22306e-19 | 1.00000 | 6.22307e-19 | 1.000000 |
| rad4          | 6.06004e-19 | 1.00000 | 6.06004e-19 | 1.000000 |
| rad50         | 2.80692e-19 | 1.00000 | 2.80692e-19 | 1.000000 |
| rad27         | 7.32110e-20 | 1.00000 | 7.32111e-20 | 1.000000 |
| rad13         | 2.00182e-20 | 1.00000 | 2.00182e-20 | 1.000000 |
| rad33         | 5.69504e-23 | 1.00000 | 5.69505e-23 | 1.000000 |
| rad19syn      | 1.69256e-23 | 1.00000 | 1.69256e-23 | 1.000000 |
| rad31         | 1.48860e-24 | 1.00000 | 1.48860e-24 | 1.000000 |
| rad20         | 5.10734e-26 | 1.00000 | 5.10734e-26 | 1.000000 |
| rad21         | 4.01466e-26 | 1.00000 | 4.01466e-26 | 1.000000 |
| rad54         | 3.44316e-27 | 1.00000 | 3.44316e-27 | 1.000000 |
| PAH10+CH3     | 2.22551e-27 | 1.00000 | 2.22552e-27 | 1.000000 |
| rad52         | 1.20084e-27 | 1.00000 | 1.20084e-27 | 1.000000 |
| rad43         | 5.29879e-28 | 1.00000 | 5.29880e-28 | 1.000000 |
| rad18         | 1.32616e-28 | 1.00000 | 1.32616e-28 | 1.000000 |
| rad22         | 9.01063e-30 | 1.00000 | 9.01063e-30 | 1.000000 |
| rad62         | 6.92562e-30 | 1.00000 | 6.92563e-30 | 1.000000 |
| rad23         | 6.19444e-30 | 1.00000 | 6.19444e-30 | 1.000000 |
| rad45         | 5.66194e-32 | 1.00000 | 5.66194e-32 | 1.000000 |
| rad24         | 2.04665e-32 | 1.00000 | 2.04665e-32 | 1.000000 |
| rad51         | 7.64880e-33 | 1.00000 | 7.64881e-33 | 1.000000 |
| rad36         | 3.50950e-33 | 1.00000 | 3.50950e-33 | 1.000000 |
| rad70         | 1.30428e-41 | 1.00000 | 1.30428e-41 | 1.000000 |
| PhcycC3H3_A+H | 5.84620e-42 | 1.00000 | 5.84620e-42 | 1.000000 |
| rad55         | 3.12785e-42 | 1.00000 | 3.12785e-42 | 1.000000 |
| rad65         | 6.80770e-44 | 1.00000 | 6.80771e-44 | 1.000000 |
| rad58         | 2.06092e-45 | 1.00000 | 2.06092e-45 | 1.000000 |
| PAH1+H        | 4.61601e-47 | 1.00000 | 4.61601e-47 | 1.000000 |
| rad34         | 3.37656e-49 | 1.00000 | 3.37656e-49 | 1.000000 |
| rad42         | 4.72659e-53 | 1.00000 | 4.72659e-53 | 1.000000 |
| rad41         | 1.17343e-53 | 1.00000 | 1.17343e-53 | 1.000000 |
| rad47         | 8.46297e-61 | 1.00000 | 8.46297e-61 | 1.000000 |

0.100000000E-07 Pa, 110.000000 K

=====

| Rate constant      | True (fraction)        | Effective (fraction)   |
|--------------------|------------------------|------------------------|
| Total              | 1.09987e-20 (1.00 )    | 1.09987e-20 (1.00 )    |
| Formation of rad11 | 1.06527e-20 (0.969 )   | 1.06526e-20 (0.969 )   |
| Formation of rad6  | 3.44008e-22 (0.0313 )  | 3.44007e-22 (0.0313 )  |
| H-abstraction      | 2.02040e-24 (0.000184) | 2.02040e-24 (0.000184) |

| species            | PYtrue      | Cumul    | PYeffective | Cumul    |
|--------------------|-------------|----------|-------------|----------|
| Indene+H           | 0.983241    | 0.983241 | 0.983241    | 0.983241 |
| C2H2+PhCH2         | 0.0101259   | 0.993367 | 0.0101259   | 0.993367 |
| PhCCH+CH3          | 0.00325306  | 0.996620 | 0.00325306  | 0.996620 |
| PhCHCCH2+H         | 0.00193739  | 0.998558 | 0.00193739  | 0.998558 |
| PhCCCH3+H          | 0.00120137  | 0.999759 | 0.00120137  | 0.999759 |
| Benzene+2-propynyl | 0.000183695 | 0.999943 | 0.000183695 | 0.999943 |
| Ph+MeAc            | 3.39186e-05 | 0.999977 | 3.39186e-05 | 0.999977 |
| rad8               | 1.12010e-05 | 0.999988 | 1.12010e-05 | 0.999988 |
| rad9               | 6.16606e-06 | 0.999994 | 6.16606e-06 | 0.999994 |
| PAH7+H             | 3.73399e-06 | 0.999998 | 3.73400e-06 | 0.999998 |
| Phenyl+Allene      | 7.03848e-07 | 0.999999 | 0.00000     | 0.999998 |
| rad30              | 5.89324e-07 | 0.999999 | 5.89324e-07 | 0.999998 |
| rad39              | 4.99784e-07 | 1.000000 | 4.99784e-07 | 0.999999 |
| rad12              | 4.42197e-07 | 1.000000 | 4.42197e-07 | 0.999999 |
| PAH9+H             | 1.24478e-07 | 1.000000 | 1.24478e-07 | 0.999999 |
| rad15              | 1.13116e-07 | 1.000000 | 1.13116e-07 | 1.000000 |
| rad35              | 6.30257e-08 | 1.000000 | 6.30258e-08 | 1.000000 |

|               |             |         |             |          |
|---------------|-------------|---------|-------------|----------|
| rad38         | 3.30971e-08 | 1.00000 | 3.30971e-08 | 1.000000 |
| rad46         | 2.78305e-10 | 1.00000 | 2.78305e-10 | 1.000000 |
| PhCH2CCH+H    | 1.60863e-10 | 1.00000 | 1.60863e-10 | 1.000000 |
| rad37         | 4.68308e-11 | 1.00000 | 4.68308e-11 | 1.000000 |
| rad60syn      | 1.27711e-11 | 1.00000 | 1.27711e-11 | 1.000000 |
| rad60anti     | 2.47072e-12 | 1.00000 | 2.47072e-12 | 1.000000 |
| rad5          | 1.14181e-13 | 1.00000 | 1.14181e-13 | 1.000000 |
| rad6          | 3.78558e-14 | 1.00000 | 3.78558e-14 | 1.000000 |
| rad28         | 2.37655e-14 | 1.00000 | 2.37655e-14 | 1.000000 |
| rad26         | 5.61558e-15 | 1.00000 | 5.61558e-15 | 1.000000 |
| rad2          | 7.02880e-17 | 1.00000 | 7.02881e-17 | 1.000000 |
| PAH3+H        | 2.76229e-17 | 1.00000 | 2.76229e-17 | 1.000000 |
| rad59         | 1.27985e-17 | 1.00000 | 1.27985e-17 | 1.000000 |
| rad1          | 4.53714e-18 | 1.00000 | 4.53714e-18 | 1.000000 |
| rad10         | 3.79836e-18 | 1.00000 | 3.79836e-18 | 1.000000 |
| rad7          | 2.75812e-18 | 1.00000 | 2.75812e-18 | 1.000000 |
| rad50         | 1.67195e-18 | 1.00000 | 1.67195e-18 | 1.000000 |
| rad14         | 1.03424e-18 | 1.00000 | 1.03424e-18 | 1.000000 |
| rad3          | 8.05856e-19 | 1.00000 | 8.05857e-19 | 1.000000 |
| rad11         | 6.92852e-19 | 1.00000 | 6.92852e-19 | 1.000000 |
| rad25         | 5.20575e-19 | 1.00000 | 5.20575e-19 | 1.000000 |
| rad4          | 4.09634e-19 | 1.00000 | 4.09635e-19 | 1.000000 |
| rad27         | 6.17169e-20 | 1.00000 | 6.17169e-20 | 1.000000 |
| rad13         | 1.54255e-20 | 1.00000 | 1.54255e-20 | 1.000000 |
| rad19syn      | 8.11793e-22 | 1.00000 | 8.11794e-22 | 1.000000 |
| rad33         | 4.62443e-23 | 1.00000 | 4.62443e-23 | 1.000000 |
| rad31         | 1.54868e-24 | 1.00000 | 1.54868e-24 | 1.000000 |
| rad54         | 3.80819e-25 | 1.00000 | 3.80819e-25 | 1.000000 |
| PAH10+CH3     | 2.48851e-25 | 1.00000 | 2.48851e-25 | 1.000000 |
| rad43         | 5.95378e-26 | 1.00000 | 5.95378e-26 | 1.000000 |
| rad52         | 5.03875e-26 | 1.00000 | 5.03875e-26 | 1.000000 |
| rad20         | 4.71790e-26 | 1.00000 | 4.71790e-26 | 1.000000 |
| rad21         | 3.72279e-26 | 1.00000 | 3.72279e-26 | 1.000000 |
| rad62         | 1.37871e-27 | 1.00000 | 1.37871e-27 | 1.000000 |
| rad18         | 1.19380e-28 | 1.00000 | 1.19380e-28 | 1.000000 |
| rad22         | 7.96231e-30 | 1.00000 | 7.96231e-30 | 1.000000 |
| rad23         | 6.38003e-30 | 1.00000 | 6.38004e-30 | 1.000000 |
| rad51         | 1.43630e-30 | 1.00000 | 1.43630e-30 | 1.000000 |
| rad45         | 5.87338e-32 | 1.00000 | 5.87338e-32 | 1.000000 |
| rad24         | 2.06677e-32 | 1.00000 | 2.06677e-32 | 1.000000 |
| rad36         | 3.63976e-33 | 1.00000 | 3.63976e-33 | 1.000000 |
| rad65         | 1.70795e-34 | 1.00000 | 1.70796e-34 | 1.000000 |
| rad70         | 1.18251e-38 | 1.00000 | 1.18251e-38 | 1.000000 |
| PhcycC3H3_A+H | 5.35274e-39 | 1.00000 | 5.35275e-39 | 1.000000 |
| rad55         | 2.86021e-39 | 1.00000 | 2.86021e-39 | 1.000000 |
| rad58         | 1.90249e-42 | 1.00000 | 1.90250e-42 | 1.000000 |
| PAH1+H        | 4.64353e-44 | 1.00000 | 4.64353e-44 | 1.000000 |
| rad34         | 3.45432e-46 | 1.00000 | 3.45433e-46 | 1.000000 |
| rad42         | 4.47797e-50 | 1.00000 | 4.47797e-50 | 1.000000 |
| rad41         | 9.57164e-51 | 1.00000 | 9.57165e-51 | 1.000000 |
| rad47         | 7.45865e-58 | 1.00000 | 7.45866e-58 | 1.000000 |

0.100000000E-07 Pa, 120.000000 K

=====

| Rate constant      | True (fraction)        | Effective (fraction)   |
|--------------------|------------------------|------------------------|
| Total              | 4.24245e-20 (1.00 )    | 4.24245e-20 (1.00 )    |
| Formation of rad11 | 4.06372e-20 (0.958 )   | 4.06372e-20 (0.958 )   |
| Formation of rad6  | 1.76944e-21 (0.0417 )  | 1.76944e-21 (0.0417 )  |
| H-abstraction      | 1.78210e-23 (0.000420) | 1.78210e-23 (0.000420) |

| species            | PYtrue      | Cumul    | PYeffective | Cumul    |
|--------------------|-------------|----------|-------------|----------|
| Indene+H           | 0.982204    | 0.982204 | 0.982205    | 0.982205 |
| C2H2+PhCH2         | 0.0105006   | 0.992705 | 0.0105006   | 0.992706 |
| PhCCH+CH3          | 0.00347862  | 0.996183 | 0.00347862  | 0.996184 |
| PhCHCCH2+H         | 0.00205094  | 0.998234 | 0.00205094  | 0.998235 |
| PhCCCH3+H          | 0.00127864  | 0.999513 | 0.00127864  | 0.999514 |
| Benzene+2-propynyl | 0.000420064 | 0.999933 | 0.000420064 | 0.999934 |
| Ph+MeAc            | 4.08463e-05 | 0.999974 | 4.08463e-05 | 0.999975 |
| rad8               | 1.21641e-05 | 0.999986 | 1.21641e-05 | 0.999987 |
| rad9               | 6.91729e-06 | 0.999993 | 6.91730e-06 | 0.999994 |
| PAH7+H             | 4.22673e-06 | 0.999997 | 4.22673e-06 | 0.999998 |
| Phenyl+Allene      | 9.95355e-07 | 0.999998 | 0.00000     | 0.999998 |
| rad30              | 6.20990e-07 | 0.999999 | 6.20991e-07 | 0.999999 |
| rad39              | 5.92508e-07 | 0.999999 | 5.92508e-07 | 0.999999 |
| rad12              | 4.97452e-07 | 1.000000 | 4.97453e-07 | 1.000000 |
| PAH9+H             | 1.32306e-07 | 1.00000  | 1.32306e-07 | 1.00000  |
| rad15              | 1.20677e-07 | 1.00000  | 1.20678e-07 | 1.00000  |
| rad35              | 6.65094e-08 | 1.00000  | 6.65095e-08 | 1.00000  |

|               |             |         |             |         |
|---------------|-------------|---------|-------------|---------|
| rad38         | 3.53966e-08 | 1.00000 | 3.53967e-08 | 1.00000 |
| PhCH2CCH+H    | 4.69873e-10 | 1.00000 | 4.69873e-10 | 1.00000 |
| rad46         | 3.12071e-10 | 1.00000 | 3.12071e-10 | 1.00000 |
| rad37         | 1.40301e-10 | 1.00000 | 1.40301e-10 | 1.00000 |
| rad60syn      | 1.62207e-11 | 1.00000 | 1.62207e-11 | 1.00000 |
| rad60anti     | 3.51574e-12 | 1.00000 | 3.51575e-12 | 1.00000 |
| rad5          | 4.33873e-13 | 1.00000 | 4.33873e-13 | 1.00000 |
| rad6          | 2.95512e-14 | 1.00000 | 2.95513e-14 | 1.00000 |
| rad28         | 1.94125e-14 | 1.00000 | 1.94125e-14 | 1.00000 |
| rad26         | 4.60882e-15 | 1.00000 | 4.60883e-15 | 1.00000 |
| PAH3+H        | 1.44941e-16 | 1.00000 | 1.44941e-16 | 1.00000 |
| rad59         | 6.43048e-17 | 1.00000 | 6.43048e-17 | 1.00000 |
| rad2          | 6.34379e-17 | 1.00000 | 6.34380e-17 | 1.00000 |
| rad50         | 7.56388e-18 | 1.00000 | 7.56389e-18 | 1.00000 |
| rad1          | 4.11139e-18 | 1.00000 | 4.11139e-18 | 1.00000 |
| rad10         | 3.29311e-18 | 1.00000 | 3.29311e-18 | 1.00000 |
| rad7          | 2.15674e-18 | 1.00000 | 2.15674e-18 | 1.00000 |
| rad14         | 8.65627e-19 | 1.00000 | 8.65628e-19 | 1.00000 |
| rad3          | 7.48665e-19 | 1.00000 | 7.48666e-19 | 1.00000 |
| rad11         | 5.43582e-19 | 1.00000 | 5.43582e-19 | 1.00000 |
| rad25         | 4.38630e-19 | 1.00000 | 4.38630e-19 | 1.00000 |
| rad4          | 3.80969e-19 | 1.00000 | 3.80969e-19 | 1.00000 |
| rad27         | 5.24264e-20 | 1.00000 | 5.24264e-20 | 1.00000 |
| rad19syn      | 2.03478e-20 | 1.00000 | 2.03479e-20 | 1.00000 |
| rad13         | 1.20746e-20 | 1.00000 | 1.20746e-20 | 1.00000 |
| rad33         | 3.82553e-23 | 1.00000 | 3.82554e-23 | 1.00000 |
| rad54         | 1.78868e-23 | 1.00000 | 1.78868e-23 | 1.00000 |
| PAH10+CH3     | 1.18111e-23 | 1.00000 | 1.18111e-23 | 1.00000 |
| rad43         | 2.84069e-24 | 1.00000 | 2.84069e-24 | 1.00000 |
| rad31         | 1.64986e-24 | 1.00000 | 1.64986e-24 | 1.00000 |
| rad52         | 1.13261e-24 | 1.00000 | 1.13261e-24 | 1.00000 |
| rad62         | 1.01744e-25 | 1.00000 | 1.01744e-25 | 1.00000 |
| rad20         | 4.40859e-26 | 1.00000 | 4.40859e-26 | 1.00000 |
| rad21         | 3.49293e-26 | 1.00000 | 3.49293e-26 | 1.00000 |
| rad18         | 1.08505e-28 | 1.00000 | 1.08505e-28 | 1.00000 |
| rad51         | 1.05156e-28 | 1.00000 | 1.05156e-28 | 1.00000 |
| rad70         | 3.03478e-29 | 1.00000 | 3.03479e-29 | 1.00000 |
| PhcycC3H3_A+H | 1.82703e-29 | 1.00000 | 1.82703e-29 | 1.00000 |
| rad55         | 1.01624e-29 | 1.00000 | 1.01625e-29 | 1.00000 |
| rad22         | 7.09680e-30 | 1.00000 | 7.09681e-30 | 1.00000 |
| rad23         | 6.96654e-30 | 1.00000 | 6.96655e-30 | 1.00000 |
| rad45         | 8.55148e-32 | 1.00000 | 8.55149e-32 | 1.00000 |
| rad65         | 3.61495e-32 | 1.00000 | 3.61495e-32 | 1.00000 |
| rad24         | 2.12046e-32 | 1.00000 | 2.12047e-32 | 1.00000 |
| rad58         | 8.74392e-33 | 1.00000 | 8.74393e-33 | 1.00000 |
| rad36         | 5.29921e-33 | 1.00000 | 5.29922e-33 | 1.00000 |
| PAH1+H        | 5.48719e-41 | 1.00000 | 5.48719e-41 | 1.00000 |
| rad34         | 4.15176e-43 | 1.00000 | 4.15176e-43 | 1.00000 |
| rad42         | 5.03722e-47 | 1.00000 | 5.03722e-47 | 1.00000 |
| rad41         | 8.80851e-48 | 1.00000 | 8.80852e-48 | 1.00000 |
| rad47         | 7.77706e-55 | 1.00000 | 7.77707e-55 | 1.00000 |

0.100000000E-07 Pa, 130.000000 K

=====

| Rate constant      | True (fraction)        | Effective (fraction)   |
|--------------------|------------------------|------------------------|
| Total              | 1.33719e-19 (1.00 )    | 1.33719e-19 (1.00 )    |
| Formation of rad11 | 1.26517e-19 (0.946 )   | 1.26517e-19 (0.946 )   |
| Formation of rad6  | 7.08974e-21 (0.0530 )  | 7.08973e-21 (0.0530 )  |
| H-abstraction      | 1.11864e-22 (0.000837) | 1.11864e-22 (0.000837) |

| species            | PYtrue      | Cumul    | PYeffective | Cumul    |
|--------------------|-------------|----------|-------------|----------|
| Indene+H           | 0.980904    | 0.980904 | 0.980906    | 0.980906 |
| C2H2+PhCH2         | 0.0109101   | 0.991814 | 0.0109102   | 0.991816 |
| PhCCH+CH3          | 0.00373014  | 0.995544 | 0.00373014  | 0.995546 |
| PhCHCCH2+H         | 0.00217634  | 0.997720 | 0.00217634  | 0.997722 |
| PhCCCH3+H          | 0.00136409  | 0.999084 | 0.00136410  | 0.999086 |
| Benzene+2-propynyl | 0.000836559 | 0.999921 | 0.000836560 | 0.999923 |
| Ph+MeAc            | 4.92740e-05 | 0.999970 | 4.92741e-05 | 0.999972 |
| rad8               | 1.32492e-05 | 0.999983 | 1.32492e-05 | 0.999986 |
| rad9               | 7.79231e-06 | 0.999991 | 7.79232e-06 | 0.999993 |
| PAH7+H             | 4.80625e-06 | 0.999996 | 4.80626e-06 | 0.999998 |
| Phenyl+Allene      | 1.38826e-06 | 0.999997 | 0.00000     | 0.999998 |
| rad39              | 7.04672e-07 | 0.999998 | 7.04673e-07 | 0.999999 |
| rad30              | 6.56263e-07 | 0.999999 | 6.56264e-07 | 1.000000 |
| rad12              | 5.61298e-07 | 0.999999 | 5.61299e-07 | 1.000000 |
| PAH9+H             | 1.41158e-07 | 0.999999 | 1.41158e-07 | 1.000000 |
| rad15              | 1.29207e-07 | 1.000000 | 1.29207e-07 | 1.000000 |
| rad35              | 7.04138e-08 | 1.000000 | 7.04139e-08 | 1.000000 |

|               |             |          |             |          |
|---------------|-------------|----------|-------------|----------|
| rad38         | 3.80131e-08 | 1.000000 | 3.80131e-08 | 1.000000 |
| PhCH2CCH+H    | 1.19679e-09 | 1.000000 | 1.19679e-09 | 1.000000 |
| rad37         | 3.52437e-10 | 1.000000 | 3.52437e-10 | 1.000000 |
| rad46         | 3.52310e-10 | 1.000000 | 3.52310e-10 | 1.000000 |
| rad60syn      | 2.06767e-11 | 1.000000 | 2.06767e-11 | 1.000000 |
| rad60anti     | 4.89746e-12 | 1.000000 | 4.89747e-12 | 1.000000 |
| rad5          | 1.36589e-12 | 1.000000 | 1.36589e-12 | 1.000000 |
| rad6          | 2.33542e-14 | 1.000000 | 2.33542e-14 | 1.000000 |
| rad28         | 1.59439e-14 | 1.000000 | 1.59439e-14 | 1.000000 |
| rad26         | 3.80160e-15 | 1.000000 | 3.80161e-15 | 1.000000 |
| PAH3+H        | 5.97639e-16 | 1.000000 | 5.97640e-16 | 1.000000 |
| rad59         | 2.54058e-16 | 1.000000 | 2.54059e-16 | 1.000000 |
| rad2          | 5.94597e-17 | 1.000000 | 5.94598e-17 | 1.000000 |
| rad50         | 2.77957e-17 | 1.000000 | 2.77958e-17 | 1.000000 |
| rad1          | 3.87024e-18 | 1.000000 | 3.87025e-18 | 1.000000 |
| rad10         | 3.38893e-18 | 1.000000 | 3.38893e-18 | 1.000000 |
| rad7          | 1.70749e-18 | 1.000000 | 1.70749e-18 | 1.000000 |
| rad3          | 7.75905e-19 | 1.000000 | 7.75907e-19 | 1.000000 |
| rad14         | 7.28442e-19 | 1.000000 | 7.28443e-19 | 1.000000 |
| rad11         | 4.31858e-19 | 1.000000 | 4.31859e-19 | 1.000000 |
| rad4          | 3.95289e-19 | 1.000000 | 3.95290e-19 | 1.000000 |
| rad25         | 3.71675e-19 | 1.000000 | 3.71675e-19 | 1.000000 |
| rad19syn      | 3.10954e-19 | 1.000000 | 3.10954e-19 | 1.000000 |
| rad27         | 4.48043e-20 | 1.000000 | 4.48044e-20 | 1.000000 |
| rad13         | 9.57006e-21 | 1.000000 | 9.57008e-21 | 1.000000 |
| rad54         | 4.59070e-22 | 1.000000 | 4.59071e-22 | 1.000000 |
| PAH10+CH3     | 3.05745e-22 | 1.000000 | 3.05745e-22 | 1.000000 |
| rad43         | 7.38552e-23 | 1.000000 | 7.38553e-23 | 1.000000 |
| rad33         | 3.21440e-23 | 1.000000 | 3.21441e-23 | 1.000000 |
| rad52         | 1.58221e-23 | 1.000000 | 1.58221e-23 | 1.000000 |
| rad62         | 3.62270e-24 | 1.000000 | 3.62270e-24 | 1.000000 |
| rad31         | 1.79709e-24 | 1.000000 | 1.79710e-24 | 1.000000 |
| rad20         | 4.15980e-26 | 1.000000 | 4.15981e-26 | 1.000000 |
| rad21         | 3.31014e-26 | 1.000000 | 3.31014e-26 | 1.000000 |
| rad51         | 3.73373e-27 | 1.000000 | 3.73373e-27 | 1.000000 |
| rad70         | 2.72512e-27 | 1.000000 | 2.72513e-27 | 1.000000 |
| PhcycC3H3_A+H | 2.14621e-27 | 1.000000 | 2.14621e-27 | 1.000000 |
| rad55         | 9.74055e-28 | 1.000000 | 9.74056e-28 | 1.000000 |
| rad18         | 9.93956e-29 | 1.000000 | 9.93957e-29 | 1.000000 |
| rad23         | 8.09142e-30 | 1.000000 | 8.09143e-30 | 1.000000 |
| rad22         | 6.36843e-30 | 1.000000 | 6.36844e-30 | 1.000000 |
| rad65         | 2.45305e-30 | 1.000000 | 2.45306e-30 | 1.000000 |
| rad58         | 1.13111e-30 | 1.000000 | 1.13111e-30 | 1.000000 |
| rad45         | 9.85143e-32 | 1.000000 | 9.85144e-32 | 1.000000 |
| rad24         | 2.20631e-32 | 1.000000 | 2.20631e-32 | 1.000000 |
| rad36         | 6.10547e-33 | 1.000000 | 6.10548e-33 | 1.000000 |
| PAH1+H        | 4.51063e-38 | 1.000000 | 4.51063e-38 | 1.000000 |
| rad34         | 3.47429e-40 | 1.000000 | 3.47430e-40 | 1.000000 |
| rad42         | 4.19204e-44 | 1.000000 | 4.19204e-44 | 1.000000 |
| rad41         | 6.41181e-45 | 1.000000 | 6.41181e-45 | 1.000000 |
| rad47         | 3.58533e-45 | 1.000000 | 3.58534e-45 | 1.000000 |

0.100000000E-07 Pa, 140.000000 K

=====

| Rate constant      | True (fraction)        | Effective (fraction)   |
|--------------------|------------------------|------------------------|
| Total              | 3.59582e-19 (1.00 )    | 3.59581e-19 (1.00 )    |
| Formation of rad11 | 2.35703e-19 (0.934 )   | 3.35702e-19 (0.934 )   |
| Formation of rad6  | 2.33415e-20 (0.0649 )  | 2.33414e-20 (0.0649 )  |
| H-abstraction      | 5.37685e-22 (0.00150 ) | 5.37685e-22 (0.00150 ) |

| species            | PYtrue      | Cumul    | PYeffective | Cumul    |
|--------------------|-------------|----------|-------------|----------|
| Indene+H           | 0.979275    | 0.979275 | 0.979277    | 0.979277 |
| C2H2+PhCH2         | 0.0113555   | 0.990631 | 0.0113556   | 0.990633 |
| PhCCH+CH3          | 0.00400897  | 0.994640 | 0.00400898  | 0.994642 |
| PhCHCCH2+H         | 0.00231397  | 0.996954 | 0.00231397  | 0.996956 |
| Benzene+2-propynyl | 0.00149531  | 0.998449 | 0.00149531  | 0.998451 |
| PhCCCH3+H          | 0.00145799  | 0.999907 | 0.00145799  | 0.999909 |
| Ph+MeAc            | 5.94561e-05 | 0.999967 | 5.94563e-05 | 0.999969 |
| rad8               | 1.44645e-05 | 0.999981 | 1.44646e-05 | 0.999983 |
| rad9               | 8.80722e-06 | 0.999990 | 8.80724e-06 | 0.999992 |
| PAH7+H             | 5.48544e-06 | 0.999995 | 5.48545e-06 | 0.999998 |
| Phenyl+Allene      | 1.91228e-06 | 0.999997 | 0.00000     | 0.999998 |
| rad39              | 8.39698e-07 | 0.999998 | 8.39700e-07 | 0.999998 |
| rad30              | 6.95392e-07 | 0.999999 | 6.95393e-07 | 0.999999 |
| rad12              | 6.34637e-07 | 1.000000 | 6.34638e-07 | 1.000000 |
| PAH9+H             | 1.51134e-07 | 1.000000 | 1.51134e-07 | 1.000000 |
| rad15              | 1.38793e-07 | 1.000000 | 1.38793e-07 | 1.000000 |
| rad35              | 7.47751e-08 | 1.000000 | 7.47752e-08 | 1.000000 |

|               |             |          |             |          |
|---------------|-------------|----------|-------------|----------|
| rad38         | 4.09818e-08 | 1.000000 | 4.09818e-08 | 1.000000 |
| PhCH2CCH+H    | 2.73838e-09 | 1.000000 | 2.73839e-09 | 1.000000 |
| rad37         | 7.72170e-10 | 1.000000 | 7.72172e-10 | 1.000000 |
| rad46         | 4.00203e-10 | 1.000000 | 4.00204e-10 | 1.000000 |
| rad60syn      | 2.64002e-11 | 1.000000 | 2.64003e-11 | 1.000000 |
| rad60anti     | 6.71540e-12 | 1.000000 | 6.71542e-12 | 1.000000 |
| rad5          | 3.71121e-12 | 1.000000 | 3.71122e-12 | 1.000000 |
| rad6          | 1.86401e-14 | 1.000000 | 1.86401e-14 | 1.000000 |
| rad28         | 1.31497e-14 | 1.000000 | 1.31497e-14 | 1.000000 |
| rad26         | 3.14780e-15 | 1.000000 | 3.14780e-15 | 1.000000 |
| PAH3+H        | 2.04392e-15 | 1.000000 | 2.04392e-15 | 1.000000 |
| rad59         | 8.33655e-16 | 1.000000 | 8.33656e-16 | 1.000000 |
| rad50         | 8.70103e-17 | 1.000000 | 8.70104e-17 | 1.000000 |
| rad2          | 7.36026e-17 | 1.000000 | 7.36028e-17 | 1.000000 |
| rad1          | 4.81358e-18 | 1.000000 | 4.81359e-18 | 1.000000 |
| rad10         | 3.37842e-18 | 1.000000 | 3.37843e-18 | 1.000000 |
| rad19syn      | 3.22743e-18 | 1.000000 | 3.22744e-18 | 1.000000 |
| rad7          | 1.36534e-18 | 1.000000 | 1.36534e-18 | 1.000000 |
| rad3          | 1.00278e-18 | 1.000000 | 1.00278e-18 | 1.000000 |
| rad14         | 6.15624e-19 | 1.000000 | 6.15625e-19 | 1.000000 |
| rad4          | 5.11524e-19 | 1.000000 | 5.11525e-19 | 1.000000 |
| rad11         | 3.46598e-19 | 1.000000 | 3.46599e-19 | 1.000000 |
| rad25         | 3.16361e-19 | 1.000000 | 3.16362e-19 | 1.000000 |
| rad27         | 3.84777e-20 | 1.000000 | 3.84778e-20 | 1.000000 |
| rad13         | 7.66131e-21 | 1.000000 | 7.66133e-21 | 1.000000 |
| rad54         | 7.40438e-21 | 1.000000 | 7.40439e-21 | 1.000000 |
| PAH10+CH3     | 4.96809e-21 | 1.000000 | 4.96810e-21 | 1.000000 |
| rad43         | 1.20454e-21 | 1.000000 | 1.20454e-21 | 1.000000 |
| rad52         | 1.52549e-22 | 1.000000 | 1.52549e-22 | 1.000000 |
| rad62         | 7.69039e-23 | 1.000000 | 7.69041e-23 | 1.000000 |
| rad33         | 2.73744e-23 | 1.000000 | 2.73745e-23 | 1.000000 |
| rad31         | 1.99938e-24 | 1.000000 | 1.99939e-24 | 1.000000 |
| rad70         | 1.16345e-25 | 1.000000 | 1.16345e-25 | 1.000000 |
| PhcycC3H3_A+H | 1.06484e-25 | 1.000000 | 1.06485e-25 | 1.000000 |
| rad51         | 7.94722e-26 | 1.000000 | 7.94724e-26 | 1.000000 |
| rad55         | 4.37363e-26 | 1.000000 | 4.37364e-26 | 1.000000 |
| rad20         | 3.95843e-26 | 1.000000 | 3.95844e-26 | 1.000000 |
| rad21         | 3.16440e-26 | 1.000000 | 3.16441e-26 | 1.000000 |
| PAH1+H        | 1.72869e-28 | 1.000000 | 1.72869e-28 | 1.000000 |
| rad18         | 9.16445e-29 | 1.000000 | 9.16447e-29 | 1.000000 |
| rad65         | 8.26211e-29 | 1.000000 | 8.26213e-29 | 1.000000 |
| rad58         | 6.05541e-29 | 1.000000 | 6.05542e-29 | 1.000000 |
| rad23         | 1.00038e-29 | 1.000000 | 1.00038e-29 | 1.000000 |
| rad22         | 5.74605e-30 | 1.000000 | 5.74606e-30 | 1.000000 |
| rad34         | 4.12810e-30 | 1.000000 | 4.12811e-30 | 1.000000 |
| rad45         | 1.55507e-31 | 1.000000 | 1.55507e-31 | 1.000000 |
| rad24         | 2.32519e-32 | 1.000000 | 2.32520e-32 | 1.000000 |
| rad36         | 9.64154e-33 | 1.000000 | 9.64156e-33 | 1.000000 |
| rad42         | 1.07647e-40 | 1.000000 | 1.07647e-40 | 1.000000 |
| rad41         | 1.50183e-41 | 1.000000 | 1.50183e-41 | 1.000000 |
| rad47         | 2.48364e-43 | 1.000000 | 2.48365e-43 | 1.000000 |

0.100000000E-07 Pa, 150.000000 K

=====

| Rate constant      | True (fraction)        | Effective (fraction)   |
|--------------------|------------------------|------------------------|
| Total              | 8.51464e-19 (1.00 )    | 8.51462e-19 (1.00 )    |
| Formation of rad11 | 7.83711e-19 (0.920 )   | 7.83709e-19 (0.920 )   |
| Formation of rad6  | 6.56651e-20 (0.0771 )  | 6.56649e-20 (0.0771 )  |
| H-abstraction      | 2.08816e-21 (0.00245 ) | 2.08816e-21 (0.00245 ) |

| species            | PYtrue      | Cumul    | PYeffective | Cumul    |
|--------------------|-------------|----------|-------------|----------|
| Indene+H           | 0.977259    | 0.977259 | 0.977261    | 0.977261 |
| C2H2+PhCH2         | 0.0118380   | 0.989097 | 0.0118380   | 0.989099 |
| PhCCH+CH3          | 0.00431648  | 0.993414 | 0.00431649  | 0.993416 |
| PhCHCCH2+H         | 0.00246423  | 0.995878 | 0.00246424  | 0.995880 |
| Benzene+2-propynyl | 0.00245244  | 0.998331 | 0.00245245  | 0.998333 |
| PhCCCH3+H          | 0.00156054  | 0.999891 | 0.00156054  | 0.999893 |
| Ph+MeAc            | 7.16784e-05 | 0.999963 | 7.16785e-05 | 0.999965 |
| rad8               | 1.58184e-05 | 0.999979 | 1.58185e-05 | 0.999981 |
| rad9               | 9.98016e-06 | 0.999989 | 9.98016e-06 | 0.999991 |
| PAH7+H             | 6.27902e-06 | 0.999995 | 6.27904e-06 | 0.999997 |
| Phenyl+Allene      | 2.60485e-06 | 0.999997 | 0.00000     | 0.999997 |
| rad39              | 1.00157e-06 | 0.999998 | 1.00157e-06 | 0.999998 |
| rad30              | 7.38656e-07 | 0.999999 | 7.38658e-07 | 0.999999 |
| rad12              | 7.18424e-07 | 1.000000 | 7.18426e-07 | 0.999999 |
| PAH9+H             | 1.62354e-07 | 1.000000 | 1.62355e-07 | 1.000000 |
| rad15              | 1.49537e-07 | 1.000000 | 1.49538e-07 | 1.000000 |
| rad35              | 7.96336e-08 | 1.000000 | 7.96338e-08 | 1.000000 |

|               |             |         |             |          |
|---------------|-------------|---------|-------------|----------|
| rad38         | 4.43439e-08 | 1.00000 | 4.43440e-08 | 1.000000 |
| PhCH2CCH+H    | 5.75227e-09 | 1.00000 | 5.75229e-09 | 1.000000 |
| rad37         | 1.51873e-09 | 1.00000 | 1.51873e-09 | 1.000000 |
| rad46         | 4.57177e-10 | 1.00000 | 4.57179e-10 | 1.000000 |
| rad60syn      | 3.37167e-11 | 1.00000 | 3.37168e-11 | 1.000000 |
| rad60anti     | 9.09684e-12 | 1.00000 | 9.09686e-12 | 1.000000 |
| rad5          | 8.96576e-12 | 1.00000 | 8.96578e-12 | 1.000000 |
| rad6          | 1.49978e-14 | 1.00000 | 1.49978e-14 | 1.000000 |
| rad28         | 1.08800e-14 | 1.00000 | 1.08800e-14 | 1.000000 |
| PAH3+H        | 6.03133e-15 | 1.00000 | 6.03135e-15 | 1.000000 |
| rad26         | 2.61411e-15 | 1.00000 | 2.61411e-15 | 1.000000 |
| rad59         | 2.36429e-15 | 1.00000 | 2.36430e-15 | 1.000000 |
| rad50         | 2.40153e-16 | 1.00000 | 2.40153e-16 | 1.000000 |
| rad2          | 5.40216e-17 | 1.00000 | 5.40217e-17 | 1.000000 |
| rad19syn      | 2.46149e-17 | 1.00000 | 2.46149e-17 | 1.000000 |
| rad1          | 3.55113e-18 | 1.00000 | 3.55114e-18 | 1.000000 |
| rad10         | 3.00032e-18 | 1.00000 | 3.00033e-18 | 1.000000 |
| rad7          | 1.10064e-18 | 1.00000 | 1.10064e-18 | 1.000000 |
| rad3          | 6.23723e-19 | 1.00000 | 6.23724e-19 | 1.000000 |
| rad14         | 5.22067e-19 | 1.00000 | 5.22068e-19 | 1.000000 |
| rad4          | 3.18612e-19 | 1.00000 | 3.18613e-19 | 1.000000 |
| rad11         | 2.80499e-19 | 1.00000 | 2.80500e-19 | 1.000000 |
| rad25         | 2.70267e-19 | 1.00000 | 2.70268e-19 | 1.000000 |
| rad54         | 8.25298e-20 | 1.00000 | 8.25301e-20 | 1.000000 |
| PAH10+CH3     | 5.57277e-20 | 1.00000 | 5.57279e-20 | 1.000000 |
| rad27         | 3.31777e-20 | 1.00000 | 3.31778e-20 | 1.000000 |
| rad43         | 1.35491e-20 | 1.00000 | 1.35491e-20 | 1.000000 |
| rad13         | 6.18366e-21 | 1.00000 | 6.18367e-21 | 1.000000 |
| rad52         | 1.09591e-21 | 1.00000 | 1.09591e-21 | 1.000000 |
| rad62         | 1.08552e-21 | 1.00000 | 1.08552e-21 | 1.000000 |
| rad33         | 2.35910e-23 | 1.00000 | 2.35910e-23 | 1.000000 |
| rad70         | 2.82757e-24 | 1.00000 | 2.82758e-24 | 1.000000 |
| PhcycC3H3_A+H | 2.82696e-24 | 1.00000 | 2.82697e-24 | 1.000000 |
| rad31         | 2.27072e-24 | 1.00000 | 2.27073e-24 | 1.000000 |
| rad51         | 1.13153e-24 | 1.00000 | 1.13153e-24 | 1.000000 |
| rad55         | 1.09836e-24 | 1.00000 | 1.09836e-24 | 1.000000 |
| rad20         | 3.79544e-26 | 1.00000 | 3.79545e-26 | 1.000000 |
| rad21         | 3.04889e-26 | 1.00000 | 3.04890e-26 | 1.000000 |
| PAH1+H        | 8.47528e-27 | 1.00000 | 8.47531e-27 | 1.000000 |
| rad65         | 1.71245e-27 | 1.00000 | 1.71245e-27 | 1.000000 |
| rad58         | 1.68999e-27 | 1.00000 | 1.69000e-27 | 1.000000 |
| rad34         | 2.52727e-28 | 1.00000 | 2.52727e-28 | 1.000000 |
| rad18         | 8.49674e-29 | 1.00000 | 8.49676e-29 | 1.000000 |
| rad23         | 1.31785e-29 | 1.00000 | 1.31785e-29 | 1.000000 |
| rad22         | 5.20768e-30 | 1.00000 | 5.20769e-30 | 1.000000 |
| rad42         | 7.85452e-31 | 1.00000 | 7.85454e-31 | 1.000000 |
| rad45         | 2.13732e-31 | 1.00000 | 2.13732e-31 | 1.000000 |
| rad41         | 1.60818e-31 | 1.00000 | 1.60819e-31 | 1.000000 |
| rad24         | 2.47996e-32 | 1.00000 | 2.47996e-32 | 1.000000 |
| rad36         | 1.32588e-32 | 1.00000 | 1.32588e-32 | 1.000000 |
| rad47         | 7.59466e-42 | 1.00000 | 7.59468e-42 | 1.000000 |

0.100000000E-07 Pa, 160.000000 K

=====

| Rate constant      | True (fraction)        | Effective (fraction)   |
|--------------------|------------------------|------------------------|
| Total              | 1.81800e-18 (1.00 )    | 1.81799e-18 (1.00 )    |
| Formation of rad11 | 1.64862e-18 (0.907 )   | 1.64862e-18 (0.907 )   |
| Formation of rad6  | 1.62558e-19 (0.0894 )  | 1.62558e-19 (0.0894 )  |
| H-abstraction      | 6.82130e-21 (0.00375 ) | 6.82130e-21 (0.00375 ) |

| species            | PYtrue      | Cumul    | PYeffective | Cumul    |
|--------------------|-------------|----------|-------------|----------|
| Indene+H           | 0.974807    | 0.974807 | 0.974810    | 0.974810 |
| C2H2+PhCH2         | 0.0123589   | 0.987166 | 0.0123590   | 0.987169 |
| PhCCH+CH3          | 0.00465408  | 0.991820 | 0.00465410  | 0.991823 |
| Benzene+2-propynyl | 0.00375209  | 0.995572 | 0.00375210  | 0.995575 |
| PhCHCCH2+H         | 0.00262749  | 0.998199 | 0.00262750  | 0.998202 |
| PhCCCH3+H          | 0.00167199  | 0.999871 | 0.00167199  | 0.999874 |
| Ph+MeAc            | 8.62614e-05 | 0.999957 | 8.62617e-05 | 0.999961 |
| rad8               | 1.73194e-05 | 0.999975 | 1.73195e-05 | 0.999978 |
| rad9               | 1.13314e-05 | 0.999986 | 1.13315e-05 | 0.999989 |
| PAH7+H             | 7.20395e-06 | 0.999993 | 7.20398e-06 | 0.999996 |
| Phenyl+Allene      | 3.51289e-06 | 0.999997 | 0.00000     | 0.999996 |
| rad39              | 1.19490e-06 | 0.999998 | 1.19491e-06 | 0.999998 |
| rad12              | 8.13675e-07 | 0.999999 | 8.13678e-07 | 0.999998 |
| rad30              | 7.86374e-07 | 1.000000 | 7.86377e-07 | 0.999999 |
| PAH9+H             | 1.74956e-07 | 1.000000 | 1.74957e-07 | 0.999999 |
| rad15              | 1.61556e-07 | 1.000000 | 1.61556e-07 | 1.000000 |
| rad35              | 8.50365e-08 | 1.000000 | 8.50368e-08 | 1.000000 |

|               |             |         |             |          |
|---------------|-------------|---------|-------------|----------|
| rad38         | 4.81471e-08 | 1.00000 | 4.81473e-08 | 1.000000 |
| PhCH2CCH+H    | 1.12739e-08 | 1.00000 | 1.12740e-08 | 1.000000 |
| rad37         | 2.73998e-09 | 1.00000 | 2.73999e-09 | 1.000000 |
| rad46         | 5.24969e-10 | 1.00000 | 5.24970e-10 | 1.000000 |
| rad60syn      | 4.30328e-11 | 1.00000 | 4.30329e-11 | 1.000000 |
| rad5          | 1.96900e-11 | 1.00000 | 1.96900e-11 | 1.000000 |
| rad60anti     | 1.22036e-11 | 1.00000 | 1.22036e-11 | 1.000000 |
| PAH3+H        | 1.58160e-14 | 1.00000 | 1.58160e-14 | 1.000000 |
| rad6          | 1.21478e-14 | 1.00000 | 1.21479e-14 | 1.000000 |
| rad28         | 9.02414e-15 | 1.00000 | 9.02417e-15 | 1.000000 |
| rad59         | 5.96957e-15 | 1.00000 | 5.96959e-15 | 1.000000 |
| rad26         | 2.17584e-15 | 1.00000 | 2.17585e-15 | 1.000000 |
| rad50         | 5.99513e-16 | 1.00000 | 5.99515e-16 | 1.000000 |
| rad19syn      | 1.46314e-16 | 1.00000 | 1.46314e-16 | 1.000000 |
| rad2          | 7.18884e-17 | 1.00000 | 7.18887e-17 | 1.000000 |
| rad1          | 4.75233e-18 | 1.00000 | 4.75235e-18 | 1.000000 |
| rad10         | 3.26720e-18 | 1.00000 | 3.26721e-18 | 1.000000 |
| rad3          | 9.51186e-19 | 1.00000 | 9.51189e-19 | 1.000000 |
| rad7          | 8.93255e-19 | 1.00000 | 8.93258e-19 | 1.000000 |
| rad54         | 6.82323e-19 | 1.00000 | 6.82326e-19 | 1.000000 |
| rad4          | 4.86637e-19 | 1.00000 | 4.86638e-19 | 1.000000 |
| PAH10+CH3     | 4.63170e-19 | 1.00000 | 4.63171e-19 | 1.000000 |
| rad14         | 4.43967e-19 | 1.00000 | 4.43969e-19 | 1.000000 |
| rad25         | 2.31588e-19 | 1.00000 | 2.31589e-19 | 1.000000 |
| rad11         | 2.28595e-19 | 1.00000 | 2.28596e-19 | 1.000000 |
| rad43         | 1.12798e-19 | 1.00000 | 1.12798e-19 | 1.000000 |
| rad27         | 2.87050e-20 | 1.00000 | 2.87051e-20 | 1.000000 |
| rad62         | 1.10170e-20 | 1.00000 | 1.10170e-20 | 1.000000 |
| rad52         | 6.21217e-21 | 1.00000 | 6.21220e-21 | 1.000000 |
| rad13         | 5.02503e-21 | 1.00000 | 5.02504e-21 | 1.000000 |
| PhcycC3H3_A+H | 4.94897e-23 | 1.00000 | 4.94899e-23 | 1.000000 |
| rad70         | 4.58079e-23 | 1.00000 | 4.58081e-23 | 1.000000 |
| rad33         | 2.05496e-23 | 1.00000 | 2.05497e-23 | 1.000000 |
| rad55         | 1.82891e-23 | 1.00000 | 1.82891e-23 | 1.000000 |
| rad51         | 1.16593e-23 | 1.00000 | 1.16593e-23 | 1.000000 |
| rad31         | 2.63163e-24 | 1.00000 | 2.63164e-24 | 1.000000 |
| PAH1+H        | 2.26749e-25 | 1.00000 | 2.26750e-25 | 1.000000 |
| rad20         | 3.66446e-26 | 1.00000 | 3.66447e-26 | 1.000000 |
| rad58         | 3.08150e-26 | 1.00000 | 3.08151e-26 | 1.000000 |
| rad21         | 2.95887e-26 | 1.00000 | 2.95888e-26 | 1.000000 |
| rad65         | 2.43580e-26 | 1.00000 | 2.43581e-26 | 1.000000 |
| rad34         | 7.87306e-27 | 1.00000 | 7.87309e-27 | 1.000000 |
| rad18         | 7.91578e-29 | 1.00000 | 7.91581e-29 | 1.000000 |
| rad42         | 4.07683e-29 | 1.00000 | 4.07685e-29 | 1.000000 |
| rad23         | 1.84503e-29 | 1.00000 | 1.84504e-29 | 1.000000 |
| rad41         | 9.77891e-30 | 1.00000 | 9.77894e-30 | 1.000000 |
| rad22         | 4.73733e-30 | 1.00000 | 4.73735e-30 | 1.000000 |
| rad45         | 3.57311e-31 | 1.00000 | 3.57312e-31 | 1.000000 |
| rad24         | 2.67539e-32 | 1.00000 | 2.67540e-32 | 1.000000 |
| rad36         | 2.21846e-32 | 1.00000 | 2.21847e-32 | 1.000000 |
| rad47         | 1.41734e-40 | 1.00000 | 1.41734e-40 | 1.000000 |

0.100000000E-07 Pa, 170.000000 K

=====

| Rate constant      | True (fraction)        | Effective (fraction)   |
|--------------------|------------------------|------------------------|
| Total              | 3.56414e-18 (1.00 )    | 3.56412e-18 (1.00 )    |
| Formation of rad11 | 3.18264e-18 (0.893 )   | 3.18262e-18 (0.893 )   |
| Formation of rad6  | 3.62173e-19 (0.102 )   | 3.62171e-19 (0.102 )   |
| H-abstraction      | 1.93278e-20 (0.00542 ) | 1.93278e-20 (0.00542 ) |

| species            | PYtrue      | Cumul    | PYeffective | Cumul    |
|--------------------|-------------|----------|-------------|----------|
| Indene+H           | 0.971885    | 0.971885 | 0.971890    | 0.971890 |
| C2H2+PhCH2         | 0.0129199   | 0.984805 | 0.0129199   | 0.984810 |
| Benzene+2-propynyl | 0.00542285  | 0.990228 | 0.00542288  | 0.990233 |
| PhCCH+CH3          | 0.00502328  | 0.995251 | 0.00502331  | 0.995256 |
| PhCHCCH2+H         | 0.00280417  | 0.998055 | 0.00280419  | 0.998060 |
| PhCCCH3+H          | 0.00179254  | 0.999848 | 0.00179254  | 0.999853 |
| Ph+MeAc            | 0.000103562 | 0.999951 | 0.000103562 | 0.999956 |
| rad8               | 1.89760e-05 | 0.999970 | 1.89761e-05 | 0.999975 |
| rad9               | 1.28842e-05 | 0.999983 | 1.28841e-05 | 0.999988 |
| PAH7+H             | 8.27969e-06 | 0.999991 | 8.27973e-06 | 0.999996 |
| Phenyl+Allene      | 4.69493e-06 | 0.999996 | 0.00000     | 0.999996 |
| rad39              | 1.42509e-06 | 0.999997 | 1.42509e-06 | 0.999998 |
| rad12              | 9.21461e-07 | 0.999998 | 9.21466e-07 | 0.999999 |
| rad30              | 8.38911e-07 | 0.999999 | 8.38915e-07 | 0.999999 |
| PAH9+H             | 1.89102e-07 | 0.999999 | 1.89103e-07 | 1.000000 |
| rad15              | 1.74977e-07 | 1.000000 | 1.74978e-07 | 1.000000 |
| rad35              | 9.10383e-08 | 1.000000 | 9.10388e-08 | 1.000000 |



|               |             |          |             |          |
|---------------|-------------|----------|-------------|----------|
| rad38         | 5.24472e-08 | 1.000000 | 5.24474e-08 | 1.000000 |
| PhCH2CCH+H    | 2.08707e-08 | 1.000000 | 2.08708e-08 | 1.000000 |
| rad37         | 4.60963e-09 | 1.000000 | 4.60965e-09 | 1.000000 |
| rad46         | 6.05682e-10 | 1.000000 | 6.05684e-10 | 1.000000 |
| rad60syn      | 5.48563e-11 | 1.000000 | 5.48566e-11 | 1.000000 |
| rad5          | 3.99754e-11 | 1.000000 | 3.99756e-11 | 1.000000 |
| rad60anti     | 1.62407e-11 | 1.000000 | 1.62407e-11 | 1.000000 |
| PAH3+H        | 3.76908e-14 | 1.000000 | 3.76910e-14 | 1.000000 |
| rad59         | 1.37229e-14 | 1.000000 | 1.37230e-14 | 1.000000 |
| rad6          | 9.89436e-15 | 1.000000 | 9.89440e-15 | 1.000000 |
| rad28         | 7.49904e-15 | 1.000000 | 7.49907e-15 | 1.000000 |
| rad26         | 1.81420e-15 | 1.000000 | 1.81421e-15 | 1.000000 |
| rad50         | 1.37985e-15 | 1.000000 | 1.37986e-15 | 1.000000 |
| rad19syn      | 7.08949e-16 | 1.000000 | 7.08951e-16 | 1.000000 |
| rad2          | 5.62473e-17 | 1.000000 | 5.62476e-17 | 1.000000 |
| rad54         | 4.41606e-18 | 1.000000 | 4.41608e-18 | 1.000000 |
| rad1          | 3.74071e-18 | 1.000000 | 3.74073e-18 | 1.000000 |
| rad10         | 3.14611e-18 | 1.000000 | 3.14613e-18 | 1.000000 |
| PAH10+CH3     | 3.01001e-18 | 1.000000 | 3.01003e-18 | 1.000000 |
| rad43         | 7.33358e-19 | 1.000000 | 7.33362e-19 | 1.000000 |
| rad7          | 7.29031e-19 | 1.000000 | 7.29035e-19 | 1.000000 |
| rad3          | 6.68153e-19 | 1.000000 | 6.68157e-19 | 1.000000 |
| rad14         | 3.78427e-19 | 1.000000 | 3.78429e-19 | 1.000000 |
| rad4          | 3.42403e-19 | 1.000000 | 3.42405e-19 | 1.000000 |
| rad25         | 1.98952e-19 | 1.000000 | 1.98953e-19 | 1.000000 |
| rad11         | 1.87396e-19 | 1.000000 | 1.87397e-19 | 1.000000 |
| rad62         | 8.52799e-20 | 1.000000 | 8.52803e-20 | 1.000000 |
| rad52         | 2.90265e-20 | 1.000000 | 2.90266e-20 | 1.000000 |
| rad27         | 2.49076e-20 | 1.000000 | 2.49077e-20 | 1.000000 |
| rad13         | 4.10683e-21 | 1.000000 | 4.10685e-21 | 1.000000 |
| PhcycC3H3_A+H | 6.18576e-22 | 1.000000 | 6.18579e-22 | 1.000000 |
| rad70         | 5.33446e-22 | 1.000000 | 5.33449e-22 | 1.000000 |
| rad55         | 2.18165e-22 | 1.000000 | 2.18166e-22 | 1.000000 |
| rad51         | 9.22228e-23 | 1.000000 | 9.22233e-23 | 1.000000 |
| rad33         | 1.80778e-23 | 1.000000 | 1.80779e-23 | 1.000000 |
| PAH1+H        | 3.94436e-24 | 1.000000 | 3.94438e-24 | 1.000000 |
| rad31         | 3.11152e-24 | 1.000000 | 3.11154e-24 | 1.000000 |
| rad58         | 3.99313e-25 | 1.000000 | 3.99315e-25 | 1.000000 |
| rad65         | 2.54727e-25 | 1.000000 | 2.54729e-25 | 1.000000 |
| rad34         | 1.50323e-25 | 1.000000 | 1.50324e-25 | 1.000000 |
| rad20         | 3.56099e-26 | 1.000000 | 3.56101e-26 | 1.000000 |
| rad21         | 2.89101e-26 | 1.000000 | 2.89102e-26 | 1.000000 |
| rad42         | 1.01747e-27 | 1.000000 | 1.01748e-27 | 1.000000 |
| rad41         | 2.58572e-28 | 1.000000 | 2.58573e-28 | 1.000000 |
| rad18         | 7.40625e-29 | 1.000000 | 7.40629e-29 | 1.000000 |
| rad23         | 2.73658e-29 | 1.000000 | 2.73660e-29 | 1.000000 |
| rad22         | 4.32307e-30 | 1.000000 | 4.32309e-30 | 1.000000 |
| rad45         | 4.83062e-31 | 1.000000 | 4.83064e-31 | 1.000000 |
| rad36         | 3.00277e-32 | 1.000000 | 3.00279e-32 | 1.000000 |
| rad24         | 2.91840e-32 | 1.000000 | 2.91842e-32 | 1.000000 |
| rad47         | 1.82774e-39 | 1.000000 | 1.82775e-39 | 1.000000 |

0.100000000E-07 Pa, 180.000000 K

=====

| Rate constant      | True (fraction)        | Effective (fraction)   |
|--------------------|------------------------|------------------------|
| Total              | 6.50681e-18 (1.00 )    | 6.50677e-18 (1.00 )    |
| Formation of rad11 | 5.71915e-18 (0.879 )   | 5.71911e-18 (0.879 )   |
| Formation of rad6  | 7.39013e-19 (0.114 )   | 7.39008e-19 (0.114 )   |
| H-abstraction      | 4.86496e-20 (0.00748 ) | 4.86496e-20 (0.00748 ) |

| species            | PYtrue      | Cumul    | PYeffective | Cumul    |
|--------------------|-------------|----------|-------------|----------|
| Indene+H           | 0.968478    | 0.968478 | 0.968484    | 0.968484 |
| C2H2+PhCH2         | 0.0135228   | 0.982001 | 0.0135229   | 0.982007 |
| Benzene+2-propynyl | 0.00747672  | 0.989478 | 0.00747676  | 0.989484 |
| PhCCH+CH3          | 0.00542564  | 0.994904 | 0.00542567  | 0.994910 |
| PhCHCCH2+H         | 0.00299468  | 0.997898 | 0.00299470  | 0.997904 |
| PhCCCH3+H          | 0.00192236  | 0.999821 | 0.00192238  | 0.999827 |
| Ph+MeAc            | 0.000123974 | 0.999945 | 0.000123974 | 0.999951 |
| rad8               | 2.07972e-05 | 0.999965 | 2.07973e-05 | 0.999972 |
| rad9               | 1.46640e-05 | 0.999980 | 1.46640e-05 | 0.999986 |
| PAH7+H             | 9.52857e-06 | 0.999990 | 9.52863e-06 | 0.999996 |
| Phenyl+Allene      | 6.22344e-06 | 0.999996 | 0.00000     | 0.999996 |
| rad39              | 1.69835e-06 | 0.999998 | 1.69836e-06 | 0.999997 |
| rad12              | 1.04290e-06 | 0.999999 | 1.04291e-06 | 0.999998 |
| rad30              | 8.96680e-07 | 0.999999 | 8.96686e-07 | 0.999999 |
| PAH9+H             | 2.04978e-07 | 1.000000 | 2.04979e-07 | 1.000000 |
| rad15              | 1.89953e-07 | 1.000000 | 1.89954e-07 | 1.000000 |
| rad35              | 9.77028e-08 | 1.000000 | 9.77034e-08 | 1.000000 |

|               |             |         |             |          |
|---------------|-------------|---------|-------------|----------|
| rad38         | 5.73097e-08 | 1.00000 | 5.73100e-08 | 1.000000 |
| PhCH2CCH+H    | 3.68401e-08 | 1.00000 | 3.68404e-08 | 1.000000 |
| rad37         | 7.32439e-09 | 1.00000 | 7.32443e-09 | 1.000000 |
| rad46         | 7.01869e-10 | 1.00000 | 7.01874e-10 | 1.000000 |
| rad5          | 7.60089e-11 | 1.00000 | 7.60094e-11 | 1.000000 |
| rad60syn      | 6.98192e-11 | 1.00000 | 6.98197e-11 | 1.000000 |
| rad60anti     | 2.14666e-11 | 1.00000 | 2.14668e-11 | 1.000000 |
| PAH3+H        | 8.30446e-14 | 1.00000 | 8.30452e-14 | 1.000000 |
| rad59         | 2.92196e-14 | 1.00000 | 2.92198e-14 | 1.000000 |
| rad6          | 8.09697e-15 | 1.00000 | 8.09702e-15 | 1.000000 |
| rad28         | 6.24071e-15 | 1.00000 | 6.24075e-15 | 1.000000 |
| rad50         | 2.97124e-15 | 1.00000 | 2.97126e-15 | 1.000000 |
| rad19syn      | 2.89949e-15 | 1.00000 | 2.89950e-15 | 1.000000 |
| rad26         | 1.51471e-15 | 1.00000 | 1.51471e-15 | 1.000000 |
| rad2          | 9.56540e-17 | 1.00000 | 9.56546e-17 | 1.000000 |
| rad54         | 2.33297e-17 | 1.00000 | 2.33298e-17 | 1.000000 |
| PAH10+CH3     | 1.59467e-17 | 1.00000 | 1.59468e-17 | 1.000000 |
| rad1          | 6.40370e-18 | 1.00000 | 6.40374e-18 | 1.000000 |
| rad43         | 3.88182e-18 | 1.00000 | 3.88185e-18 | 1.000000 |
| rad10         | 3.66007e-18 | 1.00000 | 3.66009e-18 | 1.000000 |
| rad3          | 1.27776e-18 | 1.00000 | 1.27777e-18 | 1.000000 |
| rad4          | 6.56013e-19 | 1.00000 | 6.56017e-19 | 1.000000 |
| rad7          | 5.97852e-19 | 1.00000 | 5.97856e-19 | 1.000000 |
| rad62         | 5.27068e-19 | 1.00000 | 5.27072e-19 | 1.000000 |
| rad14         | 3.23191e-19 | 1.00000 | 3.23193e-19 | 1.000000 |
| rad25         | 1.71291e-19 | 1.00000 | 1.71292e-19 | 1.000000 |
| rad11         | 1.54405e-19 | 1.00000 | 1.54406e-19 | 1.000000 |
| rad52         | 1.15650e-19 | 1.00000 | 1.15650e-19 | 1.000000 |
| rad27         | 2.16679e-20 | 1.00000 | 2.16680e-20 | 1.000000 |
| PhcycC3H3_A+H | 5.85620e-21 | 1.00000 | 5.85623e-21 | 1.000000 |
| rad70         | 4.72801e-21 | 1.00000 | 4.72804e-21 | 1.000000 |
| rad13         | 3.37274e-21 | 1.00000 | 3.37276e-21 | 1.000000 |
| rad55         | 1.97618e-21 | 1.00000 | 1.97620e-21 | 1.000000 |
| rad51         | 5.86138e-22 | 1.00000 | 5.86142e-22 | 1.000000 |
| PAH1+H        | 4.95211e-23 | 1.00000 | 4.95214e-23 | 1.000000 |
| rad33         | 1.60510e-23 | 1.00000 | 1.60511e-23 | 1.000000 |
| rad58         | 3.90830e-24 | 1.00000 | 3.90832e-24 | 1.000000 |
| rad31         | 3.75275e-24 | 1.00000 | 3.75277e-24 | 1.000000 |
| rad65         | 2.06558e-24 | 1.00000 | 2.06559e-24 | 1.000000 |
| rad34         | 2.04058e-24 | 1.00000 | 2.04059e-24 | 1.000000 |
| rad20         | 3.48188e-26 | 1.00000 | 3.48190e-26 | 1.000000 |
| rad21         | 2.84307e-26 | 1.00000 | 2.84309e-26 | 1.000000 |
| rad42         | 1.68941e-26 | 1.00000 | 1.68942e-26 | 1.000000 |
| rad41         | 4.43576e-27 | 1.00000 | 4.43577e-27 | 1.000000 |
| rad18         | 6.95655e-29 | 1.00000 | 6.95660e-29 | 1.000000 |
| rad23         | 4.29466e-29 | 1.00000 | 4.29469e-29 | 1.000000 |
| rad22         | 3.95578e-30 | 1.00000 | 3.95580e-30 | 1.000000 |
| rad45         | 8.79731e-31 | 1.00000 | 8.79737e-31 | 1.000000 |
| rad36         | 5.47639e-32 | 1.00000 | 5.47643e-32 | 1.000000 |
| rad24         | 3.21845e-32 | 1.00000 | 3.21847e-32 | 1.000000 |
| rad47         | 1.73400e-38 | 1.00000 | 1.73402e-38 | 1.000000 |

0.100000000E-07 Pa, 190.000000 K

=====

| Rate constant      | True (fraction)        | Effective (fraction)   |
|--------------------|------------------------|------------------------|
| Total              | 1.11858e-17 (1.00 )    | 1.11857e-17 (1.00 )    |
| Formation of rad11 | 9.67466e-18 (0.865 )   | 9.67458e-18 (0.865 )   |
| Formation of rad6  | 1.40029e-18 (0.125 )   | 1.40028e-18 (0.125 )   |
| H-abstraction      | 1.10851e-19 (0.00991 ) | 1.10851e-19 (0.00991 ) |

| species            | PYtrue      | Cumul    | PYeffective | Cumul    |
|--------------------|-------------|----------|-------------|----------|
| Indene+H           | 0.964584    | 0.964584 | 0.964592    | 0.964592 |
| C2H2+PhCH2         | 0.0141703   | 0.978755 | 0.0141705   | 0.978763 |
| Benzene+2-propynyl | 0.00990995  | 0.988665 | 0.00991003  | 0.988673 |
| PhCCH+CH3          | 0.00586272  | 0.994527 | 0.00586277  | 0.994535 |
| PhCHCCH2+H         | 0.00319945  | 0.997727 | 0.00319948  | 0.997735 |
| PhCCCH3+H          | 0.00206165  | 0.999788 | 0.00206166  | 0.999797 |
| Ph+MeAc            | 0.000147924 | 0.999936 | 0.000147925 | 0.999945 |
| rad8               | 2.27917e-05 | 0.999959 | 2.27919e-05 | 0.999967 |
| rad9               | 1.66999e-05 | 0.999976 | 1.67000e-05 | 0.999984 |
| PAH7+H             | 1.09761e-05 | 0.999987 | 1.09762e-05 | 0.999995 |
| Phenyl+Allene      | 8.18761e-06 | 0.999995 | 0.00000     | 0.999995 |
| rad39              | 2.02183e-06 | 0.999997 | 2.02185e-06 | 0.999997 |
| rad12              | 1.17916e-06 | 0.999998 | 1.17917e-06 | 0.999998 |
| rad30              | 9.60154e-07 | 0.999999 | 9.60162e-07 | 0.999999 |
| PAH9+H             | 2.22800e-07 | 0.999999 | 2.22802e-07 | 0.999999 |
| rad15              | 2.06653e-07 | 1.000000 | 2.06655e-07 | 1.000000 |
| rad35              | 1.05103e-07 | 1.000000 | 1.05104e-07 | 1.000000 |

|               |             |          |             |          |
|---------------|-------------|----------|-------------|----------|
| rad38         | 6.28101e-08 | 1.000000 | 6.28107e-08 | 1.000000 |
| PhCH2CCH+H    | 6.24645e-08 | 1.000000 | 6.24650e-08 | 1.000000 |
| rad37         | 1.11023e-08 | 1.000000 | 1.11024e-08 | 1.000000 |
| rad46         | 8.16620e-10 | 1.000000 | 8.16627e-10 | 1.000000 |
| rad5          | 1.36733e-10 | 1.000000 | 1.36734e-10 | 1.000000 |
| rad60syn      | 8.87049e-11 | 1.000000 | 8.87056e-11 | 1.000000 |
| rad60anti     | 2.82057e-11 | 1.000000 | 2.82059e-11 | 1.000000 |
| PAH3+H        | 1.71452e-13 | 1.000000 | 1.71454e-13 | 1.000000 |
| rad59         | 5.84005e-14 | 1.000000 | 5.84010e-14 | 1.000000 |
| rad19syn      | 1.02878e-14 | 1.000000 | 1.02879e-14 | 1.000000 |
| rad6          | 6.65277e-15 | 1.000000 | 6.65283e-15 | 1.000000 |
| rad50         | 6.05358e-15 | 1.000000 | 6.05363e-15 | 1.000000 |
| rad28         | 5.19923e-15 | 1.000000 | 5.19928e-15 | 1.000000 |
| rad26         | 1.26595e-15 | 1.000000 | 1.26596e-15 | 1.000000 |
| rad54         | 1.03970e-16 | 1.000000 | 1.03971e-16 | 1.000000 |
| PAH10+CH3     | 7.11676e-17 | 1.000000 | 7.11681e-17 | 1.000000 |
| rad2          | 7.04215e-17 | 1.000000 | 7.04220e-17 | 1.000000 |
| rad43         | 1.72857e-17 | 1.000000 | 1.72859e-17 | 1.000000 |
| rad1          | 4.74845e-18 | 1.000000 | 4.74849e-18 | 1.000000 |
| rad10         | 3.80905e-18 | 1.000000 | 3.80908e-18 | 1.000000 |
| rad62         | 2.69622e-18 | 1.000000 | 2.69624e-18 | 1.000000 |
| rad3          | 6.66960e-19 | 1.000000 | 6.66965e-19 | 1.000000 |
| rad7          | 4.92285e-19 | 1.000000 | 4.92290e-19 | 1.000000 |
| rad52         | 4.03514e-19 | 1.000000 | 4.03517e-19 | 1.000000 |
| rad4          | 3.43104e-19 | 1.000000 | 3.43106e-19 | 1.000000 |
| rad14         | 2.76482e-19 | 1.000000 | 2.76485e-19 | 1.000000 |
| rad25         | 1.47760e-19 | 1.000000 | 1.47761e-19 | 1.000000 |
| rad11         | 1.27785e-19 | 1.000000 | 1.27786e-19 | 1.000000 |
| PhcycC3H3_A+H | 4.38895e-20 | 1.000000 | 4.38899e-20 | 1.000000 |
| rad70         | 3.33202e-20 | 1.000000 | 3.33205e-20 | 1.000000 |
| rad27         | 1.88926e-20 | 1.000000 | 1.88928e-20 | 1.000000 |
| rad55         | 1.42084e-20 | 1.000000 | 1.42085e-20 | 1.000000 |
| rad51         | 3.10227e-21 | 1.000000 | 3.10230e-21 | 1.000000 |
| rad13         | 2.78145e-21 | 1.000000 | 2.78147e-21 | 1.000000 |
| PAH1+H        | 4.73309e-22 | 1.000000 | 4.73313e-22 | 1.000000 |
| rad58         | 3.02074e-23 | 1.000000 | 3.02077e-23 | 1.000000 |
| rad34         | 2.08650e-23 | 1.000000 | 2.08652e-23 | 1.000000 |
| rad33         | 1.43767e-23 | 1.000000 | 1.43769e-23 | 1.000000 |
| rad65         | 1.35334e-23 | 1.000000 | 1.35335e-23 | 1.000000 |
| rad31         | 4.61620e-24 | 1.000000 | 4.61623e-24 | 1.000000 |
| rad42         | 2.03932e-25 | 1.000000 | 2.03933e-25 | 1.000000 |
| rad41         | 5.49126e-26 | 1.000000 | 5.49130e-26 | 1.000000 |
| rad20         | 3.42493e-26 | 1.000000 | 3.42496e-26 | 1.000000 |
| rad21         | 2.81361e-26 | 1.000000 | 2.81363e-26 | 1.000000 |
| rad23         | 7.10236e-29 | 1.000000 | 7.10242e-29 | 1.000000 |
| rad18         | 6.55770e-29 | 1.000000 | 6.55775e-29 | 1.000000 |
| rad22         | 3.62834e-30 | 1.000000 | 3.62837e-30 | 1.000000 |
| rad45         | 1.52562e-30 | 1.000000 | 1.52563e-30 | 1.000000 |
| rad36         | 9.51346e-32 | 1.000000 | 9.51354e-32 | 1.000000 |
| rad24         | 3.58820e-32 | 1.000000 | 3.58822e-32 | 1.000000 |
| rad47         | 1.27121e-37 | 1.000000 | 1.27122e-37 | 1.000000 |

0.100000000E-07 Pa, 200.000000 K

=====

| Rate constant      | True (fraction)       | Effective (fraction)  |
|--------------------|-----------------------|-----------------------|
| Total              | 1.82690e-17 (1.00 )   | 1.82688e-17 (1.00 )   |
| Formation of rad11 | 1.55456e-17 (0.851 )  | 1.55454e-17 (0.851 )  |
| Formation of rad6  | 2.49126e-18 (0.136 )  | 2.49124e-18 (0.136 )  |
| H-abstraction      | 2.32112e-19 (0.0127 ) | 2.32112e-19 (0.0127 ) |

| species            | PYtrue      | Cumul    | PYeffective | Cumul    |
|--------------------|-------------|----------|-------------|----------|
| Indene+H           | 0.960215    | 0.960215 | 0.960226    | 0.960226 |
| C2H2+PhCH2         | 0.0148649   | 0.975080 | 0.0148651   | 0.975091 |
| Benzene+2-propynyl | 0.0127053   | 0.987785 | 0.0127054   | 0.987796 |
| PhCCH+CH3          | 0.00633614  | 0.994122 | 0.00633621  | 0.994133 |
| PhCHCCH2+H         | 0.00341889  | 0.997540 | 0.00341892  | 0.997552 |
| PhCCCH3+H          | 0.00221052  | 0.999751 | 0.00221055  | 0.999762 |
| Ph+MeAc            | 0.000175875 | 0.999927 | 0.000175877 | 0.999938 |
| rad8               | 2.49677e-05 | 0.999952 | 2.49680e-05 | 0.999963 |
| rad9               | 1.90241e-05 | 0.999971 | 1.90243e-05 | 0.999982 |
| PAH7+H             | 1.26513e-05 | 0.999983 | 1.26514e-05 | 0.999995 |
| Phenyl+Allene      | 1.06964e-05 | 0.999994 | 0.00000     | 0.999995 |
| rad39              | 2.40374e-06 | 0.999997 | 2.40377e-06 | 0.999997 |
| rad12              | 1.33139e-06 | 0.999998 | 1.33140e-06 | 0.999998 |
| rad30              | 1.02986e-06 | 0.999999 | 1.02987e-06 | 0.999999 |
| PAH9+H             | 2.42819e-07 | 0.999999 | 2.42822e-07 | 1.000000 |
| rad15              | 2.25265e-07 | 0.999999 | 2.25268e-07 | 1.000000 |
| rad35              | 1.13322e-07 | 1.000000 | 1.13323e-07 | 1.000000 |

|               |             |          |             |         |
|---------------|-------------|----------|-------------|---------|
| PhCH2CCH+H    | 1.02329e-07 | 1.000000 | 1.02331e-07 | 1.00000 |
| rad38         | 6.90362e-08 | 1.000000 | 6.90370e-08 | 1.00000 |
| rad37         | 1.61821e-08 | 1.000000 | 1.61823e-08 | 1.00000 |
| rad46         | 9.53657e-10 | 1.000000 | 9.53666e-10 | 1.00000 |
| rad5          | 2.34596e-10 | 1.000000 | 2.34599e-10 | 1.00000 |
| rad60syn      | 1.12479e-10 | 1.000000 | 1.12480e-10 | 1.00000 |
| rad60anti     | 3.68627e-11 | 1.000000 | 3.68631e-11 | 1.00000 |
| PAH3+H        | 3.35192e-13 | 1.000000 | 3.35196e-13 | 1.00000 |
| rad59         | 1.10713e-13 | 1.000000 | 1.10714e-13 | 1.00000 |
| rad19syn      | 3.23698e-14 | 1.000000 | 3.23702e-14 | 1.00000 |
| rad50         | 1.17726e-14 | 1.000000 | 1.17728e-14 | 1.00000 |
| rad6          | 5.48520e-15 | 1.000000 | 5.48526e-15 | 1.00000 |
| rad28         | 4.33514e-15 | 1.000000 | 4.33519e-15 | 1.00000 |
| rad26         | 1.05886e-15 | 1.000000 | 1.05887e-15 | 1.00000 |
| rad54         | 4.01275e-16 | 1.000000 | 4.01279e-16 | 1.00000 |
| PAH10+CH3     | 2.74628e-16 | 1.000000 | 2.74631e-16 | 1.00000 |
| rad43         | 6.64690e-17 | 1.000000 | 6.64697e-17 | 1.00000 |
| rad2          | 4.33097e-17 | 1.000000 | 4.33100e-17 | 1.00000 |
| rad62         | 1.17482e-17 | 1.000000 | 1.17484e-17 | 1.00000 |
| rad10         | 3.43489e-18 | 1.000000 | 3.43493e-18 | 1.00000 |
| rad1          | 2.94305e-18 | 1.000000 | 2.94309e-18 | 1.00000 |
| rad3          | 1.64408e-18 | 1.000000 | 1.64409e-18 | 1.00000 |
| rad52         | 1.25934e-18 | 1.000000 | 1.25935e-18 | 1.00000 |
| rad4          | 8.47633e-19 | 1.000000 | 8.47643e-19 | 1.00000 |
| rad7          | 4.06799e-19 | 1.000000 | 4.06803e-19 | 1.00000 |
| PhcycC3H3_A+H | 2.69648e-19 | 1.000000 | 2.69650e-19 | 1.00000 |
| rad14         | 2.36871e-19 | 1.000000 | 2.36874e-19 | 1.00000 |
| rad70         | 1.93309e-19 | 1.000000 | 1.93311e-19 | 1.00000 |
| rad25         | 1.27682e-19 | 1.000000 | 1.27684e-19 | 1.00000 |
| rad11         | 1.06169e-19 | 1.000000 | 1.06170e-19 | 1.00000 |
| rad55         | 8.39747e-20 | 1.000000 | 8.39757e-20 | 1.00000 |
| rad27         | 1.65074e-20 | 1.000000 | 1.65076e-20 | 1.00000 |
| rad51         | 1.40662e-20 | 1.000000 | 1.40663e-20 | 1.00000 |
| PAH1+H        | 3.58741e-21 | 1.000000 | 3.58745e-21 | 1.00000 |
| rad13         | 2.30216e-21 | 1.000000 | 2.30219e-21 | 1.00000 |
| rad58         | 1.90959e-22 | 1.000000 | 1.90961e-22 | 1.00000 |
| rad34         | 1.67728e-22 | 1.000000 | 1.67730e-22 | 1.00000 |
| rad65         | 7.40125e-23 | 1.000000 | 7.40132e-23 | 1.00000 |
| rad33         | 1.29860e-23 | 1.000000 | 1.29862e-23 | 1.00000 |
| rad31         | 5.79023e-24 | 1.000000 | 5.79029e-24 | 1.00000 |
| rad42         | 1.88860e-24 | 1.000000 | 1.88862e-24 | 1.00000 |
| rad41         | 5.19580e-25 | 1.000000 | 5.19585e-25 | 1.00000 |
| rad20         | 3.38872e-26 | 1.000000 | 3.38876e-26 | 1.00000 |
| rad21         | 2.80178e-26 | 1.000000 | 2.80181e-26 | 1.00000 |
| rad23         | 1.23989e-28 | 1.000000 | 1.23990e-28 | 1.00000 |
| rad18         | 6.20268e-29 | 1.000000 | 6.20275e-29 | 1.00000 |
| rad22         | 3.33512e-30 | 1.000000 | 3.33516e-30 | 1.00000 |
| rad45         | 1.99171e-30 | 1.000000 | 1.99173e-30 | 1.00000 |
| rad36         | 1.24476e-31 | 1.000000 | 1.24477e-31 | 1.00000 |
| rad24         | 4.04447e-32 | 1.000000 | 4.04451e-32 | 1.00000 |
| rad47         | 7.49047e-37 | 1.000000 | 7.49055e-37 | 1.00000 |

0.100000000E-07 Pa, 210.000000 K

=====

| Rate constant      | True (fraction)       | Effective (fraction)  |
|--------------------|-----------------------|-----------------------|
| Total              | 2.85520e-17 (1.00 )   | 2.85516e-17 (1.00 )   |
| Formation of rad11 | 2.39009e-17 (0.837 )  | 2.39006e-17 (0.837 )  |
| Formation of rad6  | 4.19900e-18 (0.147 )  | 4.19894e-18 (0.147 )  |
| H-abstraction      | 4.52111e-19 (0.0158 ) | 4.52111e-19 (0.0158 ) |

| species            | PYtrue      | Cumul    | PYeffective | Cumul    |
|--------------------|-------------|----------|-------------|----------|
| Indene+H           | 0.955393    | 0.955393 | 0.955407    | 0.955407 |
| Benzene+2-propynyl | 0.0158346   | 0.971228 | 0.0158348   | 0.971242 |
| C2H2+PhCH2         | 0.0156097   | 0.986838 | 0.0156098   | 0.986852 |
| PhCCH+CH3          | 0.00684745  | 0.993685 | 0.00684755  | 0.993699 |
| PhCHCCH2+H         | 0.00365340  | 0.997338 | 0.00365345  | 0.997353 |
| PhCCCH3+H          | 0.00236906  | 0.999707 | 0.00236909  | 0.999722 |
| Ph+MeAc            | 0.000208314 | 0.999916 | 0.000208317 | 0.999930 |
| rad8               | 2.73332e-05 | 0.999943 | 2.73336e-05 | 0.999957 |
| rad9               | 2.16716e-05 | 0.999965 | 2.16719e-05 | 0.999979 |
| PAH7+H             | 1.45867e-05 | 0.999979 | 1.45869e-05 | 0.999994 |
| Phenyl+Allene      | 1.38822e-05 | 0.999993 | 0.00000     | 0.999994 |
| rad39              | 2.85335e-06 | 0.999996 | 2.85340e-06 | 0.999996 |
| rad12              | 1.50074e-06 | 0.999998 | 1.50076e-06 | 0.999998 |
| rad30              | 1.10636e-06 | 0.999999 | 1.10637e-06 | 0.999999 |
| PAH9+H             | 2.65319e-07 | 0.999999 | 2.65323e-07 | 0.999999 |
| rad15              | 2.46003e-07 | 0.999999 | 2.46007e-07 | 1.000000 |
| PhCH2CCH+H         | 1.62721e-07 | 0.999999 | 1.62723e-07 | 1.000000 |

|               |             |          |             |          |
|---------------|-------------|----------|-------------|----------|
| rad35         | 1.22453e-07 | 1.000000 | 1.22455e-07 | 1.000000 |
| rad38         | 7.60883e-08 | 1.000000 | 7.60893e-08 | 1.000000 |
| rad37         | 2.28238e-08 | 1.000000 | 2.28241e-08 | 1.000000 |
| rad46         | 1.11744e-09 | 1.000000 | 1.11746e-09 | 1.000000 |
| rad5          | 3.86380e-10 | 1.000000 | 3.86385e-10 | 1.000000 |
| rad60syn      | 1.42324e-10 | 1.000000 | 1.42326e-10 | 1.000000 |
| rad60anti     | 4.79399e-11 | 1.000000 | 4.79406e-11 | 1.000000 |
| PAH3+H        | 6.25713e-13 | 1.000000 | 6.25721e-13 | 1.000000 |
| rad59         | 2.00722e-13 | 1.000000 | 2.00725e-13 | 1.000000 |
| rad19syn      | 9.19288e-14 | 1.000000 | 9.19301e-14 | 1.000000 |
| rad50         | 2.20051e-14 | 1.000000 | 2.20053e-14 | 1.000000 |
| rad6          | 4.53659e-15 | 1.000000 | 4.53665e-15 | 1.000000 |
| rad28         | 3.61688e-15 | 1.000000 | 3.61693e-15 | 1.000000 |
| rad54         | 1.36990e-15 | 1.000000 | 1.36992e-15 | 1.000000 |
| PAH10+CH3     | 9.35816e-16 | 1.000000 | 9.35829e-16 | 1.000000 |
| rad26         | 8.86176e-16 | 1.000000 | 8.86188e-16 | 1.000000 |
| rad43         | 2.25414e-16 | 1.000000 | 2.25418e-16 | 1.000000 |
| rad2          | 1.05361e-16 | 1.000000 | 1.05363e-16 | 1.000000 |
| rad62         | 4.46231e-17 | 1.000000 | 4.46238e-17 | 1.000000 |
| rad1          | 7.22049e-18 | 1.000000 | 7.22059e-18 | 1.000000 |
| rad10         | 4.10939e-18 | 1.000000 | 4.10945e-18 | 1.000000 |
| rad52         | 3.57588e-18 | 1.000000 | 3.57592e-18 | 1.000000 |
| rad3          | 1.57528e-18 | 1.000000 | 1.57530e-18 | 1.000000 |
| PhcycC3H3_A+H | 1.39649e-18 | 1.000000 | 1.39651e-18 | 1.000000 |
| rad70         | 9.49279e-19 | 1.000000 | 9.49292e-19 | 1.000000 |
| rad4          | 8.14097e-19 | 1.000000 | 8.14108e-19 | 1.000000 |
| rad55         | 4.19552e-19 | 1.000000 | 4.19557e-19 | 1.000000 |
| rad7          | 3.37225e-19 | 1.000000 | 3.37230e-19 | 1.000000 |
| rad14         | 2.03203e-19 | 1.000000 | 2.03206e-19 | 1.000000 |
| rad25         | 1.10508e-19 | 1.000000 | 1.10509e-19 | 1.000000 |
| rad11         | 8.85237e-20 | 1.000000 | 8.85249e-20 | 1.000000 |
| rad51         | 5.58854e-20 | 1.000000 | 5.58862e-20 | 1.000000 |
| PAH1+H        | 2.22717e-20 | 1.000000 | 2.22720e-20 | 1.000000 |
| rad27         | 1.44515e-20 | 1.000000 | 1.44517e-20 | 1.000000 |
| rad13         | 1.91170e-21 | 1.000000 | 1.91173e-21 | 1.000000 |
| rad34         | 1.09606e-21 | 1.000000 | 1.09606e-21 | 1.000000 |
| rad58         | 1.01534e-21 | 1.000000 | 1.01536e-21 | 1.000000 |
| rad65         | 3.46717e-22 | 1.000000 | 3.46721e-22 | 1.000000 |
| rad42         | 1.39290e-23 | 1.000000 | 1.39292e-23 | 1.000000 |
| rad33         | 1.18262e-23 | 1.000000 | 1.18264e-23 | 1.000000 |
| rad31         | 7.40414e-24 | 1.000000 | 7.40425e-24 | 1.000000 |
| rad41         | 3.90335e-24 | 1.000000 | 3.90341e-24 | 1.000000 |
| rad20         | 3.37250e-26 | 1.000000 | 3.37255e-26 | 1.000000 |
| rad21         | 2.80733e-26 | 1.000000 | 2.80737e-26 | 1.000000 |
| rad23         | 2.28430e-28 | 1.000000 | 2.28434e-28 | 1.000000 |
| rad18         | 5.88589e-29 | 1.000000 | 5.88598e-29 | 1.000000 |
| rad45         | 5.21091e-30 | 1.000000 | 5.21099e-30 | 1.000000 |
| rad22         | 3.07161e-30 | 1.000000 | 3.07165e-30 | 1.000000 |
| rad36         | 3.26507e-31 | 1.000000 | 3.26512e-31 | 1.000000 |
| rad24         | 4.60966e-32 | 1.000000 | 4.60972e-32 | 1.000000 |
| rad47         | 3.66234e-36 | 1.000000 | 3.66239e-36 | 1.000000 |

0.100000000E-07 Pa, 220.000000 K

=====

| Rate constant      | True (fraction)       | Effective (fraction)  |
|--------------------|-----------------------|-----------------------|
| Total              | 4.29529e-17 (1.00 )   | 4.29521e-17 (1.00 )   |
| Formation of rad11 | 3.53712e-17 (0.823 )  | 3.53705e-17 (0.823 )  |
| Formation of rad6  | 6.75433e-18 (0.157 )  | 6.75421e-18 (0.157 )  |
| H-abstraction      | 8.27372e-19 (0.0193 ) | 8.27372e-19 (0.0193 ) |

| species            | PYtrue      | Cumul    | PYeffective | Cumul    |
|--------------------|-------------|----------|-------------|----------|
| Indene+H           | 0.950149    | 0.950149 | 0.950166    | 0.950166 |
| Benzene+2-propynyl | 0.0192623   | 0.969412 | 0.0192627   | 0.969428 |
| C2H2+PhCH2         | 0.0164075   | 0.985819 | 0.0164078   | 0.985836 |
| PhCCH+CH3          | 0.00739809  | 0.993217 | 0.00739822  | 0.993235 |
| PhCHCCH2+H         | 0.00390332  | 0.997121 | 0.00390338  | 0.997138 |
| PhCCCH3+H          | 0.00253726  | 0.999658 | 0.00253729  | 0.999675 |
| Ph+MeAc            | 0.000245755 | 0.999904 | 0.000245759 | 0.999921 |
| rad8               | 2.98950e-05 | 0.999934 | 2.98956e-05 | 0.999951 |
| rad9               | 2.46815e-05 | 0.999958 | 2.46820e-05 | 0.999976 |
| Phenyl+Allene      | 1.79044e-05 | 0.999976 | 0.00000     | 0.999976 |
| PAH7+H             | 1.68192e-05 | 0.999993 | 1.68195e-05 | 0.999992 |
| rad39              | 3.38120e-06 | 0.999996 | 3.38126e-06 | 0.999996 |
| rad12              | 1.68834e-06 | 0.999998 | 1.68838e-06 | 0.999997 |
| rad30              | 1.19029e-06 | 0.999999 | 1.19031e-06 | 0.999999 |
| PAH9+H             | 2.90623e-07 | 1.000000 | 2.90628e-07 | 0.999999 |
| rad15              | 2.69099e-07 | 1.000000 | 2.69104e-07 | 0.999999 |
| PhCH2CCH+H         | 2.52107e-07 | 1.00000  | 2.52111e-07 | 0.999999 |

|               |             |         |             |          |
|---------------|-------------|---------|-------------|----------|
| rad35         | 1.32604e-07 | 1.00000 | 1.32605e-07 | 1.000000 |
| rad38         | 8.40808e-08 | 1.00000 | 8.40823e-08 | 1.000000 |
| rad37         | 3.13100e-08 | 1.00000 | 3.13105e-08 | 1.000000 |
| rad46         | 1.31334e-09 | 1.00000 | 1.31335e-09 | 1.000000 |
| rad5          | 6.14093e-10 | 1.00000 | 6.14103e-10 | 1.000000 |
| rad60syn      | 1.79683e-10 | 1.00000 | 1.79687e-10 | 1.000000 |
| rad60anti     | 6.20569e-11 | 1.00000 | 6.20579e-11 | 1.000000 |
| PAH3+H        | 1.12269e-12 | 1.00000 | 1.12271e-12 | 1.000000 |
| rad59         | 3.50301e-13 | 1.00000 | 3.50307e-13 | 1.000000 |
| rad19syn      | 2.39064e-13 | 1.00000 | 2.39067e-13 | 1.000000 |
| rad50         | 3.97497e-14 | 1.00000 | 3.97504e-14 | 1.000000 |
| rad54         | 4.20837e-15 | 1.00000 | 4.20844e-15 | 1.000000 |
| rad6          | 3.76226e-15 | 1.00000 | 3.76232e-15 | 1.000000 |
| rad28         | 3.01897e-15 | 1.00000 | 3.01901e-15 | 1.000000 |
| PAH10+CH3     | 2.86444e-15 | 1.00000 | 2.86449e-15 | 1.000000 |
| rad26         | 7.41975e-16 | 1.00000 | 7.41989e-16 | 1.000000 |
| rad43         | 6.85854e-16 | 1.00000 | 6.85867e-16 | 1.000000 |
| rad62         | 1.50549e-16 | 1.00000 | 1.50552e-16 | 1.000000 |
| rad2          | 7.04302e-17 | 1.00000 | 7.04315e-17 | 1.000000 |
| rad52         | 9.36563e-18 | 1.00000 | 9.36581e-18 | 1.000000 |
| PhcycC3H3_A+H | 6.23506e-18 | 1.00000 | 6.23517e-18 | 1.000000 |
| rad1          | 4.87104e-18 | 1.00000 | 4.87113e-18 | 1.000000 |
| rad70         | 4.03527e-18 | 1.00000 | 4.03535e-18 | 1.000000 |
| rad10         | 3.90284e-18 | 1.00000 | 3.90291e-18 | 1.000000 |
| rad55         | 1.81229e-18 | 1.00000 | 1.81231e-18 | 1.000000 |
| rad3          | 8.81290e-19 | 1.00000 | 8.81305e-19 | 1.000000 |
| rad4          | 4.56625e-19 | 1.00000 | 4.56633e-19 | 1.000000 |
| rad7          | 2.80334e-19 | 1.00000 | 2.80339e-19 | 1.000000 |
| rad51         | 1.98110e-19 | 1.00000 | 1.98114e-19 | 1.000000 |
| rad14         | 1.74533e-19 | 1.00000 | 1.74536e-19 | 1.000000 |
| PAH1+H        | 1.16260e-19 | 1.00000 | 1.16262e-19 | 1.000000 |
| rad25         | 9.57867e-20 | 1.00000 | 9.57884e-20 | 1.000000 |
| rad11         | 7.40502e-20 | 1.00000 | 7.40516e-20 | 1.000000 |
| rad27         | 1.26753e-20 | 1.00000 | 1.26755e-20 | 1.000000 |
| rad34         | 5.98216e-21 | 1.00000 | 5.98226e-21 | 1.000000 |
| rad58         | 4.64426e-21 | 1.00000 | 4.64435e-21 | 1.000000 |
| rad13         | 1.59207e-21 | 1.00000 | 1.59210e-21 | 1.000000 |
| rad65         | 1.42039e-21 | 1.00000 | 1.42042e-21 | 1.000000 |
| rad42         | 8.43153e-23 | 1.00000 | 8.43168e-23 | 1.000000 |
| rad41         | 2.40058e-23 | 1.00000 | 2.40063e-23 | 1.000000 |
| rad33         | 1.08566e-23 | 1.00000 | 1.08568e-23 | 1.000000 |
| rad31         | 9.64828e-24 | 1.00000 | 9.64845e-24 | 1.000000 |
| rad20         | 3.37603e-26 | 1.00000 | 3.37609e-26 | 1.000000 |
| rad21         | 2.83047e-26 | 1.00000 | 2.83052e-26 | 1.000000 |
| rad23         | 4.42801e-28 | 1.00000 | 4.42809e-28 | 1.000000 |
| rad18         | 5.60286e-29 | 1.00000 | 5.60296e-29 | 1.000000 |
| rad45         | 8.73841e-30 | 1.00000 | 8.73858e-30 | 1.000000 |
| rad22         | 2.83410e-30 | 1.00000 | 2.83414e-30 | 1.000000 |
| rad36         | 5.49182e-31 | 1.00000 | 5.49191e-31 | 1.000000 |
| rad24         | 5.31364e-32 | 1.00000 | 5.31373e-32 | 1.000000 |
| rad47         | 1.52506e-35 | 1.00000 | 1.52509e-35 | 1.000000 |

0.100000000E-07 Pa, 230.000000 K

=====

| Rate constant      | True (fraction)       | Effective (fraction)  |
|--------------------|-----------------------|-----------------------|
| Total              | 6.25016e-17 (1.00 )   | 6.25002e-17 (1.00 )   |
| Formation of rad11 | 5.06355e-17 (0.810 )  | 5.06343e-17 (0.810 )  |
| Formation of rad6  | 1.04318e-17 (0.167 )  | 1.04316e-17 (0.167 )  |
| H-abstraction      | 1.43428e-18 (0.0229 ) | 1.43428e-18 (0.0229 ) |

| species            | PYtrue      | Cumul    | PYeffective | Cumul    |
|--------------------|-------------|----------|-------------|----------|
| Indene+H           | 0.944516    | 0.944516 | 0.944538    | 0.944538 |
| Benzene+2-propynyl | 0.0229478   | 0.967464 | 0.0229483   | 0.967487 |
| C2H2+PhCH2         | 0.0172621   | 0.984726 | 0.0172625   | 0.984749 |
| PhCCH+CH3          | 0.00798938  | 0.992716 | 0.00798957  | 0.992739 |
| PhCHCCH2+H         | 0.00416893  | 0.996885 | 0.00416902  | 0.996908 |
| PhCCCH3+H          | 0.00271503  | 0.999600 | 0.00271509  | 0.999623 |
| Ph+MeAc            | 0.000288724 | 0.999888 | 0.000288730 | 0.999912 |
| rad8               | 3.26590e-05 | 0.999921 | 3.26598e-05 | 0.999944 |
| rad9               | 2.80960e-05 | 0.999949 | 2.80967e-05 | 0.999972 |
| Phenyl+Allene      | 2.29542e-05 | 0.999972 | 0.00000     | 0.999972 |
| PAH7+H             | 1.93897e-05 | 0.999991 | 1.93902e-05 | 0.999992 |
| rad39              | 3.99906e-06 | 0.999995 | 3.99916e-06 | 0.999996 |
| rad12              | 1.89524e-06 | 0.999997 | 1.89528e-06 | 0.999998 |
| rad30              | 1.28233e-06 | 0.999999 | 1.28236e-06 | 0.999999 |
| PhCH2CCH+H         | 3.81725e-07 | 0.999999 | 3.81734e-07 | 0.999999 |
| PAH9+H             | 3.19094e-07 | 0.999999 | 3.19100e-07 | 1.000000 |
| rad15              | 2.94806e-07 | 1.000000 | 2.94813e-07 | 1.000000 |

|               |             |          |             |          |
|---------------|-------------|----------|-------------|----------|
| rad35         | 1.43889e-07 | 1.000000 | 1.43892e-07 | 1.000000 |
| rad38         | 9.31440e-08 | 1.000000 | 9.31461e-08 | 1.000000 |
| rad37         | 4.19469e-08 | 1.000000 | 4.19480e-08 | 1.000000 |
| rad46         | 1.54769e-09 | 1.000000 | 1.54773e-09 | 1.000000 |
| rad5          | 9.45893e-10 | 1.000000 | 9.45914e-10 | 1.000000 |
| rad60syn      | 2.26302e-10 | 1.000000 | 2.26308e-10 | 1.000000 |
| rad60anti     | 7.99729e-11 | 1.000000 | 7.99747e-11 | 1.000000 |
| PAH3+H        | 1.94646e-12 | 1.000000 | 1.94651e-12 | 1.000000 |
| rad59         | 5.91559e-13 | 1.000000 | 5.91574e-13 | 1.000000 |
| rad19syn      | 5.76047e-13 | 1.000000 | 5.76061e-13 | 1.000000 |
| rad50         | 6.96960e-14 | 1.000000 | 6.96976e-14 | 1.000000 |
| rad54         | 1.17979e-14 | 1.000000 | 1.17982e-14 | 1.000000 |
| PAH10+CH3     | 7.98676e-15 | 1.000000 | 7.98694e-15 | 1.000000 |
| rad6          | 3.12811e-15 | 1.000000 | 3.12819e-15 | 1.000000 |
| rad28         | 2.52070e-15 | 1.000000 | 2.52075e-15 | 1.000000 |
| rad43         | 1.89885e-15 | 1.000000 | 1.89890e-15 | 1.000000 |
| rad26         | 6.21443e-16 | 1.000000 | 6.21458e-16 | 1.000000 |
| rad62         | 4.58150e-16 | 1.000000 | 4.58160e-16 | 1.000000 |
| rad2          | 8.57354e-17 | 1.000000 | 8.57374e-17 | 1.000000 |
| PhcycC3H3_A+H | 2.44417e-17 | 1.000000 | 2.44422e-17 | 1.000000 |
| rad52         | 2.28788e-17 | 1.000000 | 2.28794e-17 | 1.000000 |
| rad70         | 1.51220e-17 | 1.000000 | 1.51224e-17 | 1.000000 |
| rad55         | 6.89280e-18 | 1.000000 | 6.89295e-18 | 1.000000 |
| rad1          | 5.98802e-18 | 1.000000 | 5.98815e-18 | 1.000000 |
| rad10         | 4.59216e-18 | 1.000000 | 4.59226e-18 | 1.000000 |
| rad3          | 9.93203e-19 | 1.000000 | 9.93232e-19 | 1.000000 |
| rad51         | 6.35771e-19 | 1.000000 | 6.35785e-19 | 1.000000 |
| PAH1+H        | 5.21365e-19 | 1.000000 | 5.21377e-19 | 1.000000 |
| rad4          | 5.16062e-19 | 1.000000 | 5.16074e-19 | 1.000000 |
| rad7          | 2.33658e-19 | 1.000000 | 2.33663e-19 | 1.000000 |
| rad14         | 1.50080e-19 | 1.000000 | 1.50083e-19 | 1.000000 |
| rad25         | 8.31462e-20 | 1.000000 | 8.31481e-20 | 1.000000 |
| rad11         | 6.21359e-20 | 1.000000 | 6.21374e-20 | 1.000000 |
| rad34         | 2.78859e-20 | 1.000000 | 2.78866e-20 | 1.000000 |
| rad58         | 1.86124e-20 | 1.000000 | 1.86127e-20 | 1.000000 |
| rad27         | 1.11377e-20 | 1.000000 | 1.11380e-20 | 1.000000 |
| rad65         | 5.17416e-21 | 1.000000 | 5.17428e-21 | 1.000000 |
| rad13         | 1.32954e-21 | 1.000000 | 1.32957e-21 | 1.000000 |
| rad42         | 4.29489e-22 | 1.000000 | 4.29498e-22 | 1.000000 |
| rad41         | 1.23970e-22 | 1.000000 | 1.23973e-22 | 1.000000 |
| rad31         | 1.28055e-23 | 1.000000 | 1.28058e-23 | 1.000000 |
| rad33         | 1.00455e-23 | 1.000000 | 1.00458e-23 | 1.000000 |
| rad20         | 3.39962e-26 | 1.000000 | 3.39970e-26 | 1.000000 |
| rad21         | 2.87187e-26 | 1.000000 | 2.87194e-26 | 1.000000 |
| rad23         | 9.06275e-28 | 1.000000 | 9.06296e-28 | 1.000000 |
| rad18         | 5.34995e-29 | 1.000000 | 5.35007e-29 | 1.000000 |
| rad45         | 1.74938e-29 | 1.000000 | 1.74943e-29 | 1.000000 |
| rad22         | 2.61960e-30 | 1.000000 | 2.61966e-30 | 1.000000 |
| rad36         | 1.10327e-30 | 1.000000 | 1.10329e-30 | 1.000000 |
| rad24         | 6.19653e-32 | 1.000000 | 6.19668e-32 | 1.000000 |
| rad47         | 5.52650e-35 | 1.000000 | 5.52662e-35 | 1.000000 |

0.100000000E-07 Pa, 240.000000 K

=====

| Rate constant      | True (fraction)       | Effective (fraction)  |
|--------------------|-----------------------|-----------------------|
| Total              | 8.83273e-17 (1.00 )   | 8.83247e-17 (1.00 )   |
| Formation of rad11 | 7.04077e-17 (0.797 )  | 7.04056e-17 (0.797 )  |
| Formation of rad6  | 1.55481e-17 (0.176 )  | 1.55476e-17 (0.176 )  |
| H-abstraction      | 2.37143e-18 (0.0268 ) | 2.37143e-18 (0.0268 ) |

| species            | PYtrue      | Cumul    | PYeffective | Cumul    |
|--------------------|-------------|----------|-------------|----------|
| Indene+H           | 0.938534    | 0.938534 | 0.938561    | 0.938561 |
| Benzene+2-propynyl | 0.0268483   | 0.965382 | 0.0268490   | 0.965410 |
| C2H2+PhCH2         | 0.0181765   | 0.983559 | 0.0181771   | 0.983587 |
| PhCCH+CH3          | 0.00862246  | 0.992181 | 0.00862271  | 0.992210 |
| PhCHCCH2+H         | 0.00445043  | 0.996631 | 0.00445055  | 0.996661 |
| PhCCCH3+H          | 0.00290220  | 0.999534 | 0.00290229  | 0.999563 |
| Ph+MeAc            | 0.000337758 | 0.999871 | 0.000337767 | 0.999901 |
| rad8               | 3.56294e-05 | 0.999907 | 3.56305e-05 | 0.999936 |
| rad9               | 3.19609e-05 | 0.999939 | 3.19619e-05 | 0.999968 |
| Phenyl+Allene      | 2.92583e-05 | 0.999968 | 0.000000    | 0.999968 |
| PAH7+H             | 2.23438e-05 | 0.999991 | 2.23444e-05 | 0.999991 |
| rad39              | 4.72011e-06 | 0.999995 | 4.72025e-06 | 0.999995 |
| rad12              | 2.12238e-06 | 0.999997 | 2.12244e-06 | 0.999998 |
| rad30              | 1.38320e-06 | 0.999999 | 1.38325e-06 | 0.999999 |
| PhCH2CCH+H         | 5.66275e-07 | 0.999999 | 5.66292e-07 | 0.999999 |
| PAH9+H             | 3.51138e-07 | 1.000000 | 3.51148e-07 | 1.000000 |
| rad15              | 3.23402e-07 | 1.000000 | 3.23411e-07 | 1.000000 |

|               |             |         |             |         |
|---------------|-------------|---------|-------------|---------|
| rad35         | 1.56441e-07 | 1.00000 | 1.56445e-07 | 1.00000 |
| rad38         | 1.03425e-07 | 1.00000 | 1.03428e-07 | 1.00000 |
| rad37         | 5.50656e-08 | 1.00000 | 5.50672e-08 | 1.00000 |
| rad46         | 1.82809e-09 | 1.00000 | 1.82814e-09 | 1.00000 |
| rad5          | 1.41703e-09 | 1.00000 | 1.41707e-09 | 1.00000 |
| rad60syn      | 2.84283e-10 | 1.00000 | 2.84290e-10 | 1.00000 |
| rad60anti     | 1.02613e-10 | 1.00000 | 1.02616e-10 | 1.00000 |
| PAH3+H        | 3.27490e-12 | 1.00000 | 3.27499e-12 | 1.00000 |
| rad19syn      | 1.29873e-12 | 1.00000 | 1.29877e-12 | 1.00000 |
| rad59         | 9.70705e-13 | 1.00000 | 9.70734e-13 | 1.00000 |
| rad50         | 1.19032e-13 | 1.00000 | 1.19036e-13 | 1.00000 |
| rad54         | 3.05322e-14 | 1.00000 | 3.05331e-14 | 1.00000 |
| PAH10+CH3     | 2.05205e-14 | 1.00000 | 2.05210e-14 | 1.00000 |
| rad43         | 4.83974e-15 | 1.00000 | 4.83988e-15 | 1.00000 |
| rad6          | 2.60712e-15 | 1.00000 | 2.60720e-15 | 1.00000 |
| rad28         | 2.10514e-15 | 1.00000 | 2.10521e-15 | 1.00000 |
| rad62         | 1.27363e-15 | 1.00000 | 1.27367e-15 | 1.00000 |
| rad26         | 5.20620e-16 | 1.00000 | 5.20635e-16 | 1.00000 |
| rad2          | 1.55531e-16 | 1.00000 | 1.55536e-16 | 1.00000 |
| PhcycC3H3_A+H | 8.53911e-17 | 1.00000 | 8.53936e-17 | 1.00000 |
| rad52         | 5.25993e-17 | 1.00000 | 5.26010e-17 | 1.00000 |
| rad70         | 5.07092e-17 | 1.00000 | 5.07107e-17 | 1.00000 |
| rad55         | 2.34300e-17 | 1.00000 | 2.34307e-17 | 1.00000 |
| rad1          | 1.09807e-17 | 1.00000 | 1.09810e-17 | 1.00000 |
| rad10         | 5.45337e-18 | 1.00000 | 5.45353e-18 | 1.00000 |
| rad3          | 2.15146e-18 | 1.00000 | 2.15153e-18 | 1.00000 |
| PAH1+H        | 2.04480e-18 | 1.00000 | 2.04486e-18 | 1.00000 |
| rad51         | 1.86868e-18 | 1.00000 | 1.86873e-18 | 1.00000 |
| rad4          | 1.12132e-18 | 1.00000 | 1.12135e-18 | 1.00000 |
| rad7          | 1.95238e-19 | 1.00000 | 1.95243e-19 | 1.00000 |
| rad14         | 1.29198e-19 | 1.00000 | 1.29201e-19 | 1.00000 |
| rad34         | 1.13110e-19 | 1.00000 | 1.13113e-19 | 1.00000 |
| rad25         | 7.22761e-20 | 1.00000 | 7.22782e-20 | 1.00000 |
| rad58         | 6.63439e-20 | 1.00000 | 6.63458e-20 | 1.00000 |
| rad11         | 5.22947e-20 | 1.00000 | 5.22963e-20 | 1.00000 |
| rad65         | 1.69869e-20 | 1.00000 | 1.69874e-20 | 1.00000 |
| rad27         | 9.80431e-21 | 1.00000 | 9.80459e-21 | 1.00000 |
| rad42         | 1.87991e-21 | 1.00000 | 1.87996e-21 | 1.00000 |
| rad13         | 1.11320e-21 | 1.00000 | 1.11324e-21 | 1.00000 |
| rad41         | 5.49128e-22 | 1.00000 | 5.49144e-22 | 1.00000 |
| rad31         | 1.72989e-23 | 1.00000 | 1.72995e-23 | 1.00000 |
| rad33         | 9.36811e-24 | 1.00000 | 9.36839e-24 | 1.00000 |
| rad20         | 3.44407e-26 | 1.00000 | 3.44417e-26 | 1.00000 |
| rad21         | 2.93274e-26 | 1.00000 | 2.93283e-26 | 1.00000 |
| rad23         | 1.95234e-27 | 1.00000 | 1.95239e-27 | 1.00000 |
| rad18         | 5.12420e-29 | 1.00000 | 5.12434e-29 | 1.00000 |
| rad45         | 3.66596e-29 | 1.00000 | 3.66607e-29 | 1.00000 |
| rad22         | 2.42570e-30 | 1.00000 | 2.42576e-30 | 1.00000 |
| rad36         | 2.32099e-30 | 1.00000 | 2.32105e-30 | 1.00000 |
| rad24         | 7.31272e-32 | 1.00000 | 7.31293e-32 | 1.00000 |
| rad47         | 1.77440e-34 | 1.00000 | 1.77444e-34 | 1.00000 |

0.100000000E-07 Pa, 250.000000 K

=====

| Rate constant      | True (fraction)       | Effective (fraction)  |
|--------------------|-----------------------|-----------------------|
| Total              | 1.21641e-16 (1.00 )   | 1.21637e-16 (1.00 )   |
| Formation of rad11 | 9.54219e-17 (0.784 )  | 9.54182e-17 (0.784 )  |
| Formation of rad6  | 2.24583e-17 (0.185 )  | 2.24574e-17 (0.185 )  |
| H-abstraction      | 3.76121e-18 (0.0309 ) | 3.76121e-18 (0.0309 ) |

| species            | PYtrue      | Cumul    | PYeffective | Cumul    |
|--------------------|-------------|----------|-------------|----------|
| Indene+H           | 0.932238    | 0.932238 | 0.932272    | 0.932272 |
| Benzene+2-propynyl | 0.0309205   | 0.963159 | 0.0309216   | 0.963193 |
| C2H2+PhCH2         | 0.0191545   | 0.982313 | 0.0191553   | 0.982349 |
| PhCCH+CH3          | 0.00929822  | 0.991611 | 0.00929857  | 0.991647 |
| PhCHCCH2+H         | 0.00474792  | 0.996359 | 0.00474810  | 0.996395 |
| PhCCCH3+H          | 0.00309848  | 0.999458 | 0.00309859  | 0.999494 |
| Ph+MeAc            | 0.000393391 | 0.999851 | 0.000393405 | 0.999887 |
| rad8               | 3.88088e-05 | 0.999890 | 3.88103e-05 | 0.999926 |
| Phenyl+Allene      | 3.70855e-05 | 0.999927 | 0.00000     | 0.999926 |
| rad9               | 3.63257e-05 | 0.999963 | 3.63271e-05 | 0.999963 |
| PAH7+H             | 2.57317e-05 | 0.999989 | 2.57326e-05 | 0.999988 |
| rad39              | 5.55894e-06 | 0.999995 | 5.55915e-06 | 0.999994 |
| rad12              | 2.37060e-06 | 0.999997 | 2.37069e-06 | 0.999996 |
| rad30              | 1.49367e-06 | 0.999998 | 1.49373e-06 | 0.999998 |
| PhCH2CCH+H         | 8.24734e-07 | 0.999999 | 8.24764e-07 | 0.999998 |
| PAH9+H             | 3.87213e-07 | 1.000000 | 3.87227e-07 | 0.999999 |
| rad15              | 3.55187e-07 | 1.000000 | 3.55200e-07 | 0.999999 |



|               |             |         |             |          |
|---------------|-------------|---------|-------------|----------|
| rad35         | 1.70400e-07 | 1.00000 | 1.70407e-07 | 0.999999 |
| rad38         | 1.15089e-07 | 1.00000 | 1.15094e-07 | 1.000000 |
| rad37         | 7.10212e-08 | 1.00000 | 7.10239e-08 | 1.000000 |
| rad46         | 2.16348e-09 | 1.00000 | 2.16356e-09 | 1.000000 |
| rad5          | 2.07075e-09 | 1.00000 | 2.07082e-09 | 1.000000 |
| rad60syn      | 3.56139e-10 | 1.00000 | 3.56152e-10 | 1.000000 |
| rad60anti     | 1.31096e-10 | 1.00000 | 1.31101e-10 | 1.000000 |
| PAH3+H        | 5.36551e-12 | 1.00000 | 5.36572e-12 | 1.000000 |
| rad19syn      | 2.76179e-12 | 1.00000 | 2.76189e-12 | 1.000000 |
| rad59         | 1.55301e-12 | 1.00000 | 1.55307e-12 | 1.000000 |
| rad50         | 1.98576e-13 | 1.00000 | 1.98584e-13 | 1.000000 |
| rad54         | 7.36305e-14 | 1.00000 | 7.36332e-14 | 1.000000 |
| PAH10+CH3     | 4.90484e-14 | 1.00000 | 4.90502e-14 | 1.000000 |
| rad43         | 1.14663e-14 | 1.00000 | 1.14667e-14 | 1.000000 |
| rad62         | 3.26830e-15 | 1.00000 | 3.26842e-15 | 1.000000 |
| rad6          | 2.17814e-15 | 1.00000 | 2.17822e-15 | 1.000000 |
| rad28         | 1.75838e-15 | 1.00000 | 1.75844e-15 | 1.000000 |
| rad26         | 4.36238e-16 | 1.00000 | 4.36254e-16 | 1.000000 |
| PhcycC3H3_A+H | 2.69203e-16 | 1.00000 | 2.69212e-16 | 1.000000 |
| rad2          | 1.94788e-16 | 1.00000 | 1.94794e-16 | 1.000000 |
| rad70         | 1.54047e-16 | 1.00000 | 1.54052e-16 | 1.000000 |
| rad52         | 1.14634e-16 | 1.00000 | 1.14638e-16 | 1.000000 |
| rad55         | 7.20614e-17 | 1.00000 | 7.20642e-17 | 1.000000 |
| rad1          | 1.39104e-17 | 1.00000 | 1.39108e-17 | 1.000000 |
| PAH1+H        | 7.11981e-18 | 1.00000 | 7.12007e-18 | 1.000000 |
| rad10         | 6.92601e-18 | 1.00000 | 6.92626e-18 | 1.000000 |
| rad51         | 5.07774e-18 | 1.00000 | 5.07794e-18 | 1.000000 |
| rad3          | 2.53124e-18 | 1.00000 | 2.53133e-18 | 1.000000 |
| rad4          | 1.32360e-18 | 1.00000 | 1.32364e-18 | 1.000000 |
| rad34         | 4.05530e-19 | 1.00000 | 4.05545e-19 | 1.000000 |
| rad58         | 2.12987e-19 | 1.00000 | 2.12995e-19 | 1.000000 |
| rad7          | 1.63542e-19 | 1.00000 | 1.63548e-19 | 1.000000 |
| rad14         | 1.11343e-19 | 1.00000 | 1.11347e-19 | 1.000000 |
| rad25         | 6.29164e-20 | 1.00000 | 6.29188e-20 | 1.000000 |
| rad65         | 5.08172e-20 | 1.00000 | 5.08191e-20 | 1.000000 |
| rad11         | 4.41454e-20 | 1.00000 | 4.41470e-20 | 1.000000 |
| rad27         | 8.64623e-21 | 1.00000 | 8.64655e-21 | 1.000000 |
| rad42         | 7.19654e-21 | 1.00000 | 7.19681e-21 | 1.000000 |
| rad41         | 2.12408e-21 | 1.00000 | 2.12415e-21 | 1.000000 |
| rad13         | 9.34506e-22 | 1.00000 | 9.34540e-22 | 1.000000 |
| rad31         | 2.37649e-23 | 1.00000 | 2.37658e-23 | 1.000000 |
| rad33         | 8.80493e-24 | 1.00000 | 8.80525e-24 | 1.000000 |
| rad20         | 3.51070e-26 | 1.00000 | 3.51084e-26 | 1.000000 |
| rad21         | 3.01480e-26 | 1.00000 | 3.01491e-26 | 1.000000 |
| rad23         | 4.43756e-27 | 1.00000 | 4.43773e-27 | 1.000000 |
| rad45         | 1.36411e-28 | 1.00000 | 1.36415e-28 | 1.000000 |
| rad18         | 4.92318e-29 | 1.00000 | 4.92335e-29 | 1.000000 |
| rad36         | 8.67495e-30 | 1.00000 | 8.67527e-30 | 1.000000 |
| rad22         | 2.25054e-30 | 1.00000 | 2.25063e-30 | 1.000000 |
| rad24         | 8.73651e-32 | 1.00000 | 8.73684e-32 | 1.000000 |
| rad47         | 5.12438e-34 | 1.00000 | 5.12457e-34 | 1.000000 |

0.100000000E-07 Pa, 260.000000 K

=====

| Rate constant      | True (fraction)       | Effective (fraction)  |
|--------------------|-----------------------|-----------------------|
| Total              | 1.63720e-16 (1.00 )   | 1.63713e-16 (1.00 )   |
| Formation of rad11 | 1.26419e-16 (0.772 )  | 1.26412e-16 (0.772 )  |
| Formation of rad6  | 3.15515e-17 (0.193 )  | 3.15499e-17 (0.193 )  |
| H-abstraction      | 5.75028e-18 (0.0351 ) | 5.75028e-18 (0.0351 ) |

| species            | PYtrue      | Cumul    | PYeffective | Cumul    |
|--------------------|-------------|----------|-------------|----------|
| Indene+H           | 0.925667    | 0.925667 | 0.925710    | 0.925710 |
| Benzene+2-propynyl | 0.0351226   | 0.960789 | 0.0351242   | 0.960834 |
| C2H2+PhCH2         | 0.0201996   | 0.980989 | 0.0202005   | 0.981034 |
| PhCCH+CH3          | 0.0100174   | 0.991006 | 0.0100178   | 0.991052 |
| PhCHCCH2+H         | 0.00506142  | 0.996068 | 0.00506165  | 0.996114 |
| PhCCCH3+H          | 0.00330346  | 0.999371 | 0.00330362  | 0.999417 |
| Ph+MeAc            | 0.000456149 | 0.999827 | 0.000456170 | 0.999874 |
| Phenyl+Allene      | 4.67508e-05 | 0.999874 | 0.00000     | 0.999874 |
| rad8               | 4.21981e-05 | 0.999916 | 4.22001e-05 | 0.999916 |
| rad9               | 4.12432e-05 | 0.999958 | 4.12452e-05 | 0.999957 |
| PAH7+H             | 2.96088e-05 | 0.999987 | 2.96102e-05 | 0.999987 |
| rad39              | 6.53167e-06 | 0.999994 | 6.53198e-06 | 0.999993 |
| rad12              | 2.64057e-06 | 0.999996 | 2.64070e-06 | 0.999996 |
| rad30              | 1.61455e-06 | 0.999998 | 1.61462e-06 | 0.999997 |
| PhCH2CCH+H         | 1.18129e-06 | 0.999999 | 1.18135e-06 | 0.999999 |
| PAH9+H             | 4.27826e-07 | 1.000000 | 4.27846e-07 | 0.999999 |
| rad15              | 3.90482e-07 | 1.000000 | 3.90501e-07 | 0.999999 |

|               |             |         |             |          |
|---------------|-------------|---------|-------------|----------|
| rad35         | 1.85925e-07 | 1.00000 | 1.85933e-07 | 1.000000 |
| rad38         | 1.28323e-07 | 1.00000 | 1.28328e-07 | 1.000000 |
| rad37         | 9.01921e-08 | 1.00000 | 9.01963e-08 | 1.000000 |
| rad5          | 2.95913e-09 | 1.00000 | 2.95927e-09 | 1.000000 |
| rad46         | 2.56443e-09 | 1.00000 | 2.56455e-09 | 1.000000 |
| rad60syn      | 4.44859e-10 | 1.00000 | 4.44880e-10 | 1.000000 |
| rad60anti     | 1.66767e-10 | 1.00000 | 1.66774e-10 | 1.000000 |
| PAH3+H        | 8.58431e-12 | 1.00000 | 8.58471e-12 | 1.000000 |
| rad19syn      | 5.57650e-12 | 1.00000 | 5.57676e-12 | 1.000000 |
| rad59         | 2.42911e-12 | 1.00000 | 2.42922e-12 | 1.000000 |
| rad50         | 3.24314e-13 | 1.00000 | 3.24329e-13 | 1.000000 |
| rad54         | 1.66745e-13 | 1.00000 | 1.66753e-13 | 1.000000 |
| PAH10+CH3     | 1.09928e-13 | 1.00000 | 1.09934e-13 | 1.000000 |
| rad43         | 2.54567e-14 | 1.00000 | 2.54579e-14 | 1.000000 |
| rad62         | 7.80914e-15 | 1.00000 | 7.80950e-15 | 1.000000 |
| rad6          | 1.82402e-15 | 1.00000 | 1.82411e-15 | 1.000000 |
| rad28         | 1.46890e-15 | 1.00000 | 1.46897e-15 | 1.000000 |
| PhcycC3H3_A+H | 7.73853e-16 | 1.00000 | 7.73889e-16 | 1.000000 |
| rad70         | 4.28321e-16 | 1.00000 | 4.28340e-16 | 1.000000 |
| rad26         | 3.65590e-16 | 1.00000 | 3.65608e-16 | 1.000000 |
| rad52         | 2.38196e-16 | 1.00000 | 2.38208e-16 | 1.000000 |
| rad55         | 2.02608e-16 | 1.00000 | 2.02617e-16 | 1.000000 |
| rad2          | 1.36219e-16 | 1.00000 | 1.36226e-16 | 1.000000 |
| PAH1+H        | 2.22906e-17 | 1.00000 | 2.22916e-17 | 1.000000 |
| rad51         | 1.28526e-17 | 1.00000 | 1.28531e-17 | 1.000000 |
| rad1          | 9.84947e-18 | 1.00000 | 9.84993e-18 | 1.000000 |
| rad10         | 7.17562e-18 | 1.00000 | 7.17595e-18 | 1.000000 |
| rad3          | 1.75241e-18 | 1.00000 | 1.75249e-18 | 1.000000 |
| rad34         | 1.30240e-18 | 1.00000 | 1.30246e-18 | 1.000000 |
| rad4          | 9.19639e-19 | 1.00000 | 9.19682e-19 | 1.000000 |
| rad58         | 6.22358e-19 | 1.00000 | 6.22387e-19 | 1.000000 |
| rad65         | 1.39790e-19 | 1.00000 | 1.39797e-19 | 1.000000 |
| rad7          | 1.37326e-19 | 1.00000 | 1.37333e-19 | 1.000000 |
| rad14         | 9.60643e-20 | 1.00000 | 9.60688e-20 | 1.000000 |
| rad25         | 5.48483e-20 | 1.00000 | 5.48509e-20 | 1.000000 |
| rad11         | 3.73783e-20 | 1.00000 | 3.73801e-20 | 1.000000 |
| rad42         | 2.44584e-20 | 1.00000 | 2.44595e-20 | 1.000000 |
| rad27         | 7.63908e-21 | 1.00000 | 7.63943e-21 | 1.000000 |
| rad41         | 7.28487e-21 | 1.00000 | 7.28522e-21 | 1.000000 |
| rad13         | 7.86522e-22 | 1.00000 | 7.86559e-22 | 1.000000 |
| rad31         | 3.31650e-23 | 1.00000 | 3.31665e-23 | 1.000000 |
| rad33         | 8.34030e-24 | 1.00000 | 8.34070e-24 | 1.000000 |
| rad20         | 3.60141e-26 | 1.00000 | 3.60158e-26 | 1.000000 |
| rad21         | 3.12035e-26 | 1.00000 | 3.12050e-26 | 1.000000 |
| rad23         | 1.05452e-26 | 1.00000 | 1.05458e-26 | 1.000000 |
| rad45         | 3.98357e-28 | 1.00000 | 3.98376e-28 | 1.000000 |
| rad18         | 4.74490e-29 | 1.00000 | 4.74512e-29 | 1.000000 |
| rad36         | 2.54602e-29 | 1.00000 | 2.54614e-29 | 1.000000 |
| rad22         | 2.09303e-30 | 1.00000 | 2.09312e-30 | 1.000000 |
| rad24         | 1.05705e-31 | 1.00000 | 1.05711e-31 | 1.000000 |
| rad47         | 1.34824e-33 | 1.00000 | 1.34831e-33 | 1.000000 |

0.100000000E-07 Pa, 270.000000 K

=====

| Rate constant      | True (fraction)       | Effective (fraction)  |
|--------------------|-----------------------|-----------------------|
| Total              | 2.15887e-16 (1.00 )   | 2.15874e-16 (1.00 )   |
| Formation of rad11 | 1.64133e-16 (0.760 )  | 1.64123e-16 (0.760 )  |
| Formation of rad6  | 4.32452e-17 (0.200 )  | 4.32425e-17 (0.200 )  |
| H-abstraction      | 8.50919e-18 (0.0394 ) | 8.50919e-18 (0.0394 ) |

| species            | PYtrue      | Cumul    | PYeffective | Cumul    |
|--------------------|-------------|----------|-------------|----------|
| Indene+H           | 0.918855    | 0.918855 | 0.918909    | 0.918909 |
| Benzene+2-propynyl | 0.0394150   | 0.958270 | 0.0394174   | 0.958326 |
| C2H2+PhCH2         | 0.0213152   | 0.979585 | 0.0213165   | 0.979643 |
| PhCCH+CH3          | 0.0107802   | 0.990366 | 0.0107808   | 0.990423 |
| PhCHCCH2+H         | 0.00539083  | 0.995756 | 0.00539115  | 0.995815 |
| PhCCCH3+H          | 0.00351663  | 0.999273 | 0.00351684  | 0.999331 |
| Ph+MeAc            | 0.000526535 | 0.999800 | 0.000526566 | 0.999858 |
| Phenyl+Allene      | 5.86216e-05 | 0.999858 | 0.00000     | 0.999858 |
| rad9               | 4.67702e-05 | 0.999905 | 4.67730e-05 | 0.999905 |
| rad8               | 4.57958e-05 | 0.999951 | 4.57985e-05 | 0.999951 |
| PAH7+H             | 3.40355e-05 | 0.999985 | 3.40375e-05 | 0.999985 |
| rad39              | 7.65595e-06 | 0.999993 | 7.65640e-06 | 0.999992 |
| rad12              | 2.93281e-06 | 0.999995 | 2.93298e-06 | 0.999995 |
| rad30              | 1.74667e-06 | 0.999997 | 1.74677e-06 | 0.999997 |
| PhCH2CCH+H         | 1.66642e-06 | 0.999999 | 1.66651e-06 | 0.999999 |
| PAH9+H             | 4.73537e-07 | 0.999999 | 4.73564e-07 | 0.999999 |
| rad15              | 4.29630e-07 | 1.000000 | 4.29655e-07 | 0.999999 |

|               |             |          |             |          |
|---------------|-------------|----------|-------------|----------|
| rad35         | 2.03185e-07 | 1.000000 | 2.03197e-07 | 1.000000 |
| rad38         | 1.43333e-07 | 1.000000 | 1.43341e-07 | 1.000000 |
| rad37         | 1.12977e-07 | 1.000000 | 1.12984e-07 | 1.000000 |
| rad5          | 4.14381e-09 | 1.000000 | 4.14405e-09 | 1.000000 |
| rad46         | 3.04334e-09 | 1.000000 | 3.04352e-09 | 1.000000 |
| rad60syn      | 5.53971e-10 | 1.000000 | 5.54004e-10 | 1.000000 |
| rad60anti     | 2.11229e-10 | 1.000000 | 2.11241e-10 | 1.000000 |
| PAH3+H        | 1.34418e-11 | 1.000000 | 1.34427e-11 | 1.000000 |
| rad19syn      | 1.07500e-11 | 1.000000 | 1.07506e-11 | 1.000000 |
| rad59         | 3.72270e-12 | 1.000000 | 3.72291e-12 | 1.000000 |
| rad50         | 5.19450e-13 | 1.000000 | 5.19480e-13 | 1.000000 |
| rad54         | 3.56851e-13 | 1.000000 | 3.56872e-13 | 1.000000 |
| PAH10+CH3     | 2.32537e-13 | 1.000000 | 2.32551e-13 | 1.000000 |
| rad43         | 5.33186e-14 | 1.000000 | 5.33218e-14 | 1.000000 |
| rad62         | 1.74991e-14 | 1.000000 | 1.75001e-14 | 1.000000 |
| PhcycC3H3_A+H | 2.04647e-15 | 1.000000 | 2.04659e-15 | 1.000000 |
| rad6          | 1.53182e-15 | 1.000000 | 1.53191e-15 | 1.000000 |
| rad28         | 1.22718e-15 | 1.000000 | 1.22725e-15 | 1.000000 |
| rad70         | 1.09950e-15 | 1.000000 | 1.09956e-15 | 1.000000 |
| rad55         | 5.25298e-16 | 1.000000 | 5.25328e-16 | 1.000000 |
| rad52         | 4.74038e-16 | 1.000000 | 4.74066e-16 | 1.000000 |
| rad26         | 3.06429e-16 | 1.000000 | 3.06446e-16 | 1.000000 |
| rad2          | 1.96879e-16 | 1.000000 | 1.96891e-16 | 1.000000 |
| PAH1+H        | 6.34376e-17 | 1.000000 | 6.34413e-17 | 1.000000 |
| rad51         | 3.04907e-17 | 1.000000 | 3.04924e-17 | 1.000000 |
| rad1          | 1.44253e-17 | 1.000000 | 1.44261e-17 | 1.000000 |
| rad10         | 9.68135e-18 | 1.000000 | 9.68190e-18 | 1.000000 |
| rad34         | 3.78996e-18 | 1.000000 | 3.79019e-18 | 1.000000 |
| rad58         | 1.67024e-18 | 1.000000 | 1.67033e-18 | 1.000000 |
| rad3          | 1.38818e-18 | 1.000000 | 1.38826e-18 | 1.000000 |
| rad4          | 7.31327e-19 | 1.000000 | 7.31369e-19 | 1.000000 |
| rad65         | 3.56318e-19 | 1.000000 | 3.56339e-19 | 1.000000 |
| rad7          | 1.15651e-19 | 1.000000 | 1.15657e-19 | 1.000000 |
| rad14         | 8.29779e-20 | 1.000000 | 8.29828e-20 | 1.000000 |
| rad42         | 7.47520e-20 | 1.000000 | 7.47564e-20 | 1.000000 |
| rad25         | 4.78865e-20 | 1.000000 | 4.78893e-20 | 1.000000 |
| rad11         | 3.17591e-20 | 1.000000 | 3.17609e-20 | 1.000000 |
| rad41         | 2.24435e-20 | 1.000000 | 2.24449e-20 | 1.000000 |
| rad27         | 6.76215e-21 | 1.000000 | 6.76255e-21 | 1.000000 |
| rad13         | 6.64015e-22 | 1.000000 | 6.64055e-22 | 1.000000 |
| rad31         | 4.69574e-23 | 1.000000 | 4.69601e-23 | 1.000000 |
| rad33         | 7.96260e-24 | 1.000000 | 7.96307e-24 | 1.000000 |
| rad20         | 3.71875e-26 | 1.000000 | 3.71897e-26 | 1.000000 |
| rad21         | 3.25244e-26 | 1.000000 | 3.25264e-26 | 1.000000 |
| rad23         | 2.61630e-26 | 1.000000 | 2.61645e-26 | 1.000000 |
| rad45         | 1.04477e-27 | 1.000000 | 1.04484e-27 | 1.000000 |
| rad36         | 6.71701e-29 | 1.000000 | 6.71739e-29 | 1.000000 |
| rad18         | 4.58775e-29 | 1.000000 | 4.58802e-29 | 1.000000 |
| rad22         | 1.95320e-30 | 1.000000 | 1.95331e-30 | 1.000000 |
| rad24         | 1.29579e-31 | 1.000000 | 1.29587e-31 | 1.000000 |
| rad47         | 3.26704e-33 | 1.000000 | 3.26723e-33 | 1.000000 |

0.100000000E-07 Pa, 280.000000 K

=====

| Rate constant      | True (fraction)       | Effective (fraction)  |
|--------------------|-----------------------|-----------------------|
| Total              | 2.79491e-16 (1.00 )   | 2.79471e-16 (1.00 )   |
| Formation of rad11 | 2.09281e-16 (0.749 )  | 2.09265e-16 (0.749 )  |
| Formation of rad6  | 5.79792e-17 (0.207 )  | 5.79748e-17 (0.207 )  |
| H-abstraction      | 1.22310e-17 (0.0438 ) | 1.22310e-17 (0.0438 ) |

| species            | PYtrue      | Cumul    | PYeffective | Cumul    |
|--------------------|-------------|----------|-------------|----------|
| Indene+H           | 0.911836    | 0.911836 | 0.911902    | 0.911902 |
| Benzene+2-propynyl | 0.0437616   | 0.955597 | 0.0437648   | 0.955667 |
| C2H2+PhCH2         | 0.0225048   | 0.978102 | 0.0225064   | 0.978173 |
| PhCCH+CH3          | 0.0115868   | 0.989689 | 0.0115877   | 0.989761 |
| PhCHCCH2+H         | 0.00573598  | 0.995425 | 0.00573640  | 0.995498 |
| PhCCCH3+H          | 0.00373734  | 0.999162 | 0.00373762  | 0.999235 |
| Ph+MeAc            | 0.000605024 | 0.999767 | 0.000605068 | 0.999840 |
| Phenyl+Allene      | 7.31232e-05 | 0.999840 | 0.000000    | 0.999840 |
| rad9               | 5.29668e-05 | 0.999893 | 5.29707e-05 | 0.999893 |
| rad8               | 4.95985e-05 | 0.999943 | 4.96021e-05 | 0.999943 |
| PAH7+H             | 3.90776e-05 | 0.999982 | 3.90805e-05 | 0.999982 |
| rad39              | 8.95101e-06 | 0.999991 | 8.95166e-06 | 0.999991 |
| rad12              | 3.24761e-06 | 0.999994 | 3.24784e-06 | 0.999994 |
| PhCH2CCH+H         | 2.31799e-06 | 0.999996 | 2.31816e-06 | 0.999996 |
| rad30              | 1.89092e-06 | 0.999998 | 1.89106e-06 | 0.999998 |
| PAH9+H             | 5.24965e-07 | 0.999999 | 5.25004e-07 | 0.999999 |
| rad15              | 4.72995e-07 | 0.999999 | 4.73029e-07 | 0.999999 |

|               |             |          |             |          |
|---------------|-------------|----------|-------------|----------|
| rad35         | 2.22365e-07 | 0.999999 | 2.22381e-07 | 0.999999 |
| rad38         | 1.60350e-07 | 1.000000 | 1.60362e-07 | 1.000000 |
| rad37         | 1.39791e-07 | 1.000000 | 1.39802e-07 | 1.000000 |
| rad5          | 5.69647e-09 | 1.000000 | 5.69689e-09 | 1.000000 |
| rad46         | 3.61467e-09 | 1.000000 | 3.61493e-09 | 1.000000 |
| rad60syn      | 6.87607e-10 | 1.000000 | 6.87657e-10 | 1.000000 |
| rad60anti     | 2.66381e-10 | 1.000000 | 2.66401e-10 | 1.000000 |
| PAH3+H        | 2.06375e-11 | 1.000000 | 2.06390e-11 | 1.000000 |
| rad19syn      | 1.98736e-11 | 1.000000 | 1.98751e-11 | 1.000000 |
| rad59         | 5.59978e-12 | 1.000000 | 5.60018e-12 | 1.000000 |
| rad50         | 8.17024e-13 | 1.000000 | 8.17085e-13 | 1.000000 |
| rad54         | 7.25446e-13 | 1.000000 | 7.25499e-13 | 1.000000 |
| PAH10+CH3     | 4.66810e-13 | 1.000000 | 4.66845e-13 | 1.000000 |
| rad43         | 1.05951e-13 | 1.000000 | 1.05959e-13 | 1.000000 |
| rad62         | 3.69972e-14 | 1.000000 | 3.69999e-14 | 1.000000 |
| PhcycC3H3_A+H | 5.01695e-15 | 1.000000 | 5.01732e-15 | 1.000000 |
| rad70         | 2.62501e-15 | 1.000000 | 2.62520e-15 | 1.000000 |
| rad6          | 1.29013e-15 | 1.000000 | 1.29023e-15 | 1.000000 |
| rad55         | 1.26527e-15 | 1.000000 | 1.26537e-15 | 1.000000 |
| rad28         | 1.02532e-15 | 1.000000 | 1.02539e-15 | 1.000000 |
| rad52         | 9.06731e-16 | 1.000000 | 9.06798e-16 | 1.000000 |
| rad26         | 2.56876e-16 | 1.000000 | 2.56895e-16 | 1.000000 |
| rad2          | 2.02248e-16 | 1.000000 | 2.02263e-16 | 1.000000 |
| PAH1+H        | 1.65665e-16 | 1.000000 | 1.65678e-16 | 1.000000 |
| rad51         | 6.81450e-17 | 1.000000 | 6.81499e-17 | 1.000000 |
| rad1          | 1.50345e-17 | 1.000000 | 1.50356e-17 | 1.000000 |
| rad10         | 1.04427e-17 | 1.000000 | 1.04435e-17 | 1.000000 |
| rad34         | 1.00923e-17 | 1.000000 | 1.00931e-17 | 1.000000 |
| rad58         | 4.14902e-18 | 1.000000 | 4.14932e-18 | 1.000000 |
| rad3          | 2.06868e-18 | 1.000000 | 2.06883e-18 | 1.000000 |
| rad4          | 1.09445e-18 | 1.000000 | 1.09454e-18 | 1.000000 |
| rad65         | 8.47088e-19 | 1.000000 | 8.47150e-19 | 1.000000 |
| rad42         | 2.07735e-19 | 1.000000 | 2.07750e-19 | 1.000000 |
| rad7          | 9.76855e-20 | 1.000000 | 9.76928e-20 | 1.000000 |
| rad14         | 7.17608e-20 | 1.000000 | 7.17661e-20 | 1.000000 |
| rad41         | 6.28127e-20 | 1.000000 | 6.28173e-20 | 1.000000 |
| rad25         | 4.18738e-20 | 1.000000 | 4.18769e-20 | 1.000000 |
| rad11         | 2.70807e-20 | 1.000000 | 2.70826e-20 | 1.000000 |
| rad27         | 5.99780e-21 | 1.000000 | 5.99822e-21 | 1.000000 |
| rad13         | 5.62354e-22 | 1.000000 | 5.62395e-22 | 1.000000 |
| rad31         | 6.73552e-23 | 1.000000 | 6.73602e-23 | 1.000000 |
| rad33         | 7.66195e-24 | 1.000000 | 7.66250e-24 | 1.000000 |
| rad23         | 6.76662e-26 | 1.000000 | 6.76711e-26 | 1.000000 |
| rad20         | 3.86602e-26 | 1.000000 | 3.86631e-26 | 1.000000 |
| rad21         | 3.41497e-26 | 1.000000 | 3.41521e-26 | 1.000000 |
| rad45         | 2.05408e-27 | 1.000000 | 2.05422e-27 | 1.000000 |
| rad36         | 1.32887e-28 | 1.000000 | 1.32898e-28 | 1.000000 |
| rad18         | 4.45041e-29 | 1.000000 | 4.45074e-29 | 1.000000 |
| rad22         | 1.83338e-30 | 1.000000 | 1.83350e-30 | 1.000000 |
| rad24         | 1.61008e-31 | 1.000000 | 1.61019e-31 | 1.000000 |
| rad47         | 7.35922e-33 | 1.000000 | 7.35976e-33 | 1.000000 |

0.100000000E-07 Pa, 290.000000 K

=====

| Rate constant      | True (fraction)       | Effective (fraction)  |
|--------------------|-----------------------|-----------------------|
| Total              | 3.55893e-16 (1.00 )   | 3.55861e-16 (1.00 )   |
| Formation of rad11 | 2.62555e-16 (0.738 )  | 2.62530e-16 (0.738 )  |
| Formation of rad6  | 7.62093e-17 (0.214 )  | 7.62020e-17 (0.214 )  |
| H-abstraction      | 1.71289e-17 (0.0481 ) | 1.71289e-17 (0.0481 ) |

| species            | PYtrue      | Cumul    | PYeffective | Cumul    |
|--------------------|-------------|----------|-------------|----------|
| Indene+H           | 0.904639    | 0.904639 | 0.904720    | 0.904720 |
| Benzene+2-propynyl | 0.0481294   | 0.952768 | 0.0481337   | 0.952854 |
| C2H2+PhCH2         | 0.0237715   | 0.976540 | 0.0237736   | 0.976628 |
| PhCCH+CH3          | 0.0124370   | 0.988977 | 0.0124382   | 0.989066 |
| PhCHCCH2+H         | 0.00609654  | 0.995073 | 0.00609709  | 0.995163 |
| PhCCCH3+H          | 0.00396486  | 0.999038 | 0.00396522  | 0.999128 |
| Ph+MeAc            | 0.000692046 | 0.999730 | 0.000692109 | 0.999820 |
| Phenyl+Allene      | 9.07433e-05 | 0.999821 | 0.000000    | 0.999820 |
| rad9               | 5.98965e-05 | 0.999881 | 5.99019e-05 | 0.999880 |
| rad8               | 5.36003e-05 | 0.999934 | 5.36052e-05 | 0.999934 |
| PAH7+H             | 4.48061e-05 | 0.999979 | 4.48102e-05 | 0.999979 |
| rad39              | 1.04376e-05 | 0.999990 | 1.04385e-05 | 0.999989 |
| rad12              | 3.58505e-06 | 0.999993 | 3.58538e-06 | 0.999993 |
| PhCH2CCH+H         | 3.18249e-06 | 0.999996 | 3.18278e-06 | 0.999996 |
| rad30              | 2.04822e-06 | 0.999999 | 2.04840e-06 | 0.999998 |
| PAH9+H             | 5.82790e-07 | 0.999999 | 5.82843e-07 | 0.999998 |
| rad15              | 5.20962e-07 | 1.000000 | 5.21009e-07 | 0.999999 |

|               |             |          |             |          |
|---------------|-------------|----------|-------------|----------|
| rad35         | 2.43665e-07 | 1.000000 | 2.43686e-07 | 0.999999 |
| rad38         | 1.79629e-07 | 1.000000 | 1.79646e-07 | 0.999999 |
| rad37         | 1.71060e-07 | 1.000000 | 1.71075e-07 | 1.000000 |
| rad5          | 7.69913e-09 | 1.000000 | 7.69983e-09 | 1.000000 |
| rad46         | 4.29520e-09 | 1.000000 | 4.29559e-09 | 1.000000 |
| rad60syn      | 8.50568e-10 | 1.000000 | 8.50645e-10 | 1.000000 |
| rad60anti     | 3.34454e-10 | 1.000000 | 3.34484e-10 | 1.000000 |
| rad19syn      | 3.53639e-11 | 1.000000 | 3.53671e-11 | 1.000000 |
| PAH3+H        | 3.11103e-11 | 1.000000 | 3.11131e-11 | 1.000000 |
| rad59         | 8.27909e-12 | 1.000000 | 8.27984e-12 | 1.000000 |
| rad54         | 1.40689e-12 | 1.000000 | 1.40702e-12 | 1.000000 |
| rad50         | 1.26312e-12 | 1.000000 | 1.26324e-12 | 1.000000 |
| PAH10+CH3     | 8.93383e-13 | 1.000000 | 8.93464e-13 | 1.000000 |
| rad43         | 2.00697e-13 | 1.000000 | 2.00715e-13 | 1.000000 |
| rad62         | 7.41772e-14 | 1.000000 | 7.41839e-14 | 1.000000 |
| PhcycC3H3_A+H | 1.14777e-14 | 1.000000 | 1.14787e-14 | 1.000000 |
| rad70         | 5.86613e-15 | 1.000000 | 5.86667e-15 | 1.000000 |
| rad55         | 2.84964e-15 | 1.000000 | 2.84991e-15 | 1.000000 |
| rad52         | 1.67153e-15 | 1.000000 | 1.67169e-15 | 1.000000 |
| rad6          | 1.09060e-15 | 1.000000 | 1.09070e-15 | 1.000000 |
| rad28         | 8.56724e-16 | 1.000000 | 8.56801e-16 | 1.000000 |
| PAH1+H        | 4.00257e-16 | 1.000000 | 4.00293e-16 | 1.000000 |
| rad26         | 2.15371e-16 | 1.000000 | 2.15391e-16 | 1.000000 |
| rad2          | 1.50321e-16 | 1.000000 | 1.50335e-16 | 1.000000 |
| rad51         | 1.44108e-16 | 1.000000 | 1.44120e-16 | 1.000000 |
| rad34         | 2.48053e-17 | 1.000000 | 2.48074e-17 | 1.000000 |
| rad10         | 1.15545e-17 | 1.000000 | 1.15555e-17 | 1.000000 |
| rad1          | 1.13471e-17 | 1.000000 | 1.13481e-17 | 1.000000 |
| rad58         | 9.60514e-18 | 1.000000 | 9.60604e-18 | 1.000000 |
| rad3          | 2.79383e-18 | 1.000000 | 2.79408e-18 | 1.000000 |
| rad65         | 1.88893e-18 | 1.000000 | 1.88910e-18 | 1.000000 |
| rad4          | 1.48477e-18 | 1.000000 | 1.48490e-18 | 1.000000 |
| rad42         | 5.29961e-19 | 1.000000 | 5.30009e-19 | 1.000000 |
| rad41         | 1.61253e-19 | 1.000000 | 1.61268e-19 | 1.000000 |
| rad7          | 8.28239e-20 | 1.000000 | 8.28314e-20 | 1.000000 |
| rad14         | 6.21393e-20 | 1.000000 | 6.21449e-20 | 1.000000 |
| rad25         | 3.66764e-20 | 1.000000 | 3.66798e-20 | 1.000000 |
| rad11         | 2.31909e-20 | 1.000000 | 2.31930e-20 | 1.000000 |
| rad27         | 5.33088e-21 | 1.000000 | 5.33137e-21 | 1.000000 |
| rad13         | 4.78155e-22 | 1.000000 | 4.78199e-22 | 1.000000 |
| rad31         | 9.77162e-23 | 1.000000 | 9.77253e-23 | 1.000000 |
| rad33         | 7.43155e-24 | 1.000000 | 7.43222e-24 | 1.000000 |
| rad23         | 1.80911e-25 | 1.000000 | 1.80927e-25 | 1.000000 |
| rad20         | 4.04745e-26 | 1.000000 | 4.04781e-26 | 1.000000 |
| rad21         | 3.61286e-26 | 1.000000 | 3.61319e-26 | 1.000000 |
| rad45         | 7.18420e-27 | 1.000000 | 7.18485e-27 | 1.000000 |
| rad36         | 4.67922e-28 | 1.000000 | 4.67965e-28 | 1.000000 |
| rad18         | 4.33186e-29 | 1.000000 | 4.33225e-29 | 1.000000 |
| rad22         | 1.74087e-30 | 1.000000 | 1.74103e-30 | 1.000000 |
| rad24         | 2.02870e-31 | 1.000000 | 2.02889e-31 | 1.000000 |
| rad47         | 1.55335e-32 | 1.000000 | 1.55349e-32 | 1.000000 |

0.100000000E-07 Pa, 300.000000 K

=====

| Rate constant      | True (fraction)       | Effective (fraction)  |
|--------------------|-----------------------|-----------------------|
| Total              | 6.34395e-16 (1.00 )   | 6.34337e-16 (1.00 )   |
| Formation of rad11 | 4.51153e-16 (0.711 )  | 4.51110e-16 (0.711 )  |
| Formation of rad6  | 1.51589e-16 (0.239 )  | 1.51574e-16 (0.239 )  |
| H-abstraction      | 3.16530e-17 (0.0499 ) | 3.16530e-17 (0.0499 ) |

| species            | PYtrue      | Cumul    | PYeffective | Cumul    |
|--------------------|-------------|----------|-------------|----------|
| Indene+H           | 0.891220    | 0.891220 | 0.891301    | 0.891301 |
| Benzene+2-propynyl | 0.0498949   | 0.941114 | 0.0498994   | 0.941200 |
| C2H2+PhCH2         | 0.0319123   | 0.973027 | 0.0319153   | 0.973115 |
| PhCCH+CH3          | 0.0149062   | 0.987933 | 0.0149076   | 0.988023 |
| PhCHCCH2+H         | 0.00657748  | 0.994510 | 0.00657808  | 0.994601 |
| PhCCCH3+H          | 0.00446904  | 0.998979 | 0.00446944  | 0.999071 |
| Ph+MeAc            | 0.000840208 | 0.999820 | 0.000840285 | 0.999911 |
| Phenyl+Allene      | 9.13505e-05 | 0.999911 | 0.000000    | 0.999911 |
| PAH7+H             | 6.60543e-05 | 0.999977 | 6.60603e-05 | 0.999977 |
| rad39              | 1.31473e-05 | 0.999990 | 1.31484e-05 | 0.999990 |
| PhCH2CCH+H         | 5.22128e-06 | 0.999995 | 5.22175e-06 | 0.999995 |
| rad30              | 2.21236e-06 | 0.999998 | 2.21257e-06 | 0.999997 |
| PAH9+H             | 8.00108e-07 | 0.999998 | 8.00181e-07 | 0.999998 |
| rad19anti          | 7.04525e-07 | 0.999999 | 7.04590e-07 | 0.999999 |
| rad35              | 2.87143e-07 | 0.999999 | 2.87169e-07 | 0.999999 |
| rad37              | 2.27555e-07 | 1.000000 | 2.27576e-07 | 1.000000 |
| rad38              | 2.12987e-07 | 1.000000 | 2.13006e-07 | 1.000000 |

|               |             |          |             |          |
|---------------|-------------|----------|-------------|----------|
| rad46         | 5.68759e-09 | 1.000000 | 5.68810e-09 | 1.000000 |
| rad60syn      | 1.08211e-09 | 1.000000 | 1.08221e-09 | 1.000000 |
| rad60anti     | 4.39254e-10 | 1.000000 | 4.39293e-10 | 1.000000 |
| rad19syn      | 6.92341e-11 | 1.000000 | 6.92404e-11 | 1.000000 |
| PAH3+H        | 6.10400e-11 | 1.000000 | 6.10456e-11 | 1.000000 |
| rad59         | 1.31853e-11 | 1.000000 | 1.31864e-11 | 1.000000 |
| rad54         | 3.21887e-12 | 1.000000 | 3.21917e-12 | 1.000000 |
| rad50         | 2.22681e-12 | 1.000000 | 2.22701e-12 | 1.000000 |
| PAH10+CH3     | 2.02585e-12 | 1.000000 | 2.02603e-12 | 1.000000 |
| rad67         | 7.75554e-13 | 1.000000 | 7.75624e-13 | 1.000000 |
| rad43         | 4.01324e-13 | 1.000000 | 4.01360e-13 | 1.000000 |
| rad62         | 1.66581e-13 | 1.000000 | 1.66596e-13 | 1.000000 |
| rad6          | 1.44376e-13 | 1.000000 | 1.44389e-13 | 1.000000 |
| PhcycC3H3_A+H | 4.89128e-14 | 1.000000 | 4.89173e-14 | 1.000000 |
| rad70         | 1.94638e-14 | 1.000000 | 1.94656e-14 | 1.000000 |
| rad28         | 1.41166e-14 | 1.000000 | 1.41178e-14 | 1.000000 |
| rad55         | 8.48746e-15 | 1.000000 | 8.48824e-15 | 1.000000 |
| rad2          | 6.02010e-15 | 1.000000 | 6.02065e-15 | 1.000000 |
| rad26         | 6.00260e-15 | 1.000000 | 6.00314e-15 | 1.000000 |
| rad52         | 3.84231e-15 | 1.000000 | 3.84266e-15 | 1.000000 |
| PAH1+H        | 2.34440e-15 | 1.000000 | 2.34461e-15 | 1.000000 |
| rad1          | 4.53746e-16 | 1.000000 | 4.53786e-16 | 1.000000 |
| rad10         | 4.31589e-16 | 1.000000 | 4.31629e-16 | 1.000000 |
| rad51         | 4.07404e-16 | 1.000000 | 4.07441e-16 | 1.000000 |
| rad3          | 2.51390e-16 | 1.000000 | 2.51413e-16 | 1.000000 |
| rad34         | 1.57781e-16 | 1.000000 | 1.57796e-16 | 1.000000 |
| rad4          | 1.25043e-16 | 1.000000 | 1.25055e-16 | 1.000000 |
| rad58         | 2.99505e-17 | 1.000000 | 2.99533e-17 | 1.000000 |
| rad7          | 1.30332e-17 | 1.000000 | 1.30343e-17 | 1.000000 |
| rad65         | 6.35783e-18 | 1.000000 | 6.35841e-18 | 1.000000 |
| rad42         | 4.93395e-18 | 1.000000 | 4.93440e-18 | 1.000000 |
| rad11         | 4.69485e-18 | 1.000000 | 4.69528e-18 | 1.000000 |
| rad41         | 1.53085e-18 | 1.000000 | 1.53098e-18 | 1.000000 |
| rad25         | 6.59114e-19 | 1.000000 | 6.59174e-19 | 1.000000 |
| rad14         | 5.72432e-19 | 1.000000 | 5.72484e-19 | 1.000000 |
| rad27         | 1.47844e-19 | 1.000000 | 1.47858e-19 | 1.000000 |
| rad53         | 1.09682e-19 | 1.000000 | 1.09692e-19 | 1.000000 |
| rad13         | 8.01494e-20 | 1.000000 | 8.01568e-20 | 1.000000 |
| rad64         | 2.63852e-20 | 1.000000 | 2.63876e-20 | 1.000000 |
| rad23         | 2.28234e-20 | 1.000000 | 2.28255e-20 | 1.000000 |
| rad33         | 4.04947e-21 | 1.000000 | 4.04984e-21 | 1.000000 |
| rad31         | 2.87607e-21 | 1.000000 | 2.87633e-21 | 1.000000 |
| rad45         | 1.55306e-21 | 1.000000 | 1.55321e-21 | 1.000000 |
| rad56         | 3.10995e-22 | 1.000000 | 3.11023e-22 | 1.000000 |
| rad21         | 1.10062e-22 | 1.000000 | 1.10072e-22 | 1.000000 |
| rad20         | 8.39582e-23 | 1.000000 | 8.39659e-23 | 1.000000 |
| rad36         | 5.29380e-23 | 1.000000 | 5.29428e-23 | 1.000000 |
| rad61         | 3.56436e-23 | 1.000000 | 3.56468e-23 | 1.000000 |
| rad68syn      | 3.28824e-23 | 1.000000 | 3.28854e-23 | 1.000000 |
| rad68anti     | 2.37014e-23 | 1.000000 | 2.37036e-23 | 1.000000 |
| rad18         | 8.01680e-25 | 1.000000 | 8.01753e-25 | 1.000000 |
| rad9          | 6.31606e-25 | 1.000000 | 6.31664e-25 | 1.000000 |
| rad22         | 5.04411e-25 | 1.000000 | 5.04457e-25 | 1.000000 |
| rad40syn      | 5.33122e-26 | 1.000000 | 5.33171e-26 | 1.000000 |
| rad5          | 2.42035e-26 | 1.000000 | 2.42057e-26 | 1.000000 |
| rad40anti     | 1.32361e-26 | 1.000000 | 1.32374e-26 | 1.000000 |
| PAH8+H        | 1.18606e-26 | 1.000000 | 1.18617e-26 | 1.000000 |
| rad73         | 1.00619e-26 | 1.000000 | 1.00629e-26 | 1.000000 |
| rad24         | 4.89146e-27 | 1.000000 | 4.89191e-27 | 1.000000 |
| rad15         | 3.66836e-28 | 1.000000 | 3.66869e-28 | 1.000000 |
| rad71         | 9.35036e-29 | 1.000000 | 9.35121e-29 | 1.000000 |
| rad12         | 1.72006e-30 | 1.000000 | 1.72022e-30 | 1.000000 |
| rad47         | 2.86302e-32 | 1.000000 | 2.86328e-32 | 1.000000 |
| rad72         | 1.61637e-41 | 1.000000 | 1.61652e-41 | 1.000000 |
| rad8          | 1.55101e-43 | 1.000000 | 1.55115e-43 | 1.000000 |

0.100000000E-07 Pa, 400.000000 K

| Rate constant      | True (fraction)       | Effective (fraction)  |
|--------------------|-----------------------|-----------------------|
| Total              | 5.11288e-15 (1.00 )   | 5.10968e-15 (1.00 )   |
| Formation of rad11 | 3.08094e-15 (0.603 )  | 3.07881e-15 (0.603 )  |
| Formation of rad6  | 1.54092e-15 (0.301 )  | 1.53985e-15 (0.301 )  |
| H-abstraction      | 4.91025e-16 (0.0960 ) | 4.91025e-16 (0.0961 ) |

  

| species            | PYtrue    | Cumul    | PYeffective | Cumul    |
|--------------------|-----------|----------|-------------|----------|
| Indene+H           | 0.804485  | 0.804485 | 0.804989    | 0.804989 |
| Benzene+2-propynyl | 0.0960368 | 0.900522 | 0.0960969   | 0.901086 |
| C2H2+PhCH2         | 0.0525421 | 0.953064 | 0.0525751   | 0.953661 |

|               |             |          |             |          |
|---------------|-------------|----------|-------------|----------|
| PhCCH+CH3     | 0.0262535   | 0.979317 | 0.0262700   | 0.979931 |
| PhCHCCH2+H    | 0.0106706   | 0.989988 | 0.0106772   | 0.990608 |
| PhCCCH3+H     | 0.00676080  | 0.996749 | 0.00676504  | 0.997373 |
| Ph+MeAc       | 0.00228512  | 0.999034 | 0.00228655  | 0.999660 |
| Phenyl+Allene | 0.000625754 | 0.999659 | 0.000000    | 0.999660 |
| PAH7+H        | 0.000215668 | 0.999875 | 0.000215804 | 0.999875 |
| PhCH2CCH+H    | 6.37921e-05 | 0.999939 | 6.38320e-05 | 0.999939 |
| rad39         | 4.88390e-05 | 0.999988 | 4.88695e-05 | 0.999988 |
| rad30         | 4.71374e-06 | 0.999992 | 4.71670e-06 | 0.999993 |
| rad19anti     | 2.55284e-06 | 0.999995 | 2.55443e-06 | 0.999995 |
| PAH9+H        | 2.27172e-06 | 0.999997 | 2.27314e-06 | 0.999998 |
| rad37         | 9.72231e-07 | 0.999998 | 9.72835e-07 | 0.999999 |
| rad35         | 7.27597e-07 | 0.999999 | 7.28053e-07 | 0.999999 |
| rad38         | 6.64248e-07 | 1.000000 | 6.64664e-07 | 1.000000 |
| rad46         | 2.95927e-08 | 1.000000 | 2.96112e-08 | 1.000000 |
| rad60syn      | 6.77132e-09 | 1.000000 | 6.77556e-09 | 1.000000 |
| rad19syn      | 4.62790e-09 | 1.000000 | 4.63079e-09 | 1.000000 |
| rad60anti     | 3.07480e-09 | 1.000000 | 3.07673e-09 | 1.000000 |
| PAH3+H        | 1.45800e-09 | 1.000000 | 1.45892e-09 | 1.000000 |
| rad54         | 4.18669e-10 | 1.000000 | 4.18931e-10 | 1.000000 |
| rad59         | 2.84711e-10 | 1.000000 | 2.84889e-10 | 1.000000 |
| PAH10+CH3     | 1.98074e-10 | 1.000000 | 1.98198e-10 | 1.000000 |
| rad50         | 7.81204e-11 | 1.000000 | 7.81693e-11 | 1.000000 |
| rad43         | 3.26732e-11 | 1.000000 | 3.26936e-11 | 1.000000 |
| rad67         | 2.48951e-11 | 1.000000 | 2.49108e-11 | 1.000000 |
| PhcycC3H3_A+H | 2.37988e-11 | 1.000000 | 2.38137e-11 | 1.000000 |
| rad62         | 2.26679e-11 | 1.000000 | 2.26821e-11 | 1.000000 |
| rad70         | 7.63979e-12 | 1.000000 | 7.64458e-12 | 1.000000 |
| rad55         | 3.50822e-12 | 1.000000 | 3.51042e-12 | 1.000000 |
| PAH1+H        | 2.19400e-12 | 1.000000 | 2.19537e-12 | 1.000000 |
| rad52         | 4.56316e-13 | 1.000000 | 4.56602e-13 | 1.000000 |
| rad34         | 1.75088e-13 | 1.000000 | 1.75198e-13 | 1.000000 |
| rad51         | 1.36997e-13 | 1.000000 | 1.37083e-13 | 1.000000 |
| rad2          | 3.63943e-14 | 1.000000 | 3.64171e-14 | 1.000000 |
| rad6          | 3.18733e-14 | 1.000000 | 3.18932e-14 | 1.000000 |
| rad58         | 1.74184e-14 | 1.000000 | 1.74293e-14 | 1.000000 |
| rad42         | 7.28195e-15 | 1.000000 | 7.28651e-15 | 1.000000 |
| rad1          | 3.39586e-15 | 1.000000 | 3.39798e-15 | 1.000000 |
| rad65         | 3.20497e-15 | 1.000000 | 3.20698e-15 | 1.000000 |
| rad10         | 3.01247e-15 | 1.000000 | 3.01435e-15 | 1.000000 |
| rad28         | 2.79809e-15 | 1.000000 | 2.79984e-15 | 1.000000 |
| rad41         | 2.20567e-15 | 1.000000 | 2.20705e-15 | 1.000000 |
| rad26         | 1.17785e-15 | 1.000000 | 1.17858e-15 | 1.000000 |
| rad53         | 9.04225e-16 | 1.000000 | 9.04789e-16 | 1.000000 |
| rad3          | 7.31435e-16 | 1.000000 | 7.31893e-16 | 1.000000 |
| rad4          | 3.85595e-16 | 1.000000 | 3.85836e-16 | 1.000000 |
| rad64         | 3.15111e-16 | 1.000000 | 3.15309e-16 | 1.000000 |
| rad23         | 5.14170e-17 | 1.000000 | 5.14492e-17 | 1.000000 |
| rad56         | 1.60193e-17 | 1.000000 | 1.60293e-17 | 1.000000 |
| rad45         | 8.80131e-18 | 1.000000 | 8.80683e-18 | 1.000000 |
| rad7          | 3.10664e-18 | 1.000000 | 3.10859e-18 | 1.000000 |
| rad68syn      | 1.85188e-18 | 1.000000 | 1.85304e-18 | 1.000000 |
| rad11         | 1.66306e-18 | 1.000000 | 1.66410e-18 | 1.000000 |
| rad68anti     | 1.33289e-18 | 1.000000 | 1.33373e-18 | 1.000000 |
| rad61         | 9.28153e-19 | 1.000000 | 9.28733e-19 | 1.000000 |
| rad36         | 3.39495e-19 | 1.000000 | 3.39708e-19 | 1.000000 |
| rad25         | 2.27150e-19 | 1.000000 | 2.27292e-19 | 1.000000 |
| rad14         | 1.81617e-19 | 1.000000 | 1.81731e-19 | 1.000000 |
| rad27         | 5.95434e-20 | 1.000000 | 5.95807e-20 | 1.000000 |
| rad31         | 4.49564e-20 | 1.000000 | 4.49845e-20 | 1.000000 |
| rad13         | 2.59563e-20 | 1.000000 | 2.59726e-20 | 1.000000 |
| rad40syn      | 1.44546e-20 | 1.000000 | 1.44636e-20 | 1.000000 |
| PAH8+H        | 8.90780e-21 | 1.000000 | 8.91337e-21 | 1.000000 |
| rad33         | 4.86783e-21 | 1.000000 | 4.87088e-21 | 1.000000 |
| rad40anti     | 3.67526e-21 | 1.000000 | 3.67756e-21 | 1.000000 |
| rad73         | 2.38291e-21 | 1.000000 | 2.38441e-21 | 1.000000 |
| rad21         | 2.89567e-22 | 1.000000 | 2.89749e-22 | 1.000000 |
| rad20         | 1.85116e-22 | 1.000000 | 1.85232e-22 | 1.000000 |
| rad71         | 9.34273e-23 | 1.000000 | 9.34862e-23 | 1.000000 |
| rad9          | 1.35359e-23 | 1.000000 | 1.35444e-23 | 1.000000 |
| rad22         | 1.41688e-24 | 1.000000 | 1.41776e-24 | 1.000000 |
| rad18         | 8.22187e-25 | 1.000000 | 8.22702e-25 | 1.000000 |
| rad24         | 1.02123e-25 | 1.000000 | 1.02187e-25 | 1.000000 |
| rad5          | 3.48320e-26 | 1.000000 | 3.48538e-26 | 1.000000 |
| rad15         | 8.16394e-27 | 1.000000 | 8.16904e-27 | 1.000000 |
| rad12         | 1.76911e-28 | 1.000000 | 1.77021e-28 | 1.000000 |
| rad72         | 8.89714e-29 | 1.000000 | 8.90270e-29 | 1.000000 |
| rad47         | 7.50666e-30 | 1.000000 | 7.51136e-30 | 1.000000 |
| rad8          | 4.40935e-41 | 1.000000 | 4.41211e-41 | 1.000000 |

0.100000000E-07 Pa, 500.000000 K

| =====              |                 |          |                      |          |
|--------------------|-----------------|----------|----------------------|----------|
| Rate constant      | True (fraction) |          | Effective (fraction) |          |
| -----              |                 |          |                      |          |
| Total              | 2.11551e-14     | (1.00 )  | 2.10968e-14          | (1.00 )  |
| Formation of rad11 | 1.10850e-14     | (0.524 ) | 1.10494e-14          | (0.524 ) |
| Formation of rad6  | 7.08033e-15     | (0.335 ) | 7.05760e-15          | (0.335 ) |
| H-abstraction      | 2.98976e-15     | (0.141 ) | 2.98976e-15          | (0.142 ) |
| -----              |                 |          |                      |          |
| species            | PYtrue          | Cumul    | PYeffective          | Cumul    |
| -----              |                 |          |                      |          |
| Indene+H           | 0.706762        | 0.706762 | 0.708716             | 0.708716 |
| Benzene+2-propynyl | 0.141326        | 0.848088 | 0.141717             | 0.850433 |
| C2H2+PhCH2         | 0.0811037       | 0.929191 | 0.0813279            | 0.931761 |
| PhCCH+CH3          | 0.0389496       | 0.968141 | 0.0390573            | 0.970818 |
| PhCHCCH2+H         | 0.0153921       | 0.983533 | 0.0154346            | 0.986253 |
| PhCCCH3+H          | 0.00823928      | 0.991772 | 0.00826206           | 0.994515 |
| Ph+MeAc            | 0.00432839      | 0.996101 | 0.00434036           | 0.998855 |
| Phenyl+Allene      | 0.00275756      | 0.998858 | 0.000000             | 0.998855 |
| PAH7+H             | 0.000574793     | 0.999433 | 0.000576383          | 0.999432 |
| PhCH2CCH+H         | 0.000399546     | 0.999833 | 0.000400651          | 0.999832 |
| rad39              | 0.000137925     | 0.999971 | 0.000138306          | 0.999971 |
| rad30              | 9.14625e-06     | 0.999980 | 9.17153e-06          | 0.999980 |
| rad19anti          | 7.87872e-06     | 0.999988 | 7.90052e-06          | 0.999988 |
| PAH9+H             | 6.12734e-06     | 0.999994 | 6.14428e-06          | 0.999994 |
| rad37              | 2.41829e-06     | 0.999996 | 2.42498e-06          | 0.999996 |
| rad38              | 1.93439e-06     | 0.999998 | 1.93974e-06          | 0.999998 |
| rad35              | 1.76562e-06     | 1.000000 | 1.77051e-06          | 1.000000 |
| rad46              | 1.27870e-07     | 1.000000 | 1.28224e-07          | 1.000000 |
| rad19syn           | 7.63986e-08     | 1.000000 | 7.66098e-08          | 1.000000 |
| rad60syn           | 2.91346e-08     | 1.000000 | 2.92151e-08          | 1.000000 |
| PAH3+H             | 1.45909e-08     | 1.000000 | 1.46312e-08          | 1.000000 |
| rad60anti          | 1.41795e-08     | 1.000000 | 1.42187e-08          | 1.000000 |
| rad54              | 1.02843e-08     | 1.000000 | 1.03128e-08          | 1.000000 |
| PAH10+CH3          | 3.35592e-09     | 1.000000 | 3.36520e-09          | 1.000000 |
| rad59              | 2.61933e-09     | 1.000000 | 2.62658e-09          | 1.000000 |
| PhcycC3H3_A+H      | 1.25838e-09     | 1.000000 | 1.26187e-09          | 1.000000 |
| rad50              | 1.15864e-09     | 1.000000 | 1.16185e-09          | 1.000000 |
| rad62              | 4.84009e-10     | 1.000000 | 4.85347e-10          | 1.000000 |
| rad43              | 4.60419e-10     | 1.000000 | 4.61691e-10          | 1.000000 |
| rad67              | 3.97898e-10     | 1.000000 | 3.98999e-10          | 1.000000 |
| rad70              | 3.42517e-10     | 1.000000 | 3.43464e-10          | 1.000000 |
| PAH1+H             | 1.64298e-10     | 1.000000 | 1.64753e-10          | 1.000000 |
| rad55              | 1.59822e-10     | 1.000000 | 1.60264e-10          | 1.000000 |
| rad34              | 1.41616e-11     | 1.000000 | 1.42007e-11          | 1.000000 |
| rad52              | 1.34820e-11     | 1.000000 | 1.35193e-11          | 1.000000 |
| rad51              | 7.24796e-12     | 1.000000 | 7.26800e-12          | 1.000000 |
| rad58              | 1.01105e-12     | 1.000000 | 1.01385e-12          | 1.000000 |
| rad42              | 6.16327e-13     | 1.000000 | 6.18031e-13          | 1.000000 |
| rad53              | 2.35883e-13     | 1.000000 | 2.36535e-13          | 1.000000 |
| rad65              | 2.01730e-13     | 1.000000 | 2.02287e-13          | 1.000000 |
| rad2               | 1.79028e-13     | 1.000000 | 1.79524e-13          | 1.000000 |
| rad41              | 1.64828e-13     | 1.000000 | 1.65283e-13          | 1.000000 |
| rad64              | 9.67571e-14     | 1.000000 | 9.70247e-14          | 1.000000 |
| rad1               | 2.16273e-14     | 1.000000 | 2.16871e-14          | 1.000000 |
| rad56              | 1.22099e-14     | 1.000000 | 1.22437e-14          | 1.000000 |
| rad6               | 9.86849e-15     | 1.000000 | 9.89575e-15          | 1.000000 |
| rad10              | 9.80864e-15     | 1.000000 | 9.83576e-15          | 1.000000 |
| rad23              | 5.74562e-15     | 1.000000 | 5.76151e-15          | 1.000000 |
| rad3               | 4.64557e-15     | 1.000000 | 4.65842e-15          | 1.000000 |
| rad4               | 2.64915e-15     | 1.000000 | 2.65647e-15          | 1.000000 |
| rad45              | 1.56429e-15     | 1.000000 | 1.56862e-15          | 1.000000 |
| rad68syn           | 1.45353e-15     | 1.000000 | 1.45755e-15          | 1.000000 |
| rad68anti          | 1.02673e-15     | 1.000000 | 1.02957e-15          | 1.000000 |
| rad28              | 5.79574e-16     | 1.000000 | 5.81176e-16          | 1.000000 |
| rad61              | 4.14122e-16     | 1.000000 | 4.15268e-16          | 1.000000 |
| rad26              | 2.41975e-16     | 1.000000 | 2.42644e-16          | 1.000000 |
| rad36              | 8.67999e-17     | 1.000000 | 8.70394e-17          | 1.000000 |
| PAH8+H             | 3.33496e-17     | 1.000000 | 3.34418e-17          | 1.000000 |
| rad40syn           | 2.92057e-17     | 1.000000 | 2.92865e-17          | 1.000000 |
| rad40anti          | 8.32431e-18     | 1.000000 | 8.34733e-18          | 1.000000 |
| rad73              | 5.15909e-18     | 1.000000 | 5.17336e-18          | 1.000000 |
| rad7               | 1.08414e-18     | 1.000000 | 1.08714e-18          | 1.000000 |
| rad11              | 9.87810e-19     | 1.000000 | 9.90536e-19          | 1.000000 |
| rad71              | 4.73125e-19     | 1.000000 | 4.74433e-19          | 1.000000 |
| rad31              | 2.28423e-19     | 1.000000 | 2.29054e-19          | 1.000000 |
| rad25              | 1.03858e-19     | 1.000000 | 1.04144e-19          | 1.000000 |
| rad14              | 7.33222e-20     | 1.000000 | 7.35249e-20          | 1.000000 |
| rad27              | 3.27951e-20     | 1.000000 | 3.28857e-20          | 1.000000 |
| rad13              | 2.35476e-20     | 1.000000 | 2.36128e-20          | 1.000000 |



|       |             |         |             |         |
|-------|-------------|---------|-------------|---------|
| rad33 | 1.13764e-20 | 1.00000 | 1.14079e-20 | 1.00000 |
| rad21 | 1.71852e-21 | 1.00000 | 1.72327e-21 | 1.00000 |
| rad9  | 8.96696e-22 | 1.00000 | 8.99172e-22 | 1.00000 |
| rad20 | 8.81120e-22 | 1.00000 | 8.83551e-22 | 1.00000 |
| rad22 | 4.05575e-23 | 1.00000 | 4.06697e-23 | 1.00000 |
| rad72 | 9.23573e-24 | 1.00000 | 9.26122e-24 | 1.00000 |
| rad24 | 6.91966e-24 | 1.00000 | 6.93880e-24 | 1.00000 |
| rad18 | 1.33406e-24 | 1.00000 | 1.33775e-24 | 1.00000 |
| rad15 | 5.72278e-25 | 1.00000 | 5.73860e-25 | 1.00000 |
| rad12 | 6.95670e-26 | 1.00000 | 6.97593e-26 | 1.00000 |
| rad5  | 3.21171e-26 | 1.00000 | 3.22059e-26 | 1.00000 |
| rad47 | 4.86077e-28 | 1.00000 | 4.87421e-28 | 1.00000 |
| rad8  | 8.30250e-38 | 1.00000 | 8.32546e-38 | 1.00000 |

0.100000000E-07 Pa, 600.000000 K

| Rate constant      | True (fraction) |          | Effective (fraction) |          |
|--------------------|-----------------|----------|----------------------|----------|
| Total              | 6.08120e-14     | (1.00 )  | 6.02869e-14          | (1.00 )  |
| Formation of rad11 | 2.83304e-14     | (0.466 ) | 2.80313e-14          | (0.465 ) |
| Formation of rad6  | 2.13840e-14     | (0.352 ) | 2.11582e-14          | (0.351 ) |
| H-abstraction      | 1.10975e-14     | (0.182 ) | 1.10975e-14          | (0.184 ) |

  

| species            | PYtrue      | Cumul    | PYeffective | Cumul    |
|--------------------|-------------|----------|-------------|----------|
| Indene+H           | 0.606934    | 0.606934 | 0.612219    | 0.612219 |
| Benzene+2-propynyl | 0.182488    | 0.789422 | 0.184077    | 0.796297 |
| C2H2+PhCH2         | 0.112836    | 0.902258 | 0.113819    | 0.910116 |
| PhCCH+CH3          | 0.0502927   | 0.952551 | 0.0507307   | 0.960846 |
| PhCHCCH2+H         | 0.0208956   | 0.973447 | 0.0210776   | 0.981924 |
| Phenyl+Allene      | 0.00863333  | 0.982080 | 0.000000    | 0.981924 |
| PhCCCH3+H          | 0.00840933  | 0.990489 | 0.00848258  | 0.990406 |
| Ph+MeAc            | 0.00630896  | 0.996798 | 0.00636390  | 0.996770 |
| PhCH2CCH+H         | 0.00158536  | 0.998384 | 0.00159917  | 0.998369 |
| PAH7+H             | 0.00124706  | 0.999631 | 0.00125792  | 0.999627 |
| rad39              | 0.000304554 | 0.999935 | 0.000307206 | 0.999935 |
| rad19anti          | 2.07283e-05 | 0.999956 | 2.09088e-05 | 0.999955 |
| rad30              | 1.54421e-05 | 0.999971 | 1.55766e-05 | 0.999971 |
| PAH9+H             | 1.45719e-05 | 0.999986 | 1.46988e-05 | 0.999986 |
| rad38              | 4.88300e-06 | 0.999991 | 4.92552e-06 | 0.999991 |
| rad37              | 4.23980e-06 | 0.999995 | 4.27673e-06 | 0.999995 |
| rad35              | 3.83137e-06 | 0.999999 | 3.86474e-06 | 0.999999 |
| rad19syn           | 5.75843e-07 | 1.000000 | 5.80858e-07 | 0.999999 |
| rad46              | 4.35560e-07 | 1.000000 | 4.39353e-07 | 1.000000 |
| rad54              | 1.01017e-07 | 1.000000 | 1.01897e-07 | 1.000000 |
| rad60syn           | 8.96254e-08 | 1.000000 | 9.04058e-08 | 1.000000 |
| PAH3+H             | 8.11822e-08 | 1.000000 | 8.18892e-08 | 1.000000 |
| rad60anti          | 4.57655e-08 | 1.000000 | 4.61641e-08 | 1.000000 |
| PAH10+CH3          | 2.25831e-08 | 1.000000 | 2.27797e-08 | 1.000000 |
| PhcycC3H3_A+H      | 2.05528e-08 | 1.000000 | 2.07318e-08 | 1.000000 |
| rad59              | 1.35486e-08 | 1.000000 | 1.36666e-08 | 1.000000 |
| rad50              | 9.40269e-09 | 1.000000 | 9.48453e-09 | 1.000000 |
| rad70              | 4.88193e-09 | 1.000000 | 4.92445e-09 | 1.000000 |
| rad62              | 3.91161e-09 | 1.000000 | 3.94568e-09 | 1.000000 |
| rad67              | 3.65819e-09 | 1.000000 | 3.69004e-09 | 1.000000 |
| PAH1+H             | 3.25971e-09 | 1.000000 | 3.28810e-09 | 1.000000 |
| rad43              | 2.57504e-09 | 1.000000 | 2.59746e-09 | 1.000000 |
| rad55              | 2.29328e-09 | 1.000000 | 2.31325e-09 | 1.000000 |
| rad34              | 2.96007e-10 | 1.000000 | 2.98585e-10 | 1.000000 |
| rad52              | 1.70972e-10 | 1.000000 | 1.72461e-10 | 1.000000 |
| rad51              | 1.34047e-10 | 1.000000 | 1.35214e-10 | 1.000000 |
| rad58              | 1.71337e-11 | 1.000000 | 1.72829e-11 | 1.000000 |
| rad42              | 1.22225e-11 | 1.000000 | 1.23290e-11 | 1.000000 |
| rad53              | 1.06169e-11 | 1.000000 | 1.07093e-11 | 1.000000 |
| rad64              | 4.60104e-12 | 1.000000 | 4.64111e-12 | 1.000000 |
| rad65              | 4.04333e-12 | 1.000000 | 4.07854e-12 | 1.000000 |
| rad41              | 2.76375e-12 | 1.000000 | 2.78781e-12 | 1.000000 |
| rad56              | 1.10531e-12 | 1.000000 | 1.11493e-12 | 1.000000 |
| rad2               | 2.86696e-13 | 1.000000 | 2.89193e-13 | 1.000000 |
| rad68syn           | 1.32095e-13 | 1.000000 | 1.33246e-13 | 1.000000 |
| rad68anti          | 9.18033e-14 | 1.000000 | 9.26031e-14 | 1.000000 |
| rad1               | 4.58958e-14 | 1.000000 | 4.62954e-14 | 1.000000 |
| rad23              | 3.52255e-14 | 1.000000 | 3.55323e-14 | 1.000000 |
| rad61              | 2.45770e-14 | 1.000000 | 2.47911e-14 | 1.000000 |
| rad45              | 1.04458e-14 | 1.000000 | 1.05368e-14 | 1.000000 |
| rad3               | 9.03023e-15 | 1.000000 | 9.10888e-15 | 1.000000 |
| rad10              | 8.96508e-15 | 1.000000 | 9.04311e-15 | 1.000000 |
| PAH8+H             | 8.64322e-15 | 1.000000 | 8.71846e-15 | 1.000000 |
| rad4               | 5.70988e-15 | 1.000000 | 5.75960e-15 | 1.000000 |
| rad40syn           | 4.97708e-15 | 1.000000 | 5.02043e-15 | 1.000000 |

|           |             |         |             |         |
|-----------|-------------|---------|-------------|---------|
| rad6      | 4.21897e-15 | 1.00000 | 4.25571e-15 | 1.00000 |
| rad40anti | 1.59900e-15 | 1.00000 | 1.61293e-15 | 1.00000 |
| rad73     | 1.02473e-15 | 1.00000 | 1.03366e-15 | 1.00000 |
| rad36     | 9.86794e-16 | 1.00000 | 9.95393e-16 | 1.00000 |
| rad71     | 1.66064e-16 | 1.00000 | 1.67511e-16 | 1.00000 |
| rad28     | 1.34038e-16 | 1.00000 | 1.35205e-16 | 1.00000 |
| rad26     | 5.58089e-17 | 1.00000 | 5.62949e-17 | 1.00000 |
| rad11     | 1.02361e-18 | 1.00000 | 1.03253e-18 | 1.00000 |
| rad7      | 5.77485e-19 | 1.00000 | 5.82514e-19 | 1.00000 |
| rad31     | 3.07518e-19 | 1.00000 | 3.10197e-19 | 1.00000 |
| rad9      | 9.87562e-20 | 1.00000 | 9.96160e-20 | 1.00000 |
| rad13     | 7.43727e-20 | 1.00000 | 7.50204e-20 | 1.00000 |
| rad25     | 7.31624e-20 | 1.00000 | 7.37995e-20 | 1.00000 |
| rad33     | 5.23432e-20 | 1.00000 | 5.27990e-20 | 1.00000 |
| rad14     | 4.27494e-20 | 1.00000 | 4.31217e-20 | 1.00000 |
| rad72     | 2.84954e-20 | 1.00000 | 2.87435e-20 | 1.00000 |
| rad27     | 2.76910e-20 | 1.00000 | 2.79321e-20 | 1.00000 |
| rad21     | 2.17602e-20 | 1.00000 | 2.19497e-20 | 1.00000 |
| rad20     | 9.04724e-21 | 1.00000 | 9.12601e-21 | 1.00000 |
| rad24     | 7.30642e-22 | 1.00000 | 7.37005e-22 | 1.00000 |
| rad22     | 1.85751e-22 | 1.00000 | 1.87368e-22 | 1.00000 |
| rad15     | 5.95986e-23 | 1.00000 | 6.01176e-23 | 1.00000 |
| rad12     | 3.30939e-23 | 1.00000 | 3.33822e-23 | 1.00000 |
| rad18     | 3.85163e-24 | 1.00000 | 3.88518e-24 | 1.00000 |
| rad5      | 2.70169e-26 | 1.00000 | 2.72522e-26 | 1.00000 |
| rad47     | 1.06838e-26 | 1.00000 | 1.07769e-26 | 1.00000 |
| rad8      | 7.32789e-34 | 1.00000 | 7.39170e-34 | 1.00000 |

0.100000000E-07 Pa, 700.000000 K

| Rate constant      | True (fraction)      | Effective (fraction) |
|--------------------|----------------------|----------------------|
| Total              | 1.39564e-13 (1.00 )  | 1.36669e-13 (1.00 )  |
| Formation of rad11 | 5.88273e-14 (0.422 ) | 5.72650e-14 (0.419 ) |
| Formation of rad6  | 5.01684e-14 (0.359 ) | 4.88360e-14 (0.357 ) |
| H-abstraction      | 3.05678e-14 (0.219 ) | 3.05678e-14 (0.224 ) |

| species            | PYtrue      | Cumul    | PYeffective | Cumul    |
|--------------------|-------------|----------|-------------|----------|
| Indene+H           | 0.510454    | 0.510454 | 0.521265    | 0.521265 |
| Benzene+2-propynyl | 0.219024    | 0.729478 | 0.223663    | 0.744928 |
| C2H2+PhCH2         | 0.140690    | 0.870167 | 0.143670    | 0.888598 |
| PhCCH+CH3          | 0.0586093   | 0.928777 | 0.0598506   | 0.948449 |
| PhCHCCH2+H         | 0.0277623   | 0.956539 | 0.0283503   | 0.976799 |
| Phenyl+Allene      | 0.0207415   | 0.977280 | 0.000000    | 0.976799 |
| Ph+MeAc            | 0.00771340  | 0.984994 | 0.00787679  | 0.984676 |
| PhCCCH3+H          | 0.00756061  | 0.992554 | 0.00772075  | 0.992396 |
| PhCH2CCH+H         | 0.00451180  | 0.997066 | 0.00460736  | 0.997004 |
| PAH7+H             | 0.00225727  | 0.999324 | 0.00230508  | 0.999309 |
| rad39              | 0.000548289 | 0.999872 | 0.000559902 | 0.999869 |
| rad19anti          | 4.66037e-05 | 0.999918 | 4.75908e-05 | 0.999916 |
| PAH9+H             | 2.99985e-05 | 0.999948 | 3.06339e-05 | 0.999947 |
| rad30              | 2.26762e-05 | 0.999971 | 2.31565e-05 | 0.999970 |
| rad38              | 1.05314e-05 | 0.999982 | 1.07544e-05 | 0.999981 |
| rad35              | 7.29844e-06 | 0.999989 | 7.45303e-06 | 0.999988 |
| rad37              | 5.93522e-06 | 0.999995 | 6.06093e-06 | 0.999994 |
| rad19syn           | 2.61380e-06 | 0.999998 | 2.66916e-06 | 0.999997 |
| rad46              | 1.18432e-06 | 0.999999 | 1.20940e-06 | 0.999998 |
| rad54              | 5.53865e-07 | 0.999999 | 5.65596e-07 | 0.999999 |
| PAH3+H             | 2.96686e-07 | 1.000000 | 3.02969e-07 | 0.999999 |
| rad60syn           | 2.09904e-07 | 1.000000 | 2.14349e-07 | 0.999999 |
| PhcycC3H3_A+H      | 1.62838e-07 | 1.000000 | 1.66287e-07 | 1.000000 |
| rad60anti          | 1.11059e-07 | 1.000000 | 1.13411e-07 | 1.000000 |
| PAH10+CH3          | 8.88407e-08 | 1.000000 | 9.07227e-08 | 1.000000 |
| rad50              | 4.89398e-08 | 1.000000 | 4.99764e-08 | 1.000000 |
| rad59              | 4.64276e-08 | 1.000000 | 4.74110e-08 | 1.000000 |
| rad70              | 3.43279e-08 | 1.000000 | 3.50550e-08 | 1.000000 |
| PAH1+H             | 2.87927e-08 | 1.000000 | 2.94026e-08 | 1.000000 |
| rad67              | 2.16413e-08 | 1.000000 | 2.20997e-08 | 1.000000 |
| rad62              | 1.75396e-08 | 1.000000 | 1.79112e-08 | 1.000000 |
| rad55              | 1.62462e-08 | 1.000000 | 1.65903e-08 | 1.000000 |
| rad43              | 8.26632e-09 | 1.000000 | 8.44142e-09 | 1.000000 |
| rad34              | 2.73084e-09 | 1.000000 | 2.78868e-09 | 1.000000 |
| rad51              | 1.25002e-09 | 1.000000 | 1.27650e-09 | 1.000000 |
| rad52              | 1.21856e-09 | 1.000000 | 1.24437e-09 | 1.000000 |
| rad53              | 1.69563e-10 | 1.000000 | 1.73154e-10 | 1.000000 |
| rad58              | 1.35852e-10 | 1.000000 | 1.38730e-10 | 1.000000 |
| rad42              | 1.03499e-10 | 1.000000 | 1.05691e-10 | 1.000000 |
| rad64              | 7.31424e-11 | 1.000000 | 7.46916e-11 | 1.000000 |
| rad65              | 3.91347e-11 | 1.000000 | 3.99636e-11 | 1.000000 |

|           |             |         |             |          |
|-----------|-------------|---------|-------------|----------|
| rad56     | 2.88481e-11 | 1.00000 | 2.94592e-11 | 1.000000 |
| rad41     | 1.94813e-11 | 1.00000 | 1.98939e-11 | 1.000000 |
| rad68syn  | 3.41597e-12 | 1.00000 | 3.48832e-12 | 1.000000 |
| rad68anti | 2.34479e-12 | 1.00000 | 2.39446e-12 | 1.000000 |
| PAH8+H    | 4.75489e-13 | 1.00000 | 4.85561e-13 | 1.000000 |
| rad61     | 4.69346e-13 | 1.00000 | 4.79287e-13 | 1.000000 |
| rad40syn  | 2.01813e-13 | 1.00000 | 2.06087e-13 | 1.000000 |
| rad2      | 1.63927e-13 | 1.00000 | 1.67398e-13 | 1.000000 |
| rad40anti | 7.19648e-14 | 1.00000 | 7.34890e-14 | 1.000000 |
| rad73     | 4.99138e-14 | 1.00000 | 5.09710e-14 | 1.000000 |
| rad23     | 4.16934e-14 | 1.00000 | 4.25765e-14 | 1.000000 |
| rad1      | 3.27006e-14 | 1.00000 | 3.33932e-14 | 1.000000 |
| rad45     | 1.36703e-14 | 1.00000 | 1.39599e-14 | 1.000000 |
| rad71     | 1.21717e-14 | 1.00000 | 1.24296e-14 | 1.000000 |
| rad3      | 4.26729e-15 | 1.00000 | 4.35768e-15 | 1.000000 |
| rad10     | 4.23914e-15 | 1.00000 | 4.32892e-15 | 1.000000 |
| rad4      | 2.99805e-15 | 1.00000 | 3.06155e-15 | 1.000000 |
| rad6      | 1.62320e-15 | 1.00000 | 1.65758e-15 | 1.000000 |
| rad36     | 1.41534e-15 | 1.00000 | 1.44531e-15 | 1.000000 |
| rad28     | 3.68624e-17 | 1.00000 | 3.76432e-17 | 1.000000 |
| rad26     | 1.54104e-17 | 1.00000 | 1.57368e-17 | 1.000000 |
| rad9      | 7.80562e-18 | 1.00000 | 7.97096e-18 | 1.000000 |
| rad72     | 4.76757e-18 | 1.00000 | 4.86855e-18 | 1.000000 |
| rad11     | 1.88785e-18 | 1.00000 | 1.92784e-18 | 1.000000 |
| rad13     | 5.37295e-19 | 1.00000 | 5.48675e-19 | 1.000000 |
| rad7      | 4.28235e-19 | 1.00000 | 4.37305e-19 | 1.000000 |
| rad21     | 3.99856e-19 | 1.00000 | 4.08326e-19 | 1.000000 |
| rad33     | 3.80933e-19 | 1.00000 | 3.89001e-19 | 1.000000 |
| rad31     | 1.78365e-19 | 1.00000 | 1.82143e-19 | 1.000000 |
| rad20     | 1.48743e-19 | 1.00000 | 1.51893e-19 | 1.000000 |
| rad25     | 8.89367e-20 | 1.00000 | 9.08205e-20 | 1.000000 |
| rad24     | 3.96761e-20 | 1.00000 | 4.05165e-20 | 1.000000 |
| rad14     | 3.92222e-20 | 1.00000 | 4.00530e-20 | 1.000000 |
| rad27     | 3.69501e-20 | 1.00000 | 3.77328e-20 | 1.000000 |
| rad12     | 4.79208e-21 | 1.00000 | 4.89358e-21 | 1.000000 |
| rad15     | 3.10508e-21 | 1.00000 | 3.17085e-21 | 1.000000 |
| rad22     | 2.20970e-22 | 1.00000 | 2.25650e-22 | 1.000000 |
| rad18     | 2.13926e-23 | 1.00000 | 2.18456e-23 | 1.000000 |
| rad47     | 9.03917e-26 | 1.00000 | 9.23064e-26 | 1.000000 |
| rad5      | 2.52746e-26 | 1.00000 | 2.58100e-26 | 1.000000 |
| rad8      | 9.25480e-30 | 1.00000 | 9.45081e-30 | 1.000000 |

0.100000000E-07 Pa, 800.000000 K

=====

| Rate constant      | True (fraction)      | Effective (fraction) |
|--------------------|----------------------|----------------------|
| Total              | 2.75392e-13 (1.00 )  | 2.64229e-13 (1.00 )  |
| Formation of rad11 | 1.06471e-13 (0.387 ) | 1.00706e-13 (0.381 ) |
| Formation of rad6  | 9.97133e-14 (0.362 ) | 9.43145e-14 (0.357 ) |
| H-abstraction      | 6.92082e-14 (0.251 ) | 6.92082e-14 (0.262 ) |

| species            | PYtrue      | Cumul    | PYeffective | Cumul    |
|--------------------|-------------|----------|-------------|----------|
| Indene+H           | 0.420963    | 0.420963 | 0.438748    | 0.438748 |
| Benzene+2-propynyl | 0.251308    | 0.672270 | 0.261925    | 0.700673 |
| C2H2+PhCH2         | 0.158756    | 0.831027 | 0.165464    | 0.866137 |
| PhCCH+CH3          | 0.0631452   | 0.894172 | 0.0658130   | 0.931950 |
| Phenyl+Allene      | 0.0405363   | 0.934708 | 0.000000    | 0.931950 |
| PhCHCCH2+H         | 0.0360793   | 0.970788 | 0.0376036   | 0.969553 |
| PhCH2CCH+H         | 0.00999819  | 0.980786 | 0.0104207   | 0.979974 |
| Ph+MeAc            | 0.00840385  | 0.989190 | 0.00875888  | 0.988733 |
| PhCCCH3+H          | 0.00623443  | 0.995424 | 0.00649783  | 0.995231 |
| PAH7+H             | 0.00351019  | 0.998934 | 0.00365850  | 0.998889 |
| rad39              | 0.000836596 | 0.999771 | 0.000871939 | 0.999761 |
| rad19anti          | 9.01935e-05 | 0.999861 | 9.40042e-05 | 0.999855 |
| PAH9+H             | 5.38600e-05 | 0.999915 | 5.61355e-05 | 0.999911 |
| rad30              | 2.94556e-05 | 0.999944 | 3.07000e-05 | 0.999942 |
| rad38              | 1.96291e-05 | 0.999964 | 2.04585e-05 | 0.999962 |
| rad35              | 1.22732e-05 | 0.999976 | 1.27916e-05 | 0.999975 |
| rad19syn           | 8.33347e-06 | 0.999985 | 8.68552e-06 | 0.999984 |
| rad37              | 7.26188e-06 | 0.999992 | 7.56866e-06 | 0.999992 |
| rad46              | 2.65265e-06 | 0.999995 | 2.76472e-06 | 0.999994 |
| rad54              | 2.03471e-06 | 0.999997 | 2.12067e-06 | 0.999996 |
| PAH3+H             | 7.96489e-07 | 0.999997 | 8.30142e-07 | 0.999997 |
| PhcycC3H3_A+H      | 7.94325e-07 | 0.999998 | 8.27884e-07 | 0.999998 |
| rad60syn           | 3.96788e-07 | 0.999999 | 4.13552e-07 | 0.999998 |
| PAH10+CH3          | 2.53197e-07 | 0.999999 | 2.63894e-07 | 0.999999 |
| rad60anti          | 2.15811e-07 | 0.999999 | 2.24928e-07 | 0.999999 |
| rad50              | 1.82305e-07 | 0.999999 | 1.90007e-07 | 0.999999 |
| rad70              | 1.50040e-07 | 0.999999 | 1.56379e-07 | 0.999999 |

|           |             |          |             |          |
|-----------|-------------|----------|-------------|----------|
| PAH1+H    | 1.48682e-07 | 0.999999 | 1.54963e-07 | 0.999999 |
| rad59     | 1.17661e-07 | 1.000000 | 1.22632e-07 | 1.000000 |
| rad67     | 9.03380e-08 | 1.000000 | 9.41547e-08 | 1.000000 |
| rad55     | 7.18814e-08 | 1.000000 | 7.49183e-08 | 1.000000 |
| rad62     | 5.32905e-08 | 1.000000 | 5.55419e-08 | 1.000000 |
| rad43     | 1.85215e-08 | 1.000000 | 1.93041e-08 | 1.000000 |
| rad34     | 1.46559e-08 | 1.000000 | 1.52750e-08 | 1.000000 |
| rad51     | 7.22365e-09 | 1.000000 | 7.52888e-09 | 1.000000 |
| rad52     | 5.73950e-09 | 1.000000 | 5.98199e-09 | 1.000000 |
| rad53     | 1.38657e-09 | 1.000000 | 1.44515e-09 | 1.000000 |
| rad58     | 6.48417e-10 | 1.000000 | 6.75812e-10 | 1.000000 |
| rad64     | 5.75074e-10 | 1.000000 | 5.99371e-10 | 1.000000 |
| rad42     | 5.07610e-10 | 1.000000 | 5.29056e-10 | 1.000000 |
| rad56     | 3.39878e-10 | 1.000000 | 3.54238e-10 | 1.000000 |
| rad65     | 2.29598e-10 | 1.000000 | 2.39299e-10 | 1.000000 |
| rad41     | 7.94160e-11 | 1.000000 | 8.27714e-11 | 1.000000 |
| rad68syn  | 3.95119e-11 | 1.000000 | 4.11813e-11 | 1.000000 |
| rad68anti | 2.86637e-11 | 1.000000 | 2.79986e-11 | 1.000000 |
| PAH8+H    | 9.75569e-12 | 1.000000 | 1.01678e-11 | 1.000000 |
| rad61     | 4.46180e-12 | 1.000000 | 4.65031e-12 | 1.000000 |
| rad40syn  | 3.27953e-12 | 1.000000 | 3.41808e-12 | 1.000000 |
| rad40anti | 1.27570e-12 | 1.000000 | 1.32959e-12 | 1.000000 |
| rad73     | 9.82037e-13 | 1.000000 | 1.02353e-12 | 1.000000 |
| rad71     | 3.27514e-13 | 1.000000 | 3.41351e-13 | 1.000000 |
| rad2      | 5.36774e-14 | 1.000000 | 5.59452e-14 | 1.000000 |
| rad23     | 2.38414e-14 | 1.000000 | 2.48486e-14 | 1.000000 |
| rad1      | 1.06238e-14 | 1.000000 | 1.10726e-14 | 1.000000 |
| rad45     | 9.96607e-15 | 1.000000 | 1.03871e-14 | 1.000000 |
| rad3      | 1.42601e-15 | 1.000000 | 1.48626e-15 | 1.000000 |
| rad10     | 1.13818e-15 | 1.000000 | 1.18626e-15 | 1.000000 |
| rad4      | 1.01585e-15 | 1.000000 | 1.05877e-15 | 1.000000 |
| rad36     | 9.55069e-16 | 1.000000 | 9.95419e-16 | 1.000000 |
| rad6      | 6.64111e-16 | 1.000000 | 6.92169e-16 | 1.000000 |
| rad72     | 3.07086e-16 | 1.000000 | 3.20060e-16 | 1.000000 |
| rad9      | 1.94381e-16 | 1.000000 | 2.02593e-16 | 1.000000 |
| rad28     | 1.32323e-17 | 1.000000 | 1.37913e-17 | 1.000000 |
| rad11     | 6.34975e-18 | 1.000000 | 6.61801e-18 | 1.000000 |
| rad21     | 5.89264e-18 | 1.000000 | 6.14159e-18 | 1.000000 |
| rad13     | 5.65784e-18 | 1.000000 | 5.89687e-18 | 1.000000 |
| rad26     | 5.58363e-18 | 1.000000 | 5.81954e-18 | 1.000000 |
| rad33     | 2.86164e-18 | 1.000000 | 2.98255e-18 | 1.000000 |
| rad20     | 2.26268e-18 | 1.000000 | 2.35827e-18 | 1.000000 |
| rad7      | 8.56167e-19 | 1.000000 | 8.92340e-19 | 1.000000 |
| rad24     | 5.58298e-19 | 1.000000 | 5.81886e-19 | 1.000000 |
| rad25     | 1.92043e-19 | 1.000000 | 2.00156e-19 | 1.000000 |
| rad12     | 1.15817e-19 | 1.000000 | 1.20710e-19 | 1.000000 |
| rad31     | 8.40534e-20 | 1.000000 | 8.76043e-20 | 1.000000 |
| rad27     | 7.05988e-20 | 1.000000 | 7.35816e-20 | 1.000000 |
| rad14     | 5.74858e-20 | 1.000000 | 5.99146e-20 | 1.000000 |
| rad15     | 4.43278e-20 | 1.000000 | 4.62007e-20 | 1.000000 |
| rad18     | 2.25392e-22 | 1.000000 | 2.34914e-22 | 1.000000 |
| rad22     | 1.38849e-22 | 1.000000 | 1.44715e-22 | 1.000000 |
| rad47     | 5.02496e-25 | 1.000000 | 5.23725e-25 | 1.000000 |
| rad8      | 3.33307e-26 | 1.000000 | 3.47390e-26 | 1.000000 |
| rad5      | 3.10996e-26 | 1.000000 | 3.24134e-26 | 1.000000 |

0.100000000E-07 Pa, 900.000000 K

=====

| Rate constant      | True (fraction)      | Effective (fraction) |
|--------------------|----------------------|----------------------|
| Total              | 4.88072e-13 (1.00 )  | 4.55158e-13 (1.00 )  |
| Formation of rad11 | 1.74945e-13 (0.358 ) | 1.58562e-13 (0.348 ) |
| Formation of rad6  | 1.76509e-13 (0.362 ) | 1.59978e-13 (0.351 ) |
| H-abstraction      | 1.36618e-13 (0.280 ) | 1.36618e-13 (0.300 ) |

| species            | PYtrue      | Cumul    | PYeffective | Cumul    |
|--------------------|-------------|----------|-------------|----------|
| Indene+H           | 0.341014    | 0.341014 | 0.365674    | 0.365674 |
| Benzene+2-propynyl | 0.279914    | 0.620928 | 0.300155    | 0.665829 |
| C2H2+PhCH2         | 0.164625    | 0.785553 | 0.176529    | 0.842358 |
| Phenyl+Allene      | 0.0674364   | 0.852989 | 0.000000    | 0.842358 |
| PhCCH+CH3          | 0.0639259   | 0.916915 | 0.0685486   | 0.910906 |
| PhCHCCH2+H         | 0.0451268   | 0.962042 | 0.0483901   | 0.959297 |
| PhCH2CCH+H         | 0.0182967   | 0.980338 | 0.0196198   | 0.978916 |
| Ph+MeAc            | 0.00849313  | 0.988832 | 0.00910729  | 0.988024 |
| PhCCCH3+H          | 0.00485364  | 0.993685 | 0.00520463  | 0.993228 |
| PAH7+H             | 0.00482415  | 0.998509 | 0.00517299  | 0.998401 |
| rad39              | 0.00111872  | 0.999628 | 0.00119961  | 0.999601 |
| rad19anti          | 0.000152570 | 0.999781 | 0.000163603 | 0.999764 |
| PAH9+H             | 8.58055e-05 | 0.999866 | 9.20100e-05 | 0.999856 |

|               |             |          |             |          |
|---------------|-------------|----------|-------------|----------|
| rad30         | 3.45816e-05 | 0.999901 | 3.70824e-05 | 0.999894 |
| rad38         | 3.22626e-05 | 0.999933 | 3.45956e-05 | 0.999928 |
| rad19syn      | 2.05726e-05 | 0.999954 | 2.20602e-05 | 0.999950 |
| rad35         | 1.85019e-05 | 0.999972 | 1.98398e-05 | 0.999970 |
| rad37         | 8.30353e-06 | 0.999981 | 8.90399e-06 | 0.999979 |
| rad54         | 5.61022e-06 | 0.999986 | 6.01591e-06 | 0.999985 |
| rad46         | 5.06238e-06 | 0.999991 | 5.42846e-06 | 0.999990 |
| PhcycC3H3_A+H | 2.75303e-06 | 0.999994 | 2.95211e-06 | 0.999993 |
| PAH3+H        | 1.70031e-06 | 0.999996 | 1.82327e-06 | 0.999995 |
| rad60syn      | 6.35566e-07 | 0.999996 | 6.81526e-07 | 0.999996 |
| PAH10+CH3     | 5.91896e-07 | 0.999997 | 6.34698e-07 | 0.999996 |
| PAH1+H        | 5.27743e-07 | 0.999998 | 5.65906e-07 | 0.999997 |
| rad50         | 5.26055e-07 | 0.999998 | 5.64096e-07 | 0.999998 |
| rad70         | 4.68169e-07 | 0.999999 | 5.02024e-07 | 0.999998 |
| rad60anti     | 3.53464e-07 | 0.999999 | 3.79023e-07 | 0.999999 |
| rad67         | 2.86638e-07 | 0.999999 | 3.07366e-07 | 0.999999 |
| rad59         | 2.38374e-07 | 0.999999 | 2.55613e-07 | 0.999999 |
| rad55         | 2.28529e-07 | 1.000000 | 2.45055e-07 | 0.999999 |
| rad62         | 1.23575e-07 | 1.000000 | 1.32511e-07 | 0.999999 |
| rad34         | 5.38118e-08 | 1.000000 | 5.77031e-08 | 0.999999 |
| rad43         | 3.25336e-08 | 1.000000 | 3.48862e-08 | 1.000000 |
| rad51         | 2.94628e-08 | 1.000000 | 3.15934e-08 | 1.000000 |
| rad52         | 1.98861e-08 | 1.000000 | 2.13241e-08 | 1.000000 |
| rad53         | 7.16536e-09 | 1.000000 | 7.68353e-09 | 1.000000 |
| rad64         | 2.79837e-09 | 1.000000 | 3.00073e-09 | 1.000000 |
| rad56         | 2.33179e-09 | 1.000000 | 2.50041e-09 | 1.000000 |
| rad58         | 2.16896e-09 | 1.000000 | 2.32580e-09 | 1.000000 |
| rad42         | 1.71810e-09 | 1.000000 | 1.84235e-09 | 1.000000 |
| rad65         | 9.39252e-10 | 1.000000 | 1.00717e-09 | 1.000000 |
| rad68syn      | 2.64056e-10 | 1.000000 | 2.83151e-10 | 1.000000 |
| rad41         | 2.24666e-10 | 1.000000 | 2.40913e-10 | 1.000000 |
| rad68anti     | 1.78166e-10 | 1.000000 | 1.91050e-10 | 1.000000 |
| PAH8+H        | 1.02532e-10 | 1.000000 | 1.09946e-10 | 1.000000 |
| rad40syn      | 2.86480e-11 | 1.000000 | 3.07196e-11 | 1.000000 |
| rad61         | 2.66398e-11 | 1.000000 | 2.85662e-11 | 1.000000 |
| rad40anti     | 1.19773e-11 | 1.000000 | 1.28434e-11 | 1.000000 |
| rad73         | 1.03641e-11 | 1.000000 | 1.11135e-11 | 1.000000 |
| rad71         | 4.43742e-12 | 1.000000 | 4.75831e-12 | 1.000000 |
| rad2          | 1.30918e-14 | 1.000000 | 1.40385e-14 | 1.000000 |
| rad23         | 1.10453e-14 | 1.000000 | 1.18440e-14 | 1.000000 |
| rad72         | 8.45986e-15 | 1.000000 | 9.07160e-15 | 1.000000 |
| rad45         | 5.54585e-15 | 1.000000 | 5.94689e-15 | 1.000000 |
| rad1          | 2.65636e-15 | 1.000000 | 2.84845e-15 | 1.000000 |
| rad9          | 9.58550e-16 | 1.000000 | 1.02786e-15 | 1.000000 |
| rad36         | 5.29461e-16 | 1.000000 | 5.67747e-16 | 1.000000 |
| rad6          | 4.51650e-16 | 1.000000 | 4.84309e-16 | 1.000000 |
| rad3          | 4.22300e-16 | 1.000000 | 4.52837e-16 | 1.000000 |
| rad4          | 3.12881e-16 | 1.000000 | 3.35507e-16 | 1.000000 |
| rad10         | 2.35259e-16 | 1.000000 | 2.52272e-16 | 1.000000 |
| rad13         | 4.90674e-17 | 1.000000 | 5.26156e-17 | 1.000000 |
| rad21         | 3.80389e-17 | 1.000000 | 4.07897e-17 | 1.000000 |
| rad11         | 2.95865e-17 | 1.000000 | 3.17260e-17 | 1.000000 |
| rad20         | 1.64991e-17 | 1.000000 | 1.76922e-17 | 1.000000 |
| rad33         | 1.26647e-17 | 1.000000 | 1.35806e-17 | 1.000000 |
| rad28         | 6.03226e-18 | 1.000000 | 6.46846e-18 | 1.000000 |
| rad7          | 3.78968e-18 | 1.000000 | 4.06372e-18 | 1.000000 |
| rad26         | 2.56763e-18 | 1.000000 | 2.75330e-18 | 1.000000 |
| rad24         | 1.88184e-18 | 1.000000 | 2.01792e-18 | 1.000000 |
| rad25         | 5.51827e-19 | 1.000000 | 5.91731e-19 | 1.000000 |
| rad12         | 5.35710e-19 | 1.000000 | 5.74448e-19 | 1.000000 |
| rad15         | 1.51594e-19 | 1.000000 | 1.62556e-19 | 1.000000 |
| rad27         | 1.32691e-19 | 1.000000 | 1.42286e-19 | 1.000000 |
| rad14         | 1.05204e-19 | 1.000000 | 1.12812e-19 | 1.000000 |
| rad31         | 4.19944e-20 | 1.000000 | 4.50311e-20 | 1.000000 |
| rad18         | 3.26809e-21 | 1.000000 | 3.50442e-21 | 1.000000 |
| rad22         | 7.40436e-23 | 1.000000 | 7.93974e-23 | 1.000000 |
| rad8          | 1.12161e-23 | 1.000000 | 1.20272e-23 | 1.000000 |
| rad47         | 2.05588e-24 | 1.000000 | 2.20455e-24 | 1.000000 |
| rad5          | 5.08614e-26 | 1.000000 | 5.45393e-26 | 1.000000 |

0.100000000E-07 Pa, 1000.00000 K

=====

| Rate constant      | True (fraction)      | Effective (fraction) |
|--------------------|----------------------|----------------------|
| Total              | 7.98668e-13 (1.00 )  | 7.19594e-13 (1.00 )  |
| Formation of rad11 | 2.67704e-13 (0.335 ) | 2.29546e-13 (0.319 ) |
| Formation of rad6  | 2.87049e-13 (0.359 ) | 2.46133e-13 (0.342 ) |
| H-abstraction      | 2.43915e-13 (0.305 ) | 2.43915e-13 (0.339 ) |
| species            | PYtrue Cumul         | PYeffective Cumul    |

|                    |             |          |             |          |
|--------------------|-------------|----------|-------------|----------|
| Benzene+2-propynyl | 0.305402    | 0.305402 | 0.338962    | 0.338962 |
| Indene+H           | 0.272124    | 0.577526 | 0.302027    | 0.640989 |
| C2H2+PhCH2         | 0.159453    | 0.736979 | 0.176975    | 0.817964 |
| Phenyl+Allene      | 0.0990073   | 0.835987 | 0.000000    | 0.817964 |
| PhCCH+CH3          | 0.0616205   | 0.897607 | 0.0683917   | 0.886356 |
| PhCHCCH2+H         | 0.0537596   | 0.951367 | 0.0596670   | 0.946023 |
| PhCH2CCH+H         | 0.0288969   | 0.980264 | 0.0320723   | 0.978095 |
| Ph+MeAc            | 0.00817632  | 0.988440 | 0.00907480  | 0.987170 |
| PAH7+H             | 0.00601184  | 0.994452 | 0.00667246  | 0.993842 |
| PhCCCH3+H          | 0.00364277  | 0.998095 | 0.00404307  | 0.997885 |
| rad39              | 0.00134896  | 0.999444 | 0.00149719  | 0.999382 |
| rad19anti          | 0.000230025 | 0.999674 | 0.000255302 | 0.999638 |
| PAH9+H             | 0.000123695 | 0.999797 | 0.000137287 | 0.999775 |
| rad38              | 4.77792e-05 | 0.999845 | 5.30296e-05 | 0.999828 |
| rad19syn           | 4.20371e-05 | 0.999887 | 4.66565e-05 | 0.999875 |
| rad30              | 3.74826e-05 | 0.999925 | 4.16015e-05 | 0.999916 |
| rad35              | 2.54628e-05 | 0.999950 | 2.82608e-05 | 0.999945 |
| rad54              | 1.25292e-05 | 0.999963 | 1.39061e-05 | 0.999959 |
| rad37              | 9.28205e-06 | 0.999972 | 1.03021e-05 | 0.999969 |
| rad46              | 8.48861e-06 | 0.999980 | 9.42145e-06 | 0.999978 |
| PhcycC3H3_A+H      | 7.44283e-06 | 0.999988 | 8.26073e-06 | 0.999987 |
| PAH3+H             | 3.05843e-06 | 0.999991 | 3.39451e-06 | 0.999990 |
| PAH1+H             | 1.42911e-06 | 0.999992 | 1.58616e-06 | 0.999991 |
| rad50              | 1.24669e-06 | 0.999994 | 1.38369e-06 | 0.999993 |
| PAH10+CH3          | 1.21323e-06 | 0.999995 | 1.34654e-06 | 0.999994 |
| rad70              | 1.14131e-06 | 0.999996 | 1.26673e-06 | 0.999995 |
| rad60syn           | 8.97094e-07 | 0.999997 | 9.95669e-07 | 0.999996 |
| rad67              | 7.32850e-07 | 0.999998 | 8.13375e-07 | 0.999997 |
| rad55              | 5.71763e-07 | 0.999998 | 6.34592e-07 | 0.999998 |
| rad60anti          | 5.08253e-07 | 0.999999 | 5.64103e-07 | 0.999999 |
| rad59              | 4.08645e-07 | 0.999999 | 4.53550e-07 | 0.999999 |
| rad62              | 2.36337e-07 | 0.999999 | 2.62307e-07 | 0.999999 |
| rad34              | 1.49947e-07 | 0.999999 | 1.66424e-07 | 0.999999 |
| rad51              | 9.25830e-08 | 0.999999 | 1.02757e-07 | 0.999999 |
| rad52              | 5.46149e-08 | 1.000000 | 6.06164e-08 | 1.000000 |
| rad43              | 4.82842e-08 | 1.000000 | 5.35901e-08 | 1.000000 |
| rad53              | 2.66802e-08 | 1.000000 | 2.96121e-08 | 1.000000 |
| rad56              | 1.08965e-08 | 1.000000 | 1.20939e-08 | 1.000000 |
| rad64              | 9.68714e-09 | 1.000000 | 1.07517e-08 | 1.000000 |
| rad58              | 5.61421e-09 | 1.000000 | 6.23115e-09 | 1.000000 |
| rad42              | 4.47913e-09 | 1.000000 | 4.97133e-09 | 1.000000 |
| rad65              | 2.93939e-09 | 1.000000 | 3.26239e-09 | 1.000000 |
| rad68syn           | 1.19347e-09 | 1.000000 | 1.32462e-09 | 1.000000 |
| rad68anti          | 8.00253e-10 | 1.000000 | 8.88191e-10 | 1.000000 |
| PAH8+H             | 6.70053e-10 | 1.000000 | 7.43681e-10 | 1.000000 |
| rad41              | 4.94029e-10 | 1.000000 | 5.48317e-10 | 1.000000 |
| rad40syn           | 1.60977e-10 | 1.000000 | 1.78667e-10 | 1.000000 |
| rad61              | 1.14008e-10 | 1.000000 | 1.26536e-10 | 1.000000 |
| rad40anti          | 7.14860e-11 | 1.000000 | 7.93411e-11 | 1.000000 |
| rad73              | 6.98974e-11 | 1.000000 | 7.75781e-11 | 1.000000 |
| rad71              | 3.67488e-11 | 1.000000 | 4.07870e-11 | 1.000000 |
| rad72              | 1.23083e-13 | 1.000000 | 1.36609e-13 | 1.000000 |
| rad23              | 5.33400e-15 | 1.000000 | 5.92013e-15 | 1.000000 |
| rad2               | 3.20662e-15 | 1.000000 | 3.55898e-15 | 1.000000 |
| rad45              | 3.00374e-15 | 1.000000 | 3.33381e-15 | 1.000000 |
| rad9               | 1.42538e-15 | 1.000000 | 1.58200e-15 | 1.000000 |
| rad1               | 7.07073e-16 | 1.000000 | 7.84772e-16 | 1.000000 |
| rad6               | 5.84524e-16 | 1.000000 | 6.48756e-16 | 1.000000 |
| rad36              | 2.87643e-16 | 1.000000 | 3.19252e-16 | 1.000000 |
| rad13              | 2.41230e-16 | 1.000000 | 2.67738e-16 | 1.000000 |
| rad11              | 1.49792e-16 | 1.000000 | 1.66252e-16 | 1.000000 |
| rad3               | 1.39346e-16 | 1.000000 | 1.54659e-16 | 1.000000 |
| rad4               | 1.06999e-16 | 1.000000 | 1.18757e-16 | 1.000000 |
| rad21              | 9.56156e-17 | 1.000000 | 1.06122e-16 | 1.000000 |
| rad10              | 6.43985e-17 | 1.000000 | 7.14748e-17 | 1.000000 |
| rad20              | 4.65001e-17 | 1.000000 | 5.16098e-17 | 1.000000 |
| rad33              | 2.70073e-17 | 1.000000 | 2.99751e-17 | 1.000000 |
| rad7               | 2.24029e-17 | 1.000000 | 2.48647e-17 | 1.000000 |
| rad28              | 3.79060e-18 | 1.000000 | 4.20713e-18 | 1.000000 |
| rad24              | 2.48801e-18 | 1.000000 | 2.76141e-18 | 1.000000 |
| rad26              | 1.59307e-18 | 1.000000 | 1.76814e-18 | 1.000000 |
| rad25              | 1.49317e-18 | 1.000000 | 1.65725e-18 | 1.000000 |
| rad12              | 9.30060e-19 | 1.000000 | 1.03226e-18 | 1.000000 |
| rad14              | 1.89393e-19 | 1.000000 | 2.10206e-19 | 1.000000 |
| rad15              | 1.87665e-19 | 1.000000 | 2.08287e-19 | 1.000000 |
| rad27              | 1.85942e-19 | 1.000000 | 2.06374e-19 | 1.000000 |
| rad18              | 4.54218e-20 | 1.000000 | 5.04131e-20 | 1.000000 |
| rad31              | 2.32683e-20 | 1.000000 | 2.58252e-20 | 1.000000 |
| rad8               | 3.75825e-22 | 1.000000 | 4.17124e-22 | 1.000000 |

|       |             |          |             |          |
|-------|-------------|----------|-------------|----------|
| rad22 | 6.05647e-23 | 1.000000 | 6.72197e-23 | 1.000000 |
| rad47 | 6.62542e-24 | 1.000000 | 7.35346e-24 | 1.000000 |
| rad5  | 1.19898e-25 | 1.000000 | 1.33073e-25 | 1.000000 |

0.100000000E-07 Pa, 1100.00000 K

| Rate constant      | True (fraction)      | Effective (fraction) |
|--------------------|----------------------|----------------------|
| Total              | 1.22919e-12 (1.00 )  | 1.06688e-12 (1.00 )  |
| Formation of rad11 | 3.87976e-13 (0.316 ) | 3.11712e-13 (0.292 ) |
| Formation of rad6  | 4.37724e-13 (0.356 ) | 3.51681e-13 (0.330 ) |
| H-abstraction      | 4.03491e-13 (0.328 ) | 4.03491e-13 (0.378 ) |

| species            | PYtrue      | Cumul    | PYeffective | Cumul    |
|--------------------|-------------|----------|-------------|----------|
| Benzene+2-propynyl | 0.328257    | 0.328257 | 0.378196    | 0.378196 |
| Indene+H           | 0.214714    | 0.542971 | 0.247379    | 0.625574 |
| C2H2+PhCH2         | 0.146502    | 0.689473 | 0.168789    | 0.794364 |
| Phenyl+Allene      | 0.132044    | 0.821517 | 0.000000    | 0.794364 |
| PhCHCCH2+H         | 0.0609574   | 0.882474 | 0.0702309   | 0.864595 |
| PhCCH+CH3          | 0.0572446   | 0.939719 | 0.0659535   | 0.930548 |
| PhCH2CCH+H         | 0.0407440   | 0.980463 | 0.0469425   | 0.977491 |
| Ph+MeAc            | 0.00763489  | 0.988098 | 0.00879642  | 0.986287 |
| PAH7+H             | 0.00694716  | 0.995045 | 0.00800405  | 0.994291 |
| PhCCCH3+H          | 0.00267733  | 0.997722 | 0.00308464  | 0.997376 |
| rad39              | 0.00150224  | 0.999224 | 0.00173078  | 0.999107 |
| rad19anti          | 0.000315220 | 0.999539 | 0.000363175 | 0.999470 |
| PAH9+H             | 0.000164386 | 0.999704 | 0.000189394 | 0.999659 |
| rad19syn           | 7.45655e-05 | 0.999778 | 8.59091e-05 | 0.999745 |
| rad38              | 6.50359e-05 | 0.999843 | 7.49299e-05 | 0.999820 |
| rad30              | 3.82332e-05 | 0.999882 | 4.40497e-05 | 0.999864 |
| rad35              | 3.25605e-05 | 0.999914 | 3.75140e-05 | 0.999902 |
| rad54              | 2.39077e-05 | 0.999938 | 2.75448e-05 | 0.999929 |
| PhcycC3H3_A+H      | 1.67306e-05 | 0.999955 | 1.92759e-05 | 0.999948 |
| rad46              | 1.28371e-05 | 0.999968 | 1.47901e-05 | 0.999963 |
| rad37              | 1.03715e-05 | 0.999978 | 1.19494e-05 | 0.999975 |
| PAH3+H             | 4.83975e-06 | 0.999983 | 5.57602e-06 | 0.999981 |
| PAH1+H             | 3.16887e-06 | 0.999986 | 3.65096e-06 | 0.999984 |
| rad50              | 2.53500e-06 | 0.999989 | 2.92065e-06 | 0.999987 |
| rad70              | 2.31279e-06 | 0.999991 | 2.66464e-06 | 0.999990 |
| PAH10+CH3          | 2.25114e-06 | 0.999993 | 2.59361e-06 | 0.999993 |
| rad67              | 1.57911e-06 | 0.999995 | 1.81935e-06 | 0.999994 |
| rad55              | 1.19782e-06 | 0.999996 | 1.38006e-06 | 0.999996 |
| rad60syn           | 1.15117e-06 | 0.999997 | 1.32630e-06 | 0.999997 |
| rad60anti          | 6.62627e-07 | 0.999998 | 7.63433e-07 | 0.999998 |
| rad59              | 6.18406e-07 | 0.999998 | 7.12482e-07 | 0.999999 |
| rad62              | 3.93252e-07 | 0.999999 | 4.53078e-07 | 0.999999 |
| rad34              | 3.40145e-07 | 0.999999 | 3.91892e-07 | 0.999999 |
| rad51              | 2.38369e-07 | 0.999999 | 2.74633e-07 | 1.000000 |
| rad52              | 1.25451e-07 | 1.000000 | 1.44535e-07 | 1.000000 |
| rad53              | 7.80404e-08 | 1.000000 | 8.99129e-08 | 1.000000 |
| rad43              | 6.37336e-08 | 1.000000 | 7.34295e-08 | 1.000000 |
| rad56              | 3.84098e-08 | 1.000000 | 4.42533e-08 | 1.000000 |
| rad64              | 2.61428e-08 | 1.000000 | 3.01199e-08 | 1.000000 |
| rad58              | 1.20347e-08 | 1.000000 | 1.38656e-08 | 1.000000 |
| rad42              | 9.67464e-09 | 1.000000 | 1.11465e-08 | 1.000000 |
| rad65              | 7.50471e-09 | 1.000000 | 8.64638e-09 | 1.000000 |
| rad68syn           | 4.04354e-09 | 1.000000 | 4.65870e-09 | 1.000000 |
| PAH8+H             | 3.08736e-09 | 1.000000 | 3.55704e-09 | 1.000000 |
| rad68anti          | 2.69715e-09 | 1.000000 | 3.10748e-09 | 1.000000 |
| rad41              | 9.10252e-10 | 1.000000 | 1.04874e-09 | 1.000000 |
| rad40syn           | 6.53835e-10 | 1.000000 | 7.53304e-10 | 1.000000 |
| rad61              | 3.79380e-10 | 1.000000 | 4.37096e-10 | 1.000000 |
| rad73              | 3.37894e-10 | 1.000000 | 3.89299e-10 | 1.000000 |
| rad40anti          | 3.05537e-10 | 1.000000 | 3.52019e-10 | 1.000000 |
| rad71              | 2.11150e-10 | 1.000000 | 2.43273e-10 | 1.000000 |
| rad72              | 1.11745e-12 | 1.000000 | 1.28745e-12 | 1.000000 |
| rad23              | 2.67713e-15 | 1.000000 | 3.08441e-15 | 1.000000 |
| rad45              | 1.62769e-15 | 1.000000 | 1.87532e-15 | 1.000000 |
| rad9               | 1.25138e-15 | 1.000000 | 1.44175e-15 | 1.000000 |
| rad2               | 8.70028e-16 | 1.000000 | 1.00239e-15 | 1.000000 |
| rad6               | 8.67838e-16 | 1.000000 | 9.99868e-16 | 1.000000 |
| rad11              | 6.03146e-16 | 1.000000 | 6.94904e-16 | 1.000000 |
| rad13              | 5.55337e-16 | 1.000000 | 6.39824e-16 | 1.000000 |
| rad1               | 2.03409e-16 | 1.000000 | 2.34354e-16 | 1.000000 |
| rad36              | 1.56461e-16 | 1.000000 | 1.80264e-16 | 1.000000 |
| rad7               | 1.24102e-16 | 1.000000 | 1.42983e-16 | 1.000000 |
| rad21              | 1.12703e-16 | 1.000000 | 1.29848e-16 | 1.000000 |
| rad20              | 5.72530e-17 | 1.000000 | 6.59629e-17 | 1.000000 |
| rad3               | 5.14341e-17 | 1.000000 | 5.92589e-17 | 1.000000 |

|       |             |          |             |         |
|-------|-------------|----------|-------------|---------|
| rad4  | 4.03027e-17 | 1.000000 | 4.64340e-17 | 1.00000 |
| rad33 | 2.98576e-17 | 1.000000 | 3.43998e-17 | 1.00000 |
| rad10 | 2.94898e-17 | 1.000000 | 3.39761e-17 | 1.00000 |
| rad28 | 3.35309e-18 | 1.000000 | 3.86321e-18 | 1.00000 |
| rad25 | 2.72797e-18 | 1.000000 | 3.14298e-18 | 1.00000 |
| rad24 | 2.16988e-18 | 1.000000 | 2.49998e-18 | 1.00000 |
| rad26 | 1.30937e-18 | 1.000000 | 1.50857e-18 | 1.00000 |
| rad12 | 1.06574e-18 | 1.000000 | 1.22787e-18 | 1.00000 |
| rad18 | 3.95810e-19 | 1.000000 | 4.56025e-19 | 1.00000 |
| rad14 | 2.59084e-19 | 1.000000 | 2.98500e-19 | 1.00000 |
| rad27 | 1.66794e-19 | 1.000000 | 1.92169e-19 | 1.00000 |
| rad15 | 1.52912e-19 | 1.000000 | 1.76175e-19 | 1.00000 |
| rad31 | 1.37107e-20 | 1.000000 | 1.57966e-20 | 1.00000 |
| rad8  | 2.31129e-21 | 1.000000 | 2.66290e-21 | 1.00000 |
| rad22 | 2.26948e-22 | 1.000000 | 2.61474e-22 | 1.00000 |
| rad47 | 1.74352e-23 | 1.000000 | 2.00877e-23 | 1.00000 |
| rad5  | 3.96931e-25 | 1.000000 | 4.57317e-25 | 1.00000 |

0.100000000E-07 Pa, 1200.00000 K

| Rate constant      | True (fraction)      | Effective (fraction) |
|--------------------|----------------------|----------------------|
| Total              | 1.80237e-12 (1.00 )  | 1.50733e-12 (1.00 )  |
| Formation of rad11 | 5.38789e-13 (0.299 ) | 4.03336e-13 (0.268 ) |
| Formation of rad6  | 6.34764e-13 (0.352 ) | 4.75183e-13 (0.315 ) |
| H-abstraction      | 6.28816e-13 (0.349 ) | 6.28816e-13 (0.417 ) |

| species            | PYtrue      | Cumul    | PYeffective | Cumul    |
|--------------------|-------------|----------|-------------|----------|
| Benzene+2-propynyl | 0.348883    | 0.348883 | 0.417171    | 0.417171 |
| Indene+H           | 0.168224    | 0.517107 | 0.201151    | 0.618322 |
| Phenyl+Allene      | 0.163693    | 0.680800 | 0.000000    | 0.618322 |
| C2H2+PhCH2         | 0.129445    | 0.810245 | 0.154782    | 0.773104 |
| PhCHCCH2+H         | 0.0661470   | 0.876392 | 0.0790946   | 0.852199 |
| PhCH2CCH+H         | 0.0526489   | 0.929041 | 0.0629537   | 0.915152 |
| PhCCH+CH3          | 0.0518208   | 0.980862 | 0.0619641   | 0.977116 |
| PAH7+H             | 0.00758545  | 0.988447 | 0.00907010  | 0.986186 |
| Ph+MeAc            | 0.00700420  | 0.995451 | 0.00837514  | 0.994562 |
| PhCCH3+H           | 0.00195097  | 0.997402 | 0.00233284  | 0.996894 |
| rad39              | 0.00157581  | 0.998978 | 0.00188425  | 0.998779 |
| rad19anti          | 0.000399579 | 0.999378 | 0.000477791 | 0.999257 |
| PAH9+H             | 0.000204702 | 0.999582 | 0.000244769 | 0.999501 |
| rad19syn           | 0.000118863 | 0.999701 | 0.000142129 | 0.999643 |
| rad38              | 8.27680e-05 | 0.999784 | 9.89685e-05 | 0.999742 |
| rad54              | 4.05005e-05 | 0.999824 | 4.84277e-05 | 0.999791 |
| rad35              | 3.92969e-05 | 0.999864 | 4.69886e-05 | 0.999838 |
| rad30              | 3.73116e-05 | 0.999901 | 4.46148e-05 | 0.999882 |
| PhcycC3H3_A+H      | 3.27086e-05 | 0.999934 | 3.91108e-05 | 0.999922 |
| rad46              | 1.78869e-05 | 0.999952 | 2.13880e-05 | 0.999943 |
| rad37              | 1.16239e-05 | 0.999963 | 1.38991e-05 | 0.999957 |
| PAH3+H             | 6.95966e-06 | 0.999970 | 8.32193e-06 | 0.999965 |
| PAH1+H             | 6.04571e-06 | 0.999976 | 7.22906e-06 | 0.999972 |
| rad50              | 4.57121e-06 | 0.999981 | 5.46594e-06 | 0.999978 |
| rad70              | 4.07150e-06 | 0.999985 | 4.86843e-06 | 0.999983 |
| PAH10+CH3          | 3.83957e-06 | 0.999989 | 4.59109e-06 | 0.999987 |
| rad67              | 2.96796e-06 | 0.999992 | 3.54889e-06 | 0.999991 |
| rad55              | 2.19501e-06 | 0.999994 | 2.62464e-06 | 0.999993 |
| rad60syn           | 1.37645e-06 | 0.999995 | 1.64587e-06 | 0.999995 |
| rad59              | 8.52866e-07 | 0.999996 | 1.01981e-06 | 0.999996 |
| rad60anti          | 8.03342e-07 | 0.999997 | 9.60578e-07 | 0.999997 |
| rad34              | 6.59901e-07 | 0.999998 | 7.89063e-07 | 0.999998 |
| rad62              | 5.91358e-07 | 0.999998 | 7.07106e-07 | 0.999999 |
| rad51              | 5.25705e-07 | 0.999999 | 6.28605e-07 | 0.999999 |
| rad52              | 2.50703e-07 | 0.999999 | 2.99775e-07 | 0.999999 |
| rad53              | 1.90238e-07 | 0.999999 | 2.27474e-07 | 1.000000 |
| rad56              | 1.09448e-07 | 0.999999 | 1.30871e-07 | 1.000000 |
| rad43              | 7.76164e-08 | 0.999999 | 9.28086e-08 | 1.000000 |
| rad64              | 5.85550e-08 | 0.999999 | 7.00159e-08 | 1.000000 |
| rad58              | 2.24147e-08 | 0.999999 | 2.68020e-08 | 1.000000 |
| rad42              | 1.82035e-08 | 0.999999 | 2.17665e-08 | 1.000000 |
| rad65              | 1.63703e-08 | 0.999999 | 1.95744e-08 | 1.000000 |
| rad68syn           | 1.10175e-08 | 0.999999 | 1.31740e-08 | 1.000000 |
| PAH8+H             | 1.09227e-08 | 0.999999 | 1.30606e-08 | 1.000000 |
| rad68anti          | 7.31621e-09 | 0.999999 | 8.74827e-09 | 1.000000 |
| rad40syn           | 2.07794e-09 | 0.999999 | 2.48466e-09 | 1.000000 |
| rad41              | 1.48024e-09 | 0.999999 | 1.76997e-09 | 1.000000 |
| rad73              | 1.26651e-09 | 0.999999 | 1.51441e-09 | 1.000000 |
| rad61              | 1.03672e-09 | 0.999999 | 1.23964e-09 | 1.000000 |
| rad40anti          | 1.01429e-09 | 0.999999 | 1.21282e-09 | 1.000000 |
| rad71              | 9.17535e-10 | 0.999999 | 1.09712e-09 | 1.000000 |



|       |             |          |             |         |
|-------|-------------|----------|-------------|---------|
| rad72 | 7.08917e-12 | 0.999999 | 8.47678e-12 | 1.00000 |
| rad11 | 1.50132e-15 | 0.999999 | 1.79518e-15 | 1.00000 |
| rad23 | 1.37431e-15 | 0.999999 | 1.64331e-15 | 1.00000 |
| rad6  | 1.26794e-15 | 0.999999 | 1.51612e-15 | 1.00000 |
| rad9  | 9.26924e-16 | 0.999999 | 1.10835e-15 | 1.00000 |
| rad45 | 8.83423e-16 | 0.999999 | 1.05634e-15 | 1.00000 |
| rad13 | 6.46649e-16 | 0.999999 | 7.73222e-16 | 1.00000 |
| rad7  | 4.83441e-16 | 0.999999 | 5.78066e-16 | 1.00000 |
| rad2  | 2.57955e-16 | 0.999999 | 3.08445e-16 | 1.00000 |
| rad21 | 8.79041e-17 | 0.999999 | 1.05110e-16 | 1.00000 |
| rad36 | 8.56160e-17 | 0.999999 | 1.02374e-16 | 1.00000 |
| rad1  | 6.24088e-17 | 0.999999 | 7.46243e-17 | 1.00000 |
| rad20 | 4.28302e-17 | 0.999999 | 5.12134e-17 | 1.00000 |
| rad10 | 2.67830e-17 | 0.999999 | 3.20253e-17 | 1.00000 |
| rad33 | 2.25859e-17 | 0.999999 | 2.70068e-17 | 1.00000 |
| rad3  | 2.05794e-17 | 0.999999 | 2.46075e-17 | 1.00000 |
| rad4  | 1.63117e-17 | 0.999999 | 1.95044e-17 | 1.00000 |
| rad28 | 4.12598e-18 | 0.999999 | 4.93357e-18 | 1.00000 |
| rad25 | 3.12053e-18 | 0.999999 | 3.73132e-18 | 1.00000 |
| rad24 | 1.65803e-18 | 0.999999 | 1.98256e-18 | 1.00000 |
| rad18 | 1.63210e-18 | 0.999999 | 1.95156e-18 | 1.00000 |
| rad26 | 1.33743e-18 | 0.999999 | 1.59920e-18 | 1.00000 |
| rad12 | 1.03518e-18 | 0.999999 | 1.23781e-18 | 1.00000 |
| rad14 | 2.44012e-19 | 0.999999 | 2.91773e-19 | 1.00000 |
| rad15 | 1.68551e-19 | 0.999999 | 2.01542e-19 | 1.00000 |
| rad27 | 1.00941e-19 | 0.999999 | 1.20699e-19 | 1.00000 |
| rad31 | 8.42038e-21 | 0.999999 | 1.00685e-20 | 1.00000 |
| rad8  | 5.36818e-21 | 0.999999 | 6.41893e-21 | 1.00000 |
| rad22 | 2.44701e-21 | 0.999999 | 2.92597e-21 | 1.00000 |
| rad47 | 3.89980e-23 | 0.999999 | 4.66312e-23 | 1.00000 |
| rad5  | 1.66457e-24 | 0.999999 | 1.99038e-24 | 1.00000 |

0.100000000E-07 Pa, 1300.00000 K

| Rate constant      | True (fraction)      | Effective (fraction) |
|--------------------|----------------------|----------------------|
| Total              | 2.54148e-12 (1.00 )  | 2.05338e-12 (1.00 )  |
| Formation of rad11 | 7.22991e-13 (0.284 ) | 5.03422e-13 (0.245 ) |
| Formation of rad6  | 8.84215e-13 (0.348 ) | 6.15682e-13 (0.300 ) |
| H-abstraction      | 9.34273e-13 (0.368 ) | 9.34273e-13 (0.455 ) |

| species            | PYtrue      | Cumul    | PYeffective | Cumul    |
|--------------------|-------------|----------|-------------|----------|
| Benzene+2-propynyl | 0.367610    | 0.367610 | 0.454993    | 0.454993 |
| Phenyl+Allene      | 0.192054    | 0.559664 | 0.000000    | 0.454993 |
| Indene+H           | 0.131421    | 0.691086 | 0.162661    | 0.617654 |
| C2H2+PhCH2         | 0.111295    | 0.802381 | 0.137750    | 0.755405 |
| PhCHCCH2+H         | 0.0692296   | 0.871610 | 0.0856859   | 0.841091 |
| PhCH2CCH+H         | 0.0636260   | 0.935236 | 0.0787507   | 0.919842 |
| PhCCH+CH3          | 0.0461559   | 0.981392 | 0.0571276   | 0.976969 |
| PAH7+H             | 0.00794566  | 0.989338 | 0.00983443  | 0.986804 |
| Ph+MeAc            | 0.00637082  | 0.995709 | 0.00788521  | 0.994689 |
| rad39              | 0.00158196  | 0.997291 | 0.00195800  | 0.996647 |
| PhCCCH3+H          | 0.00142376  | 0.998714 | 0.00176219  | 0.998409 |
| rad19anti          | 0.000475489 | 0.999190 | 0.000588514 | 0.998997 |
| PAH9+H             | 0.000242131 | 0.999432 | 0.000299688 | 0.999297 |
| rad19syn           | 0.000174660 | 0.999607 | 0.000216178 | 0.999513 |
| rad38              | 9.98860e-05 | 0.999707 | 0.000123629 | 0.999637 |
| rad54              | 6.26274e-05 | 0.999769 | 7.75141e-05 | 0.999714 |
| PhcycC3H3_A+H      | 5.74351e-05 | 0.999827 | 7.10879e-05 | 0.999786 |
| rad35              | 4.53516e-05 | 0.999872 | 5.61319e-05 | 0.999842 |
| rad30              | 3.53185e-05 | 0.999907 | 4.37139e-05 | 0.999885 |
| rad46              | 2.33611e-05 | 0.999931 | 2.89142e-05 | 0.999914 |
| rad37              | 1.29873e-05 | 0.999944 | 1.60744e-05 | 0.999930 |
| PAH1+H             | 1.02825e-05 | 0.999954 | 1.27267e-05 | 0.999943 |
| PAH3+H             | 9.32004e-06 | 0.999963 | 1.15354e-05 | 0.999955 |
| rad50              | 7.49585e-06 | 0.999971 | 9.27759e-06 | 0.999964 |
| rad70              | 6.43021e-06 | 0.999977 | 7.95868e-06 | 0.999972 |
| PAH10+CH3          | 6.07786e-06 | 0.999983 | 7.52262e-06 | 0.999979 |
| rad67              | 4.99567e-06 | 0.999988 | 6.18315e-06 | 0.999986 |
| rad55              | 3.63003e-06 | 0.999992 | 4.49291e-06 | 0.999990 |
| rad60syn           | 1.56340e-06 | 0.999993 | 1.93503e-06 | 0.999992 |
| rad34              | 1.13462e-06 | 0.999995 | 1.40432e-06 | 0.999993 |
| rad59              | 1.09806e-06 | 0.999996 | 1.35907e-06 | 0.999995 |
| rad51              | 1.02620e-06 | 0.999997 | 1.27014e-06 | 0.999996 |
| rad60anti          | 9.23688e-07 | 0.999998 | 1.14325e-06 | 0.999997 |
| rad62              | 8.25901e-07 | 0.999998 | 1.02222e-06 | 0.999998 |
| rad52              | 4.48900e-07 | 0.999999 | 5.55607e-07 | 0.999999 |
| rad53              | 4.02868e-07 | 0.999999 | 4.98632e-07 | 0.999999 |
| rad56              | 2.64598e-07 | 1.000000 | 3.27496e-07 | 1.000000 |

|           |             |          |             |          |
|-----------|-------------|----------|-------------|----------|
| rad64     | 1.13755e-07 | 1.000000 | 1.40795e-07 | 1.000000 |
| rad43     | 8.95932e-08 | 1.000000 | 1.10890e-07 | 1.000000 |
| rad58     | 3.75497e-08 | 1.000000 | 4.64755e-08 | 1.000000 |
| rad65     | 3.15601e-08 | 1.000000 | 3.90621e-08 | 1.000000 |
| PAH8+H    | 3.15023e-08 | 1.000000 | 3.89905e-08 | 1.000000 |
| rad42     | 3.09037e-08 | 1.000000 | 3.82497e-08 | 1.000000 |
| rad68syn  | 2.53721e-08 | 1.000000 | 3.14033e-08 | 1.000000 |
| rad68anti | 1.67834e-08 | 1.000000 | 2.07729e-08 | 1.000000 |
| rad40syn  | 5.46373e-09 | 1.000000 | 6.76250e-09 | 1.000000 |
| rad73     | 3.88972e-09 | 1.000000 | 4.81434e-09 | 1.000000 |
| rad71     | 3.20241e-09 | 1.000000 | 3.96364e-09 | 1.000000 |
| rad40anti | 2.76933e-09 | 1.000000 | 3.42762e-09 | 1.000000 |
| rad61     | 2.41929e-09 | 1.000000 | 2.99437e-09 | 1.000000 |
| rad41     | 2.20456e-09 | 1.000000 | 2.72860e-09 | 1.000000 |
| rad72     | 3.39621e-11 | 1.000000 | 4.20352e-11 | 1.000000 |
| rad11     | 2.12952e-15 | 1.000000 | 2.63573e-15 | 1.000000 |
| rad6      | 2.04825e-15 | 1.000000 | 2.53514e-15 | 1.000000 |
| rad7      | 1.09746e-15 | 1.000000 | 1.35834e-15 | 1.000000 |
| rad23     | 7.23827e-16 | 1.000000 | 8.95882e-16 | 1.000000 |
| rad9      | 6.37272e-16 | 1.000000 | 7.88755e-16 | 1.000000 |
| rad13     | 4.91946e-16 | 1.000000 | 6.08887e-16 | 1.000000 |
| rad45     | 4.85614e-16 | 1.000000 | 6.01050e-16 | 1.000000 |
| rad2      | 8.14171e-17 | 1.000000 | 1.00771e-16 | 1.000000 |
| rad21     | 5.91330e-17 | 1.000000 | 7.31895e-17 | 1.000000 |
| rad36     | 4.74602e-17 | 1.000000 | 5.87419e-17 | 1.000000 |
| rad20     | 2.63323e-17 | 1.000000 | 3.25917e-17 | 1.000000 |
| rad10     | 2.44362e-17 | 1.000000 | 3.02448e-17 | 1.000000 |
| rad1      | 2.01871e-17 | 1.000000 | 2.49857e-17 | 1.000000 |
| rad33     | 1.50408e-17 | 1.000000 | 1.86161e-17 | 1.000000 |
| rad3      | 8.71845e-18 | 1.000000 | 1.07909e-17 | 1.000000 |
| rad4      | 6.97292e-18 | 1.000000 | 8.63040e-18 | 1.000000 |
| rad28     | 6.66653e-18 | 1.000000 | 8.25118e-18 | 1.000000 |
| rad18     | 3.07354e-18 | 1.000000 | 3.80413e-18 | 1.000000 |
| rad25     | 2.61840e-18 | 1.000000 | 3.24081e-18 | 1.000000 |
| rad26     | 1.53817e-18 | 1.000000 | 1.90381e-18 | 1.000000 |
| rad24     | 1.21061e-18 | 1.000000 | 1.49838e-18 | 1.000000 |
| rad12     | 9.25054e-19 | 1.000000 | 1.14494e-18 | 1.000000 |
| rad15     | 6.01041e-19 | 1.000000 | 7.43912e-19 | 1.000000 |
| rad14     | 1.73625e-19 | 1.000000 | 2.14896e-19 | 1.000000 |
| rad27     | 4.96123e-20 | 1.000000 | 6.14053e-20 | 1.000000 |
| rad22     | 2.79016e-20 | 1.000000 | 3.45339e-20 | 1.000000 |
| rad8      | 7.86598e-21 | 1.000000 | 9.73573e-21 | 1.000000 |
| rad31     | 5.35121e-21 | 1.000000 | 6.62325e-21 | 1.000000 |
| rad47     | 7.66887e-23 | 1.000000 | 9.49183e-23 | 1.000000 |
| rad5      | 7.51096e-24 | 1.000000 | 9.29634e-24 | 1.000000 |

0.100000000E-07 Pa, 1400.00000 K

=====

| Rate constant      | True (fraction)      | Effective (fraction) |
|--------------------|----------------------|----------------------|
| Total              | 3.47024e-12 (1.00 )  | 2.71984e-12 (1.00 )  |
| Formation of rad11 | 9.43269e-13 (0.272 ) | 6.11768e-13 (0.225 ) |
| Formation of rad6  | 1.19194e-12 (0.343 ) | 7.73043e-13 (0.284 ) |
| H-abstraction      | 1.33503e-12 (0.385 ) | 1.33503e-12 (0.491 ) |

| species            | PYtrue      | Cumul    | PYeffective | Cumul    |
|--------------------|-------------|----------|-------------|----------|
| Benzene+2-propynyl | 0.384709    | 0.384709 | 0.490849    | 0.490849 |
| Phenyl+Allene      | 0.216237    | 0.600946 | 0.00000     | 0.490849 |
| Indene+H           | 0.102753    | 0.703699 | 0.131102    | 0.621951 |
| C2H2+PhCH2         | 0.0940337   | 0.797733 | 0.119977    | 0.741928 |
| PhCH2CCH+H         | 0.0730480   | 0.870781 | 0.0932017   | 0.835129 |
| PhCHCCH2+H         | 0.0704361   | 0.941217 | 0.0898693   | 0.924998 |
| PhCCH+CH3          | 0.0407709   | 0.981988 | 0.0520195   | 0.977018 |
| PAH7+H             | 0.00808062  | 0.990068 | 0.0103100   | 0.987328 |
| Ph+MeAc            | 0.00578254  | 0.995851 | 0.00737791  | 0.994706 |
| rad39              | 0.00153900  | 0.997390 | 0.00196361  | 0.996669 |
| PhCCCH3+H          | 0.00104907  | 0.998439 | 0.00133851  | 0.998008 |
| rad19anti          | 0.000537563 | 0.998977 | 0.000685873 | 0.998694 |
| PAH9+H             | 0.000275092 | 0.999252 | 0.000350989 | 0.999045 |
| rad19syn           | 0.000241019 | 0.999493 | 0.000307515 | 0.999352 |
| rad38              | 0.000115616 | 0.999608 | 0.000147513 | 0.999500 |
| PhcycC3H3_A+H      | 9.27188e-05 | 0.999701 | 0.000118299 | 0.999618 |
| rad54              | 9.02066e-05 | 0.999791 | 0.000115094 | 0.999733 |
| rad35              | 5.05796e-05 | 0.999842 | 6.45344e-05 | 0.999798 |
| rad30              | 3.27889e-05 | 0.999875 | 4.18352e-05 | 0.999840 |
| rad46              | 2.89889e-05 | 0.999904 | 3.69868e-05 | 0.999877 |
| PAH1+H             | 1.59963e-05 | 0.999920 | 2.04096e-05 | 0.999897 |
| rad37              | 1.43563e-05 | 0.999934 | 1.83172e-05 | 0.999915 |
| PAH3+H             | 1.18378e-05 | 0.999946 | 1.51038e-05 | 0.999930 |

|           |             |          |             |          |
|-----------|-------------|----------|-------------|----------|
| rad50     | 1.13924e-05 | 0.999957 | 1.45355e-05 | 0.999945 |
| rad70     | 9.33021e-06 | 0.999967 | 1.19044e-05 | 0.999957 |
| PAH10+CH3 | 9.00294e-06 | 0.999976 | 1.14868e-05 | 0.999968 |
| rad67     | 7.68554e-06 | 0.999983 | 9.80595e-06 | 0.999978 |
| rad55     | 5.54137e-06 | 0.999989 | 7.07023e-06 | 0.999985 |
| rad51     | 1.81654e-06 | 0.999991 | 2.31772e-06 | 0.999988 |
| rad34     | 1.77488e-06 | 0.999992 | 2.26456e-06 | 0.999990 |
| rad60syn  | 1.71203e-06 | 0.999994 | 2.18438e-06 | 0.999992 |
| rad59     | 1.34390e-06 | 0.999995 | 1.71468e-06 | 0.999994 |
| rad62     | 1.09238e-06 | 0.999997 | 1.39377e-06 | 0.999995 |
| rad60anti | 1.02264e-06 | 0.999998 | 1.30479e-06 | 0.999996 |
| rad53     | 7.63459e-07 | 0.999998 | 9.74098e-07 | 0.999997 |
| rad52     | 7.36190e-07 | 0.999999 | 9.39297e-07 | 0.999998 |
| rad56     | 5.61676e-07 | 1.000000 | 7.16641e-07 | 0.999999 |
| rad64     | 1.97836e-07 | 1.000000 | 2.52418e-07 | 0.999999 |
| rad43     | 1.00004e-07 | 1.000000 | 1.27595e-07 | 0.999999 |
| PAH8+H    | 7.73009e-08 | 1.000000 | 9.86282e-08 | 1.000000 |
| rad58     | 5.80225e-08 | 1.000000 | 7.40306e-08 | 1.000000 |
| rad65     | 5.51354e-08 | 1.000000 | 7.03469e-08 | 1.000000 |
| rad68syn  | 5.11875e-08 | 1.000000 | 6.53098e-08 | 1.000000 |
| rad42     | 4.85214e-08 | 1.000000 | 6.19082e-08 | 1.000000 |
| rad68anti | 3.37456e-08 | 1.000000 | 4.30559e-08 | 1.000000 |
| rad40syn  | 1.23711e-08 | 1.000000 | 1.57842e-08 | 1.000000 |
| rad73     | 1.01769e-08 | 1.000000 | 1.29847e-08 | 1.000000 |
| rad71     | 9.36208e-09 | 1.000000 | 1.19451e-08 | 1.000000 |
| rad40anti | 6.47926e-09 | 1.000000 | 8.26688e-09 | 1.000000 |
| rad61     | 4.96370e-09 | 1.000000 | 6.33318e-09 | 1.000000 |
| rad41     | 3.08784e-09 | 1.000000 | 3.93976e-09 | 1.000000 |
| rad72     | 1.29425e-10 | 1.000000 | 1.65133e-10 | 1.000000 |
| rad6      | 4.02835e-15 | 1.000000 | 5.13973e-15 | 1.000000 |
| rad11     | 1.92509e-15 | 1.000000 | 2.45621e-15 | 1.000000 |
| rad7      | 1.43213e-15 | 1.000000 | 1.82725e-15 | 1.000000 |
| rad9      | 4.21289e-16 | 1.000000 | 5.37521e-16 | 1.000000 |
| rad23     | 3.91470e-16 | 1.000000 | 4.99476e-16 | 1.000000 |
| rad13     | 3.13830e-16 | 1.000000 | 4.00415e-16 | 1.000000 |
| rad45     | 2.70647e-16 | 1.000000 | 3.45317e-16 | 1.000000 |
| rad21     | 3.81060e-17 | 1.000000 | 4.86193e-17 | 1.000000 |
| rad2      | 2.73870e-17 | 1.000000 | 3.49429e-17 | 1.000000 |
| rad36     | 2.67056e-17 | 1.000000 | 3.40735e-17 | 1.000000 |
| rad10     | 1.66122e-17 | 1.000000 | 2.11955e-17 | 1.000000 |
| rad20     | 1.53040e-17 | 1.000000 | 1.95263e-17 | 1.000000 |
| rad28     | 1.26771e-17 | 1.000000 | 1.61747e-17 | 1.000000 |
| rad33     | 9.75772e-18 | 1.000000 | 1.24499e-17 | 1.000000 |
| rad1      | 6.91132e-18 | 1.000000 | 8.81814e-18 | 1.000000 |
| rad3      | 3.96423e-18 | 1.000000 | 5.05795e-18 | 1.000000 |
| rad4      | 3.18235e-18 | 1.000000 | 4.06034e-18 | 1.000000 |
| rad18     | 3.17460e-18 | 1.000000 | 4.05046e-18 | 1.000000 |
| rad25     | 1.93942e-18 | 1.000000 | 2.47449e-18 | 1.000000 |
| rad15     | 1.80771e-18 | 1.000000 | 2.30645e-18 | 1.000000 |
| rad26     | 1.78804e-18 | 1.000000 | 2.28136e-18 | 1.000000 |
| rad24     | 8.67708e-19 | 1.000000 | 1.10711e-18 | 1.000000 |
| rad12     | 7.86877e-19 | 1.000000 | 1.00397e-18 | 1.000000 |
| rad22     | 2.39641e-19 | 1.000000 | 3.05757e-19 | 1.000000 |
| rad14     | 1.10830e-19 | 1.000000 | 1.41408e-19 | 1.000000 |
| rad27     | 2.35634e-20 | 1.000000 | 3.00644e-20 | 1.000000 |
| rad8      | 9.26462e-21 | 1.000000 | 1.18207e-20 | 1.000000 |
| rad31     | 3.51109e-21 | 1.000000 | 4.47978e-21 | 1.000000 |
| rad47     | 1.36054e-22 | 1.000000 | 1.73591e-22 | 1.000000 |
| rad5      | 3.04829e-23 | 1.000000 | 3.88930e-23 | 1.000000 |

0.100000000E-07 Pa, 1500.00000 K

=====

| Rate constant      | True (fraction)      | Effective (fraction) |
|--------------------|----------------------|----------------------|
| Total              | 4.61271e-12 (1.00 )  | 3.52361e-12 (1.00 )  |
| Formation of rad11 | 1.20217e-12 (0.261 ) | 7.28782e-13 (0.207 ) |
| Formation of rad6  | 1.56360e-12 (0.339 ) | 9.47887e-13 (0.269 ) |
| H-abstraction      | 1.84694e-12 (0.400 ) | 1.84694e-12 (0.524 ) |

| species            | PYtrue     | Cumul    | PYeffective | Cumul    |
|--------------------|------------|----------|-------------|----------|
| Benzene+2-propynyl | 0.400402   | 0.400402 | 0.524162    | 0.524162 |
| Phenyl+Allene      | 0.236109   | 0.636511 | 0.000000    | 0.524162 |
| Indene+H           | 0.0806435  | 0.717155 | 0.105570    | 0.629731 |
| PhCH2CCH+H         | 0.0806387  | 0.797793 | 0.105563    | 0.735294 |
| C2H2+PhCH2         | 0.0787062  | 0.876500 | 0.103033    | 0.838328 |
| PhCHCCH2+H         | 0.0701571  | 0.946657 | 0.0918421   | 0.930170 |
| PhCCH+CH3          | 0.0359368  | 0.982594 | 0.0470444   | 0.977214 |
| PAH7+H             | 0.00805110 | 0.990645 | 0.0105396   | 0.987754 |
| Ph+MeAc            | 0.00526035 | 0.995905 | 0.00688624  | 0.994640 |

|               |             |          |             |          |
|---------------|-------------|----------|-------------|----------|
| rad39         | 0.00146497  | 0.997370 | 0.00191777  | 0.996558 |
| PhCCCH3+H     | 0.000785539 | 0.998156 | 0.00102834  | 0.997586 |
| rad19anti     | 0.000582991 | 0.998739 | 0.000763188 | 0.998349 |
| rad19syn      | 0.000316567 | 0.999055 | 0.000414413 | 0.998764 |
| PAH9+H        | 0.000302845 | 0.999358 | 0.000396450 | 0.999160 |
| PhcycC3H3_A+H | 0.000139913 | 0.999498 | 0.000183158 | 0.999343 |
| rad38         | 0.000129499 | 0.999627 | 0.000169526 | 0.999513 |
| rad54         | 0.000122808 | 0.999750 | 0.000160767 | 0.999674 |
| rad35         | 5.49599e-05 | 0.999805 | 7.19472e-05 | 0.999746 |
| rad46         | 3.45380e-05 | 0.999840 | 4.52132e-05 | 0.999791 |
| rad30         | 3.01156e-05 | 0.999870 | 3.94239e-05 | 0.999830 |
| PAH1+H        | 2.31901e-05 | 0.999893 | 3.03579e-05 | 0.999861 |
| rad50         | 1.62766e-05 | 0.999909 | 2.13074e-05 | 0.999882 |
| rad37         | 1.56192e-05 | 0.999925 | 2.04470e-05 | 0.999902 |
| PAH3+H        | 1.44553e-05 | 0.999939 | 1.89232e-05 | 0.999921 |
| rad70         | 1.26613e-05 | 0.999952 | 1.65747e-05 | 0.999938 |
| PAH10+CH3     | 1.25752e-05 | 0.999965 | 1.64620e-05 | 0.999954 |
| rad67         | 1.09793e-05 | 0.999976 | 1.43728e-05 | 0.999969 |
| rad55         | 7.93592e-06 | 0.999983 | 1.03888e-05 | 0.999979 |
| rad51         | 2.96749e-06 | 0.999986 | 3.88470e-06 | 0.999983 |
| rad34         | 2.57549e-06 | 0.999989 | 3.37153e-06 | 0.999986 |
| rad60syn      | 1.82792e-06 | 0.999991 | 2.39290e-06 | 0.999989 |
| rad59         | 1.58467e-06 | 0.999992 | 2.07447e-06 | 0.999991 |
| rad62         | 1.38706e-06 | 0.999994 | 1.81579e-06 | 0.999993 |
| rad53         | 1.32204e-06 | 0.999995 | 1.73067e-06 | 0.999994 |
| rad52         | 1.12378e-06 | 0.999996 | 1.47114e-06 | 0.999996 |
| rad60anti     | 1.10268e-06 | 0.999997 | 1.44350e-06 | 0.999997 |
| rad56         | 1.07222e-06 | 0.999998 | 1.40364e-06 | 0.999999 |
| rad64         | 3.15087e-07 | 0.999999 | 4.12476e-07 | 0.999999 |
| PAH8+H        | 1.66252e-07 | 0.999999 | 2.17639e-07 | 0.999999 |
| rad43         | 1.09523e-07 | 0.999999 | 1.43375e-07 | 0.999999 |
| rad68syn      | 9.28291e-08 | 0.999999 | 1.21521e-07 | 0.999999 |
| rad65         | 8.88724e-08 | 0.999999 | 1.16342e-07 | 1.000000 |
| rad58         | 8.42069e-08 | 0.999999 | 1.10234e-07 | 1.000000 |
| rad42         | 7.16663e-08 | 0.999999 | 9.38173e-08 | 1.000000 |
| rad68anti     | 6.10163e-08 | 0.999999 | 7.98757e-08 | 1.000000 |
| rad40syn      | 2.48114e-08 | 0.999999 | 3.24802e-08 | 1.000000 |
| rad71         | 2.35639e-08 | 0.999999 | 3.08472e-08 | 1.000000 |
| rad73         | 2.32861e-08 | 0.999999 | 3.04835e-08 | 1.000000 |
| rad40anti     | 1.33700e-08 | 0.999999 | 1.75025e-08 | 1.000000 |
| rad61         | 9.14968e-09 | 0.999999 | 1.19777e-08 | 1.000000 |
| rad41         | 4.14357e-09 | 0.999999 | 5.42427e-09 | 1.000000 |
| rad72         | 4.05222e-10 | 0.999999 | 5.30469e-10 | 1.000000 |
| rad6          | 8.50110e-15 | 0.999999 | 1.11287e-14 | 1.000000 |
| rad11         | 1.35769e-15 | 0.999999 | 1.77733e-15 | 1.000000 |
| rad7          | 1.25059e-15 | 0.999999 | 1.63713e-15 | 1.000000 |
| rad9          | 2.73205e-16 | 0.999999 | 3.57650e-16 | 1.000000 |
| rad23         | 2.18336e-16 | 0.999999 | 2.85821e-16 | 1.000000 |
| rad13         | 1.89899e-16 | 0.999999 | 2.48594e-16 | 1.000000 |
| rad45         | 1.53752e-16 | 0.999999 | 2.01275e-16 | 1.000000 |
| rad28         | 2.43765e-17 | 0.999999 | 3.19110e-17 | 1.000000 |
| rad21         | 2.42952e-17 | 0.999999 | 3.18045e-17 | 1.000000 |
| rad36         | 1.53090e-17 | 0.999999 | 2.00409e-17 | 1.000000 |
| rad2          | 9.69382e-18 | 0.999999 | 1.26900e-17 | 1.000000 |
| rad10         | 8.80119e-18 | 0.999999 | 1.15215e-17 | 1.000000 |
| rad20         | 8.79172e-18 | 0.999999 | 1.15092e-17 | 1.000000 |
| rad33         | 6.33589e-18 | 0.999999 | 8.29424e-18 | 1.000000 |
| rad15         | 2.99218e-18 | 0.999999 | 3.91702e-18 | 1.000000 |
| rad1          | 2.49128e-18 | 0.999999 | 3.26130e-18 | 1.000000 |
| rad18         | 2.34697e-18 | 0.999999 | 3.07239e-18 | 1.000000 |
| rad26         | 1.91937e-18 | 0.999999 | 2.51262e-18 | 1.000000 |
| rad3          | 1.86453e-18 | 0.999999 | 2.44083e-18 | 1.000000 |
| rad4          | 1.50486e-18 | 0.999999 | 1.96999e-18 | 1.000000 |
| rad25         | 1.37831e-18 | 0.999999 | 1.80433e-18 | 1.000000 |
| rad22         | 1.27466e-18 | 0.999999 | 1.66864e-18 | 1.000000 |
| rad12         | 6.49250e-19 | 0.999999 | 8.49924e-19 | 1.000000 |
| rad24         | 6.18581e-19 | 0.999999 | 8.09777e-19 | 1.000000 |
| rad14         | 6.98939e-20 | 0.999999 | 9.14971e-20 | 1.000000 |
| rad27         | 1.15740e-20 | 0.999999 | 1.51513e-20 | 1.000000 |
| rad8          | 9.76883e-21 | 0.999999 | 1.27883e-20 | 1.000000 |
| rad31         | 2.37694e-21 | 0.999999 | 3.11163e-21 | 1.000000 |
| rad47         | 2.21852e-22 | 0.999999 | 2.90423e-22 | 1.000000 |
| rad5          | 9.58595e-23 | 0.999999 | 1.25489e-22 | 1.000000 |

0.100000000E-07 Pa, 1750.00000 K

=====

| Rate constant      | True (fraction)      | Effective (fraction) |
|--------------------|----------------------|----------------------|
| Total              | 8.61869e-12 (1.00 )  | 6.27400e-12 (1.00 )  |
| Formation of rad11 | 2.04015e-12 (0.237 ) | 1.05237e-12 (0.168 ) |

|                   |                      |                      |
|-------------------|----------------------|----------------------|
| Formation of rad6 | 2.80256e-12 (0.325 ) | 1.44565e-12 (0.230 ) |
| H-abstraction     | 3.77597e-12 (0.438 ) | 3.77597e-12 (0.602 ) |

| species            | PYtrue      | Cumul    | PYeffective | Cumul    |
|--------------------|-------------|----------|-------------|----------|
| Benzene+2-propynyl | 0.438115    | 0.438115 | 0.601845    | 0.601845 |
| Phenyl+Allene      | 0.272047    | 0.710162 | 0.00000     | 0.601845 |
| PhCH2CCH+H         | 0.0933387   | 0.803501 | 0.128221    | 0.730066 |
| PhCHCCH2+H         | 0.0656327   | 0.869134 | 0.0901606   | 0.820227 |
| C2H2+PhCH2         | 0.0475978   | 0.916731 | 0.0653858   | 0.885612 |
| Indene+H           | 0.0395372   | 0.956269 | 0.0543127   | 0.939925 |
| PhCCH+CH3          | 0.0276514   | 0.983920 | 0.0379853   | 0.977910 |
| PAH7+H             | 0.00712605  | 0.991046 | 0.00978916  | 0.987700 |
| Ph+MeAc            | 0.00488545  | 0.995931 | 0.00671122  | 0.994411 |
| rad39              | 0.00123375  | 0.997165 | 0.00169483  | 0.996106 |
| rad19anti          | 0.000564116 | 0.997729 | 0.000774933 | 0.996881 |
| rad19syn           | 0.000506158 | 0.998235 | 0.000695318 | 0.997576 |
| PhCCH3+H           | 0.000461483 | 0.998697 | 0.000633946 | 0.998210 |
| PhcycC3H3_A+H      | 0.000354596 | 0.999052 | 0.000487115 | 0.998697 |
| PAH9+H             | 0.000266731 | 0.999318 | 0.000366412 | 0.999063 |
| rad54              | 0.000215004 | 0.999533 | 0.000295354 | 0.999359 |
| rad38              | 0.000142764 | 0.999676 | 0.000196118 | 0.999555 |
| rad35              | 4.88397e-05 | 0.999725 | 6.70919e-05 | 0.999622 |
| PAH1+H             | 4.24056e-05 | 0.999767 | 5.82532e-05 | 0.999680 |
| rad46              | 3.79670e-05 | 0.999805 | 5.21559e-05 | 0.999732 |
| rad50              | 2.38701e-05 | 0.999829 | 3.27908e-05 | 0.999765 |
| rad30              | 2.30179e-05 | 0.999852 | 3.16201e-05 | 0.999797 |
| PAH10+CH3          | 2.22275e-05 | 0.999874 | 3.05343e-05 | 0.999827 |
| rad70              | 2.20506e-05 | 0.999896 | 3.02913e-05 | 0.999858 |
| PAH3+H             | 2.08052e-05 | 0.999917 | 2.85805e-05 | 0.999886 |
| rad55              | 1.72026e-05 | 0.999934 | 2.36314e-05 | 0.999910 |
| rad67              | 1.69163e-05 | 0.999951 | 2.32382e-05 | 0.999933 |
| rad37              | 1.61425e-05 | 0.999968 | 2.21752e-05 | 0.999955 |
| rad51              | 6.11253e-06 | 0.999974 | 8.39689e-06 | 0.999964 |
| rad34              | 5.25680e-06 | 0.999979 | 7.22134e-06 | 0.999971 |
| rad53              | 4.39527e-06 | 0.999983 | 6.03786e-06 | 0.999977 |
| rad56              | 3.99314e-06 | 0.999987 | 5.48546e-06 | 0.999982 |
| rad62              | 2.35598e-06 | 0.999990 | 3.23645e-06 | 0.999986 |
| rad59              | 2.06481e-06 | 0.999992 | 2.83647e-06 | 0.999988 |
| rad52              | 2.03181e-06 | 0.999994 | 2.79112e-06 | 0.999991 |
| rad60syn           | 1.94292e-06 | 0.999996 | 2.66902e-06 | 0.999994 |
| rad60anti          | 1.30713e-06 | 0.999997 | 1.79563e-06 | 0.999996 |
| rad64              | 7.88600e-07 | 0.999998 | 1.08332e-06 | 0.999997 |
| PAH8+H             | 5.90480e-07 | 0.999998 | 8.11153e-07 | 0.999998 |
| rad68syn           | 2.81742e-07 | 0.999999 | 3.87034e-07 | 0.999998 |
| rad68anti          | 1.82569e-07 | 0.999999 | 2.50799e-07 | 0.999998 |
| rad65              | 1.74382e-07 | 0.999999 | 2.39552e-07 | 0.999998 |
| rad42              | 1.70585e-07 | 0.999999 | 2.34336e-07 | 0.999999 |
| rad58              | 1.57351e-07 | 0.999999 | 2.16156e-07 | 0.999999 |
| rad43              | 1.31435e-07 | 0.999999 | 1.80554e-07 | 0.999999 |
| rad71              | 1.24696e-07 | 1.000000 | 1.71297e-07 | 0.999999 |
| rad73              | 9.95914e-08 | 1.000000 | 1.36810e-07 | 0.999999 |
| rad40syn           | 8.39457e-08 | 1.000000 | 1.15318e-07 | 1.000000 |
| rad40anti          | 5.01024e-08 | 1.000000 | 6.88266e-08 | 1.000000 |
| rad61              | 2.64237e-08 | 1.000000 | 3.62987e-08 | 1.000000 |
| rad41              | 7.91859e-09 | 1.000000 | 1.08779e-08 | 1.000000 |
| rad72              | 3.69499e-09 | 1.000000 | 5.07588e-09 | 1.000000 |
| rad6               | 2.62815e-14 | 1.000000 | 3.61033e-14 | 1.000000 |
| rad7               | 2.29292e-16 | 1.000000 | 3.14982e-16 | 1.000000 |
| rad11              | 1.74057e-16 | 1.000000 | 2.39105e-16 | 1.000000 |
| rad28              | 6.31559e-17 | 1.000000 | 8.67580e-17 | 1.000000 |
| rad23              | 4.54212e-17 | 1.000000 | 6.23960e-17 | 1.000000 |
| rad9               | 2.21519e-17 | 1.000000 | 3.04305e-17 | 1.000000 |
| rad13              | 1.60832e-17 | 1.000000 | 2.20937e-17 | 1.000000 |
| rad45              | 1.32471e-17 | 1.000000 | 1.81978e-17 | 1.000000 |
| rad22              | 8.40659e-18 | 1.000000 | 1.15482e-17 | 1.000000 |
| rad36              | 2.29311e-18 | 1.000000 | 3.15009e-18 | 1.000000 |
| rad21              | 1.98012e-18 | 1.000000 | 2.72012e-18 | 1.000000 |
| rad26              | 1.29833e-18 | 1.000000 | 1.78353e-18 | 1.000000 |
| rad15              | 1.11834e-18 | 1.000000 | 1.53628e-18 | 1.000000 |
| rad10              | 7.65928e-19 | 1.000000 | 1.05217e-18 | 1.000000 |
| rad20              | 6.44623e-19 | 1.000000 | 8.85528e-19 | 1.000000 |
| rad33              | 5.54004e-19 | 1.000000 | 7.61045e-19 | 1.000000 |
| rad18              | 2.99781e-19 | 1.000000 | 4.11816e-19 | 1.000000 |
| rad2               | 2.57310e-19 | 1.000000 | 3.53471e-19 | 1.000000 |
| rad25              | 1.43077e-19 | 1.000000 | 1.96547e-19 | 1.000000 |
| rad12              | 7.47122e-20 | 1.000000 | 1.02634e-19 | 1.000000 |
| rad1               | 7.07251e-20 | 1.000000 | 9.71562e-20 | 1.000000 |
| rad3               | 6.46297e-20 | 1.000000 | 8.87830e-20 | 1.000000 |
| rad24              | 6.07027e-20 | 1.000000 | 8.33884e-20 | 1.000000 |

|       |             |          |             |          |
|-------|-------------|----------|-------------|----------|
| rad4  | 4.14090e-20 | 1.000000 | 5.68844e-20 | 1.000000 |
| rad14 | 7.58528e-21 | 1.000000 | 1.04200e-20 | 1.000000 |
| rad8  | 2.76592e-21 | 1.000000 | 3.79959e-21 | 1.000000 |
| rad27 | 6.88422e-22 | 1.000000 | 9.45698e-22 | 1.000000 |
| rad5  | 5.43370e-22 | 1.000000 | 7.46437e-22 | 1.000000 |
| rad47 | 1.43456e-22 | 1.000000 | 1.97067e-22 | 1.000000 |

0.100000000E-07 Pa, 2000.00000 K

| Rate constant      | True (fraction)      | Effective (fraction) |
|--------------------|----------------------|----------------------|
| Total              | 1.44111e-11 (1.00 )  | 1.02930e-11 (1.00 )  |
| Formation of rad11 | 3.16882e-12 (0.220 ) | 1.47449e-12 (0.143 ) |
| Formation of rad6  | 4.53302e-12 (0.315 ) | 2.10927e-12 (0.205 ) |
| H-abstraction      | 6.70922e-12 (0.466 ) | 6.70922e-12 (0.652 ) |

| species            | PYtrue      | Cumul    | PYeffective | Cumul    |
|--------------------|-------------|----------|-------------|----------|
| Benzene+2-propynyl | 0.465560    | 0.465560 | 0.651825    | 0.651825 |
| Phenyl+Allene      | 0.285759    | 0.751319 | 0.000000    | 0.651825 |
| PhCH2CCH+H         | 0.0971788   | 0.848498 | 0.136059    | 0.787884 |
| PhCHCCH2+H         | 0.0592993   | 0.907797 | 0.0830241   | 0.870908 |
| C2H2+PhCH2         | 0.0319942   | 0.939791 | 0.0447948   | 0.915703 |
| Indene+H           | 0.0233046   | 0.963096 | 0.0326284   | 0.948331 |
| PhCCH+CH3          | 0.0216466   | 0.984742 | 0.0303071   | 0.978638 |
| PAH7+H             | 0.00659328  | 0.991336 | 0.00923114  | 0.987869 |
| Ph+MeAc            | 0.00420938  | 0.995545 | 0.00589349  | 0.993763 |
| rad39              | 0.00101472  | 0.996560 | 0.00142069  | 0.995183 |
| rad19syn           | 0.000746783 | 0.997306 | 0.00104557  | 0.996229 |
| PhycC3H3_A+H       | 0.000656335 | 0.997963 | 0.000918925 | 0.997148 |
| rad19anti          | 0.000529228 | 0.998492 | 0.000740966 | 0.997889 |
| rad54              | 0.000330237 | 0.998822 | 0.000462359 | 0.998351 |
| PhCCCH3+H          | 0.000291962 | 0.999114 | 0.000408772 | 0.998760 |
| PAH9+H             | 0.000279546 | 0.999394 | 0.000391387 | 0.999151 |
| rad38              | 0.000156414 | 0.999550 | 0.000218994 | 0.999370 |
| PAH1+H             | 6.96990e-05 | 0.999620 | 9.75848e-05 | 0.999468 |
| rad35              | 5.18637e-05 | 0.999672 | 7.26137e-05 | 0.999541 |
| rad46              | 4.57412e-05 | 0.999717 | 6.40416e-05 | 0.999605 |
| rad50              | 3.87497e-05 | 0.999756 | 5.42530e-05 | 0.999659 |
| PAH10+CH3          | 3.34470e-05 | 0.999790 | 4.68285e-05 | 0.999706 |
| rad70              | 3.20125e-05 | 0.999822 | 4.48203e-05 | 0.999751 |
| rad55              | 2.86889e-05 | 0.999850 | 4.01669e-05 | 0.999791 |
| PAH3+H             | 2.79049e-05 | 0.999878 | 3.90694e-05 | 0.999830 |
| rad67              | 2.51584e-05 | 0.999903 | 3.52238e-05 | 0.999865 |
| rad30              | 1.88901e-05 | 0.999922 | 2.64479e-05 | 0.999891 |
| rad37              | 1.66057e-05 | 0.999939 | 2.32494e-05 | 0.999915 |
| rad51              | 1.22963e-05 | 0.999951 | 1.72160e-05 | 0.999932 |
| rad56              | 1.03249e-05 | 0.999961 | 1.44559e-05 | 0.999946 |
| rad53              | 9.90974e-06 | 0.999971 | 1.38745e-05 | 0.999960 |
| rad34              | 8.56178e-06 | 0.999980 | 1.19873e-05 | 0.999972 |
| rad52              | 3.64112e-06 | 0.999984 | 5.09788e-06 | 0.999977 |
| rad62              | 3.41505e-06 | 0.999987 | 4.78139e-06 | 0.999982 |
| rad59              | 2.58714e-06 | 0.999990 | 3.62224e-06 | 0.999986 |
| rad60syn           | 2.06844e-06 | 0.999992 | 2.89599e-06 | 0.999989 |
| PAH8+H             | 1.81455e-06 | 0.999993 | 2.54053e-06 | 0.999991 |
| rad64              | 1.47576e-06 | 0.999995 | 2.06619e-06 | 0.999993 |
| rad60anti          | 1.42207e-06 | 0.999996 | 1.99102e-06 | 0.999995 |
| rad68syn           | 6.53892e-07 | 0.999997 | 9.15510e-07 | 0.999996 |
| rad71              | 4.98025e-07 | 0.999998 | 6.97277e-07 | 0.999997 |
| rad68anti          | 4.21792e-07 | 0.999998 | 5.90544e-07 | 0.999997 |
| rad73              | 3.38736e-07 | 0.999998 | 4.74260e-07 | 0.999998 |
| rad65              | 3.37785e-07 | 0.999999 | 4.72930e-07 | 0.999998 |
| rad42              | 3.12138e-07 | 0.999999 | 4.37019e-07 | 0.999999 |
| rad58              | 2.75720e-07 | 0.999999 | 3.86032e-07 | 0.999999 |
| rad40syn           | 2.27523e-07 | 0.999999 | 3.18551e-07 | 1.000000 |
| rad43              | 1.62531e-07 | 1.000000 | 2.27558e-07 | 1.000000 |
| rad40anti          | 1.42660e-07 | 1.000000 | 1.99737e-07 | 1.000000 |
| rad61              | 5.98888e-08 | 1.000000 | 8.38493e-08 | 1.000000 |
| rad72              | 2.09307e-08 | 1.000000 | 2.93048e-08 | 1.000000 |
| rad41              | 1.34670e-08 | 1.000000 | 1.88550e-08 | 1.000000 |
| rad6               | 5.83197e-15 | 1.000000 | 8.16523e-15 | 1.000000 |
| rad7               | 5.24970e-17 | 1.000000 | 7.35005e-17 | 1.000000 |
| rad11              | 4.12472e-17 | 1.000000 | 5.77497e-17 | 1.000000 |
| rad23              | 2.97669e-17 | 1.000000 | 4.16762e-17 | 1.000000 |
| rad28              | 2.01426e-17 | 1.000000 | 2.82014e-17 | 1.000000 |
| rad9               | 7.53768e-18 | 1.000000 | 1.05534e-17 | 1.000000 |
| rad13              | 4.89589e-18 | 1.000000 | 6.85467e-18 | 1.000000 |
| rad45              | 4.01913e-18 | 1.000000 | 5.62714e-18 | 1.000000 |
| rad22              | 2.64941e-18 | 1.000000 | 3.70939e-18 | 1.000000 |
| rad21              | 7.16422e-19 | 1.000000 | 1.00305e-18 | 1.000000 |

|       |             |          |             |         |
|-------|-------------|----------|-------------|---------|
| rad36 | 7.12622e-19 | 1.000000 | 9.97735e-19 | 1.00000 |
| rad15 | 3.98237e-19 | 1.000000 | 5.57564e-19 | 1.00000 |
| rad26 | 3.09793e-19 | 1.000000 | 4.33739e-19 | 1.00000 |
| rad33 | 2.26331e-19 | 1.000000 | 3.16884e-19 | 1.00000 |
| rad20 | 1.89431e-19 | 1.000000 | 2.65220e-19 | 1.00000 |
| rad10 | 1.13995e-19 | 1.000000 | 1.59603e-19 | 1.00000 |
| rad18 | 6.66195e-20 | 1.000000 | 9.32730e-20 | 1.00000 |
| rad25 | 5.79819e-20 | 1.000000 | 8.11799e-20 | 1.00000 |
| rad12 | 4.14756e-20 | 1.000000 | 5.80694e-20 | 1.00000 |
| rad2  | 3.39772e-20 | 1.000000 | 4.75712e-20 | 1.00000 |
| rad24 | 2.85159e-20 | 1.000000 | 3.99249e-20 | 1.00000 |
| rad3  | 1.63328e-20 | 1.000000 | 2.28674e-20 | 1.00000 |
| rad4  | 1.03950e-20 | 1.000000 | 1.45539e-20 | 1.00000 |
| rad1  | 9.68367e-21 | 1.000000 | 1.35580e-20 | 1.00000 |
| rad14 | 2.92675e-21 | 1.000000 | 4.09771e-21 | 1.00000 |
| rad8  | 2.34712e-21 | 1.000000 | 3.28617e-21 | 1.00000 |
| rad5  | 3.72758e-22 | 1.000000 | 5.21894e-22 | 1.00000 |
| rad47 | 2.86742e-22 | 1.000000 | 4.01464e-22 | 1.00000 |
| rad27 | 1.89904e-22 | 1.000000 | 2.65882e-22 | 1.00000 |

0.100000000E-07 Pa, 2250.00000 K

| Rate constant      | True (fraction)      | Effective (fraction) |
|--------------------|----------------------|----------------------|
| Total              | 2.23655e-11 (1.00 )  | 1.58437e-11 (1.00 )  |
| Formation of rad11 | 4.62280e-12 (0.207 ) | 1.98925e-12 (0.126 ) |
| Formation of rad6  | 6.82518e-12 (0.305 ) | 2.93696e-12 (0.185 ) |
| H-abstraction      | 1.09175e-11 (0.488 ) | 1.09175e-11 (0.689 ) |

| species            | PYtrue      | Cumul    | PYeffective | Cumul    |
|--------------------|-------------|----------|-------------|----------|
| Benzene+2-propynyl | 0.488140    | 0.488140 | 0.689074    | 0.689074 |
| Phenyl+Allene      | 0.291600    | 0.779740 | 0.000000    | 0.689074 |
| PhCH2CCH+H         | 0.0967415   | 0.876482 | 0.136563    | 0.825637 |
| PhCHCCH2+H         | 0.0532744   | 0.929756 | 0.0752040   | 0.900841 |
| C2H2+PhCH2         | 0.0232642   | 0.953020 | 0.0328403   | 0.933682 |
| PhCCH+CH3          | 0.0176492   | 0.970669 | 0.0249142   | 0.958596 |
| Indene+H           | 0.0145378   | 0.985207 | 0.0205221   | 0.979118 |
| PAH7+H             | 0.00604332  | 0.991251 | 0.00853097  | 0.987649 |
| Ph+MeAc            | 0.00373478  | 0.994985 | 0.00527212  | 0.992921 |
| PhcycC3H3_A+H      | 0.00104439  | 0.996030 | 0.00147430  | 0.994395 |
| rad19syn           | 0.000992650 | 0.997022 | 0.00140125  | 0.995797 |
| rad39              | 0.000833753 | 0.997856 | 0.00117695  | 0.996974 |
| rad19anti          | 0.000463520 | 0.998320 | 0.000654319 | 0.997628 |
| rad54              | 0.000448432 | 0.998768 | 0.000633020 | 0.998261 |
| PAH9+H             | 0.000276004 | 0.999044 | 0.000389615 | 0.998651 |
| PhCCH3+H           | 0.000209665 | 0.999254 | 0.000295970 | 0.998946 |
| rad38              | 0.000160719 | 0.999414 | 0.000226876 | 0.999173 |
| PAH1+H             | 9.95931e-05 | 0.999514 | 0.000140589 | 0.999314 |
| rad50              | 5.46328e-05 | 0.999569 | 7.71214e-05 | 0.999391 |
| rad35              | 5.24979e-05 | 0.999621 | 7.41079e-05 | 0.999465 |
| rad46              | 5.06983e-05 | 0.999672 | 7.15674e-05 | 0.999537 |
| PAH10+CH3          | 4.32190e-05 | 0.999715 | 6.10093e-05 | 0.999598 |
| rad55              | 4.15447e-05 | 0.999757 | 5.86459e-05 | 0.999656 |
| rad70              | 4.13232e-05 | 0.999798 | 5.83331e-05 | 0.999715 |
| PAH3+H             | 3.54273e-05 | 0.999833 | 5.00103e-05 | 0.999765 |
| rad67              | 3.21710e-05 | 0.999866 | 4.54135e-05 | 0.999810 |
| rad56              | 2.10958e-05 | 0.999887 | 2.97795e-05 | 0.999840 |
| rad51              | 2.05290e-05 | 0.999907 | 2.89794e-05 | 0.999869 |
| rad53              | 1.82253e-05 | 0.999925 | 2.57273e-05 | 0.999895 |
| rad30              | 1.61770e-05 | 0.999942 | 2.28359e-05 | 0.999917 |
| rad37              | 1.58091e-05 | 0.999957 | 2.23166e-05 | 0.999940 |
| rad34              | 1.21378e-05 | 0.999970 | 1.71341e-05 | 0.999957 |
| rad52              | 5.53699e-06 | 0.999975 | 7.81618e-06 | 0.999965 |
| rad62              | 4.54170e-06 | 0.999980 | 6.41120e-06 | 0.999971 |
| PAH8+H             | 4.26413e-06 | 0.999984 | 6.01937e-06 | 0.999977 |
| rad59              | 3.10133e-06 | 0.999987 | 4.37793e-06 | 0.999982 |
| rad64              | 2.31389e-06 | 0.999989 | 3.26637e-06 | 0.999985 |
| rad60syn           | 2.18352e-06 | 0.999991 | 3.08232e-06 | 0.999988 |
| rad60anti          | 1.52762e-06 | 0.999993 | 2.15643e-06 | 0.999990 |
| rad71              | 1.42621e-06 | 0.999994 | 2.01328e-06 | 0.999992 |
| rad68syn           | 1.22834e-06 | 0.999996 | 1.73396e-06 | 0.999994 |
| rad73              | 8.52958e-07 | 0.999996 | 1.20406e-06 | 0.999995 |
| rad68anti          | 7.89692e-07 | 0.999997 | 1.11475e-06 | 0.999996 |
| rad65              | 5.43585e-07 | 0.999998 | 7.67340e-07 | 0.999997 |
| rad42              | 4.97942e-07 | 0.999998 | 7.02910e-07 | 0.999998 |
| rad40syn           | 4.83630e-07 | 0.999999 | 6.82706e-07 | 0.999998 |
| rad58              | 4.30302e-07 | 0.999999 | 6.07428e-07 | 0.999999 |
| rad40anti          | 3.15359e-07 | 1.000000 | 4.45171e-07 | 0.999999 |
| rad43              | 2.01350e-07 | 1.000000 | 2.84232e-07 | 1.000000 |

|       |             |          |             |          |
|-------|-------------|----------|-------------|----------|
| rad61 | 1.06762e-07 | 1.000000 | 1.50709e-07 | 1.000000 |
| rad72 | 7.85254e-08 | 1.000000 | 1.10849e-07 | 1.000000 |
| rad41 | 2.11925e-08 | 1.000000 | 2.99160e-08 | 1.000000 |
| rad6  | 1.18215e-15 | 1.000000 | 1.66875e-15 | 1.000000 |
| rad7  | 1.68546e-17 | 1.000000 | 2.37925e-17 | 1.000000 |
| rad11 | 1.28920e-17 | 1.000000 | 1.81987e-17 | 1.000000 |
| rad23 | 8.42296e-18 | 1.000000 | 1.18901e-17 | 1.000000 |
| rad28 | 4.33590e-18 | 1.000000 | 6.12070e-18 | 1.000000 |
| rad9  | 2.74001e-18 | 1.000000 | 3.86789e-18 | 1.000000 |
| rad13 | 1.82808e-18 | 1.000000 | 2.58058e-18 | 1.000000 |
| rad45 | 1.39760e-18 | 1.000000 | 1.97290e-18 | 1.000000 |
| rad22 | 6.74032e-19 | 1.000000 | 9.51483e-19 | 1.000000 |
| rad21 | 2.97971e-19 | 1.000000 | 4.20624e-19 | 1.000000 |
| rad36 | 2.52495e-19 | 1.000000 | 3.56430e-19 | 1.000000 |
| rad15 | 1.60376e-19 | 1.000000 | 2.26392e-19 | 1.000000 |
| rad33 | 1.06526e-19 | 1.000000 | 1.50376e-19 | 1.000000 |
| rad26 | 8.47967e-20 | 1.000000 | 1.19702e-19 | 1.000000 |
| rad20 | 6.76720e-20 | 1.000000 | 9.55283e-20 | 1.000000 |
| rad10 | 3.03996e-20 | 1.000000 | 4.29131e-20 | 1.000000 |
| rad25 | 2.68292e-20 | 1.000000 | 3.78730e-20 | 1.000000 |
| rad12 | 2.31790e-20 | 1.000000 | 3.27203e-20 | 1.000000 |
| rad18 | 2.02949e-20 | 1.000000 | 2.86490e-20 | 1.000000 |
| rad24 | 1.45642e-20 | 1.000000 | 2.05592e-20 | 1.000000 |
| rad2  | 6.50676e-21 | 1.000000 | 9.18516e-21 | 1.000000 |
| rad3  | 5.31705e-21 | 1.000000 | 7.50572e-21 | 1.000000 |
| rad4  | 3.32415e-21 | 1.000000 | 4.69246e-21 | 1.000000 |
| rad8  | 2.01388e-21 | 1.000000 | 2.84285e-21 | 1.000000 |
| rad1  | 1.87333e-21 | 1.000000 | 2.64445e-21 | 1.000000 |
| rad14 | 1.40657e-21 | 1.000000 | 1.98555e-21 | 1.000000 |
| rad47 | 4.71862e-22 | 1.000000 | 6.66093e-22 | 1.000000 |
| rad5  | 2.19043e-22 | 1.000000 | 3.09207e-22 | 1.000000 |
| rad27 | 7.37416e-23 | 1.000000 | 1.04096e-22 | 1.000000 |

0.100000000E-07 Pa, 2500.00000 K

| Rate constant      | True (fraction) |          | Effective (fraction) |          |
|--------------------|-----------------|----------|----------------------|----------|
| Total              | 3.28090e-11     | (1.00 )  | 2.31980e-11          | (1.00 )  |
| Formation of rad11 | 6.43164e-12     | (0.196 ) | 2.60906e-12          | (0.112 ) |
| Formation of rad6  | 9.73932e-12     | (0.297 ) | 3.95085e-12          | (0.170 ) |
| H-abstraction      | 1.66381e-11     | (0.507 ) | 1.66381e-11          | (0.717 ) |

  

| species            | PYtrue      | Cumul    | PYeffective | Cumul    |
|--------------------|-------------|----------|-------------|----------|
| Benzene+2-propynyl | 0.507119    | 0.507119 | 0.717221    | 0.717221 |
| Phenyl+Allene      | 0.292939    | 0.800058 | 0.000000    | 0.717221 |
| PhCH2CCH+H         | 0.0943957   | 0.894453 | 0.133305    | 0.850725 |
| PhCHCCH2+H         | 0.0481939   | 0.942647 | 0.0681609   | 0.918886 |
| C2H2+PhCH2         | 0.0183497   | 0.960997 | 0.0259521   | 0.944838 |
| PhCCH+CH3          | 0.0148752   | 0.975872 | 0.0210381   | 0.965876 |
| Indene+H           | 0.00953292  | 0.985405 | 0.0134824   | 0.979359 |
| PAH7+H             | 0.00553047  | 0.990936 | 0.00782174  | 0.987180 |
| Ph+MeAc            | 0.00339482  | 0.994330 | 0.00480131  | 0.991982 |
| PhcycC3H3_A+H      | 0.00149309  | 0.995824 | 0.00211168  | 0.994093 |
| rad19syn           | 0.00122618  | 0.997050 | 0.00173419  | 0.995828 |
| rad39              | 0.000692493 | 0.997742 | 0.000979395 | 0.996807 |
| rad54              | 0.000558297 | 0.998301 | 0.000789599 | 0.997597 |
| rad19anti          | 0.000392540 | 0.998693 | 0.000555170 | 0.998152 |
| PAH9+H             | 0.000261381 | 0.998954 | 0.000369672 | 0.998522 |
| PhCCCH3+H          | 0.000164587 | 0.999119 | 0.000232776 | 0.998754 |
| rad38              | 0.000157797 | 0.999277 | 0.000223174 | 0.998977 |
| PAH1+H             | 0.000129617 | 0.999406 | 0.000183319 | 0.999161 |
| rad50              | 6.95411e-05 | 0.999476 | 9.83527e-05 | 0.999259 |
| rad55              | 5.44673e-05 | 0.999530 | 7.70336e-05 | 0.999336 |
| rad46              | 5.29591e-05 | 0.999583 | 7.49001e-05 | 0.999411 |
| rad35              | 5.14100e-05 | 0.999635 | 7.27094e-05 | 0.999484 |
| PAH10+CH3          | 5.04331e-05 | 0.999685 | 7.13277e-05 | 0.999555 |
| rad70              | 4.95223e-05 | 0.999735 | 7.00399e-05 | 0.999625 |
| PAH3+H             | 4.31617e-05 | 0.999778 | 6.10439e-05 | 0.999686 |
| rad67              | 3.73882e-05 | 0.999815 | 5.28783e-05 | 0.999739 |
| rad56              | 3.65112e-05 | 0.999852 | 5.16378e-05 | 0.999791 |
| rad51              | 2.99347e-05 | 0.999882 | 4.23369e-05 | 0.999833 |
| rad53              | 2.90213e-05 | 0.999911 | 4.10449e-05 | 0.999874 |
| rad34              | 1.57208e-05 | 0.999926 | 2.22340e-05 | 0.999896 |
| rad30              | 1.43454e-05 | 0.999941 | 2.02888e-05 | 0.999917 |
| rad37              | 1.43019e-05 | 0.999955 | 2.02272e-05 | 0.999937 |
| PAH8+H             | 8.32886e-06 | 0.999963 | 1.17795e-05 | 0.999949 |
| rad52              | 7.47627e-06 | 0.999971 | 1.05737e-05 | 0.999959 |
| rad62              | 5.70269e-06 | 0.999977 | 8.06532e-06 | 0.999967 |
| rad59              | 3.60017e-06 | 0.999980 | 5.09173e-06 | 0.999972 |



|           |             |          |             |          |
|-----------|-------------|----------|-------------|----------|
| rad64     | 3.22135e-06 | 0.999983 | 4.55597e-06 | 0.999977 |
| rad71     | 3.21465e-06 | 0.999987 | 4.54650e-06 | 0.999981 |
| rad60syn  | 2.29248e-06 | 0.999989 | 3.24226e-06 | 0.999985 |
| rad68syn  | 1.99920e-06 | 0.999991 | 2.82747e-06 | 0.999988 |
| rad73     | 1.73023e-06 | 0.999993 | 2.44707e-06 | 0.999990 |
| rad60anti | 1.62672e-06 | 0.999994 | 2.30068e-06 | 0.999992 |
| rad68anti | 1.28205e-06 | 0.999996 | 1.81322e-06 | 0.999994 |
| rad40syn  | 8.70429e-07 | 0.999996 | 1.23105e-06 | 0.999995 |
| rad65     | 7.65686e-07 | 0.999997 | 1.08291e-06 | 0.999996 |
| rad42     | 7.25369e-07 | 0.999998 | 1.02590e-06 | 0.999997 |
| rad58     | 6.16762e-07 | 0.999999 | 8.72293e-07 | 0.999998 |
| rad40anti | 5.85898e-07 | 0.999999 | 8.28640e-07 | 0.999999 |
| rad43     | 2.45120e-07 | 0.999999 | 3.46673e-07 | 0.999999 |
| rad72     | 2.19453e-07 | 1.000000 | 3.10373e-07 | 1.000000 |
| rad61     | 1.61750e-07 | 1.000000 | 2.28765e-07 | 1.000000 |
| rad41     | 3.09947e-08 | 1.000000 | 4.38359e-08 | 1.000000 |
| rad6      | 3.23919e-16 | 1.000000 | 4.58120e-16 | 1.000000 |
| rad7      | 6.60215e-18 | 1.000000 | 9.33746e-18 | 1.000000 |
| rad11     | 4.80249e-18 | 1.000000 | 6.79219e-18 | 1.000000 |
| rad23     | 2.46173e-18 | 1.000000 | 3.48164e-18 | 1.000000 |
| rad28     | 1.17706e-18 | 1.000000 | 1.66472e-18 | 1.000000 |
| rad9      | 1.06893e-18 | 1.000000 | 1.51179e-18 | 1.000000 |
| rad13     | 7.91321e-19 | 1.000000 | 1.11917e-18 | 1.000000 |
| rad45     | 5.44210e-19 | 1.000000 | 7.69678e-19 | 1.000000 |
| rad22     | 2.12454e-19 | 1.000000 | 3.00473e-19 | 1.000000 |
| rad21     | 1.39345e-19 | 1.000000 | 1.97077e-19 | 1.000000 |
| rad36     | 1.00050e-19 | 1.000000 | 1.41500e-19 | 1.000000 |
| rad15     | 6.95052e-20 | 1.000000 | 9.83015e-20 | 1.000000 |
| rad33     | 5.56576e-20 | 1.000000 | 7.87170e-20 | 1.000000 |
| rad26     | 3.00894e-20 | 1.000000 | 4.25555e-20 | 1.000000 |
| rad20     | 2.88827e-20 | 1.000000 | 4.08489e-20 | 1.000000 |
| rad25     | 1.37165e-20 | 1.000000 | 1.93993e-20 | 1.000000 |
| rad12     | 1.32606e-20 | 1.000000 | 1.87546e-20 | 1.000000 |
| rad10     | 1.10632e-20 | 1.000000 | 1.56468e-20 | 1.000000 |
| rad24     | 7.99114e-21 | 1.000000 | 1.13019e-20 | 1.000000 |
| rad18     | 7.64139e-21 | 1.000000 | 1.08073e-20 | 1.000000 |
| rad3      | 2.11507e-21 | 1.000000 | 2.99135e-21 | 1.000000 |
| rad2      | 1.74835e-21 | 1.000000 | 2.47270e-21 | 1.000000 |
| rad8      | 1.74700e-21 | 1.000000 | 2.47079e-21 | 1.000000 |
| rad4      | 1.29409e-21 | 1.000000 | 1.83024e-21 | 1.000000 |
| rad14     | 7.76880e-22 | 1.000000 | 1.09875e-21 | 1.000000 |
| rad47     | 6.74962e-22 | 1.000000 | 9.54604e-22 | 1.000000 |
| rad1      | 4.91729e-22 | 1.000000 | 6.95454e-22 | 1.000000 |
| rad5      | 1.44553e-22 | 1.000000 | 2.04442e-22 | 1.000000 |
| rad27     | 3.67276e-23 | 1.000000 | 5.19440e-23 | 1.000000 |

0.100000000E-07 Pa, 2750.00000 K

| Rate constant      | True (fraction) |          | Effective (fraction) |          |
|--------------------|-----------------|----------|----------------------|----------|
| Total              | 4.60596e-11     | (1.00 )  | 3.26255e-11          | (1.00 )  |
| Formation of rad11 | 8.62280e-12     | (0.187 ) | 3.34633e-12          | (0.103 ) |
| Formation of rad6  | 1.33313e-11     | (0.289 ) | 5.17360e-12          | (0.159 ) |
| H-abstraction      | 2.41055e-11     | (0.523 ) | 2.41055e-11          | (0.739 ) |

  

| species            | PYtrue      | Cumul    | PYeffective | Cumul    |
|--------------------|-------------|----------|-------------|----------|
| Benzene+2-propynyl | 0.523355    | 0.523355 | 0.738856    | 0.738856 |
| Phenyl+Allene      | 0.291669    | 0.815024 | 0.000000    | 0.738856 |
| PhCH2CCH+H         | 0.0913925   | 0.906416 | 0.129025    | 0.867881 |
| PhCHCCH2+H         | 0.0440897   | 0.950506 | 0.0622446   | 0.930126 |
| C2H2+PhCH2         | 0.0155259   | 0.966032 | 0.0219190   | 0.952045 |
| PhCCH+CH3          | 0.0128664   | 0.978898 | 0.0181644   | 0.970209 |
| Indene+H           | 0.00652675  | 0.985425 | 0.00921427  | 0.979424 |
| PAH7+H             | 0.00506746  | 0.990493 | 0.00715408  | 0.986578 |
| Ph+MeAc            | 0.00315047  | 0.993643 | 0.00444775  | 0.991026 |
| PhcycC3H3_A+H      | 0.00197300  | 0.995616 | 0.00278544  | 0.993811 |
| rad19syn           | 0.00143568  | 0.997052 | 0.00202686  | 0.995838 |
| rad54              | 0.000652594 | 0.997704 | 0.000921315 | 0.996759 |
| rad39              | 0.000584043 | 0.998288 | 0.000824532 | 0.997584 |
| rad19anti          | 0.000328573 | 0.998617 | 0.000463869 | 0.998048 |
| PAH9+H             | 0.000240059 | 0.998857 | 0.000338907 | 0.998386 |
| PAH1+H             | 0.000158291 | 0.999015 | 0.000223471 | 0.998610 |
| rad38              | 0.000149711 | 0.999165 | 0.000211358 | 0.998821 |
| PhCCCH3+H          | 0.000136861 | 0.999302 | 0.000193216 | 0.999015 |
| rad50              | 8.19601e-05 | 0.999384 | 0.000115709 | 0.999130 |
| rad55              | 6.64334e-05 | 0.999450 | 9.37887e-05 | 0.999224 |
| rad70              | 5.64830e-05 | 0.999507 | 7.97407e-05 | 0.999304 |
| rad56              | 5.59920e-05 | 0.999563 | 7.90477e-05 | 0.999383 |
| PAH10+CH3          | 5.49972e-05 | 0.999618 | 7.76435e-05 | 0.999460 |

|           |             |          |             |          |
|-----------|-------------|----------|-------------|----------|
| rad46     | 5.29186e-05 | 0.999671 | 7.47090e-05 | 0.999535 |
| PAH3+H    | 5.07704e-05 | 0.999721 | 7.16761e-05 | 0.999607 |
| rad35     | 4.92117e-05 | 0.999771 | 6.94754e-05 | 0.999676 |
| rad53     | 4.15958e-05 | 0.999812 | 5.87239e-05 | 0.999735 |
| rad67     | 4.08893e-05 | 0.999853 | 5.77263e-05 | 0.999793 |
| rad51     | 3.94231e-05 | 0.999893 | 5.56562e-05 | 0.999848 |
| rad34     | 1.91382e-05 | 0.999912 | 2.70187e-05 | 0.999875 |
| PAH8+H    | 1.42400e-05 | 0.999926 | 2.01036e-05 | 0.999896 |
| rad30     | 1.30159e-05 | 0.999939 | 1.83754e-05 | 0.999914 |
| rad37     | 1.25497e-05 | 0.999951 | 1.77173e-05 | 0.999932 |
| rad52     | 9.23200e-06 | 0.999961 | 1.30335e-05 | 0.999945 |
| rad62     | 6.96508e-06 | 0.999968 | 9.83308e-06 | 0.999954 |
| rad71     | 6.06264e-06 | 0.999974 | 8.55906e-06 | 0.999963 |
| rad64     | 4.12924e-06 | 0.999978 | 5.82954e-06 | 0.999969 |
| rad59     | 4.06487e-06 | 0.999982 | 5.73866e-06 | 0.999975 |
| rad73     | 2.98825e-06 | 0.999985 | 4.21872e-06 | 0.999979 |
| rad68syn  | 2.93858e-06 | 0.999988 | 4.14861e-06 | 0.999983 |
| rad60syn  | 2.38752e-06 | 0.999990 | 3.37063e-06 | 0.999986 |
| rad68anti | 1.88086e-06 | 0.999992 | 2.65533e-06 | 0.999989 |
| rad60anti | 1.71401e-06 | 0.999994 | 2.41979e-06 | 0.999991 |
| rad40syn  | 1.39059e-06 | 0.999995 | 1.96319e-06 | 0.999993 |
| rad42     | 1.00618e-06 | 0.999996 | 1.42050e-06 | 0.999995 |
| rad65     | 9.77109e-07 | 0.999997 | 1.37945e-06 | 0.999996 |
| rad40anti | 9.60893e-07 | 0.999998 | 1.35656e-06 | 0.999998 |
| rad58     | 8.26832e-07 | 0.999999 | 1.16730e-06 | 0.999999 |
| rad72     | 4.93194e-07 | 1.000000 | 6.96274e-07 | 0.999999 |
| rad43     | 2.90363e-07 | 1.000000 | 4.09925e-07 | 1.000000 |
| rad61     | 2.19014e-07 | 1.000000 | 3.09197e-07 | 1.000000 |
| rad41     | 4.25216e-08 | 1.000000 | 6.00307e-08 | 1.000000 |
| rad6      | 1.10332e-16 | 1.000000 | 1.55763e-16 | 1.000000 |
| rad7      | 2.96666e-18 | 1.000000 | 4.18825e-18 | 1.000000 |
| rad11     | 2.05427e-18 | 1.000000 | 2.90016e-18 | 1.000000 |
| rad23     | 8.39697e-19 | 1.000000 | 1.18546e-18 | 1.000000 |
| rad9      | 4.48622e-19 | 1.000000 | 6.33352e-19 | 1.000000 |
| rad28     | 4.00876e-19 | 1.000000 | 5.65945e-19 | 1.000000 |
| rad13     | 3.84823e-19 | 1.000000 | 5.43281e-19 | 1.000000 |
| rad45     | 2.33788e-19 | 1.000000 | 3.30054e-19 | 1.000000 |
| rad22     | 7.92771e-20 | 1.000000 | 1.11921e-19 | 1.000000 |
| rad21     | 7.20273e-20 | 1.000000 | 1.01686e-19 | 1.000000 |
| rad36     | 4.36426e-20 | 1.000000 | 6.16134e-20 | 1.000000 |
| rad15     | 3.20712e-20 | 1.000000 | 4.52773e-20 | 1.000000 |
| rad33     | 3.15102e-20 | 1.000000 | 4.44850e-20 | 1.000000 |
| rad20     | 1.44342e-20 | 1.000000 | 2.03778e-20 | 1.000000 |
| rad26     | 1.23244e-20 | 1.000000 | 1.73992e-20 | 1.000000 |
| rad12     | 7.84782e-21 | 1.000000 | 1.10793e-20 | 1.000000 |
| rad25     | 7.63295e-21 | 1.000000 | 1.07760e-20 | 1.000000 |
| rad10     | 4.78152e-21 | 1.000000 | 6.75038e-21 | 1.000000 |
| rad24     | 4.65717e-21 | 1.000000 | 6.57484e-21 | 1.000000 |
| rad18     | 3.38453e-21 | 1.000000 | 4.77817e-21 | 1.000000 |
| rad8      | 1.52996e-21 | 1.000000 | 2.15996e-21 | 1.000000 |
| rad3      | 9.92423e-22 | 1.000000 | 1.40107e-21 | 1.000000 |
| rad47     | 8.69678e-22 | 1.000000 | 1.22779e-21 | 1.000000 |
| rad2      | 6.23814e-22 | 1.000000 | 8.80678e-22 | 1.000000 |
| rad4      | 5.95263e-22 | 1.000000 | 8.40376e-22 | 1.000000 |
| rad14     | 4.74805e-22 | 1.000000 | 6.70314e-22 | 1.000000 |
| rad1      | 1.65994e-22 | 1.000000 | 2.34345e-22 | 1.000000 |
| rad5      | 1.01381e-22 | 1.000000 | 1.43127e-22 | 1.000000 |
| rad27     | 2.15735e-23 | 1.000000 | 3.04569e-23 | 1.000000 |

0.100000000E-07 Pa, 3000.00000 K

=====

| Rate constant      | True (fraction)      | Effective (fraction)  |
|--------------------|----------------------|-----------------------|
| Total              | 6.24269e-11 (1.00 )  | 4.43911e-11 (1.00 )   |
| Formation of rad11 | 1.12221e-11 (0.180 ) | 4.21269e-12 (0.0949 ) |
| Formation of rad6  | 1.76534e-11 (0.283 ) | 6.62699e-12 (0.149 )  |
| H-abstraction      | 3.35514e-11 (0.537 ) | 3.35514e-11 (0.756 )  |

| species            | PYtrue     | Cumul    | PYeffective | Cumul    |
|--------------------|------------|----------|-------------|----------|
| Benzene+2-propynyl | 0.537451   | 0.537451 | 0.755814    | 0.755814 |
| Phenyl+Allene      | 0.288911   | 0.826362 | 0.000000    | 0.755814 |
| PhCH2CCH+H         | 0.0883066  | 0.914669 | 0.124185    | 0.879999 |
| PhCHCCH2+H         | 0.0408111  | 0.955480 | 0.0573925   | 0.937392 |
| C2H2+PhCH2         | 0.0138651  | 0.969345 | 0.0194984   | 0.956890 |
| PhCCH+CH3          | 0.0113582  | 0.980703 | 0.0159730   | 0.972863 |
| PAH7+H             | 0.00465329 | 0.985356 | 0.00654386  | 0.979407 |
| Indene+H           | 0.00463895 | 0.989995 | 0.00652370  | 0.985931 |
| Ph+MeAc            | 0.00297587 | 0.992971 | 0.00418496  | 0.990116 |
| PhcycC3H3_A+H      | 0.00245642 | 0.995427 | 0.00345445  | 0.993570 |

|           |             |          |             |          |
|-----------|-------------|----------|-------------|----------|
| rad19syn  | 0.00161454  | 0.997042 | 0.00227052  | 0.995841 |
| rad54     | 0.000727890 | 0.997770 | 0.00102362  | 0.996864 |
| rad39     | 0.000500510 | 0.998270 | 0.000703861 | 0.997568 |
| rad19anti | 0.000275358 | 0.998546 | 0.000387232 | 0.997955 |
| PAH9+H    | 0.000215435 | 0.998761 | 0.000302964 | 0.998258 |
| PAH1+H    | 0.000185098 | 0.998946 | 0.000260302 | 0.998519 |
| rad38     | 0.000138297 | 0.999085 | 0.000194486 | 0.998713 |
| PhCCCH3+H | 0.000118094 | 0.999203 | 0.000166074 | 0.998879 |
| rad50     | 9.10199e-05 | 0.999294 | 0.000128001 | 0.999007 |
| rad56     | 7.84307e-05 | 0.999372 | 0.000110297 | 0.999117 |
| rad55     | 7.67854e-05 | 0.999449 | 0.000107983 | 0.999225 |
| rad70     | 6.22156e-05 | 0.999511 | 8.74935e-05 | 0.999313 |
| PAH3+H    | 5.79162e-05 | 0.999569 | 8.14472e-05 | 0.999394 |
| PAH10+CH3 | 5.73435e-05 | 0.999626 | 8.06419e-05 | 0.999475 |
| rad53     | 5.50942e-05 | 0.999682 | 7.74787e-05 | 0.999552 |
| rad46     | 5.10964e-05 | 0.999733 | 7.18563e-05 | 0.999624 |
| rad51     | 4.79927e-05 | 0.999781 | 6.74918e-05 | 0.999692 |
| rad35     | 4.64038e-05 | 0.999827 | 6.52572e-05 | 0.999757 |
| rad67     | 4.30004e-05 | 0.999870 | 6.04712e-05 | 0.999818 |
| rad34     | 2.22803e-05 | 0.999892 | 3.13327e-05 | 0.999849 |
| PAH8+H    | 2.20424e-05 | 0.999914 | 3.09982e-05 | 0.999880 |
| rad30     | 1.19659e-05 | 0.999926 | 1.68276e-05 | 0.999897 |
| rad37     | 1.08360e-05 | 0.999937 | 1.52386e-05 | 0.999912 |
| rad52     | 1.06405e-05 | 0.999948 | 1.49636e-05 | 0.999927 |
| rad71     | 9.97847e-06 | 0.999958 | 1.40327e-05 | 0.999941 |
| rad62     | 8.52399e-06 | 0.999966 | 1.19872e-05 | 0.999953 |
| rad64     | 4.99011e-06 | 0.999971 | 7.01754e-06 | 0.999960 |
| rad73     | 4.56449e-06 | 0.999976 | 6.41901e-06 | 0.999966 |
| rad59     | 4.47702e-06 | 0.999980 | 6.29599e-06 | 0.999973 |
| rad68syn  | 4.00554e-06 | 0.999984 | 5.63295e-06 | 0.999978 |
| rad68anti | 2.55993e-06 | 0.999987 | 3.60001e-06 | 0.999982 |
| rad60syn  | 2.46101e-06 | 0.999989 | 3.46090e-06 | 0.999985 |
| rad40syn  | 2.03324e-06 | 0.999991 | 2.85932e-06 | 0.999988 |
| rad60anti | 1.78407e-06 | 0.999993 | 2.50894e-06 | 0.999991 |
| rad40anti | 1.43624e-06 | 0.999995 | 2.01978e-06 | 0.999993 |
| rad42     | 1.37800e-06 | 0.999996 | 1.93787e-06 | 0.999995 |
| rad65     | 1.15674e-06 | 0.999997 | 1.62672e-06 | 0.999996 |
| rad58     | 1.05023e-06 | 0.999998 | 1.47693e-06 | 0.999998 |
| rad72     | 9.39261e-07 | 0.999999 | 1.32087e-06 | 0.999999 |
| rad43     | 3.36095e-07 | 0.999999 | 4.72649e-07 | 1.000000 |
| rad61     | 2.73990e-07 | 1.000000 | 3.85311e-07 | 1.000000 |
| rad41     | 5.56844e-08 | 1.000000 | 7.83087e-08 | 1.000000 |
| rad6      | 4.38013e-17 | 1.000000 | 6.15974e-17 | 1.000000 |
| rad7      | 1.48080e-18 | 1.000000 | 2.08244e-18 | 1.000000 |
| rad11     | 9.86330e-19 | 1.000000 | 1.38707e-18 | 1.000000 |
| rad23     | 3.21472e-19 | 1.000000 | 4.52083e-19 | 1.000000 |
| rad13     | 2.05537e-19 | 1.000000 | 2.89045e-19 | 1.000000 |
| rad9      | 2.02559e-19 | 1.000000 | 2.84858e-19 | 1.000000 |
| rad28     | 1.58940e-19 | 1.000000 | 2.23516e-19 | 1.000000 |
| rad45     | 1.09081e-19 | 1.000000 | 1.53400e-19 | 1.000000 |
| rad21     | 4.05034e-20 | 1.000000 | 5.69598e-20 | 1.000000 |
| rad22     | 3.35977e-20 | 1.000000 | 4.72483e-20 | 1.000000 |
| rad36     | 2.06208e-20 | 1.000000 | 2.89990e-20 | 1.000000 |
| rad33     | 1.89985e-20 | 1.000000 | 2.67174e-20 | 1.000000 |
| rad15     | 1.57396e-20 | 1.000000 | 2.21345e-20 | 1.000000 |
| rad20     | 8.22772e-21 | 1.000000 | 1.15706e-20 | 1.000000 |
| rad26     | 5.53805e-21 | 1.000000 | 7.78814e-21 | 1.000000 |
| rad12     | 4.82938e-21 | 1.000000 | 6.79149e-21 | 1.000000 |
| rad25     | 4.56474e-21 | 1.000000 | 6.41938e-21 | 1.000000 |
| rad24     | 2.85392e-21 | 1.000000 | 4.01344e-21 | 1.000000 |
| rad10     | 2.30346e-21 | 1.000000 | 3.23932e-21 | 1.000000 |
| rad18     | 1.70015e-21 | 1.000000 | 2.39092e-21 | 1.000000 |
| rad8      | 1.34844e-21 | 1.000000 | 1.89630e-21 | 1.000000 |
| rad47     | 1.03449e-21 | 1.000000 | 1.45480e-21 | 1.000000 |
| rad3      | 5.16796e-22 | 1.000000 | 7.26763e-22 | 1.000000 |
| rad14     | 3.16322e-22 | 1.000000 | 4.44841e-22 | 1.000000 |
| rad4      | 3.07704e-22 | 1.000000 | 4.32722e-22 | 1.000000 |
| rad2      | 2.70331e-22 | 1.000000 | 3.80163e-22 | 1.000000 |
| rad5      | 7.37395e-23 | 1.000000 | 1.03700e-22 | 1.000000 |
| rad1      | 6.74965e-23 | 1.000000 | 9.49199e-23 | 1.000000 |
| rad27     | 1.40640e-23 | 1.000000 | 1.97781e-23 | 1.000000 |

0.100000000E-07 Pa, 3250.00000 K

=====

| Rate constant      | True (fraction)      | Effective (fraction)  |
|--------------------|----------------------|-----------------------|
| Total              | 8.22129e-11 (1.00 )  | 5.87536e-11 (1.00 )   |
| Formation of rad11 | 1.42538e-11 (0.173 ) | 5.21849e-12 (0.0888 ) |
| Formation of rad6  | 2.27549e-11 (0.277 ) | 8.33083e-12 (0.142 )  |
| H-abstraction      | 4.52043e-11 (0.550 ) | 4.52043e-11 (0.769 )  |

| species            | PYtrue      | Cumul    | PYeffective | Cumul    |
|--------------------|-------------|----------|-------------|----------|
| Benzene+2-propynyl | 0.549844    | 0.549844 | 0.769388    | 0.769388 |
| Phenyl+Allene      | 0.285349    | 0.835192 | 0.00000     | 0.769388 |
| PhCH2CCH+H         | 0.0853725   | 0.920565 | 0.119460    | 0.888848 |
| PhCHCCH2+H         | 0.0381839   | 0.958749 | 0.0534299   | 0.942278 |
| C2H2+PhCH2         | 0.0128678   | 0.971617 | 0.0180057   | 0.960283 |
| PhCCH+CH3          | 0.0101926   | 0.981809 | 0.0142623   | 0.974546 |
| PAH7+H             | 0.00428274  | 0.986092 | 0.00599276  | 0.980539 |
| Indene+H           | 0.00340695  | 0.989499 | 0.00476729  | 0.985306 |
| PhcycC3H3_A+H      | 0.00292038  | 0.992419 | 0.00408643  | 0.989392 |
| Ph+MeAc            | 0.00285191  | 0.995271 | 0.00399061  | 0.993383 |
| rad19syn           | 0.00176005  | 0.997031 | 0.00246280  | 0.995846 |
| rad54              | 0.000783510 | 0.997815 | 0.00109635  | 0.996942 |
| rad39              | 0.000435199 | 0.998250 | 0.000608967 | 0.997551 |
| rad19anti          | 0.000232598 | 0.998483 | 0.000325470 | 0.997876 |
| PAH1+H             | 0.000210285 | 0.998693 | 0.000294248 | 0.998171 |
| PAH9+H             | 0.000189946 | 0.998883 | 0.000265788 | 0.998436 |
| rad38              | 0.000125074 | 0.999008 | 0.000175014 | 0.998611 |
| PhCCCH3+H          | 0.000104499 | 0.999112 | 0.000146224 | 0.998758 |
| rad56              | 0.000102496 | 0.999215 | 0.000143420 | 0.998901 |
| rad50              | 9.64743e-05 | 0.999311 | 0.000134995 | 0.999036 |
| rad55              | 8.51952e-05 | 0.999397 | 0.000119212 | 0.999155 |
| rad53              | 6.86880e-05 | 0.999465 | 9.61137e-05 | 0.999251 |
| rad70              | 6.67834e-05 | 0.999532 | 9.34486e-05 | 0.999345 |
| PAH3+H             | 6.43467e-05 | 0.999596 | 9.00394e-05 | 0.999435 |
| PAH10+CH3          | 5.80427e-05 | 0.999654 | 8.12183e-05 | 0.999516 |
| rad51              | 5.49240e-05 | 0.999709 | 7.68541e-05 | 0.999593 |
| rad46              | 4.80263e-05 | 0.999757 | 6.72021e-05 | 0.999660 |
| rad67              | 4.40669e-05 | 0.999802 | 6.16619e-05 | 0.999722 |
| rad35              | 4.33473e-05 | 0.999845 | 6.06552e-05 | 0.999783 |
| PAH8+H             | 3.16111e-05 | 0.999876 | 4.42329e-05 | 0.999827 |
| rad34              | 2.50786e-05 | 0.999902 | 3.50921e-05 | 0.999862 |
| rad71              | 1.47743e-05 | 0.999916 | 2.06734e-05 | 0.999883 |
| rad52              | 1.16170e-05 | 0.999928 | 1.62555e-05 | 0.999899 |
| rad30              | 1.10774e-05 | 0.999939 | 1.55003e-05 | 0.999914 |
| rad62              | 1.06705e-05 | 0.999950 | 1.49310e-05 | 0.999929 |
| rad37              | 9.29424e-06 | 0.999959 | 1.30053e-05 | 0.999942 |
| rad73              | 6.33743e-06 | 0.999965 | 8.86788e-06 | 0.999951 |
| rad64              | 5.77649e-06 | 0.999971 | 8.08292e-06 | 0.999959 |
| rad68syn           | 5.15348e-06 | 0.999976 | 7.21118e-06 | 0.999966 |
| rad59              | 4.82486e-06 | 0.999981 | 6.75136e-06 | 0.999973 |
| rad68anti          | 3.28964e-06 | 0.999984 | 4.60314e-06 | 0.999978 |
| rad40syn           | 2.77792e-06 | 0.999987 | 3.88709e-06 | 0.999982 |
| rad60syn           | 2.50929e-06 | 0.999990 | 3.51119e-06 | 0.999985 |
| rad40anti          | 1.99952e-06 | 0.999992 | 2.79788e-06 | 0.999988 |
| rad42              | 1.90464e-06 | 0.999994 | 2.66512e-06 | 0.999991 |
| rad60anti          | 1.83422e-06 | 0.999995 | 2.56658e-06 | 0.999993 |
| rad72              | 1.57365e-06 | 0.999997 | 2.20197e-06 | 0.999995 |
| rad65              | 1.29208e-06 | 0.999998 | 1.80798e-06 | 0.999997 |
| rad58              | 1.27682e-06 | 1.000000 | 1.78663e-06 | 0.999999 |
| rad43              | 3.85029e-07 | 1.000000 | 5.38764e-07 | 1.000000 |
| rad61              | 3.23853e-07 | 1.000000 | 4.53160e-07 | 1.000000 |
| rad41              | 7.10639e-08 | 1.000000 | 9.94383e-08 | 1.000000 |
| rad6               | 1.96001e-17 | 1.000000 | 2.74260e-17 | 1.000000 |
| rad7               | 8.03344e-19 | 1.000000 | 1.12411e-18 | 1.000000 |
| rad11              | 5.21686e-19 | 1.000000 | 7.29985e-19 | 1.000000 |
| rad23              | 1.34707e-19 | 1.000000 | 1.88492e-19 | 1.000000 |
| rad13              | 1.18525e-19 | 1.000000 | 1.65850e-19 | 1.000000 |
| rad9               | 9.81808e-20 | 1.000000 | 1.37383e-19 | 1.000000 |
| rad28              | 7.06560e-20 | 1.000000 | 9.88679e-20 | 1.000000 |
| rad45              | 5.45355e-20 | 1.000000 | 7.63106e-20 | 1.000000 |
| rad21              | 2.44315e-20 | 1.000000 | 3.41865e-20 | 1.000000 |
| rad22              | 1.58051e-20 | 1.000000 | 2.21157e-20 | 1.000000 |
| rad33              | 1.20474e-20 | 1.000000 | 1.68578e-20 | 1.000000 |
| rad36              | 1.04083e-20 | 1.000000 | 1.45642e-20 | 1.000000 |
| rad15              | 8.20328e-21 | 1.000000 | 1.14787e-20 | 1.000000 |
| rad20              | 5.20430e-21 | 1.000000 | 7.28226e-21 | 1.000000 |
| rad12              | 3.09374e-21 | 1.000000 | 4.32901e-21 | 1.000000 |
| rad25              | 2.89947e-21 | 1.000000 | 4.05717e-21 | 1.000000 |
| rad26              | 2.68043e-21 | 1.000000 | 3.75068e-21 | 1.000000 |
| rad24              | 1.82403e-21 | 1.000000 | 2.55233e-21 | 1.000000 |
| rad10              | 1.20013e-21 | 1.000000 | 1.67931e-21 | 1.000000 |
| rad8               | 1.19193e-21 | 1.000000 | 1.66784e-21 | 1.000000 |
| rad47              | 1.15640e-21 | 1.000000 | 1.61813e-21 | 1.000000 |
| rad18              | 9.40390e-22 | 1.000000 | 1.31587e-21 | 1.000000 |
| rad3               | 2.94167e-22 | 1.000000 | 4.11623e-22 | 1.000000 |
| rad14              | 2.29549e-22 | 1.000000 | 3.21202e-22 | 1.000000 |
| rad4               | 1.76001e-22 | 1.000000 | 2.46276e-22 | 1.000000 |

|       |             |         |             |         |
|-------|-------------|---------|-------------|---------|
| rad2  | 1.34900e-22 | 1.00000 | 1.88763e-22 | 1.00000 |
| rad5  | 5.53994e-23 | 1.00000 | 7.75192e-23 | 1.00000 |
| rad1  | 3.17607e-23 | 1.00000 | 4.44423e-23 | 1.00000 |
| rad27 | 9.84680e-24 | 1.00000 | 1.37785e-23 | 1.00000 |

0.100000000E-07 Pa, 3500.00000 K

| =====              |                 |          |                      |           |
|--------------------|-----------------|----------|----------------------|-----------|
| Rate constant      | True (fraction) |          | Effective (fraction) |           |
| -----              |                 |          |                      |           |
| Total              | 1.05713e-10     | (1.00 )  | 7.59650e-11          | (1.00 )   |
| Formation of rad11 | 1.77412e-11     | (0.168 ) | 6.37264e-12          | (0.0839 ) |
| Formation of rad6  | 2.86822e-11     | (0.271 ) | 1.03027e-11          | (0.136 )  |
| H-abstraction      | 5.92897e-11     | (0.561 ) | 5.92897e-11          | (0.780 )  |
| species            | PYtrue          | Cumul    | PYeffective          | Cumul     |
| -----              |                 |          |                      |           |
| Benzene+2-propynyl | 0.560855        | 0.560855 | 0.780487             | 0.780487  |
| Phenyl+Allene      | 0.281404        | 0.842259 | 0.00000              | 0.780487  |
| PhCH2CCH+H         | 0.0826656       | 0.924925 | 0.115037             | 0.895524  |
| PhCHCCH2+H         | 0.0360585       | 0.960983 | 0.0501791            | 0.945703  |
| C2H2+PhCH2         | 0.0122593       | 0.973242 | 0.0170600            | 0.962764  |
| PhCCH+CH3          | 0.00927084      | 0.982513 | 0.0129013            | 0.975665  |
| PAH7+H             | 0.00395025      | 0.986463 | 0.00549717           | 0.981162  |
| PhcycC3H3_A+H      | 0.00334801      | 0.989811 | 0.00465910           | 0.985821  |
| Ph+MeAc            | 0.00276398      | 0.992575 | 0.00384635           | 0.989667  |
| Indene+H           | 0.00257590      | 0.995151 | 0.00358462           | 0.993252  |
| rad19syn           | 0.00187235      | 0.997024 | 0.00260557           | 0.995858  |
| rad54              | 0.000820548     | 0.997844 | 0.00114187           | 0.996999  |
| rad39              | 0.000383055     | 0.998227 | 0.000533059          | 0.997533  |
| PAH1+H             | 0.000234590     | 0.998462 | 0.000326455          | 0.997859  |
| rad19anti          | 0.000198628     | 0.998661 | 0.000276411          | 0.998135  |
| PAH9+H             | 0.000165224     | 0.998826 | 0.000229927          | 0.998365  |
| rad56              | 0.000126873     | 0.998953 | 0.000176556          | 0.998542  |
| rad38              | 0.000111229     | 0.999064 | 0.000154787          | 0.998697  |
| rad50              | 9.85613e-05     | 0.999162 | 0.000137158          | 0.998834  |
| PhCCCH3+H          | 9.42424e-05     | 0.999257 | 0.000131148          | 0.998965  |
| rad55              | 9.15803e-05     | 0.999348 | 0.000127443          | 0.999092  |
| rad53              | 8.16793e-05     | 0.999430 | 0.000113665          | 0.999206  |
| rad70              | 7.02694e-05     | 0.999500 | 9.77871e-05          | 0.999304  |
| PAH3+H             | 6.99220e-05     | 0.999570 | 9.73035e-05          | 0.999401  |
| rad51              | 5.98507e-05     | 0.999630 | 8.32882e-05          | 0.999484  |
| PAH10+CH3          | 5.76128e-05     | 0.999688 | 8.01742e-05          | 0.999565  |
| rad67              | 4.43734e-05     | 0.999732 | 6.17501e-05          | 0.999626  |
| rad46              | 4.41956e-05     | 0.999776 | 6.15029e-05          | 0.999688  |
| PAH8+H             | 4.26935e-05     | 0.999819 | 5.94123e-05          | 0.999747  |
| rad35              | 4.02805e-05     | 0.999859 | 5.60544e-05          | 0.999803  |
| rad34              | 2.74951e-05     | 0.999887 | 3.82622e-05          | 0.999842  |
| rad71              | 2.01281e-05     | 0.999907 | 2.80103e-05          | 0.999870  |
| rad62              | 1.37116e-05     | 0.999920 | 1.90811e-05          | 0.999889  |
| rad52              | 1.21501e-05     | 0.999933 | 1.69080e-05          | 0.999906  |
| rad30              | 1.02915e-05     | 0.999943 | 1.43216e-05          | 0.999920  |
| rad73              | 8.16310e-06     | 0.999951 | 1.13598e-05          | 0.999931  |
| rad37              | 7.96636e-06     | 0.999959 | 1.10860e-05          | 0.999942  |
| rad64              | 6.47621e-06     | 0.999966 | 9.01228e-06          | 0.999951  |
| rad68syn           | 6.33612e-06     | 0.999972 | 8.81737e-06          | 0.999960  |
| rad59              | 5.10458e-06     | 0.999977 | 7.10355e-06          | 0.999967  |
| rad68anti          | 4.04059e-06     | 0.999981 | 5.62289e-06          | 0.999973  |
| rad40syn           | 3.59895e-06     | 0.999985 | 5.00830e-06          | 0.999978  |
| rad42              | 2.66321e-06     | 0.999987 | 3.70612e-06          | 0.999982  |
| rad40anti          | 2.63316e-06     | 0.999990 | 3.66431e-06          | 0.999985  |
| rad60syn           | 2.53258e-06     | 0.999992 | 3.52435e-06          | 0.999989  |
| rad72              | 2.38441e-06     | 0.999995 | 3.31814e-06          | 0.999992  |
| rad60anti          | 1.86455e-06     | 0.999997 | 2.59471e-06          | 0.999995  |
| rad58              | 1.49815e-06     | 0.999998 | 2.08483e-06          | 0.999997  |
| rad65              | 1.37925e-06     | 1.000000 | 1.91936e-06          | 0.999999  |
| rad43              | 4.42452e-07     | 1.000000 | 6.15716e-07          | 0.999999  |
| rad61              | 3.67258e-07     | 1.00000  | 5.11077e-07          | 1.000000  |
| rad41              | 8.98821e-08     | 1.00000  | 1.25080e-07          | 1.00000   |
| rad6               | 9.67284e-18     | 1.00000  | 1.34607e-17          | 1.00000   |
| rad7               | 4.66091e-19     | 1.00000  | 6.48612e-19          | 1.00000   |
| rad11              | 2.99098e-19     | 1.00000  | 4.16225e-19          | 1.00000   |
| rad13              | 7.28305e-20     | 1.00000  | 1.01351e-19          | 1.00000   |
| rad23              | 6.08414e-20     | 1.00000  | 8.46672e-20          | 1.00000   |
| rad9               | 5.08847e-20     | 1.00000  | 7.08111e-20          | 1.00000   |
| rad28              | 3.44704e-20     | 1.00000  | 4.79691e-20          | 1.00000   |
| rad45              | 2.88136e-20     | 1.00000  | 4.00971e-20          | 1.00000   |
| rad21              | 1.56206e-20     | 1.00000  | 2.17377e-20          | 1.00000   |
| rad22              | 8.11694e-21     | 1.00000  | 1.12955e-20          | 1.00000   |
| rad33              | 7.96109e-21     | 1.00000  | 1.10787e-20          | 1.00000   |
| rad36              | 5.54320e-21     | 1.00000  | 7.71390e-21          | 1.00000   |

|       |             |         |             |         |
|-------|-------------|---------|-------------|---------|
| rad15 | 4.52557e-21 | 1.00000 | 6.29778e-21 | 1.00000 |
| rad20 | 3.56498e-21 | 1.00000 | 4.96104e-21 | 1.00000 |
| rad12 | 2.06000e-21 | 1.00000 | 2.86671e-21 | 1.00000 |
| rad25 | 1.93599e-21 | 1.00000 | 2.69413e-21 | 1.00000 |
| rad26 | 1.38427e-21 | 1.00000 | 1.92635e-21 | 1.00000 |
| rad47 | 1.23125e-21 | 1.00000 | 1.71341e-21 | 1.00000 |
| rad24 | 1.20836e-21 | 1.00000 | 1.68155e-21 | 1.00000 |
| rad8  | 1.05361e-21 | 1.00000 | 1.46621e-21 | 1.00000 |
| rad10 | 6.65296e-22 | 1.00000 | 9.25826e-22 | 1.00000 |
| rad18 | 5.60033e-22 | 1.00000 | 7.79343e-22 | 1.00000 |
| rad14 | 1.81848e-22 | 1.00000 | 2.53061e-22 | 1.00000 |
| rad3  | 1.79415e-22 | 1.00000 | 2.49674e-22 | 1.00000 |
| rad4  | 1.09169e-22 | 1.00000 | 1.51920e-22 | 1.00000 |
| rad2  | 7.41269e-23 | 1.00000 | 1.03155e-22 | 1.00000 |
| rad5  | 4.29350e-23 | 1.00000 | 5.97483e-23 | 1.00000 |
| rad1  | 1.67427e-23 | 1.00000 | 2.32991e-23 | 1.00000 |
| rad27 | 7.31080e-24 | 1.00000 | 1.01737e-23 | 1.00000 |

0.100000000E-07 Pa, 3750.00000 K

| Rate constant      | True (fraction)      | Effective (fraction)  |
|--------------------|----------------------|-----------------------|
| Total              | 1.33217e-10 (1.00 )  | 9.62711e-11 (1.00 )   |
| Formation of rad11 | 2.17064e-11 (0.163 ) | 7.68279e-12 (0.0798 ) |
| Formation of rad6  | 3.54800e-11 (0.266 ) | 1.25578e-11 (0.130 )  |
| H-abstraction      | 7.60305e-11 (0.571 ) | 7.60305e-11 (0.790 )  |

| species            | PYtrue      | Cumul    | PYeffective | Cumul    |
|--------------------|-------------|----------|-------------|----------|
| Benzene+2-propynyl | 0.570727    | 0.570727 | 0.789754    | 0.789754 |
| Phenyl+Allene      | 0.277336    | 0.848063 | 0.00000     | 0.789754 |
| PhCH2CCH+H         | 0.0801946   | 0.928257 | 0.110971    | 0.900725 |
| PhCHCCH2+H         | 0.0343186   | 0.962576 | 0.0474891   | 0.948214 |
| C2H2+PhCH2         | 0.0118838   | 0.974460 | 0.0164445   | 0.964658 |
| PhCCH+CH3          | 0.00852836  | 0.982988 | 0.0118013   | 0.976459 |
| PhcycC3H3_A+H      | 0.00372851  | 0.986717 | 0.00515939  | 0.981619 |
| PAH7+H             | 0.00365085  | 0.990368 | 0.00505194  | 0.986671 |
| Ph+MeAc            | 0.00270113  | 0.993069 | 0.00373773  | 0.990408 |
| Indene+H           | 0.00199900  | 0.995068 | 0.00276616  | 0.993175 |
| rad19syn           | 0.00195356  | 0.997021 | 0.00270328  | 0.995878 |
| rad54              | 0.000841040 | 0.997862 | 0.00116381  | 0.997042 |
| rad39              | 0.000340475 | 0.998203 | 0.000471138 | 0.997513 |
| PAH1+H             | 0.000258935 | 0.998462 | 0.000358305 | 0.997871 |
| rad19anti          | 0.000171610 | 0.998633 | 0.000237469 | 0.998109 |
| rad56              | 0.000150421 | 0.998784 | 0.000208148 | 0.998317 |
| PAH9+H             | 0.000142296 | 0.998926 | 0.000196904 | 0.998514 |
| rad50              | 9.78214e-05 | 0.999024 | 0.000135362 | 0.998649 |
| rad38              | 9.76287e-05 | 0.999121 | 0.000135095 | 0.998784 |
| rad55              | 9.60227e-05 | 0.999217 | 0.000132873 | 0.998917 |
| rad53              | 9.35446e-05 | 0.999311 | 0.000129444 | 0.999046 |
| PhCCCH3+H          | 8.63448e-05 | 0.999397 | 0.000119481 | 0.999166 |
| PAH3+H             | 7.46029e-05 | 0.999472 | 0.000103233 | 0.999269 |
| rad70              | 7.27716e-05 | 0.999545 | 0.000100699 | 0.999370 |
| rad51              | 6.27266e-05 | 0.999607 | 8.67994e-05 | 0.999457 |
| PAH10+CH3          | 5.64592e-05 | 0.999664 | 7.81267e-05 | 0.999535 |
| PAH8+H             | 5.49581e-05 | 0.999719 | 7.60493e-05 | 0.999611 |
| rad67              | 4.41361e-05 | 0.999763 | 6.10741e-05 | 0.999672 |
| rad46              | 4.00102e-05 | 0.999803 | 5.53649e-05 | 0.999727 |
| rad35              | 3.73501e-05 | 0.999840 | 5.16839e-05 | 0.999779 |
| rad34              | 2.95155e-05 | 0.999870 | 4.08426e-05 | 0.999820 |
| rad71              | 2.56704e-05 | 0.999896 | 3.55219e-05 | 0.999855 |
| rad62              | 1.78765e-05 | 0.999913 | 2.47369e-05 | 0.999880 |
| rad52              | 1.22817e-05 | 0.999926 | 1.69950e-05 | 0.999897 |
| rad73              | 9.90830e-06 | 0.999936 | 1.37108e-05 | 0.999911 |
| rad30              | 9.58077e-06 | 0.999945 | 1.32576e-05 | 0.999924 |
| rad68syn           | 7.51159e-06 | 0.999953 | 1.03943e-05 | 0.999934 |
| rad64              | 7.08717e-06 | 0.999960 | 9.80700e-06 | 0.999944 |
| rad37              | 6.84827e-06 | 0.999967 | 9.47639e-06 | 0.999954 |
| rad59              | 5.31873e-06 | 0.999972 | 7.35989e-06 | 0.999961 |
| rad68anti          | 4.78626e-06 | 0.999977 | 6.62308e-06 | 0.999968 |
| rad40syn           | 4.46912e-06 | 0.999981 | 6.18422e-06 | 0.999974 |
| rad42              | 3.72271e-06 | 0.999985 | 5.15138e-06 | 0.999979 |
| rad72              | 3.33614e-06 | 0.999988 | 4.61643e-06 | 0.999984 |
| rad40anti          | 3.31727e-06 | 0.999992 | 4.59032e-06 | 0.999988 |
| rad60syn           | 2.53369e-06 | 0.999994 | 3.50604e-06 | 0.999992 |
| rad60anti          | 1.87710e-06 | 0.999996 | 2.59748e-06 | 0.999994 |
| rad58              | 1.70809e-06 | 0.999998 | 2.36361e-06 | 0.999997 |
| rad65              | 1.42131e-06 | 0.999999 | 1.96676e-06 | 0.999999 |
| rad43              | 5.13732e-07 | 1.000000 | 7.10883e-07 | 0.999999 |
| rad61              | 4.03889e-07 | 1.00000  | 5.58888e-07 | 1.000000 |

|       |             |         |             |         |
|-------|-------------|---------|-------------|---------|
| rad41 | 1.13553e-07 | 1.00000 | 1.57130e-07 | 1.00000 |
| rad6  | 5.17935e-18 | 1.00000 | 7.16705e-18 | 1.00000 |
| rad7  | 2.85678e-19 | 1.00000 | 3.95313e-19 | 1.00000 |
| rad11 | 1.83381e-19 | 1.00000 | 2.53756e-19 | 1.00000 |
| rad13 | 4.71985e-20 | 1.00000 | 6.53121e-20 | 1.00000 |
| rad23 | 2.92895e-20 | 1.00000 | 4.05299e-20 | 1.00000 |
| rad9  | 2.80527e-20 | 1.00000 | 3.88185e-20 | 1.00000 |
| rad28 | 1.81765e-20 | 1.00000 | 2.51521e-20 | 1.00000 |
| rad45 | 1.60430e-20 | 1.00000 | 2.21999e-20 | 1.00000 |
| rad21 | 1.04834e-20 | 1.00000 | 1.45067e-20 | 1.00000 |
| rad33 | 5.44417e-21 | 1.00000 | 7.53345e-21 | 1.00000 |
| rad22 | 4.48976e-21 | 1.00000 | 6.21279e-21 | 1.00000 |
| rad36 | 3.09559e-21 | 1.00000 | 4.28357e-21 | 1.00000 |
| rad15 | 2.63078e-21 | 1.00000 | 3.64039e-21 | 1.00000 |
| rad20 | 2.59386e-21 | 1.00000 | 3.58930e-21 | 1.00000 |
| rad12 | 1.42144e-21 | 1.00000 | 1.96695e-21 | 1.00000 |
| rad25 | 1.34705e-21 | 1.00000 | 1.86401e-21 | 1.00000 |
| rad47 | 1.26179e-21 | 1.00000 | 1.74602e-21 | 1.00000 |
| rad8  | 9.29496e-22 | 1.00000 | 1.28621e-21 | 1.00000 |
| rad24 | 8.25899e-22 | 1.00000 | 1.14285e-21 | 1.00000 |
| rad26 | 7.57542e-22 | 1.00000 | 1.04827e-21 | 1.00000 |
| rad10 | 3.88522e-22 | 1.00000 | 5.37624e-22 | 1.00000 |
| rad18 | 3.53332e-22 | 1.00000 | 4.88931e-22 | 1.00000 |
| rad14 | 1.56337e-22 | 1.00000 | 2.16335e-22 | 1.00000 |
| rad3  | 1.16114e-22 | 1.00000 | 1.60674e-22 | 1.00000 |
| rad4  | 7.24720e-23 | 1.00000 | 1.00284e-22 | 1.00000 |
| rad2  | 4.38670e-23 | 1.00000 | 6.07018e-23 | 1.00000 |
| rad5  | 3.42484e-23 | 1.00000 | 4.73917e-23 | 1.00000 |
| rad1  | 9.69191e-24 | 1.00000 | 1.34114e-23 | 1.00000 |
| rad27 | 5.73762e-24 | 1.00000 | 7.93956e-24 | 1.00000 |

0.100000000E-07 Pa, 4000.00000 K

| Rate constant      | True (fraction)      | Effective (fraction)  |
|--------------------|----------------------|-----------------------|
| Total              | 1.65008e-10 (1.00 )  | 1.19912e-10 (1.00 )   |
| Formation of rad11 | 2.61707e-11 (0.159 ) | 9.15556e-12 (0.0764 ) |
| Formation of rad6  | 4.31906e-11 (0.262 ) | 1.51098e-11 (0.126 )  |
| H-abstraction      | 9.56470e-11 (0.580 ) | 9.56470e-11 (0.798 )  |

| species            | PYtrue      | Cumul    | PYeffective | Cumul    |
|--------------------|-------------|----------|-------------|----------|
| Benzene+2-propynyl | 0.579650    | 0.579650 | 0.797641    | 0.797641 |
| Phenyl+Allene      | 0.273295    | 0.852945 | 0.000000    | 0.797641 |
| PhCH2CCH+H         | 0.0779435   | 0.930888 | 0.107256    | 0.904897 |
| PhCHCCH2+H         | 0.0328766   | 0.963765 | 0.0452408   | 0.950138 |
| C2H2+PhCH2         | 0.0116508   | 0.975415 | 0.0160323   | 0.966170 |
| PhCCH+CH3          | 0.00792125  | 0.983337 | 0.0109003   | 0.977070 |
| PhcycC3H3_A+H      | 0.00405636  | 0.987393 | 0.00558187  | 0.982652 |
| PAH7+H             | 0.00338058  | 0.990774 | 0.00465193  | 0.987304 |
| Ph+MeAc            | 0.00265534  | 0.993429 | 0.00365394  | 0.990958 |
| rad19syn           | 0.00200699  | 0.995436 | 0.00276178  | 0.993720 |
| Indene+H           | 0.00158840  | 0.997024 | 0.00218576  | 0.995906 |
| rad54              | 0.000847468 | 0.997872 | 0.00116618  | 0.997072 |
| rad39              | 0.000304994 | 0.998177 | 0.000419695 | 0.997491 |
| PAH1+H             | 0.000284127 | 0.998461 | 0.000390980 | 0.997882 |
| rad56              | 0.000172242 | 0.998633 | 0.000237017 | 0.998119 |
| rad19anti          | 0.000149971 | 0.998783 | 0.000206372 | 0.998326 |
| PAH9+H             | 0.000121736 | 0.998905 | 0.000167518 | 0.998493 |
| rad53              | 0.000103935 | 0.999009 | 0.000143023 | 0.998636 |
| rad55              | 9.87033e-05 | 0.999108 | 0.000135823 | 0.998772 |
| rad50              | 9.49261e-05 | 0.999203 | 0.000130625 | 0.998903 |
| rad38              | 8.48536e-05 | 0.999287 | 0.000116765 | 0.999020 |
| PhCCCH3+H          | 8.02193e-05 | 0.999368 | 0.000110388 | 0.999130 |
| PAH3+H             | 7.84218e-05 | 0.999446 | 0.000107914 | 0.999238 |
| rad70              | 7.43978e-05 | 0.999520 | 0.000102377 | 0.999340 |
| PAH8+H             | 6.80299e-05 | 0.999588 | 9.36140e-05 | 0.999434 |
| rad51              | 6.37407e-05 | 0.999652 | 8.77122e-05 | 0.999522 |
| PAH10+CH3          | 5.48776e-05 | 0.999707 | 7.55158e-05 | 0.999597 |
| rad67              | 4.35168e-05 | 0.999751 | 5.98821e-05 | 0.999657 |
| rad46              | 3.57792e-05 | 0.999786 | 4.92350e-05 | 0.999706 |
| rad35              | 3.46400e-05 | 0.999821 | 4.76673e-05 | 0.999754 |
| rad34              | 3.11445e-05 | 0.999852 | 4.28572e-05 | 0.999797 |
| rad71              | 3.10563e-05 | 0.999883 | 4.27358e-05 | 0.999839 |
| rad62              | 2.32398e-05 | 0.999906 | 3.19798e-05 | 0.999871 |
| rad52              | 1.20851e-05 | 0.999919 | 1.66300e-05 | 0.999888 |
| rad73              | 1.14710e-05 | 0.999930 | 1.57849e-05 | 0.999904 |
| rad30              | 8.93299e-06 | 0.999939 | 1.22925e-05 | 0.999916 |
| rad68syn           | 8.64434e-06 | 0.999948 | 1.18952e-05 | 0.999928 |
| rad64              | 7.61305e-06 | 0.999955 | 1.04761e-05 | 0.999939 |

|           |             |          |             |          |
|-----------|-------------|----------|-------------|----------|
| rad37     | 5.91727e-06 | 0.999961 | 8.14263e-06 | 0.999947 |
| rad68anti | 5.50424e-06 | 0.999967 | 7.57424e-06 | 0.999954 |
| rad59     | 5.47385e-06 | 0.999972 | 7.53243e-06 | 0.999962 |
| rad40syn  | 5.36170e-06 | 0.999977 | 7.37810e-06 | 0.999969 |
| rad42     | 5.12142e-06 | 0.999983 | 7.04750e-06 | 0.999976 |
| rad72     | 4.37871e-06 | 0.999987 | 6.02543e-06 | 0.999982 |
| rad40anti | 4.03125e-06 | 0.999991 | 5.54731e-06 | 0.999988 |
| rad60syn  | 2.51669e-06 | 0.999993 | 3.46315e-06 | 0.999991 |
| rad58     | 1.90267e-06 | 0.999995 | 2.61822e-06 | 0.999994 |
| rad60anti | 1.87487e-06 | 0.999997 | 2.57996e-06 | 0.999996 |
| rad65     | 1.42564e-06 | 0.999999 | 1.96179e-06 | 0.999998 |
| rad43     | 6.01849e-07 | 0.999999 | 8.28191e-07 | 0.999999 |
| rad61     | 4.34037e-07 | 1.000000 | 5.97267e-07 | 1.000000 |
| rad41     | 1.43043e-07 | 1.000000 | 1.96838e-07 | 1.000000 |
| rad6      | 2.97075e-18 | 1.000000 | 4.08798e-18 | 1.000000 |
| rad7      | 1.83267e-19 | 1.000000 | 2.52190e-19 | 1.000000 |
| rad11     | 1.18912e-19 | 1.000000 | 1.63631e-19 | 1.000000 |
| rad13     | 3.19990e-20 | 1.000000 | 4.40329e-20 | 1.000000 |
| rad9      | 1.63562e-20 | 1.000000 | 2.25074e-20 | 1.000000 |
| rad23     | 1.48822e-20 | 1.000000 | 2.04789e-20 | 1.000000 |
| rad28     | 1.02381e-20 | 1.000000 | 1.40884e-20 | 1.000000 |
| rad45     | 9.24670e-21 | 1.000000 | 1.27242e-20 | 1.000000 |
| rad21     | 7.32814e-21 | 1.000000 | 1.00841e-20 | 1.000000 |
| rad33     | 3.83235e-21 | 1.000000 | 5.27360e-21 | 1.000000 |
| rad22     | 2.64530e-21 | 1.000000 | 3.64014e-21 | 1.000000 |
| rad20     | 1.97582e-21 | 1.000000 | 2.71888e-21 | 1.000000 |
| rad36     | 1.79111e-21 | 1.000000 | 2.46471e-21 | 1.000000 |
| rad15     | 1.60340e-21 | 1.000000 | 2.20640e-21 | 1.000000 |
| rad47     | 1.25502e-21 | 1.000000 | 1.72700e-21 | 1.000000 |
| rad12     | 1.01281e-21 | 1.000000 | 1.39370e-21 | 1.000000 |
| rad25     | 9.69849e-22 | 1.000000 | 1.33459e-21 | 1.000000 |
| rad8      | 8.17489e-22 | 1.000000 | 1.12493e-21 | 1.000000 |
| rad24     | 5.80458e-22 | 1.000000 | 7.98754e-22 | 1.000000 |
| rad26     | 4.36727e-22 | 1.000000 | 6.00970e-22 | 1.000000 |
| rad10     | 2.37427e-22 | 1.000000 | 3.26717e-22 | 1.000000 |
| rad18     | 2.33495e-22 | 1.000000 | 3.21308e-22 | 1.000000 |
| rad14     | 1.43353e-22 | 1.000000 | 1.97264e-22 | 1.000000 |
| rad3      | 7.85391e-23 | 1.000000 | 1.08076e-22 | 1.000000 |
| rad4      | 5.06489e-23 | 1.000000 | 6.96967e-23 | 1.000000 |
| rad5      | 2.80272e-23 | 1.000000 | 3.85676e-23 | 1.000000 |
| rad2      | 2.73815e-23 | 1.000000 | 3.76789e-23 | 1.000000 |
| rad1      | 6.03606e-24 | 1.000000 | 8.30609e-24 | 1.000000 |
| rad27     | 4.74794e-24 | 1.000000 | 6.53351e-24 | 1.000000 |

0.100000000E-08 Pa, 20.0000000 K

| Rate constant      | True (fraction)        | Effective (fraction)   |
|--------------------|------------------------|------------------------|
| Total              | 1.56740e-51 (1.00 )    | 1.56740e-51 (1.00 )    |
| Formation of rad11 | 1.56740e-51 (1.000 )   | 1.56740e-51 (1.000 )   |
| Formation of rad6  | 3.73945e-60 (2.39e-09) | 3.73945e-60 (2.39e-09) |
| H-abstraction      | 1.53631e-76 (9.80e-26) | 1.53631e-76 (9.80e-26) |

| species       | PYtrue      | Cumul    | PYeffective | Cumul    |
|---------------|-------------|----------|-------------|----------|
| Indene+H      | 0.987364    | 0.987364 | 0.987364    | 0.987364 |
| C2H2+PhCH2    | 0.00821196  | 0.995576 | 0.00821196  | 0.995576 |
| PhCCH+CH3     | 0.00218926  | 0.997765 | 0.00218926  | 0.997765 |
| PhCHCCH2+H    | 0.00138412  | 0.999149 | 0.00138412  | 0.999149 |
| PhCCCH3+H     | 0.000827673 | 0.999977 | 0.000827673 | 0.999977 |
| Ph+MeAc       | 1.00135e-05 | 0.999987 | 1.00135e-05 | 0.999987 |
| rad8          | 6.83678e-06 | 0.999994 | 6.83678e-06 | 0.999994 |
| rad9          | 3.09938e-06 | 0.999997 | 3.09938e-06 | 0.999997 |
| PAH7+H        | 1.76319e-06 | 0.999999 | 1.76319e-06 | 0.999999 |
| rad30         | 4.36998e-07 | 0.999999 | 4.36998e-07 | 0.999999 |
| rad12         | 2.10911e-07 | 0.999999 | 2.10911e-07 | 0.999999 |
| rad39         | 1.69911e-07 | 1.000000 | 1.69911e-07 | 1.000000 |
| PAH9+H        | 8.84766e-08 | 1.000000 | 8.84766e-08 | 1.000000 |
| rad15         | 7.82504e-08 | 1.000000 | 7.82504e-08 | 1.000000 |
| rad35         | 4.65672e-08 | 1.000000 | 4.65672e-08 | 1.000000 |
| rad38         | 2.27373e-08 | 1.000000 | 2.27373e-08 | 1.000000 |
| Phenyl+Allene | 1.59089e-08 | 1.000000 | 0.000000    | 1.000000 |
| rad46         | 1.47729e-10 | 1.000000 | 1.47729e-10 | 1.000000 |
| rad60syn      | 3.54740e-12 | 1.000000 | 3.54740e-12 | 1.000000 |
| rad6          | 6.07367e-14 | 1.000000 | 6.07367e-14 | 1.000000 |
| rad28         | 4.55502e-14 | 1.000000 | 4.55502e-14 | 1.000000 |
| rad26         | 1.07297e-14 | 1.000000 | 1.07297e-14 | 1.000000 |
| rad2          | 5.83480e-17 | 1.000000 | 5.83480e-17 | 1.000000 |
| rad7          | 4.38022e-18 | 1.000000 | 4.38022e-18 | 1.000000 |
| rad1          | 3.68776e-18 | 1.000000 | 3.68776e-18 | 1.000000 |



|                    |             |          |             |          |
|--------------------|-------------|----------|-------------|----------|
| rad10              | 3.55895e-18 | 1.000000 | 3.55895e-18 | 1.000000 |
| rad60anti          | 1.92920e-18 | 1.000000 | 1.92920e-18 | 1.000000 |
| rad14              | 1.75552e-18 | 1.000000 | 1.75552e-18 | 1.000000 |
| rad11              | 1.09331e-18 | 1.000000 | 1.09331e-18 | 1.000000 |
| rad25              | 8.47263e-19 | 1.000000 | 8.47263e-19 | 1.000000 |
| rad3               | 6.02846e-19 | 1.000000 | 6.02846e-19 | 1.000000 |
| rad4               | 3.04771e-19 | 1.000000 | 3.04771e-19 | 1.000000 |
| rad27              | 9.58645e-20 | 1.000000 | 9.58645e-20 | 1.000000 |
| rad13              | 2.43536e-20 | 1.000000 | 2.43536e-20 | 1.000000 |
| PhCH2CCH+H         | 7.54747e-21 | 1.000000 | 7.54747e-21 | 1.000000 |
| rad37              | 6.78569e-22 | 1.000000 | 6.78569e-22 | 1.000000 |
| rad33              | 6.42669e-23 | 1.000000 | 6.42669e-23 | 1.000000 |
| rad31              | 7.36389e-25 | 1.000000 | 7.36389e-25 | 1.000000 |
| rad5               | 4.35148e-25 | 1.000000 | 4.35148e-25 | 1.000000 |
| Benzene+2-propynyl | 9.80165e-26 | 1.000000 | 9.80165e-26 | 1.000000 |
| rad20              | 4.10366e-26 | 1.000000 | 4.10366e-26 | 1.000000 |
| rad21              | 3.16531e-26 | 1.000000 | 3.16531e-26 | 1.000000 |
| rad18              | 1.20563e-28 | 1.000000 | 1.20563e-28 | 1.000000 |
| rad22              | 8.96794e-30 | 1.000000 | 8.96794e-30 | 1.000000 |
| PAH3+H             | 7.68130e-30 | 1.000000 | 7.68130e-30 | 1.000000 |
| rad59              | 4.11320e-30 | 1.000000 | 4.11320e-30 | 1.000000 |
| rad23              | 3.80231e-30 | 1.000000 | 3.80231e-30 | 1.000000 |
| rad50              | 1.66010e-30 | 1.000000 | 1.66010e-30 | 1.000000 |
| rad45              | 2.49533e-32 | 1.000000 | 2.49533e-32 | 1.000000 |
| rad24              | 1.03404e-32 | 1.000000 | 1.03404e-32 | 1.000000 |
| rad36              | 1.55439e-33 | 1.000000 | 1.55439e-33 | 1.000000 |
| rad19syn           | 6.02786e-39 | 1.000000 | 6.02786e-39 | 1.000000 |
| rad52              | 7.25281e-43 | 1.000000 | 7.25281e-43 | 1.000000 |
| rad54              | 6.96609e-44 | 1.000000 | 6.96609e-44 | 1.000000 |
| PAH10+CH3          | 4.53847e-44 | 1.000000 | 4.53847e-44 | 1.000000 |
| rad43              | 1.04739e-44 | 1.000000 | 1.04739e-44 | 1.000000 |
| rad62              | 3.12311e-47 | 1.000000 | 3.12311e-47 | 1.000000 |
| rad51              | 3.48646e-50 | 1.000000 | 3.48646e-50 | 1.000000 |
| rad70              | 3.74566e-53 | 1.000000 | 3.74566e-53 | 1.000000 |
| PhcycC3H3_A+H      | 1.58635e-53 | 1.000000 | 1.58635e-53 | 1.000000 |
| rad55              | 8.54177e-54 | 1.000000 | 8.54177e-54 | 1.000000 |
| rad65              | 2.33897e-55 | 1.000000 | 2.33897e-55 | 1.000000 |
| rad58              | 5.32731e-57 | 1.000000 | 5.32731e-57 | 1.000000 |
| PAH1+H             | 7.14300e-59 | 1.000000 | 7.14300e-59 | 1.000000 |
| rad34              | 4.72920e-61 | 1.000000 | 4.72920e-61 | 1.000000 |
| rad42              | 3.37352e-65 | 1.000000 | 3.37352e-65 | 1.000000 |
| rad41              | 4.23324e-66 | 1.000000 | 4.23324e-66 | 1.000000 |
| rad47              | 1.30635e-72 | 1.000000 | 1.30635e-72 | 1.000000 |

0.100000000E-08 Pa, 30.0000000 K

| Rate constant      | True (fraction)        | Effective (fraction)   |
|--------------------|------------------------|------------------------|
| Total              | 5.03204e-39 (1.00 )    | 5.03204e-39 (1.00 )    |
| Formation of rad11 | 5.03203e-39 (1.000 )   | 5.03203e-39 (1.000 )   |
| Formation of rad6  | 9.92181e-45 (1.97e-06) | 9.92181e-45 (1.97e-06) |
| H-abstraction      | 3.33191e-55 (6.62e-17) | 3.33191e-55 (6.62e-17) |

| species            | PYtrue      | Cumul    | PYeffective | Cumul    |
|--------------------|-------------|----------|-------------|----------|
| Indene+H           | 0.987257    | 0.987257 | 0.987257    | 0.987257 |
| C2H2+PhCH2         | 0.00826619  | 0.995523 | 0.00826619  | 0.995523 |
| PhCCH+CH3          | 0.00221709  | 0.997740 | 0.00221709  | 0.997740 |
| PhCHCCH2+H         | 0.00139905  | 0.999139 | 0.00139905  | 0.999139 |
| PhCCCH3+H          | 0.000837660 | 0.999977 | 0.000837660 | 0.999977 |
| Ph+MeAc            | 1.04507e-05 | 0.999987 | 1.04507e-05 | 0.999987 |
| rad8               | 6.94466e-06 | 0.999994 | 6.94466e-06 | 0.999994 |
| rad9               | 3.16725e-06 | 0.999998 | 3.16726e-06 | 0.999998 |
| PAH7+H             | 1.80754e-06 | 0.999999 | 1.80754e-06 | 0.999999 |
| rad30              | 4.41092e-07 | 1.000000 | 4.41092e-07 | 1.000000 |
| rad12              | 2.16616e-07 | 1.000000 | 2.16616e-07 | 1.000000 |
| rad39              | 1.75976e-07 | 1.000000 | 1.75976e-07 | 1.000000 |
| PAH9+H             | 8.94084e-08 | 1.000000 | 8.94084e-08 | 1.000000 |
| rad15              | 7.91493e-08 | 1.000000 | 7.91494e-08 | 1.000000 |
| rad35              | 4.70030e-08 | 1.000000 | 4.70030e-08 | 1.000000 |
| rad38              | 2.30004e-08 | 1.000000 | 2.30004e-08 | 1.000000 |
| Phenyl+Allene      | 2.15096e-08 | 1.000000 | 0.000000    | 1.000000 |
| rad46              | 1.50536e-10 | 1.000000 | 1.50536e-10 | 1.000000 |
| rad60syn           | 3.53077e-12 | 1.000000 | 3.53077e-12 | 1.000000 |
| rad28              | 2.14726e-14 | 1.000000 | 2.14726e-14 | 1.000000 |
| rad6               | 1.79288e-14 | 1.000000 | 1.79288e-14 | 1.000000 |
| rad26              | 5.15935e-15 | 1.000000 | 5.15935e-15 | 1.000000 |
| rad60anti          | 5.73027e-16 | 1.000000 | 5.73027e-16 | 1.000000 |
| Benzene+2-propynyl | 6.62139e-17 | 1.000000 | 6.62139e-17 | 1.000000 |
| rad2               | 2.10118e-17 | 1.000000 | 2.10118e-17 | 1.000000 |

|               |             |         |             |         |
|---------------|-------------|---------|-------------|---------|
| rad10         | 1.46369e-18 | 1.00000 | 1.46369e-18 | 1.00000 |
| rad1          | 1.32878e-18 | 1.00000 | 1.32878e-18 | 1.00000 |
| rad7          | 1.29351e-18 | 1.00000 | 1.29351e-18 | 1.00000 |
| rad14         | 8.52738e-19 | 1.00000 | 8.52738e-19 | 1.00000 |
| rad25         | 4.12100e-19 | 1.00000 | 4.12100e-19 | 1.00000 |
| rad11         | 3.27402e-19 | 1.00000 | 3.27402e-19 | 1.00000 |
| rad3          | 2.48826e-19 | 1.00000 | 2.48826e-19 | 1.00000 |
| rad4          | 1.25811e-19 | 1.00000 | 1.25811e-19 | 1.00000 |
| rad27         | 4.66692e-20 | 1.00000 | 4.66692e-20 | 1.00000 |
| rad13         | 7.19308e-21 | 1.00000 | 7.19308e-21 | 1.00000 |
| PhCH2CCH+H    | 4.90639e-21 | 1.00000 | 4.90639e-21 | 1.00000 |
| rad37         | 4.43275e-22 | 1.00000 | 4.43275e-22 | 1.00000 |
| rad33         | 2.25779e-23 | 1.00000 | 2.25779e-23 | 1.00000 |
| rad31         | 3.68994e-25 | 1.00000 | 3.68994e-25 | 1.00000 |
| rad5          | 2.85156e-25 | 1.00000 | 2.85156e-25 | 1.00000 |
| rad20         | 2.03122e-26 | 1.00000 | 2.03122e-26 | 1.00000 |
| rad21         | 1.56783e-26 | 1.00000 | 1.56783e-26 | 1.00000 |
| rad18         | 5.94068e-29 | 1.00000 | 5.94068e-29 | 1.00000 |
| PAH3+H        | 5.07249e-30 | 1.00000 | 5.07249e-30 | 1.00000 |
| rad22         | 4.39757e-30 | 1.00000 | 4.39757e-30 | 1.00000 |
| rad59         | 2.71581e-30 | 1.00000 | 2.71581e-30 | 1.00000 |
| rad23         | 1.73133e-30 | 1.00000 | 1.73133e-30 | 1.00000 |
| rad50         | 1.09137e-30 | 1.00000 | 1.09137e-30 | 1.00000 |
| rad45         | 8.71788e-33 | 1.00000 | 8.71788e-33 | 1.00000 |
| rad24         | 5.20849e-33 | 1.00000 | 5.20849e-33 | 1.00000 |
| rad36         | 5.42859e-34 | 1.00000 | 5.42859e-34 | 1.00000 |
| rad19syn      | 4.14528e-39 | 1.00000 | 4.14528e-39 | 1.00000 |
| rad52         | 4.97431e-43 | 1.00000 | 4.97431e-43 | 1.00000 |
| rad54         | 4.86643e-44 | 1.00000 | 4.86643e-44 | 1.00000 |
| PAH10+CH3     | 3.18313e-44 | 1.00000 | 3.18313e-44 | 1.00000 |
| rad43         | 7.34466e-45 | 1.00000 | 7.34466e-45 | 1.00000 |
| rad62         | 2.20650e-47 | 1.00000 | 2.20650e-47 | 1.00000 |
| rad51         | 2.45781e-50 | 1.00000 | 2.45781e-50 | 1.00000 |
| rad70         | 2.70047e-53 | 1.00000 | 2.70047e-53 | 1.00000 |
| PhcycC3H3_A+H | 1.14610e-53 | 1.00000 | 1.14610e-53 | 1.00000 |
| rad55         | 6.16997e-54 | 1.00000 | 6.16997e-54 | 1.00000 |
| rad65         | 1.67484e-55 | 1.00000 | 1.67484e-55 | 1.00000 |
| rad58         | 3.85592e-57 | 1.00000 | 3.85592e-57 | 1.00000 |
| PAH1+H        | 5.26552e-59 | 1.00000 | 5.26552e-59 | 1.00000 |
| rad34         | 3.50169e-61 | 1.00000 | 3.50169e-61 | 1.00000 |
| rad42         | 2.53352e-65 | 1.00000 | 2.53352e-65 | 1.00000 |
| rad41         | 3.20409e-66 | 1.00000 | 3.20409e-66 | 1.00000 |
| rad47         | 4.75804e-73 | 1.00000 | 4.75804e-73 | 1.00000 |

0.100000000E-08 Pa, 40.0000000 K

| Rate constant      | True (fraction)        | Effective (fraction)   |
|--------------------|------------------------|------------------------|
| Total              | 9.35697e-33 (1.00 )    | 9.35697e-33 (1.00 )    |
| Formation of rad11 | 9.35644e-33 (1.000 )   | 9.35644e-33 (1.000 )   |
| Formation of rad6  | 5.26139e-37 (5.62e-05) | 5.26138e-37 (5.62e-05) |
| H-abstraction      | 1.44763e-44 (1.55e-12) | 1.44763e-44 (1.55e-12) |

| species            | PYtrue      | Cumul    | PYeffective | Cumul    |
|--------------------|-------------|----------|-------------|----------|
| Indene+H           | 0.987032    | 0.987032 | 0.987032    | 0.987032 |
| C2H2+PhCH2         | 0.00837914  | 0.995411 | 0.00837914  | 0.995411 |
| PhCCH+CH3          | 0.00227543  | 0.997687 | 0.00227543  | 0.997687 |
| PhCHCCH2+H         | 0.00143026  | 0.999117 | 0.00143026  | 0.999117 |
| PhCCCH3+H          | 0.000858562 | 0.999975 | 0.000858562 | 0.999975 |
| Ph+MeAc            | 1.13966e-05 | 0.999987 | 1.13966e-05 | 0.999987 |
| rad8               | 7.17293e-06 | 0.999994 | 7.17293e-06 | 0.999994 |
| rad9               | 3.31259e-06 | 0.999997 | 3.31259e-06 | 0.999997 |
| PAH7+H             | 1.90153e-06 | 0.999999 | 1.90153e-06 | 0.999999 |
| rad30              | 4.49659e-07 | 1.000000 | 4.49659e-07 | 1.000000 |
| rad12              | 2.28411e-07 | 1.000000 | 2.28411e-07 | 1.000000 |
| rad39              | 1.89313e-07 | 1.000000 | 1.89313e-07 | 1.000000 |
| PAH9+H             | 9.13636e-08 | 1.000000 | 9.13636e-08 | 1.000000 |
| rad15              | 8.10367e-08 | 1.000000 | 8.10367e-08 | 1.000000 |
| rad35              | 4.79160e-08 | 1.000000 | 4.79160e-08 | 1.000000 |
| Phenyl+Allene      | 3.50666e-08 | 1.000000 | 0.000000    | 1.000000 |
| rad38              | 2.35533e-08 | 1.000000 | 2.35533e-08 | 1.000000 |
| rad46              | 1.56541e-10 | 1.000000 | 1.56541e-10 | 1.000000 |
| rad60syn           | 3.61896e-12 | 1.000000 | 3.61896e-12 | 1.000000 |
| Benzene+2-propynyl | 1.54712e-12 | 1.000000 | 1.54712e-12 | 1.000000 |
| rad28              | 1.36084e-14 | 1.000000 | 1.36084e-14 | 1.000000 |
| rad60anti          | 1.04345e-14 | 1.000000 | 1.04345e-14 | 1.000000 |
| rad6               | 9.04757e-15 | 1.000000 | 9.04757e-15 | 1.000000 |
| rad26              | 3.29278e-15 | 1.000000 | 3.29278e-15 | 1.000000 |
| rad2               | 1.92855e-17 | 1.000000 | 1.92855e-17 | 1.000000 |

|               |             |         |             |         |
|---------------|-------------|---------|-------------|---------|
| rad1          | 1.22114e-18 | 1.00000 | 1.22114e-18 | 1.00000 |
| rad10         | 9.86959e-19 | 1.00000 | 9.86959e-19 | 1.00000 |
| rad7          | 6.53215e-19 | 1.00000 | 6.53215e-19 | 1.00000 |
| rad14         | 5.49820e-19 | 1.00000 | 5.49820e-19 | 1.00000 |
| rad25         | 2.66447e-19 | 1.00000 | 2.66447e-19 | 1.00000 |
| PhCH2CCH+H    | 2.60306e-19 | 1.00000 | 2.60306e-19 | 1.00000 |
| rad3          | 1.94377e-19 | 1.00000 | 1.94377e-19 | 1.00000 |
| rad11         | 1.67074e-19 | 1.00000 | 1.67074e-19 | 1.00000 |
| rad4          | 9.83134e-20 | 1.00000 | 9.83134e-20 | 1.00000 |
| rad27         | 3.02522e-20 | 1.00000 | 3.02522e-20 | 1.00000 |
| rad13         | 3.63381e-21 | 1.00000 | 3.63381e-21 | 1.00000 |
| rad37         | 1.73757e-21 | 1.00000 | 1.73757e-21 | 1.00000 |
| rad33         | 1.28281e-23 | 1.00000 | 1.28281e-23 | 1.00000 |
| rad5          | 5.53335e-25 | 1.00000 | 5.53335e-25 | 1.00000 |
| rad31         | 2.54602e-25 | 1.00000 | 2.54602e-25 | 1.00000 |
| rad20         | 1.36539e-26 | 1.00000 | 1.36539e-26 | 1.00000 |
| rad21         | 1.05533e-26 | 1.00000 | 1.05533e-26 | 1.00000 |
| rad18         | 3.95868e-29 | 1.00000 | 3.95868e-29 | 1.00000 |
| PAH3+H        | 6.53176e-30 | 1.00000 | 6.53176e-30 | 1.00000 |
| rad59         | 3.49584e-30 | 1.00000 | 3.49584e-30 | 1.00000 |
| rad22         | 2.90960e-30 | 1.00000 | 2.90960e-30 | 1.00000 |
| rad50         | 1.45848e-30 | 1.00000 | 1.45848e-30 | 1.00000 |
| rad23         | 1.13305e-30 | 1.00000 | 1.13305e-30 | 1.00000 |
| rad45         | 8.42499e-33 | 1.00000 | 8.42499e-33 | 1.00000 |
| rad24         | 3.62482e-33 | 1.00000 | 3.62482e-33 | 1.00000 |
| rad36         | 5.24344e-34 | 1.00000 | 5.24344e-34 | 1.00000 |
| rad19syn      | 5.78408e-39 | 1.00000 | 5.78408e-39 | 1.00000 |
| rad52         | 6.90211e-43 | 1.00000 | 6.90211e-43 | 1.00000 |
| rad54         | 7.01767e-44 | 1.00000 | 7.01767e-44 | 1.00000 |
| PAH10+CH3     | 4.64440e-44 | 1.00000 | 4.64440e-44 | 1.00000 |
| rad43         | 1.07125e-44 | 1.00000 | 1.07125e-44 | 1.00000 |
| rad62         | 3.26462e-47 | 1.00000 | 3.26462e-47 | 1.00000 |
| rad51         | 3.61238e-50 | 1.00000 | 3.61238e-50 | 1.00000 |
| rad70         | 4.15987e-53 | 1.00000 | 4.15987e-53 | 1.00000 |
| PhcycC3H3_A+H | 1.77329e-53 | 1.00000 | 1.77329e-53 | 1.00000 |
| rad55         | 9.54218e-54 | 1.00000 | 9.54219e-54 | 1.00000 |
| rad65         | 2.54344e-55 | 1.00000 | 2.54344e-55 | 1.00000 |
| rad58         | 5.98889e-57 | 1.00000 | 5.98889e-57 | 1.00000 |
| PAH1+H        | 8.49824e-59 | 1.00000 | 8.49824e-59 | 1.00000 |
| rad34         | 5.70365e-61 | 1.00000 | 5.70365e-61 | 1.00000 |
| rad42         | 4.27220e-65 | 1.00000 | 4.27220e-65 | 1.00000 |
| rad41         | 5.55946e-66 | 1.00000 | 5.55946e-66 | 1.00000 |
| rad47         | 5.12094e-73 | 1.00000 | 5.12094e-73 | 1.00000 |

0.100000000E-08 Pa, 50.0000000 K

| Rate constant      | True (fraction)        | Effective (fraction)   |
|--------------------|------------------------|------------------------|
| Total              | 5.52690e-29 (1.00 )    | 5.52690e-29 (1.00 )    |
| Formation of rad11 | 5.52459e-29 (1.000 )   | 5.52459e-29 (1.000 )   |
| Formation of rad6  | 2.30840e-32 (0.000418) | 2.30840e-32 (0.000418) |
| H-abstraction      | 3.35357e-38 (6.07e-10) | 3.35357e-38 (6.07e-10) |

| species            | PYtrue      | Cumul    | PYeffective | Cumul    |
|--------------------|-------------|----------|-------------|----------|
| Indene+H           | 0.986714    | 0.986714 | 0.986714    | 0.986714 |
| C2H2+PhCH2         | 0.00853777  | 0.995252 | 0.00853777  | 0.995252 |
| PhCCH+CH3          | 0.00235831  | 0.997610 | 0.00235831  | 0.997610 |
| PhCHCCH2+H         | 0.00147439  | 0.999084 | 0.00147439  | 0.999084 |
| PhCCCH3+H          | 0.000888170 | 0.999973 | 0.000888171 | 0.999973 |
| Ph+MeAc            | 1.28114e-05 | 0.999985 | 1.28114e-05 | 0.999985 |
| rad8               | 7.50115e-06 | 0.999993 | 7.50115e-06 | 0.999993 |
| rad9               | 3.52527e-06 | 0.999996 | 3.52527e-06 | 0.999996 |
| PAH7+H             | 2.03772e-06 | 0.999999 | 2.03772e-06 | 0.999999 |
| rad30              | 4.61782e-07 | 0.999999 | 4.61782e-07 | 0.999999 |
| rad12              | 2.45026e-07 | 0.999999 | 2.45026e-07 | 0.999999 |
| rad39              | 2.09458e-07 | 0.999999 | 2.09458e-07 | 0.999999 |
| PAH9+H             | 9.41437e-08 | 1.000000 | 9.41437e-08 | 1.000000 |
| rad15              | 8.37244e-08 | 1.000000 | 8.37244e-08 | 1.000000 |
| Phenyl+Allene      | 5.86047e-08 | 1.000000 | 0.000000    | 1.000000 |
| rad35              | 4.92106e-08 | 1.000000 | 4.92106e-08 | 1.000000 |
| rad38              | 2.43415e-08 | 1.000000 | 2.43415e-08 | 1.000000 |
| Benzene+2-propynyl | 6.06773e-10 | 1.000000 | 6.06773e-10 | 1.000000 |
| rad46              | 1.65326e-10 | 1.000000 | 1.65326e-10 | 1.000000 |
| rad60syn           | 3.93847e-12 | 1.000000 | 3.93847e-12 | 1.000000 |
| rad60anti          | 5.61970e-14 | 1.000000 | 5.61970e-14 | 1.000000 |
| rad28              | 9.57229e-15 | 1.000000 | 9.57229e-15 | 1.000000 |
| rad6               | 5.53472e-15 | 1.000000 | 5.53473e-15 | 1.000000 |
| rad26              | 2.32541e-15 | 1.000000 | 2.32542e-15 | 1.000000 |
| PhCH2CCH+H         | 1.27590e-16 | 1.000000 | 1.27591e-16 | 1.000000 |

|               |             |          |             |          |
|---------------|-------------|----------|-------------|----------|
| rad2          | 2.35126e-17 | 1.000000 | 2.35126e-17 | 1.000000 |
| rad37         | 3.03384e-18 | 1.000000 | 3.03384e-18 | 1.000000 |
| rad1          | 1.49129e-18 | 1.000000 | 1.49129e-18 | 1.000000 |
| rad10         | 8.00192e-19 | 1.000000 | 8.00192e-19 | 1.000000 |
| rad7          | 3.99982e-19 | 1.000000 | 3.99982e-19 | 1.000000 |
| rad14         | 3.93142e-19 | 1.000000 | 3.93142e-19 | 1.000000 |
| rad3          | 3.17383e-19 | 1.000000 | 3.17383e-19 | 1.000000 |
| rad25         | 1.91262e-19 | 1.000000 | 1.91262e-19 | 1.000000 |
| rad4          | 1.60600e-19 | 1.000000 | 1.60600e-19 | 1.000000 |
| rad11         | 1.03216e-19 | 1.000000 | 1.03216e-19 | 1.000000 |
| rad27         | 2.17997e-20 | 1.000000 | 2.17997e-20 | 1.000000 |
| rad13         | 2.22624e-21 | 1.000000 | 2.22624e-21 | 1.000000 |
| rad5          | 9.79848e-22 | 1.000000 | 9.79848e-22 | 1.000000 |
| rad33         | 8.64566e-24 | 1.000000 | 8.64566e-24 | 1.000000 |
| rad31         | 2.01344e-25 | 1.000000 | 2.01344e-25 | 1.000000 |
| rad20         | 1.03621e-26 | 1.000000 | 1.03621e-26 | 1.000000 |
| rad21         | 8.02453e-27 | 1.000000 | 8.02453e-27 | 1.000000 |
| PAH3+H        | 1.61313e-27 | 1.000000 | 1.61313e-27 | 1.000000 |
| rad50         | 1.19752e-27 | 1.000000 | 1.19752e-27 | 1.000000 |
| rad59         | 8.65657e-28 | 1.000000 | 8.65657e-28 | 1.000000 |
| rad18         | 2.96714e-29 | 1.000000 | 2.96714e-29 | 1.000000 |
| rad22         | 2.15981e-30 | 1.000000 | 2.15981e-30 | 1.000000 |
| rad23         | 8.52704e-31 | 1.000000 | 8.52704e-31 | 1.000000 |
| rad45         | 8.16742e-33 | 1.000000 | 8.16742e-33 | 1.000000 |
| rad24         | 2.88912e-33 | 1.000000 | 2.88912e-33 | 1.000000 |
| rad36         | 5.07862e-34 | 1.000000 | 5.07862e-34 | 1.000000 |
| rad19syn      | 1.57209e-38 | 1.000000 | 1.57209e-38 | 1.000000 |
| rad52         | 1.86131e-42 | 1.000000 | 1.86131e-42 | 1.000000 |
| rad54         | 1.99807e-43 | 1.000000 | 1.99807e-43 | 1.000000 |
| PAH10+CH3     | 1.35871e-43 | 1.000000 | 1.35871e-43 | 1.000000 |
| rad43         | 3.13226e-44 | 1.000000 | 3.13226e-44 | 1.000000 |
| rad62         | 9.70526e-47 | 1.000000 | 9.70526e-47 | 1.000000 |
| rad51         | 1.05662e-49 | 1.000000 | 1.05662e-49 | 1.000000 |
| rad70         | 1.30003e-52 | 1.000000 | 1.30003e-52 | 1.000000 |
| PhcycC3H3_A+H | 5.57650e-53 | 1.000000 | 5.57650e-53 | 1.000000 |
| rad55         | 2.99882e-53 | 1.000000 | 2.99882e-53 | 1.000000 |
| rad65         | 7.79130e-55 | 1.000000 | 7.79130e-55 | 1.000000 |
| rad58         | 1.89353e-56 | 1.000000 | 1.89353e-56 | 1.000000 |
| PAH1+H        | 2.83836e-58 | 1.000000 | 2.83836e-58 | 1.000000 |
| rad34         | 1.92871e-60 | 1.000000 | 1.92871e-60 | 1.000000 |
| rad42         | 1.55923e-64 | 1.000000 | 1.55923e-64 | 1.000000 |
| rad41         | 2.24576e-65 | 1.000000 | 2.24576e-65 | 1.000000 |
| rad47         | 1.27788e-72 | 1.000000 | 1.27788e-72 | 1.000000 |

0.100000000E-08 Pa, 60.0000000 K

| Rate constant      | True (fraction)        | Effective (fraction)   |
|--------------------|------------------------|------------------------|
| Total              | 1.83429e-26 (1.00 )    | 1.83429e-26 (1.00 )    |
| Formation of rad11 | 1.83139e-26 (0.998 )   | 1.83139e-26 (0.998 )   |
| Formation of rad6  | 2.90471e-29 (0.00158 ) | 2.90471e-29 (0.00158 ) |
| H-abstraction      | 5.71259e-34 (3.11e-08) | 5.71259e-34 (3.11e-08) |

| species            | PYtrue      | Cumul    | PYeffective | Cumul    |
|--------------------|-------------|----------|-------------|----------|
| Indene+H           | 0.986327    | 0.986327 | 0.986327    | 0.986327 |
| C2H2+PhCH2         | 0.00873016  | 0.995057 | 0.00873016  | 0.995057 |
| PhCCH+CH3          | 0.00246043  | 0.997518 | 0.00246043  | 0.997518 |
| PhCHCCH2+H         | 0.00152845  | 0.999046 | 0.00152845  | 0.999046 |
| PhCCCH3+H          | 0.000924508 | 0.999971 | 0.000924508 | 0.999971 |
| Ph+MeAc            | 1.46763e-05 | 0.999985 | 1.46763e-05 | 0.999985 |
| rad8               | 7.91054e-06 | 0.999993 | 7.91054e-06 | 0.999993 |
| rad9               | 3.79613e-06 | 0.999997 | 3.79613e-06 | 0.999997 |
| PAH7+H             | 2.21018e-06 | 0.999999 | 2.21018e-06 | 0.999999 |
| rad30              | 4.76631e-07 | 1.000000 | 4.76631e-07 | 1.000000 |
| rad12              | 2.65645e-07 | 1.000000 | 2.65645e-07 | 1.000000 |
| rad39              | 2.35969e-07 | 1.000000 | 2.35969e-07 | 1.000000 |
| PAH9+H             | 9.75722e-08 | 1.000000 | 9.75722e-08 | 1.000000 |
| Phenyl+Allene      | 9.48897e-08 | 1.000000 | 0.000000    | 1.000000 |
| rad15              | 8.70445e-08 | 1.000000 | 8.70445e-08 | 1.000000 |
| rad35              | 5.08007e-08 | 1.000000 | 5.08007e-08 | 1.000000 |
| Benzene+2-propynyl | 3.11432e-08 | 1.000000 | 3.11432e-08 | 1.000000 |
| rad38              | 2.53170e-08 | 1.000000 | 2.53170e-08 | 1.000000 |
| rad46              | 1.76542e-10 | 1.000000 | 1.76542e-10 | 1.000000 |
| rad60syn           | 4.52403e-12 | 1.000000 | 4.52403e-12 | 1.000000 |
| rad60anti          | 1.68171e-13 | 1.000000 | 1.68171e-13 | 1.000000 |
| PhCH2CCH+H         | 8.28082e-15 | 1.000000 | 8.28082e-15 | 1.000000 |
| rad28              | 7.10650e-15 | 1.000000 | 7.10650e-15 | 1.000000 |
| rad6               | 3.73788e-15 | 1.000000 | 3.73788e-15 | 1.000000 |
| rad26              | 1.73130e-15 | 1.000000 | 1.73131e-15 | 1.000000 |

|               |             |         |             |         |
|---------------|-------------|---------|-------------|---------|
| rad37         | 5.31840e-16 | 1.00000 | 5.31840e-16 | 1.00000 |
| rad2          | 4.77409e-18 | 1.00000 | 4.77409e-18 | 1.00000 |
| rad10         | 4.96117e-19 | 1.00000 | 4.96117e-19 | 1.00000 |
| rad1          | 3.03467e-19 | 1.00000 | 3.03467e-19 | 1.00000 |
| rad14         | 2.96864e-19 | 1.00000 | 2.96864e-19 | 1.00000 |
| rad5          | 2.78951e-19 | 1.00000 | 2.78951e-19 | 1.00000 |
| rad7          | 2.70442e-19 | 1.00000 | 2.70442e-19 | 1.00000 |
| rad25         | 1.45098e-19 | 1.00000 | 1.45098e-19 | 1.00000 |
| rad11         | 7.03538e-20 | 1.00000 | 7.03538e-20 | 1.00000 |
| rad3          | 3.86264e-20 | 1.00000 | 3.86264e-20 | 1.00000 |
| rad4          | 1.95554e-20 | 1.00000 | 1.95554e-20 | 1.00000 |
| rad27         | 1.66183e-20 | 1.00000 | 1.66183e-20 | 1.00000 |
| rad13         | 1.50621e-21 | 1.00000 | 1.50621e-21 | 1.00000 |
| rad33         | 6.36732e-24 | 1.00000 | 6.36732e-24 | 1.00000 |
| PAH3+H        | 2.18877e-24 | 1.00000 | 2.18877e-24 | 1.00000 |
| rad59         | 1.18341e-24 | 1.00000 | 1.18342e-24 | 1.00000 |
| rad50         | 7.40083e-25 | 1.00000 | 7.40083e-25 | 1.00000 |
| rad31         | 1.72791e-25 | 1.00000 | 1.72791e-25 | 1.00000 |
| rad20         | 8.41301e-27 | 1.00000 | 8.41301e-27 | 1.00000 |
| rad21         | 6.53064e-27 | 1.00000 | 6.53064e-27 | 1.00000 |
| rad18         | 2.37219e-29 | 1.00000 | 2.37219e-29 | 1.00000 |
| rad22         | 1.70661e-30 | 1.00000 | 1.70661e-30 | 1.00000 |
| rad23         | 6.94619e-31 | 1.00000 | 6.94619e-31 | 1.00000 |
| rad45         | 2.51529e-33 | 1.00000 | 2.51529e-33 | 1.00000 |
| rad24         | 2.48965e-33 | 1.00000 | 2.48965e-33 | 1.00000 |
| rad36         | 1.56281e-34 | 1.00000 | 1.56281e-34 | 1.00000 |
| rad19syn      | 1.05336e-37 | 1.00000 | 1.05336e-37 | 1.00000 |
| rad52         | 1.23556e-41 | 1.00000 | 1.23556e-41 | 1.00000 |
| rad54         | 1.41600e-42 | 1.00000 | 1.41600e-42 | 1.00000 |
| PAH10+CH3     | 1.00797e-42 | 1.00000 | 1.00797e-42 | 1.00000 |
| rad43         | 2.32252e-43 | 1.00000 | 2.32252e-43 | 1.00000 |
| rad62         | 7.32968e-46 | 1.00000 | 7.32968e-46 | 1.00000 |
| rad51         | 7.73860e-49 | 1.00000 | 7.73860e-49 | 1.00000 |
| rad70         | 1.03161e-51 | 1.00000 | 1.03161e-51 | 1.00000 |
| PhcycC3H3_A+H | 4.45897e-52 | 1.00000 | 4.45897e-52 | 1.00000 |
| rad55         | 2.39591e-52 | 1.00000 | 2.39591e-52 | 1.00000 |
| rad65         | 6.03644e-54 | 1.00000 | 6.03644e-54 | 1.00000 |
| rad58         | 1.52405e-55 | 1.00000 | 1.52405e-55 | 1.00000 |
| PAH1+H        | 2.44636e-57 | 1.00000 | 2.44637e-57 | 1.00000 |
| rad34         | 1.68595e-59 | 1.00000 | 1.68595e-59 | 1.00000 |
| rad42         | 1.65433e-63 | 1.00000 | 1.65433e-63 | 1.00000 |
| rad41         | 3.15075e-64 | 1.00000 | 3.15075e-64 | 1.00000 |
| rad47         | 8.72603e-72 | 1.00000 | 8.72603e-72 | 1.00000 |

0.100000000E-08 Pa, 70.0000000 K

| Rate constant      | True (fraction)        | Effective (fraction)   |
|--------------------|------------------------|------------------------|
| Total              | 1.17336e-24 (1.00 )    | 1.17336e-24 (1.00 )    |
| Formation of rad11 | 1.16857e-24 (0.996 )   | 1.16857e-24 (0.996 )   |
| Formation of rad6  | 4.79505e-27 (0.00409 ) | 4.79505e-27 (0.00409 ) |
| H-abstraction      | 5.89821e-31 (5.03e-07) | 5.89821e-31 (5.03e-07) |

| species            | PYtrue      | Cumul    | PYeffective | Cumul    |
|--------------------|-------------|----------|-------------|----------|
| Indene+H           | 0.985878    | 0.985878 | 0.985878    | 0.985878 |
| C2H2+PhCH2         | 0.00895096  | 0.994828 | 0.00895096  | 0.994828 |
| PhCCH+CH3          | 0.00257991  | 0.997408 | 0.00257991  | 0.997408 |
| PhCHCCH2+H         | 0.00159125  | 0.999000 | 0.00159125  | 0.999000 |
| PhCCCH3+H          | 0.000966821 | 0.999966 | 0.000966821 | 0.999966 |
| Ph+MeAc            | 1.70376e-05 | 0.999983 | 1.70376e-05 | 0.999983 |
| rad8               | 8.39501e-06 | 0.999992 | 8.39501e-06 | 0.999992 |
| rad9               | 4.12418e-06 | 0.999996 | 4.12418e-06 | 0.999996 |
| PAH7+H             | 2.41880e-06 | 0.999998 | 2.41880e-06 | 0.999998 |
| Benzene+2-propynyl | 5.02676e-07 | 0.999999 | 5.02676e-07 | 0.999999 |
| rad30              | 4.93878e-07 | 0.999999 | 4.93878e-07 | 0.999999 |
| rad12              | 2.90306e-07 | 1.000000 | 2.90306e-07 | 1.000000 |
| rad39              | 2.69236e-07 | 1.000000 | 2.69236e-07 | 1.000000 |
| Phenyl+Allene      | 1.48371e-07 | 1.000000 | 0.000000    | 1.000000 |
| PAH9+H             | 1.01589e-07 | 1.000000 | 1.01589e-07 | 1.000000 |
| rad15              | 9.09387e-08 | 1.000000 | 9.09387e-08 | 1.000000 |
| rad35              | 5.26537e-08 | 1.000000 | 5.26537e-08 | 1.000000 |
| rad38              | 2.64647e-08 | 1.000000 | 2.64647e-08 | 1.000000 |
| rad46              | 1.90211e-10 | 1.000000 | 1.90211e-10 | 1.000000 |
| rad60syn           | 5.38175e-12 | 1.000000 | 5.38175e-12 | 1.000000 |
| rad60anti          | 3.67499e-13 | 1.000000 | 3.67499e-13 | 1.000000 |
| PhCH2CCH+H         | 1.68850e-13 | 1.000000 | 1.68850e-13 | 1.000000 |
| rad37              | 2.03302e-14 | 1.000000 | 2.03302e-14 | 1.000000 |
| rad28              | 5.45653e-15 | 1.000000 | 5.45653e-15 | 1.000000 |
| rad6               | 2.68207e-15 | 1.000000 | 2.68207e-15 | 1.000000 |

|               |             |         |             |         |
|---------------|-------------|---------|-------------|---------|
| rad26         | 1.33240e-15 | 1.00000 | 1.33240e-15 | 1.00000 |
| rad2          | 1.90022e-17 | 1.00000 | 1.90022e-17 | 1.00000 |
| rad5          | 1.57196e-17 | 1.00000 | 1.57196e-17 | 1.00000 |
| rad1          | 1.21079e-18 | 1.00000 | 1.21079e-18 | 1.00000 |
| rad10         | 8.05271e-19 | 1.00000 | 8.05271e-19 | 1.00000 |
| rad3          | 3.44219e-19 | 1.00000 | 3.44219e-19 | 1.00000 |
| rad14         | 2.31992e-19 | 1.00000 | 2.31992e-19 | 1.00000 |
| rad7          | 1.94306e-19 | 1.00000 | 1.94306e-19 | 1.00000 |
| rad4          | 1.74386e-19 | 1.00000 | 1.74386e-19 | 1.00000 |
| rad25         | 1.13983e-19 | 1.00000 | 1.13983e-19 | 1.00000 |
| rad11         | 5.09360e-20 | 1.00000 | 5.09360e-20 | 1.00000 |
| rad27         | 1.31284e-20 | 1.00000 | 1.31284e-20 | 1.00000 |
| rad13         | 1.08297e-21 | 1.00000 | 1.08297e-21 | 1.00000 |
| PAH3+H        | 3.72325e-22 | 1.00000 | 3.72325e-22 | 1.00000 |
| rad59         | 1.99036e-22 | 1.00000 | 1.99036e-22 | 1.00000 |
| rad50         | 7.20079e-23 | 1.00000 | 7.20079e-23 | 1.00000 |
| rad33         | 4.95629e-24 | 1.00000 | 4.95629e-24 | 1.00000 |
| rad31         | 1.57078e-25 | 1.00000 | 1.57078e-25 | 1.00000 |
| rad20         | 7.13729e-27 | 1.00000 | 7.13729e-27 | 1.00000 |
| rad21         | 5.55554e-27 | 1.00000 | 5.55554e-27 | 1.00000 |
| rad18         | 1.97687e-29 | 1.00000 | 1.97687e-29 | 1.00000 |
| rad22         | 1.40333e-30 | 1.00000 | 1.40333e-30 | 1.00000 |
| rad23         | 6.00762e-31 | 1.00000 | 6.00762e-31 | 1.00000 |
| rad45         | 3.17862e-33 | 1.00000 | 3.17862e-33 | 1.00000 |
| rad24         | 2.25971e-33 | 1.00000 | 2.25971e-33 | 1.00000 |
| rad36         | 1.97377e-34 | 1.00000 | 1.97377e-34 | 1.00000 |
| rad19syn      | 2.18150e-36 | 1.00000 | 2.18150e-36 | 1.00000 |
| rad52         | 2.53270e-40 | 1.00000 | 2.53270e-40 | 1.00000 |
| rad54         | 3.12184e-41 | 1.00000 | 3.12184e-41 | 1.00000 |
| PAH10+CH3     | 2.29048e-41 | 1.00000 | 2.29048e-41 | 1.00000 |
| rad43         | 5.27455e-42 | 1.00000 | 5.27455e-42 | 1.00000 |
| rad62         | 1.72163e-44 | 1.00000 | 1.72163e-44 | 1.00000 |
| rad51         | 1.77099e-47 | 1.00000 | 1.77099e-47 | 1.00000 |
| rad70         | 2.58423e-50 | 1.00000 | 2.58423e-50 | 1.00000 |
| PhcycC3H3_A+H | 1.12681e-50 | 1.00000 | 1.12681e-50 | 1.00000 |
| rad55         | 6.04868e-51 | 1.00000 | 6.04868e-51 | 1.00000 |
| rad65         | 1.47263e-52 | 1.00000 | 1.47263e-52 | 1.00000 |
| rad58         | 3.88046e-54 | 1.00000 | 3.88046e-54 | 1.00000 |
| PAH1+H        | 6.75983e-56 | 1.00000 | 6.75983e-56 | 1.00000 |
| rad34         | 4.72998e-58 | 1.00000 | 4.72998e-58 | 1.00000 |
| rad42         | 6.62837e-62 | 1.00000 | 6.62837e-62 | 1.00000 |
| rad41         | 1.78772e-62 | 1.00000 | 1.78772e-62 | 1.00000 |
| rad47         | 1.97819e-70 | 1.00000 | 1.97819e-70 | 1.00000 |

0.100000000E-08 Pa, 80.0000000 K

| Rate constant      | True (fraction)        | Effective (fraction)   |
|--------------------|------------------------|------------------------|
| Total              | 2.68112e-23 (1.00 )    | 2.68112e-23 (1.00 )    |
| Formation of rad11 | 2.65890e-23 (0.992 )   | 2.65889e-23 (0.992 )   |
| Formation of rad6  | 2.22189e-25 (0.00829 ) | 2.22189e-25 (0.00829 ) |
| H-abstraction      | 1.05871e-28 (3.95e-06) | 1.05871e-28 (3.95e-06) |

| species            | PYtrue      | Cumul    | PYeffective | Cumul    |
|--------------------|-------------|----------|-------------|----------|
| Indene+H           | 0.985363    | 0.985363 | 0.985364    | 0.985364 |
| C2H2+PhCH2         | 0.00919942  | 0.994563 | 0.00919942  | 0.994564 |
| PhCCH+CH3          | 0.00271725  | 0.997280 | 0.00271725  | 0.997281 |
| PhCHCCH2+H         | 0.00166288  | 0.998943 | 0.00166288  | 0.998944 |
| PhCCCH3+H          | 0.00101520  | 0.999958 | 0.00101520  | 0.999959 |
| Ph+MeAc            | 1.99950e-05 | 0.999978 | 1.99950e-05 | 0.999979 |
| rad8               | 8.95784e-06 | 0.999987 | 8.95784e-06 | 0.999988 |
| rad9               | 4.51495e-06 | 0.999991 | 4.51495e-06 | 0.999992 |
| Benzene+2-propynyl | 3.94877e-06 | 0.999995 | 3.94877e-06 | 0.999996 |
| PAH7+H             | 2.66790e-06 | 0.999998 | 2.66790e-06 | 0.999999 |
| rad30              | 5.13552e-07 | 0.999998 | 5.13552e-07 | 0.999999 |
| rad12              | 3.19534e-07 | 0.999999 | 3.19534e-07 | 1.000000 |
| rad39              | 3.10416e-07 | 0.999999 | 3.10416e-07 | 1.000000 |
| Phenyl+Allene      | 2.25648e-07 | 0.999999 | 0.000000    | 1.000000 |
| PAH9+H             | 1.06216e-07 | 0.999999 | 1.06216e-07 | 1.000000 |
| rad15              | 9.54271e-08 | 1.000000 | 9.54272e-08 | 1.000000 |
| rad35              | 5.47755e-08 | 1.000000 | 5.47755e-08 | 1.000000 |
| rad38              | 2.77934e-08 | 1.000000 | 2.77934e-08 | 1.000000 |
| rad46              | 2.06654e-10 | 1.000000 | 2.06654e-10 | 1.000000 |
| rad60syn           | 6.54544e-12 | 1.000000 | 6.54544e-12 | 1.000000 |
| PhCH2CCH+H         | 1.67903e-12 | 1.000000 | 1.67903e-12 | 1.000000 |
| rad60anti          | 6.70981e-13 | 1.000000 | 6.70981e-13 | 1.000000 |
| rad37              | 3.02078e-13 | 1.000000 | 3.02078e-13 | 1.000000 |
| rad28              | 4.28670e-15 | 1.000000 | 4.28670e-15 | 1.000000 |
| rad6               | 2.00435e-15 | 1.000000 | 2.00435e-15 | 1.000000 |

|               |             |          |             |          |
|---------------|-------------|----------|-------------|----------|
| rad26         | 1.04888e-15 | 1.000000 | 1.04888e-15 | 1.000000 |
| rad5          | 3.25252e-16 | 1.000000 | 3.25252e-16 | 1.000000 |
| rad2          | 6.65573e-18 | 1.000000 | 6.65573e-18 | 1.000000 |
| rad1          | 4.25331e-19 | 1.000000 | 4.25331e-19 | 1.000000 |
| rad10         | 4.12706e-19 | 1.000000 | 4.12706e-19 | 1.000000 |
| rad14         | 1.85606e-19 | 1.000000 | 1.85606e-19 | 1.000000 |
| rad7          | 1.45413e-19 | 1.000000 | 1.45413e-19 | 1.000000 |
| rad25         | 9.17052e-20 | 1.000000 | 9.17053e-20 | 1.000000 |
| rad3          | 6.12851e-20 | 1.000000 | 6.12851e-20 | 1.000000 |
| rad11         | 3.84044e-20 | 1.000000 | 3.84045e-20 | 1.000000 |
| rad4          | 3.10725e-20 | 1.000000 | 3.10725e-20 | 1.000000 |
| PAH3+H        | 1.74250e-20 | 1.000000 | 1.74251e-20 | 1.000000 |
| rad27         | 1.06292e-20 | 1.000000 | 1.06292e-20 | 1.000000 |
| rad59         | 9.08289e-21 | 1.000000 | 9.08289e-21 | 1.000000 |
| rad50         | 2.22904e-21 | 1.000000 | 2.22904e-21 | 1.000000 |
| rad13         | 8.11126e-22 | 1.000000 | 8.11126e-22 | 1.000000 |
| rad33         | 4.00756e-24 | 1.000000 | 4.00756e-24 | 1.000000 |
| rad31         | 1.49182e-25 | 1.000000 | 1.49182e-25 | 1.000000 |
| rad20         | 6.24554e-27 | 1.000000 | 6.24554e-27 | 1.000000 |
| rad21         | 4.87621e-27 | 1.000000 | 4.87621e-27 | 1.000000 |
| rad19syn      | 3.50612e-28 | 1.000000 | 3.50612e-28 | 1.000000 |
| rad18         | 1.69563e-29 | 1.000000 | 1.69563e-29 | 1.000000 |
| rad22         | 1.18608e-30 | 1.000000 | 1.18608e-30 | 1.000000 |
| rad23         | 5.43191e-31 | 1.000000 | 5.43191e-31 | 1.000000 |
| rad52         | 3.70715e-32 | 1.000000 | 3.70715e-32 | 1.000000 |
| rad45         | 7.02922e-33 | 1.000000 | 7.02923e-33 | 1.000000 |
| rad24         | 2.12910e-33 | 1.000000 | 2.12910e-33 | 1.000000 |
| rad36         | 4.36255e-34 | 1.000000 | 4.36255e-34 | 1.000000 |
| rad54         | 3.49089e-39 | 1.000000 | 3.49089e-39 | 1.000000 |
| PAH10+CH3     | 2.43957e-39 | 1.000000 | 2.43957e-39 | 1.000000 |
| rad43         | 5.61231e-40 | 1.000000 | 5.61231e-40 | 1.000000 |
| rad62         | 1.94490e-42 | 1.000000 | 1.94490e-42 | 1.000000 |
| rad51         | 2.05856e-45 | 1.000000 | 2.05856e-45 | 1.000000 |
| rad70         | 3.29966e-48 | 1.000000 | 3.29966e-48 | 1.000000 |
| PhcycC3H3_A+H | 1.45182e-48 | 1.000000 | 1.45182e-48 | 1.000000 |
| rad55         | 7.78513e-49 | 1.000000 | 7.78514e-49 | 1.000000 |
| rad65         | 1.82933e-50 | 1.000000 | 1.82933e-50 | 1.000000 |
| rad58         | 5.03851e-52 | 1.000000 | 5.03851e-52 | 1.000000 |
| PAH1+H        | 9.56462e-54 | 1.000000 | 9.56462e-54 | 1.000000 |
| rad34         | 6.78732e-56 | 1.000000 | 6.78732e-56 | 1.000000 |
| rad42         | 1.11817e-59 | 1.000000 | 1.11817e-59 | 1.000000 |
| rad41         | 3.34149e-60 | 1.000000 | 3.34149e-60 | 1.000000 |
| rad47         | 2.35422e-68 | 1.000000 | 2.35422e-68 | 1.000000 |

0.100000000E-08 Pa, 90.0000000 K

| Rate constant      | True (fraction)        | Effective (fraction)   |
|--------------------|------------------------|------------------------|
| Total              | 3.08379e-22 (1.00 )    | 3.08379e-22 (1.00 )    |
| Formation of rad11 | 3.03962e-22 (0.986 )   | 3.03962e-22 (0.986 )   |
| Formation of rad6  | 4.41076e-24 (0.0143 )  | 4.41076e-24 (0.0143 )  |
| H-abstraction      | 5.92916e-27 (1.92e-05) | 5.92916e-27 (1.92e-05) |

| species            | PYtrue      | Cumul    | PYeffective | Cumul    |
|--------------------|-------------|----------|-------------|----------|
| Indene+H           | 0.984773    | 0.984773 | 0.984773    | 0.984773 |
| C2H2+PhCH2         | 0.00947690  | 0.994250 | 0.00947690  | 0.994250 |
| PhCCH+CH3          | 0.00287402  | 0.997124 | 0.00287402  | 0.997124 |
| PhCHCCH2+H         | 0.00174398  | 0.998868 | 0.00174398  | 0.998868 |
| PhCCCH3+H          | 0.00107007  | 0.999938 | 0.00107007  | 0.999938 |
| Ph+MeAc            | 2.36841e-05 | 0.999962 | 2.36841e-05 | 0.999962 |
| Benzene+2-propynyl | 1.92269e-05 | 0.999981 | 1.92269e-05 | 0.999981 |
| rad8               | 9.60693e-06 | 0.999991 | 9.60693e-06 | 0.999991 |
| rad9               | 4.97780e-06 | 0.999996 | 4.97780e-06 | 0.999996 |
| PAH7+H             | 2.96439e-06 | 0.999998 | 2.96439e-06 | 0.999998 |
| rad30              | 5.35851e-07 | 0.999999 | 5.35851e-07 | 0.999999 |
| rad39              | 3.61180e-07 | 0.999999 | 3.61180e-07 | 0.999999 |
| rad12              | 3.54060e-07 | 1.000000 | 3.54060e-07 | 1.000000 |
| Phenyl+Allene      | 3.35707e-07 | 1.000000 | 0.000000    | 1.000000 |
| PAH9+H             | 1.11519e-07 | 1.000000 | 1.11519e-07 | 1.000000 |
| rad15              | 1.00570e-07 | 1.000000 | 1.00570e-07 | 1.000000 |
| rad35              | 5.71907e-08 | 1.000000 | 5.71908e-08 | 1.000000 |
| rad38              | 2.93241e-08 | 1.000000 | 2.93241e-08 | 1.000000 |
| rad46              | 2.26382e-10 | 1.000000 | 2.26382e-10 | 1.000000 |
| PhCH2CCH+H         | 1.03766e-11 | 1.000000 | 1.03766e-11 | 1.000000 |
| rad60syn           | 8.08811e-12 | 1.000000 | 8.08812e-12 | 1.000000 |
| rad37              | 2.40347e-12 | 1.000000 | 2.40347e-12 | 1.000000 |
| rad60anti          | 1.09983e-12 | 1.000000 | 1.09983e-12 | 1.000000 |
| rad5               | 3.47577e-15 | 1.000000 | 3.47577e-15 | 1.000000 |
| rad28              | 3.42275e-15 | 1.000000 | 3.42275e-15 | 1.000000 |

|               |             |         |             |         |
|---------------|-------------|---------|-------------|---------|
| rad6          | 1.54154e-15 | 1.00000 | 1.54154e-15 | 1.00000 |
| rad26         | 8.39045e-16 | 1.00000 | 8.39046e-16 | 1.00000 |
| rad2          | 6.68392e-18 | 1.00000 | 6.68392e-18 | 1.00000 |
| rad10         | 5.43103e-19 | 1.00000 | 5.43104e-19 | 1.00000 |
| rad1          | 4.28417e-19 | 1.00000 | 4.28417e-19 | 1.00000 |
| PAH3+H        | 3.47530e-19 | 1.00000 | 3.47530e-19 | 1.00000 |
| rad59         | 1.74970e-19 | 1.00000 | 1.74970e-19 | 1.00000 |
| rad14         | 1.51005e-19 | 1.00000 | 1.51005e-19 | 1.00000 |
| rad7          | 1.12007e-19 | 1.00000 | 1.12007e-19 | 1.00000 |
| rad25         | 7.50530e-20 | 1.00000 | 7.50530e-20 | 1.00000 |
| rad3          | 4.65767e-20 | 1.00000 | 4.65767e-20 | 1.00000 |
| rad50         | 3.24534e-20 | 1.00000 | 3.24534e-20 | 1.00000 |
| rad11         | 2.98012e-20 | 1.00000 | 2.98012e-20 | 1.00000 |
| rad4          | 2.36310e-20 | 1.00000 | 2.36310e-20 | 1.00000 |
| rad27         | 8.75890e-21 | 1.00000 | 8.75890e-21 | 1.00000 |
| rad13         | 6.25335e-22 | 1.00000 | 6.25336e-22 | 1.00000 |
| rad33         | 3.33141e-24 | 1.00000 | 3.33141e-24 | 1.00000 |
| rad31         | 1.46794e-25 | 1.00000 | 1.46794e-25 | 1.00000 |
| rad19syn      | 1.46097e-25 | 1.00000 | 1.46097e-25 | 1.00000 |
| rad20         | 5.59189e-27 | 1.00000 | 5.59189e-27 | 1.00000 |
| rad21         | 4.38037e-27 | 1.00000 | 4.38037e-27 | 1.00000 |
| rad18         | 1.48519e-29 | 1.00000 | 1.48519e-29 | 1.00000 |
| rad52         | 1.23076e-29 | 1.00000 | 1.23076e-29 | 1.00000 |
| rad54         | 6.85399e-30 | 1.00000 | 6.85400e-30 | 1.00000 |
| PAH10+CH3     | 3.92949e-30 | 1.00000 | 3.92949e-30 | 1.00000 |
| rad22         | 1.02241e-30 | 1.00000 | 1.02242e-30 | 1.00000 |
| rad43         | 9.86337e-31 | 1.00000 | 9.86338e-31 | 1.00000 |
| rad23         | 5.16223e-31 | 1.00000 | 5.16223e-31 | 1.00000 |
| rad24         | 2.06374e-33 | 1.00000 | 2.06375e-33 | 1.00000 |
| rad45         | 1.35266e-33 | 1.00000 | 1.35266e-33 | 1.00000 |
| rad36         | 8.38727e-35 | 1.00000 | 8.38728e-35 | 1.00000 |
| rad62         | 7.45638e-40 | 1.00000 | 7.45638e-40 | 1.00000 |
| rad51         | 8.13631e-43 | 1.00000 | 8.13632e-43 | 1.00000 |
| rad70         | 1.43688e-45 | 1.00000 | 1.43688e-45 | 1.00000 |
| PhcycC3H3_A+H | 6.38006e-46 | 1.00000 | 6.38006e-46 | 1.00000 |
| rad55         | 3.41746e-46 | 1.00000 | 3.41746e-46 | 1.00000 |
| rad65         | 7.73695e-48 | 1.00000 | 7.73695e-48 | 1.00000 |
| rad58         | 2.23135e-49 | 1.00000 | 2.23135e-49 | 1.00000 |
| PAH1+H        | 4.59903e-51 | 1.00000 | 4.59903e-51 | 1.00000 |
| rad34         | 3.31277e-53 | 1.00000 | 3.31277e-53 | 1.00000 |
| rad42         | 5.22348e-57 | 1.00000 | 5.22348e-57 | 1.00000 |
| rad41         | 1.49027e-57 | 1.00000 | 1.49027e-57 | 1.00000 |
| rad47         | 9.71393e-66 | 1.00000 | 9.71394e-66 | 1.00000 |

0.100000000E-08 Pa, 100.000000 K

| Rate constant      | True (fraction)        | Effective (fraction)   |
|--------------------|------------------------|------------------------|
| Total              | 2.19347e-21 (1.00 )    | 2.19347e-21 (1.00 )    |
| Formation of rad11 | 2.14498e-21 (0.978 )   | 2.14497e-21 (0.978 )   |
| Formation of rad6  | 4.83503e-23 (0.0220 )  | 4.83503e-23 (0.0220 )  |
| H-abstraction      | 1.47101e-25 (6.71e-05) | 1.47101e-25 (6.71e-05) |

| species            | PYtrue      | Cumul    | PYeffective | Cumul    |
|--------------------|-------------|----------|-------------|----------|
| Indene+H           | 0.984079    | 0.984079 | 0.984079    | 0.984079 |
| C2H2+PhCH2         | 0.00978519  | 0.993864 | 0.00978520  | 0.993864 |
| PhCCH+CH3          | 0.00305206  | 0.996916 | 0.00305206  | 0.996916 |
| PhCHCCH2+H         | 0.00183526  | 0.998752 | 0.00183526  | 0.998752 |
| PhCCCH3+H          | 0.00113197  | 0.999883 | 0.00113197  | 0.999883 |
| Benzene+2-propynyl | 6.70630e-05 | 0.999951 | 6.70630e-05 | 0.999951 |
| Ph+MeAc            | 2.82652e-05 | 0.999979 | 2.82652e-05 | 0.999979 |
| rad8               | 1.03516e-05 | 0.999989 | 1.03516e-05 | 0.999989 |
| rad9               | 5.52404e-06 | 0.999995 | 5.52404e-06 | 0.999995 |
| PAH7+H             | 3.31665e-06 | 0.999998 | 3.31666e-06 | 0.999998 |
| rad30              | 5.61025e-07 | 0.999999 | 5.61025e-07 | 0.999999 |
| Phenyl+Allene      | 4.90183e-07 | 0.999999 | 0.00000     | 0.999999 |
| rad39              | 4.23541e-07 | 0.999999 | 4.23541e-07 | 0.999999 |
| rad12              | 3.94678e-07 | 1.000000 | 3.94678e-07 | 0.999999 |
| PAH9+H             | 1.17578e-07 | 1.000000 | 1.17578e-07 | 1.000000 |
| rad15              | 1.06440e-07 | 1.000000 | 1.06440e-07 | 1.000000 |
| rad35              | 5.99303e-08 | 1.000000 | 5.99303e-08 | 1.000000 |
| rad38              | 3.10828e-08 | 1.000000 | 3.10828e-08 | 1.000000 |
| rad46              | 2.50022e-10 | 1.000000 | 2.50022e-10 | 1.000000 |
| PhCH2CCH+H         | 4.60547e-11 | 1.000000 | 4.60547e-11 | 1.000000 |
| rad37              | 1.24003e-11 | 1.000000 | 1.24003e-11 | 1.000000 |
| rad60syn           | 1.01172e-11 | 1.000000 | 1.01172e-11 | 1.000000 |
| rad60anti          | 1.68511e-12 | 1.000000 | 1.68511e-12 | 1.000000 |
| rad5               | 2.34974e-14 | 1.000000 | 2.34974e-14 | 1.000000 |
| rad28              | 2.76520e-15 | 1.000000 | 2.76520e-15 | 1.000000 |



|               |             |         |             |          |
|---------------|-------------|---------|-------------|----------|
| rad6          | 1.21074e-15 | 1.00000 | 1.21074e-15 | 1.000000 |
| rad26         | 6.79064e-16 | 1.00000 | 6.79064e-16 | 1.000000 |
| PAH3+H        | 3.83495e-18 | 1.00000 | 3.83496e-18 | 1.000000 |
| rad2          | 2.22604e-18 | 1.00000 | 2.22605e-18 | 1.000000 |
| rad59         | 1.85459e-18 | 1.00000 | 1.85460e-18 | 1.000000 |
| rad10         | 3.36962e-19 | 1.00000 | 3.36962e-19 | 1.000000 |
| rad50         | 2.80692e-19 | 1.00000 | 2.80692e-19 | 1.000000 |
| rad1          | 1.43158e-19 | 1.00000 | 1.43159e-19 | 1.000000 |
| rad14         | 1.24371e-19 | 1.00000 | 1.24371e-19 | 1.000000 |
| rad7          | 8.81122e-20 | 1.00000 | 8.81123e-20 | 1.000000 |
| rad25         | 6.21993e-20 | 1.00000 | 6.21993e-20 | 1.000000 |
| rad11         | 2.36188e-20 | 1.00000 | 2.36188e-20 | 1.000000 |
| rad3          | 1.08947e-20 | 1.00000 | 1.08947e-20 | 1.000000 |
| rad27         | 7.31235e-21 | 1.00000 | 7.31235e-21 | 1.000000 |
| rad4          | 5.53218e-21 | 1.00000 | 5.53218e-21 | 1.000000 |
| rad13         | 4.92403e-22 | 1.00000 | 4.92403e-22 | 1.000000 |
| rad19syn      | 1.69256e-23 | 1.00000 | 1.69256e-23 | 1.000000 |
| rad33         | 2.82806e-24 | 1.00000 | 2.82806e-24 | 1.000000 |
| rad31         | 1.48793e-25 | 1.00000 | 1.48793e-25 | 1.000000 |
| rad20         | 5.09551e-27 | 1.00000 | 5.09551e-27 | 1.000000 |
| rad21         | 4.00579e-27 | 1.00000 | 4.00580e-27 | 1.000000 |
| rad54         | 3.44315e-27 | 1.00000 | 3.44316e-27 | 1.000000 |
| PAH10+CH3     | 2.22551e-27 | 1.00000 | 2.22551e-27 | 1.000000 |
| rad52         | 1.20084e-27 | 1.00000 | 1.20084e-27 | 1.000000 |
| rad43         | 5.29879e-28 | 1.00000 | 5.29880e-28 | 1.000000 |
| rad18         | 1.32144e-29 | 1.00000 | 1.32144e-29 | 1.000000 |
| rad62         | 6.92562e-30 | 1.00000 | 6.92563e-30 | 1.000000 |
| rad22         | 8.94251e-31 | 1.00000 | 8.94251e-31 | 1.000000 |
| rad23         | 5.12971e-31 | 1.00000 | 5.12971e-31 | 1.000000 |
| rad51         | 7.64880e-33 | 1.00000 | 7.64881e-33 | 1.000000 |
| rad24         | 2.04587e-33 | 1.00000 | 2.04587e-33 | 1.000000 |
| rad45         | 1.61954e-33 | 1.00000 | 1.61954e-33 | 1.000000 |
| rad36         | 1.00385e-34 | 1.00000 | 1.00386e-34 | 1.000000 |
| rad70         | 1.30428e-42 | 1.00000 | 1.30428e-42 | 1.000000 |
| PhcycC3H3_A+H | 5.84620e-43 | 1.00000 | 5.84620e-43 | 1.000000 |
| rad55         | 3.12785e-43 | 1.00000 | 3.12785e-43 | 1.000000 |
| rad65         | 6.80770e-45 | 1.00000 | 6.80770e-45 | 1.000000 |
| rad58         | 2.06092e-46 | 1.00000 | 2.06092e-46 | 1.000000 |
| PAH1+H        | 4.61601e-48 | 1.00000 | 4.61601e-48 | 1.000000 |
| rad34         | 3.37655e-50 | 1.00000 | 3.37655e-50 | 1.000000 |
| rad42         | 4.72658e-54 | 1.00000 | 4.72658e-54 | 1.000000 |
| rad41         | 1.17343e-54 | 1.00000 | 1.17343e-54 | 1.000000 |
| rad47         | 8.46296e-63 | 1.00000 | 8.46296e-63 | 1.000000 |

0.100000000E-08 Pa, 110.000000 K

| Rate constant      | True (fraction)        | Effective (fraction)   |
|--------------------|------------------------|------------------------|
| Total              | 1.09987e-20 (1.00 )    | 1.09987e-20 (1.00 )    |
| Formation of rad11 | 1.06527e-20 (0.969 )   | 1.06526e-20 (0.969 )   |
| Formation of rad6  | 3.44008e-22 (0.0313 )  | 3.44007e-22 (0.0313 )  |
| H-abstraction      | 2.02040e-24 (0.000184) | 2.02040e-24 (0.000184) |

| species            | PYtrue      | Cumul    | PYeffective | Cumul    |
|--------------------|-------------|----------|-------------|----------|
| Indene+H           | 0.983241    | 0.983241 | 0.983241    | 0.983241 |
| C2H2+PhCH2         | 0.0101260   | 0.993367 | 0.0101260   | 0.993367 |
| PhCCH+CH3          | 0.00325307  | 0.996620 | 0.00325307  | 0.996620 |
| PhCHCCH2+H         | 0.00193740  | 0.998558 | 0.00193740  | 0.998558 |
| PhCCCH3+H          | 0.00120137  | 0.999759 | 0.00120137  | 0.999759 |
| Benzene+2-propynyl | 0.000183695 | 0.999943 | 0.000183695 | 0.999943 |
| Ph+MeAc            | 3.39188e-05 | 0.999977 | 3.39188e-05 | 0.999977 |
| rad8               | 1.12010e-05 | 0.999988 | 1.12010e-05 | 0.999988 |
| rad9               | 6.16609e-06 | 0.999994 | 6.16609e-06 | 0.999994 |
| PAH7+H             | 3.73401e-06 | 0.999998 | 3.73402e-06 | 0.999998 |
| Phenyl+Allene      | 7.03851e-07 | 0.999999 | 0.00000     | 0.999999 |
| rad30              | 5.89325e-07 | 0.999999 | 5.89326e-07 | 0.999999 |
| rad39              | 4.99786e-07 | 1.000000 | 4.99787e-07 | 0.999999 |
| rad12              | 4.42199e-07 | 1.000000 | 4.42200e-07 | 0.999999 |
| PAH9+H             | 1.24478e-07 | 1.000000 | 1.24478e-07 | 1.000000 |
| rad15              | 1.13116e-07 | 1.000000 | 1.13117e-07 | 1.000000 |
| rad35              | 6.30259e-08 | 1.000000 | 6.30259e-08 | 1.000000 |
| rad38              | 3.30972e-08 | 1.000000 | 3.30972e-08 | 1.000000 |
| rad46              | 2.78306e-10 | 1.000000 | 2.78306e-10 | 1.000000 |
| PhCH2CCH+H         | 1.60863e-10 | 1.000000 | 1.60864e-10 | 1.000000 |
| rad37              | 4.68309e-11 | 1.000000 | 4.68309e-11 | 1.000000 |
| rad60syn           | 1.27711e-11 | 1.000000 | 1.27712e-11 | 1.000000 |
| rad60anti          | 2.47073e-12 | 1.000000 | 2.47073e-12 | 1.000000 |
| rad5               | 1.14181e-13 | 1.000000 | 1.14181e-13 | 1.000000 |
| rad28              | 2.25336e-15 | 1.000000 | 2.25337e-15 | 1.000000 |

|               |             |         |             |          |
|---------------|-------------|---------|-------------|----------|
| rad6          | 9.66020e-16 | 1.00000 | 9.66021e-16 | 1.000000 |
| rad26         | 5.54330e-16 | 1.00000 | 5.54330e-16 | 1.000000 |
| PAH3+H        | 2.76229e-17 | 1.00000 | 2.76229e-17 | 1.000000 |
| rad59         | 1.27985e-17 | 1.00000 | 1.27986e-17 | 1.000000 |
| rad2          | 4.36724e-18 | 1.00000 | 4.36725e-18 | 1.000000 |
| rad3          | 4.20588e-18 | 1.00000 | 4.20588e-18 | 1.000000 |
| rad4          | 2.13767e-18 | 1.00000 | 2.13767e-18 | 1.000000 |
| rad50         | 1.67195e-18 | 1.00000 | 1.67195e-18 | 1.000000 |
| rad10         | 3.28770e-19 | 1.00000 | 3.28770e-19 | 1.000000 |
| rad1          | 2.81891e-19 | 1.00000 | 2.81892e-19 | 1.000000 |
| rad14         | 1.03376e-19 | 1.00000 | 1.03376e-19 | 1.000000 |
| rad7          | 7.04203e-20 | 1.00000 | 7.04203e-20 | 1.000000 |
| rad25         | 5.20342e-20 | 1.00000 | 5.20342e-20 | 1.000000 |
| rad11         | 1.90197e-20 | 1.00000 | 1.90198e-20 | 1.000000 |
| rad27         | 6.16513e-21 | 1.00000 | 6.16514e-21 | 1.000000 |
| rad19syn      | 8.11793e-22 | 1.00000 | 8.11794e-22 | 1.000000 |
| rad13         | 3.93937e-22 | 1.00000 | 3.93937e-22 | 1.000000 |
| rad33         | 2.44066e-24 | 1.00000 | 2.44066e-24 | 1.000000 |
| rad54         | 3.80819e-25 | 1.00000 | 3.80819e-25 | 1.000000 |
| PAH10+CH3     | 2.48851e-25 | 1.00000 | 2.48851e-25 | 1.000000 |
| rad31         | 1.54822e-25 | 1.00000 | 1.54822e-25 | 1.000000 |
| rad43         | 5.95378e-26 | 1.00000 | 5.95378e-26 | 1.000000 |
| rad52         | 5.03875e-26 | 1.00000 | 5.03876e-26 | 1.000000 |
| rad20         | 4.70844e-27 | 1.00000 | 4.70845e-27 | 1.000000 |
| rad21         | 3.71569e-27 | 1.00000 | 3.71569e-27 | 1.000000 |
| rad62         | 1.37871e-27 | 1.00000 | 1.37871e-27 | 1.000000 |
| rad18         | 1.19003e-29 | 1.00000 | 1.19003e-29 | 1.000000 |
| rad51         | 1.43630e-30 | 1.00000 | 1.43630e-30 | 1.000000 |
| rad22         | 7.90793e-31 | 1.00000 | 7.90793e-31 | 1.000000 |
| rad23         | 5.38823e-31 | 1.00000 | 5.38823e-31 | 1.000000 |
| rad45         | 4.31032e-33 | 1.00000 | 4.31032e-33 | 1.000000 |
| rad24         | 2.06609e-33 | 1.00000 | 2.06609e-33 | 1.000000 |
| rad36         | 2.67118e-34 | 1.00000 | 2.67118e-34 | 1.000000 |
| rad65         | 1.70795e-34 | 1.00000 | 1.70796e-34 | 1.000000 |
| rad70         | 1.18251e-39 | 1.00000 | 1.18251e-39 | 1.000000 |
| PhcycC3H3_A+H | 5.35274e-40 | 1.00000 | 5.35275e-40 | 1.000000 |
| rad55         | 2.86021e-40 | 1.00000 | 2.86021e-40 | 1.000000 |
| rad58         | 1.90249e-43 | 1.00000 | 1.90250e-43 | 1.000000 |
| PAH1+H        | 4.64352e-45 | 1.00000 | 4.64353e-45 | 1.000000 |
| rad34         | 3.45432e-47 | 1.00000 | 3.45432e-47 | 1.000000 |
| rad42         | 4.47797e-51 | 1.00000 | 4.47797e-51 | 1.000000 |
| rad41         | 9.57164e-52 | 1.00000 | 9.57164e-52 | 1.000000 |
| rad47         | 7.45865e-60 | 1.00000 | 7.45865e-60 | 1.000000 |

0.100000000E-08 Pa, 120.000000 K

| Rate constant      | True (fraction)        | Effective (fraction)   |
|--------------------|------------------------|------------------------|
| Total              | 4.24245e-20 (1.00 )    | 4.24245e-20 (1.00 )    |
| Formation of rad11 | 4.06372e-20 (0.958 )   | 4.06372e-20 (0.958 )   |
| Formation of rad6  | 1.76944e-21 (0.0417 )  | 1.76944e-21 (0.0417 )  |
| H-abstraction      | 1.78210e-23 (0.000420) | 1.78210e-23 (0.000420) |

| species            | PYtrue      | Cumul    | PYeffective | Cumul    |
|--------------------|-------------|----------|-------------|----------|
| Indene+H           | 0.982204    | 0.982204 | 0.982205    | 0.982205 |
| C2H2+PhCH2         | 0.0105006   | 0.992705 | 0.0105006   | 0.992706 |
| PhCCH+CH3          | 0.00347863  | 0.996183 | 0.00347863  | 0.996184 |
| PhCHCCH2+H         | 0.00205095  | 0.998234 | 0.00205095  | 0.998235 |
| PhCCCH3+H          | 0.00127864  | 0.999513 | 0.00127864  | 0.999514 |
| Benzene+2-propynyl | 0.000420064 | 0.999933 | 0.000420064 | 0.999934 |
| Ph+MeAc            | 4.08464e-05 | 0.999974 | 4.08465e-05 | 0.999975 |
| rad8               | 1.21642e-05 | 0.999986 | 1.21642e-05 | 0.999987 |
| rad9               | 6.91732e-06 | 0.999993 | 6.91732e-06 | 0.999994 |
| PAH7+H             | 4.22675e-06 | 0.999997 | 4.22675e-06 | 0.999998 |
| Phenyl+Allene      | 9.95359e-07 | 0.999998 | 0.00000     | 0.999998 |
| rad30              | 6.20992e-07 | 0.999999 | 6.20992e-07 | 0.999999 |
| rad39              | 5.92510e-07 | 0.999999 | 5.92511e-07 | 0.999999 |
| rad12              | 4.97454e-07 | 1.000000 | 4.97455e-07 | 1.000000 |
| PAH9+H             | 1.32306e-07 | 1.00000  | 1.32307e-07 | 1.00000  |
| rad15              | 1.20678e-07 | 1.00000  | 1.20678e-07 | 1.00000  |
| rad35              | 6.65095e-08 | 1.00000  | 6.65095e-08 | 1.00000  |
| rad38              | 3.53967e-08 | 1.00000  | 3.53968e-08 | 1.00000  |
| PhCH2CCH+H         | 4.69874e-10 | 1.00000  | 4.69874e-10 | 1.00000  |
| rad46              | 3.12072e-10 | 1.00000  | 3.12072e-10 | 1.00000  |
| rad37              | 1.40301e-10 | 1.00000  | 1.40302e-10 | 1.00000  |
| rad60syn           | 1.62207e-11 | 1.00000  | 1.62208e-11 | 1.00000  |
| rad60anti          | 3.51576e-12 | 1.00000  | 3.51576e-12 | 1.00000  |
| rad5               | 4.33873e-13 | 1.00000  | 4.33873e-13 | 1.00000  |
| rad28              | 1.84812e-15 | 1.00000  | 1.84812e-15 | 1.00000  |

|               |             |         |             |         |
|---------------|-------------|---------|-------------|---------|
| rad6          | 7.80107e-16 | 1.00000 | 7.80108e-16 | 1.00000 |
| rad26         | 4.55423e-16 | 1.00000 | 4.55423e-16 | 1.00000 |
| PAH3+H        | 1.44941e-16 | 1.00000 | 1.44941e-16 | 1.00000 |
| rad59         | 6.43048e-17 | 1.00000 | 6.43049e-17 | 1.00000 |
| rad50         | 7.56389e-18 | 1.00000 | 7.56389e-18 | 1.00000 |
| rad2          | 5.67596e-18 | 1.00000 | 5.67596e-18 | 1.00000 |
| rad3          | 7.68924e-19 | 1.00000 | 7.68925e-19 | 1.00000 |
| rad4          | 3.91274e-19 | 1.00000 | 3.91274e-19 | 1.00000 |
| rad1          | 3.67897e-19 | 1.00000 | 3.67897e-19 | 1.00000 |
| rad10         | 2.36001e-19 | 1.00000 | 2.36002e-19 | 1.00000 |
| rad14         | 8.65269e-20 | 1.00000 | 8.65270e-20 | 1.00000 |
| rad7          | 5.69672e-20 | 1.00000 | 5.69672e-20 | 1.00000 |
| rad25         | 4.38453e-20 | 1.00000 | 4.38453e-20 | 1.00000 |
| rad19syn      | 2.03478e-20 | 1.00000 | 2.03479e-20 | 1.00000 |
| rad11         | 1.55061e-20 | 1.00000 | 1.55061e-20 | 1.00000 |
| rad27         | 5.23765e-21 | 1.00000 | 5.23765e-21 | 1.00000 |
| rad13         | 3.19026e-22 | 1.00000 | 3.19026e-22 | 1.00000 |
| rad54         | 1.78868e-23 | 1.00000 | 1.78868e-23 | 1.00000 |
| PAH10+CH3     | 1.18111e-23 | 1.00000 | 1.18111e-23 | 1.00000 |
| rad43         | 2.84069e-24 | 1.00000 | 2.84069e-24 | 1.00000 |
| rad33         | 2.13466e-24 | 1.00000 | 2.13466e-24 | 1.00000 |
| rad52         | 1.13261e-24 | 1.00000 | 1.13261e-24 | 1.00000 |
| rad31         | 1.64943e-25 | 1.00000 | 1.64943e-25 | 1.00000 |
| rad62         | 1.01744e-25 | 1.00000 | 1.01744e-25 | 1.00000 |
| rad20         | 4.40088e-27 | 1.00000 | 4.40089e-27 | 1.00000 |
| rad21         | 3.48713e-27 | 1.00000 | 3.48713e-27 | 1.00000 |
| rad51         | 1.05156e-28 | 1.00000 | 1.05156e-28 | 1.00000 |
| rad70         | 3.03478e-29 | 1.00000 | 3.03479e-29 | 1.00000 |
| PhcycC3H3_A+H | 1.82703e-29 | 1.00000 | 1.82703e-29 | 1.00000 |
| rad18         | 1.08200e-29 | 1.00000 | 1.08200e-29 | 1.00000 |
| rad55         | 1.01624e-29 | 1.00000 | 1.01625e-29 | 1.00000 |
| rad22         | 7.05259e-31 | 1.00000 | 7.05260e-31 | 1.00000 |
| rad23         | 5.95925e-31 | 1.00000 | 5.95926e-31 | 1.00000 |
| rad65         | 3.61495e-32 | 1.00000 | 3.61495e-32 | 1.00000 |
| rad45         | 1.67956e-32 | 1.00000 | 1.67956e-32 | 1.00000 |
| rad58         | 8.74392e-33 | 1.00000 | 8.74393e-33 | 1.00000 |
| rad24         | 2.11986e-33 | 1.00000 | 2.11986e-33 | 1.00000 |
| rad36         | 1.04057e-33 | 1.00000 | 1.04057e-33 | 1.00000 |
| PAH1+H        | 5.48719e-42 | 1.00000 | 5.48719e-42 | 1.00000 |
| rad34         | 4.15176e-44 | 1.00000 | 4.15176e-44 | 1.00000 |
| rad42         | 5.03721e-48 | 1.00000 | 5.03722e-48 | 1.00000 |
| rad41         | 8.80851e-49 | 1.00000 | 8.80852e-49 | 1.00000 |
| rad47         | 7.77706e-57 | 1.00000 | 7.77707e-57 | 1.00000 |

0.100000000E-08 Pa, 130.000000 K

| Rate constant      | True (fraction)        | Effective (fraction)   |
|--------------------|------------------------|------------------------|
| Total              | 1.33719e-19 (1.00 )    | 1.33719e-19 (1.00 )    |
| Formation of rad11 | 1.26517e-19 (0.946 )   | 1.26517e-19 (0.946 )   |
| Formation of rad6  | 7.08974e-21 (0.0530 )  | 7.08973e-21 (0.0530 )  |
| H-abstraction      | 1.11864e-22 (0.000837) | 1.11864e-22 (0.000837) |

| species            | PYtrue      | Cumul    | PYeffective | Cumul    |
|--------------------|-------------|----------|-------------|----------|
| Indene+H           | 0.980904    | 0.980904 | 0.980906    | 0.980906 |
| C2H2+PhCH2         | 0.0109102   | 0.991814 | 0.0109102   | 0.991816 |
| PhCCH+CH3          | 0.00373015  | 0.995544 | 0.00373015  | 0.995546 |
| PhCHCCH2+H         | 0.00217634  | 0.997720 | 0.00217634  | 0.997722 |
| PhCCCH3+H          | 0.00136410  | 0.999084 | 0.00136410  | 0.999086 |
| Benzene+2-propynyl | 0.000836559 | 0.999921 | 0.000836560 | 0.999923 |
| Ph+MeAc            | 4.92742e-05 | 0.999970 | 4.92743e-05 | 0.999972 |
| rad8               | 1.32493e-05 | 0.999984 | 1.32493e-05 | 0.999986 |
| rad9               | 7.79233e-06 | 0.999991 | 7.79234e-06 | 0.999993 |
| PAH7+H             | 4.80627e-06 | 0.999996 | 4.80628e-06 | 0.999998 |
| Phenyl+Allene      | 1.38826e-06 | 0.999998 | 0.00000     | 0.999998 |
| rad39              | 7.04674e-07 | 0.999998 | 7.04675e-07 | 0.999999 |
| rad30              | 6.56264e-07 | 0.999999 | 6.56265e-07 | 1.000000 |
| rad12              | 5.61300e-07 | 0.999999 | 5.61301e-07 | 1.000000 |
| PAH9+H             | 1.41158e-07 | 1.000000 | 1.41158e-07 | 1.000000 |
| rad15              | 1.29207e-07 | 1.000000 | 1.29207e-07 | 1.000000 |
| rad35              | 7.04140e-08 | 1.000000 | 7.04141e-08 | 1.000000 |
| rad38              | 3.80131e-08 | 1.000000 | 3.80132e-08 | 1.000000 |
| PhCH2CCH+H         | 1.19679e-09 | 1.000000 | 1.19679e-09 | 1.000000 |
| rad37              | 3.52437e-10 | 1.000000 | 3.52438e-10 | 1.000000 |
| rad46              | 3.52311e-10 | 1.000000 | 3.52311e-10 | 1.000000 |
| rad60syn           | 2.06768e-11 | 1.000000 | 2.06768e-11 | 1.000000 |
| rad60anti          | 4.89748e-12 | 1.000000 | 4.89748e-12 | 1.000000 |
| rad5               | 1.36589e-12 | 1.000000 | 1.36590e-12 | 1.000000 |
| rad28              | 1.52313e-15 | 1.000000 | 1.52313e-15 | 1.000000 |

|               |             |          |             |         |
|---------------|-------------|----------|-------------|---------|
| rad6          | 6.35933e-16 | 1.000000 | 6.35934e-16 | 1.00000 |
| PAH3+H        | 5.97640e-16 | 1.000000 | 5.97640e-16 | 1.00000 |
| rad26         | 3.75984e-16 | 1.000000 | 3.75984e-16 | 1.00000 |
| rad59         | 2.54058e-16 | 1.000000 | 2.54059e-16 | 1.00000 |
| rad50         | 2.77958e-17 | 1.000000 | 2.77958e-17 | 1.00000 |
| rad2          | 2.21116e-17 | 1.000000 | 2.21116e-17 | 1.00000 |
| rad3          | 3.76055e-18 | 1.000000 | 3.76056e-18 | 1.00000 |
| rad4          | 1.91579e-18 | 1.000000 | 1.91580e-18 | 1.00000 |
| rad1          | 1.43927e-18 | 1.000000 | 1.43927e-18 | 1.00000 |
| rad10         | 6.05016e-19 | 1.000000 | 6.05016e-19 | 1.00000 |
| rad19syn      | 3.10954e-19 | 1.000000 | 3.10954e-19 | 1.00000 |
| rad14         | 7.28168e-20 | 1.000000 | 7.28169e-20 | 1.00000 |
| rad7          | 4.65231e-20 | 1.000000 | 4.65232e-20 | 1.00000 |
| rad25         | 3.71540e-20 | 1.000000 | 3.71540e-20 | 1.00000 |
| rad11         | 1.27651e-20 | 1.000000 | 1.27651e-20 | 1.00000 |
| rad27         | 4.47658e-21 | 1.000000 | 4.47658e-21 | 1.00000 |
| rad54         | 4.59070e-22 | 1.000000 | 4.59071e-22 | 1.00000 |
| PAH10+CH3     | 3.05745e-22 | 1.000000 | 3.05745e-22 | 1.00000 |
| rad13         | 2.60840e-22 | 1.000000 | 2.60841e-22 | 1.00000 |
| rad43         | 7.38552e-23 | 1.000000 | 7.38553e-23 | 1.00000 |
| rad52         | 1.58221e-23 | 1.000000 | 1.58221e-23 | 1.00000 |
| rad62         | 3.62270e-24 | 1.000000 | 3.62270e-24 | 1.00000 |
| rad33         | 1.88801e-24 | 1.000000 | 1.88801e-24 | 1.00000 |
| rad31         | 1.79693e-25 | 1.000000 | 1.79694e-25 | 1.00000 |
| rad20         | 4.15343e-27 | 1.000000 | 4.15343e-27 | 1.00000 |
| rad51         | 3.73373e-27 | 1.000000 | 3.73373e-27 | 1.00000 |
| rad21         | 3.30532e-27 | 1.000000 | 3.30533e-27 | 1.00000 |
| rad70         | 2.72512e-27 | 1.000000 | 2.72513e-27 | 1.00000 |
| PhcycC3H3_A+H | 2.14621e-27 | 1.000000 | 2.14621e-27 | 1.00000 |
| rad55         | 9.74055e-28 | 1.000000 | 9.74056e-28 | 1.00000 |
| rad18         | 9.91430e-30 | 1.000000 | 9.91431e-30 | 1.00000 |
| rad65         | 2.45305e-30 | 1.000000 | 2.45306e-30 | 1.00000 |
| rad58         | 1.13111e-30 | 1.000000 | 1.13111e-30 | 1.00000 |
| rad23         | 7.05709e-31 | 1.000000 | 7.05710e-31 | 1.00000 |
| rad22         | 6.33196e-31 | 1.000000 | 6.33197e-31 | 1.00000 |
| rad45         | 6.11092e-33 | 1.000000 | 6.11092e-33 | 1.00000 |
| rad24         | 2.20576e-33 | 1.000000 | 2.20576e-33 | 1.00000 |
| rad36         | 3.78745e-34 | 1.000000 | 3.78745e-34 | 1.00000 |
| PAH1+H        | 4.51063e-39 | 1.000000 | 4.51063e-39 | 1.00000 |
| rad34         | 3.47429e-41 | 1.000000 | 3.47430e-41 | 1.00000 |
| rad42         | 4.19204e-45 | 1.000000 | 4.19204e-45 | 1.00000 |
| rad41         | 6.41180e-46 | 1.000000 | 6.41181e-46 | 1.00000 |
| rad47         | 3.58533e-46 | 1.000000 | 3.58534e-46 | 1.00000 |

0.100000000E-08 Pa, 140.000000 K

| Rate constant      | True (fraction)        | Effective (fraction)   |
|--------------------|------------------------|------------------------|
| Total              | 3.59582e-19 (1.00 )    | 3.59581e-19 (1.00 )    |
| Formation of rad11 | 3.35703e-19 (0.934 )   | 3.35702e-19 (0.934 )   |
| Formation of rad6  | 2.33415e-20 (0.0649 )  | 2.33414e-20 (0.0649 )  |
| H-abstraction      | 5.37685e-22 (0.00150 ) | 5.37685e-22 (0.00150 ) |

| species            | PYtrue      | Cumul    | PYeffective | Cumul    |
|--------------------|-------------|----------|-------------|----------|
| Indene+H           | 0.979275    | 0.979275 | 0.979277    | 0.979277 |
| C2H2+PhCH2         | 0.0113556   | 0.990631 | 0.0113556   | 0.990633 |
| PhCCH+CH3          | 0.00400898  | 0.994640 | 0.00400898  | 0.994642 |
| PhCHCCH2+H         | 0.00231397  | 0.996954 | 0.00231398  | 0.996956 |
| Benzene+2-propynyl | 0.00149531  | 0.998449 | 0.00149531  | 0.998451 |
| PhCCCH3+H          | 0.00145799  | 0.999907 | 0.00145799  | 0.999909 |
| Ph+MeAc            | 5.94563e-05 | 0.999967 | 5.94564e-05 | 0.999969 |
| rad8               | 1.44646e-05 | 0.999981 | 1.44646e-05 | 0.999983 |
| rad9               | 8.80724e-06 | 0.999990 | 8.80726e-06 | 0.999992 |
| PAH7+H             | 5.48546e-06 | 0.999996 | 5.48547e-06 | 0.999998 |
| Phenyl+Allene      | 1.91229e-06 | 0.999997 | 0.00000     | 0.999998 |
| rad39              | 8.39701e-07 | 0.999998 | 8.39703e-07 | 0.999998 |
| rad30              | 6.95393e-07 | 0.999999 | 6.95394e-07 | 0.999999 |
| rad12              | 6.34639e-07 | 1.000000 | 6.34640e-07 | 1.000000 |
| PAH9+H             | 1.51134e-07 | 1.000000 | 1.51135e-07 | 1.000000 |
| rad15              | 1.38793e-07 | 1.000000 | 1.38793e-07 | 1.00000  |
| rad35              | 7.47752e-08 | 1.000000 | 7.47754e-08 | 1.00000  |
| rad38              | 4.09818e-08 | 1.000000 | 4.09819e-08 | 1.00000  |
| PhCH2CCH+H         | 2.73839e-09 | 1.000000 | 2.73839e-09 | 1.00000  |
| rad37              | 7.72171e-10 | 1.000000 | 7.72173e-10 | 1.00000  |
| rad46              | 4.00204e-10 | 1.000000 | 4.00204e-10 | 1.00000  |
| rad60syn           | 2.64003e-11 | 1.000000 | 2.64004e-11 | 1.00000  |
| rad60anti          | 6.71542e-12 | 1.000000 | 6.71543e-12 | 1.00000  |
| rad5               | 3.71122e-12 | 1.000000 | 3.71122e-12 | 1.00000  |
| PAH3+H             | 2.04392e-15 | 1.000000 | 2.04392e-15 | 1.00000  |

|               |             |         |             |         |
|---------------|-------------|---------|-------------|---------|
| rad28         | 1.25992e-15 | 1.00000 | 1.25993e-15 | 1.00000 |
| rad59         | 8.33655e-16 | 1.00000 | 8.33657e-16 | 1.00000 |
| rad6          | 5.22281e-16 | 1.00000 | 5.22282e-16 | 1.00000 |
| rad26         | 3.11553e-16 | 1.00000 | 3.11554e-16 | 1.00000 |
| rad50         | 8.70103e-17 | 1.00000 | 8.70105e-17 | 1.00000 |
| rad2          | 5.31050e-17 | 1.00000 | 5.31051e-17 | 1.00000 |
| rad1          | 3.47279e-18 | 1.00000 | 3.47280e-18 | 1.00000 |
| rad19syn      | 3.22743e-18 | 1.00000 | 3.22744e-18 | 1.00000 |
| rad3          | 1.27303e-18 | 1.00000 | 1.27304e-18 | 1.00000 |
| rad4          | 6.49488e-19 | 1.00000 | 6.49489e-19 | 1.00000 |
| rad10         | 4.38388e-19 | 1.00000 | 4.38389e-19 | 1.00000 |
| rad14         | 6.15412e-20 | 1.00000 | 6.15413e-20 | 1.00000 |
| rad7          | 3.82808e-20 | 1.00000 | 3.82808e-20 | 1.00000 |
| rad25         | 3.16256e-20 | 1.00000 | 3.16257e-20 | 1.00000 |
| rad11         | 1.05912e-20 | 1.00000 | 1.05912e-20 | 1.00000 |
| rad54         | 7.40438e-21 | 1.00000 | 7.40439e-21 | 1.00000 |
| PAH10+CH3     | 4.96809e-21 | 1.00000 | 4.96810e-21 | 1.00000 |
| rad27         | 3.84477e-21 | 1.00000 | 3.84477e-21 | 1.00000 |
| rad43         | 1.20454e-21 | 1.00000 | 1.20454e-21 | 1.00000 |
| rad13         | 2.14891e-22 | 1.00000 | 2.14892e-22 | 1.00000 |
| rad52         | 1.52549e-22 | 1.00000 | 1.52549e-22 | 1.00000 |
| rad62         | 7.69040e-23 | 1.00000 | 7.69041e-23 | 1.00000 |
| rad33         | 1.68595e-24 | 1.00000 | 1.68595e-24 | 1.00000 |
| rad31         | 1.99919e-25 | 1.00000 | 1.99919e-25 | 1.00000 |
| rad70         | 1.16345e-25 | 1.00000 | 1.16345e-25 | 1.00000 |
| PhcycC3H3_A+H | 1.06484e-25 | 1.00000 | 1.06485e-25 | 1.00000 |
| rad51         | 7.94722e-26 | 1.00000 | 7.94724e-26 | 1.00000 |
| rad55         | 4.37363e-26 | 1.00000 | 4.37364e-26 | 1.00000 |
| rad20         | 3.95309e-27 | 1.00000 | 3.95310e-27 | 1.00000 |
| rad21         | 3.16036e-27 | 1.00000 | 3.16037e-27 | 1.00000 |
| PAH1+H        | 1.72869e-28 | 1.00000 | 1.72869e-28 | 1.00000 |
| rad65         | 8.26211e-29 | 1.00000 | 8.26213e-29 | 1.00000 |
| rad58         | 6.05541e-29 | 1.00000 | 6.05542e-29 | 1.00000 |
| rad18         | 9.14336e-30 | 1.00000 | 9.14338e-30 | 1.00000 |
| rad34         | 4.12810e-30 | 1.00000 | 4.12811e-30 | 1.00000 |
| rad23         | 8.80010e-31 | 1.00000 | 8.80012e-31 | 1.00000 |
| rad22         | 5.71560e-31 | 1.00000 | 5.71561e-31 | 1.00000 |
| rad45         | 3.92564e-33 | 1.00000 | 3.92565e-33 | 1.00000 |
| rad24         | 2.32469e-33 | 1.00000 | 2.32469e-33 | 1.00000 |
| rad36         | 2.43384e-34 | 1.00000 | 2.43385e-34 | 1.00000 |
| rad42         | 1.07647e-41 | 1.00000 | 1.07647e-41 | 1.00000 |
| rad41         | 1.50183e-42 | 1.00000 | 1.50183e-42 | 1.00000 |
| rad47         | 2.48364e-44 | 1.00000 | 2.48365e-44 | 1.00000 |

0.100000000E-08 Pa, 150.000000 K

| Rate constant      | True (fraction)        | Effective (fraction)   |
|--------------------|------------------------|------------------------|
| Total              | 8.51464e-19 (1.00 )    | 8.51462e-19 (1.00 )    |
| Formation of rad11 | 7.83711e-19 (0.920 )   | 7.83709e-19 (0.920 )   |
| Formation of rad6  | 6.56651e-20 (0.0771 )  | 6.56649e-20 (0.0771 )  |
| H-abstraction      | 2.08816e-21 (0.00245 ) | 2.08816e-21 (0.00245 ) |

| species            | PYtrue      | Cumul    | PYeffective | Cumul    |
|--------------------|-------------|----------|-------------|----------|
| Indene+H           | 0.977259    | 0.977259 | 0.977261    | 0.977261 |
| C2H2+PhCH2         | 0.0118380   | 0.989097 | 0.0118381   | 0.989100 |
| PhCCH+CH3          | 0.00431648  | 0.993414 | 0.00431650  | 0.993416 |
| PhCHCCH2+H         | 0.00246424  | 0.995878 | 0.00246424  | 0.995880 |
| Benzene+2-propynyl | 0.00245244  | 0.998331 | 0.00245245  | 0.998333 |
| PhCCCH3+H          | 0.00156054  | 0.999891 | 0.00156055  | 0.999893 |
| Ph+MeAc            | 7.16785e-05 | 0.999963 | 7.16787e-05 | 0.999965 |
| rad8               | 1.58185e-05 | 0.999979 | 1.58185e-05 | 0.999981 |
| rad9               | 9.98016e-06 | 0.999989 | 9.98016e-06 | 0.999991 |
| PAH7+H             | 6.27904e-06 | 0.999995 | 6.27905e-06 | 0.999997 |
| Phenyl+Allene      | 2.60486e-06 | 0.999997 | 0.00000     | 0.999997 |
| rad39              | 1.00157e-06 | 0.999999 | 1.00157e-06 | 0.999998 |
| rad30              | 7.38657e-07 | 0.999999 | 7.38659e-07 | 0.999999 |
| rad12              | 7.18426e-07 | 1.000000 | 7.18427e-07 | 0.999999 |
| PAH9+H             | 1.62355e-07 | 1.000000 | 1.62355e-07 | 1.000000 |
| rad15              | 1.49537e-07 | 1.000000 | 1.49538e-07 | 1.000000 |
| rad35              | 7.96337e-08 | 1.000000 | 7.96339e-08 | 1.000000 |
| rad38              | 4.43440e-08 | 1.000000 | 4.43441e-08 | 1.000000 |
| PhCH2CCH+H         | 5.75228e-09 | 1.000000 | 5.75229e-09 | 1.000000 |
| rad37              | 1.51873e-09 | 1.000000 | 1.51873e-09 | 1.000000 |
| rad46              | 4.57178e-10 | 1.000000 | 4.57180e-10 | 1.000000 |
| rad60syn           | 3.37167e-11 | 1.000000 | 3.37168e-11 | 1.000000 |
| rad60anti          | 9.09686e-12 | 1.000000 | 9.09688e-12 | 1.000000 |
| rad5               | 8.96576e-12 | 1.000000 | 8.96579e-12 | 1.000000 |
| PAH3+H             | 6.03134e-15 | 1.000000 | 6.03135e-15 | 1.000000 |

|               |             |         |             |          |
|---------------|-------------|---------|-------------|----------|
| rad59         | 2.36429e-15 | 1.00000 | 2.36430e-15 | 1.000000 |
| rad28         | 1.04514e-15 | 1.00000 | 1.04514e-15 | 1.000000 |
| rad6          | 4.31520e-16 | 1.00000 | 4.31521e-16 | 1.000000 |
| rad26         | 2.58899e-16 | 1.00000 | 2.58900e-16 | 1.000000 |
| rad50         | 2.40153e-16 | 1.00000 | 2.40153e-16 | 1.000000 |
| rad19syn      | 2.46149e-17 | 1.00000 | 2.46149e-17 | 1.000000 |
| rad2          | 1.68270e-17 | 1.00000 | 1.68271e-17 | 1.000000 |
| rad1          | 1.10634e-18 | 1.00000 | 1.10634e-18 | 1.000000 |
| rad3          | 3.87517e-19 | 1.00000 | 3.87518e-19 | 1.000000 |
| rad10         | 3.38754e-19 | 1.00000 | 3.38755e-19 | 1.000000 |
| rad4          | 1.97999e-19 | 1.00000 | 1.98000e-19 | 1.000000 |
| rad54         | 8.25299e-20 | 1.00000 | 8.25301e-20 | 1.000000 |
| PAH10+CH3     | 5.57277e-20 | 1.00000 | 5.57279e-20 | 1.000000 |
| rad14         | 5.21902e-20 | 1.00000 | 5.21903e-20 | 1.000000 |
| rad7          | 3.16902e-20 | 1.00000 | 3.16902e-20 | 1.000000 |
| rad25         | 2.70185e-20 | 1.00000 | 2.70186e-20 | 1.000000 |
| rad43         | 1.35491e-20 | 1.00000 | 1.35491e-20 | 1.000000 |
| rad11         | 8.84423e-21 | 1.00000 | 8.84425e-21 | 1.000000 |
| rad27         | 3.31542e-21 | 1.00000 | 3.31543e-21 | 1.000000 |
| rad52         | 1.09591e-21 | 1.00000 | 1.09591e-21 | 1.000000 |
| rad62         | 1.08552e-21 | 1.00000 | 1.08552e-21 | 1.000000 |
| rad13         | 1.78127e-22 | 1.00000 | 1.78127e-22 | 1.000000 |
| rad70         | 2.82757e-24 | 1.00000 | 2.82758e-24 | 1.000000 |
| PhcycC3H3_A+H | 2.82696e-24 | 1.00000 | 2.82697e-24 | 1.000000 |
| rad33         | 1.51830e-24 | 1.00000 | 1.51830e-24 | 1.000000 |
| rad51         | 1.13153e-24 | 1.00000 | 1.13153e-24 | 1.000000 |
| rad55         | 1.09836e-24 | 1.00000 | 1.09836e-24 | 1.000000 |
| rad31         | 2.27051e-25 | 1.00000 | 2.27052e-25 | 1.000000 |
| PAH1+H        | 8.47528e-27 | 1.00000 | 8.47531e-27 | 1.000000 |
| rad20         | 3.79091e-27 | 1.00000 | 3.79092e-27 | 1.000000 |
| rad21         | 3.04545e-27 | 1.00000 | 3.04546e-27 | 1.000000 |
| rad65         | 1.71245e-27 | 1.00000 | 1.71245e-27 | 1.000000 |
| rad58         | 1.68999e-27 | 1.00000 | 1.69000e-27 | 1.000000 |
| rad34         | 2.52727e-28 | 1.00000 | 2.52727e-28 | 1.000000 |
| rad18         | 8.47893e-30 | 1.00000 | 8.47895e-30 | 1.000000 |
| rad23         | 1.17379e-30 | 1.00000 | 1.17380e-30 | 1.000000 |
| rad42         | 7.85452e-31 | 1.00000 | 7.85454e-31 | 1.000000 |
| rad22         | 5.18201e-31 | 1.00000 | 5.18202e-31 | 1.000000 |
| rad41         | 1.60818e-31 | 1.00000 | 1.60819e-31 | 1.000000 |
| rad45         | 6.09775e-32 | 1.00000 | 6.09777e-32 | 1.000000 |
| rad36         | 3.78172e-33 | 1.00000 | 3.78173e-33 | 1.000000 |
| rad24         | 2.47948e-33 | 1.00000 | 2.47948e-33 | 1.000000 |
| rad47         | 7.59466e-43 | 1.00000 | 7.59468e-43 | 1.000000 |

0.100000000E-08 Pa, 160.000000 K

| Rate constant      | True (fraction)        | Effective (fraction)   |
|--------------------|------------------------|------------------------|
| Total              | 1.81800e-18 (1.00 )    | 1.81799e-18 (1.00 )    |
| Formation of rad11 | 1.64862e-18 (0.907 )   | 1.64862e-18 (0.907 )   |
| Formation of rad6  | 1.62558e-19 (0.0894 )  | 1.62558e-19 (0.0894 )  |
| H-abstraction      | 6.82130e-21 (0.00375 ) | 6.82130e-21 (0.00375 ) |

| species            | PYtrue      | Cumul    | PYeffective | Cumul    |
|--------------------|-------------|----------|-------------|----------|
| Indene+H           | 0.974807    | 0.974807 | 0.974810    | 0.974810 |
| C2H2+PhCH2         | 0.0123589   | 0.987166 | 0.0123590   | 0.987169 |
| PhCCH+CH3          | 0.00465409  | 0.991820 | 0.00465411  | 0.991823 |
| Benzene+2-propynyl | 0.00375209  | 0.995572 | 0.00375210  | 0.995575 |
| PhCHCCH2+H         | 0.00262750  | 0.998199 | 0.00262751  | 0.998202 |
| PhCCCH3+H          | 0.00167199  | 0.999871 | 0.00167199  | 0.999874 |
| Ph+MeAc            | 8.62616e-05 | 0.999957 | 8.62619e-05 | 0.999961 |
| rad8               | 1.73195e-05 | 0.999975 | 1.73195e-05 | 0.999978 |
| rad9               | 1.13314e-05 | 0.999986 | 1.13315e-05 | 0.999989 |
| PAH7+H             | 7.20397e-06 | 0.999993 | 7.20399e-06 | 0.999996 |
| Phenyl+Allene      | 3.51290e-06 | 0.999997 | 0.00000     | 0.999996 |
| rad39              | 1.19490e-06 | 0.999998 | 1.19491e-06 | 0.999998 |
| rad12              | 8.13676e-07 | 0.999999 | 8.13678e-07 | 0.999998 |
| rad30              | 7.86375e-07 | 1.000000 | 7.86378e-07 | 0.999999 |
| PAH9+H             | 1.74957e-07 | 1.000000 | 1.74957e-07 | 0.999999 |
| rad15              | 1.61556e-07 | 1.000000 | 1.61556e-07 | 1.000000 |
| rad35              | 8.50366e-08 | 1.00000  | 8.50369e-08 | 1.000000 |
| rad38              | 4.81472e-08 | 1.00000  | 4.81473e-08 | 1.000000 |
| PhCH2CCH+H         | 1.12739e-08 | 1.00000  | 1.12740e-08 | 1.000000 |
| rad37              | 2.73998e-09 | 1.00000  | 2.73999e-09 | 1.000000 |
| rad46              | 5.24970e-10 | 1.00000  | 5.24971e-10 | 1.000000 |
| rad60syn           | 4.30328e-11 | 1.00000  | 4.30330e-11 | 1.000000 |
| rad5               | 1.96900e-11 | 1.00000  | 1.96900e-11 | 1.000000 |
| rad60anti          | 1.22036e-11 | 1.00000  | 1.22036e-11 | 1.000000 |
| PAH3+H             | 1.58160e-14 | 1.00000  | 1.58160e-14 | 1.000000 |

|               |             |         |             |          |
|---------------|-------------|---------|-------------|----------|
| rad59         | 5.96957e-15 | 1.00000 | 5.96959e-15 | 1.000000 |
| rad28         | 8.68836e-16 | 1.00000 | 8.68839e-16 | 1.000000 |
| rad50         | 5.99513e-16 | 1.00000 | 5.99515e-16 | 1.000000 |
| rad6          | 3.58275e-16 | 1.00000 | 3.58276e-16 | 1.000000 |
| rad26         | 2.15614e-16 | 1.00000 | 2.15615e-16 | 1.000000 |
| rad19syn      | 1.46314e-16 | 1.00000 | 1.46314e-16 | 1.000000 |
| rad2          | 3.27828e-18 | 1.00000 | 3.27829e-18 | 1.000000 |
| rad54         | 6.82323e-19 | 1.00000 | 6.82326e-19 | 1.000000 |
| PAH10+CH3     | 4.63170e-19 | 1.00000 | 4.63171e-19 | 1.000000 |
| rad10         | 2.75542e-19 | 1.00000 | 2.75543e-19 | 1.000000 |
| rad1          | 2.16702e-19 | 1.00000 | 2.16703e-19 | 1.000000 |
| rad43         | 1.12798e-19 | 1.00000 | 1.12798e-19 | 1.000000 |
| rad3          | 9.85071e-20 | 1.00000 | 9.85074e-20 | 1.000000 |
| rad4          | 5.03981e-20 | 1.00000 | 5.03983e-20 | 1.000000 |
| rad14         | 4.43837e-20 | 1.00000 | 4.43839e-20 | 1.000000 |
| rad7          | 2.63643e-20 | 1.00000 | 2.63643e-20 | 1.000000 |
| rad25         | 2.31524e-20 | 1.00000 | 2.31525e-20 | 1.000000 |
| rad62         | 1.10170e-20 | 1.00000 | 1.10170e-20 | 1.000000 |
| rad11         | 7.42503e-21 | 1.00000 | 7.42506e-21 | 1.000000 |
| rad52         | 6.21217e-21 | 1.00000 | 6.21220e-21 | 1.000000 |
| rad27         | 2.86863e-21 | 1.00000 | 2.86864e-21 | 1.000000 |
| rad13         | 1.48396e-22 | 1.00000 | 1.48397e-22 | 1.000000 |
| PhcycC3H3_A+H | 4.94897e-23 | 1.00000 | 4.94899e-23 | 1.000000 |
| rad70         | 4.58079e-23 | 1.00000 | 4.58081e-23 | 1.000000 |
| rad55         | 1.82891e-23 | 1.00000 | 1.82891e-23 | 1.000000 |
| rad51         | 1.16593e-23 | 1.00000 | 1.16593e-23 | 1.000000 |
| rad33         | 1.37777e-24 | 1.00000 | 1.37777e-24 | 1.000000 |
| rad31         | 2.63139e-25 | 1.00000 | 2.63140e-25 | 1.000000 |
| PAH1+H        | 2.26749e-25 | 1.00000 | 2.26750e-25 | 1.000000 |
| rad58         | 3.08150e-26 | 1.00000 | 3.08151e-26 | 1.000000 |
| rad65         | 2.43580e-26 | 1.00000 | 2.43581e-26 | 1.000000 |
| rad34         | 7.87306e-27 | 1.00000 | 7.87309e-27 | 1.000000 |
| rad20         | 3.66058e-27 | 1.00000 | 3.66059e-27 | 1.000000 |
| rad21         | 2.95591e-27 | 1.00000 | 2.95592e-27 | 1.000000 |
| rad42         | 4.07683e-29 | 1.00000 | 4.07685e-29 | 1.000000 |
| rad41         | 9.77891e-30 | 1.00000 | 9.77894e-30 | 1.000000 |
| rad18         | 7.90061e-30 | 1.00000 | 7.90064e-30 | 1.000000 |
| rad23         | 1.64882e-30 | 1.00000 | 1.64883e-30 | 1.000000 |
| rad22         | 4.71550e-31 | 1.00000 | 4.71551e-31 | 1.000000 |
| rad45         | 2.28287e-32 | 1.00000 | 2.28288e-32 | 1.000000 |
| rad24         | 2.67494e-33 | 1.00000 | 2.67495e-33 | 1.000000 |
| rad36         | 1.41703e-33 | 1.00000 | 1.41704e-33 | 1.000000 |
| rad47         | 1.41734e-41 | 1.00000 | 1.41734e-41 | 1.000000 |

0.100000000E-08 Pa, 170.000000 K

| Rate constant      | True (fraction)        | Effective (fraction)   |
|--------------------|------------------------|------------------------|
| Total              | 3.56414e-18 (1.00 )    | 3.56412e-18 (1.00 )    |
| Formation of rad11 | 3.18264e-18 (0.893 )   | 3.18262e-18 (0.893 )   |
| Formation of rad6  | 3.62173e-19 (0.102 )   | 3.62171e-19 (0.102 )   |
| H-abstraction      | 1.93278e-20 (0.00542 ) | 1.93278e-20 (0.00542 ) |

| species            | PYtrue      | Cumul    | PYeffective | Cumul    |
|--------------------|-------------|----------|-------------|----------|
| Indene+H           | 0.971885    | 0.971885 | 0.971890    | 0.971890 |
| C2H2+PhCH2         | 0.0129199   | 0.984805 | 0.0129199   | 0.984810 |
| Benzene+2-propynyl | 0.00542285  | 0.990228 | 0.00542288  | 0.990233 |
| PhCCH+CH3          | 0.00502329  | 0.995251 | 0.00502332  | 0.995256 |
| PhCHCCH2+H         | 0.00280418  | 0.998055 | 0.00280419  | 0.998060 |
| PhCCCH3+H          | 0.00179254  | 0.999848 | 0.00179255  | 0.999853 |
| Ph+MeAc            | 0.000103562 | 0.999951 | 0.000103563 | 0.999956 |
| rad8               | 1.89760e-05 | 0.999970 | 1.89761e-05 | 0.999975 |
| rad9               | 1.28842e-05 | 0.999983 | 1.28841e-05 | 0.999988 |
| PAH7+H             | 8.27970e-06 | 0.999991 | 8.27974e-06 | 0.999996 |
| Phenyl+Allene      | 4.69493e-06 | 0.999996 | 0.00000     | 0.999996 |
| rad39              | 1.42509e-06 | 0.999997 | 1.42510e-06 | 0.999998 |
| rad12              | 9.21463e-07 | 0.999998 | 9.21467e-07 | 0.999999 |
| rad30              | 8.38912e-07 | 0.999999 | 8.38916e-07 | 1.000000 |
| PAH9+H             | 1.89102e-07 | 0.999999 | 1.89103e-07 | 1.000000 |
| rad15              | 1.74977e-07 | 1.000000 | 1.74978e-07 | 1.000000 |
| rad35              | 9.10384e-08 | 1.000000 | 9.10389e-08 | 1.000000 |
| rad38              | 5.24473e-08 | 1.000000 | 5.24475e-08 | 1.000000 |
| PhCH2CCH+H         | 2.08707e-08 | 1.000000 | 2.08708e-08 | 1.000000 |
| rad37              | 4.60963e-09 | 1.000000 | 4.60965e-09 | 1.000000 |
| rad46              | 6.05682e-10 | 1.000000 | 6.05685e-10 | 1.000000 |
| rad60syn           | 5.48564e-11 | 1.000000 | 5.48566e-11 | 1.000000 |
| rad5               | 3.99754e-11 | 1.000000 | 3.99756e-11 | 1.000000 |
| rad60anti          | 1.62407e-11 | 1.000000 | 1.62408e-11 | 1.000000 |
| PAH3+H             | 3.76908e-14 | 1.000000 | 3.76910e-14 | 1.000000 |

|               |             |          |             |         |
|---------------|-------------|----------|-------------|---------|
| rad59         | 1.37229e-14 | 1.000000 | 1.37230e-14 | 1.00000 |
| rad50         | 1.37986e-15 | 1.000000 | 1.37986e-15 | 1.00000 |
| rad28         | 7.23451e-16 | 1.000000 | 7.23454e-16 | 1.00000 |
| rad19syn      | 7.08949e-16 | 1.000000 | 7.08952e-16 | 1.00000 |
| rad6          | 2.98656e-16 | 1.000000 | 2.98658e-16 | 1.00000 |
| rad26         | 1.79867e-16 | 1.000000 | 1.79868e-16 | 1.00000 |
| rad54         | 4.41606e-18 | 1.000000 | 4.41608e-18 | 1.00000 |
| PAH10+CH3     | 3.01001e-18 | 1.000000 | 3.01003e-18 | 1.00000 |
| rad2          | 7.89042e-19 | 1.000000 | 7.89045e-19 | 1.00000 |
| rad43         | 7.33358e-19 | 1.000000 | 7.33362e-19 | 1.00000 |
| rad10         | 2.33947e-19 | 1.000000 | 2.33948e-19 | 1.00000 |
| rad62         | 8.52799e-20 | 1.000000 | 8.52803e-20 | 1.00000 |
| rad1          | 5.24904e-20 | 1.000000 | 5.24907e-20 | 1.00000 |
| rad14         | 3.78324e-20 | 1.000000 | 3.78326e-20 | 1.00000 |
| rad3          | 2.90954e-20 | 1.000000 | 2.90956e-20 | 1.00000 |
| rad52         | 2.90265e-20 | 1.000000 | 2.90266e-20 | 1.00000 |
| rad7          | 2.20230e-20 | 1.000000 | 2.20231e-20 | 1.00000 |
| rad25         | 1.98902e-20 | 1.000000 | 1.98902e-20 | 1.00000 |
| rad4          | 1.49088e-20 | 1.000000 | 1.49089e-20 | 1.00000 |
| rad11         | 6.26193e-21 | 1.000000 | 6.26196e-21 | 1.00000 |
| rad27         | 2.48927e-21 | 1.000000 | 2.48928e-21 | 1.00000 |
| PhcycC3H3_A+H | 6.18576e-22 | 1.000000 | 6.18579e-22 | 1.00000 |
| rad70         | 5.33446e-22 | 1.000000 | 5.33449e-22 | 1.00000 |
| rad55         | 2.18165e-22 | 1.000000 | 2.18166e-22 | 1.00000 |
| rad13         | 1.24143e-22 | 1.000000 | 1.24144e-22 | 1.00000 |
| rad51         | 9.22228e-23 | 1.000000 | 9.22233e-23 | 1.00000 |
| PAH1+H        | 3.94436e-24 | 1.000000 | 3.94438e-24 | 1.00000 |
| rad33         | 1.25904e-24 | 1.000000 | 1.25905e-24 | 1.00000 |
| rad58         | 3.99313e-25 | 1.000000 | 3.99315e-25 | 1.00000 |
| rad31         | 3.11128e-25 | 1.000000 | 3.11129e-25 | 1.00000 |
| rad65         | 2.54727e-25 | 1.000000 | 2.54729e-25 | 1.00000 |
| rad34         | 1.50323e-25 | 1.000000 | 1.50324e-25 | 1.00000 |
| rad20         | 3.55765e-27 | 1.000000 | 3.55767e-27 | 1.00000 |
| rad21         | 2.88845e-27 | 1.000000 | 2.88846e-27 | 1.00000 |
| rad42         | 1.01747e-27 | 1.000000 | 1.01748e-27 | 1.00000 |
| rad41         | 2.58572e-28 | 1.000000 | 2.58573e-28 | 1.00000 |
| rad18         | 7.39325e-30 | 1.000000 | 7.39328e-30 | 1.00000 |
| rad23         | 2.46480e-30 | 1.000000 | 2.46481e-30 | 1.00000 |
| rad22         | 4.30435e-31 | 1.000000 | 4.30437e-31 | 1.00000 |
| rad45         | 1.08013e-32 | 1.000000 | 1.08014e-32 | 1.00000 |
| rad24         | 2.91796e-33 | 1.000000 | 2.91797e-33 | 1.00000 |
| rad36         | 6.71794e-34 | 1.000000 | 6.71797e-34 | 1.00000 |
| rad47         | 1.82774e-40 | 1.000000 | 1.82775e-40 | 1.00000 |

0.100000000E-08 Pa, 180.000000 K

| Rate constant      | True (fraction)        | Effective (fraction)   |
|--------------------|------------------------|------------------------|
| Total              | 6.50681e-18 (1.00 )    | 6.50677e-18 (1.00 )    |
| Formation of rad11 | 5.71915e-18 (0.879 )   | 5.71911e-18 (0.879 )   |
| Formation of rad6  | 7.39013e-19 (0.114 )   | 7.39008e-19 (0.114 )   |
| H-abstraction      | 4.86496e-20 (0.00748 ) | 4.86496e-20 (0.00748 ) |

| species            | PYtrue      | Cumul    | PYeffective | Cumul    |
|--------------------|-------------|----------|-------------|----------|
| Indene+H           | 0.968478    | 0.968478 | 0.968484    | 0.968484 |
| C2H2+PhCH2         | 0.0135228   | 0.982001 | 0.0135229   | 0.982007 |
| Benzene+2-propynyl | 0.00747672  | 0.989478 | 0.00747676  | 0.989484 |
| PhCCH+CH3          | 0.00542564  | 0.994904 | 0.00542568  | 0.994910 |
| PhCHCCH2+H         | 0.00299468  | 0.997898 | 0.00299470  | 0.997904 |
| PhCCCH3+H          | 0.00192237  | 0.999821 | 0.00192238  | 0.999827 |
| Ph+MeAc            | 0.000123974 | 0.999945 | 0.000123975 | 0.999951 |
| rad8               | 2.07972e-05 | 0.999965 | 2.07974e-05 | 0.999972 |
| rad9               | 1.46640e-05 | 0.999980 | 1.46641e-05 | 0.999986 |
| PAH7+H             | 9.52858e-06 | 0.999990 | 9.52865e-06 | 0.999996 |
| Phenyl+Allene      | 6.22344e-06 | 0.999996 | 0.00000     | 0.999996 |
| rad39              | 1.69835e-06 | 0.999998 | 1.69836e-06 | 0.999997 |
| rad12              | 1.04290e-06 | 0.999999 | 1.04291e-06 | 0.999998 |
| rad30              | 8.96681e-07 | 0.999999 | 8.96687e-07 | 0.999999 |
| PAH9+H             | 2.04978e-07 | 1.000000 | 2.04979e-07 | 1.000000 |
| rad15              | 1.89953e-07 | 1.000000 | 1.89954e-07 | 1.000000 |
| rad35              | 9.77029e-08 | 1.000000 | 9.77035e-08 | 1.000000 |
| rad38              | 5.73097e-08 | 1.000000 | 5.73101e-08 | 1.000000 |
| PhCH2CCH+H         | 3.68402e-08 | 1.000000 | 3.68404e-08 | 1.000000 |
| rad37              | 7.32440e-09 | 1.000000 | 7.32444e-09 | 1.000000 |
| rad46              | 7.01870e-10 | 1.000000 | 7.01875e-10 | 1.000000 |
| rad5               | 7.60090e-11 | 1.000000 | 7.60095e-11 | 1.000000 |
| rad60syn           | 6.98193e-11 | 1.000000 | 6.98198e-11 | 1.000000 |
| rad60anti          | 2.14667e-11 | 1.000000 | 2.14668e-11 | 1.000000 |
| PAH3+H             | 8.30447e-14 | 1.000000 | 8.30452e-14 | 1.000000 |



|               |             |         |             |          |
|---------------|-------------|---------|-------------|----------|
| rad59         | 2.92197e-14 | 1.00000 | 2.92198e-14 | 1.000000 |
| rad50         | 2.97124e-15 | 1.00000 | 2.97126e-15 | 1.000000 |
| rad19syn      | 2.89949e-15 | 1.00000 | 2.89950e-15 | 1.000000 |
| rad28         | 6.03138e-16 | 1.00000 | 6.03141e-16 | 1.000000 |
| rad6          | 2.49787e-16 | 1.00000 | 2.49789e-16 | 1.000000 |
| rad26         | 1.50240e-16 | 1.00000 | 1.50241e-16 | 1.000000 |
| rad54         | 2.33297e-17 | 1.00000 | 2.33298e-17 | 1.000000 |
| PAH10+CH3     | 1.59467e-17 | 1.00000 | 1.59468e-17 | 1.000000 |
| rad43         | 3.88182e-18 | 1.00000 | 3.88185e-18 | 1.000000 |
| rad62         | 5.27068e-19 | 1.00000 | 5.27072e-19 | 1.000000 |
| rad2          | 4.49133e-19 | 1.00000 | 4.49136e-19 | 1.000000 |
| rad10         | 2.06166e-19 | 1.00000 | 2.06167e-19 | 1.000000 |
| rad52         | 1.15650e-19 | 1.00000 | 1.15650e-19 | 1.000000 |
| rad14         | 3.23111e-20 | 1.00000 | 3.23113e-20 | 1.000000 |
| rad1          | 3.00693e-20 | 1.00000 | 3.00695e-20 | 1.000000 |
| rad7          | 1.84592e-20 | 1.00000 | 1.84593e-20 | 1.000000 |
| rad25         | 1.71251e-20 | 1.00000 | 1.71252e-20 | 1.000000 |
| rad3          | 1.46056e-20 | 1.00000 | 1.46057e-20 | 1.000000 |
| rad4          | 7.49843e-21 | 1.00000 | 7.49848e-21 | 1.000000 |
| PhcycC3H3_A+H | 5.85620e-21 | 1.00000 | 5.85623e-21 | 1.000000 |
| rad11         | 5.30174e-21 | 1.00000 | 5.30177e-21 | 1.000000 |
| rad70         | 4.72802e-21 | 1.00000 | 4.72804e-21 | 1.000000 |
| rad27         | 2.16559e-21 | 1.00000 | 2.16561e-21 | 1.000000 |
| rad55         | 1.97618e-21 | 1.00000 | 1.97620e-21 | 1.000000 |
| rad51         | 5.86138e-22 | 1.00000 | 5.86142e-22 | 1.000000 |
| rad13         | 1.04217e-22 | 1.00000 | 1.04218e-22 | 1.000000 |
| PAH1+H        | 4.95211e-23 | 1.00000 | 4.95214e-23 | 1.000000 |
| rad58         | 3.90830e-24 | 1.00000 | 3.90832e-24 | 1.000000 |
| rad65         | 2.06558e-24 | 1.00000 | 2.06559e-24 | 1.000000 |
| rad34         | 2.04058e-24 | 1.00000 | 2.04059e-24 | 1.000000 |
| rad33         | 1.15812e-24 | 1.00000 | 1.15812e-24 | 1.000000 |
| rad31         | 3.75246e-25 | 1.00000 | 3.75248e-25 | 1.000000 |
| rad42         | 1.68941e-26 | 1.00000 | 1.68942e-26 | 1.000000 |
| rad41         | 4.43576e-27 | 1.00000 | 4.43577e-27 | 1.000000 |
| rad20         | 3.47897e-27 | 1.00000 | 3.47899e-27 | 1.000000 |
| rad21         | 2.84084e-27 | 1.00000 | 2.84086e-27 | 1.000000 |
| rad18         | 6.94531e-30 | 1.00000 | 6.94536e-30 | 1.000000 |
| rad23         | 3.89175e-30 | 1.00000 | 3.89178e-30 | 1.000000 |
| rad22         | 3.93961e-31 | 1.00000 | 3.93964e-31 | 1.000000 |
| rad45         | 1.48870e-32 | 1.00000 | 1.48870e-32 | 1.000000 |
| rad24         | 3.21802e-33 | 1.00000 | 3.21804e-33 | 1.000000 |
| rad36         | 9.27046e-34 | 1.00000 | 9.27051e-34 | 1.000000 |
| rad47         | 1.73400e-39 | 1.00000 | 1.73402e-39 | 1.000000 |

0.100000000E-08 Pa, 190.000000 K

| Rate constant      | True (fraction)        | Effective (fraction)   |
|--------------------|------------------------|------------------------|
| Total              | 1.11858e-17 (1.00 )    | 1.11857e-17 (1.00 )    |
| Formation of rad11 | 9.67466e-18 (0.865 )   | 9.67458e-18 (0.865 )   |
| Formation of rad6  | 1.40029e-18 (0.125 )   | 1.40028e-18 (0.125 )   |
| H-abstraction      | 1.10851e-19 (0.00991 ) | 1.10851e-19 (0.00991 ) |

| species            | PYtrue      | Cumul    | PYeffective | Cumul    |
|--------------------|-------------|----------|-------------|----------|
| Indene+H           | 0.964584    | 0.964584 | 0.964592    | 0.964592 |
| C2H2+PhCH2         | 0.0141704   | 0.978755 | 0.0141705   | 0.978763 |
| Benzene+2-propynyl | 0.00990995  | 0.988665 | 0.00991003  | 0.988673 |
| PhCCH+CH3          | 0.00586273  | 0.994527 | 0.00586278  | 0.994535 |
| PhCHCCH2+H         | 0.00319945  | 0.997727 | 0.00319948  | 0.997735 |
| PhCCCH3+H          | 0.00206165  | 0.999788 | 0.00206167  | 0.999797 |
| Ph+MeAc            | 0.000147924 | 0.999936 | 0.000147926 | 0.999945 |
| rad8               | 2.27917e-05 | 0.999959 | 2.27919e-05 | 0.999967 |
| rad9               | 1.66999e-05 | 0.999976 | 1.67001e-05 | 0.999984 |
| PAH7+H             | 1.09761e-05 | 0.999987 | 1.09762e-05 | 0.999995 |
| Phenyl+Allene      | 8.18762e-06 | 0.999995 | 0.00000     | 0.999995 |
| rad39              | 2.02183e-06 | 0.999997 | 2.02185e-06 | 0.999997 |
| rad12              | 1.17916e-06 | 0.999998 | 1.17917e-06 | 0.999998 |
| rad30              | 9.60155e-07 | 0.999999 | 9.60163e-07 | 0.999999 |
| PAH9+H             | 2.22801e-07 | 0.999999 | 2.22802e-07 | 0.999999 |
| rad15              | 2.06653e-07 | 1.000000 | 2.06655e-07 | 1.000000 |
| rad35              | 1.05103e-07 | 1.000000 | 1.05104e-07 | 1.000000 |
| rad38              | 6.28102e-08 | 1.000000 | 6.28107e-08 | 1.000000 |
| PhCH2CCH+H         | 6.24645e-08 | 1.000000 | 6.24651e-08 | 1.000000 |
| rad37              | 1.11023e-08 | 1.000000 | 1.11024e-08 | 1.000000 |
| rad46              | 8.16621e-10 | 1.000000 | 8.16628e-10 | 1.000000 |
| rad5               | 1.36733e-10 | 1.000000 | 1.36734e-10 | 1.000000 |
| rad60syn           | 8.87050e-11 | 1.000000 | 8.87057e-11 | 1.000000 |
| rad60anti          | 2.82057e-11 | 1.000000 | 2.82060e-11 | 1.000000 |
| PAH3+H             | 1.71452e-13 | 1.000000 | 1.71454e-13 | 1.000000 |

|               |             |          |             |          |
|---------------|-------------|----------|-------------|----------|
| rad59         | 5.84005e-14 | 1.000000 | 5.84010e-14 | 1.000000 |
| rad19syn      | 1.02878e-14 | 1.000000 | 1.02879e-14 | 1.000000 |
| rad50         | 6.05359e-15 | 1.000000 | 6.05364e-15 | 1.000000 |
| rad28         | 5.03295e-16 | 1.000000 | 5.03299e-16 | 1.000000 |
| rad6          | 2.09498e-16 | 1.000000 | 2.09500e-16 | 1.000000 |
| rad26         | 1.25616e-16 | 1.000000 | 1.25617e-16 | 1.000000 |
| rad54         | 1.03970e-16 | 1.000000 | 1.03971e-16 | 1.000000 |
| PAH10+CH3     | 7.11676e-17 | 1.000000 | 7.11682e-17 | 1.000000 |
| rad43         | 1.72858e-17 | 1.000000 | 1.72859e-17 | 1.000000 |
| rad62         | 2.69622e-18 | 1.000000 | 2.69624e-18 | 1.000000 |
| rad2          | 2.34755e-18 | 1.000000 | 2.34757e-18 | 1.000000 |
| rad52         | 4.03514e-19 | 1.000000 | 4.03517e-19 | 1.000000 |
| rad10         | 1.87835e-19 | 1.000000 | 1.87836e-19 | 1.000000 |
| rad1          | 1.58314e-19 | 1.000000 | 1.58316e-19 | 1.000000 |
| PhcycC3H3_A+H | 4.38895e-20 | 1.000000 | 4.38899e-20 | 1.000000 |
| rad70         | 3.33202e-20 | 1.000000 | 3.33205e-20 | 1.000000 |
| rad14         | 2.76417e-20 | 1.000000 | 2.76420e-20 | 1.000000 |
| rad7          | 1.55164e-20 | 1.000000 | 1.55165e-20 | 1.000000 |
| rad25         | 1.47728e-20 | 1.000000 | 1.47729e-20 | 1.000000 |
| rad55         | 1.42084e-20 | 1.000000 | 1.42085e-20 | 1.000000 |
| rad3          | 6.05474e-21 | 1.000000 | 6.05479e-21 | 1.000000 |
| rad11         | 4.50421e-21 | 1.000000 | 4.50425e-21 | 1.000000 |
| rad4          | 3.11420e-21 | 1.000000 | 3.11423e-21 | 1.000000 |
| rad51         | 3.10227e-21 | 1.000000 | 3.10230e-21 | 1.000000 |
| rad27         | 1.88830e-21 | 1.000000 | 1.88831e-21 | 1.000000 |
| PAH1+H        | 4.73309e-22 | 1.000000 | 4.73313e-22 | 1.000000 |
| rad13         | 8.77481e-23 | 1.000000 | 8.77488e-23 | 1.000000 |
| rad58         | 3.02074e-23 | 1.000000 | 3.02077e-23 | 1.000000 |
| rad34         | 2.08650e-23 | 1.000000 | 2.08652e-23 | 1.000000 |
| rad65         | 1.35334e-23 | 1.000000 | 1.35335e-23 | 1.000000 |
| rad33         | 1.07194e-24 | 1.000000 | 1.07195e-24 | 1.000000 |
| rad31         | 4.61588e-25 | 1.000000 | 4.61591e-25 | 1.000000 |
| rad42         | 2.03932e-25 | 1.000000 | 2.03933e-25 | 1.000000 |
| rad41         | 5.49126e-26 | 1.000000 | 5.49130e-26 | 1.000000 |
| rad20         | 3.42237e-27 | 1.000000 | 3.42240e-27 | 1.000000 |
| rad21         | 2.81165e-27 | 1.000000 | 2.81167e-27 | 1.000000 |
| rad18         | 6.54794e-30 | 1.000000 | 6.54799e-30 | 1.000000 |
| rad23         | 6.48451e-30 | 1.000000 | 6.48456e-30 | 1.000000 |
| rad22         | 3.61428e-31 | 1.000000 | 3.61431e-31 | 1.000000 |
| rad45         | 1.09815e-32 | 1.000000 | 1.09816e-32 | 1.000000 |
| rad24         | 3.58777e-33 | 1.000000 | 3.58780e-33 | 1.000000 |
| rad36         | 6.85027e-34 | 1.000000 | 6.85033e-34 | 1.000000 |
| rad47         | 1.27121e-38 | 1.000000 | 1.27122e-38 | 1.000000 |

0.100000000E-08 Pa, 200.000000 K

| Rate constant      | True (fraction)       | Effective (fraction)  |
|--------------------|-----------------------|-----------------------|
| Total              | 1.82690e-17 (1.00 )   | 1.82688e-17 (1.00 )   |
| Formation of rad11 | 1.55456e-17 (0.851 )  | 1.55454e-17 (0.851 )  |
| Formation of rad6  | 2.49126e-18 (0.136 )  | 2.49124e-18 (0.136 )  |
| H-abstraction      | 2.32112e-19 (0.0127 ) | 2.32112e-19 (0.0127 ) |

| species            | PYtrue      | Cumul    | PYeffective | Cumul    |
|--------------------|-------------|----------|-------------|----------|
| Indene+H           | 0.960215    | 0.960215 | 0.960226    | 0.960226 |
| C2H2+PhCH2         | 0.0148649   | 0.975080 | 0.0148651   | 0.975091 |
| Benzene+2-propynyl | 0.0127053   | 0.987785 | 0.0127054   | 0.987796 |
| PhCCH+CH3          | 0.00633615  | 0.994122 | 0.00633622  | 0.994133 |
| PhCHCCH2+H         | 0.00341889  | 0.997540 | 0.00341893  | 0.997552 |
| PhCCCH3+H          | 0.00221052  | 0.999751 | 0.00221055  | 0.999762 |
| Ph+MeAc            | 0.000175876 | 0.999927 | 0.000175878 | 0.999938 |
| rad8               | 2.49677e-05 | 0.999952 | 2.49680e-05 | 0.999963 |
| rad9               | 1.90241e-05 | 0.999971 | 1.90243e-05 | 0.999982 |
| PAH7+H             | 1.26513e-05 | 0.999983 | 1.26514e-05 | 0.999995 |
| Phenyl+Allene      | 1.06964e-05 | 0.999994 | 0.00000     | 0.999995 |
| rad39              | 2.40374e-06 | 0.999997 | 2.40377e-06 | 0.999997 |
| rad12              | 1.33139e-06 | 0.999998 | 1.33141e-06 | 0.999998 |
| rad30              | 1.02986e-06 | 0.999999 | 1.02987e-06 | 0.999999 |
| PAH9+H             | 2.42820e-07 | 0.999999 | 2.42822e-07 | 1.000000 |
| rad15              | 2.25266e-07 | 0.999999 | 2.25268e-07 | 1.000000 |
| rad35              | 1.13322e-07 | 1.000000 | 1.13323e-07 | 1.000000 |
| PhCH2CCH+H         | 1.02329e-07 | 1.000000 | 1.02331e-07 | 1.000000 |
| rad38              | 6.90363e-08 | 1.000000 | 6.90370e-08 | 1.000000 |
| rad37              | 1.61821e-08 | 1.000000 | 1.61823e-08 | 1.000000 |
| rad46              | 9.53658e-10 | 1.000000 | 9.53667e-10 | 1.000000 |
| rad5               | 2.34596e-10 | 1.000000 | 2.34599e-10 | 1.000000 |
| rad60syn           | 1.12479e-10 | 1.000000 | 1.12481e-10 | 1.000000 |
| rad60anti          | 3.68627e-11 | 1.000000 | 3.68631e-11 | 1.000000 |
| PAH3+H             | 3.35192e-13 | 1.000000 | 3.35196e-13 | 1.000000 |

|               |             |          |             |          |
|---------------|-------------|----------|-------------|----------|
| rad59         | 1.10713e-13 | 1.000000 | 1.10714e-13 | 1.000000 |
| rad19syn      | 3.23698e-14 | 1.000000 | 3.23702e-14 | 1.000000 |
| rad50         | 1.17726e-14 | 1.000000 | 1.17728e-14 | 1.000000 |
| rad28         | 4.20264e-16 | 1.000000 | 4.20269e-16 | 1.000000 |
| rad54         | 4.01275e-16 | 1.000000 | 4.01279e-16 | 1.000000 |
| PAH10+CH3     | 2.74628e-16 | 1.000000 | 2.74631e-16 | 1.000000 |
| rad6          | 1.76123e-16 | 1.000000 | 1.76123e-16 | 1.000000 |
| rad26         | 1.05104e-16 | 1.000000 | 1.05106e-16 | 1.000000 |
| rad43         | 6.64690e-17 | 1.000000 | 6.64697e-17 | 1.000000 |
| rad62         | 1.17482e-17 | 1.000000 | 1.17484e-17 | 1.000000 |
| rad52         | 1.25934e-18 | 1.000000 | 1.25935e-18 | 1.000000 |
| rad2          | 1.03788e-18 | 1.000000 | 1.03789e-18 | 1.000000 |
| PhcycC3H3_A+H | 2.69648e-19 | 1.000000 | 2.69650e-19 | 1.000000 |
| rad70         | 1.93309e-19 | 1.000000 | 1.93311e-19 | 1.000000 |
| rad10         | 1.76437e-19 | 1.000000 | 1.76439e-19 | 1.000000 |
| rad55         | 8.39747e-20 | 1.000000 | 8.39757e-20 | 1.000000 |
| rad1          | 7.05488e-20 | 1.000000 | 7.05496e-20 | 1.000000 |
| rad14         | 2.36819e-20 | 1.000000 | 2.36822e-20 | 1.000000 |
| rad51         | 1.40662e-20 | 1.000000 | 1.40663e-20 | 1.000000 |
| rad7          | 1.30744e-20 | 1.000000 | 1.30746e-20 | 1.000000 |
| rad25         | 1.27656e-20 | 1.000000 | 1.27658e-20 | 1.000000 |
| rad3          | 9.91540e-21 | 1.000000 | 9.91560e-21 | 1.000000 |
| rad4          | 5.11336e-21 | 1.000000 | 5.11342e-21 | 1.000000 |
| rad11         | 3.83839e-21 | 1.000000 | 3.83843e-21 | 1.000000 |
| PAH1+H        | 3.58741e-21 | 1.000000 | 3.58745e-21 | 1.000000 |
| rad27         | 1.64996e-21 | 1.000000 | 1.64998e-21 | 1.000000 |
| rad58         | 1.90959e-22 | 1.000000 | 1.90961e-22 | 1.000000 |
| rad34         | 1.67728e-22 | 1.000000 | 1.67730e-22 | 1.000000 |
| rad13         | 7.40698e-23 | 1.000000 | 7.40706e-23 | 1.000000 |
| rad65         | 7.40125e-23 | 1.000000 | 7.40132e-23 | 1.000000 |
| rad42         | 1.88860e-24 | 1.000000 | 1.88862e-24 | 1.000000 |
| rad33         | 9.98155e-25 | 1.000000 | 9.98175e-25 | 1.000000 |
| rad31         | 5.78990e-25 | 1.000000 | 5.78997e-25 | 1.000000 |
| rad41         | 5.19580e-25 | 1.000000 | 5.19585e-25 | 1.000000 |
| rad20         | 3.38648e-27 | 1.000000 | 3.38651e-27 | 1.000000 |
| rad21         | 2.80005e-27 | 1.000000 | 2.80008e-27 | 1.000000 |
| rad23         | 1.13913e-29 | 1.000000 | 1.13914e-29 | 1.000000 |
| rad18         | 6.19414e-30 | 1.000000 | 6.19421e-30 | 1.000000 |
| rad22         | 3.32280e-31 | 1.000000 | 3.32283e-31 | 1.000000 |
| rad45         | 1.93145e-31 | 1.000000 | 1.93147e-31 | 1.000000 |
| rad36         | 1.20760e-32 | 1.000000 | 1.20761e-32 | 1.000000 |
| rad24         | 4.04405e-33 | 1.000000 | 4.04409e-33 | 1.000000 |
| rad47         | 7.49047e-38 | 1.000000 | 7.49055e-38 | 1.000000 |

0.100000000E-08 Pa, 210.000000 K

| Rate constant      | True (fraction)       | Effective (fraction)  |
|--------------------|-----------------------|-----------------------|
| Total              | 2.85520e-17 (1.00 )   | 2.85516e-17 (1.00 )   |
| Formation of rad11 | 2.39009e-17 (0.837 )  | 2.39006e-17 (0.837 )  |
| Formation of rad6  | 4.19900e-18 (0.147 )  | 4.19894e-18 (0.147 )  |
| H-abstraction      | 4.52111e-19 (0.0158 ) | 4.52111e-19 (0.0158 ) |

| species            | PYtrue      | Cumul    | PYeffective | Cumul    |
|--------------------|-------------|----------|-------------|----------|
| Indene+H           | 0.955393    | 0.955393 | 0.955407    | 0.955407 |
| Benzene+2-propynyl | 0.0158346   | 0.971228 | 0.0158348   | 0.971242 |
| C2H2+PhCH2         | 0.0156097   | 0.986838 | 0.0156098   | 0.986852 |
| PhCCH+CH3          | 0.00684746  | 0.993685 | 0.00684756  | 0.993699 |
| PhCHCCH2+H         | 0.00365340  | 0.997338 | 0.00365345  | 0.997353 |
| PhCCCH3+H          | 0.00236906  | 0.999707 | 0.00236909  | 0.999722 |
| Ph+MeAc            | 0.000208315 | 0.999916 | 0.000208318 | 0.999930 |
| rad8               | 2.73332e-05 | 0.999943 | 2.73336e-05 | 0.999957 |
| rad9               | 2.16716e-05 | 0.999965 | 2.16720e-05 | 0.999979 |
| PAH7+H             | 1.45867e-05 | 0.999979 | 1.45869e-05 | 0.999994 |
| Phenyl+Allene      | 1.38822e-05 | 0.999993 | 0.00000     | 0.999994 |
| rad39              | 2.85336e-06 | 0.999996 | 2.85340e-06 | 0.999996 |
| rad12              | 1.50074e-06 | 0.999998 | 1.50076e-06 | 0.999998 |
| rad30              | 1.10636e-06 | 0.999999 | 1.10637e-06 | 0.999999 |
| PAH9+H             | 2.65320e-07 | 0.999999 | 2.65323e-07 | 0.999999 |
| rad15              | 2.46003e-07 | 0.999999 | 2.46007e-07 | 1.000000 |
| PhCH2CCH+H         | 1.62721e-07 | 0.999999 | 1.62723e-07 | 1.000000 |
| rad35              | 1.22453e-07 | 1.000000 | 1.22455e-07 | 1.000000 |
| rad38              | 7.60883e-08 | 1.000000 | 7.60894e-08 | 1.000000 |
| rad37              | 2.28238e-08 | 1.000000 | 2.28241e-08 | 1.000000 |
| rad46              | 1.11744e-09 | 1.000000 | 1.11746e-09 | 1.000000 |
| rad5               | 3.86380e-10 | 1.000000 | 3.86385e-10 | 1.000000 |
| rad60syn           | 1.42324e-10 | 1.000000 | 1.42326e-10 | 1.000000 |
| rad60anti          | 4.79399e-11 | 1.000000 | 4.79406e-11 | 1.000000 |
| PAH3+H             | 6.25713e-13 | 1.000000 | 6.25721e-13 | 1.000000 |

|               |             |          |             |          |
|---------------|-------------|----------|-------------|----------|
| rad59         | 2.00722e-13 | 1.000000 | 2.00725e-13 | 1.000000 |
| rad19syn      | 9.19288e-14 | 1.000000 | 9.19301e-14 | 1.000000 |
| rad50         | 2.20051e-14 | 1.000000 | 2.20053e-14 | 1.000000 |
| rad54         | 1.36990e-15 | 1.000000 | 1.36992e-15 | 1.000000 |
| PAH10+CH3     | 9.35816e-16 | 1.000000 | 9.35829e-16 | 1.000000 |
| rad28         | 3.51099e-16 | 1.000000 | 3.51104e-16 | 1.000000 |
| rad43         | 2.25414e-16 | 1.000000 | 2.25418e-16 | 1.000000 |
| rad6          | 1.48363e-16 | 1.000000 | 1.48365e-16 | 1.000000 |
| rad26         | 8.79915e-17 | 1.000000 | 8.79927e-17 | 1.000000 |
| rad62         | 4.46231e-17 | 1.000000 | 4.46238e-17 | 1.000000 |
| rad52         | 3.57588e-18 | 1.000000 | 3.57592e-18 | 1.000000 |
| PhcycC3H3_A+H | 1.39649e-18 | 1.000000 | 1.39651e-18 | 1.000000 |
| rad70         | 9.49279e-19 | 1.000000 | 9.49292e-19 | 1.000000 |
| rad2          | 8.03026e-19 | 1.000000 | 8.03037e-19 | 1.000000 |
| rad55         | 4.19552e-19 | 1.000000 | 4.19557e-19 | 1.000000 |
| rad10         | 1.70524e-19 | 1.000000 | 1.70527e-19 | 1.000000 |
| rad51         | 5.58854e-20 | 1.000000 | 5.58862e-20 | 1.000000 |
| rad1          | 5.50360e-20 | 1.000000 | 5.50368e-20 | 1.000000 |
| PAH1+H        | 2.22717e-20 | 1.000000 | 2.22720e-20 | 1.000000 |
| rad14         | 2.03162e-20 | 1.000000 | 2.03165e-20 | 1.000000 |
| rad25         | 1.10487e-20 | 1.000000 | 1.10489e-20 | 1.000000 |
| rad7          | 1.10400e-20 | 1.000000 | 1.10402e-20 | 1.000000 |
| rad3          | 6.71611e-21 | 1.000000 | 6.71621e-21 | 1.000000 |
| rad4          | 3.47090e-21 | 1.000000 | 3.47094e-21 | 1.000000 |
| rad11         | 3.28014e-21 | 1.000000 | 3.28018e-21 | 1.000000 |
| rad27         | 1.44452e-21 | 1.000000 | 1.44454e-21 | 1.000000 |
| rad34         | 1.09606e-21 | 1.000000 | 1.09606e-21 | 1.000000 |
| rad58         | 1.01534e-21 | 1.000000 | 1.01536e-21 | 1.000000 |
| rad65         | 3.46717e-22 | 1.000000 | 3.46721e-22 | 1.000000 |
| rad13         | 6.26624e-23 | 1.000000 | 6.26633e-23 | 1.000000 |
| rad42         | 1.39290e-23 | 1.000000 | 1.39292e-23 | 1.000000 |
| rad41         | 3.90335e-24 | 1.000000 | 3.90341e-24 | 1.000000 |
| rad33         | 9.34929e-25 | 1.000000 | 9.34942e-25 | 1.000000 |
| rad31         | 7.40376e-25 | 1.000000 | 7.40386e-25 | 1.000000 |
| rad20         | 3.37050e-27 | 1.000000 | 3.37055e-27 | 1.000000 |
| rad21         | 2.80579e-27 | 1.000000 | 2.80583e-27 | 1.000000 |
| rad23         | 2.10215e-29 | 1.000000 | 2.10218e-29 | 1.000000 |
| rad18         | 5.87839e-30 | 1.000000 | 5.87848e-30 | 1.000000 |
| rad22         | 3.06068e-31 | 1.000000 | 3.06072e-31 | 1.000000 |
| rad45         | 1.73796e-31 | 1.000000 | 1.73799e-31 | 1.000000 |
| rad36         | 1.08818e-32 | 1.000000 | 1.08819e-32 | 1.000000 |
| rad24         | 4.60923e-33 | 1.000000 | 4.60929e-33 | 1.000000 |
| rad47         | 3.66234e-37 | 1.000000 | 3.66239e-37 | 1.000000 |

0.100000000E-08 Pa, 220.000000 K

| Rate constant      | True (fraction)       | Effective (fraction)  |
|--------------------|-----------------------|-----------------------|
| Total              | 4.29529e-17 (1.00 )   | 4.29521e-17 (1.00 )   |
| Formation of rad11 | 3.53712e-17 (0.823 )  | 3.53705e-17 (0.823 )  |
| Formation of rad6  | 6.75433e-18 (0.157 )  | 6.75421e-18 (0.157 )  |
| H-abstraction      | 8.27372e-19 (0.0193 ) | 8.27372e-19 (0.0193 ) |

| species            | PYtrue      | Cumul    | PYeffective | Cumul    |
|--------------------|-------------|----------|-------------|----------|
| Indene+H           | 0.950149    | 0.950149 | 0.950166    | 0.950166 |
| Benzene+2-propynyl | 0.0192623   | 0.969412 | 0.0192627   | 0.969428 |
| C2H2+PhCH2         | 0.0164075   | 0.985819 | 0.0164078   | 0.985836 |
| PhCCH+CH3          | 0.00739810  | 0.993217 | 0.00739823  | 0.993235 |
| PhCHCCH2+H         | 0.00390332  | 0.997121 | 0.00390339  | 0.997138 |
| PhCCCH3+H          | 0.00253726  | 0.999658 | 0.00253730  | 0.999675 |
| Ph+MeAc            | 0.000245755 | 0.999904 | 0.000245760 | 0.999921 |
| rad8               | 2.98950e-05 | 0.999934 | 2.98956e-05 | 0.999951 |
| rad9               | 2.46815e-05 | 0.999958 | 2.46820e-05 | 0.999976 |
| Phenyl+Allene      | 1.79045e-05 | 0.999976 | 0.00000     | 0.999976 |
| PAH7+H             | 1.68193e-05 | 0.999993 | 1.68195e-05 | 0.999992 |
| rad39              | 3.38120e-06 | 0.999996 | 3.38127e-06 | 0.999996 |
| rad12              | 1.68835e-06 | 0.999998 | 1.68838e-06 | 0.999997 |
| rad30              | 1.19029e-06 | 0.999999 | 1.19031e-06 | 0.999999 |
| PAH9+H             | 2.90623e-07 | 1.000000 | 2.90629e-07 | 0.999999 |
| rad15              | 2.69099e-07 | 1.000000 | 2.69104e-07 | 0.999999 |
| PhCH2CCH+H         | 2.52107e-07 | 1.00000  | 2.52111e-07 | 0.999999 |
| rad35              | 1.32604e-07 | 1.00000  | 1.32605e-07 | 1.000000 |
| rad38              | 8.40809e-08 | 1.00000  | 8.40823e-08 | 1.000000 |
| rad37              | 3.13100e-08 | 1.00000  | 3.13105e-08 | 1.000000 |
| rad46              | 1.31334e-09 | 1.00000  | 1.31335e-09 | 1.000000 |
| rad5               | 6.14093e-10 | 1.00000  | 6.14103e-10 | 1.000000 |
| rad60syn           | 1.79683e-10 | 1.00000  | 1.79687e-10 | 1.000000 |
| rad60anti          | 6.20569e-11 | 1.00000  | 6.20580e-11 | 1.000000 |
| PAH3+H             | 1.12269e-12 | 1.00000  | 1.12271e-12 | 1.000000 |

|               |             |         |             |          |
|---------------|-------------|---------|-------------|----------|
| rad59         | 3.50301e-13 | 1.00000 | 3.50307e-13 | 1.000000 |
| rad19syn      | 2.39064e-13 | 1.00000 | 2.39067e-13 | 1.000000 |
| rad50         | 3.97497e-14 | 1.00000 | 3.97505e-14 | 1.000000 |
| rad54         | 4.20837e-15 | 1.00000 | 4.20844e-15 | 1.000000 |
| PAH10+CH3     | 2.86444e-15 | 1.00000 | 2.86449e-15 | 1.000000 |
| rad43         | 6.85854e-16 | 1.00000 | 6.85867e-16 | 1.000000 |
| rad28         | 2.93415e-16 | 1.00000 | 2.93421e-16 | 1.000000 |
| rad62         | 1.50549e-16 | 1.00000 | 1.50552e-16 | 1.000000 |
| rad6          | 1.25197e-16 | 1.00000 | 1.25200e-16 | 1.000000 |
| rad26         | 7.36946e-17 | 1.00000 | 7.36959e-17 | 1.000000 |
| rad52         | 9.36563e-18 | 1.00000 | 9.36581e-18 | 1.000000 |
| PhcycC3H3_A+H | 6.23506e-18 | 1.00000 | 6.23517e-18 | 1.000000 |
| rad70         | 4.03527e-18 | 1.00000 | 4.03535e-18 | 1.000000 |
| rad55         | 1.81229e-18 | 1.00000 | 1.81231e-18 | 1.000000 |
| rad2          | 4.24309e-19 | 1.00000 | 4.24317e-19 | 1.000000 |
| rad51         | 1.98110e-19 | 1.00000 | 1.98114e-19 | 1.000000 |
| rad10         | 1.69320e-19 | 1.00000 | 1.69323e-19 | 1.000000 |
| PAH1+H        | 1.16260e-19 | 1.00000 | 1.16262e-19 | 1.000000 |
| rad1          | 2.93497e-20 | 1.00000 | 2.93501e-20 | 1.000000 |
| rad14         | 1.74500e-20 | 1.00000 | 1.74503e-20 | 1.000000 |
| rad25         | 9.57701e-21 | 1.00000 | 9.57718e-21 | 1.000000 |
| rad7          | 9.33918e-21 | 1.00000 | 9.33935e-21 | 1.000000 |
| rad34         | 5.98216e-21 | 1.00000 | 5.98226e-21 | 1.000000 |
| rad58         | 4.64426e-21 | 1.00000 | 4.64435e-21 | 1.000000 |
| rad3          | 3.94262e-21 | 1.00000 | 3.94270e-21 | 1.000000 |
| rad11         | 2.81035e-21 | 1.00000 | 2.81040e-21 | 1.000000 |
| rad4          | 2.04272e-21 | 1.00000 | 2.04276e-21 | 1.000000 |
| rad65         | 1.42039e-21 | 1.00000 | 1.42042e-21 | 1.000000 |
| rad27         | 1.26702e-21 | 1.00000 | 1.26703e-21 | 1.000000 |
| rad42         | 8.43153e-23 | 1.00000 | 8.43168e-23 | 1.000000 |
| rad13         | 5.31161e-23 | 1.00000 | 5.31170e-23 | 1.000000 |
| rad41         | 2.40058e-23 | 1.00000 | 2.40063e-23 | 1.000000 |
| rad31         | 9.64788e-25 | 1.00000 | 9.64805e-25 | 1.000000 |
| rad33         | 8.80785e-25 | 1.00000 | 8.80801e-25 | 1.000000 |
| rad20         | 3.37425e-27 | 1.00000 | 3.37431e-27 | 1.000000 |
| rad21         | 2.82908e-27 | 1.00000 | 2.82912e-27 | 1.000000 |
| rad23         | 4.08588e-29 | 1.00000 | 4.08595e-29 | 1.000000 |
| rad18         | 5.59624e-30 | 1.00000 | 5.59634e-30 | 1.000000 |
| rad45         | 4.10239e-31 | 1.00000 | 4.10245e-31 | 1.000000 |
| rad22         | 2.82426e-31 | 1.00000 | 2.82431e-31 | 1.000000 |
| rad36         | 2.57672e-32 | 1.00000 | 2.57677e-32 | 1.000000 |
| rad24         | 5.31319e-33 | 1.00000 | 5.31328e-33 | 1.000000 |
| rad47         | 1.52506e-36 | 1.00000 | 1.52509e-36 | 1.000000 |

0.100000000E-08 Pa, 230.000000 K

| Rate constant      | True (fraction)       | Effective (fraction)  |
|--------------------|-----------------------|-----------------------|
| Total              | 6.25016e-17 (1.00 )   | 6.25002e-17 (1.00 )   |
| Formation of rad11 | 5.06355e-17 (0.810 )  | 5.06343e-17 (0.810 )  |
| Formation of rad6  | 1.04318e-17 (0.167 )  | 1.04316e-17 (0.167 )  |
| H-abstraction      | 1.43428e-18 (0.0229 ) | 1.43428e-18 (0.0229 ) |

| species            | PYtrue      | Cumul    | PYeffective | Cumul    |
|--------------------|-------------|----------|-------------|----------|
| Indene+H           | 0.944516    | 0.944516 | 0.944538    | 0.944538 |
| Benzene+2-propynyl | 0.0229478   | 0.967464 | 0.0229483   | 0.967487 |
| C2H2+PhCH2         | 0.0172621   | 0.984726 | 0.0172625   | 0.984749 |
| PhCCH+CH3          | 0.00798938  | 0.992716 | 0.00798957  | 0.992739 |
| PhCHCCH2+H         | 0.00416893  | 0.996885 | 0.00416902  | 0.996908 |
| PhCCCH3+H          | 0.00271503  | 0.999600 | 0.00271509  | 0.999623 |
| Ph+MeAc            | 0.000288724 | 0.999888 | 0.000288730 | 0.999912 |
| rad8               | 3.26590e-05 | 0.999921 | 3.26598e-05 | 0.999944 |
| rad9               | 2.80961e-05 | 0.999949 | 2.80967e-05 | 0.999972 |
| Phenyl+Allene      | 2.29542e-05 | 0.999972 | 0.000000    | 0.999972 |
| PAH7+H             | 1.93897e-05 | 0.999991 | 1.93902e-05 | 0.999992 |
| rad39              | 3.99906e-06 | 0.999995 | 3.99916e-06 | 0.999996 |
| rad12              | 1.89524e-06 | 0.999997 | 1.89528e-06 | 0.999998 |
| rad30              | 1.28233e-06 | 0.999999 | 1.28236e-06 | 0.999999 |
| PhCH2CCH+H         | 3.81725e-07 | 0.999999 | 3.81734e-07 | 0.999999 |
| PAH9+H             | 3.19094e-07 | 0.999999 | 3.19100e-07 | 1.000000 |
| rad15              | 2.94806e-07 | 1.000000 | 2.94813e-07 | 1.000000 |
| rad35              | 1.43889e-07 | 1.000000 | 1.43892e-07 | 1.000000 |
| rad38              | 9.31440e-08 | 1.000000 | 9.31462e-08 | 1.000000 |
| rad37              | 4.19470e-08 | 1.000000 | 4.19480e-08 | 1.000000 |
| rad46              | 1.54769e-09 | 1.000000 | 1.54773e-09 | 1.000000 |
| rad5               | 9.45893e-10 | 1.000000 | 9.45914e-10 | 1.000000 |
| rad60syn           | 2.26302e-10 | 1.000000 | 2.26308e-10 | 1.000000 |
| rad60anti          | 7.99729e-11 | 1.000000 | 7.99748e-11 | 1.000000 |
| PAH3+H             | 1.94646e-12 | 1.000000 | 1.94651e-12 | 1.000000 |

|               |             |          |             |         |
|---------------|-------------|----------|-------------|---------|
| rad59         | 5.91559e-13 | 1.000000 | 5.91574e-13 | 1.00000 |
| rad19syn      | 5.76047e-13 | 1.000000 | 5.76061e-13 | 1.00000 |
| rad50         | 6.96960e-14 | 1.000000 | 6.96976e-14 | 1.00000 |
| rad54         | 1.17979e-14 | 1.000000 | 1.17982e-14 | 1.00000 |
| PAH10+CH3     | 7.98676e-15 | 1.000000 | 7.98695e-15 | 1.00000 |
| rad43         | 1.89885e-15 | 1.000000 | 1.89890e-15 | 1.00000 |
| rad62         | 4.58150e-16 | 1.000000 | 4.58160e-16 | 1.00000 |
| rad28         | 2.45264e-16 | 1.000000 | 2.45269e-16 | 1.00000 |
| rad6          | 1.05813e-16 | 1.000000 | 1.05816e-16 | 1.00000 |
| rad26         | 6.17392e-17 | 1.000000 | 6.17407e-17 | 1.00000 |
| PhcycC3H3_A+H | 2.44417e-17 | 1.000000 | 2.44422e-17 | 1.00000 |
| rad52         | 2.28788e-17 | 1.000000 | 2.28794e-17 | 1.00000 |
| rad70         | 1.51220e-17 | 1.000000 | 1.51224e-17 | 1.00000 |
| rad55         | 6.89280e-18 | 1.000000 | 6.89295e-18 | 1.00000 |
| rad51         | 6.35771e-19 | 1.000000 | 6.35785e-19 | 1.00000 |
| PAH1+H        | 5.21365e-19 | 1.000000 | 5.21377e-19 | 1.00000 |
| rad2          | 1.87304e-19 | 1.000000 | 1.87308e-19 | 1.00000 |
| rad10         | 1.72522e-19 | 1.000000 | 1.72526e-19 | 1.00000 |
| rad34         | 2.78859e-20 | 1.000000 | 2.78866e-20 | 1.00000 |
| rad58         | 1.86124e-20 | 1.000000 | 1.86128e-20 | 1.00000 |
| rad14         | 1.50054e-20 | 1.000000 | 1.50057e-20 | 1.00000 |
| rad1          | 1.30838e-20 | 1.000000 | 1.30841e-20 | 1.00000 |
| rad25         | 8.31328e-21 | 1.000000 | 8.31347e-21 | 1.00000 |
| rad7          | 7.91328e-21 | 1.000000 | 7.91346e-21 | 1.00000 |
| rad65         | 5.17416e-21 | 1.000000 | 5.17428e-21 | 1.00000 |
| rad3          | 2.77803e-21 | 1.000000 | 2.77810e-21 | 1.00000 |
| rad11         | 2.41377e-21 | 1.000000 | 2.41383e-21 | 1.00000 |
| rad4          | 1.44321e-21 | 1.000000 | 1.44324e-21 | 1.00000 |
| rad27         | 1.11335e-21 | 1.000000 | 1.11337e-21 | 1.00000 |
| rad42         | 4.29489e-22 | 1.000000 | 4.29498e-22 | 1.00000 |
| rad41         | 1.23970e-22 | 1.000000 | 1.23973e-22 | 1.00000 |
| rad13         | 4.51041e-23 | 1.000000 | 4.51052e-23 | 1.00000 |
| rad31         | 1.28051e-24 | 1.000000 | 1.28054e-24 | 1.00000 |
| rad33         | 8.34568e-25 | 1.000000 | 8.34587e-25 | 1.00000 |
| rad20         | 3.39802e-27 | 1.000000 | 3.39810e-27 | 1.00000 |
| rad21         | 2.87062e-27 | 1.000000 | 2.87069e-27 | 1.00000 |
| rad23         | 8.38938e-29 | 1.000000 | 8.38957e-29 | 1.00000 |
| rad18         | 5.34407e-30 | 1.000000 | 5.34420e-30 | 1.00000 |
| rad45         | 4.95470e-31 | 1.000000 | 4.95481e-31 | 1.00000 |
| rad22         | 2.61049e-31 | 1.000000 | 2.61056e-31 | 1.00000 |
| rad36         | 3.12484e-32 | 1.000000 | 3.12490e-32 | 1.00000 |
| rad24         | 6.19606e-33 | 1.000000 | 6.19621e-33 | 1.00000 |
| rad47         | 5.52650e-36 | 1.000000 | 5.52662e-36 | 1.00000 |

0.100000000E-08 Pa, 240.000000 K

| Rate constant      | True (fraction)       | Effective (fraction)  |
|--------------------|-----------------------|-----------------------|
| Total              | 8.83273e-17 (1.00 )   | 8.83247e-17 (1.00 )   |
| Formation of rad11 | 7.04077e-17 (0.797 )  | 7.04056e-17 (0.797 )  |
| Formation of rad6  | 1.55481e-17 (0.176 )  | 1.55476e-17 (0.176 )  |
| H-abstraction      | 2.37143e-18 (0.0268 ) | 2.37143e-18 (0.0268 ) |

| species            | PYtrue      | Cumul    | PYeffective | Cumul    |
|--------------------|-------------|----------|-------------|----------|
| Indene+H           | 0.938534    | 0.938534 | 0.938561    | 0.938561 |
| Benzene+2-propynyl | 0.0268483   | 0.965382 | 0.0268490   | 0.965410 |
| C2H2+PhCH2         | 0.0181765   | 0.983559 | 0.0181771   | 0.983587 |
| PhCCH+CH3          | 0.00862247  | 0.992181 | 0.00862271  | 0.992210 |
| PhCHCCH2+H         | 0.00445043  | 0.996631 | 0.00445055  | 0.996661 |
| PhCCCH3+H          | 0.00290220  | 0.999534 | 0.00290229  | 0.999563 |
| Ph+MeAc            | 0.000337758 | 0.999871 | 0.000337767 | 0.999901 |
| rad8               | 3.56294e-05 | 0.999907 | 3.56305e-05 | 0.999936 |
| rad9               | 3.19609e-05 | 0.999939 | 3.19619e-05 | 0.999968 |
| Phenyl+Allene      | 2.92584e-05 | 0.999968 | 0.00000     | 0.999968 |
| PAH7+H             | 2.23438e-05 | 0.999991 | 2.23444e-05 | 0.999991 |
| rad39              | 4.72012e-06 | 0.999995 | 4.72025e-06 | 0.999995 |
| rad12              | 2.12239e-06 | 0.999997 | 2.12244e-06 | 0.999998 |
| rad30              | 1.38320e-06 | 0.999999 | 1.38325e-06 | 0.999999 |
| PhCH2CCH+H         | 5.66275e-07 | 0.999999 | 5.66292e-07 | 0.999999 |
| PAH9+H             | 3.51138e-07 | 1.000000 | 3.51149e-07 | 1.000000 |
| rad15              | 3.23403e-07 | 1.00000  | 3.23412e-07 | 1.00000  |
| rad35              | 1.56441e-07 | 1.00000  | 1.56445e-07 | 1.00000  |
| rad38              | 1.03425e-07 | 1.00000  | 1.03428e-07 | 1.00000  |
| rad37              | 5.50656e-08 | 1.00000  | 5.50672e-08 | 1.00000  |
| rad46              | 1.82809e-09 | 1.00000  | 1.82814e-09 | 1.00000  |
| rad5               | 1.41703e-09 | 1.00000  | 1.41707e-09 | 1.00000  |
| rad60syn           | 2.84283e-10 | 1.00000  | 2.84290e-10 | 1.00000  |
| rad60anti          | 1.02613e-10 | 1.00000  | 1.02616e-10 | 1.00000  |
| PAH3+H             | 3.27490e-12 | 1.00000  | 3.27499e-12 | 1.00000  |

|               |             |         |             |         |
|---------------|-------------|---------|-------------|---------|
| rad19syn      | 1.29873e-12 | 1.00000 | 1.29877e-12 | 1.00000 |
| rad59         | 9.70705e-13 | 1.00000 | 9.70734e-13 | 1.00000 |
| rad50         | 1.19032e-13 | 1.00000 | 1.19036e-13 | 1.00000 |
| rad54         | 3.05322e-14 | 1.00000 | 3.05331e-14 | 1.00000 |
| PAH10+CH3     | 2.05205e-14 | 1.00000 | 2.05210e-14 | 1.00000 |
| rad43         | 4.83974e-15 | 1.00000 | 4.83988e-15 | 1.00000 |
| rad62         | 1.27363e-15 | 1.00000 | 1.27367e-15 | 1.00000 |
| rad28         | 2.05042e-16 | 1.00000 | 2.05048e-16 | 1.00000 |
| rad6          | 8.95658e-17 | 1.00000 | 8.95683e-17 | 1.00000 |
| PhcycC3H3_A+H | 8.53911e-17 | 1.00000 | 8.53936e-17 | 1.00000 |
| rad52         | 5.25993e-17 | 1.00000 | 5.26010e-17 | 1.00000 |
| rad26         | 5.17349e-17 | 1.00000 | 5.17364e-17 | 1.00000 |
| rad70         | 5.07092e-17 | 1.00000 | 5.07107e-17 | 1.00000 |
| rad55         | 2.34300e-17 | 1.00000 | 2.34307e-17 | 1.00000 |
| rad2          | 1.11032e-17 | 1.00000 | 1.11035e-17 | 1.00000 |
| PAH1+H        | 2.04480e-18 | 1.00000 | 2.04486e-18 | 1.00000 |
| rad51         | 1.86868e-18 | 1.00000 | 1.86873e-18 | 1.00000 |
| rad10         | 1.01795e-18 | 1.00000 | 1.01797e-18 | 1.00000 |
| rad1          | 7.84240e-19 | 1.00000 | 7.84262e-19 | 1.00000 |
| rad34         | 1.13110e-19 | 1.00000 | 1.13113e-19 | 1.00000 |
| rad58         | 6.63439e-20 | 1.00000 | 6.63458e-20 | 1.00000 |
| rad65         | 1.69869e-20 | 1.00000 | 1.69874e-20 | 1.00000 |
| rad14         | 1.29175e-20 | 1.00000 | 1.29179e-20 | 1.00000 |
| rad25         | 7.22653e-21 | 1.00000 | 7.22674e-21 | 1.00000 |
| rad7          | 6.71588e-21 | 1.00000 | 6.71607e-21 | 1.00000 |
| rad11         | 2.07829e-21 | 1.00000 | 2.07836e-21 | 1.00000 |
| rad42         | 1.87991e-21 | 1.00000 | 1.87996e-21 | 1.00000 |
| rad27         | 9.80081e-22 | 1.00000 | 9.80109e-22 | 1.00000 |
| rad41         | 5.49128e-22 | 1.00000 | 5.49144e-22 | 1.00000 |
| rad13         | 3.83686e-23 | 1.00000 | 3.83698e-23 | 1.00000 |
| rad31         | 1.72991e-24 | 1.00000 | 1.72997e-24 | 1.00000 |
| rad33         | 7.95360e-25 | 1.00000 | 7.95383e-25 | 1.00000 |
| rad4          | 1.00537e-26 | 1.00000 | 1.00540e-26 | 1.00000 |
| rad3          | 8.08061e-27 | 1.00000 | 8.08085e-27 | 1.00000 |
| rad20         | 3.44262e-27 | 1.00000 | 3.44273e-27 | 1.00000 |
| rad21         | 2.93160e-27 | 1.00000 | 2.93169e-27 | 1.00000 |
| rad23         | 1.85140e-28 | 1.00000 | 1.85146e-28 | 1.00000 |
| rad18         | 5.11896e-30 | 1.00000 | 5.11910e-30 | 1.00000 |
| rad45         | 5.61191e-31 | 1.00000 | 5.61208e-31 | 1.00000 |
| rad22         | 2.41684e-31 | 1.00000 | 2.41692e-31 | 1.00000 |
| rad36         | 3.55584e-32 | 1.00000 | 3.55594e-32 | 1.00000 |
| rad24         | 7.31223e-33 | 1.00000 | 7.31244e-33 | 1.00000 |
| rad47         | 1.77440e-35 | 1.00000 | 1.77444e-35 | 1.00000 |

0.100000000E-08 Pa, 250.000000 K

| Rate constant      | True (fraction)       | Effective (fraction)  |
|--------------------|-----------------------|-----------------------|
| Total              | 1.21641e-16 (1.00 )   | 1.21637e-16 (1.00 )   |
| Formation of rad11 | 9.54219e-17 (0.784 )  | 9.54182e-17 (0.784 )  |
| Formation of rad6  | 2.24583e-17 (0.185 )  | 2.24574e-17 (0.185 )  |
| H-abstraction      | 3.76121e-18 (0.0309 ) | 3.76121e-18 (0.0309 ) |

| species            | PYtrue      | Cumul    | PYeffective | Cumul    |
|--------------------|-------------|----------|-------------|----------|
| Indene+H           | 0.932238    | 0.932238 | 0.932272    | 0.932272 |
| Benzene+2-propynyl | 0.0309205   | 0.963159 | 0.0309216   | 0.963193 |
| C2H2+PhCH2         | 0.0191546   | 0.982313 | 0.0191553   | 0.982349 |
| PhCCH+CH3          | 0.00929823  | 0.991611 | 0.00929857  | 0.991647 |
| PhCHCCH2+H         | 0.00474792  | 0.996359 | 0.00474810  | 0.996395 |
| PhCCCH3+H          | 0.00309848  | 0.999458 | 0.00309859  | 0.999494 |
| Ph+MeAc            | 0.000393391 | 0.999851 | 0.000393405 | 0.999887 |
| rad8               | 3.88089e-05 | 0.999890 | 3.88103e-05 | 0.999926 |
| Phenyl+Allene      | 3.70855e-05 | 0.999927 | 0.000000    | 0.999926 |
| rad9               | 3.63257e-05 | 0.999963 | 3.63271e-05 | 0.999963 |
| PAH7+H             | 2.57317e-05 | 0.999989 | 2.57326e-05 | 0.999988 |
| rad39              | 5.55895e-06 | 0.999995 | 5.55916e-06 | 0.999994 |
| rad12              | 2.37060e-06 | 0.999997 | 2.37069e-06 | 0.999996 |
| rad30              | 1.49367e-06 | 0.999999 | 1.49373e-06 | 0.999998 |
| PhCH2CCH+H         | 8.24734e-07 | 0.999999 | 8.24764e-07 | 0.999998 |
| PAH9+H             | 3.87213e-07 | 1.000000 | 3.87228e-07 | 0.999999 |
| rad15              | 3.55187e-07 | 1.000000 | 3.55200e-07 | 0.999999 |
| rad35              | 1.70400e-07 | 1.000000 | 1.70407e-07 | 0.999999 |
| rad38              | 1.15089e-07 | 1.000000 | 1.15094e-07 | 1.000000 |
| rad37              | 7.10212e-08 | 1.000000 | 7.10239e-08 | 1.000000 |
| rad46              | 2.16348e-09 | 1.000000 | 2.16356e-09 | 1.000000 |
| rad5               | 2.07075e-09 | 1.000000 | 2.07082e-09 | 1.000000 |
| rad60syn           | 3.56139e-10 | 1.000000 | 3.56152e-10 | 1.000000 |
| rad60anti          | 1.31096e-10 | 1.000000 | 1.31101e-10 | 1.000000 |
| PAH3+H             | 5.36551e-12 | 1.000000 | 5.36572e-12 | 1.000000 |

|               |             |         |             |          |
|---------------|-------------|---------|-------------|----------|
| rad19syn      | 2.76179e-12 | 1.00000 | 2.76189e-12 | 1.000000 |
| rad59         | 1.55301e-12 | 1.00000 | 1.55307e-12 | 1.000000 |
| rad50         | 1.98576e-13 | 1.00000 | 1.98584e-13 | 1.000000 |
| rad54         | 7.36305e-14 | 1.00000 | 7.36332e-14 | 1.000000 |
| PAH10+CH3     | 4.90484e-14 | 1.00000 | 4.90502e-14 | 1.000000 |
| rad43         | 1.14663e-14 | 1.00000 | 1.14667e-14 | 1.000000 |
| rad62         | 3.26830e-15 | 1.00000 | 3.26842e-15 | 1.000000 |
| PhcycC3H3_A+H | 2.69203e-16 | 1.00000 | 2.69212e-16 | 1.000000 |
| rad28         | 1.71430e-16 | 1.00000 | 1.71437e-16 | 1.000000 |
| rad70         | 1.54047e-16 | 1.00000 | 1.54052e-16 | 1.000000 |
| rad52         | 1.14634e-16 | 1.00000 | 1.14638e-16 | 1.000000 |
| rad6          | 7.59040e-17 | 1.00000 | 7.59068e-17 | 1.000000 |
| rad55         | 7.20614e-17 | 1.00000 | 7.20642e-17 | 1.000000 |
| rad26         | 4.33590e-17 | 1.00000 | 4.33606e-17 | 1.000000 |
| PAH1+H        | 7.11981e-18 | 1.00000 | 7.12007e-18 | 1.000000 |
| rad2          | 6.32422e-18 | 1.00000 | 6.32446e-18 | 1.000000 |
| rad51         | 5.07774e-18 | 1.00000 | 5.07794e-18 | 1.000000 |
| rad10         | 9.95313e-19 | 1.00000 | 9.95350e-19 | 1.000000 |
| rad1          | 4.51880e-19 | 1.00000 | 4.51896e-19 | 1.000000 |
| rad34         | 4.05530e-19 | 1.00000 | 4.05545e-19 | 1.000000 |
| rad58         | 2.12987e-19 | 1.00000 | 2.12995e-19 | 1.000000 |
| rad65         | 5.08172e-20 | 1.00000 | 5.08191e-20 | 1.000000 |
| rad14         | 1.11326e-20 | 1.00000 | 1.11330e-20 | 1.000000 |
| rad42         | 7.19654e-21 | 1.00000 | 7.19681e-21 | 1.000000 |
| rad25         | 6.29077e-21 | 1.00000 | 6.29100e-21 | 1.000000 |
| rad7          | 5.70700e-21 | 1.00000 | 5.70720e-21 | 1.000000 |
| rad41         | 2.12408e-21 | 1.00000 | 2.12415e-21 | 1.000000 |
| rad11         | 1.79352e-21 | 1.00000 | 1.79359e-21 | 1.000000 |
| rad27         | 8.64330e-22 | 1.00000 | 8.64363e-22 | 1.000000 |
| rad13         | 3.26870e-23 | 1.00000 | 3.26882e-23 | 1.000000 |
| rad31         | 2.37650e-24 | 1.00000 | 2.37659e-24 | 1.000000 |
| rad33         | 7.62409e-25 | 1.00000 | 7.62437e-25 | 1.000000 |
| rad4          | 6.14816e-27 | 1.00000 | 6.14839e-27 | 1.000000 |
| rad3          | 4.63545e-27 | 1.00000 | 4.63563e-27 | 1.000000 |
| rad20         | 3.50939e-27 | 1.00000 | 3.50951e-27 | 1.000000 |
| rad21         | 3.01375e-27 | 1.00000 | 3.01386e-27 | 1.000000 |
| rad23         | 4.21089e-28 | 1.00000 | 4.21104e-28 | 1.000000 |
| rad18         | 4.91849e-30 | 1.00000 | 4.91866e-30 | 1.000000 |
| rad45         | 1.13369e-30 | 1.00000 | 1.13372e-30 | 1.000000 |
| rad22         | 2.24117e-31 | 1.00000 | 2.24126e-31 | 1.000000 |
| rad36         | 7.22093e-32 | 1.00000 | 7.22120e-32 | 1.000000 |
| rad24         | 8.73600e-33 | 1.00000 | 8.73632e-33 | 1.000000 |
| rad47         | 5.12438e-35 | 1.00000 | 5.12457e-35 | 1.000000 |

0.100000000E-08 Pa, 260.000000 K

| Rate constant      | True (fraction)       | Effective (fraction)  |
|--------------------|-----------------------|-----------------------|
| Total              | 1.63720e-16 (1.00 )   | 1.63713e-16 (1.00 )   |
| Formation of rad11 | 1.26419e-16 (0.772 )  | 1.26412e-16 (0.772 )  |
| Formation of rad6  | 3.15515e-17 (0.193 )  | 3.15499e-17 (0.193 )  |
| H-abstraction      | 5.75028e-18 (0.0351 ) | 5.75028e-18 (0.0351 ) |

| species            | PYtrue      | Cumul    | PYeffective | Cumul    |
|--------------------|-------------|----------|-------------|----------|
| Indene+H           | 0.925667    | 0.925667 | 0.925710    | 0.925710 |
| Benzene+2-propynyl | 0.0351226   | 0.960789 | 0.0351242   | 0.960834 |
| C2H2+PhCH2         | 0.0201996   | 0.980989 | 0.0202006   | 0.981034 |
| PhCCH+CH3          | 0.0100174   | 0.991006 | 0.0100178   | 0.991052 |
| PhCHCCH2+H         | 0.00506142  | 0.996068 | 0.00506166  | 0.996114 |
| PhCCCH3+H          | 0.00330346  | 0.999371 | 0.00330362  | 0.999418 |
| Ph+MeAc            | 0.000456149 | 0.999827 | 0.000456170 | 0.999874 |
| Phenyl+Allene      | 4.67508e-05 | 0.999874 | 0.00000     | 0.999874 |
| rad8               | 4.21981e-05 | 0.999916 | 4.22001e-05 | 0.999916 |
| rad9               | 4.12433e-05 | 0.999958 | 4.12452e-05 | 0.999957 |
| PAH7+H             | 2.96088e-05 | 0.999987 | 2.96102e-05 | 0.999987 |
| rad39              | 6.53167e-06 | 0.999994 | 6.53198e-06 | 0.999993 |
| rad12              | 2.64057e-06 | 0.999996 | 2.64070e-06 | 0.999996 |
| rad30              | 1.61455e-06 | 0.999998 | 1.61462e-06 | 0.999998 |
| PhCH2CCH+H         | 1.18129e-06 | 0.999999 | 1.18135e-06 | 0.999999 |
| PAH9+H             | 4.27826e-07 | 1.000000 | 4.27846e-07 | 0.999999 |
| rad15              | 3.90482e-07 | 1.000000 | 3.90501e-07 | 1.000000 |
| rad35              | 1.85925e-07 | 1.000000 | 1.85933e-07 | 1.000000 |
| rad38              | 1.28323e-07 | 1.000000 | 1.28328e-07 | 1.000000 |
| rad37              | 9.01921e-08 | 1.000000 | 9.01963e-08 | 1.000000 |
| rad5               | 2.95913e-09 | 1.000000 | 2.95927e-09 | 1.000000 |
| rad46              | 2.56443e-09 | 1.000000 | 2.56455e-09 | 1.000000 |
| rad60syn           | 4.44860e-10 | 1.000000 | 4.44880e-10 | 1.000000 |
| rad60anti          | 1.66767e-10 | 1.000000 | 1.66774e-10 | 1.000000 |
| PAH3+H             | 8.58431e-12 | 1.000000 | 8.58471e-12 | 1.000000 |



|               |             |         |             |          |
|---------------|-------------|---------|-------------|----------|
| rad19syn      | 5.57650e-12 | 1.00000 | 5.57676e-12 | 1.000000 |
| rad59         | 2.42911e-12 | 1.00000 | 2.42922e-12 | 1.000000 |
| rad50         | 3.24314e-13 | 1.00000 | 3.24329e-13 | 1.000000 |
| rad54         | 1.66745e-13 | 1.00000 | 1.66753e-13 | 1.000000 |
| PAH10+CH3     | 1.09928e-13 | 1.00000 | 1.09934e-13 | 1.000000 |
| rad43         | 2.54567e-14 | 1.00000 | 2.54579e-14 | 1.000000 |
| rad62         | 7.80914e-15 | 1.00000 | 7.80950e-15 | 1.000000 |
| PhcycC3H3_A+H | 7.73853e-16 | 1.00000 | 7.73889e-16 | 1.000000 |
| rad70         | 4.28321e-16 | 1.00000 | 4.28340e-16 | 1.000000 |
| rad52         | 2.38196e-16 | 1.00000 | 2.38208e-16 | 1.000000 |
| rad55         | 2.02608e-16 | 1.00000 | 2.02617e-16 | 1.000000 |
| rad28         | 1.43335e-16 | 1.00000 | 1.43342e-16 | 1.000000 |
| rad6          | 6.44068e-17 | 1.00000 | 6.44098e-17 | 1.000000 |
| rad26         | 3.63442e-17 | 1.00000 | 3.63459e-17 | 1.000000 |
| PAH1+H        | 2.22906e-17 | 1.00000 | 2.22916e-17 | 1.000000 |
| rad51         | 1.28526e-17 | 1.00000 | 1.28531e-17 | 1.000000 |
| rad2          | 3.01730e-18 | 1.00000 | 3.01744e-18 | 1.000000 |
| rad34         | 1.30240e-18 | 1.00000 | 1.30246e-18 | 1.000000 |
| rad10         | 1.00613e-18 | 1.00000 | 1.00617e-18 | 1.000000 |
| rad58         | 6.22358e-19 | 1.00000 | 6.22387e-19 | 1.000000 |
| rad1          | 2.18159e-19 | 1.00000 | 2.18168e-19 | 1.000000 |
| rad65         | 1.39790e-19 | 1.00000 | 1.39797e-19 | 1.000000 |
| rad42         | 2.44584e-20 | 1.00000 | 2.44595e-20 | 1.000000 |
| rad14         | 9.60502e-21 | 1.00000 | 9.60546e-21 | 1.000000 |
| rad41         | 7.28487e-21 | 1.00000 | 7.28522e-21 | 1.000000 |
| rad25         | 5.48412e-21 | 1.00000 | 5.48437e-21 | 1.000000 |
| rad7          | 4.85620e-21 | 1.00000 | 4.85643e-21 | 1.000000 |
| rad11         | 1.55147e-21 | 1.00000 | 1.55155e-21 | 1.000000 |
| rad27         | 7.63664e-22 | 1.00000 | 7.63699e-22 | 1.000000 |
| rad13         | 2.78900e-23 | 1.00000 | 2.78913e-23 | 1.000000 |
| rad31         | 3.31651e-24 | 1.00000 | 3.31665e-24 | 1.000000 |
| rad33         | 7.35147e-25 | 1.00000 | 7.35181e-25 | 1.000000 |
| rad4          | 3.98180e-27 | 1.00000 | 3.98198e-27 | 1.000000 |
| rad20         | 3.60021e-27 | 1.00000 | 3.60038e-27 | 1.000000 |
| rad21         | 3.11939e-27 | 1.00000 | 3.11953e-27 | 1.000000 |
| rad3          | 2.76352e-27 | 1.00000 | 2.76365e-27 | 1.000000 |
| rad23         | 1.00226e-27 | 1.00000 | 1.00230e-27 | 1.000000 |
| rad18         | 4.74067e-30 | 1.00000 | 4.74090e-30 | 1.000000 |
| rad45         | 2.43891e-30 | 1.00000 | 2.43902e-30 | 1.000000 |
| rad22         | 2.08170e-31 | 1.00000 | 2.08180e-31 | 1.000000 |
| rad36         | 1.55919e-31 | 1.00000 | 1.55927e-31 | 1.000000 |
| rad24         | 1.05699e-32 | 1.00000 | 1.05705e-32 | 1.000000 |
| rad47         | 1.34824e-34 | 1.00000 | 1.34831e-34 | 1.000000 |

0.100000000E-08 Pa, 270.000000 K

| Rate constant      | True (fraction)       | Effective (fraction)  |
|--------------------|-----------------------|-----------------------|
| Total              | 2.15887e-16 (1.00 )   | 2.15874e-16 (1.00 )   |
| Formation of rad11 | 1.64133e-16 (0.760 )  | 1.64123e-16 (0.760 )  |
| Formation of rad6  | 4.32452e-17 (0.200 )  | 4.32425e-17 (0.200 )  |
| H-abstraction      | 8.50919e-18 (0.0394 ) | 8.50919e-18 (0.0394 ) |

| species            | PYtrue      | Cumul    | PYeffective | Cumul    |
|--------------------|-------------|----------|-------------|----------|
| Indene+H           | 0.918855    | 0.918855 | 0.918909    | 0.918909 |
| Benzene+2-propynyl | 0.0394150   | 0.958270 | 0.0394174   | 0.958326 |
| C2H2+PhCH2         | 0.0213153   | 0.979586 | 0.0213165   | 0.979643 |
| PhCCH+CH3          | 0.0107802   | 0.990366 | 0.0107808   | 0.990423 |
| PhCHCCH2+H         | 0.00539084  | 0.995757 | 0.00539115  | 0.995815 |
| PhCCCH3+H          | 0.00351663  | 0.999273 | 0.00351684  | 0.999331 |
| Ph+MeAc            | 0.000526535 | 0.999800 | 0.000526566 | 0.999858 |
| Phenyl+Allene      | 5.86216e-05 | 0.999858 | 0.000000    | 0.999858 |
| rad9               | 4.67703e-05 | 0.999905 | 4.67730e-05 | 0.999905 |
| rad8               | 4.57958e-05 | 0.999951 | 4.57985e-05 | 0.999951 |
| PAH7+H             | 3.40355e-05 | 0.999985 | 3.40376e-05 | 0.999985 |
| rad39              | 7.65596e-06 | 0.999993 | 7.65640e-06 | 0.999992 |
| rad12              | 2.93281e-06 | 0.999996 | 2.93298e-06 | 0.999995 |
| rad30              | 1.74667e-06 | 0.999997 | 1.74677e-06 | 0.999997 |
| PhCH2CCH+H         | 1.66642e-06 | 0.999999 | 1.66651e-06 | 0.999999 |
| PAH9+H             | 4.73537e-07 | 0.999999 | 4.73564e-07 | 0.999999 |
| rad15              | 4.29630e-07 | 1.000000 | 4.29655e-07 | 0.999999 |
| rad35              | 2.03185e-07 | 1.000000 | 2.03197e-07 | 1.000000 |
| rad38              | 1.43333e-07 | 1.000000 | 1.43341e-07 | 1.000000 |
| rad37              | 1.12977e-07 | 1.000000 | 1.12984e-07 | 1.000000 |
| rad5               | 4.14381e-09 | 1.000000 | 4.14405e-09 | 1.000000 |
| rad46              | 3.04334e-09 | 1.000000 | 3.04352e-09 | 1.000000 |
| rad60syn           | 5.53971e-10 | 1.000000 | 5.54004e-10 | 1.000000 |
| rad60anti          | 2.11229e-10 | 1.000000 | 2.11241e-10 | 1.000000 |
| PAH3+H             | 1.34419e-11 | 1.000000 | 1.34427e-11 | 1.000000 |

|               |             |         |             |          |
|---------------|-------------|---------|-------------|----------|
| rad19syn      | 1.07500e-11 | 1.00000 | 1.07506e-11 | 1.000000 |
| rad59         | 3.72270e-12 | 1.00000 | 3.72291e-12 | 1.000000 |
| rad50         | 5.19450e-13 | 1.00000 | 5.19480e-13 | 1.000000 |
| rad54         | 3.56851e-13 | 1.00000 | 3.56872e-13 | 1.000000 |
| PAH10+CH3     | 2.32537e-13 | 1.00000 | 2.32551e-13 | 1.000000 |
| rad43         | 5.33186e-14 | 1.00000 | 5.33218e-14 | 1.000000 |
| rad62         | 1.74991e-14 | 1.00000 | 1.75001e-14 | 1.000000 |
| PhcycC3H3_A+H | 2.04647e-15 | 1.00000 | 2.04659e-15 | 1.000000 |
| rad70         | 1.09950e-15 | 1.00000 | 1.09956e-15 | 1.000000 |
| rad55         | 5.25298e-16 | 1.00000 | 5.25328e-16 | 1.000000 |
| rad52         | 4.74038e-16 | 1.00000 | 4.74066e-16 | 1.000000 |
| rad28         | 1.19847e-16 | 1.00000 | 1.19855e-16 | 1.000000 |
| PAH1+H        | 6.34376e-17 | 1.00000 | 6.34413e-17 | 1.000000 |
| rad6          | 5.47202e-17 | 1.00000 | 5.47234e-17 | 1.000000 |
| rad51         | 3.04907e-17 | 1.00000 | 3.04924e-17 | 1.000000 |
| rad26         | 3.04680e-17 | 1.00000 | 3.04698e-17 | 1.000000 |
| rad2          | 5.60458e-18 | 1.00000 | 5.60491e-18 | 1.000000 |
| rad34         | 3.79996e-18 | 1.00000 | 3.79019e-18 | 1.000000 |
| rad58         | 1.67024e-18 | 1.00000 | 1.67033e-18 | 1.000000 |
| rad10         | 1.04819e-18 | 1.00000 | 1.04825e-18 | 1.000000 |
| rad1          | 4.11048e-19 | 1.00000 | 4.11072e-19 | 1.000000 |
| rad65         | 3.56318e-19 | 1.00000 | 3.56339e-19 | 1.000000 |
| rad42         | 7.47520e-20 | 1.00000 | 7.47564e-20 | 1.000000 |
| rad41         | 2.24435e-20 | 1.00000 | 2.24449e-20 | 1.000000 |
| rad14         | 8.29664e-21 | 1.00000 | 8.29713e-21 | 1.000000 |
| rad25         | 4.78807e-21 | 1.00000 | 4.78835e-21 | 1.000000 |
| rad7          | 4.13788e-21 | 1.00000 | 4.13812e-21 | 1.000000 |
| rad11         | 1.34541e-21 | 1.00000 | 1.34550e-21 | 1.000000 |
| rad27         | 6.76011e-22 | 1.00000 | 6.76049e-22 | 1.000000 |
| rad13         | 2.38350e-23 | 1.00000 | 2.38364e-23 | 1.000000 |
| rad31         | 4.69573e-24 | 1.00000 | 4.69600e-24 | 1.000000 |
| rad33         | 7.13130e-25 | 1.00000 | 7.13172e-25 | 1.000000 |
| rad20         | 3.71764e-27 | 1.00000 | 3.71786e-27 | 1.000000 |
| rad4          | 3.27002e-27 | 1.00000 | 3.27021e-27 | 1.000000 |
| rad21         | 3.25155e-27 | 1.00000 | 3.25175e-27 | 1.000000 |
| rad23         | 2.50083e-27 | 1.00000 | 2.50097e-27 | 1.000000 |
| rad3          | 2.06299e-27 | 1.00000 | 2.06311e-27 | 1.000000 |
| rad45         | 1.39802e-29 | 1.00000 | 1.39810e-29 | 1.000000 |
| rad18         | 4.58393e-30 | 1.00000 | 4.58420e-30 | 1.000000 |
| rad36         | 8.98758e-31 | 1.00000 | 8.98810e-31 | 1.000000 |
| rad22         | 1.93698e-31 | 1.00000 | 1.93709e-31 | 1.000000 |
| rad24         | 1.29573e-32 | 1.00000 | 1.29581e-32 | 1.000000 |
| rad47         | 3.26704e-34 | 1.00000 | 3.26723e-34 | 1.000000 |

0.100000000E-08 Pa, 280.000000 K

| Rate constant      | True (fraction)       | Effective (fraction)  |
|--------------------|-----------------------|-----------------------|
| Total              | 2.79491e-16 (1.00 )   | 2.79471e-16 (1.00 )   |
| Formation of rad11 | 2.09281e-16 (0.749 )  | 2.09265e-16 (0.749 )  |
| Formation of rad6  | 5.79792e-17 (0.207 )  | 5.79748e-17 (0.207 )  |
| H-abstraction      | 1.22310e-17 (0.0438 ) | 1.22310e-17 (0.0438 ) |

| species            | PYtrue      | Cumul    | PYeffective | Cumul    |
|--------------------|-------------|----------|-------------|----------|
| Indene+H           | 0.911836    | 0.911836 | 0.911902    | 0.911902 |
| Benzene+2-propynyl | 0.0437616   | 0.955597 | 0.0437648   | 0.955667 |
| C2H2+PhCH2         | 0.0225048   | 0.978102 | 0.0225064   | 0.978173 |
| PhCCH+CH3          | 0.0115868   | 0.989689 | 0.0115877   | 0.989761 |
| PhCHCCH2+H         | 0.00573598  | 0.995425 | 0.00573640  | 0.995498 |
| PhCCCH3+H          | 0.00373735  | 0.999162 | 0.00373762  | 0.999235 |
| Ph+MeAc            | 0.000605024 | 0.999767 | 0.000605068 | 0.999840 |
| Phenyl+Allene      | 7.31232e-05 | 0.999840 | 0.000000    | 0.999840 |
| rad9               | 5.29668e-05 | 0.999893 | 5.29707e-05 | 0.999893 |
| rad8               | 4.95985e-05 | 0.999943 | 4.96021e-05 | 0.999943 |
| PAH7+H             | 3.90776e-05 | 0.999982 | 3.90805e-05 | 0.999982 |
| rad39              | 8.95101e-06 | 0.999991 | 8.95167e-06 | 0.999991 |
| rad12              | 3.24761e-06 | 0.999994 | 3.24784e-06 | 0.999994 |
| PhCH2CCH+H         | 2.31799e-06 | 0.999996 | 2.31816e-06 | 0.999996 |
| rad30              | 1.89092e-06 | 0.999998 | 1.89106e-06 | 0.999998 |
| PAH9+H             | 5.24965e-07 | 0.999999 | 5.25004e-07 | 0.999999 |
| rad15              | 4.72996e-07 | 0.999999 | 4.73029e-07 | 0.999999 |
| rad35              | 2.22365e-07 | 0.999999 | 2.22381e-07 | 0.999999 |
| rad38              | 1.60350e-07 | 1.000000 | 1.60362e-07 | 1.000000 |
| rad37              | 1.39791e-07 | 1.000000 | 1.39802e-07 | 1.000000 |
| rad5               | 5.69647e-09 | 1.000000 | 5.69689e-09 | 1.000000 |
| rad46              | 3.61467e-09 | 1.000000 | 3.61493e-09 | 1.000000 |
| rad60syn           | 6.87607e-10 | 1.000000 | 6.87657e-10 | 1.000000 |
| rad60anti          | 2.66382e-10 | 1.000000 | 2.66401e-10 | 1.000000 |
| PAH3+H             | 2.06375e-11 | 1.000000 | 2.06390e-11 | 1.000000 |

|               |             |          |             |          |
|---------------|-------------|----------|-------------|----------|
| rad19syn      | 1.98736e-11 | 1.000000 | 1.98751e-11 | 1.000000 |
| rad59         | 5.59978e-12 | 1.000000 | 5.60018e-12 | 1.000000 |
| rad50         | 8.17024e-13 | 1.000000 | 8.17085e-13 | 1.000000 |
| rad54         | 7.25446e-13 | 1.000000 | 7.25499e-13 | 1.000000 |
| PAH10+CH3     | 4.66810e-13 | 1.000000 | 4.66845e-13 | 1.000000 |
| rad43         | 1.05951e-13 | 1.000000 | 1.05959e-13 | 1.000000 |
| rad62         | 3.69972e-14 | 1.000000 | 3.69999e-14 | 1.000000 |
| PhcycC3H3_A+H | 5.01695e-15 | 1.000000 | 5.01732e-15 | 1.000000 |
| rad70         | 2.62501e-15 | 1.000000 | 2.62520e-15 | 1.000000 |
| rad55         | 1.26527e-15 | 1.000000 | 1.26537e-15 | 1.000000 |
| rad52         | 9.06731e-16 | 1.000000 | 9.06798e-16 | 1.000000 |
| PAH1+H        | 1.65665e-16 | 1.000000 | 1.65678e-16 | 1.000000 |
| rad28         | 1.00211e-16 | 1.000000 | 1.00218e-16 | 1.000000 |
| rad51         | 6.81450e-17 | 1.000000 | 6.81499e-17 | 1.000000 |
| rad6          | 4.65537e-17 | 1.000000 | 4.65571e-17 | 1.000000 |
| rad26         | 2.55450e-17 | 1.000000 | 2.55469e-17 | 1.000000 |
| rad34         | 1.00923e-17 | 1.000000 | 1.00931e-17 | 1.000000 |
| rad2          | 5.01323e-18 | 1.000000 | 5.01360e-18 | 1.000000 |
| rad58         | 4.14902e-18 | 1.000000 | 4.14932e-18 | 1.000000 |
| rad10         | 1.12243e-18 | 1.000000 | 1.12251e-18 | 1.000000 |
| rad65         | 8.47088e-19 | 1.000000 | 8.47150e-19 | 1.000000 |
| rad1          | 3.72621e-19 | 1.000000 | 3.72648e-19 | 1.000000 |
| rad42         | 2.07735e-19 | 1.000000 | 2.07750e-19 | 1.000000 |
| rad41         | 6.28127e-20 | 1.000000 | 6.28173e-20 | 1.000000 |
| rad14         | 7.17514e-21 | 1.000000 | 7.17567e-21 | 1.000000 |
| rad25         | 4.18691e-21 | 1.000000 | 4.18722e-21 | 1.000000 |
| rad7          | 3.53096e-21 | 1.000000 | 3.53122e-21 | 1.000000 |
| rad11         | 1.16978e-21 | 1.000000 | 1.16986e-21 | 1.000000 |
| rad27         | 5.99605e-22 | 1.000000 | 5.99649e-22 | 1.000000 |
| rad13         | 2.04048e-23 | 1.000000 | 2.04063e-23 | 1.000000 |
| rad31         | 6.73550e-24 | 1.000000 | 6.73600e-24 | 1.000000 |
| rad33         | 6.96029e-25 | 1.000000 | 6.96080e-25 | 1.000000 |
| rad23         | 6.44862e-27 | 1.000000 | 6.44910e-27 | 1.000000 |
| rad20         | 3.86499e-27 | 1.000000 | 3.86527e-27 | 1.000000 |
| rad21         | 3.41413e-27 | 1.000000 | 3.41438e-27 | 1.000000 |
| rad4          | 2.15761e-27 | 1.000000 | 2.15776e-27 | 1.000000 |
| rad3          | 1.17836e-27 | 1.000000 | 1.17845e-27 | 1.000000 |
| rad45         | 2.28094e-29 | 1.000000 | 2.28111e-29 | 1.000000 |
| rad18         | 4.44694e-30 | 1.000000 | 4.44726e-30 | 1.000000 |
| rad36         | 1.47525e-30 | 1.000000 | 1.47536e-30 | 1.000000 |
| rad22         | 1.80597e-31 | 1.000000 | 1.80611e-31 | 1.000000 |
| rad24         | 1.61000e-32 | 1.000000 | 1.61012e-32 | 1.000000 |
| rad47         | 7.35922e-34 | 1.000000 | 7.35976e-34 | 1.000000 |

0.100000000E-08 Pa, 290.000000 K

| Rate constant      | True (fraction)       | Effective (fraction)  |
|--------------------|-----------------------|-----------------------|
| Total              | 3.55893e-16 (1.00 )   | 3.55861e-16 (1.00 )   |
| Formation of rad11 | 2.62555e-16 (0.738 )  | 2.62530e-16 (0.738 )  |
| Formation of rad6  | 7.62093e-17 (0.214 )  | 7.62020e-17 (0.214 )  |
| H-abstraction      | 1.71289e-17 (0.0481 ) | 1.71289e-17 (0.0481 ) |

| species            | PYtrue      | Cumul    | PYeffective | Cumul    |
|--------------------|-------------|----------|-------------|----------|
| Indene+H           | 0.904639    | 0.904639 | 0.904720    | 0.904720 |
| Benzene+2-propynyl | 0.0481294   | 0.952768 | 0.0481337   | 0.952854 |
| C2H2+PhCH2         | 0.0237715   | 0.976540 | 0.0237736   | 0.976628 |
| PhCCH+CH3          | 0.0124370   | 0.988977 | 0.0124382   | 0.989066 |
| PhCHCCH2+H         | 0.00609654  | 0.995073 | 0.00609709  | 0.995163 |
| PhCCCH3+H          | 0.00396486  | 0.999038 | 0.00396522  | 0.999128 |
| Ph+MeAc            | 0.000692046 | 0.999730 | 0.000692109 | 0.999820 |
| Phenyl+Allene      | 9.07433e-05 | 0.999821 | 0.000000    | 0.999820 |
| rad9               | 5.98965e-05 | 0.999881 | 5.99019e-05 | 0.999880 |
| rad8               | 5.36003e-05 | 0.999934 | 5.36052e-05 | 0.999934 |
| PAH7+H             | 4.48062e-05 | 0.999979 | 4.48102e-05 | 0.999979 |
| rad39              | 1.04376e-05 | 0.999990 | 1.04385e-05 | 0.999989 |
| rad12              | 3.58505e-06 | 0.999993 | 3.58538e-06 | 0.999993 |
| PhCH2CCH+H         | 3.18249e-06 | 0.999996 | 3.18278e-06 | 0.999996 |
| rad30              | 2.04822e-06 | 0.999999 | 2.04840e-06 | 0.999998 |
| PAH9+H             | 5.82790e-07 | 0.999999 | 5.82843e-07 | 0.999998 |
| rad15              | 5.20962e-07 | 1.000000 | 5.21009e-07 | 0.999999 |
| rad35              | 2.43665e-07 | 1.000000 | 2.43686e-07 | 0.999999 |
| rad38              | 1.79629e-07 | 1.000000 | 1.79646e-07 | 0.999999 |
| rad37              | 1.71060e-07 | 1.000000 | 1.71075e-07 | 1.000000 |
| rad5               | 7.69913e-09 | 1.000000 | 7.69983e-09 | 1.000000 |
| rad46              | 4.29520e-09 | 1.000000 | 4.29559e-09 | 1.000000 |
| rad60syn           | 8.50568e-10 | 1.000000 | 8.50645e-10 | 1.000000 |
| rad60anti          | 3.34454e-10 | 1.000000 | 3.34484e-10 | 1.000000 |
| rad19syn           | 3.53639e-11 | 1.000000 | 3.53671e-11 | 1.000000 |

|               |             |         |             |          |
|---------------|-------------|---------|-------------|----------|
| PAH3+H        | 3.11103e-11 | 1.00000 | 3.11131e-11 | 1.000000 |
| rad59         | 8.27909e-12 | 1.00000 | 8.27984e-12 | 1.000000 |
| rad54         | 1.40689e-12 | 1.00000 | 1.40702e-12 | 1.000000 |
| rad50         | 1.26312e-12 | 1.00000 | 1.26324e-12 | 1.000000 |
| PAH10+CH3     | 8.93383e-13 | 1.00000 | 8.93464e-13 | 1.000000 |
| rad43         | 2.00697e-13 | 1.00000 | 2.00715e-13 | 1.000000 |
| rad62         | 7.41772e-14 | 1.00000 | 7.41839e-14 | 1.000000 |
| PhcycC3H3_A+H | 1.14777e-14 | 1.00000 | 1.14787e-14 | 1.000000 |
| rad70         | 5.86613e-15 | 1.00000 | 5.86667e-15 | 1.000000 |
| rad55         | 2.84964e-15 | 1.00000 | 2.84991e-15 | 1.000000 |
| rad52         | 1.67154e-15 | 1.00000 | 1.67169e-15 | 1.000000 |
| PAH1+H        | 4.00257e-16 | 1.00000 | 4.00293e-16 | 1.000000 |
| rad51         | 1.44108e-16 | 1.00000 | 1.44120e-16 | 1.000000 |
| rad28         | 8.37942e-17 | 1.00000 | 8.38018e-17 | 1.000000 |
| rad6          | 3.96682e-17 | 1.00000 | 3.96717e-17 | 1.000000 |
| rad34         | 2.48053e-17 | 1.00000 | 2.48074e-17 | 1.000000 |
| rad26         | 2.14204e-17 | 1.00000 | 2.14224e-17 | 1.000000 |
| rad58         | 9.60514e-18 | 1.00000 | 9.60604e-18 | 1.000000 |
| rad2          | 2.70146e-18 | 1.00000 | 2.70170e-18 | 1.000000 |
| rad65         | 1.88893e-18 | 1.00000 | 1.88910e-18 | 1.000000 |
| rad10         | 1.23251e-18 | 1.00000 | 1.23262e-18 | 1.000000 |
| rad42         | 5.29961e-19 | 1.00000 | 5.30009e-19 | 1.000000 |
| rad3          | 4.86562e-19 | 1.00000 | 4.86606e-19 | 1.000000 |
| rad4          | 2.58525e-19 | 1.00000 | 2.58549e-19 | 1.000000 |
| rad1          | 2.04092e-19 | 1.00000 | 2.04111e-19 | 1.000000 |
| rad41         | 1.61253e-19 | 1.00000 | 1.61268e-19 | 1.000000 |
| rad14         | 6.21315e-21 | 1.00000 | 6.21372e-21 | 1.000000 |
| rad25         | 3.66726e-21 | 1.00000 | 3.66759e-21 | 1.000000 |
| rad7          | 3.01809e-21 | 1.00000 | 3.01836e-21 | 1.000000 |
| rad11         | 1.01995e-21 | 1.00000 | 1.02004e-21 | 1.000000 |
| rad27         | 5.32941e-22 | 1.00000 | 5.32990e-22 | 1.000000 |
| rad13         | 1.75028e-23 | 1.00000 | 1.75043e-23 | 1.000000 |
| rad31         | 9.77162e-24 | 1.00000 | 9.77253e-24 | 1.000000 |
| rad33         | 6.83620e-25 | 1.00000 | 6.83682e-25 | 1.000000 |
| rad23         | 1.72475e-26 | 1.00000 | 1.72491e-26 | 1.000000 |
| rad20         | 4.04648e-27 | 1.00000 | 4.04685e-27 | 1.000000 |
| rad21         | 3.61207e-27 | 1.00000 | 3.61241e-27 | 1.000000 |
| rad45         | 6.15430e-29 | 1.00000 | 6.15486e-29 | 1.000000 |
| rad18         | 4.32867e-30 | 1.00000 | 4.32906e-30 | 1.000000 |
| rad36         | 4.01070e-30 | 1.00000 | 4.01106e-30 | 1.000000 |
| rad22         | 1.68831e-31 | 1.00000 | 1.68847e-31 | 1.000000 |
| rad24         | 2.02863e-32 | 1.00000 | 2.02881e-32 | 1.000000 |
| rad47         | 1.55335e-33 | 1.00000 | 1.55349e-33 | 1.000000 |

0.100000000E-08 Pa, 300.000000 K

| Rate constant      | True (fraction)       | Effective (fraction)  |
|--------------------|-----------------------|-----------------------|
| Total              | 6.34395e-16 (1.00 )   | 6.34337e-16 (1.00 )   |
| Formation of rad11 | 4.51153e-16 (0.711 )  | 4.51110e-16 (0.711 )  |
| Formation of rad6  | 1.51589e-16 (0.239 )  | 1.51574e-16 (0.239 )  |
| H-abstraction      | 3.16530e-17 (0.0499 ) | 3.16530e-17 (0.0499 ) |

| species            | PYtrue      | Cumul    | PYeffective | Cumul    |
|--------------------|-------------|----------|-------------|----------|
| Indene+H           | 0.891220    | 0.891220 | 0.891301    | 0.891301 |
| Benzene+2-propynyl | 0.0498949   | 0.941114 | 0.0498994   | 0.941200 |
| C2H2+PhCH2         | 0.0319123   | 0.973027 | 0.0319153   | 0.973115 |
| PhCCH+CH3          | 0.0149062   | 0.987933 | 0.0149076   | 0.988023 |
| PhCHCCH2+H         | 0.00657748  | 0.994510 | 0.00657808  | 0.994601 |
| PhCCCH3+H          | 0.00446904  | 0.998979 | 0.00446944  | 0.999071 |
| Ph+MeAc            | 0.000840208 | 0.999820 | 0.000840285 | 0.999911 |
| Phenyl+Allene      | 9.13505e-05 | 0.999911 | 0.000000    | 0.999911 |
| PAH7+H             | 6.60543e-05 | 0.999977 | 6.60603e-05 | 0.999977 |
| rad39              | 1.31473e-05 | 0.999990 | 1.31484e-05 | 0.999990 |
| PhCH2CCH+H         | 5.22128e-06 | 0.999995 | 5.22175e-06 | 0.999995 |
| rad30              | 2.21236e-06 | 0.999998 | 2.21257e-06 | 0.999997 |
| PAH9+H             | 8.00108e-07 | 0.999998 | 8.00181e-07 | 0.999998 |
| rad19anti          | 7.04525e-07 | 0.999999 | 7.04590e-07 | 0.999999 |
| rad35              | 2.87143e-07 | 0.999999 | 2.87169e-07 | 0.999999 |
| rad37              | 2.27555e-07 | 1.000000 | 2.27576e-07 | 1.000000 |
| rad38              | 2.12987e-07 | 1.000000 | 2.13006e-07 | 1.000000 |
| rad46              | 5.68759e-09 | 1.000000 | 5.68810e-09 | 1.000000 |
| rad60syn           | 1.08211e-09 | 1.000000 | 1.08221e-09 | 1.000000 |
| rad60anti          | 4.39254e-10 | 1.000000 | 4.39293e-10 | 1.000000 |
| rad19syn           | 6.92341e-11 | 1.000000 | 6.92404e-11 | 1.000000 |
| PAH3+H             | 6.10400e-11 | 1.000000 | 6.10456e-11 | 1.000000 |
| rad59              | 1.31853e-11 | 1.000000 | 1.31864e-11 | 1.000000 |
| rad54              | 3.21887e-12 | 1.000000 | 3.21917e-12 | 1.000000 |
| rad50              | 2.22681e-12 | 1.000000 | 2.22701e-12 | 1.000000 |

|               |             |          |             |          |
|---------------|-------------|----------|-------------|----------|
| PAH10+CH3     | 2.02585e-12 | 1.000000 | 2.02603e-12 | 1.000000 |
| rad67         | 7.75554e-13 | 1.000000 | 7.75624e-13 | 1.000000 |
| rad43         | 4.01324e-13 | 1.000000 | 4.01360e-13 | 1.000000 |
| rad62         | 1.66581e-13 | 1.000000 | 1.66596e-13 | 1.000000 |
| PhcycC3H3_A+H | 4.89128e-14 | 1.000000 | 4.89173e-14 | 1.000000 |
| rad70         | 1.94638e-14 | 1.000000 | 1.94656e-14 | 1.000000 |
| rad55         | 8.48746e-15 | 1.000000 | 8.48824e-15 | 1.000000 |
| rad6          | 6.49624e-15 | 1.000000 | 6.49684e-15 | 1.000000 |
| rad52         | 3.84231e-15 | 1.000000 | 3.84266e-15 | 1.000000 |
| PAH1+H        | 2.34440e-15 | 1.000000 | 2.34461e-15 | 1.000000 |
| rad28         | 1.37560e-15 | 1.000000 | 1.37573e-15 | 1.000000 |
| rad26         | 5.99428e-16 | 1.000000 | 5.99483e-16 | 1.000000 |
| rad51         | 4.07404e-16 | 1.000000 | 4.07441e-16 | 1.000000 |
| rad2          | 1.67314e-16 | 1.000000 | 1.67330e-16 | 1.000000 |
| rad34         | 1.57781e-16 | 1.000000 | 1.57796e-16 | 1.000000 |
| rad10         | 7.97986e-17 | 1.000000 | 7.98059e-17 | 1.000000 |
| rad58         | 2.99505e-17 | 1.000000 | 2.99533e-17 | 1.000000 |
| rad1          | 1.25907e-17 | 1.000000 | 1.25918e-17 | 1.000000 |
| rad65         | 6.35783e-18 | 1.000000 | 6.35841e-18 | 1.000000 |
| rad42         | 4.93395e-18 | 1.000000 | 4.93440e-18 | 1.000000 |
| rad41         | 1.53085e-18 | 1.000000 | 1.53098e-18 | 1.000000 |
| rad3          | 1.13812e-18 | 1.000000 | 1.13823e-18 | 1.000000 |
| rad7          | 5.97617e-19 | 1.000000 | 5.97671e-19 | 1.000000 |
| rad4          | 5.65358e-19 | 1.000000 | 5.65410e-19 | 1.000000 |
| rad11         | 3.02227e-19 | 1.000000 | 3.02254e-19 | 1.000000 |
| rad53         | 1.09682e-19 | 1.000000 | 1.09692e-19 | 1.000000 |
| rad25         | 6.59085e-20 | 1.000000 | 6.59145e-20 | 1.000000 |
| rad14         | 5.72398e-20 | 1.000000 | 5.72451e-20 | 1.000000 |
| rad64         | 2.63852e-20 | 1.000000 | 2.63876e-20 | 1.000000 |
| rad27         | 1.47827e-20 | 1.000000 | 1.47840e-20 | 1.000000 |
| rad13         | 3.95632e-21 | 1.000000 | 3.95668e-21 | 1.000000 |
| rad23         | 2.60797e-21 | 1.000000 | 2.60821e-21 | 1.000000 |
| rad33         | 3.95850e-22 | 1.000000 | 3.95886e-22 | 1.000000 |
| rad56         | 3.10995e-22 | 1.000000 | 3.11023e-22 | 1.000000 |
| rad31         | 2.87608e-22 | 1.000000 | 2.87634e-22 | 1.000000 |
| rad45         | 2.08290e-22 | 1.000000 | 2.08309e-22 | 1.000000 |
| rad61         | 3.56436e-23 | 1.000000 | 3.56468e-23 | 1.000000 |
| rad68syn      | 3.28824e-23 | 1.000000 | 3.28854e-23 | 1.000000 |
| rad68anti     | 2.37014e-23 | 1.000000 | 2.37036e-23 | 1.000000 |
| rad21         | 1.10050e-23 | 1.000000 | 1.10060e-23 | 1.000000 |
| rad20         | 8.39464e-24 | 1.000000 | 8.39539e-24 | 1.000000 |
| rad36         | 7.11934e-24 | 1.000000 | 7.11999e-24 | 1.000000 |
| rad18         | 8.01400e-26 | 1.000000 | 8.01474e-26 | 1.000000 |
| rad9          | 6.13980e-26 | 1.000000 | 6.14036e-26 | 1.000000 |
| rad40syn      | 5.33122e-26 | 1.000000 | 5.33171e-26 | 1.000000 |
| rad22         | 5.01324e-26 | 1.000000 | 5.01370e-26 | 1.000000 |
| rad40anti     | 1.32361e-26 | 1.000000 | 1.32374e-26 | 1.000000 |
| PAH8+H        | 1.18606e-26 | 1.000000 | 1.18617e-26 | 1.000000 |
| rad73         | 1.00619e-26 | 1.000000 | 1.00629e-26 | 1.000000 |
| rad5          | 2.39481e-27 | 1.000000 | 2.39502e-27 | 1.000000 |
| rad24         | 4.89138e-28 | 1.000000 | 4.89182e-28 | 1.000000 |
| rad71         | 9.35036e-29 | 1.000000 | 9.35121e-29 | 1.000000 |
| rad15         | 3.56338e-29 | 1.000000 | 3.56370e-29 | 1.000000 |
| rad12         | 1.71989e-31 | 1.000000 | 1.72004e-31 | 1.000000 |
| rad47         | 2.86302e-33 | 1.000000 | 2.86328e-33 | 1.000000 |
| rad72         | 1.61637e-42 | 1.000000 | 1.61652e-42 | 1.000000 |
| rad8          | 1.55101e-44 | 1.000000 | 1.55115e-44 | 1.000000 |

0.100000000E-08 Pa, 400.000000 K

=====

| Rate constant      | True (fraction)       | Effective (fraction)  |
|--------------------|-----------------------|-----------------------|
| Total              | 5.11288e-15 (1.00 )   | 5.10968e-15 (1.00 )   |
| Formation of rad11 | 3.08094e-15 (0.603 )  | 3.07881e-15 (0.603 )  |
| Formation of rad6  | 1.54092e-15 (0.301 )  | 1.53985e-15 (0.301 )  |
| H-abstraction      | 4.91025e-16 (0.0960 ) | 4.91025e-16 (0.0961 ) |

| species            | PYtrue      | Cumul    | PYeffective | Cumul    |
|--------------------|-------------|----------|-------------|----------|
| Indene+H           | 0.804485    | 0.804485 | 0.804989    | 0.804989 |
| Benzene+2-propynyl | 0.0960368   | 0.900522 | 0.0960969   | 0.901086 |
| C2H2+PhCH2         | 0.0525421   | 0.953064 | 0.0525751   | 0.953661 |
| PhCCH+CH3          | 0.0262535   | 0.979317 | 0.0262700   | 0.979931 |
| PhCHCCH2+H         | 0.0106706   | 0.989988 | 0.0106772   | 0.990608 |
| PhCCCH3+H          | 0.00676080  | 0.996749 | 0.00676504  | 0.997373 |
| Ph+MeAc            | 0.00228512  | 0.999034 | 0.00228655  | 0.999660 |
| Phenyl+Allene      | 0.000625754 | 0.999659 | 0.000000    | 0.999660 |
| PAH7+H             | 0.000215668 | 0.999875 | 0.000215804 | 0.999875 |
| PhCH2CCH+H         | 6.37921e-05 | 0.999939 | 6.38320e-05 | 0.999939 |
| rad39              | 4.88390e-05 | 0.999988 | 4.88696e-05 | 0.999988 |

|               |             |          |             |          |
|---------------|-------------|----------|-------------|----------|
| rad30         | 4.71374e-06 | 0.999992 | 4.71670e-06 | 0.999993 |
| rad19anti     | 2.55284e-06 | 0.999995 | 2.55443e-06 | 0.999995 |
| PAH9+H        | 2.27172e-06 | 0.999997 | 2.27314e-06 | 0.999998 |
| rad37         | 9.72231e-07 | 0.999998 | 9.72835e-07 | 0.999999 |
| rad35         | 7.27597e-07 | 0.999999 | 7.28053e-07 | 0.999999 |
| rad38         | 6.64248e-07 | 1.000000 | 6.64664e-07 | 1.000000 |
| rad46         | 2.95927e-08 | 1.000000 | 2.96112e-08 | 1.000000 |
| rad60syn      | 6.77132e-09 | 1.000000 | 6.77556e-09 | 1.000000 |
| rad19syn      | 4.62790e-09 | 1.000000 | 4.63079e-09 | 1.000000 |
| rad60anti     | 3.07480e-09 | 1.000000 | 3.07673e-09 | 1.000000 |
| PAH3+H        | 1.45800e-09 | 1.000000 | 1.45892e-09 | 1.000000 |
| rad54         | 4.18669e-10 | 1.000000 | 4.18931e-10 | 1.000000 |
| rad59         | 2.84711e-10 | 1.000000 | 2.84889e-10 | 1.000000 |
| PAH10+CH3     | 1.98074e-10 | 1.000000 | 1.98198e-10 | 1.000000 |
| rad50         | 7.81204e-11 | 1.000000 | 7.81693e-11 | 1.000000 |
| rad43         | 3.26732e-11 | 1.000000 | 3.26936e-11 | 1.000000 |
| rad67         | 2.48951e-11 | 1.000000 | 2.49108e-11 | 1.000000 |
| PhcycC3H3_A+H | 2.37988e-11 | 1.000000 | 2.38137e-11 | 1.000000 |
| rad62         | 2.26679e-11 | 1.000000 | 2.26821e-11 | 1.000000 |
| rad70         | 7.63979e-12 | 1.000000 | 7.64458e-12 | 1.000000 |
| rad55         | 3.50822e-12 | 1.000000 | 3.51042e-12 | 1.000000 |
| PAH1+H        | 2.19400e-12 | 1.000000 | 2.19537e-12 | 1.000000 |
| rad52         | 4.56316e-13 | 1.000000 | 4.56602e-13 | 1.000000 |
| rad34         | 1.75088e-13 | 1.000000 | 1.75198e-13 | 1.000000 |
| rad51         | 1.36997e-13 | 1.000000 | 1.37083e-13 | 1.000000 |
| rad58         | 1.74184e-14 | 1.000000 | 1.74293e-14 | 1.000000 |
| rad42         | 7.28195e-15 | 1.000000 | 7.28651e-15 | 1.000000 |
| rad65         | 3.20497e-15 | 1.000000 | 3.20698e-15 | 1.000000 |
| rad41         | 2.20567e-15 | 1.000000 | 2.20705e-15 | 1.000000 |
| rad6          | 1.51438e-15 | 1.000000 | 1.51533e-15 | 1.000000 |
| rad53         | 9.04225e-16 | 1.000000 | 9.04789e-16 | 1.000000 |
| rad64         | 3.15111e-16 | 1.000000 | 3.15309e-16 | 1.000000 |
| rad28         | 2.74421e-16 | 1.000000 | 2.74592e-16 | 1.000000 |
| rad26         | 1.17644e-16 | 1.000000 | 1.17718e-16 | 1.000000 |
| rad56         | 1.60193e-17 | 1.000000 | 1.60293e-17 | 1.000000 |
| rad23         | 5.54063e-18 | 1.000000 | 5.54411e-18 | 1.000000 |
| rad68syn      | 1.85188e-18 | 1.000000 | 1.85304e-18 | 1.000000 |
| rad68anti     | 1.33289e-18 | 1.000000 | 1.33373e-18 | 1.000000 |
| rad61         | 9.28153e-19 | 1.000000 | 9.28733e-19 | 1.000000 |
| rad4          | 7.26431e-19 | 1.000000 | 7.26885e-19 | 1.000000 |
| rad3          | 4.46947e-19 | 1.000000 | 4.47227e-19 | 1.000000 |
| rad45         | 2.64934e-19 | 1.000000 | 2.65099e-19 | 1.000000 |
| rad7          | 1.53875e-19 | 1.000000 | 1.53972e-19 | 1.000000 |
| rad10         | 1.36828e-19 | 1.000000 | 1.36914e-19 | 1.000000 |
| rad11         | 1.28380e-19 | 1.000000 | 1.28460e-19 | 1.000000 |
| rad1          | 7.17869e-20 | 1.000000 | 7.18318e-20 | 1.000000 |
| rad25         | 2.27145e-20 | 1.000000 | 2.27287e-20 | 1.000000 |
| rad14         | 1.81611e-20 | 1.000000 | 1.81724e-20 | 1.000000 |
| rad40syn      | 1.44546e-20 | 1.000000 | 1.44636e-20 | 1.000000 |
| rad36         | 1.14081e-20 | 1.000000 | 1.14153e-20 | 1.000000 |
| PAH8+H        | 8.90780e-21 | 1.000000 | 8.91337e-21 | 1.000000 |
| rad27         | 5.95391e-21 | 1.000000 | 5.95763e-21 | 1.000000 |
| rad31         | 4.49562e-21 | 1.000000 | 4.49843e-21 | 1.000000 |
| rad40anti     | 3.67526e-21 | 1.000000 | 3.67756e-21 | 1.000000 |
| rad73         | 2.38291e-21 | 1.000000 | 2.38440e-21 | 1.000000 |
| rad13         | 1.64272e-21 | 1.000000 | 1.64375e-21 | 1.000000 |
| rad33         | 4.84551e-22 | 1.000000 | 4.84855e-22 | 1.000000 |
| rad2          | 3.64306e-22 | 1.000000 | 3.64535e-22 | 1.000000 |
| rad71         | 9.34273e-23 | 1.000000 | 9.34862e-23 | 1.000000 |
| rad21         | 2.89558e-23 | 1.000000 | 2.89739e-23 | 1.000000 |
| rad20         | 1.85108e-23 | 1.000000 | 1.85224e-23 | 1.000000 |
| rad9          | 1.32879e-24 | 1.000000 | 1.32962e-24 | 1.000000 |
| rad18         | 8.22034e-26 | 1.000000 | 8.22548e-26 | 1.000000 |
| rad22         | 4.06476e-26 | 1.000000 | 4.06730e-26 | 1.000000 |
| rad24         | 1.02123e-26 | 1.000000 | 1.02186e-26 | 1.000000 |
| rad5          | 3.45574e-27 | 1.000000 | 3.45790e-27 | 1.000000 |
| rad15         | 8.00665e-28 | 1.000000 | 8.01166e-28 | 1.000000 |
| rad72         | 8.88314e-29 | 1.000000 | 8.88869e-29 | 1.000000 |
| rad12         | 1.76907e-29 | 1.000000 | 1.77018e-29 | 1.000000 |
| rad47         | 7.50666e-31 | 1.000000 | 7.51136e-31 | 1.000000 |
| rad8          | 4.40934e-42 | 1.000000 | 4.41210e-42 | 1.000000 |

0.100000000E-08 Pa, 500.000000 K

=====

| Rate constant      | True (fraction)      | Effective (fraction) |
|--------------------|----------------------|----------------------|
| Total              | 2.11551e-14 (1.00 )  | 2.10968e-14 (1.00 )  |
| Formation of rad11 | 1.10850e-14 (0.524 ) | 1.10494e-14 (0.524 ) |
| Formation of rad6  | 7.08033e-15 (0.335 ) | 7.05760e-15 (0.335 ) |
| H-abstraction      | 2.98976e-15 (0.141 ) | 2.98976e-15 (0.142 ) |

| species            | PYtrue      | Cumul    | PYeffective | Cumul    |
|--------------------|-------------|----------|-------------|----------|
| Indene+H           | 0.706762    | 0.706762 | 0.708716    | 0.708716 |
| Benzene+2-propynyl | 0.141326    | 0.848088 | 0.141717    | 0.850433 |
| C2H2+PhCH2         | 0.0811037   | 0.929191 | 0.0813279   | 0.931761 |
| PhCCH+CH3          | 0.0389496   | 0.968141 | 0.0390573   | 0.970818 |
| PhCHCCH2+H         | 0.0153921   | 0.983533 | 0.0154346   | 0.986253 |
| PhCCCH3+H          | 0.00823928  | 0.991772 | 0.00826206  | 0.994515 |
| Ph+MeAc            | 0.00432839  | 0.996101 | 0.00434036  | 0.998855 |
| Phenyl+Allene      | 0.00275756  | 0.998858 | 0.000000    | 0.998855 |
| PAH7+H             | 0.000574793 | 0.999433 | 0.000576383 | 0.999432 |
| PhCH2CCH+H         | 0.000399546 | 0.999833 | 0.000400651 | 0.999832 |
| rad39              | 0.000137925 | 0.999971 | 0.000138306 | 0.999971 |
| rad30              | 9.14625e-06 | 0.999980 | 9.17153e-06 | 0.999980 |
| rad19anti          | 7.87872e-06 | 0.999988 | 7.90052e-06 | 0.999988 |
| PAH9+H             | 6.12734e-06 | 0.999994 | 6.14428e-06 | 0.999994 |
| rad37              | 2.41829e-06 | 0.999996 | 2.42498e-06 | 0.999996 |
| rad38              | 1.93439e-06 | 0.999998 | 1.93974e-06 | 0.999998 |
| rad35              | 1.76562e-06 | 1.000000 | 1.77051e-06 | 1.000000 |
| rad46              | 1.27870e-07 | 1.000000 | 1.28224e-07 | 1.000000 |
| rad19syn           | 7.63986e-08 | 1.000000 | 7.66098e-08 | 1.000000 |
| rad60syn           | 2.91346e-08 | 1.000000 | 2.92151e-08 | 1.000000 |
| PAH3+H             | 1.45909e-08 | 1.000000 | 1.46312e-08 | 1.000000 |
| rad60anti          | 1.41795e-08 | 1.000000 | 1.42187e-08 | 1.000000 |
| rad54              | 1.02843e-08 | 1.000000 | 1.03128e-08 | 1.000000 |
| PAH10+CH3          | 3.35592e-09 | 1.000000 | 3.36520e-09 | 1.000000 |
| rad59              | 2.61933e-09 | 1.000000 | 2.62658e-09 | 1.000000 |
| PhcycC3H3_A+H      | 1.25838e-09 | 1.000000 | 1.26187e-09 | 1.000000 |
| rad50              | 1.15864e-09 | 1.000000 | 1.16185e-09 | 1.000000 |
| rad62              | 4.84009e-10 | 1.000000 | 4.85347e-10 | 1.000000 |
| rad43              | 4.60419e-10 | 1.000000 | 4.61691e-10 | 1.000000 |
| rad67              | 3.97898e-10 | 1.000000 | 3.98999e-10 | 1.000000 |
| rad70              | 3.42517e-10 | 1.000000 | 3.43464e-10 | 1.000000 |
| PAH1+H             | 1.64298e-10 | 1.000000 | 1.64753e-10 | 1.000000 |
| rad55              | 1.59822e-10 | 1.000000 | 1.60264e-10 | 1.000000 |
| rad34              | 1.41616e-11 | 1.000000 | 1.42007e-11 | 1.000000 |
| rad52              | 1.34820e-11 | 1.000000 | 1.35193e-11 | 1.000000 |
| rad51              | 7.24796e-12 | 1.000000 | 7.26800e-12 | 1.000000 |
| rad58              | 1.01105e-12 | 1.000000 | 1.01385e-12 | 1.000000 |
| rad42              | 6.16327e-13 | 1.000000 | 6.18031e-13 | 1.000000 |
| rad53              | 2.35883e-13 | 1.000000 | 2.36535e-13 | 1.000000 |
| rad65              | 2.01730e-13 | 1.000000 | 2.02287e-13 | 1.000000 |
| rad41              | 1.64828e-13 | 1.000000 | 1.65283e-13 | 1.000000 |
| rad64              | 9.67571e-14 | 1.000000 | 9.70247e-14 | 1.000000 |
| rad2               | 5.38183e-14 | 1.000000 | 5.39671e-14 | 1.000000 |
| rad56              | 1.22099e-14 | 1.000000 | 1.22437e-14 | 1.000000 |
| rad1               | 6.28957e-15 | 1.000000 | 6.30696e-15 | 1.000000 |
| rad68syn           | 1.45353e-15 | 1.000000 | 1.45755e-15 | 1.000000 |
| rad10              | 1.13427e-15 | 1.000000 | 1.13740e-15 | 1.000000 |
| rad68anti          | 1.02673e-15 | 1.000000 | 1.02957e-15 | 1.000000 |
| rad23              | 6.36903e-16 | 1.000000 | 6.38664e-16 | 1.000000 |
| rad6               | 4.30602e-16 | 1.000000 | 4.31792e-16 | 1.000000 |
| rad61              | 4.14122e-16 | 1.000000 | 4.15268e-16 | 1.000000 |
| rad3               | 2.34179e-16 | 1.000000 | 2.34826e-16 | 1.000000 |
| rad45              | 1.94358e-16 | 1.000000 | 1.94896e-16 | 1.000000 |
| rad4               | 1.44976e-16 | 1.000000 | 1.45377e-16 | 1.000000 |
| rad28              | 5.70771e-17 | 1.000000 | 5.72350e-17 | 1.000000 |
| PAH8+H             | 3.33496e-17 | 1.000000 | 3.34418e-17 | 1.000000 |
| rad40syn           | 2.92057e-17 | 1.000000 | 2.92865e-17 | 1.000000 |
| rad26              | 2.41604e-17 | 1.000000 | 2.42272e-17 | 1.000000 |
| rad36              | 1.03662e-17 | 1.000000 | 1.03948e-17 | 1.000000 |
| rad40anti          | 8.32431e-18 | 1.000000 | 8.34732e-18 | 1.000000 |
| rad73              | 5.15895e-18 | 1.000000 | 5.17322e-18 | 1.000000 |
| rad71              | 4.73020e-19 | 1.000000 | 4.74328e-19 | 1.000000 |
| rad11              | 8.46712e-20 | 1.000000 | 8.49054e-20 | 1.000000 |
| rad7               | 5.23310e-20 | 1.000000 | 5.24757e-20 | 1.000000 |
| rad31              | 2.28423e-20 | 1.000000 | 2.29054e-20 | 1.000000 |
| rad25              | 1.03857e-20 | 1.000000 | 1.04143e-20 | 1.000000 |
| rad14              | 7.33208e-21 | 1.000000 | 7.35236e-21 | 1.000000 |
| rad27              | 3.27929e-21 | 1.000000 | 3.28836e-21 | 1.000000 |
| rad13              | 1.97829e-21 | 1.000000 | 1.98376e-21 | 1.000000 |
| rad33              | 1.13664e-21 | 1.000000 | 1.13977e-21 | 1.000000 |
| rad21              | 1.71850e-22 | 1.000000 | 1.72325e-22 | 1.000000 |
| rad9               | 8.86246e-23 | 1.000000 | 8.88692e-23 | 1.000000 |
| rad20              | 8.81103e-23 | 1.000000 | 8.83534e-23 | 1.000000 |
| rad72              | 8.05354e-24 | 1.000000 | 8.07581e-24 | 1.000000 |
| rad24              | 6.91963e-25 | 1.000000 | 6.93876e-25 | 1.000000 |
| rad22              | 4.33509e-25 | 1.000000 | 4.34707e-25 | 1.000000 |
| rad18              | 1.33382e-25 | 1.000000 | 1.33751e-25 | 1.000000 |

|       |             |         |             |         |
|-------|-------------|---------|-------------|---------|
| rad15 | 5.65043e-26 | 1.00000 | 5.66605e-26 | 1.00000 |
| rad12 | 6.95667e-27 | 1.00000 | 6.97591e-27 | 1.00000 |
| rad5  | 3.19206e-27 | 1.00000 | 3.20089e-27 | 1.00000 |
| rad47 | 4.86077e-29 | 1.00000 | 4.87421e-29 | 1.00000 |
| rad8  | 8.30250e-39 | 1.00000 | 8.32545e-39 | 1.00000 |

0.100000000E-08 Pa, 600.000000 K

| Rate constant      | True (fraction) |          | Effective (fraction) |          |
|--------------------|-----------------|----------|----------------------|----------|
| Total              | 6.08120e-14     | (1.00 )  | 6.02869e-14          | (1.00 )  |
| Formation of rad11 | 2.83304e-14     | (0.466 ) | 2.80313e-14          | (0.465 ) |
| Formation of rad6  | 2.13840e-14     | (0.352 ) | 2.11582e-14          | (0.351 ) |
| H-abstraction      | 1.10975e-14     | (0.182 ) | 1.10975e-14          | (0.184 ) |

  

| species            | PYtrue      | Cumul    | PYeffective | Cumul    |
|--------------------|-------------|----------|-------------|----------|
| Indene+H           | 0.606934    | 0.606934 | 0.612219    | 0.612219 |
| Benzene+2-propynyl | 0.182488    | 0.789422 | 0.184077    | 0.796297 |
| C2H2+PhCH2         | 0.112836    | 0.902258 | 0.113819    | 0.910116 |
| PhCCH+CH3          | 0.0502927   | 0.952551 | 0.0507307   | 0.960846 |
| PhCHCCH2+H         | 0.0208956   | 0.973447 | 0.0210776   | 0.981924 |
| Phenyl+Allene      | 0.00863333  | 0.982080 | 0.000000    | 0.981924 |
| PhCCCH3+H          | 0.00840933  | 0.990489 | 0.00848258  | 0.990406 |
| Ph+MeAc            | 0.00630896  | 0.996798 | 0.00636390  | 0.996770 |
| PhCH2CCH+H         | 0.00158536  | 0.998384 | 0.00159917  | 0.998369 |
| PAH7+H             | 0.00124706  | 0.999631 | 0.00125792  | 0.999627 |
| rad39              | 0.000304554 | 0.999935 | 0.000307206 | 0.999935 |
| rad19anti          | 2.07283e-05 | 0.999956 | 2.09088e-05 | 0.999955 |
| rad30              | 1.54421e-05 | 0.999971 | 1.55766e-05 | 0.999971 |
| PAH9+H             | 1.45719e-05 | 0.999986 | 1.46988e-05 | 0.999986 |
| rad38              | 4.88300e-06 | 0.999991 | 4.92552e-06 | 0.999991 |
| rad37              | 4.23980e-06 | 0.999995 | 4.27673e-06 | 0.999995 |
| rad35              | 3.83137e-06 | 0.999999 | 3.86474e-06 | 0.999999 |
| rad19syn           | 5.75843e-07 | 1.000000 | 5.80858e-07 | 0.999999 |
| rad46              | 4.35560e-07 | 1.000000 | 4.39353e-07 | 1.000000 |
| rad54              | 1.01017e-07 | 1.000000 | 1.01897e-07 | 1.000000 |
| rad60syn           | 8.96254e-08 | 1.000000 | 9.04058e-08 | 1.000000 |
| PAH3+H             | 8.11822e-08 | 1.000000 | 8.18892e-08 | 1.000000 |
| rad60anti          | 4.57655e-08 | 1.000000 | 4.61641e-08 | 1.000000 |
| PAH10+CH3          | 2.25831e-08 | 1.000000 | 2.27797e-08 | 1.000000 |
| PhcycC3H3_A+H      | 2.05528e-08 | 1.000000 | 2.07318e-08 | 1.000000 |
| rad59              | 1.35486e-08 | 1.000000 | 1.36666e-08 | 1.000000 |
| rad50              | 9.40269e-09 | 1.000000 | 9.48453e-09 | 1.000000 |
| rad70              | 4.88193e-09 | 1.000000 | 4.92445e-09 | 1.000000 |
| rad62              | 3.91161e-09 | 1.000000 | 3.94568e-09 | 1.000000 |
| rad67              | 3.65819e-09 | 1.000000 | 3.69004e-09 | 1.000000 |
| PAH1+H             | 3.25971e-09 | 1.000000 | 3.28810e-09 | 1.000000 |
| rad43              | 2.57504e-09 | 1.000000 | 2.59746e-09 | 1.000000 |
| rad55              | 2.29328e-09 | 1.000000 | 2.31325e-09 | 1.000000 |
| rad34              | 2.96007e-10 | 1.000000 | 2.98585e-10 | 1.000000 |
| rad52              | 1.70972e-10 | 1.000000 | 1.72461e-10 | 1.000000 |
| rad51              | 1.34047e-10 | 1.000000 | 1.35214e-10 | 1.000000 |
| rad58              | 1.71337e-11 | 1.000000 | 1.72829e-11 | 1.000000 |
| rad42              | 1.22225e-11 | 1.000000 | 1.23290e-11 | 1.000000 |
| rad53              | 1.06169e-11 | 1.000000 | 1.07093e-11 | 1.000000 |
| rad64              | 4.60104e-12 | 1.000000 | 4.64111e-12 | 1.000000 |
| rad65              | 4.04333e-12 | 1.000000 | 4.07854e-12 | 1.000000 |
| rad41              | 2.76375e-12 | 1.000000 | 2.78781e-12 | 1.000000 |
| rad56              | 1.10531e-12 | 1.000000 | 1.11493e-12 | 1.000000 |
| rad68syn           | 1.32095e-13 | 1.000000 | 1.33246e-13 | 1.000000 |
| rad68anti          | 9.18033e-14 | 1.000000 | 9.26031e-14 | 1.000000 |
| rad2               | 2.96269e-14 | 1.000000 | 2.98849e-14 | 1.000000 |
| rad61              | 2.45770e-14 | 1.000000 | 2.47910e-14 | 1.000000 |
| PAH8+H             | 8.64322e-15 | 1.000000 | 8.71846e-15 | 1.000000 |
| rad40syn           | 4.97708e-15 | 1.000000 | 5.02043e-15 | 1.000000 |
| rad1               | 4.63290e-15 | 1.000000 | 4.67325e-15 | 1.000000 |
| rad23              | 3.60226e-15 | 1.000000 | 3.63363e-15 | 1.000000 |
| rad3               | 1.84344e-15 | 1.000000 | 1.85950e-15 | 1.000000 |
| rad40anti          | 1.59900e-15 | 1.000000 | 1.61292e-15 | 1.000000 |
| rad4               | 1.25838e-15 | 1.000000 | 1.26934e-15 | 1.000000 |
| rad45              | 1.16014e-15 | 1.000000 | 1.17025e-15 | 1.000000 |
| rad73              | 1.02446e-15 | 1.000000 | 1.03337e-15 | 1.000000 |
| rad10              | 7.70973e-16 | 1.000000 | 7.77688e-16 | 1.000000 |
| rad71              | 1.65707e-16 | 1.000000 | 1.67150e-16 | 1.000000 |
| rad6               | 1.53808e-16 | 1.000000 | 1.55148e-16 | 1.000000 |
| rad36              | 1.02420e-16 | 1.000000 | 1.03312e-16 | 1.000000 |
| rad28              | 1.32378e-17 | 1.000000 | 1.33531e-17 | 1.000000 |
| rad26              | 5.56730e-18 | 1.000000 | 5.61578e-18 | 1.000000 |
| rad11              | 9.43400e-20 | 1.000000 | 9.51619e-20 | 1.000000 |



|       |             |         |             |         |
|-------|-------------|---------|-------------|---------|
| rad31 | 3.07518e-20 | 1.00000 | 3.10197e-20 | 1.00000 |
| rad7  | 2.78237e-20 | 1.00000 | 2.80659e-20 | 1.00000 |
| rad72 | 1.83416e-20 | 1.00000 | 1.85014e-20 | 1.00000 |
| rad9  | 9.80842e-21 | 1.00000 | 9.89379e-21 | 1.00000 |
| rad25 | 7.31622e-21 | 1.00000 | 7.37994e-21 | 1.00000 |
| rad13 | 7.19692e-21 | 1.00000 | 7.25959e-21 | 1.00000 |
| rad33 | 5.23355e-21 | 1.00000 | 5.27912e-21 | 1.00000 |
| rad14 | 4.27490e-21 | 1.00000 | 4.31213e-21 | 1.00000 |
| rad27 | 2.76898e-21 | 1.00000 | 2.79309e-21 | 1.00000 |
| rad21 | 2.17601e-21 | 1.00000 | 2.19496e-21 | 1.00000 |
| rad20 | 9.04716e-22 | 1.00000 | 9.12601e-22 | 1.00000 |
| rad24 | 7.30642e-23 | 1.00000 | 7.37005e-23 | 1.00000 |
| rad15 | 5.91251e-24 | 1.00000 | 5.96400e-24 | 1.00000 |
| rad12 | 3.30939e-24 | 1.00000 | 3.33821e-24 | 1.00000 |
| rad22 | 1.90527e-24 | 1.00000 | 1.92186e-24 | 1.00000 |
| rad18 | 3.85103e-25 | 1.00000 | 3.88457e-25 | 1.00000 |
| rad5  | 2.68867e-27 | 1.00000 | 2.71209e-27 | 1.00000 |
| rad47 | 1.06838e-27 | 1.00000 | 1.07769e-27 | 1.00000 |
| rad8  | 7.32789e-35 | 1.00000 | 7.39170e-35 | 1.00000 |

0.100000000E-08 Pa, 700.000000 K

| Rate constant      | True (fraction)      | Effective (fraction) |
|--------------------|----------------------|----------------------|
| Total              | 1.39564e-13 (1.00 )  | 1.36669e-13 (1.00 )  |
| Formation of rad11 | 5.88273e-14 (0.422 ) | 5.72650e-14 (0.419 ) |
| Formation of rad6  | 5.01684e-14 (0.359 ) | 4.88360e-14 (0.357 ) |
| H-abstraction      | 3.05678e-14 (0.219 ) | 3.05678e-14 (0.224 ) |

| species            | PYtrue      | Cumul    | PYeffective | Cumul    |
|--------------------|-------------|----------|-------------|----------|
| Indene+H           | 0.510454    | 0.510454 | 0.521265    | 0.521265 |
| Benzene+2-propynyl | 0.219024    | 0.729478 | 0.223663    | 0.744928 |
| C2H2+PhCH2         | 0.140690    | 0.870167 | 0.143670    | 0.888598 |
| PhCCH+CH3          | 0.0586093   | 0.928777 | 0.0598506   | 0.948449 |
| PhCHCCH2+H         | 0.0277623   | 0.956539 | 0.0283503   | 0.976799 |
| Phenyl+Allene      | 0.0207415   | 0.977280 | 0.000000    | 0.976799 |
| Ph+MeAc            | 0.00771340  | 0.984994 | 0.00787679  | 0.984676 |
| PhCCCH3+H          | 0.00756061  | 0.992554 | 0.00772075  | 0.992396 |
| PhCH2CCH+H         | 0.00451180  | 0.997066 | 0.00460736  | 0.997004 |
| PAH7+H             | 0.00225727  | 0.999324 | 0.00230508  | 0.999309 |
| rad39              | 0.000548289 | 0.999872 | 0.000559902 | 0.999869 |
| rad19anti          | 4.66037e-05 | 0.999918 | 4.75908e-05 | 0.999916 |
| PAH9+H             | 2.99985e-05 | 0.999948 | 3.06339e-05 | 0.999947 |
| rad30              | 2.26762e-05 | 0.999971 | 2.31565e-05 | 0.999970 |
| rad38              | 1.05314e-05 | 0.999982 | 1.07544e-05 | 0.999981 |
| rad35              | 7.29844e-06 | 0.999989 | 7.45303e-06 | 0.999988 |
| rad37              | 5.93522e-06 | 0.999995 | 6.06093e-06 | 0.999994 |
| rad19syn           | 2.61380e-06 | 0.999998 | 2.66916e-06 | 0.999997 |
| rad46              | 1.18432e-06 | 0.999999 | 1.20940e-06 | 0.999998 |
| rad54              | 5.53865e-07 | 0.999999 | 5.65596e-07 | 0.999999 |
| PAH3+H             | 2.96686e-07 | 1.000000 | 3.02969e-07 | 0.999999 |
| rad60syn           | 2.09904e-07 | 1.000000 | 2.14349e-07 | 0.999999 |
| PhcycC3H3_A+H      | 1.62838e-07 | 1.000000 | 1.66287e-07 | 1.000000 |
| rad60anti          | 1.11059e-07 | 1.000000 | 1.13411e-07 | 1.000000 |
| PAH10+CH3          | 8.88407e-08 | 1.000000 | 9.07227e-08 | 1.000000 |
| rad50              | 4.89398e-08 | 1.000000 | 4.99764e-08 | 1.000000 |
| rad59              | 4.64276e-08 | 1.000000 | 4.74110e-08 | 1.000000 |
| rad70              | 3.43279e-08 | 1.000000 | 3.50550e-08 | 1.000000 |
| PAH1+H             | 2.87927e-08 | 1.000000 | 2.94026e-08 | 1.000000 |
| rad67              | 2.16413e-08 | 1.000000 | 2.20997e-08 | 1.000000 |
| rad62              | 1.75396e-08 | 1.000000 | 1.79112e-08 | 1.000000 |
| rad55              | 1.62462e-08 | 1.000000 | 1.65903e-08 | 1.000000 |
| rad43              | 8.26632e-09 | 1.000000 | 8.44142e-09 | 1.000000 |
| rad34              | 2.73084e-09 | 1.000000 | 2.78868e-09 | 1.000000 |
| rad51              | 1.25002e-09 | 1.000000 | 1.27650e-09 | 1.000000 |
| rad52              | 1.21856e-09 | 1.000000 | 1.24437e-09 | 1.000000 |
| rad53              | 1.69563e-10 | 1.000000 | 1.73154e-10 | 1.000000 |
| rad58              | 1.35852e-10 | 1.000000 | 1.38730e-10 | 1.000000 |
| rad42              | 1.03499e-10 | 1.000000 | 1.05691e-10 | 1.000000 |
| rad64              | 7.31424e-11 | 1.000000 | 7.46916e-11 | 1.000000 |
| rad65              | 3.91347e-11 | 1.000000 | 3.99636e-11 | 1.000000 |
| rad56              | 2.88481e-11 | 1.000000 | 2.94592e-11 | 1.000000 |
| rad41              | 1.94813e-11 | 1.000000 | 1.98939e-11 | 1.000000 |
| rad68syn           | 3.41597e-12 | 1.000000 | 3.48832e-12 | 1.000000 |
| rad68anti          | 2.34479e-12 | 1.000000 | 2.39446e-12 | 1.000000 |
| PAH8+H             | 4.75489e-13 | 1.000000 | 4.85561e-13 | 1.000000 |
| rad61              | 4.69346e-13 | 1.000000 | 4.79287e-13 | 1.000000 |
| rad40syn           | 2.01813e-13 | 1.000000 | 2.06087e-13 | 1.000000 |
| rad40anti          | 7.19647e-14 | 1.000000 | 7.34890e-14 | 1.000000 |

|       |             |         |             |          |
|-------|-------------|---------|-------------|----------|
| rad73 | 4.99081e-14 | 1.00000 | 5.09652e-14 | 1.000000 |
| rad2  | 3.24727e-14 | 1.00000 | 3.31605e-14 | 1.000000 |
| rad71 | 1.21639e-14 | 1.00000 | 1.24216e-14 | 1.000000 |
| rad1  | 4.86061e-15 | 1.00000 | 4.96355e-15 | 1.000000 |
| rad23 | 4.08492e-15 | 1.00000 | 4.17144e-15 | 1.000000 |
| rad45 | 1.32674e-15 | 1.00000 | 1.35485e-15 | 1.000000 |
| rad10 | 4.96686e-16 | 1.00000 | 5.07206e-16 | 1.000000 |
| rad4  | 1.99083e-16 | 1.00000 | 2.03300e-16 | 1.000000 |
| rad3  | 1.94415e-16 | 1.00000 | 1.98533e-16 | 1.000000 |
| rad36 | 1.40045e-16 | 1.00000 | 1.43011e-16 | 1.000000 |
| rad6  | 6.47342e-17 | 1.00000 | 6.61053e-17 | 1.000000 |
| rad72 | 4.51567e-18 | 1.00000 | 4.61132e-18 | 1.000000 |
| rad28 | 3.64907e-18 | 1.00000 | 3.72636e-18 | 1.000000 |
| rad26 | 1.53685e-18 | 1.00000 | 1.56940e-18 | 1.000000 |
| rad9  | 7.77849e-19 | 1.00000 | 7.94324e-19 | 1.000000 |
| rad11 | 1.85177e-19 | 1.00000 | 1.89099e-19 | 1.000000 |
| rad13 | 5.35950e-20 | 1.00000 | 5.47302e-20 | 1.000000 |
| rad21 | 3.99856e-20 | 1.00000 | 4.08326e-20 | 1.000000 |
| rad33 | 3.80928e-20 | 1.00000 | 3.88996e-20 | 1.000000 |
| rad7  | 3.02687e-20 | 1.00000 | 3.09098e-20 | 1.000000 |
| rad31 | 1.78365e-20 | 1.00000 | 1.82143e-20 | 1.000000 |
| rad20 | 1.48743e-20 | 1.00000 | 1.51893e-20 | 1.000000 |
| rad25 | 8.89367e-21 | 1.00000 | 9.08205e-21 | 1.000000 |
| rad24 | 3.96761e-21 | 1.00000 | 4.05165e-21 | 1.000000 |
| rad14 | 3.92221e-21 | 1.00000 | 4.00528e-21 | 1.000000 |
| rad27 | 3.69497e-21 | 1.00000 | 3.77323e-21 | 1.000000 |
| rad12 | 4.79207e-22 | 1.00000 | 4.89358e-22 | 1.000000 |
| rad15 | 3.08983e-22 | 1.00000 | 3.15527e-22 | 1.000000 |
| rad22 | 2.20676e-24 | 1.00000 | 2.25350e-24 | 1.000000 |
| rad18 | 2.13915e-24 | 1.00000 | 2.18446e-24 | 1.000000 |
| rad47 | 9.03917e-27 | 1.00000 | 9.23064e-27 | 1.000000 |
| rad5  | 2.51785e-27 | 1.00000 | 2.57118e-27 | 1.000000 |
| rad8  | 9.25480e-31 | 1.00000 | 9.45081e-31 | 1.000000 |

0.100000000E-08 Pa, 800.000000 K

| =====              |                 |          |                      |          |
|--------------------|-----------------|----------|----------------------|----------|
| Rate constant      | True (fraction) |          | Effective (fraction) |          |
| -----              |                 |          |                      |          |
| Total              | 2.75392e-13     | (1.00 )  | 2.64229e-13          | (1.00 )  |
| Formation of rad11 | 1.06471e-13     | (0.387 ) | 1.00706e-13          | (0.381 ) |
| Formation of rad6  | 9.97133e-14     | (0.362 ) | 9.43145e-14          | (0.357 ) |
| H-abstraction      | 6.92082e-14     | (0.251 ) | 6.92082e-14          | (0.262 ) |
| -----              |                 |          |                      |          |
| species            | PYtrue          | Cumul    | PYeffective          | Cumul    |
| -----              |                 |          |                      |          |
| Indene+H           | 0.420963        | 0.420963 | 0.438748             | 0.438748 |
| Benzene+2-propynyl | 0.251308        | 0.672270 | 0.261925             | 0.700673 |
| C2H2+PhCH2         | 0.158756        | 0.831027 | 0.165464             | 0.866137 |
| PhCCH+CH3          | 0.0631452       | 0.894172 | 0.0658130            | 0.931950 |
| Phenyl+Allene      | 0.0405363       | 0.934708 | 0.000000             | 0.931950 |
| PhCHCCH2+H         | 0.0360793       | 0.970788 | 0.0376036            | 0.969553 |
| PhCH2CCH+H         | 0.00999819      | 0.980786 | 0.0104207            | 0.979974 |
| Ph+MeAc            | 0.00840385      | 0.989190 | 0.00875888           | 0.988733 |
| PhCCCH3+H          | 0.00623443      | 0.995424 | 0.00649783           | 0.995231 |
| PAH7+H             | 0.00351019      | 0.998934 | 0.00365850           | 0.998889 |
| rad39              | 0.000836596     | 0.999771 | 0.000871939          | 0.999761 |
| rad19anti          | 9.01935e-05     | 0.999861 | 9.40042e-05          | 0.999855 |
| PAH9+H             | 5.38600e-05     | 0.999915 | 5.61355e-05          | 0.999911 |
| rad30              | 2.94556e-05     | 0.999944 | 3.07000e-05          | 0.999942 |
| rad38              | 1.96291e-05     | 0.999964 | 2.04585e-05          | 0.999962 |
| rad35              | 1.22732e-05     | 0.999976 | 1.27916e-05          | 0.999975 |
| rad19syn           | 8.33347e-06     | 0.999985 | 8.68552e-06          | 0.999984 |
| rad37              | 7.26188e-06     | 0.999992 | 7.56866e-06          | 0.999992 |
| rad46              | 2.65265e-06     | 0.999995 | 2.76472e-06          | 0.999994 |
| rad54              | 2.03471e-06     | 0.999997 | 2.12067e-06          | 0.999996 |
| PAH3+H             | 7.96489e-07     | 0.999997 | 8.30142e-07          | 0.999997 |
| PhcycC3H3_A+H      | 7.94325e-07     | 0.999998 | 8.27884e-07          | 0.999998 |
| rad60syn           | 3.96788e-07     | 0.999999 | 4.13552e-07          | 0.999998 |
| PAH10+CH3          | 2.53197e-07     | 0.999999 | 2.63894e-07          | 0.999999 |
| rad60anti          | 2.15811e-07     | 0.999999 | 2.24928e-07          | 0.999999 |
| rad50              | 1.82305e-07     | 0.999999 | 1.90007e-07          | 0.999999 |
| rad70              | 1.50040e-07     | 0.999999 | 1.56379e-07          | 0.999999 |
| PAH1+H             | 1.48682e-07     | 0.999999 | 1.54963e-07          | 0.999999 |
| rad59              | 1.17661e-07     | 1.000000 | 1.22632e-07          | 1.000000 |
| rad67              | 9.03380e-08     | 1.000000 | 9.41547e-08          | 1.000000 |
| rad55              | 7.18814e-08     | 1.000000 | 7.49183e-08          | 1.000000 |
| rad62              | 5.32905e-08     | 1.000000 | 5.55419e-08          | 1.000000 |
| rad43              | 1.85215e-08     | 1.000000 | 1.93041e-08          | 1.000000 |
| rad34              | 1.46559e-08     | 1.000000 | 1.52750e-08          | 1.000000 |
| rad51              | 7.22365e-09     | 1.000000 | 7.52888e-09          | 1.000000 |

|           |             |          |             |          |
|-----------|-------------|----------|-------------|----------|
| rad52     | 5.73950e-09 | 1.000000 | 5.98199e-09 | 1.000000 |
| rad53     | 1.38657e-09 | 1.000000 | 1.44515e-09 | 1.000000 |
| rad58     | 6.48417e-10 | 1.000000 | 6.75812e-10 | 1.000000 |
| rad64     | 5.75074e-10 | 1.000000 | 5.99371e-10 | 1.000000 |
| rad42     | 5.07610e-10 | 1.000000 | 5.29056e-10 | 1.000000 |
| rad56     | 3.39878e-10 | 1.000000 | 3.54238e-10 | 1.000000 |
| rad65     | 2.29598e-10 | 1.000000 | 2.39299e-10 | 1.000000 |
| rad41     | 7.94160e-11 | 1.000000 | 8.27714e-11 | 1.000000 |
| rad68syn  | 3.95119e-11 | 1.000000 | 4.11813e-11 | 1.000000 |
| rad68anti | 2.68637e-11 | 1.000000 | 2.79986e-11 | 1.000000 |
| PAH8+H    | 9.75569e-12 | 1.000000 | 1.01678e-11 | 1.000000 |
| rad61     | 4.46179e-12 | 1.000000 | 4.65031e-12 | 1.000000 |
| rad40syn  | 3.27953e-12 | 1.000000 | 3.41808e-12 | 1.000000 |
| rad40anti | 1.27570e-12 | 1.000000 | 1.32959e-12 | 1.000000 |
| rad73     | 9.82022e-13 | 1.000000 | 1.02352e-12 | 1.000000 |
| rad71     | 3.27492e-13 | 1.000000 | 3.41329e-13 | 1.000000 |
| rad2      | 6.39976e-15 | 1.000000 | 6.67014e-15 | 1.000000 |
| rad23     | 2.50480e-15 | 1.000000 | 2.61063e-15 | 1.000000 |
| rad1      | 1.14096e-15 | 1.000000 | 1.18916e-15 | 1.000000 |
| rad45     | 1.09673e-15 | 1.000000 | 1.14306e-15 | 1.000000 |
| rad72     | 3.06354e-16 | 1.000000 | 3.19297e-16 | 1.000000 |
| rad10     | 1.03200e-16 | 1.000000 | 1.07560e-16 | 1.000000 |
| rad36     | 9.87121e-17 | 1.000000 | 1.02882e-16 | 1.000000 |
| rad3      | 8.91880e-17 | 1.000000 | 9.29561e-17 | 1.000000 |
| rad4      | 7.74634e-17 | 1.000000 | 8.07358e-17 | 1.000000 |
| rad6      | 3.50792e-17 | 1.000000 | 3.65612e-17 | 1.000000 |
| rad9      | 1.94055e-17 | 1.000000 | 2.02254e-17 | 1.000000 |
| rad28     | 1.31238e-18 | 1.000000 | 1.36783e-18 | 1.000000 |
| rad11     | 6.33503e-19 | 1.000000 | 6.60268e-19 | 1.000000 |
| rad21     | 5.89264e-19 | 1.000000 | 6.14159e-19 | 1.000000 |
| rad13     | 5.65710e-19 | 1.000000 | 5.89610e-19 | 1.000000 |
| rad26     | 5.57308e-19 | 1.000000 | 5.80853e-19 | 1.000000 |
| rad33     | 2.86164e-19 | 1.000000 | 2.98255e-19 | 1.000000 |
| rad20     | 2.26268e-19 | 1.000000 | 2.35827e-19 | 1.000000 |
| rad7      | 8.07300e-20 | 1.000000 | 8.41405e-20 | 1.000000 |
| rad24     | 5.58298e-20 | 1.000000 | 5.81886e-20 | 1.000000 |
| rad25     | 1.92043e-20 | 1.000000 | 2.00156e-20 | 1.000000 |
| rad12     | 1.15817e-20 | 1.000000 | 1.20710e-20 | 1.000000 |
| rad31     | 8.40534e-21 | 1.000000 | 8.76043e-21 | 1.000000 |
| rad27     | 7.05987e-21 | 1.000000 | 7.35814e-21 | 1.000000 |
| rad14     | 5.74858e-21 | 1.000000 | 5.99145e-21 | 1.000000 |
| rad15     | 4.41687e-21 | 1.000000 | 4.60348e-21 | 1.000000 |
| rad18     | 2.25390e-23 | 1.000000 | 2.34913e-23 | 1.000000 |
| rad22     | 1.54085e-24 | 1.000000 | 1.60595e-24 | 1.000000 |
| rad47     | 5.02496e-26 | 1.000000 | 5.23725e-26 | 1.000000 |
| rad8      | 3.33307e-27 | 1.000000 | 3.47390e-27 | 1.000000 |
| rad5      | 3.10036e-27 | 1.000000 | 3.23135e-27 | 1.000000 |

0.100000000E-08 Pa, 900.000000 K

=====

| Rate constant      | True (fraction)      | Effective (fraction) |
|--------------------|----------------------|----------------------|
| Total              | 4.88072e-13 (1.00 )  | 4.55158e-13 (1.00 )  |
| Formation of rad11 | 1.74945e-13 (0.358 ) | 1.58562e-13 (0.348 ) |
| Formation of rad6  | 1.76509e-13 (0.362 ) | 1.59978e-13 (0.351 ) |
| H-abstraction      | 1.36618e-13 (0.280 ) | 1.36618e-13 (0.300 ) |

| species            | PYtrue      | Cumul    | PYeffective | Cumul    |
|--------------------|-------------|----------|-------------|----------|
| Indene+H           | 0.341014    | 0.341014 | 0.365674    | 0.365674 |
| Benzene+2-propynyl | 0.279914    | 0.620928 | 0.300155    | 0.665829 |
| C2H2+PhCH2         | 0.164625    | 0.785553 | 0.176529    | 0.842358 |
| Phenyl+Allene      | 0.0674364   | 0.852989 | 0.000000    | 0.842358 |
| PhCCH+CH3          | 0.0639259   | 0.916915 | 0.0685486   | 0.910906 |
| PhCHCCH2+H         | 0.0451268   | 0.962042 | 0.0483901   | 0.959297 |
| PhCH2CCH+H         | 0.0182967   | 0.980338 | 0.0196198   | 0.978916 |
| Ph+MeAc            | 0.00849313  | 0.988832 | 0.00910729  | 0.988024 |
| PhCCCH3+H          | 0.00485364  | 0.993685 | 0.00520463  | 0.993228 |
| PAH7+H             | 0.00482415  | 0.998509 | 0.00517299  | 0.998401 |
| rad39              | 0.00111872  | 0.999628 | 0.00119961  | 0.999601 |
| rad19anti          | 0.000152570 | 0.999781 | 0.000163603 | 0.999764 |
| PAH9+H             | 8.58055e-05 | 0.999866 | 9.20100e-05 | 0.999856 |
| rad30              | 3.45816e-05 | 0.999901 | 3.70824e-05 | 0.999894 |
| rad38              | 3.22626e-05 | 0.999933 | 3.45956e-05 | 0.999928 |
| rad19syn           | 2.05726e-05 | 0.999954 | 2.20602e-05 | 0.999950 |
| rad35              | 1.85019e-05 | 0.999972 | 1.98398e-05 | 0.999970 |
| rad37              | 8.30353e-06 | 0.999981 | 8.90399e-06 | 0.999979 |
| rad54              | 5.61022e-06 | 0.999986 | 6.01591e-06 | 0.999985 |
| rad46              | 5.06238e-06 | 0.999991 | 5.42846e-06 | 0.999990 |
| PhcycC3H3_A+H      | 2.75303e-06 | 0.999994 | 2.95211e-06 | 0.999993 |

|           |             |          |             |          |
|-----------|-------------|----------|-------------|----------|
| PAH3+H    | 1.70031e-06 | 0.999996 | 1.82327e-06 | 0.999995 |
| rad60syn  | 6.35566e-07 | 0.999996 | 6.81526e-07 | 0.999996 |
| PAH10+CH3 | 5.91896e-07 | 0.999997 | 6.34698e-07 | 0.999996 |
| PAH1+H    | 5.27743e-07 | 0.999998 | 5.65906e-07 | 0.999997 |
| rad50     | 5.26055e-07 | 0.999998 | 5.64096e-07 | 0.999998 |
| rad70     | 4.68169e-07 | 0.999999 | 5.02024e-07 | 0.999998 |
| rad60anti | 3.53464e-07 | 0.999999 | 3.79023e-07 | 0.999999 |
| rad67     | 2.86638e-07 | 0.999999 | 3.07366e-07 | 0.999999 |
| rad59     | 2.38374e-07 | 0.999999 | 2.55613e-07 | 0.999999 |
| rad55     | 2.28529e-07 | 1.000000 | 2.45055e-07 | 0.999999 |
| rad62     | 1.23575e-07 | 1.000000 | 1.32511e-07 | 0.999999 |
| rad34     | 5.38118e-08 | 1.000000 | 5.77031e-08 | 0.999999 |
| rad43     | 3.25336e-08 | 1.000000 | 3.48862e-08 | 1.000000 |
| rad51     | 2.94628e-08 | 1.000000 | 3.15934e-08 | 1.000000 |
| rad52     | 1.98861e-08 | 1.000000 | 2.13241e-08 | 1.000000 |
| rad53     | 7.16536e-09 | 1.000000 | 7.68353e-09 | 1.000000 |
| rad64     | 2.79837e-09 | 1.000000 | 3.00073e-09 | 1.000000 |
| rad56     | 2.33179e-09 | 1.000000 | 2.50041e-09 | 1.000000 |
| rad58     | 2.16896e-09 | 1.000000 | 2.32580e-09 | 1.000000 |
| rad42     | 1.71810e-09 | 1.000000 | 1.84235e-09 | 1.000000 |
| rad65     | 9.39252e-10 | 1.000000 | 1.00717e-09 | 1.000000 |
| rad68syn  | 2.64056e-10 | 1.000000 | 2.83151e-10 | 1.000000 |
| rad41     | 2.24666e-10 | 1.000000 | 2.40913e-10 | 1.000000 |
| rad68anti | 1.78166e-10 | 1.000000 | 1.91050e-10 | 1.000000 |
| PAH8+H    | 1.02532e-10 | 1.000000 | 1.09946e-10 | 1.000000 |
| rad40syn  | 2.86480e-11 | 1.000000 | 3.07196e-11 | 1.000000 |
| rad61     | 2.66398e-11 | 1.000000 | 2.85662e-11 | 1.000000 |
| rad40anti | 1.19773e-11 | 1.000000 | 1.28434e-11 | 1.000000 |
| rad73     | 1.03641e-11 | 1.000000 | 1.11135e-11 | 1.000000 |
| rad71     | 4.43740e-12 | 1.000000 | 4.75828e-12 | 1.000000 |
| rad72     | 8.45914e-15 | 1.000000 | 9.07083e-15 | 1.000000 |
| rad2      | 1.35968e-15 | 1.000000 | 1.45800e-15 | 1.000000 |
| rad23     | 1.12115e-15 | 1.000000 | 1.20222e-15 | 1.000000 |
| rad45     | 5.72966e-16 | 1.000000 | 6.14399e-16 | 1.000000 |
| rad1      | 2.69144e-16 | 1.000000 | 2.88608e-16 | 1.000000 |
| rad9      | 9.57823e-17 | 1.000000 | 1.02709e-16 | 1.000000 |
| rad36     | 5.36582e-17 | 1.000000 | 5.75384e-17 | 1.000000 |
| rad3      | 3.30368e-17 | 1.000000 | 3.54257e-17 | 1.000000 |
| rad6      | 3.18948e-17 | 1.000000 | 3.42012e-17 | 1.000000 |
| rad4      | 2.68858e-17 | 1.000000 | 2.88300e-17 | 1.000000 |
| rad10     | 1.97418e-17 | 1.000000 | 2.11694e-17 | 1.000000 |
| rad13     | 4.90670e-18 | 1.000000 | 5.26151e-18 | 1.000000 |
| rad21     | 3.80389e-18 | 1.000000 | 4.07897e-18 | 1.000000 |
| rad11     | 2.95791e-18 | 1.000000 | 3.17180e-18 | 1.000000 |
| rad20     | 1.64991e-18 | 1.000000 | 1.76922e-18 | 1.000000 |
| rad33     | 1.26647e-18 | 1.000000 | 1.35806e-18 | 1.000000 |
| rad28     | 5.99481e-19 | 1.000000 | 6.42831e-19 | 1.000000 |
| rad7      | 3.76378e-19 | 1.000000 | 4.03595e-19 | 1.000000 |
| rad26     | 2.56533e-19 | 1.000000 | 2.75084e-19 | 1.000000 |
| rad24     | 1.88184e-19 | 1.000000 | 2.01792e-19 | 1.000000 |
| rad25     | 5.51827e-20 | 1.000000 | 5.91731e-20 | 1.000000 |
| rad12     | 5.35710e-20 | 1.000000 | 5.74448e-20 | 1.000000 |
| rad15     | 1.51105e-20 | 1.000000 | 1.62032e-20 | 1.000000 |
| rad27     | 1.32691e-20 | 1.000000 | 1.42286e-20 | 1.000000 |
| rad14     | 1.05204e-20 | 1.000000 | 1.12812e-20 | 1.000000 |
| rad31     | 4.19944e-21 | 1.000000 | 4.50311e-21 | 1.000000 |
| rad18     | 3.26809e-22 | 1.000000 | 3.50441e-22 | 1.000000 |
| rad8      | 1.12161e-24 | 1.000000 | 1.20272e-24 | 1.000000 |
| rad22     | 1.04377e-24 | 1.000000 | 1.11924e-24 | 1.000000 |
| rad47     | 2.05588e-25 | 1.000000 | 2.20455e-25 | 1.000000 |
| rad5      | 5.07417e-27 | 1.000000 | 5.44110e-27 | 1.000000 |

0.100000000E-08 Pa, 1000.00000 K

=====

| Rate constant      | True (fraction)      | Effective (fraction) |
|--------------------|----------------------|----------------------|
| Total              | 7.98668e-13 (1.00 )  | 7.19594e-13 (1.00 )  |
| Formation of rad11 | 2.67704e-13 (0.335 ) | 2.29546e-13 (0.319 ) |
| Formation of rad6  | 2.87049e-13 (0.359 ) | 2.46133e-13 (0.342 ) |
| H-abstraction      | 2.43915e-13 (0.305 ) | 2.43915e-13 (0.339 ) |

  

| species            | PYtrue    | Cumul    | PYeffective | Cumul    |
|--------------------|-----------|----------|-------------|----------|
| Benzene+2-propynyl | 0.305402  | 0.305402 | 0.338962    | 0.338962 |
| Indene+H           | 0.272124  | 0.577526 | 0.302027    | 0.640989 |
| C2H2+PhCH2         | 0.159453  | 0.736979 | 0.176975    | 0.817964 |
| Phenyl+Allene      | 0.0990073 | 0.835987 | 0.000000    | 0.817964 |
| PhCCH+CH3          | 0.0616205 | 0.897607 | 0.0683917   | 0.886356 |
| PhCHCCH2+H         | 0.0537596 | 0.951367 | 0.0596670   | 0.946023 |
| PhCH2CCH+H         | 0.0288969 | 0.980264 | 0.0320723   | 0.978095 |

|               |             |          |             |          |
|---------------|-------------|----------|-------------|----------|
| Ph+MeAc       | 0.00817632  | 0.988440 | 0.00907480  | 0.987170 |
| PAH7+H        | 0.00601184  | 0.994452 | 0.00667246  | 0.993842 |
| PhCCCH3+H     | 0.00364277  | 0.998095 | 0.00404307  | 0.997885 |
| rad39         | 0.00134896  | 0.999444 | 0.00149719  | 0.999382 |
| rad19anti     | 0.000230025 | 0.999674 | 0.000255302 | 0.999638 |
| PAH9+H        | 0.000123695 | 0.999797 | 0.000137287 | 0.999775 |
| rad38         | 4.77792e-05 | 0.999845 | 5.30296e-05 | 0.999828 |
| rad19syn      | 4.20371e-05 | 0.999887 | 4.66565e-05 | 0.999875 |
| rad30         | 3.74826e-05 | 0.999925 | 4.16015e-05 | 0.999916 |
| rad35         | 2.54628e-05 | 0.999950 | 2.82608e-05 | 0.999945 |
| rad54         | 1.25292e-05 | 0.999963 | 1.39061e-05 | 0.999959 |
| rad37         | 9.28205e-06 | 0.999972 | 1.03021e-05 | 0.999969 |
| rad46         | 8.48861e-06 | 0.999980 | 9.42145e-06 | 0.999978 |
| PhcycC3H3_A+H | 7.44283e-06 | 0.999988 | 8.26073e-06 | 0.999987 |
| PAH3+H        | 3.05843e-06 | 0.999991 | 3.39451e-06 | 0.999990 |
| PAH1+H        | 1.42911e-06 | 0.999992 | 1.58616e-06 | 0.999991 |
| rad50         | 1.24669e-06 | 0.999994 | 1.38369e-06 | 0.999993 |
| PAH10+CH3     | 1.21323e-06 | 0.999995 | 1.34654e-06 | 0.999994 |
| rad70         | 1.14131e-06 | 0.999996 | 1.26673e-06 | 0.999995 |
| rad60syn      | 8.97094e-07 | 0.999997 | 9.95669e-07 | 0.999996 |
| rad67         | 7.32850e-07 | 0.999998 | 8.13375e-07 | 0.999997 |
| rad55         | 5.71763e-07 | 0.999998 | 6.34592e-07 | 0.999998 |
| rad60anti     | 5.08253e-07 | 0.999999 | 5.64103e-07 | 0.999999 |
| rad59         | 4.08645e-07 | 0.999999 | 4.53550e-07 | 0.999999 |
| rad62         | 2.36337e-07 | 0.999999 | 2.62307e-07 | 0.999999 |
| rad34         | 1.49947e-07 | 0.999999 | 1.66424e-07 | 0.999999 |
| rad51         | 9.25830e-08 | 0.999999 | 1.02757e-07 | 0.999999 |
| rad52         | 5.46149e-08 | 1.000000 | 6.06164e-08 | 1.000000 |
| rad43         | 4.82842e-08 | 1.000000 | 5.35901e-08 | 1.000000 |
| rad53         | 2.66802e-08 | 1.000000 | 2.96121e-08 | 1.000000 |
| rad56         | 1.08965e-08 | 1.000000 | 1.20939e-08 | 1.000000 |
| rad64         | 9.68714e-09 | 1.000000 | 1.07517e-08 | 1.000000 |
| rad58         | 5.61421e-09 | 1.000000 | 6.23115e-09 | 1.000000 |
| rad42         | 4.47913e-09 | 1.000000 | 4.97133e-09 | 1.000000 |
| rad65         | 2.93939e-09 | 1.000000 | 3.26239e-09 | 1.000000 |
| rad68syn      | 1.19347e-09 | 1.000000 | 1.32462e-09 | 1.000000 |
| rad68anti     | 8.00253e-10 | 1.000000 | 8.88191e-10 | 1.000000 |
| PAH8+H        | 6.70053e-10 | 1.000000 | 7.43681e-10 | 1.000000 |
| rad41         | 4.94029e-10 | 1.000000 | 5.48317e-10 | 1.000000 |
| rad40syn      | 1.60977e-10 | 1.000000 | 1.78667e-10 | 1.000000 |
| rad61         | 1.14008e-10 | 1.000000 | 1.26536e-10 | 1.000000 |
| rad40anti     | 7.14860e-11 | 1.000000 | 7.93411e-11 | 1.000000 |
| rad73         | 6.98974e-11 | 1.000000 | 7.75781e-11 | 1.000000 |
| rad71         | 3.67488e-11 | 1.000000 | 4.07870e-11 | 1.000000 |
| rad72         | 1.23083e-13 | 1.000000 | 1.36608e-13 | 1.000000 |
| rad23         | 5.30476e-16 | 1.000000 | 5.88769e-16 | 1.000000 |
| rad2          | 3.25948e-16 | 1.000000 | 3.61766e-16 | 1.000000 |
| rad45         | 3.08875e-16 | 1.000000 | 3.42817e-16 | 1.000000 |
| rad9          | 1.42488e-16 | 1.000000 | 1.58146e-16 | 1.000000 |
| rad1          | 7.09636e-17 | 1.000000 | 7.87621e-17 | 1.000000 |
| rad6          | 4.68486e-17 | 1.000000 | 5.19967e-17 | 1.000000 |
| rad36         | 2.90942e-17 | 1.000000 | 3.22913e-17 | 1.000000 |
| rad13         | 2.41230e-17 | 1.000000 | 2.67738e-17 | 1.000000 |
| rad11         | 1.49785e-17 | 1.000000 | 1.66244e-17 | 1.000000 |
| rad3          | 1.18090e-17 | 1.000000 | 1.31067e-17 | 1.000000 |
| rad4          | 9.61143e-18 | 1.000000 | 1.06676e-17 | 1.000000 |
| rad21         | 9.56156e-18 | 1.000000 | 1.06122e-17 | 1.000000 |
| rad10         | 4.88255e-18 | 1.000000 | 5.41907e-18 | 1.000000 |
| rad20         | 4.65001e-18 | 1.000000 | 5.16098e-18 | 1.000000 |
| rad33         | 2.70073e-18 | 1.000000 | 2.99751e-18 | 1.000000 |
| rad7          | 2.23749e-18 | 1.000000 | 2.48336e-18 | 1.000000 |
| rad28         | 3.77306e-19 | 1.000000 | 4.18767e-19 | 1.000000 |
| rad24         | 2.48801e-19 | 1.000000 | 2.76141e-19 | 1.000000 |
| rad26         | 1.59243e-19 | 1.000000 | 1.76741e-19 | 1.000000 |
| rad25         | 1.49317e-19 | 1.000000 | 1.65725e-19 | 1.000000 |
| rad12         | 9.30060e-20 | 1.000000 | 1.03226e-19 | 1.000000 |
| rad14         | 1.89393e-20 | 1.000000 | 2.10206e-20 | 1.000000 |
| rad15         | 1.87021e-20 | 1.000000 | 2.07573e-20 | 1.000000 |
| rad27         | 1.85942e-20 | 1.000000 | 2.06374e-20 | 1.000000 |
| rad18         | 4.54218e-21 | 1.000000 | 5.04130e-21 | 1.000000 |
| rad31         | 2.32683e-21 | 1.000000 | 2.58252e-21 | 1.000000 |
| rad8          | 3.75825e-23 | 1.000000 | 4.17124e-23 | 1.000000 |
| rad22         | 2.48870e-24 | 1.000000 | 2.76217e-24 | 1.000000 |
| rad47         | 6.62542e-25 | 1.000000 | 7.35346e-25 | 1.000000 |
| rad5          | 1.19689e-26 | 1.000000 | 1.32842e-26 | 1.000000 |

0.100000000E-08 Pa, 1100.00000 K

=====

Rate constant | True (fraction) | Effective (fraction)

-----

|                    |             |          |             |          |
|--------------------|-------------|----------|-------------|----------|
| Total              | 1.22919e-12 | (1.00 )  | 1.06688e-12 | (1.00 )  |
| Formation of rad11 | 3.87976e-13 | (0.316 ) | 3.11712e-13 | (0.292 ) |
| Formation of rad6  | 4.37724e-13 | (0.356 ) | 3.51681e-13 | (0.330 ) |
| H-abstraction      | 4.03491e-13 | (0.328 ) | 4.03491e-13 | (0.378 ) |

| species            | PYtrue      | Cumul    | PYeffective | Cumul    |
|--------------------|-------------|----------|-------------|----------|
| Benzene+2-propynyl | 0.328257    | 0.328257 | 0.378196    | 0.378196 |
| Indene+H           | 0.214714    | 0.542971 | 0.247379    | 0.625574 |
| C2H2+PhCH2         | 0.146502    | 0.689473 | 0.168789    | 0.794364 |
| Phenyl+Allene      | 0.132044    | 0.821517 | 0.000000    | 0.794364 |
| PhCHCCH2+H         | 0.0609574   | 0.882474 | 0.0702309   | 0.864595 |
| PhCCH+CH3          | 0.0572446   | 0.939719 | 0.0659535   | 0.930548 |
| PhCH2CCH+H         | 0.0407440   | 0.980463 | 0.0469425   | 0.977491 |
| Ph+MeAc            | 0.00763489  | 0.988098 | 0.00879642  | 0.986287 |
| PAH7+H             | 0.00694716  | 0.995045 | 0.00800405  | 0.994291 |
| PhCCCH3+H          | 0.00267733  | 0.997722 | 0.00308464  | 0.997376 |
| rad39              | 0.00150224  | 0.999224 | 0.00173078  | 0.999107 |
| rad19anti          | 0.000315220 | 0.999539 | 0.000363175 | 0.999470 |
| PAH9+H             | 0.000164386 | 0.999704 | 0.000189394 | 0.999659 |
| rad19syn           | 7.45655e-05 | 0.999778 | 8.59091e-05 | 0.999745 |
| rad38              | 6.50359e-05 | 0.999843 | 7.49299e-05 | 0.999820 |
| rad30              | 3.82332e-05 | 0.999882 | 4.40497e-05 | 0.999864 |
| rad35              | 3.25605e-05 | 0.999914 | 3.75140e-05 | 0.999902 |
| rad54              | 2.39077e-05 | 0.999938 | 2.75448e-05 | 0.999929 |
| PhcycC3H3_A+H      | 1.67306e-05 | 0.999955 | 1.92759e-05 | 0.999948 |
| rad46              | 1.28371e-05 | 0.999968 | 1.47901e-05 | 0.999963 |
| rad37              | 1.03715e-05 | 0.999978 | 1.19494e-05 | 0.999975 |
| PAH3+H             | 4.83975e-06 | 0.999983 | 5.57602e-06 | 0.999981 |
| PAH1+H             | 3.16887e-06 | 0.999986 | 3.65096e-06 | 0.999984 |
| rad50              | 2.53500e-06 | 0.999989 | 2.92065e-06 | 0.999987 |
| rad70              | 2.31279e-06 | 0.999991 | 2.66464e-06 | 0.999990 |
| PAH10+CH3          | 2.25114e-06 | 0.999993 | 2.59361e-06 | 0.999993 |
| rad67              | 1.57911e-06 | 0.999995 | 1.81935e-06 | 0.999994 |
| rad55              | 1.19782e-06 | 0.999996 | 1.38006e-06 | 0.999996 |
| rad60syn           | 1.15117e-06 | 0.999997 | 1.32630e-06 | 0.999997 |
| rad60anti          | 6.62627e-07 | 0.999998 | 7.63433e-07 | 0.999998 |
| rad59              | 6.18406e-07 | 0.999998 | 7.12482e-07 | 0.999999 |
| rad62              | 3.93252e-07 | 0.999999 | 4.53078e-07 | 0.999999 |
| rad34              | 3.40145e-07 | 0.999999 | 3.91892e-07 | 0.999999 |
| rad51              | 2.38369e-07 | 0.999999 | 2.74633e-07 | 1.000000 |
| rad52              | 1.25451e-07 | 1.000000 | 1.44535e-07 | 1.000000 |
| rad53              | 7.80404e-08 | 1.000000 | 8.99129e-08 | 1.000000 |
| rad43              | 6.37336e-08 | 1.000000 | 7.34295e-08 | 1.000000 |
| rad56              | 3.84098e-08 | 1.000000 | 4.42533e-08 | 1.000000 |
| rad64              | 2.61428e-08 | 1.000000 | 3.01199e-08 | 1.000000 |
| rad58              | 1.20347e-08 | 1.000000 | 1.38656e-08 | 1.000000 |
| rad42              | 9.67464e-09 | 1.000000 | 1.11465e-08 | 1.000000 |
| rad65              | 7.50471e-09 | 1.000000 | 8.64638e-09 | 1.000000 |
| rad68syn           | 4.04354e-09 | 1.000000 | 4.65870e-09 | 1.000000 |
| PAH8+H             | 3.08736e-09 | 1.000000 | 3.55704e-09 | 1.000000 |
| rad68anti          | 2.69715e-09 | 1.000000 | 3.10748e-09 | 1.000000 |
| rad41              | 9.10252e-10 | 1.000000 | 1.04874e-09 | 1.000000 |
| rad40syn           | 6.53835e-10 | 1.000000 | 7.53304e-10 | 1.000000 |
| rad61              | 3.79380e-10 | 1.000000 | 4.37096e-10 | 1.000000 |
| rad73              | 3.37894e-10 | 1.000000 | 3.89299e-10 | 1.000000 |
| rad40anti          | 3.05537e-10 | 1.000000 | 3.52019e-10 | 1.000000 |
| rad71              | 2.11150e-10 | 1.000000 | 2.43273e-10 | 1.000000 |
| rad72              | 1.11745e-12 | 1.000000 | 1.28745e-12 | 1.000000 |
| rad23              | 2.66114e-16 | 1.000000 | 3.06598e-16 | 1.000000 |
| rad45              | 1.64814e-16 | 1.000000 | 1.89888e-16 | 1.000000 |
| rad9               | 1.25116e-16 | 1.000000 | 1.44150e-16 | 1.000000 |
| rad2               | 8.67562e-17 | 1.000000 | 9.99544e-17 | 1.000000 |
| rad6               | 7.25207e-17 | 1.000000 | 8.35537e-17 | 1.000000 |
| rad11              | 6.03137e-17 | 1.000000 | 6.94891e-17 | 1.000000 |
| rad13              | 5.55336e-17 | 1.000000 | 6.39818e-17 | 1.000000 |
| rad1               | 2.02569e-17 | 1.000000 | 2.33387e-17 | 1.000000 |
| rad36              | 1.57213e-17 | 1.000000 | 1.81130e-17 | 1.000000 |
| rad7               | 1.24063e-17 | 1.000000 | 1.42937e-17 | 1.000000 |
| rad21              | 1.12703e-17 | 1.000000 | 1.29848e-17 | 1.000000 |
| rad20              | 5.72530e-18 | 1.000000 | 6.59629e-18 | 1.000000 |
| rad3               | 4.48447e-18 | 1.000000 | 5.16670e-18 | 1.000000 |
| rad4               | 3.67936e-18 | 1.000000 | 4.23911e-18 | 1.000000 |
| rad33              | 2.98576e-18 | 1.000000 | 3.43998e-18 | 1.000000 |
| rad10              | 2.39142e-18 | 1.000000 | 2.75524e-18 | 1.000000 |
| rad28              | 3.34183e-19 | 1.000000 | 3.85023e-19 | 1.000000 |
| rad25              | 2.72797e-19 | 1.000000 | 3.14298e-19 | 1.000000 |
| rad24              | 2.16988e-19 | 1.000000 | 2.49998e-19 | 1.000000 |
| rad26              | 1.30911e-19 | 1.000000 | 1.50826e-19 | 1.000000 |
| rad12              | 1.06574e-19 | 1.000000 | 1.22787e-19 | 1.000000 |

|       |             |          |             |         |
|-------|-------------|----------|-------------|---------|
| rad18 | 3.95810e-20 | 1.000000 | 4.56025e-20 | 1.00000 |
| rad14 | 2.59084e-20 | 1.000000 | 2.98500e-20 | 1.00000 |
| rad27 | 1.66794e-20 | 1.000000 | 1.92169e-20 | 1.00000 |
| rad15 | 1.52341e-20 | 1.000000 | 1.75516e-20 | 1.00000 |
| rad31 | 1.37107e-21 | 1.000000 | 1.57966e-21 | 1.00000 |
| rad8  | 2.31129e-22 | 1.000000 | 2.66290e-22 | 1.00000 |
| rad22 | 2.05503e-23 | 1.000000 | 2.36766e-23 | 1.00000 |
| rad47 | 1.74352e-24 | 1.000000 | 2.00877e-24 | 1.00000 |
| rad5  | 3.96437e-26 | 1.000000 | 4.56748e-26 | 1.00000 |

0.100000000E-08 Pa, 1200.00000 K

| Rate constant      | True (fraction)      | Effective (fraction) |
|--------------------|----------------------|----------------------|
| Total              | 1.80237e-12 (1.00 )  | 1.50733e-12 (1.00 )  |
| Formation of rad11 | 5.38789e-13 (0.299 ) | 4.03336e-13 (0.268 ) |
| Formation of rad6  | 6.34764e-13 (0.352 ) | 4.75183e-13 (0.315 ) |
| H-abstraction      | 6.28816e-13 (0.349 ) | 6.28816e-13 (0.417 ) |

| species            | PYtrue      | Cumul    | PYeffective | Cumul    |
|--------------------|-------------|----------|-------------|----------|
| Benzene+2-propynyl | 0.348883    | 0.348883 | 0.417171    | 0.417171 |
| Indene+H           | 0.168224    | 0.517107 | 0.201151    | 0.618322 |
| Phenyl+Allene      | 0.163693    | 0.680800 | 0.000000    | 0.618322 |
| C2H2+PhCH2         | 0.129445    | 0.810245 | 0.154782    | 0.773104 |
| PhCHCCH2+H         | 0.0661470   | 0.876392 | 0.0790946   | 0.852199 |
| PhCH2CCH+H         | 0.0526489   | 0.929041 | 0.0629537   | 0.915152 |
| PhCCH+CH3          | 0.0518208   | 0.980862 | 0.0619641   | 0.977116 |
| PAH7+H             | 0.00758545  | 0.988447 | 0.00907010  | 0.986186 |
| Ph+MeAc            | 0.00700420  | 0.995451 | 0.00837514  | 0.994562 |
| PhCCCH3+H          | 0.00195097  | 0.997402 | 0.00233284  | 0.996894 |
| rad39              | 0.00157581  | 0.998978 | 0.00188425  | 0.998779 |
| rad19anti          | 0.000399579 | 0.999378 | 0.000477791 | 0.999257 |
| PAH9+H             | 0.000204702 | 0.999582 | 0.000244769 | 0.999501 |
| rad19syn           | 0.000118863 | 0.999701 | 0.000142129 | 0.999643 |
| rad38              | 8.27680e-05 | 0.999784 | 9.89685e-05 | 0.999742 |
| rad54              | 4.05005e-05 | 0.999824 | 4.84277e-05 | 0.999791 |
| rad35              | 3.92969e-05 | 0.999864 | 4.69886e-05 | 0.999838 |
| rad30              | 3.73116e-05 | 0.999901 | 4.46148e-05 | 0.999882 |
| PhcycC3H3_A+H      | 3.27086e-05 | 0.999934 | 3.91108e-05 | 0.999922 |
| rad46              | 1.78869e-05 | 0.999952 | 2.13880e-05 | 0.999943 |
| rad37              | 1.16239e-05 | 0.999963 | 1.38991e-05 | 0.999957 |
| PAH3+H             | 6.95966e-06 | 0.999970 | 8.32193e-06 | 0.999965 |
| PAH1+H             | 6.04571e-06 | 0.999976 | 7.22906e-06 | 0.999972 |
| rad50              | 4.57121e-06 | 0.999981 | 5.46594e-06 | 0.999978 |
| rad70              | 4.07150e-06 | 0.999985 | 4.86843e-06 | 0.999983 |
| PAH10+CH3          | 3.83957e-06 | 0.999989 | 4.59109e-06 | 0.999987 |
| rad67              | 2.96796e-06 | 0.999992 | 3.54889e-06 | 0.999991 |
| rad55              | 2.19501e-06 | 0.999994 | 2.62464e-06 | 0.999993 |
| rad60syn           | 1.37645e-06 | 0.999995 | 1.64587e-06 | 0.999995 |
| rad59              | 8.52866e-07 | 0.999996 | 1.01981e-06 | 0.999996 |
| rad60anti          | 8.03342e-07 | 0.999997 | 9.60578e-07 | 0.999997 |
| rad34              | 6.59901e-07 | 0.999998 | 7.89063e-07 | 0.999998 |
| rad62              | 5.91358e-07 | 0.999998 | 7.07106e-07 | 0.999999 |
| rad51              | 5.25705e-07 | 0.999999 | 6.28605e-07 | 0.999999 |
| rad52              | 2.50703e-07 | 0.999999 | 2.99775e-07 | 0.999999 |
| rad53              | 1.90238e-07 | 0.999999 | 2.27474e-07 | 1.000000 |
| rad56              | 1.09448e-07 | 0.999999 | 1.30871e-07 | 1.000000 |
| rad43              | 7.76164e-08 | 0.999999 | 9.28086e-08 | 1.000000 |
| rad64              | 5.85550e-08 | 0.999999 | 7.00159e-08 | 1.000000 |
| rad58              | 2.24147e-08 | 0.999999 | 2.68020e-08 | 1.000000 |
| rad42              | 1.82035e-08 | 0.999999 | 2.17665e-08 | 1.000000 |
| rad65              | 1.63703e-08 | 0.999999 | 1.95744e-08 | 1.000000 |
| rad68syn           | 1.10175e-08 | 0.999999 | 1.31740e-08 | 1.000000 |
| PAH8+H             | 1.09227e-08 | 0.999999 | 1.30606e-08 | 1.000000 |
| rad68anti          | 7.31621e-09 | 0.999999 | 8.74827e-09 | 1.000000 |
| rad40syn           | 2.07794e-09 | 0.999999 | 2.48466e-09 | 1.000000 |
| rad41              | 1.48024e-09 | 0.999999 | 1.76997e-09 | 1.000000 |
| rad73              | 1.26651e-09 | 0.999999 | 1.51441e-09 | 1.000000 |
| rad61              | 1.03672e-09 | 0.999999 | 1.23964e-09 | 1.000000 |
| rad40anti          | 1.01429e-09 | 0.999999 | 1.21282e-09 | 1.000000 |
| rad71              | 9.17535e-10 | 0.999999 | 1.09712e-09 | 1.000000 |
| rad72              | 7.08917e-12 | 0.999999 | 8.47678e-12 | 1.000000 |
| rad11              | 1.50131e-16 | 0.999999 | 1.79517e-16 | 1.000000 |
| rad23              | 1.35687e-16 | 0.999999 | 1.62246e-16 | 1.000000 |
| rad6               | 1.08591e-16 | 0.999999 | 1.29846e-16 | 1.000000 |
| rad9               | 9.26820e-17 | 0.999999 | 1.10823e-16 | 1.000000 |
| rad45              | 8.89712e-17 | 0.999999 | 1.06386e-16 | 1.000000 |
| rad13              | 6.46648e-17 | 0.999999 | 7.73216e-17 | 1.000000 |
| rad7               | 4.83389e-17 | 0.999999 | 5.78005e-17 | 1.000000 |

|       |             |          |             |         |
|-------|-------------|----------|-------------|---------|
| rad2  | 2.54787e-17 | 0.999999 | 3.04658e-17 | 1.00000 |
| rad21 | 8.79041e-18 | 0.999999 | 1.05110e-17 | 1.00000 |
| rad36 | 8.57918e-18 | 0.999999 | 1.02584e-17 | 1.00000 |
| rad1  | 6.18191e-18 | 0.999999 | 7.39191e-18 | 1.00000 |
| rad20 | 4.28302e-18 | 0.999999 | 5.12134e-18 | 1.00000 |
| rad10 | 2.44206e-18 | 0.999999 | 2.92005e-18 | 1.00000 |
| rad33 | 2.25859e-18 | 0.999999 | 2.70068e-18 | 1.00000 |
| rad3  | 1.81100e-18 | 0.999999 | 2.16548e-18 | 1.00000 |
| rad4  | 1.49731e-18 | 0.999999 | 1.79038e-18 | 1.00000 |
| rad28 | 4.11627e-19 | 0.999999 | 4.92196e-19 | 1.00000 |
| rad25 | 3.12053e-19 | 0.999999 | 3.73132e-19 | 1.00000 |
| rad24 | 1.65803e-19 | 0.999999 | 1.98256e-19 | 1.00000 |
| rad18 | 1.63210e-19 | 0.999999 | 1.95156e-19 | 1.00000 |
| rad26 | 1.33727e-19 | 0.999999 | 1.59902e-19 | 1.00000 |
| rad12 | 1.03518e-19 | 0.999999 | 1.23781e-19 | 1.00000 |
| rad14 | 2.44012e-20 | 0.999999 | 2.91773e-20 | 1.00000 |
| rad15 | 1.68122e-20 | 0.999999 | 2.01029e-20 | 1.00000 |
| rad27 | 1.00941e-20 | 0.999999 | 1.20699e-20 | 1.00000 |
| rad31 | 8.42038e-22 | 0.999999 | 1.00685e-21 | 1.00000 |
| rad8  | 5.36818e-22 | 0.999999 | 6.41893e-22 | 1.00000 |
| rad22 | 2.43373e-22 | 0.999999 | 2.91010e-22 | 1.00000 |
| rad47 | 3.89980e-24 | 0.999999 | 4.66312e-24 | 1.00000 |
| rad5  | 1.66315e-25 | 0.999999 | 1.98868e-25 | 1.00000 |

0.100000000E-08 Pa, 1300.00000 K

| Rate constant      | True (fraction)      | Effective (fraction) |
|--------------------|----------------------|----------------------|
| Total              | 2.54148e-12 (1.00 )  | 2.05338e-12 (1.00 )  |
| Formation of rad11 | 7.22991e-13 (0.284 ) | 5.03422e-13 (0.245 ) |
| Formation of rad6  | 8.84215e-13 (0.348 ) | 6.15682e-13 (0.300 ) |
| H-abstraction      | 9.34273e-13 (0.368 ) | 9.34273e-13 (0.455 ) |

| species            | PYtrue      | Cumul    | PYeffective | Cumul    |
|--------------------|-------------|----------|-------------|----------|
| Benzene+2-propynyl | 0.367610    | 0.367610 | 0.454993    | 0.454993 |
| Phenyl+Allene      | 0.192054    | 0.559664 | 0.000000    | 0.454993 |
| Indene+H           | 0.131421    | 0.691086 | 0.162661    | 0.617654 |
| C2H2+PhCH2         | 0.111295    | 0.802381 | 0.137750    | 0.755405 |
| PhCHCCH2+H         | 0.0692296   | 0.871610 | 0.0856859   | 0.841091 |
| PhCH2CCH+H         | 0.0636260   | 0.935236 | 0.0787507   | 0.919842 |
| PhCCH+CH3          | 0.0461559   | 0.981392 | 0.0571276   | 0.976969 |
| PAH7+H             | 0.00794566  | 0.989338 | 0.00983443  | 0.986804 |
| Ph+MeAc            | 0.00637082  | 0.995709 | 0.00788521  | 0.994689 |
| rad39              | 0.00158196  | 0.997291 | 0.00195800  | 0.996647 |
| PhCCCH3+H          | 0.00142376  | 0.998714 | 0.00176219  | 0.998409 |
| rad19anti          | 0.000475489 | 0.999190 | 0.000588514 | 0.998997 |
| PAH9+H             | 0.000242131 | 0.999432 | 0.000299688 | 0.999297 |
| rad19syn           | 0.000174660 | 0.999607 | 0.000216178 | 0.999513 |
| rad38              | 9.98860e-05 | 0.999707 | 0.000123629 | 0.999637 |
| rad54              | 6.26274e-05 | 0.999769 | 7.75141e-05 | 0.999714 |
| PhcycC3H3_A+H      | 5.74351e-05 | 0.999827 | 7.10879e-05 | 0.999786 |
| rad35              | 4.53516e-05 | 0.999872 | 5.61319e-05 | 0.999842 |
| rad30              | 3.53185e-05 | 0.999907 | 4.37139e-05 | 0.999885 |
| rad46              | 2.33611e-05 | 0.999931 | 2.89142e-05 | 0.999914 |
| rad37              | 1.29873e-05 | 0.999944 | 1.60744e-05 | 0.999930 |
| PAH1+H             | 1.02825e-05 | 0.999954 | 1.27267e-05 | 0.999943 |
| PAH3+H             | 9.32004e-06 | 0.999963 | 1.15354e-05 | 0.999955 |
| rad50              | 7.49585e-06 | 0.999971 | 9.27759e-06 | 0.999964 |
| rad70              | 6.43021e-06 | 0.999977 | 7.95868e-06 | 0.999972 |
| PAH10+CH3          | 6.07786e-06 | 0.999983 | 7.52262e-06 | 0.999979 |
| rad67              | 4.99567e-06 | 0.999988 | 6.18315e-06 | 0.999986 |
| rad55              | 3.63003e-06 | 0.999992 | 4.49291e-06 | 0.999990 |
| rad60syn           | 1.56340e-06 | 0.999993 | 1.93503e-06 | 0.999992 |
| rad34              | 1.13462e-06 | 0.999995 | 1.40432e-06 | 0.999993 |
| rad59              | 1.09806e-06 | 0.999996 | 1.35907e-06 | 0.999995 |
| rad51              | 1.02620e-06 | 0.999997 | 1.27014e-06 | 0.999996 |
| rad60anti          | 9.23688e-07 | 0.999998 | 1.14325e-06 | 0.999997 |
| rad62              | 8.25901e-07 | 0.999998 | 1.02222e-06 | 0.999998 |
| rad52              | 4.48900e-07 | 0.999999 | 5.55607e-07 | 0.999999 |
| rad53              | 4.02868e-07 | 0.999999 | 4.98632e-07 | 0.999999 |
| rad56              | 2.64598e-07 | 1.000000 | 3.27496e-07 | 1.000000 |
| rad64              | 1.13755e-07 | 1.000000 | 1.40795e-07 | 1.000000 |
| rad43              | 8.95932e-08 | 1.000000 | 1.10890e-07 | 1.000000 |
| rad58              | 3.75497e-08 | 1.000000 | 4.64755e-08 | 1.000000 |
| rad65              | 3.15601e-08 | 1.000000 | 3.90621e-08 | 1.000000 |
| PAH8+H             | 3.15023e-08 | 1.000000 | 3.89905e-08 | 1.000000 |
| rad42              | 3.09037e-08 | 1.000000 | 3.82497e-08 | 1.000000 |
| rad68syn           | 2.53721e-08 | 1.000000 | 3.14033e-08 | 1.000000 |
| rad68anti          | 1.67834e-08 | 1.000000 | 2.07729e-08 | 1.000000 |



|           |             |          |             |         |
|-----------|-------------|----------|-------------|---------|
| rad40syn  | 5.46373e-09 | 1.000000 | 6.76250e-09 | 1.00000 |
| rad73     | 3.88972e-09 | 1.000000 | 4.81434e-09 | 1.00000 |
| rad71     | 3.20241e-09 | 1.000000 | 3.96364e-09 | 1.00000 |
| rad40anti | 2.76933e-09 | 1.000000 | 3.42762e-09 | 1.00000 |
| rad61     | 2.41929e-09 | 1.000000 | 2.99437e-09 | 1.00000 |
| rad41     | 2.20456e-09 | 1.000000 | 2.72860e-09 | 1.00000 |
| rad72     | 3.39621e-11 | 1.000000 | 4.20352e-11 | 1.00000 |
| rad11     | 2.12952e-16 | 1.000000 | 2.63571e-16 | 1.00000 |
| rad6      | 1.81854e-16 | 1.000000 | 2.25082e-16 | 1.00000 |
| rad7      | 1.09741e-16 | 1.000000 | 1.35827e-16 | 1.00000 |
| rad23     | 7.15581e-17 | 1.000000 | 8.85679e-17 | 1.00000 |
| rad9      | 6.37221e-17 | 1.000000 | 7.88690e-17 | 1.00000 |
| rad13     | 4.91946e-17 | 1.000000 | 6.08887e-17 | 1.00000 |
| rad45     | 4.85811e-17 | 1.000000 | 6.01289e-17 | 1.00000 |
| rad2      | 7.99803e-18 | 1.000000 | 9.89923e-18 | 1.00000 |
| rad21     | 5.91330e-18 | 1.000000 | 7.31895e-18 | 1.00000 |
| rad36     | 4.74198e-18 | 1.000000 | 5.86918e-18 | 1.00000 |
| rad20     | 2.63323e-18 | 1.000000 | 3.25917e-18 | 1.00000 |
| rad10     | 2.37177e-18 | 1.000000 | 2.93555e-18 | 1.00000 |
| rad1      | 1.99580e-18 | 1.000000 | 2.47022e-18 | 1.00000 |
| rad33     | 1.50408e-18 | 1.000000 | 1.86161e-18 | 1.00000 |
| rad3      | 7.72749e-19 | 1.000000 | 9.56438e-19 | 1.00000 |
| rad28     | 6.65597e-19 | 1.000000 | 8.23816e-19 | 1.00000 |
| rad4      | 6.43356e-19 | 1.000000 | 7.96282e-19 | 1.00000 |
| rad18     | 3.07354e-19 | 1.000000 | 3.80413e-19 | 1.00000 |
| rad25     | 2.61840e-19 | 1.000000 | 3.24081e-19 | 1.00000 |
| rad26     | 1.53806e-19 | 1.000000 | 1.90367e-19 | 1.00000 |
| rad24     | 1.21061e-19 | 1.000000 | 1.49838e-19 | 1.00000 |
| rad12     | 9.25054e-20 | 1.000000 | 1.14494e-19 | 1.00000 |
| rad15     | 6.00765e-20 | 1.000000 | 7.43569e-20 | 1.00000 |
| rad14     | 1.73625e-20 | 1.000000 | 2.14896e-20 | 1.00000 |
| rad27     | 4.96123e-21 | 1.000000 | 6.14053e-21 | 1.00000 |
| rad22     | 2.78930e-21 | 1.000000 | 3.45233e-21 | 1.00000 |
| rad8      | 7.86598e-22 | 1.000000 | 9.73573e-22 | 1.00000 |
| rad31     | 5.35121e-22 | 1.000000 | 6.62325e-22 | 1.00000 |
| rad47     | 7.66887e-24 | 1.000000 | 9.49183e-24 | 1.00000 |
| rad5      | 7.50672e-25 | 1.000000 | 9.29111e-25 | 1.00000 |

0.100000000E-08 Pa, 1400.00000 K

| Rate constant      | True (fraction)      | Effective (fraction) |
|--------------------|----------------------|----------------------|
| Total              | 3.47024e-12 (1.00 )  | 2.71984e-12 (1.00 )  |
| Formation of rad11 | 9.43269e-13 (0.272 ) | 6.11768e-13 (0.225 ) |
| Formation of rad6  | 1.19194e-12 (0.343 ) | 7.73043e-13 (0.284 ) |
| H-abstraction      | 1.33503e-12 (0.385 ) | 1.33503e-12 (0.491 ) |

| species            | PYtrue      | Cumul    | PYeffective | Cumul    |
|--------------------|-------------|----------|-------------|----------|
| Benzene+2-propynyl | 0.384709    | 0.384709 | 0.490849    | 0.490849 |
| Phenyl+Allene      | 0.216237    | 0.600946 | 0.00000     | 0.490849 |
| Indene+H           | 0.102753    | 0.703699 | 0.131102    | 0.621951 |
| C2H2+PhCH2         | 0.0940337   | 0.797733 | 0.119977    | 0.741928 |
| PhCH2CCH+H         | 0.0730480   | 0.870781 | 0.0932017   | 0.835129 |
| PhCHCCH2+H         | 0.0704361   | 0.941217 | 0.0898693   | 0.924998 |
| PhCCH+CH3          | 0.0407709   | 0.981988 | 0.0520195   | 0.977018 |
| PAH7+H             | 0.00808062  | 0.990068 | 0.0103100   | 0.987328 |
| Ph+MeAc            | 0.00578254  | 0.995851 | 0.00737791  | 0.994706 |
| rad39              | 0.00153900  | 0.997390 | 0.00196361  | 0.996669 |
| PhCCCH3+H          | 0.00104907  | 0.998439 | 0.00133851  | 0.998008 |
| rad19anti          | 0.000537563 | 0.998977 | 0.000685873 | 0.998694 |
| PAH9+H             | 0.000275092 | 0.999252 | 0.000350989 | 0.999045 |
| rad19syn           | 0.000241019 | 0.999493 | 0.000307515 | 0.999352 |
| rad38              | 0.000115616 | 0.999608 | 0.000147513 | 0.999500 |
| PhcycC3H3_A+H      | 9.27188e-05 | 0.999701 | 0.000118299 | 0.999618 |
| rad54              | 9.02066e-05 | 0.999791 | 0.000115094 | 0.999733 |
| rad35              | 5.05796e-05 | 0.999842 | 6.45344e-05 | 0.999798 |
| rad30              | 3.27889e-05 | 0.999875 | 4.18352e-05 | 0.999840 |
| rad46              | 2.89889e-05 | 0.999904 | 3.69868e-05 | 0.999877 |
| PAH1+H             | 1.59963e-05 | 0.999920 | 2.04096e-05 | 0.999897 |
| rad37              | 1.43563e-05 | 0.999934 | 1.83172e-05 | 0.999915 |
| PAH3+H             | 1.18378e-05 | 0.999946 | 1.51038e-05 | 0.999930 |
| rad50              | 1.13924e-05 | 0.999957 | 1.45355e-05 | 0.999945 |
| rad70              | 9.33021e-06 | 0.999967 | 1.19044e-05 | 0.999957 |
| PAH10+CH3          | 9.00294e-06 | 0.999976 | 1.14868e-05 | 0.999968 |
| rad67              | 7.68554e-06 | 0.999983 | 9.80595e-06 | 0.999978 |
| rad55              | 5.54137e-06 | 0.999989 | 7.07023e-06 | 0.999985 |
| rad51              | 1.81654e-06 | 0.999991 | 2.31772e-06 | 0.999988 |
| rad34              | 1.77488e-06 | 0.999992 | 2.26456e-06 | 0.999990 |
| rad60syn           | 1.71203e-06 | 0.999994 | 2.18438e-06 | 0.999992 |

|           |             |          |             |          |
|-----------|-------------|----------|-------------|----------|
| rad59     | 1.34390e-06 | 0.999995 | 1.71468e-06 | 0.999994 |
| rad62     | 1.09238e-06 | 0.999997 | 1.39377e-06 | 0.999995 |
| rad60anti | 1.02264e-06 | 0.999998 | 1.30479e-06 | 0.999996 |
| rad53     | 7.63459e-07 | 0.999998 | 9.74098e-07 | 0.999997 |
| rad52     | 7.36190e-07 | 0.999999 | 9.39297e-07 | 0.999998 |
| rad56     | 5.61676e-07 | 1.000000 | 7.16641e-07 | 0.999999 |
| rad64     | 1.97836e-07 | 1.000000 | 2.52418e-07 | 0.999999 |
| rad43     | 1.00004e-07 | 1.000000 | 1.27595e-07 | 0.999999 |
| PAH8+H    | 7.73009e-08 | 1.000000 | 9.86282e-08 | 1.000000 |
| rad58     | 5.80225e-08 | 1.000000 | 7.40306e-08 | 1.000000 |
| rad65     | 5.51354e-08 | 1.000000 | 7.03469e-08 | 1.000000 |
| rad68syn  | 5.11875e-08 | 1.000000 | 6.53098e-08 | 1.000000 |
| rad42     | 4.85214e-08 | 1.000000 | 6.19082e-08 | 1.000000 |
| rad68anti | 3.37456e-08 | 1.000000 | 4.30559e-08 | 1.000000 |
| rad40syn  | 1.23711e-08 | 1.000000 | 1.57842e-08 | 1.000000 |
| rad73     | 1.01769e-08 | 1.000000 | 1.29847e-08 | 1.000000 |
| rad71     | 9.36208e-09 | 1.000000 | 1.19451e-08 | 1.000000 |
| rad40anti | 6.47926e-09 | 1.000000 | 8.26688e-09 | 1.000000 |
| rad61     | 4.96370e-09 | 1.000000 | 6.33318e-09 | 1.000000 |
| rad41     | 3.08784e-09 | 1.000000 | 3.93976e-09 | 1.000000 |
| rad72     | 1.29425e-10 | 1.000000 | 1.65133e-10 | 1.000000 |
| rad6      | 3.73272e-16 | 1.000000 | 4.76256e-16 | 1.000000 |
| rad11     | 1.92508e-16 | 1.000000 | 2.45620e-16 | 1.000000 |
| rad7      | 1.43208e-16 | 1.000000 | 1.82719e-16 | 1.000000 |
| rad9      | 4.21257e-17 | 1.000000 | 5.37480e-17 | 1.000000 |
| rad13     | 3.13830e-17 | 1.000000 | 4.00415e-17 | 1.000000 |
| rad45     | 2.39138e-17 | 1.000000 | 3.05115e-17 | 1.000000 |
| rad21     | 3.81060e-18 | 1.000000 | 4.86193e-18 | 1.000000 |
| rad36     | 2.53872e-18 | 1.000000 | 3.23913e-18 | 1.000000 |
| rad2      | 2.33228e-18 | 1.000000 | 2.97574e-18 | 1.000000 |
| rad10     | 1.66262e-18 | 1.000000 | 2.12133e-18 | 1.000000 |
| rad20     | 1.53040e-18 | 1.000000 | 1.95263e-18 | 1.000000 |
| rad28     | 1.26642e-18 | 1.000000 | 1.61581e-18 | 1.000000 |
| rad33     | 9.75772e-19 | 1.000000 | 1.24499e-18 | 1.000000 |
| rad1      | 6.49593e-19 | 1.000000 | 8.28817e-19 | 1.000000 |
| rad3      | 3.47118e-19 | 1.000000 | 4.42886e-19 | 1.000000 |
| rad18     | 3.17460e-19 | 1.000000 | 4.05046e-19 | 1.000000 |
| rad4      | 2.90779e-19 | 1.000000 | 3.71003e-19 | 1.000000 |
| rad25     | 1.93942e-19 | 1.000000 | 2.47449e-19 | 1.000000 |
| rad15     | 1.80756e-19 | 1.000000 | 2.30626e-19 | 1.000000 |
| rad26     | 1.78796e-19 | 1.000000 | 2.28125e-19 | 1.000000 |
| rad24     | 8.67708e-20 | 1.000000 | 1.10711e-19 | 1.000000 |
| rad12     | 7.86877e-20 | 1.000000 | 1.00397e-19 | 1.000000 |
| rad22     | 2.39634e-20 | 1.000000 | 3.05747e-20 | 1.000000 |
| rad14     | 1.10830e-20 | 1.000000 | 1.41408e-20 | 1.000000 |
| rad23     | 5.03750e-21 | 1.000000 | 6.42732e-21 | 1.000000 |
| rad27     | 2.35634e-21 | 1.000000 | 3.00644e-21 | 1.000000 |
| rad8      | 9.26462e-22 | 1.000000 | 1.18207e-21 | 1.000000 |
| rad31     | 3.51109e-22 | 1.000000 | 4.47978e-22 | 1.000000 |
| rad47     | 1.36054e-23 | 1.000000 | 1.73591e-23 | 1.000000 |
| rad5      | 3.04720e-24 | 1.000000 | 3.88791e-24 | 1.000000 |

0.100000000E-08 Pa, 1500.00000 K

=====

| Rate constant      | True (fraction)      | Effective (fraction) |
|--------------------|----------------------|----------------------|
| Total              | 4.61271e-12 (1.00 )  | 3.52361e-12 (1.00 )  |
| Formation of rad11 | 1.20217e-12 (0.261 ) | 7.28782e-13 (0.207 ) |
| Formation of rad6  | 1.56360e-12 (0.339 ) | 9.47887e-13 (0.269 ) |
| H-abstraction      | 1.84694e-12 (0.400 ) | 1.84694e-12 (0.524 ) |

| species            | PYtrue      | Cumul    | PYeffective | Cumul    |
|--------------------|-------------|----------|-------------|----------|
| Benzene+2-propynyl | 0.400402    | 0.400402 | 0.524162    | 0.524162 |
| Phenyl+Allene      | 0.236109    | 0.636511 | 0.00000     | 0.524162 |
| Indene+H           | 0.0806435   | 0.717155 | 0.105570    | 0.629731 |
| PhCH2CCH+H         | 0.0806387   | 0.797793 | 0.105563    | 0.735294 |
| C2H2+PhCH2         | 0.0787062   | 0.876500 | 0.103033    | 0.838328 |
| PhCHCCH2+H         | 0.0701571   | 0.946657 | 0.0918421   | 0.930170 |
| PhCCH+CH3          | 0.0359368   | 0.982594 | 0.0470444   | 0.977214 |
| PAH7+H             | 0.00805110  | 0.990645 | 0.0105396   | 0.987754 |
| Ph+MeAc            | 0.00526035  | 0.995905 | 0.00688624  | 0.994640 |
| rad39              | 0.00146497  | 0.997370 | 0.00191777  | 0.996558 |
| PhCCCH3+H          | 0.000785539 | 0.998156 | 0.00102834  | 0.997586 |
| rad19anti          | 0.000582991 | 0.998739 | 0.000763188 | 0.998349 |
| rad19syn           | 0.000316567 | 0.999055 | 0.000414413 | 0.998764 |
| PAH9+H             | 0.000302845 | 0.999358 | 0.000396450 | 0.999160 |
| PhcycC3H3_A+H      | 0.000139913 | 0.999498 | 0.000183158 | 0.999343 |
| rad38              | 0.000129499 | 0.999627 | 0.000169526 | 0.999513 |
| rad54              | 0.000122808 | 0.999750 | 0.000160767 | 0.999674 |

|           |             |          |             |          |
|-----------|-------------|----------|-------------|----------|
| rad35     | 5.49599e-05 | 0.999805 | 7.19472e-05 | 0.999746 |
| rad46     | 3.45380e-05 | 0.999840 | 4.52132e-05 | 0.999791 |
| rad30     | 3.01156e-05 | 0.999870 | 3.94239e-05 | 0.999830 |
| PAH1+H    | 2.31901e-05 | 0.999893 | 3.03579e-05 | 0.999861 |
| rad50     | 1.62766e-05 | 0.999909 | 2.13074e-05 | 0.999882 |
| rad37     | 1.56192e-05 | 0.999925 | 2.04470e-05 | 0.999902 |
| PAH3+H    | 1.44553e-05 | 0.999939 | 1.89232e-05 | 0.999921 |
| rad70     | 1.26613e-05 | 0.999952 | 1.65747e-05 | 0.999938 |
| PAH10+CH3 | 1.25752e-05 | 0.999965 | 1.64620e-05 | 0.999954 |
| rad67     | 1.09793e-05 | 0.999976 | 1.43728e-05 | 0.999969 |
| rad55     | 7.93592e-06 | 0.999983 | 1.03888e-05 | 0.999979 |
| rad51     | 2.96749e-06 | 0.999986 | 3.88470e-06 | 0.999983 |
| rad34     | 2.57549e-06 | 0.999989 | 3.37153e-06 | 0.999986 |
| rad60syn  | 1.82792e-06 | 0.999991 | 2.39290e-06 | 0.999989 |
| rad59     | 1.58467e-06 | 0.999992 | 2.07447e-06 | 0.999991 |
| rad62     | 1.38706e-06 | 0.999994 | 1.81579e-06 | 0.999993 |
| rad53     | 1.32204e-06 | 0.999995 | 1.73067e-06 | 0.999994 |
| rad52     | 1.12378e-06 | 0.999996 | 1.47114e-06 | 0.999996 |
| rad60anti | 1.10268e-06 | 0.999997 | 1.44350e-06 | 0.999997 |
| rad56     | 1.07222e-06 | 0.999998 | 1.40364e-06 | 0.999999 |
| rad64     | 3.15087e-07 | 0.999999 | 4.12476e-07 | 0.999999 |
| PAH8+H    | 1.66252e-07 | 0.999999 | 2.17639e-07 | 0.999999 |
| rad43     | 1.09523e-07 | 0.999999 | 1.43375e-07 | 0.999999 |
| rad68syn  | 9.28291e-08 | 0.999999 | 1.21521e-07 | 0.999999 |
| rad65     | 8.88724e-08 | 0.999999 | 1.16342e-07 | 1.000000 |
| rad58     | 8.42069e-08 | 0.999999 | 1.10234e-07 | 1.000000 |
| rad42     | 7.16663e-08 | 0.999999 | 9.38173e-08 | 1.000000 |
| rad68anti | 6.10163e-08 | 0.999999 | 7.98757e-08 | 1.000000 |
| rad40syn  | 2.48114e-08 | 0.999999 | 3.24802e-08 | 1.000000 |
| rad71     | 2.35639e-08 | 0.999999 | 3.08472e-08 | 1.000000 |
| rad73     | 2.32861e-08 | 0.999999 | 3.04835e-08 | 1.000000 |
| rad40anti | 1.33700e-08 | 0.999999 | 1.75025e-08 | 1.000000 |
| rad61     | 9.14968e-09 | 0.999999 | 1.19777e-08 | 1.000000 |
| rad41     | 4.14357e-09 | 0.999999 | 5.42427e-09 | 1.000000 |
| rad72     | 4.05222e-10 | 0.999999 | 5.30469e-10 | 1.000000 |
| rad6      | 8.13144e-16 | 0.999999 | 1.06447e-15 | 1.000000 |
| rad11     | 1.35768e-16 | 0.999999 | 1.77732e-16 | 1.000000 |
| rad7      | 1.25054e-16 | 0.999999 | 1.63707e-16 | 1.000000 |
| rad9      | 2.73187e-17 | 0.999999 | 3.57626e-17 | 1.000000 |
| rad13     | 1.89899e-17 | 0.999999 | 2.48594e-17 | 1.000000 |
| rad45     | 1.35782e-17 | 0.999999 | 1.77751e-17 | 1.000000 |
| rad28     | 2.43606e-18 | 0.999999 | 3.18902e-18 | 1.000000 |
| rad21     | 2.42952e-18 | 0.999999 | 3.18045e-18 | 1.000000 |
| rad36     | 1.45564e-18 | 0.999999 | 1.90556e-18 | 1.000000 |
| rad20     | 8.79172e-19 | 0.999999 | 1.15092e-18 | 1.000000 |
| rad10     | 8.76420e-19 | 0.999999 | 1.14731e-18 | 1.000000 |
| rad2      | 8.21857e-19 | 0.999999 | 1.07588e-18 | 1.000000 |
| rad33     | 6.33589e-19 | 0.999999 | 8.29424e-19 | 1.000000 |
| rad15     | 2.99210e-19 | 0.999999 | 3.91692e-19 | 1.000000 |
| rad18     | 2.34697e-19 | 0.999999 | 3.07239e-19 | 1.000000 |
| rad1      | 2.33617e-19 | 0.999999 | 3.05825e-19 | 1.000000 |
| rad26     | 1.91930e-19 | 0.999999 | 2.51253e-19 | 1.000000 |
| rad3      | 1.63676e-19 | 0.999999 | 2.14266e-19 | 1.000000 |
| rad4      | 1.37833e-19 | 0.999999 | 1.80436e-19 | 1.000000 |
| rad25     | 1.37831e-19 | 0.999999 | 1.80433e-19 | 1.000000 |
| rad22     | 1.27465e-19 | 0.999999 | 1.66863e-19 | 1.000000 |
| rad12     | 6.49250e-20 | 0.999999 | 8.49924e-20 | 1.000000 |
| rad24     | 6.18581e-20 | 0.999999 | 8.09777e-20 | 1.000000 |
| rad23     | 5.62738e-20 | 0.999999 | 7.36674e-20 | 1.000000 |
| rad14     | 6.98939e-21 | 0.999999 | 9.14971e-21 | 1.000000 |
| rad27     | 1.15740e-21 | 0.999999 | 1.51513e-21 | 1.000000 |
| rad8      | 9.76883e-22 | 0.999999 | 1.27883e-21 | 1.000000 |
| rad31     | 2.37694e-22 | 0.999999 | 3.11163e-22 | 1.000000 |
| rad47     | 2.21852e-23 | 0.999999 | 2.90423e-23 | 1.000000 |
| rad5      | 9.58379e-24 | 0.999999 | 1.25461e-23 | 1.000000 |

0.100000000E-08 Pa, 1750.00000 K

| Rate constant      | True (fraction)      | Effective (fraction) |
|--------------------|----------------------|----------------------|
| Total              | 8.61869e-12 (1.00 )  | 6.27400e-12 (1.00 )  |
| Formation of rad11 | 2.04015e-12 (0.237 ) | 1.05237e-12 (0.168 ) |
| Formation of rad6  | 2.80256e-12 (0.325 ) | 1.44565e-12 (0.230 ) |
| H-abstraction      | 3.77597e-12 (0.438 ) | 3.77597e-12 (0.602 ) |

  

| species            | PYtrue    | Cumul    | PYeffective | Cumul    |
|--------------------|-----------|----------|-------------|----------|
| Benzene+2-propynyl | 0.438115  | 0.438115 | 0.601845    | 0.601845 |
| Phenyl+Allene      | 0.272047  | 0.710162 | 0.000000    | 0.601845 |
| PhCH2CCH+H         | 0.0933387 | 0.803501 | 0.128221    | 0.730066 |

|               |             |          |             |          |
|---------------|-------------|----------|-------------|----------|
| PhCHCCH2+H    | 0.0656327   | 0.869134 | 0.0901606   | 0.820227 |
| C2H2+PhCH2    | 0.0475978   | 0.916731 | 0.0653858   | 0.885612 |
| Indene+H      | 0.0395372   | 0.956269 | 0.0543127   | 0.939925 |
| PhCCH+CH3     | 0.0276514   | 0.983920 | 0.0379853   | 0.977910 |
| PAH7+H        | 0.00712605  | 0.991046 | 0.00978916  | 0.987700 |
| Ph+MeAc       | 0.00488545  | 0.995931 | 0.00671122  | 0.994411 |
| rad39         | 0.00123375  | 0.997165 | 0.00169483  | 0.996106 |
| rad19anti     | 0.000564116 | 0.997729 | 0.000774933 | 0.996881 |
| rad19syn      | 0.000506158 | 0.998235 | 0.000695318 | 0.997576 |
| PhCCCH3+H     | 0.000461483 | 0.998697 | 0.000633946 | 0.998210 |
| PhcycC3H3_A+H | 0.000354596 | 0.999052 | 0.000487115 | 0.998697 |
| PAH9+H        | 0.000266731 | 0.999318 | 0.000366412 | 0.999063 |
| rad54         | 0.000215004 | 0.999533 | 0.000295354 | 0.999359 |
| rad38         | 0.000142764 | 0.999676 | 0.000196118 | 0.999555 |
| rad35         | 4.88397e-05 | 0.999725 | 6.70919e-05 | 0.999622 |
| PAH1+H        | 4.24056e-05 | 0.999767 | 5.82532e-05 | 0.999680 |
| rad46         | 3.79670e-05 | 0.999805 | 5.21559e-05 | 0.999732 |
| rad50         | 2.38701e-05 | 0.999829 | 3.27908e-05 | 0.999765 |
| rad30         | 2.30179e-05 | 0.999852 | 3.16201e-05 | 0.999797 |
| PAH10+CH3     | 2.22275e-05 | 0.999874 | 3.05343e-05 | 0.999827 |
| rad70         | 2.20506e-05 | 0.999896 | 3.02913e-05 | 0.999858 |
| PAH3+H        | 2.08052e-05 | 0.999917 | 2.85805e-05 | 0.999886 |
| rad55         | 1.72026e-05 | 0.999934 | 2.36314e-05 | 0.999910 |
| rad67         | 1.69163e-05 | 0.999951 | 2.32382e-05 | 0.999933 |
| rad37         | 1.61425e-05 | 0.999968 | 2.21752e-05 | 0.999955 |
| rad51         | 6.11253e-06 | 0.999974 | 8.39689e-06 | 0.999964 |
| rad34         | 5.25680e-06 | 0.999979 | 7.22134e-06 | 0.999971 |
| rad53         | 4.39527e-06 | 0.999983 | 6.03786e-06 | 0.999977 |
| rad56         | 3.99314e-06 | 0.999987 | 5.48546e-06 | 0.999982 |
| rad62         | 2.35598e-06 | 0.999990 | 3.23645e-06 | 0.999986 |
| rad59         | 2.06481e-06 | 0.999992 | 2.83647e-06 | 0.999988 |
| rad52         | 2.03181e-06 | 0.999994 | 2.79112e-06 | 0.999991 |
| rad60syn      | 1.94292e-06 | 0.999996 | 2.66902e-06 | 0.999994 |
| rad60anti     | 1.30713e-06 | 0.999997 | 1.79563e-06 | 0.999996 |
| rad64         | 7.88600e-07 | 0.999998 | 1.08332e-06 | 0.999997 |
| PAH8+H        | 5.90480e-07 | 0.999998 | 8.11153e-07 | 0.999998 |
| rad68syn      | 2.81742e-07 | 0.999999 | 3.87034e-07 | 0.999998 |
| rad68anti     | 1.82569e-07 | 0.999999 | 2.50799e-07 | 0.999998 |
| rad65         | 1.74382e-07 | 0.999999 | 2.39552e-07 | 0.999998 |
| rad42         | 1.70585e-07 | 0.999999 | 2.34336e-07 | 0.999999 |
| rad58         | 1.57351e-07 | 0.999999 | 2.16156e-07 | 0.999999 |
| rad43         | 1.31435e-07 | 0.999999 | 1.80554e-07 | 0.999999 |
| rad71         | 1.24696e-07 | 1.000000 | 1.71297e-07 | 0.999999 |
| rad73         | 9.95914e-08 | 1.000000 | 1.36810e-07 | 0.999999 |
| rad40syn      | 8.39457e-08 | 1.000000 | 1.15318e-07 | 1.000000 |
| rad40anti     | 5.01024e-08 | 1.000000 | 6.88266e-08 | 1.000000 |
| rad61         | 2.64237e-08 | 1.000000 | 3.62987e-08 | 1.000000 |
| rad41         | 7.91859e-09 | 1.000000 | 1.08779e-08 | 1.000000 |
| rad72         | 3.69499e-09 | 1.000000 | 5.07588e-09 | 1.000000 |
| rad6          | 2.60708e-15 | 1.000000 | 3.58139e-15 | 1.000000 |
| rad7          | 2.29283e-17 | 1.000000 | 3.14970e-17 | 1.000000 |
| rad11         | 1.74056e-17 | 1.000000 | 2.39103e-17 | 1.000000 |
| rad28         | 6.31553e-18 | 1.000000 | 8.67576e-18 | 1.000000 |
| rad23         | 3.58856e-18 | 1.000000 | 4.92968e-18 | 1.000000 |
| rad9          | 2.21518e-18 | 1.000000 | 3.04303e-18 | 1.000000 |
| rad13         | 1.60831e-18 | 1.000000 | 2.20937e-18 | 1.000000 |
| rad45         | 1.26507e-18 | 1.000000 | 1.73785e-18 | 1.000000 |
| rad22         | 8.40659e-19 | 1.000000 | 1.15482e-18 | 1.000000 |
| rad36         | 2.25128e-19 | 1.000000 | 3.09263e-19 | 1.000000 |
| rad21         | 1.98012e-19 | 1.000000 | 2.72012e-19 | 1.000000 |
| rad26         | 1.29831e-19 | 1.000000 | 1.78352e-19 | 1.000000 |
| rad15         | 1.11834e-19 | 1.000000 | 1.53628e-19 | 1.000000 |
| rad10         | 7.64850e-20 | 1.000000 | 1.05069e-19 | 1.000000 |
| rad20         | 6.44623e-20 | 1.000000 | 8.85528e-20 | 1.000000 |
| rad33         | 5.54004e-20 | 1.000000 | 7.61045e-20 | 1.000000 |
| rad18         | 2.99781e-20 | 1.000000 | 4.11816e-20 | 1.000000 |
| rad2          | 2.41756e-20 | 1.000000 | 3.32105e-20 | 1.000000 |
| rad25         | 1.43077e-20 | 1.000000 | 1.96547e-20 | 1.000000 |
| rad12         | 7.47122e-21 | 1.000000 | 1.02634e-20 | 1.000000 |
| rad1          | 6.90214e-21 | 1.000000 | 9.48162e-21 | 1.000000 |
| rad3          | 6.16214e-21 | 1.000000 | 8.46505e-21 | 1.000000 |
| rad24         | 6.07027e-21 | 1.000000 | 8.33884e-21 | 1.000000 |
| rad4          | 4.00645e-21 | 1.000000 | 5.50374e-21 | 1.000000 |
| rad14         | 7.58528e-22 | 1.000000 | 1.04200e-21 | 1.000000 |
| rad8          | 2.76592e-22 | 1.000000 | 3.79959e-22 | 1.000000 |
| rad27         | 6.88422e-23 | 1.000000 | 9.45698e-23 | 1.000000 |
| rad5          | 5.43367e-23 | 1.000000 | 7.46433e-23 | 1.000000 |
| rad47         | 1.43456e-23 | 1.000000 | 1.97067e-23 | 1.000000 |

0.100000000E-08 Pa, 2000.00000 K

```

=====
Rate constant      | True (fraction)      Effective (fraction)
-----
Total              | 1.44111e-11 (1.00  ) 1.02930e-11 (1.00  )
Formation of rad11| 3.16882e-12 (0.220  ) 1.47449e-12 (0.143  )
Formation of rad6  | 4.53302e-12 (0.315  ) 2.10927e-12 (0.205  )
H-abstraction     | 6.70922e-12 (0.466  ) 6.70922e-12 (0.652  )

```

```

species           | PYtrue      Cumul      | PYeffective  Cumul
-----
Benzene+2-propynyl| 0.465560    0.465560    | 0.651825    0.651825
Phenyl+Allene     | 0.285759    0.751319    | 0.000000    0.651825
PhCH2CCH+H       | 0.0971788   0.848498    | 0.136059    0.787884
PhCHCCH2+H       | 0.0592993   0.907797    | 0.0830241   0.870908
C2H2+PhCH2       | 0.0319942   0.939791    | 0.0447948   0.915703
Indene+H          | 0.0233046   0.963096    | 0.0326284   0.948331
PhCCH+CH3        | 0.0216466   0.984742    | 0.0303071   0.978638
PAH7+H           | 0.00659328  0.991336    | 0.00923114  0.987869
Ph+MeAc          | 0.00420938  0.995545    | 0.00589349  0.993763
rad39            | 0.00101472  0.996560    | 0.00142069  0.995183
rad19syn         | 0.000746783 0.997306    | 0.00104557  0.996229
PhcycC3H3_A+H   | 0.000656335 0.997963    | 0.000918925 0.997148
rad19anti        | 0.000529228 0.998492    | 0.000740966 0.997889
rad54            | 0.000330237 0.998822    | 0.000462359 0.998351
PhCCCH3+H       | 0.000291962 0.999114    | 0.000408772 0.998760
PAH9+H          | 0.000279546 0.999394    | 0.000391387 0.999151
rad38            | 0.000156414 0.999550    | 0.000218994 0.999370
PAH1+H          | 6.96990e-05 0.999620    | 9.75848e-05 0.999468
rad35            | 5.18637e-05 0.999672    | 7.26137e-05 0.999541
rad46            | 4.57412e-05 0.999717    | 6.40416e-05 0.999605
rad50            | 3.87497e-05 0.999756    | 5.42530e-05 0.999659
PAH10+CH3       | 3.34470e-05 0.999790    | 4.68285e-05 0.999706
rad70           | 3.20125e-05 0.999822    | 4.48203e-05 0.999751
rad55           | 2.86889e-05 0.999850    | 4.01669e-05 0.999791
PAH3+H          | 2.79049e-05 0.999878    | 3.90694e-05 0.999830
rad67           | 2.51584e-05 0.999903    | 3.52238e-05 0.999865
rad30           | 1.88901e-05 0.999922    | 2.64479e-05 0.999891
rad37           | 1.66057e-05 0.999939    | 2.32494e-05 0.999915
rad51           | 1.22963e-05 0.999951    | 1.72160e-05 0.999932
rad56           | 1.03249e-05 0.999961    | 1.44559e-05 0.999946
rad53           | 9.90974e-06 0.999971    | 1.38745e-05 0.999960
rad34           | 8.56178e-06 0.999980    | 1.19873e-05 0.999972
rad52           | 3.64112e-06 0.999984    | 5.09788e-06 0.999977
rad62           | 3.41505e-06 0.999987    | 4.78139e-06 0.999982
rad59           | 2.58714e-06 0.999990    | 3.62224e-06 0.999986
rad60syn        | 2.06844e-06 0.999992    | 2.89599e-06 0.999989
PAH8+H          | 1.81455e-06 0.999993    | 2.54053e-06 0.999991
rad64           | 1.47576e-06 0.999995    | 2.06619e-06 0.999993
rad60anti       | 1.42207e-06 0.999996    | 1.99102e-06 0.999995
rad68syn        | 6.53892e-07 0.999997    | 9.15510e-07 0.999996
rad71           | 4.98025e-07 0.999998    | 6.97277e-07 0.999997
rad68anti       | 4.21792e-07 0.999998    | 5.90544e-07 0.999997
rad73           | 3.38736e-07 0.999998    | 4.74260e-07 0.999998
rad65           | 3.37785e-07 0.999999    | 4.72930e-07 0.999998
rad42           | 3.12138e-07 0.999999    | 4.37019e-07 0.999999
rad58           | 2.75720e-07 0.999999    | 3.86032e-07 0.999999
rad40syn        | 2.27523e-07 0.999999    | 3.18551e-07 1.000000
rad43           | 1.62531e-07 1.000000    | 2.27558e-07 1.000000
rad40anti       | 1.42660e-07 1.000000    | 1.99737e-07 1.000000
rad61           | 5.98888e-08 1.000000    | 8.38493e-08 1.000000
rad72           | 2.09307e-08 1.000000    | 2.93048e-08 1.000000
rad41           | 1.34670e-08 1.000000    | 1.88550e-08 1.000000
rad6            | 5.81609e-08 1.000000    | 8.14302e-08 1.000000
rad7            | 5.24963e-08 1.000000    | 7.34995e-08 1.000000
rad11          | 4.12470e-08 1.000000    | 5.77494e-08 1.000000
rad23          | 2.79425e-08 1.000000    | 3.91220e-08 1.000000
rad28          | 2.01426e-08 1.000000    | 2.82014e-08 1.000000
rad9           | 7.53763e-09 1.000000    | 1.05533e-08 1.000000
rad13          | 4.89589e-09 1.000000    | 6.85467e-09 1.000000
rad45          | 3.84563e-09 1.000000    | 5.38422e-09 1.000000
rad22          | 2.64941e-09 1.000000    | 3.70939e-09 1.000000
rad21          | 7.16422e-10 1.000000    | 1.00305e-09 1.000000
rad36          | 7.00581e-10 1.000000    | 9.80872e-10 1.000000
rad15          | 3.98237e-10 1.000000    | 5.57564e-10 1.000000
rad26          | 3.09793e-10 1.000000    | 4.33736e-10 1.000000
rad33          | 2.26331e-10 1.000000    | 3.16884e-10 1.000000
rad20          | 1.89431e-10 1.000000    | 2.65220e-10 1.000000
rad10          | 1.13916e-10 1.000000    | 1.59493e-10 1.000000
rad18          | 6.66195e-11 1.000000    | 9.32730e-11 1.000000
rad25          | 5.79819e-11 1.000000    | 8.11799e-11 1.000000

```

|       |             |          |             |         |
|-------|-------------|----------|-------------|---------|
| rad12 | 4.14756e-21 | 1.000000 | 5.80694e-21 | 1.00000 |
| rad2  | 3.20016e-21 | 1.000000 | 4.48049e-21 | 1.00000 |
| rad24 | 2.85159e-21 | 1.000000 | 3.99249e-21 | 1.00000 |
| rad3  | 1.56282e-21 | 1.000000 | 2.18808e-21 | 1.00000 |
| rad4  | 1.00818e-21 | 1.000000 | 1.41154e-21 | 1.00000 |
| rad1  | 9.46926e-22 | 1.000000 | 1.32578e-21 | 1.00000 |
| rad14 | 2.92675e-22 | 1.000000 | 4.09771e-22 | 1.00000 |
| rad8  | 2.34712e-22 | 1.000000 | 3.28617e-22 | 1.00000 |
| rad5  | 3.72758e-23 | 1.000000 | 5.21894e-23 | 1.00000 |
| rad47 | 2.86742e-23 | 1.000000 | 4.01464e-23 | 1.00000 |
| rad27 | 1.89904e-23 | 1.000000 | 2.65882e-23 | 1.00000 |

0.100000000E-08 Pa, 2250.00000 K

| Rate constant      | True (fraction)      | Effective (fraction) |
|--------------------|----------------------|----------------------|
| Total              | 2.23655e-11 (1.00 )  | 1.58437e-11 (1.00 )  |
| Formation of rad11 | 4.62280e-12 (0.207 ) | 1.98925e-12 (0.126 ) |
| Formation of rad6  | 6.82518e-12 (0.305 ) | 2.93696e-12 (0.185 ) |
| H-abstraction      | 1.09175e-11 (0.488 ) | 1.09175e-11 (0.689 ) |

| species            | PYtrue      | Cumul    | PYeffective | Cumul    |
|--------------------|-------------|----------|-------------|----------|
| Benzene+2-propynyl | 0.488140    | 0.488140 | 0.689074    | 0.689074 |
| Phenyl+Allene      | 0.291600    | 0.779740 | 0.000000    | 0.689074 |
| PhCH2CCH+H         | 0.0967415   | 0.876482 | 0.136563    | 0.825637 |
| PhCHCCH2+H         | 0.0532744   | 0.929756 | 0.0752040   | 0.900841 |
| C2H2+PhCH2         | 0.0232642   | 0.953020 | 0.0328403   | 0.933682 |
| PhCCH+CH3          | 0.0176492   | 0.970669 | 0.0249142   | 0.958596 |
| Indene+H           | 0.0145378   | 0.985207 | 0.0205221   | 0.979118 |
| PAH7+H             | 0.00604332  | 0.991251 | 0.00853097  | 0.987649 |
| Ph+MeAc            | 0.00373478  | 0.994985 | 0.00527212  | 0.992921 |
| PhcycC3H3_A+H      | 0.00104439  | 0.996030 | 0.00147430  | 0.994395 |
| rad19syn           | 0.000992650 | 0.997022 | 0.00140125  | 0.995797 |
| rad39              | 0.000833753 | 0.997856 | 0.00117695  | 0.996974 |
| rad19anti          | 0.000463520 | 0.998320 | 0.000654319 | 0.997628 |
| rad54              | 0.000448432 | 0.998768 | 0.000633020 | 0.998261 |
| PAH9+H             | 0.000276004 | 0.999044 | 0.000389615 | 0.998651 |
| PhCCCH3+H          | 0.000209665 | 0.999254 | 0.000295970 | 0.998946 |
| rad38              | 0.000160719 | 0.999414 | 0.000226876 | 0.999173 |
| PAH1+H             | 9.95931e-05 | 0.999514 | 0.000140589 | 0.999314 |
| rad50              | 5.46328e-05 | 0.999569 | 7.71214e-05 | 0.999391 |
| rad35              | 5.24979e-05 | 0.999621 | 7.41079e-05 | 0.999465 |
| rad46              | 5.06983e-05 | 0.999672 | 7.15674e-05 | 0.999537 |
| PAH10+CH3          | 4.32190e-05 | 0.999715 | 6.10093e-05 | 0.999598 |
| rad55              | 4.15447e-05 | 0.999757 | 5.86459e-05 | 0.999656 |
| rad70              | 4.13232e-05 | 0.999798 | 5.83331e-05 | 0.999715 |
| PAH3+H             | 3.54273e-05 | 0.999833 | 5.00103e-05 | 0.999765 |
| rad67              | 3.21710e-05 | 0.999866 | 4.54135e-05 | 0.999810 |
| rad56              | 2.10958e-05 | 0.999887 | 2.97795e-05 | 0.999840 |
| rad51              | 2.05290e-05 | 0.999907 | 2.89794e-05 | 0.999869 |
| rad53              | 1.82253e-05 | 0.999925 | 2.57273e-05 | 0.999895 |
| rad30              | 1.61770e-05 | 0.999942 | 2.28359e-05 | 0.999917 |
| rad37              | 1.58091e-05 | 0.999957 | 2.23166e-05 | 0.999940 |
| rad34              | 1.21378e-05 | 0.999970 | 1.71341e-05 | 0.999957 |
| rad52              | 5.53699e-06 | 0.999975 | 7.81618e-06 | 0.999965 |
| rad62              | 4.54170e-06 | 0.999980 | 6.41120e-06 | 0.999971 |
| PAH8+H             | 4.26413e-06 | 0.999984 | 6.01937e-06 | 0.999977 |
| rad59              | 3.10133e-06 | 0.999987 | 4.37793e-06 | 0.999982 |
| rad64              | 2.31389e-06 | 0.999989 | 3.26637e-06 | 0.999985 |
| rad60syn           | 2.18352e-06 | 0.999991 | 3.08232e-06 | 0.999988 |
| rad60anti          | 1.52762e-06 | 0.999993 | 2.15643e-06 | 0.999990 |
| rad71              | 1.42621e-06 | 0.999994 | 2.01328e-06 | 0.999992 |
| rad68syn           | 1.22834e-06 | 0.999996 | 1.73396e-06 | 0.999994 |
| rad73              | 8.52958e-07 | 0.999996 | 1.20406e-06 | 0.999995 |
| rad68anti          | 7.89692e-07 | 0.999997 | 1.11475e-06 | 0.999996 |
| rad65              | 5.43585e-07 | 0.999998 | 7.67340e-07 | 0.999997 |
| rad42              | 4.97942e-07 | 0.999998 | 7.02910e-07 | 0.999998 |
| rad40syn           | 4.83630e-07 | 0.999999 | 6.82706e-07 | 0.999998 |
| rad58              | 4.30302e-07 | 0.999999 | 6.07428e-07 | 0.999999 |
| rad40anti          | 3.15359e-07 | 1.000000 | 4.45171e-07 | 0.999999 |
| rad43              | 2.01350e-07 | 1.000000 | 2.84232e-07 | 1.000000 |
| rad61              | 1.06762e-07 | 1.000000 | 1.50709e-07 | 1.000000 |
| rad72              | 7.85254e-08 | 1.000000 | 1.10849e-07 | 1.000000 |
| rad41              | 2.11925e-08 | 1.000000 | 2.99160e-08 | 1.000000 |
| rad6               | 1.18058e-16 | 1.000000 | 1.66654e-16 | 1.000000 |
| rad7               | 1.68545e-18 | 1.000000 | 2.37923e-18 | 1.000000 |
| rad11              | 1.28920e-18 | 1.000000 | 1.81987e-18 | 1.000000 |
| rad23              | 8.12659e-19 | 1.000000 | 1.14718e-18 | 1.000000 |
| rad28              | 4.33590e-19 | 1.000000 | 6.12070e-19 | 1.000000 |

|       |             |          |             |          |
|-------|-------------|----------|-------------|----------|
| rad9  | 2.74000e-19 | 1.000000 | 3.86786e-19 | 1.000000 |
| rad13 | 1.82808e-19 | 1.000000 | 2.58058e-19 | 1.000000 |
| rad45 | 1.33397e-19 | 1.000000 | 1.88308e-19 | 1.000000 |
| rad22 | 6.74032e-20 | 1.000000 | 9.51483e-20 | 1.000000 |
| rad21 | 2.97971e-20 | 1.000000 | 4.20624e-20 | 1.000000 |
| rad36 | 2.47994e-20 | 1.000000 | 3.50075e-20 | 1.000000 |
| rad15 | 1.60376e-20 | 1.000000 | 2.26392e-20 | 1.000000 |
| rad33 | 1.06526e-20 | 1.000000 | 1.50376e-20 | 1.000000 |
| rad26 | 8.47967e-21 | 1.000000 | 1.19702e-20 | 1.000000 |
| rad20 | 6.76720e-21 | 1.000000 | 9.55283e-21 | 1.000000 |
| rad10 | 3.03866e-21 | 1.000000 | 4.28947e-21 | 1.000000 |
| rad25 | 2.68292e-21 | 1.000000 | 3.78730e-21 | 1.000000 |
| rad12 | 2.31790e-21 | 1.000000 | 3.27203e-21 | 1.000000 |
| rad18 | 2.02949e-21 | 1.000000 | 2.86490e-21 | 1.000000 |
| rad24 | 1.45642e-21 | 1.000000 | 2.05592e-21 | 1.000000 |
| rad2  | 6.12686e-22 | 1.000000 | 8.64887e-22 | 1.000000 |
| rad3  | 5.09468e-22 | 1.000000 | 7.19181e-22 | 1.000000 |
| rad4  | 3.22592e-22 | 1.000000 | 4.55382e-22 | 1.000000 |
| rad8  | 2.01388e-22 | 1.000000 | 2.84285e-22 | 1.000000 |
| rad1  | 1.83193e-22 | 1.000000 | 2.58601e-22 | 1.000000 |
| rad14 | 1.40657e-22 | 1.000000 | 1.98555e-22 | 1.000000 |
| rad47 | 4.71862e-23 | 1.000000 | 6.66093e-23 | 1.000000 |
| rad5  | 2.19042e-23 | 1.000000 | 3.09207e-23 | 1.000000 |
| rad27 | 7.37416e-24 | 1.000000 | 1.04096e-23 | 1.000000 |

0.100000000E-08 Pa, 2500.00000 K

| Rate constant      | True (fraction) |          | Effective (fraction) |          |
|--------------------|-----------------|----------|----------------------|----------|
| Total              | 3.28090e-11     | (1.00 )  | 2.31980e-11          | (1.00 )  |
| Formation of rad11 | 6.43164e-12     | (0.196 ) | 2.60906e-12          | (0.112 ) |
| Formation of rad6  | 9.73932e-12     | (0.297 ) | 3.95085e-12          | (0.170 ) |
| H-abstraction      | 1.66381e-11     | (0.507 ) | 1.66381e-11          | (0.717 ) |

  

| species            | PYtrue      | Cumul    | PYeffective | Cumul    |
|--------------------|-------------|----------|-------------|----------|
| Benzene+2-propynyl | 0.507119    | 0.507119 | 0.717221    | 0.717221 |
| Phenyl+Allene      | 0.292939    | 0.800058 | 0.000000    | 0.717221 |
| PhCH2CCH+H         | 0.0943957   | 0.894453 | 0.133505    | 0.850725 |
| PhCHCCH2+H         | 0.0481939   | 0.942647 | 0.0681609   | 0.918886 |
| C2H2+PhCH2         | 0.0183497   | 0.960997 | 0.0259521   | 0.944838 |
| PhCCH+CH3          | 0.0148752   | 0.975872 | 0.0210381   | 0.965876 |
| Indene+H           | 0.00953292  | 0.985405 | 0.0134824   | 0.979359 |
| PAH7+H             | 0.00553047  | 0.990936 | 0.00782174  | 0.987180 |
| Ph+MeAc            | 0.00339482  | 0.994330 | 0.00480131  | 0.991982 |
| PhcycC3H3_A+H      | 0.00149309  | 0.995824 | 0.00211168  | 0.994093 |
| rad19syn           | 0.00122618  | 0.997050 | 0.00173419  | 0.995828 |
| rad39              | 0.000692493 | 0.997742 | 0.000979395 | 0.996807 |
| rad54              | 0.000558297 | 0.998301 | 0.000789599 | 0.997597 |
| rad19anti          | 0.000392540 | 0.998693 | 0.000555170 | 0.998152 |
| PAH9+H             | 0.000261381 | 0.998954 | 0.000369672 | 0.998522 |
| PhCCCH3+H          | 0.000164587 | 0.999119 | 0.000232776 | 0.998754 |
| rad38              | 0.000157797 | 0.999277 | 0.000223174 | 0.998977 |
| PAH1+H             | 0.000129617 | 0.999406 | 0.000183319 | 0.999161 |
| rad50              | 6.95411e-05 | 0.999476 | 9.83527e-05 | 0.999259 |
| rad55              | 5.44673e-05 | 0.999530 | 7.70336e-05 | 0.999336 |
| rad46              | 5.29591e-05 | 0.999583 | 7.49001e-05 | 0.999411 |
| rad35              | 5.14100e-05 | 0.999635 | 7.27094e-05 | 0.999484 |
| PAH10+CH3          | 5.04331e-05 | 0.999685 | 7.13277e-05 | 0.999555 |
| rad70              | 4.95223e-05 | 0.999735 | 7.00399e-05 | 0.999625 |
| PAH3+H             | 4.31617e-05 | 0.999778 | 6.10439e-05 | 0.999686 |
| rad67              | 3.73882e-05 | 0.999815 | 5.28783e-05 | 0.999739 |
| rad56              | 3.65112e-05 | 0.999852 | 5.16378e-05 | 0.999791 |
| rad51              | 2.99347e-05 | 0.999882 | 4.23369e-05 | 0.999833 |
| rad53              | 2.90213e-05 | 0.999911 | 4.10449e-05 | 0.999874 |
| rad34              | 1.57208e-05 | 0.999926 | 2.22340e-05 | 0.999896 |
| rad30              | 1.43454e-05 | 0.999941 | 2.02888e-05 | 0.999917 |
| rad37              | 1.43019e-05 | 0.999955 | 2.02272e-05 | 0.999937 |
| PAH8+H             | 8.32886e-06 | 0.999963 | 1.17795e-05 | 0.999949 |
| rad52              | 7.47627e-06 | 0.999971 | 1.05737e-05 | 0.999959 |
| rad62              | 5.70269e-06 | 0.999977 | 8.06532e-06 | 0.999967 |
| rad59              | 3.60017e-06 | 0.999980 | 5.09173e-06 | 0.999972 |
| rad64              | 3.22135e-06 | 0.999983 | 4.55597e-06 | 0.999977 |
| rad71              | 3.21465e-06 | 0.999987 | 4.54650e-06 | 0.999981 |
| rad60syn           | 2.29248e-06 | 0.999989 | 3.24226e-06 | 0.999985 |
| rad68syn           | 1.99920e-06 | 0.999991 | 2.82747e-06 | 0.999988 |
| rad73              | 1.73023e-06 | 0.999993 | 2.44707e-06 | 0.999990 |
| rad60anti          | 1.62672e-06 | 0.999994 | 2.30068e-06 | 0.999992 |
| rad68anti          | 1.28205e-06 | 0.999996 | 1.81322e-06 | 0.999994 |
| rad40syn           | 8.70429e-07 | 0.999996 | 1.23105e-06 | 0.999995 |

|           |             |          |             |          |
|-----------|-------------|----------|-------------|----------|
| rad65     | 7.65686e-07 | 0.999997 | 1.08291e-06 | 0.999996 |
| rad42     | 7.25369e-07 | 0.999998 | 1.02590e-06 | 0.999997 |
| rad58     | 6.16762e-07 | 0.999999 | 8.72293e-07 | 0.999998 |
| rad40anti | 5.85898e-07 | 0.999999 | 8.28640e-07 | 0.999999 |
| rad43     | 2.45120e-07 | 0.999999 | 3.46673e-07 | 0.999999 |
| rad72     | 2.19453e-07 | 1.000000 | 3.10373e-07 | 1.000000 |
| rad61     | 1.61750e-07 | 1.000000 | 2.28765e-07 | 1.000000 |
| rad41     | 3.09947e-08 | 1.000000 | 4.38359e-08 | 1.000000 |
| rad6      | 3.23599e-17 | 1.000000 | 4.57667e-17 | 1.000000 |
| rad7      | 6.60215e-19 | 1.000000 | 9.33741e-19 | 1.000000 |
| rad11     | 4.80249e-19 | 1.000000 | 6.79219e-19 | 1.000000 |
| rad23     | 2.38823e-19 | 1.000000 | 3.37769e-19 | 1.000000 |
| rad28     | 1.17706e-19 | 1.000000 | 1.66472e-19 | 1.000000 |
| rad9      | 1.06893e-19 | 1.000000 | 1.51178e-19 | 1.000000 |
| rad13     | 7.91321e-20 | 1.000000 | 1.11917e-19 | 1.000000 |
| rad45     | 5.19946e-20 | 1.000000 | 7.35365e-20 | 1.000000 |
| rad22     | 2.12454e-20 | 1.000000 | 3.00473e-20 | 1.000000 |
| rad21     | 1.39345e-20 | 1.000000 | 1.97077e-20 | 1.000000 |
| rad36     | 9.83515e-21 | 1.000000 | 1.39099e-20 | 1.000000 |
| rad15     | 6.95052e-21 | 1.000000 | 9.83015e-21 | 1.000000 |
| rad33     | 5.56576e-21 | 1.000000 | 7.87170e-21 | 1.000000 |
| rad26     | 3.00894e-21 | 1.000000 | 4.25555e-21 | 1.000000 |
| rad20     | 2.88827e-21 | 1.000000 | 4.08489e-21 | 1.000000 |
| rad25     | 1.37165e-21 | 1.000000 | 1.93993e-21 | 1.000000 |
| rad12     | 1.32606e-21 | 1.000000 | 1.87546e-21 | 1.000000 |
| rad10     | 1.10598e-21 | 1.000000 | 1.56419e-21 | 1.000000 |
| rad24     | 7.99114e-22 | 1.000000 | 1.13019e-21 | 1.000000 |
| rad18     | 7.64139e-22 | 1.000000 | 1.08073e-21 | 1.000000 |
| rad3      | 2.03107e-22 | 1.000000 | 2.87253e-22 | 1.000000 |
| rad8      | 1.74700e-22 | 1.000000 | 2.47079e-22 | 1.000000 |
| rad2      | 1.64892e-22 | 1.000000 | 2.33207e-22 | 1.000000 |
| rad4      | 1.25719e-22 | 1.000000 | 1.77806e-22 | 1.000000 |
| rad14     | 7.76880e-23 | 1.000000 | 1.09875e-22 | 1.000000 |
| rad47     | 6.74962e-23 | 1.000000 | 9.54604e-23 | 1.000000 |
| rad1      | 4.80966e-23 | 1.000000 | 6.80232e-23 | 1.000000 |
| rad5      | 1.44553e-23 | 1.000000 | 2.04442e-23 | 1.000000 |
| rad27     | 3.67276e-24 | 1.000000 | 5.19440e-24 | 1.000000 |

0.100000000E-08 Pa, 2750.00000 K

| Rate constant      | True (fraction)      | Effective (fraction) |
|--------------------|----------------------|----------------------|
| Total              | 4.60596e-11 (1.00 )  | 3.26255e-11 (1.00 )  |
| Formation of rad11 | 8.62280e-12 (0.187 ) | 3.34633e-12 (0.103 ) |
| Formation of rad6  | 1.33313e-11 (0.289 ) | 5.17360e-12 (0.159 ) |
| H-abstraction      | 2.41055e-11 (0.523 ) | 2.41055e-11 (0.739 ) |

| species            | PYtrue      | Cumul    | PYeffective | Cumul    |
|--------------------|-------------|----------|-------------|----------|
| Benzene+2-propynyl | 0.523355    | 0.523355 | 0.738856    | 0.738856 |
| Phenyl+Allene      | 0.291669    | 0.815024 | 0.000000    | 0.738856 |
| PhCH2CCH+H         | 0.0913925   | 0.906416 | 0.129025    | 0.867881 |
| PhCHCCH2+H         | 0.0440897   | 0.950506 | 0.0622446   | 0.930126 |
| C2H2+PhCH2         | 0.0155259   | 0.966032 | 0.0219190   | 0.952045 |
| PhCCH+CH3          | 0.0128664   | 0.978898 | 0.0181644   | 0.970209 |
| Indene+H           | 0.00652675  | 0.985425 | 0.00921427  | 0.979424 |
| PAH7+H             | 0.00506746  | 0.990493 | 0.00715408  | 0.986578 |
| Ph+MeAc            | 0.00315047  | 0.993643 | 0.00444775  | 0.991026 |
| PhcycC3H3_A+H      | 0.00197300  | 0.995616 | 0.00278544  | 0.993811 |
| rad19syn           | 0.00143568  | 0.997052 | 0.00202686  | 0.995838 |
| rad54              | 0.000652594 | 0.997704 | 0.000921315 | 0.996759 |
| rad39              | 0.000584043 | 0.998288 | 0.000824532 | 0.997584 |
| rad19anti          | 0.000328573 | 0.998617 | 0.000463869 | 0.998048 |
| PAH9+H             | 0.000240059 | 0.998857 | 0.000338907 | 0.998386 |
| PAH1+H             | 0.000158291 | 0.999015 | 0.000223471 | 0.998610 |
| rad38              | 0.000149711 | 0.999165 | 0.000211358 | 0.998821 |
| PhCCCH3+H          | 0.000136861 | 0.999302 | 0.000193216 | 0.999015 |
| rad50              | 8.19601e-05 | 0.999384 | 0.000115709 | 0.999130 |
| rad55              | 6.64334e-05 | 0.999450 | 9.37887e-05 | 0.999224 |
| rad70              | 5.64830e-05 | 0.999507 | 7.97407e-05 | 0.999304 |
| rad56              | 5.59920e-05 | 0.999563 | 7.90477e-05 | 0.999383 |
| PAH10+CH3          | 5.49972e-05 | 0.999618 | 7.76435e-05 | 0.999460 |
| rad46              | 5.29186e-05 | 0.999671 | 7.47090e-05 | 0.999535 |
| PAH3+H             | 5.07704e-05 | 0.999721 | 7.16761e-05 | 0.999607 |
| rad35              | 4.92117e-05 | 0.999771 | 6.94754e-05 | 0.999676 |
| rad53              | 4.15958e-05 | 0.999812 | 5.87239e-05 | 0.999735 |
| rad67              | 4.08893e-05 | 0.999853 | 5.77263e-05 | 0.999793 |
| rad51              | 3.94231e-05 | 0.999893 | 5.56562e-05 | 0.999848 |
| rad34              | 1.91382e-05 | 0.999912 | 2.70187e-05 | 0.999875 |
| PAH8+H             | 1.42400e-05 | 0.999926 | 2.01036e-05 | 0.999896 |



|           |             |          |             |          |
|-----------|-------------|----------|-------------|----------|
| rad30     | 1.30159e-05 | 0.999939 | 1.83754e-05 | 0.999914 |
| rad37     | 1.25497e-05 | 0.999951 | 1.77173e-05 | 0.999932 |
| rad52     | 9.23200e-06 | 0.999961 | 1.30335e-05 | 0.999945 |
| rad62     | 6.96508e-06 | 0.999968 | 9.83308e-06 | 0.999954 |
| rad71     | 6.06264e-06 | 0.999974 | 8.55906e-06 | 0.999963 |
| rad64     | 4.12924e-06 | 0.999978 | 5.82954e-06 | 0.999969 |
| rad59     | 4.06487e-06 | 0.999982 | 5.73866e-06 | 0.999975 |
| rad73     | 2.98825e-06 | 0.999985 | 4.21872e-06 | 0.999979 |
| rad68syn  | 2.93858e-06 | 0.999988 | 4.14861e-06 | 0.999983 |
| rad60syn  | 2.38752e-06 | 0.999990 | 3.37063e-06 | 0.999986 |
| rad68anti | 1.88086e-06 | 0.999992 | 2.65533e-06 | 0.999989 |
| rad60anti | 1.71401e-06 | 0.999994 | 2.41979e-06 | 0.999991 |
| rad40syn  | 1.39059e-06 | 0.999995 | 1.96319e-06 | 0.999993 |
| rad42     | 1.00618e-06 | 0.999996 | 1.42050e-06 | 0.999995 |
| rad65     | 9.77109e-07 | 0.999997 | 1.37945e-06 | 0.999996 |
| rad40anti | 9.60893e-07 | 0.999998 | 1.35656e-06 | 0.999998 |
| rad58     | 8.26832e-07 | 0.999999 | 1.16730e-06 | 0.999999 |
| rad72     | 4.93194e-07 | 1.000000 | 6.96274e-07 | 0.999999 |
| rad43     | 2.90363e-07 | 1.000000 | 4.09925e-07 | 1.000000 |
| rad61     | 2.19014e-07 | 1.000000 | 3.09197e-07 | 1.000000 |
| rad41     | 4.25216e-08 | 1.000000 | 6.00307e-08 | 1.000000 |
| rad6      | 1.10234e-17 | 1.000000 | 1.55625e-17 | 1.000000 |
| rad7      | 2.96665e-19 | 1.000000 | 4.18822e-19 | 1.000000 |
| rad11     | 2.05427e-19 | 1.000000 | 2.90016e-19 | 1.000000 |
| rad23     | 8.13100e-20 | 1.000000 | 1.14791e-19 | 1.000000 |
| rad9      | 4.48621e-20 | 1.000000 | 6.33349e-20 | 1.000000 |
| rad28     | 4.00876e-20 | 1.000000 | 5.65945e-20 | 1.000000 |
| rad13     | 3.84823e-20 | 1.000000 | 5.43281e-20 | 1.000000 |
| rad45     | 2.23769e-20 | 1.000000 | 3.15911e-20 | 1.000000 |
| rad22     | 7.92771e-21 | 1.000000 | 1.11921e-20 | 1.000000 |
| rad21     | 7.20273e-21 | 1.000000 | 1.01686e-20 | 1.000000 |
| rad36     | 4.29472e-21 | 1.000000 | 6.06315e-21 | 1.000000 |
| rad15     | 3.20712e-21 | 1.000000 | 4.52773e-21 | 1.000000 |
| rad33     | 3.15102e-21 | 1.000000 | 4.44850e-21 | 1.000000 |
| rad20     | 1.44342e-21 | 1.000000 | 2.03778e-21 | 1.000000 |
| rad26     | 1.23244e-21 | 1.000000 | 1.73992e-21 | 1.000000 |
| rad12     | 7.84782e-22 | 1.000000 | 1.10793e-21 | 1.000000 |
| rad25     | 7.63295e-22 | 1.000000 | 1.07760e-21 | 1.000000 |
| rad10     | 4.77970e-22 | 1.000000 | 6.74785e-22 | 1.000000 |
| rad24     | 4.65717e-22 | 1.000000 | 6.57484e-22 | 1.000000 |
| rad18     | 3.38453e-22 | 1.000000 | 4.77817e-22 | 1.000000 |
| rad8      | 1.52996e-22 | 1.000000 | 2.15996e-22 | 1.000000 |
| rad3      | 9.44301e-23 | 1.000000 | 1.33314e-22 | 1.000000 |
| rad47     | 8.69678e-23 | 1.000000 | 1.22779e-22 | 1.000000 |
| rad2      | 5.85702e-23 | 1.000000 | 8.26877e-23 | 1.000000 |
| rad4      | 5.73805e-23 | 1.000000 | 8.10081e-23 | 1.000000 |
| rad14     | 4.74805e-23 | 1.000000 | 6.70314e-23 | 1.000000 |
| rad1      | 1.61716e-23 | 1.000000 | 2.28306e-23 | 1.000000 |
| rad5      | 1.01381e-23 | 1.000000 | 1.43127e-23 | 1.000000 |
| rad27     | 2.15735e-24 | 1.000000 | 3.04569e-24 | 1.000000 |

0.100000000E-08 Pa, 3000.00000 K

=====

| Rate constant      | True (fraction)      | Effective (fraction)  |
|--------------------|----------------------|-----------------------|
| Total              | 6.24269e-11 (1.00 )  | 4.43911e-11 (1.00 )   |
| Formation of rad11 | 1.12221e-11 (0.180 ) | 4.21269e-12 (0.0949 ) |
| Formation of rad6  | 1.76534e-11 (0.283 ) | 6.62699e-12 (0.149 )  |
| H-abstraction      | 3.35514e-11 (0.537 ) | 3.35514e-11 (0.756 )  |

| species            | PYtrue      | Cumul    | PYeffective | Cumul    |
|--------------------|-------------|----------|-------------|----------|
| Benzene+2-propynyl | 0.537451    | 0.537451 | 0.755814    | 0.755814 |
| Phenyl+Allene      | 0.288911    | 0.826362 | 0.000000    | 0.755814 |
| PhCH2CCH+H         | 0.0883066   | 0.914669 | 0.124185    | 0.879999 |
| PhCHCCH2+H         | 0.0408111   | 0.955480 | 0.0573925   | 0.937392 |
| C2H2+PhCH2         | 0.0138651   | 0.969345 | 0.0194984   | 0.956890 |
| PhCCH+CH3          | 0.0113582   | 0.980703 | 0.0159730   | 0.972863 |
| PAH7+H             | 0.00465329  | 0.985356 | 0.00654386  | 0.979407 |
| Indene+H           | 0.00463895  | 0.989995 | 0.00652370  | 0.985931 |
| Ph+MeAc            | 0.00297587  | 0.992971 | 0.00418496  | 0.990116 |
| PhcycC3H3_A+H      | 0.00245642  | 0.995427 | 0.00345445  | 0.993570 |
| rad19syn           | 0.00161454  | 0.997042 | 0.00227052  | 0.995841 |
| rad54              | 0.000727890 | 0.997770 | 0.00102362  | 0.996864 |
| rad39              | 0.000500510 | 0.998270 | 0.000703861 | 0.997568 |
| rad19anti          | 0.000275358 | 0.998546 | 0.000387232 | 0.997955 |
| PAH9+H             | 0.000215435 | 0.998761 | 0.000302964 | 0.998258 |
| PAH1+H             | 0.000185098 | 0.998946 | 0.000260302 | 0.998519 |
| rad38              | 0.000138297 | 0.999085 | 0.000194486 | 0.998713 |
| PhCCCH3+H          | 0.000118094 | 0.999203 | 0.000166074 | 0.998879 |

|           |             |          |             |          |
|-----------|-------------|----------|-------------|----------|
| rad50     | 9.10199e-05 | 0.999294 | 0.000128001 | 0.999007 |
| rad56     | 7.84307e-05 | 0.999372 | 0.000110297 | 0.999117 |
| rad55     | 7.67854e-05 | 0.999449 | 0.000107983 | 0.999225 |
| rad70     | 6.22156e-05 | 0.999511 | 8.74935e-05 | 0.999313 |
| PAH3+H    | 5.79162e-05 | 0.999569 | 8.14472e-05 | 0.999394 |
| PAH10+CH3 | 5.73435e-05 | 0.999626 | 8.06419e-05 | 0.999475 |
| rad53     | 5.50942e-05 | 0.999682 | 7.74787e-05 | 0.999552 |
| rad46     | 5.10964e-05 | 0.999733 | 7.18563e-05 | 0.999624 |
| rad51     | 4.79927e-05 | 0.999781 | 6.74918e-05 | 0.999692 |
| rad35     | 4.64038e-05 | 0.999827 | 6.52572e-05 | 0.999757 |
| rad67     | 4.30004e-05 | 0.999870 | 6.04712e-05 | 0.999818 |
| rad34     | 2.22803e-05 | 0.999892 | 3.13327e-05 | 0.999849 |
| PAH8+H    | 2.20424e-05 | 0.999914 | 3.09982e-05 | 0.999880 |
| rad30     | 1.19659e-05 | 0.999926 | 1.68276e-05 | 0.999897 |
| rad37     | 1.08360e-05 | 0.999937 | 1.52386e-05 | 0.999912 |
| rad52     | 1.06405e-05 | 0.999948 | 1.49636e-05 | 0.999927 |
| rad71     | 9.97847e-06 | 0.999958 | 1.40327e-05 | 0.999941 |
| rad62     | 8.52399e-06 | 0.999966 | 1.19872e-05 | 0.999953 |
| rad64     | 4.99011e-06 | 0.999971 | 7.01754e-06 | 0.999960 |
| rad73     | 4.56449e-06 | 0.999976 | 6.41901e-06 | 0.999966 |
| rad59     | 4.47702e-06 | 0.999980 | 6.29599e-06 | 0.999973 |
| rad68syn  | 4.00554e-06 | 0.999984 | 5.63295e-06 | 0.999978 |
| rad68anti | 2.55993e-06 | 0.999987 | 3.60001e-06 | 0.999982 |
| rad60syn  | 2.46101e-06 | 0.999989 | 3.46090e-06 | 0.999985 |
| rad40syn  | 2.03324e-06 | 0.999991 | 2.85932e-06 | 0.999988 |
| rad60anti | 1.78407e-06 | 0.999993 | 2.50894e-06 | 0.999991 |
| rad40anti | 1.43624e-06 | 0.999995 | 2.01978e-06 | 0.999993 |
| rad42     | 1.37800e-06 | 0.999996 | 1.93787e-06 | 0.999995 |
| rad65     | 1.15674e-06 | 0.999997 | 1.62672e-06 | 0.999996 |
| rad58     | 1.05023e-06 | 0.999998 | 1.47693e-06 | 0.999998 |
| rad72     | 9.39261e-07 | 0.999999 | 1.32087e-06 | 0.999999 |
| rad43     | 3.36095e-07 | 0.999999 | 4.72649e-07 | 1.000000 |
| rad61     | 2.73990e-07 | 1.000000 | 3.85311e-07 | 1.000000 |
| rad41     | 5.56844e-08 | 1.000000 | 7.83087e-08 | 1.000000 |
| rad6      | 4.37642e-18 | 1.000000 | 6.15453e-18 | 1.000000 |
| rad7      | 1.48079e-19 | 1.000000 | 2.08243e-19 | 1.000000 |
| rad11     | 9.86330e-20 | 1.000000 | 1.38707e-19 | 1.000000 |
| rad23     | 3.09857e-20 | 1.000000 | 4.35750e-20 | 1.000000 |
| rad13     | 2.05537e-20 | 1.000000 | 2.89045e-20 | 1.000000 |
| rad9      | 2.02558e-20 | 1.000000 | 2.84858e-20 | 1.000000 |
| rad28     | 1.58940e-20 | 1.000000 | 2.23516e-20 | 1.000000 |
| rad45     | 1.04567e-20 | 1.000000 | 1.47053e-20 | 1.000000 |
| rad21     | 4.05034e-21 | 1.000000 | 5.69598e-21 | 1.000000 |
| rad22     | 3.35977e-21 | 1.000000 | 4.72483e-21 | 1.000000 |
| rad36     | 2.03104e-21 | 1.000000 | 2.85624e-21 | 1.000000 |
| rad33     | 1.89985e-21 | 1.000000 | 2.67174e-21 | 1.000000 |
| rad15     | 1.57396e-21 | 1.000000 | 2.21345e-21 | 1.000000 |
| rad20     | 8.22772e-22 | 1.000000 | 1.15706e-21 | 1.000000 |
| rad26     | 5.53805e-22 | 1.000000 | 7.78814e-22 | 1.000000 |
| rad12     | 4.82938e-22 | 1.000000 | 6.79149e-22 | 1.000000 |
| rad25     | 4.56474e-22 | 1.000000 | 6.41938e-22 | 1.000000 |
| rad24     | 2.85392e-22 | 1.000000 | 4.01344e-22 | 1.000000 |
| rad10     | 2.30268e-22 | 1.000000 | 3.23825e-22 | 1.000000 |
| rad18     | 1.70015e-22 | 1.000000 | 2.39092e-22 | 1.000000 |
| rad8      | 1.34844e-22 | 1.000000 | 1.89630e-22 | 1.000000 |
| rad47     | 1.03449e-22 | 1.000000 | 1.45480e-22 | 1.000000 |
| rad3      | 4.92943e-23 | 1.000000 | 6.93222e-23 | 1.000000 |
| rad14     | 3.16322e-23 | 1.000000 | 4.44841e-23 | 1.000000 |
| rad4      | 2.97106e-23 | 1.000000 | 4.17819e-23 | 1.000000 |
| rad2      | 2.54641e-23 | 1.000000 | 3.58101e-23 | 1.000000 |
| rad5      | 7.37395e-24 | 1.000000 | 1.03699e-23 | 1.000000 |
| rad1      | 6.57434e-24 | 1.000000 | 9.24542e-24 | 1.000000 |
| rad27     | 1.40640e-24 | 1.000000 | 1.97781e-24 | 1.000000 |

0.100000000E-08 Pa, 3250.00000 K

=====

| Rate constant      | True (fraction)      | Effective (fraction)  |
|--------------------|----------------------|-----------------------|
| Total              | 8.22129e-11 (1.00 )  | 5.87536e-11 (1.00 )   |
| Formation of rad11 | 1.42538e-11 (0.173 ) | 5.21849e-12 (0.0888 ) |
| Formation of rad6  | 2.27549e-11 (0.277 ) | 8.33083e-12 (0.142 )  |
| H-abstraction      | 4.52043e-11 (0.550 ) | 4.52043e-11 (0.769 )  |

| species            | PYtrue    | Cumul    | PYeffective | Cumul    |
|--------------------|-----------|----------|-------------|----------|
| Benzene+2-propynyl | 0.549844  | 0.549844 | 0.769388    | 0.769388 |
| Phenyl+Allene      | 0.285349  | 0.835192 | 0.00000     | 0.769388 |
| PhCH2CCH+H         | 0.0853725 | 0.920565 | 0.119460    | 0.888848 |
| PhCHCCH2+H         | 0.0381839 | 0.958749 | 0.0534299   | 0.942278 |
| C2H2+PhCH2         | 0.0128678 | 0.971617 | 0.0180057   | 0.960283 |

|               |             |          |             |          |
|---------------|-------------|----------|-------------|----------|
| PhCCH+CH3     | 0.0101926   | 0.981809 | 0.0142623   | 0.974546 |
| PAH7+H        | 0.00428274  | 0.986092 | 0.00599276  | 0.980539 |
| Indene+H      | 0.00340695  | 0.989499 | 0.00476729  | 0.985306 |
| PhcycC3H3_A+H | 0.00292038  | 0.992419 | 0.00408643  | 0.989392 |
| Ph+MeAc       | 0.00285191  | 0.995271 | 0.00399061  | 0.993383 |
| rad19syn      | 0.00176005  | 0.997031 | 0.00246280  | 0.995846 |
| rad54         | 0.000783510 | 0.997815 | 0.00109635  | 0.996942 |
| rad39         | 0.000435199 | 0.998250 | 0.000608967 | 0.997551 |
| rad19anti     | 0.000232598 | 0.998483 | 0.000325470 | 0.997876 |
| PAH1+H        | 0.000210285 | 0.998693 | 0.000294248 | 0.998171 |
| PAH9+H        | 0.000189946 | 0.998883 | 0.000265788 | 0.998436 |
| rad38         | 0.000125074 | 0.999008 | 0.000175014 | 0.998611 |
| PhCCCH3+H     | 0.000104499 | 0.999112 | 0.000146224 | 0.998758 |
| rad56         | 0.000102496 | 0.999215 | 0.000143420 | 0.998901 |
| rad50         | 9.64743e-05 | 0.999311 | 0.000134995 | 0.999036 |
| rad55         | 8.51952e-05 | 0.999397 | 0.000119212 | 0.999155 |
| rad53         | 6.86880e-05 | 0.999465 | 9.61137e-05 | 0.999251 |
| rad70         | 6.67834e-05 | 0.999532 | 9.34486e-05 | 0.999345 |
| PAH3+H        | 6.43467e-05 | 0.999596 | 9.00394e-05 | 0.999435 |
| PAH10+CH3     | 5.80427e-05 | 0.999654 | 8.12183e-05 | 0.999516 |
| rad51         | 5.49240e-05 | 0.999709 | 7.68541e-05 | 0.999593 |
| rad46         | 4.80263e-05 | 0.999757 | 6.72021e-05 | 0.999660 |
| rad67         | 4.40669e-05 | 0.999802 | 6.16619e-05 | 0.999722 |
| rad35         | 4.33473e-05 | 0.999845 | 6.06552e-05 | 0.999783 |
| PAH8+H        | 3.16111e-05 | 0.999876 | 4.42329e-05 | 0.999827 |
| rad34         | 2.50786e-05 | 0.999902 | 3.50921e-05 | 0.999862 |
| rad71         | 1.47743e-05 | 0.999916 | 2.06734e-05 | 0.999883 |
| rad52         | 1.16170e-05 | 0.999928 | 1.62555e-05 | 0.999899 |
| rad30         | 1.10774e-05 | 0.999939 | 1.55003e-05 | 0.999914 |
| rad62         | 1.06705e-05 | 0.999950 | 1.49310e-05 | 0.999929 |
| rad37         | 9.29424e-06 | 0.999959 | 1.30053e-05 | 0.999942 |
| rad73         | 6.33743e-06 | 0.999965 | 8.86788e-06 | 0.999951 |
| rad64         | 5.77649e-06 | 0.999971 | 8.08292e-06 | 0.999959 |
| rad68syn      | 5.15348e-06 | 0.999976 | 7.21118e-06 | 0.999966 |
| rad59         | 4.82486e-06 | 0.999981 | 6.75136e-06 | 0.999973 |
| rad68anti     | 3.28964e-06 | 0.999984 | 4.60314e-06 | 0.999978 |
| rad40syn      | 2.77792e-06 | 0.999987 | 3.88709e-06 | 0.999982 |
| rad60syn      | 2.50929e-06 | 0.999990 | 3.51119e-06 | 0.999985 |
| rad40anti     | 1.99952e-06 | 0.999992 | 2.79788e-06 | 0.999988 |
| rad42         | 1.90464e-06 | 0.999994 | 2.66512e-06 | 0.999991 |
| rad60anti     | 1.83422e-06 | 0.999995 | 2.56658e-06 | 0.999993 |
| rad72         | 1.57365e-06 | 0.999997 | 2.20197e-06 | 0.999995 |
| rad65         | 1.29208e-06 | 0.999998 | 1.80798e-06 | 0.999997 |
| rad58         | 1.27682e-06 | 1.000000 | 1.78663e-06 | 0.999999 |
| rad43         | 3.85029e-07 | 1.000000 | 5.38764e-07 | 1.000000 |
| rad61         | 3.23853e-07 | 1.000000 | 4.53160e-07 | 1.000000 |
| rad41         | 7.10639e-08 | 1.000000 | 9.94383e-08 | 1.000000 |
| rad6          | 1.95840e-18 | 1.000000 | 2.74034e-18 | 1.000000 |
| rad7          | 8.03344e-20 | 1.000000 | 1.12410e-19 | 1.000000 |
| rad11         | 5.21686e-20 | 1.000000 | 7.29985e-20 | 1.000000 |
| rad23         | 1.29076e-20 | 1.000000 | 1.80613e-20 | 1.000000 |
| rad13         | 1.18525e-20 | 1.000000 | 1.65850e-20 | 1.000000 |
| rad9          | 9.81804e-21 | 1.000000 | 1.37382e-20 | 1.000000 |
| rad28         | 7.06560e-21 | 1.000000 | 9.88679e-21 | 1.000000 |
| rad45         | 5.22978e-21 | 1.000000 | 7.31793e-21 | 1.000000 |
| rad21         | 2.44315e-21 | 1.000000 | 3.41865e-21 | 1.000000 |
| rad22         | 1.58051e-21 | 1.000000 | 2.21157e-21 | 1.000000 |
| rad33         | 1.20474e-21 | 1.000000 | 1.68578e-21 | 1.000000 |
| rad36         | 1.02554e-21 | 1.000000 | 1.43502e-21 | 1.000000 |
| rad15         | 8.20328e-22 | 1.000000 | 1.14787e-21 | 1.000000 |
| rad20         | 5.20430e-22 | 1.000000 | 7.28226e-22 | 1.000000 |
| rad12         | 3.09374e-22 | 1.000000 | 4.32901e-22 | 1.000000 |
| rad25         | 2.89947e-22 | 1.000000 | 4.05717e-22 | 1.000000 |
| rad26         | 2.68043e-22 | 1.000000 | 3.75068e-22 | 1.000000 |
| rad24         | 1.82403e-22 | 1.000000 | 2.55233e-22 | 1.000000 |
| rad10         | 1.19974e-22 | 1.000000 | 1.67878e-22 | 1.000000 |
| rad8          | 1.19193e-22 | 1.000000 | 1.66784e-22 | 1.000000 |
| rad47         | 1.15640e-22 | 1.000000 | 1.61813e-22 | 1.000000 |
| rad18         | 9.40390e-23 | 1.000000 | 1.31587e-22 | 1.000000 |
| rad3          | 2.81077e-23 | 1.000000 | 3.93305e-23 | 1.000000 |
| rad14         | 2.29549e-23 | 1.000000 | 3.21202e-23 | 1.000000 |
| rad4          | 1.70208e-23 | 1.000000 | 2.38167e-23 | 1.000000 |
| rad2          | 1.27269e-23 | 1.000000 | 1.78086e-23 | 1.000000 |
| rad5          | 5.53994e-24 | 1.000000 | 7.75192e-24 | 1.000000 |
| rad1          | 3.09113e-24 | 1.000000 | 4.32537e-24 | 1.000000 |
| rad27         | 9.84680e-25 | 1.000000 | 1.37785e-24 | 1.000000 |

0.100000000E-08 Pa, 3500.00000 K

=====  
Rate constant | True (fraction) | Effective (fraction)

|                    |                      |                       |
|--------------------|----------------------|-----------------------|
| Total              | 1.05713e-10 (1.00 )  | 7.59650e-11 (1.00 )   |
| Formation of rad11 | 1.77412e-11 (0.168 ) | 6.37264e-12 (0.0839 ) |
| Formation of rad6  | 2.86822e-11 (0.271 ) | 1.03027e-11 (0.136 )  |
| H-abstraction      | 5.92897e-11 (0.561 ) | 5.92897e-11 (0.780 )  |

| species            | PYtrue      | Cumul    | PYeffective | Cumul    |
|--------------------|-------------|----------|-------------|----------|
| Benzene+2-propynyl | 0.560855    | 0.560855 | 0.780487    | 0.780487 |
| Phenyl+Allene      | 0.281404    | 0.842259 | 0.00000     | 0.780487 |
| PhCH2CCH+H         | 0.0826656   | 0.924925 | 0.115037    | 0.895524 |
| PhCHCCH2+H         | 0.0360585   | 0.960983 | 0.0501791   | 0.945703 |
| C2H2+PhCH2         | 0.0122593   | 0.973242 | 0.0170600   | 0.962764 |
| PhCCH+CH3          | 0.00927084  | 0.982513 | 0.0129013   | 0.975665 |
| PAH7+H             | 0.00395025  | 0.986463 | 0.00549717  | 0.981162 |
| PhcycC3H3_A+H      | 0.00334801  | 0.989811 | 0.00465910  | 0.985821 |
| Ph+MeAc            | 0.00276398  | 0.992575 | 0.00384635  | 0.989667 |
| Indene+H           | 0.00257590  | 0.995151 | 0.00358462  | 0.993252 |
| rad19syn           | 0.00187235  | 0.997024 | 0.00260557  | 0.995858 |
| rad54              | 0.000820548 | 0.997844 | 0.00114187  | 0.996999 |
| rad39              | 0.000383055 | 0.998227 | 0.000533059 | 0.997533 |
| PAH1+H             | 0.000234590 | 0.998462 | 0.000326455 | 0.997859 |
| rad19anti          | 0.000198628 | 0.998661 | 0.000276411 | 0.998135 |
| PAH9+H             | 0.000165224 | 0.998826 | 0.000229927 | 0.998365 |
| rad56              | 0.000126873 | 0.998953 | 0.000176556 | 0.998542 |
| rad38              | 0.000111229 | 0.999064 | 0.000154787 | 0.998697 |
| rad50              | 9.85613e-05 | 0.999162 | 0.000137158 | 0.998834 |
| PhCCCH3+H          | 9.42424e-05 | 0.999257 | 0.000131148 | 0.998965 |
| rad55              | 9.15803e-05 | 0.999348 | 0.000127443 | 0.999092 |
| rad53              | 8.16793e-05 | 0.999430 | 0.000113665 | 0.999206 |
| rad70              | 7.02694e-05 | 0.999500 | 9.77871e-05 | 0.999304 |
| PAH3+H             | 6.99220e-05 | 0.999570 | 9.73035e-05 | 0.999401 |
| rad51              | 5.98507e-05 | 0.999630 | 8.32882e-05 | 0.999484 |
| PAH10+CH3          | 5.76128e-05 | 0.999688 | 8.01742e-05 | 0.999565 |
| rad67              | 4.43734e-05 | 0.999732 | 6.17501e-05 | 0.999626 |
| rad46              | 4.41956e-05 | 0.999776 | 6.15029e-05 | 0.999688 |
| PAH8+H             | 4.26935e-05 | 0.999819 | 5.94123e-05 | 0.999747 |
| rad35              | 4.02805e-05 | 0.999859 | 5.60544e-05 | 0.999803 |
| rad34              | 2.74951e-05 | 0.999887 | 3.82622e-05 | 0.999842 |
| rad71              | 2.01281e-05 | 0.999907 | 2.80103e-05 | 0.999870 |
| rad62              | 1.37116e-05 | 0.999920 | 1.90811e-05 | 0.999889 |
| rad52              | 1.21501e-05 | 0.999933 | 1.69080e-05 | 0.999906 |
| rad30              | 1.02915e-05 | 0.999943 | 1.43216e-05 | 0.999920 |
| rad73              | 8.16310e-06 | 0.999951 | 1.13598e-05 | 0.999931 |
| rad37              | 7.96636e-06 | 0.999959 | 1.10860e-05 | 0.999942 |
| rad64              | 6.47621e-06 | 0.999966 | 9.01228e-06 | 0.999951 |
| rad68syn           | 6.33612e-06 | 0.999972 | 8.81737e-06 | 0.999960 |
| rad59              | 5.10458e-06 | 0.999977 | 7.10355e-06 | 0.999967 |
| rad68anti          | 4.04059e-06 | 0.999981 | 5.62289e-06 | 0.999973 |
| rad40syn           | 3.59895e-06 | 0.999985 | 5.00830e-06 | 0.999978 |
| rad42              | 2.66321e-06 | 0.999987 | 3.70612e-06 | 0.999982 |
| rad40anti          | 2.63316e-06 | 0.999990 | 3.66431e-06 | 0.999985 |
| rad60syn           | 2.53258e-06 | 0.999992 | 3.52435e-06 | 0.999989 |
| rad72              | 2.38441e-06 | 0.999995 | 3.31814e-06 | 0.999992 |
| rad60anti          | 1.86455e-06 | 0.999997 | 2.59471e-06 | 0.999995 |
| rad58              | 1.49815e-06 | 0.999998 | 2.08483e-06 | 0.999997 |
| rad65              | 1.37925e-06 | 1.000000 | 1.91936e-06 | 0.999999 |
| rad43              | 4.42452e-07 | 1.000000 | 6.15716e-07 | 0.999999 |
| rad61              | 3.67258e-07 | 1.000000 | 5.11077e-07 | 1.000000 |
| rad41              | 8.98821e-08 | 1.000000 | 1.25080e-07 | 1.000000 |
| rad6               | 9.66502e-19 | 1.000000 | 1.34499e-18 | 1.000000 |
| rad7               | 4.66091e-20 | 1.000000 | 6.48612e-20 | 1.000000 |
| rad11              | 2.99097e-20 | 1.000000 | 4.16225e-20 | 1.000000 |
| rad13              | 7.28305e-21 | 1.000000 | 1.01351e-20 | 1.000000 |
| rad23              | 5.79101e-21 | 1.000000 | 8.05880e-21 | 1.000000 |
| rad9               | 5.08847e-21 | 1.000000 | 7.08109e-21 | 1.000000 |
| rad28              | 3.44704e-21 | 1.000000 | 4.79691e-21 | 1.000000 |
| rad45              | 2.76668e-21 | 1.000000 | 3.85012e-21 | 1.000000 |
| rad21              | 1.56206e-21 | 1.000000 | 2.17377e-21 | 1.000000 |
| rad22              | 8.11694e-22 | 1.000000 | 1.12955e-21 | 1.000000 |
| rad33              | 7.96109e-22 | 1.000000 | 1.10787e-21 | 1.000000 |
| rad36              | 5.46534e-22 | 1.000000 | 7.60555e-22 | 1.000000 |
| rad15              | 4.52557e-22 | 1.000000 | 6.29778e-22 | 1.000000 |
| rad20              | 3.56498e-22 | 1.000000 | 4.96104e-22 | 1.000000 |
| rad12              | 2.06000e-22 | 1.000000 | 2.86671e-22 | 1.000000 |
| rad25              | 1.93599e-22 | 1.000000 | 2.69413e-22 | 1.000000 |
| rad26              | 1.38427e-22 | 1.000000 | 1.92635e-22 | 1.000000 |
| rad47              | 1.23125e-22 | 1.000000 | 1.71341e-22 | 1.000000 |
| rad24              | 1.20836e-22 | 1.000000 | 1.68155e-22 | 1.000000 |
| rad8               | 1.05361e-22 | 1.000000 | 1.46621e-22 | 1.000000 |

|       |             |         |             |         |
|-------|-------------|---------|-------------|---------|
| rad10 | 6.65090e-23 | 1.00000 | 9.25539e-23 | 1.00000 |
| rad18 | 5.60033e-23 | 1.00000 | 7.79343e-23 | 1.00000 |
| rad14 | 1.81848e-23 | 1.00000 | 2.53061e-23 | 1.00000 |
| rad3  | 1.71733e-23 | 1.00000 | 2.38984e-23 | 1.00000 |
| rad4  | 1.05774e-23 | 1.00000 | 1.47195e-23 | 1.00000 |
| rad2  | 7.00832e-24 | 1.00000 | 9.75278e-24 | 1.00000 |
| rad5  | 4.29350e-24 | 1.00000 | 5.97483e-24 | 1.00000 |
| rad1  | 1.62951e-24 | 1.00000 | 2.26761e-24 | 1.00000 |
| rad27 | 7.31080e-25 | 1.00000 | 1.01737e-24 | 1.00000 |

0.100000000E-08 Pa, 3750.00000 K

| Rate constant      | True (fraction)      | Effective (fraction)  |
|--------------------|----------------------|-----------------------|
| Total              | 1.33217e-10 (1.00 )  | 9.62711e-11 (1.00 )   |
| Formation of rad11 | 2.17064e-11 (0.163 ) | 7.68279e-12 (0.0798 ) |
| Formation of rad6  | 3.54800e-11 (0.266 ) | 1.25578e-11 (0.130 )  |
| H-abstraction      | 7.60305e-11 (0.571 ) | 7.60305e-11 (0.790 )  |

| species            | PYtrue      | Cumul    | PYeffective | Cumul    |
|--------------------|-------------|----------|-------------|----------|
| Benzene+2-propynyl | 0.570727    | 0.570727 | 0.789754    | 0.789754 |
| Phenyl+Allene      | 0.277336    | 0.848063 | 0.00000     | 0.789754 |
| PhCH2CCH+H         | 0.0801946   | 0.928257 | 0.110971    | 0.900725 |
| PhCHCCH2+H         | 0.0343186   | 0.962576 | 0.0474891   | 0.948214 |
| C2H2+PhCH2         | 0.0118838   | 0.974460 | 0.0164445   | 0.964658 |
| PhCCH+CH3          | 0.00852836  | 0.982988 | 0.0118013   | 0.976459 |
| PhcycC3H3_A+H      | 0.00372851  | 0.986717 | 0.00515939  | 0.981619 |
| PAH7+H             | 0.00365085  | 0.990368 | 0.00505194  | 0.986671 |
| Ph+MeAc            | 0.00270113  | 0.993069 | 0.00373773  | 0.990408 |
| Indene+H           | 0.00199900  | 0.995068 | 0.00276616  | 0.993175 |
| rad19syn           | 0.00195356  | 0.997021 | 0.00270328  | 0.995878 |
| rad54              | 0.000841040 | 0.997862 | 0.00116381  | 0.997042 |
| rad39              | 0.000340475 | 0.998203 | 0.000471138 | 0.997513 |
| PAH1+H             | 0.000258935 | 0.998462 | 0.000358305 | 0.997871 |
| rad19anti          | 0.000171610 | 0.998633 | 0.000237469 | 0.998109 |
| rad56              | 0.000150421 | 0.998784 | 0.000208148 | 0.998317 |
| PAH9+H             | 0.000142296 | 0.998926 | 0.000196904 | 0.998514 |
| rad50              | 9.78214e-05 | 0.999024 | 0.000135362 | 0.998649 |
| rad38              | 9.76287e-05 | 0.999121 | 0.000135095 | 0.998784 |
| rad55              | 9.60227e-05 | 0.999217 | 0.000132873 | 0.998917 |
| rad53              | 9.35446e-05 | 0.999311 | 0.000129444 | 0.999046 |
| PhCCCH3+H          | 8.63448e-05 | 0.999397 | 0.000119481 | 0.999166 |
| PAH3+H             | 7.46029e-05 | 0.999472 | 0.000103233 | 0.999269 |
| rad70              | 7.27716e-05 | 0.999545 | 0.000100699 | 0.999370 |
| rad51              | 6.27266e-05 | 0.999607 | 8.67994e-05 | 0.999457 |
| PAH10+CH3          | 5.64592e-05 | 0.999664 | 7.81267e-05 | 0.999535 |
| PAH8+H             | 5.49581e-05 | 0.999719 | 7.60493e-05 | 0.999611 |
| rad67              | 4.41361e-05 | 0.999763 | 6.10741e-05 | 0.999672 |
| rad46              | 4.00102e-05 | 0.999803 | 5.53649e-05 | 0.999727 |
| rad35              | 3.73501e-05 | 0.999840 | 5.16839e-05 | 0.999779 |
| rad34              | 2.95155e-05 | 0.999870 | 4.08426e-05 | 0.999820 |
| rad71              | 2.56704e-05 | 0.999896 | 3.55219e-05 | 0.999855 |
| rad62              | 1.78765e-05 | 0.999913 | 2.47369e-05 | 0.999880 |
| rad52              | 1.22817e-05 | 0.999926 | 1.69950e-05 | 0.999897 |
| rad73              | 9.90830e-06 | 0.999936 | 1.37108e-05 | 0.999911 |
| rad30              | 9.58077e-06 | 0.999945 | 1.32576e-05 | 0.999924 |
| rad68syn           | 7.51159e-06 | 0.999953 | 1.03943e-05 | 0.999934 |
| rad64              | 7.08717e-06 | 0.999960 | 9.80700e-06 | 0.999944 |
| rad37              | 6.84827e-06 | 0.999967 | 9.47639e-06 | 0.999954 |
| rad59              | 5.31873e-06 | 0.999972 | 7.35989e-06 | 0.999961 |
| rad68anti          | 4.78626e-06 | 0.999977 | 6.62308e-06 | 0.999968 |
| rad40syn           | 4.46912e-06 | 0.999981 | 6.18422e-06 | 0.999974 |
| rad42              | 3.72271e-06 | 0.999985 | 5.15138e-06 | 0.999979 |
| rad72              | 3.33614e-06 | 0.999988 | 4.61643e-06 | 0.999984 |
| rad40anti          | 3.31727e-06 | 0.999992 | 4.59032e-06 | 0.999988 |
| rad60syn           | 2.53369e-06 | 0.999994 | 3.50604e-06 | 0.999992 |
| rad60anti          | 1.87710e-06 | 0.999996 | 2.59748e-06 | 0.999994 |
| rad58              | 1.70809e-06 | 0.999998 | 2.36361e-06 | 0.999997 |
| rad65              | 1.42131e-06 | 0.999999 | 1.96676e-06 | 0.999999 |
| rad43              | 5.13732e-07 | 1.000000 | 7.10883e-07 | 0.999999 |
| rad61              | 4.03889e-07 | 1.00000  | 5.58888e-07 | 1.000000 |
| rad41              | 1.13553e-07 | 1.00000  | 1.57130e-07 | 1.00000  |
| rad6               | 5.17527e-19 | 1.00000  | 7.16135e-19 | 1.00000  |
| rad7               | 2.85678e-20 | 1.00000  | 3.95313e-20 | 1.00000  |
| rad11              | 1.83381e-20 | 1.00000  | 2.53756e-20 | 1.00000  |
| rad13              | 4.71985e-21 | 1.00000  | 6.53121e-21 | 1.00000  |
| rad9               | 2.80526e-21 | 1.00000  | 3.88183e-21 | 1.00000  |
| rad23              | 2.76720e-21 | 1.00000  | 3.82917e-21 | 1.00000  |
| rad28              | 1.81765e-21 | 1.00000  | 2.51521e-21 | 1.00000  |

|       |             |         |             |         |
|-------|-------------|---------|-------------|---------|
| rad45 | 1.53396e-21 | 1.00000 | 2.12264e-21 | 1.00000 |
| rad21 | 1.04834e-21 | 1.00000 | 1.45067e-21 | 1.00000 |
| rad33 | 5.44417e-22 | 1.00000 | 7.53345e-22 | 1.00000 |
| rad22 | 4.48976e-22 | 1.00000 | 6.21279e-22 | 1.00000 |
| rad36 | 3.04624e-22 | 1.00000 | 4.21528e-22 | 1.00000 |
| rad15 | 2.63078e-22 | 1.00000 | 3.64039e-22 | 1.00000 |
| rad20 | 2.59386e-22 | 1.00000 | 3.58930e-22 | 1.00000 |
| rad12 | 1.42144e-22 | 1.00000 | 1.96695e-22 | 1.00000 |
| rad25 | 1.34705e-22 | 1.00000 | 1.86401e-22 | 1.00000 |
| rad47 | 1.26179e-22 | 1.00000 | 1.74602e-22 | 1.00000 |
| rad8  | 9.29496e-23 | 1.00000 | 1.28621e-22 | 1.00000 |
| rad24 | 8.25899e-23 | 1.00000 | 1.14285e-22 | 1.00000 |
| rad26 | 7.57542e-23 | 1.00000 | 1.04827e-22 | 1.00000 |
| rad10 | 3.88401e-23 | 1.00000 | 5.37456e-23 | 1.00000 |
| rad18 | 3.53332e-23 | 1.00000 | 4.88931e-23 | 1.00000 |
| rad14 | 1.56337e-23 | 1.00000 | 2.16335e-23 | 1.00000 |
| rad3  | 1.10935e-23 | 1.00000 | 1.53508e-23 | 1.00000 |
| rad4  | 7.01895e-24 | 1.00000 | 9.71258e-24 | 1.00000 |
| rad2  | 4.14289e-24 | 1.00000 | 5.73280e-24 | 1.00000 |
| rad5  | 3.42483e-24 | 1.00000 | 4.73917e-24 | 1.00000 |
| rad1  | 9.41975e-25 | 1.00000 | 1.30347e-24 | 1.00000 |
| rad27 | 5.73762e-25 | 1.00000 | 7.93956e-25 | 1.00000 |

0.100000000E-08 Pa, 4000.00000 K

| =====              |                 |          |                      |           |
|--------------------|-----------------|----------|----------------------|-----------|
| Rate constant      | True (fraction) |          | Effective (fraction) |           |
| -----              |                 |          |                      |           |
| Total              | 1.65008e-10     | (1.00 )  | 1.19912e-10          | (1.00 )   |
| Formation of rad11 | 2.61707e-11     | (0.159 ) | 9.15556e-12          | (0.0764 ) |
| Formation of rad6  | 4.31906e-11     | (0.262 ) | 1.51098e-11          | (0.126 )  |
| H-abstraction      | 9.56470e-11     | (0.580 ) | 9.56470e-11          | (0.798 )  |
| -----              |                 |          |                      |           |
| species            | PYtrue          | Cumul    | PYeffective          | Cumul     |
| -----              |                 |          |                      |           |
| Benzene+2-propynyl | 0.579650        | 0.579650 | 0.797641             | 0.797641  |
| Phenyl+Allene      | 0.273295        | 0.852945 | 0.000000             | 0.797641  |
| PhCH2CCH+H         | 0.0779435       | 0.930888 | 0.107256             | 0.904897  |
| PhCHCCH2+H         | 0.0328766       | 0.963765 | 0.0452408            | 0.950138  |
| C2H2+PhCH2         | 0.0116508       | 0.975415 | 0.0160323            | 0.966170  |
| PhCCH+CH3          | 0.00792125      | 0.983337 | 0.0109003            | 0.977070  |
| PhcycC3H3_A+H      | 0.00405636      | 0.987393 | 0.00558187           | 0.982652  |
| PAH7+H             | 0.00338058      | 0.990774 | 0.00465193           | 0.987304  |
| Ph+MeAc            | 0.00265534      | 0.993429 | 0.00365394           | 0.990958  |
| rad19syn           | 0.00200699      | 0.995436 | 0.00276178           | 0.993720  |
| Indene+H           | 0.00158840      | 0.997024 | 0.00218576           | 0.995906  |
| rad54              | 0.000847468     | 0.997872 | 0.00116618           | 0.997072  |
| rad39              | 0.000304994     | 0.998177 | 0.000419695          | 0.997491  |
| PAH1+H             | 0.000284127     | 0.998461 | 0.000390980          | 0.997882  |
| rad56              | 0.000172242     | 0.998633 | 0.000237017          | 0.998119  |
| rad19anti          | 0.000149971     | 0.998783 | 0.000206372          | 0.998326  |
| PAH9+H             | 0.000121736     | 0.998905 | 0.000167518          | 0.998493  |
| rad53              | 0.000103935     | 0.999009 | 0.000143023          | 0.998636  |
| rad55              | 9.87033e-05     | 0.999108 | 0.000135823          | 0.998772  |
| rad50              | 9.49261e-05     | 0.999203 | 0.000130625          | 0.998903  |
| rad38              | 8.48536e-05     | 0.999287 | 0.000116765          | 0.999020  |
| PhCCCH3+H          | 8.02193e-05     | 0.999368 | 0.000110388          | 0.999130  |
| PAH3+H             | 7.84218e-05     | 0.999446 | 0.000107914          | 0.999238  |
| rad70              | 7.43978e-05     | 0.999520 | 0.000102377          | 0.999340  |
| PAH8+H             | 6.80299e-05     | 0.999588 | 9.36140e-05          | 0.999434  |
| rad51              | 6.37407e-05     | 0.999652 | 8.77122e-05          | 0.999522  |
| PAH10+CH3          | 5.48776e-05     | 0.999707 | 7.55158e-05          | 0.999597  |
| rad67              | 4.35168e-05     | 0.999751 | 5.98821e-05          | 0.999657  |
| rad46              | 3.57792e-05     | 0.999786 | 4.92350e-05          | 0.999706  |
| rad35              | 3.46400e-05     | 0.999821 | 4.76673e-05          | 0.999754  |
| rad34              | 3.11445e-05     | 0.999852 | 4.28572e-05          | 0.999797  |
| rad71              | 3.10563e-05     | 0.999883 | 4.27358e-05          | 0.999839  |
| rad62              | 2.32398e-05     | 0.999906 | 3.19798e-05          | 0.999871  |
| rad52              | 1.20851e-05     | 0.999919 | 1.66300e-05          | 0.999888  |
| rad73              | 1.14710e-05     | 0.999930 | 1.57849e-05          | 0.999904  |
| rad30              | 8.93299e-06     | 0.999939 | 1.22925e-05          | 0.999916  |
| rad68syn           | 8.64434e-06     | 0.999948 | 1.18952e-05          | 0.999928  |
| rad64              | 7.61305e-06     | 0.999955 | 1.04761e-05          | 0.999939  |
| rad37              | 5.91727e-06     | 0.999961 | 8.14263e-06          | 0.999947  |
| rad68anti          | 5.50424e-06     | 0.999967 | 7.57424e-06          | 0.999954  |
| rad59              | 5.47385e-06     | 0.999972 | 7.53243e-06          | 0.999962  |
| rad40syn           | 5.36170e-06     | 0.999977 | 7.37810e-06          | 0.999969  |
| rad42              | 5.12142e-06     | 0.999983 | 7.04750e-06          | 0.999976  |
| rad72              | 4.37871e-06     | 0.999987 | 6.02543e-06          | 0.999982  |
| rad40anti          | 4.03125e-06     | 0.999991 | 5.54731e-06          | 0.999988  |
| rad60syn           | 2.51669e-06     | 0.999993 | 3.46315e-06          | 0.999991  |

|           |             |          |             |          |
|-----------|-------------|----------|-------------|----------|
| rad58     | 1.90267e-06 | 0.999995 | 2.61822e-06 | 0.999994 |
| rad60anti | 1.87487e-06 | 0.999997 | 2.57996e-06 | 0.999996 |
| rad65     | 1.42564e-06 | 0.999999 | 1.96179e-06 | 0.999998 |
| rad43     | 6.01849e-07 | 0.999999 | 8.28191e-07 | 0.999999 |
| rad61     | 4.34037e-07 | 1.000000 | 5.97267e-07 | 1.000000 |
| rad41     | 1.43043e-07 | 1.000000 | 1.96838e-07 | 1.000000 |
| rad6      | 2.96842e-19 | 1.000000 | 4.08478e-19 | 1.000000 |
| rad7      | 1.83267e-20 | 1.000000 | 2.52190e-20 | 1.000000 |
| rad11     | 1.18911e-20 | 1.000000 | 1.63631e-20 | 1.000000 |
| rad13     | 3.19990e-21 | 1.000000 | 4.40329e-21 | 1.000000 |
| rad9      | 1.63562e-21 | 1.000000 | 2.25074e-21 | 1.000000 |
| rad23     | 1.39587e-21 | 1.000000 | 1.92083e-21 | 1.000000 |
| rad28     | 1.02381e-21 | 1.000000 | 1.40884e-21 | 1.000000 |
| rad45     | 8.85111e-22 | 1.000000 | 1.21798e-21 | 1.000000 |
| rad21     | 7.32814e-22 | 1.000000 | 1.00841e-21 | 1.000000 |
| rad33     | 3.83235e-22 | 1.000000 | 5.27360e-22 | 1.000000 |
| rad22     | 2.64530e-22 | 1.000000 | 3.64014e-22 | 1.000000 |
| rad20     | 1.97582e-22 | 1.000000 | 2.71888e-22 | 1.000000 |
| rad36     | 1.76356e-22 | 1.000000 | 2.42679e-22 | 1.000000 |
| rad15     | 1.60340e-22 | 1.000000 | 2.20640e-22 | 1.000000 |
| rad47     | 1.25502e-22 | 1.000000 | 1.72700e-22 | 1.000000 |
| rad12     | 1.01281e-22 | 1.000000 | 1.39370e-22 | 1.000000 |
| rad25     | 9.69849e-23 | 1.000000 | 1.33459e-22 | 1.000000 |
| rad8      | 8.17489e-23 | 1.000000 | 1.12493e-22 | 1.000000 |
| rad24     | 5.80458e-23 | 1.000000 | 7.98754e-23 | 1.000000 |
| rad26     | 4.36727e-23 | 1.000000 | 6.00970e-23 | 1.000000 |
| rad10     | 2.37351e-23 | 1.000000 | 3.26612e-23 | 1.000000 |
| rad18     | 2.33495e-23 | 1.000000 | 3.21308e-23 | 1.000000 |
| rad14     | 1.43353e-23 | 1.000000 | 1.97264e-23 | 1.000000 |
| rad3      | 7.50494e-24 | 1.000000 | 1.03274e-23 | 1.000000 |
| rad4      | 4.91179e-24 | 1.000000 | 6.75902e-24 | 1.000000 |
| rad5      | 2.80272e-24 | 1.000000 | 3.85676e-24 | 1.000000 |
| rad2      | 2.58860e-24 | 1.000000 | 3.56211e-24 | 1.000000 |
| rad1      | 5.86994e-25 | 1.000000 | 8.07751e-25 | 1.000000 |
| rad27     | 4.74794e-25 | 1.000000 | 6.53351e-25 | 1.000000 |

## Tabulated effective product yields for the major products

- The re-dissociation fractions listed below are the yields prior to factoring out re-dissociation.
- N/A denotes calculations using a mechanism that did not include the product/intermediate. This is mainly in low-temperature reaction conditions where the energy ceiling used was below the ground state energy of some of the energetically higher-lying isomers and transition states.

rad11

=====

| Pa\K        | 20.0000     | 30.0000     | 40.0000     | 50.0000     | 60.0000     |
|-------------|-------------|-------------|-------------|-------------|-------------|
| 1.00000e+08 | 1.00000     | 0.999998    | 0.999943    | 0.999581    | 0.998415    |
| 1.00000e+07 | 0.999998    | 0.999993    | 0.999936    | 0.999572    | 0.998404    |
| 1.00000e+06 | 0.999976    | 0.999949    | 0.999870    | 0.999484    | 0.998293    |
| 100000.     | 0.999756    | 0.999505    | 0.999206    | 0.998598    | 0.997181    |
| 10000.0     | 0.997566    | 0.995082    | 0.992593    | 0.989791    | 0.986152    |
| 1000.00     | 0.975987    | 0.952152    | 0.929351    | 0.906790    | 0.883755    |
| 100.000     | 0.788831    | 0.626667    | 0.505304    | 0.410969    | 0.335939    |
| 10.0000     | 0.142223    | 0.0351948   | 0.0122885   | 0.00524839  | 0.00256955  |
| 1.00000     | 0.000279138 | 7.67692e-05 | 6.08469e-05 | 5.55014e-05 | 5.24702e-05 |
| 0.100000    | 4.40248e-05 | 3.79513e-05 | 3.50807e-05 | 3.32745e-05 | 3.19821e-05 |
| 0.0100000   | 2.78177e-05 | 2.44151e-05 | 2.26039e-05 | 2.13256e-05 | 2.02987e-05 |
| 0.00100000  | 1.69260e-05 | 1.29850e-05 | 1.04352e-05 | 8.52758e-06 | 7.02083e-06 |
| 0.000100000 | 3.43061e-06 | 1.08432e-06 | 4.59742e-07 | 2.28050e-07 | 1.24971e-07 |
| 1.00000e-05 | 1.95699e-08 | 2.25630e-09 | 6.27593e-10 | 2.48929e-10 | 1.19553e-10 |
| 1.00000e-06 | 1.57699e-11 | 1.92578e-12 | 5.93493e-13 | 2.58016e-13 | 1.34171e-13 |
| 1.00000e-07 | 2.37711e-14 | 3.95988e-15 | 1.45746e-15 | 7.17403e-16 | 4.10545e-16 |
| 1.00000e-08 | 9.94220e-17 | 2.23504e-17 | 9.71483e-18 | 5.36749e-18 | 3.35713e-18 |
| 1.00000e-09 | 1.09331e-18 | 3.27402e-19 | 1.67074e-19 | 1.03216e-19 | 7.03538e-20 |

| Pa\K        | 70.0000     | 80.0000     | 90.0000     | 100.000     | 110.000     |
|-------------|-------------|-------------|-------------|-------------|-------------|
| 1.00000e+08 | 0.995911    | 0.991707    | 0.985676    | 0.977887    | 0.968537    |
| 1.00000e+07 | 0.995897    | 0.991691    | 0.985657    | 0.977867    | 0.968513    |
| 1.00000e+06 | 0.995763    | 0.991534    | 0.985476    | 0.977660    | 0.968281    |
| 100000.     | 0.994423    | 0.989958    | 0.983660    | 0.975599    | 0.965965    |
| 10000.0     | 0.981136    | 0.974373    | 0.965733    | 0.955275    | 0.943180    |
| 1000.00     | 0.859660    | 0.834150    | 0.807106    | 0.778593    | 0.748778    |
| 100.000     | 0.275376    | 0.226003    | 0.185497    | 0.152143    | 0.124633    |
| 10.0000     | 0.00139404  | 0.000822107 | 0.000521081 | 0.000352521 | 0.000253288 |
| 1.00000     | 5.03653e-05 | 4.87605e-05 | 4.74711e-05 | 4.63986e-05 | 4.54826e-05 |
| 0.100000    | 3.09857e-05 | 3.01776e-05 | 2.94968e-05 | 2.89046e-05 | 2.83739e-05 |
| 0.0100000   | 1.94087e-05 | 1.85968e-05 | 1.78278e-05 | 1.70784e-05 | 1.63329e-05 |
| 0.00100000  | 5.79949e-06 | 4.79513e-06 | 3.96230e-06 | 3.26880e-06 | 2.69054e-06 |
| 0.000100000 | 7.34236e-08 | 4.54132e-08 | 2.92113e-08 | 1.93741e-08 | 1.31672e-08 |
| 1.00000e-05 | 6.47242e-11 | 3.80240e-11 | 2.36910e-11 | 1.54237e-11 | 1.03864e-11 |
| 1.00000e-06 | 7.78812e-14 | 4.86819e-14 | 3.20789e-14 | 2.19813e-14 | 1.55186e-14 |
| 1.00000e-07 | 2.57689e-16 | 1.72123e-16 | 1.20171e-16 | 8.66885e-17 | 6.41117e-17 |
| 1.00000e-08 | 2.26574e-18 | 1.60948e-18 | 1.18566e-18 | 8.97186e-19 | 6.92852e-19 |
| 1.00000e-09 | 5.09360e-20 | 3.84045e-20 | 2.98012e-20 | 2.36188e-20 | 1.90198e-20 |

| Pa\K        | 120.000     | 130.000     | 140.000     | 150.000     | 160.000     |
|-------------|-------------|-------------|-------------|-------------|-------------|
| 1.00000e+08 | 0.957869    | 0.946141    | 0.933588    | 0.920423    | 0.906828    |
| 1.00000e+07 | 0.957843    | 0.946112    | 0.933557    | 0.920389    | 0.906790    |
| 1.00000e+06 | 0.957585    | 0.945825    | 0.933241    | 0.920042    | 0.906410    |
| 100000.     | 0.955004    | 0.942967    | 0.930093    | 0.916586    | 0.902625    |
| 10000.0     | 0.929676    | 0.914998    | 0.899360    | 0.882946    | 0.865910    |
| 1000.00     | 0.717877    | 0.686112    | 0.653690    | 0.620808    | 0.587644    |
| 100.000     | 0.101939    | 0.0832316   | 0.0678317   | 0.0551768   | 0.0447986   |
| 10.0000     | 0.000192389 | 0.000153668 | 0.000128272 | 0.000111140 | 9.92729e-05 |
| 1.00000     | 4.46823e-05 | 4.39684e-05 | 4.33186e-05 | 4.27162e-05 | 4.21481e-05 |
| 0.100000    | 2.78847e-05 | 2.74212e-05 | 2.69705e-05 | 2.65218e-05 | 2.60657e-05 |
| 0.0100000   | 1.55806e-05 | 1.48147e-05 | 1.40318e-05 | 1.32315e-05 | 1.24159e-05 |
| 0.00100000  | 2.20872e-06 | 1.80806e-06 | 1.47583e-06 | 1.20124e-06 | 9.75042e-07 |
| 0.000100000 | 9.12775e-09 | 6.43158e-09 | 4.59391e-09 | 3.31925e-09 | 2.42188e-09 |
| 1.00000e-05 | 7.18290e-12 | 5.07477e-12 | 3.64853e-12 | 2.66137e-12 | 1.96502e-12 |
| 1.00000e-06 | 1.12150e-14 | 8.25753e-15 | 6.17290e-15 | 4.67268e-15 | 3.57431e-15 |
| 1.00000e-07 | 4.83444e-17 | 3.70230e-17 | 2.87104e-17 | 2.24954e-17 | 1.77785e-17 |
| 1.00000e-08 | 5.43582e-19 | 4.31859e-19 | 3.46599e-19 | 2.80500e-19 | 2.28596e-19 |
| 1.00000e-09 | 1.55061e-20 | 1.27651e-20 | 1.05912e-20 | 8.84425e-21 | 7.42506e-21 |

| Pa\K        | 170.000  | 180.000  | 190.000  | 200.000  | 210.000  |
|-------------|----------|----------|----------|----------|----------|
| 1.00000e+08 | 0.892956 | 0.878943 | 0.864900 | 0.850923 | 0.837094 |



|             |             |             |             |             |             |
|-------------|-------------|-------------|-------------|-------------|-------------|
| 1.00000e+07 | 0.892915    | 0.878897    | 0.864851    | 0.850868    | 0.837035    |
| 1.00000e+06 | 0.892500    | 0.878444    | 0.864355    | 0.850327    | 0.836443    |
| 100000.     | 0.888361    | 0.873924    | 0.859420    | 0.844941    | 0.830560    |
| 10000.0     | 0.848375    | 0.830441    | 0.812184    | 0.793662    | 0.774917    |
| 1000.00     | 0.554368    | 0.521145    | 0.488138    | 0.455505    | 0.423410    |
| 100.000     | 0.0363056   | 0.0293710   | 0.0237217   | 0.0191295   | 0.0154050   |
| 10.0000     | 9.08416e-05 | 8.46978e-05 | 8.01054e-05 | 7.65829e-05 | 7.38095e-05 |
| 1.00000     | 4.16040e-05 | 4.10763e-05 | 4.05588e-05 | 4.00469e-05 | 3.95368e-05 |
| 0.100000    | 2.55946e-05 | 2.51015e-05 | 2.45808e-05 | 2.40271e-05 | 2.34366e-05 |
| 0.0100000   | 1.15893e-05 | 1.07577e-05 | 9.92803e-06 | 9.10809e-06 | 8.30576e-06 |
| 0.00100000  | 7.89363e-07 | 6.37452e-07 | 5.13570e-07 | 4.12855e-07 | 3.31214e-07 |
| 0.000100000 | 1.78208e-09 | 1.32092e-09 | 9.85357e-10 | 7.39180e-10 | 5.57267e-10 |
| 1.00000e-05 | 1.46590e-12 | 1.10325e-12 | 8.36682e-13 | 6.38761e-13 | 4.90526e-13 |
| 1.00000e-06 | 2.75847e-15 | 2.14507e-15 | 1.67908e-15 | 1.32191e-15 | 1.04604e-15 |
| 1.00000e-07 | 1.41536e-17 | 1.13388e-17 | 9.13338e-18 | 7.39254e-18 | 6.00955e-18 |
| 1.00000e-08 | 1.87397e-19 | 1.54406e-19 | 1.27786e-19 | 1.06170e-19 | 8.85249e-20 |
| 1.00000e-09 | 6.26196e-21 | 5.30177e-21 | 4.50425e-21 | 3.83843e-21 | 3.28018e-21 |

| Pa\K        | 220.000     | 230.000     | 240.000     | 250.000     | 260.000     |
|-------------|-------------|-------------|-------------|-------------|-------------|
| 1.00000e+08 | 0.823480    | 0.810139    | 0.797114    | 0.784443    | 0.772152    |
| 1.00000e+07 | 0.823416    | 0.810068    | 0.797037    | 0.784357    | 0.772057    |
| 1.00000e+06 | 0.822768    | 0.809360    | 0.796260    | 0.783506    | 0.771120    |
| 100000.     | 0.816340    | 0.802327    | 0.788560    | 0.775064    | 0.761856    |
| 10000.0     | 0.755975    | 0.736852    | 0.717550    | 0.698066    | 0.678389    |
| 1000.00     | 0.392007    | 0.361454    | 0.331893    | 0.303464    | 0.276287    |
| 100.000     | 0.0123907   | 0.00995616  | 0.00799372  | 0.00641472  | 0.00514645  |
| 10.0000     | 7.15684e-05 | 6.97112e-05 | 6.81346e-05 | 6.67662e-05 | 6.55542e-05 |
| 1.00000     | 3.90252e-05 | 3.85092e-05 | 3.79861e-05 | 3.74530e-05 | 3.69068e-05 |
| 0.100000    | 2.28060e-05 | 2.21328e-05 | 2.14160e-05 | 2.06554e-05 | 1.98524e-05 |
| 0.0100000   | 7.52854e-06 | 6.78321e-06 | 6.07559e-06 | 5.41029e-06 | 4.79069e-06 |
| 0.00100000  | 2.65214e-07 | 2.11996e-07 | 1.69185e-07 | 1.34823e-07 | 1.07298e-07 |
| 0.000100000 | 4.21988e-10 | 3.20822e-10 | 2.44787e-10 | 1.87387e-10 | 1.43878e-10 |
| 1.00000e-05 | 3.78656e-13 | 2.93669e-13 | 2.28722e-13 | 1.78833e-13 | 1.40333e-13 |
| 1.00000e-06 | 8.31572e-16 | 6.63873e-16 | 5.32101e-16 | 4.28120e-16 | 3.45779e-16 |
| 1.00000e-07 | 4.90492e-18 | 4.01860e-18 | 3.30476e-18 | 2.72817e-18 | 2.26147e-18 |
| 1.00000e-08 | 7.40516e-20 | 6.21374e-20 | 5.22963e-20 | 4.41470e-20 | 3.73801e-20 |
| 1.00000e-09 | 2.81040e-21 | 2.41383e-21 | 2.07836e-21 | 1.79359e-21 | 1.55155e-21 |

| Pa\K        | 270.000     | 280.000     | 290.000     | 300.000     | 400.000     |
|-------------|-------------|-------------|-------------|-------------|-------------|
| 1.00000e+08 | 0.760260    | 0.748781    | 0.737722    | 0.711125    | 0.602501    |
| 1.00000e+07 | 0.760156    | 0.748667    | 0.737596    | 0.710860    | 0.601771    |
| 1.00000e+06 | 0.759125    | 0.747530    | 0.736340    | 0.708217    | 0.594618    |
| 100000.     | 0.748943    | 0.736327    | 0.724001    | 0.683057    | 0.534117    |
| 10000.0     | 0.658505    | 0.638397    | 0.618051    | 0.506807    | 0.273607    |
| 1000.00     | 0.250465    | 0.226082    | 0.203204    | 0.107329    | 0.0260238   |
| 100.000     | 0.00412936  | 0.00331491  | 0.00266355  | 0.00135750  | 0.000259294 |
| 10.0000     | 6.44617e-05 | 6.34610e-05 | 6.25322e-05 | 5.80837e-05 | 5.00645e-05 |
| 1.00000     | 3.63444e-05 | 3.57622e-05 | 3.51563e-05 | 3.17809e-05 | 2.29723e-05 |
| 0.100000    | 1.90098e-05 | 1.81311e-05 | 1.72220e-05 | 1.37242e-05 | 5.82138e-06 |
| 0.0100000   | 4.21886e-06 | 3.69571e-06 | 3.22103e-06 | 2.02104e-06 | 4.11600e-07 |
| 0.00100000  | 8.52913e-08 | 6.77262e-08 | 5.37284e-08 | 3.76446e-08 | 4.63403e-09 |
| 0.000100000 | 1.10781e-10 | 8.55205e-11 | 6.61831e-11 | 1.47498e-10 | 1.86086e-11 |
| 1.00000e-05 | 1.10501e-13 | 8.73000e-14 | 6.91975e-14 | 6.77191e-13 | 1.10585e-13 |
| 1.00000e-06 | 2.80387e-16 | 2.28349e-16 | 1.86888e-16 | 6.12197e-15 | 1.37500e-15 |
| 1.00000e-07 | 1.88334e-18 | 1.57719e-18 | 1.32997e-18 | 1.17177e-16 | 3.35927e-17 |
| 1.00000e-08 | 3.17609e-20 | 2.70826e-20 | 2.31930e-20 | 4.69528e-18 | 1.66410e-18 |
| 1.00000e-09 | 1.34550e-21 | 1.16986e-21 | 1.02004e-21 | 3.02254e-19 | 1.28460e-19 |

| Pa\K        | 500.000     | 600.000     | 700.000     | 800.000     | 900.000     |
|-------------|-------------|-------------|-------------|-------------|-------------|
| 1.00000e+08 | 0.523753    | 0.465187    | 0.419439    | 0.379538    | 0.329986    |
| 1.00000e+07 | 0.521653    | 0.459214    | 0.402912    | 0.338445    | 0.252863    |
| 1.00000e+06 | 0.502175    | 0.411605    | 0.308774    | 0.203720    | 0.118965    |
| 100000.     | 0.378684    | 0.226355    | 0.112283    | 0.0512526   | 0.0241881   |
| 10000.0     | 0.112209    | 0.0369877   | 0.0112304   | 0.00405342  | 0.00203164  |
| 1000.00     | 0.00531374  | 0.00116643  | 0.000387531 | 0.000239207 | 0.000215738 |
| 100.000     | 0.000111502 | 8.05209e-05 | 6.23332e-05 | 4.89001e-05 | 4.01903e-05 |
| 10.0000     | 3.96814e-05 | 2.62701e-05 | 1.47987e-05 | 8.21169e-06 | 4.84290e-06 |
| 1.00000     | 1.24044e-05 | 5.13560e-06 | 1.85305e-06 | 7.11734e-07 | 3.09407e-07 |
| 0.100000    | 1.73543e-06 | 4.26517e-07 | 1.01732e-07 | 2.89494e-08 | 1.02787e-08 |
| 0.0100000   | 6.90180e-08 | 1.12797e-08 | 2.05717e-09 | 5.12291e-10 | 1.99643e-10 |
| 0.00100000  | 5.98093e-10 | 9.09240e-11 | 1.78030e-11 | 5.59248e-12 | 5.23891e-12 |
| 0.000100000 | 2.99928e-12 | 7.48417e-13 | 2.47804e-13 | 1.42986e-13 | 3.50717e-13 |
| 1.00000e-05 | 3.39160e-14 | 1.92878e-14 | 9.92018e-15 | 9.29450e-15 | 3.26447e-14 |
| 1.00000e-06 | 8.22050e-16 | 6.92287e-16 | 4.70022e-16 | 7.52357e-16 | 3.20002e-15 |
| 1.00000e-07 | 2.08034e-17 | 1.91958e-17 | 2.34163e-17 | 6.75747e-17 | 3.17718e-16 |
| 1.00000e-08 | 9.90536e-19 | 1.03253e-18 | 1.92784e-18 | 6.61801e-18 | 3.17260e-17 |
| 1.00000e-09 | 8.49054e-20 | 9.51619e-20 | 1.89099e-19 | 6.60268e-19 | 3.17180e-18 |

| Pa\K        | 1000.00     | 1100.00     | 1200.00     | 1300.00     | 1400.00     |
|-------------|-------------|-------------|-------------|-------------|-------------|
| 1.00000e+08 | 0.258945    | 0.199468    | 0.169139    | 0.164973    | 0.175172    |
| 1.00000e+07 | 0.174585    | 0.131169    | 0.111028    | 0.0993053   | 0.0926863   |
| 1.00000e+06 | 0.0743746   | 0.0579158   | 0.0533242   | 0.0488685   | 0.0411424   |
| 100000.     | 0.0152298   | 0.0136646   | 0.0145842   | 0.0140084   | 0.0110217   |
| 10000.0     | 0.00172363  | 0.00211762  | 0.00268401  | 0.00267115  | 0.00203004  |
| 1000.00     | 0.000254138 | 0.000339577 | 0.000420611 | 0.000404030 | 0.000297881 |
| 100.000     | 3.84147e-05 | 4.26380e-05 | 4.80590e-05 | 4.52321e-05 | 3.34147e-05 |
| 10.0000     | 3.53350e-06 | 3.41576e-06 | 3.91857e-06 | 3.96819e-06 | 3.10552e-06 |
| 1.00000     | 1.88419e-07 | 1.94826e-07 | 2.78184e-07 | 3.28710e-07 | 2.78795e-07 |
| 0.100000    | 6.74492e-09 | 1.09422e-08 | 2.16188e-08 | 2.90690e-08 | 2.60285e-08 |
| 0.0100000   | 2.67533e-10 | 8.05361e-10 | 1.92385e-09 | 2.74180e-09 | 2.51621e-09 |
| 0.00100000  | 1.85255e-11 | 7.24116e-11 | 1.83419e-10 | 2.66923e-10 | 2.47538e-10 |
| 0.000100000 | 1.69360e-12 | 6.99617e-12 | 1.80137e-11 | 2.64103e-11 | 2.45930e-11 |
| 1.00000e-05 | 1.66848e-13 | 6.95619e-13 | 1.79604e-12 | 2.63646e-12 | 2.45668e-12 |
| 1.00000e-06 | 1.66395e-14 | 6.95047e-14 | 1.79534e-13 | 2.63586e-13 | 2.45631e-13 |
| 1.00000e-07 | 1.66280e-15 | 6.94935e-15 | 1.79521e-14 | 2.63576e-14 | 2.45624e-14 |
| 1.00000e-08 | 1.66252e-16 | 6.94904e-16 | 1.79518e-15 | 2.63573e-15 | 2.45621e-15 |
| 1.00000e-09 | 1.66244e-17 | 6.94891e-17 | 1.79517e-16 | 2.63571e-16 | 2.45620e-16 |

| Pa\K        | 1500.00     | 1750.00     | 2000.00     | 2250.00     | 2500.00     |
|-------------|-------------|-------------|-------------|-------------|-------------|
| 1.00000e+08 | 0.179390    | 0.0225128   | 0.0171982   | 0.0139421   | 0.0110059   |
| 1.00000e+07 | 0.0880483   | 0.0138872   | 0.00835291  | 0.00519071  | 0.00314340  |
| 1.00000e+06 | 0.0334222   | 0.00511130  | 0.00216840  | 0.00102406  | 0.000508320 |
| 100000.     | 0.00786327  | 0.00102701  | 0.000349634 | 0.000143624 | 6.37766e-05 |
| 10000.0     | 0.00135575  | 0.000163391 | 4.80777e-05 | 1.74125e-05 | 6.98915e-06 |
| 1000.00     | 0.000191853 | 2.19906e-05 | 5.66439e-06 | 1.86077e-06 | 7.06299e-07 |
| 100.000     | 2.14322e-05 | 2.45189e-06 | 5.90719e-07 | 1.86780e-07 | 6.97769e-08 |
| 10.0000     | 2.05768e-06 | 2.47225e-07 | 5.88913e-08 | 1.85037e-08 | 6.89910e-09 |
| 1.00000     | 1.92500e-07 | 2.43822e-08 | 5.83871e-09 | 1.83620e-09 | 6.84861e-10 |
| 0.100000    | 1.84476e-08 | 2.41250e-09 | 5.80433e-10 | 1.82734e-10 | 6.81778e-11 |
| 0.0100000   | 1.80553e-09 | 2.39743e-10 | 5.78309e-11 | 1.82178e-11 | 6.79841e-12 |
| 0.00100000  | 1.78638e-10 | 2.39262e-11 | 5.77672e-12 | 1.82022e-12 | 6.79324e-13 |
| 0.000100000 | 1.77886e-11 | 2.39158e-12 | 5.77550e-13 | 1.81997e-13 | 6.79245e-14 |
| 1.00000e-05 | 1.77759e-12 | 2.39127e-13 | 5.77518e-14 | 1.81991e-14 | 6.79231e-15 |
| 1.00000e-06 | 1.77739e-13 | 2.39114e-14 | 5.77504e-15 | 1.81989e-15 | 6.79225e-16 |
| 1.00000e-07 | 1.77735e-14 | 2.39109e-15 | 5.77501e-16 | 1.81988e-16 | 6.79222e-17 |
| 1.00000e-08 | 1.77733e-15 | 2.39105e-16 | 5.77497e-17 | 1.81987e-17 | 6.79219e-18 |
| 1.00000e-09 | 1.77732e-16 | 2.39103e-17 | 5.77494e-18 | 1.81987e-18 | 6.79219e-19 |

| Pa\K        | 2750.00     | 3000.00     | 3250.00     | 3500.00     | 3750.00     |
|-------------|-------------|-------------|-------------|-------------|-------------|
| 1.00000e+08 | 0.00841684  | 0.00627963  | 0.00461794  | 0.00337972  | 0.00248031  |
| 1.00000e+07 | 0.00189145  | 0.00115132  | 0.000716320 | 0.000457764 | 0.000301074 |
| 1.00000e+06 | 0.000263843 | 0.000143096 | 8.12095e-05 | 4.82974e-05 | 3.00957e-05 |
| 100000.     | 3.00600e-05 | 1.51072e-05 | 8.12686e-06 | 4.67198e-06 | 2.85410e-06 |
| 10000.0     | 3.07761e-06 | 1.48774e-06 | 7.84911e-07 | 4.47350e-07 | 2.72381e-07 |
| 1000.00     | 3.03001e-07 | 1.44975e-07 | 7.62337e-08 | 4.34217e-08 | 2.64465e-08 |
| 100.000     | 2.97812e-08 | 1.42332e-08 | 7.48528e-09 | 4.26534e-09 | 2.59906e-09 |
| 10.0000     | 2.94398e-09 | 1.40736e-09 | 7.40376e-10 | 4.22014e-10 | 2.57217e-10 |
| 1.00000     | 2.92322e-10 | 1.39774e-10 | 7.35453e-11 | 4.19272e-11 | 2.55577e-11 |
| 0.100000    | 2.91052e-11 | 1.39184e-11 | 7.32409e-12 | 4.17564e-12 | 2.54551e-12 |
| 0.0100000   | 2.90259e-12 | 1.38816e-12 | 7.30520e-13 | 4.16513e-13 | 2.53924e-13 |
| 0.00100000  | 2.90055e-13 | 1.38724e-13 | 7.30064e-14 | 4.16267e-14 | 2.53779e-14 |
| 0.000100000 | 2.90026e-14 | 1.38711e-14 | 7.30001e-15 | 4.16234e-15 | 2.53761e-15 |
| 1.00000e-05 | 2.90018e-15 | 1.38709e-15 | 7.29990e-16 | 4.16227e-16 | 2.53758e-16 |
| 1.00000e-06 | 2.90018e-16 | 1.38708e-16 | 7.29988e-17 | 4.16225e-17 | 2.53756e-17 |
| 1.00000e-07 | 2.90016e-17 | 1.38707e-17 | 7.29985e-18 | 4.16225e-18 | 2.53756e-18 |
| 1.00000e-08 | 2.90016e-18 | 1.38707e-18 | 7.29985e-19 | 4.16225e-19 | 2.53756e-19 |
| 1.00000e-09 | 2.90016e-19 | 1.38707e-19 | 7.29985e-20 | 4.16225e-20 | 2.53756e-20 |

| Pa\K        | 4000.00     |
|-------------|-------------|
| 1.00000e+08 | 0.00183494  |
| 1.00000e+07 | 0.000203922 |
| 1.00000e+06 | 1.96084e-05 |
| 100000.     | 1.83949e-06 |
| 10000.0     | 1.75390e-07 |
| 1000.00     | 1.70389e-08 |
| 100.000     | 1.67521e-09 |
| 10.0000     | 1.65824e-10 |
| 1.00000     | 1.64784e-11 |
| 0.100000    | 1.64131e-12 |
| 0.0100000   | 1.63734e-13 |
| 0.00100000  | 1.63646e-14 |
| 0.000100000 | 1.63634e-15 |
| 1.00000e-05 | 1.63632e-16 |

1.00000e-06 | 1.63632e-17  
 1.00000e-07 | 1.63631e-18  
 1.00000e-08 | 1.63631e-19  
 1.00000e-09 | 1.63631e-20

Indene+H  
 =====

| Pa\K        | 20.0000     | 30.0000     | 40.0000     | 50.0000     | 60.0000     |
|-------------|-------------|-------------|-------------|-------------|-------------|
| 1.00000e+08 | 3.78122e-20 | 3.12376e-19 | 1.04447e-18 | 2.46764e-18 | 4.85203e-18 |
| 1.00000e+07 | 3.78962e-17 | 3.13776e-16 | 1.05144e-15 | 2.48944e-15 | 4.90540e-15 |
| 1.00000e+06 | 3.87314e-14 | 3.27595e-13 | 1.11979e-12 | 2.70196e-12 | 5.42247e-12 |
| 100000.     | 4.65740e-11 | 4.49533e-10 | 1.68838e-09 | 4.37175e-09 | 9.26311e-09 |
| 10000.0     | 9.13293e-08 | 8.82660e-07 | 3.01170e-06 | 6.93073e-06 | 1.29941e-05 |
| 1000.00     | 7.42004e-05 | 0.000330344 | 0.000677726 | 0.00107472  | 0.00150797  |
| 100.000     | 0.00373145  | 0.00877246  | 0.0136611   | 0.0181552   | 0.0221758   |
| 10.0000     | 0.0341841   | 0.0431749   | 0.0463773   | 0.0482592   | 0.0496507   |
| 1.00000     | 0.0525601   | 0.0556631   | 0.0570613   | 0.0579449   | 0.0586126   |
| 0.100000    | 0.0591132   | 0.0612983   | 0.0635372   | 0.0658938   | 0.0683643   |
| 0.0100000   | 0.0768278   | 0.0965771   | 0.115960    | 0.135551    | 0.155641    |
| 0.00100000  | 0.230896    | 0.367885    | 0.474477    | 0.560774    | 0.631945    |
| 0.000100000 | 0.807790    | 0.930103    | 0.963193    | 0.975263    | 0.980353    |
| 1.00000e-05 | 0.986742    | 0.987365    | 0.987155    | 0.986820    | 0.986416    |
| 1.00000e-06 | 0.987411    | 0.987280    | 0.987047    | 0.986726    | 0.986336    |
| 1.00000e-07 | 0.987369    | 0.987259    | 0.987033    | 0.986715    | 0.986328    |
| 1.00000e-08 | 0.987365    | 0.987257    | 0.987032    | 0.986714    | 0.986327    |
| 1.00000e-09 | 0.987364    | 0.987257    | 0.987032    | 0.986714    | 0.986327    |

| Pa\K        | 70.0000     | 80.0000     | 90.0000     | 100.000     | 110.000     |
|-------------|-------------|-------------|-------------|-------------|-------------|
| 1.00000e+08 | 8.51864e-18 | 1.38613e-17 | 2.13808e-17 | 3.17325e-17 | 4.57918e-17 |
| 1.00000e+07 | 8.63101e-15 | 1.40752e-14 | 2.17602e-14 | 3.23720e-14 | 4.68309e-14 |
| 1.00000e+06 | 9.71272e-12 | 1.61205e-11 | 2.53628e-11 | 3.84013e-11 | 5.65520e-11 |
| 100000.     | 1.73098e-08 | 2.96972e-08 | 4.79378e-08 | 7.40010e-08 | 1.10493e-07 |
| 10000.0     | 2.15001e-05 | 3.27235e-05 | 4.69472e-05 | 6.44897e-05 | 8.57256e-05 |
| 1000.00     | 0.00197299  | 0.00246864  | 0.00299560  | 0.00355584  | 0.00415232  |
| 100.000     | 0.0257060   | 0.0287608   | 0.0313733   | 0.0335862   | 0.0354460   |
| 10.0000     | 0.0507621   | 0.0516618   | 0.0523829   | 0.0529501   | 0.0533865   |
| 1.00000     | 0.0591475   | 0.0595770   | 0.0599191   | 0.0601943   | 0.0604261   |
| 0.100000    | 0.0709458   | 0.0736573   | 0.0765427   | 0.0796657   | 0.0831035   |
| 0.0100000   | 0.176438    | 0.198153    | 0.221003    | 0.245176    | 0.270808    |
| 0.00100000  | 0.691169    | 0.740678    | 0.782133    | 0.816795    | 0.845647    |
| 0.000100000 | 0.982609    | 0.983539    | 0.983762    | 0.983546    | 0.982996    |
| 1.00000e-05 | 0.985955    | 0.985431    | 0.984832    | 0.984132    | 0.983289    |
| 1.00000e-06 | 0.985886    | 0.985371    | 0.984779    | 0.984085    | 0.983246    |
| 1.00000e-07 | 0.985879    | 0.985364    | 0.984774    | 0.984080    | 0.983242    |
| 1.00000e-08 | 0.985878    | 0.985364    | 0.984773    | 0.984079    | 0.983241    |
| 1.00000e-09 | 0.985878    | 0.985364    | 0.984773    | 0.984079    | 0.983241    |

| Pa\K        | 120.000     | 130.000     | 140.000     | 150.000     | 160.000     |
|-------------|-------------|-------------|-------------|-------------|-------------|
| 1.00000e+08 | 6.47445e-17 | 9.02146e-17 | 1.24446e-16 | 1.70562e-16 | 2.32944e-16 |
| 1.00000e+07 | 6.63886e-14 | 9.27671e-14 | 1.28358e-13 | 1.76509e-13 | 2.41945e-13 |
| 1.00000e+06 | 8.16405e-11 | 1.16230e-10 | 1.63952e-10 | 2.30007e-10 | 3.21883e-10 |
| 100000.     | 1.60898e-07 | 2.29913e-07 | 3.23893e-07 | 4.51473e-07 | 6.24381e-07 |
| 10000.0     | 0.000111103 | 0.000141160 | 0.000176534 | 0.000217983 | 0.000266401 |
| 1000.00     | 0.00478865  | 0.00546891  | 0.00619735  | 0.00697811  | 0.00781504  |
| 100.000     | 0.0369993   | 0.0382899   | 0.0393589   | 0.0402426   | 0.0409737   |
| 10.0000     | 0.0537136   | 0.0539518   | 0.0541189   | 0.0542309   | 0.0543022   |
| 1.00000     | 0.0606397   | 0.0608611   | 0.0611160   | 0.0614299   | 0.0618291   |
| 0.100000    | 0.0869426   | 0.0912762   | 0.0962036   | 0.101832    | 0.108271    |
| 0.0100000   | 0.297964    | 0.326619    | 0.356664    | 0.387904    | 0.420072    |
| 0.00100000  | 0.869473    | 0.888917    | 0.904525    | 0.916768    | 0.926059    |
| 0.000100000 | 0.982136    | 0.980946    | 0.979384    | 0.977408    | 0.974978    |
| 1.00000e-05 | 0.982248    | 0.980945    | 0.979312    | 0.977294    | 0.974840    |
| 1.00000e-06 | 0.982209    | 0.980909    | 0.979280    | 0.977264    | 0.974813    |
| 1.00000e-07 | 0.982205    | 0.980906    | 0.979277    | 0.977261    | 0.974811    |
| 1.00000e-08 | 0.982205    | 0.980906    | 0.979277    | 0.977261    | 0.974810    |
| 1.00000e-09 | 0.982205    | 0.980906    | 0.979277    | 0.977261    | 0.974810    |

| Pa\K        | 170.000     | 180.000     | 190.000     | 200.000     | 210.000     |
|-------------|-------------|-------------|-------------|-------------|-------------|
| 1.00000e+08 | 3.17772e-16 | 4.33813e-16 | 5.93564e-16 | 8.14913e-16 | 1.12357e-15 |
| 1.00000e+07 | 3.31376e-13 | 4.54394e-13 | 6.24782e-13 | 8.62458e-13 | 1.19632e-12 |
| 1.00000e+06 | 4.50455e-10 | 6.31598e-10 | 8.88597e-10 | 1.25574e-09 | 1.78364e-09 |
| 100000.     | 8.58547e-07 | 1.17554e-06 | 1.60450e-06 | 2.18450e-06 | 2.96771e-06 |
| 10000.0     | 0.000322831 | 0.000388491 | 0.000464794 | 0.000553367 | 0.000656081 |
| 1000.00     | 0.00871133  | 0.00966931  | 0.0106901   | 0.0117734   | 0.0129175   |
| 100.000     | 0.0415811   | 0.0420899   | 0.0425224   | 0.0428979   | 0.0432328   |
| 10.0000     | 0.0543454   | 0.0543726   | 0.0543949   | 0.0544227   | 0.0544669   |

|             |           |           |           |           |           |
|-------------|-----------|-----------|-----------|-----------|-----------|
| 1.00000     | 0.0623415 | 0.0629967 | 0.0638278 | 0.0648716 | 0.0661693 |
| 0.100000    | 0.115643  | 0.124071  | 0.133679  | 0.144588  | 0.156911  |
| 0.0100000   | 0.452834  | 0.485814  | 0.518607  | 0.550802  | 0.582000  |
| 0.00100000  | 0.932767  | 0.937223  | 0.939720  | 0.940526  | 0.939880  |
| 0.000100000 | 0.972068  | 0.968665  | 0.964771  | 0.960399  | 0.955573  |
| 1.00000e-05 | 0.971917  | 0.968509  | 0.964615  | 0.960247  | 0.955427  |
| 1.00000e-06 | 0.971893  | 0.968487  | 0.964595  | 0.960228  | 0.955409  |
| 1.00000e-07 | 0.971890  | 0.968484  | 0.964592  | 0.960226  | 0.955407  |
| 1.00000e-08 | 0.971890  | 0.968484  | 0.964592  | 0.960226  | 0.955407  |
| 1.00000e-09 | 0.971890  | 0.968484  | 0.964592  | 0.960226  | 0.955407  |

Pa\K | 220.000 230.000 240.000 250.000 260.000

|             |             |             |             |             |             |
|-------------|-------------|-------------|-------------|-------------|-------------|
| 1.00000e+08 | 1.55661e-15 | 2.16762e-15 | 3.03431e-15 | 4.26948e-15 | 6.03711e-15 |
| 1.00000e+07 | 1.66850e-12 | 2.34061e-12 | 3.30308e-12 | 4.68897e-12 | 6.69433e-12 |
| 1.00000e+06 | 2.54719e-09 | 3.65719e-09 | 5.27764e-09 | 7.65065e-09 | 1.11329e-08 |
| 100000.     | 4.02324e-06 | 5.44186e-06 | 7.34171e-06 | 9.87511e-06 | 1.32362e-05 |
| 10000.0     | 0.000775073 | 0.000912770 | 0.00107191  | 0.00125553  | 0.00146703  |
| 1000.00     | 0.0141185   | 0.0153716   | 0.0166697   | 0.0180048   | 0.0193678   |
| 100.000     | 0.0435417   | 0.0438367   | 0.0441281   | 0.0444246   | 0.0447334   |
| 10.0000     | 0.0545377   | 0.0546461   | 0.0548034   | 0.0550216   | 0.0553140   |
| 1.00000     | 0.0677679   | 0.0697200   | 0.0720849   | 0.0749284   | 0.0783229   |
| 0.100000    | 0.170743    | 0.186156    | 0.203183    | 0.221825    | 0.242033    |
| 0.0100000   | 0.611830    | 0.639969    | 0.666145    | 0.690151    | 0.711839    |
| 0.00100000  | 0.937988    | 0.935040    | 0.931198    | 0.926605    | 0.921381    |
| 0.000100000 | 0.950324    | 0.944686    | 0.938699    | 0.932401    | 0.925829    |
| 1.00000e-05 | 0.950184    | 0.944555    | 0.938576    | 0.932286    | 0.925722    |
| 1.00000e-06 | 0.950168    | 0.944540    | 0.938562    | 0.932274    | 0.925711    |
| 1.00000e-07 | 0.950166    | 0.944538    | 0.938561    | 0.932273    | 0.925710    |
| 1.00000e-08 | 0.950166    | 0.944538    | 0.938561    | 0.932272    | 0.925710    |
| 1.00000e-09 | 0.950166    | 0.944538    | 0.938561    | 0.932272    | 0.925710    |

Pa\K | 270.000 280.000 290.000 300.000 400.000

|             |             |             |             |             |             |
|-------------|-------------|-------------|-------------|-------------|-------------|
| 1.00000e+08 | 8.57543e-15 | 1.22299e-14 | 1.74996e-14 | 2.72304e-13 | 1.09508e-11 |
| 1.00000e+07 | 9.60815e-12 | 1.38559e-11 | 2.00612e-11 | 3.61075e-10 | 1.57392e-08 |
| 1.00000e+06 | 1.62469e-08 | 2.37542e-08 | 3.47536e-08 | 5.32876e-07 | 1.16516e-05 |
| 100000.     | 1.76701e-05 | 2.34818e-05 | 3.10471e-05 | 0.000166772 | 0.00107967  |
| 10000.0     | 0.00171008  | 0.00198866  | 0.00230694  | 0.00520076  | 0.0135043   |
| 1000.00     | 0.0207487   | 0.0221375   | 0.0235242   | 0.0296157   | 0.0370320   |
| 100.000     | 0.0450602   | 0.0454099   | 0.0457863   | 0.0464543   | 0.0511134   |
| 10.0000     | 0.0556949   | 0.0561805   | 0.0567891   | 0.0599287   | 0.0913151   |
| 1.00000     | 0.0823460   | 0.0870805   | 0.0926110   | 0.128482    | 0.276351    |
| 0.100000    | 0.263710    | 0.286712    | 0.310848    | 0.425342    | 0.620594    |
| 0.0100000   | 0.731128    | 0.747991    | 0.762453    | 0.809702    | 0.790689    |
| 0.00100000  | 0.915634    | 0.909453    | 0.902916    | 0.890225    | 0.805042    |
| 0.000100000 | 0.919019    | 0.912005    | 0.904815    | 0.891360    | 0.805013    |
| 1.00000e-05 | 0.918920    | 0.911913    | 0.904731    | 0.891307    | 0.804992    |
| 1.00000e-06 | 0.918910    | 0.911903    | 0.904721    | 0.891302    | 0.804989    |
| 1.00000e-07 | 0.918909    | 0.911902    | 0.904720    | 0.891301    | 0.804989    |
| 1.00000e-08 | 0.918909    | 0.911902    | 0.904720    | 0.891301    | 0.804989    |
| 1.00000e-09 | 0.918909    | 0.911902    | 0.904720    | 0.891301    | 0.804989    |

Pa\K | 500.000 600.000 700.000 800.000 900.000

|             |             |             |             |             |             |
|-------------|-------------|-------------|-------------|-------------|-------------|
| 1.00000e+08 | 1.02800e-09 | 9.60666e-08 | 2.65425e-06 | 4.50745e-05 | 0.000409863 |
| 1.00000e+07 | 9.16068e-07 | 2.24426e-05 | 0.000205602 | 0.00108107  | 0.00351407  |
| 1.00000e+06 | 0.000165916 | 0.00123103  | 0.00449470  | 0.00987877  | 0.0156909   |
| 100000.     | 0.00467709  | 0.0128162   | 0.0223030   | 0.0289238   | 0.0340834   |
| 10000.0     | 0.0249588   | 0.0348984   | 0.0418675   | 0.0502610   | 0.0664067   |
| 1000.00     | 0.0431396   | 0.0529753   | 0.0755861   | 0.113079    | 0.156293    |
| 100.000     | 0.0687566   | 0.117515    | 0.193888    | 0.256407    | 0.281242    |
| 10.0000     | 0.182117    | 0.306064    | 0.383688    | 0.387589    | 0.349763    |
| 1.00000     | 0.448408    | 0.520700    | 0.496428    | 0.432889    | 0.364522    |
| 0.100000    | 0.660760    | 0.603030    | 0.519890    | 0.438600    | 0.365684    |
| 0.0100000   | 0.707034    | 0.612140    | 0.521300    | 0.438768    | 0.365682    |
| 0.00100000  | 0.708779    | 0.612243    | 0.521273    | 0.438751    | 0.365675    |
| 0.000100000 | 0.708724    | 0.612222    | 0.521266    | 0.438749    | 0.365674    |
| 1.00000e-05 | 0.708717    | 0.612219    | 0.521265    | 0.438748    | 0.365674    |
| 1.00000e-06 | 0.708716    | 0.612219    | 0.521265    | 0.438748    | 0.365674    |
| 1.00000e-07 | 0.708716    | 0.612219    | 0.521265    | 0.438748    | 0.365674    |
| 1.00000e-08 | 0.708716    | 0.612219    | 0.521265    | 0.438748    | 0.365674    |
| 1.00000e-09 | 0.708716    | 0.612219    | 0.521265    | 0.438748    | 0.365674    |

Pa\K | 1000.00 1100.00 1200.00 1300.00 1400.00

|             |            |            |            |            |            |
|-------------|------------|------------|------------|------------|------------|
| 1.00000e+08 | 0.00132745 | 0.00185580 | 0.00187876 | 0.00172664 | 0.00147181 |
| 1.00000e+07 | 0.00633523 | 0.00779138 | 0.00832476 | 0.00887052 | 0.00920793 |
| 1.00000e+06 | 0.0197049  | 0.0228024  | 0.0261591  | 0.0287415  | 0.0291096  |
| 100000.     | 0.0407794  | 0.0507303  | 0.0604137  | 0.0637796  | 0.0601916  |

|             |           |          |          |          |           |
|-------------|-----------|----------|----------|----------|-----------|
| 10000.0     | 0.0889853 | 0.109024 | 0.116671 | 0.110177 | 0.0961869 |
| 1000.00     | 0.184249  | 0.187577 | 0.171356 | 0.146391 | 0.121018  |
| 100.000     | 0.267761  | 0.234237 | 0.195778 | 0.160022 | 0.129542  |
| 10.0000     | 0.297502  | 0.246088 | 0.200720 | 0.162466 | 0.130986  |
| 1.00000     | 0.301833  | 0.247354 | 0.201150 | 0.162661 | 0.131101  |
| 0.100000    | 0.302041  | 0.247386 | 0.201154 | 0.162663 | 0.131103  |
| 0.0100000   | 0.302030  | 0.247379 | 0.201152 | 0.162662 | 0.131102  |
| 0.00100000  | 0.302027  | 0.247379 | 0.201151 | 0.162661 | 0.131102  |
| 0.000100000 | 0.302027  | 0.247379 | 0.201151 | 0.162661 | 0.131102  |
| 1.00000e-05 | 0.302027  | 0.247379 | 0.201151 | 0.162661 | 0.131102  |
| 1.00000e-06 | 0.302027  | 0.247379 | 0.201151 | 0.162661 | 0.131102  |
| 1.00000e-07 | 0.302027  | 0.247379 | 0.201151 | 0.162661 | 0.131102  |
| 1.00000e-08 | 0.302027  | 0.247379 | 0.201151 | 0.162661 | 0.131102  |
| 1.00000e-09 | 0.302027  | 0.247379 | 0.201151 | 0.162661 | 0.131102  |

Pa\K | 1500.00 1750.00 2000.00 2250.00 2500.00

|             |            |            |            |            |            |
|-------------|------------|------------|------------|------------|------------|
| 1.00000e+08 | 0.00119760 | 0.00179372 | 0.00182517 | 0.00184413 | 0.00184684 |
| 1.00000e+07 | 0.00891987 | 0.00449474 | 0.00462493 | 0.00453705 | 0.00422957 |
| 1.00000e+06 | 0.0276339  | 0.0124400  | 0.0108697  | 0.00928681 | 0.00776959 |
| 100000.     | 0.0534032  | 0.0261346  | 0.0202227  | 0.0154566  | 0.0115111  |
| 10000.0     | 0.0810499  | 0.0425388  | 0.0287402  | 0.0193721  | 0.0131509  |
| 1000.00     | 0.0987962  | 0.0515239  | 0.0319241  | 0.0203629  | 0.0134460  |
| 100.000     | 0.104547   | 0.0539072  | 0.0325420  | 0.0205056  | 0.0134793  |
| 10.0000     | 0.105492   | 0.0542737  | 0.0326204  | 0.0205207  | 0.0134822  |
| 1.00000     | 0.105568   | 0.0543101  | 0.0326278  | 0.0205220  | 0.0134824  |
| 0.100000    | 0.105570   | 0.0543126  | 0.0326284  | 0.0205220  | 0.0134824  |
| 0.0100000   | 0.105570   | 0.0543127  | 0.0326284  | 0.0205221  | 0.0134824  |
| 0.00100000  | 0.105570   | 0.0543127  | 0.0326284  | 0.0205221  | 0.0134824  |
| 0.000100000 | 0.105570   | 0.0543127  | 0.0326284  | 0.0205221  | 0.0134824  |
| 1.00000e-05 | 0.105570   | 0.0543127  | 0.0326284  | 0.0205221  | 0.0134824  |
| 1.00000e-06 | 0.105570   | 0.0543127  | 0.0326284  | 0.0205221  | 0.0134824  |
| 1.00000e-07 | 0.105570   | 0.0543127  | 0.0326284  | 0.0205221  | 0.0134824  |
| 1.00000e-08 | 0.105570   | 0.0543127  | 0.0326284  | 0.0205221  | 0.0134824  |
| 1.00000e-09 | 0.105570   | 0.0543127  | 0.0326284  | 0.0205221  | 0.0134824  |

Pa\K | 2750.00 3000.00 3250.00 3500.00 3750.00

|             |            |            |            |            |            |
|-------------|------------|------------|------------|------------|------------|
| 1.00000e+08 | 0.00182493 | 0.00177258 | 0.00169401 | 0.00159725 | 0.00149000 |
| 1.00000e+07 | 0.00381968 | 0.00337995 | 0.00294867 | 0.00254684 | 0.00218625 |
| 1.00000e+06 | 0.00636294 | 0.00512432 | 0.00409140 | 0.00326482 | 0.00262014 |
| 100000.     | 0.00846070 | 0.00623615 | 0.00465801 | 0.00354437 | 0.00275288 |
| 10000.0     | 0.00911610 | 0.00649372 | 0.00475825 | 0.00358231 | 0.00276599 |
| 1000.00     | 0.00920537 | 0.00652150 | 0.00476683 | 0.00358465 | 0.00276628 |
| 100.000     | 0.00921361 | 0.00652360 | 0.00476730 | 0.00358465 | 0.00276618 |
| 10.0000     | 0.00921422 | 0.00652370 | 0.00476730 | 0.00358463 | 0.00276616 |
| 1.00000     | 0.00921427 | 0.00652370 | 0.00476729 | 0.00358462 | 0.00276616 |
| 0.100000    | 0.00921427 | 0.00652370 | 0.00476729 | 0.00358462 | 0.00276616 |
| 0.0100000   | 0.00921427 | 0.00652370 | 0.00476729 | 0.00358462 | 0.00276616 |
| 0.00100000  | 0.00921427 | 0.00652370 | 0.00476729 | 0.00358462 | 0.00276616 |
| 0.000100000 | 0.00921427 | 0.00652370 | 0.00476729 | 0.00358462 | 0.00276616 |
| 1.00000e-05 | 0.00921427 | 0.00652370 | 0.00476729 | 0.00358462 | 0.00276616 |
| 1.00000e-06 | 0.00921427 | 0.00652370 | 0.00476729 | 0.00358462 | 0.00276616 |
| 1.00000e-07 | 0.00921427 | 0.00652370 | 0.00476729 | 0.00358462 | 0.00276616 |
| 1.00000e-08 | 0.00921427 | 0.00652370 | 0.00476729 | 0.00358462 | 0.00276616 |
| 1.00000e-09 | 0.00921427 | 0.00652370 | 0.00476729 | 0.00358462 | 0.00276616 |

Pa\K | 4000.00

|             |            |
|-------------|------------|
| 1.00000e+08 | 0.00137848 |
| 1.00000e+07 | 0.00187228 |
| 1.00000e+06 | 0.00212384 |
| 100000.     | 0.00218297 |
| 10000.0     | 0.00218624 |
| 1000.00     | 0.00218589 |
| 100.000     | 0.00218578 |
| 10.0000     | 0.00218576 |
| 1.00000     | 0.00218576 |
| 0.100000    | 0.00218576 |
| 0.0100000   | 0.00218576 |
| 0.00100000  | 0.00218576 |
| 0.000100000 | 0.00218576 |
| 1.00000e-05 | 0.00218576 |
| 1.00000e-06 | 0.00218576 |
| 1.00000e-07 | 0.00218576 |
| 1.00000e-08 | 0.00218576 |
| 1.00000e-09 | 0.00218576 |

rad6

====

| Pa\K        | 20.0000     | 30.0000     | 40.0000     | 50.0000     | 60.0000     |
|-------------|-------------|-------------|-------------|-------------|-------------|
| 1.00000e+08 | 2.35504e-07 | 2.44237e-06 | 5.69336e-05 | 0.000418605 | 0.00158474  |
| 1.00000e+07 | 2.32234e-06 | 6.66196e-06 | 6.32505e-05 | 0.000427030 | 0.00159530  |
| 1.00000e+06 | 2.31802e-05 | 4.88504e-05 | 0.000126412 | 0.000511272 | 0.00170095  |
| 100000.     | 0.000231726 | 0.000470607 | 0.000757746 | 0.00135318  | 0.00275659  |
| 10000.0     | 0.00231408  | 0.00467547  | 0.00704261  | 0.00972161  | 0.0132331   |
| 1000.00     | 0.0228310   | 0.0454859   | 0.0671485   | 0.0885796   | 0.110483    |
| 100.000     | 0.200678    | 0.354558    | 0.469500    | 0.558648    | 0.629403    |
| 10.0000     | 0.812327    | 0.911838    | 0.932376    | 0.938231    | 0.940156    |
| 1.00000     | 0.942283    | 0.941839    | 0.941351    | 0.940842    | 0.940337    |
| 0.100000    | 0.940047    | 0.937769    | 0.935420    | 0.932956    | 0.930380    |
| 0.0100000   | 0.921709    | 0.901618    | 0.881983    | 0.862149    | 0.841803    |
| 0.00100000  | 0.765993    | 0.627757    | 0.520115    | 0.432850    | 0.360744    |
| 0.000100000 | 0.183596    | 0.0594558   | 0.0254360   | 0.0126713   | 0.00695857  |
| 1.00000e-05 | 0.00110197  | 0.000127518 | 3.54903e-05 | 1.40714e-05 | 6.75204e-06 |
| 1.00000e-06 | 8.94521e-07 | 1.09243e-07 | 3.36460e-08 | 1.46125e-08 | 7.58893e-09 |
| 1.00000e-07 | 1.34923e-09 | 2.24643e-10 | 8.26008e-11 | 4.06045e-11 | 2.31998e-11 |
| 1.00000e-08 | 5.63049e-12 | 1.26179e-12 | 5.46608e-13 | 3.00920e-13 | 1.87497e-13 |
| 1.00000e-09 | 6.07367e-14 | 1.79288e-14 | 9.04757e-15 | 5.53473e-15 | 3.73788e-15 |

| Pa\K        | 70.0000     | 80.0000     | 90.0000     | 100.000     | 110.000     |
|-------------|-------------|-------------|-------------|-------------|-------------|
| 1.00000e+08 | 0.00408801  | 0.00828882  | 0.0143049   | 0.0220450   | 0.0312797   |
| 1.00000e+07 | 0.00410076  | 0.00830379  | 0.0143222   | 0.0220646   | 0.0313016   |
| 1.00000e+06 | 0.00422821  | 0.00845350  | 0.0144947   | 0.0222604   | 0.0315215   |
| 100000.     | 0.00550155  | 0.00994894  | 0.0162172   | 0.0242159   | 0.0337172   |
| 10000.0     | 0.0181183   | 0.0247415   | 0.0332259   | 0.0434886   | 0.0553131   |
| 1000.00     | 0.133437    | 0.157796    | 0.183667    | 0.210965    | 0.239478    |
| 100.000     | 0.686420    | 0.732847    | 0.770908    | 0.802217    | 0.827980    |
| 10.0000     | 0.940815    | 0.941038    | 0.941122    | 0.941159    | 0.941153    |
| 1.00000     | 0.939871    | 0.939459    | 0.939098    | 0.938754    | 0.938374    |
| 0.100000    | 0.927694    | 0.924873    | 0.921865    | 0.918579    | 0.914902    |
| 0.0100000   | 0.820725    | 0.798689    | 0.775461    | 0.750819    | 0.724577    |
| 0.00100000  | 0.300595    | 0.250145    | 0.207710    | 0.171996    | 0.141976    |
| 0.000100000 | 0.00409213  | 0.00253148  | 0.00162780  | 0.00107886  | 0.000732495 |
| 1.00000e-05 | 3.65108e-06 | 2.14190e-06 | 1.33241e-06 | 8.65967e-07 | 5.82085e-07 |
| 1.00000e-06 | 4.39863e-09 | 2.74505e-09 | 1.80571e-09 | 1.23504e-09 | 8.70233e-10 |
| 1.00000e-07 | 1.45360e-11 | 9.69047e-12 | 6.75145e-12 | 4.85957e-12 | 3.58557e-12 |
| 1.00000e-08 | 1.26037e-13 | 8.91568e-14 | 6.53922e-14 | 4.92558e-14 | 3.78558e-14 |
| 1.00000e-09 | 2.68207e-15 | 2.00435e-15 | 1.54154e-15 | 1.21074e-15 | 9.66021e-16 |

| Pa\K        | 120.000     | 130.000     | 140.000     | 150.000     | 160.000     |
|-------------|-------------|-------------|-------------|-------------|-------------|
| 1.00000e+08 | 0.0417107   | 0.0530228   | 0.0649162   | 0.0771239   | 0.0894200   |
| 1.00000e+07 | 0.0417352   | 0.0530500   | 0.0649460   | 0.0771567   | 0.0894559   |
| 1.00000e+06 | 0.0419801   | 0.0533210   | 0.0652445   | 0.0774842   | 0.0898144   |
| 100000.     | 0.0444248   | 0.0560257   | 0.0682225   | 0.0807514   | 0.0933897   |
| 10000.0     | 0.0684175   | 0.0825057   | 0.0972994   | 0.112556    | 0.128077    |
| 1000.00     | 0.268939    | 0.299062    | 0.329570    | 0.360211    | 0.390758    |
| 100.000     | 0.849114    | 0.866340    | 0.880230    | 0.891253    | 0.899802    |
| 10.0000     | 0.941063    | 0.940825    | 0.940369    | 0.939628    | 0.938546    |
| 1.00000     | 0.937883    | 0.937195    | 0.936225    | 0.934888    | 0.933113    |
| 0.100000    | 0.910689    | 0.905784    | 0.900017    | 0.893221    | 0.885229    |
| 0.0100000   | 0.696609    | 0.666861    | 0.635368    | 0.602252    | 0.567725    |
| 0.00100000  | 0.116804    | 0.0957695   | 0.0782613   | 0.0637473   | 0.0517644   |
| 0.000100000 | 0.000507160 | 0.000356848 | 0.000254484 | 0.000183555 | 0.000133680 |
| 1.00000e-05 | 4.01774e-07 | 2.83283e-07 | 2.03238e-07 | 1.47923e-07 | 1.08970e-07 |
| 1.00000e-06 | 6.27624e-10 | 4.61137e-10 | 3.43964e-10 | 2.59774e-10 | 1.98240e-10 |
| 1.00000e-07 | 2.69712e-12 | 2.06018e-12 | 1.59330e-12 | 1.24488e-12 | 9.80942e-13 |
| 1.00000e-08 | 2.95513e-14 | 2.33542e-14 | 1.86401e-14 | 1.49978e-14 | 1.21479e-14 |
| 1.00000e-09 | 7.80108e-16 | 6.35934e-16 | 5.22282e-16 | 4.31521e-16 | 3.58276e-16 |

| Pa\K        | 170.000     | 180.000     | 190.000     | 200.000     | 210.000     |
|-------------|-------------|-------------|-------------|-------------|-------------|
| 1.00000e+08 | 0.101620    | 0.113580    | 0.125190    | 0.136371    | 0.147071    |
| 1.00000e+07 | 0.101660    | 0.113623    | 0.125236    | 0.136422    | 0.147127    |
| 1.00000e+06 | 0.102052    | 0.114051    | 0.125704    | 0.136932    | 0.147683    |
| 100000.     | 0.105957    | 0.118313    | 0.130351    | 0.142001    | 0.153213    |
| 10000.0     | 0.143704    | 0.159326    | 0.174865    | 0.190276    | 0.205544    |
| 1000.00     | 0.421009    | 0.450791    | 0.479943    | 0.508325    | 0.535809    |
| 100.000     | 0.906212    | 0.910774    | 0.913746    | 0.915354    | 0.915800    |
| 10.0000     | 0.937086    | 0.935225    | 0.932957    | 0.930291    | 0.927244    |
| 1.00000     | 0.930843    | 0.928033    | 0.924654    | 0.920681    | 0.916098    |
| 0.100000    | 0.875883    | 0.865035    | 0.852548    | 0.838300    | 0.822186    |
| 0.0100000   | 0.532078    | 0.495664    | 0.458883    | 0.422156    | 0.385906    |
| 0.00100000  | 0.0419110   | 0.0338394   | 0.0272515   | 0.0218931   | 0.0175486   |
| 0.000100000 | 9.81686e-05 | 7.26106e-05 | 5.40441e-05 | 4.04467e-05 | 3.04177e-05 |
| 1.00000e-05 | 8.10982e-08 | 6.08855e-08 | 4.60568e-08 | 3.50693e-08 | 2.68574e-08 |
| 1.00000e-06 | 1.52617e-10 | 1.18377e-10 | 9.24174e-11 | 7.25601e-11 | 5.72559e-11 |

|             |             |             |             |             |             |
|-------------|-------------|-------------|-------------|-------------|-------------|
| 1.00000e-07 | 7.78524e-13 | 6.21675e-13 | 4.99064e-13 | 4.02508e-13 | 3.25990e-13 |
| 1.00000e-08 | 9.89440e-15 | 8.09702e-15 | 6.65283e-15 | 5.48526e-15 | 4.53665e-15 |
| 1.00000e-09 | 2.98658e-16 | 2.49789e-16 | 2.09500e-16 | 1.76123e-16 | 1.48365e-16 |

| Pa\K        | 220.000     | 230.000     | 240.000     | 250.000     | 260.000     |
|-------------|-------------|-------------|-------------|-------------|-------------|
| 1.00000e+08 | 0.157256    | 0.166913    | 0.176036    | 0.184636    | 0.192726    |
| 1.00000e+07 | 0.157317    | 0.166979    | 0.176109    | 0.184715    | 0.192812    |
| 1.00000e+06 | 0.157924    | 0.167643    | 0.176836    | 0.185512    | 0.193688    |
| 100000.     | 0.163962    | 0.174239    | 0.184050    | 0.193410    | 0.202344    |
| 10000.0     | 0.220672    | 0.235681    | 0.250606    | 0.265489    | 0.280377    |
| 1000.00     | 0.562277    | 0.587619    | 0.611740    | 0.634553    | 0.655989    |
| 100.000     | 0.915266    | 0.913909    | 0.911871    | 0.909276    | 0.906230    |
| 10.0000     | 0.923842    | 0.920117    | 0.916099    | 0.911819    | 0.907306    |
| 1.00000     | 0.910887    | 0.905031    | 0.898503    | 0.891272    | 0.883294    |
| 0.100000    | 0.804125    | 0.784063    | 0.761979    | 0.737892    | 0.711867    |
| 0.0100000   | 0.350534    | 0.316407    | 0.283837    | 0.253082    | 0.224331    |
| 0.00100000  | 0.0140369   | 0.0112062   | 0.00893033  | 0.00710505  | 0.00564438  |
| 0.000100000 | 2.29744e-05 | 1.74197e-05 | 1.32539e-05 | 1.01164e-05 | 7.74393e-06 |
| 1.00000e-05 | 2.06738e-08 | 1.59869e-08 | 1.24137e-08 | 9.67576e-09 | 7.56823e-09 |
| 1.00000e-06 | 4.53835e-11 | 3.61216e-11 | 2.88610e-11 | 2.31457e-11 | 1.86310e-11 |
| 1.00000e-07 | 2.65031e-13 | 2.16250e-13 | 1.77072e-13 | 1.45518e-13 | 1.20053e-13 |
| 1.00000e-08 | 3.76232e-15 | 3.12819e-15 | 2.60720e-15 | 2.17822e-15 | 1.82411e-15 |
| 1.00000e-09 | 1.25200e-16 | 1.05816e-16 | 8.95683e-17 | 7.59068e-17 | 6.44098e-17 |

| Pa\K        | 270.000     | 280.000     | 290.000     | 300.000     | 400.000     |
|-------------|-------------|-------------|-------------|-------------|-------------|
| 1.00000e+08 | 0.200324    | 0.207457    | 0.214148    | 0.238977    | 0.301454    |
| 1.00000e+07 | 0.200421    | 0.207563    | 0.214265    | 0.239223    | 0.302115    |
| 1.00000e+06 | 0.201382    | 0.208621    | 0.215431    | 0.241667    | 0.308613    |
| 100000.     | 0.210882    | 0.219059    | 0.226911    | 0.264970    | 0.363739    |
| 10000.0     | 0.295319    | 0.310364    | 0.325553    | 0.428514    | 0.602112    |
| 1000.00     | 0.675990    | 0.694513    | 0.711537    | 0.799469    | 0.828400    |
| 100.000     | 0.902826    | 0.899141    | 0.895245    | 0.895376    | 0.845494    |
| 10.0000     | 0.902584    | 0.897671    | 0.892577    | 0.886531    | 0.799825    |
| 1.00000     | 0.874514    | 0.864870    | 0.854288    | 0.811388    | 0.585996    |
| 0.100000    | 0.684015    | 0.654496    | 0.623517    | 0.493267    | 0.202817    |
| 0.0100000   | 0.197713    | 0.173295    | 0.151090    | 0.0877402   | 0.0168562   |
| 0.00100000  | 0.00447789  | 0.00354810  | 0.00280828  | 0.00174143  | 0.000199289 |
| 0.000100000 | 5.94371e-06 | 4.57334e-06 | 3.52716e-06 | 6.92048e-06 | 8.07258e-07 |
| 1.00000e-05 | 5.93944e-09 | 4.67614e-09 | 3.69323e-09 | 3.17653e-08 | 4.76532e-09 |
| 1.00000e-06 | 1.50548e-11 | 1.22163e-11 | 9.96061e-12 | 2.80408e-10 | 5.58002e-11 |
| 1.00000e-07 | 9.94837e-14 | 8.28807e-14 | 6.95153e-14 | 4.75611e-12 | 1.05963e-12 |
| 1.00000e-08 | 1.53191e-15 | 1.29023e-15 | 1.09070e-15 | 1.44389e-13 | 3.18932e-14 |
| 1.00000e-09 | 5.47234e-17 | 4.65571e-17 | 3.96717e-17 | 6.49684e-15 | 1.51533e-15 |

| Pa\K        | 500.000     | 600.000     | 700.000     | 800.000     | 900.000     |
|-------------|-------------|-------------|-------------|-------------|-------------|
| 1.00000e+08 | 0.334894    | 0.352225    | 0.361144    | 0.367325    | 0.379352    |
| 1.00000e+07 | 0.336752    | 0.357366    | 0.374864    | 0.399703    | 0.436983    |
| 1.00000e+06 | 0.354079    | 0.398742    | 0.454602    | 0.510902    | 0.546208    |
| 100000.     | 0.464599    | 0.561503    | 0.623757    | 0.637915    | 0.615607    |
| 10000.0     | 0.704600    | 0.727949    | 0.704150    | 0.651537    | 0.564814    |
| 1000.00     | 0.797537    | 0.743460    | 0.658826    | 0.531882    | 0.371880    |
| 100.000     | 0.773640    | 0.650257    | 0.466809    | 0.280397    | 0.138869    |
| 10.0000     | 0.627981    | 0.389253    | 0.186691    | 0.0746241   | 0.0252587   |
| 1.00000     | 0.303189    | 0.113098    | 0.0332655   | 0.00886948  | 0.00214969  |
| 0.100000    | 0.0561047   | 0.0120168   | 0.00226777  | 0.000439744 | 8.44450e-05 |
| 0.0100000   | 0.00256006  | 0.000357412 | 5.09049e-05 | 8.52853e-06 | 1.54658e-06 |
| 0.00100000  | 2.30557e-05 | 2.97645e-06 | 4.51632e-07 | 8.61090e-08 | 1.86465e-08 |
| 0.000100000 | 1.16101e-07 | 2.44270e-08 | 5.98774e-09 | 1.41540e-09 | 3.46965e-10 |
| 1.00000e-05 | 1.29114e-09 | 6.12914e-10 | 2.15772e-10 | 5.35828e-11 | 1.23914e-11 |
| 1.00000e-06 | 2.92535e-11 | 2.02348e-11 | 7.73387e-12 | 1.94676e-12 | 4.56836e-13 |
| 1.00000e-07 | 5.25899e-13 | 3.41052e-13 | 1.29722e-13 | 3.61877e-14 | 1.20989e-14 |
| 1.00000e-08 | 9.89575e-15 | 4.25571e-15 | 1.65758e-15 | 6.92169e-16 | 4.84309e-16 |
| 1.00000e-09 | 4.31792e-16 | 1.55148e-16 | 6.61053e-17 | 3.65612e-17 | 3.42012e-17 |

| Pa\K        | 1000.00     | 1100.00     | 1200.00     | 1300.00     | 1400.00     |
|-------------|-------------|-------------|-------------|-------------|-------------|
| 1.00000e+08 | 0.397208    | 0.401245    | 0.389073    | 0.359469    | 0.322466    |
| 1.00000e+07 | 0.459387    | 0.446689    | 0.403512    | 0.338071    | 0.275831    |
| 1.00000e+06 | 0.540390    | 0.492826    | 0.404659    | 0.300458    | 0.222996    |
| 100000.     | 0.557738    | 0.458822    | 0.330539    | 0.216396    | 0.146848    |
| 10000.0     | 0.440748    | 0.299148    | 0.177254    | 0.100306    | 0.0621934   |
| 1000.00     | 0.222183    | 0.115107    | 0.0548992   | 0.0272153   | 0.0156811   |
| 100.000     | 0.0596055   | 0.0235099   | 0.00933260  | 0.00420650  | 0.00231674  |
| 10.0000     | 0.00794287  | 0.00250379  | 0.000875485 | 0.000377197 | 0.000207890 |
| 1.00000     | 0.000530327 | 0.000144509 | 4.82332e-05 | 2.14491e-05 | 1.27725e-05 |
| 0.100000    | 1.82762e-05 | 4.86455e-06 | 1.76136e-06 | 9.12406e-07 | 6.51327e-07 |
| 0.0100000   | 3.53795e-07 | 1.12182e-07 | 5.30731e-08 | 3.65132e-08 | 3.35526e-08 |

|             |             |             |             |             |             |
|-------------|-------------|-------------|-------------|-------------|-------------|
| 0.00100000  | 5.61895e-09 | 2.59223e-09 | 1.79958e-09 | 1.67508e-09 | 1.94031e-09 |
| 0.000100000 | 1.31276e-10 | 8.51984e-11 | 7.99356e-11 | 9.20369e-11 | 1.26575e-10 |
| 1.00000e-05 | 4.92087e-12 | 3.90322e-12 | 4.38600e-12 | 5.78802e-12 | 9.06977e-12 |
| 1.00000e-06 | 2.14442e-13 | 2.13199e-13 | 2.74640e-13 | 4.01487e-13 | 7.00684e-13 |
| 1.00000e-07 | 1.00856e-14 | 1.35072e-14 | 1.94055e-14 | 3.06889e-14 | 5.83197e-14 |
| 1.00000e-08 | 6.48756e-16 | 9.99868e-16 | 1.51612e-15 | 2.53514e-15 | 5.13973e-15 |
| 1.00000e-09 | 5.19967e-17 | 8.35537e-17 | 1.29846e-16 | 2.25082e-16 | 4.76256e-16 |

| Pa\K        | 1500.00     | 1750.00     | 2000.00     | 2250.00     | 2500.00     |
|-------------|-------------|-------------|-------------|-------------|-------------|
| 1.00000e+08 | 0.308020    | 0.176964    | 0.0978931   | 0.0718456   | 0.0630475   |
| 1.00000e+07 | 0.243753    | 0.145380    | 0.0737397   | 0.0473257   | 0.0361718   |
| 1.00000e+06 | 0.182111    | 0.113471    | 0.0508874   | 0.0258675   | 0.0149186   |
| 100000.     | 0.112486    | 0.0646398   | 0.0223496   | 0.00805457  | 0.00335268  |
| 10000.0     | 0.0446437   | 0.0219408   | 0.00551354  | 0.00143929  | 0.000467683 |
| 1000.00     | 0.0106524   | 0.00443225  | 0.000852742 | 0.000179159 | 5.09548e-05 |
| 100.000     | 0.00152647  | 0.000591444 | 9.82648e-05 | 1.87280e-05 | 5.08175e-06 |
| 10.0000     | 0.000139819 | 6.05339e-05 | 9.85245e-06 | 1.84665e-06 | 4.97298e-07 |
| 1.00000     | 9.50198e-06 | 5.53269e-06 | 9.49064e-07 | 1.80371e-07 | 4.87184e-08 |
| 0.100000    | 5.82207e-07 | 4.97757e-07 | 9.13563e-08 | 1.76746e-08 | 4.79317e-09 |
| 0.0100000   | 3.71544e-08 | 4.55362e-08 | 8.85747e-09 | 1.73955e-09 | 4.73336e-10 |
| 0.00100000  | 2.58988e-09 | 4.24684e-09 | 8.64564e-10 | 1.71812e-10 | 4.68735e-11 |
| 0.000100000 | 1.95824e-10 | 4.02547e-10 | 8.48548e-11 | 1.70178e-11 | 4.65223e-12 |
| 1.00000e-05 | 1.57960e-11 | 3.86574e-11 | 8.36564e-12 | 1.68948e-12 | 4.62579e-13 |
| 1.00000e-06 | 1.34289e-12 | 3.75135e-12 | 8.27745e-13 | 1.68040e-13 | 4.60631e-14 |
| 1.00000e-07 | 1.20017e-13 | 3.68078e-13 | 8.22199e-14 | 1.67466e-14 | 4.59395e-15 |
| 1.00000e-08 | 1.11287e-14 | 3.61033e-14 | 8.16523e-15 | 1.66875e-15 | 4.58120e-16 |
| 1.00000e-09 | 1.06447e-15 | 3.58139e-15 | 8.14302e-16 | 1.66654e-16 | 4.57667e-17 |

| Pa\K        | 2750.00     | 3000.00     | 3250.00     | 3500.00     | 3750.00     |
|-------------|-------------|-------------|-------------|-------------|-------------|
| 1.00000e+08 | 0.0567892   | 0.0505420   | 0.0440171   | 0.0374450   | 0.0311614   |
| 1.00000e+07 | 0.0276966   | 0.0204120   | 0.0144906   | 0.0100159   | 0.00682418  |
| 1.00000e+06 | 0.00857567  | 0.00482883  | 0.00270380  | 0.00153259  | 0.000891369 |
| 100000.     | 0.00147034  | 0.000671907 | 0.000323478 | 0.000165411 | 8.99878e-05 |
| 10000.0     | 0.000173540 | 7.15087e-05 | 3.24413e-05 | 1.60645e-05 | 8.59456e-06 |
| 1000.00     | 1.76260e-05 | 7.02249e-06 | 3.13800e-06 | 1.54362e-06 | 8.23415e-07 |
| 100.000     | 1.72451e-06 | 6.82097e-07 | 3.03959e-07 | 1.49351e-07 | 7.96218e-08 |
| 10.0000     | 1.68320e-07 | 6.65150e-08 | 2.96285e-08 | 1.45538e-08 | 7.75679e-09 |
| 1.00000     | 1.65015e-08 | 6.52162e-09 | 2.90473e-09 | 1.42660e-09 | 7.60190e-10 |
| 0.100000    | 1.62509e-09 | 6.42377e-10 | 2.86098e-10 | 1.40492e-10 | 7.48513e-11 |
| 0.0100000   | 1.60608e-10 | 6.34952e-11 | 2.82775e-11 | 1.38843e-11 | 7.39616e-12 |
| 0.00100000  | 1.59144e-11 | 6.29216e-12 | 2.80203e-12 | 1.37563e-12 | 7.32694e-13 |
| 0.000100000 | 1.58025e-12 | 6.24830e-13 | 2.78234e-13 | 1.36584e-13 | 7.27394e-14 |
| 1.00000e-05 | 1.57183e-13 | 6.21536e-14 | 2.76756e-14 | 1.35848e-14 | 7.23414e-15 |
| 1.00000e-06 | 1.56563e-14 | 6.19114e-15 | 2.75670e-15 | 1.35309e-15 | 7.20504e-16 |
| 1.00000e-07 | 1.56169e-15 | 6.17566e-16 | 2.74973e-16 | 1.34961e-16 | 7.18614e-17 |
| 1.00000e-08 | 1.55763e-16 | 6.15974e-17 | 2.74260e-17 | 1.34607e-17 | 7.16705e-18 |
| 1.00000e-09 | 1.55625e-17 | 6.15453e-18 | 2.74034e-18 | 1.34499e-18 | 7.16135e-19 |

| Pa\K        | 4000.00     |
|-------------|-------------|
| 1.00000e+08 | 0.0254535   |
| 1.00000e+07 | 0.00463508  |
| 1.00000e+06 | 0.000536294 |
| 100000.     | 5.19323e-05 |
| 10000.0     | 4.91766e-06 |
| 1000.00     | 4.70480e-07 |
| 100.000     | 4.54762e-08 |
| 10.0000     | 4.42914e-09 |
| 1.00000     | 4.33975e-10 |
| 0.100000    | 4.27229e-11 |
| 0.0100000   | 4.22083e-12 |
| 0.00100000  | 4.18068e-13 |
| 0.000100000 | 4.14994e-14 |
| 1.00000e-05 | 4.12687e-15 |
| 1.00000e-06 | 4.11002e-16 |
| 1.00000e-07 | 4.09903e-17 |
| 1.00000e-08 | 4.08798e-18 |
| 1.00000e-09 | 4.08478e-19 |

Benzene+2-propynyl

| Pa\K        | 20.0000     | 30.0000     | 40.0000     | 50.0000     | 60.0000     |
|-------------|-------------|-------------|-------------|-------------|-------------|
| 1.00000e+08 | 9.80165e-26 | 6.62139e-17 | 1.54712e-12 | 6.06773e-10 | 3.11432e-08 |
| 1.00000e+07 | 9.80165e-26 | 6.62139e-17 | 1.54712e-12 | 6.06773e-10 | 3.11432e-08 |
| 1.00000e+06 | 9.80165e-26 | 6.62139e-17 | 1.54712e-12 | 6.06773e-10 | 3.11432e-08 |
| 100000.     | 9.80165e-26 | 6.62139e-17 | 1.54712e-12 | 6.06773e-10 | 3.11432e-08 |
| 10000.0     | 9.80165e-26 | 6.62139e-17 | 1.54712e-12 | 6.06773e-10 | 3.11432e-08 |



|             |             |             |             |             |             |
|-------------|-------------|-------------|-------------|-------------|-------------|
| 1000.00     | 9.80165e-26 | 6.62139e-17 | 1.54712e-12 | 6.06773e-10 | 3.11432e-08 |
| 100.000     | 9.80165e-26 | 6.62139e-17 | 1.54712e-12 | 6.06773e-10 | 3.11432e-08 |
| 10.0000     | 9.80165e-26 | 6.62139e-17 | 1.54712e-12 | 6.06773e-10 | 3.11432e-08 |
| 1.00000     | 9.80165e-26 | 6.62139e-17 | 1.54712e-12 | 6.06773e-10 | 3.11432e-08 |
| 0.100000    | 9.80165e-26 | 6.62139e-17 | 1.54712e-12 | 6.06773e-10 | 3.11432e-08 |
| 0.0100000   | 9.80165e-26 | 6.62139e-17 | 1.54712e-12 | 6.06773e-10 | 3.11432e-08 |
| 0.00100000  | 9.80165e-26 | 6.62139e-17 | 1.54712e-12 | 6.06773e-10 | 3.11432e-08 |
| 0.000100000 | 9.80165e-26 | 6.62139e-17 | 1.54712e-12 | 6.06773e-10 | 3.11432e-08 |
| 1.00000e-05 | 9.80165e-26 | 6.62139e-17 | 1.54712e-12 | 6.06773e-10 | 3.11432e-08 |
| 1.00000e-06 | 9.80165e-26 | 6.62139e-17 | 1.54712e-12 | 6.06773e-10 | 3.11432e-08 |
| 1.00000e-07 | 9.80165e-26 | 6.62139e-17 | 1.54712e-12 | 6.06773e-10 | 3.11432e-08 |
| 1.00000e-08 | 9.80165e-26 | 6.62139e-17 | 1.54712e-12 | 6.06773e-10 | 3.11432e-08 |
| 1.00000e-09 | 9.80165e-26 | 6.62139e-17 | 1.54712e-12 | 6.06773e-10 | 3.11432e-08 |

| Pa\K        | 70.0000     | 80.0000     | 90.0000     | 100.000     | 110.000     |
|-------------|-------------|-------------|-------------|-------------|-------------|
| 1.00000e+08 | 5.02676e-07 | 3.94877e-06 | 1.92269e-05 | 6.70630e-05 | 0.000183695 |
| 1.00000e+07 | 5.02676e-07 | 3.94877e-06 | 1.92269e-05 | 6.70630e-05 | 0.000183695 |
| 1.00000e+06 | 5.02676e-07 | 3.94877e-06 | 1.92269e-05 | 6.70630e-05 | 0.000183695 |
| 100000.     | 5.02676e-07 | 3.94877e-06 | 1.92269e-05 | 6.70630e-05 | 0.000183695 |
| 10000.0     | 5.02676e-07 | 3.94877e-06 | 1.92269e-05 | 6.70630e-05 | 0.000183695 |
| 1000.00     | 5.02676e-07 | 3.94877e-06 | 1.92269e-05 | 6.70630e-05 | 0.000183695 |
| 100.000     | 5.02676e-07 | 3.94877e-06 | 1.92269e-05 | 6.70630e-05 | 0.000183695 |
| 10.0000     | 5.02676e-07 | 3.94877e-06 | 1.92269e-05 | 6.70630e-05 | 0.000183695 |
| 1.00000     | 5.02676e-07 | 3.94877e-06 | 1.92269e-05 | 6.70630e-05 | 0.000183695 |
| 0.100000    | 5.02676e-07 | 3.94877e-06 | 1.92269e-05 | 6.70630e-05 | 0.000183695 |
| 0.0100000   | 5.02676e-07 | 3.94877e-06 | 1.92269e-05 | 6.70630e-05 | 0.000183695 |
| 0.00100000  | 5.02676e-07 | 3.94877e-06 | 1.92269e-05 | 6.70630e-05 | 0.000183695 |
| 0.000100000 | 5.02676e-07 | 3.94877e-06 | 1.92269e-05 | 6.70630e-05 | 0.000183695 |
| 1.00000e-05 | 5.02676e-07 | 3.94877e-06 | 1.92269e-05 | 6.70630e-05 | 0.000183695 |
| 1.00000e-06 | 5.02676e-07 | 3.94877e-06 | 1.92269e-05 | 6.70630e-05 | 0.000183695 |
| 1.00000e-07 | 5.02676e-07 | 3.94877e-06 | 1.92269e-05 | 6.70630e-05 | 0.000183695 |
| 1.00000e-08 | 5.02676e-07 | 3.94877e-06 | 1.92269e-05 | 6.70630e-05 | 0.000183695 |
| 1.00000e-09 | 5.02676e-07 | 3.94877e-06 | 1.92269e-05 | 6.70630e-05 | 0.000183695 |

| Pa\K        | 120.000     | 130.000     | 140.000    | 150.000    | 160.000    |
|-------------|-------------|-------------|------------|------------|------------|
| 1.00000e+08 | 0.000420064 | 0.000836559 | 0.00149531 | 0.00245244 | 0.00375209 |
| 1.00000e+07 | 0.000420064 | 0.000836559 | 0.00149531 | 0.00245244 | 0.00375209 |
| 1.00000e+06 | 0.000420064 | 0.000836559 | 0.00149531 | 0.00245244 | 0.00375209 |
| 100000.     | 0.000420064 | 0.000836559 | 0.00149531 | 0.00245244 | 0.00375209 |
| 10000.0     | 0.000420064 | 0.000836559 | 0.00149531 | 0.00245244 | 0.00375209 |
| 1000.00     | 0.000420064 | 0.000836559 | 0.00149531 | 0.00245244 | 0.00375209 |
| 100.000     | 0.000420064 | 0.000836559 | 0.00149531 | 0.00245244 | 0.00375209 |
| 10.0000     | 0.000420064 | 0.000836559 | 0.00149531 | 0.00245244 | 0.00375209 |
| 1.00000     | 0.000420064 | 0.000836559 | 0.00149531 | 0.00245244 | 0.00375209 |
| 0.100000    | 0.000420064 | 0.000836559 | 0.00149531 | 0.00245244 | 0.00375209 |
| 0.0100000   | 0.000420064 | 0.000836559 | 0.00149531 | 0.00245244 | 0.00375209 |
| 0.00100000  | 0.000420064 | 0.000836559 | 0.00149531 | 0.00245245 | 0.00375210 |
| 0.000100000 | 0.000420064 | 0.000836560 | 0.00149531 | 0.00245245 | 0.00375210 |
| 1.00000e-05 | 0.000420064 | 0.000836560 | 0.00149531 | 0.00245245 | 0.00375210 |
| 1.00000e-06 | 0.000420064 | 0.000836560 | 0.00149531 | 0.00245245 | 0.00375210 |
| 1.00000e-07 | 0.000420064 | 0.000836560 | 0.00149531 | 0.00245245 | 0.00375210 |
| 1.00000e-08 | 0.000420064 | 0.000836560 | 0.00149531 | 0.00245245 | 0.00375210 |
| 1.00000e-09 | 0.000420064 | 0.000836560 | 0.00149531 | 0.00245245 | 0.00375210 |

| Pa\K        | 170.000    | 180.000    | 190.000    | 200.000   | 210.000   |
|-------------|------------|------------|------------|-----------|-----------|
| 1.00000e+08 | 0.00542285 | 0.00747672 | 0.00990995 | 0.0127053 | 0.0158346 |
| 1.00000e+07 | 0.00542285 | 0.00747672 | 0.00990995 | 0.0127053 | 0.0158346 |
| 1.00000e+06 | 0.00542285 | 0.00747672 | 0.00990995 | 0.0127053 | 0.0158346 |
| 100000.     | 0.00542285 | 0.00747672 | 0.00990995 | 0.0127053 | 0.0158346 |
| 10000.0     | 0.00542285 | 0.00747672 | 0.00990995 | 0.0127053 | 0.0158346 |
| 1000.00     | 0.00542285 | 0.00747672 | 0.00990995 | 0.0127053 | 0.0158346 |
| 100.000     | 0.00542285 | 0.00747672 | 0.00990996 | 0.0127053 | 0.0158346 |
| 10.0000     | 0.00542285 | 0.00747672 | 0.00990996 | 0.0127053 | 0.0158346 |
| 1.00000     | 0.00542285 | 0.00747672 | 0.00990996 | 0.0127053 | 0.0158346 |
| 0.100000    | 0.00542285 | 0.00747672 | 0.00990997 | 0.0127053 | 0.0158347 |
| 0.0100000   | 0.00542286 | 0.00747674 | 0.00991000 | 0.0127053 | 0.0158348 |
| 0.00100000  | 0.00542287 | 0.00747676 | 0.00991003 | 0.0127054 | 0.0158348 |
| 0.000100000 | 0.00542288 | 0.00747676 | 0.00991003 | 0.0127054 | 0.0158348 |
| 1.00000e-05 | 0.00542288 | 0.00747676 | 0.00991003 | 0.0127054 | 0.0158348 |
| 1.00000e-06 | 0.00542288 | 0.00747676 | 0.00991003 | 0.0127054 | 0.0158348 |
| 1.00000e-07 | 0.00542288 | 0.00747676 | 0.00991003 | 0.0127054 | 0.0158348 |
| 1.00000e-08 | 0.00542288 | 0.00747676 | 0.00991003 | 0.0127054 | 0.0158348 |
| 1.00000e-09 | 0.00542288 | 0.00747676 | 0.00991003 | 0.0127054 | 0.0158348 |

| Pa\K        | 220.000   | 230.000   | 240.000   | 250.000   | 260.000   |
|-------------|-----------|-----------|-----------|-----------|-----------|
| 1.00000e+08 | 0.0192623 | 0.0229478 | 0.0268483 | 0.0309205 | 0.0351226 |

|             |           |           |           |           |           |
|-------------|-----------|-----------|-----------|-----------|-----------|
| 1.00000e+07 | 0.0192623 | 0.0229478 | 0.0268483 | 0.0309205 | 0.0351226 |
| 1.00000e+06 | 0.0192623 | 0.0229478 | 0.0268483 | 0.0309205 | 0.0351226 |
| 100000.     | 0.0192623 | 0.0229478 | 0.0268483 | 0.0309205 | 0.0351226 |
| 10000.0     | 0.0192623 | 0.0229478 | 0.0268483 | 0.0309205 | 0.0351226 |
| 1000.00     | 0.0192623 | 0.0229478 | 0.0268483 | 0.0309205 | 0.0351226 |
| 100.000     | 0.0192623 | 0.0229478 | 0.0268483 | 0.0309205 | 0.0351226 |
| 10.0000     | 0.0192623 | 0.0229478 | 0.0268483 | 0.0309205 | 0.0351226 |
| 1.00000     | 0.0192623 | 0.0229479 | 0.0268483 | 0.0309206 | 0.0351227 |
| 0.100000    | 0.0192624 | 0.0229480 | 0.0268485 | 0.0309209 | 0.0351232 |
| 0.0100000   | 0.0192625 | 0.0229482 | 0.0268488 | 0.0309214 | 0.0351239 |
| 0.00100000  | 0.0192626 | 0.0229483 | 0.0268490 | 0.0309216 | 0.0351242 |
| 0.000100000 | 0.0192627 | 0.0229483 | 0.0268490 | 0.0309216 | 0.0351242 |
| 1.00000e-05 | 0.0192627 | 0.0229483 | 0.0268490 | 0.0309216 | 0.0351242 |
| 1.00000e-06 | 0.0192627 | 0.0229483 | 0.0268490 | 0.0309216 | 0.0351242 |
| 1.00000e-07 | 0.0192627 | 0.0229483 | 0.0268490 | 0.0309216 | 0.0351242 |
| 1.00000e-08 | 0.0192627 | 0.0229483 | 0.0268490 | 0.0309216 | 0.0351242 |
| 1.00000e-09 | 0.0192627 | 0.0229483 | 0.0268490 | 0.0309216 | 0.0351242 |

Pa\K | 270.000 280.000 290.000 300.000 400.000

|             |           |           |           |           |           |
|-------------|-----------|-----------|-----------|-----------|-----------|
| 1.00000e+08 | 0.0394150 | 0.0437616 | 0.0481294 | 0.0498949 | 0.0960368 |
| 1.00000e+07 | 0.0394150 | 0.0437616 | 0.0481294 | 0.0498949 | 0.0960368 |
| 1.00000e+06 | 0.0394150 | 0.0437616 | 0.0481294 | 0.0498949 | 0.0960369 |
| 100000.     | 0.0394150 | 0.0437616 | 0.0481294 | 0.0498949 | 0.0960374 |
| 10000.0     | 0.0394151 | 0.0437616 | 0.0481294 | 0.0498949 | 0.0960386 |
| 1000.00     | 0.0394151 | 0.0437617 | 0.0481295 | 0.0498950 | 0.0960394 |
| 100.000     | 0.0394151 | 0.0437617 | 0.0481296 | 0.0498951 | 0.0960412 |
| 10.0000     | 0.0394152 | 0.0437617 | 0.0481296 | 0.0498953 | 0.0960513 |
| 1.00000     | 0.0394153 | 0.0437620 | 0.0481300 | 0.0498964 | 0.0960752 |
| 0.100000    | 0.0394160 | 0.0437630 | 0.0481315 | 0.0498983 | 0.0960923 |
| 0.0100000   | 0.0394170 | 0.0437643 | 0.0481332 | 0.0498993 | 0.0960964 |
| 0.00100000  | 0.0394173 | 0.0437647 | 0.0481337 | 0.0498994 | 0.0960968 |
| 0.000100000 | 0.0394173 | 0.0437648 | 0.0481337 | 0.0498994 | 0.0960969 |
| 1.00000e-05 | 0.0394174 | 0.0437648 | 0.0481337 | 0.0498994 | 0.0960969 |
| 1.00000e-06 | 0.0394174 | 0.0437648 | 0.0481337 | 0.0498994 | 0.0960969 |
| 1.00000e-07 | 0.0394174 | 0.0437648 | 0.0481337 | 0.0498994 | 0.0960969 |
| 1.00000e-08 | 0.0394174 | 0.0437648 | 0.0481337 | 0.0498994 | 0.0960969 |
| 1.00000e-09 | 0.0394174 | 0.0437648 | 0.0481337 | 0.0498994 | 0.0960969 |

Pa\K | 500.000 600.000 700.000 800.000 900.000

|             |          |          |          |          |          |
|-------------|----------|----------|----------|----------|----------|
| 1.00000e+08 | 0.141326 | 0.182489 | 0.219031 | 0.251380 | 0.280692 |
| 1.00000e+07 | 0.141326 | 0.182492 | 0.219064 | 0.251609 | 0.281471 |
| 1.00000e+06 | 0.141328 | 0.182509 | 0.219166 | 0.251892 | 0.281696 |
| 100000.     | 0.141334 | 0.182547 | 0.219273 | 0.252120 | 0.282491 |
| 10000.0     | 0.141342 | 0.182577 | 0.219450 | 0.253135 | 0.286447 |
| 1000.00     | 0.141350 | 0.182686 | 0.220251 | 0.256242 | 0.293608 |
| 100.000     | 0.141394 | 0.183101 | 0.221953 | 0.259950 | 0.298574 |
| 10.0000     | 0.141527 | 0.183709 | 0.223242 | 0.261578 | 0.299940 |
| 1.00000     | 0.141663 | 0.184010 | 0.223606 | 0.261885 | 0.300132 |
| 0.100000    | 0.141709 | 0.184070 | 0.223657 | 0.261921 | 0.300153 |
| 0.0100000   | 0.141716 | 0.184077 | 0.223663 | 0.261925 | 0.300155 |
| 0.00100000  | 0.141716 | 0.184077 | 0.223663 | 0.261925 | 0.300155 |
| 0.000100000 | 0.141717 | 0.184077 | 0.223663 | 0.261925 | 0.300155 |
| 1.00000e-05 | 0.141717 | 0.184077 | 0.223663 | 0.261925 | 0.300155 |
| 1.00000e-06 | 0.141717 | 0.184077 | 0.223663 | 0.261925 | 0.300155 |
| 1.00000e-07 | 0.141717 | 0.184077 | 0.223663 | 0.261925 | 0.300155 |
| 1.00000e-08 | 0.141717 | 0.184077 | 0.223663 | 0.261925 | 0.300155 |
| 1.00000e-09 | 0.141717 | 0.184077 | 0.223663 | 0.261925 | 0.300155 |

Pa\K | 1000.00 1100.00 1200.00 1300.00 1400.00

|             |          |          |          |          |          |
|-------------|----------|----------|----------|----------|----------|
| 1.00000e+08 | 0.309181 | 0.336574 | 0.361342 | 0.384726 | 0.406143 |
| 1.00000e+07 | 0.310177 | 0.338834 | 0.370581 | 0.408742 | 0.446646 |
| 1.00000e+06 | 0.310197 | 0.341315 | 0.381260 | 0.429917 | 0.476285 |
| 100000.     | 0.313502 | 0.350458 | 0.396569 | 0.446295 | 0.490597 |
| 10000.0     | 0.323188 | 0.365448 | 0.411019 | 0.454844 | 0.493873 |
| 1000.00     | 0.333612 | 0.375260 | 0.416523 | 0.455753 | 0.492186 |
| 100.000     | 0.338030 | 0.377831 | 0.417168 | 0.455169 | 0.491086 |
| 10.0000     | 0.338854 | 0.378158 | 0.417171 | 0.455011 | 0.490872 |
| 1.00000     | 0.338950 | 0.378192 | 0.417171 | 0.454995 | 0.490851 |
| 0.100000    | 0.338961 | 0.378195 | 0.417171 | 0.454993 | 0.490849 |
| 0.0100000   | 0.338962 | 0.378196 | 0.417171 | 0.454993 | 0.490849 |
| 0.00100000  | 0.338962 | 0.378196 | 0.417171 | 0.454993 | 0.490849 |
| 0.000100000 | 0.338962 | 0.378196 | 0.417171 | 0.454993 | 0.490849 |
| 1.00000e-05 | 0.338962 | 0.378196 | 0.417171 | 0.454993 | 0.490849 |
| 1.00000e-06 | 0.338962 | 0.378196 | 0.417171 | 0.454993 | 0.490849 |
| 1.00000e-07 | 0.338962 | 0.378196 | 0.417171 | 0.454993 | 0.490849 |
| 1.00000e-08 | 0.338962 | 0.378196 | 0.417171 | 0.454993 | 0.490849 |
| 1.00000e-09 | 0.338962 | 0.378196 | 0.417171 | 0.454993 | 0.490849 |

| Pa\K        | 1500.00  | 1750.00  | 2000.00  | 2250.00  | 2500.00  |
|-------------|----------|----------|----------|----------|----------|
| 1.00000e+08 | 0.421869 | 0.565082 | 0.642520 | 0.681167 | 0.703563 |
| 1.00000e+07 | 0.473225 | 0.587544 | 0.664481 | 0.702405 | 0.722938 |
| 1.00000e+06 | 0.512976 | 0.606989 | 0.675111 | 0.706405 | 0.725231 |
| 100000.     | 0.527024 | 0.612427 | 0.667481 | 0.697406 | 0.720225 |
| 10000.0     | 0.528085 | 0.607536 | 0.656860 | 0.691009 | 0.717758 |
| 1000.00     | 0.525577 | 0.603339 | 0.652739 | 0.689348 | 0.717284 |
| 100.000     | 0.524397 | 0.602070 | 0.651937 | 0.689103 | 0.717227 |
| 10.0000     | 0.524185 | 0.601868 | 0.651836 | 0.689077 | 0.717221 |
| 1.00000     | 0.524164 | 0.601847 | 0.651826 | 0.689074 | 0.717221 |
| 0.100000    | 0.524162 | 0.601846 | 0.651825 | 0.689074 | 0.717221 |
| 0.0100000   | 0.524162 | 0.601845 | 0.651825 | 0.689074 | 0.717221 |
| 0.00100000  | 0.524162 | 0.601845 | 0.651825 | 0.689074 | 0.717221 |
| 0.000100000 | 0.524162 | 0.601845 | 0.651825 | 0.689074 | 0.717221 |
| 1.00000e-05 | 0.524162 | 0.601845 | 0.651825 | 0.689074 | 0.717221 |
| 1.00000e-06 | 0.524162 | 0.601845 | 0.651825 | 0.689074 | 0.717221 |
| 1.00000e-07 | 0.524162 | 0.601845 | 0.651825 | 0.689074 | 0.717221 |
| 1.00000e-08 | 0.524162 | 0.601845 | 0.651825 | 0.689074 | 0.717221 |
| 1.00000e-09 | 0.524162 | 0.601845 | 0.651825 | 0.689074 | 0.717221 |

| Pa\K        | 2750.00  | 3000.00  | 3250.00  | 3500.00  | 3750.00  |
|-------------|----------|----------|----------|----------|----------|
| 1.00000e+08 | 0.720618 | 0.735109 | 0.748094 | 0.760043 | 0.771119 |
| 1.00000e+07 | 0.738586 | 0.752432 | 0.765028 | 0.776324 | 0.786263 |
| 1.00000e+06 | 0.741543 | 0.756233 | 0.769056 | 0.780015 | 0.789339 |
| 100000.     | 0.739727 | 0.755990 | 0.769371 | 0.780434 | 0.789705 |
| 10000.0     | 0.738982 | 0.755834 | 0.769383 | 0.780479 | 0.789748 |
| 1000.00     | 0.738869 | 0.755815 | 0.769387 | 0.780486 | 0.789753 |
| 100.000     | 0.738857 | 0.755814 | 0.769387 | 0.780487 | 0.789754 |
| 10.0000     | 0.738856 | 0.755814 | 0.769387 | 0.780487 | 0.789754 |
| 1.00000     | 0.738856 | 0.755814 | 0.769388 | 0.780487 | 0.789754 |
| 0.100000    | 0.738856 | 0.755814 | 0.769388 | 0.780487 | 0.789754 |
| 0.0100000   | 0.738856 | 0.755814 | 0.769388 | 0.780487 | 0.789754 |
| 0.00100000  | 0.738856 | 0.755814 | 0.769388 | 0.780487 | 0.789754 |
| 0.000100000 | 0.738856 | 0.755814 | 0.769388 | 0.780487 | 0.789754 |
| 1.00000e-05 | 0.738856 | 0.755814 | 0.769388 | 0.780487 | 0.789754 |
| 1.00000e-06 | 0.738856 | 0.755814 | 0.769388 | 0.780487 | 0.789754 |
| 1.00000e-07 | 0.738856 | 0.755814 | 0.769388 | 0.780487 | 0.789754 |
| 1.00000e-08 | 0.738856 | 0.755814 | 0.769388 | 0.780487 | 0.789754 |
| 1.00000e-09 | 0.738856 | 0.755814 | 0.769388 | 0.780487 | 0.789754 |

| Pa\K        | 4000.00  |
|-------------|----------|
| 1.00000e+08 | 0.781325 |
| 1.00000e+07 | 0.794907 |
| 1.00000e+06 | 0.797322 |
| 100000.     | 0.797603 |
| 10000.0     | 0.797636 |
| 1000.00     | 0.797640 |
| 100.000     | 0.797641 |
| 10.0000     | 0.797641 |
| 1.00000     | 0.797641 |
| 0.100000    | 0.797641 |
| 0.0100000   | 0.797641 |
| 0.00100000  | 0.797641 |
| 0.000100000 | 0.797641 |
| 1.00000e-05 | 0.797641 |
| 1.00000e-06 | 0.797641 |
| 1.00000e-07 | 0.797641 |
| 1.00000e-08 | 0.797641 |
| 1.00000e-09 | 0.797641 |

C2H2+PhCH2

=====

| Pa\K        | 20.0000     | 30.0000     | 40.0000     | 50.0000     | 60.0000     |
|-------------|-------------|-------------|-------------|-------------|-------------|
| 1.00000e+08 | 2.95958e-20 | 2.46431e-19 | 8.37833e-19 | 2.02615e-18 | 4.09689e-18 |
| 1.00000e+07 | 2.95811e-17 | 2.46183e-16 | 8.36573e-16 | 2.02210e-15 | 4.08664e-15 |
| 1.00000e+06 | 2.94340e-14 | 2.43723e-13 | 8.24144e-13 | 1.98233e-12 | 3.98653e-12 |
| 100000.     | 2.80285e-11 | 2.21220e-10 | 7.15103e-10 | 1.64713e-09 | 3.17518e-09 |
| 10000.0     | 1.84649e-08 | 1.06632e-07 | 2.71203e-07 | 5.13021e-07 | 8.35316e-07 |
| 1000.00     | 2.70280e-06 | 8.14984e-06 | 1.43351e-05 | 2.10668e-05 | 2.83645e-05 |
| 100.000     | 5.41289e-05 | 0.000105168 | 0.000148581 | 0.000187769 | 0.000224241 |
| 10.0000     | 0.000295871 | 0.000376553 | 0.000415706 | 0.000443603 | 0.000467267 |
| 1.00000     | 0.000454885 | 0.000471231 | 0.000484404 | 0.000499102 | 0.000515236 |
| 0.100000    | 0.000485884 | 0.000503824 | 0.000525858 | 0.000552146 | 0.000582089 |
| 0.0100000   | 0.000597138 | 0.000725252 | 0.000860049 | 0.00100660  | 0.00116778  |
| 0.00100000  | 0.00156560  | 0.00247082  | 0.00323830  | 0.00393100  | 0.00457687  |

|             |            |            |            |            |            |
|-------------|------------|------------|------------|------------|------------|
| 0.000100000 | 0.00565107 | 0.00690216 | 0.00747304 | 0.00786649 | 0.00820035 |
| 1.00000e-05 | 0.00795701 | 0.00814272 | 0.00829697 | 0.00847611 | 0.00868087 |
| 1.00000e-06 | 0.00818747 | 0.00825408 | 0.00837103 | 0.00853167 | 0.00872527 |
| 1.00000e-07 | 0.00820954 | 0.00826499 | 0.00837833 | 0.00853717 | 0.00872967 |
| 1.00000e-08 | 0.00821174 | 0.00826608 | 0.00837906 | 0.00853772 | 0.00873011 |
| 1.00000e-09 | 0.00821196 | 0.00826619 | 0.00837914 | 0.00853777 | 0.00873016 |

Pa\K | 70.0000 80.0000 90.0000 100.000 110.000

|             |             |             |             |             |             |
|-------------|-------------|-------------|-------------|-------------|-------------|
| 1.00000e+08 | 7.42397e-18 | 1.25114e-17 | 2.00597e-17 | 3.10659e-17 | 4.69736e-17 |
| 1.00000e+07 | 7.40159e-15 | 1.24670e-14 | 1.99773e-14 | 3.09197e-14 | 4.67222e-14 |
| 1.00000e+06 | 7.18391e-12 | 1.20374e-11 | 1.91835e-11 | 2.95195e-11 | 4.43291e-11 |
| 100000.     | 5.48729e-09 | 8.81733e-09 | 1.34684e-08 | 1.98444e-08 | 2.84907e-08 |
| 10000.0     | 1.24339e-06 | 1.74520e-06 | 2.35239e-06 | 3.08122e-06 | 3.95354e-06 |
| 1000.00     | 3.62731e-05 | 4.48577e-05 | 5.42117e-05 | 6.44604e-05 | 7.57617e-05 |
| 100.000     | 0.000258725 | 0.000291690 | 0.000323534 | 0.000354642 | 0.000385392 |
| 10.0000     | 0.000488892 | 0.000509404 | 0.000529372 | 0.000549252 | 0.000569458 |
| 1.00000     | 0.000532389 | 0.000550361 | 0.000569200 | 0.000589139 | 0.000610529 |
| 0.100000    | 0.000615461 | 0.000652578 | 0.000694262 | 0.000741747 | 0.000796642 |
| 0.0100000   | 0.00134668  | 0.00154750  | 0.00177549  | 0.00203657  | 0.00233713  |
| 0.00100000  | 0.00519229  | 0.00578964  | 0.00637893  | 0.00696803  | 0.00756300  |
| 0.000100000 | 0.00851552  | 0.00883154  | 0.00915992  | 0.00950815  | 0.00988123  |
| 1.00000e-05 | 0.00891002  | 0.00916453  | 0.00944662  | 0.00975859  | 0.0101023   |
| 1.00000e-06 | 0.00894689  | 0.00919596  | 0.00947389  | 0.00978255  | 0.0101236   |
| 1.00000e-07 | 0.00895056  | 0.00919908  | 0.00947660  | 0.00978494  | 0.0101257   |
| 1.00000e-08 | 0.00895092  | 0.00919939  | 0.00947687  | 0.00978517  | 0.0101259   |
| 1.00000e-09 | 0.00895096  | 0.00919942  | 0.00947690  | 0.00978520  | 0.0101260   |

Pa\K | 120.000 130.000 140.000 150.000 160.000

|             |             |             |             |             |             |
|-------------|-------------|-------------|-------------|-------------|-------------|
| 1.00000e+08 | 6.98990e-17 | 1.02981e-16 | 1.50918e-16 | 2.20814e-16 | 3.23490e-16 |
| 1.00000e+07 | 6.94757e-14 | 1.02276e-13 | 1.49755e-13 | 2.18895e-13 | 3.20316e-13 |
| 1.00000e+06 | 6.54718e-11 | 9.56667e-11 | 1.38922e-10 | 2.01188e-10 | 2.91347e-10 |
| 100000.     | 4.01499e-08 | 5.58377e-08 | 7.69465e-08 | 1.05387e-07 | 1.43784e-07 |
| 10000.0     | 4.99788e-06 | 6.25084e-06 | 7.75884e-06 | 9.58042e-06 | 1.17888e-05 |
| 1000.00     | 8.83051e-05 | 0.000102312 | 0.000118037 | 0.000135767 | 0.000155824 |
| 100.000     | 0.000416154 | 0.000447289 | 0.000479148 | 0.000512080 | 0.000546433 |
| 10.0000     | 0.000590378 | 0.000612382 | 0.000635832 | 0.000661086 | 0.000688512 |
| 1.00000     | 0.000633807 | 0.000659480 | 0.000688134 | 0.000720453 | 0.000757243 |
| 0.100000    | 0.000860926 | 0.000937006 | 0.00102780  | 0.00113685  | 0.00126843  |
| 0.0100000   | 0.00268357  | 0.00308225  | 0.00353918  | 0.00405994  | 0.00464947  |
| 0.00100000  | 0.00816843  | 0.00878794  | 0.00942467  | 0.0100814   | 0.0107613   |
| 0.000100000 | 0.0102826   | 0.0107147   | 0.0111796   | 0.0116790   | 0.0122147   |
| 1.00000e-05 | 0.0104795   | 0.0108912   | 0.0113384   | 0.0118225   | 0.0123448   |
| 1.00000e-06 | 0.0104985   | 0.0109083   | 0.0113539   | 0.0118365   | 0.0123576   |
| 1.00000e-07 | 0.0105004   | 0.0109100   | 0.0113554   | 0.0118379   | 0.0123588   |
| 1.00000e-08 | 0.0105006   | 0.0109102   | 0.0113556   | 0.0118380   | 0.0123590   |
| 1.00000e-09 | 0.0105006   | 0.0109102   | 0.0113556   | 0.0118381   | 0.0123590   |

Pa\K | 170.000 180.000 190.000 200.000 210.000

|             |             |             |             |             |             |
|-------------|-------------|-------------|-------------|-------------|-------------|
| 1.00000e+08 | 4.75544e-16 | 7.02608e-16 | 1.04445e-15 | 1.56304e-15 | 2.35528e-15 |
| 1.00000e+07 | 4.70270e-13 | 6.93784e-13 | 1.02956e-12 | 1.53773e-12 | 2.31191e-12 |
| 1.00000e+06 | 4.22718e-10 | 6.15336e-10 | 8.99387e-10 | 1.32040e-09 | 1.94696e-09 |
| 100000.     | 1.95738e-07 | 2.66170e-07 | 3.61800e-07 | 4.91748e-07 | 6.68345e-07 |
| 10000.0     | 1.44755e-05 | 1.77535e-05 | 2.17628e-05 | 2.66744e-05 | 3.26974e-05 |
| 1000.00     | 0.000178562 | 0.000204368 | 0.000233657 | 0.000266871 | 0.000304467 |
| 100.000     | 0.000582557 | 0.000620812 | 0.000661568 | 0.000705208 | 0.000752131 |
| 10.0000     | 0.000718494 | 0.000751446 | 0.000787818 | 0.000828108 | 0.000872878 |
| 1.00000     | 0.000799480 | 0.000848353 | 0.000905329 | 0.000972224 | 0.00105130  |
| 0.100000    | 0.00142777  | 0.00162102  | 0.00185548  | 0.00213958  | 0.00248287  |
| 0.0100000   | 0.00531192  | 0.00605060  | 0.00686786  | 0.00776515  | 0.00874309  |
| 0.00100000  | 0.0114670   | 0.0122021   | 0.0129699   | 0.0137741   | 0.0146188   |
| 0.000100000 | 0.0127889   | 0.0134037   | 0.0140619   | 0.0147662   | 0.0155196   |
| 1.00000e-05 | 0.0129070   | 0.0135112   | 0.0141598   | 0.0148553   | 0.0156009   |
| 1.00000e-06 | 0.0129186   | 0.0135217   | 0.0141694   | 0.0148641   | 0.0156090   |
| 1.00000e-07 | 0.0129198   | 0.0135228   | 0.0141704   | 0.0148650   | 0.0156097   |
| 1.00000e-08 | 0.0129199   | 0.0135229   | 0.0141705   | 0.0148651   | 0.0156098   |
| 1.00000e-09 | 0.0129199   | 0.0135229   | 0.0141705   | 0.0148651   | 0.0156098   |

Pa\K | 220.000 230.000 240.000 250.000 260.000

|             |             |             |             |             |             |
|-------------|-------------|-------------|-------------|-------------|-------------|
| 1.00000e+08 | 3.57312e-15 | 5.45516e-15 | 8.37642e-15 | 1.29263e-14 | 2.00292e-14 |
| 1.00000e+07 | 3.49819e-12 | 5.32484e-12 | 8.14846e-12 | 1.25257e-11 | 1.93235e-11 |
| 1.00000e+06 | 2.88235e-09 | 4.28148e-09 | 6.37598e-09 | 9.51046e-09 | 1.41944e-08 |
| 100000.     | 9.08161e-07 | 1.23332e-06 | 1.67319e-06 | 2.26638e-06 | 3.06334e-06 |
| 10000.0     | 4.00841e-05 | 4.91379e-05 | 6.02197e-05 | 7.37552e-05 | 9.02417e-05 |
| 1000.00     | 0.000346922 | 0.000394719 | 0.000448346 | 0.000508287 | 0.000575023 |
| 100.000     | 0.000802751 | 0.000857509 | 0.000916862 | 0.000981300 | 0.00105133  |
| 10.0000     | 0.000922766 | 0.000978508 | 0.00104098  | 0.00111118  | 0.00119033  |

|             |            |            |            |            |            |
|-------------|------------|------------|------------|------------|------------|
| 1.00000     | 0.00114534 | 0.00125787 | 0.00139313 | 0.00155641 | 0.00175404 |
| 0.100000    | 0.00289592 | 0.00339014 | 0.00397746 | 0.00467001 | 0.00547974 |
| 0.0100000   | 0.00980155 | 0.0109399  | 0.0121570  | 0.0134517  | 0.0148226  |
| 0.00100000  | 0.0155078  | 0.0164452  | 0.0174354  | 0.0184823  | 0.0195901  |
| 0.000100000 | 0.0163255  | 0.0171874  | 0.0181087  | 0.0190929  | 0.0201437  |
| 1.00000e-05 | 0.0163997  | 0.0172550  | 0.0181703  | 0.0191491  | 0.0201949  |
| 1.00000e-06 | 0.0164070  | 0.0172617  | 0.0181764  | 0.0191547  | 0.0202001  |
| 1.00000e-07 | 0.0164077  | 0.0172624  | 0.0181770  | 0.0191552  | 0.0202005  |
| 1.00000e-08 | 0.0164078  | 0.0172625  | 0.0181771  | 0.0191553  | 0.0202005  |
| 1.00000e-09 | 0.0164078  | 0.0172625  | 0.0181771  | 0.0191553  | 0.0202006  |

Pa\K | 270.000 280.000 290.000 300.000 400.000

|             |             |             |             |             |             |
|-------------|-------------|-------------|-------------|-------------|-------------|
| 1.00000e+08 | 3.11308e-14 | 4.84781e-14 | 7.55332e-14 | 2.66050e-12 | 1.70390e-10 |
| 1.00000e+07 | 2.98861e-11 | 4.62842e-11 | 7.16787e-11 | 2.21180e-09 | 1.03236e-07 |
| 1.00000e+06 | 2.11756e-08 | 3.15408e-08 | 4.68520e-08 | 7.88965e-07 | 1.57234e-05 |
| 100000.     | 4.12933e-06 | 5.54804e-06 | 7.42554e-06 | 4.77070e-05 | 0.000366163 |
| 10000.0     | 0.000110253 | 0.000134445 | 0.000163555 | 0.000506979 | 0.00182020  |
| 1000.00     | 0.000649026 | 0.000730757 | 0.000820667 | 0.00143990  | 0.00307517  |
| 100.000     | 0.00112752  | 0.00121044  | 0.00130077  | 0.00184421  | 0.00383326  |
| 10.0000     | 0.00127989  | 0.00138163  | 0.00149765  | 0.00234717  | 0.00772430  |
| 1.00000     | 0.00199363  | 0.00228412  | 0.00263589  | 0.00563412  | 0.0226001   |
| 0.100000    | 0.00641788  | 0.00749460  | 0.00871858  | 0.0169005   | 0.0429440   |
| 0.0100000   | 0.0162689   | 0.0177894   | 0.0193838   | 0.0286075   | 0.0512881   |
| 0.00100000  | 0.0207629   | 0.0220046   | 0.0233189   | 0.0315847   | 0.0524541   |
| 0.000100000 | 0.0212647   | 0.0224592   | 0.0237307   | 0.0318835   | 0.0525632   |
| 1.00000e-05 | 0.0213113   | 0.0225017   | 0.0237694   | 0.0319121   | 0.0525739   |
| 1.00000e-06 | 0.0213160   | 0.0225060   | 0.0237732   | 0.0319149   | 0.0525750   |
| 1.00000e-07 | 0.0213165   | 0.0225063   | 0.0237736   | 0.0319152   | 0.0525751   |
| 1.00000e-08 | 0.0213165   | 0.0225064   | 0.0237736   | 0.0319153   | 0.0525751   |
| 1.00000e-09 | 0.0213165   | 0.0225064   | 0.0237736   | 0.0319153   | 0.0525751   |

Pa\K | 500.000 600.000 700.000 800.000 900.000

|             |             |             |             |             |            |
|-------------|-------------|-------------|-------------|-------------|------------|
| 1.00000e+08 | 1.21824e-08 | 7.96280e-07 | 2.14156e-05 | 0.000247920 | 0.00158732 |
| 1.00000e+07 | 3.30073e-06 | 5.77280e-05 | 0.000514495 | 0.00246233  | 0.00722402 |
| 1.00000e+06 | 0.000177598 | 0.00110275  | 0.00402335  | 0.00939489  | 0.0159683  |
| 100000.     | 0.00173506  | 0.00509245  | 0.0102381   | 0.0161102   | 0.0231044  |
| 10000.0     | 0.00452583  | 0.00862528  | 0.0146284   | 0.0245311   | 0.0418416  |
| 1000.00     | 0.00606697  | 0.0124171   | 0.0273935   | 0.0549148   | 0.0913782  |
| 100.000     | 0.0101656   | 0.0294162   | 0.0673338   | 0.111916    | 0.147042   |
| 10.0000     | 0.0278559   | 0.0690270   | 0.116750    | 0.152501    | 0.171364   |
| 1.00000     | 0.0588491   | 0.102265    | 0.139041    | 0.163781    | 0.175968   |
| 0.100000    | 0.0771075   | 0.112324    | 0.143182    | 0.165302    | 0.176476   |
| 0.0100000   | 0.0808901   | 0.113676    | 0.143623    | 0.165448    | 0.176524   |
| 0.00100000  | 0.0812863   | 0.113805    | 0.143665    | 0.165462    | 0.176529   |
| 0.000100000 | 0.0813238   | 0.113817    | 0.143669    | 0.165464    | 0.176529   |
| 1.00000e-05 | 0.0813276   | 0.113819    | 0.143670    | 0.165464    | 0.176529   |
| 1.00000e-06 | 0.0813279   | 0.113819    | 0.143670    | 0.165464    | 0.176529   |
| 1.00000e-07 | 0.0813279   | 0.113819    | 0.143670    | 0.165464    | 0.176529   |
| 1.00000e-08 | 0.0813279   | 0.113819    | 0.143670    | 0.165464    | 0.176529   |
| 1.00000e-09 | 0.0813279   | 0.113819    | 0.143670    | 0.165464    | 0.176529   |

Pa\K | 1000.00 1100.00 1200.00 1300.00 1400.00

|             |            |            |            |            |            |
|-------------|------------|------------|------------|------------|------------|
| 1.00000e+08 | 0.00451979 | 0.00625405 | 0.00639935 | 0.00592787 | 0.00518112 |
| 1.00000e+07 | 0.0126162  | 0.0156786  | 0.0172031  | 0.0189239  | 0.0201262  |
| 1.00000e+06 | 0.0217981  | 0.0273994  | 0.0335102  | 0.0385788  | 0.0404157  |
| 100000.     | 0.0331079  | 0.0473230  | 0.0618336  | 0.0694645  | 0.0685983  |
| 10000.0     | 0.0662462  | 0.0906127  | 0.105077   | 0.105783   | 0.0973718  |
| 1000.00     | 0.123018   | 0.139423   | 0.139607   | 0.129079   | 0.114122   |
| 100.000     | 0.163274   | 0.162973   | 0.152224   | 0.136396   | 0.119088   |
| 10.0000     | 0.175083   | 0.168092   | 0.154490   | 0.137597   | 0.119877   |
| 1.00000     | 0.176786   | 0.168720   | 0.154751   | 0.137734   | 0.119966   |
| 0.100000    | 0.176957   | 0.168783   | 0.154778   | 0.137749   | 0.119976   |
| 0.0100000   | 0.176973   | 0.168789   | 0.154781   | 0.137750   | 0.119977   |
| 0.00100000  | 0.176975   | 0.168789   | 0.154782   | 0.137750   | 0.119977   |
| 0.000100000 | 0.176975   | 0.168789   | 0.154782   | 0.137750   | 0.119977   |
| 1.00000e-05 | 0.176975   | 0.168789   | 0.154782   | 0.137750   | 0.119977   |
| 1.00000e-06 | 0.176975   | 0.168789   | 0.154782   | 0.137750   | 0.119977   |
| 1.00000e-07 | 0.176975   | 0.168789   | 0.154782   | 0.137750   | 0.119977   |
| 1.00000e-08 | 0.176975   | 0.168789   | 0.154782   | 0.137750   | 0.119977   |
| 1.00000e-09 | 0.176975   | 0.168789   | 0.154782   | 0.137750   | 0.119977   |

Pa\K | 1500.00 1750.00 2000.00 2250.00 2500.00

|             |            |           |           |           |           |
|-------------|------------|-----------|-----------|-----------|-----------|
| 1.00000e+08 | 0.00449505 | 0.0197443 | 0.0201175 | 0.0189199 | 0.0175804 |
| 1.00000e+07 | 0.0199048  | 0.0227808 | 0.0223096 | 0.0207362 | 0.0192601 |
| 1.00000e+06 | 0.0394065  | 0.0314741 | 0.0282524 | 0.0250654 | 0.0224253 |
| 100000.     | 0.0631167  | 0.0441368 | 0.0359320 | 0.0296068 | 0.0248635 |

|             |           |           |           |           |           |
|-------------|-----------|-----------|-----------|-----------|-----------|
| 10000.0     | 0.0858285 | 0.0566337 | 0.0419307 | 0.0320658 | 0.0257587 |
| 1000.00     | 0.0986501 | 0.0632972 | 0.0442515 | 0.0327253 | 0.0259293 |
| 100.000     | 0.102377  | 0.0650831 | 0.0447265 | 0.0328279 | 0.0259500 |
| 10.0000     | 0.102961  | 0.0653533 | 0.0447878 | 0.0328391 | 0.0259520 |
| 1.00000     | 0.103026  | 0.0653827 | 0.0447940 | 0.0328403 | 0.0259521 |
| 0.100000    | 0.103032  | 0.0653857 | 0.0447945 | 0.0328403 | 0.0259521 |
| 0.0100000   | 0.103033  | 0.0653858 | 0.0447948 | 0.0328403 | 0.0259521 |
| 0.00100000  | 0.103033  | 0.0653858 | 0.0447948 | 0.0328403 | 0.0259521 |
| 0.000100000 | 0.103033  | 0.0653858 | 0.0447948 | 0.0328403 | 0.0259521 |
| 1.00000e-05 | 0.103033  | 0.0653858 | 0.0447948 | 0.0328403 | 0.0259521 |
| 1.00000e-06 | 0.103033  | 0.0653858 | 0.0447948 | 0.0328403 | 0.0259521 |
| 1.00000e-07 | 0.103033  | 0.0653858 | 0.0447948 | 0.0328403 | 0.0259521 |
| 1.00000e-08 | 0.103033  | 0.0653858 | 0.0447948 | 0.0328403 | 0.0259521 |
| 1.00000e-09 | 0.103033  | 0.0653858 | 0.0447948 | 0.0328403 | 0.0259521 |

Pa\K | 2750.00 3000.00 3250.00 3500.00 3750.00

|             |           |           |           |           |           |
|-------------|-----------|-----------|-----------|-----------|-----------|
| 1.00000e+08 | 0.0165320 | 0.0158175 | 0.0153838 | 0.0151513 | 0.0150452 |
| 1.00000e+07 | 0.0181582 | 0.0173699 | 0.0168000 | 0.0163781 | 0.0160597 |
| 1.00000e+06 | 0.0203646 | 0.0188233 | 0.0177127 | 0.0169319 | 0.0163882 |
| 100000.     | 0.0215643 | 0.0193828 | 0.0179675 | 0.0170474 | 0.0164405 |
| 10000.0     | 0.0218713 | 0.0194866 | 0.0180030 | 0.0170596 | 0.0164446 |
| 1000.00     | 0.0219145 | 0.0194977 | 0.0180057 | 0.0170601 | 0.0164446 |
| 100.000     | 0.0219187 | 0.0194984 | 0.0180058 | 0.0170601 | 0.0164445 |
| 10.0000     | 0.0219190 | 0.0194984 | 0.0180058 | 0.0170601 | 0.0164445 |
| 1.00000     | 0.0219190 | 0.0194984 | 0.0180057 | 0.0170600 | 0.0164445 |
| 0.100000    | 0.0219190 | 0.0194984 | 0.0180057 | 0.0170600 | 0.0164445 |
| 0.0100000   | 0.0219190 | 0.0194984 | 0.0180057 | 0.0170600 | 0.0164445 |
| 0.00100000  | 0.0219190 | 0.0194984 | 0.0180057 | 0.0170600 | 0.0164445 |
| 0.000100000 | 0.0219190 | 0.0194984 | 0.0180057 | 0.0170600 | 0.0164445 |
| 1.00000e-05 | 0.0219190 | 0.0194984 | 0.0180057 | 0.0170600 | 0.0164445 |
| 1.00000e-06 | 0.0219190 | 0.0194984 | 0.0180057 | 0.0170600 | 0.0164445 |
| 1.00000e-07 | 0.0219190 | 0.0194984 | 0.0180057 | 0.0170600 | 0.0164445 |
| 1.00000e-08 | 0.0219190 | 0.0194984 | 0.0180057 | 0.0170600 | 0.0164445 |
| 1.00000e-09 | 0.0219190 | 0.0194984 | 0.0180057 | 0.0170600 | 0.0164445 |

Pa\K | 4000.00

|             |           |
|-------------|-----------|
| 1.00000e+08 | 0.0150083 |
| 1.00000e+07 | 0.0158160 |
| 1.00000e+06 | 0.0160080 |
| 100000.     | 0.0160315 |
| 10000.0     | 0.0160326 |
| 1000.00     | 0.0160324 |
| 100.000     | 0.0160323 |
| 10.0000     | 0.0160323 |
| 1.00000     | 0.0160323 |
| 0.100000    | 0.0160323 |
| 0.0100000   | 0.0160323 |
| 0.00100000  | 0.0160323 |
| 0.000100000 | 0.0160323 |
| 1.00000e-05 | 0.0160323 |
| 1.00000e-06 | 0.0160323 |
| 1.00000e-07 | 0.0160323 |
| 1.00000e-08 | 0.0160323 |
| 1.00000e-09 | 0.0160323 |

PhCH2CCH+H

=====

Pa\K | 20.0000 30.0000 40.0000 50.0000 60.0000

|             |             |             |             |             |             |
|-------------|-------------|-------------|-------------|-------------|-------------|
| 1.00000e+08 | 6.67652e-22 | 1.61759e-21 | 3.53909e-21 | 8.14238e-21 | 2.05266e-20 |
| 1.00000e+07 | 6.67648e-21 | 1.61758e-20 | 3.53904e-20 | 8.14223e-20 | 2.05262e-19 |
| 1.00000e+06 | 6.67614e-20 | 1.61741e-19 | 3.53852e-19 | 8.14068e-19 | 2.05216e-18 |
| 100000.     | 6.67275e-19 | 1.61577e-18 | 3.53328e-18 | 8.12527e-18 | 2.04757e-17 |
| 10000.0     | 6.63890e-18 | 1.59946e-17 | 3.48148e-17 | 7.97331e-17 | 2.00252e-16 |
| 1000.00     | 6.31266e-17 | 1.44777e-16 | 3.01523e-16 | 6.64510e-16 | 1.61869e-15 |
| 100.000     | 3.96977e-16 | 6.16671e-16 | 9.48014e-16 | 1.66389e-15 | 3.52019e-15 |
| 10.0000     | 2.58029e-16 | 1.41000e-16 | 1.41139e-16 | 2.21743e-16 | 5.83237e-16 |
| 1.00000     | 3.01112e-17 | 5.22052e-17 | 1.06879e-16 | 2.49392e-16 | 7.90676e-16 |
| 0.100000    | 1.92657e-16 | 4.55941e-16 | 9.74459e-16 | 2.28034e-15 | 6.67553e-15 |
| 0.0100000   | 1.74632e-15 | 3.78732e-15 | 7.47825e-15 | 1.63565e-14 | 4.54189e-14 |
| 0.00100000  | 7.93277e-15 | 9.69469e-15 | 1.27095e-14 | 2.12398e-14 | 5.63442e-14 |
| 0.000100000 | 2.30812e-15 | 1.10751e-15 | 1.06107e-15 | 1.95070e-15 | 1.37802e-14 |
| 1.00000e-05 | 9.98689e-17 | 5.64314e-17 | 6.60108e-17 | 2.68319e-16 | 8.79296e-15 |
| 1.00000e-06 | 7.79467e-18 | 4.97327e-18 | 6.36045e-18 | 1.41165e-16 | 8.33152e-15 |
| 1.00000e-07 | 7.57199e-19 | 4.90579e-19 | 8.60132e-19 | 1.28931e-16 | 8.28584e-15 |
| 1.00000e-08 | 7.54970e-20 | 4.89976e-20 | 3.14793e-19 | 1.27712e-16 | 8.28128e-15 |
| 1.00000e-09 | 7.54747e-21 | 4.90639e-21 | 2.60306e-19 | 1.27591e-16 | 8.28082e-15 |

| Pa\K        | 70.0000     | 80.0000     | 90.0000     | 100.000     | 110.000     |
|-------------|-------------|-------------|-------------|-------------|-------------|
| 1.00000e+08 | 5.99235e-20 | 2.11849e-19 | 8.51899e-19 | 3.41399e-18 | 1.25359e-17 |
| 1.00000e+07 | 5.99221e-19 | 2.11844e-18 | 8.51879e-18 | 3.41391e-17 | 1.25356e-16 |
| 1.00000e+06 | 5.99074e-18 | 2.11792e-17 | 8.51678e-17 | 3.41311e-16 | 1.25326e-15 |
| 100000.     | 5.97615e-17 | 2.11275e-16 | 8.49674e-16 | 3.40515e-15 | 1.25022e-14 |
| 10000.0     | 5.83303e-16 | 2.06214e-15 | 8.30075e-15 | 3.32745e-14 | 1.22062e-13 |
| 1000.00     | 4.63858e-15 | 1.64556e-14 | 6.70315e-14 | 2.70111e-13 | 9.85953e-13 |
| 100.000     | 1.00969e-14 | 4.19447e-14 | 2.01480e-13 | 8.83776e-13 | 3.29257e-12 |
| 10.0000     | 3.62590e-15 | 3.17205e-14 | 2.16883e-13 | 1.08969e-12 | 4.25526e-12 |
| 1.00000     | 4.87482e-15 | 4.05148e-14 | 2.70257e-13 | 1.34479e-12 | 5.24467e-12 |
| 0.100000    | 2.80515e-14 | 1.52338e-13 | 8.05240e-13 | 3.61206e-12 | 1.35771e-11 |
| 0.0100000   | 1.79465e-13 | 8.91717e-13 | 4.33064e-12 | 1.81824e-11 | 6.48632e-11 |
| 0.00100000  | 2.83323e-13 | 1.78180e-12 | 9.53999e-12 | 4.05264e-11 | 1.40404e-10 |
| 0.000100000 | 1.86141e-13 | 1.70747e-12 | 1.03201e-11 | 4.54898e-11 | 1.58626e-10 |
| 1.00000e-05 | 1.70605e-13 | 1.68210e-12 | 1.03714e-11 | 4.59984e-11 | 1.60638e-10 |
| 1.00000e-06 | 1.69025e-13 | 1.67934e-12 | 1.03761e-11 | 4.60491e-11 | 1.60841e-10 |
| 1.00000e-07 | 1.68867e-13 | 1.67906e-12 | 1.03766e-11 | 4.60542e-11 | 1.60861e-10 |
| 1.00000e-08 | 1.68851e-13 | 1.67904e-12 | 1.03766e-11 | 4.60547e-11 | 1.60863e-10 |
| 1.00000e-09 | 1.68850e-13 | 1.67903e-12 | 1.03766e-11 | 4.60547e-11 | 1.60864e-10 |

| Pa\K        | 120.000     | 130.000     | 140.000     | 150.000     | 160.000     |
|-------------|-------------|-------------|-------------|-------------|-------------|
| 1.00000e+08 | 4.11919e-17 | 1.21724e-16 | 3.27884e-16 | 8.16685e-16 | 1.90491e-15 |
| 1.00000e+07 | 4.11908e-16 | 1.21720e-15 | 3.27873e-15 | 8.16653e-15 | 1.90482e-14 |
| 1.00000e+06 | 4.11800e-15 | 1.21685e-14 | 3.27764e-14 | 8.16342e-14 | 1.90397e-13 |
| 100000.     | 4.10719e-14 | 1.21329e-13 | 3.26679e-13 | 8.13239e-13 | 1.89559e-12 |
| 10000.0     | 4.00225e-13 | 1.17892e-12 | 3.16238e-12 | 7.83576e-12 | 1.81610e-11 |
| 1000.00     | 3.18945e-12 | 9.20610e-12 | 2.40589e-11 | 5.77757e-11 | 1.29142e-10 |
| 100.000     | 1.04692e-11 | 2.90769e-11 | 7.22228e-11 | 1.63667e-10 | 3.43857e-10 |
| 10.0000     | 1.36705e-11 | 3.77545e-11 | 9.26172e-11 | 2.06795e-10 | 4.28053e-10 |
| 1.00000     | 1.69309e-11 | 4.72415e-11 | 1.17706e-10 | 2.68371e-10 | 5.70451e-10 |
| 0.100000    | 4.38195e-11 | 1.24929e-10 | 3.22351e-10 | 7.67200e-10 | 1.70870e-09 |
| 0.0100000   | 1.99998e-10 | 5.45307e-10 | 1.34209e-09 | 3.03235e-09 | 6.37526e-09 |
| 0.00100000  | 4.12485e-10 | 1.06245e-09 | 2.46264e-09 | 5.24060e-09 | 1.03975e-08 |
| 0.000100000 | 4.63487e-10 | 1.18183e-09 | 2.70784e-09 | 5.69606e-09 | 1.11785e-08 |
| 1.00000e-05 | 4.69228e-10 | 1.19528e-09 | 2.73530e-09 | 5.74661e-09 | 1.12644e-08 |
| 1.00000e-06 | 4.69809e-10 | 1.19664e-09 | 2.73808e-09 | 5.75172e-09 | 1.12730e-08 |
| 1.00000e-07 | 4.69868e-10 | 1.19678e-09 | 2.73836e-09 | 5.75224e-09 | 1.12739e-08 |
| 1.00000e-08 | 4.69873e-10 | 1.19679e-09 | 2.73839e-09 | 5.75229e-09 | 1.12740e-08 |
| 1.00000e-09 | 4.69874e-10 | 1.19679e-09 | 2.73839e-09 | 5.75229e-09 | 1.12740e-08 |

| Pa\K        | 170.000     | 180.000     | 190.000     | 200.000     | 210.000     |
|-------------|-------------|-------------|-------------|-------------|-------------|
| 1.00000e+08 | 4.20470e-15 | 8.85810e-15 | 1.79330e-14 | 3.50788e-14 | 6.65919e-14 |
| 1.00000e+07 | 4.20450e-14 | 8.85757e-14 | 1.79317e-13 | 3.50758e-13 | 6.65853e-13 |
| 1.00000e+06 | 4.20322e-13 | 8.85221e-13 | 1.79189e-12 | 3.50465e-12 | 6.65195e-12 |
| 100000.     | 4.18076e-12 | 8.79910e-12 | 1.77928e-11 | 3.47565e-11 | 6.58724e-11 |
| 10000.0     | 3.97826e-11 | 8.30561e-11 | 1.66365e-10 | 3.21402e-10 | 6.01378e-10 |
| 1000.00     | 2.71536e-10 | 5.41680e-10 | 1.03227e-09 | 1.88968e-09 | 3.33813e-09 |
| 100.000     | 6.78351e-10 | 1.26935e-09 | 2.27117e-09 | 3.91081e-09 | 6.51487e-09 |
| 10.0000     | 8.33049e-10 | 1.54098e-09 | 2.73277e-09 | 4.67804e-09 | 7.77292e-09 |
| 1.00000     | 1.14670e-09 | 2.20409e-09 | 4.08600e-09 | 7.35440e-09 | 1.29176e-08 |
| 0.100000    | 3.59984e-09 | 7.23149e-09 | 1.39340e-08 | 2.58675e-08 | 4.64233e-08 |
| 0.0100000   | 1.26071e-08 | 2.36527e-08 | 4.23974e-08 | 7.30277e-08 | 1.21450e-07 |
| 0.00100000  | 1.94641e-08 | 3.47007e-08 | 5.93544e-08 | 9.79790e-08 | 1.56833e-07 |
| 0.000100000 | 2.07188e-08 | 3.66112e-08 | 6.21345e-08 | 1.01871e-07 | 1.62106e-07 |
| 1.00000e-05 | 2.08555e-08 | 3.68173e-08 | 6.24318e-08 | 1.02285e-07 | 1.62661e-07 |
| 1.00000e-06 | 2.08692e-08 | 3.68381e-08 | 6.24617e-08 | 1.02326e-07 | 1.62717e-07 |
| 1.00000e-07 | 2.08706e-08 | 3.68402e-08 | 6.24647e-08 | 1.02330e-07 | 1.62723e-07 |
| 1.00000e-08 | 2.08708e-08 | 3.68404e-08 | 6.24650e-08 | 1.02331e-07 | 1.62723e-07 |
| 1.00000e-09 | 2.08708e-08 | 3.68404e-08 | 6.24651e-08 | 1.02331e-07 | 1.62723e-07 |

| Pa\K        | 220.000     | 230.000     | 240.000     | 250.000     | 260.000     |
|-------------|-------------|-------------|-------------|-------------|-------------|
| 1.00000e+08 | 1.23116e-13 | 2.22313e-13 | 3.92981e-13 | 6.81313e-13 | 1.16019e-12 |
| 1.00000e+07 | 1.23101e-12 | 2.22282e-12 | 3.92918e-12 | 6.81183e-12 | 1.15993e-11 |
| 1.00000e+06 | 1.22958e-11 | 2.21977e-11 | 3.92282e-11 | 6.79889e-11 | 1.15733e-10 |
| 100000.     | 1.21552e-10 | 2.18991e-10 | 3.86086e-10 | 6.67303e-10 | 1.13230e-09 |
| 10000.0     | 1.09345e-09 | 1.93708e-09 | 3.35052e-09 | 5.66800e-09 | 9.39056e-09 |
| 1000.00     | 5.71160e-09 | 9.49534e-09 | 1.53784e-08 | 2.43190e-08 | 3.76238e-08 |
| 100.000     | 1.05443e-08 | 1.66392e-08 | 2.56752e-08 | 3.88358e-08 | 5.77008e-08 |
| 10.0000     | 1.25933e-08 | 1.99696e-08 | 3.10924e-08 | 4.76603e-08 | 7.20859e-08 |
| 1.00000     | 2.22252e-08 | 3.75591e-08 | 6.24569e-08 | 1.02310e-07 | 1.65179e-07 |
| 0.100000    | 8.07564e-08 | 1.36468e-07 | 2.24443e-07 | 3.59858e-07 | 5.63327e-07 |
| 0.0100000   | 1.95797e-07 | 3.07033e-07 | 4.69661e-07 | 7.02556e-07 | 1.02990e-06 |
| 0.00100000  | 2.44364e-07 | 3.71796e-07 | 5.53825e-07 | 8.09430e-07 | 1.16282e-06 |
| 0.000100000 | 2.51304e-07 | 3.80703e-07 | 5.65005e-07 | 8.23188e-07 | 1.17944e-06 |
| 1.00000e-05 | 2.52031e-07 | 3.81631e-07 | 5.66163e-07 | 8.24606e-07 | 1.18116e-06 |
| 1.00000e-06 | 2.52103e-07 | 3.81724e-07 | 5.66279e-07 | 8.24749e-07 | 1.18133e-06 |

|             |             |             |             |             |             |
|-------------|-------------|-------------|-------------|-------------|-------------|
| 1.00000e-07 | 2.52111e-07 | 3.81733e-07 | 5.66291e-07 | 8.24763e-07 | 1.18135e-06 |
| 1.00000e-08 | 2.52111e-07 | 3.81734e-07 | 5.66292e-07 | 8.24764e-07 | 1.18135e-06 |
| 1.00000e-09 | 2.52111e-07 | 3.81734e-07 | 5.66292e-07 | 8.24764e-07 | 1.18135e-06 |

| Pa\K        | 270.000     | 280.000     | 290.000     | 300.000     | 400.000     |
|-------------|-------------|-------------|-------------|-------------|-------------|
| 1.00000e+08 | 1.94265e-12 | 3.20094e-12 | 5.19236e-12 | 6.08065e-11 | 2.25186e-09 |
| 1.00000e+07 | 1.94214e-11 | 3.19996e-11 | 5.19052e-11 | 6.06688e-10 | 2.23516e-08 |
| 1.00000e+06 | 1.93707e-10 | 3.19023e-10 | 5.17226e-10 | 5.93501e-09 | 2.09267e-07 |
| 100000.     | 1.88829e-09 | 3.09717e-09 | 4.99852e-09 | 4.94531e-08 | 1.36265e-06 |
| 10000.0     | 1.52534e-08 | 2.43122e-08 | 3.80486e-08 | 2.06534e-07 | 3.55362e-06 |
| 1000.00     | 5.70432e-08 | 8.48805e-08 | 1.24114e-07 | 3.18399e-07 | 4.66316e-06 |
| 100.000     | 8.43574e-08 | 1.21532e-07 | 1.72749e-07 | 3.79968e-07 | 7.27313e-06 |
| 10.0000     | 1.07779e-07 | 1.59520e-07 | 2.33952e-07 | 7.72819e-07 | 2.04678e-05 |
| 1.00000     | 2.62872e-07 | 4.12288e-07 | 6.37027e-07 | 2.43726e-06 | 4.63282e-05 |
| 0.100000    | 8.62191e-07 | 1.29189e-06 | 1.89731e-06 | 4.56492e-06 | 6.08455e-05 |
| 0.0100000   | 1.48226e-06 | 2.09769e-06 | 2.92297e-06 | 5.16459e-06 | 6.35097e-05 |
| 0.00100000  | 1.64447e-06 | 2.29232e-06 | 3.15288e-06 | 5.21702e-06 | 6.37997e-05 |
| 0.000100000 | 1.66427e-06 | 2.31552e-06 | 3.17975e-06 | 5.22130e-06 | 6.38288e-05 |
| 1.00000e-05 | 1.66629e-06 | 2.31790e-06 | 3.18248e-06 | 5.22171e-06 | 6.38316e-05 |
| 1.00000e-06 | 1.66650e-06 | 2.31813e-06 | 3.18276e-06 | 5.22175e-06 | 6.38320e-05 |
| 1.00000e-07 | 1.66651e-06 | 2.31816e-06 | 3.18278e-06 | 5.22175e-06 | 6.38320e-05 |
| 1.00000e-08 | 1.66651e-06 | 2.31816e-06 | 3.18278e-06 | 5.22175e-06 | 6.38320e-05 |
| 1.00000e-09 | 1.66651e-06 | 2.31816e-06 | 3.18278e-06 | 5.22175e-06 | 6.38320e-05 |

| Pa\K        | 500.000     | 600.000     | 700.000     | 800.000     | 900.000    |
|-------------|-------------|-------------|-------------|-------------|------------|
| 1.00000e+08 | 5.48854e-08 | 1.41501e-06 | 1.84288e-05 | 0.000216859 | 0.00253312 |
| 1.00000e+07 | 5.13339e-07 | 8.76075e-06 | 9.83331e-05 | 0.000786679 | 0.00425429 |
| 1.00000e+06 | 4.25325e-06 | 5.02507e-05 | 0.000325599 | 0.00133047  | 0.00395127 |
| 100000.     | 1.78590e-05 | 0.000124186 | 0.000511021 | 0.00154373  | 0.00418495 |
| 10000.0     | 3.01701e-05 | 0.000164055 | 0.000702988 | 0.00255417  | 0.00785408 |
| 1000.00     | 4.11559e-05 | 0.000288067 | 0.00154011  | 0.00556503  | 0.0143191  |
| 100.000     | 9.49747e-05 | 0.000731646 | 0.00318138  | 0.00886358  | 0.0184382  |
| 10.0000     | 0.000238006 | 0.00130540  | 0.00428921  | 0.0101678   | 0.0194681  |
| 1.00000     | 0.000361035 | 0.00155103  | 0.00456682  | 0.0103924   | 0.0196039  |
| 0.100000    | 0.000395549 | 0.00159382  | 0.00460314  | 0.0104178   | 0.0196182  |
| 0.0100000   | 0.000400122 | 0.00159863  | 0.00460693  | 0.0104204   | 0.0196197  |
| 0.00100000  | 0.000400598 | 0.00159911  | 0.00460732  | 0.0104206   | 0.0196198  |
| 0.000100000 | 0.000400646 | 0.00159916  | 0.00460736  | 0.0104207   | 0.0196198  |
| 1.00000e-05 | 0.000400650 | 0.00159917  | 0.00460736  | 0.0104207   | 0.0196198  |
| 1.00000e-06 | 0.000400651 | 0.00159917  | 0.00460736  | 0.0104207   | 0.0196198  |
| 1.00000e-07 | 0.000400651 | 0.00159917  | 0.00460736  | 0.0104207   | 0.0196198  |
| 1.00000e-08 | 0.000400651 | 0.00159917  | 0.00460736  | 0.0104207   | 0.0196198  |
| 1.00000e-09 | 0.000400651 | 0.00159917  | 0.00460736  | 0.0104207   | 0.0196198  |

| Pa\K        | 1000.00    | 1100.00   | 1200.00   | 1300.00   | 1400.00   |
|-------------|------------|-----------|-----------|-----------|-----------|
| 1.00000e+08 | 0.0124230  | 0.0262534 | 0.0351332 | 0.0368369 | 0.0336851 |
| 1.00000e+07 | 0.0128216  | 0.0251762 | 0.0405190 | 0.0574990 | 0.0691732 |
| 1.00000e+06 | 0.00947411 | 0.0204956 | 0.0399802 | 0.0645602 | 0.0832360 |
| 100000.     | 0.0108055  | 0.0250513 | 0.0477618 | 0.0724462 | 0.0908449 |
| 10000.0     | 0.0192014  | 0.0372217 | 0.0588261 | 0.0790319 | 0.0949778 |
| 1000.00     | 0.0280098  | 0.0449586 | 0.0627804 | 0.0795624 | 0.0942427 |
| 100.000     | 0.0314250  | 0.0467359 | 0.0630146 | 0.0789285 | 0.0933964 |
| 10.0000     | 0.0320015  | 0.0469230 | 0.0629618 | 0.0787694 | 0.0932213 |
| 1.00000     | 0.0320651  | 0.0469404 | 0.0629543 | 0.0787522 | 0.0932033 |
| 0.100000    | 0.0320716  | 0.0469423 | 0.0629537 | 0.0787507 | 0.0932017 |
| 0.0100000   | 0.0320723  | 0.0469424 | 0.0629537 | 0.0787507 | 0.0932017 |
| 0.00100000  | 0.0320723  | 0.0469425 | 0.0629537 | 0.0787507 | 0.0932017 |
| 0.000100000 | 0.0320723  | 0.0469425 | 0.0629537 | 0.0787507 | 0.0932017 |
| 1.00000e-05 | 0.0320723  | 0.0469425 | 0.0629537 | 0.0787507 | 0.0932017 |
| 1.00000e-06 | 0.0320723  | 0.0469425 | 0.0629537 | 0.0787507 | 0.0932017 |
| 1.00000e-07 | 0.0320723  | 0.0469425 | 0.0629537 | 0.0787507 | 0.0932017 |
| 1.00000e-08 | 0.0320723  | 0.0469425 | 0.0629537 | 0.0787507 | 0.0932017 |
| 1.00000e-09 | 0.0320723  | 0.0469425 | 0.0629537 | 0.0787507 | 0.0932017 |

| Pa\K        | 1500.00   | 1750.00  | 2000.00  | 2250.00  | 2500.00  |
|-------------|-----------|----------|----------|----------|----------|
| 1.00000e+08 | 0.0295994 | 0.127066 | 0.128166 | 0.121686 | 0.115264 |
| 1.00000e+07 | 0.0720628 | 0.125722 | 0.122824 | 0.118111 | 0.115978 |
| 1.00000e+06 | 0.0921275 | 0.115629 | 0.117762 | 0.121310 | 0.123733 |
| 100000.     | 0.101783  | 0.119360 | 0.127310 | 0.131419 | 0.131094 |
| 10000.0     | 0.106702  | 0.126666 | 0.134377 | 0.135720 | 0.133170 |
| 1000.00     | 0.106384  | 0.128286 | 0.135892 | 0.136470 | 0.133468 |
| 100.000     | 0.105718  | 0.128260 | 0.136045 | 0.136554 | 0.133501 |
| 10.0000     | 0.105578  | 0.128225 | 0.136057 | 0.136563 | 0.133504 |
| 1.00000     | 0.105564  | 0.128221 | 0.136059 | 0.136563 | 0.133504 |
| 0.100000    | 0.105563  | 0.128221 | 0.136059 | 0.136563 | 0.133505 |
| 0.0100000   | 0.105563  | 0.128221 | 0.136059 | 0.136563 | 0.133505 |



|             |          |          |          |          |          |
|-------------|----------|----------|----------|----------|----------|
| 0.00100000  | 0.105563 | 0.128221 | 0.136059 | 0.136563 | 0.133505 |
| 0.000100000 | 0.105563 | 0.128221 | 0.136059 | 0.136563 | 0.133505 |
| 1.00000e-05 | 0.105563 | 0.128221 | 0.136059 | 0.136563 | 0.133505 |
| 1.00000e-06 | 0.105563 | 0.128221 | 0.136059 | 0.136563 | 0.133505 |
| 1.00000e-07 | 0.105563 | 0.128221 | 0.136059 | 0.136563 | 0.133505 |
| 1.00000e-08 | 0.105563 | 0.128221 | 0.136059 | 0.136563 | 0.133505 |
| 1.00000e-09 | 0.105563 | 0.128221 | 0.136059 | 0.136563 | 0.133505 |

| Pa\K        | 2750.00  | 3000.00  | 3250.00  | 3500.00  | 3750.00  |
|-------------|----------|----------|----------|----------|----------|
| 1.00000e+08 | 0.110671 | 0.107588 | 0.105441 | 0.103750 | 0.102194 |
| 1.00000e+07 | 0.115269 | 0.114526 | 0.113141 | 0.111087 | 0.108566 |
| 1.00000e+06 | 0.123569 | 0.121360 | 0.118050 | 0.114342 | 0.110626 |
| 100000.     | 0.127992 | 0.123755 | 0.119280 | 0.114960 | 0.110936 |
| 10000.0     | 0.128899 | 0.124138 | 0.119442 | 0.115030 | 0.110967 |
| 1000.00     | 0.129012 | 0.124180 | 0.119458 | 0.115037 | 0.110970 |
| 100.000     | 0.129024 | 0.124185 | 0.119460 | 0.115037 | 0.110970 |
| 10.0000     | 0.129025 | 0.124185 | 0.119460 | 0.115038 | 0.110971 |
| 1.00000     | 0.129025 | 0.124185 | 0.119460 | 0.115037 | 0.110971 |
| 0.100000    | 0.129025 | 0.124185 | 0.119460 | 0.115037 | 0.110971 |
| 0.0100000   | 0.129025 | 0.124185 | 0.119460 | 0.115037 | 0.110971 |
| 0.00100000  | 0.129025 | 0.124185 | 0.119460 | 0.115037 | 0.110971 |
| 0.000100000 | 0.129025 | 0.124185 | 0.119460 | 0.115037 | 0.110971 |
| 1.00000e-05 | 0.129025 | 0.124185 | 0.119460 | 0.115037 | 0.110971 |
| 1.00000e-06 | 0.129025 | 0.124185 | 0.119460 | 0.115037 | 0.110971 |
| 1.00000e-07 | 0.129025 | 0.124185 | 0.119460 | 0.115037 | 0.110971 |
| 1.00000e-08 | 0.129025 | 0.124185 | 0.119460 | 0.115037 | 0.110971 |
| 1.00000e-09 | 0.129025 | 0.124185 | 0.119460 | 0.115037 | 0.110971 |

| Pa\K        | 4000.00  |
|-------------|----------|
| 1.00000e+08 | 0.100602 |
| 1.00000e+07 | 0.105811 |
| 1.00000e+06 | 0.107082 |
| 100000.     | 0.107240 |
| 10000.0     | 0.107255 |
| 1000.00     | 0.107256 |
| 100.000     | 0.107256 |
| 10.0000     | 0.107256 |
| 1.00000     | 0.107256 |
| 0.100000    | 0.107256 |
| 0.0100000   | 0.107256 |
| 0.00100000  | 0.107256 |
| 0.000100000 | 0.107256 |
| 1.00000e-05 | 0.107256 |
| 1.00000e-06 | 0.107256 |
| 1.00000e-07 | 0.107256 |
| 1.00000e-08 | 0.107256 |
| 1.00000e-09 | 0.107256 |

PhCHCCH2+H

=====

| Pa\K        | 20.0000     | 30.0000     | 40.0000     | 50.0000     | 60.0000     |
|-------------|-------------|-------------|-------------|-------------|-------------|
| 1.00000e+08 | 2.83510e-13 | 5.86080e-13 | 9.17755e-13 | 1.30219e-12 | 1.75668e-12 |
| 1.00000e+07 | 2.83510e-12 | 5.86079e-12 | 9.17753e-12 | 1.30219e-11 | 1.75667e-11 |
| 1.00000e+06 | 2.83508e-11 | 5.86069e-11 | 9.17728e-11 | 1.30214e-10 | 1.75659e-10 |
| 100000.     | 2.83483e-10 | 5.85964e-10 | 9.17480e-10 | 1.30167e-09 | 1.75577e-09 |
| 10000.0     | 2.83232e-09 | 5.84913e-09 | 9.15002e-09 | 1.29693e-08 | 1.74767e-08 |
| 1000.00     | 2.80749e-08 | 5.74607e-08 | 8.90926e-08 | 1.25140e-07 | 1.67044e-07 |
| 100.000     | 2.58057e-07 | 4.88081e-07 | 7.04037e-07 | 9.23495e-07 | 1.15388e-06 |
| 10.0000     | 1.41184e-06 | 1.90673e-06 | 2.21150e-06 | 2.47431e-06 | 2.73157e-06 |
| 1.00000     | 2.47199e-06 | 2.63021e-06 | 2.78297e-06 | 2.97155e-06 | 3.19688e-06 |
| 0.100000    | 2.84085e-06 | 3.37711e-06 | 4.22799e-06 | 5.43204e-06 | 7.05074e-06 |
| 0.0100000   | 1.18096e-05 | 2.80702e-05 | 4.70036e-05 | 6.87332e-05 | 9.38525e-05 |
| 0.00100000  | 0.000158635 | 0.000305882 | 0.000435775 | 0.000558742 | 0.000679501 |
| 0.000100000 | 0.000847761 | 0.00108782  | 0.00121213  | 0.00130654  | 0.00139205  |
| 1.00000e-05 | 0.00131764  | 0.00136610  | 0.00140808  | 0.00145757  | 0.00151486  |
| 1.00000e-06 | 0.00137751  | 0.00139577  | 0.00142805  | 0.00147272  | 0.00152709  |
| 1.00000e-07 | 0.00138347  | 0.00139872  | 0.00143004  | 0.00147423  | 0.00152831  |
| 1.00000e-08 | 0.00138406  | 0.00139902  | 0.00143024  | 0.00147438  | 0.00152844  |
| 1.00000e-09 | 0.00138412  | 0.00139905  | 0.00143026  | 0.00147439  | 0.00152845  |

| Pa\K        | 70.0000     | 80.0000     | 90.0000     | 100.000     | 110.000     |
|-------------|-------------|-------------|-------------|-------------|-------------|
| 1.00000e+08 | 2.29816e-12 | 2.94782e-12 | 3.73417e-12 | 4.69559e-12 | 5.88329e-12 |
| 1.00000e+07 | 2.29814e-11 | 2.94780e-11 | 3.73414e-11 | 4.69554e-11 | 5.88323e-11 |
| 1.00000e+06 | 2.29801e-10 | 2.94760e-10 | 3.73384e-10 | 4.69509e-10 | 5.88257e-10 |
| 100000.     | 2.29670e-09 | 2.94558e-09 | 3.73081e-09 | 4.69062e-09 | 5.87602e-09 |
| 10000.0     | 2.28369e-08 | 2.92556e-08 | 3.70080e-08 | 4.64635e-08 | 5.81130e-08 |

|             |             |             |             |             |             |
|-------------|-------------|-------------|-------------|-------------|-------------|
| 1000.00     | 2.16112e-07 | 2.73911e-07 | 3.42495e-07 | 4.24544e-07 | 5.23486e-07 |
| 100.000     | 1.39920e-06 | 1.66310e-06 | 1.94988e-06 | 2.26469e-06 | 2.61353e-06 |
| 10.0000     | 2.99572e-06 | 3.27387e-06 | 3.57231e-06 | 3.89773e-06 | 4.25738e-06 |
| 1.00000     | 3.45940e-06 | 3.76441e-06 | 4.12300e-06 | 4.55271e-06 | 5.07906e-06 |
| 0.100000    | 9.18359e-06 | 1.19822e-05 | 1.56614e-05 | 2.05099e-05 | 2.69034e-05 |
| 0.0100000   | 0.000123201 | 0.000157913 | 0.000199417 | 0.000249378 | 0.000309651 |
| 0.00100000  | 0.000800930 | 0.000925377 | 0.00105487  | 0.00119108  | 0.00133527  |
| 0.000100000 | 0.00147645  | 0.00156390  | 0.00165715  | 0.00175813  | 0.00186824  |
| 1.00000e-05 | 0.00157985  | 0.00165307  | 0.00173537  | 0.00182762  | 0.00193055  |
| 1.00000e-06 | 0.00159011  | 0.00166190  | 0.00174312  | 0.00183450  | 0.00193671  |
| 1.00000e-07 | 0.00159114  | 0.00166278  | 0.00174389  | 0.00183519  | 0.00193733  |
| 1.00000e-08 | 0.00159124  | 0.00166287  | 0.00174397  | 0.00183526  | 0.00193739  |
| 1.00000e-09 | 0.00159125  | 0.00166288  | 0.00174398  | 0.00183526  | 0.00193740  |

| Pa\K        | 120.000     | 130.000     | 140.000     | 150.000     | 160.000     |
|-------------|-------------|-------------|-------------|-------------|-------------|
| 1.00000e+08 | 7.36541e-12 | 9.23250e-12 | 1.16051e-11 | 1.46441e-11 | 1.85645e-11 |
| 1.00000e+07 | 7.36532e-11 | 9.23236e-11 | 1.16049e-10 | 1.46438e-10 | 1.85641e-10 |
| 1.00000e+06 | 7.36437e-10 | 9.23095e-10 | 1.16028e-09 | 1.46407e-09 | 1.85595e-09 |
| 100000.     | 7.35480e-09 | 9.21696e-09 | 1.15823e-08 | 1.46105e-08 | 1.85145e-08 |
| 10000.0     | 7.26050e-08 | 9.07949e-08 | 1.13812e-07 | 1.43148e-07 | 1.80769e-07 |
| 1000.00     | 6.40365e-07 | 7.90481e-07 | 9.70717e-07 | 1.19271e-06 | 1.46666e-06 |
| 100.000     | 3.00331e-06 | 3.44185e-06 | 3.93814e-06 | 4.50240e-06 | 5.14636e-06 |
| 10.0000     | 4.65941e-06 | 5.11309e-06 | 5.62917e-06 | 6.22052e-06 | 6.90275e-06 |
| 1.00000     | 5.73814e-06 | 6.58062e-06 | 7.67743e-06 | 9.12722e-06 | 1.10661e-05 |
| 0.100000    | 3.53222e-05 | 4.63765e-05 | 6.08364e-05 | 7.96675e-05 | 0.000104070 |
| 0.0100000   | 0.000382220 | 0.000469152 | 0.000572531 | 0.000694392 | 0.000836652 |
| 0.00100000  | 0.00148843  | 0.00165130  | 0.00182445  | 0.00200840  | 0.00220364  |
| 0.000100000 | 0.00198847  | 0.00211962  | 0.00226226  | 0.00241695  | 0.00258417  |
| 1.00000e-05 | 0.00204475  | 0.00217071  | 0.00230885  | 0.00245955  | 0.00262321  |
| 1.00000e-06 | 0.00205033  | 0.00217578  | 0.00231347  | 0.00246377  | 0.00262709  |
| 1.00000e-07 | 0.00205089  | 0.00217629  | 0.00231393  | 0.00246419  | 0.00262746  |
| 1.00000e-08 | 0.00205094  | 0.00217634  | 0.00231397  | 0.00246424  | 0.00262750  |
| 1.00000e-09 | 0.00205095  | 0.00217634  | 0.00231398  | 0.00246424  | 0.00262751  |

| Pa\K        | 170.000     | 180.000     | 190.000     | 200.000     | 210.000     |
|-------------|-------------|-------------|-------------|-------------|-------------|
| 1.00000e+08 | 2.36539e-11 | 3.02968e-11 | 3.90074e-11 | 5.04722e-11 | 6.56072e-11 |
| 1.00000e+07 | 2.36532e-10 | 3.02958e-10 | 3.90058e-10 | 5.04698e-10 | 6.56036e-10 |
| 1.00000e+06 | 2.36465e-09 | 3.02856e-09 | 3.89902e-09 | 5.04459e-09 | 6.55667e-09 |
| 100000.     | 2.35789e-08 | 3.01836e-08 | 3.88351e-08 | 5.02082e-08 | 6.52002e-08 |
| 10000.0     | 2.29271e-07 | 2.92060e-07 | 3.73598e-07 | 4.79703e-07 | 6.17918e-07 |
| 1000.00     | 1.80498e-06 | 2.2257e-06  | 2.73714e-06 | 3.36952e-06 | 4.14393e-06 |
| 100.000     | 5.88349e-06 | 6.72919e-06 | 7.70115e-06 | 8.81962e-06 | 1.01078e-05 |
| 10.0000     | 7.69528e-06 | 8.62270e-06 | 9.71675e-06 | 1.10189e-05 | 1.25841e-05 |
| 1.00000     | 1.36800e-05 | 1.72195e-05 | 2.20183e-05 | 2.85148e-05 | 3.72768e-05 |
| 0.100000    | 0.000135515 | 0.000175781 | 0.000226972 | 0.000291527 | 0.000372199 |
| 0.0100000   | 0.00100102  | 0.00118893  | 0.00140148  | 0.00163938  | 0.00190296  |
| 0.00100000  | 0.00241064  | 0.00262986  | 0.00286180  | 0.00310690  | 0.00336560  |
| 0.000100000 | 0.00276442  | 0.00295818  | 0.00316592  | 0.00338810  | 0.00362513  |
| 1.00000e-05 | 0.00280024  | 0.00299108  | 0.00319614  | 0.00341586  | 0.00365063  |
| 1.00000e-06 | 0.00280379  | 0.00299434  | 0.00319914  | 0.00341863  | 0.00365317  |
| 1.00000e-07 | 0.00280415  | 0.00299467  | 0.00319945  | 0.00341890  | 0.00365343  |
| 1.00000e-08 | 0.00280419  | 0.00299470  | 0.00319948  | 0.00341892  | 0.00365345  |
| 1.00000e-09 | 0.00280419  | 0.00299470  | 0.00319948  | 0.00341893  | 0.00365345  |

| Pa\K        | 220.000     | 230.000     | 240.000     | 250.000     | 260.000     |
|-------------|-------------|-------------|-------------|-------------|-------------|
| 1.00000e+08 | 8.56320e-11 | 1.12168e-10 | 1.47361e-10 | 1.94054e-10 | 2.55991e-10 |
| 1.00000e+07 | 8.56263e-10 | 1.12159e-09 | 1.47348e-09 | 1.94033e-09 | 2.55956e-09 |
| 1.00000e+06 | 8.55690e-09 | 1.12069e-08 | 1.47208e-08 | 1.93814e-08 | 2.55613e-08 |
| 100000.     | 8.50012e-08 | 1.11186e-07 | 1.45831e-07 | 1.91663e-07 | 2.52252e-07 |
| 10000.0     | 7.97961e-07 | 1.03227e-06 | 1.33661e-06 | 1.73086e-06 | 2.23976e-06 |
| 1000.00     | 5.08826e-06 | 6.23434e-06 | 7.61808e-06 | 9.27979e-06 | 1.12643e-05 |
| 100.000     | 1.15923e-05 | 1.33038e-05 | 1.52777e-05 | 1.75550e-05 | 2.01835e-05 |
| 10.0000     | 1.44856e-05 | 1.68208e-05 | 1.97198e-05 | 2.33544e-05 | 2.79500e-05 |
| 1.00000     | 4.90306e-05 | 6.46908e-05 | 8.53942e-05 | 0.000112530 | 0.000147774 |
| 0.100000    | 0.000472007 | 0.000594171 | 0.000741992 | 0.000918735 | 0.00112749  |
| 0.0100000   | 0.00219212  | 0.00250644  | 0.00284511  | 0.00320709  | 0.00359109  |
| 0.00100000  | 0.00363829  | 0.00392529  | 0.00422683  | 0.00454310  | 0.00487413  |
| 0.000100000 | 0.00387739  | 0.00414518  | 0.00442871  | 0.00472810  | 0.00504338  |
| 1.00000e-05 | 0.00390080  | 0.00416665  | 0.00444838  | 0.00474610  | 0.00505984  |
| 1.00000e-06 | 0.00390313  | 0.00416879  | 0.00445034  | 0.00474789  | 0.00506148  |
| 1.00000e-07 | 0.00390336  | 0.00416900  | 0.00445053  | 0.00474808  | 0.00506164  |
| 1.00000e-08 | 0.00390338  | 0.00416902  | 0.00445055  | 0.00474810  | 0.00506165  |
| 1.00000e-09 | 0.00390339  | 0.00416902  | 0.00445055  | 0.00474810  | 0.00506166  |

| Pa\K        | 270.000     | 280.000     | 290.000     | 300.000     | 400.000     |
|-------------|-------------|-------------|-------------|-------------|-------------|
| 1.00000e+08 | 3.38080e-10 | 4.46738e-10 | 5.90285e-10 | 2.63421e-09 | 3.11703e-08 |

|             |             |             |             |             |             |
|-------------|-------------|-------------|-------------|-------------|-------------|
| 1.00000e+07 | 3.38026e-09 | 4.46654e-09 | 5.90154e-09 | 2.63142e-08 | 3.10391e-07 |
| 1.00000e+06 | 3.37489e-08 | 4.45813e-08 | 5.88841e-08 | 2.60411e-07 | 2.98396e-06 |
| 100000.     | 3.32242e-07 | 4.37640e-07 | 5.76153e-07 | 2.37496e-06 | 2.25280e-05 |
| 10000.0     | 2.89383e-06 | 3.73030e-06 | 4.79399e-06 | 1.39872e-05 | 7.94212e-05 |
| 1000.00     | 1.36212e-05 | 1.64050e-05 | 1.96754e-05 | 3.24985e-05 | 0.000123682 |
| 100.000     | 2.32197e-05 | 2.67304e-05 | 3.07950e-05 | 4.32933e-05 | 0.000216448 |
| 10.0000     | 3.37986e-05 | 4.12742e-05 | 5.08493e-05 | 0.000120200 | 0.000967334 |
| 1.00000     | 0.000193104 | 0.000250821 | 0.000323541 | 0.000808394 | 0.00407241  |
| 0.100000    | 0.00137098  | 0.00165153  | 0.00197079  | 0.00328240  | 0.00850978  |
| 0.0100000   | 0.00399565  | 0.00441926  | 0.00486032  | 0.00582764  | 0.0103723   |
| 0.00100000  | 0.00521988  | 0.00558024  | 0.00595495  | 0.00649488  | 0.0106468   |
| 0.000100000 | 0.00537446  | 0.00572117  | 0.00608323  | 0.00656981  | 0.0106742   |
| 1.00000e-05 | 0.00538949  | 0.00573488  | 0.00609571  | 0.00657725  | 0.0106769   |
| 1.00000e-06 | 0.00539099  | 0.00573624  | 0.00609695  | 0.00657800  | 0.0106772   |
| 1.00000e-07 | 0.00539114  | 0.00573638  | 0.00609707  | 0.00657807  | 0.0106772   |
| 1.00000e-08 | 0.00539115  | 0.00573640  | 0.00609709  | 0.00657808  | 0.0106772   |
| 1.00000e-09 | 0.00539115  | 0.00573640  | 0.00609709  | 0.00657808  | 0.0106772   |

| Pa\K        | 500.000     | 600.000     | 700.000     | 800.000     | 900.000    |
|-------------|-------------|-------------|-------------|-------------|------------|
| 1.00000e+08 | 3.18746e-07 | 3.07497e-06 | 2.64481e-05 | 0.000234662 | 0.00204282 |
| 1.00000e+07 | 3.11949e-06 | 2.63613e-05 | 0.000189175 | 0.00110587  | 0.00459875 |
| 1.00000e+06 | 2.73352e-05 | 0.000180085 | 0.000811364 | 0.00253260  | 0.00592479 |
| 100000.     | 0.000142052 | 0.000564962 | 0.00156080  | 0.00345398  | 0.00712576 |
| 10000.0     | 0.000301254 | 0.000868945 | 0.00226001  | 0.00571736  | 0.0137096  |
| 1000.00     | 0.000438537 | 0.00156610  | 0.00526147  | 0.0139376   | 0.0286282  |
| 100.000     | 0.00118837  | 0.00492940  | 0.0137502   | 0.0270269   | 0.0423054  |
| 10.0000     | 0.00457587  | 0.0124793   | 0.0233503   | 0.0352071   | 0.0474142  |
| 1.00000     | 0.0107325   | 0.0188239   | 0.0275079   | 0.0373091   | 0.0482908  |
| 0.100000    | 0.0145237   | 0.0207811   | 0.0282623   | 0.0375756   | 0.0483808  |
| 0.0100000   | 0.0153358   | 0.0210484   | 0.0283417   | 0.0376008   | 0.0483892  |
| 0.00100000  | 0.0154250   | 0.0210747   | 0.0283494   | 0.0376033   | 0.0483900  |
| 0.000100000 | 0.0154337   | 0.0210773   | 0.0283502   | 0.0376035   | 0.0483901  |
| 1.00000e-05 | 0.0154345   | 0.0210776   | 0.0283503   | 0.0376036   | 0.0483901  |
| 1.00000e-06 | 0.0154346   | 0.0210776   | 0.0283503   | 0.0376036   | 0.0483901  |
| 1.00000e-07 | 0.0154346   | 0.0210776   | 0.0283503   | 0.0376036   | 0.0483901  |
| 1.00000e-08 | 0.0154346   | 0.0210776   | 0.0283503   | 0.0376036   | 0.0483901  |
| 1.00000e-09 | 0.0154346   | 0.0210776   | 0.0283503   | 0.0376036   | 0.0483901  |

| Pa\K        | 1000.00    | 1100.00   | 1200.00   | 1300.00   | 1400.00   |
|-------------|------------|-----------|-----------|-----------|-----------|
| 1.00000e+08 | 0.00827179 | 0.0155117 | 0.0194692 | 0.0198899 | 0.0180116 |
| 1.00000e+07 | 0.0112441  | 0.0186911 | 0.0263749 | 0.0344539 | 0.0398687 |
| 1.00000e+06 | 0.0113050  | 0.0198550 | 0.0327753 | 0.0471615 | 0.0568115 |
| 100000.     | 0.0145807  | 0.0281736 | 0.0467092 | 0.0634723 | 0.0730983 |
| 10000.0     | 0.0280816  | 0.0471700 | 0.0656549 | 0.0785958 | 0.0852748 |
| 1000.00     | 0.0464979  | 0.0632799 | 0.0761508 | 0.0845613 | 0.0892773 |
| 100.000     | 0.0567726  | 0.0690763 | 0.0787080 | 0.0855722 | 0.0898212 |
| 10.0000     | 0.0593021  | 0.0701040 | 0.0790537 | 0.0856728 | 0.0898621 |
| 1.00000     | 0.0596324  | 0.0702190 | 0.0790900 | 0.0856841 | 0.0898679 |
| 0.100000    | 0.0596637  | 0.0702297 | 0.0790940 | 0.0856854 | 0.0898688 |
| 0.0100000   | 0.0596667  | 0.0702309 | 0.0790946 | 0.0856859 | 0.0898693 |
| 0.00100000  | 0.0596670  | 0.0702309 | 0.0790946 | 0.0856859 | 0.0898693 |
| 0.000100000 | 0.0596670  | 0.0702309 | 0.0790946 | 0.0856859 | 0.0898693 |
| 1.00000e-05 | 0.0596670  | 0.0702309 | 0.0790946 | 0.0856859 | 0.0898693 |
| 1.00000e-06 | 0.0596670  | 0.0702309 | 0.0790946 | 0.0856859 | 0.0898693 |
| 1.00000e-07 | 0.0596670  | 0.0702309 | 0.0790946 | 0.0856859 | 0.0898693 |
| 1.00000e-08 | 0.0596670  | 0.0702309 | 0.0790946 | 0.0856859 | 0.0898693 |
| 1.00000e-09 | 0.0596670  | 0.0702309 | 0.0790946 | 0.0856859 | 0.0898693 |

| Pa\K        | 1500.00   | 1750.00   | 2000.00   | 2250.00   | 2500.00   |
|-------------|-----------|-----------|-----------|-----------|-----------|
| 1.00000e+08 | 0.0157486 | 0.0549801 | 0.0557430 | 0.0536035 | 0.0512371 |
| 1.00000e+07 | 0.0408703 | 0.0606034 | 0.0600773 | 0.0580477 | 0.0561089 |
| 1.00000e+06 | 0.0604207 | 0.0660808 | 0.0653391 | 0.0642209 | 0.0621868 |
| 100000.     | 0.0765024 | 0.0767223 | 0.0748065 | 0.0713756 | 0.0666233 |
| 10000.0     | 0.0876360 | 0.0861187 | 0.0809906 | 0.0744680 | 0.0679262 |
| 1000.00     | 0.0912557 | 0.0894844 | 0.0827215 | 0.0751094 | 0.0681341 |
| 100.000     | 0.0917871 | 0.0900835 | 0.0829904 | 0.0751939 | 0.0681583 |
| 10.0000     | 0.0918348 | 0.0901521 | 0.0830204 | 0.0752030 | 0.0681608 |
| 1.00000     | 0.0918412 | 0.0901598 | 0.0830239 | 0.0752040 | 0.0681609 |
| 0.100000    | 0.0918420 | 0.0901605 | 0.0830241 | 0.0752040 | 0.0681609 |
| 0.0100000   | 0.0918421 | 0.0901606 | 0.0830241 | 0.0752040 | 0.0681609 |
| 0.00100000  | 0.0918421 | 0.0901606 | 0.0830241 | 0.0752040 | 0.0681609 |
| 0.000100000 | 0.0918421 | 0.0901606 | 0.0830241 | 0.0752040 | 0.0681609 |
| 1.00000e-05 | 0.0918421 | 0.0901606 | 0.0830241 | 0.0752040 | 0.0681609 |
| 1.00000e-06 | 0.0918421 | 0.0901606 | 0.0830241 | 0.0752040 | 0.0681609 |
| 1.00000e-07 | 0.0918421 | 0.0901606 | 0.0830241 | 0.0752040 | 0.0681609 |
| 1.00000e-08 | 0.0918421 | 0.0901606 | 0.0830241 | 0.0752040 | 0.0681609 |
| 1.00000e-09 | 0.0918421 | 0.0901606 | 0.0830241 | 0.0752040 | 0.0681609 |

| Pa\K        | 2750.00   | 3000.00   | 3250.00   | 3500.00   | 3750.00   |
|-------------|-----------|-----------|-----------|-----------|-----------|
| 1.00000e+08 | 0.0492590 | 0.0475932 | 0.0461321 | 0.0448023 | 0.0435615 |
| 1.00000e+07 | 0.0542911 | 0.0524044 | 0.0504198 | 0.0484088 | 0.0464619 |
| 1.00000e+06 | 0.0592654 | 0.0559803 | 0.0527760 | 0.0498765 | 0.0473474 |
| 100000.     | 0.0616631 | 0.0571748 | 0.0533472 | 0.0501465 | 0.0474757 |
| 10000.0     | 0.0621705 | 0.0573683 | 0.0534217 | 0.0501762 | 0.0474879 |
| 1000.00     | 0.0622367 | 0.0573901 | 0.0534292 | 0.0501790 | 0.0474889 |
| 100.000     | 0.0622439 | 0.0573922 | 0.0534300 | 0.0501792 | 0.0474891 |
| 10.0000     | 0.0622444 | 0.0573925 | 0.0534300 | 0.0501792 | 0.0474891 |
| 1.00000     | 0.0622446 | 0.0573925 | 0.0534299 | 0.0501791 | 0.0474891 |
| 0.100000    | 0.0622446 | 0.0573925 | 0.0534299 | 0.0501791 | 0.0474891 |
| 0.0100000   | 0.0622446 | 0.0573925 | 0.0534299 | 0.0501791 | 0.0474891 |
| 0.00100000  | 0.0622446 | 0.0573925 | 0.0534299 | 0.0501791 | 0.0474891 |
| 0.000100000 | 0.0622446 | 0.0573925 | 0.0534299 | 0.0501791 | 0.0474891 |
| 1.00000e-05 | 0.0622446 | 0.0573925 | 0.0534299 | 0.0501791 | 0.0474891 |
| 1.00000e-06 | 0.0622446 | 0.0573925 | 0.0534299 | 0.0501791 | 0.0474891 |
| 1.00000e-07 | 0.0622446 | 0.0573925 | 0.0534299 | 0.0501791 | 0.0474891 |
| 1.00000e-08 | 0.0622446 | 0.0573925 | 0.0534299 | 0.0501791 | 0.0474891 |
| 1.00000e-09 | 0.0622446 | 0.0573925 | 0.0534299 | 0.0501791 | 0.0474891 |

| Pa\K        | 4000.00   |
|-------------|-----------|
| 1.00000e+08 | 0.0423875 |
| 1.00000e+07 | 0.0446457 |
| 1.00000e+06 | 0.0451728 |
| 100000.     | 0.0452352 |
| 10000.0     | 0.0452402 |
| 1000.00     | 0.0452407 |
| 100.000     | 0.0452406 |
| 10.0000     | 0.0452408 |
| 1.00000     | 0.0452408 |
| 0.100000    | 0.0452408 |
| 0.0100000   | 0.0452408 |
| 0.00100000  | 0.0452408 |
| 0.000100000 | 0.0452408 |
| 1.00000e-05 | 0.0452408 |
| 1.00000e-06 | 0.0452408 |
| 1.00000e-07 | 0.0452408 |
| 1.00000e-08 | 0.0452408 |
| 1.00000e-09 | 0.0452408 |

PhCCH+CH3

=====

| Pa\K        | 20.0000     | 30.0000     | 40.0000     | 50.0000     | 60.0000     |
|-------------|-------------|-------------|-------------|-------------|-------------|
| 1.00000e+08 | 1.13123e-35 | 4.36650e-32 | 4.32725e-30 | 8.24068e-29 | 6.86423e-28 |
| 1.00000e+07 | 1.95438e-31 | 4.45779e-29 | 4.14528e-27 | 7.93592e-26 | 6.63527e-25 |
| 1.00000e+06 | 2.84702e-27 | 9.08311e-26 | 4.37062e-24 | 7.95979e-23 | 6.59143e-22 |
| 100000.     | 2.95009e-23 | 5.41484e-22 | 6.52972e-21 | 8.20422e-20 | 6.22313e-19 |
| 10000.0     | 2.57386e-19 | 3.89475e-18 | 2.08658e-17 | 9.93015e-17 | 4.56232e-16 |
| 1000.00     | 1.10132e-15 | 1.14179e-14 | 4.41186e-14 | 1.24433e-13 | 3.13312e-13 |
| 100.000     | 1.48953e-12 | 1.17822e-11 | 3.86517e-11 | 9.23395e-11 | 1.88903e-10 |
| 10.0000     | 7.60245e-10 | 3.74235e-09 | 8.80075e-09 | 1.60566e-08 | 2.59073e-08 |
| 1.00000     | 5.94720e-08 | 1.57658e-07 | 2.71952e-07 | 4.08816e-07 | 5.76851e-07 |
| 0.100000    | 1.04471e-06 | 2.48546e-06 | 4.28967e-06 | 6.58435e-06 | 9.52080e-06 |
| 0.0100000   | 1.83183e-05 | 4.45579e-05 | 7.43943e-05 | 0.000108744 | 0.000148888 |
| 0.00100000  | 0.000244668 | 0.000470576 | 0.000673057 | 0.000868719 | 0.00106512  |
| 0.000100000 | 0.00130829  | 0.00169381  | 0.00190287  | 0.00206803  | 0.00222202  |
| 1.00000e-05 | 0.00207345  | 0.00215923  | 0.00223627  | 0.00232845  | 0.00243618  |
| 1.00000e-06 | 0.00217762  | 0.00221129  | 0.00227151  | 0.00235532  | 0.00245800  |
| 1.00000e-07 | 0.00218811  | 0.00221651  | 0.00227504  | 0.00235801  | 0.00246019  |
| 1.00000e-08 | 0.00218916  | 0.00221703  | 0.00227539  | 0.00235828  | 0.00246041  |
| 1.00000e-09 | 0.00218926  | 0.00221709  | 0.00227543  | 0.00235831  | 0.00246043  |

| Pa\K        | 70.0000     | 80.0000     | 90.0000     | 100.000     | 110.000     |
|-------------|-------------|-------------|-------------|-------------|-------------|
| 1.00000e+08 | 3.55804e-27 | 1.36974e-26 | 4.32643e-26 | 1.19220e-25 | 2.98495e-25 |
| 1.00000e+07 | 3.44457e-24 | 1.32597e-23 | 4.18296e-23 | 1.15007e-22 | 2.87027e-22 |
| 1.00000e+06 | 3.40650e-21 | 1.30676e-20 | 4.10860e-20 | 1.12567e-19 | 2.79859e-19 |
| 100000.     | 3.09317e-18 | 1.15378e-17 | 3.53639e-17 | 9.44414e-17 | 2.28543e-16 |
| 10000.0     | 1.76782e-15 | 5.65699e-15 | 1.54645e-14 | 3.75068e-14 | 8.32156e-14 |
| 1000.00     | 7.50459e-13 | 1.72084e-12 | 3.75661e-12 | 7.80109e-12 | 1.54838e-11 |
| 100.000     | 3.54617e-10 | 6.32321e-10 | 1.09006e-09 | 1.83296e-09 | 3.02016e-09 |
| 10.0000     | 3.90343e-08 | 5.64948e-08 | 7.98306e-08 | 1.11204e-07 | 1.53594e-07 |
| 1.00000     | 7.87831e-07 | 1.05897e-06 | 1.41520e-06 | 1.89207e-06 | 2.53972e-06 |
| 0.100000    | 1.33049e-05 | 1.82301e-05 | 2.47038e-05 | 3.32721e-05 | 4.46513e-05 |
| 0.0100000   | 0.00196461  | 0.00253636  | 0.00323162  | 0.00408304  | 0.00512782  |
| 0.00100000  | 0.00126706  | 0.00147871  | 0.00170390  | 0.00194589  | 0.00220741  |

|             |            |            |            |            |            |
|-------------|------------|------------|------------|------------|------------|
| 0.000100000 | 0.00237731 | 0.00254100 | 0.00271809 | 0.00291236 | 0.00312676 |
| 1.00000e-05 | 0.00255944 | 0.00269952 | 0.00285838 | 0.00303806 | 0.00324043 |
| 1.00000e-06 | 0.00257786 | 0.00271548 | 0.00287246 | 0.00305066 | 0.00325181 |
| 1.00000e-07 | 0.00257971 | 0.00271708 | 0.00287386 | 0.00305192 | 0.00325294 |
| 1.00000e-08 | 0.00257989 | 0.00271724 | 0.00287400 | 0.00305205 | 0.00325306 |
| 1.00000e-09 | 0.00257991 | 0.00271725 | 0.00287402 | 0.00305206 | 0.00325307 |

| Pa\K        | 120.000     | 130.000     | 140.000     | 150.000     | 160.000     |
|-------------|-------------|-------------|-------------|-------------|-------------|
| 1.00000e+08 | 6.98507e-25 | 1.55920e-24 | 3.37009e-24 | 7.13135e-24 | 1.48924e-23 |
| 1.00000e+07 | 6.68887e-22 | 1.48545e-21 | 3.19105e-21 | 6.70463e-21 | 1.38890e-20 |
| 1.00000e+06 | 6.49365e-19 | 1.43498e-18 | 3.06507e-18 | 6.39722e-18 | 1.31497e-17 |
| 100000.     | 5.15036e-16 | 1.10221e-15 | 2.27212e-15 | 4.55871e-15 | 8.96918e-15 |
| 10000.0     | 1.72871e-13 | 3.42182e-13 | 6.53928e-13 | 1.21856e-12 | 2.23068e-12 |
| 1000.00     | 2.95896e-11 | 5.48608e-11 | 9.93606e-11 | 1.76765e-10 | 3.10170e-10 |
| 100.000     | 4.88902e-09 | 7.79008e-09 | 1.22365e-08 | 1.89740e-08 | 2.90780e-08 |
| 10.0000     | 2.11102e-07 | 2.89408e-07 | 3.96446e-07 | 5.43405e-07 | 7.46173e-07 |
| 1.00000     | 3.42880e-06 | 4.65886e-06 | 6.36996e-06 | 8.75829e-06 | 1.20966e-05 |
| 0.100000    | 5.97699e-05 | 7.98246e-05 | 0.000106351 | 0.000141305 | 0.000187158 |
| 0.0100000   | 0.000640695 | 0.000796442 | 0.000984632 | 0.00120997  | 0.00147706  |
| 0.00100000  | 0.00249070  | 0.00279762  | 0.00312979  | 0.00348874  | 0.00387600  |
| 0.000100000 | 0.00336361  | 0.00362484  | 0.00391218  | 0.00422725  | 0.00457166  |
| 1.00000e-05 | 0.00346713  | 0.00371964  | 0.00399932  | 0.00430759  | 0.00464588  |
| 1.00000e-06 | 0.00347748  | 0.00372910  | 0.00400802  | 0.00431560  | 0.00465328  |
| 1.00000e-07 | 0.00347852  | 0.00373005  | 0.00400889  | 0.00431641  | 0.00465402  |
| 1.00000e-08 | 0.00347862  | 0.00373014  | 0.00400898  | 0.00431649  | 0.00465410  |
| 1.00000e-09 | 0.00347863  | 0.00373015  | 0.00400898  | 0.00431650  | 0.00465411  |

| Pa\K        | 170.000     | 180.000     | 190.000     | 200.000     | 210.000     |
|-------------|-------------|-------------|-------------|-------------|-------------|
| 1.00000e+08 | 3.08640e-23 | 6.37149e-23 | 1.31310e-22 | 2.70461e-22 | 5.56923e-22 |
| 1.00000e+07 | 2.85290e-20 | 5.83297e-20 | 1.18989e-19 | 2.42489e-19 | 4.93910e-19 |
| 1.00000e+06 | 2.67672e-17 | 5.41544e-17 | 1.09135e-16 | 2.19311e-16 | 4.39601e-16 |
| 100000.     | 1.73962e-14 | 3.33814e-14 | 6.35197e-14 | 1.20023e-13 | 2.25372e-13 |
| 10000.0     | 4.03321e-12 | 7.23054e-12 | 1.28861e-11 | 2.28658e-11 | 4.04299e-11 |
| 1000.00     | 5.38286e-10 | 9.25360e-10 | 1.57669e-09 | 2.66232e-09 | 4.45247e-09 |
| 100.000     | 4.40898e-08 | 6.62049e-08 | 9.85352e-08 | 1.45474e-07 | 2.13203e-07 |
| 10.0000     | 1.02742e-06 | 1.41956e-06 | 1.96895e-06 | 2.74170e-06 | 3.83145e-06 |
| 1.00000     | 1.67609e-05 | 2.32631e-05 | 3.22924e-05 | 4.47654e-05 | 6.18846e-05 |
| 0.100000    | 0.000246992 | 0.000324588 | 0.000424495 | 0.000552071 | 0.000713467 |
| 0.0100000   | 0.00179033  | 0.00215380  | 0.00257093  | 0.00304453  | 0.00357668  |
| 0.00100000  | 0.00429309  | 0.00474157  | 0.00522303  | 0.00573904  | 0.00629115  |
| 0.000100000 | 0.00494705  | 0.00535506  | 0.00579738  | 0.00627565  | 0.00679148  |
| 1.00000e-05 | 0.00501571  | 0.00541863  | 0.00585625  | 0.00633018  | 0.00684196  |
| 1.00000e-06 | 0.00502255  | 0.00542497  | 0.00586212  | 0.00633562  | 0.00684699  |
| 1.00000e-07 | 0.00502324  | 0.00542561  | 0.00586271  | 0.00633616  | 0.00684750  |
| 1.00000e-08 | 0.00502331  | 0.00542567  | 0.00586277  | 0.00633621  | 0.00684755  |
| 1.00000e-09 | 0.00502332  | 0.00542568  | 0.00586278  | 0.00633622  | 0.00684756  |

| Pa\K        | 220.000     | 230.000     | 240.000     | 250.000     | 260.000     |
|-------------|-------------|-------------|-------------|-------------|-------------|
| 1.00000e+08 | 1.14614e-21 | 2.35555e-21 | 4.82847e-21 | 9.85389e-21 | 1.99735e-20 |
| 1.00000e+07 | 1.00534e-18 | 2.04370e-18 | 4.14469e-18 | 8.37229e-18 | 1.68087e-17 |
| 1.00000e+06 | 8.78694e-16 | 1.75022e-15 | 3.47027e-15 | 6.83953e-15 | 1.33750e-14 |
| 100000.     | 4.20661e-13 | 7.80474e-13 | 1.43902e-12 | 2.63539e-12 | 4.79019e-12 |
| 10000.0     | 7.12407e-11 | 1.25055e-10 | 2.18521e-10 | 3.79694e-10 | 6.55152e-10 |
| 1000.00     | 7.36916e-09 | 1.20598e-08 | 1.94995e-08 | 3.11324e-08 | 4.90578e-08 |
| 100.000     | 3.10393e-07 | 4.49181e-07 | 6.46501e-07 | 9.25897e-07 | 1.31995e-06 |
| 10.0000     | 5.36989e-06 | 7.54022e-06 | 1.05943e-05 | 1.48741e-05 | 2.08372e-05 |
| 1.00000     | 8.52071e-05 | 0.000116721 | 0.000158926 | 0.000214922 | 0.000288483 |
| 0.100000    | 0.000915559 | 0.00116581  | 0.00147204  | 0.00184219  | 0.00228396  |
| 0.0100000   | 0.00416865  | 0.00482096  | 0.00553336  | 0.00630494  | 0.00713421  |
| 0.00100000  | 0.00688077  | 0.00750924  | 0.00817768  | 0.00888700  | 0.00963789  |
| 0.000100000 | 0.00734635  | 0.00794161  | 0.00857842  | 0.00925772  | 0.00998019  |
| 1.00000e-05 | 0.00739305  | 0.00798479  | 0.00861829  | 0.00929450  | 0.0100141   |
| 1.00000e-06 | 0.00739771  | 0.00798910  | 0.00862227  | 0.00929816  | 0.0100174   |
| 1.00000e-07 | 0.00739817  | 0.00798953  | 0.00862267  | 0.00929853  | 0.0100178   |
| 1.00000e-08 | 0.00739822  | 0.00798957  | 0.00862271  | 0.00929857  | 0.0100178   |
| 1.00000e-09 | 0.00739823  | 0.00798957  | 0.00862271  | 0.00929857  | 0.0100178   |

| Pa\K        | 270.000     | 280.000     | 290.000     | 300.000     | 400.000     |
|-------------|-------------|-------------|-------------|-------------|-------------|
| 1.00000e+08 | 4.00953e-20 | 7.94556e-20 | 1.54931e-19 | 1.46876e-17 | 3.51295e-14 |
| 1.00000e+07 | 3.34507e-17 | 6.57864e-17 | 1.27458e-16 | 1.15046e-14 | 1.32217e-11 |
| 1.00000e+06 | 2.58949e-14 | 4.95132e-14 | 9.32611e-14 | 4.79499e-12 | 1.66157e-09 |
| 100000.     | 8.63210e-12 | 1.54000e-11 | 2.71540e-11 | 6.76401e-10 | 6.99760e-08 |
| 10000.0     | 1.12085e-09 | 1.89809e-09 | 3.17601e-09 | 4.40199e-08 | 1.62262e-06 |
| 1000.00     | 7.62779e-08 | 1.17010e-07 | 1.77074e-07 | 1.16845e-06 | 2.27859e-05 |
| 100.000     | 1.87345e-06 | 2.64740e-06 | 3.72402e-06 | 1.76676e-05 | 0.000261783 |
| 10.0000     | 2.90870e-05 | 4.04078e-05 | 5.58016e-05 | 0.000224861 | 0.00223299  |

|             |             |             |             |            |           |
|-------------|-------------|-------------|-------------|------------|-----------|
| 1.00000     | 0.000384122 | 0.000507141 | 0.000663629 | 0.00190611 | 0.0101666 |
| 0.100000    | 0.00280452  | 0.00341011  | 0.00410577  | 0.00763583 | 0.0210996 |
| 0.0100000   | 0.00801917  | 0.00895743  | 0.00994634  | 0.0132650  | 0.0255382 |
| 0.00100000  | 0.0104308   | 0.0112658   | 0.0121427   | 0.0147208  | 0.0261955 |
| 0.000100000 | 0.0107462   | 0.0115559   | 0.0124090   | 0.0148888  | 0.0262625 |
| 1.00000e-05 | 0.0107774   | 0.0115845   | 0.0124353   | 0.0149057  | 0.0262692 |
| 1.00000e-06 | 0.0107805   | 0.0115874   | 0.0124379   | 0.0149074  | 0.0262699 |
| 1.00000e-07 | 0.0107808   | 0.0115877   | 0.0124382   | 0.0149076  | 0.0262700 |
| 1.00000e-08 | 0.0107808   | 0.0115877   | 0.0124382   | 0.0149076  | 0.0262700 |
| 1.00000e-09 | 0.0107808   | 0.0115877   | 0.0124382   | 0.0149076  | 0.0262700 |

Pa\K | 500.000 600.000 700.000 800.000 900.000

|             |             |             |             |             |             |
|-------------|-------------|-------------|-------------|-------------|-------------|
| 1.00000e+08 | 9.63063e-11 | 2.42973e-08 | 3.55657e-07 | 1.91674e-06 | 1.02497e-05 |
| 1.00000e+07 | 3.40836e-09 | 2.14968e-07 | 2.62709e-06 | 1.27011e-05 | 5.71290e-05 |
| 1.00000e+06 | 1.03609e-07 | 1.84148e-06 | 1.36438e-05 | 6.38345e-05 | 0.000276014 |
| 100000.     | 1.81622e-06 | 1.84366e-05 | 0.000111457 | 0.000487404 | 0.00180403  |
| 10000.0     | 2.33271e-05 | 0.000180162 | 0.000953286 | 0.00351895  | 0.00977939  |
| 1000.00     | 0.000244688 | 0.00155745  | 0.00632496  | 0.0165087   | 0.0311388   |
| 100.000     | 0.00210491  | 0.00922148  | 0.0239372   | 0.0413317   | 0.0552893   |
| 10.0000     | 0.0108670   | 0.0280629   | 0.0467352   | 0.0596814   | 0.0661630   |
| 1.00000     | 0.0269717   | 0.0447170   | 0.0575415   | 0.0650070   | 0.0682907   |
| 0.100000    | 0.0367355   | 0.0499305   | 0.0596034   | 0.0657349   | 0.0685244   |
| 0.0100000   | 0.0388011   | 0.0506506   | 0.0598265   | 0.0658053   | 0.0685462   |
| 0.00100000  | 0.0390319   | 0.0507228   | 0.0598482   | 0.0658122   | 0.0685483   |
| 0.000100000 | 0.0390548   | 0.0507299   | 0.0598504   | 0.0658129   | 0.0685485   |
| 1.00000e-05 | 0.0390570   | 0.0507306   | 0.0598506   | 0.0658130   | 0.0685485   |
| 1.00000e-06 | 0.0390573   | 0.0507307   | 0.0598506   | 0.0658130   | 0.0685486   |
| 1.00000e-07 | 0.0390573   | 0.0507307   | 0.0598506   | 0.0658130   | 0.0685486   |
| 1.00000e-08 | 0.0390573   | 0.0507307   | 0.0598506   | 0.0658130   | 0.0685486   |
| 1.00000e-09 | 0.0390573   | 0.0507307   | 0.0598506   | 0.0658130   | 0.0685486   |

Pa\K | 1000.00 1100.00 1200.00 1300.00 1400.00

|             |             |             |             |            |            |
|-------------|-------------|-------------|-------------|------------|------------|
| 1.00000e+08 | 5.04097e-05 | 0.000162428 | 0.000424289 | 0.00104002 | 0.00168811 |
| 1.00000e+07 | 0.000249358 | 0.000900885 | 0.00258946  | 0.00551665 | 0.00817559 |
| 1.00000e+06 | 0.00108497  | 0.00352192  | 0.00840904  | 0.0141842  | 0.0179529  |
| 100000.     | 0.00538797  | 0.0124188   | 0.0215190   | 0.0284895  | 0.0311122  |
| 10000.0     | 0.0201807   | 0.0320638   | 0.0409388   | 0.0442839  | 0.0433697  |
| 1000.00     | 0.0448599   | 0.0532879   | 0.0556331   | 0.0537354  | 0.0498723  |
| 100.000     | 0.0623061   | 0.0634158   | 0.0608937   | 0.0566019  | 0.0516995  |
| 10.0000     | 0.0675393   | 0.0656497   | 0.0618446   | 0.0570696  | 0.0519845  |
| 1.00000     | 0.0683082   | 0.0659241   | 0.0619519   | 0.0571214  | 0.0520157  |
| 0.100000    | 0.0683839   | 0.0659505   | 0.0619623   | 0.0571270  | 0.0520190  |
| 0.0100000   | 0.0683910   | 0.0659529   | 0.0619635   | 0.0571276  | 0.0520195  |
| 0.00100000  | 0.0683917   | 0.0659535   | 0.0619641   | 0.0571276  | 0.0520195  |
| 0.000100000 | 0.0683917   | 0.0659535   | 0.0619641   | 0.0571276  | 0.0520195  |
| 1.00000e-05 | 0.0683917   | 0.0659535   | 0.0619641   | 0.0571276  | 0.0520195  |
| 1.00000e-06 | 0.0683917   | 0.0659535   | 0.0619641   | 0.0571276  | 0.0520195  |
| 1.00000e-07 | 0.0683917   | 0.0659535   | 0.0619641   | 0.0571276  | 0.0520195  |
| 1.00000e-08 | 0.0683917   | 0.0659535   | 0.0619641   | 0.0571276  | 0.0520195  |
| 1.00000e-09 | 0.0683917   | 0.0659535   | 0.0619641   | 0.0571276  | 0.0520195  |

Pa\K | 1500.00 1750.00 2000.00 2250.00 2500.00

|             |            |            |            |            |            |
|-------------|------------|------------|------------|------------|------------|
| 1.00000e+08 | 0.00170504 | 0.00778568 | 0.00941807 | 0.00961490 | 0.00948724 |
| 1.00000e+07 | 0.00904804 | 0.0118873  | 0.0128356  | 0.0128175  | 0.0127442  |
| 1.00000e+06 | 0.0191724  | 0.0186390  | 0.0182525  | 0.0177276  | 0.0171050  |
| 100000.     | 0.0307088  | 0.0272966  | 0.0247784  | 0.0224237  | 0.0200323  |
| 10000.0     | 0.0405552  | 0.0342071  | 0.0288239  | 0.0244191  | 0.0208844  |
| 1000.00     | 0.0454848  | 0.0371820  | 0.0300606  | 0.0248484  | 0.0210208  |
| 100.000     | 0.0468170  | 0.0378749  | 0.0302777  | 0.0249073  | 0.0210363  |
| 10.0000     | 0.0470199  | 0.0379735  | 0.0303041  | 0.0249135  | 0.0210379  |
| 1.00000     | 0.0470418  | 0.0379841  | 0.0303068  | 0.0249142  | 0.0210380  |
| 0.100000    | 0.0470441  | 0.0379851  | 0.0303070  | 0.0249142  | 0.0210380  |
| 0.0100000   | 0.0470444  | 0.0379853  | 0.0303071  | 0.0249142  | 0.0210381  |
| 0.00100000  | 0.0470444  | 0.0379853  | 0.0303071  | 0.0249142  | 0.0210381  |
| 0.000100000 | 0.0470444  | 0.0379853  | 0.0303071  | 0.0249142  | 0.0210381  |
| 1.00000e-05 | 0.0470444  | 0.0379853  | 0.0303071  | 0.0249142  | 0.0210381  |
| 1.00000e-06 | 0.0470444  | 0.0379853  | 0.0303071  | 0.0249142  | 0.0210381  |
| 1.00000e-07 | 0.0470444  | 0.0379853  | 0.0303071  | 0.0249142  | 0.0210381  |
| 1.00000e-08 | 0.0470444  | 0.0379853  | 0.0303071  | 0.0249142  | 0.0210381  |
| 1.00000e-09 | 0.0470444  | 0.0379853  | 0.0303071  | 0.0249142  | 0.0210381  |

Pa\K | 2750.00 3000.00 3250.00 3500.00 3750.00

|             |            |            |            |            |            |
|-------------|------------|------------|------------|------------|------------|
| 1.00000e+08 | 0.00937931 | 0.00931136 | 0.00925976 | 0.00919622 | 0.00909933 |
| 1.00000e+07 | 0.0126641  | 0.0124652  | 0.0121062  | 0.0116159  | 0.0110524  |
| 1.00000e+06 | 0.0161550  | 0.0149919  | 0.0137952  | 0.0126812  | 0.0116979  |
| 100000.     | 0.0177762  | 0.0158239  | 0.0142043  | 0.0128783  | 0.0117920  |

|             |           |           |           |           |           |
|-------------|-----------|-----------|-----------|-----------|-----------|
| 10000.0     | 0.0181162 | 0.0159572 | 0.0142569 | 0.0128994 | 0.0118006 |
| 1000.00     | 0.0181596 | 0.0159716 | 0.0142619 | 0.0129012 | 0.0118012 |
| 100.000     | 0.0181639 | 0.0159729 | 0.0142623 | 0.0129013 | 0.0118012 |
| 10.0000     | 0.0181643 | 0.0159730 | 0.0142624 | 0.0129013 | 0.0118013 |
| 1.00000     | 0.0181644 | 0.0159730 | 0.0142623 | 0.0129013 | 0.0118013 |
| 0.100000    | 0.0181644 | 0.0159730 | 0.0142623 | 0.0129013 | 0.0118013 |
| 0.0100000   | 0.0181644 | 0.0159730 | 0.0142623 | 0.0129013 | 0.0118013 |
| 0.00100000  | 0.0181644 | 0.0159730 | 0.0142623 | 0.0129013 | 0.0118013 |
| 0.000100000 | 0.0181644 | 0.0159730 | 0.0142623 | 0.0129013 | 0.0118013 |
| 1.00000e-05 | 0.0181644 | 0.0159730 | 0.0142623 | 0.0129013 | 0.0118013 |
| 1.00000e-06 | 0.0181644 | 0.0159730 | 0.0142623 | 0.0129013 | 0.0118013 |
| 1.00000e-07 | 0.0181644 | 0.0159730 | 0.0142623 | 0.0129013 | 0.0118013 |
| 1.00000e-08 | 0.0181644 | 0.0159730 | 0.0142623 | 0.0129013 | 0.0118013 |
| 1.00000e-09 | 0.0181644 | 0.0159730 | 0.0142623 | 0.0129013 | 0.0118013 |

Pa\K | 4000.00

|             |            |
|-------------|------------|
| 1.00000e+08 | 0.00895930 |
| 1.00000e+07 | 0.0104710  |
| 1.00000e+06 | 0.0108518  |
| 100000.     | 0.0108966  |
| 10000.0     | 0.0109001  |
| 1000.00     | 0.0109002  |
| 100.000     | 0.0109003  |
| 10.0000     | 0.0109003  |
| 1.00000     | 0.0109003  |
| 0.100000    | 0.0109003  |
| 0.0100000   | 0.0109003  |
| 0.00100000  | 0.0109003  |
| 0.000100000 | 0.0109003  |
| 1.00000e-05 | 0.0109003  |
| 1.00000e-06 | 0.0109003  |
| 1.00000e-07 | 0.0109003  |
| 1.00000e-08 | 0.0109003  |
| 1.00000e-09 | 0.0109003  |

rad7

====

Pa\K | 20.0000 30.0000 40.0000 50.0000 60.0000

|             |             |             |             |             |             |
|-------------|-------------|-------------|-------------|-------------|-------------|
| 1.00000e+08 | 9.40319e-18 | 1.52809e-15 | 6.33096e-14 | 6.30263e-13 | 3.02445e-12 |
| 1.00000e+07 | 2.55255e-15 | 2.64005e-14 | 6.58860e-13 | 6.34926e-12 | 3.03185e-11 |
| 1.00000e+06 | 3.14330e-13 | 1.45217e-12 | 9.26367e-12 | 6.82717e-11 | 3.10715e-10 |
| 100000.     | 3.21587e-11 | 1.33410e-10 | 3.60005e-10 | 1.16006e-09 | 3.85880e-09 |
| 10000.0     | 3.21207e-09 | 1.31302e-08 | 3.00241e-08 | 5.85891e-08 | 1.12277e-07 |
| 1000.00     | 3.10224e-07 | 1.22269e-06 | 2.65318e-06 | 4.61204e-06 | 7.19272e-06 |
| 100.000     | 2.23104e-05 | 6.53219e-05 | 0.000109005 | 0.000148289 | 0.000182083 |
| 10.0000     | 0.000261815 | 0.000285208 | 0.000274727 | 0.000263079 | 0.000253353 |
| 1.00000     | 0.000218460 | 0.000191054 | 0.000177868 | 0.000169550 | 0.000163620 |
| 0.100000    | 0.000144333 | 0.000129244 | 0.000121813 | 0.000117017 | 0.000113516 |
| 0.0100000   | 0.000101987 | 9.18831e-05 | 8.61670e-05 | 8.19507e-05 | 7.84442e-05 |
| 0.00100000  | 6.66393e-05 | 5.17495e-05 | 4.17886e-05 | 3.42362e-05 | 2.82300e-05 |
| 0.000100000 | 1.38689e-05 | 4.39711e-06 | 1.86694e-06 | 9.26834e-07 | 5.08159e-07 |
| 1.00000e-05 | 7.98104e-08 | 9.21579e-09 | 2.56468e-09 | 1.01743e-09 | 4.88640e-10 |
| 1.00000e-06 | 6.45241e-11 | 7.88098e-12 | 2.42868e-12 | 1.05570e-12 | 5.48870e-13 |
| 1.00000e-07 | 9.72936e-14 | 1.62037e-14 | 5.96185e-15 | 2.93335e-15 | 1.67785e-15 |
| 1.00000e-08 | 4.06011e-16 | 9.10159e-17 | 3.94539e-17 | 2.17402e-17 | 1.35611e-17 |
| 1.00000e-09 | 4.38022e-18 | 1.29351e-18 | 6.53215e-19 | 3.99982e-19 | 2.70442e-19 |

Pa\K | 70.0000 80.0000 90.0000 100.000 110.000

|             |             |             |             |             |             |
|-------------|-------------|-------------|-------------|-------------|-------------|
| 1.00000e+08 | 9.53541e-12 | 2.30738e-11 | 4.67363e-11 | 8.35061e-11 | 1.36132e-10 |
| 1.00000e+07 | 9.54619e-11 | 2.30885e-10 | 4.67555e-10 | 8.35301e-10 | 1.36161e-09 |
| 1.00000e+06 | 9.65541e-10 | 2.32376e-09 | 4.69494e-09 | 8.37725e-09 | 1.36454e-08 |
| 100000.     | 1.07452e-08 | 2.47242e-08 | 4.88820e-08 | 8.61870e-08 | 1.39369e-07 |
| 10000.0     | 2.13829e-07 | 3.91690e-07 | 6.75680e-07 | 1.09406e-06 | 1.67236e-06 |
| 1000.00     | 1.05487e-05 | 1.48515e-05 | 2.02529e-05 | 2.68634e-05 | 3.47469e-05 |
| 100.000     | 0.000210528 | 0.000234154 | 0.000253567 | 0.000269346 | 0.000282004 |
| 10.0000     | 0.000245448 | 0.000238956 | 0.000233533 | 0.000228923 | 0.000224934 |
| 1.00000     | 0.000159090 | 0.000155467 | 0.000152477 | 0.000149945 | 0.000147752 |
| 0.100000    | 0.000110769 | 0.000108505 | 0.000106567 | 0.000104853 | 0.000103290 |
| 0.0100000   | 7.53193e-05 | 7.24028e-05 | 6.95880e-05 | 6.68027e-05 | 6.39969e-05 |
| 0.00100000  | 2.33419e-05 | 1.93118e-05 | 1.59644e-05 | 1.31736e-05 | 1.08448e-05 |
| 0.000100000 | 2.98650e-07 | 1.84750e-07 | 1.18848e-07 | 7.88244e-08 | 5.35682e-08 |
| 1.00000e-05 | 2.64519e-10 | 1.55375e-10 | 9.67883e-11 | 6.29981e-11 | 4.24122e-11 |
| 1.00000e-06 | 3.18525e-13 | 1.99051e-13 | 1.31126e-13 | 8.98239e-14 | 6.33941e-14 |
| 1.00000e-07 | 1.05259e-15 | 7.02667e-16 | 4.90272e-16 | 3.53433e-16 | 2.61198e-16 |
| 1.00000e-08 | 9.12743e-18 | 6.46554e-18 | 4.74918e-18 | 3.58285e-18 | 2.75812e-18 |
| 1.00000e-09 | 1.94306e-19 | 1.45413e-19 | 1.12007e-19 | 8.81123e-20 | 7.04203e-20 |

| Pa\K        | 120.000     | 130.000     | 140.000     | 150.000     | 160.000     |
|-------------|-------------|-------------|-------------|-------------|-------------|
| 1.00000e+08 | 2.07147e-10 | 2.98970e-10 | 4.14047e-10 | 5.55011e-10 | 7.24838e-10 |
| 1.00000e+07 | 2.07181e-09 | 2.99009e-09 | 4.14091e-09 | 5.55057e-09 | 7.24886e-09 |
| 1.00000e+06 | 2.07525e-08 | 2.99400e-08 | 4.14524e-08 | 5.55524e-08 | 7.25371e-08 |
| 100000.     | 2.10940e-07 | 3.03290e-07 | 4.18833e-07 | 5.60156e-07 | 7.30178e-07 |
| 10000.0     | 2.43360e-06 | 3.39912e-06 | 4.58995e-06 | 6.02799e-06 | 7.73732e-06 |
| 1000.00     | 4.39243e-05 | 5.43809e-05 | 6.60733e-05 | 7.89363e-05 | 9.28863e-05 |
| 100.000     | 0.000291994 | 0.000299711 | 0.000305494 | 0.000309640 | 0.000312406 |
| 10.0000     | 0.000221422 | 0.000218277 | 0.000215409 | 0.000212752 | 0.000210251 |
| 1.00000     | 0.000145812 | 0.000144057 | 0.000142438 | 0.000140911 | 0.000139444 |
| 0.100000    | 0.000101821 | 0.000100400 | 9.89868e-05 | 9.75492e-05 | 9.60573e-05 |
| 0.0100000   | 6.11364e-05 | 5.82004e-05 | 5.51796e-05 | 5.20756e-05 | 4.88992e-05 |
| 0.00100000  | 8.90315e-06 | 7.28798e-06 | 5.94832e-06 | 4.84090e-06 | 3.92864e-06 |
| 0.000100000 | 3.71303e-08 | 2.61586e-08 | 1.86808e-08 | 1.34944e-08 | 9.84357e-09 |
| 1.00000e-05 | 2.93225e-11 | 2.07101e-11 | 1.48846e-11 | 1.08536e-11 | 8.01073e-12 |
| 1.00000e-06 | 4.57976e-14 | 3.37079e-14 | 2.51884e-14 | 1.90589e-14 | 1.45725e-14 |
| 1.00000e-07 | 1.96809e-16 | 1.50595e-16 | 1.16680e-16 | 9.13355e-17 | 7.21108e-17 |
| 1.00000e-08 | 2.15674e-18 | 1.70749e-18 | 1.36534e-18 | 1.10064e-18 | 8.93258e-19 |
| 1.00000e-09 | 5.69672e-20 | 4.65232e-20 | 3.82808e-20 | 3.16902e-20 | 2.63643e-20 |

| Pa\K        | 170.000     | 180.000     | 190.000     | 200.000     | 210.000     |
|-------------|-------------|-------------|-------------|-------------|-------------|
| 1.00000e+08 | 9.27013e-10 | 1.16569e-09 | 1.44586e-09 | 1.77353e-09 | 2.15591e-09 |
| 1.00000e+07 | 9.27060e-09 | 1.16573e-08 | 1.44589e-08 | 1.77355e-08 | 2.15591e-08 |
| 1.00000e+06 | 9.27542e-08 | 1.16618e-07 | 1.44626e-07 | 1.77377e-07 | 2.15590e-07 |
| 100000.     | 9.32307e-07 | 1.17059e-06 | 1.44987e-06 | 1.77595e-06 | 2.15576e-06 |
| 10000.0     | 9.74522e-06 | 1.20831e-05 | 1.47872e-05 | 1.78991e-05 | 2.14662e-05 |
| 1000.00     | 0.000107823 | 0.000123632 | 0.000140183 | 0.000157332 | 0.000174926 |
| 100.000     | 0.000314018 | 0.000314668 | 0.000314523 | 0.000313731 | 0.000312414 |
| 10.0000     | 0.000207866 | 0.000205565 | 0.000203330 | 0.000201144 | 0.000198997 |
| 1.00000     | 0.000138012 | 0.000136596 | 0.000135181 | 0.000133754 | 0.000132305 |
| 0.100000    | 9.44857e-05 | 9.28119e-05 | 9.10164e-05 | 8.90823e-05 | 8.69957e-05 |
| 0.0100000   | 4.56694e-05 | 4.24112e-05 | 3.91542e-05 | 3.59300e-05 | 3.27709e-05 |
| 0.00100000  | 3.17978e-06 | 2.56716e-06 | 2.06763e-06 | 1.66160e-06 | 1.33252e-06 |
| 0.000100000 | 7.24101e-09 | 5.36545e-09 | 4.00103e-09 | 3.00029e-09 | 2.26099e-09 |
| 1.00000e-05 | 5.97363e-12 | 4.49396e-12 | 3.40664e-12 | 2.59960e-12 | 1.99536e-12 |
| 1.00000e-06 | 1.12412e-14 | 8.73733e-15 | 6.83577e-15 | 5.37880e-15 | 4.25395e-15 |
| 1.00000e-07 | 5.73457e-17 | 4.58872e-17 | 3.69159e-17 | 2.98393e-17 | 2.42218e-17 |
| 1.00000e-08 | 7.29035e-19 | 5.97856e-19 | 4.92290e-19 | 4.06803e-19 | 3.37230e-19 |
| 1.00000e-09 | 2.20231e-20 | 1.84593e-20 | 1.55165e-20 | 1.30746e-20 | 1.10402e-20 |

| Pa\K        | 220.000     | 230.000     | 240.000     | 250.000     | 260.000     |
|-------------|-------------|-------------|-------------|-------------|-------------|
| 1.00000e+08 | 2.60167e-09 | 3.12111e-09 | 3.72647e-09 | 4.43229e-09 | 5.25570e-09 |
| 1.00000e+07 | 2.60163e-08 | 3.12101e-08 | 3.72630e-08 | 4.43200e-08 | 5.25525e-08 |
| 1.00000e+06 | 2.60126e-07 | 3.12011e-07 | 3.72461e-07 | 4.42919e-07 | 5.25083e-07 |
| 100000.     | 2.59755e-06 | 3.11110e-06 | 3.70790e-06 | 4.40143e-06 | 5.20741e-06 |
| 10000.0     | 2.55417e-05 | 3.01843e-05 | 3.54578e-05 | 4.14303e-05 | 4.81727e-05 |
| 1000.00     | 0.000192796 | 0.000210771 | 0.000228672 | 0.000246325 | 0.000263562 |
| 100.000     | 0.000310682 | 0.000308623 | 0.000306316 | 0.000303824 | 0.000301201 |
| 10.0000     | 0.000196883 | 0.000194800 | 0.000192745 | 0.000190718 | 0.000188717 |
| 1.00000     | 0.000130827 | 0.000129314 | 0.000127755 | 0.000126145 | 0.000124473 |
| 0.100000    | 8.47453e-05 | 8.23239e-05 | 7.97275e-05 | 7.69569e-05 | 7.40176e-05 |
| 0.0100000   | 2.97073e-05 | 2.67671e-05 | 2.39739e-05 | 2.13464e-05 | 1.88985e-05 |
| 0.00100000  | 1.06656e-06 | 8.52168e-07 | 6.79759e-07 | 5.41422e-07 | 4.30653e-07 |
| 0.000100000 | 1.71138e-09 | 1.30049e-09 | 9.91787e-10 | 7.58819e-10 | 5.82310e-10 |
| 1.00000e-05 | 1.53952e-12 | 1.19335e-12 | 9.28922e-13 | 7.25885e-13 | 5.69271e-13 |
| 1.00000e-06 | 3.37975e-15 | 2.69650e-15 | 2.15985e-15 | 1.73658e-15 | 1.40155e-15 |
| 1.00000e-07 | 1.97386e-17 | 1.61446e-17 | 1.32527e-17 | 1.09191e-17 | 9.03228e-18 |
| 1.00000e-08 | 2.80339e-19 | 2.33663e-19 | 1.95243e-19 | 1.63548e-19 | 1.37333e-19 |
| 1.00000e-09 | 9.33935e-21 | 7.91346e-21 | 6.71607e-21 | 5.70720e-21 | 4.85643e-21 |

| Pa\K        | 270.000     | 280.000     | 290.000     | 300.000     | 400.000     |
|-------------|-------------|-------------|-------------|-------------|-------------|
| 1.00000e+08 | 6.21686e-09 | 7.33941e-09 | 8.65090e-09 | 1.62797e-08 | 8.33058e-08 |
| 1.00000e+07 | 6.21619e-08 | 7.33841e-08 | 8.64946e-08 | 1.62808e-07 | 8.32311e-07 |
| 1.00000e+06 | 6.20950e-07 | 7.32854e-07 | 8.63515e-07 | 1.62907e-06 | 8.24301e-06 |
| 100000.     | 6.14407e-06 | 7.23242e-06 | 8.49653e-06 | 1.62379e-05 | 7.32373e-05 |
| 10000.0     | 5.57572e-05 | 6.42557e-05 | 7.37359e-05 | 0.000133326 | 0.000334144 |
| 1000.00     | 0.000280223 | 0.000296165 | 0.000311265 | 0.000374175 | 0.000418537 |
| 100.000     | 0.000298491 | 0.000295731 | 0.000292949 | 0.000286306 | 0.000261595 |
| 10.0000     | 0.000186742 | 0.000184793 | 0.000182867 | 0.000179240 | 0.000158101 |
| 1.00000     | 0.000122731 | 0.000120906 | 0.000118987 | 0.000113551 | 8.15244e-05 |
| 0.100000    | 7.09201e-05 | 6.76798e-05 | 6.43165e-05 | 5.30012e-05 | 2.21383e-05 |
| 0.0100000   | 1.66389e-05 | 1.45714e-05 | 1.26953e-05 | 8.11324e-06 | 1.61801e-06 |
| 0.00100000  | 3.42127e-07 | 2.71502e-07 | 2.15246e-07 | 1.53956e-07 | 1.85413e-08 |
| 0.000100000 | 4.48095e-10 | 3.45705e-10 | 2.67361e-10 | 6.13955e-10 | 7.55614e-11 |
| 1.00000e-05 | 4.47970e-13 | 3.53677e-13 | 2.80144e-13 | 2.82359e-12 | 4.47004e-13 |
| 1.00000e-06 | 1.13562e-15 | 9.24094e-16 | 7.55653e-16 | 2.49484e-14 | 5.24530e-15 |



|             |             |             |             |             |             |
|-------------|-------------|-------------|-------------|-------------|-------------|
| 1.00000e-07 | 7.50528e-18 | 6.27042e-18 | 5.27461e-18 | 4.24777e-16 | 1.00543e-16 |
| 1.00000e-08 | 1.15657e-19 | 9.76928e-20 | 8.28314e-20 | 1.30343e-17 | 3.10859e-18 |
| 1.00000e-09 | 4.13812e-21 | 3.53122e-21 | 3.01836e-21 | 5.97671e-19 | 1.53972e-19 |

| Pa\K        | 500.000     | 600.000     | 700.000     | 800.000     | 900.000     |
|-------------|-------------|-------------|-------------|-------------|-------------|
| 1.00000e+08 | 3.91091e-07 | 1.79037e-06 | 7.53914e-06 | 2.70754e-05 | 0.000106657 |
| 1.00000e+07 | 3.87891e-06 | 1.63385e-05 | 6.07398e-05 | 0.000194911 | 0.000536197 |
| 1.00000e+06 | 3.67356e-05 | 0.000134554 | 0.000375641 | 0.000769018 | 0.00125612  |
| 100000.     | 0.000238920 | 0.000523375 | 0.000816039 | 0.00103237  | 0.00122253  |
| 10000.0     | 0.000529292 | 0.000626776 | 0.000651027 | 0.000661119 | 0.000691902 |
| 1000.00     | 0.000407964 | 0.000382757 | 0.000350282 | 0.000314900 | 0.000280537 |
| 100.000     | 0.000236220 | 0.000200807 | 0.000152217 | 0.000105990 | 7.05852e-05 |
| 10.0000     | 0.000124194 | 7.94484e-05 | 4.15203e-05 | 2.00277e-05 | 9.48120e-06 |
| 1.00000     | 4.30501e-05 | 1.70103e-05 | 5.63027e-06 | 1.86819e-06 | 6.47014e-07 |
| 0.100000    | 6.39867e-06 | 1.48897e-06 | 3.24021e-07 | 7.94409e-08 | 2.19167e-08 |
| 0.0100000   | 2.61861e-07 | 4.03885e-08 | 6.70574e-09 | 1.42144e-09 | 3.70805e-10 |
| 0.00100000  | 2.30717e-09 | 3.30435e-10 | 5.83158e-11 | 1.39828e-11 | 4.63232e-12 |
| 0.000100000 | 1.16963e-11 | 2.72573e-12 | 7.74535e-13 | 2.33604e-13 | 1.15496e-13 |
| 1.00000e-05 | 1.30360e-13 | 6.85154e-14 | 2.79997e-14 | 9.24424e-15 | 6.56564e-15 |
| 1.00000e-06 | 2.96017e-15 | 2.26795e-15 | 1.01601e-15 | 3.83569e-16 | 4.89913e-16 |
| 1.00000e-07 | 5.39319e-17 | 3.91222e-17 | 1.89081e-17 | 1.35032e-17 | 4.21004e-17 |
| 1.00000e-08 | 1.08714e-18 | 5.82514e-19 | 4.37305e-19 | 8.92340e-19 | 4.06372e-18 |
| 1.00000e-09 | 5.24757e-20 | 2.80659e-20 | 3.09098e-20 | 8.41405e-20 | 4.03595e-19 |

| Pa\K        | 1000.00     | 1100.00     | 1200.00     | 1300.00     | 1400.00     |
|-------------|-------------|-------------|-------------|-------------|-------------|
| 1.00000e+08 | 0.000337046 | 0.000762628 | 0.00196055  | 0.00606619  | 0.0133966   |
| 1.00000e+07 | 0.00109982  | 0.00203071  | 0.00402411  | 0.00780442  | 0.0134297   |
| 1.00000e+06 | 0.00187061  | 0.00305175  | 0.00533884  | 0.00816159  | 0.00966609  |
| 100000.     | 0.00157884  | 0.00238327  | 0.00374441  | 0.00498431  | 0.00505605  |
| 10000.0     | 0.000810889 | 0.00106996  | 0.00142391  | 0.00164282  | 0.00150022  |
| 1000.00     | 0.000267922 | 0.000280659 | 0.000306246 | 0.000313778 | 0.000269028 |
| 100.000     | 5.04764e-05 | 4.10699e-05 | 3.81857e-05 | 3.71133e-05 | 3.16822e-05 |
| 10.0000     | 5.07548e-06 | 3.35829e-06 | 2.93507e-06 | 3.04421e-06 | 2.82136e-06 |
| 1.00000     | 2.74252e-07 | 1.64668e-07 | 1.65402e-07 | 2.16701e-07 | 2.33421e-07 |
| 0.100000    | 8.29677e-09 | 5.87503e-09 | 9.40430e-09 | 1.67595e-08 | 2.04828e-08 |
| 0.0100000   | 1.68150e-10 | 2.42668e-10 | 6.87552e-10 | 1.47485e-09 | 1.91643e-09 |
| 0.00100000  | 4.66251e-12 | 1.64582e-11 | 6.08182e-11 | 1.39370e-10 | 1.85553e-10 |
| 0.000100000 | 2.92028e-13 | 1.47596e-12 | 5.84298e-12 | 1.36542e-11 | 1.83305e-11 |
| 1.00000e-05 | 2.61544e-14 | 1.44234e-13 | 5.79590e-13 | 1.35997e-12 | 1.82867e-12 |
| 1.00000e-06 | 2.52779e-15 | 1.43381e-14 | 5.78538e-14 | 1.35884e-13 | 1.82771e-13 |
| 1.00000e-07 | 2.49584e-16 | 1.43092e-15 | 5.78203e-15 | 1.35848e-14 | 1.82739e-14 |
| 1.00000e-08 | 2.48647e-17 | 1.42983e-16 | 5.78066e-16 | 1.35834e-15 | 1.82725e-15 |
| 1.00000e-09 | 2.48336e-18 | 1.42937e-17 | 5.78005e-17 | 1.35827e-16 | 1.82719e-16 |

| Pa\K        | 1500.00     | 1750.00     | 2000.00     | 2250.00     | 2500.00     |
|-------------|-------------|-------------|-------------|-------------|-------------|
| 1.00000e+08 | 0.0163555   | 0.00264797  | 0.00217992  | 0.00194334  | 0.00186280  |
| 1.00000e+07 | 0.0188489   | 0.00202778  | 0.00119494  | 0.00103671  | 0.000996344 |
| 1.00000e+06 | 0.00956380  | 0.00153639  | 0.000790097 | 0.000561056 | 0.000401861 |
| 100000.     | 0.00417311  | 0.000706960 | 0.000284147 | 0.000145807 | 7.67858e-05 |
| 10000.0     | 0.00112589  | 0.000179763 | 5.49535e-05 | 2.16672e-05 | 9.40878e-06 |
| 1000.00     | 0.000191774 | 2.83856e-05 | 7.10632e-06 | 2.42164e-06 | 9.70192e-07 |
| 100.000     | 2.25005e-05 | 3.29761e-06 | 7.55356e-07 | 2.44784e-07 | 9.60909e-08 |
| 10.0000     | 2.11437e-06 | 3.33067e-07 | 7.53897e-08 | 2.42508e-08 | 9.49905e-09 |
| 1.00000     | 1.89258e-07 | 3.25827e-08 | 7.45911e-09 | 2.40435e-09 | 9.42419e-10 |
| 0.100000    | 1.75567e-08 | 3.20142e-09 | 7.40186e-10 | 2.39089e-10 | 9.37702e-11 |
| 0.0100000   | 1.68740e-09 | 3.16829e-10 | 7.36718e-11 | 2.38267e-11 | 9.34821e-12 |
| 0.00100000  | 1.65361e-10 | 3.15645e-11 | 7.35573e-12 | 2.38021e-12 | 9.34012e-13 |
| 0.000100000 | 1.64080e-11 | 3.15281e-12 | 7.35259e-13 | 2.37965e-13 | 9.33851e-14 |
| 1.00000e-05 | 1.63815e-12 | 3.15127e-13 | 7.35130e-14 | 2.37944e-14 | 9.33797e-15 |
| 1.00000e-06 | 1.63749e-13 | 3.15050e-14 | 7.35064e-15 | 2.37934e-15 | 9.33769e-16 |
| 1.00000e-07 | 1.63724e-14 | 3.15012e-15 | 7.35033e-16 | 2.37929e-16 | 9.33758e-17 |
| 1.00000e-08 | 1.63713e-15 | 3.14982e-16 | 7.35005e-17 | 2.37925e-17 | 9.33746e-18 |
| 1.00000e-09 | 1.63707e-16 | 3.14970e-17 | 7.34995e-18 | 2.37923e-18 | 9.33741e-19 |

| Pa\K        | 2750.00     | 3000.00     | 3250.00     | 3500.00     | 3750.00     |
|-------------|-------------|-------------|-------------|-------------|-------------|
| 1.00000e+08 | 0.00184622  | 0.00183346  | 0.00179093  | 0.00170454  | 0.00157593  |
| 1.00000e+07 | 0.000916281 | 0.000786484 | 0.000635491 | 0.000490991 | 0.000368386 |
| 1.00000e+06 | 0.000271312 | 0.000175347 | 0.000111213 | 7.06138e-05 | 4.54761e-05 |
| 100000.     | 4.05485e-05 | 2.19060e-05 | 1.22983e-05 | 7.21941e-06 | 4.42998e-06 |
| 10000.0     | 4.40405e-06 | 2.22381e-06 | 1.20578e-06 | 6.96054e-07 | 4.23870e-07 |
| 1000.00     | 4.37622e-07 | 2.17702e-07 | 1.17415e-07 | 6.76765e-08 | 4.12067e-08 |
| 100.000     | 4.30637e-08 | 2.13902e-08 | 1.15364e-08 | 6.65187e-09 | 4.05186e-09 |
| 10.0000     | 4.25641e-09 | 2.11488e-09 | 1.14105e-09 | 6.58132e-10 | 4.00989e-10 |
| 1.00000     | 4.22462e-10 | 2.09974e-10 | 1.13313e-10 | 6.53676e-11 | 3.98330e-11 |
| 0.100000    | 4.20465e-11 | 2.09015e-11 | 1.12809e-11 | 6.50825e-12 | 3.96618e-12 |
| 0.0100000   | 4.19245e-12 | 2.08434e-12 | 1.12505e-12 | 6.49122e-13 | 3.95605e-13 |

|             |             |             |             |             |             |
|-------------|-------------|-------------|-------------|-------------|-------------|
| 0.00100000  | 4.18921e-13 | 2.08284e-13 | 1.12430e-13 | 6.48713e-14 | 3.95370e-14 |
| 0.000100000 | 4.18861e-14 | 2.08258e-14 | 1.12417e-14 | 6.48645e-15 | 3.95332e-15 |
| 1.00000e-05 | 4.18840e-15 | 2.08251e-15 | 1.12414e-15 | 6.48628e-16 | 3.95321e-16 |
| 1.00000e-06 | 4.18833e-16 | 2.08247e-16 | 1.12412e-16 | 6.48621e-17 | 3.95317e-17 |
| 1.00000e-07 | 4.18827e-17 | 2.08245e-17 | 1.12411e-17 | 6.48617e-18 | 3.95315e-18 |
| 1.00000e-08 | 4.18825e-18 | 2.08244e-18 | 1.12411e-18 | 6.48612e-19 | 3.95313e-19 |
| 1.00000e-09 | 4.18822e-19 | 2.08243e-19 | 1.12410e-19 | 6.48612e-20 | 3.95313e-20 |

|             |             |
|-------------|-------------|
| Pa\K        | 4000.00     |
| -----       |             |
| 1.00000e+08 | 0.00141706  |
| 1.00000e+07 | 0.000271980 |
| 1.00000e+06 | 2.99229e-05 |
| 100000.     | 2.83197e-06 |
| 10000.0     | 2.70099e-07 |
| 1000.00     | 2.62661e-08 |
| 100.000     | 2.58368e-09 |
| 10.0000     | 2.55746e-10 |
| 1.00000     | 2.54076e-11 |
| 0.100000    | 2.53000e-12 |
| 0.0100000   | 2.52368e-13 |
| 0.00100000  | 2.52222e-14 |
| 0.000100000 | 2.52200e-15 |
| 1.00000e-05 | 2.52194e-16 |
| 1.00000e-06 | 2.52192e-17 |
| 1.00000e-07 | 2.52190e-18 |
| 1.00000e-08 | 2.52190e-19 |
| 1.00000e-09 | 2.52190e-20 |

PAH7+H

=====

|             |             |             |             |             |             |
|-------------|-------------|-------------|-------------|-------------|-------------|
| Pa\K        | 20.0000     | 30.0000     | 40.0000     | 50.0000     | 60.0000     |
| -----       |             |             |             |             |             |
| 1.00000e+08 | 4.07035e-30 | 1.99378e-29 | 6.62007e-29 | 2.23238e-28 | 8.92037e-28 |
| 1.00000e+07 | 4.08728e-28 | 2.00982e-27 | 6.69249e-27 | 2.25822e-26 | 9.00082e-26 |
| 1.00000e+06 | 4.23515e-26 | 2.13362e-25 | 7.19479e-25 | 2.41976e-24 | 9.43937e-24 |
| 100000.     | 4.79976e-24 | 2.40160e-23 | 7.90109e-23 | 2.54021e-22 | 9.19602e-22 |
| 10000.0     | 4.76483e-22 | 2.20552e-21 | 6.91165e-21 | 2.07560e-20 | 6.65195e-20 |
| 1000.00     | 3.54491e-20 | 1.40742e-19 | 3.87256e-19 | 1.01860e-18 | 2.82040e-18 |
| 100.000     | 1.78875e-18 | 9.87825e-18 | 3.20848e-17 | 8.21059e-17 | 1.88131e-16 |
| 10.0000     | 6.10910e-16 | 3.55151e-15 | 9.97133e-15 | 2.19828e-14 | 4.34762e-14 |
| 1.00000     | 1.13943e-13 | 5.14327e-13 | 1.29648e-12 | 2.68417e-12 | 5.08171e-12 |
| 0.100000    | 1.23960e-11 | 5.30960e-11 | 1.30774e-10 | 2.66210e-10 | 4.96059e-10 |
| 0.0100000   | 1.16977e-09 | 4.66949e-09 | 1.07588e-08 | 2.04257e-08 | 3.52381e-08 |
| 0.00100000  | 6.96925e-08 | 1.94420e-07 | 3.37576e-07 | 5.00602e-07 | 6.87791e-07 |
| 0.000100000 | 8.40022e-07 | 1.21308e-06 | 1.45257e-06 | 1.66909e-06 | 1.89226e-06 |
| 1.00000e-05 | 1.61855e-06 | 1.73308e-06 | 1.84964e-06 | 1.99681e-06 | 2.17576e-06 |
| 1.00000e-06 | 1.74817e-06 | 1.79997e-06 | 1.89629e-06 | 2.03359e-06 | 2.20672e-06 |
| 1.00000e-07 | 1.76170e-06 | 1.80679e-06 | 1.90101e-06 | 2.03731e-06 | 2.20983e-06 |
| 1.00000e-08 | 1.76306e-06 | 1.80747e-06 | 1.90148e-06 | 2.03768e-06 | 2.21015e-06 |
| 1.00000e-09 | 1.76319e-06 | 1.80754e-06 | 1.90153e-06 | 2.03772e-06 | 2.21018e-06 |

|             |             |             |             |             |             |
|-------------|-------------|-------------|-------------|-------------|-------------|
| Pa\K        | 70.0000     | 80.0000     | 90.0000     | 100.000     | 110.000     |
| -----       |             |             |             |             |             |
| 1.00000e+08 | 4.09622e-27 | 1.89768e-26 | 8.25515e-26 | 3.32670e-25 | 1.24354e-24 |
| 1.00000e+07 | 4.11834e-25 | 1.90290e-24 | 8.26484e-24 | 3.32759e-23 | 1.24322e-22 |
| 1.00000e+06 | 4.20982e-23 | 1.91056e-22 | 8.21229e-22 | 3.28791e-21 | 1.22485e-20 |
| 100000.     | 3.79556e-21 | 1.63593e-20 | 6.87225e-20 | 2.74584e-19 | 1.03264e-18 |
| 10000.0     | 2.38720e-19 | 9.47440e-19 | 3.97667e-18 | 1.66982e-17 | 6.65696e-17 |
| 1000.00     | 8.75948e-18 | 3.16445e-17 | 1.29452e-16 | 5.43465e-16 | 2.13012e-15 |
| 100.000     | 4.14393e-16 | 9.27665e-16 | 2.24222e-15 | 6.04846e-15 | 1.74264e-14 |
| 10.0000     | 8.18097e-14 | 1.51271e-13 | 2.79799e-13 | 5.22256e-13 | 9.86839e-13 |
| 1.00000     | 9.23837e-12 | 1.65791e-11 | 2.98149e-11 | 5.40753e-11 | 9.90414e-11 |
| 0.100000    | 8.86149e-10 | 1.55655e-09 | 2.72327e-09 | 4.76589e-09 | 8.33631e-09 |
| 0.0100000   | 5.75993e-08 | 9.11379e-08 | 1.41083e-07 | 2.14598e-07 | 3.21080e-07 |
| 0.00100000  | 9.04768e-07 | 1.15886e-06 | 1.45877e-06 | 1.81415e-06 | 2.23533e-06 |
| 0.000100000 | 2.13584e-06 | 2.41055e-06 | 2.72667e-06 | 3.09449e-06 | 3.52454e-06 |
| 1.00000e-05 | 2.38867e-06 | 2.64082e-06 | 2.93960e-06 | 3.29366e-06 | 3.71246e-06 |
| 1.00000e-06 | 2.41578e-06 | 2.66518e-06 | 2.96190e-06 | 3.31435e-06 | 3.73186e-06 |
| 1.00000e-07 | 2.41850e-06 | 2.66763e-06 | 2.96414e-06 | 3.31643e-06 | 3.73380e-06 |
| 1.00000e-08 | 2.41878e-06 | 2.66788e-06 | 2.96437e-06 | 3.31664e-06 | 3.73400e-06 |
| 1.00000e-09 | 2.41880e-06 | 2.66790e-06 | 2.96439e-06 | 3.31666e-06 | 3.73402e-06 |

|             |             |             |             |             |             |
|-------------|-------------|-------------|-------------|-------------|-------------|
| Pa\K        | 120.000     | 130.000     | 140.000     | 150.000     | 160.000     |
| -----       |             |             |             |             |             |
| 1.00000e+08 | 4.31962e-24 | 1.39851e-23 | 4.24217e-23 | 1.21373e-22 | 3.29836e-22 |
| 1.00000e+07 | 4.31715e-22 | 1.39741e-21 | 4.23815e-21 | 1.21240e-20 | 3.29423e-20 |
| 1.00000e+06 | 4.24713e-20 | 1.37356e-19 | 4.16282e-19 | 1.18989e-18 | 3.22988e-18 |
| 100000.     | 3.62817e-18 | 1.18795e-17 | 3.63473e-17 | 1.04530e-16 | 2.84478e-16 |
| 10000.0     | 2.44232e-16 | 8.17280e-16 | 2.50409e-15 | 7.08594e-15 | 1.86919e-14 |

|             |             |             |             |             |             |
|-------------|-------------|-------------|-------------|-------------|-------------|
| 1000.00     | 7.46347e-15 | 2.32407e-14 | 6.49579e-14 | 1.65250e-13 | 3.87807e-13 |
| 100.000     | 4.95503e-14 | 1.32147e-13 | 3.25215e-13 | 7.40163e-13 | 1.57186e-12 |
| 10.0000     | 1.88685e-12 | 3.64082e-12 | 7.06566e-12 | 1.37495e-11 | 2.67733e-11 |
| 1.00000     | 1.82985e-10 | 3.40375e-10 | 6.36028e-10 | 1.19091e-09 | 2.22806e-09 |
| 0.100000    | 1.45288e-08 | 2.51370e-08 | 4.30240e-08 | 7.26349e-08 | 1.20670e-07 |
| 0.0100000   | 4.72462e-07 | 6.83484e-07 | 9.71927e-07 | 1.35880e-06 | 1.86839e-06 |
| 0.00100000  | 2.73334e-06 | 3.32020e-06 | 4.00923e-06 | 4.81540e-06 | 5.75582e-06 |
| 0.000100000 | 4.02787e-06 | 4.61643e-06 | 5.30351e-06 | 6.10411e-06 | 7.03540e-06 |
| 1.00000e-05 | 4.20638e-06 | 4.78690e-06 | 5.46695e-06 | 6.26131e-06 | 7.18692e-06 |
| 1.00000e-06 | 4.22471e-06 | 4.80434e-06 | 5.48361e-06 | 6.27728e-06 | 7.20228e-06 |
| 1.00000e-07 | 4.22655e-06 | 4.80608e-06 | 5.48528e-06 | 6.27888e-06 | 7.20382e-06 |
| 1.00000e-08 | 4.22673e-06 | 4.80626e-06 | 5.48545e-06 | 6.27904e-06 | 7.20398e-06 |
| 1.00000e-09 | 4.22675e-06 | 4.80628e-06 | 5.48547e-06 | 6.27905e-06 | 7.20399e-06 |

| Pa\K        | 170.000     | 180.000     | 190.000     | 200.000     | 210.000     |
|-------------|-------------|-------------|-------------|-------------|-------------|
| 1.00000e+08 | 8.56891e-22 | 2.14010e-21 | 5.16231e-21 | 1.20729e-20 | 2.74583e-20 |
| 1.00000e+07 | 8.55670e-20 | 2.13660e-19 | 5.15265e-19 | 1.20468e-18 | 2.73893e-18 |
| 1.00000e+06 | 8.37885e-18 | 2.08885e-17 | 5.02758e-17 | 1.17264e-16 | 2.65847e-16 |
| 100000.     | 7.37366e-16 | 1.83042e-15 | 4.37144e-15 | 1.00802e-14 | 2.25067e-14 |
| 10000.0     | 4.63498e-14 | 1.08801e-13 | 2.43176e-13 | 5.19951e-13 | 1.06775e-12 |
| 1000.00     | 8.49405e-13 | 1.75319e-12 | 3.43717e-12 | 6.44248e-12 | 1.16071e-11 |
| 100.000     | 3.14748e-12 | 6.00223e-12 | 1.10000e-11 | 1.95303e-11 | 3.38407e-11 |
| 10.0000     | 5.21013e-11 | 1.01245e-10 | 1.96299e-10 | 3.79301e-10 | 7.29264e-10 |
| 1.00000     | 4.15162e-09 | 7.67855e-09 | 1.40494e-08 | 2.53524e-08 | 4.50025e-08 |
| 0.100000    | 1.96925e-07 | 3.15302e-07 | 4.94940e-07 | 7.61428e-07 | 1.14802e-06 |
| 0.0100000   | 2.52835e-06 | 3.36958e-06 | 4.42608e-06 | 5.73499e-06 | 7.33637e-06 |
| 0.00100000  | 6.84995e-06 | 8.12009e-06 | 9.59161e-06 | 1.12933e-05 | 1.32577e-05 |
| 0.000100000 | 8.11702e-06 | 9.37141e-06 | 1.08242e-05 | 1.25044e-05 | 1.44448e-05 |
| 1.00000e-05 | 8.26330e-06 | 9.51279e-06 | 1.09609e-05 | 1.26366e-05 | 1.45726e-05 |
| 1.00000e-06 | 8.27809e-06 | 9.52706e-06 | 1.09747e-05 | 1.26499e-05 | 1.45855e-05 |
| 1.00000e-07 | 8.27958e-06 | 9.52849e-06 | 1.09760e-05 | 1.26513e-05 | 1.45868e-05 |
| 1.00000e-08 | 8.27973e-06 | 9.52863e-06 | 1.09762e-05 | 1.26514e-05 | 1.45869e-05 |
| 1.00000e-09 | 8.27974e-06 | 9.52865e-06 | 1.09762e-05 | 1.26514e-05 | 1.45869e-05 |

| Pa\K        | 220.000     | 230.000     | 240.000     | 250.000     | 260.000     |
|-------------|-------------|-------------|-------------|-------------|-------------|
| 1.00000e+08 | 6.08824e-20 | 1.31856e-19 | 2.79326e-19 | 5.79312e-19 | 1.17670e-18 |
| 1.00000e+07 | 6.07042e-18 | 1.31406e-17 | 2.78212e-17 | 5.76625e-17 | 1.17038e-16 |
| 1.00000e+06 | 5.87218e-16 | 1.26610e-15 | 2.66829e-15 | 5.50136e-15 | 1.11005e-14 |
| 100000.     | 4.87647e-14 | 1.02705e-13 | 2.10534e-13 | 4.20453e-13 | 8.18580e-13 |
| 10000.0     | 2.11286e-12 | 4.04020e-12 | 7.48386e-12 | 1.34578e-11 | 2.35377e-11 |
| 1000.00     | 2.01913e-11 | 3.40433e-11 | 5.58144e-11 | 8.92379e-11 | 1.39487e-10 |
| 100.000     | 5.76076e-11 | 9.69328e-11 | 1.62087e-10 | 2.70538e-10 | 4.52092e-10 |
| 10.0000     | 1.39238e-09 | 2.63404e-09 | 4.92556e-09 | 9.08356e-09 | 1.64854e-08 |
| 1.00000     | 7.84185e-08 | 1.33943e-07 | 2.24040e-07 | 3.66791e-07 | 5.87666e-07 |
| 0.100000    | 1.69671e-06 | 2.45918e-06 | 3.49737e-06 | 4.88370e-06 | 6.70090e-06 |
| 0.0100000   | 9.27326e-06 | 1.15917e-05 | 1.43408e-05 | 1.75734e-05 | 2.13453e-05 |
| 0.00100000  | 1.55211e-05 | 1.81246e-05 | 2.11134e-05 | 2.45375e-05 | 2.84520e-05 |
| 0.000100000 | 1.66820e-05 | 1.92574e-05 | 2.22163e-05 | 2.56090e-05 | 2.94909e-05 |
| 1.00000e-05 | 1.68057e-05 | 1.93768e-05 | 2.23316e-05 | 2.57202e-05 | 2.95982e-05 |
| 1.00000e-06 | 1.68182e-05 | 1.93888e-05 | 2.23432e-05 | 2.57315e-05 | 2.96090e-05 |
| 1.00000e-07 | 1.68194e-05 | 1.93901e-05 | 2.23443e-05 | 2.57325e-05 | 2.96101e-05 |
| 1.00000e-08 | 1.68195e-05 | 1.93902e-05 | 2.23444e-05 | 2.57326e-05 | 2.96102e-05 |
| 1.00000e-09 | 1.68195e-05 | 1.93902e-05 | 2.23444e-05 | 2.57326e-05 | 2.96102e-05 |

| Pa\K        | 270.000     | 280.000     | 290.000     | 300.000     | 400.000     |
|-------------|-------------|-------------|-------------|-------------|-------------|
| 1.00000e+08 | 2.34047e-18 | 4.55574e-18 | 8.67018e-18 | 4.48642e-16 | 6.06078e-14 |
| 1.00000e+07 | 2.32599e-16 | 4.52360e-16 | 8.60110e-16 | 4.31887e-14 | 5.53968e-12 |
| 1.00000e+06 | 2.19188e-14 | 4.23325e-14 | 7.99033e-14 | 3.24067e-12 | 2.99911e-10 |
| 100000.     | 1.55427e-12 | 2.87864e-12 | 5.20047e-12 | 9.89801e-11 | 4.06178e-09 |
| 10000.0     | 4.01060e-11 | 6.66688e-11 | 1.08250e-10 | 6.57453e-10 | 1.30794e-08 |
| 1000.00     | 2.13629e-10 | 3.21216e-10 | 4.74993e-10 | 1.60205e-09 | 7.73087e-08 |
| 100.000     | 7.57375e-10 | 1.27122e-09 | 2.13286e-09 | 2.99883e-08 | 1.97448e-06 |
| 10.0000     | 2.93877e-08 | 5.13751e-08 | 8.79607e-08 | 8.80904e-07 | 2.37838e-05 |
| 1.00000     | 9.21552e-07 | 1.41489e-06 | 2.12779e-06 | 9.96849e-06 | 0.000102424 |
| 0.100000    | 9.04130e-06 | 1.20059e-05 | 1.57028e-05 | 3.80036e-05 | 0.000185067 |
| 0.0100000   | 2.57166e-05 | 3.07518e-05 | 3.65190e-05 | 6.02616e-05 | 0.000211662 |
| 0.00100000  | 3.29173e-05 | 3.79990e-05 | 4.37679e-05 | 6.53851e-05 | 0.000215372 |
| 0.000100000 | 3.39228e-05 | 3.89701e-05 | 4.47042e-05 | 6.59915e-05 | 0.000215761 |
| 1.00000e-05 | 3.40260e-05 | 3.90695e-05 | 4.47996e-05 | 6.60534e-05 | 0.000215800 |
| 1.00000e-06 | 3.40364e-05 | 3.90794e-05 | 4.48091e-05 | 6.60595e-05 | 0.000215803 |
| 1.00000e-07 | 3.40374e-05 | 3.90804e-05 | 4.48101e-05 | 6.60602e-05 | 0.000215804 |
| 1.00000e-08 | 3.40375e-05 | 3.90805e-05 | 4.48102e-05 | 6.60603e-05 | 0.000215804 |
| 1.00000e-09 | 3.40376e-05 | 3.90805e-05 | 4.48102e-05 | 6.60603e-05 | 0.000215804 |

| Pa\K        | 500.000     | 600.000     | 700.000     | 800.000     | 900.000     |
|-------------|-------------|-------------|-------------|-------------|-------------|
| 1.00000e+08 | 2.39689e-11 | 6.24271e-09 | 1.08462e-07 | 1.12151e-06 | 1.34675e-05 |

|             |             |             |             |             |             |
|-------------|-------------|-------------|-------------|-------------|-------------|
| 1.00000e+07 | 3.88891e-09 | 1.78568e-07 | 1.69950e-06 | 8.52282e-06 | 3.54418e-05 |
| 1.00000e+06 | 1.18778e-07 | 3.69957e-06 | 1.74490e-05 | 4.20445e-05 | 8.87342e-05 |
| 100000.     | 2.82137e-07 | 7.96858e-06 | 3.89891e-05 | 9.27558e-05 | 0.000262186 |
| 10000.0     | 2.69788e-07 | 6.45374e-06 | 6.35570e-05 | 0.000314897 | 0.00109969  |
| 1000.00     | 3.10877e-06 | 5.01792e-05 | 0.000350427 | 0.00126394  | 0.00297169  |
| 100.000     | 4.15827e-05 | 0.000317995 | 0.00118095  | 0.00268987  | 0.00455272  |
| 10.0000     | 0.000212075 | 0.000835654 | 0.00197814  | 0.00346258  | 0.00507867  |
| 1.00000     | 0.000449024 | 0.00116669  | 0.00225542  | 0.00363443  | 0.00516266  |
| 0.100000    | 0.000555152 | 0.00124654  | 0.00229970  | 0.00365601  | 0.00517194  |
| 0.0100000   | 0.000574036 | 0.00125674  | 0.00230454  | 0.00365825  | 0.00517289  |
| 0.00100000  | 0.000576145 | 0.00125779  | 0.00230503  | 0.00365847  | 0.00517298  |
| 0.000100000 | 0.000576359 | 0.00125790  | 0.00230508  | 0.00365849  | 0.00517299  |
| 1.00000e-05 | 0.000576380 | 0.00125792  | 0.00230508  | 0.00365850  | 0.00517299  |
| 1.00000e-06 | 0.000576382 | 0.00125792  | 0.00230508  | 0.00365850  | 0.00517299  |
| 1.00000e-07 | 0.000576383 | 0.00125792  | 0.00230508  | 0.00365850  | 0.00517299  |
| 1.00000e-08 | 0.000576383 | 0.00125792  | 0.00230508  | 0.00365850  | 0.00517299  |
| 1.00000e-09 | 0.000576383 | 0.00125792  | 0.00230508  | 0.00365850  | 0.00517299  |

| Pa\K        | 1000.00     | 1100.00     | 1200.00     | 1300.00     | 1400.00     |
|-------------|-------------|-------------|-------------|-------------|-------------|
| 1.00000e+08 | 6.72805e-05 | 0.000140084 | 0.000212646 | 0.000359622 | 0.000509466 |
| 1.00000e+07 | 0.000118777 | 0.000352557 | 0.000936337 | 0.00197363  | 0.00295866  |
| 1.00000e+06 | 0.000246076 | 0.000846503 | 0.00230268  | 0.00429298  | 0.00583921  |
| 100000.     | 0.000863649 | 0.00235693  | 0.00471713  | 0.00700869  | 0.00841407  |
| 10000.0     | 0.00272888  | 0.00505046  | 0.00737670  | 0.00902376  | 0.00988451  |
| 1000.00     | 0.00512401  | 0.00716658  | 0.00872456  | 0.00972423  | 0.0102766   |
| 100.000     | 0.00635588  | 0.00787299  | 0.00902778  | 0.00982564  | 0.0103102   |
| 10.0000     | 0.00663261  | 0.00798905  | 0.00906520  | 0.00983307  | 0.0103096   |
| 1.00000     | 0.00666827  | 0.00800243  | 0.00906953  | 0.00983418  | 0.0103099   |
| 0.100000    | 0.00667200  | 0.00800387  | 0.00907005  | 0.00983437  | 0.0103100   |
| 0.0100000   | 0.00667239  | 0.00800405  | 0.00907010  | 0.00983443  | 0.0103100   |
| 0.00100000  | 0.00667246  | 0.00800405  | 0.00907010  | 0.00983443  | 0.0103100   |
| 0.000100000 | 0.00667246  | 0.00800405  | 0.00907010  | 0.00983443  | 0.0103100   |
| 1.00000e-05 | 0.00667246  | 0.00800405  | 0.00907010  | 0.00983443  | 0.0103100   |
| 1.00000e-06 | 0.00667246  | 0.00800405  | 0.00907010  | 0.00983443  | 0.0103100   |
| 1.00000e-07 | 0.00667246  | 0.00800405  | 0.00907010  | 0.00983443  | 0.0103100   |
| 1.00000e-08 | 0.00667246  | 0.00800405  | 0.00907010  | 0.00983443  | 0.0103100   |
| 1.00000e-09 | 0.00667246  | 0.00800405  | 0.00907010  | 0.00983443  | 0.0103100   |

| Pa\K        | 1500.00     | 1750.00    | 2000.00    | 2250.00    | 2500.00    |
|-------------|-------------|------------|------------|------------|------------|
| 1.00000e+08 | 0.000476587 | 0.00356880 | 0.00396356 | 0.00395344 | 0.00388677 |
| 1.00000e+07 | 0.00329863  | 0.00525885 | 0.00549677 | 0.00537879 | 0.00531521 |
| 1.00000e+06 | 0.00658111  | 0.00727376 | 0.00721260 | 0.00700291 | 0.00684428 |
| 100000.     | 0.00899633  | 0.00900498 | 0.00863698 | 0.00816009 | 0.00763807 |
| 10000.0     | 0.0102140   | 0.00968569 | 0.00914234 | 0.00847870 | 0.00779890 |
| 1000.00     | 0.0105154   | 0.00979000 | 0.00922330 | 0.00852525 | 0.00781926 |
| 100.000     | 0.0105397   | 0.00979092 | 0.00923053 | 0.00853036 | 0.00782149 |
| 10.0000     | 0.0105392   | 0.00978926 | 0.00923108 | 0.00853090 | 0.00782172 |
| 1.00000     | 0.0105394   | 0.00978915 | 0.00923115 | 0.00853097 | 0.00782174 |
| 0.100000    | 0.0105395   | 0.00978914 | 0.00923117 | 0.00853097 | 0.00782174 |
| 0.0100000   | 0.0105396   | 0.00978916 | 0.00923114 | 0.00853097 | 0.00782174 |
| 0.00100000  | 0.0105396   | 0.00978916 | 0.00923114 | 0.00853097 | 0.00782174 |
| 0.000100000 | 0.0105396   | 0.00978916 | 0.00923114 | 0.00853097 | 0.00782174 |
| 1.00000e-05 | 0.0105396   | 0.00978916 | 0.00923114 | 0.00853097 | 0.00782174 |
| 1.00000e-06 | 0.0105396   | 0.00978916 | 0.00923114 | 0.00853097 | 0.00782174 |
| 1.00000e-07 | 0.0105396   | 0.00978916 | 0.00923114 | 0.00853097 | 0.00782174 |
| 1.00000e-08 | 0.0105396   | 0.00978916 | 0.00923114 | 0.00853097 | 0.00782174 |
| 1.00000e-09 | 0.0105396   | 0.00978916 | 0.00923114 | 0.00853097 | 0.00782174 |

| Pa\K        | 2750.00    | 3000.00    | 3250.00    | 3500.00    | 3750.00    |
|-------------|------------|------------|------------|------------|------------|
| 1.00000e+08 | 0.00384318 | 0.00381652 | 0.00379494 | 0.00376579 | 0.00371821 |
| 1.00000e+07 | 0.00529210 | 0.00523992 | 0.00512152 | 0.00493447 | 0.00469624 |
| 1.00000e+06 | 0.00659361 | 0.00624082 | 0.00583246 | 0.00541196 | 0.00500563 |
| 100000.     | 0.00707068 | 0.00650622 | 0.00597513 | 0.00548843 | 0.00504730 |
| 10000.0     | 0.00714468 | 0.00653987 | 0.00599094 | 0.00549629 | 0.00505145 |
| 1000.00     | 0.00715309 | 0.00654345 | 0.00599258 | 0.00549710 | 0.00505190 |
| 100.000     | 0.00715398 | 0.00654382 | 0.00599275 | 0.00549719 | 0.00505191 |
| 10.0000     | 0.00715408 | 0.00654386 | 0.00599278 | 0.00549719 | 0.00505194 |
| 1.00000     | 0.00715408 | 0.00654386 | 0.00599276 | 0.00549717 | 0.00505194 |
| 0.100000    | 0.00715408 | 0.00654386 | 0.00599276 | 0.00549717 | 0.00505194 |
| 0.0100000   | 0.00715408 | 0.00654386 | 0.00599276 | 0.00549717 | 0.00505194 |
| 0.00100000  | 0.00715408 | 0.00654386 | 0.00599276 | 0.00549717 | 0.00505194 |
| 0.000100000 | 0.00715408 | 0.00654386 | 0.00599276 | 0.00549717 | 0.00505194 |
| 1.00000e-05 | 0.00715408 | 0.00654386 | 0.00599276 | 0.00549717 | 0.00505194 |
| 1.00000e-06 | 0.00715408 | 0.00654386 | 0.00599276 | 0.00549717 | 0.00505194 |
| 1.00000e-07 | 0.00715408 | 0.00654386 | 0.00599276 | 0.00549717 | 0.00505194 |
| 1.00000e-08 | 0.00715408 | 0.00654386 | 0.00599276 | 0.00549717 | 0.00505194 |
| 1.00000e-09 | 0.00715408 | 0.00654386 | 0.00599276 | 0.00549717 | 0.00505194 |

| Pa\K        | 4000.00    |
|-------------|------------|
| 1.00000e+08 | 0.00364579 |
| 1.00000e+07 | 0.00442968 |
| 1.00000e+06 | 0.00462604 |
| 100000.     | 0.00464937 |
| 10000.0     | 0.00465167 |
| 1000.00     | 0.00465190 |
| 100.000     | 0.00465193 |
| 10.0000     | 0.00465193 |
| 1.00000     | 0.00465193 |
| 0.100000    | 0.00465193 |
| 0.0100000   | 0.00465193 |
| 0.00100000  | 0.00465193 |
| 0.000100000 | 0.00465193 |
| 1.00000e-05 | 0.00465193 |
| 1.00000e-06 | 0.00465193 |
| 1.00000e-07 | 0.00465193 |
| 1.00000e-08 | 0.00465193 |
| 1.00000e-09 | 0.00465193 |

rad13  
=====

| Pa\K        | 20.0000     | 30.0000     | 40.0000     | 50.0000     | 60.0000     |
|-------------|-------------|-------------|-------------|-------------|-------------|
| 1.00000e+08 | 3.28128e-17 | 4.93079e-15 | 2.03412e-13 | 2.02084e-12 | 9.67492e-12 |
| 1.00000e+07 | 8.74696e-15 | 8.71065e-14 | 2.11864e-12 | 2.03283e-11 | 9.67724e-11 |
| 1.00000e+06 | 1.06387e-12 | 4.86443e-12 | 2.98588e-11 | 2.15471e-10 | 9.70426e-10 |
| 100000.     | 1.05483e-10 | 4.22393e-10 | 1.08377e-09 | 3.22413e-09 | 9.94147e-09 |
| 10000.0     | 7.95978e-09 | 2.46344e-08 | 4.40536e-08 | 6.70959e-08 | 9.80418e-08 |
| 1000.00     | 1.50011e-07 | 2.46852e-07 | 3.16731e-07 | 3.77157e-07 | 4.34708e-07 |
| 100.000     | 5.86026e-07 | 7.95017e-07 | 9.15288e-07 | 9.92558e-07 | 1.04441e-06 |
| 10.0000     | 1.05811e-06 | 9.68404e-07 | 8.91442e-07 | 8.37609e-07 | 7.98533e-07 |
| 1.00000     | 6.72605e-07 | 5.84562e-07 | 5.45445e-07 | 5.22118e-07 | 5.06273e-07 |
| 0.100000    | 4.57046e-07 | 4.25046e-07 | 4.11706e-07 | 4.04085e-07 | 3.99044e-07 |
| 0.0100000   | 3.82169e-07 | 3.68106e-07 | 3.58465e-07 | 3.49908e-07 | 3.41646e-07 |
| 0.00100000  | 3.08246e-07 | 2.52261e-07 | 2.09085e-07 | 1.74196e-07 | 1.45401e-07 |
| 0.000100000 | 7.36319e-08 | 2.38516e-08 | 1.02134e-08 | 5.09497e-09 | 2.80271e-09 |
| 1.00000e-05 | 4.41799e-10 | 5.11472e-11 | 1.42490e-11 | 5.65745e-12 | 2.71933e-12 |
| 1.00000e-06 | 3.58617e-13 | 4.38164e-14 | 1.35083e-14 | 5.87492e-15 | 3.05636e-15 |
| 1.00000e-07 | 5.40911e-16 | 9.01021e-17 | 3.31630e-17 | 1.63251e-17 | 9.34357e-18 |
| 1.00000e-08 | 2.25732e-18 | 5.06111e-19 | 2.19468e-19 | 1.20994e-19 | 7.55206e-20 |
| 1.00000e-09 | 2.43536e-20 | 7.19308e-21 | 3.63381e-21 | 2.22624e-21 | 1.50621e-21 |

| Pa\K        | 70.0000     | 80.0000     | 90.0000     | 100.000     | 110.000     |
|-------------|-------------|-------------|-------------|-------------|-------------|
| 1.00000e+08 | 3.04233e-11 | 7.34087e-11 | 1.48237e-10 | 2.64005e-10 | 4.28914e-10 |
| 1.00000e+07 | 3.03738e-10 | 7.32147e-10 | 1.47732e-09 | 2.62929e-09 | 4.26888e-09 |
| 1.00000e+06 | 2.98937e-09 | 7.13281e-09 | 1.42841e-08 | 2.52533e-08 | 4.07380e-08 |
| 100000.     | 2.59809e-08 | 5.64256e-08 | 1.05482e-07 | 1.75852e-07 | 2.68630e-07 |
| 10000.0     | 1.41098e-07 | 1.98207e-07 | 2.68854e-07 | 3.50873e-07 | 4.41372e-07 |
| 1000.00     | 4.92706e-07 | 5.52685e-07 | 6.15023e-07 | 6.79415e-07 | 7.45223e-07 |
| 100.000     | 1.07970e-06 | 1.10356e-06 | 1.11921e-06 | 1.12876e-06 | 1.13368e-06 |
| 10.0000     | 7.68862e-07 | 7.45494e-07 | 7.26557e-07 | 7.10848e-07 | 6.97555e-07 |
| 1.00000     | 4.94698e-07 | 4.85846e-07 | 4.78861e-07 | 4.73215e-07 | 4.68553e-07 |
| 0.100000    | 3.95400e-07 | 3.92590e-07 | 3.90297e-07 | 3.88313e-07 | 3.86480e-07 |
| 0.0100000   | 3.33351e-07 | 3.24820e-07 | 3.15895e-07 | 3.06448e-07 | 2.96379e-07 |
| 0.00100000  | 1.21379e-07 | 1.01216e-07 | 8.42336e-08 | 6.99178e-08 | 5.78606e-08 |
| 0.000100000 | 1.65140e-09 | 1.02378e-09 | 6.59823e-10 | 4.38383e-10 | 2.98410e-10 |
| 1.00000e-05 | 1.47332e-12 | 8.66174e-13 | 5.40067e-13 | 3.51862e-13 | 2.37125e-13 |
| 1.00000e-06 | 1.77497e-15 | 1.11008e-15 | 7.31901e-16 | 5.01820e-16 | 3.54509e-16 |
| 1.00000e-07 | 5.86576e-18 | 3.91882e-18 | 2.73660e-18 | 1.97459e-18 | 1.46070e-18 |
| 1.00000e-08 | 5.08662e-20 | 3.60603e-20 | 2.65103e-20 | 2.00182e-20 | 1.54255e-20 |
| 1.00000e-09 | 1.08297e-21 | 8.11126e-22 | 6.25336e-22 | 4.92403e-22 | 3.93937e-22 |

| Pa\K        | 120.000     | 130.000     | 140.000     | 150.000     | 160.000     |
|-------------|-------------|-------------|-------------|-------------|-------------|
| 1.00000e+08 | 6.50320e-10 | 9.35047e-10 | 1.28982e-09 | 1.72173e-09 | 2.23868e-09 |
| 1.00000e+07 | 6.46818e-09 | 9.29372e-09 | 1.28106e-08 | 1.70870e-08 | 2.21987e-08 |
| 1.00000e+06 | 6.13270e-08 | 8.75272e-08 | 1.19799e-07 | 1.58591e-07 | 2.04375e-07 |
| 100000.     | 3.83522e-07 | 5.19176e-07 | 6.73515e-07 | 8.44020e-07 | 1.02795e-06 |
| 10000.0     | 5.37396e-07 | 6.36315e-07 | 7.35980e-07 | 8.34756e-07 | 9.31484e-07 |
| 1000.00     | 8.11708e-07 | 8.78155e-07 | 9.43931e-07 | 1.00851e-06 | 1.07145e-06 |
| 100.000     | 1.13500e-06 | 1.13347e-06 | 1.12967e-06 | 1.12403e-06 | 1.11692e-06 |
| 10.0000     | 6.86092e-07 | 6.76029e-07 | 6.67036e-07 | 6.58860e-07 | 6.51310e-07 |
| 1.00000     | 4.64616e-07 | 4.61208e-07 | 4.58175e-07 | 4.55397e-07 | 4.52777e-07 |
| 0.100000    | 3.84666e-07 | 3.82758e-07 | 3.80648e-07 | 3.78239e-07 | 3.75439e-07 |
| 0.0100000   | 2.85611e-07 | 2.74109e-07 | 2.61869e-07 | 2.48929e-07 | 2.35364e-07 |
| 0.00100000  | 4.77293e-08 | 3.92439e-08 | 3.21635e-08 | 2.62787e-08 | 2.14069e-08 |

|             |             |             |             |             |             |
|-------------|-------------|-------------|-------------|-------------|-------------|
| 0.000100000 | 2.07170e-10 | 1.46182e-10 | 1.04556e-10 | 7.56467e-11 | 5.52687e-11 |
| 1.00000e-05 | 1.64116e-13 | 1.16043e-13 | 8.34993e-14 | 6.09605e-14 | 4.50512e-14 |
| 1.00000e-06 | 2.56369e-16 | 1.88898e-16 | 1.41316e-16 | 1.07056e-16 | 8.19588e-17 |
| 1.00000e-07 | 1.10175e-18 | 8.43950e-19 | 6.54634e-19 | 5.13055e-19 | 4.05578e-19 |
| 1.00000e-08 | 1.20746e-20 | 9.57008e-21 | 7.66133e-21 | 6.18367e-21 | 5.02504e-21 |
| 1.00000e-09 | 3.19026e-22 | 2.60841e-22 | 2.14892e-22 | 1.78127e-22 | 1.48397e-22 |

| Pa\K        | 170.000     | 180.000     | 190.000     | 200.000     | 210.000     |
|-------------|-------------|-------------|-------------|-------------|-------------|
| 1.00000e+08 | 2.84988e-09 | 3.56627e-09 | 4.40089e-09 | 5.36948e-09 | 6.49082e-09 |
| 1.00000e+07 | 2.82334e-08 | 3.52949e-08 | 4.35068e-08 | 5.30171e-08 | 6.40017e-08 |
| 1.00000e+06 | 2.57669e-07 | 3.19062e-07 | 3.89226e-07 | 4.68926e-07 | 5.59026e-07 |
| 100000.     | 1.22248e-06 | 1.42486e-06 | 1.63243e-06 | 1.84273e-06 | 2.05349e-06 |
| 10000.0     | 1.02542e-06 | 1.11613e-06 | 1.20349e-06 | 1.28756e-06 | 1.36853e-06 |
| 1000.00     | 1.13244e-06 | 1.19116e-06 | 1.24739e-06 | 1.30097e-06 | 1.35171e-06 |
| 100.000     | 1.10864e-06 | 1.09942e-06 | 1.08948e-06 | 1.07900e-06 | 1.06816e-06 |
| 10.0000     | 6.44238e-07 | 6.37536e-07 | 6.31126e-07 | 6.24954e-07 | 6.18981e-07 |
| 1.00000     | 4.50240e-07 | 4.47727e-07 | 4.45194e-07 | 4.42606e-07 | 4.39937e-07 |
| 0.100000    | 3.72165e-07 | 3.68338e-07 | 3.63887e-07 | 3.58745e-07 | 3.52858e-07 |
| 0.0100000   | 2.21282e-07 | 2.06820e-07 | 1.92135e-07 | 1.77395e-07 | 1.62773e-07 |
| 0.00100000  | 1.73895e-08 | 1.40889e-08 | 1.13867e-08 | 9.18181e-09 | 7.38828e-09 |
| 0.000100000 | 4.07221e-11 | 3.02243e-11 | 2.25768e-11 | 1.69597e-11 | 1.28040e-11 |
| 1.00000e-05 | 3.36401e-14 | 2.53432e-14 | 1.92398e-14 | 1.47046e-14 | 1.13051e-14 |
| 1.00000e-06 | 6.33066e-17 | 4.92741e-17 | 3.86067e-17 | 3.04248e-17 | 2.41009e-17 |
| 1.00000e-07 | 3.22963e-19 | 2.58792e-19 | 2.08502e-19 | 1.68795e-19 | 1.37240e-19 |
| 1.00000e-08 | 4.10685e-21 | 3.37276e-21 | 2.78147e-21 | 2.30219e-21 | 1.91173e-21 |
| 1.00000e-09 | 1.24144e-22 | 1.04218e-22 | 8.77488e-23 | 7.40706e-23 | 6.26633e-23 |

| Pa\K        | 220.000     | 230.000     | 240.000     | 250.000     | 260.000     |
|-------------|-------------|-------------|-------------|-------------|-------------|
| 1.00000e+08 | 7.78733e-09 | 9.28560e-09 | 1.10171e-08 | 1.30187e-08 | 1.53339e-08 |
| 1.00000e+07 | 7.66691e-08 | 9.12652e-08 | 1.08078e-07 | 1.27443e-07 | 1.49750e-07 |
| 1.00000e+06 | 6.60486e-07 | 7.74357e-07 | 9.01766e-07 | 1.04390e-06 | 1.20199e-06 |
| 100000.     | 2.26271e-06 | 2.46860e-06 | 2.66967e-06 | 2.86470e-06 | 3.05272e-06 |
| 10000.0     | 1.44674e-06 | 1.52254e-06 | 1.59640e-06 | 1.66874e-06 | 1.74000e-06 |
| 1000.00     | 1.39948e-06 | 1.44417e-06 | 1.48569e-06 | 1.52395e-06 | 1.55890e-06 |
| 100.000     | 1.05709e-06 | 1.04591e-06 | 1.03471e-06 | 1.02360e-06 | 1.01263e-06 |
| 10.0000     | 6.13187e-07 | 6.07554e-07 | 6.02077e-07 | 5.96752e-07 | 5.91576e-07 |
| 1.00000     | 4.37159e-07 | 4.34253e-07 | 4.31193e-07 | 4.27954e-07 | 4.24506e-07 |
| 0.100000    | 3.46174e-07 | 3.38657e-07 | 3.30285e-07 | 3.21050e-07 | 3.10966e-07 |
| 0.0100000   | 1.48435e-07 | 1.34532e-07 | 1.21199e-07 | 1.08547e-07 | 9.66623e-08 |
| 0.00100000  | 5.93356e-09 | 4.75681e-09 | 3.80726e-09 | 3.04280e-09 | 2.42864e-09 |
| 0.000100000 | 9.70982e-12 | 7.39306e-12 | 5.64964e-12 | 4.33177e-12 | 3.33154e-12 |
| 1.00000e-05 | 8.73739e-15 | 6.78489e-15 | 5.29141e-15 | 4.14304e-15 | 3.25591e-15 |
| 1.00000e-06 | 1.91807e-17 | 1.53303e-17 | 1.23023e-17 | 9.91086e-18 | 8.01538e-18 |
| 1.00000e-07 | 1.12031e-19 | 9.17967e-20 | 7.54966e-20 | 6.23272e-20 | 5.16657e-20 |
| 1.00000e-08 | 1.59210e-21 | 1.32957e-21 | 1.11324e-21 | 9.34540e-22 | 7.86559e-22 |
| 1.00000e-09 | 5.31170e-23 | 4.51052e-23 | 3.83698e-23 | 3.26882e-23 | 2.78913e-23 |

| Pa\K        | 270.000     | 280.000     | 290.000     | 300.000     | 400.000     |
|-------------|-------------|-------------|-------------|-------------|-------------|
| 1.00000e+08 | 1.80133e-08 | 2.11156e-08 | 2.47089e-08 | 4.55764e-08 | 2.14490e-07 |
| 1.00000e+07 | 1.75447e-07 | 2.05050e-07 | 2.39146e-07 | 4.27227e-07 | 1.79736e-06 |
| 1.00000e+06 | 1.37726e-06 | 1.57092e-06 | 1.78409e-06 | 2.60793e-06 | 6.62750e-06 |
| 100000.     | 3.23305e-06 | 3.40526e-06 | 3.56915e-06 | 3.79221e-06 | 5.35710e-06 |
| 10000.0     | 1.81062e-06 | 1.88097e-06 | 1.95138e-06 | 2.31921e-06 | 3.10812e-06 |
| 1000.00     | 1.59054e-06 | 1.61886e-06 | 1.64393e-06 | 1.73623e-06 | 1.77213e-06 |
| 100.000     | 1.00188e-06 | 9.91390e-07 | 9.81198e-07 | 9.77021e-07 | 9.48895e-07 |
| 10.0000     | 5.86548e-07 | 5.81663e-07 | 5.76918e-07 | 6.16764e-07 | 5.96814e-07 |
| 1.00000     | 4.20817e-07 | 4.16845e-07 | 4.12550e-07 | 4.49540e-07 | 3.57883e-07 |
| 0.100000    | 3.00064e-07 | 2.88400e-07 | 2.76046e-07 | 2.55195e-07 | 1.16891e-07 |
| 0.0100000   | 8.56050e-08 | 7.54109e-08 | 6.60938e-08 | 4.49417e-08 | 9.63606e-09 |
| 0.00100000  | 1.93617e-09 | 1.54198e-09 | 1.22695e-09 | 8.91042e-10 | 1.13830e-10 |
| 0.000100000 | 2.56962e-12 | 1.98728e-12 | 1.54083e-12 | 3.54073e-12 | 4.61140e-13 |
| 1.00000e-05 | 2.56773e-15 | 2.03192e-15 | 1.61337e-15 | 1.62581e-14 | 2.72944e-15 |
| 1.00000e-06 | 6.50869e-18 | 5.30851e-18 | 4.35138e-18 | 1.44084e-16 | 3.26363e-17 |
| 1.00000e-07 | 4.30265e-20 | 3.60317e-20 | 3.03846e-20 | 2.49562e-18 | 6.82337e-19 |
| 1.00000e-08 | 6.64055e-22 | 5.62395e-22 | 4.78199e-22 | 8.01568e-20 | 2.59726e-20 |
| 1.00000e-09 | 2.38364e-23 | 2.04063e-23 | 1.75043e-23 | 3.95668e-21 | 1.64375e-21 |

| Pa\K        | 500.000     | 600.000     | 700.000     | 800.000     | 900.000     |
|-------------|-------------|-------------|-------------|-------------|-------------|
| 1.00000e+08 | 9.02123e-07 | 3.26723e-06 | 9.54868e-06 | 2.22096e-05 | 5.63974e-05 |
| 1.00000e+07 | 5.92910e-06 | 1.46005e-05 | 2.82215e-05 | 5.26682e-05 | 0.000125705 |
| 1.00000e+06 | 1.17759e-05 | 1.72761e-05 | 2.54308e-05 | 4.60722e-05 | 0.000112986 |
| 100000.     | 6.95693e-06 | 9.11052e-06 | 1.29606e-05 | 2.37223e-05 | 6.02539e-05 |
| 10000.0     | 3.70478e-06 | 4.34330e-06 | 5.86643e-06 | 1.07599e-05 | 2.73240e-05 |
| 1000.00     | 1.81539e-06 | 2.04454e-06 | 2.73121e-06 | 4.69066e-06 | 1.04095e-05 |
| 100.000     | 9.70482e-07 | 1.04117e-06 | 1.18669e-06 | 1.58279e-06 | 2.64886e-06 |
| 10.0000     | 5.44542e-07 | 4.45289e-07 | 3.47135e-07 | 3.14642e-07 | 3.78743e-07 |

|             |             |             |             |             |             |
|-------------|-------------|-------------|-------------|-------------|-------------|
| 1.00000     | 2.19198e-07 | 1.08855e-07 | 5.21371e-08 | 3.17616e-08 | 2.93418e-08 |
| 0.100000    | 3.84768e-08 | 1.09792e-08 | 3.36986e-09 | 1.52012e-09 | 1.40531e-09 |
| 0.0100000   | 1.74291e-09 | 3.24264e-10 | 7.55343e-11 | 3.40332e-11 | 6.82749e-11 |
| 0.00100000  | 1.56868e-11 | 2.70568e-12 | 7.20452e-13 | 8.73969e-13 | 5.44302e-12 |
| 0.000100000 | 7.91530e-14 | 2.28305e-14 | 1.41546e-14 | 6.32492e-14 | 5.28805e-13 |
| 1.00000e-05 | 8.94563e-16 | 6.22441e-16 | 8.48808e-16 | 6.03661e-15 | 5.26807e-14 |
| 1.00000e-06 | 2.15409e-17 | 2.52074e-17 | 6.52290e-17 | 5.94259e-16 | 5.26337e-15 |
| 1.00000e-07 | 5.25619e-19 | 1.01679e-18 | 5.64115e-18 | 5.90385e-17 | 5.26185e-16 |
| 1.00000e-08 | 2.36128e-20 | 7.50204e-20 | 5.48675e-19 | 5.89687e-18 | 5.26156e-17 |
| 1.00000e-09 | 1.98376e-21 | 7.25959e-21 | 5.47302e-20 | 5.89610e-19 | 5.26151e-18 |

| Pa\K        | 1000.00     | 1100.00     | 1200.00     | 1300.00     | 1400.00     |
|-------------|-------------|-------------|-------------|-------------|-------------|
| 1.00000e+08 | 0.000179722 | 0.000572901 | 0.00185498  | 0.00530061  | 0.00924980  |
| 1.00000e+07 | 0.000368812 | 0.00102977  | 0.00232020  | 0.00413305  | 0.00541666  |
| 1.00000e+06 | 0.000339160 | 0.000938106 | 0.00181507  | 0.00235456  | 0.00229435  |
| 100000.     | 0.000189937 | 0.000526323 | 0.000917910 | 0.000994355 | 0.000819538 |
| 10000.0     | 8.38740e-05 | 0.000211556 | 0.000311558 | 0.000283742 | 0.000205284 |
| 1000.00     | 2.70629e-05 | 5.56416e-05 | 6.68688e-05 | 5.25945e-05 | 3.46595e-05 |
| 100.000     | 5.35433e-06 | 8.84257e-06 | 9.14947e-06 | 6.64775e-06 | 4.19662e-06 |
| 10.0000     | 6.14561e-07 | 9.09910e-07 | 9.13852e-07 | 6.65328e-07 | 4.22245e-07 |
| 1.00000     | 4.65124e-08 | 7.63425e-08 | 8.29588e-08 | 6.30418e-08 | 4.08726e-08 |
| 0.100000    | 3.26384e-09 | 6.71350e-09 | 7.86580e-09 | 6.13972e-09 | 4.02458e-09 |
| 0.0100000   | 2.77808e-10 | 6.45234e-10 | 7.75629e-10 | 6.09890e-10 | 4.00865e-10 |
| 0.00100000  | 2.69053e-11 | 6.40620e-11 | 7.73630e-11 | 6.09083e-11 | 4.00520e-11 |
| 0.000100000 | 2.67931e-12 | 6.39955e-12 | 7.73298e-12 | 6.08930e-12 | 4.00443e-12 |
| 1.00000e-05 | 2.67777e-13 | 6.39849e-13 | 7.73239e-13 | 6.08898e-13 | 4.00424e-13 |
| 1.00000e-06 | 2.67748e-14 | 6.39830e-14 | 7.73222e-14 | 6.08887e-14 | 4.00418e-14 |
| 1.00000e-07 | 2.67740e-15 | 6.39824e-15 | 7.73222e-15 | 6.08887e-15 | 4.00416e-15 |
| 1.00000e-08 | 2.67738e-16 | 6.39824e-16 | 7.73222e-16 | 6.08887e-16 | 4.00415e-16 |
| 1.00000e-09 | 2.67738e-17 | 6.39818e-17 | 7.73216e-17 | 6.08887e-17 | 4.00415e-17 |

| Pa\K        | 1500.00     | 1750.00     | 2000.00     | 2250.00     | 2500.00     |
|-------------|-------------|-------------|-------------|-------------|-------------|
| 1.00000e+08 | 0.00959078  | 0.000828679 | 0.000588319 | 0.000498547 | 0.000471267 |
| 1.00000e+07 | 0.00539412  | 0.000379577 | 0.000227587 | 0.000189496 | 0.000173558 |
| 1.00000e+06 | 0.00187471  | 0.000170514 | 9.79283e-05 | 7.13717e-05 | 5.20610e-05 |
| 100000.     | 0.000594720 | 5.88773e-05 | 2.91592e-05 | 1.63438e-05 | 9.12700e-06 |
| 10000.0     | 0.000136761 | 1.31064e-05 | 5.21796e-06 | 2.32376e-06 | 1.09526e-06 |
| 1000.00     | 2.17163e-05 | 1.92991e-06 | 6.50928e-07 | 2.56407e-07 | 1.13099e-07 |
| 100.000     | 2.55578e-06 | 2.18900e-07 | 6.86481e-08 | 2.59916e-08 | 1.12888e-08 |
| 10.0000     | 2.57709e-07 | 2.23078e-08 | 6.89347e-09 | 2.59297e-09 | 1.12411e-09 |
| 1.00000     | 2.52120e-08 | 2.22062e-09 | 6.87035e-10 | 2.58453e-10 | 1.12058e-10 |
| 0.100000    | 2.49514e-09 | 2.21311e-10 | 6.85905e-11 | 2.58145e-11 | 1.11944e-11 |
| 0.0100000   | 2.48823e-10 | 2.21065e-11 | 6.85613e-12 | 2.58083e-12 | 1.11924e-12 |
| 0.00100000  | 2.48656e-11 | 2.20984e-12 | 6.85522e-13 | 2.58067e-13 | 1.11920e-13 |
| 0.000100000 | 2.48613e-12 | 2.20956e-13 | 6.85491e-14 | 2.58062e-14 | 1.11918e-14 |
| 1.00000e-05 | 2.48600e-13 | 2.20945e-14 | 6.85477e-15 | 2.58059e-15 | 1.11917e-15 |
| 1.00000e-06 | 2.48597e-14 | 2.20940e-15 | 6.85474e-16 | 2.58059e-16 | 1.11917e-16 |
| 1.00000e-07 | 2.48595e-15 | 2.20939e-16 | 6.85470e-17 | 2.58058e-17 | 1.11917e-17 |
| 1.00000e-08 | 2.48594e-16 | 2.20937e-17 | 6.85467e-18 | 2.58058e-18 | 1.11917e-18 |
| 1.00000e-09 | 2.48594e-17 | 2.20937e-18 | 6.85467e-19 | 2.58058e-19 | 1.11917e-19 |

| Pa\K        | 2750.00     | 3000.00     | 3250.00     | 3500.00     | 3750.00     |
|-------------|-------------|-------------|-------------|-------------|-------------|
| 1.00000e+08 | 0.000459427 | 0.000445006 | 0.000421791 | 0.000389251 | 0.000349851 |
| 1.00000e+07 | 0.000153821 | 0.000129013 | 0.000103129 | 7.96687e-05 | 6.03210e-05 |
| 1.00000e+06 | 3.59562e-05 | 2.39050e-05 | 1.56784e-05 | 1.03436e-05 | 6.95075e-06 |
| 100000.     | 5.08459e-06 | 2.89652e-06 | 1.71501e-06 | 1.06205e-06 | 6.87750e-07 |
| 10000.0     | 5.50150e-07 | 2.96303e-07 | 1.70634e-07 | 1.04332e-07 | 6.72018e-08 |
| 1000.00     | 5.51629e-08 | 2.93718e-08 | 1.68481e-08 | 1.02906e-08 | 6.62814e-09 |
| 100.000     | 5.47971e-09 | 2.91436e-09 | 1.67164e-09 | 1.02124e-09 | 6.57944e-10 |
| 10.0000     | 5.45516e-10 | 2.90166e-10 | 1.66464e-10 | 1.01712e-10 | 6.55366e-11 |
| 1.00000     | 5.43884e-11 | 2.89336e-11 | 1.66004e-11 | 1.01439e-11 | 6.53655e-12 |
| 0.100000    | 5.43388e-12 | 2.89092e-12 | 1.65874e-12 | 1.01364e-12 | 6.53196e-13 |
| 0.0100000   | 5.43307e-13 | 2.89055e-13 | 1.65855e-13 | 1.01354e-13 | 6.53135e-14 |
| 0.00100000  | 5.43291e-14 | 2.89048e-14 | 1.65852e-14 | 1.01352e-14 | 6.53125e-15 |
| 0.000100000 | 5.43286e-15 | 2.89048e-15 | 1.65851e-15 | 1.01352e-15 | 6.53121e-16 |
| 1.00000e-05 | 5.43283e-16 | 2.89045e-16 | 1.65850e-16 | 1.01351e-16 | 6.53121e-17 |
| 1.00000e-06 | 5.43283e-17 | 2.89045e-17 | 1.65850e-17 | 1.01351e-17 | 6.53121e-18 |
| 1.00000e-07 | 5.43281e-18 | 2.89045e-18 | 1.65850e-18 | 1.01351e-18 | 6.53121e-19 |
| 1.00000e-08 | 5.43281e-19 | 2.89045e-19 | 1.65850e-19 | 1.01351e-19 | 6.53121e-20 |
| 1.00000e-09 | 5.43281e-20 | 2.89045e-20 | 1.65850e-20 | 1.01351e-20 | 6.53121e-21 |

| Pa\K        | 4000.00     |
|-------------|-------------|
| 1.00000e+08 | 0.000307225 |
| 1.00000e+07 | 4.53073e-05 |
| 1.00000e+06 | 4.78934e-06 |
| 100000.     | 4.64239e-07 |

|             |             |
|-------------|-------------|
| 10000.0     | 4.52746e-08 |
| 1000.00     | 4.46672e-09 |
| 100.000     | 4.43496e-10 |
| 10.0000     | 4.41801e-11 |
| 1.00000     | 4.40671e-12 |
| 0.100000    | 4.40378e-13 |
| 0.0100000   | 4.40338e-14 |
| 0.00100000  | 4.40331e-15 |
| 0.000100000 | 4.40331e-16 |
| 1.00000e-05 | 4.40329e-17 |
| 1.00000e-06 | 4.40329e-18 |
| 1.00000e-07 | 4.40329e-19 |
| 1.00000e-08 | 4.40329e-20 |
| 1.00000e-09 | 4.40329e-21 |

Ph+MeAc

=====

| Pa\K        | 20.0000     | 30.0000     | 40.0000     | 50.0000     | 60.0000     |
|-------------|-------------|-------------|-------------|-------------|-------------|
| 1.00000e+08 | 4.18090e-40 | 1.62986e-36 | 1.64847e-34 | 3.67845e-33 | 3.82425e-32 |
| 1.00000e+07 | 2.49758e-36 | 2.55423e-33 | 3.26579e-31 | 7.87935e-30 | 8.24085e-29 |
| 1.00000e+06 | 7.21543e-32 | 5.71410e-30 | 4.97591e-28 | 1.08964e-26 | 1.07309e-25 |
| 100000.     | 8.54508e-28 | 2.00615e-26 | 5.81960e-25 | 1.08855e-23 | 1.02140e-22 |
| 10000.0     | 7.34853e-24 | 1.18786e-22 | 9.39404e-22 | 8.47187e-21 | 6.08981e-20 |
| 1000.00     | 2.86296e-20 | 3.12234e-19 | 1.43745e-18 | 5.64948e-18 | 2.20113e-17 |
| 100.000     | 3.69945e-17 | 3.17187e-16 | 1.22953e-15 | 3.72698e-15 | 1.02612e-14 |
| 10.0000     | 2.22044e-14 | 1.45816e-13 | 4.71360e-13 | 1.20153e-12 | 2.74194e-12 |
| 1.00000     | 5.90846e-12 | 2.98604e-11 | 8.10606e-11 | 1.79499e-10 | 3.62562e-10 |
| 0.100000    | 7.33682e-10 | 3.02633e-09 | 7.25827e-09 | 1.45145e-08 | 2.66353e-08 |
| 0.0100000   | 4.48322e-08 | 1.33219e-07 | 2.55229e-07 | 4.26748e-07 | 6.71024e-07 |
| 0.00100000  | 8.41079e-07 | 1.73659e-06 | 2.70718e-06 | 3.87806e-06 | 5.34076e-06 |
| 0.000100000 | 5.04199e-06 | 7.06157e-06 | 8.68473e-06 | 1.04514e-05 | 1.25208e-05 |
| 1.00000e-05 | 9.12304e-06 | 9.97593e-06 | 1.10541e-05 | 1.25305e-05 | 1.44295e-05 |
| 1.00000e-06 | 9.91712e-06 | 1.04014e-05 | 1.13615e-05 | 1.27828e-05 | 1.46513e-05 |
| 1.00000e-07 | 1.00039e-05 | 1.04458e-05 | 1.13931e-05 | 1.28086e-05 | 1.46738e-05 |
| 1.00000e-08 | 1.00126e-05 | 1.04503e-05 | 1.13963e-05 | 1.28111e-05 | 1.46761e-05 |
| 1.00000e-09 | 1.00135e-05 | 1.04507e-05 | 1.13966e-05 | 1.28114e-05 | 1.46763e-05 |

| Pa\K        | 70.0000     | 80.0000     | 90.0000     | 100.000     | 110.000     |
|-------------|-------------|-------------|-------------|-------------|-------------|
| 1.00000e+08 | 2.55022e-31 | 1.28225e-30 | 5.33347e-30 | 1.94536e-29 | 6.46827e-29 |
| 1.00000e+07 | 5.35271e-28 | 2.58156e-27 | 1.02203e-26 | 3.53354e-26 | 1.11125e-25 |
| 1.00000e+06 | 6.66791e-25 | 3.10512e-24 | 1.19409e-23 | 4.02620e-23 | 1.23820e-22 |
| 100000.     | 6.14957e-22 | 2.78507e-21 | 1.04188e-20 | 3.41315e-20 | 1.01756e-19 |
| 10000.0     | 3.17486e-19 | 1.29112e-18 | 4.39712e-18 | 1.31950e-17 | 3.61464e-17 |
| 1000.00     | 8.10373e-17 | 2.69753e-16 | 8.10085e-16 | 2.22989e-15 | 5.73241e-15 |
| 100.000     | 2.70269e-14 | 6.88923e-14 | 1.69588e-13 | 4.02191e-13 | 9.19697e-13 |
| 10.0000     | 5.91835e-12 | 1.24105e-11 | 2.55689e-11 | 5.19461e-11 | 1.04177e-10 |
| 1.00000     | 7.01355e-10 | 1.33218e-09 | 2.51178e-09 | 4.71227e-09 | 8.78277e-09 |
| 0.100000    | 4.67286e-08 | 8.00196e-08 | 1.35015e-07 | 2.25104e-07 | 3.70799e-07 |
| 0.0100000   | 1.02289e-06 | 1.53496e-06 | 2.28345e-06 | 3.37407e-06 | 4.94850e-06 |
| 0.00100000  | 7.19685e-06 | 9.57416e-06 | 1.26276e-05 | 1.65350e-05 | 2.14959e-05 |
| 0.000100000 | 1.50080e-05 | 1.80439e-05 | 2.17808e-05 | 2.63885e-05 | 3.20545e-05 |
| 1.00000e-05 | 1.68115e-05 | 1.97820e-05 | 2.34796e-05 | 2.80661e-05 | 3.37230e-05 |
| 1.00000e-06 | 1.70147e-05 | 1.99735e-05 | 2.36635e-05 | 2.82452e-05 | 3.38991e-05 |
| 1.00000e-07 | 1.70353e-05 | 1.99928e-05 | 2.36821e-05 | 2.82632e-05 | 3.39169e-05 |
| 1.00000e-08 | 1.70374e-05 | 1.99948e-05 | 2.36839e-05 | 2.82650e-05 | 3.39186e-05 |
| 1.00000e-09 | 1.70376e-05 | 1.99950e-05 | 2.36841e-05 | 2.82652e-05 | 3.39188e-05 |

| Pa\K        | 120.000     | 130.000     | 140.000     | 150.000     | 160.000     |
|-------------|-------------|-------------|-------------|-------------|-------------|
| 1.00000e+08 | 2.01334e-28 | 5.97528e-28 | 1.71220e-27 | 4.77688e-27 | 1.30460e-26 |
| 1.00000e+07 | 3.26857e-25 | 9.16749e-25 | 2.48488e-24 | 6.56865e-24 | 1.70363e-23 |
| 1.00000e+06 | 3.56805e-22 | 9.81579e-22 | 2.61137e-21 | 6.77701e-21 | 1.72540e-20 |
| 100000.     | 2.83402e-19 | 7.50784e-19 | 1.91550e-18 | 4.74616e-18 | 1.14839e-17 |
| 10000.0     | 9.26669e-17 | 2.26276e-16 | 5.32874e-16 | 1.22097e-15 | 2.73849e-15 |
| 1000.00     | 1.39875e-14 | 3.28089e-14 | 7.46654e-14 | 1.65916e-13 | 3.61466e-13 |
| 100.000     | 2.03439e-12 | 4.37110e-12 | 9.15983e-12 | 1.87882e-11 | 3.78346e-11 |
| 10.0000     | 2.06410e-10 | 4.04512e-10 | 7.84992e-10 | 1.50962e-09 | 2.87734e-09 |
| 1.00000     | 1.62193e-08 | 2.96042e-08 | 5.33001e-08 | 9.45106e-08 | 1.64853e-07 |
| 0.100000    | 6.02924e-07 | 9.67045e-07 | 1.52951e-06 | 2.38536e-06 | 3.66835e-06 |
| 0.0100000   | 7.19139e-06 | 1.03374e-05 | 1.46778e-05 | 2.05646e-05 | 2.84128e-05 |
| 0.00100000  | 2.77305e-05 | 3.54828e-05 | 4.50231e-05 | 5.66516e-05 | 7.07009e-05 |
| 0.000100000 | 3.89849e-05 | 4.74094e-05 | 5.75850e-05 | 6.97998e-05 | 8.43762e-05 |
| 1.00000e-05 | 4.06526e-05 | 4.90813e-05 | 5.92637e-05 | 7.14863e-05 | 8.60694e-05 |
| 1.00000e-06 | 4.08270e-05 | 4.92550e-05 | 5.94371e-05 | 7.16594e-05 | 8.62426e-05 |
| 1.00000e-07 | 4.08445e-05 | 4.92724e-05 | 5.94545e-05 | 7.16768e-05 | 8.62600e-05 |
| 1.00000e-08 | 4.08463e-05 | 4.92741e-05 | 5.94563e-05 | 7.16785e-05 | 8.62617e-05 |
| 1.00000e-09 | 4.08465e-05 | 4.92743e-05 | 5.94564e-05 | 7.16787e-05 | 8.62619e-05 |



| Pa\K        | 170.000     | 180.000     | 190.000     | 200.000     | 210.000     |
|-------------|-------------|-------------|-------------|-------------|-------------|
| 1.00000e+08 | 3.49953e-26 | 9.23875e-26 | 2.40310e-25 | 6.16199e-25 | 1.55786e-24 |
| 1.00000e+07 | 4.35167e-23 | 1.09726e-22 | 2.73458e-22 | 6.73980e-22 | 1.64298e-21 |
| 1.00000e+06 | 4.32457e-20 | 1.06921e-19 | 2.61020e-19 | 6.29404e-19 | 1.49895e-18 |
| 100000.     | 2.72308e-17 | 6.34181e-17 | 1.45256e-16 | 3.27482e-16 | 7.27104e-16 |
| 10000.0     | 6.03715e-15 | 1.31170e-14 | 2.81341e-14 | 5.96251e-14 | 1.24907e-13 |
| 1000.00     | 7.73883e-13 | 1.63006e-12 | 3.37920e-12 | 6.89422e-12 | 1.38401e-11 |
| 100.000     | 7.49823e-11 | 1.46531e-10 | 2.82770e-10 | 5.39382e-10 | 1.01753e-09 |
| 10.0000     | 5.43247e-09 | 1.01479e-08 | 1.87256e-08 | 3.40731e-08 | 6.10321e-08 |
| 1.00000     | 2.82614e-07 | 4.75908e-07 | 7.86950e-07 | 1.27772e-06 | 2.03719e-06 |
| 0.100000    | 5.56312e-06 | 8.31893e-06 | 1.22646e-05 | 1.78231e-05 | 2.55242e-05 |
| 0.0100000   | 3.86987e-05 | 5.19560e-05 | 6.87673e-05 | 8.97544e-05 | 0.000115566 |
| 0.00100000  | 8.75371e-05 | 0.000107561 | 0.000131205 | 0.000158934 | 0.000191238 |
| 0.000100000 | 0.000101673 | 0.000122083 | 0.000146037 | 0.000173996 | 0.000206449 |
| 1.00000e-05 | 0.000103370 | 0.000123783 | 0.000147734 | 0.000175687 | 0.000208129 |
| 1.00000e-06 | 0.000103543 | 0.000123955 | 0.000147907 | 0.000175858 | 0.000208299 |
| 1.00000e-07 | 0.000103561 | 0.000123973 | 0.000147924 | 0.000175876 | 0.000208316 |
| 1.00000e-08 | 0.000103562 | 0.000123974 | 0.000147925 | 0.000175877 | 0.000208317 |
| 1.00000e-09 | 0.000103563 | 0.000123975 | 0.000147926 | 0.000175878 | 0.000208318 |

| Pa\K        | 220.000     | 230.000     | 240.000     | 250.000     | 260.000     |
|-------------|-------------|-------------|-------------|-------------|-------------|
| 1.00000e+08 | 3.88234e-24 | 9.52981e-24 | 2.30089e-23 | 5.45281e-23 | 1.26501e-22 |
| 1.00000e+07 | 3.96022e-21 | 9.43137e-21 | 2.21617e-20 | 5.12757e-20 | 1.16506e-19 |
| 1.00000e+06 | 3.52423e-18 | 8.17382e-18 | 1.86790e-17 | 4.19866e-17 | 9.26337e-17 |
| 100000.     | 1.59036e-15 | 3.42714e-15 | 7.27495e-15 | 1.52042e-14 | 3.12546e-14 |
| 10000.0     | 2.58643e-13 | 5.29188e-13 | 1.06911e-12 | 2.13072e-12 | 4.18372e-12 |
| 1000.00     | 2.73343e-11 | 5.31097e-11 | 1.01523e-10 | 1.90957e-10 | 3.53448e-10 |
| 100.000     | 1.89852e-09 | 3.50230e-09 | 6.38351e-09 | 1.14844e-08 | 2.03704e-08 |
| 10.0000     | 1.07454e-07 | 1.85727e-07 | 3.14891e-07 | 5.23441e-07 | 8.52945e-07 |
| 1.00000     | 3.19045e-06 | 4.90955e-06 | 7.42631e-06 | 1.10464e-05 | 1.61644e-05 |
| 0.100000    | 3.60137e-05 | 5.00559e-05 | 6.85305e-05 | 9.24194e-05 | 0.000122785 |
| 0.0100000   | 0.000146863 | 0.000184309 | 0.000228551 | 0.000280215 | 0.000339882 |
| 0.00100000  | 0.000228629 | 0.000271634 | 0.000320786 | 0.000376616 | 0.000439646 |
| 0.000100000 | 0.000243909 | 0.000286904 | 0.000335970 | 0.000391642 | 0.000454447 |
| 1.00000e-05 | 0.000245573 | 0.000288547 | 0.000337587 | 0.000393229 | 0.000455997 |
| 1.00000e-06 | 0.000245741 | 0.000288712 | 0.000337750 | 0.000393388 | 0.000456153 |
| 1.00000e-07 | 0.000245758 | 0.000288729 | 0.000337766 | 0.000393404 | 0.000456168 |
| 1.00000e-08 | 0.000245759 | 0.000288730 | 0.000337767 | 0.000393405 | 0.000456170 |
| 1.00000e-09 | 0.000245760 | 0.000288730 | 0.000337767 | 0.000393405 | 0.000456170 |

| Pa\K        | 270.000     | 280.000     | 290.000     | 300.000     | 400.000     |
|-------------|-------------|-------------|-------------|-------------|-------------|
| 1.00000e+08 | 2.86445e-22 | 6.31295e-22 | 1.35092e-21 | 3.53410e-21 | 2.41562e-21 |
| 1.00000e+07 | 2.59183e-19 | 5.62837e-19 | 1.18994e-18 | 2.74101e-18 | 7.63597e-18 |
| 1.00000e+06 | 2.00108e-16 | 4.22201e-16 | 8.68054e-16 | 1.03769e-15 | 8.31809e-15 |
| 100000.     | 6.31097e-14 | 1.24965e-13 | 2.42230e-13 | 1.32088e-12 | 3.52062e-12 |
| 10000.0     | 8.08135e-12 | 1.53310e-11 | 2.85159e-11 | 8.99617e-11 | 1.06995e-10 |
| 1000.00     | 6.43752e-10 | 1.15347e-09 | 2.03229e-09 | 3.80559e-09 | 2.18292e-09 |
| 100.000     | 3.55786e-08 | 6.11130e-08 | 1.03114e-07 | 1.10038e-07 | 2.96926e-07 |
| 10.0000     | 1.36254e-06 | 2.13431e-06 | 3.27949e-06 | 1.79603e-06 | 0.000247846 |
| 1.00000     | 2.32782e-05 | 3.30024e-05 | 4.60771e-05 | 0.000145308 | 0.000102720 |
| 0.100000    | 0.000160745 | 0.000207430 | 0.000263948 | 0.000501142 | 0.000192887 |
| 0.0100000   | 0.000408094 | 0.000485329 | 0.000572002 | 0.00071965  | 0.000223718 |
| 0.00100000  | 0.000510374 | 0.000589268 | 0.000676754 | 0.000832259 | 0.000228133 |
| 0.000100000 | 0.000524888 | 0.000603439 | 0.000690532 | 0.000839463 | 0.000228603 |
| 1.00000e-05 | 0.000526398 | 0.000604905 | 0.000691951 | 0.000840202 | 0.000228650 |
| 1.00000e-06 | 0.000526549 | 0.000605052 | 0.000692093 | 0.000840277 | 0.000228654 |
| 1.00000e-07 | 0.000526565 | 0.000605066 | 0.000692108 | 0.000840284 | 0.000228655 |
| 1.00000e-08 | 0.000526566 | 0.000605068 | 0.000692109 | 0.000840285 | 0.000228655 |
| 1.00000e-09 | 0.000526566 | 0.000605068 | 0.000692109 | 0.000840285 | 0.000228655 |

| Pa\K        | 500.000     | 600.000     | 700.000     | 800.000     | 900.000     |
|-------------|-------------|-------------|-------------|-------------|-------------|
| 1.00000e+08 | 1.34759e-11 | 4.21441e-09 | 6.44657e-08 | 3.66420e-07 | 1.99215e-06 |
| 1.00000e+07 | 4.20458e-10 | 3.63711e-08 | 4.98341e-07 | 2.80465e-06 | 1.23645e-05 |
| 1.00000e+06 | 1.26076e-08 | 3.18894e-07 | 2.49493e-06 | 1.21669e-05 | 4.97542e-05 |
| 100000.     | 2.06717e-07 | 2.72274e-06 | 1.73669e-05 | 7.64909e-05 | 0.000275522 |
| 10000.0     | 3.13152e-06 | 2.79222e-05 | 0.000148251 | 0.000534153 | 0.00142960  |
| 1000.00     | 3.56231e-05 | 0.000241104 | 0.000965672 | 0.00244530  | 0.00443813  |
| 100.000     | 0.000291309 | 0.00133733  | 0.00348135  | 0.00589459  | 0.00764863  |
| 10.0000     | 0.00138857  | 0.00380381  | 0.00644724  | 0.00816871  | 0.00890680  |
| 1.00000     | 0.00318622  | 0.00574637  | 0.00765659  | 0.00869662  | 0.00909044  |
| 0.100000    | 0.00413350  | 0.00628271  | 0.00785224  | 0.00875221  | 0.00910543  |
| 0.0100000   | 0.00431674  | 0.00635517  | 0.00787408  | 0.00875807  | 0.00910708  |
| 0.00100000  | 0.00433795  | 0.00636301  | 0.00787648  | 0.00875881  | 0.00910729  |
| 0.000100000 | 0.00434012  | 0.00636381  | 0.00787671  | 0.00875888  | 0.00910729  |
| 1.00000e-05 | 0.00434033  | 0.00636389  | 0.00787679  | 0.00875888  | 0.00910729  |
| 1.00000e-06 | 0.00434036  | 0.00636390  | 0.00787679  | 0.00875888  | 0.00910729  |

|             |            |            |            |            |            |
|-------------|------------|------------|------------|------------|------------|
| 1.00000e-07 | 0.00434036 | 0.00636390 | 0.00787679 | 0.00875888 | 0.00910729 |
| 1.00000e-08 | 0.00434036 | 0.00636390 | 0.00787679 | 0.00875888 | 0.00910729 |
| 1.00000e-09 | 0.00434036 | 0.00636390 | 0.00787679 | 0.00875888 | 0.00910729 |

| Pa\K        | 1000.00     | 1100.00     | 1200.00     | 1300.00     | 1400.00     |
|-------------|-------------|-------------|-------------|-------------|-------------|
| 1.00000e+08 | 9.37012e-06 | 2.94048e-05 | 7.61101e-05 | 0.000187524 | 0.000307252 |
| 1.00000e+07 | 4.78290e-05 | 0.000162263 | 0.000460525 | 0.000988470 | 0.00148445  |
| 1.00000e+06 | 0.000181673 | 0.000573129 | 0.00137733  | 0.00237242  | 0.00308189  |
| 100000.     | 0.000802516 | 0.00183947  | 0.00322290  | 0.00435970  | 0.00489526  |
| 10000.0     | 0.00287174  | 0.00451744  | 0.00579449  | 0.00637152  | 0.00639927  |
| 1000.00     | 0.00621531  | 0.00729746  | 0.00764635  | 0.00750522  | 0.00714297  |
| 100.000     | 0.00843680  | 0.00853871  | 0.00826736  | 0.00783134  | 0.00734444  |
| 10.0000     | 0.00900771  | 0.00877233  | 0.00836488  | 0.00787972  | 0.00737441  |
| 1.00000     | 0.00906907  | 0.00879411  | 0.00837404  | 0.00788459  | 0.00737752  |
| 0.100000    | 0.00907409  | 0.00879611  | 0.00837502  | 0.00788510  | 0.00737786  |
| 0.0100000   | 0.00907467  | 0.00879642  | 0.00837514  | 0.00788521  | 0.00737791  |
| 0.00100000  | 0.00907480  | 0.00879642  | 0.00837514  | 0.00788521  | 0.00737791  |
| 0.000100000 | 0.00907480  | 0.00879642  | 0.00837514  | 0.00788521  | 0.00737791  |
| 1.00000e-05 | 0.00907480  | 0.00879642  | 0.00837514  | 0.00788521  | 0.00737791  |
| 1.00000e-06 | 0.00907480  | 0.00879642  | 0.00837514  | 0.00788521  | 0.00737791  |
| 1.00000e-07 | 0.00907480  | 0.00879642  | 0.00837514  | 0.00788521  | 0.00737791  |
| 1.00000e-08 | 0.00907480  | 0.00879642  | 0.00837514  | 0.00788521  | 0.00737791  |
| 1.00000e-09 | 0.00907480  | 0.00879642  | 0.00837514  | 0.00788521  | 0.00737791  |

| Pa\K        | 1500.00     | 1750.00    | 2000.00    | 2250.00    | 2500.00    |
|-------------|-------------|------------|------------|------------|------------|
| 1.00000e+08 | 0.000312145 | 0.00260679 | 0.00360075 | 0.00380228 | 0.00373772 |
| 1.00000e+07 | 0.00166195  | 0.00334647 | 0.00419124 | 0.00432653 | 0.00420003 |
| 1.00000e+06 | 0.00338143  | 0.00443017 | 0.00487493 | 0.00479522 | 0.00455471 |
| 100000.     | 0.00498436  | 0.00559035 | 0.00548846 | 0.00512840 | 0.00474520 |
| 10000.0     | 0.00616967  | 0.00635085 | 0.00579519 | 0.00524592 | 0.00479325 |
| 1000.00     | 0.00671816  | 0.00663797 | 0.00587785 | 0.00526875 | 0.00480041 |
| 100.000     | 0.00686229  | 0.00670131 | 0.00589166 | 0.00527179 | 0.00480124 |
| 10.0000     | 0.00688372  | 0.00671015 | 0.00589330 | 0.00527211 | 0.00480130 |
| 1.00000     | 0.00688597  | 0.00671111 | 0.00589348 | 0.00527212 | 0.00480131 |
| 0.100000    | 0.00688623  | 0.00671121 | 0.00589349 | 0.00527212 | 0.00480131 |
| 0.0100000   | 0.00688624  | 0.00671122 | 0.00589349 | 0.00527212 | 0.00480131 |
| 0.00100000  | 0.00688624  | 0.00671122 | 0.00589349 | 0.00527212 | 0.00480131 |
| 0.000100000 | 0.00688624  | 0.00671122 | 0.00589349 | 0.00527212 | 0.00480131 |
| 1.00000e-05 | 0.00688624  | 0.00671122 | 0.00589349 | 0.00527212 | 0.00480131 |
| 1.00000e-06 | 0.00688624  | 0.00671122 | 0.00589349 | 0.00527212 | 0.00480131 |
| 1.00000e-07 | 0.00688624  | 0.00671122 | 0.00589349 | 0.00527212 | 0.00480131 |
| 1.00000e-08 | 0.00688624  | 0.00671122 | 0.00589349 | 0.00527212 | 0.00480131 |
| 1.00000e-09 | 0.00688624  | 0.00671122 | 0.00589349 | 0.00527212 | 0.00480131 |

| Pa\K        | 2750.00    | 3000.00    | 3250.00    | 3500.00    | 3750.00    |
|-------------|------------|------------|------------|------------|------------|
| 1.00000e+08 | 0.00363722 | 0.00354540 | 0.00347260 | 0.00341998 | 0.00338473 |
| 1.00000e+07 | 0.00405023 | 0.00392135 | 0.00381628 | 0.00373076 | 0.00366037 |
| 1.00000e+06 | 0.00432031 | 0.00412002 | 0.00395731 | 0.00382870 | 0.00372791 |
| 100000.     | 0.00442532 | 0.00417575 | 0.00398665 | 0.00384452 | 0.00373679 |
| 10000.0     | 0.00444503 | 0.00418396 | 0.00399022 | 0.00384620 | 0.00373765 |
| 1000.00     | 0.00444746 | 0.00418484 | 0.00399058 | 0.00384635 | 0.00373773 |
| 100.000     | 0.00444770 | 0.00418493 | 0.00399062 | 0.00384636 | 0.00373773 |
| 10.0000     | 0.00444775 | 0.00418496 | 0.00399062 | 0.00384636 | 0.00373773 |
| 1.00000     | 0.00444775 | 0.00418496 | 0.00399061 | 0.00384635 | 0.00373773 |
| 0.100000    | 0.00444775 | 0.00418496 | 0.00399061 | 0.00384635 | 0.00373773 |
| 0.0100000   | 0.00444775 | 0.00418496 | 0.00399061 | 0.00384635 | 0.00373773 |
| 0.00100000  | 0.00444775 | 0.00418496 | 0.00399061 | 0.00384635 | 0.00373773 |
| 0.000100000 | 0.00444775 | 0.00418496 | 0.00399061 | 0.00384635 | 0.00373773 |
| 1.00000e-05 | 0.00444775 | 0.00418496 | 0.00399061 | 0.00384635 | 0.00373773 |
| 1.00000e-06 | 0.00444775 | 0.00418496 | 0.00399061 | 0.00384635 | 0.00373773 |
| 1.00000e-07 | 0.00444775 | 0.00418496 | 0.00399061 | 0.00384635 | 0.00373773 |
| 1.00000e-08 | 0.00444775 | 0.00418496 | 0.00399061 | 0.00384635 | 0.00373773 |
| 1.00000e-09 | 0.00444775 | 0.00418496 | 0.00399061 | 0.00384635 | 0.00373773 |

| Pa\K        | 4000.00    |
|-------------|------------|
| 1.00000e+08 | 0.00336217 |
| 1.00000e+07 | 0.00360144 |
| 1.00000e+06 | 0.00364814 |
| 100000.     | 0.00365342 |
| 10000.0     | 0.00365390 |
| 1000.00     | 0.00365395 |
| 100.000     | 0.00365394 |
| 10.0000     | 0.00365394 |
| 1.00000     | 0.00365394 |
| 0.100000    | 0.00365394 |
| 0.0100000   | 0.00365394 |

0.00100000 | 0.00365394  
 0.000100000 | 0.00365394  
 1.00000e-05 | 0.00365394  
 1.00000e-06 | 0.00365394  
 1.00000e-07 | 0.00365394  
 1.00000e-08 | 0.00365394  
 1.00000e-09 | 0.00365394

PhcycC3H3\_A+H

=====

| Pa\K        | 20.0000     | 30.0000     | 40.0000     | 50.0000     | 60.0000     |
|-------------|-------------|-------------|-------------|-------------|-------------|
| 1.00000e+08 | 1.29433e-58 | 7.11438e-56 | 7.93567e-54 | 2.45561e-52 | 4.40121e-51 |
| 1.00000e+07 | 2.41539e-55 | 9.74051e-54 | 8.09488e-52 | 2.46379e-50 | 4.40469e-49 |
| 1.00000e+06 | 2.66567e-52 | 3.62558e-51 | 9.67840e-50 | 2.54489e-48 | 4.43946e-47 |
| 100000.     | 2.66976e-49 | 2.96294e-48 | 2.50584e-47 | 3.32473e-46 | 4.76884e-45 |
| 10000.0     | 2.44925e-46 | 2.44224e-45 | 1.40917e-44 | 8.64798e-44 | 6.67621e-43 |
| 1000.00     | 1.13977e-43 | 6.28909e-43 | 2.23614e-42 | 8.27393e-42 | 3.70214e-41 |
| 100.000     | 3.98620e-42 | 1.08440e-41 | 2.89405e-41 | 9.07572e-41 | 3.66724e-40 |
| 10.0000     | 4.13649e-41 | 1.08491e-40 | 2.82542e-40 | 8.68185e-40 | 3.46580e-39 |
| 1.00000     | 3.92676e-40 | 9.68919e-40 | 2.38706e-39 | 6.96732e-39 | 2.65275e-38 |
| 0.100000    | 2.30193e-39 | 3.53508e-39 | 5.82162e-39 | 1.19786e-38 | 3.35382e-38 |
| 0.0100000   | 6.49683e-40 | 1.56339e-40 | 8.25048e-41 | 7.81585e-41 | 1.26384e-40 |
| 0.00100000  | 3.39895e-43 | 2.60902e-44 | 1.02948e-44 | 9.70986e-45 | 1.97054e-44 |
| 0.000100000 | 5.31280e-47 | 9.82934e-48 | 7.95447e-48 | 1.54703e-47 | 8.04614e-47 |
| 1.00000e-05 | 2.83000e-49 | 1.53553e-49 | 2.13440e-49 | 6.26318e-49 | 4.74604e-48 |
| 1.00000e-06 | 1.68937e-50 | 1.18158e-50 | 1.80732e-50 | 5.64252e-50 | 4.48701e-49 |
| 1.00000e-07 | 1.59636e-51 | 1.14959e-51 | 1.77664e-51 | 5.58302e-51 | 4.46175e-50 |
| 1.00000e-08 | 1.58726e-52 | 1.14642e-52 | 1.77360e-52 | 5.57709e-52 | 4.45923e-51 |
| 1.00000e-09 | 1.58635e-53 | 1.14610e-53 | 1.77329e-53 | 5.57650e-53 | 4.45897e-52 |

| Pa\K        | 70.0000     | 80.0000     | 90.0000     | 100.000     | 110.000     |
|-------------|-------------|-------------|-------------|-------------|-------------|
| 1.00000e+08 | 6.45302e-50 | 9.86760e-49 | 2.05700e-47 | 7.85030e-46 | 5.57289e-44 |
| 1.00000e+07 | 6.45350e-48 | 9.86535e-47 | 2.05620e-45 | 7.84668e-44 | 5.57034e-42 |
| 1.00000e+06 | 6.45904e-46 | 9.84474e-45 | 2.04867e-43 | 7.81201e-42 | 5.54544e-40 |
| 100000.     | 6.50655e-44 | 9.64144e-43 | 1.97593e-41 | 7.47943e-40 | 5.30707e-38 |
| 10000.0     | 6.41414e-42 | 7.82045e-41 | 1.42901e-39 | 5.12144e-38 | 3.63838e-36 |
| 1000.00     | 2.21867e-40 | 1.94189e-39 | 2.90884e-38 | 9.71626e-37 | 7.28224e-35 |
| 100.000     | 2.10020e-39 | 1.83235e-38 | 2.79144e-37 | 9.54138e-36 | 7.35203e-34 |
| 10.0000     | 1.98182e-38 | 1.73657e-37 | 2.65778e-36 | 9.11723e-35 | 7.05658e-33 |
| 1.00000     | 1.45252e-37 | 1.22316e-36 | 1.81130e-35 | 6.15036e-34 | 4.90643e-32 |
| 0.100000    | 1.40091e-37 | 9.36595e-37 | 1.19524e-35 | 4.47140e-34 | 5.42001e-32 |
| 0.0100000   | 3.65149e-40 | 2.15338e-39 | 5.11743e-38 | 1.09466e-35 | 5.77600e-33 |
| 0.00100000  | 1.05308e-43 | 3.17000e-42 | 8.11203e-40 | 6.29104e-37 | 5.40419e-34 |
| 0.000100000 | 1.46505e-45 | 1.56634e-43 | 6.53631e-41 | 5.88999e-38 | 5.35800e-35 |
| 1.00000e-05 | 1.15701e-46 | 1.46282e-44 | 6.39553e-42 | 5.85057e-39 | 5.35327e-36 |
| 1.00000e-06 | 1.12979e-47 | 1.45291e-45 | 6.38160e-43 | 5.84663e-40 | 5.35280e-37 |
| 1.00000e-07 | 1.12711e-48 | 1.45193e-46 | 6.38021e-44 | 5.84624e-41 | 5.35275e-38 |
| 1.00000e-08 | 1.12684e-49 | 1.45183e-47 | 6.38007e-45 | 5.84620e-42 | 5.35275e-39 |
| 1.00000e-09 | 1.12681e-50 | 1.45182e-48 | 6.38006e-46 | 5.84620e-43 | 5.35275e-40 |

| Pa\K        | 120.000     | 130.000     | 140.000     | 150.000     | 160.000     |
|-------------|-------------|-------------|-------------|-------------|-------------|
| 1.00000e+08 | 5.23998e-42 | 3.52083e-40 | 1.53865e-38 | 4.26091e-37 | 8.29117e-36 |
| 1.00000e+07 | 5.23784e-40 | 3.51948e-38 | 1.53805e-36 | 4.25920e-35 | 8.28761e-34 |
| 1.00000e+06 | 5.21675e-38 | 3.50612e-36 | 1.53216e-34 | 4.24211e-33 | 8.25219e-32 |
| 100000.     | 5.01459e-36 | 3.37808e-34 | 1.47571e-32 | 4.07923e-31 | 7.91582e-30 |
| 10000.0     | 3.58361e-34 | 2.46901e-32 | 1.07999e-30 | 2.95909e-29 | 5.65800e-28 |
| 1000.00     | 8.57109e-33 | 6.50721e-31 | 2.93577e-29 | 8.01343e-28 | 1.50314e-26 |
| 100.000     | 9.50482e-32 | 7.61673e-30 | 3.52391e-28 | 9.65325e-27 | 1.80381e-25 |
| 10.0000     | 9.30833e-31 | 7.53047e-29 | 3.49478e-27 | 9.55723e-26 | 1.77942e-24 |
| 1.00000     | 7.11117e-30 | 5.91343e-28 | 2.73533e-26 | 7.36648e-25 | 1.34240e-23 |
| 0.100000    | 1.79005e-29 | 1.76737e-27 | 8.40050e-26 | 2.22094e-24 | 3.91270e-23 |
| 0.0100000   | 1.83886e-29 | 2.10692e-27 | 1.03835e-25 | 2.75383e-24 | 4.82313e-23 |
| 0.00100000  | 1.82840e-29 | 2.14230e-27 | 1.06215e-25 | 2.81951e-24 | 4.93613e-23 |
| 0.000100000 | 1.82717e-29 | 2.14582e-27 | 1.06458e-25 | 2.82622e-24 | 4.94770e-23 |
| 1.00000e-05 | 1.82704e-29 | 2.14617e-27 | 1.06482e-25 | 2.82689e-24 | 4.94886e-23 |
| 1.00000e-06 | 1.82703e-29 | 2.14621e-27 | 1.06484e-25 | 2.82696e-24 | 4.94897e-23 |
| 1.00000e-07 | 1.82703e-29 | 2.14621e-27 | 1.06485e-25 | 2.82697e-24 | 4.94898e-23 |
| 1.00000e-08 | 1.82703e-29 | 2.14621e-27 | 1.06485e-25 | 2.82697e-24 | 4.94899e-23 |
| 1.00000e-09 | 1.82703e-29 | 2.14621e-27 | 1.06485e-25 | 2.82697e-24 | 4.94899e-23 |

| Pa\K        | 170.000     | 180.000     | 190.000     | 200.000     | 210.000     |
|-------------|-------------|-------------|-------------|-------------|-------------|
| 1.00000e+08 | 1.18951e-34 | 1.31976e-33 | 1.17225e-32 | 8.57183e-32 | 5.27749e-31 |
| 1.00000e+07 | 1.18896e-32 | 1.31909e-31 | 1.17162e-30 | 8.56685e-30 | 5.27420e-29 |
| 1.00000e+06 | 1.18351e-30 | 1.31256e-29 | 1.16536e-28 | 8.51758e-28 | 5.24176e-27 |
| 100000.     | 1.13191e-28 | 1.25106e-27 | 1.10667e-26 | 8.05834e-26 | 4.94076e-25 |
| 10000.0     | 7.94586e-27 | 8.60355e-26 | 7.44652e-25 | 5.30402e-24 | 3.18272e-23 |

|             |             |             |             |             |             |
|-------------|-------------|-------------|-------------|-------------|-------------|
| 1000.00     | 2.05566e-25 | 2.15872e-24 | 1.80896e-23 | 1.24735e-22 | 7.25307e-22 |
| 100.000     | 2.44937e-24 | 2.54964e-23 | 2.11625e-22 | 1.44515e-21 | 8.32432e-21 |
| 10.0000     | 2.40491e-23 | 2.48934e-22 | 2.05314e-21 | 1.39244e-20 | 7.96276e-20 |
| 1.00000     | 1.76880e-22 | 1.77847e-21 | 1.42066e-20 | 9.31140e-20 | 5.13914e-19 |
| 0.100000    | 4.94607e-22 | 4.74777e-21 | 3.61148e-20 | 2.25224e-19 | 1.18343e-18 |
| 0.0100000   | 6.03549e-22 | 5.72270e-21 | 4.29613e-20 | 2.64397e-19 | 1.37157e-18 |
| 0.00100000  | 6.17044e-22 | 5.84261e-21 | 4.37951e-20 | 2.69115e-19 | 1.39397e-18 |
| 0.000100000 | 6.18425e-22 | 5.85487e-21 | 4.38804e-20 | 2.69597e-19 | 1.39625e-18 |
| 1.00000e-05 | 6.18563e-22 | 5.85610e-21 | 4.38889e-20 | 2.69645e-19 | 1.39648e-18 |
| 1.00000e-06 | 6.18577e-22 | 5.85622e-21 | 4.38898e-20 | 2.69650e-19 | 1.39651e-18 |
| 1.00000e-07 | 6.18578e-22 | 5.85623e-21 | 4.38898e-20 | 2.69650e-19 | 1.39651e-18 |
| 1.00000e-08 | 6.18579e-22 | 5.85623e-21 | 4.38899e-20 | 2.69650e-19 | 1.39651e-18 |
| 1.00000e-09 | 6.18579e-22 | 5.85623e-21 | 4.38899e-20 | 2.69650e-19 | 1.39651e-18 |

| Pa\K        | 220.000     | 230.000     | 240.000     | 250.000     | 260.000     |
|-------------|-------------|-------------|-------------|-------------|-------------|
| 1.00000e+08 | 2.78680e-30 | 1.28187e-29 | 5.20525e-29 | 1.88782e-28 | 6.17854e-28 |
| 1.00000e+07 | 2.78495e-28 | 1.28097e-27 | 5.20142e-27 | 1.88636e-26 | 6.17361e-26 |
| 1.00000e+06 | 2.76675e-26 | 1.27214e-25 | 5.16382e-25 | 1.87215e-24 | 6.12541e-24 |
| 100000.     | 2.59859e-24 | 1.19083e-23 | 4.81884e-23 | 1.74216e-22 | 5.68566e-22 |
| 10000.0     | 1.63997e-22 | 7.37270e-22 | 2.93122e-21 | 1.04276e-20 | 3.35350e-20 |
| 1000.00     | 3.62788e-21 | 1.58660e-20 | 6.15046e-20 | 2.13820e-19 | 6.73420e-19 |
| 100.000     | 4.12673e-20 | 1.78992e-19 | 6.88650e-19 | 2.37777e-18 | 7.44274e-18 |
| 10.0000     | 3.91820e-19 | 1.68677e-18 | 6.44152e-18 | 2.20793e-17 | 6.86206e-17 |
| 1.00000     | 2.43932e-18 | 1.01312e-17 | 3.73535e-17 | 1.23750e-16 | 3.72241e-16 |
| 0.100000    | 5.35637e-18 | 2.12638e-17 | 7.51471e-17 | 2.39373e-16 | 6.94505e-16 |
| 0.0100000   | 6.13338e-18 | 2.40778e-17 | 8.42298e-17 | 2.65853e-16 | 7.65029e-16 |
| 0.00100000  | 6.22483e-18 | 2.44053e-17 | 8.52756e-17 | 2.68872e-16 | 7.72993e-16 |
| 0.000100000 | 6.23414e-18 | 2.44385e-17 | 8.53818e-17 | 2.69178e-16 | 7.73800e-16 |
| 1.00000e-05 | 6.23507e-18 | 2.44419e-17 | 8.53924e-17 | 2.69209e-16 | 7.73881e-16 |
| 1.00000e-06 | 6.23517e-18 | 2.44422e-17 | 8.53935e-17 | 2.69212e-16 | 7.73888e-16 |
| 1.00000e-07 | 6.23517e-18 | 2.44422e-17 | 8.53936e-17 | 2.69212e-16 | 7.73889e-16 |
| 1.00000e-08 | 6.23517e-18 | 2.44422e-17 | 8.53936e-17 | 2.69212e-16 | 7.73889e-16 |
| 1.00000e-09 | 6.23517e-18 | 2.44422e-17 | 8.53936e-17 | 2.69212e-16 | 7.73889e-16 |

| Pa\K        | 270.000     | 280.000     | 290.000     | 300.000     | 400.000     |
|-------------|-------------|-------------|-------------|-------------|-------------|
| 1.00000e+08 | 1.84174e-27 | 5.04170e-27 | 1.27690e-26 | 1.88187e-23 | 8.56769e-19 |
| 1.00000e+07 | 1.84022e-25 | 5.03743e-25 | 1.27578e-24 | 1.87695e-21 | 5.18988e-17 |
| 1.00000e+06 | 1.82540e-23 | 4.99577e-23 | 1.26500e-22 | 1.97716e-19 | 9.66481e-15 |
| 100000.     | 1.69050e-21 | 4.61722e-21 | 1.16705e-20 | 1.38393e-17 | 8.63413e-14 |
| 10000.0     | 9.83879e-20 | 2.65480e-19 | 6.63638e-19 | 2.38552e-16 | 1.58526e-13 |
| 1000.00     | 1.93861e-18 | 5.14154e-18 | 1.26518e-17 | 2.27912e-15 | 1.11369e-12 |
| 100.000     | 2.13071e-17 | 5.62272e-17 | 1.37730e-16 | 1.83215e-14 | 7.13058e-12 |
| 10.0000     | 1.95096e-16 | 5.11407e-16 | 1.24465e-15 | 7.15089e-14 | 1.95692e-11 |
| 1.00000     | 1.02584e-15 | 2.61055e-15 | 6.17744e-15 | 7.48997e-14 | 2.38670e-11 |
| 0.100000    | 1.85181e-15 | 4.57295e-15 | 1.05295e-14 | 5.20768e-14 | 2.38471e-11 |
| 0.0100000   | 2.02502e-15 | 4.96846e-15 | 1.13750e-14 | 4.92093e-14 | 2.38173e-11 |
| 0.00100000  | 2.04441e-15 | 5.01238e-15 | 1.14682e-14 | 4.89461e-14 | 2.38141e-11 |
| 0.000100000 | 2.04638e-15 | 5.01682e-15 | 1.14776e-14 | 4.89201e-14 | 2.38137e-11 |
| 1.00000e-05 | 2.04657e-15 | 5.01727e-15 | 1.14786e-14 | 4.89175e-14 | 2.38137e-11 |
| 1.00000e-06 | 2.04659e-15 | 5.01731e-15 | 1.14787e-14 | 4.89173e-14 | 2.38137e-11 |
| 1.00000e-07 | 2.04659e-15 | 5.01732e-15 | 1.14787e-14 | 4.89173e-14 | 2.38137e-11 |
| 1.00000e-08 | 2.04659e-15 | 5.01732e-15 | 1.14787e-14 | 4.89173e-14 | 2.38137e-11 |
| 1.00000e-09 | 2.04659e-15 | 5.01732e-15 | 1.14787e-14 | 4.89173e-14 | 2.38137e-11 |

| Pa\K        | 500.000     | 600.000     | 700.000     | 800.000     | 900.000     |
|-------------|-------------|-------------|-------------|-------------|-------------|
| 1.00000e+08 | 4.88070e-13 | 4.76801e-10 | 9.03480e-09 | 5.13699e-08 | 2.57161e-07 |
| 1.00000e+07 | 5.52926e-12 | 3.82046e-09 | 6.71245e-08 | 2.83101e-07 | 7.82119e-07 |
| 1.00000e+06 | 1.26623e-10 | 1.15399e-08 | 1.00494e-07 | 2.65880e-07 | 5.99751e-07 |
| 100000.     | 2.39721e-10 | 1.41985e-08 | 8.15766e-08 | 2.18710e-07 | 8.98077e-07 |
| 10000.0     | 9.06262e-11 | 6.18401e-09 | 6.59087e-08 | 3.86866e-07 | 1.93892e-06 |
| 1000.00     | 1.67572e-10 | 7.63000e-09 | 1.08402e-07 | 6.87011e-07 | 2.76805e-06 |
| 100.000     | 6.41820e-10 | 1.58027e-08 | 1.54932e-07 | 8.16401e-07 | 2.94684e-06 |
| 10.0000     | 1.13336e-09 | 2.00878e-08 | 1.65849e-07 | 8.28642e-07 | 2.95318e-06 |
| 1.00000     | 1.25053e-09 | 2.06888e-08 | 1.66336e-07 | 8.28062e-07 | 2.95225e-06 |
| 0.100000    | 1.26087e-09 | 2.07285e-08 | 1.66293e-07 | 8.27896e-07 | 2.95212e-06 |
| 0.0100000   | 1.26176e-09 | 2.07315e-08 | 1.66288e-07 | 8.27884e-07 | 2.95211e-06 |
| 0.00100000  | 1.26185e-09 | 2.07318e-08 | 1.66287e-07 | 8.27884e-07 | 2.95211e-06 |
| 0.000100000 | 1.26186e-09 | 2.07318e-08 | 1.66287e-07 | 8.27884e-07 | 2.95211e-06 |
| 1.00000e-05 | 1.26187e-09 | 2.07318e-08 | 1.66287e-07 | 8.27884e-07 | 2.95211e-06 |
| 1.00000e-06 | 1.26187e-09 | 2.07318e-08 | 1.66287e-07 | 8.27884e-07 | 2.95211e-06 |
| 1.00000e-07 | 1.26187e-09 | 2.07318e-08 | 1.66287e-07 | 8.27884e-07 | 2.95211e-06 |
| 1.00000e-08 | 1.26187e-09 | 2.07318e-08 | 1.66287e-07 | 8.27884e-07 | 2.95211e-06 |
| 1.00000e-09 | 1.26187e-09 | 2.07318e-08 | 1.66287e-07 | 8.27884e-07 | 2.95211e-06 |

| Pa\K        | 1000.00     | 1100.00     | 1200.00     | 1300.00     | 1400.00     |
|-------------|-------------|-------------|-------------|-------------|-------------|
| 1.00000e+08 | 1.45310e-06 | 6.28801e-06 | 1.87799e-05 | 4.22509e-05 | 5.18129e-05 |

|             |             |             |             |             |             |
|-------------|-------------|-------------|-------------|-------------|-------------|
| 1.00000e+07 | 3.02404e-06 | 1.79713e-05 | 8.20750e-05 | 0.000226166 | 0.000361798 |
| 1.00000e+06 | 2.96752e-06 | 1.97077e-05 | 8.96121e-05 | 0.000252015 | 0.000456010 |
| 100000.     | 4.84052e-06 | 2.13410e-05 | 6.77521e-05 | 0.000156702 | 0.000276844 |
| 10000.0     | 7.37726e-06 | 2.13761e-05 | 4.93893e-05 | 9.53904e-05 | 0.000160578 |
| 1000.00     | 8.27654e-06 | 2.00019e-05 | 4.12516e-05 | 7.54087e-05 | 0.000125484 |
| 100.000     | 8.28819e-06 | 1.93932e-05 | 3.93941e-05 | 7.16234e-05 | 0.000119173 |
| 10.0000     | 8.26465e-06 | 1.92889e-05 | 3.91406e-05 | 7.11428e-05 | 0.000118389 |
| 1.00000     | 8.26107e-06 | 1.92772e-05 | 3.91137e-05 | 7.10932e-05 | 0.000118308 |
| 0.100000    | 8.26075e-06 | 1.92760e-05 | 3.91111e-05 | 7.10885e-05 | 0.000118300 |
| 0.0100000   | 8.26073e-06 | 1.92759e-05 | 3.91108e-05 | 7.10879e-05 | 0.000118299 |
| 0.00100000  | 8.26073e-06 | 1.92759e-05 | 3.91108e-05 | 7.10879e-05 | 0.000118299 |
| 0.000100000 | 8.26073e-06 | 1.92759e-05 | 3.91108e-05 | 7.10879e-05 | 0.000118299 |
| 1.00000e-05 | 8.26073e-06 | 1.92759e-05 | 3.91108e-05 | 7.10879e-05 | 0.000118299 |
| 1.00000e-06 | 8.26073e-06 | 1.92759e-05 | 3.91108e-05 | 7.10879e-05 | 0.000118299 |
| 1.00000e-07 | 8.26073e-06 | 1.92759e-05 | 3.91108e-05 | 7.10879e-05 | 0.000118299 |
| 1.00000e-08 | 8.26073e-06 | 1.92759e-05 | 3.91108e-05 | 7.10879e-05 | 0.000118299 |
| 1.00000e-09 | 8.26073e-06 | 1.92759e-05 | 3.91108e-05 | 7.10879e-05 | 0.000118299 |

| Pa\K        | 1500.00     | 1750.00     | 2000.00     | 2250.00    | 2500.00    |
|-------------|-------------|-------------|-------------|------------|------------|
| 1.00000e+08 | 3.92600e-05 | 0.00644865  | 0.00772879  | 0.00796956 | 0.00793486 |
| 1.00000e+07 | 0.000397301 | 0.00684124  | 0.00857831  | 0.00890783 | 0.00842902 |
| 1.00000e+06 | 0.000618185 | 0.00512140  | 0.00669840  | 0.00621889 | 0.00520278 |
| 100000.     | 0.000403979 | 0.00258149  | 0.00327307  | 0.00293167 | 0.00281185 |
| 10000.0     | 0.000242653 | 0.00103434  | 0.00144170  | 0.00172503 | 0.00220793 |
| 1000.00     | 0.000193253 | 0.000576718 | 0.000993803 | 0.00150476 | 0.00212207 |
| 100.000     | 0.000184383 | 0.000497823 | 0.000927275 | 0.00147746 | 0.00211272 |
| 10.0000     | 0.000183283 | 0.000488209 | 0.000919762 | 0.00147461 | 0.00211179 |
| 1.00000     | 0.000183170 | 0.000487220 | 0.000919006 | 0.00147433 | 0.00211170 |
| 0.100000    | 0.000183159 | 0.000487126 | 0.000918932 | 0.00147430 | 0.00211169 |
| 0.0100000   | 0.000183158 | 0.000487115 | 0.000918925 | 0.00147430 | 0.00211169 |
| 0.00100000  | 0.000183158 | 0.000487115 | 0.000918925 | 0.00147430 | 0.00211168 |
| 0.000100000 | 0.000183158 | 0.000487115 | 0.000918925 | 0.00147430 | 0.00211168 |
| 1.00000e-05 | 0.000183158 | 0.000487115 | 0.000918925 | 0.00147430 | 0.00211168 |
| 1.00000e-06 | 0.000183158 | 0.000487115 | 0.000918925 | 0.00147430 | 0.00211168 |
| 1.00000e-07 | 0.000183158 | 0.000487115 | 0.000918925 | 0.00147430 | 0.00211168 |
| 1.00000e-08 | 0.000183158 | 0.000487115 | 0.000918925 | 0.00147430 | 0.00211168 |
| 1.00000e-09 | 0.000183158 | 0.000487115 | 0.000918925 | 0.00147430 | 0.00211168 |

| Pa\K        | 2750.00    | 3000.00    | 3250.00    | 3500.00    | 3750.00    |
|-------------|------------|------------|------------|------------|------------|
| 1.00000e+08 | 0.00785396 | 0.00772747 | 0.00754698 | 0.00732470 | 0.00708783 |
| 1.00000e+07 | 0.00769860 | 0.00699756 | 0.00647459 | 0.00617162 | 0.00605931 |
| 1.00000e+06 | 0.00458724 | 0.00443919 | 0.00460280 | 0.00492110 | 0.00528716 |
| 100000.     | 0.00309871 | 0.00359308 | 0.00414828 | 0.00468675 | 0.00517146 |
| 10000.0     | 0.00282207 | 0.00346902 | 0.00409250 | 0.00466167 | 0.00516047 |
| 1000.00     | 0.00278912 | 0.00345585 | 0.00408700 | 0.00465935 | 0.00515950 |
| 100.000     | 0.00278579 | 0.00345457 | 0.00408648 | 0.00465913 | 0.00515941 |
| 10.0000     | 0.00278546 | 0.00345445 | 0.00408644 | 0.00465911 | 0.00515939 |
| 1.00000     | 0.00278544 | 0.00345445 | 0.00408643 | 0.00465910 | 0.00515939 |
| 0.100000    | 0.00278544 | 0.00345445 | 0.00408643 | 0.00465910 | 0.00515939 |
| 0.0100000   | 0.00278544 | 0.00345445 | 0.00408643 | 0.00465910 | 0.00515939 |
| 0.00100000  | 0.00278544 | 0.00345445 | 0.00408643 | 0.00465910 | 0.00515939 |
| 0.000100000 | 0.00278544 | 0.00345445 | 0.00408643 | 0.00465910 | 0.00515939 |
| 1.00000e-05 | 0.00278544 | 0.00345445 | 0.00408643 | 0.00465910 | 0.00515939 |
| 1.00000e-06 | 0.00278544 | 0.00345445 | 0.00408643 | 0.00465910 | 0.00515939 |
| 1.00000e-07 | 0.00278544 | 0.00345445 | 0.00408643 | 0.00465910 | 0.00515939 |
| 1.00000e-08 | 0.00278544 | 0.00345445 | 0.00408643 | 0.00465910 | 0.00515939 |
| 1.00000e-09 | 0.00278544 | 0.00345445 | 0.00408643 | 0.00465910 | 0.00515939 |

| Pa\K        | 4000.00    |
|-------------|------------|
| 1.00000e+08 | 0.00686543 |
| 1.00000e+07 | 0.00607878 |
| 1.00000e+06 | 0.00563975 |
| 100000.     | 0.00558665 |
| 10000.0     | 0.00558224 |
| 1000.00     | 0.00558189 |
| 100.000     | 0.00558187 |
| 10.0000     | 0.00558187 |
| 1.00000     | 0.00558187 |
| 0.100000    | 0.00558187 |
| 0.0100000   | 0.00558187 |
| 0.00100000  | 0.00558187 |
| 0.000100000 | 0.00558187 |
| 1.00000e-05 | 0.00558187 |
| 1.00000e-06 | 0.00558187 |
| 1.00000e-07 | 0.00558187 |
| 1.00000e-08 | 0.00558187 |
| 1.00000e-09 | 0.00558187 |

## PhCCCH3+H

=====

| Pa\K        | 20.0000     | 30.0000     | 40.0000     | 50.0000     | 60.0000     |
|-------------|-------------|-------------|-------------|-------------|-------------|
| 1.00000e+08 | 6.43000e-47 | 1.23935e-42 | 2.75933e-40 | 9.35675e-39 | 1.23774e-37 |
| 1.00000e+07 | 6.48125e-41 | 7.21639e-38 | 1.26872e-35 | 3.71161e-34 | 4.34909e-33 |
| 1.00000e+06 | 2.38558e-35 | 2.12884e-33 | 1.97289e-31 | 5.11306e-30 | 5.61115e-29 |
| 100000.     | 2.89024e-30 | 1.13865e-28 | 2.70209e-27 | 5.27219e-26 | 5.38584e-25 |
| 10000.0     | 2.55721e-25 | 7.94047e-24 | 6.93607e-23 | 5.31098e-22 | 3.59260e-21 |
| 1000.00     | 1.09287e-20 | 2.31974e-19 | 1.38274e-18 | 5.54387e-18 | 1.94125e-17 |
| 100.000     | 1.47916e-16 | 2.38285e-15 | 1.19299e-14 | 3.92702e-14 | 1.05731e-13 |
| 10.0000     | 7.40504e-13 | 7.37629e-12 | 2.63293e-11 | 6.56102e-11 | 1.37287e-10 |
| 1.00000     | 5.60046e-10 | 2.96093e-09 | 7.59956e-09 | 1.52331e-08 | 2.70986e-08 |
| 0.100000    | 8.13114e-08 | 3.26089e-07 | 7.26461e-07 | 1.30926e-06 | 2.12013e-06 |
| 0.0100000   | 5.05425e-06 | 1.43245e-05 | 2.52467e-05 | 3.79290e-05 | 5.27680e-05 |
| 0.00100000  | 8.98782e-05 | 0.000175887 | 0.000252697 | 0.000326475 | 0.000400016 |
| 0.000100000 | 0.000495423 | 0.000641314 | 0.000719357 | 0.000780139 | 0.000836127 |
| 1.00000e-05 | 0.000784566 | 0.000816179 | 0.000844056 | 0.000877139 | 0.000915574 |
| 1.00000e-06 | 0.000823354 | 0.000835514 | 0.000857113 | 0.000887069 | 0.000923616 |
| 1.00000e-07 | 0.000827245 | 0.000837447 | 0.000858419 | 0.000888061 | 0.000924419 |
| 1.00000e-08 | 0.000827634 | 0.000837641 | 0.000858549 | 0.000888161 | 0.000924500 |
| 1.00000e-09 | 0.000827673 | 0.000837660 | 0.000858562 | 0.000888171 | 0.000924508 |

| Pa\K        | 70.0000     | 80.0000     | 90.0000     | 100.000     | 110.000     |
|-------------|-------------|-------------|-------------|-------------|-------------|
| 1.00000e+08 | 9.54393e-37 | 5.25027e-36 | 2.31133e-35 | 8.74840e-35 | 2.98735e-34 |
| 1.00000e+07 | 3.02045e-32 | 1.51423e-31 | 6.12679e-31 | 2.14467e-30 | 6.80367e-30 |
| 1.00000e+06 | 3.72148e-28 | 1.80044e-27 | 7.07574e-27 | 2.41591e-26 | 7.49633e-26 |
| 100000.     | 3.44117e-24 | 1.61641e-23 | 6.17769e-23 | 2.04978e-22 | 6.16833e-22 |
| 10000.0     | 1.87538e-20 | 7.72016e-20 | 2.65603e-19 | 8.02741e-19 | 2.21275e-18 |
| 1000.00     | 6.35645e-17 | 1.94306e-16 | 5.51596e-16 | 1.46258e-15 | 3.66637e-15 |
| 100.000     | 2.55751e-13 | 5.81773e-13 | 1.27203e-12 | 2.70025e-12 | 5.59306e-12 |
| 10.0000     | 2.60923e-10 | 4.69411e-10 | 8.18299e-10 | 1.40064e-09 | 2.37120e-09 |
| 1.00000     | 4.51664e-08 | 7.26075e-08 | 1.14462e-07 | 1.78576e-07 | 2.76939e-07 |
| 0.100000    | 3.22679e-06 | 4.72793e-06 | 6.76183e-06 | 9.51458e-06 | 1.32298e-05 |
| 0.0100000   | 7.03199e-05 | 9.13360e-05 | 0.000116764 | 0.000147719 | 0.000185451 |
| 0.00100000  | 0.000475052 | 0.000553037 | 0.000635251 | 0.000722758 | 0.000816382 |
| 0.000100000 | 0.000892013 | 0.000950375 | 0.00101296  | 0.00108104  | 0.00115553  |
| 1.00000e-05 | 0.000959303 | 0.00100870  | 0.00106436  | 0.00112689  | 0.00119680  |
| 1.00000e-06 | 0.000966070 | 0.00101455  | 0.00106950  | 0.00113146  | 0.00120092  |
| 1.00000e-07 | 0.000966747 | 0.00101513  | 0.00107001  | 0.00113192  | 0.00120133  |
| 1.00000e-08 | 0.000966814 | 0.00101519  | 0.00107007  | 0.00113197  | 0.00120137  |
| 1.00000e-09 | 0.000966821 | 0.00101520  | 0.00107007  | 0.00113197  | 0.00120137  |

| Pa\K        | 120.000     | 130.000     | 140.000     | 150.000     | 160.000     |
|-------------|-------------|-------------|-------------|-------------|-------------|
| 1.00000e+08 | 9.51950e-34 | 2.90035e-33 | 8.59652e-33 | 2.50859e-32 | 7.26350e-32 |
| 1.00000e+07 | 2.02087e-29 | 5.75331e-29 | 1.59660e-28 | 4.37007e-28 | 1.18896e-27 |
| 1.00000e+06 | 2.18171e-25 | 6.09239e-25 | 1.65915e-24 | 4.45657e-24 | 1.18946e-23 |
| 100000.     | 1.73573e-21 | 4.66790e-21 | 1.21851e-20 | 3.12077e-20 | 7.89744e-20 |
| 10000.0     | 5.71887e-18 | 1.41441e-17 | 3.39808e-17 | 8.01649e-17 | 1.87097e-16 |
| 1000.00     | 8.80503e-15 | 2.04998e-14 | 4.67062e-14 | 1.04834e-13 | 2.32762e-13 |
| 100.000     | 1.13411e-11 | 2.25731e-11 | 4.42040e-11 | 8.53296e-11 | 1.62609e-10 |
| 10.0000     | 3.98672e-09 | 6.67264e-09 | 1.11334e-08 | 1.85324e-08 | 3.07806e-08 |
| 1.00000     | 4.27592e-07 | 6.57324e-07 | 1.00534e-06 | 1.52818e-06 | 2.30598e-06 |
| 0.100000    | 1.82213e-05 | 2.48898e-05 | 3.37430e-05 | 4.54188e-05 | 6.07107e-05 |
| 0.0100000   | 0.000231311 | 0.000286710 | 0.000353084 | 0.000431838 | 0.000524291 |
| 0.00100000  | 0.000916746 | 0.00102431  | 0.00113942  | 0.00126237  | 0.00139339  |
| 0.000100000 | 0.00123709  | 0.00132624  | 0.00142337  | 0.00152881  | 0.00164284  |
| 1.00000e-05 | 0.00127450  | 0.00136033  | 0.00145454  | 0.00155739  | 0.00166909  |
| 1.00000e-06 | 0.00127823  | 0.00136372  | 0.00145765  | 0.00156023  | 0.00167170  |
| 1.00000e-07 | 0.00127860  | 0.00136406  | 0.00145796  | 0.00156051  | 0.00167197  |
| 1.00000e-08 | 0.00127864  | 0.00136410  | 0.00145799  | 0.00156054  | 0.00167199  |
| 1.00000e-09 | 0.00127864  | 0.00136410  | 0.00145799  | 0.00156055  | 0.00167199  |

| Pa\K        | 170.000     | 180.000     | 190.000     | 200.000     | 210.000     |
|-------------|-------------|-------------|-------------|-------------|-------------|
| 1.00000e+08 | 2.09617e-31 | 6.04205e-31 | 1.74023e-30 | 5.00485e-30 | 1.43498e-29 |
| 1.00000e+07 | 3.23040e-27 | 8.78521e-27 | 2.39294e-26 | 6.52489e-26 | 1.77861e-25 |
| 1.00000e+06 | 3.16806e-23 | 8.43709e-23 | 2.24747e-22 | 5.98362e-22 | 1.58975e-21 |
| 100000.     | 1.98309e-19 | 4.95201e-19 | 1.23069e-18 | 3.04374e-18 | 7.48639e-18 |
| 10000.0     | 4.34082e-16 | 1.00386e-15 | 2.31659e-15 | 5.33411e-15 | 1.22428e-14 |
| 1000.00     | 5.12175e-13 | 1.11708e-12 | 2.41251e-12 | 5.15067e-12 | 1.08509e-11 |
| 100.000     | 3.06228e-10 | 5.70301e-10 | 1.05070e-09 | 1.91527e-09 | 3.45389e-09 |
| 10.0000     | 5.09886e-08 | 8.41581e-08 | 1.38208e-07 | 2.25446e-07 | 3.64613e-07 |
| 1.00000     | 3.45037e-06 | 5.11414e-06 | 7.50267e-06 | 1.08872e-05 | 1.56199e-05 |
| 0.100000    | 8.05905e-05 | 0.000106229 | 0.000139003 | 0.000180501 | 0.000232497 |
| 0.0100000   | 0.000631613 | 0.000754772 | 0.000894477 | 0.00105114  | 0.00122488  |
| 0.00100000  | 0.00153273  | 0.00168056  | 0.00183705  | 0.00200233  | 0.00217648  |

|             |            |            |            |            |            |
|-------------|------------|------------|------------|------------|------------|
| 0.000100000 | 0.00176572 | 0.00189770 | 0.00203896 | 0.00218965 | 0.00234988 |
| 1.00000e-05 | 0.00178987 | 0.00191992 | 0.00205941 | 0.00220847 | 0.00236718 |
| 1.00000e-06 | 0.00179228 | 0.00192213 | 0.00206145 | 0.00221035 | 0.00236891 |
| 1.00000e-07 | 0.00179252 | 0.00192235 | 0.00206164 | 0.00221053 | 0.00236907 |
| 1.00000e-08 | 0.00179254 | 0.00192238 | 0.00206166 | 0.00221055 | 0.00236909 |
| 1.00000e-09 | 0.00179255 | 0.00192238 | 0.00206167 | 0.00221055 | 0.00236909 |

| Pa\K        | 220.000     | 230.000     | 240.000     | 250.000     | 260.000     |
|-------------|-------------|-------------|-------------|-------------|-------------|
| 1.00000e+08 | 4.09154e-29 | 1.15602e-28 | 3.22131e-28 | 8.80434e-28 | 2.34678e-27 |
| 1.00000e+07 | 4.83613e-25 | 1.30750e-24 | 3.49999e-24 | 9.22852e-24 | 2.38363e-23 |
| 1.00000e+06 | 4.20569e-21 | 1.10462e-20 | 2.86964e-20 | 7.34107e-20 | 1.84045e-19 |
| 100000.     | 1.82928e-17 | 4.43376e-17 | 1.06375e-16 | 2.51940e-16 | 5.87106e-16 |
| 10000.0     | 2.79644e-14 | 6.34309e-14 | 1.42513e-13 | 3.16229e-13 | 6.90830e-13 |
| 1000.00     | 2.25174e-11 | 4.59601e-11 | 9.21610e-11 | 1.81395e-10 | 3.50195e-10 |
| 100.000     | 6.16001e-09 | 1.08602e-08 | 1.89147e-08 | 3.25183e-08 | 5.51392e-08 |
| 10.0000     | 5.83621e-07 | 9.23097e-07 | 1.44080e-06 | 2.21694e-06 | 3.36041e-06 |
| 1.00000     | 2.21500e-05 | 3.10408e-05 | 4.29868e-05 | 5.88281e-05 | 7.95620e-05 |
| 0.100000    | 0.000296914 | 0.000375765 | 0.000471073 | 0.000584776 | 0.000718619 |
| 0.0100000   | 0.00141547  | 0.00162238  | 0.00184482  | 0.00208173  | 0.00233182  |
| 0.00100000  | 0.00235950  | 0.00255131  | 0.00275172  | 0.00296048  | 0.00317718  |
| 0.000100000 | 0.00251965  | 0.00269889  | 0.00288744  | 0.00308500  | 0.00329120  |
| 1.00000e-05 | 0.00253554  | 0.00271348  | 0.00290081  | 0.00309724  | 0.00330238  |
| 1.00000e-06 | 0.00253713  | 0.00271493  | 0.00290214  | 0.00309846  | 0.00330349  |
| 1.00000e-07 | 0.00253729  | 0.00271508  | 0.00290227  | 0.00309858  | 0.00330361  |
| 1.00000e-08 | 0.00253729  | 0.00271509  | 0.00290229  | 0.00309859  | 0.00330362  |
| 1.00000e-09 | 0.00253730  | 0.00271509  | 0.00290229  | 0.00309859  | 0.00330362  |

| Pa\K        | 270.000     | 280.000     | 290.000     | 300.000     | 400.000     |
|-------------|-------------|-------------|-------------|-------------|-------------|
| 1.00000e+08 | 6.06878e-27 | 1.51625e-26 | 3.64934e-26 | 1.09530e-22 | 2.04254e-17 |
| 1.00000e+07 | 5.99954e-23 | 1.46509e-22 | 3.46007e-22 | 7.97228e-19 | 2.71638e-14 |
| 1.00000e+06 | 4.50104e-19 | 1.06953e-18 | 2.46177e-18 | 2.27043e-15 | 1.05815e-11 |
| 100000.     | 1.34137e-15 | 2.99424e-15 | 6.51044e-15 | 1.72651e-12 | 1.26692e-09 |
| 10000.0     | 1.48109e-12 | 3.10683e-12 | 6.35975e-12 | 4.91810e-10 | 7.91442e-08 |
| 1000.00     | 6.62731e-10 | 1.22875e-09 | 2.23070e-09 | 5.07245e-08 | 2.48925e-06 |
| 100.000     | 9.21318e-08 | 1.51564e-07 | 2.45272e-07 | 2.28090e-06 | 4.50698e-05 |
| 10.0000     | 5.01566e-06 | 7.37024e-06 | 1.06622e-05 | 4.95498e-05 | 0.000468694 |
| 1.00000     | 0.000106348 | 0.000140508 | 0.000183507 | 0.000505689 | 0.00238422  |
| 0.100000    | 0.000874054 | 0.00105214  | 0.00125344  | 0.00219194  | 0.00529537  |
| 0.0100000   | 0.00259365  | 0.00286567  | 0.00314621  | 0.00394612  | 0.00655534  |
| 0.00100000  | 0.00340135  | 0.00363234  | 0.00386944  | 0.00441041  | 0.00674392  |
| 0.000100000 | 0.00350550  | 0.00372730  | 0.00395583  | 0.00446354  | 0.00676293  |
| 1.00000e-05 | 0.00351571  | 0.00373659  | 0.00396429  | 0.00446886  | 0.00676483  |
| 1.00000e-06 | 0.00351672  | 0.00373752  | 0.00396513  | 0.00446939  | 0.00676501  |
| 1.00000e-07 | 0.00351683  | 0.00373761  | 0.00396521  | 0.00446943  | 0.00676504  |
| 1.00000e-08 | 0.00351684  | 0.00373762  | 0.00396522  | 0.00446944  | 0.00676504  |
| 1.00000e-09 | 0.00351684  | 0.00373762  | 0.00396522  | 0.00446944  | 0.00676504  |

| Pa\K        | 500.000     | 600.000     | 700.000     | 800.000     | 900.000     |
|-------------|-------------|-------------|-------------|-------------|-------------|
| 1.00000e+08 | 5.79299e-13 | 1.93147e-10 | 3.10957e-09 | 2.25545e-08 | 1.31561e-07 |
| 1.00000e+07 | 5.45567e-11 | 3.26834e-09 | 4.39451e-08 | 3.38126e-07 | 1.48196e-06 |
| 1.00000e+06 | 3.04854e-09 | 6.49785e-08 | 4.17563e-07 | 1.85827e-06 | 6.90633e-06 |
| 100000.     | 8.71323e-08 | 9.34439e-07 | 4.66940e-06 | 1.67562e-05 | 5.42705e-05 |
| 10000.0     | 2.08775e-06 | 1.47769e-05 | 6.12097e-05 | 0.000179283 | 0.000417527 |
| 1000.00     | 3.21132e-05 | 0.000168717 | 0.000537470 | 0.00112582  | 0.00176234  |
| 100.000     | 0.000331177 | 0.00118294  | 0.00249037  | 0.00348644  | 0.00379237  |
| 10.0000     | 0.00194627  | 0.00415667  | 0.00560613  | 0.00567171  | 0.00493759  |
| 1.00000     | 0.00536124  | 0.00724349  | 0.00733331  | 0.00639371  | 0.00518013  |
| 0.100000    | 0.00768047  | 0.00831531  | 0.00768094  | 0.00648887  | 0.00520275  |
| 0.0100000   | 0.00819839  | 0.00846618  | 0.00771693  | 0.00649697  | 0.00520444  |
| 0.00100000  | 0.00825582  | 0.00848094  | 0.00772037  | 0.00649774  | 0.00520461  |
| 0.000100000 | 0.00826144  | 0.00848241  | 0.00772071  | 0.00649782  | 0.00520462  |
| 1.00000e-05 | 0.00826200  | 0.00848258  | 0.00772075  | 0.00649783  | 0.00520463  |
| 1.00000e-06 | 0.00826206  | 0.00848258  | 0.00772075  | 0.00649783  | 0.00520463  |
| 1.00000e-07 | 0.00826206  | 0.00848258  | 0.00772075  | 0.00649783  | 0.00520463  |
| 1.00000e-08 | 0.00826206  | 0.00848258  | 0.00772075  | 0.00649783  | 0.00520463  |
| 1.00000e-09 | 0.00826206  | 0.00848258  | 0.00772075  | 0.00649783  | 0.00520463  |

| Pa\K        | 1000.00     | 1100.00     | 1200.00     | 1300.00     | 1400.00     |
|-------------|-------------|-------------|-------------|-------------|-------------|
| 1.00000e+08 | 5.08637e-07 | 1.33701e-06 | 3.09509e-06 | 7.04046e-06 | 1.10666e-05 |
| 1.00000e+07 | 4.48585e-06 | 1.19128e-05 | 2.86772e-05 | 5.54814e-05 | 7.72787e-05 |
| 1.00000e+06 | 2.22504e-05 | 6.10921e-05 | 0.000128451 | 0.000196301 | 0.000228517 |
| 100000.     | 0.000143455 | 0.000292636 | 0.000449841 | 0.000529963 | 0.000517380 |
| 10000.0     | 0.000742348 | 0.00102504  | 0.00113603  | 0.00106344  | 0.000903670 |
| 1000.00     | 0.00213733  | 0.00214040  | 0.00187811  | 0.00152511  | 0.00119943  |
| 100.000     | 0.00346960  | 0.00286713  | 0.00224613  | 0.00172141  | 0.00131575  |
| 10.0000     | 0.00396468  | 0.00306193  | 0.00232543  | 0.00175913  | 0.00133691  |

|             |            |            |            |            |            |
|-------------|------------|------------|------------|------------|------------|
| 1.00000     | 0.00403756 | 0.00308341 | 0.00233254 | 0.00176211 | 0.00133849 |
| 0.100000    | 0.00404267 | 0.00308456 | 0.00233282 | 0.00176219 | 0.00133851 |
| 0.0100000   | 0.00404303 | 0.00308463 | 0.00233284 | 0.00176219 | 0.00133851 |
| 0.00100000  | 0.00404306 | 0.00308464 | 0.00233284 | 0.00176219 | 0.00133851 |
| 0.000100000 | 0.00404307 | 0.00308464 | 0.00233284 | 0.00176219 | 0.00133851 |
| 1.00000e-05 | 0.00404307 | 0.00308464 | 0.00233284 | 0.00176219 | 0.00133851 |
| 1.00000e-06 | 0.00404307 | 0.00308464 | 0.00233284 | 0.00176219 | 0.00133851 |
| 1.00000e-07 | 0.00404307 | 0.00308464 | 0.00233284 | 0.00176219 | 0.00133851 |
| 1.00000e-08 | 0.00404307 | 0.00308464 | 0.00233284 | 0.00176219 | 0.00133851 |
| 1.00000e-09 | 0.00404307 | 0.00308464 | 0.00233284 | 0.00176219 | 0.00133851 |

Pa\K | 1500.00 1750.00 2000.00 2250.00 2500.00

|             |             |             |             |             |             |
|-------------|-------------|-------------|-------------|-------------|-------------|
| 1.00000e+08 | 1.11131e-05 | 0.000111070 | 0.000116942 | 0.000114096 | 0.000109870 |
| 1.00000e+07 | 8.22148e-05 | 0.000151540 | 0.000145563 | 0.000137625 | 0.000133336 |
| 1.00000e+06 | 0.000226713 | 0.000219268 | 0.000196060 | 0.000186216 | 0.000178534 |
| 100000.     | 0.000460002 | 0.000355349 | 0.000292358 | 0.000251829 | 0.000217239 |
| 10000.0     | 0.000740481 | 0.000509249 | 0.000370107 | 0.000285564 | 0.000230127 |
| 1000.00     | 0.000939998 | 0.000600200 | 0.000400934 | 0.000294400 | 0.000232473 |
| 100.000     | 0.00101432  | 0.000628651 | 0.000407759 | 0.000295807 | 0.000232752 |
| 10.0000     | 0.00102739  | 0.000633455 | 0.000408682 | 0.000295958 | 0.000232775 |
| 1.00000     | 0.00102834  | 0.000633919 | 0.000408767 | 0.000295969 | 0.000232776 |
| 0.100000    | 0.00102834  | 0.000633945 | 0.000408772 | 0.000295970 | 0.000232776 |
| 0.0100000   | 0.00102834  | 0.000633946 | 0.000408772 | 0.000295970 | 0.000232776 |
| 0.00100000  | 0.00102834  | 0.000633946 | 0.000408772 | 0.000295970 | 0.000232776 |
| 0.000100000 | 0.00102834  | 0.000633946 | 0.000408772 | 0.000295970 | 0.000232776 |
| 1.00000e-05 | 0.00102834  | 0.000633946 | 0.000408772 | 0.000295970 | 0.000232776 |
| 1.00000e-06 | 0.00102834  | 0.000633946 | 0.000408772 | 0.000295970 | 0.000232776 |
| 1.00000e-07 | 0.00102834  | 0.000633946 | 0.000408772 | 0.000295970 | 0.000232776 |
| 1.00000e-08 | 0.00102834  | 0.000633946 | 0.000408772 | 0.000295970 | 0.000232776 |
| 1.00000e-09 | 0.00102834  | 0.000633946 | 0.000408772 | 0.000295970 | 0.000232776 |

Pa\K | 2750.00 3000.00 3250.00 3500.00 3750.00

|             |             |             |             |             |             |
|-------------|-------------|-------------|-------------|-------------|-------------|
| 1.00000e+08 | 0.000106133 | 0.000102972 | 0.000100270 | 9.78438e-05 | 9.55286e-05 |
| 1.00000e+07 | 0.000130648 | 0.000127509 | 0.000123132 | 0.000117704 | 0.000111826 |
| 1.00000e+06 | 0.000167432 | 0.000154142 | 0.000140786 | 0.000128688 | 0.000118374 |
| 100000.     | 0.000187855 | 0.000164199 | 0.000145552 | 0.000130903 | 0.000119393 |
| 10000.0     | 0.000192527 | 0.000165886 | 0.000146171 | 0.000131134 | 0.000119479 |
| 1000.00     | 0.000193156 | 0.000166063 | 0.000146223 | 0.000131149 | 0.000119482 |
| 100.000     | 0.000193214 | 0.000166075 | 0.000146225 | 0.000131148 | 0.000119481 |
| 10.0000     | 0.000193217 | 0.000166075 | 0.000146225 | 0.000131148 | 0.000119481 |
| 1.00000     | 0.000193217 | 0.000166075 | 0.000146224 | 0.000131148 | 0.000119481 |
| 0.100000    | 0.000193216 | 0.000166074 | 0.000146224 | 0.000131148 | 0.000119481 |
| 0.0100000   | 0.000193216 | 0.000166074 | 0.000146224 | 0.000131148 | 0.000119481 |
| 0.00100000  | 0.000193216 | 0.000166074 | 0.000146224 | 0.000131148 | 0.000119481 |
| 0.000100000 | 0.000193216 | 0.000166074 | 0.000146224 | 0.000131148 | 0.000119481 |
| 1.00000e-05 | 0.000193216 | 0.000166074 | 0.000146224 | 0.000131148 | 0.000119481 |
| 1.00000e-06 | 0.000193216 | 0.000166074 | 0.000146224 | 0.000131148 | 0.000119481 |
| 1.00000e-07 | 0.000193216 | 0.000166074 | 0.000146224 | 0.000131148 | 0.000119481 |
| 1.00000e-08 | 0.000193216 | 0.000166074 | 0.000146224 | 0.000131148 | 0.000119481 |
| 1.00000e-09 | 0.000193216 | 0.000166074 | 0.000146224 | 0.000131148 | 0.000119481 |

Pa\K | 4000.00

|             |             |
|-------------|-------------|
| 1.00000e+08 | 9.32355e-05 |
| 1.00000e+07 | 0.000106084 |
| 1.00000e+06 | 0.000109893 |
| 100000.     | 0.000110359 |
| 10000.0     | 0.000110389 |
| 1000.00     | 0.000110389 |
| 100.000     | 0.000110388 |
| 10.0000     | 0.000110388 |
| 1.00000     | 0.000110388 |
| 0.100000    | 0.000110388 |
| 0.0100000   | 0.000110388 |
| 0.00100000  | 0.000110388 |
| 0.000100000 | 0.000110388 |
| 1.00000e-05 | 0.000110388 |
| 1.00000e-06 | 0.000110388 |
| 1.00000e-07 | 0.000110388 |
| 1.00000e-08 | 0.000110388 |
| 1.00000e-09 | 0.000110388 |

rad23

=====

Pa\K | 20.0000 30.0000 40.0000 50.0000 60.0000

|             |             |             |             |             |             |
|-------------|-------------|-------------|-------------|-------------|-------------|
| 1.00000e+08 | 6.02472e-21 | 4.98290e-20 | 1.66918e-19 | 3.95275e-19 | 7.79291e-19 |
| 1.00000e+07 | 6.16472e-18 | 5.27652e-17 | 1.82585e-16 | 4.45495e-16 | 9.02899e-16 |



|             |             |             |             |             |             |
|-------------|-------------|-------------|-------------|-------------|-------------|
| 1.00000e+06 | 8.08441e-15 | 8.05850e-14 | 3.03083e-13 | 7.76350e-13 | 1.61913e-12 |
| 100000.     | 1.47915e-11 | 1.31454e-10 | 4.41392e-10 | 1.02948e-09 | 1.98570e-09 |
| 10000.0     | 1.38597e-08 | 9.40523e-08 | 2.71359e-07 | 5.68950e-07 | 1.00979e-06 |
| 1000.00     | 5.37325e-06 | 2.68646e-05 | 6.34720e-05 | 0.000113961 | 0.000177675 |
| 100.000     | 0.000601371 | 0.00175409  | 0.00289544  | 0.00391306  | 0.00478987  |
| 10.0000     | 0.00700910  | 0.00791632  | 0.00760391  | 0.00707504  | 0.00651207  |
| 1.00000     | 0.00400580  | 0.00166245  | 0.000788641 | 0.000411511 | 0.000230741 |
| 0.100000    | 2.47191e-05 | 3.04950e-06 | 1.34043e-06 | 8.26738e-07 | 5.80342e-07 |
| 0.0100000   | 1.46296e-07 | 3.38833e-08 | 1.36978e-08 | 7.06109e-09 | 4.18162e-09 |
| 0.00100000  | 5.13172e-10 | 5.98533e-11 | 1.66737e-11 | 6.63457e-12 | 3.19964e-12 |
| 0.000100000 | 2.05336e-13 | 1.12196e-14 | 1.89404e-15 | 5.14718e-16 | 1.82759e-16 |
| 1.00000e-05 | 5.29486e-18 | 1.53553e-19 | 2.11225e-20 | 5.35273e-21 | 1.87912e-21 |
| 1.00000e-06 | 6.79388e-23 | 3.20582e-24 | 6.51496e-25 | 2.29631e-25 | 1.08155e-25 |
| 1.00000e-07 | 1.18607e-26 | 2.04980e-27 | 8.70906e-28 | 5.02612e-28 | 3.39830e-28 |
| 1.00000e-08 | 9.24580e-29 | 3.07155e-29 | 1.74724e-29 | 1.21095e-29 | 9.35348e-30 |
| 1.00000e-09 | 3.80231e-30 | 1.73133e-30 | 1.13305e-30 | 8.52704e-31 | 6.94619e-31 |

| Pa\K        | 70.0000     | 80.0000     | 90.0000     | 100.000     | 110.000     |
|-------------|-------------|-------------|-------------|-------------|-------------|
| 1.00000e+08 | 1.37221e-18 | 2.23991e-18 | 3.46674e-18 | 5.16377e-18 | 7.48027e-18 |
| 1.00000e+07 | 1.63127e-15 | 2.72778e-15 | 4.31927e-15 | 6.57515e-15 | 9.72591e-15 |
| 1.00000e+06 | 2.97255e-12 | 5.00848e-12 | 7.94325e-12 | 1.20572e-11 | 1.77215e-11 |
| 100000.     | 3.41005e-09 | 5.41888e-09 | 8.15418e-09 | 1.17955e-08 | 1.65752e-08 |
| 10000.0     | 1.61782e-06 | 2.41963e-06 | 3.44667e-06 | 4.73778e-06 | 6.34177e-06 |
| 1000.00     | 0.000254193 | 0.000343274 | 0.000444895 | 0.000559271 | 0.000686841 |
| 100.000     | 0.00553100  | 0.00614771  | 0.00665290  | 0.00705958  | 0.00737995  |
| 10.0000     | 0.00595966  | 0.00543073  | 0.00492954  | 0.00445773  | 0.00401598  |
| 1.00000     | 0.000137083 | 8.55160e-05 | 5.56908e-05 | 3.77195e-05 | 2.65061e-05 |
| 0.100000    | 4.36547e-07 | 3.43302e-07 | 2.78628e-07 | 2.31574e-07 | 1.96074e-07 |
| 0.0100000   | 2.70959e-09 | 1.86972e-09 | 1.35105e-09 | 1.01088e-09 | 7.76966e-10 |
| 0.00100000  | 1.73810e-12 | 1.02282e-12 | 6.37094e-13 | 4.13887e-13 | 2.77687e-13 |
| 0.000100000 | 7.71270e-17 | 3.67406e-17 | 1.91448e-17 | 1.06912e-17 | 6.30965e-18 |
| 1.00000e-05 | 8.08107e-22 | 3.99218e-22 | 2.18196e-22 | 1.28875e-22 | 8.10322e-23 |
| 1.00000e-06 | 6.10412e-26 | 3.90935e-26 | 2.75910e-26 | 2.11311e-26 | 1.74440e-26 |
| 1.00000e-07 | 2.54443e-28 | 2.05578e-28 | 1.77106e-28 | 1.61973e-28 | 1.57266e-28 |
| 1.00000e-08 | 7.76843e-30 | 6.83868e-30 | 6.34313e-30 | 6.19444e-30 | 6.38004e-30 |
| 1.00000e-09 | 6.00762e-31 | 5.43191e-31 | 5.16223e-31 | 5.12971e-31 | 5.38823e-31 |

| Pa\K        | 120.000     | 130.000     | 140.000     | 150.000     | 160.000     |
|-------------|-------------|-------------|-------------|-------------|-------------|
| 1.00000e+08 | 1.06195e-17 | 1.48618e-17 | 2.05965e-17 | 2.83697e-17 | 3.89523e-17 |
| 1.00000e+07 | 1.40894e-14 | 2.01087e-14 | 2.84073e-14 | 3.98700e-14 | 5.57614e-14 |
| 1.00000e+06 | 2.54355e-11 | 3.58777e-11 | 4.99786e-11 | 6.90227e-11 | 9.47943e-11 |
| 100000.     | 2.27974e-08 | 3.08645e-08 | 4.13112e-08 | 5.48521e-08 | 7.24450e-08 |
| 10000.0     | 8.32048e-06 | 1.07522e-05 | 1.37359e-05 | 1.73968e-05 | 2.18921e-05 |
| 1000.00     | 0.000828229 | 0.000984190 | 0.00115555  | 0.00134312  | 0.00154764  |
| 100.000     | 0.00762519  | 0.00780510  | 0.00792822  | 0.00800186  | 0.00803219  |
| 10.0000     | 0.00360442  | 0.00322284  | 0.00287073  | 0.00254736  | 0.00225180  |
| 1.00000     | 1.92929e-05 | 1.45237e-05 | 1.12900e-05 | 9.04427e-06 | 7.44838e-06 |
| 0.100000    | 1.68503e-07 | 1.46574e-07 | 1.28777e-07 | 1.14081e-07 | 1.01759e-07 |
| 0.0100000   | 6.09861e-10 | 4.86681e-10 | 3.93489e-10 | 3.21445e-10 | 2.64743e-10 |
| 0.00100000  | 1.91111e-13 | 1.34280e-13 | 9.60049e-14 | 6.96832e-14 | 5.12687e-14 |
| 0.000100000 | 3.89723e-18 | 2.50206e-18 | 1.66169e-18 | 1.13800e-18 | 8.02221e-19 |
| 1.00000e-05 | 5.37315e-23 | 3.73826e-23 | 2.72514e-23 | 2.08664e-23 | 1.68928e-23 |
| 1.00000e-06 | 1.55025e-26 | 1.48588e-26 | 1.53957e-26 | 1.72611e-26 | 2.09078e-26 |
| 1.00000e-07 | 1.62509e-28 | 1.79154e-28 | 2.11110e-28 | 2.65806e-28 | 3.56827e-28 |
| 1.00000e-08 | 6.96655e-30 | 8.09143e-30 | 1.00038e-29 | 1.31785e-29 | 1.84504e-29 |
| 1.00000e-09 | 5.95926e-31 | 7.05710e-31 | 8.80012e-31 | 1.17380e-30 | 1.64883e-30 |

| Pa\K        | 170.000     | 180.000     | 190.000     | 200.000     | 210.000     |
|-------------|-------------|-------------|-------------|-------------|-------------|
| 1.00000e+08 | 5.34407e-17 | 7.34027e-17 | 1.01092e-16 | 1.39766e-16 | 1.94152e-16 |
| 1.00000e+07 | 7.79003e-14 | 1.08917e-13 | 1.52633e-13 | 2.14627e-13 | 3.03061e-13 |
| 1.00000e+06 | 1.29782e-10 | 1.77472e-10 | 2.42760e-10 | 3.32541e-10 | 4.56541e-10 |
| 100000.     | 9.53776e-08 | 1.25384e-07 | 1.64805e-07 | 2.16799e-07 | 2.85623e-07 |
| 10000.0     | 2.74196e-05 | 3.42257e-05 | 4.26170e-05 | 5.29720e-05 | 6.57547e-05 |
| 1000.00     | 0.00176967  | 0.00200953  | 0.00226719  | 0.00254221  | 0.00283369  |
| 100.000     | 0.00802440  | 0.00798281  | 0.00791101  | 0.00781201  | 0.00768829  |
| 10.0000     | 0.00198297  | 0.00173968  | 0.00152063  | 0.00132444  | 0.00114962  |
| 1.00000     | 6.28843e-06 | 5.42641e-06 | 4.77157e-06 | 4.26326e-06 | 3.86031e-06 |
| 0.100000    | 9.12888e-08 | 8.22859e-08 | 7.44617e-08 | 6.75965e-08 | 6.15211e-08 |
| 0.0100000   | 2.19454e-10 | 1.82850e-10 | 1.52983e-10 | 1.28437e-10 | 1.08160e-10 |
| 0.00100000  | 3.82014e-14 | 2.88182e-14 | 2.20144e-14 | 1.70422e-14 | 1.33878e-14 |
| 0.000100000 | 5.81764e-19 | 4.34284e-19 | 3.34332e-19 | 2.66277e-19 | 2.20403e-19 |
| 1.00000e-05 | 1.46176e-23 | 1.37164e-23 | 1.41716e-23 | 1.63087e-23 | 2.09813e-23 |
| 1.00000e-06 | 2.72571e-26 | 3.80592e-26 | 5.66527e-26 | 8.95756e-26 | 1.50072e-25 |
| 1.00000e-07 | 5.09437e-28 | 7.70870e-28 | 1.23421e-27 | 2.08744e-27 | 3.72812e-27 |
| 1.00000e-08 | 2.73660e-29 | 4.29469e-29 | 7.10242e-29 | 1.23990e-28 | 2.28434e-28 |
| 1.00000e-09 | 2.46481e-30 | 3.89178e-30 | 6.48456e-30 | 1.13914e-29 | 2.10218e-29 |

| Pa\K        | 220.000     | 230.000     | 240.000     | 250.000     | 260.000     |
|-------------|-------------|-------------|-------------|-------------|-------------|
| 1.00000e+08 | 2.71138e-16 | 3.80793e-16 | 5.37891e-16 | 7.64153e-16 | 1.09158e-15 |
| 1.00000e+07 | 4.29923e-13 | 6.12850e-13 | 8.77842e-13 | 1.26327e-12 | 1.82578e-12 |
| 1.00000e+06 | 6.28503e-10 | 8.67859e-10 | 1.20211e-09 | 1.67016e-09 | 2.32708e-09 |
| 100000.     | 3.77025e-07 | 4.98741e-07 | 6.61173e-07 | 8.78274e-07 | 1.16870e-06 |
| 10000.0     | 8.15289e-05 | 0.000100973 | 0.000124895 | 0.000154246 | 0.000190128 |
| 1000.00     | 0.00314022  | 0.00345990  | 0.00379031  | 0.00412862  | 0.00447162  |
| 100.000     | 0.00754196  | 0.00737481  | 0.00718845  | 0.00698438  | 0.00676404  |
| 10.0000     | 0.000994684 | 0.000858101 | 0.000738316 | 0.000633802 | 0.000543071 |
| 1.00000     | 3.53434e-06 | 3.26555e-06 | 3.03988e-06 | 2.84728e-06 | 2.68043e-06 |
| 0.100000    | 5.61037e-08 | 5.12408e-08 | 4.68511e-08 | 4.28703e-08 | 3.92481e-08 |
| 0.0100000   | 9.13486e-11 | 7.73868e-11 | 6.57886e-11 | 5.61680e-11 | 4.82151e-11 |
| 0.00100000  | 1.06937e-14 | 8.70866e-15 | 7.25557e-15 | 6.20975e-15 | 5.48489e-15 |
| 0.000100000 | 1.90738e-19 | 1.73882e-19 | 1.68502e-19 | 1.75431e-19 | 1.98594e-19 |
| 1.00000e-05 | 3.00257e-23 | 4.72932e-23 | 8.09975e-23 | 1.49171e-22 | 2.92661e-22 |
| 1.00000e-06 | 2.66013e-25 | 4.98332e-25 | 9.85354e-25 | 2.05286e-24 | 4.49436e-24 |
| 1.00000e-07 | 7.02860e-27 | 1.39904e-26 | 2.93650e-26 | 6.48907e-26 | 1.50566e-25 |
| 1.00000e-08 | 4.42809e-28 | 9.06296e-28 | 1.95239e-27 | 4.43773e-27 | 1.05458e-26 |
| 1.00000e-09 | 4.08595e-29 | 8.38957e-29 | 1.85146e-28 | 4.21104e-28 | 1.00230e-27 |

| Pa\K        | 270.000     | 280.000     | 290.000     | 300.000     | 400.000     |
|-------------|-------------|-------------|-------------|-------------|-------------|
| 1.00000e+08 | 1.56732e-15 | 2.26083e-15 | 3.27413e-15 | 6.04006e-14 | 5.84481e-12 |
| 1.00000e+07 | 2.64897e-12 | 3.85591e-12 | 5.62722e-12 | 1.00770e-10 | 8.09413e-09 |
| 1.00000e+06 | 3.25066e-09 | 4.55065e-09 | 6.38135e-09 | 7.54389e-08 | 2.84883e-06 |
| 100000.     | 1.55732e-06 | 2.07711e-06 | 2.77161e-06 | 1.91555e-05 | 0.000229169 |
| 10000.0     | 0.000233799 | 0.000286672 | 0.000350300 | 0.00103786  | 0.00320220  |
| 1000.00     | 0.00481581  | 0.00515749  | 0.00549290  | 0.00651480  | 0.00642148  |
| 100.000     | 0.00652894  | 0.00628063  | 0.00602080  | 0.00427201  | 0.00198133  |
| 10.0000     | 0.000464683 | 0.000397276 | 0.000339569 | 0.000197510 | 7.70508e-05 |
| 1.00000     | 2.53392e-06 | 2.40376e-06 | 2.28695e-06 | 2.67540e-06 | 2.87846e-06 |
| 0.100000    | 3.59449e-08 | 3.29299e-08 | 3.01798e-08 | 5.40551e-08 | 9.44800e-08 |
| 0.0100000   | 4.16800e-11 | 3.63621e-11 | 3.21019e-11 | 2.46861e-10 | 2.11685e-09 |
| 0.00100000  | 5.02406e-15 | 4.79449e-15 | 4.78593e-15 | 4.80159e-13 | 4.85648e-11 |
| 0.000100000 | 2.47447e-19 | 3.42701e-19 | 5.29432e-19 | 3.39488e-15 | 1.98221e-12 |
| 1.00000e-05 | 6.06867e-22 | 1.32082e-21 | 2.99792e-21 | 9.04177e-17 | 1.06335e-13 |
| 1.00000e-06 | 1.03048e-23 | 2.46406e-23 | 6.11539e-23 | 3.82610e-18 | 6.83638e-15 |
| 1.00000e-07 | 3.62886e-25 | 9.23608e-25 | 2.41963e-24 | 2.49725e-19 | 5.53222e-16 |
| 1.00000e-08 | 2.61645e-26 | 6.76711e-26 | 1.80927e-25 | 2.28255e-20 | 5.14492e-17 |
| 1.00000e-09 | 2.50097e-27 | 6.44910e-27 | 1.72491e-26 | 2.60821e-21 | 5.54411e-18 |

| Pa\K        | 500.000     | 600.000     | 700.000     | 800.000     | 900.000     |
|-------------|-------------|-------------|-------------|-------------|-------------|
| 1.00000e+08 | 2.28297e-09 | 9.18425e-08 | 1.22687e-06 | 1.14540e-05 | 7.21545e-05 |
| 1.00000e+07 | 6.55251e-07 | 7.30372e-06 | 4.56445e-05 | 0.000192553 | 0.000495888 |
| 1.00000e+06 | 4.72815e-05 | 0.000169501 | 0.000455462 | 0.000898657 | 0.00117153  |
| 100000.     | 0.000984890 | 0.00159645  | 0.00176969  | 0.00157322  | 0.00117241  |
| 10000.0     | 0.00445721  | 0.00325913  | 0.00172156  | 0.000896036 | 0.000563591 |
| 1000.00     | 0.00405116  | 0.00195887  | 0.000919948 | 0.000516685 | 0.000367380 |
| 100.000     | 0.000935683 | 0.000637482 | 0.000443513 | 0.000254049 | 0.000142755 |
| 10.0000     | 8.72380e-05 | 0.000137900 | 0.000113298 | 5.59338e-05 | 2.53788e-05 |
| 1.00000     | 8.77238e-06 | 1.92796e-05 | 1.52398e-05 | 6.94020e-06 | 2.95192e-06 |
| 0.100000    | 6.41950e-07 | 1.66227e-06 | 1.39929e-06 | 6.72005e-07 | 2.94302e-07 |
| 0.0100000   | 3.33970e-08 | 1.18218e-07 | 1.16586e-07 | 6.07983e-08 | 2.75994e-08 |
| 0.00100000  | 1.89122e-09 | 8.80642e-09 | 9.70219e-09 | 5.34582e-09 | 2.48953e-09 |
| 0.000100000 | 1.26621e-10 | 6.86579e-10 | 8.05333e-10 | 4.59134e-10 | 2.17312e-10 |
| 1.00000e-05 | 9.01610e-12 | 5.24845e-11 | 6.28895e-11 | 3.62691e-11 | 1.72366e-11 |
| 1.00000e-06 | 6.80584e-13 | 4.07734e-12 | 4.91546e-12 | 2.84322e-12 | 1.35467e-12 |
| 1.00000e-07 | 5.94171e-14 | 3.61603e-13 | 4.37967e-13 | 2.53670e-13 | 1.21047e-13 |
| 1.00000e-08 | 5.76151e-15 | 3.55323e-14 | 4.25765e-14 | 2.48486e-14 | 1.18440e-14 |
| 1.00000e-09 | 6.38664e-16 | 3.63363e-15 | 4.17144e-15 | 2.61063e-15 | 1.20222e-15 |

| Pa\K        | 1000.00     | 1100.00     | 1200.00     | 1300.00     | 1400.00     |
|-------------|-------------|-------------|-------------|-------------|-------------|
| 1.00000e+08 | 0.000188105 | 0.000231463 | 0.000209973 | 0.000173328 | 0.000139756 |
| 1.00000e+07 | 0.000694700 | 0.000679824 | 0.000599234 | 0.000543149 | 0.000520773 |
| 1.00000e+06 | 0.00109033  | 0.000888132 | 0.000734698 | 0.000634274 | 0.000584308 |
| 100000.     | 0.000826653 | 0.000629184 | 0.000519948 | 0.000439497 | 0.000392570 |
| 10000.0     | 0.000454576 | 0.000400320 | 0.000334056 | 0.000264344 | 0.000216659 |
| 1000.00     | 0.000282149 | 0.000203764 | 0.000136492 | 9.06242e-05 | 6.42639e-05 |
| 100.000     | 8.24913e-05 | 4.69164e-05 | 2.66354e-05 | 1.58483e-05 | 1.02331e-05 |
| 10.0000     | 1.24336e-05 | 6.38296e-06 | 3.42263e-06 | 1.95388e-06 | 1.19944e-06 |
| 1.00000     | 1.39823e-06 | 7.07562e-07 | 3.76238e-07 | 2.11519e-07 | 1.26042e-07 |
| 0.100000    | 1.41349e-07 | 7.20006e-08 | 3.83253e-08 | 2.13825e-08 | 1.25058e-08 |
| 0.0100000   | 1.34550e-08 | 6.90601e-09 | 3.68657e-09 | 2.04811e-09 | 1.18247e-09 |
| 0.00100000  | 1.22931e-09 | 6.36075e-10 | 3.40801e-10 | 1.88754e-10 | 1.07831e-10 |
| 0.000100000 | 1.08169e-10 | 5.61996e-11 | 3.01081e-11 | 1.65822e-11 | 9.37042e-12 |
| 1.00000e-05 | 8.58821e-12 | 4.45987e-12 | 2.38400e-12 | 1.30714e-12 | 7.33916e-13 |
| 1.00000e-06 | 6.75661e-13 | 3.50793e-13 | 1.87254e-13 | 1.02420e-13 | 5.73228e-14 |

|             |             |             |             |             |             |
|-------------|-------------|-------------|-------------|-------------|-------------|
| 1.00000e-07 | 6.04238e-14 | 3.13737e-14 | 1.67273e-14 | 9.13175e-15 | 5.10592e-15 |
| 1.00000e-08 | 5.92013e-15 | 3.08441e-15 | 1.64331e-15 | 8.95882e-16 | 4.99476e-16 |
| 1.00000e-09 | 5.88769e-16 | 3.06598e-16 | 1.62246e-16 | 8.85679e-17 | 6.42732e-21 |

| Pa\K        | 1500.00     | 1750.00     | 2000.00     | 2250.00     | 2500.00     |
|-------------|-------------|-------------|-------------|-------------|-------------|
| 1.00000e+08 | 0.000127872 | 2.08705e-05 | 3.41282e-05 | 4.37841e-05 | 4.80931e-05 |
| 1.00000e+07 | 0.000548004 | 5.50773e-05 | 6.51823e-05 | 5.66261e-05 | 5.00650e-05 |
| 1.00000e+06 | 0.000605664 | 0.000164419 | 0.000140460 | 8.04241e-05 | 4.98720e-05 |
| 100000.     | 0.000391659 | 0.000189951 | 0.000128526 | 5.25833e-05 | 2.29673e-05 |
| 10000.0     | 0.000194369 | 8.63063e-05 | 4.25511e-05 | 1.25154e-05 | 4.11695e-06 |
| 1000.00     | 4.99103e-05 | 1.63275e-05 | 6.38638e-06 | 1.57002e-06 | 4.56307e-07 |
| 100.000     | 7.17276e-06 | 1.83017e-06 | 6.70749e-07 | 1.57810e-07 | 4.45297e-08 |
| 10.0000     | 7.85633e-07 | 1.64992e-07 | 6.31047e-08 | 1.51116e-08 | 4.26810e-09 |
| 1.00000     | 7.89246e-08 | 1.42667e-08 | 5.85657e-09 | 1.44528e-09 | 4.10740e-10 |
| 0.100000    | 7.60361e-09 | 1.25095e-09 | 5.48077e-10 | 1.39032e-10 | 3.97472e-11 |
| 0.0100000   | 7.04212e-10 | 1.11170e-10 | 5.17232e-11 | 1.34417e-11 | 3.86282e-12 |
| 0.00100000  | 6.31718e-11 | 9.93874e-12 | 6.91188e-12 | 1.30443e-12 | 3.76560e-13 |
| 0.000100000 | 5.41214e-12 | 8.65179e-13 | 4.64696e-13 | 1.26316e-13 | 3.66321e-14 |
| 1.00000e-05 | 4.20904e-13 | 7.58768e-14 | 4.43474e-14 | 1.23018e-14 | 3.58194e-15 |
| 1.00000e-06 | 3.27860e-14 | 6.73093e-15 | 4.26278e-15 | 1.20322e-15 | 3.51520e-16 |
| 1.00000e-07 | 2.91794e-15 | 6.30454e-16 | 4.18040e-16 | 1.19081e-16 | 3.48571e-17 |
| 1.00000e-08 | 2.85821e-16 | 6.23960e-17 | 4.16762e-17 | 1.18901e-17 | 3.48164e-18 |
| 1.00000e-09 | 7.36674e-20 | 4.92968e-18 | 3.91220e-18 | 1.14718e-18 | 3.37769e-19 |

| Pa\K        | 2750.00     | 3000.00     | 3250.00     | 3500.00     | 3750.00     |
|-------------|-------------|-------------|-------------|-------------|-------------|
| 1.00000e+08 | 4.82532e-05 | 4.62793e-05 | 4.31233e-05 | 3.93071e-05 | 3.52032e-05 |
| 1.00000e+07 | 4.24284e-05 | 3.43498e-05 | 2.69052e-05 | 2.06207e-05 | 1.55985e-05 |
| 1.00000e+06 | 3.15844e-05 | 1.97134e-05 | 1.21419e-05 | 7.44686e-06 | 4.58909e-06 |
| 100000.     | 1.06385e-05 | 5.07341e-06 | 2.49421e-06 | 1.27233e-06 | 6.76413e-07 |
| 10000.0     | 1.54818e-06 | 6.38282e-07 | 2.84164e-07 | 1.35559e-07 | 6.88439e-08 |
| 1000.00     | 1.59625e-07 | 6.31653e-08 | 2.74460e-08 | 1.28822e-08 | 6.45719e-09 |
| 100.000     | 1.53294e-08 | 6.00766e-09 | 2.59133e-09 | 1.20787e-09 | 6.00832e-10 |
| 10.0000     | 1.46509e-09 | 5.71864e-10 | 2.45527e-10 | 1.13866e-10 | 5.63285e-11 |
| 1.00000     | 1.40859e-10 | 5.48014e-11 | 2.34311e-11 | 1.08170e-11 | 5.32547e-12 |
| 0.100000    | 1.36182e-11 | 5.28145e-12 | 2.24905e-12 | 1.03371e-12 | 5.06596e-13 |
| 0.0100000   | 1.32219e-12 | 5.11193e-13 | 2.16841e-13 | 9.92411e-14 | 4.84213e-14 |
| 0.00100000  | 1.28739e-13 | 4.96161e-14 | 2.09622e-14 | 9.55160e-15 | 4.63901e-15 |
| 0.000100000 | 1.25039e-14 | 4.80065e-15 | 2.01858e-15 | 9.15037e-16 | 4.42040e-16 |
| 1.00000e-05 | 1.22121e-15 | 4.67450e-16 | 1.95812e-16 | 8.83974e-17 | 4.25212e-17 |
| 1.00000e-06 | 1.19715e-16 | 4.57009e-17 | 1.90795e-17 | 8.58146e-18 | 4.11207e-18 |
| 1.00000e-07 | 1.18693e-17 | 4.52733e-18 | 1.88808e-18 | 8.48251e-19 | 4.05972e-19 |
| 1.00000e-08 | 1.18546e-18 | 4.52083e-19 | 1.88492e-19 | 8.46672e-20 | 4.05299e-20 |
| 1.00000e-09 | 1.14791e-19 | 4.35750e-20 | 1.80613e-20 | 8.05880e-21 | 3.82917e-21 |

| Pa\K        | 4000.00     |
|-------------|-------------|
| 1.00000e+08 | 3.10938e-05 |
| 1.00000e+07 | 1.17261e-05 |
| 1.00000e+06 | 2.86327e-06 |
| 100000.     | 3.75575e-07 |
| 10000.0     | 3.70109e-08 |
| 1000.00     | 3.42678e-09 |
| 100.000     | 3.15955e-10 |
| 10.0000     | 2.94420e-11 |
| 1.00000     | 2.76977e-12 |
| 0.100000    | 2.62253e-13 |
| 0.0100000   | 2.49541e-14 |
| 0.00100000  | 2.37954e-15 |
| 0.000100000 | 2.25517e-16 |
| 1.00000e-05 | 2.15998e-17 |
| 1.00000e-06 | 2.08074e-18 |
| 1.00000e-07 | 2.05186e-19 |
| 1.00000e-08 | 2.04789e-20 |
| 1.00000e-09 | 1.92083e-21 |

rad22  
=====

| Pa\K        | 20.0000     | 30.0000     | 40.0000     | 50.0000     | 60.0000     |
|-------------|-------------|-------------|-------------|-------------|-------------|
| 1.00000e+08 | 2.66617e-13 | 1.08975e-12 | 2.43806e-12 | 4.32758e-12 | 6.79453e-12 |
| 1.00000e+07 | 2.66492e-11 | 1.08872e-10 | 2.43462e-10 | 4.31947e-10 | 6.77868e-10 |
| 1.00000e+06 | 2.65243e-09 | 1.07848e-08 | 2.40072e-08 | 4.24021e-08 | 6.62460e-08 |
| 100000.     | 2.53436e-07 | 9.86870e-07 | 2.11225e-06 | 3.59745e-06 | 5.43143e-06 |
| 10000.0     | 1.79249e-05 | 5.70066e-05 | 0.000107088 | 0.000165693 | 0.000231619 |
| 1000.00     | 0.000585682 | 0.00134955  | 0.00204600  | 0.00268719  | 0.00328536  |
| 100.000     | 0.00530849  | 0.00728646  | 0.00762441  | 0.00725538  | 0.00658624  |
| 10.0000     | 0.00309992  | 0.00685353  | 0.00205072  | 7.87260e-05 | 3.70733e-05 |
| 1.00000     | 5.79988e-06 | 1.79974e-06 | 8.05333e-07 | 4.08230e-07 | 2.25334e-07 |

|             |             |             |             |             |             |
|-------------|-------------|-------------|-------------|-------------|-------------|
| 0.100000    | 2.32735e-08 | 2.81793e-09 | 1.14869e-09 | 6.63752e-10 | 4.43806e-10 |
| 0.0100000   | 9.52338e-11 | 1.95702e-11 | 7.45633e-12 | 3.70029e-12 | 2.13282e-12 |
| 0.00100000  | 2.38651e-13 | 2.65448e-14 | 7.42383e-15 | 3.02285e-15 | 1.50531e-15 |
| 0.000100000 | 1.19305e-16 | 9.62900e-18 | 2.16172e-18 | 7.30669e-19 | 3.09055e-19 |
| 1.00000e-05 | 1.71457e-20 | 9.51212e-22 | 1.89016e-22 | 6.18098e-23 | 2.63299e-23 |
| 1.00000e-06 | 1.93838e-24 | 1.76907e-25 | 5.09945e-26 | 2.24570e-26 | 1.23077e-26 |
| 1.00000e-07 | 2.47288e-27 | 7.08089e-28 | 3.94314e-28 | 2.69542e-28 | 2.03033e-28 |
| 1.00000e-08 | 9.63424e-29 | 4.54782e-29 | 2.97487e-29 | 2.19611e-29 | 1.72963e-29 |
| 1.00000e-09 | 8.96794e-30 | 4.39757e-30 | 2.90960e-30 | 2.15981e-30 | 1.70661e-30 |

| Pa\K        | 70.0000     | 80.0000     | 90.0000     | 100.000     | 110.000     |
|-------------|-------------|-------------|-------------|-------------|-------------|
| 1.00000e+08 | 9.88560e-12 | 1.36598e-11 | 1.81950e-11 | 2.35931e-11 | 2.99889e-11 |
| 1.00000e+07 | 9.85795e-10 | 1.36152e-09 | 1.81266e-09 | 2.34926e-09 | 2.98452e-09 |
| 1.00000e+06 | 9.59069e-08 | 1.31859e-07 | 1.74735e-07 | 2.25376e-07 | 2.84893e-07 |
| 100000.     | 7.61191e-06 | 1.01444e-05 | 1.30439e-05 | 1.63375e-05 | 2.00644e-05 |
| 10000.0     | 0.000304010 | 0.000382249 | 0.000465986 | 0.000555128 | 0.000649821 |
| 1000.00     | 0.00384557  | 0.00436950  | 0.00485771  | 0.00531038  | 0.00572752  |
| 100.000     | 0.00581312  | 0.00503493  | 0.00430137  | 0.00363576  | 0.00304678  |
| 10.0000     | 2.07516e-05 | 1.33706e-05 | 9.57842e-06 | 7.38727e-06 | 5.97964e-06 |
| 1.00000     | 1.32936e-07 | 8.28995e-08 | 5.42580e-08 | 3.70920e-08 | 2.63918e-08 |
| 0.100000    | 3.21728e-10 | 2.45754e-10 | 1.94798e-10 | 1.58744e-10 | 1.32178e-10 |
| 0.0100000   | 1.35417e-12 | 9.19787e-13 | 6.56382e-13 | 4.86243e-13 | 3.70758e-13 |
| 0.00100000  | 8.48193e-16 | 5.18891e-16 | 3.36297e-16 | 2.27327e-16 | 1.58608e-16 |
| 0.000100000 | 1.50805e-19 | 8.12607e-20 | 4.70886e-20 | 2.88395e-20 | 1.84463e-20 |
| 1.00000e-05 | 1.32095e-23 | 7.40244e-24 | 4.49037e-24 | 2.88986e-24 | 1.94652e-24 |
| 1.00000e-06 | 7.70294e-27 | 5.26574e-27 | 3.83010e-27 | 2.91521e-27 | 2.29608e-27 |
| 1.00000e-07 | 1.61836e-28 | 1.33829e-28 | 1.13516e-28 | 9.80616e-29 | 8.58673e-29 |
| 1.00000e-08 | 1.41917e-29 | 1.19761e-29 | 1.03114e-29 | 9.01063e-30 | 7.96231e-30 |
| 1.00000e-09 | 1.40333e-30 | 1.18608e-30 | 1.02242e-30 | 8.94251e-31 | 7.90793e-31 |

| Pa\K        | 120.000     | 130.000     | 140.000     | 150.000     | 160.000     |
|-------------|-------------|-------------|-------------|-------------|-------------|
| 1.00000e+08 | 3.75559e-11 | 4.65162e-11 | 5.71524e-11 | 6.98221e-11 | 8.49778e-11 |
| 1.00000e+07 | 3.73549e-09 | 4.62395e-09 | 5.67757e-09 | 6.93135e-09 | 8.42944e-09 |
| 1.00000e+06 | 3.54714e-07 | 4.36654e-07 | 5.33000e-07 | 6.46604e-07 | 7.81022e-07 |
| 100000.     | 2.42789e-05 | 2.90504e-05 | 3.44663e-05 | 4.06341e-05 | 4.76844e-05 |
| 10000.0     | 0.000750420 | 0.000857454 | 0.000971604 | 0.00109367  | 0.00122458  |
| 1000.00     | 0.00610877  | 0.00645336  | 0.00675995  | 0.00702675  | 0.00725157  |
| 100.000     | 0.00253493  | 0.00209620  | 0.00172426  | 0.00141177  | 0.00115124  |
| 10.0000     | 4.98969e-06 | 4.24167e-06 | 3.64561e-06 | 3.15276e-06 | 2.73511e-06 |
| 1.00000     | 1.94877e-08 | 1.48923e-08 | 1.17444e-08 | 9.52892e-09 | 7.92910e-09 |
| 0.100000    | 1.11961e-10 | 9.61659e-11 | 8.35490e-11 | 7.32784e-11 | 6.47795e-11 |
| 0.0100000   | 2.89170e-13 | 2.29605e-13 | 1.84914e-13 | 1.50612e-13 | 1.23776e-13 |
| 0.00100000  | 1.13401e-16 | 8.26608e-17 | 6.12026e-17 | 4.59042e-17 | 3.48083e-17 |
| 0.000100000 | 1.22172e-20 | 8.32624e-21 | 5.81142e-21 | 4.13893e-21 | 2.99938e-21 |
| 1.00000e-05 | 1.35922e-24 | 9.77171e-25 | 7.19571e-25 | 5.40642e-25 | 4.13214e-25 |
| 1.00000e-06 | 1.85688e-27 | 1.53336e-27 | 1.28763e-27 | 1.09623e-27 | 9.44003e-28 |
| 1.00000e-07 | 7.59701e-29 | 6.77574e-29 | 6.08220e-29 | 5.48826e-29 | 4.97380e-29 |
| 1.00000e-08 | 7.09681e-30 | 6.36844e-30 | 5.74606e-30 | 5.20769e-30 | 4.73735e-30 |
| 1.00000e-09 | 7.05260e-31 | 6.33197e-31 | 5.71561e-31 | 5.18202e-31 | 4.71551e-31 |

| Pa\K        | 170.000     | 180.000     | 190.000     | 200.000     | 210.000     |
|-------------|-------------|-------------|-------------|-------------|-------------|
| 1.00000e+08 | 1.03190e-10 | 1.25181e-10 | 1.51860e-10 | 1.84375e-10 | 2.24174e-10 |
| 1.00000e+07 | 1.02275e-08 | 1.23956e-08 | 1.50220e-08 | 1.82177e-08 | 2.21221e-08 |
| 1.00000e+06 | 9.40660e-07 | 1.13098e-06 | 1.35870e-06 | 1.63212e-06 | 1.96140e-06 |
| 100000.     | 5.57746e-05 | 6.50932e-05 | 7.58637e-05 | 8.83502e-05 | 0.000102863 |
| 10000.0     | 0.00136534  | 0.00151699  | 0.00168069  | 0.00185752  | 0.00204856  |
| 1000.00     | 0.00743196  | 0.00756543  | 0.00764975  | 0.00768315  | 0.00766455  |
| 100.000     | 0.000935484 | 0.000757832 | 0.000612312 | 0.000493660 | 0.000397311 |
| 10.0000     | 2.37569e-06 | 2.06351e-06 | 1.79106e-06 | 1.55284e-06 | 1.34456e-06 |
| 1.00000     | 6.74501e-09 | 5.84770e-09 | 5.15220e-09 | 4.60150e-09 | 4.15666e-09 |
| 0.100000    | 5.76445e-11 | 5.15774e-11 | 4.63592e-11 | 4.18250e-11 | 3.78488e-11 |
| 0.0100000   | 1.02449e-13 | 8.52811e-14 | 7.13155e-14 | 5.98621e-14 | 5.04106e-14 |
| 0.00100000  | 2.66457e-17 | 2.05703e-17 | 1.60039e-17 | 1.25437e-17 | 9.90405e-18 |
| 0.000100000 | 2.20666e-21 | 1.64522e-21 | 1.24133e-21 | 9.46805e-22 | 7.29487e-22 |
| 1.00000e-05 | 3.20518e-25 | 2.51859e-25 | 2.00214e-25 | 1.60867e-25 | 1.30593e-25 |
| 1.00000e-06 | 8.20797e-28 | 7.19642e-28 | 6.35636e-28 | 5.65301e-28 | 5.06210e-28 |
| 1.00000e-07 | 4.52408e-29 | 4.12801e-29 | 3.77707e-29 | 3.46469e-29 | 3.18572e-29 |
| 1.00000e-08 | 4.32309e-30 | 3.95580e-30 | 3.62837e-30 | 3.33516e-30 | 3.07165e-30 |
| 1.00000e-09 | 4.30437e-31 | 3.93964e-31 | 3.61431e-31 | 3.32283e-31 | 3.06072e-31 |

| Pa\K        | 220.000     | 230.000     | 240.000     | 250.000     | 260.000     |
|-------------|-------------|-------------|-------------|-------------|-------------|
| 1.00000e+08 | 2.73083e-10 | 3.33407e-10 | 4.08046e-10 | 5.00661e-10 | 6.15856e-10 |
| 1.00000e+07 | 2.69105e-08 | 3.28030e-08 | 4.00757e-08 | 4.90746e-08 | 6.02331e-08 |
| 1.00000e+06 | 2.35902e-06 | 2.84018e-06 | 3.42348e-06 | 4.13144e-06 | 4.99141e-06 |
| 100000.     | 0.000119762 | 0.000139463 | 0.000162449 | 0.000189262 | 0.000220521 |
| 10000.0     | 0.00225476  | 0.00247692  | 0.00271561  | 0.00297104  | 0.00324303  |

|             |             |             |             |             |             |
|-------------|-------------|-------------|-------------|-------------|-------------|
| 1000.00     | 0.00759381  | 0.00747185  | 0.00730076  | 0.00708375  | 0.00682513  |
| 100.000     | 0.000319360 | 0.000256499 | 0.000205949 | 0.000165401 | 0.000132941 |
| 10.0000     | 1.16273e-06 | 1.00436e-06 | 8.66813e-07 | 7.47744e-07 | 6.45016e-07 |
| 1.00000     | 3.79061e-09 | 3.48422e-09 | 3.22379e-09 | 2.99930e-09 | 2.80336e-09 |
| 0.100000    | 3.43335e-11 | 3.12032e-11 | 2.83984e-11 | 2.58724e-11 | 2.35882e-11 |
| 0.0100000   | 4.25763e-14 | 3.60639e-14 | 3.06432e-14 | 2.61317e-14 | 2.23837e-14 |
| 0.00100000  | 7.87970e-18 | 6.32118e-18 | 5.11881e-18 | 4.19155e-18 | 3.47935e-18 |
| 0.000100000 | 5.67518e-22 | 4.45832e-22 | 3.53926e-22 | 2.84491e-22 | 2.32560e-22 |
| 1.00000e-05 | 1.07174e-25 | 8.91176e-26 | 7.55241e-26 | 6.61107e-26 | 6.14673e-26 |
| 1.00000e-06 | 4.56813e-28 | 4.16479e-28 | 3.85854e-28 | 3.67824e-28 | 3.69811e-28 |
| 1.00000e-07 | 2.93626e-29 | 2.71359e-29 | 2.51651e-29 | 2.34610e-29 | 2.20795e-29 |
| 1.00000e-08 | 2.83414e-30 | 2.61966e-30 | 2.42576e-30 | 2.25063e-30 | 2.09312e-30 |
| 1.00000e-09 | 2.82431e-31 | 2.61056e-31 | 2.41692e-31 | 2.24126e-31 | 2.08180e-31 |

| Pa\K        | 270.000     | 280.000     | 290.000     | 300.000     | 400.000     |
|-------------|-------------|-------------|-------------|-------------|-------------|
| 1.00000e+08 | 7.59425e-10 | 9.38644e-10 | 1.16262e-09 | 5.43530e-09 | 4.63315e-08 |
| 1.00000e+07 | 7.40923e-08 | 9.13277e-08 | 1.12778e-07 | 5.07159e-07 | 3.88845e-06 |
| 1.00000e+06 | 6.03640e-06 | 7.30616e-06 | 8.84829e-06 | 3.29996e-05 | 0.000179726 |
| 100000.     | 0.000256915 | 0.000299211 | 0.000348247 | 0.000920189 | 0.00275995  |
| 10000.0     | 0.00353092  | 0.00383346  | 0.00414881  | 0.00634575  | 0.00749078  |
| 1000.00     | 0.00653010  | 0.00620464  | 0.00585512  | 0.00417625  | 0.00134850  |
| 100.000     | 0.000106998 | 8.62881e-05 | 6.97678e-05 | 4.55207e-05 | 8.31682e-06 |
| 10.0000     | 5.56689e-07 | 4.81000e-07 | 4.16348e-07 | 3.08808e-07 | 1.43124e-07 |
| 1.00000     | 2.63043e-09 | 2.47626e-09 | 2.33761e-09 | 4.07875e-09 | 3.25320e-09 |
| 0.100000    | 1.15166e-11 | 1.96351e-11 | 1.79258e-11 | 5.24400e-11 | 5.44302e-11 |
| 0.0100000   | 1.92818e-14 | 1.67311e-14 | 1.46556e-14 | 2.44564e-13 | 6.40205e-13 |
| 0.00100000  | 2.93807e-18 | 2.53578e-18 | 2.25071e-18 | 3.92080e-16 | 7.51116e-15 |
| 0.000100000 | 1.95105e-22 | 1.71100e-22 | 1.62274e-22 | 6.65798e-19 | 1.22392e-16 |
| 1.00000e-05 | 6.37718e-26 | 7.85128e-26 | 1.18521e-25 | 4.37135e-21 | 1.24225e-18 |
| 1.00000e-06 | 4.09068e-28 | 5.24980e-28 | 8.07792e-28 | 8.39205e-23 | 1.14690e-20 |
| 1.00000e-07 | 2.11710e-29 | 2.10971e-29 | 2.27034e-29 | 5.34642e-24 | 1.15552e-22 |
| 1.00000e-08 | 1.95331e-30 | 1.83350e-30 | 1.74103e-30 | 5.04457e-25 | 1.41776e-24 |
| 1.00000e-09 | 1.93709e-31 | 1.80611e-31 | 1.68847e-31 | 5.01370e-26 | 4.06730e-26 |

| Pa\K        | 500.000     | 600.000     | 700.000     | 800.000     | 900.000     |
|-------------|-------------|-------------|-------------|-------------|-------------|
| 1.00000e+08 | 4.07864e-07 | 3.53908e-06 | 2.70755e-05 | 0.000134278 | 0.000404676 |
| 1.00000e+07 | 2.73017e-05 | 0.000152701 | 0.000597843 | 0.00141238  | 0.00198491  |
| 1.00000e+06 | 0.000776024 | 0.00226812  | 0.00419608  | 0.00483035  | 0.00374149  |
| 100000.     | 0.00554298  | 0.00688239  | 0.00555237  | 0.00335366  | 0.00169742  |
| 10000.0     | 0.00528124  | 0.00246227  | 0.000910730 | 0.000351154 | 0.000163407 |
| 1000.00     | 0.000320528 | 7.19149e-05 | 2.11576e-05 | 1.16699e-05 | 1.06513e-05 |
| 100.000     | 2.67802e-06 | 1.57976e-06 | 1.10733e-06 | 8.46069e-07 | 8.91190e-07 |
| 10.0000     | 1.21160e-07 | 1.34163e-07 | 1.01852e-07 | 6.07275e-08 | 5.31398e-08 |
| 1.00000     | 5.55141e-09 | 9.72709e-09 | 7.49012e-09 | 3.75378e-09 | 2.43969e-09 |
| 0.100000    | 2.23005e-10 | 4.97636e-10 | 4.16009e-10 | 2.10162e-10 | 1.07435e-10 |
| 0.0100000   | 6.43160e-12 | 2.00312e-11 | 2.00061e-11 | 1.10732e-11 | 5.47620e-12 |
| 0.00100000  | 1.84556e-13 | 7.62728e-13 | 8.62634e-13 | 5.10364e-13 | 2.58169e-13 |
| 0.000100000 | 4.27149e-15 | 1.97616e-14 | 2.36783e-14 | 1.47423e-14 | 7.64888e-15 |
| 1.00000e-05 | 4.57975e-17 | 2.15213e-16 | 2.63245e-16 | 1.69644e-16 | 9.06201e-17 |
| 1.00000e-06 | 4.15450e-19 | 1.92765e-18 | 2.34704e-18 | 1.50302e-18 | 8.00644e-19 |
| 1.00000e-07 | 4.06468e-21 | 1.87599e-20 | 2.27488e-20 | 1.44834e-20 | 7.69046e-21 |
| 1.00000e-08 | 4.06697e-23 | 1.87368e-22 | 2.25650e-22 | 1.44715e-22 | 7.93974e-23 |
| 1.00000e-09 | 4.34707e-25 | 1.92186e-24 | 2.25350e-24 | 1.60595e-24 | 1.11924e-24 |

| Pa\K        | 1000.00     | 1100.00     | 1200.00     | 1300.00     | 1400.00     |
|-------------|-------------|-------------|-------------|-------------|-------------|
| 1.00000e+08 | 0.000612601 | 0.000592778 | 0.000468047 | 0.000358344 | 0.000306489 |
| 1.00000e+07 | 0.00159974  | 0.000965461 | 0.000593342 | 0.000445254 | 0.000426085 |
| 1.00000e+06 | 0.00218005  | 0.00113804  | 0.000651236 | 0.000462792 | 0.000410226 |
| 100000.     | 0.000845985 | 0.000453388 | 0.000277288 | 0.000197240 | 0.000161240 |
| 10000.0     | 0.000106495 | 7.71900e-05 | 5.44900e-05 | 3.95119e-05 | 3.09438e-05 |
| 1000.00     | 1.15151e-05 | 9.79017e-06 | 6.90995e-06 | 4.89051e-06 | 3.75681e-06 |
| 100.000     | 1.00671e-06 | 8.24398e-07 | 5.58914e-07 | 3.87431e-07 | 2.96787e-07 |
| 10.0000     | 5.71717e-08 | 4.73489e-08 | 3.28703e-08 | 2.30136e-08 | 1.77213e-08 |
| 1.00000     | 2.34376e-09 | 2.02793e-09 | 1.49787e-09 | 1.08576e-09 | 8.58171e-10 |
| 0.100000    | 7.41376e-11 | 5.71965e-11 | 4.25415e-11 | 3.18529e-11 | 2.81820e-11 |
| 0.0100000   | 3.06524e-12 | 1.88419e-12 | 1.21459e-12 | 8.51387e-13 | 9.56598e-13 |
| 0.00100000  | 1.41467e-13 | 8.18133e-14 | 4.87518e-14 | 3.32065e-14 | 5.30469e-14 |
| 0.000100000 | 4.26895e-15 | 2.49424e-15 | 1.50243e-15 | 1.23470e-15 | 3.71331e-15 |
| 1.00000e-05 | 5.26331e-17 | 3.24600e-17 | 2.29485e-17 | 4.71927e-17 | 3.15441e-16 |
| 1.00000e-06 | 4.69157e-19 | 3.14042e-19 | 4.76623e-19 | 3.57422e-18 | 3.06732e-17 |
| 1.00000e-07 | 4.67591e-21 | 5.10553e-21 | 3.08596e-20 | 3.46403e-19 | 3.05845e-18 |
| 1.00000e-08 | 6.72197e-23 | 2.61474e-22 | 2.92597e-21 | 3.45339e-20 | 3.05757e-19 |
| 1.00000e-09 | 2.76217e-24 | 2.36766e-23 | 2.91010e-22 | 3.45233e-21 | 3.05747e-20 |

| Pa\K        | 1500.00     | 1750.00     | 2000.00     | 2250.00     | 2500.00     |
|-------------|-------------|-------------|-------------|-------------|-------------|
| 1.00000e+08 | 0.000325097 | 6.31039e-05 | 6.54128e-05 | 6.91667e-05 | 7.07545e-05 |

|             |             |             |             |             |             |
|-------------|-------------|-------------|-------------|-------------|-------------|
| 1.00000e+07 | 0.000478535 | 0.000206646 | 0.000144874 | 9.71354e-05 | 6.64992e-05 |
| 1.00000e+06 | 0.000424850 | 0.000248993 | 0.000102666 | 4.14230e-05 | 1.93032e-05 |
| 100000.     | 0.000148250 | 7.34691e-05 | 2.31201e-05 | 7.50028e-06 | 2.95576e-06 |
| 10000.0     | 2.66887e-05 | 1.24090e-05 | 3.53286e-06 | 9.96838e-07 | 3.45994e-07 |
| 1000.00     | 3.19872e-06 | 1.62989e-06 | 4.24892e-07 | 1.07651e-07 | 3.46961e-08 |
| 100.000     | 2.58527e-07 | 1.68867e-07 | 4.32378e-08 | 1.05662e-08 | 3.32887e-09 |
| 10.0000     | 1.61454e-08 | 1.54161e-08 | 4.14489e-09 | 1.01910e-09 | 3.20179e-10 |
| 1.00000     | 8.67307e-10 | 1.38862e-09 | 3.97483e-10 | 9.91204e-11 | 3.11730e-11 |
| 0.100000    | 4.04728e-11 | 1.28086e-10 | 3.85145e-11 | 9.71305e-12 | 3.05707e-12 |
| 0.0100000   | 2.41338e-12 | 1.22046e-11 | 3.78320e-12 | 9.61287e-13 | 3.02927e-13 |
| 0.00100000  | 1.94764e-13 | 1.18604e-12 | 3.74452e-13 | 9.56057e-14 | 3.01593e-14 |
| 0.000100000 | 1.75050e-14 | 1.16284e-13 | 3.71816e-14 | 9.52581e-15 | 3.00736e-15 |
| 1.00000e-05 | 1.68090e-15 | 1.15581e-14 | 3.71047e-15 | 9.51614e-16 | 3.00504e-16 |
| 1.00000e-06 | 1.66993e-16 | 1.15493e-15 | 3.70953e-16 | 9.51495e-17 | 3.00479e-17 |
| 1.00000e-07 | 1.66876e-17 | 1.15483e-16 | 3.70942e-17 | 9.51483e-18 | 3.00476e-18 |
| 1.00000e-08 | 1.66864e-18 | 1.15482e-17 | 3.70939e-18 | 9.51483e-19 | 3.00473e-19 |
| 1.00000e-09 | 1.66863e-19 | 1.15482e-18 | 3.70939e-19 | 9.51483e-20 | 3.00473e-20 |

Pa\K | 2750.00 3000.00 3250.00 3500.00 3750.00

|             |             |             |             |             |             |
|-------------|-------------|-------------|-------------|-------------|-------------|
| 1.00000e+08 | 6.82958e-05 | 6.23574e-05 | 5.43598e-05 | 4.57734e-05 | 3.76403e-05 |
| 1.00000e+07 | 4.40881e-05 | 2.85515e-05 | 1.83927e-05 | 1.19487e-05 | 7.89552e-06 |
| 1.00000e+06 | 9.64064e-06 | 5.04380e-06 | 2.75916e-06 | 1.58073e-06 | 9.48873e-07 |
| 100000.     | 1.28905e-06 | 6.05517e-07 | 3.05498e-07 | 1.65270e-07 | 9.54376e-08 |
| 10000.0     | 1.37396e-07 | 6.07300e-08 | 2.95446e-08 | 1.56531e-08 | 8.93249e-09 |
| 1000.00     | 1.32150e-08 | 5.71122e-09 | 2.74248e-09 | 1.44021e-09 | 8.16061e-10 |
| 100.000     | 1.25175e-09 | 5.36176e-10 | 2.55452e-10 | 1.33107e-10 | 7.48219e-11 |
| 10.0000     | 1.19826e-10 | 5.10222e-11 | 2.41417e-11 | 1.24835e-11 | 6.95983e-12 |
| 1.00000     | 1.16351e-11 | 4.93292e-12 | 2.32162e-12 | 1.19321e-12 | 6.60803e-13 |
| 0.100000    | 1.13845e-12 | 4.80939e-13 | 2.25352e-13 | 1.15240e-13 | 6.34697e-14 |
| 0.0100000   | 1.12776e-13 | 4.76036e-14 | 2.22822e-14 | 1.13812e-14 | 6.26037e-15 |
| 0.00100000  | 1.12302e-14 | 4.74028e-15 | 2.21864e-15 | 1.13310e-15 | 6.23196e-16 |
| 0.000100000 | 1.12007e-15 | 4.72822e-16 | 2.21308e-16 | 1.13029e-16 | 6.21670e-17 |
| 1.00000e-05 | 1.11931e-16 | 4.72522e-17 | 2.21175e-17 | 1.12964e-17 | 6.21323e-18 |
| 1.00000e-06 | 1.11922e-17 | 4.72485e-18 | 2.21159e-18 | 1.12956e-18 | 6.21285e-19 |
| 1.00000e-07 | 1.11921e-18 | 4.72483e-19 | 2.21157e-19 | 1.12955e-19 | 6.21281e-20 |
| 1.00000e-08 | 1.11921e-19 | 4.72483e-20 | 2.21157e-20 | 1.12955e-20 | 6.21279e-21 |
| 1.00000e-09 | 1.11921e-20 | 4.72483e-21 | 2.21157e-21 | 1.12955e-21 | 6.21279e-22 |

Pa\K | 4000.00

|             |             |
|-------------|-------------|
| 1.00000e+08 | 3.05064e-05 |
| 1.00000e+07 | 5.33291e-06 |
| 1.00000e+06 | 5.96021e-07 |
| 100000.     | 5.84566e-08 |
| 10000.0     | 5.43373e-09 |
| 1000.00     | 4.93292e-10 |
| 100.000     | 4.48612e-11 |
| 10.0000     | 4.13727e-12 |
| 1.00000     | 3.90009e-13 |
| 0.100000    | 3.72402e-14 |
| 0.0100000   | 3.66833e-15 |
| 0.00100000  | 3.65121e-16 |
| 0.000100000 | 3.64234e-17 |
| 1.00000e-05 | 3.64038e-18 |
| 1.00000e-06 | 3.64016e-19 |
| 1.00000e-07 | 3.64014e-20 |
| 1.00000e-08 | 3.64014e-21 |
| 1.00000e-09 | 3.64014e-22 |

rad21

====

Pa\K | 20.0000 30.0000 40.0000 50.0000 60.0000

|             |             |             |             |             |             |
|-------------|-------------|-------------|-------------|-------------|-------------|
| 1.00000e+08 | 1.20143e-08 | 2.43464e-08 | 3.65933e-08 | 4.90728e-08 | 6.19381e-08 |
| 1.00000e+07 | 1.20053e-07 | 2.43099e-07 | 3.65116e-07 | 4.89278e-07 | 6.17106e-07 |
| 1.00000e+06 | 1.19165e-06 | 2.39497e-06 | 3.57121e-06 | 4.75192e-06 | 5.95153e-06 |
| 100000.     | 1.10889e-05 | 2.08165e-05 | 2.91838e-05 | 3.66883e-05 | 4.35797e-05 |
| 10000.0     | 6.46779e-05 | 9.07211e-05 | 0.000106842 | 0.000118600 | 0.000127404 |
| 1000.00     | 0.000127704 | 9.86871e-05 | 7.36866e-05 | 5.69276e-05 | 4.54899e-05 |
| 100.000     | 1.71210e-05 | 5.46511e-06 | 2.54251e-06 | 1.39205e-06 | 8.35545e-07 |
| 10.0000     | 1.01071e-07 | 7.10671e-09 | 1.20865e-09 | 3.17858e-10 | 1.09941e-10 |
| 1.00000     | 4.42918e-12 | 7.13852e-13 | 2.92527e-13 | 1.51343e-13 | 9.03937e-14 |
| 0.100000    | 1.68417e-14 | 6.21351e-15 | 4.34590e-15 | 3.60699e-15 | 3.23803e-15 |
| 0.0100000   | 1.97549e-15 | 1.56370e-15 | 1.44363e-15 | 1.39717e-15 | 1.38202e-15 |
| 0.00100000  | 1.06650e-15 | 8.57837e-16 | 7.19957e-16 | 6.15670e-16 | 5.31948e-16 |
| 0.000100000 | 2.42422e-16 | 7.91211e-17 | 3.45906e-17 | 1.77863e-17 | 1.01545e-17 |
| 1.00000e-05 | 1.45000e-18 | 1.70006e-19 | 4.85430e-20 | 1.99475e-20 | 9.99674e-21 |
| 1.00000e-06 | 1.22843e-21 | 1.65930e-22 | 5.85660e-23 | 2.98309e-23 | 1.84446e-23 |
| 1.00000e-07 | 5.14703e-24 | 1.91845e-24 | 1.19116e-24 | 8.72843e-25 | 6.95551e-25 |

|             |             |             |             |             |             |
|-------------|-------------|-------------|-------------|-------------|-------------|
| 1.00000e-08 | 3.25282e-25 | 1.58744e-25 | 1.06382e-25 | 8.07167e-26 | 6.56050e-26 |
| 1.00000e-09 | 3.16531e-26 | 1.56783e-26 | 1.05533e-26 | 8.02453e-27 | 6.53064e-27 |

|      |         |         |         |         |         |
|------|---------|---------|---------|---------|---------|
| Pa\K | 70.0000 | 80.0000 | 90.0000 | 100.000 | 110.000 |
|------|---------|---------|---------|---------|---------|

|             |             |             |             |             |             |
|-------------|-------------|-------------|-------------|-------------|-------------|
| 1.00000e+08 | 7.52604e-08 | 8.90921e-08 | 1.03501e-07 | 1.18582e-07 | 1.34463e-07 |
| 1.00000e+07 | 7.49296e-07 | 8.86352e-07 | 1.02893e-06 | 1.17794e-06 | 1.33461e-06 |
| 1.00000e+06 | 7.17592e-06 | 8.42874e-06 | 9.71455e-06 | 1.10401e-05 | 1.24141e-05 |
| 100000.     | 4.99916e-05 | 5.60120e-05 | 6.17140e-05 | 6.71671e-05 | 7.24391e-05 |
| 10000.0     | 0.000133852 | 0.000138327 | 0.000141145 | 0.000142578 | 0.000142864 |
| 1000.00     | 3.73256e-05 | 3.12432e-05 | 2.65466e-05 | 2.28133e-05 | 1.97762e-05 |
| 100.000     | 5.32000e-07 | 3.52833e-07 | 2.41033e-07 | 1.68363e-07 | 1.19641e-07 |
| 10.0000     | 4.63756e-11 | 2.28947e-11 | 1.28751e-11 | 8.06801e-12 | 5.51996e-12 |
| 1.00000     | 6.02170e-14 | 4.37963e-14 | 3.42046e-14 | 2.82869e-14 | 2.44799e-14 |
| 0.100000    | 3.03925e-15 | 2.93495e-15 | 2.89023e-15 | 2.88695e-15 | 2.91482e-15 |
| 0.0100000   | 1.38347e-15 | 1.39468e-15 | 1.41182e-15 | 1.43237e-15 | 1.45445e-15 |
| 0.00100000  | 4.62367e-16 | 4.03226e-16 | 3.52202e-16 | 3.07759e-16 | 2.68841e-16 |
| 0.000100000 | 6.24132e-18 | 4.05228e-18 | 2.74426e-18 | 1.92128e-18 | 1.38170e-18 |
| 1.00000e-05 | 5.67979e-21 | 3.51864e-21 | 2.32172e-21 | 1.60718e-21 | 1.15530e-21 |
| 1.00000e-06 | 1.28530e-23 | 9.70634e-24 | 7.76062e-24 | 6.47226e-24 | 5.57453e-24 |
| 1.00000e-07 | 5.83739e-25 | 5.07559e-25 | 4.52807e-25 | 4.11908e-25 | 3.80493e-25 |
| 1.00000e-08 | 5.57608e-26 | 4.89116e-26 | 4.39171e-26 | 4.01466e-26 | 3.72279e-26 |
| 1.00000e-09 | 5.55554e-27 | 4.87621e-27 | 4.38037e-27 | 4.00580e-27 | 3.71569e-27 |

|      |         |         |         |         |         |
|------|---------|---------|---------|---------|---------|
| Pa\K | 120.000 | 130.000 | 140.000 | 150.000 | 160.000 |
|------|---------|---------|---------|---------|---------|

|             |             |             |             |             |             |
|-------------|-------------|-------------|-------------|-------------|-------------|
| 1.00000e+08 | 1.51303e-07 | 1.69291e-07 | 1.88650e-07 | 2.09640e-07 | 2.32555e-07 |
| 1.00000e+07 | 1.50049e-06 | 1.67739e-06 | 1.86744e-06 | 2.07311e-06 | 2.29723e-06 |
| 1.00000e+06 | 1.38477e-05 | 1.53536e-05 | 1.69462e-05 | 1.86418e-05 | 2.04580e-05 |
| 100000.     | 7.75961e-05 | 8.27015e-05 | 8.78155e-05 | 9.29955e-05 | 9.82951e-05 |
| 10000.0     | 0.000142206 | 0.000140779 | 0.000138727 | 0.000136171 | 0.000133211 |
| 1000.00     | 1.72586e-05 | 1.51396e-05 | 1.33333e-05 | 1.17772e-05 | 1.04247e-05 |
| 100.000     | 8.61834e-08 | 6.27691e-08 | 4.61318e-08 | 3.41624e-08 | 2.54624e-08 |
| 10.0000     | 4.04624e-12 | 3.12591e-12 | 2.51157e-12 | 2.07769e-12 | 1.75680e-12 |
| 1.00000     | 2.19557e-14 | 2.02513e-14 | 1.90956e-14 | 1.83240e-14 | 1.78332e-14 |
| 0.100000    | 2.96766e-15 | 3.04159e-15 | 3.13411e-15 | 3.24357e-15 | 3.36889e-15 |
| 0.0100000   | 1.47656e-15 | 1.49741e-15 | 1.51587e-15 | 1.53100e-15 | 1.54199e-15 |
| 0.00100000  | 2.34673e-16 | 2.04665e-16 | 1.78327e-16 | 1.55246e-16 | 1.35055e-16 |
| 0.000100000 | 1.01587e-18 | 7.60893e-19 | 5.79010e-19 | 4.46692e-19 | 3.48790e-19 |
| 1.00000e-05 | 8.56243e-22 | 6.50960e-22 | 5.05772e-22 | 4.00513e-22 | 3.22607e-22 |
| 1.00000e-06 | 4.92459e-24 | 4.44055e-24 | 4.07277e-24 | 3.78982e-24 | 3.57110e-24 |
| 1.00000e-07 | 3.55896e-25 | 3.36416e-25 | 3.20926e-25 | 3.08662e-25 | 2.99094e-25 |
| 1.00000e-08 | 3.49293e-26 | 3.31014e-26 | 3.16441e-26 | 3.04890e-26 | 2.95888e-26 |
| 1.00000e-09 | 3.48713e-27 | 3.30533e-27 | 3.16037e-27 | 3.04546e-27 | 2.95592e-27 |

|      |         |         |         |         |         |
|------|---------|---------|---------|---------|---------|
| Pa\K | 170.000 | 180.000 | 190.000 | 200.000 | 210.000 |
|------|---------|---------|---------|---------|---------|

|             |             |             |             |             |             |
|-------------|-------------|-------------|-------------|-------------|-------------|
| 1.00000e+08 | 2.57743e-07 | 2.85597e-07 | 3.16572e-07 | 3.51193e-07 | 3.90059e-07 |
| 1.00000e+07 | 2.54305e-06 | 2.81429e-06 | 3.11520e-06 | 3.45062e-06 | 3.82612e-06 |
| 1.00000e+06 | 2.24143e-05 | 2.45323e-05 | 2.68353e-05 | 2.93486e-05 | 3.20994e-05 |
| 100000.     | 0.000103764 | 0.000109451 | 0.000115396 | 0.000121638 | 0.000128207 |
| 10000.0     | 0.000129931 | 0.000126401 | 0.000122680 | 0.000118818 | 0.000114855 |
| 1000.00     | 9.24038e-06 | 8.19687e-06 | 7.27284e-06 | 6.45136e-06 | 5.71886e-06 |
| 100.000     | 1.90843e-08 | 1.43745e-08 | 1.08750e-08 | 8.26075e-09 | 6.29879e-09 |
| 10.0000     | 1.51066e-12 | 1.31652e-12 | 1.16025e-12 | 1.03262e-12 | 9.27431e-13 |
| 1.00000     | 1.75575e-14 | 1.74537e-14 | 1.74943e-14 | 1.76613e-14 | 1.79439e-14 |
| 0.100000    | 3.50937e-15 | 3.66452e-15 | 3.83403e-15 | 4.01766e-15 | 4.21518e-15 |
| 0.0100000   | 1.54822e-15 | 1.54924e-15 | 1.54481e-15 | 1.53485e-15 | 1.51948e-15 |
| 0.00100000  | 1.17427e-16 | 1.02066e-16 | 8.87041e-17 | 7.71013e-17 | 6.70404e-17 |
| 0.000100000 | 2.75284e-19 | 2.19379e-19 | 1.76376e-19 | 1.42959e-19 | 1.16755e-19 |
| 1.00000e-05 | 2.63933e-22 | 2.19093e-22 | 1.84404e-22 | 1.57304e-22 | 1.35968e-22 |
| 1.00000e-06 | 3.40274e-24 | 3.27520e-24 | 3.18194e-24 | 3.11848e-24 | 3.08184e-24 |
| 1.00000e-07 | 2.91855e-25 | 2.86693e-25 | 2.83445e-25 | 2.82013e-25 | 2.82360e-25 |
| 1.00000e-08 | 2.89102e-26 | 2.84309e-26 | 2.81363e-26 | 2.80181e-26 | 2.80737e-26 |
| 1.00000e-09 | 2.88846e-27 | 2.84086e-27 | 2.81167e-27 | 2.80008e-27 | 2.80583e-27 |

|      |         |         |         |         |         |
|------|---------|---------|---------|---------|---------|
| Pa\K | 220.000 | 230.000 | 240.000 | 250.000 | 260.000 |
|------|---------|---------|---------|---------|---------|

|             |             |             |             |             |             |
|-------------|-------------|-------------|-------------|-------------|-------------|
| 1.00000e+08 | 4.33861e-07 | 4.83386e-07 | 5.39542e-07 | 6.03362e-07 | 6.76031e-07 |
| 1.00000e+07 | 4.24798e-06 | 4.72333e-06 | 5.26032e-06 | 5.86813e-06 | 6.55711e-06 |
| 1.00000e+06 | 3.51172e-05 | 3.84331e-05 | 4.20803e-05 | 4.60943e-05 | 5.05118e-05 |
| 100000.     | 0.000135128 | 0.000142417 | 0.000150080 | 0.000158114 | 0.000166503 |
| 10000.0     | 0.000110826 | 0.000106760 | 0.000102680 | 9.86058e-05 | 9.45532e-05 |
| 1000.00     | 5.06433e-06 | 4.47875e-06 | 3.95458e-06 | 3.48545e-06 | 3.06592e-06 |
| 100.000     | 4.82021e-09 | 3.70180e-09 | 2.85296e-09 | 2.20671e-09 | 1.71326e-09 |
| 10.0000     | 8.40285e-13 | 7.67984e-13 | 7.08118e-13 | 6.58820e-13 | 6.18618e-13 |
| 1.00000     | 1.83365e-14 | 1.88370e-14 | 1.94464e-14 | 2.01684e-14 | 2.10088e-14 |
| 0.100000    | 4.42638e-15 | 4.65100e-15 | 4.88873e-15 | 5.13925e-15 | 5.40220e-15 |
| 0.0100000   | 1.49897e-15 | 1.47372e-15 | 1.44424e-15 | 1.41114e-15 | 1.37505e-15 |
| 0.00100000  | 5.83281e-17 | 5.07914e-17 | 4.42778e-17 | 3.86521e-17 | 3.37957e-17 |

|             |             |             |             |             |             |
|-------------|-------------|-------------|-------------|-------------|-------------|
| 0.000100000 | 9.60394e-20 | 7.95400e-20 | 6.63100e-20 | 5.56362e-20 | 4.69763e-20 |
| 1.00000e-05 | 1.19085e-22 | 1.05694e-22 | 9.50834e-23 | 8.67295e-23 | 8.02403e-23 |
| 1.00000e-06 | 3.07027e-24 | 3.08294e-24 | 3.11990e-24 | 3.18199e-24 | 3.27083e-24 |
| 1.00000e-07 | 2.84499e-25 | 2.88495e-25 | 2.94460e-25 | 3.02563e-25 | 3.13033e-25 |
| 1.00000e-08 | 2.83052e-26 | 2.87194e-26 | 2.93283e-26 | 3.01491e-26 | 3.12050e-26 |
| 1.00000e-09 | 2.82912e-27 | 2.87069e-27 | 2.93169e-27 | 3.01386e-27 | 3.11953e-27 |

| Pa\K        | 270.000     | 280.000     | 290.000     | 300.000     | 400.000     |
|-------------|-------------|-------------|-------------|-------------|-------------|
| 1.00000e+08 | 7.58902e-07 | 8.53516e-07 | 9.61627e-07 | 2.16392e-06 | 7.17210e-06 |
| 1.00000e+07 | 7.33898e-06 | 8.22688e-06 | 9.23554e-06 | 2.00466e-05 | 5.99856e-05 |
| 1.00000e+06 | 5.53721e-05 | 6.07154e-05 | 6.65843e-05 | 0.000121028 | 0.000255958 |
| 100000.     | 0.000175219 | 0.000184224 | 0.000193467 | 0.000256357 | 0.000294673 |
| 10000.0     | 9.05345e-05 | 8.65601e-05 | 8.26384e-05 | 6.89903e-05 | 3.56994e-05 |
| 1000.00     | 2.69122e-06 | 2.35715e-06 | 2.05992e-06 | 1.36396e-06 | 3.37192e-07 |
| 100.000     | 1.33542e-09 | 1.04535e-09 | 8.22070e-10 | 1.06295e-09 | 2.75657e-10 |
| 10.0000     | 5.86330e-13 | 5.61004e-13 | 5.41868e-13 | 3.93422e-12 | 7.16227e-12 |
| 1.00000     | 2.19751e-14 | 2.30772e-14 | 2.43268e-14 | 6.32857e-13 | 1.44764e-12 |
| 0.100000    | 5.67723e-15 | 5.96406e-15 | 6.26249e-15 | 2.07451e-13 | 3.25755e-13 |
| 0.0100000   | 1.33664e-15 | 1.29657e-15 | 1.25549e-15 | 3.28195e-14 | 2.52858e-14 |
| 0.00100000  | 2.96052e-17 | 2.59895e-17 | 2.28703e-17 | 6.58035e-16 | 3.30105e-16 |
| 0.000100000 | 3.99142e-20 | 3.41285e-20 | 3.93691e-20 | 3.81771e-18 | 4.26652e-18 |
| 1.00000e-05 | 7.53272e-23 | 7.17811e-23 | 6.94583e-23 | 1.24016e-19 | 2.98830e-19 |
| 1.00000e-06 | 3.38895e-24 | 3.53980e-24 | 3.72803e-24 | 1.11242e-20 | 2.90625e-20 |
| 1.00000e-07 | 3.26173e-25 | 3.42369e-25 | 3.62117e-25 | 1.10183e-21 | 2.89835e-21 |
| 1.00000e-08 | 3.25264e-26 | 3.41521e-26 | 3.61319e-26 | 1.10072e-22 | 2.89749e-22 |
| 1.00000e-09 | 3.25175e-27 | 3.41438e-27 | 3.61241e-27 | 1.10060e-23 | 2.89739e-23 |

| Pa\K        | 500.000     | 600.000     | 700.000     | 800.000     | 900.000     |
|-------------|-------------|-------------|-------------|-------------|-------------|
| 1.00000e+08 | 2.42334e-05 | 7.64649e-05 | 0.000213964 | 0.000561662 | 0.00159353  |
| 1.00000e+07 | 0.000166891 | 0.000389288 | 0.000758453 | 0.00142651  | 0.00259171  |
| 1.00000e+06 | 0.000463122 | 0.000669736 | 0.000859362 | 0.00118363  | 0.00158650  |
| 100000.     | 0.000269558 | 0.000216854 | 0.000190444 | 0.000222243 | 0.000284184 |
| 10000.0     | 1.65915e-05 | 8.42477e-06 | 6.40929e-06 | 9.47219e-06 | 1.99475e-05 |
| 1000.00     | 9.62847e-08 | 4.86963e-08 | 7.59178e-08 | 3.66206e-07 | 2.07729e-06 |
| 100.000     | 2.52301e-10 | 7.22785e-10 | 4.73750e-09 | 4.92562e-08 | 3.48454e-07 |
| 10.0000     | 2.10883e-11 | 1.01142e-10 | 8.06174e-10 | 7.94313e-09 | 4.63246e-08 |
| 1.00000     | 4.20014e-12 | 1.72561e-11 | 1.09521e-10 | 8.78519e-10 | 4.59148e-09 |
| 0.100000    | 5.91810e-13 | 1.61854e-12 | 8.41835e-12 | 7.28609e-11 | 4.22983e-10 |
| 0.0100000   | 2.70542e-14 | 6.34395e-14 | 5.05540e-13 | 6.34912e-12 | 4.10172e-11 |
| 0.00100000  | 4.16652e-16 | 2.59401e-15 | 4.18442e-14 | 6.16408e-13 | 4.08143e-12 |
| 0.000100000 | 1.86914e-17 | 2.22815e-16 | 4.09316e-15 | 6.14388e-14 | 4.07921e-13 |
| 1.00000e-05 | 1.73677e-18 | 2.19881e-17 | 4.08438e-16 | 6.14184e-15 | 4.07899e-14 |
| 1.00000e-06 | 1.72492e-19 | 2.19549e-18 | 4.08339e-17 | 6.14162e-16 | 4.07897e-15 |
| 1.00000e-07 | 1.72345e-20 | 2.19503e-19 | 4.08327e-18 | 6.14159e-17 | 4.07897e-16 |
| 1.00000e-08 | 1.72327e-21 | 2.19497e-20 | 4.08326e-19 | 6.14159e-18 | 4.07897e-17 |
| 1.00000e-09 | 1.72325e-22 | 2.19496e-21 | 4.08326e-20 | 6.14159e-19 | 4.07897e-18 |

| Pa\K        | 1000.00     | 1100.00     | 1200.00     | 1300.00     | 1400.00     |
|-------------|-------------|-------------|-------------|-------------|-------------|
| 1.00000e+08 | 0.00342243  | 0.00523218  | 0.00624738  | 0.00632601  | 0.00568736  |
| 1.00000e+07 | 0.00330962  | 0.00300518  | 0.00270144  | 0.00264904  | 0.00262110  |
| 1.00000e+06 | 0.00168475  | 0.00139782  | 0.00114898  | 0.00100538  | 0.000870654 |
| 100000.     | 0.000333827 | 0.000331303 | 0.000300887 | 0.000254705 | 0.000198472 |
| 10000.0     | 4.09065e-05 | 5.76241e-05 | 5.67083e-05 | 4.54790e-05 | 3.28521e-05 |
| 1000.00     | 6.62404e-06 | 9.77280e-06 | 8.80380e-06 | 6.46125e-06 | 4.40410e-06 |
| 100.000     | 1.01171e-06 | 1.29654e-06 | 1.05834e-06 | 7.35963e-07 | 4.88008e-07 |
| 10.0000     | 1.14604e-07 | 1.35901e-07 | 1.07886e-07 | 7.43790e-08 | 4.91755e-08 |
| 1.00000     | 1.10922e-08 | 1.32394e-08 | 1.06123e-08 | 7.35997e-09 | 4.88083e-09 |
| 0.100000    | 1.07178e-09 | 1.30325e-09 | 1.05287e-09 | 7.32592e-10 | 4.86516e-10 |
| 0.0100000   | 1.06263e-10 | 1.29908e-10 | 1.05131e-10 | 7.31982e-11 | 4.86234e-11 |
| 0.00100000  | 1.06138e-11 | 1.29855e-11 | 1.05112e-11 | 7.31900e-12 | 4.86198e-12 |
| 0.000100000 | 1.06124e-12 | 1.29849e-12 | 1.05110e-12 | 7.31895e-13 | 4.86193e-13 |
| 1.00000e-05 | 1.06122e-13 | 1.29848e-13 | 1.05110e-13 | 7.31895e-14 | 4.86193e-14 |
| 1.00000e-06 | 1.06122e-14 | 1.29848e-14 | 1.05110e-14 | 7.31895e-15 | 4.86193e-15 |
| 1.00000e-07 | 1.06122e-15 | 1.29848e-15 | 1.05110e-15 | 7.31895e-16 | 4.86193e-16 |
| 1.00000e-08 | 1.06122e-16 | 1.29848e-16 | 1.05110e-16 | 7.31895e-17 | 4.86193e-17 |
| 1.00000e-09 | 1.06122e-17 | 1.29848e-17 | 1.05110e-17 | 7.31895e-18 | 4.86193e-18 |

| Pa\K        | 1500.00     | 1750.00     | 2000.00     | 2250.00     | 2500.00     |
|-------------|-------------|-------------|-------------|-------------|-------------|
| 1.00000e+08 | 0.00488152  | 0.000279052 | 0.000270995 | 0.000266995 | 0.000255352 |
| 1.00000e+07 | 0.00245792  | 0.000168081 | 0.000149421 | 0.000120862 | 9.00353e-05 |
| 1.00000e+06 | 0.000730069 | 6.94796e-05 | 4.25497e-05 | 2.54030e-05 | 1.51358e-05 |
| 100000.     | 0.000146925 | 1.35051e-05 | 6.68619e-06 | 3.46492e-06 | 1.84595e-06 |
| 10000.0     | 2.27112e-05 | 2.01667e-06 | 8.71541e-07 | 4.02825e-07 | 1.97475e-07 |
| 1000.00     | 2.92805e-06 | 2.51253e-07 | 9.77666e-08 | 4.20881e-08 | 1.98997e-08 |
| 100.000     | 3.19001e-07 | 2.69779e-08 | 1.00382e-08 | 4.22500e-09 | 1.98131e-09 |
| 10.0000     | 3.20898e-08 | 2.72581e-09 | 1.00517e-09 | 4.21541e-10 | 1.97495e-10 |



|             |             |             |             |             |             |
|-------------|-------------|-------------|-------------|-------------|-------------|
| 1.00000     | 3.19009e-09 | 2.72306e-10 | 1.00379e-10 | 4.20888e-11 | 1.97189e-11 |
| 0.100000    | 3.18211e-10 | 2.72068e-11 | 1.00317e-11 | 4.20661e-12 | 1.97092e-12 |
| 0.0100000   | 3.18067e-11 | 2.72021e-12 | 1.00307e-12 | 4.20630e-13 | 1.97079e-13 |
| 0.00100000  | 3.18048e-12 | 2.72013e-13 | 1.00306e-13 | 4.20624e-14 | 1.97077e-14 |
| 0.000100000 | 3.18045e-13 | 2.72012e-14 | 1.00305e-14 | 4.20624e-15 | 1.97077e-15 |
| 1.00000e-05 | 3.18045e-14 | 2.72012e-15 | 1.00305e-15 | 4.20624e-16 | 1.97077e-16 |
| 1.00000e-06 | 3.18045e-15 | 2.72012e-16 | 1.00305e-16 | 4.20624e-17 | 1.97077e-17 |
| 1.00000e-07 | 3.18045e-16 | 2.72012e-17 | 1.00305e-17 | 4.20624e-18 | 1.97077e-18 |
| 1.00000e-08 | 3.18045e-17 | 2.72012e-18 | 1.00305e-18 | 4.20624e-19 | 1.97077e-19 |
| 1.00000e-09 | 3.18045e-18 | 2.72012e-19 | 1.00305e-19 | 4.20624e-20 | 1.97077e-20 |

| Pa\K        | 2750.00     | 3000.00     | 3250.00     | 3500.00     | 3750.00     |
|-------------|-------------|-------------|-------------|-------------|-------------|
| 1.00000e+08 | 0.000234539 | 0.000207172 | 0.000177398 | 0.000148626 | 0.000122829 |
| 1.00000e+07 | 6.43150e-05 | 4.52213e-05 | 3.17790e-05 | 2.25175e-05 | 1.61708e-05 |
| 1.00000e+06 | 9.14750e-06 | 5.65312e-06 | 3.59411e-06 | 2.35973e-06 | 1.60180e-06 |
| 100000.     | 1.01934e-06 | 5.89575e-07 | 3.58729e-07 | 2.29284e-07 | 1.53246e-07 |
| 10000.0     | 1.03677e-07 | 5.84038e-08 | 3.51008e-08 | 2.23182e-08 | 1.48879e-08 |
| 1000.00     | 1.02919e-08 | 5.76682e-09 | 3.46047e-09 | 2.19973e-09 | 1.46762e-09 |
| 100.000     | 1.02232e-09 | 5.72565e-10 | 3.43593e-10 | 2.18448e-10 | 1.45767e-10 |
| 10.0000     | 1.01893e-10 | 5.70714e-11 | 3.42518e-11 | 2.17783e-11 | 1.45334e-11 |
| 1.00000     | 1.01740e-11 | 5.69879e-12 | 3.42028e-12 | 2.17476e-12 | 1.45131e-12 |
| 0.100000    | 1.01693e-12 | 5.69632e-13 | 3.41885e-13 | 2.17389e-13 | 1.45075e-13 |
| 0.0100000   | 1.01687e-13 | 5.69600e-14 | 3.41867e-14 | 2.17378e-14 | 1.45068e-14 |
| 0.00100000  | 1.01686e-14 | 5.69598e-15 | 3.41865e-15 | 2.17377e-15 | 1.45067e-15 |
| 0.000100000 | 1.01686e-15 | 5.69598e-16 | 3.41865e-16 | 2.17377e-16 | 1.45067e-16 |
| 1.00000e-05 | 1.01686e-16 | 5.69598e-17 | 3.41865e-17 | 2.17377e-17 | 1.45067e-17 |
| 1.00000e-06 | 1.01686e-17 | 5.69598e-18 | 3.41865e-18 | 2.17377e-18 | 1.45067e-18 |
| 1.00000e-07 | 1.01686e-18 | 5.69598e-19 | 3.41865e-19 | 2.17377e-19 | 1.45067e-19 |
| 1.00000e-08 | 1.01686e-19 | 5.69598e-20 | 3.41865e-20 | 2.17377e-20 | 1.45067e-20 |
| 1.00000e-09 | 1.01686e-20 | 5.69598e-21 | 3.41865e-21 | 2.17377e-21 | 1.45067e-21 |

| Pa\K        | 4000.00     |
|-------------|-------------|
| 1.00000e+08 | 0.000100777 |
| 1.00000e+07 | 1.18063e-05 |
| 1.00000e+06 | 1.12310e-06 |
| 100000.     | 1.06532e-07 |
| 10000.0     | 1.03442e-08 |
| 1000.00     | 1.01998e-09 |
| 100.000     | 1.01320e-10 |
| 10.0000     | 1.01025e-11 |
| 1.00000     | 1.00885e-12 |
| 0.100000    | 1.00846e-13 |
| 0.0100000   | 1.00841e-14 |
| 0.00100000  | 1.00841e-15 |
| 0.000100000 | 1.00841e-16 |
| 1.00000e-05 | 1.00841e-17 |
| 1.00000e-06 | 1.00841e-18 |
| 1.00000e-07 | 1.00841e-19 |
| 1.00000e-08 | 1.00841e-20 |
| 1.00000e-09 | 1.00841e-21 |

rad9  
====

| Pa\K        | 20.0000     | 30.0000     | 40.0000     | 50.0000     | 60.0000     |
|-------------|-------------|-------------|-------------|-------------|-------------|
| 1.00000e+08 | 1.46899e-14 | 3.05373e-14 | 4.83702e-14 | 6.97153e-14 | 9.57786e-14 |
| 1.00000e+07 | 1.46898e-13 | 3.05372e-13 | 4.83701e-13 | 6.97151e-13 | 9.57781e-13 |
| 1.00000e+06 | 1.46897e-12 | 3.05367e-12 | 4.83688e-12 | 6.97126e-12 | 9.57738e-12 |
| 100000.     | 1.46885e-11 | 3.05315e-11 | 4.83563e-11 | 6.96882e-11 | 9.57310e-11 |
| 10000.0     | 1.46761e-10 | 3.04791e-10 | 4.82311e-10 | 6.94446e-10 | 9.53048e-10 |
| 1000.00     | 1.45530e-09 | 2.99650e-09 | 4.70137e-09 | 6.70994e-09 | 9.12423e-09 |
| 100.000     | 1.34267e-08 | 2.56331e-08 | 3.75154e-08 | 5.01070e-08 | 6.38774e-08 |
| 10.0000     | 7.53360e-08 | 1.03715e-07 | 1.22422e-07 | 1.39462e-07 | 1.56847e-07 |
| 1.00000     | 1.37094e-07 | 1.46978e-07 | 1.56729e-07 | 1.68883e-07 | 1.83425e-07 |
| 0.100000    | 1.51134e-07 | 1.58490e-07 | 1.69842e-07 | 1.85339e-07 | 2.04775e-07 |
| 0.0100000   | 1.80279e-07 | 2.18615e-07 | 2.65705e-07 | 3.24533e-07 | 3.97884e-07 |
| 0.00100000  | 4.53263e-07 | 7.31796e-07 | 1.00438e-06 | 1.29565e-06 | 1.61811e-06 |
| 0.000100000 | 2.79463e-06 | 2.31517e-06 | 2.67414e-06 | 3.00566e-06 | 3.35179e-06 |
| 1.00000e-05 | 1.86000e-06 | 3.05982e-06 | 3.23843e-06 | 3.46746e-06 | 3.74799e-06 |
| 1.00000e-06 | 3.07751e-06 | 3.15630e-06 | 3.30508e-06 | 3.51944e-06 | 3.79129e-06 |
| 1.00000e-07 | 3.09720e-06 | 3.16617e-06 | 3.31184e-06 | 3.52469e-06 | 3.79565e-06 |
| 1.00000e-08 | 3.09918e-06 | 3.16716e-06 | 3.31252e-06 | 3.52522e-06 | 3.79609e-06 |
| 1.00000e-09 | 3.09938e-06 | 3.16726e-06 | 3.31259e-06 | 3.52527e-06 | 3.79613e-06 |

| Pa\K        | 70.0000     | 80.0000     | 90.0000     | 100.000     | 110.000     |
|-------------|-------------|-------------|-------------|-------------|-------------|
| 1.00000e+08 | 1.27823e-13 | 1.67468e-13 | 2.16917e-13 | 2.79170e-13 | 3.58292e-13 |
| 1.00000e+07 | 1.27822e-12 | 1.67466e-12 | 2.16915e-12 | 2.79167e-12 | 3.58288e-12 |

|             |             |             |             |             |             |
|-------------|-------------|-------------|-------------|-------------|-------------|
| 1.00000e+06 | 1.27815e-11 | 1.67455e-11 | 2.16898e-11 | 2.79141e-11 | 3.58249e-11 |
| 100000.     | 1.27745e-10 | 1.67344e-10 | 2.16726e-10 | 2.78881e-10 | 3.57856e-10 |
| 10000.0     | 1.27045e-09 | 1.66239e-09 | 2.15026e-09 | 2.76302e-09 | 3.53976e-09 |
| 1000.00     | 1.20445e-08 | 1.55947e-08 | 1.99393e-08 | 2.52947e-08 | 3.19421e-08 |
| 100.000     | 7.91187e-08 | 9.61247e-08 | 1.15254e-07 | 1.36943e-07 | 1.61713e-07 |
| 10.0000     | 1.75302e-06 | 1.95291e-07 | 2.17272e-07 | 2.41756e-07 | 2.69324e-07 |
| 1.00000     | 2.00247e-07 | 2.19455e-07 | 2.41375e-07 | 2.66526e-07 | 2.95607e-07 |
| 0.100000    | 2.28350e-07 | 2.56812e-07 | 2.91495e-07 | 3.34369e-07 | 3.88161e-07 |
| 0.0100000   | 4.89787e-07 | 6.06265e-07 | 7.55661e-07 | 9.48847e-07 | 1.19942e-06 |
| 0.00100000  | 1.98228e-06 | 2.39997e-06 | 2.88438e-06 | 3.44949e-06 | 4.10975e-06 |
| 0.000100000 | 3.73166e-06 | 4.16028e-06 | 4.65203e-06 | 5.22110e-06 | 5.88172e-06 |
| 1.00000e-05 | 4.08239e-06 | 4.47766e-06 | 4.94387e-06 | 5.49272e-06 | 6.13685e-06 |
| 1.00000e-06 | 4.11998e-06 | 4.51120e-06 | 4.97440e-06 | 5.52090e-06 | 6.16316e-06 |
| 1.00000e-07 | 4.12376e-06 | 4.51458e-06 | 4.97746e-06 | 5.52373e-06 | 6.16580e-06 |
| 1.00000e-08 | 4.12414e-06 | 4.51491e-06 | 4.97777e-06 | 5.52401e-06 | 6.16606e-06 |
| 1.00000e-09 | 4.12418e-06 | 4.51495e-06 | 4.97780e-06 | 5.52404e-06 | 6.16609e-06 |

| Pa\K        | 120.000     | 130.000     | 140.000     | 150.000     | 160.000     |
|-------------|-------------|-------------|-------------|-------------|-------------|
| 1.00000e+08 | 4.59770e-13 | 5.91012e-13 | 7.62043e-13 | 9.86437e-13 | 1.28259e-12 |
| 1.00000e+07 | 4.59764e-12 | 5.91003e-12 | 7.62029e-12 | 9.86416e-12 | 1.28256e-11 |
| 1.00000e+06 | 4.59704e-11 | 5.90913e-11 | 7.61894e-11 | 9.86210e-11 | 1.28225e-10 |
| 100000.     | 4.59113e-10 | 5.90022e-10 | 7.60545e-10 | 9.84157e-10 | 1.27910e-09 |
| 10000.0     | 4.53287e-09 | 5.81265e-09 | 7.47337e-09 | 9.64134e-09 | 1.24857e-08 |
| 1000.00     | 4.02428e-08 | 5.06572e-08 | 6.37678e-08 | 8.03060e-08 | 1.01182e-07 |
| 100.000     | 1.90176e-07 | 2.23039e-07 | 2.61125e-07 | 3.05389e-07 | 3.56935e-07 |
| 10.0000     | 3.00643e-07 | 3.36475e-07 | 3.77706e-07 | 4.25368e-07 | 4.80670e-07 |
| 1.00000     | 3.29508e-07 | 3.69355e-07 | 4.16573e-07 | 4.72991e-07 | 5.40973e-07 |
| 0.100000    | 4.56573e-07 | 5.44591e-07 | 6.58929e-07 | 8.08594e-07 | 1.00560e-06 |
| 0.0100000   | 1.52398e-06 | 1.94235e-06 | 2.47788e-06 | 3.15745e-06 | 4.01152e-06 |
| 0.00100000  | 4.88013e-06 | 5.77636e-06 | 6.81543e-06 | 8.01593e-06 | 9.39855e-06 |
| 0.000100000 | 6.64850e-06 | 7.53681e-06 | 8.56339e-06 | 9.74674e-06 | 1.11076e-05 |
| 1.00000e-05 | 6.88981e-06 | 7.76629e-06 | 8.78248e-06 | 9.95652e-06 | 1.13088e-05 |
| 1.00000e-06 | 6.91457e-06 | 7.78973e-06 | 8.80477e-06 | 9.97777e-06 | 1.13292e-05 |
| 1.00000e-07 | 6.91705e-06 | 7.79208e-06 | 8.80701e-06 | 9.97996e-06 | 1.13312e-05 |
| 1.00000e-08 | 6.91730e-06 | 7.79232e-06 | 8.80724e-06 | 9.98016e-06 | 1.13315e-05 |
| 1.00000e-09 | 6.91732e-06 | 7.79234e-06 | 8.80726e-06 | 9.98016e-06 | 1.13315e-05 |

| Pa\K        | 170.000     | 180.000     | 190.000     | 200.000     | 210.000     |
|-------------|-------------|-------------|-------------|-------------|-------------|
| 1.00000e+08 | 1.67544e-12 | 2.19877e-12 | 2.89823e-12 | 3.83551e-12 | 5.09371e-12 |
| 1.00000e+07 | 1.67540e-11 | 2.19870e-11 | 2.89811e-11 | 3.83532e-11 | 5.09341e-11 |
| 1.00000e+06 | 1.67491e-10 | 2.19793e-10 | 2.89693e-10 | 3.83347e-10 | 5.09048e-10 |
| 100000.     | 1.67006e-09 | 2.19040e-09 | 2.88516e-09 | 3.81498e-09 | 5.06131e-09 |
| 10000.0     | 1.62324e-08 | 2.11819e-08 | 2.77329e-08 | 3.64105e-08 | 4.79030e-08 |
| 1000.00     | 1.27516e-07 | 1.60674e-07 | 2.02301e-07 | 2.54355e-07 | 3.19141e-07 |
| 100.000     | 4.17041e-07 | 4.87182e-07 | 5.69055e-07 | 6.64610e-07 | 7.76082e-07 |
| 10.0000     | 5.45036e-07 | 6.20155e-07 | 7.08034e-07 | 8.11071e-07 | 9.32147e-07 |
| 1.00000     | 6.23608e-07 | 7.24956e-07 | 8.50385e-07 | 1.00701e-06 | 1.20425e-06 |
| 0.100000    | 1.26584e-06 | 1.61003e-06 | 2.06486e-06 | 2.66400e-06 | 3.44918e-06 |
| 0.0100000   | 5.07399e-06 | 6.38187e-06 | 7.97496e-06 | 9.89546e-06 | 1.21877e-05 |
| 0.00100000  | 1.09864e-05 | 1.28051e-05 | 1.48835e-05 | 1.72535e-05 | 1.99498e-05 |
| 0.000100000 | 1.26691e-05 | 1.44573e-05 | 1.65012e-05 | 1.88330e-05 | 2.14883e-05 |
| 1.00000e-05 | 1.28825e-05 | 1.46433e-05 | 1.66800e-05 | 1.90050e-05 | 2.16535e-05 |
| 1.00000e-06 | 1.28821e-05 | 1.46620e-05 | 1.66981e-05 | 1.90223e-05 | 2.16701e-05 |
| 1.00000e-07 | 1.28840e-05 | 1.46639e-05 | 1.66999e-05 | 1.90241e-05 | 2.16718e-05 |
| 1.00000e-08 | 1.28841e-05 | 1.46640e-05 | 1.67000e-05 | 1.90243e-05 | 2.16719e-05 |
| 1.00000e-09 | 1.28841e-05 | 1.46641e-05 | 1.67001e-05 | 1.90243e-05 | 2.16720e-05 |

| Pa\K        | 220.000     | 230.000     | 240.000     | 250.000     | 260.000     |
|-------------|-------------|-------------|-------------|-------------|-------------|
| 1.00000e+08 | 6.78452e-12 | 9.05766e-12 | 1.21132e-11 | 1.62176e-11 | 2.17243e-11 |
| 1.00000e+07 | 6.78405e-11 | 9.05693e-11 | 1.21120e-10 | 1.62158e-10 | 2.17214e-10 |
| 1.00000e+06 | 6.77940e-10 | 9.04954e-10 | 1.21003e-09 | 1.61971e-09 | 2.16917e-09 |
| 100000.     | 6.73323e-09 | 8.97633e-09 | 1.19841e-08 | 1.60127e-08 | 2.13993e-08 |
| 10000.0     | 6.31055e-08 | 8.31740e-08 | 1.09588e-07 | 1.44223e-07 | 1.89434e-07 |
| 1000.00     | 3.99341e-07 | 4.98042e-07 | 6.18766e-07 | 7.65488e-07 | 9.42668e-07 |
| 100.000     | 9.06027e-07 | 1.05737e-06 | 1.23341e-06 | 1.43799e-06 | 1.67539e-06 |
| 10.0000     | 1.07475e-06 | 1.24314e-06 | 1.44253e-06 | 1.67940e-06 | 1.96177e-06 |
| 1.00000     | 1.45462e-06 | 1.77453e-06 | 2.18553e-06 | 2.71557e-06 | 3.40050e-06 |
| 0.100000    | 4.47104e-06 | 5.78965e-06 | 7.47475e-06 | 9.60544e-06 | 1.22696e-05 |
| 0.0100000   | 1.48978e-05 | 1.80735e-05 | 2.17642e-05 | 2.60209e-05 | 3.08964e-05 |
| 0.00100000  | 2.30112e-05 | 2.64796e-05 | 3.04002e-05 | 3.48223e-05 | 3.97984e-05 |
| 0.000100000 | 2.45055e-05 | 2.79274e-05 | 3.17996e-05 | 3.61715e-05 | 4.10965e-05 |
| 1.00000e-05 | 2.46643e-05 | 2.80797e-05 | 3.19456e-05 | 3.63115e-05 | 4.12303e-05 |
| 1.00000e-06 | 2.46803e-05 | 2.80950e-05 | 3.19603e-05 | 3.63255e-05 | 4.12437e-05 |
| 1.00000e-07 | 2.46818e-05 | 2.80966e-05 | 3.19618e-05 | 3.63269e-05 | 4.12451e-05 |
| 1.00000e-08 | 2.46820e-05 | 2.80967e-05 | 3.19619e-05 | 3.63271e-05 | 4.12452e-05 |
| 1.00000e-09 | 2.46820e-05 | 2.80967e-05 | 3.19619e-05 | 3.63271e-05 | 4.12452e-05 |

| Pa\K        | 270.000     | 280.000     | 290.000     | 300.000     | 400.000     |
|-------------|-------------|-------------|-------------|-------------|-------------|
| 1.00000e+08 | 2.91000e-11 | 3.89570e-11 | 5.20938e-11 | 2.56874e-10 | 3.23380e-09 |
| 1.00000e+07 | 2.90952e-10 | 3.89495e-10 | 5.20820e-10 | 2.56580e-09 | 3.22050e-08 |
| 1.00000e+06 | 2.90481e-09 | 3.88748e-09 | 5.19644e-09 | 2.53762e-08 | 3.09685e-07 |
| 100000.     | 2.85857e-08 | 3.81461e-08 | 5.08211e-08 | 2.30873e-07 | 2.32710e-06 |
| 10000.0     | 2.48145e-07 | 3.23942e-07 | 4.21168e-07 | 1.33419e-06 | 7.86496e-06 |
| 1000.00     | 1.15526e-06 | 1.40874e-06 | 1.70911e-06 | 2.85573e-06 | 9.60033e-06 |
| 100.000     | 1.95056e-06 | 2.26913e-06 | 2.63751e-06 | 2.29559e-06 | 4.26743e-06 |
| 10.0000     | 2.29972e-06 | 2.70585e-06 | 3.19596e-06 | 4.16362e-07 | 4.07504e-07 |
| 1.00000     | 4.28569e-06 | 5.42774e-06 | 6.89597e-06 | 8.02725e-09 | 7.88325e-09 |
| 0.100000    | 1.55622e-05 | 1.95847e-05 | 2.44422e-05 | 3.34289e-11 | 3.95819e-11 |
| 0.0100000   | 3.64453e-05 | 4.27244e-05 | 4.97930e-05 | 6.14804e-14 | 1.09226e-13 |
| 0.00100000  | 2.53849e-05 | 5.16419e-05 | 5.86322e-05 | 1.21784e-16 | 4.62759e-16 |
| 0.000100000 | 4.66310e-05 | 5.28352e-05 | 5.97728e-05 | 6.28969e-19 | 4.65512e-18 |
| 1.00000e-05 | 4.67588e-05 | 5.29572e-05 | 5.98890e-05 | 7.50922e-21 | 8.83466e-20 |
| 1.00000e-06 | 4.67716e-05 | 5.29693e-05 | 5.99006e-05 | 1.76545e-22 | 2.87988e-21 |
| 1.00000e-07 | 4.67729e-05 | 5.29706e-05 | 5.99017e-05 | 7.89876e-24 | 1.57735e-22 |
| 1.00000e-08 | 4.67730e-05 | 5.29707e-05 | 5.99019e-05 | 6.31664e-25 | 1.35444e-23 |
| 1.00000e-09 | 4.67730e-05 | 5.29707e-05 | 5.99019e-05 | 6.14036e-26 | 1.32962e-24 |

| Pa\K        | 500.000     | 600.000     | 700.000     | 800.000     | 900.000     |
|-------------|-------------|-------------|-------------|-------------|-------------|
| 1.00000e+08 | 3.41478e-08 | 3.38032e-07 | 2.91918e-06 | 2.71751e-05 | 0.000259793 |
| 1.00000e+07 | 3.35165e-07 | 2.87344e-06 | 1.83088e-05 | 8.76732e-05 | 0.000388502 |
| 1.00000e+06 | 2.93408e-06 | 1.88348e-05 | 6.55465e-05 | 0.000139836 | 0.000247011 |
| 100000.     | 1.48729e-05 | 5.21388e-05 | 9.38965e-05 | 0.000134907 | 0.000180511 |
| 10000.0     | 2.74717e-05 | 5.41959e-05 | 7.20638e-05 | 0.000112172 | 0.000177115 |
| 1000.00     | 2.02066e-05 | 2.85400e-05 | 4.07353e-05 | 7.94259e-05 | 0.000125676 |
| 100.000     | 5.62058e-06 | 7.23279e-06 | 1.19706e-05 | 2.46004e-05 | 3.38140e-05 |
| 10.0000     | 4.58366e-07 | 6.49475e-07 | 1.23595e-06 | 2.75746e-06 | 3.76733e-06 |
| 1.00000     | 1.04788e-08 | 1.96139e-08 | 5.39720e-08 | 1.67908e-07 | 2.85760e-07 |
| 0.100000    | 8.16412e-11 | 3.02910e-10 | 1.72970e-09 | 9.21418e-09 | 2.12241e-08 |
| 0.0100000   | 5.06595e-13 | 5.02880e-12 | 6.52442e-11 | 5.70041e-10 | 1.68604e-09 |
| 0.00100000  | 5.48568e-15 | 1.28535e-13 | 3.14489e-12 | 3.98124e-11 | 1.41943e-10 |
| 0.000100000 | 1.08633e-16 | 4.68929e-15 | 1.82737e-13 | 3.04676e-12 | 1.24846e-11 |
| 1.00000e-05 | 3.32841e-18 | 2.23675e-16 | 1.22660e-14 | 2.50338e-13 | 1.13625e-12 |
| 1.00000e-06 | 1.50530e-19 | 1.36350e-17 | 9.40377e-16 | 2.19627e-14 | 1.06739e-13 |
| 1.00000e-07 | 9.92785e-21 | 1.05614e-18 | 8.21457e-17 | 2.05565e-15 | 1.03471e-14 |
| 1.00000e-08 | 8.99172e-22 | 9.96160e-20 | 7.97096e-18 | 2.02593e-16 | 1.02786e-15 |
| 1.00000e-09 | 8.88692e-23 | 9.89379e-21 | 7.94324e-19 | 2.02254e-17 | 1.02709e-16 |

| Pa\K        | 1000.00     | 1100.00     | 1200.00     | 1300.00     | 1400.00     |
|-------------|-------------|-------------|-------------|-------------|-------------|
| 1.00000e+08 | 0.00106880  | 0.00193919  | 0.00237319  | 0.00239496  | 0.00215341  |
| 1.00000e+07 | 0.00108590  | 0.00191152  | 0.00269643  | 0.00347192  | 0.00395619  |
| 1.00000e+06 | 0.000423323 | 0.000751705 | 0.00124135  | 0.00173754  | 0.00201299  |
| 100000.     | 0.000236691 | 0.000370149 | 0.000565769 | 0.000717928 | 0.000764181 |
| 10000.0     | 0.000222924 | 0.000273420 | 0.000316976 | 0.000319734 | 0.000285028 |
| 1000.00     | 0.000127226 | 0.000113678 | 9.78107e-05 | 7.79721e-05 | 5.80660e-05 |
| 100.000     | 2.77435e-05 | 1.98951e-05 | 1.42988e-05 | 1.00309e-05 | 6.83848e-06 |
| 10.0000     | 3.00920e-06 | 2.07062e-06 | 1.43340e-06 | 9.79966e-07 | 6.56943e-07 |
| 1.00000     | 2.59672e-07 | 1.89228e-07 | 1.33738e-07 | 9.21130e-08 | 6.19161e-08 |
| 0.100000    | 2.24269e-08 | 1.74296e-08 | 1.26209e-08 | 8.77515e-09 | 5.92179e-09 |
| 0.0100000   | 2.00630e-09 | 1.63937e-09 | 1.20965e-09 | 8.47240e-10 | 5.73513e-10 |
| 0.00100000  | 1.84641e-10 | 1.56677e-10 | 1.17259e-10 | 8.25816e-11 | 5.60301e-11 |
| 0.000100000 | 1.73576e-11 | 1.51513e-11 | 1.14606e-11 | 8.10468e-12 | 5.50830e-12 |
| 1.00000e-05 | 1.65899e-12 | 1.47860e-12 | 1.12723e-12 | 7.99568e-13 | 5.44115e-13 |
| 1.00000e-06 | 1.61016e-13 | 1.45513e-13 | 1.11513e-13 | 7.92592e-14 | 5.39833e-14 |
| 1.00000e-07 | 1.58681e-14 | 1.44399e-14 | 1.10947e-14 | 7.89377e-15 | 5.37888e-15 |
| 1.00000e-08 | 1.58200e-15 | 1.44175e-15 | 1.10835e-15 | 7.88755e-16 | 5.37521e-16 |
| 1.00000e-09 | 1.58146e-16 | 1.44150e-16 | 1.10823e-16 | 7.88690e-17 | 5.37480e-17 |

| Pa\K        | 1500.00     | 1750.00     | 2000.00     | 2250.00     | 2500.00     |
|-------------|-------------|-------------|-------------|-------------|-------------|
| 1.00000e+08 | 0.00187348  | 0.000189599 | 0.000176569 | 0.000166021 | 0.000159026 |
| 1.00000e+07 | 0.00398931  | 8.25551e-05 | 8.39029e-05 | 8.80626e-05 | 8.75637e-05 |
| 1.00000e+06 | 0.00205605  | 7.32179e-05 | 7.06114e-05 | 6.15348e-05 | 4.71116e-05 |
| 100000.     | 0.000730208 | 5.34606e-05 | 3.67992e-05 | 2.22174e-05 | 1.21021e-05 |
| 10000.0     | 0.000234061 | 1.81365e-05 | 8.56597e-06 | 3.79632e-06 | 1.64615e-06 |
| 1000.00     | 4.13210e-05 | 2.93268e-06 | 1.10853e-06 | 4.24661e-07 | 1.69232e-07 |
| 100.000     | 4.56902e-06 | 3.24480e-07 | 1.14004e-07 | 4.20261e-08 | 1.64597e-08 |
| 10.0000     | 4.33974e-07 | 3.22987e-08 | 1.12025e-08 | 4.10602e-09 | 1.60473e-09 |
| 1.00000     | 4.09409e-08 | 3.17640e-09 | 1.10063e-09 | 4.03240e-10 | 1.57577e-10 |
| 0.100000    | 3.92271e-09 | 3.13422e-10 | 1.08623e-10 | 3.97991e-11 | 1.55532e-11 |
| 0.0100000   | 3.80435e-10 | 3.10350e-11 | 1.07579e-11 | 3.94192e-12 | 1.54053e-12 |
| 0.00100000  | 3.72055e-11 | 3.08096e-12 | 1.06813e-12 | 3.91406e-13 | 1.52967e-13 |
| 0.000100000 | 3.66048e-12 | 3.06440e-13 | 1.06249e-13 | 3.89357e-14 | 1.52168e-14 |
| 1.00000e-05 | 3.61790e-13 | 3.05240e-14 | 1.05841e-14 | 3.87871e-15 | 1.51589e-15 |
| 1.00000e-06 | 3.59086e-14 | 3.04488e-15 | 1.05592e-15 | 3.86985e-16 | 1.51252e-16 |

|             |             |             |             |             |             |
|-------------|-------------|-------------|-------------|-------------|-------------|
| 1.00000e-07 | 3.57874e-15 | 3.04324e-16 | 1.05540e-16 | 3.86807e-17 | 1.51187e-17 |
| 1.00000e-08 | 3.57650e-16 | 3.04305e-17 | 1.05534e-17 | 3.86789e-18 | 1.51179e-18 |
| 1.00000e-09 | 3.57626e-17 | 3.04303e-18 | 1.05533e-18 | 3.86786e-19 | 1.51178e-19 |

| Pa\K        | 2750.00     | 3000.00     | 3250.00     | 3500.00     | 3750.00     |
|-------------|-------------|-------------|-------------|-------------|-------------|
| 1.00000e+08 | 0.000153852 | 0.000148309 | 0.000141041 | 0.000131561 | 0.000120091 |
| 1.00000e+07 | 8.09002e-05 | 6.96500e-05 | 5.64795e-05 | 4.37235e-05 | 3.27643e-05 |
| 1.00000e+06 | 3.25653e-05 | 2.10148e-05 | 1.30511e-05 | 7.99594e-06 | 4.92286e-06 |
| 100000.     | 6.25384e-06 | 3.19597e-06 | 1.66257e-06 | 8.95861e-07 | 5.04312e-07 |
| 10000.0     | 7.27334e-07 | 3.35958e-07 | 1.64241e-07 | 8.52940e-08 | 4.69896e-08 |
| 1000.00     | 7.14695e-08 | 3.22573e-08 | 1.55869e-08 | 8.04612e-09 | 4.41796e-09 |
| 100.000     | 6.90046e-09 | 3.10480e-09 | 1.49811e-09 | 7.72720e-10 | 4.24024e-10 |
| 10.0000     | 6.72257e-10 | 3.02385e-10 | 1.45876e-10 | 7.52259e-11 | 4.12679e-11 |
| 1.00000     | 6.60103e-11 | 2.96903e-11 | 1.43219e-11 | 7.38450e-12 | 4.05018e-12 |
| 0.100000    | 6.51540e-12 | 2.93045e-12 | 1.41348e-12 | 7.28715e-13 | 3.99610e-13 |
| 0.0100000   | 6.45346e-13 | 2.90252e-13 | 1.39992e-13 | 7.21657e-14 | 3.95691e-14 |
| 0.00100000  | 6.40794e-14 | 2.88198e-14 | 1.38995e-14 | 7.16468e-15 | 3.92807e-15 |
| 0.000100000 | 6.37452e-15 | 2.86689e-15 | 1.38263e-15 | 7.12655e-16 | 3.90689e-16 |
| 1.00000e-05 | 6.35023e-16 | 2.85593e-16 | 1.37731e-16 | 7.09885e-17 | 3.89148e-17 |
| 1.00000e-06 | 6.33642e-17 | 2.84982e-17 | 1.37440e-17 | 7.08401e-18 | 3.88339e-18 |
| 1.00000e-07 | 6.33380e-18 | 2.84870e-18 | 1.37388e-18 | 7.08140e-19 | 3.88200e-19 |
| 1.00000e-08 | 6.33352e-19 | 2.84858e-19 | 1.37383e-19 | 7.08111e-20 | 3.88185e-20 |
| 1.00000e-09 | 6.33349e-20 | 2.84858e-20 | 1.37382e-20 | 7.08109e-21 | 3.88183e-21 |

| Pa\K        | 4000.00     |
|-------------|-------------|
| 1.00000e+08 | 0.000107308 |
| 1.00000e+07 | 2.40714e-05 |
| 1.00000e+06 | 3.08421e-06 |
| 100000.     | 2.97357e-07 |
| 10000.0     | 2.73549e-08 |
| 1000.00     | 2.56645e-09 |
| 100.000     | 2.46174e-10 |
| 10.0000     | 2.39500e-11 |
| 1.00000     | 2.34988e-12 |
| 0.100000    | 2.31800e-13 |
| 0.0100000   | 2.29489e-14 |
| 0.00100000  | 2.27788e-15 |
| 0.000100000 | 2.26539e-16 |
| 1.00000e-05 | 2.25630e-17 |
| 1.00000e-06 | 2.25163e-18 |
| 1.00000e-07 | 2.25082e-19 |
| 1.00000e-08 | 2.25074e-20 |
| 1.00000e-09 | 2.25074e-21 |

rad19syn  
=====

| Pa\K        | 20.0000     | 30.0000     | 40.0000     | 50.0000     | 60.0000     |
|-------------|-------------|-------------|-------------|-------------|-------------|
| 1.00000e+08 | 1.98103e-49 | 2.64184e-46 | 2.72943e-44 | 7.39592e-43 | 1.12592e-41 |
| 1.00000e+07 | 3.35969e-46 | 2.99107e-44 | 2.74838e-42 | 7.40418e-41 | 1.12620e-39 |
| 1.00000e+06 | 3.77722e-43 | 6.55479e-42 | 2.93772e-40 | 7.48589e-39 | 1.12895e-37 |
| 100000.     | 3.81229e-40 | 4.19408e-39 | 4.81058e-38 | 8.29107e-37 | 1.15585e-35 |
| 10000.0     | 3.69362e-37 | 3.71043e-36 | 2.16337e-35 | 1.52582e-34 | 1.37458e-33 |
| 1000.00     | 2.70797e-34 | 2.04693e-33 | 8.49720e-33 | 3.37517e-32 | 1.56372e-31 |
| 100.000     | 3.55955e-32 | 1.08362e-31 | 2.72476e-31 | 7.62082e-31 | 2.66627e-30 |
| 10.0000     | 4.53183e-31 | 1.14786e-30 | 2.75223e-30 | 7.50722e-30 | 2.59435e-29 |
| 1.00000     | 4.52266e-30 | 1.12587e-29 | 2.66247e-29 | 7.17590e-29 | 2.45546e-28 |
| 0.100000    | 4.06528e-29 | 9.11673e-29 | 1.96003e-28 | 4.83902e-28 | 1.52801e-27 |
| 0.0100000   | 1.59654e-28 | 1.71395e-28 | 2.07446e-28 | 3.22364e-28 | 7.02518e-28 |
| 0.00100000  | 1.28426e-29 | 2.49803e-30 | 1.30058e-30 | 1.30117e-30 | 2.52083e-30 |
| 0.000100000 | 1.48465e-32 | 3.04174e-33 | 2.33309e-33 | 4.02129e-33 | 1.78014e-32 |
| 1.00000e-05 | 1.04166e-34 | 5.46631e-35 | 6.88746e-35 | 1.75128e-34 | 1.11381e-33 |
| 1.00000e-06 | 6.39889e-36 | 4.26682e-36 | 5.88872e-36 | 1.58940e-35 | 1.05929e-34 |
| 1.00000e-07 | 6.06399e-37 | 4.15722e-37 | 5.79439e-37 | 1.57380e-36 | 1.05395e-35 |
| 1.00000e-08 | 6.03114e-38 | 4.14636e-38 | 5.78502e-38 | 1.57225e-37 | 1.05342e-36 |
| 1.00000e-09 | 6.02786e-39 | 4.14528e-39 | 5.78408e-39 | 1.57209e-38 | 1.05336e-37 |

| Pa\K        | 70.0000     | 80.0000     | 90.0000     | 100.000     | 110.000     |
|-------------|-------------|-------------|-------------|-------------|-------------|
| 1.00000e+08 | 1.36640e-40 | 1.67057e-39 | 2.54596e-38 | 5.27071e-37 | 1.19562e-35 |
| 1.00000e+07 | 1.36642e-38 | 1.67042e-37 | 2.54563e-36 | 5.26999e-35 | 1.19545e-33 |
| 1.00000e+06 | 1.36654e-36 | 1.66901e-35 | 2.54244e-34 | 5.26280e-33 | 1.19383e-31 |
| 100000.     | 1.36758e-34 | 1.65503e-33 | 2.51090e-32 | 5.19204e-31 | 1.17785e-29 |
| 10000.0     | 1.36300e-32 | 1.52334e-31 | 2.22920e-30 | 4.56997e-29 | 1.03826e-27 |
| 1000.00     | 9.33632e-31 | 7.64899e-30 | 9.69167e-29 | 1.97285e-27 | 4.64507e-26 |
| 100.000     | 1.29756e-29 | 9.49745e-29 | 1.18755e-27 | 2.62821e-26 | 6.75272e-25 |
| 10.0000     | 1.26235e-28 | 9.30113e-28 | 1.17650e-26 | 2.66226e-25 | 6.98232e-24 |
| 1.00000     | 1.18575e-27 | 8.69003e-27 | 1.09935e-25 | 2.51033e-24 | 6.63460e-23 |

|             |             |             |             |             |             |
|-------------|-------------|-------------|-------------|-------------|-------------|
| 0.100000    | 6.87187e-27 | 4.77375e-26 | 6.06691e-25 | 1.50719e-23 | 4.24336e-22 |
| 0.0100000   | 2.41121e-27 | 1.56091e-26 | 3.58825e-25 | 1.98002e-23 | 7.85838e-22 |
| 0.00100000  | 1.20986e-29 | 6.09205e-28 | 1.58977e-25 | 1.72285e-23 | 8.10304e-22 |
| 0.000100000 | 2.68410e-31 | 3.67585e-28 | 1.47273e-25 | 1.69555e-23 | 8.11654e-22 |
| 1.00000e-05 | 2.22758e-32 | 3.52242e-28 | 1.46214e-25 | 1.69286e-23 | 8.11780e-22 |
| 1.00000e-06 | 2.18606e-33 | 3.50774e-28 | 1.46109e-25 | 1.69259e-23 | 8.11793e-22 |
| 1.00000e-07 | 2.18195e-34 | 3.50628e-28 | 1.46099e-25 | 1.69256e-23 | 8.11794e-22 |
| 1.00000e-08 | 2.18154e-35 | 3.50614e-28 | 1.46098e-25 | 1.69256e-23 | 8.11794e-22 |
| 1.00000e-09 | 2.18150e-36 | 3.50612e-28 | 1.46097e-25 | 1.69256e-23 | 8.11794e-22 |

| Pa\K        | 120.000     | 130.000     | 140.000     | 150.000     | 160.000     |
|-------------|-------------|-------------|-------------|-------------|-------------|
| 1.00000e+08 | 2.28705e-34 | 3.33292e-33 | 3.69356e-32 | 3.20777e-31 | 2.26212e-30 |
| 1.00000e+07 | 2.28674e-32 | 3.33244e-31 | 3.69300e-30 | 3.20725e-29 | 2.26170e-28 |
| 1.00000e+06 | 2.28360e-30 | 3.32767e-29 | 3.68735e-28 | 3.20190e-27 | 2.25755e-26 |
| 100000.     | 2.25273e-28 | 3.28083e-27 | 3.63194e-26 | 3.14963e-25 | 2.21698e-24 |
| 10000.0     | 1.98500e-26 | 2.87858e-25 | 3.16249e-24 | 2.71413e-23 | 1.88580e-22 |
| 1000.00     | 9.03615e-25 | 1.30453e-23 | 1.40562e-22 | 1.17132e-21 | 7.84514e-21 |
| 100.000     | 1.37439e-23 | 2.01368e-22 | 2.16418e-21 | 1.78115e-20 | 1.17138e-19 |
| 10.0000     | 1.43688e-22 | 2.11405e-21 | 2.27251e-20 | 1.86631e-19 | 1.22298e-18 |
| 1.00000     | 1.36783e-21 | 2.00776e-20 | 2.14694e-19 | 1.74977e-18 | 1.13528e-17 |
| 0.100000    | 8.90294e-21 | 1.29465e-19 | 1.35035e-18 | 1.06232e-17 | 6.60003e-17 |
| 0.0100000   | 1.84820e-20 | 2.76169e-19 | 2.85111e-18 | 2.18013e-17 | 1.30426e-16 |
| 0.00100000  | 2.01614e-20 | 3.07236e-19 | 3.18627e-18 | 2.43047e-17 | 1.44562e-16 |
| 0.000100000 | 2.03293e-20 | 3.10580e-19 | 3.22328e-18 | 2.45836e-17 | 1.46137e-16 |
| 1.00000e-05 | 2.03460e-20 | 3.10917e-19 | 3.22702e-18 | 2.46118e-17 | 1.46296e-16 |
| 1.00000e-06 | 2.03477e-20 | 3.10951e-19 | 3.22739e-18 | 2.46146e-17 | 1.46312e-16 |
| 1.00000e-07 | 2.03478e-20 | 3.10954e-19 | 3.22743e-18 | 2.46149e-17 | 1.46314e-16 |
| 1.00000e-08 | 2.03479e-20 | 3.10954e-19 | 3.22744e-18 | 2.46149e-17 | 1.46314e-16 |
| 1.00000e-09 | 2.03479e-20 | 3.10954e-19 | 3.22744e-18 | 2.46149e-17 | 1.46314e-16 |

| Pa\K        | 170.000     | 180.000     | 190.000     | 200.000     | 210.000     |
|-------------|-------------|-------------|-------------|-------------|-------------|
| 1.00000e+08 | 1.33829e-29 | 6.82977e-29 | 3.07659e-28 | 1.24630e-27 | 4.60749e-27 |
| 1.00000e+07 | 1.33802e-27 | 6.82819e-27 | 3.07577e-26 | 1.24593e-25 | 4.60592e-25 |
| 1.00000e+06 | 1.33528e-25 | 6.81244e-25 | 3.06774e-24 | 1.24223e-23 | 4.59036e-23 |
| 100000.     | 1.30859e-23 | 6.65991e-23 | 2.99032e-22 | 1.20677e-21 | 4.44202e-21 |
| 10000.0     | 1.09598e-21 | 5.47775e-21 | 2.40897e-20 | 9.49644e-20 | 3.40606e-19 |
| 1000.00     | 4.37051e-20 | 2.08436e-19 | 8.71383e-19 | 3.25568e-18 | 1.10430e-17 |
| 100.000     | 6.38526e-19 | 2.97356e-18 | 1.21256e-17 | 4.41749e-17 | 1.46135e-16 |
| 10.0000     | 6.63620e-18 | 3.07416e-17 | 1.24628e-16 | 4.51144e-16 | 1.48215e-15 |
| 1.00000     | 6.08467e-17 | 2.77664e-16 | 1.10557e-15 | 3.91768e-15 | 1.25542e-14 |
| 0.100000    | 3.36469e-16 | 1.45200e-15 | 5.43953e-15 | 1.80559e-14 | 5.40032e-14 |
| 0.0100000   | 6.37177e-16 | 2.62926e-15 | 9.41331e-15 | 2.98781e-14 | 8.55585e-14 |
| 0.00100000  | 7.01059e-16 | 2.86992e-15 | 1.01927e-14 | 3.21005e-14 | 9.12447e-14 |
| 0.000100000 | 7.08155e-16 | 2.89652e-15 | 1.02783e-14 | 3.23431e-14 | 9.18611e-14 |
| 1.00000e-05 | 7.08872e-16 | 2.89920e-15 | 1.02869e-14 | 3.23675e-14 | 9.19232e-14 |
| 1.00000e-06 | 7.08945e-16 | 2.89947e-15 | 1.02878e-14 | 3.23699e-14 | 9.19294e-14 |
| 1.00000e-07 | 7.08951e-16 | 2.89950e-15 | 1.02879e-14 | 3.23702e-14 | 9.19301e-14 |
| 1.00000e-08 | 7.08951e-16 | 2.89950e-15 | 1.02879e-14 | 3.23702e-14 | 9.19301e-14 |
| 1.00000e-09 | 7.08952e-16 | 2.89950e-15 | 1.02879e-14 | 3.23702e-14 | 9.19301e-14 |

| Pa\K        | 220.000     | 230.000     | 240.000     | 250.000     | 260.000     |
|-------------|-------------|-------------|-------------|-------------|-------------|
| 1.00000e+08 | 1.57216e-26 | 4.99263e-26 | 1.48427e-25 | 4.14769e-25 | 1.09257e-24 |
| 1.00000e+07 | 1.57155e-24 | 4.99045e-24 | 1.48354e-23 | 4.14542e-23 | 1.09191e-22 |
| 1.00000e+06 | 1.56552e-22 | 4.96880e-22 | 1.47633e-21 | 4.12308e-21 | 1.08547e-20 |
| 100000.     | 1.50837e-20 | 4.76508e-20 | 1.40889e-19 | 3.91533e-19 | 1.02579e-18 |
| 10000.0     | 1.12457e-18 | 3.44894e-18 | 9.89218e-18 | 2.66688e-17 | 6.78350e-17 |
| 1000.00     | 3.44389e-17 | 9.97492e-17 | 2.70459e-16 | 6.90699e-16 | 1.66915e-15 |
| 100.000     | 4.44776e-16 | 1.25860e-15 | 3.33865e-15 | 8.35510e-15 | 1.98209e-14 |
| 10.0000     | 4.47758e-15 | 1.25693e-14 | 3.30581e-14 | 8.19843e-14 | 1.92666e-13 |
| 1.00000     | 3.68546e-14 | 1.00157e-13 | 2.54117e-13 | 6.06096e-13 | 1.36652e-12 |
| 0.100000    | 1.47550e-13 | 3.72507e-13 | 8.77229e-13 | 1.94223e-12 | 4.06960e-12 |
| 0.0100000   | 2.24225e-13 | 5.44160e-13 | 1.23485e-12 | 2.64149e-12 | 5.36190e-12 |
| 0.00100000  | 2.37481e-13 | 5.72668e-13 | 1.29200e-12 | 2.74922e-12 | 5.55425e-12 |
| 0.000100000 | 2.38908e-13 | 5.75719e-13 | 1.29809e-12 | 2.76062e-12 | 5.57450e-12 |
| 1.00000e-05 | 2.39052e-13 | 5.76027e-13 | 1.29870e-12 | 2.76177e-12 | 5.57654e-12 |
| 1.00000e-06 | 2.39066e-13 | 5.76057e-13 | 1.29876e-12 | 2.76188e-12 | 5.57674e-12 |
| 1.00000e-07 | 2.39067e-13 | 5.76061e-13 | 1.29877e-12 | 2.76189e-12 | 5.57676e-12 |
| 1.00000e-08 | 2.39067e-13 | 5.76061e-13 | 1.29877e-12 | 2.76189e-12 | 5.57676e-12 |
| 1.00000e-09 | 2.39067e-13 | 5.76061e-13 | 1.29877e-12 | 2.76189e-12 | 5.57676e-12 |

| Pa\K        | 270.000     | 280.000     | 290.000     | 300.000     | 400.000     |
|-------------|-------------|-------------|-------------|-------------|-------------|
| 1.00000e+08 | 2.71898e-24 | 6.40520e-24 | 1.43116e-23 | 1.52575e-21 | 3.80792e-18 |
| 1.00000e+07 | 2.71722e-22 | 6.40073e-22 | 1.43009e-21 | 1.56312e-19 | 2.03861e-16 |
| 1.00000e+06 | 2.69982e-20 | 6.35679e-20 | 1.41967e-19 | 1.60763e-17 | 2.81340e-14 |
| 100000.     | 2.53959e-18 | 5.95375e-18 | 1.32439e-17 | 1.32227e-15 | 6.48813e-13 |
| 10000.0     | 1.63276e-16 | 3.72805e-16 | 8.09283e-16 | 3.66773e-14 | 6.86801e-12 |

|             |             |             |             |             |             |
|-------------|-------------|-------------|-------------|-------------|-------------|
| 1000.00     | 3.83067e-15 | 8.37240e-15 | 1.74677e-14 | 4.17113e-13 | 6.83531e-11 |
| 100.000     | 4.47369e-14 | 9.63372e-14 | 1.98371e-13 | 3.88601e-12 | 5.41664e-10 |
| 10.0000     | 4.30661e-13 | 9.18317e-13 | 1.87243e-12 | 2.53240e-11 | 2.30933e-09 |
| 1.00000     | 2.92562e-12 | 5.97000e-12 | 1.16477e-11 | 6.80937e-11 | 4.16571e-09 |
| 0.100000    | 8.11401e-12 | 1.54642e-11 | 2.82789e-11 | 7.41171e-11 | 4.59362e-09 |
| 0.0100000   | 1.03852e-11 | 1.92799e-11 | 3.44343e-11 | 6.99135e-11 | 4.62762e-09 |
| 0.00100000  | 1.07125e-11 | 1.98132e-11 | 3.52706e-11 | 6.93086e-11 | 4.63049e-09 |
| 0.000100000 | 1.07468e-11 | 1.98688e-11 | 3.53574e-11 | 6.92472e-11 | 4.63077e-09 |
| 1.00000e-05 | 1.07503e-11 | 1.98744e-11 | 3.53661e-11 | 6.92411e-11 | 4.63079e-09 |
| 1.00000e-06 | 1.07506e-11 | 1.98750e-11 | 3.53670e-11 | 6.92404e-11 | 4.63079e-09 |
| 1.00000e-07 | 1.07506e-11 | 1.98751e-11 | 3.53671e-11 | 6.92404e-11 | 4.63079e-09 |
| 1.00000e-08 | 1.07506e-11 | 1.98751e-11 | 3.53671e-11 | 6.92404e-11 | 4.63079e-09 |
| 1.00000e-09 | 1.07506e-11 | 1.98751e-11 | 3.53671e-11 | 6.92404e-11 | 4.63079e-09 |

| Pa\K        | 500.000     | 600.000     | 700.000     | 800.000     | 900.000     |
|-------------|-------------|-------------|-------------|-------------|-------------|
| 1.00000e+08 | 7.63073e-13 | 6.46834e-10 | 1.18521e-08 | 6.67000e-08 | 3.44177e-07 |
| 1.00000e+07 | 9.36272e-12 | 5.29025e-09 | 8.79466e-08 | 3.68804e-07 | 1.11146e-06 |
| 1.00000e+06 | 2.03279e-10 | 1.70233e-08 | 1.40349e-07 | 3.94345e-07 | 1.21491e-06 |
| 100000.     | 5.60554e-10 | 2.43648e-08 | 1.42847e-07 | 5.74876e-07 | 3.20879e-06 |
| 10000.0     | 7.13066e-10 | 2.48275e-08 | 2.94261e-07 | 2.05076e-06 | 9.84932e-06 |
| 1000.00     | 4.26108e-09 | 1.01385e-07 | 1.02832e-06 | 5.34534e-06 | 1.78599e-05 |
| 100.000     | 2.28620e-08 | 3.24476e-07 | 2.08468e-06 | 7.88382e-06 | 2.13657e-05 |
| 10.0000     | 5.64808e-08 | 5.19423e-07 | 2.57247e-06 | 8.58319e-06 | 2.19864e-05 |
| 1.00000     | 7.34918e-08 | 5.73269e-07 | 2.65873e-06 | 8.67514e-06 | 2.20529e-05 |
| 0.100000    | 7.62934e-08 | 5.80091e-07 | 2.66811e-06 | 8.68446e-06 | 2.20595e-05 |
| 0.0100000   | 7.65784e-08 | 5.80781e-07 | 2.66906e-06 | 8.68545e-06 | 2.20602e-05 |
| 0.00100000  | 7.66067e-08 | 5.80850e-07 | 2.66915e-06 | 8.68552e-06 | 2.20602e-05 |
| 0.000100000 | 7.66095e-08 | 5.80857e-07 | 2.66916e-06 | 8.68552e-06 | 2.20602e-05 |
| 1.00000e-05 | 7.66098e-08 | 5.80858e-07 | 2.66916e-06 | 8.68552e-06 | 2.20602e-05 |
| 1.00000e-06 | 7.66098e-08 | 5.80858e-07 | 2.66916e-06 | 8.68552e-06 | 2.20602e-05 |
| 1.00000e-07 | 7.66098e-08 | 5.80858e-07 | 2.66916e-06 | 8.68552e-06 | 2.20602e-05 |
| 1.00000e-08 | 7.66098e-08 | 5.80858e-07 | 2.66916e-06 | 8.68552e-06 | 2.20602e-05 |
| 1.00000e-09 | 7.66098e-08 | 5.80858e-07 | 2.66916e-06 | 8.68552e-06 | 2.20602e-05 |

| Pa\K        | 1000.00     | 1100.00     | 1200.00     | 1300.00     | 1400.00     |
|-------------|-------------|-------------|-------------|-------------|-------------|
| 1.00000e+08 | 1.92903e-06 | 7.92754e-06 | 2.30785e-05 | 5.12508e-05 | 6.24037e-05 |
| 1.00000e+07 | 4.86282e-06 | 2.66174e-05 | 0.000110190 | 0.000286930 | 0.000445756 |
| 1.00000e+06 | 7.04317e-06 | 4.06226e-05 | 0.000157546 | 0.000390779 | 0.000649396 |
| 100000.     | 1.63697e-05 | 6.17003e-05 | 0.000166207 | 0.000329804 | 0.000513412 |
| 10000.0     | 3.27369e-05 | 8.07784e-05 | 0.000157950 | 0.000259188 | 0.000376156 |
| 1000.00     | 4.36610e-05 | 8.62566e-05 | 0.000147018 | 0.000225765 | 0.000321382 |
| 100.000     | 4.63440e-05 | 8.61274e-05 | 0.000142913 | 0.000217510 | 0.000309352 |
| 10.0000     | 4.66302e-05 | 8.59386e-05 | 0.000142215 | 0.000216319 | 0.000307706 |
| 1.00000     | 4.66540e-05 | 8.59122e-05 | 0.000142137 | 0.000216192 | 0.000307534 |
| 0.100000    | 4.66562e-05 | 8.59092e-05 | 0.000142129 | 0.000216180 | 0.000307517 |
| 0.0100000   | 4.66565e-05 | 8.59091e-05 | 0.000142129 | 0.000216178 | 0.000307516 |
| 0.00100000  | 4.66565e-05 | 8.59091e-05 | 0.000142129 | 0.000216178 | 0.000307516 |
| 0.000100000 | 4.66565e-05 | 8.59091e-05 | 0.000142129 | 0.000216178 | 0.000307515 |
| 1.00000e-05 | 4.66565e-05 | 8.59091e-05 | 0.000142129 | 0.000216178 | 0.000307515 |
| 1.00000e-06 | 4.66565e-05 | 8.59091e-05 | 0.000142129 | 0.000216178 | 0.000307515 |
| 1.00000e-07 | 4.66565e-05 | 8.59091e-05 | 0.000142129 | 0.000216178 | 0.000307515 |
| 1.00000e-08 | 4.66565e-05 | 8.59091e-05 | 0.000142129 | 0.000216178 | 0.000307515 |
| 1.00000e-09 | 4.66565e-05 | 8.59091e-05 | 0.000142129 | 0.000216178 | 0.000307515 |

| Pa\K        | 1500.00     | 1750.00     | 2000.00    | 2250.00    | 2500.00    |
|-------------|-------------|-------------|------------|------------|------------|
| 1.00000e+08 | 4.70032e-05 | 0.00271312  | 0.00314422 | 0.00320077 | 0.00318157 |
| 1.00000e+07 | 0.000481496 | 0.00327748  | 0.00383501 | 0.00388005 | 0.00370844 |
| 1.00000e+06 | 0.000830630 | 0.00285121  | 0.00337654 | 0.00313847 | 0.00279679 |
| 100000.     | 0.000679510 | 0.00177685  | 0.00206534 | 0.00196929 | 0.00198928 |
| 10000.0     | 0.000501070 | 0.00100411  | 0.00128513 | 0.00150336 | 0.00177044 |
| 1000.00     | 0.000431428 | 0.000749297 | 0.00108111 | 0.00141393 | 0.00173814 |
| 100.000     | 0.000416628 | 0.000701981 | 0.00104958 | 0.00140257 | 0.00173459 |
| 10.0000     | 0.000414641 | 0.000696002 | 0.00104597 | 0.00140138 | 0.00173423 |
| 1.00000     | 0.000414435 | 0.000695382 | 0.00104561 | 0.00140127 | 0.00173420 |
| 0.100000    | 0.000414415 | 0.000695321 | 0.00104557 | 0.00140125 | 0.00173419 |
| 0.0100000   | 0.000414414 | 0.000695318 | 0.00104557 | 0.00140125 | 0.00173419 |
| 0.00100000  | 0.000414413 | 0.000695318 | 0.00104557 | 0.00140125 | 0.00173419 |
| 0.000100000 | 0.000414413 | 0.000695318 | 0.00104557 | 0.00140125 | 0.00173419 |
| 1.00000e-05 | 0.000414413 | 0.000695318 | 0.00104557 | 0.00140125 | 0.00173419 |
| 1.00000e-06 | 0.000414413 | 0.000695318 | 0.00104557 | 0.00140125 | 0.00173419 |
| 1.00000e-07 | 0.000414413 | 0.000695318 | 0.00104557 | 0.00140125 | 0.00173419 |
| 1.00000e-08 | 0.000414413 | 0.000695318 | 0.00104557 | 0.00140125 | 0.00173419 |
| 1.00000e-09 | 0.000414413 | 0.000695318 | 0.00104557 | 0.00140125 | 0.00173419 |

| Pa\K        | 2750.00    | 3000.00    | 3250.00    | 3500.00    | 3750.00    |
|-------------|------------|------------|------------|------------|------------|
| 1.00000e+08 | 0.00315892 | 0.00312674 | 0.00307822 | 0.00301347 | 0.00293784 |

|             |            |            |            |            |            |
|-------------|------------|------------|------------|------------|------------|
| 1.00000e+07 | 0.00347807 | 0.00326025 | 0.00309024 | 0.00297431 | 0.00290111 |
| 1.00000e+06 | 0.00261238 | 0.00257193 | 0.00261003 | 0.00267367 | 0.00273213 |
| 100000.     | 0.00213383 | 0.00231448 | 0.00248069 | 0.00261262 | 0.00270576 |
| 10000.0     | 0.00203962 | 0.00227515 | 0.00246451 | 0.00260619 | 0.00270346 |
| 1000.00     | 0.00202814 | 0.00227097 | 0.00246295 | 0.00260561 | 0.00270329 |
| 100.000     | 0.00202698 | 0.00227056 | 0.00246283 | 0.00260558 | 0.00270328 |
| 10.0000     | 0.00202687 | 0.00227053 | 0.00246281 | 0.00260558 | 0.00270328 |
| 1.00000     | 0.00202686 | 0.00227052 | 0.00246280 | 0.00260557 | 0.00270328 |
| 0.100000    | 0.00202686 | 0.00227052 | 0.00246280 | 0.00260557 | 0.00270328 |
| 0.0100000   | 0.00202686 | 0.00227052 | 0.00246280 | 0.00260557 | 0.00270328 |
| 0.00100000  | 0.00202686 | 0.00227052 | 0.00246280 | 0.00260557 | 0.00270328 |
| 0.000100000 | 0.00202686 | 0.00227052 | 0.00246280 | 0.00260557 | 0.00270328 |
| 1.00000e-05 | 0.00202686 | 0.00227052 | 0.00246280 | 0.00260557 | 0.00270328 |
| 1.00000e-06 | 0.00202686 | 0.00227052 | 0.00246280 | 0.00260557 | 0.00270328 |
| 1.00000e-07 | 0.00202686 | 0.00227052 | 0.00246280 | 0.00260557 | 0.00270328 |
| 1.00000e-08 | 0.00202686 | 0.00227052 | 0.00246280 | 0.00260557 | 0.00270328 |
| 1.00000e-09 | 0.00202686 | 0.00227052 | 0.00246280 | 0.00260557 | 0.00270328 |

Pa\K | 4000.00

|             |            |
|-------------|------------|
| 1.00000e+08 | 0.00285810 |
| 1.00000e+07 | 0.00285385 |
| 1.00000e+06 | 0.00277168 |
| 100000.     | 0.00276233 |
| 10000.0     | 0.00276180 |
| 1000.00     | 0.00276176 |
| 100.000     | 0.00276178 |
| 10.0000     | 0.00276178 |
| 1.00000     | 0.00276178 |
| 0.100000    | 0.00276178 |
| 0.0100000   | 0.00276178 |
| 0.00100000  | 0.00276178 |
| 0.000100000 | 0.00276178 |
| 1.00000e-05 | 0.00276178 |
| 1.00000e-06 | 0.00276178 |
| 1.00000e-07 | 0.00276178 |
| 1.00000e-08 | 0.00276178 |
| 1.00000e-09 | 0.00276178 |

rad45

=====

Pa\K | 20.0000 30.0000 40.0000 50.0000 60.0000

|             |             |             |             |             |             |
|-------------|-------------|-------------|-------------|-------------|-------------|
| 1.00000e+08 | 9.61692e-17 | 7.50018e-16 | 2.44085e-15 | 5.68542e-15 | 1.10807e-14 |
| 1.00000e+07 | 8.82331e-14 | 7.30189e-13 | 2.41481e-12 | 5.61341e-12 | 1.08296e-11 |
| 1.00000e+06 | 7.88637e-11 | 5.47778e-10 | 1.56428e-09 | 3.20236e-09 | 5.52103e-09 |
| 100000.     | 2.55245e-08 | 1.07887e-07 | 2.36319e-07 | 4.08180e-07 | 6.23510e-07 |
| 10000.0     | 2.06010e-06 | 6.66559e-06 | 1.26575e-05 | 1.97643e-05 | 2.78705e-05 |
| 1000.00     | 7.00164e-05 | 0.000162203 | 0.000245068 | 0.000319569 | 0.000387314 |
| 100.000     | 0.000563600 | 0.000677597 | 0.000675697 | 0.000656623 | 0.000640992 |
| 10.0000     | 0.000556746 | 0.000491369 | 0.000424410 | 0.000368221 | 0.000321770 |
| 1.00000     | 0.000163881 | 5.75805e-05 | 2.49876e-05 | 1.22838e-05 | 6.58978e-06 |
| 0.100000    | 6.01202e-07 | 6.44763e-08 | 2.63114e-08 | 1.54450e-08 | 1.04533e-08 |
| 0.0100000   | 2.30808e-09 | 4.77052e-10 | 1.81667e-10 | 9.00239e-11 | 5.17928e-11 |
| 0.00100000  | 5.72258e-12 | 6.10998e-13 | 1.62597e-13 | 6.27910e-14 | 2.96302e-14 |
| 0.000100000 | 1.75641e-15 | 8.98387e-17 | 1.46566e-17 | 3.89508e-18 | 1.36083e-18 |
| 1.00000e-05 | 3.72023e-20 | 1.03266e-21 | 1.39301e-22 | 3.49082e-23 | 1.21655e-23 |
| 1.00000e-06 | 4.30524e-25 | 2.01087e-26 | 4.07350e-27 | 1.43429e-27 | 6.75858e-28 |
| 1.00000e-07 | 7.38420e-29 | 1.29239e-29 | 5.53279e-30 | 3.26849e-30 | 2.25461e-30 |
| 1.00000e-08 | 6.05569e-31 | 1.99876e-31 | 1.19353e-31 | 8.09026e-32 | 7.31126e-32 |
| 1.00000e-09 | 2.49533e-32 | 8.71788e-33 | 8.42499e-33 | 8.16742e-33 | 2.51529e-33 |

Pa\K | 70.0000 80.0000 90.0000 100.0000 110.0000

|             |             |             |             |             |             |
|-------------|-------------|-------------|-------------|-------------|-------------|
| 1.00000e+08 | 1.93221e-14 | 3.12403e-14 | 4.78626e-14 | 7.04973e-14 | 1.00847e-13 |
| 1.00000e+07 | 1.86208e-11 | 2.96283e-11 | 4.46236e-11 | 6.45672e-11 | 9.06820e-11 |
| 1.00000e+06 | 8.58035e-09 | 1.24519e-08 | 1.72285e-08 | 2.30345e-08 | 3.00340e-08 |
| 100000.     | 8.83411e-07 | 1.19002e-06 | 1.54684e-06 | 1.95907e-06 | 2.43391e-06 |
| 10000.0     | 3.69013e-05 | 4.68122e-05 | 5.75922e-05 | 6.92658e-05 | 8.18906e-05 |
| 1000.00     | 0.000449217 | 0.000505844 | 0.000557645 | 0.000605035 | 0.000648404 |
| 100.000     | 0.000631141 | 0.000625430 | 0.000621877 | 0.000618981 | 0.000615769 |
| 10.0000     | 0.000282643 | 0.000249028 | 0.000219712 | 0.000193880 | 0.000170970 |
| 1.00000     | 3.78105e-06 | 2.29248e-06 | 1.45760e-06 | 9.67156e-07 | 6.67582e-07 |
| 0.100000    | 7.64152e-09 | 5.87094e-09 | 4.67290e-09 | 3.81963e-09 | 3.18776e-09 |
| 0.0100000   | 3.28133e-11 | 2.22336e-11 | 1.58242e-11 | 1.16887e-11 | 8.88524e-12 |
| 0.00100000  | 1.58271e-14 | 9.18858e-15 | 5.65979e-15 | 3.64244e-15 | 2.42424e-15 |
| 0.000100000 | 5.67202e-19 | 2.67529e-19 | 1.38278e-19 | 7.67046e-20 | 4.50141e-20 |
| 1.00000e-05 | 5.20544e-24 | 2.56279e-24 | 1.39707e-24 | 8.23736e-25 | 5.17513e-25 |
| 1.00000e-06 | 3.82227e-28 | 2.45851e-28 | 1.74384e-28 | 1.34525e-28 | 1.12488e-28 |
| 1.00000e-07 | 1.71177e-30 | 1.42429e-30 | 1.27336e-30 | 1.25685e-30 | 1.27555e-30 |

1.00000e-08 | 6.81861e-32 5.12397e-32 5.16880e-32 5.66194e-32 5.87338e-32  
1.00000e-09 | 3.17862e-33 7.02923e-33 1.35266e-33 1.61954e-33 4.31032e-33

| Pa\K        | 120.000     | 130.000     | 140.000     | 150.000     | 160.000     |
|-------------|-------------|-------------|-------------|-------------|-------------|
| 1.00000e+08 | 1.41162e-13 | 1.94437e-13 | 2.64705e-13 | 3.57413e-13 | 4.79971e-13 |
| 1.00000e+07 | 1.24549e-10 | 1.68223e-10 | 2.24401e-10 | 2.96624e-10 | 3.89558e-10 |
| 1.00000e+06 | 3.84420e-08 | 4.85359e-08 | 6.06705e-08 | 7.52988e-08 | 9.29955e-08 |
| 100000.     | 2.98085e-06 | 3.61200e-06 | 4.34260e-06 | 5.19157e-06 | 6.18223e-06 |
| 10000.0     | 9.55553e-05 | 0.000110377 | 0.000126498 | 0.000144086 | 0.000163332 |
| 1000.00     | 0.000688106 | 0.000724453 | 0.000757712 | 0.000788106 | 0.000815826 |
| 100.000     | 0.000611673 | 0.000606404 | 0.000599849 | 0.000591996 | 0.000582895 |
| 10.0000     | 0.000150571 | 0.000132373 | 0.000116131 | 0.000101641 | 8.87311e-05 |
| 1.00000     | 4.78305e-07 | 3.55058e-07 | 2.72561e-07 | 2.15893e-07 | 1.75995e-07 |
| 0.100000    | 2.70511e-09 | 2.32694e-09 | 2.02421e-09 | 1.77739e-09 | 1.57291e-09 |
| 0.0100000   | 6.90759e-12 | 5.46624e-12 | 4.38700e-12 | 3.56052e-12 | 2.91567e-12 |
| 0.00100000  | 1.65691e-15 | 1.15724e-15 | 8.23086e-16 | 5.94728e-16 | 4.35861e-16 |
| 0.000100000 | 2.76712e-20 | 1.76944e-20 | 1.17123e-20 | 7.99886e-21 | 5.62631e-21 |
| 1.00000e-05 | 3.42967e-25 | 2.38599e-25 | 1.74120e-25 | 1.33528e-25 | 1.08376e-25 |
| 1.00000e-06 | 1.01235e-28 | 9.91284e-29 | 1.05164e-28 | 1.21361e-28 | 1.51967e-28 |
| 1.00000e-07 | 1.42730e-30 | 1.68470e-30 | 2.13166e-30 | 2.94762e-30 | 4.24587e-30 |
| 1.00000e-08 | 8.55149e-32 | 9.85144e-32 | 1.55507e-31 | 2.13732e-31 | 3.57312e-31 |
| 1.00000e-09 | 1.67956e-32 | 6.11092e-33 | 3.92565e-33 | 6.09777e-32 | 2.28288e-32 |

| Pa\K        | 170.000     | 180.000     | 190.000     | 200.000     | 210.000     |
|-------------|-------------|-------------|-------------|-------------|-------------|
| 1.00000e+08 | 6.42490e-13 | 8.58817e-13 | 1.14797e-12 | 1.53611e-12 | 2.05933e-12 |
| 1.00000e+07 | 5.09365e-10 | 6.64185e-10 | 8.64770e-10 | 1.12532e-09 | 1.46456e-09 |
| 1.00000e+06 | 1.14489e-07 | 1.40700e-07 | 1.72792e-07 | 2.12228e-07 | 2.60851e-07 |
| 100000.     | 7.34313e-06 | 8.70910e-06 | 1.03224e-05 | 1.22340e-05 | 1.45051e-05 |
| 10000.0     | 0.000184449 | 0.000207674 | 0.000233254 | 0.000261455 | 0.000292546 |
| 1000.00     | 0.000841040 | 0.000863902 | 0.000884564 | 0.000903182 | 0.000919918 |
| 100.000     | 0.000572622 | 0.000561268 | 0.000548922 | 0.000535667 | 0.000521581 |
| 10.0000     | 7.42524e-05 | 6.70724e-05 | 5.80719e-05 | 5.01414e-05 | 4.31800e-05 |
| 1.00000     | 1.47223e-07 | 1.25986e-07 | 1.09949e-07 | 9.75712e-08 | 8.78118e-08 |
| 0.100000    | 1.40111e-09 | 1.25498e-09 | 1.12928e-09 | 1.02008e-09 | 9.24379e-10 |
| 0.0100000   | 2.40475e-12 | 1.99483e-12 | 1.66265e-12 | 1.39137e-12 | 1.16854e-12 |
| 0.00100000  | 3.23686e-16 | 2.43495e-16 | 1.85575e-16 | 1.43397e-16 | 1.12496e-16 |
| 0.000100000 | 4.07313e-21 | 3.03711e-21 | 2.33657e-21 | 1.86094e-21 | 1.54132e-21 |
| 1.00000e-05 | 9.42214e-26 | 8.89498e-26 | 9.26644e-26 | 1.07835e-25 | 1.40697e-25 |
| 1.00000e-06 | 2.05382e-28 | 2.98127e-28 | 4.61405e-28 | 7.61835e-28 | 1.35222e-27 |
| 1.00000e-07 | 6.47713e-30 | 1.05315e-29 | 1.83353e-29 | 3.33753e-29 | 6.39287e-29 |
| 1.00000e-08 | 4.83064e-31 | 8.79737e-31 | 1.52563e-30 | 1.99173e-30 | 5.21099e-30 |
| 1.00000e-09 | 1.08014e-32 | 1.48870e-32 | 1.09816e-32 | 1.93147e-31 | 1.73799e-31 |

| Pa\K        | 220.000     | 230.000     | 240.000     | 250.000     | 260.000     |
|-------------|-------------|-------------|-------------|-------------|-------------|
| 1.00000e+08 | 2.76734e-12 | 3.72886e-12 | 5.03872e-12 | 6.82777e-12 | 9.27644e-12 |
| 1.00000e+07 | 1.90715e-09 | 2.48552e-09 | 3.24220e-09 | 4.23283e-09 | 5.52999e-09 |
| 1.00000e+06 | 3.20972e-07 | 3.95483e-07 | 4.88000e-07 | 6.03024e-07 | 7.46149e-07 |
| 100000.     | 1.72089e-05 | 2.04321e-05 | 2.42771e-05 | 2.88639e-05 | 3.43320e-05 |
| 10000.0     | 0.000326797 | 0.000364460 | 0.000405769 | 0.000450917 | 0.000500038 |
| 1000.00     | 0.000934944 | 0.000948438 | 0.000960582 | 0.000971551 | 0.000981502 |
| 100.000     | 0.000506733 | 0.000491191 | 0.000475014 | 0.000458265 | 0.000441009 |
| 10.0000     | 3.70931e-05 | 3.17928e-05 | 2.71966e-05 | 2.32276e-05 | 1.98144e-05 |
| 1.00000     | 7.99619e-08 | 7.35288e-08 | 6.81660e-08 | 6.36257e-08 | 5.97289e-08 |
| 0.100000    | 8.39840e-10 | 7.64647e-10 | 6.97373e-10 | 6.36894e-10 | 5.82325e-10 |
| 0.0100000   | 9.84798e-13 | 8.32925e-13 | 7.07330e-13 | 6.03582e-13 | 5.18159e-13 |
| 0.00100000  | 8.97802e-17 | 7.30894e-17 | 6.09080e-17 | 5.21732e-17 | 4.61573e-17 |
| 0.000100000 | 1.33593e-21 | 1.22103e-21 | 1.18792e-21 | 1.24397e-21 | 1.41988e-21 |
| 1.00000e-05 | 2.04714e-25 | 3.29229e-25 | 5.78876e-25 | 1.10090e-24 | 2.24692e-24 |
| 1.00000e-06 | 2.52696e-27 | 5.06677e-27 | 1.07755e-26 | 2.44456e-26 | 5.86289e-26 |
| 1.00000e-07 | 1.26409e-28 | 2.83482e-28 | 6.36909e-28 | 1.55147e-27 | 4.08678e-27 |
| 1.00000e-08 | 8.73858e-30 | 1.74943e-29 | 3.66607e-29 | 1.36415e-28 | 3.98376e-28 |
| 1.00000e-09 | 4.10245e-31 | 4.95481e-31 | 5.61208e-31 | 1.13372e-30 | 2.43902e-30 |

| Pa\K        | 270.000     | 280.000     | 290.000     | 300.000     | 400.000     |
|-------------|-------------|-------------|-------------|-------------|-------------|
| 1.00000e+08 | 1.26330e-11 | 1.72381e-11 | 2.35571e-11 | 2.35562e-10 | 4.52628e-09 |
| 1.00000e+07 | 7.22806e-09 | 9.44913e-09 | 1.23504e-08 | 7.85544e-08 | 8.29244e-07 |
| 1.00000e+06 | 9.24303e-07 | 1.14602e-06 | 1.42179e-06 | 6.12933e-06 | 3.94582e-05 |
| 100000.     | 4.08419e-05 | 4.85771e-05 | 5.77449e-05 | 0.000168895 | 0.000542596 |
| 10000.0     | 0.000553201 | 0.000610381 | 0.000671454 | 0.00108614  | 0.00150369  |
| 1000.00     | 0.000990594 | 0.000998934 | 0.00100662  | 0.00108575  | 0.000985489 |
| 100.000     | 0.000423315 | 0.000405261 | 0.000386932 | 0.000308954 | 0.000168151 |
| 10.0000     | 1.68913e-05 | 1.43978e-05 | 1.22789e-05 | 8.12198e-06 | 3.95450e-06 |
| 1.00000     | 5.63442e-08 | 5.33747e-08 | 5.07476e-08 | 6.80208e-08 | 1.00323e-07 |
| 0.100000    | 5.32972e-10 | 4.88290e-10 | 4.47860e-10 | 9.24566e-10 | 2.93732e-09 |
| 0.0100000   | 4.48244e-13 | 3.91596e-13 | 3.46461e-13 | 3.16373e-12 | 7.71921e-11 |
| 0.00100000  | 4.23867e-17 | 4.06007e-17 | 4.07434e-17 | 5.78721e-15 | 2.32384e-12 |



|             |             |             |             |             |             |
|-------------|-------------|-------------|-------------|-------------|-------------|
| 0.000100000 | 1.78972e-21 | 2.51840e-21 | 3.97565e-21 | 5.22960e-17 | 1.29148e-13 |
| 1.00000e-05 | 4.88875e-24 | 1.12915e-23 | 2.74880e-23 | 2.51679e-18 | 1.05243e-14 |
| 1.00000e-06 | 1.49008e-25 | 3.96829e-25 | 1.10385e-24 | 2.09883e-19 | 1.00354e-15 |
| 1.00000e-07 | 1.04097e-26 | 2.95611e-26 | 8.44449e-26 | 2.05503e-20 | 9.89973e-17 |
| 1.00000e-08 | 1.04484e-27 | 2.05422e-27 | 7.18485e-27 | 1.55321e-21 | 8.80683e-18 |
| 1.00000e-09 | 1.39810e-29 | 2.28111e-29 | 6.15486e-29 | 2.08309e-22 | 2.65099e-19 |

| Pa\K        | 500.000     | 600.000     | 700.000     | 800.000     | 900.000     |
|-------------|-------------|-------------|-------------|-------------|-------------|
| 1.00000e+08 | 7.30337e-08 | 9.64753e-07 | 1.03748e-05 | 7.81769e-05 | 0.000444919 |
| 1.00000e+07 | 6.52026e-06 | 3.44527e-05 | 0.000158444 | 0.000562360 | 0.00149016  |
| 1.00000e+06 | 0.000154270 | 0.000305144 | 0.000451868 | 0.000713171 | 0.00103995  |
| 100000.     | 0.000957902 | 0.000939450 | 0.000556489 | 0.000399823 | 0.000404176 |
| 10000.0     | 0.00150616  | 0.00104048  | 0.000487954 | 0.000295030 | 0.000285813 |
| 1000.00     | 0.000807659 | 0.000540070 | 0.000301212 | 0.000211602 | 0.000187035 |
| 100.000     | 0.000128418 | 0.000132091 | 0.000108331 | 7.61371e-05 | 5.16483e-05 |
| 10.0000     | 8.78947e-06 | 2.16201e-05 | 2.07774e-05 | 1.27465e-05 | 7.00753e-06 |
| 1.00000     | 7.82599e-07 | 2.58453e-06 | 2.35592e-06 | 1.34489e-06 | 6.94020e-07 |
| 0.100000    | 5.97453e-08 | 2.12241e-07 | 2.02476e-07 | 1.22627e-07 | 6.51640e-08 |
| 0.0100000   | 3.52231e-09 | 1.55969e-08 | 1.71841e-08 | 1.13590e-08 | 6.24675e-09 |
| 0.00100000  | 2.33911e-10 | 1.26537e-09 | 1.54782e-09 | 1.08403e-09 | 6.08985e-10 |
| 0.000100000 | 1.86411e-11 | 1.11495e-10 | 1.45141e-10 | 1.05359e-10 | 5.99726e-11 |
| 1.00000e-05 | 1.71420e-12 | 1.06228e-11 | 1.41649e-11 | 1.04250e-11 | 5.96448e-12 |
| 1.00000e-06 | 1.68136e-13 | 1.05024e-12 | 1.40832e-12 | 1.03984e-12 | 5.95681e-13 |
| 1.00000e-07 | 1.67164e-14 | 1.04898e-13 | 1.40741e-13 | 1.04012e-13 | 5.95544e-14 |
| 1.00000e-08 | 1.56862e-15 | 1.05368e-14 | 1.39599e-14 | 1.03871e-14 | 5.94689e-15 |
| 1.00000e-09 | 1.94896e-16 | 1.17025e-15 | 1.35485e-15 | 1.14306e-15 | 6.14399e-16 |

| Pa\K        | 1000.00     | 1100.00     | 1200.00     | 1300.00     | 1400.00     |
|-------------|-------------|-------------|-------------|-------------|-------------|
| 1.00000e+08 | 0.00120603  | 0.00157430  | 0.00153319  | 0.00139204  | 0.00120993  |
| 1.00000e+07 | 0.00250133  | 0.00298827  | 0.00312321  | 0.00326509  | 0.00332725  |
| 1.00000e+06 | 0.00129237  | 0.00148410  | 0.00166715  | 0.00176819  | 0.00171416  |
| 100000.     | 0.000475466 | 0.000581710 | 0.000666255 | 0.000663759 | 0.000583180 |
| 10000.0     | 0.000329711 | 0.000356365 | 0.000332717 | 0.000268584 | 0.000196403 |
| 1000.00     | 0.000165203 | 0.000130062 | 9.12139e-05 | 5.89485e-05 | 3.65241e-05 |
| 100.000     | 3.38088e-05 | 2.08427e-05 | 1.23153e-05 | 7.13788e-06 | 4.12822e-06 |
| 10.0000     | 3.90037e-06 | 2.17782e-06 | 1.22104e-06 | 6.90076e-07 | 3.94320e-07 |
| 1.00000     | 3.73935e-07 | 2.06314e-07 | 1.15376e-07 | 6.52616e-08 | 3.73655e-08 |
| 0.100000    | 3.55866e-08 | 1.97697e-08 | 1.10997e-08 | 6.29564e-09 | 3.61223e-09 |
| 0.0100000   | 3.45258e-09 | 1.92723e-09 | 1.08466e-09 | 6.16152e-10 | 3.53931e-10 |
| 0.00100000  | 3.38980e-10 | 1.89742e-10 | 1.06935e-10 | 6.07971e-11 | 3.49440e-11 |
| 0.000100000 | 3.35289e-11 | 1.87998e-11 | 1.06043e-11 | 6.03224e-12 | 3.46836e-12 |
| 1.00000e-05 | 3.34029e-12 | 1.87424e-12 | 1.05761e-12 | 6.01774e-13 | 3.46071e-13 |
| 1.00000e-06 | 3.33750e-13 | 1.87300e-13 | 1.05701e-13 | 6.01491e-14 | 3.45921e-14 |
| 1.00000e-07 | 3.33649e-14 | 1.87297e-14 | 1.05688e-14 | 6.01344e-15 | 3.45936e-15 |
| 1.00000e-08 | 3.33381e-15 | 1.87532e-15 | 1.05634e-15 | 6.01050e-16 | 3.45317e-16 |
| 1.00000e-09 | 3.42817e-16 | 1.89888e-16 | 1.06386e-16 | 6.01289e-17 | 3.05115e-17 |

| Pa\K        | 1500.00     | 1750.00     | 2000.00     | 2250.00     | 2500.00     |
|-------------|-------------|-------------|-------------|-------------|-------------|
| 1.00000e+08 | 0.00103267  | 7.79899e-05 | 7.38415e-05 | 7.04191e-05 | 6.71757e-05 |
| 1.00000e+07 | 0.00315973  | 3.92505e-05 | 3.77670e-05 | 3.52743e-05 | 3.13919e-05 |
| 1.00000e+06 | 0.00155259  | 3.81337e-05 | 3.03853e-05 | 2.32191e-05 | 1.70726e-05 |
| 100000.     | 0.000476254 | 3.08942e-05 | 1.80166e-05 | 1.01967e-05 | 5.58430e-06 |
| 10000.0     | 0.000136463 | 1.08420e-05 | 4.46730e-06 | 1.87960e-06 | 8.15210e-07 |
| 1000.00     | 2.23122e-05 | 1.72112e-06 | 5.77572e-07 | 2.10826e-07 | 8.39114e-08 |
| 100.000     | 2.40579e-06 | 1.89869e-07 | 5.94199e-08 | 2.08686e-08 | 8.16050e-09 |
| 10.0000     | 2.28382e-07 | 1.89100e-08 | 5.84881e-09 | 2.04362e-09 | 7.97725e-10 |
| 1.00000     | 2.16901e-08 | 1.86178e-09 | 5.76173e-10 | 2.01393e-10 | 7.86297e-11 |
| 0.100000    | 2.10043e-09 | 1.84206e-10 | 5.70551e-11 | 1.99513e-11 | 7.79108e-12 |
| 0.0100000   | 2.05976e-10 | 1.83002e-11 | 5.66990e-12 | 1.98308e-12 | 7.74476e-13 |
| 0.00100000  | 2.03448e-11 | 1.82267e-12 | 5.64793e-13 | 1.97563e-13 | 7.71634e-14 |
| 0.000100000 | 2.01986e-12 | 1.82035e-13 | 5.64121e-14 | 1.97346e-14 | 7.70834e-15 |
| 1.00000e-05 | 2.01569e-13 | 1.81994e-14 | 5.64002e-15 | 1.97308e-15 | 7.70698e-16 |
| 1.00000e-06 | 2.01497e-14 | 1.81981e-15 | 5.63974e-16 | 1.97287e-16 | 7.70608e-17 |
| 1.00000e-07 | 2.01436e-15 | 1.81995e-16 | 5.64128e-17 | 1.97230e-17 | 7.70611e-18 |
| 1.00000e-08 | 2.01275e-16 | 1.81978e-17 | 5.62714e-18 | 1.97290e-18 | 7.69678e-19 |
| 1.00000e-09 | 1.77751e-17 | 1.73785e-18 | 5.38422e-19 | 1.88308e-19 | 7.35365e-20 |

| Pa\K        | 2750.00     | 3000.00     | 3250.00     | 3500.00     | 3750.00     |
|-------------|-------------|-------------|-------------|-------------|-------------|
| 1.00000e+08 | 6.35044e-05 | 5.91019e-05 | 5.41273e-05 | 4.88866e-05 | 4.36574e-05 |
| 1.00000e+07 | 2.68695e-05 | 2.23336e-05 | 1.81494e-05 | 1.44910e-05 | 1.14172e-05 |
| 1.00000e+06 | 1.20501e-05 | 8.22082e-06 | 5.47838e-06 | 3.60324e-06 | 2.35993e-06 |
| 100000.     | 2.99712e-06 | 1.60858e-06 | 8.76558e-07 | 4.89192e-07 | 2.80714e-07 |
| 10000.0     | 3.69638e-07 | 1.76768e-07 | 8.91883e-08 | 4.72830e-08 | 2.61966e-08 |
| 1000.00     | 3.63082e-08 | 1.69425e-08 | 8.43745e-09 | 4.43994e-09 | 2.44805e-09 |
| 100.000     | 3.50607e-09 | 1.63157e-09 | 8.11647e-10 | 4.26881e-10 | 2.35280e-10 |
| 10.0000     | 3.42602e-10 | 1.59438e-10 | 7.93258e-11 | 4.17264e-11 | 2.30001e-11 |

|             |             |             |             |             |             |
|-------------|-------------|-------------|-------------|-------------|-------------|
| 1.00000     | 3.37755e-11 | 1.57207e-11 | 7.82261e-12 | 4.11523e-12 | 2.26857e-12 |
| 0.100000    | 3.34705e-12 | 1.55803e-12 | 7.75333e-13 | 4.07908e-13 | 2.24875e-13 |
| 0.0100000   | 3.32739e-13 | 1.54896e-13 | 7.70852e-14 | 4.05568e-14 | 2.23594e-14 |
| 0.00100000  | 3.31543e-14 | 1.54348e-14 | 7.68177e-15 | 4.04183e-15 | 2.22844e-15 |
| 0.000100000 | 3.31214e-15 | 1.54203e-15 | 7.67481e-16 | 4.03831e-16 | 2.22657e-16 |
| 1.00000e-05 | 3.31159e-16 | 1.54178e-16 | 7.67365e-17 | 4.03772e-17 | 2.22623e-17 |
| 1.00000e-06 | 3.31164e-17 | 1.54169e-17 | 7.67347e-18 | 4.03739e-18 | 2.22617e-18 |
| 1.00000e-07 | 3.31190e-18 | 1.54162e-18 | 7.67312e-19 | 4.04020e-19 | 2.22644e-19 |
| 1.00000e-08 | 3.30054e-19 | 1.53400e-19 | 7.63106e-20 | 4.00971e-20 | 2.21999e-20 |
| 1.00000e-09 | 3.15911e-20 | 1.47053e-20 | 7.31793e-21 | 3.85012e-21 | 2.12264e-21 |

Pa\K | 4000.00

|             |             |
|-------------|-------------|
| 1.00000e+08 | 3.86425e-05 |
| 1.00000e+07 | 8.91501e-06 |
| 1.00000e+06 | 1.55045e-06 |
| 100000.     | 1.65861e-07 |
| 10000.0     | 1.50917e-08 |
| 1000.00     | 1.40498e-09 |
| 100.000     | 1.34973e-10 |
| 10.0000     | 1.31950e-11 |
| 1.00000     | 1.30154e-12 |
| 0.100000    | 1.29025e-13 |
| 0.0100000   | 1.28295e-14 |
| 0.00100000  | 1.27871e-15 |
| 0.000100000 | 1.27767e-16 |
| 1.00000e-05 | 1.27749e-17 |
| 1.00000e-06 | 1.27749e-18 |
| 1.00000e-07 | 1.27728e-19 |
| 1.00000e-08 | 1.27242e-20 |
| 1.00000e-09 | 1.21798e-21 |

rad39

====

Pa\K | 20.0000 30.0000 40.0000 50.0000 60.0000

|             |             |             |             |             |             |
|-------------|-------------|-------------|-------------|-------------|-------------|
| 1.00000e+08 | 1.25655e-42 | 6.80810e-39 | 7.32674e-37 | 1.52776e-35 | 1.41137e-34 |
| 1.00000e+07 | 1.40473e-38 | 7.08312e-36 | 7.33977e-34 | 1.52727e-32 | 1.41020e-31 |
| 1.00000e+06 | 1.94031e-34 | 1.03214e-32 | 7.48741e-31 | 1.52289e-29 | 1.39880e-28 |
| 100000.     | 1.98951e-30 | 4.15967e-29 | 8.88576e-28 | 1.48310e-26 | 1.29630e-25 |
| 10000.0     | 1.71273e-26 | 2.69775e-25 | 1.80174e-24 | 1.29201e-23 | 8.10698e-23 |
| 1000.00     | 7.15463e-23 | 7.69341e-22 | 3.26923e-21 | 1.10397e-20 | 3.59036e-20 |
| 100.000     | 9.72177e-20 | 8.06712e-19 | 2.89903e-18 | 7.89665e-18 | 1.91519e-17 |
| 10.0000     | 5.55690e-17 | 3.26143e-16 | 9.42318e-16 | 2.16741e-15 | 4.51964e-15 |
| 1.00000     | 1.02342e-14 | 4.68610e-14 | 1.21848e-13 | 2.63476e-13 | 5.26081e-13 |
| 0.100000    | 1.11109e-12 | 4.82888e-12 | 1.22645e-11 | 2.60612e-11 | 5.11733e-11 |
| 0.0100000   | 1.04347e-10 | 4.21138e-10 | 9.97679e-10 | 1.97151e-09 | 3.57103e-09 |
| 0.00100000  | 6.10310e-09 | 1.72188e-08 | 3.08243e-08 | 4.76756e-08 | 6.87695e-08 |
| 0.000100000 | 7.48169e-08 | 1.11651e-07 | 1.38762e-07 | 1.66312e-07 | 1.97284e-07 |
| 1.00000e-05 | 1.53078e-07 | 1.67124e-07 | 1.83037e-07 | 2.04398e-07 | 2.31594e-07 |
| 1.00000e-06 | 1.68105e-07 | 1.75060e-07 | 1.88672e-07 | 2.08944e-07 | 2.35527e-07 |
| 1.00000e-07 | 1.69731e-07 | 1.75885e-07 | 1.89249e-07 | 2.09407e-07 | 2.35925e-07 |
| 1.00000e-08 | 1.69895e-07 | 1.75968e-07 | 1.89307e-07 | 2.09454e-07 | 2.35965e-07 |
| 1.00000e-09 | 1.69911e-07 | 1.75976e-07 | 1.89313e-07 | 2.09458e-07 | 2.35969e-07 |

Pa\K | 70.0000 80.0000 90.0000 100.000 110.000

|             |             |             |             |             |             |
|-------------|-------------|-------------|-------------|-------------|-------------|
| 1.00000e+08 | 8.20883e-34 | 3.58191e-33 | 1.29430e-32 | 4.11729e-32 | 1.20079e-31 |
| 1.00000e+07 | 8.19954e-31 | 3.57686e-30 | 1.29210e-29 | 4.10894e-29 | 1.19791e-28 |
| 1.00000e+06 | 8.10814e-28 | 3.52719e-27 | 1.27048e-26 | 4.02734e-26 | 1.16985e-25 |
| 100000.     | 7.30408e-25 | 3.10066e-24 | 1.08974e-23 | 3.36501e-23 | 9.49693e-23 |
| 10000.0     | 3.86204e-22 | 1.45807e-21 | 4.64535e-21 | 1.31143e-20 | 3.39808e-20 |
| 1000.00     | 1.13169e-19 | 3.34207e-19 | 9.14093e-19 | 2.33277e-18 | 5.63322e-18 |
| 100.000     | 4.42101e-17 | 9.97720e-17 | 2.21783e-16 | 4.85993e-16 | 1.05031e-15 |
| 10.0000     | 9.04664e-15 | 1.79014e-14 | 3.54841e-14 | 7.07151e-14 | 1.41622e-13 |
| 1.00000     | 1.01747e-12 | 1.95599e-12 | 3.78187e-12 | 7.37431e-12 | 1.44787e-11 |
| 0.100000    | 9.71225e-11 | 1.82399e-10 | 3.42231e-10 | 6.41942e-10 | 1.19943e-09 |
| 0.0100000   | 6.16939e-09 | 1.03647e-08 | 1.70690e-08 | 2.76024e-08 | 4.37925e-08 |
| 0.00100000  | 9.53543e-08 | 1.29044e-07 | 1.71806e-07 | 2.25900e-07 | 2.93858e-07 |
| 0.000100000 | 2.33451e-07 | 2.76610e-07 | 3.28762e-07 | 3.92111e-07 | 4.69069e-07 |
| 1.00000e-05 | 2.65289e-07 | 3.06756e-07 | 3.57720e-07 | 4.20224e-07 | 4.96574e-07 |
| 1.00000e-06 | 2.68838e-07 | 3.10047e-07 | 3.60832e-07 | 4.23208e-07 | 4.99464e-07 |
| 1.00000e-07 | 2.69197e-07 | 3.10379e-07 | 3.61146e-07 | 4.23508e-07 | 4.99755e-07 |
| 1.00000e-08 | 2.69233e-07 | 3.10413e-07 | 3.61177e-07 | 4.23538e-07 | 4.99784e-07 |
| 1.00000e-09 | 2.69236e-07 | 3.10416e-07 | 3.61180e-07 | 4.23541e-07 | 4.99787e-07 |

Pa\K | 120.000 130.000 140.000 150.000 160.000

|             |             |             |             |             |             |
|-------------|-------------|-------------|-------------|-------------|-------------|
| 1.00000e+08 | 3.30191e-31 | 8.73066e-31 | 2.25038e-30 | 5.70684e-30 | 1.43222e-29 |
| 1.00000e+07 | 3.29254e-28 | 8.70136e-28 | 2.24143e-27 | 5.67991e-27 | 1.42418e-26 |

|             |             |             |             |             |             |
|-------------|-------------|-------------|-------------|-------------|-------------|
| 1.00000e+06 | 3.20181e-25 | 8.41938e-25 | 2.15595e-24 | 5.42480e-24 | 1.34884e-23 |
| 100000.     | 2.51695e-22 | 6.38316e-22 | 1.56925e-21 | 3.77221e-21 | 8.91508e-21 |
| 10000.0     | 8.28744e-20 | 1.93717e-19 | 4.39645e-19 | 9.77635e-19 | 2.14337e-18 |
| 1000.00     | 1.30562e-17 | 2.93979e-17 | 6.49145e-17 | 1.41531e-16 | 3.06059e-16 |
| 100.000     | 2.24260e-15 | 4.74336e-15 | 9.96569e-15 | 2.08442e-14 | 4.34669e-14 |
| 10.0000     | 2.84676e-13 | 5.73878e-13 | 1.15972e-12 | 2.34856e-12 | 4.76296e-12 |
| 1.00000     | 2.85475e-11 | 5.63798e-11 | 1.11272e-10 | 2.18938e-10 | 4.28300e-10 |
| 0.100000    | 2.22191e-09 | 4.06346e-09 | 7.31136e-09 | 1.29094e-08 | 2.23254e-08 |
| 0.0100000   | 6.80792e-08 | 1.03624e-07 | 1.54414e-07 | 2.25353e-07 | 3.22338e-07 |
| 0.00100000  | 3.78499e-07 | 4.82991e-07 | 6.10924e-07 | 7.66413e-07 | 9.54187e-07 |
| 0.000100000 | 5.62314e-07 | 6.74868e-07 | 8.10198e-07 | 9.72317e-07 | 1.16588e-06 |
| 1.00000e-05 | 5.89376e-07 | 7.01600e-07 | 8.36673e-07 | 9.98575e-07 | 1.19195e-06 |
| 1.00000e-06 | 5.92196e-07 | 7.04367e-07 | 8.39399e-07 | 1.00127e-06 | 1.19461e-06 |
| 1.00000e-07 | 5.92480e-07 | 7.04645e-07 | 8.39673e-07 | 1.00154e-06 | 1.19488e-06 |
| 1.00000e-08 | 5.92508e-07 | 7.04673e-07 | 8.39700e-07 | 1.00157e-06 | 1.19491e-06 |
| 1.00000e-09 | 5.92511e-07 | 7.04675e-07 | 8.39703e-07 | 1.00157e-06 | 1.19491e-06 |

| Pa\K        | 170.000     | 180.000     | 190.000     | 200.000     | 210.000     |
|-------------|-------------|-------------|-------------|-------------|-------------|
| 1.00000e+08 | 3.56910e-29 | 8.84607e-29 | 2.18160e-28 | 5.35177e-28 | 1.30481e-27 |
| 1.00000e+07 | 3.54525e-26 | 8.77570e-26 | 2.16096e-25 | 5.29159e-25 | 1.28743e-24 |
| 1.00000e+06 | 3.32452e-23 | 8.13387e-23 | 1.97584e-22 | 4.76280e-22 | 1.13811e-21 |
| 100000.     | 2.07814e-20 | 4.78591e-20 | 1.08966e-19 | 2.45304e-19 | 5.45888e-19 |
| 10000.0     | 4.65194e-18 | 1.00202e-17 | 2.14509e-17 | 4.56681e-17 | 9.67022e-17 |
| 1000.00     | 6.58201e-16 | 1.40943e-15 | 3.00575e-15 | 6.38114e-15 | 1.34746e-14 |
| 100.000     | 9.04343e-14 | 1.87728e-13 | 3.88639e-13 | 8.01745e-13 | 1.64643e-12 |
| 10.0000     | 9.66294e-12 | 1.95802e-11 | 3.95490e-11 | 7.94457e-11 | 1.58323e-10 |
| 1.00000     | 8.30566e-10 | 1.59164e-09 | 3.00503e-09 | 5.57476e-09 | 1.01396e-08 |
| 0.100000    | 3.77688e-08 | 6.24576e-08 | 1.00932e-07 | 1.59397e-07 | 2.46084e-07 |
| 0.0100000   | 4.52309e-07 | 6.23281e-07 | 8.44356e-07 | 1.12572e-06 | 1.47866e-06 |
| 0.00100000  | 1.17970e-06 | 1.44920e-06 | 1.76987e-06 | 2.14992e-06 | 2.59862e-06 |
| 0.000100000 | 1.39629e-06 | 1.66977e-06 | 1.99351e-06 | 2.37570e-06 | 2.82564e-06 |
| 1.00000e-05 | 1.42217e-06 | 1.69546e-06 | 2.01898e-06 | 2.40093e-06 | 2.85060e-06 |
| 1.00000e-06 | 1.42480e-06 | 1.69807e-06 | 2.02157e-06 | 2.40348e-06 | 2.85311e-06 |
| 1.00000e-07 | 1.42507e-06 | 1.69833e-06 | 2.02182e-06 | 2.40374e-06 | 2.85337e-06 |
| 1.00000e-08 | 1.42509e-06 | 1.69836e-06 | 2.02185e-06 | 2.40377e-06 | 2.85340e-06 |
| 1.00000e-09 | 1.42510e-06 | 1.69836e-06 | 2.02185e-06 | 2.40377e-06 | 2.85340e-06 |

| Pa\K        | 220.000     | 230.000     | 240.000     | 250.000     | 260.000     |
|-------------|-------------|-------------|-------------|-------------|-------------|
| 1.00000e+08 | 3.15756e-27 | 7.56979e-27 | 1.79302e-26 | 4.18174e-26 | 9.56385e-26 |
| 1.00000e+07 | 3.10793e-24 | 7.43018e-24 | 1.75454e-23 | 4.07842e-23 | 9.29495e-23 |
| 1.00000e+06 | 2.69224e-21 | 6.29311e-21 | 1.45020e-20 | 3.28514e-20 | 7.29104e-20 |
| 100000.     | 1.20033e-18 | 2.60626e-18 | 5.58240e-18 | 1.17786e-17 | 2.44335e-17 |
| 10000.0     | 2.03606e-16 | 4.25971e-16 | 8.84506e-16 | 1.81970e-15 | 3.70040e-15 |
| 1000.00     | 2.82712e-14 | 5.88636e-14 | 1.21447e-13 | 2.47860e-13 | 4.99304e-13 |
| 100.000     | 3.36155e-12 | 6.81429e-12 | 1.36929e-11 | 2.72243e-11 | 5.34400e-11 |
| 10.0000     | 3.12219e-10 | 6.07781e-10 | 1.16523e-09 | 2.19565e-09 | 4.05900e-09 |
| 1.00000     | 1.80517e-08 | 3.14224e-08 | 5.34466e-08 | 8.88118e-08 | 1.44191e-07 |
| 0.100000    | 3.71597e-07 | 5.49212e-07 | 7.95114e-07 | 1.12853e-06 | 1.57177e-06 |
| 0.0100000   | 1.91552e-06 | 2.44975e-06 | 3.09593e-06 | 3.86978e-06 | 4.78821e-06 |
| 0.00100000  | 3.12644e-06 | 3.74517e-06 | 4.46792e-06 | 5.30925e-06 | 6.28524e-06 |
| 0.000100000 | 3.35384e-06 | 3.97212e-06 | 4.69363e-06 | 5.53299e-06 | 6.50632e-06 |
| 1.00000e-05 | 3.37850e-06 | 3.99643e-06 | 4.71757e-06 | 5.55653e-06 | 6.52940e-06 |
| 1.00000e-06 | 3.38098e-06 | 3.99889e-06 | 4.71999e-06 | 5.55890e-06 | 6.53173e-06 |
| 1.00000e-07 | 3.38124e-06 | 3.99913e-06 | 4.72023e-06 | 5.55913e-06 | 6.53196e-06 |
| 1.00000e-08 | 3.38126e-06 | 3.99916e-06 | 4.72025e-06 | 5.55915e-06 | 6.53198e-06 |
| 1.00000e-09 | 3.38127e-06 | 3.99916e-06 | 4.72025e-06 | 5.55916e-06 | 6.53198e-06 |

| Pa\K        | 270.000     | 280.000     | 290.000     | 300.000     | 400.000     |
|-------------|-------------|-------------|-------------|-------------|-------------|
| 1.00000e+08 | 2.13576e-25 | 4.63857e-25 | 9.76505e-25 | 1.52529e-22 | 8.56673e-17 |
| 1.00000e+07 | 2.06830e-22 | 4.47600e-22 | 9.38968e-22 | 1.38705e-19 | 9.65008e-14 |
| 1.00000e+06 | 1.57982e-19 | 3.33084e-19 | 6.81375e-19 | 5.55314e-17 | 9.57378e-12 |
| 100000.     | 4.97139e-17 | 9.89573e-17 | 1.92219e-16 | 8.79587e-15 | 7.28207e-11 |
| 10000.0     | 7.41647e-15 | 1.46036e-14 | 2.81623e-14 | 1.07874e-12 | 2.62975e-10 |
| 1000.00     | 9.90334e-13 | 1.92875e-12 | 3.67853e-12 | 1.03931e-10 | 1.44697e-08 |
| 100.000     | 1.03318e-10 | 1.96236e-10 | 3.65247e-10 | 6.68250e-09 | 4.73786e-07 |
| 10.0000     | 7.35052e-09 | 1.30233e-08 | 2.25525e-08 | 2.02952e-07 | 5.71015e-06 |
| 1.00000     | 2.28807e-07 | 3.55045e-07 | 5.39057e-07 | 2.20670e-06 | 2.40374e-05 |
| 0.100000    | 2.15005e-06 | 2.89136e-06 | 3.82606e-06 | 7.95520e-06 | 4.23956e-05 |
| 0.0100000   | 5.86938e-06 | 7.13273e-06 | 8.59898e-06 | 1.21258e-05 | 4.80098e-05 |
| 0.00100000  | 7.41349e-06 | 8.71319e-06 | 1.02051e-05 | 1.30294e-05 | 4.87796e-05 |
| 0.000100000 | 7.63129e-06 | 8.92713e-06 | 1.04147e-05 | 1.31363e-05 | 4.88605e-05 |
| 1.00000e-05 | 7.65388e-06 | 8.94920e-06 | 1.04362e-05 | 1.31473e-05 | 4.88686e-05 |
| 1.00000e-06 | 7.65615e-06 | 8.95142e-06 | 1.04384e-05 | 1.31483e-05 | 4.88695e-05 |
| 1.00000e-07 | 7.65638e-06 | 8.95164e-06 | 1.04385e-05 | 1.31484e-05 | 4.88695e-05 |
| 1.00000e-08 | 7.65640e-06 | 8.95166e-06 | 1.04385e-05 | 1.31484e-05 | 4.88695e-05 |
| 1.00000e-09 | 7.65640e-06 | 8.95167e-06 | 1.04385e-05 | 1.31484e-05 | 4.88696e-05 |

| Pa\K        | 500.000     | 600.000     | 700.000     | 800.000     | 900.000     |
|-------------|-------------|-------------|-------------|-------------|-------------|
| 1.00000e+08 | 3.72075e-12 | 5.95583e-10 | 1.00155e-08 | 6.72721e-08 | 4.36445e-07 |
| 1.00000e+07 | 1.63767e-09 | 6.59631e-08 | 4.91777e-07 | 1.93353e-06 | 5.65969e-06 |
| 1.00000e+06 | 4.52612e-08 | 1.60616e-06 | 7.41932e-06 | 1.67543e-05 | 2.98064e-05 |
| 100000.     | 6.82147e-08 | 3.02808e-06 | 1.61552e-05 | 3.48631e-05 | 7.53456e-05 |
| 10000.0     | 3.78284e-08 | 1.70026e-06 | 1.83000e-05 | 8.17541e-05 | 0.000260142 |
| 1000.00     | 7.17800e-07 | 1.19430e-05 | 8.41193e-05 | 0.000299567 | 0.000685011 |
| 100.000     | 1.01422e-05 | 7.73788e-05 | 0.000284594 | 0.000637525 | 0.00105220  |
| 10.0000     | 5.18107e-05 | 0.000204572 | 0.000479823 | 0.000824241 | 0.00117698  |
| 1.00000     | 0.000108718 | 0.000285303 | 0.000547779 | 0.000866067 | 0.00119712  |
| 0.100000    | 0.000133467 | 0.000304488 | 0.000558585 | 0.000871332 | 0.00119936  |
| 0.0100000   | 0.000137771 | 0.000306926 | 0.000559769 | 0.000871881 | 0.00119959  |
| 0.00100000  | 0.000138251 | 0.000307179 | 0.000559889 | 0.000871932 | 0.00119961  |
| 0.000100000 | 0.000138300 | 0.000307204 | 0.000559900 | 0.000871939 | 0.00119961  |
| 1.00000e-05 | 0.000138306 | 0.000307206 | 0.000559902 | 0.000871939 | 0.00119961  |
| 1.00000e-06 | 0.000138306 | 0.000307206 | 0.000559902 | 0.000871939 | 0.00119961  |
| 1.00000e-07 | 0.000138306 | 0.000307206 | 0.000559902 | 0.000871939 | 0.00119961  |
| 1.00000e-08 | 0.000138306 | 0.000307206 | 0.000559902 | 0.000871939 | 0.00119961  |
| 1.00000e-09 | 0.000138306 | 0.000307206 | 0.000559902 | 0.000871939 | 0.00119961  |

| Pa\K        | 1000.00     | 1100.00     | 1200.00     | 1300.00     | 1400.00     |
|-------------|-------------|-------------|-------------|-------------|-------------|
| 1.00000e+08 | 1.91724e-06 | 5.66570e-06 | 1.42554e-05 | 3.46707e-05 | 5.50973e-05 |
| 1.00000e+07 | 1.42913e-05 | 4.10970e-05 | 0.000116185 | 0.000252111 | 0.000376151 |
| 1.00000e+06 | 5.93908e-05 | 0.000160109 | 0.000391163 | 0.000684978 | 0.000884868 |
| 100000.     | 0.000199865 | 0.000488638 | 0.000913444 | 0.00128317  | 0.00146087  |
| 10000.0     | 0.000608046 | 0.00107334  | 0.00149860  | 0.00175007  | 0.00182688  |
| 1000.00     | 0.00114230  | 0.00154015  | 0.00180166  | 0.00192385  | 0.00194363  |
| 100.000     | 0.00142316  | 0.00170011  | 0.00187350  | 0.00195433  | 0.00196164  |
| 10.0000     | 0.00148776  | 0.00172721  | 0.00188297  | 0.00195749  | 0.00196329  |
| 1.00000     | 0.00149619  | 0.00173039  | 0.00188410  | 0.00195792  | 0.00196355  |
| 0.100000    | 0.00149709  | 0.00173074  | 0.00188423  | 0.00195799  | 0.00196360  |
| 0.0100000   | 0.00149718  | 0.00173077  | 0.00188425  | 0.00195800  | 0.00196361  |
| 0.00100000  | 0.00149719  | 0.00173078  | 0.00188425  | 0.00195800  | 0.00196361  |
| 0.000100000 | 0.00149719  | 0.00173078  | 0.00188425  | 0.00195800  | 0.00196361  |
| 1.00000e-05 | 0.00149719  | 0.00173078  | 0.00188425  | 0.00195800  | 0.00196361  |
| 1.00000e-06 | 0.00149719  | 0.00173078  | 0.00188425  | 0.00195800  | 0.00196361  |
| 1.00000e-07 | 0.00149719  | 0.00173078  | 0.00188425  | 0.00195800  | 0.00196361  |
| 1.00000e-08 | 0.00149719  | 0.00173078  | 0.00188425  | 0.00195800  | 0.00196361  |
| 1.00000e-09 | 0.00149719  | 0.00173078  | 0.00188425  | 0.00195800  | 0.00196361  |

| Pa\K        | 1500.00     | 1750.00     | 2000.00     | 2250.00     | 2500.00     |
|-------------|-------------|-------------|-------------|-------------|-------------|
| 1.00000e+08 | 5.08059e-05 | 0.000384267 | 0.000395259 | 0.000391875 | 0.000389196 |
| 1.00000e+07 | 0.000412442 | 0.000781319 | 0.000753320 | 0.000723984 | 0.000700243 |
| 1.00000e+06 | 0.000950550 | 0.00143048  | 0.00123441  | 0.00110033  | 0.000987047 |
| 100000.     | 0.00148137  | 0.00182889  | 0.00146550  | 0.00121980  | 0.00101776  |
| 10000.0     | 0.00179716  | 0.00177180  | 0.00143735  | 0.00118631  | 0.000985568 |
| 1000.00     | 0.00189885  | 0.00170612  | 0.00142181  | 0.00117770  | 0.000979966 |
| 100.000     | 0.00191573  | 0.00169599  | 0.00142073  | 0.00117700  | 0.000979445 |
| 10.0000     | 0.00191747  | 0.00169492  | 0.00142069  | 0.00117695  | 0.000979399 |
| 1.00000     | 0.00191773  | 0.00169484  | 0.00142069  | 0.00117695  | 0.000979395 |
| 0.100000    | 0.00191777  | 0.00169483  | 0.00142069  | 0.00117695  | 0.000979395 |
| 0.0100000   | 0.00191777  | 0.00169483  | 0.00142069  | 0.00117695  | 0.000979395 |
| 0.00100000  | 0.00191777  | 0.00169483  | 0.00142069  | 0.00117695  | 0.000979395 |
| 0.000100000 | 0.00191777  | 0.00169483  | 0.00142069  | 0.00117695  | 0.000979395 |
| 1.00000e-05 | 0.00191777  | 0.00169483  | 0.00142069  | 0.00117695  | 0.000979395 |
| 1.00000e-06 | 0.00191777  | 0.00169483  | 0.00142069  | 0.00117695  | 0.000979395 |
| 1.00000e-07 | 0.00191777  | 0.00169483  | 0.00142069  | 0.00117695  | 0.000979395 |
| 1.00000e-08 | 0.00191777  | 0.00169483  | 0.00142069  | 0.00117695  | 0.000979395 |
| 1.00000e-09 | 0.00191777  | 0.00169483  | 0.00142069  | 0.00117695  | 0.000979395 |

| Pa\K        | 2750.00     | 3000.00     | 3250.00     | 3500.00     | 3750.00     |
|-------------|-------------|-------------|-------------|-------------|-------------|
| 1.00000e+08 | 0.000387484 | 0.000384330 | 0.000378549 | 0.000369548 | 0.000357134 |
| 1.00000e+07 | 0.000671725 | 0.000633323 | 0.000585626 | 0.000532687 | 0.000479255 |
| 1.00000e+06 | 0.000867246 | 0.000749378 | 0.000644442 | 0.000556720 | 0.000485368 |
| 100000.     | 0.000850960 | 0.000719501 | 0.000617433 | 0.000537364 | 0.000473195 |
| 10000.0     | 0.000828027 | 0.000705665 | 0.000609845 | 0.000533470 | 0.000471316 |
| 1000.00     | 0.000824864 | 0.000704032 | 0.000609048 | 0.000533097 | 0.000471155 |
| 100.000     | 0.000824563 | 0.000703878 | 0.000608975 | 0.000533064 | 0.000471140 |
| 10.0000     | 0.000824538 | 0.000703863 | 0.000608968 | 0.000533060 | 0.000471138 |
| 1.00000     | 0.000824532 | 0.000703861 | 0.000608967 | 0.000533059 | 0.000471138 |
| 0.100000    | 0.000824532 | 0.000703861 | 0.000608967 | 0.000533059 | 0.000471138 |
| 0.0100000   | 0.000824532 | 0.000703861 | 0.000608967 | 0.000533059 | 0.000471138 |
| 0.00100000  | 0.000824532 | 0.000703861 | 0.000608967 | 0.000533059 | 0.000471138 |
| 0.000100000 | 0.000824532 | 0.000703861 | 0.000608967 | 0.000533059 | 0.000471138 |
| 1.00000e-05 | 0.000824532 | 0.000703861 | 0.000608967 | 0.000533059 | 0.000471138 |
| 1.00000e-06 | 0.000824532 | 0.000703861 | 0.000608967 | 0.000533059 | 0.000471138 |

|             |             |             |             |             |             |
|-------------|-------------|-------------|-------------|-------------|-------------|
| 1.00000e-07 | 0.000824532 | 0.000703861 | 0.000608967 | 0.000533059 | 0.000471138 |
| 1.00000e-08 | 0.000824532 | 0.000703861 | 0.000608967 | 0.000533059 | 0.000471138 |
| 1.00000e-09 | 0.000824532 | 0.000703861 | 0.000608967 | 0.000533059 | 0.000471138 |

| Pa\K        | 4000.00     |
|-------------|-------------|
| 1.00000e+08 | 0.000341605 |
| 1.00000e+07 | 0.000428932 |
| 1.00000e+06 | 0.000427527 |
| 100000.     | 0.000420592 |
| 10000.0     | 0.000419761 |
| 1000.00     | 0.000419700 |
| 100.000     | 0.000419695 |
| 10.0000     | 0.000419695 |
| 1.00000     | 0.000419695 |
| 0.100000    | 0.000419695 |
| 0.0100000   | 0.000419695 |
| 0.00100000  | 0.000419695 |
| 0.000100000 | 0.000419695 |
| 1.00000e-05 | 0.000419695 |
| 1.00000e-06 | 0.000419695 |
| 1.00000e-07 | 0.000419695 |
| 1.00000e-08 | 0.000419695 |
| 1.00000e-09 | 0.000419695 |

rad54  
=====

| Pa\K        | 20.0000     | 30.0000     | 40.0000     | 50.0000     | 60.0000     |
|-------------|-------------|-------------|-------------|-------------|-------------|
| 1.00000e+08 | 1.32038e-50 | 1.30420e-47 | 1.41434e-45 | 4.13653e-44 | 6.92723e-43 |
| 1.00000e+07 | 2.37065e-47 | 1.54398e-45 | 1.41089e-43 | 4.07427e-42 | 6.78521e-41 |
| 1.00000e+06 | 2.56550e-44 | 3.81951e-43 | 1.38059e-41 | 3.53481e-40 | 5.59425e-39 |
| 100000.     | 1.95702e-41 | 1.66925e-40 | 1.27000e-39 | 1.55820e-38 | 1.85411e-37 |
| 10000.0     | 5.19433e-39 | 2.91409e-38 | 1.17406e-37 | 5.61745e-37 | 3.58761e-36 |
| 1000.00     | 4.93920e-37 | 2.11858e-36 | 6.75585e-36 | 2.28658e-35 | 9.38400e-35 |
| 100.000     | 1.42146e-35 | 3.80897e-35 | 9.55936e-35 | 2.74968e-34 | 1.00234e-33 |
| 10.0000     | 1.49333e-34 | 3.81729e-34 | 9.39231e-34 | 2.66026e-33 | 9.62304e-33 |
| 1.00000     | 1.47014e-33 | 3.67452e-33 | 8.85905e-33 | 2.46316e-32 | 8.76626e-32 |
| 0.100000    | 1.22253e-32 | 2.56264e-32 | 5.27291e-32 | 1.26914e-31 | 3.96046e-31 |
| 0.0100000   | 2.69126e-32 | 1.92321e-32 | 1.80373e-32 | 2.37295e-32 | 4.63251e-32 |
| 0.00100000  | 4.21113e-34 | 5.48587e-35 | 2.48534e-35 | 2.36885e-35 | 4.56739e-35 |
| 0.000100000 | 1.99604e-37 | 3.85786e-38 | 2.98400e-38 | 5.32147e-38 | 2.47277e-37 |
| 1.00000e-05 | 1.22304e-39 | 6.46829e-40 | 8.40130e-40 | 2.23492e-39 | 1.50222e-38 |
| 1.00000e-06 | 7.40665e-41 | 5.01310e-41 | 7.14847e-41 | 2.02090e-40 | 1.42443e-39 |
| 1.00000e-07 | 7.00896e-42 | 4.88084e-42 | 7.03056e-42 | 2.00032e-41 | 1.41683e-40 |
| 1.00000e-08 | 6.96998e-43 | 4.86774e-43 | 7.01884e-43 | 1.99827e-42 | 1.41607e-41 |
| 1.00000e-09 | 6.96609e-44 | 4.86643e-44 | 7.01767e-44 | 1.99807e-43 | 1.41600e-42 |

| Pa\K        | 70.0000     | 80.0000     | 90.0000     | 100.0000    | 110.0000    |
|-------------|-------------|-------------|-------------|-------------|-------------|
| 1.00000e+08 | 9.39183e-42 | 1.30155e-40 | 2.31230e-39 | 6.20193e-38 | 2.09877e-36 |
| 1.00000e+07 | 9.15728e-40 | 1.26413e-38 | 2.24107e-37 | 6.01826e-36 | 2.04188e-34 |
| 1.00000e+06 | 7.25033e-38 | 9.67893e-37 | 1.68701e-35 | 4.59158e-34 | 1.59698e-32 |
| 100000.     | 2.02561e-36 | 2.40194e-35 | 4.00725e-34 | 1.19141e-32 | 4.69191e-31 |
| 10000.0     | 2.87174e-35 | 2.90883e-34 | 4.49066e-33 | 1.36046e-31 | 5.72411e-30 |
| 1000.00     | 5.13191e-34 | 4.04665e-33 | 5.39308e-32 | 1.51734e-30 | 6.31543e-29 |
| 100.000     | 5.12033e-33 | 3.95346e-32 | 5.30922e-31 | 1.52227e-29 | 6.48994e-28 |
| 10.0000     | 4.92794e-32 | 3.83527e-31 | 5.19245e-30 | 1.49921e-28 | 6.43719e-27 |
| 1.00000     | 4.42777e-31 | 3.40696e-30 | 4.58738e-29 | 1.34051e-27 | 5.84954e-26 |
| 0.100000    | 1.77812e-30 | 1.24237e-29 | 1.62877e-28 | 5.59055e-27 | 2.87733e-25 |
| 0.0100000   | 1.48016e-31 | 9.10104e-31 | 2.56447e-29 | 4.13654e-27 | 3.82166e-25 |
| 0.00100000  | 2.23657e-34 | 6.03121e-33 | 7.76777e-30 | 3.50618e-27 | 3.81108e-25 |
| 0.000100000 | 3.94924e-36 | 3.67583e-34 | 6.93872e-30 | 3.44938e-27 | 3.80849e-25 |
| 1.00000e-05 | 3.19673e-37 | 3.50878e-35 | 6.86241e-30 | 3.44378e-27 | 3.80822e-25 |
| 1.00000e-06 | 3.12925e-38 | 3.49267e-36 | 6.85484e-30 | 3.44322e-27 | 3.80819e-25 |
| 1.00000e-07 | 3.12257e-39 | 3.49107e-37 | 6.85408e-30 | 3.44316e-27 | 3.80819e-25 |
| 1.00000e-08 | 3.12191e-40 | 3.49091e-38 | 6.85400e-30 | 3.44316e-27 | 3.80819e-25 |
| 1.00000e-09 | 3.12184e-41 | 3.49089e-39 | 6.85400e-30 | 3.44316e-27 | 3.80819e-25 |

| Pa\K        | 120.0000    | 130.0000    | 140.0000    | 150.0000    | 160.0000    |
|-------------|-------------|-------------|-------------|-------------|-------------|
| 1.00000e+08 | 6.28905e-35 | 1.40132e-33 | 2.26764e-32 | 2.74144e-31 | 2.57742e-30 |
| 1.00000e+07 | 6.12692e-33 | 1.36514e-31 | 2.20679e-30 | 2.66314e-29 | 2.49787e-28 |
| 1.00000e+06 | 4.85625e-31 | 1.08319e-29 | 1.73849e-28 | 2.07134e-27 | 1.90992e-26 |
| 100000.     | 1.52698e-29 | 3.47281e-28 | 5.52521e-27 | 6.42128e-26 | 5.71944e-25 |
| 10000.0     | 1.94618e-28 | 4.51114e-27 | 7.21309e-26 | 8.36535e-25 | 7.41094e-24 |
| 1000.00     | 2.16559e-27 | 5.07396e-26 | 8.20556e-25 | 9.62713e-24 | 8.62743e-23 |
| 100.000     | 2.26168e-26 | 5.35333e-25 | 8.72090e-24 | 1.02857e-22 | 9.25000e-22 |
| 10.0000     | 2.25226e-25 | 5.34062e-24 | 8.70511e-23 | 1.02635e-21 | 9.21952e-21 |
| 1.00000     | 2.05816e-24 | 4.87175e-23 | 7.89121e-22 | 9.21448e-21 | 8.17233e-20 |

|             |             |             |             |             |             |
|-------------|-------------|-------------|-------------|-------------|-------------|
| 0.100000    | 1.07662e-23 | 2.56736e-22 | 4.08133e-21 | 4.60744e-20 | 3.91114e-19 |
| 0.0100000   | 1.70443e-23 | 4.29131e-22 | 6.87834e-21 | 7.66535e-20 | 6.35554e-19 |
| 0.00100000  | 1.78040e-23 | 4.55977e-22 | 7.34905e-21 | 8.19076e-20 | 6.77364e-19 |
| 0.000100000 | 1.78785e-23 | 4.58760e-22 | 7.39883e-21 | 8.24675e-20 | 6.81827e-19 |
| 1.00000e-05 | 1.78860e-23 | 4.59040e-22 | 7.40384e-21 | 8.25238e-20 | 6.82276e-19 |
| 1.00000e-06 | 1.78867e-23 | 4.59068e-22 | 7.40434e-21 | 8.25294e-20 | 6.82321e-19 |
| 1.00000e-07 | 1.78868e-23 | 4.59071e-22 | 7.40439e-21 | 8.25300e-20 | 6.82325e-19 |
| 1.00000e-08 | 1.78868e-23 | 4.59071e-22 | 7.40439e-21 | 8.25301e-20 | 6.82326e-19 |
| 1.00000e-09 | 1.78868e-23 | 4.59071e-22 | 7.40439e-21 | 8.25301e-20 | 6.82326e-19 |

| Pa\K        | 170.000     | 180.000     | 190.000     | 200.000     | 210.000     |
|-------------|-------------|-------------|-------------|-------------|-------------|
| 1.00000e+08 | 1.95766e-29 | 1.24152e-28 | 6.75617e-28 | 3.22544e-27 | 1.37472e-26 |
| 1.00000e+07 | 1.89170e-27 | 1.19553e-26 | 6.47997e-26 | 3.07960e-25 | 1.30600e-24 |
| 1.00000e+06 | 1.41687e-25 | 8.74371e-25 | 4.61431e-24 | 2.12969e-23 | 8.75253e-23 |
| 100000.     | 4.07380e-24 | 2.40456e-23 | 1.21101e-22 | 5.32890e-22 | 2.08827e-21 |
| 10000.0     | 5.24407e-23 | 3.07529e-22 | 1.54006e-21 | 6.74698e-21 | 2.63636e-20 |
| 1000.00     | 6.17311e-22 | 3.65799e-21 | 1.84916e-20 | 8.16738e-20 | 3.21283e-19 |
| 100.000     | 6.63123e-21 | 3.93134e-20 | 1.98576e-19 | 8.75425e-19 | 3.43420e-18 |
| 10.0000     | 6.59701e-20 | 3.90084e-19 | 1.96372e-18 | 8.62112e-18 | 3.36515e-17 |
| 1.00000     | 5.75572e-19 | 3.33886e-18 | 1.64317e-17 | 7.02631e-17 | 2.66138e-16 |
| 0.100000    | 2.61709e-18 | 1.43409e-17 | 6.63659e-17 | 2.65918e-16 | 9.41460e-16 |
| 0.0100000   | 4.13132e-18 | 2.19357e-17 | 9.82743e-17 | 3.81276e-16 | 1.30819e-15 |
| 0.00100000  | 4.38590e-18 | 2.31824e-17 | 1.03370e-16 | 3.99177e-16 | 1.36345e-15 |
| 0.000100000 | 4.41304e-18 | 2.33150e-17 | 1.03911e-16 | 4.01068e-16 | 1.36927e-15 |
| 1.00000e-05 | 4.41577e-18 | 2.33283e-17 | 1.03965e-16 | 4.01258e-16 | 1.36986e-15 |
| 1.00000e-06 | 4.41605e-18 | 2.33297e-17 | 1.03970e-16 | 4.01277e-16 | 1.36992e-15 |
| 1.00000e-07 | 4.41607e-18 | 2.33298e-17 | 1.03971e-16 | 4.01279e-16 | 1.36992e-15 |
| 1.00000e-08 | 4.41608e-18 | 2.33298e-17 | 1.03971e-16 | 4.01279e-16 | 1.36992e-15 |
| 1.00000e-09 | 4.41608e-18 | 2.33298e-17 | 1.03971e-16 | 4.01279e-16 | 1.36992e-15 |

| Pa\K        | 220.000     | 230.000     | 240.000     | 250.000     | 260.000     |
|-------------|-------------|-------------|-------------|-------------|-------------|
| 1.00000e+08 | 5.30217e-26 | 1.86960e-25 | 6.07363e-25 | 1.82863e-24 | 5.12691e-24 |
| 1.00000e+07 | 5.00976e-24 | 1.75633e-23 | 5.67163e-23 | 1.69722e-22 | 4.72939e-22 |
| 1.00000e+06 | 3.24865e-22 | 1.10105e-21 | 3.43666e-21 | 9.94421e-21 | 2.68179e-20 |
| 100000.     | 7.39911e-21 | 2.39874e-20 | 7.18131e-20 | 1.99959e-19 | 5.20744e-19 |
| 10000.0     | 9.32946e-20 | 3.02576e-19 | 9.07633e-19 | 2.53584e-18 | 6.63459e-18 |
| 1000.00     | 1.14282e-18 | 3.72045e-18 | 1.11872e-17 | 3.12962e-17 | 8.19158e-17 |
| 100.000     | 1.21744e-17 | 3.94788e-17 | 1.18223e-16 | 3.29356e-16 | 8.58552e-16 |
| 10.0000     | 1.18606e-16 | 3.82096e-16 | 1.13598e-15 | 3.14027e-15 | 8.11970e-15 |
| 1.00000     | 9.06970e-16 | 2.81617e-15 | 8.04873e-15 | 2.13499e-14 | 5.29171e-14 |
| 0.100000    | 2.99448e-15 | 8.67433e-15 | 2.31434e-14 | 5.74012e-14 | 1.33362e-13 |
| 0.0100000   | 4.03786e-15 | 1.13700e-14 | 2.95436e-14 | 7.15081e-14 | 1.62474e-13 |
| 0.00100000  | 4.19064e-15 | 1.17536e-14 | 3.04305e-14 | 7.34136e-14 | 1.66312e-13 |
| 0.000100000 | 4.20666e-15 | 1.17937e-14 | 3.05228e-14 | 7.36112e-14 | 1.66708e-13 |
| 1.00000e-05 | 4.20827e-15 | 1.17978e-14 | 3.05320e-14 | 7.36311e-14 | 1.66749e-13 |
| 1.00000e-06 | 4.20842e-15 | 1.17982e-14 | 3.05330e-14 | 7.36330e-14 | 1.66753e-13 |
| 1.00000e-07 | 4.20844e-15 | 1.17982e-14 | 3.05331e-14 | 7.36332e-14 | 1.66753e-13 |
| 1.00000e-08 | 4.20844e-15 | 1.17982e-14 | 3.05331e-14 | 7.36332e-14 | 1.66753e-13 |
| 1.00000e-09 | 4.20844e-15 | 1.17982e-14 | 3.05331e-14 | 7.36332e-14 | 1.66753e-13 |

| Pa\K        | 270.000     | 280.000     | 290.000     | 300.000     | 400.000     |
|-------------|-------------|-------------|-------------|-------------|-------------|
| 1.00000e+08 | 1.34403e-23 | 3.30688e-23 | 7.66352e-23 | 1.30288e-20 | 1.77878e-17 |
| 1.00000e+07 | 1.23230e-21 | 3.01379e-21 | 6.94303e-21 | 7.94122e-19 | 4.35068e-16 |
| 1.00000e+06 | 6.77080e-20 | 1.60668e-19 | 3.59643e-19 | 1.75848e-17 | 1.40786e-14 |
| 100000.     | 1.27414e-18 | 2.94022e-18 | 6.42074e-18 | 2.96034e-16 | 1.77789e-13 |
| 10000.0     | 1.63254e-17 | 3.79175e-17 | 8.33940e-17 | 3.92846e-15 | 1.04020e-12 |
| 1000.00     | 2.01519e-16 | 4.67735e-16 | 1.02773e-15 | 3.84103e-14 | 9.26533e-12 |
| 100.000     | 2.10388e-15 | 4.86536e-15 | 1.06542e-14 | 3.41453e-13 | 6.87513e-11 |
| 10.0000     | 1.97322e-14 | 4.52502e-14 | 9.82644e-14 | 1.93170e-12 | 2.54870e-10 |
| 1.00000     | 1.23243e-13 | 2.70979e-13 | 5.64782e-13 | 3.90423e-12 | 3.97657e-10 |
| 0.100000    | 2.92085e-13 | 6.06205e-13 | 1.19748e-12 | 3.48840e-12 | 4.17886e-10 |
| 0.0100000   | 3.48734e-13 | 7.10794e-13 | 1.38164e-12 | 3.24815e-12 | 4.18852e-10 |
| 0.00100000  | 3.56035e-13 | 7.23993e-13 | 1.40443e-12 | 3.22205e-12 | 4.18924e-10 |
| 0.000100000 | 3.56788e-13 | 7.25348e-13 | 1.40676e-12 | 3.21945e-12 | 4.18930e-10 |
| 1.00000e-05 | 3.56863e-13 | 7.25484e-13 | 1.40700e-12 | 3.21920e-12 | 4.18931e-10 |
| 1.00000e-06 | 3.56871e-13 | 7.25499e-13 | 1.40702e-12 | 3.21917e-12 | 4.18931e-10 |
| 1.00000e-07 | 3.56872e-13 | 7.25499e-13 | 1.40702e-12 | 3.21917e-12 | 4.18931e-10 |
| 1.00000e-08 | 3.56872e-13 | 7.25499e-13 | 1.40702e-12 | 3.21917e-12 | 4.18931e-10 |
| 1.00000e-09 | 3.56872e-13 | 7.25499e-13 | 1.40702e-12 | 3.21917e-12 | 4.18931e-10 |

| Pa\K        | 500.000     | 600.000     | 700.000     | 800.000     | 900.000     |
|-------------|-------------|-------------|-------------|-------------|-------------|
| 1.00000e+08 | 6.85992e-13 | 4.33812e-10 | 7.32002e-09 | 3.97088e-08 | 2.03822e-07 |
| 1.00000e+07 | 4.45423e-12 | 2.42891e-09 | 3.99640e-08 | 1.67565e-07 | 5.14615e-07 |
| 1.00000e+06 | 8.33045e-11 | 7.16289e-09 | 5.98395e-08 | 1.64955e-07 | 4.79581e-07 |
| 100000.     | 2.11554e-10 | 9.71094e-09 | 5.50127e-08 | 1.98462e-07 | 1.07731e-06 |
| 10000.0     | 1.72358e-10 | 7.29407e-09 | 8.56076e-08 | 6.01563e-07 | 3.01722e-06 |

|             |             |             |             |             |             |
|-------------|-------------|-------------|-------------|-------------|-------------|
| 1000.00     | 7.71098e-10 | 2.22378e-08 | 2.52965e-07 | 1.42482e-06 | 5.10200e-06 |
| 100.000     | 3.75209e-09 | 6.35346e-08 | 4.67304e-07 | 1.97496e-06 | 5.88480e-06 |
| 10.0000     | 8.25545e-09 | 9.40384e-08 | 5.51402e-07 | 2.10404e-06 | 6.00314e-06 |
| 1.00000     | 1.00480e-08 | 1.01024e-07 | 5.64171e-07 | 2.11905e-06 | 6.01466e-06 |
| 0.100000    | 1.02874e-08 | 1.01811e-07 | 5.65455e-07 | 2.12050e-06 | 6.01578e-06 |
| 0.0100000   | 1.03102e-08 | 1.01888e-07 | 5.65582e-07 | 2.12065e-06 | 6.01590e-06 |
| 0.00100000  | 1.03125e-08 | 1.01896e-07 | 5.65595e-07 | 2.12067e-06 | 6.01591e-06 |
| 0.000100000 | 1.03128e-08 | 1.01897e-07 | 5.65596e-07 | 2.12067e-06 | 6.01591e-06 |
| 1.00000e-05 | 1.03128e-08 | 1.01897e-07 | 5.65596e-07 | 2.12067e-06 | 6.01591e-06 |
| 1.00000e-06 | 1.03128e-08 | 1.01897e-07 | 5.65596e-07 | 2.12067e-06 | 6.01591e-06 |
| 1.00000e-07 | 1.03128e-08 | 1.01897e-07 | 5.65596e-07 | 2.12067e-06 | 6.01591e-06 |
| 1.00000e-08 | 1.03128e-08 | 1.01897e-07 | 5.65596e-07 | 2.12067e-06 | 6.01591e-06 |
| 1.00000e-09 | 1.03128e-08 | 1.01897e-07 | 5.65596e-07 | 2.12067e-06 | 6.01591e-06 |

| Pa\K        | 1000.00     | 1100.00     | 1200.00     | 1300.00     | 1400.00     |
|-------------|-------------|-------------|-------------|-------------|-------------|
| 1.00000e+08 | 1.04459e-06 | 3.31936e-06 | 8.58599e-06 | 2.18609e-05 | 3.69791e-05 |
| 1.00000e+07 | 2.38984e-06 | 1.21825e-05 | 4.38181e-05 | 0.000109338 | 0.000183922 |
| 1.00000e+06 | 2.87754e-06 | 1.71707e-05 | 6.33583e-05 | 0.000147882 | 0.000245422 |
| 100000.     | 5.78476e-06 | 2.30347e-05 | 6.30139e-05 | 0.000123673 | 0.000192822 |
| 10000.0     | 1.05719e-05 | 2.75024e-05 | 5.59959e-05 | 9.44854e-05 | 0.000140797 |
| 1000.00     | 1.33281e-05 | 2.80260e-05 | 5.04482e-05 | 8.11277e-05 | 0.000120174 |
| 100.000     | 1.38644e-05 | 2.76589e-05 | 4.87295e-05 | 7.80018e-05 | 0.000115757 |
| 10.0000     | 1.39037e-05 | 2.75586e-05 | 4.84604e-05 | 7.75655e-05 | 0.000115163 |
| 1.00000     | 1.39058e-05 | 2.75462e-05 | 4.84310e-05 | 7.75194e-05 | 0.000115101 |
| 0.100000    | 1.39060e-05 | 2.75450e-05 | 4.84281e-05 | 7.75147e-05 | 0.000115095 |
| 0.0100000   | 1.39061e-05 | 2.75448e-05 | 4.84278e-05 | 7.75141e-05 | 0.000115094 |
| 0.00100000  | 1.39061e-05 | 2.75448e-05 | 4.84277e-05 | 7.75141e-05 | 0.000115094 |
| 0.000100000 | 1.39061e-05 | 2.75448e-05 | 4.84277e-05 | 7.75141e-05 | 0.000115094 |
| 1.00000e-05 | 1.39061e-05 | 2.75448e-05 | 4.84277e-05 | 7.75141e-05 | 0.000115094 |
| 1.00000e-06 | 1.39061e-05 | 2.75448e-05 | 4.84277e-05 | 7.75141e-05 | 0.000115094 |
| 1.00000e-07 | 1.39061e-05 | 2.75448e-05 | 4.84277e-05 | 7.75141e-05 | 0.000115094 |
| 1.00000e-08 | 1.39061e-05 | 2.75448e-05 | 4.84277e-05 | 7.75141e-05 | 0.000115094 |
| 1.00000e-09 | 1.39061e-05 | 2.75448e-05 | 4.84277e-05 | 7.75141e-05 | 0.000115094 |

| Pa\K        | 1500.00     | 1750.00     | 2000.00     | 2250.00     | 2500.00     |
|-------------|-------------|-------------|-------------|-------------|-------------|
| 1.00000e+08 | 3.83329e-05 | 0.000878194 | 0.00109694  | 0.00112769  | 0.00110874  |
| 1.00000e+07 | 0.000222167 | 0.000945835 | 0.00123396  | 0.00125314  | 0.00120009  |
| 1.00000e+06 | 0.000330659 | 0.000839105 | 0.00110685  | 0.00107712  | 0.00102890  |
| 100000.     | 0.000264175 | 0.000592707 | 0.000768568 | 0.000794134 | 0.000855109 |
| 10000.0     | 0.000194127 | 0.000387772 | 0.000539865 | 0.000664271 | 0.000799641 |
| 1000.00     | 0.000167204 | 0.000312384 | 0.000474352 | 0.000637038 | 0.000790721 |
| 100.000     | 0.000161596 | 0.000297508 | 0.000463738 | 0.000633443 | 0.000789710 |
| 10.0000     | 0.000160852 | 0.000295576 | 0.000462498 | 0.000633062 | 0.000789609 |
| 1.00000     | 0.000160776 | 0.000295376 | 0.000462372 | 0.000633023 | 0.000789599 |
| 0.100000    | 0.000160768 | 0.000295356 | 0.000462363 | 0.000633020 | 0.000789599 |
| 0.0100000   | 0.000160767 | 0.000295354 | 0.000462359 | 0.000633020 | 0.000789599 |
| 0.00100000  | 0.000160767 | 0.000295354 | 0.000462359 | 0.000633020 | 0.000789599 |
| 0.000100000 | 0.000160767 | 0.000295354 | 0.000462359 | 0.000633020 | 0.000789599 |
| 1.00000e-05 | 0.000160767 | 0.000295354 | 0.000462359 | 0.000633020 | 0.000789599 |
| 1.00000e-06 | 0.000160767 | 0.000295354 | 0.000462359 | 0.000633020 | 0.000789599 |
| 1.00000e-07 | 0.000160767 | 0.000295354 | 0.000462359 | 0.000633020 | 0.000789599 |
| 1.00000e-08 | 0.000160767 | 0.000295354 | 0.000462359 | 0.000633020 | 0.000789599 |
| 1.00000e-09 | 0.000160767 | 0.000295354 | 0.000462359 | 0.000633020 | 0.000789599 |

| Pa\K        | 2750.00     | 3000.00    | 3250.00    | 3500.00    | 3750.00    |
|-------------|-------------|------------|------------|------------|------------|
| 1.00000e+08 | 0.00108729  | 0.00107003 | 0.00105814 | 0.00105086 | 0.00104600 |
| 1.00000e+07 | 0.00115777  | 0.00113950 | 0.00113923 | 0.00114599 | 0.00115045 |
| 1.00000e+06 | 0.00103356  | 0.00107019 | 0.00111267 | 0.00114557 | 0.00116282 |
| 100000.     | 0.000945213 | 0.00103164 | 0.00109868 | 0.00114228 | 0.00116361 |
| 10000.0     | 0.000924361 | 0.00102450 | 0.00109656 | 0.00114189 | 0.00116377 |
| 1000.00     | 0.000921623 | 0.00102371 | 0.00109637 | 0.00114187 | 0.00116380 |
| 100.000     | 0.000921345 | 0.00102363 | 0.00109635 | 0.00114187 | 0.00116380 |
| 10.0000     | 0.000921317 | 0.00102362 | 0.00109635 | 0.00114188 | 0.00116381 |
| 1.00000     | 0.000921315 | 0.00102362 | 0.00109635 | 0.00114187 | 0.00116381 |
| 0.100000    | 0.000921315 | 0.00102362 | 0.00109635 | 0.00114187 | 0.00116381 |
| 0.0100000   | 0.000921315 | 0.00102362 | 0.00109635 | 0.00114187 | 0.00116381 |
| 0.00100000  | 0.000921315 | 0.00102362 | 0.00109635 | 0.00114187 | 0.00116381 |
| 0.000100000 | 0.000921315 | 0.00102362 | 0.00109635 | 0.00114187 | 0.00116381 |
| 1.00000e-05 | 0.000921315 | 0.00102362 | 0.00109635 | 0.00114187 | 0.00116381 |
| 1.00000e-06 | 0.000921315 | 0.00102362 | 0.00109635 | 0.00114187 | 0.00116381 |
| 1.00000e-07 | 0.000921315 | 0.00102362 | 0.00109635 | 0.00114187 | 0.00116381 |
| 1.00000e-08 | 0.000921315 | 0.00102362 | 0.00109635 | 0.00114187 | 0.00116381 |
| 1.00000e-09 | 0.000921315 | 0.00102362 | 0.00109635 | 0.00114187 | 0.00116381 |

| Pa\K        | 4000.00    |
|-------------|------------|
| 1.00000e+08 | 0.00104072 |

|             |            |
|-------------|------------|
| 1.00000e+07 | 0.00114707 |
| 1.00000e+06 | 0.00116383 |
| 100000.     | 0.00116586 |
| 10000.0     | 0.00116614 |
| 1000.00     | 0.00116618 |
| 100.000     | 0.00116618 |
| 10.0000     | 0.00116618 |
| 1.00000     | 0.00116618 |
| 0.100000    | 0.00116618 |
| 0.0100000   | 0.00116618 |
| 0.00100000  | 0.00116618 |
| 0.000100000 | 0.00116618 |
| 1.00000e-05 | 0.00116618 |
| 1.00000e-06 | 0.00116618 |
| 1.00000e-07 | 0.00116618 |
| 1.00000e-08 | 0.00116618 |
| 1.00000e-09 | 0.00116618 |

rad20  
=====

| Pa\K        | 20.0000     | 30.0000     | 40.0000     | 50.0000     | 60.0000     |
|-------------|-------------|-------------|-------------|-------------|-------------|
| 1.00000e+08 | 6.93617e-13 | 2.83495e-12 | 6.34237e-12 | 1.12575e-11 | 1.76747e-11 |
| 1.00000e+07 | 6.93070e-11 | 2.83045e-10 | 6.32736e-10 | 1.12222e-09 | 1.76057e-09 |
| 1.00000e+06 | 6.87635e-09 | 2.78594e-08 | 6.18000e-08 | 1.08779e-07 | 1.69365e-07 |
| 100000.     | 6.36506e-07 | 2.39135e-06 | 4.94409e-06 | 8.13836e-06 | 1.18779e-05 |
| 10000.0     | 3.30722e-05 | 7.69156e-05 | 0.000110924 | 0.000136508 | 0.000155741 |
| 1000.00     | 0.000175760 | 0.000143149 | 0.000108948 | 8.51113e-05 | 6.85354e-05 |
| 100.000     | 2.64523e-05 | 8.60624e-06 | 4.03910e-06 | 2.22291e-06 | 1.33880e-06 |
| 10.0000     | 1.63463e-07 | 1.15143e-08 | 1.95386e-09 | 5.12214e-10 | 1.76514e-10 |
| 1.00000     | 6.91017e-12 | 1.08725e-12 | 4.44156e-13 | 2.29809e-13 | 1.37388e-13 |
| 0.100000    | 2.55699e-14 | 9.29706e-15 | 6.42257e-15 | 5.28027e-15 | 4.70388e-15 |
| 0.0100000   | 2.80830e-15 | 2.18345e-15 | 1.99992e-15 | 1.92603e-15 | 1.89810e-15 |
| 0.00100000  | 1.45979e-15 | 1.17012e-15 | 9.80352e-16 | 8.37089e-16 | 7.22153e-16 |
| 0.000100000 | 3.29908e-16 | 1.07603e-16 | 4.70047e-17 | 2.41444e-17 | 1.37672e-17 |
| 1.00000e-05 | 1.97196e-18 | 2.31100e-19 | 6.59341e-20 | 2.70631e-20 | 1.35436e-20 |
| 1.00000e-06 | 1.66776e-21 | 2.24381e-22 | 7.87934e-23 | 3.99071e-23 | 2.45297e-23 |
| 1.00000e-07 | 6.72069e-24 | 2.50588e-24 | 1.54901e-24 | 1.13122e-24 | 8.98546e-25 |
| 1.00000e-08 | 4.22190e-25 | 2.05769e-25 | 1.37684e-25 | 1.04256e-25 | 8.45316e-26 |
| 1.00000e-09 | 4.10366e-26 | 2.03122e-26 | 1.36539e-26 | 1.03621e-26 | 8.41301e-27 |

| Pa\K        | 70.0000     | 80.0000     | 90.0000     | 100.000     | 110.000     |
|-------------|-------------|-------------|-------------|-------------|-------------|
| 1.00000e+08 | 2.57154e-11 | 3.55335e-11 | 4.73309e-11 | 6.13745e-11 | 7.80145e-11 |
| 1.00000e+07 | 2.55950e-09 | 3.53390e-09 | 4.70331e-09 | 6.09364e-09 | 7.73883e-09 |
| 1.00000e+06 | 2.44346e-07 | 3.34757e-07 | 4.41996e-07 | 5.67947e-07 | 7.15099e-07 |
| 100000.     | 1.60905e-05 | 2.07211e-05 | 2.57317e-05 | 3.11002e-05 | 3.68186e-05 |
| 10000.0     | 0.000170062 | 0.000180477 | 0.000187736 | 0.000192428 | 0.000195028 |
| 1000.00     | 5.65608e-05 | 4.75609e-05 | 4.05630e-05 | 3.49685e-05 | 3.03946e-05 |
| 100.000     | 8.54454e-07 | 5.67665e-07 | 3.88286e-07 | 2.71474e-07 | 1.93049e-07 |
| 10.0000     | 7.41425e-11 | 3.64264e-11 | 2.03777e-11 | 1.27023e-11 | 8.64812e-12 |
| 1.00000     | 9.16130e-14 | 6.66723e-14 | 5.20739e-14 | 4.30415e-14 | 3.72084e-14 |
| 0.100000    | 4.38646e-15 | 4.21178e-15 | 4.12631e-15 | 4.10212e-15 | 4.12335e-15 |
| 0.0100000   | 1.89417e-15 | 1.90415e-15 | 1.92244e-15 | 1.94538e-15 | 1.97030e-15 |
| 0.00100000  | 6.26684e-16 | 5.45595e-16 | 4.75695e-16 | 4.14874e-16 | 3.61677e-16 |
| 0.000100000 | 8.44970e-18 | 5.47745e-18 | 3.70303e-18 | 2.58774e-18 | 1.85732e-18 |
| 1.00000e-05 | 7.68236e-21 | 4.75040e-21 | 3.12801e-21 | 2.16040e-21 | 1.54909e-21 |
| 1.00000e-06 | 1.69917e-23 | 1.27556e-23 | 1.01384e-23 | 8.40567e-24 | 7.19728e-24 |
| 1.00000e-07 | 7.51634e-25 | 6.51311e-25 | 5.78970e-25 | 5.24686e-25 | 4.82739e-25 |
| 1.00000e-08 | 7.16486e-26 | 6.26557e-26 | 5.60705e-26 | 5.10734e-26 | 4.71790e-26 |
| 1.00000e-09 | 7.13729e-27 | 6.24554e-27 | 5.59189e-27 | 5.09551e-27 | 4.70845e-27 |

| Pa\K        | 120.000     | 130.000     | 140.000     | 150.000     | 160.000     |
|-------------|-------------|-------------|-------------|-------------|-------------|
| 1.00000e+08 | 9.77034e-11 | 1.21021e-10 | 1.48703e-10 | 1.81686e-10 | 2.21148e-10 |
| 1.00000e+07 | 9.68274e-09 | 1.19815e-08 | 1.47061e-08 | 1.79467e-08 | 2.18166e-08 |
| 1.00000e+06 | 8.86650e-07 | 1.08664e-06 | 1.32011e-06 | 1.59328e-06 | 1.91379e-06 |
| 100000.     | 4.28910e-05 | 4.93303e-05 | 5.61565e-05 | 6.33948e-05 | 7.10740e-05 |
| 10000.0     | 0.000195922 | 0.000195426 | 0.000193800 | 0.000191255 | 0.000187966 |
| 1000.00     | 2.65871e-05 | 2.33703e-05 | 2.06191e-05 | 1.82419e-05 | 1.61699e-05 |
| 100.000     | 1.39134e-07 | 1.01371e-07 | 7.45200e-08 | 5.51928e-08 | 4.11396e-08 |
| 10.0000     | 6.31244e-12 | 4.85993e-12 | 3.89451e-12 | 3.21553e-12 | 2.71532e-12 |
| 1.00000     | 3.33207e-14 | 3.06762e-14 | 2.88634e-14 | 2.76319e-14 | 2.68242e-14 |
| 0.100000    | 4.18034e-15 | 4.26701e-15 | 4.37928e-15 | 4.51443e-15 | 4.67054e-15 |
| 0.0100000   | 1.99507e-15 | 2.01791e-15 | 2.03729e-15 | 2.05189e-15 | 2.06066e-15 |
| 0.00100000  | 3.15038e-16 | 2.74132e-16 | 2.38287e-16 | 2.06925e-16 | 1.79537e-16 |
| 0.000100000 | 1.36270e-18 | 1.01839e-18 | 7.73124e-19 | 5.94953e-19 | 4.63327e-19 |
| 1.00000e-05 | 1.14495e-21 | 8.67831e-22 | 6.72048e-22 | 5.30255e-22 | 4.25410e-22 |
| 1.00000e-06 | 6.32071e-24 | 5.66559e-24 | 5.16504e-24 | 4.77669e-24 | 4.47271e-24 |
| 1.00000e-07 | 4.49637e-25 | 4.23143e-25 | 4.01773e-25 | 3.84515e-25 | 3.70658e-25 |



|             |             |             |             |             |             |
|-------------|-------------|-------------|-------------|-------------|-------------|
| 1.00000e-08 | 4.40859e-26 | 4.15981e-26 | 3.95844e-26 | 3.79545e-26 | 3.66447e-26 |
| 1.00000e-09 | 4.40089e-27 | 4.15343e-27 | 3.95310e-27 | 3.79092e-27 | 3.66059e-27 |

| Pa\K        | 170.000     | 180.000     | 190.000     | 200.000     | 210.000     |
|-------------|-------------|-------------|-------------|-------------|-------------|
| 1.00000e+08 | 2.68583e-10 | 3.25875e-10 | 3.95405e-10 | 4.80179e-10 | 5.83989e-10 |
| 1.00000e+07 | 2.64586e-08 | 3.20524e-08 | 3.88238e-08 | 4.70564e-08 | 5.71063e-08 |
| 1.00000e+06 | 2.29097e-06 | 2.73611e-06 | 3.26287e-06 | 3.88764e-06 | 4.62997e-06 |
| 100000.     | 7.92245e-05 | 8.78768e-05 | 9.70601e-05 | 0.000106800 | 0.000117117 |
| 10000.0     | 0.000184078 | 0.000179712 | 0.000174969 | 0.000169932 | 0.000164674 |
| 1000.00     | 1.43512e-05 | 1.27450e-05 | 1.13199e-05 | 1.00506e-05 | 8.91673e-06 |
| 100.000     | 3.08341e-08 | 2.32228e-08 | 1.75667e-08 | 1.33414e-08 | 1.01704e-08 |
| 10.0000     | 2.33296e-12 | 2.03227e-12 | 1.79083e-12 | 1.59405e-12 | 1.43210e-12 |
| 1.00000     | 2.63395e-14 | 2.61114e-14 | 2.60967e-14 | 2.62671e-14 | 2.66045e-14 |
| 0.100000    | 4.84626e-15 | 5.04055e-15 | 5.25261e-15 | 5.48172e-15 | 5.72718e-15 |
| 0.0100000   | 2.06278e-15 | 2.05769e-15 | 2.04510e-15 | 2.02497e-15 | 1.99750e-15 |
| 0.00100000  | 1.55666e-16 | 1.34905e-16 | 1.16880e-16 | 1.01259e-16 | 8.77410e-17 |
| 0.000100000 | 3.64658e-19 | 2.89741e-19 | 2.32214e-19 | 1.87592e-19 | 1.52669e-19 |
| 1.00000e-05 | 3.46511e-22 | 2.86249e-22 | 2.39641e-22 | 2.03218e-22 | 1.74512e-22 |
| 1.00000e-06 | 4.23429e-24 | 4.04841e-24 | 3.90600e-24 | 3.80068e-24 | 3.72807e-24 |
| 1.00000e-07 | 3.59704e-25 | 3.51299e-25 | 3.45199e-25 | 3.41245e-25 | 3.39344e-25 |
| 1.00000e-08 | 3.56101e-26 | 3.48190e-26 | 3.42496e-26 | 3.38876e-26 | 3.37255e-26 |
| 1.00000e-09 | 3.55767e-27 | 3.47899e-27 | 3.42240e-27 | 3.38651e-27 | 3.37055e-27 |

| Pa\K        | 220.000     | 230.000     | 240.000     | 250.000     | 260.000     |
|-------------|-------------|-------------|-------------|-------------|-------------|
| 1.00000e+08 | 7.11622e-10 | 8.69123e-10 | 1.06411e-09 | 1.30620e-09 | 1.60751e-09 |
| 1.00000e+07 | 6.94195e-08 | 8.45551e-08 | 1.03212e-07 | 1.26266e-07 | 1.54805e-07 |
| 1.00000e+06 | 5.51306e-06 | 6.56427e-06 | 7.81558e-06 | 9.30418e-06 | 1.10729e-05 |
| 100000.     | 0.000128023 | 0.000139523 | 0.000151608 | 0.000164259 | 0.000177440 |
| 10000.0     | 0.000159252 | 0.000153719 | 0.000148113 | 0.000142469 | 0.000136817 |
| 1000.00     | 7.90204e-06 | 6.99291e-06 | 6.17806e-06 | 5.44792e-06 | 4.79426e-06 |
| 100.000     | 7.78075e-09 | 5.97343e-09 | 4.60194e-09 | 3.55797e-09 | 2.76102e-09 |
| 10.0000     | 1.29809e-12 | 1.18699e-12 | 1.09501e-12 | 1.01925e-12 | 9.57408e-13 |
| 1.00000     | 2.70988e-14 | 2.77448e-14 | 2.85421e-14 | 2.94934e-14 | 3.06047e-14 |
| 0.100000    | 5.98829e-15 | 6.26426e-15 | 6.55422e-15 | 6.85725e-15 | 7.17235e-15 |
| 0.0100000   | 1.96312e-15 | 1.92242e-15 | 1.87614e-15 | 1.82510e-15 | 1.77022e-15 |
| 0.00100000  | 7.60595e-17 | 6.59764e-17 | 5.72809e-17 | 4.97879e-17 | 4.33344e-17 |
| 0.000100000 | 1.25112e-19 | 1.03208e-19 | 8.56799e-20 | 7.15672e-20 | 6.01405e-20 |
| 1.00000e-05 | 1.51747e-22 | 1.33618e-22 | 1.19161e-22 | 1.07661e-22 | 9.85736e-23 |
| 1.00000e-06 | 3.68523e-24 | 3.67045e-24 | 3.68299e-24 | 3.72296e-24 | 3.79134e-24 |
| 1.00000e-07 | 3.39465e-25 | 3.41629e-25 | 3.45909e-25 | 3.52435e-25 | 3.61391e-25 |
| 1.00000e-08 | 3.37609e-26 | 3.39970e-26 | 3.44417e-26 | 3.51084e-26 | 3.60158e-26 |
| 1.00000e-09 | 3.37431e-27 | 3.39810e-27 | 3.44273e-27 | 3.50951e-27 | 3.60038e-27 |

| Pa\K        | 270.000     | 280.000     | 290.000     | 300.000     | 400.000     |
|-------------|-------------|-------------|-------------|-------------|-------------|
| 1.00000e+08 | 1.98329e-09 | 2.45271e-09 | 3.03980e-09 | 1.29709e-08 | 1.09688e-07 |
| 1.00000e+07 | 1.90187e-07 | 2.34097e-07 | 2.88614e-07 | 1.14865e-06 | 7.99224e-06 |
| 1.00000e+06 | 1.31709e-05 | 1.56533e-05 | 1.85825e-05 | 5.06046e-05 | 0.000173069 |
| 100000.     | 0.000191104 | 0.000205184 | 0.000219601 | 0.000294254 | 0.000358766 |
| 10000.0     | 0.000131178 | 0.000125573 | 0.000120016 | 9.53962e-05 | 4.91154e-05 |
| 1000.00     | 4.20989e-06 | 3.68840e-06 | 3.22407e-06 | 2.01522e-06 | 4.89783e-07 |
| 100.000     | 2.15096e-09 | 1.68273e-09 | 1.32243e-09 | 1.60359e-09 | 4.01604e-10 |
| 10.0000     | 9.07645e-13 | 8.68475e-13 | 8.38696e-13 | 5.64540e-12 | 9.57996e-12 |
| 1.00000     | 3.18839e-14 | 3.33419e-14 | 3.49915e-14 | 7.75292e-13 | 1.58772e-12 |
| 0.100000    | 7.49853e-15 | 7.83482e-15 | 8.18036e-15 | 2.10899e-13 | 2.96577e-13 |
| 0.0100000   | 1.71239e-15 | 1.65253e-15 | 1.59150e-15 | 3.14415e-14 | 2.18705e-14 |
| 0.00100000  | 3.77784e-17 | 3.29960e-17 | 2.88795e-17 | 6.23245e-16 | 2.77024e-16 |
| 0.000100000 | 5.08408e-20 | 4.32364e-20 | 3.69917e-20 | 3.40109e-18 | 3.00588e-18 |
| 1.00000e-05 | 9.14987e-23 | 8.61343e-23 | 8.22628e-23 | 9.69378e-20 | 1.92746e-19 |
| 1.00000e-06 | 3.88996e-24 | 4.02156e-24 | 4.18992e-24 | 8.50492e-21 | 1.85959e-20 |
| 1.00000e-07 | 3.73030e-25 | 3.87679e-25 | 4.05761e-25 | 8.40695e-22 | 1.85305e-21 |
| 1.00000e-08 | 3.71897e-26 | 3.86631e-26 | 4.04781e-26 | 8.39659e-23 | 1.85232e-22 |
| 1.00000e-09 | 3.71786e-27 | 3.86527e-27 | 4.04685e-27 | 8.39539e-24 | 1.85224e-23 |

| Pa\K        | 500.000     | 600.000     | 700.000     | 800.000     | 900.000     |
|-------------|-------------|-------------|-------------|-------------|-------------|
| 1.00000e+08 | 9.34658e-07 | 7.00417e-06 | 3.53628e-05 | 0.000102119 | 0.000257663 |
| 1.00000e+07 | 4.46762e-05 | 0.000163230 | 0.000362912 | 0.000588114 | 0.000865619 |
| 1.00000e+06 | 0.000400454 | 0.000619468 | 0.000734502 | 0.000844614 | 0.000949669 |
| 100000.     | 0.000329936 | 0.000253581 | 0.000199970 | 0.000202548 | 0.000227224 |
| 10000.0     | 2.22137e-05 | 1.05461e-05 | 7.13954e-06 | 9.07000e-06 | 1.62191e-05 |
| 1000.00     | 1.33852e-07 | 6.16588e-08 | 8.09715e-08 | 3.10678e-07 | 1.44774e-06 |
| 100.000     | 3.40861e-10 | 8.40875e-10 | 4.32069e-09 | 3.47341e-08 | 2.12275e-07 |
| 10.0000     | 2.48824e-11 | 9.72187e-11 | 5.91907e-10 | 4.69436e-09 | 2.54184e-08 |
| 1.00000     | 3.91886e-12 | 1.29121e-11 | 6.40381e-11 | 4.36083e-10 | 2.24231e-09 |
| 0.100000    | 4.60924e-13 | 1.02085e-12 | 4.12818e-12 | 3.10440e-11 | 1.89272e-10 |
| 0.0100000   | 1.99366e-14 | 3.56165e-14 | 2.08629e-13 | 2.49010e-12 | 1.78729e-11 |
| 0.00100000  | 2.68698e-16 | 1.16023e-15 | 1.57675e-14 | 2.37245e-13 | 1.77117e-12 |

|             |             |             |             |             |             |
|-------------|-------------|-------------|-------------|-------------|-------------|
| 0.000100000 | 9.87944e-18 | 9.32820e-17 | 1.52460e-15 | 2.35971e-14 | 1.76942e-13 |
| 1.00000e-05 | 8.93241e-19 | 9.15057e-18 | 1.51961e-16 | 2.35843e-15 | 1.76924e-14 |
| 1.00000e-06 | 8.84787e-20 | 9.12960e-19 | 1.51903e-17 | 2.35829e-16 | 1.76923e-15 |
| 1.00000e-07 | 8.83689e-21 | 9.12642e-20 | 1.51895e-18 | 2.35827e-17 | 1.76922e-16 |
| 1.00000e-08 | 8.83551e-22 | 9.12601e-21 | 1.51893e-19 | 2.35827e-18 | 1.76922e-17 |
| 1.00000e-09 | 8.83534e-23 | 9.12601e-22 | 1.51893e-20 | 2.35827e-19 | 1.76922e-18 |

| Pa\K        | 1000.00     | 1100.00     | 1200.00     | 1300.00     | 1400.00     |
|-------------|-------------|-------------|-------------|-------------|-------------|
| 1.00000e+08 | 0.000516356 | 0.000815065 | 0.00102659  | 0.00107506  | 0.000982032 |
| 1.00000e+07 | 0.000937924 | 0.000752374 | 0.000616259 | 0.000580129 | 0.000567498 |
| 1.00000e+06 | 0.000877451 | 0.000633213 | 0.000444879 | 0.000344116 | 0.000275616 |
| 100000.     | 0.000235608 | 0.000201127 | 0.000152654 | 0.000110547 | 7.65872e-05 |
| 10000.0     | 2.85220e-05 | 3.48814e-05 | 2.95839e-05 | 2.06240e-05 | 1.32108e-05 |
| 1000.00     | 4.13202e-06 | 5.64938e-06 | 4.59068e-06 | 2.99064e-06 | 1.81776e-06 |
| 100.000     | 5.92653e-07 | 7.35347e-07 | 5.52871e-07 | 3.44137e-07 | 2.03922e-07 |
| 10.0000     | 6.34221e-08 | 7.44643e-08 | 5.51078e-08 | 3.42337e-08 | 2.02862e-08 |
| 1.00000     | 5.70273e-09 | 6.92390e-09 | 5.25898e-09 | 3.31509e-09 | 1.97817e-09 |
| 0.100000    | 5.27113e-10 | 6.65499e-10 | 5.14471e-10 | 3.26848e-10 | 1.95687e-10 |
| 0.0100000   | 5.17518e-11 | 6.60344e-11 | 5.12415e-11 | 3.26030e-11 | 1.95316e-11 |
| 0.00100000  | 5.16250e-12 | 6.59703e-12 | 5.12165e-12 | 3.25930e-12 | 1.95269e-12 |
| 0.000100000 | 5.16114e-13 | 6.59635e-13 | 5.12137e-13 | 3.25918e-13 | 1.95264e-13 |
| 1.00000e-05 | 5.16100e-14 | 6.59629e-14 | 5.12134e-14 | 3.25917e-14 | 1.95263e-14 |
| 1.00000e-06 | 5.16098e-15 | 6.59629e-15 | 5.12134e-15 | 3.25917e-15 | 1.95263e-15 |
| 1.00000e-07 | 5.16098e-16 | 6.59629e-16 | 5.12134e-16 | 3.25917e-16 | 1.95263e-16 |
| 1.00000e-08 | 5.16098e-17 | 6.59629e-17 | 5.12134e-17 | 3.25917e-17 | 1.95263e-17 |
| 1.00000e-09 | 5.16098e-18 | 6.59629e-18 | 5.12134e-18 | 3.25917e-18 | 1.95263e-18 |

| Pa\K        | 1500.00     | 1750.00     | 2000.00     | 2250.00     | 2500.00     |
|-------------|-------------|-------------|-------------|-------------|-------------|
| 1.00000e+08 | 0.000851101 | 7.11160e-05 | 6.74923e-05 | 6.49524e-05 | 6.22237e-05 |
| 1.00000e+07 | 0.000531668 | 3.56540e-05 | 3.15982e-05 | 2.55353e-05 | 1.92291e-05 |
| 1.00000e+06 | 0.000219864 | 1.89164e-05 | 1.05303e-05 | 5.86887e-06 | 3.37389e-06 |
| 100000.     | 5.18150e-05 | 4.05203e-06 | 1.73320e-06 | 8.13428e-07 | 4.09792e-07 |
| 10000.0     | 8.23873e-06 | 6.24155e-07 | 2.28685e-07 | 9.41084e-08 | 4.29459e-08 |
| 1000.00     | 1.08710e-06 | 8.07511e-08 | 2.60681e-08 | 9.78808e-09 | 4.25217e-09 |
| 100.000     | 1.19733e-07 | 8.85642e-09 | 2.68997e-09 | 9.76251e-10 | 4.18541e-10 |
| 10.0000     | 1.18986e-08 | 8.96541e-10 | 2.68618e-10 | 9.68570e-11 | 4.14410e-11 |
| 1.00000     | 1.16391e-09 | 8.90059e-11 | 2.66413e-11 | 9.59570e-12 | 4.10319e-12 |
| 0.100000    | 1.15308e-10 | 8.86308e-12 | 2.65397e-12 | 9.55870e-13 | 4.08732e-13 |
| 0.0100000   | 1.15119e-11 | 8.85640e-13 | 2.65242e-13 | 9.55348e-14 | 4.08515e-14 |
| 0.00100000  | 1.15095e-12 | 8.85544e-14 | 2.65223e-14 | 9.55289e-15 | 4.08492e-15 |
| 0.000100000 | 1.15092e-13 | 8.85532e-15 | 2.65220e-15 | 9.55283e-16 | 4.08489e-16 |
| 1.00000e-05 | 1.15092e-14 | 8.85528e-16 | 2.65220e-16 | 9.55283e-17 | 4.08489e-17 |
| 1.00000e-06 | 1.15092e-15 | 8.85528e-17 | 2.65220e-17 | 9.55283e-18 | 4.08489e-18 |
| 1.00000e-07 | 1.15092e-16 | 8.85528e-18 | 2.65220e-18 | 9.55283e-19 | 4.08489e-19 |
| 1.00000e-08 | 1.15092e-17 | 8.85528e-19 | 2.65220e-19 | 9.55283e-20 | 4.08489e-20 |
| 1.00000e-09 | 1.15092e-18 | 8.85528e-20 | 2.65220e-20 | 9.55283e-21 | 4.08489e-21 |

| Pa\K        | 2750.00     | 3000.00     | 3250.00     | 3500.00     | 3750.00     |
|-------------|-------------|-------------|-------------|-------------|-------------|
| 1.00000e+08 | 5.83579e-05 | 5.32277e-05 | 4.73543e-05 | 4.13645e-05 | 3.57152e-05 |
| 1.00000e+07 | 1.40814e-05 | 1.02860e-05 | 7.59381e-06 | 5.70094e-06 | 4.36352e-06 |
| 1.00000e+06 | 2.03048e-06 | 1.28334e-06 | 8.52203e-07 | 5.93464e-07 | 4.31618e-07 |
| 100000.     | 2.22303e-07 | 1.30603e-07 | 8.29106e-08 | 5.63473e-08 | 4.05105e-08 |
| 10000.0     | 2.19389e-08 | 1.25170e-08 | 7.85896e-09 | 5.32919e-09 | 3.83666e-09 |
| 1000.00     | 2.12900e-09 | 1.20779e-09 | 7.58340e-10 | 5.15196e-10 | 3.71740e-10 |
| 100.000     | 2.08837e-10 | 1.18478e-10 | 7.44688e-11 | 5.06564e-11 | 3.65956e-11 |
| 10.0000     | 2.06722e-11 | 1.17316e-11 | 7.37759e-12 | 5.02128e-12 | 3.62945e-12 |
| 1.00000     | 2.04660e-12 | 1.16175e-12 | 7.30933e-13 | 4.97772e-13 | 3.60017e-13 |
| 0.100000    | 2.03892e-13 | 1.15766e-13 | 7.28565e-14 | 4.96310e-14 | 3.59062e-14 |
| 0.0100000   | 2.03790e-14 | 1.15712e-14 | 7.28260e-15 | 4.96123e-15 | 3.58942e-15 |
| 0.00100000  | 2.03779e-15 | 1.15707e-15 | 7.28230e-16 | 4.96106e-16 | 3.58930e-16 |
| 0.000100000 | 2.03778e-16 | 1.15706e-16 | 7.28226e-17 | 4.96104e-17 | 3.58930e-17 |
| 1.00000e-05 | 2.03778e-17 | 1.15706e-17 | 7.28226e-18 | 4.96104e-18 | 3.58930e-18 |
| 1.00000e-06 | 2.03778e-18 | 1.15706e-18 | 7.28226e-19 | 4.96104e-19 | 3.58930e-19 |
| 1.00000e-07 | 2.03778e-19 | 1.15706e-19 | 7.28226e-20 | 4.96104e-20 | 3.58930e-20 |
| 1.00000e-08 | 2.03778e-20 | 1.15706e-20 | 7.28226e-21 | 4.96104e-21 | 3.58930e-21 |
| 1.00000e-09 | 2.03778e-21 | 1.15706e-21 | 7.28226e-22 | 4.96104e-22 | 3.58930e-22 |

| Pa\K        | 4000.00     |
|-------------|-------------|
| 1.00000e+08 | 3.06525e-05 |
| 1.00000e+07 | 3.40779e-06 |
| 1.00000e+06 | 3.26052e-07 |
| 100000.     | 3.04678e-08 |
| 10000.0     | 2.89291e-09 |
| 1000.00     | 2.80901e-10 |
| 100.000     | 2.76829e-11 |
| 10.0000     | 2.74686e-12 |

|             |             |
|-------------|-------------|
| 1.00000     | 2.72628e-13 |
| 0.100000    | 2.71979e-14 |
| 0.0100000   | 2.71898e-15 |
| 0.00100000  | 2.71888e-16 |
| 0.000100000 | 2.71888e-17 |
| 1.00000e-05 | 2.71888e-18 |
| 1.00000e-06 | 2.71888e-19 |
| 1.00000e-07 | 2.71888e-20 |
| 1.00000e-08 | 2.71888e-21 |
| 1.00000e-09 | 2.71888e-22 |

PAH9+H  
=====

| Pa\K        | 20.0000     | 30.0000     | 40.0000     | 50.0000     | 60.0000     |
|-------------|-------------|-------------|-------------|-------------|-------------|
| 1.00000e+08 | 2.87456e-36 | 4.87279e-35 | 2.51417e-34 | 8.27106e-34 | 2.15166e-33 |
| 1.00000e+07 | 2.88803e-32 | 4.94367e-31 | 2.57937e-30 | 8.58466e-30 | 2.25976e-29 |
| 1.00000e+06 | 3.21391e-28 | 6.03784e-27 | 3.36549e-26 | 1.17661e-25 | 3.21683e-25 |
| 100000.     | 5.01852e-24 | 9.54939e-23 | 5.10931e-22 | 1.69897e-21 | 4.41659e-21 |
| 10000.0     | 5.59108e-20 | 8.24031e-19 | 3.78125e-18 | 1.12629e-17 | 2.68440e-17 |
| 1000.00     | 2.60569e-16 | 2.88979e-15 | 1.10970e-14 | 2.88131e-14 | 6.11760e-14 |
| 100.000     | 4.05136e-13 | 2.82989e-12 | 8.02608e-12 | 1.64087e-11 | 2.83831e-11 |
| 10.0000     | 9.60301e-11 | 2.99010e-10 | 5.23105e-10 | 7.59795e-10 | 1.00961e-09 |
| 1.00000     | 1.67492e-09 | 2.71419e-09 | 3.38228e-09 | 3.90521e-09 | 4.36321e-09 |
| 0.100000    | 4.53145e-09 | 5.05593e-09 | 5.43469e-09 | 5.82823e-09 | 6.26073e-09 |
| 0.0100000   | 6.22631e-09 | 7.55617e-09 | 8.98333e-09 | 1.05874e-08 | 1.24117e-08 |
| 0.00100000  | 1.58468e-08 | 2.49692e-08 | 3.30041e-08 | 4.06097e-08 | 4.80772e-08 |
| 0.000100000 | 5.76413e-08 | 7.17956e-08 | 7.91013e-08 | 8.47263e-08 | 8.99134e-08 |
| 1.00000e-05 | 8.47907e-08 | 8.75826e-08 | 9.01320e-08 | 9.32068e-08 | 9.68126e-08 |
| 1.00000e-06 | 8.81109e-08 | 8.92267e-08 | 9.12409e-08 | 9.40503e-08 | 9.74964e-08 |
| 1.00000e-07 | 8.84404e-08 | 8.93904e-08 | 9.13514e-08 | 9.41345e-08 | 9.75647e-08 |
| 1.00000e-08 | 8.84733e-08 | 8.94068e-08 | 9.13625e-08 | 9.41429e-08 | 9.75715e-08 |
| 1.00000e-09 | 8.84766e-08 | 8.94084e-08 | 9.13636e-08 | 9.41437e-08 | 9.75722e-08 |

| Pa\K        | 70.0000     | 80.0000     | 90.0000     | 100.000     | 110.000     |
|-------------|-------------|-------------|-------------|-------------|-------------|
| 1.00000e+08 | 4.85733e-33 | 1.00060e-32 | 1.94067e-32 | 3.62010e-32 | 6.59537e-32 |
| 1.00000e+07 | 5.16262e-29 | 1.07645e-28 | 2.11378e-28 | 3.99357e-28 | 7.37272e-28 |
| 1.00000e+06 | 7.57164e-25 | 1.61677e-24 | 3.23591e-24 | 6.20699e-24 | 1.15944e-23 |
| 100000.     | 9.90127e-21 | 2.01741e-20 | 3.85841e-20 | 7.07828e-20 | 1.26483e-19 |
| 10000.0     | 5.59498e-17 | 1.06919e-16 | 1.92846e-16 | 3.34728e-16 | 5.66818e-16 |
| 1000.00     | 1.15080e-13 | 2.00088e-13 | 3.29889e-13 | 5.24498e-13 | 8.13563e-13 |
| 100.000     | 4.44036e-11 | 6.50427e-11 | 9.10666e-11 | 1.23507e-10 | 1.63733e-10 |
| 10.0000     | 1.27401e-09 | 1.55511e-09 | 1.85604e-09 | 2.18094e-09 | 2.53497e-09 |
| 1.00000     | 4.79092e-09 | 5.20779e-09 | 5.62809e-09 | 6.06434e-09 | 6.52882e-09 |
| 0.100000    | 6.74132e-09 | 7.28174e-09 | 7.89967e-09 | 8.61931e-09 | 9.47221e-09 |
| 0.0100000   | 1.45073e-08 | 1.69468e-08 | 1.98258e-08 | 2.32607e-08 | 2.73875e-08 |
| 0.00100000  | 5.55924e-08 | 6.33188e-08 | 7.14098e-08 | 8.00061e-08 | 8.92356e-08 |
| 0.000100000 | 9.51250e-08 | 1.00620e-07 | 1.06583e-07 | 1.13163e-07 | 1.20487e-07 |
| 1.00000e-05 | 1.00948e-07 | 1.05662e-07 | 1.11030e-07 | 1.17140e-07 | 1.24082e-07 |
| 1.00000e-06 | 1.01525e-07 | 1.06161e-07 | 1.11470e-07 | 1.17534e-07 | 1.24439e-07 |
| 1.00000e-07 | 1.01582e-07 | 1.06211e-07 | 1.11514e-07 | 1.17574e-07 | 1.24474e-07 |
| 1.00000e-08 | 1.01588e-07 | 1.06216e-07 | 1.11519e-07 | 1.17578e-07 | 1.24478e-07 |
| 1.00000e-09 | 1.01589e-07 | 1.06216e-07 | 1.11519e-07 | 1.17578e-07 | 1.24478e-07 |

| Pa\K        | 120.000     | 130.000     | 140.000     | 150.000     | 160.000     |
|-------------|-------------|-------------|-------------|-------------|-------------|
| 1.00000e+08 | 1.18727e-31 | 2.13096e-31 | 3.84071e-31 | 6.98966e-31 | 1.28967e-30 |
| 1.00000e+07 | 1.34571e-27 | 2.45087e-27 | 4.48605e-27 | 8.29899e-27 | 1.55808e-26 |
| 1.00000e+06 | 2.13451e-23 | 3.90884e-23 | 7.17133e-23 | 1.32532e-22 | 2.47693e-22 |
| 100000.     | 2.22673e-19 | 3.89601e-19 | 6.82027e-19 | 1.20068e-18 | 2.13358e-18 |
| 10000.0     | 9.45881e-16 | 1.56731e-15 | 2.59347e-15 | 4.30378e-15 | 7.18360e-15 |
| 1000.00     | 1.24133e-12 | 1.87413e-12 | 2.81160e-12 | 4.20336e-12 | 6.27346e-12 |
| 100.000     | 2.13541e-10 | 2.75265e-10 | 3.51915e-10 | 4.47358e-10 | 5.66547e-10 |
| 10.0000     | 2.92429e-09 | 3.35618e-09 | 3.83908e-09 | 4.38288e-09 | 4.99914e-09 |
| 1.00000     | 7.03431e-09 | 7.59493e-09 | 8.22689e-09 | 8.94956e-09 | 9.78671e-09 |
| 0.100000    | 1.04987e-08 | 1.17501e-08 | 1.32928e-08 | 1.52124e-08 | 1.76192e-08 |
| 0.0100000   | 3.23598e-08 | 3.83497e-08 | 4.55473e-08 | 5.41607e-08 | 6.44155e-08 |
| 0.00100000  | 9.92176e-08 | 1.10069e-07 | 1.21911e-07 | 1.34876e-07 | 1.49114e-07 |
| 0.000100000 | 1.28669e-07 | 1.37819e-07 | 1.48054e-07 | 1.59502e-07 | 1.72306e-07 |
| 1.00000e-05 | 1.31946e-07 | 1.40826e-07 | 1.50828e-07 | 1.62071e-07 | 1.74693e-07 |
| 1.00000e-06 | 1.32270e-07 | 1.41125e-07 | 1.51104e-07 | 1.62327e-07 | 1.74931e-07 |
| 1.00000e-07 | 1.32303e-07 | 1.41155e-07 | 1.51132e-07 | 1.62352e-07 | 1.74955e-07 |
| 1.00000e-08 | 1.32306e-07 | 1.41158e-07 | 1.51134e-07 | 1.62355e-07 | 1.74957e-07 |
| 1.00000e-09 | 1.32307e-07 | 1.41158e-07 | 1.51135e-07 | 1.62355e-07 | 1.74957e-07 |

| Pa\K        | 170.000     | 180.000     | 190.000     | 200.000     | 210.000     |
|-------------|-------------|-------------|-------------|-------------|-------------|
| 1.00000e+08 | 2.41915e-30 | 4.62002e-30 | 8.98625e-30 | 1.77922e-29 | 3.58148e-29 |
| 1.00000e+07 | 2.97670e-26 | 5.79524e-26 | 1.15004e-25 | 2.32465e-25 | 4.77973e-25 |

|             |             |             |             |             |             |
|-------------|-------------|-------------|-------------|-------------|-------------|
| 1.00000e+06 | 4.69321e-22 | 9.02679e-22 | 1.76274e-21 | 3.49260e-21 | 7.01238e-21 |
| 100000.     | 3.83619e-18 | 6.98821e-18 | 1.29014e-17 | 2.41268e-17 | 4.56531e-17 |
| 10000.0     | 1.20819e-14 | 2.04912e-14 | 3.50424e-14 | 6.03755e-14 | 1.04663e-13 |
| 1000.00     | 9.35582e-12 | 1.39448e-11 | 2.07663e-11 | 3.08773e-11 | 4.58012e-11 |
| 100.000     | 7.15792e-10 | 9.03099e-10 | 1.13857e-09 | 1.43492e-09 | 1.80797e-09 |
| 10.0000     | 5.70140e-09 | 6.50566e-09 | 7.43085e-09 | 8.49955e-09 | 9.73887e-09 |
| 1.00000     | 1.07682e-08 | 1.19321e-08 | 1.33276e-08 | 1.50188e-08 | 1.70898e-08 |
| 0.100000    | 2.06559e-08 | 2.45044e-08 | 2.93954e-08 | 3.56163e-08 | 4.35206e-08 |
| 0.0100000   | 7.65541e-08 | 9.08350e-08 | 1.07533e-07 | 1.26938e-07 | 1.49362e-07 |
| 0.00100000  | 1.64795e-07 | 1.82114e-07 | 2.01293e-07 | 2.22590e-07 | 2.46291e-07 |
| 0.000100000 | 1.86632e-07 | 2.02671e-07 | 2.20644e-07 | 2.40800e-07 | 2.63428e-07 |
| 1.00000e-05 | 1.88857e-07 | 2.04750e-07 | 2.22587e-07 | 2.42621e-07 | 2.65134e-07 |
| 1.00000e-06 | 1.89078e-07 | 2.04956e-07 | 2.22781e-07 | 2.42802e-07 | 2.65304e-07 |
| 1.00000e-07 | 1.89101e-07 | 2.04977e-07 | 2.22800e-07 | 2.42820e-07 | 2.65322e-07 |
| 1.00000e-08 | 1.89103e-07 | 2.04979e-07 | 2.22802e-07 | 2.42822e-07 | 2.65323e-07 |
| 1.00000e-09 | 1.89103e-07 | 2.04979e-07 | 2.22802e-07 | 2.42822e-07 | 2.65323e-07 |

| Pa\K        | 220.000     | 230.000     | 240.000     | 250.000     | 260.000     |
|-------------|-------------|-------------|-------------|-------------|-------------|
| 1.00000e+08 | 7.31667e-29 | 1.51374e-28 | 3.16342e-28 | 6.65704e-28 | 1.40537e-27 |
| 1.00000e+07 | 9.97753e-25 | 2.10968e-24 | 4.50639e-24 | 9.69370e-24 | 2.09208e-23 |
| 1.00000e+06 | 1.42433e-20 | 2.92106e-20 | 6.03544e-20 | 1.25325e-19 | 2.60784e-19 |
| 100000.     | 8.72732e-17 | 1.68245e-16 | 3.26423e-16 | 6.35983e-16 | 1.24133e-15 |
| 10000.0     | 1.82242e-13 | 3.18136e-13 | 5.55695e-13 | 9.69341e-13 | 1.68548e-12 |
| 1000.00     | 6.77126e-11 | 9.96847e-11 | 1.46019e-10 | 2.12677e-10 | 3.07846e-10 |
| 100.000     | 2.27737e-09 | 2.86735e-09 | 3.60749e-09 | 4.53382e-09 | 5.68979e-09 |
| 10.0000     | 1.11816e-08 | 1.28676e-08 | 1.48461e-08 | 1.71781e-08 | 1.99394e-08 |
| 1.00000     | 1.96510e-08 | 2.28474e-08 | 2.68688e-08 | 3.19627e-08 | 3.84482e-08 |
| 0.100000    | 5.35354e-08 | 6.61673e-08 | 8.20057e-08 | 1.01724e-07 | 1.26079e-07 |
| 0.0100000   | 1.75132e-07 | 2.04606e-07 | 2.38168e-07 | 2.76239e-07 | 3.19280e-07 |
| 0.00100000  | 2.72726e-07 | 3.02263e-07 | 3.35312e-07 | 3.72334e-07 | 4.13840e-07 |
| 0.000100000 | 2.88849e-07 | 3.17429e-07 | 3.49578e-07 | 3.85752e-07 | 4.26459e-07 |
| 1.00000e-05 | 2.90451e-07 | 3.18934e-07 | 3.50992e-07 | 3.87081e-07 | 4.27707e-07 |
| 1.00000e-06 | 2.90610e-07 | 3.19084e-07 | 3.51133e-07 | 3.87213e-07 | 4.27832e-07 |
| 1.00000e-07 | 2.90627e-07 | 3.19099e-07 | 3.51147e-07 | 3.87226e-07 | 4.27844e-07 |
| 1.00000e-08 | 2.90628e-07 | 3.19100e-07 | 3.51148e-07 | 3.87227e-07 | 4.27846e-07 |
| 1.00000e-09 | 2.90629e-07 | 3.19100e-07 | 3.51149e-07 | 3.87228e-07 | 4.27846e-07 |

| Pa\K        | 270.000     | 280.000     | 290.000     | 300.000     | 400.000     |
|-------------|-------------|-------------|-------------|-------------|-------------|
| 1.00000e+08 | 2.96327e-27 | 6.21058e-27 | 1.28759e-26 | 5.23315e-23 | 3.21015e-16 |
| 1.00000e+07 | 4.51068e-23 | 9.67130e-23 | 2.05272e-22 | 1.10615e-18 | 1.50060e-12 |
| 1.00000e+06 | 5.41990e-19 | 1.12091e-18 | 2.29801e-18 | 5.97620e-15 | 5.10174e-10 |
| 100000.     | 2.42076e-15 | 4.70291e-15 | 9.07387e-15 | 5.23642e-12 | 1.60249e-08 |
| 10000.0     | 2.91604e-12 | 5.01122e-12 | 8.53975e-12 | 4.61541e-10 | 6.61521e-08 |
| 1000.00     | 4.42663e-10 | 6.32140e-10 | 8.96292e-10 | 6.59831e-09 | 1.12138e-07 |
| 100.000     | 7.12750e-09 | 8.90902e-09 | 1.11078e-08 | 2.92375e-08 | 1.80717e-07 |
| 10.0000     | 2.32256e-08 | 2.71573e-08 | 3.18861e-08 | 6.25240e-08 | 4.42250e-07 |
| 1.00000     | 4.67335e-08 | 5.73326e-08 | 7.08835e-08 | 1.75934e-07 | 1.20077e-06 |
| 0.100000    | 1.55905e-07 | 1.92104e-07 | 2.35641e-07 | 4.78947e-07 | 1.97605e-06 |
| 0.0100000   | 3.67804e-07 | 4.22373e-07 | 4.83611e-07 | 7.32257e-07 | 2.23336e-06 |
| 0.00100000  | 4.60396e-07 | 5.12622e-07 | 5.71204e-07 | 7.92672e-07 | 2.26910e-06 |
| 0.000100000 | 4.72261e-07 | 5.23778e-07 | 5.81690e-07 | 7.99432e-07 | 2.27274e-06 |
| 1.00000e-05 | 4.73435e-07 | 5.24881e-07 | 5.82728e-07 | 8.00106e-07 | 2.27311e-06 |
| 1.00000e-06 | 4.73552e-07 | 5.24991e-07 | 5.82832e-07 | 8.00174e-07 | 2.27314e-06 |
| 1.00000e-07 | 4.73563e-07 | 5.25003e-07 | 5.82842e-07 | 8.00180e-07 | 2.27314e-06 |
| 1.00000e-08 | 4.73564e-07 | 5.25004e-07 | 5.82843e-07 | 8.00181e-07 | 2.27314e-06 |
| 1.00000e-09 | 4.73564e-07 | 5.25004e-07 | 5.82843e-07 | 8.00181e-07 | 2.27314e-06 |

| Pa\K        | 500.000     | 600.000     | 700.000     | 800.000     | 900.000     |
|-------------|-------------|-------------|-------------|-------------|-------------|
| 1.00000e+08 | 1.51891e-11 | 1.12174e-09 | 1.59190e-08 | 1.33694e-07 | 1.01875e-06 |
| 1.00000e+07 | 1.64399e-08 | 5.82641e-07 | 3.94536e-06 | 1.51809e-05 | 4.21261e-05 |
| 1.00000e+06 | 7.38491e-07 | 1.82830e-05 | 7.78761e-05 | 0.000168232 | 0.000269202 |
| 100000.     | 3.15822e-06 | 5.33302e-05 | 0.000200369 | 0.000347004 | 0.000472461 |
| 10000.0     | 2.88156e-06 | 3.55461e-05 | 0.000161313 | 0.000346536 | 0.000551380 |
| 1000.00     | 1.39981e-06 | 1.44084e-05 | 9.26864e-05 | 0.000266630 | 0.000425410 |
| 100.000     | 1.24856e-06 | 8.97347e-06 | 4.98593e-05 | 0.000130559 | 0.000184903 |
| 10.0000     | 2.84579e-06 | 1.16739e-05 | 3.41029e-05 | 6.87076e-05 | 0.000104715 |
| 1.00000     | 5.00570e-06 | 1.40329e-05 | 3.10475e-05 | 5.75236e-05 | 9.32917e-05 |
| 0.100000    | 5.95449e-06 | 1.46158e-05 | 3.06742e-05 | 5.62696e-05 | 9.21328e-05 |
| 0.0100000   | 6.12362e-06 | 1.46903e-05 | 3.06378e-05 | 5.61486e-05 | 9.20219e-05 |
| 0.00100000  | 6.14221e-06 | 1.46979e-05 | 3.06343e-05 | 5.61368e-05 | 9.20114e-05 |
| 0.000100000 | 6.14407e-06 | 1.46987e-05 | 3.06339e-05 | 5.61357e-05 | 9.20100e-05 |
| 1.00000e-05 | 6.14426e-06 | 1.46988e-05 | 3.06339e-05 | 5.61355e-05 | 9.20100e-05 |
| 1.00000e-06 | 6.14428e-06 | 1.46988e-05 | 3.06339e-05 | 5.61355e-05 | 9.20100e-05 |
| 1.00000e-07 | 6.14428e-06 | 1.46988e-05 | 3.06339e-05 | 5.61355e-05 | 9.20100e-05 |
| 1.00000e-08 | 6.14428e-06 | 1.46988e-05 | 3.06339e-05 | 5.61355e-05 | 9.20100e-05 |
| 1.00000e-09 | 6.14428e-06 | 1.46988e-05 | 3.06339e-05 | 5.61355e-05 | 9.20100e-05 |

| Pa\K        | 1000.00     | 1100.00     | 1200.00     | 1300.00     | 1400.00     |
|-------------|-------------|-------------|-------------|-------------|-------------|
| 1.00000e+08 | 3.67370e-06 | 5.79127e-06 | 6.65290e-06 | 7.02613e-06 | 6.80994e-06 |
| 1.00000e+07 | 7.59460e-05 | 9.93521e-05 | 0.000113515 | 0.000129374 | 0.000142852 |
| 1.00000e+06 | 0.000352647 | 0.000431094 | 0.000518285 | 0.000589677 | 0.000612872 |
| 100000.     | 0.000615528 | 0.000800788 | 0.000970607 | 0.00102956  | 0.000973480 |
| 10000.0     | 0.000756676 | 0.000897370 | 0.000918699 | 0.000840931 | 0.000734846 |
| 1000.00     | 0.000491872 | 0.000486282 | 0.000457043 | 0.000436629 | 0.000434135 |
| 100.000     | 0.000211517 | 0.000238321 | 0.000274321 | 0.000316859 | 0.000360796 |
| 10.0000     | 0.000145918 | 0.000194535 | 0.000247706 | 0.000301347 | 0.000351922 |
| 1.00000     | 0.000138120 | 0.000189881 | 0.000245045 | 0.000299843 | 0.000351076 |
| 0.100000    | 0.000137367 | 0.000189441 | 0.000244795 | 0.000299702 | 0.000350998 |
| 0.0100000   | 0.000137295 | 0.000189398 | 0.000244771 | 0.000299689 | 0.000350990 |
| 0.00100000  | 0.000137288 | 0.000189394 | 0.000244769 | 0.000299688 | 0.000350989 |
| 0.000100000 | 0.000137288 | 0.000189394 | 0.000244769 | 0.000299688 | 0.000350989 |
| 1.00000e-05 | 0.000137287 | 0.000189394 | 0.000244769 | 0.000299688 | 0.000350989 |
| 1.00000e-06 | 0.000137287 | 0.000189394 | 0.000244769 | 0.000299688 | 0.000350989 |
| 1.00000e-07 | 0.000137287 | 0.000189394 | 0.000244769 | 0.000299688 | 0.000350989 |
| 1.00000e-08 | 0.000137287 | 0.000189394 | 0.000244769 | 0.000299688 | 0.000350989 |
| 1.00000e-09 | 0.000137287 | 0.000189394 | 0.000244769 | 0.000299688 | 0.000350989 |

| Pa\K        | 1500.00     | 1750.00     | 2000.00     | 2250.00     | 2500.00     |
|-------------|-------------|-------------|-------------|-------------|-------------|
| 1.00000e+08 | 5.85294e-06 | 0.000132934 | 0.000143382 | 0.000149165 | 0.000151648 |
| 1.00000e+07 | 0.000145586 | 0.000315251 | 0.000351121 | 0.000365009 | 0.000341642 |
| 1.00000e+06 | 0.000594214 | 0.000673494 | 0.000633410 | 0.000571702 | 0.000474746 |
| 100000.     | 0.000868611 | 0.000813903 | 0.000655814 | 0.000543668 | 0.000440525 |
| 10000.0     | 0.000647675 | 0.000555909 | 0.000473066 | 0.000425817 | 0.000382705 |
| 1000.00     | 0.000445077 | 0.000398914 | 0.000402813 | 0.000393959 | 0.000371057 |
| 100.000     | 0.000401976 | 0.000370125 | 0.000392584 | 0.000390045 | 0.000369803 |
| 10.0000     | 0.000396969 | 0.000366782 | 0.000391504 | 0.000389659 | 0.000369685 |
| 1.00000     | 0.000396498 | 0.000366449 | 0.000391400 | 0.000389621 | 0.000369675 |
| 0.100000    | 0.000396454 | 0.000366416 | 0.000391391 | 0.000389615 | 0.000369672 |
| 0.0100000   | 0.000396451 | 0.000366413 | 0.000391387 | 0.000389615 | 0.000369672 |
| 0.00100000  | 0.000396450 | 0.000366412 | 0.000391387 | 0.000389615 | 0.000369672 |
| 0.000100000 | 0.000396450 | 0.000366412 | 0.000391387 | 0.000389615 | 0.000369672 |
| 1.00000e-05 | 0.000396450 | 0.000366412 | 0.000391387 | 0.000389615 | 0.000369672 |
| 1.00000e-06 | 0.000396450 | 0.000366412 | 0.000391387 | 0.000389615 | 0.000369672 |
| 1.00000e-07 | 0.000396450 | 0.000366412 | 0.000391387 | 0.000389615 | 0.000369672 |
| 1.00000e-08 | 0.000396450 | 0.000366412 | 0.000391387 | 0.000389615 | 0.000369672 |
| 1.00000e-09 | 0.000396450 | 0.000366412 | 0.000391387 | 0.000389615 | 0.000369672 |

| Pa\K        | 2750.00     | 3000.00     | 3250.00     | 3500.00     | 3750.00     |
|-------------|-------------|-------------|-------------|-------------|-------------|
| 1.00000e+08 | 0.000150827 | 0.000146517 | 0.000139423 | 0.000130590 | 0.000120965 |
| 1.00000e+07 | 0.000303327 | 0.000263390 | 0.000227048 | 0.000195646 | 0.000168990 |
| 1.00000e+06 | 0.000387170 | 0.000318901 | 0.000266532 | 0.000225174 | 0.000191297 |
| 100000.     | 0.000366332 | 0.000311831 | 0.000267696 | 0.000229609 | 0.000196107 |
| 10000.0     | 0.000342993 | 0.000304033 | 0.000265927 | 0.000229823 | 0.000196771 |
| 1000.00     | 0.000339296 | 0.000303051 | 0.000265787 | 0.000229908 | 0.000196886 |
| 100.000     | 0.000338942 | 0.000302971 | 0.000265786 | 0.000229925 | 0.000196902 |
| 10.0000     | 0.000338912 | 0.000302966 | 0.000265788 | 0.000229927 | 0.000196904 |
| 1.00000     | 0.000338907 | 0.000302964 | 0.000265788 | 0.000229927 | 0.000196904 |
| 0.100000    | 0.000338907 | 0.000302964 | 0.000265788 | 0.000229927 | 0.000196904 |
| 0.0100000   | 0.000338907 | 0.000302964 | 0.000265788 | 0.000229927 | 0.000196904 |
| 0.00100000  | 0.000338907 | 0.000302964 | 0.000265788 | 0.000229927 | 0.000196904 |
| 0.000100000 | 0.000338907 | 0.000302964 | 0.000265788 | 0.000229927 | 0.000196904 |
| 1.00000e-05 | 0.000338907 | 0.000302964 | 0.000265788 | 0.000229927 | 0.000196904 |
| 1.00000e-06 | 0.000338907 | 0.000302964 | 0.000265788 | 0.000229927 | 0.000196904 |
| 1.00000e-07 | 0.000338907 | 0.000302964 | 0.000265788 | 0.000229927 | 0.000196904 |
| 1.00000e-08 | 0.000338907 | 0.000302964 | 0.000265788 | 0.000229927 | 0.000196904 |
| 1.00000e-09 | 0.000338907 | 0.000302964 | 0.000265788 | 0.000229927 | 0.000196904 |

| Pa\K        | 4000.00     |
|-------------|-------------|
| 1.00000e+08 | 0.000111243 |
| 1.00000e+07 | 0.000146429 |
| 1.00000e+06 | 0.000162854 |
| 100000.     | 0.000166797 |
| 10000.0     | 0.000167411 |
| 1000.00     | 0.000167504 |
| 100.000     | 0.000167516 |
| 10.0000     | 0.000167518 |
| 1.00000     | 0.000167518 |
| 0.100000    | 0.000167518 |
| 0.0100000   | 0.000167518 |
| 0.00100000  | 0.000167518 |
| 0.000100000 | 0.000167518 |
| 1.00000e-05 | 0.000167518 |
| 1.00000e-06 | 0.000167518 |

1.00000e-07 | 0.000167518  
1.00000e-08 | 0.000167518  
1.00000e-09 | 0.000167518

rad50  
=====

| Pa\K        | 20.0000     | 30.0000     | 40.0000     | 50.0000     | 60.0000     |
|-------------|-------------|-------------|-------------|-------------|-------------|
| 1.00000e+08 | 1.72188e-44 | 3.43912e-43 | 2.54679e-42 | 1.40990e-41 | 7.03886e-41 |
| 1.00000e+07 | 1.55242e-40 | 2.92758e-39 | 2.08910e-38 | 1.12529e-37 | 5.50027e-37 |
| 1.00000e+06 | 1.13251e-36 | 1.91785e-35 | 1.24929e-34 | 6.21414e-34 | 2.83670e-33 |
| 100000.     | 4.13836e-33 | 4.65112e-32 | 2.37190e-31 | 9.98981e-31 | 4.04720e-30 |
| 10000.0     | 3.73903e-30 | 2.91214e-29 | 1.23405e-28 | 4.60899e-28 | 1.71475e-27 |
| 1000.00     | 1.07718e-27 | 5.66111e-27 | 1.87657e-26 | 5.87407e-26 | 1.91457e-25 |
| 100.000     | 6.15348e-26 | 1.59488e-25 | 3.46099e-25 | 8.14221e-25 | 2.17658e-24 |
| 10.0000     | 3.82021e-25 | 6.93809e-25 | 1.25381e-24 | 2.54357e-24 | 6.05720e-24 |
| 1.00000     | 5.71358e-25 | 4.66851e-25 | 6.40121e-25 | 1.26941e-24 | 3.49954e-24 |
| 0.100000    | 6.97938e-25 | 1.65222e-24 | 3.59143e-24 | 8.61692e-24 | 2.57210e-23 |
| 0.0100000   | 5.90526e-24 | 1.20025e-23 | 2.26680e-23 | 4.81807e-23 | 1.30948e-22 |
| 0.00100000  | 1.58331e-23 | 1.35687e-23 | 1.43009e-23 | 2.07211e-23 | 4.88501e-23 |
| 0.000100000 | 1.16182e-24 | 4.04099e-25 | 3.46854e-25 | 5.83910e-25 | 2.99049e-24 |
| 1.00000e-05 | 2.47223e-26 | 1.33544e-26 | 1.56850e-26 | 3.65207e-26 | 9.21838e-25 |
| 1.00000e-06 | 1.73579e-27 | 1.11493e-27 | 1.40381e-27 | 4.51411e-27 | 7.57813e-25 |
| 1.00000e-07 | 1.66754e-28 | 1.09370e-28 | 1.38835e-28 | 1.52411e-27 | 7.41836e-25 |
| 1.00000e-08 | 1.66078e-29 | 1.09158e-29 | 1.39327e-29 | 1.22719e-27 | 7.40243e-25 |
| 1.00000e-09 | 1.66010e-30 | 1.09137e-30 | 1.45848e-30 | 1.19752e-27 | 7.40083e-25 |

| Pa\K        | 70.0000     | 80.0000     | 90.0000     | 100.000     | 110.000     |
|-------------|-------------|-------------|-------------|-------------|-------------|
| 1.00000e+08 | 3.47408e-40 | 1.79859e-39 | 1.00119e-38 | 5.87013e-38 | 3.44772e-37 |
| 1.00000e+07 | 2.67178e-36 | 1.36824e-35 | 7.56687e-35 | 4.41792e-34 | 2.58332e-33 |
| 1.00000e+06 | 1.30239e-32 | 6.38634e-32 | 3.42193e-31 | 1.94683e-30 | 1.10695e-29 |
| 100000.     | 1.70629e-29 | 7.90552e-29 | 4.09316e-28 | 2.27196e-27 | 1.25549e-26 |
| 10000.0     | 6.80550e-27 | 3.03276e-26 | 1.53669e-25 | 8.39682e-25 | 4.53943e-24 |
| 1000.00     | 6.90510e-25 | 2.90388e-24 | 1.43759e-23 | 7.76830e-23 | 4.09927e-22 |
| 100.000     | 6.96838e-24 | 2.88162e-23 | 1.55187e-22 | 9.28696e-22 | 5.17809e-21 |
| 10.0000     | 1.84691e-23 | 8.32624e-23 | 5.45877e-22 | 3.82591e-21 | 2.30374e-20 |
| 1.00000     | 1.47141e-23 | 1.04573e-22 | 9.71684e-22 | 7.95550e-21 | 5.05386e-20 |
| 0.100000    | 1.07663e-22 | 6.57873e-22 | 4.91993e-21 | 3.44971e-20 | 2.00789e-19 |
| 0.0100000   | 5.23993e-22 | 3.23156e-21 | 2.43273e-20 | 1.66498e-19 | 9.27838e-19 |
| 0.00100000  | 2.64779e-22 | 3.05339e-21 | 3.39074e-20 | 2.69755e-19 | 1.56372e-18 |
| 0.000100000 | 8.76831e-23 | 2.31957e-21 | 3.26744e-20 | 2.79794e-19 | 1.66105e-18 |
| 1.00000e-05 | 7.34873e-23 | 2.23807e-21 | 3.24762e-20 | 2.80605e-19 | 1.67086e-18 |
| 1.00000e-06 | 7.21547e-23 | 2.22994e-21 | 3.24557e-20 | 2.80683e-19 | 1.67184e-18 |
| 1.00000e-07 | 7.20224e-23 | 2.22913e-21 | 3.24536e-20 | 2.80691e-19 | 1.67194e-18 |
| 1.00000e-08 | 7.20092e-23 | 2.22905e-21 | 3.24534e-20 | 2.80692e-19 | 1.67195e-18 |
| 1.00000e-09 | 7.20079e-23 | 2.22904e-21 | 3.24534e-20 | 2.80692e-19 | 1.67195e-18 |

| Pa\K        | 120.000     | 130.000     | 140.000     | 150.000     | 160.000     |
|-------------|-------------|-------------|-------------|-------------|-------------|
| 1.00000e+08 | 1.93780e-36 | 1.01700e-35 | 4.95098e-35 | 2.24276e-34 | 9.51955e-34 |
| 1.00000e+07 | 1.44307e-32 | 7.51118e-32 | 3.61906e-31 | 1.61945e-30 | 6.77778e-30 |
| 1.00000e+06 | 5.97283e-29 | 2.98009e-28 | 1.36690e-27 | 5.78899e-27 | 2.28222e-26 |
| 100000.     | 6.52030e-26 | 3.10193e-25 | 1.34698e-24 | 5.37448e-24 | 1.98991e-23 |
| 10000.0     | 2.28080e-23 | 1.03854e-22 | 4.27808e-22 | 1.60741e-21 | 5.56951e-21 |
| 1000.00     | 1.96691e-21 | 8.38240e-21 | 3.18000e-20 | 1.08648e-19 | 3.38863e-19 |
| 100.000     | 2.49579e-20 | 1.03194e-19 | 3.71908e-19 | 1.19268e-18 | 3.46923e-18 |
| 10.0000     | 1.13535e-19 | 4.65306e-19 | 1.63250e-18 | 5.04041e-18 | 1.40167e-17 |
| 1.00000     | 2.52363e-19 | 1.03277e-18 | 3.60588e-18 | 1.11029e-17 | 3.09486e-17 |
| 0.100000    | 9.60135e-19 | 3.86762e-18 | 1.35207e-17 | 4.20988e-17 | 1.19191e-16 |
| 0.0100000   | 4.20648e-18 | 1.59633e-17 | 5.22865e-17 | 1.51747e-16 | 3.98565e-16 |
| 0.00100000  | 7.02832e-18 | 2.58788e-17 | 8.14608e-17 | 2.26392e-16 | 5.69229e-16 |
| 0.000100000 | 7.50783e-18 | 2.75930e-17 | 8.64222e-17 | 2.38697e-16 | 5.96324e-16 |
| 1.00000e-05 | 7.55826e-18 | 2.77754e-17 | 8.69513e-17 | 2.40007e-16 | 5.99194e-16 |
| 1.00000e-06 | 7.56333e-18 | 2.77938e-17 | 8.70046e-17 | 2.40139e-16 | 5.99483e-16 |
| 1.00000e-07 | 7.56384e-18 | 2.77956e-17 | 8.70099e-17 | 2.40152e-16 | 5.99512e-16 |
| 1.00000e-08 | 7.56389e-18 | 2.77958e-17 | 8.70104e-17 | 2.40153e-16 | 5.99515e-16 |
| 1.00000e-09 | 7.56389e-18 | 2.77958e-17 | 8.70105e-17 | 2.40153e-16 | 5.99515e-16 |

| Pa\K        | 170.000     | 180.000     | 190.000     | 200.000     | 210.000     |
|-------------|-------------|-------------|-------------|-------------|-------------|
| 1.00000e+08 | 3.81543e-33 | 1.45433e-32 | 5.30429e-32 | 1.86034e-31 | 6.29799e-31 |
| 1.00000e+07 | 2.67383e-29 | 1.00142e-28 | 3.58253e-28 | 1.23037e-27 | 4.07238e-27 |
| 1.00000e+06 | 8.44871e-26 | 2.96049e-25 | 9.88670e-25 | 3.16459e-24 | 9.75324e-24 |
| 100000.     | 6.90497e-23 | 2.26537e-22 | 7.07893e-22 | 2.11960e-21 | 6.11064e-21 |
| 10000.0     | 1.79860e-20 | 5.46383e-20 | 1.57337e-19 | 4.32156e-19 | 1.13788e-18 |
| 1000.00     | 9.77032e-19 | 2.63262e-18 | 6.68961e-18 | 1.61514e-17 | 3.72830e-17 |
| 100.000     | 9.30190e-18 | 2.32919e-17 | 5.50365e-17 | 1.23733e-16 | 2.66402e-16 |
| 10.0000     | 3.57695e-17 | 8.50295e-17 | 1.90556e-16 | 4.06505e-16 | 8.31984e-16 |
| 1.00000     | 7.97064e-17 | 1.92689e-16 | 4.42596e-16 | 9.74833e-16 | 2.07288e-15 |

|             |             |             |             |             |             |
|-------------|-------------|-------------|-------------|-------------|-------------|
| 0.100000    | 3.11776e-16 | 7.62649e-16 | 1.76067e-15 | 3.86327e-15 | 8.10104e-15 |
| 0.0100000   | 9.63420e-16 | 2.17187e-15 | 4.61474e-15 | 9.32058e-15 | 1.80180e-14 |
| 0.00100000  | 1.31922e-15 | 2.85879e-15 | 5.85787e-15 | 1.14496e-14 | 2.14952e-14 |
| 0.000100000 | 1.37350e-15 | 2.95952e-15 | 6.03329e-15 | 1.17393e-14 | 2.19528e-14 |
| 1.00000e-05 | 1.37922e-15 | 2.97008e-15 | 6.05159e-15 | 1.17694e-14 | 2.20000e-14 |
| 1.00000e-06 | 1.37980e-15 | 2.97114e-15 | 6.05343e-15 | 1.17724e-14 | 2.20048e-14 |
| 1.00000e-07 | 1.37986e-15 | 2.97125e-15 | 6.05362e-15 | 1.17727e-14 | 2.20052e-14 |
| 1.00000e-08 | 1.37986e-15 | 2.97126e-15 | 6.05363e-15 | 1.17728e-14 | 2.20053e-14 |
| 1.00000e-09 | 1.37986e-15 | 2.97126e-15 | 6.05364e-15 | 1.17728e-14 | 2.20053e-14 |

| Pa\K        | 220.000     | 230.000     | 240.000     | 250.000     | 260.000     |
|-------------|-------------|-------------|-------------|-------------|-------------|
| 1.00000e+08 | 2.06328e-30 | 6.54884e-30 | 2.01356e-29 | 5.99027e-29 | 1.72132e-28 |
| 1.00000e+07 | 1.30265e-26 | 4.03319e-26 | 1.20916e-25 | 3.50809e-25 | 9.83731e-25 |
| 1.00000e+06 | 2.90450e-23 | 8.37812e-23 | 2.34401e-22 | 6.36298e-22 | 1.67513e-21 |
| 100000.     | 1.70252e-20 | 4.59700e-20 | 1.20509e-19 | 3.07000e-19 | 7.60132e-19 |
| 10000.0     | 2.88362e-18 | 7.05590e-18 | 1.67112e-17 | 3.83792e-17 | 8.55774e-17 |
| 1000.00     | 8.27072e-17 | 1.77079e-16 | 3.67220e-16 | 7.39720e-16 | 1.45068e-15 |
| 100.000     | 5.52149e-16 | 1.10622e-15 | 2.14948e-15 | 4.06147e-15 | 7.47818e-15 |
| 10.0000     | 1.64424e-15 | 3.15434e-15 | 5.89958e-15 | 1.07939e-14 | 1.93679e-14 |
| 1.00000     | 4.27608e-15 | 8.58585e-15 | 1.68151e-14 | 3.21593e-14 | 6.00927e-14 |
| 0.100000    | 1.63057e-14 | 3.16173e-14 | 5.92408e-14 | 1.07540e-13 | 1.89562e-13 |
| 0.0100000   | 3.35253e-14 | 6.03185e-14 | 1.05340e-13 | 1.79131e-13 | 2.97376e-13 |
| 0.00100000  | 3.89754e-14 | 6.85587e-14 | 1.17410e-13 | 1.96321e-13 | 3.21252e-13 |
| 0.000100000 | 3.96708e-14 | 6.95810e-14 | 1.18870e-13 | 1.98353e-13 | 3.24017e-13 |
| 1.00000e-05 | 3.97424e-14 | 6.96860e-14 | 1.19019e-13 | 1.98560e-13 | 3.24298e-13 |
| 1.00000e-06 | 3.97496e-14 | 6.96964e-14 | 1.19034e-13 | 1.98581e-13 | 3.24326e-13 |
| 1.00000e-07 | 3.97504e-14 | 6.96975e-14 | 1.19036e-13 | 1.98583e-13 | 3.24329e-13 |
| 1.00000e-08 | 3.97504e-14 | 6.96976e-14 | 1.19036e-13 | 1.98584e-13 | 3.24329e-13 |
| 1.00000e-09 | 3.97505e-14 | 6.96976e-14 | 1.19036e-13 | 1.98584e-13 | 3.24329e-13 |

| Pa\K        | 270.000     | 280.000     | 290.000     | 300.000     | 400.000     |
|-------------|-------------|-------------|-------------|-------------|-------------|
| 1.00000e+08 | 4.76950e-28 | 1.27272e-27 | 3.26873e-27 | 1.62844e-22 | 2.76149e-16 |
| 1.00000e+07 | 2.66262e-24 | 6.94814e-24 | 1.74684e-23 | 4.43109e-19 | 3.00841e-13 |
| 1.00000e+06 | 4.27292e-21 | 1.05494e-20 | 2.51861e-20 | 2.62914e-16 | 3.20722e-11 |
| 100000.     | 1.82850e-18 | 4.27007e-18 | 9.67234e-18 | 2.59841e-14 | 2.77471e-10 |
| 10000.0     | 1.85401e-16 | 3.90383e-16 | 7.98906e-16 | 2.14387e-13 | 2.30097e-10 |
| 1000.00     | 2.77439e-15 | 5.17986e-15 | 9.44757e-15 | 2.84825e-13 | 5.70021e-11 |
| 100.000     | 1.34388e-14 | 2.35974e-14 | 4.05164e-14 | 2.70020e-13 | 2.16930e-11 |
| 10.0000     | 3.41400e-14 | 5.91677e-14 | 1.00830e-13 | 5.88399e-13 | 3.99818e-11 |
| 1.00000     | 1.09712e-13 | 1.95656e-13 | 3.40681e-13 | 1.58111e-12 | 6.79994e-11 |
| 0.100000    | 3.25097e-13 | 5.43345e-13 | 8.86190e-13 | 2.19938e-12 | 7.69993e-11 |
| 0.0100000   | 4.82952e-13 | 7.68560e-13 | 1.19993e-12 | 2.23504e-12 | 7.80589e-11 |
| 0.00100000  | 5.15377e-13 | 8.11712e-13 | 1.25632e-12 | 2.22809e-12 | 7.81584e-11 |
| 0.000100000 | 5.19064e-13 | 8.16541e-13 | 1.26255e-12 | 2.22712e-12 | 7.81682e-11 |
| 1.00000e-05 | 5.19439e-13 | 8.17030e-13 | 1.26317e-12 | 2.22703e-12 | 7.81692e-11 |
| 1.00000e-06 | 5.19476e-13 | 8.17079e-13 | 1.26323e-12 | 2.22701e-12 | 7.81693e-11 |
| 1.00000e-07 | 5.19480e-13 | 8.17084e-13 | 1.26324e-12 | 2.22701e-12 | 7.81693e-11 |
| 1.00000e-08 | 5.19480e-13 | 8.17085e-13 | 1.26324e-12 | 2.22701e-12 | 7.81693e-11 |
| 1.00000e-09 | 5.19480e-13 | 8.17085e-13 | 1.26324e-12 | 2.22701e-12 | 7.81693e-11 |

| Pa\K        | 500.000     | 600.000     | 700.000     | 800.000     | 900.000     |
|-------------|-------------|-------------|-------------|-------------|-------------|
| 1.00000e+08 | 7.98941e-12 | 5.31109e-10 | 7.08025e-09 | 5.37161e-08 | 3.08074e-07 |
| 1.00000e+07 | 3.63725e-09 | 1.32709e-07 | 8.98435e-07 | 3.47770e-06 | 9.61320e-06 |
| 1.00000e+06 | 1.04468e-07 | 3.46367e-06 | 1.56848e-05 | 3.48362e-05 | 5.66900e-05 |
| 100000.     | 1.78467e-07 | 6.87382e-06 | 3.45356e-05 | 6.55689e-05 | 9.23620e-05 |
| 10000.0     | 5.08354e-08 | 2.53522e-06 | 2.14195e-05 | 5.62386e-05 | 9.53336e-05 |
| 1000.00     | 7.58250e-09 | 6.56185e-07 | 1.01144e-05 | 3.78109e-05 | 6.37094e-05 |
| 100.000     | 1.73550e-09 | 1.83555e-07 | 3.65870e-06 | 1.33283e-05 | 1.77730e-05 |
| 10.0000     | 1.22926e-09 | 5.46847e-08 | 8.21561e-07 | 2.43240e-06 | 2.91747e-06 |
| 1.00000     | 1.19262e-09 | 1.74004e-08 | 1.51957e-07 | 4.40365e-07 | 8.02895e-07 |
| 0.100000    | 1.16763e-09 | 1.04111e-08 | 6.04315e-08 | 2.14419e-07 | 5.87083e-07 |
| 0.0100000   | 1.16249e-09 | 9.57796e-09 | 5.10023e-08 | 1.92387e-07 | 5.66340e-07 |
| 0.00100000  | 1.16191e-09 | 9.49383e-09 | 5.00781e-08 | 1.90242e-07 | 5.64318e-07 |
| 0.000100000 | 1.16186e-09 | 9.48551e-09 | 4.99865e-08 | 1.90031e-07 | 5.64118e-07 |
| 1.00000e-05 | 1.16185e-09 | 9.48461e-09 | 4.99774e-08 | 1.90010e-07 | 5.64099e-07 |
| 1.00000e-06 | 1.16185e-09 | 9.48453e-09 | 4.99765e-08 | 1.90008e-07 | 5.64097e-07 |
| 1.00000e-07 | 1.16185e-09 | 9.48453e-09 | 4.99764e-08 | 1.90008e-07 | 5.64096e-07 |
| 1.00000e-08 | 1.16185e-09 | 9.48453e-09 | 4.99764e-08 | 1.90007e-07 | 5.64096e-07 |
| 1.00000e-09 | 1.16185e-09 | 9.48453e-09 | 4.99764e-08 | 1.90007e-07 | 5.64096e-07 |

| Pa\K        | 1000.00     | 1100.00     | 1200.00     | 1300.00     | 1400.00     |
|-------------|-------------|-------------|-------------|-------------|-------------|
| 1.00000e+08 | 8.62639e-07 | 1.18437e-06 | 1.22039e-06 | 1.17157e-06 | 1.07356e-06 |
| 1.00000e+07 | 1.68571e-05 | 2.13205e-05 | 2.36747e-05 | 2.62810e-05 | 2.83400e-05 |
| 1.00000e+06 | 7.45326e-05 | 9.05962e-05 | 0.000107866 | 0.000121355 | 0.000124749 |
| 100000.     | 0.000121288 | 0.000156754 | 0.000187119 | 0.000194337 | 0.000179228 |
| 10000.0     | 0.000131473 | 0.000151878 | 0.000147755 | 0.000125472 | 0.000100051 |

|             |             |             |             |             |             |
|-------------|-------------|-------------|-------------|-------------|-------------|
| 1000.00     | 6.99675e-05 | 6.07854e-05 | 4.71191e-05 | 3.65520e-05 | 3.16181e-05 |
| 100.000     | 1.54275e-05 | 1.22551e-05 | 1.11412e-05 | 1.26173e-05 | 1.64954e-05 |
| 10.0000     | 3.01503e-06 | 3.90174e-06 | 6.03158e-06 | 9.60216e-06 | 1.47238e-05 |
| 1.00000     | 1.54200e-06 | 3.01425e-06 | 5.51964e-06 | 9.30842e-06 | 1.45534e-05 |
| 0.100000    | 1.39891e-06 | 2.92967e-06 | 5.47112e-06 | 9.28059e-06 | 1.45372e-05 |
| 0.0100000   | 1.38517e-06 | 2.92154e-06 | 5.46645e-06 | 9.27792e-06 | 1.45357e-05 |
| 0.00100000  | 1.38383e-06 | 2.92074e-06 | 5.46599e-06 | 9.27765e-06 | 1.45355e-05 |
| 0.000100000 | 1.38370e-06 | 2.92066e-06 | 5.46594e-06 | 9.27765e-06 | 1.45355e-05 |
| 1.00000e-05 | 1.38369e-06 | 2.92065e-06 | 5.46594e-06 | 9.27759e-06 | 1.45355e-05 |
| 1.00000e-06 | 1.38369e-06 | 2.92065e-06 | 5.46594e-06 | 9.27759e-06 | 1.45355e-05 |
| 1.00000e-07 | 1.38369e-06 | 2.92065e-06 | 5.46594e-06 | 9.27759e-06 | 1.45355e-05 |
| 1.00000e-08 | 1.38369e-06 | 2.92065e-06 | 5.46594e-06 | 9.27759e-06 | 1.45355e-05 |
| 1.00000e-09 | 1.38369e-06 | 2.92065e-06 | 5.46594e-06 | 9.27759e-06 | 1.45355e-05 |

| Pa\K        | 1500.00     | 1750.00     | 2000.00     | 2250.00     | 2500.00     |
|-------------|-------------|-------------|-------------|-------------|-------------|
| 1.00000e+08 | 9.62709e-07 | 0.000187838 | 0.000192674 | 0.000195855 | 0.000196947 |
| 1.00000e+07 | 2.83534e-05 | 0.000428327 | 0.000434896 | 0.000419922 | 0.000383650 |
| 1.00000e+06 | 0.000119542 | 0.000809303 | 0.000672107 | 0.000535432 | 0.000414060 |
| 100000.     | 0.000155569 | 0.000761786 | 0.000486179 | 0.000318828 | 0.000223553 |
| 10000.0     | 8.08423e-05 | 0.000295317 | 0.000165836 | 0.000124115 | 0.000117617 |
| 1000.00     | 3.18760e-05 | 7.47901e-05 | 6.89123e-05 | 8.24852e-05 | 0.000100357 |
| 100.000     | 2.24727e-05 | 3.74471e-05 | 5.57712e-05 | 7.76543e-05 | 9.85474e-05 |
| 10.0000     | 2.14188e-05 | 3.32556e-05 | 5.44027e-05 | 7.71737e-05 | 9.83717e-05 |
| 1.00000     | 2.13180e-05 | 3.28366e-05 | 5.42678e-05 | 7.71264e-05 | 9.83547e-05 |
| 0.100000    | 2.13085e-05 | 3.27953e-05 | 5.42544e-05 | 7.71218e-05 | 9.83530e-05 |
| 0.0100000   | 2.13075e-05 | 3.27912e-05 | 5.42530e-05 | 7.71214e-05 | 9.83527e-05 |
| 0.00100000  | 2.13074e-05 | 3.27908e-05 | 5.42530e-05 | 7.71214e-05 | 9.83527e-05 |
| 0.000100000 | 2.13074e-05 | 3.27908e-05 | 5.42530e-05 | 7.71214e-05 | 9.83527e-05 |
| 1.00000e-05 | 2.13074e-05 | 3.27908e-05 | 5.42530e-05 | 7.71214e-05 | 9.83527e-05 |
| 1.00000e-06 | 2.13074e-05 | 3.27908e-05 | 5.42530e-05 | 7.71214e-05 | 9.83527e-05 |
| 1.00000e-07 | 2.13074e-05 | 3.27908e-05 | 5.42530e-05 | 7.71214e-05 | 9.83527e-05 |
| 1.00000e-08 | 2.13074e-05 | 3.27908e-05 | 5.42530e-05 | 7.71214e-05 | 9.83527e-05 |
| 1.00000e-09 | 2.13074e-05 | 3.27908e-05 | 5.42530e-05 | 7.71214e-05 | 9.83527e-05 |

| Pa\K        | 2750.00     | 3000.00     | 3250.00     | 3500.00     | 3750.00     |
|-------------|-------------|-------------|-------------|-------------|-------------|
| 1.00000e+08 | 0.000194835 | 0.000188861 | 0.000179656 | 0.000168349 | 0.000156020 |
| 1.00000e+07 | 0.000338176 | 0.000292108 | 0.000250104 | 0.000214067 | 0.000184248 |
| 1.00000e+06 | 0.000319075 | 0.000251353 | 0.000205884 | 0.000175861 | 0.000155350 |
| 100000.     | 0.000177211 | 0.000157184 | 0.000148458 | 0.000143155 | 0.000137873 |
| 10000.0     | 0.000123625 | 0.000131285 | 0.000136354 | 0.000137702 | 0.000135559 |
| 1000.00     | 0.000116486 | 0.000128311 | 0.000135118 | 0.000137205 | 0.000135378 |
| 100.000     | 0.000115783 | 0.000128030 | 0.000135006 | 0.000137162 | 0.000135363 |
| 10.0000     | 0.000115716 | 0.000128003 | 0.000134996 | 0.000137159 | 0.000135362 |
| 1.00000     | 0.000115709 | 0.000128001 | 0.000134995 | 0.000137158 | 0.000135362 |
| 0.100000    | 0.000115709 | 0.000128001 | 0.000134995 | 0.000137158 | 0.000135362 |
| 0.0100000   | 0.000115709 | 0.000128001 | 0.000134995 | 0.000137158 | 0.000135362 |
| 0.00100000  | 0.000115709 | 0.000128001 | 0.000134995 | 0.000137158 | 0.000135362 |
| 0.000100000 | 0.000115709 | 0.000128001 | 0.000134995 | 0.000137158 | 0.000135362 |
| 1.00000e-05 | 0.000115709 | 0.000128001 | 0.000134995 | 0.000137158 | 0.000135362 |
| 1.00000e-06 | 0.000115709 | 0.000128001 | 0.000134995 | 0.000137158 | 0.000135362 |
| 1.00000e-07 | 0.000115709 | 0.000128001 | 0.000134995 | 0.000137158 | 0.000135362 |
| 1.00000e-08 | 0.000115709 | 0.000128001 | 0.000134995 | 0.000137158 | 0.000135362 |
| 1.00000e-09 | 0.000115709 | 0.000128001 | 0.000134995 | 0.000137158 | 0.000135362 |

| Pa\K        | 4000.00     |
|-------------|-------------|
| 1.00000e+08 | 0.000143503 |
| 1.00000e+07 | 0.000160025 |
| 1.00000e+06 | 0.000140211 |
| 100000.     | 0.000131540 |
| 10000.0     | 0.000130676 |
| 1000.00     | 0.000130628 |
| 100.000     | 0.000130626 |
| 10.0000     | 0.000130625 |
| 1.00000     | 0.000130625 |
| 0.100000    | 0.000130625 |
| 0.0100000   | 0.000130625 |
| 0.00100000  | 0.000130625 |
| 0.000100000 | 0.000130625 |
| 1.00000e-05 | 0.000130625 |
| 1.00000e-06 | 0.000130625 |
| 1.00000e-07 | 0.000130625 |
| 1.00000e-08 | 0.000130625 |
| 1.00000e-09 | 0.000130625 |

rad33

=====

| Pa\K | 20.0000 | 30.0000 | 40.0000 | 50.0000 | 60.0000 |
|------|---------|---------|---------|---------|---------|
|------|---------|---------|---------|---------|---------|



|             |             |             |             |             |             |
|-------------|-------------|-------------|-------------|-------------|-------------|
| 1.00000e+08 | 2.26646e-19 | 4.41452e-17 | 1.84595e-15 | 1.84674e-14 | 8.91197e-14 |
| 1.00000e+07 | 6.36772e-17 | 7.21682e-16 | 1.90486e-14 | 1.84974e-13 | 8.87690e-13 |
| 1.00000e+06 | 7.94990e-15 | 3.69841e-14 | 2.50803e-13 | 1.88220e-12 | 8.54548e-12 |
| 100000.     | 7.54693e-13 | 2.88211e-12 | 7.19605e-12 | 2.11030e-11 | 6.29710e-11 |
| 10000.0     | 3.90252e-11 | 9.09181e-11 | 1.34406e-10 | 1.77725e-10 | 2.31878e-10 |
| 1000.00     | 2.72578e-10 | 3.75388e-10 | 4.50351e-10 | 5.16722e-10 | 5.81330e-10 |
| 100.000     | 7.29712e-10 | 9.47773e-10 | 1.07322e-09 | 1.15419e-09 | 1.20898e-09 |
| 10.0000     | 1.21225e-09 | 1.11935e-09 | 1.04401e-09 | 9.93768e-10 | 9.59048e-10 |
| 1.00000     | 8.50450e-10 | 7.90045e-10 | 7.68432e-10 | 7.57733e-10 | 7.51777e-10 |
| 0.100000    | 7.29193e-10 | 7.19346e-10 | 7.15718e-10 | 7.13823e-10 | 7.12709e-10 |
| 0.0100000   | 6.99672e-10 | 6.83991e-10 | 6.69735e-10 | 6.55819e-10 | 6.41797e-10 |
| 0.00100000  | 5.80135e-10 | 4.75685e-10 | 3.94640e-10 | 3.29062e-10 | 2.74899e-10 |
| 0.000100000 | 1.39015e-10 | 4.50473e-11 | 1.92981e-11 | 9.63238e-12 | 5.30238e-12 |
| 1.00000e-05 | 8.34375e-13 | 9.66156e-14 | 2.69265e-14 | 1.06969e-14 | 5.14515e-15 |
| 1.00000e-06 | 6.77352e-16 | 8.27860e-17 | 2.55365e-17 | 1.11145e-17 | 5.78754e-18 |
| 1.00000e-07 | 1.02379e-18 | 1.71195e-19 | 6.33069e-20 | 3.13339e-20 | 1.80449e-20 |
| 1.00000e-08 | 4.44981e-21 | 1.04680e-21 | 4.74683e-22 | 2.73298e-22 | 1.78150e-22 |
| 1.00000e-09 | 6.42669e-23 | 2.25779e-23 | 1.28281e-23 | 8.64566e-24 | 6.36732e-24 |

| Pa\K        | 70.0000     | 80.0000     | 90.0000     | 100.000     | 110.000     |
|-------------|-------------|-------------|-------------|-------------|-------------|
| 1.00000e+08 | 2.82767e-13 | 6.89027e-13 | 1.40612e-12 | 2.53245e-12 | 4.16323e-12 |
| 1.00000e+07 | 2.80972e-12 | 6.83453e-12 | 1.39254e-11 | 2.50406e-11 | 4.10992e-11 |
| 1.00000e+06 | 2.64001e-11 | 6.31176e-11 | 1.26636e-10 | 2.24303e-10 | 3.62521e-10 |
| 100000.     | 1.57295e-10 | 3.25433e-10 | 5.79436e-10 | 9.20694e-10 | 1.34176e-09 |
| 10000.0     | 3.04568e-10 | 3.98332e-10 | 5.11561e-10 | 6.40323e-10 | 7.79908e-10 |
| 1000.00     | 6.47628e-10 | 7.17104e-10 | 7.89954e-10 | 8.65627e-10 | 9.43238e-10 |
| 100.000     | 1.24674e-09 | 1.27278e-09 | 1.29042e-09 | 1.30183e-09 | 1.30853e-09 |
| 10.0000     | 9.34023e-10 | 9.15395e-10 | 9.01213e-10 | 8.90237e-10 | 8.81638e-10 |
| 1.00000     | 7.48388e-10 | 7.46587e-10 | 7.45858e-10 | 7.45887e-10 | 7.46454e-10 |
| 0.100000    | 7.12025e-10 | 7.11586e-10 | 7.11265e-10 | 7.10942e-10 | 7.10496e-10 |
| 0.0100000   | 6.27386e-10 | 6.12344e-10 | 5.96442e-10 | 5.79469e-10 | 5.61252e-10 |
| 0.00100000  | 2.29687e-10 | 1.91712e-10 | 1.59707e-10 | 1.32705e-10 | 1.09944e-10 |
| 0.000100000 | 1.32671e-12 | 1.94007e-12 | 1.25157e-12 | 8.32378e-13 | 5.67222e-13 |
| 1.00000e-05 | 2.78982e-15 | 1.64158e-15 | 1.02452e-15 | 6.68177e-16 | 4.50791e-16 |
| 1.00000e-06 | 3.36469e-18 | 2.10686e-18 | 1.39098e-18 | 9.55140e-19 | 6.75867e-19 |
| 1.00000e-07 | 1.14074e-20 | 7.68086e-21 | 5.41088e-21 | 3.94273e-21 | 2.94891e-21 |
| 1.00000e-08 | 1.25421e-22 | 9.30709e-23 | 7.17557e-23 | 5.69505e-23 | 4.62443e-23 |
| 1.00000e-09 | 4.95629e-24 | 4.00756e-24 | 3.33141e-24 | 2.82806e-24 | 2.44066e-24 |

| Pa\K        | 120.000     | 130.000     | 140.000     | 150.000     | 160.000     |
|-------------|-------------|-------------|-------------|-------------|-------------|
| 1.00000e+08 | 6.39130e-12 | 9.31066e-12 | 1.30214e-11 | 1.76352e-11 | 2.32823e-11 |
| 1.00000e+07 | 6.29878e-11 | 9.15930e-11 | 1.27848e-10 | 1.72783e-10 | 2.27585e-10 |
| 1.00000e+06 | 5.46747e-10 | 7.81693e-10 | 1.07160e-09 | 1.42049e-09 | 1.83240e-09 |
| 100000.     | 1.82935e-09 | 2.36726e-09 | 2.93863e-09 | 3.52750e-09 | 4.11970e-09 |
| 10000.0     | 9.25791e-10 | 1.07411e-09 | 1.22186e-09 | 1.36681e-09 | 1.50750e-09 |
| 1000.00     | 1.02182e-09 | 1.10050e-09 | 1.17848e-09 | 1.25515e-09 | 1.33001e-09 |
| 100.000     | 1.31157e-09 | 1.31172e-09 | 1.30959e-09 | 1.30563e-09 | 1.30021e-09 |
| 10.0000     | 8.74825e-10 | 8.69360e-10 | 8.64909e-10 | 8.61214e-10 | 8.58080e-10 |
| 1.00000     | 7.47387e-10 | 7.48545e-10 | 7.49807e-10 | 7.51073e-10 | 7.52257e-10 |
| 0.100000    | 7.09795e-10 | 7.08699e-10 | 7.07065e-10 | 7.04749e-10 | 7.01608e-10 |
| 0.0100000   | 5.41661e-10 | 5.20625e-10 | 4.98139e-10 | 4.74272e-10 | 4.49158e-10 |
| 0.00100000  | 9.08004e-11 | 7.47511e-11 | 6.13452e-11 | 5.01908e-11 | 4.09460e-11 |
| 0.000100000 | 3.94247e-13 | 2.78527e-13 | 1.99475e-13 | 1.44519e-13 | 1.05741e-13 |
| 1.00000e-05 | 3.12361e-16 | 2.21139e-16 | 1.59332e-16 | 1.16488e-16 | 8.62151e-17 |
| 1.00000e-06 | 4.89654e-19 | 3.61508e-19 | 2.71046e-19 | 2.05837e-19 | 1.58011e-19 |
| 1.00000e-07 | 2.25189e-21 | 1.74912e-21 | 1.37813e-21 | 1.09927e-21 | 8.86417e-22 |
| 1.00000e-08 | 3.82554e-23 | 3.21441e-23 | 2.73745e-23 | 2.35910e-23 | 2.05497e-23 |
| 1.00000e-09 | 2.13466e-24 | 1.88801e-24 | 1.68595e-24 | 1.51830e-24 | 1.37777e-24 |

| Pa\K        | 170.000     | 180.000     | 190.000     | 200.000     | 210.000     |
|-------------|-------------|-------------|-------------|-------------|-------------|
| 1.00000e+08 | 3.01172e-11 | 3.83264e-11 | 4.81365e-11 | 5.98227e-11 | 7.37186e-11 |
| 1.00000e+07 | 2.93651e-10 | 3.72649e-10 | 4.66580e-10 | 5.77849e-10 | 7.09331e-10 |
| 1.00000e+06 | 2.31152e-09 | 2.86224e-09 | 3.48923e-09 | 4.19728e-09 | 4.99127e-09 |
| 100000.     | 4.70341e-09 | 5.26910e-09 | 5.80965e-09 | 6.32005e-09 | 6.79716e-09 |
| 10000.0     | 1.64306e-09 | 1.77310e-09 | 1.89763e-09 | 2.01690e-09 | 2.13140e-09 |
| 1000.00     | 1.40267e-09 | 1.47282e-09 | 1.54020e-09 | 1.60463e-09 | 1.66595e-09 |
| 100.000     | 1.29365e-09 | 1.28620e-09 | 1.27812e-09 | 1.26958e-09 | 1.26078e-09 |
| 10.0000     | 8.55364e-10 | 8.52962e-10 | 8.50801e-10 | 8.48838e-10 | 8.47050e-10 |
| 1.00000     | 7.53296e-10 | 7.54140e-10 | 7.54754e-10 | 7.55109e-10 | 7.55186e-10 |
| 0.100000    | 6.97501e-10 | 6.92297e-10 | 6.85867e-10 | 6.78095e-10 | 6.68872e-10 |
| 0.0100000   | 4.23000e-10 | 3.96051e-10 | 3.68607e-10 | 3.40986e-10 | 3.13512e-10 |
| 0.00100000  | 3.33132e-11 | 2.70341e-11 | 2.18868e-11 | 1.76809e-11 | 1.42546e-11 |
| 0.000100000 | 7.80295e-14 | 5.80083e-14 | 4.34051e-14 | 3.26650e-14 | 2.47082e-14 |
| 1.00000e-05 | 6.44790e-17 | 4.86574e-17 | 3.70049e-17 | 2.83355e-17 | 2.18284e-17 |
| 1.00000e-06 | 1.22421e-19 | 9.56078e-20 | 7.51945e-20 | 5.95128e-20 | 4.73722e-20 |
| 1.00000e-07 | 7.21850e-22 | 5.93238e-22 | 4.91799e-22 | 4.11177e-22 | 3.46680e-22 |

|             |             |             |             |             |             |
|-------------|-------------|-------------|-------------|-------------|-------------|
| 1.00000e-08 | 1.80779e-23 | 1.60511e-23 | 1.43769e-23 | 1.29862e-23 | 1.18264e-23 |
| 1.00000e-09 | 1.25905e-24 | 1.15812e-24 | 1.07195e-24 | 9.98175e-25 | 9.34942e-25 |

| Pa\K        | 220.000     | 230.000     | 240.000     | 250.000     | 260.000     |
|-------------|-------------|-------------|-------------|-------------|-------------|
| 1.00000e+08 | 9.02288e-11 | 1.09841e-10 | 1.33144e-10 | 1.60842e-10 | 1.93780e-10 |
| 1.00000e+07 | 8.64454e-10 | 1.04728e-09 | 1.26261e-09 | 1.51606e-09 | 1.81418e-09 |
| 1.00000e+06 | 5.87595e-09 | 6.85570e-09 | 7.93434e-09 | 9.11478e-09 | 1.03989e-08 |
| 100000.     | 7.23943e-09 | 7.64664e-09 | 8.01955e-09 | 8.35979e-09 | 8.66955e-09 |
| 10000.0     | 2.24173e-09 | 2.34861e-09 | 2.45277e-09 | 2.55498e-09 | 2.65597e-09 |
| 1000.00     | 1.72401e-09 | 1.77870e-09 | 1.82993e-09 | 1.87764e-09 | 1.92179e-09 |
| 100.000     | 1.25189e-09 | 1.24304e-09 | 1.23435e-09 | 1.22593e-09 | 1.21790e-09 |
| 10.0000     | 8.45430e-10 | 8.43980e-10 | 8.42709e-10 | 8.41637e-10 | 8.40777e-10 |
| 1.00000     | 7.54966e-10 | 7.54430e-10 | 7.53552e-10 | 7.52304e-10 | 7.50644e-10 |
| 0.100000    | 6.58103e-10 | 6.45716e-10 | 6.31659e-10 | 6.15910e-10 | 5.98481e-10 |
| 0.0100000   | 2.86502e-10 | 2.60248e-10 | 2.35008e-10 | 2.10998e-10 | 1.88388e-10 |
| 0.00100000  | 1.14712e-11 | 9.21599e-12 | 7.39311e-12 | 5.92289e-12 | 4.73949e-12 |
| 0.000100000 | 1.87713e-11 | 1.43262e-11 | 1.09728e-11 | 8.43344e-12 | 6.50269e-12 |
| 1.00000e-05 | 1.69066e-17 | 1.31584e-17 | 1.02870e-17 | 8.07545e-18 | 6.36400e-18 |
| 1.00000e-06 | 3.79098e-20 | 3.04917e-20 | 2.46472e-20 | 2.00228e-20 | 1.63509e-20 |
| 1.00000e-07 | 2.94812e-22 | 2.52923e-22 | 2.18992e-22 | 1.91462e-22 | 1.69125e-22 |
| 1.00000e-08 | 1.08568e-23 | 1.00458e-23 | 9.36839e-24 | 8.80525e-24 | 8.34070e-24 |
| 1.00000e-09 | 8.80801e-25 | 8.34587e-25 | 7.95383e-25 | 7.62437e-25 | 7.35181e-25 |

| Pa\K        | 270.000     | 280.000     | 290.000     | 300.000     | 400.000     |
|-------------|-------------|-------------|-------------|-------------|-------------|
| 1.00000e+08 | 2.32966e-10 | 2.79596e-10 | 3.35085e-10 | 6.29560e-10 | 3.69526e-09 |
| 1.00000e+07 | 2.16460e-09 | 2.57604e-09 | 3.05848e-09 | 5.32819e-09 | 2.43753e-08 |
| 1.00000e+06 | 1.17870e-08 | 1.32781e-08 | 1.48693e-08 | 1.88173e-08 | 4.03996e-08 |
| 100000.     | 8.95142e-09 | 9.20826e-09 | 9.44309e-09 | 1.01039e-08 | 1.36580e-08 |
| 10000.0     | 2.75645e-09 | 2.85708e-09 | 2.95842e-09 | 3.83072e-09 | 5.46990e-09 |
| 1000.00     | 1.96240e-09 | 1.99949e-09 | 2.03317e-09 | 2.48180e-09 | 2.82390e-09 |
| 100.000     | 1.21032e-09 | 1.20327e-09 | 1.19682e-09 | 1.50096e-09 | 1.65919e-09 |
| 10.0000     | 8.40149e-10 | 8.39768e-10 | 8.39650e-10 | 1.15625e-09 | 1.26241e-09 |
| 1.00000     | 7.48521e-10 | 7.45877e-10 | 7.42641e-10 | 1.00419e-09 | 8.85620e-10 |
| 0.100000    | 5.79423e-10 | 5.58825e-10 | 5.36816e-10 | 6.06731e-10 | 3.04993e-10 |
| 0.0100000   | 1.67300e-10 | 1.47810e-10 | 1.29950e-10 | 1.07857e-10 | 2.53394e-11 |
| 0.00100000  | 3.78867e-12 | 3.02599e-12 | 2.41511e-12 | 2.14126e-12 | 3.00233e-13 |
| 0.000100000 | 5.02912e-15 | 3.90058e-15 | 3.03356e-15 | 8.55630e-15 | 1.26707e-15 |
| 1.00000e-05 | 5.03397e-18 | 3.99642e-18 | 3.18430e-18 | 4.30651e-17 | 1.20413e-17 |
| 1.00000e-06 | 1.34273e-20 | 1.10953e-20 | 9.23382e-21 | 7.31999e-19 | 5.65456e-19 |
| 1.00000e-07 | 1.51041e-22 | 1.36482e-22 | 1.24880e-22 | 4.44885e-20 | 4.97726e-20 |
| 1.00000e-08 | 7.96307e-24 | 7.66250e-24 | 7.43222e-24 | 4.04984e-21 | 4.87088e-21 |
| 1.00000e-09 | 7.13172e-25 | 6.96080e-25 | 6.83682e-25 | 3.95886e-22 | 4.84855e-22 |

| Pa\K        | 500.000     | 600.000     | 700.000     | 800.000     | 900.000     |
|-------------|-------------|-------------|-------------|-------------|-------------|
| 1.00000e+08 | 1.85064e-08 | 7.35054e-08 | 2.24081e-07 | 6.43979e-07 | 2.68075e-06 |
| 1.00000e+07 | 7.91745e-08 | 1.88967e-07 | 4.22388e-07 | 1.25725e-06 | 5.25845e-06 |
| 1.00000e+06 | 6.50505e-08 | 1.05374e-07 | 2.34878e-07 | 8.51654e-07 | 3.98100e-06 |
| 100000.     | 1.94016e-08 | 3.36518e-08 | 8.40195e-08 | 3.43083e-07 | 1.87369e-06 |
| 10000.0     | 7.69937e-09 | 1.27692e-08 | 3.17616e-08 | 1.40778e-07 | 8.78869e-07 |
| 1000.00     | 3.54830e-09 | 5.76680e-09 | 1.44080e-08 | 6.41623e-08 | 3.72182e-07 |
| 100.000     | 2.08648e-09 | 3.18371e-09 | 6.77450e-09 | 2.43405e-08 | 1.03856e-07 |
| 10.0000     | 1.38872e-09 | 1.57871e-09 | 2.28359e-09 | 5.61168e-09 | 1.66504e-08 |
| 1.00000     | 6.44774e-10 | 4.41983e-10 | 3.95221e-10 | 6.83212e-10 | 1.70390e-09 |
| 0.100000    | 1.18802e-10 | 4.68970e-11 | 2.82872e-11 | 4.85770e-11 | 1.48053e-10 |
| 0.0100000   | 5.42812e-12 | 1.43609e-12 | 9.41418e-13 | 3.34124e-12 | 1.37844e-11 |
| 0.00100000  | 5.01264e-14 | 1.70395e-14 | 4.40750e-14 | 3.02025e-13 | 1.36032e-12 |
| 0.000100000 | 3.63022e-16 | 6.22689e-16 | 3.94749e-15 | 2.98680e-14 | 1.35831e-13 |
| 1.00000e-05 | 1.40726e-17 | 5.47766e-17 | 3.90302e-16 | 2.98326e-15 | 1.35808e-14 |
| 1.00000e-06 | 1.19558e-18 | 5.33577e-18 | 3.89348e-17 | 2.98269e-16 | 1.35806e-15 |
| 1.00000e-07 | 1.14881e-19 | 5.28809e-19 | 3.89050e-18 | 2.98257e-17 | 1.35806e-16 |
| 1.00000e-08 | 1.14079e-20 | 5.27990e-20 | 3.89001e-19 | 2.98255e-18 | 1.35806e-17 |
| 1.00000e-09 | 1.13977e-21 | 5.27912e-21 | 3.88996e-20 | 2.98255e-19 | 1.35806e-18 |

| Pa\K        | 1000.00     | 1100.00     | 1200.00     | 1300.00     | 1400.00     |
|-------------|-------------|-------------|-------------|-------------|-------------|
| 1.00000e+08 | 1.38188e-05 | 5.65407e-05 | 0.000185082 | 0.000493518 | 0.000806256 |
| 1.00000e+07 | 2.12072e-05 | 6.35359e-05 | 0.000159419 | 0.000310638 | 0.000415112 |
| 1.00000e+06 | 1.63682e-05 | 4.57857e-05 | 8.87749e-05 | 0.000123684 | 0.000128180 |
| 100000.     | 8.68406e-06 | 2.32410e-05 | 3.67202e-05 | 4.04240e-05 | 3.53391e-05 |
| 10000.0     | 4.02643e-06 | 8.85752e-06 | 1.07699e-05 | 9.54144e-06 | 7.28529e-06 |
| 1000.00     | 1.33104e-06 | 2.16141e-06 | 2.04553e-06 | 1.54114e-06 | 1.07538e-06 |
| 100.000     | 2.62082e-07 | 3.26917e-07 | 2.64313e-07 | 1.83613e-07 | 1.23055e-07 |
| 10.0000     | 3.25559e-08 | 3.58102e-08 | 2.75631e-08 | 1.88215e-08 | 1.25319e-08 |
| 1.00000     | 3.19608e-09 | 3.51676e-09 | 2.72557e-09 | 1.87021e-09 | 1.24846e-09 |
| 0.100000    | 3.05205e-10 | 3.45792e-10 | 2.70609e-10 | 1.86346e-10 | 1.24576e-10 |
| 0.0100000   | 3.00585e-11 | 3.44266e-11 | 2.70151e-11 | 1.86191e-11 | 1.24512e-11 |
| 0.00100000  | 2.99846e-12 | 3.44031e-12 | 2.70079e-12 | 1.86165e-12 | 1.24501e-12 |

|             |             |             |             |             |             |
|-------------|-------------|-------------|-------------|-------------|-------------|
| 0.000100000 | 2.99761e-13 | 3.44003e-13 | 2.70070e-13 | 1.86161e-13 | 1.24499e-13 |
| 1.00000e-05 | 2.99752e-14 | 3.43999e-14 | 2.70068e-14 | 1.86161e-14 | 1.24499e-14 |
| 1.00000e-06 | 2.99751e-15 | 3.43998e-15 | 2.70068e-15 | 1.86161e-15 | 1.24499e-15 |
| 1.00000e-07 | 2.99751e-16 | 3.43998e-16 | 2.70068e-16 | 1.86161e-16 | 1.24499e-16 |
| 1.00000e-08 | 2.99751e-17 | 3.43998e-17 | 2.70068e-17 | 1.86161e-17 | 1.24499e-17 |
| 1.00000e-09 | 2.99751e-18 | 3.43998e-18 | 2.70068e-18 | 1.86161e-18 | 1.24499e-18 |

| Pa\K        | 1500.00     | 1750.00     | 2000.00     | 2250.00     | 2500.00     |
|-------------|-------------|-------------|-------------|-------------|-------------|
| 1.00000e+08 | 0.000799589 | 8.36038e-05 | 6.33240e-05 | 5.36743e-05 | 5.05079e-05 |
| 1.00000e+07 | 0.000413904 | 3.01335e-05 | 1.95630e-05 | 1.67669e-05 | 1.60230e-05 |
| 1.00000e+06 | 0.000110557 | 1.02145e-05 | 6.63690e-06 | 5.29821e-06 | 4.21850e-06 |
| 100000.     | 2.74245e-05 | 2.79265e-06 | 1.65580e-06 | 1.06564e-06 | 6.73574e-07 |
| 10000.0     | 5.23589e-06 | 5.23900e-07 | 2.61922e-07 | 1.39698e-07 | 7.72140e-08 |
| 1000.00     | 7.34075e-07 | 6.93047e-08 | 3.05817e-08 | 1.49265e-08 | 7.89022e-09 |
| 100.000     | 8.20753e-08 | 7.51555e-09 | 3.15919e-09 | 1.50496e-09 | 7.88584e-10 |
| 10.0000     | 8.32981e-09 | 7.61057e-10 | 3.16931e-10 | 1.50424e-10 | 7.87440e-11 |
| 1.00000     | 8.31001e-10 | 7.61400e-11 | 3.16926e-11 | 1.50387e-11 | 7.87213e-12 |
| 0.100000    | 8.29795e-11 | 7.61164e-12 | 3.16897e-12 | 1.50378e-12 | 7.87179e-13 |
| 0.0100000   | 8.29496e-12 | 7.61077e-13 | 3.16887e-13 | 1.50377e-13 | 7.87173e-14 |
| 0.00100000  | 8.29439e-13 | 7.61053e-14 | 3.16884e-14 | 1.50376e-14 | 7.87170e-15 |
| 0.000100000 | 8.29429e-14 | 7.61049e-15 | 3.16884e-15 | 1.50376e-15 | 7.87170e-16 |
| 1.00000e-05 | 8.29424e-15 | 7.61045e-16 | 3.16884e-16 | 1.50376e-16 | 7.87170e-17 |
| 1.00000e-06 | 8.29424e-16 | 7.61045e-17 | 3.16884e-17 | 1.50376e-17 | 7.87170e-18 |
| 1.00000e-07 | 8.29424e-17 | 7.61045e-18 | 3.16884e-18 | 1.50376e-18 | 7.87170e-19 |
| 1.00000e-08 | 8.29424e-18 | 7.61045e-19 | 3.16884e-19 | 1.50376e-19 | 7.87170e-20 |
| 1.00000e-09 | 8.29424e-19 | 7.61045e-20 | 3.16884e-20 | 1.50376e-20 | 7.87170e-21 |

| Pa\K        | 2750.00     | 3000.00     | 3250.00     | 3500.00     | 3750.00     |
|-------------|-------------|-------------|-------------|-------------|-------------|
| 1.00000e+08 | 4.94967e-05 | 4.86244e-05 | 4.69706e-05 | 4.42264e-05 | 4.04951e-05 |
| 1.00000e+07 | 1.49056e-05 | 1.31020e-05 | 1.09267e-05 | 8.75591e-06 | 6.83265e-06 |
| 1.00000e+06 | 3.15989e-06 | 2.26173e-06 | 1.58366e-06 | 1.10461e-06 | 7.76367e-07 |
| 100000.     | 4.20286e-07 | 2.64800e-07 | 1.70780e-07 | 1.13314e-07 | 7.73584e-08 |
| 10000.0     | 4.45782e-08 | 2.69799e-08 | 1.70665e-08 | 1.12235e-08 | 7.63219e-09 |
| 1000.00     | 4.47143e-09 | 2.68723e-09 | 1.69562e-09 | 1.11421e-09 | 7.57549e-10 |
| 100.000     | 4.45710e-10 | 2.67674e-10 | 1.68878e-10 | 1.10975e-10 | 7.54566e-11 |
| 10.0000     | 4.44991e-11 | 2.67249e-11 | 1.68622e-11 | 1.10814e-11 | 7.53515e-12 |
| 1.00000     | 4.44871e-12 | 2.67183e-12 | 1.68583e-12 | 1.10790e-12 | 7.53364e-13 |
| 0.100000    | 4.44853e-13 | 2.67176e-13 | 1.68579e-13 | 1.10787e-13 | 7.53347e-14 |
| 0.0100000   | 4.44850e-14 | 2.67174e-14 | 1.68578e-14 | 1.10787e-14 | 7.53345e-15 |
| 0.00100000  | 4.44850e-15 | 2.67174e-15 | 1.68578e-15 | 1.10787e-15 | 7.53345e-16 |
| 0.000100000 | 4.44850e-16 | 2.67174e-16 | 1.68578e-16 | 1.10787e-16 | 7.53345e-17 |
| 1.00000e-05 | 4.44850e-17 | 2.67174e-17 | 1.68578e-17 | 1.10787e-17 | 7.53345e-18 |
| 1.00000e-06 | 4.44850e-18 | 2.67174e-18 | 1.68578e-18 | 1.10787e-18 | 7.53345e-19 |
| 1.00000e-07 | 4.44850e-19 | 2.67174e-19 | 1.68578e-19 | 1.10787e-19 | 7.53345e-20 |
| 1.00000e-08 | 4.44850e-20 | 2.67174e-20 | 1.68578e-20 | 1.10787e-20 | 7.53345e-21 |
| 1.00000e-09 | 4.44850e-21 | 2.67174e-21 | 1.68578e-21 | 1.10787e-21 | 7.53345e-22 |

| Pa\K        | 4000.00     |
|-------------|-------------|
| 1.00000e+08 | 3.61150e-05 |
| 1.00000e+07 | 5.25278e-06 |
| 1.00000e+06 | 5.53272e-07 |
| 100000.     | 5.42313e-08 |
| 10000.0     | 5.34180e-09 |
| 1000.00     | 5.30231e-10 |
| 100.000     | 5.28182e-11 |
| 10.0000     | 5.27473e-12 |
| 1.00000     | 5.27372e-13 |
| 0.100000    | 5.27362e-14 |
| 0.0100000   | 5.27360e-15 |
| 0.00100000  | 5.27360e-16 |
| 0.000100000 | 5.27360e-17 |
| 1.00000e-05 | 5.27360e-18 |
| 1.00000e-06 | 5.27360e-19 |
| 1.00000e-07 | 5.27360e-20 |
| 1.00000e-08 | 5.27360e-21 |
| 1.00000e-09 | 5.27360e-22 |

rad19anti

=====

| Pa\K        | 20.0000 | 30.0000 | 40.0000 | 50.0000 | 60.0000 |
|-------------|---------|---------|---------|---------|---------|
| 1.00000e+08 | N/A     | N/A     | N/A     | N/A     | N/A     |
| 1.00000e+07 | N/A     | N/A     | N/A     | N/A     | N/A     |
| 1.00000e+06 | N/A     | N/A     | N/A     | N/A     | N/A     |
| 100000.     | N/A     | N/A     | N/A     | N/A     | N/A     |
| 10000.0     | N/A     | N/A     | N/A     | N/A     | N/A     |
| 1000.00     | N/A     | N/A     | N/A     | N/A     | N/A     |



|             |     |     |     |     |     |
|-------------|-----|-----|-----|-----|-----|
| 1.00000e+06 | N/A | N/A | N/A | N/A | N/A |
| 100000.     | N/A | N/A | N/A | N/A | N/A |
| 10000.0     | N/A | N/A | N/A | N/A | N/A |
| 1000.00     | N/A | N/A | N/A | N/A | N/A |
| 100.000     | N/A | N/A | N/A | N/A | N/A |
| 10.0000     | N/A | N/A | N/A | N/A | N/A |
| 1.00000     | N/A | N/A | N/A | N/A | N/A |
| 0.100000    | N/A | N/A | N/A | N/A | N/A |
| 0.0100000   | N/A | N/A | N/A | N/A | N/A |
| 0.00100000  | N/A | N/A | N/A | N/A | N/A |
| 0.000100000 | N/A | N/A | N/A | N/A | N/A |
| 1.00000e-05 | N/A | N/A | N/A | N/A | N/A |
| 1.00000e-06 | N/A | N/A | N/A | N/A | N/A |
| 1.00000e-07 | N/A | N/A | N/A | N/A | N/A |
| 1.00000e-08 | N/A | N/A | N/A | N/A | N/A |
| 1.00000e-09 | N/A | N/A | N/A | N/A | N/A |

Pa\K | 270.000 280.000 290.000 300.000 400.000

|             |     |     |     |             |             |
|-------------|-----|-----|-----|-------------|-------------|
| 1.00000e+08 | N/A | N/A | N/A | 2.69625e-18 | 2.92716e-16 |
| 1.00000e+07 | N/A | N/A | N/A | 2.68825e-16 | 3.06676e-14 |
| 1.00000e+06 | N/A | N/A | N/A | 2.61366e-14 | 3.18814e-12 |
| 100000.     | N/A | N/A | N/A | 2.08971e-12 | 1.56501e-10 |
| 10000.0     | N/A | N/A | N/A | 8.08341e-11 | 3.10720e-09 |
| 1000.00     | N/A | N/A | N/A | 1.15845e-09 | 2.62483e-08 |
| 100.000     | N/A | N/A | N/A | 8.29786e-09 | 1.20248e-07 |
| 10.0000     | N/A | N/A | N/A | 3.53121e-08 | 4.69747e-07 |
| 1.00000     | N/A | N/A | N/A | 1.54081e-07 | 1.38942e-06 |
| 0.100000    | N/A | N/A | N/A | 4.43828e-07 | 2.25191e-06 |
| 0.0100000   | N/A | N/A | N/A | 6.52559e-07 | 2.51424e-06 |
| 0.00100000  | N/A | N/A | N/A | 6.98569e-07 | 2.55024e-06 |
| 0.000100000 | N/A | N/A | N/A | 7.03977e-07 | 2.55401e-06 |
| 1.00000e-05 | N/A | N/A | N/A | 7.04528e-07 | 2.55439e-06 |
| 1.00000e-06 | N/A | N/A | N/A | 7.04583e-07 | 2.55443e-06 |
| 1.00000e-07 | N/A | N/A | N/A | 7.04589e-07 | 2.55443e-06 |
| 1.00000e-08 | N/A | N/A | N/A | 7.04590e-07 | 2.55443e-06 |
| 1.00000e-09 | N/A | N/A | N/A | 7.04590e-07 | 2.55443e-06 |

Pa\K | 500.000 600.000 700.000 800.000 900.000

|             |             |             |             |             |             |
|-------------|-------------|-------------|-------------|-------------|-------------|
| 1.00000e+08 | 4.15128e-13 | 2.94723e-10 | 1.20176e-08 | 1.86086e-07 | 1.20201e-06 |
| 1.00000e+07 | 7.75298e-11 | 6.84135e-09 | 2.76813e-07 | 3.35715e-06 | 1.39605e-05 |
| 1.00000e+06 | 4.01613e-09 | 1.72552e-07 | 2.34200e-06 | 1.23394e-05 | 3.49363e-05 |
| 100000.     | 1.81476e-08 | 6.79451e-07 | 5.80126e-06 | 1.96981e-05 | 4.94001e-05 |
| 10000.0     | 8.55686e-08 | 1.25306e-06 | 7.86670e-06 | 2.93002e-05 | 8.73774e-05 |
| 1000.00     | 3.50059e-07 | 2.80626e-06 | 1.50552e-05 | 5.37336e-05 | 0.000137696 |
| 100.000     | 1.23067e-06 | 7.93535e-06 | 3.09508e-05 | 8.02651e-05 | 0.000158892 |
| 10.0000     | 3.68020e-06 | 1.56825e-05 | 4.34212e-05 | 9.16787e-05 | 0.000163001 |
| 1.00000     | 6.52495e-06 | 1.98791e-05 | 4.70321e-05 | 9.37561e-05 | 0.000163537 |
| 0.100000    | 7.67959e-06 | 2.07844e-05 | 4.75313e-05 | 9.39781e-05 | 0.000163596 |
| 0.0100000   | 7.87616e-06 | 2.08959e-05 | 4.75846e-05 | 9.40013e-05 | 0.000163603 |
| 0.00100000  | 7.89805e-06 | 2.09075e-05 | 4.75901e-05 | 9.40042e-05 | 0.000163603 |
| 0.000100000 | 7.90027e-06 | 2.09087e-05 | 4.75908e-05 | 9.40042e-05 | 0.000163603 |
| 1.00000e-05 | 7.90049e-06 | 2.09088e-05 | 4.75908e-05 | 9.40042e-05 | 0.000163603 |
| 1.00000e-06 | 7.90051e-06 | 2.09088e-05 | 4.75908e-05 | 9.40042e-05 | 0.000163603 |
| 1.00000e-07 | 7.90052e-06 | 2.09088e-05 | 4.75908e-05 | 9.40042e-05 | 0.000163603 |
| 1.00000e-08 | 7.90052e-06 | 2.09088e-05 | 4.75908e-05 | 9.40042e-05 | 0.000163603 |
| 1.00000e-09 | 7.90052e-06 | 2.09088e-05 | 4.75908e-05 | 9.40042e-05 | 0.000163603 |

Pa\K | 1000.00 1100.00 1200.00 1300.00 1400.00

|             |             |             |             |             |             |
|-------------|-------------|-------------|-------------|-------------|-------------|
| 1.00000e+08 | 3.26408e-06 | 4.94416e-06 | 5.79063e-06 | 5.91568e-06 | 5.50337e-06 |
| 1.00000e+07 | 2.95451e-05 | 4.48626e-05 | 6.13177e-05 | 8.11832e-05 | 9.67225e-05 |
| 1.00000e+06 | 7.17796e-05 | 0.000128953 | 0.000215185 | 0.000315950 | 0.000389452 |
| 100000.     | 0.000111208 | 0.000222501 | 0.000376764 | 0.000524100 | 0.000618971 |
| 10000.0     | 0.000201087 | 0.000354553 | 0.000510224 | 0.000634344 | 0.000718711 |
| 1000.00     | 0.000260784 | 0.000390595 | 0.000510239 | 0.000615456 | 0.000703785 |
| 100.000     | 0.000259402 | 0.000370196 | 0.000483928 | 0.000592852 | 0.000688565 |
| 10.0000     | 0.000255783 | 0.000363909 | 0.000478380 | 0.000588904 | 0.000686101 |
| 1.00000     | 0.000255334 | 0.000363233 | 0.000477837 | 0.000588546 | 0.000685890 |
| 0.100000    | 0.000255303 | 0.000363179 | 0.000477794 | 0.000588520 | 0.000685878 |
| 0.0100000   | 0.000255302 | 0.000363175 | 0.000477791 | 0.000588514 | 0.000685873 |
| 0.00100000  | 0.000255302 | 0.000363175 | 0.000477791 | 0.000588514 | 0.000685873 |
| 0.000100000 | 0.000255302 | 0.000363175 | 0.000477791 | 0.000588514 | 0.000685873 |
| 1.00000e-05 | 0.000255302 | 0.000363175 | 0.000477791 | 0.000588514 | 0.000685873 |
| 1.00000e-06 | 0.000255302 | 0.000363175 | 0.000477791 | 0.000588514 | 0.000685873 |
| 1.00000e-07 | 0.000255302 | 0.000363175 | 0.000477791 | 0.000588514 | 0.000685873 |
| 1.00000e-08 | 0.000255302 | 0.000363175 | 0.000477791 | 0.000588514 | 0.000685873 |
| 1.00000e-09 | 0.000255302 | 0.000363175 | 0.000477791 | 0.000588514 | 0.000685873 |

| Pa\K        | 1500.00     | 1750.00     | 2000.00     | 2250.00     | 2500.00     |
|-------------|-------------|-------------|-------------|-------------|-------------|
| 1.00000e+08 | 4.99278e-06 | 0.000171220 | 0.000173888 | 0.000167874 | 0.000160718 |
| 1.00000e+07 | 0.000102128 | 0.000227469 | 0.000220444 | 0.000214301 | 0.000215179 |
| 1.00000e+06 | 0.000422435 | 0.000299809 | 0.000312620 | 0.000339774 | 0.000356565 |
| 100000.     | 0.000664659 | 0.000491341 | 0.000533237 | 0.000538860 | 0.000500371 |
| 10000.0     | 0.000772345 | 0.000697228 | 0.000694865 | 0.000634040 | 0.000547283 |
| 1000.00     | 0.000772484 | 0.000764938 | 0.000735146 | 0.000651962 | 0.000554314 |
| 100.000     | 0.000764598 | 0.000774003 | 0.000740362 | 0.000654078 | 0.000555081 |
| 10.0000     | 0.000763289 | 0.000774836 | 0.000740904 | 0.000654295 | 0.000555160 |
| 1.00000     | 0.000763189 | 0.000774925 | 0.000740960 | 0.000654319 | 0.000555170 |
| 0.100000    | 0.000763187 | 0.000774932 | 0.000740966 | 0.000654319 | 0.000555170 |
| 0.0100000   | 0.000763188 | 0.000774933 | 0.000740966 | 0.000654319 | 0.000555170 |
| 0.00100000  | 0.000763188 | 0.000774933 | 0.000740966 | 0.000654319 | 0.000555170 |
| 0.000100000 | 0.000763188 | 0.000774933 | 0.000740966 | 0.000654319 | 0.000555170 |
| 1.00000e-05 | 0.000763188 | 0.000774933 | 0.000740966 | 0.000654319 | 0.000555170 |
| 1.00000e-06 | 0.000763188 | 0.000774933 | 0.000740966 | 0.000654319 | 0.000555170 |
| 1.00000e-07 | 0.000763188 | 0.000774933 | 0.000740966 | 0.000654319 | 0.000555170 |
| 1.00000e-08 | 0.000763188 | 0.000774933 | 0.000740966 | 0.000654319 | 0.000555170 |
| 1.00000e-09 | 0.000763188 | 0.000774933 | 0.000740966 | 0.000654319 | 0.000555170 |

| Pa\K        | 2750.00     | 3000.00     | 3250.00     | 3500.00     | 3750.00     |
|-------------|-------------|-------------|-------------|-------------|-------------|
| 1.00000e+08 | 0.000154793 | 0.000150400 | 0.000147294 | 0.000144884 | 0.000142478 |
| 1.00000e+07 | 0.000219508 | 0.000222001 | 0.000219484 | 0.000211493 | 0.000199342 |
| 1.00000e+06 | 0.000351258 | 0.000328081 | 0.000296026 | 0.000262330 | 0.000230984 |
| 100000.     | 0.000439999 | 0.000377291 | 0.000321430 | 0.000274805 | 0.000236859 |
| 10000.0     | 0.000460921 | 0.000386139 | 0.000325066 | 0.000276264 | 0.000237419 |
| 1000.00     | 0.000463563 | 0.000387123 | 0.000325430 | 0.000276397 | 0.000237463 |
| 100.000     | 0.000463839 | 0.000387223 | 0.000325466 | 0.000276409 | 0.000237469 |
| 10.0000     | 0.000463867 | 0.000387232 | 0.000325471 | 0.000276411 | 0.000237469 |
| 1.00000     | 0.000463869 | 0.000387232 | 0.000325470 | 0.000276411 | 0.000237469 |
| 0.100000    | 0.000463869 | 0.000387232 | 0.000325470 | 0.000276411 | 0.000237469 |
| 0.0100000   | 0.000463869 | 0.000387232 | 0.000325470 | 0.000276411 | 0.000237469 |
| 0.00100000  | 0.000463869 | 0.000387232 | 0.000325470 | 0.000276411 | 0.000237469 |
| 0.000100000 | 0.000463869 | 0.000387232 | 0.000325470 | 0.000276411 | 0.000237469 |
| 1.00000e-05 | 0.000463869 | 0.000387232 | 0.000325470 | 0.000276411 | 0.000237469 |
| 1.00000e-06 | 0.000463869 | 0.000387232 | 0.000325470 | 0.000276411 | 0.000237469 |
| 1.00000e-07 | 0.000463869 | 0.000387232 | 0.000325470 | 0.000276411 | 0.000237469 |
| 1.00000e-08 | 0.000463869 | 0.000387232 | 0.000325470 | 0.000276411 | 0.000237469 |
| 1.00000e-09 | 0.000463869 | 0.000387232 | 0.000325470 | 0.000276411 | 0.000237469 |

| Pa\K        | 4000.00     |
|-------------|-------------|
| 1.00000e+08 | 0.000139523 |
| 1.00000e+07 | 0.000184908 |
| 1.00000e+06 | 0.000203541 |
| 100000.     | 0.000206169 |
| 10000.0     | 0.000206358 |
| 1000.00     | 0.000206370 |
| 100.000     | 0.000206372 |
| 10.0000     | 0.000206372 |
| 1.00000     | 0.000206372 |
| 0.100000    | 0.000206372 |
| 0.0100000   | 0.000206372 |
| 0.00100000  | 0.000206372 |
| 0.000100000 | 0.000206372 |
| 1.00000e-05 | 0.000206372 |
| 1.00000e-06 | 0.000206372 |
| 1.00000e-07 | 0.000206372 |
| 1.00000e-08 | 0.000206372 |
| 1.00000e-09 | 0.000206372 |

rad2  
====

| Pa\K        | 20.0000     | 30.0000     | 40.0000     | 50.0000     | 60.0000     |
|-------------|-------------|-------------|-------------|-------------|-------------|
| 1.00000e+08 | 4.08956e-34 | 2.06288e-30 | 2.59921e-28 | 5.56923e-27 | 4.89315e-26 |
| 1.00000e+07 | 4.04663e-29 | 6.09925e-27 | 5.15973e-25 | 9.29882e-24 | 7.23391e-23 |
| 1.00000e+06 | 6.84875e-25 | 1.64908e-23 | 5.33356e-22 | 8.81818e-21 | 6.80671e-20 |
| 100000.     | 6.50785e-21 | 1.19386e-19 | 1.02968e-18 | 9.88513e-18 | 6.63281e-17 |
| 10000.0     | 5.98534e-17 | 8.78361e-16 | 4.24230e-15 | 1.60072e-14 | 5.76272e-14 |
| 1000.00     | 2.44158e-13 | 2.43171e-12 | 8.89481e-12 | 2.30184e-11 | 5.11955e-11 |
| 100.000     | 3.13323e-10 | 2.40642e-09 | 7.53573e-09 | 1.69050e-08 | 3.19866e-08 |
| 10.0000     | 1.50333e-07 | 6.92804e-07 | 1.51446e-06 | 2.54992e-06 | 3.77412e-06 |
| 1.00000     | 9.29971e-06 | 2.19650e-05 | 3.45741e-05 | 4.74627e-05 | 6.08883e-05 |
| 0.100000    | 0.000111464 | 0.000207874 | 0.000287427 | 0.000355454 | 0.000414528 |
| 0.0100000   | 0.000560588 | 0.000662309 | 0.000673400 | 0.000661411 | 0.000642199 |
| 0.00100000  | 0.000545274 | 0.000411909 | 0.000325565 | 0.000262382 | 0.000213503 |
| 0.000100000 | 9.95361e-05 | 2.98876e-05 | 1.22915e-05 | 5.96666e-06 | 3.21549e-06 |

|             |             |             |             |             |             |
|-------------|-------------|-------------|-------------|-------------|-------------|
| 1.00000e-05 | 4.75896e-07 | 5.21188e-08 | 1.41130e-08 | 5.49827e-09 | 2.60622e-09 |
| 1.00000e-06 | 3.30175e-10 | 3.90749e-11 | 1.18837e-11 | 5.13177e-12 | 2.66002e-12 |
| 1.00000e-07 | 4.67802e-13 | 7.92285e-14 | 3.00938e-14 | 1.52049e-14 | 9.19912e-15 |
| 1.00000e-08 | 2.48920e-15 | 6.62498e-16 | 3.56721e-16 | 2.21406e-16 | 1.87145e-16 |
| 1.00000e-09 | 5.83480e-17 | 2.10118e-17 | 1.92855e-17 | 2.35126e-17 | 4.77409e-18 |

Pa\K | 70.0000 80.0000 90.0000 100.000 110.000

|             |             |             |             |             |             |
|-------------|-------------|-------------|-------------|-------------|-------------|
| 1.00000e+08 | 2.56963e-25 | 9.74331e-25 | 2.96613e-24 | 7.73686e-24 | 1.80445e-23 |
| 1.00000e+07 | 3.46240e-22 | 1.21991e-21 | 3.49893e-21 | 8.68821e-21 | 1.94448e-20 |
| 1.00000e+06 | 3.26537e-19 | 1.15466e-18 | 3.32247e-18 | 8.27001e-18 | 1.85372e-17 |
| 100000.     | 3.01031e-16 | 1.02817e-15 | 2.87494e-15 | 6.96487e-15 | 1.51910e-14 |
| 10000.0     | 1.86485e-13 | 5.20437e-13 | 1.26494e-12 | 2.74635e-12 | 5.45889e-12 |
| 1000.00     | 1.05513e-10 | 2.06726e-10 | 3.87547e-10 | 6.96831e-10 | 1.20561e-09 |
| 100.000     | 5.47366e-08 | 8.77980e-08 | 1.34669e-07 | 1.99846e-07 | 2.88955e-07 |
| 10.0000     | 5.18460e-06 | 6.79584e-06 | 8.63555e-06 | 1.07418e-05 | 1.31611e-05 |
| 1.00000     | 7.50637e-05 | 9.02057e-05 | 0.000106537 | 0.000124269 | 0.000143583 |
| 0.100000    | 0.000466150 | 0.000511352 | 0.000550867 | 0.000585211 | 0.000614744 |
| 0.0100000   | 0.000620522 | 0.000597931 | 0.000574885 | 0.000551442 | 0.000527529 |
| 0.00100000  | 0.000174582 | 0.000143060 | 0.000117267 | 9.60382e-05 | 7.85202e-05 |
| 0.000100000 | 1.86362e-06 | 1.13950e-06 | 7.25677e-07 | 4.77086e-07 | 3.21696e-07 |
| 1.00000e-05 | 1.39658e-09 | 8.13456e-10 | 5.03393e-10 | 3.25819e-10 | 2.18401e-10 |
| 1.00000e-06 | 1.54339e-12 | 9.65962e-13 | 6.39102e-13 | 4.41351e-13 | 3.14305e-13 |
| 1.00000e-07 | 5.93747e-15 | 4.30660e-15 | 3.17675e-15 | 2.40657e-15 | 1.95050e-15 |
| 1.00000e-08 | 1.44327e-16 | 1.09965e-16 | 9.18346e-17 | 1.01120e-16 | 7.02881e-17 |
| 1.00000e-09 | 1.90022e-17 | 6.65573e-18 | 6.68392e-18 | 2.22605e-18 | 4.36725e-18 |

Pa\K | 120.000 130.000 140.000 150.000 160.000

|             |             |             |             |             |             |
|-------------|-------------|-------------|-------------|-------------|-------------|
| 1.00000e+08 | 3.87550e-23 | 7.82921e-23 | 1.51129e-22 | 2.82092e-22 | 5.13837e-22 |
| 1.00000e+07 | 4.03300e-20 | 7.90831e-20 | 1.48803e-19 | 2.71705e-19 | 4.85607e-19 |
| 1.00000e+06 | 3.84715e-17 | 7.54171e-17 | 1.41729e-16 | 2.58203e-16 | 4.59921e-16 |
| 100000.     | 3.06405e-14 | 5.82692e-14 | 1.05976e-13 | 1.86318e-13 | 3.19241e-13 |
| 10000.0     | 1.01361e-11 | 1.78615e-11 | 3.02400e-11 | 4.96605e-11 | 7.96994e-11 |
| 1000.00     | 2.01610e-09 | 3.27524e-09 | 5.19450e-09 | 8.07841e-09 | 1.23648e-08 |
| 100.000     | 4.08919e-07 | 5.68145e-07 | 7.76760e-07 | 1.04688e-06 | 1.39293e-06 |
| 10.0000     | 1.59479e-05 | 1.91650e-05 | 2.28839e-05 | 2.71867e-05 | 3.21656e-05 |
| 1.00000     | 0.000164614 | 0.000187441 | 0.000212076 | 0.000238461 | 0.000266461 |
| 0.100000    | 0.000639731 | 0.000660384 | 0.000676886 | 0.000689411 | 0.000698130 |
| 0.0100000   | 0.000503053 | 0.000477950 | 0.000452211 | 0.000425884 | 0.000399083 |
| 0.00100000  | 6.40593e-05 | 5.21360e-05 | 4.23255e-05 | 3.42744e-05 | 2.76866e-05 |
| 0.000100000 | 2.21424e-07 | 1.55019e-07 | 1.10074e-07 | 7.90989e-08 | 5.74272e-08 |
| 1.00000e-05 | 1.50375e-10 | 1.05967e-10 | 7.60037e-11 | 5.53520e-11 | 4.08612e-11 |
| 1.00000e-06 | 2.29883e-13 | 1.71787e-13 | 1.31537e-13 | 1.01627e-13 | 8.10014e-14 |
| 1.00000e-07 | 1.61368e-15 | 1.36671e-15 | 1.20641e-15 | 1.07101e-15 | 1.01326e-15 |
| 1.00000e-08 | 6.34380e-17 | 5.94598e-17 | 7.36028e-17 | 5.40217e-17 | 7.18887e-17 |
| 1.00000e-09 | 5.67596e-18 | 2.21116e-17 | 5.31051e-17 | 1.68271e-17 | 3.27829e-18 |

Pa\K | 170.000 180.000 190.000 200.000 210.000

|             |             |             |             |             |             |
|-------------|-------------|-------------|-------------|-------------|-------------|
| 1.00000e+08 | 9.19833e-22 | 1.62701e-21 | 2.85528e-21 | 4.98648e-21 | 8.68485e-21 |
| 1.00000e+07 | 8.55173e-19 | 1.49143e-18 | 2.58574e-18 | 4.46876e-18 | 7.71330e-18 |
| 1.00000e+06 | 8.06216e-16 | 1.39766e-15 | 2.40500e-15 | 4.11821e-15 | 7.02969e-15 |
| 100000.     | 5.36393e-13 | 8.87955e-13 | 1.45335e-12 | 2.35805e-12 | 3.79976e-12 |
| 10000.0     | 1.25734e-10 | 1.95878e-10 | 3.02391e-10 | 4.63811e-10 | 7.08138e-10 |
| 1000.00     | 1.86799e-08 | 2.79130e-08 | 4.13123e-08 | 6.06080e-08 | 8.81625e-08 |
| 100.000     | 1.83200e-06 | 2.38428e-06 | 3.07348e-06 | 3.92741e-06 | 4.97851e-06 |
| 10.0000     | 3.79243e-05 | 4.45766e-05 | 5.22441e-05 | 6.10524e-05 | 7.11263e-05 |
| 1.00000     | 0.000295866 | 0.000326392 | 0.000357697 | 0.000389382 | 0.000421015 |
| 0.100000    | 0.000703206 | 0.000704802 | 0.000703074 | 0.000698170 | 0.000690236 |
| 0.0100000   | 0.000371974 | 0.000344766 | 0.000317700 | 0.000291029 | 0.000265005 |
| 0.00100000  | 2.23121e-05 | 1.79405e-05 | 1.43949e-05 | 1.15275e-05 | 9.21440e-06 |
| 0.000100000 | 4.20639e-08 | 3.10502e-08 | 2.30766e-08 | 1.72548e-08 | 1.29725e-08 |
| 1.00000e-05 | 3.05062e-11 | 2.30337e-11 | 1.75531e-11 | 1.35041e-11 | 1.04763e-11 |
| 1.00000e-06 | 6.47220e-14 | 5.34440e-14 | 4.49992e-14 | 3.85122e-14 | 3.41168e-14 |
| 1.00000e-07 | 9.01252e-16 | 9.30545e-16 | 8.98594e-16 | 9.10932e-16 | 9.33050e-16 |
| 1.00000e-08 | 5.62476e-17 | 9.56546e-17 | 7.04220e-17 | 4.33100e-17 | 1.05363e-16 |
| 1.00000e-09 | 7.89045e-19 | 4.49136e-19 | 2.34757e-18 | 1.03789e-18 | 8.03037e-19 |

Pa\K | 220.000 230.000 240.000 250.000 260.000

|             |             |             |             |             |             |
|-------------|-------------|-------------|-------------|-------------|-------------|
| 1.00000e+08 | 1.51072e-20 | 2.62687e-20 | 4.56761e-20 | 7.94137e-20 | 1.37977e-19 |
| 1.00000e+07 | 1.33128e-17 | 2.29911e-17 | 3.97362e-17 | 6.87126e-17 | 1.18797e-16 |
| 1.00000e+06 | 1.19743e-14 | 2.03641e-14 | 3.45785e-14 | 5.86058e-14 | 9.90794e-14 |
| 100000.     | 6.08915e-12 | 9.71270e-12 | 1.54295e-11 | 2.44185e-11 | 3.85001e-11 |
| 10000.0     | 1.07756e-09 | 1.63536e-09 | 2.47593e-09 | 3.73896e-09 | 5.62903e-09 |
| 1000.00     | 1.27148e-07 | 1.81751e-07 | 2.57396e-07 | 3.60984e-07 | 5.01135e-07 |
| 100.000     | 6.26437e-06 | 7.82832e-06 | 9.71962e-06 | 1.19936e-05 | 1.47116e-05 |
| 10.0000     | 8.25814e-05 | 9.55170e-05 | 0.000110005 | 0.000126083 | 0.000143744 |
| 1.00000     | 0.000452146 | 0.000482318 | 0.000511094 | 0.000538063 | 0.000562853 |

|             |             |             |             |             |             |
|-------------|-------------|-------------|-------------|-------------|-------------|
| 0.100000    | 0.000679415 | 0.000665851 | 0.000649700 | 0.000631134 | 0.000610342 |
| 0.0100000   | 0.000239868 | 0.000215832 | 0.000193074 | 0.000171735 | 0.000151913 |
| 0.00100000  | 7.35329e-06 | 5.85937e-06 | 4.66275e-06 | 3.70617e-06 | 2.94302e-06 |
| 0.000100000 | 9.80189e-09 | 7.44141e-09 | 5.67444e-09 | 4.34625e-09 | 3.34383e-09 |
| 1.00000e-05 | 8.21956e-12 | 6.51904e-12 | 5.23416e-12 | 4.27372e-12 | 3.55666e-12 |
| 1.00000e-06 | 3.10143e-14 | 2.91902e-14 | 2.84455e-14 | 2.87962e-14 | 3.01631e-14 |
| 1.00000e-07 | 9.59415e-16 | 1.07421e-15 | 1.20762e-15 | 1.34067e-15 | 1.57902e-15 |
| 1.00000e-08 | 7.04315e-17 | 8.57374e-17 | 1.55536e-16 | 1.94794e-16 | 1.36226e-16 |
| 1.00000e-09 | 4.24317e-19 | 1.87308e-19 | 1.11035e-17 | 6.32446e-18 | 3.01744e-18 |

| Pa\K        | 270.000     | 280.000     | 290.000     | 300.000     | 400.000     |
|-------------|-------------|-------------|-------------|-------------|-------------|
| 1.00000e+08 | 2.39301e-19 | 4.13628e-19 | 7.11045e-19 | 1.86644e-17 | 8.11139e-15 |
| 1.00000e+07 | 2.05108e-16 | 3.53068e-16 | 6.04699e-16 | 1.57658e-14 | 4.37366e-12 |
| 1.00000e+06 | 1.66919e-13 | 2.79859e-13 | 4.66215e-13 | 7.90321e-12 | 8.38407e-10 |
| 100000.     | 6.04636e-11 | 9.45412e-11 | 1.47070e-10 | 1.40460e-09 | 5.39542e-08 |
| 10000.0     | 8.44207e-09 | 1.25997e-08 | 1.86921e-08 | 1.23983e-07 | 1.74437e-06 |
| 1000.00     | 6.88415e-07 | 9.35539e-07 | 1.25752e-06 | 4.37436e-06 | 2.38636e-05 |
| 100.000     | 1.79392e-05 | 2.17459e-05 | 2.62016e-05 | 5.42404e-05 | 0.000148323 |
| 10.0000     | 0.000162927 | 0.000183519 | 0.000205351 | 0.000296314 | 0.000436335 |
| 1.00000     | 0.000585140 | 0.000604647 | 0.000621158 | 0.000635715 | 0.000509743 |
| 0.100000    | 0.000585140 | 0.000562961 | 0.000536876 | 0.000417208 | 0.000177101 |
| 0.0100000   | 0.000133666 | 0.000117012 | 0.000101936 | 5.93261e-05 | 1.25854e-05 |
| 0.00100000  | 2.33515e-06 | 1.85172e-06 | 1.46783e-06 | 9.41828e-07 | 1.50833e-07 |
| 0.000100000 | 2.58455e-09 | 2.00832e-09 | 1.56979e-09 | 3.57103e-09 | 1.71763e-09 |
| 1.00000e-05 | 3.02513e-12 | 2.66933e-12 | 2.43113e-12 | 3.00473e-11 | 6.92317e-11 |
| 1.00000e-06 | 3.25197e-14 | 3.64632e-14 | 4.17410e-14 | 1.12514e-12 | 4.95519e-12 |
| 1.00000e-07 | 1.83124e-15 | 2.14745e-15 | 2.71339e-15 | 9.34749e-14 | 4.75003e-13 |
| 1.00000e-08 | 1.96891e-16 | 2.02263e-16 | 1.50335e-16 | 6.02065e-15 | 3.64171e-14 |
| 1.00000e-09 | 5.60491e-18 | 5.01360e-18 | 2.70170e-18 | 1.67330e-16 | 3.64535e-22 |

| Pa\K        | 500.000     | 600.000     | 700.000     | 800.000     | 900.000     |
|-------------|-------------|-------------|-------------|-------------|-------------|
| 1.00000e+08 | 3.70714e-12 | 2.20963e-10 | 3.22120e-09 | 2.63624e-08 | 1.63130e-07 |
| 1.00000e+07 | 2.98425e-10 | 2.61654e-09 | 1.27925e-08 | 6.16569e-08 | 2.63053e-07 |
| 1.00000e+06 | 1.52296e-08 | 6.03924e-08 | 1.53797e-07 | 3.17982e-07 | 8.26286e-07 |
| 100000.     | 4.25193e-07 | 1.21720e-06 | 2.44029e-06 | 3.74098e-06 | 6.26011e-06 |
| 10000.0     | 6.82115e-06 | 1.42857e-05 | 2.28649e-05 | 2.61784e-05 | 2.79220e-05 |
| 1000.00     | 5.36083e-05 | 8.54510e-05 | 0.000102988 | 8.19971e-05 | 5.49755e-05 |
| 100.000     | 0.000213029 | 0.000248185 | 0.000204190 | 0.000106464 | 4.49887e-05 |
| 10.0000     | 0.000400546 | 0.000309565 | 0.000160825 | 5.45928e-05 | 1.53418e-05 |
| 1.00000     | 0.000283795 | 0.000138032 | 4.66414e-05 | 1.12708e-05 | 2.37640e-06 |
| 0.100000    | 5.82380e-05 | 1.96159e-05 | 5.19585e-06 | 1.09770e-06 | 2.12124e-07 |
| 0.0100000   | 2.96814e-06 | 1.05503e-06 | 3.28036e-07 | 7.97881e-08 | 1.69485e-08 |
| 0.00100000  | 6.82070e-08 | 5.20606e-08 | 2.30857e-08 | 6.63153e-09 | 1.52970e-09 |
| 0.000100000 | 3.07754e-09 | 3.76458e-09 | 1.95670e-09 | 6.09221e-10 | 1.46387e-10 |
| 1.00000e-05 | 2.14421e-10 | 3.15980e-10 | 1.77670e-10 | 5.79649e-11 | 1.42759e-11 |
| 1.00000e-06 | 1.83256e-11 | 2.92943e-11 | 1.70442e-11 | 5.67430e-12 | 1.41289e-12 |
| 1.00000e-07 | 1.74987e-12 | 2.88075e-12 | 1.68756e-12 | 5.64450e-13 | 1.41073e-13 |
| 1.00000e-08 | 1.79524e-13 | 2.89193e-13 | 1.67398e-13 | 5.59452e-14 | 1.40385e-14 |
| 1.00000e-09 | 5.39671e-14 | 2.98849e-14 | 3.31605e-14 | 6.67014e-15 | 1.45800e-15 |

| Pa\K        | 1000.00     | 1100.00     | 1200.00     | 1300.00     | 1400.00     |
|-------------|-------------|-------------|-------------|-------------|-------------|
| 1.00000e+08 | 6.85661e-07 | 1.86673e-06 | 4.29184e-06 | 9.46040e-06 | 1.42151e-05 |
| 1.00000e+07 | 9.01716e-07 | 2.53290e-06 | 5.83426e-06 | 1.02732e-05 | 1.27623e-05 |
| 1.00000e+06 | 2.35476e-06 | 5.63525e-06 | 9.66211e-06 | 1.15271e-05 | 1.02019e-05 |
| 100000.     | 1.06845e-05 | 1.55276e-05 | 1.71297e-05 | 1.41276e-05 | 9.38321e-06 |
| 10000.0     | 2.85245e-05 | 2.55262e-05 | 1.86292e-05 | 1.11352e-05 | 5.84693e-06 |
| 1000.00     | 3.47904e-05 | 2.03010e-05 | 1.04987e-05 | 4.88029e-06 | 2.14565e-06 |
| 100.000     | 1.85285e-05 | 7.60477e-06 | 3.02832e-06 | 1.17713e-06 | 4.58091e-07 |
| 10.0000     | 4.48157e-06 | 1.41878e-06 | 4.72758e-07 | 1.64281e-07 | 5.97146e-08 |
| 1.00000     | 5.58888e-07 | 1.52877e-07 | 4.66626e-08 | 1.54820e-08 | 5.51953e-09 |
| 0.100000    | 4.75470e-08 | 1.27189e-08 | 3.84916e-09 | 1.27359e-09 | 4.54401e-10 |
| 0.0100000   | 4.01012e-09 | 1.10251e-09 | 3.37235e-10 | 1.11495e-10 | 3.94345e-11 |
| 0.00100000  | 3.74821e-10 | 1.04394e-10 | 3.20031e-11 | 1.05292e-11 | 3.68167e-12 |
| 0.000100000 | 3.64518e-11 | 1.02065e-11 | 3.13056e-12 | 1.02720e-12 | 3.56933e-13 |
| 1.00000e-05 | 3.58942e-12 | 1.00829e-12 | 3.09454e-13 | 1.01436e-13 | 3.51500e-14 |
| 1.00000e-06 | 3.56742e-13 | 1.00351e-13 | 3.08107e-14 | 1.00956e-14 | 3.49461e-15 |
| 1.00000e-07 | 3.56733e-14 | 1.00332e-14 | 3.07927e-15 | 1.00853e-15 | 3.49194e-16 |
| 1.00000e-08 | 3.55898e-15 | 1.00239e-15 | 3.08445e-16 | 1.00771e-16 | 3.49429e-17 |
| 1.00000e-09 | 3.61766e-16 | 9.99544e-17 | 3.04658e-17 | 9.89923e-18 | 2.97574e-18 |

| Pa\K        | 1500.00     | 1750.00     | 2000.00     | 2250.00     | 2500.00     |
|-------------|-------------|-------------|-------------|-------------|-------------|
| 1.00000e+08 | 1.36133e-05 | 6.20188e-07 | 5.08197e-07 | 4.45283e-07 | 4.20736e-07 |
| 1.00000e+07 | 1.21660e-05 | 3.56257e-07 | 2.31002e-07 | 2.01913e-07 | 1.88797e-07 |
| 1.00000e+06 | 7.59247e-06 | 3.26757e-07 | 1.77952e-07 | 1.19452e-07 | 8.07626e-08 |
| 100000.     | 5.58783e-06 | 2.39880e-07 | 9.01695e-08 | 4.01884e-08 | 1.88462e-08 |
| 10000.0     | 2.91766e-06 | 1.03273e-07 | 2.55591e-08 | 7.83909e-09 | 2.78685e-09 |



|             |             |             |             |             |             |
|-------------|-------------|-------------|-------------|-------------|-------------|
| 1000.00     | 9.34485e-07 | 2.66600e-08 | 4.65018e-09 | 1.08979e-09 | 3.29300e-10 |
| 100.000     | 1.81978e-07 | 4.54405e-09 | 6.30958e-10 | 1.26880e-10 | 3.56150e-11 |
| 10.0000     | 2.27323e-08 | 5.67326e-10 | 7.14032e-11 | 1.34959e-11 | 3.69298e-12 |
| 1.00000     | 2.09983e-09 | 5.77704e-11 | 7.22072e-12 | 1.34787e-12 | 3.66021e-13 |
| 0.100000    | 1.74013e-10 | 5.24361e-12 | 6.74903e-13 | 1.26814e-13 | 3.43509e-14 |
| 0.0100000   | 1.49143e-11 | 4.57946e-13 | 6.06814e-14 | 1.15306e-14 | 3.12081e-15 |
| 0.00100000  | 1.36775e-12 | 4.09184e-14 | 5.50754e-15 | 1.05511e-15 | 2.85197e-16 |
| 0.000100000 | 1.31137e-13 | 3.81348e-15 | 5.15815e-16 | 9.91966e-17 | 2.67661e-17 |
| 1.00000e-05 | 1.28425e-14 | 3.66309e-16 | 4.95443e-17 | 9.54499e-18 | 2.57285e-18 |
| 1.00000e-06 | 1.27331e-15 | 3.57561e-17 | 4.82968e-18 | 9.32007e-19 | 2.51281e-19 |
| 1.00000e-07 | 1.27010e-16 | 3.54500e-18 | 4.78205e-19 | 9.23497e-20 | 2.48869e-20 |
| 1.00000e-08 | 1.26900e-17 | 3.53471e-19 | 4.75712e-20 | 9.18516e-21 | 2.47270e-21 |
| 1.00000e-09 | 1.07588e-18 | 3.32105e-20 | 4.48049e-21 | 8.64887e-22 | 2.33207e-22 |

| Pa\K        | 2750.00     | 3000.00     | 3250.00     | 3500.00     | 3750.00     |
|-------------|-------------|-------------|-------------|-------------|-------------|
| 1.00000e+08 | 4.10695e-07 | 4.01190e-07 | 3.85507e-07 | 3.61759e-07 | 3.31236e-07 |
| 1.00000e+07 | 1.68657e-07 | 1.41805e-07 | 1.13259e-07 | 8.71902e-08 | 6.56601e-08 |
| 1.00000e+06 | 5.24346e-08 | 3.30684e-08 | 2.06682e-08 | 1.30266e-08 | 8.38323e-09 |
| 100000.     | 9.13306e-09 | 4.64108e-09 | 2.49898e-09 | 1.42865e-09 | 8.64532e-10 |
| 10000.0     | 1.12714e-09 | 5.15432e-10 | 2.62308e-10 | 1.45713e-10 | 8.69049e-11 |
| 1000.00     | 1.22589e-10 | 5.39951e-11 | 2.70337e-11 | 1.49034e-11 | 8.85164e-12 |
| 100.000     | 1.28654e-11 | 5.59496e-12 | 2.78193e-12 | 1.52610e-12 | 9.02672e-13 |
| 10.0000     | 1.31986e-12 | 5.70130e-13 | 2.81862e-13 | 1.53808e-13 | 9.05201e-14 |
| 1.00000     | 1.30125e-13 | 5.59515e-14 | 2.75427e-14 | 1.49665e-14 | 8.77028e-15 |
| 0.100000    | 1.21795e-14 | 5.22931e-15 | 2.57191e-15 | 1.39608e-15 | 8.16742e-16 |
| 0.0100000   | 1.10586e-15 | 4.75484e-16 | 2.34344e-16 | 1.27408e-16 | 7.45732e-17 |
| 0.00100000  | 1.01015e-16 | 4.35088e-17 | 2.14960e-17 | 1.17095e-17 | 6.86001e-18 |
| 0.000100000 | 9.47296e-18 | 4.08413e-18 | 2.02090e-18 | 1.10216e-18 | 6.46018e-19 |
| 1.00000e-05 | 8.10503e-19 | 3.93022e-19 | 1.94797e-19 | 1.06394e-19 | 6.24252e-20 |
| 1.00000e-06 | 8.89949e-20 | 3.84734e-20 | 1.91048e-20 | 1.04496e-20 | 6.13964e-21 |
| 1.00000e-07 | 8.83431e-21 | 3.82105e-21 | 1.89870e-21 | 1.03924e-21 | 6.10985e-22 |
| 1.00000e-08 | 8.80678e-22 | 3.80163e-22 | 1.88763e-22 | 1.03155e-22 | 6.07018e-23 |
| 1.00000e-09 | 8.26877e-23 | 3.58101e-23 | 1.78086e-23 | 9.75278e-24 | 5.73280e-24 |

| Pa\K        | 4000.00     |
|-------------|-------------|
| 1.00000e+08 | 2.96757e-07 |
| 1.00000e+07 | 4.90105e-08 |
| 1.00000e+06 | 5.55181e-09 |
| 100000.     | 5.51158e-10 |
| 10000.0     | 5.49838e-11 |
| 1000.00     | 5.58500e-12 |
| 100.000     | 5.67435e-13 |
| 10.0000     | 5.66237e-14 |
| 1.00000     | 5.46094e-15 |
| 0.100000    | 5.07314e-16 |
| 0.0100000   | 4.62860e-17 |
| 0.00100000  | 4.25719e-18 |
| 0.000100000 | 4.00807e-19 |
| 1.00000e-05 | 3.87544e-20 |
| 1.00000e-06 | 3.81508e-21 |
| 1.00000e-07 | 3.79911e-22 |
| 1.00000e-08 | 3.76789e-23 |
| 1.00000e-09 | 3.56211e-24 |

rad28

====

| Pa\K        | 20.0000     | 30.0000     | 40.0000     | 50.0000     | 60.0000     |
|-------------|-------------|-------------|-------------|-------------|-------------|
| 1.00000e+08 | 3.28001e-27 | 3.42992e-24 | 2.22580e-22 | 3.04225e-21 | 1.89663e-20 |
| 1.00000e+07 | 9.12895e-24 | 4.30048e-22 | 2.25599e-20 | 3.04739e-19 | 1.89604e-18 |
| 1.00000e+06 | 1.27588e-20 | 1.42892e-19 | 2.58468e-18 | 3.10334e-17 | 1.89104e-16 |
| 100000.     | 1.30669e-17 | 1.10828e-16 | 5.69798e-16 | 3.62753e-15 | 1.84980e-14 |
| 10000.0     | 1.11845e-14 | 8.02760e-14 | 2.52746e-13 | 6.67587e-13 | 1.75096e-12 |
| 1000.00     | 4.37069e-12 | 2.12324e-11 | 5.15232e-11 | 9.89074e-11 | 1.71772e-10 |
| 100.000     | 5.50065e-10 | 2.11864e-09 | 4.50585e-09 | 7.70895e-09 | 1.18201e-08 |
| 10.0000     | 3.04584e-08 | 8.16324e-08 | 1.38488e-07 | 2.01331e-07 | 2.71708e-07 |
| 1.00000     | 5.17616e-07 | 1.09651e-06 | 1.69660e-06 | 2.34567e-06 | 3.06469e-06 |
| 0.100000    | 5.48573e-06 | 1.11596e-05 | 1.69464e-05 | 2.31018e-05 | 2.97935e-05 |
| 0.0100000   | 5.14002e-05 | 9.70539e-05 | 0.000137201 | 0.000173788 | 0.000207417 |
| 0.00100000  | 0.000282220 | 0.000336580 | 0.000326869 | 0.000297644 | 0.000262989 |
| 0.000100000 | 0.000150412 | 5.41076e-05 | 2.46212e-05 | 1.28571e-05 | 7.34195e-06 |
| 1.00000e-05 | 1.38063e-06 | 1.98804e-07 | 6.42077e-08 | 2.85351e-08 | 1.50243e-08 |
| 1.00000e-06 | 2.94875e-09 | 5.53758e-10 | 2.21825e-10 | 1.16336e-10 | 6.99357e-11 |
| 1.00000e-07 | 2.21636e-11 | 6.48970e-12 | 3.29554e-12 | 2.02591e-12 | 1.37074e-12 |
| 1.00000e-08 | 6.42199e-13 | 2.62326e-13 | 1.57185e-13 | 1.07261e-13 | 7.81191e-14 |
| 1.00000e-09 | 4.55502e-14 | 2.14726e-14 | 1.36084e-14 | 9.57229e-15 | 7.10650e-15 |

| Pa\K | 70.0000 | 80.0000 | 90.0000 | 100.000 | 110.000 |
|------|---------|---------|---------|---------|---------|
|------|---------|---------|---------|---------|---------|

|             |             |             |             |             |             |
|-------------|-------------|-------------|-------------|-------------|-------------|
| 1.00000e+08 | 7.52597e-20 | 2.24624e-19 | 5.53648e-19 | 1.19283e-18 | 2.33097e-18 |
| 1.00000e+07 | 7.51819e-18 | 2.24292e-17 | 5.52624e-17 | 1.19021e-16 | 2.32499e-16 |
| 1.00000e+06 | 7.44261e-16 | 2.21041e-15 | 5.42617e-15 | 1.16458e-14 | 2.26686e-14 |
| 100000.     | 6.79175e-14 | 1.93552e-13 | 4.59956e-13 | 9.58395e-13 | 1.81215e-12 |
| 10000.0     | 4.36752e-12 | 9.85088e-12 | 1.99646e-11 | 3.68696e-11 | 6.31452e-11 |
| 1000.00     | 2.84332e-10 | 4.56665e-10 | 7.14400e-10 | 1.08888e-09 | 1.61816e-09 |
| 100.000     | 1.70085e-08 | 2.35221e-08 | 3.16899e-08 | 4.19271e-08 | 5.47468e-08 |
| 10.0000     | 3.51695e-07 | 4.44058e-07 | 5.52360e-07 | 6.81017e-07 | 8.35422e-07 |
| 1.00000     | 3.87556e-06 | 4.80558e-06 | 5.88893e-06 | 7.16714e-06 | 8.68969e-06 |
| 0.100000    | 3.71761e-05 | 4.54234e-05 | 5.47275e-05 | 6.52835e-05 | 7.72710e-05 |
| 0.0100000   | 0.000238182 | 0.000265967 | 0.000290513 | 0.000311478 | 0.000328497 |
| 0.00100000  | 0.000228348 | 0.000195947 | 0.000166643 | 0.000140673 | 0.000117985 |
| 0.000100000 | 4.46570e-06 | 2.84623e-06 | 1.87993e-06 | 1.27675e-06 | 8.86510e-07 |
| 1.00000e-05 | 8.78562e-09 | 5.51461e-09 | 3.64059e-09 | 2.49479e-09 | 1.75884e-09 |
| 1.00000e-06 | 4.56493e-11 | 3.14694e-11 | 2.25421e-11 | 1.66049e-11 | 1.24904e-11 |
| 1.00000e-07 | 9.82527e-13 | 7.31655e-13 | 5.59536e-13 | 4.36201e-13 | 3.44912e-13 |
| 1.00000e-08 | 5.91910e-14 | 4.60490e-14 | 3.64928e-14 | 2.93064e-14 | 2.37655e-14 |
| 1.00000e-09 | 5.45653e-15 | 4.28670e-15 | 3.42275e-15 | 2.76520e-15 | 2.25337e-15 |

| Pa\K        | 120.000     | 130.000     | 140.000     | 150.000     | 160.000     |
|-------------|-------------|-------------|-------------|-------------|-------------|
| 1.00000e+08 | 4.23719e-18 | 7.29488e-18 | 1.20531e-17 | 1.93036e-17 | 3.01958e-17 |
| 1.00000e+07 | 4.22469e-16 | 7.27030e-16 | 1.20068e-15 | 1.92195e-15 | 3.00462e-15 |
| 1.00000e+06 | 4.10359e-14 | 7.03309e-14 | 1.15629e-13 | 1.84161e-13 | 2.86280e-13 |
| 100000.     | 3.18477e-12 | 5.29252e-12 | 8.42225e-12 | 1.29561e-11 | 1.94052e-11 |
| 10000.0     | 1.01882e-10 | 1.56853e-10 | 2.32770e-10 | 3.35635e-10 | 4.73207e-10 |
| 1000.00     | 2.34914e-09 | 3.34075e-09 | 4.66840e-09 | 6.42998e-09 | 8.75368e-09 |
| 100.000     | 7.07834e-08 | 9.08256e-08 | 1.15864e-07 | 1.47155e-07 | 1.86294e-07 |
| 10.0000     | 1.02215e-06 | 1.24927e-06 | 1.52681e-06 | 1.86731e-06 | 2.28651e-06 |
| 1.00000     | 1.05151e-05 | 1.27127e-05 | 1.53643e-05 | 1.85665e-05 | 2.24315e-05 |
| 0.100000    | 9.08355e-05 | 0.000106070 | 0.000122999 | 0.000141559 | 0.000161591 |
| 0.0100000   | 0.000341249 | 0.000349517 | 0.000353228 | 0.000352459 | 0.000347440 |
| 0.00100000  | 9.83870e-05 | 8.16163e-05 | 6.73821e-05 | 5.53882e-05 | 4.53472e-05 |
| 0.000100000 | 6.26657e-07 | 4.49520e-07 | 3.26409e-07 | 2.39454e-07 | 1.77196e-07 |
| 1.00000e-05 | 1.26770e-09 | 9.29878e-10 | 6.91813e-10 | 5.20695e-10 | 3.95680e-10 |
| 1.00000e-06 | 9.54783e-12 | 7.39085e-12 | 5.77867e-12 | 4.55469e-12 | 3.61359e-12 |
| 1.00000e-07 | 1.75664e-13 | 2.22135e-13 | 1.80148e-13 | 1.46832e-13 | 1.20154e-13 |
| 1.00000e-08 | 1.94125e-14 | 1.59439e-14 | 1.31497e-14 | 1.08800e-14 | 9.02417e-15 |
| 1.00000e-09 | 1.84812e-15 | 1.52313e-15 | 1.25993e-15 | 1.04514e-15 | 8.68839e-16 |

| Pa\K        | 170.000     | 180.000     | 190.000     | 200.000     | 210.000     |
|-------------|-------------|-------------|-------------|-------------|-------------|
| 1.00000e+08 | 4.64062e-17 | 7.03906e-17 | 1.05754e-16 | 1.57798e-16 | 2.34326e-16 |
| 1.00000e+07 | 4.61451e-15 | 6.99399e-15 | 1.04983e-14 | 1.56484e-14 | 2.32095e-14 |
| 1.00000e+06 | 4.36863e-13 | 6.57327e-13 | 9.78517e-13 | 1.44481e-12 | 2.11990e-12 |
| 100000.     | 2.84541e-11 | 4.10198e-11 | 5.83300e-11 | 8.20233e-11 | 1.14281e-10 |
| 10000.0     | 6.55623e-10 | 8.96222e-10 | 1.21261e-09 | 1.62812e-09 | 2.17366e-09 |
| 1000.00     | 1.18080e-08 | 1.58148e-08 | 2.10657e-08 | 2.79440e-08 | 3.69508e-08 |
| 100.000     | 2.35326e-07 | 2.96864e-07 | 3.74256e-07 | 4.71791e-07 | 5.94950e-07 |
| 10.0000     | 2.80427e-06 | 3.44555e-06 | 4.24171e-06 | 5.23183e-06 | 6.46429e-06 |
| 1.00000     | 2.70885e-05 | 3.26812e-05 | 3.93656e-05 | 4.73032e-05 | 5.66526e-05 |
| 0.100000    | 0.000182833 | 0.000204921 | 0.000227401 | 0.000249748 | 0.000271393 |
| 0.0100000   | 0.000338535 | 0.000326216 | 0.000311028 | 0.000293560 | 0.000274414 |
| 0.00100000  | 3.69902e-05 | 3.00714e-05 | 2.43707e-05 | 1.96942e-05 | 1.58730e-05 |
| 0.000100000 | 1.32100e-07 | 9.91124e-08 | 7.47748e-08 | 5.66862e-08 | 4.31556e-08 |
| 1.00000e-05 | 3.03100e-10 | 2.33757e-10 | 1.81318e-10 | 1.41337e-10 | 1.10641e-10 |
| 1.00000e-06 | 2.88245e-12 | 2.30955e-12 | 1.85743e-12 | 1.49851e-12 | 1.21216e-12 |
| 1.00000e-07 | 9.86357e-14 | 8.11769e-14 | 6.69446e-14 | 5.52983e-14 | 4.57387e-14 |
| 1.00000e-08 | 7.49907e-15 | 6.24075e-15 | 5.19928e-15 | 4.33519e-15 | 3.61693e-15 |
| 1.00000e-09 | 7.23454e-16 | 6.03141e-16 | 5.03299e-16 | 4.20269e-16 | 3.51104e-16 |

| Pa\K        | 220.000     | 230.000     | 240.000     | 250.000     | 260.000     |
|-------------|-------------|-------------|-------------|-------------|-------------|
| 1.00000e+08 | 3.46815e-16 | 5.12154e-16 | 7.55146e-16 | 1.11214e-15 | 1.63626e-15 |
| 1.00000e+07 | 3.43037e-14 | 5.05762e-14 | 7.44344e-14 | 1.09392e-13 | 1.60554e-13 |
| 1.00000e+06 | 3.09502e-12 | 4.50023e-12 | 6.52016e-12 | 9.41537e-12 | 1.35512e-11 |
| 100000.     | 1.58002e-10 | 2.17016e-10 | 2.96382e-10 | 4.02745e-10 | 5.44814e-10 |
| 10000.0     | 2.89025e-09 | 3.83236e-09 | 5.07221e-09 | 6.70549e-09 | 8.85874e-09 |
| 1000.00     | 4.87403e-08 | 6.41629e-08 | 8.43200e-08 | 1.10633e-07 | 1.44928e-07 |
| 100.000     | 7.50729e-07 | 9.48035e-07 | 1.19817e-06 | 1.51543e-06 | 1.91776e-06 |
| 10.0000     | 7.99842e-06 | 9.90594e-06 | 1.22726e-05 | 1.51985e-05 | 1.87986e-05 |
| 1.00000     | 6.75580e-05 | 8.01364e-05 | 9.44620e-05 | 0.000110555 | 0.000128364 |
| 0.100000    | 0.000291752 | 0.000310258 | 0.000326397 | 0.000339729 | 0.000349914 |
| 0.0100000   | 0.000254169 | 0.000233370 | 0.000212502 | 0.000191981 | 0.000172152 |
| 0.00100000  | 1.27623e-05 | 1.02383e-05 | 8.19672e-06 | 6.54996e-06 | 5.22510e-06 |
| 0.000100000 | 3.29778e-08 | 2.52840e-08 | 1.94429e-08 | 1.49913e-08 | 1.15870e-08 |
| 1.00000e-05 | 8.69310e-11 | 6.85232e-11 | 5.41674e-11 | 4.29279e-11 | 3.40982e-11 |
| 1.00000e-06 | 9.82748e-13 | 7.98304e-13 | 6.49574e-13 | 5.29337e-13 | 4.31924e-13 |
| 1.00000e-07 | 3.78723e-14 | 3.13864e-14 | 2.60300e-14 | 2.16008e-14 | 1.79343e-14 |

|             |             |             |             |             |             |
|-------------|-------------|-------------|-------------|-------------|-------------|
| 1.00000e-08 | 3.01901e-15 | 2.52075e-15 | 2.10521e-15 | 1.75844e-15 | 1.46897e-15 |
| 1.00000e-09 | 2.93421e-16 | 2.45269e-16 | 2.05048e-16 | 1.71437e-16 | 1.43342e-16 |

| Pa\K | 270.000 | 280.000 | 290.000 | 300.000 | 400.000 |
|------|---------|---------|---------|---------|---------|
|------|---------|---------|---------|---------|---------|

|             |             |             |             |             |             |
|-------------|-------------|-------------|-------------|-------------|-------------|
| 1.00000e+08 | 2.40463e-15 | 3.52844e-15 | 5.16614e-15 | 3.55977e-14 | 1.32458e-12 |
| 1.00000e+07 | 2.35300e-13 | 3.44203e-13 | 5.02239e-13 | 3.25744e-12 | 1.02989e-10 |
| 1.00000e+06 | 1.94358e-11 | 2.77681e-11 | 3.94981e-11 | 1.87863e-10 | 3.71401e-09 |
| 100000.     | 7.33947e-10 | 9.84878e-10 | 1.31659e-09 | 4.34388e-09 | 6.46544e-08 |
| 10000.0     | 1.16988e-08 | 1.54442e-08 | 2.03798e-08 | 7.49693e-08 | 9.53941e-07 |
| 1000.00     | 1.89543e-07 | 2.47446e-07 | 3.22388e-07 | 1.08227e-06 | 1.02527e-05 |
| 100.000     | 2.42762e-06 | 3.07284e-06 | 3.88754e-06 | 1.10294e-05 | 7.38952e-05 |
| 10.0000     | 2.32018e-05 | 2.85481e-05 | 3.49853e-05 | 7.92740e-05 | 0.000273483 |
| 1.00000     | 0.000147768 | 0.000168561 | 0.000190462 | 0.000285195 | 0.000386014 |
| 0.100000    | 0.000356722 | 0.000360041 | 0.000359882 | 0.000327731 | 0.000161573 |
| 0.0100000   | 0.000153285 | 0.000135576 | 0.000119159 | 7.03237e-05 | 1.40346e-05 |
| 0.00100000  | 4.16175e-06 | 3.31013e-06 | 2.62945e-06 | 1.61368e-06 | 1.90798e-07 |
| 0.000100000 | 8.97565e-09 | 6.96710e-09 | 5.41836e-09 | 9.86651e-09 | 1.21432e-09 |
| 1.00000e-05 | 2.71407e-11 | 2.16437e-11 | 1.72906e-11 | 1.09776e-10 | 1.66768e-11 |
| 1.00000e-06 | 3.52856e-13 | 2.88575e-13 | 2.36244e-13 | 3.25672e-12 | 5.71669e-13 |
| 1.00000e-07 | 1.48969e-14 | 1.23789e-14 | 1.02905e-14 | 1.72157e-13 | 3.27377e-14 |
| 1.00000e-08 | 1.22725e-15 | 1.02539e-15 | 8.56801e-16 | 1.41178e-14 | 2.79984e-15 |
| 1.00000e-09 | 1.19855e-16 | 1.00218e-16 | 8.38018e-17 | 1.37573e-15 | 2.74592e-16 |

| Pa\K | 500.000 | 600.000 | 700.000 | 800.000 | 900.000 |
|------|---------|---------|---------|---------|---------|
|------|---------|---------|---------|---------|---------|

|             |             |             |             |             |             |
|-------------|-------------|-------------|-------------|-------------|-------------|
| 1.00000e+08 | 7.84724e-11 | 8.91365e-09 | 1.13098e-07 | 6.74223e-07 | 4.12330e-06 |
| 1.00000e+07 | 2.63258e-09 | 5.52930e-08 | 4.68450e-07 | 2.83724e-06 | 1.66854e-05 |
| 1.00000e+06 | 5.37794e-08 | 5.29431e-07 | 3.72644e-06 | 1.97314e-05 | 7.95586e-05 |
| 100000.     | 7.58873e-07 | 6.11269e-06 | 3.35631e-05 | 0.000121475 | 0.000307361 |
| 10000.0     | 8.70310e-06 | 5.14903e-05 | 0.000186259 | 0.000412736 | 0.000620581 |
| 1000.00     | 6.62640e-05 | 0.000238110 | 0.000480029 | 0.000607287 | 0.000542741 |
| 100.000     | 0.000264979 | 0.000478694 | 0.000503386 | 0.000364572 | 0.000199648 |
| 10.0000     | 0.000437648 | 0.000374539 | 0.000207723 | 8.95425e-05 | 3.18601e-05 |
| 1.00000     | 0.000259604 | 0.000108038 | 3.35180e-05 | 9.28726e-06 | 2.34462e-06 |
| 0.100000    | 4.79999e-05 | 1.06469e-05 | 2.06192e-06 | 4.13022e-07 | 8.33595e-08 |
| 0.0100000   | 2.17860e-06 | 3.09715e-07 | 4.51341e-08 | 7.85843e-09 | 1.52069e-09 |
| 0.00100000  | 2.25371e-08 | 2.90344e-09 | 4.36387e-10 | 8.63016e-11 | 2.03995e-11 |
| 0.000100000 | 1.65584e-10 | 2.64833e-11 | 5.14916e-12 | 1.30738e-12 | 4.05841e-13 |
| 1.00000e-05 | 2.79065e-12 | 5.45925e-13 | 1.28744e-13 | 3.91779e-14 | 1.48884e-14 |
| 1.00000e-06 | 1.07745e-13 | 2.32126e-14 | 6.00901e-15 | 2.04062e-15 | 8.80895e-16 |
| 1.00000e-07 | 6.59841e-15 | 1.50258e-15 | 4.10830e-16 | 1.48144e-16 | 6.83236e-17 |
| 1.00000e-08 | 5.81176e-16 | 1.35205e-16 | 3.76432e-17 | 1.37913e-17 | 6.46846e-18 |
| 1.00000e-09 | 5.72350e-17 | 1.33531e-17 | 3.72636e-18 | 1.36783e-18 | 6.42831e-19 |

| Pa\K | 1000.00 | 1100.00 | 1200.00 | 1300.00 | 1400.00 |
|------|---------|---------|---------|---------|---------|
|------|---------|---------|---------|---------|---------|

|             |             |             |             |             |             |
|-------------|-------------|-------------|-------------|-------------|-------------|
| 1.00000e+08 | 1.71934e-05 | 4.14005e-05 | 8.53387e-05 | 0.000162466 | 0.000230715 |
| 1.00000e+07 | 6.29237e-05 | 0.000144450 | 0.000240889 | 0.000305970 | 0.000312185 |
| 1.00000e+06 | 0.000218314 | 0.000397945 | 0.000495315 | 0.000456231 | 0.000368292 |
| 100000.     | 0.000532849 | 0.000651023 | 0.000588492 | 0.000435348 | 0.000312122 |
| 10000.0     | 0.000665290 | 0.000542529 | 0.000361990 | 0.000222262 | 0.000144869 |
| 1000.00     | 0.000371668 | 0.000211346 | 0.000109679 | 5.85550e-05 | 3.56067e-05 |
| 100.000     | 9.17788e-05 | 3.88984e-05 | 1.68137e-05 | 8.20624e-06 | 4.80363e-06 |
| 10.0000     | 1.05846e-05 | 3.61076e-06 | 1.38901e-06 | 6.51905e-07 | 3.84431e-07 |
| 1.00000     | 6.16533e-07 | 1.84498e-07 | 6.82324e-08 | 3.30879e-08 | 2.12386e-08 |
| 0.100000    | 1.95407e-08 | 5.76726e-09 | 2.30210e-09 | 1.29427e-09 | 1.01055e-09 |
| 0.0100000   | 3.80636e-10 | 1.32257e-10 | 6.70953e-11 | 4.99162e-11 | 5.15485e-11 |
| 0.00100000  | 6.70650e-12 | 3.22378e-12 | 2.29639e-12 | 2.34135e-12 | 3.14386e-12 |
| 0.000100000 | 1.78982e-13 | 1.15861e-13 | 1.08895e-13 | 1.40987e-13 | 2.27976e-13 |
| 1.00000e-05 | 8.03545e-15 | 6.28445e-15 | 7.00007e-15 | 1.04713e-14 | 1.88886e-14 |
| 1.00000e-06 | 5.33510e-16 | 4.61207e-16 | 5.60071e-16 | 8.99833e-16 | 1.71226e-15 |
| 1.00000e-07 | 4.38358e-17 | 3.98096e-17 | 5.03896e-17 | 8.36972e-17 | 1.63255e-16 |
| 1.00000e-08 | 4.20713e-18 | 3.86321e-18 | 4.93357e-18 | 8.25118e-18 | 1.61747e-17 |
| 1.00000e-09 | 4.18767e-19 | 3.85023e-19 | 4.92196e-19 | 8.23816e-19 | 1.61581e-18 |

| Pa\K | 1500.00 | 1750.00 | 2000.00 | 2250.00 | 2500.00 |
|------|---------|---------|---------|---------|---------|
|------|---------|---------|---------|---------|---------|

|             |             |             |             |             |             |
|-------------|-------------|-------------|-------------|-------------|-------------|
| 1.00000e+08 | 0.000263212 | 8.07181e-05 | 7.56868e-05 | 7.56301e-05 | 8.00739e-05 |
| 1.00000e+07 | 0.000318996 | 0.000130360 | 9.36108e-05 | 7.56898e-05 | 7.20549e-05 |
| 1.00000e+06 | 0.000307581 | 0.000184540 | 0.000121122 | 7.07921e-05 | 4.45892e-05 |
| 100000.     | 0.000244327 | 0.000149823 | 7.30055e-05 | 2.76244e-05 | 1.15866e-05 |
| 10000.0     | 0.000107231 | 5.81019e-05 | 1.99046e-05 | 5.26455e-06 | 1.67403e-06 |
| 1000.00     | 2.51565e-05 | 1.18371e-05 | 3.09859e-06 | 6.58694e-07 | 1.82526e-07 |
| 100.000     | 3.32426e-06 | 1.50710e-06 | 3.48161e-07 | 6.81707e-08 | 1.81144e-08 |
| 10.0000     | 2.74927e-07 | 1.45123e-07 | 3.39861e-08 | 6.66564e-09 | 1.76800e-09 |
| 1.00000     | 1.71183e-08 | 1.26368e-08 | 3.21757e-09 | 6.48570e-10 | 1.73211e-10 |
| 0.100000    | 1.00512e-09 | 1.10679e-09 | 3.07089e-10 | 6.35122e-11 | 1.70698e-11 |
| 0.0100000   | 6.50100e-11 | 1.00318e-10 | 2.96880e-11 | 6.25804e-12 | 1.68979e-12 |
| 0.00100000  | 4.80097e-12 | 9.37416e-12 | 2.89931e-12 | 6.19396e-13 | 1.67802e-13 |

|             |             |             |             |             |             |
|-------------|-------------|-------------|-------------|-------------|-------------|
| 0.000100000 | 3.95188e-13 | 8.95956e-13 | 2.85257e-13 | 6.15030e-14 | 1.67000e-14 |
| 1.00000e-05 | 3.52171e-14 | 8.72891e-14 | 2.82605e-14 | 6.12596e-15 | 1.66563e-15 |
| 1.00000e-06 | 3.30983e-15 | 8.68161e-15 | 2.82078e-15 | 6.12126e-16 | 1.66482e-16 |
| 1.00000e-07 | 3.20995e-16 | 8.67631e-16 | 2.82020e-16 | 6.12076e-17 | 1.66473e-17 |
| 1.00000e-08 | 3.19110e-17 | 8.67580e-17 | 2.82014e-17 | 6.12070e-18 | 1.66472e-18 |
| 1.00000e-09 | 3.18902e-18 | 8.67576e-18 | 2.82014e-18 | 6.12070e-19 | 1.66472e-19 |

| Pa\K        | 2750.00     | 3000.00     | 3250.00     | 3500.00     | 3750.00     |
|-------------|-------------|-------------|-------------|-------------|-------------|
| 1.00000e+08 | 8.41122e-05 | 8.65581e-05 | 8.59939e-05 | 8.18540e-05 | 7.46702e-05 |
| 1.00000e+07 | 6.54046e-05 | 5.43117e-05 | 4.17839e-05 | 3.04459e-05 | 2.14485e-05 |
| 1.00000e+06 | 2.73158e-05 | 1.60064e-05 | 9.15750e-06 | 5.23482e-06 | 3.04220e-06 |
| 100000.     | 5.14531e-06 | 2.36789e-06 | 1.13895e-06 | 5.77914e-07 | 3.10384e-07 |
| 10000.0     | 6.18651e-07 | 2.54216e-07 | 1.14495e-07 | 5.60159e-08 | 2.94967e-08 |
| 1000.00     | 6.27511e-08 | 2.49010e-08 | 1.10362e-08 | 5.36008e-09 | 2.81270e-09 |
| 100.000     | 6.12113e-09 | 2.41296e-09 | 1.06670e-09 | 5.17496e-10 | 2.71385e-10 |
| 10.0000     | 5.96969e-10 | 2.35265e-10 | 1.03989e-10 | 5.04420e-11 | 2.64481e-11 |
| 1.00000     | 5.85962e-11 | 2.31061e-11 | 1.02148e-11 | 4.95493e-12 | 2.59784e-12 |
| 0.100000    | 5.78449e-12 | 2.28217e-12 | 1.00907e-12 | 4.89492e-13 | 2.56635e-13 |
| 0.0100000   | 5.73338e-13 | 2.26288e-13 | 1.00067e-13 | 4.85437e-14 | 2.54509e-14 |
| 0.00100000  | 5.69847e-14 | 2.24971e-14 | 9.94945e-15 | 4.82680e-15 | 2.53069e-15 |
| 0.000100000 | 5.67470e-15 | 2.24075e-15 | 9.91052e-16 | 4.80808e-16 | 2.52091e-16 |
| 1.00000e-05 | 5.66204e-16 | 2.23608e-16 | 9.89065e-17 | 4.79868e-17 | 2.51610e-17 |
| 1.00000e-06 | 5.65974e-17 | 2.23525e-17 | 9.88721e-18 | 4.79710e-18 | 2.51530e-18 |
| 1.00000e-07 | 5.65948e-18 | 2.23517e-18 | 9.88684e-19 | 4.79693e-19 | 2.51521e-19 |
| 1.00000e-08 | 5.65945e-19 | 2.23516e-19 | 9.88679e-20 | 4.79691e-20 | 2.51521e-20 |
| 1.00000e-09 | 5.65945e-20 | 2.23516e-20 | 9.88679e-21 | 4.79691e-21 | 2.51521e-21 |

| Pa\K        | 4000.00     |
|-------------|-------------|
| 1.00000e+08 | 6.56162e-05 |
| 1.00000e+07 | 1.48587e-05 |
| 1.00000e+06 | 1.81701e-06 |
| 100000.     | 1.76198e-07 |
| 10000.0     | 1.65656e-08 |
| 1000.00     | 1.57670e-09 |
| 100.000     | 1.52058e-10 |
| 10.0000     | 1.48156e-11 |
| 1.00000     | 1.45510e-12 |
| 0.100000    | 1.43740e-13 |
| 0.0100000   | 1.42549e-14 |
| 0.00100000  | 1.41742e-15 |
| 0.000100000 | 1.41196e-16 |
| 1.00000e-05 | 1.40933e-17 |
| 1.00000e-06 | 1.40890e-18 |
| 1.00000e-07 | 1.40885e-19 |
| 1.00000e-08 | 1.40884e-20 |
| 1.00000e-09 | 1.40884e-21 |

PAH1+H  
=====

| Pa\K        | 20.0000     | 30.0000     | 40.0000     | 50.0000     | 60.0000     |
|-------------|-------------|-------------|-------------|-------------|-------------|
| 1.00000e+08 | 6.49593e-68 | 2.53493e-65 | 4.23105e-63 | 1.84449e-61 | 4.45006e-60 |
| 1.00000e+07 | 8.35612e-64 | 4.27516e-62 | 4.35429e-60 | 1.83220e-58 | 4.38300e-57 |
| 1.00000e+06 | 7.28000e-60 | 1.67275e-58 | 5.03572e-57 | 1.68413e-55 | 3.77136e-54 |
| 100000.     | 4.21612e-56 | 7.36979e-55 | 7.35656e-54 | 1.00750e-52 | 1.53142e-51 |
| 10000.0     | 1.10952e-52 | 1.29193e-51 | 8.17664e-51 | 5.24575e-50 | 4.08283e-49 |
| 1000.00     | 8.52121e-50 | 6.55348e-49 | 3.08314e-48 | 1.45858e-47 | 8.14476e-47 |
| 100.000     | 1.52833e-47 | 8.35780e-47 | 3.36695e-46 | 1.43348e-45 | 7.45072e-45 |
| 10.0000     | 1.45083e-45 | 7.12023e-45 | 2.61556e-44 | 1.02525e-43 | 4.96920e-43 |
| 1.00000     | 7.17981e-44 | 2.17459e-43 | 5.69415e-43 | 1.72507e-42 | 6.80165e-42 |
| 0.100000    | 4.20934e-43 | 4.74348e-43 | 6.26794e-43 | 1.10327e-42 | 2.76571e-42 |
| 0.0100000   | 2.24442e-44 | 2.85061e-45 | 1.14021e-45 | 9.46921e-46 | 1.44633e-45 |
| 0.00100000  | 2.30008e-48 | 1.50008e-49 | 5.79098e-50 | 5.60578e-50 | 1.19670e-49 |
| 0.000100000 | 2.53797e-52 | 4.67267e-53 | 3.90739e-53 | 8.02211e-53 | 4.47275e-52 |
| 1.00000e-05 | 1.28627e-54 | 7.08951e-55 | 1.02622e-54 | 3.19497e-54 | 2.60754e-53 |
| 1.00000e-06 | 7.61510e-56 | 5.43141e-56 | 8.66425e-56 | 2.87262e-55 | 2.46210e-54 |
| 1.00000e-07 | 7.18888e-57 | 5.28180e-57 | 8.51459e-57 | 2.84174e-56 | 2.44792e-55 |
| 1.00000e-08 | 7.14717e-58 | 5.26700e-58 | 8.49972e-58 | 2.83867e-57 | 2.44651e-56 |
| 1.00000e-09 | 7.14300e-59 | 5.26552e-59 | 8.49824e-59 | 2.83836e-58 | 2.44637e-57 |

| Pa\K        | 70.0000     | 80.0000     | 90.0000     | 100.000     | 110.000     |
|-------------|-------------|-------------|-------------|-------------|-------------|
| 1.00000e+08 | 8.54302e-59 | 1.67404e-57 | 4.35335e-56 | 1.99073e-54 | 1.65225e-52 |
| 1.00000e+07 | 8.37220e-56 | 1.63380e-54 | 4.23484e-53 | 1.93381e-51 | 1.60611e-49 |
| 1.00000e+06 | 6.90782e-53 | 1.30129e-51 | 3.28125e-50 | 1.48233e-48 | 1.24070e-46 |
| 100000.     | 2.26563e-50 | 3.67348e-49 | 8.37086e-48 | 3.68425e-46 | 3.23399e-44 |
| 10000.0     | 3.99545e-48 | 5.11751e-47 | 1.01700e-45 | 4.17482e-44 | 3.61812e-42 |
| 1000.00     | 5.98735e-46 | 6.33892e-45 | 1.13228e-43 | 4.41018e-42 | 3.73817e-40 |

|             |             |             |             |             |             |
|-------------|-------------|-------------|-------------|-------------|-------------|
| 100.000     | 5.31428e-44 | 5.65286e-43 | 1.03137e-41 | 4.09764e-40 | 3.49855e-38 |
| 10.0000     | 3.35205e-42 | 3.40030e-41 | 5.93332e-40 | 2.27267e-38 | 1.90567e-36 |
| 1.00000     | 3.86606e-41 | 3.39059e-40 | 5.24486e-39 | 1.86399e-37 | 1.55669e-35 |
| 0.100000    | 1.06955e-41 | 6.79010e-41 | 8.39260e-40 | 3.08904e-38 | 3.73000e-36 |
| 0.0100000   | 4.12350e-45 | 2.46801e-44 | 6.06874e-43 | 1.36008e-40 | 7.59137e-38 |
| 0.00100000  | 6.83659e-49 | 2.22792e-47 | 6.19193e-45 | 5.22885e-42 | 4.91120e-39 |
| 0.000100000 | 8.86362e-51 | 1.03877e-48 | 4.73915e-46 | 4.67485e-43 | 4.66999e-40 |
| 1.00000e-05 | 6.94696e-52 | 9.64353e-50 | 4.61286e-47 | 4.62187e-44 | 4.64617e-41 |
| 1.00000e-06 | 6.77831e-53 | 9.57247e-51 | 4.60041e-48 | 4.61659e-45 | 4.64379e-42 |
| 1.00000e-07 | 6.76166e-54 | 9.56540e-52 | 4.59917e-49 | 4.61607e-46 | 4.64355e-43 |
| 1.00000e-08 | 6.76000e-55 | 9.56469e-53 | 4.59904e-50 | 4.61601e-47 | 4.64353e-44 |
| 1.00000e-09 | 6.75983e-56 | 9.56462e-54 | 4.59903e-51 | 4.61601e-48 | 4.64353e-45 |

| Pa\K        | 120.000     | 130.000     | 140.000     | 150.000     | 160.000     |
|-------------|-------------|-------------|-------------|-------------|-------------|
| 1.00000e+08 | 1.88173e-50 | 1.97742e-48 | 1.84388e-46 | 8.76080e-45 | 2.68324e-43 |
| 1.00000e+07 | 1.83271e-47 | 1.93000e-45 | 1.80385e-43 | 8.56651e-42 | 2.62077e-40 |
| 1.00000e+06 | 1.44207e-44 | 1.54923e-42 | 1.47998e-40 | 7.00560e-39 | 2.12458e-37 |
| 100000.     | 4.11060e-42 | 4.87751e-40 | 5.21748e-38 | 2.47081e-36 | 7.35537e-35 |
| 10000.0     | 4.73974e-40 | 5.97943e-38 | 7.03773e-36 | 3.39583e-34 | 1.01921e-32 |
| 1000.00     | 4.87057e-38 | 6.20349e-36 | 7.44584e-34 | 3.69483e-32 | 1.12791e-30 |
| 100.000     | 4.56418e-36 | 5.83257e-34 | 7.05501e-32 | 3.51997e-30 | 1.07063e-28 |
| 10.0000     | 2.50158e-34 | 3.28999e-32 | 4.18626e-30 | 2.02473e-28 | 5.88236e-27 |
| 1.00000     | 2.21726e-33 | 3.43502e-31 | 5.87302e-29 | 2.76603e-27 | 7.58073e-26 |
| 0.100000    | 9.71664e-34 | 2.97037e-31 | 1.49730e-28 | 7.20251e-27 | 1.92788e-25 |
| 0.0100000   | 6.64600e-35 | 4.32132e-32 | 1.70382e-28 | 8.33277e-27 | 2.22910e-25 |
| 0.00100000  | 5.57808e-36 | 4.49140e-33 | 1.72618e-28 | 8.46089e-27 | 2.26361e-25 |
| 0.000100000 | 5.49633e-37 | 4.50871e-34 | 1.72844e-28 | 8.47387e-27 | 2.26711e-25 |
| 1.00000e-05 | 5.48811e-38 | 4.51044e-35 | 1.72867e-28 | 8.47516e-27 | 2.26746e-25 |
| 1.00000e-06 | 5.48728e-39 | 4.51061e-36 | 1.72869e-28 | 8.47529e-27 | 2.26750e-25 |
| 1.00000e-07 | 5.48720e-40 | 4.51063e-37 | 1.72869e-28 | 8.47531e-27 | 2.26750e-25 |
| 1.00000e-08 | 5.48719e-41 | 4.51063e-38 | 1.72869e-28 | 8.47531e-27 | 2.26750e-25 |
| 1.00000e-09 | 5.48719e-42 | 4.51063e-39 | 1.72869e-28 | 8.47531e-27 | 2.26750e-25 |

| Pa\K        | 170.000     | 180.000     | 190.000     | 200.000     | 210.000     |
|-------------|-------------|-------------|-------------|-------------|-------------|
| 1.00000e+08 | 5.54419e-42 | 8.47068e-41 | 9.92258e-40 | 9.20120e-39 | 6.94168e-38 |
| 1.00000e+07 | 5.40786e-39 | 8.25011e-38 | 9.64901e-37 | 8.93314e-36 | 6.72850e-35 |
| 1.00000e+06 | 4.33882e-36 | 6.54380e-35 | 7.56241e-34 | 6.91710e-33 | 5.14755e-32 |
| 100000.     | 1.46681e-33 | 2.15472e-32 | 2.42450e-31 | 2.16094e-30 | 1.56915e-29 |
| 10000.0     | 2.03863e-31 | 2.99360e-30 | 3.36530e-29 | 2.99874e-28 | 2.17885e-27 |
| 1000.00     | 2.27791e-29 | 3.35850e-28 | 3.78330e-27 | 3.37620e-26 | 2.45591e-25 |
| 100.000     | 2.14811e-27 | 3.14017e-26 | 3.50480e-25 | 3.09806e-24 | 2.23221e-23 |
| 10.0000     | 1.12899e-25 | 1.57730e-24 | 1.68280e-23 | 1.42289e-22 | 9.82074e-22 |
| 1.00000     | 1.36983e-24 | 1.79805e-23 | 1.80188e-22 | 1.43263e-21 | 9.31846e-21 |
| 0.100000    | 3.37134e-24 | 4.26375e-23 | 4.10906e-22 | 3.14120e-21 | 1.96656e-20 |
| 0.0100000   | 3.87953e-24 | 4.87440e-23 | 4.66295e-22 | 3.53753e-21 | 2.19819e-20 |
| 0.00100000  | 3.93781e-24 | 4.94425e-23 | 4.72602e-22 | 3.58240e-21 | 2.22426e-20 |
| 0.000100000 | 3.94373e-24 | 4.95134e-23 | 4.73241e-22 | 3.58695e-21 | 2.22690e-20 |
| 1.00000e-05 | 3.94431e-24 | 4.95206e-23 | 4.73306e-22 | 3.58740e-21 | 2.22717e-20 |
| 1.00000e-06 | 3.94437e-24 | 4.95213e-23 | 4.73312e-22 | 3.58745e-21 | 2.22720e-20 |
| 1.00000e-07 | 3.94438e-24 | 4.95214e-23 | 4.73313e-22 | 3.58745e-21 | 2.22720e-20 |
| 1.00000e-08 | 3.94438e-24 | 4.95214e-23 | 4.73313e-22 | 3.58745e-21 | 2.22720e-20 |
| 1.00000e-09 | 3.94438e-24 | 4.95214e-23 | 4.73313e-22 | 3.58745e-21 | 2.22720e-20 |

| Pa\K        | 220.000     | 230.000     | 240.000     | 250.000     | 260.000     |
|-------------|-------------|-------------|-------------|-------------|-------------|
| 1.00000e+08 | 4.36215e-37 | 2.33012e-36 | 1.07683e-35 | 4.37187e-35 | 1.58031e-34 |
| 1.00000e+07 | 4.22131e-34 | 2.25122e-33 | 1.03868e-32 | 4.21016e-32 | 1.51940e-31 |
| 1.00000e+06 | 3.19122e-31 | 1.68205e-30 | 7.67203e-30 | 3.07483e-29 | 1.09743e-28 |
| 100000.     | 9.50727e-29 | 4.90548e-28 | 2.19375e-27 | 8.63370e-27 | 3.03026e-26 |
| 10000.0     | 1.32200e-26 | 6.83556e-26 | 3.06509e-25 | 1.21007e-24 | 4.26175e-24 |
| 1000.00     | 1.49140e-24 | 7.71637e-24 | 3.46154e-23 | 1.36688e-22 | 4.81395e-22 |
| 100.000     | 1.34287e-22 | 6.88434e-22 | 3.06080e-21 | 1.19817e-20 | 4.18425e-20 |
| 10.0000     | 5.66983e-21 | 2.79515e-20 | 1.19750e-19 | 4.52605e-19 | 1.52894e-18 |
| 1.00000     | 5.08486e-20 | 2.37706e-19 | 9.68904e-19 | 3.49549e-18 | 1.13057e-17 |
| 0.100000    | 1.03477e-19 | 4.67494e-19 | 1.84604e-18 | 6.46769e-18 | 2.03629e-17 |
| 0.0100000   | 1.14847e-19 | 5.15449e-19 | 2.02310e-18 | 7.04903e-18 | 2.20826e-17 |
| 0.00100000  | 1.16118e-19 | 5.20777e-19 | 2.04266e-18 | 7.11290e-18 | 2.22706e-17 |
| 0.000100000 | 1.16247e-19 | 5.21317e-19 | 2.04464e-18 | 7.11935e-18 | 2.22895e-17 |
| 1.00000e-05 | 1.16260e-19 | 5.21370e-19 | 2.04483e-18 | 7.12000e-18 | 2.22914e-17 |
| 1.00000e-06 | 1.16262e-19 | 5.21376e-19 | 2.04485e-18 | 7.12006e-18 | 2.22916e-17 |
| 1.00000e-07 | 1.16262e-19 | 5.21376e-19 | 2.04486e-18 | 7.12007e-18 | 2.22916e-17 |
| 1.00000e-08 | 1.16262e-19 | 5.21377e-19 | 2.04486e-18 | 7.12007e-18 | 2.22916e-17 |
| 1.00000e-09 | 1.16262e-19 | 5.21377e-19 | 2.04486e-18 | 7.12007e-18 | 2.22916e-17 |

| Pa\K        | 270.000     | 280.000     | 290.000     | 300.000     | 400.000     |
|-------------|-------------|-------------|-------------|-------------|-------------|
| 1.00000e+08 | 5.14589e-34 | 1.52502e-33 | 4.15055e-33 | 1.58124e-27 | 3.91764e-19 |
| 1.00000e+07 | 4.93954e-31 | 1.46150e-30 | 3.97119e-30 | 2.99184e-24 | 1.00901e-15 |

|             |             |             |             |             |             |
|-------------|-------------|-------------|-------------|-------------|-------------|
| 1.00000e+06 | 3.52901e-28 | 1.03300e-27 | 2.77731e-27 | 2.46166e-21 | 7.38684e-14 |
| 100000.     | 9.59559e-26 | 2.76944e-25 | 7.35067e-25 | 2.16822e-19 | 2.07959e-13 |
| 10000.0     | 1.35446e-23 | 3.92389e-23 | 1.04540e-22 | 2.32860e-18 | 4.02609e-14 |
| 1000.00     | 1.52956e-21 | 4.42886e-21 | 1.17900e-20 | 8.08707e-17 | 8.49679e-14 |
| 100.000     | 1.31858e-19 | 3.78736e-19 | 1.00032e-18 | 1.36426e-15 | 7.66229e-13 |
| 10.0000     | 4.66874e-17 | 1.30148e-17 | 3.34088e-17 | 5.10651e-15 | 1.98777e-12 |
| 1.00000     | 3.31480e-17 | 8.89570e-17 | 2.20354e-16 | 3.75547e-15 | 2.22385e-12 |
| 0.100000    | 5.82455e-17 | 1.52803e-16 | 3.70704e-16 | 2.46973e-15 | 2.19962e-12 |
| 0.0100000   | 6.28806e-17 | 1.64294e-16 | 3.97125e-16 | 2.35615e-15 | 2.19581e-12 |
| 0.00100000  | 6.33848e-17 | 1.65539e-16 | 3.99974e-16 | 2.34576e-15 | 2.19542e-12 |
| 0.000100000 | 6.34356e-17 | 1.65664e-16 | 4.00262e-16 | 2.34472e-15 | 2.19537e-12 |
| 1.00000e-05 | 6.34407e-17 | 1.65676e-16 | 4.00290e-16 | 2.34463e-15 | 2.19537e-12 |
| 1.00000e-06 | 6.34413e-17 | 1.65677e-16 | 4.00293e-16 | 2.34462e-15 | 2.19537e-12 |
| 1.00000e-07 | 6.34413e-17 | 1.65678e-16 | 4.00293e-16 | 2.34461e-15 | 2.19537e-12 |
| 1.00000e-08 | 6.34413e-17 | 1.65678e-16 | 4.00293e-16 | 2.34461e-15 | 2.19537e-12 |
| 1.00000e-09 | 6.34413e-17 | 1.65678e-16 | 4.00293e-16 | 2.34461e-15 | 2.19537e-12 |

| Pa\K        | 500.000     | 600.000     | 700.000     | 800.000     | 900.000     |
|-------------|-------------|-------------|-------------|-------------|-------------|
| 1.00000e+08 | 7.02243e-14 | 4.06175e-11 | 8.11857e-10 | 5.37300e-09 | 3.77294e-08 |
| 1.00000e+07 | 3.82849e-11 | 1.96473e-09 | 1.85961e-08 | 7.63680e-08 | 2.19937e-07 |
| 1.00000e+06 | 9.76869e-10 | 4.21596e-08 | 2.06167e-07 | 4.74728e-07 | 8.10462e-07 |
| 100000.     | 7.81449e-10 | 6.54599e-08 | 4.01576e-07 | 8.21875e-07 | 1.29636e-06 |
| 10000.0     | 8.68164e-11 | 1.75772e-08 | 2.22950e-07 | 7.02292e-07 | 1.50064e-06 |
| 1000.00     | 2.76788e-11 | 5.16335e-09 | 1.17142e-07 | 5.56042e-07 | 1.30012e-06 |
| 100.000     | 9.20391e-11 | 3.72343e-09 | 6.50254e-08 | 3.13760e-07 | 7.92542e-07 |
| 10.0000     | 1.53253e-10 | 3.55090e-09 | 3.85943e-08 | 1.87136e-07 | 6.02205e-07 |
| 1.00000     | 1.64120e-10 | 3.35281e-09 | 3.08466e-08 | 1.59132e-07 | 5.69998e-07 |
| 0.100000    | 1.64722e-10 | 3.29633e-09 | 2.95554e-08 | 1.55372e-07 | 5.66293e-07 |
| 0.0100000   | 1.64749e-10 | 3.28890e-09 | 2.94167e-08 | 1.55001e-07 | 5.65942e-07 |
| 0.00100000  | 1.64752e-10 | 3.28818e-09 | 2.94039e-08 | 1.54967e-07 | 5.65909e-07 |
| 0.000100000 | 1.64753e-10 | 3.28811e-09 | 2.94027e-08 | 1.54964e-07 | 5.65906e-07 |
| 1.00000e-05 | 1.64753e-10 | 3.28810e-09 | 2.94026e-08 | 1.54963e-07 | 5.65906e-07 |
| 1.00000e-06 | 1.64753e-10 | 3.28810e-09 | 2.94026e-08 | 1.54963e-07 | 5.65906e-07 |
| 1.00000e-07 | 1.64753e-10 | 3.28810e-09 | 2.94026e-08 | 1.54963e-07 | 5.65906e-07 |
| 1.00000e-08 | 1.64753e-10 | 3.28810e-09 | 2.94026e-08 | 1.54963e-07 | 5.65906e-07 |
| 1.00000e-09 | 1.64753e-10 | 3.28810e-09 | 2.94026e-08 | 1.54963e-07 | 5.65906e-07 |

| Pa\K        | 1000.00     | 1100.00     | 1200.00     | 1300.00     | 1400.00     |
|-------------|-------------|-------------|-------------|-------------|-------------|
| 1.00000e+08 | 1.89090e-07 | 6.50836e-07 | 1.79455e-06 | 4.68164e-06 | 7.82282e-06 |
| 1.00000e+07 | 6.28240e-07 | 2.60656e-06 | 1.00844e-05 | 2.66080e-05 | 4.57896e-05 |
| 1.00000e+06 | 1.41228e-06 | 4.24588e-06 | 1.45185e-05 | 3.46987e-05 | 5.88797e-05 |
| 100000.     | 2.38732e-06 | 5.79640e-06 | 1.40081e-05 | 2.70756e-05 | 4.25840e-05 |
| 10000.0     | 3.00573e-06 | 5.88778e-06 | 1.08509e-05 | 1.80713e-05 | 2.74969e-05 |
| 1000.00     | 2.44933e-06 | 4.52568e-06 | 8.16244e-06 | 1.38080e-05 | 2.17120e-05 |
| 100.000     | 1.78138e-06 | 3.79940e-06 | 7.35849e-06 | 1.28632e-05 | 2.05698e-05 |
| 10.0000     | 1.61164e-06 | 3.66766e-06 | 7.24258e-06 | 1.27406e-05 | 2.04260e-05 |
| 1.00000     | 1.58877e-06 | 3.65258e-06 | 7.23035e-06 | 1.27281e-05 | 2.04112e-05 |
| 0.100000    | 1.58640e-06 | 3.65111e-06 | 7.22918e-06 | 1.27268e-05 | 2.04098e-05 |
| 0.0100000   | 1.58618e-06 | 3.65097e-06 | 7.22906e-06 | 1.27267e-05 | 2.04097e-05 |
| 0.00100000  | 1.58616e-06 | 3.65096e-06 | 7.22906e-06 | 1.27267e-05 | 2.04097e-05 |
| 0.000100000 | 1.58616e-06 | 3.65096e-06 | 7.22906e-06 | 1.27267e-05 | 2.04096e-05 |
| 1.00000e-05 | 1.58616e-06 | 3.65096e-06 | 7.22906e-06 | 1.27267e-05 | 2.04096e-05 |
| 1.00000e-06 | 1.58616e-06 | 3.65096e-06 | 7.22906e-06 | 1.27267e-05 | 2.04096e-05 |
| 1.00000e-07 | 1.58616e-06 | 3.65096e-06 | 7.22906e-06 | 1.27267e-05 | 2.04096e-05 |
| 1.00000e-08 | 1.58616e-06 | 3.65096e-06 | 7.22906e-06 | 1.27267e-05 | 2.04096e-05 |
| 1.00000e-09 | 1.58616e-06 | 3.65096e-06 | 7.22906e-06 | 1.27267e-05 | 2.04096e-05 |

| Pa\K        | 1500.00     | 1750.00     | 2000.00     | 2250.00     | 2500.00     |
|-------------|-------------|-------------|-------------|-------------|-------------|
| 1.00000e+08 | 7.39400e-06 | 0.000426973 | 0.000597003 | 0.000650595 | 0.000648267 |
| 1.00000e+07 | 5.50242e-05 | 0.000371222 | 0.000568439 | 0.000638788 | 0.000606865 |
| 1.00000e+06 | 8.07306e-05 | 0.000295856 | 0.000453428 | 0.000468536 | 0.000401847 |
| 100000.     | 5.95136e-05 | 0.000189874 | 0.000261007 | 0.000254297 | 0.000239249 |
| 10000.0     | 3.92551e-05 | 9.86348e-05 | 0.000136918 | 0.000161471 | 0.000191433 |
| 1000.00     | 3.19533e-05 | 6.51350e-05 | 0.000103348 | 0.000143168 | 0.000184203 |
| 100.000     | 3.05539e-05 | 5.90772e-05 | 9.82297e-05 | 0.000140857 | 0.000183407 |
| 10.0000     | 3.03779e-05 | 5.83374e-05 | 9.76496e-05 | 0.000140615 | 0.000183328 |
| 1.00000     | 3.03598e-05 | 5.82613e-05 | 9.75912e-05 | 0.000140592 | 0.000183320 |
| 0.100000    | 3.03581e-05 | 5.82540e-05 | 9.75855e-05 | 0.000140589 | 0.000183319 |
| 0.0100000   | 3.03579e-05 | 5.82532e-05 | 9.75848e-05 | 0.000140589 | 0.000183319 |
| 0.00100000  | 3.03579e-05 | 5.82532e-05 | 9.75848e-05 | 0.000140589 | 0.000183319 |
| 0.000100000 | 3.03579e-05 | 5.82532e-05 | 9.75848e-05 | 0.000140589 | 0.000183319 |
| 1.00000e-05 | 3.03579e-05 | 5.82532e-05 | 9.75848e-05 | 0.000140589 | 0.000183319 |
| 1.00000e-06 | 3.03579e-05 | 5.82532e-05 | 9.75848e-05 | 0.000140589 | 0.000183319 |
| 1.00000e-07 | 3.03579e-05 | 5.82532e-05 | 9.75848e-05 | 0.000140589 | 0.000183319 |
| 1.00000e-08 | 3.03579e-05 | 5.82532e-05 | 9.75848e-05 | 0.000140589 | 0.000183319 |
| 1.00000e-09 | 3.03579e-05 | 5.82532e-05 | 9.75848e-05 | 0.000140589 | 0.000183319 |

| Pa\K        | 2750.00     | 3000.00     | 3250.00     | 3500.00     | 3750.00     |
|-------------|-------------|-------------|-------------|-------------|-------------|
| 1.00000e+08 | 0.000630775 | 0.000606396 | 0.000578371 | 0.000550247 | 0.000525942 |
| 1.00000e+07 | 0.000546652 | 0.000489170 | 0.000447096 | 0.000423689 | 0.000417468 |
| 1.00000e+06 | 0.000350242 | 0.000329044 | 0.000330266 | 0.000344978 | 0.000367671 |
| 100000.     | 0.000248273 | 0.000271103 | 0.000299010 | 0.000328590 | 0.000359265 |
| 10000.0     | 0.000226494 | 0.000261470 | 0.000294724 | 0.000326655 | 0.000358389 |
| 1000.00     | 0.000223776 | 0.000260416 | 0.000294293 | 0.000326475 | 0.000358313 |
| 100.000     | 0.000223500 | 0.000260314 | 0.000294253 | 0.000326458 | 0.000358305 |
| 10.0000     | 0.000223474 | 0.000260305 | 0.000294251 | 0.000326456 | 0.000358305 |
| 1.00000     | 0.000223471 | 0.000260302 | 0.000294248 | 0.000326455 | 0.000358305 |
| 0.100000    | 0.000223471 | 0.000260302 | 0.000294248 | 0.000326455 | 0.000358305 |
| 0.0100000   | 0.000223471 | 0.000260302 | 0.000294248 | 0.000326455 | 0.000358305 |
| 0.00100000  | 0.000223471 | 0.000260302 | 0.000294248 | 0.000326455 | 0.000358305 |
| 0.000100000 | 0.000223471 | 0.000260302 | 0.000294248 | 0.000326455 | 0.000358305 |
| 1.00000e-05 | 0.000223471 | 0.000260302 | 0.000294248 | 0.000326455 | 0.000358305 |
| 1.00000e-06 | 0.000223471 | 0.000260302 | 0.000294248 | 0.000326455 | 0.000358305 |
| 1.00000e-07 | 0.000223471 | 0.000260302 | 0.000294248 | 0.000326455 | 0.000358305 |
| 1.00000e-08 | 0.000223471 | 0.000260302 | 0.000294248 | 0.000326455 | 0.000358305 |
| 1.00000e-09 | 0.000223471 | 0.000260302 | 0.000294248 | 0.000326455 | 0.000358305 |

| Pa\K        | 4000.00     |
|-------------|-------------|
| 1.00000e+08 | 0.000508784 |
| 1.00000e+07 | 0.000425224 |
| 1.00000e+06 | 0.000395562 |
| 100000.     | 0.000391398 |
| 10000.0     | 0.000391015 |
| 1000.00     | 0.000390983 |
| 100.000     | 0.000390980 |
| 10.0000     | 0.000390980 |
| 1.00000     | 0.000390980 |
| 0.100000    | 0.000390980 |
| 0.0100000   | 0.000390980 |
| 0.00100000  | 0.000390980 |
| 0.000100000 | 0.000390980 |
| 1.00000e-05 | 0.000390980 |
| 1.00000e-06 | 0.000390980 |
| 1.00000e-07 | 0.000390980 |
| 1.00000e-08 | 0.000390980 |
| 1.00000e-09 | 0.000390980 |

rad51  
====

| Pa\K        | 20.0000     | 30.0000     | 40.0000     | 50.0000     | 60.0000     |
|-------------|-------------|-------------|-------------|-------------|-------------|
| 1.00000e+08 | 9.60610e-58 | 4.08813e-56 | 5.43250e-55 | 5.38595e-54 | 5.00882e-53 |
| 1.00000e+07 | 5.70439e-53 | 1.73698e-51 | 1.81971e-50 | 1.49345e-49 | 1.18295e-48 |
| 1.00000e+06 | 8.47811e-49 | 1.53504e-47 | 1.18474e-46 | 7.80851e-46 | 5.22138e-45 |
| 100000.     | 2.14452e-45 | 2.27029e-44 | 1.32395e-43 | 7.29092e-43 | 4.30939e-42 |
| 10000.0     | 1.14336e-42 | 8.28016e-42 | 3.88683e-41 | 1.84089e-40 | 9.77072e-40 |
| 1000.00     | 1.44238e-40 | 5.54228e-40 | 1.72864e-39 | 6.09215e-39 | 2.59212e-38 |
| 100.000     | 1.36867e-39 | 2.68364e-39 | 6.17956e-39 | 1.72580e-38 | 5.89319e-38 |
| 10.0000     | 3.00616e-39 | 3.17593e-39 | 5.04210e-39 | 1.17661e-38 | 3.92501e-38 |
| 1.00000     | 4.79691e-39 | 1.22431e-38 | 3.00453e-38 | 8.53038e-38 | 3.11071e-37 |
| 0.100000    | 3.88648e-38 | 7.70275e-38 | 1.52246e-37 | 3.56632e-37 | 1.09379e-36 |
| 0.0100000   | 5.52656e-38 | 3.00373e-38 | 2.40451e-38 | 2.87063e-38 | 5.27677e-38 |
| 0.00100000  | 3.30801e-40 | 3.58607e-41 | 1.53717e-41 | 1.44627e-41 | 2.80927e-41 |
| 0.000100000 | 1.06012e-43 | 2.00823e-44 | 1.56806e-44 | 2.85879e-44 | 1.36858e-43 |
| 1.00000e-05 | 6.15944e-46 | 3.27702e-46 | 4.33374e-46 | 1.18376e-45 | 8.22026e-45 |
| 1.00000e-06 | 3.70929e-47 | 2.53268e-47 | 3.68049e-47 | 1.06886e-46 | 7.78570e-46 |
| 1.00000e-07 | 3.50814e-48 | 2.46516e-48 | 3.61910e-48 | 1.05783e-47 | 7.74326e-47 |
| 1.00000e-08 | 3.48843e-49 | 2.45848e-49 | 3.61299e-49 | 1.05673e-48 | 7.73903e-48 |
| 1.00000e-09 | 3.48646e-50 | 2.45781e-50 | 3.61238e-50 | 1.05662e-49 | 7.73860e-49 |

| Pa\K        | 70.0000     | 80.0000     | 90.0000     | 100.000     | 110.000     |
|-------------|-------------|-------------|-------------|-------------|-------------|
| 1.00000e+08 | 4.92157e-52 | 5.65277e-51 | 8.37911e-50 | 1.70753e-48 | 4.56635e-47 |
| 1.00000e+07 | 1.01048e-47 | 1.03005e-46 | 1.39527e-45 | 2.70983e-44 | 7.20795e-43 |
| 1.00000e+06 | 3.90679e-44 | 3.60654e-43 | 4.58060e-42 | 8.65328e-41 | 2.31105e-39 |
| 100000.     | 2.96442e-41 | 2.59581e-40 | 3.20715e-39 | 6.00542e-38 | 1.61346e-36 |
| 10000.0     | 6.24918e-39 | 5.23621e-38 | 6.31664e-37 | 1.16802e-35 | 3.13617e-34 |
| 1000.00     | 1.40387e-37 | 1.04093e-36 | 1.16436e-35 | 2.14375e-34 | 6.35325e-33 |
| 100.000     | 2.57900e-37 | 1.59962e-36 | 1.68310e-35 | 3.70021e-34 | 1.68730e-32 |
| 10.0000     | 1.96525e-37 | 1.55624e-36 | 2.20858e-35 | 7.12351e-34 | 4.52610e-32 |
| 1.00000     | 1.61427e-36 | 1.27883e-35 | 1.77207e-34 | 5.67424e-33 | 3.29848e-31 |
| 0.100000    | 4.86246e-36 | 3.38357e-35 | 4.41540e-34 | 1.74460e-32 | 1.31072e-30 |
| 0.0100000   | 1.62622e-37 | 9.80661e-37 | 2.31373e-35 | 9.19865e-33 | 1.46500e-30 |
| 0.00100000  | 1.40234e-40 | 3.88323e-39 | 9.07386e-37 | 7.78146e-33 | 1.43957e-30 |
| 0.000100000 | 2.26407e-42 | 2.18771e-40 | 8.22400e-38 | 7.66185e-33 | 1.43663e-30 |

|             |             |             |             |             |             |
|-------------|-------------|-------------|-------------|-------------|-------------|
| 1.00000e-05 | 1.81540e-43 | 2.07103e-41 | 8.14503e-39 | 7.65011e-33 | 1.43633e-30 |
| 1.00000e-06 | 1.77538e-44 | 2.05980e-42 | 8.13719e-40 | 7.64894e-33 | 1.43630e-30 |
| 1.00000e-07 | 1.77143e-45 | 2.05868e-43 | 8.13640e-41 | 7.64882e-33 | 1.43630e-30 |
| 1.00000e-08 | 1.77103e-46 | 2.05857e-44 | 8.13632e-42 | 7.64881e-33 | 1.43630e-30 |
| 1.00000e-09 | 1.77099e-47 | 2.05856e-45 | 8.13632e-43 | 7.64881e-33 | 1.43630e-30 |

| Pa\K        | 120.000     | 130.000     | 140.000     | 150.000     | 160.000     |
|-------------|-------------|-------------|-------------|-------------|-------------|
| 1.00000e+08 | 1.35464e-45 | 3.69811e-44 | 8.35549e-43 | 1.51502e-41 | 2.21577e-40 |
| 1.00000e+07 | 2.16990e-41 | 5.95438e-40 | 1.32778e-38 | 2.33953e-37 | 3.28662e-36 |
| 1.00000e+06 | 7.07058e-38 | 1.94082e-36 | 4.24131e-35 | 7.20882e-34 | 9.65986e-33 |
| 100000.     | 4.99980e-35 | 1.36976e-33 | 2.93918e-32 | 4.84616e-31 | 6.24601e-30 |
| 10000.0     | 9.81103e-33 | 2.66753e-31 | 5.57466e-30 | 8.82081e-29 | 1.07858e-27 |
| 1000.00     | 2.32854e-31 | 6.83498e-30 | 1.44596e-28 | 2.22666e-27 | 2.58475e-26 |
| 100.000     | 9.71664e-31 | 3.42210e-29 | 7.80133e-28 | 1.23283e-26 | 1.43102e-25 |
| 10.0000     | 3.09366e-30 | 1.12680e-28 | 2.57155e-27 | 4.01208e-26 | 4.57224e-25 |
| 1.00000     | 1.74431e-29 | 5.75856e-28 | 1.24127e-26 | 1.86169e-25 | 2.06317e-24 |
| 0.100000    | 7.33971e-29 | 2.41525e-27 | 5.05490e-26 | 7.26364e-25 | 7.65090e-24 |
| 0.0100000   | 1.01877e-28 | 3.55967e-27 | 7.53703e-26 | 1.07283e-24 | 1.10788e-23 |
| 0.00100000  | 1.04835e-28 | 3.71594e-27 | 7.90469e-26 | 1.12541e-24 | 1.15987e-23 |
| 0.000100000 | 1.05124e-28 | 3.73196e-27 | 7.94297e-26 | 1.13092e-24 | 1.16532e-23 |
| 1.00000e-05 | 1.05153e-28 | 3.73355e-27 | 7.94681e-26 | 1.13147e-24 | 1.16587e-23 |
| 1.00000e-06 | 1.05156e-28 | 3.73371e-27 | 7.94720e-26 | 1.13153e-24 | 1.16593e-23 |
| 1.00000e-07 | 1.05156e-28 | 3.73373e-27 | 7.94724e-26 | 1.13153e-24 | 1.16593e-23 |
| 1.00000e-08 | 1.05156e-28 | 3.73373e-27 | 7.94724e-26 | 1.13153e-24 | 1.16593e-23 |
| 1.00000e-09 | 1.05156e-28 | 3.73373e-27 | 7.94724e-26 | 1.13153e-24 | 1.16593e-23 |

| Pa\K        | 170.000     | 180.000     | 190.000     | 200.000     | 210.000     |
|-------------|-------------|-------------|-------------|-------------|-------------|
| 1.00000e+08 | 2.65979e-39 | 2.67709e-38 | 2.30431e-37 | 1.72419e-36 | 1.13613e-35 |
| 1.00000e+07 | 3.75774e-35 | 3.58110e-34 | 2.90662e-33 | 2.04553e-32 | 1.26591e-31 |
| 1.00000e+06 | 1.04549e-31 | 9.38508e-31 | 7.15516e-30 | 4.72520e-29 | 2.74569e-28 |
| 100000.     | 6.46442e-29 | 5.52758e-28 | 4.00453e-27 | 2.51017e-26 | 1.38458e-25 |
| 10000.0     | 1.04966e-26 | 8.37917e-26 | 5.63479e-25 | 3.26455e-24 | 1.65967e-23 |
| 1000.00     | 2.34987e-25 | 1.73362e-24 | 1.06974e-23 | 5.66146e-23 | 2.62320e-22 |
| 100.000     | 1.28138e-24 | 9.22323e-24 | 5.51784e-23 | 2.81899e-22 | 1.25702e-21 |
| 10.0000     | 4.01346e-24 | 2.83380e-23 | 1.66630e-22 | 8.38961e-22 | 3.69783e-21 |
| 1.00000     | 1.77537e-23 | 1.23548e-22 | 7.18319e-22 | 3.58121e-21 | 1.56308e-20 |
| 0.100000    | 6.22519e-23 | 4.08116e-22 | 2.22964e-21 | 1.04293e-20 | 4.26874e-20 |
| 0.0100000   | 8.79316e-23 | 5.61080e-22 | 2.98189e-21 | 1.35751e-20 | 5.41420e-20 |
| 0.00100000  | 9.17752e-23 | 5.83530e-22 | 3.08978e-21 | 1.40154e-20 | 5.57059e-20 |
| 0.000100000 | 9.21782e-23 | 5.85880e-22 | 3.10104e-21 | 1.40612e-20 | 5.58682e-20 |
| 1.00000e-05 | 9.22187e-23 | 5.86115e-22 | 3.10217e-21 | 1.40658e-20 | 5.58844e-20 |
| 1.00000e-06 | 9.22228e-23 | 5.86139e-22 | 3.10229e-21 | 1.40663e-20 | 5.58861e-20 |
| 1.00000e-07 | 9.22232e-23 | 5.86142e-22 | 3.10230e-21 | 1.40663e-20 | 5.58862e-20 |
| 1.00000e-08 | 9.22233e-23 | 5.86142e-22 | 3.10230e-21 | 1.40663e-20 | 5.58862e-20 |
| 1.00000e-09 | 9.22233e-23 | 5.86142e-22 | 3.10230e-21 | 1.40663e-20 | 5.58862e-20 |

| Pa\K        | 220.000     | 230.000     | 240.000     | 250.000     | 260.000     |
|-------------|-------------|-------------|-------------|-------------|-------------|
| 1.00000e+08 | 6.66108e-35 | 3.50490e-34 | 1.66786e-33 | 7.22954e-33 | 2.87407e-32 |
| 1.00000e+07 | 6.96679e-31 | 3.44083e-30 | 1.53728e-29 | 6.25854e-29 | 2.33784e-28 |
| 1.00000e+06 | 1.42127e-27 | 6.61885e-27 | 2.79625e-26 | 1.07950e-25 | 3.83366e-25 |
| 100000.     | 6.81074e-25 | 3.01959e-24 | 1.21719e-23 | 4.49419e-23 | 1.52996e-22 |
| 10000.0     | 7.51481e-23 | 3.06685e-22 | 1.13907e-21 | 3.88132e-21 | 1.22165e-20 |
| 1000.00     | 1.08193e-21 | 4.02544e-21 | 1.36558e-20 | 4.26040e-20 | 1.23112e-19 |
| 100.000     | 4.97884e-21 | 1.77648e-20 | 5.77454e-20 | 1.72558e-19 | 4.77559e-19 |
| 10.0000     | 1.45199e-20 | 5.14928e-20 | 1.66710e-19 | 4.96913e-19 | 1.37299e-18 |
| 1.00000     | 6.07194e-20 | 2.12701e-19 | 6.79001e-19 | 1.99221e-18 | 5.41053e-18 |
| 0.100000    | 1.55598e-19 | 5.12306e-19 | 1.54118e-18 | 4.27580e-18 | 1.10235e-17 |
| 0.0100000   | 1.92615e-19 | 6.20142e-19 | 1.82805e-18 | 4.98014e-18 | 1.26339e-17 |
| 0.00100000  | 1.97547e-19 | 6.34176e-19 | 1.86456e-18 | 5.06793e-18 | 1.28307e-17 |
| 0.000100000 | 1.98057e-19 | 6.35624e-19 | 1.86831e-18 | 5.07693e-18 | 1.28509e-17 |
| 1.00000e-05 | 1.98108e-19 | 6.35768e-19 | 1.86869e-18 | 5.07784e-18 | 1.28529e-17 |
| 1.00000e-06 | 1.98113e-19 | 6.35783e-19 | 1.86873e-18 | 5.07792e-18 | 1.28531e-17 |
| 1.00000e-07 | 1.98114e-19 | 6.35785e-19 | 1.86873e-18 | 5.07793e-18 | 1.28531e-17 |
| 1.00000e-08 | 1.98114e-19 | 6.35785e-19 | 1.86873e-18 | 5.07794e-18 | 1.28531e-17 |
| 1.00000e-09 | 1.98114e-19 | 6.35785e-19 | 1.86873e-18 | 5.07794e-18 | 1.28531e-17 |

| Pa\K        | 270.000     | 280.000     | 290.000     | 300.000     | 400.000     |
|-------------|-------------|-------------|-------------|-------------|-------------|
| 1.00000e+08 | 1.05471e-31 | 3.59458e-31 | 1.14402e-30 | 6.29655e-24 | 6.80088e-17 |
| 1.00000e+07 | 8.06528e-28 | 2.58561e-27 | 7.74665e-27 | 1.39737e-20 | 6.34645e-14 |
| 1.00000e+06 | 1.26022e-24 | 3.85680e-24 | 1.10470e-23 | 7.26367e-18 | 4.97166e-12 |
| 100000.     | 4.83096e-22 | 1.42257e-21 | 3.92581e-21 | 4.78961e-16 | 2.46222e-11 |
| 10000.0     | 3.57307e-20 | 9.76252e-20 | 2.50349e-19 | 1.73826e-15 | 9.27799e-12 |
| 1000.00     | 3.31480e-19 | 8.35946e-19 | 1.98366e-18 | 6.70838e-16 | 8.90209e-13 |
| 100.000     | 1.23159e-18 | 2.97538e-18 | 6.76498e-18 | 2.14098e-16 | 1.39055e-13 |
| 10.0000     | 3.53655e-18 | 8.53367e-18 | 1.93742e-17 | 4.56988e-16 | 1.31722e-13 |
| 1.00000     | 1.36833e-17 | 3.23950e-17 | 7.21318e-17 | 5.68109e-16 | 1.41403e-13 |



|             |             |             |             |             |             |
|-------------|-------------|-------------|-------------|-------------|-------------|
| 0.100000    | 2.65764e-17 | 6.02355e-17 | 1.28936e-16 | 4.36416e-16 | 1.37992e-13 |
| 0.0100000   | 3.00307e-17 | 6.72303e-17 | 1.42379e-16 | 4.10260e-16 | 1.37186e-13 |
| 0.00100000  | 3.04454e-17 | 6.80564e-17 | 1.43943e-16 | 4.07720e-16 | 1.37094e-13 |
| 0.000100000 | 3.04877e-17 | 6.81406e-17 | 1.44102e-16 | 4.07469e-16 | 1.37084e-13 |
| 1.00000e-05 | 3.04920e-17 | 6.81491e-17 | 1.44118e-16 | 4.07444e-16 | 1.37083e-13 |
| 1.00000e-06 | 3.04924e-17 | 6.81498e-17 | 1.44120e-16 | 4.07441e-16 | 1.37083e-13 |
| 1.00000e-07 | 3.04924e-17 | 6.81499e-17 | 1.44120e-16 | 4.07441e-16 | 1.37083e-13 |
| 1.00000e-08 | 3.04924e-17 | 6.81499e-17 | 1.44120e-16 | 4.07441e-16 | 1.37083e-13 |
| 1.00000e-09 | 3.04924e-17 | 6.81499e-17 | 1.44120e-16 | 4.07441e-16 | 1.37083e-13 |

| Pa\K        | 500.000     | 600.000     | 700.000     | 800.000     | 900.000     |
|-------------|-------------|-------------|-------------|-------------|-------------|
| 1.00000e+08 | 2.64285e-12 | 1.74759e-10 | 2.28640e-09 | 1.74728e-08 | 9.83129e-08 |
| 1.00000e+07 | 1.15003e-09 | 4.34121e-08 | 2.95284e-07 | 1.14967e-06 | 3.17803e-06 |
| 1.00000e+06 | 2.94089e-08 | 1.10347e-06 | 5.11577e-06 | 1.14835e-05 | 1.88048e-05 |
| 100000.     | 3.36249e-08 | 1.91748e-06 | 1.07262e-05 | 2.10219e-05 | 2.99775e-05 |
| 10000.0     | 5.63270e-09 | 5.84465e-07 | 6.17466e-06 | 1.72741e-05 | 2.99605e-05 |
| 1000.00     | 5.73334e-10 | 1.41279e-07 | 2.83627e-06 | 1.14136e-05 | 1.97363e-05 |
| 100.000     | 9.61698e-11 | 3.81641e-08 | 1.01396e-06 | 3.97925e-06 | 5.38932e-06 |
| 10.0000     | 3.08754e-11 | 9.98635e-09 | 2.17571e-07 | 6.85031e-07 | 7.63983e-07 |
| 1.00000     | 1.26660e-11 | 1.85579e-09 | 2.98485e-08 | 8.31619e-08 | 1.05909e-07 |
| 0.100000    | 8.02494e-12 | 3.36442e-10 | 4.20424e-09 | 1.49034e-08 | 3.87475e-08 |
| 0.0100000   | 7.34831e-12 | 1.55493e-10 | 1.56369e-09 | 8.24784e-09 | 3.22916e-08 |
| 0.00100000  | 7.27606e-12 | 1.37235e-10 | 1.30494e-09 | 7.59981e-09 | 3.16622e-08 |
| 0.000100000 | 7.26881e-12 | 1.35415e-10 | 1.27933e-09 | 7.53589e-09 | 3.16002e-08 |
| 1.00000e-05 | 7.26808e-12 | 1.35233e-10 | 1.27679e-09 | 7.52954e-09 | 3.15940e-08 |
| 1.00000e-06 | 7.26801e-12 | 1.35215e-10 | 1.27653e-09 | 7.52888e-09 | 3.15934e-08 |
| 1.00000e-07 | 7.26800e-12 | 1.35214e-10 | 1.27651e-09 | 7.52888e-09 | 3.15934e-08 |
| 1.00000e-08 | 7.26800e-12 | 1.35214e-10 | 1.27650e-09 | 7.52888e-09 | 3.15934e-08 |
| 1.00000e-09 | 7.26800e-12 | 1.35214e-10 | 1.27650e-09 | 7.52888e-09 | 3.15934e-08 |

| Pa\K        | 1000.00     | 1100.00     | 1200.00     | 1300.00     | 1400.00     |
|-------------|-------------|-------------|-------------|-------------|-------------|
| 1.00000e+08 | 2.70662e-07 | 3.69140e-07 | 3.79829e-07 | 3.64968e-07 | 3.34975e-07 |
| 1.00000e+07 | 5.56609e-06 | 7.03785e-06 | 7.81701e-06 | 8.68203e-06 | 9.36862e-06 |
| 1.00000e+06 | 2.47897e-05 | 3.01526e-05 | 3.58873e-05 | 4.03403e-05 | 4.14388e-05 |
| 100000.     | 3.95298e-05 | 5.10934e-05 | 6.08440e-05 | 6.29070e-05 | 5.76527e-05 |
| 10000.0     | 4.15934e-05 | 4.79854e-05 | 4.63137e-05 | 3.86763e-05 | 2.99783e-05 |
| 1000.00     | 2.17391e-05 | 1.86099e-05 | 1.38530e-05 | 9.93953e-06 | 7.75585e-06 |
| 100.000     | 4.52371e-06 | 3.22591e-06 | 2.42598e-06 | 2.32816e-06 | 2.93846e-06 |
| 10.0000     | 6.16131e-07 | 5.84737e-07 | 8.07684e-07 | 1.37291e-06 | 2.37732e-06 |
| 1.00000     | 1.52581e-07 | 3.04220e-07 | 6.45606e-07 | 1.27990e-06 | 2.32339e-06 |
| 0.100000    | 1.07550e-07 | 2.77485e-07 | 6.30248e-07 | 1.27108e-06 | 2.31827e-06 |
| 0.0100000   | 1.03225e-07 | 2.74912e-07 | 6.28762e-07 | 1.27023e-06 | 2.31777e-06 |
| 0.00100000  | 1.02803e-07 | 2.74660e-07 | 6.28622e-07 | 1.27015e-06 | 2.31772e-06 |
| 0.000100000 | 1.02762e-07 | 2.74636e-07 | 6.28605e-07 | 1.27014e-06 | 2.31772e-06 |
| 1.00000e-05 | 1.02757e-07 | 2.74634e-07 | 6.28605e-07 | 1.27014e-06 | 2.31772e-06 |
| 1.00000e-06 | 1.02757e-07 | 2.74633e-07 | 6.28605e-07 | 1.27014e-06 | 2.31772e-06 |
| 1.00000e-07 | 1.02757e-07 | 2.74633e-07 | 6.28605e-07 | 1.27014e-06 | 2.31772e-06 |
| 1.00000e-08 | 1.02757e-07 | 2.74633e-07 | 6.28605e-07 | 1.27014e-06 | 2.31772e-06 |
| 1.00000e-09 | 1.02757e-07 | 2.74633e-07 | 6.28605e-07 | 1.27014e-06 | 2.31772e-06 |

| Pa\K        | 1500.00     | 1750.00     | 2000.00     | 2250.00     | 2500.00     |
|-------------|-------------|-------------|-------------|-------------|-------------|
| 1.00000e+08 | 3.00727e-07 | 0.000151580 | 0.000155555 | 0.000158516 | 0.000159893 |
| 1.00000e+07 | 9.38001e-06 | 0.000351734 | 0.000358281 | 0.000347746 | 0.000318172 |
| 1.00000e+06 | 3.96888e-05 | 0.000650370 | 0.000538750 | 0.000428205 | 0.000326483 |
| 100000.     | 4.96450e-05 | 0.000591727 | 0.000368009 | 0.000231219 | 0.000150420 |
| 10000.0     | 2.33032e-05 | 0.000215582 | 0.000106247 | 6.76591e-05 | 5.87452e-05 |
| 1000.00     | 7.26000e-06 | 4.13460e-05 | 2.88328e-05 | 3.33777e-05 | 4.40438e-05 |
| 100.000     | 4.25385e-06 | 1.20404e-05 | 1.84170e-05 | 2.94166e-05 | 4.25031e-05 |
| 10.0000     | 3.91996e-06 | 8.76049e-06 | 1.73344e-05 | 2.90222e-05 | 4.23529e-05 |
| 1.00000     | 3.88806e-06 | 8.43272e-06 | 1.72276e-05 | 2.89836e-05 | 4.23383e-05 |
| 0.100000    | 3.88502e-06 | 8.40042e-06 | 1.72171e-05 | 2.89798e-05 | 4.23369e-05 |
| 0.0100000   | 3.88473e-06 | 8.39721e-06 | 1.72161e-05 | 2.89794e-05 | 4.23369e-05 |
| 0.00100000  | 3.88470e-06 | 8.39689e-06 | 1.72160e-05 | 2.89794e-05 | 4.23369e-05 |
| 0.000100000 | 3.88470e-06 | 8.39689e-06 | 1.72160e-05 | 2.89794e-05 | 4.23369e-05 |
| 1.00000e-05 | 3.88470e-06 | 8.39689e-06 | 1.72160e-05 | 2.89794e-05 | 4.23369e-05 |
| 1.00000e-06 | 3.88470e-06 | 8.39689e-06 | 1.72160e-05 | 2.89794e-05 | 4.23369e-05 |
| 1.00000e-07 | 3.88470e-06 | 8.39689e-06 | 1.72160e-05 | 2.89794e-05 | 4.23369e-05 |
| 1.00000e-08 | 3.88470e-06 | 8.39689e-06 | 1.72160e-05 | 2.89794e-05 | 4.23369e-05 |
| 1.00000e-09 | 3.88470e-06 | 8.39689e-06 | 1.72160e-05 | 2.89794e-05 | 4.23369e-05 |

| Pa\K        | 2750.00     | 3000.00     | 3250.00     | 3500.00     | 3750.00     |
|-------------|-------------|-------------|-------------|-------------|-------------|
| 1.00000e+08 | 0.000158653 | 0.000154173 | 0.000146908 | 0.000137757 | 0.000127610 |
| 1.00000e+07 | 0.000279870 | 0.000240504 | 0.000204344 | 0.000173269 | 0.000147676 |
| 1.00000e+06 | 0.000245281 | 0.000187253 | 0.000149006 | 0.000124969 | 0.000109897 |
| 100000.     | 0.000110674 | 9.47765e-05 | 9.01683e-05 | 8.96742e-05 | 8.97725e-05 |
| 10000.0     | 6.26806e-05 | 7.05648e-05 | 7.82190e-05 | 8.38924e-05 | 8.70576e-05 |

|             |             |             |             |             |             |
|-------------|-------------|-------------|-------------|-------------|-------------|
| 1000.00     | 5.63495e-05 | 6.77852e-05 | 7.69813e-05 | 8.33430e-05 | 8.68219e-05 |
| 100.000     | 5.57231e-05 | 6.75198e-05 | 7.68663e-05 | 8.32935e-05 | 8.68013e-05 |
| 10.0000     | 5.56628e-05 | 6.74945e-05 | 7.68555e-05 | 8.32889e-05 | 8.67996e-05 |
| 1.00000     | 5.56570e-05 | 6.74920e-05 | 7.68544e-05 | 8.32882e-05 | 8.67994e-05 |
| 0.100000    | 5.56565e-05 | 6.74918e-05 | 7.68541e-05 | 8.32882e-05 | 8.67994e-05 |
| 0.0100000   | 5.56562e-05 | 6.74918e-05 | 7.68541e-05 | 8.32882e-05 | 8.67994e-05 |
| 0.00100000  | 5.56562e-05 | 6.74918e-05 | 7.68541e-05 | 8.32882e-05 | 8.67994e-05 |
| 0.000100000 | 5.56562e-05 | 6.74918e-05 | 7.68541e-05 | 8.32882e-05 | 8.67994e-05 |
| 1.00000e-05 | 5.56562e-05 | 6.74918e-05 | 7.68541e-05 | 8.32882e-05 | 8.67994e-05 |
| 1.00000e-06 | 5.56562e-05 | 6.74918e-05 | 7.68541e-05 | 8.32882e-05 | 8.67994e-05 |
| 1.00000e-07 | 5.56562e-05 | 6.74918e-05 | 7.68541e-05 | 8.32882e-05 | 8.67994e-05 |
| 1.00000e-08 | 5.56562e-05 | 6.74918e-05 | 7.68541e-05 | 8.32882e-05 | 8.67994e-05 |
| 1.00000e-09 | 5.56562e-05 | 6.74918e-05 | 7.68541e-05 | 8.32882e-05 | 8.67994e-05 |

| Pa\K        | 4000.00     |
|-------------|-------------|
| 1.00000e+08 | 0.000117178 |
| 1.00000e+07 | 0.000127115 |
| 1.00000e+06 | 9.98977e-05 |
| 100000.     | 8.90128e-05 |
| 10000.0     | 8.78115e-05 |
| 1000.00     | 8.77201e-05 |
| 100.000     | 8.77128e-05 |
| 10.0000     | 8.77122e-05 |
| 1.00000     | 8.77122e-05 |
| 0.100000    | 8.77122e-05 |
| 0.0100000   | 8.77122e-05 |
| 0.00100000  | 8.77122e-05 |
| 0.000100000 | 8.77122e-05 |
| 1.00000e-05 | 8.77122e-05 |
| 1.00000e-06 | 8.77122e-05 |
| 1.00000e-07 | 8.77122e-05 |
| 1.00000e-08 | 8.77122e-05 |
| 1.00000e-09 | 8.77122e-05 |

rad38  
=====

| Pa\K        | 20.0000     | 30.0000     | 40.0000     | 50.0000     | 60.0000     |
|-------------|-------------|-------------|-------------|-------------|-------------|
| 1.00000e+08 | 1.94796e-33 | 6.33634e-32 | 4.63090e-31 | 1.91971e-30 | 5.91839e-30 |
| 1.00000e+07 | 1.36410e-28 | 3.45088e-27 | 2.10059e-26 | 7.54737e-26 | 2.06894e-25 |
| 1.00000e+06 | 3.13183e-24 | 5.25927e-23 | 2.55953e-22 | 7.87277e-22 | 1.91140e-21 |
| 100000.     | 1.92119e-20 | 2.08247e-19 | 7.81795e-19 | 2.00032e-18 | 4.21112e-18 |
| 10000.0     | 2.74837e-17 | 2.02427e-16 | 6.22952e-16 | 1.39536e-15 | 2.65619e-15 |
| 1000.00     | 1.28946e-14 | 7.03115e-14 | 1.79973e-13 | 3.50336e-13 | 5.93282e-13 |
| 100.000     | 1.95872e-12 | 6.82443e-12 | 1.32078e-11 | 2.08355e-11 | 2.97063e-11 |
| 10.0000     | 5.86892e-11 | 1.23658e-10 | 1.86009e-10 | 2.49603e-10 | 3.16168e-10 |
| 1.00000     | 4.66688e-10 | 7.19247e-10 | 8.85505e-10 | 1.01928e-09 | 1.13928e-09 |
| 0.100000    | 1.16551e-09 | 1.29969e-09 | 1.39924e-09 | 1.50435e-09 | 1.62104e-09 |
| 0.0100000   | 1.59342e-09 | 1.93039e-09 | 2.29568e-09 | 2.71029e-09 | 3.18600e-09 |
| 0.00100000  | 4.01410e-09 | 6.32156e-09 | 8.37443e-09 | 1.03412e-08 | 1.22968e-08 |
| 0.000100000 | 1.46207e-08 | 1.82985e-08 | 2.02492e-08 | 2.17857e-08 | 2.32259e-08 |
| 1.00000e-05 | 2.17325e-08 | 2.25005e-08 | 2.32151e-08 | 2.40835e-08 | 2.51072e-08 |
| 1.00000e-06 | 2.26371e-08 | 2.29505e-08 | 2.35195e-08 | 2.43157e-08 | 2.52960e-08 |
| 1.00000e-07 | 2.27274e-08 | 2.29955e-08 | 2.35499e-08 | 2.43389e-08 | 2.53149e-08 |
| 1.00000e-08 | 2.27364e-08 | 2.30000e-08 | 2.35529e-08 | 2.43412e-08 | 2.53168e-08 |
| 1.00000e-09 | 2.27373e-08 | 2.30004e-08 | 2.35533e-08 | 2.43415e-08 | 2.53170e-08 |

| Pa\K        | 70.0000     | 80.0000     | 90.0000     | 100.000     | 110.000     |
|-------------|-------------|-------------|-------------|-------------|-------------|
| 1.00000e+08 | 1.52501e-29 | 3.49583e-29 | 7.40647e-29 | 1.48761e-28 | 2.88383e-28 |
| 1.00000e+07 | 4.82379e-25 | 1.01306e-24 | 1.98424e-24 | 3.70908e-24 | 6.72457e-24 |
| 1.00000e+06 | 4.02551e-21 | 7.73194e-21 | 1.39637e-20 | 2.41965e-20 | 4.08049e-20 |
| 100000.     | 7.89146e-18 | 1.37204e-17 | 2.26965e-17 | 3.63237e-17 | 5.69074e-17 |
| 10000.0     | 4.58532e-15 | 7.42922e-15 | 1.15374e-14 | 1.74157e-14 | 2.58072e-14 |
| 1000.00     | 9.24270e-13 | 1.36395e-12 | 1.94062e-12 | 2.69319e-12 | 3.67503e-12 |
| 100.000     | 3.99131e-11 | 5.16301e-11 | 6.51248e-11 | 8.07712e-11 | 9.90653e-11 |
| 10.0000     | 3.86670e-10 | 4.61995e-10 | 5.43223e-10 | 6.31701e-10 | 7.29067e-10 |
| 1.00000     | 1.25360e-09 | 1.36694e-09 | 1.48295e-09 | 1.60498e-09 | 1.73647e-09 |
| 0.100000    | 1.75172e-09 | 1.89971e-09 | 2.07009e-09 | 2.26985e-09 | 2.50819e-09 |
| 0.0100000   | 3.73725e-09 | 4.38476e-09 | 5.15609e-09 | 6.08531e-09 | 7.21271e-09 |
| 0.00100000  | 1.42906e-08 | 1.63675e-08 | 1.85711e-08 | 2.09429e-08 | 2.35216e-08 |
| 0.000100000 | 2.46904e-08 | 2.62493e-08 | 2.79555e-08 | 2.98527e-08 | 3.19798e-08 |
| 1.00000e-05 | 2.62872e-08 | 2.76391e-08 | 2.91874e-08 | 3.09600e-08 | 3.29857e-08 |
| 1.00000e-06 | 2.64470e-08 | 2.77780e-08 | 2.93104e-08 | 3.10705e-08 | 3.30861e-08 |
| 1.00000e-07 | 2.64629e-08 | 2.77919e-08 | 2.93227e-08 | 3.10816e-08 | 3.30961e-08 |
| 1.00000e-08 | 2.64645e-08 | 2.77933e-08 | 2.93239e-08 | 3.10827e-08 | 3.30971e-08 |
| 1.00000e-09 | 2.64647e-08 | 2.77934e-08 | 2.93241e-08 | 3.10828e-08 | 3.30972e-08 |

| Pa\K | 120.000 | 130.000 | 140.000 | 150.000 | 160.000 |
|------|---------|---------|---------|---------|---------|
|------|---------|---------|---------|---------|---------|

|             |             |             |             |             |             |
|-------------|-------------|-------------|-------------|-------------|-------------|
| 1.00000e+08 | 5.46726e-28 | 1.02382e-27 | 1.90837e-27 | 3.56133e-27 | 6.68252e-27 |
| 1.00000e+07 | 1.19655e-23 | 2.10828e-23 | 3.70353e-23 | 6.51967e-23 | 1.15446e-22 |
| 1.00000e+06 | 6.76694e-20 | 1.11220e-19 | 1.82250e-19 | 2.99090e-19 | 4.93197e-19 |
| 100000.     | 8.80309e-17 | 1.35334e-16 | 2.07796e-16 | 3.19866e-16 | 4.95008e-16 |
| 10000.0     | 3.78112e-14 | 5.50700e-14 | 8.00528e-14 | 1.16496e-13 | 1.70077e-13 |
| 1000.00     | 4.95913e-12 | 6.64486e-12 | 8.86737e-12 | 1.18100e-11 | 1.57207e-11 |
| 100.000     | 1.20649e-10 | 1.46346e-10 | 1.77203e-10 | 2.14550e-10 | 2.60079e-10 |
| 10.0000     | 8.37273e-10 | 9.58612e-10 | 1.09578e-09 | 1.25194e-09 | 1.43085e-09 |
| 1.00000     | 1.88112e-09 | 2.04311e-09 | 2.22734e-09 | 2.43978e-09 | 2.68783e-09 |
| 0.100000    | 2.79700e-09 | 3.15165e-09 | 3.59211e-09 | 4.14445e-09 | 4.84275e-09 |
| 0.0100000   | 8.58477e-09 | 1.02544e-08 | 1.22812e-08 | 1.47318e-08 | 1.76797e-08 |
| 0.00100000  | 2.63444e-08 | 2.94492e-08 | 3.28760e-08 | 3.66691e-08 | 4.08788e-08 |
| 0.000100000 | 3.43732e-08 | 3.70693e-08 | 4.01068e-08 | 4.35294e-08 | 4.73861e-08 |
| 1.00000e-05 | 3.52947e-08 | 3.79190e-08 | 4.08947e-08 | 4.42628e-08 | 4.80714e-08 |
| 1.00000e-06 | 3.53866e-08 | 3.80038e-08 | 4.09732e-08 | 4.43359e-08 | 4.81397e-08 |
| 1.00000e-07 | 3.53958e-08 | 3.80123e-08 | 4.09810e-08 | 4.43433e-08 | 4.81466e-08 |
| 1.00000e-08 | 3.53967e-08 | 3.80131e-08 | 4.09818e-08 | 4.43440e-08 | 4.81473e-08 |
| 1.00000e-09 | 3.53968e-08 | 3.80132e-08 | 4.09819e-08 | 4.43441e-08 | 4.81473e-08 |

| Pa\K        | 170.000     | 180.000     | 190.000     | 200.000     | 210.000     |
|-------------|-------------|-------------|-------------|-------------|-------------|
| 1.00000e+08 | 1.26453e-26 | 2.41740e-26 | 4.67254e-26 | 9.13170e-26 | 1.80343e-25 |
| 1.00000e+07 | 2.06145e-22 | 3.71738e-22 | 6.77342e-22 | 1.24685e-21 | 2.31714e-21 |
| 1.00000e+06 | 8.19052e-19 | 1.37175e-18 | 2.31833e-18 | 3.95381e-18 | 6.80147e-18 |
| 100000.     | 7.17644e-16 | 1.21311e-15 | 1.92440e-15 | 3.08036e-15 | 4.97313e-15 |
| 10000.0     | 2.49461e-13 | 3.67887e-13 | 5.45601e-13 | 8.13551e-13 | 1.21894e-12 |
| 1000.00     | 2.09336e-11 | 2.78974e-11 | 3.72120e-11 | 4.96759e-11 | 6.63479e-11 |
| 100.000     | 3.15938e-10 | 3.84839e-10 | 4.70203e-10 | 5.76325e-10 | 7.08578e-10 |
| 10.0000     | 1.63691e-09 | 1.87542e-09 | 2.15267e-09 | 2.47622e-09 | 2.85523e-09 |
| 1.00000     | 2.98091e-09 | 3.33113e-09 | 3.75429e-09 | 4.27119e-09 | 4.90923e-09 |
| 0.100000    | 5.73141e-09 | 6.86778e-09 | 8.32525e-09 | 1.01964e-08 | 1.25964e-08 |
| 0.0100000   | 2.12058e-08 | 2.53977e-08 | 3.03506e-08 | 3.61673e-08 | 4.29589e-08 |
| 0.00100000  | 4.55634e-08 | 5.07896e-08 | 5.66348e-08 | 6.31876e-08 | 7.05497e-08 |
| 0.000100000 | 5.17345e-08 | 5.66407e-08 | 6.21812e-08 | 6.84441e-08 | 7.55303e-08 |
| 1.00000e-05 | 5.23764e-08 | 5.72433e-08 | 6.27479e-08 | 6.89778e-08 | 7.60335e-08 |
| 1.00000e-06 | 5.24405e-08 | 5.73034e-08 | 6.28045e-08 | 6.90311e-08 | 7.60837e-08 |
| 1.00000e-07 | 5.24468e-08 | 5.73094e-08 | 6.28101e-08 | 6.90365e-08 | 7.60888e-08 |
| 1.00000e-08 | 5.24474e-08 | 5.73100e-08 | 6.28107e-08 | 6.90370e-08 | 7.60893e-08 |
| 1.00000e-09 | 5.24475e-08 | 5.73101e-08 | 6.28107e-08 | 6.90370e-08 | 7.60894e-08 |

| Pa\K        | 220.000     | 230.000     | 240.000     | 250.000     | 260.000     |
|-------------|-------------|-------------|-------------|-------------|-------------|
| 1.00000e+08 | 3.59572e-25 | 7.22908e-25 | 1.46347e-24 | 2.97856e-24 | 6.08333e-24 |
| 1.00000e+07 | 4.34272e-21 | 8.19762e-21 | 1.55641e-20 | 2.96766e-20 | 5.67342e-20 |
| 1.00000e+06 | 1.17923e-17 | 2.05868e-17 | 3.61498e-17 | 6.37763e-17 | 1.12909e-16 |
| 100000.     | 8.09185e-15 | 1.32567e-14 | 2.18437e-14 | 3.61585e-14 | 6.00593e-14 |
| 10000.0     | 1.83357e-12 | 2.76618e-12 | 4.18073e-12 | 6.32290e-12 | 9.55855e-12 |
| 1000.00     | 8.86268e-11 | 1.18354e-10 | 1.57949e-10 | 2.10578e-10 | 2.80378e-10 |
| 100.000     | 8.73643e-10 | 1.07978e-09 | 1.33716e-09 | 1.65818e-09 | 2.05797e-09 |
| 10.0000     | 3.30086e-09 | 3.82678e-09 | 4.44995e-09 | 5.19149e-09 | 6.07795e-09 |
| 1.00000     | 5.70481e-09 | 6.70608e-09 | 7.97666e-09 | 9.60010e-09 | 1.16852e-08 |
| 0.100000    | 1.56659e-08 | 1.95737e-08 | 2.45187e-08 | 3.07314e-08 | 3.84737e-08 |
| 0.0100000   | 5.08460e-08 | 5.99600e-08 | 7.04449e-08 | 8.24596e-08 | 9.61797e-08 |
| 0.00100000  | 7.88364e-08 | 8.81788e-08 | 9.87252e-08 | 1.10642e-07 | 1.24114e-07 |
| 0.000100000 | 8.35548e-08 | 9.26480e-08 | 1.02957e-07 | 1.14649e-07 | 1.27908e-07 |
| 1.00000e-05 | 8.40297e-08 | 9.30964e-08 | 1.03381e-07 | 1.15049e-07 | 1.28287e-07 |
| 1.00000e-06 | 8.40771e-08 | 9.31413e-08 | 1.03424e-07 | 1.15089e-07 | 1.28325e-07 |
| 1.00000e-07 | 8.40818e-08 | 9.31458e-08 | 1.03427e-07 | 1.15094e-07 | 1.28328e-07 |
| 1.00000e-08 | 8.40823e-08 | 9.31461e-08 | 1.03428e-07 | 1.15094e-07 | 1.28328e-07 |
| 1.00000e-09 | 8.40823e-08 | 9.31462e-08 | 1.03428e-07 | 1.15094e-07 | 1.28328e-07 |

| Pa\K        | 270.000     | 280.000     | 290.000     | 300.000     | 400.000     |
|-------------|-------------|-------------|-------------|-------------|-------------|
| 1.00000e+08 | 1.24408e-23 | 2.54117e-23 | 5.17000e-23 | 4.84749e-20 | 1.85986e-15 |
| 1.00000e+07 | 1.08546e-19 | 2.07403e-19 | 3.94864e-19 | 1.40457e-16 | 2.32212e-12 |
| 1.00000e+06 | 2.00328e-16 | 3.55668e-16 | 6.30797e-16 | 9.90076e-14 | 4.27679e-10 |
| 100000.     | 9.99777e-14 | 1.66580e-13 | 2.77407e-13 | 1.72533e-11 | 9.84162e-09 |
| 10000.0     | 1.44284e-11 | 2.17248e-11 | 3.25975e-11 | 4.71283e-10 | 3.19960e-08 |
| 1000.00     | 3.72735e-10 | 4.94644e-10 | 6.55145e-10 | 2.75551e-09 | 4.14106e-08 |
| 100.000     | 2.55472e-09 | 3.17035e-09 | 3.93095e-09 | 8.51975e-09 | 5.65292e-08 |
| 10.0000     | 7.14285e-09 | 8.42876e-09 | 9.98959e-09 | 1.72277e-08 | 1.35401e-07 |
| 1.00000     | 1.43722e-08 | 1.78392e-08 | 2.23092e-08 | 4.88954e-08 | 3.61526e-07 |
| 0.100000    | 4.80383e-08 | 5.97474e-08 | 7.39501e-08 | 1.30467e-07 | 5.82898e-07 |
| 0.0100000   | 1.11800e-07 | 1.29539e-07 | 1.49635e-07 | 1.95781e-07 | 6.53769e-07 |
| 0.00100000  | 1.39353e-07 | 1.56587e-07 | 1.76075e-07 | 2.11080e-07 | 6.63550e-07 |
| 0.000100000 | 1.42943e-07 | 1.59986e-07 | 1.79291e-07 | 2.12813e-07 | 6.64553e-07 |
| 1.00000e-05 | 1.43302e-07 | 1.60324e-07 | 1.79611e-07 | 2.12987e-07 | 6.64654e-07 |
| 1.00000e-06 | 1.43337e-07 | 1.60358e-07 | 1.79643e-07 | 2.13004e-07 | 6.64663e-07 |
| 1.00000e-07 | 1.43341e-07 | 1.60362e-07 | 1.79646e-07 | 2.13006e-07 | 6.64664e-07 |

1.00000e-08 | 1.43341e-07 1.60362e-07 1.79646e-07 2.13006e-07 6.64664e-07  
1.00000e-09 | 1.43341e-07 1.60362e-07 1.79646e-07 2.13006e-07 6.64664e-07

| Pa\K        | 500.000     | 600.000     | 700.000     | 800.000     | 900.000     |
|-------------|-------------|-------------|-------------|-------------|-------------|
| 1.00000e+08 | 2.13134e-11 | 1.29066e-09 | 1.66004e-08 | 1.23851e-07 | 6.84872e-07 |
| 1.00000e+07 | 9.87621e-09 | 3.24888e-07 | 2.15939e-06 | 8.20528e-06 | 2.22128e-05 |
| 1.00000e+06 | 3.76489e-07 | 9.08853e-06 | 3.86513e-05 | 8.34889e-05 | 0.000133377 |
| 100000.     | 1.47849e-06 | 2.53304e-05 | 9.69968e-05 | 0.000169161 | 0.000230764 |
| 10000.0     | 1.23491e-06 | 1.60190e-05 | 7.59920e-05 | 0.000166022 | 0.000265263 |
| 1000.00     | 5.38505e-07 | 6.15526e-06 | 4.24630e-05 | 0.000125032 | 0.000199696 |
| 100.000     | 4.27320e-07 | 3.44075e-06 | 2.12387e-05 | 5.75331e-05 | 8.05258e-05 |
| 10.0000     | 9.32087e-07 | 4.07092e-06 | 1.28212e-05 | 2.67803e-05 | 4.09012e-05 |
| 1.00000     | 1.60136e-06 | 4.73941e-06 | 1.10177e-05 | 2.11622e-05 | 3.52343e-05 |
| 0.100000    | 1.88439e-06 | 4.90247e-06 | 1.07808e-05 | 2.05266e-05 | 3.46569e-05 |
| 0.0100000   | 1.93371e-06 | 4.92315e-06 | 1.07570e-05 | 2.04651e-05 | 3.46016e-05 |
| 0.00100000  | 1.93913e-06 | 4.92528e-06 | 1.07547e-05 | 2.04591e-05 | 3.45962e-05 |
| 0.000100000 | 1.93968e-06 | 4.92550e-06 | 1.07545e-05 | 2.04585e-05 | 3.45957e-05 |
| 1.00000e-05 | 1.93973e-06 | 4.92552e-06 | 1.07545e-05 | 2.04585e-05 | 3.45956e-05 |
| 1.00000e-06 | 1.93974e-06 | 4.92552e-06 | 1.07544e-05 | 2.04585e-05 | 3.45956e-05 |
| 1.00000e-07 | 1.93974e-06 | 4.92552e-06 | 1.07544e-05 | 2.04585e-05 | 3.45956e-05 |
| 1.00000e-08 | 1.93974e-06 | 4.92552e-06 | 1.07544e-05 | 2.04585e-05 | 3.45956e-05 |
| 1.00000e-09 | 1.93974e-06 | 4.92552e-06 | 1.07544e-05 | 2.04585e-05 | 3.45956e-05 |

| Pa\K        | 1000.00     | 1100.00     | 1200.00     | 1300.00     | 1400.00     |
|-------------|-------------|-------------|-------------|-------------|-------------|
| 1.00000e+08 | 1.87056e-06 | 2.54805e-06 | 2.63669e-06 | 2.57906e-06 | 2.40688e-06 |
| 1.00000e+07 | 3.84993e-05 | 4.85136e-05 | 5.40041e-05 | 6.03574e-05 | 6.54795e-05 |
| 1.00000e+06 | 0.000173954 | 0.000211184 | 0.000252175 | 0.000285061 | 0.000294286 |
| 100000.     | 0.000300326 | 0.000389477 | 0.000470022 | 0.000495987 | 0.000466145 |
| 10000.0     | 0.000363276 | 0.000428323 | 0.000434655 | 0.000393393 | 0.000339579 |
| 1000.00     | 0.000228314 | 0.000221461 | 0.000203656 | 0.000191235 | 0.000188715 |
| 100.000     | 8.96479e-05 | 9.90250e-05 | 0.000113509 | 0.000132084 | 0.000152359 |
| 10.0000     | 5.72965e-05 | 7.74654e-05 | 0.000100416 | 0.000124448 | 0.000147975 |
| 1.00000     | 5.34424e-05 | 7.51704e-05 | 9.91049e-05 | 0.000123706 | 0.000147557 |
| 0.100000    | 5.30691e-05 | 7.49530e-05 | 9.89813e-05 | 0.000123637 | 0.000147517 |
| 0.0100000   | 5.30335e-05 | 7.49324e-05 | 9.89696e-05 | 0.000123630 | 0.000147514 |
| 0.00100000  | 5.30300e-05 | 7.49299e-05 | 9.89685e-05 | 0.000123629 | 0.000147513 |
| 0.000100000 | 5.30296e-05 | 7.49299e-05 | 9.89685e-05 | 0.000123629 | 0.000147513 |
| 1.00000e-05 | 5.30296e-05 | 7.49299e-05 | 9.89685e-05 | 0.000123629 | 0.000147513 |
| 1.00000e-06 | 5.30296e-05 | 7.49299e-05 | 9.89685e-05 | 0.000123629 | 0.000147513 |
| 1.00000e-07 | 5.30296e-05 | 7.49299e-05 | 9.89685e-05 | 0.000123629 | 0.000147513 |
| 1.00000e-08 | 5.30296e-05 | 7.49299e-05 | 9.89685e-05 | 0.000123629 | 0.000147513 |
| 1.00000e-09 | 5.30296e-05 | 7.49299e-05 | 9.89685e-05 | 0.000123629 | 0.000147513 |

| Pa\K        | 1500.00     | 1750.00     | 2000.00     | 2250.00     | 2500.00     |
|-------------|-------------|-------------|-------------|-------------|-------------|
| 1.00000e+08 | 2.13649e-06 | 9.65752e-05 | 9.94528e-05 | 0.000101468 | 0.000102523 |
| 1.00000e+07 | 6.56108e-05 | 0.000250882 | 0.000256084 | 0.000249255 | 0.000230503 |
| 1.00000e+06 | 0.000282943 | 0.000545742 | 0.000464614 | 0.000383517 | 0.000313300 |
| 100000.     | 0.000412912 | 0.000618248 | 0.000444944 | 0.000338337 | 0.000272873 |
| 10000.0     | 0.000296091 | 0.000364115 | 0.000284083 | 0.000250948 | 0.000231529 |
| 1000.00     | 0.000193794 | 0.000224225 | 0.000227874 | 0.000229679 | 0.000224037 |
| 100.000     | 0.000172276 | 0.000199296 | 0.000219921 | 0.000227153 | 0.000223255 |
| 10.0000     | 0.000169785 | 0.000196435 | 0.000219085 | 0.000226903 | 0.000223182 |
| 1.00000     | 0.000169550 | 0.000196149 | 0.000219003 | 0.000226879 | 0.000223175 |
| 0.100000    | 0.000169528 | 0.000196121 | 0.000218995 | 0.000226877 | 0.000223174 |
| 0.0100000   | 0.000169526 | 0.000196118 | 0.000218994 | 0.000226876 | 0.000223174 |
| 0.00100000  | 0.000169526 | 0.000196118 | 0.000218994 | 0.000226876 | 0.000223174 |
| 0.000100000 | 0.000169526 | 0.000196118 | 0.000218994 | 0.000226876 | 0.000223174 |
| 1.00000e-05 | 0.000169526 | 0.000196118 | 0.000218994 | 0.000226876 | 0.000223174 |
| 1.00000e-06 | 0.000169526 | 0.000196118 | 0.000218994 | 0.000226876 | 0.000223174 |
| 1.00000e-07 | 0.000169526 | 0.000196118 | 0.000218994 | 0.000226876 | 0.000223174 |
| 1.00000e-08 | 0.000169526 | 0.000196118 | 0.000218994 | 0.000226876 | 0.000223174 |
| 1.00000e-09 | 0.000169526 | 0.000196118 | 0.000218994 | 0.000226876 | 0.000223174 |

| Pa\K        | 2750.00     | 3000.00     | 3250.00     | 3500.00     | 3750.00     |
|-------------|-------------|-------------|-------------|-------------|-------------|
| 1.00000e+08 | 0.000102002 | 9.94954e-05 | 9.52613e-05 | 8.98271e-05 | 8.37094e-05 |
| 1.00000e+07 | 0.000206439 | 0.000181630 | 0.000158406 | 0.000137654 | 0.000119510 |
| 1.00000e+06 | 0.000257360 | 0.000214295 | 0.000181049 | 0.000154578 | 0.000132671 |
| 100000.     | 0.000231382 | 0.000201553 | 0.000176909 | 0.000154838 | 0.000134622 |
| 10000.0     | 0.000214074 | 0.000195253 | 0.000175142 | 0.000154730 | 0.000135003 |
| 1000.00     | 0.000211611 | 0.000194547 | 0.000175017 | 0.000154776 | 0.000135083 |
| 100.000     | 0.000211381 | 0.000194491 | 0.000175014 | 0.000154786 | 0.000135094 |
| 10.0000     | 0.000211361 | 0.000194486 | 0.000175014 | 0.000154787 | 0.000135095 |
| 1.00000     | 0.000211358 | 0.000194486 | 0.000175014 | 0.000154787 | 0.000135095 |
| 0.100000    | 0.000211358 | 0.000194486 | 0.000175014 | 0.000154787 | 0.000135095 |
| 0.0100000   | 0.000211358 | 0.000194486 | 0.000175014 | 0.000154787 | 0.000135095 |
| 0.00100000  | 0.000211358 | 0.000194486 | 0.000175014 | 0.000154787 | 0.000135095 |

|             |             |             |             |             |             |
|-------------|-------------|-------------|-------------|-------------|-------------|
| 0.000100000 | 0.000211358 | 0.000194486 | 0.000175014 | 0.000154787 | 0.000135095 |
| 1.00000e-05 | 0.000211358 | 0.000194486 | 0.000175014 | 0.000154787 | 0.000135095 |
| 1.00000e-06 | 0.000211358 | 0.000194486 | 0.000175014 | 0.000154787 | 0.000135095 |
| 1.00000e-07 | 0.000211358 | 0.000194486 | 0.000175014 | 0.000154787 | 0.000135095 |
| 1.00000e-08 | 0.000211358 | 0.000194486 | 0.000175014 | 0.000154787 | 0.000135095 |
| 1.00000e-09 | 0.000211358 | 0.000194486 | 0.000175014 | 0.000154787 | 0.000135095 |

| Pa\K        | 4000.00     |
|-------------|-------------|
| 1.00000e+08 | 7.73182e-05 |
| 1.00000e+07 | 0.000103789 |
| 1.00000e+06 | 0.000114013 |
| 100000.     | 0.000116244 |
| 10000.0     | 0.000116684 |
| 1000.00     | 0.000116755 |
| 100.000     | 0.000116764 |
| 10.0000     | 0.000116765 |
| 1.00000     | 0.000116765 |
| 0.100000    | 0.000116765 |
| 0.0100000   | 0.000116765 |
| 0.00100000  | 0.000116765 |
| 0.000100000 | 0.000116765 |
| 1.00000e-05 | 0.000116765 |
| 1.00000e-06 | 0.000116765 |
| 1.00000e-07 | 0.000116765 |
| 1.00000e-08 | 0.000116765 |
| 1.00000e-09 | 0.000116765 |

rad71

=====

| Pa\K        | 20.0000 | 30.0000 | 40.0000 | 50.0000 | 60.0000 |
|-------------|---------|---------|---------|---------|---------|
| 1.00000e+08 | N/A     | N/A     | N/A     | N/A     | N/A     |
| 1.00000e+07 | N/A     | N/A     | N/A     | N/A     | N/A     |
| 1.00000e+06 | N/A     | N/A     | N/A     | N/A     | N/A     |
| 100000.     | N/A     | N/A     | N/A     | N/A     | N/A     |
| 10000.0     | N/A     | N/A     | N/A     | N/A     | N/A     |
| 1000.00     | N/A     | N/A     | N/A     | N/A     | N/A     |
| 100.000     | N/A     | N/A     | N/A     | N/A     | N/A     |
| 10.0000     | N/A     | N/A     | N/A     | N/A     | N/A     |
| 1.00000     | N/A     | N/A     | N/A     | N/A     | N/A     |
| 0.100000    | N/A     | N/A     | N/A     | N/A     | N/A     |
| 0.0100000   | N/A     | N/A     | N/A     | N/A     | N/A     |
| 0.00100000  | N/A     | N/A     | N/A     | N/A     | N/A     |
| 0.000100000 | N/A     | N/A     | N/A     | N/A     | N/A     |
| 1.00000e-05 | N/A     | N/A     | N/A     | N/A     | N/A     |
| 1.00000e-06 | N/A     | N/A     | N/A     | N/A     | N/A     |
| 1.00000e-07 | N/A     | N/A     | N/A     | N/A     | N/A     |
| 1.00000e-08 | N/A     | N/A     | N/A     | N/A     | N/A     |
| 1.00000e-09 | N/A     | N/A     | N/A     | N/A     | N/A     |

| Pa\K        | 70.0000 | 80.0000 | 90.0000 | 100.0000 | 110.0000 |
|-------------|---------|---------|---------|----------|----------|
| 1.00000e+08 | N/A     | N/A     | N/A     | N/A      | N/A      |
| 1.00000e+07 | N/A     | N/A     | N/A     | N/A      | N/A      |
| 1.00000e+06 | N/A     | N/A     | N/A     | N/A      | N/A      |
| 100000.     | N/A     | N/A     | N/A     | N/A      | N/A      |
| 10000.0     | N/A     | N/A     | N/A     | N/A      | N/A      |
| 1000.00     | N/A     | N/A     | N/A     | N/A      | N/A      |
| 100.000     | N/A     | N/A     | N/A     | N/A      | N/A      |
| 10.0000     | N/A     | N/A     | N/A     | N/A      | N/A      |
| 1.00000     | N/A     | N/A     | N/A     | N/A      | N/A      |
| 0.100000    | N/A     | N/A     | N/A     | N/A      | N/A      |
| 0.0100000   | N/A     | N/A     | N/A     | N/A      | N/A      |
| 0.00100000  | N/A     | N/A     | N/A     | N/A      | N/A      |
| 0.000100000 | N/A     | N/A     | N/A     | N/A      | N/A      |
| 1.00000e-05 | N/A     | N/A     | N/A     | N/A      | N/A      |
| 1.00000e-06 | N/A     | N/A     | N/A     | N/A      | N/A      |
| 1.00000e-07 | N/A     | N/A     | N/A     | N/A      | N/A      |
| 1.00000e-08 | N/A     | N/A     | N/A     | N/A      | N/A      |
| 1.00000e-09 | N/A     | N/A     | N/A     | N/A      | N/A      |

| Pa\K        | 120.0000 | 130.0000 | 140.0000 | 150.0000 | 160.0000 |
|-------------|----------|----------|----------|----------|----------|
| 1.00000e+08 | N/A      | N/A      | N/A      | N/A      | N/A      |
| 1.00000e+07 | N/A      | N/A      | N/A      | N/A      | N/A      |
| 1.00000e+06 | N/A      | N/A      | N/A      | N/A      | N/A      |
| 100000.     | N/A      | N/A      | N/A      | N/A      | N/A      |
| 10000.0     | N/A      | N/A      | N/A      | N/A      | N/A      |
| 1000.00     | N/A      | N/A      | N/A      | N/A      | N/A      |

|             |     |     |     |     |     |
|-------------|-----|-----|-----|-----|-----|
| 100.0000    | N/A | N/A | N/A | N/A | N/A |
| 10.0000     | N/A | N/A | N/A | N/A | N/A |
| 1.000000    | N/A | N/A | N/A | N/A | N/A |
| 0.100000    | N/A | N/A | N/A | N/A | N/A |
| 0.0100000   | N/A | N/A | N/A | N/A | N/A |
| 0.00100000  | N/A | N/A | N/A | N/A | N/A |
| 0.000100000 | N/A | N/A | N/A | N/A | N/A |
| 1.00000e-05 | N/A | N/A | N/A | N/A | N/A |
| 1.00000e-06 | N/A | N/A | N/A | N/A | N/A |
| 1.00000e-07 | N/A | N/A | N/A | N/A | N/A |
| 1.00000e-08 | N/A | N/A | N/A | N/A | N/A |
| 1.00000e-09 | N/A | N/A | N/A | N/A | N/A |

Pa\K | 170.000 180.000 190.000 200.000 210.000

|             |     |     |     |     |     |
|-------------|-----|-----|-----|-----|-----|
| 1.00000e+08 | N/A | N/A | N/A | N/A | N/A |
| 1.00000e+07 | N/A | N/A | N/A | N/A | N/A |
| 1.00000e+06 | N/A | N/A | N/A | N/A | N/A |
| 100000.     | N/A | N/A | N/A | N/A | N/A |
| 10000.0     | N/A | N/A | N/A | N/A | N/A |
| 1000.00     | N/A | N/A | N/A | N/A | N/A |
| 100.000     | N/A | N/A | N/A | N/A | N/A |
| 10.0000     | N/A | N/A | N/A | N/A | N/A |
| 1.00000     | N/A | N/A | N/A | N/A | N/A |
| 0.100000    | N/A | N/A | N/A | N/A | N/A |
| 0.0100000   | N/A | N/A | N/A | N/A | N/A |
| 0.00100000  | N/A | N/A | N/A | N/A | N/A |
| 0.000100000 | N/A | N/A | N/A | N/A | N/A |
| 1.00000e-05 | N/A | N/A | N/A | N/A | N/A |
| 1.00000e-06 | N/A | N/A | N/A | N/A | N/A |
| 1.00000e-07 | N/A | N/A | N/A | N/A | N/A |
| 1.00000e-08 | N/A | N/A | N/A | N/A | N/A |
| 1.00000e-09 | N/A | N/A | N/A | N/A | N/A |

Pa\K | 220.000 230.000 240.000 250.000 260.000

|             |     |     |     |     |     |
|-------------|-----|-----|-----|-----|-----|
| 1.00000e+08 | N/A | N/A | N/A | N/A | N/A |
| 1.00000e+07 | N/A | N/A | N/A | N/A | N/A |
| 1.00000e+06 | N/A | N/A | N/A | N/A | N/A |
| 100000.     | N/A | N/A | N/A | N/A | N/A |
| 10000.0     | N/A | N/A | N/A | N/A | N/A |
| 1000.00     | N/A | N/A | N/A | N/A | N/A |
| 100.000     | N/A | N/A | N/A | N/A | N/A |
| 10.0000     | N/A | N/A | N/A | N/A | N/A |
| 1.00000     | N/A | N/A | N/A | N/A | N/A |
| 0.100000    | N/A | N/A | N/A | N/A | N/A |
| 0.0100000   | N/A | N/A | N/A | N/A | N/A |
| 0.00100000  | N/A | N/A | N/A | N/A | N/A |
| 0.000100000 | N/A | N/A | N/A | N/A | N/A |
| 1.00000e-05 | N/A | N/A | N/A | N/A | N/A |
| 1.00000e-06 | N/A | N/A | N/A | N/A | N/A |
| 1.00000e-07 | N/A | N/A | N/A | N/A | N/A |
| 1.00000e-08 | N/A | N/A | N/A | N/A | N/A |
| 1.00000e-09 | N/A | N/A | N/A | N/A | N/A |

Pa\K | 270.000 280.000 290.000 300.000 400.000

|             |     |     |     |             |             |
|-------------|-----|-----|-----|-------------|-------------|
| 1.00000e+08 | N/A | N/A | N/A | 3.17755e-28 | 1.11686e-18 |
| 1.00000e+07 | N/A | N/A | N/A | 1.01596e-24 | 9.92642e-16 |
| 1.00000e+06 | N/A | N/A | N/A | 3.38087e-22 | 3.13939e-14 |
| 100000.     | N/A | N/A | N/A | 4.82469e-21 | 2.31832e-14 |
| 10000.0     | N/A | N/A | N/A | 8.49025e-22 | 6.40227e-16 |
| 1000.00     | N/A | N/A | N/A | 3.02933e-24 | 5.62831e-18 |
| 100.000     | N/A | N/A | N/A | 4.17400e-26 | 2.89698e-19 |
| 10.0000     | N/A | N/A | N/A | 3.50954e-27 | 6.14275e-20 |
| 1.00000     | N/A | N/A | N/A | 5.70779e-28 | 1.52564e-20 |
| 0.100000    | N/A | N/A | N/A | 1.53590e-28 | 2.51251e-21 |
| 0.0100000   | N/A | N/A | N/A | 9.99715e-29 | 3.66740e-22 |
| 0.00100000  | N/A | N/A | N/A | 9.41657e-29 | 1.21226e-22 |
| 0.000100000 | N/A | N/A | N/A | 9.35776e-29 | 9.62639e-23 |
| 1.00000e-05 | N/A | N/A | N/A | 9.35187e-29 | 9.37637e-23 |
| 1.00000e-06 | N/A | N/A | N/A | 9.35128e-29 | 9.35133e-23 |
| 1.00000e-07 | N/A | N/A | N/A | 9.35121e-29 | 9.34889e-23 |
| 1.00000e-08 | N/A | N/A | N/A | 9.35121e-29 | 9.34862e-23 |
| 1.00000e-09 | N/A | N/A | N/A | 9.35121e-29 | 9.34862e-23 |

Pa\K | 500.000 600.000 700.000 800.000 900.000

|             |             |             |             |             |             |
|-------------|-------------|-------------|-------------|-------------|-------------|
| 1.00000e+08 | 7.23224e-14 | 3.71650e-12 | 4.34645e-11 | 3.31954e-10 | 1.95648e-09 |
| 1.00000e+07 | 4.15128e-11 | 1.51497e-09 | 9.43667e-09 | 3.64302e-08 | 1.03518e-07 |

|             |             |             |             |             |             |
|-------------|-------------|-------------|-------------|-------------|-------------|
| 1.00000e+06 | 8.71278e-10 | 4.23097e-08 | 2.03947e-07 | 4.68791e-07 | 7.83662e-07 |
| 100000.     | 3.43453e-10 | 5.59846e-08 | 3.97678e-07 | 8.39891e-07 | 1.23526e-06 |
| 10000.0     | 1.45385e-11 | 1.21492e-08 | 2.00636e-07 | 6.38709e-07 | 1.16562e-06 |
| 1000.00     | 8.53690e-13 | 2.78774e-09 | 8.93741e-08 | 4.12466e-07 | 7.55197e-07 |
| 100.000     | 1.30627e-13 | 7.52236e-10 | 3.18473e-08 | 1.43226e-07 | 2.04915e-07 |
| 10.0000     | 3.43966e-14 | 1.95028e-10 | 6.80076e-09 | 2.44257e-08 | 2.80096e-08 |
| 1.00000     | 7.81823e-15 | 3.41471e-11 | 8.98140e-10 | 2.72696e-09 | 2.84641e-09 |
| 0.100000    | 1.09837e-15 | 3.99710e-12 | 9.19741e-11 | 2.66190e-10 | 2.78322e-10 |
| 0.0100000   | 1.17001e-16 | 4.02890e-13 | 9.02764e-12 | 2.62604e-11 | 3.14580e-11 |
| 0.00100000  | 1.21607e-17 | 4.03011e-14 | 9.05131e-13 | 2.90024e-12 | 7.39274e-12 |
| 0.000100000 | 1.64301e-18 | 4.17679e-15 | 1.01300e-13 | 5.95471e-13 | 5.01972e-12 |
| 1.00000e-05 | 5.91187e-19 | 5.67985e-16 | 2.12953e-14 | 3.66679e-13 | 4.78436e-12 |
| 1.00000e-06 | 4.86004e-19 | 2.07195e-16 | 1.33079e-14 | 3.43859e-13 | 4.76088e-12 |
| 1.00000e-07 | 4.75486e-19 | 1.71119e-16 | 1.25094e-14 | 3.41579e-13 | 4.75854e-12 |
| 1.00000e-08 | 4.74433e-19 | 1.67511e-16 | 1.24296e-14 | 3.41351e-13 | 4.75831e-12 |
| 1.00000e-09 | 4.74328e-19 | 1.67150e-16 | 1.24216e-14 | 3.41329e-13 | 4.75828e-12 |

Pa\K | 1000.00 | 1100.00 | 1200.00 | 1300.00 | 1400.00

|             |             |             |             |             |             |
|-------------|-------------|-------------|-------------|-------------|-------------|
| 1.00000e+08 | 5.59633e-09 | 7.82418e-09 | 8.19270e-09 | 7.98023e-09 | 7.41009e-09 |
| 1.00000e+07 | 1.85569e-07 | 2.38672e-07 | 2.68628e-07 | 3.01719e-07 | 3.28830e-07 |
| 1.00000e+06 | 1.04477e-06 | 1.27748e-06 | 1.52362e-06 | 1.71298e-06 | 1.75941e-06 |
| 100000.     | 1.64784e-06 | 2.13535e-06 | 2.53730e-06 | 2.60657e-06 | 2.36353e-06 |
| 10000.0     | 1.64785e-06 | 1.90900e-06 | 1.83380e-06 | 1.50605e-06 | 1.12421e-06 |
| 1000.00     | 8.47693e-07 | 7.24573e-07 | 5.25120e-07 | 3.47637e-07 | 2.27250e-07 |
| 100.000     | 1.72936e-07 | 1.16640e-07 | 7.21977e-08 | 4.58177e-08 | 3.64376e-08 |
| 10.0000     | 2.01141e-08 | 1.24714e-08 | 8.17965e-09 | 8.02779e-09 | 1.42953e-08 |
| 1.00000     | 1.98893e-09 | 1.40994e-09 | 1.76965e-09 | 4.34957e-09 | 1.21686e-08 |
| 0.100000    | 2.28205e-10 | 3.55711e-10 | 1.16207e-09 | 4.00099e-09 | 1.19667e-08 |
| 0.0100000   | 5.91094e-11 | 2.54278e-10 | 1.10349e-09 | 3.96730e-09 | 1.19472e-08 |
| 0.00100000  | 4.25953e-11 | 2.44359e-10 | 1.09775e-09 | 3.96400e-09 | 1.19453e-08 |
| 0.000100000 | 4.09665e-11 | 2.43380e-10 | 1.09719e-09 | 3.96367e-09 | 1.19451e-08 |
| 1.00000e-05 | 4.08049e-11 | 2.43283e-10 | 1.09713e-09 | 3.96365e-09 | 1.19451e-08 |
| 1.00000e-06 | 4.07888e-11 | 2.43273e-10 | 1.09712e-09 | 3.96364e-09 | 1.19451e-08 |
| 1.00000e-07 | 4.07872e-11 | 2.43273e-10 | 1.09712e-09 | 3.96364e-09 | 1.19451e-08 |
| 1.00000e-08 | 4.07870e-11 | 2.43273e-10 | 1.09712e-09 | 3.96364e-09 | 1.19451e-08 |
| 1.00000e-09 | 4.07870e-11 | 2.43273e-10 | 1.09712e-09 | 3.96364e-09 | 1.19451e-08 |

Pa\K | 1500.00 | 1750.00 | 2000.00 | 2250.00 | 2500.00

|             |             |             |             |             |             |
|-------------|-------------|-------------|-------------|-------------|-------------|
| 1.00000e+08 | 6.72505e-09 | 0.000110396 | 0.000114421 | 0.000117443 | 0.000119123 |
| 1.00000e+07 | 3.32141e-07 | 0.000306899 | 0.000313627 | 0.000305029 | 0.000279140 |
| 1.00000e+06 | 1.68510e-06 | 0.000568773 | 0.000466388 | 0.000367413 | 0.000274269 |
| 100000.     | 2.00215e-06 | 0.000499070 | 0.000300145 | 0.000177963 | 0.000101658 |
| 10000.0     | 8.13897e-07 | 0.000175679 | 7.54482e-05 | 3.50108e-05 | 1.90139e-05 |
| 1000.00     | 1.63990e-07 | 2.80009e-05 | 1.03900e-05 | 5.74458e-06 | 6.04756e-06 |
| 100.000     | 4.53123e-08 | 3.24377e-06 | 1.69716e-06 | 2.38393e-06 | 4.69288e-06 |
| 10.0000     | 3.22274e-08 | 4.77778e-07 | 7.95872e-07 | 2.04962e-06 | 4.56080e-06 |
| 1.00000     | 3.09788e-08 | 2.01513e-07 | 7.07003e-07 | 2.01686e-06 | 4.54791e-06 |
| 0.100000    | 3.08600e-08 | 1.74289e-07 | 6.98241e-07 | 2.01364e-06 | 4.54664e-06 |
| 0.0100000   | 3.08485e-08 | 1.71595e-07 | 6.97374e-07 | 2.01332e-06 | 4.54650e-06 |
| 0.00100000  | 3.08474e-08 | 1.71327e-07 | 6.97287e-07 | 2.01329e-06 | 4.54650e-06 |
| 0.000100000 | 3.08473e-08 | 1.71300e-07 | 6.97280e-07 | 2.01328e-06 | 4.54650e-06 |
| 1.00000e-05 | 3.08472e-08 | 1.71297e-07 | 6.97277e-07 | 2.01328e-06 | 4.54650e-06 |
| 1.00000e-06 | 3.08472e-08 | 1.71297e-07 | 6.97277e-07 | 2.01328e-06 | 4.54650e-06 |
| 1.00000e-07 | 3.08472e-08 | 1.71297e-07 | 6.97277e-07 | 2.01328e-06 | 4.54650e-06 |
| 1.00000e-08 | 3.08472e-08 | 1.71297e-07 | 6.97277e-07 | 2.01328e-06 | 4.54650e-06 |
| 1.00000e-09 | 3.08472e-08 | 1.71297e-07 | 6.97277e-07 | 2.01328e-06 | 4.54650e-06 |

Pa\K | 2750.00 | 3000.00 | 3250.00 | 3500.00 | 3750.00

|             |             |             |             |             |             |
|-------------|-------------|-------------|-------------|-------------|-------------|
| 1.00000e+08 | 0.000118744 | 0.000115854 | 0.000110793 | 0.000104243 | 9.68943e-05 |
| 1.00000e+07 | 0.000244846 | 0.000208965 | 0.000175539 | 0.000146657 | 0.000123111 |
| 1.00000e+06 | 0.000197290 | 0.000140563 | 0.000102675 | 7.96950e-05 | 6.72743e-05 |
| 100000.     | 6.02589e-05 | 4.13036e-05 | 3.51172e-05 | 3.57142e-05 | 3.96382e-05 |
| 10000.0     | 1.50617e-05 | 1.70837e-05 | 2.21653e-05 | 2.87622e-05 | 3.59060e-05 |
| 1000.00     | 9.20187e-06 | 1.43265e-05 | 2.08148e-05 | 2.80809e-05 | 3.55576e-05 |
| 100.000     | 8.62126e-06 | 1.40610e-05 | 2.06870e-05 | 2.80172e-05 | 3.55253e-05 |
| 10.0000     | 8.56515e-06 | 1.40354e-05 | 2.06748e-05 | 2.80110e-05 | 3.55223e-05 |
| 1.00000     | 8.55966e-06 | 1.40329e-05 | 2.06735e-05 | 2.80105e-05 | 3.55219e-05 |
| 0.100000    | 8.55914e-06 | 1.40327e-05 | 2.06734e-05 | 2.80103e-05 | 3.55219e-05 |
| 0.0100000   | 8.55909e-06 | 1.40327e-05 | 2.06734e-05 | 2.80103e-05 | 3.55219e-05 |
| 0.00100000  | 8.55909e-06 | 1.40327e-05 | 2.06734e-05 | 2.80103e-05 | 3.55219e-05 |
| 0.000100000 | 8.55906e-06 | 1.40327e-05 | 2.06734e-05 | 2.80103e-05 | 3.55219e-05 |
| 1.00000e-05 | 8.55906e-06 | 1.40327e-05 | 2.06734e-05 | 2.80103e-05 | 3.55219e-05 |
| 1.00000e-06 | 8.55906e-06 | 1.40327e-05 | 2.06734e-05 | 2.80103e-05 | 3.55219e-05 |
| 1.00000e-07 | 8.55906e-06 | 1.40327e-05 | 2.06734e-05 | 2.80103e-05 | 3.55219e-05 |
| 1.00000e-08 | 8.55906e-06 | 1.40327e-05 | 2.06734e-05 | 2.80103e-05 | 3.55219e-05 |
| 1.00000e-09 | 8.55906e-06 | 1.40327e-05 | 2.06734e-05 | 2.80103e-05 | 3.55219e-05 |

| Pa\K        | 4000.00     |
|-------------|-------------|
| 1.00000e+08 | 8.93131e-05 |
| 1.00000e+07 | 0.000104819 |
| 1.00000e+06 | 6.16876e-05 |
| 100000.     | 4.49090e-05 |
| 10000.0     | 4.29299e-05 |
| 1000.00     | 4.27535e-05 |
| 100.000     | 4.27374e-05 |
| 10.0000     | 4.27360e-05 |
| 1.00000     | 4.27358e-05 |
| 0.100000    | 4.27358e-05 |
| 0.0100000   | 4.27358e-05 |
| 0.00100000  | 4.27358e-05 |
| 0.000100000 | 4.27358e-05 |
| 1.00000e-05 | 4.27358e-05 |
| 1.00000e-06 | 4.27358e-05 |
| 1.00000e-07 | 4.27358e-05 |
| 1.00000e-08 | 4.27358e-05 |
| 1.00000e-09 | 4.27358e-05 |

Phenyl+Allene

| Pa\K        | 20.0000     | 30.0000     | 40.0000     | 50.0000     | 60.0000     |
|-------------|-------------|-------------|-------------|-------------|-------------|
| 1.00000e+08 | 1.80102e-16 | 4.28138e-16 | 8.71713e-16 | 1.69700e-15 | 3.16390e-15 |
| 1.00000e+07 | 1.80102e-15 | 4.28137e-15 | 8.71710e-15 | 1.69699e-14 | 3.16388e-14 |
| 1.00000e+06 | 1.80100e-14 | 4.28126e-14 | 8.71679e-14 | 1.69692e-13 | 3.16372e-13 |
| 100000.     | 1.80077e-13 | 4.28021e-13 | 8.71377e-13 | 1.69618e-12 | 3.16204e-12 |
| 10000.0     | 1.79849e-12 | 4.26967e-12 | 8.68363e-12 | 1.68879e-11 | 3.14541e-11 |
| 1000.00     | 1.77598e-11 | 4.16700e-11 | 8.39325e-11 | 1.61839e-10 | 2.98860e-10 |
| 100.000     | 1.57687e-10 | 3.35130e-10 | 6.28071e-10 | 1.14353e-09 | 2.00247e-09 |
| 10.0000     | 7.13731e-10 | 1.07183e-09 | 1.73176e-09 | 2.89487e-09 | 4.71326e-09 |
| 1.00000     | 9.46702e-10 | 1.26062e-09 | 2.04844e-09 | 3.42645e-09 | 5.52227e-09 |
| 0.100000    | 9.64928e-10 | 1.34615e-09 | 2.24443e-09 | 3.81302e-09 | 6.24462e-09 |
| 0.0100000   | 1.29963e-09 | 2.13356e-09 | 3.82782e-09 | 6.89357e-09 | 1.20939e-08 |
| 0.00100000  | 4.12784e-09 | 7.83891e-09 | 1.41560e-08 | 2.53625e-08 | 4.43517e-08 |
| 0.000100000 | 1.33504e-08 | 1.92097e-08 | 3.07805e-08 | 5.14158e-08 | 8.42993e-08 |
| 1.00000e-05 | 1.61488e-08 | 2.14368e-08 | 3.46391e-08 | 5.77998e-08 | 9.36940e-08 |
| 1.00000e-06 | 1.59521e-08 | 2.15063e-08 | 3.50244e-08 | 5.85234e-08 | 9.47686e-08 |
| 1.00000e-07 | 1.59134e-08 | 2.15093e-08 | 3.50625e-08 | 5.85966e-08 | 9.48777e-08 |
| 1.00000e-08 | 1.59093e-08 | 2.15096e-08 | 3.50663e-08 | 5.86040e-08 | 9.48886e-08 |
| 1.00000e-09 | 1.59089e-08 | 2.15096e-08 | 3.50666e-08 | 5.86047e-08 | 9.48897e-08 |

| Pa\K        | 70.0000     | 80.0000     | 90.0000     | 100.000     | 110.000     |
|-------------|-------------|-------------|-------------|-------------|-------------|
| 1.00000e+08 | 5.66892e-15 | 9.83799e-15 | 1.66586e-14 | 2.76747e-14 | 4.52837e-14 |
| 1.00000e+07 | 5.66889e-14 | 9.83792e-14 | 1.66585e-13 | 2.76744e-13 | 4.52831e-13 |
| 1.00000e+06 | 5.66853e-13 | 9.83719e-13 | 1.66570e-12 | 2.76715e-12 | 4.52776e-12 |
| 100000.     | 5.66497e-12 | 9.82987e-12 | 1.66424e-11 | 2.76429e-11 | 4.52222e-11 |
| 10000.0     | 5.62956e-11 | 9.75736e-11 | 1.64978e-10 | 2.73600e-10 | 4.46763e-10 |
| 1000.00     | 5.29957e-10 | 9.08995e-10 | 1.51859e-09 | 2.48366e-09 | 3.99057e-09 |
| 100.000     | 3.36400e-09 | 5.44909e-09 | 8.56286e-09 | 1.31181e-08 | 1.96645e-08 |
| 10.0000     | 7.37482e-09 | 1.11406e-08 | 1.63667e-08 | 2.35238e-08 | 3.32245e-08 |
| 1.00000     | 8.52378e-09 | 1.27115e-08 | 1.84825e-08 | 2.63776e-08 | 3.71249e-08 |
| 0.100000    | 9.84668e-09 | 1.51157e-08 | 2.28249e-08 | 3.41501e-08 | 5.08727e-08 |
| 0.0100000   | 2.07283e-08 | 3.49890e-08 | 5.84105e-08 | 9.64652e-08 | 1.57368e-07 |
| 0.00100000  | 7.53941e-08 | 1.24735e-07 | 2.01034e-07 | 3.15790e-07 | 4.83858e-07 |
| 0.000100000 | 1.34021e-07 | 2.07204e-07 | 3.12822e-07 | 4.62501e-07 | 6.71015e-07 |
| 1.00000e-05 | 1.46770e-07 | 2.23623e-07 | 3.33232e-07 | 4.87229e-07 | 7.00384e-07 |
| 1.00000e-06 | 1.48209e-07 | 2.25443e-07 | 3.35457e-07 | 4.89886e-07 | 7.03502e-07 |
| 1.00000e-07 | 1.48355e-07 | 2.25627e-07 | 3.35682e-07 | 4.90154e-07 | 7.03816e-07 |
| 1.00000e-08 | 1.48369e-07 | 2.25646e-07 | 3.35704e-07 | 4.90181e-07 | 7.03848e-07 |
| 1.00000e-09 | 1.48371e-07 | 2.25648e-07 | 3.35707e-07 | 4.90183e-07 | 7.03851e-07 |

| Pa\K        | 120.000     | 130.000     | 140.000     | 150.000     | 160.000     |
|-------------|-------------|-------------|-------------|-------------|-------------|
| 1.00000e+08 | 7.31919e-14 | 1.17112e-13 | 1.85818e-13 | 2.92728e-13 | 4.58264e-13 |
| 1.00000e+07 | 7.31908e-13 | 1.17110e-12 | 1.85814e-12 | 2.92721e-12 | 4.58250e-12 |
| 1.00000e+06 | 7.31802e-12 | 1.17090e-11 | 1.85776e-11 | 2.92650e-11 | 4.58118e-11 |
| 100000.     | 7.30743e-11 | 1.16889e-10 | 1.85397e-10 | 2.91938e-10 | 4.56790e-10 |
| 10000.0     | 7.20329e-10 | 1.14920e-09 | 1.81699e-09 | 2.85037e-09 | 4.43990e-09 |
| 1000.00     | 6.31443e-09 | 9.85709e-09 | 1.51989e-08 | 2.31675e-08 | 3.49271e-08 |
| 100.000     | 2.89256e-08 | 4.18477e-08 | 5.96596e-08 | 8.39473e-08 | 1.16742e-07 |
| 10.0000     | 4.62614e-08 | 6.36600e-08 | 8.67478e-08 | 1.17240e-07 | 1.57350e-07 |
| 1.00000     | 5.17074e-08 | 7.14630e-08 | 9.82307e-08 | 1.34561e-07 | 1.84021e-07 |
| 0.100000    | 7.56966e-08 | 1.12740e-07 | 1.68275e-07 | 2.51817e-07 | 3.77689e-07 |
| 0.0100000   | 2.53142e-07 | 4.00978e-07 | 6.24896e-07 | 9.57695e-07 | 1.44316e-06 |
| 0.00100000  | 7.24186e-07 | 1.06078e-06 | 1.52394e-06 | 2.15172e-06 | 2.99174e-06 |
| 0.000100000 | 9.57034e-07 | 1.34413e-06 | 1.86209e-06 | 2.54835e-06 | 3.44992e-06 |



|             |             |             |             |             |             |
|-------------|-------------|-------------|-------------|-------------|-------------|
| 1.00000e-05 | 9.91349e-07 | 1.38368e-06 | 1.90710e-06 | 2.59905e-06 | 3.50646e-06 |
| 1.00000e-06 | 9.94956e-07 | 1.38780e-06 | 1.91177e-06 | 2.60427e-06 | 3.51225e-06 |
| 1.00000e-07 | 9.95319e-07 | 1.38822e-06 | 1.91223e-06 | 2.60480e-06 | 3.51284e-06 |
| 1.00000e-08 | 9.95355e-07 | 1.38826e-06 | 1.91228e-06 | 2.60485e-06 | 3.51289e-06 |
| 1.00000e-09 | 9.95359e-07 | 1.38826e-06 | 1.91229e-06 | 2.60486e-06 | 3.51290e-06 |

Pa\K | 170.000 180.000 190.000 200.000 210.000

|             |             |             |             |             |             |
|-------------|-------------|-------------|-------------|-------------|-------------|
| 1.00000e+08 | 7.13332e-13 | 1.10443e-12 | 1.70107e-12 | 2.60652e-12 | 3.97312e-12 |
| 1.00000e+07 | 7.13308e-12 | 1.10438e-11 | 1.70098e-11 | 2.60637e-11 | 3.97283e-11 |
| 1.00000e+06 | 7.13059e-11 | 1.10392e-10 | 1.70014e-10 | 2.60482e-10 | 3.97001e-10 |
| 100000.     | 7.10594e-10 | 1.09937e-09 | 1.69176e-09 | 2.58949e-09 | 3.94214e-09 |
| 10000.0     | 6.86994e-09 | 1.05613e-08 | 1.61311e-08 | 2.44748e-08 | 3.68787e-08 |
| 1000.00     | 5.20903e-08 | 7.68581e-08 | 1.12187e-07 | 1.61987e-07 | 2.31353e-07 |
| 100.000     | 1.60631e-07 | 2.18877e-07 | 2.95579e-07 | 3.95840e-07 | 5.25989e-07 |
| 10.0000     | 2.09928e-07 | 2.78640e-07 | 3.68197e-07 | 4.84660e-07 | 6.35848e-07 |
| 1.00000     | 2.51640e-07 | 3.44563e-07 | 4.73000e-07 | 6.51604e-07 | 9.01447e-07 |
| 0.100000    | 5.67205e-07 | 8.51617e-07 | 1.27595e-06 | 1.90383e-06 | 2.82325e-06 |
| 0.0100000   | 2.13852e-06 | 3.11709e-06 | 4.47113e-06 | 6.31492e-06 | 8.78808e-06 |
| 0.00100000  | 4.10319e-06 | 5.55927e-06 | 7.44989e-06 | 9.88470e-06 | 1.29968e-05 |
| 0.000100000 | 4.62531e-06 | 6.14707e-06 | 8.10445e-06 | 1.06065e-05 | 1.37855e-05 |
| 1.00000e-05 | 4.68784e-06 | 6.21569e-06 | 8.17919e-06 | 1.06874e-05 | 1.38725e-05 |
| 1.00000e-06 | 4.69423e-06 | 6.22266e-06 | 8.18678e-06 | 1.06956e-05 | 1.38813e-05 |
| 1.00000e-07 | 4.69486e-06 | 6.22337e-06 | 8.18753e-06 | 1.06964e-05 | 1.38821e-05 |
| 1.00000e-08 | 4.69493e-06 | 6.22344e-06 | 8.18761e-06 | 1.06964e-05 | 1.38822e-05 |
| 1.00000e-09 | 4.69493e-06 | 6.22344e-06 | 8.18762e-06 | 1.06964e-05 | 1.38822e-05 |

Pa\K | 220.000 230.000 240.000 250.000 260.000

|             |             |             |             |             |             |
|-------------|-------------|-------------|-------------|-------------|-------------|
| 1.00000e+08 | 6.02411e-12 | 9.08440e-12 | 1.36233e-11 | 2.03143e-11 | 3.01154e-11 |
| 1.00000e+07 | 6.02360e-11 | 9.08348e-11 | 1.36218e-10 | 2.03114e-10 | 3.01103e-10 |
| 1.00000e+06 | 6.01850e-10 | 9.07431e-10 | 1.36053e-09 | 2.02824e-09 | 3.00592e-09 |
| 100000.     | 5.96816e-09 | 8.98401e-09 | 1.34446e-08 | 1.99985e-08 | 2.95620e-08 |
| 10000.0     | 5.51699e-08 | 8.19126e-08 | 1.20663e-07 | 1.76287e-07 | 2.55359e-07 |
| 1000.00     | 3.26823e-07 | 4.56674e-07 | 6.31243e-07 | 8.63280e-07 | 1.16833e-06 |
| 100.000     | 6.93824e-07 | 9.08912e-07 | 1.18293e-06 | 1.53012e-06 | 1.96774e-06 |
| 10.0000     | 8.31874e-07 | 1.08590e-06 | 1.41512e-06 | 1.84218e-06 | 2.39703e-06 |
| 1.00000     | 1.25280e-06 | 1.74901e-06 | 2.45166e-06 | 3.44745e-06 | 4.85691e-06 |
| 0.100000    | 4.15331e-06 | 6.05161e-06 | 8.72215e-06 | 1.24233e-05 | 1.74758e-05 |
| 0.0100000   | 1.20591e-05 | 1.63293e-05 | 2.18370e-05 | 2.88624e-05 | 3.77321e-05 |
| 0.00100000  | 1.69463e-05 | 2.19247e-05 | 2.81598e-05 | 3.59207e-05 | 4.55230e-05 |
| 0.000100000 | 1.78012e-05 | 2.28443e-05 | 2.91422e-05 | 3.69633e-05 | 4.66229e-05 |
| 1.00000e-05 | 1.78940e-05 | 2.29430e-05 | 2.92466e-05 | 3.70732e-05 | 4.67380e-05 |
| 1.00000e-06 | 1.79035e-05 | 2.29530e-05 | 2.92572e-05 | 3.70843e-05 | 4.67496e-05 |
| 1.00000e-07 | 1.79044e-05 | 2.29541e-05 | 2.92582e-05 | 3.70854e-05 | 4.67507e-05 |
| 1.00000e-08 | 1.79044e-05 | 2.29542e-05 | 2.92583e-05 | 3.70855e-05 | 4.67508e-05 |
| 1.00000e-09 | 1.79045e-05 | 2.29542e-05 | 2.92584e-05 | 3.70855e-05 | 4.67508e-05 |

Pa\K | 270.000 280.000 290.000 300.000 400.000

|             |             |             |             |             |             |
|-------------|-------------|-------------|-------------|-------------|-------------|
| 1.00000e+08 | 4.43782e-11 | 6.49910e-11 | 9.45617e-11 | 4.24257e-10 | 9.48501e-09 |
| 1.00000e+07 | 4.43692e-10 | 6.49756e-10 | 9.45354e-10 | 4.23574e-09 | 9.43078e-08 |
| 1.00000e+06 | 4.42804e-09 | 6.48222e-09 | 9.42734e-09 | 4.16946e-08 | 8.94938e-07 |
| 100000.     | 4.34177e-08 | 6.33409e-08 | 9.17590e-08 | 3.64476e-07 | 6.27619e-06 |
| 10000.0     | 3.66630e-07 | 5.21584e-07 | 7.35044e-07 | 1.81231e-06 | 1.89158e-05 |
| 1000.00     | 1.56516e-06 | 2.07612e-06 | 2.72763e-06 | 3.40460e-06 | 2.72075e-05 |
| 100.000     | 2.51670e-06 | 3.20227e-06 | 4.05485e-06 | 4.27157e-06 | 4.63564e-05 |
| 10.0000     | 3.11939e-06 | 4.06212e-06 | 5.29517e-06 | 8.65755e-06 | 0.000151744 |
| 1.00000     | 6.84501e-06 | 9.63372e-06 | 1.35156e-05 | 3.06198e-05 | 0.000399655 |
| 0.100000    | 2.42693e-05 | 3.32691e-05 | 4.50199e-05 | 6.97323e-05 | 0.000578302 |
| 0.0100000   | 4.88248e-05 | 6.25759e-05 | 7.94827e-05 | 8.81216e-05 | 0.000620075 |
| 0.00100000  | 5.73346e-05 | 7.17811e-05 | 8.93509e-05 | 9.10077e-05 | 0.000625171 |
| 0.000100000 | 5.84883e-05 | 7.29848e-05 | 9.06004e-05 | 9.13159e-05 | 0.000625696 |
| 1.00000e-05 | 5.86083e-05 | 7.31093e-05 | 9.07290e-05 | 9.13471e-05 | 0.000625749 |
| 1.00000e-06 | 5.86203e-05 | 7.31217e-05 | 9.07418e-05 | 9.13501e-05 | 0.000625754 |
| 1.00000e-07 | 5.86215e-05 | 7.31230e-05 | 9.07432e-05 | 9.13505e-05 | 0.000625754 |
| 1.00000e-08 | 5.86216e-05 | 7.31232e-05 | 9.07433e-05 | 9.13505e-05 | 0.000625754 |
| 1.00000e-09 | 5.86216e-05 | 7.31232e-05 | 9.07433e-05 | 9.13505e-05 | 0.000625754 |

Pa\K | 500.000 600.000 700.000 800.000 900.000

|             |             |             |             |             |            |
|-------------|-------------|-------------|-------------|-------------|------------|
| 1.00000e+08 | 1.53931e-07 | 2.58903e-06 | 2.94833e-05 | 0.000286710 | 0.00277186 |
| 1.00000e+07 | 1.48205e-06 | 1.91754e-05 | 0.000182812 | 0.00119800  | 0.00553209 |
| 1.00000e+06 | 1.26193e-05 | 0.000116054 | 0.000647692 | 0.00231912  | 0.00632774 |
| 100000.     | 5.90676e-05 | 0.000320637 | 0.00113341  | 0.00322275  | 0.00912501 |
| 10000.0     | 0.000112636 | 0.000487532 | 0.00193881  | 0.00721836  | 0.0228073  |
| 1000.00     | 0.000172634 | 0.00108045  | 0.00556917  | 0.0192573   | 0.0466409  |
| 100.000     | 0.000486130 | 0.00334630  | 0.0131952   | 0.0332469   | 0.0624972  |
| 10.0000     | 0.00142480  | 0.00664250  | 0.0188942   | 0.0392645   | 0.0667668  |
| 1.00000     | 0.00238141  | 0.00827077  | 0.0204905   | 0.0403895   | 0.0673651  |

|             |            |            |           |           |           |
|-------------|------------|------------|-----------|-----------|-----------|
| 0.100000    | 0.00270377 | 0.00859123 | 0.0207148 | 0.0405212 | 0.0674292 |
| 0.0100000   | 0.00275181 | 0.00862900 | 0.0207387 | 0.0405348 | 0.0674357 |
| 0.00100000  | 0.00275697 | 0.00863292 | 0.0207412 | 0.0405361 | 0.0674364 |
| 0.000100000 | 0.00275750 | 0.00863333 | 0.0207414 | 0.0405363 | 0.0674364 |
| 1.00000e-05 | 0.00275755 | 0.00863333 | 0.0207415 | 0.0405363 | 0.0674364 |
| 1.00000e-06 | 0.00275756 | 0.00863333 | 0.0207415 | 0.0405363 | 0.0674364 |
| 1.00000e-07 | 0.00275756 | 0.00863333 | 0.0207415 | 0.0405363 | 0.0674364 |
| 1.00000e-08 | 0.00275756 | 0.00863333 | 0.0207415 | 0.0405363 | 0.0674364 |
| 1.00000e-09 | 0.00275756 | 0.00863333 | 0.0207415 | 0.0405363 | 0.0674364 |

| Pa\K        | 1000.00   | 1100.00   | 1200.00   | 1300.00   | 1400.00   |
|-------------|-----------|-----------|-----------|-----------|-----------|
| 1.00000e+08 | 0.0122244 | 0.0247095 | 0.0344806 | 0.0444879 | 0.0527745 |
| 1.00000e+07 | 0.0153956 | 0.0312144 | 0.0585510 | 0.100632  | 0.138671  |
| 1.00000e+06 | 0.0154567 | 0.0382567 | 0.0849219 | 0.144928  | 0.192272  |
| 100000.     | 0.0258379 | 0.0633476 | 0.120246  | 0.176307  | 0.215835  |
| 10000.0     | 0.0550320 | 0.101768  | 0.151175  | 0.191788  | 0.221037  |
| 1000.00     | 0.0845583 | 0.125254  | 0.162391  | 0.193401  | 0.218366  |
| 100.000     | 0.0965255 | 0.131207  | 0.163687  | 0.192367  | 0.216616  |
| 10.0000     | 0.0987218 | 0.131957  | 0.163693  | 0.192086  | 0.216275  |
| 1.00000     | 0.0989774 | 0.132034  | 0.163692  | 0.192057  | 0.216240  |
| 0.100000    | 0.0990045 | 0.132043  | 0.163693  | 0.192054  | 0.216237  |
| 0.0100000   | 0.0990073 | 0.132044  | 0.163693  | 0.192054  | 0.216237  |
| 0.00100000  | 0.0990073 | 0.132044  | 0.163693  | 0.192054  | 0.216237  |
| 0.000100000 | 0.0990073 | 0.132044  | 0.163693  | 0.192054  | 0.216237  |
| 1.00000e-05 | 0.0990073 | 0.132044  | 0.163693  | 0.192054  | 0.216237  |
| 1.00000e-06 | 0.0990073 | 0.132044  | 0.163693  | 0.192054  | 0.216237  |
| 1.00000e-07 | 0.0990073 | 0.132044  | 0.163693  | 0.192054  | 0.216237  |
| 1.00000e-08 | 0.0990073 | 0.132044  | 0.163693  | 0.192054  | 0.216237  |
| 1.00000e-09 | 0.0990073 | 0.132044  | 0.163693  | 0.192054  | 0.216237  |

| Pa\K        | 1500.00   | 1750.00  | 2000.00  | 2250.00  | 2500.00  |
|-------------|-----------|----------|----------|----------|----------|
| 1.00000e+08 | 0.0508856 | 0.224689 | 0.275415 | 0.283376 | 0.279213 |
| 1.00000e+07 | 0.153887  | 0.254329 | 0.299363 | 0.305044 | 0.298531 |
| 1.00000e+06 | 0.219452  | 0.278217 | 0.310395 | 0.308980 | 0.300749 |
| 100000.     | 0.240258  | 0.284626 | 0.302512 | 0.300063 | 0.295889 |
| 10000.0     | 0.241785  | 0.278867 | 0.291234 | 0.293584 | 0.293469 |
| 1000.00     | 0.238166  | 0.273849 | 0.286758 | 0.291881 | 0.293001 |
| 100.000     | 0.236452  | 0.272319 | 0.285881 | 0.291630 | 0.292945 |
| 10.0000     | 0.236143  | 0.272076 | 0.285771 | 0.291602 | 0.292940 |
| 1.00000     | 0.236112  | 0.272050 | 0.285760 | 0.291600 | 0.292939 |
| 0.100000    | 0.236110  | 0.272048 | 0.285759 | 0.291600 | 0.292939 |
| 0.0100000   | 0.236109  | 0.272047 | 0.285759 | 0.291600 | 0.292939 |
| 0.00100000  | 0.236109  | 0.272047 | 0.285759 | 0.291600 | 0.292939 |
| 0.000100000 | 0.236109  | 0.272047 | 0.285759 | 0.291600 | 0.292939 |
| 1.00000e-05 | 0.236109  | 0.272047 | 0.285759 | 0.291600 | 0.292939 |
| 1.00000e-06 | 0.236109  | 0.272047 | 0.285759 | 0.291600 | 0.292939 |
| 1.00000e-07 | 0.236109  | 0.272047 | 0.285759 | 0.291600 | 0.292939 |
| 1.00000e-08 | 0.236109  | 0.272047 | 0.285759 | 0.291600 | 0.292939 |
| 1.00000e-09 | 0.236109  | 0.272047 | 0.285759 | 0.291600 | 0.292939 |

| Pa\K        | 2750.00  | 3000.00  | 3250.00  | 3500.00  | 3750.00  |
|-------------|----------|----------|----------|----------|----------|
| 1.00000e+08 | 0.273742 | 0.268882 | 0.265007 | 0.262075 | 0.259872 |
| 1.00000e+07 | 0.291410 | 0.285714 | 0.281276 | 0.277551 | 0.274127 |
| 1.00000e+06 | 0.294236 | 0.289305 | 0.285041 | 0.280970 | 0.276955 |
| 100000.     | 0.292503 | 0.289076 | 0.285333 | 0.281355 | 0.277291 |
| 10000.0     | 0.291790 | 0.288929 | 0.285344 | 0.281397 | 0.277330 |
| 1000.00     | 0.291681 | 0.288912 | 0.285348 | 0.281403 | 0.277335 |
| 100.000     | 0.291670 | 0.288911 | 0.285348 | 0.281404 | 0.277336 |
| 10.0000     | 0.291669 | 0.288911 | 0.285348 | 0.281404 | 0.277336 |
| 1.00000     | 0.291669 | 0.288911 | 0.285349 | 0.281404 | 0.277336 |
| 0.100000    | 0.291669 | 0.288911 | 0.285349 | 0.281404 | 0.277336 |
| 0.0100000   | 0.291669 | 0.288911 | 0.285349 | 0.281404 | 0.277336 |
| 0.00100000  | 0.291669 | 0.288911 | 0.285349 | 0.281404 | 0.277336 |
| 0.000100000 | 0.291669 | 0.288911 | 0.285349 | 0.281404 | 0.277336 |
| 1.00000e-05 | 0.291669 | 0.288911 | 0.285349 | 0.281404 | 0.277336 |
| 1.00000e-06 | 0.291669 | 0.288911 | 0.285349 | 0.281404 | 0.277336 |
| 1.00000e-07 | 0.291669 | 0.288911 | 0.285349 | 0.281404 | 0.277336 |
| 1.00000e-08 | 0.291669 | 0.288911 | 0.285349 | 0.281404 | 0.277336 |
| 1.00000e-09 | 0.291669 | 0.288911 | 0.285349 | 0.281404 | 0.277336 |

| Pa\K        | 4000.00  |
|-------------|----------|
| 1.00000e+08 | 0.258120 |
| 1.00000e+07 | 0.270796 |
| 1.00000e+06 | 0.273005 |
| 100000.     | 0.273261 |
| 10000.0     | 0.273291 |

|             |  |          |
|-------------|--|----------|
| 1000.00     |  | 0.273295 |
| 100.000     |  | 0.273295 |
| 10.0000     |  | 0.273295 |
| 1.00000     |  | 0.273295 |
| 0.100000    |  | 0.273295 |
| 0.0100000   |  | 0.273295 |
| 0.00100000  |  | 0.273295 |
| 0.000100000 |  | 0.273295 |
| 1.00000e-05 |  | 0.273295 |
| 1.00000e-06 |  | 0.273295 |
| 1.00000e-07 |  | 0.273295 |
| 1.00000e-08 |  | 0.273295 |
| 1.00000e-09 |  | 0.273295 |
